# Supplementary material for: Molecular Analysis of SARS-CoV-2 Circulating in Bangladesh during 2020 Revealed Lineage Diversity and Potential Mutations
Source: MDPI journal article supplement (doi:10.3390/microorganisms9051035), 2021-05-12
Supplement: s1 [file s1]

Suppl. Table S1. Distribution of SARS-CoV-2 clades in eight divisions of Bangladesh

| Division/<br>Total number of<br>sequences (n) | Clades   |          |           |        |        |        |        |
|-----------------------------------------------|----------|----------|-----------|--------|--------|--------|--------|
|                                               | G        | GH       | GR        | GRY    | 0      | S      | L      |
| Dhaka (n=339)                                 | 37 (10%) | 13 (3%)  | 283 (83%) | 0      | 5 (1%) | 0      | 1 (0%) |
| Chattagram<br>(n=109)                         | 2 (1%)   | 20 (18%) | 80 (73%)  | 0      | 2 (1%) | 5 (4%) | 0      |
| Rajshahi (n=40)                               | 0        | 2 (5%)   | 38 (95%)  | 0      | 0      | 0      | 0      |
| Khulna (n=31)                                 | 1 (3%)   | 3 (9%)   | 24 (77%)  | 0      | 3 (9%) | 0      | 0      |
| Sylhet (n=37)                                 | 0        | 2 (5%)   | 33 (89%)  | 2 (5%) | 0      | 0      | 0      |
| Barishal (n=39)                               | 6 (15%)  | 2 (5%)   | 29 (74%)  | 0      | 2(5%)  | 0      | 0      |
| Rangpur (n=30)                                | 1 (3%)   | 3 (10%)  | 26 (86%)  | 0      | 0      | 0      | 0      |
| Mymensingh<br>(n=17)                          | 0        | 0        | 17 (100%) | 0      | 0      | 0      | 0      |
| *Anonymous<br>(n=149)                         | 16 (10%) | 6 (4%)   | 126 (85%) | 1 (0%) | 0      | 0      | 0      |
| Total (n=791)                                 | 63       | 51       | 656       | 3      | 12     | 5      | 1      |

\* The sequences are from Bangladesh but the division name is unknown.
