# Supplementary material for: Molecular Analysis of SARS-CoV-2 Circulating in Bangladesh during 2020 Revealed Lineage Diversity and Potential Mutations
Source: MDPI journal article supplement (doi:10.3390/microorganisms9051035), 2021-05-12
Supplement: s1 [file s1]

853

|          |          |          |          |          |          |          |
|----------|----------|----------|----------|----------|----------|----------|
| S001     | 0.000000 | 0.000000 | 0.012337 | 0.012101 | 0.012101 | 0.012169 |
| 0.012011 | 0.011943 | 0.012169 | 0.011597 | 0.011664 | 0.011632 | 0.011597 |
| 0.011631 | 0.011799 | 0.011597 | 0.011631 | 0.011698 | 0.011664 | 0.011631 |
| 0.011597 | 0.011631 | 0.011732 | 0.011598 | 0.011631 | 0.011631 | 0.011977 |
| 0.011866 | 0.011631 | 0.011530 | 0.011765 | 0.011698 | 0.011665 | 0.011698 |
| 0.011664 | 0.011765 | 0.011664 | 0.011664 | 0.011698 | 0.011664 | 0.011832 |
| 0.011597 | 0.011664 | 0.011698 | 0.011631 | 0.011732 | 0.011765 | 0.011698 |
| 0.011664 | 0.011833 | 0.011732 | 0.012000 | 0.011664 | 0.011933 | 0.011664 |
| 0.011631 | 0.011732 | 0.011799 | 0.011933 | 0.012034 | 0.011732 | 0.011832 |
| 0.011698 | 0.011765 | 0.011664 | 0.011900 | 0.012135 | 0.011664 | 0.011732 |
| 0.011631 | 0.011732 | 0.011698 | 0.011765 | 0.011698 | 0.011698 | 0.011698 |
| 0.011597 | 0.011631 | 0.011597 | 0.011698 | 0.011664 | 0.011700 | 0.011765 |
| 0.011698 | 0.011664 | 0.011732 | 0.011631 | 0.011765 | 0.011597 | 0.011664 |
| 0.011832 | 0.011765 | 0.012000 | 0.011832 | 0.011664 | 0.011900 | 0.011664 |
| 0.011616 | 0.011845 | 0.011664 | 0.011373 | 0.011620 | 0.011686 | 0.011572 |
| 0.012452 | 0.011620 | 0.011348 | 0.011899 | 0.011900 | 0.011698 | 0.011799 |
| 0.011732 | 0.011631 | 0.011564 | 0.011664 | 0.011765 | 0.011698 | 0.011564 |
| 0.011597 | 0.011765 | 0.011900 | 0.011832 | 0.011732 | 0.011698 | 0.011631 |
| 0.011597 | 0.011597 | 0.011665 | 0.011631 | 0.011833 | 0.011799 | 0.011732 |
| 0.011833 | 0.011900 | 0.011631 | 0.011631 | 0.011665 | 0.011665 | 0.011668 |
| 0.011737 | 0.011665 | 0.011665 | 0.011564 | 0.011639 | 0.011586 | 0.011665 |
| 0.011670 | 0.011610 | 0.011688 | 0.011647 | 0.011570 | 0.011608 | 0.011634 |
| 0.011924 | 0.011681 | 0.011715 | 0.011598 | 0.011613 | 0.011733 | 0.011699 |
| 0.011767 | 0.011701 | 0.011699 | 0.011664 | 0.011463 | 0.012101 | 0.011900 |
| 0.011933 | 0.011799 | 0.011664 | 0.011766 | 0.011564 | 0.011799 | 0.011598 |
| 0.011664 | 0.011664 | 0.011631 | 0.011597 | 0.011631 | 0.011597 | 0.011698 |
| 0.011665 | 0.011766 | 0.011698 | 0.011597 | 0.011701 | 0.011799 | 0.011804 |
| 0.011799 | 0.011699 | 0.011597 | 0.011532 | 0.011665 | 0.011598 | 0.011531 |
| 0.011638 | 0.011799 | 0.011598 | 0.011799 | 0.011564 | 0.011665 | 0.011631 |
| 0.011732 | 0.011631 | 0.011665 | 0.011631 | 0.011665 | 0.011530 | 0.011665 |
| 0.011698 | 0.011631 | 0.011698 | 0.011631 | 0.011530 | 0.011698 | 0.011934 |
| 0.012034 | 0.011967 | 0.012035 | 0.011802 | 0.012035 | 0.011530 | 0.011631 |
| 0.011668 | 0.012031 | 0.011792 | 0.011575 | 0.012045 | 0.011538 | 0.011651 |
| 0.012045 | 0.011945 | 0.011799 | 0.011967 | 0.011538 | 0.011900 | 0.011866 |
| 0.011799 | 0.011967 | 0.011664 | 0.011596 | 0.011689 | 0.011698 | 0.011703 |
| 0.011866 | 0.011634 | 0.011872 | 0.011974 | 0.011765 | 0.011900 | 0.011941 |
| 0.011669 | 0.011943 | 0.011670 | 0.011838 | 0.012036 | 0.011564 | 0.011768 |
| 0.011732 | 0.011664 | 0.011564 | 0.011564 | 0.011631 | 0.011631 | 0.011698 |
| 0.011631 | 0.011698 | 0.011597 | 0.011698 | 0.011631 | 0.011631 | 0.011698 |
| 0.011631 | 0.012068 | 0.011967 | 0.012001 | 0.011530 | 0.011631 | 0.011664 |
| 0.011664 | 0.011631 | 0.011698 | 0.011732 | 0.011597 | 0.011597 | 0.011597 |
| 0.012135 | 0.011765 | 0.011765 | 0.011564 | 0.011664 | 0.011833 | 0.011597 |
| 0.011597 | 0.011664 | 0.011631 | 0.011799 | 0.011597 | 0.011732 | 0.011866 |
| 0.011799 | 0.011631 | 0.011631 | 0.011564 | 0.011564 | 0.011732 | 0.011664 |
| 0.011564 | 0.011664 | 0.011530 | 0.011564 | 0.011698 | 0.011833 | 0.011597 |
| 0.011564 | 0.011698 | 0.011632 | 0.011530 | 0.011866 | 0.011530 | 0.011698 |
| 0.011642 | 0.011597 | 0.011900 | 0.011732 | 0.011765 | 0.011631 | 0.011732 |
| 0.011597 | 0.011933 | 0.011530 | 0.011799 | 0.011597 | 0.011597 | 0.011530 |
| 0.011765 | 0.011967 | 0.011664 | 0.011732 | 0.011564 | 0.011967 | 0.011597 |
| 0.011597 | 0.011597 | 0.011631 | 0.011732 | 0.011631 | 0.011732 | 0.011799 |
| 0.011799 | 0.011765 | 0.011664 | 0.011765 | 0.011732 | 0.011597 | 0.011564 |
| 0.011597 | 0.011597 | 0.011664 | 0.011597 | 0.011564 | 0.011732 | 0.011597 |
| 0.011631 | 0.011631 | 0.011765 | 0.011799 | 0.011698 | 0.011631 | 0.011631 |
| 0.011698 | 0.011631 | 0.011732 | 0.011597 | 0.011732 | 0.011832 | 0.012135 |
| 0.011631 | 0.012034 | 0.011647 | 0.018202 | 0.011387 | 0.011611 | 0.012002 |
| 0.011960 | 0.012010 | 0.011532 | 0.011466 | 0.011939 | 0.012027 | 0.011546 |
| 0.011629 | 0.011732 | 0.011333 | 0.011437 | 0.011685 | 0.011505 | 0.011447 |
| 0.011623 | 0.011843 | 0.011839 | 0.011722 | 0.011765 | 0.011262 | 0.011737 |
| 0.011644 | 0.011765 | 0.011765 | 0.011732 | 0.011698 | 0.011698 | 0.011665 |

|          |          |          |          |          |          |          |
|----------|----------|----------|----------|----------|----------|----------|
| 0.011698 | 0.011631 | 0.011665 | 0.011698 | 0.011665 | 0.011598 | 0.011497 |
| 0.011497 | 0.011698 | 0.011597 | 0.011698 | 0.011732 | 0.011765 | 0.011530 |
| 0.011698 | 0.011665 | 0.012001 | 0.012001 | 0.011732 | 0.011766 | 0.011799 |
| 0.011564 | 0.011564 | 0.011597 | 0.011698 | 0.011564 | 0.011799 | 0.011799 |
| 0.011833 | 0.011799 | 0.011765 | 0.011866 | 0.012035 | 0.011869 | 0.011698 |
| 0.011698 | 0.011766 | 0.011799 | 0.011631 | 0.011698 | 0.011665 | 0.011698 |
| 0.011766 | 0.011766 | 0.011799 | 0.011766 | 0.011666 | 0.011866 | 0.011833 |
| 0.011704 | 0.011598 | 0.011698 | 0.011799 | 0.011698 | 0.011833 | 0.011866 |
| 0.011967 | 0.011538 | 0.011900 | 0.011866 | 0.011799 | 0.011967 | 0.011598 |
| 0.011768 | 0.011665 | 0.011497 | 0.011497 | 0.011698 | 0.011597 | 0.011698 |
| 0.011732 | 0.011765 | 0.011530 | 0.011698 | 0.011665 | 0.012001 | 0.012001 |
| 0.011732 | 0.011766 | 0.011564 | 0.011497 | 0.012373 | 0.011775 | 0.011588 |
| 0.011799 | 0.011754 | 0.011763 | 0.011718 | 0.011830 | 0.011716 | 0.011784 |
| 0.012262 | 0.011510 | 0.011643 | 0.011614 | 0.011921 | 0.011843 | 0.011945 |
| 0.012284 | 0.011776 | 0.011940 | 0.012001 | 0.011866 | 0.011866 | 0.011905 |
| 0.011564 | 0.011732 | 0.011866 | 0.011832 | 0.011838 | 0.011832 | 0.011801 |
| 0.011664 | 0.011597 | 0.011631 | 0.011664 | 0.011564 | 0.011631 | 0.011530 |
| 0.011664 | 0.011698 | 0.011597 | 0.011564 | 0.011664 | 0.011597 | 0.011631 |
| 0.011631 | 0.011564 | 0.011631 | 0.011664 | 0.011564 | 0.011765 | 0.011799 |
| 0.011698 | 0.011765 | 0.011698 | 0.011698 | 0.011631 | 0.012034 | 0.011664 |
| 0.011687 | 0.011631 | 0.011867 | 0.011875 | 0.011732 | 0.011732 | 0.011732 |
| 0.011732 | 0.011664 | 0.011631 | 0.011664 | 0.011765 | 0.011765 | 0.011698 |
| 0.011698 | 0.011832 | 0.012000 | 0.011732 | 0.011933 | 0.011933 | 0.011799 |
| 0.011631 | 0.011698 | 0.011732 | 0.012135 | 0.011699 | 0.011732 | 0.011698 |
| 0.011732 | 0.011664 | 0.011664 | 0.011967 | 0.011900 | 0.011933 | 0.011664 |
| 0.011765 | 0.011832 | 0.011698 | 0.011765 | 0.011732 | 0.011597 | 0.011933 |
| 0.011698 | 0.011664 | 0.011664 | 0.011832 | 0.011664 | 0.011765 | 0.012001 |
| 0.011698 | 0.012079 | 0.012068 | 0.011670 | 0.011399 | 0.011774 | 0.011370 |
| 0.011500 | 0.011917 | 0.011622 | 0.011641 | 0.011402 | 0.011518 | 0.011538 |
| 0.011672 | 0.011389 | 0.011506 | 0.011390 | 0.011384 | 0.011596 | 0.011506 |
| 0.011550 | 0.011454 | 0.011765 | 0.011694 | 0.011701 | 0.011833 | 0.011900 |
| 0.011900 | 0.011766 | 0.011872 | 0.011874 | 0.012010 | 0.012050 | 0.011698 |
| 0.011933 | 0.011799 | 0.011664 | 0.011766 | 0.011564 | 0.011799 | 0.011598 |
| 0.011664 | 0.011664 | 0.011631 | 0.011597 | 0.011631 | 0.011597 | 0.011698 |
| 0.011689 | 0.011690 | 0.011677 | 0.011711 | 0.011847 | 0.011812 | 0.011812 |
| 0.011810 | 0.011733 | 0.011540 | 0.011564 | 0.011670 | 0.011840 | 0.011841 |
| 0.011632 | 0.011704 | 0.011936 | 0.011905 | 0.011834 | 0.011868 | 0.011530 |
| 0.011732 | 0.011732 | 0.011732 | 0.011698 | 0.012236 | 0.011866 | 0.011933 |
| 0.011967 | 0.012057 | 0.011674 | 0.011753 | 0.011631 | 0.011698 | 0.011262 |
| 0.011834 | 0.011732 | 0.011866 | 0.011866 | 0.012004 | 0.011866 | 0.011650 |
| 0.011533 | 0.011510 | 0.011605 | 0.011604 | 0.011709 | 0.011545 | 0.011876 |
| 0.011678 | 0.011806 | 0.011584 | 0.011510 | 0.011666 | 0.011745 | 0.011631 |
| 0.011597 | 0.011597 | 0.011665 | 0.011631 | 0.011833 | 0.011799 | 0.011732 |
| 0.011833 | 0.011900 | 0.011631 | 0.011631 | 0.011665 | 0.011665 | 0.011668 |
| 0.011737 | 0.011665 | 0.011665 | 0.011701 | 0.011833 | 0.011900 | 0.011900 |
| 0.011766 | 0.011872 | 0.011874 | 0.012010 | 0.012050 | 0.011698 | 0.011866 |
| 0.011262 | 0.011262 | 0.011635 | 0.011826 | 0.011755 | 0.011775 | 0.011656 |
| 0.011818 | 0.012063 | 0.011907 | 0.011706 | 0.011598 | 0.011799 | 0.011665 |
| 0.011766 | 0.011698 | 0.011597 | 0.011701 | 0.011799 | 0.011804 | 0.011699 |
| 0.011597 | 0.011532 | 0.011665 | 0.011598 | 0.011531 | 0.011638 | 0.011799 |
| 0.011698 | 0.011631 | 0.011665 | 0.011698 | 0.011665 | 0.011598 | 0.011799 |
| 0.011664 | 0.011698 | 0.011698 | 0.011631 | 0.011698 | 0.011933 | 0.011597 |
| 0.011631 | 0.012034 | 0.011631 | 0.011664 | 0.011631 | 0.012000 | 0.011403 |
| 0.011903 | 0.011358 | 0.011411 | 0.011866 | 0.011671 | 0.011850 | 0.011353 |
| 0.011375 | 0.011799 | 0.011900 | 0.012011 | 0.011868 | 0.012008 | 0.012137 |
| 0.012036 | 0.012075 | 0.012034 | 0.012222 | 0.012001 | 0.012741 | 0.012038 |
| 0.012777 | 0.012410 | 0.012544 | 0.012951 | 0.012000 | 0.011698 | 0.012001 |
| 0.012407 | 0.012376 | 0.011967 | 0.011866 | 0.011935 | 0.011935 | 0.011906 |
| 0.011799 | 0.011807 | 0.011866 | 0.011834 | 0.012204 | 0.012270 | 0.012272 |
| 0.012171 | 0.012238 | 0.012376 | 0.012143 | 0.012408 | 0.012415 | 0.012475 |

|          |          |          |          |          |          |          |
|----------|----------|----------|----------|----------|----------|----------|
| 0.012475 | 0.012509 | 0.012460 | 0.012476 | 0.012477 | 0.011463 | 0.012002 |
| 0.012103 | 0.012607 | 0.012078 | 0.012337 | 0.012812 | 0.011876 | 0.011766 |
| 0.011732 | 0.011732 | 0.012203 | 0.012213 | 0.012363 | 0.012068 | 0.011734 |
| S002     | 0.000000 | 0.000000 | 0.012337 | 0.012101 | 0.012101 | 0.012169 |
| 0.012011 | 0.011943 | 0.012169 | 0.011597 | 0.011664 | 0.011632 | 0.011597 |
| 0.011631 | 0.011799 | 0.011597 | 0.011631 | 0.011698 | 0.011664 | 0.011631 |
| 0.011597 | 0.011631 | 0.011732 | 0.011598 | 0.011631 | 0.011631 | 0.011977 |
| 0.011866 | 0.011631 | 0.011530 | 0.011765 | 0.011698 | 0.011665 | 0.011698 |
| 0.011664 | 0.011765 | 0.011664 | 0.011664 | 0.011698 | 0.011664 | 0.011832 |
| 0.011597 | 0.011664 | 0.011698 | 0.011631 | 0.011732 | 0.011765 | 0.011698 |
| 0.011664 | 0.011833 | 0.011732 | 0.012000 | 0.011664 | 0.011933 | 0.011664 |
| 0.011631 | 0.011732 | 0.011799 | 0.011933 | 0.012034 | 0.011732 | 0.011832 |
| 0.011698 | 0.011765 | 0.011664 | 0.011900 | 0.012135 | 0.011664 | 0.011732 |
| 0.011631 | 0.011732 | 0.011698 | 0.011765 | 0.011698 | 0.011698 | 0.011698 |
| 0.011597 | 0.011631 | 0.011597 | 0.011698 | 0.011664 | 0.011700 | 0.011765 |
| 0.011698 | 0.011664 | 0.011732 | 0.011631 | 0.011765 | 0.011597 | 0.011664 |
| 0.011832 | 0.011765 | 0.012000 | 0.011832 | 0.011664 | 0.011900 | 0.011664 |
| 0.011616 | 0.011845 | 0.011664 | 0.011373 | 0.011620 | 0.011686 | 0.011572 |
| 0.012452 | 0.011620 | 0.011348 | 0.011899 | 0.011900 | 0.011698 | 0.011799 |
| 0.011732 | 0.011631 | 0.011564 | 0.011664 | 0.011765 | 0.011698 | 0.011564 |
| 0.011597 | 0.011765 | 0.011900 | 0.011832 | 0.011732 | 0.011698 | 0.011631 |
| 0.011597 | 0.011597 | 0.011665 | 0.011631 | 0.011833 | 0.011799 | 0.011732 |
| 0.011833 | 0.011900 | 0.011631 | 0.011631 | 0.011665 | 0.011665 | 0.011668 |
| 0.011737 | 0.011665 | 0.011665 | 0.011564 | 0.011639 | 0.011586 | 0.011665 |
| 0.011670 | 0.011610 | 0.011688 | 0.011647 | 0.011570 | 0.011608 | 0.011634 |
| 0.011924 | 0.011681 | 0.011715 | 0.011598 | 0.011613 | 0.011733 | 0.011699 |
| 0.011767 | 0.011701 | 0.011699 | 0.011664 | 0.011463 | 0.012101 | 0.011900 |
| 0.011933 | 0.011799 | 0.011664 | 0.011766 | 0.011564 | 0.011799 | 0.011598 |
| 0.011664 | 0.011664 | 0.011631 | 0.011597 | 0.011631 | 0.011597 | 0.011698 |
| 0.011665 | 0.011766 | 0.011698 | 0.011597 | 0.011701 | 0.011799 | 0.011804 |
| 0.011799 | 0.011699 | 0.011597 | 0.011532 | 0.011665 | 0.011598 | 0.011531 |
| 0.011638 | 0.011799 | 0.011598 | 0.011799 | 0.011564 | 0.011665 | 0.011631 |
| 0.011732 | 0.011631 | 0.011665 | 0.011631 | 0.011665 | 0.011530 | 0.011665 |
| 0.011698 | 0.011631 | 0.011698 | 0.011631 | 0.011530 | 0.011698 | 0.011934 |
| 0.012034 | 0.011967 | 0.012035 | 0.011802 | 0.012035 | 0.011530 | 0.011631 |
| 0.011668 | 0.012031 | 0.011792 | 0.011575 | 0.012045 | 0.011538 | 0.011651 |
| 0.012045 | 0.011945 | 0.011799 | 0.011967 | 0.011538 | 0.011900 | 0.011866 |
| 0.011799 | 0.011967 | 0.011664 | 0.011596 | 0.011689 | 0.011698 | 0.011703 |
| 0.011866 | 0.011634 | 0.011872 | 0.011974 | 0.011765 | 0.011900 | 0.011941 |
| 0.011669 | 0.011943 | 0.011670 | 0.011838 | 0.012036 | 0.011564 | 0.011768 |
| 0.011732 | 0.011664 | 0.011564 | 0.011564 | 0.011631 | 0.011631 | 0.011698 |
| 0.011631 | 0.011698 | 0.011597 | 0.011698 | 0.011631 | 0.011631 | 0.011698 |
| 0.011631 | 0.012068 | 0.011967 | 0.012001 | 0.011530 | 0.011631 | 0.011664 |
| 0.011664 | 0.011631 | 0.011698 | 0.011732 | 0.011597 | 0.011597 | 0.011597 |
| 0.012135 | 0.011765 | 0.011765 | 0.011564 | 0.011664 | 0.011833 | 0.011597 |
| 0.011597 | 0.011664 | 0.011631 | 0.011799 | 0.011597 | 0.011732 | 0.011866 |
| 0.011799 | 0.011631 | 0.011631 | 0.011564 | 0.011564 | 0.011732 | 0.011664 |
| 0.011564 | 0.011664 | 0.011530 | 0.011564 | 0.011698 | 0.011833 | 0.011597 |
| 0.011564 | 0.011698 | 0.011632 | 0.011530 | 0.011866 | 0.011530 | 0.011698 |
| 0.011642 | 0.011597 | 0.011900 | 0.011732 | 0.011765 | 0.011631 | 0.011732 |
| 0.011597 | 0.011933 | 0.011530 | 0.011799 | 0.011597 | 0.011597 | 0.011530 |
| 0.011765 | 0.011967 | 0.011664 | 0.011732 | 0.011564 | 0.011967 | 0.011597 |
| 0.011597 | 0.011597 | 0.011631 | 0.011732 | 0.011631 | 0.011732 | 0.011799 |
| 0.011799 | 0.011765 | 0.011664 | 0.011765 | 0.011732 | 0.011597 | 0.011564 |
| 0.011597 | 0.011597 | 0.011664 | 0.011597 | 0.011564 | 0.011732 | 0.011597 |
| 0.011631 | 0.011631 | 0.011765 | 0.011799 | 0.011698 | 0.011631 | 0.011631 |
| 0.011698 | 0.011631 | 0.011732 | 0.011597 | 0.011732 | 0.011832 | 0.012135 |
| 0.011631 | 0.012034 | 0.011647 | 0.018202 | 0.011387 | 0.011611 | 0.012002 |
| 0.011960 | 0.012010 | 0.011532 | 0.011466 | 0.011939 | 0.012027 | 0.011546 |
| 0.011629 | 0.011732 | 0.011333 | 0.011437 | 0.011685 | 0.011505 | 0.011447 |

|          |          |          |          |          |          |          |
|----------|----------|----------|----------|----------|----------|----------|
| 0.011623 | 0.011843 | 0.011839 | 0.011722 | 0.011765 | 0.011262 | 0.011737 |
| 0.011644 | 0.011765 | 0.011765 | 0.011732 | 0.011698 | 0.011698 | 0.011665 |
| 0.011698 | 0.011631 | 0.011665 | 0.011698 | 0.011665 | 0.011598 | 0.011497 |
| 0.011497 | 0.011698 | 0.011597 | 0.011698 | 0.011732 | 0.011765 | 0.011530 |
| 0.011698 | 0.011665 | 0.012001 | 0.012001 | 0.011732 | 0.011766 | 0.011799 |
| 0.011564 | 0.011564 | 0.011597 | 0.011698 | 0.011564 | 0.011799 | 0.011799 |
| 0.011833 | 0.011799 | 0.011765 | 0.011866 | 0.012035 | 0.011869 | 0.011698 |
| 0.011698 | 0.011766 | 0.011799 | 0.011631 | 0.011698 | 0.011665 | 0.011698 |
| 0.011766 | 0.011766 | 0.011799 | 0.011766 | 0.011666 | 0.011866 | 0.011833 |
| 0.011704 | 0.011598 | 0.011698 | 0.011799 | 0.011698 | 0.011833 | 0.011866 |
| 0.011967 | 0.011538 | 0.011900 | 0.011866 | 0.011799 | 0.011967 | 0.011598 |
| 0.011768 | 0.011665 | 0.011497 | 0.011497 | 0.011698 | 0.011597 | 0.011698 |
| 0.011732 | 0.011765 | 0.011530 | 0.011698 | 0.011665 | 0.012001 | 0.012001 |
| 0.011732 | 0.011766 | 0.011564 | 0.011497 | 0.012373 | 0.011775 | 0.011588 |
| 0.011799 | 0.011754 | 0.011763 | 0.011718 | 0.011830 | 0.011716 | 0.011784 |
| 0.012262 | 0.011510 | 0.011643 | 0.011614 | 0.011921 | 0.011843 | 0.011945 |
| 0.012284 | 0.011776 | 0.011940 | 0.012001 | 0.011866 | 0.011866 | 0.011905 |
| 0.011564 | 0.011732 | 0.011866 | 0.011832 | 0.011838 | 0.011832 | 0.011801 |
| 0.011664 | 0.011597 | 0.011631 | 0.011664 | 0.011564 | 0.011631 | 0.011530 |
| 0.011664 | 0.011698 | 0.011597 | 0.011564 | 0.011664 | 0.011597 | 0.011631 |
| 0.011631 | 0.011564 | 0.011631 | 0.011664 | 0.011564 | 0.011765 | 0.011799 |
| 0.011698 | 0.011765 | 0.011698 | 0.011698 | 0.011631 | 0.012034 | 0.011664 |
| 0.011687 | 0.011631 | 0.011867 | 0.011875 | 0.011732 | 0.011732 | 0.011732 |
| 0.011732 | 0.011664 | 0.011631 | 0.011664 | 0.011765 | 0.011765 | 0.011698 |
| 0.011698 | 0.011832 | 0.012000 | 0.011732 | 0.011933 | 0.011933 | 0.011799 |
| 0.011631 | 0.011698 | 0.011732 | 0.012135 | 0.011699 | 0.011732 | 0.011698 |
| 0.011732 | 0.011664 | 0.011664 | 0.011967 | 0.011900 | 0.011933 | 0.011664 |
| 0.011765 | 0.011832 | 0.011698 | 0.011765 | 0.011732 | 0.011597 | 0.011933 |
| 0.011698 | 0.011664 | 0.011664 | 0.011832 | 0.011664 | 0.011765 | 0.012001 |
| 0.011698 | 0.012079 | 0.012068 | 0.011670 | 0.011399 | 0.011774 | 0.011370 |
| 0.011500 | 0.011917 | 0.011622 | 0.011641 | 0.011402 | 0.011518 | 0.011538 |
| 0.011672 | 0.011389 | 0.011506 | 0.011390 | 0.011384 | 0.011596 | 0.011506 |
| 0.011550 | 0.011454 | 0.011765 | 0.011694 | 0.011701 | 0.011833 | 0.011900 |
| 0.011900 | 0.011766 | 0.011872 | 0.011874 | 0.012010 | 0.012050 | 0.011698 |
| 0.011933 | 0.011799 | 0.011664 | 0.011766 | 0.011564 | 0.011799 | 0.011598 |
| 0.011664 | 0.011664 | 0.011631 | 0.011597 | 0.011631 | 0.011597 | 0.011698 |
| 0.011689 | 0.011690 | 0.011677 | 0.011711 | 0.011847 | 0.011812 | 0.011812 |
| 0.011810 | 0.011733 | 0.011540 | 0.011564 | 0.011670 | 0.011840 | 0.011841 |
| 0.011632 | 0.011704 | 0.011936 | 0.011905 | 0.011834 | 0.011868 | 0.011530 |
| 0.011732 | 0.011732 | 0.011732 | 0.011698 | 0.012236 | 0.011866 | 0.011933 |
| 0.011967 | 0.012057 | 0.011674 | 0.011753 | 0.011631 | 0.011698 | 0.011262 |
| 0.011834 | 0.011732 | 0.011866 | 0.011866 | 0.012004 | 0.011866 | 0.011650 |
| 0.011533 | 0.011510 | 0.011605 | 0.011604 | 0.011709 | 0.011545 | 0.011876 |
| 0.011678 | 0.011806 | 0.011584 | 0.011510 | 0.011666 | 0.011745 | 0.011631 |
| 0.011597 | 0.011597 | 0.011665 | 0.011631 | 0.011833 | 0.011799 | 0.011732 |
| 0.011833 | 0.011900 | 0.011631 | 0.011631 | 0.011665 | 0.011665 | 0.011668 |
| 0.011737 | 0.011665 | 0.011665 | 0.011701 | 0.011833 | 0.011900 | 0.011900 |
| 0.011766 | 0.011872 | 0.011874 | 0.012010 | 0.012050 | 0.011698 | 0.011866 |
| 0.011262 | 0.011262 | 0.011635 | 0.011826 | 0.011755 | 0.011775 | 0.011656 |
| 0.011818 | 0.012063 | 0.011907 | 0.011706 | 0.011598 | 0.011799 | 0.011665 |
| 0.011766 | 0.011698 | 0.011597 | 0.011701 | 0.011799 | 0.011804 | 0.011699 |
| 0.011597 | 0.011532 | 0.011665 | 0.011598 | 0.011531 | 0.011638 | 0.011799 |
| 0.011698 | 0.011631 | 0.011665 | 0.011698 | 0.011665 | 0.011598 | 0.011799 |
| 0.011664 | 0.011698 | 0.011698 | 0.011631 | 0.011698 | 0.011933 | 0.011597 |
| 0.011631 | 0.012034 | 0.011631 | 0.011664 | 0.011631 | 0.012000 | 0.011403 |
| 0.011903 | 0.011358 | 0.011411 | 0.011866 | 0.011671 | 0.011850 | 0.011353 |
| 0.011375 | 0.011799 | 0.011900 | 0.012011 | 0.011868 | 0.012008 | 0.012137 |
| 0.012036 | 0.012075 | 0.012034 | 0.012222 | 0.012001 | 0.012741 | 0.012038 |
| 0.012777 | 0.012410 | 0.012544 | 0.012951 | 0.012000 | 0.011698 | 0.012001 |
| 0.012407 | 0.012376 | 0.011967 | 0.011866 | 0.011935 | 0.011935 | 0.011906 |

|          |          |          |          |          |          |          |
|----------|----------|----------|----------|----------|----------|----------|
| 0.011799 | 0.011807 | 0.011866 | 0.011834 | 0.012204 | 0.012270 | 0.012272 |
| 0.012171 | 0.012238 | 0.012376 | 0.012143 | 0.012408 | 0.012415 | 0.012475 |
| 0.012475 | 0.012509 | 0.012460 | 0.012476 | 0.012477 | 0.011463 | 0.012002 |
| 0.012103 | 0.012607 | 0.012078 | 0.012337 | 0.012812 | 0.011876 | 0.011766 |
| 0.011732 | 0.011732 | 0.012203 | 0.012213 | 0.012363 | 0.012068 | 0.011734 |
| S003     | 0.012337 | 0.012337 | 0.000000 | 0.011429 | 0.011429 | 0.011496 |
| 0.012046 | 0.011978 | 0.011631 | 0.011765 | 0.012001 | 0.011767 | 0.011933 |
| 0.011900 | 0.012135 | 0.011866 | 0.011967 | 0.012034 | 0.012001 | 0.011967 |
| 0.011933 | 0.011967 | 0.011732 | 0.011901 | 0.011934 | 0.011967 | 0.012011 |
| 0.011933 | 0.011967 | 0.011866 | 0.011765 | 0.012034 | 0.011833 | 0.012034 |
| 0.012001 | 0.012101 | 0.012001 | 0.012001 | 0.012034 | 0.012000 | 0.012169 |
| 0.011866 | 0.012000 | 0.012034 | 0.011967 | 0.012001 | 0.012101 | 0.012034 |
| 0.012001 | 0.012169 | 0.012069 | 0.012068 | 0.012001 | 0.012270 | 0.012001 |
| 0.011967 | 0.012001 | 0.012102 | 0.012270 | 0.012102 | 0.012001 | 0.012101 |
| 0.012034 | 0.012102 | 0.011933 | 0.012236 | 0.012203 | 0.012001 | 0.012068 |
| 0.011967 | 0.012068 | 0.011967 | 0.012101 | 0.012034 | 0.012034 | 0.012034 |
| 0.011933 | 0.011967 | 0.011933 | 0.011967 | 0.012000 | 0.012037 | 0.012101 |
| 0.012034 | 0.012000 | 0.012068 | 0.011967 | 0.012034 | 0.011933 | 0.012001 |
| 0.012169 | 0.012101 | 0.012135 | 0.012169 | 0.012001 | 0.012236 | 0.012001 |
| 0.011988 | 0.011882 | 0.012004 | 0.011685 | 0.011695 | 0.011797 | 0.011533 |
| 0.012158 | 0.011671 | 0.011761 | 0.012236 | 0.012236 | 0.011967 | 0.012068 |
| 0.012068 | 0.012034 | 0.012101 | 0.012001 | 0.012068 | 0.012034 | 0.012034 |
| 0.012001 | 0.012034 | 0.012303 | 0.012169 | 0.012068 | 0.012035 | 0.011967 |
| 0.011934 | 0.011866 | 0.012001 | 0.011967 | 0.011833 | 0.011799 | 0.011732 |
| 0.011833 | 0.011900 | 0.011967 | 0.011967 | 0.012001 | 0.012001 | 0.012007 |
| 0.012075 | 0.012001 | 0.012001 | 0.011672 | 0.011711 | 0.011656 | 0.011800 |
| 0.011772 | 0.011713 | 0.011761 | 0.011750 | 0.011706 | 0.011711 | 0.011770 |
| 0.011744 | 0.011784 | 0.011818 | 0.011733 | 0.011717 | 0.011868 | 0.011767 |
| 0.011834 | 0.011836 | 0.011834 | 0.012135 | 0.012068 | 0.012438 | 0.012169 |
| 0.012001 | 0.012068 | 0.012001 | 0.012035 | 0.011900 | 0.011866 | 0.011934 |
| 0.012001 | 0.012001 | 0.011967 | 0.011933 | 0.011967 | 0.011934 | 0.012035 |
| 0.012001 | 0.012102 | 0.012035 | 0.011934 | 0.012038 | 0.012136 | 0.012143 |
| 0.012136 | 0.012035 | 0.011934 | 0.011870 | 0.012001 | 0.011934 | 0.011867 |
| 0.011842 | 0.012136 | 0.011934 | 0.012136 | 0.011900 | 0.012001 | 0.011967 |
| 0.012068 | 0.011967 | 0.012001 | 0.011967 | 0.012001 | 0.011867 | 0.012001 |
| 0.012035 | 0.011967 | 0.012035 | 0.011967 | 0.012001 | 0.012035 | 0.012270 |
| 0.012102 | 0.012034 | 0.012102 | 0.012106 | 0.012102 | 0.012001 | 0.011967 |
| 0.011871 | 0.011990 | 0.011929 | 0.011884 | 0.012113 | 0.011811 | 0.011729 |
| 0.012080 | 0.011809 | 0.012169 | 0.012371 | 0.012017 | 0.012236 | 0.012203 |
| 0.012135 | 0.012303 | 0.012056 | 0.011926 | 0.011815 | 0.011934 | 0.011974 |
| 0.012068 | 0.011904 | 0.012245 | 0.012110 | 0.012135 | 0.012169 | 0.012247 |
| 0.012042 | 0.012045 | 0.012042 | 0.012075 | 0.012238 | 0.011900 | 0.011835 |
| 0.012068 | 0.012001 | 0.011866 | 0.011900 | 0.011967 | 0.011967 | 0.012034 |
| 0.011967 | 0.012034 | 0.011933 | 0.011967 | 0.011967 | 0.011967 | 0.012034 |
| 0.011967 | 0.012135 | 0.012034 | 0.012068 | 0.011866 | 0.011967 | 0.012001 |
| 0.012001 | 0.011967 | 0.012034 | 0.012001 | 0.011933 | 0.011933 | 0.011933 |
| 0.012135 | 0.012034 | 0.012101 | 0.011900 | 0.012000 | 0.012169 | 0.011933 |
| 0.011933 | 0.012000 | 0.011967 | 0.012135 | 0.011933 | 0.011799 | 0.011933 |
| 0.011866 | 0.011967 | 0.011967 | 0.011900 | 0.011900 | 0.012068 | 0.012001 |
| 0.011900 | 0.012000 | 0.011765 | 0.011799 | 0.011933 | 0.011800 | 0.011833 |
| 0.011800 | 0.011933 | 0.011867 | 0.011765 | 0.011933 | 0.011765 | 0.011933 |
| 0.011882 | 0.011933 | 0.011866 | 0.011967 | 0.012034 | 0.011967 | 0.012068 |
| 0.011933 | 0.012270 | 0.011866 | 0.012068 | 0.011866 | 0.011866 | 0.011866 |
| 0.012101 | 0.012001 | 0.011933 | 0.012068 | 0.011900 | 0.012034 | 0.011866 |
| 0.011933 | 0.011933 | 0.011967 | 0.012068 | 0.011967 | 0.012068 | 0.012135 |
| 0.012135 | 0.012101 | 0.012001 | 0.012102 | 0.012068 | 0.011933 | 0.011900 |
| 0.011933 | 0.011933 | 0.011933 | 0.011866 | 0.011900 | 0.012068 | 0.011933 |
| 0.011900 | 0.011967 | 0.012101 | 0.012068 | 0.012034 | 0.011967 | 0.011967 |
| 0.011967 | 0.011967 | 0.012068 | 0.011933 | 0.012068 | 0.012169 | 0.012135 |
| 0.011967 | 0.012102 | 0.011751 | 0.018314 | 0.011649 | 0.011855 | 0.011828 |

|          |          |          |          |          |          |          |
|----------|----------|----------|----------|----------|----------|----------|
| 0.011787 | 0.011835 | 0.011899 | 0.011641 | 0.011885 | 0.011855 | 0.011972 |
| 0.011440 | 0.011610 | 0.011685 | 0.011772 | 0.011685 | 0.011752 | 0.011749 |
| 0.011624 | 0.011619 | 0.011617 | 0.011523 | 0.012102 | 0.012135 | 0.012143 |
| 0.011747 | 0.012102 | 0.012102 | 0.012001 | 0.012034 | 0.012035 | 0.012002 |
| 0.012034 | 0.011967 | 0.012001 | 0.012035 | 0.012001 | 0.011934 | 0.011967 |
| 0.011967 | 0.012035 | 0.011934 | 0.012035 | 0.012068 | 0.012102 | 0.012001 |
| 0.011967 | 0.011934 | 0.012068 | 0.012068 | 0.012068 | 0.012103 | 0.012136 |
| 0.011900 | 0.011900 | 0.011934 | 0.012035 | 0.011900 | 0.012136 | 0.012136 |
| 0.012169 | 0.012169 | 0.012102 | 0.012203 | 0.012102 | 0.012206 | 0.012034 |
| 0.012035 | 0.012102 | 0.012136 | 0.011900 | 0.012035 | 0.012001 | 0.012034 |
| 0.012103 | 0.012102 | 0.012136 | 0.012102 | 0.012004 | 0.012203 | 0.012169 |
| 0.012043 | 0.011934 | 0.012035 | 0.012136 | 0.012035 | 0.012102 | 0.012202 |
| 0.012371 | 0.012017 | 0.012236 | 0.012203 | 0.012135 | 0.012303 | 0.011766 |
| 0.012105 | 0.011935 | 0.011967 | 0.011967 | 0.012035 | 0.011934 | 0.012035 |
| 0.012068 | 0.012102 | 0.012001 | 0.011967 | 0.011934 | 0.012068 | 0.012068 |
| 0.012068 | 0.012103 | 0.012169 | 0.012102 | 0.012474 | 0.011953 | 0.011975 |
| 0.011939 | 0.012101 | 0.011974 | 0.012100 | 0.012006 | 0.012061 | 0.011888 |
| 0.012469 | 0.011787 | 0.012123 | 0.011856 | 0.012094 | 0.012149 | 0.012047 |
| 0.012421 | 0.011852 | 0.012279 | 0.012337 | 0.012202 | 0.011866 | 0.012244 |
| 0.011900 | 0.012068 | 0.012202 | 0.012169 | 0.012176 | 0.011900 | 0.011599 |
| 0.012001 | 0.011933 | 0.011967 | 0.012001 | 0.011900 | 0.011967 | 0.011866 |
| 0.011933 | 0.011967 | 0.011933 | 0.011900 | 0.012001 | 0.011933 | 0.011967 |
| 0.011967 | 0.011900 | 0.011967 | 0.012001 | 0.011900 | 0.012101 | 0.012135 |
| 0.012034 | 0.012034 | 0.012034 | 0.012034 | 0.011967 | 0.012102 | 0.012000 |
| 0.011582 | 0.011900 | 0.011732 | 0.011705 | 0.012068 | 0.012068 | 0.012068 |
| 0.012068 | 0.012001 | 0.011967 | 0.012001 | 0.012101 | 0.012101 | 0.012034 |
| 0.012034 | 0.012101 | 0.012068 | 0.012068 | 0.012270 | 0.012270 | 0.012135 |
| 0.011967 | 0.012034 | 0.012068 | 0.012203 | 0.012035 | 0.012068 | 0.012034 |
| 0.012068 | 0.011933 | 0.011933 | 0.012236 | 0.012236 | 0.012202 | 0.012001 |
| 0.012102 | 0.012169 | 0.012034 | 0.012102 | 0.012068 | 0.011933 | 0.012001 |
| 0.012034 | 0.012001 | 0.011933 | 0.012169 | 0.012001 | 0.012101 | 0.012135 |
| 0.011933 | 0.012114 | 0.012135 | 0.011711 | 0.011568 | 0.011842 | 0.011473 |
| 0.011610 | 0.011605 | 0.011728 | 0.011820 | 0.011793 | 0.011824 | 0.011698 |
| 0.011672 | 0.011653 | 0.011728 | 0.011523 | 0.011653 | 0.011596 | 0.011953 |
| 0.011927 | 0.011847 | 0.011800 | 0.011800 | 0.011971 | 0.011900 | 0.011900 |
| 0.011900 | 0.011968 | 0.012143 | 0.011874 | 0.012214 | 0.012227 | 0.012034 |
| 0.012001 | 0.012068 | 0.012001 | 0.012035 | 0.011900 | 0.011866 | 0.011934 |
| 0.012001 | 0.012001 | 0.011967 | 0.011933 | 0.011967 | 0.011934 | 0.012035 |
| 0.011794 | 0.011795 | 0.011780 | 0.011814 | 0.011950 | 0.011915 | 0.011914 |
| 0.011912 | 0.011867 | 0.011651 | 0.011672 | 0.011772 | 0.011942 | 0.011943 |
| 0.011767 | 0.011806 | 0.012071 | 0.012041 | 0.011969 | 0.012003 | 0.012135 |
| 0.012068 | 0.012135 | 0.012135 | 0.012034 | 0.012338 | 0.012202 | 0.012270 |
| 0.012304 | 0.012129 | 0.011948 | 0.011892 | 0.011799 | 0.012135 | 0.012135 |
| 0.012171 | 0.012169 | 0.012202 | 0.012202 | 0.012201 | 0.012337 | 0.011719 |
| 0.011703 | 0.011718 | 0.011741 | 0.011706 | 0.011812 | 0.011657 | 0.011706 |
| 0.011746 | 0.011630 | 0.011680 | 0.011697 | 0.011800 | 0.011848 | 0.011967 |
| 0.011934 | 0.011866 | 0.012001 | 0.011967 | 0.011833 | 0.011799 | 0.011732 |
| 0.011833 | 0.011900 | 0.011967 | 0.011967 | 0.012001 | 0.012001 | 0.012007 |
| 0.012075 | 0.012001 | 0.012001 | 0.011971 | 0.011900 | 0.011900 | 0.011900 |
| 0.011968 | 0.012143 | 0.011874 | 0.012214 | 0.012227 | 0.012034 | 0.012203 |
| 0.012135 | 0.012135 | 0.011974 | 0.011896 | 0.012069 | 0.012117 | 0.011656 |
| 0.012094 | 0.012063 | 0.011907 | 0.011978 | 0.011934 | 0.012136 | 0.012001 |
| 0.012102 | 0.012035 | 0.011934 | 0.012038 | 0.012136 | 0.012143 | 0.012035 |
| 0.011934 | 0.011870 | 0.012001 | 0.011934 | 0.011867 | 0.011842 | 0.012136 |
| 0.012034 | 0.011967 | 0.012001 | 0.012035 | 0.012001 | 0.011934 | 0.011732 |
| 0.012001 | 0.012034 | 0.012034 | 0.011967 | 0.012034 | 0.012270 | 0.011866 |
| 0.011967 | 0.012102 | 0.011967 | 0.012001 | 0.011967 | 0.012068 | 0.011746 |
| 0.011566 | 0.011613 | 0.011512 | 0.011664 | 0.011753 | 0.011671 | 0.011604 |
| 0.011480 | 0.011597 | 0.011698 | 0.011603 | 0.011498 | 0.011602 | 0.011935 |
| 0.011632 | 0.011703 | 0.011832 | 0.011709 | 0.011463 | 0.012404 | 0.011498 |

|          |          |          |          |          |          |          |
|----------|----------|----------|----------|----------|----------|----------|
| 0.012103 | 0.011869 | 0.012071 | 0.012511 | 0.012068 | 0.011665 | 0.011799 |
| 0.012373 | 0.012140 | 0.011698 | 0.011665 | 0.011531 | 0.011531 | 0.011771 |
| 0.011597 | 0.011569 | 0.011664 | 0.011430 | 0.012103 | 0.012270 | 0.012137 |
| 0.012070 | 0.012204 | 0.012173 | 0.011974 | 0.012543 | 0.012551 | 0.012610 |
| 0.012577 | 0.012610 | 0.012563 | 0.012577 | 0.012613 | 0.012068 | 0.012170 |
| 0.012171 | 0.012843 | 0.012214 | 0.012405 | 0.012879 | 0.011740 | 0.011632 |
| 0.011799 | 0.011799 | 0.012137 | 0.012048 | 0.012187 | 0.012135 | 0.011633 |
| S004     | 0.012101 | 0.012101 | 0.011429 | 0.000000 | 0.000000 | 0.011262 |
| 0.011807 | 0.011739 | 0.011396 | 0.011698 | 0.011765 | 0.011733 | 0.011698 |
| 0.011664 | 0.011900 | 0.011631 | 0.011731 | 0.011799 | 0.011765 | 0.011731 |
| 0.011698 | 0.011732 | 0.011496 | 0.011665 | 0.011699 | 0.011732 | 0.011773 |
| 0.011698 | 0.011732 | 0.011631 | 0.011530 | 0.011799 | 0.011698 | 0.011799 |
| 0.011765 | 0.011866 | 0.011765 | 0.011765 | 0.011799 | 0.011765 | 0.011933 |
| 0.011631 | 0.011765 | 0.011799 | 0.011732 | 0.011765 | 0.011866 | 0.011799 |
| 0.011765 | 0.011933 | 0.011833 | 0.011832 | 0.011765 | 0.012034 | 0.011765 |
| 0.011731 | 0.011765 | 0.011866 | 0.012034 | 0.011866 | 0.011765 | 0.011866 |
| 0.011799 | 0.011866 | 0.011765 | 0.012000 | 0.011967 | 0.011765 | 0.011832 |
| 0.011732 | 0.011832 | 0.011799 | 0.011866 | 0.011799 | 0.011799 | 0.011799 |
| 0.011698 | 0.011732 | 0.011698 | 0.011732 | 0.011765 | 0.011801 | 0.011866 |
| 0.011799 | 0.011765 | 0.011832 | 0.011731 | 0.011799 | 0.011698 | 0.011765 |
| 0.011933 | 0.011866 | 0.011900 | 0.011933 | 0.011765 | 0.012000 | 0.011765 |
| 0.011950 | 0.011845 | 0.011966 | 0.011646 | 0.011620 | 0.011760 | 0.011454 |
| 0.012085 | 0.011620 | 0.011678 | 0.012000 | 0.012000 | 0.011732 | 0.011832 |
| 0.011832 | 0.011799 | 0.011866 | 0.011765 | 0.011832 | 0.011799 | 0.011799 |
| 0.011765 | 0.011799 | 0.012068 | 0.011933 | 0.011832 | 0.011799 | 0.011732 |
| 0.011698 | 0.011631 | 0.011765 | 0.011732 | 0.011597 | 0.011564 | 0.011497 |
| 0.011597 | 0.011665 | 0.011732 | 0.011732 | 0.011766 | 0.011765 | 0.011770 |
| 0.011838 | 0.011765 | 0.011765 | 0.011636 | 0.011675 | 0.011621 | 0.011766 |
| 0.011738 | 0.011679 | 0.011724 | 0.011716 | 0.011672 | 0.011677 | 0.011736 |
| 0.011708 | 0.011750 | 0.011784 | 0.011699 | 0.011683 | 0.011834 | 0.011733 |
| 0.011800 | 0.011802 | 0.011800 | 0.011899 | 0.011832 | 0.012202 | 0.011934 |
| 0.011765 | 0.011833 | 0.011765 | 0.011799 | 0.011665 | 0.011631 | 0.011698 |
| 0.011765 | 0.011765 | 0.011732 | 0.011698 | 0.011731 | 0.011698 | 0.011799 |
| 0.011765 | 0.011866 | 0.011799 | 0.011698 | 0.011802 | 0.011900 | 0.011905 |
| 0.011900 | 0.011799 | 0.011698 | 0.011633 | 0.011765 | 0.011698 | 0.011631 |
| 0.011604 | 0.011900 | 0.011698 | 0.011900 | 0.011664 | 0.011766 | 0.011732 |
| 0.011833 | 0.011732 | 0.011765 | 0.011732 | 0.011765 | 0.011631 | 0.011765 |
| 0.011799 | 0.011732 | 0.011799 | 0.011732 | 0.011765 | 0.011799 | 0.012035 |
| 0.011866 | 0.011799 | 0.011867 | 0.011869 | 0.011867 | 0.011765 | 0.011732 |
| 0.011702 | 0.011950 | 0.011838 | 0.011643 | 0.011875 | 0.011640 | 0.011690 |
| 0.011841 | 0.011774 | 0.011933 | 0.012135 | 0.011846 | 0.012000 | 0.011967 |
| 0.011899 | 0.012068 | 0.011842 | 0.011678 | 0.011731 | 0.011799 | 0.011838 |
| 0.011967 | 0.011870 | 0.012007 | 0.012008 | 0.012001 | 0.012034 | 0.012111 |
| 0.011906 | 0.012011 | 0.012008 | 0.011940 | 0.012204 | 0.011664 | 0.011802 |
| 0.011832 | 0.011765 | 0.011631 | 0.011664 | 0.011732 | 0.011732 | 0.011799 |
| 0.011732 | 0.011799 | 0.011698 | 0.011732 | 0.011732 | 0.011731 | 0.011799 |
| 0.011732 | 0.011900 | 0.011799 | 0.011833 | 0.011631 | 0.011732 | 0.011765 |
| 0.011765 | 0.011731 | 0.011799 | 0.011765 | 0.011698 | 0.011698 | 0.011698 |
| 0.011900 | 0.011799 | 0.011866 | 0.011664 | 0.011765 | 0.011933 | 0.011698 |
| 0.011698 | 0.011765 | 0.011731 | 0.011900 | 0.011698 | 0.011564 | 0.011698 |
| 0.011631 | 0.011732 | 0.011731 | 0.011664 | 0.011664 | 0.011832 | 0.011765 |
| 0.011664 | 0.011765 | 0.011631 | 0.011664 | 0.011799 | 0.011665 | 0.011698 |
| 0.011665 | 0.011799 | 0.011732 | 0.011631 | 0.011698 | 0.011631 | 0.011799 |
| 0.011813 | 0.011698 | 0.011732 | 0.011833 | 0.011799 | 0.011732 | 0.011832 |
| 0.011698 | 0.012034 | 0.011631 | 0.011832 | 0.011631 | 0.011631 | 0.011631 |
| 0.011866 | 0.011766 | 0.011765 | 0.011832 | 0.011664 | 0.011799 | 0.011631 |
| 0.011698 | 0.011698 | 0.011731 | 0.011832 | 0.011731 | 0.011832 | 0.011900 |
| 0.011900 | 0.011866 | 0.011765 | 0.011866 | 0.011832 | 0.011698 | 0.011664 |
| 0.011698 | 0.011698 | 0.011765 | 0.011631 | 0.011664 | 0.011832 | 0.011698 |
| 0.011664 | 0.011732 | 0.011866 | 0.011832 | 0.011799 | 0.011731 | 0.011732 |

|          |          |          |          |          |          |          |
|----------|----------|----------|----------|----------|----------|----------|
| 0.011799 | 0.011732 | 0.011832 | 0.011698 | 0.011832 | 0.011933 | 0.011967 |
| 0.011732 | 0.011866 | 0.011716 | 0.018239 | 0.011518 | 0.011917 | 0.011793 |
| 0.011753 | 0.011799 | 0.011794 | 0.011524 | 0.011885 | 0.011820 | 0.011850 |
| 0.011392 | 0.011549 | 0.011646 | 0.011730 | 0.011646 | 0.011751 | 0.011749 |
| 0.011577 | 0.011544 | 0.011542 | 0.011391 | 0.011866 | 0.011900 | 0.011906 |
| 0.011713 | 0.011866 | 0.011866 | 0.011765 | 0.011799 | 0.011799 | 0.011766 |
| 0.011799 | 0.011732 | 0.011765 | 0.011799 | 0.011766 | 0.011698 | 0.011732 |
| 0.011732 | 0.011799 | 0.011698 | 0.011799 | 0.011833 | 0.011866 | 0.011765 |
| 0.011732 | 0.011698 | 0.011833 | 0.011833 | 0.011833 | 0.011867 | 0.011900 |
| 0.011665 | 0.011665 | 0.011698 | 0.011799 | 0.011665 | 0.011900 | 0.011900 |
| 0.011933 | 0.011933 | 0.011866 | 0.011967 | 0.011867 | 0.011970 | 0.011799 |
| 0.011799 | 0.011866 | 0.011900 | 0.011665 | 0.011799 | 0.011765 | 0.011799 |
| 0.011867 | 0.011866 | 0.011900 | 0.011867 | 0.011767 | 0.011967 | 0.011934 |
| 0.011805 | 0.011698 | 0.011799 | 0.011900 | 0.011799 | 0.011866 | 0.011967 |
| 0.012135 | 0.011846 | 0.012000 | 0.011967 | 0.011899 | 0.012068 | 0.011699 |
| 0.011869 | 0.011766 | 0.011732 | 0.011732 | 0.011799 | 0.011698 | 0.011799 |
| 0.011833 | 0.011866 | 0.011765 | 0.011732 | 0.011698 | 0.011833 | 0.011833 |
| 0.011833 | 0.011867 | 0.011933 | 0.011866 | 0.012440 | 0.011918 | 0.011764 |
| 0.011904 | 0.011858 | 0.011904 | 0.011822 | 0.011970 | 0.011888 | 0.011853 |
| 0.012365 | 0.011753 | 0.011882 | 0.011821 | 0.012059 | 0.011979 | 0.012013 |
| 0.012386 | 0.011776 | 0.012041 | 0.012101 | 0.011967 | 0.011631 | 0.012007 |
| 0.011664 | 0.011832 | 0.011967 | 0.011933 | 0.011939 | 0.011664 | 0.011363 |
| 0.011765 | 0.011698 | 0.011732 | 0.011765 | 0.011664 | 0.011732 | 0.011631 |
| 0.011698 | 0.011732 | 0.011698 | 0.011664 | 0.011765 | 0.011698 | 0.011732 |
| 0.011731 | 0.011664 | 0.011732 | 0.011765 | 0.011664 | 0.011866 | 0.011900 |
| 0.011799 | 0.011799 | 0.011799 | 0.011799 | 0.011731 | 0.011866 | 0.011765 |
| 0.011373 | 0.011732 | 0.011699 | 0.011671 | 0.011832 | 0.011832 | 0.011832 |
| 0.011832 | 0.011765 | 0.011731 | 0.011765 | 0.011866 | 0.011866 | 0.011799 |
| 0.011799 | 0.011933 | 0.011832 | 0.011832 | 0.012034 | 0.012034 | 0.011899 |
| 0.011731 | 0.011799 | 0.011832 | 0.011967 | 0.011799 | 0.011832 | 0.011799 |
| 0.011832 | 0.011698 | 0.011698 | 0.012001 | 0.012001 | 0.011967 | 0.011765 |
| 0.011866 | 0.011933 | 0.011799 | 0.011866 | 0.011832 | 0.011698 | 0.011765 |
| 0.011799 | 0.011765 | 0.011698 | 0.011933 | 0.011765 | 0.011866 | 0.011900 |
| 0.011799 | 0.011875 | 0.011900 | 0.011629 | 0.011455 | 0.011808 | 0.011421 |
| 0.011719 | 0.011527 | 0.011692 | 0.011730 | 0.011695 | 0.011722 | 0.011591 |
| 0.011570 | 0.011587 | 0.011617 | 0.011456 | 0.011545 | 0.011663 | 0.011912 |
| 0.011889 | 0.011769 | 0.011765 | 0.011730 | 0.011734 | 0.011665 | 0.011665 |
| 0.011665 | 0.011733 | 0.011906 | 0.011636 | 0.011976 | 0.011979 | 0.011799 |
| 0.011765 | 0.011833 | 0.011765 | 0.011799 | 0.011665 | 0.011631 | 0.011698 |
| 0.011765 | 0.011765 | 0.011732 | 0.011698 | 0.011731 | 0.011698 | 0.011799 |
| 0.011759 | 0.011760 | 0.011745 | 0.011780 | 0.011916 | 0.011880 | 0.011880 |
| 0.011878 | 0.011834 | 0.011614 | 0.011636 | 0.011738 | 0.011908 | 0.011909 |
| 0.011733 | 0.011772 | 0.012037 | 0.012007 | 0.011935 | 0.011969 | 0.011900 |
| 0.011832 | 0.011900 | 0.011899 | 0.011799 | 0.012102 | 0.011967 | 0.012034 |
| 0.012068 | 0.011879 | 0.011777 | 0.011857 | 0.011732 | 0.011900 | 0.011900 |
| 0.011935 | 0.011967 | 0.011967 | 0.011967 | 0.012161 | 0.012101 | 0.011685 |
| 0.011601 | 0.011580 | 0.011707 | 0.011672 | 0.011641 | 0.011620 | 0.011672 |
| 0.011712 | 0.011543 | 0.011584 | 0.011622 | 0.011766 | 0.011813 | 0.011732 |
| 0.011698 | 0.011631 | 0.011765 | 0.011732 | 0.011597 | 0.011564 | 0.011497 |
| 0.011597 | 0.011665 | 0.011732 | 0.011732 | 0.011766 | 0.011765 | 0.011770 |
| 0.011838 | 0.011765 | 0.011765 | 0.011734 | 0.011665 | 0.011665 | 0.011665 |
| 0.011733 | 0.011906 | 0.011636 | 0.011976 | 0.011979 | 0.011799 | 0.011967 |
| 0.011900 | 0.011900 | 0.011737 | 0.011861 | 0.011825 | 0.011878 | 0.011621 |
| 0.011921 | 0.011972 | 0.011823 | 0.011808 | 0.011698 | 0.011900 | 0.011765 |
| 0.011866 | 0.011799 | 0.011698 | 0.011802 | 0.011900 | 0.011905 | 0.011799 |
| 0.011698 | 0.011633 | 0.011765 | 0.011698 | 0.011631 | 0.011604 | 0.011900 |
| 0.011799 | 0.011732 | 0.011765 | 0.011799 | 0.011766 | 0.011698 | 0.011631 |
| 0.011765 | 0.011799 | 0.011799 | 0.011731 | 0.011799 | 0.012034 | 0.011631 |
| 0.011732 | 0.011866 | 0.011731 | 0.011765 | 0.011731 | 0.011832 | 0.011660 |
| 0.011454 | 0.011528 | 0.011461 | 0.011584 | 0.011671 | 0.011635 | 0.011520 |



|          |          |          |          |          |          |          |
|----------|----------|----------|----------|----------|----------|----------|
| 0.011428 | 0.011362 | 0.011463 | 0.011569 | 0.011430 | 0.011534 | 0.011699 |
| 0.011598 | 0.011669 | 0.011597 | 0.011675 | 0.011228 | 0.012169 | 0.011464 |
| 0.012001 | 0.011835 | 0.011970 | 0.012443 | 0.011832 | 0.011564 | 0.011564 |
| 0.012339 | 0.011903 | 0.011530 | 0.011430 | 0.011497 | 0.011497 | 0.011534 |
| 0.011362 | 0.011331 | 0.011429 | 0.011396 | 0.012036 | 0.012102 | 0.012103 |
| 0.012002 | 0.012103 | 0.012207 | 0.011940 | 0.012475 | 0.012483 | 0.012542 |
| 0.012543 | 0.012577 | 0.012494 | 0.012543 | 0.012545 | 0.011832 | 0.012069 |
| 0.012137 | 0.012606 | 0.012146 | 0.012169 | 0.012643 | 0.011706 | 0.011598 |
| 0.011564 | 0.011564 | 0.012035 | 0.011965 | 0.012151 | 0.011900 | 0.011566 |
| S005     | 0.012101 | 0.012101 | 0.011429 | 0.000000 | 0.000000 | 0.011262 |
| 0.011807 | 0.011739 | 0.011396 | 0.011698 | 0.011765 | 0.011733 | 0.011698 |
| 0.011664 | 0.011900 | 0.011631 | 0.011731 | 0.011799 | 0.011765 | 0.011731 |
| 0.011698 | 0.011732 | 0.011496 | 0.011665 | 0.011699 | 0.011732 | 0.011773 |
| 0.011698 | 0.011732 | 0.011631 | 0.011530 | 0.011799 | 0.011698 | 0.011799 |
| 0.011765 | 0.011866 | 0.011765 | 0.011765 | 0.011799 | 0.011765 | 0.011933 |
| 0.011631 | 0.011765 | 0.011799 | 0.011732 | 0.011765 | 0.011866 | 0.011799 |
| 0.011765 | 0.011933 | 0.011833 | 0.011832 | 0.011765 | 0.012034 | 0.011765 |
| 0.011731 | 0.011765 | 0.011866 | 0.012034 | 0.011866 | 0.011765 | 0.011866 |
| 0.011799 | 0.011866 | 0.011765 | 0.012000 | 0.011967 | 0.011765 | 0.011832 |
| 0.011732 | 0.011832 | 0.011799 | 0.011866 | 0.011799 | 0.011799 | 0.011799 |
| 0.011698 | 0.011732 | 0.011698 | 0.011732 | 0.011765 | 0.011801 | 0.011866 |
| 0.011799 | 0.011765 | 0.011832 | 0.011731 | 0.011799 | 0.011698 | 0.011765 |
| 0.011933 | 0.011866 | 0.011900 | 0.011933 | 0.011765 | 0.012000 | 0.011765 |
| 0.011950 | 0.011845 | 0.011966 | 0.011646 | 0.011620 | 0.011760 | 0.011454 |
| 0.012085 | 0.011620 | 0.011678 | 0.012000 | 0.012000 | 0.011732 | 0.011832 |
| 0.011832 | 0.011799 | 0.011866 | 0.011765 | 0.011832 | 0.011799 | 0.011799 |
| 0.011765 | 0.011799 | 0.012068 | 0.011933 | 0.011832 | 0.011799 | 0.011732 |
| 0.011698 | 0.011631 | 0.011765 | 0.011732 | 0.011597 | 0.011564 | 0.011497 |
| 0.011597 | 0.011665 | 0.011732 | 0.011732 | 0.011766 | 0.011765 | 0.011770 |
| 0.011838 | 0.011765 | 0.011765 | 0.011636 | 0.011675 | 0.011621 | 0.011766 |
| 0.011738 | 0.011679 | 0.011724 | 0.011716 | 0.011672 | 0.011677 | 0.011736 |
| 0.011708 | 0.011750 | 0.011784 | 0.011699 | 0.011683 | 0.011834 | 0.011733 |
| 0.011800 | 0.011802 | 0.011800 | 0.011899 | 0.011832 | 0.012202 | 0.011934 |
| 0.011765 | 0.011833 | 0.011765 | 0.011799 | 0.011665 | 0.011631 | 0.011698 |
| 0.011765 | 0.011765 | 0.011732 | 0.011698 | 0.011731 | 0.011698 | 0.011799 |
| 0.011765 | 0.011866 | 0.011799 | 0.011698 | 0.011802 | 0.011900 | 0.011905 |
| 0.011900 | 0.011799 | 0.011698 | 0.011633 | 0.011765 | 0.011698 | 0.011631 |
| 0.011604 | 0.011900 | 0.011698 | 0.011900 | 0.011664 | 0.011766 | 0.011732 |
| 0.011833 | 0.011732 | 0.011765 | 0.011732 | 0.011765 | 0.011631 | 0.011765 |
| 0.011799 | 0.011732 | 0.011799 | 0.011732 | 0.011765 | 0.011799 | 0.012035 |
| 0.011866 | 0.011799 | 0.011867 | 0.011869 | 0.011867 | 0.011765 | 0.011732 |
| 0.011702 | 0.011950 | 0.011838 | 0.011643 | 0.011875 | 0.011640 | 0.011690 |
| 0.011841 | 0.011774 | 0.011933 | 0.012135 | 0.011846 | 0.012000 | 0.011967 |
| 0.011899 | 0.012068 | 0.011842 | 0.011678 | 0.011731 | 0.011799 | 0.011838 |
| 0.011967 | 0.011870 | 0.012007 | 0.012008 | 0.012001 | 0.012034 | 0.012111 |
| 0.011906 | 0.012011 | 0.012008 | 0.011940 | 0.012204 | 0.011664 | 0.011802 |
| 0.011832 | 0.011765 | 0.011631 | 0.011664 | 0.011732 | 0.011732 | 0.011799 |
| 0.011732 | 0.011799 | 0.011698 | 0.011732 | 0.011732 | 0.011731 | 0.011799 |
| 0.011732 | 0.011900 | 0.011799 | 0.011833 | 0.011631 | 0.011732 | 0.011765 |
| 0.011765 | 0.011731 | 0.011799 | 0.011765 | 0.011698 | 0.011698 | 0.011698 |
| 0.011900 | 0.011799 | 0.011866 | 0.011664 | 0.011765 | 0.011933 | 0.011698 |
| 0.011698 | 0.011765 | 0.011731 | 0.011900 | 0.011698 | 0.011564 | 0.011698 |
| 0.011631 | 0.011732 | 0.011731 | 0.011664 | 0.011664 | 0.011832 | 0.011765 |
| 0.011664 | 0.011765 | 0.011631 | 0.011664 | 0.011799 | 0.011665 | 0.011698 |
| 0.011665 | 0.011799 | 0.011732 | 0.011631 | 0.011698 | 0.011631 | 0.011799 |
| 0.011813 | 0.011698 | 0.011732 | 0.011833 | 0.011799 | 0.011732 | 0.011832 |
| 0.011698 | 0.012034 | 0.011631 | 0.011832 | 0.011631 | 0.011631 | 0.011631 |
| 0.011866 | 0.011766 | 0.011765 | 0.011832 | 0.011664 | 0.011799 | 0.011631 |
| 0.011698 | 0.011698 | 0.011731 | 0.011832 | 0.011731 | 0.011832 | 0.011900 |
| 0.011900 | 0.011866 | 0.011765 | 0.011866 | 0.011832 | 0.011698 | 0.011664 |

|          |          |          |          |          |          |          |
|----------|----------|----------|----------|----------|----------|----------|
| 0.011698 | 0.011698 | 0.011765 | 0.011631 | 0.011664 | 0.011832 | 0.011698 |
| 0.011664 | 0.011732 | 0.011866 | 0.011832 | 0.011799 | 0.011731 | 0.011732 |
| 0.011799 | 0.011732 | 0.011832 | 0.011698 | 0.011832 | 0.011933 | 0.011967 |
| 0.011732 | 0.011866 | 0.011716 | 0.018239 | 0.011518 | 0.011917 | 0.011793 |
| 0.011753 | 0.011799 | 0.011794 | 0.011524 | 0.011885 | 0.011820 | 0.011850 |
| 0.011392 | 0.011549 | 0.011646 | 0.011730 | 0.011646 | 0.011751 | 0.011749 |
| 0.011577 | 0.011544 | 0.011542 | 0.011391 | 0.011866 | 0.011900 | 0.011906 |
| 0.011713 | 0.011866 | 0.011866 | 0.011765 | 0.011799 | 0.011799 | 0.011766 |
| 0.011799 | 0.011732 | 0.011765 | 0.011799 | 0.011766 | 0.011698 | 0.011732 |
| 0.011732 | 0.011799 | 0.011698 | 0.011799 | 0.011833 | 0.011866 | 0.011765 |
| 0.011732 | 0.011698 | 0.011833 | 0.011833 | 0.011833 | 0.011867 | 0.011900 |
| 0.011665 | 0.011665 | 0.011698 | 0.011799 | 0.011665 | 0.011900 | 0.011900 |
| 0.011933 | 0.011933 | 0.011866 | 0.011967 | 0.011867 | 0.011970 | 0.011799 |
| 0.011799 | 0.011866 | 0.011900 | 0.011665 | 0.011799 | 0.011765 | 0.011799 |
| 0.011867 | 0.011866 | 0.011900 | 0.011867 | 0.011767 | 0.011967 | 0.011934 |
| 0.011805 | 0.011698 | 0.011799 | 0.011900 | 0.011799 | 0.011866 | 0.011967 |
| 0.012135 | 0.011846 | 0.012000 | 0.011967 | 0.011899 | 0.012068 | 0.011699 |
| 0.011869 | 0.011766 | 0.011732 | 0.011732 | 0.011799 | 0.011698 | 0.011799 |
| 0.011833 | 0.011866 | 0.011765 | 0.011732 | 0.011698 | 0.011833 | 0.011833 |
| 0.011833 | 0.011867 | 0.011933 | 0.011866 | 0.012440 | 0.011918 | 0.011764 |
| 0.011904 | 0.011858 | 0.011904 | 0.011822 | 0.011970 | 0.011888 | 0.011853 |
| 0.012365 | 0.011753 | 0.011882 | 0.011821 | 0.012059 | 0.011979 | 0.012013 |
| 0.012386 | 0.011776 | 0.012041 | 0.012101 | 0.011967 | 0.011631 | 0.012007 |
| 0.011664 | 0.011832 | 0.011967 | 0.011933 | 0.011939 | 0.011664 | 0.011363 |
| 0.011765 | 0.011698 | 0.011732 | 0.011765 | 0.011664 | 0.011732 | 0.011631 |
| 0.011698 | 0.011732 | 0.011698 | 0.011664 | 0.011765 | 0.011698 | 0.011732 |
| 0.011731 | 0.011664 | 0.011732 | 0.011765 | 0.011664 | 0.011866 | 0.011900 |
| 0.011799 | 0.011799 | 0.011799 | 0.011799 | 0.011731 | 0.011866 | 0.011765 |
| 0.011373 | 0.011732 | 0.011699 | 0.011671 | 0.011832 | 0.011832 | 0.011832 |
| 0.011832 | 0.011765 | 0.011731 | 0.011765 | 0.011866 | 0.011866 | 0.011799 |
| 0.011799 | 0.011933 | 0.011832 | 0.011832 | 0.012034 | 0.012034 | 0.011899 |
| 0.011731 | 0.011799 | 0.011832 | 0.011967 | 0.011799 | 0.011832 | 0.011799 |
| 0.011832 | 0.011698 | 0.011698 | 0.012001 | 0.012001 | 0.011967 | 0.011765 |
| 0.011866 | 0.011933 | 0.011799 | 0.011866 | 0.011832 | 0.011698 | 0.011765 |
| 0.011799 | 0.011765 | 0.011698 | 0.011933 | 0.011765 | 0.011866 | 0.011900 |
| 0.011799 | 0.011875 | 0.011900 | 0.011629 | 0.011455 | 0.011808 | 0.011421 |
| 0.011719 | 0.011527 | 0.011692 | 0.011730 | 0.011695 | 0.011722 | 0.011591 |
| 0.011570 | 0.011587 | 0.011617 | 0.011456 | 0.011545 | 0.011663 | 0.011912 |
| 0.011889 | 0.011769 | 0.011765 | 0.011730 | 0.011734 | 0.011665 | 0.011665 |
| 0.011665 | 0.011733 | 0.011906 | 0.011636 | 0.011976 | 0.011979 | 0.011799 |
| 0.011765 | 0.011833 | 0.011765 | 0.011799 | 0.011665 | 0.011631 | 0.011698 |
| 0.011765 | 0.011765 | 0.011732 | 0.011698 | 0.011731 | 0.011698 | 0.011799 |
| 0.011759 | 0.011760 | 0.011745 | 0.011780 | 0.011916 | 0.011880 | 0.011880 |
| 0.011878 | 0.011834 | 0.011614 | 0.011636 | 0.011738 | 0.011908 | 0.011909 |
| 0.011733 | 0.011772 | 0.012037 | 0.012007 | 0.011935 | 0.011969 | 0.011900 |
| 0.011832 | 0.011900 | 0.011899 | 0.011799 | 0.012102 | 0.011967 | 0.012034 |
| 0.012068 | 0.011879 | 0.011777 | 0.011857 | 0.011732 | 0.011900 | 0.011900 |
| 0.011935 | 0.011967 | 0.011967 | 0.011967 | 0.012161 | 0.012101 | 0.011685 |
| 0.011601 | 0.011580 | 0.011707 | 0.011672 | 0.011641 | 0.011620 | 0.011672 |
| 0.011712 | 0.011543 | 0.011584 | 0.011622 | 0.011766 | 0.011813 | 0.011732 |
| 0.011698 | 0.011631 | 0.011765 | 0.011732 | 0.011597 | 0.011564 | 0.011497 |
| 0.011597 | 0.011665 | 0.011732 | 0.011732 | 0.011766 | 0.011765 | 0.011770 |
| 0.011838 | 0.011765 | 0.011765 | 0.011734 | 0.011665 | 0.011665 | 0.011665 |
| 0.011733 | 0.011906 | 0.011636 | 0.011976 | 0.011979 | 0.011799 | 0.011967 |
| 0.011900 | 0.011900 | 0.011737 | 0.011861 | 0.011825 | 0.011878 | 0.011621 |
| 0.011921 | 0.011972 | 0.011823 | 0.011808 | 0.011698 | 0.011900 | 0.011765 |
| 0.011866 | 0.011799 | 0.011698 | 0.011802 | 0.011900 | 0.011905 | 0.011799 |
| 0.011698 | 0.011633 | 0.011765 | 0.011698 | 0.011631 | 0.011604 | 0.011900 |
| 0.011799 | 0.011732 | 0.011765 | 0.011799 | 0.011766 | 0.011698 | 0.011631 |
| 0.011765 | 0.011799 | 0.011799 | 0.011731 | 0.011799 | 0.012034 | 0.011631 |

|          |          |          |          |          |          |          |
|----------|----------|----------|----------|----------|----------|----------|
| 0.011732 | 0.011866 | 0.011731 | 0.011765 | 0.011731 | 0.011832 | 0.011660 |
| 0.011454 | 0.011528 | 0.011461 | 0.011584 | 0.011671 | 0.011635 | 0.011520 |
| 0.011428 | 0.011362 | 0.011463 | 0.011569 | 0.011430 | 0.011534 | 0.011699 |
| 0.011598 | 0.011669 | 0.011597 | 0.011675 | 0.011228 | 0.012169 | 0.011464 |
| 0.012001 | 0.011835 | 0.011970 | 0.012443 | 0.011832 | 0.011564 | 0.011564 |
| 0.012339 | 0.011903 | 0.011530 | 0.011430 | 0.011497 | 0.011497 | 0.011534 |
| 0.011362 | 0.011331 | 0.011429 | 0.011396 | 0.012036 | 0.012102 | 0.012103 |
| 0.012002 | 0.012103 | 0.012207 | 0.011940 | 0.012475 | 0.012483 | 0.012542 |
| 0.012543 | 0.012577 | 0.012494 | 0.012543 | 0.012545 | 0.011832 | 0.012069 |
| 0.012137 | 0.012606 | 0.012146 | 0.012169 | 0.012643 | 0.011706 | 0.011598 |
| 0.011564 | 0.011564 | 0.012035 | 0.011965 | 0.012151 | 0.011900 | 0.011566 |
| S006     | 0.012169 | 0.012169 | 0.011496 | 0.011262 | 0.011262 | 0.000000 |
| 0.011875 | 0.011807 | 0.011463 | 0.011765 | 0.011832 | 0.011801 | 0.011765 |
| 0.011732 | 0.011967 | 0.011698 | 0.011799 | 0.011866 | 0.011832 | 0.011799 |
| 0.011765 | 0.011799 | 0.011564 | 0.011732 | 0.011766 | 0.011799 | 0.011841 |
| 0.011765 | 0.011799 | 0.011698 | 0.011597 | 0.011866 | 0.011833 | 0.011866 |
| 0.011832 | 0.011933 | 0.011832 | 0.011832 | 0.011866 | 0.011832 | 0.012000 |
| 0.011698 | 0.011832 | 0.011866 | 0.011799 | 0.011832 | 0.011933 | 0.011866 |
| 0.011832 | 0.012001 | 0.011900 | 0.011900 | 0.011832 | 0.012101 | 0.011832 |
| 0.011799 | 0.011833 | 0.011933 | 0.012101 | 0.011933 | 0.011832 | 0.011933 |
| 0.011866 | 0.011933 | 0.011832 | 0.012068 | 0.012034 | 0.011832 | 0.011900 |
| 0.011799 | 0.011900 | 0.011866 | 0.011933 | 0.011866 | 0.011866 | 0.011866 |
| 0.011765 | 0.011799 | 0.011765 | 0.011799 | 0.011832 | 0.011868 | 0.011933 |
| 0.011866 | 0.011832 | 0.011900 | 0.011799 | 0.011866 | 0.011765 | 0.011832 |
| 0.012000 | 0.011933 | 0.011967 | 0.012000 | 0.011832 | 0.012068 | 0.011832 |
| 0.011988 | 0.011882 | 0.012004 | 0.011685 | 0.011695 | 0.011797 | 0.011533 |
| 0.012158 | 0.011671 | 0.011761 | 0.012067 | 0.012068 | 0.011799 | 0.011900 |
| 0.011900 | 0.011866 | 0.011933 | 0.011832 | 0.011900 | 0.011866 | 0.011866 |
| 0.011832 | 0.011866 | 0.012135 | 0.012000 | 0.011900 | 0.011866 | 0.011799 |
| 0.011765 | 0.011698 | 0.011833 | 0.011799 | 0.011665 | 0.011631 | 0.011564 |
| 0.011665 | 0.011732 | 0.011799 | 0.011799 | 0.011833 | 0.011833 | 0.011837 |
| 0.011906 | 0.011833 | 0.011833 | 0.011672 | 0.011747 | 0.011691 | 0.011834 |
| 0.011806 | 0.011748 | 0.011761 | 0.011750 | 0.011740 | 0.011746 | 0.011804 |
| 0.011744 | 0.011819 | 0.011853 | 0.011766 | 0.011717 | 0.011902 | 0.011800 |
| 0.011868 | 0.011869 | 0.011867 | 0.011967 | 0.011900 | 0.012269 | 0.012001 |
| 0.011832 | 0.011900 | 0.011832 | 0.011866 | 0.011732 | 0.011698 | 0.011766 |
| 0.011832 | 0.011832 | 0.011799 | 0.011765 | 0.011799 | 0.011765 | 0.011866 |
| 0.011833 | 0.011934 | 0.011866 | 0.011765 | 0.011869 | 0.011967 | 0.011973 |
| 0.011967 | 0.011867 | 0.011765 | 0.011701 | 0.011833 | 0.011766 | 0.011699 |
| 0.011672 | 0.011967 | 0.011766 | 0.011967 | 0.011732 | 0.011833 | 0.011799 |
| 0.011900 | 0.011799 | 0.011833 | 0.011799 | 0.011833 | 0.011698 | 0.011833 |
| 0.011866 | 0.011799 | 0.011866 | 0.011799 | 0.011833 | 0.011866 | 0.012102 |
| 0.011934 | 0.011866 | 0.011934 | 0.011937 | 0.011934 | 0.011833 | 0.011799 |
| 0.011770 | 0.012031 | 0.011838 | 0.011712 | 0.011943 | 0.011708 | 0.011729 |
| 0.011909 | 0.011843 | 0.012000 | 0.012202 | 0.011914 | 0.012068 | 0.012034 |
| 0.011967 | 0.012135 | 0.011913 | 0.011719 | 0.011731 | 0.011866 | 0.011906 |
| 0.012034 | 0.011937 | 0.012075 | 0.012076 | 0.012068 | 0.012102 | 0.012145 |
| 0.011974 | 0.012045 | 0.012076 | 0.012007 | 0.012272 | 0.011731 | 0.011869 |
| 0.011900 | 0.011832 | 0.011698 | 0.011731 | 0.011799 | 0.011799 | 0.011866 |
| 0.011799 | 0.011866 | 0.011765 | 0.011799 | 0.011799 | 0.011799 | 0.011866 |
| 0.011799 | 0.011967 | 0.011866 | 0.011900 | 0.011698 | 0.011799 | 0.011832 |
| 0.011832 | 0.011799 | 0.011866 | 0.011832 | 0.011765 | 0.011765 | 0.011765 |
| 0.011967 | 0.011866 | 0.011933 | 0.011732 | 0.011832 | 0.012001 | 0.011765 |
| 0.011765 | 0.011832 | 0.011799 | 0.011967 | 0.011765 | 0.011631 | 0.011765 |
| 0.011698 | 0.011799 | 0.011799 | 0.011732 | 0.011732 | 0.011900 | 0.011832 |
| 0.011732 | 0.011832 | 0.011698 | 0.011732 | 0.011866 | 0.011732 | 0.011765 |
| 0.011732 | 0.011866 | 0.011800 | 0.011698 | 0.011765 | 0.011698 | 0.011866 |
| 0.011882 | 0.011765 | 0.011799 | 0.011900 | 0.011866 | 0.011799 | 0.011900 |
| 0.011765 | 0.012101 | 0.011698 | 0.011900 | 0.011698 | 0.011698 | 0.011698 |
| 0.011933 | 0.011833 | 0.011832 | 0.011900 | 0.011732 | 0.011866 | 0.011698 |

|          |          |          |          |          |          |          |
|----------|----------|----------|----------|----------|----------|----------|
| 0.011765 | 0.011765 | 0.011799 | 0.011900 | 0.011799 | 0.011900 | 0.011967 |
| 0.011967 | 0.011933 | 0.011832 | 0.011933 | 0.011900 | 0.011765 | 0.011732 |
| 0.011765 | 0.011765 | 0.011832 | 0.011698 | 0.011732 | 0.011900 | 0.011765 |
| 0.011732 | 0.011799 | 0.011933 | 0.011900 | 0.011799 | 0.011799 | 0.011799 |
| 0.011866 | 0.011799 | 0.011900 | 0.011765 | 0.011900 | 0.012000 | 0.012034 |
| 0.011799 | 0.011933 | 0.011751 | 0.018314 | 0.011650 | 0.011917 | 0.011828 |
| 0.011787 | 0.011835 | 0.011899 | 0.011699 | 0.011885 | 0.011855 | 0.011972 |
| 0.011487 | 0.011610 | 0.011685 | 0.011772 | 0.011685 | 0.011752 | 0.011749 |
| 0.011670 | 0.011619 | 0.011617 | 0.011457 | 0.011933 | 0.011967 | 0.011974 |
| 0.011747 | 0.011933 | 0.011933 | 0.011833 | 0.011866 | 0.011867 | 0.011833 |
| 0.011866 | 0.011799 | 0.011832 | 0.011866 | 0.011833 | 0.011765 | 0.011799 |
| 0.011799 | 0.011866 | 0.011765 | 0.011866 | 0.011900 | 0.011933 | 0.011832 |
| 0.011799 | 0.011766 | 0.011900 | 0.011900 | 0.011900 | 0.011935 | 0.011967 |
| 0.011732 | 0.011732 | 0.011765 | 0.011866 | 0.011732 | 0.011967 | 0.011967 |
| 0.012001 | 0.012000 | 0.011933 | 0.012034 | 0.011934 | 0.012037 | 0.011866 |
| 0.011866 | 0.011934 | 0.011967 | 0.011732 | 0.011866 | 0.011833 | 0.011866 |
| 0.011934 | 0.011934 | 0.011967 | 0.011934 | 0.011835 | 0.012034 | 0.012001 |
| 0.011873 | 0.011765 | 0.011866 | 0.011967 | 0.011866 | 0.011934 | 0.012034 |
| 0.012202 | 0.011914 | 0.012068 | 0.012034 | 0.011967 | 0.012135 | 0.011766 |
| 0.011936 | 0.011834 | 0.011799 | 0.011799 | 0.011866 | 0.011765 | 0.011866 |
| 0.011900 | 0.011933 | 0.011832 | 0.011799 | 0.011766 | 0.011900 | 0.011900 |
| 0.011900 | 0.011935 | 0.012000 | 0.011933 | 0.012507 | 0.011918 | 0.011799 |
| 0.011904 | 0.011892 | 0.011939 | 0.011857 | 0.012006 | 0.011923 | 0.011922 |
| 0.012400 | 0.011787 | 0.011917 | 0.011856 | 0.012093 | 0.012047 | 0.012047 |
| 0.012420 | 0.011814 | 0.012109 | 0.012169 | 0.012034 | 0.011698 | 0.012074 |
| 0.011731 | 0.011900 | 0.012034 | 0.012000 | 0.012007 | 0.011732 | 0.011431 |
| 0.011832 | 0.011765 | 0.011799 | 0.011832 | 0.011732 | 0.011799 | 0.011698 |
| 0.011765 | 0.011799 | 0.011765 | 0.011732 | 0.011832 | 0.011765 | 0.011799 |
| 0.011799 | 0.011731 | 0.011799 | 0.011832 | 0.011732 | 0.011933 | 0.011967 |
| 0.011866 | 0.011866 | 0.011866 | 0.011866 | 0.011799 | 0.011933 | 0.011832 |
| 0.011408 | 0.011799 | 0.011766 | 0.011705 | 0.011900 | 0.011900 | 0.011900 |
| 0.011900 | 0.011832 | 0.011799 | 0.011832 | 0.011933 | 0.011933 | 0.011866 |
| 0.011866 | 0.012000 | 0.011900 | 0.011900 | 0.012101 | 0.012101 | 0.011967 |
| 0.011799 | 0.011866 | 0.011900 | 0.012034 | 0.011867 | 0.011900 | 0.011866 |
| 0.011900 | 0.011765 | 0.011765 | 0.012068 | 0.012068 | 0.012034 | 0.011832 |
| 0.011933 | 0.012000 | 0.011866 | 0.011933 | 0.011899 | 0.011765 | 0.011832 |
| 0.011866 | 0.011832 | 0.011765 | 0.012000 | 0.011832 | 0.011933 | 0.011967 |
| 0.011866 | 0.011943 | 0.011967 | 0.011711 | 0.011512 | 0.011842 | 0.011473 |
| 0.011720 | 0.011605 | 0.011728 | 0.011820 | 0.011744 | 0.011824 | 0.011698 |
| 0.011621 | 0.011653 | 0.011728 | 0.011523 | 0.011599 | 0.011730 | 0.011953 |
| 0.011927 | 0.011847 | 0.011800 | 0.011800 | 0.011802 | 0.011732 | 0.011732 |
| 0.011732 | 0.011800 | 0.011973 | 0.011704 | 0.012044 | 0.012050 | 0.011866 |
| 0.011832 | 0.011900 | 0.011832 | 0.011866 | 0.011732 | 0.011698 | 0.011766 |
| 0.011832 | 0.011832 | 0.011799 | 0.011765 | 0.011799 | 0.011765 | 0.011866 |
| 0.011829 | 0.011830 | 0.011780 | 0.011848 | 0.011984 | 0.011949 | 0.011948 |
| 0.011946 | 0.011901 | 0.011614 | 0.011672 | 0.011806 | 0.011976 | 0.011977 |
| 0.011800 | 0.011839 | 0.012104 | 0.012075 | 0.012002 | 0.012037 | 0.011967 |
| 0.011900 | 0.011967 | 0.011967 | 0.011866 | 0.012169 | 0.012034 | 0.012102 |
| 0.012136 | 0.011951 | 0.011845 | 0.011927 | 0.011799 | 0.011967 | 0.011967 |
| 0.012002 | 0.012034 | 0.012034 | 0.012034 | 0.012240 | 0.012169 | 0.011719 |
| 0.011635 | 0.011614 | 0.011741 | 0.011706 | 0.011675 | 0.011620 | 0.011706 |
| 0.011746 | 0.011586 | 0.011632 | 0.011660 | 0.011834 | 0.011882 | 0.011799 |
| 0.011765 | 0.011698 | 0.011833 | 0.011799 | 0.011665 | 0.011631 | 0.011564 |
| 0.011665 | 0.011732 | 0.011799 | 0.011799 | 0.011833 | 0.011833 | 0.011837 |
| 0.011906 | 0.011833 | 0.011833 | 0.011802 | 0.011732 | 0.011732 | 0.011732 |
| 0.011800 | 0.011973 | 0.011704 | 0.012044 | 0.012050 | 0.011866 | 0.012034 |
| 0.011967 | 0.011967 | 0.011804 | 0.011931 | 0.011860 | 0.011946 | 0.011691 |
| 0.011990 | 0.012063 | 0.011907 | 0.011876 | 0.011766 | 0.011967 | 0.011833 |
| 0.011934 | 0.011866 | 0.011765 | 0.011869 | 0.011967 | 0.011973 | 0.011867 |
| 0.011765 | 0.011701 | 0.011833 | 0.011766 | 0.011699 | 0.011672 | 0.011967 |

|          |          |          |          |          |          |          |
|----------|----------|----------|----------|----------|----------|----------|
| 0.011866 | 0.011799 | 0.011832 | 0.011866 | 0.011833 | 0.011765 | 0.011698 |
| 0.011832 | 0.011866 | 0.011866 | 0.011799 | 0.011866 | 0.012101 | 0.011698 |
| 0.011799 | 0.011933 | 0.011799 | 0.011832 | 0.011799 | 0.011900 | 0.011746 |
| 0.011510 | 0.011613 | 0.011512 | 0.011664 | 0.011753 | 0.011671 | 0.011604 |
| 0.011533 | 0.011429 | 0.011530 | 0.011603 | 0.011498 | 0.011601 | 0.011766 |
| 0.011666 | 0.011737 | 0.011664 | 0.011743 | 0.011295 | 0.012236 | 0.011532 |
| 0.012069 | 0.011903 | 0.012037 | 0.012511 | 0.011900 | 0.011631 | 0.011631 |
| 0.012407 | 0.011971 | 0.011597 | 0.011497 | 0.011565 | 0.011565 | 0.011601 |
| 0.011429 | 0.011399 | 0.011496 | 0.011464 | 0.012103 | 0.012169 | 0.012171 |
| 0.012070 | 0.012170 | 0.012275 | 0.012008 | 0.012543 | 0.012551 | 0.012610 |
| 0.012610 | 0.012644 | 0.012528 | 0.012611 | 0.012612 | 0.011900 | 0.012136 |
| 0.012204 | 0.012674 | 0.012214 | 0.012237 | 0.012710 | 0.011774 | 0.011665 |
| 0.011631 | 0.011631 | 0.012103 | 0.012007 | 0.012187 | 0.011967 | 0.011633 |
| S007     | 0.012011 | 0.012011 | 0.012046 | 0.011807 | 0.011807 | 0.011875 |
| 0.000000 | 0.011196 | 0.011841 | 0.011604 | 0.011671 | 0.011639 | 0.011569 |
| 0.011535 | 0.011807 | 0.011535 | 0.011637 | 0.011671 | 0.011637 | 0.011637 |
| 0.011603 | 0.011637 | 0.011468 | 0.011604 | 0.011638 | 0.011637 | 0.011196 |
| 0.011604 | 0.011637 | 0.011535 | 0.011502 | 0.011705 | 0.011672 | 0.011705 |
| 0.011671 | 0.011773 | 0.011671 | 0.011671 | 0.011705 | 0.011671 | 0.011841 |
| 0.011535 | 0.011671 | 0.011705 | 0.011637 | 0.011671 | 0.011773 | 0.011705 |
| 0.011671 | 0.011841 | 0.011706 | 0.011332 | 0.011671 | 0.011909 | 0.011671 |
| 0.011637 | 0.011672 | 0.011807 | 0.011909 | 0.011434 | 0.011671 | 0.011773 |
| 0.011705 | 0.011773 | 0.011671 | 0.011909 | 0.011468 | 0.011671 | 0.011739 |
| 0.011637 | 0.011739 | 0.011705 | 0.011773 | 0.011637 | 0.011705 | 0.011705 |
| 0.011569 | 0.011637 | 0.011603 | 0.011637 | 0.011671 | 0.011673 | 0.011739 |
| 0.011705 | 0.011637 | 0.011739 | 0.011603 | 0.011502 | 0.011603 | 0.011671 |
| 0.011807 | 0.011773 | 0.011535 | 0.011841 | 0.011637 | 0.011875 | 0.011671 |
| 0.011806 | 0.011286 | 0.011819 | 0.011532 | 0.011589 | 0.011694 | 0.011417 |
| 0.012135 | 0.011419 | 0.011558 | 0.011909 | 0.011909 | 0.011637 | 0.011501 |
| 0.011705 | 0.011705 | 0.011773 | 0.011671 | 0.011773 | 0.011705 | 0.011637 |
| 0.011603 | 0.011671 | 0.011977 | 0.011841 | 0.011705 | 0.011706 | 0.011638 |
| 0.011604 | 0.011536 | 0.011672 | 0.011604 | 0.011570 | 0.011536 | 0.011468 |
| 0.011570 | 0.011638 | 0.011638 | 0.011638 | 0.011672 | 0.011672 | 0.011675 |
| 0.011744 | 0.011638 | 0.011672 | 0.011533 | 0.011609 | 0.011557 | 0.011638 |
| 0.011643 | 0.011582 | 0.011658 | 0.011619 | 0.011576 | 0.011580 | 0.011641 |
| 0.011534 | 0.011583 | 0.011688 | 0.011604 | 0.011550 | 0.011707 | 0.011639 |
| 0.011673 | 0.011708 | 0.011707 | 0.011773 | 0.011739 | 0.012045 | 0.011808 |
| 0.011671 | 0.011740 | 0.011671 | 0.011706 | 0.011570 | 0.011536 | 0.011604 |
| 0.011671 | 0.011671 | 0.011638 | 0.011603 | 0.011637 | 0.011604 | 0.011706 |
| 0.011672 | 0.011774 | 0.011706 | 0.011604 | 0.011708 | 0.011808 | 0.011813 |
| 0.011808 | 0.011672 | 0.011604 | 0.011538 | 0.011672 | 0.011604 | 0.011536 |
| 0.011541 | 0.011808 | 0.011604 | 0.011808 | 0.011570 | 0.011672 | 0.011638 |
| 0.011706 | 0.011604 | 0.011638 | 0.011638 | 0.011672 | 0.011536 | 0.011672 |
| 0.011706 | 0.011638 | 0.011672 | 0.011604 | 0.011638 | 0.011706 | 0.011944 |
| 0.011366 | 0.011298 | 0.011366 | 0.011811 | 0.011434 | 0.011672 | 0.011638 |
| 0.011607 | 0.011960 | 0.011663 | 0.011581 | 0.011369 | 0.011543 | 0.011738 |
| 0.011366 | 0.011611 | 0.011841 | 0.012045 | 0.011751 | 0.011909 | 0.011876 |
| 0.011807 | 0.011977 | 0.011852 | 0.011771 | 0.011741 | 0.011706 | 0.011779 |
| 0.011876 | 0.011743 | 0.011916 | 0.011985 | 0.011875 | 0.011944 | 0.011986 |
| 0.011779 | 0.011988 | 0.011848 | 0.011847 | 0.012116 | 0.011569 | 0.011776 |
| 0.011705 | 0.011671 | 0.011569 | 0.011569 | 0.011637 | 0.011637 | 0.011705 |
| 0.011637 | 0.011705 | 0.011603 | 0.011637 | 0.011637 | 0.011603 | 0.011705 |
| 0.011637 | 0.011400 | 0.011298 | 0.011332 | 0.011535 | 0.011637 | 0.011637 |
| 0.011671 | 0.011569 | 0.011705 | 0.011671 | 0.011603 | 0.011603 | 0.011603 |
| 0.011400 | 0.011705 | 0.011773 | 0.011569 | 0.011671 | 0.011841 | 0.011603 |
| 0.011603 | 0.011637 | 0.011637 | 0.011807 | 0.011603 | 0.011536 | 0.011671 |
| 0.011604 | 0.011637 | 0.011637 | 0.011569 | 0.011569 | 0.011739 | 0.011671 |
| 0.011569 | 0.011671 | 0.011536 | 0.011569 | 0.011705 | 0.011502 | 0.011604 |
| 0.011570 | 0.011705 | 0.011604 | 0.011536 | 0.011264 | 0.011536 | 0.011705 |
| 0.011788 | 0.011603 | 0.011230 | 0.011740 | 0.011705 | 0.011603 | 0.011739 |

|          |          |          |          |          |          |          |
|----------|----------|----------|----------|----------|----------|----------|
| 0.011603 | 0.011909 | 0.011535 | 0.011536 | 0.011535 | 0.011535 | 0.011535 |
| 0.011773 | 0.011638 | 0.011671 | 0.011739 | 0.011569 | 0.011298 | 0.011535 |
| 0.011603 | 0.011603 | 0.011637 | 0.011739 | 0.011637 | 0.011739 | 0.011807 |
| 0.011807 | 0.011773 | 0.011671 | 0.011773 | 0.011739 | 0.011603 | 0.011569 |
| 0.011603 | 0.011603 | 0.011671 | 0.011535 | 0.011569 | 0.011739 | 0.011603 |
| 0.011569 | 0.011637 | 0.011773 | 0.011739 | 0.011705 | 0.011637 | 0.011638 |
| 0.011671 | 0.011637 | 0.011705 | 0.011603 | 0.011739 | 0.011841 | 0.011468 |
| 0.011637 | 0.011434 | 0.011654 | 0.018217 | 0.011325 | 0.011554 | 0.011272 |
| 0.011235 | 0.011274 | 0.011800 | 0.011587 | 0.011337 | 0.011305 | 0.011612 |
| 0.011634 | 0.011368 | 0.011492 | 0.011608 | 0.011535 | 0.011458 | 0.011623 |
| 0.011344 | 0.011513 | 0.011361 | 0.011598 | 0.011773 | 0.011808 | 0.011813 |
| 0.011686 | 0.011774 | 0.011773 | 0.011672 | 0.011671 | 0.011672 | 0.011672 |
| 0.011672 | 0.011603 | 0.011671 | 0.011706 | 0.011672 | 0.011604 | 0.011638 |
| 0.011638 | 0.011706 | 0.011604 | 0.011706 | 0.011740 | 0.011774 | 0.011671 |
| 0.011603 | 0.011604 | 0.011400 | 0.011400 | 0.011740 | 0.011775 | 0.011808 |
| 0.011570 | 0.011570 | 0.011604 | 0.011706 | 0.011570 | 0.011808 | 0.011808 |
| 0.011842 | 0.011841 | 0.011773 | 0.011875 | 0.011434 | 0.011878 | 0.011706 |
| 0.011706 | 0.011774 | 0.011808 | 0.011638 | 0.011706 | 0.011672 | 0.011706 |
| 0.011774 | 0.011774 | 0.011808 | 0.011774 | 0.011673 | 0.011876 | 0.011808 |
| 0.011711 | 0.011604 | 0.011706 | 0.011808 | 0.011706 | 0.011774 | 0.011875 |
| 0.012045 | 0.011751 | 0.011909 | 0.011876 | 0.011807 | 0.011977 | 0.011604 |
| 0.011776 | 0.011672 | 0.011638 | 0.011638 | 0.011706 | 0.011604 | 0.011706 |
| 0.011740 | 0.011774 | 0.011671 | 0.011603 | 0.011604 | 0.011400 | 0.011400 |
| 0.011740 | 0.011775 | 0.011841 | 0.011773 | 0.012251 | 0.011856 | 0.011772 |
| 0.011843 | 0.011797 | 0.011914 | 0.011796 | 0.011911 | 0.011828 | 0.011723 |
| 0.012207 | 0.011691 | 0.011823 | 0.011760 | 0.011966 | 0.011886 | 0.011990 |
| 0.012230 | 0.011824 | 0.011950 | 0.012011 | 0.011875 | 0.011604 | 0.011915 |
| 0.011569 | 0.011739 | 0.011875 | 0.011841 | 0.011847 | 0.011569 | 0.011537 |
| 0.011671 | 0.011603 | 0.011637 | 0.011671 | 0.011569 | 0.011637 | 0.011535 |
| 0.011603 | 0.011637 | 0.011603 | 0.011569 | 0.011671 | 0.011603 | 0.011637 |
| 0.011637 | 0.011569 | 0.011637 | 0.011671 | 0.011569 | 0.011773 | 0.011807 |
| 0.011705 | 0.011705 | 0.011705 | 0.011705 | 0.011637 | 0.011434 | 0.011671 |
| 0.011448 | 0.011638 | 0.011604 | 0.011609 | 0.011671 | 0.011671 | 0.011739 |
| 0.011739 | 0.011671 | 0.011637 | 0.011671 | 0.011773 | 0.011773 | 0.011671 |
| 0.011705 | 0.011841 | 0.011332 | 0.011739 | 0.011943 | 0.011943 | 0.011773 |
| 0.011637 | 0.011705 | 0.011739 | 0.011536 | 0.011672 | 0.011671 | 0.011705 |
| 0.011739 | 0.011603 | 0.011603 | 0.011910 | 0.011910 | 0.011875 | 0.011671 |
| 0.011739 | 0.011773 | 0.011705 | 0.011739 | 0.011705 | 0.011603 | 0.011230 |
| 0.011705 | 0.011637 | 0.011603 | 0.011841 | 0.011671 | 0.011773 | 0.011502 |
| 0.011705 | 0.011332 | 0.011400 | 0.011510 | 0.011402 | 0.011714 | 0.011424 |
| 0.011393 | 0.011765 | 0.011593 | 0.011600 | 0.011601 | 0.011368 | 0.011328 |
| 0.011523 | 0.011260 | 0.011453 | 0.011327 | 0.011332 | 0.011534 | 0.011754 |
| 0.011742 | 0.011654 | 0.011666 | 0.011702 | 0.011708 | 0.011570 | 0.011638 |
| 0.011638 | 0.011707 | 0.011813 | 0.011609 | 0.011952 | 0.011990 | 0.011705 |
| 0.011671 | 0.011740 | 0.011671 | 0.011706 | 0.011570 | 0.011536 | 0.011604 |
| 0.011671 | 0.011671 | 0.011638 | 0.011603 | 0.011637 | 0.011604 | 0.011706 |
| 0.011661 | 0.011662 | 0.011649 | 0.011649 | 0.011787 | 0.011752 | 0.011751 |
| 0.011750 | 0.011707 | 0.011546 | 0.011533 | 0.011643 | 0.011746 | 0.011816 |
| 0.011639 | 0.011677 | 0.011912 | 0.011915 | 0.011843 | 0.011877 | 0.011807 |
| 0.011739 | 0.011807 | 0.011807 | 0.011705 | 0.011671 | 0.011875 | 0.011909 |
| 0.011944 | 0.011348 | 0.011612 | 0.011761 | 0.011637 | 0.011807 | 0.011807 |
| 0.011775 | 0.011875 | 0.011875 | 0.011875 | 0.011897 | 0.012011 | 0.011657 |
| 0.011539 | 0.011551 | 0.011646 | 0.011610 | 0.011648 | 0.011589 | 0.011198 |
| 0.011685 | 0.011461 | 0.011690 | 0.011661 | 0.011673 | 0.011718 | 0.011638 |
| 0.011604 | 0.011536 | 0.011672 | 0.011604 | 0.011570 | 0.011536 | 0.011468 |
| 0.011570 | 0.011638 | 0.011638 | 0.011638 | 0.011672 | 0.011672 | 0.011675 |
| 0.011744 | 0.011638 | 0.011672 | 0.011708 | 0.011570 | 0.011638 | 0.011638 |
| 0.011707 | 0.011813 | 0.011609 | 0.011952 | 0.011990 | 0.011705 | 0.011875 |
| 0.011807 | 0.011807 | 0.011642 | 0.011835 | 0.011764 | 0.011749 | 0.011663 |
| 0.011827 | 0.012033 | 0.011834 | 0.011713 | 0.011604 | 0.011808 | 0.011672 |

|          |          |          |          |          |          |          |
|----------|----------|----------|----------|----------|----------|----------|
| 0.011774 | 0.011706 | 0.011604 | 0.011708 | 0.011808 | 0.011813 | 0.011672 |
| 0.011604 | 0.011538 | 0.011672 | 0.011604 | 0.011536 | 0.011541 | 0.011808 |
| 0.011672 | 0.011603 | 0.011671 | 0.011706 | 0.011672 | 0.011604 | 0.011536 |
| 0.011671 | 0.011705 | 0.011671 | 0.011637 | 0.011705 | 0.011943 | 0.011535 |
| 0.011637 | 0.011434 | 0.011637 | 0.011671 | 0.011637 | 0.011332 | 0.011578 |
| 0.011854 | 0.011402 | 0.011414 | 0.011509 | 0.011552 | 0.011569 | 0.011355 |
| 0.011378 | 0.011536 | 0.011638 | 0.011747 | 0.011605 | 0.011745 | 0.011877 |
| 0.011775 | 0.011779 | 0.011773 | 0.011959 | 0.011705 | 0.012454 | 0.011742 |
| 0.012490 | 0.012186 | 0.012322 | 0.012665 | 0.011637 | 0.011638 | 0.011740 |
| 0.012286 | 0.012050 | 0.011706 | 0.011570 | 0.011673 | 0.011673 | 0.011539 |
| 0.011536 | 0.011541 | 0.011603 | 0.011571 | 0.011945 | 0.011978 | 0.012013 |
| 0.011877 | 0.011979 | 0.012118 | 0.011848 | 0.012287 | 0.012294 | 0.012355 |
| 0.012355 | 0.012355 | 0.012303 | 0.012321 | 0.012323 | 0.011739 | 0.011910 |
| 0.012047 | 0.012522 | 0.011918 | 0.011978 | 0.012456 | 0.011541 | 0.011434 |
| 0.011332 | 0.011400 | 0.011945 | 0.011936 | 0.012058 | 0.011739 | 0.011469 |
| S008     | 0.011943 | 0.011943 | 0.011978 | 0.011739 | 0.011739 | 0.011807 |
| 0.011196 | 0.000000 | 0.011773 | 0.011536 | 0.011603 | 0.011537 | 0.011502 |
| 0.011468 | 0.011739 | 0.011468 | 0.011569 | 0.011603 | 0.011569 | 0.011569 |
| 0.011535 | 0.011569 | 0.011400 | 0.011536 | 0.011570 | 0.011569 | 0.011128 |
| 0.011536 | 0.011569 | 0.011468 | 0.011434 | 0.011637 | 0.011604 | 0.011637 |
| 0.011603 | 0.011705 | 0.011603 | 0.011603 | 0.011637 | 0.011603 | 0.011773 |
| 0.011468 | 0.011603 | 0.011637 | 0.011569 | 0.011603 | 0.011705 | 0.011637 |
| 0.011603 | 0.011773 | 0.011638 | 0.011264 | 0.011603 | 0.011841 | 0.011603 |
| 0.011569 | 0.011604 | 0.011739 | 0.011841 | 0.011366 | 0.011603 | 0.011705 |
| 0.011637 | 0.011705 | 0.011603 | 0.011841 | 0.011400 | 0.011603 | 0.011671 |
| 0.011569 | 0.011671 | 0.011637 | 0.011705 | 0.011569 | 0.011637 | 0.011637 |
| 0.011501 | 0.011569 | 0.011535 | 0.011570 | 0.011603 | 0.011571 | 0.011671 |
| 0.011637 | 0.011569 | 0.011671 | 0.011535 | 0.011434 | 0.011535 | 0.011603 |
| 0.011739 | 0.011705 | 0.011468 | 0.011773 | 0.011569 | 0.011807 | 0.011603 |
| 0.011732 | 0.011210 | 0.011743 | 0.011453 | 0.011476 | 0.011619 | 0.011338 |
| 0.012024 | 0.011317 | 0.011475 | 0.011841 | 0.011841 | 0.011569 | 0.011434 |
| 0.011637 | 0.011637 | 0.011705 | 0.011603 | 0.011705 | 0.011637 | 0.011569 |
| 0.011535 | 0.011603 | 0.011909 | 0.011773 | 0.011637 | 0.011638 | 0.011570 |
| 0.011536 | 0.011468 | 0.011604 | 0.011536 | 0.011502 | 0.011468 | 0.011400 |
| 0.011502 | 0.011570 | 0.011570 | 0.011570 | 0.011604 | 0.011604 | 0.011607 |
| 0.011676 | 0.011570 | 0.011604 | 0.011424 | 0.011499 | 0.011450 | 0.011536 |
| 0.011540 | 0.011477 | 0.011546 | 0.011514 | 0.011473 | 0.011476 | 0.011539 |
| 0.011425 | 0.011549 | 0.011583 | 0.011502 | 0.011445 | 0.011605 | 0.011536 |
| 0.011571 | 0.011606 | 0.011604 | 0.011705 | 0.011671 | 0.011977 | 0.011740 |
| 0.011603 | 0.011672 | 0.011603 | 0.011638 | 0.011502 | 0.011468 | 0.011536 |
| 0.011603 | 0.011603 | 0.011570 | 0.011536 | 0.011569 | 0.011536 | 0.011638 |
| 0.011604 | 0.011706 | 0.011638 | 0.011536 | 0.011640 | 0.011740 | 0.011744 |
| 0.011740 | 0.011570 | 0.011536 | 0.011470 | 0.011604 | 0.011536 | 0.011468 |
| 0.011473 | 0.011740 | 0.011536 | 0.011740 | 0.011502 | 0.011604 | 0.011570 |
| 0.011638 | 0.011536 | 0.011570 | 0.011570 | 0.011604 | 0.011468 | 0.011604 |
| 0.011638 | 0.011570 | 0.011604 | 0.011536 | 0.011570 | 0.011638 | 0.011876 |
| 0.011298 | 0.011230 | 0.011298 | 0.011708 | 0.011366 | 0.011604 | 0.011570 |
| 0.011504 | 0.011837 | 0.011571 | 0.011477 | 0.011300 | 0.011440 | 0.011619 |
| 0.011298 | 0.011508 | 0.011773 | 0.011977 | 0.011682 | 0.011841 | 0.011807 |
| 0.011739 | 0.011909 | 0.011780 | 0.011645 | 0.011656 | 0.011638 | 0.011711 |
| 0.011808 | 0.011674 | 0.011847 | 0.011916 | 0.011807 | 0.011876 | 0.011917 |
| 0.011711 | 0.011919 | 0.011779 | 0.011779 | 0.012047 | 0.011501 | 0.011708 |
| 0.011637 | 0.011603 | 0.011501 | 0.011501 | 0.011569 | 0.011569 | 0.011637 |
| 0.011569 | 0.011637 | 0.011535 | 0.011569 | 0.011569 | 0.011535 | 0.011637 |
| 0.011569 | 0.011332 | 0.011230 | 0.011264 | 0.011468 | 0.011569 | 0.011569 |
| 0.011603 | 0.011502 | 0.011637 | 0.011603 | 0.011535 | 0.011535 | 0.011535 |
| 0.011332 | 0.011637 | 0.011705 | 0.011502 | 0.011603 | 0.011773 | 0.011535 |
| 0.011535 | 0.011569 | 0.011569 | 0.011739 | 0.011535 | 0.011468 | 0.011603 |
| 0.011536 | 0.011569 | 0.011569 | 0.011502 | 0.011501 | 0.011671 | 0.011603 |
| 0.011502 | 0.011603 | 0.011468 | 0.011502 | 0.011637 | 0.011434 | 0.011536 |

|          |          |          |          |          |          |          |
|----------|----------|----------|----------|----------|----------|----------|
| 0.011502 | 0.011637 | 0.011536 | 0.011468 | 0.011196 | 0.011468 | 0.011637 |
| 0.011718 | 0.011536 | 0.011162 | 0.011672 | 0.011637 | 0.011535 | 0.011671 |
| 0.011535 | 0.011841 | 0.011468 | 0.011468 | 0.011468 | 0.011468 | 0.011468 |
| 0.011705 | 0.011570 | 0.011603 | 0.011671 | 0.011501 | 0.011230 | 0.011468 |
| 0.011535 | 0.011535 | 0.011569 | 0.011671 | 0.011569 | 0.011671 | 0.011739 |
| 0.011739 | 0.011705 | 0.011603 | 0.011705 | 0.011671 | 0.011535 | 0.011502 |
| 0.011535 | 0.011535 | 0.011603 | 0.011468 | 0.011502 | 0.011671 | 0.011535 |
| 0.011502 | 0.011569 | 0.011705 | 0.011671 | 0.011637 | 0.011569 | 0.011570 |
| 0.011603 | 0.011569 | 0.011637 | 0.011535 | 0.011671 | 0.011773 | 0.011468 |
| 0.011569 | 0.011366 | 0.011549 | 0.018141 | 0.011259 | 0.011554 | 0.011201 |
| 0.011165 | 0.011203 | 0.011694 | 0.011470 | 0.011337 | 0.011235 | 0.011612 |
| 0.011538 | 0.011368 | 0.011413 | 0.011524 | 0.011456 | 0.011458 | 0.011537 |
| 0.011249 | 0.011400 | 0.011248 | 0.011396 | 0.011705 | 0.011740 | 0.011745 |
| 0.011616 | 0.011706 | 0.011705 | 0.011604 | 0.011604 | 0.011604 | 0.011604 |
| 0.011604 | 0.011536 | 0.011604 | 0.011638 | 0.011604 | 0.011536 | 0.011570 |
| 0.011570 | 0.011638 | 0.011536 | 0.011638 | 0.011672 | 0.011706 | 0.011603 |
| 0.011536 | 0.011536 | 0.011332 | 0.011332 | 0.011672 | 0.011707 | 0.011740 |
| 0.011502 | 0.011502 | 0.011536 | 0.011638 | 0.011502 | 0.011740 | 0.011740 |
| 0.011774 | 0.011773 | 0.011705 | 0.011807 | 0.011366 | 0.011810 | 0.011638 |
| 0.011638 | 0.011706 | 0.011740 | 0.011570 | 0.011638 | 0.011604 | 0.011638 |
| 0.011672 | 0.011672 | 0.011740 | 0.011672 | 0.011571 | 0.011808 | 0.011740 |
| 0.011643 | 0.011536 | 0.011638 | 0.011740 | 0.011638 | 0.011706 | 0.011807 |
| 0.011977 | 0.011682 | 0.011841 | 0.011807 | 0.011739 | 0.011909 | 0.011536 |
| 0.011674 | 0.011570 | 0.011570 | 0.011570 | 0.011638 | 0.011536 | 0.011638 |
| 0.011672 | 0.011706 | 0.011603 | 0.011536 | 0.011536 | 0.011332 | 0.011332 |
| 0.011672 | 0.011707 | 0.011773 | 0.011705 | 0.012183 | 0.011783 | 0.011701 |
| 0.011772 | 0.011727 | 0.011843 | 0.011726 | 0.011840 | 0.011758 | 0.011653 |
| 0.012137 | 0.011621 | 0.011753 | 0.011690 | 0.011896 | 0.011817 | 0.011921 |
| 0.012161 | 0.011709 | 0.011881 | 0.011943 | 0.011807 | 0.011536 | 0.011847 |
| 0.011501 | 0.011671 | 0.011807 | 0.011773 | 0.011778 | 0.011502 | 0.011435 |
| 0.011603 | 0.011535 | 0.011569 | 0.011603 | 0.011502 | 0.011569 | 0.011468 |
| 0.011535 | 0.011569 | 0.011535 | 0.011502 | 0.011603 | 0.011535 | 0.011569 |
| 0.011569 | 0.011501 | 0.011569 | 0.011603 | 0.011501 | 0.011705 | 0.011739 |
| 0.011637 | 0.011637 | 0.011637 | 0.011637 | 0.011569 | 0.011366 | 0.011603 |
| 0.011377 | 0.011570 | 0.011536 | 0.011541 | 0.011603 | 0.011603 | 0.011671 |
| 0.011671 | 0.011603 | 0.011569 | 0.011603 | 0.011705 | 0.011705 | 0.011603 |
| 0.011637 | 0.011773 | 0.011264 | 0.011671 | 0.011875 | 0.011875 | 0.011705 |
| 0.011569 | 0.011637 | 0.011671 | 0.011468 | 0.011638 | 0.011603 | 0.011637 |
| 0.011671 | 0.011535 | 0.011535 | 0.011842 | 0.011841 | 0.011807 | 0.011603 |
| 0.011671 | 0.011705 | 0.011637 | 0.011671 | 0.011637 | 0.011535 | 0.011162 |
| 0.011637 | 0.011569 | 0.011535 | 0.011773 | 0.011603 | 0.011705 | 0.011434 |
| 0.011637 | 0.011264 | 0.011332 | 0.011428 | 0.011288 | 0.011610 | 0.011320 |
| 0.011393 | 0.011648 | 0.011487 | 0.011555 | 0.011503 | 0.011317 | 0.011274 |
| 0.011420 | 0.011193 | 0.011397 | 0.011260 | 0.011278 | 0.011466 | 0.011672 |
| 0.011666 | 0.011575 | 0.011595 | 0.011595 | 0.011640 | 0.011502 | 0.011570 |
| 0.011570 | 0.011604 | 0.011744 | 0.011540 | 0.011884 | 0.011919 | 0.011637 |
| 0.011603 | 0.011672 | 0.011603 | 0.011638 | 0.011502 | 0.011468 | 0.011536 |
| 0.011603 | 0.011603 | 0.011570 | 0.011536 | 0.011569 | 0.011536 | 0.011638 |
| 0.011555 | 0.011556 | 0.011545 | 0.011545 | 0.011683 | 0.011648 | 0.011647 |
| 0.011646 | 0.011604 | 0.011434 | 0.011424 | 0.011540 | 0.011643 | 0.011712 |
| 0.011536 | 0.011574 | 0.011810 | 0.011813 | 0.011741 | 0.011775 | 0.011739 |
| 0.011671 | 0.011739 | 0.011739 | 0.011637 | 0.011603 | 0.011807 | 0.011841 |
| 0.011876 | 0.011276 | 0.011543 | 0.011656 | 0.011570 | 0.011740 | 0.011739 |
| 0.011707 | 0.011807 | 0.011807 | 0.011807 | 0.011857 | 0.011943 | 0.011587 |
| 0.011471 | 0.011481 | 0.011577 | 0.011541 | 0.011579 | 0.011514 | 0.011129 |
| 0.011615 | 0.011327 | 0.011544 | 0.011548 | 0.011570 | 0.011614 | 0.011570 |
| 0.011536 | 0.011468 | 0.011604 | 0.011536 | 0.011502 | 0.011468 | 0.011400 |
| 0.011502 | 0.011570 | 0.011570 | 0.011570 | 0.011604 | 0.011604 | 0.011607 |
| 0.011676 | 0.011570 | 0.011604 | 0.011640 | 0.011502 | 0.011570 | 0.011570 |
| 0.011604 | 0.011744 | 0.011540 | 0.011884 | 0.011919 | 0.011637 | 0.011807 |



|          |          |          |          |          |          |          |
|----------|----------|----------|----------|----------|----------|----------|
| 0.011739 | 0.011739 | 0.011539 | 0.011765 | 0.011658 | 0.011680 | 0.011557 |
| 0.011722 | 0.011940 | 0.011748 | 0.011645 | 0.011536 | 0.011740 | 0.011604 |
| 0.011706 | 0.011638 | 0.011536 | 0.011640 | 0.011740 | 0.011744 | 0.011570 |
| 0.011536 | 0.011470 | 0.011604 | 0.011536 | 0.011468 | 0.011473 | 0.011740 |
| 0.011604 | 0.011536 | 0.011604 | 0.011638 | 0.011604 | 0.011536 | 0.011468 |
| 0.011603 | 0.011637 | 0.011603 | 0.011569 | 0.011637 | 0.011875 | 0.011468 |
| 0.011569 | 0.011366 | 0.011569 | 0.011603 | 0.011569 | 0.011264 | 0.011492 |
| 0.011741 | 0.011317 | 0.011313 | 0.011428 | 0.011470 | 0.011460 | 0.011271 |
| 0.011272 | 0.011468 | 0.011570 | 0.011644 | 0.011503 | 0.011642 | 0.011775 |
| 0.011707 | 0.011710 | 0.011705 | 0.011856 | 0.011637 | 0.012386 | 0.011640 |
| 0.012421 | 0.012084 | 0.012254 | 0.012563 | 0.011569 | 0.011570 | 0.011638 |
| 0.012184 | 0.011948 | 0.011638 | 0.011502 | 0.011571 | 0.011571 | 0.011505 |
| 0.011468 | 0.011438 | 0.011536 | 0.011468 | 0.011843 | 0.011910 | 0.011911 |
| 0.011809 | 0.011877 | 0.012016 | 0.011745 | 0.012184 | 0.012191 | 0.012252 |
| 0.012253 | 0.012253 | 0.012200 | 0.012219 | 0.012220 | 0.011671 | 0.011842 |
| 0.011945 | 0.012454 | 0.011849 | 0.011910 | 0.012354 | 0.011438 | 0.011332 |
| 0.011264 | 0.011332 | 0.011876 | 0.011853 | 0.011951 | 0.011671 | 0.011367 |
| S009     | 0.012169 | 0.012169 | 0.011631 | 0.011396 | 0.011396 | 0.011463 |
| 0.011841 | 0.011773 | 0.000000 | 0.011765 | 0.011832 | 0.011733 | 0.011765 |
| 0.011731 | 0.011899 | 0.011698 | 0.011799 | 0.011866 | 0.011832 | 0.011799 |
| 0.011765 | 0.011799 | 0.011631 | 0.011732 | 0.011766 | 0.011799 | 0.011807 |
| 0.011765 | 0.011799 | 0.011698 | 0.011664 | 0.011866 | 0.011832 | 0.011866 |
| 0.011832 | 0.011933 | 0.011832 | 0.011832 | 0.011866 | 0.011832 | 0.012000 |
| 0.011698 | 0.011832 | 0.011866 | 0.011799 | 0.011832 | 0.011933 | 0.011866 |
| 0.011832 | 0.012000 | 0.011900 | 0.011900 | 0.011832 | 0.012101 | 0.011832 |
| 0.011799 | 0.011833 | 0.011933 | 0.012101 | 0.011933 | 0.011832 | 0.011933 |
| 0.011866 | 0.011933 | 0.011832 | 0.012067 | 0.012034 | 0.011765 | 0.011900 |
| 0.011799 | 0.011899 | 0.011866 | 0.011933 | 0.011866 | 0.011866 | 0.011866 |
| 0.011765 | 0.011799 | 0.011765 | 0.011799 | 0.011832 | 0.011801 | 0.011933 |
| 0.011866 | 0.011832 | 0.011899 | 0.011799 | 0.011866 | 0.011765 | 0.011832 |
| 0.012000 | 0.011933 | 0.011967 | 0.012000 | 0.011832 | 0.012068 | 0.011765 |
| 0.011913 | 0.011807 | 0.011928 | 0.011607 | 0.011657 | 0.011760 | 0.011533 |
| 0.012195 | 0.011620 | 0.011678 | 0.012067 | 0.012068 | 0.011799 | 0.011900 |
| 0.011899 | 0.011866 | 0.011933 | 0.011832 | 0.011900 | 0.011866 | 0.011866 |
| 0.011832 | 0.011866 | 0.012135 | 0.011933 | 0.011899 | 0.011866 | 0.011732 |
| 0.011698 | 0.011631 | 0.011765 | 0.011732 | 0.011665 | 0.011631 | 0.011564 |
| 0.011665 | 0.011732 | 0.011732 | 0.011732 | 0.011766 | 0.011765 | 0.011770 |
| 0.011838 | 0.011765 | 0.011765 | 0.011636 | 0.011675 | 0.011621 | 0.011766 |
| 0.011738 | 0.011679 | 0.011724 | 0.011716 | 0.011672 | 0.011677 | 0.011736 |
| 0.011708 | 0.011750 | 0.011784 | 0.011699 | 0.011683 | 0.011834 | 0.011733 |
| 0.011800 | 0.011802 | 0.011800 | 0.011967 | 0.011899 | 0.012269 | 0.011934 |
| 0.011832 | 0.011833 | 0.011799 | 0.011799 | 0.011665 | 0.011631 | 0.011698 |
| 0.011832 | 0.011832 | 0.011732 | 0.011765 | 0.011799 | 0.011698 | 0.011799 |
| 0.011765 | 0.011866 | 0.011799 | 0.011698 | 0.011734 | 0.011900 | 0.011905 |
| 0.011900 | 0.011799 | 0.011698 | 0.011633 | 0.011765 | 0.011698 | 0.011631 |
| 0.011604 | 0.011900 | 0.011698 | 0.011900 | 0.011732 | 0.011766 | 0.011732 |
| 0.011833 | 0.011732 | 0.011765 | 0.011732 | 0.011765 | 0.011631 | 0.011765 |
| 0.011799 | 0.011732 | 0.011799 | 0.011732 | 0.011765 | 0.011799 | 0.012035 |
| 0.011866 | 0.011799 | 0.011867 | 0.011869 | 0.011867 | 0.011765 | 0.011732 |
| 0.011702 | 0.011950 | 0.011838 | 0.011643 | 0.011807 | 0.011640 | 0.011729 |
| 0.011807 | 0.011774 | 0.012000 | 0.012202 | 0.011846 | 0.012068 | 0.012034 |
| 0.011967 | 0.012068 | 0.011949 | 0.011719 | 0.011857 | 0.011866 | 0.011906 |
| 0.012034 | 0.011937 | 0.012075 | 0.012076 | 0.012068 | 0.012102 | 0.012179 |
| 0.011974 | 0.012079 | 0.012076 | 0.012007 | 0.012272 | 0.011731 | 0.011869 |
| 0.011899 | 0.011832 | 0.011698 | 0.011731 | 0.011799 | 0.011731 | 0.011866 |
| 0.011799 | 0.011866 | 0.011765 | 0.011799 | 0.011799 | 0.011799 | 0.011866 |
| 0.011799 | 0.011967 | 0.011866 | 0.011900 | 0.011698 | 0.011799 | 0.011832 |
| 0.011832 | 0.011799 | 0.011866 | 0.011832 | 0.011765 | 0.011765 | 0.011765 |
| 0.011967 | 0.011866 | 0.011933 | 0.011731 | 0.011832 | 0.012000 | 0.011765 |
| 0.011765 | 0.011832 | 0.011799 | 0.011967 | 0.011765 | 0.011631 | 0.011765 |

|          |          |          |          |          |          |          |
|----------|----------|----------|----------|----------|----------|----------|
| 0.011698 | 0.011799 | 0.011799 | 0.011732 | 0.011731 | 0.011900 | 0.011832 |
| 0.011732 | 0.011832 | 0.011698 | 0.011732 | 0.011866 | 0.011732 | 0.011732 |
| 0.011732 | 0.011866 | 0.011800 | 0.011698 | 0.011765 | 0.011698 | 0.011799 |
| 0.011916 | 0.011765 | 0.011799 | 0.011900 | 0.011866 | 0.011799 | 0.011899 |
| 0.011765 | 0.012101 | 0.011698 | 0.011900 | 0.011698 | 0.011698 | 0.011698 |
| 0.011933 | 0.011833 | 0.011832 | 0.011900 | 0.011731 | 0.011866 | 0.011698 |
| 0.011765 | 0.011765 | 0.011799 | 0.011899 | 0.011799 | 0.011899 | 0.011967 |
| 0.011967 | 0.011933 | 0.011832 | 0.011933 | 0.011899 | 0.011765 | 0.011731 |
| 0.011765 | 0.011765 | 0.011832 | 0.011698 | 0.011731 | 0.011900 | 0.011765 |
| 0.011731 | 0.011799 | 0.011933 | 0.011900 | 0.011866 | 0.011799 | 0.011799 |
| 0.011866 | 0.011799 | 0.011899 | 0.011765 | 0.011899 | 0.011933 | 0.012034 |
| 0.011799 | 0.011933 | 0.011716 | 0.018276 | 0.011518 | 0.011855 | 0.011793 |
| 0.011753 | 0.011799 | 0.011899 | 0.011640 | 0.011775 | 0.011820 | 0.011850 |
| 0.011392 | 0.011610 | 0.011606 | 0.011730 | 0.011646 | 0.011653 | 0.011706 |
| 0.011576 | 0.011582 | 0.011579 | 0.011457 | 0.011933 | 0.011933 | 0.011906 |
| 0.011782 | 0.011866 | 0.011866 | 0.011765 | 0.011866 | 0.011866 | 0.011766 |
| 0.011799 | 0.011732 | 0.011765 | 0.011799 | 0.011766 | 0.011698 | 0.011732 |
| 0.011732 | 0.011799 | 0.011698 | 0.011799 | 0.011833 | 0.011866 | 0.011799 |
| 0.011799 | 0.011698 | 0.011833 | 0.011833 | 0.011900 | 0.011800 | 0.011900 |
| 0.011665 | 0.011665 | 0.011698 | 0.011799 | 0.011665 | 0.011900 | 0.011900 |
| 0.011933 | 0.012000 | 0.011933 | 0.011967 | 0.011867 | 0.011970 | 0.011799 |
| 0.011799 | 0.011866 | 0.011900 | 0.011665 | 0.011799 | 0.011765 | 0.011799 |
| 0.011867 | 0.011866 | 0.011900 | 0.011867 | 0.011767 | 0.011967 | 0.011934 |
| 0.011873 | 0.011698 | 0.011799 | 0.011900 | 0.011799 | 0.011866 | 0.012034 |
| 0.012202 | 0.011846 | 0.012068 | 0.012034 | 0.011967 | 0.012068 | 0.011699 |
| 0.011869 | 0.011699 | 0.011732 | 0.011732 | 0.011799 | 0.011698 | 0.011799 |
| 0.011833 | 0.011866 | 0.011799 | 0.011799 | 0.011698 | 0.011833 | 0.011833 |
| 0.011900 | 0.011800 | 0.012000 | 0.011933 | 0.012507 | 0.011989 | 0.011869 |
| 0.011974 | 0.011927 | 0.012009 | 0.011926 | 0.012041 | 0.011957 | 0.011922 |
| 0.012434 | 0.011822 | 0.011951 | 0.011890 | 0.012128 | 0.012047 | 0.012081 |
| 0.012454 | 0.011814 | 0.012075 | 0.012101 | 0.011967 | 0.011698 | 0.012041 |
| 0.011731 | 0.011832 | 0.012034 | 0.012000 | 0.012007 | 0.011731 | 0.011363 |
| 0.011832 | 0.011765 | 0.011799 | 0.011832 | 0.011731 | 0.011799 | 0.011698 |
| 0.011765 | 0.011799 | 0.011765 | 0.011731 | 0.011832 | 0.011765 | 0.011799 |
| 0.011799 | 0.011731 | 0.011799 | 0.011832 | 0.011731 | 0.011933 | 0.011967 |
| 0.011866 | 0.011866 | 0.011866 | 0.011866 | 0.011799 | 0.011933 | 0.011832 |
| 0.011547 | 0.011799 | 0.011766 | 0.011739 | 0.011900 | 0.011899 | 0.011899 |
| 0.011900 | 0.011832 | 0.011799 | 0.011832 | 0.011866 | 0.011933 | 0.011866 |
| 0.011866 | 0.012000 | 0.011900 | 0.011899 | 0.012101 | 0.012101 | 0.011967 |
| 0.011799 | 0.011866 | 0.011900 | 0.012034 | 0.011867 | 0.011900 | 0.011866 |
| 0.011899 | 0.011765 | 0.011765 | 0.012068 | 0.012068 | 0.012034 | 0.011832 |
| 0.011933 | 0.012000 | 0.011866 | 0.011933 | 0.011899 | 0.011765 | 0.011832 |
| 0.011866 | 0.011832 | 0.011765 | 0.012000 | 0.011832 | 0.011933 | 0.011967 |
| 0.011866 | 0.011909 | 0.011967 | 0.011629 | 0.011512 | 0.011808 | 0.011421 |
| 0.011610 | 0.011527 | 0.011692 | 0.011686 | 0.011695 | 0.011671 | 0.011538 |
| 0.011570 | 0.011521 | 0.011561 | 0.011456 | 0.011491 | 0.011663 | 0.011872 |
| 0.011852 | 0.011769 | 0.011765 | 0.011765 | 0.011734 | 0.011665 | 0.011665 |
| 0.011732 | 0.011733 | 0.011906 | 0.011704 | 0.011976 | 0.011979 | 0.011866 |
| 0.011832 | 0.011833 | 0.011799 | 0.011799 | 0.011665 | 0.011631 | 0.011698 |
| 0.011832 | 0.011832 | 0.011732 | 0.011765 | 0.011799 | 0.011698 | 0.011799 |
| 0.011724 | 0.011760 | 0.011745 | 0.011780 | 0.011916 | 0.011880 | 0.011880 |
| 0.011878 | 0.011834 | 0.011577 | 0.011600 | 0.011670 | 0.011908 | 0.011909 |
| 0.011733 | 0.011772 | 0.012037 | 0.012007 | 0.011935 | 0.011902 | 0.011967 |
| 0.011899 | 0.011967 | 0.011967 | 0.011799 | 0.012169 | 0.012034 | 0.012101 |
| 0.012068 | 0.011951 | 0.011845 | 0.011857 | 0.011799 | 0.011900 | 0.011967 |
| 0.012002 | 0.012034 | 0.012034 | 0.012034 | 0.012122 | 0.012169 | 0.011754 |
| 0.011669 | 0.011649 | 0.011775 | 0.011740 | 0.011709 | 0.011695 | 0.011740 |
| 0.011780 | 0.011586 | 0.011680 | 0.011622 | 0.011766 | 0.011813 | 0.011732 |
| 0.011698 | 0.011631 | 0.011765 | 0.011732 | 0.011665 | 0.011631 | 0.011564 |
| 0.011665 | 0.011732 | 0.011732 | 0.011732 | 0.011766 | 0.011765 | 0.011770 |

|          |          |          |          |          |          |          |
|----------|----------|----------|----------|----------|----------|----------|
| 0.011838 | 0.011765 | 0.011765 | 0.011734 | 0.011665 | 0.011665 | 0.011732 |
| 0.011733 | 0.011906 | 0.011704 | 0.011976 | 0.011979 | 0.011866 | 0.011967 |
| 0.011967 | 0.011967 | 0.011737 | 0.011861 | 0.011755 | 0.011878 | 0.011621 |
| 0.011921 | 0.011972 | 0.011865 | 0.011808 | 0.011698 | 0.011900 | 0.011765 |
| 0.011866 | 0.011799 | 0.011698 | 0.011734 | 0.011900 | 0.011905 | 0.011799 |
| 0.011698 | 0.011633 | 0.011765 | 0.011698 | 0.011631 | 0.011604 | 0.011900 |
| 0.011799 | 0.011732 | 0.011765 | 0.011799 | 0.011766 | 0.011698 | 0.011631 |
| 0.011832 | 0.011866 | 0.011866 | 0.011799 | 0.011866 | 0.012101 | 0.011698 |
| 0.011799 | 0.011933 | 0.011799 | 0.011832 | 0.011799 | 0.011900 | 0.011660 |
| 0.011510 | 0.011528 | 0.011461 | 0.011624 | 0.011671 | 0.011635 | 0.011520 |
| 0.011428 | 0.011429 | 0.011530 | 0.011569 | 0.011430 | 0.011534 | 0.011699 |
| 0.011598 | 0.011669 | 0.011664 | 0.011675 | 0.011295 | 0.012202 | 0.011464 |
| 0.012001 | 0.011835 | 0.011970 | 0.012443 | 0.011900 | 0.011564 | 0.011564 |
| 0.012339 | 0.011903 | 0.011597 | 0.011497 | 0.011497 | 0.011497 | 0.011601 |
| 0.011429 | 0.011331 | 0.011496 | 0.011396 | 0.012036 | 0.012169 | 0.012103 |
| 0.012070 | 0.012103 | 0.012207 | 0.011940 | 0.012475 | 0.012483 | 0.012542 |
| 0.012543 | 0.012577 | 0.012494 | 0.012543 | 0.012545 | 0.011899 | 0.012069 |
| 0.012137 | 0.012674 | 0.012146 | 0.012236 | 0.012643 | 0.011706 | 0.011598 |
| 0.011631 | 0.011631 | 0.012035 | 0.012007 | 0.012151 | 0.011967 | 0.011566 |
| S010     | 0.011597 | 0.011597 | 0.011765 | 0.011698 | 0.011698 | 0.011765 |
| 0.011604 | 0.011536 | 0.011765 | 0.000000 | 0.011262 | 0.011228 | 0.011195 |
| 0.011228 | 0.011396 | 0.011195 | 0.011228 | 0.011295 | 0.011262 | 0.011228 |
| 0.011195 | 0.011228 | 0.011329 | 0.011195 | 0.011228 | 0.011228 | 0.011570 |
| 0.011463 | 0.011228 | 0.011127 | 0.011362 | 0.011295 | 0.011262 | 0.011295 |
| 0.011262 | 0.011362 | 0.011262 | 0.011262 | 0.011295 | 0.011262 | 0.011430 |
| 0.011195 | 0.011262 | 0.011295 | 0.011228 | 0.011329 | 0.011362 | 0.011295 |
| 0.011262 | 0.011430 | 0.011329 | 0.011597 | 0.011262 | 0.011530 | 0.011262 |
| 0.011228 | 0.011329 | 0.011396 | 0.011530 | 0.011631 | 0.011329 | 0.011429 |
| 0.011295 | 0.011362 | 0.011262 | 0.011497 | 0.011732 | 0.011262 | 0.011329 |
| 0.011228 | 0.011329 | 0.011295 | 0.011362 | 0.011295 | 0.011295 | 0.011295 |
| 0.011195 | 0.011228 | 0.011195 | 0.011295 | 0.011262 | 0.011296 | 0.011362 |
| 0.011295 | 0.011262 | 0.011329 | 0.011228 | 0.011362 | 0.011195 | 0.011262 |
| 0.011429 | 0.011362 | 0.011597 | 0.011430 | 0.011262 | 0.011497 | 0.011262 |
| 0.011431 | 0.011658 | 0.011475 | 0.011177 | 0.011172 | 0.011244 | 0.011375 |
| 0.012011 | 0.011467 | 0.011184 | 0.011497 | 0.011497 | 0.011295 | 0.011396 |
| 0.011329 | 0.011295 | 0.011362 | 0.011262 | 0.011362 | 0.011295 | 0.011295 |
| 0.011262 | 0.011362 | 0.011564 | 0.011429 | 0.011329 | 0.011295 | 0.011228 |
| 0.011195 | 0.011195 | 0.011262 | 0.011228 | 0.011430 | 0.011396 | 0.011329 |
| 0.011430 | 0.011497 | 0.011228 | 0.011228 | 0.011262 | 0.011262 | 0.011263 |
| 0.011331 | 0.011262 | 0.011262 | 0.011096 | 0.011169 | 0.011130 | 0.011262 |
| 0.011263 | 0.011198 | 0.011245 | 0.011233 | 0.011162 | 0.011197 | 0.011229 |
| 0.011456 | 0.011267 | 0.011301 | 0.011195 | 0.011199 | 0.011329 | 0.011296 |
| 0.011363 | 0.011296 | 0.011296 | 0.011396 | 0.011329 | 0.011698 | 0.011497 |
| 0.011530 | 0.011396 | 0.011262 | 0.011363 | 0.011161 | 0.011396 | 0.011195 |
| 0.011262 | 0.011262 | 0.011228 | 0.011195 | 0.011228 | 0.011195 | 0.011295 |
| 0.011262 | 0.011362 | 0.011295 | 0.011195 | 0.011296 | 0.011396 | 0.011398 |
| 0.011396 | 0.011295 | 0.011195 | 0.011128 | 0.011262 | 0.011195 | 0.011128 |
| 0.011230 | 0.011396 | 0.011195 | 0.011396 | 0.011161 | 0.011262 | 0.011228 |
| 0.011329 | 0.011228 | 0.011262 | 0.011228 | 0.011262 | 0.011127 | 0.011262 |
| 0.011295 | 0.011228 | 0.011295 | 0.011228 | 0.011262 | 0.011295 | 0.011530 |
| 0.011631 | 0.011564 | 0.011631 | 0.011397 | 0.011631 | 0.011262 | 0.011228 |
| 0.011263 | 0.011505 | 0.011335 | 0.011163 | 0.011637 | 0.011129 | 0.011218 |
| 0.011638 | 0.011536 | 0.011429 | 0.011631 | 0.011333 | 0.011497 | 0.011463 |
| 0.011396 | 0.011564 | 0.011416 | 0.011225 | 0.011270 | 0.011295 | 0.011365 |
| 0.011463 | 0.011364 | 0.011500 | 0.011568 | 0.011497 | 0.011564 | 0.011670 |
| 0.011399 | 0.011569 | 0.011500 | 0.011432 | 0.011699 | 0.011161 | 0.011363 |
| 0.011329 | 0.011262 | 0.011161 | 0.011161 | 0.011228 | 0.011228 | 0.011295 |
| 0.011228 | 0.011295 | 0.011195 | 0.011295 | 0.011228 | 0.011228 | 0.011295 |
| 0.011228 | 0.011665 | 0.011564 | 0.011597 | 0.011127 | 0.011228 | 0.011262 |
| 0.011262 | 0.011228 | 0.011295 | 0.011329 | 0.011195 | 0.011195 | 0.011195 |

|          |          |          |          |          |          |          |
|----------|----------|----------|----------|----------|----------|----------|
| 0.011732 | 0.011362 | 0.011362 | 0.011161 | 0.011262 | 0.011430 | 0.011195 |
| 0.011195 | 0.011262 | 0.011228 | 0.011396 | 0.011195 | 0.011329 | 0.011463 |
| 0.011396 | 0.011228 | 0.011228 | 0.011161 | 0.011161 | 0.011329 | 0.011262 |
| 0.011161 | 0.011262 | 0.011127 | 0.011161 | 0.011295 | 0.011430 | 0.011195 |
| 0.011161 | 0.011295 | 0.011228 | 0.011127 | 0.011463 | 0.011127 | 0.011295 |
| 0.011368 | 0.011195 | 0.011497 | 0.011329 | 0.011362 | 0.011228 | 0.011329 |
| 0.011195 | 0.011530 | 0.011127 | 0.011396 | 0.011195 | 0.011195 | 0.011127 |
| 0.011362 | 0.011564 | 0.011262 | 0.011329 | 0.011161 | 0.011564 | 0.011195 |
| 0.011195 | 0.011195 | 0.011228 | 0.011329 | 0.011228 | 0.011329 | 0.011396 |
| 0.011396 | 0.011362 | 0.011262 | 0.011362 | 0.011329 | 0.011195 | 0.011161 |
| 0.011195 | 0.011195 | 0.011262 | 0.011195 | 0.011161 | 0.011329 | 0.011195 |
| 0.011228 | 0.011228 | 0.011362 | 0.011396 | 0.011295 | 0.011228 | 0.011228 |
| 0.011295 | 0.011228 | 0.011329 | 0.011195 | 0.011329 | 0.011429 | 0.011665 |
| 0.011228 | 0.011631 | 0.011233 | 0.017747 | 0.011126 | 0.011366 | 0.011583 |
| 0.011545 | 0.011588 | 0.011322 | 0.011292 | 0.011664 | 0.011612 | 0.011242 |
| 0.011487 | 0.011487 | 0.011138 | 0.011228 | 0.011216 | 0.011258 | 0.011232 |
| 0.011482 | 0.011395 | 0.011394 | 0.011193 | 0.011362 | 0.011396 | 0.011398 |
| 0.011266 | 0.011362 | 0.011362 | 0.011329 | 0.011295 | 0.011295 | 0.011262 |
| 0.011295 | 0.011228 | 0.011262 | 0.011295 | 0.011262 | 0.011195 | 0.011228 |
| 0.011228 | 0.011295 | 0.011195 | 0.011295 | 0.011329 | 0.011362 | 0.011262 |
| 0.011295 | 0.011262 | 0.011598 | 0.011598 | 0.011329 | 0.011363 | 0.011396 |
| 0.011161 | 0.011161 | 0.011195 | 0.011295 | 0.011161 | 0.011396 | 0.011396 |
| 0.011430 | 0.011429 | 0.011362 | 0.011463 | 0.011631 | 0.011464 | 0.011295 |
| 0.011295 | 0.011362 | 0.011396 | 0.011228 | 0.011295 | 0.011262 | 0.011295 |
| 0.011363 | 0.011363 | 0.011396 | 0.011363 | 0.011262 | 0.011463 | 0.011430 |
| 0.011297 | 0.011195 | 0.011295 | 0.011396 | 0.011295 | 0.011430 | 0.011463 |
| 0.011631 | 0.011333 | 0.011497 | 0.011463 | 0.011396 | 0.011564 | 0.011195 |
| 0.011363 | 0.011262 | 0.011228 | 0.011228 | 0.011295 | 0.011195 | 0.011295 |
| 0.011329 | 0.011362 | 0.011262 | 0.011295 | 0.011262 | 0.011598 | 0.011598 |
| 0.011329 | 0.011363 | 0.011429 | 0.011362 | 0.012002 | 0.011417 | 0.011342 |
| 0.011412 | 0.011372 | 0.011482 | 0.011372 | 0.011480 | 0.011405 | 0.011370 |
| 0.011953 | 0.011268 | 0.011403 | 0.011337 | 0.011611 | 0.011468 | 0.011570 |
| 0.011978 | 0.011437 | 0.011534 | 0.011597 | 0.011463 | 0.011463 | 0.011500 |
| 0.011161 | 0.011329 | 0.011463 | 0.011429 | 0.011432 | 0.011429 | 0.011397 |
| 0.011262 | 0.011195 | 0.011228 | 0.011262 | 0.011161 | 0.011228 | 0.011127 |
| 0.011262 | 0.011295 | 0.011195 | 0.011161 | 0.011262 | 0.011195 | 0.011228 |
| 0.011228 | 0.011161 | 0.011228 | 0.011262 | 0.011161 | 0.011362 | 0.011396 |
| 0.011295 | 0.011362 | 0.011295 | 0.011295 | 0.011228 | 0.011631 | 0.011262 |
| 0.011304 | 0.011228 | 0.011463 | 0.011467 | 0.011329 | 0.011329 | 0.011329 |
| 0.011329 | 0.011262 | 0.011228 | 0.011262 | 0.011362 | 0.011362 | 0.011295 |
| 0.011295 | 0.011430 | 0.011597 | 0.011329 | 0.011530 | 0.011530 | 0.011396 |
| 0.011228 | 0.011295 | 0.011329 | 0.011732 | 0.011295 | 0.011329 | 0.011295 |
| 0.011329 | 0.011262 | 0.011262 | 0.011564 | 0.011497 | 0.011530 | 0.011262 |
| 0.011362 | 0.011430 | 0.011295 | 0.011362 | 0.011329 | 0.011195 | 0.011530 |
| 0.011295 | 0.011262 | 0.011262 | 0.011430 | 0.011262 | 0.011362 | 0.011597 |
| 0.011228 | 0.011672 | 0.011665 | 0.011467 | 0.011173 | 0.011366 | 0.011267 |
| 0.011170 | 0.011683 | 0.011201 | 0.011417 | 0.011207 | 0.011366 | 0.011273 |
| 0.011468 | 0.000000 | 0.011227 | 0.000000 | 0.011168 | 0.011261 | 0.011344 |
| 0.011362 | 0.011257 | 0.011342 | 0.011272 | 0.011296 | 0.011430 | 0.011497 |
| 0.011497 | 0.011363 | 0.011466 | 0.011467 | 0.011603 | 0.011626 | 0.011295 |
| 0.011530 | 0.011396 | 0.011262 | 0.011363 | 0.011161 | 0.011396 | 0.011195 |
| 0.011262 | 0.011262 | 0.011228 | 0.011195 | 0.011228 | 0.011195 | 0.011295 |
| 0.011270 | 0.011270 | 0.011266 | 0.011300 | 0.011437 | 0.011402 | 0.011402 |
| 0.011401 | 0.011329 | 0.011097 | 0.011132 | 0.011263 | 0.011433 | 0.011433 |
| 0.011228 | 0.011297 | 0.011531 | 0.011500 | 0.011430 | 0.011464 | 0.011396 |
| 0.011329 | 0.011396 | 0.011396 | 0.011295 | 0.011866 | 0.011463 | 0.011530 |
| 0.011564 | 0.011630 | 0.011265 | 0.011337 | 0.011228 | 0.011430 | 0.011396 |
| 0.011430 | 0.011463 | 0.011463 | 0.011463 | 0.011610 | 0.011597 | 0.011234 |
| 0.011128 | 0.011130 | 0.011230 | 0.011196 | 0.011299 | 0.011135 | 0.011468 |
| 0.011266 | 0.011367 | 0.011108 | 0.011248 | 0.011262 | 0.011334 | 0.011228 |

|          |          |          |          |          |          |          |
|----------|----------|----------|----------|----------|----------|----------|
| 0.011195 | 0.011195 | 0.011262 | 0.011228 | 0.011430 | 0.011396 | 0.011329 |
| 0.011430 | 0.011497 | 0.011228 | 0.011228 | 0.011262 | 0.011262 | 0.011263 |
| 0.011331 | 0.011262 | 0.011262 | 0.011296 | 0.011430 | 0.011497 | 0.011497 |
| 0.011363 | 0.011466 | 0.011467 | 0.011603 | 0.011626 | 0.011295 | 0.011463 |
| 0.011396 | 0.011396 | 0.011229 | 0.011408 | 0.011338 | 0.011367 | 0.011235 |
| 0.011405 | 0.011561 | 0.011357 | 0.011298 | 0.011195 | 0.011396 | 0.011262 |
| 0.011362 | 0.011295 | 0.011195 | 0.011296 | 0.011396 | 0.011398 | 0.011295 |
| 0.011195 | 0.011128 | 0.011262 | 0.011195 | 0.011128 | 0.011230 | 0.011396 |
| 0.011295 | 0.011228 | 0.011262 | 0.011295 | 0.011262 | 0.011195 | 0.011396 |
| 0.011262 | 0.011295 | 0.011295 | 0.011228 | 0.011295 | 0.011530 | 0.011195 |
| 0.011228 | 0.011631 | 0.011228 | 0.011262 | 0.011228 | 0.011597 | 0.011189 |
| 0.011622 | 0.011145 | 0.011261 | 0.011422 | 0.011508 | 0.011419 | 0.011144 |
| 0.011218 | 0.011396 | 0.011497 | 0.011603 | 0.011464 | 0.011601 | 0.011733 |
| 0.011632 | 0.011669 | 0.011631 | 0.011880 | 0.011597 | 0.012472 | 0.011633 |
| 0.012372 | 0.012139 | 0.012274 | 0.012545 | 0.011597 | 0.011295 | 0.011598 |
| 0.012036 | 0.011971 | 0.011564 | 0.011463 | 0.011531 | 0.011531 | 0.011500 |
| 0.011396 | 0.011399 | 0.011463 | 0.011430 | 0.011800 | 0.011866 | 0.011867 |
| 0.011767 | 0.011867 | 0.011970 | 0.011737 | 0.012036 | 0.012042 | 0.012104 |
| 0.012104 | 0.012138 | 0.012084 | 0.012104 | 0.012106 | 0.011329 | 0.011632 |
| 0.011699 | 0.012203 | 0.011704 | 0.011934 | 0.012407 | 0.011468 | 0.011363 |
| 0.011329 | 0.011329 | 0.011800 | 0.011800 | 0.011940 | 0.011665 | 0.011330 |
| S011     | 0.011664 | 0.011664 | 0.012001 | 0.011765 | 0.011765 | 0.011832 |
| 0.011671 | 0.011603 | 0.011832 | 0.011262 | 0.000000 | 0.011296 | 0.011262 |
| 0.011295 | 0.011463 | 0.011262 | 0.011295 | 0.011362 | 0.011329 | 0.011295 |
| 0.011262 | 0.011295 | 0.011396 | 0.011262 | 0.011295 | 0.011295 | 0.011637 |
| 0.011530 | 0.011295 | 0.011194 | 0.011429 | 0.011362 | 0.011329 | 0.011362 |
| 0.011329 | 0.011429 | 0.011329 | 0.011329 | 0.011362 | 0.011329 | 0.011496 |
| 0.011262 | 0.011329 | 0.011362 | 0.011295 | 0.011396 | 0.011429 | 0.011362 |
| 0.011329 | 0.011496 | 0.011396 | 0.011664 | 0.011329 | 0.011597 | 0.011329 |
| 0.011295 | 0.011396 | 0.011463 | 0.011597 | 0.011698 | 0.011396 | 0.011496 |
| 0.011362 | 0.011429 | 0.011329 | 0.011564 | 0.011799 | 0.011329 | 0.011396 |
| 0.011295 | 0.011362 | 0.011362 | 0.011429 | 0.011362 | 0.011362 | 0.011362 |
| 0.011262 | 0.011295 | 0.011262 | 0.011362 | 0.011329 | 0.011363 | 0.011429 |
| 0.011362 | 0.011329 | 0.011396 | 0.011295 | 0.011429 | 0.011262 | 0.011329 |
| 0.011496 | 0.011429 | 0.011664 | 0.011496 | 0.011329 | 0.011564 | 0.011329 |
| 0.011468 | 0.011695 | 0.011513 | 0.011217 | 0.011210 | 0.011318 | 0.011415 |
| 0.012048 | 0.011467 | 0.011225 | 0.011563 | 0.011564 | 0.011362 | 0.011463 |
| 0.011396 | 0.011362 | 0.011429 | 0.011329 | 0.011429 | 0.011362 | 0.011362 |
| 0.011329 | 0.011429 | 0.011631 | 0.011496 | 0.011396 | 0.011362 | 0.011295 |
| 0.011262 | 0.011262 | 0.011329 | 0.011295 | 0.011497 | 0.011463 | 0.011396 |
| 0.011497 | 0.011564 | 0.011295 | 0.011295 | 0.011329 | 0.011329 | 0.011330 |
| 0.011398 | 0.011329 | 0.011329 | 0.011204 | 0.011277 | 0.011236 | 0.011329 |
| 0.011331 | 0.011266 | 0.011282 | 0.011302 | 0.011230 | 0.011266 | 0.011297 |
| 0.011564 | 0.011336 | 0.011370 | 0.011262 | 0.011268 | 0.011397 | 0.011363 |
| 0.011430 | 0.011363 | 0.011363 | 0.011463 | 0.011396 | 0.011765 | 0.011564 |
| 0.011597 | 0.011463 | 0.011329 | 0.011429 | 0.011228 | 0.011463 | 0.011262 |
| 0.011329 | 0.011329 | 0.011295 | 0.011262 | 0.011295 | 0.011262 | 0.011362 |
| 0.011329 | 0.011429 | 0.011362 | 0.011262 | 0.011363 | 0.011463 | 0.011466 |
| 0.011463 | 0.011362 | 0.011262 | 0.011195 | 0.011329 | 0.011262 | 0.011195 |
| 0.011298 | 0.011463 | 0.011262 | 0.011463 | 0.011228 | 0.011329 | 0.011295 |
| 0.011396 | 0.011295 | 0.011329 | 0.011295 | 0.011329 | 0.011195 | 0.011329 |
| 0.011362 | 0.011295 | 0.011362 | 0.011295 | 0.011329 | 0.011362 | 0.011597 |
| 0.011698 | 0.011631 | 0.011698 | 0.011431 | 0.011698 | 0.011329 | 0.011295 |
| 0.011330 | 0.011586 | 0.011472 | 0.011197 | 0.011705 | 0.011197 | 0.011296 |
| 0.011705 | 0.011604 | 0.011496 | 0.011698 | 0.011402 | 0.011564 | 0.011530 |
| 0.011463 | 0.011631 | 0.011486 | 0.011349 | 0.011354 | 0.011362 | 0.011432 |
| 0.011530 | 0.011431 | 0.011567 | 0.011635 | 0.011564 | 0.011631 | 0.011738 |
| 0.011466 | 0.011637 | 0.011568 | 0.011500 | 0.011766 | 0.011228 | 0.011431 |
| 0.011396 | 0.011329 | 0.011228 | 0.011228 | 0.011295 | 0.011295 | 0.011362 |
| 0.011295 | 0.011362 | 0.011262 | 0.011362 | 0.011295 | 0.011295 | 0.011362 |

|          |          |          |          |          |          |          |
|----------|----------|----------|----------|----------|----------|----------|
| 0.011295 | 0.011731 | 0.011631 | 0.011664 | 0.011194 | 0.011295 | 0.011329 |
| 0.011329 | 0.011295 | 0.011362 | 0.011396 | 0.011262 | 0.011262 | 0.011262 |
| 0.011799 | 0.011429 | 0.011429 | 0.011228 | 0.011329 | 0.011496 | 0.011262 |
| 0.011262 | 0.011329 | 0.011295 | 0.011463 | 0.011262 | 0.011396 | 0.011530 |
| 0.011463 | 0.011295 | 0.011295 | 0.011228 | 0.011228 | 0.011396 | 0.011329 |
| 0.011228 | 0.011329 | 0.011195 | 0.011228 | 0.011362 | 0.011497 | 0.011262 |
| 0.011228 | 0.011362 | 0.011295 | 0.011195 | 0.011530 | 0.011195 | 0.011362 |
| 0.011437 | 0.011262 | 0.011564 | 0.011396 | 0.011429 | 0.011295 | 0.011396 |
| 0.011262 | 0.011597 | 0.011194 | 0.011463 | 0.011262 | 0.011262 | 0.011194 |
| 0.011429 | 0.011631 | 0.011329 | 0.011396 | 0.011228 | 0.011631 | 0.011262 |
| 0.011262 | 0.011262 | 0.011295 | 0.011396 | 0.011295 | 0.011396 | 0.011463 |
| 0.011463 | 0.011429 | 0.011329 | 0.011429 | 0.011396 | 0.011262 | 0.011228 |
| 0.011262 | 0.011262 | 0.011329 | 0.011262 | 0.011228 | 0.011329 | 0.011262 |
| 0.011295 | 0.011295 | 0.011429 | 0.011463 | 0.011362 | 0.011295 | 0.011295 |
| 0.011362 | 0.011295 | 0.011396 | 0.011262 | 0.011396 | 0.011496 | 0.011799 |
| 0.011295 | 0.011698 | 0.011267 | 0.011785 | 0.011257 | 0.011366 | 0.011618 |
| 0.011579 | 0.011623 | 0.011322 | 0.011234 | 0.011719 | 0.011647 | 0.011364 |
| 0.011487 | 0.011549 | 0.011177 | 0.011186 | 0.011216 | 0.011307 | 0.011232 |
| 0.011482 | 0.011433 | 0.011431 | 0.011259 | 0.011429 | 0.011463 | 0.011466 |
| 0.011335 | 0.011429 | 0.011429 | 0.011396 | 0.011362 | 0.011362 | 0.011329 |
| 0.011362 | 0.011295 | 0.011329 | 0.011362 | 0.011329 | 0.011262 | 0.011295 |
| 0.011295 | 0.011362 | 0.011262 | 0.011362 | 0.011396 | 0.011429 | 0.011329 |
| 0.011362 | 0.011329 | 0.011665 | 0.011665 | 0.011396 | 0.011430 | 0.011463 |
| 0.011228 | 0.011228 | 0.011262 | 0.011362 | 0.011228 | 0.011463 | 0.011463 |
| 0.011497 | 0.011496 | 0.011429 | 0.011530 | 0.011698 | 0.011531 | 0.011362 |
| 0.011362 | 0.011429 | 0.011463 | 0.011295 | 0.011362 | 0.011329 | 0.011362 |
| 0.011430 | 0.011430 | 0.011463 | 0.011430 | 0.011330 | 0.011530 | 0.011497 |
| 0.011365 | 0.011262 | 0.011362 | 0.011463 | 0.011362 | 0.011497 | 0.011530 |
| 0.011698 | 0.011402 | 0.011564 | 0.011530 | 0.011463 | 0.011631 | 0.011262 |
| 0.011431 | 0.011329 | 0.011295 | 0.011295 | 0.011362 | 0.011262 | 0.011362 |
| 0.011396 | 0.011429 | 0.011329 | 0.011362 | 0.011329 | 0.011665 | 0.011665 |
| 0.011396 | 0.011430 | 0.011496 | 0.011429 | 0.012069 | 0.011489 | 0.011412 |
| 0.011482 | 0.011441 | 0.011552 | 0.011441 | 0.011550 | 0.011474 | 0.011439 |
| 0.012021 | 0.011337 | 0.011471 | 0.011406 | 0.011680 | 0.011536 | 0.011638 |
| 0.012046 | 0.011512 | 0.011601 | 0.011664 | 0.011530 | 0.011530 | 0.011567 |
| 0.011228 | 0.011396 | 0.011530 | 0.011496 | 0.011499 | 0.011496 | 0.011464 |
| 0.011127 | 0.011262 | 0.011295 | 0.011329 | 0.011228 | 0.011295 | 0.011194 |
| 0.011329 | 0.011362 | 0.011262 | 0.011228 | 0.011329 | 0.011262 | 0.011295 |
| 0.011295 | 0.011228 | 0.011295 | 0.011329 | 0.011228 | 0.011429 | 0.011463 |
| 0.011362 | 0.011429 | 0.011362 | 0.011362 | 0.011295 | 0.011698 | 0.011329 |
| 0.011373 | 0.011295 | 0.011530 | 0.011535 | 0.011396 | 0.011396 | 0.011396 |
| 0.011396 | 0.011329 | 0.011295 | 0.011329 | 0.011429 | 0.011429 | 0.011362 |
| 0.011362 | 0.011429 | 0.011664 | 0.011396 | 0.011597 | 0.011597 | 0.011463 |
| 0.011295 | 0.011362 | 0.011396 | 0.011799 | 0.011362 | 0.011396 | 0.011362 |
| 0.011396 | 0.011329 | 0.011329 | 0.011631 | 0.011564 | 0.011597 | 0.011329 |
| 0.011429 | 0.011496 | 0.011362 | 0.011429 | 0.011396 | 0.011262 | 0.011597 |
| 0.011362 | 0.011329 | 0.011329 | 0.011496 | 0.011329 | 0.011429 | 0.011664 |
| 0.011362 | 0.011739 | 0.011731 | 0.011507 | 0.011286 | 0.011434 | 0.011318 |
| 0.011225 | 0.011722 | 0.011236 | 0.011462 | 0.011304 | 0.011416 | 0.011379 |
| 0.011468 | 0.011126 | 0.011339 | 0.011192 | 0.011276 | 0.011395 | 0.011385 |
| 0.011399 | 0.011296 | 0.011377 | 0.011307 | 0.011363 | 0.011497 | 0.011564 |
| 0.011564 | 0.011430 | 0.011533 | 0.011535 | 0.011670 | 0.011696 | 0.011362 |
| 0.011597 | 0.011463 | 0.011329 | 0.011429 | 0.011228 | 0.011463 | 0.011262 |
| 0.011329 | 0.011329 | 0.011295 | 0.011262 | 0.011295 | 0.011262 | 0.011362 |
| 0.011340 | 0.011340 | 0.011334 | 0.011368 | 0.011505 | 0.011470 | 0.011470 |
| 0.011469 | 0.011396 | 0.011171 | 0.011168 | 0.011331 | 0.011501 | 0.011501 |
| 0.011296 | 0.011365 | 0.011599 | 0.011567 | 0.011497 | 0.011531 | 0.011463 |
| 0.011396 | 0.011463 | 0.011463 | 0.011362 | 0.011933 | 0.011530 | 0.011597 |
| 0.011631 | 0.011701 | 0.011333 | 0.011407 | 0.011295 | 0.011497 | 0.011463 |
| 0.011497 | 0.011530 | 0.011530 | 0.011530 | 0.011689 | 0.011664 | 0.011303 |

|          |          |          |          |          |          |          |
|----------|----------|----------|----------|----------|----------|----------|
| 0.011195 | 0.011199 | 0.011298 | 0.011264 | 0.011368 | 0.011210 | 0.011536 |
| 0.011335 | 0.011455 | 0.011203 | 0.011360 | 0.011329 | 0.011402 | 0.011295 |
| 0.011262 | 0.011262 | 0.011329 | 0.011295 | 0.011497 | 0.011463 | 0.011396 |
| 0.011497 | 0.011564 | 0.011295 | 0.011295 | 0.011329 | 0.011329 | 0.011330 |
| 0.011398 | 0.011329 | 0.011329 | 0.011363 | 0.011497 | 0.011564 | 0.011564 |
| 0.011430 | 0.011533 | 0.011535 | 0.011670 | 0.011696 | 0.011362 | 0.011530 |
| 0.011463 | 0.011463 | 0.011297 | 0.011478 | 0.011408 | 0.011435 | 0.011235 |
| 0.011473 | 0.011607 | 0.011357 | 0.011366 | 0.011262 | 0.011463 | 0.011329 |
| 0.011429 | 0.011362 | 0.011262 | 0.011363 | 0.011463 | 0.011466 | 0.011362 |
| 0.011262 | 0.011195 | 0.011329 | 0.011262 | 0.011195 | 0.011298 | 0.011463 |
| 0.011362 | 0.011295 | 0.011329 | 0.011362 | 0.011329 | 0.011262 | 0.011463 |
| 0.011329 | 0.011362 | 0.011362 | 0.011295 | 0.011362 | 0.011597 | 0.011262 |
| 0.011295 | 0.011698 | 0.011295 | 0.011329 | 0.011295 | 0.011664 | 0.011189 |
| 0.011678 | 0.011230 | 0.011261 | 0.011463 | 0.011549 | 0.011455 | 0.011144 |
| 0.011218 | 0.011463 | 0.011564 | 0.011671 | 0.011531 | 0.011635 | 0.011800 |
| 0.011699 | 0.011737 | 0.011631 | 0.011914 | 0.011664 | 0.012539 | 0.011700 |
| 0.012439 | 0.012207 | 0.012341 | 0.012612 | 0.011664 | 0.011362 | 0.011665 |
| 0.012103 | 0.012004 | 0.011631 | 0.011530 | 0.011598 | 0.011598 | 0.011567 |
| 0.011463 | 0.011433 | 0.011530 | 0.011497 | 0.011867 | 0.011933 | 0.011867 |
| 0.011834 | 0.011934 | 0.012038 | 0.011770 | 0.012104 | 0.012110 | 0.012171 |
| 0.012171 | 0.012205 | 0.012118 | 0.012171 | 0.012173 | 0.011396 | 0.011699 |
| 0.011766 | 0.012270 | 0.011772 | 0.012001 | 0.012474 | 0.011536 | 0.011430 |
| 0.011396 | 0.011396 | 0.011867 | 0.011924 | 0.012010 | 0.011732 | 0.011397 |
| S012     | 0.011632 | 0.011632 | 0.011767 | 0.011733 | 0.011733 | 0.011801 |
| 0.011639 | 0.011537 | 0.011733 | 0.011228 | 0.011296 | 0.000000 | 0.011228 |
| 0.011262 | 0.011430 | 0.011228 | 0.011262 | 0.011262 | 0.011296 | 0.011262 |
| 0.011228 | 0.011262 | 0.011363 | 0.011229 | 0.011262 | 0.011262 | 0.011605 |
| 0.011498 | 0.011262 | 0.011161 | 0.011397 | 0.011329 | 0.011296 | 0.011329 |
| 0.011296 | 0.011397 | 0.011296 | 0.011296 | 0.011329 | 0.011296 | 0.011464 |
| 0.011228 | 0.011296 | 0.011329 | 0.011262 | 0.011363 | 0.011397 | 0.011329 |
| 0.011296 | 0.011464 | 0.011363 | 0.011632 | 0.011296 | 0.011565 | 0.011296 |
| 0.011262 | 0.011363 | 0.011430 | 0.011565 | 0.011666 | 0.011363 | 0.011464 |
| 0.011329 | 0.011397 | 0.011296 | 0.011531 | 0.011767 | 0.011296 | 0.011363 |
| 0.011262 | 0.011363 | 0.011329 | 0.011397 | 0.011329 | 0.011329 | 0.011329 |
| 0.011228 | 0.011262 | 0.011228 | 0.011329 | 0.011296 | 0.011330 | 0.011397 |
| 0.011329 | 0.011296 | 0.011363 | 0.011262 | 0.011397 | 0.011229 | 0.011296 |
| 0.011464 | 0.011397 | 0.011632 | 0.011464 | 0.011296 | 0.011531 | 0.011296 |
| 0.011431 | 0.011658 | 0.011475 | 0.011177 | 0.011172 | 0.011318 | 0.011375 |
| 0.012011 | 0.011467 | 0.011184 | 0.011531 | 0.011531 | 0.011329 | 0.011430 |
| 0.011363 | 0.011329 | 0.011397 | 0.011296 | 0.011397 | 0.011329 | 0.011329 |
| 0.011296 | 0.011397 | 0.011599 | 0.011464 | 0.011363 | 0.011330 | 0.011262 |
| 0.011228 | 0.011228 | 0.011296 | 0.011262 | 0.011464 | 0.011430 | 0.011363 |
| 0.011464 | 0.011531 | 0.011262 | 0.011262 | 0.011296 | 0.011296 | 0.011297 |
| 0.011365 | 0.011296 | 0.011296 | 0.011168 | 0.011241 | 0.011201 | 0.011296 |
| 0.011298 | 0.011232 | 0.011282 | 0.011267 | 0.011196 | 0.011232 | 0.011196 |
| 0.011529 | 0.011302 | 0.011336 | 0.011229 | 0.011233 | 0.011363 | 0.011330 |
| 0.011397 | 0.011330 | 0.011329 | 0.011430 | 0.011363 | 0.011733 | 0.011498 |
| 0.011565 | 0.011430 | 0.011296 | 0.011397 | 0.011195 | 0.011430 | 0.011229 |
| 0.011296 | 0.011296 | 0.011262 | 0.011228 | 0.011262 | 0.011228 | 0.011329 |
| 0.011296 | 0.011397 | 0.011329 | 0.011228 | 0.011330 | 0.011430 | 0.011433 |
| 0.011430 | 0.011329 | 0.011228 | 0.011162 | 0.011296 | 0.011229 | 0.011161 |
| 0.011264 | 0.011431 | 0.011229 | 0.011431 | 0.011195 | 0.011296 | 0.011262 |
| 0.011363 | 0.011262 | 0.011296 | 0.011262 | 0.011296 | 0.011161 | 0.011296 |
| 0.011329 | 0.011262 | 0.011329 | 0.011262 | 0.011296 | 0.011329 | 0.011531 |
| 0.011666 | 0.011599 | 0.011666 | 0.011431 | 0.011666 | 0.011296 | 0.011262 |
| 0.011297 | 0.011586 | 0.011381 | 0.011198 | 0.011672 | 0.011163 | 0.011296 |
| 0.011673 | 0.011571 | 0.011464 | 0.011666 | 0.011368 | 0.011531 | 0.011498 |
| 0.011430 | 0.011599 | 0.011452 | 0.011308 | 0.011354 | 0.011329 | 0.011399 |
| 0.011498 | 0.011398 | 0.011535 | 0.011603 | 0.011531 | 0.011599 | 0.011705 |
| 0.011433 | 0.011604 | 0.011535 | 0.011467 | 0.011734 | 0.011195 | 0.011398 |

|          |          |          |          |          |          |          |
|----------|----------|----------|----------|----------|----------|----------|
| 0.011363 | 0.011296 | 0.011195 | 0.011195 | 0.011262 | 0.011262 | 0.011329 |
| 0.011262 | 0.011329 | 0.011228 | 0.011329 | 0.011262 | 0.011262 | 0.011329 |
| 0.011262 | 0.011700 | 0.011599 | 0.011632 | 0.011161 | 0.011262 | 0.011296 |
| 0.011296 | 0.011262 | 0.011329 | 0.011363 | 0.011228 | 0.011228 | 0.011228 |
| 0.011767 | 0.011363 | 0.011397 | 0.011195 | 0.011296 | 0.011464 | 0.011229 |
| 0.011228 | 0.011296 | 0.011262 | 0.011430 | 0.011228 | 0.011363 | 0.011498 |
| 0.011430 | 0.011262 | 0.011262 | 0.011195 | 0.011195 | 0.011363 | 0.011296 |
| 0.011195 | 0.011296 | 0.011161 | 0.011195 | 0.011329 | 0.011464 | 0.011229 |
| 0.011195 | 0.011329 | 0.011262 | 0.011161 | 0.011498 | 0.011161 | 0.011329 |
| 0.011403 | 0.011161 | 0.011531 | 0.011363 | 0.011397 | 0.011262 | 0.011363 |
| 0.011228 | 0.011565 | 0.011161 | 0.011430 | 0.011228 | 0.011228 | 0.011161 |
| 0.011397 | 0.011599 | 0.011296 | 0.011363 | 0.011195 | 0.011599 | 0.011228 |
| 0.011229 | 0.011228 | 0.011262 | 0.011363 | 0.011262 | 0.011363 | 0.011430 |
| 0.011430 | 0.011397 | 0.011296 | 0.011397 | 0.011363 | 0.011228 | 0.011195 |
| 0.011228 | 0.011228 | 0.011296 | 0.011228 | 0.011195 | 0.011363 | 0.011228 |
| 0.011262 | 0.011262 | 0.011397 | 0.011430 | 0.011329 | 0.011262 | 0.011262 |
| 0.011329 | 0.011262 | 0.011363 | 0.011228 | 0.011363 | 0.011464 | 0.011700 |
| 0.011262 | 0.011666 | 0.011267 | 0.017748 | 0.011191 | 0.011366 | 0.011618 |
| 0.011579 | 0.011623 | 0.011322 | 0.011292 | 0.011609 | 0.011647 | 0.011303 |
| 0.011487 | 0.011426 | 0.011138 | 0.011270 | 0.011216 | 0.011208 | 0.011232 |
| 0.011482 | 0.011395 | 0.011394 | 0.011259 | 0.011397 | 0.011430 | 0.011433 |
| 0.011301 | 0.011397 | 0.011397 | 0.011363 | 0.011296 | 0.011296 | 0.011296 |
| 0.011329 | 0.011262 | 0.011296 | 0.011329 | 0.011296 | 0.011229 | 0.011262 |
| 0.011262 | 0.011329 | 0.011228 | 0.011330 | 0.011363 | 0.011397 | 0.011296 |
| 0.011329 | 0.011296 | 0.011632 | 0.011632 | 0.011363 | 0.011397 | 0.011430 |
| 0.011195 | 0.011195 | 0.011228 | 0.011329 | 0.011195 | 0.011430 | 0.011430 |
| 0.011464 | 0.011464 | 0.011397 | 0.011498 | 0.011666 | 0.011499 | 0.011329 |
| 0.011329 | 0.011397 | 0.011430 | 0.011262 | 0.011329 | 0.011296 | 0.011329 |
| 0.011397 | 0.011397 | 0.011430 | 0.011397 | 0.011296 | 0.011498 | 0.011464 |
| 0.011332 | 0.011229 | 0.011329 | 0.011430 | 0.011330 | 0.011464 | 0.011498 |
| 0.011666 | 0.011368 | 0.011531 | 0.011498 | 0.011430 | 0.011599 | 0.011229 |
| 0.011398 | 0.011296 | 0.011262 | 0.011262 | 0.011329 | 0.011228 | 0.011330 |
| 0.011363 | 0.011397 | 0.011296 | 0.011329 | 0.011296 | 0.011632 | 0.011632 |
| 0.011363 | 0.011397 | 0.011464 | 0.011397 | 0.012037 | 0.011454 | 0.011378 |
| 0.011448 | 0.011408 | 0.011518 | 0.011407 | 0.011516 | 0.011440 | 0.011406 |
| 0.011990 | 0.011303 | 0.011438 | 0.011372 | 0.011647 | 0.011503 | 0.011606 |
| 0.012014 | 0.011475 | 0.011331 | 0.011329 | 0.011329 | 0.011363 | 0.011297 |
| 0.011195 | 0.011229 | 0.011363 | 0.011329 | 0.011331 | 0.011464 | 0.011431 |
| 0.011296 | 0.011228 | 0.011262 | 0.011296 | 0.011195 | 0.011262 | 0.011161 |
| 0.011296 | 0.011329 | 0.011228 | 0.011195 | 0.011296 | 0.011228 | 0.011262 |
| 0.011262 | 0.011195 | 0.011262 | 0.011296 | 0.011195 | 0.011397 | 0.011430 |
| 0.011329 | 0.011397 | 0.011329 | 0.011329 | 0.011262 | 0.011666 | 0.011296 |
| 0.011339 | 0.011262 | 0.011498 | 0.011502 | 0.011363 | 0.011363 | 0.011363 |
| 0.011363 | 0.011296 | 0.011262 | 0.011296 | 0.011397 | 0.011397 | 0.011329 |
| 0.011329 | 0.011464 | 0.011632 | 0.011363 | 0.011565 | 0.011565 | 0.011430 |
| 0.011262 | 0.011329 | 0.011363 | 0.011767 | 0.011330 | 0.011363 | 0.011329 |
| 0.011363 | 0.011296 | 0.011296 | 0.011531 | 0.011532 | 0.011565 | 0.011296 |
| 0.011397 | 0.011464 | 0.011329 | 0.011397 | 0.011363 | 0.011229 | 0.011565 |
| 0.011329 | 0.011296 | 0.011296 | 0.011464 | 0.011296 | 0.011397 | 0.011632 |
| 0.011262 | 0.011707 | 0.011700 | 0.011467 | 0.011229 | 0.011400 | 0.011267 |
| 0.011170 | 0.011683 | 0.011236 | 0.011417 | 0.011255 | 0.011264 | 0.011379 |
| 0.011468 | 0.011126 | 0.011339 | 0.011192 | 0.011222 | 0.011395 | 0.011344 |
| 0.011362 | 0.011257 | 0.011377 | 0.011307 | 0.011330 | 0.011464 | 0.011531 |
| 0.011498 | 0.011397 | 0.011501 | 0.011502 | 0.011638 | 0.011662 | 0.011296 |
| 0.011565 | 0.011430 | 0.011296 | 0.011397 | 0.011195 | 0.011430 | 0.011229 |
| 0.011296 | 0.011296 | 0.011262 | 0.011228 | 0.011262 | 0.011228 | 0.011329 |
| 0.011305 | 0.011305 | 0.011300 | 0.011334 | 0.011471 | 0.011436 | 0.011436 |
| 0.011435 | 0.011363 | 0.011171 | 0.011168 | 0.011298 | 0.011467 | 0.011468 |
| 0.011262 | 0.011331 | 0.011566 | 0.011534 | 0.011464 | 0.011498 | 0.011430 |
| 0.011363 | 0.011430 | 0.011430 | 0.011329 | 0.011902 | 0.011498 | 0.011565 |



|          |          |          |          |          |          |          |
|----------|----------|----------|----------|----------|----------|----------|
| 0.011599 | 0.011667 | 0.011300 | 0.011372 | 0.011262 | 0.011464 | 0.011430 |
| 0.011465 | 0.011464 | 0.011498 | 0.011498 | 0.011611 | 0.011632 | 0.011269 |
| 0.011162 | 0.011164 | 0.011265 | 0.011162 | 0.011334 | 0.011172 | 0.011503 |
| 0.011301 | 0.011455 | 0.011203 | 0.011323 | 0.011296 | 0.011368 | 0.011262 |
| 0.011228 | 0.011228 | 0.011296 | 0.011262 | 0.011464 | 0.011430 | 0.011363 |
| 0.011464 | 0.011531 | 0.011262 | 0.011262 | 0.011296 | 0.011296 | 0.011297 |
| 0.011365 | 0.011296 | 0.011296 | 0.011330 | 0.011464 | 0.011531 | 0.011498 |
| 0.011397 | 0.011501 | 0.011502 | 0.011638 | 0.011662 | 0.011296 | 0.011498 |
| 0.011430 | 0.011430 | 0.011264 | 0.011444 | 0.011373 | 0.011401 | 0.011270 |
| 0.011439 | 0.011607 | 0.011442 | 0.011333 | 0.011229 | 0.011431 | 0.011296 |
| 0.011397 | 0.011329 | 0.011228 | 0.011330 | 0.011430 | 0.011433 | 0.011329 |
| 0.011228 | 0.011162 | 0.011296 | 0.011229 | 0.011161 | 0.011264 | 0.011431 |
| 0.011329 | 0.011262 | 0.011296 | 0.011329 | 0.011296 | 0.011229 | 0.011430 |
| 0.011296 | 0.011329 | 0.011329 | 0.011262 | 0.011329 | 0.011565 | 0.011228 |
| 0.011262 | 0.011666 | 0.011262 | 0.011296 | 0.011262 | 0.011632 | 0.011189 |
| 0.011679 | 0.011188 | 0.011261 | 0.011422 | 0.011508 | 0.011419 | 0.011144 |
| 0.011218 | 0.011430 | 0.011531 | 0.011638 | 0.011498 | 0.011636 | 0.011767 |
| 0.011667 | 0.011704 | 0.011666 | 0.011915 | 0.011632 | 0.012509 | 0.011667 |
| 0.012374 | 0.012173 | 0.012310 | 0.012579 | 0.011632 | 0.011329 | 0.011632 |
| 0.012071 | 0.011837 | 0.011599 | 0.011498 | 0.011565 | 0.011565 | 0.011535 |
| 0.011430 | 0.011434 | 0.011498 | 0.011464 | 0.011835 | 0.011902 | 0.011902 |
| 0.011802 | 0.011902 | 0.012004 | 0.011771 | 0.012071 | 0.012077 | 0.012139 |
| 0.012139 | 0.012173 | 0.012119 | 0.012139 | 0.012140 | 0.011363 | 0.011666 |
| 0.011734 | 0.012205 | 0.011739 | 0.011970 | 0.012138 | 0.011502 | 0.011397 |
| 0.011363 | 0.011363 | 0.011835 | 0.011884 | 0.011976 | 0.011700 | 0.011364 |
| S013     | 0.011597 | 0.011597 | 0.011933 | 0.011698 | 0.011698 | 0.011765 |
| 0.011569 | 0.011502 | 0.011765 | 0.011195 | 0.011262 | 0.011228 | 0.000000 |
| 0.011228 | 0.011396 | 0.011194 | 0.011228 | 0.011295 | 0.011262 | 0.011228 |
| 0.011194 | 0.011228 | 0.011329 | 0.011195 | 0.011228 | 0.011228 | 0.011535 |
| 0.011463 | 0.011228 | 0.011127 | 0.011362 | 0.011228 | 0.011262 | 0.011295 |
| 0.011262 | 0.011362 | 0.011262 | 0.011262 | 0.011295 | 0.011262 | 0.011429 |
| 0.011194 | 0.011262 | 0.011295 | 0.011228 | 0.011329 | 0.011362 | 0.011295 |
| 0.011262 | 0.011429 | 0.011329 | 0.011597 | 0.011262 | 0.011530 | 0.011262 |
| 0.011228 | 0.011329 | 0.011396 | 0.011530 | 0.011631 | 0.011329 | 0.011429 |
| 0.011295 | 0.011362 | 0.011262 | 0.011496 | 0.011732 | 0.011262 | 0.011329 |
| 0.011228 | 0.011329 | 0.011295 | 0.011362 | 0.011295 | 0.011295 | 0.011295 |
| 0.011194 | 0.011228 | 0.011194 | 0.011295 | 0.011262 | 0.011296 | 0.011362 |
| 0.011295 | 0.011262 | 0.011329 | 0.011228 | 0.011362 | 0.011194 | 0.011262 |
| 0.011429 | 0.011362 | 0.011597 | 0.011429 | 0.011262 | 0.011463 | 0.011262 |
| 0.011394 | 0.011620 | 0.011437 | 0.011138 | 0.011172 | 0.011281 | 0.011336 |
| 0.012011 | 0.011416 | 0.011143 | 0.011496 | 0.011496 | 0.011295 | 0.011396 |
| 0.011329 | 0.011295 | 0.011362 | 0.011262 | 0.011362 | 0.011295 | 0.011295 |
| 0.011262 | 0.011362 | 0.011564 | 0.011429 | 0.011329 | 0.011295 | 0.011228 |
| 0.011195 | 0.011195 | 0.011262 | 0.011228 | 0.011429 | 0.011396 | 0.011329 |
| 0.011429 | 0.011497 | 0.011228 | 0.011228 | 0.011262 | 0.011262 | 0.011263 |
| 0.011331 | 0.011262 | 0.011262 | 0.011132 | 0.011205 | 0.011165 | 0.011262 |
| 0.011263 | 0.011198 | 0.011245 | 0.011233 | 0.011162 | 0.011197 | 0.011229 |
| 0.011492 | 0.011267 | 0.011301 | 0.011195 | 0.011129 | 0.011329 | 0.011296 |
| 0.011363 | 0.011296 | 0.011296 | 0.011396 | 0.011329 | 0.011698 | 0.011497 |
| 0.011530 | 0.011396 | 0.011262 | 0.011362 | 0.011161 | 0.011396 | 0.011195 |
| 0.011262 | 0.011262 | 0.011228 | 0.011194 | 0.011228 | 0.011195 | 0.011295 |
| 0.011262 | 0.011362 | 0.011295 | 0.011195 | 0.011296 | 0.011396 | 0.011398 |
| 0.011396 | 0.011295 | 0.011195 | 0.011128 | 0.011262 | 0.011195 | 0.011127 |
| 0.011230 | 0.011396 | 0.011195 | 0.011396 | 0.011161 | 0.011262 | 0.011228 |
| 0.011329 | 0.011228 | 0.011262 | 0.011228 | 0.011262 | 0.011127 | 0.011262 |
| 0.011295 | 0.011228 | 0.011295 | 0.011228 | 0.011262 | 0.011295 | 0.011530 |
| 0.011631 | 0.011564 | 0.011631 | 0.011397 | 0.011631 | 0.011262 | 0.011228 |
| 0.011263 | 0.011545 | 0.011380 | 0.011163 | 0.011637 | 0.011129 | 0.011257 |
| 0.011603 | 0.011536 | 0.011429 | 0.011631 | 0.011333 | 0.011496 | 0.011463 |
| 0.011396 | 0.011564 | 0.011415 | 0.011225 | 0.011270 | 0.011295 | 0.011365 |

|          |          |          |          |          |          |          |
|----------|----------|----------|----------|----------|----------|----------|
| 0.011463 | 0.011364 | 0.011500 | 0.011568 | 0.011497 | 0.011564 | 0.011670 |
| 0.011399 | 0.011569 | 0.011500 | 0.011432 | 0.011699 | 0.011161 | 0.011363 |
| 0.011329 | 0.011262 | 0.011161 | 0.011161 | 0.011228 | 0.011228 | 0.011295 |
| 0.011228 | 0.011295 | 0.011194 | 0.011295 | 0.011228 | 0.011228 | 0.011295 |
| 0.011228 | 0.011664 | 0.011564 | 0.011597 | 0.011127 | 0.011228 | 0.011262 |
| 0.011262 | 0.011228 | 0.011295 | 0.011329 | 0.011194 | 0.011194 | 0.011194 |
| 0.011731 | 0.011362 | 0.011362 | 0.011161 | 0.011262 | 0.011429 | 0.011194 |
| 0.011194 | 0.011262 | 0.011228 | 0.011396 | 0.011194 | 0.011329 | 0.011463 |
| 0.011396 | 0.011228 | 0.011228 | 0.011161 | 0.011161 | 0.011329 | 0.011262 |
| 0.011161 | 0.011262 | 0.011127 | 0.011161 | 0.011295 | 0.011430 | 0.011195 |
| 0.011161 | 0.011295 | 0.011228 | 0.011127 | 0.011463 | 0.011127 | 0.011295 |
| 0.011368 | 0.011195 | 0.011496 | 0.011329 | 0.011362 | 0.011228 | 0.011329 |
| 0.011194 | 0.011530 | 0.011127 | 0.011396 | 0.011194 | 0.011194 | 0.011127 |
| 0.011362 | 0.011564 | 0.011262 | 0.011329 | 0.011161 | 0.011564 | 0.011194 |
| 0.011194 | 0.011194 | 0.011228 | 0.011329 | 0.011228 | 0.011329 | 0.011396 |
| 0.011396 | 0.011362 | 0.011262 | 0.011362 | 0.011329 | 0.011194 | 0.011161 |
| 0.011194 | 0.011194 | 0.011262 | 0.011194 | 0.011161 | 0.011329 | 0.011194 |
| 0.011228 | 0.011228 | 0.011362 | 0.011396 | 0.011295 | 0.011228 | 0.011228 |
| 0.011295 | 0.011228 | 0.011329 | 0.011194 | 0.011329 | 0.011429 | 0.011732 |
| 0.011228 | 0.011631 | 0.011233 | 0.017747 | 0.011126 | 0.011305 | 0.011583 |
| 0.011545 | 0.011588 | 0.011270 | 0.011234 | 0.011609 | 0.011612 | 0.011242 |
| 0.011440 | 0.011426 | 0.011099 | 0.011186 | 0.011216 | 0.011208 | 0.011146 |
| 0.011436 | 0.011395 | 0.011394 | 0.011259 | 0.011362 | 0.011396 | 0.011398 |
| 0.011266 | 0.011362 | 0.011362 | 0.011329 | 0.011295 | 0.011295 | 0.011262 |
| 0.011295 | 0.011228 | 0.011262 | 0.011295 | 0.011262 | 0.011195 | 0.011228 |
| 0.011228 | 0.011295 | 0.011195 | 0.011295 | 0.011329 | 0.011362 | 0.011262 |
| 0.011295 | 0.011262 | 0.011597 | 0.011597 | 0.011329 | 0.011363 | 0.011396 |
| 0.011161 | 0.011161 | 0.011195 | 0.011295 | 0.011161 | 0.011396 | 0.011396 |
| 0.011429 | 0.011429 | 0.011362 | 0.011463 | 0.011631 | 0.011464 | 0.011295 |
| 0.011295 | 0.011362 | 0.011396 | 0.011228 | 0.011295 | 0.011262 | 0.011295 |
| 0.011363 | 0.011362 | 0.011396 | 0.011363 | 0.011262 | 0.011463 | 0.011429 |
| 0.011297 | 0.011195 | 0.011295 | 0.011396 | 0.011295 | 0.011430 | 0.011463 |
| 0.011631 | 0.011333 | 0.011496 | 0.011463 | 0.011396 | 0.011564 | 0.011195 |
| 0.011363 | 0.011262 | 0.011228 | 0.011228 | 0.011295 | 0.011195 | 0.011295 |
| 0.011329 | 0.011362 | 0.011262 | 0.011295 | 0.011262 | 0.011597 | 0.011597 |
| 0.011329 | 0.011363 | 0.011429 | 0.011362 | 0.012002 | 0.011417 | 0.011341 |
| 0.011412 | 0.011372 | 0.011482 | 0.011372 | 0.011480 | 0.011405 | 0.011370 |
| 0.011953 | 0.011268 | 0.011403 | 0.011337 | 0.011611 | 0.011468 | 0.011570 |
| 0.011978 | 0.011437 | 0.011533 | 0.011597 | 0.011463 | 0.011463 | 0.011499 |
| 0.011161 | 0.011329 | 0.011463 | 0.011429 | 0.011432 | 0.011429 | 0.011397 |
| 0.011262 | 0.011194 | 0.011228 | 0.011262 | 0.011161 | 0.011228 | 0.011127 |
| 0.011262 | 0.011295 | 0.011194 | 0.011161 | 0.011262 | 0.011194 | 0.011228 |
| 0.011228 | 0.011161 | 0.011228 | 0.011262 | 0.011161 | 0.011362 | 0.011396 |
| 0.011295 | 0.011362 | 0.011295 | 0.011295 | 0.011228 | 0.011631 | 0.011262 |
| 0.011304 | 0.011228 | 0.011463 | 0.011467 | 0.011329 | 0.011329 | 0.011329 |
| 0.011329 | 0.011262 | 0.011228 | 0.011262 | 0.011362 | 0.011362 | 0.011228 |
| 0.011295 | 0.011429 | 0.011597 | 0.011329 | 0.011530 | 0.011530 | 0.011396 |
| 0.011228 | 0.011295 | 0.011329 | 0.011732 | 0.011295 | 0.011329 | 0.011295 |
| 0.011329 | 0.011262 | 0.011262 | 0.011564 | 0.011497 | 0.011530 | 0.011262 |
| 0.011362 | 0.011429 | 0.011295 | 0.011362 | 0.011329 | 0.011194 | 0.011530 |
| 0.011295 | 0.011262 | 0.011262 | 0.011429 | 0.011262 | 0.011362 | 0.011597 |
| 0.011295 | 0.011637 | 0.011664 | 0.011426 | 0.011173 | 0.011366 | 0.011215 |
| 0.011115 | 0.011644 | 0.011201 | 0.011373 | 0.011207 | 0.011315 | 0.011326 |
| 0.011417 | 0.000000 | 0.011283 | 0.000000 | 0.011168 | 0.011261 | 0.011303 |
| 0.011324 | 0.011218 | 0.011342 | 0.011272 | 0.011296 | 0.011429 | 0.011497 |
| 0.011497 | 0.011363 | 0.011466 | 0.011467 | 0.011602 | 0.011626 | 0.011295 |
| 0.011530 | 0.011396 | 0.011262 | 0.011362 | 0.011161 | 0.011396 | 0.011195 |
| 0.011262 | 0.011262 | 0.011228 | 0.011194 | 0.011228 | 0.011195 | 0.011295 |
| 0.011270 | 0.011270 | 0.011266 | 0.011300 | 0.011437 | 0.011402 | 0.011402 |
| 0.011401 | 0.011329 | 0.011134 | 0.011132 | 0.011263 | 0.011433 | 0.011433 |

|          |          |          |          |          |          |          |
|----------|----------|----------|----------|----------|----------|----------|
| 0.011228 | 0.011297 | 0.011531 | 0.011500 | 0.011430 | 0.011464 | 0.011396 |
| 0.011329 | 0.011396 | 0.011396 | 0.011295 | 0.011866 | 0.011463 | 0.011530 |
| 0.011564 | 0.011630 | 0.011265 | 0.011337 | 0.011228 | 0.011429 | 0.011396 |
| 0.011430 | 0.011463 | 0.011463 | 0.011463 | 0.011610 | 0.011597 | 0.011234 |
| 0.011128 | 0.011130 | 0.011230 | 0.011196 | 0.011299 | 0.011135 | 0.011468 |
| 0.011266 | 0.011367 | 0.011108 | 0.011248 | 0.011262 | 0.011334 | 0.011228 |
| 0.011195 | 0.011195 | 0.011262 | 0.011228 | 0.011429 | 0.011396 | 0.011329 |
| 0.011429 | 0.011497 | 0.011228 | 0.011228 | 0.011262 | 0.011262 | 0.011263 |
| 0.011331 | 0.011262 | 0.011262 | 0.011296 | 0.011429 | 0.011497 | 0.011497 |
| 0.011363 | 0.011466 | 0.011467 | 0.011602 | 0.011626 | 0.011295 | 0.011463 |
| 0.011396 | 0.011396 | 0.011229 | 0.011408 | 0.011338 | 0.011367 | 0.011235 |
| 0.011405 | 0.011607 | 0.011399 | 0.011298 | 0.011195 | 0.011396 | 0.011262 |
| 0.011362 | 0.011295 | 0.011195 | 0.011296 | 0.011396 | 0.011398 | 0.011295 |
| 0.011195 | 0.011128 | 0.011262 | 0.011195 | 0.011127 | 0.011230 | 0.011396 |
| 0.011295 | 0.011228 | 0.011262 | 0.011295 | 0.011262 | 0.011195 | 0.011396 |
| 0.011262 | 0.011295 | 0.011295 | 0.011228 | 0.011295 | 0.011530 | 0.011194 |
| 0.011228 | 0.011631 | 0.011228 | 0.011262 | 0.011228 | 0.011597 | 0.011146 |
| 0.011622 | 0.011145 | 0.011211 | 0.011422 | 0.011467 | 0.011419 | 0.011102 |
| 0.011165 | 0.011396 | 0.011496 | 0.011603 | 0.011464 | 0.011601 | 0.011733 |
| 0.011632 | 0.011669 | 0.011631 | 0.011880 | 0.011597 | 0.012472 | 0.011633 |
| 0.012372 | 0.012139 | 0.012273 | 0.012545 | 0.011597 | 0.011295 | 0.011598 |
| 0.012036 | 0.011971 | 0.011564 | 0.011463 | 0.011531 | 0.011531 | 0.011500 |
| 0.011396 | 0.011399 | 0.011463 | 0.011430 | 0.011800 | 0.011866 | 0.011867 |
| 0.011766 | 0.011867 | 0.011970 | 0.011737 | 0.012036 | 0.012042 | 0.012104 |
| 0.012104 | 0.012138 | 0.012084 | 0.012104 | 0.012105 | 0.011329 | 0.011631 |
| 0.011699 | 0.012202 | 0.011704 | 0.011933 | 0.012406 | 0.011468 | 0.011363 |
| 0.011329 | 0.011329 | 0.011799 | 0.011842 | 0.011940 | 0.011664 | 0.011330 |
| S014     | 0.011631 | 0.011631 | 0.011900 | 0.011664 | 0.011664 | 0.011732 |
| 0.011535 | 0.011468 | 0.011731 | 0.011228 | 0.011295 | 0.011262 | 0.011228 |
| 0.000000 | 0.011429 | 0.011161 | 0.011262 | 0.011329 | 0.011295 | 0.011262 |
| 0.011228 | 0.011262 | 0.011295 | 0.011228 | 0.011262 | 0.011262 | 0.011501 |
| 0.011429 | 0.011262 | 0.011161 | 0.011329 | 0.011329 | 0.011295 | 0.011329 |
| 0.011295 | 0.011396 | 0.011295 | 0.011295 | 0.011329 | 0.011295 | 0.011463 |
| 0.011161 | 0.011295 | 0.011329 | 0.011262 | 0.011295 | 0.011396 | 0.011329 |
| 0.011295 | 0.011463 | 0.011362 | 0.011564 | 0.011295 | 0.011564 | 0.011295 |
| 0.011262 | 0.011295 | 0.011429 | 0.011564 | 0.011597 | 0.011295 | 0.011396 |
| 0.011329 | 0.011396 | 0.011295 | 0.011530 | 0.011698 | 0.011295 | 0.011362 |
| 0.011262 | 0.011362 | 0.011329 | 0.011396 | 0.011329 | 0.011329 | 0.011329 |
| 0.011228 | 0.011262 | 0.011228 | 0.011262 | 0.011295 | 0.011329 | 0.011396 |
| 0.011329 | 0.011295 | 0.011362 | 0.011262 | 0.011329 | 0.011228 | 0.011295 |
| 0.011463 | 0.011396 | 0.011631 | 0.011463 | 0.011295 | 0.011530 | 0.011295 |
| 0.011431 | 0.011583 | 0.011475 | 0.011177 | 0.011209 | 0.011318 | 0.011296 |
| 0.011975 | 0.011365 | 0.011184 | 0.011530 | 0.011530 | 0.011262 | 0.011362 |
| 0.011362 | 0.011329 | 0.011396 | 0.011295 | 0.011396 | 0.011329 | 0.011329 |
| 0.011295 | 0.011329 | 0.011597 | 0.011463 | 0.011362 | 0.011329 | 0.011262 |
| 0.011228 | 0.011161 | 0.011295 | 0.011262 | 0.011396 | 0.011362 | 0.011295 |
| 0.011396 | 0.011463 | 0.011262 | 0.011262 | 0.011295 | 0.011295 | 0.011297 |
| 0.011364 | 0.011295 | 0.011295 | 0.011168 | 0.011241 | 0.011200 | 0.011296 |
| 0.011297 | 0.011232 | 0.011282 | 0.011267 | 0.011196 | 0.011231 | 0.011263 |
| 0.011456 | 0.011301 | 0.011336 | 0.011228 | 0.011233 | 0.011363 | 0.011262 |
| 0.011329 | 0.011330 | 0.011329 | 0.011429 | 0.011362 | 0.011732 | 0.011463 |
| 0.011496 | 0.011362 | 0.011295 | 0.011329 | 0.011195 | 0.011362 | 0.011228 |
| 0.011295 | 0.011295 | 0.011262 | 0.011228 | 0.011262 | 0.011228 | 0.011329 |
| 0.011295 | 0.011396 | 0.011329 | 0.011228 | 0.011330 | 0.011430 | 0.011432 |
| 0.011430 | 0.011329 | 0.011228 | 0.011161 | 0.011295 | 0.011228 | 0.011161 |
| 0.011264 | 0.011430 | 0.011228 | 0.011430 | 0.011195 | 0.011295 | 0.011262 |
| 0.011362 | 0.011262 | 0.011295 | 0.011262 | 0.011295 | 0.011161 | 0.011295 |
| 0.011329 | 0.011262 | 0.011329 | 0.011262 | 0.011295 | 0.011329 | 0.011564 |
| 0.011597 | 0.011530 | 0.011597 | 0.011431 | 0.011598 | 0.011295 | 0.011262 |
| 0.011229 | 0.011505 | 0.011380 | 0.011197 | 0.011603 | 0.011163 | 0.011296 |

|          |          |          |          |          |          |          |
|----------|----------|----------|----------|----------|----------|----------|
| 0.011569 | 0.011502 | 0.011463 | 0.011664 | 0.011367 | 0.011530 | 0.011497 |
| 0.011429 | 0.011597 | 0.011451 | 0.011307 | 0.011354 | 0.011329 | 0.011398 |
| 0.011497 | 0.011397 | 0.011533 | 0.011601 | 0.011530 | 0.011597 | 0.011704 |
| 0.011432 | 0.011603 | 0.011534 | 0.011466 | 0.011733 | 0.011194 | 0.011397 |
| 0.011362 | 0.011295 | 0.011194 | 0.011194 | 0.011262 | 0.011262 | 0.011329 |
| 0.011262 | 0.011329 | 0.011228 | 0.011262 | 0.011262 | 0.011262 | 0.011329 |
| 0.011262 | 0.011631 | 0.011530 | 0.011564 | 0.011161 | 0.011262 | 0.011295 |
| 0.011295 | 0.011262 | 0.011329 | 0.011295 | 0.011228 | 0.011228 | 0.011228 |
| 0.011698 | 0.011329 | 0.011396 | 0.011194 | 0.011295 | 0.011463 | 0.011228 |
| 0.011228 | 0.011295 | 0.011262 | 0.011429 | 0.011228 | 0.011362 | 0.011496 |
| 0.011429 | 0.011262 | 0.011262 | 0.011194 | 0.011194 | 0.011362 | 0.011295 |
| 0.011194 | 0.011295 | 0.011161 | 0.011194 | 0.011329 | 0.011396 | 0.011228 |
| 0.011195 | 0.011329 | 0.011262 | 0.011161 | 0.011429 | 0.011161 | 0.011329 |
| 0.011402 | 0.011228 | 0.011463 | 0.011362 | 0.011329 | 0.011262 | 0.011362 |
| 0.011228 | 0.011564 | 0.011161 | 0.011362 | 0.011161 | 0.011161 | 0.011161 |
| 0.011396 | 0.011530 | 0.011295 | 0.011362 | 0.011194 | 0.011530 | 0.011161 |
| 0.011228 | 0.011228 | 0.011262 | 0.011362 | 0.011262 | 0.011362 | 0.011429 |
| 0.011429 | 0.011396 | 0.011295 | 0.011396 | 0.011362 | 0.011228 | 0.011194 |
| 0.011228 | 0.011228 | 0.011295 | 0.011161 | 0.011194 | 0.011362 | 0.011228 |
| 0.011194 | 0.011262 | 0.011396 | 0.011362 | 0.011329 | 0.011262 | 0.011262 |
| 0.011329 | 0.011262 | 0.011362 | 0.011228 | 0.011362 | 0.011463 | 0.011698 |
| 0.011262 | 0.011597 | 0.011267 | 0.017785 | 0.011257 | 0.011366 | 0.011548 |
| 0.011510 | 0.011553 | 0.011322 | 0.011292 | 0.011664 | 0.011578 | 0.011364 |
| 0.011392 | 0.011487 | 0.011138 | 0.011228 | 0.011177 | 0.011258 | 0.011232 |
| 0.011389 | 0.011358 | 0.011357 | 0.011126 | 0.011396 | 0.011429 | 0.011432 |
| 0.011301 | 0.011396 | 0.011396 | 0.011295 | 0.011329 | 0.011329 | 0.011295 |
| 0.011329 | 0.011262 | 0.011295 | 0.011329 | 0.011295 | 0.011228 | 0.011262 |
| 0.011262 | 0.011329 | 0.011228 | 0.011329 | 0.011362 | 0.011396 | 0.011295 |
| 0.011262 | 0.011228 | 0.011564 | 0.011564 | 0.011362 | 0.011396 | 0.011430 |
| 0.011195 | 0.011195 | 0.011228 | 0.011329 | 0.011195 | 0.011429 | 0.011429 |
| 0.011463 | 0.011463 | 0.011396 | 0.011497 | 0.011597 | 0.011498 | 0.011329 |
| 0.011329 | 0.011396 | 0.011429 | 0.011262 | 0.011329 | 0.011295 | 0.011329 |
| 0.011396 | 0.011396 | 0.011429 | 0.011396 | 0.011296 | 0.011497 | 0.011463 |
| 0.011331 | 0.011228 | 0.011329 | 0.011430 | 0.011329 | 0.011396 | 0.011496 |
| 0.011664 | 0.011367 | 0.011530 | 0.011497 | 0.011429 | 0.011597 | 0.011228 |
| 0.011397 | 0.011295 | 0.011262 | 0.011262 | 0.011329 | 0.011228 | 0.011329 |
| 0.011362 | 0.011396 | 0.011295 | 0.011262 | 0.011228 | 0.011564 | 0.011564 |
| 0.011362 | 0.011396 | 0.011463 | 0.011396 | 0.011968 | 0.011453 | 0.011377 |
| 0.011447 | 0.011407 | 0.011517 | 0.011406 | 0.011515 | 0.011439 | 0.011405 |
| 0.011918 | 0.011302 | 0.011437 | 0.011371 | 0.011645 | 0.011502 | 0.011604 |
| 0.011944 | 0.011399 | 0.011567 | 0.011631 | 0.011496 | 0.011429 | 0.011533 |
| 0.011194 | 0.011362 | 0.011496 | 0.011463 | 0.011466 | 0.011396 | 0.011363 |
| 0.011295 | 0.011228 | 0.011262 | 0.011295 | 0.011194 | 0.011262 | 0.011161 |
| 0.011228 | 0.011262 | 0.011228 | 0.011194 | 0.011295 | 0.011228 | 0.011262 |
| 0.011262 | 0.011194 | 0.011262 | 0.011295 | 0.011194 | 0.011396 | 0.011429 |
| 0.011329 | 0.011329 | 0.011329 | 0.011329 | 0.011262 | 0.011597 | 0.011295 |
| 0.011269 | 0.011262 | 0.011430 | 0.011433 | 0.011362 | 0.011362 | 0.011362 |
| 0.011362 | 0.011295 | 0.011262 | 0.011295 | 0.011396 | 0.011396 | 0.011329 |
| 0.011329 | 0.011463 | 0.011564 | 0.011362 | 0.011564 | 0.011564 | 0.011429 |
| 0.011262 | 0.011329 | 0.011362 | 0.011698 | 0.011329 | 0.011362 | 0.011329 |
| 0.011362 | 0.011228 | 0.011228 | 0.011530 | 0.011530 | 0.011497 | 0.011295 |
| 0.011396 | 0.011463 | 0.011329 | 0.011396 | 0.011362 | 0.011228 | 0.011496 |
| 0.011329 | 0.011295 | 0.011228 | 0.011463 | 0.011295 | 0.011396 | 0.011631 |
| 0.011329 | 0.011603 | 0.011631 | 0.011385 | 0.011117 | 0.011332 | 0.011163 |
| 0.011170 | 0.011605 | 0.011236 | 0.011328 | 0.011158 | 0.011315 | 0.011273 |
| 0.011366 | 0.011192 | 0.011339 | 0.011192 | 0.011222 | 0.011395 | 0.011344 |
| 0.011362 | 0.011257 | 0.011307 | 0.011307 | 0.011330 | 0.011396 | 0.011463 |
| 0.011463 | 0.011329 | 0.011432 | 0.011433 | 0.011569 | 0.011590 | 0.011329 |
| 0.011496 | 0.011362 | 0.011295 | 0.011329 | 0.011195 | 0.011362 | 0.011228 |
| 0.011295 | 0.011295 | 0.011262 | 0.011228 | 0.011262 | 0.011228 | 0.011329 |

|          |          |          |          |          |          |          |
|----------|----------|----------|----------|----------|----------|----------|
| 0.011305 | 0.011305 | 0.011300 | 0.011334 | 0.011471 | 0.011436 | 0.011436 |
| 0.011435 | 0.011363 | 0.011134 | 0.011132 | 0.011297 | 0.011467 | 0.011467 |
| 0.011262 | 0.011331 | 0.011565 | 0.011533 | 0.011464 | 0.011498 | 0.011429 |
| 0.011362 | 0.011429 | 0.011429 | 0.011329 | 0.011832 | 0.011496 | 0.011564 |
| 0.011597 | 0.011594 | 0.011299 | 0.011372 | 0.011262 | 0.011463 | 0.011429 |
| 0.011464 | 0.011496 | 0.011496 | 0.011496 | 0.011650 | 0.011631 | 0.011268 |
| 0.011162 | 0.011164 | 0.011264 | 0.011230 | 0.011265 | 0.011172 | 0.011434 |
| 0.011300 | 0.011367 | 0.011203 | 0.011285 | 0.011296 | 0.011368 | 0.011262 |
| 0.011228 | 0.011161 | 0.011295 | 0.011262 | 0.011396 | 0.011362 | 0.011295 |
| 0.011396 | 0.011463 | 0.011262 | 0.011262 | 0.011295 | 0.011295 | 0.011297 |
| 0.011364 | 0.011295 | 0.011295 | 0.011330 | 0.011396 | 0.011463 | 0.011463 |
| 0.011329 | 0.011432 | 0.011433 | 0.011569 | 0.011590 | 0.011329 | 0.011496 |
| 0.011429 | 0.011429 | 0.011263 | 0.011443 | 0.011373 | 0.011401 | 0.011270 |
| 0.011439 | 0.011607 | 0.011399 | 0.011332 | 0.011228 | 0.011430 | 0.011295 |
| 0.011396 | 0.011329 | 0.011228 | 0.011330 | 0.011430 | 0.011432 | 0.011329 |
| 0.011228 | 0.011161 | 0.011295 | 0.011228 | 0.011161 | 0.011264 | 0.011430 |
| 0.011329 | 0.011262 | 0.011295 | 0.011329 | 0.011295 | 0.011228 | 0.011362 |
| 0.011295 | 0.011329 | 0.011329 | 0.011262 | 0.011329 | 0.011564 | 0.011161 |
| 0.011262 | 0.011597 | 0.011262 | 0.011295 | 0.011262 | 0.011564 | 0.011189 |
| 0.011566 | 0.011188 | 0.011161 | 0.011382 | 0.011427 | 0.011383 | 0.011144 |
| 0.011113 | 0.011362 | 0.011463 | 0.011569 | 0.011430 | 0.011568 | 0.011699 |
| 0.011598 | 0.011635 | 0.011597 | 0.011846 | 0.011564 | 0.012438 | 0.011599 |
| 0.012338 | 0.012105 | 0.012240 | 0.012511 | 0.011564 | 0.011262 | 0.011564 |
| 0.012002 | 0.011937 | 0.011530 | 0.011430 | 0.011497 | 0.011497 | 0.011466 |
| 0.011362 | 0.011365 | 0.011429 | 0.011396 | 0.011766 | 0.011832 | 0.011834 |
| 0.011733 | 0.011833 | 0.011937 | 0.011703 | 0.012003 | 0.012008 | 0.012070 |
| 0.012070 | 0.012104 | 0.012050 | 0.012071 | 0.012072 | 0.011362 | 0.011598 |
| 0.011666 | 0.012169 | 0.011670 | 0.011900 | 0.012373 | 0.011434 | 0.011329 |
| 0.011295 | 0.011295 | 0.011766 | 0.011800 | 0.011904 | 0.011631 | 0.011296 |
| S015     | 0.011799 | 0.011799 | 0.012135 | 0.011900 | 0.011900 | 0.011967 |
| 0.011807 | 0.011739 | 0.011899 | 0.011396 | 0.011463 | 0.011430 | 0.011396 |
| 0.011429 | 0.000000 | 0.011396 | 0.011429 | 0.011496 | 0.011463 | 0.011429 |
| 0.011396 | 0.011429 | 0.011530 | 0.011396 | 0.011430 | 0.011429 | 0.011773 |
| 0.011664 | 0.011429 | 0.011329 | 0.011564 | 0.011496 | 0.011463 | 0.011497 |
| 0.011463 | 0.011564 | 0.011463 | 0.011463 | 0.011496 | 0.011463 | 0.011631 |
| 0.011396 | 0.011463 | 0.011496 | 0.011429 | 0.011530 | 0.011564 | 0.011496 |
| 0.011463 | 0.011631 | 0.011530 | 0.011799 | 0.011463 | 0.011732 | 0.011463 |
| 0.011429 | 0.011530 | 0.011597 | 0.011732 | 0.011832 | 0.011530 | 0.011631 |
| 0.011496 | 0.011564 | 0.011463 | 0.011698 | 0.011933 | 0.011396 | 0.011530 |
| 0.011429 | 0.011530 | 0.011497 | 0.011564 | 0.011496 | 0.011496 | 0.011496 |
| 0.011396 | 0.011429 | 0.011396 | 0.011497 | 0.011463 | 0.011498 | 0.011564 |
| 0.011497 | 0.011463 | 0.011530 | 0.011429 | 0.011564 | 0.011396 | 0.011463 |
| 0.011631 | 0.011564 | 0.011799 | 0.011631 | 0.011463 | 0.011698 | 0.011396 |
| 0.011653 | 0.011882 | 0.011702 | 0.011412 | 0.011359 | 0.011502 | 0.011572 |
| 0.012195 | 0.011670 | 0.011390 | 0.011698 | 0.011698 | 0.011496 | 0.011597 |
| 0.011530 | 0.011496 | 0.011564 | 0.011463 | 0.011564 | 0.011496 | 0.011496 |
| 0.011463 | 0.011564 | 0.011765 | 0.011564 | 0.011530 | 0.011497 | 0.011430 |
| 0.011396 | 0.011396 | 0.011463 | 0.011429 | 0.011631 | 0.011597 | 0.011530 |
| 0.011631 | 0.011698 | 0.011429 | 0.011429 | 0.011463 | 0.011463 | 0.011465 |
| 0.011533 | 0.011463 | 0.011463 | 0.011348 | 0.011422 | 0.011376 | 0.011464 |
| 0.011467 | 0.011404 | 0.011466 | 0.011440 | 0.011366 | 0.011403 | 0.011432 |
| 0.011708 | 0.011474 | 0.011508 | 0.011396 | 0.011406 | 0.011531 | 0.011497 |
| 0.011565 | 0.011498 | 0.011497 | 0.011597 | 0.011530 | 0.011900 | 0.011698 |
| 0.011731 | 0.011597 | 0.011463 | 0.011564 | 0.011362 | 0.011597 | 0.011396 |
| 0.011463 | 0.011463 | 0.011429 | 0.011396 | 0.011429 | 0.011396 | 0.011497 |
| 0.011463 | 0.011564 | 0.011497 | 0.011396 | 0.011431 | 0.011598 | 0.011601 |
| 0.011598 | 0.011430 | 0.011396 | 0.011330 | 0.011463 | 0.011396 | 0.011329 |
| 0.011434 | 0.011598 | 0.011396 | 0.011598 | 0.011362 | 0.011463 | 0.011430 |
| 0.011530 | 0.011429 | 0.011463 | 0.011430 | 0.011463 | 0.011329 | 0.011463 |
| 0.011497 | 0.011429 | 0.011497 | 0.011429 | 0.011463 | 0.011497 | 0.011732 |

|          |          |          |          |          |          |          |
|----------|----------|----------|----------|----------|----------|----------|
| 0.011833 | 0.011765 | 0.011833 | 0.011599 | 0.011833 | 0.011463 | 0.011429 |
| 0.011465 | 0.011747 | 0.011609 | 0.011369 | 0.011773 | 0.011333 | 0.011454 |
| 0.011841 | 0.011740 | 0.011631 | 0.011832 | 0.011538 | 0.011698 | 0.011665 |
| 0.011597 | 0.011765 | 0.011629 | 0.011472 | 0.011521 | 0.011497 | 0.011568 |
| 0.011665 | 0.011566 | 0.011703 | 0.011771 | 0.011698 | 0.011765 | 0.011873 |
| 0.011602 | 0.011773 | 0.011703 | 0.011635 | 0.011901 | 0.011362 | 0.011566 |
| 0.011496 | 0.011463 | 0.011362 | 0.011362 | 0.011429 | 0.011362 | 0.011496 |
| 0.011429 | 0.011497 | 0.011396 | 0.011496 | 0.011429 | 0.011429 | 0.011496 |
| 0.011429 | 0.011866 | 0.011765 | 0.011799 | 0.011329 | 0.011429 | 0.011463 |
| 0.011463 | 0.011429 | 0.011497 | 0.011530 | 0.011396 | 0.011396 | 0.011396 |
| 0.011933 | 0.011564 | 0.011564 | 0.011362 | 0.011463 | 0.011631 | 0.011396 |
| 0.011396 | 0.011463 | 0.011429 | 0.011597 | 0.011396 | 0.011530 | 0.011664 |
| 0.011597 | 0.011429 | 0.011429 | 0.011362 | 0.011362 | 0.011530 | 0.011463 |
| 0.011362 | 0.011463 | 0.011329 | 0.011362 | 0.011497 | 0.011631 | 0.011362 |
| 0.011363 | 0.011496 | 0.011430 | 0.011329 | 0.011664 | 0.011329 | 0.011429 |
| 0.011574 | 0.011396 | 0.011698 | 0.011530 | 0.011564 | 0.011429 | 0.011530 |
| 0.011396 | 0.011732 | 0.011329 | 0.011597 | 0.011396 | 0.011396 | 0.011329 |
| 0.011564 | 0.011766 | 0.011463 | 0.011530 | 0.011362 | 0.011765 | 0.011396 |
| 0.011396 | 0.011396 | 0.011429 | 0.011530 | 0.011429 | 0.011530 | 0.011597 |
| 0.011597 | 0.011564 | 0.011463 | 0.011564 | 0.011530 | 0.011396 | 0.011362 |
| 0.011396 | 0.011396 | 0.011463 | 0.011396 | 0.011362 | 0.011530 | 0.011396 |
| 0.011429 | 0.011429 | 0.011564 | 0.011597 | 0.011496 | 0.011429 | 0.011429 |
| 0.011496 | 0.011429 | 0.011530 | 0.011396 | 0.011530 | 0.011564 | 0.011933 |
| 0.011429 | 0.011832 | 0.011440 | 0.017899 | 0.011191 | 0.011549 | 0.011793 |
| 0.011752 | 0.011799 | 0.011479 | 0.011466 | 0.011829 | 0.011820 | 0.011425 |
| 0.011630 | 0.011671 | 0.011372 | 0.011437 | 0.011411 | 0.011406 | 0.011447 |
| 0.011717 | 0.011582 | 0.011579 | 0.011457 | 0.011564 | 0.011597 | 0.011601 |
| 0.011472 | 0.011564 | 0.011564 | 0.011530 | 0.011429 | 0.011430 | 0.011463 |
| 0.011497 | 0.011429 | 0.011463 | 0.011497 | 0.011463 | 0.011396 | 0.011429 |
| 0.011429 | 0.011497 | 0.011396 | 0.011497 | 0.011530 | 0.011564 | 0.011463 |
| 0.011496 | 0.011463 | 0.011799 | 0.011799 | 0.011530 | 0.011497 | 0.011598 |
| 0.011362 | 0.011362 | 0.011396 | 0.011497 | 0.011362 | 0.011597 | 0.011597 |
| 0.011631 | 0.011631 | 0.011564 | 0.011664 | 0.011833 | 0.011666 | 0.011497 |
| 0.011497 | 0.011564 | 0.011597 | 0.011430 | 0.011497 | 0.011463 | 0.011497 |
| 0.011564 | 0.011564 | 0.011597 | 0.011564 | 0.011464 | 0.011665 | 0.011631 |
| 0.011500 | 0.011396 | 0.011497 | 0.011598 | 0.011497 | 0.011631 | 0.011664 |
| 0.011832 | 0.011538 | 0.011698 | 0.011665 | 0.011597 | 0.011765 | 0.011396 |
| 0.011566 | 0.011396 | 0.011429 | 0.011429 | 0.011497 | 0.011396 | 0.011497 |
| 0.011530 | 0.011564 | 0.011463 | 0.011496 | 0.011463 | 0.011799 | 0.011799 |
| 0.011530 | 0.011497 | 0.011631 | 0.011564 | 0.012204 | 0.011596 | 0.011517 |
| 0.011587 | 0.011580 | 0.011693 | 0.011545 | 0.011690 | 0.011612 | 0.011577 |
| 0.012159 | 0.011475 | 0.011608 | 0.011544 | 0.011818 | 0.011672 | 0.011775 |
| 0.012182 | 0.011626 | 0.011736 | 0.011799 | 0.011664 | 0.011664 | 0.011702 |
| 0.011362 | 0.011530 | 0.011664 | 0.011631 | 0.011634 | 0.011597 | 0.011599 |
| 0.011463 | 0.011396 | 0.011429 | 0.011463 | 0.011362 | 0.011429 | 0.011329 |
| 0.011463 | 0.011496 | 0.011396 | 0.011362 | 0.011463 | 0.011396 | 0.011429 |
| 0.011429 | 0.011362 | 0.011429 | 0.011463 | 0.011362 | 0.011564 | 0.011597 |
| 0.011497 | 0.011564 | 0.011496 | 0.011497 | 0.011429 | 0.011832 | 0.011463 |
| 0.011478 | 0.011429 | 0.011665 | 0.011671 | 0.011530 | 0.011530 | 0.011530 |
| 0.011530 | 0.011463 | 0.011429 | 0.011463 | 0.011497 | 0.011564 | 0.011496 |
| 0.011496 | 0.011631 | 0.011799 | 0.011530 | 0.011732 | 0.011732 | 0.011597 |
| 0.011429 | 0.011496 | 0.011530 | 0.011933 | 0.011497 | 0.011530 | 0.011497 |
| 0.011530 | 0.011463 | 0.011463 | 0.011765 | 0.011698 | 0.011665 | 0.011463 |
| 0.011564 | 0.011631 | 0.011496 | 0.011564 | 0.011530 | 0.011396 | 0.011731 |
| 0.011496 | 0.011463 | 0.011463 | 0.011631 | 0.011463 | 0.011564 | 0.011799 |
| 0.011496 | 0.011875 | 0.011866 | 0.011670 | 0.011342 | 0.011570 | 0.011421 |
| 0.011335 | 0.011878 | 0.011411 | 0.011596 | 0.011451 | 0.011417 | 0.011485 |
| 0.011621 | 0.011126 | 0.011450 | 0.011258 | 0.011330 | 0.011462 | 0.011587 |
| 0.011588 | 0.011454 | 0.011553 | 0.011448 | 0.011498 | 0.011597 | 0.011698 |
| 0.011698 | 0.011565 | 0.011669 | 0.011670 | 0.011806 | 0.011838 | 0.011497 |

|          |          |          |          |          |          |          |
|----------|----------|----------|----------|----------|----------|----------|
| 0.011731 | 0.011597 | 0.011463 | 0.011564 | 0.011362 | 0.011597 | 0.011396 |
| 0.011463 | 0.011463 | 0.011429 | 0.011396 | 0.011429 | 0.011396 | 0.011497 |
| 0.011479 | 0.011480 | 0.011471 | 0.011505 | 0.011642 | 0.011607 | 0.011606 |
| 0.011605 | 0.011531 | 0.011356 | 0.011348 | 0.011399 | 0.011636 | 0.011637 |
| 0.011430 | 0.011501 | 0.011734 | 0.011702 | 0.011632 | 0.011599 | 0.011597 |
| 0.011530 | 0.011597 | 0.011597 | 0.011497 | 0.012068 | 0.011664 | 0.011732 |
| 0.011766 | 0.011843 | 0.011469 | 0.011545 | 0.011429 | 0.011631 | 0.011597 |
| 0.011632 | 0.011664 | 0.011664 | 0.011664 | 0.011847 | 0.011799 | 0.011442 |
| 0.011297 | 0.011337 | 0.011435 | 0.011400 | 0.011470 | 0.011321 | 0.011672 |
| 0.011472 | 0.011630 | 0.011394 | 0.011472 | 0.011464 | 0.011539 | 0.011430 |
| 0.011396 | 0.011396 | 0.011463 | 0.011429 | 0.011631 | 0.011597 | 0.011530 |
| 0.011631 | 0.011698 | 0.011429 | 0.011429 | 0.011463 | 0.011463 | 0.011465 |
| 0.011533 | 0.011463 | 0.011463 | 0.011498 | 0.011597 | 0.011698 | 0.011698 |
| 0.011565 | 0.011669 | 0.011670 | 0.011806 | 0.011838 | 0.011497 | 0.011664 |
| 0.011597 | 0.011597 | 0.011432 | 0.011617 | 0.011442 | 0.011537 | 0.011446 |
| 0.011611 | 0.011881 | 0.011568 | 0.011502 | 0.011396 | 0.011598 | 0.011463 |
| 0.011564 | 0.011497 | 0.011396 | 0.011431 | 0.011598 | 0.011601 | 0.011430 |
| 0.011396 | 0.011330 | 0.011463 | 0.011396 | 0.011329 | 0.011434 | 0.011598 |
| 0.011497 | 0.011429 | 0.011463 | 0.011497 | 0.011463 | 0.011396 | 0.011597 |
| 0.011463 | 0.011497 | 0.011496 | 0.011429 | 0.011496 | 0.011732 | 0.011396 |
| 0.011429 | 0.011832 | 0.011429 | 0.011463 | 0.011429 | 0.011799 | 0.011403 |
| 0.011791 | 0.011358 | 0.011411 | 0.011624 | 0.011712 | 0.011634 | 0.011353 |
| 0.011375 | 0.011597 | 0.011698 | 0.011773 | 0.011666 | 0.011805 | 0.011935 |
| 0.011834 | 0.011872 | 0.011832 | 0.012086 | 0.011799 | 0.012674 | 0.011835 |
| 0.012574 | 0.012342 | 0.012476 | 0.012748 | 0.011799 | 0.011497 | 0.011799 |
| 0.012238 | 0.012173 | 0.011765 | 0.011665 | 0.011733 | 0.011733 | 0.011703 |
| 0.011597 | 0.011569 | 0.011664 | 0.011632 | 0.012002 | 0.012068 | 0.012069 |
| 0.011969 | 0.012069 | 0.012173 | 0.011940 | 0.012239 | 0.012246 | 0.012306 |
| 0.012307 | 0.012340 | 0.012289 | 0.012307 | 0.012308 | 0.011530 | 0.011833 |
| 0.011901 | 0.012404 | 0.011908 | 0.012135 | 0.012609 | 0.011671 | 0.011564 |
| 0.011530 | 0.011530 | 0.012001 | 0.012048 | 0.012151 | 0.011866 | 0.011532 |
| S016     | 0.011597 | 0.011597 | 0.011866 | 0.011631 | 0.011631 | 0.011698 |
| 0.011535 | 0.011468 | 0.011698 | 0.011195 | 0.011262 | 0.011228 | 0.011194 |
| 0.011161 | 0.011396 | 0.000000 | 0.011228 | 0.011295 | 0.011262 | 0.011228 |
| 0.011194 | 0.011228 | 0.011262 | 0.011195 | 0.011228 | 0.011228 | 0.011501 |
| 0.011396 | 0.011228 | 0.011127 | 0.011295 | 0.011295 | 0.011262 | 0.011295 |
| 0.011262 | 0.011362 | 0.011262 | 0.011262 | 0.011295 | 0.011262 | 0.011429 |
| 0.011127 | 0.011262 | 0.011295 | 0.011228 | 0.011262 | 0.011362 | 0.011295 |
| 0.011262 | 0.011429 | 0.011329 | 0.011530 | 0.011262 | 0.011530 | 0.011262 |
| 0.011228 | 0.011262 | 0.011396 | 0.011530 | 0.011564 | 0.011262 | 0.011362 |
| 0.011295 | 0.011362 | 0.011262 | 0.011496 | 0.011664 | 0.011262 | 0.011329 |
| 0.011228 | 0.011329 | 0.011295 | 0.011362 | 0.011295 | 0.011295 | 0.011295 |
| 0.011194 | 0.011228 | 0.011194 | 0.011228 | 0.011262 | 0.011296 | 0.011362 |
| 0.011295 | 0.011262 | 0.011329 | 0.011228 | 0.011295 | 0.011194 | 0.011262 |
| 0.011429 | 0.011362 | 0.011597 | 0.011429 | 0.011262 | 0.011496 | 0.011262 |
| 0.011431 | 0.011583 | 0.011475 | 0.011177 | 0.011172 | 0.011281 | 0.011296 |
| 0.011938 | 0.011365 | 0.011184 | 0.011496 | 0.011496 | 0.011161 | 0.011329 |
| 0.011329 | 0.011295 | 0.011362 | 0.011262 | 0.011362 | 0.011295 | 0.011295 |
| 0.011262 | 0.011295 | 0.011564 | 0.011362 | 0.011329 | 0.011295 | 0.011228 |
| 0.011195 | 0.011127 | 0.011262 | 0.011228 | 0.011362 | 0.011329 | 0.011262 |
| 0.011362 | 0.011429 | 0.011228 | 0.011228 | 0.011262 | 0.011262 | 0.011263 |
| 0.011331 | 0.011262 | 0.011262 | 0.011132 | 0.011205 | 0.011165 | 0.011262 |
| 0.011263 | 0.011198 | 0.011245 | 0.011233 | 0.011162 | 0.011197 | 0.011229 |
| 0.011420 | 0.011267 | 0.011301 | 0.011195 | 0.011199 | 0.011329 | 0.011228 |
| 0.011296 | 0.011296 | 0.011296 | 0.011396 | 0.011329 | 0.011698 | 0.011430 |
| 0.011463 | 0.011329 | 0.011262 | 0.011295 | 0.011161 | 0.011329 | 0.011195 |
| 0.011262 | 0.011262 | 0.011228 | 0.011194 | 0.011228 | 0.011195 | 0.011295 |
| 0.011262 | 0.011362 | 0.011295 | 0.011195 | 0.011296 | 0.011396 | 0.011398 |
| 0.011396 | 0.011295 | 0.011195 | 0.011128 | 0.011262 | 0.011195 | 0.011127 |
| 0.011230 | 0.011396 | 0.011195 | 0.011396 | 0.011161 | 0.011262 | 0.011228 |

|          |          |          |          |          |          |          |
|----------|----------|----------|----------|----------|----------|----------|
| 0.011329 | 0.011228 | 0.011262 | 0.011228 | 0.011262 | 0.011127 | 0.011262 |
| 0.011295 | 0.011228 | 0.011295 | 0.011228 | 0.011262 | 0.011295 | 0.011530 |
| 0.011564 | 0.011496 | 0.011564 | 0.011397 | 0.011564 | 0.011262 | 0.011228 |
| 0.011128 | 0.011464 | 0.011335 | 0.011163 | 0.011569 | 0.011129 | 0.011257 |
| 0.011569 | 0.011468 | 0.011429 | 0.011631 | 0.011333 | 0.011496 | 0.011463 |
| 0.011396 | 0.011564 | 0.011415 | 0.011266 | 0.011312 | 0.011295 | 0.011365 |
| 0.011463 | 0.011364 | 0.011500 | 0.011568 | 0.011496 | 0.011564 | 0.011670 |
| 0.011398 | 0.011569 | 0.011500 | 0.011432 | 0.011699 | 0.011161 | 0.011363 |
| 0.011329 | 0.011262 | 0.011161 | 0.011161 | 0.011228 | 0.011228 | 0.011295 |
| 0.011228 | 0.011295 | 0.011194 | 0.011228 | 0.011228 | 0.011228 | 0.011295 |
| 0.011228 | 0.011597 | 0.011496 | 0.011530 | 0.011127 | 0.011228 | 0.011262 |
| 0.011262 | 0.011228 | 0.011295 | 0.011262 | 0.011194 | 0.011194 | 0.011194 |
| 0.011664 | 0.011295 | 0.011362 | 0.011161 | 0.011262 | 0.011429 | 0.011194 |
| 0.011194 | 0.011262 | 0.011228 | 0.011396 | 0.011194 | 0.011329 | 0.011463 |
| 0.011396 | 0.011228 | 0.011228 | 0.011161 | 0.011161 | 0.011329 | 0.011262 |
| 0.011161 | 0.011262 | 0.011127 | 0.011161 | 0.011295 | 0.011362 | 0.011195 |
| 0.011161 | 0.011295 | 0.011228 | 0.011127 | 0.011396 | 0.011127 | 0.011295 |
| 0.011368 | 0.011194 | 0.011429 | 0.011329 | 0.011295 | 0.011228 | 0.011329 |
| 0.011194 | 0.011530 | 0.011127 | 0.011329 | 0.000000 | 0.000000 | 0.011127 |
| 0.011362 | 0.011497 | 0.011262 | 0.011329 | 0.011161 | 0.011496 | 0.000000 |
| 0.011194 | 0.011194 | 0.011228 | 0.011329 | 0.011228 | 0.011329 | 0.011396 |
| 0.011396 | 0.011362 | 0.011262 | 0.011362 | 0.011329 | 0.011194 | 0.011161 |
| 0.011194 | 0.011194 | 0.011262 | 0.011127 | 0.011161 | 0.011329 | 0.011194 |
| 0.011094 | 0.011228 | 0.011362 | 0.011329 | 0.011295 | 0.011228 | 0.011228 |
| 0.011295 | 0.011228 | 0.011329 | 0.011194 | 0.011329 | 0.011429 | 0.011664 |
| 0.011228 | 0.011564 | 0.011233 | 0.017747 | 0.011191 | 0.011366 | 0.011514 |
| 0.011475 | 0.011517 | 0.011322 | 0.011292 | 0.011609 | 0.011543 | 0.011303 |
| 0.011392 | 0.011487 | 0.011138 | 0.011228 | 0.011138 | 0.011258 | 0.011232 |
| 0.011389 | 0.011321 | 0.011320 | 0.000000 | 0.011362 | 0.011396 | 0.011398 |
| 0.011266 | 0.011362 | 0.011362 | 0.011262 | 0.011295 | 0.011295 | 0.011262 |
| 0.011295 | 0.011228 | 0.011262 | 0.011295 | 0.011262 | 0.011195 | 0.011228 |
| 0.011228 | 0.011295 | 0.011195 | 0.011295 | 0.011329 | 0.011362 | 0.011262 |
| 0.011228 | 0.011195 | 0.011530 | 0.011530 | 0.011329 | 0.011363 | 0.011396 |
| 0.011161 | 0.011161 | 0.011195 | 0.011295 | 0.011161 | 0.011396 | 0.011396 |
| 0.011429 | 0.011429 | 0.011362 | 0.011463 | 0.011564 | 0.011464 | 0.011295 |
| 0.011295 | 0.011362 | 0.011396 | 0.011228 | 0.011295 | 0.011262 | 0.011295 |
| 0.011363 | 0.011362 | 0.011396 | 0.011362 | 0.011262 | 0.011463 | 0.011429 |
| 0.011297 | 0.011195 | 0.011295 | 0.011396 | 0.011295 | 0.011362 | 0.011463 |
| 0.011631 | 0.011333 | 0.011496 | 0.011463 | 0.011396 | 0.011564 | 0.011195 |
| 0.011363 | 0.011262 | 0.011228 | 0.011228 | 0.011295 | 0.011195 | 0.011295 |
| 0.011329 | 0.011362 | 0.011262 | 0.011228 | 0.011195 | 0.011530 | 0.011530 |
| 0.011329 | 0.011363 | 0.011429 | 0.011362 | 0.011934 | 0.011417 | 0.011341 |
| 0.011412 | 0.011372 | 0.011482 | 0.011372 | 0.011480 | 0.011405 | 0.011370 |
| 0.011884 | 0.011268 | 0.011403 | 0.011337 | 0.011611 | 0.011468 | 0.011570 |
| 0.011910 | 0.011362 | 0.011533 | 0.011597 | 0.011463 | 0.011396 | 0.011499 |
| 0.011161 | 0.011329 | 0.011463 | 0.011429 | 0.011432 | 0.011362 | 0.011330 |
| 0.011262 | 0.011194 | 0.011228 | 0.011262 | 0.011161 | 0.011228 | 0.011127 |
| 0.011194 | 0.011228 | 0.011194 | 0.011161 | 0.011262 | 0.011194 | 0.011228 |
| 0.011228 | 0.011161 | 0.011228 | 0.011262 | 0.011161 | 0.011362 | 0.011396 |
| 0.011295 | 0.011295 | 0.011295 | 0.011295 | 0.011228 | 0.011564 | 0.011262 |
| 0.011234 | 0.011228 | 0.011396 | 0.011399 | 0.011329 | 0.011329 | 0.011329 |
| 0.011329 | 0.011262 | 0.011228 | 0.011262 | 0.011362 | 0.011362 | 0.011295 |
| 0.011295 | 0.011429 | 0.011530 | 0.011329 | 0.011530 | 0.011530 | 0.011396 |
| 0.011228 | 0.011295 | 0.011329 | 0.011664 | 0.011295 | 0.011329 | 0.011295 |
| 0.011329 | 0.011194 | 0.011194 | 0.011497 | 0.011497 | 0.011463 | 0.011262 |
| 0.011362 | 0.011429 | 0.011295 | 0.011362 | 0.011329 | 0.011194 | 0.011463 |
| 0.011295 | 0.011262 | 0.011194 | 0.011429 | 0.011262 | 0.011362 | 0.011597 |
| 0.011295 | 0.011603 | 0.011597 | 0.011385 | 0.000000 | 0.011298 | 0.011163 |
| 0.011170 | 0.011605 | 0.011201 | 0.011283 | 0.011109 | 0.011264 | 0.011220 |
| 0.011315 | 0.011126 | 0.011283 | 0.011126 | 0.011168 | 0.011328 | 0.011344 |



|          |          |          |          |          |          |          |
|----------|----------|----------|----------|----------|----------|----------|
| 0.011362 | 0.011257 | 0.011201 | 0.011272 | 0.011296 | 0.011362 | 0.011429 |
| 0.011429 | 0.011296 | 0.011398 | 0.011365 | 0.011467 | 0.011555 | 0.011295 |
| 0.011463 | 0.011329 | 0.011262 | 0.011295 | 0.011161 | 0.011329 | 0.011195 |
| 0.011262 | 0.011262 | 0.011228 | 0.011194 | 0.011228 | 0.011195 | 0.011295 |
| 0.011270 | 0.011270 | 0.011266 | 0.011300 | 0.011436 | 0.011402 | 0.011402 |
| 0.011401 | 0.011329 | 0.011134 | 0.011132 | 0.011263 | 0.011433 | 0.011433 |
| 0.011228 | 0.011297 | 0.011531 | 0.011499 | 0.011430 | 0.011464 | 0.011396 |
| 0.011329 | 0.011396 | 0.011396 | 0.011295 | 0.011799 | 0.011463 | 0.011530 |
| 0.011564 | 0.011558 | 0.011265 | 0.011337 | 0.011228 | 0.011429 | 0.011396 |
| 0.011430 | 0.011463 | 0.011463 | 0.011463 | 0.011571 | 0.011597 | 0.011234 |
| 0.011128 | 0.011130 | 0.011230 | 0.011196 | 0.011231 | 0.011135 | 0.011400 |
| 0.011266 | 0.011323 | 0.011156 | 0.011285 | 0.011262 | 0.011334 | 0.011228 |
| 0.011195 | 0.011127 | 0.011262 | 0.011228 | 0.011362 | 0.011329 | 0.011262 |
| 0.011362 | 0.011429 | 0.011228 | 0.011228 | 0.011262 | 0.011262 | 0.011263 |
| 0.011331 | 0.011262 | 0.011262 | 0.011296 | 0.011362 | 0.011429 | 0.011429 |
| 0.011296 | 0.011398 | 0.011365 | 0.011467 | 0.011555 | 0.011295 | 0.011463 |
| 0.011396 | 0.011396 | 0.011229 | 0.011408 | 0.011338 | 0.011367 | 0.011235 |
| 0.011404 | 0.011561 | 0.011357 | 0.011298 | 0.011195 | 0.011396 | 0.011262 |
| 0.011362 | 0.011295 | 0.011195 | 0.011296 | 0.011396 | 0.011398 | 0.011295 |
| 0.011195 | 0.011128 | 0.011262 | 0.011195 | 0.011127 | 0.011230 | 0.011396 |
| 0.011295 | 0.011228 | 0.011262 | 0.011295 | 0.011262 | 0.011195 | 0.011329 |
| 0.011262 | 0.011295 | 0.011295 | 0.011228 | 0.011295 | 0.011530 | 0.011127 |
| 0.011228 | 0.011564 | 0.011228 | 0.011262 | 0.011228 | 0.011530 | 0.011189 |
| 0.011510 | 0.011188 | 0.011161 | 0.011342 | 0.011426 | 0.011347 | 0.011144 |
| 0.011113 | 0.011329 | 0.011429 | 0.011535 | 0.011397 | 0.011534 | 0.011665 |
| 0.011565 | 0.011601 | 0.011564 | 0.011812 | 0.011530 | 0.012404 | 0.011565 |
| 0.012304 | 0.012072 | 0.012206 | 0.012477 | 0.011530 | 0.011228 | 0.011530 |
| 0.011969 | 0.011903 | 0.011496 | 0.011396 | 0.011464 | 0.011464 | 0.011432 |
| 0.011329 | 0.011331 | 0.011396 | 0.011363 | 0.011733 | 0.011799 | 0.011800 |
| 0.011699 | 0.011800 | 0.011903 | 0.011669 | 0.011969 | 0.011974 | 0.012036 |
| 0.012037 | 0.012070 | 0.012015 | 0.012037 | 0.012038 | 0.011329 | 0.011564 |
| 0.011632 | 0.012135 | 0.011636 | 0.011866 | 0.012339 | 0.011400 | 0.011295 |
| 0.011262 | 0.011262 | 0.011732 | 0.011759 | 0.011869 | 0.011597 | 0.011262 |
| S017     | 0.011631 | 0.011631 | 0.011967 | 0.011731 | 0.011731 | 0.011799 |
| 0.011637 | 0.011569 | 0.011799 | 0.011228 | 0.011295 | 0.011262 | 0.011228 |
| 0.011262 | 0.011429 | 0.011228 | 0.000000 | 0.011329 | 0.011295 | 0.011262 |
| 0.011228 | 0.011262 | 0.011362 | 0.011228 | 0.011262 | 0.011262 | 0.011603 |
| 0.011496 | 0.011262 | 0.011161 | 0.011396 | 0.011329 | 0.011295 | 0.011329 |
| 0.011295 | 0.011396 | 0.011295 | 0.011295 | 0.011262 | 0.011295 | 0.011463 |
| 0.011228 | 0.011295 | 0.011262 | 0.011262 | 0.011362 | 0.011329 | 0.011329 |
| 0.011295 | 0.011396 | 0.011362 | 0.011631 | 0.011228 | 0.011564 | 0.011228 |
| 0.011262 | 0.011362 | 0.011429 | 0.011564 | 0.011664 | 0.011362 | 0.011463 |
| 0.011329 | 0.011396 | 0.011295 | 0.011530 | 0.011765 | 0.011295 | 0.011362 |
| 0.011262 | 0.011362 | 0.011329 | 0.011396 | 0.011329 | 0.011329 | 0.011329 |
| 0.011228 | 0.011262 | 0.011228 | 0.011329 | 0.011295 | 0.011329 | 0.011396 |
| 0.011329 | 0.011295 | 0.011362 | 0.011262 | 0.011396 | 0.011228 | 0.011295 |
| 0.011463 | 0.011396 | 0.011631 | 0.011463 | 0.011295 | 0.011530 | 0.011295 |
| 0.011468 | 0.011695 | 0.011475 | 0.011177 | 0.011172 | 0.011281 | 0.011414 |
| 0.012048 | 0.011416 | 0.011184 | 0.011463 | 0.011530 | 0.011329 | 0.011429 |
| 0.011362 | 0.011329 | 0.011396 | 0.011295 | 0.011396 | 0.011329 | 0.011329 |
| 0.011295 | 0.011396 | 0.011597 | 0.011463 | 0.011362 | 0.011329 | 0.011262 |
| 0.011228 | 0.011228 | 0.011295 | 0.011262 | 0.011463 | 0.011429 | 0.011362 |
| 0.011463 | 0.011530 | 0.011262 | 0.011262 | 0.011295 | 0.011295 | 0.011297 |
| 0.011364 | 0.011295 | 0.011295 | 0.011168 | 0.011241 | 0.011200 | 0.011296 |
| 0.011297 | 0.011232 | 0.011245 | 0.011267 | 0.011196 | 0.011231 | 0.011263 |
| 0.011528 | 0.011301 | 0.011336 | 0.011228 | 0.011233 | 0.011363 | 0.011329 |
| 0.011396 | 0.011330 | 0.011329 | 0.011429 | 0.011362 | 0.011664 | 0.011530 |
| 0.011564 | 0.011430 | 0.011295 | 0.011396 | 0.011195 | 0.011429 | 0.011228 |
| 0.011295 | 0.011295 | 0.011262 | 0.011228 | 0.011262 | 0.011228 | 0.011329 |
| 0.011295 | 0.011396 | 0.011329 | 0.011228 | 0.011330 | 0.011430 | 0.011432 |

|          |          |          |          |          |          |          |
|----------|----------|----------|----------|----------|----------|----------|
| 0.011430 | 0.011329 | 0.011228 | 0.011161 | 0.011295 | 0.011228 | 0.011161 |
| 0.011264 | 0.011430 | 0.011228 | 0.011430 | 0.011195 | 0.011295 | 0.011262 |
| 0.011362 | 0.011262 | 0.011295 | 0.011262 | 0.011295 | 0.011161 | 0.011295 |
| 0.011329 | 0.011262 | 0.011329 | 0.011262 | 0.011295 | 0.011329 | 0.011564 |
| 0.011664 | 0.011597 | 0.011665 | 0.011431 | 0.011665 | 0.011295 | 0.011262 |
| 0.011297 | 0.011586 | 0.011380 | 0.011197 | 0.011671 | 0.011163 | 0.011218 |
| 0.011671 | 0.011570 | 0.011463 | 0.011664 | 0.011367 | 0.011530 | 0.011497 |
| 0.011362 | 0.011597 | 0.011380 | 0.011266 | 0.011312 | 0.011329 | 0.011331 |
| 0.011497 | 0.011397 | 0.011533 | 0.011601 | 0.011530 | 0.011597 | 0.011704 |
| 0.011432 | 0.011603 | 0.011466 | 0.011466 | 0.011699 | 0.011194 | 0.011397 |
| 0.011362 | 0.011295 | 0.011194 | 0.011194 | 0.011262 | 0.011262 | 0.011329 |
| 0.011262 | 0.011329 | 0.011228 | 0.011329 | 0.011262 | 0.011262 | 0.011262 |
| 0.011262 | 0.011698 | 0.011597 | 0.011631 | 0.011161 | 0.011262 | 0.011295 |
| 0.011295 | 0.011262 | 0.011329 | 0.011362 | 0.011228 | 0.011228 | 0.011228 |
| 0.011765 | 0.011396 | 0.011396 | 0.011194 | 0.011295 | 0.011396 | 0.011228 |
| 0.011228 | 0.011295 | 0.011262 | 0.011429 | 0.011228 | 0.011362 | 0.011496 |
| 0.011429 | 0.011262 | 0.011262 | 0.011194 | 0.011194 | 0.011362 | 0.011295 |
| 0.011194 | 0.011295 | 0.011161 | 0.011194 | 0.011329 | 0.011463 | 0.011228 |
| 0.011195 | 0.011329 | 0.011262 | 0.011161 | 0.011496 | 0.011161 | 0.011329 |
| 0.011402 | 0.011228 | 0.011530 | 0.011362 | 0.011396 | 0.011262 | 0.011295 |
| 0.011228 | 0.011564 | 0.011161 | 0.011429 | 0.011228 | 0.011228 | 0.011161 |
| 0.011396 | 0.011597 | 0.011295 | 0.011362 | 0.011194 | 0.011597 | 0.011228 |
| 0.011228 | 0.011228 | 0.011262 | 0.011362 | 0.011262 | 0.011362 | 0.011429 |
| 0.011429 | 0.011396 | 0.011295 | 0.011396 | 0.011362 | 0.011228 | 0.011194 |
| 0.011228 | 0.011228 | 0.011295 | 0.011228 | 0.011194 | 0.011362 | 0.011228 |
| 0.011262 | 0.011262 | 0.011396 | 0.011429 | 0.011329 | 0.011262 | 0.011262 |
| 0.011329 | 0.011262 | 0.011362 | 0.011228 | 0.011362 | 0.011463 | 0.011765 |
| 0.011262 | 0.011664 | 0.011267 | 0.017785 | 0.011191 | 0.011366 | 0.011618 |
| 0.011579 | 0.011623 | 0.011270 | 0.011234 | 0.011664 | 0.011647 | 0.011303 |
| 0.011392 | 0.011487 | 0.011177 | 0.011186 | 0.011255 | 0.011258 | 0.011189 |
| 0.011436 | 0.011433 | 0.011394 | 0.011259 | 0.011396 | 0.011429 | 0.011432 |
| 0.011301 | 0.011396 | 0.011396 | 0.011362 | 0.011329 | 0.011329 | 0.011295 |
| 0.011329 | 0.011262 | 0.011295 | 0.011329 | 0.011295 | 0.011228 | 0.011262 |
| 0.011262 | 0.011329 | 0.011228 | 0.011329 | 0.011362 | 0.011396 | 0.011295 |
| 0.011329 | 0.011295 | 0.011631 | 0.011631 | 0.011362 | 0.011329 | 0.011430 |
| 0.011195 | 0.011195 | 0.011228 | 0.011329 | 0.011195 | 0.011429 | 0.011429 |
| 0.011463 | 0.011463 | 0.011396 | 0.011497 | 0.011665 | 0.011498 | 0.011329 |
| 0.011329 | 0.011396 | 0.011429 | 0.011262 | 0.011329 | 0.011295 | 0.011262 |
| 0.011396 | 0.011396 | 0.011429 | 0.011396 | 0.011296 | 0.011497 | 0.011463 |
| 0.011331 | 0.011228 | 0.011329 | 0.011430 | 0.011329 | 0.011463 | 0.011496 |
| 0.011664 | 0.011367 | 0.011530 | 0.011497 | 0.011362 | 0.011597 | 0.011228 |
| 0.011296 | 0.011295 | 0.011262 | 0.011262 | 0.011329 | 0.011228 | 0.011329 |
| 0.011362 | 0.011396 | 0.011295 | 0.011329 | 0.011295 | 0.011631 | 0.011631 |
| 0.011362 | 0.011329 | 0.011463 | 0.011396 | 0.012035 | 0.011453 | 0.011377 |
| 0.011447 | 0.011407 | 0.011517 | 0.011406 | 0.011515 | 0.011439 | 0.011405 |
| 0.011987 | 0.011302 | 0.011437 | 0.011371 | 0.011645 | 0.011502 | 0.011604 |
| 0.012012 | 0.011475 | 0.011567 | 0.011631 | 0.011496 | 0.011496 | 0.011533 |
| 0.011194 | 0.011362 | 0.011496 | 0.011463 | 0.011466 | 0.011463 | 0.011431 |
| 0.011295 | 0.011228 | 0.011262 | 0.011295 | 0.011194 | 0.011262 | 0.011161 |
| 0.011295 | 0.011329 | 0.011228 | 0.011194 | 0.011295 | 0.011228 | 0.011262 |
| 0.011194 | 0.011194 | 0.011262 | 0.011295 | 0.011194 | 0.011396 | 0.011429 |
| 0.011329 | 0.011396 | 0.011329 | 0.011329 | 0.011262 | 0.011664 | 0.011295 |
| 0.011338 | 0.011262 | 0.011497 | 0.011501 | 0.011362 | 0.011362 | 0.011362 |
| 0.011362 | 0.011295 | 0.011262 | 0.011295 | 0.011396 | 0.011396 | 0.011329 |
| 0.011329 | 0.011463 | 0.011631 | 0.011362 | 0.011564 | 0.011564 | 0.011429 |
| 0.011262 | 0.011329 | 0.011362 | 0.011765 | 0.011329 | 0.011362 | 0.011329 |
| 0.011362 | 0.011295 | 0.011295 | 0.011597 | 0.011530 | 0.011564 | 0.011295 |
| 0.011396 | 0.011463 | 0.011329 | 0.011396 | 0.011362 | 0.011228 | 0.011564 |
| 0.011329 | 0.011295 | 0.011295 | 0.011463 | 0.011295 | 0.011396 | 0.011631 |
| 0.011329 | 0.011705 | 0.011698 | 0.011507 | 0.011229 | 0.011400 | 0.011267 |

|          |          |          |          |          |          |          |
|----------|----------|----------|----------|----------|----------|----------|
| 0.011170 | 0.011683 | 0.011236 | 0.011417 | 0.011255 | 0.011315 | 0.011326 |
| 0.011417 | 0.011126 | 0.011283 | 0.011126 | 0.011222 | 0.011328 | 0.011385 |
| 0.011399 | 0.011296 | 0.011377 | 0.011307 | 0.011330 | 0.011463 | 0.011530 |
| 0.011530 | 0.011396 | 0.011500 | 0.011501 | 0.011636 | 0.011625 | 0.011329 |
| 0.011564 | 0.011430 | 0.011295 | 0.011396 | 0.011195 | 0.011429 | 0.011228 |
| 0.011295 | 0.011295 | 0.011262 | 0.011228 | 0.011262 | 0.011228 | 0.011329 |
| 0.011305 | 0.011305 | 0.011231 | 0.011334 | 0.011471 | 0.011436 | 0.011367 |
| 0.011435 | 0.011363 | 0.011134 | 0.011132 | 0.011297 | 0.011467 | 0.011467 |
| 0.011262 | 0.011331 | 0.011565 | 0.011533 | 0.011464 | 0.011498 | 0.011429 |
| 0.011362 | 0.011429 | 0.011429 | 0.011329 | 0.011900 | 0.011496 | 0.011564 |
| 0.011597 | 0.011665 | 0.011299 | 0.011372 | 0.011262 | 0.011463 | 0.011429 |
| 0.011464 | 0.011496 | 0.011496 | 0.011496 | 0.011571 | 0.011631 | 0.011234 |
| 0.011162 | 0.011164 | 0.011264 | 0.011230 | 0.011333 | 0.011135 | 0.011502 |
| 0.011300 | 0.011411 | 0.011108 | 0.011322 | 0.011296 | 0.011368 | 0.011262 |
| 0.011228 | 0.011228 | 0.011295 | 0.011262 | 0.011463 | 0.011429 | 0.011362 |
| 0.011463 | 0.011530 | 0.011262 | 0.011262 | 0.011295 | 0.011295 | 0.011297 |
| 0.011364 | 0.011295 | 0.011295 | 0.011330 | 0.011463 | 0.011530 | 0.011530 |
| 0.011396 | 0.011500 | 0.011501 | 0.011636 | 0.011625 | 0.011329 | 0.011496 |
| 0.011429 | 0.011429 | 0.011229 | 0.011443 | 0.011373 | 0.011401 | 0.011270 |
| 0.011439 | 0.011607 | 0.011399 | 0.011332 | 0.011228 | 0.011430 | 0.011295 |
| 0.011396 | 0.011329 | 0.011228 | 0.011330 | 0.011430 | 0.011432 | 0.011329 |
| 0.011228 | 0.011161 | 0.011295 | 0.011228 | 0.011161 | 0.011264 | 0.011430 |
| 0.011329 | 0.011262 | 0.011295 | 0.011329 | 0.011295 | 0.011228 | 0.011430 |
| 0.011295 | 0.011329 | 0.011329 | 0.011262 | 0.011329 | 0.011564 | 0.011228 |
| 0.011262 | 0.011664 | 0.011262 | 0.011295 | 0.011262 | 0.011631 | 0.011146 |
| 0.011566 | 0.011230 | 0.011211 | 0.011463 | 0.011549 | 0.011455 | 0.011102 |
| 0.011165 | 0.011429 | 0.011463 | 0.011569 | 0.011430 | 0.011568 | 0.011699 |
| 0.011598 | 0.011635 | 0.011597 | 0.011914 | 0.011631 | 0.012505 | 0.011666 |
| 0.012405 | 0.012173 | 0.012307 | 0.012578 | 0.011631 | 0.011329 | 0.011564 |
| 0.012070 | 0.011937 | 0.011597 | 0.011497 | 0.011564 | 0.011564 | 0.011534 |
| 0.011429 | 0.011433 | 0.011496 | 0.011464 | 0.011833 | 0.011900 | 0.011901 |
| 0.011800 | 0.011901 | 0.012004 | 0.011770 | 0.012070 | 0.012076 | 0.012137 |
| 0.012138 | 0.012172 | 0.012118 | 0.012138 | 0.012139 | 0.011362 | 0.011665 |
| 0.011733 | 0.012236 | 0.011738 | 0.011967 | 0.012440 | 0.011502 | 0.011396 |
| 0.011362 | 0.011362 | 0.011833 | 0.011883 | 0.011975 | 0.011698 | 0.011363 |
| S018     | 0.011698 | 0.011698 | 0.012034 | 0.011799 | 0.011799 | 0.011866 |
| 0.011671 | 0.011603 | 0.011866 | 0.011295 | 0.011362 | 0.011262 | 0.011295 |
| 0.011329 | 0.011496 | 0.011295 | 0.011329 | 0.000000 | 0.011362 | 0.011329 |
| 0.011295 | 0.011329 | 0.011429 | 0.011295 | 0.011329 | 0.011329 | 0.011637 |
| 0.011564 | 0.011329 | 0.011228 | 0.011463 | 0.011396 | 0.011362 | 0.011396 |
| 0.011362 | 0.011463 | 0.011362 | 0.011362 | 0.011396 | 0.011362 | 0.011530 |
| 0.011295 | 0.011362 | 0.011396 | 0.011329 | 0.011429 | 0.011463 | 0.011396 |
| 0.011362 | 0.011530 | 0.011430 | 0.011698 | 0.011362 | 0.011631 | 0.011362 |
| 0.011329 | 0.011429 | 0.011496 | 0.011631 | 0.011732 | 0.011429 | 0.011530 |
| 0.011396 | 0.011463 | 0.011362 | 0.011597 | 0.011832 | 0.011362 | 0.011429 |
| 0.011329 | 0.011429 | 0.011396 | 0.011463 | 0.011396 | 0.011396 | 0.011396 |
| 0.011295 | 0.011329 | 0.011295 | 0.011396 | 0.011362 | 0.011397 | 0.011463 |
| 0.011396 | 0.011362 | 0.011429 | 0.011329 | 0.011463 | 0.011295 | 0.011362 |
| 0.011530 | 0.011463 | 0.011698 | 0.011530 | 0.011362 | 0.011597 | 0.011362 |
| 0.011468 | 0.011695 | 0.011513 | 0.011216 | 0.011247 | 0.011391 | 0.011414 |
| 0.012085 | 0.011467 | 0.011184 | 0.011597 | 0.011597 | 0.011396 | 0.011496 |
| 0.011429 | 0.011396 | 0.011463 | 0.011362 | 0.011463 | 0.011396 | 0.011396 |
| 0.011362 | 0.011463 | 0.011664 | 0.011530 | 0.011429 | 0.011396 | 0.011329 |
| 0.011295 | 0.011295 | 0.011362 | 0.011329 | 0.011530 | 0.011497 | 0.011429 |
| 0.011530 | 0.011597 | 0.011329 | 0.011329 | 0.011362 | 0.011362 | 0.011364 |
| 0.011432 | 0.011362 | 0.011362 | 0.011240 | 0.011313 | 0.011271 | 0.011363 |
| 0.011365 | 0.011301 | 0.011355 | 0.011336 | 0.011264 | 0.011300 | 0.011330 |
| 0.011600 | 0.011370 | 0.011405 | 0.011296 | 0.011302 | 0.011430 | 0.011396 |
| 0.011464 | 0.011397 | 0.011396 | 0.011496 | 0.011429 | 0.011799 | 0.011598 |
| 0.011631 | 0.011497 | 0.011362 | 0.011463 | 0.011262 | 0.011496 | 0.011295 |

|          |          |          |          |          |          |          |
|----------|----------|----------|----------|----------|----------|----------|
| 0.011362 | 0.011362 | 0.011329 | 0.011295 | 0.011329 | 0.011295 | 0.011396 |
| 0.011362 | 0.011463 | 0.011396 | 0.011295 | 0.011363 | 0.011497 | 0.011499 |
| 0.011497 | 0.011396 | 0.011295 | 0.011229 | 0.011362 | 0.011295 | 0.011228 |
| 0.011332 | 0.011497 | 0.011295 | 0.011497 | 0.011262 | 0.011362 | 0.011329 |
| 0.011430 | 0.011329 | 0.011362 | 0.011329 | 0.011362 | 0.011228 | 0.011362 |
| 0.011396 | 0.011329 | 0.011396 | 0.011329 | 0.011362 | 0.011396 | 0.011631 |
| 0.011732 | 0.011664 | 0.011732 | 0.011498 | 0.011732 | 0.011362 | 0.011329 |
| 0.011364 | 0.011667 | 0.011517 | 0.011266 | 0.011705 | 0.011231 | 0.011375 |
| 0.011705 | 0.011638 | 0.011530 | 0.011732 | 0.011436 | 0.011597 | 0.011564 |
| 0.011496 | 0.011664 | 0.011486 | 0.011349 | 0.011395 | 0.011396 | 0.011466 |
| 0.011564 | 0.011465 | 0.011601 | 0.011669 | 0.011597 | 0.011665 | 0.011772 |
| 0.011466 | 0.011671 | 0.011602 | 0.011534 | 0.011800 | 0.011262 | 0.011464 |
| 0.011429 | 0.011362 | 0.011262 | 0.011262 | 0.011329 | 0.011329 | 0.011396 |
| 0.011329 | 0.011396 | 0.011295 | 0.011396 | 0.011329 | 0.011329 | 0.011396 |
| 0.011329 | 0.011765 | 0.011664 | 0.011698 | 0.011228 | 0.011329 | 0.011362 |
| 0.011362 | 0.011329 | 0.011396 | 0.011429 | 0.011295 | 0.011295 | 0.011295 |
| 0.011832 | 0.011463 | 0.011463 | 0.011262 | 0.011362 | 0.011530 | 0.011295 |
| 0.011295 | 0.011362 | 0.011329 | 0.011497 | 0.011295 | 0.011429 | 0.011564 |
| 0.011496 | 0.011329 | 0.011329 | 0.011262 | 0.011262 | 0.011429 | 0.011362 |
| 0.011262 | 0.011362 | 0.011228 | 0.011262 | 0.011396 | 0.011530 | 0.011295 |
| 0.011262 | 0.011396 | 0.011329 | 0.011228 | 0.011564 | 0.011228 | 0.011329 |
| 0.011471 | 0.011295 | 0.011597 | 0.011429 | 0.011463 | 0.011329 | 0.011429 |
| 0.011295 | 0.011631 | 0.011228 | 0.011496 | 0.011295 | 0.011295 | 0.011228 |
| 0.011463 | 0.011665 | 0.011362 | 0.011429 | 0.011262 | 0.011664 | 0.011295 |
| 0.011295 | 0.011295 | 0.011329 | 0.011429 | 0.011329 | 0.011429 | 0.011496 |
| 0.011496 | 0.011463 | 0.011362 | 0.011463 | 0.011429 | 0.011295 | 0.011262 |
| 0.011295 | 0.011295 | 0.011362 | 0.011295 | 0.011262 | 0.011429 | 0.011295 |
| 0.011329 | 0.011329 | 0.011463 | 0.011496 | 0.011396 | 0.011329 | 0.011329 |
| 0.011396 | 0.011329 | 0.011429 | 0.011295 | 0.011429 | 0.011530 | 0.011832 |
| 0.011329 | 0.011732 | 0.011336 | 0.011785 | 0.011126 | 0.011488 | 0.011688 |
| 0.011648 | 0.011693 | 0.011322 | 0.011292 | 0.011719 | 0.011716 | 0.011364 |
| 0.011487 | 0.011548 | 0.011177 | 0.011270 | 0.011255 | 0.011307 | 0.011275 |
| 0.011482 | 0.011470 | 0.011431 | 0.011259 | 0.011463 | 0.011497 | 0.011500 |
| 0.011369 | 0.011463 | 0.011463 | 0.011429 | 0.011396 | 0.011396 | 0.011362 |
| 0.011396 | 0.011329 | 0.011362 | 0.011396 | 0.011362 | 0.011295 | 0.011329 |
| 0.011329 | 0.011396 | 0.011295 | 0.011396 | 0.011430 | 0.011396 | 0.011362 |
| 0.011396 | 0.011362 | 0.011698 | 0.011698 | 0.011430 | 0.011464 | 0.011497 |
| 0.011262 | 0.011262 | 0.011295 | 0.011396 | 0.011262 | 0.011497 | 0.011497 |
| 0.011530 | 0.011530 | 0.011463 | 0.011564 | 0.011732 | 0.011565 | 0.011396 |
| 0.011396 | 0.011463 | 0.011497 | 0.011329 | 0.011396 | 0.011362 | 0.011396 |
| 0.011463 | 0.011463 | 0.011497 | 0.011463 | 0.011363 | 0.011564 | 0.011530 |
| 0.011331 | 0.011295 | 0.011329 | 0.011497 | 0.011396 | 0.011530 | 0.011496 |
| 0.011732 | 0.011436 | 0.011597 | 0.011564 | 0.011496 | 0.011664 | 0.011295 |
| 0.011464 | 0.011363 | 0.011329 | 0.011329 | 0.011396 | 0.011295 | 0.011396 |
| 0.011430 | 0.011396 | 0.011362 | 0.011396 | 0.011362 | 0.011698 | 0.011698 |
| 0.011430 | 0.011464 | 0.011530 | 0.011463 | 0.012103 | 0.011524 | 0.011412 |
| 0.011517 | 0.011476 | 0.011482 | 0.011476 | 0.011585 | 0.011508 | 0.011474 |
| 0.012021 | 0.011372 | 0.011505 | 0.011441 | 0.011714 | 0.011570 | 0.011673 |
| 0.012080 | 0.011437 | 0.011635 | 0.011698 | 0.011564 | 0.011564 | 0.011601 |
| 0.011262 | 0.011429 | 0.011564 | 0.011530 | 0.011533 | 0.011530 | 0.011498 |
| 0.011362 | 0.011295 | 0.011329 | 0.011362 | 0.011262 | 0.011329 | 0.011228 |
| 0.011362 | 0.011396 | 0.011295 | 0.011262 | 0.011362 | 0.011295 | 0.011329 |
| 0.011329 | 0.011262 | 0.011329 | 0.011362 | 0.011262 | 0.011463 | 0.011496 |
| 0.011396 | 0.011463 | 0.011396 | 0.011396 | 0.011329 | 0.011732 | 0.011362 |
| 0.011408 | 0.011329 | 0.011564 | 0.011569 | 0.011429 | 0.011429 | 0.011429 |
| 0.011429 | 0.011362 | 0.011329 | 0.011362 | 0.011463 | 0.011463 | 0.011396 |
| 0.011329 | 0.011530 | 0.011698 | 0.011429 | 0.011631 | 0.011631 | 0.011496 |
| 0.011329 | 0.011396 | 0.011429 | 0.011832 | 0.011396 | 0.011429 | 0.011396 |
| 0.011429 | 0.011362 | 0.011362 | 0.011665 | 0.011597 | 0.011631 | 0.011362 |
| 0.011463 | 0.011530 | 0.011396 | 0.011463 | 0.011429 | 0.011295 | 0.011631 |

|          |          |          |          |          |          |          |
|----------|----------|----------|----------|----------|----------|----------|
| 0.011396 | 0.011362 | 0.011362 | 0.011530 | 0.011362 | 0.011463 | 0.011698 |
| 0.011396 | 0.011739 | 0.011765 | 0.011507 | 0.011173 | 0.011468 | 0.011267 |
| 0.011280 | 0.011722 | 0.011306 | 0.011417 | 0.011255 | 0.011366 | 0.011379 |
| 0.011468 | 0.000000 | 0.011338 | 0.011192 | 0.011222 | 0.011328 | 0.011385 |
| 0.011399 | 0.011296 | 0.011448 | 0.011377 | 0.011397 | 0.011530 | 0.011597 |
| 0.011597 | 0.011464 | 0.011567 | 0.011569 | 0.011704 | 0.011732 | 0.011396 |
| 0.011631 | 0.011497 | 0.011362 | 0.011463 | 0.011262 | 0.011496 | 0.011295 |
| 0.011362 | 0.011362 | 0.011329 | 0.011295 | 0.011329 | 0.011295 | 0.011396 |
| 0.011375 | 0.011375 | 0.011368 | 0.011403 | 0.011539 | 0.011504 | 0.011504 |
| 0.011503 | 0.011430 | 0.011208 | 0.011204 | 0.011365 | 0.011535 | 0.011535 |
| 0.011329 | 0.011331 | 0.011632 | 0.011601 | 0.011531 | 0.011565 | 0.011496 |
| 0.011429 | 0.011496 | 0.011496 | 0.011396 | 0.011967 | 0.011564 | 0.011631 |
| 0.011665 | 0.011701 | 0.011367 | 0.011441 | 0.011329 | 0.011530 | 0.011496 |
| 0.011531 | 0.011564 | 0.011564 | 0.011564 | 0.011650 | 0.011698 | 0.011303 |
| 0.011229 | 0.011233 | 0.011332 | 0.011298 | 0.011402 | 0.011172 | 0.011570 |
| 0.011335 | 0.011455 | 0.011203 | 0.011322 | 0.011363 | 0.011437 | 0.011329 |
| 0.011295 | 0.011295 | 0.011362 | 0.011329 | 0.011530 | 0.011497 | 0.011429 |
| 0.011530 | 0.011597 | 0.011329 | 0.011329 | 0.011362 | 0.011362 | 0.011364 |
| 0.011432 | 0.011362 | 0.011362 | 0.011397 | 0.011530 | 0.011597 | 0.011597 |
| 0.011464 | 0.011567 | 0.011569 | 0.011704 | 0.011732 | 0.011396 | 0.011496 |
| 0.011496 | 0.011496 | 0.011331 | 0.011478 | 0.011442 | 0.011469 | 0.011340 |
| 0.011508 | 0.011744 | 0.011526 | 0.011400 | 0.011295 | 0.011497 | 0.011362 |
| 0.011463 | 0.011396 | 0.011295 | 0.011363 | 0.011497 | 0.011499 | 0.011396 |
| 0.011295 | 0.011229 | 0.011362 | 0.011295 | 0.011228 | 0.011332 | 0.011497 |
| 0.011396 | 0.011329 | 0.011362 | 0.011396 | 0.011362 | 0.011295 | 0.011497 |
| 0.011362 | 0.011396 | 0.011396 | 0.011329 | 0.011396 | 0.011631 | 0.011295 |
| 0.011329 | 0.011732 | 0.011329 | 0.011362 | 0.011329 | 0.011698 | 0.011189 |
| 0.011622 | 0.011230 | 0.011261 | 0.011503 | 0.011549 | 0.011491 | 0.011186 |
| 0.011218 | 0.011496 | 0.011597 | 0.011705 | 0.011565 | 0.011703 | 0.011834 |
| 0.011733 | 0.011770 | 0.011731 | 0.011983 | 0.011698 | 0.012573 | 0.011734 |
| 0.012473 | 0.012241 | 0.012375 | 0.012646 | 0.011698 | 0.011396 | 0.011698 |
| 0.012137 | 0.012072 | 0.011664 | 0.011564 | 0.011632 | 0.011632 | 0.011601 |
| 0.011496 | 0.011501 | 0.011564 | 0.011531 | 0.011901 | 0.011900 | 0.011968 |
| 0.011867 | 0.011968 | 0.012072 | 0.011838 | 0.012138 | 0.012144 | 0.012205 |
| 0.012205 | 0.012239 | 0.012186 | 0.012205 | 0.012207 | 0.011429 | 0.011732 |
| 0.011800 | 0.012303 | 0.011806 | 0.012034 | 0.012508 | 0.011570 | 0.011464 |
| 0.011429 | 0.011429 | 0.011900 | 0.011924 | 0.012045 | 0.011765 | 0.011431 |
| S019     | 0.011664 | 0.011664 | 0.012001 | 0.011765 | 0.011765 | 0.011832 |
| 0.011637 | 0.011569 | 0.011832 | 0.011262 | 0.011329 | 0.011296 | 0.011262 |
| 0.011295 | 0.011463 | 0.011262 | 0.011295 | 0.011362 | 0.000000 | 0.011295 |
| 0.011262 | 0.011094 | 0.011396 | 0.011262 | 0.011295 | 0.011295 | 0.011603 |
| 0.011530 | 0.011295 | 0.011194 | 0.011429 | 0.011362 | 0.011329 | 0.011362 |
| 0.011329 | 0.011429 | 0.011329 | 0.011329 | 0.011362 | 0.011329 | 0.011497 |
| 0.011262 | 0.011329 | 0.011362 | 0.011295 | 0.011396 | 0.011429 | 0.011362 |
| 0.011329 | 0.011497 | 0.011396 | 0.011664 | 0.011329 | 0.011597 | 0.011329 |
| 0.011295 | 0.011396 | 0.011463 | 0.011597 | 0.011698 | 0.011396 | 0.011496 |
| 0.011362 | 0.011429 | 0.011329 | 0.011564 | 0.011799 | 0.011329 | 0.011396 |
| 0.011295 | 0.011396 | 0.011362 | 0.011429 | 0.011362 | 0.011362 | 0.011362 |
| 0.011262 | 0.011295 | 0.011262 | 0.011362 | 0.011329 | 0.011363 | 0.011429 |
| 0.011362 | 0.011329 | 0.011396 | 0.011295 | 0.011429 | 0.011262 | 0.011329 |
| 0.011496 | 0.011429 | 0.011664 | 0.011497 | 0.011329 | 0.011564 | 0.011329 |
| 0.011468 | 0.011695 | 0.011513 | 0.011216 | 0.011247 | 0.011355 | 0.011415 |
| 0.012085 | 0.011467 | 0.011225 | 0.011564 | 0.011564 | 0.011362 | 0.011463 |
| 0.011396 | 0.011362 | 0.011429 | 0.011329 | 0.011429 | 0.011362 | 0.011362 |
| 0.011329 | 0.011429 | 0.011631 | 0.011496 | 0.011396 | 0.011362 | 0.011295 |
| 0.011262 | 0.011262 | 0.011329 | 0.011295 | 0.011497 | 0.011463 | 0.011396 |
| 0.011497 | 0.011564 | 0.011295 | 0.011295 | 0.011329 | 0.011329 | 0.011330 |
| 0.011398 | 0.011329 | 0.011329 | 0.011204 | 0.011277 | 0.011236 | 0.011329 |
| 0.011331 | 0.011266 | 0.011318 | 0.011302 | 0.011230 | 0.011266 | 0.011297 |
| 0.011564 | 0.011336 | 0.011370 | 0.011262 | 0.011268 | 0.011397 | 0.011363 |

|          |          |          |          |          |          |          |
|----------|----------|----------|----------|----------|----------|----------|
| 0.011430 | 0.011364 | 0.011363 | 0.011463 | 0.011396 | 0.011765 | 0.011564 |
| 0.011597 | 0.011463 | 0.011329 | 0.011430 | 0.011228 | 0.011463 | 0.011262 |
| 0.011329 | 0.011329 | 0.011295 | 0.011262 | 0.011295 | 0.011262 | 0.011362 |
| 0.011329 | 0.011430 | 0.011362 | 0.011262 | 0.011363 | 0.011463 | 0.011466 |
| 0.011463 | 0.011362 | 0.011262 | 0.011195 | 0.011329 | 0.011262 | 0.011195 |
| 0.011298 | 0.011463 | 0.011262 | 0.011463 | 0.011228 | 0.011329 | 0.011295 |
| 0.011396 | 0.011295 | 0.011329 | 0.011295 | 0.011329 | 0.011195 | 0.011329 |
| 0.011362 | 0.011295 | 0.011362 | 0.011295 | 0.011329 | 0.011362 | 0.011597 |
| 0.011698 | 0.011631 | 0.011698 | 0.011465 | 0.011698 | 0.011329 | 0.011295 |
| 0.011330 | 0.011586 | 0.011335 | 0.011232 | 0.011705 | 0.011197 | 0.011296 |
| 0.011671 | 0.011604 | 0.011496 | 0.011698 | 0.011402 | 0.011564 | 0.011530 |
| 0.011463 | 0.011631 | 0.011486 | 0.011349 | 0.011395 | 0.011362 | 0.011432 |
| 0.011530 | 0.011431 | 0.011567 | 0.011635 | 0.011564 | 0.011631 | 0.011738 |
| 0.011466 | 0.011637 | 0.011568 | 0.011500 | 0.011767 | 0.011228 | 0.011431 |
| 0.011396 | 0.011329 | 0.011228 | 0.011228 | 0.011295 | 0.011295 | 0.011362 |
| 0.011295 | 0.011362 | 0.011262 | 0.011362 | 0.011295 | 0.011295 | 0.011362 |
| 0.011094 | 0.011731 | 0.011631 | 0.011664 | 0.011194 | 0.011295 | 0.011329 |
| 0.011329 | 0.011295 | 0.011362 | 0.011396 | 0.011262 | 0.011262 | 0.011262 |
| 0.011799 | 0.011429 | 0.011429 | 0.011228 | 0.011329 | 0.011497 | 0.011262 |
| 0.011262 | 0.011329 | 0.011295 | 0.011463 | 0.011262 | 0.011396 | 0.011530 |
| 0.011463 | 0.011295 | 0.011295 | 0.011228 | 0.011228 | 0.011396 | 0.011329 |
| 0.011228 | 0.011329 | 0.011195 | 0.011228 | 0.011362 | 0.011497 | 0.011262 |
| 0.011228 | 0.011362 | 0.011295 | 0.011195 | 0.011530 | 0.011195 | 0.011362 |
| 0.011437 | 0.011262 | 0.011564 | 0.011396 | 0.011429 | 0.011295 | 0.011396 |
| 0.011262 | 0.011597 | 0.011194 | 0.011463 | 0.011262 | 0.011262 | 0.011194 |
| 0.011429 | 0.011631 | 0.011329 | 0.011396 | 0.011228 | 0.011631 | 0.011262 |
| 0.011262 | 0.011262 | 0.011295 | 0.011396 | 0.011295 | 0.011396 | 0.011463 |
| 0.011463 | 0.011429 | 0.011329 | 0.011429 | 0.011396 | 0.011262 | 0.011228 |
| 0.011262 | 0.011262 | 0.011329 | 0.011262 | 0.011228 | 0.011396 | 0.011262 |
| 0.011295 | 0.011295 | 0.011429 | 0.011463 | 0.011362 | 0.011295 | 0.011295 |
| 0.011362 | 0.011295 | 0.011396 | 0.011262 | 0.011396 | 0.011496 | 0.011799 |
| 0.011295 | 0.011698 | 0.011302 | 0.017823 | 0.011191 | 0.011488 | 0.011653 |
| 0.011614 | 0.011658 | 0.011374 | 0.011350 | 0.011774 | 0.011682 | 0.011425 |
| 0.011534 | 0.011610 | 0.011177 | 0.011270 | 0.011294 | 0.011356 | 0.011275 |
| 0.011482 | 0.011470 | 0.011468 | 0.011193 | 0.011429 | 0.011463 | 0.011466 |
| 0.011335 | 0.011429 | 0.011429 | 0.011396 | 0.011362 | 0.011362 | 0.011329 |
| 0.011362 | 0.011295 | 0.011329 | 0.011362 | 0.011329 | 0.011262 | 0.011295 |
| 0.011295 | 0.011362 | 0.011262 | 0.011362 | 0.011396 | 0.011429 | 0.011329 |
| 0.011362 | 0.011329 | 0.011665 | 0.011665 | 0.011396 | 0.011430 | 0.011463 |
| 0.011228 | 0.011228 | 0.011262 | 0.011362 | 0.011228 | 0.011463 | 0.011463 |
| 0.011497 | 0.011496 | 0.011429 | 0.011530 | 0.011698 | 0.011532 | 0.011362 |
| 0.011362 | 0.011430 | 0.011463 | 0.011295 | 0.011362 | 0.011329 | 0.011362 |
| 0.011430 | 0.011430 | 0.011463 | 0.011430 | 0.011330 | 0.011530 | 0.011497 |
| 0.011365 | 0.011262 | 0.011362 | 0.011463 | 0.011362 | 0.011497 | 0.011530 |
| 0.011698 | 0.011402 | 0.011564 | 0.011530 | 0.011463 | 0.011631 | 0.011262 |
| 0.011431 | 0.011329 | 0.011295 | 0.011295 | 0.011362 | 0.011262 | 0.011362 |
| 0.011396 | 0.011429 | 0.011329 | 0.011362 | 0.011329 | 0.011665 | 0.011665 |
| 0.011396 | 0.011430 | 0.011496 | 0.011429 | 0.012069 | 0.011489 | 0.011412 |
| 0.011482 | 0.011442 | 0.011552 | 0.011441 | 0.011550 | 0.011474 | 0.011439 |
| 0.012022 | 0.011337 | 0.011471 | 0.011406 | 0.011680 | 0.011536 | 0.011639 |
| 0.012046 | 0.011512 | 0.011601 | 0.011664 | 0.011530 | 0.011530 | 0.011567 |
| 0.011228 | 0.011396 | 0.011530 | 0.011496 | 0.011499 | 0.011496 | 0.011464 |
| 0.011329 | 0.011262 | 0.011295 | 0.011329 | 0.011228 | 0.011295 | 0.011194 |
| 0.011329 | 0.011362 | 0.011262 | 0.011228 | 0.011329 | 0.011262 | 0.011295 |
| 0.011295 | 0.011228 | 0.011295 | 0.011329 | 0.011228 | 0.011429 | 0.011463 |
| 0.011362 | 0.011429 | 0.011362 | 0.011362 | 0.011295 | 0.011698 | 0.011329 |
| 0.011373 | 0.011295 | 0.011530 | 0.011535 | 0.011396 | 0.011396 | 0.011396 |
| 0.011396 | 0.011329 | 0.011295 | 0.011329 | 0.011429 | 0.011429 | 0.011362 |
| 0.011362 | 0.011497 | 0.011664 | 0.011396 | 0.011597 | 0.011597 | 0.011463 |
| 0.011295 | 0.011362 | 0.011396 | 0.011799 | 0.011362 | 0.011396 | 0.011362 |

|          |          |          |          |          |          |          |
|----------|----------|----------|----------|----------|----------|----------|
| 0.011396 | 0.011329 | 0.011329 | 0.011631 | 0.011564 | 0.011597 | 0.011329 |
| 0.011429 | 0.011497 | 0.011362 | 0.011429 | 0.011396 | 0.011262 | 0.011597 |
| 0.011362 | 0.011329 | 0.011329 | 0.011497 | 0.011329 | 0.011429 | 0.011664 |
| 0.011362 | 0.011705 | 0.011732 | 0.011507 | 0.011229 | 0.011434 | 0.011318 |
| 0.011280 | 0.011722 | 0.011271 | 0.011462 | 0.011304 | 0.011417 | 0.011432 |
| 0.011468 | 0.011192 | 0.011394 | 0.011192 | 0.011276 | 0.011395 | 0.011385 |
| 0.011399 | 0.011296 | 0.011412 | 0.011342 | 0.011364 | 0.011497 | 0.011564 |
| 0.011564 | 0.011430 | 0.011533 | 0.011535 | 0.011670 | 0.011696 | 0.011362 |
| 0.011597 | 0.011463 | 0.011329 | 0.011430 | 0.011228 | 0.011463 | 0.011262 |
| 0.011329 | 0.011329 | 0.011295 | 0.011262 | 0.011295 | 0.011262 | 0.011362 |
| 0.011340 | 0.011340 | 0.011334 | 0.011368 | 0.011505 | 0.011470 | 0.011470 |
| 0.011469 | 0.011396 | 0.011208 | 0.011204 | 0.011331 | 0.011501 | 0.011501 |
| 0.011296 | 0.011365 | 0.011599 | 0.011567 | 0.011497 | 0.011531 | 0.011463 |
| 0.011396 | 0.011463 | 0.011463 | 0.011362 | 0.011933 | 0.011530 | 0.011597 |
| 0.011631 | 0.011701 | 0.011333 | 0.011372 | 0.011295 | 0.011497 | 0.011463 |
| 0.011497 | 0.011530 | 0.011530 | 0.011530 | 0.011689 | 0.011664 | 0.011303 |
| 0.011195 | 0.011199 | 0.011298 | 0.011264 | 0.011368 | 0.011209 | 0.011536 |
| 0.011335 | 0.011455 | 0.011203 | 0.011322 | 0.011329 | 0.011402 | 0.011295 |
| 0.011262 | 0.011262 | 0.011329 | 0.011295 | 0.011497 | 0.011463 | 0.011396 |
| 0.011497 | 0.011564 | 0.011295 | 0.011295 | 0.011329 | 0.011329 | 0.011330 |
| 0.011398 | 0.011329 | 0.011329 | 0.011364 | 0.011497 | 0.011564 | 0.011564 |
| 0.011430 | 0.011533 | 0.011535 | 0.011670 | 0.011696 | 0.011362 | 0.011530 |
| 0.011463 | 0.011463 | 0.011297 | 0.011478 | 0.011408 | 0.011435 | 0.011305 |
| 0.011473 | 0.011698 | 0.011399 | 0.011366 | 0.011262 | 0.011463 | 0.011329 |
| 0.011430 | 0.011362 | 0.011262 | 0.011363 | 0.011463 | 0.011466 | 0.011362 |
| 0.011262 | 0.011195 | 0.011329 | 0.011262 | 0.011195 | 0.011298 | 0.011463 |
| 0.011362 | 0.011295 | 0.011329 | 0.011362 | 0.011329 | 0.011262 | 0.011463 |
| 0.011329 | 0.011362 | 0.011362 | 0.011295 | 0.011362 | 0.011597 | 0.011262 |
| 0.011295 | 0.011698 | 0.011295 | 0.011329 | 0.011295 | 0.011664 | 0.011232 |
| 0.011679 | 0.011230 | 0.011261 | 0.011503 | 0.011549 | 0.011491 | 0.011186 |
| 0.011218 | 0.011463 | 0.011564 | 0.011671 | 0.011531 | 0.011669 | 0.011800 |
| 0.011699 | 0.011737 | 0.011698 | 0.011949 | 0.011664 | 0.012539 | 0.011700 |
| 0.012439 | 0.012207 | 0.012341 | 0.012613 | 0.011664 | 0.011362 | 0.011665 |
| 0.012103 | 0.012038 | 0.011631 | 0.011530 | 0.011598 | 0.011598 | 0.011567 |
| 0.011463 | 0.011467 | 0.011530 | 0.011497 | 0.011867 | 0.011866 | 0.011935 |
| 0.011766 | 0.011867 | 0.012038 | 0.011804 | 0.012104 | 0.012110 | 0.012171 |
| 0.012172 | 0.012205 | 0.012152 | 0.012172 | 0.012173 | 0.011396 | 0.011699 |
| 0.011767 | 0.012270 | 0.011772 | 0.012001 | 0.012474 | 0.011536 | 0.011430 |
| 0.011396 | 0.011396 | 0.011867 | 0.011883 | 0.012010 | 0.011732 | 0.011397 |
| S020     | 0.011631 | 0.011631 | 0.011967 | 0.011731 | 0.011731 | 0.011799 |
| 0.011637 | 0.011569 | 0.011799 | 0.011228 | 0.011295 | 0.011262 | 0.011228 |
| 0.011262 | 0.011429 | 0.011228 | 0.011262 | 0.011329 | 0.011295 | 0.000000 |
| 0.011228 | 0.011262 | 0.011362 | 0.011228 | 0.011262 | 0.011262 | 0.011603 |
| 0.011496 | 0.011262 | 0.011161 | 0.011396 | 0.011329 | 0.011295 | 0.011329 |
| 0.011295 | 0.011396 | 0.011295 | 0.011295 | 0.011329 | 0.011295 | 0.011463 |
| 0.011228 | 0.011295 | 0.011329 | 0.011262 | 0.011362 | 0.011396 | 0.011329 |
| 0.011295 | 0.011463 | 0.011362 | 0.011631 | 0.011295 | 0.011564 | 0.011295 |
| 0.011262 | 0.011362 | 0.011429 | 0.011564 | 0.011664 | 0.011362 | 0.011463 |
| 0.011329 | 0.011396 | 0.011295 | 0.011530 | 0.011765 | 0.011295 | 0.011362 |
| 0.011262 | 0.011362 | 0.011329 | 0.011396 | 0.011329 | 0.011329 | 0.011329 |
| 0.011228 | 0.011262 | 0.011228 | 0.011329 | 0.011295 | 0.011329 | 0.011396 |
| 0.011329 | 0.011295 | 0.011362 | 0.011262 | 0.011396 | 0.011228 | 0.011295 |
| 0.011463 | 0.011396 | 0.011631 | 0.011463 | 0.011295 | 0.011530 | 0.011295 |
| 0.011431 | 0.011658 | 0.011475 | 0.011177 | 0.011172 | 0.011318 | 0.011375 |
| 0.012011 | 0.011467 | 0.011102 | 0.011530 | 0.011530 | 0.011329 | 0.011429 |
| 0.011362 | 0.011329 | 0.011396 | 0.011295 | 0.011396 | 0.011329 | 0.011329 |
| 0.011295 | 0.011396 | 0.011597 | 0.011463 | 0.011362 | 0.011329 | 0.011262 |
| 0.011228 | 0.011228 | 0.011295 | 0.011262 | 0.011463 | 0.011429 | 0.011362 |
| 0.011463 | 0.011530 | 0.011262 | 0.011262 | 0.011295 | 0.011295 | 0.011297 |
| 0.011364 | 0.011295 | 0.011295 | 0.011168 | 0.011241 | 0.011200 | 0.011296 |

|          |          |          |          |          |          |          |
|----------|----------|----------|----------|----------|----------|----------|
| 0.011297 | 0.011232 | 0.011245 | 0.011267 | 0.011196 | 0.011231 | 0.011263 |
| 0.011528 | 0.011301 | 0.011336 | 0.011161 | 0.011233 | 0.011363 | 0.011329 |
| 0.011396 | 0.011330 | 0.011329 | 0.011429 | 0.011362 | 0.011732 | 0.011530 |
| 0.011564 | 0.011430 | 0.011295 | 0.011396 | 0.011195 | 0.011429 | 0.011228 |
| 0.011295 | 0.011295 | 0.011262 | 0.011228 | 0.011262 | 0.011228 | 0.011329 |
| 0.011295 | 0.011396 | 0.011329 | 0.011228 | 0.011330 | 0.011430 | 0.011432 |
| 0.011430 | 0.011329 | 0.011228 | 0.011161 | 0.011295 | 0.011228 | 0.011161 |
| 0.011196 | 0.011430 | 0.011228 | 0.011430 | 0.011195 | 0.011295 | 0.011262 |
| 0.011362 | 0.011262 | 0.011295 | 0.011262 | 0.011295 | 0.011161 | 0.011295 |
| 0.011329 | 0.011195 | 0.011329 | 0.011262 | 0.011295 | 0.011329 | 0.011564 |
| 0.011664 | 0.011597 | 0.011665 | 0.011431 | 0.011665 | 0.011295 | 0.011195 |
| 0.011297 | 0.011586 | 0.011426 | 0.011197 | 0.011671 | 0.011163 | 0.011257 |
| 0.011671 | 0.011570 | 0.011463 | 0.011664 | 0.011367 | 0.011530 | 0.011497 |
| 0.011429 | 0.011597 | 0.011451 | 0.011307 | 0.011270 | 0.011262 | 0.011398 |
| 0.011497 | 0.011397 | 0.011533 | 0.011601 | 0.011530 | 0.011597 | 0.011704 |
| 0.011432 | 0.011603 | 0.011534 | 0.011466 | 0.011733 | 0.011194 | 0.011397 |
| 0.011362 | 0.011295 | 0.011194 | 0.011194 | 0.011262 | 0.011262 | 0.011329 |
| 0.011262 | 0.011329 | 0.011228 | 0.011329 | 0.011262 | 0.011194 | 0.011329 |
| 0.011262 | 0.011698 | 0.011597 | 0.011631 | 0.011161 | 0.011262 | 0.011295 |
| 0.011295 | 0.011262 | 0.011329 | 0.011362 | 0.011228 | 0.011228 | 0.011228 |
| 0.011765 | 0.011396 | 0.011396 | 0.011194 | 0.011295 | 0.011463 | 0.011228 |
| 0.011228 | 0.011295 | 0.011262 | 0.011429 | 0.011228 | 0.011362 | 0.011496 |
| 0.011429 | 0.011262 | 0.011194 | 0.011194 | 0.011194 | 0.011362 | 0.011295 |
| 0.011194 | 0.011295 | 0.011161 | 0.011194 | 0.011329 | 0.011463 | 0.011228 |
| 0.011195 | 0.011329 | 0.011262 | 0.011161 | 0.011496 | 0.011161 | 0.011329 |
| 0.011402 | 0.011228 | 0.011530 | 0.011362 | 0.011396 | 0.011262 | 0.011362 |
| 0.011228 | 0.011564 | 0.011161 | 0.011429 | 0.011228 | 0.011228 | 0.011161 |
| 0.011396 | 0.011597 | 0.011295 | 0.011362 | 0.011194 | 0.011597 | 0.011228 |
| 0.011228 | 0.011161 | 0.011262 | 0.011362 | 0.011262 | 0.011362 | 0.011429 |
| 0.011429 | 0.011396 | 0.011295 | 0.011396 | 0.011362 | 0.011228 | 0.011194 |
| 0.011228 | 0.011228 | 0.011295 | 0.011228 | 0.011194 | 0.011362 | 0.011228 |
| 0.011262 | 0.011262 | 0.011396 | 0.011429 | 0.011329 | 0.011262 | 0.011262 |
| 0.011329 | 0.011262 | 0.011362 | 0.011228 | 0.011362 | 0.011463 | 0.011765 |
| 0.011262 | 0.011664 | 0.011267 | 0.017747 | 0.011257 | 0.011488 | 0.011618 |
| 0.011579 | 0.011623 | 0.011322 | 0.011292 | 0.011719 | 0.011647 | 0.011364 |
| 0.011487 | 0.011548 | 0.011138 | 0.011270 | 0.011216 | 0.011307 | 0.011232 |
| 0.011482 | 0.011395 | 0.011394 | 0.011126 | 0.011396 | 0.011429 | 0.011432 |
| 0.011301 | 0.011396 | 0.011396 | 0.011362 | 0.011329 | 0.011329 | 0.011295 |
| 0.011329 | 0.011262 | 0.011295 | 0.011329 | 0.011295 | 0.011228 | 0.011262 |
| 0.011262 | 0.011329 | 0.011228 | 0.011329 | 0.011362 | 0.011396 | 0.011295 |
| 0.011329 | 0.011295 | 0.011631 | 0.011631 | 0.011362 | 0.011396 | 0.011430 |
| 0.011195 | 0.011195 | 0.011228 | 0.011329 | 0.011195 | 0.011429 | 0.011429 |
| 0.011463 | 0.011463 | 0.011396 | 0.011497 | 0.011665 | 0.011498 | 0.011329 |
| 0.011329 | 0.011396 | 0.011429 | 0.011262 | 0.011329 | 0.011295 | 0.011329 |
| 0.011396 | 0.011396 | 0.011429 | 0.011396 | 0.011296 | 0.011497 | 0.011463 |
| 0.011331 | 0.011228 | 0.011329 | 0.011430 | 0.011329 | 0.011463 | 0.011496 |
| 0.011664 | 0.011367 | 0.011530 | 0.011497 | 0.011429 | 0.011597 | 0.011228 |
| 0.011397 | 0.011295 | 0.011262 | 0.011262 | 0.011329 | 0.011228 | 0.011329 |
| 0.011362 | 0.011396 | 0.011295 | 0.011329 | 0.011295 | 0.011631 | 0.011631 |
| 0.011362 | 0.011396 | 0.011463 | 0.011396 | 0.012035 | 0.011453 | 0.011377 |
| 0.011447 | 0.011407 | 0.011517 | 0.011406 | 0.011515 | 0.011439 | 0.011405 |
| 0.011987 | 0.011302 | 0.011437 | 0.011371 | 0.011645 | 0.011502 | 0.011604 |
| 0.012012 | 0.011437 | 0.011567 | 0.011631 | 0.011496 | 0.011496 | 0.011533 |
| 0.011194 | 0.011362 | 0.011496 | 0.011463 | 0.011466 | 0.011463 | 0.011431 |
| 0.011295 | 0.011161 | 0.011262 | 0.011295 | 0.011194 | 0.011262 | 0.011161 |
| 0.011295 | 0.011329 | 0.011228 | 0.011194 | 0.011295 | 0.011228 | 0.011262 |
| 0.011262 | 0.011194 | 0.011262 | 0.011295 | 0.011194 | 0.011396 | 0.011429 |
| 0.011329 | 0.011396 | 0.011329 | 0.011329 | 0.011262 | 0.011664 | 0.011295 |
| 0.011338 | 0.011262 | 0.011497 | 0.011501 | 0.011362 | 0.011362 | 0.011362 |
| 0.011362 | 0.011295 | 0.011262 | 0.011295 | 0.011396 | 0.011396 | 0.011329 |



|          |          |          |          |          |          |          |
|----------|----------|----------|----------|----------|----------|----------|
| 0.011329 | 0.011463 | 0.011631 | 0.011362 | 0.011564 | 0.011564 | 0.011429 |
| 0.011262 | 0.011329 | 0.011362 | 0.011765 | 0.011329 | 0.011362 | 0.011329 |
| 0.011362 | 0.011295 | 0.011295 | 0.011597 | 0.011530 | 0.011564 | 0.011295 |
| 0.011396 | 0.011463 | 0.011329 | 0.011396 | 0.011362 | 0.011228 | 0.011564 |
| 0.011329 | 0.011295 | 0.011295 | 0.011463 | 0.011295 | 0.011396 | 0.011631 |
| 0.011329 | 0.011705 | 0.011698 | 0.011467 | 0.011229 | 0.011400 | 0.011267 |
| 0.011280 | 0.011683 | 0.011236 | 0.011417 | 0.011255 | 0.011366 | 0.011379 |
| 0.011468 | 0.011192 | 0.011339 | 0.011192 | 0.011222 | 0.011395 | 0.011344 |
| 0.011362 | 0.011257 | 0.011377 | 0.011307 | 0.011330 | 0.011463 | 0.011530 |
| 0.011530 | 0.011396 | 0.011500 | 0.011501 | 0.011569 | 0.011661 | 0.011329 |
| 0.011564 | 0.011430 | 0.011295 | 0.011396 | 0.011195 | 0.011429 | 0.011228 |
| 0.011295 | 0.011295 | 0.011262 | 0.011228 | 0.011262 | 0.011228 | 0.011329 |
| 0.011305 | 0.011305 | 0.011231 | 0.011334 | 0.011471 | 0.011436 | 0.011436 |
| 0.011435 | 0.011363 | 0.011171 | 0.011168 | 0.011297 | 0.011467 | 0.011467 |
| 0.011262 | 0.011331 | 0.011565 | 0.011533 | 0.011464 | 0.011498 | 0.011429 |
| 0.011362 | 0.011429 | 0.011429 | 0.011329 | 0.011900 | 0.011496 | 0.011564 |
| 0.011597 | 0.011665 | 0.011265 | 0.011372 | 0.011262 | 0.011463 | 0.011429 |
| 0.011464 | 0.011496 | 0.011496 | 0.011496 | 0.011571 | 0.011631 | 0.011268 |
| 0.011162 | 0.011164 | 0.011264 | 0.011230 | 0.011333 | 0.011098 | 0.011502 |
| 0.011232 | 0.011367 | 0.011108 | 0.011248 | 0.011296 | 0.011368 | 0.011262 |
| 0.011228 | 0.011228 | 0.011295 | 0.011262 | 0.011463 | 0.011429 | 0.011362 |
| 0.011463 | 0.011530 | 0.011262 | 0.011262 | 0.011295 | 0.011295 | 0.011297 |
| 0.011364 | 0.011295 | 0.011295 | 0.011330 | 0.011463 | 0.011530 | 0.011530 |
| 0.011396 | 0.011500 | 0.011501 | 0.011569 | 0.011661 | 0.011329 | 0.011496 |
| 0.011429 | 0.011429 | 0.011263 | 0.011443 | 0.011373 | 0.011401 | 0.011270 |
| 0.011439 | 0.011652 | 0.011441 | 0.011332 | 0.011228 | 0.011430 | 0.011295 |
| 0.011396 | 0.011329 | 0.011228 | 0.011330 | 0.011430 | 0.011432 | 0.011329 |
| 0.011228 | 0.011161 | 0.011295 | 0.011228 | 0.011161 | 0.011196 | 0.011430 |
| 0.011329 | 0.011262 | 0.011295 | 0.011329 | 0.011295 | 0.011228 | 0.011430 |
| 0.011295 | 0.011329 | 0.011329 | 0.011262 | 0.011329 | 0.011564 | 0.011228 |
| 0.011262 | 0.011664 | 0.011262 | 0.011295 | 0.011262 | 0.011631 | 0.011189 |
| 0.011678 | 0.011188 | 0.011261 | 0.011422 | 0.011508 | 0.011419 | 0.011144 |
| 0.011218 | 0.011429 | 0.011530 | 0.011637 | 0.011498 | 0.011635 | 0.011766 |
| 0.011666 | 0.011703 | 0.011664 | 0.011914 | 0.011631 | 0.012505 | 0.011666 |
| 0.012405 | 0.012173 | 0.012307 | 0.012578 | 0.011631 | 0.011329 | 0.011631 |
| 0.012070 | 0.012004 | 0.011597 | 0.011497 | 0.011564 | 0.011564 | 0.011534 |
| 0.011429 | 0.011433 | 0.011496 | 0.011464 | 0.011833 | 0.011900 | 0.011901 |
| 0.011800 | 0.011901 | 0.012004 | 0.011770 | 0.012070 | 0.012076 | 0.012137 |
| 0.012138 | 0.012172 | 0.012118 | 0.012138 | 0.012139 | 0.011362 | 0.011665 |
| 0.011733 | 0.012236 | 0.011738 | 0.011967 | 0.012440 | 0.011502 | 0.011396 |
| 0.011362 | 0.011362 | 0.011833 | 0.011800 | 0.011975 | 0.011698 | 0.011363 |
| S021     | 0.011597 | 0.011597 | 0.011933 | 0.011698 | 0.011698 | 0.011765 |
| 0.011603 | 0.011535 | 0.011765 | 0.011195 | 0.011262 | 0.011228 | 0.011194 |
| 0.011228 | 0.011396 | 0.011194 | 0.011228 | 0.011295 | 0.011262 | 0.011228 |
| 0.000000 | 0.011228 | 0.011329 | 0.011195 | 0.011228 | 0.011228 | 0.011569 |
| 0.011463 | 0.011228 | 0.011127 | 0.011362 | 0.011295 | 0.011262 | 0.011295 |
| 0.011262 | 0.011362 | 0.011262 | 0.011262 | 0.011295 | 0.011262 | 0.011429 |
| 0.011194 | 0.011262 | 0.011295 | 0.011228 | 0.011329 | 0.011362 | 0.011295 |
| 0.011262 | 0.011429 | 0.011329 | 0.011597 | 0.011262 | 0.011530 | 0.011262 |
| 0.011228 | 0.011329 | 0.011396 | 0.011530 | 0.011631 | 0.011329 | 0.011429 |
| 0.011295 | 0.011362 | 0.011262 | 0.011496 | 0.011732 | 0.011262 | 0.011329 |
| 0.011228 | 0.011329 | 0.011295 | 0.011362 | 0.011295 | 0.011295 | 0.011295 |
| 0.011194 | 0.011228 | 0.011194 | 0.011295 | 0.011262 | 0.011296 | 0.011362 |
| 0.011295 | 0.011262 | 0.011329 | 0.011228 | 0.011362 | 0.011194 | 0.011262 |
| 0.011429 | 0.011362 | 0.011597 | 0.011429 | 0.011262 | 0.011496 | 0.011262 |
| 0.011431 | 0.011658 | 0.011475 | 0.011177 | 0.011172 | 0.011281 | 0.011375 |
| 0.012011 | 0.011467 | 0.011184 | 0.011429 | 0.011496 | 0.011295 | 0.011396 |
| 0.011329 | 0.011295 | 0.011362 | 0.011262 | 0.011362 | 0.011295 | 0.011295 |
| 0.011262 | 0.011362 | 0.011564 | 0.011429 | 0.011329 | 0.011295 | 0.011228 |
| 0.011195 | 0.011195 | 0.011262 | 0.011228 | 0.011429 | 0.011396 | 0.011329 |

|          |          |          |          |          |          |          |
|----------|----------|----------|----------|----------|----------|----------|
| 0.011429 | 0.011497 | 0.011228 | 0.011228 | 0.011262 | 0.011262 | 0.011263 |
| 0.011331 | 0.011262 | 0.011262 | 0.011132 | 0.011205 | 0.011165 | 0.011262 |
| 0.011263 | 0.011198 | 0.011245 | 0.011233 | 0.011162 | 0.011197 | 0.011229 |
| 0.011492 | 0.011267 | 0.011301 | 0.011195 | 0.011199 | 0.011329 | 0.011296 |
| 0.011363 | 0.011296 | 0.011296 | 0.011396 | 0.011329 | 0.011698 | 0.011497 |
| 0.011530 | 0.011396 | 0.011262 | 0.011362 | 0.011161 | 0.011396 | 0.011195 |
| 0.011262 | 0.011262 | 0.011228 | 0.011194 | 0.011228 | 0.011195 | 0.011295 |
| 0.011262 | 0.011362 | 0.011295 | 0.011195 | 0.011296 | 0.011396 | 0.011398 |
| 0.011396 | 0.011295 | 0.011195 | 0.011128 | 0.011262 | 0.011195 | 0.011127 |
| 0.011230 | 0.011396 | 0.011195 | 0.011396 | 0.011161 | 0.011262 | 0.011228 |
| 0.011329 | 0.011228 | 0.011262 | 0.011228 | 0.011262 | 0.011127 | 0.011262 |
| 0.011295 | 0.011228 | 0.011295 | 0.011228 | 0.011262 | 0.011295 | 0.011530 |
| 0.011631 | 0.011564 | 0.011631 | 0.011397 | 0.011631 | 0.011262 | 0.011228 |
| 0.011263 | 0.011545 | 0.011289 | 0.011163 | 0.011637 | 0.011129 | 0.011257 |
| 0.011637 | 0.011536 | 0.011429 | 0.011631 | 0.011333 | 0.011496 | 0.011463 |
| 0.011396 | 0.011564 | 0.011415 | 0.011266 | 0.011312 | 0.011295 | 0.011365 |
| 0.011463 | 0.011364 | 0.011500 | 0.011568 | 0.011497 | 0.011564 | 0.011670 |
| 0.011399 | 0.011569 | 0.011500 | 0.011432 | 0.011699 | 0.011161 | 0.011363 |
| 0.011329 | 0.011262 | 0.011161 | 0.011161 | 0.011228 | 0.011228 | 0.011295 |
| 0.011228 | 0.011295 | 0.011194 | 0.011295 | 0.011228 | 0.011228 | 0.011295 |
| 0.011228 | 0.011664 | 0.011564 | 0.011597 | 0.011127 | 0.011228 | 0.011262 |
| 0.011262 | 0.011228 | 0.011295 | 0.011329 | 0.011194 | 0.011194 | 0.011194 |
| 0.011731 | 0.011362 | 0.011362 | 0.011161 | 0.011262 | 0.011429 | 0.011194 |
| 0.011194 | 0.011262 | 0.011228 | 0.011396 | 0.011194 | 0.011329 | 0.011463 |
| 0.011396 | 0.011228 | 0.011228 | 0.011161 | 0.011161 | 0.011329 | 0.011262 |
| 0.011161 | 0.011262 | 0.011127 | 0.011161 | 0.011295 | 0.011430 | 0.011195 |
| 0.011161 | 0.011295 | 0.011228 | 0.011127 | 0.011463 | 0.011127 | 0.011295 |
| 0.011368 | 0.011195 | 0.011496 | 0.011329 | 0.011362 | 0.011228 | 0.011329 |
| 0.011194 | 0.011530 | 0.011127 | 0.011396 | 0.011194 | 0.011194 | 0.011127 |
| 0.011362 | 0.011564 | 0.011262 | 0.011329 | 0.011161 | 0.011564 | 0.011194 |
| 0.011194 | 0.011194 | 0.011228 | 0.011329 | 0.011228 | 0.011329 | 0.011396 |
| 0.011396 | 0.011362 | 0.011262 | 0.011362 | 0.011329 | 0.011194 | 0.011161 |
| 0.011194 | 0.011194 | 0.011262 | 0.011194 | 0.011161 | 0.011329 | 0.011194 |
| 0.011228 | 0.011228 | 0.011362 | 0.011396 | 0.011295 | 0.011228 | 0.011228 |
| 0.011295 | 0.011228 | 0.011329 | 0.011194 | 0.011329 | 0.011429 | 0.011732 |
| 0.011228 | 0.011631 | 0.011233 | 0.017747 | 0.011191 | 0.011305 | 0.011583 |
| 0.011545 | 0.011588 | 0.011270 | 0.011234 | 0.011609 | 0.011612 | 0.011242 |
| 0.011487 | 0.011426 | 0.011138 | 0.011186 | 0.011216 | 0.011208 | 0.011232 |
| 0.011482 | 0.011395 | 0.011394 | 0.011259 | 0.011362 | 0.011396 | 0.011398 |
| 0.011266 | 0.011362 | 0.011362 | 0.011329 | 0.011295 | 0.011295 | 0.011262 |
| 0.011295 | 0.011228 | 0.011262 | 0.011295 | 0.011262 | 0.011195 | 0.011228 |
| 0.011228 | 0.011295 | 0.011195 | 0.011295 | 0.011329 | 0.011362 | 0.011262 |
| 0.011295 | 0.011262 | 0.011597 | 0.011597 | 0.011329 | 0.011363 | 0.011396 |
| 0.011161 | 0.011161 | 0.011195 | 0.011295 | 0.011161 | 0.011396 | 0.011396 |
| 0.011429 | 0.011429 | 0.011362 | 0.011463 | 0.011631 | 0.011464 | 0.011295 |
| 0.011295 | 0.011362 | 0.011396 | 0.011228 | 0.011295 | 0.011262 | 0.011295 |
| 0.011295 | 0.011295 | 0.011329 | 0.011363 | 0.011262 | 0.011463 | 0.011429 |
| 0.011297 | 0.011195 | 0.011295 | 0.011396 | 0.011295 | 0.011430 | 0.011463 |
| 0.011631 | 0.011333 | 0.011496 | 0.011463 | 0.011396 | 0.011564 | 0.011195 |
| 0.011363 | 0.011262 | 0.011228 | 0.011228 | 0.011295 | 0.011195 | 0.011295 |
| 0.011329 | 0.011362 | 0.011262 | 0.011295 | 0.011262 | 0.011597 | 0.011597 |
| 0.011329 | 0.011363 | 0.011429 | 0.011362 | 0.012002 | 0.011417 | 0.011341 |
| 0.011412 | 0.011372 | 0.011482 | 0.011372 | 0.011480 | 0.011405 | 0.011370 |
| 0.011953 | 0.011268 | 0.011403 | 0.011337 | 0.011611 | 0.011468 | 0.011570 |
| 0.011978 | 0.011437 | 0.011533 | 0.011597 | 0.011463 | 0.011463 | 0.011499 |
| 0.011161 | 0.011329 | 0.011463 | 0.011429 | 0.011432 | 0.011429 | 0.011397 |
| 0.011262 | 0.011194 | 0.011228 | 0.011262 | 0.011161 | 0.011228 | 0.011127 |
| 0.011262 | 0.011295 | 0.011194 | 0.011161 | 0.011262 | 0.011194 | 0.011228 |
| 0.011228 | 0.011161 | 0.011228 | 0.011262 | 0.011161 | 0.011362 | 0.011396 |
| 0.011295 | 0.011362 | 0.011295 | 0.011295 | 0.011228 | 0.011631 | 0.011262 |

|          |          |          |          |          |          |          |
|----------|----------|----------|----------|----------|----------|----------|
| 0.011304 | 0.011228 | 0.011463 | 0.011467 | 0.011329 | 0.011329 | 0.011329 |
| 0.011329 | 0.011262 | 0.011228 | 0.011262 | 0.011362 | 0.011362 | 0.011295 |
| 0.011295 | 0.011429 | 0.011597 | 0.011329 | 0.011530 | 0.011530 | 0.011396 |
| 0.011228 | 0.011295 | 0.011329 | 0.011732 | 0.011295 | 0.011329 | 0.011295 |
| 0.011329 | 0.011262 | 0.011262 | 0.011564 | 0.011497 | 0.011530 | 0.011262 |
| 0.011362 | 0.011429 | 0.011295 | 0.011362 | 0.011329 | 0.011194 | 0.011530 |
| 0.011295 | 0.011262 | 0.011262 | 0.011429 | 0.011262 | 0.011362 | 0.011597 |
| 0.011295 | 0.011671 | 0.011664 | 0.011467 | 0.011229 | 0.011366 | 0.011215 |
| 0.011115 | 0.011683 | 0.011201 | 0.011417 | 0.011255 | 0.011315 | 0.011379 |
| 0.011468 | 0.011126 | 0.011339 | 0.011192 | 0.011222 | 0.011328 | 0.011344 |
| 0.011362 | 0.011257 | 0.011342 | 0.011272 | 0.011296 | 0.011429 | 0.011497 |
| 0.011497 | 0.011363 | 0.011466 | 0.011467 | 0.011602 | 0.011590 | 0.011295 |
| 0.011530 | 0.011396 | 0.011262 | 0.011362 | 0.011161 | 0.011396 | 0.011195 |
| 0.011262 | 0.011262 | 0.011228 | 0.011194 | 0.011228 | 0.011195 | 0.011295 |
| 0.011270 | 0.011270 | 0.011266 | 0.011300 | 0.011437 | 0.011402 | 0.011402 |
| 0.011401 | 0.011329 | 0.011134 | 0.011132 | 0.011263 | 0.011433 | 0.011433 |
| 0.011228 | 0.011297 | 0.011531 | 0.011500 | 0.011430 | 0.011464 | 0.011396 |
| 0.011329 | 0.011396 | 0.011396 | 0.011295 | 0.011866 | 0.011463 | 0.011530 |
| 0.011564 | 0.011630 | 0.011265 | 0.011337 | 0.011228 | 0.011429 | 0.011396 |
| 0.011430 | 0.011463 | 0.011463 | 0.011463 | 0.011610 | 0.011597 | 0.011234 |
| 0.011128 | 0.011130 | 0.011230 | 0.011196 | 0.011299 | 0.011135 | 0.011468 |
| 0.011266 | 0.011367 | 0.011156 | 0.011285 | 0.011262 | 0.011334 | 0.011228 |
| 0.011195 | 0.011195 | 0.011262 | 0.011228 | 0.011429 | 0.011396 | 0.011329 |
| 0.011429 | 0.011497 | 0.011228 | 0.011228 | 0.011262 | 0.011262 | 0.011263 |
| 0.011331 | 0.011262 | 0.011262 | 0.011296 | 0.011429 | 0.011497 | 0.011497 |
| 0.011363 | 0.011466 | 0.011467 | 0.011602 | 0.011590 | 0.011295 | 0.011463 |
| 0.011396 | 0.011396 | 0.011229 | 0.011408 | 0.011303 | 0.011367 | 0.011200 |
| 0.011405 | 0.011561 | 0.011399 | 0.011298 | 0.011195 | 0.011396 | 0.011262 |
| 0.011362 | 0.011295 | 0.011195 | 0.011296 | 0.011396 | 0.011398 | 0.011295 |
| 0.011195 | 0.011128 | 0.011262 | 0.011195 | 0.011127 | 0.011230 | 0.011396 |
| 0.011295 | 0.011228 | 0.011262 | 0.011295 | 0.011262 | 0.011195 | 0.011396 |
| 0.011262 | 0.011295 | 0.011295 | 0.011228 | 0.011295 | 0.011530 | 0.011194 |
| 0.011228 | 0.011631 | 0.011228 | 0.011262 | 0.011228 | 0.011597 | 0.011189 |
| 0.011678 | 0.011188 | 0.011261 | 0.011422 | 0.011508 | 0.011419 | 0.011144 |
| 0.011218 | 0.011396 | 0.011496 | 0.011603 | 0.011464 | 0.011601 | 0.011733 |
| 0.011632 | 0.011669 | 0.011631 | 0.011880 | 0.011597 | 0.012472 | 0.011633 |
| 0.012372 | 0.012139 | 0.012273 | 0.012545 | 0.011597 | 0.011295 | 0.011598 |
| 0.012036 | 0.011971 | 0.011564 | 0.011463 | 0.011531 | 0.011531 | 0.011500 |
| 0.011396 | 0.011399 | 0.011463 | 0.011430 | 0.011800 | 0.011866 | 0.011867 |
| 0.011766 | 0.011867 | 0.011970 | 0.011737 | 0.012036 | 0.012042 | 0.012104 |
| 0.012104 | 0.012138 | 0.012084 | 0.012104 | 0.012105 | 0.011329 | 0.011631 |
| 0.011699 | 0.012202 | 0.011704 | 0.011933 | 0.012406 | 0.011468 | 0.011363 |
| 0.011329 | 0.011329 | 0.011799 | 0.011842 | 0.011940 | 0.011664 | 0.011330 |
| S022     | 0.011631 | 0.011631 | 0.011967 | 0.011732 | 0.011732 | 0.011799 |
| 0.011637 | 0.011569 | 0.011799 | 0.011228 | 0.011295 | 0.011262 | 0.011228 |
| 0.011262 | 0.011429 | 0.011228 | 0.011262 | 0.011329 | 0.011094 | 0.011262 |
| 0.011228 | 0.000000 | 0.011362 | 0.011228 | 0.011262 | 0.011262 | 0.011603 |
| 0.011496 | 0.011262 | 0.011161 | 0.011396 | 0.011329 | 0.011295 | 0.011329 |
| 0.011295 | 0.011396 | 0.011295 | 0.011295 | 0.011329 | 0.011295 | 0.011463 |
| 0.011228 | 0.011295 | 0.011329 | 0.011262 | 0.011362 | 0.011396 | 0.011329 |
| 0.011295 | 0.011463 | 0.011362 | 0.011631 | 0.011295 | 0.011564 | 0.011295 |
| 0.011262 | 0.011362 | 0.011429 | 0.011564 | 0.011664 | 0.011362 | 0.011463 |
| 0.011329 | 0.011396 | 0.011295 | 0.011530 | 0.011765 | 0.011295 | 0.011362 |
| 0.011262 | 0.011362 | 0.011329 | 0.011396 | 0.011329 | 0.011329 | 0.011329 |
| 0.011228 | 0.011262 | 0.011228 | 0.011329 | 0.011295 | 0.011329 | 0.011396 |
| 0.011329 | 0.011295 | 0.011362 | 0.011262 | 0.011396 | 0.011228 | 0.011295 |
| 0.011463 | 0.011396 | 0.011631 | 0.011463 | 0.011295 | 0.011530 | 0.011295 |
| 0.011468 | 0.011695 | 0.011513 | 0.011216 | 0.011210 | 0.011318 | 0.011415 |
| 0.012048 | 0.011467 | 0.011225 | 0.011530 | 0.011530 | 0.011329 | 0.011429 |
| 0.011362 | 0.011329 | 0.011396 | 0.011295 | 0.011396 | 0.011329 | 0.011329 |

|          |          |          |          |          |          |          |
|----------|----------|----------|----------|----------|----------|----------|
| 0.011295 | 0.011396 | 0.011597 | 0.011463 | 0.011362 | 0.011329 | 0.011262 |
| 0.011228 | 0.011228 | 0.011295 | 0.011262 | 0.011463 | 0.011430 | 0.011362 |
| 0.011463 | 0.011530 | 0.011262 | 0.011262 | 0.011295 | 0.011295 | 0.011297 |
| 0.011364 | 0.011295 | 0.011295 | 0.011168 | 0.011241 | 0.011200 | 0.011296 |
| 0.011297 | 0.011232 | 0.011282 | 0.011267 | 0.011196 | 0.011232 | 0.011263 |
| 0.011528 | 0.011302 | 0.011336 | 0.011228 | 0.011233 | 0.011363 | 0.011329 |
| 0.011397 | 0.011330 | 0.011329 | 0.011429 | 0.011362 | 0.011732 | 0.011530 |
| 0.011564 | 0.011430 | 0.011295 | 0.011396 | 0.011195 | 0.011429 | 0.011228 |
| 0.011295 | 0.011295 | 0.011262 | 0.011228 | 0.011262 | 0.011228 | 0.011329 |
| 0.011295 | 0.011396 | 0.011329 | 0.011228 | 0.011330 | 0.011430 | 0.011432 |
| 0.011430 | 0.011329 | 0.011228 | 0.011161 | 0.011295 | 0.011228 | 0.011161 |
| 0.011264 | 0.011430 | 0.011228 | 0.011430 | 0.011195 | 0.011295 | 0.011262 |
| 0.011362 | 0.011262 | 0.011295 | 0.011262 | 0.011295 | 0.011161 | 0.011295 |
| 0.011329 | 0.011262 | 0.011329 | 0.011262 | 0.011295 | 0.011329 | 0.011564 |
| 0.011664 | 0.011597 | 0.011665 | 0.011431 | 0.011665 | 0.011295 | 0.011262 |
| 0.011297 | 0.011545 | 0.011335 | 0.011197 | 0.011671 | 0.011163 | 0.011257 |
| 0.011671 | 0.011570 | 0.011463 | 0.011664 | 0.011368 | 0.011530 | 0.011497 |
| 0.011429 | 0.011597 | 0.011451 | 0.011307 | 0.011354 | 0.011329 | 0.011398 |
| 0.011497 | 0.011397 | 0.011533 | 0.011601 | 0.011530 | 0.011597 | 0.011704 |
| 0.011432 | 0.011603 | 0.011534 | 0.011466 | 0.011733 | 0.011194 | 0.011397 |
| 0.011362 | 0.011295 | 0.011194 | 0.011194 | 0.011262 | 0.011262 | 0.011329 |
| 0.011262 | 0.011329 | 0.011228 | 0.011329 | 0.011262 | 0.011262 | 0.011329 |
| 0.000000 | 0.011698 | 0.011597 | 0.011631 | 0.011161 | 0.011262 | 0.011295 |
| 0.011295 | 0.011262 | 0.011329 | 0.011362 | 0.011228 | 0.011228 | 0.011228 |
| 0.011765 | 0.011396 | 0.011396 | 0.011194 | 0.011295 | 0.011463 | 0.011228 |
| 0.011228 | 0.011295 | 0.011262 | 0.011429 | 0.011228 | 0.011362 | 0.011496 |
| 0.011429 | 0.011262 | 0.011262 | 0.011194 | 0.011194 | 0.011362 | 0.011295 |
| 0.011194 | 0.011295 | 0.011161 | 0.011195 | 0.011329 | 0.011463 | 0.011228 |
| 0.011195 | 0.011329 | 0.011262 | 0.011161 | 0.011496 | 0.011161 | 0.011329 |
| 0.011403 | 0.011228 | 0.011530 | 0.011362 | 0.011396 | 0.011262 | 0.011362 |
| 0.011228 | 0.011564 | 0.011161 | 0.011429 | 0.011228 | 0.011228 | 0.011161 |
| 0.011396 | 0.011598 | 0.011295 | 0.011362 | 0.011194 | 0.011597 | 0.011228 |
| 0.011228 | 0.011228 | 0.011262 | 0.011362 | 0.011262 | 0.011362 | 0.011429 |
| 0.011429 | 0.011396 | 0.011295 | 0.011396 | 0.011362 | 0.011228 | 0.011194 |
| 0.011228 | 0.011228 | 0.011295 | 0.011228 | 0.011194 | 0.011362 | 0.011228 |
| 0.011262 | 0.011262 | 0.011396 | 0.011429 | 0.011329 | 0.011262 | 0.011262 |
| 0.011329 | 0.011262 | 0.011362 | 0.011228 | 0.011362 | 0.011463 | 0.011765 |
| 0.011262 | 0.011664 | 0.011267 | 0.017785 | 0.011191 | 0.011488 | 0.011618 |
| 0.011579 | 0.011623 | 0.011374 | 0.011350 | 0.011774 | 0.011647 | 0.011425 |
| 0.011534 | 0.011610 | 0.011177 | 0.011270 | 0.011255 | 0.011356 | 0.011275 |
| 0.011482 | 0.011433 | 0.011431 | 0.011126 | 0.011396 | 0.011429 | 0.011432 |
| 0.011301 | 0.011396 | 0.011396 | 0.011362 | 0.011329 | 0.011329 | 0.011295 |
| 0.011329 | 0.011262 | 0.011295 | 0.011329 | 0.011295 | 0.011228 | 0.011262 |
| 0.011262 | 0.011329 | 0.011228 | 0.011329 | 0.011362 | 0.011396 | 0.011295 |
| 0.011329 | 0.011295 | 0.011631 | 0.011631 | 0.011362 | 0.011396 | 0.011430 |
| 0.011195 | 0.011195 | 0.011228 | 0.011329 | 0.011195 | 0.011430 | 0.011430 |
| 0.011463 | 0.011463 | 0.011396 | 0.011497 | 0.011665 | 0.011498 | 0.011329 |
| 0.011329 | 0.011396 | 0.011430 | 0.011262 | 0.011329 | 0.011295 | 0.011329 |
| 0.011396 | 0.011396 | 0.011429 | 0.011396 | 0.011296 | 0.011497 | 0.011463 |
| 0.011331 | 0.011228 | 0.011329 | 0.011430 | 0.011329 | 0.011463 | 0.011496 |
| 0.011664 | 0.011368 | 0.011530 | 0.011497 | 0.011429 | 0.011597 | 0.011228 |
| 0.011397 | 0.011296 | 0.011262 | 0.011262 | 0.011329 | 0.011228 | 0.011329 |
| 0.011362 | 0.011396 | 0.011295 | 0.011329 | 0.011295 | 0.011631 | 0.011631 |
| 0.011362 | 0.011396 | 0.011463 | 0.011396 | 0.012035 | 0.011453 | 0.011377 |
| 0.011447 | 0.011407 | 0.011517 | 0.011406 | 0.011515 | 0.011439 | 0.011405 |
| 0.011987 | 0.011302 | 0.011437 | 0.011371 | 0.011645 | 0.011502 | 0.011605 |
| 0.012012 | 0.011475 | 0.011567 | 0.011631 | 0.011496 | 0.011497 | 0.011533 |
| 0.011194 | 0.011362 | 0.011496 | 0.011463 | 0.011466 | 0.011463 | 0.011431 |
| 0.011295 | 0.011228 | 0.011262 | 0.011295 | 0.011194 | 0.011262 | 0.011161 |
| 0.011295 | 0.011329 | 0.011228 | 0.011194 | 0.011295 | 0.011228 | 0.011262 |

|          |          |          |          |          |          |          |
|----------|----------|----------|----------|----------|----------|----------|
| 0.011262 | 0.011194 | 0.011262 | 0.011295 | 0.011194 | 0.011396 | 0.011429 |
| 0.011329 | 0.011396 | 0.011329 | 0.011329 | 0.011262 | 0.011664 | 0.011295 |
| 0.011338 | 0.011262 | 0.011497 | 0.011501 | 0.011362 | 0.011362 | 0.011362 |
| 0.011362 | 0.011295 | 0.011262 | 0.011295 | 0.011396 | 0.011396 | 0.011329 |
| 0.011329 | 0.011463 | 0.011631 | 0.011362 | 0.011564 | 0.011564 | 0.011429 |
| 0.011262 | 0.011329 | 0.011362 | 0.011765 | 0.011329 | 0.011362 | 0.011329 |
| 0.011362 | 0.011295 | 0.011295 | 0.011597 | 0.011530 | 0.011564 | 0.011295 |
| 0.011396 | 0.011463 | 0.011329 | 0.011396 | 0.011362 | 0.011228 | 0.011564 |
| 0.011329 | 0.011295 | 0.011295 | 0.011463 | 0.011295 | 0.011396 | 0.011631 |
| 0.011329 | 0.011705 | 0.011698 | 0.011507 | 0.011229 | 0.011400 | 0.011318 |
| 0.011280 | 0.011722 | 0.011236 | 0.011462 | 0.011304 | 0.011417 | 0.011432 |
| 0.011468 | 0.011192 | 0.011394 | 0.011192 | 0.011276 | 0.011395 | 0.011385 |
| 0.011399 | 0.011296 | 0.011377 | 0.011307 | 0.011330 | 0.011463 | 0.011530 |
| 0.011530 | 0.011396 | 0.011500 | 0.011501 | 0.011636 | 0.011661 | 0.011329 |
| 0.011564 | 0.011430 | 0.011295 | 0.011396 | 0.011195 | 0.011429 | 0.011228 |
| 0.011295 | 0.011295 | 0.011262 | 0.011228 | 0.011262 | 0.011228 | 0.011329 |
| 0.011305 | 0.011305 | 0.011300 | 0.011334 | 0.011471 | 0.011436 | 0.011436 |
| 0.011435 | 0.011363 | 0.011171 | 0.011168 | 0.011297 | 0.011467 | 0.011467 |
| 0.011262 | 0.011331 | 0.011565 | 0.011533 | 0.011464 | 0.011498 | 0.011429 |
| 0.011362 | 0.011429 | 0.011429 | 0.011329 | 0.011900 | 0.011497 | 0.011564 |
| 0.011597 | 0.011665 | 0.011299 | 0.011337 | 0.011262 | 0.011463 | 0.011429 |
| 0.011464 | 0.011496 | 0.011496 | 0.011496 | 0.011650 | 0.011631 | 0.011268 |
| 0.011162 | 0.011164 | 0.011264 | 0.011230 | 0.011333 | 0.011172 | 0.011502 |
| 0.011300 | 0.011411 | 0.011156 | 0.011322 | 0.011296 | 0.011368 | 0.011262 |
| 0.011228 | 0.011228 | 0.011295 | 0.011262 | 0.011463 | 0.011430 | 0.011362 |
| 0.011463 | 0.011530 | 0.011262 | 0.011262 | 0.011295 | 0.011295 | 0.011297 |
| 0.011364 | 0.011295 | 0.011295 | 0.011330 | 0.011463 | 0.011530 | 0.011530 |
| 0.011396 | 0.011500 | 0.011501 | 0.011636 | 0.011661 | 0.011329 | 0.011496 |
| 0.011429 | 0.011429 | 0.011263 | 0.011443 | 0.011373 | 0.011401 | 0.011270 |
| 0.011439 | 0.011653 | 0.011357 | 0.011332 | 0.011228 | 0.011430 | 0.011295 |
| 0.011396 | 0.011329 | 0.011228 | 0.011330 | 0.011430 | 0.011432 | 0.011329 |
| 0.011228 | 0.011161 | 0.011295 | 0.011228 | 0.011161 | 0.011264 | 0.011430 |
| 0.011329 | 0.011262 | 0.011295 | 0.011329 | 0.011295 | 0.011228 | 0.011430 |
| 0.011295 | 0.011329 | 0.011329 | 0.011262 | 0.011329 | 0.011564 | 0.011228 |
| 0.011262 | 0.011664 | 0.011262 | 0.011295 | 0.011262 | 0.011631 | 0.011232 |
| 0.011679 | 0.011230 | 0.011261 | 0.011463 | 0.011549 | 0.011455 | 0.011186 |
| 0.011218 | 0.011429 | 0.011530 | 0.011637 | 0.011498 | 0.011635 | 0.011766 |
| 0.011666 | 0.011703 | 0.011664 | 0.011914 | 0.011631 | 0.012505 | 0.011667 |
| 0.012406 | 0.012173 | 0.012307 | 0.012579 | 0.011631 | 0.011329 | 0.011631 |
| 0.012070 | 0.012005 | 0.011597 | 0.011497 | 0.011565 | 0.011565 | 0.011534 |
| 0.011429 | 0.011433 | 0.011496 | 0.011464 | 0.011834 | 0.011900 | 0.011901 |
| 0.011800 | 0.011901 | 0.012004 | 0.011770 | 0.012070 | 0.012076 | 0.012137 |
| 0.012138 | 0.012172 | 0.012118 | 0.012138 | 0.012139 | 0.011362 | 0.011665 |
| 0.011733 | 0.012236 | 0.011738 | 0.011967 | 0.012440 | 0.011502 | 0.011396 |
| 0.011362 | 0.011362 | 0.011833 | 0.011842 | 0.011975 | 0.011698 | 0.011363 |
| S023     | 0.011732 | 0.011732 | 0.011732 | 0.011496 | 0.011496 | 0.011564 |
| 0.011468 | 0.011400 | 0.011631 | 0.011329 | 0.011396 | 0.011363 | 0.011329 |
| 0.011295 | 0.011530 | 0.011262 | 0.011362 | 0.011429 | 0.011396 | 0.011362 |
| 0.011329 | 0.011362 | 0.000000 | 0.011329 | 0.011362 | 0.011362 | 0.011434 |
| 0.011329 | 0.011362 | 0.011262 | 0.011094 | 0.011429 | 0.011396 | 0.011429 |
| 0.011396 | 0.011496 | 0.011396 | 0.011396 | 0.011429 | 0.011396 | 0.011564 |
| 0.011262 | 0.011396 | 0.011429 | 0.011362 | 0.011396 | 0.011496 | 0.011429 |
| 0.011396 | 0.011564 | 0.011463 | 0.011463 | 0.011396 | 0.011664 | 0.011396 |
| 0.011362 | 0.011396 | 0.011530 | 0.011664 | 0.011497 | 0.011396 | 0.011496 |
| 0.011429 | 0.011496 | 0.011396 | 0.011631 | 0.011597 | 0.011396 | 0.011463 |
| 0.011362 | 0.011463 | 0.011429 | 0.011496 | 0.011429 | 0.011429 | 0.011429 |
| 0.011329 | 0.011362 | 0.011329 | 0.011362 | 0.011396 | 0.011430 | 0.011496 |
| 0.011429 | 0.011396 | 0.011463 | 0.011362 | 0.011429 | 0.011329 | 0.011396 |
| 0.011564 | 0.011496 | 0.011530 | 0.011564 | 0.011396 | 0.011631 | 0.011396 |
| 0.011579 | 0.011508 | 0.011626 | 0.011334 | 0.011321 | 0.011391 | 0.011139 |

|          |          |          |          |          |          |          |
|----------|----------|----------|----------|----------|----------|----------|
| 0.011792 | 0.011213 | 0.011348 | 0.011631 | 0.011631 | 0.011362 | 0.011463 |
| 0.011463 | 0.011429 | 0.011496 | 0.011396 | 0.011496 | 0.011429 | 0.011429 |
| 0.011396 | 0.011429 | 0.011698 | 0.011564 | 0.011463 | 0.011429 | 0.011362 |
| 0.011329 | 0.011262 | 0.011396 | 0.011362 | 0.011228 | 0.011195 | 0.011127 |
| 0.011228 | 0.011295 | 0.011362 | 0.011362 | 0.011396 | 0.011396 | 0.011398 |
| 0.011466 | 0.011396 | 0.011396 | 0.011276 | 0.011349 | 0.011306 | 0.011396 |
| 0.011399 | 0.011335 | 0.011392 | 0.011371 | 0.011298 | 0.011334 | 0.011364 |
| 0.011348 | 0.011405 | 0.011439 | 0.011329 | 0.011337 | 0.011464 | 0.011363 |
| 0.011430 | 0.011431 | 0.011430 | 0.011530 | 0.011463 | 0.011832 | 0.011564 |
| 0.011396 | 0.011463 | 0.011396 | 0.011430 | 0.011295 | 0.011262 | 0.011329 |
| 0.011396 | 0.011396 | 0.011362 | 0.011329 | 0.011362 | 0.011329 | 0.011429 |
| 0.011396 | 0.011497 | 0.011429 | 0.011329 | 0.011397 | 0.011530 | 0.011533 |
| 0.011530 | 0.011362 | 0.011329 | 0.011263 | 0.011396 | 0.011329 | 0.011262 |
| 0.011264 | 0.011530 | 0.011329 | 0.011530 | 0.011295 | 0.011396 | 0.011362 |
| 0.011463 | 0.011362 | 0.011396 | 0.011362 | 0.011396 | 0.011262 | 0.011396 |
| 0.011429 | 0.011362 | 0.011429 | 0.011362 | 0.011396 | 0.011429 | 0.011665 |
| 0.011497 | 0.011429 | 0.011497 | 0.011532 | 0.011497 | 0.011396 | 0.011362 |
| 0.011330 | 0.011586 | 0.011472 | 0.011300 | 0.011501 | 0.011265 | 0.011375 |
| 0.011502 | 0.011400 | 0.011564 | 0.011765 | 0.011470 | 0.011631 | 0.011597 |
| 0.011530 | 0.011698 | 0.011557 | 0.011431 | 0.011479 | 0.011429 | 0.011500 |
| 0.011597 | 0.011499 | 0.011635 | 0.011703 | 0.011631 | 0.011698 | 0.011805 |
| 0.011534 | 0.011705 | 0.011636 | 0.011567 | 0.011834 | 0.011295 | 0.011498 |
| 0.011463 | 0.011396 | 0.011295 | 0.011295 | 0.011362 | 0.011362 | 0.011429 |
| 0.011362 | 0.011429 | 0.011329 | 0.011362 | 0.011362 | 0.011362 | 0.011429 |
| 0.011362 | 0.011530 | 0.011429 | 0.011463 | 0.011262 | 0.011362 | 0.011396 |
| 0.011396 | 0.011362 | 0.011429 | 0.011396 | 0.011329 | 0.011329 | 0.011329 |
| 0.011597 | 0.011429 | 0.011496 | 0.011295 | 0.011396 | 0.011564 | 0.011329 |
| 0.011329 | 0.011396 | 0.011362 | 0.011530 | 0.011329 | 0.011262 | 0.011396 |
| 0.011329 | 0.011362 | 0.011362 | 0.011295 | 0.011295 | 0.011463 | 0.011396 |
| 0.011295 | 0.011396 | 0.011262 | 0.011295 | 0.011429 | 0.011295 | 0.011329 |
| 0.011295 | 0.011429 | 0.011363 | 0.011262 | 0.011329 | 0.011262 | 0.011429 |
| 0.011505 | 0.011329 | 0.011362 | 0.011463 | 0.011429 | 0.011362 | 0.011463 |
| 0.011329 | 0.011664 | 0.011262 | 0.011463 | 0.011262 | 0.011262 | 0.011262 |
| 0.011496 | 0.011430 | 0.011396 | 0.011463 | 0.011295 | 0.011429 | 0.011262 |
| 0.011329 | 0.011329 | 0.011362 | 0.011463 | 0.011362 | 0.011463 | 0.011530 |
| 0.011530 | 0.011496 | 0.011396 | 0.011496 | 0.011463 | 0.011329 | 0.011295 |
| 0.011329 | 0.011329 | 0.011396 | 0.011262 | 0.011295 | 0.011463 | 0.011329 |
| 0.011295 | 0.011362 | 0.011496 | 0.011463 | 0.011429 | 0.011362 | 0.011362 |
| 0.011429 | 0.011362 | 0.011463 | 0.011329 | 0.011463 | 0.011564 | 0.011530 |
| 0.011362 | 0.011497 | 0.011371 | 0.017899 | 0.011322 | 0.011611 | 0.011444 |
| 0.011406 | 0.011447 | 0.011427 | 0.011234 | 0.011555 | 0.011475 | 0.011607 |
| 0.011392 | 0.011243 | 0.011294 | 0.011395 | 0.011255 | 0.011455 | 0.011404 |
| 0.011248 | 0.011246 | 0.011246 | 0.000000 | 0.011496 | 0.011530 | 0.011534 |
| 0.011404 | 0.011497 | 0.011497 | 0.011396 | 0.011429 | 0.011430 | 0.011396 |
| 0.011429 | 0.011362 | 0.011396 | 0.011429 | 0.011396 | 0.011329 | 0.011362 |
| 0.011362 | 0.011429 | 0.011329 | 0.011430 | 0.011463 | 0.011497 | 0.011396 |
| 0.011362 | 0.011329 | 0.011463 | 0.011463 | 0.011463 | 0.011497 | 0.011530 |
| 0.011295 | 0.011295 | 0.011329 | 0.011429 | 0.011295 | 0.011530 | 0.011530 |
| 0.011564 | 0.011564 | 0.011496 | 0.011597 | 0.011497 | 0.011599 | 0.011429 |
| 0.011429 | 0.011497 | 0.011530 | 0.011362 | 0.011429 | 0.011396 | 0.011429 |
| 0.011497 | 0.011497 | 0.011530 | 0.011497 | 0.011397 | 0.011597 | 0.011564 |
| 0.011433 | 0.011329 | 0.011429 | 0.011530 | 0.011430 | 0.011497 | 0.011597 |
| 0.011765 | 0.011470 | 0.011631 | 0.011597 | 0.011530 | 0.011698 | 0.011329 |
| 0.011498 | 0.011396 | 0.011362 | 0.011362 | 0.011429 | 0.011329 | 0.011430 |
| 0.011463 | 0.011497 | 0.011396 | 0.011362 | 0.011329 | 0.011463 | 0.011463 |
| 0.011463 | 0.011497 | 0.011564 | 0.011496 | 0.012069 | 0.011560 | 0.011482 |
| 0.011552 | 0.011511 | 0.011622 | 0.011510 | 0.011620 | 0.011543 | 0.011508 |
| 0.012021 | 0.011406 | 0.011540 | 0.011475 | 0.011749 | 0.011604 | 0.011707 |
| 0.012046 | 0.011512 | 0.011669 | 0.011731 | 0.011597 | 0.011262 | 0.011635 |
| 0.011295 | 0.011463 | 0.011597 | 0.011564 | 0.011567 | 0.011295 | 0.011262 |

|          |          |          |          |          |          |          |
|----------|----------|----------|----------|----------|----------|----------|
| 0.011396 | 0.011329 | 0.011362 | 0.011396 | 0.011295 | 0.011362 | 0.011262 |
| 0.011329 | 0.011362 | 0.011329 | 0.011295 | 0.011396 | 0.011329 | 0.011362 |
| 0.011362 | 0.011295 | 0.011362 | 0.011396 | 0.011295 | 0.011496 | 0.011530 |
| 0.011429 | 0.011429 | 0.011429 | 0.011429 | 0.011362 | 0.011497 | 0.011396 |
| 0.011095 | 0.011362 | 0.011329 | 0.011332 | 0.011463 | 0.011463 | 0.011463 |
| 0.011463 | 0.011396 | 0.011362 | 0.011396 | 0.011496 | 0.011496 | 0.011429 |
| 0.011429 | 0.011564 | 0.011463 | 0.011463 | 0.011664 | 0.011664 | 0.011530 |
| 0.011362 | 0.011429 | 0.011463 | 0.011597 | 0.011430 | 0.011463 | 0.011429 |
| 0.011463 | 0.011329 | 0.011329 | 0.011631 | 0.011631 | 0.011597 | 0.011396 |
| 0.011496 | 0.011564 | 0.011429 | 0.011496 | 0.011463 | 0.011329 | 0.011396 |
| 0.011429 | 0.011396 | 0.011329 | 0.011564 | 0.011396 | 0.011496 | 0.011530 |
| 0.011429 | 0.011535 | 0.011530 | 0.011304 | 0.011117 | 0.011434 | 0.011163 |
| 0.011390 | 0.011527 | 0.011341 | 0.011507 | 0.011353 | 0.011366 | 0.011326 |
| 0.011213 | 0.011258 | 0.011394 | 0.011192 | 0.011276 | 0.011395 | 0.011506 |
| 0.011512 | 0.011414 | 0.011412 | 0.011412 | 0.011431 | 0.011295 | 0.011362 |
| 0.011228 | 0.011430 | 0.011533 | 0.011264 | 0.011670 | 0.011696 | 0.011429 |
| 0.011396 | 0.011463 | 0.011396 | 0.011430 | 0.011295 | 0.011262 | 0.011329 |
| 0.011396 | 0.011396 | 0.011362 | 0.011329 | 0.011362 | 0.011329 | 0.011429 |
| 0.011409 | 0.011410 | 0.011403 | 0.011437 | 0.011573 | 0.011538 | 0.011538 |
| 0.011537 | 0.011464 | 0.011282 | 0.011276 | 0.011399 | 0.011568 | 0.011569 |
| 0.011363 | 0.011433 | 0.011666 | 0.011635 | 0.011565 | 0.011599 | 0.011530 |
| 0.011463 | 0.011530 | 0.011530 | 0.011429 | 0.011732 | 0.011597 | 0.011664 |
| 0.011698 | 0.011487 | 0.011401 | 0.011476 | 0.011362 | 0.011564 | 0.011530 |
| 0.011565 | 0.011597 | 0.011597 | 0.011597 | 0.011768 | 0.011731 | 0.011372 |
| 0.011263 | 0.011268 | 0.011366 | 0.011332 | 0.011368 | 0.011284 | 0.011332 |
| 0.011403 | 0.011236 | 0.011298 | 0.011435 | 0.011396 | 0.011471 | 0.011362 |
| 0.011329 | 0.011262 | 0.011396 | 0.011362 | 0.011228 | 0.011195 | 0.011127 |
| 0.011228 | 0.011295 | 0.011362 | 0.011362 | 0.011396 | 0.011396 | 0.011398 |
| 0.011466 | 0.011396 | 0.011396 | 0.011431 | 0.011295 | 0.011362 | 0.011228 |
| 0.011430 | 0.011533 | 0.011264 | 0.011670 | 0.011696 | 0.011429 | 0.011597 |
| 0.011530 | 0.011530 | 0.011365 | 0.011547 | 0.011477 | 0.011503 | 0.011375 |
| 0.011508 | 0.011698 | 0.011484 | 0.011434 | 0.011329 | 0.011530 | 0.011396 |
| 0.011497 | 0.011429 | 0.011329 | 0.011397 | 0.011530 | 0.011533 | 0.011362 |
| 0.011329 | 0.011263 | 0.011396 | 0.011329 | 0.011262 | 0.011264 | 0.011530 |
| 0.011429 | 0.011362 | 0.011396 | 0.011429 | 0.011396 | 0.011329 | 0.011262 |
| 0.011396 | 0.011429 | 0.011429 | 0.011362 | 0.011429 | 0.011664 | 0.011262 |
| 0.011362 | 0.011497 | 0.011362 | 0.011396 | 0.011362 | 0.011463 | 0.011360 |
| 0.011510 | 0.011230 | 0.011161 | 0.011262 | 0.011345 | 0.011276 | 0.011186 |
| 0.011113 | 0.011262 | 0.011362 | 0.011468 | 0.011330 | 0.011466 | 0.011598 |
| 0.011498 | 0.011534 | 0.011496 | 0.011744 | 0.011463 | 0.012337 | 0.011498 |
| 0.012237 | 0.012004 | 0.012139 | 0.012410 | 0.011463 | 0.011362 | 0.011463 |
| 0.012103 | 0.011836 | 0.011429 | 0.011329 | 0.011396 | 0.011396 | 0.011365 |
| 0.011262 | 0.011264 | 0.011329 | 0.011296 | 0.011665 | 0.011732 | 0.011733 |
| 0.011632 | 0.011733 | 0.011836 | 0.011601 | 0.012104 | 0.012110 | 0.012171 |
| 0.012171 | 0.012205 | 0.012152 | 0.012172 | 0.012173 | 0.011463 | 0.011699 |
| 0.011766 | 0.012270 | 0.011772 | 0.011799 | 0.012272 | 0.011332 | 0.011228 |
| 0.011194 | 0.011194 | 0.011665 | 0.011677 | 0.011799 | 0.011530 | 0.011195 |
| S024     | 0.011598 | 0.011598 | 0.011901 | 0.011665 | 0.011665 | 0.011732 |
| 0.011604 | 0.011536 | 0.011732 | 0.011195 | 0.011262 | 0.011229 | 0.011195 |
| 0.011228 | 0.011396 | 0.011195 | 0.011228 | 0.011295 | 0.011262 | 0.011228 |
| 0.011195 | 0.011228 | 0.011329 | 0.000000 | 0.011228 | 0.011228 | 0.011570 |
| 0.011463 | 0.011228 | 0.011127 | 0.011363 | 0.011295 | 0.011262 | 0.011295 |
| 0.011262 | 0.011363 | 0.011262 | 0.011262 | 0.011295 | 0.011262 | 0.011430 |
| 0.011195 | 0.011262 | 0.011295 | 0.011228 | 0.011329 | 0.011363 | 0.011295 |
| 0.011262 | 0.011430 | 0.011329 | 0.011598 | 0.011262 | 0.011531 | 0.011262 |
| 0.011228 | 0.011329 | 0.011396 | 0.011531 | 0.011631 | 0.011329 | 0.011430 |
| 0.011295 | 0.011363 | 0.011262 | 0.011497 | 0.011732 | 0.011262 | 0.011329 |
| 0.011228 | 0.011329 | 0.011295 | 0.011363 | 0.011295 | 0.011295 | 0.011295 |
| 0.011195 | 0.011228 | 0.011195 | 0.011295 | 0.011262 | 0.011296 | 0.011363 |
| 0.011295 | 0.011262 | 0.011329 | 0.011228 | 0.011363 | 0.011195 | 0.011262 |

|          |          |          |          |          |          |          |
|----------|----------|----------|----------|----------|----------|----------|
| 0.011430 | 0.011363 | 0.011598 | 0.011430 | 0.011262 | 0.011497 | 0.011262 |
| 0.011394 | 0.011621 | 0.011438 | 0.011139 | 0.011172 | 0.011244 | 0.011336 |
| 0.012013 | 0.011417 | 0.011143 | 0.011497 | 0.011497 | 0.011295 | 0.011396 |
| 0.011329 | 0.011295 | 0.011363 | 0.011262 | 0.011363 | 0.011295 | 0.011295 |
| 0.011262 | 0.011363 | 0.011564 | 0.011430 | 0.011329 | 0.011295 | 0.011228 |
| 0.011195 | 0.011195 | 0.011262 | 0.011228 | 0.011430 | 0.011396 | 0.011329 |
| 0.011430 | 0.011497 | 0.011228 | 0.011228 | 0.011262 | 0.011262 | 0.011263 |
| 0.011331 | 0.011262 | 0.011262 | 0.011132 | 0.011205 | 0.011166 | 0.011262 |
| 0.011264 | 0.011198 | 0.011245 | 0.011233 | 0.011162 | 0.011197 | 0.011229 |
| 0.011493 | 0.011267 | 0.011302 | 0.011195 | 0.011199 | 0.011330 | 0.011296 |
| 0.011363 | 0.011296 | 0.011296 | 0.011396 | 0.011329 | 0.011699 | 0.011497 |
| 0.011530 | 0.011396 | 0.011262 | 0.011363 | 0.011161 | 0.011396 | 0.011195 |
| 0.011262 | 0.011262 | 0.011228 | 0.011195 | 0.011228 | 0.011195 | 0.011295 |
| 0.011262 | 0.011363 | 0.011296 | 0.011195 | 0.011296 | 0.011396 | 0.011365 |
| 0.011396 | 0.011296 | 0.011195 | 0.011128 | 0.011262 | 0.011195 | 0.011128 |
| 0.011230 | 0.011396 | 0.011195 | 0.011396 | 0.011161 | 0.011262 | 0.011228 |
| 0.011329 | 0.011228 | 0.011262 | 0.011228 | 0.011262 | 0.011128 | 0.011262 |
| 0.011296 | 0.011228 | 0.011296 | 0.011228 | 0.011262 | 0.011295 | 0.011531 |
| 0.011632 | 0.011564 | 0.011632 | 0.011398 | 0.011632 | 0.011262 | 0.011228 |
| 0.011263 | 0.011505 | 0.011381 | 0.011163 | 0.011637 | 0.011129 | 0.011257 |
| 0.011638 | 0.011503 | 0.011430 | 0.011631 | 0.011334 | 0.011497 | 0.011463 |
| 0.011329 | 0.011564 | 0.011416 | 0.011266 | 0.011270 | 0.011295 | 0.011365 |
| 0.011463 | 0.011364 | 0.011500 | 0.011568 | 0.011497 | 0.011564 | 0.011671 |
| 0.011399 | 0.011570 | 0.011501 | 0.011432 | 0.011700 | 0.011161 | 0.011364 |
| 0.011329 | 0.011262 | 0.011161 | 0.011161 | 0.011228 | 0.011228 | 0.011295 |
| 0.011228 | 0.011295 | 0.011195 | 0.011295 | 0.011228 | 0.011228 | 0.011295 |
| 0.011228 | 0.011665 | 0.011564 | 0.011598 | 0.011127 | 0.011228 | 0.011262 |
| 0.011262 | 0.011228 | 0.011295 | 0.011329 | 0.011195 | 0.011195 | 0.011195 |
| 0.011699 | 0.011363 | 0.011363 | 0.011161 | 0.011262 | 0.011430 | 0.011195 |
| 0.011195 | 0.011262 | 0.011228 | 0.011396 | 0.011195 | 0.011329 | 0.011463 |
| 0.011396 | 0.011228 | 0.011228 | 0.011161 | 0.011161 | 0.011329 | 0.011262 |
| 0.011161 | 0.011262 | 0.011128 | 0.011161 | 0.011295 | 0.011430 | 0.011195 |
| 0.011161 | 0.011295 | 0.011228 | 0.011128 | 0.011463 | 0.011128 | 0.011295 |
| 0.011368 | 0.011195 | 0.011497 | 0.011329 | 0.011363 | 0.011228 | 0.011329 |
| 0.011195 | 0.011531 | 0.011127 | 0.011396 | 0.011195 | 0.011195 | 0.011127 |
| 0.011363 | 0.011564 | 0.011262 | 0.011329 | 0.011161 | 0.011564 | 0.011195 |
| 0.011195 | 0.011195 | 0.011228 | 0.011329 | 0.011228 | 0.011329 | 0.011396 |
| 0.011396 | 0.011363 | 0.011262 | 0.011363 | 0.011329 | 0.011195 | 0.011161 |
| 0.011195 | 0.011195 | 0.011262 | 0.011195 | 0.011161 | 0.011329 | 0.011195 |
| 0.011228 | 0.011228 | 0.011363 | 0.011396 | 0.011295 | 0.011228 | 0.011228 |
| 0.011295 | 0.011228 | 0.011329 | 0.011195 | 0.011329 | 0.011430 | 0.011732 |
| 0.011228 | 0.011631 | 0.011233 | 0.017718 | 0.011191 | 0.011305 | 0.011549 |
| 0.011510 | 0.011553 | 0.011217 | 0.011176 | 0.011610 | 0.011579 | 0.011243 |
| 0.011393 | 0.011427 | 0.011099 | 0.011186 | 0.011178 | 0.011209 | 0.011189 |
| 0.011436 | 0.011396 | 0.011394 | 0.011259 | 0.011363 | 0.011396 | 0.011399 |
| 0.011267 | 0.011363 | 0.011363 | 0.011329 | 0.011295 | 0.011296 | 0.011262 |
| 0.011295 | 0.011228 | 0.011262 | 0.011296 | 0.011262 | 0.011195 | 0.011228 |
| 0.011228 | 0.011296 | 0.011195 | 0.011296 | 0.011329 | 0.011363 | 0.011262 |
| 0.011295 | 0.011262 | 0.011598 | 0.011598 | 0.011329 | 0.011363 | 0.011396 |
| 0.011161 | 0.011161 | 0.011195 | 0.011296 | 0.011161 | 0.011396 | 0.011396 |
| 0.011430 | 0.011430 | 0.011363 | 0.011463 | 0.011632 | 0.011397 | 0.011295 |
| 0.011296 | 0.011363 | 0.011396 | 0.011228 | 0.011295 | 0.011262 | 0.011295 |
| 0.011363 | 0.011363 | 0.011396 | 0.011363 | 0.011262 | 0.011464 | 0.011430 |
| 0.011298 | 0.011195 | 0.011295 | 0.011396 | 0.011296 | 0.011430 | 0.011463 |
| 0.011631 | 0.011334 | 0.011497 | 0.011463 | 0.011329 | 0.011564 | 0.011195 |
| 0.011364 | 0.011262 | 0.011228 | 0.011228 | 0.011296 | 0.011195 | 0.011296 |
| 0.011329 | 0.011363 | 0.011262 | 0.011295 | 0.011262 | 0.011598 | 0.011598 |
| 0.011329 | 0.011363 | 0.011430 | 0.011363 | 0.012003 | 0.011418 | 0.011342 |
| 0.011412 | 0.011373 | 0.011482 | 0.011372 | 0.011481 | 0.011405 | 0.011371 |
| 0.011953 | 0.011268 | 0.011403 | 0.011337 | 0.011577 | 0.011469 | 0.011571 |



|          |          |          |          |          |          |          |
|----------|----------|----------|----------|----------|----------|----------|
| 0.011979 | 0.011437 | 0.011534 | 0.011598 | 0.011463 | 0.011463 | 0.011500 |
| 0.011161 | 0.011329 | 0.011463 | 0.011430 | 0.011432 | 0.011430 | 0.011364 |
| 0.011262 | 0.011195 | 0.011228 | 0.011262 | 0.011161 | 0.011228 | 0.011127 |
| 0.011262 | 0.011295 | 0.011195 | 0.011161 | 0.011262 | 0.011195 | 0.011228 |
| 0.011228 | 0.011161 | 0.011228 | 0.011262 | 0.011161 | 0.011363 | 0.011396 |
| 0.011295 | 0.011363 | 0.011295 | 0.011295 | 0.011228 | 0.011631 | 0.011262 |
| 0.011304 | 0.011228 | 0.011464 | 0.011468 | 0.011329 | 0.011329 | 0.011329 |
| 0.011329 | 0.011262 | 0.011228 | 0.011262 | 0.011363 | 0.011363 | 0.011295 |
| 0.011295 | 0.011430 | 0.011598 | 0.011329 | 0.011531 | 0.011531 | 0.011396 |
| 0.011228 | 0.011295 | 0.011329 | 0.011732 | 0.011296 | 0.011329 | 0.011295 |
| 0.011329 | 0.011262 | 0.011262 | 0.011564 | 0.011497 | 0.011531 | 0.011262 |
| 0.011363 | 0.011396 | 0.011295 | 0.011363 | 0.011329 | 0.011195 | 0.011531 |
| 0.011295 | 0.011262 | 0.011262 | 0.011430 | 0.011262 | 0.011363 | 0.011598 |
| 0.011295 | 0.011672 | 0.011665 | 0.011426 | 0.011173 | 0.011366 | 0.011215 |
| 0.011115 | 0.011645 | 0.011201 | 0.011373 | 0.011207 | 0.011315 | 0.011326 |
| 0.011418 | 0.000000 | 0.011283 | 0.000000 | 0.011168 | 0.011329 | 0.011304 |
| 0.011324 | 0.011218 | 0.011307 | 0.011272 | 0.011296 | 0.011430 | 0.011497 |
| 0.011497 | 0.011363 | 0.011466 | 0.011467 | 0.011603 | 0.011626 | 0.011295 |
| 0.011530 | 0.011396 | 0.011262 | 0.011363 | 0.011161 | 0.011396 | 0.011195 |
| 0.011262 | 0.011262 | 0.011228 | 0.011195 | 0.011228 | 0.011195 | 0.011295 |
| 0.011270 | 0.011270 | 0.011266 | 0.011300 | 0.011437 | 0.011402 | 0.011402 |
| 0.011401 | 0.011329 | 0.011134 | 0.011132 | 0.011264 | 0.011433 | 0.011434 |
| 0.011229 | 0.011298 | 0.011532 | 0.011500 | 0.011430 | 0.011397 | 0.011396 |
| 0.011329 | 0.011396 | 0.011396 | 0.011295 | 0.011867 | 0.011463 | 0.011531 |
| 0.011564 | 0.011630 | 0.011231 | 0.011338 | 0.011228 | 0.011430 | 0.011396 |
| 0.011431 | 0.011463 | 0.011463 | 0.011463 | 0.011572 | 0.011598 | 0.011234 |
| 0.011128 | 0.011130 | 0.011231 | 0.011196 | 0.011300 | 0.011135 | 0.011468 |
| 0.011266 | 0.011411 | 0.011156 | 0.011285 | 0.011262 | 0.011334 | 0.011228 |
| 0.011195 | 0.011195 | 0.011262 | 0.011228 | 0.011430 | 0.011396 | 0.011329 |
| 0.011430 | 0.011497 | 0.011228 | 0.011228 | 0.011262 | 0.011262 | 0.011263 |
| 0.011331 | 0.011262 | 0.011262 | 0.011296 | 0.011430 | 0.011497 | 0.011497 |
| 0.011363 | 0.011466 | 0.011467 | 0.011603 | 0.011626 | 0.011295 | 0.011463 |
| 0.011396 | 0.011396 | 0.011229 | 0.011409 | 0.011338 | 0.011367 | 0.011236 |
| 0.011405 | 0.011608 | 0.011399 | 0.011298 | 0.011195 | 0.011396 | 0.011262 |
| 0.011363 | 0.011296 | 0.011195 | 0.011296 | 0.011396 | 0.011365 | 0.011296 |
| 0.011195 | 0.011128 | 0.011262 | 0.011195 | 0.011128 | 0.011230 | 0.011396 |
| 0.011295 | 0.011228 | 0.011262 | 0.011296 | 0.011262 | 0.011195 | 0.011396 |
| 0.011262 | 0.011295 | 0.011295 | 0.011228 | 0.011295 | 0.011531 | 0.011195 |
| 0.011228 | 0.011631 | 0.011228 | 0.011262 | 0.011228 | 0.011598 | 0.011146 |
| 0.011567 | 0.011145 | 0.011211 | 0.011383 | 0.011468 | 0.011419 | 0.011102 |
| 0.011165 | 0.011363 | 0.011463 | 0.011570 | 0.011431 | 0.011568 | 0.011700 |
| 0.011599 | 0.011636 | 0.011598 | 0.011847 | 0.011564 | 0.012439 | 0.011600 |
| 0.012306 | 0.012107 | 0.012241 | 0.012546 | 0.011598 | 0.011296 | 0.011565 |
| 0.012037 | 0.011938 | 0.011531 | 0.011430 | 0.011498 | 0.011498 | 0.011466 |
| 0.011363 | 0.011366 | 0.011430 | 0.011397 | 0.011801 | 0.011867 | 0.011868 |
| 0.011767 | 0.011868 | 0.011971 | 0.011737 | 0.012038 | 0.012043 | 0.012105 |
| 0.012105 | 0.012139 | 0.012085 | 0.012105 | 0.012107 | 0.011329 | 0.011632 |
| 0.011700 | 0.012204 | 0.011705 | 0.011934 | 0.012408 | 0.011468 | 0.011363 |
| 0.011329 | 0.011329 | 0.011800 | 0.011801 | 0.011905 | 0.011665 | 0.011330 |
| S025     | 0.011631 | 0.011631 | 0.011934 | 0.011699 | 0.011699 | 0.011766 |
| 0.011638 | 0.011570 | 0.011766 | 0.011228 | 0.011295 | 0.011262 | 0.011228 |
| 0.011262 | 0.011430 | 0.011228 | 0.011262 | 0.011329 | 0.011295 | 0.011262 |
| 0.011228 | 0.011262 | 0.011362 | 0.011228 | 0.000000 | 0.011262 | 0.011604 |
| 0.011497 | 0.011262 | 0.011161 | 0.011396 | 0.011262 | 0.011295 | 0.011262 |
| 0.011295 | 0.011329 | 0.011295 | 0.011295 | 0.011329 | 0.011295 | 0.011463 |
| 0.011228 | 0.011295 | 0.011329 | 0.011262 | 0.011363 | 0.011396 | 0.011329 |
| 0.011295 | 0.011463 | 0.011363 | 0.011631 | 0.011295 | 0.011497 | 0.011295 |
| 0.011262 | 0.011363 | 0.011430 | 0.011497 | 0.011665 | 0.011363 | 0.011463 |
| 0.011262 | 0.011329 | 0.011295 | 0.011463 | 0.011766 | 0.011295 | 0.011363 |
| 0.011262 | 0.011363 | 0.011329 | 0.011396 | 0.011329 | 0.011329 | 0.011329 |

|          |          |          |          |          |          |          |
|----------|----------|----------|----------|----------|----------|----------|
| 0.011228 | 0.011262 | 0.011228 | 0.011329 | 0.011295 | 0.011330 | 0.011396 |
| 0.011329 | 0.011295 | 0.011295 | 0.011262 | 0.011396 | 0.011161 | 0.011295 |
| 0.011463 | 0.011396 | 0.011631 | 0.011463 | 0.011295 | 0.011463 | 0.011295 |
| 0.011468 | 0.011696 | 0.011513 | 0.011217 | 0.011210 | 0.011318 | 0.011415 |
| 0.012049 | 0.011467 | 0.011225 | 0.011530 | 0.011531 | 0.011329 | 0.011430 |
| 0.011363 | 0.011329 | 0.011396 | 0.011295 | 0.011396 | 0.011262 | 0.011329 |
| 0.011295 | 0.011396 | 0.011598 | 0.011463 | 0.011363 | 0.011329 | 0.011195 |
| 0.011228 | 0.011228 | 0.011228 | 0.011262 | 0.011463 | 0.011430 | 0.011363 |
| 0.011463 | 0.011531 | 0.011262 | 0.011262 | 0.011295 | 0.011295 | 0.011297 |
| 0.011365 | 0.011295 | 0.011296 | 0.011132 | 0.011241 | 0.011201 | 0.011296 |
| 0.011298 | 0.011232 | 0.011282 | 0.011267 | 0.011196 | 0.011232 | 0.011263 |
| 0.011529 | 0.011302 | 0.011267 | 0.011229 | 0.011233 | 0.011363 | 0.011330 |
| 0.011397 | 0.011330 | 0.011329 | 0.011430 | 0.011362 | 0.011665 | 0.011531 |
| 0.011564 | 0.011430 | 0.011295 | 0.011396 | 0.011195 | 0.011430 | 0.011228 |
| 0.011295 | 0.011295 | 0.011262 | 0.011228 | 0.011262 | 0.011228 | 0.011329 |
| 0.011228 | 0.011329 | 0.011329 | 0.011228 | 0.011330 | 0.011396 | 0.011432 |
| 0.011363 | 0.011329 | 0.011228 | 0.011162 | 0.011295 | 0.011228 | 0.011161 |
| 0.011264 | 0.011363 | 0.011161 | 0.011363 | 0.011195 | 0.011296 | 0.011262 |
| 0.011295 | 0.011262 | 0.011228 | 0.011262 | 0.011296 | 0.011161 | 0.011228 |
| 0.011262 | 0.011262 | 0.011329 | 0.011262 | 0.011295 | 0.011329 | 0.011564 |
| 0.011665 | 0.011598 | 0.011665 | 0.011431 | 0.011665 | 0.011295 | 0.011262 |
| 0.011297 | 0.011546 | 0.011289 | 0.011198 | 0.011671 | 0.011163 | 0.011297 |
| 0.011672 | 0.011571 | 0.011463 | 0.011665 | 0.011368 | 0.011531 | 0.011430 |
| 0.011430 | 0.011598 | 0.011451 | 0.011308 | 0.011354 | 0.011329 | 0.011399 |
| 0.011497 | 0.011398 | 0.011534 | 0.011534 | 0.011531 | 0.011598 | 0.011704 |
| 0.011433 | 0.011536 | 0.011535 | 0.011466 | 0.011734 | 0.011195 | 0.011397 |
| 0.011295 | 0.011295 | 0.011195 | 0.011195 | 0.011195 | 0.011262 | 0.011329 |
| 0.011195 | 0.011262 | 0.011161 | 0.011329 | 0.011195 | 0.011262 | 0.011329 |
| 0.011262 | 0.011698 | 0.011598 | 0.011631 | 0.011161 | 0.011262 | 0.011295 |
| 0.011295 | 0.011262 | 0.011329 | 0.011363 | 0.011228 | 0.011228 | 0.011228 |
| 0.011732 | 0.011396 | 0.011396 | 0.011195 | 0.011295 | 0.011396 | 0.011228 |
| 0.011228 | 0.011295 | 0.011262 | 0.011363 | 0.011228 | 0.011363 | 0.011430 |
| 0.011430 | 0.011228 | 0.011262 | 0.011195 | 0.011195 | 0.011363 | 0.011295 |
| 0.011195 | 0.011262 | 0.011161 | 0.011195 | 0.011329 | 0.011464 | 0.011228 |
| 0.011195 | 0.011329 | 0.011262 | 0.011161 | 0.011497 | 0.011161 | 0.011329 |
| 0.011334 | 0.011228 | 0.011531 | 0.011363 | 0.011396 | 0.011262 | 0.011363 |
| 0.011228 | 0.011497 | 0.011161 | 0.011430 | 0.011228 | 0.011228 | 0.011161 |
| 0.011329 | 0.011598 | 0.011295 | 0.011363 | 0.011195 | 0.011598 | 0.011228 |
| 0.011228 | 0.011228 | 0.011262 | 0.011295 | 0.011262 | 0.011329 | 0.011430 |
| 0.011430 | 0.011396 | 0.011295 | 0.011396 | 0.011295 | 0.011228 | 0.011195 |
| 0.011228 | 0.011228 | 0.011295 | 0.011228 | 0.011127 | 0.011363 | 0.011228 |
| 0.011262 | 0.011262 | 0.011396 | 0.011430 | 0.011329 | 0.011195 | 0.011262 |
| 0.011329 | 0.011262 | 0.011363 | 0.011228 | 0.011363 | 0.011463 | 0.011766 |
| 0.011262 | 0.011665 | 0.011267 | 0.017755 | 0.011191 | 0.011489 | 0.011619 |
| 0.011580 | 0.011624 | 0.011322 | 0.011293 | 0.011665 | 0.011648 | 0.011304 |
| 0.011440 | 0.011610 | 0.011177 | 0.011228 | 0.011217 | 0.011357 | 0.011276 |
| 0.011483 | 0.011433 | 0.011394 | 0.011193 | 0.011396 | 0.011430 | 0.011433 |
| 0.011232 | 0.011396 | 0.011396 | 0.011363 | 0.011329 | 0.011329 | 0.011296 |
| 0.011329 | 0.011262 | 0.011295 | 0.011329 | 0.011296 | 0.011228 | 0.011262 |
| 0.011262 | 0.011329 | 0.011228 | 0.011329 | 0.011363 | 0.011396 | 0.011295 |
| 0.011329 | 0.011296 | 0.011598 | 0.011598 | 0.011363 | 0.011397 | 0.011430 |
| 0.011195 | 0.011195 | 0.011228 | 0.011262 | 0.011195 | 0.011430 | 0.011430 |
| 0.011463 | 0.011463 | 0.011396 | 0.011497 | 0.011665 | 0.011498 | 0.011262 |
| 0.011329 | 0.011396 | 0.011363 | 0.011262 | 0.011329 | 0.011295 | 0.011329 |
| 0.011397 | 0.011396 | 0.011430 | 0.011329 | 0.011229 | 0.011497 | 0.011396 |
| 0.011331 | 0.011228 | 0.011329 | 0.011430 | 0.011329 | 0.011464 | 0.011497 |
| 0.011665 | 0.011368 | 0.011531 | 0.011430 | 0.011430 | 0.011598 | 0.011228 |
| 0.011397 | 0.011296 | 0.011262 | 0.011262 | 0.011329 | 0.011228 | 0.011329 |
| 0.011363 | 0.011396 | 0.011295 | 0.011329 | 0.011296 | 0.011598 | 0.011598 |
| 0.011363 | 0.011397 | 0.011463 | 0.011396 | 0.012037 | 0.011454 | 0.011377 |

|          |          |          |          |          |          |          |
|----------|----------|----------|----------|----------|----------|----------|
| 0.011447 | 0.011407 | 0.011517 | 0.011407 | 0.011516 | 0.011440 | 0.011405 |
| 0.011988 | 0.011303 | 0.011437 | 0.011372 | 0.011646 | 0.011503 | 0.011537 |
| 0.012013 | 0.011475 | 0.011568 | 0.011631 | 0.011497 | 0.011497 | 0.011534 |
| 0.011195 | 0.011295 | 0.011497 | 0.011463 | 0.011466 | 0.011463 | 0.011397 |
| 0.011295 | 0.011161 | 0.011195 | 0.011295 | 0.011127 | 0.011262 | 0.011161 |
| 0.011295 | 0.011329 | 0.011228 | 0.011195 | 0.011295 | 0.011228 | 0.011262 |
| 0.011262 | 0.011195 | 0.011262 | 0.011295 | 0.011195 | 0.011329 | 0.011430 |
| 0.011329 | 0.011396 | 0.011329 | 0.011329 | 0.011262 | 0.011665 | 0.011295 |
| 0.011339 | 0.011262 | 0.011497 | 0.011502 | 0.011295 | 0.011363 | 0.011363 |
| 0.011363 | 0.011228 | 0.011262 | 0.011228 | 0.011396 | 0.011396 | 0.011329 |
| 0.011329 | 0.011463 | 0.011631 | 0.011362 | 0.011564 | 0.011564 | 0.011430 |
| 0.011262 | 0.011329 | 0.011363 | 0.011766 | 0.011329 | 0.011295 | 0.011329 |
| 0.011363 | 0.011295 | 0.011295 | 0.011598 | 0.011463 | 0.011564 | 0.011295 |
| 0.011396 | 0.011430 | 0.011329 | 0.011396 | 0.011363 | 0.011228 | 0.011564 |
| 0.011329 | 0.011295 | 0.011295 | 0.011463 | 0.011295 | 0.011396 | 0.011631 |
| 0.011329 | 0.011706 | 0.011699 | 0.011508 | 0.011230 | 0.011400 | 0.011215 |
| 0.011280 | 0.011684 | 0.011236 | 0.011418 | 0.011207 | 0.011366 | 0.011326 |
| 0.011469 | 0.011126 | 0.011283 | 0.011126 | 0.011168 | 0.011262 | 0.011304 |
| 0.011362 | 0.011178 | 0.011378 | 0.011307 | 0.011330 | 0.011463 | 0.011531 |
| 0.011531 | 0.011397 | 0.011500 | 0.011501 | 0.011637 | 0.011662 | 0.011329 |
| 0.011564 | 0.011430 | 0.011295 | 0.011396 | 0.011195 | 0.011430 | 0.011228 |
| 0.011295 | 0.011295 | 0.011262 | 0.011228 | 0.011262 | 0.011228 | 0.011329 |
| 0.011305 | 0.011305 | 0.011300 | 0.011334 | 0.011471 | 0.011300 | 0.011436 |
| 0.011435 | 0.011363 | 0.011134 | 0.011168 | 0.011298 | 0.011467 | 0.011434 |
| 0.011262 | 0.011331 | 0.011566 | 0.011534 | 0.011464 | 0.011498 | 0.011430 |
| 0.011363 | 0.011430 | 0.011430 | 0.011329 | 0.011901 | 0.011497 | 0.011564 |
| 0.011598 | 0.011666 | 0.011299 | 0.011372 | 0.011262 | 0.011463 | 0.011430 |
| 0.011464 | 0.011497 | 0.011497 | 0.011497 | 0.011651 | 0.011631 | 0.011269 |
| 0.011162 | 0.011164 | 0.011265 | 0.011230 | 0.011334 | 0.011172 | 0.011502 |
| 0.011301 | 0.011411 | 0.011156 | 0.011323 | 0.011296 | 0.011368 | 0.011195 |
| 0.011228 | 0.011228 | 0.011228 | 0.011262 | 0.011463 | 0.011430 | 0.011363 |
| 0.011463 | 0.011531 | 0.011262 | 0.011262 | 0.011295 | 0.011295 | 0.011297 |
| 0.011365 | 0.011295 | 0.011296 | 0.011330 | 0.011463 | 0.011531 | 0.011531 |
| 0.011397 | 0.011500 | 0.011501 | 0.011637 | 0.011662 | 0.011329 | 0.011497 |
| 0.011430 | 0.011430 | 0.011263 | 0.011443 | 0.011373 | 0.011401 | 0.011271 |
| 0.011370 | 0.011607 | 0.011399 | 0.011332 | 0.011161 | 0.011363 | 0.011228 |
| 0.011329 | 0.011329 | 0.011228 | 0.011330 | 0.011396 | 0.011432 | 0.011329 |
| 0.011228 | 0.011162 | 0.011295 | 0.011228 | 0.011161 | 0.011264 | 0.011363 |
| 0.011329 | 0.011262 | 0.011295 | 0.011329 | 0.011296 | 0.011228 | 0.011430 |
| 0.011295 | 0.011329 | 0.011329 | 0.011262 | 0.011329 | 0.011564 | 0.011228 |
| 0.011262 | 0.011665 | 0.011262 | 0.011228 | 0.011262 | 0.011631 | 0.011232 |
| 0.011567 | 0.011231 | 0.011261 | 0.011463 | 0.011549 | 0.011455 | 0.011186 |
| 0.011218 | 0.011396 | 0.011497 | 0.011604 | 0.011465 | 0.011602 | 0.011733 |
| 0.011633 | 0.011670 | 0.011631 | 0.011881 | 0.011598 | 0.012473 | 0.011634 |
| 0.012373 | 0.012140 | 0.012275 | 0.012580 | 0.011631 | 0.011329 | 0.011598 |
| 0.012071 | 0.011972 | 0.011564 | 0.011464 | 0.011464 | 0.011464 | 0.011500 |
| 0.011396 | 0.011400 | 0.011463 | 0.011430 | 0.011834 | 0.011867 | 0.011902 |
| 0.011801 | 0.011902 | 0.012005 | 0.011771 | 0.012071 | 0.012077 | 0.012138 |
| 0.012139 | 0.012173 | 0.012119 | 0.012139 | 0.012140 | 0.011362 | 0.011666 |
| 0.011734 | 0.012237 | 0.011739 | 0.011968 | 0.012442 | 0.011502 | 0.011397 |
| 0.011362 | 0.011362 | 0.011834 | 0.011883 | 0.011976 | 0.011699 | 0.011364 |
| S026     | 0.011631 | 0.011631 | 0.011967 | 0.011732 | 0.011732 | 0.011799 |
| 0.011637 | 0.011569 | 0.011799 | 0.011228 | 0.011295 | 0.011262 | 0.011228 |
| 0.011262 | 0.011429 | 0.011228 | 0.011262 | 0.011329 | 0.011295 | 0.011262 |
| 0.011228 | 0.011262 | 0.011362 | 0.011228 | 0.011262 | 0.000000 | 0.011603 |
| 0.011496 | 0.011262 | 0.011161 | 0.011396 | 0.011329 | 0.011295 | 0.011329 |
| 0.011295 | 0.011396 | 0.011295 | 0.011295 | 0.011329 | 0.011295 | 0.011463 |
| 0.011228 | 0.011295 | 0.011329 | 0.011262 | 0.011362 | 0.011396 | 0.011329 |
| 0.011295 | 0.011463 | 0.011362 | 0.011631 | 0.011295 | 0.011564 | 0.011295 |
| 0.011262 | 0.011362 | 0.011429 | 0.011564 | 0.011664 | 0.011362 | 0.011463 |

|          |          |          |           |          |          |          |
|----------|----------|----------|-----------|----------|----------|----------|
| 0.011329 | 0.011396 | 0.011295 | 0.011530  | 0.011765 | 0.011295 | 0.011362 |
| 0.011262 | 0.011362 | 0.011329 | 0.011396  | 0.011329 | 0.011329 | 0.011329 |
| 0.011228 | 0.011262 | 0.011228 | 0.011329  | 0.011295 | 0.011329 | 0.011396 |
| 0.011329 | 0.011295 | 0.011362 | 0.011262  | 0.011396 | 0.011228 | 0.011295 |
| 0.011463 | 0.011396 | 0.011631 | 0.011463  | 0.011295 | 0.011530 | 0.011295 |
| 0.011431 | 0.011658 | 0.011437 | 0.011138  | 0.011135 | 0.011281 | 0.011336 |
| 0.012011 | 0.011416 | 0.011143 | 0.011530  | 0.011463 | 0.011329 | 0.011429 |
| 0.011362 | 0.011329 | 0.011396 | 0.011295  | 0.011396 | 0.011329 | 0.011329 |
| 0.011295 | 0.011396 | 0.011597 | 0.011463  | 0.011362 | 0.011329 | 0.011262 |
| 0.011228 | 0.011228 | 0.011295 | 0.011262  | 0.011463 | 0.011429 | 0.011362 |
| 0.011463 | 0.011530 | 0.011262 | 0.011262  | 0.011295 | 0.011295 | 0.011297 |
| 0.011364 | 0.011295 | 0.011295 | 0.011168  | 0.011205 | 0.011200 | 0.011296 |
| 0.011297 | 0.011232 | 0.011208 | 0.011267  | 0.011196 | 0.011232 | 0.011263 |
| 0.011528 | 0.011301 | 0.011336 | 0.011228  | 0.011233 | 0.011363 | 0.011329 |
| 0.011396 | 0.011330 | 0.011329 | 0.011429  | 0.011362 | 0.011732 | 0.011530 |
| 0.011564 | 0.011430 | 0.011295 | 0.011396  | 0.011195 | 0.011429 | 0.011228 |
| 0.011295 | 0.011295 | 0.011262 | 0.011228  | 0.011262 | 0.011228 | 0.011329 |
| 0.011295 | 0.011396 | 0.011329 | 0.011228  | 0.011330 | 0.011430 | 0.011432 |
| 0.011430 | 0.011329 | 0.011228 | 0.011161  | 0.011295 | 0.011228 | 0.011161 |
| 0.011264 | 0.011430 | 0.011228 | 0.011430  | 0.011161 | 0.011295 | 0.011262 |
| 0.011362 | 0.011262 | 0.011295 | 0.011262  | 0.011295 | 0.011161 | 0.011295 |
| 0.011329 | 0.011262 | 0.011329 | 0.011262  | 0.011295 | 0.011329 | 0.011564 |
| 0.011664 | 0.011597 | 0.011665 | 0.011397  | 0.011665 | 0.011295 | 0.011262 |
| 0.011297 | 0.011545 | 0.011426 | 0.011163  | 0.011671 | 0.011163 | 0.011257 |
| 0.011671 | 0.011570 | 0.011396 | 0.011664  | 0.011368 | 0.011530 | 0.011497 |
| 0.011429 | 0.011597 | 0.011451 | 0.011307  | 0.011354 | 0.011329 | 0.011398 |
| 0.011497 | 0.011397 | 0.011533 | 0.011601  | 0.011530 | 0.011597 | 0.011704 |
| 0.011432 | 0.011603 | 0.011534 | 0.011466  | 0.011733 | 0.011194 | 0.011397 |
| 0.011362 | 0.011295 | 0.011194 | 0.011194  | 0.011262 | 0.011262 | 0.011329 |
| 0.011262 | 0.011329 | 0.011228 | 0.011329  | 0.011262 | 0.011262 | 0.011329 |
| 0.011262 | 0.011698 | 0.011597 | 0.011631  | 0.011161 | 0.011262 | 0.011295 |
| 0.011295 | 0.011262 | 0.011329 | 0.011362  | 0.011228 | 0.011228 | 0.011228 |
| 0.011765 | 0.011396 | 0.011396 | 0.011194  | 0.011295 | 0.011463 | 0.011228 |
| 0.011228 | 0.011295 | 0.011262 | 0.011429  | 0.011228 | 0.011362 | 0.011496 |
| 0.011429 | 0.011262 | 0.011262 | 0.011194  | 0.011194 | 0.011362 | 0.011295 |
| 0.011194 | 0.011295 | 0.011161 | 0.011195  | 0.011329 | 0.011463 | 0.011228 |
| 0.011195 | 0.011329 | 0.011262 | 0.011161  | 0.011496 | 0.011161 | 0.011329 |
| 0.011402 | 0.011228 | 0.011530 | 0.011362  | 0.011396 | 0.011262 | 0.011362 |
| 0.011228 | 0.011564 | 0.011161 | 0.011429  | 0.011228 | 0.011228 | 0.011161 |
| 0.011396 | 0.011564 | 0.011295 | 0.011362  | 0.011194 | 0.011597 | 0.011228 |
| 0.011228 | 0.011228 | 0.011262 | 0.011362  | 0.011262 | 0.011362 | 0.011429 |
| 0.011429 | 0.011396 | 0.011295 | 0.011396  | 0.011362 | 0.011228 | 0.011194 |
| 0.011228 | 0.011228 | 0.011295 | 0.011228  | 0.011194 | 0.011362 | 0.011228 |
| 0.011262 | 0.011262 | 0.011396 | 0.011429  | 0.011329 | 0.011262 | 0.011262 |
| 0.011329 | 0.011262 | 0.011362 | 0.011228  | 0.011362 | 0.011463 | 0.011765 |
| 0.011262 | 0.011664 | 0.011233 | 0.0117747 | 0.011126 | 0.011427 | 0.011583 |
| 0.011545 | 0.011588 | 0.011217 | 0.011176  | 0.011664 | 0.011612 | 0.011303 |
| 0.011392 | 0.011487 | 0.011099 | 0.011228  | 0.011138 | 0.011258 | 0.011232 |
| 0.011436 | 0.011358 | 0.011394 | 0.011126  | 0.011396 | 0.011429 | 0.011432 |
| 0.011301 | 0.011396 | 0.011396 | 0.011362  | 0.011329 | 0.011329 | 0.011295 |
| 0.011329 | 0.011262 | 0.011295 | 0.011329  | 0.011295 | 0.011228 | 0.011262 |
| 0.011262 | 0.011329 | 0.011228 | 0.011329  | 0.011362 | 0.011396 | 0.011295 |
| 0.011329 | 0.011295 | 0.011631 | 0.011631  | 0.011362 | 0.011396 | 0.011430 |
| 0.011195 | 0.011195 | 0.011228 | 0.011329  | 0.011195 | 0.011429 | 0.011429 |
| 0.011463 | 0.011396 | 0.011329 | 0.011497  | 0.011665 | 0.011498 | 0.011329 |
| 0.011329 | 0.011396 | 0.011429 | 0.011262  | 0.011329 | 0.011295 | 0.011329 |
| 0.011396 | 0.011396 | 0.011429 | 0.011396  | 0.011296 | 0.011497 | 0.011463 |
| 0.011331 | 0.011228 | 0.011329 | 0.011430  | 0.011329 | 0.011463 | 0.011496 |
| 0.011664 | 0.011368 | 0.011530 | 0.011497  | 0.011429 | 0.011597 | 0.011228 |
| 0.011397 | 0.011295 | 0.011262 | 0.011262  | 0.011329 | 0.011228 | 0.011329 |

|          |          |          |          |          |          |          |
|----------|----------|----------|----------|----------|----------|----------|
| 0.011362 | 0.011396 | 0.011295 | 0.011329 | 0.011295 | 0.011631 | 0.011631 |
| 0.011362 | 0.011396 | 0.011463 | 0.011396 | 0.012035 | 0.011453 | 0.011377 |
| 0.011447 | 0.011407 | 0.011517 | 0.011406 | 0.011515 | 0.011439 | 0.011405 |
| 0.011987 | 0.011302 | 0.011437 | 0.011371 | 0.011645 | 0.011502 | 0.011604 |
| 0.012012 | 0.011475 | 0.011567 | 0.011631 | 0.011496 | 0.011497 | 0.011533 |
| 0.011194 | 0.011362 | 0.011496 | 0.011463 | 0.011466 | 0.011463 | 0.011431 |
| 0.011295 | 0.011228 | 0.011262 | 0.011295 | 0.011194 | 0.011262 | 0.011161 |
| 0.011295 | 0.011329 | 0.011228 | 0.011194 | 0.011295 | 0.011228 | 0.011262 |
| 0.011262 | 0.011194 | 0.011262 | 0.011295 | 0.011194 | 0.011396 | 0.011429 |
| 0.011329 | 0.011396 | 0.011329 | 0.011329 | 0.011262 | 0.011664 | 0.011295 |
| 0.011338 | 0.011262 | 0.011497 | 0.011501 | 0.011362 | 0.011362 | 0.011362 |
| 0.011362 | 0.011295 | 0.011262 | 0.011295 | 0.011396 | 0.011396 | 0.011329 |
| 0.011329 | 0.011463 | 0.011631 | 0.011362 | 0.011564 | 0.011564 | 0.011429 |
| 0.011262 | 0.011329 | 0.011362 | 0.011765 | 0.011329 | 0.011362 | 0.011329 |
| 0.011362 | 0.011295 | 0.011295 | 0.011597 | 0.011530 | 0.011564 | 0.011295 |
| 0.011396 | 0.011463 | 0.011329 | 0.011396 | 0.011362 | 0.011228 | 0.011564 |
| 0.011329 | 0.011295 | 0.011295 | 0.011463 | 0.011295 | 0.011396 | 0.011631 |
| 0.011329 | 0.011705 | 0.011698 | 0.011426 | 0.011117 | 0.011400 | 0.011163 |
| 0.011225 | 0.011644 | 0.011201 | 0.011373 | 0.011207 | 0.011264 | 0.011273 |
| 0.011366 | 0.000000 | 0.011227 | 0.000000 | 0.011168 | 0.011261 | 0.011304 |
| 0.011362 | 0.011218 | 0.011342 | 0.011272 | 0.011330 | 0.011463 | 0.011530 |
| 0.011530 | 0.011396 | 0.011500 | 0.011501 | 0.011636 | 0.011661 | 0.011329 |
| 0.011564 | 0.011430 | 0.011295 | 0.011396 | 0.011195 | 0.011429 | 0.011228 |
| 0.011295 | 0.011295 | 0.011262 | 0.011228 | 0.011262 | 0.011228 | 0.011329 |
| 0.011305 | 0.011305 | 0.011300 | 0.011334 | 0.011471 | 0.011436 | 0.011436 |
| 0.011435 | 0.011363 | 0.011171 | 0.011168 | 0.011297 | 0.011467 | 0.011467 |
| 0.011262 | 0.011331 | 0.011565 | 0.011533 | 0.011464 | 0.011498 | 0.011429 |
| 0.011362 | 0.011429 | 0.011429 | 0.011329 | 0.011900 | 0.011496 | 0.011564 |
| 0.011597 | 0.011630 | 0.011299 | 0.011372 | 0.011262 | 0.011463 | 0.011429 |
| 0.011464 | 0.011496 | 0.011496 | 0.011496 | 0.011650 | 0.011631 | 0.011268 |
| 0.011162 | 0.011164 | 0.011264 | 0.011230 | 0.011333 | 0.011172 | 0.011502 |
| 0.011300 | 0.011455 | 0.011203 | 0.011322 | 0.011296 | 0.011368 | 0.011262 |
| 0.011228 | 0.011228 | 0.011295 | 0.011262 | 0.011463 | 0.011429 | 0.011362 |
| 0.011463 | 0.011530 | 0.011262 | 0.011262 | 0.011295 | 0.011295 | 0.011297 |
| 0.011364 | 0.011295 | 0.011295 | 0.011330 | 0.011463 | 0.011530 | 0.011530 |
| 0.011396 | 0.011500 | 0.011501 | 0.011636 | 0.011661 | 0.011329 | 0.011496 |
| 0.011429 | 0.011429 | 0.011263 | 0.011443 | 0.011373 | 0.011401 | 0.011235 |
| 0.011439 | 0.011607 | 0.011441 | 0.011332 | 0.011228 | 0.011430 | 0.011295 |
| 0.011396 | 0.011329 | 0.011228 | 0.011330 | 0.011430 | 0.011432 | 0.011329 |
| 0.011228 | 0.011161 | 0.011295 | 0.011228 | 0.011161 | 0.011264 | 0.011430 |
| 0.011329 | 0.011262 | 0.011295 | 0.011329 | 0.011295 | 0.011228 | 0.011430 |
| 0.011295 | 0.011329 | 0.011329 | 0.011262 | 0.011329 | 0.011564 | 0.011228 |
| 0.011262 | 0.011664 | 0.011262 | 0.011295 | 0.011262 | 0.011631 | 0.011146 |
| 0.011566 | 0.011145 | 0.011211 | 0.011382 | 0.011467 | 0.011419 | 0.011102 |
| 0.011113 | 0.011429 | 0.011530 | 0.011637 | 0.011498 | 0.011601 | 0.011766 |
| 0.011666 | 0.011703 | 0.011664 | 0.011880 | 0.011631 | 0.012505 | 0.011667 |
| 0.012405 | 0.012173 | 0.012307 | 0.012578 | 0.011631 | 0.011329 | 0.011631 |
| 0.012070 | 0.011971 | 0.011597 | 0.011497 | 0.011565 | 0.011565 | 0.011534 |
| 0.011429 | 0.011399 | 0.011496 | 0.011464 | 0.011833 | 0.011900 | 0.011901 |
| 0.011800 | 0.011901 | 0.012004 | 0.011737 | 0.012070 | 0.012076 | 0.012137 |
| 0.012138 | 0.012172 | 0.012084 | 0.012138 | 0.012139 | 0.011362 | 0.011665 |
| 0.011733 | 0.012236 | 0.011738 | 0.011967 | 0.012440 | 0.011502 | 0.011396 |
| 0.011362 | 0.011362 | 0.011833 | 0.011883 | 0.011975 | 0.011698 | 0.011363 |
| S027     | 0.011977 | 0.011977 | 0.012011 | 0.011773 | 0.011773 | 0.011841 |
| 0.011196 | 0.011128 | 0.011807 | 0.011570 | 0.011637 | 0.011605 | 0.011535 |
| 0.011501 | 0.011773 | 0.011501 | 0.011603 | 0.011637 | 0.011603 | 0.011603 |
| 0.011569 | 0.011603 | 0.011434 | 0.011570 | 0.011604 | 0.011603 | 0.000000 |
| 0.011569 | 0.011603 | 0.011501 | 0.011468 | 0.011671 | 0.011637 | 0.011671 |
| 0.011637 | 0.011739 | 0.011637 | 0.011637 | 0.011671 | 0.011637 | 0.011807 |
| 0.011501 | 0.011637 | 0.011671 | 0.011603 | 0.011637 | 0.011739 | 0.011671 |

|          |          |          |          |          |          |          |
|----------|----------|----------|----------|----------|----------|----------|
| 0.011637 | 0.011807 | 0.011672 | 0.011298 | 0.011637 | 0.011875 | 0.011637 |
| 0.011603 | 0.011638 | 0.011773 | 0.011875 | 0.011400 | 0.011637 | 0.011739 |
| 0.011671 | 0.011739 | 0.011637 | 0.011875 | 0.011434 | 0.011637 | 0.011705 |
| 0.011603 | 0.011705 | 0.011671 | 0.011739 | 0.011603 | 0.011671 | 0.011671 |
| 0.011535 | 0.011603 | 0.011569 | 0.011603 | 0.011637 | 0.011639 | 0.011705 |
| 0.011671 | 0.011603 | 0.011705 | 0.011569 | 0.011467 | 0.011569 | 0.011637 |
| 0.011773 | 0.011739 | 0.011501 | 0.011807 | 0.011603 | 0.011841 | 0.011637 |
| 0.011806 | 0.011286 | 0.011819 | 0.011532 | 0.011551 | 0.011694 | 0.011417 |
| 0.012098 | 0.011419 | 0.011557 | 0.011875 | 0.011875 | 0.011603 | 0.011467 |
| 0.011671 | 0.011671 | 0.011739 | 0.011637 | 0.011739 | 0.011671 | 0.011603 |
| 0.011569 | 0.011637 | 0.011943 | 0.011807 | 0.011671 | 0.011672 | 0.011604 |
| 0.011570 | 0.011502 | 0.011638 | 0.011570 | 0.011536 | 0.011502 | 0.011434 |
| 0.011536 | 0.011604 | 0.011604 | 0.011604 | 0.011638 | 0.011638 | 0.011641 |
| 0.011710 | 0.011604 | 0.011638 | 0.011497 | 0.011573 | 0.011521 | 0.011604 |
| 0.011608 | 0.011547 | 0.011621 | 0.011584 | 0.011541 | 0.011545 | 0.011607 |
| 0.011498 | 0.011618 | 0.011653 | 0.011570 | 0.011515 | 0.011673 | 0.011604 |
| 0.011639 | 0.011674 | 0.011672 | 0.011739 | 0.011705 | 0.012011 | 0.011774 |
| 0.011637 | 0.011706 | 0.011637 | 0.011672 | 0.011536 | 0.011502 | 0.011570 |
| 0.011637 | 0.011637 | 0.011604 | 0.011569 | 0.011603 | 0.011570 | 0.011672 |
| 0.011638 | 0.011740 | 0.011672 | 0.011570 | 0.011674 | 0.011774 | 0.011778 |
| 0.011774 | 0.011638 | 0.011570 | 0.011504 | 0.011638 | 0.011570 | 0.011502 |
| 0.011507 | 0.011774 | 0.011570 | 0.011774 | 0.011535 | 0.011638 | 0.011604 |
| 0.011672 | 0.011570 | 0.011604 | 0.011604 | 0.011638 | 0.011502 | 0.011638 |
| 0.011672 | 0.011604 | 0.011638 | 0.011570 | 0.011604 | 0.011672 | 0.011910 |
| 0.011332 | 0.011264 | 0.011332 | 0.011776 | 0.011400 | 0.011638 | 0.011604 |
| 0.011573 | 0.011919 | 0.011663 | 0.011546 | 0.011335 | 0.011509 | 0.011698 |
| 0.011298 | 0.011576 | 0.011807 | 0.012011 | 0.011717 | 0.011875 | 0.011841 |
| 0.011773 | 0.011943 | 0.011779 | 0.011729 | 0.011698 | 0.011672 | 0.011745 |
| 0.011841 | 0.011708 | 0.011881 | 0.011950 | 0.011841 | 0.011909 | 0.011951 |
| 0.011745 | 0.011953 | 0.011814 | 0.011813 | 0.012081 | 0.011535 | 0.011742 |
| 0.011671 | 0.011637 | 0.011535 | 0.011535 | 0.011603 | 0.011603 | 0.011671 |
| 0.011603 | 0.011671 | 0.011569 | 0.011603 | 0.011603 | 0.011569 | 0.011671 |
| 0.011603 | 0.011366 | 0.011264 | 0.011298 | 0.011501 | 0.011603 | 0.011603 |
| 0.011637 | 0.011535 | 0.011671 | 0.011637 | 0.011569 | 0.011569 | 0.011569 |
| 0.011366 | 0.011671 | 0.011739 | 0.011535 | 0.011637 | 0.011807 | 0.011569 |
| 0.011569 | 0.011603 | 0.011603 | 0.011773 | 0.011569 | 0.011502 | 0.011637 |
| 0.011570 | 0.011603 | 0.011603 | 0.011535 | 0.011535 | 0.011705 | 0.011637 |
| 0.011535 | 0.011637 | 0.011502 | 0.011535 | 0.011671 | 0.011468 | 0.011570 |
| 0.011536 | 0.011671 | 0.011570 | 0.011502 | 0.011230 | 0.011502 | 0.011671 |
| 0.011753 | 0.011569 | 0.011196 | 0.011706 | 0.011671 | 0.011569 | 0.011705 |
| 0.011569 | 0.011875 | 0.011501 | 0.011502 | 0.011501 | 0.011501 | 0.011501 |
| 0.011739 | 0.011604 | 0.011637 | 0.011705 | 0.011535 | 0.011264 | 0.011501 |
| 0.011569 | 0.011569 | 0.011603 | 0.011705 | 0.011603 | 0.011705 | 0.011773 |
| 0.011773 | 0.011739 | 0.011637 | 0.011739 | 0.011705 | 0.011569 | 0.011535 |
| 0.011569 | 0.011569 | 0.011637 | 0.011501 | 0.011535 | 0.011705 | 0.011569 |
| 0.011535 | 0.011603 | 0.011739 | 0.011705 | 0.011671 | 0.011603 | 0.011604 |
| 0.011637 | 0.011603 | 0.011671 | 0.011569 | 0.011705 | 0.011807 | 0.011501 |
| 0.011603 | 0.011400 | 0.011619 | 0.018216 | 0.011391 | 0.011616 | 0.011272 |
| 0.011235 | 0.011274 | 0.011799 | 0.011528 | 0.011448 | 0.011305 | 0.011735 |
| 0.011634 | 0.011491 | 0.011492 | 0.011608 | 0.011535 | 0.011558 | 0.011580 |
| 0.011344 | 0.011475 | 0.011323 | 0.011463 | 0.011739 | 0.011773 | 0.011779 |
| 0.011651 | 0.011740 | 0.011739 | 0.011638 | 0.011637 | 0.011638 | 0.011638 |
| 0.011637 | 0.011569 | 0.011637 | 0.011672 | 0.011638 | 0.011570 | 0.011604 |
| 0.011604 | 0.011672 | 0.011570 | 0.011672 | 0.011706 | 0.011740 | 0.011637 |
| 0.011569 | 0.011570 | 0.011366 | 0.011366 | 0.011706 | 0.011741 | 0.011774 |
| 0.011536 | 0.011536 | 0.011570 | 0.011672 | 0.011536 | 0.011774 | 0.011774 |
| 0.011807 | 0.011807 | 0.011739 | 0.011841 | 0.011400 | 0.011844 | 0.011671 |
| 0.011672 | 0.011740 | 0.011774 | 0.011604 | 0.011672 | 0.011638 | 0.011671 |
| 0.011740 | 0.011740 | 0.011774 | 0.011740 | 0.011639 | 0.011841 | 0.011774 |
| 0.011677 | 0.011570 | 0.011672 | 0.011774 | 0.011672 | 0.011740 | 0.011841 |

|          |          |          |          |          |          |          |
|----------|----------|----------|----------|----------|----------|----------|
| 0.012011 | 0.011717 | 0.011875 | 0.011841 | 0.011773 | 0.011943 | 0.011570 |
| 0.011742 | 0.011638 | 0.011604 | 0.011604 | 0.011672 | 0.011570 | 0.011672 |
| 0.011706 | 0.011740 | 0.011637 | 0.011569 | 0.011570 | 0.011366 | 0.011366 |
| 0.011706 | 0.011741 | 0.011807 | 0.011739 | 0.012217 | 0.011820 | 0.011736 |
| 0.011807 | 0.011762 | 0.011878 | 0.011761 | 0.011875 | 0.011793 | 0.011688 |
| 0.012172 | 0.011656 | 0.011788 | 0.011725 | 0.011931 | 0.011852 | 0.011955 |
| 0.012195 | 0.011786 | 0.011915 | 0.011977 | 0.011841 | 0.011570 | 0.011881 |
| 0.011535 | 0.011705 | 0.011841 | 0.011807 | 0.011812 | 0.011535 | 0.011503 |
| 0.011637 | 0.011569 | 0.011603 | 0.011637 | 0.011535 | 0.011603 | 0.011501 |
| 0.011569 | 0.011603 | 0.011569 | 0.011535 | 0.011637 | 0.011569 | 0.011603 |
| 0.011603 | 0.011535 | 0.011603 | 0.011637 | 0.011535 | 0.011739 | 0.011773 |
| 0.011671 | 0.011671 | 0.011671 | 0.011671 | 0.011603 | 0.011400 | 0.011637 |
| 0.011412 | 0.011603 | 0.011570 | 0.011575 | 0.011637 | 0.011637 | 0.011705 |
| 0.011705 | 0.011637 | 0.011603 | 0.011637 | 0.011739 | 0.011739 | 0.011637 |
| 0.011671 | 0.011807 | 0.011298 | 0.011705 | 0.011909 | 0.011909 | 0.011671 |
| 0.011603 | 0.011671 | 0.011705 | 0.011501 | 0.011672 | 0.011637 | 0.011671 |
| 0.011705 | 0.011569 | 0.011569 | 0.011875 | 0.011875 | 0.011841 | 0.011637 |
| 0.011705 | 0.011739 | 0.011671 | 0.011705 | 0.011671 | 0.011569 | 0.011196 |
| 0.011671 | 0.011603 | 0.011569 | 0.011807 | 0.011637 | 0.011739 | 0.011468 |
| 0.011671 | 0.011264 | 0.011366 | 0.011510 | 0.011402 | 0.011679 | 0.011424 |
| 0.011448 | 0.011726 | 0.011558 | 0.011645 | 0.011601 | 0.011419 | 0.011381 |
| 0.011523 | 0.011326 | 0.011509 | 0.011394 | 0.011386 | 0.011602 | 0.011754 |
| 0.011742 | 0.011654 | 0.011666 | 0.011666 | 0.011674 | 0.011536 | 0.011604 |
| 0.011604 | 0.011672 | 0.011779 | 0.011575 | 0.011918 | 0.011954 | 0.011671 |
| 0.011637 | 0.011706 | 0.011637 | 0.011672 | 0.011536 | 0.011502 | 0.011570 |
| 0.011637 | 0.011637 | 0.011604 | 0.011569 | 0.011603 | 0.011570 | 0.011672 |
| 0.011626 | 0.011627 | 0.011545 | 0.011615 | 0.011752 | 0.011717 | 0.011716 |
| 0.011715 | 0.011672 | 0.011508 | 0.011497 | 0.011608 | 0.011711 | 0.011781 |
| 0.011604 | 0.011643 | 0.011878 | 0.011881 | 0.011809 | 0.011843 | 0.011773 |
| 0.011705 | 0.011773 | 0.011773 | 0.011671 | 0.011637 | 0.011841 | 0.011875 |
| 0.011910 | 0.011312 | 0.011578 | 0.011726 | 0.011603 | 0.011773 | 0.011773 |
| 0.011741 | 0.011841 | 0.011841 | 0.011841 | 0.011937 | 0.011977 | 0.011622 |
| 0.011505 | 0.011516 | 0.011611 | 0.011576 | 0.011613 | 0.011551 | 0.011163 |
| 0.011650 | 0.011372 | 0.011544 | 0.011585 | 0.011638 | 0.011683 | 0.011604 |
| 0.011570 | 0.011502 | 0.011638 | 0.011570 | 0.011536 | 0.011502 | 0.011434 |
| 0.011536 | 0.011604 | 0.011604 | 0.011604 | 0.011638 | 0.011638 | 0.011641 |
| 0.011710 | 0.011604 | 0.011638 | 0.011674 | 0.011536 | 0.011604 | 0.011604 |
| 0.011672 | 0.011779 | 0.011575 | 0.011918 | 0.011954 | 0.011671 | 0.011841 |
| 0.011773 | 0.011773 | 0.011608 | 0.011800 | 0.011693 | 0.011715 | 0.011628 |
| 0.011792 | 0.011986 | 0.011833 | 0.011679 | 0.011570 | 0.011774 | 0.011638 |
| 0.011740 | 0.011672 | 0.011570 | 0.011674 | 0.011774 | 0.011778 | 0.011638 |
| 0.011570 | 0.011504 | 0.011638 | 0.011570 | 0.011502 | 0.011507 | 0.011774 |
| 0.011637 | 0.011569 | 0.011637 | 0.011672 | 0.011638 | 0.011570 | 0.011502 |
| 0.011637 | 0.011671 | 0.011637 | 0.011603 | 0.011671 | 0.011909 | 0.011501 |
| 0.011603 | 0.011400 | 0.011603 | 0.011637 | 0.011603 | 0.011298 | 0.011578 |
| 0.011854 | 0.011402 | 0.011414 | 0.011509 | 0.011552 | 0.011533 | 0.011355 |
| 0.011378 | 0.011502 | 0.011603 | 0.011713 | 0.011571 | 0.011711 | 0.011843 |
| 0.011741 | 0.011745 | 0.011739 | 0.011925 | 0.011671 | 0.012420 | 0.011708 |
| 0.012455 | 0.012152 | 0.012288 | 0.012631 | 0.011603 | 0.011604 | 0.011706 |
| 0.012252 | 0.012016 | 0.011672 | 0.011536 | 0.011639 | 0.011639 | 0.011539 |
| 0.011502 | 0.011506 | 0.011569 | 0.011536 | 0.011911 | 0.011944 | 0.011979 |
| 0.011843 | 0.011945 | 0.012084 | 0.011813 | 0.012252 | 0.012259 | 0.012320 |
| 0.012321 | 0.012321 | 0.012269 | 0.012287 | 0.012289 | 0.011705 | 0.011876 |
| 0.012013 | 0.012488 | 0.011918 | 0.011944 | 0.012422 | 0.011507 | 0.011400 |
| 0.011298 | 0.011366 | 0.011910 | 0.011894 | 0.012022 | 0.011705 | 0.011435 |
| S028     | 0.011866 | 0.011866 | 0.011933 | 0.011698 | 0.011698 | 0.011765 |
| 0.011604 | 0.011536 | 0.011765 | 0.011463 | 0.011530 | 0.011498 | 0.011463 |
| 0.011429 | 0.011664 | 0.011396 | 0.011496 | 0.011564 | 0.011530 | 0.011496 |
| 0.011463 | 0.011496 | 0.011329 | 0.011463 | 0.011497 | 0.011496 | 0.011569 |
| 0.000000 | 0.011496 | 0.011396 | 0.011362 | 0.011564 | 0.011530 | 0.011564 |

|          |          |          |          |          |          |          |
|----------|----------|----------|----------|----------|----------|----------|
| 0.011530 | 0.011631 | 0.011530 | 0.011530 | 0.011564 | 0.011530 | 0.011698 |
| 0.011396 | 0.011530 | 0.011564 | 0.011496 | 0.011530 | 0.011631 | 0.011564 |
| 0.011530 | 0.011698 | 0.011598 | 0.011597 | 0.011530 | 0.011799 | 0.011530 |
| 0.011496 | 0.011530 | 0.011597 | 0.011799 | 0.011631 | 0.011530 | 0.011631 |
| 0.011564 | 0.011631 | 0.011530 | 0.011765 | 0.011732 | 0.011530 | 0.011597 |
| 0.011496 | 0.011597 | 0.011564 | 0.011631 | 0.011564 | 0.011564 | 0.011564 |
| 0.011463 | 0.011496 | 0.011463 | 0.011496 | 0.011530 | 0.011565 | 0.011631 |
| 0.011564 | 0.011530 | 0.011597 | 0.011496 | 0.011564 | 0.011463 | 0.011530 |
| 0.011698 | 0.011631 | 0.011664 | 0.011698 | 0.011530 | 0.011731 | 0.011530 |
| 0.011728 | 0.011658 | 0.011739 | 0.011490 | 0.011433 | 0.011576 | 0.011336 |
| 0.011975 | 0.011416 | 0.011472 | 0.011765 | 0.011765 | 0.011496 | 0.011597 |
| 0.011597 | 0.011564 | 0.011631 | 0.011530 | 0.011631 | 0.011564 | 0.011564 |
| 0.011530 | 0.011564 | 0.011832 | 0.011698 | 0.011597 | 0.011564 | 0.011497 |
| 0.011463 | 0.011396 | 0.011530 | 0.011497 | 0.011430 | 0.011396 | 0.011329 |
| 0.011430 | 0.011497 | 0.011497 | 0.011497 | 0.011530 | 0.011530 | 0.011533 |
| 0.011601 | 0.011530 | 0.011530 | 0.011420 | 0.011458 | 0.011446 | 0.011531 |
| 0.011534 | 0.011473 | 0.011503 | 0.011509 | 0.011434 | 0.011471 | 0.011499 |
| 0.011492 | 0.011543 | 0.011542 | 0.011464 | 0.011475 | 0.011598 | 0.011497 |
| 0.011565 | 0.011566 | 0.011564 | 0.011664 | 0.011597 | 0.011900 | 0.011698 |
| 0.011429 | 0.011597 | 0.011530 | 0.011564 | 0.011429 | 0.011161 | 0.011463 |
| 0.011530 | 0.011530 | 0.011497 | 0.011463 | 0.011496 | 0.011463 | 0.011564 |
| 0.011530 | 0.011631 | 0.011564 | 0.011463 | 0.011566 | 0.011665 | 0.011669 |
| 0.011665 | 0.011564 | 0.011463 | 0.011397 | 0.011530 | 0.011463 | 0.011396 |
| 0.011400 | 0.011665 | 0.011463 | 0.011665 | 0.011429 | 0.011530 | 0.011497 |
| 0.011597 | 0.011497 | 0.011530 | 0.011497 | 0.011530 | 0.011396 | 0.011530 |
| 0.011564 | 0.011497 | 0.011564 | 0.011497 | 0.011530 | 0.011564 | 0.011799 |
| 0.011631 | 0.011564 | 0.011631 | 0.011667 | 0.011631 | 0.011530 | 0.011497 |
| 0.011466 | 0.011748 | 0.011609 | 0.011437 | 0.011637 | 0.011401 | 0.011493 |
| 0.011637 | 0.011536 | 0.011698 | 0.011900 | 0.011607 | 0.011765 | 0.011732 |
| 0.011664 | 0.011832 | 0.011664 | 0.011555 | 0.011605 | 0.011564 | 0.011635 |
| 0.011732 | 0.011633 | 0.011770 | 0.011838 | 0.011765 | 0.011833 | 0.011941 |
| 0.011669 | 0.011841 | 0.011771 | 0.011703 | 0.011969 | 0.011429 | 0.011633 |
| 0.011597 | 0.011530 | 0.011429 | 0.011429 | 0.011496 | 0.011496 | 0.011564 |
| 0.011496 | 0.011564 | 0.011463 | 0.011496 | 0.011463 | 0.011496 | 0.011564 |
| 0.011496 | 0.011664 | 0.011564 | 0.011597 | 0.011396 | 0.011496 | 0.011530 |
| 0.011530 | 0.011496 | 0.011564 | 0.011530 | 0.011463 | 0.011463 | 0.011463 |
| 0.011732 | 0.011564 | 0.011631 | 0.011429 | 0.011530 | 0.011698 | 0.011463 |
| 0.011463 | 0.011530 | 0.011496 | 0.011664 | 0.011463 | 0.011396 | 0.011530 |
| 0.011463 | 0.011496 | 0.011496 | 0.011429 | 0.011429 | 0.011597 | 0.011530 |
| 0.011429 | 0.011530 | 0.011396 | 0.011429 | 0.011564 | 0.011430 | 0.011463 |
| 0.011430 | 0.011564 | 0.011497 | 0.011396 | 0.011463 | 0.011396 | 0.011564 |
| 0.011608 | 0.011463 | 0.011497 | 0.011597 | 0.011564 | 0.011496 | 0.011597 |
| 0.011463 | 0.011799 | 0.011396 | 0.011597 | 0.011396 | 0.011396 | 0.011396 |
| 0.011631 | 0.011564 | 0.011530 | 0.011597 | 0.011429 | 0.011564 | 0.011396 |
| 0.011463 | 0.011463 | 0.011496 | 0.011597 | 0.011496 | 0.011597 | 0.011664 |
| 0.011664 | 0.011631 | 0.011530 | 0.011631 | 0.011597 | 0.011463 | 0.011429 |
| 0.011463 | 0.011463 | 0.011530 | 0.011396 | 0.011429 | 0.011597 | 0.011463 |
| 0.011429 | 0.011496 | 0.011631 | 0.011597 | 0.011564 | 0.011496 | 0.011497 |
| 0.011564 | 0.011496 | 0.011597 | 0.011463 | 0.011597 | 0.011698 | 0.011732 |
| 0.011496 | 0.011631 | 0.011509 | 0.018012 | 0.011453 | 0.011733 | 0.011583 |
| 0.011545 | 0.011588 | 0.011689 | 0.011466 | 0.011720 | 0.011613 | 0.011728 |
| 0.011582 | 0.011427 | 0.011450 | 0.011521 | 0.011450 | 0.011653 | 0.011576 |
| 0.011436 | 0.011246 | 0.011394 | 0.011193 | 0.011631 | 0.011665 | 0.011669 |
| 0.011541 | 0.011631 | 0.011631 | 0.011530 | 0.011564 | 0.011564 | 0.011530 |
| 0.011564 | 0.011496 | 0.011530 | 0.011564 | 0.011530 | 0.011463 | 0.011497 |
| 0.011497 | 0.011564 | 0.011463 | 0.011564 | 0.011597 | 0.011631 | 0.011530 |
| 0.011496 | 0.011463 | 0.011598 | 0.011598 | 0.011597 | 0.011632 | 0.011665 |
| 0.011429 | 0.011429 | 0.011463 | 0.011564 | 0.011429 | 0.011665 | 0.011665 |
| 0.011698 | 0.011698 | 0.011631 | 0.011732 | 0.011631 | 0.011734 | 0.011564 |
| 0.011564 | 0.011631 | 0.011665 | 0.011497 | 0.011564 | 0.011530 | 0.011564 |



|          |          |          |          |          |          |          |
|----------|----------|----------|----------|----------|----------|----------|
| 0.011631 | 0.011631 | 0.011665 | 0.011631 | 0.011532 | 0.011732 | 0.011698 |
| 0.011568 | 0.011463 | 0.011564 | 0.011665 | 0.011564 | 0.011631 | 0.011731 |
| 0.011900 | 0.011607 | 0.011765 | 0.011732 | 0.011664 | 0.011832 | 0.011463 |
| 0.011633 | 0.011531 | 0.011497 | 0.011497 | 0.011564 | 0.011463 | 0.011564 |
| 0.011597 | 0.011631 | 0.011530 | 0.011496 | 0.011463 | 0.011598 | 0.011598 |
| 0.011597 | 0.011632 | 0.011698 | 0.011631 | 0.012204 | 0.011703 | 0.011588 |
| 0.011693 | 0.011650 | 0.011763 | 0.011614 | 0.011760 | 0.011681 | 0.011646 |
| 0.012159 | 0.011545 | 0.011677 | 0.011613 | 0.011887 | 0.011740 | 0.011843 |
| 0.012148 | 0.011625 | 0.011804 | 0.011866 | 0.011732 | 0.011463 | 0.011770 |
| 0.011429 | 0.011597 | 0.011731 | 0.011698 | 0.011702 | 0.011194 | 0.011397 |
| 0.011530 | 0.011463 | 0.011496 | 0.011530 | 0.011429 | 0.011496 | 0.011396 |
| 0.011463 | 0.011496 | 0.011463 | 0.011429 | 0.011530 | 0.011463 | 0.011496 |
| 0.011496 | 0.011429 | 0.011496 | 0.011530 | 0.011429 | 0.011631 | 0.011664 |
| 0.011564 | 0.011564 | 0.011564 | 0.011564 | 0.011496 | 0.011631 | 0.011530 |
| 0.011304 | 0.011497 | 0.000000 | 0.000000 | 0.011597 | 0.011597 | 0.011597 |
| 0.011597 | 0.011530 | 0.011496 | 0.011530 | 0.011631 | 0.011631 | 0.011564 |
| 0.011564 | 0.011698 | 0.011597 | 0.011597 | 0.011799 | 0.011799 | 0.011664 |
| 0.011496 | 0.011564 | 0.011597 | 0.011732 | 0.011564 | 0.011597 | 0.011564 |
| 0.011597 | 0.011463 | 0.011463 | 0.011765 | 0.011765 | 0.011732 | 0.011530 |
| 0.011631 | 0.011698 | 0.011564 | 0.011631 | 0.011597 | 0.011463 | 0.011530 |
| 0.011564 | 0.011530 | 0.011463 | 0.011698 | 0.011530 | 0.011631 | 0.011665 |
| 0.011564 | 0.011671 | 0.011664 | 0.011223 | 0.011342 | 0.011570 | 0.011267 |
| 0.011555 | 0.011644 | 0.011446 | 0.011641 | 0.011499 | 0.011518 | 0.011485 |
| 0.011264 | 0.011455 | 0.011561 | 0.011456 | 0.011438 | 0.011663 | 0.011628 |
| 0.011663 | 0.011532 | 0.011553 | 0.011553 | 0.011566 | 0.011195 | 0.011262 |
| 0.011497 | 0.011564 | 0.011669 | 0.011467 | 0.011806 | 0.011838 | 0.011564 |
| 0.011429 | 0.011597 | 0.011530 | 0.011564 | 0.011429 | 0.011161 | 0.011463 |
| 0.011530 | 0.011530 | 0.011497 | 0.011463 | 0.011496 | 0.011463 | 0.011564 |
| 0.011549 | 0.011550 | 0.011540 | 0.011574 | 0.011710 | 0.011675 | 0.011675 |
| 0.011673 | 0.011598 | 0.011429 | 0.011420 | 0.011534 | 0.011704 | 0.011705 |
| 0.011497 | 0.011568 | 0.011801 | 0.011770 | 0.011699 | 0.011733 | 0.011664 |
| 0.011597 | 0.011664 | 0.011664 | 0.011564 | 0.011866 | 0.011732 | 0.011799 |
| 0.011833 | 0.011630 | 0.011538 | 0.011580 | 0.011497 | 0.011698 | 0.011664 |
| 0.011699 | 0.011731 | 0.011731 | 0.011731 | 0.011886 | 0.011866 | 0.011511 |
| 0.011398 | 0.011406 | 0.011503 | 0.011468 | 0.011504 | 0.011433 | 0.011468 |
| 0.011540 | 0.011367 | 0.011441 | 0.011547 | 0.011531 | 0.011608 | 0.011497 |
| 0.011463 | 0.011396 | 0.011530 | 0.011497 | 0.011430 | 0.011396 | 0.011329 |
| 0.011430 | 0.011497 | 0.011497 | 0.011497 | 0.011530 | 0.011530 | 0.011533 |
| 0.011601 | 0.011530 | 0.011530 | 0.011566 | 0.011195 | 0.011262 | 0.011497 |
| 0.011564 | 0.011669 | 0.011467 | 0.011806 | 0.011838 | 0.011564 | 0.011732 |
| 0.011664 | 0.011664 | 0.011500 | 0.011687 | 0.011616 | 0.011639 | 0.011516 |
| 0.011680 | 0.011789 | 0.011695 | 0.011570 | 0.011463 | 0.011665 | 0.011530 |
| 0.011631 | 0.011564 | 0.011463 | 0.011566 | 0.011665 | 0.011669 | 0.011564 |
| 0.011463 | 0.011397 | 0.011530 | 0.011463 | 0.011396 | 0.011400 | 0.011665 |
| 0.011564 | 0.011496 | 0.011530 | 0.011564 | 0.011530 | 0.011463 | 0.011396 |
| 0.011530 | 0.011564 | 0.011564 | 0.011496 | 0.011564 | 0.011799 | 0.011396 |
| 0.011496 | 0.011631 | 0.011496 | 0.011530 | 0.011496 | 0.011597 | 0.011489 |
| 0.011735 | 0.011358 | 0.011361 | 0.011181 | 0.011264 | 0.011204 | 0.011311 |
| 0.011323 | 0.011396 | 0.011497 | 0.011603 | 0.011464 | 0.011602 | 0.011733 |
| 0.011632 | 0.011669 | 0.011631 | 0.011880 | 0.011597 | 0.012472 | 0.011633 |
| 0.012372 | 0.012139 | 0.012274 | 0.012545 | 0.011597 | 0.011497 | 0.011598 |
| 0.012238 | 0.011971 | 0.011564 | 0.011463 | 0.011531 | 0.011531 | 0.011500 |
| 0.011396 | 0.011399 | 0.011463 | 0.011430 | 0.011800 | 0.011866 | 0.011867 |
| 0.011767 | 0.011867 | 0.011971 | 0.011737 | 0.012239 | 0.012246 | 0.012306 |
| 0.012307 | 0.012340 | 0.012289 | 0.012307 | 0.012308 | 0.011597 | 0.011833 |
| 0.011901 | 0.012404 | 0.011908 | 0.011934 | 0.012407 | 0.011468 | 0.011363 |
| 0.011329 | 0.011329 | 0.011800 | 0.011801 | 0.011940 | 0.011664 | 0.011330 |
| S029     | 0.011631 | 0.011631 | 0.011967 | 0.011732 | 0.011732 | 0.011799 |
| 0.011637 | 0.011569 | 0.011799 | 0.011228 | 0.011295 | 0.011262 | 0.011228 |
| 0.011262 | 0.011429 | 0.011228 | 0.011262 | 0.011329 | 0.011295 | 0.011262 |

|          |          |          |          |          |          |          |
|----------|----------|----------|----------|----------|----------|----------|
| 0.011228 | 0.011262 | 0.011362 | 0.011228 | 0.011262 | 0.011262 | 0.011603 |
| 0.011496 | 0.000000 | 0.011161 | 0.011396 | 0.011329 | 0.011295 | 0.011329 |
| 0.011295 | 0.011396 | 0.011295 | 0.011295 | 0.011329 | 0.011295 | 0.011463 |
| 0.011228 | 0.011295 | 0.011329 | 0.011262 | 0.011362 | 0.011396 | 0.011329 |
| 0.011295 | 0.011463 | 0.011362 | 0.011631 | 0.011295 | 0.011564 | 0.011295 |
| 0.011262 | 0.011362 | 0.011429 | 0.011564 | 0.011664 | 0.011362 | 0.011463 |
| 0.011329 | 0.011396 | 0.011295 | 0.011530 | 0.011765 | 0.011295 | 0.011362 |
| 0.011262 | 0.011362 | 0.011329 | 0.011396 | 0.011329 | 0.011329 | 0.011329 |
| 0.011228 | 0.011262 | 0.011228 | 0.011329 | 0.011295 | 0.011329 | 0.011396 |
| 0.011329 | 0.011295 | 0.011362 | 0.011262 | 0.011396 | 0.011228 | 0.011295 |
| 0.011463 | 0.011396 | 0.011631 | 0.011463 | 0.011295 | 0.011530 | 0.011295 |
| 0.011468 | 0.011695 | 0.011513 | 0.011216 | 0.011210 | 0.011281 | 0.011415 |
| 0.012048 | 0.011518 | 0.011225 | 0.011530 | 0.011530 | 0.011329 | 0.011429 |
| 0.011362 | 0.011329 | 0.011396 | 0.011295 | 0.011396 | 0.011329 | 0.011329 |
| 0.011295 | 0.011396 | 0.011597 | 0.011463 | 0.011362 | 0.011329 | 0.011262 |
| 0.011228 | 0.011228 | 0.011295 | 0.011262 | 0.011463 | 0.011430 | 0.011362 |
| 0.011463 | 0.011530 | 0.011262 | 0.011262 | 0.011295 | 0.011295 | 0.011297 |
| 0.011364 | 0.011295 | 0.011295 | 0.011168 | 0.011205 | 0.000000 | 0.011296 |
| 0.011297 | 0.011232 | 0.000000 | 0.000000 | 0.011196 | 0.011232 | 0.011263 |
| 0.011528 | 0.011302 | 0.011336 | 0.011228 | 0.011233 | 0.011363 | 0.011329 |
| 0.011397 | 0.011330 | 0.011329 | 0.011429 | 0.011362 | 0.011732 | 0.011530 |
| 0.011564 | 0.011430 | 0.011295 | 0.011396 | 0.011195 | 0.011429 | 0.011228 |
| 0.011295 | 0.011295 | 0.011262 | 0.011228 | 0.011262 | 0.011228 | 0.011329 |
| 0.011295 | 0.011396 | 0.011329 | 0.011228 | 0.011330 | 0.011430 | 0.011432 |
| 0.011396 | 0.011329 | 0.011228 | 0.011161 | 0.011295 | 0.011228 | 0.011161 |
| 0.011264 | 0.011396 | 0.011228 | 0.011396 | 0.011195 | 0.011295 | 0.011262 |
| 0.011362 | 0.011262 | 0.011295 | 0.011262 | 0.011295 | 0.011161 | 0.011295 |
| 0.011329 | 0.011262 | 0.011329 | 0.011262 | 0.011295 | 0.011329 | 0.011564 |
| 0.011665 | 0.011597 | 0.011665 | 0.011431 | 0.011665 | 0.011295 | 0.011262 |
| 0.011297 | 0.011586 | 0.011380 | 0.011197 | 0.011671 | 0.011163 | 0.011296 |
| 0.011671 | 0.011570 | 0.011463 | 0.011664 | 0.011368 | 0.011530 | 0.011497 |
| 0.011429 | 0.011597 | 0.011415 | 0.011225 | 0.011312 | 0.011329 | 0.011365 |
| 0.011497 | 0.011397 | 0.011533 | 0.011602 | 0.011530 | 0.011597 | 0.011704 |
| 0.011432 | 0.011603 | 0.011534 | 0.011466 | 0.011733 | 0.011194 | 0.011397 |
| 0.011362 | 0.011295 | 0.011194 | 0.011194 | 0.011262 | 0.011262 | 0.011329 |
| 0.011262 | 0.011329 | 0.011228 | 0.011329 | 0.011262 | 0.011262 | 0.011329 |
| 0.011262 | 0.011698 | 0.011597 | 0.011631 | 0.011161 | 0.011262 | 0.011295 |
| 0.011295 | 0.011262 | 0.011329 | 0.011362 | 0.011228 | 0.011228 | 0.011228 |
| 0.011765 | 0.011396 | 0.011396 | 0.011195 | 0.011295 | 0.011463 | 0.011228 |
| 0.011228 | 0.011295 | 0.011262 | 0.011429 | 0.011228 | 0.011362 | 0.011496 |
| 0.011429 | 0.011262 | 0.011262 | 0.011194 | 0.011194 | 0.011362 | 0.011295 |
| 0.011194 | 0.011295 | 0.011161 | 0.011195 | 0.011329 | 0.011463 | 0.011228 |
| 0.011195 | 0.011329 | 0.011262 | 0.011161 | 0.011496 | 0.011161 | 0.011329 |
| 0.011403 | 0.011228 | 0.011530 | 0.011362 | 0.011396 | 0.011262 | 0.011362 |
| 0.011228 | 0.011564 | 0.011161 | 0.011429 | 0.011228 | 0.011228 | 0.011161 |
| 0.011396 | 0.011598 | 0.011295 | 0.011362 | 0.011194 | 0.011597 | 0.011228 |
| 0.011228 | 0.011228 | 0.011262 | 0.011362 | 0.011262 | 0.011362 | 0.011429 |
| 0.011429 | 0.011396 | 0.011295 | 0.011396 | 0.011362 | 0.011228 | 0.011195 |
| 0.011228 | 0.011228 | 0.011295 | 0.011228 | 0.011195 | 0.011362 | 0.011228 |
| 0.011262 | 0.011262 | 0.011396 | 0.011429 | 0.011329 | 0.011262 | 0.011262 |
| 0.011329 | 0.011262 | 0.011362 | 0.011228 | 0.011362 | 0.011463 | 0.011765 |
| 0.011262 | 0.011664 | 0.011267 | 0.017786 | 0.011257 | 0.011427 | 0.011618 |
| 0.011579 | 0.011623 | 0.011322 | 0.011292 | 0.011774 | 0.011647 | 0.011425 |
| 0.011487 | 0.011610 | 0.011177 | 0.011270 | 0.011255 | 0.011356 | 0.011275 |
| 0.011483 | 0.011433 | 0.011431 | 0.011193 | 0.011396 | 0.011429 | 0.011432 |
| 0.011266 | 0.011362 | 0.011396 | 0.011362 | 0.011329 | 0.011329 | 0.011295 |
| 0.011329 | 0.011262 | 0.011295 | 0.011329 | 0.011295 | 0.011228 | 0.011262 |
| 0.011262 | 0.011329 | 0.011228 | 0.011329 | 0.011362 | 0.011396 | 0.011295 |
| 0.011329 | 0.011295 | 0.011631 | 0.011631 | 0.011362 | 0.011396 | 0.011430 |
| 0.011195 | 0.011195 | 0.011228 | 0.011329 | 0.011195 | 0.011430 | 0.011430 |

|          |          |          |          |          |          |          |
|----------|----------|----------|----------|----------|----------|----------|
| 0.011463 | 0.011463 | 0.011396 | 0.011497 | 0.011665 | 0.011498 | 0.011329 |
| 0.011329 | 0.011396 | 0.011430 | 0.011262 | 0.011329 | 0.011295 | 0.011329 |
| 0.011396 | 0.011396 | 0.011429 | 0.011396 | 0.011296 | 0.011497 | 0.011463 |
| 0.011331 | 0.011228 | 0.011329 | 0.011430 | 0.011329 | 0.011463 | 0.011496 |
| 0.011664 | 0.011368 | 0.011530 | 0.011497 | 0.011429 | 0.011597 | 0.011228 |
| 0.011397 | 0.011296 | 0.011262 | 0.011262 | 0.011329 | 0.011228 | 0.011329 |
| 0.011362 | 0.011396 | 0.011295 | 0.011329 | 0.011295 | 0.011631 | 0.011631 |
| 0.011362 | 0.011396 | 0.011463 | 0.011396 | 0.012036 | 0.011453 | 0.011342 |
| 0.011447 | 0.011407 | 0.011482 | 0.011406 | 0.011515 | 0.011439 | 0.011405 |
| 0.011987 | 0.011302 | 0.011437 | 0.011371 | 0.011645 | 0.011502 | 0.011605 |
| 0.012012 | 0.011437 | 0.011567 | 0.011631 | 0.011496 | 0.011497 | 0.011533 |
| 0.011194 | 0.011362 | 0.011496 | 0.011463 | 0.011466 | 0.011463 | 0.011431 |
| 0.011295 | 0.011228 | 0.011262 | 0.011295 | 0.011195 | 0.011262 | 0.011161 |
| 0.011295 | 0.011329 | 0.011228 | 0.011195 | 0.011295 | 0.011228 | 0.011262 |
| 0.011262 | 0.011194 | 0.011262 | 0.011295 | 0.011194 | 0.011396 | 0.011429 |
| 0.011329 | 0.011396 | 0.011329 | 0.011329 | 0.011262 | 0.011664 | 0.011295 |
| 0.011304 | 0.011262 | 0.011497 | 0.011501 | 0.011362 | 0.011362 | 0.011362 |
| 0.011362 | 0.011295 | 0.011262 | 0.011295 | 0.011396 | 0.011396 | 0.011329 |
| 0.011329 | 0.011463 | 0.011631 | 0.011362 | 0.011564 | 0.011564 | 0.011429 |
| 0.011262 | 0.011329 | 0.011362 | 0.011765 | 0.011329 | 0.011362 | 0.011329 |
| 0.011362 | 0.011295 | 0.011295 | 0.011597 | 0.011530 | 0.011564 | 0.011295 |
| 0.011396 | 0.011463 | 0.011329 | 0.011396 | 0.011362 | 0.011228 | 0.011564 |
| 0.011329 | 0.011295 | 0.011295 | 0.011463 | 0.011295 | 0.011396 | 0.011631 |
| 0.011329 | 0.011705 | 0.011698 | 0.011507 | 0.011229 | 0.011400 | 0.011267 |
| 0.011225 | 0.011722 | 0.011236 | 0.011462 | 0.011304 | 0.011417 | 0.011432 |
| 0.011468 | 0.011258 | 0.011339 | 0.011192 | 0.011276 | 0.011395 | 0.011385 |
| 0.011362 | 0.011296 | 0.011377 | 0.011307 | 0.011330 | 0.011463 | 0.011530 |
| 0.011530 | 0.011396 | 0.011500 | 0.011501 | 0.011636 | 0.011661 | 0.011329 |
| 0.011564 | 0.011430 | 0.011295 | 0.011396 | 0.011195 | 0.011429 | 0.011228 |
| 0.011295 | 0.011295 | 0.011262 | 0.011228 | 0.011262 | 0.011228 | 0.011329 |
| 0.011305 | 0.011305 | 0.011300 | 0.011334 | 0.011471 | 0.011436 | 0.011436 |
| 0.011435 | 0.011363 | 0.011171 | 0.011168 | 0.011297 | 0.011467 | 0.011467 |
| 0.011262 | 0.011331 | 0.011565 | 0.011533 | 0.011464 | 0.011498 | 0.011429 |
| 0.011362 | 0.011429 | 0.011429 | 0.011329 | 0.011900 | 0.011497 | 0.011564 |
| 0.011598 | 0.011665 | 0.011299 | 0.011372 | 0.011262 | 0.011463 | 0.011429 |
| 0.011464 | 0.011496 | 0.011497 | 0.011497 | 0.011611 | 0.011631 | 0.011234 |
| 0.011162 | 0.011130 | 0.000000 | 0.011230 | 0.011299 | 0.011135 | 0.011502 |
| 0.011300 | 0.011411 | 0.011108 | 0.011285 | 0.011296 | 0.011368 | 0.011262 |
| 0.011228 | 0.011228 | 0.011295 | 0.011262 | 0.011463 | 0.011430 | 0.011362 |
| 0.011463 | 0.011530 | 0.011262 | 0.011262 | 0.011295 | 0.011295 | 0.011297 |
| 0.011364 | 0.011295 | 0.011295 | 0.011330 | 0.011463 | 0.011530 | 0.011530 |
| 0.011396 | 0.011500 | 0.011501 | 0.011636 | 0.011661 | 0.011329 | 0.011496 |
| 0.011429 | 0.011429 | 0.011263 | 0.011443 | 0.011338 | 0.011401 | 0.011270 |
| 0.011439 | 0.011561 | 0.011441 | 0.011332 | 0.011228 | 0.011396 | 0.011295 |
| 0.011396 | 0.011329 | 0.011228 | 0.011330 | 0.011430 | 0.011432 | 0.011329 |
| 0.011228 | 0.011161 | 0.011295 | 0.011228 | 0.011161 | 0.011264 | 0.011396 |
| 0.011329 | 0.011262 | 0.011295 | 0.011329 | 0.011295 | 0.011228 | 0.011430 |
| 0.011295 | 0.011329 | 0.011329 | 0.011262 | 0.011329 | 0.011564 | 0.011228 |
| 0.011262 | 0.011664 | 0.011262 | 0.011295 | 0.011262 | 0.011631 | 0.011189 |
| 0.011679 | 0.011230 | 0.011261 | 0.011463 | 0.011549 | 0.011455 | 0.011186 |
| 0.011218 | 0.011429 | 0.011530 | 0.011637 | 0.011498 | 0.011635 | 0.011766 |
| 0.011666 | 0.011703 | 0.011664 | 0.011914 | 0.011631 | 0.012505 | 0.011667 |
| 0.012406 | 0.012173 | 0.012307 | 0.012579 | 0.011631 | 0.011329 | 0.011631 |
| 0.012002 | 0.012005 | 0.011597 | 0.011497 | 0.011565 | 0.011565 | 0.011534 |
| 0.011429 | 0.011433 | 0.011496 | 0.011464 | 0.011834 | 0.011900 | 0.011901 |
| 0.011800 | 0.011901 | 0.012004 | 0.011771 | 0.012070 | 0.012076 | 0.012137 |
| 0.012138 | 0.012172 | 0.012118 | 0.012138 | 0.012072 | 0.011362 | 0.011665 |
| 0.011733 | 0.012236 | 0.011738 | 0.011967 | 0.012440 | 0.011502 | 0.011396 |
| 0.011362 | 0.011362 | 0.011833 | 0.011842 | 0.011975 | 0.011698 | 0.011363 |

|          |          |          |          |          |          |          |
|----------|----------|----------|----------|----------|----------|----------|
| S030     | 0.011530 | 0.011530 | 0.011866 | 0.011631 | 0.011631 | 0.011698 |
| 0.011535 | 0.011468 | 0.011698 | 0.011127 | 0.011194 | 0.011161 | 0.011127 |
| 0.011161 | 0.011329 | 0.011127 | 0.011161 | 0.011228 | 0.011194 | 0.011161 |
| 0.011127 | 0.011161 | 0.011262 | 0.011127 | 0.011161 | 0.011161 | 0.011501 |
| 0.011396 | 0.011161 | 0.000000 | 0.011295 | 0.011228 | 0.011195 | 0.011228 |
| 0.011194 | 0.011295 | 0.011194 | 0.011194 | 0.011228 | 0.011194 | 0.011362 |
| 0.011127 | 0.011194 | 0.011228 | 0.011161 | 0.011262 | 0.011295 | 0.011228 |
| 0.011194 | 0.011362 | 0.011262 | 0.011530 | 0.011194 | 0.011463 | 0.011194 |
| 0.011161 | 0.011262 | 0.011329 | 0.011463 | 0.011564 | 0.011262 | 0.011362 |
| 0.011228 | 0.011295 | 0.011195 | 0.011429 | 0.011664 | 0.011194 | 0.011262 |
| 0.011161 | 0.011262 | 0.011228 | 0.011295 | 0.011228 | 0.011228 | 0.011228 |
| 0.011127 | 0.011161 | 0.011127 | 0.011228 | 0.011194 | 0.011228 | 0.011295 |
| 0.011228 | 0.011194 | 0.011262 | 0.011161 | 0.011295 | 0.011127 | 0.011194 |
| 0.011362 | 0.011295 | 0.011530 | 0.011362 | 0.011194 | 0.011429 | 0.011194 |
| 0.011357 | 0.011583 | 0.011400 | 0.011099 | 0.011098 | 0.011207 | 0.011296 |
| 0.011938 | 0.011365 | 0.011102 | 0.011429 | 0.011429 | 0.011228 | 0.011329 |
| 0.011262 | 0.011228 | 0.011295 | 0.011194 | 0.011295 | 0.011228 | 0.011228 |
| 0.011194 | 0.011295 | 0.011496 | 0.011362 | 0.011262 | 0.011228 | 0.011161 |
| 0.011127 | 0.011127 | 0.011195 | 0.011161 | 0.011362 | 0.011329 | 0.011262 |
| 0.011362 | 0.011429 | 0.011161 | 0.011161 | 0.011195 | 0.011195 | 0.011195 |
| 0.011263 | 0.011195 | 0.011195 | 0.000000 | 0.011133 | 0.011095 | 0.011195 |
| 0.011196 | 0.011129 | 0.011171 | 0.011164 | 0.011094 | 0.011129 | 0.011162 |
| 0.011420 | 0.011198 | 0.011232 | 0.011128 | 0.011129 | 0.011262 | 0.011228 |
| 0.011296 | 0.011229 | 0.011228 | 0.011329 | 0.011262 | 0.011631 | 0.011430 |
| 0.011463 | 0.011329 | 0.011195 | 0.011295 | 0.011094 | 0.011329 | 0.011127 |
| 0.011194 | 0.011194 | 0.011161 | 0.011127 | 0.011161 | 0.011127 | 0.011228 |
| 0.011195 | 0.011295 | 0.011228 | 0.011127 | 0.011229 | 0.011329 | 0.011331 |
| 0.011329 | 0.011228 | 0.011127 | 0.000000 | 0.011195 | 0.011127 | 0.000000 |
| 0.011162 | 0.011329 | 0.011127 | 0.011329 | 0.011094 | 0.011195 | 0.011161 |
| 0.011262 | 0.011161 | 0.011195 | 0.011161 | 0.011195 | 0.000000 | 0.011195 |
| 0.011228 | 0.011161 | 0.011228 | 0.011161 | 0.011195 | 0.011228 | 0.011463 |
| 0.011564 | 0.011496 | 0.011564 | 0.011330 | 0.011564 | 0.011195 | 0.011161 |
| 0.011195 | 0.011464 | 0.011289 | 0.011095 | 0.011569 | 0.000000 | 0.011178 |
| 0.011569 | 0.011468 | 0.011362 | 0.011564 | 0.011265 | 0.011429 | 0.011396 |
| 0.011329 | 0.011496 | 0.011344 | 0.011184 | 0.011228 | 0.011228 | 0.011297 |
| 0.011396 | 0.011296 | 0.011432 | 0.011500 | 0.011429 | 0.011497 | 0.011602 |
| 0.011331 | 0.011501 | 0.011432 | 0.011364 | 0.011632 | 0.011094 | 0.011296 |
| 0.011262 | 0.011194 | 0.011094 | 0.011094 | 0.011161 | 0.011161 | 0.011228 |
| 0.011161 | 0.011228 | 0.011127 | 0.011228 | 0.011161 | 0.011161 | 0.011228 |
| 0.011161 | 0.011597 | 0.011496 | 0.011530 | 0.000000 | 0.011161 | 0.011195 |
| 0.011194 | 0.011161 | 0.011228 | 0.011262 | 0.011127 | 0.011127 | 0.011127 |
| 0.011664 | 0.011295 | 0.011295 | 0.011094 | 0.011194 | 0.011362 | 0.011127 |
| 0.011127 | 0.011194 | 0.011161 | 0.011329 | 0.011127 | 0.011262 | 0.011396 |
| 0.011329 | 0.011161 | 0.011161 | 0.011094 | 0.011094 | 0.011262 | 0.011194 |
| 0.011094 | 0.011194 | 0.000000 | 0.011094 | 0.011228 | 0.011362 | 0.011127 |
| 0.011094 | 0.011228 | 0.011161 | 0.000000 | 0.011396 | 0.000000 | 0.011228 |
| 0.011300 | 0.011127 | 0.011429 | 0.011262 | 0.011295 | 0.011161 | 0.011262 |
| 0.011127 | 0.011463 | 0.000000 | 0.011329 | 0.011127 | 0.011127 | 0.000000 |
| 0.011295 | 0.011497 | 0.011195 | 0.011262 | 0.011094 | 0.011496 | 0.011127 |
| 0.011127 | 0.011127 | 0.011161 | 0.011262 | 0.011161 | 0.011262 | 0.011329 |
| 0.011329 | 0.011295 | 0.011194 | 0.011295 | 0.011262 | 0.011127 | 0.011094 |
| 0.011127 | 0.011127 | 0.011195 | 0.011127 | 0.011094 | 0.011262 | 0.011127 |
| 0.011161 | 0.011161 | 0.011295 | 0.011329 | 0.011228 | 0.011161 | 0.011161 |
| 0.011228 | 0.011161 | 0.011262 | 0.011127 | 0.011262 | 0.011362 | 0.011664 |
| 0.011161 | 0.011564 | 0.011164 | 0.017672 | 0.011126 | 0.011305 | 0.011514 |
| 0.011475 | 0.011517 | 0.011217 | 0.011176 | 0.011609 | 0.011543 | 0.011242 |
| 0.011392 | 0.011426 | 0.000000 | 0.011144 | 0.011138 | 0.011208 | 0.011146 |
| 0.011389 | 0.011321 | 0.011320 | 0.011126 | 0.011295 | 0.011329 | 0.011331 |
| 0.011198 | 0.011295 | 0.011295 | 0.011262 | 0.011228 | 0.011228 | 0.011195 |
| 0.011228 | 0.011161 | 0.011195 | 0.011228 | 0.011195 | 0.011127 | 0.011161 |

|          |          |          |          |          |          |          |
|----------|----------|----------|----------|----------|----------|----------|
| 0.011161 | 0.011228 | 0.011127 | 0.011228 | 0.011262 | 0.011295 | 0.011195 |
| 0.011228 | 0.011195 | 0.011530 | 0.011530 | 0.011262 | 0.011296 | 0.011329 |
| 0.011094 | 0.011094 | 0.011127 | 0.011228 | 0.011094 | 0.011329 | 0.011329 |
| 0.011362 | 0.011362 | 0.011295 | 0.011396 | 0.011564 | 0.011397 | 0.011228 |
| 0.011228 | 0.011295 | 0.011329 | 0.011161 | 0.011228 | 0.011195 | 0.011228 |
| 0.011295 | 0.011295 | 0.011329 | 0.011295 | 0.011195 | 0.011396 | 0.011362 |
| 0.011230 | 0.011127 | 0.011228 | 0.011329 | 0.011228 | 0.011362 | 0.011396 |
| 0.011564 | 0.011265 | 0.011429 | 0.011396 | 0.011329 | 0.011496 | 0.011128 |
| 0.011296 | 0.011195 | 0.011161 | 0.011161 | 0.011228 | 0.011127 | 0.011228 |
| 0.011262 | 0.011295 | 0.011195 | 0.011228 | 0.011195 | 0.011530 | 0.011530 |
| 0.011262 | 0.011296 | 0.011362 | 0.011295 | 0.011934 | 0.011346 | 0.011271 |
| 0.011341 | 0.011303 | 0.011411 | 0.011303 | 0.011410 | 0.011336 | 0.011302 |
| 0.011884 | 0.011199 | 0.011334 | 0.011268 | 0.011542 | 0.011400 | 0.011502 |
| 0.011910 | 0.011362 | 0.011466 | 0.011530 | 0.011396 | 0.011396 | 0.011432 |
| 0.011094 | 0.011262 | 0.011396 | 0.011362 | 0.011364 | 0.011362 | 0.011330 |
| 0.011194 | 0.011127 | 0.011161 | 0.011194 | 0.011094 | 0.011161 | 0.000000 |
| 0.011194 | 0.011228 | 0.011127 | 0.011094 | 0.011194 | 0.011127 | 0.011161 |
| 0.011161 | 0.011094 | 0.011161 | 0.011195 | 0.011094 | 0.011295 | 0.011329 |
| 0.011228 | 0.011295 | 0.011228 | 0.011228 | 0.011161 | 0.011564 | 0.011194 |
| 0.011234 | 0.011161 | 0.011396 | 0.011399 | 0.011262 | 0.011262 | 0.011262 |
| 0.011262 | 0.011195 | 0.011161 | 0.011195 | 0.011295 | 0.011295 | 0.011228 |
| 0.011228 | 0.011362 | 0.011530 | 0.011262 | 0.011463 | 0.011463 | 0.011329 |
| 0.011161 | 0.011228 | 0.011262 | 0.011664 | 0.011228 | 0.011262 | 0.011228 |
| 0.011262 | 0.011194 | 0.011194 | 0.011497 | 0.011429 | 0.011463 | 0.011194 |
| 0.011295 | 0.011362 | 0.011228 | 0.011295 | 0.011262 | 0.011127 | 0.011463 |
| 0.011228 | 0.011194 | 0.011194 | 0.011362 | 0.011194 | 0.011295 | 0.011530 |
| 0.011228 | 0.011603 | 0.011597 | 0.011385 | 0.011117 | 0.011298 | 0.011163 |
| 0.011115 | 0.011605 | 0.011131 | 0.011328 | 0.011158 | 0.011264 | 0.011273 |
| 0.011366 | 0.000000 | 0.011227 | 0.000000 | 0.011114 | 0.011261 | 0.011263 |
| 0.011286 | 0.011178 | 0.011272 | 0.011201 | 0.011229 | 0.011362 | 0.011429 |
| 0.011429 | 0.011296 | 0.011398 | 0.011399 | 0.011535 | 0.011555 | 0.011228 |
| 0.011463 | 0.011329 | 0.011195 | 0.011295 | 0.011094 | 0.011329 | 0.011127 |
| 0.011194 | 0.011194 | 0.011161 | 0.011127 | 0.011161 | 0.011127 | 0.011228 |
| 0.011200 | 0.011200 | 0.011197 | 0.011231 | 0.011368 | 0.011333 | 0.011333 |
| 0.011333 | 0.011262 | 0.000000 | 0.000000 | 0.011196 | 0.011365 | 0.011366 |
| 0.011161 | 0.011230 | 0.011464 | 0.011432 | 0.011363 | 0.011397 | 0.011329 |
| 0.011262 | 0.011329 | 0.011329 | 0.011228 | 0.011799 | 0.011396 | 0.011463 |
| 0.011497 | 0.011558 | 0.011197 | 0.011268 | 0.011161 | 0.011362 | 0.011329 |
| 0.011363 | 0.011396 | 0.011396 | 0.011396 | 0.011532 | 0.011530 | 0.011164 |
| 0.000000 | 0.000000 | 0.011162 | 0.011128 | 0.011231 | 0.000000 | 0.011400 |
| 0.011197 | 0.011323 | 0.000000 | 0.011210 | 0.011195 | 0.011265 | 0.011161 |
| 0.011127 | 0.011127 | 0.011195 | 0.011161 | 0.011362 | 0.011329 | 0.011262 |
| 0.011362 | 0.011429 | 0.011161 | 0.011161 | 0.011195 | 0.011195 | 0.011195 |
| 0.011263 | 0.011195 | 0.011195 | 0.011229 | 0.011362 | 0.011429 | 0.011429 |
| 0.011296 | 0.011398 | 0.011399 | 0.011535 | 0.011555 | 0.011228 | 0.011396 |
| 0.011329 | 0.011329 | 0.011162 | 0.011339 | 0.011269 | 0.011299 | 0.011165 |
| 0.011336 | 0.011516 | 0.011314 | 0.011230 | 0.011127 | 0.011329 | 0.011195 |
| 0.011295 | 0.011228 | 0.011127 | 0.011229 | 0.011329 | 0.011331 | 0.011228 |
| 0.011127 | 0.000000 | 0.011195 | 0.011127 | 0.000000 | 0.011162 | 0.011329 |
| 0.011228 | 0.011161 | 0.011195 | 0.011228 | 0.011195 | 0.011127 | 0.011329 |
| 0.011194 | 0.011228 | 0.011228 | 0.011161 | 0.011228 | 0.011463 | 0.011127 |
| 0.011161 | 0.011564 | 0.011161 | 0.011194 | 0.011161 | 0.011530 | 0.011103 |
| 0.011566 | 0.011103 | 0.011161 | 0.011342 | 0.011426 | 0.011347 | 0.000000 |
| 0.011113 | 0.011329 | 0.011429 | 0.011535 | 0.011397 | 0.011534 | 0.011665 |
| 0.011565 | 0.011601 | 0.011564 | 0.011812 | 0.011530 | 0.012404 | 0.011565 |
| 0.012304 | 0.012072 | 0.012206 | 0.012477 | 0.011530 | 0.011228 | 0.011530 |
| 0.011969 | 0.011903 | 0.011496 | 0.011396 | 0.011464 | 0.011464 | 0.011432 |
| 0.011329 | 0.011331 | 0.011396 | 0.011363 | 0.011733 | 0.011799 | 0.011800 |
| 0.011699 | 0.011800 | 0.011903 | 0.011669 | 0.011969 | 0.011974 | 0.012036 |
| 0.012037 | 0.012070 | 0.012015 | 0.012037 | 0.012038 | 0.011262 | 0.011564 |

|          |          |          |          |          |          |          |
|----------|----------|----------|----------|----------|----------|----------|
| 0.011632 | 0.012135 | 0.011636 | 0.011866 | 0.012339 | 0.011400 | 0.011295 |
| 0.011262 | 0.011262 | 0.011732 | 0.011759 | 0.011869 | 0.011597 | 0.011262 |
| S031     | 0.011765 | 0.011765 | 0.011765 | 0.011530 | 0.011530 | 0.011597 |
| 0.011502 | 0.011434 | 0.011664 | 0.011362 | 0.011429 | 0.011397 | 0.011362 |
| 0.011329 | 0.011564 | 0.011295 | 0.011396 | 0.011463 | 0.011429 | 0.011396 |
| 0.011362 | 0.011396 | 0.011094 | 0.011363 | 0.011396 | 0.011396 | 0.011468 |
| 0.011362 | 0.011396 | 0.011295 | 0.000000 | 0.011463 | 0.011429 | 0.011463 |
| 0.011429 | 0.011530 | 0.011429 | 0.011429 | 0.011463 | 0.011429 | 0.011597 |
| 0.011295 | 0.011429 | 0.011463 | 0.011396 | 0.011429 | 0.011530 | 0.011463 |
| 0.011429 | 0.011597 | 0.011497 | 0.011497 | 0.011429 | 0.011698 | 0.011429 |
| 0.011396 | 0.011429 | 0.011564 | 0.011698 | 0.011530 | 0.011429 | 0.011530 |
| 0.011463 | 0.011530 | 0.011429 | 0.011664 | 0.011631 | 0.011429 | 0.011496 |
| 0.011396 | 0.011496 | 0.011463 | 0.011530 | 0.011463 | 0.011463 | 0.011463 |
| 0.011362 | 0.011396 | 0.011362 | 0.011396 | 0.011429 | 0.011464 | 0.011530 |
| 0.011463 | 0.011429 | 0.011496 | 0.011396 | 0.011463 | 0.011362 | 0.011429 |
| 0.011597 | 0.011530 | 0.011564 | 0.011597 | 0.011429 | 0.011664 | 0.011429 |
| 0.011616 | 0.011508 | 0.011664 | 0.011334 | 0.011359 | 0.011428 | 0.011139 |
| 0.011828 | 0.011213 | 0.011390 | 0.011664 | 0.011664 | 0.011396 | 0.011496 |
| 0.011496 | 0.011463 | 0.011530 | 0.011429 | 0.011530 | 0.011463 | 0.011463 |
| 0.011429 | 0.011463 | 0.011731 | 0.011597 | 0.011496 | 0.011463 | 0.011396 |
| 0.011362 | 0.011295 | 0.011429 | 0.011396 | 0.011262 | 0.011228 | 0.011161 |
| 0.011262 | 0.011329 | 0.011396 | 0.011396 | 0.011430 | 0.011429 | 0.011432 |
| 0.011500 | 0.011429 | 0.011429 | 0.011312 | 0.011386 | 0.011341 | 0.011430 |
| 0.011433 | 0.011369 | 0.011429 | 0.011405 | 0.011332 | 0.011368 | 0.011398 |
| 0.011384 | 0.011439 | 0.011473 | 0.011363 | 0.011371 | 0.011497 | 0.011396 |
| 0.011464 | 0.011465 | 0.011464 | 0.011564 | 0.011496 | 0.011866 | 0.011597 |
| 0.011429 | 0.011497 | 0.011429 | 0.011463 | 0.011329 | 0.011295 | 0.011362 |
| 0.011429 | 0.011429 | 0.011396 | 0.011362 | 0.011396 | 0.011362 | 0.011463 |
| 0.011429 | 0.011530 | 0.011463 | 0.011362 | 0.011431 | 0.011564 | 0.011567 |
| 0.011564 | 0.011396 | 0.011362 | 0.011296 | 0.011429 | 0.011362 | 0.011295 |
| 0.011298 | 0.011564 | 0.011362 | 0.011564 | 0.011329 | 0.011430 | 0.011396 |
| 0.011497 | 0.011396 | 0.011429 | 0.011396 | 0.011429 | 0.011295 | 0.011429 |
| 0.011463 | 0.011396 | 0.011463 | 0.011396 | 0.011429 | 0.011463 | 0.011698 |
| 0.011530 | 0.011463 | 0.011530 | 0.011566 | 0.011531 | 0.011429 | 0.011396 |
| 0.011364 | 0.011626 | 0.011472 | 0.011335 | 0.011535 | 0.011299 | 0.011414 |
| 0.011536 | 0.011434 | 0.011597 | 0.011799 | 0.011504 | 0.011664 | 0.011631 |
| 0.011564 | 0.011732 | 0.011593 | 0.011472 | 0.011521 | 0.011463 | 0.011534 |
| 0.011631 | 0.011532 | 0.011669 | 0.011737 | 0.011664 | 0.011732 | 0.011839 |
| 0.011568 | 0.011739 | 0.011669 | 0.011601 | 0.011867 | 0.011329 | 0.011532 |
| 0.011496 | 0.011429 | 0.011329 | 0.011329 | 0.011396 | 0.011396 | 0.011463 |
| 0.011396 | 0.011463 | 0.011362 | 0.011396 | 0.011396 | 0.011396 | 0.011463 |
| 0.011396 | 0.011564 | 0.011463 | 0.011497 | 0.011295 | 0.011396 | 0.011429 |
| 0.011429 | 0.011396 | 0.011463 | 0.011429 | 0.011362 | 0.011362 | 0.011362 |
| 0.011631 | 0.011463 | 0.011530 | 0.011329 | 0.011429 | 0.011597 | 0.011362 |
| 0.011362 | 0.011429 | 0.011396 | 0.011564 | 0.011362 | 0.011295 | 0.011429 |
| 0.011362 | 0.011396 | 0.011396 | 0.011329 | 0.011329 | 0.011496 | 0.011429 |
| 0.011329 | 0.011429 | 0.011295 | 0.011329 | 0.011463 | 0.011329 | 0.011362 |
| 0.011329 | 0.011463 | 0.011396 | 0.011295 | 0.011362 | 0.011295 | 0.011463 |
| 0.011539 | 0.011362 | 0.011396 | 0.011497 | 0.011463 | 0.011396 | 0.011496 |
| 0.011362 | 0.011698 | 0.011295 | 0.011496 | 0.011295 | 0.011295 | 0.011295 |
| 0.011530 | 0.011463 | 0.011429 | 0.011496 | 0.011329 | 0.011463 | 0.011295 |
| 0.011362 | 0.011362 | 0.011396 | 0.011496 | 0.011396 | 0.011496 | 0.011564 |
| 0.011564 | 0.011530 | 0.011429 | 0.011530 | 0.011496 | 0.011362 | 0.011329 |
| 0.011362 | 0.011362 | 0.011429 | 0.011295 | 0.011329 | 0.011496 | 0.011362 |
| 0.011329 | 0.011396 | 0.011530 | 0.011496 | 0.011463 | 0.011396 | 0.011396 |
| 0.011463 | 0.011396 | 0.011496 | 0.011362 | 0.011496 | 0.011597 | 0.011564 |
| 0.011396 | 0.011530 | 0.011405 | 0.017936 | 0.011322 | 0.011611 | 0.011479 |
| 0.011441 | 0.011482 | 0.011427 | 0.011234 | 0.011555 | 0.011509 | 0.011607 |
| 0.011440 | 0.011243 | 0.011294 | 0.011437 | 0.011294 | 0.011455 | 0.011404 |
| 0.011248 | 0.011284 | 0.011283 | 0.011126 | 0.011530 | 0.011564 | 0.011567 |

|          |          |          |          |          |          |          |
|----------|----------|----------|----------|----------|----------|----------|
| 0.011438 | 0.011530 | 0.011530 | 0.011429 | 0.011463 | 0.011463 | 0.011430 |
| 0.011463 | 0.011396 | 0.011429 | 0.011463 | 0.011430 | 0.011362 | 0.011396 |
| 0.011396 | 0.011463 | 0.011362 | 0.011463 | 0.011497 | 0.011530 | 0.011429 |
| 0.011396 | 0.011362 | 0.011497 | 0.011497 | 0.011497 | 0.011531 | 0.011564 |
| 0.011329 | 0.011329 | 0.011362 | 0.011463 | 0.011329 | 0.011564 | 0.011564 |
| 0.011597 | 0.011597 | 0.011530 | 0.011631 | 0.011530 | 0.011633 | 0.011463 |
| 0.011463 | 0.011530 | 0.011564 | 0.011396 | 0.011463 | 0.011429 | 0.011463 |
| 0.011531 | 0.011530 | 0.011564 | 0.011530 | 0.011431 | 0.011631 | 0.011597 |
| 0.011466 | 0.011362 | 0.011463 | 0.011564 | 0.011463 | 0.011530 | 0.011631 |
| 0.011799 | 0.011504 | 0.011664 | 0.011631 | 0.011564 | 0.011732 | 0.011363 |
| 0.011532 | 0.011430 | 0.011396 | 0.011396 | 0.011463 | 0.011362 | 0.011463 |
| 0.011497 | 0.011530 | 0.011429 | 0.011396 | 0.011362 | 0.011497 | 0.011497 |
| 0.011497 | 0.011531 | 0.011597 | 0.011530 | 0.012103 | 0.011596 | 0.011517 |
| 0.011587 | 0.011545 | 0.011657 | 0.011545 | 0.011655 | 0.011577 | 0.011543 |
| 0.012056 | 0.011441 | 0.011574 | 0.011510 | 0.011783 | 0.011638 | 0.011741 |
| 0.012080 | 0.011550 | 0.011703 | 0.011765 | 0.011631 | 0.011295 | 0.011668 |
| 0.011329 | 0.011497 | 0.011631 | 0.011597 | 0.011601 | 0.011329 | 0.011296 |
| 0.011429 | 0.011362 | 0.011396 | 0.011429 | 0.011329 | 0.011396 | 0.011295 |
| 0.011362 | 0.011396 | 0.011362 | 0.011329 | 0.011429 | 0.011362 | 0.011396 |
| 0.011396 | 0.011329 | 0.011396 | 0.011429 | 0.011329 | 0.011530 | 0.011564 |
| 0.011463 | 0.011463 | 0.011463 | 0.011463 | 0.011396 | 0.011530 | 0.011429 |
| 0.011130 | 0.011396 | 0.011363 | 0.011365 | 0.011497 | 0.011496 | 0.011496 |
| 0.011496 | 0.011429 | 0.011396 | 0.011429 | 0.011530 | 0.011530 | 0.011463 |
| 0.011463 | 0.011597 | 0.011497 | 0.011496 | 0.011698 | 0.011698 | 0.011564 |
| 0.011396 | 0.011463 | 0.011496 | 0.011631 | 0.011463 | 0.011497 | 0.011463 |
| 0.011496 | 0.011362 | 0.011362 | 0.011664 | 0.011664 | 0.011631 | 0.011429 |
| 0.011530 | 0.011597 | 0.011463 | 0.011530 | 0.011496 | 0.011362 | 0.011429 |
| 0.011463 | 0.011429 | 0.011362 | 0.011597 | 0.011429 | 0.011530 | 0.011564 |
| 0.011463 | 0.011569 | 0.011564 | 0.011304 | 0.011117 | 0.011468 | 0.011215 |
| 0.011390 | 0.011527 | 0.011376 | 0.011507 | 0.011353 | 0.011366 | 0.011326 |
| 0.011213 | 0.011258 | 0.011394 | 0.011192 | 0.011276 | 0.011395 | 0.011547 |
| 0.011550 | 0.011454 | 0.011448 | 0.011448 | 0.011465 | 0.011329 | 0.011396 |
| 0.011262 | 0.011464 | 0.011567 | 0.011297 | 0.011704 | 0.011732 | 0.011463 |
| 0.011429 | 0.011497 | 0.011429 | 0.011463 | 0.011329 | 0.011295 | 0.011362 |
| 0.011429 | 0.011429 | 0.011396 | 0.011362 | 0.011396 | 0.011362 | 0.011463 |
| 0.011444 | 0.011445 | 0.011437 | 0.011471 | 0.011608 | 0.011573 | 0.011572 |
| 0.011571 | 0.011497 | 0.011319 | 0.011312 | 0.011433 | 0.011602 | 0.011603 |
| 0.011396 | 0.011467 | 0.011700 | 0.011668 | 0.011598 | 0.011632 | 0.011564 |
| 0.011496 | 0.011564 | 0.011563 | 0.011463 | 0.011765 | 0.011631 | 0.011698 |
| 0.011732 | 0.011523 | 0.011435 | 0.011511 | 0.011396 | 0.011597 | 0.011564 |
| 0.011598 | 0.011631 | 0.011631 | 0.011631 | 0.011807 | 0.011765 | 0.011407 |
| 0.011297 | 0.011303 | 0.011401 | 0.011366 | 0.011402 | 0.011321 | 0.011366 |
| 0.011437 | 0.011279 | 0.011346 | 0.011472 | 0.011430 | 0.011505 | 0.011396 |
| 0.011362 | 0.011295 | 0.011429 | 0.011396 | 0.011262 | 0.011228 | 0.011161 |
| 0.011262 | 0.011329 | 0.011396 | 0.011396 | 0.011430 | 0.011429 | 0.011432 |
| 0.011500 | 0.011429 | 0.011429 | 0.011465 | 0.011329 | 0.011396 | 0.011262 |
| 0.011464 | 0.011567 | 0.011297 | 0.011704 | 0.011732 | 0.011463 | 0.011631 |
| 0.011564 | 0.011564 | 0.011398 | 0.011582 | 0.011477 | 0.011537 | 0.011411 |
| 0.011542 | 0.011698 | 0.011484 | 0.011468 | 0.011362 | 0.011564 | 0.011429 |
| 0.011530 | 0.011463 | 0.011362 | 0.011431 | 0.011564 | 0.011567 | 0.011396 |
| 0.011362 | 0.011296 | 0.011429 | 0.011362 | 0.011295 | 0.011298 | 0.011564 |
| 0.011463 | 0.011396 | 0.011429 | 0.011463 | 0.011430 | 0.011362 | 0.011295 |
| 0.011429 | 0.011463 | 0.011463 | 0.011396 | 0.011463 | 0.011698 | 0.011295 |
| 0.011396 | 0.011530 | 0.011396 | 0.011429 | 0.011396 | 0.011497 | 0.011403 |
| 0.011510 | 0.011273 | 0.011161 | 0.011302 | 0.011386 | 0.011311 | 0.011227 |
| 0.011113 | 0.011295 | 0.011396 | 0.011502 | 0.011363 | 0.011500 | 0.011632 |
| 0.011531 | 0.011567 | 0.011530 | 0.011778 | 0.011497 | 0.012371 | 0.011532 |
| 0.012271 | 0.012038 | 0.012172 | 0.012444 | 0.011496 | 0.011396 | 0.011497 |
| 0.012137 | 0.011870 | 0.011463 | 0.011362 | 0.011430 | 0.011430 | 0.011398 |
| 0.011295 | 0.011298 | 0.011362 | 0.011329 | 0.011699 | 0.011765 | 0.011766 |

|          |          |          |          |          |          |          |
|----------|----------|----------|----------|----------|----------|----------|
| 0.011598 | 0.011766 | 0.011869 | 0.011635 | 0.012138 | 0.012144 | 0.012205 |
| 0.012205 | 0.012239 | 0.012186 | 0.012205 | 0.012207 | 0.011496 | 0.011732 |
| 0.011800 | 0.012303 | 0.011806 | 0.011833 | 0.012305 | 0.011366 | 0.011262 |
| 0.011228 | 0.011228 | 0.011699 | 0.011718 | 0.011834 | 0.011564 | 0.011229 |
| S032     | 0.011698 | 0.011698 | 0.012034 | 0.011799 | 0.011799 | 0.011866 |
| 0.011705 | 0.011637 | 0.011866 | 0.011295 | 0.011362 | 0.011329 | 0.011228 |
| 0.011329 | 0.011496 | 0.011295 | 0.011329 | 0.011396 | 0.011362 | 0.011329 |
| 0.011295 | 0.011329 | 0.011429 | 0.011295 | 0.011262 | 0.011329 | 0.011671 |
| 0.011564 | 0.011329 | 0.011228 | 0.011463 | 0.000000 | 0.011362 | 0.011329 |
| 0.011362 | 0.011396 | 0.011362 | 0.011362 | 0.011396 | 0.011362 | 0.011530 |
| 0.011295 | 0.011362 | 0.011396 | 0.011329 | 0.011429 | 0.011463 | 0.011396 |
| 0.011362 | 0.011530 | 0.011430 | 0.011698 | 0.011362 | 0.011564 | 0.011362 |
| 0.011329 | 0.011429 | 0.011497 | 0.011564 | 0.011732 | 0.011429 | 0.011530 |
| 0.011329 | 0.011396 | 0.011362 | 0.011530 | 0.011832 | 0.011362 | 0.011429 |
| 0.011329 | 0.011429 | 0.011396 | 0.011463 | 0.011396 | 0.011396 | 0.011396 |
| 0.011295 | 0.011329 | 0.011295 | 0.011396 | 0.011362 | 0.011363 | 0.011463 |
| 0.011396 | 0.011362 | 0.011362 | 0.011329 | 0.011463 | 0.011228 | 0.011362 |
| 0.011530 | 0.011463 | 0.011698 | 0.011530 | 0.011362 | 0.011530 | 0.011362 |
| 0.011505 | 0.011733 | 0.011551 | 0.011216 | 0.011247 | 0.011355 | 0.011454 |
| 0.012085 | 0.011467 | 0.011266 | 0.011597 | 0.011597 | 0.011362 | 0.011497 |
| 0.011429 | 0.011396 | 0.011463 | 0.011362 | 0.011463 | 0.011295 | 0.011396 |
| 0.011362 | 0.011463 | 0.011664 | 0.011530 | 0.011429 | 0.011396 | 0.011262 |
| 0.011295 | 0.011295 | 0.011295 | 0.011329 | 0.011530 | 0.011497 | 0.011429 |
| 0.011530 | 0.011597 | 0.011329 | 0.011329 | 0.011362 | 0.011362 | 0.011364 |
| 0.011432 | 0.011362 | 0.011362 | 0.011168 | 0.011277 | 0.011236 | 0.011363 |
| 0.011365 | 0.011301 | 0.011318 | 0.011336 | 0.011230 | 0.011266 | 0.011297 |
| 0.011564 | 0.011336 | 0.011301 | 0.011296 | 0.011302 | 0.011430 | 0.011396 |
| 0.011464 | 0.011397 | 0.011396 | 0.011496 | 0.011429 | 0.011732 | 0.011598 |
| 0.011631 | 0.011497 | 0.011362 | 0.011463 | 0.011262 | 0.011496 | 0.011295 |
| 0.011362 | 0.011362 | 0.011329 | 0.011295 | 0.011329 | 0.011295 | 0.011396 |
| 0.011295 | 0.011396 | 0.011396 | 0.011295 | 0.011397 | 0.011497 | 0.011499 |
| 0.011430 | 0.011396 | 0.011295 | 0.011229 | 0.011362 | 0.011295 | 0.011228 |
| 0.011332 | 0.011430 | 0.011228 | 0.011430 | 0.011262 | 0.011362 | 0.011329 |
| 0.011362 | 0.011329 | 0.011295 | 0.011329 | 0.011362 | 0.011228 | 0.011295 |
| 0.011329 | 0.011329 | 0.011396 | 0.011329 | 0.011362 | 0.011396 | 0.011631 |
| 0.011665 | 0.011664 | 0.011732 | 0.011465 | 0.011732 | 0.011362 | 0.011329 |
| 0.011330 | 0.011545 | 0.011472 | 0.011232 | 0.011739 | 0.011231 | 0.011336 |
| 0.011739 | 0.011638 | 0.011530 | 0.011732 | 0.011436 | 0.011597 | 0.011497 |
| 0.011496 | 0.011664 | 0.011486 | 0.011266 | 0.011354 | 0.011396 | 0.011466 |
| 0.011564 | 0.011465 | 0.011601 | 0.011601 | 0.011597 | 0.011665 | 0.011772 |
| 0.011500 | 0.011603 | 0.011568 | 0.011500 | 0.011800 | 0.011262 | 0.011465 |
| 0.011362 | 0.011362 | 0.011262 | 0.011262 | 0.011262 | 0.011329 | 0.011396 |
| 0.011262 | 0.011329 | 0.011228 | 0.011396 | 0.011262 | 0.011329 | 0.011396 |
| 0.011329 | 0.011765 | 0.011664 | 0.011698 | 0.011228 | 0.011329 | 0.011362 |
| 0.011362 | 0.011329 | 0.011396 | 0.011429 | 0.011295 | 0.011295 | 0.011295 |
| 0.011832 | 0.011463 | 0.011463 | 0.011262 | 0.011362 | 0.011463 | 0.011295 |
| 0.011295 | 0.011362 | 0.011329 | 0.011429 | 0.011295 | 0.011429 | 0.011496 |
| 0.011496 | 0.011329 | 0.011329 | 0.011262 | 0.011262 | 0.011429 | 0.011362 |
| 0.011262 | 0.011362 | 0.011228 | 0.011262 | 0.011396 | 0.011497 | 0.011295 |
| 0.011262 | 0.011396 | 0.011329 | 0.011228 | 0.011564 | 0.011228 | 0.011396 |
| 0.011402 | 0.011295 | 0.011597 | 0.011430 | 0.011463 | 0.011329 | 0.011429 |
| 0.011295 | 0.011564 | 0.011228 | 0.011497 | 0.011295 | 0.011295 | 0.011228 |
| 0.011396 | 0.011665 | 0.011362 | 0.011429 | 0.011262 | 0.011664 | 0.011295 |
| 0.011295 | 0.011295 | 0.011329 | 0.011362 | 0.011329 | 0.011429 | 0.011496 |
| 0.011497 | 0.011463 | 0.011362 | 0.011463 | 0.011362 | 0.011295 | 0.011262 |
| 0.011295 | 0.011295 | 0.011362 | 0.011295 | 0.011194 | 0.011429 | 0.011295 |
| 0.011329 | 0.011329 | 0.011463 | 0.011496 | 0.011396 | 0.011262 | 0.011329 |
| 0.011396 | 0.011329 | 0.011429 | 0.011295 | 0.011429 | 0.011530 | 0.011832 |
| 0.011329 | 0.011732 | 0.011302 | 0.017823 | 0.011191 | 0.011366 | 0.011653 |
| 0.011614 | 0.011658 | 0.011374 | 0.011350 | 0.011664 | 0.011682 | 0.011303 |



|          |          |          |          |          |          |          |
|----------|----------|----------|----------|----------|----------|----------|
| 0.011487 | 0.011487 | 0.011216 | 0.011270 | 0.011255 | 0.011307 | 0.011189 |
| 0.011482 | 0.011470 | 0.011431 | 0.011325 | 0.011463 | 0.011497 | 0.011466 |
| 0.011301 | 0.011463 | 0.011463 | 0.011429 | 0.011396 | 0.011396 | 0.011362 |
| 0.011396 | 0.011329 | 0.011362 | 0.011396 | 0.011362 | 0.011295 | 0.011329 |
| 0.011329 | 0.011396 | 0.011295 | 0.011396 | 0.011430 | 0.011463 | 0.011362 |
| 0.011396 | 0.011362 | 0.011698 | 0.011698 | 0.011430 | 0.011464 | 0.011497 |
| 0.011262 | 0.011262 | 0.011295 | 0.011329 | 0.011262 | 0.011497 | 0.011497 |
| 0.011530 | 0.011530 | 0.011463 | 0.011564 | 0.011732 | 0.011565 | 0.011329 |
| 0.011396 | 0.011463 | 0.011429 | 0.011329 | 0.011396 | 0.011362 | 0.011396 |
| 0.011463 | 0.011463 | 0.011497 | 0.011396 | 0.011296 | 0.011564 | 0.011463 |
| 0.011399 | 0.011295 | 0.011396 | 0.011497 | 0.011396 | 0.011530 | 0.011564 |
| 0.011732 | 0.011436 | 0.011597 | 0.011497 | 0.011496 | 0.011664 | 0.011295 |
| 0.011464 | 0.011363 | 0.011329 | 0.011329 | 0.011396 | 0.011295 | 0.011396 |
| 0.011430 | 0.011463 | 0.011362 | 0.011396 | 0.011362 | 0.011698 | 0.011698 |
| 0.011430 | 0.011464 | 0.011530 | 0.011463 | 0.012103 | 0.011453 | 0.011447 |
| 0.011482 | 0.011407 | 0.011552 | 0.011476 | 0.011550 | 0.011508 | 0.011439 |
| 0.012022 | 0.011337 | 0.011471 | 0.011406 | 0.011680 | 0.011536 | 0.011604 |
| 0.012080 | 0.011512 | 0.011635 | 0.011698 | 0.011564 | 0.011564 | 0.011601 |
| 0.011262 | 0.011362 | 0.011564 | 0.011530 | 0.011533 | 0.011530 | 0.011464 |
| 0.011362 | 0.011228 | 0.011262 | 0.011362 | 0.011194 | 0.011329 | 0.011228 |
| 0.011362 | 0.011396 | 0.011295 | 0.011262 | 0.011362 | 0.011295 | 0.011329 |
| 0.011329 | 0.011262 | 0.011329 | 0.011362 | 0.011262 | 0.011396 | 0.011496 |
| 0.011396 | 0.011463 | 0.011396 | 0.011396 | 0.011329 | 0.011732 | 0.011362 |
| 0.011373 | 0.011329 | 0.011564 | 0.011569 | 0.011362 | 0.011429 | 0.011429 |
| 0.011362 | 0.011295 | 0.011329 | 0.011295 | 0.011463 | 0.011463 | 0.011396 |
| 0.011396 | 0.011530 | 0.011698 | 0.011429 | 0.011631 | 0.011631 | 0.011496 |
| 0.011329 | 0.011396 | 0.011362 | 0.011832 | 0.011396 | 0.011362 | 0.011396 |
| 0.011429 | 0.011362 | 0.011362 | 0.011665 | 0.011530 | 0.011631 | 0.011362 |
| 0.011463 | 0.011530 | 0.011396 | 0.011463 | 0.011429 | 0.011295 | 0.011631 |
| 0.011396 | 0.011362 | 0.011362 | 0.011530 | 0.011362 | 0.011463 | 0.011698 |
| 0.011396 | 0.011773 | 0.011698 | 0.011548 | 0.011173 | 0.011468 | 0.011267 |
| 0.011170 | 0.011761 | 0.011271 | 0.011507 | 0.011255 | 0.011417 | 0.011379 |
| 0.011519 | 0.011126 | 0.011339 | 0.011126 | 0.011222 | 0.011328 | 0.011385 |
| 0.011399 | 0.011257 | 0.011412 | 0.011342 | 0.011397 | 0.011530 | 0.011597 |
| 0.011597 | 0.011464 | 0.011567 | 0.011569 | 0.011704 | 0.011732 | 0.011396 |
| 0.011631 | 0.011497 | 0.011362 | 0.011463 | 0.011262 | 0.011496 | 0.011295 |
| 0.011362 | 0.011362 | 0.011329 | 0.011295 | 0.011329 | 0.011295 | 0.011396 |
| 0.011340 | 0.011340 | 0.011368 | 0.011368 | 0.011505 | 0.011436 | 0.011504 |
| 0.011469 | 0.011430 | 0.011208 | 0.011204 | 0.011365 | 0.011535 | 0.011535 |
| 0.011329 | 0.011399 | 0.011632 | 0.011601 | 0.011497 | 0.011565 | 0.011496 |
| 0.011429 | 0.011496 | 0.011496 | 0.011396 | 0.011967 | 0.011530 | 0.011631 |
| 0.011665 | 0.011737 | 0.011367 | 0.011441 | 0.011329 | 0.011530 | 0.011496 |
| 0.011531 | 0.011564 | 0.011564 | 0.011564 | 0.011729 | 0.011698 | 0.011338 |
| 0.011229 | 0.011233 | 0.011333 | 0.011298 | 0.011368 | 0.011210 | 0.011570 |
| 0.011369 | 0.011411 | 0.011156 | 0.011360 | 0.011363 | 0.011402 | 0.011262 |
| 0.011295 | 0.011295 | 0.011295 | 0.011329 | 0.011530 | 0.011497 | 0.011429 |
| 0.011530 | 0.011597 | 0.011329 | 0.011329 | 0.011362 | 0.011362 | 0.011364 |
| 0.011432 | 0.011362 | 0.011362 | 0.011397 | 0.011530 | 0.011597 | 0.011597 |
| 0.011464 | 0.011567 | 0.011569 | 0.011704 | 0.011732 | 0.011396 | 0.011564 |
| 0.011496 | 0.011496 | 0.011331 | 0.011513 | 0.011442 | 0.011469 | 0.011305 |
| 0.011404 | 0.011652 | 0.011483 | 0.011400 | 0.011228 | 0.011430 | 0.011295 |
| 0.011396 | 0.011396 | 0.011295 | 0.011397 | 0.011497 | 0.011499 | 0.011396 |
| 0.011295 | 0.011229 | 0.011362 | 0.011295 | 0.011228 | 0.011332 | 0.011430 |
| 0.011396 | 0.011329 | 0.011362 | 0.011396 | 0.011362 | 0.011295 | 0.011497 |
| 0.011362 | 0.011396 | 0.011396 | 0.011329 | 0.011396 | 0.011631 | 0.011295 |
| 0.011329 | 0.011732 | 0.011329 | 0.011295 | 0.011329 | 0.011698 | 0.011274 |
| 0.011678 | 0.011230 | 0.011261 | 0.011463 | 0.011589 | 0.011491 | 0.011186 |
| 0.011218 | 0.011496 | 0.011597 | 0.011705 | 0.011531 | 0.011669 | 0.011834 |
| 0.011733 | 0.011770 | 0.011731 | 0.011949 | 0.011698 | 0.012573 | 0.011734 |
| 0.012473 | 0.012207 | 0.012375 | 0.012612 | 0.011698 | 0.011396 | 0.011699 |

|          |          |          |          |          |          |          |
|----------|----------|----------|----------|----------|----------|----------|
| 0.012137 | 0.012038 | 0.011664 | 0.011564 | 0.011632 | 0.011632 | 0.011601 |
| 0.011496 | 0.011467 | 0.011564 | 0.011531 | 0.011901 | 0.011967 | 0.011968 |
| 0.011868 | 0.011968 | 0.012038 | 0.011737 | 0.012138 | 0.012144 | 0.012205 |
| 0.012205 | 0.012239 | 0.012152 | 0.012206 | 0.012173 | 0.011429 | 0.011732 |
| 0.011800 | 0.012303 | 0.011772 | 0.012034 | 0.012508 | 0.011536 | 0.011464 |
| 0.011429 | 0.011429 | 0.011900 | 0.011924 | 0.012045 | 0.011765 | 0.011397 |
| S033     | 0.011665 | 0.011665 | 0.011833 | 0.011698 | 0.011698 | 0.011833 |
| 0.011672 | 0.011604 | 0.011832 | 0.011262 | 0.011329 | 0.011296 | 0.011262 |
| 0.011295 | 0.011463 | 0.011262 | 0.011295 | 0.011362 | 0.011329 | 0.011295 |
| 0.011262 | 0.011295 | 0.011396 | 0.011262 | 0.011295 | 0.011295 | 0.011637 |
| 0.011530 | 0.011295 | 0.011195 | 0.011429 | 0.011362 | 0.000000 | 0.011362 |
| 0.011329 | 0.011429 | 0.011329 | 0.011329 | 0.011362 | 0.011329 | 0.011497 |
| 0.011262 | 0.011329 | 0.011362 | 0.011295 | 0.011396 | 0.011429 | 0.011362 |
| 0.011329 | 0.011497 | 0.011396 | 0.011664 | 0.011329 | 0.011597 | 0.011329 |
| 0.011295 | 0.011396 | 0.011463 | 0.011597 | 0.011698 | 0.011396 | 0.011497 |
| 0.011362 | 0.011430 | 0.011329 | 0.011564 | 0.011799 | 0.011329 | 0.011396 |
| 0.011295 | 0.011396 | 0.011362 | 0.011429 | 0.011362 | 0.011362 | 0.011362 |
| 0.011262 | 0.011295 | 0.011262 | 0.011362 | 0.011329 | 0.011363 | 0.011429 |
| 0.011362 | 0.011329 | 0.011396 | 0.011295 | 0.011429 | 0.011262 | 0.011329 |
| 0.011497 | 0.011429 | 0.011664 | 0.011497 | 0.011329 | 0.011564 | 0.011329 |
| 0.011505 | 0.011733 | 0.011551 | 0.011255 | 0.011210 | 0.011355 | 0.011415 |
| 0.012011 | 0.011467 | 0.011184 | 0.011564 | 0.011564 | 0.011362 | 0.011463 |
| 0.011396 | 0.011362 | 0.011429 | 0.011329 | 0.011430 | 0.011362 | 0.011362 |
| 0.011329 | 0.011429 | 0.011631 | 0.011497 | 0.011396 | 0.011362 | 0.011295 |
| 0.011262 | 0.011262 | 0.011329 | 0.011295 | 0.011497 | 0.011463 | 0.011396 |
| 0.011497 | 0.011564 | 0.011295 | 0.011295 | 0.011329 | 0.011329 | 0.011330 |
| 0.011398 | 0.011329 | 0.011329 | 0.011204 | 0.011277 | 0.011236 | 0.011329 |
| 0.011331 | 0.011266 | 0.011318 | 0.011302 | 0.011230 | 0.011266 | 0.011297 |
| 0.011564 | 0.011336 | 0.011370 | 0.011262 | 0.011268 | 0.011397 | 0.011363 |
| 0.011430 | 0.011363 | 0.011363 | 0.011463 | 0.011396 | 0.011765 | 0.011564 |
| 0.011597 | 0.011463 | 0.011329 | 0.011430 | 0.011228 | 0.011463 | 0.011262 |
| 0.011329 | 0.011329 | 0.011295 | 0.011262 | 0.011295 | 0.011262 | 0.011362 |
| 0.011329 | 0.011430 | 0.011363 | 0.011262 | 0.011364 | 0.011463 | 0.011466 |
| 0.011463 | 0.011363 | 0.011262 | 0.011195 | 0.011329 | 0.011262 | 0.011195 |
| 0.011298 | 0.011463 | 0.011262 | 0.011463 | 0.011228 | 0.011329 | 0.011295 |
| 0.011396 | 0.011295 | 0.011329 | 0.011295 | 0.011329 | 0.011195 | 0.011329 |
| 0.011363 | 0.011295 | 0.011362 | 0.011295 | 0.011329 | 0.011362 | 0.011598 |
| 0.011698 | 0.011631 | 0.011698 | 0.011465 | 0.011699 | 0.011329 | 0.011295 |
| 0.011330 | 0.011626 | 0.011426 | 0.011232 | 0.011705 | 0.011197 | 0.011296 |
| 0.011705 | 0.011604 | 0.011497 | 0.011698 | 0.011402 | 0.011564 | 0.011530 |
| 0.011463 | 0.011631 | 0.011451 | 0.011349 | 0.011354 | 0.011362 | 0.011432 |
| 0.011530 | 0.011431 | 0.011567 | 0.011635 | 0.011564 | 0.011631 | 0.011738 |
| 0.011466 | 0.011637 | 0.011568 | 0.011500 | 0.011767 | 0.011228 | 0.011431 |
| 0.011396 | 0.011329 | 0.011228 | 0.011228 | 0.011295 | 0.011295 | 0.011362 |
| 0.011295 | 0.011362 | 0.011262 | 0.011362 | 0.011295 | 0.011295 | 0.011362 |
| 0.011295 | 0.011732 | 0.011631 | 0.011665 | 0.011195 | 0.011295 | 0.011329 |
| 0.011329 | 0.011295 | 0.011362 | 0.011396 | 0.011262 | 0.011262 | 0.011262 |
| 0.011799 | 0.011429 | 0.011429 | 0.011228 | 0.011329 | 0.011497 | 0.011262 |
| 0.011262 | 0.011329 | 0.011295 | 0.011463 | 0.011262 | 0.011396 | 0.011530 |
| 0.011463 | 0.011295 | 0.011295 | 0.011228 | 0.011228 | 0.011396 | 0.011329 |
| 0.011228 | 0.011329 | 0.011195 | 0.011228 | 0.011362 | 0.011497 | 0.011262 |
| 0.011228 | 0.011362 | 0.011295 | 0.011195 | 0.011530 | 0.011195 | 0.011362 |
| 0.011437 | 0.011262 | 0.011564 | 0.011396 | 0.011429 | 0.011295 | 0.011396 |
| 0.011262 | 0.011597 | 0.011195 | 0.011463 | 0.011262 | 0.011262 | 0.011195 |
| 0.011429 | 0.011631 | 0.011329 | 0.011396 | 0.011228 | 0.011631 | 0.011262 |
| 0.011262 | 0.011262 | 0.011295 | 0.011396 | 0.011295 | 0.011396 | 0.011463 |
| 0.011463 | 0.011429 | 0.011329 | 0.011430 | 0.011396 | 0.011262 | 0.011228 |
| 0.011262 | 0.011262 | 0.011329 | 0.011262 | 0.011228 | 0.011396 | 0.011262 |
| 0.011295 | 0.011295 | 0.011429 | 0.011463 | 0.011362 | 0.011295 | 0.011295 |
| 0.011362 | 0.011295 | 0.011396 | 0.011262 | 0.011396 | 0.011497 | 0.011732 |

|          |          |          |          |          |          |          |
|----------|----------|----------|----------|----------|----------|----------|
| 0.011295 | 0.011698 | 0.011302 | 0.017785 | 0.011257 | 0.011427 | 0.011653 |
| 0.011614 | 0.011658 | 0.011374 | 0.011292 | 0.011829 | 0.011682 | 0.011364 |
| 0.011487 | 0.011671 | 0.011216 | 0.011311 | 0.011255 | 0.011406 | 0.011318 |
| 0.011482 | 0.011433 | 0.011431 | 0.011259 | 0.011429 | 0.011463 | 0.011466 |
| 0.011335 | 0.011430 | 0.011430 | 0.011396 | 0.011362 | 0.011363 | 0.011329 |
| 0.011362 | 0.011295 | 0.011329 | 0.011362 | 0.011329 | 0.011262 | 0.011295 |
| 0.011295 | 0.011362 | 0.011262 | 0.011363 | 0.011396 | 0.011430 | 0.011329 |
| 0.011362 | 0.011329 | 0.011665 | 0.011665 | 0.011396 | 0.011430 | 0.011463 |
| 0.011228 | 0.011228 | 0.011262 | 0.011363 | 0.011228 | 0.011463 | 0.011463 |
| 0.011497 | 0.011497 | 0.011429 | 0.011530 | 0.011698 | 0.011532 | 0.011362 |
| 0.011362 | 0.011430 | 0.011463 | 0.011295 | 0.011362 | 0.011329 | 0.011362 |
| 0.011430 | 0.011430 | 0.011463 | 0.011430 | 0.011330 | 0.011530 | 0.011497 |
| 0.011365 | 0.011262 | 0.011362 | 0.011463 | 0.011363 | 0.011497 | 0.011530 |
| 0.011698 | 0.011402 | 0.011564 | 0.011530 | 0.011463 | 0.011631 | 0.011262 |
| 0.011431 | 0.011329 | 0.011295 | 0.011295 | 0.011362 | 0.011262 | 0.011363 |
| 0.011396 | 0.011430 | 0.011329 | 0.011362 | 0.011329 | 0.011665 | 0.011665 |
| 0.011396 | 0.011430 | 0.011497 | 0.011429 | 0.012069 | 0.011489 | 0.011412 |
| 0.011482 | 0.011442 | 0.011552 | 0.011441 | 0.011550 | 0.011474 | 0.011439 |
| 0.012022 | 0.011337 | 0.011471 | 0.011406 | 0.011680 | 0.011536 | 0.011639 |
| 0.012046 | 0.011512 | 0.011601 | 0.011665 | 0.011530 | 0.011530 | 0.011567 |
| 0.011228 | 0.011396 | 0.011530 | 0.011497 | 0.011499 | 0.011497 | 0.011464 |
| 0.011329 | 0.011262 | 0.011295 | 0.011329 | 0.011228 | 0.011295 | 0.011195 |
| 0.011329 | 0.011362 | 0.011262 | 0.011228 | 0.011329 | 0.011262 | 0.011295 |
| 0.011295 | 0.011228 | 0.011295 | 0.011329 | 0.011228 | 0.011429 | 0.011463 |
| 0.011362 | 0.011429 | 0.011362 | 0.011362 | 0.011295 | 0.011698 | 0.011329 |
| 0.011373 | 0.011295 | 0.011530 | 0.011535 | 0.011396 | 0.011396 | 0.011396 |
| 0.011396 | 0.011329 | 0.011295 | 0.011329 | 0.011429 | 0.011429 | 0.011362 |
| 0.011362 | 0.011497 | 0.011664 | 0.011396 | 0.011597 | 0.011597 | 0.011463 |
| 0.011295 | 0.011362 | 0.011396 | 0.011799 | 0.011363 | 0.011396 | 0.011362 |
| 0.011396 | 0.011329 | 0.011329 | 0.011631 | 0.011564 | 0.011597 | 0.011329 |
| 0.011430 | 0.011497 | 0.011362 | 0.011430 | 0.011396 | 0.011262 | 0.011597 |
| 0.011362 | 0.011329 | 0.011329 | 0.011497 | 0.011329 | 0.011429 | 0.011665 |
| 0.011295 | 0.011739 | 0.011732 | 0.011507 | 0.011229 | 0.011434 | 0.011267 |
| 0.011335 | 0.011683 | 0.011271 | 0.011417 | 0.011255 | 0.011366 | 0.011379 |
| 0.011468 | 0.011192 | 0.011339 | 0.011192 | 0.011222 | 0.011395 | 0.011425 |
| 0.011437 | 0.011296 | 0.011412 | 0.011236 | 0.011364 | 0.011497 | 0.011564 |
| 0.011564 | 0.011430 | 0.011534 | 0.011535 | 0.011671 | 0.011696 | 0.011362 |
| 0.011597 | 0.011463 | 0.011329 | 0.011430 | 0.011228 | 0.011463 | 0.011262 |
| 0.011329 | 0.011329 | 0.011295 | 0.011262 | 0.011295 | 0.011262 | 0.011362 |
| 0.011340 | 0.011340 | 0.011334 | 0.011368 | 0.011505 | 0.011470 | 0.011470 |
| 0.011469 | 0.011396 | 0.011208 | 0.011204 | 0.011331 | 0.011501 | 0.011501 |
| 0.011296 | 0.011365 | 0.011599 | 0.011567 | 0.011497 | 0.011531 | 0.011463 |
| 0.011396 | 0.011463 | 0.011463 | 0.011362 | 0.011934 | 0.011530 | 0.011598 |
| 0.011631 | 0.011701 | 0.011333 | 0.011407 | 0.011295 | 0.011497 | 0.011463 |
| 0.011498 | 0.011530 | 0.011530 | 0.011530 | 0.011689 | 0.011665 | 0.011303 |
| 0.011195 | 0.011199 | 0.011298 | 0.011264 | 0.011368 | 0.011209 | 0.011536 |
| 0.011335 | 0.011455 | 0.011203 | 0.011360 | 0.011329 | 0.011402 | 0.011295 |
| 0.011262 | 0.011262 | 0.011329 | 0.011295 | 0.011497 | 0.011463 | 0.011396 |
| 0.011497 | 0.011564 | 0.011295 | 0.011295 | 0.011329 | 0.011329 | 0.011330 |
| 0.011398 | 0.011329 | 0.011329 | 0.011364 | 0.011497 | 0.011564 | 0.011564 |
| 0.011430 | 0.011534 | 0.011535 | 0.011671 | 0.011696 | 0.011362 | 0.011530 |
| 0.011463 | 0.011463 | 0.011297 | 0.011478 | 0.011408 | 0.011435 | 0.011270 |
| 0.011473 | 0.011698 | 0.011399 | 0.011366 | 0.011262 | 0.011463 | 0.011329 |
| 0.011430 | 0.011363 | 0.011262 | 0.011364 | 0.011463 | 0.011466 | 0.011363 |
| 0.011262 | 0.011195 | 0.011329 | 0.011262 | 0.011195 | 0.011298 | 0.011463 |
| 0.011362 | 0.011295 | 0.011329 | 0.011362 | 0.011329 | 0.011262 | 0.011463 |
| 0.011329 | 0.011362 | 0.011362 | 0.011295 | 0.011362 | 0.011597 | 0.011262 |
| 0.011295 | 0.011698 | 0.011295 | 0.011329 | 0.011295 | 0.011664 | 0.011189 |
| 0.011678 | 0.011188 | 0.011261 | 0.011422 | 0.011508 | 0.011491 | 0.011144 |
| 0.011218 | 0.011463 | 0.011564 | 0.011671 | 0.011531 | 0.011669 | 0.011800 |

|          |          |          |          |          |          |          |
|----------|----------|----------|----------|----------|----------|----------|
| 0.011699 | 0.011737 | 0.011698 | 0.011949 | 0.011664 | 0.012539 | 0.011700 |
| 0.012439 | 0.012207 | 0.012341 | 0.012612 | 0.011664 | 0.011362 | 0.011665 |
| 0.012103 | 0.012039 | 0.011631 | 0.011530 | 0.011598 | 0.011598 | 0.011568 |
| 0.011463 | 0.011467 | 0.011530 | 0.011497 | 0.011867 | 0.011933 | 0.011935 |
| 0.011834 | 0.011934 | 0.012038 | 0.011804 | 0.012104 | 0.012110 | 0.012171 |
| 0.012172 | 0.012205 | 0.012152 | 0.012172 | 0.012173 | 0.011396 | 0.011699 |
| 0.011766 | 0.012270 | 0.011772 | 0.012001 | 0.012474 | 0.011536 | 0.011430 |
| 0.011396 | 0.011396 | 0.011867 | 0.011924 | 0.012010 | 0.011732 | 0.011397 |
| S034     | 0.011698 | 0.011698 | 0.012034 | 0.011799 | 0.011799 | 0.011866 |
| 0.011705 | 0.011637 | 0.011866 | 0.011295 | 0.011362 | 0.011329 | 0.011295 |
| 0.011329 | 0.011497 | 0.011295 | 0.011329 | 0.011396 | 0.011362 | 0.011329 |
| 0.011295 | 0.011329 | 0.011429 | 0.011295 | 0.011262 | 0.011329 | 0.011671 |
| 0.011564 | 0.011329 | 0.011228 | 0.011463 | 0.011329 | 0.011362 | 0.000000 |
| 0.011362 | 0.011396 | 0.011362 | 0.011362 | 0.011396 | 0.011362 | 0.011530 |
| 0.011295 | 0.011362 | 0.011396 | 0.011329 | 0.011429 | 0.011463 | 0.011396 |
| 0.011362 | 0.011530 | 0.011430 | 0.011698 | 0.011362 | 0.011564 | 0.011362 |
| 0.011329 | 0.011430 | 0.011497 | 0.011564 | 0.011732 | 0.011429 | 0.011530 |
| 0.011329 | 0.011396 | 0.011362 | 0.011530 | 0.011833 | 0.011362 | 0.011429 |
| 0.011329 | 0.011429 | 0.011396 | 0.011463 | 0.011396 | 0.011396 | 0.011396 |
| 0.011295 | 0.011329 | 0.011295 | 0.011396 | 0.011362 | 0.011397 | 0.011463 |
| 0.011396 | 0.011362 | 0.011362 | 0.011329 | 0.011463 | 0.011228 | 0.011362 |
| 0.011530 | 0.011463 | 0.011698 | 0.011530 | 0.011362 | 0.011530 | 0.011362 |
| 0.011468 | 0.011695 | 0.011437 | 0.011177 | 0.011135 | 0.011318 | 0.011336 |
| 0.012011 | 0.011365 | 0.011143 | 0.011597 | 0.011597 | 0.011396 | 0.011497 |
| 0.011429 | 0.011396 | 0.011463 | 0.011362 | 0.011463 | 0.011329 | 0.011396 |
| 0.011362 | 0.011463 | 0.011664 | 0.011530 | 0.011429 | 0.011396 | 0.011262 |
| 0.011295 | 0.011295 | 0.011295 | 0.011329 | 0.011530 | 0.011497 | 0.011430 |
| 0.011530 | 0.011597 | 0.011329 | 0.011329 | 0.011362 | 0.011362 | 0.011364 |
| 0.011432 | 0.011362 | 0.011362 | 0.011096 | 0.011241 | 0.011271 | 0.011363 |
| 0.011365 | 0.011301 | 0.011208 | 0.011267 | 0.011264 | 0.011300 | 0.011330 |
| 0.011456 | 0.011370 | 0.011301 | 0.011296 | 0.011233 | 0.011430 | 0.011397 |
| 0.011464 | 0.011397 | 0.011396 | 0.011496 | 0.011429 | 0.011732 | 0.011598 |
| 0.011631 | 0.011497 | 0.011362 | 0.011463 | 0.011262 | 0.011497 | 0.011295 |
| 0.011362 | 0.011362 | 0.011329 | 0.011295 | 0.011329 | 0.011295 | 0.011396 |
| 0.011295 | 0.011396 | 0.011396 | 0.011295 | 0.011397 | 0.011497 | 0.011500 |
| 0.011430 | 0.011396 | 0.011295 | 0.011229 | 0.011362 | 0.011295 | 0.011228 |
| 0.011332 | 0.011430 | 0.011228 | 0.011430 | 0.011262 | 0.011363 | 0.011329 |
| 0.011362 | 0.011329 | 0.011295 | 0.011329 | 0.011362 | 0.011228 | 0.011295 |
| 0.011329 | 0.011329 | 0.011396 | 0.011329 | 0.011362 | 0.011396 | 0.011631 |
| 0.011732 | 0.011664 | 0.011732 | 0.011498 | 0.011732 | 0.011362 | 0.011329 |
| 0.011364 | 0.011626 | 0.011426 | 0.011266 | 0.011739 | 0.011231 | 0.011336 |
| 0.011739 | 0.011570 | 0.011530 | 0.011732 | 0.011436 | 0.011597 | 0.011497 |
| 0.011497 | 0.011664 | 0.011522 | 0.011390 | 0.011437 | 0.011396 | 0.011466 |
| 0.011564 | 0.011465 | 0.011601 | 0.011602 | 0.011597 | 0.011665 | 0.011772 |
| 0.011500 | 0.011603 | 0.011602 | 0.011534 | 0.011800 | 0.011262 | 0.011465 |
| 0.011362 | 0.011362 | 0.011262 | 0.011262 | 0.011262 | 0.011329 | 0.011396 |
| 0.011262 | 0.011329 | 0.011228 | 0.011396 | 0.011262 | 0.011329 | 0.011396 |
| 0.011329 | 0.011765 | 0.011664 | 0.011698 | 0.011228 | 0.011329 | 0.011362 |
| 0.011362 | 0.011329 | 0.011396 | 0.011429 | 0.011295 | 0.011295 | 0.011295 |
| 0.011832 | 0.011463 | 0.011463 | 0.011262 | 0.011362 | 0.011463 | 0.011295 |
| 0.011295 | 0.011362 | 0.011329 | 0.011429 | 0.011295 | 0.011429 | 0.011496 |
| 0.011497 | 0.011329 | 0.011329 | 0.011262 | 0.011262 | 0.011430 | 0.011362 |
| 0.011262 | 0.011362 | 0.011228 | 0.011262 | 0.011396 | 0.011530 | 0.011295 |
| 0.011262 | 0.011396 | 0.011329 | 0.011228 | 0.011564 | 0.011228 | 0.011396 |
| 0.011403 | 0.011295 | 0.011597 | 0.011430 | 0.011463 | 0.011329 | 0.011429 |
| 0.011295 | 0.011564 | 0.011228 | 0.011497 | 0.011295 | 0.011295 | 0.011228 |
| 0.011396 | 0.011597 | 0.011362 | 0.011429 | 0.011262 | 0.011664 | 0.011295 |
| 0.011295 | 0.011295 | 0.011329 | 0.011362 | 0.011329 | 0.011429 | 0.011497 |
| 0.011497 | 0.011463 | 0.011362 | 0.011463 | 0.011362 | 0.011295 | 0.011262 |
| 0.011295 | 0.011295 | 0.011362 | 0.011295 | 0.011194 | 0.011429 | 0.011295 |

|          |          |          |          |          |          |          |
|----------|----------|----------|----------|----------|----------|----------|
| 0.011329 | 0.011329 | 0.011463 | 0.011497 | 0.011396 | 0.011262 | 0.011329 |
| 0.011396 | 0.011329 | 0.011429 | 0.011295 | 0.011429 | 0.011530 | 0.011832 |
| 0.011329 | 0.011732 | 0.011336 | 0.017748 | 0.011126 | 0.011488 | 0.011688 |
| 0.011648 | 0.011623 | 0.011270 | 0.011176 | 0.011609 | 0.011716 | 0.011303 |
| 0.011392 | 0.011487 | 0.011138 | 0.011228 | 0.011177 | 0.011307 | 0.011275 |
| 0.011389 | 0.011358 | 0.011357 | 0.011126 | 0.011463 | 0.011497 | 0.011500 |
| 0.011301 | 0.011463 | 0.011463 | 0.011430 | 0.011396 | 0.011396 | 0.011363 |
| 0.011396 | 0.011329 | 0.011362 | 0.011396 | 0.011363 | 0.011295 | 0.011329 |
| 0.011329 | 0.011396 | 0.011295 | 0.011396 | 0.011430 | 0.011463 | 0.011362 |
| 0.011396 | 0.011362 | 0.011698 | 0.011698 | 0.011430 | 0.011464 | 0.011497 |
| 0.011262 | 0.011262 | 0.011295 | 0.011329 | 0.011262 | 0.011497 | 0.011497 |
| 0.011530 | 0.011530 | 0.011463 | 0.011564 | 0.011732 | 0.011565 | 0.011329 |
| 0.011396 | 0.011463 | 0.011430 | 0.011329 | 0.011396 | 0.011362 | 0.011396 |
| 0.011463 | 0.011463 | 0.011497 | 0.011396 | 0.011296 | 0.011564 | 0.011463 |
| 0.011399 | 0.011295 | 0.011396 | 0.011497 | 0.011396 | 0.011530 | 0.011564 |
| 0.011732 | 0.011436 | 0.011597 | 0.011497 | 0.011497 | 0.011664 | 0.011295 |
| 0.011464 | 0.011363 | 0.011329 | 0.011329 | 0.011396 | 0.011295 | 0.011396 |
| 0.011430 | 0.011463 | 0.011362 | 0.011396 | 0.011362 | 0.011698 | 0.011698 |
| 0.011430 | 0.011464 | 0.011530 | 0.011463 | 0.012103 | 0.011525 | 0.011447 |
| 0.011517 | 0.011476 | 0.011587 | 0.011476 | 0.011585 | 0.011508 | 0.011474 |
| 0.012056 | 0.011372 | 0.011505 | 0.011441 | 0.011714 | 0.011570 | 0.011605 |
| 0.012080 | 0.011550 | 0.011635 | 0.011698 | 0.011564 | 0.011564 | 0.011601 |
| 0.011262 | 0.011362 | 0.011564 | 0.011530 | 0.011533 | 0.011530 | 0.011498 |
| 0.011362 | 0.011228 | 0.011262 | 0.011362 | 0.011194 | 0.011329 | 0.011228 |
| 0.011362 | 0.011396 | 0.011295 | 0.011262 | 0.011362 | 0.011295 | 0.011329 |
| 0.011329 | 0.011262 | 0.011329 | 0.011362 | 0.011262 | 0.011396 | 0.011497 |
| 0.011396 | 0.011463 | 0.011396 | 0.011396 | 0.011329 | 0.011732 | 0.011362 |
| 0.011408 | 0.011329 | 0.011564 | 0.011569 | 0.011362 | 0.011429 | 0.011429 |
| 0.011429 | 0.011295 | 0.011329 | 0.011295 | 0.011463 | 0.011463 | 0.011396 |
| 0.011396 | 0.011530 | 0.011698 | 0.011429 | 0.011631 | 0.011631 | 0.011496 |
| 0.011329 | 0.011396 | 0.011429 | 0.011833 | 0.011396 | 0.011362 | 0.011396 |
| 0.011429 | 0.011362 | 0.011362 | 0.011665 | 0.011530 | 0.011631 | 0.011362 |
| 0.011463 | 0.011530 | 0.011396 | 0.011463 | 0.011429 | 0.011295 | 0.011631 |
| 0.011396 | 0.011362 | 0.011362 | 0.011530 | 0.011362 | 0.011463 | 0.011698 |
| 0.011396 | 0.011773 | 0.011765 | 0.011426 | 0.011117 | 0.011468 | 0.011163 |
| 0.011280 | 0.011644 | 0.011201 | 0.011373 | 0.011158 | 0.011315 | 0.011273 |
| 0.011366 | 0.000000 | 0.011227 | 0.000000 | 0.011114 | 0.011261 | 0.011263 |
| 0.011362 | 0.011139 | 0.011448 | 0.011377 | 0.011397 | 0.011530 | 0.011598 |
| 0.011597 | 0.011464 | 0.011567 | 0.011569 | 0.011704 | 0.011696 | 0.011396 |
| 0.011631 | 0.011497 | 0.011362 | 0.011463 | 0.011262 | 0.011497 | 0.011295 |
| 0.011362 | 0.011362 | 0.011329 | 0.011295 | 0.011329 | 0.011295 | 0.011396 |
| 0.011305 | 0.011340 | 0.011368 | 0.011403 | 0.011539 | 0.011436 | 0.011504 |
| 0.011503 | 0.011430 | 0.011171 | 0.011132 | 0.011365 | 0.011535 | 0.011535 |
| 0.011329 | 0.011399 | 0.011633 | 0.011601 | 0.011531 | 0.011565 | 0.011496 |
| 0.011429 | 0.011497 | 0.011496 | 0.011396 | 0.011967 | 0.011564 | 0.011631 |
| 0.011665 | 0.011737 | 0.011367 | 0.011441 | 0.011329 | 0.011530 | 0.011497 |
| 0.011531 | 0.011564 | 0.011564 | 0.011564 | 0.011689 | 0.011698 | 0.011338 |
| 0.011229 | 0.011233 | 0.011333 | 0.011298 | 0.011402 | 0.011247 | 0.011570 |
| 0.011369 | 0.011499 | 0.011251 | 0.011397 | 0.011363 | 0.011437 | 0.011262 |
| 0.011295 | 0.011295 | 0.011295 | 0.011329 | 0.011530 | 0.011497 | 0.011430 |
| 0.011530 | 0.011597 | 0.011329 | 0.011329 | 0.011362 | 0.011362 | 0.011364 |
| 0.011432 | 0.011362 | 0.011362 | 0.011397 | 0.011530 | 0.011598 | 0.011597 |
| 0.011464 | 0.011567 | 0.011569 | 0.011704 | 0.011696 | 0.011396 | 0.011564 |
| 0.011497 | 0.011497 | 0.011331 | 0.011513 | 0.011442 | 0.011469 | 0.011305 |
| 0.011232 | 0.011653 | 0.011483 | 0.011400 | 0.011228 | 0.011430 | 0.011295 |
| 0.011396 | 0.011396 | 0.011295 | 0.011397 | 0.011497 | 0.011500 | 0.011396 |
| 0.011295 | 0.011229 | 0.011362 | 0.011295 | 0.011228 | 0.011332 | 0.011430 |
| 0.011396 | 0.011329 | 0.011362 | 0.011396 | 0.011363 | 0.011295 | 0.011497 |
| 0.011362 | 0.011396 | 0.011396 | 0.011329 | 0.011396 | 0.011631 | 0.011295 |
| 0.011329 | 0.011732 | 0.011329 | 0.011295 | 0.011329 | 0.011698 | 0.011146 |

|          |          |          |          |          |          |          |
|----------|----------|----------|----------|----------|----------|----------|
| 0.011566 | 0.011145 | 0.011161 | 0.011382 | 0.011467 | 0.011419 | 0.011102 |
| 0.011113 | 0.011496 | 0.011597 | 0.011705 | 0.011565 | 0.011703 | 0.011834 |
| 0.011733 | 0.011770 | 0.011732 | 0.011983 | 0.011698 | 0.012573 | 0.011734 |
| 0.012473 | 0.012241 | 0.012375 | 0.012646 | 0.011698 | 0.011396 | 0.011699 |
| 0.012137 | 0.012072 | 0.011664 | 0.011564 | 0.011632 | 0.011632 | 0.011567 |
| 0.011496 | 0.011501 | 0.011564 | 0.011531 | 0.011901 | 0.011967 | 0.011968 |
| 0.011868 | 0.011968 | 0.012072 | 0.011838 | 0.012138 | 0.012144 | 0.012205 |
| 0.012206 | 0.012239 | 0.012186 | 0.012206 | 0.012207 | 0.011429 | 0.011732 |
| 0.011800 | 0.012303 | 0.011806 | 0.012034 | 0.012508 | 0.011570 | 0.011464 |
| 0.011429 | 0.011429 | 0.011900 | 0.011965 | 0.012045 | 0.011765 | 0.011431 |
| S035     | 0.011664 | 0.011664 | 0.012001 | 0.011765 | 0.011765 | 0.011832 |
| 0.011671 | 0.011603 | 0.011832 | 0.011262 | 0.011329 | 0.011296 | 0.011262 |
| 0.011295 | 0.011463 | 0.011262 | 0.011295 | 0.011362 | 0.011329 | 0.011295 |
| 0.011262 | 0.011295 | 0.011396 | 0.011262 | 0.011295 | 0.011295 | 0.011637 |
| 0.011530 | 0.011295 | 0.011194 | 0.011429 | 0.011362 | 0.011329 | 0.011362 |
| 0.000000 | 0.011429 | 0.011329 | 0.011329 | 0.011362 | 0.011329 | 0.011497 |
| 0.011262 | 0.011329 | 0.011362 | 0.011295 | 0.011396 | 0.011429 | 0.011161 |
| 0.011329 | 0.011497 | 0.011396 | 0.011664 | 0.011329 | 0.011597 | 0.011329 |
| 0.011295 | 0.011396 | 0.011463 | 0.011597 | 0.011698 | 0.011396 | 0.011496 |
| 0.011362 | 0.011429 | 0.011329 | 0.011564 | 0.011799 | 0.011329 | 0.011329 |
| 0.011295 | 0.011396 | 0.011362 | 0.011429 | 0.011362 | 0.011362 | 0.011362 |
| 0.011262 | 0.011295 | 0.011262 | 0.011362 | 0.011329 | 0.011363 | 0.011429 |
| 0.011362 | 0.011329 | 0.011396 | 0.011295 | 0.011429 | 0.011262 | 0.011329 |
| 0.011496 | 0.011429 | 0.011664 | 0.011497 | 0.011329 | 0.011564 | 0.011329 |
| 0.011468 | 0.011695 | 0.011513 | 0.011216 | 0.011247 | 0.011355 | 0.011415 |
| 0.012085 | 0.011518 | 0.011225 | 0.011564 | 0.011564 | 0.011362 | 0.011463 |
| 0.011396 | 0.011362 | 0.011429 | 0.011329 | 0.011429 | 0.011362 | 0.011362 |
| 0.011329 | 0.011429 | 0.011631 | 0.011496 | 0.011396 | 0.011362 | 0.011295 |
| 0.011262 | 0.011262 | 0.011329 | 0.011295 | 0.011497 | 0.011463 | 0.011396 |
| 0.011497 | 0.011564 | 0.011295 | 0.011295 | 0.011329 | 0.011329 | 0.011330 |
| 0.011398 | 0.011329 | 0.011329 | 0.011168 | 0.011241 | 0.011201 | 0.011329 |
| 0.011331 | 0.011266 | 0.011318 | 0.011302 | 0.011196 | 0.011232 | 0.011297 |
| 0.011528 | 0.011302 | 0.011370 | 0.011262 | 0.011268 | 0.011397 | 0.011363 |
| 0.011430 | 0.011364 | 0.011363 | 0.011463 | 0.011396 | 0.011765 | 0.011564 |
| 0.011597 | 0.011463 | 0.011329 | 0.011430 | 0.011228 | 0.011463 | 0.011262 |
| 0.011329 | 0.011329 | 0.011295 | 0.011262 | 0.011295 | 0.011262 | 0.011362 |
| 0.011329 | 0.011430 | 0.011362 | 0.011262 | 0.011363 | 0.011463 | 0.011466 |
| 0.011463 | 0.011362 | 0.011262 | 0.011195 | 0.011329 | 0.011262 | 0.011195 |
| 0.011298 | 0.011463 | 0.011262 | 0.011463 | 0.011228 | 0.011329 | 0.011295 |
| 0.011396 | 0.011295 | 0.011329 | 0.011295 | 0.011329 | 0.011195 | 0.011329 |
| 0.011362 | 0.011295 | 0.011362 | 0.011295 | 0.011329 | 0.011362 | 0.011597 |
| 0.011698 | 0.011631 | 0.011698 | 0.011465 | 0.011698 | 0.011329 | 0.011295 |
| 0.011330 | 0.011626 | 0.011426 | 0.011232 | 0.011705 | 0.011197 | 0.011336 |
| 0.011705 | 0.011604 | 0.011496 | 0.011698 | 0.011402 | 0.011564 | 0.011530 |
| 0.011463 | 0.011631 | 0.011451 | 0.011307 | 0.011354 | 0.011362 | 0.011432 |
| 0.011530 | 0.011431 | 0.011567 | 0.011635 | 0.011564 | 0.011631 | 0.011738 |
| 0.011466 | 0.011637 | 0.011534 | 0.011466 | 0.011767 | 0.011228 | 0.011431 |
| 0.011396 | 0.011329 | 0.011228 | 0.011228 | 0.011295 | 0.011295 | 0.011362 |
| 0.011295 | 0.011362 | 0.011262 | 0.011362 | 0.011295 | 0.011295 | 0.011362 |
| 0.011295 | 0.011731 | 0.011631 | 0.011664 | 0.011194 | 0.011295 | 0.011329 |
| 0.011329 | 0.011295 | 0.011362 | 0.011396 | 0.011262 | 0.011262 | 0.011262 |
| 0.011799 | 0.011429 | 0.011429 | 0.011228 | 0.011329 | 0.011497 | 0.011262 |
| 0.011262 | 0.011329 | 0.011295 | 0.011463 | 0.011262 | 0.011396 | 0.011530 |
| 0.011463 | 0.011295 | 0.011295 | 0.011228 | 0.011228 | 0.011396 | 0.011329 |
| 0.011228 | 0.011329 | 0.011195 | 0.011228 | 0.011362 | 0.011463 | 0.011262 |
| 0.011228 | 0.011362 | 0.011295 | 0.011195 | 0.011530 | 0.011195 | 0.011362 |
| 0.011437 | 0.011262 | 0.011564 | 0.011396 | 0.011429 | 0.011295 | 0.011396 |
| 0.011262 | 0.011597 | 0.011194 | 0.011463 | 0.011262 | 0.011262 | 0.011194 |
| 0.011429 | 0.011631 | 0.011329 | 0.011396 | 0.011228 | 0.011631 | 0.011262 |
| 0.011262 | 0.011262 | 0.011295 | 0.011396 | 0.011295 | 0.011396 | 0.011463 |

|          |          |          |          |          |          |          |
|----------|----------|----------|----------|----------|----------|----------|
| 0.011463 | 0.011429 | 0.011329 | 0.011429 | 0.011396 | 0.011262 | 0.011228 |
| 0.011262 | 0.011262 | 0.011329 | 0.011262 | 0.011228 | 0.011396 | 0.011262 |
| 0.011295 | 0.011295 | 0.011429 | 0.011463 | 0.011362 | 0.011295 | 0.011295 |
| 0.011362 | 0.011295 | 0.011396 | 0.011262 | 0.011396 | 0.011496 | 0.011799 |
| 0.011295 | 0.011698 | 0.011302 | 0.017823 | 0.011322 | 0.011366 | 0.011653 |
| 0.011614 | 0.011658 | 0.011374 | 0.011350 | 0.011774 | 0.011682 | 0.011303 |
| 0.011534 | 0.011487 | 0.011177 | 0.011270 | 0.011294 | 0.011356 | 0.011232 |
| 0.011529 | 0.011470 | 0.011468 | 0.011391 | 0.011429 | 0.011463 | 0.011466 |
| 0.011301 | 0.011429 | 0.011429 | 0.011396 | 0.011362 | 0.011362 | 0.011329 |
| 0.011362 | 0.011295 | 0.011329 | 0.011362 | 0.011329 | 0.011262 | 0.011295 |
| 0.011295 | 0.011362 | 0.011262 | 0.011362 | 0.011396 | 0.011429 | 0.011329 |
| 0.011362 | 0.011329 | 0.011665 | 0.011665 | 0.011396 | 0.011430 | 0.011463 |
| 0.011228 | 0.011228 | 0.011262 | 0.011362 | 0.011228 | 0.011463 | 0.011463 |
| 0.011497 | 0.011496 | 0.011429 | 0.011530 | 0.011698 | 0.011532 | 0.011362 |
| 0.011362 | 0.011430 | 0.011463 | 0.011295 | 0.011362 | 0.011329 | 0.011362 |
| 0.011430 | 0.011430 | 0.011463 | 0.011430 | 0.011330 | 0.011530 | 0.011497 |
| 0.011365 | 0.011262 | 0.011362 | 0.011463 | 0.011362 | 0.011497 | 0.011530 |
| 0.011698 | 0.011402 | 0.011564 | 0.011530 | 0.011463 | 0.011631 | 0.011262 |
| 0.011431 | 0.011329 | 0.011295 | 0.011295 | 0.011362 | 0.011262 | 0.011362 |
| 0.011396 | 0.011429 | 0.011329 | 0.011362 | 0.011329 | 0.011665 | 0.011665 |
| 0.011396 | 0.011430 | 0.011496 | 0.011429 | 0.012069 | 0.011453 | 0.011412 |
| 0.011447 | 0.011407 | 0.011517 | 0.011441 | 0.011515 | 0.011439 | 0.011405 |
| 0.012022 | 0.011302 | 0.011437 | 0.011371 | 0.011646 | 0.011502 | 0.011639 |
| 0.012046 | 0.011475 | 0.011601 | 0.011664 | 0.011530 | 0.011530 | 0.011567 |
| 0.011228 | 0.011396 | 0.011530 | 0.011496 | 0.011499 | 0.011496 | 0.011464 |
| 0.011329 | 0.011262 | 0.011295 | 0.011329 | 0.011228 | 0.011295 | 0.011194 |
| 0.011329 | 0.011362 | 0.011262 | 0.011228 | 0.011329 | 0.011262 | 0.011295 |
| 0.011295 | 0.011228 | 0.011295 | 0.011329 | 0.011228 | 0.011429 | 0.011463 |
| 0.011362 | 0.011429 | 0.011362 | 0.011295 | 0.011295 | 0.011698 | 0.011329 |
| 0.011338 | 0.011295 | 0.011530 | 0.011535 | 0.011396 | 0.011396 | 0.011396 |
| 0.011396 | 0.011329 | 0.011295 | 0.011329 | 0.011429 | 0.011429 | 0.011362 |
| 0.011362 | 0.011497 | 0.011664 | 0.011396 | 0.011597 | 0.011597 | 0.011463 |
| 0.011295 | 0.011362 | 0.011396 | 0.011799 | 0.011362 | 0.011396 | 0.011362 |
| 0.011396 | 0.011329 | 0.011329 | 0.011631 | 0.011564 | 0.011597 | 0.011329 |
| 0.011429 | 0.011497 | 0.011362 | 0.011429 | 0.011396 | 0.011262 | 0.011597 |
| 0.011362 | 0.011329 | 0.011329 | 0.011497 | 0.011329 | 0.011429 | 0.011664 |
| 0.011362 | 0.011739 | 0.011732 | 0.011507 | 0.011229 | 0.011434 | 0.011318 |
| 0.011170 | 0.011722 | 0.011271 | 0.011462 | 0.011304 | 0.011417 | 0.011432 |
| 0.011519 | 0.011258 | 0.011394 | 0.011258 | 0.011276 | 0.011462 | 0.011385 |
| 0.011399 | 0.011296 | 0.011412 | 0.011342 | 0.011364 | 0.011497 | 0.011564 |
| 0.011564 | 0.011430 | 0.011533 | 0.011535 | 0.011670 | 0.011696 | 0.011362 |
| 0.011597 | 0.011463 | 0.011329 | 0.011430 | 0.011228 | 0.011463 | 0.011262 |
| 0.011329 | 0.011329 | 0.011295 | 0.011262 | 0.011295 | 0.011262 | 0.011362 |
| 0.011305 | 0.011305 | 0.011334 | 0.011334 | 0.011471 | 0.011470 | 0.011470 |
| 0.011469 | 0.011396 | 0.011171 | 0.011168 | 0.011331 | 0.011501 | 0.011501 |
| 0.011296 | 0.011365 | 0.011599 | 0.011567 | 0.011497 | 0.011531 | 0.011463 |
| 0.011396 | 0.011463 | 0.011463 | 0.011362 | 0.011933 | 0.011530 | 0.011597 |
| 0.011631 | 0.011701 | 0.011333 | 0.011407 | 0.011295 | 0.011497 | 0.011463 |
| 0.011497 | 0.011530 | 0.011530 | 0.011530 | 0.011689 | 0.011664 | 0.011303 |
| 0.011195 | 0.011199 | 0.011298 | 0.011264 | 0.011333 | 0.011172 | 0.011536 |
| 0.011335 | 0.011455 | 0.011156 | 0.011322 | 0.011329 | 0.011368 | 0.011295 |
| 0.011262 | 0.011262 | 0.011329 | 0.011295 | 0.011497 | 0.011463 | 0.011396 |
| 0.011497 | 0.011564 | 0.011295 | 0.011295 | 0.011329 | 0.011329 | 0.011330 |
| 0.011398 | 0.011329 | 0.011329 | 0.011364 | 0.011497 | 0.011564 | 0.011564 |
| 0.011430 | 0.011533 | 0.011535 | 0.011670 | 0.011696 | 0.011362 | 0.011530 |
| 0.011463 | 0.011463 | 0.011297 | 0.011478 | 0.011408 | 0.011435 | 0.011305 |
| 0.011473 | 0.011698 | 0.011441 | 0.011366 | 0.011262 | 0.011463 | 0.011329 |
| 0.011430 | 0.011362 | 0.011262 | 0.011363 | 0.011463 | 0.011466 | 0.011362 |
| 0.011262 | 0.011195 | 0.011329 | 0.011262 | 0.011195 | 0.011298 | 0.011463 |
| 0.011362 | 0.011295 | 0.011329 | 0.011362 | 0.011329 | 0.011262 | 0.011463 |

|          |          |          |          |          |          |          |
|----------|----------|----------|----------|----------|----------|----------|
| 0.011329 | 0.011362 | 0.011362 | 0.011295 | 0.011362 | 0.011597 | 0.011262 |
| 0.011295 | 0.011698 | 0.011295 | 0.011329 | 0.011295 | 0.011664 | 0.011232 |
| 0.011679 | 0.011188 | 0.011311 | 0.011463 | 0.011549 | 0.011491 | 0.011186 |
| 0.011270 | 0.011463 | 0.011564 | 0.011671 | 0.011531 | 0.011669 | 0.011800 |
| 0.011699 | 0.011737 | 0.011698 | 0.011949 | 0.011664 | 0.012539 | 0.011700 |
| 0.012439 | 0.012207 | 0.012341 | 0.012545 | 0.011664 | 0.011362 | 0.011665 |
| 0.012103 | 0.012038 | 0.011631 | 0.011530 | 0.011598 | 0.011598 | 0.011567 |
| 0.011463 | 0.011467 | 0.011530 | 0.011497 | 0.011867 | 0.011933 | 0.011935 |
| 0.011834 | 0.011934 | 0.012038 | 0.011804 | 0.012104 | 0.012076 | 0.012171 |
| 0.012172 | 0.012205 | 0.012152 | 0.012172 | 0.012173 | 0.011396 | 0.011699 |
| 0.011767 | 0.012270 | 0.011772 | 0.012001 | 0.012474 | 0.011536 | 0.011430 |
| 0.011396 | 0.011396 | 0.011867 | 0.011883 | 0.012010 | 0.011732 | 0.011397 |
| S036     | 0.011765 | 0.011765 | 0.012101 | 0.011866 | 0.011866 | 0.011933 |
| 0.011773 | 0.011705 | 0.011933 | 0.011362 | 0.011429 | 0.011397 | 0.011362 |
| 0.011396 | 0.011564 | 0.011362 | 0.011396 | 0.011463 | 0.011429 | 0.011396 |
| 0.011362 | 0.011396 | 0.011496 | 0.011363 | 0.011329 | 0.011396 | 0.011739 |
| 0.011631 | 0.011396 | 0.011295 | 0.011530 | 0.011396 | 0.011429 | 0.011396 |
| 0.011429 | 0.000000 | 0.011429 | 0.011429 | 0.011463 | 0.011429 | 0.011597 |
| 0.011362 | 0.011429 | 0.011463 | 0.011396 | 0.011496 | 0.011530 | 0.011463 |
| 0.011429 | 0.011597 | 0.011497 | 0.011765 | 0.011429 | 0.011631 | 0.011429 |
| 0.011396 | 0.011497 | 0.011564 | 0.011631 | 0.011799 | 0.011497 | 0.011597 |
| 0.011396 | 0.011329 | 0.011429 | 0.011597 | 0.011900 | 0.011429 | 0.011497 |
| 0.011396 | 0.011496 | 0.011463 | 0.011530 | 0.011463 | 0.011463 | 0.011463 |
| 0.011362 | 0.011396 | 0.011362 | 0.011463 | 0.011429 | 0.011464 | 0.011530 |
| 0.011463 | 0.011429 | 0.011429 | 0.011396 | 0.011530 | 0.011295 | 0.011429 |
| 0.011597 | 0.011530 | 0.011765 | 0.011530 | 0.011429 | 0.011597 | 0.011429 |
| 0.011616 | 0.011845 | 0.011664 | 0.011334 | 0.011321 | 0.011465 | 0.011572 |
| 0.012195 | 0.011569 | 0.011390 | 0.011664 | 0.011664 | 0.011463 | 0.011564 |
| 0.011497 | 0.011463 | 0.011530 | 0.011429 | 0.011530 | 0.011396 | 0.011463 |
| 0.011429 | 0.011530 | 0.011732 | 0.011597 | 0.011497 | 0.011463 | 0.011329 |
| 0.011362 | 0.011362 | 0.011362 | 0.011396 | 0.011597 | 0.011564 | 0.011497 |
| 0.011597 | 0.011665 | 0.011396 | 0.011396 | 0.011430 | 0.011429 | 0.011432 |
| 0.011500 | 0.011430 | 0.011430 | 0.011276 | 0.011386 | 0.011341 | 0.011430 |
| 0.011433 | 0.011370 | 0.011429 | 0.011405 | 0.011332 | 0.011369 | 0.011398 |
| 0.011636 | 0.011439 | 0.011405 | 0.011363 | 0.011371 | 0.011498 | 0.011464 |
| 0.011531 | 0.011465 | 0.011464 | 0.011564 | 0.011496 | 0.011799 | 0.011665 |
| 0.011698 | 0.011564 | 0.011429 | 0.011530 | 0.011329 | 0.011564 | 0.011362 |
| 0.011429 | 0.011429 | 0.011396 | 0.011362 | 0.011396 | 0.011362 | 0.011463 |
| 0.011362 | 0.011463 | 0.011463 | 0.011362 | 0.011465 | 0.011564 | 0.011533 |
| 0.011497 | 0.011463 | 0.011362 | 0.011296 | 0.011429 | 0.011362 | 0.011295 |
| 0.011400 | 0.011497 | 0.011295 | 0.011497 | 0.011329 | 0.011430 | 0.011396 |
| 0.011430 | 0.011396 | 0.011362 | 0.011396 | 0.011430 | 0.011295 | 0.011362 |
| 0.011396 | 0.011396 | 0.011463 | 0.011396 | 0.011429 | 0.011463 | 0.011698 |
| 0.011799 | 0.011732 | 0.011799 | 0.011566 | 0.011799 | 0.011429 | 0.011396 |
| 0.011432 | 0.011667 | 0.011472 | 0.011335 | 0.011807 | 0.011299 | 0.011414 |
| 0.011807 | 0.011706 | 0.011597 | 0.011799 | 0.011504 | 0.011664 | 0.011564 |
| 0.011564 | 0.011732 | 0.011593 | 0.011390 | 0.011479 | 0.011463 | 0.011534 |
| 0.011631 | 0.011532 | 0.011669 | 0.011669 | 0.011664 | 0.011732 | 0.011839 |
| 0.011568 | 0.011671 | 0.011670 | 0.011601 | 0.011868 | 0.011329 | 0.011532 |
| 0.011429 | 0.011429 | 0.011329 | 0.011329 | 0.011329 | 0.011396 | 0.011463 |
| 0.011329 | 0.011396 | 0.011295 | 0.011463 | 0.011329 | 0.011396 | 0.011463 |
| 0.011396 | 0.011832 | 0.011732 | 0.011765 | 0.011295 | 0.011396 | 0.011429 |
| 0.011429 | 0.011396 | 0.011463 | 0.011497 | 0.011362 | 0.011362 | 0.011362 |
| 0.011832 | 0.011530 | 0.011530 | 0.011329 | 0.011429 | 0.011396 | 0.011362 |
| 0.011362 | 0.011429 | 0.011396 | 0.011497 | 0.011362 | 0.011496 | 0.011564 |
| 0.011564 | 0.011329 | 0.011396 | 0.011329 | 0.011329 | 0.011497 | 0.011429 |
| 0.011329 | 0.011429 | 0.011295 | 0.011329 | 0.011463 | 0.011598 | 0.011362 |
| 0.011329 | 0.011463 | 0.011396 | 0.011295 | 0.011631 | 0.011295 | 0.011463 |
| 0.011471 | 0.011362 | 0.011664 | 0.011497 | 0.011530 | 0.011396 | 0.011496 |
| 0.011362 | 0.011631 | 0.011295 | 0.011564 | 0.011362 | 0.011362 | 0.011295 |



|          |          |          |          |          |          |          |
|----------|----------|----------|----------|----------|----------|----------|
| 0.011463 | 0.011732 | 0.011429 | 0.011497 | 0.011329 | 0.011732 | 0.011362 |
| 0.011362 | 0.011362 | 0.011329 | 0.011295 | 0.011396 | 0.011496 | 0.011564 |
| 0.011496 | 0.011530 | 0.011429 | 0.011530 | 0.011429 | 0.011362 | 0.011329 |
| 0.011362 | 0.011362 | 0.011429 | 0.011362 | 0.011262 | 0.011497 | 0.011362 |
| 0.011396 | 0.011396 | 0.011530 | 0.011564 | 0.011463 | 0.011329 | 0.011396 |
| 0.011463 | 0.011396 | 0.011496 | 0.011362 | 0.011496 | 0.011597 | 0.011900 |
| 0.011396 | 0.011799 | 0.011405 | 0.017936 | 0.011387 | 0.011427 | 0.011758 |
| 0.011718 | 0.011764 | 0.011479 | 0.011408 | 0.011774 | 0.011785 | 0.011364 |
| 0.011582 | 0.011610 | 0.011333 | 0.011395 | 0.011372 | 0.011406 | 0.011361 |
| 0.011576 | 0.011582 | 0.011542 | 0.011523 | 0.011530 | 0.011564 | 0.011568 |
| 0.011369 | 0.011530 | 0.011530 | 0.011497 | 0.011463 | 0.011463 | 0.011430 |
| 0.011463 | 0.011396 | 0.011429 | 0.011463 | 0.011430 | 0.011362 | 0.011396 |
| 0.011396 | 0.011463 | 0.011362 | 0.011463 | 0.011497 | 0.011530 | 0.011429 |
| 0.011463 | 0.011430 | 0.011765 | 0.011765 | 0.011497 | 0.011531 | 0.011564 |
| 0.011329 | 0.011329 | 0.011362 | 0.011396 | 0.011329 | 0.011564 | 0.011564 |
| 0.011597 | 0.011597 | 0.011530 | 0.011631 | 0.011799 | 0.011633 | 0.011396 |
| 0.011463 | 0.011530 | 0.011497 | 0.011396 | 0.011463 | 0.011430 | 0.011463 |
| 0.011531 | 0.011530 | 0.011564 | 0.011463 | 0.011363 | 0.011631 | 0.011530 |
| 0.011467 | 0.011362 | 0.011463 | 0.011564 | 0.011463 | 0.011598 | 0.011631 |
| 0.011799 | 0.011504 | 0.011664 | 0.011564 | 0.011564 | 0.011732 | 0.011363 |
| 0.011532 | 0.011430 | 0.011396 | 0.011396 | 0.011463 | 0.011362 | 0.011463 |
| 0.011497 | 0.011530 | 0.011429 | 0.011463 | 0.011430 | 0.011765 | 0.011765 |
| 0.011497 | 0.011531 | 0.011597 | 0.011530 | 0.012170 | 0.011596 | 0.011517 |
| 0.011587 | 0.011546 | 0.011658 | 0.011545 | 0.011655 | 0.011577 | 0.011543 |
| 0.012125 | 0.011441 | 0.011574 | 0.011510 | 0.011783 | 0.011638 | 0.011673 |
| 0.012148 | 0.011626 | 0.011703 | 0.011765 | 0.011631 | 0.011631 | 0.011668 |
| 0.011329 | 0.011429 | 0.011631 | 0.011597 | 0.011601 | 0.011597 | 0.011565 |
| 0.011429 | 0.011295 | 0.011329 | 0.011429 | 0.011262 | 0.011396 | 0.011295 |
| 0.011429 | 0.011463 | 0.011362 | 0.011329 | 0.011429 | 0.011362 | 0.011396 |
| 0.011396 | 0.011329 | 0.011396 | 0.011429 | 0.011329 | 0.000000 | 0.011564 |
| 0.011463 | 0.011530 | 0.011463 | 0.011463 | 0.011396 | 0.011799 | 0.011429 |
| 0.011478 | 0.011396 | 0.011631 | 0.011637 | 0.011429 | 0.011496 | 0.011496 |
| 0.011497 | 0.011362 | 0.011396 | 0.011362 | 0.011530 | 0.011530 | 0.011463 |
| 0.011463 | 0.011597 | 0.011765 | 0.011496 | 0.011698 | 0.011698 | 0.011530 |
| 0.011396 | 0.011463 | 0.011497 | 0.011900 | 0.011463 | 0.011429 | 0.011463 |
| 0.011496 | 0.011429 | 0.011429 | 0.011732 | 0.011597 | 0.011698 | 0.011429 |
| 0.011530 | 0.011597 | 0.011463 | 0.011530 | 0.011496 | 0.011362 | 0.011698 |
| 0.011463 | 0.011429 | 0.011429 | 0.011597 | 0.011429 | 0.011530 | 0.011765 |
| 0.011463 | 0.011841 | 0.011832 | 0.011629 | 0.011399 | 0.011536 | 0.011370 |
| 0.011335 | 0.011878 | 0.011376 | 0.011596 | 0.011402 | 0.011569 | 0.011485 |
| 0.011570 | 0.011324 | 0.011450 | 0.011324 | 0.011330 | 0.011462 | 0.011506 |
| 0.011512 | 0.011375 | 0.011518 | 0.011448 | 0.011465 | 0.011597 | 0.011665 |
| 0.011665 | 0.011531 | 0.011635 | 0.011636 | 0.011772 | 0.011767 | 0.011463 |
| 0.011698 | 0.011564 | 0.011429 | 0.011530 | 0.011329 | 0.011564 | 0.011362 |
| 0.011429 | 0.011429 | 0.011396 | 0.011362 | 0.011396 | 0.011362 | 0.011463 |
| 0.011444 | 0.011445 | 0.011437 | 0.011471 | 0.011608 | 0.011504 | 0.011572 |
| 0.011571 | 0.011497 | 0.011282 | 0.011276 | 0.011433 | 0.011602 | 0.011603 |
| 0.011396 | 0.011467 | 0.011700 | 0.011669 | 0.011598 | 0.011632 | 0.011564 |
| 0.011496 | 0.011564 | 0.011564 | 0.011463 | 0.012034 | 0.011597 | 0.011698 |
| 0.011732 | 0.011808 | 0.011435 | 0.011476 | 0.011396 | 0.011597 | 0.011564 |
| 0.011598 | 0.011631 | 0.011631 | 0.011631 | 0.011807 | 0.011765 | 0.011407 |
| 0.011297 | 0.011303 | 0.011401 | 0.011366 | 0.011470 | 0.011321 | 0.011638 |
| 0.011437 | 0.011543 | 0.011298 | 0.011472 | 0.011430 | 0.011505 | 0.011329 |
| 0.011362 | 0.011362 | 0.011362 | 0.011396 | 0.011597 | 0.011564 | 0.011497 |
| 0.011597 | 0.011665 | 0.011396 | 0.011396 | 0.011430 | 0.011429 | 0.011432 |
| 0.011500 | 0.011430 | 0.011430 | 0.011465 | 0.011597 | 0.011665 | 0.011665 |
| 0.011531 | 0.011635 | 0.011636 | 0.011772 | 0.011767 | 0.011463 | 0.011631 |
| 0.011564 | 0.011564 | 0.011398 | 0.011582 | 0.011512 | 0.011537 | 0.011411 |
| 0.011508 | 0.011698 | 0.011526 | 0.011468 | 0.011295 | 0.011497 | 0.011362 |
| 0.011463 | 0.011463 | 0.011362 | 0.011465 | 0.011564 | 0.011533 | 0.011463 |

|          |          |          |          |          |          |          |
|----------|----------|----------|----------|----------|----------|----------|
| 0.011362 | 0.011296 | 0.011429 | 0.011362 | 0.011295 | 0.011400 | 0.011497 |
| 0.011463 | 0.011396 | 0.011429 | 0.011463 | 0.011430 | 0.011362 | 0.011564 |
| 0.011429 | 0.011463 | 0.011463 | 0.011396 | 0.011463 | 0.011698 | 0.011362 |
| 0.011396 | 0.011799 | 0.011396 | 0.011362 | 0.011396 | 0.011765 | 0.011360 |
| 0.011791 | 0.011358 | 0.011361 | 0.011624 | 0.011671 | 0.011599 | 0.011311 |
| 0.011323 | 0.011564 | 0.011664 | 0.011773 | 0.011632 | 0.011771 | 0.011901 |
| 0.011733 | 0.011838 | 0.011799 | 0.012051 | 0.011765 | 0.012640 | 0.011801 |
| 0.012540 | 0.012308 | 0.012442 | 0.012714 | 0.011765 | 0.011463 | 0.011766 |
| 0.012205 | 0.012140 | 0.011732 | 0.011631 | 0.011699 | 0.011699 | 0.011669 |
| 0.011564 | 0.011569 | 0.011631 | 0.011598 | 0.011968 | 0.012034 | 0.012036 |
| 0.011935 | 0.012035 | 0.012139 | 0.011906 | 0.012205 | 0.012212 | 0.012272 |
| 0.012273 | 0.012307 | 0.012255 | 0.012273 | 0.012274 | 0.011496 | 0.011800 |
| 0.011868 | 0.012371 | 0.011874 | 0.012102 | 0.012575 | 0.011638 | 0.011531 |
| 0.011496 | 0.011496 | 0.011968 | 0.012048 | 0.012116 | 0.011832 | 0.011498 |
| S037     | 0.011664 | 0.011664 | 0.012001 | 0.011765 | 0.011765 | 0.011832 |
| 0.011671 | 0.011603 | 0.011832 | 0.011262 | 0.011329 | 0.011296 | 0.011262 |
| 0.011295 | 0.011463 | 0.011262 | 0.011295 | 0.011362 | 0.011329 | 0.011295 |
| 0.011262 | 0.011295 | 0.011396 | 0.011262 | 0.011295 | 0.011295 | 0.011637 |
| 0.011530 | 0.011295 | 0.011194 | 0.011429 | 0.011362 | 0.011329 | 0.011362 |
| 0.011329 | 0.011429 | 0.000000 | 0.011329 | 0.011295 | 0.011329 | 0.011496 |
| 0.011262 | 0.011329 | 0.011295 | 0.011228 | 0.011396 | 0.011429 | 0.011362 |
| 0.011329 | 0.011429 | 0.011396 | 0.011664 | 0.011262 | 0.011597 | 0.011262 |
| 0.011295 | 0.011396 | 0.011396 | 0.011597 | 0.011698 | 0.011396 | 0.011496 |
| 0.011362 | 0.011429 | 0.011329 | 0.011564 | 0.011799 | 0.011329 | 0.011396 |
| 0.011295 | 0.011396 | 0.011362 | 0.011429 | 0.011362 | 0.011295 | 0.011295 |
| 0.011262 | 0.011295 | 0.011262 | 0.011362 | 0.011329 | 0.011363 | 0.011429 |
| 0.011362 | 0.011329 | 0.011396 | 0.011295 | 0.011429 | 0.011262 | 0.011329 |
| 0.011496 | 0.011429 | 0.011664 | 0.011497 | 0.011329 | 0.011564 | 0.011262 |
| 0.011505 | 0.011733 | 0.011551 | 0.011256 | 0.011247 | 0.011355 | 0.011454 |
| 0.012085 | 0.011518 | 0.011266 | 0.011564 | 0.011564 | 0.011362 | 0.011463 |
| 0.011396 | 0.011362 | 0.011429 | 0.011329 | 0.011429 | 0.011362 | 0.011362 |
| 0.011329 | 0.011429 | 0.011631 | 0.011496 | 0.011396 | 0.011362 | 0.011295 |
| 0.011262 | 0.011262 | 0.011329 | 0.011295 | 0.011497 | 0.011463 | 0.011396 |
| 0.011497 | 0.011564 | 0.011295 | 0.011295 | 0.011329 | 0.011329 | 0.011330 |
| 0.011398 | 0.011329 | 0.011329 | 0.011204 | 0.011277 | 0.011236 | 0.011329 |
| 0.011331 | 0.011266 | 0.011318 | 0.011302 | 0.011230 | 0.011266 | 0.011297 |
| 0.011564 | 0.011336 | 0.011370 | 0.011262 | 0.011268 | 0.011397 | 0.011363 |
| 0.011430 | 0.011363 | 0.011363 | 0.011463 | 0.011396 | 0.011765 | 0.011564 |
| 0.011597 | 0.011463 | 0.011329 | 0.011430 | 0.011228 | 0.011463 | 0.011262 |
| 0.011329 | 0.011329 | 0.011295 | 0.011262 | 0.011295 | 0.011262 | 0.011362 |
| 0.011329 | 0.011430 | 0.011362 | 0.011262 | 0.011363 | 0.011463 | 0.011466 |
| 0.011463 | 0.011362 | 0.011262 | 0.011195 | 0.011329 | 0.011262 | 0.011195 |
| 0.011298 | 0.011463 | 0.011262 | 0.011463 | 0.011228 | 0.011329 | 0.011295 |
| 0.011396 | 0.011295 | 0.011329 | 0.011295 | 0.011329 | 0.011195 | 0.011329 |
| 0.011362 | 0.011295 | 0.011362 | 0.011295 | 0.011329 | 0.011362 | 0.011597 |
| 0.011698 | 0.011631 | 0.011698 | 0.011397 | 0.011698 | 0.011329 | 0.011295 |
| 0.011330 | 0.011626 | 0.011426 | 0.011232 | 0.011705 | 0.011197 | 0.011336 |
| 0.011705 | 0.011604 | 0.011496 | 0.011698 | 0.011402 | 0.011564 | 0.011530 |
| 0.011463 | 0.011631 | 0.011486 | 0.011349 | 0.011395 | 0.011362 | 0.011432 |
| 0.011530 | 0.011431 | 0.011567 | 0.011635 | 0.011564 | 0.011631 | 0.011738 |
| 0.011466 | 0.011637 | 0.011568 | 0.011500 | 0.011767 | 0.011228 | 0.011431 |
| 0.011396 | 0.011329 | 0.011228 | 0.011228 | 0.011295 | 0.011295 | 0.011295 |
| 0.011295 | 0.011362 | 0.011262 | 0.011362 | 0.011295 | 0.011295 | 0.011362 |
| 0.011295 | 0.011731 | 0.011631 | 0.011664 | 0.011194 | 0.011295 | 0.011329 |
| 0.011329 | 0.011295 | 0.011362 | 0.011396 | 0.011262 | 0.011262 | 0.011262 |
| 0.011799 | 0.011429 | 0.011429 | 0.011228 | 0.011329 | 0.011497 | 0.011262 |
| 0.011262 | 0.011329 | 0.011295 | 0.011463 | 0.011262 | 0.011396 | 0.011530 |
| 0.011463 | 0.011295 | 0.011295 | 0.011228 | 0.011228 | 0.011396 | 0.011329 |
| 0.011228 | 0.011329 | 0.011195 | 0.011228 | 0.011362 | 0.011497 | 0.011262 |
| 0.011228 | 0.011362 | 0.011295 | 0.011195 | 0.011530 | 0.011195 | 0.011362 |

|          |          |          |          |          |          |          |
|----------|----------|----------|----------|----------|----------|----------|
| 0.011437 | 0.011262 | 0.011564 | 0.011396 | 0.011429 | 0.011295 | 0.011329 |
| 0.011262 | 0.011597 | 0.011194 | 0.011463 | 0.011262 | 0.011262 | 0.011194 |
| 0.011429 | 0.011631 | 0.011329 | 0.011396 | 0.011228 | 0.011631 | 0.011262 |
| 0.011262 | 0.011262 | 0.011295 | 0.011396 | 0.011295 | 0.011396 | 0.011463 |
| 0.011463 | 0.011429 | 0.011262 | 0.011429 | 0.011396 | 0.011194 | 0.011228 |
| 0.011262 | 0.011194 | 0.011329 | 0.011262 | 0.011228 | 0.011396 | 0.011262 |
| 0.011295 | 0.011295 | 0.011429 | 0.011463 | 0.011362 | 0.011295 | 0.011295 |
| 0.011362 | 0.011295 | 0.011396 | 0.011262 | 0.011396 | 0.011496 | 0.011799 |
| 0.011295 | 0.011698 | 0.011302 | 0.017823 | 0.011387 | 0.011427 | 0.011653 |
| 0.011614 | 0.011658 | 0.011427 | 0.011292 | 0.011774 | 0.011682 | 0.011425 |
| 0.011582 | 0.011610 | 0.011216 | 0.011311 | 0.011294 | 0.011356 | 0.011275 |
| 0.011576 | 0.011470 | 0.011468 | 0.011259 | 0.011429 | 0.011463 | 0.011466 |
| 0.011335 | 0.011429 | 0.011429 | 0.011396 | 0.011362 | 0.011362 | 0.011329 |
| 0.011362 | 0.011295 | 0.011329 | 0.011362 | 0.011329 | 0.011262 | 0.011295 |
| 0.011295 | 0.011362 | 0.011262 | 0.011362 | 0.011396 | 0.011429 | 0.011329 |
| 0.011362 | 0.011329 | 0.011665 | 0.011665 | 0.011396 | 0.011430 | 0.011463 |
| 0.011228 | 0.011228 | 0.011262 | 0.011362 | 0.011228 | 0.011463 | 0.011463 |
| 0.011497 | 0.011496 | 0.011429 | 0.011530 | 0.011698 | 0.011498 | 0.011362 |
| 0.011362 | 0.011429 | 0.011463 | 0.011295 | 0.011362 | 0.011329 | 0.011362 |
| 0.011430 | 0.011430 | 0.011463 | 0.011430 | 0.011330 | 0.011530 | 0.011497 |
| 0.011331 | 0.011262 | 0.011362 | 0.011396 | 0.011362 | 0.011497 | 0.011530 |
| 0.011698 | 0.011402 | 0.011564 | 0.011530 | 0.011463 | 0.011631 | 0.011262 |
| 0.011431 | 0.011329 | 0.011295 | 0.011295 | 0.011362 | 0.011262 | 0.011362 |
| 0.011396 | 0.011429 | 0.011329 | 0.011362 | 0.011329 | 0.011665 | 0.011665 |
| 0.011396 | 0.011430 | 0.011496 | 0.011429 | 0.012069 | 0.011489 | 0.011412 |
| 0.011482 | 0.011442 | 0.011552 | 0.011441 | 0.011550 | 0.011474 | 0.011439 |
| 0.012021 | 0.011337 | 0.011471 | 0.011406 | 0.011680 | 0.011536 | 0.011639 |
| 0.012046 | 0.011512 | 0.011601 | 0.011664 | 0.011530 | 0.011530 | 0.011567 |
| 0.011228 | 0.011396 | 0.011530 | 0.011496 | 0.011499 | 0.011496 | 0.011464 |
| 0.011329 | 0.011262 | 0.011295 | 0.011329 | 0.011228 | 0.011295 | 0.011194 |
| 0.011329 | 0.011362 | 0.011262 | 0.011228 | 0.011329 | 0.011262 | 0.011295 |
| 0.011295 | 0.011228 | 0.011295 | 0.011329 | 0.011228 | 0.011429 | 0.011463 |
| 0.011362 | 0.011429 | 0.011362 | 0.011362 | 0.011295 | 0.011698 | 0.011329 |
| 0.011373 | 0.011295 | 0.011530 | 0.011535 | 0.011396 | 0.011329 | 0.011396 |
| 0.011396 | 0.011329 | 0.011295 | 0.011329 | 0.011429 | 0.011429 | 0.011362 |
| 0.011362 | 0.011496 | 0.011664 | 0.011396 | 0.011597 | 0.011597 | 0.011463 |
| 0.011295 | 0.011362 | 0.011396 | 0.011799 | 0.011362 | 0.011396 | 0.011362 |
| 0.011396 | 0.011329 | 0.011329 | 0.011631 | 0.011564 | 0.011597 | 0.011329 |
| 0.011429 | 0.011496 | 0.011362 | 0.011429 | 0.011396 | 0.011262 | 0.011597 |
| 0.011362 | 0.011329 | 0.011329 | 0.011496 | 0.011329 | 0.011429 | 0.011664 |
| 0.011362 | 0.011739 | 0.011732 | 0.011548 | 0.011342 | 0.011434 | 0.011267 |
| 0.011225 | 0.011761 | 0.011271 | 0.011507 | 0.011353 | 0.011366 | 0.011485 |
| 0.011570 | 0.011258 | 0.011394 | 0.011258 | 0.011330 | 0.011529 | 0.011425 |
| 0.011437 | 0.011336 | 0.011412 | 0.011342 | 0.011364 | 0.011497 | 0.011564 |
| 0.011564 | 0.011430 | 0.011533 | 0.011535 | 0.011670 | 0.011696 | 0.011362 |
| 0.011597 | 0.011463 | 0.011329 | 0.011430 | 0.011228 | 0.011463 | 0.011262 |
| 0.011329 | 0.011329 | 0.011295 | 0.011262 | 0.011295 | 0.011262 | 0.011362 |
| 0.011340 | 0.011340 | 0.011334 | 0.011368 | 0.011505 | 0.011470 | 0.011470 |
| 0.011469 | 0.011396 | 0.011208 | 0.011204 | 0.011331 | 0.011501 | 0.011501 |
| 0.011296 | 0.011365 | 0.011531 | 0.011567 | 0.011497 | 0.011531 | 0.011463 |
| 0.011396 | 0.011463 | 0.011463 | 0.011362 | 0.011933 | 0.011530 | 0.011597 |
| 0.011631 | 0.011701 | 0.011333 | 0.011407 | 0.011295 | 0.011497 | 0.011463 |
| 0.011497 | 0.011530 | 0.011530 | 0.011530 | 0.011610 | 0.011664 | 0.011303 |
| 0.011195 | 0.011199 | 0.011298 | 0.011264 | 0.011368 | 0.011209 | 0.011536 |
| 0.011335 | 0.011499 | 0.011251 | 0.011360 | 0.011329 | 0.011402 | 0.011295 |
| 0.011262 | 0.011262 | 0.011329 | 0.011295 | 0.011497 | 0.011463 | 0.011396 |
| 0.011497 | 0.011564 | 0.011295 | 0.011295 | 0.011329 | 0.011329 | 0.011330 |
| 0.011398 | 0.011329 | 0.011329 | 0.011364 | 0.011497 | 0.011564 | 0.011564 |
| 0.011430 | 0.011533 | 0.011535 | 0.011670 | 0.011696 | 0.011362 | 0.011530 |
| 0.011463 | 0.011463 | 0.011229 | 0.011478 | 0.011408 | 0.011435 | 0.011305 |

|          |          |          |          |          |          |          |
|----------|----------|----------|----------|----------|----------|----------|
| 0.011473 | 0.011698 | 0.011484 | 0.011366 | 0.011262 | 0.011463 | 0.011329 |
| 0.011430 | 0.011362 | 0.011262 | 0.011363 | 0.011463 | 0.011466 | 0.011362 |
| 0.011262 | 0.011195 | 0.011329 | 0.011262 | 0.011195 | 0.011298 | 0.011463 |
| 0.011362 | 0.011295 | 0.011329 | 0.011362 | 0.011329 | 0.011262 | 0.011463 |
| 0.011329 | 0.011362 | 0.011362 | 0.011295 | 0.011362 | 0.011597 | 0.011262 |
| 0.011295 | 0.011698 | 0.011295 | 0.011329 | 0.011295 | 0.011664 | 0.011274 |
| 0.011791 | 0.011273 | 0.011361 | 0.011503 | 0.011589 | 0.011491 | 0.011227 |
| 0.011323 | 0.011463 | 0.011564 | 0.011671 | 0.011531 | 0.011669 | 0.011800 |
| 0.011699 | 0.011737 | 0.011698 | 0.011949 | 0.011664 | 0.012539 | 0.011700 |
| 0.012439 | 0.012207 | 0.012341 | 0.012612 | 0.011664 | 0.011362 | 0.011665 |
| 0.012103 | 0.012038 | 0.011631 | 0.011530 | 0.011598 | 0.011598 | 0.011567 |
| 0.011463 | 0.011467 | 0.011530 | 0.011497 | 0.011867 | 0.011933 | 0.011935 |
| 0.011834 | 0.011934 | 0.012038 | 0.011804 | 0.012104 | 0.012110 | 0.012171 |
| 0.012172 | 0.012205 | 0.012152 | 0.012172 | 0.012173 | 0.011396 | 0.011699 |
| 0.011766 | 0.012270 | 0.011772 | 0.012001 | 0.012474 | 0.011536 | 0.011430 |
| 0.011396 | 0.011396 | 0.011867 | 0.011883 | 0.012010 | 0.011732 | 0.011397 |
| S038     | 0.011664 | 0.011664 | 0.012001 | 0.011765 | 0.011765 | 0.011832 |
| 0.011671 | 0.011603 | 0.011832 | 0.011262 | 0.011329 | 0.011296 | 0.011262 |
| 0.011295 | 0.011463 | 0.011262 | 0.011295 | 0.011362 | 0.011329 | 0.011295 |
| 0.011262 | 0.011295 | 0.011396 | 0.011262 | 0.011295 | 0.011295 | 0.011637 |
| 0.011530 | 0.011295 | 0.011194 | 0.011429 | 0.011362 | 0.011329 | 0.011362 |
| 0.011329 | 0.011429 | 0.011329 | 0.000000 | 0.011362 | 0.011329 | 0.011497 |
| 0.011262 | 0.011329 | 0.011362 | 0.011295 | 0.011396 | 0.011429 | 0.011362 |
| 0.011329 | 0.011497 | 0.011396 | 0.011664 | 0.011329 | 0.011597 | 0.011329 |
| 0.011295 | 0.011396 | 0.011463 | 0.011597 | 0.011698 | 0.011396 | 0.011496 |
| 0.011362 | 0.011429 | 0.011329 | 0.011564 | 0.011799 | 0.011329 | 0.011396 |
| 0.011295 | 0.011396 | 0.011362 | 0.011429 | 0.011362 | 0.011362 | 0.011362 |
| 0.011262 | 0.011295 | 0.011262 | 0.011362 | 0.011329 | 0.011363 | 0.011429 |
| 0.011362 | 0.011329 | 0.011396 | 0.011295 | 0.011429 | 0.011262 | 0.011329 |
| 0.011496 | 0.011429 | 0.011664 | 0.011497 | 0.011329 | 0.011564 | 0.011329 |
| 0.011505 | 0.011733 | 0.011551 | 0.011255 | 0.011247 | 0.011355 | 0.011454 |
| 0.012085 | 0.011569 | 0.011266 | 0.011564 | 0.011564 | 0.011362 | 0.011463 |
| 0.011396 | 0.011362 | 0.011429 | 0.011329 | 0.011429 | 0.011362 | 0.011362 |
| 0.011329 | 0.011429 | 0.011631 | 0.011496 | 0.011396 | 0.011362 | 0.011295 |
| 0.011262 | 0.011262 | 0.011329 | 0.011295 | 0.011497 | 0.011463 | 0.011396 |
| 0.011497 | 0.011564 | 0.011295 | 0.011295 | 0.011329 | 0.011329 | 0.011330 |
| 0.011398 | 0.011329 | 0.011329 | 0.011204 | 0.011277 | 0.011236 | 0.011329 |
| 0.011331 | 0.011266 | 0.011318 | 0.011302 | 0.011230 | 0.011266 | 0.011297 |
| 0.011564 | 0.011336 | 0.011370 | 0.011262 | 0.011268 | 0.011397 | 0.011363 |
| 0.011430 | 0.011364 | 0.011363 | 0.011463 | 0.011396 | 0.011765 | 0.011564 |
| 0.011597 | 0.011463 | 0.011329 | 0.011430 | 0.011228 | 0.011463 | 0.011262 |
| 0.011329 | 0.011329 | 0.011295 | 0.011262 | 0.011295 | 0.011262 | 0.011362 |
| 0.011329 | 0.011430 | 0.011362 | 0.011262 | 0.011363 | 0.011463 | 0.011466 |
| 0.011463 | 0.011362 | 0.011262 | 0.011195 | 0.011329 | 0.011262 | 0.011195 |
| 0.011298 | 0.011463 | 0.011262 | 0.011463 | 0.011228 | 0.011329 | 0.011295 |
| 0.011396 | 0.011295 | 0.011329 | 0.011295 | 0.011329 | 0.011195 | 0.011329 |
| 0.011362 | 0.011295 | 0.011362 | 0.011295 | 0.011329 | 0.011362 | 0.011597 |
| 0.011698 | 0.011631 | 0.011698 | 0.011465 | 0.011698 | 0.011329 | 0.011295 |
| 0.011330 | 0.011626 | 0.011380 | 0.011232 | 0.011705 | 0.011197 | 0.011336 |
| 0.011705 | 0.011604 | 0.011496 | 0.011698 | 0.011402 | 0.011564 | 0.011463 |
| 0.011463 | 0.011631 | 0.011486 | 0.011349 | 0.011395 | 0.011362 | 0.011432 |
| 0.011530 | 0.011431 | 0.011567 | 0.011635 | 0.011564 | 0.011631 | 0.011738 |
| 0.011466 | 0.011637 | 0.011568 | 0.011500 | 0.011767 | 0.011228 | 0.011431 |
| 0.011396 | 0.011329 | 0.011228 | 0.011228 | 0.011295 | 0.011295 | 0.011362 |
| 0.011295 | 0.011362 | 0.011262 | 0.011362 | 0.011295 | 0.011295 | 0.011362 |
| 0.011295 | 0.011731 | 0.011631 | 0.011664 | 0.011194 | 0.011295 | 0.011329 |
| 0.011329 | 0.011295 | 0.011362 | 0.011329 | 0.011262 | 0.011262 | 0.011262 |
| 0.011799 | 0.011429 | 0.011429 | 0.011228 | 0.011329 | 0.011497 | 0.011262 |
| 0.011262 | 0.011329 | 0.011295 | 0.011463 | 0.011262 | 0.011396 | 0.011530 |
| 0.011463 | 0.011295 | 0.011295 | 0.011228 | 0.011228 | 0.011396 | 0.011329 |

|          |          |          |          |          |          |          |
|----------|----------|----------|----------|----------|----------|----------|
| 0.011228 | 0.011329 | 0.011195 | 0.011228 | 0.011362 | 0.011497 | 0.011262 |
| 0.011228 | 0.011362 | 0.011295 | 0.011195 | 0.011530 | 0.011195 | 0.011362 |
| 0.011437 | 0.011262 | 0.011564 | 0.011396 | 0.011429 | 0.011295 | 0.011396 |
| 0.011262 | 0.011597 | 0.011194 | 0.011463 | 0.011262 | 0.011262 | 0.011194 |
| 0.011429 | 0.011631 | 0.011329 | 0.011396 | 0.011228 | 0.011631 | 0.011262 |
| 0.011262 | 0.011194 | 0.011295 | 0.011396 | 0.011295 | 0.011396 | 0.011463 |
| 0.011463 | 0.011429 | 0.011329 | 0.011430 | 0.011396 | 0.011262 | 0.011228 |
| 0.011262 | 0.011262 | 0.011329 | 0.011262 | 0.011228 | 0.011396 | 0.011262 |
| 0.011295 | 0.011295 | 0.011429 | 0.011463 | 0.011362 | 0.011295 | 0.011295 |
| 0.011362 | 0.011295 | 0.011396 | 0.011262 | 0.011396 | 0.011496 | 0.011799 |
| 0.011295 | 0.011698 | 0.011302 | 0.017823 | 0.011322 | 0.011427 | 0.011653 |
| 0.011614 | 0.011658 | 0.011427 | 0.011408 | 0.011719 | 0.011682 | 0.011364 |
| 0.011582 | 0.011549 | 0.011216 | 0.011312 | 0.011294 | 0.011307 | 0.011318 |
| 0.011576 | 0.011470 | 0.011468 | 0.011391 | 0.011429 | 0.011463 | 0.011466 |
| 0.011335 | 0.011430 | 0.011429 | 0.011396 | 0.011362 | 0.011362 | 0.011329 |
| 0.011362 | 0.011295 | 0.011329 | 0.011362 | 0.011329 | 0.011262 | 0.011295 |
| 0.011295 | 0.011362 | 0.011262 | 0.011363 | 0.011396 | 0.011430 | 0.011329 |
| 0.011362 | 0.011329 | 0.011665 | 0.011665 | 0.011396 | 0.011430 | 0.011463 |
| 0.011228 | 0.011228 | 0.011262 | 0.011362 | 0.011228 | 0.011396 | 0.011396 |
| 0.011497 | 0.011496 | 0.011429 | 0.011530 | 0.011698 | 0.011532 | 0.011362 |
| 0.011362 | 0.011430 | 0.011463 | 0.011295 | 0.011362 | 0.011329 | 0.011362 |
| 0.011430 | 0.011430 | 0.011463 | 0.011430 | 0.011330 | 0.011530 | 0.011497 |
| 0.011365 | 0.011262 | 0.011362 | 0.011463 | 0.011363 | 0.011497 | 0.011530 |
| 0.011698 | 0.011402 | 0.011564 | 0.011463 | 0.011463 | 0.011631 | 0.011262 |
| 0.011431 | 0.011329 | 0.011295 | 0.011295 | 0.011362 | 0.011262 | 0.011363 |
| 0.011396 | 0.011430 | 0.011329 | 0.011362 | 0.011329 | 0.011665 | 0.011665 |
| 0.011396 | 0.011430 | 0.011496 | 0.011429 | 0.012069 | 0.011489 | 0.011412 |
| 0.011482 | 0.011442 | 0.011552 | 0.011441 | 0.011550 | 0.011474 | 0.011439 |
| 0.012022 | 0.011337 | 0.011471 | 0.011406 | 0.011680 | 0.011536 | 0.011639 |
| 0.012046 | 0.011512 | 0.011601 | 0.011664 | 0.011530 | 0.011530 | 0.011567 |
| 0.011228 | 0.011396 | 0.011530 | 0.011496 | 0.011499 | 0.011496 | 0.011464 |
| 0.011329 | 0.011262 | 0.011295 | 0.011329 | 0.011228 | 0.011295 | 0.011194 |
| 0.011329 | 0.011362 | 0.011262 | 0.011228 | 0.011329 | 0.011262 | 0.011295 |
| 0.011295 | 0.011228 | 0.011295 | 0.011329 | 0.011228 | 0.011429 | 0.011463 |
| 0.011362 | 0.011429 | 0.011362 | 0.011362 | 0.011295 | 0.011698 | 0.011329 |
| 0.011373 | 0.011295 | 0.011530 | 0.011535 | 0.011396 | 0.011396 | 0.011396 |
| 0.011396 | 0.011329 | 0.011295 | 0.011329 | 0.011429 | 0.011429 | 0.011362 |
| 0.011362 | 0.011497 | 0.011664 | 0.011396 | 0.011597 | 0.011597 | 0.011463 |
| 0.011295 | 0.011362 | 0.011396 | 0.011799 | 0.011362 | 0.011396 | 0.011362 |
| 0.011396 | 0.011329 | 0.011329 | 0.011631 | 0.011564 | 0.011597 | 0.011329 |
| 0.011429 | 0.011497 | 0.011362 | 0.011429 | 0.011396 | 0.011262 | 0.011597 |
| 0.011295 | 0.011329 | 0.011329 | 0.011497 | 0.011329 | 0.011429 | 0.011664 |
| 0.011362 | 0.011739 | 0.011732 | 0.011548 | 0.011342 | 0.011434 | 0.011370 |
| 0.011225 | 0.011761 | 0.011271 | 0.011462 | 0.011353 | 0.011417 | 0.011432 |
| 0.011570 | 0.011258 | 0.011394 | 0.011192 | 0.011276 | 0.011395 | 0.011425 |
| 0.011437 | 0.011336 | 0.011412 | 0.011342 | 0.011364 | 0.011497 | 0.011564 |
| 0.011564 | 0.011430 | 0.011534 | 0.011535 | 0.011670 | 0.011696 | 0.011362 |
| 0.011597 | 0.011463 | 0.011329 | 0.011430 | 0.011228 | 0.011463 | 0.011262 |
| 0.011329 | 0.011329 | 0.011295 | 0.011262 | 0.011295 | 0.011262 | 0.011362 |
| 0.011340 | 0.011340 | 0.011334 | 0.011368 | 0.011505 | 0.011470 | 0.011470 |
| 0.011469 | 0.011396 | 0.011208 | 0.011204 | 0.011331 | 0.011501 | 0.011501 |
| 0.011296 | 0.011365 | 0.011599 | 0.011567 | 0.011497 | 0.011531 | 0.011463 |
| 0.011396 | 0.011463 | 0.011463 | 0.011362 | 0.011933 | 0.011530 | 0.011597 |
| 0.011631 | 0.011701 | 0.011333 | 0.011407 | 0.011295 | 0.011497 | 0.011463 |
| 0.011497 | 0.011530 | 0.011530 | 0.011530 | 0.011611 | 0.011664 | 0.011303 |
| 0.011195 | 0.011199 | 0.011299 | 0.011264 | 0.011368 | 0.011210 | 0.011536 |
| 0.011335 | 0.011499 | 0.011251 | 0.011360 | 0.011329 | 0.011402 | 0.011295 |
| 0.011262 | 0.011262 | 0.011329 | 0.011295 | 0.011497 | 0.011463 | 0.011396 |
| 0.011497 | 0.011564 | 0.011295 | 0.011295 | 0.011329 | 0.011329 | 0.011330 |
| 0.011398 | 0.011329 | 0.011329 | 0.011364 | 0.011497 | 0.011564 | 0.011564 |

|          |          |          |          |          |          |          |
|----------|----------|----------|----------|----------|----------|----------|
| 0.011430 | 0.011534 | 0.011535 | 0.011670 | 0.011696 | 0.011362 | 0.011530 |
| 0.011463 | 0.011463 | 0.011297 | 0.011478 | 0.011408 | 0.011435 | 0.011270 |
| 0.011473 | 0.011698 | 0.011483 | 0.011366 | 0.011262 | 0.011463 | 0.011329 |
| 0.011430 | 0.011362 | 0.011262 | 0.011363 | 0.011463 | 0.011466 | 0.011362 |
| 0.011262 | 0.011195 | 0.011329 | 0.011262 | 0.011195 | 0.011298 | 0.011463 |
| 0.011362 | 0.011295 | 0.011329 | 0.011362 | 0.011329 | 0.011262 | 0.011463 |
| 0.011329 | 0.011362 | 0.011362 | 0.011295 | 0.011362 | 0.011597 | 0.011262 |
| 0.011295 | 0.011698 | 0.011295 | 0.011329 | 0.011295 | 0.011664 | 0.011275 |
| 0.011791 | 0.011273 | 0.011361 | 0.011503 | 0.011589 | 0.011491 | 0.011227 |
| 0.011323 | 0.011463 | 0.011564 | 0.011671 | 0.011531 | 0.011669 | 0.011800 |
| 0.011699 | 0.011737 | 0.011698 | 0.011949 | 0.011664 | 0.012539 | 0.011700 |
| 0.012439 | 0.012207 | 0.012341 | 0.012613 | 0.011664 | 0.011363 | 0.011665 |
| 0.012103 | 0.012038 | 0.011631 | 0.011530 | 0.011598 | 0.011598 | 0.011567 |
| 0.011463 | 0.011467 | 0.011530 | 0.011497 | 0.011867 | 0.011933 | 0.011935 |
| 0.011834 | 0.011934 | 0.012038 | 0.011804 | 0.012104 | 0.012110 | 0.012171 |
| 0.012172 | 0.012205 | 0.012152 | 0.012172 | 0.012173 | 0.011396 | 0.011699 |
| 0.011767 | 0.012270 | 0.011772 | 0.012001 | 0.012474 | 0.011536 | 0.011430 |
| 0.011396 | 0.011396 | 0.011799 | 0.011924 | 0.012010 | 0.011732 | 0.011397 |
| S039     | 0.011698 | 0.011698 | 0.012034 | 0.011799 | 0.011799 | 0.011866 |
| 0.011705 | 0.011637 | 0.011866 | 0.011295 | 0.011362 | 0.011329 | 0.011295 |
| 0.011329 | 0.011496 | 0.011295 | 0.011262 | 0.011396 | 0.011362 | 0.011329 |
| 0.011295 | 0.011329 | 0.011429 | 0.011295 | 0.011329 | 0.011329 | 0.011671 |
| 0.011564 | 0.011329 | 0.011228 | 0.011463 | 0.011396 | 0.011362 | 0.011396 |
| 0.011362 | 0.011463 | 0.011295 | 0.011362 | 0.000000 | 0.011362 | 0.011530 |
| 0.011295 | 0.011362 | 0.011127 | 0.011262 | 0.011429 | 0.011396 | 0.011396 |
| 0.011362 | 0.011262 | 0.011430 | 0.011698 | 0.011094 | 0.011631 | 0.011094 |
| 0.011329 | 0.011429 | 0.011362 | 0.011631 | 0.011731 | 0.011429 | 0.011530 |
| 0.011396 | 0.011463 | 0.011362 | 0.011597 | 0.011832 | 0.011362 | 0.011429 |
| 0.011329 | 0.011429 | 0.011396 | 0.011463 | 0.011396 | 0.011329 | 0.011329 |
| 0.011295 | 0.011329 | 0.011295 | 0.011396 | 0.011362 | 0.011397 | 0.011463 |
| 0.011396 | 0.011362 | 0.011429 | 0.011329 | 0.011463 | 0.011295 | 0.011362 |
| 0.011530 | 0.011463 | 0.011698 | 0.011530 | 0.011362 | 0.011597 | 0.011295 |
| 0.011505 | 0.011732 | 0.011551 | 0.011295 | 0.011284 | 0.011355 | 0.011454 |
| 0.012121 | 0.011569 | 0.011266 | 0.011530 | 0.011597 | 0.011396 | 0.011496 |
| 0.011429 | 0.011396 | 0.011463 | 0.011362 | 0.011463 | 0.011396 | 0.011396 |
| 0.011362 | 0.011463 | 0.011664 | 0.011530 | 0.011429 | 0.011396 | 0.011329 |
| 0.011295 | 0.011295 | 0.011362 | 0.011329 | 0.011530 | 0.011497 | 0.011429 |
| 0.011530 | 0.011597 | 0.011329 | 0.011329 | 0.011362 | 0.011362 | 0.011364 |
| 0.011432 | 0.011362 | 0.011362 | 0.011240 | 0.011313 | 0.011271 | 0.011363 |
| 0.011365 | 0.011301 | 0.011355 | 0.011336 | 0.011264 | 0.011300 | 0.011330 |
| 0.011600 | 0.011370 | 0.011405 | 0.011296 | 0.011302 | 0.011430 | 0.011396 |
| 0.011464 | 0.011397 | 0.011396 | 0.011496 | 0.011429 | 0.011732 | 0.011597 |
| 0.011631 | 0.011497 | 0.011362 | 0.011463 | 0.011262 | 0.011496 | 0.011295 |
| 0.011362 | 0.011362 | 0.011329 | 0.011295 | 0.011329 | 0.011295 | 0.011396 |
| 0.011362 | 0.011463 | 0.011396 | 0.011295 | 0.011397 | 0.011497 | 0.011499 |
| 0.011497 | 0.011396 | 0.011295 | 0.011229 | 0.011362 | 0.011295 | 0.011228 |
| 0.011332 | 0.011497 | 0.011295 | 0.011497 | 0.011262 | 0.011362 | 0.011329 |
| 0.011430 | 0.011329 | 0.011362 | 0.011329 | 0.011362 | 0.011228 | 0.011362 |
| 0.011396 | 0.011329 | 0.011396 | 0.011329 | 0.011362 | 0.011396 | 0.011631 |
| 0.011732 | 0.011664 | 0.011732 | 0.011363 | 0.011732 | 0.011362 | 0.011329 |
| 0.011364 | 0.011667 | 0.011472 | 0.011266 | 0.011739 | 0.011231 | 0.011296 |
| 0.011739 | 0.011638 | 0.011530 | 0.011732 | 0.011436 | 0.011597 | 0.011564 |
| 0.011429 | 0.011664 | 0.011486 | 0.011307 | 0.011354 | 0.011396 | 0.011466 |
| 0.011564 | 0.011431 | 0.011601 | 0.011635 | 0.011597 | 0.011665 | 0.011738 |
| 0.011500 | 0.011637 | 0.011534 | 0.011533 | 0.011767 | 0.011262 | 0.011464 |
| 0.011429 | 0.011362 | 0.011262 | 0.011262 | 0.011329 | 0.011329 | 0.011329 |
| 0.011329 | 0.011396 | 0.011295 | 0.011396 | 0.011329 | 0.011329 | 0.011329 |
| 0.011329 | 0.011765 | 0.011664 | 0.011698 | 0.011228 | 0.011329 | 0.011362 |
| 0.011362 | 0.011329 | 0.011396 | 0.011429 | 0.011295 | 0.011295 | 0.011295 |
| 0.011832 | 0.011463 | 0.011463 | 0.011262 | 0.011362 | 0.011463 | 0.011295 |

|          |          |          |          |          |          |          |
|----------|----------|----------|----------|----------|----------|----------|
| 0.011295 | 0.011362 | 0.011329 | 0.011497 | 0.011295 | 0.011429 | 0.011564 |
| 0.011496 | 0.011329 | 0.011329 | 0.011262 | 0.011262 | 0.011429 | 0.011362 |
| 0.011262 | 0.011362 | 0.011228 | 0.011262 | 0.011396 | 0.011530 | 0.011295 |
| 0.011262 | 0.011396 | 0.011329 | 0.011228 | 0.011564 | 0.011228 | 0.011396 |
| 0.011437 | 0.011295 | 0.011597 | 0.011429 | 0.011463 | 0.011329 | 0.011094 |
| 0.011295 | 0.011631 | 0.011228 | 0.011496 | 0.011295 | 0.011295 | 0.011228 |
| 0.011463 | 0.011665 | 0.011362 | 0.011429 | 0.011262 | 0.011664 | 0.011295 |
| 0.011295 | 0.011295 | 0.011329 | 0.011429 | 0.011329 | 0.011429 | 0.011496 |
| 0.011496 | 0.011463 | 0.011295 | 0.011463 | 0.011429 | 0.011228 | 0.011262 |
| 0.011295 | 0.011228 | 0.011362 | 0.011295 | 0.011262 | 0.011429 | 0.011295 |
| 0.011329 | 0.011329 | 0.011463 | 0.011496 | 0.011396 | 0.011329 | 0.011329 |
| 0.011396 | 0.011329 | 0.011429 | 0.011295 | 0.011429 | 0.011530 | 0.011832 |
| 0.011329 | 0.011732 | 0.011336 | 0.017861 | 0.011387 | 0.011611 | 0.011688 |
| 0.011648 | 0.011693 | 0.011427 | 0.011350 | 0.011829 | 0.011716 | 0.011485 |
| 0.011534 | 0.011671 | 0.011216 | 0.011353 | 0.011333 | 0.011406 | 0.011361 |
| 0.011576 | 0.011507 | 0.011505 | 0.011126 | 0.011463 | 0.011497 | 0.011500 |
| 0.011335 | 0.011463 | 0.011463 | 0.011429 | 0.011396 | 0.011396 | 0.011362 |
| 0.011396 | 0.011329 | 0.011362 | 0.011396 | 0.011362 | 0.011295 | 0.011329 |
| 0.011329 | 0.011396 | 0.011295 | 0.011396 | 0.011429 | 0.011463 | 0.011362 |
| 0.011396 | 0.011362 | 0.011698 | 0.011698 | 0.011430 | 0.011396 | 0.011497 |
| 0.011262 | 0.011262 | 0.011295 | 0.011396 | 0.011262 | 0.011497 | 0.011497 |
| 0.011530 | 0.011530 | 0.011463 | 0.011564 | 0.011732 | 0.011565 | 0.011396 |
| 0.011396 | 0.011396 | 0.011497 | 0.011329 | 0.011396 | 0.011362 | 0.011329 |
| 0.011463 | 0.011463 | 0.011497 | 0.011463 | 0.011363 | 0.011564 | 0.011530 |
| 0.011399 | 0.011295 | 0.011396 | 0.011430 | 0.011396 | 0.011530 | 0.011564 |
| 0.011732 | 0.011436 | 0.011597 | 0.011564 | 0.011429 | 0.011664 | 0.011295 |
| 0.011397 | 0.011363 | 0.011329 | 0.011329 | 0.011396 | 0.011295 | 0.011396 |
| 0.011429 | 0.011463 | 0.011362 | 0.011396 | 0.011362 | 0.011698 | 0.011698 |
| 0.011430 | 0.011396 | 0.011530 | 0.011463 | 0.012103 | 0.011453 | 0.011377 |
| 0.011447 | 0.011407 | 0.011552 | 0.011441 | 0.011515 | 0.011439 | 0.011474 |
| 0.012021 | 0.011302 | 0.011437 | 0.011371 | 0.011645 | 0.011570 | 0.011639 |
| 0.012046 | 0.011475 | 0.011635 | 0.011698 | 0.011564 | 0.011564 | 0.011601 |
| 0.011262 | 0.011429 | 0.011564 | 0.011530 | 0.011533 | 0.011530 | 0.011498 |
| 0.011362 | 0.011295 | 0.011329 | 0.011362 | 0.011262 | 0.011329 | 0.011228 |
| 0.011362 | 0.011396 | 0.011295 | 0.011262 | 0.011362 | 0.011295 | 0.011329 |
| 0.011262 | 0.011262 | 0.011329 | 0.011362 | 0.011262 | 0.011463 | 0.011496 |
| 0.011396 | 0.011463 | 0.011396 | 0.011396 | 0.011329 | 0.011731 | 0.011362 |
| 0.011373 | 0.011329 | 0.011564 | 0.011535 | 0.011429 | 0.011362 | 0.011429 |
| 0.011429 | 0.011362 | 0.011329 | 0.011362 | 0.011463 | 0.011463 | 0.011396 |
| 0.011396 | 0.011530 | 0.011698 | 0.011429 | 0.011631 | 0.011631 | 0.011496 |
| 0.011329 | 0.011396 | 0.011429 | 0.011832 | 0.011396 | 0.011429 | 0.011396 |
| 0.011429 | 0.011362 | 0.011362 | 0.011665 | 0.011597 | 0.011631 | 0.011362 |
| 0.011463 | 0.011530 | 0.011396 | 0.011463 | 0.011429 | 0.011295 | 0.011631 |
| 0.011396 | 0.011362 | 0.011362 | 0.011530 | 0.011362 | 0.011463 | 0.011698 |
| 0.011396 | 0.011773 | 0.011765 | 0.011548 | 0.011342 | 0.011468 | 0.011267 |
| 0.011390 | 0.011761 | 0.011306 | 0.011507 | 0.011353 | 0.011213 | 0.011485 |
| 0.011570 | 0.011258 | 0.011450 | 0.011324 | 0.011330 | 0.011529 | 0.011425 |
| 0.011437 | 0.011336 | 0.011448 | 0.011377 | 0.011397 | 0.011530 | 0.011597 |
| 0.011597 | 0.011464 | 0.011567 | 0.011569 | 0.011704 | 0.011732 | 0.011396 |
| 0.011631 | 0.011497 | 0.011362 | 0.011463 | 0.011262 | 0.011496 | 0.011295 |
| 0.011362 | 0.011362 | 0.011329 | 0.011295 | 0.011329 | 0.011295 | 0.011396 |
| 0.011375 | 0.011375 | 0.011300 | 0.011403 | 0.011539 | 0.011504 | 0.011436 |
| 0.011503 | 0.011430 | 0.011208 | 0.011204 | 0.011365 | 0.011535 | 0.011535 |
| 0.011329 | 0.011399 | 0.011632 | 0.011601 | 0.011531 | 0.011565 | 0.011496 |
| 0.011429 | 0.011496 | 0.011496 | 0.011396 | 0.011967 | 0.011564 | 0.011631 |
| 0.011665 | 0.011737 | 0.011367 | 0.011441 | 0.011329 | 0.011530 | 0.011496 |
| 0.011531 | 0.011564 | 0.011564 | 0.011564 | 0.011650 | 0.011698 | 0.011303 |
| 0.011195 | 0.011199 | 0.011298 | 0.011264 | 0.011368 | 0.011209 | 0.011536 |
| 0.011335 | 0.011455 | 0.011203 | 0.011322 | 0.011363 | 0.011437 | 0.011329 |
| 0.011295 | 0.011295 | 0.011362 | 0.011329 | 0.011530 | 0.011497 | 0.011429 |

|          |          |          |          |          |          |          |
|----------|----------|----------|----------|----------|----------|----------|
| 0.011530 | 0.011597 | 0.011329 | 0.011329 | 0.011362 | 0.011362 | 0.011364 |
| 0.011432 | 0.011362 | 0.011362 | 0.011397 | 0.011530 | 0.011597 | 0.011597 |
| 0.011464 | 0.011567 | 0.011569 | 0.011704 | 0.011732 | 0.011396 | 0.011564 |
| 0.011496 | 0.011496 | 0.011263 | 0.011513 | 0.011442 | 0.011469 | 0.011340 |
| 0.011508 | 0.011698 | 0.011484 | 0.011400 | 0.011295 | 0.011497 | 0.011362 |
| 0.011463 | 0.011396 | 0.011295 | 0.011397 | 0.011497 | 0.011499 | 0.011396 |
| 0.011295 | 0.011229 | 0.011362 | 0.011295 | 0.011228 | 0.011332 | 0.011497 |
| 0.011396 | 0.011329 | 0.011362 | 0.011396 | 0.011362 | 0.011295 | 0.011463 |
| 0.011362 | 0.011396 | 0.011396 | 0.011329 | 0.011396 | 0.011631 | 0.011295 |
| 0.011329 | 0.011731 | 0.011329 | 0.011362 | 0.011329 | 0.011698 | 0.011317 |
| 0.011735 | 0.011273 | 0.011361 | 0.011503 | 0.011589 | 0.011527 | 0.011269 |
| 0.011323 | 0.011496 | 0.011530 | 0.011637 | 0.011498 | 0.011635 | 0.011766 |
| 0.011666 | 0.011669 | 0.011664 | 0.011983 | 0.011698 | 0.012573 | 0.011734 |
| 0.012473 | 0.012241 | 0.012375 | 0.012646 | 0.011698 | 0.011396 | 0.011631 |
| 0.012137 | 0.012005 | 0.011664 | 0.011564 | 0.011632 | 0.011632 | 0.011601 |
| 0.011496 | 0.011501 | 0.011564 | 0.011531 | 0.011901 | 0.011967 | 0.011968 |
| 0.011867 | 0.011968 | 0.012072 | 0.011838 | 0.012138 | 0.012144 | 0.012205 |
| 0.012205 | 0.012239 | 0.012186 | 0.012205 | 0.012207 | 0.011429 | 0.011732 |
| 0.011800 | 0.012303 | 0.011806 | 0.012034 | 0.012508 | 0.011570 | 0.011464 |
| 0.011429 | 0.011429 | 0.011900 | 0.011883 | 0.012045 | 0.011765 | 0.011431 |
| S040     | 0.011664 | 0.011664 | 0.012000 | 0.011765 | 0.011765 | 0.011832 |
| 0.011671 | 0.011603 | 0.011832 | 0.011262 | 0.011329 | 0.011296 | 0.011262 |
| 0.011295 | 0.011463 | 0.011262 | 0.011295 | 0.011362 | 0.011329 | 0.011295 |
| 0.011262 | 0.011295 | 0.011396 | 0.011262 | 0.011295 | 0.011295 | 0.011637 |
| 0.011530 | 0.011295 | 0.011194 | 0.011429 | 0.011362 | 0.011329 | 0.011362 |
| 0.011329 | 0.011429 | 0.011329 | 0.011329 | 0.011362 | 0.000000 | 0.011496 |
| 0.011262 | 0.011329 | 0.011362 | 0.011295 | 0.011396 | 0.011429 | 0.011362 |
| 0.011329 | 0.011497 | 0.011396 | 0.011664 | 0.011329 | 0.011597 | 0.011329 |
| 0.011295 | 0.011396 | 0.011463 | 0.011597 | 0.011698 | 0.011396 | 0.011496 |
| 0.011362 | 0.011429 | 0.011329 | 0.011496 | 0.011799 | 0.011329 | 0.011396 |
| 0.011295 | 0.011396 | 0.011362 | 0.011429 | 0.011362 | 0.011362 | 0.011362 |
| 0.011262 | 0.011295 | 0.011262 | 0.011362 | 0.011329 | 0.011363 | 0.011429 |
| 0.011362 | 0.011329 | 0.011396 | 0.011295 | 0.011429 | 0.011262 | 0.011329 |
| 0.011496 | 0.011429 | 0.011664 | 0.011295 | 0.011329 | 0.011564 | 0.011329 |
| 0.011357 | 0.011732 | 0.011551 | 0.011255 | 0.011247 | 0.011207 | 0.011454 |
| 0.012085 | 0.011518 | 0.011266 | 0.011564 | 0.011564 | 0.011362 | 0.011463 |
| 0.011396 | 0.011362 | 0.011429 | 0.011329 | 0.011429 | 0.011362 | 0.011362 |
| 0.011329 | 0.011429 | 0.011631 | 0.011496 | 0.011396 | 0.011362 | 0.011295 |
| 0.011262 | 0.011262 | 0.011329 | 0.011295 | 0.011497 | 0.011463 | 0.011396 |
| 0.011497 | 0.011564 | 0.011295 | 0.011295 | 0.011329 | 0.011329 | 0.011330 |
| 0.011398 | 0.011329 | 0.011329 | 0.011204 | 0.011277 | 0.011235 | 0.011329 |
| 0.011128 | 0.011266 | 0.011318 | 0.011302 | 0.011230 | 0.011266 | 0.011297 |
| 0.011564 | 0.011336 | 0.011370 | 0.011262 | 0.011268 | 0.011397 | 0.011363 |
| 0.011430 | 0.011363 | 0.011363 | 0.011463 | 0.011396 | 0.011765 | 0.011564 |
| 0.011597 | 0.011463 | 0.011329 | 0.011430 | 0.011228 | 0.011463 | 0.011262 |
| 0.011329 | 0.011329 | 0.011295 | 0.011262 | 0.011295 | 0.011262 | 0.011362 |
| 0.011329 | 0.011429 | 0.011362 | 0.011262 | 0.011363 | 0.011463 | 0.011466 |
| 0.011463 | 0.011362 | 0.011262 | 0.011195 | 0.011329 | 0.011262 | 0.011195 |
| 0.011298 | 0.011463 | 0.011262 | 0.011463 | 0.011228 | 0.011329 | 0.011295 |
| 0.011396 | 0.011295 | 0.011329 | 0.011295 | 0.011329 | 0.011195 | 0.011329 |
| 0.011362 | 0.011295 | 0.011362 | 0.011295 | 0.011329 | 0.011362 | 0.011597 |
| 0.011698 | 0.011631 | 0.011698 | 0.011465 | 0.011698 | 0.011329 | 0.011295 |
| 0.011330 | 0.011626 | 0.011380 | 0.011232 | 0.011705 | 0.011197 | 0.011296 |
| 0.011705 | 0.011604 | 0.011496 | 0.011698 | 0.011402 | 0.011564 | 0.011530 |
| 0.011463 | 0.011631 | 0.011486 | 0.011349 | 0.011395 | 0.011362 | 0.011432 |
| 0.011530 | 0.011431 | 0.011567 | 0.011635 | 0.011564 | 0.011631 | 0.011738 |
| 0.011466 | 0.011637 | 0.011568 | 0.011297 | 0.011766 | 0.011228 | 0.011431 |
| 0.011396 | 0.011329 | 0.011228 | 0.011228 | 0.011295 | 0.011295 | 0.011362 |
| 0.011295 | 0.011362 | 0.011262 | 0.011362 | 0.011295 | 0.011295 | 0.011362 |
| 0.011295 | 0.011731 | 0.011631 | 0.011664 | 0.011194 | 0.011295 | 0.011329 |



|          |          |          |          |          |          |          |
|----------|----------|----------|----------|----------|----------|----------|
| 0.011329 | 0.011295 | 0.011362 | 0.011396 | 0.011262 | 0.011262 | 0.011262 |
| 0.011799 | 0.011429 | 0.011429 | 0.011228 | 0.011329 | 0.011497 | 0.011262 |
| 0.011262 | 0.011329 | 0.011295 | 0.011463 | 0.011262 | 0.011396 | 0.011530 |
| 0.011463 | 0.011295 | 0.011295 | 0.011228 | 0.011228 | 0.011396 | 0.011329 |
| 0.011228 | 0.011329 | 0.011194 | 0.011228 | 0.011161 | 0.011497 | 0.011262 |
| 0.011228 | 0.011161 | 0.011295 | 0.011194 | 0.011530 | 0.011195 | 0.011362 |
| 0.011437 | 0.011262 | 0.011564 | 0.011396 | 0.011295 | 0.011295 | 0.011396 |
| 0.011262 | 0.011597 | 0.011194 | 0.011463 | 0.011262 | 0.011262 | 0.011194 |
| 0.011429 | 0.011631 | 0.011329 | 0.011396 | 0.011228 | 0.011631 | 0.011262 |
| 0.011262 | 0.011262 | 0.011295 | 0.011396 | 0.011295 | 0.011396 | 0.011463 |
| 0.011262 | 0.011429 | 0.011329 | 0.011429 | 0.011396 | 0.011262 | 0.011228 |
| 0.011262 | 0.011262 | 0.011329 | 0.011262 | 0.011228 | 0.011396 | 0.011262 |
| 0.011295 | 0.011295 | 0.011429 | 0.011463 | 0.011362 | 0.011295 | 0.011295 |
| 0.011362 | 0.011295 | 0.011396 | 0.011262 | 0.011396 | 0.011496 | 0.011799 |
| 0.011295 | 0.011698 | 0.011302 | 0.017823 | 0.011191 | 0.011488 | 0.011653 |
| 0.011614 | 0.011658 | 0.011270 | 0.011292 | 0.011774 | 0.011682 | 0.011425 |
| 0.011534 | 0.011610 | 0.011216 | 0.011311 | 0.011255 | 0.011356 | 0.011318 |
| 0.011529 | 0.011470 | 0.011468 | 0.011193 | 0.011429 | 0.011463 | 0.011466 |
| 0.011335 | 0.011429 | 0.011429 | 0.011396 | 0.011362 | 0.011362 | 0.011329 |
| 0.011362 | 0.011295 | 0.011329 | 0.011362 | 0.011329 | 0.011262 | 0.011295 |
| 0.011295 | 0.011362 | 0.011262 | 0.011362 | 0.011396 | 0.011228 | 0.011329 |
| 0.011362 | 0.011329 | 0.011665 | 0.011665 | 0.011396 | 0.011430 | 0.011463 |
| 0.011228 | 0.011228 | 0.011262 | 0.011362 | 0.011228 | 0.011463 | 0.011463 |
| 0.011497 | 0.011496 | 0.011429 | 0.011530 | 0.011698 | 0.011532 | 0.011362 |
| 0.011362 | 0.011429 | 0.011463 | 0.011295 | 0.011362 | 0.011329 | 0.011362 |
| 0.011430 | 0.011430 | 0.011463 | 0.011430 | 0.011330 | 0.011530 | 0.011497 |
| 0.011365 | 0.011262 | 0.011362 | 0.011463 | 0.011362 | 0.011497 | 0.011530 |
| 0.011698 | 0.011402 | 0.011564 | 0.011530 | 0.011463 | 0.011631 | 0.011262 |
| 0.011431 | 0.011329 | 0.011295 | 0.011295 | 0.011362 | 0.011262 | 0.011362 |
| 0.011396 | 0.011228 | 0.011329 | 0.011362 | 0.011329 | 0.011665 | 0.011665 |
| 0.011396 | 0.011430 | 0.011496 | 0.011429 | 0.012069 | 0.011489 | 0.011412 |
| 0.011271 | 0.011441 | 0.011552 | 0.011441 | 0.011550 | 0.011474 | 0.011439 |
| 0.012021 | 0.011337 | 0.011471 | 0.011406 | 0.011680 | 0.011536 | 0.011639 |
| 0.012046 | 0.011512 | 0.011601 | 0.011664 | 0.011530 | 0.011530 | 0.011567 |
| 0.011228 | 0.011396 | 0.011530 | 0.011496 | 0.011499 | 0.011496 | 0.011464 |
| 0.011329 | 0.011262 | 0.011295 | 0.011329 | 0.011228 | 0.011295 | 0.011194 |
| 0.011262 | 0.011295 | 0.011262 | 0.011228 | 0.011329 | 0.011262 | 0.011295 |
| 0.011295 | 0.011228 | 0.011295 | 0.011329 | 0.011228 | 0.011429 | 0.011329 |
| 0.011228 | 0.011295 | 0.011161 | 0.011295 | 0.011295 | 0.011698 | 0.011329 |
| 0.011373 | 0.011295 | 0.011530 | 0.011535 | 0.011396 | 0.011396 | 0.011396 |
| 0.011396 | 0.011329 | 0.011295 | 0.011329 | 0.011429 | 0.011429 | 0.011362 |
| 0.011362 | 0.011496 | 0.011664 | 0.011396 | 0.011597 | 0.011597 | 0.011463 |
| 0.011295 | 0.011362 | 0.011396 | 0.011799 | 0.011362 | 0.011396 | 0.011362 |
| 0.011396 | 0.011329 | 0.011329 | 0.011631 | 0.011564 | 0.011597 | 0.011329 |
| 0.011429 | 0.011496 | 0.011362 | 0.011429 | 0.011396 | 0.011262 | 0.011597 |
| 0.011362 | 0.011329 | 0.011329 | 0.011496 | 0.011329 | 0.011429 | 0.011664 |
| 0.011362 | 0.011739 | 0.011731 | 0.011548 | 0.011229 | 0.011434 | 0.011267 |
| 0.011280 | 0.011761 | 0.011271 | 0.011462 | 0.011353 | 0.011366 | 0.011379 |
| 0.011468 | 0.011192 | 0.011339 | 0.011126 | 0.011276 | 0.011328 | 0.011425 |
| 0.011437 | 0.011336 | 0.011412 | 0.011342 | 0.011364 | 0.011497 | 0.011564 |
| 0.011564 | 0.011430 | 0.011533 | 0.011535 | 0.011670 | 0.011696 | 0.011362 |
| 0.011597 | 0.011463 | 0.011329 | 0.011430 | 0.011228 | 0.011463 | 0.011262 |
| 0.011329 | 0.011329 | 0.011295 | 0.011262 | 0.011295 | 0.011262 | 0.011362 |
| 0.011340 | 0.011340 | 0.011334 | 0.011368 | 0.011505 | 0.011470 | 0.011470 |
| 0.011469 | 0.011396 | 0.011208 | 0.011204 | 0.011331 | 0.011501 | 0.011501 |
| 0.011296 | 0.011365 | 0.011599 | 0.011567 | 0.011497 | 0.011531 | 0.011463 |
| 0.011396 | 0.011463 | 0.011463 | 0.011362 | 0.011933 | 0.011530 | 0.011597 |
| 0.011631 | 0.011665 | 0.011333 | 0.011407 | 0.011295 | 0.011497 | 0.011463 |
| 0.011497 | 0.011530 | 0.011530 | 0.011530 | 0.011650 | 0.011664 | 0.011303 |
| 0.011195 | 0.011199 | 0.011298 | 0.011264 | 0.011368 | 0.011209 | 0.011536 |

|          |          |          |          |          |          |          |
|----------|----------|----------|----------|----------|----------|----------|
| 0.011335 | 0.011455 | 0.011203 | 0.011360 | 0.011329 | 0.011402 | 0.011295 |
| 0.011262 | 0.011262 | 0.011329 | 0.011295 | 0.011497 | 0.011463 | 0.011396 |
| 0.011497 | 0.011564 | 0.011295 | 0.011295 | 0.011329 | 0.011329 | 0.011330 |
| 0.011398 | 0.011329 | 0.011329 | 0.011364 | 0.011497 | 0.011564 | 0.011564 |
| 0.011430 | 0.011533 | 0.011535 | 0.011670 | 0.011696 | 0.011362 | 0.011530 |
| 0.011463 | 0.011463 | 0.011297 | 0.011478 | 0.011408 | 0.011435 | 0.011305 |
| 0.011473 | 0.011652 | 0.011441 | 0.011366 | 0.011262 | 0.011463 | 0.011329 |
| 0.011429 | 0.011362 | 0.011262 | 0.011363 | 0.011463 | 0.011466 | 0.011362 |
| 0.011262 | 0.011195 | 0.011329 | 0.011262 | 0.011195 | 0.011298 | 0.011463 |
| 0.011362 | 0.011295 | 0.011329 | 0.011362 | 0.011329 | 0.011262 | 0.011463 |
| 0.011329 | 0.011362 | 0.011362 | 0.011295 | 0.011161 | 0.011530 | 0.011262 |
| 0.011295 | 0.011698 | 0.011295 | 0.011329 | 0.011295 | 0.011664 | 0.011274 |
| 0.011678 | 0.011273 | 0.011311 | 0.011503 | 0.011589 | 0.011491 | 0.011227 |
| 0.011218 | 0.011463 | 0.011564 | 0.011671 | 0.011531 | 0.011669 | 0.011800 |
| 0.011699 | 0.011737 | 0.011698 | 0.011949 | 0.011664 | 0.012539 | 0.011700 |
| 0.012439 | 0.012207 | 0.012341 | 0.012612 | 0.011664 | 0.011362 | 0.011665 |
| 0.012103 | 0.012038 | 0.011631 | 0.011530 | 0.011598 | 0.011598 | 0.011567 |
| 0.011463 | 0.011467 | 0.011530 | 0.011497 | 0.011867 | 0.011933 | 0.011935 |
| 0.011834 | 0.011934 | 0.012038 | 0.011804 | 0.012104 | 0.012110 | 0.012171 |
| 0.012171 | 0.012205 | 0.012152 | 0.012172 | 0.012173 | 0.011396 | 0.011699 |
| 0.011766 | 0.012270 | 0.011772 | 0.012001 | 0.012474 | 0.011536 | 0.011430 |
| 0.011396 | 0.011396 | 0.011867 | 0.011924 | 0.012010 | 0.011731 | 0.011397 |
| S041     | 0.011832 | 0.011832 | 0.012169 | 0.011933 | 0.011933 | 0.012000 |
| 0.011841 | 0.011773 | 0.012000 | 0.011430 | 0.011496 | 0.011464 | 0.011429 |
| 0.011463 | 0.011631 | 0.011429 | 0.011463 | 0.011530 | 0.011497 | 0.011463 |
| 0.011429 | 0.011463 | 0.011564 | 0.011430 | 0.011463 | 0.011463 | 0.011807 |
| 0.011698 | 0.011463 | 0.011362 | 0.011597 | 0.011530 | 0.011497 | 0.011530 |
| 0.011497 | 0.011597 | 0.011496 | 0.011497 | 0.011530 | 0.011496 | 0.000000 |
| 0.011429 | 0.011496 | 0.011530 | 0.011463 | 0.011564 | 0.011597 | 0.011530 |
| 0.011497 | 0.011665 | 0.011564 | 0.011832 | 0.011496 | 0.011765 | 0.011496 |
| 0.011463 | 0.011564 | 0.011631 | 0.011765 | 0.011866 | 0.011564 | 0.011664 |
| 0.011530 | 0.011597 | 0.011497 | 0.011731 | 0.011967 | 0.011497 | 0.011564 |
| 0.011463 | 0.011564 | 0.011530 | 0.011597 | 0.011530 | 0.011530 | 0.011530 |
| 0.011429 | 0.011463 | 0.011429 | 0.011530 | 0.011496 | 0.011531 | 0.011597 |
| 0.011530 | 0.011496 | 0.011496 | 0.011463 | 0.011597 | 0.011429 | 0.011496 |
| 0.011664 | 0.011597 | 0.011832 | 0.011665 | 0.011497 | 0.011732 | 0.011496 |
| 0.011691 | 0.011920 | 0.011739 | 0.011451 | 0.011433 | 0.011539 | 0.011651 |
| 0.012268 | 0.011772 | 0.011472 | 0.011731 | 0.011732 | 0.011530 | 0.011631 |
| 0.011564 | 0.011530 | 0.011597 | 0.011496 | 0.011597 | 0.011530 | 0.011530 |
| 0.011496 | 0.011597 | 0.011799 | 0.011664 | 0.011564 | 0.011530 | 0.011463 |
| 0.011430 | 0.011429 | 0.011497 | 0.011463 | 0.011665 | 0.011631 | 0.011564 |
| 0.011665 | 0.011732 | 0.011463 | 0.011463 | 0.011497 | 0.011497 | 0.011499 |
| 0.011567 | 0.011497 | 0.011497 | 0.011384 | 0.011422 | 0.011376 | 0.011497 |
| 0.011501 | 0.011438 | 0.011503 | 0.011474 | 0.011400 | 0.011437 | 0.011466 |
| 0.011744 | 0.011508 | 0.011473 | 0.011430 | 0.011440 | 0.011565 | 0.011531 |
| 0.011598 | 0.011532 | 0.011531 | 0.011631 | 0.011564 | 0.011933 | 0.011665 |
| 0.011765 | 0.011631 | 0.011497 | 0.011598 | 0.011396 | 0.011631 | 0.011430 |
| 0.011497 | 0.011496 | 0.011463 | 0.011429 | 0.011463 | 0.011430 | 0.011530 |
| 0.011497 | 0.011597 | 0.011530 | 0.011430 | 0.011532 | 0.011631 | 0.011635 |
| 0.011631 | 0.011530 | 0.011430 | 0.011364 | 0.011497 | 0.011430 | 0.011363 |
| 0.011468 | 0.011631 | 0.011430 | 0.011631 | 0.011396 | 0.011497 | 0.011463 |
| 0.011564 | 0.011463 | 0.011497 | 0.011463 | 0.011497 | 0.011362 | 0.011497 |
| 0.011530 | 0.011463 | 0.011530 | 0.011463 | 0.011497 | 0.011530 | 0.011765 |
| 0.011866 | 0.011799 | 0.011866 | 0.011633 | 0.011867 | 0.011497 | 0.011463 |
| 0.011499 | 0.011788 | 0.011609 | 0.011403 | 0.011875 | 0.011367 | 0.011532 |
| 0.011875 | 0.011774 | 0.011664 | 0.011866 | 0.011572 | 0.011732 | 0.011698 |
| 0.011631 | 0.011799 | 0.011629 | 0.011472 | 0.011521 | 0.011530 | 0.011568 |
| 0.011698 | 0.011600 | 0.011736 | 0.011737 | 0.011732 | 0.011799 | 0.011907 |
| 0.011636 | 0.011739 | 0.011737 | 0.011669 | 0.011935 | 0.011396 | 0.011599 |
| 0.011564 | 0.011497 | 0.011396 | 0.011396 | 0.011463 | 0.011463 | 0.011530 |

|          |          |          |          |          |          |          |
|----------|----------|----------|----------|----------|----------|----------|
| 0.011463 | 0.011530 | 0.011429 | 0.011530 | 0.011463 | 0.011463 | 0.011530 |
| 0.011463 | 0.011899 | 0.011799 | 0.011832 | 0.011362 | 0.011463 | 0.011497 |
| 0.011497 | 0.011463 | 0.011530 | 0.011564 | 0.011429 | 0.011429 | 0.011429 |
| 0.011967 | 0.011597 | 0.011597 | 0.011396 | 0.011496 | 0.011665 | 0.011429 |
| 0.011429 | 0.011496 | 0.011463 | 0.011631 | 0.011429 | 0.011564 | 0.011698 |
| 0.011631 | 0.011463 | 0.011463 | 0.011396 | 0.011396 | 0.011564 | 0.011496 |
| 0.011396 | 0.011496 | 0.011362 | 0.011396 | 0.011530 | 0.011665 | 0.011429 |
| 0.011396 | 0.011530 | 0.011463 | 0.011362 | 0.011698 | 0.011362 | 0.011530 |
| 0.011608 | 0.011429 | 0.011732 | 0.011564 | 0.011597 | 0.011463 | 0.011564 |
| 0.011429 | 0.011765 | 0.011362 | 0.011631 | 0.011429 | 0.011429 | 0.011362 |
| 0.011597 | 0.011799 | 0.011497 | 0.011564 | 0.011396 | 0.011799 | 0.011429 |
| 0.011429 | 0.011429 | 0.011463 | 0.011564 | 0.011463 | 0.011564 | 0.011631 |
| 0.011631 | 0.011597 | 0.011496 | 0.011597 | 0.011564 | 0.011429 | 0.011396 |
| 0.011429 | 0.011429 | 0.011497 | 0.011429 | 0.011396 | 0.011564 | 0.011429 |
| 0.011463 | 0.011463 | 0.011597 | 0.011631 | 0.011530 | 0.011463 | 0.011463 |
| 0.011530 | 0.011463 | 0.011564 | 0.011429 | 0.011564 | 0.011664 | 0.011967 |
| 0.011463 | 0.011866 | 0.011474 | 0.018012 | 0.011584 | 0.011611 | 0.011828 |
| 0.011787 | 0.011834 | 0.011584 | 0.011466 | 0.012050 | 0.011854 | 0.011729 |
| 0.011724 | 0.011915 | 0.011411 | 0.011479 | 0.011490 | 0.011603 | 0.011447 |
| 0.011717 | 0.011656 | 0.011653 | 0.011391 | 0.011597 | 0.011631 | 0.011635 |
| 0.011438 | 0.011597 | 0.011597 | 0.011564 | 0.011530 | 0.011530 | 0.011497 |
| 0.011530 | 0.011463 | 0.011497 | 0.011530 | 0.011497 | 0.011430 | 0.011463 |
| 0.011463 | 0.011530 | 0.011430 | 0.011530 | 0.011564 | 0.011597 | 0.011496 |
| 0.011530 | 0.011497 | 0.011833 | 0.011833 | 0.011564 | 0.011598 | 0.011631 |
| 0.011396 | 0.011396 | 0.011430 | 0.011530 | 0.011396 | 0.011631 | 0.011631 |
| 0.011665 | 0.011664 | 0.011597 | 0.011698 | 0.011866 | 0.011700 | 0.011530 |
| 0.011530 | 0.011597 | 0.011631 | 0.011463 | 0.011530 | 0.011497 | 0.011530 |
| 0.011598 | 0.011598 | 0.011631 | 0.011598 | 0.011498 | 0.011698 | 0.011665 |
| 0.011263 | 0.011430 | 0.011530 | 0.011631 | 0.011530 | 0.011665 | 0.011698 |
| 0.011866 | 0.011572 | 0.011732 | 0.011698 | 0.011631 | 0.011799 | 0.011430 |
| 0.011599 | 0.011497 | 0.011463 | 0.011463 | 0.011530 | 0.011430 | 0.011530 |
| 0.011564 | 0.011597 | 0.011496 | 0.011530 | 0.011497 | 0.011833 | 0.011833 |
| 0.011564 | 0.011598 | 0.011597 | 0.011597 | 0.012204 | 0.011667 | 0.011552 |
| 0.011658 | 0.011615 | 0.011693 | 0.011614 | 0.011725 | 0.011646 | 0.011612 |
| 0.012159 | 0.011510 | 0.011642 | 0.011579 | 0.011852 | 0.011706 | 0.011741 |
| 0.012182 | 0.011663 | 0.011770 | 0.011832 | 0.011698 | 0.011698 | 0.011736 |
| 0.011396 | 0.011564 | 0.011698 | 0.011664 | 0.011668 | 0.011664 | 0.011633 |
| 0.011496 | 0.011429 | 0.011463 | 0.011496 | 0.011396 | 0.011463 | 0.011362 |
| 0.011496 | 0.011530 | 0.011429 | 0.011396 | 0.011497 | 0.011429 | 0.011463 |
| 0.011463 | 0.011396 | 0.011463 | 0.011497 | 0.011396 | 0.011597 | 0.011631 |
| 0.011530 | 0.011597 | 0.011530 | 0.011530 | 0.011463 | 0.011866 | 0.011496 |
| 0.011512 | 0.011463 | 0.011699 | 0.011705 | 0.011564 | 0.011564 | 0.011564 |
| 0.011564 | 0.011497 | 0.011463 | 0.011497 | 0.011597 | 0.011597 | 0.011530 |
| 0.011530 | 0.011664 | 0.011832 | 0.011564 | 0.011765 | 0.011765 | 0.011631 |
| 0.011463 | 0.011530 | 0.011564 | 0.011967 | 0.011530 | 0.011564 | 0.011530 |
| 0.011564 | 0.011496 | 0.011496 | 0.011799 | 0.011732 | 0.011765 | 0.011497 |
| 0.011597 | 0.011664 | 0.011530 | 0.011597 | 0.011564 | 0.011429 | 0.011765 |
| 0.011530 | 0.011496 | 0.011496 | 0.011664 | 0.011497 | 0.011597 | 0.011833 |
| 0.011530 | 0.011909 | 0.011900 | 0.011751 | 0.011568 | 0.011604 | 0.011525 |
| 0.011445 | 0.011956 | 0.011447 | 0.011730 | 0.011597 | 0.011722 | 0.011751 |
| 0.011774 | 0.011587 | 0.011673 | 0.011523 | 0.011599 | 0.011730 | 0.011628 |
| 0.011625 | 0.011532 | 0.011589 | 0.011518 | 0.011532 | 0.011665 | 0.011732 |
| 0.011732 | 0.011598 | 0.011703 | 0.011704 | 0.011840 | 0.011873 | 0.011530 |
| 0.011765 | 0.011631 | 0.011497 | 0.011598 | 0.011396 | 0.011631 | 0.011430 |
| 0.011497 | 0.011496 | 0.011463 | 0.011429 | 0.011463 | 0.011430 | 0.011530 |
| 0.011514 | 0.011515 | 0.011505 | 0.011540 | 0.011676 | 0.011641 | 0.011641 |
| 0.011639 | 0.011565 | 0.011393 | 0.011384 | 0.011501 | 0.011670 | 0.011671 |
| 0.011464 | 0.011534 | 0.011767 | 0.011736 | 0.011666 | 0.011700 | 0.011631 |
| 0.011564 | 0.011631 | 0.011631 | 0.011530 | 0.012102 | 0.011698 | 0.011765 |
| 0.011799 | 0.011879 | 0.011504 | 0.011580 | 0.011463 | 0.011664 | 0.011631 |

|          |          |          |          |          |          |          |
|----------|----------|----------|----------|----------|----------|----------|
| 0.011666 | 0.011698 | 0.011698 | 0.011698 | 0.011886 | 0.011832 | 0.011442 |
| 0.011364 | 0.011337 | 0.011469 | 0.011434 | 0.011538 | 0.011359 | 0.011706 |
| 0.011506 | 0.011586 | 0.011346 | 0.011510 | 0.011497 | 0.011573 | 0.011463 |
| 0.011430 | 0.011429 | 0.011497 | 0.011463 | 0.011665 | 0.011631 | 0.011564 |
| 0.011665 | 0.011732 | 0.011463 | 0.011463 | 0.011497 | 0.011497 | 0.011499 |
| 0.011567 | 0.011497 | 0.011497 | 0.011532 | 0.011665 | 0.011732 | 0.011732 |
| 0.011598 | 0.011703 | 0.011704 | 0.011840 | 0.011873 | 0.011530 | 0.011698 |
| 0.011631 | 0.011631 | 0.011466 | 0.011652 | 0.011581 | 0.011605 | 0.011481 |
| 0.011646 | 0.011881 | 0.011695 | 0.011536 | 0.011430 | 0.011631 | 0.011497 |
| 0.011597 | 0.011530 | 0.011430 | 0.011532 | 0.011631 | 0.011635 | 0.011530 |
| 0.011430 | 0.011364 | 0.011497 | 0.011430 | 0.011363 | 0.011468 | 0.011631 |
| 0.011530 | 0.011463 | 0.011497 | 0.011530 | 0.011497 | 0.011430 | 0.011631 |
| 0.011496 | 0.011530 | 0.011530 | 0.011463 | 0.011530 | 0.011765 | 0.011429 |
| 0.011463 | 0.011866 | 0.011463 | 0.011497 | 0.011463 | 0.011832 | 0.011446 |
| 0.012016 | 0.011485 | 0.011511 | 0.011704 | 0.011793 | 0.011670 | 0.011436 |
| 0.011480 | 0.011631 | 0.011732 | 0.011841 | 0.011700 | 0.011838 | 0.011968 |
| 0.011868 | 0.011906 | 0.011866 | 0.012120 | 0.011832 | 0.012708 | 0.011869 |
| 0.012608 | 0.012376 | 0.012510 | 0.012782 | 0.011832 | 0.011530 | 0.011833 |
| 0.012239 | 0.012207 | 0.011799 | 0.011698 | 0.011766 | 0.011766 | 0.011737 |
| 0.011631 | 0.011637 | 0.011698 | 0.011665 | 0.012036 | 0.012102 | 0.012103 |
| 0.012002 | 0.012103 | 0.012207 | 0.011974 | 0.012239 | 0.012246 | 0.012306 |
| 0.012307 | 0.012341 | 0.012289 | 0.012307 | 0.012309 | 0.011564 | 0.011833 |
| 0.011935 | 0.012438 | 0.011908 | 0.012102 | 0.012643 | 0.011705 | 0.011598 |
| 0.011564 | 0.011564 | 0.012035 | 0.012048 | 0.012186 | 0.011900 | 0.011566 |
| S042     | 0.011597 | 0.011597 | 0.011866 | 0.011631 | 0.011631 | 0.011698 |
| 0.011535 | 0.011468 | 0.011698 | 0.011195 | 0.011262 | 0.011228 | 0.011194 |
| 0.011161 | 0.011396 | 0.011127 | 0.011228 | 0.011295 | 0.011262 | 0.011228 |
| 0.011194 | 0.011228 | 0.011262 | 0.011195 | 0.011228 | 0.011228 | 0.011501 |
| 0.011396 | 0.011228 | 0.011127 | 0.011295 | 0.011295 | 0.011262 | 0.011295 |
| 0.011262 | 0.011362 | 0.011262 | 0.011262 | 0.011295 | 0.011262 | 0.011429 |
| 0.000000 | 0.011262 | 0.011295 | 0.011228 | 0.011262 | 0.011362 | 0.011295 |
| 0.011262 | 0.011429 | 0.011329 | 0.011530 | 0.011262 | 0.011530 | 0.011262 |
| 0.011228 | 0.011262 | 0.011396 | 0.011530 | 0.011564 | 0.011262 | 0.011362 |
| 0.011295 | 0.011362 | 0.011262 | 0.011496 | 0.011664 | 0.011262 | 0.011329 |
| 0.011228 | 0.011329 | 0.011295 | 0.011362 | 0.011295 | 0.011295 | 0.011295 |
| 0.011194 | 0.011228 | 0.011194 | 0.011228 | 0.011262 | 0.011296 | 0.011362 |
| 0.011295 | 0.011262 | 0.011329 | 0.011228 | 0.011295 | 0.011194 | 0.011262 |
| 0.011429 | 0.011362 | 0.011597 | 0.011429 | 0.011262 | 0.011496 | 0.011262 |
| 0.011431 | 0.011583 | 0.011437 | 0.011138 | 0.011135 | 0.011281 | 0.011257 |
| 0.011938 | 0.011314 | 0.011143 | 0.011496 | 0.011496 | 0.011228 | 0.011329 |
| 0.011329 | 0.011295 | 0.011362 | 0.011262 | 0.011362 | 0.011295 | 0.011295 |
| 0.011262 | 0.011295 | 0.011564 | 0.011429 | 0.011329 | 0.011295 | 0.011228 |
| 0.011195 | 0.011127 | 0.011262 | 0.011228 | 0.011362 | 0.011329 | 0.011262 |
| 0.011362 | 0.011429 | 0.011228 | 0.011228 | 0.011262 | 0.011262 | 0.011263 |
| 0.011331 | 0.011262 | 0.011262 | 0.011132 | 0.011169 | 0.011165 | 0.011262 |
| 0.011263 | 0.011198 | 0.011208 | 0.011233 | 0.011162 | 0.011197 | 0.011229 |
| 0.011420 | 0.011267 | 0.011301 | 0.011195 | 0.011199 | 0.011329 | 0.011228 |
| 0.011296 | 0.011296 | 0.011296 | 0.011396 | 0.011329 | 0.011698 | 0.011430 |
| 0.011463 | 0.011329 | 0.011262 | 0.011295 | 0.011161 | 0.011329 | 0.011195 |
| 0.011262 | 0.011262 | 0.011228 | 0.011194 | 0.011228 | 0.011195 | 0.011295 |
| 0.011262 | 0.011362 | 0.011295 | 0.011195 | 0.011296 | 0.011396 | 0.011398 |
| 0.011396 | 0.011295 | 0.011195 | 0.011128 | 0.011262 | 0.011195 | 0.011127 |
| 0.011230 | 0.011396 | 0.011195 | 0.011396 | 0.011161 | 0.011262 | 0.011228 |
| 0.011329 | 0.011228 | 0.011262 | 0.011228 | 0.011262 | 0.011127 | 0.011262 |
| 0.011295 | 0.011228 | 0.011295 | 0.011228 | 0.011262 | 0.011295 | 0.011530 |
| 0.011564 | 0.011496 | 0.011564 | 0.011397 | 0.011564 | 0.011262 | 0.011228 |
| 0.011195 | 0.011464 | 0.011335 | 0.011163 | 0.011569 | 0.011129 | 0.011257 |
| 0.011569 | 0.011468 | 0.011429 | 0.011631 | 0.011333 | 0.011496 | 0.011463 |
| 0.011396 | 0.011564 | 0.011415 | 0.011266 | 0.011312 | 0.011295 | 0.011365 |
| 0.011463 | 0.011364 | 0.011500 | 0.011568 | 0.011497 | 0.011564 | 0.011670 |

|          |          |          |          |          |          |          |
|----------|----------|----------|----------|----------|----------|----------|
| 0.011399 | 0.011569 | 0.011500 | 0.011432 | 0.011699 | 0.011161 | 0.011363 |
| 0.011329 | 0.011262 | 0.011161 | 0.011161 | 0.011228 | 0.011228 | 0.011295 |
| 0.011228 | 0.011295 | 0.011194 | 0.011228 | 0.011228 | 0.011228 | 0.011295 |
| 0.011228 | 0.011597 | 0.011497 | 0.011530 | 0.011127 | 0.011228 | 0.011262 |
| 0.011262 | 0.011228 | 0.011295 | 0.011262 | 0.011194 | 0.011194 | 0.011194 |
| 0.011664 | 0.011295 | 0.011362 | 0.011161 | 0.011262 | 0.011429 | 0.011194 |
| 0.011194 | 0.011262 | 0.011228 | 0.011396 | 0.011194 | 0.011329 | 0.011463 |
| 0.011396 | 0.011228 | 0.011228 | 0.011161 | 0.011161 | 0.011329 | 0.011262 |
| 0.011161 | 0.011262 | 0.011127 | 0.011161 | 0.011295 | 0.011362 | 0.011195 |
| 0.011161 | 0.011295 | 0.011228 | 0.011127 | 0.011396 | 0.011127 | 0.011295 |
| 0.011368 | 0.011195 | 0.011429 | 0.011329 | 0.011295 | 0.011228 | 0.011329 |
| 0.011194 | 0.011530 | 0.011127 | 0.011329 | 0.011127 | 0.011127 | 0.011127 |
| 0.011362 | 0.011497 | 0.011262 | 0.011329 | 0.011161 | 0.011497 | 0.011127 |
| 0.011194 | 0.011194 | 0.011228 | 0.011329 | 0.011228 | 0.011329 | 0.011396 |
| 0.011396 | 0.011362 | 0.011262 | 0.011362 | 0.011329 | 0.011194 | 0.011161 |
| 0.011194 | 0.011194 | 0.011262 | 0.000000 | 0.011161 | 0.011329 | 0.011194 |
| 0.011161 | 0.011228 | 0.011362 | 0.011329 | 0.011295 | 0.011228 | 0.011228 |
| 0.011295 | 0.011228 | 0.011329 | 0.011194 | 0.011329 | 0.011429 | 0.011664 |
| 0.011228 | 0.011564 | 0.011233 | 0.017747 | 0.011191 | 0.011366 | 0.011514 |
| 0.011475 | 0.011517 | 0.011270 | 0.011234 | 0.011609 | 0.011543 | 0.011303 |
| 0.011345 | 0.011426 | 0.011099 | 0.011228 | 0.011099 | 0.011208 | 0.011232 |
| 0.011342 | 0.011284 | 0.011320 | 0.000000 | 0.011362 | 0.011396 | 0.011398 |
| 0.011266 | 0.011362 | 0.011362 | 0.011262 | 0.011295 | 0.011295 | 0.011262 |
| 0.011295 | 0.011228 | 0.011262 | 0.011295 | 0.011262 | 0.011195 | 0.011228 |
| 0.011228 | 0.011295 | 0.011195 | 0.011295 | 0.011329 | 0.011362 | 0.011262 |
| 0.011228 | 0.011195 | 0.011530 | 0.011530 | 0.011329 | 0.011363 | 0.011396 |
| 0.011161 | 0.011161 | 0.011195 | 0.011295 | 0.011161 | 0.011396 | 0.011396 |
| 0.011429 | 0.011429 | 0.011362 | 0.011463 | 0.011564 | 0.011464 | 0.011295 |
| 0.011295 | 0.011362 | 0.011396 | 0.011228 | 0.011295 | 0.011262 | 0.011295 |
| 0.011363 | 0.011362 | 0.011396 | 0.011363 | 0.011262 | 0.011463 | 0.011429 |
| 0.011297 | 0.011195 | 0.011295 | 0.011396 | 0.011295 | 0.011362 | 0.011463 |
| 0.011631 | 0.011333 | 0.011496 | 0.011463 | 0.011396 | 0.011564 | 0.011195 |
| 0.011363 | 0.011262 | 0.011228 | 0.011228 | 0.011295 | 0.011195 | 0.011295 |
| 0.011329 | 0.011362 | 0.011262 | 0.011228 | 0.011195 | 0.011530 | 0.011530 |
| 0.011329 | 0.011363 | 0.011429 | 0.011362 | 0.011935 | 0.011417 | 0.011341 |
| 0.011412 | 0.011372 | 0.011482 | 0.011372 | 0.011480 | 0.011405 | 0.011370 |
| 0.011884 | 0.011268 | 0.011403 | 0.011337 | 0.011611 | 0.011468 | 0.011570 |
| 0.011910 | 0.011362 | 0.011533 | 0.011597 | 0.011463 | 0.011396 | 0.011499 |
| 0.011161 | 0.011329 | 0.011463 | 0.011429 | 0.011432 | 0.011362 | 0.011330 |
| 0.011262 | 0.011194 | 0.011228 | 0.011262 | 0.011161 | 0.011228 | 0.011127 |
| 0.011194 | 0.011228 | 0.011194 | 0.011161 | 0.011262 | 0.011194 | 0.011228 |
| 0.011228 | 0.011161 | 0.011228 | 0.011262 | 0.011161 | 0.011362 | 0.011396 |
| 0.011295 | 0.011295 | 0.011295 | 0.011295 | 0.011228 | 0.011564 | 0.011262 |
| 0.011234 | 0.011228 | 0.011396 | 0.011399 | 0.011329 | 0.011329 | 0.011329 |
| 0.011329 | 0.011262 | 0.011228 | 0.011262 | 0.011362 | 0.011362 | 0.011295 |
| 0.011295 | 0.011429 | 0.011530 | 0.011329 | 0.011530 | 0.011530 | 0.011396 |
| 0.011228 | 0.011295 | 0.011329 | 0.011664 | 0.011295 | 0.011329 | 0.011295 |
| 0.011329 | 0.011194 | 0.011194 | 0.011497 | 0.011497 | 0.011463 | 0.011262 |
| 0.011362 | 0.011429 | 0.011295 | 0.011362 | 0.011329 | 0.011194 | 0.011463 |
| 0.011295 | 0.011262 | 0.011194 | 0.011429 | 0.011262 | 0.011362 | 0.011597 |
| 0.011295 | 0.011603 | 0.011597 | 0.011345 | 0.000000 | 0.011298 | 0.011112 |
| 0.011170 | 0.011566 | 0.011201 | 0.011283 | 0.011109 | 0.011264 | 0.011220 |
| 0.011315 | 0.011126 | 0.011283 | 0.011126 | 0.011168 | 0.011328 | 0.011303 |
| 0.011362 | 0.011218 | 0.011272 | 0.011272 | 0.011296 | 0.011362 | 0.011430 |
| 0.011429 | 0.011296 | 0.011398 | 0.011399 | 0.011535 | 0.011555 | 0.011295 |
| 0.011463 | 0.011329 | 0.011262 | 0.011295 | 0.011161 | 0.011329 | 0.011195 |
| 0.011262 | 0.011262 | 0.011228 | 0.011194 | 0.011228 | 0.011195 | 0.011295 |
| 0.011270 | 0.011270 | 0.011266 | 0.011300 | 0.011437 | 0.011402 | 0.011402 |
| 0.011401 | 0.011329 | 0.011134 | 0.011132 | 0.011263 | 0.011433 | 0.011433 |
| 0.011228 | 0.011297 | 0.011531 | 0.011500 | 0.011430 | 0.011464 | 0.011396 |

|          |          |          |          |          |          |          |
|----------|----------|----------|----------|----------|----------|----------|
| 0.011329 | 0.011396 | 0.011396 | 0.011295 | 0.011799 | 0.011463 | 0.011530 |
| 0.011564 | 0.011559 | 0.011265 | 0.011337 | 0.011228 | 0.011429 | 0.011396 |
| 0.011430 | 0.011463 | 0.011463 | 0.011463 | 0.011610 | 0.011597 | 0.011234 |
| 0.011128 | 0.011130 | 0.011230 | 0.011196 | 0.011231 | 0.011135 | 0.011400 |
| 0.011266 | 0.011323 | 0.011156 | 0.011285 | 0.011262 | 0.011334 | 0.011228 |
| 0.011195 | 0.011127 | 0.011262 | 0.011228 | 0.011362 | 0.011329 | 0.011262 |
| 0.011362 | 0.011429 | 0.011228 | 0.011228 | 0.011262 | 0.011262 | 0.011263 |
| 0.011331 | 0.011262 | 0.011262 | 0.011296 | 0.011362 | 0.011430 | 0.011429 |
| 0.011296 | 0.011398 | 0.011399 | 0.011535 | 0.011555 | 0.011295 | 0.011463 |
| 0.011396 | 0.011396 | 0.011229 | 0.011408 | 0.011338 | 0.011367 | 0.011235 |
| 0.011405 | 0.011561 | 0.011357 | 0.011298 | 0.011195 | 0.011396 | 0.011262 |
| 0.011362 | 0.011295 | 0.011195 | 0.011296 | 0.011396 | 0.011398 | 0.011295 |
| 0.011195 | 0.011128 | 0.011262 | 0.011195 | 0.011127 | 0.011230 | 0.011396 |
| 0.011295 | 0.011228 | 0.011262 | 0.011295 | 0.011262 | 0.011195 | 0.011329 |
| 0.011262 | 0.011295 | 0.011295 | 0.011228 | 0.011295 | 0.011530 | 0.000000 |
| 0.011228 | 0.011564 | 0.011228 | 0.011262 | 0.011228 | 0.011530 | 0.011146 |
| 0.011510 | 0.011145 | 0.011110 | 0.011302 | 0.011386 | 0.011347 | 0.011102 |
| 0.000000 | 0.011329 | 0.011429 | 0.011535 | 0.011397 | 0.011534 | 0.011665 |
| 0.011565 | 0.011601 | 0.011564 | 0.011812 | 0.011530 | 0.012404 | 0.011565 |
| 0.012304 | 0.012072 | 0.012206 | 0.012477 | 0.011530 | 0.011228 | 0.011530 |
| 0.011969 | 0.011903 | 0.011497 | 0.011396 | 0.011464 | 0.011464 | 0.011432 |
| 0.011329 | 0.011331 | 0.011396 | 0.011363 | 0.011733 | 0.011799 | 0.011800 |
| 0.011699 | 0.011800 | 0.011903 | 0.011669 | 0.011969 | 0.011974 | 0.012036 |
| 0.012037 | 0.012070 | 0.012016 | 0.012037 | 0.012038 | 0.011329 | 0.011564 |
| 0.011632 | 0.012135 | 0.011636 | 0.011866 | 0.012339 | 0.011400 | 0.011295 |
| 0.011262 | 0.011262 | 0.011732 | 0.011759 | 0.011869 | 0.011597 | 0.011262 |
| S043     | 0.011664 | 0.011664 | 0.012000 | 0.011765 | 0.011765 | 0.011832 |
| 0.011671 | 0.011603 | 0.011832 | 0.011262 | 0.011329 | 0.011296 | 0.011262 |
| 0.011295 | 0.011463 | 0.011262 | 0.011295 | 0.011362 | 0.011329 | 0.011295 |
| 0.011262 | 0.011295 | 0.011396 | 0.011262 | 0.011295 | 0.011295 | 0.011637 |
| 0.011530 | 0.011295 | 0.011194 | 0.011429 | 0.011362 | 0.011329 | 0.011362 |
| 0.011329 | 0.011429 | 0.011329 | 0.011329 | 0.011362 | 0.011329 | 0.011496 |
| 0.011262 | 0.000000 | 0.011362 | 0.011295 | 0.011396 | 0.011429 | 0.011362 |
| 0.011329 | 0.011497 | 0.011396 | 0.011664 | 0.011329 | 0.011597 | 0.011329 |
| 0.011295 | 0.011396 | 0.011463 | 0.011597 | 0.011698 | 0.011396 | 0.011496 |
| 0.011362 | 0.011429 | 0.011329 | 0.011563 | 0.011799 | 0.011329 | 0.011396 |
| 0.011295 | 0.011396 | 0.011362 | 0.011429 | 0.011362 | 0.011362 | 0.011362 |
| 0.011262 | 0.011295 | 0.011262 | 0.011362 | 0.011329 | 0.011363 | 0.011429 |
| 0.011362 | 0.011329 | 0.011396 | 0.011295 | 0.011429 | 0.011262 | 0.011329 |
| 0.011496 | 0.011429 | 0.011664 | 0.011496 | 0.011329 | 0.011564 | 0.011329 |
| 0.011505 | 0.011732 | 0.011551 | 0.011255 | 0.011247 | 0.011318 | 0.011454 |
| 0.012085 | 0.011518 | 0.011225 | 0.011564 | 0.011564 | 0.011362 | 0.011463 |
| 0.011396 | 0.011362 | 0.011429 | 0.011329 | 0.011429 | 0.011362 | 0.011362 |
| 0.011329 | 0.011429 | 0.011631 | 0.011496 | 0.011396 | 0.011362 | 0.011295 |
| 0.011262 | 0.011262 | 0.011329 | 0.011295 | 0.011497 | 0.011463 | 0.011396 |
| 0.011497 | 0.011564 | 0.011295 | 0.011295 | 0.011329 | 0.011329 | 0.011330 |
| 0.011398 | 0.011329 | 0.011329 | 0.011204 | 0.011277 | 0.011235 | 0.011329 |
| 0.011331 | 0.011266 | 0.011318 | 0.011302 | 0.011230 | 0.011266 | 0.011297 |
| 0.011564 | 0.011336 | 0.011370 | 0.011262 | 0.011268 | 0.011397 | 0.011363 |
| 0.011430 | 0.011363 | 0.011363 | 0.011463 | 0.011396 | 0.011698 | 0.011564 |
| 0.011597 | 0.011463 | 0.011329 | 0.011430 | 0.011228 | 0.011463 | 0.011262 |
| 0.011329 | 0.011329 | 0.011295 | 0.011262 | 0.011295 | 0.011262 | 0.011362 |
| 0.011329 | 0.011429 | 0.011362 | 0.011262 | 0.011363 | 0.011463 | 0.011466 |
| 0.011463 | 0.011362 | 0.011262 | 0.011195 | 0.011329 | 0.011262 | 0.011195 |
| 0.011298 | 0.011463 | 0.011262 | 0.011463 | 0.011228 | 0.011329 | 0.011295 |
| 0.011396 | 0.011295 | 0.011329 | 0.011295 | 0.011329 | 0.011195 | 0.011329 |
| 0.011362 | 0.011295 | 0.011362 | 0.011295 | 0.011329 | 0.011362 | 0.011597 |
| 0.011698 | 0.011631 | 0.011698 | 0.011465 | 0.011698 | 0.011329 | 0.011295 |
| 0.011330 | 0.011626 | 0.011426 | 0.011232 | 0.011705 | 0.011197 | 0.011336 |
| 0.011705 | 0.011604 | 0.011496 | 0.011698 | 0.011402 | 0.011564 | 0.011530 |

|          |          |          |          |          |          |          |
|----------|----------|----------|----------|----------|----------|----------|
| 0.011463 | 0.011631 | 0.011486 | 0.011349 | 0.011354 | 0.011362 | 0.011432 |
| 0.011530 | 0.011431 | 0.011567 | 0.011635 | 0.011564 | 0.011631 | 0.011738 |
| 0.011466 | 0.011637 | 0.011568 | 0.011500 | 0.011766 | 0.011228 | 0.011431 |
| 0.011396 | 0.011329 | 0.011228 | 0.011228 | 0.011295 | 0.011295 | 0.011362 |
| 0.011295 | 0.011362 | 0.011262 | 0.011362 | 0.011295 | 0.011295 | 0.011362 |
| 0.011295 | 0.011731 | 0.011631 | 0.011664 | 0.011194 | 0.011295 | 0.011329 |
| 0.011329 | 0.011295 | 0.011362 | 0.011396 | 0.011262 | 0.011262 | 0.011262 |
| 0.011799 | 0.011429 | 0.011429 | 0.011228 | 0.011329 | 0.011497 | 0.011262 |
| 0.011262 | 0.011329 | 0.011295 | 0.011463 | 0.011262 | 0.011396 | 0.011530 |
| 0.011463 | 0.011295 | 0.011295 | 0.011228 | 0.011228 | 0.011396 | 0.011329 |
| 0.011228 | 0.011329 | 0.011194 | 0.011228 | 0.011362 | 0.011497 | 0.011262 |
| 0.011228 | 0.011362 | 0.011295 | 0.011194 | 0.011530 | 0.011195 | 0.011362 |
| 0.011437 | 0.011262 | 0.011564 | 0.011396 | 0.011429 | 0.011295 | 0.011396 |
| 0.011262 | 0.011597 | 0.011194 | 0.011463 | 0.011262 | 0.011262 | 0.011194 |
| 0.011429 | 0.011631 | 0.011329 | 0.011396 | 0.011228 | 0.011631 | 0.011262 |
| 0.011262 | 0.011262 | 0.011295 | 0.011396 | 0.011295 | 0.011396 | 0.011463 |
| 0.011463 | 0.011429 | 0.011329 | 0.011429 | 0.011396 | 0.011262 | 0.011228 |
| 0.011262 | 0.011262 | 0.011329 | 0.011262 | 0.011228 | 0.011396 | 0.011262 |
| 0.011295 | 0.011295 | 0.011429 | 0.011463 | 0.011362 | 0.011295 | 0.011295 |
| 0.011362 | 0.011295 | 0.011396 | 0.011262 | 0.011396 | 0.011496 | 0.011799 |
| 0.011295 | 0.011698 | 0.011302 | 0.017785 | 0.011257 | 0.011366 | 0.011653 |
| 0.011614 | 0.011658 | 0.011374 | 0.011350 | 0.011774 | 0.011682 | 0.011425 |
| 0.011534 | 0.011610 | 0.011216 | 0.011270 | 0.011255 | 0.011356 | 0.011318 |
| 0.011529 | 0.011470 | 0.011431 | 0.011193 | 0.011429 | 0.011463 | 0.011466 |
| 0.011335 | 0.011429 | 0.011429 | 0.011396 | 0.011362 | 0.011362 | 0.011329 |
| 0.011362 | 0.011295 | 0.011329 | 0.011362 | 0.011329 | 0.011262 | 0.011295 |
| 0.011295 | 0.011362 | 0.011262 | 0.011362 | 0.011396 | 0.011429 | 0.011329 |
| 0.011362 | 0.011329 | 0.011665 | 0.011665 | 0.011396 | 0.011430 | 0.011463 |
| 0.011228 | 0.011228 | 0.011262 | 0.011362 | 0.011228 | 0.011463 | 0.011463 |
| 0.011497 | 0.011496 | 0.011429 | 0.011530 | 0.011698 | 0.011532 | 0.011362 |
| 0.011362 | 0.011429 | 0.011463 | 0.011295 | 0.011362 | 0.011329 | 0.011362 |
| 0.011430 | 0.011430 | 0.011463 | 0.011430 | 0.011330 | 0.011530 | 0.011497 |
| 0.011365 | 0.011262 | 0.011362 | 0.011463 | 0.011362 | 0.011497 | 0.011530 |
| 0.011698 | 0.011402 | 0.011564 | 0.011530 | 0.011463 | 0.011631 | 0.011262 |
| 0.011431 | 0.011329 | 0.011295 | 0.011295 | 0.011362 | 0.011262 | 0.011362 |
| 0.011396 | 0.011429 | 0.011329 | 0.011362 | 0.011329 | 0.011665 | 0.011665 |
| 0.011396 | 0.011430 | 0.011496 | 0.011429 | 0.012069 | 0.011489 | 0.011412 |
| 0.011482 | 0.011441 | 0.011552 | 0.011441 | 0.011550 | 0.011474 | 0.011439 |
| 0.012021 | 0.011337 | 0.011471 | 0.011406 | 0.011680 | 0.011536 | 0.011639 |
| 0.012046 | 0.011512 | 0.011601 | 0.011664 | 0.011530 | 0.011530 | 0.011567 |
| 0.011228 | 0.011396 | 0.011530 | 0.011496 | 0.011499 | 0.011496 | 0.011464 |
| 0.011329 | 0.011262 | 0.011295 | 0.011329 | 0.011228 | 0.011295 | 0.011194 |
| 0.011329 | 0.011362 | 0.011262 | 0.011228 | 0.011329 | 0.011262 | 0.011295 |
| 0.011295 | 0.011228 | 0.011295 | 0.011329 | 0.011228 | 0.011429 | 0.011463 |
| 0.011362 | 0.011429 | 0.011362 | 0.011362 | 0.011295 | 0.011698 | 0.000000 |
| 0.011373 | 0.011295 | 0.011530 | 0.011535 | 0.011396 | 0.011396 | 0.011396 |
| 0.011396 | 0.011329 | 0.011295 | 0.011329 | 0.011429 | 0.011429 | 0.011362 |
| 0.011362 | 0.011496 | 0.011664 | 0.011396 | 0.011597 | 0.011597 | 0.011463 |
| 0.011295 | 0.011362 | 0.011396 | 0.011799 | 0.011362 | 0.011396 | 0.011362 |
| 0.011396 | 0.011329 | 0.011329 | 0.011631 | 0.011564 | 0.011597 | 0.011329 |
| 0.011429 | 0.011496 | 0.011362 | 0.011429 | 0.011396 | 0.011262 | 0.011597 |
| 0.011362 | 0.011329 | 0.011329 | 0.011496 | 0.011329 | 0.011429 | 0.011664 |
| 0.011362 | 0.011739 | 0.011731 | 0.011548 | 0.011286 | 0.011434 | 0.011318 |
| 0.011280 | 0.011761 | 0.011271 | 0.011417 | 0.011353 | 0.011416 | 0.011379 |
| 0.011519 | 0.011126 | 0.011338 | 0.011192 | 0.011222 | 0.011395 | 0.011425 |
| 0.011437 | 0.011336 | 0.011412 | 0.011342 | 0.011364 | 0.011497 | 0.011564 |
| 0.011564 | 0.011430 | 0.011533 | 0.011535 | 0.011670 | 0.011696 | 0.011362 |
| 0.011597 | 0.011463 | 0.011329 | 0.011430 | 0.011228 | 0.011463 | 0.011262 |
| 0.011329 | 0.011329 | 0.011295 | 0.011262 | 0.011295 | 0.011262 | 0.011362 |
| 0.011340 | 0.011340 | 0.011334 | 0.011368 | 0.011505 | 0.011470 | 0.011470 |

|          |          |          |          |          |          |          |
|----------|----------|----------|----------|----------|----------|----------|
| 0.011469 | 0.011396 | 0.011208 | 0.011204 | 0.011331 | 0.011501 | 0.011501 |
| 0.011296 | 0.011365 | 0.011599 | 0.011567 | 0.011497 | 0.011531 | 0.011463 |
| 0.011396 | 0.011463 | 0.011463 | 0.011362 | 0.011933 | 0.011530 | 0.011597 |
| 0.011631 | 0.011701 | 0.011333 | 0.011407 | 0.011295 | 0.011497 | 0.011463 |
| 0.011497 | 0.011530 | 0.011530 | 0.011530 | 0.011650 | 0.011664 | 0.011303 |
| 0.011195 | 0.011199 | 0.011298 | 0.011264 | 0.011368 | 0.011172 | 0.011536 |
| 0.011335 | 0.011455 | 0.011203 | 0.011360 | 0.011329 | 0.011402 | 0.011295 |
| 0.011262 | 0.011262 | 0.011329 | 0.011295 | 0.011497 | 0.011463 | 0.011396 |
| 0.011497 | 0.011564 | 0.011295 | 0.011295 | 0.011329 | 0.011329 | 0.011330 |
| 0.011398 | 0.011329 | 0.011329 | 0.011364 | 0.011497 | 0.011564 | 0.011564 |
| 0.011430 | 0.011533 | 0.011535 | 0.011670 | 0.011696 | 0.011362 | 0.011530 |
| 0.011463 | 0.011463 | 0.011297 | 0.011478 | 0.011408 | 0.011435 | 0.011305 |
| 0.011439 | 0.011652 | 0.011483 | 0.011366 | 0.011262 | 0.011463 | 0.011329 |
| 0.011429 | 0.011362 | 0.011262 | 0.011363 | 0.011463 | 0.011466 | 0.011362 |
| 0.011262 | 0.011195 | 0.011329 | 0.011262 | 0.011195 | 0.011298 | 0.011463 |
| 0.011362 | 0.011295 | 0.011329 | 0.011362 | 0.011329 | 0.011262 | 0.011463 |
| 0.011329 | 0.011362 | 0.011362 | 0.011295 | 0.011362 | 0.011597 | 0.011262 |
| 0.011295 | 0.011698 | 0.011295 | 0.011329 | 0.011295 | 0.011664 | 0.011232 |
| 0.011734 | 0.011273 | 0.011311 | 0.011503 | 0.011589 | 0.011491 | 0.011227 |
| 0.011270 | 0.011463 | 0.011564 | 0.011671 | 0.011531 | 0.011669 | 0.011800 |
| 0.011699 | 0.011737 | 0.011698 | 0.011949 | 0.011664 | 0.012539 | 0.011700 |
| 0.012439 | 0.012207 | 0.012341 | 0.012612 | 0.011664 | 0.011362 | 0.011665 |
| 0.012103 | 0.012038 | 0.011631 | 0.011530 | 0.011598 | 0.011598 | 0.011567 |
| 0.011463 | 0.011467 | 0.011530 | 0.011497 | 0.011867 | 0.011933 | 0.011935 |
| 0.011834 | 0.011934 | 0.012038 | 0.011804 | 0.012104 | 0.012110 | 0.012171 |
| 0.012171 | 0.012205 | 0.012152 | 0.012172 | 0.012173 | 0.011396 | 0.011699 |
| 0.011766 | 0.012270 | 0.011772 | 0.012001 | 0.012474 | 0.011536 | 0.011430 |
| 0.011396 | 0.011396 | 0.011867 | 0.011924 | 0.012010 | 0.011731 | 0.011397 |
| S044     | 0.011698 | 0.011698 | 0.012034 | 0.011799 | 0.011799 | 0.011866 |
| 0.011705 | 0.011637 | 0.011866 | 0.011295 | 0.011362 | 0.011329 | 0.011295 |
| 0.011329 | 0.011496 | 0.011295 | 0.011262 | 0.011396 | 0.011362 | 0.011329 |
| 0.011295 | 0.011329 | 0.011429 | 0.011295 | 0.011329 | 0.011329 | 0.011671 |
| 0.011564 | 0.011329 | 0.011228 | 0.011463 | 0.011396 | 0.011362 | 0.011396 |
| 0.011362 | 0.011463 | 0.011295 | 0.011362 | 0.011127 | 0.011362 | 0.011530 |
| 0.011295 | 0.011362 | 0.000000 | 0.011262 | 0.011429 | 0.011396 | 0.011396 |
| 0.011362 | 0.011262 | 0.011430 | 0.011698 | 0.011094 | 0.011631 | 0.011094 |
| 0.011329 | 0.011429 | 0.011362 | 0.011631 | 0.011732 | 0.011429 | 0.011530 |
| 0.011396 | 0.011463 | 0.011362 | 0.011597 | 0.011832 | 0.011362 | 0.011429 |
| 0.011329 | 0.011429 | 0.011396 | 0.011463 | 0.011396 | 0.011329 | 0.011329 |
| 0.011295 | 0.011329 | 0.011295 | 0.011396 | 0.011362 | 0.011397 | 0.011463 |
| 0.011396 | 0.011362 | 0.011429 | 0.011329 | 0.011463 | 0.011295 | 0.011362 |
| 0.011530 | 0.011463 | 0.011698 | 0.011530 | 0.011362 | 0.011597 | 0.011295 |
| 0.011505 | 0.011733 | 0.011551 | 0.011295 | 0.011284 | 0.011355 | 0.011454 |
| 0.012121 | 0.011569 | 0.011266 | 0.011530 | 0.011597 | 0.011396 | 0.011497 |
| 0.011429 | 0.011396 | 0.011463 | 0.011362 | 0.011463 | 0.011396 | 0.011396 |
| 0.011362 | 0.011463 | 0.011664 | 0.011530 | 0.011429 | 0.011396 | 0.011329 |
| 0.011295 | 0.011295 | 0.011362 | 0.011329 | 0.011530 | 0.011497 | 0.011429 |
| 0.011530 | 0.011597 | 0.011329 | 0.011329 | 0.011362 | 0.011362 | 0.011364 |
| 0.011432 | 0.011362 | 0.011362 | 0.011240 | 0.011313 | 0.011271 | 0.011363 |
| 0.011365 | 0.011301 | 0.011355 | 0.011336 | 0.011264 | 0.011300 | 0.011330 |
| 0.011600 | 0.011370 | 0.011405 | 0.011296 | 0.011302 | 0.011430 | 0.011396 |
| 0.011464 | 0.011397 | 0.011396 | 0.011496 | 0.011429 | 0.011732 | 0.011598 |
| 0.011631 | 0.011497 | 0.011362 | 0.011463 | 0.011262 | 0.011496 | 0.011295 |
| 0.011362 | 0.011362 | 0.011329 | 0.011295 | 0.011329 | 0.011295 | 0.011396 |
| 0.011362 | 0.011463 | 0.011396 | 0.011295 | 0.011397 | 0.011497 | 0.011499 |
| 0.011497 | 0.011396 | 0.011295 | 0.011229 | 0.011362 | 0.011295 | 0.011228 |
| 0.011332 | 0.011497 | 0.011295 | 0.011497 | 0.011262 | 0.011362 | 0.011329 |
| 0.011430 | 0.011329 | 0.011362 | 0.011329 | 0.011362 | 0.011228 | 0.011362 |
| 0.011396 | 0.011329 | 0.011396 | 0.011329 | 0.011362 | 0.011396 | 0.011631 |
| 0.011732 | 0.011664 | 0.011732 | 0.011364 | 0.011732 | 0.011362 | 0.011329 |



|          |          |          |          |          |          |          |
|----------|----------|----------|----------|----------|----------|----------|
| 0.011364 | 0.011667 | 0.011472 | 0.011266 | 0.011739 | 0.011231 | 0.011336 |
| 0.011739 | 0.011638 | 0.011530 | 0.011732 | 0.011436 | 0.011597 | 0.011564 |
| 0.011429 | 0.011664 | 0.011522 | 0.011349 | 0.011395 | 0.011396 | 0.011466 |
| 0.011564 | 0.011465 | 0.011601 | 0.011669 | 0.011597 | 0.011665 | 0.011772 |
| 0.011500 | 0.011671 | 0.011534 | 0.011534 | 0.011767 | 0.011262 | 0.011465 |
| 0.011429 | 0.011362 | 0.011262 | 0.011262 | 0.011329 | 0.011329 | 0.011329 |
| 0.011329 | 0.011396 | 0.011295 | 0.011396 | 0.011329 | 0.011329 | 0.011329 |
| 0.011329 | 0.011765 | 0.011664 | 0.011698 | 0.011228 | 0.011329 | 0.011362 |
| 0.011362 | 0.011329 | 0.011396 | 0.011429 | 0.011295 | 0.011295 | 0.011295 |
| 0.011832 | 0.011463 | 0.011463 | 0.011262 | 0.011362 | 0.011463 | 0.011295 |
| 0.011295 | 0.011362 | 0.011329 | 0.011497 | 0.011295 | 0.011429 | 0.011564 |
| 0.011496 | 0.011329 | 0.011329 | 0.011262 | 0.011262 | 0.011429 | 0.011362 |
| 0.011262 | 0.011362 | 0.011228 | 0.011262 | 0.011396 | 0.011530 | 0.011295 |
| 0.011262 | 0.011396 | 0.011329 | 0.011228 | 0.011564 | 0.011228 | 0.011396 |
| 0.011471 | 0.011295 | 0.011597 | 0.011430 | 0.011463 | 0.011329 | 0.011161 |
| 0.011295 | 0.011631 | 0.011228 | 0.011497 | 0.011295 | 0.011295 | 0.011228 |
| 0.011463 | 0.011665 | 0.011362 | 0.011429 | 0.011262 | 0.011664 | 0.011295 |
| 0.011295 | 0.011295 | 0.011329 | 0.011429 | 0.011329 | 0.011429 | 0.011496 |
| 0.011497 | 0.011463 | 0.011295 | 0.011463 | 0.011429 | 0.011228 | 0.011262 |
| 0.011295 | 0.011228 | 0.011362 | 0.011295 | 0.011262 | 0.011429 | 0.011295 |
| 0.011329 | 0.011329 | 0.011463 | 0.011496 | 0.011396 | 0.011329 | 0.011329 |
| 0.011396 | 0.011329 | 0.011429 | 0.011295 | 0.011429 | 0.011530 | 0.011832 |
| 0.011329 | 0.011732 | 0.011336 | 0.017861 | 0.011387 | 0.011611 | 0.011688 |
| 0.011648 | 0.011693 | 0.011427 | 0.011350 | 0.011829 | 0.011716 | 0.011485 |
| 0.011534 | 0.011671 | 0.011216 | 0.011353 | 0.011333 | 0.011406 | 0.011361 |
| 0.011576 | 0.011507 | 0.011505 | 0.011193 | 0.011463 | 0.011497 | 0.011500 |
| 0.011369 | 0.011463 | 0.011463 | 0.011429 | 0.011396 | 0.011396 | 0.011363 |
| 0.011396 | 0.011329 | 0.011362 | 0.011396 | 0.011362 | 0.011295 | 0.011329 |
| 0.011329 | 0.011396 | 0.011295 | 0.011396 | 0.011430 | 0.011463 | 0.011362 |
| 0.011396 | 0.011362 | 0.011698 | 0.011698 | 0.011430 | 0.011396 | 0.011497 |
| 0.011262 | 0.011262 | 0.011295 | 0.011396 | 0.011262 | 0.011497 | 0.011497 |
| 0.011530 | 0.011530 | 0.011463 | 0.011564 | 0.011732 | 0.011565 | 0.011396 |
| 0.011396 | 0.011463 | 0.011497 | 0.011329 | 0.011396 | 0.011362 | 0.011329 |
| 0.011463 | 0.011463 | 0.011497 | 0.011463 | 0.011363 | 0.011564 | 0.011530 |
| 0.011365 | 0.011295 | 0.011396 | 0.011430 | 0.011396 | 0.011530 | 0.011564 |
| 0.011732 | 0.011436 | 0.011597 | 0.011564 | 0.011429 | 0.011664 | 0.011295 |
| 0.011397 | 0.011363 | 0.011329 | 0.011329 | 0.011396 | 0.011295 | 0.011396 |
| 0.011430 | 0.011463 | 0.011362 | 0.011396 | 0.011362 | 0.011698 | 0.011698 |
| 0.011430 | 0.011396 | 0.011530 | 0.011463 | 0.012103 | 0.011489 | 0.011412 |
| 0.011482 | 0.011442 | 0.011587 | 0.011476 | 0.011550 | 0.011474 | 0.011474 |
| 0.012056 | 0.011337 | 0.011471 | 0.011406 | 0.011680 | 0.011570 | 0.011673 |
| 0.012080 | 0.011512 | 0.011635 | 0.011698 | 0.011564 | 0.011564 | 0.011601 |
| 0.011262 | 0.011429 | 0.011564 | 0.011530 | 0.011533 | 0.011530 | 0.011498 |
| 0.011362 | 0.011295 | 0.011329 | 0.011362 | 0.011262 | 0.011329 | 0.011228 |
| 0.011362 | 0.011396 | 0.011295 | 0.011262 | 0.011362 | 0.011295 | 0.011329 |
| 0.011262 | 0.011262 | 0.011329 | 0.011362 | 0.011262 | 0.011463 | 0.011496 |
| 0.011396 | 0.011463 | 0.011396 | 0.011396 | 0.011329 | 0.011732 | 0.011362 |
| 0.011408 | 0.011329 | 0.011564 | 0.011569 | 0.011429 | 0.011362 | 0.011429 |
| 0.011429 | 0.011362 | 0.011329 | 0.011362 | 0.011463 | 0.011463 | 0.011396 |
| 0.011396 | 0.011530 | 0.011698 | 0.011429 | 0.011631 | 0.011631 | 0.011496 |
| 0.011329 | 0.011396 | 0.011429 | 0.011832 | 0.011396 | 0.011430 | 0.011396 |
| 0.011429 | 0.011362 | 0.011362 | 0.011665 | 0.011597 | 0.011631 | 0.011362 |
| 0.011463 | 0.011530 | 0.011396 | 0.011463 | 0.011429 | 0.011295 | 0.011631 |
| 0.011396 | 0.011362 | 0.011362 | 0.011530 | 0.011362 | 0.011463 | 0.011698 |
| 0.011396 | 0.011773 | 0.011765 | 0.011548 | 0.011342 | 0.011468 | 0.011318 |
| 0.011390 | 0.011761 | 0.011306 | 0.011507 | 0.011353 | 0.011213 | 0.011485 |
| 0.011570 | 0.011258 | 0.011450 | 0.011324 | 0.011330 | 0.011529 | 0.011425 |
| 0.011437 | 0.011336 | 0.011448 | 0.011377 | 0.011397 | 0.011530 | 0.011597 |
| 0.011597 | 0.011464 | 0.011567 | 0.011569 | 0.011704 | 0.011696 | 0.011396 |
| 0.011631 | 0.011497 | 0.011362 | 0.011463 | 0.011262 | 0.011496 | 0.011295 |

|          |          |          |          |          |          |          |
|----------|----------|----------|----------|----------|----------|----------|
| 0.011362 | 0.011362 | 0.011329 | 0.011295 | 0.011329 | 0.011295 | 0.011396 |
| 0.011375 | 0.011375 | 0.011300 | 0.011403 | 0.011539 | 0.011504 | 0.011436 |
| 0.011503 | 0.011430 | 0.011245 | 0.011204 | 0.011365 | 0.011535 | 0.011535 |
| 0.011329 | 0.011399 | 0.011632 | 0.011601 | 0.011531 | 0.011565 | 0.011496 |
| 0.011429 | 0.011496 | 0.011496 | 0.011396 | 0.011967 | 0.011564 | 0.011631 |
| 0.011665 | 0.011737 | 0.011367 | 0.011441 | 0.011329 | 0.011530 | 0.011497 |
| 0.011531 | 0.011564 | 0.011564 | 0.011564 | 0.011611 | 0.011698 | 0.011338 |
| 0.011229 | 0.011233 | 0.011333 | 0.011298 | 0.011402 | 0.011247 | 0.011570 |
| 0.011369 | 0.011499 | 0.011251 | 0.011360 | 0.011363 | 0.011437 | 0.011329 |
| 0.011295 | 0.011295 | 0.011362 | 0.011329 | 0.011530 | 0.011497 | 0.011429 |
| 0.011530 | 0.011597 | 0.011329 | 0.011329 | 0.011362 | 0.011362 | 0.011364 |
| 0.011432 | 0.011362 | 0.011362 | 0.011397 | 0.011530 | 0.011597 | 0.011597 |
| 0.011464 | 0.011567 | 0.011569 | 0.011704 | 0.011696 | 0.011396 | 0.011564 |
| 0.011497 | 0.011497 | 0.011263 | 0.011513 | 0.011442 | 0.011469 | 0.011340 |
| 0.011508 | 0.011653 | 0.011526 | 0.011400 | 0.011295 | 0.011497 | 0.011362 |
| 0.011463 | 0.011396 | 0.011295 | 0.011397 | 0.011497 | 0.011499 | 0.011396 |
| 0.011295 | 0.011229 | 0.011362 | 0.011295 | 0.011228 | 0.011332 | 0.011497 |
| 0.011396 | 0.011329 | 0.011362 | 0.011396 | 0.011362 | 0.011295 | 0.011497 |
| 0.011362 | 0.011396 | 0.011396 | 0.011329 | 0.011396 | 0.011631 | 0.011295 |
| 0.011329 | 0.011732 | 0.011329 | 0.011362 | 0.011329 | 0.011698 | 0.011317 |
| 0.011735 | 0.011273 | 0.011361 | 0.011503 | 0.011589 | 0.011527 | 0.011269 |
| 0.011323 | 0.011496 | 0.011530 | 0.011637 | 0.011498 | 0.011635 | 0.011766 |
| 0.011666 | 0.011703 | 0.011664 | 0.011983 | 0.011698 | 0.012539 | 0.011734 |
| 0.012473 | 0.012241 | 0.012375 | 0.012646 | 0.011698 | 0.011396 | 0.011631 |
| 0.012137 | 0.012005 | 0.011664 | 0.011564 | 0.011632 | 0.011632 | 0.011601 |
| 0.011496 | 0.011501 | 0.011564 | 0.011531 | 0.011901 | 0.011967 | 0.011968 |
| 0.011868 | 0.011968 | 0.012072 | 0.011838 | 0.012138 | 0.012110 | 0.012205 |
| 0.012205 | 0.012239 | 0.012186 | 0.012206 | 0.012207 | 0.011429 | 0.011732 |
| 0.011800 | 0.012303 | 0.011806 | 0.012034 | 0.012508 | 0.011570 | 0.011464 |
| 0.011429 | 0.011429 | 0.011900 | 0.011924 | 0.012045 | 0.011765 | 0.011431 |
| S045     | 0.011631 | 0.011631 | 0.011967 | 0.011732 | 0.011732 | 0.011799 |
| 0.011637 | 0.011569 | 0.011799 | 0.011228 | 0.011295 | 0.011262 | 0.011228 |
| 0.011262 | 0.011429 | 0.011228 | 0.011262 | 0.011329 | 0.011295 | 0.011262 |
| 0.011228 | 0.011262 | 0.011362 | 0.011228 | 0.011262 | 0.011262 | 0.011603 |
| 0.011496 | 0.011262 | 0.011161 | 0.011396 | 0.011329 | 0.011295 | 0.011329 |
| 0.011295 | 0.011396 | 0.011228 | 0.011295 | 0.011262 | 0.011295 | 0.011463 |
| 0.011228 | 0.011295 | 0.011262 | 0.000000 | 0.011362 | 0.011396 | 0.011329 |
| 0.011295 | 0.011396 | 0.011362 | 0.011631 | 0.011228 | 0.011564 | 0.011228 |
| 0.011262 | 0.011362 | 0.011362 | 0.011564 | 0.011664 | 0.011362 | 0.011463 |
| 0.011329 | 0.011396 | 0.011295 | 0.011530 | 0.011765 | 0.011295 | 0.011362 |
| 0.011262 | 0.011362 | 0.011329 | 0.011396 | 0.011329 | 0.011127 | 0.011127 |
| 0.011228 | 0.011262 | 0.011228 | 0.011329 | 0.011295 | 0.011329 | 0.011396 |
| 0.011329 | 0.011295 | 0.011362 | 0.011262 | 0.011396 | 0.011228 | 0.011295 |
| 0.011463 | 0.011396 | 0.011631 | 0.011463 | 0.011295 | 0.011530 | 0.011228 |
| 0.011468 | 0.011695 | 0.011513 | 0.011216 | 0.011210 | 0.011318 | 0.011415 |
| 0.012048 | 0.011416 | 0.011225 | 0.011530 | 0.011530 | 0.011329 | 0.011429 |
| 0.011362 | 0.011329 | 0.011396 | 0.011295 | 0.011396 | 0.011329 | 0.011329 |
| 0.011295 | 0.011396 | 0.011597 | 0.011463 | 0.011362 | 0.011329 | 0.011262 |
| 0.011228 | 0.011228 | 0.011295 | 0.011262 | 0.011463 | 0.011430 | 0.011362 |
| 0.011463 | 0.011530 | 0.011262 | 0.011262 | 0.011295 | 0.011295 | 0.011297 |
| 0.011364 | 0.011295 | 0.011295 | 0.011168 | 0.011241 | 0.011200 | 0.011296 |
| 0.011297 | 0.011232 | 0.011282 | 0.011267 | 0.011196 | 0.011231 | 0.011263 |
| 0.011528 | 0.011301 | 0.011336 | 0.011228 | 0.011233 | 0.011363 | 0.011329 |
| 0.011396 | 0.011330 | 0.011329 | 0.011429 | 0.011362 | 0.011731 | 0.011530 |
| 0.011564 | 0.011429 | 0.011295 | 0.011396 | 0.011195 | 0.011429 | 0.011228 |
| 0.011295 | 0.011295 | 0.011262 | 0.011228 | 0.011262 | 0.011228 | 0.011329 |
| 0.011295 | 0.011396 | 0.011329 | 0.011228 | 0.011330 | 0.011430 | 0.011432 |
| 0.011430 | 0.011329 | 0.011228 | 0.011161 | 0.011295 | 0.011228 | 0.011161 |
| 0.011264 | 0.011430 | 0.011228 | 0.011430 | 0.011195 | 0.011295 | 0.011262 |
| 0.011362 | 0.011262 | 0.011295 | 0.011262 | 0.011295 | 0.011161 | 0.011295 |

|          |          |          |          |          |          |          |
|----------|----------|----------|----------|----------|----------|----------|
| 0.011329 | 0.011262 | 0.011329 | 0.011262 | 0.011295 | 0.011329 | 0.011564 |
| 0.011664 | 0.011597 | 0.011665 | 0.011364 | 0.011665 | 0.011295 | 0.011262 |
| 0.011263 | 0.011586 | 0.011335 | 0.011197 | 0.011671 | 0.011163 | 0.011296 |
| 0.011671 | 0.011570 | 0.011463 | 0.011664 | 0.011368 | 0.011530 | 0.011497 |
| 0.011429 | 0.011597 | 0.011451 | 0.011307 | 0.011354 | 0.011329 | 0.011398 |
| 0.011497 | 0.011397 | 0.011533 | 0.011601 | 0.011530 | 0.011597 | 0.011704 |
| 0.011432 | 0.011603 | 0.011534 | 0.011466 | 0.011733 | 0.011194 | 0.011397 |
| 0.011362 | 0.011295 | 0.011194 | 0.011194 | 0.011262 | 0.011262 | 0.011194 |
| 0.011262 | 0.011329 | 0.011228 | 0.011329 | 0.011262 | 0.011262 | 0.011329 |
| 0.011262 | 0.011698 | 0.011597 | 0.011631 | 0.011161 | 0.011262 | 0.011295 |
| 0.011295 | 0.011262 | 0.011329 | 0.011362 | 0.011228 | 0.011228 | 0.011228 |
| 0.011765 | 0.011396 | 0.011396 | 0.011194 | 0.011295 | 0.011463 | 0.011228 |
| 0.011228 | 0.011295 | 0.011262 | 0.011429 | 0.011228 | 0.011362 | 0.011496 |
| 0.011429 | 0.011262 | 0.011262 | 0.011195 | 0.011194 | 0.011362 | 0.011295 |
| 0.011195 | 0.011295 | 0.011161 | 0.011195 | 0.011329 | 0.011463 | 0.011228 |
| 0.011195 | 0.011329 | 0.011262 | 0.011161 | 0.011496 | 0.011161 | 0.011329 |
| 0.011402 | 0.011228 | 0.011530 | 0.011362 | 0.011396 | 0.011262 | 0.011295 |
| 0.011228 | 0.011564 | 0.011161 | 0.011429 | 0.011228 | 0.011228 | 0.011161 |
| 0.011396 | 0.011598 | 0.011295 | 0.011362 | 0.011194 | 0.011597 | 0.011228 |
| 0.011228 | 0.011228 | 0.011262 | 0.011362 | 0.011262 | 0.011362 | 0.011429 |
| 0.011429 | 0.011396 | 0.011094 | 0.011396 | 0.011362 | 0.011161 | 0.011194 |
| 0.011228 | 0.011161 | 0.011295 | 0.011228 | 0.011194 | 0.011362 | 0.011228 |
| 0.011262 | 0.011262 | 0.011396 | 0.011429 | 0.011329 | 0.011262 | 0.011262 |
| 0.011329 | 0.011262 | 0.011362 | 0.011228 | 0.011362 | 0.011463 | 0.011765 |
| 0.011262 | 0.011664 | 0.011267 | 0.017785 | 0.011191 | 0.011488 | 0.011618 |
| 0.011579 | 0.011623 | 0.011374 | 0.011234 | 0.011774 | 0.011647 | 0.011364 |
| 0.011487 | 0.011610 | 0.011177 | 0.011270 | 0.011255 | 0.011356 | 0.011275 |
| 0.011436 | 0.011433 | 0.011431 | 0.011259 | 0.011396 | 0.011429 | 0.011432 |
| 0.011301 | 0.011396 | 0.011396 | 0.011362 | 0.011329 | 0.011329 | 0.011295 |
| 0.011329 | 0.011262 | 0.011295 | 0.011329 | 0.011295 | 0.011228 | 0.011262 |
| 0.011262 | 0.011329 | 0.011228 | 0.011329 | 0.011362 | 0.011396 | 0.011295 |
| 0.011329 | 0.011295 | 0.011631 | 0.011631 | 0.011362 | 0.011396 | 0.011430 |
| 0.011195 | 0.011195 | 0.011228 | 0.011329 | 0.011195 | 0.011429 | 0.011429 |
| 0.011463 | 0.011463 | 0.011396 | 0.011496 | 0.011665 | 0.011498 | 0.011329 |
| 0.011329 | 0.011396 | 0.011429 | 0.011262 | 0.011329 | 0.011295 | 0.011329 |
| 0.011396 | 0.011396 | 0.011429 | 0.011396 | 0.011296 | 0.011497 | 0.011463 |
| 0.011331 | 0.011228 | 0.011329 | 0.011362 | 0.011329 | 0.011463 | 0.011496 |
| 0.011664 | 0.011368 | 0.011530 | 0.011497 | 0.011429 | 0.011597 | 0.011228 |
| 0.011397 | 0.011296 | 0.011262 | 0.011262 | 0.011329 | 0.011228 | 0.011329 |
| 0.011362 | 0.011396 | 0.011295 | 0.011329 | 0.011295 | 0.011631 | 0.011631 |
| 0.011362 | 0.011396 | 0.011463 | 0.011396 | 0.012035 | 0.011453 | 0.011377 |
| 0.011447 | 0.011407 | 0.011517 | 0.011406 | 0.011515 | 0.011439 | 0.011405 |
| 0.011987 | 0.011302 | 0.011437 | 0.011371 | 0.011645 | 0.011502 | 0.011604 |
| 0.012012 | 0.011475 | 0.011567 | 0.011631 | 0.011496 | 0.011497 | 0.011533 |
| 0.011194 | 0.011362 | 0.011496 | 0.011463 | 0.011466 | 0.011463 | 0.011431 |
| 0.011295 | 0.011228 | 0.011262 | 0.011295 | 0.011194 | 0.011262 | 0.011161 |
| 0.011295 | 0.011329 | 0.011228 | 0.011194 | 0.011295 | 0.011228 | 0.011262 |
| 0.011262 | 0.011194 | 0.011262 | 0.011295 | 0.011194 | 0.011396 | 0.011429 |
| 0.011329 | 0.011396 | 0.011329 | 0.011329 | 0.011262 | 0.011664 | 0.011295 |
| 0.011338 | 0.011262 | 0.011497 | 0.011501 | 0.011362 | 0.011295 | 0.011362 |
| 0.011362 | 0.011295 | 0.011262 | 0.011295 | 0.011396 | 0.011396 | 0.011329 |
| 0.011329 | 0.011463 | 0.011631 | 0.011362 | 0.011564 | 0.011564 | 0.011429 |
| 0.011262 | 0.011329 | 0.011362 | 0.011765 | 0.011329 | 0.011362 | 0.011329 |
| 0.011362 | 0.011295 | 0.011295 | 0.011597 | 0.011530 | 0.011564 | 0.011295 |
| 0.011396 | 0.011463 | 0.011329 | 0.011396 | 0.011362 | 0.011228 | 0.011564 |
| 0.011329 | 0.011295 | 0.011295 | 0.011463 | 0.011295 | 0.011396 | 0.011631 |
| 0.011329 | 0.011705 | 0.011698 | 0.011507 | 0.011286 | 0.011400 | 0.011215 |
| 0.011280 | 0.011722 | 0.011236 | 0.011417 | 0.011304 | 0.011315 | 0.011379 |
| 0.011417 | 0.011126 | 0.011339 | 0.011126 | 0.011222 | 0.011328 | 0.011385 |
| 0.011399 | 0.011296 | 0.011377 | 0.011307 | 0.011330 | 0.011463 | 0.011530 |

|          |          |          |          |          |          |          |
|----------|----------|----------|----------|----------|----------|----------|
| 0.011530 | 0.011396 | 0.011500 | 0.011501 | 0.011636 | 0.011661 | 0.011329 |
| 0.011564 | 0.011429 | 0.011295 | 0.011396 | 0.011195 | 0.011429 | 0.011228 |
| 0.011295 | 0.011295 | 0.011262 | 0.011228 | 0.011262 | 0.011228 | 0.011329 |
| 0.011270 | 0.011270 | 0.011300 | 0.011334 | 0.011471 | 0.011436 | 0.011436 |
| 0.011435 | 0.011363 | 0.011134 | 0.011132 | 0.011297 | 0.011467 | 0.011467 |
| 0.011262 | 0.011331 | 0.011565 | 0.011533 | 0.011464 | 0.011498 | 0.011429 |
| 0.011362 | 0.011429 | 0.011429 | 0.011329 | 0.011900 | 0.011496 | 0.011564 |
| 0.011597 | 0.011630 | 0.011299 | 0.011372 | 0.011262 | 0.011463 | 0.011429 |
| 0.011464 | 0.011496 | 0.011496 | 0.011496 | 0.011610 | 0.011631 | 0.011268 |
| 0.011162 | 0.011164 | 0.011264 | 0.011230 | 0.011333 | 0.011172 | 0.011502 |
| 0.011300 | 0.011455 | 0.011203 | 0.011322 | 0.011296 | 0.011368 | 0.011262 |
| 0.011228 | 0.011228 | 0.011295 | 0.011262 | 0.011463 | 0.011430 | 0.011362 |
| 0.011463 | 0.011530 | 0.011262 | 0.011262 | 0.011295 | 0.011295 | 0.011297 |
| 0.011364 | 0.011295 | 0.011295 | 0.011330 | 0.011463 | 0.011530 | 0.011530 |
| 0.011396 | 0.011500 | 0.011501 | 0.011636 | 0.011661 | 0.011329 | 0.011496 |
| 0.011429 | 0.011429 | 0.011196 | 0.011443 | 0.011373 | 0.011401 | 0.011270 |
| 0.011439 | 0.011607 | 0.011357 | 0.011332 | 0.011228 | 0.011430 | 0.011295 |
| 0.011396 | 0.011329 | 0.011228 | 0.011330 | 0.011430 | 0.011432 | 0.011329 |
| 0.011228 | 0.011161 | 0.011295 | 0.011228 | 0.011161 | 0.011264 | 0.011430 |
| 0.011329 | 0.011262 | 0.011295 | 0.011329 | 0.011295 | 0.011228 | 0.011430 |
| 0.011295 | 0.011329 | 0.011329 | 0.011262 | 0.011329 | 0.011564 | 0.011228 |
| 0.011262 | 0.011664 | 0.011262 | 0.011295 | 0.011262 | 0.011631 | 0.011232 |
| 0.011678 | 0.011230 | 0.011211 | 0.011463 | 0.011549 | 0.011455 | 0.011186 |
| 0.011165 | 0.011429 | 0.011530 | 0.011637 | 0.011498 | 0.011635 | 0.011766 |
| 0.011666 | 0.011703 | 0.011664 | 0.011914 | 0.011631 | 0.012505 | 0.011666 |
| 0.012405 | 0.012173 | 0.012307 | 0.012578 | 0.011631 | 0.011329 | 0.011631 |
| 0.012070 | 0.012004 | 0.011597 | 0.011497 | 0.011565 | 0.011565 | 0.011534 |
| 0.011429 | 0.011433 | 0.011496 | 0.011464 | 0.011833 | 0.011900 | 0.011901 |
| 0.011800 | 0.011901 | 0.012004 | 0.011770 | 0.012070 | 0.012076 | 0.012137 |
| 0.012138 | 0.012171 | 0.012118 | 0.012138 | 0.012139 | 0.011362 | 0.011665 |
| 0.011733 | 0.012236 | 0.011738 | 0.011967 | 0.012440 | 0.011502 | 0.011396 |
| 0.011362 | 0.011362 | 0.011833 | 0.011883 | 0.011975 | 0.011698 | 0.011363 |
| S046     | 0.011732 | 0.011732 | 0.012001 | 0.011765 | 0.011765 | 0.011832 |
| 0.011671 | 0.011603 | 0.011832 | 0.011329 | 0.011396 | 0.011363 | 0.011329 |
| 0.011295 | 0.011530 | 0.011262 | 0.011362 | 0.011429 | 0.011396 | 0.011362 |
| 0.011329 | 0.011362 | 0.011396 | 0.011329 | 0.011363 | 0.011362 | 0.011637 |
| 0.011530 | 0.011362 | 0.011262 | 0.011429 | 0.011429 | 0.011396 | 0.011429 |
| 0.011396 | 0.011496 | 0.011396 | 0.011396 | 0.011429 | 0.011396 | 0.011564 |
| 0.011262 | 0.011396 | 0.011429 | 0.011362 | 0.000000 | 0.011496 | 0.011429 |
| 0.011396 | 0.011564 | 0.011463 | 0.011664 | 0.011396 | 0.011664 | 0.011396 |
| 0.011362 | 0.000000 | 0.011530 | 0.011664 | 0.011698 | 0.011396 | 0.011496 |
| 0.011429 | 0.011496 | 0.011396 | 0.011631 | 0.011799 | 0.011396 | 0.011463 |
| 0.011362 | 0.011463 | 0.011429 | 0.011496 | 0.011429 | 0.011429 | 0.011429 |
| 0.011329 | 0.011362 | 0.011329 | 0.011362 | 0.011396 | 0.011430 | 0.011496 |
| 0.011429 | 0.011396 | 0.011463 | 0.011362 | 0.011429 | 0.011329 | 0.011396 |
| 0.011564 | 0.011496 | 0.011731 | 0.011564 | 0.011396 | 0.011631 | 0.011396 |
| 0.011579 | 0.011733 | 0.011626 | 0.011334 | 0.011321 | 0.011428 | 0.011454 |
| 0.012085 | 0.011518 | 0.011348 | 0.011631 | 0.011631 | 0.011362 | 0.011463 |
| 0.011463 | 0.011429 | 0.011496 | 0.011396 | 0.011496 | 0.011429 | 0.011429 |
| 0.011396 | 0.011429 | 0.011698 | 0.011563 | 0.011463 | 0.011429 | 0.011362 |
| 0.011329 | 0.011262 | 0.011396 | 0.011362 | 0.011497 | 0.011463 | 0.011396 |
| 0.011497 | 0.011564 | 0.011362 | 0.011362 | 0.011396 | 0.011396 | 0.011398 |
| 0.011466 | 0.011396 | 0.011396 | 0.011276 | 0.011349 | 0.011306 | 0.011396 |
| 0.011399 | 0.011335 | 0.011392 | 0.011371 | 0.011298 | 0.011334 | 0.011364 |
| 0.011564 | 0.011405 | 0.011439 | 0.011329 | 0.011337 | 0.011464 | 0.011363 |
| 0.011430 | 0.011431 | 0.011430 | 0.011530 | 0.011463 | 0.011832 | 0.011564 |
| 0.011597 | 0.011463 | 0.011396 | 0.011430 | 0.011295 | 0.011463 | 0.011329 |
| 0.011396 | 0.011396 | 0.011362 | 0.011329 | 0.011362 | 0.011329 | 0.011429 |
| 0.011396 | 0.011497 | 0.011430 | 0.011329 | 0.011431 | 0.011530 | 0.011533 |
| 0.011530 | 0.011430 | 0.011329 | 0.011263 | 0.011396 | 0.011329 | 0.011262 |

|          |          |          |          |          |          |          |
|----------|----------|----------|----------|----------|----------|----------|
| 0.011366 | 0.011530 | 0.011329 | 0.011530 | 0.011295 | 0.011396 | 0.011362 |
| 0.011463 | 0.011362 | 0.011396 | 0.011362 | 0.011396 | 0.011262 | 0.011396 |
| 0.011430 | 0.011362 | 0.011430 | 0.011362 | 0.011396 | 0.011429 | 0.011665 |
| 0.011698 | 0.011631 | 0.011698 | 0.011532 | 0.011698 | 0.011396 | 0.011362 |
| 0.011330 | 0.011626 | 0.011426 | 0.011300 | 0.011705 | 0.011265 | 0.011414 |
| 0.011705 | 0.011604 | 0.011564 | 0.011765 | 0.011470 | 0.011631 | 0.011597 |
| 0.011530 | 0.011698 | 0.011557 | 0.011390 | 0.011479 | 0.011429 | 0.011500 |
| 0.011597 | 0.011499 | 0.011635 | 0.011703 | 0.011631 | 0.011698 | 0.011805 |
| 0.011534 | 0.011705 | 0.011636 | 0.011567 | 0.011834 | 0.011295 | 0.011498 |
| 0.011463 | 0.011396 | 0.011295 | 0.011295 | 0.011362 | 0.011362 | 0.011429 |
| 0.011362 | 0.011429 | 0.011329 | 0.011362 | 0.011362 | 0.011362 | 0.011429 |
| 0.011362 | 0.011664 | 0.011631 | 0.011664 | 0.011262 | 0.011362 | 0.011396 |
| 0.011396 | 0.011362 | 0.011429 | 0.011396 | 0.011329 | 0.011329 | 0.011329 |
| 0.011799 | 0.011429 | 0.011496 | 0.011295 | 0.011396 | 0.011564 | 0.011329 |
| 0.011329 | 0.011396 | 0.011362 | 0.011530 | 0.011329 | 0.011463 | 0.011597 |
| 0.011530 | 0.011362 | 0.011362 | 0.011295 | 0.011295 | 0.011463 | 0.011396 |
| 0.011295 | 0.011396 | 0.011262 | 0.011295 | 0.011429 | 0.011497 | 0.011329 |
| 0.011295 | 0.011429 | 0.011363 | 0.011262 | 0.011530 | 0.011262 | 0.011429 |
| 0.011505 | 0.011329 | 0.011564 | 0.011463 | 0.011429 | 0.011362 | 0.011463 |
| 0.011329 | 0.011664 | 0.011262 | 0.011463 | 0.011262 | 0.011262 | 0.011262 |
| 0.011496 | 0.011631 | 0.011396 | 0.011463 | 0.011295 | 0.011631 | 0.011262 |
| 0.011329 | 0.011329 | 0.011362 | 0.011463 | 0.011362 | 0.011463 | 0.011530 |
| 0.011530 | 0.011496 | 0.011396 | 0.011497 | 0.011463 | 0.011329 | 0.011295 |
| 0.011329 | 0.011329 | 0.011396 | 0.011262 | 0.011295 | 0.011463 | 0.011329 |
| 0.011295 | 0.011362 | 0.011496 | 0.011463 | 0.011429 | 0.011362 | 0.011362 |
| 0.011429 | 0.011362 | 0.011463 | 0.011329 | 0.011463 | 0.011564 | 0.011799 |
| 0.011362 | 0.011698 | 0.011371 | 0.017823 | 0.011387 | 0.011427 | 0.011653 |
| 0.011614 | 0.011658 | 0.011427 | 0.011408 | 0.011719 | 0.011682 | 0.011425 |
| 0.011534 | 0.011548 | 0.011294 | 0.011353 | 0.011294 | 0.011307 | 0.011361 |
| 0.011529 | 0.011470 | 0.011468 | 0.011259 | 0.011496 | 0.011530 | 0.011534 |
| 0.011404 | 0.011497 | 0.011497 | 0.011396 | 0.011429 | 0.011430 | 0.011396 |
| 0.011429 | 0.011362 | 0.011396 | 0.011430 | 0.011396 | 0.011329 | 0.011362 |
| 0.011362 | 0.011430 | 0.011329 | 0.011430 | 0.011463 | 0.011497 | 0.011396 |
| 0.011362 | 0.011329 | 0.011665 | 0.011665 | 0.011463 | 0.011497 | 0.011530 |
| 0.011295 | 0.011295 | 0.011329 | 0.011430 | 0.011295 | 0.011530 | 0.011530 |
| 0.011564 | 0.011564 | 0.011496 | 0.011597 | 0.011698 | 0.011599 | 0.011429 |
| 0.011430 | 0.011497 | 0.011530 | 0.011362 | 0.011429 | 0.011396 | 0.011429 |
| 0.011497 | 0.011497 | 0.011530 | 0.011430 | 0.011397 | 0.011597 | 0.011564 |
| 0.011433 | 0.011329 | 0.011429 | 0.011530 | 0.011430 | 0.011497 | 0.011597 |
| 0.011765 | 0.011470 | 0.011631 | 0.011597 | 0.011530 | 0.011698 | 0.011295 |
| 0.011498 | 0.011396 | 0.011362 | 0.011362 | 0.011430 | 0.011329 | 0.011430 |
| 0.011463 | 0.011497 | 0.011396 | 0.011362 | 0.011329 | 0.011665 | 0.011665 |
| 0.011463 | 0.011497 | 0.011563 | 0.011496 | 0.012069 | 0.011560 | 0.011482 |
| 0.011552 | 0.011511 | 0.011622 | 0.011510 | 0.011620 | 0.011543 | 0.011508 |
| 0.012021 | 0.011406 | 0.011540 | 0.011475 | 0.011749 | 0.011604 | 0.011707 |
| 0.012046 | 0.011512 | 0.011669 | 0.011732 | 0.011597 | 0.011530 | 0.011635 |
| 0.011295 | 0.011463 | 0.011597 | 0.011563 | 0.011567 | 0.011496 | 0.011464 |
| 0.011396 | 0.011329 | 0.011362 | 0.011396 | 0.011295 | 0.011362 | 0.011262 |
| 0.011329 | 0.011362 | 0.011329 | 0.011295 | 0.011396 | 0.011329 | 0.011362 |
| 0.011362 | 0.011295 | 0.011362 | 0.011396 | 0.011295 | 0.011496 | 0.011530 |
| 0.011429 | 0.011429 | 0.011429 | 0.011429 | 0.011362 | 0.011698 | 0.011396 |
| 0.011373 | 0.011362 | 0.011530 | 0.011535 | 0.011463 | 0.011463 | 0.011463 |
| 0.011463 | 0.011396 | 0.011362 | 0.011396 | 0.011496 | 0.011496 | 0.011429 |
| 0.011429 | 0.011564 | 0.011664 | 0.011463 | 0.011664 | 0.011664 | 0.011530 |
| 0.011362 | 0.011429 | 0.011463 | 0.011799 | 0.011430 | 0.011463 | 0.011429 |
| 0.011463 | 0.011329 | 0.011329 | 0.011631 | 0.011631 | 0.011597 | 0.011396 |
| 0.011496 | 0.011564 | 0.011429 | 0.011496 | 0.011463 | 0.011329 | 0.011597 |
| 0.011429 | 0.011396 | 0.011329 | 0.011564 | 0.011396 | 0.011496 | 0.011732 |
| 0.011429 | 0.011739 | 0.011731 | 0.011548 | 0.011286 | 0.011434 | 0.011370 |
| 0.011225 | 0.011761 | 0.011341 | 0.011507 | 0.011353 | 0.011518 | 0.011432 |

|          |          |          |          |          |          |          |
|----------|----------|----------|----------|----------|----------|----------|
| 0.011519 | 0.011323 | 0.011505 | 0.011324 | 0.011437 | 0.011529 | 0.011506 |
| 0.011512 | 0.011414 | 0.011412 | 0.011412 | 0.011431 | 0.011497 | 0.011564 |
| 0.011564 | 0.011430 | 0.011533 | 0.011535 | 0.011670 | 0.011696 | 0.011429 |
| 0.011597 | 0.011463 | 0.011396 | 0.011430 | 0.011295 | 0.011463 | 0.011329 |
| 0.011396 | 0.011396 | 0.011362 | 0.011329 | 0.011362 | 0.011329 | 0.011429 |
| 0.011409 | 0.011410 | 0.011403 | 0.011437 | 0.011573 | 0.011538 | 0.011538 |
| 0.011537 | 0.011464 | 0.011282 | 0.011276 | 0.011399 | 0.011568 | 0.011569 |
| 0.011363 | 0.011433 | 0.011666 | 0.011635 | 0.011565 | 0.011599 | 0.011530 |
| 0.011463 | 0.011530 | 0.011530 | 0.011429 | 0.011933 | 0.011597 | 0.011665 |
| 0.011698 | 0.011701 | 0.011401 | 0.011441 | 0.011362 | 0.011564 | 0.011530 |
| 0.011565 | 0.011597 | 0.011597 | 0.011597 | 0.011768 | 0.011731 | 0.011372 |
| 0.011263 | 0.011268 | 0.011367 | 0.011332 | 0.011368 | 0.011284 | 0.011536 |
| 0.011403 | 0.011499 | 0.011298 | 0.011435 | 0.011396 | 0.011471 | 0.011362 |
| 0.011329 | 0.011262 | 0.011396 | 0.011362 | 0.011497 | 0.011463 | 0.011396 |
| 0.011497 | 0.011564 | 0.011362 | 0.011362 | 0.011396 | 0.011396 | 0.011398 |
| 0.011466 | 0.011396 | 0.011396 | 0.011431 | 0.011497 | 0.011564 | 0.011564 |
| 0.011430 | 0.011533 | 0.011535 | 0.011670 | 0.011696 | 0.011429 | 0.011597 |
| 0.011530 | 0.011530 | 0.011364 | 0.011547 | 0.011477 | 0.011503 | 0.011340 |
| 0.011542 | 0.011698 | 0.011526 | 0.011434 | 0.011329 | 0.011530 | 0.011396 |
| 0.011497 | 0.011430 | 0.011329 | 0.011431 | 0.011530 | 0.011533 | 0.011430 |
| 0.011329 | 0.011263 | 0.011396 | 0.011329 | 0.011262 | 0.011366 | 0.011530 |
| 0.011429 | 0.011362 | 0.011396 | 0.011430 | 0.011396 | 0.011329 | 0.011463 |
| 0.011396 | 0.011429 | 0.011429 | 0.011362 | 0.011429 | 0.011664 | 0.011262 |
| 0.011362 | 0.011698 | 0.011362 | 0.011396 | 0.011362 | 0.011664 | 0.011317 |
| 0.011678 | 0.011358 | 0.011311 | 0.011503 | 0.011589 | 0.011491 | 0.011269 |
| 0.011270 | 0.011463 | 0.011564 | 0.011671 | 0.011531 | 0.011669 | 0.011800 |
| 0.011699 | 0.011737 | 0.011698 | 0.011949 | 0.011664 | 0.012539 | 0.011700 |
| 0.012439 | 0.012207 | 0.012341 | 0.012612 | 0.011664 | 0.011362 | 0.011665 |
| 0.012103 | 0.012038 | 0.011631 | 0.011530 | 0.011598 | 0.011598 | 0.011567 |
| 0.011463 | 0.011467 | 0.011530 | 0.011497 | 0.011867 | 0.011933 | 0.011935 |
| 0.011834 | 0.011934 | 0.012038 | 0.011804 | 0.012036 | 0.012110 | 0.012171 |
| 0.012172 | 0.012205 | 0.012152 | 0.012172 | 0.012173 | 0.011463 | 0.011699 |
| 0.011766 | 0.012270 | 0.011772 | 0.012001 | 0.012474 | 0.011536 | 0.011430 |
| 0.011396 | 0.011396 | 0.011867 | 0.011924 | 0.012010 | 0.011731 | 0.011397 |
| S047     | 0.011765 | 0.011765 | 0.012101 | 0.011866 | 0.011866 | 0.011933 |
| 0.011773 | 0.011705 | 0.011933 | 0.011362 | 0.011429 | 0.011397 | 0.011362 |
| 0.011396 | 0.011564 | 0.011362 | 0.011329 | 0.011463 | 0.011429 | 0.011396 |
| 0.011362 | 0.011396 | 0.011496 | 0.011363 | 0.011396 | 0.011396 | 0.011739 |
| 0.011631 | 0.011396 | 0.011295 | 0.011530 | 0.011463 | 0.011429 | 0.011463 |
| 0.011429 | 0.011530 | 0.011429 | 0.011429 | 0.011396 | 0.011429 | 0.011597 |
| 0.011362 | 0.011429 | 0.011396 | 0.011396 | 0.011496 | 0.000000 | 0.011463 |
| 0.011429 | 0.011530 | 0.011497 | 0.011765 | 0.011362 | 0.011698 | 0.011362 |
| 0.011396 | 0.011497 | 0.011564 | 0.011698 | 0.011799 | 0.011496 | 0.011597 |
| 0.011463 | 0.011530 | 0.011429 | 0.011664 | 0.011900 | 0.011429 | 0.011496 |
| 0.011396 | 0.011496 | 0.011463 | 0.011530 | 0.011463 | 0.011463 | 0.011463 |
| 0.011362 | 0.011396 | 0.011362 | 0.011463 | 0.011429 | 0.011464 | 0.011530 |
| 0.011463 | 0.011429 | 0.011496 | 0.011396 | 0.011530 | 0.011362 | 0.011429 |
| 0.011597 | 0.011530 | 0.011765 | 0.011597 | 0.011429 | 0.011664 | 0.011429 |
| 0.011616 | 0.011845 | 0.011664 | 0.011373 | 0.011359 | 0.011428 | 0.011572 |
| 0.012195 | 0.011721 | 0.011390 | 0.011530 | 0.011597 | 0.011463 | 0.011564 |
| 0.011496 | 0.011463 | 0.011530 | 0.011429 | 0.011530 | 0.011463 | 0.011463 |
| 0.011429 | 0.011530 | 0.011732 | 0.011597 | 0.011496 | 0.011463 | 0.011396 |
| 0.011362 | 0.011362 | 0.011430 | 0.011396 | 0.011597 | 0.011564 | 0.011497 |
| 0.011597 | 0.011665 | 0.011396 | 0.011396 | 0.011430 | 0.011429 | 0.011432 |
| 0.011500 | 0.011429 | 0.011430 | 0.011312 | 0.011386 | 0.011341 | 0.011430 |
| 0.011433 | 0.011369 | 0.011429 | 0.011405 | 0.011332 | 0.011368 | 0.011398 |
| 0.011672 | 0.011439 | 0.011473 | 0.011363 | 0.011371 | 0.011497 | 0.011464 |
| 0.011531 | 0.011465 | 0.011464 | 0.011563 | 0.011496 | 0.011799 | 0.011665 |
| 0.011698 | 0.011564 | 0.011429 | 0.011530 | 0.011329 | 0.011564 | 0.011362 |
| 0.011429 | 0.011429 | 0.011396 | 0.011362 | 0.011396 | 0.011362 | 0.011463 |

|          |          |          |          |          |          |          |
|----------|----------|----------|----------|----------|----------|----------|
| 0.011430 | 0.011530 | 0.011463 | 0.011362 | 0.011464 | 0.011564 | 0.011567 |
| 0.011564 | 0.011463 | 0.011362 | 0.011296 | 0.011429 | 0.011362 | 0.011295 |
| 0.011400 | 0.011564 | 0.011362 | 0.011564 | 0.011329 | 0.011430 | 0.011396 |
| 0.011497 | 0.011396 | 0.011430 | 0.011396 | 0.011430 | 0.011295 | 0.011430 |
| 0.011463 | 0.011396 | 0.011463 | 0.011396 | 0.011429 | 0.011463 | 0.011698 |
| 0.011799 | 0.011732 | 0.011799 | 0.011566 | 0.011799 | 0.011429 | 0.011396 |
| 0.011432 | 0.011747 | 0.011563 | 0.011335 | 0.011807 | 0.011299 | 0.011414 |
| 0.011807 | 0.011706 | 0.011530 | 0.011799 | 0.011504 | 0.011597 | 0.011631 |
| 0.011496 | 0.011664 | 0.011593 | 0.011431 | 0.011437 | 0.011463 | 0.011534 |
| 0.011631 | 0.011532 | 0.011635 | 0.011737 | 0.011664 | 0.011732 | 0.011839 |
| 0.011568 | 0.011739 | 0.011602 | 0.011601 | 0.011834 | 0.011329 | 0.011532 |
| 0.011496 | 0.011429 | 0.011329 | 0.011329 | 0.011396 | 0.011396 | 0.011463 |
| 0.011396 | 0.011463 | 0.011362 | 0.011463 | 0.011396 | 0.011396 | 0.011396 |
| 0.011396 | 0.011832 | 0.011732 | 0.011765 | 0.011295 | 0.011396 | 0.011429 |
| 0.011429 | 0.011396 | 0.011463 | 0.011496 | 0.011362 | 0.011362 | 0.011362 |
| 0.011899 | 0.011530 | 0.011530 | 0.011329 | 0.011429 | 0.011530 | 0.011362 |
| 0.011362 | 0.011429 | 0.011396 | 0.011564 | 0.011362 | 0.011496 | 0.011631 |
| 0.011564 | 0.011396 | 0.011396 | 0.011329 | 0.011329 | 0.011497 | 0.011429 |
| 0.011329 | 0.011429 | 0.011295 | 0.011329 | 0.011463 | 0.011598 | 0.011362 |
| 0.011329 | 0.011463 | 0.011396 | 0.011295 | 0.011631 | 0.011295 | 0.011463 |
| 0.011539 | 0.011362 | 0.011664 | 0.011497 | 0.011530 | 0.011396 | 0.011429 |
| 0.011362 | 0.011698 | 0.011295 | 0.011564 | 0.011362 | 0.011362 | 0.011295 |
| 0.011530 | 0.011732 | 0.011429 | 0.011496 | 0.011329 | 0.011732 | 0.011362 |
| 0.011362 | 0.011362 | 0.011396 | 0.011496 | 0.011396 | 0.011496 | 0.011564 |
| 0.011564 | 0.011530 | 0.011429 | 0.011530 | 0.011496 | 0.011362 | 0.011329 |
| 0.011362 | 0.011362 | 0.011429 | 0.011362 | 0.011329 | 0.011496 | 0.011362 |
| 0.011396 | 0.011396 | 0.011530 | 0.011564 | 0.011463 | 0.011396 | 0.011396 |
| 0.011463 | 0.011396 | 0.011496 | 0.011362 | 0.011496 | 0.011530 | 0.011900 |
| 0.011396 | 0.011799 | 0.011405 | 0.017899 | 0.011322 | 0.011488 | 0.011758 |
| 0.011718 | 0.011764 | 0.011479 | 0.011466 | 0.011774 | 0.011785 | 0.011425 |
| 0.011629 | 0.011610 | 0.011294 | 0.011395 | 0.011333 | 0.011356 | 0.011404 |
| 0.011717 | 0.011582 | 0.011579 | 0.011391 | 0.011530 | 0.011564 | 0.011567 |
| 0.011438 | 0.011530 | 0.011463 | 0.011497 | 0.011463 | 0.011463 | 0.011430 |
| 0.011463 | 0.011396 | 0.011362 | 0.011463 | 0.011430 | 0.011362 | 0.011396 |
| 0.011396 | 0.011463 | 0.011362 | 0.011463 | 0.011497 | 0.011530 | 0.011429 |
| 0.011463 | 0.011430 | 0.011765 | 0.011765 | 0.011497 | 0.011464 | 0.011564 |
| 0.011329 | 0.011329 | 0.011362 | 0.011463 | 0.011329 | 0.011564 | 0.011564 |
| 0.011530 | 0.011530 | 0.011530 | 0.011564 | 0.011799 | 0.011565 | 0.011463 |
| 0.011396 | 0.011530 | 0.011564 | 0.011396 | 0.011463 | 0.011429 | 0.011396 |
| 0.011463 | 0.011463 | 0.011497 | 0.011530 | 0.011363 | 0.011631 | 0.011597 |
| 0.011467 | 0.011362 | 0.011463 | 0.011564 | 0.011463 | 0.011598 | 0.011631 |
| 0.011799 | 0.011504 | 0.011597 | 0.011631 | 0.011496 | 0.011664 | 0.011363 |
| 0.000000 | 0.011430 | 0.011396 | 0.011396 | 0.011463 | 0.011362 | 0.011463 |
| 0.011497 | 0.011530 | 0.011429 | 0.011463 | 0.011430 | 0.011765 | 0.011765 |
| 0.011497 | 0.011464 | 0.011597 | 0.011530 | 0.012170 | 0.011560 | 0.011517 |
| 0.011587 | 0.011511 | 0.011657 | 0.011545 | 0.011620 | 0.011577 | 0.011508 |
| 0.012125 | 0.011441 | 0.011574 | 0.011510 | 0.011783 | 0.011638 | 0.011741 |
| 0.012148 | 0.011626 | 0.011703 | 0.011765 | 0.011631 | 0.011631 | 0.011668 |
| 0.011329 | 0.011497 | 0.011631 | 0.011597 | 0.011601 | 0.011597 | 0.011565 |
| 0.011429 | 0.011362 | 0.011396 | 0.011429 | 0.011329 | 0.011396 | 0.011295 |
| 0.011429 | 0.011463 | 0.011362 | 0.011329 | 0.011429 | 0.011362 | 0.011396 |
| 0.011329 | 0.011329 | 0.011396 | 0.011429 | 0.011329 | 0.011530 | 0.011564 |
| 0.011463 | 0.011530 | 0.011463 | 0.011463 | 0.011396 | 0.011799 | 0.011429 |
| 0.011478 | 0.011396 | 0.011631 | 0.011637 | 0.011497 | 0.011496 | 0.011496 |
| 0.011497 | 0.011429 | 0.011396 | 0.011429 | 0.011530 | 0.011530 | 0.011463 |
| 0.011463 | 0.011597 | 0.011765 | 0.011496 | 0.011698 | 0.011698 | 0.011564 |
| 0.011396 | 0.011463 | 0.011497 | 0.011900 | 0.011463 | 0.011497 | 0.011463 |
| 0.011429 | 0.011429 | 0.011429 | 0.011732 | 0.011665 | 0.011698 | 0.011429 |
| 0.011530 | 0.011597 | 0.011463 | 0.011530 | 0.011496 | 0.011362 | 0.011698 |
| 0.011463 | 0.011429 | 0.011429 | 0.011597 | 0.011429 | 0.011530 | 0.011765 |

|          |          |          |          |          |          |          |
|----------|----------|----------|----------|----------|----------|----------|
| 0.011463 | 0.011841 | 0.011832 | 0.011670 | 0.011399 | 0.011536 | 0.011421 |
| 0.011335 | 0.011839 | 0.011376 | 0.011596 | 0.011451 | 0.011467 | 0.011538 |
| 0.011672 | 0.011258 | 0.011505 | 0.011258 | 0.011437 | 0.011462 | 0.011506 |
| 0.011550 | 0.011414 | 0.011518 | 0.011448 | 0.011465 | 0.011597 | 0.011665 |
| 0.011665 | 0.011531 | 0.011635 | 0.011636 | 0.011772 | 0.011767 | 0.011463 |
| 0.011698 | 0.011564 | 0.011429 | 0.011530 | 0.011329 | 0.011564 | 0.011362 |
| 0.011429 | 0.011429 | 0.011396 | 0.011362 | 0.011396 | 0.011362 | 0.011463 |
| 0.011409 | 0.011445 | 0.011368 | 0.011471 | 0.011608 | 0.011573 | 0.011504 |
| 0.011571 | 0.011497 | 0.011319 | 0.011276 | 0.011433 | 0.011602 | 0.011603 |
| 0.011396 | 0.011467 | 0.011700 | 0.011669 | 0.011531 | 0.011632 | 0.011564 |
| 0.011496 | 0.011564 | 0.011564 | 0.011463 | 0.012034 | 0.011564 | 0.011631 |
| 0.011732 | 0.011772 | 0.011435 | 0.011511 | 0.011396 | 0.011597 | 0.011564 |
| 0.011598 | 0.011631 | 0.011564 | 0.011564 | 0.011729 | 0.011765 | 0.011407 |
| 0.011297 | 0.011303 | 0.011401 | 0.011366 | 0.011470 | 0.011321 | 0.011638 |
| 0.011437 | 0.011543 | 0.011298 | 0.011472 | 0.011430 | 0.011505 | 0.011396 |
| 0.011362 | 0.011362 | 0.011430 | 0.011396 | 0.011597 | 0.011564 | 0.011497 |
| 0.011597 | 0.011665 | 0.011396 | 0.011396 | 0.011430 | 0.011429 | 0.011432 |
| 0.011500 | 0.011429 | 0.011430 | 0.011465 | 0.011597 | 0.011665 | 0.011665 |
| 0.011531 | 0.011635 | 0.011636 | 0.011772 | 0.011767 | 0.011463 | 0.011631 |
| 0.011564 | 0.011564 | 0.011398 | 0.011582 | 0.011512 | 0.011537 | 0.011411 |
| 0.011577 | 0.011789 | 0.011611 | 0.011468 | 0.011362 | 0.011564 | 0.011430 |
| 0.011530 | 0.011463 | 0.011362 | 0.011464 | 0.011564 | 0.011567 | 0.011463 |
| 0.011362 | 0.011296 | 0.011429 | 0.011362 | 0.011295 | 0.011400 | 0.011564 |
| 0.011463 | 0.011396 | 0.011362 | 0.011463 | 0.011430 | 0.011362 | 0.011564 |
| 0.011362 | 0.011463 | 0.011463 | 0.011396 | 0.011463 | 0.011698 | 0.011362 |
| 0.011396 | 0.011799 | 0.011396 | 0.011429 | 0.011396 | 0.011765 | 0.011403 |
| 0.011791 | 0.011400 | 0.011511 | 0.011624 | 0.011712 | 0.011599 | 0.011353 |
| 0.011427 | 0.011564 | 0.011597 | 0.011705 | 0.011565 | 0.011703 | 0.011834 |
| 0.011733 | 0.011770 | 0.011732 | 0.012051 | 0.011765 | 0.012640 | 0.011801 |
| 0.012540 | 0.012308 | 0.012442 | 0.012714 | 0.011765 | 0.011463 | 0.011699 |
| 0.012204 | 0.012072 | 0.011732 | 0.011631 | 0.011699 | 0.011699 | 0.011669 |
| 0.011564 | 0.011569 | 0.011631 | 0.011598 | 0.011968 | 0.012034 | 0.012036 |
| 0.011935 | 0.012035 | 0.012139 | 0.011906 | 0.012205 | 0.012212 | 0.012272 |
| 0.012273 | 0.012307 | 0.012255 | 0.012273 | 0.012274 | 0.011496 | 0.011800 |
| 0.011867 | 0.012371 | 0.011874 | 0.012102 | 0.012575 | 0.011637 | 0.011531 |
| 0.011463 | 0.011496 | 0.011968 | 0.012048 | 0.012116 | 0.011832 | 0.011498 |
| S048     | 0.011698 | 0.011698 | 0.012034 | 0.011799 | 0.011799 | 0.011866 |
| 0.011705 | 0.011637 | 0.011866 | 0.011295 | 0.011362 | 0.011329 | 0.011295 |
| 0.011329 | 0.011496 | 0.011295 | 0.011329 | 0.011396 | 0.011362 | 0.011329 |
| 0.011295 | 0.011329 | 0.011429 | 0.011295 | 0.011329 | 0.011329 | 0.011671 |
| 0.011564 | 0.011329 | 0.011228 | 0.011463 | 0.011396 | 0.011362 | 0.011396 |
| 0.011161 | 0.011463 | 0.011362 | 0.011362 | 0.011396 | 0.011362 | 0.011530 |
| 0.011295 | 0.011362 | 0.011396 | 0.011329 | 0.011429 | 0.011463 | 0.000000 |
| 0.011362 | 0.011530 | 0.011430 | 0.011698 | 0.011362 | 0.011631 | 0.011362 |
| 0.011329 | 0.011429 | 0.011497 | 0.011631 | 0.011732 | 0.011429 | 0.011530 |
| 0.011396 | 0.011463 | 0.011362 | 0.011597 | 0.011832 | 0.011362 | 0.011362 |
| 0.011329 | 0.011429 | 0.011396 | 0.011463 | 0.011396 | 0.011396 | 0.011396 |
| 0.011295 | 0.011329 | 0.011295 | 0.011396 | 0.011362 | 0.011397 | 0.011463 |
| 0.011396 | 0.011362 | 0.011429 | 0.011329 | 0.011463 | 0.011295 | 0.011362 |
| 0.011530 | 0.011463 | 0.011698 | 0.011530 | 0.011362 | 0.011597 | 0.011362 |
| 0.011542 | 0.011770 | 0.011588 | 0.011295 | 0.011284 | 0.011391 | 0.011493 |
| 0.012121 | 0.011620 | 0.011307 | 0.011597 | 0.011597 | 0.011396 | 0.011497 |
| 0.011429 | 0.011396 | 0.011463 | 0.011362 | 0.011463 | 0.011396 | 0.011396 |
| 0.011362 | 0.011463 | 0.011664 | 0.011530 | 0.011429 | 0.011396 | 0.011329 |
| 0.011295 | 0.011295 | 0.011362 | 0.011329 | 0.011530 | 0.011497 | 0.011429 |
| 0.011530 | 0.011597 | 0.011329 | 0.011329 | 0.011362 | 0.011362 | 0.011364 |
| 0.011432 | 0.011362 | 0.011362 | 0.011204 | 0.011277 | 0.011236 | 0.011363 |
| 0.011365 | 0.011301 | 0.011355 | 0.011336 | 0.011230 | 0.011266 | 0.011330 |
| 0.011564 | 0.011336 | 0.011405 | 0.011296 | 0.011302 | 0.011430 | 0.011396 |
| 0.011464 | 0.011397 | 0.011396 | 0.011496 | 0.011429 | 0.011799 | 0.011598 |



|          |          |          |          |          |          |          |
|----------|----------|----------|----------|----------|----------|----------|
| 0.011631 | 0.011497 | 0.011362 | 0.011463 | 0.011262 | 0.011496 | 0.011295 |
| 0.011362 | 0.011362 | 0.011329 | 0.011295 | 0.011329 | 0.011295 | 0.011396 |
| 0.011362 | 0.011463 | 0.011396 | 0.011295 | 0.011397 | 0.011497 | 0.011499 |
| 0.011497 | 0.011396 | 0.011295 | 0.011229 | 0.011362 | 0.011295 | 0.011228 |
| 0.011332 | 0.011497 | 0.011295 | 0.011497 | 0.011262 | 0.011362 | 0.011329 |
| 0.011430 | 0.011329 | 0.011362 | 0.011329 | 0.011362 | 0.011228 | 0.011362 |
| 0.011396 | 0.011329 | 0.011396 | 0.011329 | 0.011362 | 0.011396 | 0.011631 |
| 0.011732 | 0.011664 | 0.011732 | 0.011498 | 0.011732 | 0.011362 | 0.011329 |
| 0.011364 | 0.011667 | 0.011472 | 0.011266 | 0.011739 | 0.011231 | 0.011375 |
| 0.011739 | 0.011638 | 0.011530 | 0.011732 | 0.011436 | 0.011597 | 0.011564 |
| 0.011496 | 0.011664 | 0.011486 | 0.011307 | 0.011354 | 0.011396 | 0.011466 |
| 0.011564 | 0.011465 | 0.011601 | 0.011669 | 0.011597 | 0.011665 | 0.011772 |
| 0.011500 | 0.011671 | 0.011568 | 0.011500 | 0.011800 | 0.011262 | 0.011465 |
| 0.011429 | 0.011362 | 0.011262 | 0.011262 | 0.011329 | 0.011329 | 0.011396 |
| 0.011329 | 0.011396 | 0.011295 | 0.011396 | 0.011329 | 0.011329 | 0.011396 |
| 0.011329 | 0.011765 | 0.011664 | 0.011698 | 0.011228 | 0.011329 | 0.011362 |
| 0.011362 | 0.011329 | 0.011396 | 0.011429 | 0.011295 | 0.011295 | 0.011295 |
| 0.011832 | 0.011463 | 0.011463 | 0.011262 | 0.011362 | 0.011530 | 0.011295 |
| 0.011295 | 0.011362 | 0.011329 | 0.011497 | 0.011295 | 0.011429 | 0.011564 |
| 0.011496 | 0.011329 | 0.011329 | 0.011262 | 0.011262 | 0.011429 | 0.011362 |
| 0.011262 | 0.011362 | 0.011228 | 0.011262 | 0.011396 | 0.011497 | 0.011295 |
| 0.011262 | 0.011396 | 0.011329 | 0.011228 | 0.011564 | 0.011228 | 0.011396 |
| 0.011471 | 0.011295 | 0.011597 | 0.011430 | 0.011463 | 0.011329 | 0.011429 |
| 0.011295 | 0.011631 | 0.011228 | 0.011497 | 0.011295 | 0.011295 | 0.011228 |
| 0.011463 | 0.011665 | 0.011362 | 0.011429 | 0.011262 | 0.011664 | 0.011295 |
| 0.011295 | 0.011295 | 0.011329 | 0.011429 | 0.011329 | 0.011429 | 0.011496 |
| 0.011497 | 0.011463 | 0.011362 | 0.011463 | 0.011429 | 0.011295 | 0.011262 |
| 0.011295 | 0.011295 | 0.011362 | 0.011295 | 0.011262 | 0.011429 | 0.011295 |
| 0.011329 | 0.011329 | 0.011463 | 0.011496 | 0.011396 | 0.011329 | 0.011329 |
| 0.011396 | 0.011329 | 0.011429 | 0.011295 | 0.011429 | 0.011530 | 0.011832 |
| 0.011329 | 0.011732 | 0.011336 | 0.017823 | 0.011388 | 0.011427 | 0.011688 |
| 0.011648 | 0.011693 | 0.011427 | 0.011408 | 0.011829 | 0.011716 | 0.011364 |
| 0.011629 | 0.011549 | 0.011255 | 0.011353 | 0.011333 | 0.011406 | 0.011318 |
| 0.011623 | 0.011507 | 0.011505 | 0.011391 | 0.011463 | 0.011497 | 0.011500 |
| 0.011335 | 0.011463 | 0.011463 | 0.011429 | 0.011396 | 0.011396 | 0.011363 |
| 0.011396 | 0.011329 | 0.011362 | 0.011396 | 0.011362 | 0.011295 | 0.011329 |
| 0.011329 | 0.011396 | 0.011295 | 0.011396 | 0.011430 | 0.011463 | 0.011362 |
| 0.011396 | 0.011362 | 0.011698 | 0.011698 | 0.011430 | 0.011464 | 0.011497 |
| 0.011262 | 0.011262 | 0.011295 | 0.011396 | 0.011262 | 0.011497 | 0.011497 |
| 0.011530 | 0.011530 | 0.011463 | 0.011564 | 0.011732 | 0.011565 | 0.011396 |
| 0.011396 | 0.011463 | 0.011497 | 0.011329 | 0.011396 | 0.011362 | 0.011396 |
| 0.011463 | 0.011463 | 0.011497 | 0.011463 | 0.011363 | 0.011564 | 0.011530 |
| 0.011399 | 0.011295 | 0.011396 | 0.011497 | 0.011396 | 0.011530 | 0.011564 |
| 0.011732 | 0.011436 | 0.011597 | 0.011564 | 0.011496 | 0.011664 | 0.011295 |
| 0.011464 | 0.011363 | 0.011329 | 0.011329 | 0.011396 | 0.011295 | 0.011396 |
| 0.011430 | 0.011463 | 0.011362 | 0.011396 | 0.011362 | 0.011698 | 0.011698 |
| 0.011430 | 0.011464 | 0.011530 | 0.011463 | 0.012103 | 0.011489 | 0.011447 |
| 0.011482 | 0.011442 | 0.011552 | 0.011476 | 0.011550 | 0.011474 | 0.011439 |
| 0.012056 | 0.011337 | 0.011471 | 0.011406 | 0.011680 | 0.011536 | 0.011673 |
| 0.012080 | 0.011512 | 0.011635 | 0.011698 | 0.011564 | 0.011564 | 0.011601 |
| 0.011262 | 0.011429 | 0.011564 | 0.011530 | 0.011533 | 0.011530 | 0.011498 |
| 0.011362 | 0.011295 | 0.011329 | 0.011362 | 0.011262 | 0.011329 | 0.011228 |
| 0.011362 | 0.011396 | 0.011295 | 0.011262 | 0.011362 | 0.011295 | 0.011329 |
| 0.011329 | 0.011262 | 0.011329 | 0.011362 | 0.011262 | 0.011463 | 0.011496 |
| 0.011396 | 0.011463 | 0.011396 | 0.011329 | 0.011329 | 0.011732 | 0.011362 |
| 0.011373 | 0.011329 | 0.011564 | 0.011569 | 0.011429 | 0.011429 | 0.011429 |
| 0.011429 | 0.011362 | 0.011329 | 0.011362 | 0.011463 | 0.011463 | 0.011396 |
| 0.011396 | 0.011530 | 0.011698 | 0.011429 | 0.011631 | 0.011631 | 0.011496 |
| 0.011329 | 0.011396 | 0.011429 | 0.011832 | 0.011396 | 0.011430 | 0.011396 |
| 0.011429 | 0.011362 | 0.011362 | 0.011665 | 0.011597 | 0.011631 | 0.011362 |

|          |          |          |          |          |          |          |
|----------|----------|----------|----------|----------|----------|----------|
| 0.011463 | 0.011530 | 0.011396 | 0.011463 | 0.011429 | 0.011295 | 0.011631 |
| 0.011396 | 0.011362 | 0.011362 | 0.011530 | 0.011362 | 0.011463 | 0.011698 |
| 0.011396 | 0.011773 | 0.011765 | 0.011589 | 0.011286 | 0.011468 | 0.011370 |
| 0.011225 | 0.011800 | 0.011306 | 0.011551 | 0.011402 | 0.011518 | 0.011538 |
| 0.011621 | 0.011324 | 0.011506 | 0.011324 | 0.011384 | 0.011529 | 0.011466 |
| 0.011475 | 0.011375 | 0.011448 | 0.011377 | 0.011397 | 0.011530 | 0.011597 |
| 0.011597 | 0.011464 | 0.011567 | 0.011569 | 0.011704 | 0.011732 | 0.011396 |
| 0.011631 | 0.011497 | 0.011362 | 0.011463 | 0.011262 | 0.011496 | 0.011295 |
| 0.011362 | 0.011362 | 0.011329 | 0.011295 | 0.011329 | 0.011295 | 0.011396 |
| 0.011340 | 0.011340 | 0.011368 | 0.011368 | 0.011505 | 0.011504 | 0.011504 |
| 0.011503 | 0.011430 | 0.011208 | 0.011204 | 0.011365 | 0.011535 | 0.011535 |
| 0.011329 | 0.011399 | 0.011632 | 0.011601 | 0.011531 | 0.011565 | 0.011496 |
| 0.011429 | 0.011496 | 0.011496 | 0.011396 | 0.011967 | 0.011564 | 0.011631 |
| 0.011665 | 0.011737 | 0.011367 | 0.011441 | 0.011329 | 0.011530 | 0.011497 |
| 0.011531 | 0.011564 | 0.011564 | 0.011564 | 0.011728 | 0.011698 | 0.011338 |
| 0.011229 | 0.011233 | 0.011333 | 0.011298 | 0.011368 | 0.011210 | 0.011570 |
| 0.011369 | 0.011455 | 0.011156 | 0.011360 | 0.011363 | 0.011402 | 0.011329 |
| 0.011295 | 0.011295 | 0.011362 | 0.011329 | 0.011530 | 0.011497 | 0.011429 |
| 0.011530 | 0.011597 | 0.011329 | 0.011329 | 0.011362 | 0.011362 | 0.011364 |
| 0.011432 | 0.011362 | 0.011362 | 0.011397 | 0.011530 | 0.011597 | 0.011597 |
| 0.011464 | 0.011567 | 0.011569 | 0.011704 | 0.011732 | 0.011396 | 0.011564 |
| 0.011497 | 0.011497 | 0.011331 | 0.011513 | 0.011442 | 0.011469 | 0.011340 |
| 0.011508 | 0.011744 | 0.011484 | 0.011400 | 0.011295 | 0.011497 | 0.011362 |
| 0.011463 | 0.011396 | 0.011295 | 0.011397 | 0.011497 | 0.011499 | 0.011396 |
| 0.011295 | 0.011229 | 0.011362 | 0.011295 | 0.011228 | 0.011332 | 0.011497 |
| 0.011396 | 0.011329 | 0.011362 | 0.011396 | 0.011362 | 0.011295 | 0.011497 |
| 0.011362 | 0.011396 | 0.011396 | 0.011329 | 0.011396 | 0.011631 | 0.011295 |
| 0.011329 | 0.011732 | 0.011329 | 0.011362 | 0.011329 | 0.011698 | 0.011317 |
| 0.011735 | 0.011273 | 0.011411 | 0.011503 | 0.011630 | 0.011527 | 0.011269 |
| 0.011375 | 0.011496 | 0.011597 | 0.011705 | 0.011565 | 0.011703 | 0.011834 |
| 0.011733 | 0.011770 | 0.011732 | 0.011983 | 0.011698 | 0.012573 | 0.011734 |
| 0.012473 | 0.012241 | 0.012375 | 0.012646 | 0.011698 | 0.011396 | 0.011699 |
| 0.012137 | 0.012072 | 0.011664 | 0.011564 | 0.011632 | 0.011632 | 0.011567 |
| 0.011496 | 0.011501 | 0.011564 | 0.011531 | 0.011901 | 0.011967 | 0.011968 |
| 0.011868 | 0.011968 | 0.012072 | 0.011838 | 0.012138 | 0.012110 | 0.012205 |
| 0.012205 | 0.012239 | 0.012186 | 0.012206 | 0.012207 | 0.011429 | 0.011732 |
| 0.011800 | 0.012303 | 0.011806 | 0.012034 | 0.012508 | 0.011570 | 0.011464 |
| 0.011429 | 0.011429 | 0.011900 | 0.011924 | 0.012045 | 0.011765 | 0.011431 |
| S049     | 0.011664 | 0.011664 | 0.012001 | 0.011765 | 0.011765 | 0.011832 |
| 0.011671 | 0.011603 | 0.011832 | 0.011262 | 0.011329 | 0.011296 | 0.011262 |
| 0.011295 | 0.011463 | 0.011262 | 0.011295 | 0.011362 | 0.011329 | 0.011295 |
| 0.011262 | 0.011295 | 0.011396 | 0.011262 | 0.011295 | 0.011295 | 0.011637 |
| 0.011530 | 0.011295 | 0.011194 | 0.011429 | 0.011362 | 0.011329 | 0.011362 |
| 0.011329 | 0.011429 | 0.011329 | 0.011329 | 0.011362 | 0.011329 | 0.011497 |
| 0.011262 | 0.011329 | 0.011362 | 0.011295 | 0.011396 | 0.011429 | 0.011362 |
| 0.000000 | 0.011497 | 0.011396 | 0.011664 | 0.011329 | 0.011597 | 0.011329 |
| 0.011295 | 0.011396 | 0.011463 | 0.011597 | 0.011698 | 0.011396 | 0.011496 |
| 0.011362 | 0.011429 | 0.011329 | 0.011564 | 0.011799 | 0.011329 | 0.011396 |
| 0.011295 | 0.011396 | 0.011362 | 0.011429 | 0.011362 | 0.011362 | 0.011362 |
| 0.011262 | 0.011295 | 0.011262 | 0.011362 | 0.011329 | 0.011363 | 0.011429 |
| 0.011362 | 0.011329 | 0.011396 | 0.011295 | 0.011429 | 0.011262 | 0.011329 |
| 0.011496 | 0.011429 | 0.011664 | 0.011497 | 0.011329 | 0.011564 | 0.011329 |
| 0.011505 | 0.011733 | 0.011551 | 0.011256 | 0.011247 | 0.011355 | 0.011454 |
| 0.012085 | 0.011569 | 0.011266 | 0.011564 | 0.011564 | 0.011362 | 0.011463 |
| 0.011396 | 0.011362 | 0.011429 | 0.011329 | 0.011429 | 0.011362 | 0.011362 |
| 0.011329 | 0.011429 | 0.011631 | 0.011496 | 0.011396 | 0.011362 | 0.011295 |
| 0.011262 | 0.011262 | 0.011329 | 0.011295 | 0.011497 | 0.011463 | 0.011396 |
| 0.011497 | 0.011564 | 0.011295 | 0.011295 | 0.011329 | 0.011329 | 0.011330 |
| 0.011398 | 0.011329 | 0.011329 | 0.011204 | 0.011277 | 0.011236 | 0.011329 |
| 0.011331 | 0.011266 | 0.011318 | 0.011302 | 0.011230 | 0.011266 | 0.011297 |

|          |          |          |          |          |          |          |
|----------|----------|----------|----------|----------|----------|----------|
| 0.011564 | 0.011336 | 0.011370 | 0.011262 | 0.011268 | 0.011397 | 0.011363 |
| 0.011430 | 0.011364 | 0.011363 | 0.011463 | 0.011396 | 0.011765 | 0.011564 |
| 0.011597 | 0.011463 | 0.011329 | 0.011430 | 0.011228 | 0.011463 | 0.011262 |
| 0.011329 | 0.011329 | 0.011295 | 0.011262 | 0.011295 | 0.011262 | 0.011362 |
| 0.011329 | 0.011430 | 0.011362 | 0.011262 | 0.011363 | 0.011463 | 0.011466 |
| 0.011463 | 0.011362 | 0.011262 | 0.011195 | 0.011329 | 0.011262 | 0.011195 |
| 0.011298 | 0.011463 | 0.011262 | 0.011463 | 0.011228 | 0.011329 | 0.011295 |
| 0.011396 | 0.011295 | 0.011329 | 0.011295 | 0.011329 | 0.011195 | 0.011329 |
| 0.011362 | 0.011295 | 0.011362 | 0.011295 | 0.011329 | 0.011362 | 0.011597 |
| 0.011698 | 0.011631 | 0.011698 | 0.011465 | 0.011698 | 0.011329 | 0.011295 |
| 0.011330 | 0.011586 | 0.011472 | 0.011232 | 0.011637 | 0.011163 | 0.011296 |
| 0.011705 | 0.011604 | 0.011496 | 0.011698 | 0.011402 | 0.011564 | 0.011530 |
| 0.011463 | 0.011631 | 0.011486 | 0.011307 | 0.011354 | 0.011362 | 0.011432 |
| 0.011530 | 0.011431 | 0.011567 | 0.011635 | 0.011564 | 0.011631 | 0.011738 |
| 0.011466 | 0.011637 | 0.011568 | 0.011500 | 0.011767 | 0.011228 | 0.011431 |
| 0.011396 | 0.011329 | 0.011228 | 0.011228 | 0.011295 | 0.011295 | 0.011362 |
| 0.011295 | 0.011362 | 0.011262 | 0.011362 | 0.011295 | 0.011295 | 0.011362 |
| 0.011295 | 0.011731 | 0.011631 | 0.011664 | 0.011194 | 0.011295 | 0.011329 |
| 0.011329 | 0.011295 | 0.011362 | 0.011396 | 0.011262 | 0.011262 | 0.011262 |
| 0.011799 | 0.011429 | 0.011429 | 0.011228 | 0.011329 | 0.011497 | 0.011262 |
| 0.011262 | 0.011329 | 0.011295 | 0.011463 | 0.011262 | 0.011396 | 0.011530 |
| 0.011463 | 0.011295 | 0.011295 | 0.011228 | 0.011228 | 0.011396 | 0.011329 |
| 0.011228 | 0.011329 | 0.011195 | 0.011228 | 0.011362 | 0.011497 | 0.011262 |
| 0.011228 | 0.011362 | 0.011295 | 0.011195 | 0.011530 | 0.011195 | 0.011362 |
| 0.011437 | 0.011262 | 0.011564 | 0.011396 | 0.011429 | 0.011295 | 0.011396 |
| 0.011262 | 0.011597 | 0.011194 | 0.011463 | 0.011262 | 0.011262 | 0.011194 |
| 0.011429 | 0.011631 | 0.011329 | 0.011396 | 0.011228 | 0.011631 | 0.011262 |
| 0.011262 | 0.011262 | 0.011295 | 0.011396 | 0.011295 | 0.011396 | 0.011463 |
| 0.011463 | 0.011429 | 0.011329 | 0.011429 | 0.011396 | 0.011262 | 0.011228 |
| 0.011262 | 0.011262 | 0.011329 | 0.011262 | 0.011228 | 0.011396 | 0.011262 |
| 0.011295 | 0.011295 | 0.011429 | 0.011463 | 0.011362 | 0.011295 | 0.011295 |
| 0.011362 | 0.011295 | 0.011396 | 0.011262 | 0.011396 | 0.011496 | 0.011799 |
| 0.011295 | 0.011698 | 0.011302 | 0.017823 | 0.011388 | 0.011366 | 0.011653 |
| 0.011614 | 0.011658 | 0.011322 | 0.011292 | 0.011774 | 0.011682 | 0.011364 |
| 0.011582 | 0.011549 | 0.011216 | 0.011270 | 0.011294 | 0.011356 | 0.011275 |
| 0.011576 | 0.011470 | 0.011468 | 0.011391 | 0.011429 | 0.011463 | 0.011466 |
| 0.011335 | 0.011429 | 0.011429 | 0.011396 | 0.011362 | 0.011362 | 0.011329 |
| 0.011362 | 0.011295 | 0.011329 | 0.011362 | 0.011329 | 0.011262 | 0.011295 |
| 0.011295 | 0.011362 | 0.011262 | 0.011362 | 0.011396 | 0.011429 | 0.011329 |
| 0.011362 | 0.011329 | 0.011665 | 0.011665 | 0.011396 | 0.011430 | 0.011463 |
| 0.011228 | 0.011228 | 0.011262 | 0.011362 | 0.011228 | 0.011463 | 0.011463 |
| 0.011497 | 0.011496 | 0.011429 | 0.011530 | 0.011698 | 0.011532 | 0.011362 |
| 0.011362 | 0.011430 | 0.011463 | 0.011295 | 0.011362 | 0.011329 | 0.011362 |
| 0.011430 | 0.011430 | 0.011463 | 0.011430 | 0.011330 | 0.011530 | 0.011497 |
| 0.011365 | 0.011262 | 0.011362 | 0.011463 | 0.011362 | 0.011497 | 0.011530 |
| 0.011698 | 0.011402 | 0.011564 | 0.011530 | 0.011463 | 0.011631 | 0.011262 |
| 0.011431 | 0.011329 | 0.011295 | 0.011295 | 0.011362 | 0.011262 | 0.011362 |
| 0.011396 | 0.011429 | 0.011329 | 0.011362 | 0.011329 | 0.011665 | 0.011665 |
| 0.011396 | 0.011430 | 0.011496 | 0.011429 | 0.012069 | 0.011489 | 0.011412 |
| 0.011482 | 0.011442 | 0.011552 | 0.011441 | 0.011550 | 0.011474 | 0.011439 |
| 0.012022 | 0.011337 | 0.011471 | 0.011406 | 0.011680 | 0.011536 | 0.011639 |
| 0.012046 | 0.011475 | 0.011601 | 0.011664 | 0.011530 | 0.011530 | 0.011567 |
| 0.011228 | 0.011396 | 0.011530 | 0.011496 | 0.011499 | 0.011496 | 0.011464 |
| 0.011329 | 0.011262 | 0.011295 | 0.011329 | 0.011228 | 0.011295 | 0.011194 |
| 0.011329 | 0.011362 | 0.011262 | 0.011228 | 0.011329 | 0.011262 | 0.011295 |
| 0.011295 | 0.011228 | 0.011295 | 0.011329 | 0.011228 | 0.011429 | 0.011463 |
| 0.011362 | 0.011429 | 0.011362 | 0.011362 | 0.011295 | 0.011698 | 0.011329 |
| 0.011373 | 0.011295 | 0.011530 | 0.011535 | 0.011396 | 0.011396 | 0.011396 |
| 0.011396 | 0.011329 | 0.011295 | 0.011329 | 0.011429 | 0.011429 | 0.011362 |
| 0.011362 | 0.011497 | 0.011664 | 0.011396 | 0.011597 | 0.011597 | 0.011463 |

|          |          |          |          |          |          |          |
|----------|----------|----------|----------|----------|----------|----------|
| 0.011295 | 0.011362 | 0.011396 | 0.011799 | 0.011362 | 0.011396 | 0.011362 |
| 0.011396 | 0.011329 | 0.011329 | 0.011631 | 0.011564 | 0.011597 | 0.011329 |
| 0.011429 | 0.011497 | 0.011362 | 0.011429 | 0.011396 | 0.011262 | 0.011597 |
| 0.011362 | 0.011329 | 0.011329 | 0.011497 | 0.011329 | 0.011429 | 0.011664 |
| 0.011362 | 0.011739 | 0.011732 | 0.011548 | 0.011286 | 0.011434 | 0.011370 |
| 0.011170 | 0.011761 | 0.011271 | 0.011507 | 0.011353 | 0.011417 | 0.011485 |
| 0.011570 | 0.011192 | 0.011450 | 0.011258 | 0.011330 | 0.011529 | 0.011425 |
| 0.011437 | 0.011336 | 0.011412 | 0.011342 | 0.011364 | 0.011497 | 0.011564 |
| 0.011564 | 0.011430 | 0.011533 | 0.011535 | 0.011670 | 0.011661 | 0.011362 |
| 0.011597 | 0.011463 | 0.011329 | 0.011430 | 0.011228 | 0.011463 | 0.011262 |
| 0.011329 | 0.011329 | 0.011295 | 0.011262 | 0.011295 | 0.011262 | 0.011362 |
| 0.011340 | 0.011340 | 0.011334 | 0.011368 | 0.011505 | 0.011470 | 0.011470 |
| 0.011469 | 0.011396 | 0.011208 | 0.011204 | 0.011331 | 0.011501 | 0.011501 |
| 0.011296 | 0.011365 | 0.011599 | 0.011567 | 0.011497 | 0.011531 | 0.011463 |
| 0.011396 | 0.011463 | 0.011463 | 0.011362 | 0.011933 | 0.011530 | 0.011597 |
| 0.011631 | 0.011701 | 0.011333 | 0.011407 | 0.011295 | 0.011497 | 0.011463 |
| 0.011497 | 0.011530 | 0.011530 | 0.011530 | 0.011650 | 0.011664 | 0.011303 |
| 0.011195 | 0.011199 | 0.011298 | 0.011264 | 0.011368 | 0.011209 | 0.011536 |
| 0.011335 | 0.011499 | 0.011203 | 0.011360 | 0.011329 | 0.011402 | 0.011295 |
| 0.011262 | 0.011262 | 0.011329 | 0.011295 | 0.011497 | 0.011463 | 0.011396 |
| 0.011497 | 0.011564 | 0.011295 | 0.011295 | 0.011329 | 0.011329 | 0.011330 |
| 0.011398 | 0.011329 | 0.011329 | 0.011364 | 0.011497 | 0.011564 | 0.011564 |
| 0.011430 | 0.011533 | 0.011535 | 0.011670 | 0.011661 | 0.011362 | 0.011530 |
| 0.011463 | 0.011463 | 0.011263 | 0.011443 | 0.011408 | 0.011435 | 0.011305 |
| 0.011473 | 0.011607 | 0.011441 | 0.011366 | 0.011262 | 0.011463 | 0.011329 |
| 0.011430 | 0.011362 | 0.011262 | 0.011363 | 0.011463 | 0.011466 | 0.011362 |
| 0.011262 | 0.011195 | 0.011329 | 0.011262 | 0.011195 | 0.011298 | 0.011463 |
| 0.011362 | 0.011295 | 0.011329 | 0.011362 | 0.011329 | 0.011262 | 0.011463 |
| 0.011329 | 0.011362 | 0.011362 | 0.011295 | 0.011362 | 0.011597 | 0.011262 |
| 0.011295 | 0.011698 | 0.011295 | 0.011329 | 0.011295 | 0.011664 | 0.011274 |
| 0.011791 | 0.011273 | 0.011361 | 0.011503 | 0.011589 | 0.011491 | 0.011227 |
| 0.011323 | 0.011463 | 0.011564 | 0.011671 | 0.011531 | 0.011669 | 0.011800 |
| 0.011699 | 0.011737 | 0.011698 | 0.011949 | 0.011664 | 0.012539 | 0.011700 |
| 0.012439 | 0.012207 | 0.012341 | 0.012613 | 0.011664 | 0.011362 | 0.011665 |
| 0.012103 | 0.012038 | 0.011631 | 0.011530 | 0.011598 | 0.011598 | 0.011567 |
| 0.011463 | 0.011467 | 0.011530 | 0.011497 | 0.011867 | 0.011933 | 0.011935 |
| 0.011834 | 0.011934 | 0.012038 | 0.011804 | 0.012104 | 0.012110 | 0.012171 |
| 0.012172 | 0.012205 | 0.012152 | 0.012172 | 0.012173 | 0.011396 | 0.011699 |
| 0.011767 | 0.012270 | 0.011772 | 0.012001 | 0.012474 | 0.011536 | 0.011430 |
| 0.011396 | 0.011396 | 0.011867 | 0.011924 | 0.012010 | 0.011732 | 0.011397 |
| S050     | 0.011833 | 0.011833 | 0.012169 | 0.011933 | 0.011933 | 0.012001 |
| 0.011841 | 0.011773 | 0.012000 | 0.011430 | 0.011496 | 0.011464 | 0.011429 |
| 0.011463 | 0.011631 | 0.011429 | 0.011396 | 0.011530 | 0.011497 | 0.011463 |
| 0.011429 | 0.011463 | 0.011564 | 0.011430 | 0.011463 | 0.011463 | 0.011807 |
| 0.011698 | 0.011463 | 0.011362 | 0.011597 | 0.011530 | 0.011497 | 0.011530 |
| 0.011497 | 0.011597 | 0.011429 | 0.011497 | 0.011262 | 0.011497 | 0.011665 |
| 0.011429 | 0.011497 | 0.011262 | 0.011396 | 0.011564 | 0.011530 | 0.011530 |
| 0.011497 | 0.000000 | 0.011564 | 0.011832 | 0.011228 | 0.011765 | 0.011228 |
| 0.011463 | 0.011564 | 0.011497 | 0.011765 | 0.011866 | 0.011564 | 0.011665 |
| 0.011530 | 0.011597 | 0.011497 | 0.011732 | 0.011967 | 0.011497 | 0.011564 |
| 0.011463 | 0.011564 | 0.011530 | 0.011597 | 0.011530 | 0.011463 | 0.011463 |
| 0.011429 | 0.011463 | 0.011429 | 0.011530 | 0.011497 | 0.011531 | 0.011597 |
| 0.011530 | 0.011497 | 0.011564 | 0.011463 | 0.011597 | 0.011429 | 0.011497 |
| 0.011664 | 0.011597 | 0.011832 | 0.011665 | 0.011497 | 0.011732 | 0.011429 |
| 0.011654 | 0.011882 | 0.011664 | 0.011451 | 0.011396 | 0.011502 | 0.011612 |
| 0.012268 | 0.011670 | 0.011431 | 0.011664 | 0.011732 | 0.011530 | 0.011631 |
| 0.011564 | 0.011530 | 0.011597 | 0.011497 | 0.011597 | 0.011530 | 0.011530 |
| 0.011496 | 0.011597 | 0.011799 | 0.011664 | 0.011564 | 0.011530 | 0.011463 |
| 0.011430 | 0.011430 | 0.011497 | 0.011463 | 0.011665 | 0.011631 | 0.011564 |
| 0.011665 | 0.011732 | 0.011463 | 0.011463 | 0.011497 | 0.011497 | 0.011499 |

|          |          |          |          |          |          |          |
|----------|----------|----------|----------|----------|----------|----------|
| 0.011567 | 0.011497 | 0.011497 | 0.011384 | 0.011458 | 0.011411 | 0.011497 |
| 0.011501 | 0.011438 | 0.011503 | 0.011474 | 0.011400 | 0.011437 | 0.011466 |
| 0.011744 | 0.011508 | 0.011543 | 0.011430 | 0.011441 | 0.011565 | 0.011531 |
| 0.011599 | 0.011532 | 0.011531 | 0.011631 | 0.011564 | 0.011866 | 0.011732 |
| 0.011765 | 0.011631 | 0.011497 | 0.011598 | 0.011396 | 0.011631 | 0.011430 |
| 0.011497 | 0.011497 | 0.011463 | 0.011429 | 0.011463 | 0.011430 | 0.011530 |
| 0.011497 | 0.011598 | 0.011531 | 0.011430 | 0.011532 | 0.011631 | 0.011635 |
| 0.011631 | 0.011531 | 0.011430 | 0.011364 | 0.011497 | 0.011430 | 0.011363 |
| 0.011468 | 0.011631 | 0.011430 | 0.011631 | 0.011396 | 0.011497 | 0.011463 |
| 0.011564 | 0.011463 | 0.011497 | 0.011463 | 0.011497 | 0.011362 | 0.011497 |
| 0.011531 | 0.011463 | 0.011530 | 0.011463 | 0.011497 | 0.011530 | 0.011766 |
| 0.011866 | 0.011799 | 0.011867 | 0.011498 | 0.011867 | 0.011497 | 0.011463 |
| 0.011499 | 0.011788 | 0.011609 | 0.011403 | 0.011875 | 0.011367 | 0.011454 |
| 0.011875 | 0.011774 | 0.011664 | 0.011866 | 0.011573 | 0.011732 | 0.011698 |
| 0.011564 | 0.011799 | 0.011664 | 0.011514 | 0.011563 | 0.011530 | 0.011602 |
| 0.011698 | 0.011600 | 0.011737 | 0.011805 | 0.011732 | 0.011799 | 0.011907 |
| 0.011636 | 0.011807 | 0.011670 | 0.011669 | 0.011902 | 0.011396 | 0.011599 |
| 0.011564 | 0.011497 | 0.011396 | 0.011396 | 0.011463 | 0.011463 | 0.011463 |
| 0.011463 | 0.011530 | 0.011429 | 0.011530 | 0.011463 | 0.011463 | 0.011463 |
| 0.011463 | 0.011900 | 0.011799 | 0.011833 | 0.011362 | 0.011463 | 0.011497 |
| 0.011497 | 0.011463 | 0.011530 | 0.011564 | 0.011429 | 0.011429 | 0.011429 |
| 0.011967 | 0.011597 | 0.011530 | 0.011396 | 0.011497 | 0.011598 | 0.011429 |
| 0.011429 | 0.011496 | 0.011463 | 0.011631 | 0.011429 | 0.011564 | 0.011698 |
| 0.011631 | 0.011463 | 0.011463 | 0.011396 | 0.011396 | 0.011564 | 0.011497 |
| 0.011396 | 0.011497 | 0.011362 | 0.011396 | 0.011530 | 0.011665 | 0.011430 |
| 0.011396 | 0.011530 | 0.011463 | 0.011362 | 0.011698 | 0.011362 | 0.011530 |
| 0.011608 | 0.011430 | 0.011732 | 0.011564 | 0.011597 | 0.011463 | 0.011295 |
| 0.011429 | 0.011765 | 0.011362 | 0.011631 | 0.011429 | 0.011429 | 0.011362 |
| 0.011597 | 0.011799 | 0.011497 | 0.011564 | 0.011396 | 0.011799 | 0.011429 |
| 0.011429 | 0.011429 | 0.011463 | 0.011564 | 0.011463 | 0.011564 | 0.011631 |
| 0.011631 | 0.011597 | 0.011429 | 0.011598 | 0.011564 | 0.011362 | 0.011396 |
| 0.011429 | 0.011362 | 0.011497 | 0.011429 | 0.011396 | 0.011564 | 0.011429 |
| 0.011463 | 0.011463 | 0.011597 | 0.011631 | 0.011530 | 0.011463 | 0.011463 |
| 0.011530 | 0.011463 | 0.011564 | 0.011429 | 0.011564 | 0.011664 | 0.011967 |
| 0.011463 | 0.011866 | 0.011474 | 0.018012 | 0.011519 | 0.011733 | 0.011828 |
| 0.011787 | 0.011834 | 0.011584 | 0.011525 | 0.011995 | 0.011855 | 0.011668 |
| 0.011677 | 0.011854 | 0.011372 | 0.011521 | 0.011490 | 0.011554 | 0.011491 |
| 0.011670 | 0.011656 | 0.011654 | 0.011325 | 0.011597 | 0.011631 | 0.011635 |
| 0.011507 | 0.011598 | 0.011597 | 0.011564 | 0.011530 | 0.011531 | 0.011497 |
| 0.011530 | 0.011463 | 0.011497 | 0.011530 | 0.011497 | 0.011430 | 0.011463 |
| 0.011463 | 0.011530 | 0.011430 | 0.011531 | 0.011564 | 0.011598 | 0.011497 |
| 0.011530 | 0.011497 | 0.011833 | 0.011833 | 0.011564 | 0.011531 | 0.011631 |
| 0.011396 | 0.011396 | 0.011430 | 0.011531 | 0.011396 | 0.011631 | 0.011631 |
| 0.011665 | 0.011664 | 0.011597 | 0.011698 | 0.011867 | 0.011700 | 0.011530 |
| 0.011530 | 0.011598 | 0.011631 | 0.011463 | 0.011530 | 0.011497 | 0.011463 |
| 0.011598 | 0.011598 | 0.011631 | 0.011598 | 0.011498 | 0.011698 | 0.011665 |
| 0.011534 | 0.011430 | 0.011530 | 0.011564 | 0.011531 | 0.011665 | 0.011698 |
| 0.011866 | 0.011573 | 0.011732 | 0.011698 | 0.011564 | 0.011799 | 0.011430 |
| 0.011532 | 0.011497 | 0.011463 | 0.011463 | 0.011530 | 0.011430 | 0.011531 |
| 0.011564 | 0.011598 | 0.011497 | 0.011530 | 0.011497 | 0.011833 | 0.011833 |
| 0.011564 | 0.011531 | 0.011664 | 0.011597 | 0.012238 | 0.011632 | 0.011553 |
| 0.011623 | 0.011580 | 0.011728 | 0.011580 | 0.011690 | 0.011612 | 0.011612 |
| 0.012194 | 0.011476 | 0.011608 | 0.011544 | 0.011818 | 0.011707 | 0.011809 |
| 0.012216 | 0.011663 | 0.011770 | 0.011833 | 0.011698 | 0.011698 | 0.011736 |
| 0.011396 | 0.011564 | 0.011698 | 0.011664 | 0.011668 | 0.011664 | 0.011633 |
| 0.011496 | 0.011429 | 0.011463 | 0.011497 | 0.011396 | 0.011463 | 0.011362 |
| 0.011497 | 0.011530 | 0.011429 | 0.011396 | 0.011497 | 0.011429 | 0.011463 |
| 0.011396 | 0.011396 | 0.011463 | 0.011497 | 0.011396 | 0.011597 | 0.011631 |
| 0.011530 | 0.011597 | 0.011530 | 0.011530 | 0.011463 | 0.011866 | 0.011497 |
| 0.011547 | 0.011463 | 0.011699 | 0.011705 | 0.011564 | 0.011497 | 0.011564 |

|          |          |          |          |          |          |          |
|----------|----------|----------|----------|----------|----------|----------|
| 0.011564 | 0.011497 | 0.011463 | 0.011497 | 0.011597 | 0.011597 | 0.011530 |
| 0.011530 | 0.011665 | 0.011832 | 0.011564 | 0.011766 | 0.011766 | 0.011631 |
| 0.011463 | 0.011530 | 0.011564 | 0.011967 | 0.011530 | 0.011564 | 0.011530 |
| 0.011564 | 0.011497 | 0.011497 | 0.011799 | 0.011732 | 0.011765 | 0.011497 |
| 0.011597 | 0.011665 | 0.011530 | 0.011597 | 0.011564 | 0.011429 | 0.011765 |
| 0.011530 | 0.011497 | 0.011497 | 0.011665 | 0.011497 | 0.011597 | 0.011833 |
| 0.011530 | 0.011909 | 0.011900 | 0.011670 | 0.011455 | 0.011604 | 0.011473 |
| 0.011555 | 0.011917 | 0.011447 | 0.011686 | 0.011499 | 0.011366 | 0.011645 |
| 0.011672 | 0.011455 | 0.011617 | 0.011457 | 0.011492 | 0.011663 | 0.011587 |
| 0.011588 | 0.011493 | 0.011589 | 0.011518 | 0.011532 | 0.011665 | 0.011732 |
| 0.011732 | 0.011598 | 0.011703 | 0.011704 | 0.011840 | 0.011838 | 0.011530 |
| 0.011765 | 0.011631 | 0.011497 | 0.011598 | 0.011396 | 0.011631 | 0.011430 |
| 0.011497 | 0.011497 | 0.011463 | 0.011429 | 0.011463 | 0.011430 | 0.011530 |
| 0.011514 | 0.011515 | 0.011437 | 0.011540 | 0.011676 | 0.011641 | 0.011573 |
| 0.011640 | 0.011565 | 0.011393 | 0.011348 | 0.011501 | 0.011670 | 0.011671 |
| 0.011464 | 0.011535 | 0.011767 | 0.011737 | 0.011666 | 0.011700 | 0.011631 |
| 0.011564 | 0.011631 | 0.011631 | 0.011530 | 0.012102 | 0.011698 | 0.011766 |
| 0.011799 | 0.011879 | 0.011504 | 0.011580 | 0.011463 | 0.011665 | 0.011631 |
| 0.011666 | 0.011698 | 0.011698 | 0.011698 | 0.011808 | 0.011833 | 0.011477 |
| 0.011364 | 0.011372 | 0.011469 | 0.011434 | 0.011539 | 0.011396 | 0.011706 |
| 0.011506 | 0.011586 | 0.011441 | 0.011510 | 0.011497 | 0.011574 | 0.011463 |
| 0.011430 | 0.011430 | 0.011497 | 0.011463 | 0.011665 | 0.011631 | 0.011564 |
| 0.011665 | 0.011732 | 0.011463 | 0.011463 | 0.011497 | 0.011497 | 0.011499 |
| 0.011567 | 0.011497 | 0.011497 | 0.011532 | 0.011665 | 0.011732 | 0.011732 |
| 0.011598 | 0.011703 | 0.011704 | 0.011840 | 0.011838 | 0.011530 | 0.011698 |
| 0.011631 | 0.011631 | 0.011398 | 0.011652 | 0.011582 | 0.011605 | 0.011481 |
| 0.011611 | 0.011835 | 0.011653 | 0.011536 | 0.011430 | 0.011631 | 0.011497 |
| 0.011598 | 0.011531 | 0.011430 | 0.011532 | 0.011631 | 0.011635 | 0.011531 |
| 0.011430 | 0.011364 | 0.011497 | 0.011430 | 0.011363 | 0.011468 | 0.011631 |
| 0.011530 | 0.011463 | 0.011497 | 0.011530 | 0.011497 | 0.011430 | 0.011631 |
| 0.011497 | 0.011530 | 0.011530 | 0.011463 | 0.011530 | 0.011765 | 0.011429 |
| 0.011463 | 0.011866 | 0.011463 | 0.011497 | 0.011463 | 0.011832 | 0.011446 |
| 0.011847 | 0.011400 | 0.011461 | 0.011664 | 0.011712 | 0.011670 | 0.011395 |
| 0.011428 | 0.011631 | 0.011665 | 0.011773 | 0.011633 | 0.011771 | 0.011901 |
| 0.011801 | 0.011838 | 0.011799 | 0.012120 | 0.011832 | 0.012708 | 0.011869 |
| 0.012608 | 0.012376 | 0.012510 | 0.012782 | 0.011832 | 0.011531 | 0.011766 |
| 0.012272 | 0.012140 | 0.011799 | 0.011698 | 0.011767 | 0.011767 | 0.011737 |
| 0.011631 | 0.011637 | 0.011698 | 0.011666 | 0.012036 | 0.012102 | 0.012103 |
| 0.012003 | 0.012103 | 0.012207 | 0.011974 | 0.012273 | 0.012280 | 0.012340 |
| 0.012341 | 0.012374 | 0.012323 | 0.012341 | 0.012342 | 0.011564 | 0.011867 |
| 0.011935 | 0.012438 | 0.011942 | 0.012169 | 0.012643 | 0.011706 | 0.011598 |
| 0.011564 | 0.011564 | 0.012035 | 0.012089 | 0.012187 | 0.011900 | 0.011566 |
| S051     | 0.011732 | 0.011732 | 0.012069 | 0.011833 | 0.011833 | 0.011900 |
| 0.011706 | 0.011638 | 0.011900 | 0.011329 | 0.011396 | 0.011363 | 0.011329 |
| 0.011362 | 0.011530 | 0.011329 | 0.011362 | 0.011430 | 0.011396 | 0.011362 |
| 0.011329 | 0.011362 | 0.011463 | 0.011329 | 0.011363 | 0.011362 | 0.011672 |
| 0.011598 | 0.011362 | 0.011262 | 0.011497 | 0.011430 | 0.011396 | 0.011430 |
| 0.011396 | 0.011497 | 0.011396 | 0.011396 | 0.011430 | 0.011396 | 0.011564 |
| 0.011329 | 0.011396 | 0.011430 | 0.011362 | 0.011463 | 0.011497 | 0.011430 |
| 0.011396 | 0.011564 | 0.000000 | 0.011732 | 0.011396 | 0.011665 | 0.011396 |
| 0.011362 | 0.011463 | 0.011530 | 0.011665 | 0.011766 | 0.011463 | 0.011564 |
| 0.011430 | 0.011497 | 0.011396 | 0.011631 | 0.011867 | 0.011396 | 0.011463 |
| 0.011362 | 0.011463 | 0.011430 | 0.011497 | 0.011430 | 0.011430 | 0.011430 |
| 0.011329 | 0.011362 | 0.011329 | 0.011430 | 0.011396 | 0.011431 | 0.011497 |
| 0.011430 | 0.011396 | 0.011463 | 0.011362 | 0.011497 | 0.011329 | 0.011396 |
| 0.011564 | 0.011497 | 0.011732 | 0.011564 | 0.011396 | 0.011631 | 0.011396 |
| 0.011506 | 0.011733 | 0.011513 | 0.011256 | 0.011247 | 0.011392 | 0.011415 |
| 0.012086 | 0.011467 | 0.011225 | 0.011631 | 0.011631 | 0.011430 | 0.011531 |
| 0.011463 | 0.011430 | 0.011497 | 0.011396 | 0.011497 | 0.011430 | 0.011430 |
| 0.011396 | 0.011497 | 0.011699 | 0.011564 | 0.011463 | 0.011430 | 0.011363 |

|          |          |          |          |          |          |          |
|----------|----------|----------|----------|----------|----------|----------|
| 0.011329 | 0.011329 | 0.011396 | 0.011363 | 0.011564 | 0.011531 | 0.011463 |
| 0.011564 | 0.011631 | 0.011363 | 0.011363 | 0.011396 | 0.011396 | 0.011398 |
| 0.011466 | 0.011396 | 0.011396 | 0.011276 | 0.011314 | 0.011306 | 0.011397 |
| 0.011399 | 0.011335 | 0.011282 | 0.011371 | 0.011298 | 0.011334 | 0.011364 |
| 0.011637 | 0.011405 | 0.011405 | 0.011329 | 0.011337 | 0.011464 | 0.011430 |
| 0.011498 | 0.011431 | 0.011430 | 0.011463 | 0.011463 | 0.011833 | 0.011632 |
| 0.011665 | 0.011531 | 0.011396 | 0.011497 | 0.011295 | 0.011530 | 0.011329 |
| 0.011396 | 0.011396 | 0.011363 | 0.011329 | 0.011362 | 0.011329 | 0.011430 |
| 0.011396 | 0.011497 | 0.011430 | 0.011329 | 0.011431 | 0.011531 | 0.011534 |
| 0.011531 | 0.011430 | 0.011329 | 0.011263 | 0.011396 | 0.011329 | 0.011262 |
| 0.011366 | 0.011531 | 0.011329 | 0.011531 | 0.011295 | 0.011396 | 0.011363 |
| 0.011463 | 0.011363 | 0.011396 | 0.011363 | 0.011396 | 0.011262 | 0.011396 |
| 0.011430 | 0.011363 | 0.011430 | 0.011363 | 0.011396 | 0.011430 | 0.011665 |
| 0.011766 | 0.011699 | 0.011766 | 0.011532 | 0.011766 | 0.011396 | 0.011363 |
| 0.011398 | 0.011626 | 0.011518 | 0.011266 | 0.011773 | 0.011265 | 0.011336 |
| 0.011740 | 0.011673 | 0.011564 | 0.011766 | 0.011470 | 0.011631 | 0.011598 |
| 0.011530 | 0.011699 | 0.011558 | 0.011431 | 0.011480 | 0.011430 | 0.011500 |
| 0.011598 | 0.011499 | 0.011635 | 0.011704 | 0.011631 | 0.011699 | 0.011806 |
| 0.011534 | 0.011706 | 0.011636 | 0.011568 | 0.011835 | 0.011295 | 0.011499 |
| 0.011463 | 0.011396 | 0.011295 | 0.011295 | 0.011362 | 0.011362 | 0.011430 |
| 0.011362 | 0.011430 | 0.011329 | 0.011430 | 0.011362 | 0.011362 | 0.011430 |
| 0.011362 | 0.011799 | 0.011699 | 0.011732 | 0.011262 | 0.011362 | 0.011396 |
| 0.011396 | 0.011362 | 0.011430 | 0.011463 | 0.011329 | 0.011329 | 0.011329 |
| 0.011867 | 0.011497 | 0.011497 | 0.011295 | 0.011396 | 0.011564 | 0.011329 |
| 0.011329 | 0.011396 | 0.011362 | 0.011531 | 0.011329 | 0.011463 | 0.011598 |
| 0.011530 | 0.011362 | 0.011362 | 0.011295 | 0.011295 | 0.011463 | 0.011396 |
| 0.011295 | 0.011396 | 0.011262 | 0.011295 | 0.011430 | 0.011564 | 0.011329 |
| 0.011296 | 0.011430 | 0.011363 | 0.011262 | 0.011598 | 0.011262 | 0.011430 |
| 0.011506 | 0.011329 | 0.011631 | 0.011463 | 0.011497 | 0.011362 | 0.011463 |
| 0.011329 | 0.011665 | 0.011262 | 0.011531 | 0.011329 | 0.011329 | 0.011262 |
| 0.011497 | 0.011699 | 0.011396 | 0.011463 | 0.011295 | 0.011699 | 0.011329 |
| 0.011329 | 0.011329 | 0.011362 | 0.011463 | 0.011362 | 0.011463 | 0.011530 |
| 0.011530 | 0.011497 | 0.011396 | 0.011497 | 0.011463 | 0.011329 | 0.011295 |
| 0.011329 | 0.011329 | 0.011396 | 0.011329 | 0.011295 | 0.011463 | 0.011329 |
| 0.011362 | 0.011362 | 0.011497 | 0.011530 | 0.011430 | 0.011362 | 0.011363 |
| 0.011430 | 0.011362 | 0.011463 | 0.011329 | 0.011463 | 0.011564 | 0.011867 |
| 0.011362 | 0.011766 | 0.011337 | 0.017830 | 0.011322 | 0.011428 | 0.011689 |
| 0.011649 | 0.011694 | 0.011374 | 0.011234 | 0.011719 | 0.011717 | 0.011425 |
| 0.011535 | 0.011549 | 0.011216 | 0.011312 | 0.011333 | 0.011406 | 0.011276 |
| 0.011482 | 0.011470 | 0.011505 | 0.011325 | 0.011497 | 0.011531 | 0.011534 |
| 0.011404 | 0.011497 | 0.011497 | 0.011463 | 0.011430 | 0.011430 | 0.011396 |
| 0.011430 | 0.011363 | 0.011396 | 0.011430 | 0.011396 | 0.011329 | 0.011363 |
| 0.011363 | 0.011430 | 0.011329 | 0.011430 | 0.011463 | 0.011497 | 0.011396 |
| 0.011430 | 0.011396 | 0.011732 | 0.011732 | 0.011463 | 0.011498 | 0.011531 |
| 0.011295 | 0.011295 | 0.011329 | 0.011430 | 0.011295 | 0.011531 | 0.011531 |
| 0.011564 | 0.011564 | 0.011497 | 0.011598 | 0.011766 | 0.011566 | 0.011430 |
| 0.011430 | 0.011497 | 0.011531 | 0.011363 | 0.011430 | 0.011396 | 0.011430 |
| 0.011497 | 0.011497 | 0.011531 | 0.011497 | 0.011397 | 0.011598 | 0.011564 |
| 0.011399 | 0.011329 | 0.011430 | 0.011531 | 0.011430 | 0.011564 | 0.011598 |
| 0.011766 | 0.011470 | 0.011631 | 0.011598 | 0.011530 | 0.011699 | 0.011329 |
| 0.011498 | 0.011397 | 0.011363 | 0.011363 | 0.011430 | 0.011329 | 0.011430 |
| 0.011463 | 0.011497 | 0.011396 | 0.011430 | 0.011396 | 0.011732 | 0.011732 |
| 0.011463 | 0.011498 | 0.011564 | 0.011497 | 0.012138 | 0.011561 | 0.011483 |
| 0.011553 | 0.011511 | 0.011623 | 0.011476 | 0.011621 | 0.011543 | 0.011509 |
| 0.012091 | 0.011407 | 0.011540 | 0.011475 | 0.011749 | 0.011605 | 0.011707 |
| 0.012115 | 0.011588 | 0.011669 | 0.011732 | 0.011598 | 0.011598 | 0.011635 |
| 0.011295 | 0.011463 | 0.011598 | 0.011564 | 0.011567 | 0.011564 | 0.011532 |
| 0.011396 | 0.011329 | 0.011362 | 0.011396 | 0.011295 | 0.011362 | 0.011262 |
| 0.011396 | 0.011430 | 0.011329 | 0.011295 | 0.011396 | 0.011329 | 0.011362 |
| 0.011362 | 0.011295 | 0.011362 | 0.011396 | 0.011295 | 0.011497 | 0.011530 |

|          |          |          |          |          |          |          |
|----------|----------|----------|----------|----------|----------|----------|
| 0.011430 | 0.011497 | 0.011430 | 0.011430 | 0.011362 | 0.011766 | 0.011396 |
| 0.011443 | 0.011363 | 0.011598 | 0.011603 | 0.011463 | 0.011463 | 0.011463 |
| 0.011463 | 0.011396 | 0.011362 | 0.011396 | 0.011497 | 0.011497 | 0.011430 |
| 0.011430 | 0.011564 | 0.011732 | 0.011463 | 0.011665 | 0.011665 | 0.011530 |
| 0.011362 | 0.011430 | 0.011463 | 0.011867 | 0.011430 | 0.011463 | 0.011430 |
| 0.011463 | 0.011396 | 0.011396 | 0.011699 | 0.011631 | 0.011665 | 0.011396 |
| 0.011497 | 0.011564 | 0.011430 | 0.011497 | 0.011463 | 0.011329 | 0.011665 |
| 0.011430 | 0.011396 | 0.011396 | 0.011564 | 0.011396 | 0.011497 | 0.011732 |
| 0.011430 | 0.011774 | 0.011799 | 0.011508 | 0.011229 | 0.011502 | 0.011318 |
| 0.011225 | 0.011723 | 0.011271 | 0.011463 | 0.011304 | 0.011417 | 0.011432 |
| 0.011519 | 0.011258 | 0.011394 | 0.011192 | 0.011222 | 0.011462 | 0.011385 |
| 0.011437 | 0.011296 | 0.011448 | 0.011377 | 0.011431 | 0.011564 | 0.011632 |
| 0.011631 | 0.011498 | 0.011602 | 0.011603 | 0.011739 | 0.011768 | 0.011430 |
| 0.011665 | 0.011531 | 0.011396 | 0.011497 | 0.011295 | 0.011530 | 0.011329 |
| 0.011396 | 0.011396 | 0.011363 | 0.011329 | 0.011362 | 0.011329 | 0.011430 |
| 0.011410 | 0.011410 | 0.011403 | 0.011437 | 0.011574 | 0.011539 | 0.011539 |
| 0.011538 | 0.011464 | 0.011245 | 0.011240 | 0.011399 | 0.011569 | 0.011570 |
| 0.011363 | 0.011433 | 0.011667 | 0.011635 | 0.011565 | 0.011599 | 0.011530 |
| 0.011463 | 0.011530 | 0.011530 | 0.011430 | 0.012001 | 0.011598 | 0.011665 |
| 0.011699 | 0.011773 | 0.011401 | 0.011476 | 0.011363 | 0.011564 | 0.011530 |
| 0.011565 | 0.011598 | 0.011598 | 0.011598 | 0.011690 | 0.011732 | 0.011373 |
| 0.011263 | 0.011268 | 0.011367 | 0.011332 | 0.011436 | 0.011284 | 0.011604 |
| 0.011403 | 0.011499 | 0.011251 | 0.011398 | 0.011397 | 0.011471 | 0.011363 |
| 0.011329 | 0.011329 | 0.011396 | 0.011363 | 0.011564 | 0.011531 | 0.011463 |
| 0.011564 | 0.011631 | 0.011363 | 0.011363 | 0.011396 | 0.011396 | 0.011398 |
| 0.011466 | 0.011396 | 0.011396 | 0.011431 | 0.011564 | 0.011632 | 0.011631 |
| 0.011498 | 0.011602 | 0.011603 | 0.011739 | 0.011768 | 0.011430 | 0.011598 |
| 0.011530 | 0.011530 | 0.011365 | 0.011478 | 0.011478 | 0.011503 | 0.011341 |
| 0.011508 | 0.011653 | 0.011484 | 0.011434 | 0.011329 | 0.011531 | 0.011396 |
| 0.011497 | 0.011430 | 0.011329 | 0.011431 | 0.011531 | 0.011534 | 0.011430 |
| 0.011329 | 0.011263 | 0.011396 | 0.011329 | 0.011262 | 0.011366 | 0.011531 |
| 0.011430 | 0.011363 | 0.011396 | 0.011430 | 0.011396 | 0.011329 | 0.011531 |
| 0.011396 | 0.011430 | 0.011430 | 0.011362 | 0.011430 | 0.011665 | 0.011329 |
| 0.011362 | 0.011766 | 0.011362 | 0.011396 | 0.011362 | 0.011732 | 0.011232 |
| 0.011735 | 0.011230 | 0.011261 | 0.011503 | 0.011549 | 0.011491 | 0.011186 |
| 0.011218 | 0.011530 | 0.011631 | 0.011740 | 0.011599 | 0.011704 | 0.011868 |
| 0.011767 | 0.011805 | 0.011766 | 0.011984 | 0.011732 | 0.012608 | 0.011768 |
| 0.012508 | 0.012276 | 0.012410 | 0.012682 | 0.011732 | 0.011430 | 0.011733 |
| 0.012172 | 0.012073 | 0.011699 | 0.011598 | 0.011666 | 0.011666 | 0.011636 |
| 0.011530 | 0.011501 | 0.011598 | 0.011565 | 0.011935 | 0.012001 | 0.012003 |
| 0.011902 | 0.012003 | 0.012106 | 0.011839 | 0.012172 | 0.012179 | 0.012239 |
| 0.012240 | 0.012274 | 0.012187 | 0.012240 | 0.012242 | 0.011463 | 0.011767 |
| 0.011835 | 0.012338 | 0.011841 | 0.012069 | 0.012543 | 0.011604 | 0.011498 |
| 0.011463 | 0.011463 | 0.011935 | 0.011966 | 0.012046 | 0.011799 | 0.011465 |
| S052     | 0.012000 | 0.012000 | 0.012068 | 0.011832 | 0.011832 | 0.011900 |
| 0.011332 | 0.011264 | 0.011900 | 0.011597 | 0.011664 | 0.011632 | 0.011597 |
| 0.011564 | 0.011799 | 0.011530 | 0.011631 | 0.011698 | 0.011664 | 0.011631 |
| 0.011597 | 0.011631 | 0.011463 | 0.011598 | 0.011631 | 0.011631 | 0.011298 |
| 0.011597 | 0.011631 | 0.011530 | 0.011497 | 0.011698 | 0.011664 | 0.011698 |
| 0.011664 | 0.011765 | 0.011664 | 0.011664 | 0.011698 | 0.011664 | 0.011832 |
| 0.011530 | 0.011664 | 0.011698 | 0.011631 | 0.011664 | 0.011765 | 0.011698 |
| 0.011664 | 0.011832 | 0.011732 | 0.000000 | 0.011664 | 0.011933 | 0.011664 |
| 0.011631 | 0.011665 | 0.011799 | 0.011933 | 0.011429 | 0.011664 | 0.011765 |
| 0.011698 | 0.011765 | 0.011664 | 0.011899 | 0.011463 | 0.011664 | 0.011732 |
| 0.011631 | 0.011731 | 0.011698 | 0.011765 | 0.011698 | 0.011698 | 0.011698 |
| 0.011597 | 0.011631 | 0.011597 | 0.011631 | 0.011664 | 0.011700 | 0.011765 |
| 0.011698 | 0.011664 | 0.011732 | 0.011631 | 0.011496 | 0.011597 | 0.011664 |
| 0.011832 | 0.011765 | 0.011530 | 0.011832 | 0.011664 | 0.011900 | 0.011664 |
| 0.011876 | 0.011359 | 0.011890 | 0.011568 | 0.011583 | 0.011723 | 0.011493 |
| 0.012121 | 0.011467 | 0.011637 | 0.011899 | 0.011900 | 0.011631 | 0.011530 |



|          |          |          |          |          |          |          |
|----------|----------|----------|----------|----------|----------|----------|
| 0.011732 | 0.011698 | 0.011765 | 0.011664 | 0.011765 | 0.011698 | 0.011698 |
| 0.011664 | 0.011698 | 0.011967 | 0.011832 | 0.011732 | 0.011698 | 0.011631 |
| 0.011597 | 0.011530 | 0.011665 | 0.011631 | 0.011564 | 0.011530 | 0.011463 |
| 0.011564 | 0.011631 | 0.011631 | 0.011631 | 0.011665 | 0.011665 | 0.011668 |
| 0.011736 | 0.011665 | 0.011665 | 0.011528 | 0.011603 | 0.011551 | 0.011665 |
| 0.011636 | 0.011576 | 0.011651 | 0.011612 | 0.011570 | 0.011574 | 0.011634 |
| 0.011528 | 0.011646 | 0.011680 | 0.011598 | 0.011579 | 0.011733 | 0.011632 |
| 0.011699 | 0.011701 | 0.011699 | 0.011799 | 0.011731 | 0.012101 | 0.011833 |
| 0.011664 | 0.011732 | 0.011664 | 0.011698 | 0.011564 | 0.011530 | 0.011598 |
| 0.011664 | 0.011664 | 0.011631 | 0.011597 | 0.011631 | 0.011597 | 0.011698 |
| 0.011665 | 0.011765 | 0.011698 | 0.011597 | 0.011700 | 0.011799 | 0.011804 |
| 0.011799 | 0.011698 | 0.011597 | 0.011532 | 0.011665 | 0.011597 | 0.011530 |
| 0.011468 | 0.011799 | 0.011597 | 0.011799 | 0.011564 | 0.011665 | 0.011631 |
| 0.011732 | 0.011631 | 0.011665 | 0.011631 | 0.011665 | 0.011530 | 0.011665 |
| 0.011698 | 0.011631 | 0.011698 | 0.011631 | 0.011665 | 0.011698 | 0.011933 |
| 0.011362 | 0.011295 | 0.011362 | 0.011802 | 0.011430 | 0.011665 | 0.011631 |
| 0.011601 | 0.011909 | 0.011701 | 0.011575 | 0.011365 | 0.011538 | 0.011729 |
| 0.011366 | 0.011604 | 0.011832 | 0.012034 | 0.011743 | 0.011900 | 0.011866 |
| 0.011799 | 0.011967 | 0.011842 | 0.011719 | 0.011773 | 0.011698 | 0.011771 |
| 0.011866 | 0.011769 | 0.011906 | 0.011974 | 0.011900 | 0.011967 | 0.012077 |
| 0.011805 | 0.011977 | 0.011839 | 0.011838 | 0.012103 | 0.011564 | 0.011768 |
| 0.011731 | 0.011664 | 0.011564 | 0.011564 | 0.011631 | 0.011631 | 0.011698 |
| 0.011631 | 0.011698 | 0.011597 | 0.011631 | 0.011631 | 0.011631 | 0.011698 |
| 0.011631 | 0.011396 | 0.011295 | 0.011329 | 0.011530 | 0.011631 | 0.011664 |
| 0.011664 | 0.011564 | 0.011698 | 0.011664 | 0.011597 | 0.011597 | 0.011597 |
| 0.011463 | 0.011698 | 0.011765 | 0.011564 | 0.011664 | 0.011833 | 0.011597 |
| 0.011597 | 0.011664 | 0.011631 | 0.011799 | 0.011597 | 0.011530 | 0.011664 |
| 0.011597 | 0.011631 | 0.011631 | 0.011564 | 0.011564 | 0.011732 | 0.011664 |
| 0.011564 | 0.011664 | 0.011530 | 0.011564 | 0.011698 | 0.011497 | 0.011597 |
| 0.011564 | 0.011698 | 0.011631 | 0.011530 | 0.011262 | 0.011530 | 0.011698 |
| 0.011779 | 0.011597 | 0.011228 | 0.011732 | 0.011698 | 0.011631 | 0.011731 |
| 0.011597 | 0.011933 | 0.011530 | 0.011530 | 0.011530 | 0.011530 | 0.011530 |
| 0.011765 | 0.011631 | 0.011664 | 0.011732 | 0.011564 | 0.011295 | 0.011530 |
| 0.011597 | 0.011597 | 0.011631 | 0.011732 | 0.011631 | 0.011731 | 0.011799 |
| 0.011799 | 0.011765 | 0.011664 | 0.011765 | 0.011731 | 0.011597 | 0.011564 |
| 0.011597 | 0.011597 | 0.011664 | 0.011530 | 0.011564 | 0.011732 | 0.011597 |
| 0.011564 | 0.011631 | 0.011765 | 0.011732 | 0.011698 | 0.011631 | 0.011631 |
| 0.011698 | 0.011631 | 0.011731 | 0.011597 | 0.011732 | 0.011832 | 0.011530 |
| 0.011631 | 0.011429 | 0.011647 | 0.018163 | 0.011387 | 0.011611 | 0.011304 |
| 0.011268 | 0.011306 | 0.011899 | 0.011698 | 0.011445 | 0.011336 | 0.011728 |
| 0.011677 | 0.011426 | 0.011567 | 0.011688 | 0.011529 | 0.011554 | 0.011663 |
| 0.011389 | 0.011507 | 0.011357 | 0.011589 | 0.011765 | 0.011799 | 0.011804 |
| 0.011678 | 0.011765 | 0.011765 | 0.011665 | 0.011698 | 0.011698 | 0.011665 |
| 0.011698 | 0.011631 | 0.011664 | 0.011698 | 0.011665 | 0.011597 | 0.011631 |
| 0.011631 | 0.011698 | 0.011597 | 0.011698 | 0.011732 | 0.011765 | 0.011664 |
| 0.011631 | 0.011598 | 0.011396 | 0.011396 | 0.011732 | 0.011766 | 0.011799 |
| 0.011564 | 0.011564 | 0.011597 | 0.011698 | 0.011564 | 0.011799 | 0.011799 |
| 0.011833 | 0.011832 | 0.011765 | 0.011866 | 0.011429 | 0.011869 | 0.011698 |
| 0.011698 | 0.011765 | 0.011799 | 0.011631 | 0.011698 | 0.011665 | 0.011698 |
| 0.011766 | 0.011766 | 0.011799 | 0.011766 | 0.011633 | 0.011866 | 0.011833 |
| 0.011704 | 0.011597 | 0.011698 | 0.011799 | 0.011698 | 0.011766 | 0.011866 |
| 0.012034 | 0.011743 | 0.011900 | 0.011866 | 0.011799 | 0.011967 | 0.011598 |
| 0.011768 | 0.011665 | 0.011631 | 0.011631 | 0.011698 | 0.011597 | 0.011698 |
| 0.011732 | 0.011765 | 0.011664 | 0.011631 | 0.011598 | 0.011396 | 0.011396 |
| 0.011732 | 0.011766 | 0.011832 | 0.011765 | 0.012339 | 0.011846 | 0.011764 |
| 0.011834 | 0.011788 | 0.011904 | 0.011788 | 0.011900 | 0.011819 | 0.011750 |
| 0.012297 | 0.011683 | 0.011814 | 0.011752 | 0.012025 | 0.011877 | 0.011979 |
| 0.012318 | 0.011814 | 0.011939 | 0.012000 | 0.011866 | 0.011597 | 0.011905 |
| 0.011564 | 0.011732 | 0.011866 | 0.011832 | 0.011837 | 0.011564 | 0.011532 |
| 0.011664 | 0.011597 | 0.011631 | 0.011664 | 0.011564 | 0.011631 | 0.011530 |

|          |          |          |          |          |          |          |
|----------|----------|----------|----------|----------|----------|----------|
| 0.011597 | 0.011631 | 0.011597 | 0.011564 | 0.011664 | 0.011597 | 0.011631 |
| 0.011631 | 0.011564 | 0.011631 | 0.011664 | 0.011564 | 0.011765 | 0.011799 |
| 0.011698 | 0.011698 | 0.011698 | 0.011698 | 0.011631 | 0.011429 | 0.011664 |
| 0.011443 | 0.011631 | 0.011598 | 0.011603 | 0.011664 | 0.011664 | 0.011731 |
| 0.011732 | 0.011664 | 0.011631 | 0.011664 | 0.011765 | 0.011765 | 0.011698 |
| 0.011698 | 0.011832 | 0.011329 | 0.011731 | 0.011933 | 0.011933 | 0.011799 |
| 0.011631 | 0.011698 | 0.011732 | 0.011530 | 0.011698 | 0.011664 | 0.011698 |
| 0.011732 | 0.011597 | 0.011597 | 0.011900 | 0.011900 | 0.011866 | 0.011664 |
| 0.011765 | 0.011832 | 0.011698 | 0.011765 | 0.011731 | 0.011597 | 0.011262 |
| 0.011698 | 0.011664 | 0.011597 | 0.011832 | 0.011664 | 0.011765 | 0.011530 |
| 0.011698 | 0.011400 | 0.011396 | 0.011589 | 0.011455 | 0.011706 | 0.011473 |
| 0.011445 | 0.011800 | 0.011622 | 0.011730 | 0.011646 | 0.011366 | 0.011432 |
| 0.011621 | 0.011324 | 0.011506 | 0.011390 | 0.011384 | 0.011596 | 0.011831 |
| 0.011814 | 0.011729 | 0.011694 | 0.011694 | 0.011701 | 0.011564 | 0.011631 |
| 0.011631 | 0.011699 | 0.011804 | 0.011603 | 0.011942 | 0.011979 | 0.011698 |
| 0.011664 | 0.011732 | 0.011664 | 0.011698 | 0.011564 | 0.011530 | 0.011598 |
| 0.011664 | 0.011664 | 0.011631 | 0.011597 | 0.011631 | 0.011597 | 0.011698 |
| 0.011654 | 0.011655 | 0.011642 | 0.011677 | 0.011813 | 0.011778 | 0.011777 |
| 0.011776 | 0.011733 | 0.011540 | 0.011528 | 0.011636 | 0.011806 | 0.011807 |
| 0.011632 | 0.011670 | 0.011936 | 0.011905 | 0.011834 | 0.011868 | 0.011799 |
| 0.011731 | 0.011799 | 0.011799 | 0.011698 | 0.011664 | 0.011866 | 0.011933 |
| 0.011967 | 0.011345 | 0.011606 | 0.011753 | 0.011631 | 0.011832 | 0.011799 |
| 0.011834 | 0.011866 | 0.011866 | 0.011866 | 0.011965 | 0.012000 | 0.011650 |
| 0.011533 | 0.011545 | 0.011639 | 0.011604 | 0.011641 | 0.011583 | 0.011196 |
| 0.011678 | 0.011455 | 0.011680 | 0.011697 | 0.011665 | 0.011710 | 0.011631 |
| 0.011597 | 0.011530 | 0.011665 | 0.011631 | 0.011564 | 0.011530 | 0.011463 |
| 0.011564 | 0.011631 | 0.011631 | 0.011631 | 0.011665 | 0.011665 | 0.011668 |
| 0.011736 | 0.011665 | 0.011665 | 0.011701 | 0.011564 | 0.011631 | 0.011631 |
| 0.011699 | 0.011804 | 0.011603 | 0.011942 | 0.011979 | 0.011698 | 0.011866 |
| 0.011799 | 0.011799 | 0.011635 | 0.011826 | 0.011755 | 0.011775 | 0.011656 |
| 0.011818 | 0.011972 | 0.011865 | 0.011706 | 0.011597 | 0.011799 | 0.011665 |
| 0.011765 | 0.011698 | 0.011597 | 0.011700 | 0.011799 | 0.011804 | 0.011698 |
| 0.011597 | 0.011532 | 0.011665 | 0.011597 | 0.011530 | 0.011468 | 0.011799 |
| 0.011698 | 0.011631 | 0.011664 | 0.011698 | 0.011665 | 0.011597 | 0.011530 |
| 0.011664 | 0.011698 | 0.011698 | 0.011631 | 0.011698 | 0.011933 | 0.011530 |
| 0.011631 | 0.011429 | 0.011631 | 0.011664 | 0.011631 | 0.000000 | 0.011660 |
| 0.011960 | 0.011485 | 0.011461 | 0.011543 | 0.011630 | 0.011563 | 0.011395 |
| 0.011427 | 0.011530 | 0.011631 | 0.011739 | 0.011599 | 0.011737 | 0.011868 |
| 0.011767 | 0.011804 | 0.011765 | 0.012017 | 0.011732 | 0.012607 | 0.011768 |
| 0.012507 | 0.012275 | 0.012409 | 0.012681 | 0.011664 | 0.011631 | 0.011732 |
| 0.012373 | 0.012106 | 0.011698 | 0.011598 | 0.011666 | 0.011666 | 0.011601 |
| 0.011530 | 0.011535 | 0.011597 | 0.011565 | 0.011935 | 0.012001 | 0.012002 |
| 0.011902 | 0.012002 | 0.012106 | 0.011872 | 0.012374 | 0.012381 | 0.012441 |
| 0.012442 | 0.012475 | 0.012426 | 0.012442 | 0.012443 | 0.011731 | 0.011968 |
| 0.012036 | 0.012539 | 0.012044 | 0.012001 | 0.012474 | 0.011536 | 0.011430 |
| 0.011329 | 0.011396 | 0.011934 | 0.011965 | 0.012046 | 0.011732 | 0.011465 |
| S053     | 0.011664 | 0.011664 | 0.012001 | 0.011765 | 0.011765 | 0.011832 |
| 0.011671 | 0.011603 | 0.011832 | 0.011262 | 0.011329 | 0.011296 | 0.011262 |
| 0.011295 | 0.011463 | 0.011262 | 0.011228 | 0.011362 | 0.011329 | 0.011295 |
| 0.011262 | 0.011295 | 0.011396 | 0.011262 | 0.011295 | 0.011295 | 0.011637 |
| 0.011530 | 0.011295 | 0.011194 | 0.011429 | 0.011362 | 0.011329 | 0.011362 |
| 0.011329 | 0.011429 | 0.011262 | 0.011329 | 0.011094 | 0.011329 | 0.011496 |
| 0.011262 | 0.011329 | 0.011094 | 0.011228 | 0.011396 | 0.011362 | 0.011362 |
| 0.011329 | 0.011228 | 0.011396 | 0.011664 | 0.000000 | 0.011597 | 0.000000 |
| 0.011295 | 0.011396 | 0.011329 | 0.011597 | 0.011698 | 0.011396 | 0.011496 |
| 0.011362 | 0.011429 | 0.011329 | 0.011564 | 0.011799 | 0.011329 | 0.011396 |
| 0.011295 | 0.011396 | 0.011362 | 0.011429 | 0.011362 | 0.011295 | 0.011295 |
| 0.011262 | 0.011295 | 0.011262 | 0.011362 | 0.011329 | 0.011363 | 0.011429 |
| 0.011362 | 0.011329 | 0.011396 | 0.011295 | 0.011429 | 0.011262 | 0.011329 |
| 0.011496 | 0.011429 | 0.011664 | 0.011497 | 0.011329 | 0.011564 | 0.011262 |

|          |          |          |          |          |          |          |
|----------|----------|----------|----------|----------|----------|----------|
| 0.011468 | 0.011695 | 0.011513 | 0.011255 | 0.011247 | 0.011318 | 0.011414 |
| 0.012085 | 0.011518 | 0.011225 | 0.011496 | 0.011564 | 0.011362 | 0.011463 |
| 0.011396 | 0.011362 | 0.011429 | 0.011329 | 0.011429 | 0.011362 | 0.011362 |
| 0.011329 | 0.011429 | 0.011631 | 0.011496 | 0.011396 | 0.011362 | 0.011295 |
| 0.011262 | 0.011262 | 0.011329 | 0.011295 | 0.011497 | 0.011463 | 0.011396 |
| 0.011497 | 0.011564 | 0.011295 | 0.011295 | 0.011329 | 0.011329 | 0.011330 |
| 0.011398 | 0.011329 | 0.011329 | 0.011204 | 0.011277 | 0.011236 | 0.011329 |
| 0.011331 | 0.011266 | 0.011318 | 0.011302 | 0.011230 | 0.011266 | 0.011297 |
| 0.011564 | 0.011336 | 0.011370 | 0.011262 | 0.011268 | 0.011397 | 0.011363 |
| 0.011430 | 0.011363 | 0.011363 | 0.011463 | 0.011396 | 0.011698 | 0.011564 |
| 0.011597 | 0.011463 | 0.011329 | 0.011430 | 0.011228 | 0.011463 | 0.011262 |
| 0.011329 | 0.011329 | 0.011295 | 0.011262 | 0.011295 | 0.011262 | 0.011362 |
| 0.011329 | 0.011429 | 0.011362 | 0.011262 | 0.011363 | 0.011463 | 0.011466 |
| 0.011463 | 0.011362 | 0.011262 | 0.011195 | 0.011329 | 0.011262 | 0.011195 |
| 0.011298 | 0.011463 | 0.011262 | 0.011463 | 0.011228 | 0.011329 | 0.011295 |
| 0.011396 | 0.011295 | 0.011329 | 0.011295 | 0.011329 | 0.011195 | 0.011329 |
| 0.011362 | 0.011295 | 0.011362 | 0.011295 | 0.011329 | 0.011362 | 0.011597 |
| 0.011698 | 0.011631 | 0.011698 | 0.011330 | 0.011698 | 0.011329 | 0.011295 |
| 0.011330 | 0.011626 | 0.011472 | 0.011232 | 0.011705 | 0.011197 | 0.011296 |
| 0.011705 | 0.011604 | 0.011496 | 0.011698 | 0.011402 | 0.011564 | 0.011530 |
| 0.011396 | 0.011631 | 0.011486 | 0.011307 | 0.011354 | 0.011362 | 0.011432 |
| 0.011530 | 0.011431 | 0.011567 | 0.011635 | 0.011564 | 0.011631 | 0.011738 |
| 0.011466 | 0.011637 | 0.011500 | 0.011500 | 0.011733 | 0.011228 | 0.011431 |
| 0.011396 | 0.011329 | 0.011228 | 0.011228 | 0.011295 | 0.011295 | 0.011295 |
| 0.011295 | 0.011362 | 0.011262 | 0.011362 | 0.011295 | 0.011295 | 0.011295 |
| 0.011295 | 0.011731 | 0.011631 | 0.011664 | 0.011194 | 0.011295 | 0.011329 |
| 0.011329 | 0.011295 | 0.011362 | 0.011396 | 0.011262 | 0.011262 | 0.011262 |
| 0.011799 | 0.011429 | 0.011429 | 0.011228 | 0.011329 | 0.011429 | 0.011262 |
| 0.011262 | 0.011329 | 0.011295 | 0.011463 | 0.011262 | 0.011396 | 0.011530 |
| 0.011463 | 0.011295 | 0.011295 | 0.011228 | 0.011228 | 0.011396 | 0.011329 |
| 0.011228 | 0.011329 | 0.011195 | 0.011228 | 0.011362 | 0.011497 | 0.011262 |
| 0.011228 | 0.011362 | 0.011295 | 0.011195 | 0.011530 | 0.011195 | 0.011362 |
| 0.011437 | 0.011262 | 0.011564 | 0.011396 | 0.011429 | 0.011295 | 0.011127 |
| 0.011262 | 0.011597 | 0.011194 | 0.011463 | 0.011262 | 0.011262 | 0.011194 |
| 0.011429 | 0.011631 | 0.011329 | 0.011396 | 0.011228 | 0.011631 | 0.011262 |
| 0.011262 | 0.011262 | 0.011295 | 0.011396 | 0.011295 | 0.011396 | 0.011463 |
| 0.011463 | 0.011429 | 0.011262 | 0.011429 | 0.011396 | 0.011194 | 0.011228 |
| 0.011262 | 0.011194 | 0.011329 | 0.011262 | 0.011228 | 0.011396 | 0.011262 |
| 0.011295 | 0.011295 | 0.011429 | 0.011463 | 0.011362 | 0.011295 | 0.011295 |
| 0.011362 | 0.011295 | 0.011396 | 0.011262 | 0.011396 | 0.011496 | 0.011799 |
| 0.011295 | 0.011698 | 0.011302 | 0.017823 | 0.011322 | 0.011549 | 0.011653 |
| 0.011614 | 0.011658 | 0.011374 | 0.011292 | 0.011774 | 0.011682 | 0.011425 |
| 0.011487 | 0.011610 | 0.011177 | 0.011311 | 0.011294 | 0.011356 | 0.011318 |
| 0.011529 | 0.011470 | 0.011468 | 0.011126 | 0.011429 | 0.011463 | 0.011466 |
| 0.011335 | 0.011429 | 0.011429 | 0.011396 | 0.011362 | 0.011362 | 0.011329 |
| 0.011362 | 0.011295 | 0.011329 | 0.011362 | 0.011329 | 0.011262 | 0.011295 |
| 0.011295 | 0.011362 | 0.011262 | 0.011362 | 0.011396 | 0.011429 | 0.011329 |
| 0.011362 | 0.011329 | 0.011665 | 0.011665 | 0.011396 | 0.011363 | 0.011463 |
| 0.011228 | 0.011228 | 0.011262 | 0.011362 | 0.011228 | 0.011463 | 0.011463 |
| 0.011497 | 0.011496 | 0.011429 | 0.011530 | 0.011698 | 0.011532 | 0.011362 |
| 0.011362 | 0.011429 | 0.011463 | 0.011295 | 0.011362 | 0.011329 | 0.011295 |
| 0.011430 | 0.011430 | 0.011463 | 0.011430 | 0.011330 | 0.011530 | 0.011497 |
| 0.011365 | 0.011262 | 0.011362 | 0.011396 | 0.011362 | 0.011497 | 0.011530 |
| 0.011698 | 0.011402 | 0.011564 | 0.011530 | 0.011396 | 0.011631 | 0.011262 |
| 0.011363 | 0.011329 | 0.011295 | 0.011295 | 0.011362 | 0.011262 | 0.011362 |
| 0.011396 | 0.011429 | 0.011329 | 0.011362 | 0.011329 | 0.011665 | 0.011665 |
| 0.011396 | 0.011363 | 0.011496 | 0.011429 | 0.012069 | 0.011453 | 0.011377 |
| 0.011447 | 0.011407 | 0.011552 | 0.011441 | 0.011515 | 0.011439 | 0.011439 |
| 0.012021 | 0.011302 | 0.011437 | 0.011371 | 0.011645 | 0.011536 | 0.011639 |
| 0.012046 | 0.011475 | 0.011601 | 0.011664 | 0.011530 | 0.011530 | 0.011567 |

|          |          |          |          |          |          |          |
|----------|----------|----------|----------|----------|----------|----------|
| 0.011228 | 0.011396 | 0.011530 | 0.011496 | 0.011499 | 0.011496 | 0.011464 |
| 0.011329 | 0.011262 | 0.011295 | 0.011329 | 0.011228 | 0.011295 | 0.011194 |
| 0.011329 | 0.011362 | 0.011262 | 0.011228 | 0.011329 | 0.011262 | 0.011295 |
| 0.011228 | 0.011228 | 0.011295 | 0.011329 | 0.011228 | 0.011429 | 0.011463 |
| 0.011362 | 0.011429 | 0.011362 | 0.011362 | 0.011295 | 0.011698 | 0.011329 |
| 0.011373 | 0.011295 | 0.011530 | 0.011535 | 0.011396 | 0.011329 | 0.011396 |
| 0.011396 | 0.011329 | 0.011295 | 0.011329 | 0.011429 | 0.011429 | 0.011362 |
| 0.011362 | 0.011496 | 0.011664 | 0.011396 | 0.011597 | 0.011597 | 0.011463 |
| 0.011295 | 0.011362 | 0.011396 | 0.011799 | 0.011362 | 0.011396 | 0.011362 |
| 0.011396 | 0.011329 | 0.011329 | 0.011631 | 0.011564 | 0.011597 | 0.011329 |
| 0.011429 | 0.011496 | 0.011362 | 0.011429 | 0.011396 | 0.011262 | 0.011597 |
| 0.011362 | 0.011329 | 0.011329 | 0.011496 | 0.011329 | 0.011429 | 0.011664 |
| 0.011362 | 0.011739 | 0.011731 | 0.011507 | 0.011286 | 0.011434 | 0.011267 |
| 0.011335 | 0.011722 | 0.011271 | 0.011462 | 0.011304 | 0.011162 | 0.011432 |
| 0.011519 | 0.011192 | 0.011394 | 0.011258 | 0.011276 | 0.011462 | 0.011385 |
| 0.011399 | 0.011296 | 0.011412 | 0.011342 | 0.011364 | 0.011497 | 0.011564 |
| 0.011564 | 0.011430 | 0.011533 | 0.011535 | 0.011670 | 0.011696 | 0.011362 |
| 0.011597 | 0.011463 | 0.011329 | 0.011430 | 0.011228 | 0.011463 | 0.011262 |
| 0.011329 | 0.011329 | 0.011295 | 0.011262 | 0.011295 | 0.011262 | 0.011362 |
| 0.011340 | 0.011340 | 0.011266 | 0.011368 | 0.011505 | 0.011470 | 0.011402 |
| 0.011469 | 0.011396 | 0.011208 | 0.011168 | 0.011331 | 0.011501 | 0.011501 |
| 0.011296 | 0.011365 | 0.011599 | 0.011567 | 0.011497 | 0.011531 | 0.011463 |
| 0.011396 | 0.011463 | 0.011463 | 0.011362 | 0.011933 | 0.011530 | 0.011597 |
| 0.011631 | 0.011701 | 0.011333 | 0.011407 | 0.011295 | 0.011497 | 0.011463 |
| 0.011497 | 0.011530 | 0.011530 | 0.011530 | 0.011611 | 0.011664 | 0.011303 |
| 0.011195 | 0.011199 | 0.011298 | 0.011264 | 0.011368 | 0.011209 | 0.011536 |
| 0.011335 | 0.011455 | 0.011203 | 0.011322 | 0.011329 | 0.011402 | 0.011295 |
| 0.011262 | 0.011262 | 0.011329 | 0.011295 | 0.011497 | 0.011463 | 0.011396 |
| 0.011497 | 0.011564 | 0.011295 | 0.011295 | 0.011329 | 0.011329 | 0.011330 |
| 0.011398 | 0.011329 | 0.011329 | 0.011364 | 0.011497 | 0.011564 | 0.011564 |
| 0.011430 | 0.011533 | 0.011535 | 0.011670 | 0.011696 | 0.011362 | 0.011530 |
| 0.011463 | 0.011463 | 0.011229 | 0.011478 | 0.011408 | 0.011435 | 0.011305 |
| 0.011473 | 0.011653 | 0.011484 | 0.011366 | 0.011262 | 0.011463 | 0.011329 |
| 0.011429 | 0.011362 | 0.011262 | 0.011363 | 0.011463 | 0.011466 | 0.011362 |
| 0.011262 | 0.011195 | 0.011329 | 0.011262 | 0.011195 | 0.011298 | 0.011463 |
| 0.011362 | 0.011295 | 0.011329 | 0.011362 | 0.011329 | 0.011262 | 0.011463 |
| 0.011329 | 0.011362 | 0.011362 | 0.011295 | 0.011362 | 0.011597 | 0.011262 |
| 0.011295 | 0.011698 | 0.011295 | 0.011329 | 0.011295 | 0.011664 | 0.011274 |
| 0.011678 | 0.011230 | 0.011311 | 0.011463 | 0.011549 | 0.011491 | 0.011227 |
| 0.011270 | 0.011463 | 0.011496 | 0.011603 | 0.011464 | 0.011601 | 0.011733 |
| 0.011632 | 0.011669 | 0.011631 | 0.011949 | 0.011664 | 0.012539 | 0.011700 |
| 0.012439 | 0.012207 | 0.012341 | 0.012612 | 0.011664 | 0.011362 | 0.011598 |
| 0.012103 | 0.011971 | 0.011631 | 0.011530 | 0.011598 | 0.011598 | 0.011567 |
| 0.011463 | 0.011467 | 0.011530 | 0.011497 | 0.011867 | 0.011933 | 0.011935 |
| 0.011834 | 0.011934 | 0.012038 | 0.011804 | 0.012104 | 0.012110 | 0.012171 |
| 0.012172 | 0.012205 | 0.012152 | 0.012172 | 0.012173 | 0.011396 | 0.011699 |
| 0.011766 | 0.012270 | 0.011772 | 0.012001 | 0.012474 | 0.011536 | 0.011430 |
| 0.011396 | 0.011396 | 0.011867 | 0.011883 | 0.012010 | 0.011732 | 0.011397 |
| S054     | 0.011933 | 0.011933 | 0.012270 | 0.012034 | 0.012034 | 0.012101 |
| 0.011909 | 0.011841 | 0.012101 | 0.011530 | 0.011597 | 0.011565 | 0.011530 |
| 0.011564 | 0.011732 | 0.011530 | 0.011564 | 0.011631 | 0.011597 | 0.011564 |
| 0.011530 | 0.011564 | 0.011664 | 0.011531 | 0.011497 | 0.011564 | 0.011875 |
| 0.011799 | 0.011564 | 0.011463 | 0.011698 | 0.011564 | 0.011597 | 0.011564 |
| 0.011597 | 0.011631 | 0.011597 | 0.011597 | 0.011631 | 0.011597 | 0.011765 |
| 0.011530 | 0.011597 | 0.011631 | 0.011564 | 0.011664 | 0.011698 | 0.011631 |
| 0.011597 | 0.011765 | 0.011665 | 0.011933 | 0.011597 | 0.000000 | 0.011597 |
| 0.011564 | 0.011665 | 0.011732 | 0.000000 | 0.011967 | 0.011664 | 0.011765 |
| 0.011564 | 0.011631 | 0.011597 | 0.011765 | 0.012068 | 0.011597 | 0.011664 |
| 0.011564 | 0.011664 | 0.011631 | 0.011698 | 0.011631 | 0.011631 | 0.011631 |
| 0.011530 | 0.011564 | 0.011530 | 0.011631 | 0.011597 | 0.011632 | 0.011698 |

|          |          |          |          |          |          |          |
|----------|----------|----------|----------|----------|----------|----------|
| 0.011631 | 0.011597 | 0.011597 | 0.011564 | 0.011698 | 0.011463 | 0.011530 |
| 0.011765 | 0.011698 | 0.011933 | 0.011765 | 0.011597 | 0.011765 | 0.011597 |
| 0.011765 | 0.011994 | 0.011777 | 0.011451 | 0.011508 | 0.011649 | 0.011690 |
| 0.012341 | 0.011670 | 0.011431 | 0.011832 | 0.011832 | 0.011631 | 0.011732 |
| 0.011664 | 0.011631 | 0.011698 | 0.011597 | 0.011698 | 0.011564 | 0.011631 |
| 0.011597 | 0.011698 | 0.011900 | 0.011765 | 0.011664 | 0.011631 | 0.011497 |
| 0.011530 | 0.011530 | 0.011530 | 0.011564 | 0.011765 | 0.011732 | 0.011665 |
| 0.011765 | 0.011833 | 0.011564 | 0.011564 | 0.011597 | 0.011597 | 0.011601 |
| 0.011669 | 0.011597 | 0.011597 | 0.011456 | 0.011530 | 0.011516 | 0.011598 |
| 0.011602 | 0.011541 | 0.011577 | 0.011578 | 0.011502 | 0.011540 | 0.011567 |
| 0.011852 | 0.011612 | 0.011577 | 0.011531 | 0.011544 | 0.011666 | 0.011632 |
| 0.011699 | 0.011633 | 0.011632 | 0.011731 | 0.011664 | 0.011967 | 0.011833 |
| 0.011866 | 0.011732 | 0.011597 | 0.011698 | 0.011497 | 0.011732 | 0.011530 |
| 0.011597 | 0.011597 | 0.011564 | 0.011530 | 0.011564 | 0.011530 | 0.011631 |
| 0.011530 | 0.011631 | 0.011631 | 0.011530 | 0.011633 | 0.011732 | 0.011736 |
| 0.011665 | 0.011631 | 0.011530 | 0.011465 | 0.011597 | 0.011530 | 0.011463 |
| 0.011570 | 0.011665 | 0.011463 | 0.011665 | 0.011429 | 0.011598 | 0.011497 |
| 0.011597 | 0.011564 | 0.011530 | 0.011497 | 0.011530 | 0.011463 | 0.011530 |
| 0.011564 | 0.011564 | 0.011631 | 0.011564 | 0.011597 | 0.011631 | 0.011866 |
| 0.011967 | 0.011900 | 0.011967 | 0.011734 | 0.011967 | 0.011597 | 0.011564 |
| 0.011601 | 0.011909 | 0.011609 | 0.011472 | 0.011976 | 0.011469 | 0.011611 |
| 0.011943 | 0.011876 | 0.011765 | 0.011967 | 0.011675 | 0.011832 | 0.011732 |
| 0.011732 | 0.011900 | 0.011771 | 0.011637 | 0.011689 | 0.011631 | 0.011703 |
| 0.011799 | 0.011701 | 0.011838 | 0.011601 | 0.011832 | 0.011900 | 0.012009 |
| 0.011737 | 0.011603 | 0.011839 | 0.011770 | 0.012036 | 0.011496 | 0.011700 |
| 0.011597 | 0.011597 | 0.011496 | 0.011496 | 0.011496 | 0.011564 | 0.011631 |
| 0.011496 | 0.011564 | 0.011463 | 0.011631 | 0.011496 | 0.011564 | 0.011631 |
| 0.011564 | 0.012000 | 0.011900 | 0.011933 | 0.011463 | 0.011564 | 0.011597 |
| 0.011597 | 0.011496 | 0.011631 | 0.011664 | 0.011530 | 0.011530 | 0.011530 |
| 0.012068 | 0.011698 | 0.011698 | 0.011496 | 0.011597 | 0.011698 | 0.011530 |
| 0.011530 | 0.011597 | 0.011564 | 0.011664 | 0.011530 | 0.011664 | 0.011731 |
| 0.011731 | 0.011564 | 0.011564 | 0.011496 | 0.011496 | 0.011664 | 0.011597 |
| 0.011496 | 0.011597 | 0.011463 | 0.011496 | 0.011631 | 0.011766 | 0.011530 |
| 0.011497 | 0.011631 | 0.011564 | 0.011463 | 0.011799 | 0.011463 | 0.011631 |
| 0.011642 | 0.011530 | 0.011832 | 0.011665 | 0.011698 | 0.011564 | 0.011664 |
| 0.011530 | 0.000000 | 0.011463 | 0.011732 | 0.011530 | 0.011530 | 0.011463 |
| 0.011631 | 0.011900 | 0.011597 | 0.011664 | 0.011496 | 0.011900 | 0.011530 |
| 0.011530 | 0.011530 | 0.011564 | 0.011597 | 0.011564 | 0.011664 | 0.011731 |
| 0.011732 | 0.011631 | 0.011597 | 0.011698 | 0.011597 | 0.011530 | 0.011496 |
| 0.011530 | 0.011530 | 0.011597 | 0.011530 | 0.011429 | 0.011664 | 0.011530 |
| 0.011564 | 0.011564 | 0.011698 | 0.011732 | 0.011631 | 0.011496 | 0.011564 |
| 0.011631 | 0.011564 | 0.011664 | 0.011530 | 0.011664 | 0.011765 | 0.012068 |
| 0.011564 | 0.011967 | 0.011578 | 0.018087 | 0.011518 | 0.011733 | 0.011932 |
| 0.011891 | 0.011940 | 0.011532 | 0.011466 | 0.011939 | 0.011958 | 0.011485 |
| 0.011677 | 0.011793 | 0.011450 | 0.011479 | 0.011450 | 0.011554 | 0.011576 |
| 0.011670 | 0.011731 | 0.011690 | 0.011523 | 0.011698 | 0.011732 | 0.011737 |
| 0.011541 | 0.011698 | 0.011698 | 0.011665 | 0.011631 | 0.011631 | 0.011598 |
| 0.011631 | 0.011564 | 0.011530 | 0.011631 | 0.011598 | 0.011530 | 0.011564 |
| 0.011564 | 0.011631 | 0.011530 | 0.011631 | 0.011665 | 0.011698 | 0.011597 |
| 0.011631 | 0.011597 | 0.011934 | 0.011934 | 0.011665 | 0.011699 | 0.011732 |
| 0.011497 | 0.011497 | 0.011530 | 0.011564 | 0.011497 | 0.011732 | 0.011732 |
| 0.011765 | 0.011765 | 0.011698 | 0.011799 | 0.011967 | 0.011801 | 0.011564 |
| 0.011631 | 0.011698 | 0.011665 | 0.011564 | 0.011631 | 0.011597 | 0.011631 |
| 0.011699 | 0.011698 | 0.011732 | 0.011631 | 0.011464 | 0.011799 | 0.011698 |
| 0.011636 | 0.011530 | 0.011631 | 0.011732 | 0.011631 | 0.011766 | 0.011799 |
| 0.011967 | 0.011675 | 0.011832 | 0.011732 | 0.011732 | 0.011900 | 0.011531 |
| 0.011700 | 0.011598 | 0.011564 | 0.011564 | 0.011631 | 0.011530 | 0.011631 |
| 0.011665 | 0.011698 | 0.011597 | 0.011631 | 0.011597 | 0.011934 | 0.011934 |
| 0.011665 | 0.011699 | 0.011765 | 0.011698 | 0.012339 | 0.011775 | 0.011693 |
| 0.011763 | 0.011719 | 0.011833 | 0.011718 | 0.011830 | 0.011750 | 0.011715 |

|          |          |          |          |          |          |          |
|----------|----------|----------|----------|----------|----------|----------|
| 0.012297 | 0.011614 | 0.011745 | 0.011683 | 0.011956 | 0.011808 | 0.011638 |
| 0.012318 | 0.011814 | 0.011872 | 0.011933 | 0.011799 | 0.011799 | 0.011837 |
| 0.011496 | 0.011597 | 0.011731 | 0.011698 | 0.011770 | 0.011765 | 0.011734 |
| 0.011597 | 0.011463 | 0.011496 | 0.011530 | 0.011429 | 0.011564 | 0.011463 |
| 0.011597 | 0.011631 | 0.011530 | 0.011496 | 0.011597 | 0.011530 | 0.011564 |
| 0.011564 | 0.011496 | 0.011564 | 0.011597 | 0.011496 | 0.011631 | 0.011731 |
| 0.011631 | 0.011698 | 0.011631 | 0.011631 | 0.011564 | 0.011967 | 0.011597 |
| 0.011652 | 0.011564 | 0.011799 | 0.011807 | 0.011597 | 0.011664 | 0.011664 |
| 0.011664 | 0.011530 | 0.011564 | 0.011530 | 0.011698 | 0.011698 | 0.011631 |
| 0.011631 | 0.011765 | 0.011933 | 0.011597 | 0.011866 | 0.011866 | 0.011731 |
| 0.011564 | 0.011631 | 0.011664 | 0.012068 | 0.011631 | 0.011597 | 0.011631 |
| 0.011664 | 0.011597 | 0.011597 | 0.011832 | 0.011765 | 0.011799 | 0.011597 |
| 0.011698 | 0.011765 | 0.011631 | 0.011698 | 0.011664 | 0.011530 | 0.011866 |
| 0.011631 | 0.011597 | 0.011597 | 0.011765 | 0.011597 | 0.011698 | 0.011933 |
| 0.011631 | 0.011977 | 0.012000 | 0.011792 | 0.011455 | 0.011706 | 0.011421 |
| 0.011500 | 0.011956 | 0.011552 | 0.011596 | 0.011499 | 0.011671 | 0.011591 |
| 0.011723 | 0.011389 | 0.011561 | 0.011324 | 0.011437 | 0.011529 | 0.011628 |
| 0.011663 | 0.011493 | 0.011694 | 0.011624 | 0.011633 | 0.011765 | 0.011833 |
| 0.011833 | 0.011699 | 0.011804 | 0.011806 | 0.011942 | 0.011979 | 0.011631 |
| 0.011866 | 0.011732 | 0.011597 | 0.011698 | 0.011497 | 0.011732 | 0.011530 |
| 0.011597 | 0.011597 | 0.011564 | 0.011530 | 0.011564 | 0.011530 | 0.011631 |
| 0.011619 | 0.011620 | 0.011608 | 0.011642 | 0.011779 | 0.011675 | 0.011743 |
| 0.011742 | 0.011665 | 0.011503 | 0.011492 | 0.011602 | 0.011772 | 0.011773 |
| 0.011565 | 0.011636 | 0.011868 | 0.011838 | 0.011767 | 0.011801 | 0.011731 |
| 0.011664 | 0.011732 | 0.011731 | 0.011631 | 0.012202 | 0.011732 | 0.011866 |
| 0.011900 | 0.011915 | 0.011606 | 0.011684 | 0.011564 | 0.011765 | 0.011732 |
| 0.011767 | 0.011799 | 0.011799 | 0.011799 | 0.011925 | 0.011933 | 0.011581 |
| 0.011466 | 0.011476 | 0.011571 | 0.011536 | 0.011641 | 0.011508 | 0.011808 |
| 0.011609 | 0.011674 | 0.011441 | 0.011622 | 0.011598 | 0.011676 | 0.011497 |
| 0.011530 | 0.011530 | 0.011530 | 0.011564 | 0.011765 | 0.011732 | 0.011665 |
| 0.011765 | 0.011833 | 0.011564 | 0.011564 | 0.011597 | 0.011597 | 0.011601 |
| 0.011669 | 0.011597 | 0.011597 | 0.011633 | 0.011765 | 0.011833 | 0.011833 |
| 0.011699 | 0.011804 | 0.011806 | 0.011942 | 0.011979 | 0.011631 | 0.011799 |
| 0.011732 | 0.011732 | 0.011567 | 0.011756 | 0.011651 | 0.011707 | 0.011516 |
| 0.011646 | 0.011926 | 0.011695 | 0.011638 | 0.011463 | 0.011665 | 0.011530 |
| 0.011631 | 0.011631 | 0.011530 | 0.011633 | 0.011732 | 0.011736 | 0.011631 |
| 0.011530 | 0.011465 | 0.011597 | 0.011530 | 0.011463 | 0.011570 | 0.011665 |
| 0.011631 | 0.011564 | 0.011530 | 0.011631 | 0.011598 | 0.011530 | 0.011732 |
| 0.011597 | 0.011631 | 0.011631 | 0.011564 | 0.011631 | 0.011866 | 0.011530 |
| 0.011564 | 0.011967 | 0.011564 | 0.011530 | 0.011564 | 0.011933 | 0.011446 |
| 0.011960 | 0.011485 | 0.011461 | 0.011745 | 0.011793 | 0.011778 | 0.011395 |
| 0.011427 | 0.011731 | 0.011832 | 0.011943 | 0.011801 | 0.011872 | 0.012069 |
| 0.011969 | 0.012007 | 0.011967 | 0.012188 | 0.011933 | 0.012809 | 0.011970 |
| 0.012709 | 0.012477 | 0.012611 | 0.012883 | 0.011933 | 0.011631 | 0.011934 |
| 0.012373 | 0.012309 | 0.011900 | 0.011799 | 0.011867 | 0.011867 | 0.011838 |
| 0.011731 | 0.011739 | 0.011799 | 0.011766 | 0.012137 | 0.012202 | 0.012204 |
| 0.012103 | 0.012204 | 0.012308 | 0.012075 | 0.012374 | 0.012381 | 0.012441 |
| 0.012442 | 0.012475 | 0.012426 | 0.012442 | 0.012443 | 0.011664 | 0.011968 |
| 0.012036 | 0.012539 | 0.012010 | 0.012203 | 0.012676 | 0.011807 | 0.011699 |
| 0.011664 | 0.011664 | 0.012136 | 0.012254 | 0.012292 | 0.012000 | 0.011667 |
| S055     | 0.011664 | 0.011664 | 0.012001 | 0.011765 | 0.011765 | 0.011832 |
| 0.011671 | 0.011603 | 0.011832 | 0.011262 | 0.011329 | 0.011296 | 0.011262 |
| 0.011295 | 0.011463 | 0.011262 | 0.011228 | 0.011362 | 0.011329 | 0.011295 |
| 0.011262 | 0.011295 | 0.011396 | 0.011262 | 0.011295 | 0.011295 | 0.011637 |
| 0.011530 | 0.011295 | 0.011194 | 0.011429 | 0.011362 | 0.011329 | 0.011362 |
| 0.011329 | 0.011429 | 0.011262 | 0.011329 | 0.011094 | 0.011329 | 0.011496 |
| 0.011262 | 0.011329 | 0.011094 | 0.011228 | 0.011396 | 0.011362 | 0.011362 |
| 0.011329 | 0.011228 | 0.011396 | 0.011664 | 0.000000 | 0.011597 | 0.000000 |
| 0.011295 | 0.011396 | 0.011329 | 0.011597 | 0.011698 | 0.011396 | 0.011496 |
| 0.011362 | 0.011429 | 0.011329 | 0.011564 | 0.011799 | 0.011329 | 0.011396 |

|          |          |          |          |          |          |          |
|----------|----------|----------|----------|----------|----------|----------|
| 0.011295 | 0.011396 | 0.011362 | 0.011429 | 0.011362 | 0.011295 | 0.011295 |
| 0.011262 | 0.011295 | 0.011262 | 0.011362 | 0.011329 | 0.011363 | 0.011429 |
| 0.011362 | 0.011329 | 0.011396 | 0.011295 | 0.011429 | 0.011262 | 0.011329 |
| 0.011496 | 0.011429 | 0.011664 | 0.011497 | 0.011329 | 0.011564 | 0.011262 |
| 0.011468 | 0.011695 | 0.011513 | 0.011255 | 0.011247 | 0.011318 | 0.011414 |
| 0.012085 | 0.011518 | 0.011225 | 0.011496 | 0.011564 | 0.011362 | 0.011463 |
| 0.011396 | 0.011362 | 0.011429 | 0.011329 | 0.011429 | 0.011362 | 0.011362 |
| 0.011329 | 0.011429 | 0.011631 | 0.011496 | 0.011396 | 0.011362 | 0.011295 |
| 0.011262 | 0.011262 | 0.011329 | 0.011295 | 0.011497 | 0.011463 | 0.011396 |
| 0.011497 | 0.011564 | 0.011295 | 0.011295 | 0.011329 | 0.011329 | 0.011330 |
| 0.011398 | 0.011329 | 0.011329 | 0.011204 | 0.011277 | 0.011236 | 0.011329 |
| 0.011331 | 0.011266 | 0.011318 | 0.011302 | 0.011230 | 0.011266 | 0.011297 |
| 0.011564 | 0.011336 | 0.011370 | 0.011262 | 0.011268 | 0.011397 | 0.011363 |
| 0.011430 | 0.011363 | 0.011363 | 0.011463 | 0.011396 | 0.011698 | 0.011564 |
| 0.011597 | 0.011463 | 0.011329 | 0.011430 | 0.011228 | 0.011463 | 0.011262 |
| 0.011329 | 0.011329 | 0.011295 | 0.011262 | 0.011295 | 0.011262 | 0.011362 |
| 0.011329 | 0.011429 | 0.011362 | 0.011262 | 0.011363 | 0.011463 | 0.011466 |
| 0.011463 | 0.011362 | 0.011262 | 0.011195 | 0.011329 | 0.011262 | 0.011195 |
| 0.011298 | 0.011463 | 0.011262 | 0.011463 | 0.011228 | 0.011329 | 0.011295 |
| 0.011396 | 0.011295 | 0.011329 | 0.011295 | 0.011329 | 0.011195 | 0.011329 |
| 0.011362 | 0.011295 | 0.011362 | 0.011295 | 0.011329 | 0.011362 | 0.011597 |
| 0.011698 | 0.011631 | 0.011698 | 0.011330 | 0.011698 | 0.011329 | 0.011295 |
| 0.011330 | 0.011626 | 0.011472 | 0.011232 | 0.011705 | 0.011197 | 0.011296 |
| 0.011705 | 0.011604 | 0.011496 | 0.011698 | 0.011402 | 0.011564 | 0.011530 |
| 0.011396 | 0.011631 | 0.011486 | 0.011307 | 0.011354 | 0.011362 | 0.011432 |
| 0.011530 | 0.011431 | 0.011567 | 0.011635 | 0.011564 | 0.011631 | 0.011738 |
| 0.011466 | 0.011637 | 0.011500 | 0.011500 | 0.011733 | 0.011228 | 0.011431 |
| 0.011396 | 0.011329 | 0.011228 | 0.011228 | 0.011295 | 0.011295 | 0.011295 |
| 0.011295 | 0.011362 | 0.011262 | 0.011362 | 0.011295 | 0.011295 | 0.011295 |
| 0.011295 | 0.011731 | 0.011631 | 0.011664 | 0.011194 | 0.011295 | 0.011329 |
| 0.011329 | 0.011295 | 0.011362 | 0.011396 | 0.011262 | 0.011262 | 0.011262 |
| 0.011799 | 0.011429 | 0.011429 | 0.011228 | 0.011329 | 0.011429 | 0.011262 |
| 0.011262 | 0.011329 | 0.011295 | 0.011463 | 0.011262 | 0.011396 | 0.011530 |
| 0.011463 | 0.011295 | 0.011295 | 0.011228 | 0.011228 | 0.011396 | 0.011329 |
| 0.011228 | 0.011329 | 0.011195 | 0.011228 | 0.011362 | 0.011497 | 0.011262 |
| 0.011228 | 0.011362 | 0.011295 | 0.011195 | 0.011530 | 0.011195 | 0.011362 |
| 0.011437 | 0.011262 | 0.011564 | 0.011396 | 0.011429 | 0.011295 | 0.011127 |
| 0.011262 | 0.011597 | 0.011194 | 0.011463 | 0.011262 | 0.011262 | 0.011194 |
| 0.011429 | 0.011631 | 0.011329 | 0.011396 | 0.011228 | 0.011631 | 0.011262 |
| 0.011262 | 0.011262 | 0.011295 | 0.011396 | 0.011295 | 0.011396 | 0.011463 |
| 0.011463 | 0.011429 | 0.011262 | 0.011429 | 0.011396 | 0.011194 | 0.011228 |
| 0.011262 | 0.011194 | 0.011329 | 0.011262 | 0.011228 | 0.011396 | 0.011262 |
| 0.011295 | 0.011295 | 0.011429 | 0.011463 | 0.011362 | 0.011295 | 0.011295 |
| 0.011362 | 0.011295 | 0.011396 | 0.011262 | 0.011396 | 0.011496 | 0.011799 |
| 0.011295 | 0.011698 | 0.011302 | 0.017823 | 0.011322 | 0.011549 | 0.011653 |
| 0.011614 | 0.011658 | 0.011374 | 0.011292 | 0.011774 | 0.011682 | 0.011425 |
| 0.011487 | 0.011610 | 0.011177 | 0.011311 | 0.011294 | 0.011356 | 0.011318 |
| 0.011529 | 0.011470 | 0.011468 | 0.011126 | 0.011429 | 0.011463 | 0.011466 |
| 0.011335 | 0.011429 | 0.011429 | 0.011396 | 0.011362 | 0.011362 | 0.011329 |
| 0.011362 | 0.011295 | 0.011329 | 0.011362 | 0.011329 | 0.011262 | 0.011295 |
| 0.011295 | 0.011362 | 0.011262 | 0.011362 | 0.011396 | 0.011429 | 0.011329 |
| 0.011362 | 0.011329 | 0.011665 | 0.011665 | 0.011396 | 0.011363 | 0.011463 |
| 0.011228 | 0.011228 | 0.011262 | 0.011362 | 0.011228 | 0.011463 | 0.011463 |
| 0.011497 | 0.011496 | 0.011429 | 0.011530 | 0.011698 | 0.011532 | 0.011362 |
| 0.011362 | 0.011429 | 0.011463 | 0.011295 | 0.011362 | 0.011329 | 0.011295 |
| 0.011430 | 0.011430 | 0.011463 | 0.011430 | 0.011330 | 0.011530 | 0.011497 |
| 0.011365 | 0.011262 | 0.011362 | 0.011396 | 0.011362 | 0.011497 | 0.011530 |
| 0.011698 | 0.011402 | 0.011564 | 0.011530 | 0.011396 | 0.011631 | 0.011262 |
| 0.011363 | 0.011329 | 0.011295 | 0.011295 | 0.011362 | 0.011262 | 0.011362 |
| 0.011396 | 0.011429 | 0.011329 | 0.011362 | 0.011329 | 0.011665 | 0.011665 |

|          |          |          |          |          |          |          |
|----------|----------|----------|----------|----------|----------|----------|
| 0.011396 | 0.011363 | 0.011496 | 0.011429 | 0.012069 | 0.011453 | 0.011377 |
| 0.011447 | 0.011407 | 0.011552 | 0.011441 | 0.011515 | 0.011439 | 0.011439 |
| 0.012021 | 0.011302 | 0.011437 | 0.011371 | 0.011645 | 0.011536 | 0.011639 |
| 0.012046 | 0.011475 | 0.011601 | 0.011664 | 0.011530 | 0.011530 | 0.011567 |
| 0.011228 | 0.011396 | 0.011530 | 0.011496 | 0.011499 | 0.011496 | 0.011464 |
| 0.011329 | 0.011262 | 0.011295 | 0.011329 | 0.011228 | 0.011295 | 0.011194 |
| 0.011329 | 0.011362 | 0.011262 | 0.011228 | 0.011329 | 0.011262 | 0.011295 |
| 0.011228 | 0.011228 | 0.011295 | 0.011329 | 0.011228 | 0.011429 | 0.011463 |
| 0.011362 | 0.011429 | 0.011362 | 0.011362 | 0.011295 | 0.011698 | 0.011329 |
| 0.011373 | 0.011295 | 0.011530 | 0.011535 | 0.011396 | 0.011329 | 0.011396 |
| 0.011396 | 0.011329 | 0.011295 | 0.011329 | 0.011429 | 0.011429 | 0.011362 |
| 0.011362 | 0.011496 | 0.011664 | 0.011396 | 0.011597 | 0.011597 | 0.011463 |
| 0.011295 | 0.011362 | 0.011396 | 0.011799 | 0.011362 | 0.011396 | 0.011362 |
| 0.011396 | 0.011329 | 0.011329 | 0.011631 | 0.011564 | 0.011597 | 0.011329 |
| 0.011429 | 0.011496 | 0.011362 | 0.011429 | 0.011396 | 0.011262 | 0.011597 |
| 0.011362 | 0.011329 | 0.011329 | 0.011496 | 0.011329 | 0.011429 | 0.011664 |
| 0.011362 | 0.011739 | 0.011731 | 0.011507 | 0.011286 | 0.011434 | 0.011267 |
| 0.011335 | 0.011722 | 0.011271 | 0.011462 | 0.011304 | 0.011162 | 0.011432 |
| 0.011519 | 0.011192 | 0.011394 | 0.011258 | 0.011276 | 0.011462 | 0.011385 |
| 0.011399 | 0.011296 | 0.011412 | 0.011342 | 0.011364 | 0.011497 | 0.011564 |
| 0.011564 | 0.011430 | 0.011533 | 0.011535 | 0.011670 | 0.011696 | 0.011362 |
| 0.011597 | 0.011463 | 0.011329 | 0.011430 | 0.011228 | 0.011463 | 0.011262 |
| 0.011329 | 0.011329 | 0.011295 | 0.011262 | 0.011295 | 0.011262 | 0.011362 |
| 0.011340 | 0.011340 | 0.011266 | 0.011368 | 0.011505 | 0.011470 | 0.011402 |
| 0.011469 | 0.011396 | 0.011208 | 0.011168 | 0.011331 | 0.011501 | 0.011501 |
| 0.011296 | 0.011365 | 0.011599 | 0.011567 | 0.011497 | 0.011531 | 0.011463 |
| 0.011396 | 0.011463 | 0.011463 | 0.011362 | 0.011933 | 0.011530 | 0.011597 |
| 0.011631 | 0.011701 | 0.011333 | 0.011407 | 0.011295 | 0.011497 | 0.011463 |
| 0.011497 | 0.011530 | 0.011530 | 0.011530 | 0.011611 | 0.011664 | 0.011303 |
| 0.011195 | 0.011199 | 0.011298 | 0.011264 | 0.011368 | 0.011209 | 0.011536 |
| 0.011335 | 0.011455 | 0.011203 | 0.011322 | 0.011329 | 0.011402 | 0.011295 |
| 0.011262 | 0.011262 | 0.011329 | 0.011295 | 0.011497 | 0.011463 | 0.011396 |
| 0.011497 | 0.011564 | 0.011295 | 0.011295 | 0.011329 | 0.011329 | 0.011330 |
| 0.011398 | 0.011329 | 0.011329 | 0.011364 | 0.011497 | 0.011564 | 0.011564 |
| 0.011430 | 0.011533 | 0.011535 | 0.011670 | 0.011696 | 0.011362 | 0.011530 |
| 0.011463 | 0.011463 | 0.011229 | 0.011478 | 0.011408 | 0.011435 | 0.011305 |
| 0.011473 | 0.011653 | 0.011484 | 0.011366 | 0.011262 | 0.011463 | 0.011329 |
| 0.011429 | 0.011362 | 0.011262 | 0.011363 | 0.011463 | 0.011466 | 0.011362 |
| 0.011262 | 0.011195 | 0.011329 | 0.011262 | 0.011195 | 0.011298 | 0.011463 |
| 0.011362 | 0.011295 | 0.011329 | 0.011362 | 0.011329 | 0.011262 | 0.011463 |
| 0.011329 | 0.011362 | 0.011362 | 0.011295 | 0.011362 | 0.011597 | 0.011262 |
| 0.011295 | 0.011698 | 0.011295 | 0.011329 | 0.011295 | 0.011664 | 0.011274 |
| 0.011678 | 0.011230 | 0.011311 | 0.011463 | 0.011549 | 0.011491 | 0.011227 |
| 0.011270 | 0.011463 | 0.011496 | 0.011603 | 0.011464 | 0.011601 | 0.011733 |
| 0.011632 | 0.011669 | 0.011631 | 0.011949 | 0.011664 | 0.012539 | 0.011700 |
| 0.012439 | 0.012207 | 0.012341 | 0.012612 | 0.011664 | 0.011362 | 0.011598 |
| 0.012103 | 0.011971 | 0.011631 | 0.011530 | 0.011598 | 0.011598 | 0.011567 |
| 0.011463 | 0.011467 | 0.011530 | 0.011497 | 0.011867 | 0.011933 | 0.011935 |
| 0.011834 | 0.011934 | 0.012038 | 0.011804 | 0.012104 | 0.012110 | 0.012171 |
| 0.012172 | 0.012205 | 0.012152 | 0.012172 | 0.012173 | 0.011396 | 0.011699 |
| 0.011766 | 0.012270 | 0.011772 | 0.012001 | 0.012474 | 0.011536 | 0.011430 |
| 0.011396 | 0.011396 | 0.011867 | 0.011883 | 0.012010 | 0.011732 | 0.011397 |
| s056     | 0.011631 | 0.011631 | 0.011967 | 0.011731 | 0.011731 | 0.011799 |
| 0.011637 | 0.011569 | 0.011799 | 0.011228 | 0.011295 | 0.011262 | 0.011228 |
| 0.011262 | 0.011429 | 0.011228 | 0.011262 | 0.011329 | 0.011295 | 0.011262 |
| 0.011228 | 0.011262 | 0.011362 | 0.011228 | 0.011262 | 0.011262 | 0.011603 |
| 0.011496 | 0.011262 | 0.011161 | 0.011396 | 0.011329 | 0.011295 | 0.011329 |
| 0.011295 | 0.011396 | 0.011295 | 0.011295 | 0.011329 | 0.011295 | 0.011463 |
| 0.011228 | 0.011295 | 0.011329 | 0.011262 | 0.011362 | 0.011396 | 0.011329 |
| 0.011295 | 0.011463 | 0.011362 | 0.011631 | 0.011295 | 0.011564 | 0.011295 |



|          |          |          |          |          |          |          |
|----------|----------|----------|----------|----------|----------|----------|
| 0.000000 | 0.011362 | 0.011429 | 0.011564 | 0.011664 | 0.011362 | 0.011463 |
| 0.011329 | 0.011396 | 0.011295 | 0.011530 | 0.011765 | 0.011295 | 0.011362 |
| 0.011262 | 0.011362 | 0.011329 | 0.011396 | 0.011329 | 0.011329 | 0.011329 |
| 0.011228 | 0.011262 | 0.011228 | 0.011329 | 0.011295 | 0.011329 | 0.011396 |
| 0.011329 | 0.011295 | 0.011362 | 0.011262 | 0.011396 | 0.011228 | 0.011295 |
| 0.011463 | 0.011396 | 0.011631 | 0.011463 | 0.011295 | 0.011530 | 0.011295 |
| 0.011468 | 0.011695 | 0.011513 | 0.011216 | 0.011210 | 0.011318 | 0.011414 |
| 0.012048 | 0.011467 | 0.011225 | 0.011530 | 0.011530 | 0.011329 | 0.011429 |
| 0.011362 | 0.011329 | 0.011396 | 0.011295 | 0.011396 | 0.011329 | 0.011329 |
| 0.011295 | 0.011396 | 0.011597 | 0.011463 | 0.011362 | 0.011329 | 0.011262 |
| 0.011228 | 0.011228 | 0.011295 | 0.011262 | 0.011463 | 0.011429 | 0.011362 |
| 0.011463 | 0.011530 | 0.011262 | 0.011262 | 0.011295 | 0.011295 | 0.011297 |
| 0.011364 | 0.011295 | 0.011295 | 0.011168 | 0.011241 | 0.011200 | 0.011296 |
| 0.011297 | 0.011232 | 0.011282 | 0.011267 | 0.011196 | 0.011231 | 0.011263 |
| 0.011528 | 0.011301 | 0.011336 | 0.011228 | 0.011233 | 0.011363 | 0.011329 |
| 0.011396 | 0.011330 | 0.011329 | 0.011429 | 0.011362 | 0.011732 | 0.011530 |
| 0.011564 | 0.011429 | 0.011295 | 0.011396 | 0.011195 | 0.011429 | 0.011228 |
| 0.011295 | 0.011295 | 0.011262 | 0.011228 | 0.011262 | 0.011228 | 0.011329 |
| 0.011295 | 0.011396 | 0.011329 | 0.011228 | 0.011330 | 0.011430 | 0.011432 |
| 0.011430 | 0.011329 | 0.011228 | 0.011161 | 0.011295 | 0.011228 | 0.011161 |
| 0.011264 | 0.011430 | 0.011228 | 0.011430 | 0.011195 | 0.011295 | 0.011262 |
| 0.011362 | 0.011262 | 0.011295 | 0.011262 | 0.011295 | 0.011161 | 0.011295 |
| 0.011329 | 0.011262 | 0.011329 | 0.011262 | 0.011295 | 0.011329 | 0.011564 |
| 0.011664 | 0.011597 | 0.011665 | 0.011431 | 0.011665 | 0.011295 | 0.011262 |
| 0.011297 | 0.011586 | 0.011426 | 0.011197 | 0.011671 | 0.011163 | 0.011296 |
| 0.011671 | 0.011570 | 0.011463 | 0.011664 | 0.011367 | 0.011530 | 0.011497 |
| 0.011429 | 0.011597 | 0.011451 | 0.011266 | 0.011312 | 0.011329 | 0.011398 |
| 0.011497 | 0.011397 | 0.011533 | 0.011601 | 0.011530 | 0.011597 | 0.011704 |
| 0.011432 | 0.011603 | 0.011534 | 0.011466 | 0.011733 | 0.011194 | 0.011397 |
| 0.011362 | 0.011295 | 0.011194 | 0.011194 | 0.011262 | 0.011262 | 0.011329 |
| 0.011262 | 0.011329 | 0.011228 | 0.011329 | 0.011262 | 0.011262 | 0.011329 |
| 0.011262 | 0.011698 | 0.011597 | 0.011631 | 0.011161 | 0.011262 | 0.011295 |
| 0.011295 | 0.011262 | 0.011329 | 0.011362 | 0.011228 | 0.011228 | 0.011228 |
| 0.011765 | 0.011396 | 0.011396 | 0.011194 | 0.011295 | 0.011463 | 0.011228 |
| 0.011228 | 0.011295 | 0.011262 | 0.011429 | 0.011228 | 0.011362 | 0.011496 |
| 0.011429 | 0.011262 | 0.011262 | 0.011194 | 0.011194 | 0.011362 | 0.011295 |
| 0.011194 | 0.011295 | 0.011161 | 0.011194 | 0.011329 | 0.011463 | 0.011228 |
| 0.011195 | 0.011329 | 0.011262 | 0.011161 | 0.011496 | 0.011161 | 0.011329 |
| 0.011402 | 0.011228 | 0.011530 | 0.011362 | 0.011396 | 0.011262 | 0.011362 |
| 0.011228 | 0.011564 | 0.011161 | 0.011429 | 0.011228 | 0.011228 | 0.011161 |
| 0.011396 | 0.011597 | 0.011295 | 0.011362 | 0.011194 | 0.011597 | 0.011228 |
| 0.011228 | 0.011228 | 0.011262 | 0.011362 | 0.011262 | 0.011362 | 0.011429 |
| 0.011429 | 0.011396 | 0.011295 | 0.011396 | 0.011362 | 0.011228 | 0.011194 |
| 0.011228 | 0.011228 | 0.011295 | 0.011228 | 0.011194 | 0.011362 | 0.011228 |
| 0.011262 | 0.011262 | 0.011396 | 0.011429 | 0.011329 | 0.011262 | 0.011262 |
| 0.011329 | 0.011262 | 0.011362 | 0.011228 | 0.011362 | 0.011463 | 0.011765 |
| 0.011262 | 0.011664 | 0.011267 | 0.011785 | 0.011191 | 0.011305 | 0.011618 |
| 0.011579 | 0.011623 | 0.011270 | 0.011234 | 0.011664 | 0.011647 | 0.011242 |
| 0.011487 | 0.011426 | 0.011177 | 0.011186 | 0.011255 | 0.011258 | 0.011232 |
| 0.011482 | 0.011433 | 0.011431 | 0.011325 | 0.011396 | 0.011429 | 0.011432 |
| 0.011301 | 0.011396 | 0.011396 | 0.011362 | 0.011329 | 0.011329 | 0.011295 |
| 0.011329 | 0.011262 | 0.011295 | 0.011329 | 0.011295 | 0.011228 | 0.011262 |
| 0.011262 | 0.011329 | 0.011228 | 0.011329 | 0.011362 | 0.011396 | 0.011295 |
| 0.011329 | 0.011295 | 0.011631 | 0.011631 | 0.011362 | 0.011396 | 0.011430 |
| 0.011195 | 0.011195 | 0.011228 | 0.011329 | 0.011195 | 0.011429 | 0.011429 |
| 0.011463 | 0.011463 | 0.011396 | 0.011496 | 0.011665 | 0.011498 | 0.011329 |
| 0.011329 | 0.011396 | 0.011429 | 0.011262 | 0.011329 | 0.011295 | 0.011329 |
| 0.011396 | 0.011396 | 0.011429 | 0.011396 | 0.011296 | 0.011497 | 0.011463 |
| 0.011331 | 0.011228 | 0.011329 | 0.011430 | 0.011329 | 0.011463 | 0.011496 |
| 0.011664 | 0.011367 | 0.011530 | 0.011497 | 0.011429 | 0.011597 | 0.011228 |

|          |          |          |          |          |          |          |
|----------|----------|----------|----------|----------|----------|----------|
| 0.011397 | 0.011295 | 0.011262 | 0.011262 | 0.011329 | 0.011228 | 0.011329 |
| 0.011362 | 0.011396 | 0.011295 | 0.011329 | 0.011295 | 0.011631 | 0.011631 |
| 0.011362 | 0.011396 | 0.011463 | 0.011396 | 0.012035 | 0.011453 | 0.011377 |
| 0.011447 | 0.011407 | 0.011517 | 0.011406 | 0.011515 | 0.011439 | 0.011405 |
| 0.011987 | 0.011302 | 0.011437 | 0.011371 | 0.011645 | 0.011502 | 0.011604 |
| 0.012012 | 0.011437 | 0.011567 | 0.011631 | 0.011496 | 0.011497 | 0.011533 |
| 0.011194 | 0.011362 | 0.011496 | 0.011463 | 0.011466 | 0.011463 | 0.011431 |
| 0.011295 | 0.011228 | 0.011262 | 0.011295 | 0.011194 | 0.011262 | 0.011161 |
| 0.011295 | 0.011329 | 0.011228 | 0.011194 | 0.011295 | 0.011228 | 0.011262 |
| 0.011262 | 0.011194 | 0.011262 | 0.011295 | 0.011194 | 0.011396 | 0.011429 |
| 0.011329 | 0.011396 | 0.011329 | 0.011329 | 0.011262 | 0.011664 | 0.011295 |
| 0.011338 | 0.011262 | 0.011497 | 0.011501 | 0.011362 | 0.011362 | 0.011362 |
| 0.011362 | 0.011295 | 0.011262 | 0.011295 | 0.011396 | 0.011396 | 0.011329 |
| 0.011329 | 0.011463 | 0.011631 | 0.011362 | 0.011564 | 0.011564 | 0.011429 |
| 0.011262 | 0.011329 | 0.011362 | 0.011765 | 0.011329 | 0.011362 | 0.011329 |
| 0.011362 | 0.011295 | 0.011295 | 0.011597 | 0.011530 | 0.011564 | 0.011295 |
| 0.011396 | 0.011463 | 0.011329 | 0.011396 | 0.011362 | 0.011228 | 0.011564 |
| 0.011329 | 0.011295 | 0.011295 | 0.011463 | 0.011295 | 0.011396 | 0.011631 |
| 0.011329 | 0.011705 | 0.011698 | 0.011507 | 0.011229 | 0.011400 | 0.011267 |
| 0.011115 | 0.011722 | 0.011236 | 0.011462 | 0.011255 | 0.011315 | 0.011379 |
| 0.011468 | 0.011126 | 0.011339 | 0.011192 | 0.011222 | 0.011395 | 0.011385 |
| 0.011399 | 0.011296 | 0.011377 | 0.011307 | 0.011330 | 0.011463 | 0.011530 |
| 0.011530 | 0.011396 | 0.011500 | 0.011501 | 0.011636 | 0.011661 | 0.011329 |
| 0.011564 | 0.011429 | 0.011295 | 0.011396 | 0.011195 | 0.011429 | 0.011228 |
| 0.011295 | 0.011295 | 0.011262 | 0.011228 | 0.011262 | 0.011228 | 0.011329 |
| 0.011305 | 0.011305 | 0.011300 | 0.011334 | 0.011471 | 0.011436 | 0.011436 |
| 0.011435 | 0.011363 | 0.011171 | 0.011168 | 0.011297 | 0.011467 | 0.011467 |
| 0.011262 | 0.011331 | 0.011565 | 0.011533 | 0.011464 | 0.011498 | 0.011429 |
| 0.011362 | 0.011429 | 0.011429 | 0.011329 | 0.011900 | 0.011496 | 0.011564 |
| 0.011597 | 0.011665 | 0.011299 | 0.011372 | 0.011262 | 0.011463 | 0.011429 |
| 0.011464 | 0.011496 | 0.011496 | 0.011496 | 0.011610 | 0.011631 | 0.011268 |
| 0.011162 | 0.011164 | 0.011264 | 0.011230 | 0.011333 | 0.011172 | 0.011502 |
| 0.011300 | 0.011455 | 0.011203 | 0.011322 | 0.011296 | 0.011368 | 0.011262 |
| 0.011228 | 0.011228 | 0.011295 | 0.011262 | 0.011463 | 0.011429 | 0.011362 |
| 0.011463 | 0.011530 | 0.011262 | 0.011262 | 0.011295 | 0.011295 | 0.011297 |
| 0.011364 | 0.011295 | 0.011295 | 0.011330 | 0.011463 | 0.011530 | 0.011530 |
| 0.011396 | 0.011500 | 0.011501 | 0.011636 | 0.011661 | 0.011329 | 0.011496 |
| 0.011429 | 0.011429 | 0.011263 | 0.011443 | 0.011373 | 0.011401 | 0.011270 |
| 0.011439 | 0.011607 | 0.011441 | 0.011332 | 0.011228 | 0.011430 | 0.011295 |
| 0.011396 | 0.011329 | 0.011228 | 0.011330 | 0.011430 | 0.011432 | 0.011329 |
| 0.011228 | 0.011161 | 0.011295 | 0.011228 | 0.011161 | 0.011264 | 0.011430 |
| 0.011329 | 0.011262 | 0.011295 | 0.011329 | 0.011295 | 0.011228 | 0.011430 |
| 0.011295 | 0.011329 | 0.011329 | 0.000000 | 0.011329 | 0.011564 | 0.011228 |
| 0.011262 | 0.011664 | 0.000000 | 0.011295 | 0.011262 | 0.011631 | 0.011189 |
| 0.011678 | 0.011230 | 0.011261 | 0.011422 | 0.011508 | 0.011455 | 0.011144 |
| 0.011218 | 0.011429 | 0.011530 | 0.011637 | 0.011498 | 0.011635 | 0.011766 |
| 0.011666 | 0.011703 | 0.011664 | 0.011914 | 0.011631 | 0.012505 | 0.011666 |
| 0.012405 | 0.012173 | 0.012307 | 0.012578 | 0.011631 | 0.011329 | 0.011631 |
| 0.012070 | 0.012004 | 0.011597 | 0.011497 | 0.011565 | 0.011565 | 0.011534 |
| 0.011429 | 0.011433 | 0.011496 | 0.011464 | 0.011833 | 0.011900 | 0.011901 |
| 0.011800 | 0.011901 | 0.012004 | 0.011770 | 0.012070 | 0.012076 | 0.012137 |
| 0.012138 | 0.012171 | 0.012118 | 0.012138 | 0.012139 | 0.011362 | 0.011665 |
| 0.011733 | 0.012236 | 0.011738 | 0.011967 | 0.012440 | 0.011502 | 0.011396 |
| 0.011362 | 0.011362 | 0.011833 | 0.011842 | 0.011975 | 0.011698 | 0.011363 |
| s057     | 0.011732 | 0.011732 | 0.012001 | 0.011765 | 0.011765 | 0.011833 |
| 0.011672 | 0.011604 | 0.011833 | 0.011329 | 0.011396 | 0.011363 | 0.011329 |
| 0.011295 | 0.011530 | 0.011262 | 0.011362 | 0.011429 | 0.011396 | 0.011362 |
| 0.011329 | 0.011362 | 0.011396 | 0.011329 | 0.011363 | 0.011362 | 0.011638 |
| 0.011530 | 0.011362 | 0.011262 | 0.011429 | 0.011429 | 0.011396 | 0.011430 |
| 0.011396 | 0.011497 | 0.011396 | 0.011396 | 0.011429 | 0.011396 | 0.011564 |

|          |          |          |          |          |          |          |
|----------|----------|----------|----------|----------|----------|----------|
| 0.011262 | 0.011396 | 0.011429 | 0.011362 | 0.000000 | 0.011497 | 0.011429 |
| 0.011396 | 0.011564 | 0.011463 | 0.011665 | 0.011396 | 0.011665 | 0.011396 |
| 0.011362 | 0.000000 | 0.011530 | 0.011665 | 0.011698 | 0.011396 | 0.011497 |
| 0.011429 | 0.011497 | 0.011396 | 0.011631 | 0.011799 | 0.011396 | 0.011463 |
| 0.011362 | 0.011463 | 0.011429 | 0.011497 | 0.011429 | 0.011429 | 0.011429 |
| 0.011329 | 0.011362 | 0.011329 | 0.011362 | 0.011396 | 0.011430 | 0.011497 |
| 0.011430 | 0.011396 | 0.011463 | 0.011362 | 0.011429 | 0.011329 | 0.011396 |
| 0.011564 | 0.011497 | 0.011732 | 0.011564 | 0.011396 | 0.011631 | 0.011396 |
| 0.011580 | 0.011733 | 0.011626 | 0.011334 | 0.011322 | 0.011428 | 0.011454 |
| 0.012085 | 0.011518 | 0.011349 | 0.011631 | 0.011631 | 0.011362 | 0.011463 |
| 0.011463 | 0.011429 | 0.011497 | 0.011396 | 0.011497 | 0.011429 | 0.011429 |
| 0.011396 | 0.011429 | 0.011698 | 0.011564 | 0.011463 | 0.011430 | 0.011363 |
| 0.011329 | 0.011262 | 0.011396 | 0.011362 | 0.011497 | 0.011463 | 0.011396 |
| 0.011497 | 0.011564 | 0.011362 | 0.011362 | 0.011396 | 0.011396 | 0.011398 |
| 0.011466 | 0.011396 | 0.011396 | 0.011276 | 0.011350 | 0.011306 | 0.011396 |
| 0.011399 | 0.011335 | 0.011392 | 0.011371 | 0.011298 | 0.011334 | 0.011364 |
| 0.011564 | 0.011405 | 0.011439 | 0.011329 | 0.011337 | 0.011464 | 0.011363 |
| 0.011430 | 0.011431 | 0.011430 | 0.011530 | 0.011463 | 0.011833 | 0.011564 |
| 0.011597 | 0.011463 | 0.011396 | 0.011430 | 0.011295 | 0.011463 | 0.011329 |
| 0.011396 | 0.011396 | 0.011362 | 0.011329 | 0.011362 | 0.011329 | 0.011430 |
| 0.011396 | 0.011497 | 0.011430 | 0.011329 | 0.011431 | 0.011530 | 0.011533 |
| 0.011531 | 0.011430 | 0.011329 | 0.011263 | 0.011396 | 0.011329 | 0.011262 |
| 0.011366 | 0.011531 | 0.011329 | 0.011531 | 0.011295 | 0.011396 | 0.011362 |
| 0.011463 | 0.011362 | 0.011396 | 0.011363 | 0.011396 | 0.011262 | 0.011396 |
| 0.011430 | 0.011362 | 0.011430 | 0.011362 | 0.011396 | 0.011430 | 0.011665 |
| 0.011698 | 0.011631 | 0.011699 | 0.011532 | 0.011699 | 0.011396 | 0.011362 |
| 0.011331 | 0.011626 | 0.011426 | 0.011300 | 0.011705 | 0.011265 | 0.011414 |
| 0.011706 | 0.011604 | 0.011564 | 0.011765 | 0.011470 | 0.011631 | 0.011598 |
| 0.011530 | 0.011698 | 0.011558 | 0.011390 | 0.011479 | 0.011430 | 0.011500 |
| 0.011598 | 0.011499 | 0.011635 | 0.011703 | 0.011631 | 0.011698 | 0.011806 |
| 0.011534 | 0.011705 | 0.011636 | 0.011568 | 0.011834 | 0.011295 | 0.011498 |
| 0.011463 | 0.011396 | 0.011295 | 0.011295 | 0.011362 | 0.011362 | 0.011429 |
| 0.011362 | 0.011430 | 0.011329 | 0.011362 | 0.011362 | 0.011362 | 0.011429 |
| 0.011362 | 0.011665 | 0.011631 | 0.011665 | 0.011262 | 0.011362 | 0.011396 |
| 0.011396 | 0.011362 | 0.011430 | 0.011396 | 0.011329 | 0.011329 | 0.011329 |
| 0.011799 | 0.011429 | 0.011497 | 0.011295 | 0.011396 | 0.011564 | 0.011329 |
| 0.011329 | 0.011396 | 0.011362 | 0.011530 | 0.011329 | 0.011463 | 0.011597 |
| 0.011530 | 0.011362 | 0.011362 | 0.011295 | 0.011295 | 0.011463 | 0.011396 |
| 0.011295 | 0.011396 | 0.011262 | 0.011295 | 0.011430 | 0.011497 | 0.011329 |
| 0.011295 | 0.011429 | 0.011363 | 0.011262 | 0.011530 | 0.011262 | 0.011430 |
| 0.011505 | 0.011329 | 0.011564 | 0.011463 | 0.011430 | 0.011362 | 0.011463 |
| 0.011329 | 0.011665 | 0.011262 | 0.011463 | 0.011262 | 0.011262 | 0.011262 |
| 0.011497 | 0.011631 | 0.011396 | 0.011463 | 0.011295 | 0.011631 | 0.011262 |
| 0.011329 | 0.011329 | 0.011362 | 0.011463 | 0.011362 | 0.011463 | 0.011530 |
| 0.011530 | 0.011497 | 0.011396 | 0.011497 | 0.011463 | 0.011329 | 0.011295 |
| 0.011329 | 0.011329 | 0.011396 | 0.011262 | 0.011295 | 0.011463 | 0.011329 |
| 0.011295 | 0.011362 | 0.011497 | 0.011463 | 0.011429 | 0.011362 | 0.011362 |
| 0.011429 | 0.011362 | 0.011463 | 0.011329 | 0.011463 | 0.011564 | 0.011799 |
| 0.011362 | 0.011698 | 0.011371 | 0.017826 | 0.011388 | 0.011427 | 0.011653 |
| 0.011614 | 0.011658 | 0.011427 | 0.011408 | 0.011720 | 0.011682 | 0.011425 |
| 0.011535 | 0.011549 | 0.011294 | 0.011353 | 0.011295 | 0.011307 | 0.011361 |
| 0.011530 | 0.011470 | 0.011468 | 0.011259 | 0.011497 | 0.011530 | 0.011534 |
| 0.011404 | 0.011497 | 0.011497 | 0.011396 | 0.011430 | 0.011430 | 0.011396 |
| 0.011430 | 0.011362 | 0.011396 | 0.011430 | 0.011396 | 0.011329 | 0.011362 |
| 0.011362 | 0.011430 | 0.011329 | 0.011430 | 0.011463 | 0.011497 | 0.011396 |
| 0.011362 | 0.011329 | 0.011665 | 0.011665 | 0.011463 | 0.011497 | 0.011531 |
| 0.011295 | 0.011295 | 0.011329 | 0.011430 | 0.011295 | 0.011530 | 0.011530 |
| 0.011564 | 0.011564 | 0.011497 | 0.011597 | 0.011699 | 0.011599 | 0.011430 |
| 0.011430 | 0.011497 | 0.011530 | 0.011362 | 0.011430 | 0.011396 | 0.011430 |
| 0.011497 | 0.011497 | 0.011530 | 0.011430 | 0.011397 | 0.011598 | 0.011564 |

|          |          |          |          |          |          |          |
|----------|----------|----------|----------|----------|----------|----------|
| 0.011433 | 0.011329 | 0.011430 | 0.011531 | 0.011430 | 0.011497 | 0.011597 |
| 0.011765 | 0.011470 | 0.011631 | 0.011598 | 0.011530 | 0.011698 | 0.011295 |
| 0.011498 | 0.011396 | 0.011362 | 0.011362 | 0.011430 | 0.011329 | 0.011430 |
| 0.011463 | 0.011497 | 0.011396 | 0.011362 | 0.011329 | 0.011665 | 0.011665 |
| 0.011463 | 0.011497 | 0.011564 | 0.011497 | 0.012070 | 0.011560 | 0.011482 |
| 0.011552 | 0.011511 | 0.011623 | 0.011511 | 0.011620 | 0.011543 | 0.011509 |
| 0.012022 | 0.011406 | 0.011540 | 0.011475 | 0.011749 | 0.011604 | 0.011707 |
| 0.012046 | 0.011512 | 0.011669 | 0.011732 | 0.011597 | 0.011530 | 0.011635 |
| 0.011295 | 0.011463 | 0.011597 | 0.011564 | 0.011567 | 0.011497 | 0.011464 |
| 0.011396 | 0.011329 | 0.011362 | 0.011396 | 0.011295 | 0.011362 | 0.011262 |
| 0.011329 | 0.011362 | 0.011329 | 0.011295 | 0.011396 | 0.011329 | 0.011362 |
| 0.011362 | 0.011295 | 0.011362 | 0.011396 | 0.011295 | 0.011497 | 0.011530 |
| 0.011430 | 0.011430 | 0.011429 | 0.011430 | 0.011362 | 0.011698 | 0.011396 |
| 0.011373 | 0.011362 | 0.011531 | 0.011535 | 0.011463 | 0.011463 | 0.011463 |
| 0.011463 | 0.011396 | 0.011362 | 0.011396 | 0.011497 | 0.011497 | 0.011429 |
| 0.011429 | 0.011564 | 0.011665 | 0.011463 | 0.011665 | 0.011665 | 0.011530 |
| 0.011362 | 0.011429 | 0.011463 | 0.011799 | 0.011430 | 0.011463 | 0.011430 |
| 0.011463 | 0.011329 | 0.011329 | 0.011631 | 0.011631 | 0.011598 | 0.011396 |
| 0.011497 | 0.011564 | 0.011429 | 0.011497 | 0.011463 | 0.011329 | 0.011597 |
| 0.011429 | 0.011396 | 0.011329 | 0.011564 | 0.011396 | 0.011497 | 0.011732 |
| 0.011429 | 0.011739 | 0.011732 | 0.011548 | 0.011286 | 0.011434 | 0.011370 |
| 0.011225 | 0.011761 | 0.011341 | 0.011507 | 0.011353 | 0.011518 | 0.011432 |
| 0.011519 | 0.011323 | 0.011506 | 0.011325 | 0.011438 | 0.011529 | 0.011506 |
| 0.011512 | 0.011414 | 0.011413 | 0.011413 | 0.011431 | 0.011497 | 0.011564 |
| 0.011564 | 0.011430 | 0.011534 | 0.011535 | 0.011671 | 0.011697 | 0.011430 |
| 0.011597 | 0.011463 | 0.011396 | 0.011430 | 0.011295 | 0.011463 | 0.011329 |
| 0.011396 | 0.011396 | 0.011362 | 0.011329 | 0.011362 | 0.011329 | 0.011430 |
| 0.011410 | 0.011410 | 0.011403 | 0.011437 | 0.011574 | 0.011539 | 0.011538 |
| 0.011537 | 0.011464 | 0.011282 | 0.011276 | 0.011399 | 0.011569 | 0.011569 |
| 0.011363 | 0.011433 | 0.011666 | 0.011635 | 0.011565 | 0.011599 | 0.011530 |
| 0.011463 | 0.011530 | 0.011530 | 0.011430 | 0.011934 | 0.011597 | 0.011665 |
| 0.011699 | 0.011701 | 0.011401 | 0.011441 | 0.011362 | 0.011564 | 0.011530 |
| 0.011565 | 0.011597 | 0.011597 | 0.011597 | 0.011768 | 0.011732 | 0.011372 |
| 0.011263 | 0.011268 | 0.011367 | 0.011332 | 0.011368 | 0.011284 | 0.011536 |
| 0.011403 | 0.011499 | 0.011298 | 0.011435 | 0.011397 | 0.011471 | 0.011363 |
| 0.011329 | 0.011262 | 0.011396 | 0.011362 | 0.011497 | 0.011463 | 0.011396 |
| 0.011497 | 0.011564 | 0.011362 | 0.011362 | 0.011396 | 0.011396 | 0.011398 |
| 0.011466 | 0.011396 | 0.011396 | 0.011431 | 0.011497 | 0.011564 | 0.011564 |
| 0.011430 | 0.011534 | 0.011535 | 0.011671 | 0.011697 | 0.011430 | 0.011597 |
| 0.011530 | 0.011530 | 0.011365 | 0.011547 | 0.011477 | 0.011503 | 0.011341 |
| 0.011542 | 0.011698 | 0.011526 | 0.011434 | 0.011329 | 0.011531 | 0.011396 |
| 0.011497 | 0.011430 | 0.011329 | 0.011431 | 0.011530 | 0.011533 | 0.011430 |
| 0.011329 | 0.011263 | 0.011396 | 0.011329 | 0.011262 | 0.011366 | 0.011531 |
| 0.011430 | 0.011362 | 0.011396 | 0.011430 | 0.011396 | 0.011329 | 0.011463 |
| 0.011396 | 0.011430 | 0.011429 | 0.011362 | 0.011429 | 0.011665 | 0.011262 |
| 0.011362 | 0.011698 | 0.011362 | 0.011396 | 0.011362 | 0.011665 | 0.011317 |
| 0.011679 | 0.011358 | 0.011311 | 0.011503 | 0.011590 | 0.011491 | 0.011269 |
| 0.011270 | 0.011463 | 0.011564 | 0.011672 | 0.011532 | 0.011669 | 0.011800 |
| 0.011700 | 0.011737 | 0.011698 | 0.011949 | 0.011665 | 0.012540 | 0.011701 |
| 0.012440 | 0.012207 | 0.012341 | 0.012613 | 0.011665 | 0.011363 | 0.011665 |
| 0.012104 | 0.012039 | 0.011631 | 0.011530 | 0.011598 | 0.011598 | 0.011568 |
| 0.011463 | 0.011467 | 0.011530 | 0.011497 | 0.011868 | 0.011934 | 0.011935 |
| 0.011834 | 0.011935 | 0.012038 | 0.011805 | 0.012037 | 0.012110 | 0.012171 |
| 0.012172 | 0.012206 | 0.012153 | 0.012172 | 0.012174 | 0.011463 | 0.011699 |
| 0.011767 | 0.012270 | 0.011772 | 0.012001 | 0.012474 | 0.011536 | 0.011430 |
| 0.011396 | 0.011396 | 0.011867 | 0.011924 | 0.012010 | 0.011732 | 0.011397 |
| S058     | 0.011799 | 0.011799 | 0.012102 | 0.011866 | 0.011866 | 0.011933 |
| 0.011807 | 0.011739 | 0.011933 | 0.011396 | 0.011463 | 0.011430 | 0.011396 |
| 0.011429 | 0.011597 | 0.011396 | 0.011429 | 0.011496 | 0.011463 | 0.011429 |
| 0.011396 | 0.011429 | 0.011530 | 0.011396 | 0.011430 | 0.011429 | 0.011773 |

|          |          |          |          |          |          |          |
|----------|----------|----------|----------|----------|----------|----------|
| 0.011597 | 0.011429 | 0.011329 | 0.011564 | 0.011497 | 0.011463 | 0.011497 |
| 0.011463 | 0.011564 | 0.011396 | 0.011463 | 0.011362 | 0.011463 | 0.011631 |
| 0.011396 | 0.011463 | 0.011362 | 0.011362 | 0.011530 | 0.011564 | 0.011497 |
| 0.011463 | 0.011497 | 0.011530 | 0.011799 | 0.011329 | 0.011732 | 0.011329 |
| 0.011429 | 0.011530 | 0.000000 | 0.011732 | 0.011832 | 0.011530 | 0.011631 |
| 0.011496 | 0.011564 | 0.011463 | 0.011698 | 0.011933 | 0.011463 | 0.011530 |
| 0.011429 | 0.011530 | 0.011497 | 0.011564 | 0.011496 | 0.011429 | 0.011429 |
| 0.011396 | 0.011429 | 0.011396 | 0.011497 | 0.011463 | 0.011498 | 0.011564 |
| 0.011497 | 0.011463 | 0.011530 | 0.011429 | 0.011564 | 0.011396 | 0.011463 |
| 0.011631 | 0.011564 | 0.011799 | 0.011631 | 0.011463 | 0.011698 | 0.011396 |
| 0.011542 | 0.011770 | 0.011626 | 0.011334 | 0.011359 | 0.011465 | 0.011493 |
| 0.012195 | 0.011569 | 0.011307 | 0.011698 | 0.011698 | 0.011496 | 0.011597 |
| 0.011530 | 0.011496 | 0.011564 | 0.011463 | 0.011497 | 0.011497 | 0.011496 |
| 0.011463 | 0.011564 | 0.011765 | 0.011631 | 0.011530 | 0.011497 | 0.011430 |
| 0.011396 | 0.011396 | 0.011463 | 0.011430 | 0.011631 | 0.011597 | 0.011530 |
| 0.011631 | 0.011698 | 0.011429 | 0.011429 | 0.011463 | 0.011463 | 0.011465 |
| 0.011533 | 0.011463 | 0.011463 | 0.011348 | 0.011422 | 0.011376 | 0.011464 |
| 0.011467 | 0.011404 | 0.011429 | 0.011440 | 0.011366 | 0.011403 | 0.011432 |
| 0.011708 | 0.011474 | 0.011508 | 0.011396 | 0.011406 | 0.011531 | 0.011497 |
| 0.011565 | 0.011498 | 0.011497 | 0.011597 | 0.011530 | 0.011900 | 0.011698 |
| 0.011731 | 0.011598 | 0.011463 | 0.011564 | 0.011362 | 0.011597 | 0.011396 |
| 0.011463 | 0.011463 | 0.011430 | 0.011396 | 0.011429 | 0.011396 | 0.011497 |
| 0.011463 | 0.011564 | 0.011497 | 0.011396 | 0.011498 | 0.011598 | 0.011601 |
| 0.011598 | 0.011497 | 0.011396 | 0.011330 | 0.011463 | 0.011396 | 0.011329 |
| 0.011434 | 0.011598 | 0.011396 | 0.011598 | 0.011362 | 0.011463 | 0.011430 |
| 0.011530 | 0.011429 | 0.011463 | 0.011430 | 0.011463 | 0.011329 | 0.011463 |
| 0.011497 | 0.011430 | 0.011497 | 0.011429 | 0.011463 | 0.011497 | 0.011732 |
| 0.011833 | 0.011765 | 0.011833 | 0.011431 | 0.011833 | 0.011463 | 0.011430 |
| 0.011466 | 0.011707 | 0.011609 | 0.011335 | 0.011841 | 0.011333 | 0.011375 |
| 0.011841 | 0.011740 | 0.011631 | 0.011833 | 0.011538 | 0.011698 | 0.011665 |
| 0.011597 | 0.011765 | 0.011593 | 0.011390 | 0.011479 | 0.011497 | 0.011568 |
| 0.011665 | 0.011566 | 0.011703 | 0.011771 | 0.011698 | 0.011765 | 0.011873 |
| 0.011602 | 0.011739 | 0.011703 | 0.011635 | 0.011901 | 0.011362 | 0.011566 |
| 0.011530 | 0.011429 | 0.011295 | 0.011362 | 0.011429 | 0.011429 | 0.011429 |
| 0.011429 | 0.011497 | 0.011396 | 0.011497 | 0.011429 | 0.011429 | 0.011496 |
| 0.011429 | 0.011866 | 0.011765 | 0.011799 | 0.011329 | 0.011429 | 0.011463 |
| 0.011463 | 0.011429 | 0.011497 | 0.011530 | 0.011396 | 0.011396 | 0.011396 |
| 0.011933 | 0.011564 | 0.011564 | 0.011362 | 0.011463 | 0.011631 | 0.011396 |
| 0.011396 | 0.011463 | 0.011429 | 0.011597 | 0.011396 | 0.011530 | 0.011664 |
| 0.011597 | 0.011429 | 0.011429 | 0.011362 | 0.011362 | 0.011530 | 0.011463 |
| 0.011362 | 0.011463 | 0.011329 | 0.011362 | 0.011497 | 0.011631 | 0.011396 |
| 0.011329 | 0.011497 | 0.011430 | 0.011329 | 0.011664 | 0.011329 | 0.011497 |
| 0.011540 | 0.011396 | 0.011698 | 0.011530 | 0.011564 | 0.011429 | 0.011396 |
| 0.011396 | 0.011732 | 0.011329 | 0.011597 | 0.011396 | 0.011396 | 0.011329 |
| 0.011564 | 0.011732 | 0.011463 | 0.011530 | 0.011362 | 0.011765 | 0.011396 |
| 0.011396 | 0.011396 | 0.011429 | 0.011530 | 0.011429 | 0.011530 | 0.011597 |
| 0.011597 | 0.011564 | 0.011396 | 0.011564 | 0.011530 | 0.011329 | 0.011362 |
| 0.011396 | 0.011329 | 0.011463 | 0.011396 | 0.011362 | 0.011530 | 0.011396 |
| 0.011429 | 0.011429 | 0.011564 | 0.011597 | 0.011496 | 0.011429 | 0.011430 |
| 0.011497 | 0.011429 | 0.011530 | 0.011396 | 0.011530 | 0.011631 | 0.011933 |
| 0.011429 | 0.011832 | 0.011405 | 0.017937 | 0.011387 | 0.011672 | 0.011758 |
| 0.011718 | 0.011764 | 0.011479 | 0.011408 | 0.011884 | 0.011785 | 0.011546 |
| 0.011629 | 0.011732 | 0.011255 | 0.011395 | 0.011412 | 0.011455 | 0.011404 |
| 0.011623 | 0.011582 | 0.011579 | 0.011193 | 0.011564 | 0.011597 | 0.011601 |
| 0.011438 | 0.011564 | 0.011564 | 0.011530 | 0.011497 | 0.011497 | 0.011463 |
| 0.011497 | 0.011429 | 0.011463 | 0.011497 | 0.011463 | 0.011396 | 0.011429 |
| 0.011429 | 0.011497 | 0.011396 | 0.011497 | 0.011530 | 0.011564 | 0.011463 |
| 0.011497 | 0.011463 | 0.011799 | 0.011799 | 0.011530 | 0.011565 | 0.011598 |
| 0.011362 | 0.011362 | 0.011396 | 0.011497 | 0.011362 | 0.011597 | 0.011597 |
| 0.011631 | 0.011631 | 0.011564 | 0.011665 | 0.011833 | 0.011666 | 0.011497 |

|          |          |          |          |          |          |          |
|----------|----------|----------|----------|----------|----------|----------|
| 0.011497 | 0.011564 | 0.011598 | 0.011430 | 0.011497 | 0.011463 | 0.011497 |
| 0.011564 | 0.011564 | 0.011597 | 0.011564 | 0.011464 | 0.011665 | 0.011631 |
| 0.011500 | 0.011396 | 0.011497 | 0.011531 | 0.011497 | 0.011631 | 0.011664 |
| 0.011833 | 0.011538 | 0.011698 | 0.011665 | 0.011597 | 0.011765 | 0.011396 |
| 0.011566 | 0.011464 | 0.011429 | 0.011429 | 0.011497 | 0.011396 | 0.011497 |
| 0.011530 | 0.011564 | 0.011463 | 0.011497 | 0.011463 | 0.011799 | 0.011799 |
| 0.011530 | 0.011565 | 0.011631 | 0.011564 | 0.012204 | 0.011560 | 0.011482 |
| 0.011552 | 0.011511 | 0.011658 | 0.011545 | 0.011620 | 0.011543 | 0.011577 |
| 0.012125 | 0.011406 | 0.011540 | 0.011475 | 0.011749 | 0.011672 | 0.011775 |
| 0.012182 | 0.011588 | 0.011736 | 0.011799 | 0.011664 | 0.011664 | 0.011702 |
| 0.011362 | 0.011530 | 0.011664 | 0.011631 | 0.011635 | 0.011631 | 0.011599 |
| 0.011463 | 0.011396 | 0.011429 | 0.011463 | 0.011362 | 0.011429 | 0.011329 |
| 0.011463 | 0.011496 | 0.011396 | 0.011362 | 0.011463 | 0.011396 | 0.011429 |
| 0.011429 | 0.011362 | 0.011429 | 0.011463 | 0.011362 | 0.011564 | 0.011597 |
| 0.011497 | 0.011564 | 0.011497 | 0.011497 | 0.011429 | 0.011832 | 0.011463 |
| 0.011478 | 0.011429 | 0.011598 | 0.011569 | 0.011530 | 0.011463 | 0.011530 |
| 0.011530 | 0.011463 | 0.011429 | 0.011463 | 0.011564 | 0.011564 | 0.011497 |
| 0.011496 | 0.011631 | 0.011799 | 0.011530 | 0.011732 | 0.011732 | 0.011597 |
| 0.011429 | 0.011497 | 0.011530 | 0.011933 | 0.011497 | 0.011530 | 0.011497 |
| 0.011530 | 0.011463 | 0.011463 | 0.011765 | 0.011698 | 0.011732 | 0.011463 |
| 0.011564 | 0.011631 | 0.011496 | 0.011564 | 0.011530 | 0.011396 | 0.011732 |
| 0.011496 | 0.011463 | 0.011463 | 0.011631 | 0.011463 | 0.011564 | 0.011799 |
| 0.011496 | 0.011875 | 0.011866 | 0.011589 | 0.011399 | 0.011570 | 0.011267 |
| 0.011445 | 0.011878 | 0.011376 | 0.011551 | 0.011353 | 0.011366 | 0.011485 |
| 0.011621 | 0.011258 | 0.011394 | 0.011258 | 0.011330 | 0.011529 | 0.011425 |
| 0.011475 | 0.011414 | 0.011518 | 0.011448 | 0.011498 | 0.011631 | 0.011698 |
| 0.011698 | 0.011565 | 0.011635 | 0.011670 | 0.011806 | 0.011838 | 0.011497 |
| 0.011731 | 0.011598 | 0.011463 | 0.011564 | 0.011362 | 0.011597 | 0.011396 |
| 0.011463 | 0.011463 | 0.011430 | 0.011396 | 0.011429 | 0.011396 | 0.011497 |
| 0.011479 | 0.011480 | 0.011471 | 0.011505 | 0.011642 | 0.011607 | 0.011607 |
| 0.011605 | 0.011531 | 0.011319 | 0.011348 | 0.011467 | 0.011636 | 0.011637 |
| 0.011430 | 0.011501 | 0.011734 | 0.011703 | 0.011632 | 0.011666 | 0.011597 |
| 0.011530 | 0.011597 | 0.011597 | 0.011497 | 0.012068 | 0.011664 | 0.011732 |
| 0.011766 | 0.011844 | 0.011469 | 0.011545 | 0.011396 | 0.011631 | 0.011597 |
| 0.011632 | 0.011664 | 0.011664 | 0.011664 | 0.011768 | 0.011799 | 0.011407 |
| 0.011297 | 0.011303 | 0.011401 | 0.011366 | 0.011470 | 0.011321 | 0.011638 |
| 0.011437 | 0.011586 | 0.011346 | 0.011435 | 0.011464 | 0.011539 | 0.011430 |
| 0.011396 | 0.011396 | 0.011463 | 0.011430 | 0.011631 | 0.011597 | 0.011530 |
| 0.011631 | 0.011698 | 0.011429 | 0.011429 | 0.011463 | 0.011463 | 0.011465 |
| 0.011533 | 0.011463 | 0.011463 | 0.011498 | 0.011631 | 0.011698 | 0.011698 |
| 0.011565 | 0.011635 | 0.011670 | 0.011806 | 0.011838 | 0.011497 | 0.011664 |
| 0.011597 | 0.011597 | 0.011365 | 0.011617 | 0.011547 | 0.011537 | 0.011411 |
| 0.011611 | 0.011744 | 0.011568 | 0.011502 | 0.011396 | 0.011598 | 0.011463 |
| 0.011564 | 0.011497 | 0.011396 | 0.011498 | 0.011598 | 0.011601 | 0.011497 |
| 0.011396 | 0.011330 | 0.011463 | 0.011396 | 0.011329 | 0.011434 | 0.011598 |
| 0.011497 | 0.011429 | 0.011463 | 0.011497 | 0.011463 | 0.011396 | 0.011597 |
| 0.011463 | 0.011497 | 0.011496 | 0.011429 | 0.011497 | 0.011732 | 0.011396 |
| 0.011429 | 0.011832 | 0.011429 | 0.011463 | 0.011429 | 0.011799 | 0.011360 |
| 0.011847 | 0.011315 | 0.011411 | 0.011543 | 0.011630 | 0.011599 | 0.011353 |
| 0.011375 | 0.011597 | 0.011698 | 0.011807 | 0.011666 | 0.011771 | 0.011935 |
| 0.011834 | 0.011838 | 0.011832 | 0.012051 | 0.011765 | 0.012640 | 0.011835 |
| 0.012540 | 0.012308 | 0.012442 | 0.012748 | 0.011799 | 0.011430 | 0.011799 |
| 0.012238 | 0.012140 | 0.011765 | 0.011665 | 0.011733 | 0.011733 | 0.011703 |
| 0.011597 | 0.011569 | 0.011664 | 0.011632 | 0.012002 | 0.012068 | 0.012069 |
| 0.011969 | 0.012069 | 0.012173 | 0.011906 | 0.012239 | 0.012246 | 0.012306 |
| 0.012307 | 0.012340 | 0.012255 | 0.012307 | 0.012308 | 0.011530 | 0.011833 |
| 0.011901 | 0.012404 | 0.011908 | 0.012135 | 0.012609 | 0.011672 | 0.011564 |
| 0.011530 | 0.011530 | 0.012001 | 0.012006 | 0.012151 | 0.011866 | 0.011532 |
| S059     | 0.011933 | 0.011933 | 0.012270 | 0.012034 | 0.012034 | 0.012101 |
| 0.011909 | 0.011841 | 0.012101 | 0.011530 | 0.011597 | 0.011565 | 0.011530 |

|          |          |          |          |          |          |          |
|----------|----------|----------|----------|----------|----------|----------|
| 0.011564 | 0.011732 | 0.011530 | 0.011564 | 0.011631 | 0.011597 | 0.011564 |
| 0.011530 | 0.011564 | 0.011664 | 0.011531 | 0.011497 | 0.011564 | 0.011875 |
| 0.011799 | 0.011564 | 0.011463 | 0.011698 | 0.011564 | 0.011597 | 0.011564 |
| 0.011597 | 0.011631 | 0.011597 | 0.011597 | 0.011631 | 0.011597 | 0.011765 |
| 0.011530 | 0.011597 | 0.011631 | 0.011564 | 0.011664 | 0.011698 | 0.011631 |
| 0.011597 | 0.011765 | 0.011665 | 0.011933 | 0.011597 | 0.000000 | 0.011597 |
| 0.011564 | 0.011665 | 0.011732 | 0.000000 | 0.011967 | 0.011664 | 0.011765 |
| 0.011564 | 0.011631 | 0.011597 | 0.011765 | 0.012068 | 0.011597 | 0.011664 |
| 0.011564 | 0.011664 | 0.011631 | 0.011698 | 0.011631 | 0.011631 | 0.011631 |
| 0.011530 | 0.011564 | 0.011530 | 0.011631 | 0.011597 | 0.011632 | 0.011698 |
| 0.011631 | 0.011597 | 0.011597 | 0.011564 | 0.011698 | 0.011463 | 0.011530 |
| 0.011765 | 0.011698 | 0.011933 | 0.011765 | 0.011597 | 0.011765 | 0.011597 |
| 0.011765 | 0.011994 | 0.011777 | 0.011451 | 0.011508 | 0.011649 | 0.011690 |
| 0.012341 | 0.011670 | 0.011431 | 0.011832 | 0.011832 | 0.011631 | 0.011732 |
| 0.011664 | 0.011631 | 0.011698 | 0.011597 | 0.011698 | 0.011564 | 0.011631 |
| 0.011597 | 0.011698 | 0.011900 | 0.011765 | 0.011664 | 0.011631 | 0.011497 |
| 0.011530 | 0.011530 | 0.011530 | 0.011564 | 0.011765 | 0.011732 | 0.011665 |
| 0.011765 | 0.011833 | 0.011564 | 0.011564 | 0.011597 | 0.011597 | 0.011601 |
| 0.011669 | 0.011597 | 0.011597 | 0.011456 | 0.011530 | 0.011516 | 0.011598 |
| 0.011602 | 0.011541 | 0.011577 | 0.011578 | 0.011502 | 0.011540 | 0.011567 |
| 0.011852 | 0.011612 | 0.011577 | 0.011531 | 0.011544 | 0.011666 | 0.011632 |
| 0.011699 | 0.011633 | 0.011632 | 0.011731 | 0.011664 | 0.011967 | 0.011833 |
| 0.011866 | 0.011732 | 0.011597 | 0.011698 | 0.011497 | 0.011732 | 0.011530 |
| 0.011597 | 0.011597 | 0.011564 | 0.011530 | 0.011564 | 0.011530 | 0.011631 |
| 0.011530 | 0.011631 | 0.011631 | 0.011530 | 0.011633 | 0.011732 | 0.011736 |
| 0.011665 | 0.011631 | 0.011530 | 0.011465 | 0.011597 | 0.011530 | 0.011463 |
| 0.011570 | 0.011665 | 0.011463 | 0.011665 | 0.011429 | 0.011598 | 0.011497 |
| 0.011597 | 0.011564 | 0.011530 | 0.011497 | 0.011530 | 0.011463 | 0.011530 |
| 0.011564 | 0.011564 | 0.011631 | 0.011564 | 0.011597 | 0.011631 | 0.011866 |
| 0.011967 | 0.011900 | 0.011967 | 0.011734 | 0.011967 | 0.011597 | 0.011564 |
| 0.011601 | 0.011909 | 0.011609 | 0.011472 | 0.011976 | 0.011469 | 0.011611 |
| 0.011943 | 0.011876 | 0.011765 | 0.011967 | 0.011675 | 0.011832 | 0.011732 |
| 0.011732 | 0.011900 | 0.011771 | 0.011637 | 0.011689 | 0.011631 | 0.011703 |
| 0.011799 | 0.011701 | 0.011838 | 0.011601 | 0.011832 | 0.011900 | 0.012009 |
| 0.011737 | 0.011603 | 0.011839 | 0.011770 | 0.012036 | 0.011496 | 0.011700 |
| 0.011597 | 0.011597 | 0.011496 | 0.011496 | 0.011496 | 0.011564 | 0.011631 |
| 0.011496 | 0.011564 | 0.011463 | 0.011631 | 0.011496 | 0.011564 | 0.011631 |
| 0.011564 | 0.012000 | 0.011900 | 0.011933 | 0.011463 | 0.011564 | 0.011597 |
| 0.011597 | 0.011496 | 0.011631 | 0.011664 | 0.011530 | 0.011530 | 0.011530 |
| 0.012068 | 0.011698 | 0.011698 | 0.011496 | 0.011597 | 0.011698 | 0.011530 |
| 0.011530 | 0.011597 | 0.011564 | 0.011664 | 0.011530 | 0.011664 | 0.011731 |
| 0.011731 | 0.011564 | 0.011564 | 0.011496 | 0.011496 | 0.011664 | 0.011597 |
| 0.011496 | 0.011597 | 0.011463 | 0.011496 | 0.011631 | 0.011766 | 0.011530 |
| 0.011497 | 0.011631 | 0.011564 | 0.011463 | 0.011799 | 0.011463 | 0.011631 |
| 0.011642 | 0.011530 | 0.011832 | 0.011665 | 0.011698 | 0.011564 | 0.011664 |
| 0.011530 | 0.000000 | 0.011463 | 0.011732 | 0.011530 | 0.011530 | 0.011463 |
| 0.011631 | 0.011900 | 0.011597 | 0.011664 | 0.011496 | 0.011900 | 0.011530 |
| 0.011530 | 0.011530 | 0.011564 | 0.011597 | 0.011564 | 0.011664 | 0.011731 |
| 0.011732 | 0.011631 | 0.011597 | 0.011698 | 0.011597 | 0.011530 | 0.011496 |
| 0.011530 | 0.011530 | 0.011597 | 0.011530 | 0.011429 | 0.011664 | 0.011530 |
| 0.011564 | 0.011564 | 0.011698 | 0.011732 | 0.011631 | 0.011496 | 0.011564 |
| 0.011631 | 0.011564 | 0.011664 | 0.011530 | 0.011664 | 0.011765 | 0.012068 |
| 0.011564 | 0.011967 | 0.011578 | 0.018087 | 0.011518 | 0.011733 | 0.011932 |
| 0.011891 | 0.011940 | 0.011532 | 0.011466 | 0.011939 | 0.011958 | 0.011485 |
| 0.011677 | 0.011793 | 0.011450 | 0.011479 | 0.011450 | 0.011554 | 0.011576 |
| 0.011670 | 0.011731 | 0.011690 | 0.011523 | 0.011698 | 0.011732 | 0.011737 |
| 0.011541 | 0.011698 | 0.011698 | 0.011665 | 0.011631 | 0.011631 | 0.011598 |
| 0.011631 | 0.011564 | 0.011530 | 0.011631 | 0.011598 | 0.011530 | 0.011564 |
| 0.011564 | 0.011631 | 0.011530 | 0.011631 | 0.011665 | 0.011698 | 0.011597 |
| 0.011631 | 0.011597 | 0.011934 | 0.011934 | 0.011665 | 0.011699 | 0.011732 |

|          |          |          |          |          |          |          |
|----------|----------|----------|----------|----------|----------|----------|
| 0.011497 | 0.011497 | 0.011530 | 0.011564 | 0.011497 | 0.011732 | 0.011732 |
| 0.011765 | 0.011765 | 0.011698 | 0.011799 | 0.011967 | 0.011801 | 0.011564 |
| 0.011631 | 0.011698 | 0.011665 | 0.011564 | 0.011631 | 0.011597 | 0.011631 |
| 0.011699 | 0.011698 | 0.011732 | 0.011631 | 0.011464 | 0.011799 | 0.011698 |
| 0.011636 | 0.011530 | 0.011631 | 0.011732 | 0.011631 | 0.011766 | 0.011799 |
| 0.011967 | 0.011675 | 0.011832 | 0.011732 | 0.011732 | 0.011900 | 0.011531 |
| 0.011700 | 0.011598 | 0.011564 | 0.011564 | 0.011631 | 0.011530 | 0.011631 |
| 0.011665 | 0.011698 | 0.011597 | 0.011631 | 0.011597 | 0.011934 | 0.011934 |
| 0.011665 | 0.011699 | 0.011765 | 0.011698 | 0.012339 | 0.011775 | 0.011693 |
| 0.011763 | 0.011719 | 0.011833 | 0.011718 | 0.011830 | 0.011750 | 0.011715 |
| 0.012297 | 0.011614 | 0.011745 | 0.011683 | 0.011956 | 0.011808 | 0.011638 |
| 0.012318 | 0.011814 | 0.011872 | 0.011933 | 0.011799 | 0.011799 | 0.011837 |
| 0.011496 | 0.011597 | 0.011731 | 0.011698 | 0.011770 | 0.011765 | 0.011734 |
| 0.011597 | 0.011463 | 0.011496 | 0.011530 | 0.011429 | 0.011564 | 0.011463 |
| 0.011597 | 0.011631 | 0.011530 | 0.011496 | 0.011597 | 0.011530 | 0.011564 |
| 0.011564 | 0.011496 | 0.011564 | 0.011597 | 0.011496 | 0.011631 | 0.011731 |
| 0.011631 | 0.011698 | 0.011631 | 0.011631 | 0.011564 | 0.011967 | 0.011597 |
| 0.011652 | 0.011564 | 0.011799 | 0.011807 | 0.011597 | 0.011664 | 0.011664 |
| 0.011664 | 0.011530 | 0.011564 | 0.011530 | 0.011698 | 0.011698 | 0.011631 |
| 0.011631 | 0.011765 | 0.011933 | 0.011597 | 0.011866 | 0.011866 | 0.011731 |
| 0.011564 | 0.011631 | 0.011664 | 0.012068 | 0.011631 | 0.011597 | 0.011631 |
| 0.011664 | 0.011597 | 0.011597 | 0.011832 | 0.011765 | 0.011799 | 0.011597 |
| 0.011698 | 0.011765 | 0.011631 | 0.011698 | 0.011664 | 0.011530 | 0.011866 |
| 0.011631 | 0.011597 | 0.011597 | 0.011765 | 0.011597 | 0.011698 | 0.011933 |
| 0.011631 | 0.011977 | 0.012000 | 0.011792 | 0.011455 | 0.011706 | 0.011421 |
| 0.011500 | 0.011956 | 0.011552 | 0.011596 | 0.011499 | 0.011671 | 0.011591 |
| 0.011723 | 0.011389 | 0.011561 | 0.011324 | 0.011437 | 0.011529 | 0.011628 |
| 0.011663 | 0.011493 | 0.011694 | 0.011624 | 0.011633 | 0.011765 | 0.011833 |
| 0.011833 | 0.011699 | 0.011804 | 0.011806 | 0.011942 | 0.011979 | 0.011631 |
| 0.011866 | 0.011732 | 0.011597 | 0.011698 | 0.011497 | 0.011732 | 0.011530 |
| 0.011597 | 0.011597 | 0.011564 | 0.011530 | 0.011564 | 0.011530 | 0.011631 |
| 0.011619 | 0.011620 | 0.011608 | 0.011642 | 0.011779 | 0.011675 | 0.011743 |
| 0.011742 | 0.011665 | 0.011503 | 0.011492 | 0.011602 | 0.011772 | 0.011773 |
| 0.011565 | 0.011636 | 0.011868 | 0.011838 | 0.011767 | 0.011801 | 0.011731 |
| 0.011664 | 0.011732 | 0.011731 | 0.011631 | 0.012202 | 0.011732 | 0.011866 |
| 0.011900 | 0.011915 | 0.011606 | 0.011684 | 0.011564 | 0.011765 | 0.011732 |
| 0.011767 | 0.011799 | 0.011799 | 0.011799 | 0.011925 | 0.011933 | 0.011581 |
| 0.011466 | 0.011476 | 0.011571 | 0.011536 | 0.011641 | 0.011508 | 0.011808 |
| 0.011609 | 0.011674 | 0.011441 | 0.011622 | 0.011598 | 0.011676 | 0.011497 |
| 0.011530 | 0.011530 | 0.011530 | 0.011564 | 0.011765 | 0.011732 | 0.011665 |
| 0.011765 | 0.011833 | 0.011564 | 0.011564 | 0.011597 | 0.011597 | 0.011601 |
| 0.011669 | 0.011597 | 0.011597 | 0.011633 | 0.011765 | 0.011833 | 0.011833 |
| 0.011699 | 0.011804 | 0.011806 | 0.011942 | 0.011979 | 0.011631 | 0.011799 |
| 0.011732 | 0.011732 | 0.011567 | 0.011756 | 0.011651 | 0.011707 | 0.011516 |
| 0.011646 | 0.011926 | 0.011695 | 0.011638 | 0.011463 | 0.011665 | 0.011530 |
| 0.011631 | 0.011631 | 0.011530 | 0.011633 | 0.011732 | 0.011736 | 0.011631 |
| 0.011530 | 0.011465 | 0.011597 | 0.011530 | 0.011463 | 0.011570 | 0.011665 |
| 0.011631 | 0.011564 | 0.011530 | 0.011631 | 0.011598 | 0.011530 | 0.011732 |
| 0.011597 | 0.011631 | 0.011631 | 0.011564 | 0.011631 | 0.011866 | 0.011530 |
| 0.011564 | 0.011967 | 0.011564 | 0.011530 | 0.011564 | 0.011933 | 0.011446 |
| 0.011960 | 0.011485 | 0.011461 | 0.011745 | 0.011793 | 0.011778 | 0.011395 |
| 0.011427 | 0.011731 | 0.011832 | 0.011943 | 0.011801 | 0.011872 | 0.012069 |
| 0.011969 | 0.012007 | 0.011967 | 0.012188 | 0.011933 | 0.012809 | 0.011970 |
| 0.012709 | 0.012477 | 0.012611 | 0.012883 | 0.011933 | 0.011631 | 0.011934 |
| 0.012373 | 0.012309 | 0.011900 | 0.011799 | 0.011867 | 0.011867 | 0.011838 |
| 0.011731 | 0.011739 | 0.011799 | 0.011766 | 0.012137 | 0.012202 | 0.012204 |
| 0.012103 | 0.012204 | 0.012308 | 0.012075 | 0.012374 | 0.012381 | 0.012441 |
| 0.012442 | 0.012475 | 0.012426 | 0.012442 | 0.012443 | 0.011664 | 0.011968 |
| 0.012036 | 0.012539 | 0.012010 | 0.012203 | 0.012676 | 0.011807 | 0.011699 |
| 0.011664 | 0.011664 | 0.012136 | 0.012254 | 0.012292 | 0.012000 | 0.011667 |



|          |          |          |          |          |          |          |
|----------|----------|----------|----------|----------|----------|----------|
| S060     | 0.012034 | 0.012034 | 0.012102 | 0.011866 | 0.011866 | 0.011933 |
| 0.011434 | 0.011366 | 0.011933 | 0.011631 | 0.011698 | 0.011666 | 0.011631 |
| 0.011597 | 0.011832 | 0.011564 | 0.011664 | 0.011732 | 0.011698 | 0.011664 |
| 0.011631 | 0.011664 | 0.011497 | 0.011631 | 0.011665 | 0.011664 | 0.011400 |
| 0.011631 | 0.011664 | 0.011564 | 0.011530 | 0.011732 | 0.011698 | 0.011732 |
| 0.011698 | 0.011799 | 0.011698 | 0.011698 | 0.011731 | 0.011698 | 0.011866 |
| 0.011564 | 0.011698 | 0.011732 | 0.011664 | 0.011698 | 0.011799 | 0.011732 |
| 0.011698 | 0.011866 | 0.011766 | 0.011429 | 0.011698 | 0.011967 | 0.011698 |
| 0.011664 | 0.011698 | 0.011832 | 0.011967 | 0.000000 | 0.011698 | 0.011799 |
| 0.011731 | 0.011799 | 0.011698 | 0.011933 | 0.011564 | 0.011698 | 0.011765 |
| 0.011664 | 0.011765 | 0.011732 | 0.011799 | 0.011731 | 0.011732 | 0.011732 |
| 0.011631 | 0.011664 | 0.011631 | 0.011664 | 0.011698 | 0.011733 | 0.011799 |
| 0.011732 | 0.011698 | 0.011765 | 0.011664 | 0.011597 | 0.011631 | 0.011698 |
| 0.011866 | 0.011799 | 0.011564 | 0.011866 | 0.011698 | 0.011933 | 0.011698 |
| 0.011913 | 0.011471 | 0.011928 | 0.011646 | 0.011620 | 0.011760 | 0.011533 |
| 0.012121 | 0.011467 | 0.011637 | 0.011933 | 0.011933 | 0.011664 | 0.011564 |
| 0.011765 | 0.011731 | 0.011799 | 0.011698 | 0.011799 | 0.011732 | 0.011731 |
| 0.011698 | 0.011731 | 0.012000 | 0.011866 | 0.011765 | 0.011732 | 0.011665 |
| 0.011631 | 0.011564 | 0.011698 | 0.011665 | 0.011598 | 0.011564 | 0.011497 |
| 0.011598 | 0.011665 | 0.011665 | 0.011665 | 0.011698 | 0.011698 | 0.011702 |
| 0.011770 | 0.011698 | 0.011698 | 0.011528 | 0.011603 | 0.011551 | 0.011699 |
| 0.011670 | 0.011610 | 0.011687 | 0.011647 | 0.011570 | 0.011574 | 0.011634 |
| 0.011528 | 0.011646 | 0.011680 | 0.011632 | 0.011613 | 0.011767 | 0.011666 |
| 0.011733 | 0.011734 | 0.011733 | 0.011832 | 0.011765 | 0.012135 | 0.011867 |
| 0.011698 | 0.011766 | 0.011698 | 0.011732 | 0.011597 | 0.011564 | 0.011631 |
| 0.011698 | 0.011698 | 0.011665 | 0.011631 | 0.011664 | 0.011631 | 0.011732 |
| 0.011698 | 0.011799 | 0.011732 | 0.011631 | 0.011734 | 0.011833 | 0.011838 |
| 0.011833 | 0.011732 | 0.011631 | 0.011566 | 0.011698 | 0.011631 | 0.011564 |
| 0.011570 | 0.011833 | 0.011631 | 0.011833 | 0.011597 | 0.011698 | 0.011665 |
| 0.011766 | 0.011665 | 0.011698 | 0.011665 | 0.011698 | 0.011564 | 0.011698 |
| 0.011732 | 0.011665 | 0.011732 | 0.011665 | 0.011698 | 0.011732 | 0.011967 |
| 0.011463 | 0.011396 | 0.011463 | 0.011836 | 0.011396 | 0.011698 | 0.011665 |
| 0.011634 | 0.011869 | 0.011701 | 0.011609 | 0.011467 | 0.011572 | 0.011769 |
| 0.011468 | 0.011638 | 0.011866 | 0.012068 | 0.011777 | 0.011933 | 0.011900 |
| 0.011832 | 0.012000 | 0.011842 | 0.011761 | 0.011689 | 0.011732 | 0.011805 |
| 0.011900 | 0.011802 | 0.011939 | 0.012008 | 0.011933 | 0.012001 | 0.012111 |
| 0.011839 | 0.012011 | 0.011839 | 0.011838 | 0.012137 | 0.011597 | 0.011802 |
| 0.011765 | 0.011698 | 0.011597 | 0.011597 | 0.011664 | 0.011664 | 0.011731 |
| 0.011664 | 0.011732 | 0.011631 | 0.011664 | 0.011664 | 0.011664 | 0.011731 |
| 0.011664 | 0.011496 | 0.011396 | 0.011429 | 0.011564 | 0.011664 | 0.011698 |
| 0.011698 | 0.011597 | 0.011732 | 0.011698 | 0.011631 | 0.011631 | 0.011631 |
| 0.011564 | 0.011732 | 0.011799 | 0.011597 | 0.011698 | 0.011866 | 0.011631 |
| 0.011631 | 0.011698 | 0.011664 | 0.011832 | 0.011631 | 0.011564 | 0.011698 |
| 0.011631 | 0.011664 | 0.011664 | 0.011597 | 0.011597 | 0.011765 | 0.011698 |
| 0.011597 | 0.011698 | 0.011564 | 0.011597 | 0.011732 | 0.011531 | 0.011631 |
| 0.011598 | 0.011732 | 0.011665 | 0.011564 | 0.011262 | 0.011564 | 0.011732 |
| 0.011814 | 0.011631 | 0.011329 | 0.011765 | 0.011732 | 0.011664 | 0.011765 |
| 0.011631 | 0.011967 | 0.011564 | 0.011631 | 0.011564 | 0.011564 | 0.011564 |
| 0.011799 | 0.011665 | 0.011698 | 0.011765 | 0.011597 | 0.011396 | 0.011564 |
| 0.011631 | 0.011631 | 0.011664 | 0.011765 | 0.011664 | 0.011765 | 0.011832 |
| 0.011832 | 0.011799 | 0.011698 | 0.011799 | 0.011765 | 0.011564 | 0.011597 |
| 0.011631 | 0.011564 | 0.011698 | 0.011564 | 0.011597 | 0.011765 | 0.011631 |
| 0.011597 | 0.011664 | 0.011799 | 0.011765 | 0.011732 | 0.011664 | 0.011665 |
| 0.011732 | 0.011664 | 0.011765 | 0.011631 | 0.011765 | 0.011866 | 0.011362 |
| 0.011664 | 0.011329 | 0.011681 | 0.018201 | 0.011518 | 0.011855 | 0.011409 |
| 0.011372 | 0.011412 | 0.011899 | 0.011640 | 0.011610 | 0.011440 | 0.011850 |
| 0.011677 | 0.011671 | 0.011606 | 0.011688 | 0.011529 | 0.011751 | 0.011663 |
| 0.011389 | 0.011544 | 0.011357 | 0.011391 | 0.011799 | 0.011833 | 0.011838 |
| 0.011713 | 0.011799 | 0.011799 | 0.011698 | 0.011732 | 0.011732 | 0.011699 |
| 0.011732 | 0.011664 | 0.011698 | 0.011732 | 0.011698 | 0.011631 | 0.011665 |

|          |          |          |          |          |          |          |
|----------|----------|----------|----------|----------|----------|----------|
| 0.011665 | 0.011732 | 0.011631 | 0.011732 | 0.011765 | 0.011799 | 0.011698 |
| 0.011664 | 0.011564 | 0.011362 | 0.011362 | 0.011766 | 0.011800 | 0.011833 |
| 0.011597 | 0.011597 | 0.011631 | 0.011732 | 0.011597 | 0.011833 | 0.011833 |
| 0.011866 | 0.011866 | 0.011799 | 0.011900 | 0.011396 | 0.011902 | 0.011732 |
| 0.011732 | 0.011799 | 0.011833 | 0.011665 | 0.011732 | 0.011698 | 0.011732 |
| 0.011800 | 0.011799 | 0.011833 | 0.011799 | 0.011700 | 0.011900 | 0.011866 |
| 0.011738 | 0.011631 | 0.011732 | 0.011799 | 0.011732 | 0.011799 | 0.011899 |
| 0.012068 | 0.011777 | 0.011933 | 0.011900 | 0.011832 | 0.012000 | 0.011631 |
| 0.011802 | 0.011699 | 0.011665 | 0.011665 | 0.011732 | 0.011631 | 0.011732 |
| 0.011765 | 0.011799 | 0.011698 | 0.011664 | 0.011564 | 0.011362 | 0.011362 |
| 0.011766 | 0.011800 | 0.011866 | 0.011799 | 0.012373 | 0.011846 | 0.011799 |
| 0.011834 | 0.011788 | 0.011904 | 0.011822 | 0.011900 | 0.011819 | 0.011750 |
| 0.012297 | 0.011683 | 0.011814 | 0.011752 | 0.012025 | 0.011877 | 0.012013 |
| 0.012353 | 0.011777 | 0.011973 | 0.012034 | 0.011900 | 0.011631 | 0.011939 |
| 0.011597 | 0.011765 | 0.011899 | 0.011866 | 0.011871 | 0.011597 | 0.011566 |
| 0.011698 | 0.011631 | 0.011664 | 0.011698 | 0.011597 | 0.011664 | 0.011564 |
| 0.011631 | 0.011664 | 0.011631 | 0.011597 | 0.011698 | 0.011631 | 0.011664 |
| 0.011664 | 0.011597 | 0.011664 | 0.011698 | 0.011597 | 0.011799 | 0.011832 |
| 0.011732 | 0.011732 | 0.011732 | 0.011732 | 0.011664 | 0.000000 | 0.011698 |
| 0.011478 | 0.011665 | 0.011631 | 0.011637 | 0.011698 | 0.011698 | 0.011765 |
| 0.011698 | 0.011698 | 0.011664 | 0.011698 | 0.011799 | 0.011799 | 0.011732 |
| 0.011731 | 0.011866 | 0.011429 | 0.011765 | 0.011967 | 0.011967 | 0.011832 |
| 0.011664 | 0.011732 | 0.011698 | 0.011496 | 0.011732 | 0.011698 | 0.011732 |
| 0.011765 | 0.011631 | 0.011631 | 0.011934 | 0.011933 | 0.011900 | 0.011698 |
| 0.011799 | 0.011866 | 0.011732 | 0.011799 | 0.011765 | 0.011631 | 0.011362 |
| 0.011731 | 0.011698 | 0.011631 | 0.011866 | 0.011698 | 0.011799 | 0.011631 |
| 0.011731 | 0.011501 | 0.011496 | 0.011629 | 0.011399 | 0.011740 | 0.011473 |
| 0.011664 | 0.011800 | 0.011657 | 0.011775 | 0.011646 | 0.011569 | 0.011538 |
| 0.011570 | 0.011455 | 0.011617 | 0.011523 | 0.011491 | 0.011730 | 0.011831 |
| 0.011814 | 0.011769 | 0.011730 | 0.011730 | 0.011734 | 0.011598 | 0.011665 |
| 0.011665 | 0.011733 | 0.011838 | 0.011637 | 0.011976 | 0.012015 | 0.011732 |
| 0.011698 | 0.011766 | 0.011698 | 0.011732 | 0.011597 | 0.011564 | 0.011631 |
| 0.011698 | 0.011698 | 0.011665 | 0.011631 | 0.011664 | 0.011631 | 0.011732 |
| 0.011654 | 0.011655 | 0.011677 | 0.011677 | 0.011813 | 0.011812 | 0.011709 |
| 0.011776 | 0.011766 | 0.011540 | 0.011492 | 0.011670 | 0.011840 | 0.011841 |
| 0.011666 | 0.011704 | 0.011969 | 0.011939 | 0.011868 | 0.011902 | 0.011832 |
| 0.011765 | 0.011832 | 0.011832 | 0.011732 | 0.011631 | 0.011900 | 0.011967 |
| 0.012001 | 0.011416 | 0.011640 | 0.011788 | 0.011664 | 0.011866 | 0.011832 |
| 0.011868 | 0.011899 | 0.011900 | 0.011900 | 0.011965 | 0.012034 | 0.011685 |
| 0.011567 | 0.011580 | 0.011673 | 0.011638 | 0.011641 | 0.011545 | 0.011298 |
| 0.011712 | 0.011411 | 0.011584 | 0.011660 | 0.011699 | 0.011710 | 0.011665 |
| 0.011631 | 0.011564 | 0.011698 | 0.011665 | 0.011598 | 0.011564 | 0.011497 |
| 0.011598 | 0.011665 | 0.011665 | 0.011665 | 0.011698 | 0.011698 | 0.011702 |
| 0.011770 | 0.011698 | 0.011698 | 0.011734 | 0.011598 | 0.011665 | 0.011665 |
| 0.011733 | 0.011838 | 0.011637 | 0.011976 | 0.012015 | 0.011732 | 0.011900 |
| 0.011832 | 0.011832 | 0.011669 | 0.011861 | 0.011790 | 0.011809 | 0.011691 |
| 0.011852 | 0.012017 | 0.011865 | 0.011740 | 0.011631 | 0.011833 | 0.011698 |
| 0.011799 | 0.011732 | 0.011631 | 0.011734 | 0.011833 | 0.011838 | 0.011732 |
| 0.011631 | 0.011566 | 0.011698 | 0.011631 | 0.011564 | 0.011570 | 0.011833 |
| 0.011732 | 0.011664 | 0.011698 | 0.011732 | 0.011698 | 0.011631 | 0.011564 |
| 0.011698 | 0.011732 | 0.011731 | 0.011664 | 0.011732 | 0.011967 | 0.011564 |
| 0.011664 | 0.000000 | 0.011664 | 0.011698 | 0.011664 | 0.011429 | 0.011660 |
| 0.011848 | 0.011443 | 0.011461 | 0.011503 | 0.011630 | 0.011599 | 0.011436 |
| 0.011428 | 0.011564 | 0.011665 | 0.011774 | 0.011633 | 0.011771 | 0.011901 |
| 0.011801 | 0.011838 | 0.011799 | 0.012017 | 0.011765 | 0.012641 | 0.011802 |
| 0.012541 | 0.012309 | 0.012443 | 0.012715 | 0.011698 | 0.011665 | 0.011766 |
| 0.012407 | 0.012140 | 0.011732 | 0.011631 | 0.011699 | 0.011699 | 0.011669 |
| 0.011564 | 0.011569 | 0.011631 | 0.011598 | 0.011969 | 0.012035 | 0.012036 |
| 0.011935 | 0.012036 | 0.012140 | 0.011906 | 0.012408 | 0.012415 | 0.012475 |
| 0.012475 | 0.012509 | 0.012460 | 0.012476 | 0.012477 | 0.011765 | 0.012002 |

|          |          |          |          |          |          |          |
|----------|----------|----------|----------|----------|----------|----------|
| 0.012070 | 0.012573 | 0.012078 | 0.012035 | 0.012508 | 0.011570 | 0.011464 |
| 0.011362 | 0.011429 | 0.011968 | 0.011924 | 0.012081 | 0.011765 | 0.011498 |
| S061     | 0.011732 | 0.011732 | 0.012001 | 0.011765 | 0.011765 | 0.011832 |
| 0.011671 | 0.011603 | 0.011832 | 0.011329 | 0.011396 | 0.011363 | 0.011329 |
| 0.011295 | 0.011530 | 0.011262 | 0.011362 | 0.011429 | 0.011396 | 0.011362 |
| 0.011329 | 0.011362 | 0.011396 | 0.011329 | 0.011363 | 0.011362 | 0.011637 |
| 0.011530 | 0.011362 | 0.011262 | 0.011429 | 0.011429 | 0.011396 | 0.011429 |
| 0.011396 | 0.011497 | 0.011396 | 0.011396 | 0.011429 | 0.011396 | 0.011564 |
| 0.011262 | 0.011396 | 0.011429 | 0.011362 | 0.011396 | 0.011496 | 0.011429 |
| 0.011396 | 0.011564 | 0.011463 | 0.011664 | 0.011396 | 0.011664 | 0.011396 |
| 0.011362 | 0.011396 | 0.011530 | 0.011664 | 0.011698 | 0.000000 | 0.011497 |
| 0.011429 | 0.011497 | 0.011396 | 0.011631 | 0.011799 | 0.011396 | 0.011463 |
| 0.011362 | 0.011463 | 0.011429 | 0.011497 | 0.011429 | 0.011429 | 0.011429 |
| 0.011329 | 0.011362 | 0.011329 | 0.011362 | 0.011396 | 0.011430 | 0.011496 |
| 0.011429 | 0.011396 | 0.011463 | 0.011362 | 0.011429 | 0.011329 | 0.011396 |
| 0.011564 | 0.011496 | 0.011732 | 0.011564 | 0.011396 | 0.011631 | 0.011396 |
| 0.011579 | 0.011733 | 0.011626 | 0.011295 | 0.011321 | 0.011428 | 0.011454 |
| 0.012048 | 0.011365 | 0.011266 | 0.011631 | 0.011631 | 0.011362 | 0.011463 |
| 0.011463 | 0.011429 | 0.011496 | 0.011396 | 0.011497 | 0.011429 | 0.011429 |
| 0.011396 | 0.011429 | 0.011698 | 0.011564 | 0.011463 | 0.011430 | 0.011362 |
| 0.011329 | 0.011262 | 0.011396 | 0.011362 | 0.011497 | 0.011463 | 0.011396 |
| 0.011497 | 0.011564 | 0.011362 | 0.011362 | 0.011396 | 0.011396 | 0.011398 |
| 0.011466 | 0.011396 | 0.011396 | 0.011240 | 0.011313 | 0.011271 | 0.011396 |
| 0.011399 | 0.011335 | 0.011355 | 0.011371 | 0.011298 | 0.011334 | 0.011364 |
| 0.011528 | 0.011370 | 0.011439 | 0.011329 | 0.011337 | 0.011464 | 0.011363 |
| 0.011430 | 0.011431 | 0.011430 | 0.011530 | 0.011463 | 0.011832 | 0.011564 |
| 0.011597 | 0.011463 | 0.011396 | 0.011430 | 0.011295 | 0.011463 | 0.011329 |
| 0.011329 | 0.011396 | 0.011362 | 0.011329 | 0.011362 | 0.011329 | 0.011430 |
| 0.011396 | 0.011497 | 0.011430 | 0.011329 | 0.011431 | 0.011530 | 0.011533 |
| 0.011530 | 0.011430 | 0.011329 | 0.011263 | 0.011396 | 0.011329 | 0.011262 |
| 0.011366 | 0.011531 | 0.011329 | 0.011530 | 0.011295 | 0.011396 | 0.011362 |
| 0.011463 | 0.011362 | 0.011396 | 0.011362 | 0.011396 | 0.011262 | 0.011396 |
| 0.011430 | 0.011362 | 0.011430 | 0.011362 | 0.011396 | 0.011430 | 0.011665 |
| 0.011698 | 0.011631 | 0.011698 | 0.011532 | 0.011699 | 0.011396 | 0.011362 |
| 0.011330 | 0.011586 | 0.011426 | 0.011300 | 0.011671 | 0.011265 | 0.011414 |
| 0.011705 | 0.011604 | 0.011564 | 0.011765 | 0.011470 | 0.011631 | 0.011597 |
| 0.011530 | 0.011698 | 0.011522 | 0.011349 | 0.011354 | 0.011430 | 0.011500 |
| 0.011597 | 0.011499 | 0.011635 | 0.011703 | 0.011631 | 0.011698 | 0.011806 |
| 0.011534 | 0.011705 | 0.011636 | 0.011567 | 0.011834 | 0.011295 | 0.011498 |
| 0.011463 | 0.011396 | 0.011295 | 0.011295 | 0.011362 | 0.011362 | 0.011429 |
| 0.011362 | 0.011429 | 0.011329 | 0.011362 | 0.011362 | 0.011362 | 0.011429 |
| 0.011362 | 0.011732 | 0.011631 | 0.011664 | 0.011262 | 0.011362 | 0.011396 |
| 0.011396 | 0.011362 | 0.011429 | 0.011396 | 0.011329 | 0.011329 | 0.011329 |
| 0.011799 | 0.011429 | 0.011497 | 0.011295 | 0.011396 | 0.011564 | 0.011329 |
| 0.011329 | 0.011396 | 0.011362 | 0.011530 | 0.011329 | 0.011463 | 0.011597 |
| 0.011530 | 0.011362 | 0.011362 | 0.011295 | 0.011295 | 0.011463 | 0.011396 |
| 0.011295 | 0.011396 | 0.011262 | 0.011295 | 0.011429 | 0.011497 | 0.011329 |
| 0.011295 | 0.011429 | 0.011363 | 0.011262 | 0.011530 | 0.011262 | 0.011429 |
| 0.011505 | 0.011329 | 0.011564 | 0.011463 | 0.011429 | 0.011362 | 0.011463 |
| 0.011329 | 0.011664 | 0.011262 | 0.011463 | 0.011262 | 0.011262 | 0.011262 |
| 0.011496 | 0.011631 | 0.011396 | 0.011463 | 0.011295 | 0.011631 | 0.011262 |
| 0.011329 | 0.011329 | 0.011362 | 0.011463 | 0.011362 | 0.011463 | 0.011530 |
| 0.011530 | 0.011497 | 0.011396 | 0.011497 | 0.011463 | 0.011329 | 0.011295 |
| 0.011329 | 0.011329 | 0.011396 | 0.011262 | 0.011295 | 0.011463 | 0.011329 |
| 0.011295 | 0.011362 | 0.011497 | 0.011463 | 0.011429 | 0.011362 | 0.011362 |
| 0.011429 | 0.011362 | 0.011463 | 0.011329 | 0.011463 | 0.011564 | 0.011799 |
| 0.011362 | 0.011698 | 0.011371 | 0.017861 | 0.011191 | 0.011488 | 0.011653 |
| 0.011614 | 0.011658 | 0.011374 | 0.011292 | 0.011774 | 0.011682 | 0.011425 |
| 0.011345 | 0.011610 | 0.011294 | 0.011311 | 0.011177 | 0.011357 | 0.011318 |
| 0.011342 | 0.011470 | 0.011431 | 0.011193 | 0.011497 | 0.011530 | 0.011534 |

|          |          |          |          |          |          |          |
|----------|----------|----------|----------|----------|----------|----------|
| 0.011404 | 0.011497 | 0.011497 | 0.011396 | 0.011429 | 0.011430 | 0.011396 |
| 0.011430 | 0.011362 | 0.011396 | 0.011430 | 0.011396 | 0.011329 | 0.011362 |
| 0.011362 | 0.011430 | 0.011329 | 0.011430 | 0.011463 | 0.011497 | 0.011396 |
| 0.011362 | 0.011329 | 0.011665 | 0.011665 | 0.011463 | 0.011497 | 0.011530 |
| 0.011295 | 0.011295 | 0.011329 | 0.011430 | 0.011295 | 0.011530 | 0.011530 |
| 0.011564 | 0.011564 | 0.011497 | 0.011597 | 0.011698 | 0.011599 | 0.011430 |
| 0.011430 | 0.011497 | 0.011530 | 0.011362 | 0.011430 | 0.011396 | 0.011430 |
| 0.011497 | 0.011497 | 0.011530 | 0.011497 | 0.011397 | 0.011597 | 0.011564 |
| 0.011433 | 0.011329 | 0.011430 | 0.011530 | 0.011430 | 0.011497 | 0.011597 |
| 0.011765 | 0.011470 | 0.011631 | 0.011597 | 0.011530 | 0.011698 | 0.011329 |
| 0.011498 | 0.011396 | 0.011362 | 0.011362 | 0.011430 | 0.011329 | 0.011430 |
| 0.011463 | 0.011497 | 0.011396 | 0.011362 | 0.011329 | 0.011665 | 0.011665 |
| 0.011463 | 0.011497 | 0.011564 | 0.011496 | 0.012069 | 0.011560 | 0.011482 |
| 0.011552 | 0.011511 | 0.011622 | 0.011510 | 0.011620 | 0.011543 | 0.011508 |
| 0.012022 | 0.011406 | 0.011540 | 0.011475 | 0.011749 | 0.011604 | 0.011707 |
| 0.012046 | 0.011475 | 0.011669 | 0.011732 | 0.011597 | 0.011530 | 0.011635 |
| 0.011295 | 0.011463 | 0.011597 | 0.011564 | 0.011567 | 0.011496 | 0.011464 |
| 0.011396 | 0.011329 | 0.011362 | 0.011396 | 0.011295 | 0.011362 | 0.011262 |
| 0.011329 | 0.011362 | 0.011329 | 0.011295 | 0.011396 | 0.011329 | 0.011362 |
| 0.011362 | 0.011295 | 0.011362 | 0.011396 | 0.011295 | 0.011497 | 0.011530 |
| 0.011429 | 0.011429 | 0.011429 | 0.011429 | 0.011362 | 0.011698 | 0.011396 |
| 0.011373 | 0.011362 | 0.011531 | 0.011535 | 0.011463 | 0.011463 | 0.011463 |
| 0.011463 | 0.011396 | 0.011362 | 0.011396 | 0.011497 | 0.011497 | 0.011429 |
| 0.011429 | 0.011564 | 0.011664 | 0.011463 | 0.011665 | 0.011665 | 0.011530 |
| 0.011362 | 0.011429 | 0.011463 | 0.011799 | 0.011430 | 0.011463 | 0.011429 |
| 0.011463 | 0.011329 | 0.011329 | 0.011631 | 0.011631 | 0.011597 | 0.011396 |
| 0.011497 | 0.011564 | 0.011429 | 0.011497 | 0.011463 | 0.011329 | 0.011597 |
| 0.011429 | 0.011396 | 0.011329 | 0.011564 | 0.011396 | 0.011496 | 0.011732 |
| 0.011429 | 0.011739 | 0.011732 | 0.011548 | 0.011117 | 0.011434 | 0.011163 |
| 0.011280 | 0.011722 | 0.011341 | 0.011417 | 0.011255 | 0.011417 | 0.011273 |
| 0.011366 | 0.011192 | 0.011283 | 0.011126 | 0.011276 | 0.011328 | 0.011506 |
| 0.011512 | 0.011414 | 0.011413 | 0.011412 | 0.011431 | 0.011497 | 0.011564 |
| 0.011564 | 0.011430 | 0.011534 | 0.011535 | 0.011670 | 0.011696 | 0.011429 |
| 0.011597 | 0.011463 | 0.011396 | 0.011430 | 0.011295 | 0.011463 | 0.011329 |
| 0.011329 | 0.011396 | 0.011362 | 0.011329 | 0.011362 | 0.011329 | 0.011430 |
| 0.011410 | 0.011410 | 0.011403 | 0.011437 | 0.011573 | 0.011538 | 0.011538 |
| 0.011537 | 0.011464 | 0.011282 | 0.011276 | 0.011399 | 0.011568 | 0.011569 |
| 0.011363 | 0.011433 | 0.011666 | 0.011635 | 0.011565 | 0.011599 | 0.011530 |
| 0.011463 | 0.011530 | 0.011530 | 0.011429 | 0.011934 | 0.011597 | 0.011665 |
| 0.011698 | 0.011665 | 0.011401 | 0.011476 | 0.011362 | 0.011564 | 0.011530 |
| 0.011565 | 0.011597 | 0.011597 | 0.011597 | 0.011689 | 0.011732 | 0.011338 |
| 0.011263 | 0.011268 | 0.011367 | 0.011332 | 0.011368 | 0.011209 | 0.011536 |
| 0.011403 | 0.011367 | 0.011156 | 0.011435 | 0.011396 | 0.011471 | 0.011362 |
| 0.011329 | 0.011262 | 0.011396 | 0.011362 | 0.011497 | 0.011463 | 0.011396 |
| 0.011497 | 0.011564 | 0.011362 | 0.011362 | 0.011396 | 0.011396 | 0.011398 |
| 0.011466 | 0.011396 | 0.011396 | 0.011431 | 0.011497 | 0.011564 | 0.011564 |
| 0.011430 | 0.011534 | 0.011535 | 0.011670 | 0.011696 | 0.011429 | 0.011597 |
| 0.011530 | 0.011530 | 0.011365 | 0.011513 | 0.011442 | 0.011469 | 0.011340 |
| 0.011542 | 0.011698 | 0.011526 | 0.011434 | 0.011329 | 0.011530 | 0.011396 |
| 0.011497 | 0.011430 | 0.011329 | 0.011431 | 0.011530 | 0.011533 | 0.011430 |
| 0.011329 | 0.011263 | 0.011396 | 0.011329 | 0.011262 | 0.011366 | 0.011531 |
| 0.011430 | 0.011362 | 0.011396 | 0.011430 | 0.011396 | 0.011329 | 0.011463 |
| 0.011396 | 0.011429 | 0.011429 | 0.011362 | 0.011429 | 0.011664 | 0.011262 |
| 0.011362 | 0.011698 | 0.011362 | 0.011396 | 0.011362 | 0.011664 | 0.011189 |
| 0.011566 | 0.011315 | 0.011110 | 0.011463 | 0.011549 | 0.011491 | 0.011186 |
| 0.000000 | 0.011463 | 0.011564 | 0.011671 | 0.011532 | 0.011669 | 0.011800 |
| 0.011700 | 0.011737 | 0.011698 | 0.011949 | 0.011664 | 0.012539 | 0.011700 |
| 0.012439 | 0.012207 | 0.012341 | 0.012613 | 0.011664 | 0.011363 | 0.011665 |
| 0.012104 | 0.012038 | 0.011631 | 0.011530 | 0.011598 | 0.011598 | 0.011567 |
| 0.011463 | 0.011467 | 0.011530 | 0.011497 | 0.011867 | 0.011933 | 0.011935 |

|          |          |          |          |          |          |          |
|----------|----------|----------|----------|----------|----------|----------|
| 0.011834 | 0.011935 | 0.012038 | 0.011804 | 0.012104 | 0.012110 | 0.012171 |
| 0.012172 | 0.012206 | 0.012152 | 0.012172 | 0.012173 | 0.011463 | 0.011699 |
| 0.011767 | 0.012270 | 0.011772 | 0.012001 | 0.012474 | 0.011536 | 0.011430 |
| 0.011396 | 0.011396 | 0.011867 | 0.011883 | 0.012010 | 0.011732 | 0.011397 |
| S062     | 0.011832 | 0.011832 | 0.012101 | 0.011866 | 0.011866 | 0.011933 |
| 0.011773 | 0.011705 | 0.011933 | 0.011429 | 0.011496 | 0.011464 | 0.011429 |
| 0.011396 | 0.011631 | 0.011362 | 0.011463 | 0.011530 | 0.011496 | 0.011463 |
| 0.011429 | 0.011463 | 0.011496 | 0.011430 | 0.011463 | 0.011463 | 0.011739 |
| 0.011631 | 0.011463 | 0.011362 | 0.011530 | 0.011530 | 0.011497 | 0.011530 |
| 0.011496 | 0.011597 | 0.011496 | 0.011496 | 0.011530 | 0.011496 | 0.011664 |
| 0.011362 | 0.011496 | 0.011530 | 0.011463 | 0.011496 | 0.011597 | 0.011530 |
| 0.011496 | 0.011665 | 0.011564 | 0.011765 | 0.011496 | 0.011765 | 0.011496 |
| 0.011463 | 0.011497 | 0.011631 | 0.011765 | 0.011799 | 0.011497 | 0.000000 |
| 0.011530 | 0.011597 | 0.011497 | 0.011731 | 0.011900 | 0.011496 | 0.011564 |
| 0.011463 | 0.011564 | 0.011530 | 0.011597 | 0.011530 | 0.011530 | 0.011530 |
| 0.011429 | 0.011463 | 0.011429 | 0.011463 | 0.011496 | 0.011531 | 0.011597 |
| 0.011530 | 0.011496 | 0.011564 | 0.011463 | 0.011530 | 0.011429 | 0.011496 |
| 0.011664 | 0.011597 | 0.011832 | 0.011664 | 0.011496 | 0.011732 | 0.011496 |
| 0.011691 | 0.011807 | 0.011739 | 0.011412 | 0.011433 | 0.011539 | 0.011533 |
| 0.012195 | 0.011569 | 0.011472 | 0.011731 | 0.011732 | 0.011463 | 0.011564 |
| 0.011564 | 0.011530 | 0.011597 | 0.011496 | 0.011597 | 0.011530 | 0.011530 |
| 0.011496 | 0.011530 | 0.011799 | 0.011664 | 0.011564 | 0.011530 | 0.011463 |
| 0.011430 | 0.011362 | 0.011497 | 0.011463 | 0.011597 | 0.011564 | 0.011497 |
| 0.011597 | 0.011665 | 0.011463 | 0.011463 | 0.011497 | 0.011497 | 0.011499 |
| 0.011567 | 0.011497 | 0.011497 | 0.011384 | 0.011458 | 0.011411 | 0.011497 |
| 0.011500 | 0.011438 | 0.011503 | 0.011474 | 0.011400 | 0.011437 | 0.011466 |
| 0.011636 | 0.011508 | 0.011542 | 0.011430 | 0.011440 | 0.011565 | 0.011464 |
| 0.011531 | 0.011532 | 0.011531 | 0.011631 | 0.011564 | 0.011933 | 0.011665 |
| 0.011698 | 0.011295 | 0.011497 | 0.011262 | 0.011396 | 0.011564 | 0.011430 |
| 0.011496 | 0.011496 | 0.011463 | 0.011429 | 0.011463 | 0.011429 | 0.011530 |
| 0.011497 | 0.011597 | 0.011530 | 0.011429 | 0.011532 | 0.011631 | 0.011635 |
| 0.011631 | 0.011530 | 0.011429 | 0.011364 | 0.011497 | 0.011430 | 0.011363 |
| 0.011468 | 0.011631 | 0.011430 | 0.011631 | 0.011396 | 0.011497 | 0.011463 |
| 0.011564 | 0.011463 | 0.011497 | 0.011463 | 0.011497 | 0.011362 | 0.011497 |
| 0.011530 | 0.011463 | 0.011530 | 0.011463 | 0.011497 | 0.011530 | 0.011765 |
| 0.011732 | 0.011732 | 0.011799 | 0.011633 | 0.011799 | 0.011497 | 0.011463 |
| 0.011432 | 0.011667 | 0.011563 | 0.011403 | 0.011773 | 0.011367 | 0.011493 |
| 0.011807 | 0.011706 | 0.011664 | 0.011866 | 0.011572 | 0.011732 | 0.011698 |
| 0.011631 | 0.011799 | 0.011664 | 0.011472 | 0.011563 | 0.011530 | 0.011602 |
| 0.011698 | 0.011600 | 0.011736 | 0.011805 | 0.011732 | 0.011732 | 0.011907 |
| 0.011635 | 0.011807 | 0.011737 | 0.011669 | 0.011935 | 0.011396 | 0.011599 |
| 0.011564 | 0.011496 | 0.011396 | 0.011396 | 0.011463 | 0.011463 | 0.011530 |
| 0.011463 | 0.011530 | 0.011429 | 0.011463 | 0.011463 | 0.011463 | 0.011530 |
| 0.011463 | 0.011832 | 0.011732 | 0.011765 | 0.011362 | 0.011463 | 0.011497 |
| 0.011496 | 0.011463 | 0.011530 | 0.011228 | 0.011429 | 0.011429 | 0.011429 |
| 0.011900 | 0.011530 | 0.011597 | 0.011396 | 0.011496 | 0.011665 | 0.011429 |
| 0.011429 | 0.011496 | 0.011463 | 0.011631 | 0.011429 | 0.011564 | 0.011698 |
| 0.011631 | 0.011463 | 0.011463 | 0.011396 | 0.011396 | 0.011564 | 0.011496 |
| 0.011396 | 0.011496 | 0.011362 | 0.011396 | 0.011530 | 0.011530 | 0.011429 |
| 0.011396 | 0.011530 | 0.011463 | 0.011362 | 0.011631 | 0.011362 | 0.011530 |
| 0.011608 | 0.011429 | 0.011664 | 0.011564 | 0.011530 | 0.011463 | 0.011564 |
| 0.011429 | 0.011765 | 0.011362 | 0.011564 | 0.011362 | 0.011362 | 0.011362 |
| 0.011597 | 0.011732 | 0.011497 | 0.011564 | 0.011396 | 0.011732 | 0.011362 |
| 0.011429 | 0.011429 | 0.011463 | 0.011564 | 0.011396 | 0.011564 | 0.011631 |
| 0.011631 | 0.011597 | 0.011496 | 0.011597 | 0.011564 | 0.011429 | 0.011396 |
| 0.011429 | 0.011429 | 0.011497 | 0.011362 | 0.011396 | 0.011564 | 0.011429 |
| 0.011396 | 0.011463 | 0.011597 | 0.011564 | 0.011530 | 0.011463 | 0.011463 |
| 0.011530 | 0.011463 | 0.011564 | 0.011429 | 0.011564 | 0.011664 | 0.011900 |
| 0.011463 | 0.011799 | 0.011474 | 0.018012 | 0.011387 | 0.011549 | 0.011758 |
| 0.011718 | 0.011764 | 0.011584 | 0.011466 | 0.011884 | 0.011785 | 0.011607 |

|          |          |          |          |          |          |          |
|----------|----------|----------|----------|----------|----------|----------|
| 0.011677 | 0.011671 | 0.011372 | 0.011521 | 0.011294 | 0.011505 | 0.011404 |
| 0.011623 | 0.011582 | 0.011579 | 0.011391 | 0.011597 | 0.011631 | 0.011635 |
| 0.011507 | 0.011597 | 0.011597 | 0.011430 | 0.011530 | 0.011530 | 0.011497 |
| 0.011530 | 0.011463 | 0.011497 | 0.011530 | 0.011497 | 0.011430 | 0.011463 |
| 0.011463 | 0.011530 | 0.011430 | 0.011530 | 0.011564 | 0.011597 | 0.011496 |
| 0.011463 | 0.011430 | 0.011765 | 0.011765 | 0.011564 | 0.011598 | 0.011631 |
| 0.011396 | 0.011396 | 0.011430 | 0.011530 | 0.011396 | 0.011631 | 0.011631 |
| 0.011665 | 0.011664 | 0.011597 | 0.011698 | 0.011799 | 0.011666 | 0.011530 |
| 0.011530 | 0.011597 | 0.011631 | 0.011463 | 0.011530 | 0.011497 | 0.011530 |
| 0.011598 | 0.011598 | 0.011631 | 0.011598 | 0.011498 | 0.011698 | 0.011665 |
| 0.011500 | 0.011430 | 0.011530 | 0.011631 | 0.011530 | 0.011598 | 0.011698 |
| 0.011866 | 0.011572 | 0.011732 | 0.011698 | 0.011631 | 0.011799 | 0.011430 |
| 0.011599 | 0.011497 | 0.011463 | 0.011463 | 0.011530 | 0.011430 | 0.011530 |
| 0.011564 | 0.011597 | 0.011496 | 0.011463 | 0.011430 | 0.011765 | 0.011765 |
| 0.011564 | 0.011598 | 0.011664 | 0.011597 | 0.012170 | 0.011667 | 0.011588 |
| 0.011658 | 0.011615 | 0.011728 | 0.011614 | 0.011725 | 0.011646 | 0.011612 |
| 0.012125 | 0.011510 | 0.011642 | 0.011579 | 0.011783 | 0.011706 | 0.011809 |
| 0.012148 | 0.011626 | 0.011770 | 0.011832 | 0.011698 | 0.011631 | 0.011736 |
| 0.011396 | 0.011564 | 0.011698 | 0.011664 | 0.011668 | 0.011597 | 0.011565 |
| 0.011496 | 0.011429 | 0.011463 | 0.011496 | 0.011396 | 0.011463 | 0.011362 |
| 0.011429 | 0.011463 | 0.011429 | 0.011396 | 0.011496 | 0.011429 | 0.011463 |
| 0.011463 | 0.011396 | 0.011463 | 0.011497 | 0.011396 | 0.011597 | 0.011631 |
| 0.011530 | 0.011530 | 0.011530 | 0.011530 | 0.011463 | 0.011799 | 0.011496 |
| 0.011478 | 0.011463 | 0.011631 | 0.011637 | 0.011564 | 0.011564 | 0.011564 |
| 0.011564 | 0.011497 | 0.011463 | 0.011497 | 0.011597 | 0.011597 | 0.011530 |
| 0.011530 | 0.011664 | 0.011765 | 0.011564 | 0.011765 | 0.011765 | 0.011631 |
| 0.011463 | 0.011530 | 0.011564 | 0.011900 | 0.011530 | 0.011564 | 0.011530 |
| 0.011564 | 0.011429 | 0.011429 | 0.011732 | 0.011732 | 0.011698 | 0.011496 |
| 0.011597 | 0.011664 | 0.011530 | 0.011597 | 0.011564 | 0.011429 | 0.011698 |
| 0.011530 | 0.011496 | 0.011429 | 0.011664 | 0.011496 | 0.011597 | 0.011832 |
| 0.011530 | 0.011841 | 0.011832 | 0.011629 | 0.011286 | 0.011536 | 0.011422 |
| 0.011390 | 0.011839 | 0.011447 | 0.011596 | 0.011451 | 0.011518 | 0.011538 |
| 0.011519 | 0.011455 | 0.011561 | 0.011324 | 0.011545 | 0.011462 | 0.011628 |
| 0.011625 | 0.011532 | 0.011518 | 0.011483 | 0.011532 | 0.011597 | 0.011665 |
| 0.011665 | 0.011262 | 0.011364 | 0.011636 | 0.011704 | 0.011519 | 0.011530 |
| 0.011698 | 0.011295 | 0.011497 | 0.011262 | 0.011396 | 0.011564 | 0.011430 |
| 0.011496 | 0.011496 | 0.011463 | 0.011429 | 0.011463 | 0.011429 | 0.011530 |
| 0.011514 | 0.011480 | 0.011505 | 0.011540 | 0.011676 | 0.011641 | 0.011641 |
| 0.011639 | 0.011565 | 0.011393 | 0.011384 | 0.011501 | 0.011670 | 0.011671 |
| 0.011464 | 0.011534 | 0.011767 | 0.011736 | 0.011666 | 0.011700 | 0.011631 |
| 0.011564 | 0.011631 | 0.011631 | 0.011530 | 0.012034 | 0.011698 | 0.011765 |
| 0.011799 | 0.011772 | 0.011503 | 0.011580 | 0.011463 | 0.011664 | 0.011631 |
| 0.011666 | 0.011698 | 0.011698 | 0.011698 | 0.011768 | 0.011832 | 0.011476 |
| 0.011364 | 0.011372 | 0.011469 | 0.011434 | 0.011470 | 0.011396 | 0.011638 |
| 0.011506 | 0.011411 | 0.011298 | 0.011510 | 0.011497 | 0.011573 | 0.011463 |
| 0.011430 | 0.011362 | 0.011497 | 0.011463 | 0.011597 | 0.011564 | 0.011497 |
| 0.011597 | 0.011665 | 0.011463 | 0.011463 | 0.011497 | 0.011497 | 0.011499 |
| 0.011567 | 0.011497 | 0.011497 | 0.011532 | 0.011597 | 0.011665 | 0.011665 |
| 0.011262 | 0.011364 | 0.011636 | 0.011704 | 0.011519 | 0.011530 | 0.011698 |
| 0.011631 | 0.011631 | 0.011466 | 0.011652 | 0.011581 | 0.011605 | 0.011481 |
| 0.011646 | 0.011789 | 0.011568 | 0.011536 | 0.011430 | 0.011631 | 0.011497 |
| 0.011597 | 0.011530 | 0.011429 | 0.011532 | 0.011631 | 0.011635 | 0.011530 |
| 0.011429 | 0.011364 | 0.011497 | 0.011430 | 0.011363 | 0.011468 | 0.011631 |
| 0.011530 | 0.011463 | 0.011497 | 0.011530 | 0.011497 | 0.011430 | 0.011564 |
| 0.011496 | 0.011530 | 0.011530 | 0.011463 | 0.011530 | 0.011765 | 0.011362 |
| 0.011463 | 0.011799 | 0.011463 | 0.011496 | 0.011463 | 0.011765 | 0.011489 |
| 0.011791 | 0.011485 | 0.011411 | 0.011624 | 0.011712 | 0.011599 | 0.011436 |
| 0.011270 | 0.011564 | 0.011664 | 0.011773 | 0.011632 | 0.011771 | 0.011901 |
| 0.011800 | 0.011838 | 0.011799 | 0.012051 | 0.011765 | 0.012573 | 0.011801 |
| 0.012540 | 0.012241 | 0.012375 | 0.012714 | 0.011765 | 0.011463 | 0.011766 |

|          |          |          |          |          |          |          |
|----------|----------|----------|----------|----------|----------|----------|
| 0.012205 | 0.012140 | 0.011732 | 0.011631 | 0.011699 | 0.011699 | 0.011669 |
| 0.011564 | 0.011569 | 0.011631 | 0.011598 | 0.011968 | 0.011967 | 0.012036 |
| 0.011935 | 0.012035 | 0.012139 | 0.011838 | 0.012205 | 0.012212 | 0.012272 |
| 0.012273 | 0.012307 | 0.012255 | 0.012273 | 0.012274 | 0.011564 | 0.011800 |
| 0.011868 | 0.012371 | 0.011874 | 0.012102 | 0.012575 | 0.011638 | 0.011531 |
| 0.011496 | 0.011496 | 0.011968 | 0.011965 | 0.012116 | 0.011832 | 0.011498 |
| S063     | 0.011698 | 0.011698 | 0.012034 | 0.011799 | 0.011799 | 0.011866 |
| 0.011705 | 0.011637 | 0.011866 | 0.011295 | 0.011362 | 0.011329 | 0.011295 |
| 0.011329 | 0.011496 | 0.011295 | 0.011329 | 0.011396 | 0.011362 | 0.011329 |
| 0.011295 | 0.011329 | 0.011429 | 0.011295 | 0.011262 | 0.011329 | 0.011671 |
| 0.011564 | 0.011329 | 0.011228 | 0.011463 | 0.011329 | 0.011362 | 0.011329 |
| 0.011362 | 0.011396 | 0.011362 | 0.011362 | 0.011396 | 0.011362 | 0.011530 |
| 0.011295 | 0.011362 | 0.011396 | 0.011329 | 0.011429 | 0.011463 | 0.011396 |
| 0.011362 | 0.011530 | 0.011430 | 0.011698 | 0.011362 | 0.011564 | 0.011362 |
| 0.011329 | 0.011429 | 0.011496 | 0.011564 | 0.011731 | 0.011429 | 0.011530 |
| 0.000000 | 0.011396 | 0.011362 | 0.011329 | 0.011832 | 0.011362 | 0.011429 |
| 0.011329 | 0.011429 | 0.011396 | 0.011463 | 0.011396 | 0.011396 | 0.011396 |
| 0.011295 | 0.011329 | 0.011295 | 0.011396 | 0.011362 | 0.011397 | 0.011463 |
| 0.011396 | 0.011362 | 0.011362 | 0.011329 | 0.011463 | 0.011228 | 0.011362 |
| 0.011530 | 0.011463 | 0.011698 | 0.011530 | 0.011362 | 0.011530 | 0.011362 |
| 0.011542 | 0.011770 | 0.011588 | 0.011295 | 0.011284 | 0.011391 | 0.011493 |
| 0.012121 | 0.011518 | 0.011307 | 0.011597 | 0.011597 | 0.011396 | 0.011496 |
| 0.011429 | 0.011396 | 0.011463 | 0.011362 | 0.011463 | 0.011329 | 0.011396 |
| 0.011362 | 0.011463 | 0.011664 | 0.011530 | 0.011429 | 0.011396 | 0.011262 |
| 0.011295 | 0.011295 | 0.011295 | 0.011329 | 0.011530 | 0.011497 | 0.011429 |
| 0.011530 | 0.011597 | 0.011329 | 0.011329 | 0.011362 | 0.011362 | 0.011364 |
| 0.011432 | 0.011362 | 0.011362 | 0.011204 | 0.011313 | 0.011271 | 0.011363 |
| 0.011365 | 0.011301 | 0.011355 | 0.011336 | 0.011264 | 0.011266 | 0.011330 |
| 0.011600 | 0.011370 | 0.011336 | 0.011296 | 0.011302 | 0.011430 | 0.011396 |
| 0.011464 | 0.011397 | 0.011396 | 0.011496 | 0.011429 | 0.011731 | 0.011597 |
| 0.011631 | 0.011497 | 0.011362 | 0.011463 | 0.011262 | 0.011496 | 0.011295 |
| 0.011362 | 0.011362 | 0.011329 | 0.011295 | 0.011329 | 0.011295 | 0.011396 |
| 0.011295 | 0.011396 | 0.011396 | 0.011295 | 0.011397 | 0.011497 | 0.011499 |
| 0.011430 | 0.011396 | 0.011295 | 0.011229 | 0.011295 | 0.011295 | 0.011228 |
| 0.011332 | 0.011430 | 0.011228 | 0.011430 | 0.011262 | 0.011362 | 0.011329 |
| 0.011362 | 0.011329 | 0.011295 | 0.011329 | 0.011362 | 0.011228 | 0.011295 |
| 0.011329 | 0.011329 | 0.011396 | 0.011329 | 0.011362 | 0.011396 | 0.011631 |
| 0.011732 | 0.011664 | 0.011732 | 0.011498 | 0.011732 | 0.011362 | 0.011329 |
| 0.011364 | 0.011586 | 0.011472 | 0.011266 | 0.011739 | 0.011231 | 0.011375 |
| 0.011739 | 0.011638 | 0.011530 | 0.011732 | 0.011436 | 0.011597 | 0.011497 |
| 0.011496 | 0.011664 | 0.011522 | 0.011349 | 0.011395 | 0.011396 | 0.011466 |
| 0.011564 | 0.011465 | 0.011601 | 0.011601 | 0.011597 | 0.011665 | 0.011772 |
| 0.011500 | 0.011603 | 0.011602 | 0.011533 | 0.011800 | 0.011262 | 0.011464 |
| 0.011362 | 0.011362 | 0.011262 | 0.011262 | 0.011262 | 0.011329 | 0.011396 |
| 0.011262 | 0.011329 | 0.011228 | 0.011396 | 0.011262 | 0.011329 | 0.011396 |
| 0.011329 | 0.011765 | 0.011664 | 0.011698 | 0.011228 | 0.011329 | 0.011362 |
| 0.011362 | 0.011329 | 0.011396 | 0.011429 | 0.011295 | 0.011295 | 0.011295 |
| 0.011832 | 0.011463 | 0.011463 | 0.011262 | 0.011362 | 0.011463 | 0.011295 |
| 0.011295 | 0.011362 | 0.011329 | 0.011429 | 0.011295 | 0.011429 | 0.011496 |
| 0.011496 | 0.011329 | 0.011329 | 0.011262 | 0.011262 | 0.011429 | 0.011362 |
| 0.011262 | 0.011362 | 0.011228 | 0.011262 | 0.011396 | 0.011530 | 0.011295 |
| 0.011262 | 0.011396 | 0.011329 | 0.011228 | 0.011564 | 0.011195 | 0.011396 |
| 0.011402 | 0.011295 | 0.011597 | 0.011429 | 0.011463 | 0.011329 | 0.011429 |
| 0.011295 | 0.011564 | 0.011228 | 0.011496 | 0.011295 | 0.011295 | 0.011228 |
| 0.011396 | 0.011665 | 0.011362 | 0.011429 | 0.011262 | 0.011664 | 0.011295 |
| 0.011295 | 0.011295 | 0.011329 | 0.011362 | 0.011329 | 0.011429 | 0.011496 |
| 0.011496 | 0.011463 | 0.011362 | 0.011463 | 0.011094 | 0.011295 | 0.011262 |
| 0.011295 | 0.011295 | 0.011362 | 0.011295 | 0.011194 | 0.011429 | 0.011295 |
| 0.011329 | 0.011329 | 0.011463 | 0.011496 | 0.011396 | 0.011262 | 0.011329 |
| 0.011396 | 0.011329 | 0.011429 | 0.011295 | 0.011429 | 0.011530 | 0.011832 |

|          |          |          |          |          |          |          |
|----------|----------|----------|----------|----------|----------|----------|
| 0.011329 | 0.011732 | 0.011336 | 0.017861 | 0.011322 | 0.011427 | 0.011688 |
| 0.011648 | 0.011693 | 0.011374 | 0.011408 | 0.011719 | 0.011716 | 0.011364 |
| 0.011582 | 0.011548 | 0.011255 | 0.011270 | 0.011294 | 0.011406 | 0.011318 |
| 0.011576 | 0.011507 | 0.011468 | 0.011325 | 0.011463 | 0.011497 | 0.011500 |
| 0.011301 | 0.011463 | 0.011463 | 0.011429 | 0.011396 | 0.011396 | 0.011362 |
| 0.011396 | 0.011329 | 0.011362 | 0.011396 | 0.011362 | 0.011295 | 0.011329 |
| 0.011329 | 0.011396 | 0.011295 | 0.011396 | 0.011429 | 0.011463 | 0.011362 |
| 0.011396 | 0.011362 | 0.011698 | 0.011698 | 0.011430 | 0.011464 | 0.011497 |
| 0.011262 | 0.011262 | 0.011295 | 0.011329 | 0.011262 | 0.011497 | 0.011497 |
| 0.011530 | 0.011530 | 0.011463 | 0.011564 | 0.011732 | 0.011565 | 0.011329 |
| 0.011396 | 0.011463 | 0.011429 | 0.011329 | 0.011396 | 0.011362 | 0.011396 |
| 0.011463 | 0.011463 | 0.011497 | 0.011396 | 0.011296 | 0.011564 | 0.011463 |
| 0.011399 | 0.011295 | 0.011396 | 0.011497 | 0.011396 | 0.011530 | 0.011564 |
| 0.011732 | 0.011436 | 0.011597 | 0.011497 | 0.011496 | 0.011664 | 0.011295 |
| 0.011464 | 0.011363 | 0.011329 | 0.011329 | 0.011396 | 0.011295 | 0.011396 |
| 0.011429 | 0.011463 | 0.011362 | 0.011396 | 0.011362 | 0.011698 | 0.011698 |
| 0.011430 | 0.011464 | 0.011530 | 0.011463 | 0.012103 | 0.011489 | 0.011412 |
| 0.011482 | 0.011476 | 0.011587 | 0.011441 | 0.011585 | 0.011508 | 0.011474 |
| 0.012056 | 0.011372 | 0.011505 | 0.011441 | 0.011714 | 0.011570 | 0.011604 |
| 0.012080 | 0.011512 | 0.011635 | 0.011698 | 0.011564 | 0.011564 | 0.011601 |
| 0.011262 | 0.011362 | 0.011564 | 0.011530 | 0.011533 | 0.011530 | 0.011498 |
| 0.011362 | 0.011228 | 0.011262 | 0.011362 | 0.011194 | 0.011329 | 0.011228 |
| 0.011362 | 0.011396 | 0.011295 | 0.011262 | 0.011362 | 0.011295 | 0.011329 |
| 0.011329 | 0.011262 | 0.011329 | 0.011362 | 0.011262 | 0.011396 | 0.011496 |
| 0.011396 | 0.011463 | 0.011396 | 0.011396 | 0.011329 | 0.011731 | 0.011362 |
| 0.011373 | 0.011329 | 0.011564 | 0.011569 | 0.011362 | 0.011429 | 0.011429 |
| 0.011429 | 0.011295 | 0.011329 | 0.011295 | 0.011463 | 0.011463 | 0.011396 |
| 0.011396 | 0.011530 | 0.011698 | 0.011429 | 0.011631 | 0.011631 | 0.011496 |
| 0.011329 | 0.011396 | 0.011429 | 0.011832 | 0.011396 | 0.011362 | 0.011396 |
| 0.011429 | 0.011362 | 0.011362 | 0.011665 | 0.011530 | 0.011631 | 0.011362 |
| 0.011463 | 0.011530 | 0.011396 | 0.011463 | 0.011429 | 0.011295 | 0.011631 |
| 0.011396 | 0.011362 | 0.011362 | 0.011530 | 0.011362 | 0.011463 | 0.011698 |
| 0.011396 | 0.011773 | 0.011765 | 0.011588 | 0.011286 | 0.011468 | 0.011370 |
| 0.011280 | 0.011800 | 0.011306 | 0.011551 | 0.011304 | 0.011518 | 0.011485 |
| 0.011519 | 0.011258 | 0.011450 | 0.011258 | 0.011276 | 0.011462 | 0.011425 |
| 0.011437 | 0.011296 | 0.011448 | 0.011377 | 0.011397 | 0.011530 | 0.011597 |
| 0.011597 | 0.011464 | 0.011567 | 0.011569 | 0.011704 | 0.011732 | 0.011396 |
| 0.011631 | 0.011497 | 0.011362 | 0.011463 | 0.011262 | 0.011496 | 0.011295 |
| 0.011362 | 0.011362 | 0.011329 | 0.011295 | 0.011329 | 0.011295 | 0.011396 |
| 0.011375 | 0.011375 | 0.011368 | 0.011403 | 0.011539 | 0.011436 | 0.011504 |
| 0.011503 | 0.011430 | 0.011245 | 0.011240 | 0.011365 | 0.011535 | 0.011535 |
| 0.011329 | 0.011399 | 0.011632 | 0.011601 | 0.011531 | 0.011565 | 0.011496 |
| 0.011429 | 0.011496 | 0.011496 | 0.011396 | 0.011967 | 0.011564 | 0.011631 |
| 0.011665 | 0.011737 | 0.011367 | 0.011441 | 0.011329 | 0.011530 | 0.011496 |
| 0.011531 | 0.011564 | 0.011564 | 0.011564 | 0.011728 | 0.011698 | 0.011338 |
| 0.011229 | 0.011199 | 0.011332 | 0.011298 | 0.011368 | 0.011209 | 0.011570 |
| 0.011369 | 0.011411 | 0.011203 | 0.011360 | 0.011363 | 0.011437 | 0.011262 |
| 0.011295 | 0.011295 | 0.011295 | 0.011329 | 0.011530 | 0.011497 | 0.011429 |
| 0.011530 | 0.011597 | 0.011329 | 0.011329 | 0.011362 | 0.011362 | 0.011364 |
| 0.011432 | 0.011362 | 0.011362 | 0.011397 | 0.011530 | 0.011597 | 0.011597 |
| 0.011464 | 0.011567 | 0.011569 | 0.011704 | 0.011732 | 0.011396 | 0.011564 |
| 0.011496 | 0.011496 | 0.011331 | 0.011513 | 0.011408 | 0.011469 | 0.011340 |
| 0.011439 | 0.011653 | 0.011441 | 0.011400 | 0.011228 | 0.011430 | 0.011295 |
| 0.011396 | 0.011396 | 0.011295 | 0.011397 | 0.011497 | 0.011499 | 0.011396 |
| 0.011295 | 0.011229 | 0.011295 | 0.011295 | 0.011228 | 0.011332 | 0.011430 |
| 0.011396 | 0.011329 | 0.011362 | 0.011396 | 0.011362 | 0.011295 | 0.011497 |
| 0.011362 | 0.011396 | 0.011396 | 0.011329 | 0.011396 | 0.011631 | 0.011295 |
| 0.011329 | 0.011731 | 0.011329 | 0.011295 | 0.011329 | 0.011698 | 0.011317 |
| 0.011734 | 0.011315 | 0.011311 | 0.011543 | 0.011630 | 0.011527 | 0.011269 |
| 0.011323 | 0.011496 | 0.011597 | 0.011671 | 0.011565 | 0.011703 | 0.011834 |



|          |          |          |          |          |          |          |
|----------|----------|----------|----------|----------|----------|----------|
| 0.011733 | 0.011770 | 0.011731 | 0.011983 | 0.011698 | 0.012573 | 0.011734 |
| 0.012473 | 0.012241 | 0.012375 | 0.012646 | 0.011698 | 0.011396 | 0.011698 |
| 0.012137 | 0.012072 | 0.011664 | 0.011564 | 0.011632 | 0.011632 | 0.011601 |
| 0.011496 | 0.011501 | 0.011564 | 0.011531 | 0.011901 | 0.011967 | 0.011968 |
| 0.011867 | 0.011968 | 0.012072 | 0.011838 | 0.012138 | 0.012144 | 0.012205 |
| 0.012205 | 0.012239 | 0.012186 | 0.012205 | 0.012207 | 0.011429 | 0.011732 |
| 0.011800 | 0.012303 | 0.011806 | 0.012034 | 0.012508 | 0.011570 | 0.011464 |
| 0.011429 | 0.011429 | 0.011900 | 0.011924 | 0.012045 | 0.011765 | 0.011431 |
| S064     | 0.011765 | 0.011765 | 0.012102 | 0.011866 | 0.011866 | 0.011933 |
| 0.011773 | 0.011705 | 0.011933 | 0.011362 | 0.011429 | 0.011397 | 0.011362 |
| 0.011396 | 0.011564 | 0.011362 | 0.011396 | 0.011463 | 0.011429 | 0.011396 |
| 0.011362 | 0.011396 | 0.011496 | 0.011363 | 0.011329 | 0.011396 | 0.011739 |
| 0.011631 | 0.011396 | 0.011295 | 0.011530 | 0.011396 | 0.011430 | 0.011396 |
| 0.011429 | 0.011329 | 0.011429 | 0.011429 | 0.011463 | 0.011429 | 0.011597 |
| 0.011362 | 0.011429 | 0.011463 | 0.011396 | 0.011496 | 0.011530 | 0.011463 |
| 0.011429 | 0.011597 | 0.011497 | 0.011765 | 0.011429 | 0.011631 | 0.011429 |
| 0.011396 | 0.011497 | 0.011564 | 0.011631 | 0.011799 | 0.011497 | 0.011597 |
| 0.011396 | 0.000000 | 0.011430 | 0.011597 | 0.011900 | 0.011429 | 0.011497 |
| 0.011396 | 0.011496 | 0.011463 | 0.011530 | 0.011463 | 0.011463 | 0.011463 |
| 0.011362 | 0.011396 | 0.011362 | 0.011463 | 0.011429 | 0.011464 | 0.011530 |
| 0.011463 | 0.011429 | 0.011429 | 0.011396 | 0.011530 | 0.011295 | 0.011429 |
| 0.011597 | 0.011530 | 0.011765 | 0.011530 | 0.011429 | 0.011597 | 0.011429 |
| 0.011579 | 0.011807 | 0.011664 | 0.011295 | 0.011284 | 0.011465 | 0.011493 |
| 0.012158 | 0.011467 | 0.011349 | 0.011664 | 0.011664 | 0.011463 | 0.011564 |
| 0.011497 | 0.011463 | 0.011530 | 0.011429 | 0.011530 | 0.011396 | 0.011463 |
| 0.011429 | 0.011530 | 0.011732 | 0.011597 | 0.011497 | 0.011463 | 0.011329 |
| 0.011362 | 0.011362 | 0.011362 | 0.011396 | 0.011597 | 0.011564 | 0.011497 |
| 0.011597 | 0.011665 | 0.011396 | 0.011396 | 0.011430 | 0.011429 | 0.011432 |
| 0.011500 | 0.011430 | 0.011430 | 0.011276 | 0.011386 | 0.011341 | 0.011430 |
| 0.011433 | 0.011370 | 0.011429 | 0.011405 | 0.011332 | 0.011369 | 0.011398 |
| 0.011672 | 0.011439 | 0.011405 | 0.011363 | 0.011371 | 0.011498 | 0.011464 |
| 0.011531 | 0.011465 | 0.011464 | 0.011564 | 0.011496 | 0.011799 | 0.011665 |
| 0.011698 | 0.011564 | 0.011429 | 0.011530 | 0.011329 | 0.011564 | 0.011362 |
| 0.011429 | 0.011429 | 0.011396 | 0.011362 | 0.011396 | 0.011362 | 0.011463 |
| 0.011362 | 0.011463 | 0.011463 | 0.011362 | 0.011465 | 0.011564 | 0.011533 |
| 0.011497 | 0.011463 | 0.011362 | 0.011296 | 0.011430 | 0.011362 | 0.011295 |
| 0.011400 | 0.011497 | 0.011295 | 0.011497 | 0.011329 | 0.011430 | 0.011396 |
| 0.011430 | 0.011396 | 0.011362 | 0.011396 | 0.011430 | 0.011295 | 0.011362 |
| 0.011396 | 0.011396 | 0.011463 | 0.011396 | 0.011430 | 0.011463 | 0.011698 |
| 0.011799 | 0.011732 | 0.011799 | 0.011566 | 0.011799 | 0.011429 | 0.011396 |
| 0.011432 | 0.011626 | 0.011380 | 0.011335 | 0.011807 | 0.011299 | 0.011454 |
| 0.011807 | 0.011706 | 0.011597 | 0.011799 | 0.011504 | 0.011665 | 0.011564 |
| 0.011564 | 0.011732 | 0.011593 | 0.011390 | 0.011521 | 0.011463 | 0.011534 |
| 0.011631 | 0.011532 | 0.011669 | 0.011669 | 0.011665 | 0.011732 | 0.011839 |
| 0.011568 | 0.011671 | 0.011670 | 0.011601 | 0.011868 | 0.011329 | 0.011532 |
| 0.011429 | 0.011429 | 0.011329 | 0.011329 | 0.011329 | 0.011396 | 0.011463 |
| 0.011329 | 0.011396 | 0.011295 | 0.011463 | 0.011329 | 0.011396 | 0.011463 |
| 0.011396 | 0.011832 | 0.011732 | 0.011765 | 0.011295 | 0.011396 | 0.011430 |
| 0.011429 | 0.011396 | 0.011463 | 0.011497 | 0.011362 | 0.011362 | 0.011362 |
| 0.011900 | 0.011530 | 0.011530 | 0.011329 | 0.011429 | 0.011262 | 0.011362 |
| 0.011362 | 0.011429 | 0.011396 | 0.011497 | 0.011362 | 0.011497 | 0.011564 |
| 0.011564 | 0.011396 | 0.011396 | 0.011329 | 0.011329 | 0.011497 | 0.011429 |
| 0.011329 | 0.011429 | 0.011295 | 0.011329 | 0.011463 | 0.011598 | 0.011362 |
| 0.011329 | 0.011463 | 0.011396 | 0.011295 | 0.011631 | 0.011295 | 0.011463 |
| 0.011471 | 0.011362 | 0.011664 | 0.011497 | 0.011530 | 0.011396 | 0.011497 |
| 0.011362 | 0.011631 | 0.011295 | 0.011429 | 0.011362 | 0.011362 | 0.011295 |
| 0.011463 | 0.011732 | 0.011430 | 0.011497 | 0.011329 | 0.011732 | 0.011362 |
| 0.011362 | 0.011362 | 0.011396 | 0.011094 | 0.011396 | 0.011497 | 0.011564 |
| 0.011497 | 0.011463 | 0.011429 | 0.011530 | 0.011429 | 0.011362 | 0.011329 |
| 0.011362 | 0.011362 | 0.011430 | 0.011362 | 0.011262 | 0.011497 | 0.011362 |

|          |          |          |          |          |          |          |
|----------|----------|----------|----------|----------|----------|----------|
| 0.011396 | 0.011396 | 0.011530 | 0.011564 | 0.011463 | 0.011329 | 0.011396 |
| 0.011463 | 0.011396 | 0.011496 | 0.011362 | 0.011497 | 0.011597 | 0.011900 |
| 0.011396 | 0.011799 | 0.011405 | 0.017899 | 0.011257 | 0.011488 | 0.011758 |
| 0.011718 | 0.011729 | 0.011322 | 0.011234 | 0.011719 | 0.011785 | 0.011303 |
| 0.011535 | 0.011610 | 0.011294 | 0.011353 | 0.011372 | 0.011356 | 0.011318 |
| 0.011482 | 0.011544 | 0.011505 | 0.011457 | 0.011530 | 0.011564 | 0.011568 |
| 0.011369 | 0.011530 | 0.011530 | 0.011497 | 0.011463 | 0.011463 | 0.011430 |
| 0.011463 | 0.011396 | 0.011429 | 0.011463 | 0.011430 | 0.011362 | 0.011396 |
| 0.011396 | 0.011463 | 0.011362 | 0.011463 | 0.011497 | 0.011530 | 0.011429 |
| 0.011463 | 0.011430 | 0.011766 | 0.011766 | 0.011497 | 0.011531 | 0.011564 |
| 0.011329 | 0.011329 | 0.011362 | 0.011396 | 0.011329 | 0.011564 | 0.011564 |
| 0.011597 | 0.011597 | 0.011530 | 0.011631 | 0.011799 | 0.011633 | 0.011396 |
| 0.011463 | 0.011530 | 0.011497 | 0.011396 | 0.011463 | 0.011430 | 0.011463 |
| 0.011531 | 0.011530 | 0.011564 | 0.011463 | 0.011363 | 0.011631 | 0.011530 |
| 0.011467 | 0.011362 | 0.011463 | 0.011564 | 0.011463 | 0.011598 | 0.011631 |
| 0.011799 | 0.011504 | 0.011665 | 0.011564 | 0.011564 | 0.011732 | 0.011363 |
| 0.011532 | 0.011430 | 0.011396 | 0.011396 | 0.011463 | 0.011362 | 0.011463 |
| 0.011497 | 0.011530 | 0.011429 | 0.011463 | 0.011430 | 0.011766 | 0.011766 |
| 0.011497 | 0.011531 | 0.011597 | 0.011530 | 0.012170 | 0.011596 | 0.011517 |
| 0.011588 | 0.011546 | 0.011658 | 0.011545 | 0.011655 | 0.011577 | 0.011543 |
| 0.012125 | 0.011441 | 0.011574 | 0.011510 | 0.011783 | 0.011638 | 0.011673 |
| 0.012148 | 0.011626 | 0.011703 | 0.011765 | 0.011631 | 0.011631 | 0.011668 |
| 0.011329 | 0.011429 | 0.011631 | 0.011597 | 0.011601 | 0.011597 | 0.011565 |
| 0.011429 | 0.011295 | 0.011329 | 0.011429 | 0.011262 | 0.011396 | 0.011295 |
| 0.011429 | 0.011463 | 0.011362 | 0.011329 | 0.011429 | 0.011362 | 0.011396 |
| 0.011396 | 0.011329 | 0.011396 | 0.011430 | 0.011329 | 0.011329 | 0.011564 |
| 0.011463 | 0.011530 | 0.011463 | 0.011463 | 0.011396 | 0.011799 | 0.011429 |
| 0.011478 | 0.011396 | 0.011631 | 0.011637 | 0.011430 | 0.011496 | 0.011497 |
| 0.011497 | 0.011362 | 0.011396 | 0.011362 | 0.011530 | 0.011530 | 0.011463 |
| 0.011463 | 0.011597 | 0.011765 | 0.011496 | 0.011698 | 0.011698 | 0.011564 |
| 0.011396 | 0.011463 | 0.011497 | 0.011900 | 0.011463 | 0.011430 | 0.011463 |
| 0.011497 | 0.011429 | 0.011429 | 0.011732 | 0.011597 | 0.011698 | 0.011429 |
| 0.011463 | 0.011530 | 0.011463 | 0.011463 | 0.011496 | 0.011295 | 0.011698 |
| 0.011463 | 0.011429 | 0.011429 | 0.011597 | 0.011429 | 0.011530 | 0.011765 |
| 0.011463 | 0.011841 | 0.011832 | 0.011548 | 0.011286 | 0.011502 | 0.011267 |
| 0.011280 | 0.011761 | 0.011341 | 0.011507 | 0.011304 | 0.011467 | 0.011379 |
| 0.011468 | 0.011192 | 0.011339 | 0.011192 | 0.011222 | 0.011328 | 0.011506 |
| 0.011512 | 0.011336 | 0.011518 | 0.011412 | 0.011465 | 0.011597 | 0.011665 |
| 0.011665 | 0.011531 | 0.011635 | 0.011636 | 0.011772 | 0.011767 | 0.011463 |
| 0.011698 | 0.011564 | 0.011429 | 0.011530 | 0.011329 | 0.011564 | 0.011362 |
| 0.011429 | 0.011429 | 0.011396 | 0.011362 | 0.011396 | 0.011362 | 0.011463 |
| 0.011444 | 0.011445 | 0.011437 | 0.011471 | 0.011608 | 0.011504 | 0.011572 |
| 0.011571 | 0.011497 | 0.011319 | 0.011312 | 0.011433 | 0.011602 | 0.011603 |
| 0.011397 | 0.011467 | 0.011700 | 0.011669 | 0.011598 | 0.011632 | 0.011564 |
| 0.011496 | 0.011564 | 0.011564 | 0.011463 | 0.012034 | 0.011597 | 0.011698 |
| 0.011732 | 0.011808 | 0.011435 | 0.011476 | 0.011396 | 0.011597 | 0.011564 |
| 0.011598 | 0.011631 | 0.011631 | 0.011631 | 0.011807 | 0.011765 | 0.011407 |
| 0.011297 | 0.011303 | 0.011401 | 0.011366 | 0.011470 | 0.011321 | 0.011638 |
| 0.011437 | 0.011586 | 0.011298 | 0.011472 | 0.011430 | 0.011505 | 0.011329 |
| 0.011362 | 0.011362 | 0.011362 | 0.011396 | 0.011597 | 0.011564 | 0.011497 |
| 0.011597 | 0.011665 | 0.011396 | 0.011396 | 0.011430 | 0.011429 | 0.011432 |
| 0.011500 | 0.011430 | 0.011430 | 0.011465 | 0.011597 | 0.011665 | 0.011665 |
| 0.011531 | 0.011635 | 0.011636 | 0.011772 | 0.011767 | 0.011463 | 0.011631 |
| 0.011564 | 0.011564 | 0.011398 | 0.011582 | 0.011477 | 0.011537 | 0.011376 |
| 0.011508 | 0.011744 | 0.011526 | 0.011468 | 0.011295 | 0.011497 | 0.011362 |
| 0.011463 | 0.011463 | 0.011362 | 0.011465 | 0.011564 | 0.011533 | 0.011463 |
| 0.011362 | 0.011296 | 0.011430 | 0.011362 | 0.011295 | 0.011400 | 0.011497 |
| 0.011463 | 0.011396 | 0.011429 | 0.011463 | 0.011430 | 0.011362 | 0.011564 |
| 0.011429 | 0.011463 | 0.011463 | 0.011396 | 0.011463 | 0.011698 | 0.011362 |
| 0.011396 | 0.011799 | 0.011396 | 0.011362 | 0.011396 | 0.011765 | 0.011317 |

|          |          |          |          |          |          |          |
|----------|----------|----------|----------|----------|----------|----------|
| 0.011735 | 0.011315 | 0.011261 | 0.011584 | 0.011630 | 0.011599 | 0.011269 |
| 0.011218 | 0.011564 | 0.011664 | 0.011773 | 0.011633 | 0.011737 | 0.011901 |
| 0.011801 | 0.011838 | 0.011799 | 0.012017 | 0.011765 | 0.012640 | 0.011802 |
| 0.012540 | 0.012308 | 0.012442 | 0.012714 | 0.011765 | 0.011463 | 0.011766 |
| 0.012205 | 0.012140 | 0.011732 | 0.011631 | 0.011699 | 0.011699 | 0.011669 |
| 0.011564 | 0.011535 | 0.011631 | 0.011598 | 0.011968 | 0.012034 | 0.012036 |
| 0.011935 | 0.012036 | 0.012139 | 0.011906 | 0.012205 | 0.012212 | 0.012272 |
| 0.012273 | 0.012307 | 0.012255 | 0.012273 | 0.012275 | 0.011496 | 0.011800 |
| 0.011868 | 0.012371 | 0.011874 | 0.012102 | 0.012575 | 0.011638 | 0.011531 |
| 0.011496 | 0.011496 | 0.011968 | 0.012048 | 0.012116 | 0.011832 | 0.011498 |
| S065     | 0.011664 | 0.011664 | 0.011933 | 0.011765 | 0.011765 | 0.011832 |
| 0.011671 | 0.011603 | 0.011832 | 0.011262 | 0.011329 | 0.011296 | 0.011262 |
| 0.011295 | 0.011463 | 0.011262 | 0.011295 | 0.011362 | 0.011329 | 0.011295 |
| 0.011262 | 0.011295 | 0.011396 | 0.011262 | 0.011295 | 0.011295 | 0.011637 |
| 0.011530 | 0.011295 | 0.011195 | 0.011429 | 0.011362 | 0.011329 | 0.011362 |
| 0.011329 | 0.011429 | 0.011329 | 0.011329 | 0.011362 | 0.011329 | 0.011497 |
| 0.011262 | 0.011329 | 0.011362 | 0.011295 | 0.011396 | 0.011429 | 0.011362 |
| 0.011329 | 0.011497 | 0.011396 | 0.011664 | 0.011329 | 0.011597 | 0.011329 |
| 0.011295 | 0.011396 | 0.011463 | 0.011597 | 0.011698 | 0.011396 | 0.011497 |
| 0.011362 | 0.011430 | 0.000000 | 0.011564 | 0.011799 | 0.011329 | 0.011396 |
| 0.011295 | 0.011396 | 0.011295 | 0.011429 | 0.011362 | 0.011362 | 0.011362 |
| 0.011262 | 0.011295 | 0.011262 | 0.011362 | 0.011329 | 0.011363 | 0.011429 |
| 0.011362 | 0.011329 | 0.011396 | 0.011295 | 0.011429 | 0.011262 | 0.011329 |
| 0.011496 | 0.011429 | 0.011664 | 0.011497 | 0.011329 | 0.011564 | 0.011329 |
| 0.011468 | 0.011695 | 0.011513 | 0.011216 | 0.011210 | 0.011318 | 0.011415 |
| 0.012048 | 0.011518 | 0.011225 | 0.011564 | 0.011564 | 0.011362 | 0.011463 |
| 0.011396 | 0.011362 | 0.011429 | 0.011329 | 0.011430 | 0.011362 | 0.011362 |
| 0.011329 | 0.011429 | 0.011631 | 0.011496 | 0.011396 | 0.011362 | 0.011295 |
| 0.011262 | 0.011262 | 0.011329 | 0.011295 | 0.011497 | 0.011463 | 0.011396 |
| 0.011497 | 0.011564 | 0.011295 | 0.011295 | 0.011329 | 0.011329 | 0.011330 |
| 0.011398 | 0.011329 | 0.011329 | 0.011204 | 0.011277 | 0.011236 | 0.011329 |
| 0.011331 | 0.011266 | 0.011282 | 0.011302 | 0.011230 | 0.011266 | 0.011297 |
| 0.011564 | 0.011336 | 0.011370 | 0.011262 | 0.011268 | 0.011397 | 0.011363 |
| 0.011430 | 0.011364 | 0.011363 | 0.011463 | 0.011396 | 0.011765 | 0.011564 |
| 0.011597 | 0.011463 | 0.011329 | 0.011430 | 0.011228 | 0.011463 | 0.011262 |
| 0.011329 | 0.011329 | 0.011295 | 0.011262 | 0.011295 | 0.011262 | 0.011362 |
| 0.011329 | 0.011430 | 0.011363 | 0.011262 | 0.011363 | 0.011463 | 0.011466 |
| 0.011463 | 0.011363 | 0.011262 | 0.011195 | 0.011329 | 0.011262 | 0.011195 |
| 0.011264 | 0.011463 | 0.011262 | 0.011463 | 0.011228 | 0.011329 | 0.011295 |
| 0.011396 | 0.011295 | 0.011329 | 0.011295 | 0.011329 | 0.011195 | 0.011329 |
| 0.011363 | 0.011295 | 0.011362 | 0.011295 | 0.011329 | 0.011362 | 0.011597 |
| 0.011698 | 0.011631 | 0.011698 | 0.011431 | 0.011699 | 0.011329 | 0.011295 |
| 0.011330 | 0.011586 | 0.011472 | 0.011198 | 0.011705 | 0.011197 | 0.011296 |
| 0.011705 | 0.011570 | 0.011496 | 0.011698 | 0.011402 | 0.011564 | 0.011530 |
| 0.011463 | 0.011631 | 0.011486 | 0.011349 | 0.011396 | 0.011362 | 0.011432 |
| 0.011530 | 0.011364 | 0.011567 | 0.011635 | 0.011564 | 0.011631 | 0.011738 |
| 0.011466 | 0.011637 | 0.011568 | 0.011500 | 0.011767 | 0.011228 | 0.011431 |
| 0.011396 | 0.011329 | 0.011228 | 0.011228 | 0.011295 | 0.011295 | 0.011362 |
| 0.011295 | 0.011362 | 0.011262 | 0.011362 | 0.011295 | 0.011295 | 0.011362 |
| 0.011295 | 0.011732 | 0.011631 | 0.011664 | 0.011195 | 0.011295 | 0.011262 |
| 0.011329 | 0.011295 | 0.011362 | 0.011396 | 0.011262 | 0.011262 | 0.011262 |
| 0.011799 | 0.011429 | 0.011429 | 0.011228 | 0.011329 | 0.011497 | 0.011262 |
| 0.011262 | 0.011329 | 0.011295 | 0.011463 | 0.011262 | 0.011396 | 0.011530 |
| 0.011463 | 0.011295 | 0.011295 | 0.011228 | 0.011228 | 0.011396 | 0.011329 |
| 0.011228 | 0.011329 | 0.011195 | 0.011228 | 0.011362 | 0.011497 | 0.011262 |
| 0.011228 | 0.011362 | 0.011295 | 0.011195 | 0.011530 | 0.011195 | 0.011362 |
| 0.011437 | 0.011262 | 0.011564 | 0.011396 | 0.011429 | 0.011295 | 0.011396 |
| 0.011262 | 0.011597 | 0.011195 | 0.011463 | 0.011262 | 0.011262 | 0.011195 |
| 0.011429 | 0.011598 | 0.000000 | 0.011396 | 0.011228 | 0.011631 | 0.011262 |
| 0.011262 | 0.011262 | 0.011295 | 0.011396 | 0.011295 | 0.011396 | 0.011463 |

|          |          |          |          |          |          |          |
|----------|----------|----------|----------|----------|----------|----------|
| 0.011463 | 0.011429 | 0.011329 | 0.011430 | 0.011396 | 0.011262 | 0.011228 |
| 0.011262 | 0.011262 | 0.000000 | 0.011262 | 0.011228 | 0.011396 | 0.011262 |
| 0.011295 | 0.011295 | 0.011429 | 0.011463 | 0.011362 | 0.011295 | 0.011295 |
| 0.011295 | 0.011295 | 0.011396 | 0.011262 | 0.011396 | 0.011497 | 0.011799 |
| 0.011295 | 0.011698 | 0.011267 | 0.017785 | 0.011257 | 0.011427 | 0.011618 |
| 0.011579 | 0.011623 | 0.011322 | 0.011234 | 0.011719 | 0.011647 | 0.011364 |
| 0.011487 | 0.011549 | 0.011177 | 0.011270 | 0.011255 | 0.011307 | 0.011275 |
| 0.011529 | 0.011433 | 0.011431 | 0.011259 | 0.011429 | 0.011463 | 0.011466 |
| 0.011335 | 0.011430 | 0.011429 | 0.011396 | 0.011362 | 0.011363 | 0.011329 |
| 0.011362 | 0.011295 | 0.011329 | 0.011362 | 0.011329 | 0.011262 | 0.011295 |
| 0.011295 | 0.011362 | 0.011262 | 0.011161 | 0.011396 | 0.011430 | 0.011329 |
| 0.011362 | 0.011329 | 0.011665 | 0.011665 | 0.011396 | 0.011430 | 0.011463 |
| 0.011228 | 0.011228 | 0.011262 | 0.011363 | 0.011228 | 0.011463 | 0.011463 |
| 0.011497 | 0.011496 | 0.011429 | 0.011530 | 0.011698 | 0.011532 | 0.011362 |
| 0.011362 | 0.011430 | 0.011463 | 0.011295 | 0.011362 | 0.011329 | 0.011362 |
| 0.011430 | 0.011430 | 0.011463 | 0.011430 | 0.011330 | 0.011530 | 0.011497 |
| 0.011365 | 0.011262 | 0.011362 | 0.011463 | 0.011363 | 0.011497 | 0.011530 |
| 0.011698 | 0.011402 | 0.011564 | 0.011530 | 0.011463 | 0.011631 | 0.011262 |
| 0.011431 | 0.011329 | 0.011295 | 0.011295 | 0.011362 | 0.011262 | 0.011161 |
| 0.011396 | 0.011430 | 0.011329 | 0.011362 | 0.011329 | 0.011665 | 0.011665 |
| 0.011396 | 0.011430 | 0.011496 | 0.011429 | 0.012069 | 0.011489 | 0.011412 |
| 0.011482 | 0.011442 | 0.011552 | 0.011441 | 0.011550 | 0.011474 | 0.011440 |
| 0.012022 | 0.011337 | 0.011471 | 0.011406 | 0.011680 | 0.011536 | 0.011639 |
| 0.012046 | 0.011513 | 0.011601 | 0.011664 | 0.011530 | 0.011530 | 0.011567 |
| 0.011228 | 0.011396 | 0.011530 | 0.011496 | 0.011499 | 0.011496 | 0.011464 |
| 0.011329 | 0.011262 | 0.011295 | 0.011329 | 0.011228 | 0.011295 | 0.011195 |
| 0.011329 | 0.011362 | 0.011262 | 0.011228 | 0.011329 | 0.011262 | 0.011295 |
| 0.011295 | 0.011228 | 0.011295 | 0.011329 | 0.011228 | 0.011429 | 0.011463 |
| 0.011362 | 0.011429 | 0.011362 | 0.011362 | 0.011295 | 0.011698 | 0.011329 |
| 0.011373 | 0.011295 | 0.011531 | 0.011535 | 0.011396 | 0.011396 | 0.011396 |
| 0.011396 | 0.011329 | 0.011295 | 0.011329 | 0.011429 | 0.011429 | 0.011362 |
| 0.011362 | 0.011429 | 0.011664 | 0.011396 | 0.011597 | 0.011597 | 0.011463 |
| 0.011295 | 0.011362 | 0.011396 | 0.011799 | 0.011362 | 0.011396 | 0.011362 |
| 0.011396 | 0.011329 | 0.011329 | 0.011631 | 0.011564 | 0.011597 | 0.011329 |
| 0.011430 | 0.011497 | 0.011362 | 0.011430 | 0.011396 | 0.011262 | 0.011597 |
| 0.011362 | 0.011329 | 0.011329 | 0.011497 | 0.011329 | 0.011429 | 0.011665 |
| 0.011362 | 0.011739 | 0.011732 | 0.011507 | 0.011229 | 0.011434 | 0.011215 |
| 0.011225 | 0.011722 | 0.011236 | 0.011462 | 0.011304 | 0.011366 | 0.011379 |
| 0.011519 | 0.011192 | 0.011339 | 0.011192 | 0.011222 | 0.011194 | 0.011385 |
| 0.011399 | 0.011296 | 0.011377 | 0.011307 | 0.011364 | 0.011497 | 0.011564 |
| 0.011564 | 0.011430 | 0.011534 | 0.011535 | 0.011670 | 0.011661 | 0.011362 |
| 0.011597 | 0.011463 | 0.011329 | 0.011430 | 0.011228 | 0.011463 | 0.011262 |
| 0.011329 | 0.011329 | 0.011295 | 0.011262 | 0.011295 | 0.011262 | 0.011362 |
| 0.011340 | 0.011340 | 0.011334 | 0.011368 | 0.011505 | 0.011470 | 0.011470 |
| 0.011469 | 0.011329 | 0.011208 | 0.011204 | 0.011331 | 0.011501 | 0.011501 |
| 0.011296 | 0.011365 | 0.011599 | 0.011567 | 0.011497 | 0.011531 | 0.011463 |
| 0.011396 | 0.011463 | 0.011463 | 0.011362 | 0.011934 | 0.011530 | 0.011598 |
| 0.011631 | 0.011701 | 0.011333 | 0.011407 | 0.011295 | 0.011497 | 0.011463 |
| 0.011498 | 0.011530 | 0.011530 | 0.011530 | 0.011650 | 0.011664 | 0.011303 |
| 0.011196 | 0.011199 | 0.011299 | 0.011264 | 0.011368 | 0.011210 | 0.011536 |
| 0.011335 | 0.011499 | 0.011251 | 0.011360 | 0.011329 | 0.011402 | 0.011295 |
| 0.011262 | 0.011262 | 0.011329 | 0.011295 | 0.011497 | 0.011463 | 0.011396 |
| 0.011497 | 0.011564 | 0.011295 | 0.011295 | 0.011329 | 0.011329 | 0.011330 |
| 0.011398 | 0.011329 | 0.011329 | 0.011364 | 0.011497 | 0.011564 | 0.011564 |
| 0.011430 | 0.011534 | 0.011535 | 0.011670 | 0.011661 | 0.011362 | 0.011530 |
| 0.011463 | 0.011463 | 0.011297 | 0.011478 | 0.011408 | 0.011435 | 0.011270 |
| 0.011439 | 0.011653 | 0.011484 | 0.011366 | 0.011262 | 0.011463 | 0.011329 |
| 0.011430 | 0.011363 | 0.011262 | 0.011363 | 0.011463 | 0.011466 | 0.011363 |
| 0.011262 | 0.011195 | 0.011329 | 0.011262 | 0.011195 | 0.011264 | 0.011463 |
| 0.011362 | 0.011295 | 0.011329 | 0.011362 | 0.011329 | 0.011262 | 0.011463 |

|          |          |          |          |          |          |          |
|----------|----------|----------|----------|----------|----------|----------|
| 0.011329 | 0.011362 | 0.011362 | 0.011295 | 0.011362 | 0.011597 | 0.011262 |
| 0.011295 | 0.011698 | 0.011295 | 0.011329 | 0.011295 | 0.011664 | 0.011232 |
| 0.011679 | 0.011188 | 0.011261 | 0.011463 | 0.011549 | 0.011455 | 0.011186 |
| 0.011218 | 0.011463 | 0.011564 | 0.011671 | 0.011532 | 0.011635 | 0.011800 |
| 0.011700 | 0.011737 | 0.011698 | 0.011915 | 0.011664 | 0.012539 | 0.011700 |
| 0.012439 | 0.012207 | 0.012341 | 0.012613 | 0.011664 | 0.011363 | 0.011665 |
| 0.012104 | 0.012005 | 0.011631 | 0.011530 | 0.011598 | 0.011598 | 0.011567 |
| 0.011463 | 0.011433 | 0.011530 | 0.011497 | 0.011867 | 0.011933 | 0.011935 |
| 0.011834 | 0.011935 | 0.012038 | 0.011771 | 0.012104 | 0.012110 | 0.012171 |
| 0.012172 | 0.012206 | 0.012118 | 0.012172 | 0.012173 | 0.011396 | 0.011699 |
| 0.011767 | 0.012270 | 0.011772 | 0.012001 | 0.012474 | 0.011536 | 0.011430 |
| 0.011396 | 0.011396 | 0.011867 | 0.011924 | 0.012010 | 0.011664 | 0.011397 |
| S066     | 0.011900 | 0.011900 | 0.012236 | 0.012000 | 0.012000 | 0.012068 |
| 0.011909 | 0.011841 | 0.012067 | 0.011497 | 0.011564 | 0.011531 | 0.011496 |
| 0.011530 | 0.011698 | 0.011496 | 0.011530 | 0.011597 | 0.011564 | 0.011530 |
| 0.011496 | 0.011530 | 0.011631 | 0.011497 | 0.011463 | 0.011530 | 0.011875 |
| 0.011765 | 0.011530 | 0.011429 | 0.011664 | 0.011530 | 0.011564 | 0.011530 |
| 0.011564 | 0.011597 | 0.011564 | 0.011564 | 0.011597 | 0.011496 | 0.011731 |
| 0.011496 | 0.011563 | 0.011597 | 0.011530 | 0.011631 | 0.011664 | 0.011597 |
| 0.011564 | 0.011732 | 0.011631 | 0.011899 | 0.011564 | 0.011765 | 0.011564 |
| 0.011530 | 0.011631 | 0.011698 | 0.011765 | 0.011933 | 0.011631 | 0.011731 |
| 0.011329 | 0.011597 | 0.011564 | 0.000000 | 0.012034 | 0.011564 | 0.011631 |
| 0.011530 | 0.011631 | 0.011597 | 0.011664 | 0.011597 | 0.011597 | 0.011597 |
| 0.011496 | 0.011530 | 0.011496 | 0.011597 | 0.011563 | 0.011599 | 0.011664 |
| 0.011597 | 0.011563 | 0.011563 | 0.011530 | 0.011664 | 0.011429 | 0.011564 |
| 0.011731 | 0.011664 | 0.011899 | 0.011664 | 0.011564 | 0.011731 | 0.011563 |
| 0.011653 | 0.011957 | 0.011777 | 0.011490 | 0.011433 | 0.011502 | 0.011690 |
| 0.012305 | 0.011772 | 0.011513 | 0.011799 | 0.011799 | 0.011597 | 0.011698 |
| 0.011631 | 0.011597 | 0.011664 | 0.011564 | 0.011664 | 0.011530 | 0.011597 |
| 0.011563 | 0.011664 | 0.011866 | 0.011731 | 0.011631 | 0.011597 | 0.011463 |
| 0.011497 | 0.011497 | 0.011497 | 0.011530 | 0.011732 | 0.011698 | 0.011631 |
| 0.011732 | 0.011799 | 0.011530 | 0.011530 | 0.011564 | 0.011564 | 0.011567 |
| 0.011635 | 0.011564 | 0.011564 | 0.011384 | 0.011530 | 0.011481 | 0.011564 |
| 0.011500 | 0.011507 | 0.011540 | 0.011509 | 0.011468 | 0.011471 | 0.011533 |
| 0.011780 | 0.011577 | 0.011542 | 0.011497 | 0.011475 | 0.011632 | 0.011598 |
| 0.011665 | 0.011599 | 0.011598 | 0.011698 | 0.011631 | 0.011933 | 0.011799 |
| 0.011832 | 0.011698 | 0.011564 | 0.011665 | 0.011463 | 0.011698 | 0.011497 |
| 0.011564 | 0.011564 | 0.011530 | 0.011496 | 0.011530 | 0.011497 | 0.011597 |
| 0.011497 | 0.011597 | 0.011597 | 0.011497 | 0.011599 | 0.011698 | 0.011702 |
| 0.011631 | 0.011598 | 0.011497 | 0.011431 | 0.011497 | 0.011497 | 0.011430 |
| 0.011536 | 0.011631 | 0.011429 | 0.011631 | 0.011463 | 0.011564 | 0.011530 |
| 0.011564 | 0.011530 | 0.011497 | 0.011530 | 0.011564 | 0.011429 | 0.011497 |
| 0.011530 | 0.011530 | 0.011597 | 0.011530 | 0.011564 | 0.011597 | 0.011833 |
| 0.011933 | 0.011866 | 0.011933 | 0.011701 | 0.011934 | 0.011564 | 0.011530 |
| 0.011567 | 0.011747 | 0.011563 | 0.011472 | 0.011942 | 0.011435 | 0.011572 |
| 0.011943 | 0.011842 | 0.011731 | 0.011933 | 0.011641 | 0.011731 | 0.011698 |
| 0.011698 | 0.011866 | 0.011735 | 0.011596 | 0.011563 | 0.011597 | 0.011669 |
| 0.011765 | 0.011667 | 0.011804 | 0.011804 | 0.011799 | 0.011866 | 0.011975 |
| 0.011703 | 0.011807 | 0.011805 | 0.011669 | 0.012002 | 0.011463 | 0.011667 |
| 0.011563 | 0.011564 | 0.011463 | 0.011463 | 0.011463 | 0.011530 | 0.011597 |
| 0.011463 | 0.011530 | 0.011429 | 0.011597 | 0.011463 | 0.011530 | 0.011597 |
| 0.011530 | 0.011967 | 0.011866 | 0.011899 | 0.011429 | 0.011530 | 0.011564 |
| 0.011564 | 0.011530 | 0.011597 | 0.011631 | 0.011496 | 0.011496 | 0.011496 |
| 0.012034 | 0.011664 | 0.011664 | 0.011463 | 0.011563 | 0.011664 | 0.011496 |
| 0.011496 | 0.011563 | 0.011530 | 0.011631 | 0.011496 | 0.011631 | 0.011698 |
| 0.011698 | 0.011530 | 0.011530 | 0.011463 | 0.011463 | 0.011631 | 0.011564 |
| 0.011463 | 0.011563 | 0.011429 | 0.011463 | 0.011530 | 0.011732 | 0.011497 |
| 0.011463 | 0.011530 | 0.011531 | 0.011429 | 0.011765 | 0.011396 | 0.011597 |
| 0.011608 | 0.011496 | 0.011799 | 0.011631 | 0.011597 | 0.011530 | 0.011631 |
| 0.011496 | 0.011765 | 0.011429 | 0.011698 | 0.011496 | 0.011496 | 0.011429 |

|          |          |          |          |          |          |          |
|----------|----------|----------|----------|----------|----------|----------|
| 0.011597 | 0.011866 | 0.011564 | 0.011631 | 0.011463 | 0.011866 | 0.011496 |
| 0.011496 | 0.011496 | 0.011530 | 0.011564 | 0.011530 | 0.011631 | 0.011698 |
| 0.011631 | 0.011664 | 0.011563 | 0.011664 | 0.011362 | 0.011496 | 0.011463 |
| 0.011496 | 0.011496 | 0.011564 | 0.011496 | 0.011396 | 0.011631 | 0.011496 |
| 0.011530 | 0.011530 | 0.011664 | 0.011698 | 0.011597 | 0.011463 | 0.011530 |
| 0.011597 | 0.011530 | 0.011631 | 0.011496 | 0.011631 | 0.011731 | 0.012034 |
| 0.011530 | 0.011866 | 0.011509 | 0.018011 | 0.011387 | 0.011549 | 0.011862 |
| 0.011822 | 0.011869 | 0.011584 | 0.011582 | 0.011884 | 0.011889 | 0.011546 |
| 0.011724 | 0.011732 | 0.011450 | 0.011521 | 0.011450 | 0.011554 | 0.011533 |
| 0.011764 | 0.011693 | 0.011653 | 0.011523 | 0.011664 | 0.011698 | 0.011703 |
| 0.011507 | 0.011665 | 0.011664 | 0.011631 | 0.011597 | 0.011598 | 0.011564 |
| 0.011597 | 0.011530 | 0.011564 | 0.011597 | 0.011564 | 0.011497 | 0.011530 |
| 0.011530 | 0.011597 | 0.011497 | 0.011597 | 0.011631 | 0.011597 | 0.011564 |
| 0.011597 | 0.011564 | 0.011900 | 0.011900 | 0.011631 | 0.011665 | 0.011698 |
| 0.011463 | 0.011463 | 0.011497 | 0.011530 | 0.011463 | 0.011698 | 0.011698 |
| 0.011732 | 0.011731 | 0.011664 | 0.011765 | 0.011933 | 0.011767 | 0.011530 |
| 0.011597 | 0.011665 | 0.011631 | 0.011530 | 0.011597 | 0.011564 | 0.011597 |
| 0.011665 | 0.011665 | 0.011698 | 0.011598 | 0.011498 | 0.011765 | 0.011665 |
| 0.011602 | 0.011497 | 0.011597 | 0.011698 | 0.011597 | 0.011732 | 0.011765 |
| 0.011933 | 0.011641 | 0.011731 | 0.011698 | 0.011698 | 0.011866 | 0.011497 |
| 0.011667 | 0.011564 | 0.011530 | 0.011530 | 0.011597 | 0.011497 | 0.011597 |
| 0.011631 | 0.011597 | 0.011564 | 0.011597 | 0.011564 | 0.011900 | 0.011900 |
| 0.011631 | 0.011665 | 0.011731 | 0.011664 | 0.012305 | 0.011739 | 0.011658 |
| 0.011658 | 0.011684 | 0.011798 | 0.011684 | 0.011795 | 0.011715 | 0.011681 |
| 0.012262 | 0.011579 | 0.011711 | 0.011648 | 0.011921 | 0.011774 | 0.011809 |
| 0.012284 | 0.011776 | 0.011838 | 0.011899 | 0.011765 | 0.011765 | 0.011804 |
| 0.011463 | 0.011564 | 0.011765 | 0.011731 | 0.011736 | 0.011731 | 0.011700 |
| 0.011563 | 0.011429 | 0.011463 | 0.011564 | 0.011396 | 0.011530 | 0.011429 |
| 0.011496 | 0.011530 | 0.011496 | 0.011463 | 0.011564 | 0.011496 | 0.011530 |
| 0.011530 | 0.011463 | 0.011530 | 0.011564 | 0.011463 | 0.011597 | 0.011631 |
| 0.011530 | 0.011597 | 0.011530 | 0.011530 | 0.011530 | 0.011933 | 0.011563 |
| 0.011617 | 0.011530 | 0.011766 | 0.011773 | 0.011564 | 0.011631 | 0.011631 |
| 0.011631 | 0.011496 | 0.011530 | 0.011496 | 0.011664 | 0.011664 | 0.011597 |
| 0.011597 | 0.011731 | 0.011899 | 0.011631 | 0.011832 | 0.011832 | 0.011698 |
| 0.011530 | 0.011597 | 0.011631 | 0.012034 | 0.011598 | 0.011564 | 0.011597 |
| 0.011631 | 0.011563 | 0.011563 | 0.011866 | 0.011732 | 0.011832 | 0.011564 |
| 0.011664 | 0.011731 | 0.011597 | 0.011664 | 0.011631 | 0.011496 | 0.011832 |
| 0.011597 | 0.011564 | 0.011563 | 0.011731 | 0.011564 | 0.011664 | 0.011899 |
| 0.011597 | 0.011977 | 0.011967 | 0.011751 | 0.011511 | 0.011638 | 0.011525 |
| 0.011445 | 0.011995 | 0.011482 | 0.011685 | 0.011499 | 0.011569 | 0.011538 |
| 0.011723 | 0.011323 | 0.011505 | 0.011390 | 0.011383 | 0.011529 | 0.011628 |
| 0.011625 | 0.011493 | 0.011624 | 0.011553 | 0.011599 | 0.011732 | 0.011799 |
| 0.011799 | 0.011665 | 0.011770 | 0.011772 | 0.011908 | 0.011944 | 0.011597 |
| 0.011832 | 0.011698 | 0.011564 | 0.011665 | 0.011463 | 0.011698 | 0.011497 |
| 0.011564 | 0.011564 | 0.011530 | 0.011496 | 0.011530 | 0.011497 | 0.011597 |
| 0.011584 | 0.011585 | 0.011540 | 0.011608 | 0.011744 | 0.011641 | 0.011709 |
| 0.011708 | 0.011632 | 0.011429 | 0.011420 | 0.011568 | 0.011738 | 0.011739 |
| 0.011531 | 0.011602 | 0.011835 | 0.011804 | 0.011733 | 0.011767 | 0.011698 |
| 0.011631 | 0.011698 | 0.011698 | 0.011597 | 0.012169 | 0.011765 | 0.011832 |
| 0.011866 | 0.011915 | 0.011572 | 0.011649 | 0.011530 | 0.011732 | 0.011698 |
| 0.011733 | 0.011765 | 0.011765 | 0.011765 | 0.011886 | 0.011899 | 0.011546 |
| 0.011432 | 0.011406 | 0.011537 | 0.011502 | 0.011607 | 0.011471 | 0.011774 |
| 0.011575 | 0.011630 | 0.011489 | 0.011622 | 0.011564 | 0.011642 | 0.011463 |
| 0.011497 | 0.011497 | 0.011497 | 0.011530 | 0.011732 | 0.011698 | 0.011631 |
| 0.011732 | 0.011799 | 0.011530 | 0.011530 | 0.011564 | 0.011564 | 0.011567 |
| 0.011635 | 0.011564 | 0.011564 | 0.011599 | 0.011732 | 0.011799 | 0.011799 |
| 0.011665 | 0.011770 | 0.011772 | 0.011908 | 0.011944 | 0.011597 | 0.011765 |
| 0.011698 | 0.011698 | 0.011534 | 0.011721 | 0.011651 | 0.011673 | 0.011551 |
| 0.011611 | 0.011926 | 0.011653 | 0.011604 | 0.011429 | 0.011631 | 0.011497 |
| 0.011597 | 0.011597 | 0.011497 | 0.011599 | 0.011698 | 0.011702 | 0.011598 |

|          |          |          |          |          |          |          |
|----------|----------|----------|----------|----------|----------|----------|
| 0.011497 | 0.011431 | 0.011497 | 0.011497 | 0.011430 | 0.011536 | 0.011631 |
| 0.011597 | 0.011530 | 0.011564 | 0.011597 | 0.011564 | 0.011497 | 0.011698 |
| 0.011564 | 0.011597 | 0.011597 | 0.011530 | 0.011530 | 0.011765 | 0.011496 |
| 0.011530 | 0.011933 | 0.011530 | 0.011496 | 0.011530 | 0.011899 | 0.011489 |
| 0.011903 | 0.011485 | 0.011561 | 0.011745 | 0.011793 | 0.011706 | 0.011436 |
| 0.011480 | 0.011698 | 0.011799 | 0.011909 | 0.011767 | 0.011906 | 0.012036 |
| 0.011935 | 0.011973 | 0.011933 | 0.012188 | 0.011899 | 0.012775 | 0.011936 |
| 0.012675 | 0.012443 | 0.012577 | 0.012849 | 0.011899 | 0.011598 | 0.011900 |
| 0.012339 | 0.012275 | 0.011866 | 0.011765 | 0.011834 | 0.011834 | 0.011804 |
| 0.011698 | 0.011705 | 0.011765 | 0.011733 | 0.012103 | 0.012169 | 0.012170 |
| 0.012069 | 0.012170 | 0.012274 | 0.012041 | 0.012340 | 0.012347 | 0.012407 |
| 0.012408 | 0.012441 | 0.012357 | 0.012408 | 0.012409 | 0.011631 | 0.011934 |
| 0.012002 | 0.012505 | 0.012010 | 0.012236 | 0.012710 | 0.011773 | 0.011665 |
| 0.011631 | 0.011631 | 0.012102 | 0.012212 | 0.012221 | 0.011967 | 0.011633 |
| S067     | 0.012135 | 0.012135 | 0.012203 | 0.011967 | 0.011967 | 0.012034 |
| 0.011468 | 0.011400 | 0.012034 | 0.011732 | 0.011799 | 0.011767 | 0.011732 |
| 0.011698 | 0.011933 | 0.011664 | 0.011765 | 0.011832 | 0.011799 | 0.011765 |
| 0.011732 | 0.011765 | 0.011597 | 0.011732 | 0.011766 | 0.011765 | 0.011434 |
| 0.011732 | 0.011765 | 0.011664 | 0.011631 | 0.011832 | 0.011799 | 0.011833 |
| 0.011799 | 0.011900 | 0.011799 | 0.011799 | 0.011832 | 0.011799 | 0.011967 |
| 0.011664 | 0.011799 | 0.011832 | 0.011765 | 0.011799 | 0.011900 | 0.011832 |
| 0.011799 | 0.011967 | 0.011867 | 0.011463 | 0.011799 | 0.012068 | 0.011799 |
| 0.011765 | 0.011799 | 0.011933 | 0.012068 | 0.011564 | 0.011799 | 0.011900 |
| 0.011832 | 0.011900 | 0.011799 | 0.012034 | 0.000000 | 0.011799 | 0.011866 |
| 0.011765 | 0.011866 | 0.011833 | 0.011900 | 0.011832 | 0.011832 | 0.011832 |
| 0.011732 | 0.011765 | 0.011732 | 0.011765 | 0.011799 | 0.011835 | 0.011900 |
| 0.011833 | 0.011799 | 0.011866 | 0.011765 | 0.011631 | 0.011732 | 0.011799 |
| 0.011967 | 0.011900 | 0.011664 | 0.011967 | 0.011799 | 0.012034 | 0.011799 |
| 0.011988 | 0.011434 | 0.011966 | 0.011646 | 0.011657 | 0.011797 | 0.011533 |
| 0.012195 | 0.011416 | 0.011637 | 0.012034 | 0.012034 | 0.011765 | 0.011664 |
| 0.011866 | 0.011832 | 0.011900 | 0.011799 | 0.011900 | 0.011832 | 0.011832 |
| 0.011799 | 0.011832 | 0.012102 | 0.011967 | 0.011866 | 0.011833 | 0.011766 |
| 0.011732 | 0.011665 | 0.011799 | 0.011766 | 0.011699 | 0.011665 | 0.011598 |
| 0.011699 | 0.011766 | 0.011765 | 0.011765 | 0.011799 | 0.011799 | 0.011803 |
| 0.011872 | 0.011799 | 0.011799 | 0.011600 | 0.011675 | 0.011691 | 0.011800 |
| 0.011772 | 0.011713 | 0.011688 | 0.011716 | 0.011706 | 0.011711 | 0.011770 |
| 0.011600 | 0.011784 | 0.011784 | 0.011733 | 0.011683 | 0.011868 | 0.011767 |
| 0.011834 | 0.011836 | 0.011834 | 0.011933 | 0.011866 | 0.012236 | 0.011968 |
| 0.011799 | 0.011867 | 0.011799 | 0.011833 | 0.011698 | 0.011665 | 0.011732 |
| 0.011799 | 0.011799 | 0.011766 | 0.011732 | 0.011765 | 0.011732 | 0.011833 |
| 0.011799 | 0.011900 | 0.011833 | 0.011732 | 0.011836 | 0.011934 | 0.011939 |
| 0.011934 | 0.011833 | 0.011732 | 0.011667 | 0.011799 | 0.011732 | 0.011665 |
| 0.011672 | 0.011934 | 0.011732 | 0.011934 | 0.011698 | 0.011799 | 0.011766 |
| 0.011867 | 0.011765 | 0.011799 | 0.011766 | 0.011799 | 0.011665 | 0.011799 |
| 0.011833 | 0.011766 | 0.011833 | 0.011765 | 0.011799 | 0.011833 | 0.012068 |
| 0.011497 | 0.011429 | 0.011362 | 0.011937 | 0.011564 | 0.011799 | 0.011766 |
| 0.011736 | 0.012072 | 0.011792 | 0.011712 | 0.011501 | 0.011674 | 0.011887 |
| 0.011502 | 0.011707 | 0.011967 | 0.012169 | 0.011880 | 0.012034 | 0.012001 |
| 0.011933 | 0.012101 | 0.011984 | 0.011843 | 0.011899 | 0.011833 | 0.011906 |
| 0.012001 | 0.011904 | 0.012041 | 0.012110 | 0.012034 | 0.012102 | 0.012213 |
| 0.011941 | 0.012113 | 0.011975 | 0.011974 | 0.012238 | 0.011698 | 0.011903 |
| 0.011866 | 0.011799 | 0.011698 | 0.011698 | 0.011765 | 0.011765 | 0.011832 |
| 0.011765 | 0.011833 | 0.011732 | 0.011765 | 0.011765 | 0.011765 | 0.011832 |
| 0.011765 | 0.011530 | 0.011295 | 0.011329 | 0.011664 | 0.011765 | 0.011799 |
| 0.011799 | 0.011698 | 0.011833 | 0.011799 | 0.011732 | 0.011732 | 0.011732 |
| 0.011597 | 0.011832 | 0.011900 | 0.011698 | 0.011799 | 0.011967 | 0.011732 |
| 0.011732 | 0.011799 | 0.011765 | 0.011933 | 0.011732 | 0.011665 | 0.011799 |
| 0.011732 | 0.011765 | 0.011765 | 0.011698 | 0.011698 | 0.011866 | 0.011799 |
| 0.011698 | 0.011799 | 0.011665 | 0.011698 | 0.011833 | 0.011632 | 0.011732 |
| 0.011699 | 0.011832 | 0.011766 | 0.011665 | 0.011396 | 0.011665 | 0.011833 |

|          |          |          |          |          |          |          |
|----------|----------|----------|----------|----------|----------|----------|
| 0.011917 | 0.011732 | 0.011362 | 0.011866 | 0.011833 | 0.011765 | 0.011866 |
| 0.011732 | 0.012068 | 0.011664 | 0.011530 | 0.011664 | 0.011664 | 0.011664 |
| 0.011900 | 0.011766 | 0.011799 | 0.011866 | 0.011698 | 0.011295 | 0.011664 |
| 0.011732 | 0.011732 | 0.011765 | 0.011866 | 0.011765 | 0.011866 | 0.011933 |
| 0.011933 | 0.011900 | 0.011799 | 0.011900 | 0.011866 | 0.011732 | 0.011698 |
| 0.011732 | 0.011732 | 0.011799 | 0.011664 | 0.011698 | 0.011866 | 0.011732 |
| 0.011698 | 0.011765 | 0.011900 | 0.011866 | 0.011832 | 0.011765 | 0.011766 |
| 0.011832 | 0.011765 | 0.011866 | 0.011732 | 0.011866 | 0.011967 | 0.011664 |
| 0.011765 | 0.011564 | 0.011785 | 0.018201 | 0.011388 | 0.011855 | 0.011444 |
| 0.011406 | 0.011412 | 0.011951 | 0.011641 | 0.011500 | 0.011475 | 0.011850 |
| 0.011725 | 0.011549 | 0.011607 | 0.011773 | 0.011646 | 0.011702 | 0.011749 |
| 0.011342 | 0.011545 | 0.011431 | 0.011523 | 0.011900 | 0.011934 | 0.011940 |
| 0.011816 | 0.011900 | 0.011900 | 0.011799 | 0.011833 | 0.011833 | 0.011800 |
| 0.011833 | 0.011765 | 0.011799 | 0.011833 | 0.011799 | 0.011732 | 0.011765 |
| 0.011765 | 0.011833 | 0.011732 | 0.011833 | 0.011866 | 0.011900 | 0.011799 |
| 0.011765 | 0.011732 | 0.011530 | 0.011530 | 0.011866 | 0.011901 | 0.011934 |
| 0.011698 | 0.011698 | 0.011732 | 0.011833 | 0.011698 | 0.011934 | 0.011934 |
| 0.011967 | 0.011967 | 0.011900 | 0.012001 | 0.011564 | 0.012004 | 0.011833 |
| 0.011833 | 0.011900 | 0.011934 | 0.011766 | 0.011833 | 0.011799 | 0.011833 |
| 0.011901 | 0.011900 | 0.011934 | 0.011901 | 0.011801 | 0.012001 | 0.011967 |
| 0.011839 | 0.011732 | 0.011833 | 0.011934 | 0.011833 | 0.011900 | 0.012000 |
| 0.012169 | 0.011880 | 0.012034 | 0.012001 | 0.011933 | 0.012101 | 0.011732 |
| 0.011903 | 0.011800 | 0.011765 | 0.011765 | 0.011833 | 0.011732 | 0.011833 |
| 0.011866 | 0.011900 | 0.011799 | 0.011765 | 0.011732 | 0.011530 | 0.011530 |
| 0.011866 | 0.011901 | 0.011967 | 0.011900 | 0.012474 | 0.011989 | 0.011905 |
| 0.011975 | 0.011927 | 0.012045 | 0.011926 | 0.012041 | 0.011957 | 0.011888 |
| 0.012435 | 0.011822 | 0.011951 | 0.011891 | 0.012163 | 0.012013 | 0.012116 |
| 0.012455 | 0.011965 | 0.012075 | 0.012135 | 0.012001 | 0.011732 | 0.012041 |
| 0.011698 | 0.011866 | 0.012000 | 0.011967 | 0.011973 | 0.011698 | 0.011667 |
| 0.011799 | 0.011732 | 0.011765 | 0.011799 | 0.011698 | 0.011765 | 0.011664 |
| 0.011732 | 0.011765 | 0.011732 | 0.011698 | 0.011799 | 0.011732 | 0.011765 |
| 0.011765 | 0.011698 | 0.011765 | 0.011799 | 0.011698 | 0.011900 | 0.011933 |
| 0.011833 | 0.011833 | 0.011832 | 0.011833 | 0.011765 | 0.011564 | 0.011799 |
| 0.011582 | 0.011765 | 0.011733 | 0.011739 | 0.011799 | 0.011799 | 0.011866 |
| 0.011866 | 0.011799 | 0.011765 | 0.011799 | 0.011900 | 0.011900 | 0.011832 |
| 0.011832 | 0.011967 | 0.011463 | 0.011866 | 0.012068 | 0.012068 | 0.011933 |
| 0.011765 | 0.011832 | 0.011866 | 0.011665 | 0.011833 | 0.011799 | 0.011833 |
| 0.011866 | 0.011732 | 0.011732 | 0.012035 | 0.012035 | 0.012001 | 0.011799 |
| 0.011900 | 0.011967 | 0.011832 | 0.011900 | 0.011866 | 0.011732 | 0.011396 |
| 0.011832 | 0.011799 | 0.011732 | 0.011967 | 0.011799 | 0.011900 | 0.011665 |
| 0.011832 | 0.011535 | 0.011530 | 0.011589 | 0.011455 | 0.011842 | 0.011473 |
| 0.011665 | 0.011800 | 0.011693 | 0.011641 | 0.011695 | 0.011518 | 0.011432 |
| 0.011519 | 0.011324 | 0.011506 | 0.011391 | 0.011384 | 0.011596 | 0.011912 |
| 0.011927 | 0.011808 | 0.011836 | 0.011835 | 0.011836 | 0.011698 | 0.011766 |
| 0.011766 | 0.011834 | 0.011940 | 0.011739 | 0.012078 | 0.012121 | 0.011833 |
| 0.011799 | 0.011867 | 0.011799 | 0.011833 | 0.011698 | 0.011665 | 0.011732 |
| 0.011799 | 0.011799 | 0.011766 | 0.011732 | 0.011765 | 0.011732 | 0.011833 |
| 0.011759 | 0.011795 | 0.011780 | 0.011814 | 0.011950 | 0.011915 | 0.011914 |
| 0.011912 | 0.011868 | 0.011614 | 0.011600 | 0.011772 | 0.011942 | 0.011943 |
| 0.011767 | 0.011806 | 0.012071 | 0.012041 | 0.011969 | 0.012003 | 0.011933 |
| 0.011866 | 0.011933 | 0.011933 | 0.011832 | 0.011799 | 0.012001 | 0.012068 |
| 0.012102 | 0.011345 | 0.011743 | 0.011892 | 0.011765 | 0.011967 | 0.011933 |
| 0.011969 | 0.012000 | 0.012001 | 0.012001 | 0.012083 | 0.012135 | 0.011789 |
| 0.011669 | 0.011684 | 0.011775 | 0.011740 | 0.011778 | 0.011695 | 0.011332 |
| 0.011815 | 0.011587 | 0.011823 | 0.011847 | 0.011800 | 0.011848 | 0.011766 |
| 0.011732 | 0.011665 | 0.011799 | 0.011766 | 0.011699 | 0.011665 | 0.011598 |
| 0.011699 | 0.011766 | 0.011765 | 0.011765 | 0.011799 | 0.011799 | 0.011803 |
| 0.011872 | 0.011799 | 0.011799 | 0.011836 | 0.011698 | 0.011766 | 0.011766 |
| 0.011834 | 0.011940 | 0.011739 | 0.012078 | 0.012121 | 0.011833 | 0.012001 |
| 0.011933 | 0.011933 | 0.011771 | 0.011931 | 0.011895 | 0.011912 | 0.011796 |



|          |          |          |          |          |          |          |
|----------|----------|----------|----------|----------|----------|----------|
| 0.011922 | 0.012063 | 0.011992 | 0.011842 | 0.011732 | 0.011934 | 0.011799 |
| 0.011900 | 0.011833 | 0.011732 | 0.011836 | 0.011934 | 0.011939 | 0.011833 |
| 0.011732 | 0.011667 | 0.011799 | 0.011732 | 0.011665 | 0.011672 | 0.011934 |
| 0.011833 | 0.011765 | 0.011799 | 0.011833 | 0.011799 | 0.011732 | 0.011665 |
| 0.011799 | 0.011833 | 0.011832 | 0.011765 | 0.011832 | 0.012068 | 0.011664 |
| 0.011765 | 0.011564 | 0.011765 | 0.011799 | 0.011765 | 0.011463 | 0.011660 |
| 0.011904 | 0.011528 | 0.011411 | 0.011584 | 0.011671 | 0.011635 | 0.011478 |
| 0.011375 | 0.011665 | 0.011766 | 0.011876 | 0.011734 | 0.011873 | 0.012002 |
| 0.011902 | 0.011940 | 0.011900 | 0.012155 | 0.011866 | 0.012742 | 0.011903 |
| 0.012642 | 0.012410 | 0.012544 | 0.012817 | 0.011799 | 0.011766 | 0.011867 |
| 0.012508 | 0.012242 | 0.011833 | 0.011732 | 0.011800 | 0.011800 | 0.011737 |
| 0.011665 | 0.011671 | 0.011732 | 0.011700 | 0.012070 | 0.012136 | 0.012137 |
| 0.012037 | 0.012137 | 0.012241 | 0.012008 | 0.012509 | 0.012517 | 0.012576 |
| 0.012577 | 0.012611 | 0.012563 | 0.012577 | 0.012579 | 0.011866 | 0.012103 |
| 0.012171 | 0.012674 | 0.012180 | 0.012136 | 0.012609 | 0.011672 | 0.011565 |
| 0.011463 | 0.011530 | 0.012069 | 0.012130 | 0.012187 | 0.011866 | 0.011600 |
| S068     | 0.011664 | 0.011664 | 0.012001 | 0.011765 | 0.011765 | 0.011832 |
| 0.011671 | 0.011603 | 0.011765 | 0.011262 | 0.011329 | 0.011296 | 0.011262 |
| 0.011295 | 0.011396 | 0.011262 | 0.011295 | 0.011362 | 0.011329 | 0.011295 |
| 0.011262 | 0.011295 | 0.011396 | 0.011262 | 0.011295 | 0.011295 | 0.011637 |
| 0.011530 | 0.011295 | 0.011194 | 0.011429 | 0.011362 | 0.011329 | 0.011362 |
| 0.011329 | 0.011429 | 0.011329 | 0.011329 | 0.011362 | 0.011329 | 0.011497 |
| 0.011262 | 0.011329 | 0.011362 | 0.011295 | 0.011396 | 0.011429 | 0.011362 |
| 0.011329 | 0.011497 | 0.011396 | 0.011664 | 0.011329 | 0.011597 | 0.011329 |
| 0.011295 | 0.011396 | 0.011463 | 0.011597 | 0.011698 | 0.011396 | 0.011496 |
| 0.011362 | 0.011429 | 0.011329 | 0.011564 | 0.011799 | 0.000000 | 0.011396 |
| 0.011295 | 0.011396 | 0.011362 | 0.011429 | 0.011362 | 0.011362 | 0.011362 |
| 0.011262 | 0.011295 | 0.011262 | 0.011362 | 0.011329 | 0.011363 | 0.011429 |
| 0.011362 | 0.011329 | 0.011396 | 0.011295 | 0.011429 | 0.011262 | 0.011329 |
| 0.011496 | 0.011429 | 0.011664 | 0.011497 | 0.011329 | 0.011564 | 0.011262 |
| 0.011505 | 0.011733 | 0.011551 | 0.011256 | 0.011247 | 0.011355 | 0.011454 |
| 0.012085 | 0.011569 | 0.011266 | 0.011564 | 0.011564 | 0.011362 | 0.011463 |
| 0.011396 | 0.011362 | 0.011429 | 0.011329 | 0.011429 | 0.011362 | 0.011362 |
| 0.011329 | 0.011429 | 0.011631 | 0.011429 | 0.011396 | 0.011362 | 0.011295 |
| 0.011262 | 0.011262 | 0.011329 | 0.011295 | 0.011497 | 0.011463 | 0.011396 |
| 0.011497 | 0.011564 | 0.011295 | 0.011295 | 0.011329 | 0.011329 | 0.011330 |
| 0.011398 | 0.011329 | 0.011329 | 0.011204 | 0.011277 | 0.011236 | 0.011329 |
| 0.011331 | 0.011266 | 0.011318 | 0.011302 | 0.011230 | 0.011266 | 0.011297 |
| 0.011564 | 0.011336 | 0.011370 | 0.011262 | 0.011268 | 0.011397 | 0.011363 |
| 0.011430 | 0.011364 | 0.011363 | 0.011463 | 0.011396 | 0.011765 | 0.011564 |
| 0.011597 | 0.011463 | 0.011329 | 0.011430 | 0.011228 | 0.011463 | 0.011262 |
| 0.011329 | 0.011329 | 0.011295 | 0.011262 | 0.011295 | 0.011262 | 0.011362 |
| 0.011329 | 0.011430 | 0.011362 | 0.011262 | 0.011296 | 0.011463 | 0.011466 |
| 0.011463 | 0.011362 | 0.011262 | 0.011195 | 0.011329 | 0.011262 | 0.011195 |
| 0.011298 | 0.011463 | 0.011262 | 0.011463 | 0.011228 | 0.011329 | 0.011295 |
| 0.011396 | 0.011295 | 0.011329 | 0.011295 | 0.011329 | 0.011195 | 0.011329 |
| 0.011362 | 0.011295 | 0.011362 | 0.011295 | 0.011329 | 0.011362 | 0.011597 |
| 0.011698 | 0.011631 | 0.011698 | 0.011465 | 0.011698 | 0.011329 | 0.011295 |
| 0.011330 | 0.011586 | 0.011380 | 0.011232 | 0.011637 | 0.011197 | 0.011257 |
| 0.011705 | 0.011604 | 0.011496 | 0.011698 | 0.011402 | 0.011564 | 0.011530 |
| 0.011463 | 0.011631 | 0.011451 | 0.011307 | 0.011354 | 0.011362 | 0.011432 |
| 0.011530 | 0.011397 | 0.011567 | 0.011601 | 0.011564 | 0.011631 | 0.011704 |
| 0.011466 | 0.011603 | 0.011568 | 0.011500 | 0.011767 | 0.011228 | 0.011431 |
| 0.011396 | 0.011329 | 0.011228 | 0.011228 | 0.011295 | 0.011228 | 0.011362 |
| 0.011295 | 0.011362 | 0.011262 | 0.011362 | 0.011295 | 0.011295 | 0.011362 |
| 0.011295 | 0.011731 | 0.011631 | 0.011664 | 0.011194 | 0.011295 | 0.011329 |
| 0.011329 | 0.011295 | 0.011362 | 0.011396 | 0.011262 | 0.011262 | 0.011262 |
| 0.011799 | 0.011429 | 0.011429 | 0.011228 | 0.011329 | 0.011497 | 0.011262 |
| 0.011262 | 0.011329 | 0.011295 | 0.011463 | 0.011262 | 0.011396 | 0.011530 |
| 0.011463 | 0.011295 | 0.011295 | 0.011228 | 0.011228 | 0.011396 | 0.011329 |

|          |          |          |          |          |          |          |
|----------|----------|----------|----------|----------|----------|----------|
| 0.011228 | 0.011329 | 0.011195 | 0.011228 | 0.011362 | 0.011497 | 0.011228 |
| 0.011228 | 0.011362 | 0.011295 | 0.011195 | 0.011530 | 0.011195 | 0.011295 |
| 0.011403 | 0.011262 | 0.011564 | 0.011396 | 0.011429 | 0.011295 | 0.011396 |
| 0.011262 | 0.011597 | 0.011194 | 0.011463 | 0.011262 | 0.011262 | 0.011194 |
| 0.011429 | 0.011631 | 0.011329 | 0.011396 | 0.011228 | 0.011631 | 0.011262 |
| 0.011262 | 0.011262 | 0.011295 | 0.011396 | 0.011295 | 0.011396 | 0.011463 |
| 0.011463 | 0.011429 | 0.011329 | 0.011429 | 0.011396 | 0.011262 | 0.011228 |
| 0.011262 | 0.011262 | 0.011329 | 0.011262 | 0.011228 | 0.011329 | 0.011262 |
| 0.011295 | 0.011295 | 0.011362 | 0.011463 | 0.011362 | 0.011295 | 0.011295 |
| 0.011362 | 0.011295 | 0.011329 | 0.011262 | 0.011396 | 0.011362 | 0.011799 |
| 0.011295 | 0.011698 | 0.011302 | 0.017823 | 0.011388 | 0.011427 | 0.011653 |
| 0.011614 | 0.011658 | 0.011427 | 0.011350 | 0.011719 | 0.011682 | 0.011364 |
| 0.011582 | 0.011549 | 0.011216 | 0.011311 | 0.011294 | 0.011307 | 0.011318 |
| 0.011576 | 0.011470 | 0.011468 | 0.011325 | 0.011429 | 0.011463 | 0.011466 |
| 0.011301 | 0.011429 | 0.011429 | 0.011396 | 0.011362 | 0.011362 | 0.011329 |
| 0.011362 | 0.011295 | 0.011329 | 0.011362 | 0.011329 | 0.011262 | 0.011295 |
| 0.011295 | 0.011362 | 0.011262 | 0.011362 | 0.011396 | 0.011429 | 0.011329 |
| 0.011362 | 0.011329 | 0.011665 | 0.011665 | 0.011396 | 0.011363 | 0.011463 |
| 0.011228 | 0.011228 | 0.011262 | 0.011362 | 0.011228 | 0.011463 | 0.011463 |
| 0.011497 | 0.011496 | 0.011429 | 0.011530 | 0.011698 | 0.011532 | 0.011362 |
| 0.011362 | 0.011430 | 0.011463 | 0.011295 | 0.011362 | 0.011329 | 0.011362 |
| 0.011430 | 0.011430 | 0.011463 | 0.011430 | 0.011330 | 0.011530 | 0.011497 |
| 0.011365 | 0.011262 | 0.011362 | 0.011463 | 0.011362 | 0.011497 | 0.011530 |
| 0.011698 | 0.011402 | 0.011564 | 0.011530 | 0.011463 | 0.011631 | 0.011262 |
| 0.011431 | 0.011195 | 0.011295 | 0.011295 | 0.011362 | 0.011262 | 0.011362 |
| 0.011396 | 0.011429 | 0.011329 | 0.011362 | 0.011329 | 0.011665 | 0.011665 |
| 0.011396 | 0.011363 | 0.011496 | 0.011429 | 0.012069 | 0.011453 | 0.011377 |
| 0.011447 | 0.011407 | 0.011517 | 0.011406 | 0.011515 | 0.011439 | 0.011439 |
| 0.011987 | 0.011302 | 0.011437 | 0.011371 | 0.011645 | 0.011536 | 0.011605 |
| 0.012012 | 0.011475 | 0.011601 | 0.011664 | 0.011530 | 0.011530 | 0.011567 |
| 0.011228 | 0.011396 | 0.011530 | 0.011496 | 0.011499 | 0.011496 | 0.011464 |
| 0.011329 | 0.011262 | 0.011295 | 0.011329 | 0.011228 | 0.011295 | 0.011194 |
| 0.011329 | 0.011362 | 0.011262 | 0.011228 | 0.011329 | 0.011262 | 0.011295 |
| 0.011295 | 0.011228 | 0.011295 | 0.011329 | 0.011228 | 0.011429 | 0.011463 |
| 0.011362 | 0.011429 | 0.011362 | 0.011362 | 0.011295 | 0.011698 | 0.011329 |
| 0.011338 | 0.011295 | 0.011530 | 0.011501 | 0.011396 | 0.011396 | 0.011396 |
| 0.011396 | 0.011329 | 0.011295 | 0.011329 | 0.011228 | 0.011429 | 0.011362 |
| 0.011362 | 0.011497 | 0.011664 | 0.011396 | 0.011597 | 0.011597 | 0.011463 |
| 0.011295 | 0.011362 | 0.011396 | 0.011799 | 0.011362 | 0.011396 | 0.011362 |
| 0.011396 | 0.011329 | 0.011329 | 0.011631 | 0.011564 | 0.011597 | 0.011329 |
| 0.011429 | 0.011497 | 0.011362 | 0.011429 | 0.011396 | 0.011262 | 0.011597 |
| 0.011362 | 0.011329 | 0.011329 | 0.011497 | 0.011329 | 0.011429 | 0.011664 |
| 0.011362 | 0.011739 | 0.011732 | 0.011548 | 0.011342 | 0.011434 | 0.011267 |
| 0.011225 | 0.011761 | 0.011271 | 0.011507 | 0.011353 | 0.011467 | 0.011485 |
| 0.011570 | 0.011324 | 0.011450 | 0.011324 | 0.011330 | 0.011462 | 0.011425 |
| 0.011437 | 0.011336 | 0.011412 | 0.011342 | 0.011364 | 0.011497 | 0.011564 |
| 0.011564 | 0.011430 | 0.011533 | 0.011535 | 0.011670 | 0.011661 | 0.011362 |
| 0.011597 | 0.011463 | 0.011329 | 0.011430 | 0.011228 | 0.011463 | 0.011262 |
| 0.011329 | 0.011329 | 0.011295 | 0.011262 | 0.011295 | 0.011262 | 0.011362 |
| 0.011340 | 0.011340 | 0.011334 | 0.011368 | 0.011505 | 0.011470 | 0.011470 |
| 0.011469 | 0.011396 | 0.011134 | 0.011204 | 0.011264 | 0.011501 | 0.011501 |
| 0.011296 | 0.011365 | 0.011599 | 0.011567 | 0.011497 | 0.011464 | 0.011463 |
| 0.011396 | 0.011463 | 0.011463 | 0.011362 | 0.011933 | 0.011530 | 0.011597 |
| 0.011631 | 0.011701 | 0.011333 | 0.011407 | 0.011295 | 0.011497 | 0.011463 |
| 0.011497 | 0.011530 | 0.011530 | 0.011530 | 0.011650 | 0.011664 | 0.011268 |
| 0.011162 | 0.011164 | 0.011264 | 0.011230 | 0.011333 | 0.011172 | 0.011502 |
| 0.011300 | 0.011455 | 0.011156 | 0.011322 | 0.011329 | 0.011402 | 0.011295 |
| 0.011262 | 0.011262 | 0.011329 | 0.011295 | 0.011497 | 0.011463 | 0.011396 |
| 0.011497 | 0.011564 | 0.011295 | 0.011295 | 0.011329 | 0.011329 | 0.011330 |
| 0.011398 | 0.011329 | 0.011329 | 0.011364 | 0.011497 | 0.011564 | 0.011564 |

|          |          |          |          |          |          |          |
|----------|----------|----------|----------|----------|----------|----------|
| 0.011430 | 0.011533 | 0.011535 | 0.011670 | 0.011661 | 0.011362 | 0.011530 |
| 0.011463 | 0.011463 | 0.011297 | 0.011478 | 0.011269 | 0.011435 | 0.011305 |
| 0.011473 | 0.011698 | 0.011441 | 0.011366 | 0.011262 | 0.011463 | 0.011329 |
| 0.011430 | 0.011362 | 0.011262 | 0.011296 | 0.011463 | 0.011466 | 0.011362 |
| 0.011262 | 0.011195 | 0.011329 | 0.011262 | 0.011195 | 0.011298 | 0.011463 |
| 0.011362 | 0.011295 | 0.011329 | 0.011362 | 0.011329 | 0.011262 | 0.011463 |
| 0.011329 | 0.011362 | 0.011362 | 0.011295 | 0.011362 | 0.011597 | 0.011262 |
| 0.011295 | 0.011698 | 0.011295 | 0.011329 | 0.011295 | 0.011664 | 0.011274 |
| 0.011791 | 0.011273 | 0.011361 | 0.011503 | 0.011589 | 0.011491 | 0.011227 |
| 0.011323 | 0.011463 | 0.011564 | 0.011671 | 0.011531 | 0.011669 | 0.011800 |
| 0.011699 | 0.011703 | 0.011698 | 0.011949 | 0.011664 | 0.012539 | 0.011700 |
| 0.012439 | 0.012207 | 0.012341 | 0.012613 | 0.011664 | 0.011362 | 0.011665 |
| 0.012103 | 0.012038 | 0.011631 | 0.011530 | 0.011598 | 0.011598 | 0.011534 |
| 0.011463 | 0.011467 | 0.011530 | 0.011497 | 0.011867 | 0.011933 | 0.011935 |
| 0.011834 | 0.011934 | 0.012038 | 0.011804 | 0.012104 | 0.012110 | 0.012171 |
| 0.012172 | 0.012205 | 0.012152 | 0.012172 | 0.012173 | 0.011396 | 0.011699 |
| 0.011767 | 0.012270 | 0.011772 | 0.012001 | 0.012474 | 0.011536 | 0.011430 |
| 0.011396 | 0.011396 | 0.011867 | 0.011883 | 0.012010 | 0.011732 | 0.011397 |
| S069     | 0.011732 | 0.011732 | 0.012068 | 0.011832 | 0.011832 | 0.011900 |
| 0.011739 | 0.011671 | 0.011900 | 0.011329 | 0.011396 | 0.011363 | 0.011329 |
| 0.011362 | 0.011530 | 0.011329 | 0.011362 | 0.011429 | 0.011396 | 0.011362 |
| 0.011329 | 0.011362 | 0.011463 | 0.011329 | 0.011363 | 0.011362 | 0.011705 |
| 0.011597 | 0.011362 | 0.011262 | 0.011496 | 0.011429 | 0.011396 | 0.011429 |
| 0.011329 | 0.011497 | 0.011396 | 0.011396 | 0.011429 | 0.011396 | 0.011564 |
| 0.011329 | 0.011396 | 0.011429 | 0.011362 | 0.011463 | 0.011496 | 0.011362 |
| 0.011396 | 0.011564 | 0.011463 | 0.011732 | 0.011396 | 0.011664 | 0.011396 |
| 0.011362 | 0.011463 | 0.011530 | 0.011664 | 0.011765 | 0.011463 | 0.011564 |
| 0.011429 | 0.011497 | 0.011396 | 0.011631 | 0.011866 | 0.011396 | 0.000000 |
| 0.011362 | 0.011463 | 0.011429 | 0.011497 | 0.011429 | 0.011429 | 0.011429 |
| 0.011329 | 0.011362 | 0.011329 | 0.011429 | 0.011396 | 0.011430 | 0.011496 |
| 0.011429 | 0.011396 | 0.011463 | 0.011362 | 0.011496 | 0.011329 | 0.011396 |
| 0.011564 | 0.011496 | 0.011732 | 0.011564 | 0.011396 | 0.011631 | 0.011396 |
| 0.011579 | 0.011770 | 0.011626 | 0.011295 | 0.011321 | 0.011428 | 0.011493 |
| 0.012158 | 0.011518 | 0.011307 | 0.011631 | 0.011631 | 0.011429 | 0.011530 |
| 0.011463 | 0.011429 | 0.011496 | 0.011396 | 0.011497 | 0.011429 | 0.011429 |
| 0.011396 | 0.011496 | 0.011698 | 0.011564 | 0.011463 | 0.011430 | 0.011362 |
| 0.011329 | 0.011329 | 0.011396 | 0.011362 | 0.011564 | 0.011530 | 0.011463 |
| 0.011564 | 0.011631 | 0.011362 | 0.011362 | 0.011396 | 0.011396 | 0.011398 |
| 0.011466 | 0.011396 | 0.011396 | 0.011276 | 0.011349 | 0.011306 | 0.011396 |
| 0.011399 | 0.011335 | 0.011392 | 0.011371 | 0.011298 | 0.011334 | 0.011364 |
| 0.011636 | 0.011405 | 0.011439 | 0.011329 | 0.011337 | 0.011464 | 0.011430 |
| 0.011497 | 0.011431 | 0.011430 | 0.011530 | 0.011463 | 0.011832 | 0.011631 |
| 0.011664 | 0.011530 | 0.011396 | 0.011497 | 0.011295 | 0.011530 | 0.011329 |
| 0.011396 | 0.011396 | 0.011362 | 0.011329 | 0.011362 | 0.011329 | 0.011430 |
| 0.011396 | 0.011497 | 0.011430 | 0.011329 | 0.011431 | 0.011530 | 0.011533 |
| 0.011530 | 0.011430 | 0.011329 | 0.011263 | 0.011396 | 0.011329 | 0.011262 |
| 0.011366 | 0.011530 | 0.011329 | 0.011530 | 0.011295 | 0.011396 | 0.011362 |
| 0.011463 | 0.011362 | 0.011396 | 0.011362 | 0.011396 | 0.011262 | 0.011396 |
| 0.011430 | 0.011362 | 0.011430 | 0.011362 | 0.011396 | 0.011430 | 0.011665 |
| 0.011765 | 0.011698 | 0.011766 | 0.011532 | 0.011766 | 0.011396 | 0.011362 |
| 0.011398 | 0.011707 | 0.011472 | 0.011300 | 0.011773 | 0.011265 | 0.011414 |
| 0.011773 | 0.011672 | 0.011564 | 0.011765 | 0.011470 | 0.011631 | 0.011597 |
| 0.011530 | 0.011698 | 0.011558 | 0.011431 | 0.011479 | 0.011430 | 0.011500 |
| 0.011597 | 0.011499 | 0.011635 | 0.011703 | 0.011631 | 0.011698 | 0.011806 |
| 0.011534 | 0.011705 | 0.011636 | 0.011567 | 0.011834 | 0.011295 | 0.011498 |
| 0.011463 | 0.011396 | 0.011295 | 0.011295 | 0.011362 | 0.011362 | 0.011429 |
| 0.011362 | 0.011429 | 0.011329 | 0.011429 | 0.011362 | 0.011362 | 0.011429 |
| 0.011362 | 0.011799 | 0.011698 | 0.011732 | 0.011262 | 0.011362 | 0.011396 |
| 0.011396 | 0.011362 | 0.011429 | 0.011463 | 0.011329 | 0.011329 | 0.011329 |
| 0.011866 | 0.011496 | 0.011497 | 0.011295 | 0.011396 | 0.011564 | 0.011329 |

|          |          |          |          |          |          |          |
|----------|----------|----------|----------|----------|----------|----------|
| 0.011329 | 0.011396 | 0.011362 | 0.011530 | 0.011329 | 0.011463 | 0.011597 |
| 0.011530 | 0.011362 | 0.011362 | 0.011295 | 0.011295 | 0.011463 | 0.011396 |
| 0.011295 | 0.011396 | 0.011262 | 0.011295 | 0.011429 | 0.011564 | 0.011329 |
| 0.011295 | 0.011429 | 0.011363 | 0.011262 | 0.011597 | 0.011262 | 0.011429 |
| 0.011505 | 0.011329 | 0.011631 | 0.011463 | 0.011497 | 0.011362 | 0.011463 |
| 0.011329 | 0.011664 | 0.011262 | 0.011530 | 0.011329 | 0.011329 | 0.011262 |
| 0.011496 | 0.011698 | 0.011396 | 0.011463 | 0.011295 | 0.011698 | 0.011329 |
| 0.011329 | 0.011329 | 0.011362 | 0.011463 | 0.011362 | 0.011463 | 0.011530 |
| 0.011530 | 0.011497 | 0.011396 | 0.011497 | 0.011463 | 0.011329 | 0.011295 |
| 0.011329 | 0.011329 | 0.011396 | 0.011329 | 0.011295 | 0.011463 | 0.011329 |
| 0.011362 | 0.011362 | 0.011496 | 0.011530 | 0.011429 | 0.011362 | 0.011362 |
| 0.011429 | 0.011362 | 0.011463 | 0.011329 | 0.011463 | 0.011564 | 0.011866 |
| 0.011362 | 0.011765 | 0.011371 | 0.017899 | 0.011388 | 0.011488 | 0.011723 |
| 0.011683 | 0.011729 | 0.011427 | 0.011350 | 0.011775 | 0.011751 | 0.011485 |
| 0.011629 | 0.011671 | 0.011255 | 0.011353 | 0.011372 | 0.011455 | 0.011361 |
| 0.011576 | 0.011544 | 0.011542 | 0.011391 | 0.011497 | 0.011530 | 0.011534 |
| 0.011404 | 0.011497 | 0.011497 | 0.011463 | 0.011429 | 0.011430 | 0.011396 |
| 0.011430 | 0.011362 | 0.011396 | 0.011430 | 0.011396 | 0.011329 | 0.011362 |
| 0.011362 | 0.011430 | 0.011329 | 0.011430 | 0.011463 | 0.011497 | 0.011396 |
| 0.011429 | 0.011396 | 0.011732 | 0.011732 | 0.011463 | 0.011497 | 0.011530 |
| 0.011295 | 0.011295 | 0.011329 | 0.011430 | 0.011295 | 0.011530 | 0.011530 |
| 0.011564 | 0.011564 | 0.011497 | 0.011597 | 0.011766 | 0.011599 | 0.011430 |
| 0.011430 | 0.011497 | 0.011530 | 0.011362 | 0.011430 | 0.011396 | 0.011430 |
| 0.011497 | 0.011497 | 0.011530 | 0.011497 | 0.011397 | 0.011597 | 0.011564 |
| 0.011433 | 0.011329 | 0.011430 | 0.011530 | 0.011430 | 0.011564 | 0.011597 |
| 0.011765 | 0.011470 | 0.011631 | 0.011597 | 0.011530 | 0.011698 | 0.011329 |
| 0.011498 | 0.011396 | 0.011362 | 0.011362 | 0.011430 | 0.011329 | 0.011430 |
| 0.011463 | 0.011497 | 0.011396 | 0.011429 | 0.011396 | 0.011732 | 0.011732 |
| 0.011463 | 0.011497 | 0.011564 | 0.011496 | 0.012137 | 0.011560 | 0.011482 |
| 0.011552 | 0.011511 | 0.011622 | 0.011510 | 0.011620 | 0.011543 | 0.011508 |
| 0.012090 | 0.011406 | 0.011540 | 0.011475 | 0.011749 | 0.011604 | 0.011707 |
| 0.012114 | 0.011588 | 0.011669 | 0.011732 | 0.011597 | 0.011597 | 0.011635 |
| 0.011295 | 0.011463 | 0.011597 | 0.011564 | 0.011567 | 0.011564 | 0.011532 |
| 0.011396 | 0.011329 | 0.011362 | 0.011396 | 0.011295 | 0.011362 | 0.011262 |
| 0.011396 | 0.011429 | 0.011329 | 0.011295 | 0.011396 | 0.011329 | 0.011362 |
| 0.011362 | 0.011295 | 0.011362 | 0.011396 | 0.011295 | 0.011497 | 0.011530 |
| 0.011429 | 0.011497 | 0.011429 | 0.011362 | 0.011362 | 0.011765 | 0.011396 |
| 0.011443 | 0.011362 | 0.011598 | 0.011603 | 0.011463 | 0.011463 | 0.011463 |
| 0.011463 | 0.011396 | 0.011362 | 0.011396 | 0.011497 | 0.011497 | 0.011429 |
| 0.011429 | 0.011564 | 0.011732 | 0.011463 | 0.011665 | 0.011665 | 0.011530 |
| 0.011362 | 0.011429 | 0.011463 | 0.011866 | 0.011430 | 0.011463 | 0.011429 |
| 0.011463 | 0.011396 | 0.011396 | 0.011698 | 0.011631 | 0.011665 | 0.011396 |
| 0.011497 | 0.011564 | 0.011429 | 0.011497 | 0.011463 | 0.011329 | 0.011664 |
| 0.011429 | 0.011396 | 0.011396 | 0.011564 | 0.011396 | 0.011496 | 0.011732 |
| 0.011429 | 0.011807 | 0.011799 | 0.011589 | 0.011342 | 0.011502 | 0.011421 |
| 0.011335 | 0.011800 | 0.011341 | 0.011552 | 0.011353 | 0.011467 | 0.011485 |
| 0.011570 | 0.011324 | 0.011450 | 0.011324 | 0.011330 | 0.011529 | 0.011466 |
| 0.011512 | 0.011414 | 0.011483 | 0.011412 | 0.011431 | 0.011564 | 0.011631 |
| 0.011631 | 0.011497 | 0.011601 | 0.011603 | 0.011704 | 0.011767 | 0.011429 |
| 0.011664 | 0.011530 | 0.011396 | 0.011497 | 0.011295 | 0.011530 | 0.011329 |
| 0.011396 | 0.011396 | 0.011362 | 0.011329 | 0.011362 | 0.011329 | 0.011430 |
| 0.011410 | 0.011410 | 0.011403 | 0.011437 | 0.011573 | 0.011538 | 0.011538 |
| 0.011537 | 0.011464 | 0.011282 | 0.011276 | 0.011399 | 0.011568 | 0.011569 |
| 0.011363 | 0.011433 | 0.011666 | 0.011635 | 0.011565 | 0.011599 | 0.011530 |
| 0.011463 | 0.011530 | 0.011530 | 0.011429 | 0.012001 | 0.011597 | 0.011665 |
| 0.011698 | 0.011772 | 0.011401 | 0.011476 | 0.011362 | 0.011564 | 0.011530 |
| 0.011565 | 0.011597 | 0.011597 | 0.011597 | 0.011729 | 0.011732 | 0.011372 |
| 0.011263 | 0.011268 | 0.011367 | 0.011332 | 0.011436 | 0.011284 | 0.011604 |
| 0.011403 | 0.011586 | 0.011346 | 0.011435 | 0.011396 | 0.011471 | 0.011362 |
| 0.011329 | 0.011329 | 0.011396 | 0.011362 | 0.011564 | 0.011530 | 0.011463 |

|          |          |          |          |          |          |          |
|----------|----------|----------|----------|----------|----------|----------|
| 0.011564 | 0.011631 | 0.011362 | 0.011362 | 0.011396 | 0.011396 | 0.011398 |
| 0.011466 | 0.011396 | 0.011396 | 0.011431 | 0.011564 | 0.011631 | 0.011631 |
| 0.011497 | 0.011601 | 0.011603 | 0.011704 | 0.011767 | 0.011429 | 0.011597 |
| 0.011530 | 0.011530 | 0.011365 | 0.011547 | 0.011477 | 0.011503 | 0.011376 |
| 0.011542 | 0.011744 | 0.011483 | 0.011434 | 0.011329 | 0.011530 | 0.011396 |
| 0.011497 | 0.011430 | 0.011329 | 0.011431 | 0.011530 | 0.011533 | 0.011430 |
| 0.011329 | 0.011263 | 0.011396 | 0.011329 | 0.011262 | 0.011366 | 0.011530 |
| 0.011430 | 0.011362 | 0.011396 | 0.011430 | 0.011396 | 0.011329 | 0.011530 |
| 0.011396 | 0.011429 | 0.011429 | 0.011362 | 0.011429 | 0.011664 | 0.011329 |
| 0.011362 | 0.011765 | 0.011362 | 0.011396 | 0.011362 | 0.011732 | 0.011317 |
| 0.011791 | 0.011315 | 0.011311 | 0.011543 | 0.011630 | 0.011563 | 0.011311 |
| 0.011270 | 0.011530 | 0.011631 | 0.011739 | 0.011599 | 0.011737 | 0.011867 |
| 0.011767 | 0.011804 | 0.011765 | 0.012017 | 0.011732 | 0.012606 | 0.011768 |
| 0.012507 | 0.012274 | 0.012409 | 0.012680 | 0.011731 | 0.011430 | 0.011732 |
| 0.012171 | 0.012106 | 0.011698 | 0.011597 | 0.011665 | 0.011665 | 0.011635 |
| 0.011530 | 0.011535 | 0.011597 | 0.011565 | 0.011935 | 0.012001 | 0.012002 |
| 0.011901 | 0.012002 | 0.012106 | 0.011872 | 0.012171 | 0.012144 | 0.012238 |
| 0.012239 | 0.012273 | 0.012221 | 0.012239 | 0.012241 | 0.011463 | 0.011766 |
| 0.011834 | 0.012337 | 0.011840 | 0.012068 | 0.012541 | 0.011604 | 0.011497 |
| 0.011463 | 0.011463 | 0.011934 | 0.012006 | 0.012081 | 0.011799 | 0.011465 |
| S070     | 0.011631 | 0.011631 | 0.011967 | 0.011732 | 0.011732 | 0.011799 |
| 0.011637 | 0.011569 | 0.011799 | 0.011228 | 0.011295 | 0.011262 | 0.011228 |
| 0.011262 | 0.011429 | 0.011228 | 0.011262 | 0.011329 | 0.011295 | 0.011262 |
| 0.011228 | 0.011262 | 0.011362 | 0.011228 | 0.011262 | 0.011262 | 0.011603 |
| 0.011496 | 0.011262 | 0.011161 | 0.011396 | 0.011329 | 0.011295 | 0.011329 |
| 0.011295 | 0.011396 | 0.011295 | 0.011295 | 0.011329 | 0.011295 | 0.011463 |
| 0.011228 | 0.011295 | 0.011329 | 0.011262 | 0.011362 | 0.011396 | 0.011329 |
| 0.011295 | 0.011463 | 0.011362 | 0.011631 | 0.011295 | 0.011564 | 0.011295 |
| 0.011262 | 0.011362 | 0.011429 | 0.011564 | 0.011664 | 0.011362 | 0.011463 |
| 0.011329 | 0.011396 | 0.011295 | 0.011530 | 0.011765 | 0.011295 | 0.011362 |
| 0.000000 | 0.011362 | 0.011329 | 0.011396 | 0.011329 | 0.011329 | 0.011329 |
| 0.011228 | 0.011262 | 0.011228 | 0.011329 | 0.011295 | 0.011329 | 0.011396 |
| 0.011329 | 0.011295 | 0.011362 | 0.011262 | 0.011396 | 0.011161 | 0.011295 |
| 0.011463 | 0.011396 | 0.011631 | 0.011463 | 0.011295 | 0.011530 | 0.011295 |
| 0.011468 | 0.011695 | 0.011513 | 0.011216 | 0.011210 | 0.011318 | 0.011415 |
| 0.012048 | 0.011518 | 0.011225 | 0.011530 | 0.011530 | 0.011329 | 0.011429 |
| 0.011362 | 0.011329 | 0.011396 | 0.011295 | 0.011396 | 0.011329 | 0.011329 |
| 0.011295 | 0.011396 | 0.011597 | 0.011463 | 0.011362 | 0.011329 | 0.011262 |
| 0.011228 | 0.011228 | 0.011295 | 0.011262 | 0.011463 | 0.011430 | 0.011362 |
| 0.011463 | 0.011530 | 0.011262 | 0.011262 | 0.011295 | 0.011295 | 0.011297 |
| 0.011364 | 0.011295 | 0.011295 | 0.011168 | 0.011241 | 0.011200 | 0.011296 |
| 0.011297 | 0.011232 | 0.011282 | 0.011267 | 0.011196 | 0.011232 | 0.011263 |
| 0.011528 | 0.011302 | 0.011336 | 0.011228 | 0.011233 | 0.011363 | 0.011329 |
| 0.011397 | 0.011330 | 0.011329 | 0.011429 | 0.011362 | 0.011732 | 0.011530 |
| 0.011564 | 0.011430 | 0.011295 | 0.011396 | 0.011195 | 0.011429 | 0.011228 |
| 0.011295 | 0.011295 | 0.011262 | 0.011228 | 0.011262 | 0.011228 | 0.011329 |
| 0.011295 | 0.011396 | 0.011329 | 0.011228 | 0.011330 | 0.011430 | 0.011432 |
| 0.011430 | 0.011329 | 0.011228 | 0.011161 | 0.011295 | 0.011228 | 0.011161 |
| 0.011264 | 0.011430 | 0.011228 | 0.011430 | 0.011195 | 0.011295 | 0.011262 |
| 0.011362 | 0.011262 | 0.011295 | 0.011262 | 0.011295 | 0.011161 | 0.011295 |
| 0.011329 | 0.011262 | 0.011329 | 0.011262 | 0.011295 | 0.011329 | 0.011564 |
| 0.011664 | 0.011597 | 0.011665 | 0.011431 | 0.011665 | 0.011295 | 0.011262 |
| 0.011297 | 0.011586 | 0.011380 | 0.011197 | 0.011671 | 0.011163 | 0.011296 |
| 0.011671 | 0.011570 | 0.011463 | 0.011664 | 0.011368 | 0.011530 | 0.011497 |
| 0.011429 | 0.011597 | 0.011415 | 0.011266 | 0.011312 | 0.011329 | 0.011398 |
| 0.011497 | 0.011397 | 0.011533 | 0.011601 | 0.011530 | 0.011597 | 0.011704 |
| 0.011432 | 0.011603 | 0.011534 | 0.011466 | 0.011733 | 0.011194 | 0.011397 |
| 0.011362 | 0.011295 | 0.011194 | 0.011194 | 0.011262 | 0.011262 | 0.011329 |
| 0.011262 | 0.011329 | 0.011228 | 0.011329 | 0.011262 | 0.011262 | 0.011329 |
| 0.011262 | 0.011698 | 0.011597 | 0.011631 | 0.011161 | 0.011262 | 0.011295 |

|          |          |          |          |          |          |          |
|----------|----------|----------|----------|----------|----------|----------|
| 0.011295 | 0.011262 | 0.011329 | 0.011362 | 0.011228 | 0.011228 | 0.011228 |
| 0.011765 | 0.011396 | 0.011396 | 0.011194 | 0.011295 | 0.011463 | 0.011228 |
| 0.011228 | 0.011295 | 0.011262 | 0.011429 | 0.011228 | 0.011362 | 0.011496 |
| 0.011429 | 0.011262 | 0.011262 | 0.011194 | 0.011194 | 0.011362 | 0.011295 |
| 0.011194 | 0.011295 | 0.011161 | 0.011195 | 0.011329 | 0.011463 | 0.011228 |
| 0.011195 | 0.011329 | 0.011262 | 0.011161 | 0.011496 | 0.011161 | 0.011329 |
| 0.011368 | 0.011228 | 0.011530 | 0.011362 | 0.011329 | 0.011262 | 0.011362 |
| 0.011228 | 0.011564 | 0.011161 | 0.011429 | 0.011228 | 0.011228 | 0.011161 |
| 0.011396 | 0.011598 | 0.011295 | 0.011362 | 0.011194 | 0.011597 | 0.011228 |
| 0.011228 | 0.011228 | 0.011262 | 0.011362 | 0.011262 | 0.011362 | 0.011429 |
| 0.011429 | 0.011396 | 0.011295 | 0.011396 | 0.011362 | 0.011228 | 0.011194 |
| 0.011228 | 0.011228 | 0.011295 | 0.011228 | 0.011194 | 0.011362 | 0.011228 |
| 0.011262 | 0.011262 | 0.011396 | 0.011429 | 0.011329 | 0.011262 | 0.011262 |
| 0.011329 | 0.011262 | 0.011362 | 0.011228 | 0.011362 | 0.011463 | 0.011765 |
| 0.011262 | 0.011664 | 0.011267 | 0.017785 | 0.011257 | 0.011366 | 0.011618 |
| 0.011579 | 0.011623 | 0.011322 | 0.011292 | 0.011719 | 0.011647 | 0.011303 |
| 0.011534 | 0.011487 | 0.011177 | 0.011228 | 0.011255 | 0.011307 | 0.011275 |
| 0.011529 | 0.011433 | 0.011431 | 0.011325 | 0.011396 | 0.011429 | 0.011432 |
| 0.011301 | 0.011396 | 0.011396 | 0.011362 | 0.011329 | 0.011329 | 0.011295 |
| 0.011329 | 0.011262 | 0.011295 | 0.011329 | 0.011295 | 0.011228 | 0.011262 |
| 0.011262 | 0.011329 | 0.011228 | 0.011329 | 0.011362 | 0.011396 | 0.011295 |
| 0.011329 | 0.011295 | 0.011631 | 0.011631 | 0.011362 | 0.011396 | 0.011430 |
| 0.011195 | 0.011195 | 0.011228 | 0.011329 | 0.011195 | 0.011430 | 0.011430 |
| 0.011463 | 0.011463 | 0.011396 | 0.011497 | 0.011665 | 0.011498 | 0.011329 |
| 0.011329 | 0.011396 | 0.011430 | 0.011262 | 0.011329 | 0.011295 | 0.011329 |
| 0.011396 | 0.011396 | 0.011429 | 0.011396 | 0.011296 | 0.011497 | 0.011463 |
| 0.011331 | 0.011228 | 0.011329 | 0.011430 | 0.011329 | 0.011463 | 0.011496 |
| 0.011664 | 0.011368 | 0.011530 | 0.011497 | 0.011429 | 0.011597 | 0.011228 |
| 0.011397 | 0.011296 | 0.011262 | 0.011262 | 0.011329 | 0.011228 | 0.011329 |
| 0.011362 | 0.011396 | 0.011295 | 0.011329 | 0.011295 | 0.011631 | 0.011631 |
| 0.011362 | 0.011396 | 0.011463 | 0.011396 | 0.012035 | 0.011453 | 0.011341 |
| 0.011447 | 0.011407 | 0.011482 | 0.011372 | 0.011515 | 0.011439 | 0.011405 |
| 0.011953 | 0.011302 | 0.011437 | 0.011371 | 0.011645 | 0.011502 | 0.011605 |
| 0.012012 | 0.011437 | 0.011567 | 0.011631 | 0.011496 | 0.011497 | 0.011533 |
| 0.011194 | 0.011362 | 0.011496 | 0.011463 | 0.011466 | 0.011463 | 0.011431 |
| 0.011295 | 0.011228 | 0.011262 | 0.011295 | 0.011194 | 0.011262 | 0.011161 |
| 0.011295 | 0.011329 | 0.011228 | 0.011194 | 0.011295 | 0.011228 | 0.011262 |
| 0.011262 | 0.011194 | 0.011262 | 0.011295 | 0.011194 | 0.011396 | 0.011429 |
| 0.011329 | 0.011329 | 0.011329 | 0.011329 | 0.011262 | 0.011664 | 0.011295 |
| 0.011304 | 0.011262 | 0.011497 | 0.011501 | 0.011362 | 0.011362 | 0.011362 |
| 0.011362 | 0.011295 | 0.011262 | 0.011295 | 0.011396 | 0.011396 | 0.011329 |
| 0.011329 | 0.011463 | 0.011631 | 0.011362 | 0.011564 | 0.011564 | 0.011429 |
| 0.011262 | 0.011329 | 0.011362 | 0.011765 | 0.011329 | 0.011362 | 0.011329 |
| 0.011362 | 0.011295 | 0.011295 | 0.011597 | 0.011530 | 0.011564 | 0.011295 |
| 0.011396 | 0.011463 | 0.011329 | 0.011396 | 0.011362 | 0.011228 | 0.011564 |
| 0.011329 | 0.011295 | 0.011295 | 0.011463 | 0.011295 | 0.011396 | 0.011631 |
| 0.011329 | 0.011705 | 0.011698 | 0.011507 | 0.011286 | 0.011400 | 0.011318 |
| 0.011225 | 0.011722 | 0.011236 | 0.011462 | 0.011304 | 0.011366 | 0.011432 |
| 0.011519 | 0.011258 | 0.011394 | 0.011258 | 0.011276 | 0.011462 | 0.011385 |
| 0.011399 | 0.011296 | 0.011377 | 0.011307 | 0.011330 | 0.011463 | 0.011530 |
| 0.011530 | 0.011396 | 0.011500 | 0.011501 | 0.011636 | 0.011661 | 0.011329 |
| 0.011564 | 0.011430 | 0.011295 | 0.011396 | 0.011195 | 0.011429 | 0.011228 |
| 0.011295 | 0.011295 | 0.011262 | 0.011228 | 0.011262 | 0.011228 | 0.011329 |
| 0.011305 | 0.011305 | 0.011300 | 0.011334 | 0.011471 | 0.011436 | 0.011436 |
| 0.011435 | 0.011363 | 0.011171 | 0.011168 | 0.011297 | 0.011467 | 0.011467 |
| 0.011262 | 0.011331 | 0.011565 | 0.011533 | 0.011464 | 0.011498 | 0.011429 |
| 0.011362 | 0.011429 | 0.011429 | 0.011329 | 0.011900 | 0.011497 | 0.011564 |
| 0.011597 | 0.011665 | 0.011299 | 0.011372 | 0.011262 | 0.011463 | 0.011429 |
| 0.011464 | 0.011496 | 0.011496 | 0.011496 | 0.011650 | 0.011631 | 0.011268 |
| 0.011162 | 0.011164 | 0.011264 | 0.011230 | 0.011333 | 0.011172 | 0.011502 |

|          |          |          |          |          |          |          |
|----------|----------|----------|----------|----------|----------|----------|
| 0.011300 | 0.011411 | 0.011156 | 0.011285 | 0.011296 | 0.011368 | 0.011262 |
| 0.011228 | 0.011228 | 0.011295 | 0.011262 | 0.011463 | 0.011430 | 0.011362 |
| 0.011463 | 0.011530 | 0.011262 | 0.011262 | 0.011295 | 0.011295 | 0.011297 |
| 0.011364 | 0.011295 | 0.011295 | 0.011330 | 0.011463 | 0.011530 | 0.011530 |
| 0.011396 | 0.011500 | 0.011501 | 0.011636 | 0.011661 | 0.011329 | 0.011496 |
| 0.011429 | 0.011429 | 0.011263 | 0.011443 | 0.011373 | 0.011401 | 0.011270 |
| 0.011439 | 0.011653 | 0.011357 | 0.011332 | 0.011228 | 0.011430 | 0.011295 |
| 0.011396 | 0.011329 | 0.011228 | 0.011330 | 0.011430 | 0.011432 | 0.011329 |
| 0.011228 | 0.011161 | 0.011295 | 0.011228 | 0.011161 | 0.011264 | 0.011430 |
| 0.011329 | 0.011262 | 0.011295 | 0.011329 | 0.011295 | 0.011228 | 0.011430 |
| 0.011295 | 0.011329 | 0.011329 | 0.011262 | 0.011329 | 0.011564 | 0.011228 |
| 0.000000 | 0.011664 | 0.011262 | 0.011295 | 0.011262 | 0.011631 | 0.011232 |
| 0.011735 | 0.011230 | 0.011311 | 0.011463 | 0.011549 | 0.011455 | 0.011186 |
| 0.011270 | 0.011429 | 0.011530 | 0.011637 | 0.011498 | 0.011635 | 0.011766 |
| 0.011666 | 0.011703 | 0.011664 | 0.011914 | 0.011631 | 0.012505 | 0.011667 |
| 0.012406 | 0.012173 | 0.012307 | 0.012579 | 0.011631 | 0.011329 | 0.011631 |
| 0.012070 | 0.012005 | 0.011597 | 0.011497 | 0.011565 | 0.011565 | 0.011534 |
| 0.011429 | 0.011433 | 0.011496 | 0.011464 | 0.011834 | 0.011900 | 0.011901 |
| 0.011800 | 0.011901 | 0.012004 | 0.011770 | 0.012070 | 0.012042 | 0.012137 |
| 0.012138 | 0.012172 | 0.012118 | 0.012138 | 0.012139 | 0.011362 | 0.011665 |
| 0.011733 | 0.012236 | 0.011738 | 0.011967 | 0.012440 | 0.011502 | 0.011396 |
| 0.011362 | 0.011362 | 0.011833 | 0.011842 | 0.011975 | 0.011698 | 0.011363 |
| S071     | 0.011732 | 0.011732 | 0.012068 | 0.011832 | 0.011832 | 0.011900 |
| 0.011739 | 0.011671 | 0.011899 | 0.011329 | 0.011362 | 0.011363 | 0.011329 |
| 0.011362 | 0.011530 | 0.011329 | 0.011362 | 0.011429 | 0.011396 | 0.011362 |
| 0.011329 | 0.011362 | 0.011463 | 0.011329 | 0.011363 | 0.011362 | 0.011705 |
| 0.011597 | 0.011362 | 0.011262 | 0.011496 | 0.011429 | 0.011396 | 0.011429 |
| 0.011396 | 0.011496 | 0.011396 | 0.011396 | 0.011429 | 0.011396 | 0.011564 |
| 0.011329 | 0.011396 | 0.011429 | 0.011362 | 0.011463 | 0.011496 | 0.011429 |
| 0.011396 | 0.011564 | 0.011463 | 0.011731 | 0.011396 | 0.011664 | 0.011396 |
| 0.011362 | 0.011463 | 0.011530 | 0.011664 | 0.011765 | 0.011463 | 0.011564 |
| 0.011429 | 0.011496 | 0.011396 | 0.011631 | 0.011866 | 0.011396 | 0.011463 |
| 0.011362 | 0.000000 | 0.011429 | 0.011496 | 0.011429 | 0.011429 | 0.011429 |
| 0.011329 | 0.011362 | 0.011329 | 0.011429 | 0.011396 | 0.011430 | 0.011496 |
| 0.011429 | 0.011396 | 0.011463 | 0.011362 | 0.011496 | 0.011329 | 0.011396 |
| 0.011564 | 0.011496 | 0.011731 | 0.011564 | 0.011396 | 0.011631 | 0.011396 |
| 0.011542 | 0.011770 | 0.011588 | 0.011295 | 0.011247 | 0.011391 | 0.011415 |
| 0.012085 | 0.011518 | 0.011225 | 0.011631 | 0.011631 | 0.011429 | 0.011530 |
| 0.011463 | 0.011429 | 0.011496 | 0.011396 | 0.011496 | 0.011429 | 0.011429 |
| 0.011396 | 0.011496 | 0.011698 | 0.011564 | 0.011463 | 0.011429 | 0.011362 |
| 0.011329 | 0.011329 | 0.011396 | 0.011362 | 0.011564 | 0.011530 | 0.011463 |
| 0.011564 | 0.011631 | 0.011362 | 0.011362 | 0.011396 | 0.011396 | 0.011398 |
| 0.011466 | 0.011396 | 0.011396 | 0.011276 | 0.011349 | 0.011306 | 0.011396 |
| 0.011399 | 0.011335 | 0.011355 | 0.011371 | 0.011298 | 0.011334 | 0.011364 |
| 0.011636 | 0.011405 | 0.011439 | 0.011329 | 0.011337 | 0.011464 | 0.011430 |
| 0.011497 | 0.011431 | 0.011430 | 0.011530 | 0.011463 | 0.011832 | 0.011631 |
| 0.011664 | 0.011530 | 0.011396 | 0.011497 | 0.011295 | 0.011530 | 0.011329 |
| 0.011396 | 0.011396 | 0.011362 | 0.011329 | 0.011362 | 0.011329 | 0.011429 |
| 0.011396 | 0.011497 | 0.011430 | 0.011329 | 0.011431 | 0.011530 | 0.011533 |
| 0.011530 | 0.011430 | 0.011329 | 0.011263 | 0.011396 | 0.011329 | 0.011262 |
| 0.011366 | 0.011530 | 0.011329 | 0.011530 | 0.011295 | 0.011396 | 0.011362 |
| 0.011463 | 0.011362 | 0.011396 | 0.011362 | 0.011396 | 0.011262 | 0.011396 |
| 0.011430 | 0.011362 | 0.011429 | 0.011362 | 0.011396 | 0.011429 | 0.011665 |
| 0.011765 | 0.011698 | 0.011765 | 0.011498 | 0.011766 | 0.011396 | 0.011362 |
| 0.011398 | 0.011667 | 0.011472 | 0.011266 | 0.011773 | 0.011265 | 0.011375 |
| 0.011773 | 0.011672 | 0.011564 | 0.011765 | 0.011470 | 0.011631 | 0.011597 |
| 0.011530 | 0.011698 | 0.011522 | 0.011390 | 0.011437 | 0.011429 | 0.011500 |
| 0.011597 | 0.011499 | 0.011635 | 0.011703 | 0.011631 | 0.011698 | 0.011805 |
| 0.011534 | 0.011705 | 0.011636 | 0.011567 | 0.011834 | 0.011295 | 0.011498 |
| 0.011463 | 0.011396 | 0.011295 | 0.011295 | 0.011362 | 0.011362 | 0.011429 |

|          |          |          |          |          |          |          |
|----------|----------|----------|----------|----------|----------|----------|
| 0.011362 | 0.011429 | 0.011329 | 0.011429 | 0.011362 | 0.011362 | 0.011429 |
| 0.011362 | 0.011799 | 0.011698 | 0.011731 | 0.011262 | 0.011362 | 0.011396 |
| 0.011396 | 0.011362 | 0.011429 | 0.011463 | 0.011329 | 0.011329 | 0.011329 |
| 0.011866 | 0.011496 | 0.011496 | 0.011295 | 0.011396 | 0.011496 | 0.011329 |
| 0.011329 | 0.011396 | 0.011362 | 0.011530 | 0.011329 | 0.011463 | 0.011597 |
| 0.011530 | 0.011362 | 0.011362 | 0.011295 | 0.011295 | 0.011463 | 0.011396 |
| 0.011295 | 0.011396 | 0.011262 | 0.011295 | 0.011429 | 0.011564 | 0.011329 |
| 0.011295 | 0.011429 | 0.011363 | 0.011262 | 0.011597 | 0.011262 | 0.011429 |
| 0.011505 | 0.011329 | 0.011631 | 0.011463 | 0.011496 | 0.011362 | 0.011463 |
| 0.011329 | 0.011664 | 0.011262 | 0.011530 | 0.011329 | 0.011329 | 0.011262 |
| 0.011496 | 0.011698 | 0.011396 | 0.011463 | 0.011295 | 0.011698 | 0.011329 |
| 0.011329 | 0.011329 | 0.011362 | 0.011463 | 0.011362 | 0.011463 | 0.011530 |
| 0.011530 | 0.011496 | 0.011396 | 0.011497 | 0.011463 | 0.011329 | 0.011295 |
| 0.011329 | 0.011329 | 0.011396 | 0.011329 | 0.011295 | 0.011463 | 0.011329 |
| 0.011362 | 0.011362 | 0.011496 | 0.011530 | 0.011429 | 0.011362 | 0.011362 |
| 0.011429 | 0.011362 | 0.011463 | 0.011329 | 0.011463 | 0.011564 | 0.011866 |
| 0.011362 | 0.011765 | 0.011336 | 0.017823 | 0.011322 | 0.011549 | 0.011688 |
| 0.011648 | 0.011693 | 0.011374 | 0.011408 | 0.011829 | 0.011716 | 0.011425 |
| 0.011535 | 0.011610 | 0.011216 | 0.011353 | 0.011333 | 0.011406 | 0.011361 |
| 0.011529 | 0.011470 | 0.011468 | 0.011259 | 0.011496 | 0.011530 | 0.011534 |
| 0.011404 | 0.011497 | 0.011497 | 0.011463 | 0.011429 | 0.011430 | 0.011396 |
| 0.011429 | 0.011362 | 0.011396 | 0.011429 | 0.011396 | 0.011329 | 0.011362 |
| 0.011362 | 0.011429 | 0.011329 | 0.011430 | 0.011463 | 0.011497 | 0.011396 |
| 0.011429 | 0.011396 | 0.011732 | 0.011732 | 0.011463 | 0.011497 | 0.011530 |
| 0.011295 | 0.011295 | 0.011329 | 0.011430 | 0.011295 | 0.011530 | 0.011530 |
| 0.011564 | 0.011564 | 0.011496 | 0.011597 | 0.011765 | 0.011599 | 0.011429 |
| 0.011429 | 0.011497 | 0.011530 | 0.011362 | 0.011429 | 0.011396 | 0.011429 |
| 0.011497 | 0.011497 | 0.011530 | 0.011497 | 0.011397 | 0.011597 | 0.011564 |
| 0.011433 | 0.011329 | 0.011429 | 0.011530 | 0.011430 | 0.011564 | 0.011597 |
| 0.011765 | 0.011470 | 0.011631 | 0.011597 | 0.011530 | 0.011698 | 0.011329 |
| 0.011498 | 0.011396 | 0.011362 | 0.011362 | 0.011429 | 0.011329 | 0.011430 |
| 0.011463 | 0.011497 | 0.011396 | 0.011429 | 0.011396 | 0.011732 | 0.011732 |
| 0.011463 | 0.011497 | 0.011564 | 0.011496 | 0.012136 | 0.011524 | 0.011482 |
| 0.011517 | 0.011511 | 0.011622 | 0.011510 | 0.011620 | 0.011543 | 0.011508 |
| 0.012090 | 0.011406 | 0.011540 | 0.011441 | 0.011749 | 0.011604 | 0.011707 |
| 0.012114 | 0.011550 | 0.011669 | 0.011731 | 0.011597 | 0.011597 | 0.011635 |
| 0.011295 | 0.011463 | 0.011597 | 0.011563 | 0.011567 | 0.011564 | 0.011532 |
| 0.011362 | 0.011329 | 0.011362 | 0.011396 | 0.011295 | 0.011362 | 0.011262 |
| 0.011396 | 0.011429 | 0.011329 | 0.011295 | 0.011396 | 0.011329 | 0.011362 |
| 0.011362 | 0.011295 | 0.011362 | 0.011396 | 0.011295 | 0.011496 | 0.011530 |
| 0.011429 | 0.011496 | 0.011429 | 0.011429 | 0.011362 | 0.011765 | 0.011396 |
| 0.011443 | 0.011362 | 0.011598 | 0.011603 | 0.011463 | 0.011463 | 0.011463 |
| 0.011463 | 0.011396 | 0.011362 | 0.011396 | 0.011496 | 0.011496 | 0.011429 |
| 0.011429 | 0.011530 | 0.011731 | 0.011463 | 0.011664 | 0.011664 | 0.011530 |
| 0.011362 | 0.011429 | 0.011463 | 0.011866 | 0.011430 | 0.011463 | 0.011429 |
| 0.011463 | 0.011396 | 0.011396 | 0.011698 | 0.011631 | 0.011664 | 0.011396 |
| 0.011496 | 0.011564 | 0.011429 | 0.011496 | 0.011463 | 0.011329 | 0.011664 |
| 0.011429 | 0.011396 | 0.011396 | 0.011564 | 0.011396 | 0.011496 | 0.011732 |
| 0.011429 | 0.011807 | 0.011799 | 0.011548 | 0.011229 | 0.011502 | 0.011318 |
| 0.011335 | 0.011761 | 0.011306 | 0.011507 | 0.011304 | 0.011417 | 0.011432 |
| 0.011468 | 0.011258 | 0.011394 | 0.011258 | 0.011276 | 0.011395 | 0.011425 |
| 0.011437 | 0.011296 | 0.011448 | 0.011342 | 0.011431 | 0.011564 | 0.011631 |
| 0.011631 | 0.011497 | 0.011601 | 0.011603 | 0.011738 | 0.011732 | 0.011429 |
| 0.011664 | 0.011530 | 0.011396 | 0.011497 | 0.011295 | 0.011530 | 0.011329 |
| 0.011396 | 0.011396 | 0.011362 | 0.011329 | 0.011362 | 0.011329 | 0.011429 |
| 0.011409 | 0.011410 | 0.011403 | 0.011437 | 0.011573 | 0.011538 | 0.011538 |
| 0.011537 | 0.011464 | 0.011282 | 0.011276 | 0.011399 | 0.011568 | 0.011569 |
| 0.011363 | 0.011433 | 0.011666 | 0.011635 | 0.011565 | 0.011599 | 0.011530 |
| 0.011463 | 0.011530 | 0.011530 | 0.011429 | 0.012000 | 0.011597 | 0.011664 |
| 0.011698 | 0.011772 | 0.011401 | 0.011441 | 0.011362 | 0.011564 | 0.011530 |



|          |          |          |          |          |          |          |
|----------|----------|----------|----------|----------|----------|----------|
| 0.011565 | 0.011597 | 0.011597 | 0.011597 | 0.011689 | 0.011732 | 0.011372 |
| 0.011263 | 0.011268 | 0.011366 | 0.011332 | 0.011436 | 0.011247 | 0.011604 |
| 0.011403 | 0.011586 | 0.011298 | 0.011397 | 0.011396 | 0.011471 | 0.011362 |
| 0.011329 | 0.011329 | 0.011396 | 0.011362 | 0.011564 | 0.011530 | 0.011463 |
| 0.011564 | 0.011631 | 0.011362 | 0.011362 | 0.011396 | 0.011396 | 0.011398 |
| 0.011466 | 0.011396 | 0.011396 | 0.011431 | 0.011564 | 0.011631 | 0.011631 |
| 0.011497 | 0.011601 | 0.011603 | 0.011738 | 0.011732 | 0.011429 | 0.011597 |
| 0.011530 | 0.011530 | 0.011365 | 0.011547 | 0.011477 | 0.011503 | 0.011340 |
| 0.011542 | 0.011653 | 0.011484 | 0.011434 | 0.011329 | 0.011530 | 0.011396 |
| 0.011497 | 0.011430 | 0.011329 | 0.011431 | 0.011530 | 0.011533 | 0.011430 |
| 0.011329 | 0.011263 | 0.011396 | 0.011329 | 0.011262 | 0.011366 | 0.011530 |
| 0.011429 | 0.011362 | 0.011396 | 0.011429 | 0.011396 | 0.011329 | 0.011530 |
| 0.011396 | 0.011429 | 0.011429 | 0.011362 | 0.011429 | 0.011664 | 0.011329 |
| 0.011362 | 0.011765 | 0.011362 | 0.011396 | 0.011362 | 0.011731 | 0.011274 |
| 0.011622 | 0.011230 | 0.011311 | 0.011463 | 0.011589 | 0.011527 | 0.011227 |
| 0.011270 | 0.011530 | 0.011631 | 0.011739 | 0.011599 | 0.011703 | 0.011867 |
| 0.011767 | 0.011804 | 0.011765 | 0.011983 | 0.011731 | 0.012606 | 0.011768 |
| 0.012507 | 0.012274 | 0.012408 | 0.012680 | 0.011731 | 0.011430 | 0.011732 |
| 0.012171 | 0.012072 | 0.011698 | 0.011597 | 0.011665 | 0.011665 | 0.011635 |
| 0.011530 | 0.011501 | 0.011597 | 0.011565 | 0.011934 | 0.012000 | 0.012002 |
| 0.011901 | 0.012002 | 0.012105 | 0.011838 | 0.012171 | 0.012178 | 0.012238 |
| 0.012239 | 0.012273 | 0.012186 | 0.012239 | 0.012240 | 0.011463 | 0.011766 |
| 0.011834 | 0.012337 | 0.011840 | 0.012068 | 0.012541 | 0.011603 | 0.011497 |
| 0.011463 | 0.011463 | 0.011934 | 0.011965 | 0.012080 | 0.011799 | 0.011465 |
| S072     | 0.011698 | 0.011698 | 0.011967 | 0.011799 | 0.011799 | 0.011866 |
| 0.011705 | 0.011637 | 0.011866 | 0.011295 | 0.011362 | 0.011329 | 0.011295 |
| 0.011329 | 0.011497 | 0.011295 | 0.011329 | 0.011396 | 0.011362 | 0.011329 |
| 0.011295 | 0.011329 | 0.011429 | 0.011295 | 0.011329 | 0.011329 | 0.011671 |
| 0.011564 | 0.011329 | 0.011228 | 0.011463 | 0.011396 | 0.011362 | 0.011396 |
| 0.011362 | 0.011463 | 0.011362 | 0.011362 | 0.011396 | 0.011362 | 0.011530 |
| 0.011295 | 0.011362 | 0.011396 | 0.011329 | 0.011429 | 0.011463 | 0.011396 |
| 0.011362 | 0.011530 | 0.011430 | 0.011698 | 0.011362 | 0.011631 | 0.011362 |
| 0.011329 | 0.011429 | 0.011497 | 0.011631 | 0.011732 | 0.011429 | 0.011530 |
| 0.011396 | 0.011463 | 0.011295 | 0.011597 | 0.011833 | 0.011362 | 0.011429 |
| 0.011329 | 0.011429 | 0.000000 | 0.011463 | 0.011396 | 0.011396 | 0.011396 |
| 0.011295 | 0.011329 | 0.011295 | 0.011396 | 0.011362 | 0.011397 | 0.011463 |
| 0.011396 | 0.011362 | 0.011429 | 0.011329 | 0.011463 | 0.011295 | 0.011362 |
| 0.011530 | 0.011463 | 0.011698 | 0.011530 | 0.011362 | 0.011597 | 0.011362 |
| 0.011542 | 0.011770 | 0.011588 | 0.011295 | 0.011284 | 0.011391 | 0.011493 |
| 0.012121 | 0.011620 | 0.011307 | 0.011597 | 0.011597 | 0.011396 | 0.011497 |
| 0.011429 | 0.011396 | 0.011463 | 0.011362 | 0.011463 | 0.011396 | 0.011396 |
| 0.011362 | 0.011463 | 0.011664 | 0.011530 | 0.011429 | 0.011396 | 0.011329 |
| 0.011295 | 0.011295 | 0.011362 | 0.011329 | 0.011530 | 0.011497 | 0.011430 |
| 0.011530 | 0.011597 | 0.011329 | 0.011329 | 0.011362 | 0.011362 | 0.011364 |
| 0.011432 | 0.011362 | 0.011362 | 0.011204 | 0.011241 | 0.011201 | 0.011363 |
| 0.011365 | 0.011301 | 0.011319 | 0.011336 | 0.011264 | 0.011300 | 0.011330 |
| 0.011528 | 0.011336 | 0.011405 | 0.011296 | 0.011302 | 0.011430 | 0.011397 |
| 0.011464 | 0.011397 | 0.011396 | 0.011496 | 0.011429 | 0.011799 | 0.011598 |
| 0.011631 | 0.011497 | 0.011362 | 0.011463 | 0.011262 | 0.011497 | 0.011295 |
| 0.011362 | 0.011362 | 0.011329 | 0.011295 | 0.011329 | 0.011295 | 0.011396 |
| 0.011362 | 0.011463 | 0.011396 | 0.011295 | 0.011330 | 0.011497 | 0.011499 |
| 0.011497 | 0.011396 | 0.011295 | 0.011229 | 0.011362 | 0.011295 | 0.011228 |
| 0.011332 | 0.011497 | 0.011295 | 0.011497 | 0.011262 | 0.011362 | 0.011329 |
| 0.011430 | 0.011329 | 0.011362 | 0.011329 | 0.011362 | 0.011228 | 0.011362 |
| 0.011396 | 0.011329 | 0.011396 | 0.011329 | 0.011362 | 0.011396 | 0.011631 |
| 0.011732 | 0.011664 | 0.011732 | 0.011498 | 0.011732 | 0.011362 | 0.011329 |
| 0.011364 | 0.011667 | 0.011518 | 0.011266 | 0.011739 | 0.011231 | 0.011336 |
| 0.011739 | 0.011638 | 0.011530 | 0.011732 | 0.011436 | 0.011597 | 0.011564 |
| 0.011497 | 0.011664 | 0.011486 | 0.011349 | 0.011395 | 0.011396 | 0.011432 |
| 0.011564 | 0.011465 | 0.011601 | 0.011669 | 0.011597 | 0.011665 | 0.011772 |

|          |          |          |           |          |          |          |
|----------|----------|----------|-----------|----------|----------|----------|
| 0.011500 | 0.011671 | 0.011602 | 0.011534  | 0.011800 | 0.011262 | 0.011465 |
| 0.011429 | 0.011362 | 0.011262 | 0.011262  | 0.011329 | 0.011329 | 0.011396 |
| 0.011329 | 0.011396 | 0.011295 | 0.011396  | 0.011329 | 0.011329 | 0.011396 |
| 0.011329 | 0.011765 | 0.011664 | 0.011698  | 0.011228 | 0.011329 | 0.011362 |
| 0.011362 | 0.011329 | 0.011396 | 0.011429  | 0.011295 | 0.011295 | 0.011295 |
| 0.011832 | 0.011463 | 0.011463 | 0.011262  | 0.011362 | 0.011530 | 0.011295 |
| 0.011295 | 0.011362 | 0.011329 | 0.011497  | 0.011295 | 0.011429 | 0.011564 |
| 0.011497 | 0.011329 | 0.011329 | 0.011262  | 0.011262 | 0.011429 | 0.011362 |
| 0.011262 | 0.011362 | 0.011228 | 0.011262  | 0.011396 | 0.011530 | 0.011295 |
| 0.011262 | 0.011396 | 0.011329 | 0.011228  | 0.011564 | 0.011228 | 0.011396 |
| 0.011471 | 0.011295 | 0.011597 | 0.011430  | 0.011463 | 0.011329 | 0.011429 |
| 0.011295 | 0.011631 | 0.011228 | 0.011497  | 0.011295 | 0.011295 | 0.011228 |
| 0.011463 | 0.011665 | 0.011295 | 0.011429  | 0.011262 | 0.011664 | 0.011295 |
| 0.011295 | 0.011295 | 0.011329 | 0.011429  | 0.011329 | 0.011429 | 0.011497 |
| 0.011497 | 0.011463 | 0.011362 | 0.011463  | 0.011429 | 0.011295 | 0.011262 |
| 0.011295 | 0.011295 | 0.011295 | 0.011295  | 0.011262 | 0.011429 | 0.011295 |
| 0.011329 | 0.011329 | 0.011463 | 0.011497  | 0.011396 | 0.011329 | 0.011329 |
| 0.011329 | 0.011329 | 0.011429 | 0.011295  | 0.011429 | 0.011530 | 0.011832 |
| 0.011329 | 0.011732 | 0.011336 | 0.0117861 | 0.011322 | 0.011549 | 0.011688 |
| 0.011648 | 0.011693 | 0.011427 | 0.011408  | 0.011885 | 0.011716 | 0.011486 |
| 0.011582 | 0.011732 | 0.011255 | 0.011353  | 0.011333 | 0.011455 | 0.011361 |
| 0.011576 | 0.011507 | 0.011505 | 0.011325  | 0.011463 | 0.011497 | 0.011500 |
| 0.011369 | 0.011463 | 0.011463 | 0.011430  | 0.011396 | 0.011396 | 0.011363 |
| 0.011396 | 0.011329 | 0.011362 | 0.011396  | 0.011362 | 0.011295 | 0.011329 |
| 0.011329 | 0.011396 | 0.011295 | 0.011396  | 0.011430 | 0.011463 | 0.011362 |
| 0.011396 | 0.011362 | 0.011698 | 0.011698  | 0.011430 | 0.011396 | 0.011497 |
| 0.011262 | 0.011262 | 0.011295 | 0.011396  | 0.011262 | 0.011497 | 0.011497 |
| 0.011530 | 0.011530 | 0.011463 | 0.011564  | 0.011732 | 0.011565 | 0.011396 |
| 0.011396 | 0.011463 | 0.011497 | 0.011329  | 0.011396 | 0.011362 | 0.011396 |
| 0.011463 | 0.011463 | 0.011497 | 0.011463  | 0.011363 | 0.011564 | 0.011530 |
| 0.011365 | 0.011295 | 0.011396 | 0.011497  | 0.011396 | 0.011530 | 0.011564 |
| 0.011732 | 0.011436 | 0.011597 | 0.011564  | 0.011497 | 0.011664 | 0.011295 |
| 0.011464 | 0.011363 | 0.011329 | 0.011329  | 0.011396 | 0.011295 | 0.011396 |
| 0.011430 | 0.011463 | 0.011362 | 0.011396  | 0.011362 | 0.011698 | 0.011698 |
| 0.011430 | 0.011396 | 0.011530 | 0.011463  | 0.012103 | 0.011525 | 0.011412 |
| 0.011517 | 0.011476 | 0.011587 | 0.011476  | 0.011585 | 0.011508 | 0.011474 |
| 0.012056 | 0.011372 | 0.011505 | 0.011441  | 0.011714 | 0.011570 | 0.011673 |
| 0.012080 | 0.011512 | 0.011635 | 0.011698  | 0.011564 | 0.011564 | 0.011601 |
| 0.011262 | 0.011429 | 0.011564 | 0.011530  | 0.011533 | 0.011530 | 0.011498 |
| 0.011362 | 0.011295 | 0.011329 | 0.011362  | 0.011262 | 0.011329 | 0.011228 |
| 0.011362 | 0.011396 | 0.011295 | 0.011262  | 0.011362 | 0.011295 | 0.011329 |
| 0.011329 | 0.011262 | 0.011329 | 0.011362  | 0.011262 | 0.011463 | 0.011497 |
| 0.011396 | 0.011463 | 0.011396 | 0.011396  | 0.011329 | 0.011732 | 0.011362 |
| 0.011373 | 0.011329 | 0.011564 | 0.011569  | 0.011430 | 0.011429 | 0.011429 |
| 0.011429 | 0.011362 | 0.011329 | 0.011362  | 0.011463 | 0.011463 | 0.011396 |
| 0.011396 | 0.011396 | 0.011698 | 0.011429  | 0.011631 | 0.011631 | 0.011496 |
| 0.011329 | 0.011396 | 0.011429 | 0.011833  | 0.011396 | 0.011430 | 0.011396 |
| 0.011429 | 0.011362 | 0.011362 | 0.011665  | 0.011597 | 0.011631 | 0.011362 |
| 0.011463 | 0.011530 | 0.011396 | 0.011463  | 0.011429 | 0.011295 | 0.011631 |
| 0.011396 | 0.011362 | 0.011362 | 0.011530  | 0.011362 | 0.011463 | 0.011698 |
| 0.011396 | 0.011773 | 0.011765 | 0.011589  | 0.011286 | 0.011468 | 0.011370 |
| 0.011335 | 0.011800 | 0.011306 | 0.011552  | 0.011402 | 0.011518 | 0.011485 |
| 0.011570 | 0.011389 | 0.011394 | 0.011258  | 0.011330 | 0.011328 | 0.011466 |
| 0.011475 | 0.011375 | 0.011448 | 0.011377  | 0.011397 | 0.011530 | 0.011598 |
| 0.011597 | 0.011464 | 0.011567 | 0.011569  | 0.011704 | 0.011732 | 0.011396 |
| 0.011631 | 0.011497 | 0.011362 | 0.011463  | 0.011262 | 0.011497 | 0.011295 |
| 0.011362 | 0.011362 | 0.011329 | 0.011295  | 0.011329 | 0.011295 | 0.011396 |
| 0.011375 | 0.011305 | 0.011368 | 0.011403  | 0.011539 | 0.011504 | 0.011504 |
| 0.011503 | 0.011430 | 0.011171 | 0.011240  | 0.011365 | 0.011535 | 0.011535 |
| 0.011329 | 0.011399 | 0.011633 | 0.011601  | 0.011531 | 0.011565 | 0.011496 |

|          |          |          |          |          |          |          |
|----------|----------|----------|----------|----------|----------|----------|
| 0.011429 | 0.011497 | 0.011496 | 0.011396 | 0.011967 | 0.011564 | 0.011631 |
| 0.011665 | 0.011737 | 0.011367 | 0.011441 | 0.011329 | 0.011530 | 0.011497 |
| 0.011531 | 0.011564 | 0.011564 | 0.011564 | 0.011729 | 0.011698 | 0.011303 |
| 0.011229 | 0.011199 | 0.011333 | 0.011298 | 0.011402 | 0.011209 | 0.011570 |
| 0.011369 | 0.011499 | 0.011203 | 0.011360 | 0.011363 | 0.011437 | 0.011329 |
| 0.011295 | 0.011295 | 0.011362 | 0.011329 | 0.011530 | 0.011497 | 0.011430 |
| 0.011530 | 0.011597 | 0.011329 | 0.011329 | 0.011362 | 0.011362 | 0.011364 |
| 0.011432 | 0.011362 | 0.011362 | 0.011397 | 0.011530 | 0.011598 | 0.011597 |
| 0.011464 | 0.011567 | 0.011569 | 0.011704 | 0.011732 | 0.011396 | 0.011564 |
| 0.011497 | 0.011497 | 0.011331 | 0.011513 | 0.011442 | 0.011469 | 0.011341 |
| 0.011508 | 0.011744 | 0.011526 | 0.011400 | 0.011295 | 0.011497 | 0.011362 |
| 0.011463 | 0.011396 | 0.011295 | 0.011330 | 0.011497 | 0.011499 | 0.011396 |
| 0.011295 | 0.011229 | 0.011362 | 0.011295 | 0.011228 | 0.011332 | 0.011497 |
| 0.011396 | 0.011329 | 0.011362 | 0.011396 | 0.011362 | 0.011295 | 0.011497 |
| 0.011362 | 0.011396 | 0.011396 | 0.011329 | 0.011396 | 0.011631 | 0.011295 |
| 0.011329 | 0.011732 | 0.011329 | 0.011362 | 0.011329 | 0.011698 | 0.011274 |
| 0.011735 | 0.011273 | 0.011361 | 0.011543 | 0.011630 | 0.011527 | 0.011269 |
| 0.011323 | 0.011496 | 0.011597 | 0.011705 | 0.011565 | 0.011703 | 0.011834 |
| 0.011733 | 0.011770 | 0.011732 | 0.011983 | 0.011698 | 0.012573 | 0.011734 |
| 0.012473 | 0.012241 | 0.012375 | 0.012646 | 0.011698 | 0.011396 | 0.011699 |
| 0.012137 | 0.012072 | 0.011664 | 0.011564 | 0.011632 | 0.011632 | 0.011601 |
| 0.011496 | 0.011501 | 0.011564 | 0.011531 | 0.011901 | 0.011967 | 0.011968 |
| 0.011868 | 0.011968 | 0.012072 | 0.011838 | 0.012138 | 0.012144 | 0.012205 |
| 0.012205 | 0.012239 | 0.012186 | 0.012206 | 0.012207 | 0.011429 | 0.011732 |
| 0.011800 | 0.012303 | 0.011806 | 0.012034 | 0.012508 | 0.011570 | 0.011464 |
| 0.011429 | 0.011429 | 0.011900 | 0.011883 | 0.012045 | 0.011765 | 0.011431 |
| S073     | 0.011765 | 0.011765 | 0.012101 | 0.011866 | 0.011866 | 0.011933 |
| 0.011773 | 0.011705 | 0.011933 | 0.011362 | 0.011429 | 0.011397 | 0.011362 |
| 0.011396 | 0.011564 | 0.011362 | 0.011396 | 0.011463 | 0.011429 | 0.011396 |
| 0.011362 | 0.011396 | 0.011496 | 0.011363 | 0.011396 | 0.011396 | 0.011739 |
| 0.011631 | 0.011396 | 0.011295 | 0.011530 | 0.011463 | 0.011429 | 0.011463 |
| 0.011429 | 0.011530 | 0.011429 | 0.011429 | 0.011463 | 0.011429 | 0.011597 |
| 0.011362 | 0.011429 | 0.011463 | 0.011396 | 0.011496 | 0.011530 | 0.011463 |
| 0.011429 | 0.011597 | 0.011497 | 0.011765 | 0.011429 | 0.011698 | 0.011429 |
| 0.011396 | 0.011497 | 0.011564 | 0.011698 | 0.011799 | 0.011497 | 0.011597 |
| 0.011463 | 0.011530 | 0.011429 | 0.011664 | 0.011900 | 0.011429 | 0.011497 |
| 0.011396 | 0.011496 | 0.011463 | 0.000000 | 0.011463 | 0.011463 | 0.011463 |
| 0.011362 | 0.011396 | 0.011362 | 0.011463 | 0.011429 | 0.011464 | 0.011530 |
| 0.011463 | 0.011429 | 0.011496 | 0.011396 | 0.011530 | 0.011362 | 0.011429 |
| 0.011597 | 0.011530 | 0.011765 | 0.011597 | 0.011429 | 0.011664 | 0.011429 |
| 0.011579 | 0.011807 | 0.011626 | 0.011334 | 0.011321 | 0.011428 | 0.011533 |
| 0.012158 | 0.011670 | 0.011349 | 0.011664 | 0.011664 | 0.011463 | 0.011564 |
| 0.011497 | 0.011463 | 0.011530 | 0.011429 | 0.011530 | 0.011463 | 0.011463 |
| 0.011429 | 0.011530 | 0.011664 | 0.011597 | 0.011497 | 0.011463 | 0.011396 |
| 0.011362 | 0.011362 | 0.011430 | 0.011396 | 0.011597 | 0.011564 | 0.011497 |
| 0.011597 | 0.011665 | 0.011396 | 0.011396 | 0.011430 | 0.011429 | 0.011432 |
| 0.011500 | 0.011430 | 0.011430 | 0.011312 | 0.011386 | 0.011341 | 0.011430 |
| 0.011433 | 0.011370 | 0.011392 | 0.011405 | 0.011332 | 0.011368 | 0.011398 |
| 0.011672 | 0.011439 | 0.011473 | 0.011363 | 0.011371 | 0.011498 | 0.011464 |
| 0.011531 | 0.011465 | 0.011464 | 0.011564 | 0.011496 | 0.011866 | 0.011665 |
| 0.011698 | 0.011564 | 0.011429 | 0.011530 | 0.011329 | 0.011564 | 0.011362 |
| 0.011429 | 0.011429 | 0.011396 | 0.011362 | 0.011396 | 0.011362 | 0.011463 |
| 0.011430 | 0.011530 | 0.011463 | 0.011362 | 0.011465 | 0.011564 | 0.011567 |
| 0.011564 | 0.011463 | 0.011362 | 0.011296 | 0.011429 | 0.011362 | 0.011295 |
| 0.011400 | 0.011564 | 0.011362 | 0.011564 | 0.011329 | 0.011430 | 0.011396 |
| 0.011497 | 0.011396 | 0.011430 | 0.011396 | 0.011430 | 0.011295 | 0.011430 |
| 0.011463 | 0.011396 | 0.011463 | 0.011396 | 0.011429 | 0.011463 | 0.011698 |
| 0.011799 | 0.011732 | 0.011799 | 0.011532 | 0.011799 | 0.011429 | 0.011396 |
| 0.011432 | 0.011626 | 0.011609 | 0.011300 | 0.011807 | 0.011299 | 0.011414 |
| 0.011807 | 0.011706 | 0.011597 | 0.011732 | 0.011504 | 0.011664 | 0.011631 |

|          |          |          |          |          |          |          |
|----------|----------|----------|----------|----------|----------|----------|
| 0.011564 | 0.011664 | 0.011593 | 0.011431 | 0.011479 | 0.011463 | 0.011534 |
| 0.011631 | 0.011532 | 0.011669 | 0.011737 | 0.011664 | 0.011732 | 0.011839 |
| 0.011568 | 0.011739 | 0.011670 | 0.011601 | 0.011868 | 0.011329 | 0.011532 |
| 0.011496 | 0.011429 | 0.011329 | 0.011329 | 0.011396 | 0.011396 | 0.011463 |
| 0.011396 | 0.011463 | 0.011362 | 0.011463 | 0.011396 | 0.011396 | 0.011463 |
| 0.011396 | 0.011832 | 0.011732 | 0.011765 | 0.011295 | 0.011396 | 0.011429 |
| 0.011429 | 0.011396 | 0.011463 | 0.011497 | 0.011362 | 0.011362 | 0.011362 |
| 0.011899 | 0.011530 | 0.011530 | 0.011329 | 0.011429 | 0.011597 | 0.011362 |
| 0.011362 | 0.011429 | 0.011396 | 0.011564 | 0.011362 | 0.011496 | 0.011631 |
| 0.011564 | 0.011396 | 0.011396 | 0.011329 | 0.011329 | 0.011497 | 0.011429 |
| 0.011329 | 0.011429 | 0.011295 | 0.011329 | 0.011463 | 0.011598 | 0.011362 |
| 0.011329 | 0.011463 | 0.011396 | 0.011295 | 0.011631 | 0.011295 | 0.011463 |
| 0.011539 | 0.011362 | 0.011664 | 0.011497 | 0.011530 | 0.011396 | 0.011496 |
| 0.011362 | 0.011698 | 0.011295 | 0.011564 | 0.011362 | 0.011362 | 0.011295 |
| 0.011530 | 0.011698 | 0.011429 | 0.011497 | 0.011329 | 0.011732 | 0.011362 |
| 0.011362 | 0.011362 | 0.011396 | 0.011497 | 0.011396 | 0.011496 | 0.011564 |
| 0.011564 | 0.011530 | 0.011429 | 0.011530 | 0.011496 | 0.011362 | 0.011329 |
| 0.011362 | 0.011362 | 0.011429 | 0.011362 | 0.011329 | 0.011497 | 0.011362 |
| 0.011396 | 0.011396 | 0.011530 | 0.011564 | 0.011463 | 0.011396 | 0.011396 |
| 0.011463 | 0.011396 | 0.011496 | 0.011362 | 0.011496 | 0.011597 | 0.011900 |
| 0.011396 | 0.011799 | 0.011371 | 0.017899 | 0.011519 | 0.011549 | 0.011723 |
| 0.011683 | 0.011729 | 0.011479 | 0.011466 | 0.011939 | 0.011751 | 0.011607 |
| 0.011677 | 0.011732 | 0.011294 | 0.011395 | 0.011372 | 0.011455 | 0.011361 |
| 0.011670 | 0.011544 | 0.011542 | 0.011325 | 0.011530 | 0.011564 | 0.011567 |
| 0.011438 | 0.011530 | 0.011530 | 0.011497 | 0.011463 | 0.011463 | 0.011430 |
| 0.011463 | 0.011396 | 0.011429 | 0.011463 | 0.011430 | 0.011362 | 0.011396 |
| 0.011396 | 0.011127 | 0.011362 | 0.011463 | 0.011497 | 0.011530 | 0.011429 |
| 0.011463 | 0.011430 | 0.011765 | 0.011765 | 0.011497 | 0.011531 | 0.011564 |
| 0.011329 | 0.011329 | 0.011362 | 0.011463 | 0.011329 | 0.011564 | 0.011564 |
| 0.011597 | 0.011597 | 0.011530 | 0.011631 | 0.011799 | 0.011633 | 0.011463 |
| 0.011463 | 0.011530 | 0.011564 | 0.011396 | 0.011463 | 0.011430 | 0.011463 |
| 0.011531 | 0.011530 | 0.011564 | 0.011531 | 0.011431 | 0.011631 | 0.011597 |
| 0.011433 | 0.011362 | 0.011463 | 0.011564 | 0.011463 | 0.011598 | 0.011631 |
| 0.011732 | 0.011504 | 0.011664 | 0.011631 | 0.011564 | 0.011664 | 0.011363 |
| 0.011532 | 0.011430 | 0.011396 | 0.011396 | 0.011127 | 0.011362 | 0.011463 |
| 0.011497 | 0.011530 | 0.011429 | 0.011463 | 0.011430 | 0.011765 | 0.011765 |
| 0.011497 | 0.011531 | 0.011597 | 0.011530 | 0.012170 | 0.011596 | 0.011517 |
| 0.011587 | 0.011546 | 0.011657 | 0.011545 | 0.011655 | 0.011577 | 0.011543 |
| 0.012125 | 0.011441 | 0.011574 | 0.011510 | 0.011783 | 0.011638 | 0.011741 |
| 0.012148 | 0.011626 | 0.011703 | 0.011765 | 0.011631 | 0.011631 | 0.011668 |
| 0.011329 | 0.011497 | 0.011631 | 0.011597 | 0.011601 | 0.011597 | 0.011565 |
| 0.011429 | 0.011362 | 0.011396 | 0.011429 | 0.011329 | 0.011396 | 0.011295 |
| 0.011429 | 0.011463 | 0.011362 | 0.011329 | 0.011429 | 0.011362 | 0.011396 |
| 0.011396 | 0.011329 | 0.011396 | 0.011429 | 0.011329 | 0.011530 | 0.011564 |
| 0.011463 | 0.011530 | 0.011463 | 0.011463 | 0.011396 | 0.011799 | 0.011429 |
| 0.011478 | 0.011396 | 0.011631 | 0.011637 | 0.011497 | 0.011496 | 0.011496 |
| 0.011497 | 0.011429 | 0.011396 | 0.011429 | 0.011530 | 0.011530 | 0.011463 |
| 0.011463 | 0.011597 | 0.011765 | 0.011496 | 0.011698 | 0.011698 | 0.011564 |
| 0.011396 | 0.011463 | 0.011497 | 0.011900 | 0.011463 | 0.011497 | 0.011463 |
| 0.011496 | 0.011429 | 0.011429 | 0.011732 | 0.011665 | 0.011698 | 0.011429 |
| 0.011530 | 0.011597 | 0.011463 | 0.011530 | 0.011496 | 0.011362 | 0.011698 |
| 0.011463 | 0.011429 | 0.011429 | 0.011597 | 0.011429 | 0.011530 | 0.011765 |
| 0.011463 | 0.011841 | 0.011832 | 0.011629 | 0.011455 | 0.011536 | 0.011473 |
| 0.011390 | 0.011839 | 0.011341 | 0.011596 | 0.011451 | 0.011569 | 0.011591 |
| 0.011672 | 0.011389 | 0.011561 | 0.011390 | 0.011438 | 0.011663 | 0.011506 |
| 0.011512 | 0.011414 | 0.011483 | 0.011412 | 0.011465 | 0.011597 | 0.011665 |
| 0.011665 | 0.011531 | 0.011635 | 0.011636 | 0.011738 | 0.011767 | 0.011463 |
| 0.011698 | 0.011564 | 0.011429 | 0.011530 | 0.011329 | 0.011564 | 0.011362 |
| 0.011429 | 0.011429 | 0.011396 | 0.011362 | 0.011396 | 0.011362 | 0.011463 |
| 0.011444 | 0.011445 | 0.011437 | 0.011471 | 0.011608 | 0.011573 | 0.011572 |

|          |          |          |          |          |          |          |
|----------|----------|----------|----------|----------|----------|----------|
| 0.011571 | 0.011497 | 0.011319 | 0.011312 | 0.011433 | 0.011602 | 0.011603 |
| 0.011396 | 0.011467 | 0.011700 | 0.011669 | 0.011598 | 0.011632 | 0.011564 |
| 0.011496 | 0.011564 | 0.011564 | 0.011463 | 0.012034 | 0.011631 | 0.011698 |
| 0.011732 | 0.011808 | 0.011435 | 0.011511 | 0.011396 | 0.011597 | 0.011564 |
| 0.011598 | 0.011631 | 0.011631 | 0.011631 | 0.011768 | 0.011765 | 0.011407 |
| 0.011297 | 0.011303 | 0.011401 | 0.011366 | 0.011470 | 0.011284 | 0.011638 |
| 0.011437 | 0.011586 | 0.011346 | 0.011472 | 0.011430 | 0.011505 | 0.011396 |
| 0.011362 | 0.011362 | 0.011430 | 0.011396 | 0.011597 | 0.011564 | 0.011497 |
| 0.011597 | 0.011665 | 0.011396 | 0.011396 | 0.011430 | 0.011429 | 0.011432 |
| 0.011500 | 0.011430 | 0.011430 | 0.011465 | 0.011597 | 0.011665 | 0.011665 |
| 0.011531 | 0.011635 | 0.011636 | 0.011738 | 0.011767 | 0.011463 | 0.011631 |
| 0.011564 | 0.011564 | 0.011398 | 0.011582 | 0.011512 | 0.011537 | 0.011376 |
| 0.011577 | 0.011744 | 0.011568 | 0.011468 | 0.011362 | 0.011564 | 0.011430 |
| 0.011530 | 0.011463 | 0.011362 | 0.011465 | 0.011564 | 0.011567 | 0.011463 |
| 0.011362 | 0.011296 | 0.011429 | 0.011362 | 0.011295 | 0.011400 | 0.011564 |
| 0.011463 | 0.011396 | 0.011429 | 0.011463 | 0.011430 | 0.011362 | 0.011564 |
| 0.011429 | 0.011463 | 0.011463 | 0.011396 | 0.011463 | 0.011698 | 0.011362 |
| 0.011396 | 0.011799 | 0.011396 | 0.011429 | 0.011396 | 0.011765 | 0.011360 |
| 0.011847 | 0.011358 | 0.011461 | 0.011584 | 0.011671 | 0.011563 | 0.011311 |
| 0.011428 | 0.011564 | 0.011664 | 0.011773 | 0.011632 | 0.011737 | 0.011901 |
| 0.011800 | 0.011838 | 0.011799 | 0.012017 | 0.011765 | 0.012640 | 0.011801 |
| 0.012540 | 0.012308 | 0.012442 | 0.012714 | 0.011765 | 0.011463 | 0.011766 |
| 0.012205 | 0.012106 | 0.011732 | 0.011631 | 0.011699 | 0.011699 | 0.011669 |
| 0.011564 | 0.011535 | 0.011631 | 0.011598 | 0.011968 | 0.012034 | 0.012036 |
| 0.011935 | 0.012035 | 0.012139 | 0.011872 | 0.012205 | 0.012212 | 0.012272 |
| 0.012273 | 0.012307 | 0.012221 | 0.012273 | 0.012274 | 0.011496 | 0.011800 |
| 0.011868 | 0.012371 | 0.011874 | 0.012102 | 0.012575 | 0.011638 | 0.011531 |
| 0.011496 | 0.011496 | 0.011968 | 0.012048 | 0.012116 | 0.011832 | 0.011498 |
| S074     | 0.011698 | 0.011698 | 0.012034 | 0.011799 | 0.011799 | 0.011866 |
| 0.011637 | 0.011569 | 0.011866 | 0.011295 | 0.011362 | 0.011329 | 0.011295 |
| 0.011329 | 0.011496 | 0.011295 | 0.011329 | 0.011396 | 0.011362 | 0.011329 |
| 0.011295 | 0.011329 | 0.011429 | 0.011295 | 0.011329 | 0.011329 | 0.011603 |
| 0.011564 | 0.011329 | 0.011228 | 0.011463 | 0.011396 | 0.011362 | 0.011396 |
| 0.011362 | 0.011463 | 0.011362 | 0.011362 | 0.011396 | 0.011362 | 0.011530 |
| 0.011295 | 0.011362 | 0.011396 | 0.011329 | 0.011429 | 0.011463 | 0.011396 |
| 0.011362 | 0.011530 | 0.011430 | 0.011698 | 0.011362 | 0.011631 | 0.011362 |
| 0.011329 | 0.011429 | 0.011496 | 0.011631 | 0.011731 | 0.011429 | 0.011530 |
| 0.011396 | 0.011463 | 0.011362 | 0.011597 | 0.011832 | 0.011362 | 0.011429 |
| 0.011329 | 0.011429 | 0.011396 | 0.011463 | 0.000000 | 0.011396 | 0.011396 |
| 0.011295 | 0.011329 | 0.011295 | 0.011396 | 0.011362 | 0.011397 | 0.011463 |
| 0.011396 | 0.011362 | 0.011429 | 0.011194 | 0.011463 | 0.011295 | 0.011362 |
| 0.011530 | 0.011463 | 0.011698 | 0.011530 | 0.011362 | 0.011597 | 0.011362 |
| 0.011468 | 0.011695 | 0.011513 | 0.011216 | 0.011210 | 0.011355 | 0.011415 |
| 0.012085 | 0.011467 | 0.011225 | 0.011597 | 0.011597 | 0.011396 | 0.011496 |
| 0.011429 | 0.011396 | 0.011463 | 0.011362 | 0.011463 | 0.011396 | 0.011396 |
| 0.011362 | 0.011262 | 0.011664 | 0.011530 | 0.011429 | 0.011396 | 0.011329 |
| 0.011295 | 0.011295 | 0.011362 | 0.011329 | 0.011530 | 0.011497 | 0.011429 |
| 0.011530 | 0.011597 | 0.011329 | 0.011329 | 0.011362 | 0.011362 | 0.011364 |
| 0.011432 | 0.011362 | 0.011362 | 0.011204 | 0.011313 | 0.011271 | 0.011363 |
| 0.011365 | 0.011301 | 0.011318 | 0.011336 | 0.011264 | 0.011300 | 0.011330 |
| 0.011600 | 0.011302 | 0.011405 | 0.011296 | 0.011302 | 0.011430 | 0.011396 |
| 0.011464 | 0.011397 | 0.011396 | 0.011496 | 0.011429 | 0.011799 | 0.011597 |
| 0.011631 | 0.011497 | 0.011362 | 0.011463 | 0.011262 | 0.011496 | 0.011295 |
| 0.011362 | 0.011362 | 0.011329 | 0.011295 | 0.011329 | 0.011295 | 0.011396 |
| 0.011362 | 0.011463 | 0.011396 | 0.011295 | 0.011397 | 0.011497 | 0.011466 |
| 0.011497 | 0.011396 | 0.011295 | 0.011195 | 0.011362 | 0.011295 | 0.011228 |
| 0.011298 | 0.011497 | 0.011295 | 0.011497 | 0.011262 | 0.011362 | 0.011329 |
| 0.011430 | 0.011329 | 0.011362 | 0.011329 | 0.011362 | 0.011228 | 0.011362 |
| 0.011396 | 0.011329 | 0.011396 | 0.011329 | 0.011362 | 0.011396 | 0.011631 |
| 0.011732 | 0.011664 | 0.011732 | 0.011465 | 0.011732 | 0.011362 | 0.011329 |

|          |          |          |          |          |          |          |
|----------|----------|----------|----------|----------|----------|----------|
| 0.011364 | 0.011586 | 0.011426 | 0.011232 | 0.011739 | 0.011231 | 0.011296 |
| 0.011671 | 0.011638 | 0.011530 | 0.011732 | 0.011436 | 0.011597 | 0.011564 |
| 0.011496 | 0.011664 | 0.011486 | 0.011349 | 0.011395 | 0.011396 | 0.011466 |
| 0.011564 | 0.011465 | 0.011601 | 0.011669 | 0.011597 | 0.011665 | 0.011738 |
| 0.011500 | 0.011637 | 0.011602 | 0.011533 | 0.011800 | 0.011262 | 0.011464 |
| 0.011429 | 0.011362 | 0.011262 | 0.011262 | 0.011329 | 0.011329 | 0.011396 |
| 0.011329 | 0.011396 | 0.011295 | 0.011396 | 0.011329 | 0.011329 | 0.011396 |
| 0.011329 | 0.011765 | 0.011664 | 0.011698 | 0.011228 | 0.011329 | 0.011362 |
| 0.011362 | 0.011329 | 0.011396 | 0.011429 | 0.011295 | 0.011295 | 0.011295 |
| 0.011832 | 0.011463 | 0.011463 | 0.011262 | 0.011362 | 0.011530 | 0.011295 |
| 0.011295 | 0.011362 | 0.011329 | 0.011497 | 0.011295 | 0.011429 | 0.011564 |
| 0.011496 | 0.011329 | 0.011329 | 0.011262 | 0.011262 | 0.011429 | 0.011362 |
| 0.011262 | 0.011362 | 0.011228 | 0.011262 | 0.011396 | 0.011530 | 0.011295 |
| 0.011262 | 0.011396 | 0.011329 | 0.011228 | 0.011564 | 0.011228 | 0.011396 |
| 0.011437 | 0.011295 | 0.011597 | 0.011429 | 0.011463 | 0.011329 | 0.011429 |
| 0.011295 | 0.011631 | 0.011228 | 0.011496 | 0.011295 | 0.011295 | 0.011228 |
| 0.011463 | 0.011665 | 0.011362 | 0.011429 | 0.011262 | 0.011664 | 0.011295 |
| 0.011295 | 0.011295 | 0.011329 | 0.011429 | 0.011329 | 0.011429 | 0.011496 |
| 0.011496 | 0.011463 | 0.011362 | 0.011463 | 0.011429 | 0.011295 | 0.011262 |
| 0.011295 | 0.011295 | 0.011362 | 0.011295 | 0.011262 | 0.011429 | 0.011295 |
| 0.011329 | 0.011329 | 0.011463 | 0.011496 | 0.011396 | 0.011329 | 0.011329 |
| 0.011262 | 0.011329 | 0.011429 | 0.011295 | 0.011429 | 0.011530 | 0.011832 |
| 0.011329 | 0.011732 | 0.011302 | 0.017823 | 0.011257 | 0.011427 | 0.011653 |
| 0.011614 | 0.011658 | 0.011322 | 0.011292 | 0.011719 | 0.011682 | 0.011364 |
| 0.011487 | 0.011549 | 0.011177 | 0.011270 | 0.011294 | 0.011307 | 0.011232 |
| 0.011482 | 0.011470 | 0.011468 | 0.011325 | 0.011463 | 0.011497 | 0.011500 |
| 0.011335 | 0.011463 | 0.011463 | 0.011429 | 0.011396 | 0.011396 | 0.011329 |
| 0.011396 | 0.011329 | 0.011362 | 0.011396 | 0.011362 | 0.011295 | 0.011329 |
| 0.011329 | 0.011396 | 0.011295 | 0.011396 | 0.011429 | 0.011463 | 0.011362 |
| 0.011396 | 0.011362 | 0.011698 | 0.011698 | 0.011430 | 0.011464 | 0.011497 |
| 0.011262 | 0.011262 | 0.011295 | 0.011396 | 0.011262 | 0.011497 | 0.011497 |
| 0.011530 | 0.011530 | 0.011463 | 0.011564 | 0.011732 | 0.011565 | 0.011396 |
| 0.011396 | 0.011463 | 0.011497 | 0.011329 | 0.011396 | 0.011362 | 0.011396 |
| 0.011463 | 0.011463 | 0.011497 | 0.011463 | 0.011363 | 0.011564 | 0.011530 |
| 0.011399 | 0.011295 | 0.011396 | 0.011497 | 0.011396 | 0.011530 | 0.011564 |
| 0.011732 | 0.011436 | 0.011597 | 0.011564 | 0.011496 | 0.011664 | 0.011295 |
| 0.011464 | 0.011363 | 0.011329 | 0.011329 | 0.011396 | 0.011295 | 0.011396 |
| 0.011429 | 0.011463 | 0.011362 | 0.011396 | 0.011362 | 0.011698 | 0.011698 |
| 0.011430 | 0.011464 | 0.011530 | 0.011463 | 0.012103 | 0.011489 | 0.011412 |
| 0.011482 | 0.011441 | 0.011552 | 0.011441 | 0.011550 | 0.011474 | 0.011474 |
| 0.012021 | 0.011337 | 0.011471 | 0.011406 | 0.011680 | 0.011570 | 0.011638 |
| 0.012046 | 0.011512 | 0.011635 | 0.011698 | 0.011564 | 0.011564 | 0.011601 |
| 0.011262 | 0.011429 | 0.011564 | 0.011530 | 0.011533 | 0.011530 | 0.011464 |
| 0.011362 | 0.011295 | 0.011329 | 0.011362 | 0.011262 | 0.011329 | 0.011228 |
| 0.011362 | 0.011396 | 0.011295 | 0.011262 | 0.011362 | 0.011295 | 0.011329 |
| 0.011329 | 0.011262 | 0.011329 | 0.011362 | 0.011262 | 0.011463 | 0.011496 |
| 0.011396 | 0.011463 | 0.011396 | 0.011396 | 0.011329 | 0.011731 | 0.011362 |
| 0.011373 | 0.011329 | 0.011564 | 0.011535 | 0.011429 | 0.011429 | 0.011429 |
| 0.011429 | 0.011362 | 0.011329 | 0.011362 | 0.011463 | 0.011463 | 0.011396 |
| 0.011396 | 0.011530 | 0.011698 | 0.011429 | 0.011631 | 0.011631 | 0.011496 |
| 0.011329 | 0.011396 | 0.011429 | 0.011832 | 0.011396 | 0.011429 | 0.011396 |
| 0.011429 | 0.011362 | 0.011362 | 0.011665 | 0.011597 | 0.011631 | 0.011362 |
| 0.011463 | 0.011530 | 0.011396 | 0.011463 | 0.011429 | 0.011295 | 0.011631 |
| 0.011396 | 0.011362 | 0.011362 | 0.011530 | 0.011362 | 0.011463 | 0.011698 |
| 0.011396 | 0.011705 | 0.011765 | 0.011467 | 0.011229 | 0.011468 | 0.011215 |
| 0.011225 | 0.011722 | 0.011271 | 0.011462 | 0.011255 | 0.011366 | 0.011379 |
| 0.011468 | 0.011192 | 0.011339 | 0.011192 | 0.011222 | 0.011395 | 0.011385 |
| 0.011399 | 0.011296 | 0.011412 | 0.011342 | 0.011397 | 0.011530 | 0.011597 |
| 0.011597 | 0.011464 | 0.011567 | 0.011569 | 0.011704 | 0.011732 | 0.011396 |
| 0.011631 | 0.011497 | 0.011362 | 0.011463 | 0.011262 | 0.011496 | 0.011295 |

|          |          |          |          |          |          |          |
|----------|----------|----------|----------|----------|----------|----------|
| 0.011362 | 0.011362 | 0.011329 | 0.011295 | 0.011329 | 0.011295 | 0.011396 |
| 0.011375 | 0.011375 | 0.011368 | 0.011197 | 0.011539 | 0.011504 | 0.011504 |
| 0.011503 | 0.011228 | 0.011171 | 0.011204 | 0.011365 | 0.011535 | 0.011535 |
| 0.011329 | 0.011399 | 0.011632 | 0.011601 | 0.011531 | 0.011565 | 0.011496 |
| 0.011429 | 0.011496 | 0.011496 | 0.011396 | 0.011967 | 0.011564 | 0.011631 |
| 0.011665 | 0.011737 | 0.011367 | 0.011441 | 0.011329 | 0.011530 | 0.011496 |
| 0.011329 | 0.011564 | 0.011564 | 0.011564 | 0.011728 | 0.011698 | 0.011303 |
| 0.011195 | 0.011199 | 0.011298 | 0.011264 | 0.011368 | 0.011209 | 0.011536 |
| 0.011335 | 0.011499 | 0.011251 | 0.011285 | 0.011363 | 0.011437 | 0.011329 |
| 0.011295 | 0.011295 | 0.011362 | 0.011329 | 0.011530 | 0.011497 | 0.011429 |
| 0.011530 | 0.011597 | 0.011329 | 0.011329 | 0.011362 | 0.011362 | 0.011364 |
| 0.011432 | 0.011362 | 0.011362 | 0.011397 | 0.011530 | 0.011597 | 0.011597 |
| 0.011464 | 0.011567 | 0.011569 | 0.011704 | 0.011732 | 0.011396 | 0.011564 |
| 0.011496 | 0.011496 | 0.011331 | 0.011513 | 0.011442 | 0.011265 | 0.011305 |
| 0.011473 | 0.011653 | 0.011483 | 0.011400 | 0.011295 | 0.011497 | 0.011362 |
| 0.011463 | 0.011396 | 0.011295 | 0.011397 | 0.011497 | 0.011466 | 0.011396 |
| 0.011295 | 0.011195 | 0.011362 | 0.011295 | 0.011228 | 0.011298 | 0.011497 |
| 0.011396 | 0.011329 | 0.011362 | 0.011396 | 0.011362 | 0.011295 | 0.011497 |
| 0.011362 | 0.011396 | 0.011396 | 0.011329 | 0.011396 | 0.011631 | 0.011295 |
| 0.011329 | 0.011731 | 0.011329 | 0.011362 | 0.011329 | 0.011698 | 0.011189 |
| 0.011679 | 0.011188 | 0.011261 | 0.011503 | 0.011508 | 0.011491 | 0.011144 |
| 0.011218 | 0.011496 | 0.011597 | 0.011705 | 0.011565 | 0.011669 | 0.011834 |
| 0.011733 | 0.011770 | 0.011731 | 0.011949 | 0.011698 | 0.012573 | 0.011734 |
| 0.012473 | 0.012207 | 0.012375 | 0.012646 | 0.011698 | 0.011396 | 0.011698 |
| 0.012137 | 0.012038 | 0.011664 | 0.011564 | 0.011632 | 0.011632 | 0.011601 |
| 0.011496 | 0.011467 | 0.011564 | 0.011531 | 0.011901 | 0.011967 | 0.011968 |
| 0.011867 | 0.011968 | 0.012038 | 0.011804 | 0.012138 | 0.012144 | 0.012205 |
| 0.012205 | 0.012239 | 0.012152 | 0.012205 | 0.012207 | 0.011429 | 0.011732 |
| 0.011800 | 0.012303 | 0.011806 | 0.012034 | 0.012508 | 0.011570 | 0.011464 |
| 0.011429 | 0.011429 | 0.011900 | 0.011924 | 0.012045 | 0.011765 | 0.011431 |
| S075     | 0.011698 | 0.011698 | 0.012034 | 0.011799 | 0.011799 | 0.011866 |
| 0.011705 | 0.011637 | 0.011866 | 0.011295 | 0.011362 | 0.011329 | 0.011295 |
| 0.011329 | 0.011496 | 0.011295 | 0.011329 | 0.011396 | 0.011362 | 0.011329 |
| 0.011295 | 0.011329 | 0.011429 | 0.011295 | 0.011329 | 0.011329 | 0.011671 |
| 0.011564 | 0.011329 | 0.011228 | 0.011463 | 0.011396 | 0.011362 | 0.011396 |
| 0.011362 | 0.011463 | 0.011295 | 0.011362 | 0.011329 | 0.011362 | 0.011530 |
| 0.011295 | 0.011362 | 0.011329 | 0.011127 | 0.011429 | 0.011463 | 0.011396 |
| 0.011362 | 0.011463 | 0.011430 | 0.011698 | 0.011295 | 0.011631 | 0.011295 |
| 0.011329 | 0.011429 | 0.011429 | 0.011631 | 0.011732 | 0.011429 | 0.011530 |
| 0.011396 | 0.011463 | 0.011362 | 0.011597 | 0.011832 | 0.011362 | 0.011429 |
| 0.011329 | 0.011429 | 0.011396 | 0.011463 | 0.011396 | 0.000000 | 0.000000 |
| 0.011295 | 0.011329 | 0.011295 | 0.011396 | 0.011362 | 0.011397 | 0.011463 |
| 0.011396 | 0.011362 | 0.011429 | 0.011329 | 0.011463 | 0.011295 | 0.011362 |
| 0.011530 | 0.011463 | 0.011698 | 0.011530 | 0.011362 | 0.011597 | 0.011295 |
| 0.011505 | 0.011733 | 0.011551 | 0.011256 | 0.011284 | 0.011355 | 0.011454 |
| 0.012121 | 0.011467 | 0.011266 | 0.011597 | 0.011597 | 0.011396 | 0.011497 |
| 0.011429 | 0.011396 | 0.011463 | 0.011362 | 0.011463 | 0.011396 | 0.011396 |
| 0.011362 | 0.011463 | 0.011664 | 0.011530 | 0.011429 | 0.011396 | 0.011329 |
| 0.011295 | 0.011295 | 0.011362 | 0.011329 | 0.011530 | 0.011497 | 0.011429 |
| 0.011530 | 0.011597 | 0.011329 | 0.011329 | 0.011362 | 0.011362 | 0.011364 |
| 0.011432 | 0.011362 | 0.011362 | 0.011240 | 0.011313 | 0.011271 | 0.011363 |
| 0.011365 | 0.011301 | 0.011355 | 0.011336 | 0.011264 | 0.011300 | 0.011330 |
| 0.011600 | 0.011370 | 0.011405 | 0.011296 | 0.011302 | 0.011430 | 0.011396 |
| 0.011464 | 0.011397 | 0.011396 | 0.011496 | 0.011429 | 0.011799 | 0.011598 |
| 0.011631 | 0.011497 | 0.011362 | 0.011463 | 0.011262 | 0.011497 | 0.011295 |
| 0.011362 | 0.011362 | 0.011329 | 0.011295 | 0.011329 | 0.011295 | 0.011396 |
| 0.011362 | 0.011463 | 0.011396 | 0.011295 | 0.011397 | 0.011497 | 0.011499 |
| 0.011497 | 0.011396 | 0.011295 | 0.011229 | 0.011362 | 0.011295 | 0.011228 |
| 0.011332 | 0.011497 | 0.011295 | 0.011497 | 0.011262 | 0.011362 | 0.011329 |
| 0.011430 | 0.011329 | 0.011362 | 0.011329 | 0.011362 | 0.011228 | 0.011362 |

|          |          |          |          |          |          |          |
|----------|----------|----------|----------|----------|----------|----------|
| 0.011396 | 0.011329 | 0.011396 | 0.011329 | 0.011362 | 0.011396 | 0.011631 |
| 0.011732 | 0.011664 | 0.011732 | 0.011431 | 0.011732 | 0.011362 | 0.011329 |
| 0.011330 | 0.011667 | 0.011426 | 0.011232 | 0.011739 | 0.011231 | 0.011375 |
| 0.011739 | 0.011638 | 0.011530 | 0.011732 | 0.011436 | 0.011597 | 0.011564 |
| 0.011496 | 0.011664 | 0.011522 | 0.011390 | 0.011437 | 0.011396 | 0.011466 |
| 0.011564 | 0.011465 | 0.011601 | 0.011669 | 0.011597 | 0.011665 | 0.011772 |
| 0.011500 | 0.011671 | 0.011602 | 0.011534 | 0.011800 | 0.011262 | 0.011465 |
| 0.011429 | 0.011362 | 0.011262 | 0.011262 | 0.011329 | 0.011329 | 0.011262 |
| 0.011329 | 0.011396 | 0.011295 | 0.011396 | 0.011329 | 0.011329 | 0.011396 |
| 0.011329 | 0.011765 | 0.011664 | 0.011698 | 0.011228 | 0.011329 | 0.011362 |
| 0.011362 | 0.011329 | 0.011396 | 0.011429 | 0.011295 | 0.011295 | 0.011295 |
| 0.011832 | 0.011463 | 0.011463 | 0.011262 | 0.011362 | 0.011530 | 0.011295 |
| 0.011295 | 0.011362 | 0.011329 | 0.011497 | 0.011295 | 0.011429 | 0.011564 |
| 0.011496 | 0.011329 | 0.011329 | 0.011262 | 0.011262 | 0.011429 | 0.011362 |
| 0.011262 | 0.011362 | 0.011228 | 0.011262 | 0.011396 | 0.011530 | 0.011295 |
| 0.011262 | 0.011396 | 0.011329 | 0.011228 | 0.011564 | 0.011228 | 0.011396 |
| 0.011471 | 0.011295 | 0.011597 | 0.011430 | 0.011463 | 0.011329 | 0.011362 |
| 0.011295 | 0.011631 | 0.011228 | 0.011497 | 0.011295 | 0.011295 | 0.011228 |
| 0.011463 | 0.011665 | 0.011362 | 0.011429 | 0.011262 | 0.011664 | 0.011295 |
| 0.011295 | 0.011295 | 0.011329 | 0.011429 | 0.011329 | 0.011429 | 0.011496 |
| 0.011497 | 0.011463 | 0.011161 | 0.011463 | 0.011429 | 0.011228 | 0.011262 |
| 0.011295 | 0.011228 | 0.011362 | 0.011295 | 0.011262 | 0.011429 | 0.011295 |
| 0.011329 | 0.011329 | 0.011463 | 0.011496 | 0.011396 | 0.011329 | 0.011329 |
| 0.011396 | 0.011329 | 0.011429 | 0.011295 | 0.011429 | 0.011530 | 0.011832 |
| 0.011329 | 0.011732 | 0.011336 | 0.017823 | 0.011257 | 0.011488 | 0.011653 |
| 0.011614 | 0.011658 | 0.011427 | 0.011292 | 0.011829 | 0.011682 | 0.011364 |
| 0.011534 | 0.011610 | 0.011216 | 0.011311 | 0.011294 | 0.011406 | 0.011318 |
| 0.011482 | 0.011507 | 0.011505 | 0.011391 | 0.011463 | 0.011497 | 0.011500 |
| 0.011369 | 0.011463 | 0.011463 | 0.011429 | 0.011396 | 0.011396 | 0.011363 |
| 0.011396 | 0.011329 | 0.011362 | 0.011396 | 0.011362 | 0.011295 | 0.011329 |
| 0.011329 | 0.011396 | 0.011295 | 0.011396 | 0.011430 | 0.011463 | 0.011362 |
| 0.011396 | 0.011362 | 0.011698 | 0.011698 | 0.011430 | 0.011464 | 0.011497 |
| 0.011262 | 0.011262 | 0.011295 | 0.011396 | 0.011262 | 0.011497 | 0.011497 |
| 0.011530 | 0.011530 | 0.011463 | 0.011564 | 0.011732 | 0.011565 | 0.011396 |
| 0.011396 | 0.011463 | 0.011497 | 0.011329 | 0.011396 | 0.011362 | 0.011396 |
| 0.011463 | 0.011463 | 0.011497 | 0.011463 | 0.011363 | 0.011564 | 0.011530 |
| 0.011399 | 0.011295 | 0.011396 | 0.011430 | 0.011396 | 0.011530 | 0.011564 |
| 0.011732 | 0.011436 | 0.011597 | 0.011564 | 0.011496 | 0.011664 | 0.011295 |
| 0.011464 | 0.011363 | 0.011329 | 0.011329 | 0.011396 | 0.011295 | 0.011396 |
| 0.011430 | 0.011463 | 0.011362 | 0.011396 | 0.011362 | 0.011698 | 0.011698 |
| 0.011430 | 0.011464 | 0.011530 | 0.011463 | 0.012103 | 0.011524 | 0.011447 |
| 0.011517 | 0.011476 | 0.011587 | 0.011476 | 0.011585 | 0.011508 | 0.011474 |
| 0.012056 | 0.011372 | 0.011505 | 0.011441 | 0.011714 | 0.011570 | 0.011673 |
| 0.012080 | 0.011550 | 0.011635 | 0.011698 | 0.011564 | 0.011564 | 0.011601 |
| 0.011262 | 0.011429 | 0.011564 | 0.011530 | 0.011533 | 0.011530 | 0.011498 |
| 0.011362 | 0.011295 | 0.011329 | 0.011362 | 0.011262 | 0.011329 | 0.011228 |
| 0.011362 | 0.011396 | 0.011295 | 0.011262 | 0.011362 | 0.011295 | 0.011329 |
| 0.011329 | 0.011262 | 0.011329 | 0.011362 | 0.011262 | 0.011463 | 0.011496 |
| 0.011396 | 0.011463 | 0.011396 | 0.011396 | 0.011329 | 0.011732 | 0.011362 |
| 0.011408 | 0.011329 | 0.011564 | 0.011569 | 0.011429 | 0.011362 | 0.011429 |
| 0.011429 | 0.011362 | 0.011329 | 0.011362 | 0.011463 | 0.011463 | 0.011396 |
| 0.011396 | 0.011530 | 0.011698 | 0.011429 | 0.011631 | 0.011631 | 0.011496 |
| 0.011329 | 0.011396 | 0.011429 | 0.011832 | 0.011396 | 0.011429 | 0.011396 |
| 0.011429 | 0.011362 | 0.011362 | 0.011665 | 0.011597 | 0.011631 | 0.011362 |
| 0.011463 | 0.011530 | 0.011396 | 0.011463 | 0.011429 | 0.011295 | 0.011631 |
| 0.011396 | 0.011362 | 0.011362 | 0.011530 | 0.011362 | 0.011463 | 0.011698 |
| 0.011396 | 0.011773 | 0.011765 | 0.011548 | 0.011342 | 0.011468 | 0.011267 |
| 0.011280 | 0.011800 | 0.011306 | 0.011462 | 0.011353 | 0.011366 | 0.011432 |
| 0.011468 | 0.011192 | 0.011394 | 0.011192 | 0.011276 | 0.011395 | 0.011425 |
| 0.011437 | 0.011336 | 0.011412 | 0.011377 | 0.011397 | 0.011530 | 0.011597 |



|          |          |          |          |          |          |          |
|----------|----------|----------|----------|----------|----------|----------|
| 0.011597 | 0.011464 | 0.011567 | 0.011569 | 0.011704 | 0.011732 | 0.011396 |
| 0.011631 | 0.011497 | 0.011362 | 0.011463 | 0.011262 | 0.011497 | 0.011295 |
| 0.011362 | 0.011362 | 0.011329 | 0.011295 | 0.011329 | 0.011295 | 0.011396 |
| 0.011340 | 0.011340 | 0.011368 | 0.011403 | 0.011539 | 0.011504 | 0.011504 |
| 0.011503 | 0.011430 | 0.011208 | 0.011204 | 0.011365 | 0.011535 | 0.011535 |
| 0.011329 | 0.011399 | 0.011632 | 0.011601 | 0.011531 | 0.011565 | 0.011496 |
| 0.011429 | 0.011496 | 0.011496 | 0.011396 | 0.011967 | 0.011564 | 0.011631 |
| 0.011665 | 0.011701 | 0.011367 | 0.011441 | 0.011329 | 0.011530 | 0.011497 |
| 0.011531 | 0.011564 | 0.011564 | 0.011564 | 0.011650 | 0.011698 | 0.011338 |
| 0.011229 | 0.011233 | 0.011333 | 0.011298 | 0.011402 | 0.011247 | 0.011570 |
| 0.011369 | 0.011543 | 0.011298 | 0.011397 | 0.011363 | 0.011437 | 0.011329 |
| 0.011295 | 0.011295 | 0.011362 | 0.011329 | 0.011530 | 0.011497 | 0.011429 |
| 0.011530 | 0.011597 | 0.011329 | 0.011329 | 0.011362 | 0.011362 | 0.011364 |
| 0.011432 | 0.011362 | 0.011362 | 0.011397 | 0.011530 | 0.011597 | 0.011597 |
| 0.011464 | 0.011567 | 0.011569 | 0.011704 | 0.011732 | 0.011396 | 0.011564 |
| 0.011497 | 0.011497 | 0.011263 | 0.011513 | 0.011442 | 0.011469 | 0.011340 |
| 0.011508 | 0.011698 | 0.011441 | 0.011400 | 0.011295 | 0.011497 | 0.011362 |
| 0.011463 | 0.011396 | 0.011295 | 0.011397 | 0.011497 | 0.011499 | 0.011396 |
| 0.011295 | 0.011229 | 0.011362 | 0.011295 | 0.011228 | 0.011332 | 0.011497 |
| 0.011396 | 0.011329 | 0.011362 | 0.011396 | 0.011362 | 0.011295 | 0.011497 |
| 0.011362 | 0.011396 | 0.011396 | 0.011329 | 0.011396 | 0.011631 | 0.011295 |
| 0.011329 | 0.011732 | 0.011329 | 0.011362 | 0.011329 | 0.011698 | 0.011274 |
| 0.011735 | 0.011273 | 0.011261 | 0.011503 | 0.011589 | 0.011527 | 0.011227 |
| 0.011218 | 0.011496 | 0.011597 | 0.011705 | 0.011565 | 0.011703 | 0.011834 |
| 0.011733 | 0.011770 | 0.011732 | 0.011983 | 0.011698 | 0.012573 | 0.011734 |
| 0.012473 | 0.012241 | 0.012375 | 0.012646 | 0.011698 | 0.011396 | 0.011699 |
| 0.012137 | 0.012072 | 0.011664 | 0.011564 | 0.011632 | 0.011632 | 0.011601 |
| 0.011496 | 0.011501 | 0.011564 | 0.011531 | 0.011901 | 0.011967 | 0.011968 |
| 0.011868 | 0.011968 | 0.012072 | 0.011838 | 0.012138 | 0.012144 | 0.012137 |
| 0.012205 | 0.012239 | 0.012186 | 0.012205 | 0.012207 | 0.011429 | 0.011732 |
| 0.011800 | 0.012303 | 0.011806 | 0.012034 | 0.012508 | 0.011570 | 0.011464 |
| 0.011429 | 0.011429 | 0.011900 | 0.011924 | 0.012045 | 0.011765 | 0.011431 |
| S076     | 0.011698 | 0.011698 | 0.012034 | 0.011799 | 0.011799 | 0.011866 |
| 0.011705 | 0.011637 | 0.011866 | 0.011295 | 0.011362 | 0.011329 | 0.011295 |
| 0.011329 | 0.011496 | 0.011295 | 0.011329 | 0.011396 | 0.011362 | 0.011329 |
| 0.011295 | 0.011329 | 0.011429 | 0.011295 | 0.011329 | 0.011329 | 0.011671 |
| 0.011564 | 0.011329 | 0.011228 | 0.011463 | 0.011396 | 0.011362 | 0.011396 |
| 0.011362 | 0.011463 | 0.011295 | 0.011362 | 0.011329 | 0.011362 | 0.011530 |
| 0.011295 | 0.011362 | 0.011329 | 0.011127 | 0.011429 | 0.011463 | 0.011396 |
| 0.011362 | 0.011463 | 0.011430 | 0.011698 | 0.011295 | 0.011631 | 0.011295 |
| 0.011329 | 0.011429 | 0.011429 | 0.011631 | 0.011732 | 0.011429 | 0.011530 |
| 0.011396 | 0.011463 | 0.011362 | 0.011597 | 0.011832 | 0.011362 | 0.011429 |
| 0.011329 | 0.011429 | 0.011396 | 0.011463 | 0.011396 | 0.000000 | 0.000000 |
| 0.011295 | 0.011329 | 0.011295 | 0.011396 | 0.011362 | 0.011397 | 0.011463 |
| 0.011396 | 0.011362 | 0.011429 | 0.011329 | 0.011463 | 0.011295 | 0.011362 |
| 0.011530 | 0.011463 | 0.011698 | 0.011530 | 0.011362 | 0.011597 | 0.011295 |
| 0.011505 | 0.011733 | 0.011551 | 0.011256 | 0.011284 | 0.011355 | 0.011454 |
| 0.012121 | 0.011467 | 0.011266 | 0.011597 | 0.011597 | 0.011396 | 0.011497 |
| 0.011429 | 0.011396 | 0.011463 | 0.011362 | 0.011463 | 0.011396 | 0.011396 |
| 0.011362 | 0.011463 | 0.011664 | 0.011530 | 0.011429 | 0.011396 | 0.011329 |
| 0.011295 | 0.011295 | 0.011362 | 0.011329 | 0.011530 | 0.011497 | 0.011429 |
| 0.011530 | 0.011597 | 0.011329 | 0.011329 | 0.011362 | 0.011362 | 0.011364 |
| 0.011432 | 0.011362 | 0.011362 | 0.011240 | 0.011313 | 0.011271 | 0.011363 |
| 0.011365 | 0.011301 | 0.011355 | 0.011336 | 0.011264 | 0.011300 | 0.011330 |
| 0.011600 | 0.011370 | 0.011405 | 0.011296 | 0.011302 | 0.011430 | 0.011396 |
| 0.011464 | 0.011397 | 0.011396 | 0.011496 | 0.011429 | 0.011799 | 0.011598 |
| 0.011631 | 0.011497 | 0.011362 | 0.011463 | 0.011262 | 0.011497 | 0.011295 |
| 0.011362 | 0.011362 | 0.011329 | 0.011295 | 0.011329 | 0.011295 | 0.011396 |
| 0.011362 | 0.011463 | 0.011396 | 0.011295 | 0.011397 | 0.011497 | 0.011499 |
| 0.011497 | 0.011396 | 0.011295 | 0.011229 | 0.011362 | 0.011295 | 0.011228 |

|          |          |          |          |          |          |          |
|----------|----------|----------|----------|----------|----------|----------|
| 0.011332 | 0.011497 | 0.011295 | 0.011497 | 0.011262 | 0.011362 | 0.011329 |
| 0.011430 | 0.011329 | 0.011362 | 0.011329 | 0.011362 | 0.011228 | 0.011362 |
| 0.011396 | 0.011329 | 0.011396 | 0.011329 | 0.011362 | 0.011396 | 0.011631 |
| 0.011732 | 0.011664 | 0.011732 | 0.011431 | 0.011732 | 0.011362 | 0.011329 |
| 0.011330 | 0.011667 | 0.011426 | 0.011232 | 0.011739 | 0.011231 | 0.011375 |
| 0.011739 | 0.011638 | 0.011530 | 0.011732 | 0.011436 | 0.011597 | 0.011564 |
| 0.011496 | 0.011664 | 0.011522 | 0.011390 | 0.011437 | 0.011396 | 0.011466 |
| 0.011564 | 0.011465 | 0.011601 | 0.011669 | 0.011597 | 0.011665 | 0.011772 |
| 0.011500 | 0.011671 | 0.011602 | 0.011534 | 0.011800 | 0.011262 | 0.011465 |
| 0.011429 | 0.011362 | 0.011262 | 0.011262 | 0.011329 | 0.011329 | 0.011262 |
| 0.011329 | 0.011396 | 0.011295 | 0.011396 | 0.011329 | 0.011329 | 0.011396 |
| 0.011329 | 0.011765 | 0.011664 | 0.011698 | 0.011228 | 0.011329 | 0.011362 |
| 0.011362 | 0.011329 | 0.011396 | 0.011429 | 0.011295 | 0.011295 | 0.011295 |
| 0.011832 | 0.011463 | 0.011463 | 0.011262 | 0.011362 | 0.011530 | 0.011295 |
| 0.011295 | 0.011362 | 0.011329 | 0.011497 | 0.011295 | 0.011429 | 0.011564 |
| 0.011496 | 0.011329 | 0.011329 | 0.011262 | 0.011262 | 0.011429 | 0.011362 |
| 0.011262 | 0.011362 | 0.011228 | 0.011262 | 0.011396 | 0.011530 | 0.011295 |
| 0.011262 | 0.011396 | 0.011329 | 0.011228 | 0.011564 | 0.011228 | 0.011396 |
| 0.011471 | 0.011295 | 0.011597 | 0.011430 | 0.011463 | 0.011329 | 0.011362 |
| 0.011295 | 0.011631 | 0.011228 | 0.011497 | 0.011295 | 0.011295 | 0.011228 |
| 0.011463 | 0.011665 | 0.011362 | 0.011429 | 0.011262 | 0.011664 | 0.011295 |
| 0.011295 | 0.011295 | 0.011329 | 0.011429 | 0.011329 | 0.011429 | 0.011496 |
| 0.011497 | 0.011463 | 0.011161 | 0.011463 | 0.011429 | 0.011228 | 0.011262 |
| 0.011295 | 0.011228 | 0.011362 | 0.011295 | 0.011262 | 0.011429 | 0.011295 |
| 0.011329 | 0.011329 | 0.011463 | 0.011496 | 0.011396 | 0.011329 | 0.011329 |
| 0.011396 | 0.011329 | 0.011429 | 0.011295 | 0.011429 | 0.011530 | 0.011832 |
| 0.011329 | 0.011732 | 0.011336 | 0.017823 | 0.011257 | 0.011488 | 0.011653 |
| 0.011614 | 0.011658 | 0.011427 | 0.011292 | 0.011829 | 0.011682 | 0.011364 |
| 0.011534 | 0.011610 | 0.011216 | 0.011311 | 0.011294 | 0.011406 | 0.011318 |
| 0.011482 | 0.011507 | 0.011505 | 0.011391 | 0.011463 | 0.011497 | 0.011500 |
| 0.011369 | 0.011463 | 0.011463 | 0.011429 | 0.011396 | 0.011396 | 0.011363 |
| 0.011396 | 0.011329 | 0.011362 | 0.011396 | 0.011362 | 0.011295 | 0.011329 |
| 0.011329 | 0.011396 | 0.011295 | 0.011396 | 0.011430 | 0.011463 | 0.011362 |
| 0.011396 | 0.011362 | 0.011698 | 0.011698 | 0.011430 | 0.011464 | 0.011497 |
| 0.011262 | 0.011262 | 0.011295 | 0.011396 | 0.011262 | 0.011497 | 0.011497 |
| 0.011530 | 0.011530 | 0.011463 | 0.011564 | 0.011732 | 0.011565 | 0.011396 |
| 0.011396 | 0.011463 | 0.011497 | 0.011329 | 0.011396 | 0.011362 | 0.011396 |
| 0.011463 | 0.011463 | 0.011497 | 0.011463 | 0.011363 | 0.011564 | 0.011530 |
| 0.011399 | 0.011295 | 0.011396 | 0.011430 | 0.011396 | 0.011530 | 0.011564 |
| 0.011732 | 0.011436 | 0.011597 | 0.011564 | 0.011496 | 0.011664 | 0.011295 |
| 0.011464 | 0.011363 | 0.011329 | 0.011329 | 0.011396 | 0.011295 | 0.011396 |
| 0.011430 | 0.011463 | 0.011362 | 0.011396 | 0.011362 | 0.011698 | 0.011698 |
| 0.011430 | 0.011464 | 0.011530 | 0.011463 | 0.012103 | 0.011524 | 0.011447 |
| 0.011517 | 0.011476 | 0.011587 | 0.011476 | 0.011585 | 0.011508 | 0.011474 |
| 0.012056 | 0.011372 | 0.011505 | 0.011441 | 0.011714 | 0.011570 | 0.011673 |
| 0.012080 | 0.011550 | 0.011635 | 0.011698 | 0.011564 | 0.011564 | 0.011601 |
| 0.011262 | 0.011429 | 0.011564 | 0.011530 | 0.011533 | 0.011530 | 0.011498 |
| 0.011362 | 0.011295 | 0.011329 | 0.011362 | 0.011262 | 0.011329 | 0.011228 |
| 0.011362 | 0.011396 | 0.011295 | 0.011262 | 0.011362 | 0.011295 | 0.011329 |
| 0.011329 | 0.011262 | 0.011329 | 0.011362 | 0.011262 | 0.011463 | 0.011496 |
| 0.011396 | 0.011463 | 0.011396 | 0.011396 | 0.011329 | 0.011732 | 0.011362 |
| 0.011408 | 0.011329 | 0.011564 | 0.011569 | 0.011429 | 0.011362 | 0.011429 |
| 0.011429 | 0.011362 | 0.011329 | 0.011362 | 0.011463 | 0.011463 | 0.011396 |
| 0.011396 | 0.011530 | 0.011698 | 0.011429 | 0.011631 | 0.011631 | 0.011496 |
| 0.011329 | 0.011396 | 0.011429 | 0.011832 | 0.011396 | 0.011429 | 0.011396 |
| 0.011429 | 0.011362 | 0.011362 | 0.011665 | 0.011597 | 0.011631 | 0.011362 |
| 0.011463 | 0.011530 | 0.011396 | 0.011463 | 0.011429 | 0.011295 | 0.011631 |
| 0.011396 | 0.011362 | 0.011362 | 0.011530 | 0.011362 | 0.011463 | 0.011698 |
| 0.011396 | 0.011773 | 0.011765 | 0.011548 | 0.011342 | 0.011468 | 0.011267 |
| 0.011280 | 0.011800 | 0.011306 | 0.011462 | 0.011353 | 0.011366 | 0.011432 |

|          |          |          |          |          |          |          |
|----------|----------|----------|----------|----------|----------|----------|
| 0.011468 | 0.011192 | 0.011394 | 0.011192 | 0.011276 | 0.011395 | 0.011425 |
| 0.011437 | 0.011336 | 0.011412 | 0.011377 | 0.011397 | 0.011530 | 0.011597 |
| 0.011597 | 0.011464 | 0.011567 | 0.011569 | 0.011704 | 0.011732 | 0.011396 |
| 0.011631 | 0.011497 | 0.011362 | 0.011463 | 0.011262 | 0.011497 | 0.011295 |
| 0.011362 | 0.011362 | 0.011329 | 0.011295 | 0.011329 | 0.011295 | 0.011396 |
| 0.011340 | 0.011340 | 0.011368 | 0.011403 | 0.011539 | 0.011504 | 0.011504 |
| 0.011503 | 0.011430 | 0.011208 | 0.011204 | 0.011365 | 0.011535 | 0.011535 |
| 0.011329 | 0.011399 | 0.011632 | 0.011601 | 0.011531 | 0.011565 | 0.011496 |
| 0.011429 | 0.011496 | 0.011496 | 0.011396 | 0.011967 | 0.011564 | 0.011631 |
| 0.011665 | 0.011701 | 0.011367 | 0.011441 | 0.011329 | 0.011530 | 0.011497 |
| 0.011531 | 0.011564 | 0.011564 | 0.011564 | 0.011650 | 0.011698 | 0.011338 |
| 0.011229 | 0.011233 | 0.011333 | 0.011298 | 0.011402 | 0.011247 | 0.011570 |
| 0.011369 | 0.011543 | 0.011298 | 0.011397 | 0.011363 | 0.011437 | 0.011329 |
| 0.011295 | 0.011295 | 0.011362 | 0.011329 | 0.011530 | 0.011497 | 0.011429 |
| 0.011530 | 0.011597 | 0.011329 | 0.011329 | 0.011362 | 0.011362 | 0.011364 |
| 0.011432 | 0.011362 | 0.011362 | 0.011397 | 0.011530 | 0.011597 | 0.011597 |
| 0.011464 | 0.011567 | 0.011569 | 0.011704 | 0.011732 | 0.011396 | 0.011564 |
| 0.011497 | 0.011497 | 0.011263 | 0.011513 | 0.011442 | 0.011469 | 0.011340 |
| 0.011508 | 0.011698 | 0.011441 | 0.011400 | 0.011295 | 0.011497 | 0.011362 |
| 0.011463 | 0.011396 | 0.011295 | 0.011397 | 0.011497 | 0.011499 | 0.011396 |
| 0.011295 | 0.011229 | 0.011362 | 0.011295 | 0.011228 | 0.011332 | 0.011497 |
| 0.011396 | 0.011329 | 0.011362 | 0.011396 | 0.011362 | 0.011295 | 0.011497 |
| 0.011362 | 0.011396 | 0.011396 | 0.011329 | 0.011396 | 0.011631 | 0.011295 |
| 0.011329 | 0.011732 | 0.011329 | 0.011362 | 0.011329 | 0.011698 | 0.011274 |
| 0.011735 | 0.011273 | 0.011261 | 0.011503 | 0.011589 | 0.011527 | 0.011227 |
| 0.011218 | 0.011496 | 0.011597 | 0.011705 | 0.011565 | 0.011703 | 0.011834 |
| 0.011733 | 0.011770 | 0.011732 | 0.011983 | 0.011698 | 0.012573 | 0.011734 |
| 0.012473 | 0.012241 | 0.012375 | 0.012646 | 0.011698 | 0.011396 | 0.011699 |
| 0.012137 | 0.012072 | 0.011664 | 0.011564 | 0.011632 | 0.011632 | 0.011601 |
| 0.011496 | 0.011501 | 0.011564 | 0.011531 | 0.011901 | 0.011967 | 0.011968 |
| 0.011868 | 0.011968 | 0.012072 | 0.011838 | 0.012138 | 0.012144 | 0.012137 |
| 0.012205 | 0.012239 | 0.012186 | 0.012205 | 0.012207 | 0.011429 | 0.011732 |
| 0.011800 | 0.012303 | 0.011806 | 0.012034 | 0.012508 | 0.011570 | 0.011464 |
| 0.011429 | 0.011429 | 0.011900 | 0.011924 | 0.012045 | 0.011765 | 0.011431 |
| S077     | 0.011597 | 0.011597 | 0.011933 | 0.011698 | 0.011698 | 0.011765 |
| 0.011569 | 0.011501 | 0.011765 | 0.011195 | 0.011262 | 0.011228 | 0.011194 |
| 0.011228 | 0.011396 | 0.011194 | 0.011228 | 0.011295 | 0.011262 | 0.011228 |
| 0.011194 | 0.011228 | 0.011329 | 0.011195 | 0.011228 | 0.011228 | 0.011535 |
| 0.011463 | 0.011228 | 0.011127 | 0.011362 | 0.011295 | 0.011262 | 0.011295 |
| 0.011262 | 0.011362 | 0.011262 | 0.011262 | 0.011295 | 0.011262 | 0.011429 |
| 0.011194 | 0.011262 | 0.011295 | 0.011228 | 0.011329 | 0.011362 | 0.011295 |
| 0.011262 | 0.011429 | 0.011329 | 0.011597 | 0.011262 | 0.011530 | 0.011262 |
| 0.011228 | 0.011329 | 0.011396 | 0.011530 | 0.011631 | 0.011329 | 0.011429 |
| 0.011295 | 0.011362 | 0.011262 | 0.011496 | 0.011732 | 0.011262 | 0.011329 |
| 0.011228 | 0.011329 | 0.011295 | 0.011362 | 0.011295 | 0.011295 | 0.011295 |
| 0.000000 | 0.011228 | 0.011194 | 0.011295 | 0.011262 | 0.011296 | 0.011362 |
| 0.011295 | 0.011262 | 0.011329 | 0.011228 | 0.011362 | 0.011194 | 0.011262 |
| 0.011429 | 0.011362 | 0.011597 | 0.011429 | 0.011262 | 0.011496 | 0.011262 |
| 0.011431 | 0.011658 | 0.011475 | 0.011177 | 0.011172 | 0.011281 | 0.011375 |
| 0.012011 | 0.011467 | 0.011184 | 0.011496 | 0.011496 | 0.011295 | 0.011396 |
| 0.011329 | 0.011295 | 0.011362 | 0.011262 | 0.011362 | 0.011295 | 0.011295 |
| 0.011262 | 0.011362 | 0.011564 | 0.011429 | 0.011329 | 0.011295 | 0.011228 |
| 0.011195 | 0.011195 | 0.011262 | 0.011228 | 0.011429 | 0.011396 | 0.011329 |
| 0.011429 | 0.011497 | 0.011228 | 0.011228 | 0.011262 | 0.011262 | 0.011263 |
| 0.011331 | 0.011262 | 0.011262 | 0.011132 | 0.011205 | 0.011165 | 0.011262 |
| 0.011263 | 0.011198 | 0.011245 | 0.011233 | 0.011162 | 0.011197 | 0.011229 |
| 0.011492 | 0.011267 | 0.011301 | 0.011195 | 0.011199 | 0.011329 | 0.011296 |
| 0.011363 | 0.011296 | 0.011296 | 0.011396 | 0.011329 | 0.011698 | 0.011497 |
| 0.011530 | 0.011396 | 0.011262 | 0.011362 | 0.011161 | 0.011396 | 0.011195 |
| 0.011262 | 0.011262 | 0.011228 | 0.011194 | 0.011228 | 0.011195 | 0.011295 |

|          |          |          |          |          |          |          |
|----------|----------|----------|----------|----------|----------|----------|
| 0.011262 | 0.011362 | 0.011295 | 0.011195 | 0.011296 | 0.011396 | 0.011398 |
| 0.011396 | 0.011295 | 0.011195 | 0.011128 | 0.011262 | 0.011195 | 0.011127 |
| 0.011230 | 0.011396 | 0.011195 | 0.011396 | 0.011161 | 0.011262 | 0.011228 |
| 0.011329 | 0.011228 | 0.011262 | 0.011228 | 0.011262 | 0.011127 | 0.011262 |
| 0.011295 | 0.011228 | 0.011295 | 0.011228 | 0.011262 | 0.011295 | 0.011530 |
| 0.011631 | 0.011564 | 0.011631 | 0.011397 | 0.011631 | 0.011262 | 0.011228 |
| 0.011263 | 0.011545 | 0.011380 | 0.011163 | 0.011637 | 0.011129 | 0.011257 |
| 0.011603 | 0.011536 | 0.011429 | 0.011631 | 0.011333 | 0.011496 | 0.011463 |
| 0.011396 | 0.011564 | 0.011415 | 0.011266 | 0.011312 | 0.011295 | 0.011365 |
| 0.011463 | 0.011364 | 0.011500 | 0.011568 | 0.011496 | 0.011564 | 0.011670 |
| 0.011398 | 0.011569 | 0.011500 | 0.011432 | 0.011699 | 0.011161 | 0.011363 |
| 0.011329 | 0.011262 | 0.011161 | 0.011161 | 0.011228 | 0.011228 | 0.011295 |
| 0.011228 | 0.011295 | 0.011194 | 0.011295 | 0.011228 | 0.011228 | 0.011295 |
| 0.011228 | 0.011664 | 0.011564 | 0.011597 | 0.011127 | 0.011228 | 0.011262 |
| 0.011262 | 0.011228 | 0.011295 | 0.011329 | 0.011194 | 0.011194 | 0.011194 |
| 0.011731 | 0.011362 | 0.011362 | 0.011161 | 0.011262 | 0.011429 | 0.011194 |
| 0.011194 | 0.011262 | 0.011228 | 0.011396 | 0.011194 | 0.011329 | 0.011463 |
| 0.011396 | 0.011228 | 0.011228 | 0.011161 | 0.011161 | 0.011329 | 0.011262 |
| 0.011161 | 0.011262 | 0.011127 | 0.011161 | 0.011295 | 0.011430 | 0.011195 |
| 0.011161 | 0.011295 | 0.011228 | 0.011127 | 0.011463 | 0.011127 | 0.011295 |
| 0.011368 | 0.011194 | 0.011496 | 0.011329 | 0.011362 | 0.011228 | 0.011329 |
| 0.011194 | 0.011530 | 0.011127 | 0.011396 | 0.011194 | 0.011194 | 0.011127 |
| 0.011362 | 0.011564 | 0.011262 | 0.011329 | 0.011161 | 0.011564 | 0.011194 |
| 0.011194 | 0.011194 | 0.011228 | 0.011329 | 0.011228 | 0.011329 | 0.011396 |
| 0.011396 | 0.011362 | 0.011262 | 0.011362 | 0.011329 | 0.011194 | 0.011161 |
| 0.011194 | 0.011194 | 0.011262 | 0.011194 | 0.011161 | 0.011329 | 0.011194 |
| 0.011228 | 0.011228 | 0.011362 | 0.011396 | 0.011295 | 0.011228 | 0.011228 |
| 0.011295 | 0.011228 | 0.011329 | 0.011194 | 0.011329 | 0.011429 | 0.011731 |
| 0.011228 | 0.011631 | 0.011233 | 0.017747 | 0.011257 | 0.011366 | 0.011583 |
| 0.011545 | 0.011588 | 0.011322 | 0.011292 | 0.011719 | 0.011612 | 0.011364 |
| 0.011487 | 0.011548 | 0.011138 | 0.011228 | 0.011216 | 0.011307 | 0.011232 |
| 0.011482 | 0.011395 | 0.011394 | 0.011193 | 0.011362 | 0.011396 | 0.011398 |
| 0.011266 | 0.011362 | 0.011362 | 0.011329 | 0.011295 | 0.011295 | 0.011262 |
| 0.011295 | 0.011228 | 0.011262 | 0.011295 | 0.011262 | 0.011195 | 0.011228 |
| 0.011228 | 0.011295 | 0.011195 | 0.011295 | 0.011329 | 0.011362 | 0.011262 |
| 0.011295 | 0.011262 | 0.011597 | 0.011597 | 0.011329 | 0.011363 | 0.011396 |
| 0.011161 | 0.011161 | 0.011195 | 0.011295 | 0.011161 | 0.011396 | 0.011396 |
| 0.011429 | 0.011429 | 0.011362 | 0.011463 | 0.011631 | 0.011464 | 0.011295 |
| 0.011295 | 0.011362 | 0.011396 | 0.011228 | 0.011295 | 0.011262 | 0.011295 |
| 0.011363 | 0.011362 | 0.011396 | 0.011362 | 0.011262 | 0.011463 | 0.011429 |
| 0.011297 | 0.011195 | 0.011295 | 0.011396 | 0.011295 | 0.011430 | 0.011463 |
| 0.011631 | 0.011333 | 0.011496 | 0.011463 | 0.011396 | 0.011564 | 0.011195 |
| 0.011363 | 0.011262 | 0.011228 | 0.011228 | 0.011295 | 0.011195 | 0.011295 |
| 0.011329 | 0.011362 | 0.011262 | 0.011295 | 0.011262 | 0.011597 | 0.011597 |
| 0.011329 | 0.011363 | 0.011429 | 0.011362 | 0.012002 | 0.011417 | 0.011341 |
| 0.011412 | 0.011372 | 0.011482 | 0.011372 | 0.011480 | 0.011405 | 0.011370 |
| 0.011953 | 0.011268 | 0.011403 | 0.011337 | 0.011611 | 0.011468 | 0.011570 |
| 0.011978 | 0.011437 | 0.011533 | 0.011597 | 0.011463 | 0.011463 | 0.011499 |
| 0.011161 | 0.011329 | 0.011463 | 0.011429 | 0.011432 | 0.011429 | 0.011397 |
| 0.011262 | 0.011194 | 0.011228 | 0.011262 | 0.011161 | 0.011228 | 0.011127 |
| 0.011262 | 0.011295 | 0.011194 | 0.011161 | 0.011262 | 0.011194 | 0.011228 |
| 0.011228 | 0.011161 | 0.011228 | 0.011262 | 0.011161 | 0.011362 | 0.011396 |
| 0.011295 | 0.011362 | 0.011295 | 0.011295 | 0.011228 | 0.011631 | 0.011262 |
| 0.011304 | 0.011228 | 0.011463 | 0.011467 | 0.011329 | 0.011329 | 0.011329 |
| 0.011329 | 0.011262 | 0.011228 | 0.011262 | 0.011362 | 0.011362 | 0.011295 |
| 0.011295 | 0.011429 | 0.011597 | 0.011329 | 0.011530 | 0.011530 | 0.011396 |
| 0.011228 | 0.011295 | 0.011329 | 0.011732 | 0.011295 | 0.011329 | 0.011295 |
| 0.011329 | 0.011262 | 0.011262 | 0.011564 | 0.011497 | 0.011530 | 0.011262 |
| 0.011362 | 0.011429 | 0.011295 | 0.011362 | 0.011329 | 0.011194 | 0.011530 |
| 0.011295 | 0.011262 | 0.011262 | 0.011429 | 0.011262 | 0.011362 | 0.011597 |

|          |          |          |          |          |          |          |
|----------|----------|----------|----------|----------|----------|----------|
| 0.011295 | 0.011637 | 0.011664 | 0.011467 | 0.011229 | 0.011366 | 0.011267 |
| 0.011170 | 0.011683 | 0.011201 | 0.011417 | 0.011255 | 0.011366 | 0.011379 |
| 0.011468 | 0.011192 | 0.011338 | 0.011192 | 0.011222 | 0.011395 | 0.011344 |
| 0.011362 | 0.011257 | 0.011342 | 0.011272 | 0.011296 | 0.011429 | 0.011497 |
| 0.011497 | 0.011363 | 0.011466 | 0.011467 | 0.011602 | 0.011590 | 0.011295 |
| 0.011530 | 0.011396 | 0.011262 | 0.011362 | 0.011161 | 0.011396 | 0.011195 |
| 0.011262 | 0.011262 | 0.011228 | 0.011194 | 0.011228 | 0.011195 | 0.011295 |
| 0.011270 | 0.011270 | 0.011266 | 0.011300 | 0.011436 | 0.011402 | 0.011402 |
| 0.011401 | 0.011329 | 0.011134 | 0.011132 | 0.011263 | 0.011433 | 0.011433 |
| 0.011228 | 0.011297 | 0.011531 | 0.011499 | 0.011430 | 0.011464 | 0.011396 |
| 0.011329 | 0.011396 | 0.011396 | 0.011295 | 0.011866 | 0.011463 | 0.011530 |
| 0.011564 | 0.011630 | 0.011265 | 0.011337 | 0.011228 | 0.011429 | 0.011396 |
| 0.011430 | 0.011463 | 0.011463 | 0.011463 | 0.011610 | 0.011597 | 0.011234 |
| 0.011128 | 0.011130 | 0.011230 | 0.011196 | 0.011299 | 0.011135 | 0.011468 |
| 0.011266 | 0.011411 | 0.011156 | 0.011248 | 0.011262 | 0.011334 | 0.011228 |
| 0.011195 | 0.011195 | 0.011262 | 0.011228 | 0.011429 | 0.011396 | 0.011329 |
| 0.011429 | 0.011497 | 0.011228 | 0.011228 | 0.011262 | 0.011262 | 0.011263 |
| 0.011331 | 0.011262 | 0.011262 | 0.011296 | 0.011429 | 0.011497 | 0.011497 |
| 0.011363 | 0.011466 | 0.011467 | 0.011602 | 0.011590 | 0.011295 | 0.011463 |
| 0.011396 | 0.011396 | 0.011229 | 0.011408 | 0.011338 | 0.011367 | 0.011235 |
| 0.011404 | 0.011607 | 0.011399 | 0.011298 | 0.011195 | 0.011396 | 0.011262 |
| 0.011362 | 0.011295 | 0.011195 | 0.011296 | 0.011396 | 0.011398 | 0.011295 |
| 0.011195 | 0.011128 | 0.011262 | 0.011195 | 0.011127 | 0.011230 | 0.011396 |
| 0.011295 | 0.011228 | 0.011262 | 0.011295 | 0.011262 | 0.011195 | 0.011396 |
| 0.011262 | 0.011295 | 0.011295 | 0.011228 | 0.011295 | 0.011530 | 0.011194 |
| 0.011228 | 0.011631 | 0.011228 | 0.011262 | 0.011228 | 0.011597 | 0.011189 |
| 0.011678 | 0.011188 | 0.011261 | 0.011422 | 0.011508 | 0.011419 | 0.011144 |
| 0.011218 | 0.011396 | 0.011496 | 0.011603 | 0.011464 | 0.011601 | 0.011733 |
| 0.011632 | 0.011669 | 0.011631 | 0.011880 | 0.011597 | 0.012471 | 0.011633 |
| 0.012372 | 0.012139 | 0.012273 | 0.012545 | 0.011597 | 0.011295 | 0.011598 |
| 0.012036 | 0.011971 | 0.011564 | 0.011463 | 0.011531 | 0.011531 | 0.011500 |
| 0.011396 | 0.011399 | 0.011463 | 0.011430 | 0.011800 | 0.011866 | 0.011867 |
| 0.011766 | 0.011867 | 0.011970 | 0.011737 | 0.012036 | 0.012042 | 0.012103 |
| 0.012104 | 0.012138 | 0.012084 | 0.012104 | 0.012105 | 0.011329 | 0.011631 |
| 0.011699 | 0.012202 | 0.011704 | 0.011933 | 0.012406 | 0.011468 | 0.011363 |
| 0.011329 | 0.011329 | 0.011799 | 0.011842 | 0.011939 | 0.011664 | 0.011330 |
| S078     | 0.011631 | 0.011631 | 0.011967 | 0.011732 | 0.011732 | 0.011799 |
| 0.011637 | 0.011569 | 0.011799 | 0.011228 | 0.011295 | 0.011262 | 0.011228 |
| 0.011262 | 0.011429 | 0.011228 | 0.011262 | 0.011329 | 0.011295 | 0.011262 |
| 0.011228 | 0.011262 | 0.011362 | 0.011228 | 0.011262 | 0.011262 | 0.011603 |
| 0.011496 | 0.011262 | 0.011161 | 0.011396 | 0.011329 | 0.011295 | 0.011329 |
| 0.011295 | 0.011396 | 0.011295 | 0.011295 | 0.011329 | 0.011295 | 0.011463 |
| 0.011228 | 0.011295 | 0.011329 | 0.011262 | 0.011362 | 0.011396 | 0.011329 |
| 0.011295 | 0.011463 | 0.011362 | 0.011631 | 0.011295 | 0.011564 | 0.011295 |
| 0.011262 | 0.011362 | 0.011429 | 0.011564 | 0.011664 | 0.011362 | 0.011463 |
| 0.011329 | 0.011396 | 0.011295 | 0.011530 | 0.011765 | 0.011295 | 0.011362 |
| 0.011262 | 0.011362 | 0.011329 | 0.011396 | 0.011329 | 0.011329 | 0.011329 |
| 0.011228 | 0.000000 | 0.011228 | 0.011329 | 0.011295 | 0.011329 | 0.011396 |
| 0.011329 | 0.011295 | 0.011362 | 0.011262 | 0.011396 | 0.011228 | 0.011295 |
| 0.011463 | 0.011396 | 0.011631 | 0.011463 | 0.011295 | 0.011530 | 0.011295 |
| 0.011431 | 0.011658 | 0.011475 | 0.011177 | 0.011172 | 0.011281 | 0.011375 |
| 0.012011 | 0.011467 | 0.011184 | 0.011530 | 0.011530 | 0.011329 | 0.011429 |
| 0.011362 | 0.011329 | 0.011396 | 0.011295 | 0.011396 | 0.011329 | 0.011329 |
| 0.011295 | 0.011396 | 0.011597 | 0.011463 | 0.011362 | 0.011329 | 0.011262 |
| 0.011228 | 0.011228 | 0.011295 | 0.011262 | 0.011463 | 0.011430 | 0.011362 |
| 0.011463 | 0.011530 | 0.011262 | 0.011262 | 0.011295 | 0.011295 | 0.011297 |
| 0.011364 | 0.011295 | 0.011295 | 0.011168 | 0.011241 | 0.011200 | 0.011296 |
| 0.011297 | 0.011232 | 0.011245 | 0.011267 | 0.011196 | 0.011231 | 0.011263 |
| 0.011528 | 0.011301 | 0.011336 | 0.011228 | 0.011233 | 0.011363 | 0.011329 |
| 0.011396 | 0.011330 | 0.011329 | 0.011429 | 0.011362 | 0.011731 | 0.011530 |

|          |          |          |          |          |          |          |
|----------|----------|----------|----------|----------|----------|----------|
| 0.011564 | 0.011429 | 0.011295 | 0.011396 | 0.011195 | 0.011429 | 0.011228 |
| 0.011295 | 0.011295 | 0.011262 | 0.011228 | 0.011262 | 0.011228 | 0.011329 |
| 0.011295 | 0.011396 | 0.011329 | 0.011228 | 0.011330 | 0.011430 | 0.011432 |
| 0.011430 | 0.011329 | 0.011228 | 0.011161 | 0.011295 | 0.011228 | 0.011161 |
| 0.011264 | 0.011430 | 0.011228 | 0.011430 | 0.011195 | 0.011295 | 0.011262 |
| 0.011362 | 0.011262 | 0.011295 | 0.011262 | 0.011295 | 0.011161 | 0.011295 |
| 0.011329 | 0.011262 | 0.011329 | 0.011262 | 0.011295 | 0.011329 | 0.011564 |
| 0.011664 | 0.011597 | 0.011665 | 0.011431 | 0.011665 | 0.011295 | 0.011262 |
| 0.011297 | 0.011545 | 0.011426 | 0.011163 | 0.011671 | 0.011163 | 0.011257 |
| 0.011671 | 0.011570 | 0.011463 | 0.011664 | 0.011368 | 0.011530 | 0.011497 |
| 0.011429 | 0.011597 | 0.011451 | 0.011307 | 0.011312 | 0.011329 | 0.011398 |
| 0.011497 | 0.011397 | 0.011533 | 0.011601 | 0.011530 | 0.011597 | 0.011704 |
| 0.011432 | 0.011603 | 0.011534 | 0.011466 | 0.011733 | 0.011194 | 0.011397 |
| 0.011362 | 0.011295 | 0.011194 | 0.011194 | 0.011262 | 0.011262 | 0.011329 |
| 0.011262 | 0.011329 | 0.011228 | 0.011329 | 0.011262 | 0.011262 | 0.011329 |
| 0.011262 | 0.011698 | 0.011597 | 0.011631 | 0.011161 | 0.011262 | 0.011295 |
| 0.011295 | 0.011262 | 0.011329 | 0.011362 | 0.011228 | 0.011228 | 0.011228 |
| 0.011765 | 0.011396 | 0.011396 | 0.011194 | 0.011295 | 0.011463 | 0.011228 |
| 0.011228 | 0.011295 | 0.011262 | 0.011429 | 0.011228 | 0.011362 | 0.011496 |
| 0.011429 | 0.011262 | 0.011262 | 0.011195 | 0.011194 | 0.011362 | 0.011295 |
| 0.011195 | 0.011295 | 0.011161 | 0.011195 | 0.011329 | 0.011463 | 0.011228 |
| 0.011195 | 0.011329 | 0.011262 | 0.011161 | 0.011496 | 0.011161 | 0.011329 |
| 0.011402 | 0.011228 | 0.011530 | 0.011362 | 0.011396 | 0.011262 | 0.011362 |
| 0.011228 | 0.011564 | 0.011161 | 0.011429 | 0.011228 | 0.011228 | 0.011161 |
| 0.011396 | 0.011598 | 0.011295 | 0.011362 | 0.011194 | 0.011597 | 0.011228 |
| 0.011228 | 0.011228 | 0.011262 | 0.011362 | 0.011262 | 0.011362 | 0.011429 |
| 0.011429 | 0.011396 | 0.011295 | 0.011396 | 0.011362 | 0.011228 | 0.011194 |
| 0.011228 | 0.011228 | 0.011295 | 0.011228 | 0.011194 | 0.011362 | 0.011228 |
| 0.011262 | 0.011262 | 0.011396 | 0.011429 | 0.011329 | 0.011262 | 0.011262 |
| 0.011329 | 0.011262 | 0.011362 | 0.011228 | 0.011362 | 0.011463 | 0.011765 |
| 0.011262 | 0.011664 | 0.011233 | 0.017747 | 0.011257 | 0.011366 | 0.011583 |
| 0.011545 | 0.011588 | 0.011322 | 0.011234 | 0.011719 | 0.011612 | 0.011364 |
| 0.011487 | 0.011549 | 0.011138 | 0.011186 | 0.011177 | 0.011307 | 0.011232 |
| 0.011482 | 0.011395 | 0.011394 | 0.011193 | 0.011396 | 0.011429 | 0.011432 |
| 0.011301 | 0.011396 | 0.011396 | 0.011362 | 0.011329 | 0.011329 | 0.011295 |
| 0.011329 | 0.011262 | 0.011295 | 0.011329 | 0.011295 | 0.011228 | 0.011262 |
| 0.011262 | 0.011329 | 0.011228 | 0.011329 | 0.011362 | 0.011396 | 0.011295 |
| 0.011329 | 0.011295 | 0.011631 | 0.011631 | 0.011362 | 0.011396 | 0.011430 |
| 0.011195 | 0.011195 | 0.011228 | 0.011329 | 0.011195 | 0.011429 | 0.011429 |
| 0.011463 | 0.011463 | 0.011396 | 0.011496 | 0.011665 | 0.011498 | 0.011329 |
| 0.011329 | 0.011396 | 0.011429 | 0.011262 | 0.011329 | 0.011295 | 0.011329 |
| 0.011396 | 0.011396 | 0.011429 | 0.011396 | 0.011296 | 0.011497 | 0.011463 |
| 0.011331 | 0.011228 | 0.011329 | 0.011430 | 0.011329 | 0.011463 | 0.011496 |
| 0.011664 | 0.011368 | 0.011530 | 0.011497 | 0.011429 | 0.011597 | 0.011228 |
| 0.011397 | 0.011296 | 0.011262 | 0.011262 | 0.011329 | 0.011228 | 0.011329 |
| 0.011362 | 0.011396 | 0.011295 | 0.011329 | 0.011295 | 0.011631 | 0.011631 |
| 0.011362 | 0.011396 | 0.011463 | 0.011396 | 0.012035 | 0.011453 | 0.011377 |
| 0.011447 | 0.011407 | 0.011517 | 0.011406 | 0.011515 | 0.011439 | 0.011405 |
| 0.011987 | 0.011302 | 0.011437 | 0.011371 | 0.011645 | 0.011502 | 0.011604 |
| 0.012012 | 0.011475 | 0.011567 | 0.011631 | 0.011496 | 0.011497 | 0.011533 |
| 0.011194 | 0.011362 | 0.011496 | 0.011463 | 0.011466 | 0.011463 | 0.011431 |
| 0.011295 | 0.011228 | 0.011262 | 0.011295 | 0.011194 | 0.011262 | 0.011161 |
| 0.011295 | 0.011329 | 0.011228 | 0.011194 | 0.011295 | 0.011228 | 0.011262 |
| 0.011262 | 0.011194 | 0.011262 | 0.011295 | 0.011194 | 0.011396 | 0.011429 |
| 0.011329 | 0.011396 | 0.011329 | 0.011329 | 0.011262 | 0.011664 | 0.011295 |
| 0.011338 | 0.011262 | 0.011497 | 0.011501 | 0.011362 | 0.011362 | 0.011362 |
| 0.011362 | 0.011295 | 0.011262 | 0.011295 | 0.011396 | 0.011396 | 0.011329 |
| 0.011329 | 0.011463 | 0.011631 | 0.011362 | 0.011564 | 0.011564 | 0.011429 |
| 0.011262 | 0.011329 | 0.011362 | 0.011765 | 0.011329 | 0.011362 | 0.011329 |
| 0.011362 | 0.011295 | 0.011295 | 0.011597 | 0.011530 | 0.011564 | 0.011295 |

|          |          |          |          |          |          |          |
|----------|----------|----------|----------|----------|----------|----------|
| 0.011396 | 0.011463 | 0.011329 | 0.011396 | 0.011362 | 0.011228 | 0.011564 |
| 0.011329 | 0.011295 | 0.011295 | 0.011463 | 0.011295 | 0.011396 | 0.011631 |
| 0.011329 | 0.011705 | 0.011698 | 0.011467 | 0.011229 | 0.011400 | 0.011267 |
| 0.011225 | 0.011683 | 0.011201 | 0.011417 | 0.011255 | 0.011366 | 0.011379 |
| 0.011468 | 0.011192 | 0.011339 | 0.011192 | 0.011222 | 0.011395 | 0.011344 |
| 0.011362 | 0.011257 | 0.011342 | 0.011272 | 0.011330 | 0.011463 | 0.011530 |
| 0.011530 | 0.011396 | 0.011500 | 0.011501 | 0.011636 | 0.011661 | 0.011329 |
| 0.011564 | 0.011429 | 0.011295 | 0.011396 | 0.011195 | 0.011429 | 0.011228 |
| 0.011295 | 0.011295 | 0.011262 | 0.011228 | 0.011262 | 0.011228 | 0.011329 |
| 0.011305 | 0.011305 | 0.011300 | 0.011334 | 0.011471 | 0.011436 | 0.011436 |
| 0.011435 | 0.011363 | 0.011171 | 0.011168 | 0.011297 | 0.011467 | 0.011467 |
| 0.011262 | 0.011331 | 0.011565 | 0.011533 | 0.011464 | 0.011498 | 0.011429 |
| 0.011362 | 0.011429 | 0.011429 | 0.011329 | 0.011900 | 0.011496 | 0.011564 |
| 0.011597 | 0.011665 | 0.011299 | 0.011372 | 0.011262 | 0.011463 | 0.011429 |
| 0.011464 | 0.011496 | 0.011496 | 0.011496 | 0.011610 | 0.011631 | 0.011268 |
| 0.011162 | 0.011164 | 0.011264 | 0.011230 | 0.011333 | 0.011172 | 0.011502 |
| 0.011300 | 0.011411 | 0.011156 | 0.011322 | 0.011296 | 0.011368 | 0.011262 |
| 0.011228 | 0.011228 | 0.011295 | 0.011262 | 0.011463 | 0.011430 | 0.011362 |
| 0.011463 | 0.011530 | 0.011262 | 0.011262 | 0.011295 | 0.011295 | 0.011297 |
| 0.011364 | 0.011295 | 0.011295 | 0.011330 | 0.011463 | 0.011530 | 0.011530 |
| 0.011396 | 0.011500 | 0.011501 | 0.011636 | 0.011661 | 0.011329 | 0.011496 |
| 0.011429 | 0.011429 | 0.011263 | 0.011443 | 0.011373 | 0.011401 | 0.011235 |
| 0.011439 | 0.011607 | 0.011399 | 0.011332 | 0.011228 | 0.011430 | 0.011295 |
| 0.011396 | 0.011329 | 0.011228 | 0.011330 | 0.011430 | 0.011432 | 0.011329 |
| 0.011228 | 0.011161 | 0.011295 | 0.011228 | 0.011161 | 0.011264 | 0.011430 |
| 0.011329 | 0.011262 | 0.011295 | 0.011329 | 0.011295 | 0.011228 | 0.011430 |
| 0.011295 | 0.011329 | 0.011329 | 0.011262 | 0.011329 | 0.011564 | 0.011228 |
| 0.011262 | 0.011664 | 0.011262 | 0.011295 | 0.011262 | 0.011631 | 0.011189 |
| 0.011678 | 0.011188 | 0.011261 | 0.011422 | 0.011508 | 0.011419 | 0.011144 |
| 0.011218 | 0.011429 | 0.011530 | 0.011637 | 0.011498 | 0.011601 | 0.011766 |
| 0.011666 | 0.011703 | 0.011664 | 0.011880 | 0.011631 | 0.012505 | 0.011666 |
| 0.012405 | 0.012173 | 0.012307 | 0.012578 | 0.011631 | 0.011329 | 0.011631 |
| 0.012070 | 0.011971 | 0.011597 | 0.011497 | 0.011565 | 0.011565 | 0.011534 |
| 0.011429 | 0.011399 | 0.011496 | 0.011464 | 0.011833 | 0.011900 | 0.011901 |
| 0.011800 | 0.011901 | 0.012004 | 0.011737 | 0.012070 | 0.012076 | 0.012137 |
| 0.012138 | 0.012171 | 0.012084 | 0.012138 | 0.012139 | 0.011362 | 0.011665 |
| 0.011733 | 0.012236 | 0.011738 | 0.011967 | 0.012440 | 0.011502 | 0.011396 |
| 0.011362 | 0.011362 | 0.011833 | 0.011883 | 0.011975 | 0.011698 | 0.011363 |
| S079     | 0.011597 | 0.011597 | 0.011933 | 0.011698 | 0.011698 | 0.011765 |
| 0.011603 | 0.011535 | 0.011765 | 0.011195 | 0.011262 | 0.011228 | 0.011194 |
| 0.011228 | 0.011396 | 0.011194 | 0.011228 | 0.011295 | 0.011262 | 0.011228 |
| 0.011194 | 0.011228 | 0.011329 | 0.011195 | 0.011228 | 0.011228 | 0.011569 |
| 0.011463 | 0.011228 | 0.011127 | 0.011362 | 0.011295 | 0.011262 | 0.011295 |
| 0.011262 | 0.011362 | 0.011262 | 0.011262 | 0.011295 | 0.011262 | 0.011429 |
| 0.011194 | 0.011262 | 0.011295 | 0.011228 | 0.011329 | 0.011362 | 0.011295 |
| 0.011262 | 0.011429 | 0.011329 | 0.011597 | 0.011262 | 0.011530 | 0.011262 |
| 0.011228 | 0.011329 | 0.011396 | 0.011530 | 0.011631 | 0.011329 | 0.011429 |
| 0.011295 | 0.011362 | 0.011262 | 0.011496 | 0.011732 | 0.011262 | 0.011329 |
| 0.011228 | 0.011329 | 0.011295 | 0.011362 | 0.011295 | 0.011295 | 0.011295 |
| 0.011194 | 0.011228 | 0.000000 | 0.011295 | 0.011262 | 0.011296 | 0.011362 |
| 0.011295 | 0.011262 | 0.011329 | 0.011228 | 0.011362 | 0.011194 | 0.011262 |
| 0.011429 | 0.011362 | 0.011597 | 0.011429 | 0.011262 | 0.011496 | 0.011262 |
| 0.011394 | 0.011620 | 0.011437 | 0.011138 | 0.011135 | 0.011244 | 0.011336 |
| 0.011975 | 0.011416 | 0.011143 | 0.011496 | 0.011496 | 0.011295 | 0.011396 |
| 0.011329 | 0.011295 | 0.011362 | 0.011262 | 0.011362 | 0.011295 | 0.011295 |
| 0.011262 | 0.011362 | 0.011564 | 0.011429 | 0.011329 | 0.011295 | 0.011228 |
| 0.011195 | 0.011195 | 0.011262 | 0.011228 | 0.011429 | 0.011396 | 0.011329 |
| 0.011429 | 0.011497 | 0.011228 | 0.011228 | 0.011262 | 0.011262 | 0.011263 |
| 0.011331 | 0.011262 | 0.011262 | 0.011096 | 0.011205 | 0.011165 | 0.011262 |
| 0.011263 | 0.011198 | 0.011208 | 0.011198 | 0.011162 | 0.011197 | 0.011229 |

|          |          |          |          |          |          |          |
|----------|----------|----------|----------|----------|----------|----------|
| 0.011456 | 0.011267 | 0.011301 | 0.011195 | 0.011164 | 0.011329 | 0.011296 |
| 0.011363 | 0.011296 | 0.011296 | 0.011396 | 0.011329 | 0.011698 | 0.011497 |
| 0.011530 | 0.011396 | 0.011262 | 0.011362 | 0.011161 | 0.011396 | 0.011195 |
| 0.011262 | 0.011262 | 0.011228 | 0.011195 | 0.011228 | 0.011195 | 0.011295 |
| 0.011262 | 0.011362 | 0.011295 | 0.011195 | 0.011296 | 0.011396 | 0.011398 |
| 0.011396 | 0.011295 | 0.011195 | 0.011128 | 0.011262 | 0.011195 | 0.011127 |
| 0.011230 | 0.011396 | 0.011195 | 0.011396 | 0.011161 | 0.011262 | 0.011228 |
| 0.011329 | 0.011228 | 0.011262 | 0.011228 | 0.011262 | 0.011127 | 0.011262 |
| 0.011295 | 0.011228 | 0.011295 | 0.011228 | 0.011262 | 0.011295 | 0.011530 |
| 0.011631 | 0.011564 | 0.011631 | 0.011397 | 0.011631 | 0.011262 | 0.011228 |
| 0.011263 | 0.011545 | 0.011380 | 0.011163 | 0.011637 | 0.011129 | 0.011257 |
| 0.011637 | 0.011536 | 0.011429 | 0.011631 | 0.011333 | 0.011496 | 0.011463 |
| 0.011396 | 0.011564 | 0.011415 | 0.011266 | 0.011312 | 0.011295 | 0.011365 |
| 0.011463 | 0.011364 | 0.011500 | 0.011568 | 0.011497 | 0.011564 | 0.011670 |
| 0.011399 | 0.011569 | 0.011500 | 0.011432 | 0.011699 | 0.011161 | 0.011363 |
| 0.011329 | 0.011262 | 0.011161 | 0.011161 | 0.011228 | 0.011228 | 0.011295 |
| 0.011228 | 0.011295 | 0.011194 | 0.011295 | 0.011228 | 0.011228 | 0.011295 |
| 0.011228 | 0.011664 | 0.011564 | 0.011597 | 0.011127 | 0.011228 | 0.011262 |
| 0.011262 | 0.011228 | 0.011295 | 0.011329 | 0.011194 | 0.011194 | 0.011194 |
| 0.011731 | 0.011362 | 0.011362 | 0.011161 | 0.011262 | 0.011429 | 0.011194 |
| 0.011194 | 0.011262 | 0.011228 | 0.011396 | 0.011194 | 0.011329 | 0.011463 |
| 0.011396 | 0.011228 | 0.011228 | 0.011161 | 0.011161 | 0.011329 | 0.011262 |
| 0.011161 | 0.011262 | 0.011127 | 0.011161 | 0.011295 | 0.011430 | 0.011195 |
| 0.011161 | 0.011295 | 0.011228 | 0.011127 | 0.011463 | 0.011127 | 0.011295 |
| 0.011368 | 0.011195 | 0.011496 | 0.011329 | 0.011362 | 0.011228 | 0.011329 |
| 0.011194 | 0.011530 | 0.011127 | 0.011396 | 0.011194 | 0.011194 | 0.011127 |
| 0.011362 | 0.011564 | 0.011262 | 0.011329 | 0.011161 | 0.011564 | 0.011194 |
| 0.011194 | 0.011194 | 0.011228 | 0.011329 | 0.011228 | 0.011329 | 0.011396 |
| 0.011396 | 0.011362 | 0.011262 | 0.011362 | 0.011329 | 0.011194 | 0.011161 |
| 0.011194 | 0.011194 | 0.011262 | 0.011194 | 0.011161 | 0.011329 | 0.011194 |
| 0.011228 | 0.011228 | 0.011362 | 0.011396 | 0.011295 | 0.011228 | 0.011228 |
| 0.011295 | 0.011228 | 0.011329 | 0.011194 | 0.011329 | 0.011429 | 0.011731 |
| 0.011228 | 0.011631 | 0.011198 | 0.017710 | 0.011191 | 0.011366 | 0.011548 |
| 0.011510 | 0.011553 | 0.011270 | 0.011234 | 0.011664 | 0.011578 | 0.011303 |
| 0.011440 | 0.011487 | 0.011099 | 0.011186 | 0.011177 | 0.011258 | 0.011189 |
| 0.011436 | 0.011358 | 0.011357 | 0.011126 | 0.011362 | 0.011396 | 0.011398 |
| 0.011266 | 0.011362 | 0.011362 | 0.011329 | 0.011295 | 0.011295 | 0.011262 |
| 0.011295 | 0.011228 | 0.011262 | 0.011295 | 0.011262 | 0.011195 | 0.011228 |
| 0.011228 | 0.011295 | 0.011195 | 0.011295 | 0.011329 | 0.011362 | 0.011262 |
| 0.011295 | 0.011262 | 0.011597 | 0.011597 | 0.011329 | 0.011363 | 0.011396 |
| 0.011161 | 0.011161 | 0.011195 | 0.011295 | 0.011161 | 0.011396 | 0.011396 |
| 0.011429 | 0.011429 | 0.011362 | 0.011463 | 0.011631 | 0.011464 | 0.011295 |
| 0.011295 | 0.011362 | 0.011396 | 0.011228 | 0.011295 | 0.011262 | 0.011295 |
| 0.011363 | 0.011362 | 0.011396 | 0.011363 | 0.011262 | 0.011463 | 0.011429 |
| 0.011297 | 0.011195 | 0.011295 | 0.011396 | 0.011295 | 0.011430 | 0.011463 |
| 0.011631 | 0.011333 | 0.011496 | 0.011463 | 0.011396 | 0.011564 | 0.011195 |
| 0.011363 | 0.011262 | 0.011228 | 0.011228 | 0.011295 | 0.011195 | 0.011295 |
| 0.011329 | 0.011362 | 0.011262 | 0.011295 | 0.011262 | 0.011597 | 0.011597 |
| 0.011329 | 0.011363 | 0.011429 | 0.011362 | 0.012002 | 0.011417 | 0.011341 |
| 0.011412 | 0.011372 | 0.011482 | 0.011372 | 0.011480 | 0.011405 | 0.011370 |
| 0.011953 | 0.011268 | 0.011403 | 0.011337 | 0.011611 | 0.011468 | 0.011570 |
| 0.011978 | 0.011437 | 0.011533 | 0.011597 | 0.011463 | 0.011463 | 0.011499 |
| 0.011161 | 0.011329 | 0.011463 | 0.011429 | 0.011432 | 0.011429 | 0.011397 |
| 0.011262 | 0.011194 | 0.011228 | 0.011262 | 0.011161 | 0.011228 | 0.011127 |
| 0.011262 | 0.011295 | 0.011194 | 0.011161 | 0.011262 | 0.011194 | 0.011228 |
| 0.011228 | 0.011161 | 0.011228 | 0.011262 | 0.011161 | 0.011362 | 0.011396 |
| 0.011295 | 0.011362 | 0.011295 | 0.011295 | 0.011228 | 0.011631 | 0.011262 |
| 0.011304 | 0.011228 | 0.011463 | 0.011467 | 0.011329 | 0.011329 | 0.011329 |
| 0.011329 | 0.011262 | 0.011228 | 0.011262 | 0.011362 | 0.011362 | 0.011295 |
| 0.011295 | 0.011429 | 0.011597 | 0.011329 | 0.011530 | 0.011530 | 0.011396 |



|          |          |          |          |          |          |          |
|----------|----------|----------|----------|----------|----------|----------|
| 0.011228 | 0.011295 | 0.011329 | 0.011732 | 0.011295 | 0.011329 | 0.011295 |
| 0.011329 | 0.011262 | 0.011262 | 0.011564 | 0.011497 | 0.011530 | 0.011262 |
| 0.011362 | 0.011429 | 0.011295 | 0.011362 | 0.011329 | 0.011194 | 0.011530 |
| 0.011295 | 0.011262 | 0.011262 | 0.011429 | 0.011262 | 0.011362 | 0.011597 |
| 0.011295 | 0.011671 | 0.011664 | 0.011426 | 0.011173 | 0.011332 | 0.011215 |
| 0.011170 | 0.011644 | 0.011166 | 0.011373 | 0.011207 | 0.011315 | 0.011326 |
| 0.011417 | 0.011126 | 0.011283 | 0.011126 | 0.011168 | 0.011328 | 0.011303 |
| 0.011324 | 0.011218 | 0.011307 | 0.011236 | 0.011296 | 0.011429 | 0.011497 |
| 0.011497 | 0.011363 | 0.011466 | 0.011467 | 0.011603 | 0.011625 | 0.011295 |
| 0.011530 | 0.011396 | 0.011262 | 0.011362 | 0.011161 | 0.011396 | 0.011195 |
| 0.011262 | 0.011262 | 0.011228 | 0.011195 | 0.011228 | 0.011195 | 0.011295 |
| 0.011235 | 0.011270 | 0.011231 | 0.011300 | 0.011436 | 0.011402 | 0.011402 |
| 0.011401 | 0.011329 | 0.011097 | 0.011096 | 0.011263 | 0.011433 | 0.011433 |
| 0.011228 | 0.011297 | 0.011531 | 0.011500 | 0.011430 | 0.011464 | 0.011396 |
| 0.011329 | 0.011396 | 0.011396 | 0.011295 | 0.011866 | 0.011463 | 0.011530 |
| 0.011564 | 0.011630 | 0.011265 | 0.011337 | 0.011228 | 0.011429 | 0.011396 |
| 0.011430 | 0.011463 | 0.011463 | 0.011463 | 0.011610 | 0.011597 | 0.011234 |
| 0.011128 | 0.011130 | 0.011230 | 0.011196 | 0.011299 | 0.011135 | 0.011468 |
| 0.011266 | 0.011411 | 0.011156 | 0.011285 | 0.011262 | 0.011334 | 0.011228 |
| 0.011195 | 0.011195 | 0.011262 | 0.011228 | 0.011429 | 0.011396 | 0.011329 |
| 0.011429 | 0.011497 | 0.011228 | 0.011228 | 0.011262 | 0.011262 | 0.011263 |
| 0.011331 | 0.011262 | 0.011262 | 0.011296 | 0.011429 | 0.011497 | 0.011497 |
| 0.011363 | 0.011466 | 0.011467 | 0.011603 | 0.011625 | 0.011295 | 0.011463 |
| 0.011396 | 0.011396 | 0.011229 | 0.011408 | 0.011338 | 0.011367 | 0.011235 |
| 0.011404 | 0.011607 | 0.011399 | 0.011298 | 0.011195 | 0.011396 | 0.011262 |
| 0.011362 | 0.011295 | 0.011195 | 0.011296 | 0.011396 | 0.011398 | 0.011295 |
| 0.011195 | 0.011128 | 0.011262 | 0.011195 | 0.011127 | 0.011230 | 0.011396 |
| 0.011295 | 0.011228 | 0.011262 | 0.011295 | 0.011262 | 0.011195 | 0.011396 |
| 0.011262 | 0.011295 | 0.011295 | 0.011228 | 0.011295 | 0.011530 | 0.011194 |
| 0.011228 | 0.011631 | 0.011228 | 0.011262 | 0.011228 | 0.011597 | 0.011146 |
| 0.011622 | 0.011145 | 0.011211 | 0.011382 | 0.011467 | 0.011383 | 0.011102 |
| 0.011165 | 0.011396 | 0.011496 | 0.011603 | 0.011464 | 0.011601 | 0.011733 |
| 0.011632 | 0.011669 | 0.011631 | 0.011880 | 0.011597 | 0.012472 | 0.011633 |
| 0.012372 | 0.012139 | 0.012273 | 0.012545 | 0.011597 | 0.011295 | 0.011598 |
| 0.012036 | 0.011971 | 0.011564 | 0.011463 | 0.011531 | 0.011531 | 0.011500 |
| 0.011396 | 0.011399 | 0.011463 | 0.011430 | 0.011800 | 0.011866 | 0.011867 |
| 0.011766 | 0.011867 | 0.011970 | 0.011737 | 0.012036 | 0.012042 | 0.012103 |
| 0.012104 | 0.012138 | 0.012050 | 0.012104 | 0.012105 | 0.011329 | 0.011631 |
| 0.011699 | 0.012202 | 0.011704 | 0.011933 | 0.012406 | 0.011468 | 0.011363 |
| 0.011329 | 0.011329 | 0.011799 | 0.011842 | 0.011904 | 0.011664 | 0.011330 |
| S080     | 0.011698 | 0.011698 | 0.011967 | 0.011732 | 0.011732 | 0.011799 |
| 0.011637 | 0.011570 | 0.011799 | 0.011295 | 0.011362 | 0.011329 | 0.011295 |
| 0.011262 | 0.011497 | 0.011228 | 0.011329 | 0.011396 | 0.011362 | 0.011329 |
| 0.011295 | 0.011329 | 0.011362 | 0.011295 | 0.011329 | 0.011329 | 0.011603 |
| 0.011496 | 0.011329 | 0.011228 | 0.011396 | 0.011396 | 0.011362 | 0.011396 |
| 0.011362 | 0.011463 | 0.011362 | 0.011362 | 0.011396 | 0.011362 | 0.011530 |
| 0.011228 | 0.011362 | 0.011396 | 0.011329 | 0.011362 | 0.011463 | 0.011396 |
| 0.011362 | 0.011530 | 0.011430 | 0.011631 | 0.011362 | 0.011631 | 0.011362 |
| 0.011329 | 0.011362 | 0.011497 | 0.011631 | 0.011664 | 0.011362 | 0.011463 |
| 0.011396 | 0.011463 | 0.011362 | 0.011597 | 0.011765 | 0.011362 | 0.011429 |
| 0.011329 | 0.011429 | 0.011396 | 0.011463 | 0.011396 | 0.011396 | 0.011396 |
| 0.011295 | 0.011329 | 0.011295 | 0.000000 | 0.011362 | 0.011397 | 0.011463 |
| 0.011396 | 0.011362 | 0.011429 | 0.011329 | 0.011396 | 0.011295 | 0.011362 |
| 0.011530 | 0.011463 | 0.011698 | 0.011530 | 0.011362 | 0.011597 | 0.011362 |
| 0.011468 | 0.011620 | 0.011551 | 0.011216 | 0.011247 | 0.011355 | 0.011336 |
| 0.012011 | 0.011416 | 0.011184 | 0.011597 | 0.011597 | 0.011329 | 0.011430 |
| 0.011429 | 0.011396 | 0.011463 | 0.011362 | 0.011463 | 0.011396 | 0.011396 |
| 0.011362 | 0.011396 | 0.011664 | 0.011530 | 0.011429 | 0.011396 | 0.011329 |
| 0.011295 | 0.011228 | 0.011362 | 0.011329 | 0.011463 | 0.011430 | 0.011362 |
| 0.011463 | 0.011530 | 0.011329 | 0.011329 | 0.011362 | 0.011362 | 0.011364 |

|          |          |          |          |          |          |          |
|----------|----------|----------|----------|----------|----------|----------|
| 0.011432 | 0.011362 | 0.011362 | 0.011204 | 0.011277 | 0.011271 | 0.011363 |
| 0.011365 | 0.011266 | 0.011282 | 0.011302 | 0.011264 | 0.011300 | 0.011330 |
| 0.011492 | 0.011370 | 0.011370 | 0.011296 | 0.011268 | 0.011430 | 0.011329 |
| 0.011397 | 0.011397 | 0.011396 | 0.011496 | 0.011429 | 0.011799 | 0.011531 |
| 0.011564 | 0.011430 | 0.011362 | 0.011396 | 0.011262 | 0.011429 | 0.011295 |
| 0.011362 | 0.011362 | 0.011329 | 0.011295 | 0.011329 | 0.011295 | 0.011396 |
| 0.011362 | 0.011463 | 0.011396 | 0.011295 | 0.011397 | 0.011497 | 0.011500 |
| 0.011497 | 0.011396 | 0.011295 | 0.011229 | 0.011362 | 0.011295 | 0.011228 |
| 0.011332 | 0.011497 | 0.011295 | 0.011497 | 0.011262 | 0.011363 | 0.011329 |
| 0.011430 | 0.011329 | 0.011362 | 0.011329 | 0.011362 | 0.011228 | 0.011362 |
| 0.011396 | 0.011329 | 0.011396 | 0.011329 | 0.011362 | 0.011396 | 0.011631 |
| 0.011665 | 0.011597 | 0.011665 | 0.011498 | 0.011665 | 0.011362 | 0.011329 |
| 0.011297 | 0.011545 | 0.011426 | 0.011266 | 0.011671 | 0.011231 | 0.011336 |
| 0.011671 | 0.011570 | 0.011530 | 0.011732 | 0.011436 | 0.011597 | 0.011564 |
| 0.011497 | 0.011664 | 0.011522 | 0.011307 | 0.011354 | 0.011396 | 0.011466 |
| 0.011564 | 0.011465 | 0.011601 | 0.011669 | 0.011597 | 0.011665 | 0.011772 |
| 0.011500 | 0.011671 | 0.011602 | 0.011534 | 0.011800 | 0.011262 | 0.011465 |
| 0.011429 | 0.011362 | 0.011262 | 0.011262 | 0.011329 | 0.011329 | 0.011396 |
| 0.011329 | 0.011396 | 0.011295 | 0.011329 | 0.011329 | 0.011329 | 0.011396 |
| 0.011329 | 0.011698 | 0.011597 | 0.011631 | 0.011228 | 0.011329 | 0.011362 |
| 0.011362 | 0.011329 | 0.011396 | 0.011362 | 0.011295 | 0.011295 | 0.011295 |
| 0.011765 | 0.011329 | 0.011463 | 0.011262 | 0.011362 | 0.011530 | 0.011295 |
| 0.011295 | 0.011362 | 0.011329 | 0.011497 | 0.011295 | 0.011429 | 0.011564 |
| 0.011497 | 0.011329 | 0.011329 | 0.011262 | 0.011262 | 0.011430 | 0.011362 |
| 0.011262 | 0.011362 | 0.011228 | 0.011262 | 0.011396 | 0.011463 | 0.011295 |
| 0.011262 | 0.011396 | 0.011329 | 0.011228 | 0.011497 | 0.011228 | 0.011396 |
| 0.011471 | 0.011295 | 0.011530 | 0.011430 | 0.011396 | 0.011329 | 0.011429 |
| 0.011295 | 0.011631 | 0.011228 | 0.011430 | 0.011228 | 0.011228 | 0.011228 |
| 0.011463 | 0.011598 | 0.011362 | 0.011429 | 0.011262 | 0.011597 | 0.011228 |
| 0.011295 | 0.011295 | 0.011329 | 0.011429 | 0.011329 | 0.011429 | 0.011497 |
| 0.011497 | 0.011463 | 0.011362 | 0.011463 | 0.011429 | 0.011295 | 0.011262 |
| 0.011295 | 0.011295 | 0.011362 | 0.011228 | 0.011262 | 0.011429 | 0.011295 |
| 0.011262 | 0.011329 | 0.011463 | 0.011429 | 0.011396 | 0.011329 | 0.011329 |
| 0.011396 | 0.011329 | 0.011429 | 0.011295 | 0.011429 | 0.011530 | 0.011765 |
| 0.011329 | 0.011665 | 0.011302 | 0.017823 | 0.011257 | 0.011366 | 0.011583 |
| 0.011545 | 0.011588 | 0.011374 | 0.011408 | 0.011664 | 0.011613 | 0.011364 |
| 0.011487 | 0.011487 | 0.011138 | 0.011312 | 0.011216 | 0.011307 | 0.011275 |
| 0.011483 | 0.011358 | 0.011394 | 0.011126 | 0.011463 | 0.011497 | 0.011500 |
| 0.011369 | 0.011463 | 0.011463 | 0.011362 | 0.011396 | 0.011396 | 0.011363 |
| 0.011396 | 0.011329 | 0.011362 | 0.011396 | 0.011363 | 0.011295 | 0.011329 |
| 0.011329 | 0.011396 | 0.011295 | 0.011396 | 0.011430 | 0.011463 | 0.011362 |
| 0.011262 | 0.011295 | 0.011631 | 0.011631 | 0.011430 | 0.011464 | 0.011497 |
| 0.011262 | 0.011262 | 0.011295 | 0.011396 | 0.011262 | 0.011497 | 0.011497 |
| 0.011530 | 0.011530 | 0.011463 | 0.011564 | 0.011665 | 0.011565 | 0.011396 |
| 0.011396 | 0.011463 | 0.011497 | 0.011329 | 0.011396 | 0.011362 | 0.011396 |
| 0.011463 | 0.011463 | 0.011497 | 0.011463 | 0.011363 | 0.011564 | 0.011530 |
| 0.011399 | 0.011295 | 0.011396 | 0.011497 | 0.011396 | 0.011463 | 0.011564 |
| 0.011732 | 0.011436 | 0.011597 | 0.011564 | 0.011497 | 0.011664 | 0.011295 |
| 0.011464 | 0.011363 | 0.011329 | 0.011329 | 0.011396 | 0.011295 | 0.011396 |
| 0.011430 | 0.011463 | 0.011362 | 0.011262 | 0.011295 | 0.011631 | 0.011631 |
| 0.011430 | 0.011464 | 0.011530 | 0.011463 | 0.012036 | 0.011489 | 0.011447 |
| 0.011517 | 0.011442 | 0.011587 | 0.011476 | 0.011550 | 0.011508 | 0.011439 |
| 0.011987 | 0.011372 | 0.011505 | 0.011441 | 0.011714 | 0.011570 | 0.011673 |
| 0.012012 | 0.011475 | 0.011635 | 0.011698 | 0.011564 | 0.011497 | 0.011601 |
| 0.011262 | 0.011429 | 0.011564 | 0.011530 | 0.011533 | 0.011463 | 0.011431 |
| 0.011362 | 0.011295 | 0.011329 | 0.011362 | 0.011262 | 0.011329 | 0.011228 |
| 0.011295 | 0.011329 | 0.011295 | 0.011262 | 0.011362 | 0.011295 | 0.011329 |
| 0.011329 | 0.011262 | 0.011329 | 0.011362 | 0.011262 | 0.011463 | 0.011497 |
| 0.011396 | 0.011396 | 0.011396 | 0.011396 | 0.011329 | 0.011664 | 0.011362 |
| 0.011339 | 0.011329 | 0.011497 | 0.011501 | 0.011430 | 0.011429 | 0.011429 |

|          |          |          |          |          |          |          |
|----------|----------|----------|----------|----------|----------|----------|
| 0.011429 | 0.011362 | 0.011329 | 0.011362 | 0.011463 | 0.011463 | 0.011396 |
| 0.011396 | 0.011530 | 0.011631 | 0.011429 | 0.011631 | 0.011631 | 0.011496 |
| 0.011329 | 0.011396 | 0.011429 | 0.011765 | 0.011396 | 0.011430 | 0.011396 |
| 0.011429 | 0.011295 | 0.011295 | 0.011598 | 0.011597 | 0.011564 | 0.011362 |
| 0.011463 | 0.011530 | 0.011396 | 0.011463 | 0.011429 | 0.011295 | 0.011564 |
| 0.011396 | 0.011362 | 0.011295 | 0.011530 | 0.011362 | 0.011463 | 0.011698 |
| 0.011396 | 0.011705 | 0.011698 | 0.011385 | 0.011117 | 0.011366 | 0.011215 |
| 0.011225 | 0.011605 | 0.011271 | 0.011328 | 0.011158 | 0.011315 | 0.011273 |
| 0.011366 | 0.011192 | 0.011339 | 0.011192 | 0.011222 | 0.011395 | 0.011385 |
| 0.011399 | 0.011296 | 0.011307 | 0.011342 | 0.011397 | 0.011463 | 0.011530 |
| 0.011530 | 0.011397 | 0.011500 | 0.011501 | 0.011637 | 0.011661 | 0.011396 |
| 0.011564 | 0.011430 | 0.011362 | 0.011396 | 0.011262 | 0.011429 | 0.011295 |
| 0.011362 | 0.011362 | 0.011329 | 0.011295 | 0.011329 | 0.011295 | 0.011396 |
| 0.011305 | 0.011340 | 0.011334 | 0.011403 | 0.011539 | 0.011470 | 0.011504 |
| 0.011503 | 0.011430 | 0.011208 | 0.011204 | 0.011365 | 0.011535 | 0.011535 |
| 0.011329 | 0.011399 | 0.011633 | 0.011567 | 0.011531 | 0.011565 | 0.011496 |
| 0.011429 | 0.011497 | 0.011496 | 0.011396 | 0.011900 | 0.011564 | 0.011631 |
| 0.011665 | 0.011666 | 0.011367 | 0.011441 | 0.011329 | 0.011530 | 0.011497 |
| 0.011531 | 0.011564 | 0.011564 | 0.011564 | 0.011729 | 0.011698 | 0.011338 |
| 0.011229 | 0.011233 | 0.011333 | 0.011298 | 0.011334 | 0.011247 | 0.011502 |
| 0.011369 | 0.011367 | 0.011203 | 0.011397 | 0.011363 | 0.011437 | 0.011329 |
| 0.011295 | 0.011228 | 0.011362 | 0.011329 | 0.011463 | 0.011430 | 0.011362 |
| 0.011463 | 0.011530 | 0.011329 | 0.011329 | 0.011362 | 0.011362 | 0.011364 |
| 0.011432 | 0.011362 | 0.011362 | 0.011397 | 0.011463 | 0.011530 | 0.011530 |
| 0.011397 | 0.011500 | 0.011501 | 0.011637 | 0.011661 | 0.011396 | 0.011564 |
| 0.011497 | 0.011497 | 0.011331 | 0.011513 | 0.011442 | 0.011469 | 0.011341 |
| 0.011508 | 0.011698 | 0.011484 | 0.011400 | 0.011295 | 0.011497 | 0.011362 |
| 0.011463 | 0.011396 | 0.011295 | 0.011397 | 0.011497 | 0.011500 | 0.011396 |
| 0.011295 | 0.011229 | 0.011362 | 0.011295 | 0.011228 | 0.011332 | 0.011497 |
| 0.011396 | 0.011329 | 0.011362 | 0.011396 | 0.011363 | 0.011295 | 0.011430 |
| 0.011362 | 0.011396 | 0.011396 | 0.011329 | 0.011396 | 0.011631 | 0.011228 |
| 0.011329 | 0.011664 | 0.011329 | 0.011362 | 0.011329 | 0.011631 | 0.011189 |
| 0.011566 | 0.011188 | 0.011110 | 0.011342 | 0.011427 | 0.011383 | 0.011144 |
| 0.011165 | 0.011429 | 0.011530 | 0.011637 | 0.011498 | 0.011635 | 0.011766 |
| 0.011666 | 0.011703 | 0.011664 | 0.011915 | 0.011631 | 0.012505 | 0.011667 |
| 0.012406 | 0.012173 | 0.012307 | 0.012579 | 0.011631 | 0.011329 | 0.011631 |
| 0.012070 | 0.012005 | 0.011597 | 0.011497 | 0.011565 | 0.011565 | 0.011534 |
| 0.011429 | 0.011433 | 0.011496 | 0.011464 | 0.011834 | 0.011900 | 0.011901 |
| 0.011767 | 0.011901 | 0.012004 | 0.011771 | 0.012070 | 0.012076 | 0.012137 |
| 0.012138 | 0.012172 | 0.012084 | 0.012138 | 0.012140 | 0.011429 | 0.011665 |
| 0.011733 | 0.012236 | 0.011738 | 0.011967 | 0.012440 | 0.011502 | 0.011396 |
| 0.011362 | 0.011362 | 0.011833 | 0.011842 | 0.011940 | 0.011698 | 0.011363 |
| S081     | 0.011664 | 0.011664 | 0.012000 | 0.011765 | 0.011765 | 0.011832 |
| 0.011671 | 0.011603 | 0.011832 | 0.011262 | 0.011329 | 0.011296 | 0.011262 |
| 0.011295 | 0.011463 | 0.011262 | 0.011295 | 0.011362 | 0.011329 | 0.011295 |
| 0.011262 | 0.011295 | 0.011396 | 0.011262 | 0.011295 | 0.011295 | 0.011637 |
| 0.011530 | 0.011295 | 0.011194 | 0.011429 | 0.011362 | 0.011329 | 0.011362 |
| 0.011329 | 0.011429 | 0.011329 | 0.011329 | 0.011362 | 0.011329 | 0.011496 |
| 0.011262 | 0.011329 | 0.011362 | 0.011295 | 0.011396 | 0.011429 | 0.011362 |
| 0.011329 | 0.011497 | 0.011396 | 0.011664 | 0.011329 | 0.011597 | 0.011329 |
| 0.011295 | 0.011396 | 0.011463 | 0.011597 | 0.011698 | 0.011396 | 0.011496 |
| 0.011362 | 0.011429 | 0.011329 | 0.011563 | 0.011799 | 0.011329 | 0.011396 |
| 0.011295 | 0.011396 | 0.011362 | 0.011429 | 0.011362 | 0.011362 | 0.011362 |
| 0.011262 | 0.011295 | 0.011262 | 0.011362 | 0.000000 | 0.011363 | 0.011429 |
| 0.011362 | 0.011329 | 0.011396 | 0.011295 | 0.011429 | 0.011262 | 0.011329 |
| 0.011496 | 0.011429 | 0.011664 | 0.011496 | 0.011329 | 0.011564 | 0.011329 |
| 0.011505 | 0.011732 | 0.011551 | 0.011216 | 0.011247 | 0.011355 | 0.011454 |
| 0.012085 | 0.011416 | 0.011266 | 0.011563 | 0.011564 | 0.011362 | 0.011463 |
| 0.011396 | 0.011362 | 0.011429 | 0.011329 | 0.011429 | 0.011362 | 0.011362 |
| 0.011329 | 0.011429 | 0.011631 | 0.011496 | 0.011396 | 0.011362 | 0.011295 |

|          |          |          |          |          |          |          |
|----------|----------|----------|----------|----------|----------|----------|
| 0.011262 | 0.011262 | 0.011329 | 0.011295 | 0.011497 | 0.011463 | 0.011396 |
| 0.011497 | 0.011564 | 0.011295 | 0.011295 | 0.011329 | 0.011329 | 0.011330 |
| 0.011398 | 0.011329 | 0.011329 | 0.011204 | 0.011277 | 0.011235 | 0.011329 |
| 0.011331 | 0.011266 | 0.011318 | 0.011302 | 0.011230 | 0.011266 | 0.011297 |
| 0.011564 | 0.011336 | 0.011370 | 0.011262 | 0.011268 | 0.011397 | 0.011363 |
| 0.011430 | 0.011363 | 0.011363 | 0.011463 | 0.011396 | 0.011765 | 0.011564 |
| 0.011597 | 0.011463 | 0.011329 | 0.011429 | 0.011228 | 0.011463 | 0.011262 |
| 0.011329 | 0.011329 | 0.011295 | 0.011262 | 0.011295 | 0.011262 | 0.011362 |
| 0.011329 | 0.011429 | 0.011362 | 0.011262 | 0.011363 | 0.011463 | 0.011466 |
| 0.011463 | 0.011362 | 0.011262 | 0.011195 | 0.011329 | 0.011262 | 0.011195 |
| 0.011298 | 0.011463 | 0.011262 | 0.011463 | 0.011228 | 0.011329 | 0.011295 |
| 0.011396 | 0.011295 | 0.011329 | 0.011295 | 0.011329 | 0.011195 | 0.011329 |
| 0.011362 | 0.011295 | 0.011362 | 0.011295 | 0.011329 | 0.011362 | 0.011597 |
| 0.011698 | 0.011631 | 0.011698 | 0.011465 | 0.011698 | 0.011329 | 0.011295 |
| 0.011330 | 0.011586 | 0.011426 | 0.011232 | 0.011705 | 0.011197 | 0.011296 |
| 0.011705 | 0.011604 | 0.011496 | 0.011698 | 0.011402 | 0.011564 | 0.011530 |
| 0.011463 | 0.011631 | 0.011486 | 0.011266 | 0.011354 | 0.011362 | 0.011432 |
| 0.011530 | 0.011431 | 0.011567 | 0.011635 | 0.011564 | 0.011631 | 0.011738 |
| 0.011466 | 0.011637 | 0.011568 | 0.011500 | 0.011766 | 0.011228 | 0.011431 |
| 0.011396 | 0.011329 | 0.011228 | 0.011228 | 0.011295 | 0.011295 | 0.011362 |
| 0.011295 | 0.011362 | 0.011262 | 0.011362 | 0.011295 | 0.011295 | 0.011362 |
| 0.011295 | 0.011731 | 0.011631 | 0.011664 | 0.011194 | 0.011295 | 0.011329 |
| 0.011329 | 0.011295 | 0.011362 | 0.011396 | 0.011262 | 0.011262 | 0.011262 |
| 0.011799 | 0.011429 | 0.011396 | 0.011228 | 0.011329 | 0.011497 | 0.011262 |
| 0.011262 | 0.011329 | 0.011295 | 0.011463 | 0.011262 | 0.011396 | 0.011530 |
| 0.011463 | 0.011295 | 0.011295 | 0.011228 | 0.011228 | 0.011396 | 0.011329 |
| 0.011228 | 0.011329 | 0.011194 | 0.011228 | 0.011362 | 0.011497 | 0.011262 |
| 0.011228 | 0.011362 | 0.011295 | 0.011194 | 0.011530 | 0.011195 | 0.011362 |
| 0.011437 | 0.011262 | 0.011564 | 0.011396 | 0.011429 | 0.011295 | 0.011396 |
| 0.011262 | 0.011597 | 0.011194 | 0.011463 | 0.011262 | 0.011262 | 0.011194 |
| 0.011429 | 0.011631 | 0.011329 | 0.011362 | 0.011228 | 0.011631 | 0.011262 |
| 0.011262 | 0.011262 | 0.011295 | 0.011396 | 0.011295 | 0.011396 | 0.011463 |
| 0.011463 | 0.011429 | 0.011329 | 0.011429 | 0.011396 | 0.011262 | 0.011228 |
| 0.011262 | 0.011262 | 0.011329 | 0.011262 | 0.011228 | 0.011396 | 0.011262 |
| 0.011295 | 0.011295 | 0.011429 | 0.011463 | 0.011362 | 0.011295 | 0.011295 |
| 0.011362 | 0.011295 | 0.011396 | 0.011262 | 0.011396 | 0.011496 | 0.011799 |
| 0.011295 | 0.011698 | 0.011302 | 0.017823 | 0.011257 | 0.011366 | 0.011653 |
| 0.011614 | 0.011658 | 0.011322 | 0.011234 | 0.011664 | 0.011682 | 0.011303 |
| 0.011487 | 0.011487 | 0.011216 | 0.011228 | 0.011294 | 0.011258 | 0.011232 |
| 0.011482 | 0.011470 | 0.011468 | 0.011325 | 0.011429 | 0.011463 | 0.011466 |
| 0.011335 | 0.011429 | 0.011429 | 0.011396 | 0.011362 | 0.011362 | 0.011329 |
| 0.011362 | 0.011295 | 0.011329 | 0.011362 | 0.011329 | 0.011262 | 0.011295 |
| 0.011295 | 0.011362 | 0.011262 | 0.011362 | 0.011396 | 0.011429 | 0.011329 |
| 0.011362 | 0.011329 | 0.011665 | 0.011665 | 0.011396 | 0.011430 | 0.011463 |
| 0.011228 | 0.011228 | 0.011262 | 0.011362 | 0.011228 | 0.011463 | 0.011463 |
| 0.011497 | 0.011496 | 0.011429 | 0.011530 | 0.011698 | 0.011532 | 0.011362 |
| 0.011362 | 0.011429 | 0.011463 | 0.011295 | 0.011362 | 0.011329 | 0.011362 |
| 0.011430 | 0.011430 | 0.011463 | 0.011430 | 0.011330 | 0.011530 | 0.011497 |
| 0.011365 | 0.011262 | 0.011362 | 0.011463 | 0.011362 | 0.011497 | 0.011530 |
| 0.011698 | 0.011402 | 0.011564 | 0.011530 | 0.011463 | 0.011631 | 0.011262 |
| 0.011431 | 0.011329 | 0.011295 | 0.011295 | 0.011362 | 0.011262 | 0.011362 |
| 0.011396 | 0.011429 | 0.011329 | 0.011362 | 0.011329 | 0.011665 | 0.011665 |
| 0.011396 | 0.011430 | 0.011496 | 0.011429 | 0.012069 | 0.011489 | 0.011412 |
| 0.011482 | 0.011441 | 0.011552 | 0.011441 | 0.011550 | 0.011474 | 0.011439 |
| 0.012021 | 0.011337 | 0.011471 | 0.011406 | 0.011680 | 0.011536 | 0.011638 |
| 0.012046 | 0.011512 | 0.011601 | 0.011664 | 0.011530 | 0.011530 | 0.011567 |
| 0.011228 | 0.011396 | 0.011530 | 0.011496 | 0.011499 | 0.011496 | 0.011464 |
| 0.011329 | 0.011262 | 0.011295 | 0.011329 | 0.011228 | 0.011295 | 0.011194 |
| 0.011329 | 0.011362 | 0.011262 | 0.011228 | 0.011329 | 0.011262 | 0.011295 |
| 0.011295 | 0.011228 | 0.011295 | 0.011329 | 0.011228 | 0.011429 | 0.011463 |

|          |          |          |          |          |          |          |
|----------|----------|----------|----------|----------|----------|----------|
| 0.011362 | 0.011429 | 0.011362 | 0.011362 | 0.011295 | 0.011698 | 0.011329 |
| 0.011373 | 0.011295 | 0.011530 | 0.011535 | 0.011396 | 0.011396 | 0.011396 |
| 0.011396 | 0.011329 | 0.011295 | 0.011329 | 0.011429 | 0.011429 | 0.011362 |
| 0.011362 | 0.011496 | 0.011664 | 0.011329 | 0.011597 | 0.011597 | 0.011463 |
| 0.011295 | 0.011362 | 0.011396 | 0.011799 | 0.011362 | 0.011396 | 0.011362 |
| 0.011396 | 0.011329 | 0.011329 | 0.011631 | 0.011564 | 0.011597 | 0.011329 |
| 0.011429 | 0.011496 | 0.011362 | 0.011429 | 0.011396 | 0.011262 | 0.011597 |
| 0.011362 | 0.011329 | 0.011329 | 0.011496 | 0.011329 | 0.011396 | 0.011664 |
| 0.011362 | 0.011739 | 0.011731 | 0.011507 | 0.011286 | 0.011434 | 0.011215 |
| 0.011170 | 0.011761 | 0.011271 | 0.011462 | 0.011353 | 0.011416 | 0.011379 |
| 0.011468 | 0.011192 | 0.011283 | 0.011126 | 0.011222 | 0.011328 | 0.011425 |
| 0.011437 | 0.011336 | 0.011412 | 0.011342 | 0.011363 | 0.011497 | 0.011564 |
| 0.011564 | 0.011430 | 0.011533 | 0.011535 | 0.011670 | 0.011696 | 0.011362 |
| 0.011597 | 0.011463 | 0.011329 | 0.011429 | 0.011228 | 0.011463 | 0.011262 |
| 0.011329 | 0.011329 | 0.011295 | 0.011262 | 0.011295 | 0.011262 | 0.011362 |
| 0.011340 | 0.011305 | 0.011334 | 0.011368 | 0.011505 | 0.011470 | 0.011470 |
| 0.011469 | 0.011396 | 0.011171 | 0.011204 | 0.011331 | 0.011501 | 0.011501 |
| 0.011296 | 0.011365 | 0.011599 | 0.011567 | 0.011497 | 0.011531 | 0.011463 |
| 0.011396 | 0.011463 | 0.011463 | 0.011362 | 0.011933 | 0.011530 | 0.011597 |
| 0.011631 | 0.011701 | 0.011333 | 0.011372 | 0.011295 | 0.011497 | 0.011463 |
| 0.011497 | 0.011530 | 0.011530 | 0.011530 | 0.011650 | 0.011664 | 0.011303 |
| 0.011195 | 0.011199 | 0.011298 | 0.011264 | 0.011368 | 0.011209 | 0.011536 |
| 0.011335 | 0.011499 | 0.011156 | 0.011360 | 0.011329 | 0.011402 | 0.011295 |
| 0.011262 | 0.011262 | 0.011329 | 0.011295 | 0.011497 | 0.011463 | 0.011396 |
| 0.011497 | 0.011564 | 0.011295 | 0.011295 | 0.011329 | 0.011329 | 0.011330 |
| 0.011398 | 0.011329 | 0.011329 | 0.011363 | 0.011497 | 0.011564 | 0.011564 |
| 0.011430 | 0.011533 | 0.011535 | 0.011670 | 0.011696 | 0.011362 | 0.011530 |
| 0.011463 | 0.011463 | 0.011297 | 0.011478 | 0.011408 | 0.011401 | 0.011305 |
| 0.011473 | 0.011652 | 0.011441 | 0.011366 | 0.011262 | 0.011463 | 0.011329 |
| 0.011429 | 0.011362 | 0.011262 | 0.011363 | 0.011463 | 0.011466 | 0.011362 |
| 0.011262 | 0.011195 | 0.011329 | 0.011262 | 0.011195 | 0.011298 | 0.011463 |
| 0.011362 | 0.011295 | 0.011329 | 0.011362 | 0.011329 | 0.011262 | 0.011463 |
| 0.011329 | 0.011362 | 0.011362 | 0.011295 | 0.011362 | 0.011597 | 0.011262 |
| 0.011295 | 0.011698 | 0.011295 | 0.011329 | 0.011295 | 0.011664 | 0.011232 |
| 0.011735 | 0.011230 | 0.011261 | 0.011503 | 0.011589 | 0.011491 | 0.011186 |
| 0.011218 | 0.011463 | 0.011564 | 0.011671 | 0.011531 | 0.011669 | 0.011800 |
| 0.011699 | 0.011737 | 0.011698 | 0.011949 | 0.011664 | 0.012539 | 0.011700 |
| 0.012439 | 0.012207 | 0.012341 | 0.012612 | 0.011664 | 0.011362 | 0.011665 |
| 0.012103 | 0.012038 | 0.011631 | 0.011530 | 0.011598 | 0.011598 | 0.011567 |
| 0.011463 | 0.011467 | 0.011530 | 0.011497 | 0.011867 | 0.011933 | 0.011935 |
| 0.011834 | 0.011934 | 0.012038 | 0.011804 | 0.012104 | 0.012110 | 0.012171 |
| 0.012171 | 0.012205 | 0.012152 | 0.012172 | 0.012173 | 0.011396 | 0.011699 |
| 0.011766 | 0.012202 | 0.011772 | 0.012001 | 0.012474 | 0.011536 | 0.011430 |
| 0.011396 | 0.011396 | 0.011867 | 0.011924 | 0.012010 | 0.011731 | 0.011397 |
| S082     | 0.011700 | 0.011700 | 0.012037 | 0.011801 | 0.011801 | 0.011868 |
| 0.011673 | 0.011571 | 0.011801 | 0.011296 | 0.011363 | 0.011330 | 0.011296 |
| 0.011329 | 0.011498 | 0.011296 | 0.011329 | 0.011397 | 0.011363 | 0.011329 |
| 0.011296 | 0.011329 | 0.011430 | 0.011296 | 0.011330 | 0.011329 | 0.011639 |
| 0.011565 | 0.011329 | 0.011228 | 0.011464 | 0.011363 | 0.011363 | 0.011397 |
| 0.011363 | 0.011464 | 0.011363 | 0.011363 | 0.011397 | 0.011363 | 0.011531 |
| 0.011296 | 0.011363 | 0.011397 | 0.011329 | 0.011430 | 0.011464 | 0.011397 |
| 0.011363 | 0.011531 | 0.011431 | 0.011700 | 0.011363 | 0.011632 | 0.011363 |
| 0.011329 | 0.011430 | 0.011498 | 0.011632 | 0.011733 | 0.011430 | 0.011531 |
| 0.011397 | 0.011464 | 0.011363 | 0.011599 | 0.011835 | 0.011363 | 0.011430 |
| 0.011329 | 0.011430 | 0.011397 | 0.011464 | 0.011397 | 0.011397 | 0.011397 |
| 0.011296 | 0.011329 | 0.011296 | 0.011397 | 0.011363 | 0.000000 | 0.011464 |
| 0.011397 | 0.011363 | 0.011430 | 0.011329 | 0.011464 | 0.011296 | 0.011363 |
| 0.011531 | 0.011464 | 0.011700 | 0.011464 | 0.011363 | 0.011599 | 0.011363 |
| 0.011505 | 0.011732 | 0.011513 | 0.011216 | 0.011209 | 0.011355 | 0.011454 |
| 0.012048 | 0.011467 | 0.011184 | 0.011599 | 0.011599 | 0.011363 | 0.011498 |

|          |          |          |          |          |          |          |
|----------|----------|----------|----------|----------|----------|----------|
| 0.011430 | 0.011397 | 0.011464 | 0.011363 | 0.011464 | 0.011363 | 0.011397 |
| 0.011363 | 0.011464 | 0.011666 | 0.011531 | 0.011430 | 0.011397 | 0.011329 |
| 0.011296 | 0.011296 | 0.011363 | 0.011329 | 0.011531 | 0.011498 | 0.011430 |
| 0.011531 | 0.011599 | 0.011329 | 0.011329 | 0.011363 | 0.011363 | 0.011331 |
| 0.011399 | 0.011363 | 0.011363 | 0.011204 | 0.011278 | 0.011271 | 0.011363 |
| 0.011366 | 0.011267 | 0.011318 | 0.011337 | 0.011264 | 0.011300 | 0.011331 |
| 0.011601 | 0.011371 | 0.011405 | 0.011296 | 0.011303 | 0.011431 | 0.011397 |
| 0.011465 | 0.011398 | 0.011397 | 0.011498 | 0.011430 | 0.011733 | 0.011599 |
| 0.011632 | 0.011498 | 0.011363 | 0.011464 | 0.011262 | 0.011498 | 0.011296 |
| 0.011363 | 0.011363 | 0.011329 | 0.011296 | 0.011329 | 0.011296 | 0.011397 |
| 0.011363 | 0.011464 | 0.011397 | 0.011296 | 0.011398 | 0.011498 | 0.011500 |
| 0.011498 | 0.011397 | 0.011296 | 0.011229 | 0.011363 | 0.011296 | 0.011229 |
| 0.011298 | 0.011498 | 0.011296 | 0.011498 | 0.011262 | 0.011363 | 0.011329 |
| 0.011430 | 0.011329 | 0.011363 | 0.011329 | 0.011363 | 0.011228 | 0.011363 |
| 0.011397 | 0.011329 | 0.011397 | 0.011329 | 0.011363 | 0.011397 | 0.011599 |
| 0.011733 | 0.011666 | 0.011733 | 0.011498 | 0.011733 | 0.011363 | 0.011329 |
| 0.011364 | 0.011586 | 0.011381 | 0.011266 | 0.011740 | 0.011231 | 0.011336 |
| 0.011707 | 0.011639 | 0.011531 | 0.011733 | 0.011437 | 0.011599 | 0.011565 |
| 0.011498 | 0.011666 | 0.011488 | 0.011391 | 0.011355 | 0.011397 | 0.011467 |
| 0.011565 | 0.011466 | 0.011603 | 0.011671 | 0.011599 | 0.011666 | 0.011774 |
| 0.011501 | 0.011673 | 0.011603 | 0.011535 | 0.011802 | 0.011262 | 0.011466 |
| 0.011430 | 0.011363 | 0.011262 | 0.011262 | 0.011329 | 0.011329 | 0.011397 |
| 0.011329 | 0.011397 | 0.011296 | 0.011397 | 0.011329 | 0.011329 | 0.011397 |
| 0.011329 | 0.011767 | 0.011666 | 0.011700 | 0.011228 | 0.011329 | 0.011363 |
| 0.011363 | 0.011329 | 0.011397 | 0.011430 | 0.011296 | 0.011296 | 0.011296 |
| 0.011834 | 0.011464 | 0.011464 | 0.011262 | 0.011363 | 0.011531 | 0.011296 |
| 0.011296 | 0.011363 | 0.011329 | 0.011498 | 0.011296 | 0.011430 | 0.011565 |
| 0.011498 | 0.011329 | 0.011329 | 0.011262 | 0.011262 | 0.011430 | 0.011363 |
| 0.011262 | 0.011363 | 0.011229 | 0.011262 | 0.011397 | 0.011532 | 0.011296 |
| 0.011262 | 0.011397 | 0.011330 | 0.011229 | 0.011565 | 0.011229 | 0.011397 |
| 0.011472 | 0.011296 | 0.011599 | 0.011431 | 0.011464 | 0.011329 | 0.011430 |
| 0.011296 | 0.011632 | 0.011228 | 0.011498 | 0.011296 | 0.011296 | 0.011228 |
| 0.011464 | 0.011666 | 0.011363 | 0.011430 | 0.011262 | 0.011666 | 0.011296 |
| 0.011296 | 0.011296 | 0.011329 | 0.011430 | 0.011329 | 0.011430 | 0.011498 |
| 0.011430 | 0.011464 | 0.011363 | 0.011464 | 0.011430 | 0.011296 | 0.011262 |
| 0.011296 | 0.011296 | 0.011363 | 0.011296 | 0.011262 | 0.011430 | 0.011296 |
| 0.011329 | 0.011329 | 0.011464 | 0.011498 | 0.011397 | 0.011329 | 0.011330 |
| 0.011397 | 0.011329 | 0.011430 | 0.011296 | 0.011430 | 0.011531 | 0.011834 |
| 0.011329 | 0.011733 | 0.011302 | 0.017823 | 0.011191 | 0.011488 | 0.011653 |
| 0.011648 | 0.011658 | 0.011374 | 0.011292 | 0.011774 | 0.011716 | 0.011364 |
| 0.011487 | 0.011610 | 0.011216 | 0.011270 | 0.011255 | 0.011356 | 0.011275 |
| 0.011482 | 0.011470 | 0.011431 | 0.011193 | 0.011464 | 0.011498 | 0.011501 |
| 0.011370 | 0.011464 | 0.011464 | 0.011430 | 0.011363 | 0.011363 | 0.011363 |
| 0.011397 | 0.011329 | 0.011363 | 0.011397 | 0.011363 | 0.011296 | 0.011329 |
| 0.011329 | 0.011397 | 0.011296 | 0.011397 | 0.011430 | 0.011464 | 0.011363 |
| 0.011329 | 0.011363 | 0.011700 | 0.011700 | 0.011431 | 0.011465 | 0.011498 |
| 0.011262 | 0.011262 | 0.011296 | 0.011397 | 0.011262 | 0.011498 | 0.011498 |
| 0.011531 | 0.011531 | 0.011464 | 0.011565 | 0.011733 | 0.011566 | 0.011397 |
| 0.011397 | 0.011464 | 0.011498 | 0.011329 | 0.011397 | 0.011363 | 0.011397 |
| 0.011464 | 0.011464 | 0.011498 | 0.011464 | 0.011364 | 0.011565 | 0.011531 |
| 0.011400 | 0.011296 | 0.011397 | 0.011498 | 0.011397 | 0.011531 | 0.011565 |
| 0.011733 | 0.011437 | 0.011599 | 0.011565 | 0.011498 | 0.011666 | 0.011296 |
| 0.011465 | 0.011363 | 0.011329 | 0.011329 | 0.011397 | 0.011296 | 0.011397 |
| 0.011430 | 0.011464 | 0.011363 | 0.011329 | 0.011363 | 0.011700 | 0.011700 |
| 0.011431 | 0.011465 | 0.011531 | 0.011464 | 0.012106 | 0.011526 | 0.011448 |
| 0.011483 | 0.011477 | 0.011589 | 0.011477 | 0.011587 | 0.011510 | 0.011475 |
| 0.012059 | 0.011373 | 0.011507 | 0.011442 | 0.011716 | 0.011572 | 0.011674 |
| 0.012083 | 0.011551 | 0.011365 | 0.011397 | 0.011397 | 0.011430 | 0.011331 |
| 0.011262 | 0.011296 | 0.011430 | 0.011397 | 0.011365 | 0.011531 | 0.011498 |
| 0.011363 | 0.011296 | 0.011329 | 0.011363 | 0.011262 | 0.011329 | 0.011228 |

|          |          |          |          |          |          |          |
|----------|----------|----------|----------|----------|----------|----------|
| 0.011363 | 0.011397 | 0.011296 | 0.011262 | 0.011363 | 0.011296 | 0.011329 |
| 0.011329 | 0.011262 | 0.011329 | 0.011363 | 0.011262 | 0.011464 | 0.011498 |
| 0.011329 | 0.011464 | 0.011397 | 0.011397 | 0.011329 | 0.011733 | 0.011363 |
| 0.011409 | 0.011329 | 0.011565 | 0.011570 | 0.011430 | 0.011430 | 0.011430 |
| 0.011430 | 0.011363 | 0.011329 | 0.011363 | 0.011464 | 0.011464 | 0.011397 |
| 0.011397 | 0.011531 | 0.011700 | 0.011430 | 0.011632 | 0.011632 | 0.011498 |
| 0.011329 | 0.011397 | 0.011430 | 0.011835 | 0.011397 | 0.011430 | 0.011397 |
| 0.011430 | 0.011363 | 0.011363 | 0.011666 | 0.011599 | 0.011632 | 0.011363 |
| 0.011464 | 0.011531 | 0.011397 | 0.011464 | 0.011430 | 0.011296 | 0.011632 |
| 0.011397 | 0.011363 | 0.011363 | 0.011531 | 0.011363 | 0.011464 | 0.011700 |
| 0.011397 | 0.011741 | 0.011767 | 0.011548 | 0.011229 | 0.011469 | 0.011267 |
| 0.011280 | 0.011722 | 0.011271 | 0.011417 | 0.011255 | 0.011366 | 0.011379 |
| 0.011468 | 0.011126 | 0.011339 | 0.011192 | 0.011222 | 0.011395 | 0.011425 |
| 0.011437 | 0.011336 | 0.011412 | 0.011342 | 0.011398 | 0.011531 | 0.011599 |
| 0.011599 | 0.011464 | 0.011568 | 0.011570 | 0.011706 | 0.011698 | 0.011363 |
| 0.011632 | 0.011498 | 0.011363 | 0.011464 | 0.011262 | 0.011498 | 0.011296 |
| 0.011363 | 0.011363 | 0.011329 | 0.011296 | 0.011329 | 0.011296 | 0.011397 |
| 0.011375 | 0.011376 | 0.011369 | 0.011403 | 0.011540 | 0.011505 | 0.011505 |
| 0.011504 | 0.011431 | 0.011245 | 0.011241 | 0.011366 | 0.011535 | 0.011536 |
| 0.011330 | 0.011400 | 0.011634 | 0.011534 | 0.011532 | 0.011566 | 0.011498 |
| 0.011430 | 0.011498 | 0.011498 | 0.011397 | 0.011969 | 0.011565 | 0.011633 |
| 0.011666 | 0.011703 | 0.011368 | 0.011442 | 0.011329 | 0.011531 | 0.011498 |
| 0.011532 | 0.011565 | 0.011565 | 0.011565 | 0.011690 | 0.011700 | 0.011338 |
| 0.011230 | 0.011199 | 0.011333 | 0.011299 | 0.011403 | 0.011210 | 0.011571 |
| 0.011370 | 0.011412 | 0.011156 | 0.011361 | 0.011363 | 0.011437 | 0.011329 |
| 0.011296 | 0.011296 | 0.011363 | 0.011329 | 0.011531 | 0.011498 | 0.011430 |
| 0.011531 | 0.011599 | 0.011329 | 0.011329 | 0.011363 | 0.011363 | 0.011331 |
| 0.011399 | 0.011363 | 0.011363 | 0.011398 | 0.011531 | 0.011599 | 0.011599 |
| 0.011464 | 0.011568 | 0.011570 | 0.011706 | 0.011698 | 0.011363 | 0.011565 |
| 0.011498 | 0.011498 | 0.011331 | 0.011479 | 0.011443 | 0.011470 | 0.011340 |
| 0.011508 | 0.011744 | 0.011442 | 0.011401 | 0.011296 | 0.011498 | 0.011363 |
| 0.011464 | 0.011397 | 0.011296 | 0.011398 | 0.011498 | 0.011500 | 0.011397 |
| 0.011296 | 0.011229 | 0.011363 | 0.011296 | 0.011229 | 0.011298 | 0.011498 |
| 0.011397 | 0.011329 | 0.011363 | 0.011397 | 0.011363 | 0.011296 | 0.011464 |
| 0.011363 | 0.011397 | 0.011397 | 0.011329 | 0.011397 | 0.011632 | 0.011296 |
| 0.011329 | 0.011733 | 0.011329 | 0.011363 | 0.011329 | 0.011700 | 0.011189 |
| 0.011678 | 0.011230 | 0.011261 | 0.011463 | 0.011549 | 0.011491 | 0.011144 |
| 0.011218 | 0.011498 | 0.011599 | 0.011706 | 0.011565 | 0.011703 | 0.011834 |
| 0.011735 | 0.011772 | 0.011733 | 0.011949 | 0.011700 | 0.012577 | 0.011734 |
| 0.012476 | 0.012241 | 0.012378 | 0.012646 | 0.011700 | 0.011397 | 0.011700 |
| 0.012139 | 0.011836 | 0.011666 | 0.011565 | 0.011633 | 0.011633 | 0.011603 |
| 0.011498 | 0.011501 | 0.011565 | 0.011532 | 0.011902 | 0.011969 | 0.011970 |
| 0.011870 | 0.011969 | 0.012072 | 0.011838 | 0.012139 | 0.012146 | 0.012207 |
| 0.012207 | 0.012241 | 0.012186 | 0.012140 | 0.012207 | 0.011430 | 0.011734 |
| 0.011802 | 0.012273 | 0.011806 | 0.012037 | 0.011801 | 0.011570 | 0.011464 |
| 0.011430 | 0.011430 | 0.011902 | 0.011926 | 0.012012 | 0.011733 | 0.011431 |
| S083     | 0.011765 | 0.011765 | 0.012101 | 0.011866 | 0.011866 | 0.011933 |
| 0.011739 | 0.011671 | 0.011933 | 0.011362 | 0.011429 | 0.011397 | 0.011362 |
| 0.011396 | 0.011564 | 0.011362 | 0.011396 | 0.011463 | 0.011429 | 0.011396 |
| 0.011362 | 0.011396 | 0.011496 | 0.011363 | 0.011396 | 0.011396 | 0.011705 |
| 0.011631 | 0.011396 | 0.011295 | 0.011530 | 0.011463 | 0.011429 | 0.011463 |
| 0.011429 | 0.011530 | 0.011429 | 0.011429 | 0.011463 | 0.011429 | 0.011597 |
| 0.011362 | 0.011429 | 0.011463 | 0.011396 | 0.011496 | 0.011530 | 0.011463 |
| 0.011429 | 0.011597 | 0.011497 | 0.011765 | 0.011429 | 0.011698 | 0.011429 |
| 0.011396 | 0.011497 | 0.011564 | 0.011698 | 0.011799 | 0.011496 | 0.011597 |
| 0.011463 | 0.011530 | 0.011429 | 0.011664 | 0.011900 | 0.011429 | 0.011496 |
| 0.011396 | 0.011496 | 0.011463 | 0.011530 | 0.011463 | 0.011463 | 0.011463 |
| 0.011362 | 0.011396 | 0.011362 | 0.011463 | 0.011429 | 0.011464 | 0.000000 |
| 0.011463 | 0.011429 | 0.011496 | 0.011396 | 0.011530 | 0.011362 | 0.011429 |
| 0.011262 | 0.011530 | 0.011765 | 0.011597 | 0.011429 | 0.011664 | 0.011429 |

|          |          |          |          |          |          |          |
|----------|----------|----------|----------|----------|----------|----------|
| 0.011616 | 0.011845 | 0.011664 | 0.011373 | 0.011321 | 0.011465 | 0.011533 |
| 0.012158 | 0.011670 | 0.011348 | 0.011664 | 0.011664 | 0.011463 | 0.011564 |
| 0.011496 | 0.011463 | 0.011530 | 0.011429 | 0.011530 | 0.011463 | 0.011463 |
| 0.011429 | 0.011530 | 0.011731 | 0.011597 | 0.011496 | 0.011463 | 0.011396 |
| 0.011362 | 0.011362 | 0.011429 | 0.011396 | 0.011597 | 0.011564 | 0.011497 |
| 0.011597 | 0.011665 | 0.011396 | 0.011396 | 0.011430 | 0.011429 | 0.011432 |
| 0.011500 | 0.011429 | 0.011429 | 0.011312 | 0.011349 | 0.011306 | 0.011430 |
| 0.011433 | 0.011369 | 0.011429 | 0.011405 | 0.011332 | 0.011368 | 0.011398 |
| 0.011636 | 0.011439 | 0.011473 | 0.011363 | 0.011371 | 0.011497 | 0.011464 |
| 0.011531 | 0.011465 | 0.011464 | 0.011564 | 0.011496 | 0.011866 | 0.011665 |
| 0.011698 | 0.011564 | 0.011429 | 0.011530 | 0.011329 | 0.011564 | 0.011362 |
| 0.011429 | 0.011429 | 0.011396 | 0.011362 | 0.011396 | 0.011362 | 0.011463 |
| 0.011429 | 0.011530 | 0.011463 | 0.011362 | 0.011464 | 0.011564 | 0.011567 |
| 0.011564 | 0.011463 | 0.011362 | 0.011296 | 0.011429 | 0.011362 | 0.011295 |
| 0.011400 | 0.011564 | 0.011362 | 0.011564 | 0.011329 | 0.011430 | 0.011396 |
| 0.011497 | 0.011396 | 0.011429 | 0.011396 | 0.011429 | 0.011295 | 0.011429 |
| 0.011463 | 0.011396 | 0.011463 | 0.011396 | 0.011429 | 0.011463 | 0.011698 |
| 0.011799 | 0.011732 | 0.011799 | 0.011566 | 0.011799 | 0.011429 | 0.011396 |
| 0.011432 | 0.011747 | 0.011609 | 0.011335 | 0.011807 | 0.011299 | 0.011414 |
| 0.011773 | 0.011706 | 0.011597 | 0.011799 | 0.011504 | 0.011664 | 0.011631 |
| 0.011564 | 0.011732 | 0.011557 | 0.011431 | 0.011437 | 0.011463 | 0.011500 |
| 0.011631 | 0.011532 | 0.011669 | 0.011737 | 0.011664 | 0.011732 | 0.011839 |
| 0.011568 | 0.011739 | 0.011669 | 0.011601 | 0.011867 | 0.011329 | 0.011532 |
| 0.011496 | 0.011429 | 0.011329 | 0.011329 | 0.011396 | 0.011396 | 0.011463 |
| 0.011396 | 0.011463 | 0.011362 | 0.011463 | 0.011396 | 0.011396 | 0.011463 |
| 0.011396 | 0.011832 | 0.011731 | 0.011765 | 0.011295 | 0.011396 | 0.011429 |
| 0.011429 | 0.011396 | 0.011463 | 0.011496 | 0.011362 | 0.011362 | 0.011362 |
| 0.011899 | 0.011530 | 0.011530 | 0.011329 | 0.011429 | 0.011597 | 0.011362 |
| 0.011362 | 0.011429 | 0.011396 | 0.011564 | 0.011362 | 0.011496 | 0.011631 |
| 0.011564 | 0.011396 | 0.011396 | 0.011329 | 0.011329 | 0.011496 | 0.011429 |
| 0.011329 | 0.011429 | 0.011295 | 0.011329 | 0.011463 | 0.011598 | 0.011362 |
| 0.011329 | 0.011463 | 0.011396 | 0.011295 | 0.011631 | 0.011295 | 0.011463 |
| 0.011539 | 0.011362 | 0.011664 | 0.011497 | 0.011530 | 0.011396 | 0.011496 |
| 0.011362 | 0.011698 | 0.011295 | 0.011564 | 0.011362 | 0.011362 | 0.011295 |
| 0.011530 | 0.011732 | 0.011429 | 0.011496 | 0.011329 | 0.011731 | 0.011362 |
| 0.011362 | 0.011362 | 0.011396 | 0.011496 | 0.011396 | 0.011496 | 0.011564 |
| 0.011564 | 0.011530 | 0.011429 | 0.011530 | 0.011496 | 0.011362 | 0.011329 |
| 0.011362 | 0.011362 | 0.011429 | 0.011362 | 0.011329 | 0.011496 | 0.011362 |
| 0.011396 | 0.011396 | 0.011530 | 0.011564 | 0.011463 | 0.011396 | 0.011396 |
| 0.011463 | 0.011396 | 0.011496 | 0.011362 | 0.011496 | 0.011597 | 0.011899 |
| 0.011396 | 0.011799 | 0.011405 | 0.017898 | 0.011387 | 0.011549 | 0.011758 |
| 0.011718 | 0.011764 | 0.011427 | 0.011350 | 0.011884 | 0.011785 | 0.011485 |
| 0.011629 | 0.011732 | 0.011333 | 0.011437 | 0.011411 | 0.011455 | 0.011404 |
| 0.011623 | 0.011544 | 0.011542 | 0.011325 | 0.011530 | 0.011564 | 0.011567 |
| 0.011438 | 0.011530 | 0.011530 | 0.011497 | 0.011463 | 0.011463 | 0.011430 |
| 0.011463 | 0.011396 | 0.011429 | 0.011463 | 0.011430 | 0.011362 | 0.011396 |
| 0.011396 | 0.011463 | 0.011362 | 0.011463 | 0.011497 | 0.011530 | 0.011429 |
| 0.011463 | 0.011429 | 0.011765 | 0.011765 | 0.011497 | 0.011531 | 0.011564 |
| 0.011329 | 0.011329 | 0.011362 | 0.011463 | 0.011329 | 0.011564 | 0.011564 |
| 0.011597 | 0.011597 | 0.011530 | 0.011631 | 0.011799 | 0.011599 | 0.011463 |
| 0.011463 | 0.011530 | 0.011564 | 0.011396 | 0.011463 | 0.011429 | 0.011463 |
| 0.011531 | 0.011530 | 0.011564 | 0.011530 | 0.011431 | 0.011631 | 0.011597 |
| 0.011399 | 0.011362 | 0.011463 | 0.011564 | 0.011463 | 0.011597 | 0.011631 |
| 0.011799 | 0.011504 | 0.011664 | 0.011631 | 0.011564 | 0.011732 | 0.011363 |
| 0.011532 | 0.011430 | 0.011396 | 0.011396 | 0.011463 | 0.011362 | 0.011463 |
| 0.011497 | 0.011530 | 0.011429 | 0.011463 | 0.011429 | 0.011765 | 0.011765 |
| 0.011497 | 0.011531 | 0.011597 | 0.011530 | 0.012170 | 0.011596 | 0.011482 |
| 0.011587 | 0.011545 | 0.011657 | 0.011545 | 0.011655 | 0.011577 | 0.011543 |
| 0.012124 | 0.011441 | 0.011574 | 0.011510 | 0.011783 | 0.011638 | 0.011741 |
| 0.012148 | 0.011588 | 0.011703 | 0.011765 | 0.011631 | 0.011631 | 0.011668 |



|          |          |          |          |          |          |          |
|----------|----------|----------|----------|----------|----------|----------|
| 0.011329 | 0.011497 | 0.011631 | 0.011597 | 0.011601 | 0.011597 | 0.011565 |
| 0.011429 | 0.011362 | 0.011396 | 0.011429 | 0.011329 | 0.011396 | 0.011295 |
| 0.011429 | 0.011463 | 0.011362 | 0.011329 | 0.011429 | 0.011362 | 0.011396 |
| 0.011396 | 0.011329 | 0.011396 | 0.011429 | 0.011329 | 0.011530 | 0.011564 |
| 0.011463 | 0.011530 | 0.011463 | 0.011463 | 0.011396 | 0.011799 | 0.011429 |
| 0.011443 | 0.011396 | 0.011631 | 0.011637 | 0.011497 | 0.011496 | 0.011496 |
| 0.011496 | 0.011429 | 0.011396 | 0.011429 | 0.011530 | 0.011530 | 0.011463 |
| 0.011463 | 0.011597 | 0.011765 | 0.011496 | 0.011698 | 0.011698 | 0.011496 |
| 0.011396 | 0.011463 | 0.011496 | 0.011900 | 0.011463 | 0.011497 | 0.011463 |
| 0.011496 | 0.011429 | 0.011429 | 0.011732 | 0.011664 | 0.011698 | 0.011429 |
| 0.011530 | 0.011597 | 0.011463 | 0.011530 | 0.011496 | 0.011362 | 0.011698 |
| 0.011463 | 0.011429 | 0.011429 | 0.011597 | 0.011429 | 0.011530 | 0.011765 |
| 0.011463 | 0.011807 | 0.011832 | 0.011629 | 0.011399 | 0.011536 | 0.011421 |
| 0.011335 | 0.011839 | 0.011376 | 0.011596 | 0.011451 | 0.011518 | 0.011591 |
| 0.011621 | 0.011324 | 0.011505 | 0.011324 | 0.011437 | 0.011596 | 0.011547 |
| 0.011550 | 0.011414 | 0.011518 | 0.011412 | 0.011465 | 0.011597 | 0.011665 |
| 0.011665 | 0.011531 | 0.011635 | 0.011603 | 0.011772 | 0.011802 | 0.011463 |
| 0.011698 | 0.011564 | 0.011429 | 0.011530 | 0.011329 | 0.011564 | 0.011362 |
| 0.011429 | 0.011429 | 0.011396 | 0.011362 | 0.011396 | 0.011362 | 0.011463 |
| 0.011444 | 0.011445 | 0.011437 | 0.011471 | 0.011608 | 0.011573 | 0.011572 |
| 0.011571 | 0.011497 | 0.011319 | 0.011312 | 0.011433 | 0.011602 | 0.011603 |
| 0.011396 | 0.011467 | 0.011700 | 0.011668 | 0.011598 | 0.011632 | 0.011564 |
| 0.011496 | 0.011564 | 0.011563 | 0.011463 | 0.012034 | 0.011631 | 0.011698 |
| 0.011732 | 0.011772 | 0.011435 | 0.011511 | 0.011396 | 0.011597 | 0.011564 |
| 0.011598 | 0.011631 | 0.011631 | 0.011631 | 0.011768 | 0.011765 | 0.011372 |
| 0.011297 | 0.011268 | 0.011401 | 0.011366 | 0.011470 | 0.011284 | 0.011638 |
| 0.011437 | 0.011543 | 0.011298 | 0.011435 | 0.011430 | 0.011505 | 0.011396 |
| 0.011362 | 0.011362 | 0.011429 | 0.011396 | 0.011597 | 0.011564 | 0.011497 |
| 0.011597 | 0.011665 | 0.011396 | 0.011396 | 0.011430 | 0.011429 | 0.011432 |
| 0.011500 | 0.011429 | 0.011429 | 0.011465 | 0.011597 | 0.011665 | 0.011665 |
| 0.011531 | 0.011635 | 0.011603 | 0.011772 | 0.011802 | 0.011463 | 0.011631 |
| 0.011564 | 0.011564 | 0.011398 | 0.011582 | 0.011477 | 0.011537 | 0.011411 |
| 0.011577 | 0.011698 | 0.011526 | 0.011468 | 0.011362 | 0.011564 | 0.011429 |
| 0.011530 | 0.011463 | 0.011362 | 0.011464 | 0.011564 | 0.011567 | 0.011463 |
| 0.011362 | 0.011296 | 0.011429 | 0.011362 | 0.011295 | 0.011400 | 0.011564 |
| 0.011463 | 0.011396 | 0.011429 | 0.011463 | 0.011430 | 0.011362 | 0.011564 |
| 0.011429 | 0.011463 | 0.011463 | 0.011396 | 0.011463 | 0.011698 | 0.011362 |
| 0.011396 | 0.011799 | 0.011396 | 0.011429 | 0.011396 | 0.011765 | 0.011317 |
| 0.011847 | 0.011358 | 0.011411 | 0.011583 | 0.011671 | 0.011598 | 0.011311 |
| 0.011375 | 0.011564 | 0.011664 | 0.011773 | 0.011632 | 0.011771 | 0.011901 |
| 0.011800 | 0.011838 | 0.011799 | 0.012051 | 0.011765 | 0.012640 | 0.011801 |
| 0.012540 | 0.012308 | 0.012442 | 0.012714 | 0.011765 | 0.011463 | 0.011766 |
| 0.012204 | 0.012140 | 0.011732 | 0.011631 | 0.011699 | 0.011699 | 0.011669 |
| 0.011564 | 0.011569 | 0.011631 | 0.011598 | 0.011968 | 0.012034 | 0.012036 |
| 0.011935 | 0.012035 | 0.012139 | 0.011906 | 0.012205 | 0.012211 | 0.012272 |
| 0.012273 | 0.012306 | 0.012255 | 0.012273 | 0.012274 | 0.011496 | 0.011799 |
| 0.011867 | 0.012371 | 0.011874 | 0.012102 | 0.012575 | 0.011637 | 0.011531 |
| 0.011496 | 0.011496 | 0.011968 | 0.011965 | 0.012116 | 0.011832 | 0.011498 |
| S084     | 0.011698 | 0.011698 | 0.012034 | 0.011799 | 0.011799 | 0.011866 |
| 0.011705 | 0.011637 | 0.011866 | 0.011295 | 0.011362 | 0.011329 | 0.011295 |
| 0.011329 | 0.011497 | 0.011295 | 0.011329 | 0.011396 | 0.011362 | 0.011329 |
| 0.011295 | 0.011329 | 0.011429 | 0.011295 | 0.011329 | 0.011329 | 0.011671 |
| 0.011564 | 0.011329 | 0.011228 | 0.011463 | 0.011396 | 0.011362 | 0.011396 |
| 0.011362 | 0.011463 | 0.011362 | 0.011362 | 0.011396 | 0.011362 | 0.011530 |
| 0.011295 | 0.011362 | 0.011396 | 0.011329 | 0.011429 | 0.011463 | 0.011396 |
| 0.011362 | 0.011530 | 0.011430 | 0.011698 | 0.011362 | 0.011631 | 0.011362 |
| 0.011329 | 0.011430 | 0.011497 | 0.011631 | 0.011732 | 0.011429 | 0.011530 |
| 0.011396 | 0.011463 | 0.011362 | 0.011597 | 0.011833 | 0.011362 | 0.011429 |
| 0.011329 | 0.011429 | 0.011396 | 0.011463 | 0.011396 | 0.011396 | 0.011396 |
| 0.011295 | 0.011329 | 0.011295 | 0.011396 | 0.011362 | 0.011397 | 0.011463 |

|          |          |          |          |          |          |          |
|----------|----------|----------|----------|----------|----------|----------|
| 0.000000 | 0.011362 | 0.011429 | 0.011329 | 0.011463 | 0.011295 | 0.011362 |
| 0.011530 | 0.011463 | 0.011698 | 0.011530 | 0.011362 | 0.011597 | 0.011362 |
| 0.011542 | 0.011770 | 0.011588 | 0.011295 | 0.011284 | 0.011355 | 0.011493 |
| 0.012121 | 0.011518 | 0.011266 | 0.011597 | 0.011597 | 0.011396 | 0.011497 |
| 0.011429 | 0.011396 | 0.011463 | 0.011362 | 0.011463 | 0.011396 | 0.011396 |
| 0.011362 | 0.011463 | 0.011664 | 0.011530 | 0.011295 | 0.011396 | 0.011329 |
| 0.011295 | 0.011295 | 0.011362 | 0.011329 | 0.011530 | 0.011497 | 0.011430 |
| 0.011530 | 0.011597 | 0.011329 | 0.011329 | 0.011362 | 0.011362 | 0.011364 |
| 0.011432 | 0.011362 | 0.011362 | 0.011240 | 0.011313 | 0.011271 | 0.011363 |
| 0.011365 | 0.011301 | 0.011318 | 0.011336 | 0.011264 | 0.011300 | 0.011330 |
| 0.011600 | 0.011370 | 0.011405 | 0.011296 | 0.011302 | 0.011430 | 0.011397 |
| 0.011464 | 0.011397 | 0.011396 | 0.011496 | 0.011429 | 0.011799 | 0.011598 |
| 0.011631 | 0.011497 | 0.011362 | 0.011463 | 0.011262 | 0.011497 | 0.011295 |
| 0.011362 | 0.011362 | 0.011329 | 0.011295 | 0.011329 | 0.011295 | 0.011396 |
| 0.011362 | 0.011463 | 0.011396 | 0.011295 | 0.011397 | 0.011497 | 0.011500 |
| 0.011497 | 0.011396 | 0.011295 | 0.011229 | 0.011362 | 0.011295 | 0.011228 |
| 0.011298 | 0.011497 | 0.011295 | 0.011497 | 0.011262 | 0.011228 | 0.011329 |
| 0.011430 | 0.011329 | 0.011362 | 0.011329 | 0.011362 | 0.011228 | 0.011362 |
| 0.011396 | 0.011329 | 0.011396 | 0.011329 | 0.011362 | 0.011396 | 0.011631 |
| 0.011732 | 0.011664 | 0.011732 | 0.011498 | 0.011732 | 0.011362 | 0.011329 |
| 0.011364 | 0.011667 | 0.011472 | 0.011266 | 0.011739 | 0.011231 | 0.011375 |
| 0.011739 | 0.011638 | 0.011530 | 0.011732 | 0.011436 | 0.011597 | 0.011564 |
| 0.011497 | 0.011664 | 0.011522 | 0.011349 | 0.011354 | 0.011396 | 0.011466 |
| 0.011564 | 0.011465 | 0.011601 | 0.011669 | 0.011597 | 0.011665 | 0.011772 |
| 0.011500 | 0.011671 | 0.011602 | 0.011534 | 0.011800 | 0.011262 | 0.011465 |
| 0.011429 | 0.011362 | 0.011262 | 0.011262 | 0.011329 | 0.011329 | 0.011396 |
| 0.011329 | 0.011329 | 0.011295 | 0.011396 | 0.011329 | 0.011329 | 0.011396 |
| 0.011329 | 0.011765 | 0.011664 | 0.011698 | 0.011228 | 0.011329 | 0.011362 |
| 0.011228 | 0.011329 | 0.011396 | 0.011429 | 0.011295 | 0.011295 | 0.011295 |
| 0.011832 | 0.011463 | 0.011463 | 0.011262 | 0.011362 | 0.011530 | 0.011295 |
| 0.011295 | 0.011362 | 0.011329 | 0.011497 | 0.011295 | 0.011429 | 0.011564 |
| 0.011497 | 0.011329 | 0.011329 | 0.011262 | 0.011262 | 0.011430 | 0.011362 |
| 0.011262 | 0.011362 | 0.011228 | 0.011262 | 0.011396 | 0.011530 | 0.011295 |
| 0.011262 | 0.011396 | 0.011329 | 0.011228 | 0.011564 | 0.011228 | 0.011396 |
| 0.011471 | 0.011295 | 0.011597 | 0.011430 | 0.011463 | 0.011262 | 0.011429 |
| 0.011295 | 0.011631 | 0.011228 | 0.011497 | 0.011295 | 0.011295 | 0.011228 |
| 0.011463 | 0.011665 | 0.011362 | 0.011429 | 0.011262 | 0.011664 | 0.011295 |
| 0.011295 | 0.011295 | 0.011329 | 0.011429 | 0.011329 | 0.011429 | 0.011497 |
| 0.011497 | 0.011463 | 0.011362 | 0.011463 | 0.011429 | 0.011295 | 0.011262 |
| 0.011295 | 0.011295 | 0.011362 | 0.011295 | 0.011262 | 0.011429 | 0.011295 |
| 0.011329 | 0.011329 | 0.011463 | 0.011497 | 0.011396 | 0.011329 | 0.011329 |
| 0.011396 | 0.011329 | 0.011429 | 0.011295 | 0.011429 | 0.011530 | 0.011832 |
| 0.011329 | 0.011732 | 0.011336 | 0.017861 | 0.011322 | 0.011549 | 0.011688 |
| 0.011648 | 0.011693 | 0.011427 | 0.011350 | 0.011774 | 0.011716 | 0.011425 |
| 0.011630 | 0.011610 | 0.011216 | 0.011353 | 0.011333 | 0.011455 | 0.011361 |
| 0.011623 | 0.011470 | 0.011505 | 0.011193 | 0.011329 | 0.011497 | 0.011500 |
| 0.011369 | 0.011463 | 0.011463 | 0.011430 | 0.011396 | 0.011396 | 0.011363 |
| 0.011396 | 0.011329 | 0.011362 | 0.011396 | 0.011228 | 0.011295 | 0.011329 |
| 0.011329 | 0.011396 | 0.011295 | 0.011396 | 0.011430 | 0.011463 | 0.011362 |
| 0.011396 | 0.011362 | 0.011698 | 0.011698 | 0.011362 | 0.011464 | 0.011497 |
| 0.011262 | 0.011262 | 0.011295 | 0.011396 | 0.011262 | 0.011497 | 0.011497 |
| 0.011530 | 0.011530 | 0.011329 | 0.011564 | 0.011732 | 0.011565 | 0.011396 |
| 0.011396 | 0.011463 | 0.011497 | 0.011329 | 0.011396 | 0.011362 | 0.011396 |
| 0.011463 | 0.011463 | 0.011497 | 0.011463 | 0.011363 | 0.011564 | 0.011530 |
| 0.011399 | 0.011295 | 0.011396 | 0.011497 | 0.011396 | 0.011530 | 0.011564 |
| 0.011732 | 0.011436 | 0.011597 | 0.011564 | 0.011497 | 0.011664 | 0.011295 |
| 0.011464 | 0.011363 | 0.011329 | 0.011329 | 0.011396 | 0.011295 | 0.011396 |
| 0.011430 | 0.011463 | 0.011362 | 0.011396 | 0.011362 | 0.011698 | 0.011698 |
| 0.011362 | 0.011464 | 0.011530 | 0.011463 | 0.012103 | 0.011525 | 0.011447 |
| 0.011517 | 0.011476 | 0.011587 | 0.011476 | 0.011585 | 0.011508 | 0.011474 |

|          |          |          |          |          |          |          |
|----------|----------|----------|----------|----------|----------|----------|
| 0.012056 | 0.011372 | 0.011505 | 0.011441 | 0.011714 | 0.011570 | 0.011673 |
| 0.012080 | 0.011550 | 0.011635 | 0.011698 | 0.011564 | 0.011564 | 0.011601 |
| 0.011262 | 0.011429 | 0.011564 | 0.011530 | 0.011533 | 0.011530 | 0.011498 |
| 0.011362 | 0.011295 | 0.011329 | 0.011362 | 0.011262 | 0.011329 | 0.011228 |
| 0.011362 | 0.011396 | 0.011295 | 0.011262 | 0.011362 | 0.011295 | 0.011329 |
| 0.011329 | 0.011262 | 0.011329 | 0.011362 | 0.011262 | 0.011463 | 0.011497 |
| 0.011396 | 0.011463 | 0.011396 | 0.011396 | 0.011329 | 0.011732 | 0.011362 |
| 0.011408 | 0.011329 | 0.011564 | 0.011569 | 0.011430 | 0.011429 | 0.011429 |
| 0.011429 | 0.011362 | 0.011329 | 0.011362 | 0.011463 | 0.011463 | 0.011262 |
| 0.011396 | 0.011530 | 0.011698 | 0.011429 | 0.011631 | 0.011631 | 0.011496 |
| 0.011329 | 0.011396 | 0.011429 | 0.011833 | 0.011396 | 0.011430 | 0.000000 |
| 0.011429 | 0.011362 | 0.011362 | 0.011665 | 0.011597 | 0.011631 | 0.011362 |
| 0.011463 | 0.011530 | 0.011396 | 0.011463 | 0.011429 | 0.011295 | 0.011631 |
| 0.011396 | 0.011362 | 0.011362 | 0.011530 | 0.011362 | 0.011463 | 0.011698 |
| 0.011396 | 0.011773 | 0.011765 | 0.011548 | 0.011342 | 0.011468 | 0.011318 |
| 0.011335 | 0.011761 | 0.011306 | 0.011507 | 0.011353 | 0.011467 | 0.011485 |
| 0.011570 | 0.011258 | 0.011450 | 0.011324 | 0.011330 | 0.011529 | 0.011466 |
| 0.011475 | 0.011375 | 0.011448 | 0.011377 | 0.011397 | 0.011530 | 0.011598 |
| 0.011597 | 0.011464 | 0.011567 | 0.011569 | 0.011704 | 0.011732 | 0.011396 |
| 0.011631 | 0.011497 | 0.011362 | 0.011463 | 0.011262 | 0.011497 | 0.011295 |
| 0.011362 | 0.011362 | 0.011329 | 0.011295 | 0.011329 | 0.011295 | 0.011396 |
| 0.011375 | 0.011375 | 0.011368 | 0.011403 | 0.011539 | 0.011504 | 0.011504 |
| 0.011503 | 0.011430 | 0.011245 | 0.011240 | 0.011365 | 0.011535 | 0.011535 |
| 0.011329 | 0.011399 | 0.011633 | 0.011601 | 0.011531 | 0.011565 | 0.011496 |
| 0.011429 | 0.011497 | 0.011496 | 0.011396 | 0.011967 | 0.011564 | 0.011631 |
| 0.011665 | 0.011737 | 0.011333 | 0.011337 | 0.011329 | 0.011530 | 0.011497 |
| 0.011531 | 0.011564 | 0.011564 | 0.011564 | 0.011729 | 0.011698 | 0.011338 |
| 0.011229 | 0.011233 | 0.011333 | 0.011298 | 0.011402 | 0.011247 | 0.011570 |
| 0.011369 | 0.011499 | 0.011298 | 0.011397 | 0.011363 | 0.011437 | 0.011329 |
| 0.011295 | 0.011295 | 0.011362 | 0.011329 | 0.011530 | 0.011497 | 0.011430 |
| 0.011530 | 0.011597 | 0.011329 | 0.011329 | 0.011362 | 0.011362 | 0.011364 |
| 0.011432 | 0.011362 | 0.011362 | 0.011397 | 0.011530 | 0.011598 | 0.011597 |
| 0.011464 | 0.011567 | 0.011569 | 0.011704 | 0.011732 | 0.011396 | 0.011564 |
| 0.011497 | 0.011497 | 0.011331 | 0.011513 | 0.011442 | 0.011469 | 0.011341 |
| 0.011508 | 0.011744 | 0.011526 | 0.011400 | 0.011295 | 0.011497 | 0.011362 |
| 0.011463 | 0.011396 | 0.011295 | 0.011397 | 0.011497 | 0.011500 | 0.011396 |
| 0.011295 | 0.011229 | 0.011362 | 0.011295 | 0.011228 | 0.011298 | 0.011497 |
| 0.011396 | 0.011329 | 0.011362 | 0.011396 | 0.011228 | 0.011295 | 0.011497 |
| 0.011362 | 0.011396 | 0.011396 | 0.011329 | 0.011396 | 0.011631 | 0.011295 |
| 0.011329 | 0.011732 | 0.011329 | 0.011362 | 0.011329 | 0.011698 | 0.011275 |
| 0.011791 | 0.011273 | 0.011361 | 0.011503 | 0.011589 | 0.011527 | 0.011227 |
| 0.011323 | 0.011496 | 0.011597 | 0.011705 | 0.011565 | 0.011703 | 0.011834 |
| 0.011733 | 0.011770 | 0.011732 | 0.011983 | 0.011698 | 0.012573 | 0.011734 |
| 0.012473 | 0.012241 | 0.012375 | 0.012646 | 0.011698 | 0.011396 | 0.011699 |
| 0.012137 | 0.012072 | 0.011664 | 0.011564 | 0.011632 | 0.011632 | 0.011601 |
| 0.011496 | 0.011501 | 0.011564 | 0.011531 | 0.011901 | 0.011967 | 0.011968 |
| 0.011868 | 0.011968 | 0.012072 | 0.011838 | 0.012138 | 0.012144 | 0.012205 |
| 0.012206 | 0.012239 | 0.012186 | 0.012206 | 0.012207 | 0.011429 | 0.011732 |
| 0.011800 | 0.012303 | 0.011806 | 0.012034 | 0.012508 | 0.011570 | 0.011464 |
| 0.011429 | 0.011429 | 0.011900 | 0.011883 | 0.012045 | 0.011765 | 0.011431 |
| S085     | 0.011664 | 0.011664 | 0.012000 | 0.011765 | 0.011765 | 0.011832 |
| 0.011637 | 0.011569 | 0.011832 | 0.011262 | 0.011329 | 0.011296 | 0.011262 |
| 0.011295 | 0.011463 | 0.011262 | 0.011295 | 0.011362 | 0.011329 | 0.011295 |
| 0.011262 | 0.011295 | 0.011396 | 0.011262 | 0.011295 | 0.011295 | 0.011603 |
| 0.011530 | 0.011295 | 0.011194 | 0.011429 | 0.011362 | 0.011329 | 0.011362 |
| 0.011329 | 0.011429 | 0.011329 | 0.011329 | 0.011362 | 0.011329 | 0.011496 |
| 0.011262 | 0.011329 | 0.011362 | 0.011295 | 0.011396 | 0.011429 | 0.011362 |
| 0.011329 | 0.011497 | 0.011396 | 0.011664 | 0.011329 | 0.011597 | 0.011329 |
| 0.011295 | 0.011396 | 0.011463 | 0.011597 | 0.011698 | 0.011396 | 0.011496 |
| 0.011362 | 0.011429 | 0.011329 | 0.011563 | 0.011799 | 0.011329 | 0.011396 |

|          |          |          |          |          |          |          |
|----------|----------|----------|----------|----------|----------|----------|
| 0.011295 | 0.011396 | 0.011362 | 0.011429 | 0.011362 | 0.011362 | 0.011362 |
| 0.011262 | 0.011295 | 0.011262 | 0.011362 | 0.011329 | 0.011363 | 0.011429 |
| 0.011362 | 0.000000 | 0.011396 | 0.011295 | 0.011429 | 0.011262 | 0.011329 |
| 0.011496 | 0.011429 | 0.011664 | 0.011496 | 0.011329 | 0.011564 | 0.011329 |
| 0.011431 | 0.011658 | 0.011513 | 0.011177 | 0.011247 | 0.011355 | 0.011375 |
| 0.012085 | 0.011467 | 0.011225 | 0.011564 | 0.011564 | 0.011362 | 0.011463 |
| 0.011396 | 0.011362 | 0.011429 | 0.011329 | 0.011429 | 0.011362 | 0.011362 |
| 0.011329 | 0.011429 | 0.011631 | 0.011496 | 0.011396 | 0.011362 | 0.011295 |
| 0.011262 | 0.011262 | 0.011329 | 0.011295 | 0.011497 | 0.011463 | 0.011396 |
| 0.011497 | 0.011564 | 0.011295 | 0.011295 | 0.011329 | 0.011329 | 0.011330 |
| 0.011398 | 0.011329 | 0.011329 | 0.011168 | 0.011241 | 0.011200 | 0.011329 |
| 0.011331 | 0.011266 | 0.011318 | 0.011302 | 0.011196 | 0.011231 | 0.011263 |
| 0.011528 | 0.011301 | 0.011336 | 0.011262 | 0.011268 | 0.011397 | 0.011363 |
| 0.011430 | 0.011363 | 0.011363 | 0.011396 | 0.011396 | 0.011765 | 0.011564 |
| 0.011597 | 0.011463 | 0.011329 | 0.011430 | 0.011228 | 0.011463 | 0.011262 |
| 0.011329 | 0.011329 | 0.011295 | 0.011262 | 0.011295 | 0.011262 | 0.011362 |
| 0.011329 | 0.011429 | 0.011362 | 0.011262 | 0.011363 | 0.011463 | 0.011466 |
| 0.011463 | 0.011362 | 0.011262 | 0.011195 | 0.011329 | 0.011262 | 0.011195 |
| 0.011298 | 0.011463 | 0.011262 | 0.011463 | 0.011228 | 0.011329 | 0.011295 |
| 0.011396 | 0.011295 | 0.011329 | 0.011295 | 0.011329 | 0.011195 | 0.011329 |
| 0.011362 | 0.011295 | 0.011362 | 0.011295 | 0.011329 | 0.011362 | 0.011597 |
| 0.011698 | 0.011631 | 0.011698 | 0.011465 | 0.011698 | 0.011329 | 0.011295 |
| 0.011330 | 0.011586 | 0.011380 | 0.011232 | 0.011705 | 0.011197 | 0.011336 |
| 0.011671 | 0.011604 | 0.011496 | 0.011698 | 0.011402 | 0.011564 | 0.011530 |
| 0.011463 | 0.011631 | 0.011451 | 0.011307 | 0.011354 | 0.011362 | 0.011432 |
| 0.011530 | 0.011431 | 0.011567 | 0.011635 | 0.011564 | 0.011631 | 0.011738 |
| 0.011466 | 0.011637 | 0.011534 | 0.011466 | 0.011766 | 0.011228 | 0.011431 |
| 0.011396 | 0.011329 | 0.011228 | 0.011228 | 0.011295 | 0.011295 | 0.011362 |
| 0.011295 | 0.011362 | 0.011262 | 0.011362 | 0.011295 | 0.011295 | 0.011362 |
| 0.011295 | 0.011731 | 0.011631 | 0.011664 | 0.011194 | 0.011295 | 0.011329 |
| 0.011329 | 0.011295 | 0.011362 | 0.011396 | 0.011262 | 0.011262 | 0.011262 |
| 0.011799 | 0.011429 | 0.011429 | 0.011228 | 0.011329 | 0.011497 | 0.011262 |
| 0.011262 | 0.011329 | 0.011295 | 0.011463 | 0.011262 | 0.011396 | 0.011530 |
| 0.011463 | 0.011295 | 0.011295 | 0.011228 | 0.011228 | 0.011396 | 0.011329 |
| 0.011228 | 0.011329 | 0.011194 | 0.011228 | 0.011362 | 0.011497 | 0.011262 |
| 0.011228 | 0.011362 | 0.011295 | 0.011194 | 0.011530 | 0.011195 | 0.011362 |
| 0.011437 | 0.011262 | 0.011564 | 0.011396 | 0.011429 | 0.011295 | 0.011396 |
| 0.011262 | 0.011597 | 0.011194 | 0.011463 | 0.011262 | 0.011262 | 0.011194 |
| 0.011429 | 0.011631 | 0.011329 | 0.011396 | 0.011228 | 0.011631 | 0.011262 |
| 0.011262 | 0.011262 | 0.011295 | 0.011396 | 0.011295 | 0.011396 | 0.011463 |
| 0.011463 | 0.011429 | 0.011329 | 0.011429 | 0.011396 | 0.011262 | 0.011228 |
| 0.011262 | 0.011262 | 0.011329 | 0.011262 | 0.011228 | 0.011396 | 0.011262 |
| 0.011295 | 0.011295 | 0.011429 | 0.011463 | 0.011362 | 0.011295 | 0.011295 |
| 0.011362 | 0.011295 | 0.011396 | 0.011262 | 0.011396 | 0.011429 | 0.011799 |
| 0.011295 | 0.011698 | 0.011302 | 0.017823 | 0.011257 | 0.011305 | 0.011653 |
| 0.011614 | 0.011658 | 0.011322 | 0.011292 | 0.011719 | 0.011682 | 0.011303 |
| 0.011534 | 0.011426 | 0.011138 | 0.011270 | 0.011294 | 0.011307 | 0.011189 |
| 0.011482 | 0.011470 | 0.011468 | 0.011391 | 0.011429 | 0.011463 | 0.011466 |
| 0.011335 | 0.011429 | 0.011429 | 0.011396 | 0.011362 | 0.011362 | 0.011329 |
| 0.011362 | 0.011295 | 0.011329 | 0.011362 | 0.011329 | 0.011262 | 0.011295 |
| 0.011295 | 0.011362 | 0.011262 | 0.011362 | 0.011396 | 0.011429 | 0.011329 |
| 0.011362 | 0.011329 | 0.011665 | 0.011665 | 0.011396 | 0.011430 | 0.011430 |
| 0.011228 | 0.011228 | 0.011262 | 0.011362 | 0.011228 | 0.011463 | 0.011463 |
| 0.011497 | 0.011496 | 0.011429 | 0.011530 | 0.011698 | 0.011532 | 0.011362 |
| 0.011362 | 0.011429 | 0.011463 | 0.011295 | 0.011362 | 0.011329 | 0.011362 |
| 0.011430 | 0.011430 | 0.011463 | 0.011430 | 0.011330 | 0.011530 | 0.011497 |
| 0.011365 | 0.011262 | 0.011362 | 0.011463 | 0.011362 | 0.011497 | 0.011530 |
| 0.011698 | 0.011402 | 0.011564 | 0.011530 | 0.011463 | 0.011631 | 0.011262 |
| 0.011431 | 0.011329 | 0.011295 | 0.011295 | 0.011362 | 0.011262 | 0.011362 |
| 0.011396 | 0.011429 | 0.011329 | 0.011362 | 0.011329 | 0.011665 | 0.011665 |

|          |          |          |          |          |          |          |
|----------|----------|----------|----------|----------|----------|----------|
| 0.011396 | 0.011430 | 0.011496 | 0.011429 | 0.012069 | 0.011453 | 0.011412 |
| 0.011447 | 0.011407 | 0.011517 | 0.011441 | 0.011515 | 0.011474 | 0.011405 |
| 0.011987 | 0.011302 | 0.011437 | 0.011371 | 0.011645 | 0.011502 | 0.011639 |
| 0.012046 | 0.011475 | 0.011601 | 0.011664 | 0.011530 | 0.011530 | 0.011567 |
| 0.011228 | 0.011396 | 0.011530 | 0.011496 | 0.011499 | 0.011496 | 0.011464 |
| 0.011329 | 0.011262 | 0.011295 | 0.011329 | 0.011228 | 0.011295 | 0.011194 |
| 0.011329 | 0.011362 | 0.011262 | 0.011228 | 0.011329 | 0.011262 | 0.011295 |
| 0.011295 | 0.011228 | 0.011295 | 0.011329 | 0.011228 | 0.011429 | 0.011463 |
| 0.011362 | 0.011429 | 0.011362 | 0.011362 | 0.011295 | 0.011698 | 0.011329 |
| 0.011373 | 0.011295 | 0.011530 | 0.011535 | 0.011396 | 0.011396 | 0.011396 |
| 0.011396 | 0.011329 | 0.011295 | 0.011329 | 0.011429 | 0.011429 | 0.011362 |
| 0.011362 | 0.011496 | 0.011664 | 0.011396 | 0.011597 | 0.011597 | 0.011463 |
| 0.011295 | 0.011362 | 0.011396 | 0.011799 | 0.011362 | 0.011396 | 0.011362 |
| 0.011396 | 0.011329 | 0.011329 | 0.011631 | 0.011564 | 0.011597 | 0.011329 |
| 0.011429 | 0.011496 | 0.011362 | 0.011429 | 0.011396 | 0.011262 | 0.011597 |
| 0.011362 | 0.011329 | 0.011329 | 0.011496 | 0.011329 | 0.011429 | 0.011664 |
| 0.011362 | 0.011705 | 0.011731 | 0.011467 | 0.011173 | 0.011434 | 0.011318 |
| 0.011115 | 0.011683 | 0.011271 | 0.011417 | 0.011255 | 0.011366 | 0.011379 |
| 0.011468 | 0.011192 | 0.011338 | 0.011192 | 0.011222 | 0.011395 | 0.011385 |
| 0.011399 | 0.011296 | 0.011412 | 0.011342 | 0.011364 | 0.011497 | 0.011564 |
| 0.011564 | 0.011430 | 0.011533 | 0.011535 | 0.011670 | 0.011696 | 0.011362 |
| 0.011597 | 0.011463 | 0.011329 | 0.011430 | 0.011228 | 0.011463 | 0.011262 |
| 0.011329 | 0.011329 | 0.011295 | 0.011262 | 0.011295 | 0.011262 | 0.011362 |
| 0.011305 | 0.011305 | 0.011334 | 0.011334 | 0.011471 | 0.011470 | 0.011436 |
| 0.011435 | 0.011396 | 0.011134 | 0.011132 | 0.011331 | 0.011501 | 0.011501 |
| 0.011296 | 0.011365 | 0.011599 | 0.011567 | 0.011497 | 0.011531 | 0.011463 |
| 0.011396 | 0.011463 | 0.011463 | 0.011362 | 0.011933 | 0.011530 | 0.011597 |
| 0.011631 | 0.011701 | 0.011333 | 0.011407 | 0.011295 | 0.011497 | 0.011463 |
| 0.011497 | 0.011530 | 0.011530 | 0.011530 | 0.011650 | 0.011664 | 0.011303 |
| 0.011195 | 0.011199 | 0.011298 | 0.011264 | 0.011368 | 0.011172 | 0.011536 |
| 0.011335 | 0.011455 | 0.011203 | 0.011285 | 0.011329 | 0.011368 | 0.011295 |
| 0.011262 | 0.011262 | 0.011329 | 0.011295 | 0.011497 | 0.011463 | 0.011396 |
| 0.011497 | 0.011564 | 0.011295 | 0.011295 | 0.011329 | 0.011329 | 0.011330 |
| 0.011398 | 0.011329 | 0.011329 | 0.011364 | 0.011497 | 0.011564 | 0.011564 |
| 0.011430 | 0.011533 | 0.011535 | 0.011670 | 0.011696 | 0.011362 | 0.011530 |
| 0.011463 | 0.011463 | 0.011297 | 0.011478 | 0.011408 | 0.011435 | 0.011305 |
| 0.011473 | 0.011698 | 0.011399 | 0.011366 | 0.011262 | 0.011463 | 0.011329 |
| 0.011429 | 0.011362 | 0.011262 | 0.011363 | 0.011463 | 0.011466 | 0.011362 |
| 0.011262 | 0.011195 | 0.011329 | 0.011262 | 0.011195 | 0.011298 | 0.011463 |
| 0.011362 | 0.011295 | 0.011329 | 0.011362 | 0.011329 | 0.011262 | 0.011463 |
| 0.011329 | 0.011362 | 0.011362 | 0.011295 | 0.011362 | 0.011597 | 0.011262 |
| 0.011295 | 0.011698 | 0.011295 | 0.011329 | 0.011295 | 0.011664 | 0.011232 |
| 0.011622 | 0.011188 | 0.011261 | 0.011463 | 0.011549 | 0.011491 | 0.011186 |
| 0.011218 | 0.011463 | 0.011564 | 0.011671 | 0.011531 | 0.011669 | 0.011800 |
| 0.011699 | 0.011737 | 0.011698 | 0.011949 | 0.011664 | 0.012539 | 0.011700 |
| 0.012439 | 0.012207 | 0.012341 | 0.012612 | 0.011664 | 0.011362 | 0.011665 |
| 0.012103 | 0.012038 | 0.011631 | 0.011530 | 0.011598 | 0.011598 | 0.011567 |
| 0.011463 | 0.011467 | 0.011530 | 0.011497 | 0.011867 | 0.011933 | 0.011935 |
| 0.011834 | 0.011934 | 0.012038 | 0.011804 | 0.012104 | 0.012110 | 0.012171 |
| 0.012171 | 0.012205 | 0.012152 | 0.012172 | 0.012173 | 0.011396 | 0.011699 |
| 0.011766 | 0.012270 | 0.011772 | 0.012001 | 0.012474 | 0.011536 | 0.011430 |
| 0.011396 | 0.011396 | 0.011867 | 0.011883 | 0.012010 | 0.011731 | 0.011397 |
| s086     | 0.011732 | 0.011732 | 0.012068 | 0.011832 | 0.011832 | 0.011900 |
| 0.011739 | 0.011671 | 0.011899 | 0.011329 | 0.011396 | 0.011363 | 0.011329 |
| 0.011362 | 0.011530 | 0.011329 | 0.011362 | 0.011429 | 0.011396 | 0.011362 |
| 0.011329 | 0.011362 | 0.011463 | 0.011329 | 0.011295 | 0.011362 | 0.011705 |
| 0.011597 | 0.011362 | 0.011262 | 0.011496 | 0.011362 | 0.011396 | 0.011362 |
| 0.011396 | 0.011429 | 0.011396 | 0.011396 | 0.011429 | 0.011396 | 0.011496 |
| 0.011329 | 0.011396 | 0.011429 | 0.011362 | 0.011463 | 0.011496 | 0.011429 |
| 0.011396 | 0.011564 | 0.011463 | 0.011732 | 0.011396 | 0.011597 | 0.011396 |

|          |          |          |          |          |          |          |
|----------|----------|----------|----------|----------|----------|----------|
| 0.011362 | 0.011463 | 0.011530 | 0.011597 | 0.011765 | 0.011463 | 0.011564 |
| 0.011362 | 0.011429 | 0.011396 | 0.011563 | 0.011866 | 0.011396 | 0.011463 |
| 0.011362 | 0.011463 | 0.011429 | 0.011496 | 0.011429 | 0.011429 | 0.011429 |
| 0.011329 | 0.011362 | 0.011329 | 0.011429 | 0.011396 | 0.011430 | 0.011496 |
| 0.011429 | 0.011396 | 0.000000 | 0.011362 | 0.011496 | 0.011262 | 0.011396 |
| 0.011564 | 0.011496 | 0.011731 | 0.011564 | 0.011396 | 0.011564 | 0.011396 |
| 0.011579 | 0.011807 | 0.011626 | 0.011334 | 0.011321 | 0.011428 | 0.011533 |
| 0.012158 | 0.011569 | 0.011348 | 0.011631 | 0.011631 | 0.011429 | 0.011530 |
| 0.011463 | 0.011429 | 0.011496 | 0.011396 | 0.011497 | 0.011362 | 0.011429 |
| 0.011396 | 0.011496 | 0.011698 | 0.011564 | 0.011463 | 0.011430 | 0.011295 |
| 0.011329 | 0.011329 | 0.011262 | 0.011362 | 0.011564 | 0.011530 | 0.011463 |
| 0.011564 | 0.011631 | 0.011362 | 0.011362 | 0.011396 | 0.011396 | 0.011398 |
| 0.011466 | 0.011396 | 0.011396 | 0.011240 | 0.011349 | 0.011306 | 0.011396 |
| 0.011399 | 0.011335 | 0.011392 | 0.011371 | 0.011298 | 0.011334 | 0.011364 |
| 0.011636 | 0.011405 | 0.011301 | 0.011329 | 0.011337 | 0.011464 | 0.011430 |
| 0.011497 | 0.011431 | 0.011430 | 0.011530 | 0.011463 | 0.011765 | 0.011631 |
| 0.011664 | 0.011530 | 0.011396 | 0.011497 | 0.011295 | 0.011530 | 0.011329 |
| 0.011396 | 0.011396 | 0.011362 | 0.011329 | 0.011362 | 0.011329 | 0.011429 |
| 0.011329 | 0.011429 | 0.011430 | 0.011329 | 0.011431 | 0.011530 | 0.011533 |
| 0.011396 | 0.011430 | 0.011329 | 0.011263 | 0.011396 | 0.011329 | 0.011262 |
| 0.011366 | 0.011396 | 0.011262 | 0.011396 | 0.011295 | 0.011396 | 0.011362 |
| 0.011396 | 0.011362 | 0.011329 | 0.011362 | 0.011396 | 0.011262 | 0.011329 |
| 0.011362 | 0.011362 | 0.011430 | 0.011362 | 0.011396 | 0.011430 | 0.011665 |
| 0.011765 | 0.011698 | 0.011765 | 0.011532 | 0.011766 | 0.011396 | 0.011362 |
| 0.011398 | 0.011626 | 0.011517 | 0.011300 | 0.011739 | 0.011265 | 0.011414 |
| 0.011773 | 0.011672 | 0.011564 | 0.011765 | 0.011470 | 0.011631 | 0.011530 |
| 0.011530 | 0.011698 | 0.011558 | 0.011307 | 0.011354 | 0.011430 | 0.011500 |
| 0.011597 | 0.011499 | 0.011635 | 0.011635 | 0.011631 | 0.011698 | 0.011805 |
| 0.011534 | 0.011637 | 0.011636 | 0.011567 | 0.011834 | 0.011295 | 0.011498 |
| 0.011396 | 0.011396 | 0.011295 | 0.011295 | 0.011295 | 0.011362 | 0.011429 |
| 0.011295 | 0.011362 | 0.011262 | 0.011429 | 0.011295 | 0.011362 | 0.011429 |
| 0.011362 | 0.011799 | 0.011698 | 0.011732 | 0.011262 | 0.011362 | 0.011396 |
| 0.011396 | 0.011362 | 0.011429 | 0.011463 | 0.011329 | 0.011329 | 0.011329 |
| 0.011866 | 0.011496 | 0.011496 | 0.011295 | 0.011396 | 0.011497 | 0.011329 |
| 0.011329 | 0.011396 | 0.011362 | 0.011463 | 0.011329 | 0.011463 | 0.011530 |
| 0.011530 | 0.011362 | 0.011362 | 0.011295 | 0.011295 | 0.011463 | 0.011396 |
| 0.011295 | 0.011396 | 0.011262 | 0.011295 | 0.011429 | 0.011564 | 0.011329 |
| 0.011295 | 0.011429 | 0.011363 | 0.011262 | 0.011597 | 0.011262 | 0.011429 |
| 0.011437 | 0.011329 | 0.011631 | 0.011463 | 0.011496 | 0.011362 | 0.011463 |
| 0.011329 | 0.011597 | 0.011262 | 0.011530 | 0.011329 | 0.011329 | 0.011262 |
| 0.011429 | 0.011698 | 0.011396 | 0.011463 | 0.011295 | 0.011698 | 0.011329 |
| 0.011329 | 0.011329 | 0.011362 | 0.011396 | 0.011362 | 0.011463 | 0.011530 |
| 0.011530 | 0.011496 | 0.011396 | 0.011497 | 0.011396 | 0.011329 | 0.011295 |
| 0.011329 | 0.011329 | 0.011396 | 0.011329 | 0.011228 | 0.011463 | 0.011329 |
| 0.011362 | 0.011362 | 0.011496 | 0.011530 | 0.011429 | 0.011295 | 0.011362 |
| 0.011429 | 0.011362 | 0.011463 | 0.011329 | 0.011463 | 0.011564 | 0.011866 |
| 0.011362 | 0.011765 | 0.011371 | 0.017861 | 0.011257 | 0.011488 | 0.011723 |
| 0.011683 | 0.011729 | 0.011322 | 0.011292 | 0.011774 | 0.011751 | 0.011425 |
| 0.011629 | 0.011610 | 0.011294 | 0.011353 | 0.011333 | 0.011356 | 0.011361 |
| 0.011623 | 0.011544 | 0.011505 | 0.011325 | 0.011497 | 0.011530 | 0.011534 |
| 0.011266 | 0.011497 | 0.011497 | 0.011463 | 0.011429 | 0.011430 | 0.011396 |
| 0.011429 | 0.011362 | 0.011396 | 0.011430 | 0.011396 | 0.011329 | 0.011362 |
| 0.011362 | 0.011430 | 0.011329 | 0.011430 | 0.011463 | 0.011497 | 0.011396 |
| 0.011429 | 0.011396 | 0.011732 | 0.011732 | 0.011463 | 0.011497 | 0.011530 |
| 0.011295 | 0.011295 | 0.011329 | 0.011362 | 0.011295 | 0.011530 | 0.011530 |
| 0.011564 | 0.011564 | 0.011497 | 0.011597 | 0.011765 | 0.011599 | 0.011362 |
| 0.011430 | 0.011497 | 0.011463 | 0.011362 | 0.011430 | 0.011396 | 0.011429 |
| 0.011497 | 0.011497 | 0.011530 | 0.011430 | 0.011330 | 0.011597 | 0.011497 |
| 0.011433 | 0.011329 | 0.011429 | 0.011530 | 0.011430 | 0.011564 | 0.011597 |
| 0.011765 | 0.011470 | 0.011631 | 0.011530 | 0.011530 | 0.011698 | 0.011329 |

|          |          |          |          |          |          |          |
|----------|----------|----------|----------|----------|----------|----------|
| 0.011498 | 0.011396 | 0.011362 | 0.011362 | 0.011430 | 0.011329 | 0.011430 |
| 0.011463 | 0.011497 | 0.011396 | 0.011429 | 0.011396 | 0.011732 | 0.011732 |
| 0.011463 | 0.011497 | 0.011564 | 0.011496 | 0.012137 | 0.011560 | 0.011482 |
| 0.011552 | 0.011511 | 0.011622 | 0.011510 | 0.011620 | 0.011543 | 0.011508 |
| 0.012090 | 0.011406 | 0.011540 | 0.011475 | 0.011749 | 0.011604 | 0.011639 |
| 0.012114 | 0.011588 | 0.011669 | 0.011732 | 0.011597 | 0.011597 | 0.011635 |
| 0.011295 | 0.011396 | 0.011597 | 0.011564 | 0.011567 | 0.011564 | 0.011532 |
| 0.011396 | 0.011262 | 0.011295 | 0.011396 | 0.011228 | 0.011362 | 0.011262 |
| 0.011396 | 0.011429 | 0.011329 | 0.011295 | 0.011396 | 0.011329 | 0.011362 |
| 0.011362 | 0.011295 | 0.011362 | 0.011396 | 0.011295 | 0.011429 | 0.011530 |
| 0.011429 | 0.011496 | 0.011429 | 0.011429 | 0.011362 | 0.011765 | 0.011396 |
| 0.011443 | 0.011362 | 0.011598 | 0.011603 | 0.011396 | 0.011463 | 0.011463 |
| 0.011463 | 0.011329 | 0.011362 | 0.011329 | 0.011496 | 0.011497 | 0.011429 |
| 0.011429 | 0.011564 | 0.011731 | 0.011463 | 0.011664 | 0.011664 | 0.011530 |
| 0.011362 | 0.011429 | 0.011463 | 0.011866 | 0.011430 | 0.011396 | 0.011429 |
| 0.011463 | 0.011396 | 0.011396 | 0.011698 | 0.011564 | 0.011664 | 0.011396 |
| 0.011497 | 0.011564 | 0.011429 | 0.011497 | 0.011463 | 0.011329 | 0.011664 |
| 0.011429 | 0.011396 | 0.011396 | 0.011564 | 0.011396 | 0.011496 | 0.011732 |
| 0.011429 | 0.011807 | 0.011799 | 0.011629 | 0.011229 | 0.011502 | 0.011370 |
| 0.011280 | 0.011839 | 0.011341 | 0.011596 | 0.011402 | 0.011569 | 0.011538 |
| 0.011570 | 0.011192 | 0.011450 | 0.011126 | 0.011384 | 0.011395 | 0.011466 |
| 0.011475 | 0.011336 | 0.011483 | 0.011377 | 0.011431 | 0.011564 | 0.011631 |
| 0.011631 | 0.011497 | 0.011601 | 0.011603 | 0.011738 | 0.011767 | 0.011429 |
| 0.011664 | 0.011530 | 0.011396 | 0.011497 | 0.011295 | 0.011530 | 0.011329 |
| 0.011396 | 0.011396 | 0.011362 | 0.011329 | 0.011362 | 0.011329 | 0.011429 |
| 0.011409 | 0.011410 | 0.011403 | 0.011437 | 0.011573 | 0.011470 | 0.011538 |
| 0.011537 | 0.011464 | 0.011282 | 0.011276 | 0.011399 | 0.011568 | 0.011569 |
| 0.011363 | 0.011433 | 0.011666 | 0.011635 | 0.011565 | 0.011599 | 0.011530 |
| 0.011463 | 0.011530 | 0.011530 | 0.011429 | 0.012001 | 0.011597 | 0.011665 |
| 0.011698 | 0.011737 | 0.011401 | 0.011476 | 0.011362 | 0.011564 | 0.011530 |
| 0.011565 | 0.011597 | 0.011597 | 0.011597 | 0.011729 | 0.011732 | 0.011372 |
| 0.011263 | 0.011268 | 0.011367 | 0.011332 | 0.011436 | 0.011284 | 0.011604 |
| 0.011403 | 0.011367 | 0.011108 | 0.011435 | 0.011396 | 0.011471 | 0.011295 |
| 0.011329 | 0.011329 | 0.011262 | 0.011362 | 0.011564 | 0.011530 | 0.011463 |
| 0.011564 | 0.011631 | 0.011362 | 0.011362 | 0.011396 | 0.011396 | 0.011398 |
| 0.011466 | 0.011396 | 0.011396 | 0.011431 | 0.011564 | 0.011631 | 0.011631 |
| 0.011497 | 0.011601 | 0.011603 | 0.011738 | 0.011767 | 0.011429 | 0.011597 |
| 0.011530 | 0.011530 | 0.011364 | 0.011547 | 0.011477 | 0.011503 | 0.011375 |
| 0.011473 | 0.011698 | 0.011526 | 0.011434 | 0.011262 | 0.011396 | 0.011329 |
| 0.011429 | 0.011430 | 0.011329 | 0.011431 | 0.011530 | 0.011533 | 0.011430 |
| 0.011329 | 0.011263 | 0.011396 | 0.011329 | 0.011262 | 0.011366 | 0.011396 |
| 0.011429 | 0.011362 | 0.011396 | 0.011430 | 0.011396 | 0.011329 | 0.011530 |
| 0.011396 | 0.011429 | 0.011429 | 0.011362 | 0.011429 | 0.011664 | 0.011329 |
| 0.011362 | 0.011765 | 0.011362 | 0.011329 | 0.011362 | 0.011732 | 0.011360 |
| 0.011678 | 0.011358 | 0.011411 | 0.011584 | 0.011671 | 0.011563 | 0.011311 |
| 0.011323 | 0.011530 | 0.011631 | 0.011739 | 0.011599 | 0.011737 | 0.011867 |
| 0.011767 | 0.011804 | 0.011765 | 0.012017 | 0.011731 | 0.012606 | 0.011768 |
| 0.012507 | 0.012274 | 0.012408 | 0.012680 | 0.011731 | 0.011430 | 0.011732 |
| 0.012171 | 0.012106 | 0.011698 | 0.011597 | 0.011665 | 0.011665 | 0.011635 |
| 0.011530 | 0.011535 | 0.011597 | 0.011565 | 0.011935 | 0.012001 | 0.012002 |
| 0.011901 | 0.012002 | 0.012106 | 0.011872 | 0.012171 | 0.012178 | 0.012238 |
| 0.012239 | 0.012273 | 0.012221 | 0.012239 | 0.012241 | 0.011463 | 0.011766 |
| 0.011834 | 0.012337 | 0.011840 | 0.012068 | 0.012541 | 0.011604 | 0.011497 |
| 0.011463 | 0.011463 | 0.011934 | 0.011965 | 0.012081 | 0.011799 | 0.011465 |
| s087     | 0.011631 | 0.011631 | 0.011967 | 0.011731 | 0.011731 | 0.011799 |
| 0.011603 | 0.011535 | 0.011799 | 0.011228 | 0.011295 | 0.011262 | 0.011228 |
| 0.011262 | 0.011429 | 0.011228 | 0.011262 | 0.011329 | 0.011295 | 0.011262 |
| 0.011228 | 0.011262 | 0.011362 | 0.011228 | 0.011262 | 0.011262 | 0.011569 |
| 0.011496 | 0.011262 | 0.011161 | 0.011396 | 0.011329 | 0.011295 | 0.011329 |
| 0.011295 | 0.011396 | 0.011295 | 0.011295 | 0.011329 | 0.011295 | 0.011463 |

|          |          |          |          |          |          |          |
|----------|----------|----------|----------|----------|----------|----------|
| 0.011228 | 0.011295 | 0.011329 | 0.011262 | 0.011362 | 0.011396 | 0.011329 |
| 0.011295 | 0.011463 | 0.011362 | 0.011631 | 0.011295 | 0.011564 | 0.011295 |
| 0.011262 | 0.011362 | 0.011429 | 0.011564 | 0.011664 | 0.011362 | 0.011463 |
| 0.011329 | 0.011396 | 0.011295 | 0.011530 | 0.011765 | 0.011295 | 0.011362 |
| 0.011262 | 0.011362 | 0.011329 | 0.011396 | 0.011194 | 0.011329 | 0.011329 |
| 0.011228 | 0.011262 | 0.011228 | 0.011329 | 0.011295 | 0.011329 | 0.011396 |
| 0.011329 | 0.011295 | 0.011362 | 0.000000 | 0.011396 | 0.011228 | 0.011295 |
| 0.011463 | 0.011396 | 0.011631 | 0.011463 | 0.011295 | 0.011530 | 0.011295 |
| 0.011357 | 0.011583 | 0.011400 | 0.011099 | 0.011172 | 0.011281 | 0.011296 |
| 0.012011 | 0.011365 | 0.011102 | 0.011530 | 0.011530 | 0.011329 | 0.011429 |
| 0.011362 | 0.011329 | 0.011396 | 0.011295 | 0.011396 | 0.011329 | 0.011329 |
| 0.011295 | 0.011262 | 0.011597 | 0.011463 | 0.011362 | 0.011329 | 0.011262 |
| 0.011228 | 0.011228 | 0.011295 | 0.011262 | 0.011463 | 0.011429 | 0.011362 |
| 0.011463 | 0.011530 | 0.011262 | 0.011262 | 0.011295 | 0.011295 | 0.011297 |
| 0.011364 | 0.011295 | 0.011295 | 0.011132 | 0.011241 | 0.011200 | 0.011296 |
| 0.011297 | 0.011232 | 0.011245 | 0.011267 | 0.011196 | 0.011231 | 0.011263 |
| 0.011528 | 0.011233 | 0.011336 | 0.011228 | 0.011233 | 0.011363 | 0.011329 |
| 0.011396 | 0.011330 | 0.011329 | 0.011429 | 0.011362 | 0.011731 | 0.011530 |
| 0.011563 | 0.011429 | 0.011295 | 0.011396 | 0.011195 | 0.011429 | 0.011228 |
| 0.011295 | 0.011295 | 0.011262 | 0.011228 | 0.011262 | 0.011228 | 0.011329 |
| 0.011295 | 0.011396 | 0.011329 | 0.011228 | 0.011330 | 0.011429 | 0.011432 |
| 0.011430 | 0.011329 | 0.011228 | 0.011161 | 0.011295 | 0.011228 | 0.011161 |
| 0.011264 | 0.011430 | 0.011228 | 0.011430 | 0.011195 | 0.011295 | 0.011262 |
| 0.011362 | 0.011262 | 0.011295 | 0.011262 | 0.011295 | 0.011161 | 0.011295 |
| 0.011329 | 0.011262 | 0.011329 | 0.011262 | 0.011295 | 0.011329 | 0.011564 |
| 0.011664 | 0.011597 | 0.011665 | 0.011397 | 0.011665 | 0.011295 | 0.011262 |
| 0.011297 | 0.011545 | 0.011426 | 0.011163 | 0.011671 | 0.011163 | 0.011257 |
| 0.011637 | 0.011570 | 0.011463 | 0.011664 | 0.011367 | 0.011530 | 0.011497 |
| 0.011429 | 0.011597 | 0.011451 | 0.011307 | 0.011354 | 0.011329 | 0.011398 |
| 0.011497 | 0.011397 | 0.011533 | 0.011601 | 0.011530 | 0.011597 | 0.011704 |
| 0.011432 | 0.011603 | 0.011534 | 0.011466 | 0.011733 | 0.011194 | 0.011397 |
| 0.011362 | 0.011295 | 0.011194 | 0.011194 | 0.011262 | 0.011262 | 0.011329 |
| 0.011262 | 0.011329 | 0.011228 | 0.011329 | 0.011262 | 0.011262 | 0.011329 |
| 0.011262 | 0.011698 | 0.011597 | 0.011631 | 0.011161 | 0.011262 | 0.011295 |
| 0.011295 | 0.011262 | 0.011329 | 0.011362 | 0.011228 | 0.011228 | 0.011228 |
| 0.011765 | 0.011396 | 0.011396 | 0.011194 | 0.011295 | 0.011463 | 0.011228 |
| 0.011228 | 0.011295 | 0.011262 | 0.011429 | 0.011228 | 0.011362 | 0.011496 |
| 0.011429 | 0.011262 | 0.011262 | 0.011194 | 0.011194 | 0.011362 | 0.011295 |
| 0.011194 | 0.011295 | 0.011161 | 0.011195 | 0.011329 | 0.011463 | 0.011228 |
| 0.011195 | 0.011329 | 0.011262 | 0.011161 | 0.011496 | 0.011161 | 0.011329 |
| 0.011402 | 0.011228 | 0.011530 | 0.011362 | 0.011396 | 0.011262 | 0.011362 |
| 0.011228 | 0.011564 | 0.011161 | 0.011429 | 0.011228 | 0.011228 | 0.011161 |
| 0.011396 | 0.011597 | 0.011295 | 0.011362 | 0.011194 | 0.011597 | 0.011228 |
| 0.011228 | 0.011228 | 0.011262 | 0.011362 | 0.011262 | 0.011362 | 0.011429 |
| 0.011429 | 0.011396 | 0.011295 | 0.011396 | 0.011362 | 0.011228 | 0.011194 |
| 0.011228 | 0.011228 | 0.011295 | 0.011228 | 0.011194 | 0.011362 | 0.011228 |
| 0.011262 | 0.011262 | 0.011396 | 0.011429 | 0.011329 | 0.011262 | 0.011262 |
| 0.011262 | 0.011262 | 0.011362 | 0.011228 | 0.011362 | 0.011463 | 0.011765 |
| 0.011262 | 0.011664 | 0.011233 | 0.017747 | 0.011126 | 0.011305 | 0.011583 |
| 0.011545 | 0.011588 | 0.011217 | 0.011176 | 0.011609 | 0.011612 | 0.011242 |
| 0.011392 | 0.011426 | 0.000000 | 0.011144 | 0.011216 | 0.011208 | 0.011146 |
| 0.011389 | 0.011395 | 0.011394 | 0.011259 | 0.011396 | 0.011429 | 0.011432 |
| 0.011301 | 0.011396 | 0.011396 | 0.011362 | 0.011329 | 0.011329 | 0.011295 |
| 0.011329 | 0.011262 | 0.011295 | 0.011329 | 0.011295 | 0.011228 | 0.011262 |
| 0.011262 | 0.011329 | 0.011228 | 0.011329 | 0.011362 | 0.011396 | 0.011295 |
| 0.011329 | 0.011295 | 0.011631 | 0.011631 | 0.011362 | 0.011396 | 0.011430 |
| 0.011195 | 0.011195 | 0.011228 | 0.011329 | 0.011195 | 0.011429 | 0.011429 |
| 0.011463 | 0.011463 | 0.011396 | 0.011496 | 0.011665 | 0.011498 | 0.011329 |
| 0.011329 | 0.011396 | 0.011429 | 0.011262 | 0.011329 | 0.011295 | 0.011329 |
| 0.011396 | 0.011396 | 0.011429 | 0.011396 | 0.011296 | 0.011497 | 0.011463 |



|          |          |          |          |          |          |          |
|----------|----------|----------|----------|----------|----------|----------|
| 0.011331 | 0.011228 | 0.011329 | 0.011430 | 0.011329 | 0.011463 | 0.011496 |
| 0.011664 | 0.011367 | 0.011530 | 0.011497 | 0.011429 | 0.011597 | 0.011228 |
| 0.011397 | 0.011295 | 0.011262 | 0.011262 | 0.011329 | 0.011228 | 0.011329 |
| 0.011362 | 0.011396 | 0.011295 | 0.011329 | 0.011295 | 0.011631 | 0.011631 |
| 0.011362 | 0.011396 | 0.011463 | 0.011396 | 0.012035 | 0.011453 | 0.011377 |
| 0.011447 | 0.011407 | 0.011517 | 0.011406 | 0.011515 | 0.011439 | 0.011405 |
| 0.011987 | 0.011302 | 0.011437 | 0.011371 | 0.011645 | 0.011502 | 0.011604 |
| 0.012012 | 0.011475 | 0.011567 | 0.011631 | 0.011496 | 0.011497 | 0.011533 |
| 0.011194 | 0.011362 | 0.011496 | 0.011463 | 0.011466 | 0.011463 | 0.011397 |
| 0.011295 | 0.011228 | 0.011262 | 0.011295 | 0.011194 | 0.011262 | 0.011161 |
| 0.011295 | 0.011329 | 0.011228 | 0.011194 | 0.011295 | 0.011228 | 0.011262 |
| 0.011262 | 0.011194 | 0.011262 | 0.011295 | 0.011194 | 0.011396 | 0.011429 |
| 0.011329 | 0.011396 | 0.011329 | 0.011329 | 0.011262 | 0.011664 | 0.011295 |
| 0.011338 | 0.011262 | 0.011497 | 0.011501 | 0.011362 | 0.011362 | 0.011362 |
| 0.011362 | 0.011295 | 0.011262 | 0.011295 | 0.011396 | 0.011396 | 0.011329 |
| 0.011329 | 0.011463 | 0.011631 | 0.011362 | 0.011564 | 0.011564 | 0.011429 |
| 0.011262 | 0.011329 | 0.011362 | 0.011765 | 0.011329 | 0.011362 | 0.011329 |
| 0.011362 | 0.011295 | 0.011295 | 0.011597 | 0.011530 | 0.011564 | 0.011295 |
| 0.011396 | 0.011463 | 0.011329 | 0.011396 | 0.011362 | 0.011228 | 0.011564 |
| 0.011329 | 0.011295 | 0.011295 | 0.011463 | 0.011295 | 0.011396 | 0.011631 |
| 0.011329 | 0.011671 | 0.011698 | 0.011385 | 0.011117 | 0.011400 | 0.011163 |
| 0.011115 | 0.011605 | 0.011201 | 0.011328 | 0.011158 | 0.011264 | 0.011273 |
| 0.011366 | 0.000000 | 0.011227 | 0.000000 | 0.011114 | 0.011261 | 0.011263 |
| 0.011286 | 0.011178 | 0.011342 | 0.011272 | 0.011330 | 0.011463 | 0.011530 |
| 0.011530 | 0.011396 | 0.011500 | 0.011501 | 0.011636 | 0.011661 | 0.011329 |
| 0.011563 | 0.011429 | 0.011295 | 0.011396 | 0.011195 | 0.011429 | 0.011228 |
| 0.011295 | 0.011295 | 0.011262 | 0.011228 | 0.011262 | 0.011228 | 0.011329 |
| 0.011305 | 0.011305 | 0.011300 | 0.011197 | 0.011471 | 0.011436 | 0.011436 |
| 0.011435 | 0.011228 | 0.011134 | 0.011132 | 0.011297 | 0.011467 | 0.011467 |
| 0.011262 | 0.011331 | 0.011565 | 0.011533 | 0.011464 | 0.011498 | 0.011429 |
| 0.011362 | 0.011429 | 0.011429 | 0.011329 | 0.011900 | 0.011496 | 0.011564 |
| 0.011597 | 0.011665 | 0.011299 | 0.011372 | 0.011262 | 0.011463 | 0.011429 |
| 0.011329 | 0.011496 | 0.011496 | 0.011496 | 0.011650 | 0.011631 | 0.011268 |
| 0.011162 | 0.011164 | 0.011264 | 0.011230 | 0.011333 | 0.011172 | 0.011502 |
| 0.011300 | 0.011455 | 0.011203 | 0.011285 | 0.011296 | 0.011368 | 0.011262 |
| 0.011228 | 0.011228 | 0.011295 | 0.011262 | 0.011463 | 0.011429 | 0.011362 |
| 0.011463 | 0.011530 | 0.011262 | 0.011262 | 0.011295 | 0.011295 | 0.011297 |
| 0.011364 | 0.011295 | 0.011295 | 0.011330 | 0.011463 | 0.011530 | 0.011530 |
| 0.011396 | 0.011500 | 0.011501 | 0.011636 | 0.011661 | 0.011329 | 0.011496 |
| 0.011429 | 0.011429 | 0.011263 | 0.011443 | 0.011373 | 0.011265 | 0.011235 |
| 0.011404 | 0.011607 | 0.011441 | 0.011332 | 0.011228 | 0.011430 | 0.011295 |
| 0.011396 | 0.011329 | 0.011228 | 0.011330 | 0.011429 | 0.011432 | 0.011329 |
| 0.011228 | 0.011161 | 0.011295 | 0.011228 | 0.011161 | 0.011264 | 0.011430 |
| 0.011329 | 0.011262 | 0.011295 | 0.011329 | 0.011295 | 0.011228 | 0.011430 |
| 0.011295 | 0.011329 | 0.011329 | 0.011262 | 0.011329 | 0.011564 | 0.011228 |
| 0.011262 | 0.011664 | 0.011262 | 0.011295 | 0.011262 | 0.011631 | 0.011103 |
| 0.011566 | 0.011103 | 0.011161 | 0.011422 | 0.011426 | 0.011419 | 0.000000 |
| 0.011113 | 0.011429 | 0.011530 | 0.011637 | 0.011498 | 0.011601 | 0.011766 |
| 0.011666 | 0.011703 | 0.011664 | 0.011880 | 0.011631 | 0.012505 | 0.011666 |
| 0.012405 | 0.012139 | 0.012307 | 0.012578 | 0.011631 | 0.011329 | 0.011631 |
| 0.012070 | 0.011971 | 0.011597 | 0.011497 | 0.011564 | 0.011564 | 0.011534 |
| 0.011429 | 0.011399 | 0.011496 | 0.011464 | 0.011833 | 0.011900 | 0.011901 |
| 0.011800 | 0.011901 | 0.011970 | 0.011737 | 0.012070 | 0.012076 | 0.012137 |
| 0.012138 | 0.012171 | 0.012084 | 0.012138 | 0.012139 | 0.011362 | 0.011665 |
| 0.011733 | 0.012236 | 0.011738 | 0.011967 | 0.012440 | 0.011502 | 0.011396 |
| 0.011362 | 0.011362 | 0.011833 | 0.011883 | 0.011975 | 0.011698 | 0.011363 |
| S088     | 0.011765 | 0.011765 | 0.012034 | 0.011799 | 0.011799 | 0.011866 |
| 0.011502 | 0.011434 | 0.011866 | 0.011362 | 0.011429 | 0.011397 | 0.011362 |
| 0.011329 | 0.011564 | 0.011295 | 0.011396 | 0.011463 | 0.011429 | 0.011396 |
| 0.011362 | 0.011396 | 0.011429 | 0.011363 | 0.011396 | 0.011396 | 0.011467 |

|          |          |          |          |          |          |          |
|----------|----------|----------|----------|----------|----------|----------|
| 0.011564 | 0.011396 | 0.011295 | 0.011463 | 0.011463 | 0.011429 | 0.011463 |
| 0.011429 | 0.011530 | 0.011429 | 0.011429 | 0.011463 | 0.011429 | 0.011597 |
| 0.011295 | 0.011429 | 0.011463 | 0.011396 | 0.011429 | 0.011530 | 0.011463 |
| 0.011429 | 0.011597 | 0.011497 | 0.011496 | 0.011429 | 0.011698 | 0.011429 |
| 0.011396 | 0.011429 | 0.011564 | 0.011698 | 0.011597 | 0.011429 | 0.011530 |
| 0.011463 | 0.011530 | 0.011429 | 0.011664 | 0.011631 | 0.011429 | 0.011496 |
| 0.011396 | 0.011496 | 0.011463 | 0.011530 | 0.011463 | 0.011463 | 0.011463 |
| 0.011362 | 0.011396 | 0.011362 | 0.011396 | 0.011429 | 0.011464 | 0.011530 |
| 0.011463 | 0.011429 | 0.011496 | 0.011396 | 0.000000 | 0.011362 | 0.011429 |
| 0.011597 | 0.011530 | 0.011631 | 0.011597 | 0.011429 | 0.011664 | 0.011429 |
| 0.011616 | 0.011546 | 0.011664 | 0.011373 | 0.011359 | 0.011428 | 0.011493 |
| 0.012121 | 0.011467 | 0.011390 | 0.011664 | 0.011664 | 0.011396 | 0.011429 |
| 0.011496 | 0.011463 | 0.011530 | 0.011429 | 0.011530 | 0.011463 | 0.011463 |
| 0.011429 | 0.011463 | 0.011731 | 0.011597 | 0.011496 | 0.011463 | 0.011396 |
| 0.011362 | 0.011295 | 0.011429 | 0.011396 | 0.011530 | 0.011497 | 0.011429 |
| 0.011530 | 0.011597 | 0.011396 | 0.011396 | 0.011430 | 0.011429 | 0.011432 |
| 0.011500 | 0.011429 | 0.011429 | 0.011312 | 0.011386 | 0.011341 | 0.011430 |
| 0.011433 | 0.011369 | 0.011429 | 0.011405 | 0.011332 | 0.011368 | 0.011398 |
| 0.011528 | 0.011439 | 0.011473 | 0.011363 | 0.011371 | 0.011497 | 0.011396 |
| 0.011464 | 0.011465 | 0.011464 | 0.011563 | 0.011496 | 0.011866 | 0.011597 |
| 0.011631 | 0.011497 | 0.011429 | 0.011463 | 0.011329 | 0.011496 | 0.011362 |
| 0.011429 | 0.011429 | 0.011396 | 0.011362 | 0.011396 | 0.011362 | 0.011463 |
| 0.011429 | 0.011530 | 0.011463 | 0.011362 | 0.011464 | 0.011564 | 0.011567 |
| 0.011564 | 0.011463 | 0.011362 | 0.011296 | 0.011429 | 0.011362 | 0.011295 |
| 0.011400 | 0.011564 | 0.011362 | 0.011564 | 0.011329 | 0.011430 | 0.011329 |
| 0.011497 | 0.011396 | 0.011429 | 0.011396 | 0.011429 | 0.011295 | 0.011429 |
| 0.011463 | 0.011396 | 0.011463 | 0.011396 | 0.011429 | 0.011463 | 0.011698 |
| 0.011530 | 0.011463 | 0.011530 | 0.011566 | 0.011597 | 0.011429 | 0.011396 |
| 0.011364 | 0.011626 | 0.011426 | 0.011335 | 0.011535 | 0.011299 | 0.011454 |
| 0.011535 | 0.011570 | 0.011597 | 0.011799 | 0.011504 | 0.011664 | 0.011631 |
| 0.011564 | 0.011732 | 0.011593 | 0.011472 | 0.011479 | 0.011463 | 0.011534 |
| 0.011631 | 0.011532 | 0.011669 | 0.011737 | 0.011664 | 0.011732 | 0.011839 |
| 0.011568 | 0.011739 | 0.011602 | 0.011601 | 0.011867 | 0.011329 | 0.011532 |
| 0.011496 | 0.011429 | 0.011329 | 0.011329 | 0.011396 | 0.011396 | 0.011463 |
| 0.011396 | 0.011463 | 0.011362 | 0.011396 | 0.011396 | 0.011396 | 0.011463 |
| 0.011396 | 0.011564 | 0.011463 | 0.011496 | 0.011295 | 0.011396 | 0.011429 |
| 0.011429 | 0.011329 | 0.011463 | 0.011429 | 0.011362 | 0.011362 | 0.011362 |
| 0.011631 | 0.011463 | 0.011530 | 0.011329 | 0.011429 | 0.011597 | 0.011362 |
| 0.011362 | 0.011429 | 0.011396 | 0.011564 | 0.011362 | 0.011496 | 0.011631 |
| 0.011564 | 0.011396 | 0.011396 | 0.011329 | 0.011329 | 0.011496 | 0.011362 |
| 0.011329 | 0.011362 | 0.011295 | 0.011329 | 0.011463 | 0.011463 | 0.011362 |
| 0.011329 | 0.011463 | 0.011396 | 0.011295 | 0.011429 | 0.011295 | 0.011463 |
| 0.011539 | 0.011362 | 0.011396 | 0.011497 | 0.011463 | 0.011396 | 0.011496 |
| 0.011362 | 0.011698 | 0.011295 | 0.011362 | 0.011295 | 0.011295 | 0.011295 |
| 0.011530 | 0.011598 | 0.011429 | 0.011496 | 0.011329 | 0.011463 | 0.011295 |
| 0.011362 | 0.011362 | 0.011396 | 0.011496 | 0.011396 | 0.011496 | 0.011564 |
| 0.011564 | 0.011530 | 0.011429 | 0.011530 | 0.011496 | 0.011362 | 0.011329 |
| 0.011362 | 0.011362 | 0.011429 | 0.011295 | 0.011329 | 0.011496 | 0.011362 |
| 0.011329 | 0.011396 | 0.011530 | 0.011496 | 0.011463 | 0.011396 | 0.011396 |
| 0.011463 | 0.011396 | 0.011496 | 0.011362 | 0.011496 | 0.011597 | 0.011698 |
| 0.011396 | 0.011597 | 0.011405 | 0.017898 | 0.011387 | 0.011488 | 0.011479 |
| 0.011441 | 0.011482 | 0.011479 | 0.011466 | 0.011774 | 0.011509 | 0.011485 |
| 0.011582 | 0.011549 | 0.011333 | 0.011437 | 0.011294 | 0.011307 | 0.011404 |
| 0.011482 | 0.011507 | 0.011431 | 0.011325 | 0.011530 | 0.011564 | 0.011567 |
| 0.011438 | 0.011530 | 0.011530 | 0.011429 | 0.011463 | 0.011463 | 0.011430 |
| 0.011463 | 0.011396 | 0.011429 | 0.011463 | 0.011430 | 0.011362 | 0.011396 |
| 0.011396 | 0.011463 | 0.011362 | 0.011463 | 0.011497 | 0.011530 | 0.011429 |
| 0.011396 | 0.011362 | 0.011564 | 0.011564 | 0.011497 | 0.011531 | 0.011564 |
| 0.011329 | 0.011329 | 0.011362 | 0.011463 | 0.011329 | 0.011564 | 0.011564 |
| 0.011597 | 0.011597 | 0.011530 | 0.011631 | 0.011597 | 0.011633 | 0.011463 |

|          |          |          |          |          |          |          |
|----------|----------|----------|----------|----------|----------|----------|
| 0.011463 | 0.011530 | 0.011564 | 0.011396 | 0.011463 | 0.011429 | 0.011463 |
| 0.011531 | 0.011530 | 0.011564 | 0.011530 | 0.011431 | 0.011631 | 0.011597 |
| 0.011467 | 0.011362 | 0.011463 | 0.011564 | 0.011463 | 0.011530 | 0.011631 |
| 0.011799 | 0.011504 | 0.011664 | 0.011631 | 0.011564 | 0.011732 | 0.011363 |
| 0.011532 | 0.011430 | 0.011396 | 0.011396 | 0.011463 | 0.011362 | 0.011463 |
| 0.011497 | 0.011530 | 0.011429 | 0.011396 | 0.011362 | 0.011564 | 0.011564 |
| 0.011497 | 0.011531 | 0.011597 | 0.011530 | 0.012103 | 0.011596 | 0.011517 |
| 0.011587 | 0.011546 | 0.011657 | 0.011545 | 0.011655 | 0.011577 | 0.011543 |
| 0.012056 | 0.011441 | 0.011574 | 0.011510 | 0.011783 | 0.011638 | 0.011741 |
| 0.012080 | 0.011512 | 0.011703 | 0.011765 | 0.011631 | 0.011564 | 0.011668 |
| 0.011329 | 0.011497 | 0.011631 | 0.011597 | 0.011601 | 0.011530 | 0.011498 |
| 0.011429 | 0.011362 | 0.011396 | 0.011429 | 0.011329 | 0.011396 | 0.011295 |
| 0.011362 | 0.011396 | 0.011362 | 0.011329 | 0.011429 | 0.011362 | 0.011396 |
| 0.011396 | 0.011329 | 0.011396 | 0.011429 | 0.011329 | 0.011530 | 0.011564 |
| 0.011463 | 0.011463 | 0.011463 | 0.011463 | 0.011396 | 0.011597 | 0.011429 |
| 0.011408 | 0.011396 | 0.011564 | 0.011569 | 0.011429 | 0.011429 | 0.011496 |
| 0.011496 | 0.011429 | 0.011396 | 0.011429 | 0.011530 | 0.011530 | 0.011463 |
| 0.011463 | 0.011597 | 0.011429 | 0.011496 | 0.011698 | 0.011698 | 0.011564 |
| 0.011396 | 0.011463 | 0.011496 | 0.011698 | 0.011463 | 0.011429 | 0.011463 |
| 0.011496 | 0.011362 | 0.011362 | 0.011665 | 0.011664 | 0.011631 | 0.011429 |
| 0.011530 | 0.011597 | 0.011463 | 0.011530 | 0.011496 | 0.011362 | 0.011429 |
| 0.011463 | 0.011429 | 0.011362 | 0.011597 | 0.011429 | 0.011530 | 0.011564 |
| 0.011463 | 0.011569 | 0.011564 | 0.011588 | 0.011399 | 0.011468 | 0.011370 |
| 0.011280 | 0.011800 | 0.011376 | 0.011462 | 0.011402 | 0.011416 | 0.011432 |
| 0.011570 | 0.011258 | 0.011505 | 0.011324 | 0.011384 | 0.011596 | 0.011547 |
| 0.011550 | 0.011454 | 0.011448 | 0.011448 | 0.011465 | 0.011530 | 0.011597 |
| 0.011597 | 0.011464 | 0.011567 | 0.011569 | 0.011704 | 0.011732 | 0.011463 |
| 0.011631 | 0.011497 | 0.011429 | 0.011463 | 0.011329 | 0.011496 | 0.011362 |
| 0.011429 | 0.011429 | 0.011396 | 0.011362 | 0.011396 | 0.011362 | 0.011463 |
| 0.011444 | 0.011445 | 0.011437 | 0.011471 | 0.011608 | 0.011573 | 0.011572 |
| 0.011571 | 0.011497 | 0.011319 | 0.011312 | 0.011433 | 0.011602 | 0.011603 |
| 0.011396 | 0.011467 | 0.011700 | 0.011668 | 0.011598 | 0.011632 | 0.011564 |
| 0.011429 | 0.011564 | 0.011563 | 0.011463 | 0.011832 | 0.011631 | 0.011698 |
| 0.011732 | 0.011523 | 0.011367 | 0.011511 | 0.011396 | 0.011597 | 0.011564 |
| 0.011598 | 0.011631 | 0.011631 | 0.011631 | 0.011689 | 0.011765 | 0.011407 |
| 0.011297 | 0.011303 | 0.011401 | 0.011366 | 0.011402 | 0.011284 | 0.011366 |
| 0.011437 | 0.011411 | 0.011346 | 0.011435 | 0.011430 | 0.011505 | 0.011396 |
| 0.011362 | 0.011295 | 0.011429 | 0.011396 | 0.011530 | 0.011497 | 0.011429 |
| 0.011530 | 0.011597 | 0.011396 | 0.011396 | 0.011430 | 0.011429 | 0.011432 |
| 0.011500 | 0.011429 | 0.011429 | 0.011465 | 0.011530 | 0.011597 | 0.011597 |
| 0.011464 | 0.011567 | 0.011569 | 0.011704 | 0.011732 | 0.011463 | 0.011631 |
| 0.011564 | 0.011564 | 0.011398 | 0.011582 | 0.011512 | 0.011537 | 0.011411 |
| 0.011577 | 0.011744 | 0.011568 | 0.011468 | 0.011362 | 0.011564 | 0.011429 |
| 0.011530 | 0.011463 | 0.011362 | 0.011464 | 0.011564 | 0.011567 | 0.011463 |
| 0.011362 | 0.011296 | 0.011429 | 0.011362 | 0.011295 | 0.011400 | 0.011564 |
| 0.011463 | 0.011396 | 0.011429 | 0.011463 | 0.011430 | 0.011362 | 0.011497 |
| 0.011429 | 0.011463 | 0.011463 | 0.011396 | 0.011463 | 0.011698 | 0.011295 |
| 0.011396 | 0.011597 | 0.011396 | 0.011429 | 0.011396 | 0.011496 | 0.011403 |
| 0.011735 | 0.011400 | 0.011361 | 0.011543 | 0.011630 | 0.011527 | 0.011353 |
| 0.011323 | 0.011496 | 0.011597 | 0.011705 | 0.011565 | 0.011703 | 0.011834 |
| 0.011733 | 0.011770 | 0.011731 | 0.011983 | 0.011698 | 0.012573 | 0.011734 |
| 0.012473 | 0.012241 | 0.012375 | 0.012646 | 0.011698 | 0.011396 | 0.011698 |
| 0.012137 | 0.012072 | 0.011664 | 0.011564 | 0.011632 | 0.011632 | 0.011567 |
| 0.011496 | 0.011501 | 0.011564 | 0.011531 | 0.011901 | 0.011967 | 0.011968 |
| 0.011867 | 0.011968 | 0.012072 | 0.011838 | 0.012138 | 0.012144 | 0.012205 |
| 0.012205 | 0.012239 | 0.012186 | 0.012205 | 0.012207 | 0.011496 | 0.011732 |
| 0.011800 | 0.012303 | 0.011806 | 0.011967 | 0.012440 | 0.011502 | 0.011396 |
| 0.011362 | 0.011362 | 0.011900 | 0.011924 | 0.012045 | 0.011765 | 0.011431 |
| S089     | 0.011597 | 0.011597 | 0.011933 | 0.011698 | 0.011698 | 0.011765 |
| 0.011603 | 0.011535 | 0.011765 | 0.011195 | 0.011262 | 0.011229 | 0.011194 |

|          |          |          |          |          |          |          |
|----------|----------|----------|----------|----------|----------|----------|
| 0.011228 | 0.011396 | 0.011194 | 0.011228 | 0.011295 | 0.011262 | 0.011228 |
| 0.011194 | 0.011228 | 0.011329 | 0.011195 | 0.011161 | 0.011228 | 0.011569 |
| 0.011463 | 0.011228 | 0.011127 | 0.011362 | 0.011228 | 0.011262 | 0.011228 |
| 0.011262 | 0.011295 | 0.011262 | 0.011262 | 0.011295 | 0.011262 | 0.011429 |
| 0.011194 | 0.011262 | 0.011295 | 0.011228 | 0.011329 | 0.011362 | 0.011295 |
| 0.011262 | 0.011429 | 0.011329 | 0.011597 | 0.011262 | 0.011463 | 0.011262 |
| 0.011228 | 0.011329 | 0.011396 | 0.011463 | 0.011631 | 0.011329 | 0.011429 |
| 0.011228 | 0.011295 | 0.011262 | 0.011429 | 0.011732 | 0.011262 | 0.011329 |
| 0.011161 | 0.011329 | 0.011295 | 0.011362 | 0.011295 | 0.011295 | 0.011295 |
| 0.011194 | 0.011228 | 0.011194 | 0.011295 | 0.011262 | 0.011296 | 0.011362 |
| 0.011295 | 0.011262 | 0.011262 | 0.011228 | 0.011362 | 0.000000 | 0.011262 |
| 0.011429 | 0.011362 | 0.011597 | 0.011429 | 0.011262 | 0.011429 | 0.011262 |
| 0.011431 | 0.011658 | 0.011475 | 0.011177 | 0.011172 | 0.011281 | 0.011375 |
| 0.012011 | 0.011416 | 0.011184 | 0.011496 | 0.011496 | 0.011295 | 0.011396 |
| 0.011329 | 0.011295 | 0.011362 | 0.011262 | 0.011362 | 0.011228 | 0.011295 |
| 0.011262 | 0.011362 | 0.011564 | 0.011429 | 0.011329 | 0.011295 | 0.011161 |
| 0.011195 | 0.011195 | 0.011195 | 0.011228 | 0.011429 | 0.011396 | 0.011329 |
| 0.011429 | 0.011497 | 0.011228 | 0.011228 | 0.011262 | 0.011262 | 0.011263 |
| 0.011331 | 0.011262 | 0.011262 | 0.011096 | 0.011205 | 0.011165 | 0.011262 |
| 0.011263 | 0.011198 | 0.011245 | 0.011233 | 0.011162 | 0.011197 | 0.011229 |
| 0.011492 | 0.011267 | 0.011232 | 0.011195 | 0.011199 | 0.011329 | 0.011296 |
| 0.011363 | 0.011296 | 0.011296 | 0.011396 | 0.011329 | 0.011631 | 0.011497 |
| 0.011530 | 0.011396 | 0.011262 | 0.011362 | 0.011161 | 0.011396 | 0.011195 |
| 0.011262 | 0.011262 | 0.011228 | 0.011195 | 0.011228 | 0.011195 | 0.011295 |
| 0.011195 | 0.011295 | 0.011295 | 0.011195 | 0.011296 | 0.011396 | 0.011398 |
| 0.011329 | 0.011295 | 0.011195 | 0.011128 | 0.011262 | 0.011195 | 0.011128 |
| 0.011230 | 0.011329 | 0.011127 | 0.011329 | 0.011161 | 0.011262 | 0.011228 |
| 0.011262 | 0.011228 | 0.011195 | 0.011228 | 0.011262 | 0.011127 | 0.011195 |
| 0.011228 | 0.011228 | 0.011295 | 0.011228 | 0.011262 | 0.011295 | 0.011530 |
| 0.011631 | 0.011564 | 0.011631 | 0.011397 | 0.011631 | 0.011262 | 0.011228 |
| 0.011263 | 0.011505 | 0.011335 | 0.011163 | 0.011637 | 0.011129 | 0.011257 |
| 0.011637 | 0.011536 | 0.011429 | 0.011631 | 0.011333 | 0.011497 | 0.011396 |
| 0.011396 | 0.011564 | 0.011380 | 0.011225 | 0.011270 | 0.011295 | 0.011365 |
| 0.011463 | 0.011364 | 0.011500 | 0.011500 | 0.011497 | 0.011564 | 0.011670 |
| 0.011399 | 0.011501 | 0.011500 | 0.011432 | 0.011699 | 0.011161 | 0.011363 |
| 0.011262 | 0.011262 | 0.011161 | 0.011161 | 0.011161 | 0.011228 | 0.011295 |
| 0.011161 | 0.011228 | 0.011127 | 0.011295 | 0.011161 | 0.011228 | 0.011295 |
| 0.011228 | 0.011664 | 0.011564 | 0.011597 | 0.011127 | 0.011228 | 0.011262 |
| 0.011262 | 0.011228 | 0.011295 | 0.011329 | 0.011194 | 0.011194 | 0.011194 |
| 0.011731 | 0.011362 | 0.011362 | 0.011161 | 0.011262 | 0.011362 | 0.011195 |
| 0.011194 | 0.011262 | 0.011228 | 0.011329 | 0.011194 | 0.011329 | 0.011396 |
| 0.011396 | 0.011228 | 0.011228 | 0.011161 | 0.011161 | 0.011329 | 0.011262 |
| 0.011161 | 0.011262 | 0.011127 | 0.011161 | 0.011295 | 0.011430 | 0.011195 |
| 0.011161 | 0.011295 | 0.011228 | 0.011127 | 0.011463 | 0.011127 | 0.011295 |
| 0.011266 | 0.011195 | 0.011497 | 0.011329 | 0.011362 | 0.011228 | 0.011329 |
| 0.011194 | 0.011463 | 0.011127 | 0.011396 | 0.011194 | 0.011194 | 0.011127 |
| 0.011295 | 0.011564 | 0.011262 | 0.011329 | 0.011161 | 0.011564 | 0.011194 |
| 0.011195 | 0.011194 | 0.011228 | 0.011262 | 0.011228 | 0.011329 | 0.011396 |
| 0.011396 | 0.011362 | 0.011262 | 0.011362 | 0.011262 | 0.011194 | 0.011161 |
| 0.011194 | 0.011194 | 0.011262 | 0.011194 | 0.011094 | 0.011329 | 0.011194 |
| 0.011228 | 0.011228 | 0.011362 | 0.011396 | 0.011295 | 0.011161 | 0.011228 |
| 0.011295 | 0.011228 | 0.011329 | 0.011194 | 0.011329 | 0.011429 | 0.011732 |
| 0.011228 | 0.011631 | 0.011233 | 0.017748 | 0.011126 | 0.011366 | 0.011583 |
| 0.011545 | 0.011588 | 0.011217 | 0.011176 | 0.011664 | 0.011613 | 0.011242 |
| 0.011440 | 0.011487 | 0.011138 | 0.011144 | 0.011177 | 0.011307 | 0.011232 |
| 0.011436 | 0.011395 | 0.011357 | 0.011193 | 0.011362 | 0.011396 | 0.011398 |
| 0.011198 | 0.011362 | 0.011362 | 0.011329 | 0.011295 | 0.011295 | 0.011262 |
| 0.011295 | 0.011228 | 0.011262 | 0.011295 | 0.011262 | 0.011195 | 0.011228 |
| 0.011228 | 0.011295 | 0.011195 | 0.011295 | 0.011329 | 0.011362 | 0.011262 |
| 0.011295 | 0.011262 | 0.011597 | 0.011597 | 0.011329 | 0.011363 | 0.011396 |

|          |          |          |          |          |          |          |
|----------|----------|----------|----------|----------|----------|----------|
| 0.011161 | 0.011161 | 0.011195 | 0.011228 | 0.011161 | 0.011396 | 0.011396 |
| 0.011429 | 0.011429 | 0.011362 | 0.011463 | 0.011631 | 0.011464 | 0.011228 |
| 0.011295 | 0.011362 | 0.011329 | 0.011228 | 0.011295 | 0.011262 | 0.011295 |
| 0.011363 | 0.011362 | 0.011396 | 0.011295 | 0.011195 | 0.011463 | 0.011362 |
| 0.011297 | 0.011195 | 0.011295 | 0.011396 | 0.011295 | 0.011430 | 0.011463 |
| 0.011631 | 0.011333 | 0.011497 | 0.011396 | 0.011396 | 0.011564 | 0.011195 |
| 0.011363 | 0.011262 | 0.011228 | 0.011228 | 0.011295 | 0.011195 | 0.011295 |
| 0.011329 | 0.011362 | 0.011262 | 0.011295 | 0.011262 | 0.011597 | 0.011597 |
| 0.011329 | 0.011363 | 0.011429 | 0.011362 | 0.012002 | 0.011417 | 0.011306 |
| 0.011412 | 0.011372 | 0.011447 | 0.011337 | 0.011480 | 0.011405 | 0.011370 |
| 0.011918 | 0.011268 | 0.011403 | 0.011337 | 0.011611 | 0.011468 | 0.011502 |
| 0.011978 | 0.011399 | 0.011533 | 0.011597 | 0.011463 | 0.011463 | 0.011499 |
| 0.011161 | 0.011262 | 0.011463 | 0.011429 | 0.011432 | 0.011429 | 0.011397 |
| 0.011262 | 0.011127 | 0.011161 | 0.011262 | 0.011094 | 0.011228 | 0.011127 |
| 0.011262 | 0.011295 | 0.011194 | 0.011161 | 0.011262 | 0.011194 | 0.011228 |
| 0.011228 | 0.011161 | 0.011228 | 0.011262 | 0.011161 | 0.011295 | 0.011396 |
| 0.011295 | 0.011362 | 0.011295 | 0.011295 | 0.011228 | 0.011631 | 0.011262 |
| 0.011269 | 0.011228 | 0.011463 | 0.011467 | 0.011262 | 0.011329 | 0.011329 |
| 0.011329 | 0.011195 | 0.011228 | 0.011195 | 0.011362 | 0.011362 | 0.011295 |
| 0.011295 | 0.011429 | 0.011597 | 0.011329 | 0.011530 | 0.011530 | 0.011396 |
| 0.011228 | 0.011295 | 0.011329 | 0.011732 | 0.011295 | 0.011262 | 0.011295 |
| 0.011329 | 0.011262 | 0.011262 | 0.011564 | 0.011429 | 0.011530 | 0.011262 |
| 0.011362 | 0.011429 | 0.011295 | 0.011362 | 0.011329 | 0.011195 | 0.011530 |
| 0.011295 | 0.011262 | 0.011262 | 0.011429 | 0.011262 | 0.011362 | 0.011597 |
| 0.011295 | 0.011671 | 0.011664 | 0.011467 | 0.011173 | 0.011366 | 0.011215 |
| 0.011225 | 0.011683 | 0.011201 | 0.011417 | 0.011207 | 0.011366 | 0.011326 |
| 0.011417 | 0.011126 | 0.011283 | 0.011126 | 0.011168 | 0.011328 | 0.011303 |
| 0.011324 | 0.011178 | 0.011342 | 0.011272 | 0.011296 | 0.011429 | 0.011497 |
| 0.011497 | 0.011363 | 0.011466 | 0.011467 | 0.011603 | 0.011626 | 0.011295 |
| 0.011530 | 0.011396 | 0.011262 | 0.011362 | 0.011161 | 0.011396 | 0.011195 |
| 0.011262 | 0.011262 | 0.011228 | 0.011195 | 0.011228 | 0.011195 | 0.011295 |
| 0.011270 | 0.011270 | 0.011266 | 0.011300 | 0.011437 | 0.011333 | 0.011402 |
| 0.011401 | 0.011329 | 0.011134 | 0.011132 | 0.011263 | 0.011433 | 0.011433 |
| 0.011228 | 0.011297 | 0.011531 | 0.011500 | 0.011430 | 0.011464 | 0.011396 |
| 0.011329 | 0.011396 | 0.011396 | 0.011295 | 0.011866 | 0.011463 | 0.011530 |
| 0.011564 | 0.011630 | 0.011265 | 0.011337 | 0.011228 | 0.011429 | 0.011396 |
| 0.011430 | 0.011463 | 0.011463 | 0.011463 | 0.011611 | 0.011597 | 0.011234 |
| 0.011128 | 0.011130 | 0.011230 | 0.011196 | 0.011299 | 0.011135 | 0.011468 |
| 0.011266 | 0.011323 | 0.000000 | 0.011248 | 0.011262 | 0.011334 | 0.011161 |
| 0.011195 | 0.011195 | 0.011195 | 0.011228 | 0.011429 | 0.011396 | 0.011329 |
| 0.011429 | 0.011497 | 0.011228 | 0.011228 | 0.011262 | 0.011262 | 0.011263 |
| 0.011331 | 0.011262 | 0.011262 | 0.011296 | 0.011429 | 0.011497 | 0.011497 |
| 0.011363 | 0.011466 | 0.011467 | 0.011603 | 0.011626 | 0.011295 | 0.011463 |
| 0.011396 | 0.011396 | 0.011229 | 0.011408 | 0.011338 | 0.011367 | 0.011235 |
| 0.011336 | 0.011561 | 0.011357 | 0.011298 | 0.011127 | 0.011329 | 0.011195 |
| 0.011295 | 0.011295 | 0.011195 | 0.011296 | 0.011396 | 0.011398 | 0.011295 |
| 0.011195 | 0.011128 | 0.011262 | 0.011195 | 0.011128 | 0.011230 | 0.011329 |
| 0.011295 | 0.011228 | 0.011262 | 0.011295 | 0.011262 | 0.011195 | 0.011396 |
| 0.011262 | 0.011295 | 0.011295 | 0.011228 | 0.011295 | 0.011530 | 0.011194 |
| 0.011161 | 0.011631 | 0.011228 | 0.011194 | 0.011228 | 0.011597 | 0.011189 |
| 0.011622 | 0.011188 | 0.011211 | 0.011422 | 0.011508 | 0.011419 | 0.011144 |
| 0.011165 | 0.011396 | 0.011496 | 0.011603 | 0.011464 | 0.011601 | 0.011733 |
| 0.011632 | 0.011669 | 0.011631 | 0.011880 | 0.011597 | 0.012472 | 0.011633 |
| 0.012372 | 0.012139 | 0.012273 | 0.012545 | 0.011597 | 0.011295 | 0.011598 |
| 0.012036 | 0.011971 | 0.011564 | 0.011463 | 0.011531 | 0.011531 | 0.011500 |
| 0.011396 | 0.011399 | 0.011463 | 0.011430 | 0.011800 | 0.011866 | 0.011867 |
| 0.011767 | 0.011867 | 0.011970 | 0.011737 | 0.012037 | 0.012042 | 0.012104 |
| 0.012104 | 0.012138 | 0.012084 | 0.012104 | 0.012106 | 0.011329 | 0.011631 |
| 0.011699 | 0.012202 | 0.011704 | 0.011933 | 0.012406 | 0.011468 | 0.011363 |
| 0.011329 | 0.011329 | 0.011799 | 0.011800 | 0.011940 | 0.011664 | 0.011330 |

|          |          |          |          |          |          |          |
|----------|----------|----------|----------|----------|----------|----------|
| S090     | 0.011664 | 0.011664 | 0.012001 | 0.011765 | 0.011765 | 0.011832 |
| 0.011671 | 0.011603 | 0.011832 | 0.011262 | 0.011329 | 0.011296 | 0.011262 |
| 0.011295 | 0.011463 | 0.011262 | 0.011295 | 0.011362 | 0.011329 | 0.011295 |
| 0.011262 | 0.011295 | 0.011396 | 0.011262 | 0.011295 | 0.011295 | 0.011637 |
| 0.011530 | 0.011295 | 0.011194 | 0.011429 | 0.011362 | 0.011329 | 0.011362 |
| 0.011329 | 0.011429 | 0.011329 | 0.011329 | 0.011362 | 0.011329 | 0.011496 |
| 0.011262 | 0.011329 | 0.011362 | 0.011295 | 0.011396 | 0.011429 | 0.011362 |
| 0.011329 | 0.011497 | 0.011396 | 0.011664 | 0.011329 | 0.011530 | 0.011329 |
| 0.011295 | 0.011396 | 0.011463 | 0.011530 | 0.011698 | 0.011396 | 0.011496 |
| 0.011362 | 0.011429 | 0.011329 | 0.011564 | 0.011799 | 0.011329 | 0.011396 |
| 0.011295 | 0.011396 | 0.011362 | 0.011429 | 0.011362 | 0.011362 | 0.011362 |
| 0.011262 | 0.011295 | 0.011262 | 0.011362 | 0.011329 | 0.011363 | 0.011429 |
| 0.011362 | 0.011329 | 0.011396 | 0.011295 | 0.011429 | 0.011262 | 0.000000 |
| 0.011496 | 0.011429 | 0.011664 | 0.011497 | 0.011329 | 0.011564 | 0.011329 |
| 0.011468 | 0.011695 | 0.011475 | 0.011138 | 0.011172 | 0.011318 | 0.011375 |
| 0.012011 | 0.011416 | 0.011184 | 0.011564 | 0.011564 | 0.011362 | 0.011463 |
| 0.011396 | 0.011362 | 0.011429 | 0.011329 | 0.011429 | 0.011362 | 0.011362 |
| 0.011329 | 0.011429 | 0.011631 | 0.011496 | 0.011396 | 0.011362 | 0.011295 |
| 0.011262 | 0.011262 | 0.011329 | 0.011295 | 0.011497 | 0.011463 | 0.011396 |
| 0.011497 | 0.011564 | 0.011295 | 0.011295 | 0.011329 | 0.011329 | 0.011330 |
| 0.011398 | 0.011329 | 0.011329 | 0.011168 | 0.011241 | 0.011200 | 0.011329 |
| 0.011297 | 0.011232 | 0.011245 | 0.011267 | 0.011230 | 0.011232 | 0.011297 |
| 0.011528 | 0.011302 | 0.011336 | 0.011262 | 0.011233 | 0.011397 | 0.011363 |
| 0.011430 | 0.011330 | 0.011363 | 0.011463 | 0.011396 | 0.011765 | 0.011564 |
| 0.011597 | 0.011463 | 0.011329 | 0.011430 | 0.011228 | 0.011463 | 0.011262 |
| 0.011329 | 0.011329 | 0.011295 | 0.011262 | 0.011295 | 0.011262 | 0.011362 |
| 0.011329 | 0.011429 | 0.011362 | 0.011262 | 0.011363 | 0.011463 | 0.011466 |
| 0.011463 | 0.011362 | 0.011262 | 0.011195 | 0.011329 | 0.011262 | 0.011195 |
| 0.011298 | 0.011463 | 0.011262 | 0.011463 | 0.011228 | 0.011329 | 0.011295 |
| 0.011396 | 0.011295 | 0.011329 | 0.011295 | 0.011329 | 0.011195 | 0.011329 |
| 0.011362 | 0.011295 | 0.011362 | 0.011295 | 0.011329 | 0.011362 | 0.011597 |
| 0.011698 | 0.011631 | 0.011698 | 0.011431 | 0.011698 | 0.011329 | 0.011295 |
| 0.011330 | 0.011586 | 0.011426 | 0.011197 | 0.011705 | 0.011197 | 0.011296 |
| 0.011705 | 0.011604 | 0.011496 | 0.011698 | 0.011402 | 0.011564 | 0.011530 |
| 0.011463 | 0.011631 | 0.011486 | 0.011307 | 0.011354 | 0.011362 | 0.011432 |
| 0.011530 | 0.011431 | 0.011567 | 0.011635 | 0.011564 | 0.011631 | 0.011738 |
| 0.011466 | 0.011637 | 0.011568 | 0.011500 | 0.011767 | 0.011228 | 0.011431 |
| 0.011396 | 0.011329 | 0.011228 | 0.011228 | 0.011295 | 0.011295 | 0.011362 |
| 0.011295 | 0.011362 | 0.011262 | 0.011362 | 0.011295 | 0.011295 | 0.011362 |
| 0.011295 | 0.011731 | 0.011631 | 0.011664 | 0.011194 | 0.011295 | 0.011329 |
| 0.011329 | 0.011295 | 0.011362 | 0.011396 | 0.011262 | 0.011262 | 0.011262 |
| 0.011799 | 0.011429 | 0.011429 | 0.011228 | 0.011329 | 0.011497 | 0.011262 |
| 0.011262 | 0.011329 | 0.011295 | 0.011463 | 0.011262 | 0.011396 | 0.011530 |
| 0.011463 | 0.011295 | 0.011295 | 0.011228 | 0.011228 | 0.011396 | 0.011329 |
| 0.011228 | 0.011329 | 0.011195 | 0.011228 | 0.011362 | 0.011497 | 0.011262 |
| 0.011228 | 0.011362 | 0.011295 | 0.011195 | 0.011530 | 0.011195 | 0.011362 |
| 0.011437 | 0.011262 | 0.011564 | 0.011396 | 0.011429 | 0.011295 | 0.011396 |
| 0.011262 | 0.011530 | 0.011194 | 0.011463 | 0.011262 | 0.011262 | 0.011194 |
| 0.011429 | 0.011597 | 0.011329 | 0.011396 | 0.011228 | 0.011631 | 0.011262 |
| 0.011262 | 0.011262 | 0.011295 | 0.011396 | 0.011295 | 0.011396 | 0.011463 |
| 0.011463 | 0.011429 | 0.011329 | 0.011429 | 0.011396 | 0.011262 | 0.011228 |
| 0.011262 | 0.011262 | 0.011329 | 0.011262 | 0.011228 | 0.011396 | 0.011262 |
| 0.011295 | 0.011295 | 0.011429 | 0.011463 | 0.011362 | 0.011295 | 0.011295 |
| 0.011362 | 0.011295 | 0.011396 | 0.011262 | 0.011396 | 0.011496 | 0.011799 |
| 0.011295 | 0.011698 | 0.011267 | 0.017785 | 0.011191 | 0.011305 | 0.011618 |
| 0.011579 | 0.011623 | 0.011322 | 0.011292 | 0.011664 | 0.011647 | 0.011303 |
| 0.011440 | 0.011487 | 0.011138 | 0.011228 | 0.011216 | 0.011258 | 0.011189 |
| 0.011436 | 0.011395 | 0.011394 | 0.011259 | 0.011429 | 0.011463 | 0.011466 |
| 0.011335 | 0.011429 | 0.011429 | 0.011396 | 0.011362 | 0.011362 | 0.011329 |
| 0.011362 | 0.011295 | 0.011329 | 0.011362 | 0.011329 | 0.011262 | 0.011295 |

|          |          |          |          |          |          |          |
|----------|----------|----------|----------|----------|----------|----------|
| 0.011295 | 0.011362 | 0.011262 | 0.011362 | 0.011396 | 0.011429 | 0.011329 |
| 0.011362 | 0.011329 | 0.011665 | 0.011665 | 0.011396 | 0.011430 | 0.011463 |
| 0.011228 | 0.011228 | 0.011262 | 0.011362 | 0.011228 | 0.011463 | 0.011463 |
| 0.011497 | 0.011496 | 0.011429 | 0.011530 | 0.011698 | 0.011532 | 0.011362 |
| 0.011362 | 0.011429 | 0.011463 | 0.011295 | 0.011362 | 0.011329 | 0.011362 |
| 0.011430 | 0.011430 | 0.011463 | 0.011430 | 0.011330 | 0.011530 | 0.011497 |
| 0.011365 | 0.011262 | 0.011362 | 0.011463 | 0.011362 | 0.011497 | 0.011530 |
| 0.011698 | 0.011402 | 0.011564 | 0.011530 | 0.011463 | 0.011631 | 0.011262 |
| 0.011431 | 0.011295 | 0.011295 | 0.011295 | 0.011362 | 0.011262 | 0.011362 |
| 0.011396 | 0.011429 | 0.011329 | 0.011362 | 0.011329 | 0.011665 | 0.011665 |
| 0.011396 | 0.011430 | 0.011496 | 0.011429 | 0.012069 | 0.011489 | 0.011412 |
| 0.011482 | 0.011442 | 0.011552 | 0.011441 | 0.011550 | 0.011474 | 0.011405 |
| 0.012021 | 0.011337 | 0.011471 | 0.011406 | 0.011680 | 0.011536 | 0.011639 |
| 0.012046 | 0.011512 | 0.011601 | 0.011664 | 0.011530 | 0.011530 | 0.011567 |
| 0.011228 | 0.011396 | 0.011530 | 0.011496 | 0.011499 | 0.011496 | 0.011431 |
| 0.011329 | 0.011262 | 0.011295 | 0.011194 | 0.011228 | 0.011295 | 0.011194 |
| 0.011329 | 0.011362 | 0.011262 | 0.011228 | 0.011329 | 0.011262 | 0.011295 |
| 0.011295 | 0.011228 | 0.011295 | 0.011329 | 0.011228 | 0.011429 | 0.011463 |
| 0.011362 | 0.011429 | 0.011362 | 0.011362 | 0.011295 | 0.011698 | 0.011329 |
| 0.011373 | 0.011295 | 0.011530 | 0.011535 | 0.011396 | 0.011396 | 0.011396 |
| 0.011396 | 0.011329 | 0.011295 | 0.011329 | 0.011429 | 0.011429 | 0.011362 |
| 0.011362 | 0.011496 | 0.011664 | 0.011396 | 0.011597 | 0.011597 | 0.011463 |
| 0.011295 | 0.011362 | 0.011396 | 0.011799 | 0.011362 | 0.011396 | 0.011362 |
| 0.011396 | 0.011329 | 0.011329 | 0.011631 | 0.011564 | 0.011597 | 0.011329 |
| 0.011429 | 0.011496 | 0.011362 | 0.011429 | 0.011396 | 0.011262 | 0.011597 |
| 0.011362 | 0.011329 | 0.011329 | 0.011496 | 0.011329 | 0.011429 | 0.011664 |
| 0.011362 | 0.011739 | 0.011731 | 0.011467 | 0.011173 | 0.011434 | 0.011215 |
| 0.011170 | 0.011683 | 0.011236 | 0.011328 | 0.011207 | 0.011315 | 0.011326 |
| 0.011468 | 0.011126 | 0.011283 | 0.011126 | 0.011168 | 0.011328 | 0.011385 |
| 0.011399 | 0.011296 | 0.011377 | 0.011307 | 0.011364 | 0.011497 | 0.011564 |
| 0.011564 | 0.011430 | 0.011533 | 0.011535 | 0.011670 | 0.011696 | 0.011362 |
| 0.011597 | 0.011463 | 0.011329 | 0.011430 | 0.011228 | 0.011463 | 0.011262 |
| 0.011329 | 0.011329 | 0.011295 | 0.011262 | 0.011295 | 0.011262 | 0.011362 |
| 0.011305 | 0.011305 | 0.011300 | 0.011334 | 0.011471 | 0.011436 | 0.011436 |
| 0.011435 | 0.011396 | 0.011171 | 0.011168 | 0.011297 | 0.011467 | 0.011467 |
| 0.011296 | 0.011331 | 0.011599 | 0.011533 | 0.011497 | 0.011531 | 0.011463 |
| 0.011396 | 0.011463 | 0.011463 | 0.011362 | 0.011933 | 0.011530 | 0.011597 |
| 0.011631 | 0.011701 | 0.011333 | 0.011407 | 0.011295 | 0.011497 | 0.011463 |
| 0.011497 | 0.011530 | 0.011530 | 0.011530 | 0.011689 | 0.011664 | 0.011303 |
| 0.011195 | 0.011199 | 0.011298 | 0.011264 | 0.011368 | 0.011209 | 0.011536 |
| 0.011335 | 0.011455 | 0.011203 | 0.011322 | 0.011329 | 0.011368 | 0.011295 |
| 0.011262 | 0.011262 | 0.011329 | 0.011295 | 0.011497 | 0.011463 | 0.011396 |
| 0.011497 | 0.011564 | 0.011295 | 0.011295 | 0.011329 | 0.011329 | 0.011330 |
| 0.011398 | 0.011329 | 0.011329 | 0.011364 | 0.011497 | 0.011564 | 0.011564 |
| 0.011430 | 0.011533 | 0.011535 | 0.011670 | 0.011696 | 0.011362 | 0.011530 |
| 0.011463 | 0.011463 | 0.011297 | 0.011478 | 0.011408 | 0.011435 | 0.011270 |
| 0.011473 | 0.011652 | 0.011441 | 0.011366 | 0.011262 | 0.011463 | 0.011329 |
| 0.011429 | 0.011362 | 0.011262 | 0.011363 | 0.011463 | 0.011466 | 0.011362 |
| 0.011262 | 0.011195 | 0.011329 | 0.011262 | 0.011195 | 0.011298 | 0.011463 |
| 0.011362 | 0.011295 | 0.011329 | 0.011362 | 0.011329 | 0.011262 | 0.011463 |
| 0.011329 | 0.011362 | 0.011362 | 0.011295 | 0.011362 | 0.011597 | 0.011262 |
| 0.011295 | 0.011698 | 0.011295 | 0.011329 | 0.011295 | 0.011664 | 0.011189 |
| 0.011678 | 0.011188 | 0.011211 | 0.011422 | 0.011508 | 0.011455 | 0.011102 |
| 0.011165 | 0.011463 | 0.011564 | 0.011671 | 0.011531 | 0.011635 | 0.011800 |
| 0.011699 | 0.011737 | 0.011698 | 0.011914 | 0.011664 | 0.012539 | 0.011700 |
| 0.012439 | 0.012207 | 0.012341 | 0.012612 | 0.011664 | 0.011362 | 0.011665 |
| 0.012103 | 0.012004 | 0.011631 | 0.011530 | 0.011598 | 0.011598 | 0.011567 |
| 0.011463 | 0.011433 | 0.011530 | 0.011497 | 0.011867 | 0.011933 | 0.011935 |
| 0.011834 | 0.011934 | 0.012038 | 0.011770 | 0.012104 | 0.012110 | 0.012171 |
| 0.012172 | 0.012205 | 0.012118 | 0.012172 | 0.012173 | 0.011396 | 0.011699 |

|          |          |          |          |          |          |          |
|----------|----------|----------|----------|----------|----------|----------|
| 0.011766 | 0.012270 | 0.011772 | 0.012001 | 0.012474 | 0.011536 | 0.011430 |
| 0.011396 | 0.011396 | 0.011867 | 0.011883 | 0.011975 | 0.011731 | 0.011397 |
| S091     | 0.011832 | 0.011832 | 0.012169 | 0.011933 | 0.011933 | 0.012000 |
| 0.011807 | 0.011739 | 0.012000 | 0.011429 | 0.011496 | 0.011464 | 0.011429 |
| 0.011463 | 0.011631 | 0.011429 | 0.011463 | 0.011530 | 0.011496 | 0.011463 |
| 0.011429 | 0.011463 | 0.011564 | 0.011430 | 0.011463 | 0.011463 | 0.011773 |
| 0.011698 | 0.011463 | 0.011362 | 0.011597 | 0.011530 | 0.011497 | 0.011530 |
| 0.011496 | 0.011597 | 0.011496 | 0.011496 | 0.011530 | 0.011496 | 0.011664 |
| 0.011429 | 0.011496 | 0.011530 | 0.011463 | 0.011564 | 0.011597 | 0.011530 |
| 0.011496 | 0.011664 | 0.011564 | 0.011832 | 0.011496 | 0.011765 | 0.011496 |
| 0.011463 | 0.011564 | 0.011631 | 0.011765 | 0.011866 | 0.011564 | 0.011664 |
| 0.011530 | 0.011597 | 0.011496 | 0.011731 | 0.011967 | 0.011496 | 0.011564 |
| 0.011463 | 0.011564 | 0.011530 | 0.011597 | 0.011530 | 0.011530 | 0.011530 |
| 0.011429 | 0.011463 | 0.011429 | 0.011530 | 0.011496 | 0.011531 | 0.011262 |
| 0.011530 | 0.011496 | 0.011564 | 0.011463 | 0.011597 | 0.011429 | 0.011496 |
| 0.000000 | 0.011597 | 0.011832 | 0.011664 | 0.011496 | 0.011731 | 0.011496 |
| 0.011653 | 0.011882 | 0.011702 | 0.011412 | 0.011359 | 0.011502 | 0.011572 |
| 0.012195 | 0.011721 | 0.011390 | 0.011731 | 0.011731 | 0.011530 | 0.011631 |
| 0.011564 | 0.011530 | 0.011597 | 0.011496 | 0.011597 | 0.011530 | 0.011530 |
| 0.011496 | 0.011597 | 0.011799 | 0.011664 | 0.011564 | 0.011530 | 0.011463 |
| 0.011429 | 0.011429 | 0.011497 | 0.011463 | 0.011665 | 0.011631 | 0.011564 |
| 0.011665 | 0.011732 | 0.011463 | 0.011463 | 0.011497 | 0.011497 | 0.011465 |
| 0.011533 | 0.011497 | 0.011497 | 0.011348 | 0.011422 | 0.011411 | 0.011497 |
| 0.011500 | 0.011404 | 0.011503 | 0.011474 | 0.011400 | 0.011437 | 0.011465 |
| 0.011744 | 0.011508 | 0.011542 | 0.011430 | 0.011440 | 0.011565 | 0.011531 |
| 0.011598 | 0.011532 | 0.011531 | 0.011631 | 0.011564 | 0.011933 | 0.011732 |
| 0.011765 | 0.011631 | 0.011496 | 0.011597 | 0.011396 | 0.011631 | 0.011430 |
| 0.011496 | 0.011496 | 0.011463 | 0.011429 | 0.011463 | 0.011429 | 0.011530 |
| 0.011497 | 0.011597 | 0.011530 | 0.011429 | 0.011532 | 0.011631 | 0.011635 |
| 0.011631 | 0.011530 | 0.011429 | 0.011364 | 0.011497 | 0.011429 | 0.011362 |
| 0.011468 | 0.011631 | 0.011430 | 0.011631 | 0.011396 | 0.011497 | 0.011463 |
| 0.011564 | 0.011463 | 0.011497 | 0.011463 | 0.011497 | 0.011362 | 0.011497 |
| 0.011530 | 0.011463 | 0.011530 | 0.011463 | 0.011497 | 0.011530 | 0.011765 |
| 0.011866 | 0.011799 | 0.011866 | 0.011633 | 0.011866 | 0.011497 | 0.011463 |
| 0.011499 | 0.011828 | 0.011609 | 0.011403 | 0.011875 | 0.011367 | 0.011493 |
| 0.011841 | 0.011774 | 0.011664 | 0.011866 | 0.011572 | 0.011732 | 0.011698 |
| 0.011631 | 0.011799 | 0.011664 | 0.011555 | 0.011563 | 0.011530 | 0.011601 |
| 0.011698 | 0.011600 | 0.011736 | 0.011805 | 0.011732 | 0.011799 | 0.011907 |
| 0.011635 | 0.011807 | 0.011737 | 0.011669 | 0.011935 | 0.011396 | 0.011599 |
| 0.011564 | 0.011496 | 0.011396 | 0.011396 | 0.011463 | 0.011463 | 0.011530 |
| 0.011463 | 0.011530 | 0.011429 | 0.011530 | 0.011463 | 0.011463 | 0.011530 |
| 0.011463 | 0.011899 | 0.011799 | 0.011832 | 0.011362 | 0.011463 | 0.011496 |
| 0.011496 | 0.011463 | 0.011530 | 0.011564 | 0.011429 | 0.011429 | 0.011429 |
| 0.011967 | 0.011597 | 0.011597 | 0.011396 | 0.011496 | 0.011664 | 0.011429 |
| 0.011429 | 0.011496 | 0.011463 | 0.011631 | 0.011429 | 0.011564 | 0.011698 |
| 0.011631 | 0.011463 | 0.011463 | 0.011396 | 0.011396 | 0.011564 | 0.011496 |
| 0.011396 | 0.011496 | 0.011362 | 0.011396 | 0.011530 | 0.011665 | 0.011429 |
| 0.011396 | 0.011530 | 0.011463 | 0.011362 | 0.011698 | 0.011362 | 0.011530 |
| 0.011608 | 0.011429 | 0.011732 | 0.011564 | 0.011597 | 0.011463 | 0.011564 |
| 0.011429 | 0.011765 | 0.011362 | 0.011631 | 0.011429 | 0.011429 | 0.011362 |
| 0.011597 | 0.011799 | 0.011496 | 0.011564 | 0.011396 | 0.011799 | 0.011429 |
| 0.011429 | 0.011429 | 0.011463 | 0.011564 | 0.011463 | 0.011564 | 0.011631 |
| 0.011631 | 0.011597 | 0.011496 | 0.011597 | 0.011564 | 0.011429 | 0.011396 |
| 0.011429 | 0.011429 | 0.011496 | 0.011429 | 0.011396 | 0.011564 | 0.011429 |
| 0.011463 | 0.011463 | 0.011597 | 0.011631 | 0.011530 | 0.011463 | 0.011463 |
| 0.011530 | 0.011463 | 0.011564 | 0.011429 | 0.011564 | 0.011664 | 0.011967 |
| 0.011463 | 0.011866 | 0.011440 | 0.017898 | 0.011387 | 0.011488 | 0.011793 |
| 0.011787 | 0.011799 | 0.011479 | 0.011466 | 0.011829 | 0.011854 | 0.011425 |
| 0.011724 | 0.011671 | 0.011372 | 0.011479 | 0.011450 | 0.011406 | 0.011447 |
| 0.011717 | 0.011581 | 0.011579 | 0.011457 | 0.011597 | 0.011631 | 0.011635 |



|          |          |          |          |          |          |          |
|----------|----------|----------|----------|----------|----------|----------|
| 0.011507 | 0.011597 | 0.011597 | 0.011564 | 0.011530 | 0.011530 | 0.011497 |
| 0.011530 | 0.011463 | 0.011497 | 0.011530 | 0.011497 | 0.011429 | 0.011463 |
| 0.011463 | 0.011530 | 0.011429 | 0.011530 | 0.011564 | 0.011597 | 0.011496 |
| 0.011530 | 0.011497 | 0.011833 | 0.011833 | 0.011564 | 0.011598 | 0.011631 |
| 0.011396 | 0.011396 | 0.011429 | 0.011530 | 0.011396 | 0.011631 | 0.011631 |
| 0.011665 | 0.011664 | 0.011597 | 0.011698 | 0.011866 | 0.011666 | 0.011530 |
| 0.011530 | 0.011597 | 0.011631 | 0.011463 | 0.011530 | 0.011497 | 0.011530 |
| 0.011598 | 0.011598 | 0.011631 | 0.011598 | 0.011498 | 0.011698 | 0.011665 |
| 0.011500 | 0.011429 | 0.011530 | 0.011631 | 0.011530 | 0.011665 | 0.011698 |
| 0.011866 | 0.011572 | 0.011732 | 0.011698 | 0.011631 | 0.011799 | 0.011430 |
| 0.011599 | 0.011497 | 0.011463 | 0.011463 | 0.011530 | 0.011429 | 0.011530 |
| 0.011564 | 0.011597 | 0.011496 | 0.011530 | 0.011497 | 0.011833 | 0.011833 |
| 0.011564 | 0.011598 | 0.011664 | 0.011597 | 0.012238 | 0.011667 | 0.011588 |
| 0.011623 | 0.011615 | 0.011728 | 0.011614 | 0.011725 | 0.011646 | 0.011612 |
| 0.012193 | 0.011510 | 0.011642 | 0.011579 | 0.011852 | 0.011706 | 0.011809 |
| 0.012216 | 0.011701 | 0.011736 | 0.011832 | 0.011698 | 0.011698 | 0.011702 |
| 0.011396 | 0.011564 | 0.011698 | 0.011664 | 0.011634 | 0.011664 | 0.011633 |
| 0.011496 | 0.011429 | 0.011463 | 0.011496 | 0.011396 | 0.011463 | 0.011362 |
| 0.011496 | 0.011530 | 0.011429 | 0.011396 | 0.011496 | 0.011429 | 0.011463 |
| 0.011463 | 0.011396 | 0.011463 | 0.011496 | 0.011396 | 0.011597 | 0.011631 |
| 0.011530 | 0.011597 | 0.011530 | 0.011530 | 0.011463 | 0.011866 | 0.011496 |
| 0.011547 | 0.011463 | 0.011698 | 0.011705 | 0.011564 | 0.011564 | 0.011564 |
| 0.011564 | 0.011496 | 0.011463 | 0.011496 | 0.011597 | 0.011597 | 0.011530 |
| 0.011530 | 0.011664 | 0.011832 | 0.011563 | 0.011765 | 0.011765 | 0.011564 |
| 0.011463 | 0.011530 | 0.011564 | 0.011967 | 0.011530 | 0.011564 | 0.011530 |
| 0.011564 | 0.011496 | 0.011496 | 0.011799 | 0.011732 | 0.011765 | 0.011496 |
| 0.011597 | 0.011664 | 0.011530 | 0.011597 | 0.011564 | 0.011429 | 0.011765 |
| 0.011530 | 0.011496 | 0.011496 | 0.011664 | 0.011496 | 0.011597 | 0.011832 |
| 0.011530 | 0.011875 | 0.011899 | 0.011670 | 0.011455 | 0.011604 | 0.011525 |
| 0.011280 | 0.011878 | 0.011411 | 0.011596 | 0.011499 | 0.011467 | 0.011538 |
| 0.011672 | 0.011258 | 0.011505 | 0.011324 | 0.011437 | 0.011596 | 0.011587 |
| 0.011588 | 0.011454 | 0.011553 | 0.011448 | 0.011532 | 0.011665 | 0.011732 |
| 0.011732 | 0.011598 | 0.011703 | 0.011636 | 0.011840 | 0.011873 | 0.011530 |
| 0.011765 | 0.011631 | 0.011496 | 0.011597 | 0.011396 | 0.011631 | 0.011430 |
| 0.011496 | 0.011496 | 0.011463 | 0.011429 | 0.011463 | 0.011429 | 0.011530 |
| 0.011514 | 0.011515 | 0.011505 | 0.011540 | 0.011676 | 0.011641 | 0.011641 |
| 0.011639 | 0.011564 | 0.011392 | 0.011384 | 0.011500 | 0.011670 | 0.011671 |
| 0.011464 | 0.011534 | 0.011767 | 0.011736 | 0.011666 | 0.011699 | 0.011631 |
| 0.011564 | 0.011631 | 0.011631 | 0.011530 | 0.012101 | 0.011698 | 0.011765 |
| 0.011799 | 0.011843 | 0.011503 | 0.011580 | 0.011463 | 0.011664 | 0.011631 |
| 0.011666 | 0.011698 | 0.011698 | 0.011698 | 0.011807 | 0.011832 | 0.011476 |
| 0.011364 | 0.011372 | 0.011469 | 0.011434 | 0.011538 | 0.011396 | 0.011706 |
| 0.011506 | 0.011630 | 0.011394 | 0.011547 | 0.011497 | 0.011573 | 0.011463 |
| 0.011429 | 0.011429 | 0.011497 | 0.011463 | 0.011665 | 0.011631 | 0.011564 |
| 0.011665 | 0.011732 | 0.011463 | 0.011463 | 0.011497 | 0.011497 | 0.011465 |
| 0.011533 | 0.011497 | 0.011497 | 0.011532 | 0.011665 | 0.011732 | 0.011732 |
| 0.011598 | 0.011703 | 0.011636 | 0.011840 | 0.011873 | 0.011530 | 0.011698 |
| 0.011631 | 0.011631 | 0.011466 | 0.011652 | 0.011547 | 0.011605 | 0.011481 |
| 0.011646 | 0.011835 | 0.011610 | 0.011536 | 0.011430 | 0.011631 | 0.011497 |
| 0.011597 | 0.011530 | 0.011429 | 0.011532 | 0.011631 | 0.011635 | 0.011530 |
| 0.011429 | 0.011364 | 0.011497 | 0.011429 | 0.011362 | 0.011468 | 0.011631 |
| 0.011530 | 0.011463 | 0.011497 | 0.011530 | 0.011497 | 0.011429 | 0.011631 |
| 0.011496 | 0.011530 | 0.011530 | 0.011463 | 0.011530 | 0.011765 | 0.011429 |
| 0.011463 | 0.011866 | 0.011463 | 0.011496 | 0.011463 | 0.011832 | 0.011403 |
| 0.011903 | 0.011400 | 0.011511 | 0.011624 | 0.011711 | 0.011634 | 0.011353 |
| 0.011480 | 0.011631 | 0.011731 | 0.011841 | 0.011700 | 0.011838 | 0.011968 |
| 0.011868 | 0.011906 | 0.011866 | 0.012120 | 0.011832 | 0.012707 | 0.011869 |
| 0.012608 | 0.012376 | 0.012510 | 0.012781 | 0.011832 | 0.011530 | 0.011833 |
| 0.012272 | 0.012207 | 0.011799 | 0.011698 | 0.011766 | 0.011766 | 0.011737 |
| 0.011631 | 0.011637 | 0.011698 | 0.011665 | 0.012035 | 0.012101 | 0.012103 |

|          |          |          |          |          |          |          |
|----------|----------|----------|----------|----------|----------|----------|
| 0.012002 | 0.012103 | 0.012207 | 0.011974 | 0.012272 | 0.012279 | 0.012339 |
| 0.012340 | 0.012374 | 0.012323 | 0.012340 | 0.012342 | 0.011564 | 0.011867 |
| 0.011935 | 0.012438 | 0.011942 | 0.012169 | 0.012643 | 0.011705 | 0.011598 |
| 0.011564 | 0.011563 | 0.012035 | 0.012089 | 0.012151 | 0.011899 | 0.011566 |
| S092     | 0.011765 | 0.011765 | 0.012101 | 0.011866 | 0.011866 | 0.011933 |
| 0.011773 | 0.011705 | 0.011933 | 0.011362 | 0.011429 | 0.011397 | 0.011362 |
| 0.011396 | 0.011564 | 0.011362 | 0.011396 | 0.011463 | 0.011429 | 0.011396 |
| 0.011362 | 0.011396 | 0.011496 | 0.011363 | 0.011396 | 0.011396 | 0.011739 |
| 0.011631 | 0.011396 | 0.011295 | 0.011530 | 0.011463 | 0.011429 | 0.011463 |
| 0.011429 | 0.011530 | 0.011429 | 0.011429 | 0.011463 | 0.011429 | 0.011597 |
| 0.011362 | 0.011429 | 0.011463 | 0.011396 | 0.011496 | 0.011530 | 0.011463 |
| 0.011429 | 0.011597 | 0.011497 | 0.011765 | 0.011429 | 0.011698 | 0.011429 |
| 0.011396 | 0.011497 | 0.011564 | 0.011698 | 0.011799 | 0.011496 | 0.011597 |
| 0.011463 | 0.011530 | 0.011429 | 0.011664 | 0.011900 | 0.011429 | 0.011496 |
| 0.011396 | 0.011496 | 0.011463 | 0.011530 | 0.011463 | 0.011463 | 0.011463 |
| 0.011362 | 0.011396 | 0.011362 | 0.011463 | 0.011429 | 0.011464 | 0.011530 |
| 0.011463 | 0.011429 | 0.011496 | 0.011396 | 0.011530 | 0.011362 | 0.011429 |
| 0.011597 | 0.000000 | 0.011631 | 0.011597 | 0.011429 | 0.011664 | 0.011429 |
| 0.011616 | 0.011845 | 0.011664 | 0.011334 | 0.011359 | 0.011428 | 0.011572 |
| 0.012195 | 0.011620 | 0.011348 | 0.011664 | 0.011664 | 0.011463 | 0.011564 |
| 0.011496 | 0.011463 | 0.011530 | 0.011429 | 0.011530 | 0.011463 | 0.011463 |
| 0.011429 | 0.011530 | 0.011731 | 0.011597 | 0.011496 | 0.011463 | 0.011396 |
| 0.011362 | 0.011362 | 0.011429 | 0.011396 | 0.011597 | 0.011564 | 0.011497 |
| 0.011597 | 0.011665 | 0.011396 | 0.011396 | 0.011430 | 0.011429 | 0.011432 |
| 0.011500 | 0.011429 | 0.011429 | 0.011276 | 0.011349 | 0.011341 | 0.011430 |
| 0.011433 | 0.011369 | 0.011392 | 0.011405 | 0.011332 | 0.011368 | 0.011398 |
| 0.011636 | 0.011439 | 0.011473 | 0.011363 | 0.011371 | 0.011497 | 0.011464 |
| 0.011531 | 0.011465 | 0.011464 | 0.011564 | 0.011496 | 0.011866 | 0.011665 |
| 0.011698 | 0.011564 | 0.011429 | 0.011530 | 0.011329 | 0.011564 | 0.011362 |
| 0.011429 | 0.011429 | 0.011396 | 0.011362 | 0.011396 | 0.011362 | 0.011463 |
| 0.011429 | 0.011530 | 0.011463 | 0.011362 | 0.011464 | 0.011564 | 0.011567 |
| 0.011564 | 0.011463 | 0.011362 | 0.011296 | 0.011429 | 0.011362 | 0.011295 |
| 0.011400 | 0.011564 | 0.011362 | 0.011564 | 0.011329 | 0.011430 | 0.011396 |
| 0.011497 | 0.011396 | 0.011429 | 0.011396 | 0.011429 | 0.011295 | 0.011429 |
| 0.011463 | 0.011396 | 0.011463 | 0.011396 | 0.011429 | 0.011463 | 0.011698 |
| 0.011799 | 0.011732 | 0.011799 | 0.011566 | 0.011799 | 0.011429 | 0.011329 |
| 0.011432 | 0.011707 | 0.011517 | 0.011335 | 0.011807 | 0.011299 | 0.011454 |
| 0.011807 | 0.011706 | 0.011597 | 0.011799 | 0.011504 | 0.011664 | 0.011631 |
| 0.011564 | 0.011732 | 0.011593 | 0.011390 | 0.011479 | 0.011463 | 0.011534 |
| 0.011631 | 0.011532 | 0.011669 | 0.011737 | 0.011664 | 0.011732 | 0.011839 |
| 0.011568 | 0.011739 | 0.011669 | 0.011601 | 0.011867 | 0.011329 | 0.011532 |
| 0.011496 | 0.011429 | 0.011329 | 0.011329 | 0.011396 | 0.011396 | 0.011463 |
| 0.011396 | 0.011463 | 0.011362 | 0.011463 | 0.011396 | 0.011396 | 0.011463 |
| 0.011396 | 0.011832 | 0.011731 | 0.011765 | 0.011295 | 0.011396 | 0.011429 |
| 0.011429 | 0.011396 | 0.011463 | 0.011496 | 0.011362 | 0.011362 | 0.011362 |
| 0.011899 | 0.011530 | 0.011530 | 0.011329 | 0.011429 | 0.011597 | 0.011362 |
| 0.011362 | 0.011429 | 0.011396 | 0.011564 | 0.011362 | 0.011496 | 0.011631 |
| 0.011564 | 0.011396 | 0.011396 | 0.011329 | 0.011329 | 0.011496 | 0.011429 |
| 0.011329 | 0.011429 | 0.011295 | 0.011329 | 0.011463 | 0.011598 | 0.011362 |
| 0.011329 | 0.011463 | 0.011396 | 0.011295 | 0.011631 | 0.011295 | 0.011463 |
| 0.011539 | 0.011362 | 0.011664 | 0.011497 | 0.011530 | 0.011396 | 0.011496 |
| 0.011362 | 0.011698 | 0.011295 | 0.011564 | 0.011362 | 0.011362 | 0.011295 |
| 0.011530 | 0.011732 | 0.011429 | 0.011496 | 0.011329 | 0.011731 | 0.011362 |
| 0.011362 | 0.011362 | 0.011396 | 0.011496 | 0.011396 | 0.011496 | 0.011564 |
| 0.011564 | 0.011530 | 0.011429 | 0.011530 | 0.011496 | 0.011362 | 0.011329 |
| 0.011362 | 0.011362 | 0.011429 | 0.011362 | 0.011329 | 0.011496 | 0.011362 |
| 0.011396 | 0.011396 | 0.011530 | 0.011564 | 0.011463 | 0.011396 | 0.011396 |
| 0.011463 | 0.011396 | 0.011496 | 0.011362 | 0.011496 | 0.011597 | 0.011899 |
| 0.011396 | 0.011799 | 0.011405 | 0.017936 | 0.011322 | 0.011427 | 0.011758 |
| 0.011718 | 0.011764 | 0.011532 | 0.011524 | 0.011774 | 0.011785 | 0.011364 |

|          |          |          |          |          |          |          |
|----------|----------|----------|----------|----------|----------|----------|
| 0.011629 | 0.011549 | 0.011294 | 0.011437 | 0.011372 | 0.011406 | 0.011361 |
| 0.011623 | 0.011544 | 0.011579 | 0.011457 | 0.011530 | 0.011564 | 0.011567 |
| 0.011438 | 0.011530 | 0.011530 | 0.011497 | 0.011463 | 0.011463 | 0.011430 |
| 0.011463 | 0.011396 | 0.011429 | 0.011463 | 0.011430 | 0.011362 | 0.011396 |
| 0.011396 | 0.011463 | 0.011362 | 0.011463 | 0.011497 | 0.011530 | 0.011429 |
| 0.011463 | 0.011429 | 0.011765 | 0.011765 | 0.011497 | 0.011531 | 0.011564 |
| 0.011329 | 0.011329 | 0.011362 | 0.011463 | 0.011329 | 0.011564 | 0.011564 |
| 0.011597 | 0.011597 | 0.011530 | 0.011631 | 0.011799 | 0.011633 | 0.011463 |
| 0.011463 | 0.011530 | 0.011564 | 0.011396 | 0.011463 | 0.011429 | 0.011463 |
| 0.011531 | 0.011530 | 0.011564 | 0.011530 | 0.011431 | 0.011631 | 0.011597 |
| 0.011466 | 0.011362 | 0.011463 | 0.011564 | 0.011463 | 0.011597 | 0.011631 |
| 0.011799 | 0.011504 | 0.011664 | 0.011631 | 0.011564 | 0.011732 | 0.011363 |
| 0.011498 | 0.011430 | 0.011396 | 0.011396 | 0.011463 | 0.011362 | 0.011463 |
| 0.011497 | 0.011530 | 0.011429 | 0.011463 | 0.011429 | 0.011765 | 0.011765 |
| 0.011497 | 0.011531 | 0.011597 | 0.011530 | 0.012170 | 0.011596 | 0.011517 |
| 0.011587 | 0.011545 | 0.011657 | 0.011545 | 0.011655 | 0.011577 | 0.011543 |
| 0.012124 | 0.011441 | 0.011574 | 0.011510 | 0.011783 | 0.011638 | 0.011741 |
| 0.012148 | 0.011625 | 0.011703 | 0.011765 | 0.011631 | 0.011631 | 0.011668 |
| 0.011329 | 0.011497 | 0.011631 | 0.011597 | 0.011601 | 0.011597 | 0.011565 |
| 0.011429 | 0.011362 | 0.011396 | 0.011429 | 0.011329 | 0.011396 | 0.011295 |
| 0.011429 | 0.011463 | 0.011362 | 0.011329 | 0.011429 | 0.011362 | 0.011396 |
| 0.011396 | 0.011329 | 0.011396 | 0.011429 | 0.011329 | 0.011530 | 0.011564 |
| 0.011463 | 0.011530 | 0.011463 | 0.011463 | 0.011396 | 0.011799 | 0.011429 |
| 0.011478 | 0.011396 | 0.011631 | 0.011637 | 0.011497 | 0.011496 | 0.011295 |
| 0.011496 | 0.011429 | 0.011396 | 0.011429 | 0.011530 | 0.011530 | 0.011463 |
| 0.011463 | 0.011597 | 0.011765 | 0.011496 | 0.011698 | 0.011698 | 0.011564 |
| 0.011396 | 0.011463 | 0.011496 | 0.011900 | 0.011195 | 0.011497 | 0.011463 |
| 0.011496 | 0.011429 | 0.011429 | 0.011732 | 0.011664 | 0.011698 | 0.011429 |
| 0.011530 | 0.011597 | 0.011463 | 0.011530 | 0.011496 | 0.011362 | 0.011698 |
| 0.011463 | 0.011429 | 0.011429 | 0.011597 | 0.011429 | 0.011530 | 0.011765 |
| 0.011463 | 0.011841 | 0.011832 | 0.011629 | 0.011342 | 0.011536 | 0.011370 |
| 0.011280 | 0.011839 | 0.011376 | 0.011596 | 0.011402 | 0.011467 | 0.011485 |
| 0.011621 | 0.011258 | 0.011450 | 0.011258 | 0.011383 | 0.011462 | 0.011547 |
| 0.011550 | 0.011454 | 0.011518 | 0.011448 | 0.011465 | 0.011597 | 0.011665 |
| 0.011665 | 0.011531 | 0.011635 | 0.011636 | 0.011772 | 0.011802 | 0.011463 |
| 0.011698 | 0.011564 | 0.011429 | 0.011530 | 0.011329 | 0.011564 | 0.011362 |
| 0.011429 | 0.011429 | 0.011396 | 0.011362 | 0.011396 | 0.011362 | 0.011463 |
| 0.011444 | 0.011445 | 0.011437 | 0.011471 | 0.011608 | 0.011573 | 0.011572 |
| 0.011571 | 0.011497 | 0.011282 | 0.011276 | 0.011433 | 0.011602 | 0.011603 |
| 0.011396 | 0.011467 | 0.011700 | 0.011668 | 0.011598 | 0.011632 | 0.011564 |
| 0.011496 | 0.011564 | 0.011563 | 0.011463 | 0.012034 | 0.011631 | 0.011698 |
| 0.011732 | 0.011772 | 0.011435 | 0.011511 | 0.011396 | 0.011597 | 0.011564 |
| 0.011598 | 0.011631 | 0.011631 | 0.011631 | 0.011807 | 0.011765 | 0.011407 |
| 0.011297 | 0.011303 | 0.011401 | 0.011366 | 0.011470 | 0.011321 | 0.011638 |
| 0.011437 | 0.011586 | 0.011346 | 0.011472 | 0.011430 | 0.011505 | 0.011396 |
| 0.011362 | 0.011362 | 0.011429 | 0.011396 | 0.011597 | 0.011564 | 0.011497 |
| 0.011597 | 0.011665 | 0.011396 | 0.011396 | 0.011430 | 0.011429 | 0.011432 |
| 0.011500 | 0.011429 | 0.011429 | 0.011465 | 0.011597 | 0.011665 | 0.011665 |
| 0.011531 | 0.011635 | 0.011636 | 0.011772 | 0.011802 | 0.011463 | 0.011631 |
| 0.011564 | 0.011564 | 0.011398 | 0.011582 | 0.011512 | 0.011537 | 0.011411 |
| 0.011577 | 0.011789 | 0.011568 | 0.011468 | 0.011362 | 0.011564 | 0.011429 |
| 0.011530 | 0.011463 | 0.011362 | 0.011464 | 0.011564 | 0.011567 | 0.011463 |
| 0.011362 | 0.011296 | 0.011429 | 0.011362 | 0.011295 | 0.011400 | 0.011564 |
| 0.011463 | 0.011396 | 0.011429 | 0.011463 | 0.011430 | 0.011362 | 0.011564 |
| 0.011429 | 0.011463 | 0.011463 | 0.011396 | 0.011463 | 0.011698 | 0.011362 |
| 0.011396 | 0.011799 | 0.011396 | 0.011429 | 0.011396 | 0.011765 | 0.011360 |
| 0.011847 | 0.011358 | 0.011411 | 0.011583 | 0.011671 | 0.011598 | 0.011269 |
| 0.011323 | 0.011564 | 0.011664 | 0.011773 | 0.011632 | 0.011771 | 0.011901 |
| 0.011800 | 0.011838 | 0.011799 | 0.012051 | 0.011765 | 0.012640 | 0.011801 |
| 0.012540 | 0.012308 | 0.012442 | 0.012714 | 0.011765 | 0.011463 | 0.011766 |

|          |          |          |          |          |          |          |
|----------|----------|----------|----------|----------|----------|----------|
| 0.012204 | 0.012140 | 0.011732 | 0.011631 | 0.011699 | 0.011699 | 0.011669 |
| 0.011564 | 0.011569 | 0.011631 | 0.011598 | 0.011968 | 0.012034 | 0.012036 |
| 0.011935 | 0.012035 | 0.012139 | 0.011906 | 0.012205 | 0.012211 | 0.012272 |
| 0.012273 | 0.012306 | 0.012255 | 0.012273 | 0.012274 | 0.011496 | 0.011799 |
| 0.011867 | 0.012371 | 0.011874 | 0.012102 | 0.012575 | 0.011637 | 0.011531 |
| 0.011496 | 0.011496 | 0.011968 | 0.012048 | 0.012116 | 0.011832 | 0.011498 |
| S093     | 0.012000 | 0.012000 | 0.012135 | 0.011900 | 0.011900 | 0.011967 |
| 0.011535 | 0.011468 | 0.011967 | 0.011597 | 0.011664 | 0.011632 | 0.011597 |
| 0.011631 | 0.011799 | 0.011597 | 0.011631 | 0.011698 | 0.011664 | 0.011631 |
| 0.011597 | 0.011631 | 0.011530 | 0.011598 | 0.011631 | 0.011631 | 0.011501 |
| 0.011664 | 0.011631 | 0.011530 | 0.011564 | 0.011698 | 0.011664 | 0.011698 |
| 0.011664 | 0.011765 | 0.011664 | 0.011664 | 0.011698 | 0.011664 | 0.011832 |
| 0.011597 | 0.011664 | 0.011698 | 0.011631 | 0.011731 | 0.011765 | 0.011698 |
| 0.011664 | 0.011832 | 0.011732 | 0.011530 | 0.011664 | 0.011933 | 0.011664 |
| 0.011631 | 0.011732 | 0.011799 | 0.011933 | 0.011564 | 0.011732 | 0.011832 |
| 0.011698 | 0.011765 | 0.011664 | 0.011899 | 0.011664 | 0.011664 | 0.011732 |
| 0.011631 | 0.011731 | 0.011698 | 0.011765 | 0.011698 | 0.011698 | 0.011698 |
| 0.011597 | 0.011631 | 0.011597 | 0.011698 | 0.011664 | 0.011700 | 0.011765 |
| 0.011698 | 0.011664 | 0.011731 | 0.011631 | 0.011631 | 0.011597 | 0.011664 |
| 0.011832 | 0.011631 | 0.000000 | 0.011832 | 0.011664 | 0.011900 | 0.011664 |
| 0.011839 | 0.011471 | 0.011890 | 0.011607 | 0.011583 | 0.011649 | 0.011572 |
| 0.012195 | 0.011518 | 0.011554 | 0.011899 | 0.011899 | 0.011698 | 0.011664 |
| 0.011732 | 0.011698 | 0.011765 | 0.011664 | 0.011765 | 0.011698 | 0.011698 |
| 0.011664 | 0.011765 | 0.011967 | 0.011832 | 0.011732 | 0.011698 | 0.011631 |
| 0.011597 | 0.011597 | 0.011665 | 0.011631 | 0.011631 | 0.011598 | 0.011530 |
| 0.011631 | 0.011698 | 0.011631 | 0.011631 | 0.011665 | 0.011665 | 0.011668 |
| 0.011736 | 0.011665 | 0.011665 | 0.011492 | 0.011603 | 0.011586 | 0.011665 |
| 0.011670 | 0.011610 | 0.011614 | 0.011612 | 0.011570 | 0.011608 | 0.011634 |
| 0.011564 | 0.011681 | 0.011715 | 0.011598 | 0.011579 | 0.011733 | 0.011699 |
| 0.011767 | 0.011701 | 0.011699 | 0.011799 | 0.011731 | 0.012101 | 0.011900 |
| 0.011732 | 0.011799 | 0.011664 | 0.011765 | 0.011564 | 0.011597 | 0.011598 |
| 0.011664 | 0.011664 | 0.011631 | 0.011597 | 0.011631 | 0.011597 | 0.011698 |
| 0.011665 | 0.011765 | 0.011631 | 0.011597 | 0.011700 | 0.011799 | 0.011804 |
| 0.011799 | 0.011698 | 0.011597 | 0.011532 | 0.011665 | 0.011597 | 0.011530 |
| 0.011536 | 0.011799 | 0.011597 | 0.011799 | 0.011564 | 0.011665 | 0.011631 |
| 0.011732 | 0.011631 | 0.011665 | 0.011631 | 0.011665 | 0.011530 | 0.011665 |
| 0.011698 | 0.011631 | 0.011698 | 0.011631 | 0.011665 | 0.011698 | 0.011934 |
| 0.011564 | 0.011496 | 0.011564 | 0.011802 | 0.011497 | 0.011665 | 0.011631 |
| 0.011668 | 0.011950 | 0.011838 | 0.011575 | 0.011569 | 0.011538 | 0.011729 |
| 0.011569 | 0.011638 | 0.011832 | 0.012034 | 0.011743 | 0.011900 | 0.011866 |
| 0.011799 | 0.011967 | 0.011842 | 0.011719 | 0.011773 | 0.011698 | 0.011771 |
| 0.011866 | 0.011769 | 0.011906 | 0.011974 | 0.011900 | 0.011967 | 0.012077 |
| 0.011805 | 0.011977 | 0.011839 | 0.011838 | 0.012103 | 0.011564 | 0.011768 |
| 0.011731 | 0.011664 | 0.011564 | 0.011564 | 0.011631 | 0.011631 | 0.011698 |
| 0.011631 | 0.011698 | 0.011597 | 0.011698 | 0.011631 | 0.011631 | 0.011698 |
| 0.011631 | 0.011597 | 0.011496 | 0.011530 | 0.011530 | 0.011631 | 0.011664 |
| 0.011664 | 0.011564 | 0.011698 | 0.011732 | 0.011597 | 0.011597 | 0.011597 |
| 0.011664 | 0.011765 | 0.011765 | 0.011564 | 0.011664 | 0.011832 | 0.011597 |
| 0.011597 | 0.011664 | 0.011631 | 0.011799 | 0.011597 | 0.011530 | 0.011664 |
| 0.011597 | 0.011631 | 0.011631 | 0.011564 | 0.011564 | 0.011732 | 0.011664 |
| 0.011564 | 0.011664 | 0.011530 | 0.011564 | 0.011698 | 0.011564 | 0.011597 |
| 0.011564 | 0.011698 | 0.011631 | 0.011530 | 0.011396 | 0.011530 | 0.011698 |
| 0.011779 | 0.011597 | 0.011429 | 0.011732 | 0.011765 | 0.011631 | 0.011731 |
| 0.011597 | 0.011933 | 0.011530 | 0.011732 | 0.011597 | 0.011597 | 0.011530 |
| 0.011765 | 0.011698 | 0.011664 | 0.011732 | 0.011564 | 0.011496 | 0.011597 |
| 0.011597 | 0.011597 | 0.011631 | 0.011732 | 0.011631 | 0.011731 | 0.011799 |
| 0.011799 | 0.011765 | 0.011664 | 0.011765 | 0.011731 | 0.011597 | 0.011564 |
| 0.011597 | 0.011597 | 0.011664 | 0.011597 | 0.011564 | 0.011732 | 0.011597 |
| 0.011631 | 0.011631 | 0.011765 | 0.011799 | 0.011698 | 0.011631 | 0.011631 |
| 0.011698 | 0.011631 | 0.011731 | 0.011597 | 0.011731 | 0.011832 | 0.011664 |

|          |          |          |          |          |          |          |
|----------|----------|----------|----------|----------|----------|----------|
| 0.011631 | 0.011564 | 0.011647 | 0.018125 | 0.011387 | 0.011794 | 0.011514 |
| 0.011475 | 0.011482 | 0.011846 | 0.011582 | 0.011554 | 0.011543 | 0.011728 |
| 0.011772 | 0.011549 | 0.011528 | 0.011688 | 0.011646 | 0.011702 | 0.011706 |
| 0.011436 | 0.011544 | 0.011431 | 0.011457 | 0.011765 | 0.011799 | 0.011804 |
| 0.011678 | 0.011765 | 0.011765 | 0.011732 | 0.011698 | 0.011698 | 0.011665 |
| 0.011698 | 0.011631 | 0.011664 | 0.011698 | 0.011665 | 0.011597 | 0.011631 |
| 0.011631 | 0.011698 | 0.011597 | 0.011698 | 0.011732 | 0.011765 | 0.011664 |
| 0.011698 | 0.011665 | 0.011530 | 0.011530 | 0.011732 | 0.011766 | 0.011799 |
| 0.011564 | 0.011564 | 0.011597 | 0.011698 | 0.011564 | 0.011799 | 0.011799 |
| 0.011833 | 0.011832 | 0.011765 | 0.011866 | 0.011564 | 0.011869 | 0.011698 |
| 0.011698 | 0.011765 | 0.011799 | 0.011631 | 0.011698 | 0.011665 | 0.011698 |
| 0.011766 | 0.011766 | 0.011799 | 0.011766 | 0.011666 | 0.011866 | 0.011833 |
| 0.011704 | 0.011597 | 0.011698 | 0.011799 | 0.011698 | 0.011833 | 0.011866 |
| 0.012034 | 0.011743 | 0.011900 | 0.011866 | 0.011799 | 0.011967 | 0.011598 |
| 0.011768 | 0.011665 | 0.011631 | 0.011631 | 0.011698 | 0.011597 | 0.011698 |
| 0.011732 | 0.011765 | 0.011664 | 0.011698 | 0.011665 | 0.011530 | 0.011530 |
| 0.011732 | 0.011766 | 0.011832 | 0.011765 | 0.012406 | 0.011846 | 0.011764 |
| 0.011834 | 0.011788 | 0.011904 | 0.011788 | 0.011900 | 0.011819 | 0.011784 |
| 0.012365 | 0.011683 | 0.011814 | 0.011752 | 0.012025 | 0.011877 | 0.011979 |
| 0.012386 | 0.011890 | 0.011939 | 0.012000 | 0.011866 | 0.011664 | 0.011905 |
| 0.011564 | 0.011732 | 0.011866 | 0.011832 | 0.011837 | 0.011631 | 0.011599 |
| 0.011664 | 0.011597 | 0.011631 | 0.011664 | 0.011564 | 0.011631 | 0.011530 |
| 0.011664 | 0.011698 | 0.011597 | 0.011564 | 0.011664 | 0.011597 | 0.011631 |
| 0.011631 | 0.011564 | 0.011631 | 0.011664 | 0.011564 | 0.011765 | 0.011799 |
| 0.011698 | 0.011765 | 0.011698 | 0.011698 | 0.011631 | 0.011564 | 0.011664 |
| 0.011512 | 0.011631 | 0.011665 | 0.011671 | 0.011664 | 0.011664 | 0.011463 |
| 0.011732 | 0.011664 | 0.011631 | 0.011664 | 0.011765 | 0.011765 | 0.011698 |
| 0.011698 | 0.011832 | 0.011530 | 0.011731 | 0.011933 | 0.011933 | 0.011799 |
| 0.011631 | 0.011698 | 0.011732 | 0.011463 | 0.011698 | 0.011664 | 0.011698 |
| 0.011731 | 0.011664 | 0.011664 | 0.011967 | 0.011900 | 0.011933 | 0.011664 |
| 0.011765 | 0.011832 | 0.011698 | 0.011765 | 0.011731 | 0.011597 | 0.011463 |
| 0.011698 | 0.011664 | 0.011664 | 0.011832 | 0.011664 | 0.011765 | 0.011597 |
| 0.011698 | 0.011603 | 0.011597 | 0.011629 | 0.011455 | 0.011774 | 0.011473 |
| 0.011609 | 0.011839 | 0.011587 | 0.011820 | 0.011695 | 0.011518 | 0.011591 |
| 0.011621 | 0.011323 | 0.011561 | 0.011390 | 0.011437 | 0.011596 | 0.011750 |
| 0.011776 | 0.011690 | 0.011765 | 0.011694 | 0.011701 | 0.011631 | 0.011698 |
| 0.011631 | 0.011766 | 0.011872 | 0.011670 | 0.012010 | 0.012015 | 0.011698 |
| 0.011732 | 0.011799 | 0.011664 | 0.011765 | 0.011564 | 0.011597 | 0.011598 |
| 0.011664 | 0.011664 | 0.011631 | 0.011597 | 0.011631 | 0.011597 | 0.011698 |
| 0.011654 | 0.011690 | 0.011677 | 0.011711 | 0.011847 | 0.011812 | 0.011811 |
| 0.011810 | 0.011733 | 0.011503 | 0.011492 | 0.011670 | 0.011840 | 0.011841 |
| 0.011632 | 0.011704 | 0.011936 | 0.011905 | 0.011834 | 0.011868 | 0.011799 |
| 0.011731 | 0.011799 | 0.011799 | 0.011698 | 0.011799 | 0.011866 | 0.011933 |
| 0.011967 | 0.011558 | 0.011606 | 0.011753 | 0.011631 | 0.011832 | 0.011799 |
| 0.011834 | 0.011866 | 0.011866 | 0.011866 | 0.012004 | 0.012000 | 0.011650 |
| 0.011533 | 0.011545 | 0.011639 | 0.011604 | 0.011709 | 0.011583 | 0.011400 |
| 0.011678 | 0.011543 | 0.011680 | 0.011735 | 0.011665 | 0.011745 | 0.011631 |
| 0.011597 | 0.011597 | 0.011665 | 0.011631 | 0.011631 | 0.011598 | 0.011530 |
| 0.011631 | 0.011698 | 0.011631 | 0.011631 | 0.011665 | 0.011665 | 0.011668 |
| 0.011736 | 0.011665 | 0.011665 | 0.011701 | 0.011631 | 0.011698 | 0.011631 |
| 0.011766 | 0.011872 | 0.011670 | 0.012010 | 0.012015 | 0.011698 | 0.011866 |
| 0.011799 | 0.011799 | 0.011635 | 0.011826 | 0.011755 | 0.011775 | 0.011656 |
| 0.011818 | 0.012109 | 0.011865 | 0.011706 | 0.011597 | 0.011799 | 0.011665 |
| 0.011765 | 0.011631 | 0.011597 | 0.011700 | 0.011799 | 0.011804 | 0.011698 |
| 0.011597 | 0.011532 | 0.011665 | 0.011597 | 0.011530 | 0.011536 | 0.011799 |
| 0.011698 | 0.011631 | 0.011664 | 0.011698 | 0.011665 | 0.011597 | 0.011597 |
| 0.011664 | 0.011698 | 0.011698 | 0.011631 | 0.011698 | 0.011933 | 0.011597 |
| 0.011631 | 0.011564 | 0.011631 | 0.011664 | 0.011631 | 0.011530 | 0.011574 |
| 0.011903 | 0.011400 | 0.011511 | 0.011543 | 0.011630 | 0.011599 | 0.011395 |
| 0.011480 | 0.011597 | 0.011698 | 0.011807 | 0.011666 | 0.011805 | 0.011935 |

|          |          |          |          |          |          |          |
|----------|----------|----------|----------|----------|----------|----------|
| 0.011834 | 0.011872 | 0.011832 | 0.012086 | 0.011799 | 0.012674 | 0.011835 |
| 0.012574 | 0.012342 | 0.012476 | 0.012748 | 0.011731 | 0.011698 | 0.011800 |
| 0.012440 | 0.012174 | 0.011765 | 0.011665 | 0.011733 | 0.011733 | 0.011703 |
| 0.011597 | 0.011603 | 0.011664 | 0.011632 | 0.012002 | 0.012068 | 0.012070 |
| 0.011969 | 0.012069 | 0.012173 | 0.011940 | 0.012441 | 0.012449 | 0.012508 |
| 0.012509 | 0.012543 | 0.012494 | 0.012509 | 0.012511 | 0.011731 | 0.012035 |
| 0.012103 | 0.012606 | 0.012112 | 0.012068 | 0.012541 | 0.011604 | 0.011497 |
| 0.011396 | 0.011463 | 0.012002 | 0.012089 | 0.012151 | 0.011799 | 0.011532 |
| S094     | 0.011832 | 0.011832 | 0.012169 | 0.011933 | 0.011933 | 0.012000 |
| 0.011841 | 0.011773 | 0.012000 | 0.011430 | 0.011496 | 0.011464 | 0.011429 |
| 0.011463 | 0.011631 | 0.011429 | 0.011463 | 0.011530 | 0.011497 | 0.011463 |
| 0.011429 | 0.011463 | 0.011564 | 0.011430 | 0.011463 | 0.011463 | 0.011807 |
| 0.011698 | 0.011463 | 0.011362 | 0.011597 | 0.011530 | 0.011497 | 0.011530 |
| 0.011497 | 0.011530 | 0.011497 | 0.011497 | 0.011530 | 0.011295 | 0.011665 |
| 0.011429 | 0.011496 | 0.011530 | 0.011463 | 0.011564 | 0.011597 | 0.011530 |
| 0.011497 | 0.011665 | 0.011564 | 0.011832 | 0.011497 | 0.011765 | 0.011497 |
| 0.011463 | 0.011564 | 0.011631 | 0.011765 | 0.011866 | 0.011564 | 0.011664 |
| 0.011530 | 0.011530 | 0.011497 | 0.011664 | 0.011967 | 0.011497 | 0.011564 |
| 0.011463 | 0.011564 | 0.011530 | 0.011597 | 0.011530 | 0.011530 | 0.011530 |
| 0.011429 | 0.011463 | 0.011429 | 0.011530 | 0.011496 | 0.011464 | 0.011597 |
| 0.011530 | 0.011496 | 0.011564 | 0.011463 | 0.011597 | 0.011429 | 0.011497 |
| 0.011664 | 0.011597 | 0.011832 | 0.000000 | 0.011497 | 0.011732 | 0.011496 |
| 0.011505 | 0.011882 | 0.011664 | 0.011334 | 0.011359 | 0.011355 | 0.011572 |
| 0.012195 | 0.011620 | 0.011390 | 0.011732 | 0.011732 | 0.011530 | 0.011631 |
| 0.011564 | 0.011530 | 0.011597 | 0.011497 | 0.011597 | 0.011530 | 0.011530 |
| 0.011496 | 0.011597 | 0.011799 | 0.011664 | 0.011564 | 0.011530 | 0.011463 |
| 0.011430 | 0.011430 | 0.011497 | 0.011463 | 0.011665 | 0.011631 | 0.011564 |
| 0.011665 | 0.011732 | 0.011463 | 0.011463 | 0.011497 | 0.011497 | 0.011499 |
| 0.011567 | 0.011497 | 0.011497 | 0.011312 | 0.011386 | 0.011376 | 0.011497 |
| 0.011264 | 0.011404 | 0.011429 | 0.011405 | 0.011400 | 0.011403 | 0.011432 |
| 0.011672 | 0.011474 | 0.011474 | 0.011430 | 0.011371 | 0.011531 | 0.011531 |
| 0.011598 | 0.011498 | 0.011531 | 0.011631 | 0.011564 | 0.011933 | 0.011732 |
| 0.011765 | 0.011631 | 0.011497 | 0.011598 | 0.011396 | 0.011631 | 0.011430 |
| 0.011497 | 0.011497 | 0.011463 | 0.011429 | 0.011463 | 0.011430 | 0.011530 |
| 0.011497 | 0.011598 | 0.011530 | 0.011430 | 0.011532 | 0.011631 | 0.011635 |
| 0.011631 | 0.011531 | 0.011430 | 0.011364 | 0.011497 | 0.011430 | 0.011363 |
| 0.011434 | 0.011631 | 0.011430 | 0.011631 | 0.011396 | 0.011497 | 0.011463 |
| 0.011564 | 0.011463 | 0.011497 | 0.011463 | 0.011497 | 0.011362 | 0.011497 |
| 0.011530 | 0.011463 | 0.011530 | 0.011463 | 0.011497 | 0.011530 | 0.011765 |
| 0.011866 | 0.011799 | 0.011866 | 0.011633 | 0.011867 | 0.011497 | 0.011463 |
| 0.011466 | 0.011788 | 0.011518 | 0.011403 | 0.011875 | 0.011333 | 0.011454 |
| 0.011875 | 0.011774 | 0.011664 | 0.011866 | 0.011572 | 0.011732 | 0.011698 |
| 0.011631 | 0.011799 | 0.011664 | 0.011513 | 0.011605 | 0.011530 | 0.011602 |
| 0.011698 | 0.011600 | 0.011736 | 0.011805 | 0.011732 | 0.011799 | 0.011907 |
| 0.011636 | 0.011807 | 0.011737 | 0.011466 | 0.011935 | 0.011396 | 0.011599 |
| 0.011564 | 0.011497 | 0.011396 | 0.011396 | 0.011463 | 0.011463 | 0.011530 |
| 0.011463 | 0.011530 | 0.011429 | 0.011530 | 0.011463 | 0.011463 | 0.011530 |
| 0.011463 | 0.011900 | 0.011799 | 0.011832 | 0.011362 | 0.011463 | 0.011497 |
| 0.011497 | 0.011463 | 0.011530 | 0.011564 | 0.011429 | 0.011429 | 0.011429 |
| 0.011967 | 0.011597 | 0.011597 | 0.011396 | 0.011496 | 0.011597 | 0.011429 |
| 0.011429 | 0.011496 | 0.011463 | 0.011631 | 0.011429 | 0.011564 | 0.011698 |
| 0.011631 | 0.011463 | 0.011463 | 0.011396 | 0.011396 | 0.011564 | 0.011496 |
| 0.011396 | 0.011496 | 0.011362 | 0.011396 | 0.011329 | 0.011665 | 0.011430 |
| 0.011396 | 0.011329 | 0.011463 | 0.011362 | 0.011698 | 0.011362 | 0.011530 |
| 0.011608 | 0.011429 | 0.011732 | 0.011564 | 0.011463 | 0.011463 | 0.011564 |
| 0.011429 | 0.011765 | 0.011362 | 0.011631 | 0.011429 | 0.011429 | 0.011362 |
| 0.011597 | 0.011799 | 0.011497 | 0.011564 | 0.011396 | 0.011799 | 0.011429 |
| 0.011429 | 0.011429 | 0.011463 | 0.011497 | 0.011463 | 0.011564 | 0.011631 |
| 0.011094 | 0.011597 | 0.011496 | 0.011597 | 0.011564 | 0.011429 | 0.011396 |
| 0.011429 | 0.011429 | 0.011497 | 0.011429 | 0.011396 | 0.011564 | 0.011429 |

|          |          |          |          |          |          |          |
|----------|----------|----------|----------|----------|----------|----------|
| 0.011463 | 0.011463 | 0.011597 | 0.011631 | 0.011530 | 0.011463 | 0.011463 |
| 0.011530 | 0.011463 | 0.011564 | 0.011429 | 0.011564 | 0.011664 | 0.011967 |
| 0.011463 | 0.011866 | 0.011440 | 0.017974 | 0.011257 | 0.011549 | 0.011793 |
| 0.011752 | 0.011799 | 0.011427 | 0.011466 | 0.011885 | 0.011820 | 0.011485 |
| 0.011630 | 0.011671 | 0.011333 | 0.011437 | 0.011373 | 0.011455 | 0.011404 |
| 0.011623 | 0.011582 | 0.011579 | 0.011325 | 0.011597 | 0.011631 | 0.011635 |
| 0.011507 | 0.011597 | 0.011597 | 0.011564 | 0.011530 | 0.011530 | 0.011497 |
| 0.011530 | 0.011463 | 0.011497 | 0.011530 | 0.011497 | 0.011430 | 0.011463 |
| 0.011463 | 0.011530 | 0.011430 | 0.011531 | 0.011564 | 0.011396 | 0.011497 |
| 0.011530 | 0.011497 | 0.011833 | 0.011833 | 0.011564 | 0.011598 | 0.011631 |
| 0.011396 | 0.011396 | 0.011430 | 0.011530 | 0.011396 | 0.011631 | 0.011631 |
| 0.011665 | 0.011664 | 0.011597 | 0.011698 | 0.011866 | 0.011700 | 0.011530 |
| 0.011530 | 0.011598 | 0.011631 | 0.011463 | 0.011530 | 0.011497 | 0.011530 |
| 0.011598 | 0.011598 | 0.011631 | 0.011598 | 0.011498 | 0.011698 | 0.011665 |
| 0.011534 | 0.011430 | 0.011530 | 0.011631 | 0.011531 | 0.011665 | 0.011698 |
| 0.011866 | 0.011572 | 0.011732 | 0.011698 | 0.011631 | 0.011799 | 0.011430 |
| 0.011599 | 0.011497 | 0.011463 | 0.011463 | 0.011530 | 0.011430 | 0.011531 |
| 0.011564 | 0.011396 | 0.011497 | 0.011530 | 0.011497 | 0.011833 | 0.011833 |
| 0.011564 | 0.011598 | 0.011664 | 0.011597 | 0.012238 | 0.011668 | 0.011588 |
| 0.011447 | 0.011615 | 0.011728 | 0.011614 | 0.011725 | 0.011647 | 0.011612 |
| 0.012194 | 0.011510 | 0.011642 | 0.011579 | 0.011852 | 0.011706 | 0.011809 |
| 0.012216 | 0.011701 | 0.011770 | 0.011832 | 0.011698 | 0.011698 | 0.011736 |
| 0.011396 | 0.011564 | 0.011698 | 0.011664 | 0.011668 | 0.011664 | 0.011633 |
| 0.011496 | 0.011429 | 0.011463 | 0.011497 | 0.011396 | 0.011463 | 0.011362 |
| 0.011429 | 0.011463 | 0.011429 | 0.011396 | 0.011497 | 0.011429 | 0.011463 |
| 0.011463 | 0.011396 | 0.011463 | 0.011497 | 0.011396 | 0.011530 | 0.011497 |
| 0.011329 | 0.011463 | 0.011329 | 0.011463 | 0.011463 | 0.011866 | 0.011496 |
| 0.011547 | 0.011463 | 0.011699 | 0.011705 | 0.011564 | 0.011564 | 0.011564 |
| 0.011564 | 0.011497 | 0.011463 | 0.011497 | 0.011597 | 0.011597 | 0.011530 |
| 0.011530 | 0.011664 | 0.011832 | 0.011564 | 0.011765 | 0.011765 | 0.011631 |
| 0.011463 | 0.011530 | 0.011564 | 0.011967 | 0.011530 | 0.011564 | 0.011530 |
| 0.011564 | 0.011496 | 0.011496 | 0.011799 | 0.011732 | 0.011765 | 0.011497 |
| 0.011597 | 0.011664 | 0.011530 | 0.011597 | 0.011564 | 0.011429 | 0.011765 |
| 0.011530 | 0.011497 | 0.011496 | 0.011664 | 0.011497 | 0.011597 | 0.011833 |
| 0.011530 | 0.011909 | 0.011900 | 0.011670 | 0.011399 | 0.011570 | 0.011422 |
| 0.011335 | 0.011878 | 0.011411 | 0.011552 | 0.011499 | 0.011519 | 0.011485 |
| 0.011570 | 0.011258 | 0.011450 | 0.011258 | 0.011384 | 0.011462 | 0.011587 |
| 0.011588 | 0.011493 | 0.011553 | 0.011483 | 0.011532 | 0.011665 | 0.011732 |
| 0.011732 | 0.011598 | 0.011703 | 0.011704 | 0.011840 | 0.011873 | 0.011530 |
| 0.011765 | 0.011631 | 0.011497 | 0.011598 | 0.011396 | 0.011631 | 0.011430 |
| 0.011497 | 0.011497 | 0.011463 | 0.011429 | 0.011463 | 0.011430 | 0.011530 |
| 0.011444 | 0.011480 | 0.011437 | 0.011505 | 0.011642 | 0.011573 | 0.011607 |
| 0.011605 | 0.011565 | 0.011319 | 0.011312 | 0.011467 | 0.011636 | 0.011637 |
| 0.011430 | 0.011501 | 0.011734 | 0.011703 | 0.011632 | 0.011666 | 0.011631 |
| 0.011564 | 0.011631 | 0.011631 | 0.011530 | 0.012102 | 0.011698 | 0.011766 |
| 0.011799 | 0.011844 | 0.011504 | 0.011545 | 0.011463 | 0.011664 | 0.011631 |
| 0.011666 | 0.011698 | 0.011698 | 0.011698 | 0.011847 | 0.011832 | 0.011477 |
| 0.011364 | 0.011372 | 0.011469 | 0.011434 | 0.011538 | 0.011396 | 0.011706 |
| 0.011506 | 0.011674 | 0.011394 | 0.011510 | 0.011497 | 0.011539 | 0.011463 |
| 0.011430 | 0.011430 | 0.011497 | 0.011463 | 0.011665 | 0.011631 | 0.011564 |
| 0.011665 | 0.011732 | 0.011463 | 0.011463 | 0.011497 | 0.011497 | 0.011499 |
| 0.011567 | 0.011497 | 0.011497 | 0.011532 | 0.011665 | 0.011732 | 0.011732 |
| 0.011598 | 0.011703 | 0.011704 | 0.011840 | 0.011873 | 0.011530 | 0.011698 |
| 0.011631 | 0.011631 | 0.011432 | 0.011617 | 0.011582 | 0.011605 | 0.011446 |
| 0.011646 | 0.011789 | 0.011526 | 0.011536 | 0.011430 | 0.011631 | 0.011497 |
| 0.011598 | 0.011530 | 0.011430 | 0.011532 | 0.011631 | 0.011635 | 0.011531 |
| 0.011430 | 0.011364 | 0.011497 | 0.011430 | 0.011363 | 0.011434 | 0.011631 |
| 0.011530 | 0.011463 | 0.011497 | 0.011530 | 0.011497 | 0.011430 | 0.011631 |
| 0.011497 | 0.011530 | 0.011530 | 0.011463 | 0.011329 | 0.011698 | 0.011429 |
| 0.011463 | 0.011866 | 0.011463 | 0.011497 | 0.011463 | 0.011832 | 0.011403 |

|          |          |          |          |          |          |          |
|----------|----------|----------|----------|----------|----------|----------|
| 0.011848 | 0.011400 | 0.011411 | 0.011624 | 0.011712 | 0.011634 | 0.011353 |
| 0.011323 | 0.011631 | 0.011732 | 0.011841 | 0.011700 | 0.011839 | 0.011968 |
| 0.011868 | 0.011906 | 0.011866 | 0.012120 | 0.011832 | 0.012708 | 0.011869 |
| 0.012608 | 0.012376 | 0.012510 | 0.012782 | 0.011832 | 0.011531 | 0.011833 |
| 0.012272 | 0.012207 | 0.011799 | 0.011698 | 0.011766 | 0.011766 | 0.011737 |
| 0.011631 | 0.011637 | 0.011698 | 0.011666 | 0.012036 | 0.012102 | 0.012103 |
| 0.012002 | 0.012103 | 0.012207 | 0.011974 | 0.012273 | 0.012280 | 0.012340 |
| 0.012341 | 0.012374 | 0.012289 | 0.012341 | 0.012342 | 0.011564 | 0.011867 |
| 0.011935 | 0.012438 | 0.011942 | 0.012169 | 0.012643 | 0.011706 | 0.011598 |
| 0.011564 | 0.011564 | 0.012035 | 0.012006 | 0.012116 | 0.011900 | 0.011566 |
| S095     | 0.011664 | 0.011664 | 0.012001 | 0.011765 | 0.011765 | 0.011832 |
| 0.011637 | 0.011569 | 0.011832 | 0.011262 | 0.011329 | 0.011296 | 0.011262 |
| 0.011295 | 0.011463 | 0.011262 | 0.011295 | 0.011362 | 0.011329 | 0.011295 |
| 0.011262 | 0.011295 | 0.011396 | 0.011262 | 0.011295 | 0.011295 | 0.011603 |
| 0.011530 | 0.011295 | 0.011194 | 0.011429 | 0.011362 | 0.011329 | 0.011362 |
| 0.011329 | 0.011429 | 0.011329 | 0.011329 | 0.011362 | 0.011329 | 0.011497 |
| 0.011262 | 0.011329 | 0.011362 | 0.011295 | 0.011396 | 0.011429 | 0.011362 |
| 0.011329 | 0.011497 | 0.011396 | 0.011664 | 0.011329 | 0.011597 | 0.011329 |
| 0.011295 | 0.011396 | 0.011463 | 0.011597 | 0.011698 | 0.011396 | 0.011496 |
| 0.011362 | 0.011429 | 0.011329 | 0.011564 | 0.011799 | 0.011329 | 0.011396 |
| 0.011295 | 0.011396 | 0.011362 | 0.011429 | 0.011362 | 0.011362 | 0.011362 |
| 0.011262 | 0.011295 | 0.011262 | 0.011362 | 0.011329 | 0.011363 | 0.011429 |
| 0.011362 | 0.011329 | 0.011396 | 0.011295 | 0.011429 | 0.011262 | 0.011329 |
| 0.011496 | 0.011429 | 0.011664 | 0.011497 | 0.000000 | 0.011564 | 0.011329 |
| 0.011468 | 0.011695 | 0.011551 | 0.011216 | 0.011247 | 0.011355 | 0.011415 |
| 0.012085 | 0.011569 | 0.011225 | 0.011564 | 0.011564 | 0.011362 | 0.011463 |
| 0.011396 | 0.011362 | 0.011429 | 0.011329 | 0.011429 | 0.011362 | 0.011362 |
| 0.011329 | 0.011429 | 0.011631 | 0.011496 | 0.011396 | 0.011362 | 0.011295 |
| 0.011262 | 0.011262 | 0.011329 | 0.011295 | 0.011497 | 0.011463 | 0.011396 |
| 0.011497 | 0.011564 | 0.011295 | 0.011295 | 0.011329 | 0.011329 | 0.011330 |
| 0.011398 | 0.011262 | 0.011329 | 0.011204 | 0.011277 | 0.011236 | 0.011329 |
| 0.011331 | 0.011266 | 0.011318 | 0.011302 | 0.011230 | 0.011266 | 0.011297 |
| 0.011564 | 0.011336 | 0.011370 | 0.011262 | 0.011268 | 0.011397 | 0.011363 |
| 0.011430 | 0.011364 | 0.011363 | 0.011463 | 0.011396 | 0.011765 | 0.011564 |
| 0.011597 | 0.011463 | 0.011329 | 0.011430 | 0.011228 | 0.011463 | 0.011262 |
| 0.011329 | 0.011329 | 0.011295 | 0.011262 | 0.011295 | 0.011262 | 0.011362 |
| 0.011329 | 0.011430 | 0.011362 | 0.011262 | 0.011363 | 0.011463 | 0.011466 |
| 0.011463 | 0.011362 | 0.011262 | 0.011195 | 0.011329 | 0.011262 | 0.011195 |
| 0.011298 | 0.011463 | 0.011262 | 0.011463 | 0.011228 | 0.011329 | 0.011295 |
| 0.011329 | 0.011295 | 0.011262 | 0.011295 | 0.011329 | 0.011195 | 0.011329 |
| 0.011362 | 0.011295 | 0.011362 | 0.011295 | 0.011329 | 0.011362 | 0.011597 |
| 0.011698 | 0.011631 | 0.011698 | 0.011465 | 0.011698 | 0.011329 | 0.011295 |
| 0.011297 | 0.011626 | 0.011380 | 0.011232 | 0.011705 | 0.011197 | 0.011336 |
| 0.011671 | 0.011604 | 0.011496 | 0.011698 | 0.011402 | 0.011564 | 0.011530 |
| 0.011463 | 0.011631 | 0.011486 | 0.011307 | 0.011312 | 0.011362 | 0.011432 |
| 0.011530 | 0.011431 | 0.011567 | 0.011635 | 0.011564 | 0.011631 | 0.011670 |
| 0.011466 | 0.011637 | 0.011568 | 0.011500 | 0.011767 | 0.011228 | 0.011431 |
| 0.011329 | 0.011329 | 0.011228 | 0.011228 | 0.011295 | 0.011295 | 0.011362 |
| 0.011295 | 0.011362 | 0.011262 | 0.011362 | 0.011295 | 0.011295 | 0.011362 |
| 0.011295 | 0.011731 | 0.011631 | 0.011664 | 0.011194 | 0.011295 | 0.011329 |
| 0.011329 | 0.011295 | 0.011362 | 0.011396 | 0.011262 | 0.011262 | 0.011262 |
| 0.011799 | 0.011429 | 0.011429 | 0.011228 | 0.011329 | 0.011497 | 0.011262 |
| 0.011262 | 0.011329 | 0.011295 | 0.011463 | 0.011262 | 0.011396 | 0.011530 |
| 0.011463 | 0.011295 | 0.011295 | 0.011228 | 0.011228 | 0.011396 | 0.011329 |
| 0.011228 | 0.011329 | 0.011195 | 0.011228 | 0.011362 | 0.011497 | 0.011262 |
| 0.011228 | 0.011362 | 0.011228 | 0.011195 | 0.011530 | 0.011195 | 0.011362 |
| 0.011437 | 0.011262 | 0.011564 | 0.011396 | 0.011429 | 0.011295 | 0.011396 |
| 0.011262 | 0.011597 | 0.011194 | 0.011463 | 0.011262 | 0.011262 | 0.011194 |
| 0.011429 | 0.011631 | 0.011329 | 0.011396 | 0.011228 | 0.011631 | 0.011262 |
| 0.011262 | 0.011262 | 0.011295 | 0.011396 | 0.011295 | 0.011396 | 0.011463 |



|          |          |          |          |          |          |          |
|----------|----------|----------|----------|----------|----------|----------|
| 0.011463 | 0.011429 | 0.011329 | 0.011430 | 0.011396 | 0.011262 | 0.011228 |
| 0.011262 | 0.011262 | 0.011329 | 0.011262 | 0.011228 | 0.011396 | 0.011262 |
| 0.011295 | 0.011295 | 0.011429 | 0.011463 | 0.011362 | 0.011295 | 0.011295 |
| 0.011362 | 0.011295 | 0.011396 | 0.011262 | 0.011396 | 0.011496 | 0.011799 |
| 0.011295 | 0.011698 | 0.011302 | 0.017823 | 0.011322 | 0.011427 | 0.011653 |
| 0.011614 | 0.011658 | 0.011374 | 0.011408 | 0.011774 | 0.011682 | 0.011364 |
| 0.011582 | 0.011549 | 0.011177 | 0.011312 | 0.011294 | 0.011357 | 0.011275 |
| 0.011576 | 0.011470 | 0.011468 | 0.011193 | 0.011429 | 0.011463 | 0.011466 |
| 0.011335 | 0.011430 | 0.011429 | 0.011396 | 0.011362 | 0.011362 | 0.011329 |
| 0.011362 | 0.011295 | 0.011329 | 0.011362 | 0.011329 | 0.011262 | 0.011295 |
| 0.011295 | 0.011362 | 0.011262 | 0.011363 | 0.011396 | 0.011430 | 0.011329 |
| 0.011362 | 0.011329 | 0.011665 | 0.011665 | 0.011396 | 0.011430 | 0.011463 |
| 0.011228 | 0.011228 | 0.011262 | 0.011362 | 0.011228 | 0.011463 | 0.011463 |
| 0.011429 | 0.011496 | 0.011429 | 0.011463 | 0.011698 | 0.011464 | 0.011362 |
| 0.011362 | 0.011430 | 0.011463 | 0.011295 | 0.011362 | 0.011329 | 0.011362 |
| 0.011430 | 0.011430 | 0.011463 | 0.011430 | 0.011330 | 0.011530 | 0.011497 |
| 0.011365 | 0.011262 | 0.011362 | 0.011463 | 0.011363 | 0.011497 | 0.011530 |
| 0.011698 | 0.011402 | 0.011564 | 0.011530 | 0.011463 | 0.011631 | 0.011262 |
| 0.011431 | 0.011329 | 0.011295 | 0.011295 | 0.011362 | 0.011262 | 0.011363 |
| 0.011396 | 0.011430 | 0.011329 | 0.011362 | 0.011329 | 0.011665 | 0.011665 |
| 0.011396 | 0.011430 | 0.011496 | 0.011429 | 0.012069 | 0.011453 | 0.011412 |
| 0.011482 | 0.011407 | 0.011552 | 0.011441 | 0.011515 | 0.011474 | 0.011405 |
| 0.012022 | 0.011337 | 0.011471 | 0.011406 | 0.011680 | 0.011536 | 0.011639 |
| 0.012046 | 0.011437 | 0.011601 | 0.011664 | 0.011530 | 0.011530 | 0.011567 |
| 0.011228 | 0.011396 | 0.011530 | 0.011496 | 0.011499 | 0.011496 | 0.011464 |
| 0.011329 | 0.011262 | 0.011295 | 0.011329 | 0.011228 | 0.011295 | 0.011194 |
| 0.011329 | 0.011362 | 0.011262 | 0.011228 | 0.011329 | 0.011262 | 0.011295 |
| 0.011295 | 0.011228 | 0.011295 | 0.011329 | 0.011228 | 0.011429 | 0.011463 |
| 0.011362 | 0.011429 | 0.011362 | 0.011362 | 0.011295 | 0.011698 | 0.011329 |
| 0.011373 | 0.011295 | 0.011530 | 0.011535 | 0.011396 | 0.011396 | 0.011396 |
| 0.011396 | 0.011329 | 0.011295 | 0.011329 | 0.011429 | 0.011429 | 0.011362 |
| 0.011362 | 0.011497 | 0.011664 | 0.011396 | 0.011597 | 0.011597 | 0.011463 |
| 0.011295 | 0.011362 | 0.011396 | 0.011799 | 0.011362 | 0.011396 | 0.011362 |
| 0.011396 | 0.011329 | 0.011329 | 0.011631 | 0.011564 | 0.011597 | 0.011329 |
| 0.011429 | 0.011429 | 0.011362 | 0.011429 | 0.011396 | 0.011262 | 0.011597 |
| 0.011362 | 0.011329 | 0.011329 | 0.011497 | 0.011329 | 0.011429 | 0.011664 |
| 0.011362 | 0.011705 | 0.011732 | 0.011507 | 0.011286 | 0.011434 | 0.011370 |
| 0.011225 | 0.011722 | 0.011271 | 0.011462 | 0.011304 | 0.011417 | 0.011326 |
| 0.011519 | 0.011258 | 0.011394 | 0.011258 | 0.011276 | 0.011462 | 0.011385 |
| 0.011399 | 0.011296 | 0.011377 | 0.011342 | 0.011364 | 0.011497 | 0.011564 |
| 0.011564 | 0.011430 | 0.011534 | 0.011535 | 0.011670 | 0.011696 | 0.011362 |
| 0.011597 | 0.011463 | 0.011329 | 0.011430 | 0.011228 | 0.011463 | 0.011262 |
| 0.011329 | 0.011329 | 0.011295 | 0.011262 | 0.011295 | 0.011262 | 0.011362 |
| 0.011305 | 0.011340 | 0.011334 | 0.011368 | 0.011505 | 0.011470 | 0.011470 |
| 0.011469 | 0.011396 | 0.011208 | 0.011204 | 0.011331 | 0.011433 | 0.011501 |
| 0.011296 | 0.011365 | 0.011599 | 0.011567 | 0.011497 | 0.011531 | 0.011463 |
| 0.011396 | 0.011463 | 0.011463 | 0.011362 | 0.011933 | 0.011530 | 0.011597 |
| 0.011631 | 0.011701 | 0.011333 | 0.011407 | 0.011295 | 0.011497 | 0.011463 |
| 0.011497 | 0.011530 | 0.011530 | 0.011530 | 0.011689 | 0.011664 | 0.011303 |
| 0.011195 | 0.011199 | 0.011299 | 0.011264 | 0.011368 | 0.011172 | 0.011536 |
| 0.011335 | 0.011411 | 0.011156 | 0.011322 | 0.011329 | 0.011402 | 0.011295 |
| 0.011262 | 0.011262 | 0.011329 | 0.011295 | 0.011497 | 0.011463 | 0.011396 |
| 0.011497 | 0.011564 | 0.011295 | 0.011295 | 0.011329 | 0.011329 | 0.011330 |
| 0.011398 | 0.011262 | 0.011329 | 0.011364 | 0.011497 | 0.011564 | 0.011564 |
| 0.011430 | 0.011534 | 0.011535 | 0.011670 | 0.011696 | 0.011362 | 0.011530 |
| 0.011463 | 0.011463 | 0.011297 | 0.011478 | 0.011408 | 0.011435 | 0.011305 |
| 0.011473 | 0.011653 | 0.011441 | 0.011366 | 0.011262 | 0.011463 | 0.011329 |
| 0.011430 | 0.011362 | 0.011262 | 0.011363 | 0.011463 | 0.011466 | 0.011362 |
| 0.011262 | 0.011195 | 0.011329 | 0.011262 | 0.011195 | 0.011298 | 0.011463 |
| 0.011362 | 0.011295 | 0.011329 | 0.011362 | 0.011329 | 0.011262 | 0.011463 |

|          |          |          |          |          |          |          |
|----------|----------|----------|----------|----------|----------|----------|
| 0.011329 | 0.011362 | 0.011362 | 0.011295 | 0.011362 | 0.011597 | 0.011262 |
| 0.011295 | 0.011698 | 0.011295 | 0.011329 | 0.011295 | 0.011664 | 0.011232 |
| 0.011735 | 0.011230 | 0.011361 | 0.011463 | 0.011549 | 0.011455 | 0.011186 |
| 0.011323 | 0.011463 | 0.011564 | 0.011671 | 0.011531 | 0.011669 | 0.011800 |
| 0.011699 | 0.011737 | 0.011698 | 0.011880 | 0.011664 | 0.012472 | 0.011700 |
| 0.012439 | 0.012207 | 0.012307 | 0.012613 | 0.011664 | 0.011363 | 0.011665 |
| 0.012103 | 0.012038 | 0.011631 | 0.011463 | 0.011598 | 0.011598 | 0.011500 |
| 0.011463 | 0.011467 | 0.011530 | 0.011464 | 0.011867 | 0.011933 | 0.011935 |
| 0.011834 | 0.011934 | 0.012038 | 0.011804 | 0.012104 | 0.012110 | 0.012171 |
| 0.012172 | 0.012205 | 0.012152 | 0.012172 | 0.012173 | 0.011396 | 0.011699 |
| 0.011767 | 0.012270 | 0.011772 | 0.012001 | 0.012474 | 0.011536 | 0.011430 |
| 0.011396 | 0.011396 | 0.011867 | 0.011842 | 0.012010 | 0.011732 | 0.011397 |
| S096     | 0.011900 | 0.011900 | 0.012236 | 0.012000 | 0.012000 | 0.012068 |
| 0.011875 | 0.011807 | 0.012068 | 0.011497 | 0.011564 | 0.011531 | 0.011463 |
| 0.011530 | 0.011698 | 0.011496 | 0.011530 | 0.011597 | 0.011564 | 0.011530 |
| 0.011496 | 0.011530 | 0.011631 | 0.011497 | 0.011463 | 0.011530 | 0.011841 |
| 0.011731 | 0.011530 | 0.011429 | 0.011664 | 0.011530 | 0.011564 | 0.011530 |
| 0.011564 | 0.011597 | 0.011564 | 0.011564 | 0.011597 | 0.011564 | 0.011732 |
| 0.011496 | 0.011564 | 0.011597 | 0.011530 | 0.011631 | 0.011664 | 0.011597 |
| 0.011564 | 0.011732 | 0.011631 | 0.011900 | 0.011564 | 0.011765 | 0.011564 |
| 0.011530 | 0.011631 | 0.011698 | 0.011765 | 0.011933 | 0.011631 | 0.011732 |
| 0.011530 | 0.011597 | 0.011564 | 0.011731 | 0.012034 | 0.011564 | 0.011631 |
| 0.011530 | 0.011631 | 0.011597 | 0.011664 | 0.011597 | 0.011597 | 0.011597 |
| 0.011496 | 0.011530 | 0.011496 | 0.011597 | 0.011564 | 0.011599 | 0.011664 |
| 0.011597 | 0.011564 | 0.011564 | 0.011530 | 0.011664 | 0.011429 | 0.011564 |
| 0.011731 | 0.011664 | 0.011900 | 0.011732 | 0.011564 | 0.000000 | 0.011564 |
| 0.011728 | 0.011957 | 0.011777 | 0.011451 | 0.011508 | 0.011612 | 0.011690 |
| 0.012341 | 0.011721 | 0.011513 | 0.011799 | 0.011799 | 0.011597 | 0.011698 |
| 0.011631 | 0.011597 | 0.011664 | 0.011564 | 0.011664 | 0.011530 | 0.011597 |
| 0.011564 | 0.011664 | 0.011866 | 0.011731 | 0.011631 | 0.011597 | 0.011463 |
| 0.011497 | 0.011497 | 0.011497 | 0.011530 | 0.011732 | 0.011698 | 0.011631 |
| 0.011732 | 0.011799 | 0.011530 | 0.011530 | 0.011564 | 0.011564 | 0.011567 |
| 0.011635 | 0.011564 | 0.011564 | 0.011420 | 0.011530 | 0.011481 | 0.011565 |
| 0.011568 | 0.011507 | 0.011577 | 0.011543 | 0.011468 | 0.011506 | 0.011533 |
| 0.011816 | 0.011577 | 0.011542 | 0.011497 | 0.011475 | 0.011632 | 0.011598 |
| 0.011666 | 0.011599 | 0.011598 | 0.011698 | 0.011631 | 0.011866 | 0.011799 |
| 0.011765 | 0.011698 | 0.011564 | 0.011665 | 0.011463 | 0.011631 | 0.011497 |
| 0.011564 | 0.011564 | 0.011530 | 0.011497 | 0.011530 | 0.011497 | 0.011597 |
| 0.011497 | 0.011597 | 0.011598 | 0.011497 | 0.011599 | 0.011698 | 0.011702 |
| 0.011631 | 0.011598 | 0.011497 | 0.011431 | 0.011564 | 0.011497 | 0.011430 |
| 0.011536 | 0.011631 | 0.011430 | 0.011631 | 0.011463 | 0.011564 | 0.011530 |
| 0.011564 | 0.011530 | 0.011497 | 0.011530 | 0.011564 | 0.011430 | 0.011497 |
| 0.011530 | 0.011530 | 0.011598 | 0.011530 | 0.011564 | 0.011597 | 0.011833 |
| 0.011933 | 0.011866 | 0.011934 | 0.011701 | 0.011934 | 0.011564 | 0.011530 |
| 0.011567 | 0.011788 | 0.011701 | 0.011472 | 0.011943 | 0.011435 | 0.011493 |
| 0.011909 | 0.011842 | 0.011731 | 0.011933 | 0.011607 | 0.011799 | 0.011497 |
| 0.011631 | 0.011866 | 0.011735 | 0.011555 | 0.011605 | 0.011597 | 0.011669 |
| 0.011765 | 0.011667 | 0.011804 | 0.011805 | 0.011799 | 0.011866 | 0.011975 |
| 0.011703 | 0.011807 | 0.011805 | 0.011737 | 0.012002 | 0.011463 | 0.011667 |
| 0.011564 | 0.011564 | 0.011463 | 0.011463 | 0.011463 | 0.011530 | 0.011597 |
| 0.011463 | 0.011530 | 0.011429 | 0.011597 | 0.011396 | 0.011530 | 0.011597 |
| 0.011530 | 0.011967 | 0.011866 | 0.011900 | 0.011429 | 0.011530 | 0.011564 |
| 0.011564 | 0.011530 | 0.011597 | 0.011631 | 0.011496 | 0.011496 | 0.011496 |
| 0.012034 | 0.011664 | 0.011664 | 0.011463 | 0.011564 | 0.011664 | 0.011497 |
| 0.011496 | 0.011564 | 0.011530 | 0.011631 | 0.011496 | 0.011631 | 0.011698 |
| 0.011698 | 0.011530 | 0.011530 | 0.011463 | 0.011463 | 0.011631 | 0.011564 |
| 0.011463 | 0.011564 | 0.011429 | 0.011463 | 0.011597 | 0.011732 | 0.011497 |
| 0.011463 | 0.011597 | 0.011531 | 0.011429 | 0.011765 | 0.011429 | 0.011597 |
| 0.011608 | 0.011497 | 0.011799 | 0.011631 | 0.011664 | 0.011530 | 0.011631 |
| 0.011496 | 0.011765 | 0.011429 | 0.011698 | 0.011496 | 0.011496 | 0.011429 |

|          |          |          |          |          |          |          |
|----------|----------|----------|----------|----------|----------|----------|
| 0.011597 | 0.011866 | 0.011564 | 0.011631 | 0.011463 | 0.011866 | 0.011496 |
| 0.011497 | 0.011496 | 0.011530 | 0.011564 | 0.011530 | 0.011631 | 0.011698 |
| 0.011698 | 0.011664 | 0.011564 | 0.011665 | 0.011564 | 0.011496 | 0.011463 |
| 0.011496 | 0.011496 | 0.011564 | 0.011496 | 0.011396 | 0.011631 | 0.011496 |
| 0.011530 | 0.011530 | 0.011664 | 0.011698 | 0.011597 | 0.011463 | 0.011530 |
| 0.011597 | 0.011530 | 0.011631 | 0.011496 | 0.011631 | 0.011732 | 0.012034 |
| 0.011530 | 0.011933 | 0.011474 | 0.018050 | 0.011453 | 0.011733 | 0.011898 |
| 0.011856 | 0.011905 | 0.011636 | 0.011582 | 0.012050 | 0.011924 | 0.011729 |
| 0.011724 | 0.011976 | 0.011450 | 0.011395 | 0.011529 | 0.011653 | 0.011491 |
| 0.011764 | 0.011656 | 0.011691 | 0.011523 | 0.011664 | 0.011698 | 0.011703 |
| 0.011507 | 0.011665 | 0.011665 | 0.011631 | 0.011597 | 0.011598 | 0.011564 |
| 0.011597 | 0.011530 | 0.011564 | 0.011598 | 0.011564 | 0.011497 | 0.011530 |
| 0.011530 | 0.011598 | 0.011497 | 0.011598 | 0.011631 | 0.011665 | 0.011564 |
| 0.011597 | 0.011564 | 0.011900 | 0.011900 | 0.011564 | 0.011666 | 0.011698 |
| 0.011463 | 0.011463 | 0.011497 | 0.011530 | 0.011463 | 0.011698 | 0.011698 |
| 0.011732 | 0.011731 | 0.011664 | 0.011765 | 0.011934 | 0.011767 | 0.011530 |
| 0.011598 | 0.011665 | 0.011631 | 0.011530 | 0.011597 | 0.011564 | 0.011597 |
| 0.011665 | 0.011665 | 0.011698 | 0.011598 | 0.011498 | 0.011765 | 0.011665 |
| 0.011602 | 0.011497 | 0.011597 | 0.011698 | 0.011598 | 0.011732 | 0.011765 |
| 0.011933 | 0.011607 | 0.011799 | 0.011497 | 0.011631 | 0.011866 | 0.011497 |
| 0.011667 | 0.011564 | 0.011530 | 0.011530 | 0.011598 | 0.011497 | 0.011598 |
| 0.011631 | 0.011665 | 0.011564 | 0.011597 | 0.011564 | 0.011900 | 0.011900 |
| 0.011564 | 0.011666 | 0.011731 | 0.011664 | 0.012305 | 0.011703 | 0.011658 |
| 0.011728 | 0.011684 | 0.011798 | 0.011684 | 0.011795 | 0.011715 | 0.011681 |
| 0.012262 | 0.011579 | 0.011711 | 0.011648 | 0.011921 | 0.011774 | 0.011809 |
| 0.012284 | 0.011776 | 0.011838 | 0.011900 | 0.011765 | 0.011765 | 0.011804 |
| 0.011463 | 0.011564 | 0.011765 | 0.011731 | 0.011736 | 0.011664 | 0.011700 |
| 0.011564 | 0.011429 | 0.011463 | 0.011564 | 0.011396 | 0.011530 | 0.011429 |
| 0.011564 | 0.011597 | 0.011496 | 0.011463 | 0.011497 | 0.011496 | 0.011530 |
| 0.011530 | 0.011463 | 0.011530 | 0.011564 | 0.011463 | 0.011597 | 0.011698 |
| 0.011597 | 0.011664 | 0.011597 | 0.011597 | 0.011530 | 0.011933 | 0.011564 |
| 0.011617 | 0.011530 | 0.011732 | 0.011739 | 0.011564 | 0.011631 | 0.011631 |
| 0.011631 | 0.011497 | 0.011530 | 0.011497 | 0.011664 | 0.011664 | 0.011564 |
| 0.011597 | 0.011664 | 0.011900 | 0.011631 | 0.011833 | 0.011833 | 0.011698 |
| 0.011530 | 0.011597 | 0.011631 | 0.012034 | 0.011598 | 0.011564 | 0.011597 |
| 0.011631 | 0.011564 | 0.011564 | 0.011866 | 0.011732 | 0.011833 | 0.011564 |
| 0.011664 | 0.011732 | 0.011597 | 0.011664 | 0.011631 | 0.011497 | 0.011832 |
| 0.011597 | 0.011564 | 0.011564 | 0.011732 | 0.011564 | 0.011664 | 0.011900 |
| 0.011597 | 0.011943 | 0.011967 | 0.011711 | 0.011455 | 0.011672 | 0.011473 |
| 0.011500 | 0.011917 | 0.011517 | 0.011730 | 0.011548 | 0.011620 | 0.011591 |
| 0.011723 | 0.011324 | 0.011506 | 0.011390 | 0.011438 | 0.011663 | 0.011628 |
| 0.011625 | 0.011493 | 0.011659 | 0.011589 | 0.011600 | 0.011665 | 0.011732 |
| 0.011799 | 0.011665 | 0.011770 | 0.011772 | 0.011908 | 0.011944 | 0.011597 |
| 0.011765 | 0.011698 | 0.011564 | 0.011665 | 0.011463 | 0.011631 | 0.011497 |
| 0.011564 | 0.011564 | 0.011530 | 0.011497 | 0.011530 | 0.011497 | 0.011597 |
| 0.011584 | 0.011585 | 0.011574 | 0.011608 | 0.011745 | 0.011641 | 0.011709 |
| 0.011708 | 0.011632 | 0.011466 | 0.011456 | 0.011568 | 0.011738 | 0.011739 |
| 0.011531 | 0.011602 | 0.011835 | 0.011804 | 0.011733 | 0.011767 | 0.011698 |
| 0.011631 | 0.011698 | 0.011698 | 0.011597 | 0.012169 | 0.011765 | 0.011833 |
| 0.011866 | 0.011950 | 0.011572 | 0.011649 | 0.011530 | 0.011732 | 0.011698 |
| 0.011733 | 0.011765 | 0.011765 | 0.011765 | 0.011847 | 0.011900 | 0.011546 |
| 0.011432 | 0.011441 | 0.011537 | 0.011502 | 0.011607 | 0.011471 | 0.011774 |
| 0.011575 | 0.011718 | 0.011489 | 0.011585 | 0.011565 | 0.011574 | 0.011463 |
| 0.011497 | 0.011497 | 0.011497 | 0.011530 | 0.011732 | 0.011698 | 0.011631 |
| 0.011732 | 0.011799 | 0.011530 | 0.011530 | 0.011564 | 0.011564 | 0.011567 |
| 0.011635 | 0.011564 | 0.011564 | 0.011600 | 0.011665 | 0.011732 | 0.011799 |
| 0.011665 | 0.011770 | 0.011772 | 0.011908 | 0.011944 | 0.011597 | 0.011765 |
| 0.011698 | 0.011698 | 0.011534 | 0.011687 | 0.011651 | 0.011639 | 0.011551 |
| 0.011646 | 0.011926 | 0.011568 | 0.011604 | 0.011430 | 0.011631 | 0.011497 |
| 0.011597 | 0.011598 | 0.011497 | 0.011599 | 0.011698 | 0.011702 | 0.011598 |

|          |          |          |          |          |          |          |
|----------|----------|----------|----------|----------|----------|----------|
| 0.011497 | 0.011431 | 0.011564 | 0.011497 | 0.011430 | 0.011536 | 0.011631 |
| 0.011597 | 0.011530 | 0.011564 | 0.011598 | 0.011564 | 0.011497 | 0.011698 |
| 0.011564 | 0.011597 | 0.011597 | 0.011530 | 0.011597 | 0.011832 | 0.011496 |
| 0.011530 | 0.011933 | 0.011530 | 0.011496 | 0.011530 | 0.011900 | 0.011532 |
| 0.012016 | 0.011485 | 0.011511 | 0.011704 | 0.011752 | 0.011670 | 0.011436 |
| 0.011480 | 0.011698 | 0.011799 | 0.011841 | 0.011767 | 0.011838 | 0.011968 |
| 0.011868 | 0.011906 | 0.011866 | 0.012120 | 0.011900 | 0.012775 | 0.011936 |
| 0.012675 | 0.012443 | 0.012577 | 0.012781 | 0.011899 | 0.011598 | 0.011900 |
| 0.012339 | 0.012275 | 0.011866 | 0.011766 | 0.011834 | 0.011834 | 0.011804 |
| 0.011698 | 0.011705 | 0.011765 | 0.011733 | 0.012103 | 0.012169 | 0.012171 |
| 0.012070 | 0.012170 | 0.012274 | 0.012041 | 0.012340 | 0.012347 | 0.012407 |
| 0.012408 | 0.012442 | 0.012392 | 0.012408 | 0.012410 | 0.011631 | 0.011934 |
| 0.012002 | 0.012505 | 0.012010 | 0.012236 | 0.012710 | 0.011773 | 0.011665 |
| 0.011631 | 0.011631 | 0.012102 | 0.012130 | 0.012257 | 0.011967 | 0.011633 |
| S097     | 0.011664 | 0.011664 | 0.012001 | 0.011765 | 0.011765 | 0.011832 |
| 0.011671 | 0.011603 | 0.011765 | 0.011262 | 0.011329 | 0.011296 | 0.011262 |
| 0.011295 | 0.011396 | 0.011262 | 0.011295 | 0.011362 | 0.011329 | 0.011295 |
| 0.011262 | 0.011295 | 0.011396 | 0.011262 | 0.011295 | 0.011295 | 0.011637 |
| 0.011530 | 0.011295 | 0.011194 | 0.011429 | 0.011362 | 0.011329 | 0.011362 |
| 0.011329 | 0.011429 | 0.011262 | 0.011329 | 0.011295 | 0.011329 | 0.011496 |
| 0.011262 | 0.011329 | 0.011295 | 0.011228 | 0.011396 | 0.011429 | 0.011362 |
| 0.011329 | 0.011429 | 0.011396 | 0.011664 | 0.011262 | 0.011597 | 0.011262 |
| 0.011295 | 0.011396 | 0.011396 | 0.011597 | 0.011698 | 0.011396 | 0.011496 |
| 0.011362 | 0.011429 | 0.011329 | 0.011563 | 0.011799 | 0.011262 | 0.011396 |
| 0.011295 | 0.011396 | 0.011362 | 0.011429 | 0.011362 | 0.011295 | 0.011295 |
| 0.011262 | 0.011295 | 0.011262 | 0.011362 | 0.011329 | 0.011363 | 0.011429 |
| 0.011362 | 0.011329 | 0.011396 | 0.011295 | 0.011429 | 0.011262 | 0.011329 |
| 0.011496 | 0.011429 | 0.011664 | 0.011496 | 0.011329 | 0.011564 | 0.000000 |
| 0.011505 | 0.011732 | 0.011551 | 0.011255 | 0.011247 | 0.011355 | 0.011454 |
| 0.012085 | 0.011518 | 0.011266 | 0.011563 | 0.011564 | 0.011362 | 0.011463 |
| 0.011396 | 0.011362 | 0.011429 | 0.011329 | 0.011429 | 0.011362 | 0.011362 |
| 0.011329 | 0.011429 | 0.011631 | 0.011429 | 0.011396 | 0.011362 | 0.011295 |
| 0.011262 | 0.011262 | 0.011329 | 0.011295 | 0.011497 | 0.011463 | 0.011396 |
| 0.011497 | 0.011564 | 0.011295 | 0.011295 | 0.011329 | 0.011329 | 0.011330 |
| 0.011398 | 0.011329 | 0.011329 | 0.011204 | 0.011277 | 0.011235 | 0.011329 |
| 0.011331 | 0.011266 | 0.011318 | 0.011302 | 0.011230 | 0.011266 | 0.011297 |
| 0.011564 | 0.011336 | 0.011370 | 0.011262 | 0.011268 | 0.011397 | 0.011363 |
| 0.011430 | 0.011363 | 0.011363 | 0.011463 | 0.011396 | 0.011765 | 0.011564 |
| 0.011597 | 0.011463 | 0.011329 | 0.011429 | 0.011228 | 0.011463 | 0.011262 |
| 0.011329 | 0.011329 | 0.011295 | 0.011262 | 0.011295 | 0.011262 | 0.011362 |
| 0.011329 | 0.011429 | 0.011362 | 0.011262 | 0.011296 | 0.011463 | 0.011466 |
| 0.011463 | 0.011362 | 0.011262 | 0.011195 | 0.011329 | 0.011262 | 0.011195 |
| 0.011298 | 0.011463 | 0.011262 | 0.011463 | 0.011228 | 0.011329 | 0.011295 |
| 0.011396 | 0.011295 | 0.011329 | 0.011295 | 0.011329 | 0.011195 | 0.011329 |
| 0.011362 | 0.011295 | 0.011362 | 0.011295 | 0.011329 | 0.011362 | 0.011597 |
| 0.011698 | 0.011631 | 0.011698 | 0.011397 | 0.011698 | 0.011329 | 0.011295 |
| 0.011297 | 0.011626 | 0.011426 | 0.011232 | 0.011637 | 0.011197 | 0.011257 |
| 0.011705 | 0.011604 | 0.011496 | 0.011698 | 0.011402 | 0.011564 | 0.011530 |
| 0.011463 | 0.011631 | 0.011486 | 0.011307 | 0.011395 | 0.011362 | 0.011432 |
| 0.011530 | 0.011431 | 0.011567 | 0.011635 | 0.011564 | 0.011631 | 0.011738 |
| 0.011466 | 0.011637 | 0.011568 | 0.011500 | 0.011766 | 0.011228 | 0.011431 |
| 0.011396 | 0.011329 | 0.011228 | 0.011228 | 0.011295 | 0.011228 | 0.011295 |
| 0.011295 | 0.011362 | 0.011262 | 0.011362 | 0.011295 | 0.011295 | 0.011362 |
| 0.011295 | 0.011731 | 0.011631 | 0.011664 | 0.011194 | 0.011295 | 0.011329 |
| 0.011329 | 0.011295 | 0.011362 | 0.011396 | 0.011262 | 0.011262 | 0.011262 |
| 0.011799 | 0.011429 | 0.011429 | 0.011228 | 0.011329 | 0.011497 | 0.011262 |
| 0.011262 | 0.011329 | 0.011295 | 0.011463 | 0.011262 | 0.011396 | 0.011530 |
| 0.011463 | 0.011295 | 0.011295 | 0.011228 | 0.011228 | 0.011396 | 0.011329 |
| 0.011228 | 0.011329 | 0.011195 | 0.011228 | 0.011362 | 0.011497 | 0.011228 |
| 0.011228 | 0.011362 | 0.011295 | 0.011195 | 0.011530 | 0.011195 | 0.011295 |

|          |          |          |          |          |          |          |
|----------|----------|----------|----------|----------|----------|----------|
| 0.011437 | 0.011262 | 0.011564 | 0.011396 | 0.011429 | 0.011295 | 0.011329 |
| 0.011262 | 0.011597 | 0.011194 | 0.011463 | 0.011262 | 0.011262 | 0.011194 |
| 0.011429 | 0.011631 | 0.011329 | 0.011396 | 0.011228 | 0.011631 | 0.011262 |
| 0.011262 | 0.011262 | 0.011295 | 0.011396 | 0.011295 | 0.011396 | 0.011463 |
| 0.011463 | 0.011429 | 0.011262 | 0.011429 | 0.011396 | 0.011194 | 0.011228 |
| 0.011262 | 0.011194 | 0.011329 | 0.011262 | 0.011228 | 0.011396 | 0.011262 |
| 0.011295 | 0.011295 | 0.011429 | 0.011463 | 0.011362 | 0.011295 | 0.011295 |
| 0.011362 | 0.011295 | 0.011396 | 0.011262 | 0.011396 | 0.011429 | 0.011799 |
| 0.011295 | 0.011698 | 0.011302 | 0.017823 | 0.011322 | 0.011366 | 0.011653 |
| 0.011614 | 0.011658 | 0.011374 | 0.011292 | 0.011719 | 0.011681 | 0.011303 |
| 0.011534 | 0.011487 | 0.011216 | 0.011270 | 0.011294 | 0.011307 | 0.011275 |
| 0.011529 | 0.011470 | 0.011468 | 0.011325 | 0.011429 | 0.011463 | 0.011466 |
| 0.011335 | 0.011429 | 0.011429 | 0.011396 | 0.011362 | 0.011362 | 0.011329 |
| 0.011362 | 0.011295 | 0.011329 | 0.011362 | 0.011329 | 0.011262 | 0.011295 |
| 0.011295 | 0.011362 | 0.011262 | 0.011362 | 0.011396 | 0.011429 | 0.011329 |
| 0.011362 | 0.011329 | 0.011665 | 0.011665 | 0.011396 | 0.011363 | 0.011463 |
| 0.011228 | 0.011228 | 0.011262 | 0.011362 | 0.011228 | 0.011463 | 0.011463 |
| 0.011497 | 0.011496 | 0.011429 | 0.011530 | 0.011698 | 0.011532 | 0.011362 |
| 0.011362 | 0.011429 | 0.011463 | 0.011295 | 0.011362 | 0.011329 | 0.011362 |
| 0.011430 | 0.011430 | 0.011463 | 0.011430 | 0.011330 | 0.011530 | 0.011497 |
| 0.011365 | 0.011262 | 0.011362 | 0.011396 | 0.011362 | 0.011497 | 0.011530 |
| 0.011698 | 0.011402 | 0.011564 | 0.011530 | 0.011463 | 0.011631 | 0.011262 |
| 0.011431 | 0.011262 | 0.011295 | 0.011295 | 0.011362 | 0.011262 | 0.011362 |
| 0.011396 | 0.011429 | 0.011329 | 0.011362 | 0.011329 | 0.011665 | 0.011665 |
| 0.011396 | 0.011363 | 0.011496 | 0.011429 | 0.012069 | 0.011489 | 0.011412 |
| 0.011482 | 0.011441 | 0.011552 | 0.011441 | 0.011550 | 0.011474 | 0.011439 |
| 0.012021 | 0.011337 | 0.011471 | 0.011406 | 0.011680 | 0.011536 | 0.011638 |
| 0.012046 | 0.011512 | 0.011601 | 0.011664 | 0.011530 | 0.011530 | 0.011567 |
| 0.011228 | 0.011396 | 0.011530 | 0.011496 | 0.011499 | 0.011496 | 0.011464 |
| 0.011329 | 0.011262 | 0.011295 | 0.011329 | 0.011228 | 0.011295 | 0.011194 |
| 0.011329 | 0.011362 | 0.011262 | 0.011228 | 0.011329 | 0.011262 | 0.011295 |
| 0.011295 | 0.011228 | 0.011295 | 0.011329 | 0.011228 | 0.011429 | 0.011463 |
| 0.011362 | 0.011429 | 0.011362 | 0.011362 | 0.011295 | 0.011698 | 0.011329 |
| 0.011373 | 0.011295 | 0.011530 | 0.011535 | 0.011396 | 0.011329 | 0.011396 |
| 0.011396 | 0.011329 | 0.011295 | 0.011329 | 0.011362 | 0.011429 | 0.011362 |
| 0.011362 | 0.011496 | 0.011664 | 0.011396 | 0.011597 | 0.011597 | 0.011463 |
| 0.011295 | 0.011362 | 0.011396 | 0.011799 | 0.011362 | 0.011396 | 0.011362 |
| 0.011396 | 0.011329 | 0.011329 | 0.011631 | 0.011564 | 0.011597 | 0.011329 |
| 0.011429 | 0.011496 | 0.011362 | 0.011429 | 0.011396 | 0.011262 | 0.011597 |
| 0.011362 | 0.011329 | 0.011329 | 0.011496 | 0.011329 | 0.011429 | 0.011664 |
| 0.011362 | 0.011739 | 0.011731 | 0.011548 | 0.011342 | 0.011434 | 0.011318 |
| 0.011170 | 0.011761 | 0.011271 | 0.011507 | 0.011353 | 0.011366 | 0.011432 |
| 0.011519 | 0.011192 | 0.011394 | 0.011258 | 0.011330 | 0.011462 | 0.011425 |
| 0.011437 | 0.011336 | 0.011412 | 0.011342 | 0.011363 | 0.011497 | 0.011564 |
| 0.011564 | 0.011430 | 0.011533 | 0.011535 | 0.011670 | 0.011696 | 0.011362 |
| 0.011597 | 0.011463 | 0.011329 | 0.011429 | 0.011228 | 0.011463 | 0.011262 |
| 0.011329 | 0.011329 | 0.011295 | 0.011262 | 0.011295 | 0.011262 | 0.011362 |
| 0.011340 | 0.011340 | 0.011334 | 0.011368 | 0.011505 | 0.011470 | 0.011470 |
| 0.011469 | 0.011396 | 0.011208 | 0.011204 | 0.011263 | 0.011501 | 0.011501 |
| 0.011296 | 0.011365 | 0.011599 | 0.011567 | 0.011497 | 0.011464 | 0.011463 |
| 0.011396 | 0.011463 | 0.011463 | 0.011362 | 0.011933 | 0.011530 | 0.011597 |
| 0.011631 | 0.011701 | 0.011333 | 0.011407 | 0.011295 | 0.011497 | 0.011463 |
| 0.011497 | 0.011530 | 0.011530 | 0.011530 | 0.011650 | 0.011664 | 0.011303 |
| 0.011195 | 0.011199 | 0.011298 | 0.011264 | 0.011368 | 0.011209 | 0.011536 |
| 0.011335 | 0.011499 | 0.011203 | 0.011360 | 0.011329 | 0.011402 | 0.011295 |
| 0.011262 | 0.011262 | 0.011329 | 0.011295 | 0.011497 | 0.011463 | 0.011396 |
| 0.011497 | 0.011564 | 0.011295 | 0.011295 | 0.011329 | 0.011329 | 0.011330 |
| 0.011398 | 0.011329 | 0.011329 | 0.011363 | 0.011497 | 0.011564 | 0.011564 |
| 0.011430 | 0.011533 | 0.011535 | 0.011670 | 0.011696 | 0.011362 | 0.011530 |
| 0.011463 | 0.011463 | 0.011229 | 0.011478 | 0.011338 | 0.011435 | 0.011270 |

|          |          |          |          |          |          |          |
|----------|----------|----------|----------|----------|----------|----------|
| 0.011439 | 0.011653 | 0.011399 | 0.011366 | 0.011262 | 0.011463 | 0.011329 |
| 0.011429 | 0.011362 | 0.011262 | 0.011296 | 0.011463 | 0.011466 | 0.011362 |
| 0.011262 | 0.011195 | 0.011329 | 0.011262 | 0.011195 | 0.011298 | 0.011463 |
| 0.011362 | 0.011295 | 0.011329 | 0.011362 | 0.011329 | 0.011262 | 0.011463 |
| 0.011329 | 0.011362 | 0.011362 | 0.011295 | 0.011362 | 0.011597 | 0.011262 |
| 0.011295 | 0.011698 | 0.011295 | 0.011329 | 0.011295 | 0.011664 | 0.011232 |
| 0.011735 | 0.011273 | 0.011311 | 0.011503 | 0.011589 | 0.011491 | 0.011186 |
| 0.011270 | 0.011463 | 0.011564 | 0.011671 | 0.011531 | 0.011669 | 0.011800 |
| 0.011699 | 0.011737 | 0.011698 | 0.011949 | 0.011664 | 0.012539 | 0.011700 |
| 0.012439 | 0.012207 | 0.012341 | 0.012612 | 0.011664 | 0.011362 | 0.011665 |
| 0.012103 | 0.012038 | 0.011631 | 0.011530 | 0.011598 | 0.011598 | 0.011567 |
| 0.011463 | 0.011467 | 0.011530 | 0.011497 | 0.011867 | 0.011933 | 0.011935 |
| 0.011834 | 0.011934 | 0.012038 | 0.011804 | 0.012104 | 0.012110 | 0.012171 |
| 0.012171 | 0.012205 | 0.012152 | 0.012172 | 0.012173 | 0.011396 | 0.011699 |
| 0.011766 | 0.012270 | 0.011772 | 0.012001 | 0.012474 | 0.011536 | 0.011430 |
| 0.011396 | 0.011396 | 0.011867 | 0.011924 | 0.012010 | 0.011732 | 0.011397 |
| S098     | 0.011616 | 0.011616 | 0.011988 | 0.011950 | 0.011950 | 0.011988 |
| 0.011806 | 0.011732 | 0.011913 | 0.011431 | 0.011468 | 0.011431 | 0.011394 |
| 0.011431 | 0.011653 | 0.011431 | 0.011468 | 0.011468 | 0.011468 | 0.011431 |
| 0.011431 | 0.011468 | 0.011579 | 0.011394 | 0.011468 | 0.011431 | 0.011806 |
| 0.011728 | 0.011468 | 0.011357 | 0.011616 | 0.011505 | 0.011505 | 0.011468 |
| 0.011468 | 0.011616 | 0.011505 | 0.011505 | 0.011505 | 0.011357 | 0.011691 |
| 0.011431 | 0.011505 | 0.011505 | 0.011468 | 0.011579 | 0.011616 | 0.011542 |
| 0.011505 | 0.011654 | 0.011506 | 0.011876 | 0.011468 | 0.011765 | 0.011468 |
| 0.011468 | 0.011580 | 0.011542 | 0.011765 | 0.011913 | 0.011579 | 0.011691 |
| 0.011542 | 0.011579 | 0.011468 | 0.011653 | 0.011988 | 0.011505 | 0.011579 |
| 0.011468 | 0.011542 | 0.011542 | 0.011579 | 0.011468 | 0.011505 | 0.011505 |
| 0.011431 | 0.011431 | 0.011394 | 0.011468 | 0.011505 | 0.011505 | 0.011616 |
| 0.011542 | 0.011431 | 0.011579 | 0.011357 | 0.011616 | 0.011431 | 0.011468 |
| 0.011653 | 0.011616 | 0.011839 | 0.011505 | 0.011468 | 0.011728 | 0.011505 |
| 0.000000 | 0.011845 | 0.011678 | 0.011376 | 0.011337 | 0.011255 | 0.011533 |
| 0.012221 | 0.011636 | 0.011311 | 0.011728 | 0.011728 | 0.011505 | 0.011579 |
| 0.011542 | 0.011542 | 0.011616 | 0.011505 | 0.011542 | 0.011505 | 0.011468 |
| 0.011431 | 0.011542 | 0.011802 | 0.011653 | 0.011542 | 0.011542 | 0.011468 |
| 0.011394 | 0.011431 | 0.011505 | 0.011394 | 0.011691 | 0.011653 | 0.011579 |
| 0.011691 | 0.011765 | 0.011468 | 0.011468 | 0.011505 | 0.011505 | 0.011506 |
| 0.011580 | 0.011505 | 0.011505 | 0.011331 | 0.011415 | 0.011410 | 0.011468 |
| 0.011322 | 0.011434 | 0.011496 | 0.011471 | 0.011398 | 0.011439 | 0.011470 |
| 0.011725 | 0.011441 | 0.011477 | 0.011431 | 0.011397 | 0.011542 | 0.011542 |
| 0.011617 | 0.011543 | 0.011542 | 0.011579 | 0.011542 | 0.011876 | 0.011728 |
| 0.011765 | 0.011654 | 0.011468 | 0.011616 | 0.011394 | 0.011653 | 0.011394 |
| 0.011505 | 0.011505 | 0.011431 | 0.011431 | 0.011431 | 0.011431 | 0.011542 |
| 0.011468 | 0.011616 | 0.011542 | 0.011357 | 0.011544 | 0.011654 | 0.011620 |
| 0.011654 | 0.011542 | 0.011431 | 0.011358 | 0.011505 | 0.011431 | 0.011357 |
| 0.011472 | 0.011654 | 0.011431 | 0.011654 | 0.011394 | 0.011468 | 0.011468 |
| 0.011579 | 0.011431 | 0.011505 | 0.011468 | 0.011505 | 0.011357 | 0.011468 |
| 0.011505 | 0.011468 | 0.011505 | 0.011431 | 0.011468 | 0.011542 | 0.011728 |
| 0.011913 | 0.011765 | 0.011913 | 0.011616 | 0.011914 | 0.011505 | 0.011468 |
| 0.011470 | 0.011736 | 0.011628 | 0.011399 | 0.011923 | 0.011362 | 0.011410 |
| 0.011918 | 0.011810 | 0.011653 | 0.011876 | 0.011513 | 0.011765 | 0.011654 |
| 0.011616 | 0.011802 | 0.011687 | 0.011511 | 0.011429 | 0.011542 | 0.011621 |
| 0.011728 | 0.011580 | 0.011765 | 0.011805 | 0.011542 | 0.011802 | 0.011919 |
| 0.011582 | 0.011810 | 0.011659 | 0.011546 | 0.011951 | 0.011394 | 0.011544 |
| 0.011542 | 0.011468 | 0.011357 | 0.011357 | 0.011431 | 0.011468 | 0.011542 |
| 0.011468 | 0.011542 | 0.011431 | 0.011505 | 0.011468 | 0.011468 | 0.011542 |
| 0.011468 | 0.011950 | 0.011839 | 0.011876 | 0.011357 | 0.011468 | 0.011505 |
| 0.011505 | 0.011468 | 0.011542 | 0.011579 | 0.011394 | 0.011394 | 0.011394 |
| 0.011988 | 0.011579 | 0.011616 | 0.011394 | 0.011505 | 0.011654 | 0.011394 |
| 0.011394 | 0.011431 | 0.011468 | 0.011616 | 0.011431 | 0.011579 | 0.011728 |
| 0.011653 | 0.011468 | 0.011468 | 0.011394 | 0.011394 | 0.011505 | 0.011468 |

|          |          |          |          |          |          |          |
|----------|----------|----------|----------|----------|----------|----------|
| 0.011394 | 0.011505 | 0.011357 | 0.011394 | 0.011394 | 0.011691 | 0.011394 |
| 0.011394 | 0.011394 | 0.011394 | 0.011357 | 0.011728 | 0.011357 | 0.011542 |
| 0.011628 | 0.011431 | 0.011765 | 0.011542 | 0.011542 | 0.011431 | 0.011542 |
| 0.011431 | 0.011765 | 0.011357 | 0.011616 | 0.011431 | 0.011431 | 0.011357 |
| 0.011542 | 0.011839 | 0.011468 | 0.011579 | 0.011394 | 0.011839 | 0.011431 |
| 0.011431 | 0.011431 | 0.011468 | 0.011542 | 0.011468 | 0.011579 | 0.011653 |
| 0.011505 | 0.011616 | 0.011505 | 0.011617 | 0.011579 | 0.011431 | 0.011394 |
| 0.011431 | 0.011431 | 0.011468 | 0.011431 | 0.011394 | 0.011542 | 0.011431 |
| 0.011468 | 0.011431 | 0.011542 | 0.011653 | 0.011505 | 0.011468 | 0.011468 |
| 0.011505 | 0.011468 | 0.011505 | 0.011394 | 0.011579 | 0.011691 | 0.011950 |
| 0.011431 | 0.011876 | 0.011431 | 0.018175 | 0.011257 | 0.011567 | 0.011765 |
| 0.011765 | 0.011765 | 0.011217 | 0.011420 | 0.011885 | 0.011802 | 0.011485 |
| 0.011696 | 0.011610 | 0.011333 | 0.011452 | 0.011387 | 0.011406 | 0.011452 |
| 0.011686 | 0.011612 | 0.011570 | 0.011342 | 0.011616 | 0.011616 | 0.011546 |
| 0.011475 | 0.011579 | 0.011579 | 0.011542 | 0.011505 | 0.011506 | 0.011505 |
| 0.011505 | 0.011431 | 0.011505 | 0.011542 | 0.011468 | 0.011431 | 0.011468 |
| 0.011468 | 0.011505 | 0.011357 | 0.011505 | 0.011579 | 0.011468 | 0.011505 |
| 0.011542 | 0.011505 | 0.011839 | 0.011839 | 0.011580 | 0.011617 | 0.011616 |
| 0.011394 | 0.011394 | 0.011394 | 0.011542 | 0.011394 | 0.011653 | 0.011653 |
| 0.011691 | 0.011653 | 0.011579 | 0.011728 | 0.011913 | 0.011693 | 0.011542 |
| 0.011542 | 0.011616 | 0.011653 | 0.011468 | 0.011468 | 0.011431 | 0.011542 |
| 0.011579 | 0.011579 | 0.011616 | 0.011616 | 0.011506 | 0.011653 | 0.011653 |
| 0.011547 | 0.011394 | 0.011505 | 0.011654 | 0.011505 | 0.011691 | 0.011691 |
| 0.011876 | 0.011513 | 0.011765 | 0.011654 | 0.011616 | 0.011802 | 0.011431 |
| 0.011618 | 0.011505 | 0.011468 | 0.011468 | 0.011505 | 0.011357 | 0.011505 |
| 0.011579 | 0.011468 | 0.011505 | 0.011542 | 0.011505 | 0.011839 | 0.011839 |
| 0.011580 | 0.011617 | 0.011616 | 0.011579 | 0.012211 | 0.011644 | 0.011564 |
| 0.011482 | 0.011627 | 0.011717 | 0.011557 | 0.011746 | 0.011666 | 0.011587 |
| 0.012154 | 0.011516 | 0.011624 | 0.011553 | 0.011853 | 0.011695 | 0.011807 |
| 0.012225 | 0.011683 | 0.011543 | 0.011542 | 0.011542 | 0.011579 | 0.011506 |
| 0.011394 | 0.011431 | 0.011579 | 0.011542 | 0.011543 | 0.011691 | 0.011653 |
| 0.011468 | 0.011431 | 0.011468 | 0.011468 | 0.011394 | 0.011431 | 0.011357 |
| 0.011431 | 0.011468 | 0.011431 | 0.011394 | 0.011505 | 0.011431 | 0.011468 |
| 0.011468 | 0.011394 | 0.011468 | 0.011505 | 0.011394 | 0.011616 | 0.011579 |
| 0.011431 | 0.011542 | 0.011394 | 0.011431 | 0.011468 | 0.011913 | 0.011505 |
| 0.011562 | 0.011431 | 0.011728 | 0.011735 | 0.011542 | 0.011505 | 0.011579 |
| 0.011579 | 0.011505 | 0.011468 | 0.011505 | 0.011616 | 0.011616 | 0.011505 |
| 0.011542 | 0.011654 | 0.011876 | 0.011505 | 0.011691 | 0.011691 | 0.011579 |
| 0.011431 | 0.011542 | 0.011579 | 0.011988 | 0.011543 | 0.011542 | 0.011542 |
| 0.011579 | 0.011431 | 0.011431 | 0.011839 | 0.011728 | 0.011802 | 0.011505 |
| 0.011579 | 0.011654 | 0.011505 | 0.011579 | 0.011505 | 0.011431 | 0.011765 |
| 0.011542 | 0.011468 | 0.011431 | 0.011579 | 0.011505 | 0.011579 | 0.011839 |
| 0.011468 | 0.011881 | 0.011950 | 0.011670 | 0.011289 | 0.011579 | 0.011380 |
| 0.011343 | 0.011905 | 0.011360 | 0.011552 | 0.011451 | 0.011468 | 0.011432 |
| 0.011525 | 0.011324 | 0.011394 | 0.011258 | 0.011330 | 0.011395 | 0.011548 |
| 0.011551 | 0.011419 | 0.011505 | 0.011401 | 0.011544 | 0.011691 | 0.011728 |
| 0.011728 | 0.011617 | 0.011693 | 0.011734 | 0.011808 | 0.011843 | 0.011468 |
| 0.011765 | 0.011654 | 0.011468 | 0.011616 | 0.011394 | 0.011653 | 0.011394 |
| 0.011505 | 0.011505 | 0.011431 | 0.011431 | 0.011431 | 0.011431 | 0.011542 |
| 0.011512 | 0.011523 | 0.011509 | 0.011476 | 0.011664 | 0.011622 | 0.011587 |
| 0.011587 | 0.011468 | 0.011341 | 0.011333 | 0.011509 | 0.011659 | 0.011622 |
| 0.011468 | 0.011546 | 0.011803 | 0.011693 | 0.011691 | 0.011654 | 0.011579 |
| 0.011579 | 0.011654 | 0.011653 | 0.011505 | 0.012174 | 0.011728 | 0.011765 |
| 0.011839 | 0.011846 | 0.011437 | 0.011595 | 0.011468 | 0.011653 | 0.011616 |
| 0.011580 | 0.011616 | 0.011691 | 0.011691 | 0.011539 | 0.011802 | 0.011481 |
| 0.011359 | 0.011365 | 0.011472 | 0.011435 | 0.011551 | 0.011308 | 0.011734 |
| 0.011513 | 0.011591 | 0.011323 | 0.011471 | 0.011505 | 0.011589 | 0.011468 |
| 0.011394 | 0.011431 | 0.011505 | 0.011394 | 0.011691 | 0.011653 | 0.011579 |
| 0.011691 | 0.011765 | 0.011468 | 0.011468 | 0.011505 | 0.011505 | 0.011506 |
| 0.011580 | 0.011505 | 0.011505 | 0.011544 | 0.011691 | 0.011728 | 0.011728 |

|          |          |          |          |          |          |          |
|----------|----------|----------|----------|----------|----------|----------|
| 0.011617 | 0.011693 | 0.011734 | 0.011808 | 0.011843 | 0.011468 | 0.011690 |
| 0.011616 | 0.011616 | 0.011434 | 0.011636 | 0.011598 | 0.011550 | 0.011485 |
| 0.011592 | 0.011982 | 0.011631 | 0.011548 | 0.011431 | 0.011654 | 0.011468 |
| 0.011616 | 0.011542 | 0.011357 | 0.011544 | 0.011654 | 0.011620 | 0.011542 |
| 0.011431 | 0.011358 | 0.011505 | 0.011431 | 0.011357 | 0.011472 | 0.011654 |
| 0.011505 | 0.011431 | 0.011505 | 0.011542 | 0.011468 | 0.011431 | 0.011616 |
| 0.011505 | 0.011542 | 0.011542 | 0.011468 | 0.011394 | 0.011691 | 0.011431 |
| 0.011468 | 0.011913 | 0.011468 | 0.011505 | 0.011431 | 0.011876 | 0.011368 |
| 0.011859 | 0.011319 | 0.011473 | 0.011561 | 0.011638 | 0.011623 | 0.011317 |
| 0.011384 | 0.011653 | 0.011765 | 0.011885 | 0.011728 | 0.011877 | 0.012025 |
| 0.011914 | 0.011919 | 0.011913 | 0.012073 | 0.011802 | 0.012657 | 0.011913 |
| 0.012657 | 0.012285 | 0.012512 | 0.012696 | 0.011802 | 0.011505 | 0.011876 |
| 0.012249 | 0.012025 | 0.011839 | 0.011728 | 0.011802 | 0.011802 | 0.011770 |
| 0.011653 | 0.011656 | 0.011728 | 0.011691 | 0.012062 | 0.012099 | 0.012099 |
| 0.011951 | 0.012025 | 0.012211 | 0.011913 | 0.012249 | 0.012256 | 0.012361 |
| 0.012361 | 0.012323 | 0.012249 | 0.012286 | 0.012286 | 0.011542 | 0.011839 |
| 0.011951 | 0.012471 | 0.011920 | 0.012062 | 0.011877 | 0.011734 | 0.011616 |
| 0.011579 | 0.011579 | 0.011988 | 0.011999 | 0.012165 | 0.011913 | 0.011580 |
| S099     | 0.011845 | 0.011845 | 0.011882 | 0.011845 | 0.011845 | 0.011882 |
| 0.011286 | 0.011210 | 0.011807 | 0.011658 | 0.011695 | 0.011658 | 0.011620 |
| 0.011583 | 0.011882 | 0.011583 | 0.011695 | 0.011695 | 0.011695 | 0.011658 |
| 0.011658 | 0.011695 | 0.011508 | 0.011621 | 0.011696 | 0.011658 | 0.011286 |
| 0.011658 | 0.011695 | 0.011583 | 0.011508 | 0.011733 | 0.011733 | 0.011695 |
| 0.011695 | 0.011845 | 0.011733 | 0.011733 | 0.011732 | 0.011732 | 0.011920 |
| 0.011583 | 0.011732 | 0.011733 | 0.011695 | 0.011733 | 0.011845 | 0.011770 |
| 0.011733 | 0.011882 | 0.011733 | 0.011359 | 0.011695 | 0.011994 | 0.011695 |
| 0.011695 | 0.011733 | 0.011770 | 0.011994 | 0.011471 | 0.011733 | 0.011807 |
| 0.011770 | 0.011807 | 0.011695 | 0.011957 | 0.011434 | 0.011733 | 0.011770 |
| 0.011695 | 0.011770 | 0.011770 | 0.011807 | 0.011695 | 0.011733 | 0.011733 |
| 0.011658 | 0.011658 | 0.011620 | 0.011620 | 0.011732 | 0.011732 | 0.011845 |
| 0.011770 | 0.011658 | 0.011807 | 0.011583 | 0.011546 | 0.011658 | 0.011695 |
| 0.011882 | 0.011845 | 0.011471 | 0.011882 | 0.011695 | 0.011957 | 0.011732 |
| 0.011845 | 0.000000 | 0.011917 | 0.011573 | 0.011617 | 0.011765 | 0.011493 |
| 0.012190 | 0.011479 | 0.011650 | 0.011957 | 0.011957 | 0.011658 | 0.011508 |
| 0.011770 | 0.011770 | 0.011845 | 0.011733 | 0.011770 | 0.011733 | 0.011695 |
| 0.011658 | 0.011695 | 0.012032 | 0.011845 | 0.011770 | 0.011770 | 0.011695 |
| 0.011620 | 0.011583 | 0.011733 | 0.011620 | 0.011621 | 0.011583 | 0.011508 |
| 0.011621 | 0.011695 | 0.011695 | 0.011695 | 0.011733 | 0.011732 | 0.011733 |
| 0.011809 | 0.011733 | 0.011733 | 0.011567 | 0.011617 | 0.011608 | 0.011695 |
| 0.011663 | 0.011625 | 0.011699 | 0.011663 | 0.011627 | 0.011632 | 0.011698 |
| 0.011573 | 0.011674 | 0.011671 | 0.011658 | 0.011589 | 0.011770 | 0.011695 |
| 0.011770 | 0.011772 | 0.011770 | 0.011807 | 0.011770 | 0.012107 | 0.011882 |
| 0.011695 | 0.011807 | 0.011695 | 0.011770 | 0.011620 | 0.011583 | 0.011621 |
| 0.011733 | 0.011733 | 0.011658 | 0.011658 | 0.011658 | 0.011658 | 0.011770 |
| 0.011695 | 0.011845 | 0.011695 | 0.011658 | 0.011773 | 0.011882 | 0.011849 |
| 0.011882 | 0.011770 | 0.011658 | 0.011586 | 0.011732 | 0.011658 | 0.011583 |
| 0.011588 | 0.011882 | 0.011658 | 0.011882 | 0.011620 | 0.011695 | 0.011695 |
| 0.011807 | 0.011658 | 0.011733 | 0.011695 | 0.011733 | 0.011583 | 0.011695 |
| 0.011658 | 0.011695 | 0.011733 | 0.011658 | 0.011695 | 0.011732 | 0.011957 |
| 0.011396 | 0.011247 | 0.011396 | 0.011845 | 0.011471 | 0.011732 | 0.011695 |
| 0.011660 | 0.011878 | 0.011783 | 0.011630 | 0.011400 | 0.011592 | 0.011809 |
| 0.011398 | 0.011664 | 0.011882 | 0.012107 | 0.011783 | 0.011957 | 0.011882 |
| 0.011845 | 0.012032 | 0.011929 | 0.011834 | 0.011712 | 0.011770 | 0.011852 |
| 0.011957 | 0.011809 | 0.011995 | 0.012035 | 0.011770 | 0.012032 | 0.012152 |
| 0.011811 | 0.012043 | 0.011814 | 0.011927 | 0.012183 | 0.011620 | 0.011735 |
| 0.011733 | 0.011695 | 0.011583 | 0.011583 | 0.011658 | 0.011695 | 0.011733 |
| 0.011695 | 0.011770 | 0.011658 | 0.011658 | 0.011695 | 0.011695 | 0.011770 |
| 0.011695 | 0.011434 | 0.011322 | 0.011359 | 0.011583 | 0.011695 | 0.011733 |
| 0.011733 | 0.011620 | 0.011770 | 0.011733 | 0.011620 | 0.011620 | 0.011620 |
| 0.011471 | 0.011733 | 0.011845 | 0.011620 | 0.011732 | 0.011882 | 0.011620 |



|          |          |          |          |          |          |          |
|----------|----------|----------|----------|----------|----------|----------|
| 0.011620 | 0.011658 | 0.011695 | 0.011845 | 0.011658 | 0.011583 | 0.011733 |
| 0.011658 | 0.011695 | 0.011695 | 0.011620 | 0.011620 | 0.011733 | 0.011695 |
| 0.011620 | 0.011732 | 0.011583 | 0.011620 | 0.011770 | 0.011509 | 0.011621 |
| 0.011621 | 0.011770 | 0.011621 | 0.011583 | 0.011284 | 0.011583 | 0.011770 |
| 0.011861 | 0.011658 | 0.011247 | 0.011770 | 0.011770 | 0.011658 | 0.011770 |
| 0.011658 | 0.011994 | 0.011583 | 0.011546 | 0.011583 | 0.011583 | 0.011583 |
| 0.011770 | 0.011695 | 0.011695 | 0.011807 | 0.011620 | 0.011322 | 0.011583 |
| 0.011658 | 0.011658 | 0.011695 | 0.011770 | 0.011695 | 0.011807 | 0.011882 |
| 0.011882 | 0.011845 | 0.011732 | 0.011845 | 0.011807 | 0.011658 | 0.011620 |
| 0.011658 | 0.011658 | 0.011695 | 0.011583 | 0.011620 | 0.011770 | 0.011658 |
| 0.011620 | 0.011658 | 0.011770 | 0.011807 | 0.011733 | 0.011695 | 0.011695 |
| 0.011733 | 0.011695 | 0.011733 | 0.011620 | 0.011807 | 0.011919 | 0.011508 |
| 0.011658 | 0.011434 | 0.011695 | 0.018507 | 0.011388 | 0.011693 | 0.011284 |
| 0.011284 | 0.011284 | 0.011899 | 0.011659 | 0.011445 | 0.011322 | 0.011728 |
| 0.011652 | 0.011427 | 0.011568 | 0.011719 | 0.011596 | 0.011505 | 0.011669 |
| 0.011397 | 0.011537 | 0.011376 | 0.011489 | 0.011845 | 0.011845 | 0.011813 |
| 0.011706 | 0.011807 | 0.011807 | 0.011695 | 0.011733 | 0.011733 | 0.011733 |
| 0.011733 | 0.011658 | 0.011733 | 0.011770 | 0.011695 | 0.011658 | 0.011695 |
| 0.011695 | 0.011733 | 0.011583 | 0.011733 | 0.011807 | 0.011845 | 0.011732 |
| 0.011695 | 0.011658 | 0.011396 | 0.011396 | 0.011808 | 0.011846 | 0.011845 |
| 0.011620 | 0.011620 | 0.011620 | 0.011770 | 0.011620 | 0.011882 | 0.011882 |
| 0.011919 | 0.011882 | 0.011807 | 0.011957 | 0.011471 | 0.011960 | 0.011770 |
| 0.011770 | 0.011845 | 0.011882 | 0.011658 | 0.011695 | 0.011658 | 0.011770 |
| 0.011807 | 0.011807 | 0.011845 | 0.011845 | 0.011734 | 0.011882 | 0.011882 |
| 0.011777 | 0.011620 | 0.011733 | 0.011882 | 0.011733 | 0.011845 | 0.011919 |
| 0.012107 | 0.011783 | 0.011957 | 0.011882 | 0.011845 | 0.012032 | 0.011658 |
| 0.011847 | 0.011733 | 0.011695 | 0.011695 | 0.011733 | 0.011583 | 0.011733 |
| 0.011807 | 0.011845 | 0.011732 | 0.011695 | 0.011658 | 0.011396 | 0.011396 |
| 0.011808 | 0.011846 | 0.011845 | 0.011807 | 0.012370 | 0.011923 | 0.011802 |
| 0.011911 | 0.011859 | 0.011956 | 0.011792 | 0.011982 | 0.011900 | 0.011781 |
| 0.012315 | 0.011749 | 0.011856 | 0.011825 | 0.012088 | 0.011925 | 0.012039 |
| 0.012385 | 0.011856 | 0.011771 | 0.011770 | 0.011770 | 0.011508 | 0.011733 |
| 0.011620 | 0.011658 | 0.011807 | 0.011770 | 0.011771 | 0.011620 | 0.011546 |
| 0.011695 | 0.011658 | 0.011695 | 0.011695 | 0.011620 | 0.011658 | 0.011583 |
| 0.011658 | 0.011695 | 0.011658 | 0.011620 | 0.011733 | 0.011658 | 0.011695 |
| 0.011695 | 0.011620 | 0.011695 | 0.011733 | 0.011620 | 0.011845 | 0.011882 |
| 0.011733 | 0.011770 | 0.011770 | 0.011733 | 0.011695 | 0.011471 | 0.011732 |
| 0.011488 | 0.011658 | 0.011658 | 0.011664 | 0.011695 | 0.011658 | 0.011733 |
| 0.011807 | 0.011733 | 0.011695 | 0.011733 | 0.011845 | 0.011845 | 0.011733 |
| 0.011770 | 0.011882 | 0.011359 | 0.011732 | 0.011882 | 0.011882 | 0.011807 |
| 0.011658 | 0.011770 | 0.011807 | 0.011546 | 0.011771 | 0.011695 | 0.011770 |
| 0.011807 | 0.011583 | 0.011583 | 0.011957 | 0.011957 | 0.011920 | 0.011733 |
| 0.011807 | 0.011882 | 0.011733 | 0.011807 | 0.011733 | 0.011658 | 0.011247 |
| 0.011770 | 0.011695 | 0.011583 | 0.011807 | 0.011733 | 0.011807 | 0.011546 |
| 0.011695 | 0.011361 | 0.011434 | 0.011589 | 0.011518 | 0.011770 | 0.011491 |
| 0.011513 | 0.011784 | 0.011626 | 0.011596 | 0.011695 | 0.011417 | 0.011432 |
| 0.011577 | 0.011324 | 0.011506 | 0.011390 | 0.011384 | 0.011596 | 0.011840 |
| 0.011822 | 0.011743 | 0.011695 | 0.011747 | 0.011735 | 0.011620 | 0.011621 |
| 0.011583 | 0.011733 | 0.011847 | 0.011663 | 0.011926 | 0.011927 | 0.011695 |
| 0.011695 | 0.011807 | 0.011695 | 0.011770 | 0.011620 | 0.011583 | 0.011621 |
| 0.011733 | 0.011733 | 0.011658 | 0.011658 | 0.011658 | 0.011658 | 0.011770 |
| 0.011705 | 0.011720 | 0.011701 | 0.011670 | 0.011859 | 0.011815 | 0.011781 |
| 0.011780 | 0.011695 | 0.011586 | 0.011570 | 0.011700 | 0.011851 | 0.011815 |
| 0.011695 | 0.011738 | 0.012033 | 0.011922 | 0.011920 | 0.011883 | 0.011807 |
| 0.011807 | 0.011882 | 0.011882 | 0.011732 | 0.011733 | 0.011957 | 0.011995 |
| 0.012069 | 0.011337 | 0.011630 | 0.011830 | 0.011695 | 0.011882 | 0.011845 |
| 0.011809 | 0.011845 | 0.011920 | 0.011920 | 0.011848 | 0.012032 | 0.011715 |
| 0.011587 | 0.011597 | 0.011702 | 0.011665 | 0.011706 | 0.011601 | 0.011211 |
| 0.011745 | 0.011449 | 0.011696 | 0.011722 | 0.011733 | 0.011784 | 0.011695 |
| 0.011620 | 0.011583 | 0.011733 | 0.011620 | 0.011621 | 0.011583 | 0.011508 |

|          |          |          |          |          |          |          |
|----------|----------|----------|----------|----------|----------|----------|
| 0.011621 | 0.011695 | 0.011695 | 0.011695 | 0.011733 | 0.011732 | 0.011733 |
| 0.011809 | 0.011733 | 0.011733 | 0.011735 | 0.011620 | 0.011621 | 0.011583 |
| 0.011733 | 0.011847 | 0.011663 | 0.011926 | 0.011927 | 0.011695 | 0.011919 |
| 0.011845 | 0.011845 | 0.011662 | 0.011872 | 0.011833 | 0.011781 | 0.011721 |
| 0.011826 | 0.012135 | 0.011870 | 0.011779 | 0.011658 | 0.011882 | 0.011695 |
| 0.011845 | 0.011695 | 0.011658 | 0.011773 | 0.011882 | 0.011849 | 0.011770 |
| 0.011658 | 0.011586 | 0.011732 | 0.011658 | 0.011583 | 0.011588 | 0.011882 |
| 0.011733 | 0.011658 | 0.011733 | 0.011770 | 0.011695 | 0.011658 | 0.011546 |
| 0.011695 | 0.011770 | 0.011770 | 0.011695 | 0.011770 | 0.011995 | 0.011583 |
| 0.011695 | 0.011471 | 0.011695 | 0.011733 | 0.011658 | 0.011359 | 0.011681 |
| 0.011916 | 0.011495 | 0.011473 | 0.011565 | 0.011601 | 0.011589 | 0.011449 |
| 0.011438 | 0.011546 | 0.011658 | 0.011778 | 0.011620 | 0.011771 | 0.011920 |
| 0.011808 | 0.011813 | 0.011807 | 0.011967 | 0.011695 | 0.012631 | 0.011808 |
| 0.012557 | 0.012257 | 0.012485 | 0.012671 | 0.011658 | 0.011620 | 0.011770 |
| 0.012370 | 0.011920 | 0.011733 | 0.011621 | 0.011695 | 0.011695 | 0.011663 |
| 0.011546 | 0.011548 | 0.011620 | 0.011583 | 0.011995 | 0.011995 | 0.012032 |
| 0.011845 | 0.011957 | 0.012144 | 0.011807 | 0.012408 | 0.012416 | 0.012520 |
| 0.012520 | 0.012483 | 0.012407 | 0.012370 | 0.012445 | 0.011770 | 0.011995 |
| 0.012107 | 0.012631 | 0.012077 | 0.011920 | 0.011733 | 0.011588 | 0.011471 |
| 0.011359 | 0.011434 | 0.011920 | 0.011962 | 0.012059 | 0.011770 | 0.011509 |
| S100     | 0.011664 | 0.011664 | 0.012004 | 0.011966 | 0.011966 | 0.012004 |
| 0.011819 | 0.011743 | 0.011928 | 0.011475 | 0.011513 | 0.011475 | 0.011437 |
| 0.011475 | 0.011702 | 0.011475 | 0.011475 | 0.011513 | 0.011513 | 0.011475 |
| 0.011475 | 0.011513 | 0.011626 | 0.011438 | 0.011513 | 0.011437 | 0.011819 |
| 0.011739 | 0.011513 | 0.011400 | 0.011664 | 0.011551 | 0.011551 | 0.011437 |
| 0.011513 | 0.011664 | 0.011551 | 0.011551 | 0.011551 | 0.011551 | 0.011739 |
| 0.011437 | 0.011551 | 0.011551 | 0.011513 | 0.011626 | 0.011664 | 0.011588 |
| 0.011551 | 0.011664 | 0.011513 | 0.011890 | 0.011513 | 0.011777 | 0.011513 |
| 0.011513 | 0.011626 | 0.011626 | 0.011777 | 0.011928 | 0.011626 | 0.011739 |
| 0.011588 | 0.011664 | 0.011513 | 0.011777 | 0.011966 | 0.011551 | 0.011626 |
| 0.011513 | 0.011588 | 0.011588 | 0.011626 | 0.011513 | 0.011551 | 0.011551 |
| 0.011475 | 0.011475 | 0.011437 | 0.011551 | 0.011551 | 0.011513 | 0.011664 |
| 0.011588 | 0.011513 | 0.011626 | 0.011400 | 0.011664 | 0.011475 | 0.011475 |
| 0.011702 | 0.011664 | 0.011890 | 0.011664 | 0.011551 | 0.011777 | 0.011551 |
| 0.011678 | 0.011917 | 0.000000 | 0.011459 | 0.011446 | 0.011536 | 0.011658 |
| 0.011600 | 0.011772 | 0.011431 | 0.011777 | 0.011664 | 0.011551 | 0.011588 |
| 0.011588 | 0.011551 | 0.011664 | 0.011551 | 0.011626 | 0.011551 | 0.011513 |
| 0.011475 | 0.011588 | 0.011815 | 0.011739 | 0.011588 | 0.011589 | 0.011513 |
| 0.011475 | 0.011475 | 0.011551 | 0.011437 | 0.011739 | 0.011702 | 0.011626 |
| 0.011739 | 0.011815 | 0.011475 | 0.011475 | 0.011513 | 0.011513 | 0.011513 |
| 0.011589 | 0.011551 | 0.011551 | 0.011372 | 0.011411 | 0.011413 | 0.011513 |
| 0.011551 | 0.011475 | 0.011524 | 0.011513 | 0.011404 | 0.011442 | 0.011477 |
| 0.011690 | 0.011483 | 0.011514 | 0.011475 | 0.011437 | 0.011588 | 0.011589 |
| 0.011664 | 0.011588 | 0.011588 | 0.011626 | 0.011588 | 0.011966 | 0.011777 |
| 0.011777 | 0.011702 | 0.011513 | 0.011664 | 0.011437 | 0.011664 | 0.011438 |
| 0.011513 | 0.011513 | 0.011475 | 0.011475 | 0.011475 | 0.011475 | 0.011588 |
| 0.011513 | 0.011626 | 0.011551 | 0.011475 | 0.011590 | 0.011702 | 0.011629 |
| 0.011664 | 0.011588 | 0.011437 | 0.011401 | 0.011551 | 0.011437 | 0.011400 |
| 0.011517 | 0.011664 | 0.011475 | 0.011664 | 0.011400 | 0.011513 | 0.011475 |
| 0.011626 | 0.011475 | 0.011551 | 0.011475 | 0.011513 | 0.011400 | 0.011513 |
| 0.011551 | 0.011513 | 0.011551 | 0.011475 | 0.011513 | 0.011588 | 0.011739 |
| 0.011928 | 0.011777 | 0.011928 | 0.011664 | 0.011928 | 0.011551 | 0.011513 |
| 0.011553 | 0.011792 | 0.011685 | 0.011444 | 0.011938 | 0.011405 | 0.011586 |
| 0.011933 | 0.011784 | 0.011664 | 0.011891 | 0.011598 | 0.011777 | 0.011740 |
| 0.011702 | 0.011777 | 0.011659 | 0.011435 | 0.011432 | 0.011589 | 0.011631 |
| 0.011777 | 0.011627 | 0.011740 | 0.011894 | 0.011588 | 0.011853 | 0.011972 |
| 0.011629 | 0.011900 | 0.011707 | 0.011707 | 0.012005 | 0.011437 | 0.011590 |
| 0.011588 | 0.011513 | 0.011400 | 0.011400 | 0.011475 | 0.011513 | 0.011588 |
| 0.011513 | 0.011588 | 0.011475 | 0.011551 | 0.011513 | 0.011513 | 0.011513 |
| 0.011513 | 0.011966 | 0.011853 | 0.011890 | 0.011400 | 0.011513 | 0.011551 |

|          |          |          |          |          |          |          |
|----------|----------|----------|----------|----------|----------|----------|
| 0.011551 | 0.011475 | 0.011588 | 0.011626 | 0.011475 | 0.011475 | 0.011475 |
| 0.012004 | 0.011626 | 0.011664 | 0.011437 | 0.011513 | 0.011740 | 0.011437 |
| 0.011437 | 0.011437 | 0.011513 | 0.011626 | 0.011475 | 0.011626 | 0.011739 |
| 0.011702 | 0.011513 | 0.011513 | 0.011437 | 0.011437 | 0.011513 | 0.011551 |
| 0.011437 | 0.011551 | 0.011400 | 0.011437 | 0.011588 | 0.011740 | 0.011475 |
| 0.011438 | 0.011588 | 0.011476 | 0.011400 | 0.011739 | 0.011400 | 0.011588 |
| 0.011677 | 0.011475 | 0.011777 | 0.011589 | 0.011664 | 0.011475 | 0.011588 |
| 0.011475 | 0.011777 | 0.011400 | 0.011664 | 0.011475 | 0.011475 | 0.011400 |
| 0.011588 | 0.011815 | 0.011513 | 0.011626 | 0.011437 | 0.011853 | 0.011475 |
| 0.011475 | 0.011475 | 0.011475 | 0.011626 | 0.011513 | 0.011626 | 0.011702 |
| 0.011664 | 0.011588 | 0.011551 | 0.011588 | 0.011626 | 0.011475 | 0.011437 |
| 0.011475 | 0.011475 | 0.011513 | 0.011437 | 0.011437 | 0.011588 | 0.011475 |
| 0.011513 | 0.011475 | 0.011588 | 0.011702 | 0.011551 | 0.011513 | 0.011513 |
| 0.011551 | 0.011475 | 0.011551 | 0.011475 | 0.011626 | 0.011702 | 0.011966 |
| 0.011513 | 0.011891 | 0.011513 | 0.018388 | 0.011519 | 0.011651 | 0.011815 |
| 0.011815 | 0.011815 | 0.011591 | 0.011467 | 0.012050 | 0.011853 | 0.011678 |
| 0.011725 | 0.011793 | 0.011419 | 0.011500 | 0.011387 | 0.011561 | 0.011506 |
| 0.011765 | 0.011683 | 0.011684 | 0.011552 | 0.011588 | 0.011664 | 0.011668 |
| 0.011521 | 0.011664 | 0.011626 | 0.011588 | 0.011551 | 0.011551 | 0.011551 |
| 0.011551 | 0.011475 | 0.011475 | 0.011588 | 0.011513 | 0.011475 | 0.011513 |
| 0.011513 | 0.011551 | 0.011437 | 0.011551 | 0.011626 | 0.011664 | 0.011551 |
| 0.011588 | 0.011551 | 0.011815 | 0.011815 | 0.011626 | 0.011665 | 0.011664 |
| 0.011400 | 0.011437 | 0.011437 | 0.011588 | 0.011437 | 0.011702 | 0.011702 |
| 0.011664 | 0.011664 | 0.011626 | 0.011702 | 0.011928 | 0.011704 | 0.011588 |
| 0.011551 | 0.011664 | 0.011702 | 0.011513 | 0.011513 | 0.011475 | 0.011588 |
| 0.011626 | 0.011626 | 0.011664 | 0.011588 | 0.011552 | 0.011664 | 0.011702 |
| 0.011594 | 0.011437 | 0.011588 | 0.011702 | 0.011513 | 0.011740 | 0.011739 |
| 0.011891 | 0.011598 | 0.011777 | 0.011740 | 0.011702 | 0.011777 | 0.011475 |
| 0.011666 | 0.011551 | 0.011513 | 0.011513 | 0.011551 | 0.011437 | 0.011551 |
| 0.011626 | 0.011664 | 0.011551 | 0.011588 | 0.011551 | 0.011815 | 0.011815 |
| 0.011626 | 0.011665 | 0.011664 | 0.011626 | 0.012269 | 0.011661 | 0.011613 |
| 0.011685 | 0.011603 | 0.011729 | 0.011605 | 0.011686 | 0.011715 | 0.011560 |
| 0.012174 | 0.011524 | 0.011634 | 0.011601 | 0.011868 | 0.011706 | 0.011896 |
| 0.012245 | 0.011740 | 0.011552 | 0.011551 | 0.011551 | 0.011626 | 0.011514 |
| 0.011437 | 0.011475 | 0.011588 | 0.011551 | 0.011551 | 0.011702 | 0.011702 |
| 0.011513 | 0.011475 | 0.011513 | 0.011513 | 0.011437 | 0.011475 | 0.011400 |
| 0.011551 | 0.011588 | 0.011475 | 0.011437 | 0.011551 | 0.011475 | 0.011513 |
| 0.011513 | 0.011437 | 0.011513 | 0.011551 | 0.011437 | 0.011664 | 0.011702 |
| 0.011551 | 0.011664 | 0.011588 | 0.011551 | 0.011437 | 0.011928 | 0.011551 |
| 0.011610 | 0.011475 | 0.011739 | 0.011747 | 0.011589 | 0.011551 | 0.011626 |
| 0.011626 | 0.011551 | 0.011513 | 0.011551 | 0.011664 | 0.011664 | 0.011551 |
| 0.011588 | 0.011702 | 0.011890 | 0.011551 | 0.011740 | 0.011740 | 0.011664 |
| 0.011475 | 0.011588 | 0.011626 | 0.011966 | 0.011589 | 0.011589 | 0.011588 |
| 0.011588 | 0.011513 | 0.011513 | 0.011815 | 0.011778 | 0.011777 | 0.011551 |
| 0.011626 | 0.011702 | 0.011551 | 0.011626 | 0.011513 | 0.011475 | 0.011777 |
| 0.011588 | 0.011513 | 0.011513 | 0.011664 | 0.011551 | 0.011664 | 0.011891 |
| 0.011513 | 0.011895 | 0.011966 | 0.011760 | 0.011399 | 0.011626 | 0.011473 |
| 0.011528 | 0.011947 | 0.011437 | 0.011686 | 0.011548 | 0.011620 | 0.011645 |
| 0.011724 | 0.011455 | 0.011617 | 0.011457 | 0.011546 | 0.011664 | 0.011640 |
| 0.011649 | 0.011542 | 0.011594 | 0.011523 | 0.011591 | 0.011702 | 0.011777 |
| 0.011739 | 0.011665 | 0.011783 | 0.011708 | 0.011858 | 0.011934 | 0.011513 |
| 0.011777 | 0.011702 | 0.011513 | 0.011664 | 0.011437 | 0.011664 | 0.011438 |
| 0.011513 | 0.011513 | 0.011475 | 0.011475 | 0.011475 | 0.011475 | 0.011588 |
| 0.011483 | 0.011525 | 0.011551 | 0.011480 | 0.011670 | 0.011627 | 0.011592 |
| 0.011630 | 0.011513 | 0.011342 | 0.011373 | 0.011551 | 0.011702 | 0.011665 |
| 0.011513 | 0.011588 | 0.011853 | 0.011740 | 0.011702 | 0.011664 | 0.011626 |
| 0.011588 | 0.011702 | 0.011702 | 0.011551 | 0.012193 | 0.011664 | 0.011778 |
| 0.011890 | 0.011860 | 0.011520 | 0.011604 | 0.011513 | 0.011702 | 0.011664 |
| 0.011627 | 0.011702 | 0.011702 | 0.011702 | 0.011853 | 0.011890 | 0.011526 |
| 0.011402 | 0.011408 | 0.011518 | 0.011480 | 0.011521 | 0.011394 | 0.011746 |

|          |          |          |          |          |          |          |
|----------|----------|----------|----------|----------|----------|----------|
| 0.011559 | 0.011546 | 0.011273 | 0.011558 | 0.011551 | 0.011594 | 0.011513 |
| 0.011475 | 0.011475 | 0.011551 | 0.011437 | 0.011739 | 0.011702 | 0.011626 |
| 0.011739 | 0.011815 | 0.011475 | 0.011475 | 0.011513 | 0.011513 | 0.011513 |
| 0.011589 | 0.011551 | 0.011551 | 0.011591 | 0.011702 | 0.011777 | 0.011739 |
| 0.011665 | 0.011783 | 0.011708 | 0.011858 | 0.011934 | 0.011513 | 0.011739 |
| 0.011664 | 0.011664 | 0.011440 | 0.011645 | 0.011645 | 0.011597 | 0.011532 |
| 0.011524 | 0.011883 | 0.011787 | 0.011595 | 0.011475 | 0.011664 | 0.011513 |
| 0.011626 | 0.011551 | 0.011475 | 0.011590 | 0.011702 | 0.011629 | 0.011588 |
| 0.011437 | 0.011401 | 0.011551 | 0.011437 | 0.011400 | 0.011517 | 0.011664 |
| 0.011551 | 0.011475 | 0.011475 | 0.011588 | 0.011513 | 0.011475 | 0.011664 |
| 0.011551 | 0.011588 | 0.011588 | 0.011513 | 0.011588 | 0.011777 | 0.011437 |
| 0.011513 | 0.011928 | 0.011513 | 0.011513 | 0.011513 | 0.011890 | 0.011450 |
| 0.011847 | 0.011405 | 0.011562 | 0.011644 | 0.011720 | 0.011671 | 0.011398 |
| 0.011480 | 0.011702 | 0.011815 | 0.011938 | 0.011777 | 0.011929 | 0.012079 |
| 0.011967 | 0.011972 | 0.011928 | 0.012126 | 0.011815 | 0.012798 | 0.011966 |
| 0.012610 | 0.012420 | 0.012651 | 0.012839 | 0.011815 | 0.011551 | 0.011928 |
| 0.012307 | 0.012080 | 0.011890 | 0.011778 | 0.011853 | 0.011853 | 0.011820 |
| 0.011702 | 0.011704 | 0.011777 | 0.011740 | 0.012080 | 0.012117 | 0.012117 |
| 0.011966 | 0.011966 | 0.012193 | 0.011966 | 0.012308 | 0.012277 | 0.012421 |
| 0.012383 | 0.012383 | 0.012307 | 0.012345 | 0.012346 | 0.011588 | 0.011891 |
| 0.011928 | 0.012458 | 0.011973 | 0.012117 | 0.011966 | 0.011744 | 0.011664 |
| 0.011626 | 0.011626 | 0.012042 | 0.012113 | 0.012176 | 0.011928 | 0.011626 |
| S101     | 0.011373 | 0.011373 | 0.011685 | 0.011646 | 0.011646 | 0.011685 |
| 0.011532 | 0.011453 | 0.011607 | 0.011177 | 0.011217 | 0.011177 | 0.011138 |
| 0.011177 | 0.011412 | 0.011177 | 0.011177 | 0.011216 | 0.011216 | 0.011177 |
| 0.011177 | 0.011216 | 0.011334 | 0.011139 | 0.011217 | 0.011138 | 0.011532 |
| 0.011490 | 0.011216 | 0.011099 | 0.011334 | 0.011216 | 0.011255 | 0.011177 |
| 0.011216 | 0.011334 | 0.011256 | 0.011255 | 0.011295 | 0.011255 | 0.011451 |
| 0.011138 | 0.011255 | 0.011295 | 0.011216 | 0.011334 | 0.011373 | 0.011295 |
| 0.011256 | 0.011451 | 0.011256 | 0.011568 | 0.011255 | 0.011451 | 0.011255 |
| 0.011216 | 0.011334 | 0.011334 | 0.011451 | 0.011646 | 0.011295 | 0.011412 |
| 0.011295 | 0.011295 | 0.011216 | 0.011490 | 0.011646 | 0.011256 | 0.011295 |
| 0.011216 | 0.011295 | 0.011295 | 0.011334 | 0.011216 | 0.011256 | 0.011256 |
| 0.011177 | 0.011177 | 0.011138 | 0.011216 | 0.011216 | 0.011216 | 0.011373 |
| 0.011295 | 0.011177 | 0.011334 | 0.011099 | 0.011373 | 0.011177 | 0.011138 |
| 0.011412 | 0.011334 | 0.011607 | 0.011334 | 0.011216 | 0.011451 | 0.011255 |
| 0.011376 | 0.011573 | 0.011459 | 0.000000 | 0.011141 | 0.011183 | 0.011346 |
| 0.011343 | 0.011427 | 0.011147 | 0.011451 | 0.011373 | 0.011255 | 0.011295 |
| 0.011295 | 0.011255 | 0.011334 | 0.011256 | 0.011295 | 0.011256 | 0.011177 |
| 0.011138 | 0.011295 | 0.011490 | 0.011412 | 0.011295 | 0.011295 | 0.011216 |
| 0.011138 | 0.011177 | 0.011255 | 0.011138 | 0.011451 | 0.011373 | 0.011334 |
| 0.011412 | 0.011490 | 0.011177 | 0.011177 | 0.011217 | 0.011216 | 0.011217 |
| 0.011256 | 0.011255 | 0.011255 | 0.011101 | 0.011142 | 0.011142 | 0.011216 |
| 0.011216 | 0.011177 | 0.011222 | 0.011216 | 0.011139 | 0.011179 | 0.011217 |
| 0.011388 | 0.011220 | 0.011219 | 0.011177 | 0.011099 | 0.011295 | 0.011256 |
| 0.011334 | 0.011295 | 0.011295 | 0.011295 | 0.011295 | 0.011607 | 0.011451 |
| 0.011529 | 0.011412 | 0.011216 | 0.011373 | 0.011138 | 0.011412 | 0.011138 |
| 0.011216 | 0.011216 | 0.011177 | 0.011177 | 0.011177 | 0.011177 | 0.011295 |
| 0.011216 | 0.011334 | 0.011255 | 0.011177 | 0.011295 | 0.011412 | 0.011335 |
| 0.011373 | 0.011295 | 0.011138 | 0.011100 | 0.011255 | 0.011138 | 0.011099 |
| 0.011218 | 0.011373 | 0.011177 | 0.011373 | 0.011099 | 0.011216 | 0.011138 |
| 0.011334 | 0.011138 | 0.011255 | 0.011177 | 0.011216 | 0.011099 | 0.011216 |
| 0.011255 | 0.011216 | 0.011255 | 0.011177 | 0.011177 | 0.011255 | 0.011451 |
| 0.011607 | 0.011490 | 0.011607 | 0.011412 | 0.011646 | 0.011216 | 0.011177 |
| 0.011256 | 0.011440 | 0.011326 | 0.011140 | 0.011653 | 0.011100 | 0.011197 |
| 0.011650 | 0.011454 | 0.011334 | 0.011568 | 0.011339 | 0.011490 | 0.011373 |
| 0.011334 | 0.011529 | 0.011352 | 0.011250 | 0.011206 | 0.011295 | 0.011297 |
| 0.011490 | 0.011296 | 0.011493 | 0.011572 | 0.011255 | 0.011529 | 0.011652 |
| 0.011296 | 0.011574 | 0.011375 | 0.011454 | 0.011647 | 0.011138 | 0.011295 |
| 0.011295 | 0.011216 | 0.011099 | 0.011099 | 0.011177 | 0.011216 | 0.011256 |

|          |          |          |          |          |          |          |
|----------|----------|----------|----------|----------|----------|----------|
| 0.011216 | 0.011295 | 0.011177 | 0.011216 | 0.011216 | 0.011216 | 0.011255 |
| 0.011216 | 0.011685 | 0.011529 | 0.011529 | 0.011099 | 0.011216 | 0.011256 |
| 0.011255 | 0.011177 | 0.011295 | 0.011334 | 0.011138 | 0.011138 | 0.011138 |
| 0.011724 | 0.011334 | 0.011373 | 0.011138 | 0.011216 | 0.011373 | 0.011138 |
| 0.011138 | 0.011138 | 0.011216 | 0.011412 | 0.011177 | 0.011334 | 0.011490 |
| 0.011412 | 0.011216 | 0.011216 | 0.011138 | 0.011138 | 0.011216 | 0.011216 |
| 0.011138 | 0.011255 | 0.011099 | 0.011138 | 0.011295 | 0.011412 | 0.011138 |
| 0.011139 | 0.011295 | 0.011139 | 0.011099 | 0.011451 | 0.011099 | 0.011295 |
| 0.011380 | 0.011177 | 0.011490 | 0.011295 | 0.011373 | 0.011177 | 0.011334 |
| 0.011177 | 0.011451 | 0.011099 | 0.011295 | 0.011177 | 0.011177 | 0.011099 |
| 0.011295 | 0.011490 | 0.011216 | 0.011334 | 0.011138 | 0.011529 | 0.011177 |
| 0.011177 | 0.011177 | 0.011216 | 0.011255 | 0.011216 | 0.011334 | 0.011373 |
| 0.011334 | 0.011334 | 0.011255 | 0.011373 | 0.011334 | 0.011177 | 0.011138 |
| 0.011177 | 0.011177 | 0.011216 | 0.011138 | 0.011138 | 0.011295 | 0.011177 |
| 0.011216 | 0.011177 | 0.011295 | 0.011373 | 0.011216 | 0.011216 | 0.011217 |
| 0.011256 | 0.011177 | 0.011255 | 0.011138 | 0.011295 | 0.011451 | 0.011685 |
| 0.011177 | 0.011607 | 0.011138 | 0.018410 | 0.011191 | 0.011378 | 0.011529 |
| 0.011490 | 0.011529 | 0.011277 | 0.011244 | 0.011665 | 0.011568 | 0.011303 |
| 0.011455 | 0.011427 | 0.011101 | 0.011151 | 0.011187 | 0.011208 | 0.011191 |
| 0.011446 | 0.011386 | 0.011383 | 0.011137 | 0.011334 | 0.011373 | 0.011296 |
| 0.011221 | 0.011334 | 0.011334 | 0.011255 | 0.011256 | 0.011256 | 0.011256 |
| 0.011256 | 0.011138 | 0.011216 | 0.011295 | 0.011216 | 0.011177 | 0.011177 |
| 0.011177 | 0.011255 | 0.011099 | 0.011256 | 0.011334 | 0.011373 | 0.011217 |
| 0.011295 | 0.011216 | 0.011529 | 0.011529 | 0.011295 | 0.011373 | 0.011412 |
| 0.011138 | 0.011099 | 0.011138 | 0.011295 | 0.011099 | 0.011373 | 0.011373 |
| 0.011412 | 0.011334 | 0.011334 | 0.011451 | 0.011646 | 0.011452 | 0.011295 |
| 0.011295 | 0.011373 | 0.011412 | 0.011216 | 0.011216 | 0.011177 | 0.011295 |
| 0.011334 | 0.011334 | 0.011373 | 0.011334 | 0.011256 | 0.011412 | 0.011412 |
| 0.011297 | 0.011138 | 0.011255 | 0.011373 | 0.011216 | 0.011412 | 0.011451 |
| 0.011568 | 0.011339 | 0.011490 | 0.011373 | 0.011334 | 0.011529 | 0.011138 |
| 0.011374 | 0.011256 | 0.011177 | 0.011177 | 0.011255 | 0.011099 | 0.011256 |
| 0.011334 | 0.011373 | 0.011217 | 0.011295 | 0.011216 | 0.011529 | 0.011529 |
| 0.011295 | 0.011373 | 0.011373 | 0.011334 | 0.011920 | 0.011392 | 0.011266 |
| 0.011428 | 0.011341 | 0.011431 | 0.011303 | 0.011466 | 0.011383 | 0.011336 |
| 0.011862 | 0.011222 | 0.011340 | 0.011303 | 0.011583 | 0.011457 | 0.011575 |
| 0.011891 | 0.011461 | 0.011256 | 0.011255 | 0.011255 | 0.011334 | 0.011217 |
| 0.011138 | 0.011177 | 0.011295 | 0.011255 | 0.011256 | 0.011451 | 0.011373 |
| 0.011216 | 0.011177 | 0.011216 | 0.011177 | 0.011138 | 0.011177 | 0.011099 |
| 0.011255 | 0.011295 | 0.011138 | 0.011138 | 0.011256 | 0.011177 | 0.011216 |
| 0.011216 | 0.011138 | 0.011216 | 0.011256 | 0.011138 | 0.011334 | 0.011412 |
| 0.011255 | 0.011373 | 0.011295 | 0.011255 | 0.011177 | 0.011646 | 0.011255 |
| 0.011305 | 0.011177 | 0.011490 | 0.011495 | 0.011295 | 0.011216 | 0.011295 |
| 0.011295 | 0.011256 | 0.011216 | 0.011256 | 0.011373 | 0.011334 | 0.011255 |
| 0.011295 | 0.011412 | 0.011607 | 0.011216 | 0.011334 | 0.011334 | 0.011334 |
| 0.011177 | 0.011295 | 0.011295 | 0.011724 | 0.011295 | 0.011295 | 0.011295 |
| 0.011334 | 0.011177 | 0.011177 | 0.011490 | 0.011490 | 0.011451 | 0.011255 |
| 0.011334 | 0.011412 | 0.011216 | 0.011334 | 0.011216 | 0.011177 | 0.011490 |
| 0.011295 | 0.011216 | 0.011177 | 0.011334 | 0.011255 | 0.011334 | 0.011568 |
| 0.011216 | 0.011610 | 0.011646 | 0.011440 | 0.011177 | 0.011295 | 0.011222 |
| 0.011174 | 0.011638 | 0.011139 | 0.011332 | 0.011209 | 0.011319 | 0.011326 |
| 0.011428 | 0.011126 | 0.011283 | 0.011126 | 0.011168 | 0.011328 | 0.011318 |
| 0.011342 | 0.011229 | 0.011295 | 0.011220 | 0.011296 | 0.011451 | 0.011490 |
| 0.011451 | 0.011373 | 0.011452 | 0.011376 | 0.011532 | 0.011596 | 0.011216 |
| 0.011529 | 0.011412 | 0.011216 | 0.011373 | 0.011138 | 0.011412 | 0.011138 |
| 0.011216 | 0.011216 | 0.011177 | 0.011177 | 0.011177 | 0.011177 | 0.011295 |
| 0.011257 | 0.011261 | 0.011256 | 0.011179 | 0.011415 | 0.011373 | 0.011336 |
| 0.011335 | 0.011216 | 0.011102 | 0.011101 | 0.011256 | 0.011412 | 0.011373 |
| 0.011216 | 0.011295 | 0.011568 | 0.011412 | 0.011412 | 0.011373 | 0.011334 |
| 0.011334 | 0.011373 | 0.011373 | 0.011216 | 0.011881 | 0.011373 | 0.011529 |
| 0.011607 | 0.011560 | 0.011219 | 0.011342 | 0.011216 | 0.011373 | 0.011373 |

|          |          |          |          |          |          |          |
|----------|----------|----------|----------|----------|----------|----------|
| 0.011295 | 0.011334 | 0.011451 | 0.011451 | 0.011426 | 0.011529 | 0.011222 |
| 0.011100 | 0.011101 | 0.011219 | 0.011179 | 0.011260 | 0.011104 | 0.011456 |
| 0.011260 | 0.011415 | 0.011116 | 0.011278 | 0.011177 | 0.011258 | 0.011216 |
| 0.011138 | 0.011177 | 0.011255 | 0.011138 | 0.011451 | 0.011373 | 0.011334 |
| 0.011412 | 0.011490 | 0.011177 | 0.011177 | 0.011217 | 0.011216 | 0.011217 |
| 0.011256 | 0.011255 | 0.011255 | 0.011296 | 0.011451 | 0.011490 | 0.011451 |
| 0.011373 | 0.011452 | 0.011376 | 0.011532 | 0.011596 | 0.011216 | 0.011451 |
| 0.011373 | 0.011373 | 0.011178 | 0.011424 | 0.011342 | 0.011298 | 0.011223 |
| 0.011341 | 0.011592 | 0.011407 | 0.011298 | 0.011177 | 0.011373 | 0.011216 |
| 0.011334 | 0.011255 | 0.011177 | 0.011295 | 0.011412 | 0.011335 | 0.011295 |
| 0.011138 | 0.011100 | 0.011255 | 0.011138 | 0.011099 | 0.011218 | 0.011373 |
| 0.011256 | 0.011138 | 0.011216 | 0.011295 | 0.011216 | 0.011177 | 0.011373 |
| 0.011216 | 0.011295 | 0.011295 | 0.011216 | 0.011295 | 0.011490 | 0.011138 |
| 0.011216 | 0.011646 | 0.011216 | 0.011216 | 0.011177 | 0.011568 | 0.011150 |
| 0.011592 | 0.011151 | 0.011215 | 0.011407 | 0.011449 | 0.011416 | 0.011104 |
| 0.011168 | 0.011373 | 0.011490 | 0.011574 | 0.011451 | 0.011608 | 0.011763 |
| 0.011647 | 0.011611 | 0.011607 | 0.011848 | 0.011490 | 0.012468 | 0.011646 |
| 0.012312 | 0.012076 | 0.012315 | 0.012508 | 0.011568 | 0.011216 | 0.011607 |
| 0.011960 | 0.011764 | 0.011529 | 0.011451 | 0.011490 | 0.011490 | 0.011493 |
| 0.011373 | 0.011374 | 0.011451 | 0.011412 | 0.011803 | 0.011802 | 0.011881 |
| 0.011646 | 0.011763 | 0.011920 | 0.011607 | 0.011960 | 0.011966 | 0.012077 |
| 0.012038 | 0.012038 | 0.011960 | 0.011999 | 0.011999 | 0.011295 | 0.011529 |
| 0.011646 | 0.012116 | 0.011611 | 0.011803 | 0.011646 | 0.011453 | 0.011373 |
| 0.011334 | 0.011334 | 0.011724 | 0.011871 | 0.011937 | 0.011685 | 0.011334 |
| S102     | 0.011620 | 0.011620 | 0.011695 | 0.011620 | 0.011620 | 0.011695 |
| 0.011589 | 0.011476 | 0.011657 | 0.011172 | 0.011210 | 0.011172 | 0.011172 |
| 0.011209 | 0.011359 | 0.011172 | 0.011172 | 0.011247 | 0.011247 | 0.011172 |
| 0.011172 | 0.011210 | 0.011321 | 0.011172 | 0.011210 | 0.011135 | 0.011551 |
| 0.011433 | 0.011210 | 0.011098 | 0.011359 | 0.011247 | 0.011210 | 0.011135 |
| 0.011247 | 0.011321 | 0.011247 | 0.011247 | 0.011284 | 0.011247 | 0.011433 |
| 0.011135 | 0.011247 | 0.011284 | 0.011210 | 0.011321 | 0.011359 | 0.011284 |
| 0.011247 | 0.011396 | 0.011247 | 0.011583 | 0.011247 | 0.011508 | 0.011247 |
| 0.011210 | 0.011322 | 0.011359 | 0.011508 | 0.011620 | 0.011321 | 0.011433 |
| 0.011284 | 0.011284 | 0.011210 | 0.011433 | 0.011657 | 0.011247 | 0.011321 |
| 0.011210 | 0.011247 | 0.011284 | 0.011321 | 0.011210 | 0.011284 | 0.011284 |
| 0.011172 | 0.011172 | 0.011135 | 0.011247 | 0.011247 | 0.011209 | 0.011321 |
| 0.011284 | 0.011247 | 0.011321 | 0.011172 | 0.011359 | 0.011172 | 0.011172 |
| 0.011359 | 0.011359 | 0.011583 | 0.011359 | 0.011247 | 0.011508 | 0.011247 |
| 0.011337 | 0.011617 | 0.011446 | 0.011141 | 0.000000 | 0.011219 | 0.011342 |
| 0.011324 | 0.011416 | 0.011144 | 0.011433 | 0.011359 | 0.011247 | 0.011321 |
| 0.011321 | 0.011247 | 0.011359 | 0.011247 | 0.011321 | 0.011247 | 0.011284 |
| 0.011247 | 0.011284 | 0.011471 | 0.011433 | 0.011321 | 0.011284 | 0.011210 |
| 0.011172 | 0.011172 | 0.011247 | 0.011172 | 0.011433 | 0.011396 | 0.011321 |
| 0.011433 | 0.011508 | 0.011135 | 0.011135 | 0.011172 | 0.011172 | 0.011172 |
| 0.011247 | 0.011247 | 0.011247 | 0.011099 | 0.011137 | 0.011138 | 0.011247 |
| 0.011247 | 0.011172 | 0.011213 | 0.011210 | 0.011136 | 0.011174 | 0.011210 |
| 0.011411 | 0.011212 | 0.011247 | 0.011172 | 0.011172 | 0.011321 | 0.011284 |
| 0.011359 | 0.011247 | 0.011247 | 0.011321 | 0.011321 | 0.011695 | 0.011471 |
| 0.011545 | 0.011396 | 0.011209 | 0.011359 | 0.011135 | 0.011359 | 0.011098 |
| 0.011210 | 0.011172 | 0.011172 | 0.011172 | 0.011172 | 0.011172 | 0.011284 |
| 0.011210 | 0.011321 | 0.011247 | 0.011172 | 0.011248 | 0.011396 | 0.011359 |
| 0.011359 | 0.011284 | 0.011098 | 0.011098 | 0.011247 | 0.011098 | 0.011098 |
| 0.011173 | 0.011359 | 0.011172 | 0.011359 | 0.011098 | 0.011210 | 0.011172 |
| 0.011321 | 0.011209 | 0.011247 | 0.011172 | 0.011210 | 0.011098 | 0.011210 |
| 0.011247 | 0.011209 | 0.011284 | 0.011210 | 0.011247 | 0.011284 | 0.011433 |
| 0.011620 | 0.011471 | 0.011620 | 0.011396 | 0.011620 | 0.011210 | 0.011209 |
| 0.011248 | 0.011555 | 0.011314 | 0.011136 | 0.011627 | 0.011098 | 0.011233 |
| 0.011589 | 0.011474 | 0.011359 | 0.011545 | 0.011326 | 0.011471 | 0.011471 |
| 0.011396 | 0.011471 | 0.011378 | 0.011201 | 0.011246 | 0.011284 | 0.011324 |
| 0.011471 | 0.011360 | 0.011436 | 0.011512 | 0.011321 | 0.011583 | 0.011701 |

|          |          |          |          |          |          |          |
|----------|----------|----------|----------|----------|----------|----------|
| 0.011360 | 0.011513 | 0.011474 | 0.011436 | 0.011695 | 0.011135 | 0.011322 |
| 0.011247 | 0.011210 | 0.011098 | 0.011098 | 0.011210 | 0.011210 | 0.011284 |
| 0.011210 | 0.011284 | 0.011172 | 0.011247 | 0.011210 | 0.011209 | 0.011210 |
| 0.011210 | 0.011620 | 0.011545 | 0.011583 | 0.011098 | 0.011210 | 0.011247 |
| 0.011247 | 0.011172 | 0.011284 | 0.011321 | 0.011172 | 0.011172 | 0.011172 |
| 0.011695 | 0.011321 | 0.011359 | 0.011135 | 0.011210 | 0.011359 | 0.011135 |
| 0.011135 | 0.011172 | 0.011210 | 0.011359 | 0.011172 | 0.011321 | 0.011433 |
| 0.011396 | 0.011210 | 0.011209 | 0.011135 | 0.011135 | 0.011210 | 0.011247 |
| 0.011135 | 0.011247 | 0.011098 | 0.011135 | 0.011284 | 0.011434 | 0.011172 |
| 0.011135 | 0.011284 | 0.011210 | 0.011098 | 0.011433 | 0.011098 | 0.011284 |
| 0.011365 | 0.011172 | 0.011471 | 0.011284 | 0.011359 | 0.011210 | 0.011321 |
| 0.011172 | 0.011508 | 0.011098 | 0.011321 | 0.011172 | 0.011172 | 0.011098 |
| 0.011284 | 0.011508 | 0.011210 | 0.011321 | 0.011135 | 0.011545 | 0.011172 |
| 0.011172 | 0.011172 | 0.011172 | 0.011247 | 0.011210 | 0.011321 | 0.011396 |
| 0.011359 | 0.011284 | 0.011247 | 0.011359 | 0.011321 | 0.011172 | 0.011135 |
| 0.011172 | 0.011172 | 0.011210 | 0.011135 | 0.011135 | 0.011284 | 0.011172 |
| 0.011210 | 0.011172 | 0.011284 | 0.011396 | 0.011247 | 0.011210 | 0.011210 |
| 0.011247 | 0.011172 | 0.011284 | 0.011172 | 0.011321 | 0.011396 | 0.011657 |
| 0.011210 | 0.011583 | 0.011210 | 0.017989 | 0.011191 | 0.011389 | 0.011513 |
| 0.011513 | 0.011513 | 0.011273 | 0.011176 | 0.011675 | 0.011589 | 0.011307 |
| 0.011440 | 0.011434 | 0.011101 | 0.011194 | 0.011183 | 0.011213 | 0.011194 |
| 0.011436 | 0.011364 | 0.011365 | 0.011129 | 0.011284 | 0.011396 | 0.011399 |
| 0.011213 | 0.011359 | 0.011321 | 0.011284 | 0.011247 | 0.011247 | 0.011247 |
| 0.011284 | 0.011209 | 0.011172 | 0.011284 | 0.011210 | 0.011172 | 0.011210 |
| 0.011210 | 0.011247 | 0.011135 | 0.011247 | 0.011321 | 0.011359 | 0.011247 |
| 0.011284 | 0.011247 | 0.011508 | 0.011508 | 0.011322 | 0.011359 | 0.011396 |
| 0.011098 | 0.011135 | 0.011135 | 0.011284 | 0.011135 | 0.011359 | 0.011359 |
| 0.011321 | 0.011359 | 0.011321 | 0.011359 | 0.011620 | 0.011360 | 0.011284 |
| 0.011247 | 0.011321 | 0.011396 | 0.011210 | 0.011210 | 0.011172 | 0.011284 |
| 0.011284 | 0.011284 | 0.011321 | 0.011247 | 0.011247 | 0.011359 | 0.011433 |
| 0.011286 | 0.011135 | 0.011284 | 0.011396 | 0.011210 | 0.011396 | 0.011433 |
| 0.011545 | 0.011326 | 0.011471 | 0.011471 | 0.011396 | 0.011471 | 0.011172 |
| 0.011360 | 0.011247 | 0.011210 | 0.011210 | 0.011247 | 0.011135 | 0.011247 |
| 0.011321 | 0.011359 | 0.011247 | 0.011284 | 0.011247 | 0.011508 | 0.011508 |
| 0.011322 | 0.011359 | 0.011396 | 0.011359 | 0.011994 | 0.011380 | 0.011296 |
| 0.011411 | 0.011331 | 0.011452 | 0.011292 | 0.011412 | 0.011406 | 0.011326 |
| 0.011978 | 0.011253 | 0.011404 | 0.011291 | 0.011635 | 0.011439 | 0.011514 |
| 0.011967 | 0.011442 | 0.011210 | 0.011210 | 0.011209 | 0.011321 | 0.011172 |
| 0.011135 | 0.011172 | 0.011247 | 0.011210 | 0.011210 | 0.011359 | 0.011396 |
| 0.011210 | 0.011172 | 0.011210 | 0.011210 | 0.011135 | 0.011172 | 0.011098 |
| 0.011247 | 0.011284 | 0.011172 | 0.011135 | 0.011247 | 0.011172 | 0.011210 |
| 0.011210 | 0.011135 | 0.011210 | 0.011247 | 0.011135 | 0.011321 | 0.011396 |
| 0.011247 | 0.011359 | 0.011284 | 0.011247 | 0.011135 | 0.011620 | 0.011247 |
| 0.011293 | 0.011135 | 0.011433 | 0.011437 | 0.011322 | 0.011247 | 0.011321 |
| 0.011321 | 0.011247 | 0.011172 | 0.011247 | 0.011359 | 0.011359 | 0.011284 |
| 0.011284 | 0.011359 | 0.011583 | 0.011284 | 0.011433 | 0.011433 | 0.011359 |
| 0.011172 | 0.011284 | 0.011321 | 0.011657 | 0.011284 | 0.011322 | 0.011284 |
| 0.011247 | 0.011209 | 0.011209 | 0.011471 | 0.011471 | 0.011433 | 0.011210 |
| 0.011359 | 0.011396 | 0.011247 | 0.011359 | 0.011247 | 0.011172 | 0.011508 |
| 0.011284 | 0.011209 | 0.011209 | 0.011396 | 0.011210 | 0.011359 | 0.011620 |
| 0.011209 | 0.011665 | 0.011657 | 0.011430 | 0.011173 | 0.011284 | 0.011163 |
| 0.011178 | 0.011657 | 0.011135 | 0.011377 | 0.011207 | 0.011315 | 0.011326 |
| 0.011417 | 0.011126 | 0.011283 | 0.011126 | 0.011168 | 0.011328 | 0.011272 |
| 0.011341 | 0.011223 | 0.011289 | 0.011211 | 0.011285 | 0.011359 | 0.011471 |
| 0.011433 | 0.011359 | 0.011474 | 0.011399 | 0.011549 | 0.011608 | 0.011210 |
| 0.011545 | 0.011396 | 0.011209 | 0.011359 | 0.011135 | 0.011359 | 0.011098 |
| 0.011210 | 0.011172 | 0.011172 | 0.011172 | 0.011172 | 0.011172 | 0.011284 |
| 0.011212 | 0.011252 | 0.011247 | 0.011211 | 0.011437 | 0.011359 | 0.011361 |
| 0.011398 | 0.011210 | 0.011100 | 0.011099 | 0.011247 | 0.011433 | 0.011359 |
| 0.011172 | 0.011284 | 0.011545 | 0.011471 | 0.011396 | 0.011471 | 0.011396 |

|          |          |          |          |          |          |          |
|----------|----------|----------|----------|----------|----------|----------|
| 0.011284 | 0.011396 | 0.011359 | 0.011247 | 0.011882 | 0.011321 | 0.011508 |
| 0.011583 | 0.011577 | 0.011212 | 0.011291 | 0.011210 | 0.011433 | 0.011396 |
| 0.011359 | 0.011396 | 0.011396 | 0.011396 | 0.011411 | 0.011620 | 0.011215 |
| 0.011098 | 0.011099 | 0.011212 | 0.011174 | 0.011250 | 0.011102 | 0.011438 |
| 0.011251 | 0.011399 | 0.011114 | 0.011269 | 0.011247 | 0.011324 | 0.011210 |
| 0.011172 | 0.011172 | 0.011247 | 0.011172 | 0.011433 | 0.011396 | 0.011321 |
| 0.011433 | 0.011508 | 0.011135 | 0.011135 | 0.011172 | 0.011172 | 0.011172 |
| 0.011247 | 0.011247 | 0.011247 | 0.011285 | 0.011359 | 0.011471 | 0.011433 |
| 0.011359 | 0.011474 | 0.011399 | 0.011549 | 0.011608 | 0.011210 | 0.011433 |
| 0.011396 | 0.011396 | 0.011173 | 0.011369 | 0.011330 | 0.011288 | 0.011216 |
| 0.011250 | 0.011563 | 0.011391 | 0.011287 | 0.011172 | 0.011359 | 0.011210 |
| 0.011321 | 0.011247 | 0.011172 | 0.011248 | 0.011396 | 0.011359 | 0.011284 |
| 0.011098 | 0.011098 | 0.011247 | 0.011098 | 0.011098 | 0.011173 | 0.011359 |
| 0.011284 | 0.011209 | 0.011172 | 0.011284 | 0.011210 | 0.011172 | 0.011359 |
| 0.011247 | 0.011284 | 0.011284 | 0.011210 | 0.011284 | 0.011433 | 0.011135 |
| 0.011210 | 0.011620 | 0.011210 | 0.011210 | 0.011209 | 0.011583 | 0.011146 |
| 0.011622 | 0.011146 | 0.011211 | 0.011390 | 0.011431 | 0.011400 | 0.011102 |
| 0.011165 | 0.011396 | 0.011508 | 0.011626 | 0.011471 | 0.011620 | 0.011769 |
| 0.011658 | 0.011699 | 0.011620 | 0.011925 | 0.011545 | 0.012480 | 0.011657 |
| 0.012293 | 0.012143 | 0.012334 | 0.012519 | 0.011545 | 0.011247 | 0.011620 |
| 0.012069 | 0.011807 | 0.011545 | 0.011471 | 0.011545 | 0.011545 | 0.011511 |
| 0.011396 | 0.011396 | 0.011471 | 0.011433 | 0.011695 | 0.011807 | 0.011769 |
| 0.011657 | 0.011732 | 0.011844 | 0.011658 | 0.011995 | 0.012038 | 0.012144 |
| 0.012107 | 0.012144 | 0.012069 | 0.012107 | 0.012107 | 0.011321 | 0.011583 |
| 0.011620 | 0.012143 | 0.011737 | 0.011844 | 0.011695 | 0.011436 | 0.011359 |
| 0.011321 | 0.011321 | 0.011732 | 0.011755 | 0.011897 | 0.011545 | 0.011321 |
| S103     | 0.011686 | 0.011686 | 0.011797 | 0.011760 | 0.011760 | 0.011797 |
| 0.011694 | 0.011619 | 0.011760 | 0.011244 | 0.011318 | 0.011318 | 0.011281 |
| 0.011318 | 0.011502 | 0.011281 | 0.011281 | 0.011391 | 0.011355 | 0.011318 |
| 0.011281 | 0.011318 | 0.011391 | 0.011244 | 0.011318 | 0.011281 | 0.011694 |
| 0.011576 | 0.011281 | 0.011207 | 0.011428 | 0.011355 | 0.011355 | 0.011318 |
| 0.011355 | 0.011465 | 0.011355 | 0.011355 | 0.011355 | 0.011207 | 0.011539 |
| 0.011281 | 0.011318 | 0.011355 | 0.011318 | 0.011428 | 0.011428 | 0.011391 |
| 0.011355 | 0.011502 | 0.011392 | 0.011723 | 0.011318 | 0.011649 | 0.011318 |
| 0.011318 | 0.011428 | 0.011465 | 0.011649 | 0.011760 | 0.011428 | 0.011539 |
| 0.011391 | 0.011465 | 0.011318 | 0.011502 | 0.011797 | 0.011355 | 0.011428 |
| 0.011318 | 0.011391 | 0.011391 | 0.011428 | 0.011355 | 0.011355 | 0.011355 |
| 0.011281 | 0.011281 | 0.011244 | 0.011355 | 0.011355 | 0.011355 | 0.011465 |
| 0.011355 | 0.011355 | 0.011428 | 0.011281 | 0.011428 | 0.011281 | 0.011318 |
| 0.011502 | 0.011428 | 0.011649 | 0.011355 | 0.011355 | 0.011612 | 0.011355 |
| 0.011255 | 0.011765 | 0.011536 | 0.011183 | 0.011219 | 0.000000 | 0.011433 |
| 0.012108 | 0.011488 | 0.011234 | 0.011575 | 0.011576 | 0.011355 | 0.011465 |
| 0.011428 | 0.011391 | 0.011465 | 0.011355 | 0.011428 | 0.011355 | 0.011391 |
| 0.011355 | 0.011428 | 0.011649 | 0.011539 | 0.011428 | 0.011392 | 0.011318 |
| 0.011244 | 0.011281 | 0.011355 | 0.011281 | 0.011539 | 0.011502 | 0.011428 |
| 0.011539 | 0.011539 | 0.011318 | 0.011318 | 0.011355 | 0.011355 | 0.011355 |
| 0.011429 | 0.011355 | 0.011355 | 0.011175 | 0.011217 | 0.011214 | 0.011355 |
| 0.011209 | 0.011283 | 0.011258 | 0.011283 | 0.011246 | 0.011286 | 0.011319 |
| 0.011565 | 0.011287 | 0.011399 | 0.011281 | 0.011283 | 0.011428 | 0.011392 |
| 0.011465 | 0.011392 | 0.011391 | 0.011465 | 0.011428 | 0.011760 | 0.011539 |
| 0.011649 | 0.011465 | 0.011355 | 0.011465 | 0.011244 | 0.011502 | 0.011244 |
| 0.011355 | 0.011355 | 0.011281 | 0.011281 | 0.011281 | 0.011281 | 0.011391 |
| 0.011318 | 0.011465 | 0.011391 | 0.011207 | 0.011392 | 0.011391 | 0.011393 |
| 0.011502 | 0.011355 | 0.011281 | 0.011208 | 0.011355 | 0.011281 | 0.011208 |
| 0.011321 | 0.011502 | 0.011281 | 0.011502 | 0.011244 | 0.011318 | 0.011318 |
| 0.011428 | 0.011318 | 0.011355 | 0.011318 | 0.011355 | 0.011207 | 0.011318 |
| 0.011355 | 0.011318 | 0.011391 | 0.011318 | 0.011355 | 0.011391 | 0.011539 |
| 0.011760 | 0.011612 | 0.011723 | 0.011502 | 0.011760 | 0.011355 | 0.011318 |
| 0.011319 | 0.011589 | 0.011461 | 0.011246 | 0.011768 | 0.011210 | 0.011359 |
| 0.011768 | 0.011655 | 0.011539 | 0.011723 | 0.011434 | 0.011612 | 0.011539 |



|          |          |          |          |          |          |          |
|----------|----------|----------|----------|----------|----------|----------|
| 0.011465 | 0.011649 | 0.011530 | 0.011379 | 0.011383 | 0.011392 | 0.011469 |
| 0.011539 | 0.011467 | 0.011617 | 0.011691 | 0.011465 | 0.011649 | 0.011804 |
| 0.011430 | 0.011693 | 0.011506 | 0.011394 | 0.011797 | 0.011244 | 0.011393 |
| 0.011391 | 0.011318 | 0.011207 | 0.011207 | 0.011281 | 0.011318 | 0.011391 |
| 0.011318 | 0.011355 | 0.011281 | 0.011391 | 0.011318 | 0.011318 | 0.011355 |
| 0.011318 | 0.011796 | 0.011649 | 0.011686 | 0.011207 | 0.011318 | 0.011355 |
| 0.011355 | 0.011318 | 0.011391 | 0.011428 | 0.011244 | 0.011244 | 0.011244 |
| 0.011870 | 0.011391 | 0.011428 | 0.011244 | 0.011355 | 0.011465 | 0.011244 |
| 0.011244 | 0.011318 | 0.011318 | 0.011502 | 0.011244 | 0.011428 | 0.011575 |
| 0.011502 | 0.011318 | 0.011318 | 0.011244 | 0.011244 | 0.011355 | 0.011355 |
| 0.011244 | 0.011355 | 0.011207 | 0.011244 | 0.011244 | 0.011539 | 0.011281 |
| 0.011244 | 0.011244 | 0.011318 | 0.011207 | 0.011539 | 0.011207 | 0.011391 |
| 0.011474 | 0.011281 | 0.011612 | 0.011392 | 0.011391 | 0.011281 | 0.011391 |
| 0.011281 | 0.011649 | 0.011207 | 0.011465 | 0.011281 | 0.011281 | 0.011207 |
| 0.011391 | 0.011686 | 0.011318 | 0.011391 | 0.011244 | 0.011649 | 0.011281 |
| 0.011244 | 0.011281 | 0.011318 | 0.011428 | 0.011318 | 0.011428 | 0.011502 |
| 0.011355 | 0.011465 | 0.011355 | 0.011465 | 0.011428 | 0.011281 | 0.011244 |
| 0.011281 | 0.011281 | 0.011318 | 0.011281 | 0.011244 | 0.011391 | 0.011281 |
| 0.011318 | 0.011281 | 0.011391 | 0.011502 | 0.011355 | 0.011318 | 0.011318 |
| 0.011391 | 0.011318 | 0.011428 | 0.011281 | 0.011428 | 0.011539 | 0.011760 |
| 0.011318 | 0.011723 | 0.011318 | 0.018162 | 0.011128 | 0.011514 | 0.011649 |
| 0.011649 | 0.011649 | 0.011115 | 0.011242 | 0.011754 | 0.011686 | 0.011382 |
| 0.011458 | 0.011513 | 0.011183 | 0.011325 | 0.011221 | 0.011267 | 0.011333 |
| 0.011552 | 0.011456 | 0.011493 | 0.011199 | 0.011465 | 0.011465 | 0.011468 |
| 0.011362 | 0.011465 | 0.011391 | 0.011428 | 0.011355 | 0.011355 | 0.011355 |
| 0.011391 | 0.011318 | 0.011355 | 0.011391 | 0.011318 | 0.011244 | 0.011318 |
| 0.011318 | 0.011355 | 0.011244 | 0.011355 | 0.011428 | 0.011318 | 0.011355 |
| 0.011391 | 0.011355 | 0.011686 | 0.011686 | 0.011391 | 0.011428 | 0.011465 |
| 0.011244 | 0.011244 | 0.011281 | 0.011391 | 0.011244 | 0.011502 | 0.011502 |
| 0.011539 | 0.011539 | 0.011428 | 0.011576 | 0.011760 | 0.011577 | 0.011391 |
| 0.011391 | 0.011465 | 0.011465 | 0.011281 | 0.011318 | 0.011244 | 0.011355 |
| 0.011465 | 0.011465 | 0.011502 | 0.011465 | 0.011355 | 0.011539 | 0.011539 |
| 0.011395 | 0.011244 | 0.011391 | 0.011502 | 0.011392 | 0.011502 | 0.011502 |
| 0.011723 | 0.011434 | 0.011612 | 0.011539 | 0.011465 | 0.011649 | 0.011281 |
| 0.011429 | 0.011355 | 0.011318 | 0.011318 | 0.011355 | 0.011244 | 0.011355 |
| 0.011428 | 0.011318 | 0.011355 | 0.011391 | 0.011355 | 0.011686 | 0.011686 |
| 0.011391 | 0.011428 | 0.011502 | 0.011465 | 0.012129 | 0.011533 | 0.011409 |
| 0.011368 | 0.011480 | 0.011601 | 0.011365 | 0.011599 | 0.011515 | 0.011438 |
| 0.012041 | 0.011364 | 0.011512 | 0.011440 | 0.011703 | 0.011508 | 0.011695 |
| 0.012104 | 0.011516 | 0.011392 | 0.011391 | 0.011391 | 0.011428 | 0.011355 |
| 0.011244 | 0.011281 | 0.011428 | 0.011391 | 0.011392 | 0.011539 | 0.011465 |
| 0.011318 | 0.011281 | 0.011281 | 0.011318 | 0.011244 | 0.011281 | 0.011207 |
| 0.011281 | 0.011318 | 0.011281 | 0.011244 | 0.011355 | 0.011281 | 0.011318 |
| 0.011281 | 0.011244 | 0.011318 | 0.011355 | 0.011244 | 0.011465 | 0.011391 |
| 0.011281 | 0.011391 | 0.011244 | 0.011281 | 0.011318 | 0.011760 | 0.011318 |
| 0.011405 | 0.011281 | 0.011576 | 0.011581 | 0.011428 | 0.011391 | 0.011391 |
| 0.011428 | 0.011355 | 0.011281 | 0.011355 | 0.011465 | 0.011428 | 0.011391 |
| 0.011391 | 0.011502 | 0.011686 | 0.011391 | 0.011539 | 0.011539 | 0.011465 |
| 0.011281 | 0.011391 | 0.011428 | 0.011834 | 0.011392 | 0.011428 | 0.011355 |
| 0.011428 | 0.011318 | 0.011318 | 0.011649 | 0.011576 | 0.011612 | 0.011355 |
| 0.011465 | 0.011539 | 0.011355 | 0.011465 | 0.011355 | 0.011281 | 0.011649 |
| 0.011391 | 0.011318 | 0.011318 | 0.011428 | 0.011355 | 0.011428 | 0.011723 |
| 0.011318 | 0.011806 | 0.011797 | 0.011531 | 0.011180 | 0.011465 | 0.011223 |
| 0.011292 | 0.011682 | 0.011283 | 0.011391 | 0.011315 | 0.011332 | 0.011340 |
| 0.011431 | 0.011129 | 0.011236 | 0.000000 | 0.011228 | 0.011269 | 0.011398 |
| 0.011455 | 0.011309 | 0.011395 | 0.011324 | 0.011356 | 0.011539 | 0.011575 |
| 0.011539 | 0.011429 | 0.011579 | 0.011581 | 0.011692 | 0.011681 | 0.011318 |
| 0.011649 | 0.011465 | 0.011355 | 0.011465 | 0.011244 | 0.011502 | 0.011244 |
| 0.011355 | 0.011355 | 0.011281 | 0.011281 | 0.011281 | 0.011281 | 0.011391 |
| 0.011362 | 0.011328 | 0.011320 | 0.011360 | 0.011548 | 0.011506 | 0.011471 |

|          |          |          |          |          |          |          |
|----------|----------|----------|----------|----------|----------|----------|
| 0.011471 | 0.011355 | 0.011180 | 0.011177 | 0.011357 | 0.011543 | 0.011469 |
| 0.011318 | 0.011394 | 0.011650 | 0.011540 | 0.011539 | 0.011502 | 0.011465 |
| 0.011391 | 0.011502 | 0.011502 | 0.011318 | 0.012018 | 0.011576 | 0.011613 |
| 0.011686 | 0.011646 | 0.011360 | 0.011439 | 0.011318 | 0.011539 | 0.011465 |
| 0.011503 | 0.011465 | 0.011539 | 0.011539 | 0.011574 | 0.011686 | 0.011327 |
| 0.011209 | 0.011213 | 0.011284 | 0.011284 | 0.011398 | 0.011226 | 0.011582 |
| 0.011361 | 0.011542 | 0.011216 | 0.011348 | 0.011355 | 0.011435 | 0.011318 |
| 0.011244 | 0.011281 | 0.011355 | 0.011281 | 0.011539 | 0.011502 | 0.011428 |
| 0.011539 | 0.011539 | 0.011318 | 0.011318 | 0.011355 | 0.011355 | 0.011355 |
| 0.011429 | 0.011355 | 0.011355 | 0.011356 | 0.011539 | 0.011575 | 0.011539 |
| 0.011429 | 0.011579 | 0.011581 | 0.011692 | 0.011681 | 0.011318 | 0.011502 |
| 0.011465 | 0.011465 | 0.011282 | 0.011519 | 0.011442 | 0.011434 | 0.011328 |
| 0.011437 | 0.011712 | 0.011517 | 0.011396 | 0.011281 | 0.011502 | 0.011318 |
| 0.011465 | 0.011391 | 0.011207 | 0.011392 | 0.011391 | 0.011393 | 0.011355 |
| 0.011281 | 0.011208 | 0.011355 | 0.011281 | 0.011208 | 0.011321 | 0.011502 |
| 0.011391 | 0.011318 | 0.011355 | 0.011391 | 0.011318 | 0.011244 | 0.011465 |
| 0.011318 | 0.011391 | 0.011355 | 0.011318 | 0.011244 | 0.011539 | 0.011281 |
| 0.011318 | 0.011760 | 0.011318 | 0.011355 | 0.011318 | 0.011723 | 0.011242 |
| 0.011644 | 0.011240 | 0.011324 | 0.011484 | 0.011532 | 0.011517 | 0.011193 |
| 0.011169 | 0.011465 | 0.011539 | 0.011655 | 0.011502 | 0.011650 | 0.011797 |
| 0.011687 | 0.011727 | 0.011686 | 0.011991 | 0.011612 | 0.012350 | 0.011723 |
| 0.012461 | 0.012055 | 0.012205 | 0.012647 | 0.011686 | 0.011318 | 0.011612 |
| 0.012092 | 0.011797 | 0.011649 | 0.011539 | 0.011612 | 0.011612 | 0.011617 |
| 0.011465 | 0.011467 | 0.011539 | 0.011502 | 0.011907 | 0.011981 | 0.011907 |
| 0.011834 | 0.011944 | 0.012055 | 0.011797 | 0.012129 | 0.012173 | 0.012240 |
| 0.012240 | 0.012203 | 0.012203 | 0.012203 | 0.012203 | 0.011391 | 0.011723 |
| 0.011797 | 0.012202 | 0.011839 | 0.011981 | 0.011797 | 0.011580 | 0.011465 |
| 0.011428 | 0.011428 | 0.011760 | 0.011923 | 0.011968 | 0.011760 | 0.011429 |
| S104     | 0.011572 | 0.011572 | 0.011533 | 0.011454 | 0.011454 | 0.011533 |
| 0.011417 | 0.011338 | 0.011533 | 0.011375 | 0.011415 | 0.011375 | 0.011336 |
| 0.011296 | 0.011572 | 0.011296 | 0.011414 | 0.011414 | 0.011415 | 0.011375 |
| 0.011375 | 0.011415 | 0.011139 | 0.011336 | 0.011415 | 0.011336 | 0.011417 |
| 0.011336 | 0.011415 | 0.011296 | 0.011139 | 0.011454 | 0.011415 | 0.011336 |
| 0.011415 | 0.011572 | 0.011454 | 0.011454 | 0.011454 | 0.011454 | 0.011651 |
| 0.011257 | 0.011454 | 0.011454 | 0.011415 | 0.011454 | 0.011572 | 0.011493 |
| 0.011454 | 0.011612 | 0.011415 | 0.011493 | 0.011414 | 0.011690 | 0.011414 |
| 0.011414 | 0.011454 | 0.011493 | 0.011690 | 0.011533 | 0.011454 | 0.011533 |
| 0.011493 | 0.011493 | 0.011415 | 0.011690 | 0.011533 | 0.011454 | 0.011493 |
| 0.011415 | 0.011415 | 0.011493 | 0.011533 | 0.011415 | 0.011454 | 0.011454 |
| 0.011375 | 0.011375 | 0.011336 | 0.011336 | 0.011454 | 0.011454 | 0.011533 |
| 0.011493 | 0.011375 | 0.011533 | 0.011296 | 0.011493 | 0.011375 | 0.011375 |
| 0.011572 | 0.011572 | 0.011572 | 0.011572 | 0.011415 | 0.011690 | 0.011454 |
| 0.011533 | 0.011493 | 0.011658 | 0.011346 | 0.011342 | 0.011433 | 0.000000 |
| 0.000000 | 0.011270 | 0.011358 | 0.011611 | 0.011572 | 0.011375 | 0.011415 |
| 0.011493 | 0.011454 | 0.011572 | 0.011454 | 0.011493 | 0.011454 | 0.011415 |
| 0.011375 | 0.011415 | 0.011769 | 0.011611 | 0.011493 | 0.011454 | 0.011415 |
| 0.011336 | 0.011296 | 0.011454 | 0.011336 | 0.011257 | 0.011218 | 0.011139 |
| 0.011257 | 0.011336 | 0.011375 | 0.011375 | 0.011415 | 0.011414 | 0.011415 |
| 0.011494 | 0.011415 | 0.011454 | 0.011305 | 0.011346 | 0.011347 | 0.011414 |
| 0.011414 | 0.011375 | 0.011428 | 0.011415 | 0.011339 | 0.011379 | 0.011416 |
| 0.011348 | 0.011422 | 0.011416 | 0.011375 | 0.011336 | 0.011493 | 0.011415 |
| 0.011493 | 0.011415 | 0.011415 | 0.011493 | 0.011493 | 0.011848 | 0.011612 |
| 0.011415 | 0.011533 | 0.011414 | 0.011493 | 0.011336 | 0.011257 | 0.011296 |
| 0.011415 | 0.011414 | 0.011375 | 0.011375 | 0.011375 | 0.011375 | 0.011493 |
| 0.011415 | 0.011533 | 0.011493 | 0.011336 | 0.011455 | 0.011611 | 0.011575 |
| 0.011572 | 0.011493 | 0.011375 | 0.011298 | 0.011454 | 0.011375 | 0.011297 |
| 0.011299 | 0.011572 | 0.011375 | 0.011572 | 0.011296 | 0.011415 | 0.011375 |
| 0.011533 | 0.011375 | 0.011454 | 0.011375 | 0.011415 | 0.011296 | 0.011415 |
| 0.011454 | 0.011414 | 0.011454 | 0.011375 | 0.011414 | 0.011454 | 0.011651 |
| 0.011533 | 0.011375 | 0.011493 | 0.011572 | 0.011533 | 0.011415 | 0.011414 |

|          |          |          |          |          |          |          |
|----------|----------|----------|----------|----------|----------|----------|
| 0.011377 | 0.011639 | 0.011550 | 0.011300 | 0.011539 | 0.011300 | 0.011474 |
| 0.011536 | 0.011418 | 0.011533 | 0.011848 | 0.011501 | 0.011651 | 0.011612 |
| 0.011572 | 0.011690 | 0.011644 | 0.011448 | 0.011453 | 0.011493 | 0.011577 |
| 0.011690 | 0.011534 | 0.011612 | 0.011693 | 0.011493 | 0.011769 | 0.011893 |
| 0.011535 | 0.011698 | 0.011616 | 0.011656 | 0.011888 | 0.011336 | 0.011495 |
| 0.011454 | 0.011415 | 0.011296 | 0.011296 | 0.011375 | 0.011415 | 0.011454 |
| 0.011415 | 0.011493 | 0.011375 | 0.011375 | 0.011415 | 0.011414 | 0.011415 |
| 0.011415 | 0.011533 | 0.011454 | 0.011493 | 0.011296 | 0.011415 | 0.011454 |
| 0.011454 | 0.011375 | 0.011454 | 0.011454 | 0.011336 | 0.011336 | 0.011336 |
| 0.011572 | 0.011454 | 0.011572 | 0.011336 | 0.011414 | 0.011572 | 0.011336 |
| 0.011336 | 0.011336 | 0.011414 | 0.011533 | 0.011375 | 0.011296 | 0.011415 |
| 0.011375 | 0.011415 | 0.011414 | 0.011336 | 0.011336 | 0.011454 | 0.011415 |
| 0.011336 | 0.011454 | 0.011296 | 0.011336 | 0.011493 | 0.011297 | 0.011336 |
| 0.011336 | 0.011493 | 0.011336 | 0.011296 | 0.011336 | 0.011296 | 0.011493 |
| 0.011583 | 0.011375 | 0.011375 | 0.011493 | 0.011493 | 0.011375 | 0.011493 |
| 0.011375 | 0.011690 | 0.011296 | 0.011415 | 0.011296 | 0.011296 | 0.011296 |
| 0.011493 | 0.011454 | 0.011415 | 0.011533 | 0.011336 | 0.011454 | 0.011296 |
| 0.011375 | 0.011375 | 0.011375 | 0.011454 | 0.011414 | 0.011533 | 0.011611 |
| 0.011572 | 0.011493 | 0.011454 | 0.011572 | 0.011533 | 0.011375 | 0.011336 |
| 0.011375 | 0.011375 | 0.011415 | 0.011257 | 0.011336 | 0.011493 | 0.011375 |
| 0.011336 | 0.011375 | 0.011493 | 0.011533 | 0.011454 | 0.011414 | 0.011415 |
| 0.011454 | 0.011375 | 0.011454 | 0.011336 | 0.011533 | 0.011611 | 0.011572 |
| 0.011375 | 0.011494 | 0.011415 | 0.018505 | 0.011257 | 0.011675 | 0.011415 |
| 0.011415 | 0.011415 | 0.011492 | 0.011304 | 0.011507 | 0.011454 | 0.011555 |
| 0.011456 | 0.011123 | 0.011261 | 0.011430 | 0.011317 | 0.011365 | 0.011427 |
| 0.011302 | 0.011261 | 0.011264 | 0.000000 | 0.011533 | 0.011572 | 0.011536 |
| 0.011421 | 0.011533 | 0.011533 | 0.011415 | 0.011454 | 0.011454 | 0.011415 |
| 0.011454 | 0.011375 | 0.011375 | 0.011493 | 0.011415 | 0.011375 | 0.011415 |
| 0.011415 | 0.011454 | 0.011296 | 0.011454 | 0.011533 | 0.011572 | 0.011454 |
| 0.011415 | 0.011375 | 0.011415 | 0.011415 | 0.011533 | 0.011573 | 0.011572 |
| 0.011296 | 0.011336 | 0.011336 | 0.011493 | 0.011336 | 0.011572 | 0.011572 |
| 0.011533 | 0.011533 | 0.011533 | 0.011572 | 0.011533 | 0.011574 | 0.011493 |
| 0.011454 | 0.011533 | 0.011611 | 0.011415 | 0.011415 | 0.011375 | 0.011493 |
| 0.011454 | 0.011454 | 0.011493 | 0.011454 | 0.011455 | 0.011572 | 0.011611 |
| 0.011498 | 0.011336 | 0.011454 | 0.011612 | 0.011415 | 0.011533 | 0.011651 |
| 0.011848 | 0.011501 | 0.011651 | 0.011612 | 0.011572 | 0.011690 | 0.011375 |
| 0.011574 | 0.011454 | 0.011415 | 0.011415 | 0.011454 | 0.011296 | 0.011454 |
| 0.011533 | 0.011572 | 0.011454 | 0.011415 | 0.011375 | 0.011415 | 0.011415 |
| 0.011533 | 0.011573 | 0.011572 | 0.011533 | 0.012125 | 0.011599 | 0.011514 |
| 0.011632 | 0.011542 | 0.011677 | 0.011508 | 0.011587 | 0.011624 | 0.011497 |
| 0.012063 | 0.011464 | 0.011580 | 0.011544 | 0.011823 | 0.011655 | 0.011695 |
| 0.012138 | 0.011593 | 0.011455 | 0.011454 | 0.011454 | 0.011139 | 0.011415 |
| 0.011336 | 0.011375 | 0.011493 | 0.011454 | 0.011454 | 0.011257 | 0.011296 |
| 0.011415 | 0.011375 | 0.011415 | 0.011414 | 0.011336 | 0.011375 | 0.011296 |
| 0.011375 | 0.011415 | 0.011375 | 0.011336 | 0.011454 | 0.011375 | 0.011415 |
| 0.011414 | 0.011336 | 0.011415 | 0.011454 | 0.011336 | 0.011572 | 0.011611 |
| 0.011454 | 0.011493 | 0.011493 | 0.011454 | 0.011336 | 0.011533 | 0.011454 |
| 0.011101 | 0.011375 | 0.011336 | 0.011339 | 0.011493 | 0.011375 | 0.011533 |
| 0.011533 | 0.011454 | 0.011375 | 0.011454 | 0.011572 | 0.011572 | 0.011454 |
| 0.011493 | 0.011572 | 0.011493 | 0.011414 | 0.011611 | 0.011611 | 0.011493 |
| 0.011375 | 0.011493 | 0.011533 | 0.011572 | 0.011494 | 0.011493 | 0.011493 |
| 0.011493 | 0.011296 | 0.011296 | 0.011612 | 0.011690 | 0.011572 | 0.011415 |
| 0.011533 | 0.011533 | 0.011454 | 0.011533 | 0.011414 | 0.011375 | 0.011375 |
| 0.011493 | 0.011414 | 0.011296 | 0.011533 | 0.011415 | 0.011533 | 0.011572 |
| 0.011414 | 0.011496 | 0.011572 | 0.011307 | 0.011118 | 0.011415 | 0.011168 |
| 0.011424 | 0.011548 | 0.011296 | 0.011467 | 0.011304 | 0.011315 | 0.011273 |
| 0.011267 | 0.011192 | 0.011339 | 0.011126 | 0.011222 | 0.011328 | 0.011437 |
| 0.011537 | 0.011384 | 0.011415 | 0.011418 | 0.011495 | 0.011257 | 0.011336 |
| 0.011296 | 0.011494 | 0.011574 | 0.011219 | 0.011654 | 0.011724 | 0.011415 |
| 0.011415 | 0.011533 | 0.011414 | 0.011493 | 0.011336 | 0.011257 | 0.011296 |

|          |          |          |          |          |          |          |
|----------|----------|----------|----------|----------|----------|----------|
| 0.011415 | 0.011414 | 0.011375 | 0.011375 | 0.011375 | 0.011375 | 0.011493 |
| 0.011417 | 0.011465 | 0.011454 | 0.011419 | 0.011617 | 0.011534 | 0.011536 |
| 0.011536 | 0.011415 | 0.011313 | 0.011305 | 0.011454 | 0.011612 | 0.011573 |
| 0.011375 | 0.011493 | 0.011769 | 0.011651 | 0.011611 | 0.011611 | 0.011533 |
| 0.011493 | 0.011611 | 0.011611 | 0.011454 | 0.011809 | 0.011572 | 0.011690 |
| 0.011808 | 0.011479 | 0.011381 | 0.011507 | 0.011414 | 0.011611 | 0.011572 |
| 0.011534 | 0.011572 | 0.011533 | 0.011533 | 0.011706 | 0.011769 | 0.011426 |
| 0.011298 | 0.011303 | 0.011418 | 0.011379 | 0.011381 | 0.011324 | 0.011339 |
| 0.011461 | 0.011266 | 0.011342 | 0.011495 | 0.011454 | 0.011538 | 0.011415 |
| 0.011336 | 0.011296 | 0.011454 | 0.011336 | 0.011257 | 0.011218 | 0.011139 |
| 0.011257 | 0.011336 | 0.011375 | 0.011375 | 0.011415 | 0.011414 | 0.011415 |
| 0.011494 | 0.011415 | 0.011454 | 0.011495 | 0.011257 | 0.011336 | 0.011296 |
| 0.011494 | 0.011574 | 0.011219 | 0.011654 | 0.011724 | 0.011415 | 0.011651 |
| 0.011572 | 0.011572 | 0.011338 | 0.011547 | 0.011548 | 0.011500 | 0.011430 |
| 0.011464 | 0.011812 | 0.011612 | 0.011459 | 0.011375 | 0.011572 | 0.011415 |
| 0.011533 | 0.011493 | 0.011336 | 0.011455 | 0.011611 | 0.011575 | 0.011493 |
| 0.011375 | 0.011298 | 0.011454 | 0.011375 | 0.011297 | 0.011299 | 0.011572 |
| 0.011454 | 0.011375 | 0.011375 | 0.011493 | 0.011415 | 0.011375 | 0.011257 |
| 0.011414 | 0.011493 | 0.011493 | 0.011414 | 0.011493 | 0.011651 | 0.011257 |
| 0.011415 | 0.011533 | 0.011414 | 0.011415 | 0.011375 | 0.011493 | 0.011374 |
| 0.011581 | 0.011236 | 0.011215 | 0.011273 | 0.011313 | 0.011257 | 0.011191 |
| 0.011169 | 0.011296 | 0.011415 | 0.011538 | 0.011375 | 0.011533 | 0.011690 |
| 0.011573 | 0.011576 | 0.011572 | 0.011735 | 0.011415 | 0.012440 | 0.011572 |
| 0.012243 | 0.012045 | 0.012286 | 0.012363 | 0.011415 | 0.011375 | 0.011533 |
| 0.012164 | 0.011691 | 0.011454 | 0.011375 | 0.011454 | 0.011454 | 0.011378 |
| 0.011296 | 0.011297 | 0.011375 | 0.011336 | 0.011612 | 0.011651 | 0.011690 |
| 0.011493 | 0.011612 | 0.011769 | 0.011493 | 0.012125 | 0.012172 | 0.012283 |
| 0.012283 | 0.012244 | 0.012164 | 0.012204 | 0.012204 | 0.011493 | 0.011730 |
| 0.011769 | 0.012243 | 0.011814 | 0.011730 | 0.011533 | 0.011338 | 0.011257 |
| 0.011218 | 0.011218 | 0.011651 | 0.011631 | 0.011783 | 0.011454 | 0.011218 |
| S105     | 0.012452 | 0.012452 | 0.012158 | 0.012085 | 0.012085 | 0.012158 |
| 0.012135 | 0.012024 | 0.012195 | 0.012011 | 0.012048 | 0.012011 | 0.012011 |
| 0.011975 | 0.012195 | 0.011938 | 0.012048 | 0.012085 | 0.012085 | 0.012011 |
| 0.012011 | 0.012048 | 0.011792 | 0.012013 | 0.012049 | 0.012011 | 0.012098 |
| 0.011975 | 0.012048 | 0.011938 | 0.011828 | 0.012085 | 0.012011 | 0.012011 |
| 0.012085 | 0.012195 | 0.012085 | 0.012085 | 0.012121 | 0.012085 | 0.012268 |
| 0.011938 | 0.012085 | 0.012121 | 0.012048 | 0.012085 | 0.012195 | 0.012121 |
| 0.012085 | 0.012268 | 0.012086 | 0.012121 | 0.012085 | 0.012341 | 0.012085 |
| 0.012048 | 0.012085 | 0.012195 | 0.012341 | 0.012121 | 0.012048 | 0.012195 |
| 0.012121 | 0.012158 | 0.012048 | 0.012305 | 0.012195 | 0.012085 | 0.012158 |
| 0.012048 | 0.012085 | 0.012121 | 0.012158 | 0.012085 | 0.012121 | 0.012121 |
| 0.012011 | 0.012011 | 0.011975 | 0.012011 | 0.012085 | 0.012048 | 0.012158 |
| 0.012121 | 0.012085 | 0.012158 | 0.012011 | 0.012121 | 0.012011 | 0.012011 |
| 0.012195 | 0.012195 | 0.012195 | 0.012195 | 0.012085 | 0.012341 | 0.012085 |
| 0.012221 | 0.012190 | 0.011600 | 0.011343 | 0.011324 | 0.012108 | 0.000000 |
| 0.000000 | 0.011264 | 0.011348 | 0.012268 | 0.012268 | 0.012011 | 0.012085 |
| 0.012158 | 0.012085 | 0.012195 | 0.012085 | 0.012158 | 0.012085 | 0.012121 |
| 0.012085 | 0.012085 | 0.012378 | 0.012268 | 0.012158 | 0.012122 | 0.012048 |
| 0.012011 | 0.011938 | 0.012085 | 0.012011 | 0.011902 | 0.011865 | 0.011792 |
| 0.011902 | 0.011975 | 0.012011 | 0.012011 | 0.012048 | 0.012048 | 0.012049 |
| 0.012123 | 0.012085 | 0.012085 | 0.011891 | 0.011899 | 0.012010 | 0.012085 |
| 0.012085 | 0.012011 | 0.011404 | 0.012048 | 0.011985 | 0.012023 | 0.012052 |
| 0.012052 | 0.012066 | 0.012088 | 0.012011 | 0.011719 | 0.012158 | 0.012011 |
| 0.012085 | 0.012085 | 0.012085 | 0.012158 | 0.012158 | 0.012525 | 0.012231 |
| 0.012085 | 0.012158 | 0.012048 | 0.012121 | 0.011975 | 0.011902 | 0.011938 |
| 0.012048 | 0.012048 | 0.012011 | 0.012011 | 0.012011 | 0.012011 | 0.012121 |
| 0.012048 | 0.012195 | 0.012121 | 0.012011 | 0.012089 | 0.012231 | 0.012203 |
| 0.012231 | 0.012121 | 0.012011 | 0.011942 | 0.012085 | 0.012011 | 0.011939 |
| 0.011947 | 0.012231 | 0.012012 | 0.012231 | 0.011975 | 0.012048 | 0.012048 |
| 0.012158 | 0.012048 | 0.012085 | 0.012048 | 0.012085 | 0.011938 | 0.012048 |

|          |          |          |          |          |          |          |
|----------|----------|----------|----------|----------|----------|----------|
| 0.012085 | 0.012048 | 0.012121 | 0.012048 | 0.012085 | 0.012121 | 0.012305 |
| 0.012158 | 0.012011 | 0.012158 | 0.012231 | 0.012121 | 0.012048 | 0.012048 |
| 0.012015 | 0.012474 | 0.012413 | 0.011991 | 0.012171 | 0.011952 | 0.011444 |
| 0.012134 | 0.012095 | 0.012231 | 0.012451 | 0.012178 | 0.012305 | 0.012305 |
| 0.012231 | 0.012341 | 0.012297 | 0.012245 | 0.012288 | 0.012122 | 0.012204 |
| 0.012305 | 0.012199 | 0.012278 | 0.012352 | 0.012158 | 0.012415 | 0.012539 |
| 0.012201 | 0.012355 | 0.012315 | 0.012277 | 0.012526 | 0.011975 | 0.012162 |
| 0.012048 | 0.012048 | 0.011938 | 0.011938 | 0.012048 | 0.012048 | 0.012121 |
| 0.012048 | 0.012121 | 0.012011 | 0.012011 | 0.012048 | 0.012048 | 0.012085 |
| 0.012048 | 0.012158 | 0.012085 | 0.012121 | 0.011938 | 0.012048 | 0.012085 |
| 0.012085 | 0.012048 | 0.012121 | 0.012085 | 0.012011 | 0.012011 | 0.012011 |
| 0.012231 | 0.012085 | 0.012195 | 0.011975 | 0.012085 | 0.012231 | 0.011975 |
| 0.011975 | 0.012011 | 0.012048 | 0.012195 | 0.012011 | 0.011938 | 0.012048 |
| 0.012011 | 0.012048 | 0.012048 | 0.011975 | 0.011975 | 0.012085 | 0.012085 |
| 0.011975 | 0.012085 | 0.011938 | 0.011975 | 0.012121 | 0.011939 | 0.012012 |
| 0.011976 | 0.012121 | 0.012049 | 0.011938 | 0.011975 | 0.011938 | 0.012121 |
| 0.012218 | 0.012012 | 0.012011 | 0.012122 | 0.012121 | 0.012048 | 0.012158 |
| 0.012011 | 0.012341 | 0.011938 | 0.012085 | 0.011938 | 0.011938 | 0.011938 |
| 0.012121 | 0.012121 | 0.012048 | 0.012158 | 0.011975 | 0.012085 | 0.011938 |
| 0.012011 | 0.012011 | 0.012011 | 0.012121 | 0.012048 | 0.012158 | 0.012231 |
| 0.012195 | 0.012158 | 0.012085 | 0.012195 | 0.012158 | 0.012011 | 0.011975 |
| 0.012011 | 0.012011 | 0.012048 | 0.011938 | 0.011975 | 0.012121 | 0.012011 |
| 0.011975 | 0.012011 | 0.012121 | 0.012121 | 0.012085 | 0.012048 | 0.012048 |
| 0.012121 | 0.012011 | 0.012121 | 0.012011 | 0.012158 | 0.012231 | 0.012158 |
| 0.012048 | 0.012085 | 0.012048 | 0.018730 | 0.011257 | 0.012842 | 0.012059 |
| 0.012059 | 0.012059 | 0.011492 | 0.011292 | 0.011515 | 0.012133 | 0.011554 |
| 0.011440 | 0.011124 | 0.011262 | 0.012206 | 0.011300 | 0.011369 | 0.012224 |
| 0.011295 | 0.011248 | 0.011249 | 0.000000 | 0.012158 | 0.012231 | 0.012240 |
| 0.012072 | 0.012195 | 0.012158 | 0.012048 | 0.012085 | 0.012086 | 0.012086 |
| 0.012121 | 0.012048 | 0.012048 | 0.012121 | 0.012048 | 0.012011 | 0.012048 |
| 0.012048 | 0.012085 | 0.011975 | 0.012085 | 0.012158 | 0.012195 | 0.012048 |
| 0.012048 | 0.012011 | 0.012011 | 0.012011 | 0.012159 | 0.012196 | 0.012231 |
| 0.011938 | 0.011975 | 0.011975 | 0.012121 | 0.011975 | 0.012195 | 0.012195 |
| 0.012195 | 0.012231 | 0.012158 | 0.012231 | 0.012121 | 0.012235 | 0.012121 |
| 0.012085 | 0.012158 | 0.012231 | 0.012048 | 0.012048 | 0.012011 | 0.012121 |
| 0.012122 | 0.012121 | 0.012158 | 0.012121 | 0.012088 | 0.012231 | 0.012268 |
| 0.012132 | 0.011975 | 0.012121 | 0.012231 | 0.012048 | 0.012158 | 0.012268 |
| 0.012451 | 0.012178 | 0.012305 | 0.012305 | 0.012231 | 0.012341 | 0.012012 |
| 0.012198 | 0.012085 | 0.012048 | 0.012048 | 0.012085 | 0.011975 | 0.012085 |
| 0.012158 | 0.012195 | 0.012048 | 0.012048 | 0.012011 | 0.012011 | 0.012011 |
| 0.012159 | 0.012196 | 0.012231 | 0.012195 | 0.012783 | 0.012273 | 0.012177 |
| 0.012283 | 0.012198 | 0.012367 | 0.012158 | 0.012285 | 0.012266 | 0.012178 |
| 0.012786 | 0.012119 | 0.012257 | 0.012155 | 0.012489 | 0.012285 | 0.012359 |
| 0.012803 | 0.012304 | 0.012087 | 0.012085 | 0.012085 | 0.011792 | 0.012050 |
| 0.011975 | 0.012011 | 0.012121 | 0.012085 | 0.012086 | 0.011902 | 0.011938 |
| 0.012048 | 0.012011 | 0.012048 | 0.012048 | 0.011975 | 0.012011 | 0.011938 |
| 0.012011 | 0.012048 | 0.012011 | 0.011975 | 0.012085 | 0.012011 | 0.012048 |
| 0.012048 | 0.011975 | 0.012048 | 0.012085 | 0.011975 | 0.012195 | 0.012231 |
| 0.012085 | 0.012121 | 0.012121 | 0.012085 | 0.011975 | 0.012121 | 0.012085 |
| 0.011783 | 0.012012 | 0.011975 | 0.011985 | 0.012158 | 0.012121 | 0.012158 |
| 0.012158 | 0.012085 | 0.012011 | 0.012085 | 0.012195 | 0.012195 | 0.012121 |
| 0.012121 | 0.012195 | 0.012121 | 0.012158 | 0.012268 | 0.012268 | 0.012195 |
| 0.012011 | 0.012121 | 0.012158 | 0.012158 | 0.012122 | 0.012158 | 0.012121 |
| 0.012121 | 0.011975 | 0.011975 | 0.012305 | 0.012305 | 0.012268 | 0.012048 |
| 0.012195 | 0.012231 | 0.012085 | 0.012195 | 0.012085 | 0.012011 | 0.012048 |
| 0.012121 | 0.012048 | 0.011975 | 0.012231 | 0.012048 | 0.012195 | 0.012231 |
| 0.012048 | 0.012209 | 0.012195 | 0.011307 | 0.011117 | 0.012085 | 0.011164 |
| 0.012412 | 0.011527 | 0.011975 | 0.011462 | 0.011304 | 0.011315 | 0.011273 |
| 0.011264 | 0.011192 | 0.011339 | 0.011126 | 0.011222 | 0.011328 | 0.011438 |
| 0.012240 | 0.011381 | 0.012070 | 0.012058 | 0.012126 | 0.011902 | 0.012011 |

|          |          |          |          |          |          |          |
|----------|----------|----------|----------|----------|----------|----------|
| 0.011938 | 0.012122 | 0.012240 | 0.011947 | 0.011650 | 0.012407 | 0.012011 |
| 0.012085 | 0.012158 | 0.012048 | 0.012121 | 0.011975 | 0.011902 | 0.011938 |
| 0.012048 | 0.012048 | 0.012011 | 0.012011 | 0.012011 | 0.012011 | 0.012121 |
| 0.011917 | 0.011474 | 0.012086 | 0.012097 | 0.012280 | 0.012124 | 0.012203 |
| 0.012239 | 0.012085 | 0.011295 | 0.011289 | 0.012085 | 0.012268 | 0.012197 |
| 0.012011 | 0.012121 | 0.012378 | 0.012305 | 0.012231 | 0.012305 | 0.012231 |
| 0.012121 | 0.012231 | 0.012195 | 0.012085 | 0.012378 | 0.012231 | 0.012341 |
| 0.012415 | 0.012145 | 0.012065 | 0.012154 | 0.012048 | 0.012268 | 0.012231 |
| 0.012234 | 0.012231 | 0.012231 | 0.012231 | 0.012478 | 0.012451 | 0.012083 |
| 0.011945 | 0.011968 | 0.012062 | 0.012023 | 0.012030 | 0.012045 | 0.011986 |
| 0.012106 | 0.012107 | 0.012254 | 0.012204 | 0.012085 | 0.012133 | 0.012048 |
| 0.012011 | 0.011938 | 0.012085 | 0.012011 | 0.011902 | 0.011865 | 0.011792 |
| 0.011902 | 0.011975 | 0.012011 | 0.012011 | 0.012048 | 0.012048 | 0.012049 |
| 0.012123 | 0.012085 | 0.012085 | 0.012126 | 0.011902 | 0.012011 | 0.011938 |
| 0.012122 | 0.012240 | 0.011947 | 0.011650 | 0.012407 | 0.012011 | 0.012268 |
| 0.012231 | 0.012231 | 0.012018 | 0.012232 | 0.012194 | 0.012174 | 0.012087 |
| 0.012107 | 0.012601 | 0.012403 | 0.012135 | 0.012012 | 0.012231 | 0.012048 |
| 0.012195 | 0.012121 | 0.012011 | 0.012089 | 0.012231 | 0.012203 | 0.012121 |
| 0.012011 | 0.011942 | 0.012085 | 0.012011 | 0.011939 | 0.011947 | 0.012231 |
| 0.012121 | 0.012048 | 0.012048 | 0.012121 | 0.012048 | 0.012011 | 0.011902 |
| 0.012085 | 0.012121 | 0.012121 | 0.012048 | 0.012121 | 0.012268 | 0.011938 |
| 0.012048 | 0.012121 | 0.012048 | 0.012048 | 0.012048 | 0.012121 | 0.011360 |
| 0.011566 | 0.011230 | 0.011211 | 0.011262 | 0.011305 | 0.011949 | 0.011186 |
| 0.011165 | 0.011938 | 0.012048 | 0.012170 | 0.012011 | 0.012158 | 0.012305 |
| 0.012196 | 0.012239 | 0.012195 | 0.012125 | 0.012085 | 0.013002 | 0.012195 |
| 0.012856 | 0.012672 | 0.012860 | 0.013041 | 0.012085 | 0.012011 | 0.012158 |
| 0.012820 | 0.012342 | 0.012085 | 0.012012 | 0.012085 | 0.012085 | 0.011982 |
| 0.011938 | 0.011939 | 0.012011 | 0.011975 | 0.012232 | 0.012378 | 0.012305 |
| 0.012231 | 0.012341 | 0.012378 | 0.012196 | 0.012783 | 0.012868 | 0.012931 |
| 0.012930 | 0.012930 | 0.012856 | 0.012856 | 0.012893 | 0.012158 | 0.012378 |
| 0.012415 | 0.012966 | 0.012462 | 0.012415 | 0.012232 | 0.011983 | 0.011902 |
| 0.011865 | 0.011865 | 0.012268 | 0.012417 | 0.012440 | 0.012085 | 0.011866 |
| S106     | 0.011620 | 0.011620 | 0.011671 | 0.011620 | 0.011620 | 0.011671 |
| 0.011419 | 0.011317 | 0.011620 | 0.011467 | 0.011467 | 0.011467 | 0.011416 |
| 0.011365 | 0.011670 | 0.011365 | 0.011416 | 0.011467 | 0.011467 | 0.011467 |
| 0.011467 | 0.011467 | 0.011213 | 0.011417 | 0.011467 | 0.011416 | 0.011419 |
| 0.011416 | 0.011518 | 0.011365 | 0.011213 | 0.011467 | 0.011467 | 0.011365 |
| 0.011518 | 0.011569 | 0.011518 | 0.011569 | 0.011569 | 0.011518 | 0.011772 |
| 0.011314 | 0.011518 | 0.011569 | 0.011416 | 0.011518 | 0.011721 | 0.011620 |
| 0.011569 | 0.011670 | 0.011467 | 0.011467 | 0.011518 | 0.011670 | 0.011518 |
| 0.011467 | 0.011518 | 0.011569 | 0.011670 | 0.011467 | 0.011365 | 0.011569 |
| 0.011518 | 0.011467 | 0.011518 | 0.011772 | 0.011416 | 0.011569 | 0.011518 |
| 0.011518 | 0.011518 | 0.011620 | 0.011670 | 0.011467 | 0.011467 | 0.011467 |
| 0.011467 | 0.011467 | 0.011416 | 0.011416 | 0.011416 | 0.011467 | 0.011670 |
| 0.011518 | 0.011467 | 0.011569 | 0.011365 | 0.011467 | 0.011416 | 0.011416 |
| 0.011721 | 0.011620 | 0.011518 | 0.011620 | 0.011569 | 0.011721 | 0.011518 |
| 0.011636 | 0.011479 | 0.011772 | 0.011427 | 0.011416 | 0.011488 | 0.011270 |
| 0.011264 | 0.000000 | 0.011427 | 0.011619 | 0.011518 | 0.011467 | 0.011518 |
| 0.011518 | 0.011467 | 0.011620 | 0.011518 | 0.011671 | 0.011518 | 0.011467 |
| 0.011416 | 0.011467 | 0.011721 | 0.011721 | 0.011569 | 0.011569 | 0.011467 |
| 0.011416 | 0.011365 | 0.011467 | 0.011365 | 0.011365 | 0.011213 | 0.011213 |
| 0.011314 | 0.011314 | 0.011416 | 0.011416 | 0.011416 | 0.011416 | 0.011417 |
| 0.011417 | 0.011518 | 0.011518 | 0.011376 | 0.011432 | 0.011433 | 0.011467 |
| 0.011518 | 0.011467 | 0.011519 | 0.011518 | 0.011370 | 0.011474 | 0.011521 |
| 0.011167 | 0.011528 | 0.011520 | 0.011467 | 0.011365 | 0.011518 | 0.011416 |
| 0.011518 | 0.011467 | 0.011467 | 0.011569 | 0.011518 | 0.011874 | 0.011620 |
| 0.011416 | 0.011518 | 0.011467 | 0.011518 | 0.011416 | 0.011264 | 0.011365 |
| 0.011467 | 0.011467 | 0.011416 | 0.011467 | 0.011467 | 0.011467 | 0.011569 |
| 0.011467 | 0.011620 | 0.011518 | 0.011365 | 0.011569 | 0.011620 | 0.011570 |
| 0.011620 | 0.011518 | 0.011365 | 0.011365 | 0.011518 | 0.011365 | 0.011365 |

|          |          |          |          |          |          |          |
|----------|----------|----------|----------|----------|----------|----------|
| 0.011369 | 0.011620 | 0.011416 | 0.011620 | 0.011365 | 0.011467 | 0.011416 |
| 0.011569 | 0.011365 | 0.011518 | 0.011467 | 0.011467 | 0.011365 | 0.011416 |
| 0.011518 | 0.011467 | 0.011467 | 0.011416 | 0.011467 | 0.011518 | 0.011721 |
| 0.011467 | 0.011365 | 0.011416 | 0.011619 | 0.011366 | 0.011467 | 0.011467 |
| 0.011468 | 0.011703 | 0.011517 | 0.011419 | 0.011522 | 0.011371 | 0.011580 |
| 0.011419 | 0.011266 | 0.011620 | 0.011772 | 0.011523 | 0.011721 | 0.011671 |
| 0.011721 | 0.011721 | 0.011656 | 0.011431 | 0.011507 | 0.011569 | 0.011626 |
| 0.011721 | 0.011570 | 0.011671 | 0.011724 | 0.011518 | 0.011772 | 0.012087 |
| 0.011572 | 0.011731 | 0.011729 | 0.011677 | 0.011824 | 0.011416 | 0.011622 |
| 0.011467 | 0.011467 | 0.011365 | 0.011365 | 0.011416 | 0.011518 | 0.011467 |
| 0.011467 | 0.011518 | 0.011416 | 0.011416 | 0.011416 | 0.011467 | 0.011416 |
| 0.011467 | 0.011569 | 0.011365 | 0.011365 | 0.011365 | 0.011467 | 0.011569 |
| 0.011518 | 0.011314 | 0.011569 | 0.011467 | 0.011467 | 0.011467 | 0.011467 |
| 0.011620 | 0.011518 | 0.011620 | 0.011416 | 0.011518 | 0.011518 | 0.011416 |
| 0.011416 | 0.011416 | 0.011518 | 0.011620 | 0.011416 | 0.011365 | 0.011416 |
| 0.011467 | 0.011518 | 0.011518 | 0.011416 | 0.011365 | 0.011416 | 0.011569 |
| 0.011416 | 0.011518 | 0.011365 | 0.011365 | 0.011569 | 0.000000 | 0.011467 |
| 0.011417 | 0.011569 | 0.011468 | 0.011365 | 0.011264 | 0.011365 | 0.011620 |
| 0.011479 | 0.011467 | 0.011365 | 0.011569 | 0.011518 | 0.011467 | 0.011569 |
| 0.011467 | 0.011670 | 0.011365 | 0.011314 | 0.011365 | 0.011365 | 0.011365 |
| 0.011518 | 0.011264 | 0.011518 | 0.011620 | 0.011365 | 0.011365 | 0.011365 |
| 0.011365 | 0.011467 | 0.011467 | 0.011416 | 0.011518 | 0.011670 | 0.011620 |
| 0.011620 | 0.011569 | 0.011467 | 0.011620 | 0.011569 | 0.011467 | 0.011416 |
| 0.011416 | 0.011467 | 0.011518 | 0.011314 | 0.011365 | 0.011569 | 0.011416 |
| 0.011365 | 0.011467 | 0.011518 | 0.011518 | 0.011467 | 0.011416 | 0.011518 |
| 0.011467 | 0.011467 | 0.011518 | 0.011467 | 0.011569 | 0.011670 | 0.011416 |
| 0.011518 | 0.011416 | 0.011416 | 0.019854 | 0.011281 | 0.011575 | 0.011365 |
| 0.011416 | 0.011416 | 0.011565 | 0.011388 | 0.011461 | 0.011518 | 0.011574 |
| 0.011492 | 0.011213 | 0.011379 | 0.011448 | 0.011379 | 0.011316 | 0.011512 |
| 0.011215 | 0.011264 | 0.011213 | 0.011248 | 0.011569 | 0.011620 | 0.011521 |
| 0.011476 | 0.011670 | 0.011620 | 0.011467 | 0.011518 | 0.011518 | 0.011467 |
| 0.011467 | 0.011365 | 0.011416 | 0.011569 | 0.011467 | 0.011467 | 0.011467 |
| 0.011467 | 0.011569 | 0.011365 | 0.011569 | 0.011620 | 0.011569 | 0.011467 |
| 0.011518 | 0.011416 | 0.011315 | 0.011315 | 0.011569 | 0.011671 | 0.011670 |
| 0.011365 | 0.011365 | 0.011416 | 0.011467 | 0.011365 | 0.011620 | 0.011620 |
| 0.011467 | 0.011620 | 0.011619 | 0.011518 | 0.011416 | 0.011520 | 0.011467 |
| 0.011518 | 0.011518 | 0.011619 | 0.011518 | 0.011518 | 0.011365 | 0.011518 |
| 0.011518 | 0.011518 | 0.011569 | 0.011467 | 0.011519 | 0.011670 | 0.011569 |
| 0.011575 | 0.011365 | 0.011518 | 0.011670 | 0.011518 | 0.011620 | 0.011721 |
| 0.011772 | 0.011523 | 0.011721 | 0.011671 | 0.011721 | 0.011721 | 0.011416 |
| 0.011724 | 0.011569 | 0.011467 | 0.011467 | 0.011569 | 0.011365 | 0.011569 |
| 0.011620 | 0.011569 | 0.011467 | 0.011518 | 0.011416 | 0.011315 | 0.011315 |
| 0.011569 | 0.011671 | 0.011569 | 0.011569 | 0.012130 | 0.011546 | 0.011434 |
| 0.011689 | 0.011535 | 0.011702 | 0.011584 | 0.011647 | 0.011687 | 0.011581 |
| 0.012101 | 0.011480 | 0.011682 | 0.011480 | 0.011843 | 0.011727 | 0.011779 |
| 0.012147 | 0.011582 | 0.011417 | 0.011467 | 0.011467 | 0.011213 | 0.011417 |
| 0.011416 | 0.011365 | 0.011518 | 0.011467 | 0.011417 | 0.011264 | 0.011314 |
| 0.011518 | 0.011416 | 0.011467 | 0.011467 | 0.011365 | 0.011467 | 0.011365 |
| 0.011467 | 0.011467 | 0.011365 | 0.011416 | 0.011518 | 0.011467 | 0.011518 |
| 0.011467 | 0.011416 | 0.011416 | 0.011467 | 0.011365 | 0.011569 | 0.011670 |
| 0.011467 | 0.011518 | 0.011518 | 0.011518 | 0.011365 | 0.011467 | 0.011518 |
| 0.011219 | 0.011416 | 0.011416 | 0.011421 | 0.011569 | 0.011569 | 0.011569 |
| 0.011620 | 0.011467 | 0.011416 | 0.011467 | 0.011721 | 0.011569 | 0.011467 |
| 0.011518 | 0.011671 | 0.011467 | 0.011569 | 0.011620 | 0.011620 | 0.011670 |
| 0.011467 | 0.011518 | 0.011620 | 0.011416 | 0.011569 | 0.011569 | 0.011518 |
| 0.011467 | 0.011365 | 0.011365 | 0.011620 | 0.011721 | 0.011620 | 0.011467 |
| 0.011670 | 0.011671 | 0.011467 | 0.011670 | 0.011518 | 0.011467 | 0.011315 |
| 0.011518 | 0.011518 | 0.011365 | 0.011620 | 0.011467 | 0.011620 | 0.011467 |
| 0.011518 | 0.011316 | 0.011416 | 0.011322 | 0.011188 | 0.011416 | 0.011236 |
| 0.011356 | 0.011474 | 0.011365 | 0.011461 | 0.011355 | 0.011249 | 0.011307 |

|            |          |          |          |          |          |          |
|------------|----------|----------|----------|----------|----------|----------|
| 0.0111228  | 0.011214 | 0.011374 | 0.011203 | 0.011245 | 0.011438 | 0.011607 |
| 0.011636   | 0.011485 | 0.011525 | 0.011518 | 0.011572 | 0.011264 | 0.011365 |
| 0.011365   | 0.011518 | 0.011676 | 0.011266 | 0.011778 | 0.011704 | 0.011467 |
| 0.011416   | 0.011518 | 0.011467 | 0.011518 | 0.011416 | 0.011264 | 0.011365 |
| 0.011467   | 0.011467 | 0.011416 | 0.011467 | 0.011467 | 0.011467 | 0.011569 |
| 0.011475   | 0.011530 | 0.011569 | 0.011421 | 0.011730 | 0.011519 | 0.011572 |
| 0.011676   | 0.011416 | 0.011386 | 0.011374 | 0.011569 | 0.011772 | 0.011620 |
| 0.011467   | 0.011620 | 0.011925 | 0.011722 | 0.011569 | 0.011772 | 0.011467 |
| 0.011518   | 0.011620 | 0.011467 | 0.011467 | 0.011773 | 0.011467 | 0.011620 |
| 0.012027   | 0.011381 | 0.011371 | 0.011586 | 0.011467 | 0.011467 | 0.011620 |
| 0.011467   | 0.011670 | 0.011518 | 0.011518 | 0.011585 | 0.011823 | 0.011482 |
| 0.011369   | 0.011376 | 0.011524 | 0.011474 | 0.011476 | 0.011399 | 0.011318 |
| 0.011528   | 0.000000 | 0.011487 | 0.011515 | 0.011467 | 0.011473 | 0.011467 |
| 0.011416   | 0.011365 | 0.011467 | 0.011365 | 0.011365 | 0.011213 | 0.011213 |
| 0.011314   | 0.011314 | 0.011416 | 0.011416 | 0.011416 | 0.011416 | 0.011417 |
| 0.011417   | 0.011518 | 0.011518 | 0.011572 | 0.011264 | 0.011365 | 0.011365 |
| 0.011518   | 0.011676 | 0.011266 | 0.011778 | 0.011704 | 0.011467 | 0.011670 |
| 0.011620   | 0.011620 | 0.011418 | 0.011583 | 0.011634 | 0.011520 | 0.011533 |
| 0.011472   | 0.011909 | 0.011669 | 0.011574 | 0.011416 | 0.011620 | 0.011467 |
| 0.011620   | 0.011518 | 0.011365 | 0.011569 | 0.011620 | 0.011570 | 0.011518 |
| 0.011365   | 0.011365 | 0.011518 | 0.011365 | 0.011365 | 0.011369 | 0.011620 |
| 0.011467   | 0.011365 | 0.011416 | 0.011569 | 0.011467 | 0.011467 | 0.011314 |
| 0.011467   | 0.011569 | 0.011620 | 0.011467 | 0.011518 | 0.011721 | 0.011314 |
| 0.011518   | 0.011467 | 0.011467 | 0.011467 | 0.011467 | 0.011467 | 0.011428 |
| 0.011586   | 0.011224 | 0.011217 | 0.011273 | 0.011319 | 0.011267 | 0.011215 |
| 0.011170   | 0.011314 | 0.011467 | 0.011569 | 0.011416 | 0.011620 | 0.011670 |
| 0.011569   | 0.011625 | 0.011518 | 0.011926 | 0.011467 | 0.012486 | 0.011569 |
| 0.012231   | 0.012027 | 0.012286 | 0.012437 | 0.011365 | 0.011416 | 0.011569 |
| 0.012334   | 0.011671 | 0.011467 | 0.011416 | 0.011416 | 0.011416 | 0.011368 |
| 0.011314   | 0.011315 | 0.011365 | 0.011315 | 0.011722 | 0.011671 | 0.011772 |
| 0.011518   | 0.011620 | 0.011772 | 0.011518 | 0.012181 | 0.012138 | 0.012232 |
| 0.012283   | 0.012232 | 0.012232 | 0.012181 | 0.012232 | 0.011518 | 0.011721 |
| 0.011721   | 0.012231 | 0.011877 | 0.011569 | 0.011467 | 0.011162 | 0.011111 |
| 0.011162   | 0.011111 | 0.011722 | 0.011742 | 0.011886 | 0.011518 | 0.011162 |
| S107       | 0.011348 | 0.011348 | 0.011761 | 0.011678 | 0.011678 | 0.011761 |
| 0.011558   | 0.011475 | 0.011678 | 0.011184 | 0.011225 | 0.011184 | 0.011143 |
| 0.011184   | 0.011390 | 0.011184 | 0.011184 | 0.011184 | 0.011225 | 0.011102 |
| 0.011184   | 0.011225 | 0.011348 | 0.011143 | 0.011225 | 0.011143 | 0.011557 |
| 0.011472   | 0.011225 | 0.011102 | 0.011390 | 0.011266 | 0.011184 | 0.011143 |
| 0.011225   | 0.011390 | 0.011266 | 0.011266 | 0.011266 | 0.011266 | 0.011472 |
| 0.011143   | 0.011225 | 0.011266 | 0.011225 | 0.011348 | 0.011390 | 0.011307 |
| 0.011266   | 0.011431 | 0.011225 | 0.011637 | 0.011225 | 0.011431 | 0.011225 |
| 0.011225   | 0.011349 | 0.011307 | 0.011431 | 0.011637 | 0.011266 | 0.011472 |
| 0.011307</ |          |          |          |          |          |          |



|          |          |          |          |          |          |          |
|----------|----------|----------|----------|----------|----------|----------|
| 0.011225 | 0.011348 | 0.011225 | 0.011184 | 0.011267 | 0.011431 | 0.011392 |
| 0.011390 | 0.011307 | 0.011143 | 0.011102 | 0.011266 | 0.011143 | 0.011102 |
| 0.011144 | 0.011390 | 0.011184 | 0.011390 | 0.011102 | 0.011225 | 0.011184 |
| 0.011349 | 0.011184 | 0.011266 | 0.011184 | 0.011225 | 0.011102 | 0.011225 |
| 0.011266 | 0.011143 | 0.011225 | 0.011184 | 0.011225 | 0.011307 | 0.011390 |
| 0.011678 | 0.011513 | 0.011637 | 0.011307 | 0.011596 | 0.011184 | 0.011143 |
| 0.011267 | 0.011510 | 0.011346 | 0.011144 | 0.011684 | 0.011102 | 0.011253 |
| 0.011641 | 0.011518 | 0.011348 | 0.011555 | 0.011310 | 0.011472 | 0.011472 |
| 0.011390 | 0.011472 | 0.011407 | 0.011162 | 0.011110 | 0.011225 | 0.011351 |
| 0.011472 | 0.011308 | 0.011431 | 0.011474 | 0.011307 | 0.011554 | 0.011724 |
| 0.011350 | 0.011477 | 0.011476 | 0.011476 | 0.011679 | 0.011143 | 0.011308 |
| 0.011225 | 0.011184 | 0.011102 | 0.011102 | 0.011184 | 0.011225 | 0.011307 |
| 0.011225 | 0.011307 | 0.011184 | 0.011266 | 0.011225 | 0.011143 | 0.011225 |
| 0.011225 | 0.011678 | 0.011554 | 0.011596 | 0.011102 | 0.011184 | 0.011266 |
| 0.011266 | 0.011184 | 0.011307 | 0.011349 | 0.011184 | 0.011184 | 0.011184 |
| 0.011719 | 0.011307 | 0.011348 | 0.011143 | 0.011225 | 0.011431 | 0.011143 |
| 0.011143 | 0.011143 | 0.011184 | 0.011349 | 0.011184 | 0.011348 | 0.011472 |
| 0.011431 | 0.011225 | 0.011143 | 0.011143 | 0.011143 | 0.011225 | 0.011266 |
| 0.011143 | 0.011266 | 0.011102 | 0.011102 | 0.011307 | 0.011390 | 0.011184 |
| 0.011143 | 0.011307 | 0.011143 | 0.011102 | 0.011472 | 0.011102 | 0.011307 |
| 0.011313 | 0.011184 | 0.011513 | 0.011266 | 0.011390 | 0.011184 | 0.011266 |
| 0.011184 | 0.011431 | 0.011102 | 0.011307 | 0.011184 | 0.011184 | 0.011102 |
| 0.011307 | 0.011554 | 0.011225 | 0.011307 | 0.011102 | 0.011554 | 0.011184 |
| 0.011184 | 0.011102 | 0.011184 | 0.011307 | 0.011225 | 0.011348 | 0.011431 |
| 0.011390 | 0.011266 | 0.011266 | 0.011390 | 0.011348 | 0.011184 | 0.011143 |
| 0.011143 | 0.011184 | 0.011225 | 0.011143 | 0.011143 | 0.011307 | 0.011143 |
| 0.011184 | 0.011143 | 0.011266 | 0.011390 | 0.011266 | 0.011225 | 0.011225 |
| 0.011266 | 0.011184 | 0.011266 | 0.011143 | 0.011307 | 0.011390 | 0.011678 |
| 0.011225 | 0.011596 | 0.011225 | 0.018031 | 0.011193 | 0.011430 | 0.011555 |
| 0.011554 | 0.011555 | 0.011286 | 0.011246 | 0.011724 | 0.011596 | 0.011325 |
| 0.011456 | 0.011461 | 0.011103 | 0.011204 | 0.011192 | 0.011227 | 0.011207 |
| 0.011456 | 0.011390 | 0.011393 | 0.011132 | 0.011307 | 0.011348 | 0.011267 |
| 0.011228 | 0.011307 | 0.011348 | 0.011307 | 0.011266 | 0.011266 | 0.011266 |
| 0.011225 | 0.011184 | 0.011143 | 0.011307 | 0.011225 | 0.011184 | 0.011184 |
| 0.011184 | 0.011266 | 0.011143 | 0.011266 | 0.011348 | 0.011348 | 0.011184 |
| 0.011307 | 0.011266 | 0.011472 | 0.011472 | 0.011349 | 0.011390 | 0.011390 |
| 0.011102 | 0.011143 | 0.011143 | 0.011266 | 0.011143 | 0.011390 | 0.011390 |
| 0.011307 | 0.011348 | 0.011348 | 0.011348 | 0.011554 | 0.011350 | 0.011266 |
| 0.011225 | 0.011307 | 0.011431 | 0.011225 | 0.011225 | 0.011184 | 0.011266 |
| 0.011266 | 0.011266 | 0.011307 | 0.011266 | 0.011267 | 0.011348 | 0.011390 |
| 0.011310 | 0.011143 | 0.011184 | 0.011431 | 0.011225 | 0.011431 | 0.011431 |
| 0.011555 | 0.011310 | 0.011472 | 0.011472 | 0.011390 | 0.011472 | 0.011184 |
| 0.011391 | 0.011266 | 0.011184 | 0.011184 | 0.011266 | 0.011143 | 0.011266 |
| 0.011348 | 0.011348 | 0.011184 | 0.011307 | 0.011266 | 0.011472 | 0.011472 |
| 0.011349 | 0.011390 | 0.011348 | 0.011349 | 0.012009 | 0.011363 | 0.011276 |
| 0.011443 | 0.011354 | 0.011448 | 0.011316 | 0.011400 | 0.011440 | 0.011310 |
| 0.011942 | 0.011272 | 0.011395 | 0.011313 | 0.011607 | 0.011434 | 0.011517 |
| 0.011979 | 0.011338 | 0.011184 | 0.011225 | 0.011184 | 0.011348 | 0.011143 |
| 0.011143 | 0.011184 | 0.011266 | 0.011225 | 0.011184 | 0.011390 | 0.011431 |
| 0.011225 | 0.011102 | 0.011225 | 0.011225 | 0.011143 | 0.011184 | 0.011102 |
| 0.011266 | 0.011307 | 0.011184 | 0.011143 | 0.011266 | 0.011184 | 0.011225 |
| 0.011225 | 0.011143 | 0.011225 | 0.011266 | 0.011143 | 0.011390 | 0.011431 |
| 0.011266 | 0.011390 | 0.011307 | 0.011266 | 0.011143 | 0.011637 | 0.011225 |
| 0.011318 | 0.011184 | 0.011472 | 0.011477 | 0.011307 | 0.011266 | 0.011307 |
| 0.011349 | 0.011266 | 0.011184 | 0.011266 | 0.011390 | 0.011348 | 0.011266 |
| 0.011266 | 0.011349 | 0.011637 | 0.011266 | 0.011472 | 0.011472 | 0.011348 |
| 0.011184 | 0.011266 | 0.011349 | 0.011596 | 0.011266 | 0.011307 | 0.011266 |
| 0.011266 | 0.011225 | 0.011225 | 0.011513 | 0.011431 | 0.011513 | 0.011225 |
| 0.011349 | 0.011390 | 0.011266 | 0.011349 | 0.011225 | 0.011184 | 0.011513 |
| 0.011307 | 0.011225 | 0.011225 | 0.011348 | 0.011225 | 0.011348 | 0.011637 |

|          |          |          |          |          |          |          |
|----------|----------|----------|----------|----------|----------|----------|
| 0.011225 | 0.011599 | 0.011719 | 0.011448 | 0.011173 | 0.011307 | 0.011220 |
| 0.011190 | 0.011685 | 0.011102 | 0.011381 | 0.011161 | 0.011322 | 0.011330 |
| 0.011417 | 0.011127 | 0.011286 | 0.011128 | 0.011170 | 0.011328 | 0.011280 |
| 0.011358 | 0.011230 | 0.011307 | 0.011185 | 0.011308 | 0.011390 | 0.011513 |
| 0.011472 | 0.011390 | 0.011475 | 0.011435 | 0.011516 | 0.011582 | 0.011143 |
| 0.011596 | 0.011431 | 0.011225 | 0.011390 | 0.011143 | 0.011390 | 0.011102 |
| 0.011184 | 0.011184 | 0.011184 | 0.011184 | 0.011184 | 0.011184 | 0.011307 |
| 0.011185 | 0.011230 | 0.011184 | 0.011227 | 0.011435 | 0.011308 | 0.011309 |
| 0.011351 | 0.011184 | 0.011104 | 0.011103 | 0.011266 | 0.011431 | 0.011390 |
| 0.011184 | 0.011307 | 0.011596 | 0.011431 | 0.011390 | 0.011431 | 0.011348 |
| 0.011266 | 0.011431 | 0.011390 | 0.011266 | 0.011843 | 0.011348 | 0.011431 |
| 0.011637 | 0.011580 | 0.011144 | 0.011315 | 0.011225 | 0.011431 | 0.011348 |
| 0.011349 | 0.011390 | 0.011390 | 0.011390 | 0.011391 | 0.011513 | 0.011230 |
| 0.011102 | 0.011103 | 0.011227 | 0.011185 | 0.011270 | 0.000000 | 0.011476 |
| 0.011186 | 0.011372 | 0.000000 | 0.011241 | 0.011266 | 0.011310 | 0.011225 |
| 0.011184 | 0.011184 | 0.011266 | 0.011143 | 0.011472 | 0.011431 | 0.011348 |
| 0.011472 | 0.011554 | 0.011143 | 0.011143 | 0.011143 | 0.011143 | 0.011143 |
| 0.011184 | 0.011266 | 0.011266 | 0.011308 | 0.011390 | 0.011513 | 0.011472 |
| 0.011390 | 0.011475 | 0.011435 | 0.011516 | 0.011582 | 0.011143 | 0.011431 |
| 0.011348 | 0.011348 | 0.011143 | 0.011400 | 0.011359 | 0.011269 | 0.011232 |
| 0.011271 | 0.011624 | 0.011428 | 0.011310 | 0.011184 | 0.011390 | 0.011225 |
| 0.011348 | 0.011225 | 0.011184 | 0.011267 | 0.011431 | 0.011392 | 0.011307 |
| 0.011143 | 0.011102 | 0.011266 | 0.011143 | 0.011102 | 0.011144 | 0.011390 |
| 0.011225 | 0.011184 | 0.011143 | 0.011307 | 0.011225 | 0.011184 | 0.011390 |
| 0.011266 | 0.011266 | 0.011307 | 0.011225 | 0.011307 | 0.011472 | 0.011143 |
| 0.011225 | 0.011637 | 0.011225 | 0.011225 | 0.011184 | 0.011637 | 0.011148 |
| 0.011622 | 0.011147 | 0.011215 | 0.011398 | 0.011440 | 0.011390 | 0.011104 |
| 0.011169 | 0.011431 | 0.011554 | 0.011685 | 0.011513 | 0.011678 | 0.011843 |
| 0.011720 | 0.011724 | 0.011678 | 0.011926 | 0.011554 | 0.012586 | 0.011719 |
| 0.012339 | 0.012173 | 0.012425 | 0.012546 | 0.011513 | 0.011266 | 0.011678 |
| 0.012050 | 0.011843 | 0.011596 | 0.011514 | 0.011554 | 0.011554 | 0.011475 |
| 0.011431 | 0.011431 | 0.011472 | 0.011431 | 0.011761 | 0.011761 | 0.011843 |
| 0.011678 | 0.011761 | 0.011884 | 0.011678 | 0.012009 | 0.012016 | 0.012009 |
| 0.012091 | 0.012092 | 0.012050 | 0.012050 | 0.012092 | 0.011307 | 0.011596 |
| 0.011596 | 0.012215 | 0.011640 | 0.011843 | 0.011678 | 0.011473 | 0.011390 |
| 0.011348 | 0.011348 | 0.011761 | 0.011705 | 0.011852 | 0.011596 | 0.011348 |
| S108     | 0.011899 | 0.011899 | 0.012236 | 0.012000 | 0.012000 | 0.012067 |
| 0.011909 | 0.011841 | 0.012067 | 0.011497 | 0.011563 | 0.011531 | 0.011496 |
| 0.011530 | 0.011698 | 0.011496 | 0.011463 | 0.011597 | 0.011564 | 0.011530 |
| 0.011429 | 0.011530 | 0.011631 | 0.011497 | 0.011530 | 0.011530 | 0.011875 |
| 0.011765 | 0.011530 | 0.011429 | 0.011664 | 0.011597 | 0.011564 | 0.011597 |
| 0.011564 | 0.011664 | 0.011564 | 0.011564 | 0.011530 | 0.011564 | 0.011731 |
| 0.011496 | 0.011564 | 0.011530 | 0.011530 | 0.011631 | 0.011530 | 0.011597 |
| 0.011564 | 0.011664 | 0.011631 | 0.011899 | 0.011496 | 0.011832 | 0.011496 |
| 0.011530 | 0.011631 | 0.011698 | 0.011832 | 0.011933 | 0.011631 | 0.011731 |
| 0.011597 | 0.011664 | 0.011564 | 0.011799 | 0.012034 | 0.011564 | 0.011631 |
| 0.011530 | 0.011631 | 0.011597 | 0.011664 | 0.011597 | 0.011597 | 0.011597 |
| 0.011496 | 0.011530 | 0.011496 | 0.011597 | 0.011563 | 0.011599 | 0.011664 |
| 0.011597 | 0.011564 | 0.011631 | 0.011530 | 0.011664 | 0.011496 | 0.011564 |
| 0.011731 | 0.011664 | 0.011899 | 0.011732 | 0.011564 | 0.011799 | 0.011563 |
| 0.011728 | 0.011957 | 0.011777 | 0.011451 | 0.011433 | 0.011575 | 0.011611 |
| 0.012268 | 0.011619 | 0.011431 | 0.000000 | 0.011597 | 0.011597 | 0.011698 |
| 0.011631 | 0.011597 | 0.011664 | 0.011564 | 0.011664 | 0.011597 | 0.011597 |
| 0.011563 | 0.011664 | 0.011866 | 0.011731 | 0.011631 | 0.011597 | 0.011530 |
| 0.011497 | 0.011497 | 0.011564 | 0.011530 | 0.011732 | 0.011698 | 0.011631 |
| 0.011732 | 0.011799 | 0.011530 | 0.011530 | 0.011564 | 0.011564 | 0.011567 |
| 0.011635 | 0.011564 | 0.011564 | 0.011456 | 0.011494 | 0.011481 | 0.011564 |
| 0.011568 | 0.011507 | 0.011540 | 0.011543 | 0.011468 | 0.011505 | 0.011533 |
| 0.011780 | 0.011577 | 0.011577 | 0.011497 | 0.011475 | 0.011632 | 0.011598 |
| 0.011666 | 0.011599 | 0.011598 | 0.011698 | 0.011631 | 0.011933 | 0.011799 |

|          |          |          |           |          |          |          |
|----------|----------|----------|-----------|----------|----------|----------|
| 0.011832 | 0.011698 | 0.011564 | 0.011665  | 0.011463 | 0.011698 | 0.011497 |
| 0.011564 | 0.011564 | 0.011530 | 0.011496  | 0.011530 | 0.011497 | 0.011597 |
| 0.011564 | 0.011665 | 0.011597 | 0.011497  | 0.011599 | 0.011698 | 0.011702 |
| 0.011698 | 0.011598 | 0.011497 | 0.011431  | 0.011564 | 0.011497 | 0.011430 |
| 0.011536 | 0.011698 | 0.011497 | 0.011698  | 0.011463 | 0.011564 | 0.011530 |
| 0.011631 | 0.011530 | 0.011564 | 0.011530  | 0.011564 | 0.011429 | 0.011564 |
| 0.011597 | 0.011530 | 0.011597 | 0.011530  | 0.011564 | 0.011597 | 0.011833 |
| 0.011933 | 0.011866 | 0.011933 | 0.011633  | 0.011934 | 0.011564 | 0.011530 |
| 0.011567 | 0.011869 | 0.011609 | 0.011437  | 0.011942 | 0.011435 | 0.011493 |
| 0.011943 | 0.011842 | 0.011530 | 0.011933  | 0.011641 | 0.011597 | 0.011765 |
| 0.011631 | 0.011664 | 0.011735 | 0.011349  | 0.011647 | 0.011597 | 0.011669 |
| 0.011765 | 0.011667 | 0.011669 | 0.011872  | 0.011799 | 0.011866 | 0.011975 |
| 0.011703 | 0.011875 | 0.011737 | 0.011703  | 0.011969 | 0.011463 | 0.011667 |
| 0.011631 | 0.011564 | 0.011463 | 0.011463  | 0.011530 | 0.011530 | 0.011597 |
| 0.011530 | 0.011597 | 0.011496 | 0.011597  | 0.011530 | 0.011530 | 0.011530 |
| 0.011530 | 0.011967 | 0.011866 | 0.011899  | 0.011429 | 0.011530 | 0.011564 |
| 0.011564 | 0.011530 | 0.011597 | 0.011631  | 0.011496 | 0.011496 | 0.011496 |
| 0.012034 | 0.011664 | 0.011664 | 0.011463  | 0.011563 | 0.011664 | 0.011496 |
| 0.011496 | 0.011563 | 0.011530 | 0.011698  | 0.011496 | 0.011631 | 0.011765 |
| 0.011698 | 0.011530 | 0.011530 | 0.011463  | 0.011463 | 0.011631 | 0.011564 |
| 0.011463 | 0.011563 | 0.011429 | 0.011463  | 0.011597 | 0.011732 | 0.011497 |
| 0.011463 | 0.011597 | 0.011531 | 0.011429  | 0.011765 | 0.011429 | 0.011597 |
| 0.011676 | 0.011496 | 0.011799 | 0.011631  | 0.011664 | 0.011530 | 0.011564 |
| 0.011496 | 0.011832 | 0.011429 | 0.011698  | 0.011496 | 0.011496 | 0.011429 |
| 0.011664 | 0.011866 | 0.011564 | 0.011631  | 0.011463 | 0.011866 | 0.011496 |
| 0.011496 | 0.011496 | 0.011530 | 0.011631  | 0.011530 | 0.011631 | 0.011698 |
| 0.011698 | 0.011664 | 0.011563 | 0.011664  | 0.011631 | 0.011496 | 0.011463 |
| 0.011496 | 0.011496 | 0.011564 | 0.011496  | 0.011463 | 0.011631 | 0.011496 |
| 0.011530 | 0.011530 | 0.011664 | 0.011698  | 0.011564 | 0.011530 | 0.011530 |
| 0.011597 | 0.011530 | 0.011631 | 0.011496  | 0.011631 | 0.011530 | 0.012034 |
| 0.011530 | 0.011933 | 0.011543 | 0.0117936 | 0.011257 | 0.011611 | 0.011897 |
| 0.011856 | 0.011904 | 0.011532 | 0.011524  | 0.011884 | 0.011923 | 0.011485 |
| 0.011629 | 0.011671 | 0.011450 | 0.011479  | 0.011529 | 0.011504 | 0.011490 |
| 0.011670 | 0.011656 | 0.011653 | 0.011523  | 0.011664 | 0.011698 | 0.011703 |
| 0.011575 | 0.011665 | 0.011597 | 0.011631  | 0.011597 | 0.011598 | 0.011564 |
| 0.011530 | 0.011530 | 0.011362 | 0.011597  | 0.011564 | 0.011497 | 0.011530 |
| 0.011530 | 0.011597 | 0.011497 | 0.011597  | 0.011631 | 0.011665 | 0.011564 |
| 0.011597 | 0.011564 | 0.011900 | 0.011900  | 0.011631 | 0.011598 | 0.011698 |
| 0.011463 | 0.011463 | 0.011497 | 0.011597  | 0.011463 | 0.011698 | 0.011698 |
| 0.011530 | 0.011530 | 0.011664 | 0.011564  | 0.011933 | 0.011565 | 0.011597 |
| 0.011396 | 0.011665 | 0.011698 | 0.011530  | 0.011597 | 0.011564 | 0.011463 |
| 0.011195 | 0.011195 | 0.011228 | 0.011665  | 0.011565 | 0.011765 | 0.011732 |
| 0.011602 | 0.011497 | 0.011597 | 0.011698  | 0.011597 | 0.011732 | 0.011765 |
| 0.011933 | 0.011641 | 0.011597 | 0.011765  | 0.011631 | 0.011664 | 0.011497 |
| 0.011532 | 0.011564 | 0.011530 | 0.011530  | 0.011597 | 0.011497 | 0.011597 |
| 0.011631 | 0.011665 | 0.011564 | 0.011597  | 0.011564 | 0.011900 | 0.011900 |
| 0.011631 | 0.011598 | 0.011731 | 0.011664  | 0.012305 | 0.011560 | 0.011658 |
| 0.011693 | 0.011546 | 0.011798 | 0.011684  | 0.011655 | 0.011715 | 0.011543 |
| 0.012262 | 0.011579 | 0.011711 | 0.011648  | 0.011921 | 0.011774 | 0.011877 |
| 0.012284 | 0.011776 | 0.011838 | 0.011899  | 0.011765 | 0.011765 | 0.011804 |
| 0.011463 | 0.011631 | 0.011765 | 0.011731  | 0.011736 | 0.011731 | 0.011700 |
| 0.011563 | 0.011496 | 0.011530 | 0.011564  | 0.011463 | 0.011530 | 0.011429 |
| 0.011564 | 0.011597 | 0.011496 | 0.011463  | 0.011564 | 0.011496 | 0.011530 |
| 0.011463 | 0.011463 | 0.011530 | 0.011564  | 0.011463 | 0.011664 | 0.011698 |
| 0.011597 | 0.011664 | 0.011597 | 0.011597  | 0.011530 | 0.011933 | 0.011564 |
| 0.011617 | 0.011530 | 0.011766 | 0.011773  | 0.011631 | 0.011631 | 0.011631 |
| 0.011631 | 0.011564 | 0.011530 | 0.011564  | 0.011664 | 0.011664 | 0.011597 |
| 0.011597 | 0.011731 | 0.011899 | 0.011631  | 0.011832 | 0.011832 | 0.011698 |
| 0.011530 | 0.011597 | 0.011631 | 0.012034  | 0.011598 | 0.011631 | 0.011597 |
| 0.011429 | 0.011563 | 0.011563 | 0.011866  | 0.011799 | 0.011832 | 0.011564 |

|          |          |          |          |          |          |          |
|----------|----------|----------|----------|----------|----------|----------|
| 0.011664 | 0.011731 | 0.011564 | 0.011664 | 0.011631 | 0.011496 | 0.011832 |
| 0.011597 | 0.011564 | 0.011563 | 0.011731 | 0.011564 | 0.011664 | 0.011900 |
| 0.011597 | 0.011977 | 0.011967 | 0.011710 | 0.011399 | 0.011672 | 0.011473 |
| 0.011390 | 0.011917 | 0.011482 | 0.011641 | 0.011499 | 0.011518 | 0.011538 |
| 0.011672 | 0.011258 | 0.011450 | 0.011258 | 0.011437 | 0.011462 | 0.011628 |
| 0.011625 | 0.011532 | 0.011659 | 0.011518 | 0.011599 | 0.011732 | 0.011799 |
| 0.011799 | 0.011665 | 0.011736 | 0.011772 | 0.011908 | 0.011873 | 0.011597 |
| 0.011832 | 0.011698 | 0.011564 | 0.011665 | 0.011463 | 0.011698 | 0.011497 |
| 0.011564 | 0.011564 | 0.011530 | 0.011496 | 0.011530 | 0.011497 | 0.011597 |
| 0.011409 | 0.011550 | 0.011505 | 0.011608 | 0.011744 | 0.011709 | 0.011572 |
| 0.011708 | 0.011632 | 0.011429 | 0.011348 | 0.011568 | 0.011738 | 0.011739 |
| 0.011531 | 0.011602 | 0.011835 | 0.011804 | 0.011531 | 0.011767 | 0.011698 |
| 0.011631 | 0.011698 | 0.011698 | 0.011597 | 0.012169 | 0.011564 | 0.011631 |
| 0.011866 | 0.011915 | 0.011572 | 0.011649 | 0.011530 | 0.011732 | 0.011698 |
| 0.011733 | 0.011765 | 0.011564 | 0.011564 | 0.011886 | 0.011899 | 0.011546 |
| 0.011432 | 0.011441 | 0.011537 | 0.011502 | 0.011607 | 0.011471 | 0.011774 |
| 0.011575 | 0.011762 | 0.011489 | 0.011622 | 0.011564 | 0.011642 | 0.011530 |
| 0.011497 | 0.011497 | 0.011564 | 0.011530 | 0.011732 | 0.011698 | 0.011631 |
| 0.011732 | 0.011799 | 0.011530 | 0.011530 | 0.011564 | 0.011564 | 0.011567 |
| 0.011635 | 0.011564 | 0.011564 | 0.011599 | 0.011732 | 0.011799 | 0.011799 |
| 0.011665 | 0.011736 | 0.011772 | 0.011908 | 0.011873 | 0.011597 | 0.011765 |
| 0.011698 | 0.011698 | 0.011500 | 0.011687 | 0.011616 | 0.011673 | 0.011516 |
| 0.011714 | 0.011880 | 0.011695 | 0.011604 | 0.011497 | 0.011698 | 0.011564 |
| 0.011665 | 0.011597 | 0.011497 | 0.011599 | 0.011698 | 0.011702 | 0.011598 |
| 0.011497 | 0.011431 | 0.011564 | 0.011497 | 0.011430 | 0.011536 | 0.011698 |
| 0.011530 | 0.011530 | 0.011362 | 0.011597 | 0.011564 | 0.011497 | 0.011698 |
| 0.011564 | 0.011597 | 0.011597 | 0.011530 | 0.011597 | 0.011832 | 0.011496 |
| 0.011530 | 0.011933 | 0.011530 | 0.011564 | 0.011530 | 0.011899 | 0.011403 |
| 0.011847 | 0.011485 | 0.011461 | 0.011704 | 0.011793 | 0.011706 | 0.011353 |
| 0.011375 | 0.011698 | 0.011731 | 0.011841 | 0.011700 | 0.011838 | 0.011968 |
| 0.011868 | 0.011906 | 0.011866 | 0.012188 | 0.011899 | 0.012775 | 0.011936 |
| 0.012607 | 0.012443 | 0.012577 | 0.012849 | 0.011899 | 0.011598 | 0.011833 |
| 0.012339 | 0.012207 | 0.011866 | 0.011765 | 0.011834 | 0.011834 | 0.011736 |
| 0.011698 | 0.011671 | 0.011765 | 0.011733 | 0.012103 | 0.012169 | 0.012170 |
| 0.012069 | 0.012170 | 0.012274 | 0.012041 | 0.012340 | 0.012347 | 0.012407 |
| 0.012408 | 0.012441 | 0.012391 | 0.012408 | 0.012409 | 0.011631 | 0.011934 |
| 0.012002 | 0.012505 | 0.012010 | 0.012236 | 0.012710 | 0.011773 | 0.011665 |
| 0.011597 | 0.011631 | 0.012102 | 0.012171 | 0.012257 | 0.011967 | 0.011633 |
| S109     | 0.011900 | 0.011900 | 0.012236 | 0.012000 | 0.012000 | 0.012068 |
| 0.011909 | 0.011841 | 0.012068 | 0.011497 | 0.011564 | 0.011531 | 0.011496 |
| 0.011530 | 0.011698 | 0.011496 | 0.011530 | 0.011597 | 0.011564 | 0.011530 |
| 0.011496 | 0.011530 | 0.011631 | 0.011497 | 0.011531 | 0.011463 | 0.011875 |
| 0.011765 | 0.011530 | 0.011429 | 0.011664 | 0.011597 | 0.011564 | 0.011597 |
| 0.011564 | 0.011664 | 0.011564 | 0.011564 | 0.011597 | 0.011564 | 0.011732 |
| 0.011496 | 0.011564 | 0.011597 | 0.011530 | 0.011631 | 0.011597 | 0.011597 |
| 0.011564 | 0.011732 | 0.011631 | 0.011900 | 0.011564 | 0.011832 | 0.011564 |
| 0.011530 | 0.011631 | 0.011698 | 0.011832 | 0.011933 | 0.011631 | 0.011732 |
| 0.011597 | 0.011664 | 0.011564 | 0.011799 | 0.012034 | 0.011564 | 0.011631 |
| 0.011530 | 0.011631 | 0.011597 | 0.011664 | 0.011597 | 0.011597 | 0.011597 |
| 0.011496 | 0.011530 | 0.011496 | 0.011597 | 0.011564 | 0.011599 | 0.011664 |
| 0.011597 | 0.011564 | 0.011631 | 0.011530 | 0.011664 | 0.011496 | 0.011564 |
| 0.011731 | 0.011664 | 0.011899 | 0.011732 | 0.011564 | 0.011799 | 0.011564 |
| 0.011728 | 0.011957 | 0.011664 | 0.011373 | 0.011359 | 0.011576 | 0.011572 |
| 0.012268 | 0.011518 | 0.011348 | 0.011597 | 0.000000 | 0.011597 | 0.011698 |
| 0.011631 | 0.011597 | 0.011664 | 0.011564 | 0.011664 | 0.011597 | 0.011597 |
| 0.011564 | 0.011664 | 0.011866 | 0.011731 | 0.011631 | 0.011597 | 0.011530 |
| 0.011497 | 0.011497 | 0.011564 | 0.011530 | 0.011732 | 0.011698 | 0.011631 |
| 0.011732 | 0.011799 | 0.011530 | 0.011530 | 0.011564 | 0.011564 | 0.011533 |
| 0.011601 | 0.011564 | 0.011564 | 0.011456 | 0.011422 | 0.011481 | 0.011564 |
| 0.011568 | 0.011507 | 0.011429 | 0.011543 | 0.011468 | 0.011506 | 0.011533 |

|          |          |          |          |          |          |          |
|----------|----------|----------|----------|----------|----------|----------|
| 0.011780 | 0.011577 | 0.011577 | 0.011497 | 0.011475 | 0.011632 | 0.011598 |
| 0.011666 | 0.011599 | 0.011598 | 0.011698 | 0.011631 | 0.012000 | 0.011799 |
| 0.011832 | 0.011698 | 0.011564 | 0.011665 | 0.011463 | 0.011698 | 0.011497 |
| 0.011564 | 0.011564 | 0.011530 | 0.011496 | 0.011530 | 0.011497 | 0.011597 |
| 0.011564 | 0.011665 | 0.011598 | 0.011497 | 0.011599 | 0.011698 | 0.011702 |
| 0.011698 | 0.011598 | 0.011497 | 0.011431 | 0.011564 | 0.011497 | 0.011430 |
| 0.011536 | 0.011698 | 0.011497 | 0.011698 | 0.011429 | 0.011564 | 0.011530 |
| 0.011631 | 0.011530 | 0.011564 | 0.011530 | 0.011564 | 0.011430 | 0.011564 |
| 0.011598 | 0.011530 | 0.011597 | 0.011530 | 0.011564 | 0.011597 | 0.011833 |
| 0.011933 | 0.011866 | 0.011934 | 0.011599 | 0.011934 | 0.011564 | 0.011530 |
| 0.011567 | 0.011869 | 0.011609 | 0.011403 | 0.011942 | 0.011435 | 0.011532 |
| 0.011943 | 0.011842 | 0.011530 | 0.011933 | 0.011641 | 0.011530 | 0.011765 |
| 0.011698 | 0.011597 | 0.011735 | 0.011431 | 0.011647 | 0.011597 | 0.011669 |
| 0.011765 | 0.011667 | 0.011669 | 0.011872 | 0.011799 | 0.011866 | 0.011975 |
| 0.011703 | 0.011875 | 0.011805 | 0.011737 | 0.012002 | 0.011463 | 0.011667 |
| 0.011631 | 0.011564 | 0.011463 | 0.011463 | 0.011530 | 0.011530 | 0.011597 |
| 0.011530 | 0.011597 | 0.011496 | 0.011597 | 0.011530 | 0.011530 | 0.011597 |
| 0.011530 | 0.011967 | 0.011866 | 0.011900 | 0.011429 | 0.011530 | 0.011564 |
| 0.011564 | 0.011530 | 0.011597 | 0.011631 | 0.011496 | 0.011496 | 0.011496 |
| 0.012034 | 0.011664 | 0.011664 | 0.011463 | 0.011564 | 0.011732 | 0.011496 |
| 0.011496 | 0.011564 | 0.011530 | 0.011698 | 0.011496 | 0.011631 | 0.011765 |
| 0.011698 | 0.011530 | 0.011530 | 0.011463 | 0.011463 | 0.011631 | 0.011564 |
| 0.011463 | 0.011564 | 0.011429 | 0.011463 | 0.011597 | 0.011732 | 0.011497 |
| 0.011463 | 0.011597 | 0.011531 | 0.011429 | 0.011765 | 0.011429 | 0.011597 |
| 0.011676 | 0.011497 | 0.011799 | 0.011631 | 0.011664 | 0.011530 | 0.011631 |
| 0.011496 | 0.011832 | 0.011429 | 0.011698 | 0.011496 | 0.011496 | 0.011429 |
| 0.011664 | 0.011833 | 0.011564 | 0.011631 | 0.011463 | 0.011866 | 0.011496 |
| 0.011496 | 0.011496 | 0.011530 | 0.011631 | 0.011530 | 0.011631 | 0.011698 |
| 0.011698 | 0.011664 | 0.011564 | 0.011665 | 0.011631 | 0.011496 | 0.011463 |
| 0.011496 | 0.011496 | 0.011564 | 0.011496 | 0.011463 | 0.011631 | 0.011496 |
| 0.011530 | 0.011530 | 0.011664 | 0.011698 | 0.011597 | 0.011530 | 0.011530 |
| 0.011597 | 0.011530 | 0.011631 | 0.011496 | 0.011631 | 0.011530 | 0.012034 |
| 0.011530 | 0.011933 | 0.011509 | 0.017936 | 0.011257 | 0.011672 | 0.011863 |
| 0.011822 | 0.011869 | 0.011479 | 0.011408 | 0.011774 | 0.011889 | 0.011485 |
| 0.011629 | 0.011610 | 0.011372 | 0.011521 | 0.011411 | 0.011406 | 0.011533 |
| 0.011529 | 0.011582 | 0.011579 | 0.011457 | 0.011664 | 0.011698 | 0.011703 |
| 0.011575 | 0.011665 | 0.011597 | 0.011631 | 0.011597 | 0.011598 | 0.011564 |
| 0.011530 | 0.011530 | 0.011362 | 0.011597 | 0.011564 | 0.011497 | 0.011530 |
| 0.011530 | 0.011597 | 0.011497 | 0.011598 | 0.011631 | 0.011665 | 0.011564 |
| 0.011597 | 0.011564 | 0.011900 | 0.011900 | 0.011631 | 0.011665 | 0.011698 |
| 0.011463 | 0.011463 | 0.011497 | 0.011598 | 0.011463 | 0.011698 | 0.011698 |
| 0.011463 | 0.011530 | 0.011597 | 0.011496 | 0.011934 | 0.011498 | 0.011597 |
| 0.011396 | 0.011665 | 0.011698 | 0.011530 | 0.011597 | 0.011564 | 0.011530 |
| 0.011463 | 0.011463 | 0.011497 | 0.011665 | 0.011565 | 0.011765 | 0.011732 |
| 0.011602 | 0.011497 | 0.011597 | 0.011698 | 0.011598 | 0.011732 | 0.011765 |
| 0.011933 | 0.011641 | 0.011530 | 0.011765 | 0.011698 | 0.011597 | 0.011497 |
| 0.011599 | 0.011564 | 0.011530 | 0.011530 | 0.011597 | 0.011497 | 0.011598 |
| 0.011631 | 0.011665 | 0.011564 | 0.011597 | 0.011564 | 0.011900 | 0.011900 |
| 0.011631 | 0.011665 | 0.011731 | 0.011664 | 0.012305 | 0.011489 | 0.011658 |
| 0.011728 | 0.011476 | 0.011798 | 0.011684 | 0.011655 | 0.011715 | 0.011474 |
| 0.012262 | 0.011579 | 0.011711 | 0.011648 | 0.011921 | 0.011774 | 0.011877 |
| 0.012284 | 0.011776 | 0.011804 | 0.011900 | 0.011765 | 0.011765 | 0.011770 |
| 0.011463 | 0.011631 | 0.011765 | 0.011731 | 0.011702 | 0.011731 | 0.011700 |
| 0.011564 | 0.011496 | 0.011530 | 0.011564 | 0.011463 | 0.011530 | 0.011429 |
| 0.011564 | 0.011597 | 0.011496 | 0.011463 | 0.011564 | 0.011496 | 0.011530 |
| 0.011530 | 0.011463 | 0.011530 | 0.011564 | 0.011463 | 0.011664 | 0.011698 |
| 0.011597 | 0.011664 | 0.011597 | 0.011597 | 0.011530 | 0.011933 | 0.011564 |
| 0.011617 | 0.011530 | 0.011766 | 0.011773 | 0.011631 | 0.011631 | 0.011631 |
| 0.011631 | 0.011564 | 0.011530 | 0.011564 | 0.011664 | 0.011664 | 0.011597 |
| 0.011597 | 0.011732 | 0.011899 | 0.011631 | 0.011832 | 0.011832 | 0.011698 |

|          |          |          |          |          |          |          |
|----------|----------|----------|----------|----------|----------|----------|
| 0.011530 | 0.011597 | 0.011631 | 0.012034 | 0.011598 | 0.011631 | 0.011597 |
| 0.011429 | 0.011564 | 0.011564 | 0.011866 | 0.011732 | 0.011832 | 0.011564 |
| 0.011664 | 0.011732 | 0.011597 | 0.011664 | 0.011631 | 0.011496 | 0.011832 |
| 0.011597 | 0.011564 | 0.011564 | 0.011732 | 0.011564 | 0.011664 | 0.011900 |
| 0.011597 | 0.011977 | 0.011967 | 0.011670 | 0.011342 | 0.011672 | 0.011421 |
| 0.011445 | 0.011878 | 0.011446 | 0.011551 | 0.011499 | 0.011569 | 0.011538 |
| 0.011519 | 0.011258 | 0.011505 | 0.011258 | 0.011384 | 0.011462 | 0.011547 |
| 0.011663 | 0.011454 | 0.011624 | 0.011553 | 0.011600 | 0.011732 | 0.011799 |
| 0.011799 | 0.011665 | 0.011770 | 0.011772 | 0.011908 | 0.011944 | 0.011597 |
| 0.011832 | 0.011698 | 0.011564 | 0.011665 | 0.011463 | 0.011698 | 0.011497 |
| 0.011564 | 0.011564 | 0.011530 | 0.011496 | 0.011530 | 0.011497 | 0.011597 |
| 0.011409 | 0.011550 | 0.011574 | 0.011608 | 0.011745 | 0.011709 | 0.011641 |
| 0.011708 | 0.011632 | 0.011356 | 0.011348 | 0.011568 | 0.011738 | 0.011739 |
| 0.011531 | 0.011602 | 0.011835 | 0.011804 | 0.011464 | 0.011767 | 0.011698 |
| 0.011631 | 0.011698 | 0.011698 | 0.011597 | 0.012169 | 0.011496 | 0.011564 |
| 0.011866 | 0.011879 | 0.011572 | 0.011649 | 0.011530 | 0.011732 | 0.011698 |
| 0.011733 | 0.011765 | 0.011496 | 0.011496 | 0.011925 | 0.011900 | 0.011546 |
| 0.011432 | 0.011441 | 0.011537 | 0.011502 | 0.011607 | 0.011471 | 0.011774 |
| 0.011575 | 0.011718 | 0.011489 | 0.011622 | 0.011565 | 0.011642 | 0.011530 |
| 0.011497 | 0.011497 | 0.011564 | 0.011530 | 0.011732 | 0.011698 | 0.011631 |
| 0.011732 | 0.011799 | 0.011530 | 0.011530 | 0.011564 | 0.011564 | 0.011533 |
| 0.011601 | 0.011564 | 0.011564 | 0.011600 | 0.011732 | 0.011799 | 0.011799 |
| 0.011665 | 0.011770 | 0.011772 | 0.011908 | 0.011944 | 0.011597 | 0.011765 |
| 0.011698 | 0.011698 | 0.011534 | 0.011687 | 0.011651 | 0.011639 | 0.011516 |
| 0.011715 | 0.011926 | 0.011653 | 0.011604 | 0.011497 | 0.011698 | 0.011564 |
| 0.011665 | 0.011598 | 0.011497 | 0.011599 | 0.011698 | 0.011702 | 0.011598 |
| 0.011497 | 0.011431 | 0.011564 | 0.011497 | 0.011430 | 0.011536 | 0.011698 |
| 0.011530 | 0.011530 | 0.011362 | 0.011597 | 0.011564 | 0.011497 | 0.011698 |
| 0.011564 | 0.011597 | 0.011597 | 0.011530 | 0.011597 | 0.011832 | 0.011496 |
| 0.011530 | 0.011933 | 0.011530 | 0.011564 | 0.011530 | 0.011900 | 0.011360 |
| 0.011735 | 0.011400 | 0.011311 | 0.011624 | 0.011712 | 0.011670 | 0.011353 |
| 0.011270 | 0.011698 | 0.011799 | 0.011909 | 0.011767 | 0.011872 | 0.012036 |
| 0.011935 | 0.011974 | 0.011933 | 0.012154 | 0.011899 | 0.012775 | 0.011936 |
| 0.012608 | 0.012443 | 0.012577 | 0.012849 | 0.011899 | 0.011598 | 0.011900 |
| 0.012339 | 0.012241 | 0.011866 | 0.011765 | 0.011834 | 0.011834 | 0.011737 |
| 0.011698 | 0.011671 | 0.011765 | 0.011733 | 0.012103 | 0.012169 | 0.012170 |
| 0.012070 | 0.012170 | 0.012274 | 0.012008 | 0.012340 | 0.012347 | 0.012407 |
| 0.012408 | 0.012442 | 0.012357 | 0.012408 | 0.012410 | 0.011631 | 0.011934 |
| 0.012002 | 0.012505 | 0.012010 | 0.012236 | 0.012710 | 0.011739 | 0.011665 |
| 0.011597 | 0.011631 | 0.012102 | 0.012212 | 0.012257 | 0.011967 | 0.011633 |
| S110     | 0.011698 | 0.011698 | 0.011967 | 0.011732 | 0.011732 | 0.011799 |
| 0.011637 | 0.011569 | 0.011799 | 0.011295 | 0.011362 | 0.011329 | 0.011295 |
| 0.011262 | 0.011496 | 0.011161 | 0.011329 | 0.011396 | 0.011362 | 0.011329 |
| 0.011295 | 0.011329 | 0.011362 | 0.011295 | 0.011329 | 0.011329 | 0.011603 |
| 0.011496 | 0.011329 | 0.011228 | 0.011396 | 0.011362 | 0.011362 | 0.011396 |
| 0.011362 | 0.011463 | 0.011362 | 0.011362 | 0.011396 | 0.011362 | 0.011530 |
| 0.011228 | 0.011362 | 0.011396 | 0.011329 | 0.011362 | 0.011463 | 0.011396 |
| 0.011362 | 0.011530 | 0.011430 | 0.011631 | 0.011362 | 0.011631 | 0.011362 |
| 0.011329 | 0.011362 | 0.011496 | 0.011631 | 0.011664 | 0.011362 | 0.011463 |
| 0.011396 | 0.011463 | 0.011362 | 0.011597 | 0.011765 | 0.011362 | 0.011429 |
| 0.011329 | 0.011429 | 0.011396 | 0.011463 | 0.011396 | 0.011396 | 0.011396 |
| 0.011295 | 0.011329 | 0.011295 | 0.011329 | 0.011362 | 0.011363 | 0.011463 |
| 0.011396 | 0.011362 | 0.011429 | 0.011329 | 0.011396 | 0.011295 | 0.011362 |
| 0.011530 | 0.011463 | 0.011698 | 0.011530 | 0.011362 | 0.011597 | 0.011362 |
| 0.011505 | 0.011658 | 0.011551 | 0.011255 | 0.011247 | 0.011355 | 0.011375 |
| 0.012011 | 0.011467 | 0.011266 | 0.011597 | 0.011597 | 0.000000 | 0.011429 |
| 0.011429 | 0.011396 | 0.011463 | 0.011362 | 0.011463 | 0.011262 | 0.011396 |
| 0.011362 | 0.011329 | 0.011664 | 0.011463 | 0.011429 | 0.011396 | 0.011329 |
| 0.011295 | 0.011228 | 0.011362 | 0.011329 | 0.011463 | 0.011430 | 0.011362 |
| 0.011463 | 0.011530 | 0.011329 | 0.011329 | 0.011362 | 0.011362 | 0.011364 |

|          |          |          |          |          |          |          |
|----------|----------|----------|----------|----------|----------|----------|
| 0.011432 | 0.011362 | 0.011362 | 0.011240 | 0.011313 | 0.011271 | 0.011363 |
| 0.011365 | 0.011301 | 0.011318 | 0.011336 | 0.011264 | 0.011300 | 0.011330 |
| 0.011528 | 0.011370 | 0.011405 | 0.011296 | 0.011302 | 0.011430 | 0.011329 |
| 0.011396 | 0.011397 | 0.011396 | 0.011496 | 0.011429 | 0.011799 | 0.011530 |
| 0.011564 | 0.011429 | 0.011362 | 0.011396 | 0.011262 | 0.011429 | 0.011295 |
| 0.011362 | 0.011362 | 0.011329 | 0.011295 | 0.011329 | 0.011295 | 0.011396 |
| 0.011362 | 0.011463 | 0.011396 | 0.011295 | 0.011397 | 0.011497 | 0.011499 |
| 0.011497 | 0.011396 | 0.011295 | 0.011229 | 0.011362 | 0.011295 | 0.011228 |
| 0.011332 | 0.011497 | 0.011295 | 0.011497 | 0.011262 | 0.011362 | 0.011329 |
| 0.011429 | 0.011329 | 0.011362 | 0.011329 | 0.011362 | 0.011228 | 0.011362 |
| 0.011396 | 0.011329 | 0.011396 | 0.011329 | 0.011362 | 0.011396 | 0.011631 |
| 0.011664 | 0.011597 | 0.011665 | 0.011465 | 0.011665 | 0.011362 | 0.011329 |
| 0.000000 | 0.011545 | 0.011472 | 0.011232 | 0.011671 | 0.011197 | 0.011336 |
| 0.011671 | 0.011570 | 0.011530 | 0.011732 | 0.011436 | 0.011597 | 0.011564 |
| 0.011496 | 0.011664 | 0.011522 | 0.011390 | 0.011395 | 0.011396 | 0.011466 |
| 0.011564 | 0.011465 | 0.011601 | 0.011669 | 0.011597 | 0.011664 | 0.011771 |
| 0.011500 | 0.011671 | 0.011602 | 0.011533 | 0.011800 | 0.011262 | 0.011464 |
| 0.011429 | 0.011362 | 0.011262 | 0.011262 | 0.011329 | 0.011329 | 0.011396 |
| 0.011329 | 0.011396 | 0.011295 | 0.011329 | 0.011329 | 0.011329 | 0.011396 |
| 0.011329 | 0.011698 | 0.011597 | 0.011631 | 0.011228 | 0.011329 | 0.011362 |
| 0.011362 | 0.011329 | 0.011396 | 0.011362 | 0.011295 | 0.011295 | 0.011295 |
| 0.011765 | 0.011396 | 0.011463 | 0.011262 | 0.011362 | 0.011530 | 0.011295 |
| 0.011295 | 0.011362 | 0.011329 | 0.011496 | 0.011295 | 0.011429 | 0.011564 |
| 0.011496 | 0.011329 | 0.011329 | 0.011262 | 0.011262 | 0.011429 | 0.011362 |
| 0.011262 | 0.011362 | 0.011228 | 0.011262 | 0.011396 | 0.011463 | 0.011295 |
| 0.011262 | 0.011396 | 0.011329 | 0.011228 | 0.011496 | 0.011228 | 0.011396 |
| 0.011471 | 0.011295 | 0.011530 | 0.011430 | 0.011396 | 0.011329 | 0.011429 |
| 0.011295 | 0.011631 | 0.011228 | 0.011429 | 0.011161 | 0.011161 | 0.011228 |
| 0.011463 | 0.011598 | 0.011362 | 0.011429 | 0.011262 | 0.011597 | 0.011161 |
| 0.011295 | 0.011295 | 0.011329 | 0.011429 | 0.011329 | 0.011429 | 0.011496 |
| 0.011496 | 0.011463 | 0.011362 | 0.011463 | 0.011429 | 0.011295 | 0.011262 |
| 0.011295 | 0.011295 | 0.011362 | 0.011228 | 0.011262 | 0.011429 | 0.011295 |
| 0.011194 | 0.011329 | 0.011463 | 0.011429 | 0.011396 | 0.011329 | 0.011329 |
| 0.011396 | 0.011329 | 0.011429 | 0.011295 | 0.011429 | 0.011530 | 0.011765 |
| 0.011329 | 0.011664 | 0.011302 | 0.017823 | 0.011322 | 0.011366 | 0.011583 |
| 0.011545 | 0.011588 | 0.011427 | 0.011408 | 0.011664 | 0.011612 | 0.011425 |
| 0.011487 | 0.011549 | 0.011216 | 0.011311 | 0.011216 | 0.011307 | 0.011318 |
| 0.011482 | 0.011395 | 0.011394 | 0.011193 | 0.011463 | 0.011497 | 0.011500 |
| 0.011369 | 0.011463 | 0.011463 | 0.011362 | 0.011396 | 0.011396 | 0.011362 |
| 0.011396 | 0.011329 | 0.011362 | 0.011396 | 0.011362 | 0.011295 | 0.011329 |
| 0.011329 | 0.011396 | 0.011295 | 0.011396 | 0.011429 | 0.011463 | 0.011362 |
| 0.011329 | 0.011295 | 0.011631 | 0.011631 | 0.011429 | 0.011464 | 0.011497 |
| 0.011262 | 0.011262 | 0.011295 | 0.011396 | 0.011262 | 0.011497 | 0.011497 |
| 0.011530 | 0.011530 | 0.011463 | 0.011564 | 0.011665 | 0.011565 | 0.011396 |
| 0.011396 | 0.011463 | 0.011497 | 0.011329 | 0.011396 | 0.011362 | 0.011396 |
| 0.011463 | 0.011463 | 0.011497 | 0.011463 | 0.011363 | 0.011564 | 0.011530 |
| 0.011399 | 0.011295 | 0.011396 | 0.011497 | 0.011396 | 0.011463 | 0.011564 |
| 0.011732 | 0.011436 | 0.011597 | 0.011564 | 0.011496 | 0.011664 | 0.011295 |
| 0.011464 | 0.011363 | 0.011329 | 0.011329 | 0.011396 | 0.011295 | 0.011396 |
| 0.011429 | 0.011463 | 0.011362 | 0.011329 | 0.011295 | 0.011631 | 0.011631 |
| 0.011429 | 0.011464 | 0.011530 | 0.011463 | 0.012035 | 0.011524 | 0.011447 |
| 0.011517 | 0.011476 | 0.011587 | 0.011476 | 0.011585 | 0.011508 | 0.011474 |
| 0.011987 | 0.011372 | 0.011505 | 0.011440 | 0.011714 | 0.011570 | 0.011672 |
| 0.012012 | 0.011475 | 0.011635 | 0.011698 | 0.011564 | 0.011497 | 0.011601 |
| 0.011262 | 0.011429 | 0.011563 | 0.011530 | 0.011533 | 0.011463 | 0.011397 |
| 0.011362 | 0.011295 | 0.011329 | 0.011362 | 0.011262 | 0.011329 | 0.011228 |
| 0.011295 | 0.011329 | 0.011295 | 0.011262 | 0.011362 | 0.011295 | 0.011329 |
| 0.011329 | 0.011262 | 0.011329 | 0.011362 | 0.011262 | 0.011463 | 0.011496 |
| 0.011396 | 0.011396 | 0.011396 | 0.011396 | 0.011329 | 0.011664 | 0.011362 |
| 0.011338 | 0.011329 | 0.011497 | 0.011501 | 0.011429 | 0.011429 | 0.011429 |

|          |          |          |          |          |          |          |
|----------|----------|----------|----------|----------|----------|----------|
| 0.011429 | 0.011362 | 0.011329 | 0.011362 | 0.011463 | 0.011463 | 0.011396 |
| 0.011396 | 0.011530 | 0.011631 | 0.011429 | 0.011631 | 0.011631 | 0.011496 |
| 0.011329 | 0.011396 | 0.011429 | 0.011765 | 0.011396 | 0.011429 | 0.011396 |
| 0.011429 | 0.011295 | 0.011295 | 0.011597 | 0.011597 | 0.011564 | 0.011362 |
| 0.011463 | 0.011530 | 0.011396 | 0.011463 | 0.011429 | 0.011295 | 0.011564 |
| 0.011396 | 0.011362 | 0.011295 | 0.011530 | 0.011362 | 0.011463 | 0.011698 |
| 0.011396 | 0.011705 | 0.011698 | 0.011467 | 0.011173 | 0.011400 | 0.011267 |
| 0.011225 | 0.011683 | 0.011271 | 0.011373 | 0.011207 | 0.011315 | 0.011326 |
| 0.011417 | 0.011258 | 0.011394 | 0.011258 | 0.011276 | 0.011462 | 0.011425 |
| 0.011437 | 0.011336 | 0.011272 | 0.011342 | 0.011397 | 0.011463 | 0.011530 |
| 0.011530 | 0.011396 | 0.011500 | 0.011467 | 0.011569 | 0.011625 | 0.011396 |
| 0.011564 | 0.011429 | 0.011362 | 0.011396 | 0.011262 | 0.011429 | 0.011295 |
| 0.011362 | 0.011362 | 0.011329 | 0.011295 | 0.011329 | 0.011295 | 0.011396 |
| 0.011375 | 0.011375 | 0.011368 | 0.011403 | 0.011539 | 0.011504 | 0.011504 |
| 0.011503 | 0.011430 | 0.011245 | 0.011240 | 0.011365 | 0.011534 | 0.011535 |
| 0.011329 | 0.011399 | 0.011632 | 0.011601 | 0.011531 | 0.011565 | 0.011496 |
| 0.011429 | 0.011496 | 0.011496 | 0.011396 | 0.011900 | 0.011564 | 0.011631 |
| 0.011665 | 0.011665 | 0.011367 | 0.011441 | 0.011329 | 0.011530 | 0.011496 |
| 0.011531 | 0.011563 | 0.011564 | 0.011564 | 0.011689 | 0.011698 | 0.011338 |
| 0.011229 | 0.011233 | 0.011332 | 0.011298 | 0.011333 | 0.011247 | 0.011502 |
| 0.011369 | 0.011411 | 0.011251 | 0.011397 | 0.011363 | 0.011437 | 0.011329 |
| 0.011295 | 0.011228 | 0.011362 | 0.011329 | 0.011463 | 0.011430 | 0.011362 |
| 0.011463 | 0.011530 | 0.011329 | 0.011329 | 0.011362 | 0.011362 | 0.011364 |
| 0.011432 | 0.011362 | 0.011362 | 0.011397 | 0.011463 | 0.011530 | 0.011530 |
| 0.011396 | 0.011500 | 0.011467 | 0.011569 | 0.011625 | 0.011396 | 0.011564 |
| 0.011496 | 0.011496 | 0.011331 | 0.011513 | 0.011442 | 0.011469 | 0.011305 |
| 0.011473 | 0.011653 | 0.011441 | 0.011400 | 0.011295 | 0.011497 | 0.011362 |
| 0.011463 | 0.011396 | 0.011295 | 0.011397 | 0.011497 | 0.011499 | 0.011396 |
| 0.011295 | 0.011229 | 0.011362 | 0.011295 | 0.011228 | 0.011332 | 0.011497 |
| 0.011396 | 0.011329 | 0.011362 | 0.011396 | 0.011362 | 0.011295 | 0.011430 |
| 0.011362 | 0.011396 | 0.011396 | 0.011329 | 0.011396 | 0.011631 | 0.011228 |
| 0.011329 | 0.011664 | 0.011329 | 0.011362 | 0.011329 | 0.011631 | 0.011274 |
| 0.011622 | 0.011273 | 0.011261 | 0.011422 | 0.011508 | 0.011419 | 0.011227 |
| 0.011218 | 0.011429 | 0.011530 | 0.011637 | 0.011464 | 0.011601 | 0.011766 |
| 0.011666 | 0.011703 | 0.011664 | 0.011880 | 0.011631 | 0.012505 | 0.011666 |
| 0.012405 | 0.012139 | 0.012307 | 0.012545 | 0.011631 | 0.011329 | 0.011631 |
| 0.012070 | 0.011971 | 0.011597 | 0.011497 | 0.011565 | 0.011565 | 0.011534 |
| 0.011429 | 0.011399 | 0.011496 | 0.011464 | 0.011833 | 0.011900 | 0.011901 |
| 0.011800 | 0.011901 | 0.011970 | 0.011737 | 0.012070 | 0.012076 | 0.012137 |
| 0.012138 | 0.012171 | 0.012084 | 0.012138 | 0.012105 | 0.011429 | 0.011665 |
| 0.011733 | 0.012236 | 0.011704 | 0.011967 | 0.012440 | 0.011468 | 0.011396 |
| 0.011362 | 0.011362 | 0.011833 | 0.011883 | 0.011975 | 0.011631 | 0.011330 |
| S111     | 0.011799 | 0.011799 | 0.012068 | 0.011832 | 0.011832 | 0.011900 |
| 0.011501 | 0.011434 | 0.011900 | 0.011396 | 0.011463 | 0.011430 | 0.011396 |
| 0.011362 | 0.011597 | 0.011329 | 0.011429 | 0.011496 | 0.011463 | 0.011429 |
| 0.011396 | 0.011429 | 0.011463 | 0.011396 | 0.011430 | 0.011429 | 0.011467 |
| 0.011597 | 0.011429 | 0.011329 | 0.011496 | 0.011497 | 0.011463 | 0.011497 |
| 0.011463 | 0.011564 | 0.011463 | 0.011463 | 0.011496 | 0.011463 | 0.011631 |
| 0.011329 | 0.011463 | 0.011497 | 0.011429 | 0.011463 | 0.011564 | 0.011497 |
| 0.011463 | 0.011631 | 0.011531 | 0.011530 | 0.011463 | 0.011732 | 0.011463 |
| 0.011429 | 0.011463 | 0.011597 | 0.011732 | 0.011564 | 0.011463 | 0.011564 |
| 0.011496 | 0.011564 | 0.011463 | 0.011698 | 0.011664 | 0.011463 | 0.011530 |
| 0.011429 | 0.011530 | 0.011497 | 0.011564 | 0.011496 | 0.011497 | 0.011497 |
| 0.011396 | 0.011429 | 0.011396 | 0.011430 | 0.011463 | 0.011498 | 0.011564 |
| 0.011497 | 0.011463 | 0.011530 | 0.011429 | 0.011429 | 0.011396 | 0.011463 |
| 0.011631 | 0.011564 | 0.011664 | 0.011631 | 0.011463 | 0.011698 | 0.011463 |
| 0.011579 | 0.011508 | 0.011588 | 0.011295 | 0.011321 | 0.011465 | 0.011415 |
| 0.012085 | 0.011518 | 0.011307 | 0.011698 | 0.011698 | 0.011429 | 0.000000 |
| 0.011530 | 0.011496 | 0.011564 | 0.011463 | 0.011564 | 0.011497 | 0.011496 |
| 0.011463 | 0.011496 | 0.011765 | 0.011631 | 0.011530 | 0.011497 | 0.011430 |



|          |          |          |          |          |          |          |
|----------|----------|----------|----------|----------|----------|----------|
| 0.011396 | 0.011329 | 0.011463 | 0.011430 | 0.011564 | 0.011530 | 0.011463 |
| 0.011564 | 0.011631 | 0.011429 | 0.011429 | 0.011463 | 0.011463 | 0.011432 |
| 0.011500 | 0.011463 | 0.011463 | 0.011276 | 0.011349 | 0.011341 | 0.011464 |
| 0.011433 | 0.011335 | 0.011429 | 0.011405 | 0.011366 | 0.011369 | 0.011432 |
| 0.011564 | 0.011439 | 0.011473 | 0.011396 | 0.011371 | 0.011531 | 0.011430 |
| 0.011498 | 0.011498 | 0.011497 | 0.011597 | 0.011530 | 0.011900 | 0.011631 |
| 0.011664 | 0.011530 | 0.011463 | 0.011497 | 0.011362 | 0.011530 | 0.011396 |
| 0.011463 | 0.011463 | 0.011430 | 0.011396 | 0.011429 | 0.011396 | 0.011497 |
| 0.011463 | 0.011564 | 0.011497 | 0.011396 | 0.011498 | 0.011598 | 0.011601 |
| 0.011598 | 0.011497 | 0.011396 | 0.011330 | 0.011463 | 0.011396 | 0.011329 |
| 0.011434 | 0.011598 | 0.011396 | 0.011598 | 0.011362 | 0.011463 | 0.011430 |
| 0.011530 | 0.011430 | 0.011463 | 0.011430 | 0.011463 | 0.011329 | 0.011463 |
| 0.011497 | 0.011430 | 0.011497 | 0.011429 | 0.011463 | 0.011497 | 0.011732 |
| 0.011564 | 0.011496 | 0.011564 | 0.011600 | 0.011564 | 0.011463 | 0.011430 |
| 0.011398 | 0.011707 | 0.011563 | 0.011369 | 0.011569 | 0.011333 | 0.011493 |
| 0.011535 | 0.011672 | 0.011631 | 0.011833 | 0.011538 | 0.011698 | 0.011665 |
| 0.011597 | 0.011765 | 0.011629 | 0.011513 | 0.011521 | 0.011497 | 0.011568 |
| 0.011665 | 0.011566 | 0.011703 | 0.011771 | 0.011698 | 0.011765 | 0.011873 |
| 0.011602 | 0.011773 | 0.011636 | 0.011635 | 0.011901 | 0.011362 | 0.011566 |
| 0.011530 | 0.011463 | 0.011362 | 0.011362 | 0.011429 | 0.011429 | 0.011496 |
| 0.011429 | 0.011497 | 0.011396 | 0.011429 | 0.011429 | 0.011429 | 0.011496 |
| 0.011429 | 0.011597 | 0.011496 | 0.011530 | 0.011329 | 0.011429 | 0.011463 |
| 0.011463 | 0.011429 | 0.011497 | 0.011463 | 0.011396 | 0.011396 | 0.011396 |
| 0.011664 | 0.011497 | 0.011564 | 0.011362 | 0.011463 | 0.011631 | 0.011396 |
| 0.011396 | 0.011429 | 0.011429 | 0.011597 | 0.011396 | 0.011530 | 0.011664 |
| 0.011597 | 0.011429 | 0.011429 | 0.011362 | 0.011362 | 0.011530 | 0.011463 |
| 0.011362 | 0.011463 | 0.011329 | 0.011362 | 0.011497 | 0.011564 | 0.011396 |
| 0.011363 | 0.011497 | 0.011430 | 0.011329 | 0.011396 | 0.011329 | 0.011497 |
| 0.011574 | 0.011396 | 0.011429 | 0.011530 | 0.011497 | 0.011429 | 0.011530 |
| 0.011396 | 0.011732 | 0.011329 | 0.011463 | 0.011329 | 0.011329 | 0.011329 |
| 0.011564 | 0.011698 | 0.011463 | 0.011530 | 0.011362 | 0.011496 | 0.011329 |
| 0.011396 | 0.011396 | 0.011429 | 0.011530 | 0.011429 | 0.011530 | 0.011597 |
| 0.011597 | 0.011564 | 0.011463 | 0.011564 | 0.011530 | 0.011396 | 0.011362 |
| 0.011396 | 0.011396 | 0.011463 | 0.011329 | 0.011362 | 0.011530 | 0.011396 |
| 0.011362 | 0.011429 | 0.011564 | 0.011530 | 0.011496 | 0.011429 | 0.011430 |
| 0.011497 | 0.011429 | 0.011530 | 0.011396 | 0.011530 | 0.011631 | 0.011664 |
| 0.011429 | 0.011564 | 0.011405 | 0.017937 | 0.011388 | 0.011427 | 0.011479 |
| 0.011441 | 0.011482 | 0.011479 | 0.011466 | 0.011664 | 0.011543 | 0.011485 |
| 0.011535 | 0.011610 | 0.011255 | 0.011353 | 0.011294 | 0.011357 | 0.011361 |
| 0.011436 | 0.011470 | 0.011394 | 0.011325 | 0.011564 | 0.011597 | 0.011601 |
| 0.011472 | 0.011564 | 0.011564 | 0.011463 | 0.011497 | 0.011497 | 0.011463 |
| 0.011497 | 0.011429 | 0.011463 | 0.011497 | 0.011463 | 0.011396 | 0.011429 |
| 0.011429 | 0.011497 | 0.011396 | 0.011497 | 0.011530 | 0.011564 | 0.011463 |
| 0.011429 | 0.011396 | 0.011530 | 0.011530 | 0.011530 | 0.011565 | 0.011598 |
| 0.011362 | 0.011362 | 0.011396 | 0.011497 | 0.011362 | 0.011598 | 0.011598 |
| 0.011631 | 0.011631 | 0.011564 | 0.011665 | 0.011564 | 0.011666 | 0.011497 |
| 0.011497 | 0.011564 | 0.011598 | 0.011430 | 0.011497 | 0.011463 | 0.011497 |
| 0.011564 | 0.011564 | 0.011597 | 0.011564 | 0.011464 | 0.011665 | 0.011631 |
| 0.011500 | 0.011396 | 0.011497 | 0.011598 | 0.011497 | 0.011564 | 0.011664 |
| 0.011833 | 0.011538 | 0.011698 | 0.011665 | 0.011597 | 0.011765 | 0.011396 |
| 0.011566 | 0.011464 | 0.011429 | 0.011429 | 0.011497 | 0.011396 | 0.011497 |
| 0.011530 | 0.011564 | 0.011463 | 0.011429 | 0.011396 | 0.011530 | 0.011530 |
| 0.011530 | 0.011565 | 0.011631 | 0.011564 | 0.012137 | 0.011632 | 0.011553 |
| 0.011623 | 0.011580 | 0.011693 | 0.011580 | 0.011690 | 0.011612 | 0.011543 |
| 0.012090 | 0.011475 | 0.011608 | 0.011544 | 0.011818 | 0.011672 | 0.011775 |
| 0.012114 | 0.011588 | 0.011703 | 0.011799 | 0.011664 | 0.011597 | 0.011668 |
| 0.011362 | 0.011530 | 0.011664 | 0.011631 | 0.011601 | 0.011564 | 0.011532 |
| 0.011463 | 0.011396 | 0.011429 | 0.011463 | 0.011362 | 0.011429 | 0.011329 |
| 0.011396 | 0.011429 | 0.011396 | 0.011362 | 0.011463 | 0.011396 | 0.011429 |
| 0.011429 | 0.011362 | 0.011429 | 0.011463 | 0.011362 | 0.011564 | 0.011597 |

|          |          |          |          |          |          |          |
|----------|----------|----------|----------|----------|----------|----------|
| 0.011497 | 0.011497 | 0.011497 | 0.011497 | 0.011429 | 0.011564 | 0.011463 |
| 0.011443 | 0.011429 | 0.011598 | 0.011603 | 0.011463 | 0.011463 | 0.011530 |
| 0.011530 | 0.011463 | 0.011429 | 0.011463 | 0.011564 | 0.011564 | 0.011497 |
| 0.011496 | 0.011631 | 0.011530 | 0.011530 | 0.011732 | 0.011732 | 0.011597 |
| 0.011429 | 0.011497 | 0.011530 | 0.011664 | 0.011497 | 0.011463 | 0.011497 |
| 0.011530 | 0.011396 | 0.011396 | 0.011698 | 0.011698 | 0.011665 | 0.011463 |
| 0.011564 | 0.011564 | 0.011496 | 0.011564 | 0.011530 | 0.011396 | 0.011463 |
| 0.011496 | 0.011463 | 0.011396 | 0.011631 | 0.011463 | 0.011564 | 0.011732 |
| 0.011496 | 0.011569 | 0.011597 | 0.011507 | 0.011286 | 0.011502 | 0.011318 |
| 0.011280 | 0.011722 | 0.011376 | 0.011462 | 0.011304 | 0.011417 | 0.011432 |
| 0.011519 | 0.011324 | 0.011506 | 0.011391 | 0.011384 | 0.011596 | 0.011506 |
| 0.011512 | 0.011414 | 0.011448 | 0.011448 | 0.011498 | 0.011564 | 0.011631 |
| 0.011631 | 0.011497 | 0.011601 | 0.011603 | 0.011738 | 0.011767 | 0.011497 |
| 0.011664 | 0.011530 | 0.011463 | 0.011497 | 0.011362 | 0.011530 | 0.011396 |
| 0.011463 | 0.011463 | 0.011430 | 0.011396 | 0.011429 | 0.011396 | 0.011497 |
| 0.011444 | 0.011445 | 0.011437 | 0.011471 | 0.011608 | 0.011573 | 0.011572 |
| 0.011571 | 0.011531 | 0.011282 | 0.011276 | 0.011433 | 0.011602 | 0.011603 |
| 0.011430 | 0.011467 | 0.011734 | 0.011703 | 0.011632 | 0.011666 | 0.011597 |
| 0.011530 | 0.011597 | 0.011597 | 0.011497 | 0.011799 | 0.011664 | 0.011732 |
| 0.011766 | 0.011558 | 0.011469 | 0.011545 | 0.011429 | 0.011631 | 0.011597 |
| 0.011632 | 0.011664 | 0.011664 | 0.011664 | 0.011807 | 0.011799 | 0.011442 |
| 0.011331 | 0.011337 | 0.011435 | 0.011400 | 0.011436 | 0.011359 | 0.011400 |
| 0.011472 | 0.011543 | 0.011394 | 0.011435 | 0.011464 | 0.011505 | 0.011430 |
| 0.011396 | 0.011329 | 0.011463 | 0.011430 | 0.011564 | 0.011530 | 0.011463 |
| 0.011564 | 0.011631 | 0.011429 | 0.011429 | 0.011463 | 0.011463 | 0.011432 |
| 0.011500 | 0.011463 | 0.011463 | 0.011498 | 0.011564 | 0.011631 | 0.011631 |
| 0.011497 | 0.011601 | 0.011603 | 0.011738 | 0.011767 | 0.011497 | 0.011664 |
| 0.011597 | 0.011597 | 0.011432 | 0.011617 | 0.011547 | 0.011571 | 0.011446 |
| 0.011611 | 0.011789 | 0.011568 | 0.011502 | 0.011396 | 0.011598 | 0.011463 |
| 0.011564 | 0.011497 | 0.011396 | 0.011498 | 0.011598 | 0.011601 | 0.011497 |
| 0.011396 | 0.011330 | 0.011463 | 0.011396 | 0.011329 | 0.011434 | 0.011598 |
| 0.011497 | 0.011429 | 0.011463 | 0.011497 | 0.011463 | 0.011396 | 0.011530 |
| 0.011463 | 0.011497 | 0.011496 | 0.011429 | 0.011497 | 0.011732 | 0.011329 |
| 0.011429 | 0.011564 | 0.011429 | 0.011463 | 0.011429 | 0.011530 | 0.011317 |
| 0.011735 | 0.011315 | 0.011311 | 0.011503 | 0.011549 | 0.011527 | 0.011227 |
| 0.011270 | 0.011530 | 0.011631 | 0.011739 | 0.011599 | 0.011737 | 0.011867 |
| 0.011767 | 0.011804 | 0.011765 | 0.012017 | 0.011732 | 0.012607 | 0.011768 |
| 0.012507 | 0.012275 | 0.012409 | 0.012680 | 0.011732 | 0.011430 | 0.011732 |
| 0.012171 | 0.012106 | 0.011698 | 0.011598 | 0.011666 | 0.011666 | 0.011635 |
| 0.011530 | 0.011535 | 0.011597 | 0.011565 | 0.011935 | 0.012001 | 0.012002 |
| 0.011901 | 0.012002 | 0.012106 | 0.011872 | 0.012172 | 0.012178 | 0.012239 |
| 0.012239 | 0.012273 | 0.012221 | 0.012240 | 0.012241 | 0.011530 | 0.011766 |
| 0.011834 | 0.012337 | 0.011840 | 0.012068 | 0.012541 | 0.011604 | 0.011497 |
| 0.011396 | 0.011463 | 0.011934 | 0.011965 | 0.012010 | 0.011799 | 0.011465 |
| S112     | 0.011732 | 0.011732 | 0.012068 | 0.011832 | 0.011832 | 0.011900 |
| 0.011705 | 0.011637 | 0.011899 | 0.011329 | 0.011396 | 0.011363 | 0.011329 |
| 0.011362 | 0.011530 | 0.011329 | 0.011362 | 0.011429 | 0.011396 | 0.011362 |
| 0.011329 | 0.011362 | 0.011463 | 0.011329 | 0.011363 | 0.011362 | 0.011671 |
| 0.011597 | 0.011362 | 0.011262 | 0.011496 | 0.011429 | 0.011396 | 0.011429 |
| 0.011396 | 0.011497 | 0.011396 | 0.011396 | 0.011429 | 0.011396 | 0.011564 |
| 0.011329 | 0.011396 | 0.011429 | 0.011362 | 0.011463 | 0.011496 | 0.011429 |
| 0.011396 | 0.011564 | 0.011463 | 0.011732 | 0.011396 | 0.011664 | 0.011396 |
| 0.011362 | 0.011463 | 0.011530 | 0.011664 | 0.011765 | 0.011463 | 0.011564 |
| 0.011429 | 0.011497 | 0.011396 | 0.011631 | 0.011866 | 0.011396 | 0.011463 |
| 0.011362 | 0.011463 | 0.011429 | 0.011497 | 0.011429 | 0.011429 | 0.011429 |
| 0.011329 | 0.011362 | 0.011329 | 0.011429 | 0.011396 | 0.011430 | 0.011496 |
| 0.011429 | 0.011396 | 0.011463 | 0.011362 | 0.011496 | 0.011329 | 0.011396 |
| 0.011564 | 0.011496 | 0.011732 | 0.011564 | 0.011396 | 0.011631 | 0.011396 |
| 0.011542 | 0.011770 | 0.011588 | 0.011295 | 0.011321 | 0.011428 | 0.011493 |
| 0.012158 | 0.011518 | 0.011266 | 0.011631 | 0.011631 | 0.011429 | 0.011530 |

|          |          |          |          |          |          |          |
|----------|----------|----------|----------|----------|----------|----------|
| 0.000000 | 0.011429 | 0.011496 | 0.011396 | 0.011497 | 0.011429 | 0.011429 |
| 0.011396 | 0.011496 | 0.011698 | 0.011564 | 0.011463 | 0.011430 | 0.011362 |
| 0.011329 | 0.011329 | 0.011396 | 0.011362 | 0.011564 | 0.011530 | 0.011463 |
| 0.011564 | 0.011631 | 0.011362 | 0.011362 | 0.011396 | 0.011396 | 0.011398 |
| 0.011466 | 0.011396 | 0.011396 | 0.011276 | 0.011349 | 0.011306 | 0.011396 |
| 0.011399 | 0.011335 | 0.011392 | 0.011371 | 0.011298 | 0.011334 | 0.011364 |
| 0.011636 | 0.011405 | 0.011439 | 0.011329 | 0.011337 | 0.000000 | 0.011430 |
| 0.011497 | 0.011431 | 0.011430 | 0.011530 | 0.011463 | 0.011832 | 0.011631 |
| 0.011664 | 0.011530 | 0.011396 | 0.011497 | 0.011295 | 0.011530 | 0.011329 |
| 0.011396 | 0.011396 | 0.011362 | 0.011329 | 0.011362 | 0.011329 | 0.011430 |
| 0.011396 | 0.011497 | 0.011430 | 0.011329 | 0.011431 | 0.011530 | 0.011533 |
| 0.011530 | 0.011430 | 0.011329 | 0.011263 | 0.011396 | 0.011329 | 0.011262 |
| 0.011366 | 0.011531 | 0.011329 | 0.011530 | 0.011295 | 0.011396 | 0.011362 |
| 0.011463 | 0.011362 | 0.011396 | 0.011362 | 0.011396 | 0.011262 | 0.011396 |
| 0.011430 | 0.011362 | 0.011094 | 0.011362 | 0.011396 | 0.011430 | 0.011665 |
| 0.011765 | 0.011698 | 0.011766 | 0.011532 | 0.011766 | 0.011396 | 0.011362 |
| 0.011398 | 0.011667 | 0.011426 | 0.011300 | 0.011773 | 0.011265 | 0.011336 |
| 0.011739 | 0.011672 | 0.011564 | 0.011765 | 0.011436 | 0.011631 | 0.011597 |
| 0.011530 | 0.011698 | 0.011558 | 0.011431 | 0.011479 | 0.011430 | 0.011500 |
| 0.011597 | 0.011499 | 0.011635 | 0.011703 | 0.011631 | 0.011698 | 0.011806 |
| 0.011534 | 0.011705 | 0.011636 | 0.011567 | 0.011834 | 0.011295 | 0.011498 |
| 0.011463 | 0.011396 | 0.011295 | 0.011295 | 0.011362 | 0.011362 | 0.011429 |
| 0.011362 | 0.011429 | 0.011329 | 0.011429 | 0.011362 | 0.011362 | 0.011429 |
| 0.011362 | 0.011799 | 0.011698 | 0.011732 | 0.011262 | 0.011362 | 0.011396 |
| 0.011396 | 0.011362 | 0.011429 | 0.011463 | 0.011329 | 0.011329 | 0.011329 |
| 0.011866 | 0.011496 | 0.011497 | 0.011295 | 0.011396 | 0.011564 | 0.011329 |
| 0.011329 | 0.011396 | 0.011362 | 0.011530 | 0.011329 | 0.011463 | 0.011597 |
| 0.011530 | 0.011362 | 0.011362 | 0.011295 | 0.011295 | 0.011463 | 0.011396 |
| 0.011295 | 0.011329 | 0.011262 | 0.011295 | 0.011429 | 0.011564 | 0.011329 |
| 0.011295 | 0.011429 | 0.011363 | 0.011262 | 0.011597 | 0.011262 | 0.011429 |
| 0.011505 | 0.011329 | 0.011631 | 0.011463 | 0.011497 | 0.011362 | 0.011396 |
| 0.011329 | 0.011664 | 0.011262 | 0.011530 | 0.011329 | 0.011329 | 0.011262 |
| 0.011496 | 0.011698 | 0.011396 | 0.011463 | 0.011295 | 0.011698 | 0.011329 |
| 0.011329 | 0.011329 | 0.011362 | 0.011463 | 0.011362 | 0.011463 | 0.011530 |
| 0.011530 | 0.011497 | 0.011396 | 0.011497 | 0.011463 | 0.011329 | 0.011295 |
| 0.011329 | 0.011329 | 0.011396 | 0.011329 | 0.011295 | 0.011463 | 0.011329 |
| 0.011362 | 0.011362 | 0.011497 | 0.011530 | 0.011429 | 0.011362 | 0.011362 |
| 0.011429 | 0.011362 | 0.011463 | 0.011329 | 0.011463 | 0.011564 | 0.011866 |
| 0.011362 | 0.011765 | 0.011371 | 0.017861 | 0.011387 | 0.011488 | 0.011723 |
| 0.011683 | 0.011729 | 0.011427 | 0.011408 | 0.011829 | 0.011751 | 0.011485 |
| 0.011582 | 0.011610 | 0.011255 | 0.011312 | 0.011372 | 0.011406 | 0.011361 |
| 0.011623 | 0.011507 | 0.011542 | 0.011391 | 0.011497 | 0.011530 | 0.011500 |
| 0.011404 | 0.011497 | 0.011497 | 0.011463 | 0.011429 | 0.011430 | 0.011396 |
| 0.011430 | 0.011362 | 0.011396 | 0.011430 | 0.011396 | 0.011329 | 0.011362 |
| 0.011362 | 0.011430 | 0.011329 | 0.011430 | 0.011463 | 0.011497 | 0.011396 |
| 0.011429 | 0.011396 | 0.011732 | 0.011732 | 0.011463 | 0.011497 | 0.011530 |
| 0.011295 | 0.011295 | 0.011329 | 0.011430 | 0.011295 | 0.011530 | 0.011530 |
| 0.011564 | 0.011564 | 0.011497 | 0.011597 | 0.011766 | 0.011599 | 0.011430 |
| 0.011430 | 0.011497 | 0.011530 | 0.011362 | 0.011430 | 0.011396 | 0.011430 |
| 0.011497 | 0.011497 | 0.011530 | 0.011497 | 0.011397 | 0.011597 | 0.011564 |
| 0.011433 | 0.011329 | 0.011430 | 0.011530 | 0.011430 | 0.011564 | 0.011597 |
| 0.011765 | 0.011436 | 0.011631 | 0.011597 | 0.011530 | 0.011698 | 0.011329 |
| 0.011498 | 0.011396 | 0.011362 | 0.011362 | 0.011430 | 0.011329 | 0.011430 |
| 0.011463 | 0.011497 | 0.011396 | 0.011429 | 0.011396 | 0.011732 | 0.011732 |
| 0.011463 | 0.011497 | 0.011564 | 0.011496 | 0.012137 | 0.011560 | 0.011482 |
| 0.011552 | 0.011511 | 0.011622 | 0.011510 | 0.011620 | 0.011543 | 0.011508 |
| 0.012090 | 0.011406 | 0.011540 | 0.011475 | 0.011749 | 0.011604 | 0.011707 |
| 0.012114 | 0.011588 | 0.011669 | 0.011732 | 0.011597 | 0.011597 | 0.011635 |
| 0.011295 | 0.011463 | 0.011597 | 0.011564 | 0.011567 | 0.011564 | 0.011532 |
| 0.011396 | 0.011329 | 0.011362 | 0.011396 | 0.011295 | 0.011362 | 0.011262 |

|          |          |          |          |          |          |          |
|----------|----------|----------|----------|----------|----------|----------|
| 0.011396 | 0.011429 | 0.011329 | 0.011295 | 0.011396 | 0.011329 | 0.011362 |
| 0.011362 | 0.011295 | 0.011362 | 0.011396 | 0.011295 | 0.011497 | 0.011530 |
| 0.011429 | 0.011497 | 0.011429 | 0.011429 | 0.011362 | 0.011765 | 0.011396 |
| 0.011443 | 0.011362 | 0.011598 | 0.011603 | 0.011463 | 0.011463 | 0.011463 |
| 0.011463 | 0.011396 | 0.011362 | 0.011396 | 0.011497 | 0.011497 | 0.011429 |
| 0.011429 | 0.011564 | 0.011732 | 0.011463 | 0.011665 | 0.011665 | 0.011530 |
| 0.011362 | 0.011429 | 0.011463 | 0.011866 | 0.011430 | 0.011463 | 0.011429 |
| 0.011463 | 0.011396 | 0.011396 | 0.011698 | 0.011631 | 0.011665 | 0.011396 |
| 0.011497 | 0.011564 | 0.011429 | 0.011497 | 0.011463 | 0.011329 | 0.011664 |
| 0.011429 | 0.011396 | 0.011396 | 0.011564 | 0.011396 | 0.011496 | 0.011732 |
| 0.011429 | 0.011773 | 0.011799 | 0.011548 | 0.011342 | 0.011502 | 0.011370 |
| 0.011280 | 0.011761 | 0.011341 | 0.011507 | 0.011353 | 0.011467 | 0.011485 |
| 0.011570 | 0.011324 | 0.011450 | 0.011324 | 0.011330 | 0.011462 | 0.011425 |
| 0.011475 | 0.011336 | 0.011483 | 0.011412 | 0.011431 | 0.011564 | 0.011631 |
| 0.011631 | 0.011497 | 0.011601 | 0.011603 | 0.011738 | 0.011767 | 0.011429 |
| 0.011664 | 0.011530 | 0.011396 | 0.011497 | 0.011295 | 0.011530 | 0.011329 |
| 0.011396 | 0.011396 | 0.011362 | 0.011329 | 0.011362 | 0.011329 | 0.011430 |
| 0.011410 | 0.011410 | 0.011403 | 0.011437 | 0.011573 | 0.011538 | 0.011538 |
| 0.011469 | 0.011464 | 0.011245 | 0.011240 | 0.011399 | 0.011568 | 0.011569 |
| 0.011363 | 0.011433 | 0.011666 | 0.011635 | 0.011565 | 0.011599 | 0.011530 |
| 0.011463 | 0.011530 | 0.011530 | 0.011429 | 0.012001 | 0.011597 | 0.011665 |
| 0.011698 | 0.011737 | 0.011401 | 0.011476 | 0.011362 | 0.011564 | 0.011530 |
| 0.011565 | 0.011597 | 0.011597 | 0.011597 | 0.011729 | 0.011732 | 0.011372 |
| 0.011263 | 0.011268 | 0.011367 | 0.011332 | 0.011436 | 0.011284 | 0.011604 |
| 0.011403 | 0.011586 | 0.011346 | 0.011397 | 0.011396 | 0.011471 | 0.011362 |
| 0.011329 | 0.011329 | 0.011396 | 0.011362 | 0.011564 | 0.011530 | 0.011463 |
| 0.011564 | 0.011631 | 0.011362 | 0.011362 | 0.011396 | 0.011396 | 0.011398 |
| 0.011466 | 0.011396 | 0.011396 | 0.011431 | 0.011564 | 0.011631 | 0.011631 |
| 0.011497 | 0.011601 | 0.011603 | 0.011738 | 0.011767 | 0.011429 | 0.011597 |
| 0.011530 | 0.011530 | 0.011365 | 0.011547 | 0.011477 | 0.011503 | 0.011376 |
| 0.011542 | 0.011744 | 0.011568 | 0.011434 | 0.011329 | 0.011530 | 0.011396 |
| 0.011497 | 0.011430 | 0.011329 | 0.011431 | 0.011530 | 0.011533 | 0.011430 |
| 0.011329 | 0.011263 | 0.011396 | 0.011329 | 0.011262 | 0.011366 | 0.011531 |
| 0.011430 | 0.011362 | 0.011396 | 0.011430 | 0.011396 | 0.011329 | 0.011530 |
| 0.011396 | 0.011429 | 0.011429 | 0.011362 | 0.011429 | 0.011597 | 0.011329 |
| 0.011362 | 0.011765 | 0.011362 | 0.011396 | 0.011362 | 0.011732 | 0.011274 |
| 0.011791 | 0.011273 | 0.011311 | 0.011543 | 0.011589 | 0.011563 | 0.011227 |
| 0.011270 | 0.011530 | 0.011631 | 0.011739 | 0.011599 | 0.011737 | 0.011867 |
| 0.011767 | 0.011804 | 0.011765 | 0.012017 | 0.011732 | 0.012606 | 0.011768 |
| 0.012507 | 0.012274 | 0.012409 | 0.012680 | 0.011731 | 0.011430 | 0.011732 |
| 0.012171 | 0.012106 | 0.011698 | 0.011597 | 0.011665 | 0.011665 | 0.011635 |
| 0.011530 | 0.011535 | 0.011597 | 0.011565 | 0.011935 | 0.012001 | 0.012002 |
| 0.011901 | 0.012002 | 0.012106 | 0.011872 | 0.012171 | 0.012178 | 0.012238 |
| 0.012239 | 0.012273 | 0.012221 | 0.012239 | 0.012241 | 0.011463 | 0.011766 |
| 0.011834 | 0.012337 | 0.011806 | 0.012068 | 0.012541 | 0.011604 | 0.011497 |
| 0.011463 | 0.011463 | 0.011934 | 0.012006 | 0.012045 | 0.011799 | 0.011465 |
| S113     | 0.011631 | 0.011631 | 0.012034 | 0.011799 | 0.011799 | 0.011866 |
| 0.011705 | 0.011637 | 0.011866 | 0.011295 | 0.011362 | 0.011329 | 0.011295 |
| 0.011329 | 0.011496 | 0.011295 | 0.011329 | 0.011396 | 0.011362 | 0.011329 |
| 0.011295 | 0.011329 | 0.011429 | 0.011295 | 0.011329 | 0.011329 | 0.011671 |
| 0.011564 | 0.011329 | 0.011228 | 0.011463 | 0.011396 | 0.011362 | 0.011396 |
| 0.011362 | 0.011463 | 0.011362 | 0.011362 | 0.011396 | 0.011362 | 0.011530 |
| 0.011295 | 0.011362 | 0.011396 | 0.011329 | 0.011429 | 0.011463 | 0.011396 |
| 0.011362 | 0.011530 | 0.011430 | 0.011698 | 0.011362 | 0.011631 | 0.011362 |
| 0.011329 | 0.011429 | 0.011496 | 0.011631 | 0.011731 | 0.011429 | 0.011530 |
| 0.011396 | 0.011463 | 0.011362 | 0.011597 | 0.011832 | 0.011362 | 0.011429 |
| 0.011329 | 0.011429 | 0.011396 | 0.011463 | 0.011396 | 0.011396 | 0.011396 |
| 0.011295 | 0.011329 | 0.011295 | 0.011396 | 0.011362 | 0.011397 | 0.011463 |
| 0.011396 | 0.011362 | 0.011429 | 0.011329 | 0.011463 | 0.011295 | 0.011362 |
| 0.011530 | 0.011463 | 0.011698 | 0.011530 | 0.011362 | 0.011597 | 0.011362 |

|          |          |          |          |          |          |          |
|----------|----------|----------|----------|----------|----------|----------|
| 0.011542 | 0.011770 | 0.011551 | 0.011255 | 0.011247 | 0.011391 | 0.011454 |
| 0.012085 | 0.011467 | 0.011266 | 0.011597 | 0.011597 | 0.011396 | 0.011496 |
| 0.011429 | 0.000000 | 0.011396 | 0.011362 | 0.011463 | 0.011396 | 0.011329 |
| 0.011295 | 0.011463 | 0.011463 | 0.011530 | 0.011429 | 0.011396 | 0.011329 |
| 0.011295 | 0.011295 | 0.011362 | 0.011329 | 0.011530 | 0.011497 | 0.011429 |
| 0.011530 | 0.011597 | 0.011329 | 0.011329 | 0.011362 | 0.011362 | 0.011364 |
| 0.011432 | 0.011362 | 0.011362 | 0.011240 | 0.011277 | 0.011271 | 0.011363 |
| 0.011365 | 0.011301 | 0.011318 | 0.011336 | 0.011264 | 0.011300 | 0.011330 |
| 0.011600 | 0.011370 | 0.011370 | 0.011296 | 0.011302 | 0.011430 | 0.011396 |
| 0.011464 | 0.011397 | 0.011396 | 0.011429 | 0.011362 | 0.011799 | 0.011597 |
| 0.011631 | 0.011497 | 0.011362 | 0.011463 | 0.011262 | 0.011496 | 0.011295 |
| 0.011362 | 0.011362 | 0.011329 | 0.011295 | 0.011329 | 0.011295 | 0.011396 |
| 0.011362 | 0.011463 | 0.011396 | 0.011295 | 0.011397 | 0.011497 | 0.011499 |
| 0.011497 | 0.011396 | 0.011295 | 0.011229 | 0.011362 | 0.011295 | 0.011228 |
| 0.011332 | 0.011497 | 0.011295 | 0.011497 | 0.011262 | 0.011362 | 0.011329 |
| 0.011430 | 0.011329 | 0.011362 | 0.011329 | 0.011362 | 0.011228 | 0.011362 |
| 0.011396 | 0.011329 | 0.011396 | 0.011329 | 0.011295 | 0.011396 | 0.011631 |
| 0.011732 | 0.011664 | 0.011732 | 0.011498 | 0.011732 | 0.011295 | 0.011329 |
| 0.011364 | 0.011626 | 0.011380 | 0.011266 | 0.011739 | 0.011231 | 0.011336 |
| 0.011739 | 0.011638 | 0.011496 | 0.011530 | 0.011436 | 0.011597 | 0.011564 |
| 0.011496 | 0.011664 | 0.011451 | 0.011349 | 0.011395 | 0.011396 | 0.011398 |
| 0.011564 | 0.011397 | 0.011601 | 0.011669 | 0.011530 | 0.011463 | 0.011704 |
| 0.011432 | 0.011671 | 0.011534 | 0.011533 | 0.011598 | 0.011262 | 0.011464 |
| 0.011429 | 0.011362 | 0.011262 | 0.011262 | 0.011329 | 0.011329 | 0.011396 |
| 0.011329 | 0.011396 | 0.011295 | 0.011396 | 0.011329 | 0.011329 | 0.011329 |
| 0.011329 | 0.011765 | 0.011664 | 0.011698 | 0.011228 | 0.011329 | 0.011362 |
| 0.011362 | 0.011329 | 0.011396 | 0.011429 | 0.011295 | 0.011295 | 0.011295 |
| 0.011832 | 0.011463 | 0.011463 | 0.011262 | 0.011362 | 0.011530 | 0.011295 |
| 0.011295 | 0.011362 | 0.011329 | 0.011497 | 0.011295 | 0.011429 | 0.011564 |
| 0.011496 | 0.011329 | 0.011329 | 0.011262 | 0.011262 | 0.011429 | 0.011362 |
| 0.011262 | 0.011362 | 0.011228 | 0.011262 | 0.011396 | 0.011530 | 0.011295 |
| 0.011262 | 0.011396 | 0.011329 | 0.011228 | 0.011564 | 0.011228 | 0.011396 |
| 0.011471 | 0.011295 | 0.011597 | 0.011429 | 0.011463 | 0.011329 | 0.011429 |
| 0.011295 | 0.011631 | 0.011228 | 0.011496 | 0.011295 | 0.011295 | 0.011228 |
| 0.011463 | 0.011665 | 0.011362 | 0.011429 | 0.011262 | 0.011664 | 0.011295 |
| 0.011295 | 0.011295 | 0.011329 | 0.011429 | 0.011329 | 0.011429 | 0.011496 |
| 0.011496 | 0.011463 | 0.011362 | 0.011463 | 0.011429 | 0.011295 | 0.011262 |
| 0.011295 | 0.011295 | 0.011362 | 0.011295 | 0.011262 | 0.011429 | 0.011295 |
| 0.011329 | 0.011329 | 0.011463 | 0.011496 | 0.011396 | 0.011329 | 0.011329 |
| 0.011396 | 0.011329 | 0.011429 | 0.011295 | 0.011429 | 0.011530 | 0.011832 |
| 0.011329 | 0.011732 | 0.011336 | 0.017823 | 0.011191 | 0.011427 | 0.011688 |
| 0.011648 | 0.011693 | 0.011427 | 0.011350 | 0.011664 | 0.011716 | 0.011303 |
| 0.011487 | 0.011487 | 0.011255 | 0.011311 | 0.011294 | 0.011356 | 0.011318 |
| 0.011482 | 0.011470 | 0.011468 | 0.011325 | 0.011463 | 0.011429 | 0.011500 |
| 0.011369 | 0.011463 | 0.011463 | 0.011429 | 0.011396 | 0.011396 | 0.011362 |
| 0.011396 | 0.011329 | 0.011362 | 0.011396 | 0.011362 | 0.011295 | 0.011262 |
| 0.011262 | 0.011396 | 0.011295 | 0.011396 | 0.011429 | 0.011463 | 0.011295 |
| 0.011396 | 0.011362 | 0.011698 | 0.011698 | 0.011430 | 0.011464 | 0.011430 |
| 0.011262 | 0.011262 | 0.011295 | 0.011396 | 0.011262 | 0.011497 | 0.011497 |
| 0.011530 | 0.011496 | 0.011463 | 0.011564 | 0.011732 | 0.011565 | 0.011396 |
| 0.011396 | 0.011463 | 0.011497 | 0.011329 | 0.011396 | 0.011362 | 0.011396 |
| 0.011463 | 0.011463 | 0.011497 | 0.011463 | 0.011363 | 0.011564 | 0.011530 |
| 0.011399 | 0.011295 | 0.011396 | 0.011497 | 0.011329 | 0.011530 | 0.011564 |
| 0.011530 | 0.011436 | 0.011597 | 0.011564 | 0.011496 | 0.011664 | 0.011295 |
| 0.011464 | 0.011363 | 0.011262 | 0.011262 | 0.011396 | 0.011295 | 0.011396 |
| 0.011429 | 0.011463 | 0.011295 | 0.011396 | 0.011362 | 0.011698 | 0.011698 |
| 0.011430 | 0.011464 | 0.011463 | 0.011396 | 0.012069 | 0.011524 | 0.011377 |
| 0.011517 | 0.011476 | 0.011587 | 0.011476 | 0.011585 | 0.011302 | 0.011474 |
| 0.012021 | 0.011302 | 0.011437 | 0.011233 | 0.011508 | 0.011570 | 0.011673 |
| 0.012046 | 0.011550 | 0.011635 | 0.011698 | 0.011564 | 0.011564 | 0.011601 |

|          |          |          |          |          |          |          |
|----------|----------|----------|----------|----------|----------|----------|
| 0.011262 | 0.011429 | 0.011564 | 0.011530 | 0.011533 | 0.011530 | 0.011498 |
| 0.011362 | 0.011295 | 0.011329 | 0.011362 | 0.011262 | 0.011329 | 0.011228 |
| 0.011362 | 0.011396 | 0.011295 | 0.011262 | 0.011362 | 0.011295 | 0.011329 |
| 0.011329 | 0.011262 | 0.011329 | 0.011362 | 0.011262 | 0.011463 | 0.011496 |
| 0.011396 | 0.011463 | 0.011396 | 0.011396 | 0.011329 | 0.011731 | 0.011362 |
| 0.011408 | 0.011329 | 0.011564 | 0.011569 | 0.011429 | 0.011429 | 0.011429 |
| 0.011429 | 0.011362 | 0.011329 | 0.011362 | 0.011463 | 0.011463 | 0.011396 |
| 0.011396 | 0.011530 | 0.011698 | 0.011429 | 0.011631 | 0.011631 | 0.011496 |
| 0.011329 | 0.011396 | 0.011429 | 0.011832 | 0.011396 | 0.011429 | 0.011396 |
| 0.011429 | 0.011362 | 0.011362 | 0.011665 | 0.011597 | 0.011631 | 0.011362 |
| 0.011463 | 0.011530 | 0.011396 | 0.011463 | 0.011429 | 0.011295 | 0.011631 |
| 0.011396 | 0.011362 | 0.011362 | 0.011530 | 0.011362 | 0.011463 | 0.011698 |
| 0.011396 | 0.011773 | 0.011765 | 0.011548 | 0.011229 | 0.011468 | 0.011267 |
| 0.011225 | 0.011761 | 0.011271 | 0.011507 | 0.011255 | 0.011366 | 0.011379 |
| 0.011519 | 0.011126 | 0.011339 | 0.011192 | 0.011222 | 0.011395 | 0.011385 |
| 0.011362 | 0.011336 | 0.011448 | 0.011377 | 0.011397 | 0.011530 | 0.011597 |
| 0.011597 | 0.011464 | 0.011567 | 0.011569 | 0.011704 | 0.011732 | 0.011396 |
| 0.011631 | 0.011497 | 0.011362 | 0.011463 | 0.011262 | 0.011496 | 0.011295 |
| 0.011362 | 0.011362 | 0.011329 | 0.011295 | 0.011329 | 0.011295 | 0.011396 |
| 0.011375 | 0.011375 | 0.011368 | 0.011403 | 0.011539 | 0.011504 | 0.011504 |
| 0.011503 | 0.011430 | 0.011245 | 0.011240 | 0.011365 | 0.011535 | 0.011535 |
| 0.011329 | 0.011399 | 0.011632 | 0.011601 | 0.011531 | 0.011565 | 0.011429 |
| 0.011429 | 0.011295 | 0.011295 | 0.011396 | 0.011933 | 0.011564 | 0.011631 |
| 0.011665 | 0.011737 | 0.011367 | 0.011441 | 0.011329 | 0.011463 | 0.011429 |
| 0.011531 | 0.011496 | 0.011564 | 0.011564 | 0.011532 | 0.011631 | 0.011338 |
| 0.011229 | 0.011233 | 0.011332 | 0.011298 | 0.011402 | 0.011247 | 0.011570 |
| 0.011369 | 0.011499 | 0.011251 | 0.011360 | 0.011363 | 0.011437 | 0.011329 |
| 0.011295 | 0.011295 | 0.011362 | 0.011329 | 0.011530 | 0.011497 | 0.011429 |
| 0.011530 | 0.011597 | 0.011329 | 0.011329 | 0.011362 | 0.011362 | 0.011364 |
| 0.011432 | 0.011362 | 0.011362 | 0.011397 | 0.011530 | 0.011597 | 0.011597 |
| 0.011464 | 0.011567 | 0.011569 | 0.011704 | 0.011732 | 0.011396 | 0.011564 |
| 0.011429 | 0.011429 | 0.011331 | 0.011513 | 0.011442 | 0.011469 | 0.011340 |
| 0.011508 | 0.011653 | 0.011484 | 0.011400 | 0.011295 | 0.011497 | 0.011362 |
| 0.011463 | 0.011396 | 0.011295 | 0.011397 | 0.011497 | 0.011499 | 0.011396 |
| 0.011295 | 0.011229 | 0.011362 | 0.011295 | 0.011228 | 0.011332 | 0.011497 |
| 0.011396 | 0.011329 | 0.011362 | 0.011396 | 0.011362 | 0.011295 | 0.011497 |
| 0.011362 | 0.011396 | 0.011396 | 0.011329 | 0.011396 | 0.011631 | 0.011295 |
| 0.011329 | 0.011731 | 0.011329 | 0.011362 | 0.011329 | 0.011698 | 0.011274 |
| 0.011735 | 0.011273 | 0.011261 | 0.011503 | 0.011589 | 0.011491 | 0.011186 |
| 0.011218 | 0.011496 | 0.011597 | 0.011705 | 0.011565 | 0.011703 | 0.011834 |
| 0.011733 | 0.011770 | 0.011731 | 0.011983 | 0.011698 | 0.012505 | 0.011734 |
| 0.012473 | 0.012173 | 0.012307 | 0.012578 | 0.011698 | 0.011396 | 0.011698 |
| 0.012103 | 0.012072 | 0.011664 | 0.011564 | 0.011632 | 0.011632 | 0.011601 |
| 0.011496 | 0.011501 | 0.011564 | 0.011531 | 0.011901 | 0.011967 | 0.011968 |
| 0.011867 | 0.011968 | 0.012072 | 0.011838 | 0.012104 | 0.012110 | 0.012171 |
| 0.012172 | 0.012205 | 0.012152 | 0.012172 | 0.012173 | 0.011362 | 0.011699 |
| 0.011800 | 0.012303 | 0.011772 | 0.012034 | 0.012508 | 0.011570 | 0.011464 |
| 0.011429 | 0.011429 | 0.011900 | 0.011965 | 0.012045 | 0.011765 | 0.011431 |
| S114     | 0.011564 | 0.011564 | 0.012101 | 0.011866 | 0.011866 | 0.011933 |
| 0.011773 | 0.011705 | 0.011933 | 0.011362 | 0.011429 | 0.011397 | 0.011362 |
| 0.011396 | 0.011564 | 0.011362 | 0.011396 | 0.011463 | 0.011429 | 0.011396 |
| 0.011362 | 0.011396 | 0.011496 | 0.011363 | 0.011396 | 0.011396 | 0.011739 |
| 0.011631 | 0.011396 | 0.011295 | 0.011530 | 0.011463 | 0.011429 | 0.011463 |
| 0.011429 | 0.011530 | 0.011429 | 0.011429 | 0.011463 | 0.011429 | 0.011597 |
| 0.011362 | 0.011429 | 0.011463 | 0.011396 | 0.011496 | 0.011530 | 0.011463 |
| 0.011429 | 0.011597 | 0.011497 | 0.011765 | 0.011429 | 0.011698 | 0.011429 |
| 0.011396 | 0.011497 | 0.011564 | 0.011698 | 0.011799 | 0.011496 | 0.011597 |
| 0.011463 | 0.011530 | 0.011429 | 0.011664 | 0.011900 | 0.011429 | 0.011496 |
| 0.011396 | 0.011496 | 0.011463 | 0.011530 | 0.011463 | 0.011463 | 0.011463 |
| 0.011362 | 0.011396 | 0.011362 | 0.011463 | 0.011429 | 0.011464 | 0.011530 |

|          |          |          |          |          |          |          |
|----------|----------|----------|----------|----------|----------|----------|
| 0.011463 | 0.011429 | 0.011496 | 0.011396 | 0.011530 | 0.011362 | 0.011429 |
| 0.011597 | 0.011530 | 0.011765 | 0.011597 | 0.011429 | 0.011664 | 0.011429 |
| 0.011616 | 0.011845 | 0.011664 | 0.011334 | 0.011359 | 0.011465 | 0.011572 |
| 0.012195 | 0.011620 | 0.011390 | 0.011664 | 0.011664 | 0.011463 | 0.011564 |
| 0.011496 | 0.011396 | 0.000000 | 0.011429 | 0.011530 | 0.011463 | 0.011329 |
| 0.011362 | 0.011530 | 0.011664 | 0.011597 | 0.011496 | 0.011463 | 0.011396 |
| 0.011362 | 0.011362 | 0.011429 | 0.011396 | 0.011597 | 0.011564 | 0.011497 |
| 0.011597 | 0.011665 | 0.011396 | 0.011396 | 0.011430 | 0.011429 | 0.011432 |
| 0.011500 | 0.011429 | 0.011429 | 0.011312 | 0.011386 | 0.011341 | 0.011430 |
| 0.011433 | 0.011369 | 0.011429 | 0.011405 | 0.011332 | 0.011368 | 0.011398 |
| 0.011672 | 0.011439 | 0.011473 | 0.011363 | 0.011371 | 0.011497 | 0.011464 |
| 0.011531 | 0.011465 | 0.011464 | 0.011429 | 0.011295 | 0.011866 | 0.011665 |
| 0.011698 | 0.011564 | 0.011429 | 0.011530 | 0.011329 | 0.011564 | 0.011362 |
| 0.011429 | 0.011429 | 0.011396 | 0.011362 | 0.011396 | 0.011362 | 0.011463 |
| 0.011429 | 0.011530 | 0.011463 | 0.011362 | 0.011464 | 0.011564 | 0.011567 |
| 0.011564 | 0.011463 | 0.011362 | 0.011296 | 0.011429 | 0.011362 | 0.011295 |
| 0.011400 | 0.011564 | 0.011362 | 0.011564 | 0.011329 | 0.011430 | 0.011396 |
| 0.011497 | 0.011396 | 0.011429 | 0.011396 | 0.011429 | 0.011295 | 0.011429 |
| 0.011463 | 0.011396 | 0.011463 | 0.011396 | 0.011295 | 0.011463 | 0.011698 |
| 0.011799 | 0.011732 | 0.011799 | 0.011566 | 0.011799 | 0.011295 | 0.011396 |
| 0.011432 | 0.011747 | 0.011426 | 0.011335 | 0.011807 | 0.011299 | 0.011375 |
| 0.011807 | 0.011706 | 0.011564 | 0.011732 | 0.011367 | 0.011664 | 0.011631 |
| 0.011564 | 0.011732 | 0.011451 | 0.011349 | 0.011437 | 0.011463 | 0.011466 |
| 0.011631 | 0.011397 | 0.011669 | 0.011737 | 0.011530 | 0.011665 | 0.011704 |
| 0.011432 | 0.011705 | 0.011500 | 0.011601 | 0.011800 | 0.011329 | 0.011532 |
| 0.011496 | 0.011429 | 0.011329 | 0.011329 | 0.011396 | 0.011396 | 0.011463 |
| 0.011396 | 0.011463 | 0.011362 | 0.011463 | 0.011396 | 0.011396 | 0.011463 |
| 0.011396 | 0.011832 | 0.011731 | 0.011765 | 0.011295 | 0.011396 | 0.011429 |
| 0.011429 | 0.011396 | 0.011463 | 0.011496 | 0.011362 | 0.011362 | 0.011362 |
| 0.011899 | 0.011530 | 0.011530 | 0.011329 | 0.011429 | 0.011597 | 0.011362 |
| 0.011362 | 0.011429 | 0.011396 | 0.011564 | 0.011362 | 0.011496 | 0.011631 |
| 0.011564 | 0.011396 | 0.011396 | 0.011329 | 0.011329 | 0.011496 | 0.011429 |
| 0.011329 | 0.011429 | 0.011295 | 0.011329 | 0.011463 | 0.011598 | 0.011362 |
| 0.011329 | 0.011463 | 0.011396 | 0.011295 | 0.011631 | 0.011295 | 0.011463 |
| 0.011471 | 0.011362 | 0.011664 | 0.011497 | 0.011530 | 0.011396 | 0.011496 |
| 0.011362 | 0.011698 | 0.011295 | 0.011564 | 0.011362 | 0.011362 | 0.011295 |
| 0.011530 | 0.011732 | 0.011429 | 0.011496 | 0.011329 | 0.011731 | 0.011362 |
| 0.011362 | 0.011362 | 0.011396 | 0.011496 | 0.011396 | 0.011496 | 0.011564 |
| 0.011564 | 0.011530 | 0.011429 | 0.011530 | 0.011496 | 0.011362 | 0.011329 |
| 0.011362 | 0.011362 | 0.011429 | 0.011362 | 0.011329 | 0.011496 | 0.011362 |
| 0.011396 | 0.011396 | 0.011530 | 0.011564 | 0.011463 | 0.011396 | 0.011396 |
| 0.011463 | 0.011396 | 0.011496 | 0.011362 | 0.011496 | 0.011597 | 0.011899 |
| 0.011396 | 0.011799 | 0.011405 | 0.017936 | 0.011387 | 0.011549 | 0.011758 |
| 0.011718 | 0.011764 | 0.011532 | 0.011466 | 0.011939 | 0.011785 | 0.011546 |
| 0.011677 | 0.011732 | 0.011333 | 0.011395 | 0.011411 | 0.011504 | 0.011361 |
| 0.011623 | 0.011581 | 0.011579 | 0.011325 | 0.011530 | 0.011362 | 0.011500 |
| 0.011438 | 0.011530 | 0.011530 | 0.011497 | 0.011463 | 0.011463 | 0.011430 |
| 0.011463 | 0.011396 | 0.011429 | 0.011463 | 0.011430 | 0.011362 | 0.011262 |
| 0.011262 | 0.011463 | 0.011362 | 0.011463 | 0.011497 | 0.011530 | 0.011295 |
| 0.011463 | 0.011429 | 0.011765 | 0.011765 | 0.011497 | 0.011531 | 0.011564 |
| 0.011329 | 0.011329 | 0.011362 | 0.011463 | 0.011329 | 0.011564 | 0.011564 |
| 0.011597 | 0.011564 | 0.011530 | 0.011631 | 0.011799 | 0.011633 | 0.011463 |
| 0.011463 | 0.011530 | 0.011564 | 0.011396 | 0.011463 | 0.011429 | 0.011463 |
| 0.011531 | 0.011530 | 0.011564 | 0.011530 | 0.011431 | 0.011631 | 0.011597 |
| 0.011467 | 0.011362 | 0.011463 | 0.011564 | 0.011463 | 0.011597 | 0.011631 |
| 0.011732 | 0.011367 | 0.011664 | 0.011631 | 0.011564 | 0.011732 | 0.011363 |
| 0.011532 | 0.011430 | 0.011262 | 0.011262 | 0.011463 | 0.011362 | 0.011463 |
| 0.011497 | 0.011530 | 0.011295 | 0.011463 | 0.011429 | 0.011765 | 0.011765 |
| 0.011497 | 0.011531 | 0.011396 | 0.011329 | 0.012136 | 0.011560 | 0.011377 |
| 0.011587 | 0.011546 | 0.011622 | 0.011476 | 0.011620 | 0.011508 | 0.011543 |

|          |          |          |          |          |          |          |
|----------|----------|----------|----------|----------|----------|----------|
| 0.012056 | 0.011302 | 0.011437 | 0.011406 | 0.011714 | 0.011638 | 0.011741 |
| 0.012046 | 0.011550 | 0.011703 | 0.011765 | 0.011631 | 0.011631 | 0.011668 |
| 0.011329 | 0.011497 | 0.011631 | 0.011597 | 0.011601 | 0.011597 | 0.011565 |
| 0.011429 | 0.011362 | 0.011396 | 0.011429 | 0.011329 | 0.011396 | 0.011295 |
| 0.011429 | 0.011463 | 0.011362 | 0.011329 | 0.011429 | 0.011362 | 0.011396 |
| 0.011396 | 0.011329 | 0.011396 | 0.011429 | 0.011329 | 0.011530 | 0.011564 |
| 0.011463 | 0.011530 | 0.011463 | 0.011463 | 0.011396 | 0.011799 | 0.011429 |
| 0.011443 | 0.011396 | 0.011631 | 0.011637 | 0.011497 | 0.011496 | 0.011496 |
| 0.011496 | 0.011429 | 0.011396 | 0.011429 | 0.011530 | 0.011530 | 0.011463 |
| 0.011463 | 0.011597 | 0.011765 | 0.011496 | 0.011698 | 0.011698 | 0.011564 |
| 0.011396 | 0.011463 | 0.011496 | 0.011900 | 0.011463 | 0.011497 | 0.011463 |
| 0.011496 | 0.011429 | 0.011429 | 0.011732 | 0.011664 | 0.011698 | 0.011429 |
| 0.011530 | 0.011597 | 0.011463 | 0.011530 | 0.011496 | 0.011362 | 0.011698 |
| 0.011463 | 0.011429 | 0.011429 | 0.011530 | 0.011429 | 0.011530 | 0.011765 |
| 0.011463 | 0.011841 | 0.011832 | 0.011670 | 0.011399 | 0.011536 | 0.011421 |
| 0.011390 | 0.011878 | 0.011376 | 0.011641 | 0.011451 | 0.011569 | 0.011591 |
| 0.011672 | 0.011389 | 0.011561 | 0.011390 | 0.011437 | 0.011596 | 0.011547 |
| 0.011550 | 0.011454 | 0.011518 | 0.011448 | 0.011465 | 0.011597 | 0.011665 |
| 0.011665 | 0.011531 | 0.011635 | 0.011636 | 0.011772 | 0.011802 | 0.011463 |
| 0.011698 | 0.011564 | 0.011429 | 0.011530 | 0.011329 | 0.011564 | 0.011362 |
| 0.011429 | 0.011429 | 0.011396 | 0.011362 | 0.011396 | 0.011362 | 0.011463 |
| 0.011444 | 0.011445 | 0.011437 | 0.011471 | 0.011608 | 0.011573 | 0.011572 |
| 0.011571 | 0.011497 | 0.011282 | 0.011312 | 0.011433 | 0.011602 | 0.011603 |
| 0.011396 | 0.011467 | 0.011700 | 0.011668 | 0.011598 | 0.011632 | 0.011362 |
| 0.011496 | 0.011496 | 0.011496 | 0.011463 | 0.012000 | 0.011631 | 0.011698 |
| 0.011732 | 0.011808 | 0.011435 | 0.011511 | 0.011396 | 0.011463 | 0.011362 |
| 0.011598 | 0.011496 | 0.011631 | 0.011631 | 0.011728 | 0.011631 | 0.011407 |
| 0.011297 | 0.011303 | 0.011401 | 0.011366 | 0.011470 | 0.011321 | 0.011638 |
| 0.011437 | 0.011455 | 0.011203 | 0.011322 | 0.011430 | 0.011505 | 0.011396 |
| 0.011362 | 0.011362 | 0.011429 | 0.011396 | 0.011597 | 0.011564 | 0.011497 |
| 0.011597 | 0.011665 | 0.011396 | 0.011396 | 0.011430 | 0.011429 | 0.011432 |
| 0.011500 | 0.011429 | 0.011429 | 0.011465 | 0.011597 | 0.011665 | 0.011665 |
| 0.011531 | 0.011635 | 0.011636 | 0.011772 | 0.011802 | 0.011463 | 0.011631 |
| 0.011362 | 0.011362 | 0.011398 | 0.011582 | 0.011512 | 0.011537 | 0.011411 |
| 0.011577 | 0.011789 | 0.011526 | 0.011468 | 0.011362 | 0.011564 | 0.011429 |
| 0.011530 | 0.011463 | 0.011362 | 0.011464 | 0.011564 | 0.011567 | 0.011463 |
| 0.011362 | 0.011296 | 0.011429 | 0.011362 | 0.011295 | 0.011400 | 0.011564 |
| 0.011463 | 0.011396 | 0.011429 | 0.011463 | 0.011430 | 0.011362 | 0.011564 |
| 0.011429 | 0.011463 | 0.011463 | 0.011396 | 0.011463 | 0.011698 | 0.011362 |
| 0.011396 | 0.011799 | 0.011396 | 0.011429 | 0.011396 | 0.011765 | 0.011403 |
| 0.011903 | 0.011400 | 0.011411 | 0.011624 | 0.011711 | 0.011598 | 0.011311 |
| 0.011375 | 0.011564 | 0.011664 | 0.011773 | 0.011632 | 0.011771 | 0.011901 |
| 0.011800 | 0.011838 | 0.011799 | 0.012051 | 0.011765 | 0.012573 | 0.011801 |
| 0.012540 | 0.012241 | 0.012375 | 0.012714 | 0.011765 | 0.011463 | 0.011766 |
| 0.012171 | 0.012140 | 0.011732 | 0.011631 | 0.011699 | 0.011699 | 0.011669 |
| 0.011564 | 0.011569 | 0.011631 | 0.011598 | 0.011968 | 0.012034 | 0.012036 |
| 0.011935 | 0.012035 | 0.012139 | 0.011906 | 0.012171 | 0.012178 | 0.012238 |
| 0.012239 | 0.012273 | 0.012220 | 0.012239 | 0.012240 | 0.011295 | 0.011766 |
| 0.011867 | 0.012371 | 0.011840 | 0.012101 | 0.012575 | 0.011637 | 0.011531 |
| 0.011496 | 0.011496 | 0.011968 | 0.011924 | 0.012116 | 0.011832 | 0.011498 |
| S115     | 0.011664 | 0.011664 | 0.012001 | 0.011765 | 0.011765 | 0.011832 |
| 0.011671 | 0.011603 | 0.011832 | 0.011262 | 0.011329 | 0.011296 | 0.011262 |
| 0.011295 | 0.011463 | 0.011262 | 0.011295 | 0.011362 | 0.011329 | 0.011295 |
| 0.011262 | 0.011295 | 0.011396 | 0.011262 | 0.011295 | 0.011295 | 0.011637 |
| 0.011530 | 0.011295 | 0.011194 | 0.011429 | 0.011362 | 0.011329 | 0.011362 |
| 0.011329 | 0.011429 | 0.011329 | 0.011329 | 0.011362 | 0.011329 | 0.011496 |
| 0.011262 | 0.011329 | 0.011362 | 0.011295 | 0.011396 | 0.011429 | 0.011362 |
| 0.011329 | 0.011497 | 0.011396 | 0.011664 | 0.011329 | 0.011597 | 0.011329 |
| 0.011295 | 0.011396 | 0.011463 | 0.011597 | 0.011698 | 0.011396 | 0.011496 |
| 0.011362 | 0.011429 | 0.011329 | 0.011564 | 0.011799 | 0.011329 | 0.011396 |



|          |          |          |          |          |          |          |
|----------|----------|----------|----------|----------|----------|----------|
| 0.011295 | 0.011396 | 0.011362 | 0.011429 | 0.011362 | 0.011362 | 0.011362 |
| 0.011262 | 0.011295 | 0.011262 | 0.011362 | 0.011329 | 0.011363 | 0.011429 |
| 0.011362 | 0.011329 | 0.011396 | 0.011295 | 0.011429 | 0.011262 | 0.011329 |
| 0.011496 | 0.011429 | 0.011664 | 0.011497 | 0.011329 | 0.011564 | 0.011329 |
| 0.011505 | 0.011733 | 0.011551 | 0.011256 | 0.011247 | 0.011355 | 0.011454 |
| 0.012085 | 0.011518 | 0.011266 | 0.011564 | 0.011564 | 0.011362 | 0.011463 |
| 0.011396 | 0.011362 | 0.011429 | 0.000000 | 0.011429 | 0.011362 | 0.011362 |
| 0.011329 | 0.011429 | 0.011631 | 0.011496 | 0.011396 | 0.011362 | 0.011295 |
| 0.011262 | 0.011262 | 0.011329 | 0.011295 | 0.011497 | 0.011463 | 0.011396 |
| 0.011497 | 0.011564 | 0.011295 | 0.011295 | 0.011329 | 0.011329 | 0.011330 |
| 0.011398 | 0.011329 | 0.011329 | 0.011204 | 0.011277 | 0.011236 | 0.011329 |
| 0.011331 | 0.011266 | 0.011318 | 0.011302 | 0.011230 | 0.011266 | 0.011297 |
| 0.011564 | 0.011336 | 0.011370 | 0.011262 | 0.011268 | 0.011397 | 0.011363 |
| 0.011430 | 0.011363 | 0.011363 | 0.011463 | 0.011396 | 0.011765 | 0.011564 |
| 0.011597 | 0.011463 | 0.011329 | 0.011430 | 0.011228 | 0.011463 | 0.011262 |
| 0.011329 | 0.011329 | 0.011295 | 0.011262 | 0.011295 | 0.011262 | 0.011362 |
| 0.011329 | 0.011430 | 0.011362 | 0.011262 | 0.011363 | 0.011463 | 0.011466 |
| 0.011463 | 0.011362 | 0.011262 | 0.011195 | 0.011329 | 0.011262 | 0.011195 |
| 0.011298 | 0.011463 | 0.011262 | 0.011463 | 0.011228 | 0.011329 | 0.011295 |
| 0.011396 | 0.011295 | 0.011329 | 0.011295 | 0.011329 | 0.011195 | 0.011329 |
| 0.011362 | 0.011295 | 0.011362 | 0.011295 | 0.011329 | 0.011362 | 0.011597 |
| 0.011698 | 0.011631 | 0.011698 | 0.011465 | 0.011698 | 0.011329 | 0.011295 |
| 0.011330 | 0.011586 | 0.011472 | 0.011232 | 0.011705 | 0.011197 | 0.011336 |
| 0.011705 | 0.011604 | 0.011496 | 0.011698 | 0.011402 | 0.011564 | 0.011530 |
| 0.011463 | 0.011631 | 0.011486 | 0.011307 | 0.011312 | 0.011362 | 0.011432 |
| 0.011530 | 0.011431 | 0.011567 | 0.011635 | 0.011564 | 0.011631 | 0.011738 |
| 0.011466 | 0.011637 | 0.011568 | 0.011500 | 0.011767 | 0.011228 | 0.011431 |
| 0.011396 | 0.011329 | 0.011228 | 0.011228 | 0.011295 | 0.011295 | 0.011362 |
| 0.011295 | 0.011362 | 0.011262 | 0.011362 | 0.011295 | 0.011295 | 0.011362 |
| 0.011295 | 0.011731 | 0.011631 | 0.011664 | 0.011194 | 0.011295 | 0.011329 |
| 0.011329 | 0.011295 | 0.011362 | 0.011396 | 0.011262 | 0.011262 | 0.011262 |
| 0.011799 | 0.011429 | 0.011429 | 0.011228 | 0.011329 | 0.011497 | 0.011262 |
| 0.011262 | 0.011329 | 0.011295 | 0.011463 | 0.011262 | 0.011396 | 0.011530 |
| 0.011463 | 0.011295 | 0.011295 | 0.011228 | 0.011228 | 0.011396 | 0.011329 |
| 0.011228 | 0.011329 | 0.011195 | 0.011228 | 0.011362 | 0.011497 | 0.011262 |
| 0.011228 | 0.011362 | 0.011295 | 0.011195 | 0.011530 | 0.011195 | 0.011362 |
| 0.011437 | 0.011262 | 0.011564 | 0.011396 | 0.011429 | 0.011295 | 0.011396 |
| 0.011262 | 0.011597 | 0.011194 | 0.011463 | 0.011262 | 0.011262 | 0.011194 |
| 0.011429 | 0.011631 | 0.011329 | 0.011396 | 0.011228 | 0.011631 | 0.011262 |
| 0.011262 | 0.011262 | 0.011295 | 0.011396 | 0.011295 | 0.011396 | 0.011463 |
| 0.011463 | 0.011429 | 0.011329 | 0.011429 | 0.011396 | 0.011262 | 0.011228 |
| 0.011262 | 0.011262 | 0.011329 | 0.011262 | 0.011228 | 0.011396 | 0.011262 |
| 0.011295 | 0.011295 | 0.011429 | 0.011463 | 0.011362 | 0.011295 | 0.011295 |
| 0.011362 | 0.011295 | 0.011396 | 0.011262 | 0.011396 | 0.011496 | 0.011799 |
| 0.011295 | 0.011698 | 0.011302 | 0.017823 | 0.011322 | 0.011427 | 0.011653 |
| 0.011614 | 0.011658 | 0.011374 | 0.011292 | 0.011774 | 0.011682 | 0.011425 |
| 0.011534 | 0.011610 | 0.011216 | 0.011270 | 0.011294 | 0.011356 | 0.011318 |
| 0.011529 | 0.011470 | 0.011468 | 0.011259 | 0.011429 | 0.011463 | 0.011466 |
| 0.011335 | 0.011429 | 0.011429 | 0.011396 | 0.011362 | 0.011362 | 0.011329 |
| 0.011362 | 0.011295 | 0.011329 | 0.011362 | 0.011329 | 0.011262 | 0.011295 |
| 0.011295 | 0.011362 | 0.011262 | 0.011362 | 0.011396 | 0.011429 | 0.011329 |
| 0.011362 | 0.011329 | 0.011665 | 0.011665 | 0.011396 | 0.011430 | 0.011463 |
| 0.011228 | 0.011228 | 0.011262 | 0.011362 | 0.011228 | 0.011463 | 0.011463 |
| 0.011497 | 0.011496 | 0.011429 | 0.011530 | 0.011698 | 0.011532 | 0.011362 |
| 0.011362 | 0.011429 | 0.011463 | 0.011295 | 0.011362 | 0.011329 | 0.011362 |
| 0.011430 | 0.011430 | 0.011463 | 0.011430 | 0.011330 | 0.011530 | 0.011497 |
| 0.011365 | 0.011262 | 0.011362 | 0.011463 | 0.011362 | 0.011497 | 0.011530 |
| 0.011698 | 0.011402 | 0.011564 | 0.011530 | 0.011463 | 0.011631 | 0.011262 |
| 0.011431 | 0.011329 | 0.011295 | 0.011295 | 0.011362 | 0.011262 | 0.011362 |
| 0.011396 | 0.011429 | 0.011329 | 0.011362 | 0.011329 | 0.011665 | 0.011665 |

|          |          |          |          |          |          |          |
|----------|----------|----------|----------|----------|----------|----------|
| 0.011396 | 0.011430 | 0.011496 | 0.011429 | 0.012069 | 0.011453 | 0.011412 |
| 0.011482 | 0.011442 | 0.011552 | 0.011441 | 0.011550 | 0.011474 | 0.011439 |
| 0.012021 | 0.011337 | 0.011471 | 0.011406 | 0.011680 | 0.011536 | 0.011639 |
| 0.012046 | 0.011475 | 0.011601 | 0.011664 | 0.011530 | 0.011530 | 0.011567 |
| 0.011228 | 0.011396 | 0.011530 | 0.011496 | 0.011499 | 0.011496 | 0.011464 |
| 0.011329 | 0.011262 | 0.011295 | 0.011329 | 0.011228 | 0.011295 | 0.011194 |
| 0.011329 | 0.011362 | 0.011262 | 0.011228 | 0.011329 | 0.011262 | 0.011295 |
| 0.011295 | 0.011228 | 0.011295 | 0.011329 | 0.011228 | 0.011429 | 0.011463 |
| 0.011362 | 0.011429 | 0.011362 | 0.011362 | 0.011295 | 0.011698 | 0.011329 |
| 0.011373 | 0.011295 | 0.011530 | 0.011535 | 0.011396 | 0.011396 | 0.011396 |
| 0.011396 | 0.011329 | 0.011295 | 0.011329 | 0.011429 | 0.011429 | 0.011362 |
| 0.011362 | 0.011496 | 0.011664 | 0.011396 | 0.011597 | 0.011597 | 0.011463 |
| 0.011295 | 0.011362 | 0.011396 | 0.011799 | 0.011362 | 0.011396 | 0.011362 |
| 0.011396 | 0.011329 | 0.011329 | 0.011631 | 0.011564 | 0.011597 | 0.011329 |
| 0.011429 | 0.011496 | 0.011362 | 0.011429 | 0.011396 | 0.011262 | 0.011597 |
| 0.011362 | 0.011329 | 0.011329 | 0.011496 | 0.011329 | 0.011429 | 0.011664 |
| 0.011362 | 0.011739 | 0.011732 | 0.011548 | 0.011286 | 0.011434 | 0.011318 |
| 0.011280 | 0.011761 | 0.011271 | 0.011507 | 0.011304 | 0.011416 | 0.011432 |
| 0.011519 | 0.011258 | 0.011394 | 0.011258 | 0.011276 | 0.011462 | 0.011425 |
| 0.011437 | 0.011336 | 0.011412 | 0.011342 | 0.011364 | 0.011497 | 0.011564 |
| 0.011564 | 0.011430 | 0.011533 | 0.011535 | 0.011670 | 0.011661 | 0.011362 |
| 0.011597 | 0.011463 | 0.011329 | 0.011430 | 0.011228 | 0.011463 | 0.011262 |
| 0.011329 | 0.011329 | 0.011295 | 0.011262 | 0.011295 | 0.011262 | 0.011362 |
| 0.011340 | 0.011340 | 0.011334 | 0.011368 | 0.011505 | 0.011470 | 0.011470 |
| 0.011469 | 0.011396 | 0.011208 | 0.011204 | 0.011331 | 0.011501 | 0.011501 |
| 0.011296 | 0.011365 | 0.011599 | 0.011567 | 0.011497 | 0.011531 | 0.011463 |
| 0.011396 | 0.011463 | 0.011463 | 0.011362 | 0.011933 | 0.011530 | 0.011597 |
| 0.011631 | 0.011701 | 0.011333 | 0.011407 | 0.011295 | 0.011497 | 0.011463 |
| 0.011497 | 0.011530 | 0.011530 | 0.011530 | 0.011689 | 0.011664 | 0.011303 |
| 0.011195 | 0.011199 | 0.011298 | 0.011264 | 0.011368 | 0.011209 | 0.011536 |
| 0.011335 | 0.011455 | 0.011203 | 0.011360 | 0.011329 | 0.011402 | 0.011295 |
| 0.011262 | 0.011262 | 0.011329 | 0.011295 | 0.011497 | 0.011463 | 0.011396 |
| 0.011497 | 0.011564 | 0.011295 | 0.011295 | 0.011329 | 0.011329 | 0.011330 |
| 0.011398 | 0.011329 | 0.011329 | 0.011364 | 0.011497 | 0.011564 | 0.011564 |
| 0.011430 | 0.011533 | 0.011535 | 0.011670 | 0.011661 | 0.011362 | 0.011530 |
| 0.011463 | 0.011463 | 0.011297 | 0.011478 | 0.011408 | 0.011435 | 0.011305 |
| 0.011473 | 0.011698 | 0.011484 | 0.011366 | 0.011262 | 0.011463 | 0.011329 |
| 0.011430 | 0.011362 | 0.011262 | 0.011363 | 0.011463 | 0.011466 | 0.011362 |
| 0.011262 | 0.011195 | 0.011329 | 0.011262 | 0.011195 | 0.011298 | 0.011463 |
| 0.011362 | 0.011295 | 0.011329 | 0.011362 | 0.011329 | 0.011262 | 0.011463 |
| 0.011329 | 0.011362 | 0.011362 | 0.011295 | 0.011362 | 0.011597 | 0.011262 |
| 0.011295 | 0.011698 | 0.011295 | 0.011329 | 0.011295 | 0.011664 | 0.011232 |
| 0.011735 | 0.011273 | 0.011311 | 0.011463 | 0.011549 | 0.011491 | 0.011186 |
| 0.011270 | 0.011463 | 0.011564 | 0.011671 | 0.011531 | 0.011669 | 0.011800 |
| 0.011699 | 0.011737 | 0.011698 | 0.011949 | 0.011664 | 0.012539 | 0.011700 |
| 0.012439 | 0.012207 | 0.012341 | 0.012612 | 0.011664 | 0.011362 | 0.011665 |
| 0.012103 | 0.012038 | 0.011631 | 0.011530 | 0.011598 | 0.011598 | 0.011534 |
| 0.011463 | 0.011467 | 0.011530 | 0.011497 | 0.011867 | 0.011933 | 0.011935 |
| 0.011834 | 0.011934 | 0.012038 | 0.011804 | 0.012104 | 0.012110 | 0.012171 |
| 0.012172 | 0.012205 | 0.012152 | 0.012172 | 0.012173 | 0.011396 | 0.011699 |
| 0.011766 | 0.012270 | 0.011772 | 0.012001 | 0.012474 | 0.011536 | 0.011430 |
| 0.011396 | 0.011396 | 0.011867 | 0.011883 | 0.012010 | 0.011732 | 0.011397 |
| s116     | 0.011765 | 0.011765 | 0.012068 | 0.011832 | 0.011832 | 0.011900 |
| 0.011773 | 0.011705 | 0.011900 | 0.011362 | 0.011429 | 0.011397 | 0.011362 |
| 0.011396 | 0.011564 | 0.011362 | 0.011396 | 0.011463 | 0.011429 | 0.011396 |
| 0.011362 | 0.011396 | 0.011496 | 0.011363 | 0.011396 | 0.011396 | 0.011739 |
| 0.011631 | 0.011396 | 0.011295 | 0.011530 | 0.011463 | 0.011430 | 0.011463 |
| 0.011429 | 0.011530 | 0.011429 | 0.011429 | 0.011463 | 0.011429 | 0.011597 |
| 0.011362 | 0.011429 | 0.011463 | 0.011396 | 0.011496 | 0.011530 | 0.011463 |
| 0.011429 | 0.011597 | 0.011497 | 0.011765 | 0.011429 | 0.011698 | 0.011429 |

|          |          |          |          |          |          |          |
|----------|----------|----------|----------|----------|----------|----------|
| 0.011396 | 0.011497 | 0.011497 | 0.011698 | 0.011799 | 0.011497 | 0.011597 |
| 0.011463 | 0.011530 | 0.011430 | 0.011664 | 0.011900 | 0.011429 | 0.011497 |
| 0.011396 | 0.011496 | 0.011463 | 0.011530 | 0.011463 | 0.011463 | 0.011463 |
| 0.011362 | 0.011396 | 0.011362 | 0.011463 | 0.011429 | 0.011464 | 0.011530 |
| 0.011463 | 0.011429 | 0.011497 | 0.011396 | 0.011530 | 0.011362 | 0.011429 |
| 0.011597 | 0.011530 | 0.011765 | 0.011597 | 0.011429 | 0.011664 | 0.011429 |
| 0.011542 | 0.011770 | 0.011626 | 0.011295 | 0.011321 | 0.011428 | 0.011493 |
| 0.012158 | 0.011671 | 0.011307 | 0.011664 | 0.011664 | 0.011463 | 0.011564 |
| 0.011497 | 0.011463 | 0.011530 | 0.011429 | 0.000000 | 0.011463 | 0.011463 |
| 0.011429 | 0.011530 | 0.011732 | 0.011597 | 0.011497 | 0.011463 | 0.011396 |
| 0.011362 | 0.011362 | 0.011430 | 0.011396 | 0.011597 | 0.011564 | 0.011497 |
| 0.011597 | 0.011665 | 0.011396 | 0.011396 | 0.011430 | 0.011429 | 0.011432 |
| 0.011500 | 0.011430 | 0.011430 | 0.011312 | 0.011386 | 0.011341 | 0.011430 |
| 0.011433 | 0.011370 | 0.011392 | 0.011405 | 0.011332 | 0.011369 | 0.011398 |
| 0.011672 | 0.011439 | 0.011474 | 0.011363 | 0.011371 | 0.011498 | 0.011464 |
| 0.011531 | 0.011465 | 0.011464 | 0.011564 | 0.011496 | 0.011866 | 0.011665 |
| 0.011698 | 0.011564 | 0.011429 | 0.011530 | 0.011329 | 0.011564 | 0.011362 |
| 0.011429 | 0.011429 | 0.011396 | 0.011362 | 0.011396 | 0.011362 | 0.011463 |
| 0.011430 | 0.011530 | 0.011463 | 0.011362 | 0.011465 | 0.011564 | 0.011567 |
| 0.011564 | 0.011463 | 0.011362 | 0.011296 | 0.011430 | 0.011362 | 0.011295 |
| 0.011400 | 0.011564 | 0.011362 | 0.011564 | 0.011329 | 0.011430 | 0.011396 |
| 0.011497 | 0.011396 | 0.011430 | 0.011396 | 0.011430 | 0.011295 | 0.011430 |
| 0.011463 | 0.011396 | 0.011463 | 0.011396 | 0.011430 | 0.011463 | 0.011698 |
| 0.011799 | 0.011732 | 0.011799 | 0.011532 | 0.011799 | 0.011429 | 0.011396 |
| 0.011432 | 0.011667 | 0.011563 | 0.011300 | 0.011773 | 0.011265 | 0.011414 |
| 0.011807 | 0.011706 | 0.011597 | 0.011799 | 0.011504 | 0.011665 | 0.011631 |
| 0.011564 | 0.011732 | 0.011558 | 0.011349 | 0.011354 | 0.011463 | 0.011534 |
| 0.011631 | 0.011532 | 0.011669 | 0.011737 | 0.011665 | 0.011732 | 0.011839 |
| 0.011568 | 0.011739 | 0.011670 | 0.011601 | 0.011868 | 0.011329 | 0.011532 |
| 0.011496 | 0.011429 | 0.011262 | 0.011329 | 0.011396 | 0.011396 | 0.011463 |
| 0.011396 | 0.011463 | 0.011362 | 0.011463 | 0.011396 | 0.011396 | 0.011463 |
| 0.011396 | 0.011832 | 0.011732 | 0.011765 | 0.011295 | 0.011396 | 0.011430 |
| 0.011429 | 0.011396 | 0.011463 | 0.011497 | 0.011362 | 0.011362 | 0.011362 |
| 0.011900 | 0.011530 | 0.011530 | 0.011329 | 0.011429 | 0.011597 | 0.011362 |
| 0.011362 | 0.011429 | 0.011396 | 0.011564 | 0.011362 | 0.011497 | 0.011631 |
| 0.011564 | 0.011396 | 0.011396 | 0.011329 | 0.011329 | 0.011497 | 0.011429 |
| 0.011329 | 0.011429 | 0.011295 | 0.011329 | 0.011463 | 0.011598 | 0.011362 |
| 0.011329 | 0.011463 | 0.011396 | 0.011295 | 0.011631 | 0.011295 | 0.011463 |
| 0.011540 | 0.011362 | 0.011664 | 0.011497 | 0.011530 | 0.011396 | 0.011497 |
| 0.011362 | 0.011698 | 0.011295 | 0.011564 | 0.011362 | 0.011362 | 0.011295 |
| 0.011530 | 0.011698 | 0.011430 | 0.011497 | 0.011329 | 0.011732 | 0.011362 |
| 0.011362 | 0.011362 | 0.011396 | 0.011497 | 0.011396 | 0.011497 | 0.011564 |
| 0.011564 | 0.011530 | 0.011429 | 0.011530 | 0.011496 | 0.011362 | 0.011329 |
| 0.011362 | 0.011362 | 0.011430 | 0.011362 | 0.011329 | 0.011497 | 0.011362 |
| 0.011396 | 0.011396 | 0.011530 | 0.011564 | 0.011463 | 0.011396 | 0.011396 |
| 0.011463 | 0.011396 | 0.011496 | 0.011362 | 0.011497 | 0.011597 | 0.011900 |
| 0.011396 | 0.011799 | 0.011371 | 0.011789 | 0.011322 | 0.011427 | 0.011723 |
| 0.011683 | 0.011729 | 0.011374 | 0.011408 | 0.011885 | 0.011751 | 0.011425 |
| 0.011677 | 0.011610 | 0.011255 | 0.011312 | 0.011373 | 0.011455 | 0.011318 |
| 0.011670 | 0.011544 | 0.011542 | 0.011325 | 0.011530 | 0.011564 | 0.011568 |
| 0.011438 | 0.011463 | 0.011530 | 0.011497 | 0.011463 | 0.011463 | 0.011430 |
| 0.011463 | 0.011396 | 0.011429 | 0.011463 | 0.011430 | 0.011362 | 0.011396 |
| 0.011396 | 0.011463 | 0.011362 | 0.011463 | 0.011497 | 0.011530 | 0.011429 |
| 0.011463 | 0.011430 | 0.011766 | 0.011766 | 0.011497 | 0.011531 | 0.011564 |
| 0.011329 | 0.011329 | 0.011362 | 0.011463 | 0.011329 | 0.011564 | 0.011564 |
| 0.011597 | 0.011597 | 0.011530 | 0.011631 | 0.011799 | 0.011633 | 0.011463 |
| 0.011463 | 0.011530 | 0.011564 | 0.011396 | 0.011463 | 0.011430 | 0.011463 |
| 0.011531 | 0.011530 | 0.011564 | 0.011531 | 0.011431 | 0.011631 | 0.011597 |
| 0.011467 | 0.011362 | 0.011463 | 0.011564 | 0.011463 | 0.011598 | 0.011631 |
| 0.011799 | 0.011504 | 0.011665 | 0.011631 | 0.011564 | 0.011732 | 0.011363 |

|          |          |          |          |          |          |          |
|----------|----------|----------|----------|----------|----------|----------|
| 0.011532 | 0.011430 | 0.011396 | 0.011396 | 0.011463 | 0.011362 | 0.011463 |
| 0.011497 | 0.011530 | 0.011429 | 0.011463 | 0.011430 | 0.011766 | 0.011766 |
| 0.011497 | 0.011531 | 0.011597 | 0.011530 | 0.012170 | 0.011525 | 0.011482 |
| 0.011588 | 0.011511 | 0.011622 | 0.011545 | 0.011620 | 0.011577 | 0.011508 |
| 0.012125 | 0.011441 | 0.011574 | 0.011510 | 0.011783 | 0.011638 | 0.011741 |
| 0.012148 | 0.011550 | 0.011703 | 0.011765 | 0.011631 | 0.011631 | 0.011668 |
| 0.011329 | 0.011497 | 0.011631 | 0.011597 | 0.011601 | 0.011597 | 0.011565 |
| 0.011429 | 0.011362 | 0.011396 | 0.011429 | 0.011329 | 0.011396 | 0.011295 |
| 0.011429 | 0.011463 | 0.011362 | 0.011329 | 0.011429 | 0.011362 | 0.011396 |
| 0.011396 | 0.011329 | 0.011396 | 0.011430 | 0.011329 | 0.011530 | 0.011564 |
| 0.011463 | 0.011530 | 0.011463 | 0.011463 | 0.011396 | 0.011799 | 0.011429 |
| 0.011478 | 0.011396 | 0.011631 | 0.011637 | 0.011497 | 0.011496 | 0.011497 |
| 0.011497 | 0.011430 | 0.011396 | 0.011430 | 0.011530 | 0.011530 | 0.011463 |
| 0.011463 | 0.011597 | 0.011765 | 0.011496 | 0.011698 | 0.011698 | 0.011564 |
| 0.011396 | 0.011463 | 0.011497 | 0.011900 | 0.011463 | 0.011497 | 0.011463 |
| 0.011497 | 0.011429 | 0.011429 | 0.011732 | 0.011665 | 0.011698 | 0.011429 |
| 0.011530 | 0.011597 | 0.011463 | 0.011530 | 0.011496 | 0.011362 | 0.011698 |
| 0.011463 | 0.011429 | 0.011429 | 0.011597 | 0.011429 | 0.011530 | 0.011765 |
| 0.011463 | 0.011841 | 0.011832 | 0.011589 | 0.011286 | 0.011536 | 0.011473 |
| 0.011335 | 0.011800 | 0.011341 | 0.011552 | 0.011353 | 0.011468 | 0.011538 |
| 0.011621 | 0.011258 | 0.011506 | 0.011391 | 0.011384 | 0.011529 | 0.011466 |
| 0.011475 | 0.011375 | 0.011448 | 0.011412 | 0.011465 | 0.011597 | 0.011665 |
| 0.011665 | 0.011531 | 0.011635 | 0.011636 | 0.011772 | 0.011802 | 0.011463 |
| 0.011698 | 0.011564 | 0.011429 | 0.011530 | 0.011329 | 0.011564 | 0.011362 |
| 0.011429 | 0.011429 | 0.011396 | 0.011362 | 0.011396 | 0.011362 | 0.011463 |
| 0.011410 | 0.011445 | 0.011437 | 0.011471 | 0.011608 | 0.011573 | 0.011572 |
| 0.011571 | 0.011497 | 0.011319 | 0.011312 | 0.011433 | 0.011602 | 0.011603 |
| 0.011397 | 0.011467 | 0.011700 | 0.011669 | 0.011598 | 0.011632 | 0.011564 |
| 0.011496 | 0.011564 | 0.011564 | 0.011463 | 0.012034 | 0.011631 | 0.011698 |
| 0.011732 | 0.011808 | 0.011435 | 0.011511 | 0.011396 | 0.011597 | 0.011564 |
| 0.011598 | 0.011631 | 0.011631 | 0.011631 | 0.011768 | 0.011765 | 0.011407 |
| 0.011297 | 0.011268 | 0.011401 | 0.011366 | 0.011470 | 0.011284 | 0.011638 |
| 0.011403 | 0.011499 | 0.011203 | 0.011397 | 0.011430 | 0.011505 | 0.011396 |
| 0.011362 | 0.011362 | 0.011430 | 0.011396 | 0.011597 | 0.011564 | 0.011497 |
| 0.011597 | 0.011665 | 0.011396 | 0.011396 | 0.011430 | 0.011429 | 0.011432 |
| 0.011500 | 0.011430 | 0.011430 | 0.011465 | 0.011597 | 0.011665 | 0.011665 |
| 0.011531 | 0.011635 | 0.011636 | 0.011772 | 0.011802 | 0.011463 | 0.011631 |
| 0.011564 | 0.011564 | 0.011398 | 0.011547 | 0.011512 | 0.011537 | 0.011376 |
| 0.011577 | 0.011744 | 0.011526 | 0.011468 | 0.011362 | 0.011564 | 0.011430 |
| 0.011530 | 0.011463 | 0.011362 | 0.011465 | 0.011564 | 0.011567 | 0.011463 |
| 0.011362 | 0.011296 | 0.011430 | 0.011362 | 0.011295 | 0.011400 | 0.011564 |
| 0.011463 | 0.011396 | 0.011429 | 0.011463 | 0.011430 | 0.011362 | 0.011564 |
| 0.011429 | 0.011463 | 0.011463 | 0.011396 | 0.011463 | 0.011698 | 0.011362 |
| 0.011396 | 0.011799 | 0.011396 | 0.011429 | 0.011396 | 0.011765 | 0.011317 |
| 0.011791 | 0.011315 | 0.011461 | 0.011543 | 0.011630 | 0.011527 | 0.011269 |
| 0.011428 | 0.011564 | 0.011664 | 0.011773 | 0.011633 | 0.011737 | 0.011901 |
| 0.011801 | 0.011838 | 0.011799 | 0.012017 | 0.011732 | 0.012607 | 0.011802 |
| 0.012507 | 0.012275 | 0.012409 | 0.012714 | 0.011765 | 0.011396 | 0.011766 |
| 0.012205 | 0.012106 | 0.011732 | 0.011631 | 0.011699 | 0.011699 | 0.011669 |
| 0.011564 | 0.011535 | 0.011631 | 0.011598 | 0.011968 | 0.012034 | 0.012036 |
| 0.011935 | 0.012036 | 0.012139 | 0.011872 | 0.012205 | 0.012212 | 0.012272 |
| 0.012273 | 0.012307 | 0.012221 | 0.012273 | 0.012275 | 0.011496 | 0.011800 |
| 0.011868 | 0.012371 | 0.011874 | 0.012102 | 0.012575 | 0.011638 | 0.011531 |
| 0.011496 | 0.011496 | 0.011968 | 0.011883 | 0.012116 | 0.011832 | 0.011498 |
| s117     | 0.011698 | 0.011698 | 0.012034 | 0.011799 | 0.011799 | 0.011866 |
| 0.011705 | 0.011637 | 0.011866 | 0.011295 | 0.011362 | 0.011329 | 0.011295 |
| 0.011329 | 0.011496 | 0.011295 | 0.011329 | 0.011396 | 0.011362 | 0.011329 |
| 0.011295 | 0.011329 | 0.011429 | 0.011295 | 0.011262 | 0.011329 | 0.011671 |
| 0.011564 | 0.011329 | 0.011228 | 0.011463 | 0.011295 | 0.011362 | 0.011329 |
| 0.011362 | 0.011396 | 0.011362 | 0.011362 | 0.011396 | 0.011362 | 0.011530 |

|          |          |          |          |          |          |          |
|----------|----------|----------|----------|----------|----------|----------|
| 0.011295 | 0.011362 | 0.011396 | 0.011329 | 0.011429 | 0.011463 | 0.011396 |
| 0.011362 | 0.011530 | 0.011430 | 0.011698 | 0.011362 | 0.011564 | 0.011362 |
| 0.011329 | 0.011429 | 0.011497 | 0.011564 | 0.011732 | 0.011429 | 0.011530 |
| 0.011329 | 0.011396 | 0.011362 | 0.011530 | 0.011832 | 0.011362 | 0.011429 |
| 0.011329 | 0.011429 | 0.011396 | 0.011463 | 0.011396 | 0.011396 | 0.011396 |
| 0.011295 | 0.011329 | 0.011295 | 0.011396 | 0.011362 | 0.011363 | 0.011463 |
| 0.011396 | 0.011362 | 0.011362 | 0.011329 | 0.011463 | 0.011228 | 0.011362 |
| 0.011530 | 0.011463 | 0.011698 | 0.011530 | 0.011362 | 0.011530 | 0.011362 |
| 0.011505 | 0.011733 | 0.011551 | 0.011256 | 0.011247 | 0.011355 | 0.011454 |
| 0.012085 | 0.011518 | 0.011266 | 0.011597 | 0.011597 | 0.011262 | 0.011497 |
| 0.011429 | 0.011396 | 0.011463 | 0.011362 | 0.011463 | 0.000000 | 0.011396 |
| 0.011362 | 0.011463 | 0.011664 | 0.011530 | 0.011429 | 0.011396 | 0.011262 |
| 0.011295 | 0.011295 | 0.011295 | 0.011329 | 0.011530 | 0.011497 | 0.011429 |
| 0.011530 | 0.011597 | 0.011329 | 0.011329 | 0.011362 | 0.011362 | 0.011364 |
| 0.011432 | 0.011362 | 0.011362 | 0.011204 | 0.011313 | 0.011271 | 0.011363 |
| 0.011365 | 0.011301 | 0.011318 | 0.011336 | 0.011264 | 0.011300 | 0.011330 |
| 0.011600 | 0.011370 | 0.011336 | 0.011296 | 0.011302 | 0.011430 | 0.011396 |
| 0.011464 | 0.011397 | 0.011396 | 0.011496 | 0.011429 | 0.011732 | 0.011598 |
| 0.011631 | 0.011497 | 0.011362 | 0.011463 | 0.011262 | 0.011496 | 0.011295 |
| 0.011362 | 0.011362 | 0.011329 | 0.011295 | 0.011329 | 0.011295 | 0.011396 |
| 0.011295 | 0.011396 | 0.011396 | 0.011295 | 0.011397 | 0.011497 | 0.011499 |
| 0.011430 | 0.011396 | 0.011295 | 0.011229 | 0.011362 | 0.011295 | 0.011228 |
| 0.011332 | 0.011430 | 0.011228 | 0.011430 | 0.011262 | 0.011362 | 0.011329 |
| 0.011362 | 0.011329 | 0.011295 | 0.011329 | 0.011362 | 0.011228 | 0.011295 |
| 0.011329 | 0.011329 | 0.011396 | 0.011329 | 0.011362 | 0.011396 | 0.011631 |
| 0.011732 | 0.011664 | 0.011732 | 0.011465 | 0.011732 | 0.011362 | 0.011329 |
| 0.011263 | 0.011586 | 0.011472 | 0.011232 | 0.011739 | 0.011231 | 0.011336 |
| 0.011739 | 0.011638 | 0.011530 | 0.011732 | 0.011436 | 0.011597 | 0.011497 |
| 0.011496 | 0.011664 | 0.011522 | 0.011390 | 0.011395 | 0.011396 | 0.011466 |
| 0.011564 | 0.011465 | 0.011601 | 0.011601 | 0.011597 | 0.011665 | 0.011772 |
| 0.011500 | 0.011603 | 0.011602 | 0.011534 | 0.011800 | 0.011262 | 0.011465 |
| 0.011362 | 0.011362 | 0.011262 | 0.011262 | 0.011262 | 0.011329 | 0.011396 |
| 0.011262 | 0.011329 | 0.011228 | 0.011396 | 0.011262 | 0.011329 | 0.011396 |
| 0.011329 | 0.011765 | 0.011664 | 0.011698 | 0.011228 | 0.011329 | 0.011362 |
| 0.011362 | 0.011329 | 0.011396 | 0.011429 | 0.011295 | 0.011295 | 0.011295 |
| 0.011832 | 0.011463 | 0.011463 | 0.011262 | 0.011362 | 0.011463 | 0.011295 |
| 0.011295 | 0.011362 | 0.011329 | 0.011429 | 0.011295 | 0.011429 | 0.011496 |
| 0.011496 | 0.011329 | 0.011329 | 0.011262 | 0.011262 | 0.011429 | 0.011362 |
| 0.011262 | 0.011362 | 0.011228 | 0.011262 | 0.011396 | 0.011530 | 0.011295 |
| 0.011262 | 0.011396 | 0.011329 | 0.011228 | 0.011564 | 0.011228 | 0.011396 |
| 0.011402 | 0.011295 | 0.011597 | 0.011430 | 0.011463 | 0.011329 | 0.011429 |
| 0.011295 | 0.011564 | 0.011228 | 0.011497 | 0.011295 | 0.011295 | 0.011228 |
| 0.011396 | 0.011665 | 0.011362 | 0.011429 | 0.011262 | 0.011664 | 0.011295 |
| 0.011295 | 0.011295 | 0.011329 | 0.011362 | 0.011329 | 0.011429 | 0.011496 |
| 0.011497 | 0.011463 | 0.011362 | 0.011463 | 0.011362 | 0.011295 | 0.011262 |
| 0.011295 | 0.011295 | 0.011362 | 0.011295 | 0.011194 | 0.011429 | 0.011295 |
| 0.011329 | 0.011329 | 0.011463 | 0.011496 | 0.011396 | 0.011262 | 0.011329 |
| 0.011396 | 0.011329 | 0.011429 | 0.011295 | 0.011429 | 0.011530 | 0.011832 |
| 0.011329 | 0.011732 | 0.011302 | 0.017823 | 0.011257 | 0.011488 | 0.011653 |
| 0.011614 | 0.011658 | 0.011374 | 0.011292 | 0.011774 | 0.011682 | 0.011425 |
| 0.011534 | 0.011671 | 0.011216 | 0.011270 | 0.011255 | 0.011406 | 0.011318 |
| 0.011529 | 0.011470 | 0.011431 | 0.011259 | 0.011463 | 0.011497 | 0.011500 |
| 0.011301 | 0.011463 | 0.011463 | 0.011429 | 0.011396 | 0.011396 | 0.011363 |
| 0.011396 | 0.011329 | 0.011362 | 0.011396 | 0.011362 | 0.011295 | 0.011329 |
| 0.011329 | 0.011396 | 0.011295 | 0.011396 | 0.011430 | 0.011463 | 0.011362 |
| 0.011396 | 0.011362 | 0.011698 | 0.011698 | 0.011430 | 0.011464 | 0.011497 |
| 0.011262 | 0.011262 | 0.011295 | 0.011329 | 0.011262 | 0.011497 | 0.011497 |
| 0.011530 | 0.011530 | 0.011463 | 0.011564 | 0.011732 | 0.011565 | 0.011329 |
| 0.011396 | 0.011463 | 0.011429 | 0.011329 | 0.011396 | 0.011362 | 0.011396 |
| 0.011463 | 0.011463 | 0.011497 | 0.011396 | 0.011296 | 0.011564 | 0.011463 |

|          |          |          |          |          |          |          |
|----------|----------|----------|----------|----------|----------|----------|
| 0.011399 | 0.011295 | 0.011396 | 0.011497 | 0.011396 | 0.011530 | 0.011564 |
| 0.011732 | 0.011436 | 0.011597 | 0.011497 | 0.011496 | 0.011664 | 0.011295 |
| 0.011464 | 0.011363 | 0.011329 | 0.011329 | 0.011396 | 0.011295 | 0.011396 |
| 0.011430 | 0.011463 | 0.011362 | 0.011396 | 0.011362 | 0.011698 | 0.011698 |
| 0.011430 | 0.011464 | 0.011530 | 0.011463 | 0.012103 | 0.011524 | 0.011447 |
| 0.011517 | 0.011476 | 0.011587 | 0.011476 | 0.011585 | 0.011508 | 0.011474 |
| 0.012056 | 0.011372 | 0.011505 | 0.011441 | 0.011714 | 0.011570 | 0.011604 |
| 0.012080 | 0.011550 | 0.011635 | 0.011698 | 0.011564 | 0.011564 | 0.011601 |
| 0.011262 | 0.011362 | 0.011564 | 0.011530 | 0.011533 | 0.011530 | 0.011464 |
| 0.011362 | 0.011228 | 0.011262 | 0.011362 | 0.011194 | 0.011329 | 0.011228 |
| 0.011362 | 0.011396 | 0.011295 | 0.011262 | 0.011362 | 0.011295 | 0.011329 |
| 0.011329 | 0.011262 | 0.011329 | 0.011362 | 0.011262 | 0.011396 | 0.011496 |
| 0.011396 | 0.011463 | 0.011396 | 0.011396 | 0.011329 | 0.011732 | 0.011362 |
| 0.011408 | 0.011329 | 0.011564 | 0.011569 | 0.011362 | 0.011429 | 0.011429 |
| 0.011429 | 0.011295 | 0.011329 | 0.011295 | 0.011463 | 0.011463 | 0.011396 |
| 0.011396 | 0.011530 | 0.011698 | 0.011429 | 0.011631 | 0.011631 | 0.011496 |
| 0.011329 | 0.011396 | 0.011429 | 0.011832 | 0.011396 | 0.011362 | 0.011396 |
| 0.011429 | 0.011362 | 0.011362 | 0.011665 | 0.011530 | 0.011631 | 0.011362 |
| 0.011463 | 0.011530 | 0.011396 | 0.011463 | 0.011429 | 0.011295 | 0.011631 |
| 0.011396 | 0.011362 | 0.011362 | 0.011530 | 0.011362 | 0.011463 | 0.011698 |
| 0.011396 | 0.011773 | 0.011765 | 0.011548 | 0.011286 | 0.011468 | 0.011267 |
| 0.011335 | 0.011761 | 0.011271 | 0.011507 | 0.011304 | 0.011467 | 0.011432 |
| 0.011519 | 0.011258 | 0.011394 | 0.011258 | 0.011276 | 0.011462 | 0.011385 |
| 0.011399 | 0.011257 | 0.011412 | 0.011342 | 0.011397 | 0.011530 | 0.011597 |
| 0.011597 | 0.011464 | 0.011567 | 0.011569 | 0.011704 | 0.011696 | 0.011396 |
| 0.011631 | 0.011497 | 0.011362 | 0.011463 | 0.011262 | 0.011496 | 0.011295 |
| 0.011362 | 0.011362 | 0.011329 | 0.011295 | 0.011329 | 0.011295 | 0.011396 |
| 0.011375 | 0.011375 | 0.011368 | 0.011403 | 0.011539 | 0.011436 | 0.011504 |
| 0.011503 | 0.011430 | 0.011245 | 0.011240 | 0.011365 | 0.011535 | 0.011535 |
| 0.011329 | 0.011399 | 0.011632 | 0.011601 | 0.011531 | 0.011565 | 0.011496 |
| 0.011429 | 0.011496 | 0.011496 | 0.011396 | 0.011967 | 0.011564 | 0.011631 |
| 0.011665 | 0.011737 | 0.011367 | 0.011441 | 0.011329 | 0.011530 | 0.011497 |
| 0.011531 | 0.011564 | 0.011564 | 0.011564 | 0.011728 | 0.011698 | 0.011338 |
| 0.011229 | 0.011233 | 0.011333 | 0.011298 | 0.011402 | 0.011247 | 0.011570 |
| 0.011369 | 0.011455 | 0.011203 | 0.011397 | 0.011363 | 0.011437 | 0.011262 |
| 0.011295 | 0.011295 | 0.011295 | 0.011329 | 0.011530 | 0.011497 | 0.011429 |
| 0.011530 | 0.011597 | 0.011329 | 0.011329 | 0.011362 | 0.011362 | 0.011364 |
| 0.011432 | 0.011362 | 0.011362 | 0.011397 | 0.011530 | 0.011597 | 0.011597 |
| 0.011464 | 0.011567 | 0.011569 | 0.011704 | 0.011696 | 0.011396 | 0.011564 |
| 0.011497 | 0.011497 | 0.011331 | 0.011513 | 0.011442 | 0.011469 | 0.011305 |
| 0.011404 | 0.011607 | 0.011484 | 0.011400 | 0.011228 | 0.011430 | 0.011295 |
| 0.011396 | 0.011396 | 0.011295 | 0.011397 | 0.011497 | 0.011499 | 0.011396 |
| 0.011295 | 0.011229 | 0.011362 | 0.011295 | 0.011228 | 0.011332 | 0.011430 |
| 0.011396 | 0.011329 | 0.011362 | 0.011396 | 0.011362 | 0.011295 | 0.011497 |
| 0.011362 | 0.011396 | 0.011396 | 0.011329 | 0.011396 | 0.011631 | 0.011295 |
| 0.011329 | 0.011732 | 0.011329 | 0.011295 | 0.011329 | 0.011698 | 0.011274 |
| 0.011735 | 0.011273 | 0.011311 | 0.011503 | 0.011589 | 0.011491 | 0.011227 |
| 0.011270 | 0.011496 | 0.011597 | 0.011705 | 0.011531 | 0.011669 | 0.011834 |
| 0.011733 | 0.011770 | 0.011732 | 0.011949 | 0.011698 | 0.012573 | 0.011734 |
| 0.012473 | 0.012207 | 0.012375 | 0.012613 | 0.011698 | 0.011396 | 0.011699 |
| 0.012137 | 0.012038 | 0.011664 | 0.011564 | 0.011632 | 0.011632 | 0.011601 |
| 0.011496 | 0.011467 | 0.011564 | 0.011531 | 0.011901 | 0.011967 | 0.011968 |
| 0.011868 | 0.011968 | 0.012038 | 0.011804 | 0.012138 | 0.012144 | 0.012205 |
| 0.012205 | 0.012239 | 0.012152 | 0.012206 | 0.012173 | 0.011429 | 0.011732 |
| 0.011800 | 0.012303 | 0.011772 | 0.012034 | 0.012508 | 0.011536 | 0.011464 |
| 0.011429 | 0.011429 | 0.011900 | 0.011965 | 0.012045 | 0.011698 | 0.011397 |
| S118     | 0.011564 | 0.011564 | 0.012034 | 0.011799 | 0.011799 | 0.011866 |
| 0.011637 | 0.011569 | 0.011866 | 0.011295 | 0.011362 | 0.011329 | 0.011295 |
| 0.011329 | 0.011496 | 0.011295 | 0.011329 | 0.011396 | 0.011362 | 0.011329 |
| 0.011295 | 0.011329 | 0.011429 | 0.011295 | 0.011329 | 0.011329 | 0.011603 |

|          |          |          |          |          |          |          |
|----------|----------|----------|----------|----------|----------|----------|
| 0.011564 | 0.011329 | 0.011228 | 0.011463 | 0.011396 | 0.011362 | 0.011396 |
| 0.011362 | 0.011463 | 0.011362 | 0.011362 | 0.011396 | 0.011362 | 0.011530 |
| 0.011295 | 0.011362 | 0.011396 | 0.011329 | 0.011429 | 0.011463 | 0.011396 |
| 0.011362 | 0.011530 | 0.011430 | 0.011698 | 0.011362 | 0.011631 | 0.011362 |
| 0.011329 | 0.011429 | 0.011496 | 0.011631 | 0.011731 | 0.011429 | 0.011530 |
| 0.011396 | 0.011463 | 0.011362 | 0.011597 | 0.011832 | 0.011362 | 0.011429 |
| 0.011329 | 0.011429 | 0.011396 | 0.011463 | 0.011396 | 0.011396 | 0.011396 |
| 0.011295 | 0.011329 | 0.011295 | 0.011396 | 0.011362 | 0.011397 | 0.011463 |
| 0.011396 | 0.011362 | 0.011429 | 0.011329 | 0.011463 | 0.011295 | 0.011362 |
| 0.011530 | 0.011463 | 0.011698 | 0.011530 | 0.011362 | 0.011597 | 0.011362 |
| 0.011468 | 0.011695 | 0.011513 | 0.011177 | 0.011284 | 0.011391 | 0.011415 |
| 0.012121 | 0.011467 | 0.011225 | 0.011597 | 0.011597 | 0.011396 | 0.011496 |
| 0.011429 | 0.011329 | 0.011329 | 0.011362 | 0.011463 | 0.011396 | 0.000000 |
| 0.011094 | 0.011463 | 0.011597 | 0.011530 | 0.011429 | 0.011396 | 0.011329 |
| 0.011295 | 0.011295 | 0.011362 | 0.011329 | 0.011530 | 0.011497 | 0.011429 |
| 0.011530 | 0.011597 | 0.011329 | 0.011329 | 0.011362 | 0.011362 | 0.011364 |
| 0.011432 | 0.011362 | 0.011362 | 0.011240 | 0.011313 | 0.011271 | 0.011363 |
| 0.011365 | 0.011301 | 0.011355 | 0.011336 | 0.011264 | 0.011300 | 0.011330 |
| 0.011600 | 0.011370 | 0.011404 | 0.011296 | 0.011302 | 0.011430 | 0.011396 |
| 0.011464 | 0.011397 | 0.011396 | 0.011228 | 0.011295 | 0.011799 | 0.011597 |
| 0.011631 | 0.011497 | 0.011362 | 0.011463 | 0.011262 | 0.011496 | 0.011295 |
| 0.011362 | 0.011362 | 0.011329 | 0.011295 | 0.011329 | 0.011295 | 0.011396 |
| 0.011362 | 0.011463 | 0.011396 | 0.011295 | 0.011397 | 0.011497 | 0.011499 |
| 0.011497 | 0.011396 | 0.011295 | 0.011229 | 0.011362 | 0.011295 | 0.011228 |
| 0.011332 | 0.011497 | 0.011295 | 0.011497 | 0.011262 | 0.011362 | 0.011329 |
| 0.011429 | 0.011262 | 0.011362 | 0.011329 | 0.011362 | 0.011228 | 0.011362 |
| 0.011396 | 0.011329 | 0.011396 | 0.011329 | 0.011161 | 0.011396 | 0.011631 |
| 0.011732 | 0.011664 | 0.011732 | 0.011498 | 0.011732 | 0.011228 | 0.011329 |
| 0.011364 | 0.011666 | 0.011426 | 0.011266 | 0.011739 | 0.011231 | 0.011336 |
| 0.011671 | 0.011638 | 0.011496 | 0.011664 | 0.011367 | 0.011597 | 0.011564 |
| 0.011496 | 0.011664 | 0.011415 | 0.011307 | 0.011395 | 0.011396 | 0.011398 |
| 0.011564 | 0.011263 | 0.011601 | 0.011669 | 0.011396 | 0.011597 | 0.011636 |
| 0.011297 | 0.011671 | 0.011466 | 0.011533 | 0.011733 | 0.011262 | 0.011464 |
| 0.011429 | 0.011362 | 0.011262 | 0.011262 | 0.011329 | 0.011329 | 0.011396 |
| 0.011329 | 0.011396 | 0.011295 | 0.011396 | 0.011329 | 0.011329 | 0.011396 |
| 0.011329 | 0.011765 | 0.011664 | 0.011698 | 0.011228 | 0.011329 | 0.011362 |
| 0.011362 | 0.011329 | 0.011396 | 0.011429 | 0.011295 | 0.011295 | 0.011295 |
| 0.011832 | 0.011463 | 0.011463 | 0.011262 | 0.011362 | 0.011530 | 0.011295 |
| 0.011295 | 0.011362 | 0.011329 | 0.011496 | 0.011295 | 0.011429 | 0.011564 |
| 0.011496 | 0.011329 | 0.011329 | 0.011262 | 0.011262 | 0.011429 | 0.011362 |
| 0.011262 | 0.011362 | 0.011228 | 0.011262 | 0.011396 | 0.011530 | 0.011295 |
| 0.011262 | 0.011396 | 0.011329 | 0.011228 | 0.011564 | 0.011228 | 0.011396 |
| 0.011437 | 0.011295 | 0.011597 | 0.011430 | 0.011463 | 0.011329 | 0.011429 |
| 0.011295 | 0.011631 | 0.011228 | 0.011496 | 0.011295 | 0.011295 | 0.011228 |
| 0.011463 | 0.011665 | 0.011362 | 0.011429 | 0.011262 | 0.011664 | 0.011295 |
| 0.011295 | 0.011295 | 0.011329 | 0.011429 | 0.011329 | 0.011429 | 0.011496 |
| 0.011496 | 0.011463 | 0.011362 | 0.011463 | 0.011429 | 0.011295 | 0.011262 |
| 0.011295 | 0.011295 | 0.011362 | 0.011295 | 0.011262 | 0.011429 | 0.011295 |
| 0.011329 | 0.011329 | 0.011463 | 0.011496 | 0.011396 | 0.011329 | 0.011329 |
| 0.011396 | 0.011329 | 0.011429 | 0.011295 | 0.011429 | 0.011530 | 0.011832 |
| 0.011329 | 0.011731 | 0.011336 | 0.017860 | 0.011191 | 0.011305 | 0.011688 |
| 0.011648 | 0.011693 | 0.011322 | 0.011292 | 0.011664 | 0.011716 | 0.011303 |
| 0.011487 | 0.011426 | 0.011177 | 0.011228 | 0.011333 | 0.011307 | 0.011232 |
| 0.011482 | 0.011507 | 0.011505 | 0.011457 | 0.011463 | 0.011362 | 0.011432 |
| 0.011369 | 0.011463 | 0.011463 | 0.011429 | 0.011396 | 0.011396 | 0.011363 |
| 0.011396 | 0.011262 | 0.011362 | 0.011396 | 0.011362 | 0.011295 | 0.011195 |
| 0.011195 | 0.011396 | 0.011295 | 0.011396 | 0.011429 | 0.011463 | 0.011228 |
| 0.011396 | 0.011362 | 0.011698 | 0.011698 | 0.011429 | 0.011464 | 0.011497 |
| 0.011262 | 0.011262 | 0.011295 | 0.011396 | 0.011262 | 0.011497 | 0.011497 |
| 0.011530 | 0.011496 | 0.011463 | 0.011564 | 0.011732 | 0.011565 | 0.011396 |

|          |          |          |          |          |          |          |
|----------|----------|----------|----------|----------|----------|----------|
| 0.011396 | 0.011463 | 0.011497 | 0.011329 | 0.011396 | 0.011362 | 0.011396 |
| 0.011463 | 0.011463 | 0.011497 | 0.011463 | 0.011363 | 0.011564 | 0.011463 |
| 0.011399 | 0.011295 | 0.011396 | 0.011497 | 0.011396 | 0.011530 | 0.011564 |
| 0.011664 | 0.011367 | 0.011597 | 0.011564 | 0.011496 | 0.011664 | 0.011295 |
| 0.011464 | 0.011363 | 0.011195 | 0.011195 | 0.011396 | 0.011295 | 0.011396 |
| 0.011429 | 0.011463 | 0.011228 | 0.011396 | 0.011362 | 0.011698 | 0.011698 |
| 0.011429 | 0.011464 | 0.011396 | 0.011329 | 0.012069 | 0.011524 | 0.011341 |
| 0.011517 | 0.011476 | 0.011587 | 0.011441 | 0.011585 | 0.011439 | 0.011474 |
| 0.012021 | 0.011233 | 0.011368 | 0.011371 | 0.011645 | 0.011570 | 0.011672 |
| 0.012012 | 0.011512 | 0.011635 | 0.011698 | 0.011564 | 0.011564 | 0.011601 |
| 0.011262 | 0.011429 | 0.011564 | 0.011530 | 0.011533 | 0.011530 | 0.011498 |
| 0.011362 | 0.011295 | 0.011329 | 0.011362 | 0.011262 | 0.011329 | 0.011228 |
| 0.011362 | 0.011396 | 0.011295 | 0.011262 | 0.011362 | 0.011295 | 0.011329 |
| 0.011329 | 0.011262 | 0.011329 | 0.011362 | 0.011262 | 0.011463 | 0.011496 |
| 0.011396 | 0.011463 | 0.011396 | 0.011396 | 0.011329 | 0.011731 | 0.011362 |
| 0.011408 | 0.011329 | 0.011564 | 0.011569 | 0.011429 | 0.011429 | 0.011429 |
| 0.011429 | 0.011362 | 0.011329 | 0.011362 | 0.011463 | 0.011463 | 0.011396 |
| 0.011396 | 0.011530 | 0.011698 | 0.011429 | 0.011631 | 0.011631 | 0.011496 |
| 0.011329 | 0.011396 | 0.011429 | 0.011832 | 0.011396 | 0.011429 | 0.011396 |
| 0.011429 | 0.011362 | 0.011362 | 0.011664 | 0.011597 | 0.011631 | 0.011362 |
| 0.011463 | 0.011530 | 0.011396 | 0.011463 | 0.011429 | 0.011295 | 0.011631 |
| 0.011396 | 0.011362 | 0.011362 | 0.011530 | 0.011362 | 0.011463 | 0.011698 |
| 0.011396 | 0.011705 | 0.011765 | 0.011507 | 0.011229 | 0.011468 | 0.011267 |
| 0.011225 | 0.011722 | 0.011306 | 0.011462 | 0.011255 | 0.011366 | 0.011379 |
| 0.011519 | 0.011192 | 0.011339 | 0.011192 | 0.011222 | 0.011395 | 0.011385 |
| 0.011399 | 0.011296 | 0.011448 | 0.011377 | 0.011397 | 0.011530 | 0.011597 |
| 0.011597 | 0.011464 | 0.011567 | 0.011569 | 0.011704 | 0.011731 | 0.011396 |
| 0.011631 | 0.011497 | 0.011362 | 0.011463 | 0.011262 | 0.011496 | 0.011295 |
| 0.011362 | 0.011362 | 0.011329 | 0.011295 | 0.011329 | 0.011295 | 0.011396 |
| 0.011375 | 0.011375 | 0.011368 | 0.011403 | 0.011539 | 0.011470 | 0.011504 |
| 0.011503 | 0.011430 | 0.011171 | 0.011168 | 0.011365 | 0.011534 | 0.011535 |
| 0.011329 | 0.011399 | 0.011632 | 0.011601 | 0.011531 | 0.011565 | 0.011362 |
| 0.011429 | 0.011429 | 0.011429 | 0.011396 | 0.011933 | 0.011564 | 0.011631 |
| 0.011665 | 0.011736 | 0.011367 | 0.011441 | 0.011329 | 0.011262 | 0.011362 |
| 0.011531 | 0.011429 | 0.011564 | 0.011564 | 0.011650 | 0.011564 | 0.011338 |
| 0.011229 | 0.011233 | 0.011332 | 0.011298 | 0.011402 | 0.011247 | 0.011570 |
| 0.011369 | 0.011499 | 0.011251 | 0.011285 | 0.011363 | 0.011437 | 0.011329 |
| 0.011295 | 0.011295 | 0.011362 | 0.011329 | 0.011530 | 0.011497 | 0.011429 |
| 0.011530 | 0.011597 | 0.011329 | 0.011329 | 0.011362 | 0.011362 | 0.011364 |
| 0.011432 | 0.011362 | 0.011362 | 0.011397 | 0.011530 | 0.011597 | 0.011597 |
| 0.011464 | 0.011567 | 0.011569 | 0.011704 | 0.011731 | 0.011396 | 0.011564 |
| 0.011362 | 0.011362 | 0.011331 | 0.011513 | 0.011442 | 0.011469 | 0.011340 |
| 0.011508 | 0.011698 | 0.011526 | 0.011400 | 0.011295 | 0.011497 | 0.011362 |
| 0.011463 | 0.011396 | 0.011295 | 0.011397 | 0.011497 | 0.011499 | 0.011396 |
| 0.011295 | 0.011229 | 0.011362 | 0.011295 | 0.011228 | 0.011332 | 0.011497 |
| 0.011396 | 0.011262 | 0.011362 | 0.011396 | 0.011362 | 0.011295 | 0.011497 |
| 0.011362 | 0.011396 | 0.011396 | 0.011329 | 0.011396 | 0.011631 | 0.011295 |
| 0.011329 | 0.011731 | 0.011329 | 0.011362 | 0.011329 | 0.011698 | 0.011232 |
| 0.011734 | 0.011230 | 0.011261 | 0.011543 | 0.011549 | 0.011527 | 0.011144 |
| 0.011218 | 0.011496 | 0.011597 | 0.011705 | 0.011565 | 0.011703 | 0.011834 |
| 0.011733 | 0.011770 | 0.011731 | 0.011983 | 0.011698 | 0.012505 | 0.011734 |
| 0.012473 | 0.012173 | 0.012307 | 0.012646 | 0.011698 | 0.011396 | 0.011698 |
| 0.012103 | 0.012072 | 0.011664 | 0.011564 | 0.011632 | 0.011632 | 0.011601 |
| 0.011496 | 0.011501 | 0.011564 | 0.011531 | 0.011901 | 0.011967 | 0.011968 |
| 0.011867 | 0.011968 | 0.012072 | 0.011838 | 0.012104 | 0.012110 | 0.012171 |
| 0.012171 | 0.012205 | 0.012084 | 0.012171 | 0.012173 | 0.011295 | 0.011699 |
| 0.011800 | 0.012303 | 0.011772 | 0.012034 | 0.012508 | 0.011570 | 0.011464 |
| 0.011429 | 0.011429 | 0.011900 | 0.011924 | 0.012045 | 0.011765 | 0.011431 |
| s119     | 0.011597 | 0.011597 | 0.012001 | 0.011765 | 0.011765 | 0.011832 |
| 0.011603 | 0.011535 | 0.011832 | 0.011262 | 0.011329 | 0.011296 | 0.011262 |



|          |          |          |          |          |          |          |
|----------|----------|----------|----------|----------|----------|----------|
| 0.011295 | 0.011463 | 0.011262 | 0.011295 | 0.011362 | 0.011329 | 0.011295 |
| 0.011262 | 0.011295 | 0.011396 | 0.011262 | 0.011295 | 0.011295 | 0.011569 |
| 0.011530 | 0.011295 | 0.011194 | 0.011429 | 0.011362 | 0.011329 | 0.011362 |
| 0.011329 | 0.011429 | 0.011329 | 0.011329 | 0.011362 | 0.011329 | 0.011496 |
| 0.011262 | 0.011329 | 0.011362 | 0.011295 | 0.011396 | 0.011429 | 0.011362 |
| 0.011329 | 0.011496 | 0.011396 | 0.011664 | 0.011329 | 0.011597 | 0.011329 |
| 0.011295 | 0.011396 | 0.011463 | 0.011597 | 0.011698 | 0.011396 | 0.011496 |
| 0.011362 | 0.011429 | 0.011329 | 0.011563 | 0.011799 | 0.011329 | 0.011396 |
| 0.011295 | 0.011396 | 0.011362 | 0.011429 | 0.011362 | 0.011362 | 0.011362 |
| 0.011262 | 0.011295 | 0.011262 | 0.011362 | 0.011329 | 0.011363 | 0.011429 |
| 0.011362 | 0.011329 | 0.011396 | 0.011295 | 0.011429 | 0.011262 | 0.011329 |
| 0.011496 | 0.011429 | 0.011664 | 0.011496 | 0.011329 | 0.011564 | 0.011329 |
| 0.011431 | 0.011658 | 0.011475 | 0.011138 | 0.011247 | 0.011355 | 0.011375 |
| 0.012085 | 0.011416 | 0.011184 | 0.011563 | 0.011564 | 0.011362 | 0.011463 |
| 0.011396 | 0.011295 | 0.011362 | 0.011329 | 0.011429 | 0.011362 | 0.011094 |
| 0.000000 | 0.011429 | 0.011564 | 0.011496 | 0.011396 | 0.011362 | 0.011295 |
| 0.011262 | 0.011262 | 0.011329 | 0.011295 | 0.011497 | 0.011463 | 0.011396 |
| 0.011497 | 0.011564 | 0.011295 | 0.011295 | 0.011329 | 0.011329 | 0.011330 |
| 0.011398 | 0.011329 | 0.011329 | 0.011204 | 0.011277 | 0.011235 | 0.011329 |
| 0.011331 | 0.011266 | 0.011318 | 0.011302 | 0.011230 | 0.011266 | 0.011297 |
| 0.011564 | 0.011336 | 0.011370 | 0.011262 | 0.011268 | 0.011397 | 0.011363 |
| 0.011430 | 0.011363 | 0.011363 | 0.011262 | 0.011329 | 0.011765 | 0.011564 |
| 0.011597 | 0.011463 | 0.011329 | 0.011429 | 0.011228 | 0.011463 | 0.011262 |
| 0.011329 | 0.011329 | 0.011295 | 0.011262 | 0.011295 | 0.011262 | 0.011362 |
| 0.011329 | 0.011429 | 0.011362 | 0.011262 | 0.011363 | 0.011463 | 0.011466 |
| 0.011463 | 0.011362 | 0.011262 | 0.011195 | 0.011329 | 0.011262 | 0.011195 |
| 0.011298 | 0.011463 | 0.011262 | 0.011463 | 0.011228 | 0.011329 | 0.011295 |
| 0.011396 | 0.011228 | 0.011329 | 0.011295 | 0.011329 | 0.011195 | 0.011329 |
| 0.011362 | 0.011295 | 0.011362 | 0.011295 | 0.011195 | 0.011362 | 0.011597 |
| 0.011698 | 0.011631 | 0.011698 | 0.011465 | 0.011698 | 0.011262 | 0.011295 |
| 0.011330 | 0.011626 | 0.011426 | 0.011232 | 0.011705 | 0.011197 | 0.011336 |
| 0.011637 | 0.011604 | 0.011463 | 0.011631 | 0.011402 | 0.011564 | 0.011530 |
| 0.011463 | 0.011631 | 0.011415 | 0.011307 | 0.011395 | 0.011362 | 0.011365 |
| 0.011530 | 0.011296 | 0.011567 | 0.011635 | 0.011429 | 0.011564 | 0.011670 |
| 0.011331 | 0.011637 | 0.011500 | 0.011500 | 0.011699 | 0.011228 | 0.011431 |
| 0.011396 | 0.011329 | 0.011228 | 0.011228 | 0.011295 | 0.011295 | 0.011362 |
| 0.011295 | 0.011362 | 0.011262 | 0.011362 | 0.011295 | 0.011295 | 0.011362 |
| 0.011295 | 0.011731 | 0.011631 | 0.011664 | 0.011194 | 0.011295 | 0.011329 |
| 0.011329 | 0.011295 | 0.011362 | 0.011396 | 0.011262 | 0.011262 | 0.011262 |
| 0.011799 | 0.011429 | 0.011429 | 0.011228 | 0.011329 | 0.011496 | 0.011262 |
| 0.011262 | 0.011329 | 0.011295 | 0.011463 | 0.011262 | 0.011396 | 0.011530 |
| 0.011463 | 0.011295 | 0.011295 | 0.011228 | 0.011228 | 0.011396 | 0.011329 |
| 0.011228 | 0.011329 | 0.011195 | 0.011228 | 0.011362 | 0.011497 | 0.011262 |
| 0.011228 | 0.011362 | 0.011295 | 0.011195 | 0.011530 | 0.011195 | 0.011362 |
| 0.011437 | 0.011262 | 0.011564 | 0.011396 | 0.011429 | 0.011295 | 0.011396 |
| 0.011262 | 0.011597 | 0.011194 | 0.011463 | 0.011262 | 0.011262 | 0.011194 |
| 0.011429 | 0.011631 | 0.011329 | 0.011396 | 0.011228 | 0.011631 | 0.011262 |
| 0.011262 | 0.011262 | 0.011295 | 0.011396 | 0.011295 | 0.011396 | 0.011463 |
| 0.011463 | 0.011429 | 0.011329 | 0.011429 | 0.011396 | 0.011262 | 0.011228 |
| 0.011262 | 0.011262 | 0.011329 | 0.011262 | 0.011228 | 0.011396 | 0.011262 |
| 0.011295 | 0.011295 | 0.011429 | 0.011463 | 0.011362 | 0.011295 | 0.011295 |
| 0.011362 | 0.011295 | 0.011396 | 0.011262 | 0.011396 | 0.011496 | 0.011799 |
| 0.011295 | 0.011698 | 0.011302 | 0.017823 | 0.011191 | 0.011305 | 0.011653 |
| 0.011614 | 0.011658 | 0.011322 | 0.011292 | 0.011609 | 0.011681 | 0.011303 |
| 0.011440 | 0.011426 | 0.011138 | 0.011228 | 0.011294 | 0.011258 | 0.011189 |
| 0.011436 | 0.011470 | 0.011468 | 0.011391 | 0.011429 | 0.011396 | 0.011466 |
| 0.011335 | 0.011429 | 0.011429 | 0.011396 | 0.011362 | 0.011362 | 0.011329 |
| 0.011362 | 0.011228 | 0.011329 | 0.011362 | 0.011329 | 0.011262 | 0.011228 |
| 0.011228 | 0.011362 | 0.011262 | 0.011362 | 0.011396 | 0.011429 | 0.011262 |
| 0.011362 | 0.011329 | 0.011665 | 0.011665 | 0.011396 | 0.011430 | 0.011463 |

|          |          |          |          |          |          |          |
|----------|----------|----------|----------|----------|----------|----------|
| 0.011228 | 0.011228 | 0.011262 | 0.011362 | 0.011228 | 0.011463 | 0.011463 |
| 0.011497 | 0.011463 | 0.011429 | 0.011530 | 0.011698 | 0.011531 | 0.011362 |
| 0.011362 | 0.011429 | 0.011463 | 0.011295 | 0.011362 | 0.011329 | 0.011362 |
| 0.011430 | 0.011430 | 0.011463 | 0.011430 | 0.011330 | 0.011530 | 0.011429 |
| 0.011365 | 0.011262 | 0.011362 | 0.011463 | 0.011362 | 0.011497 | 0.011530 |
| 0.011631 | 0.011402 | 0.011564 | 0.011530 | 0.011463 | 0.011631 | 0.011262 |
| 0.011431 | 0.011329 | 0.011228 | 0.011228 | 0.011362 | 0.011262 | 0.011362 |
| 0.011396 | 0.011429 | 0.011262 | 0.011362 | 0.011329 | 0.011665 | 0.011665 |
| 0.011396 | 0.011430 | 0.011429 | 0.011362 | 0.012035 | 0.011489 | 0.011341 |
| 0.011482 | 0.011441 | 0.011552 | 0.011441 | 0.011550 | 0.011405 | 0.011439 |
| 0.011987 | 0.011268 | 0.011403 | 0.011337 | 0.011611 | 0.011536 | 0.011638 |
| 0.012012 | 0.011512 | 0.011601 | 0.011664 | 0.011530 | 0.011530 | 0.011567 |
| 0.011228 | 0.011396 | 0.011530 | 0.011496 | 0.011499 | 0.011496 | 0.011464 |
| 0.011329 | 0.011262 | 0.011295 | 0.011329 | 0.011228 | 0.011295 | 0.011194 |
| 0.011329 | 0.011362 | 0.011262 | 0.011228 | 0.011329 | 0.011262 | 0.011295 |
| 0.011295 | 0.011228 | 0.011295 | 0.011329 | 0.011228 | 0.011429 | 0.011463 |
| 0.011362 | 0.011429 | 0.011362 | 0.011362 | 0.011295 | 0.011698 | 0.011329 |
| 0.011373 | 0.011295 | 0.011530 | 0.011535 | 0.011396 | 0.011396 | 0.011396 |
| 0.011396 | 0.011329 | 0.011295 | 0.011329 | 0.011429 | 0.011429 | 0.011362 |
| 0.011362 | 0.011496 | 0.011664 | 0.011396 | 0.011597 | 0.011597 | 0.011463 |
| 0.011295 | 0.011362 | 0.011396 | 0.011799 | 0.011362 | 0.011396 | 0.011362 |
| 0.011396 | 0.011329 | 0.011329 | 0.011631 | 0.011564 | 0.011597 | 0.011329 |
| 0.011429 | 0.011496 | 0.011362 | 0.011429 | 0.011396 | 0.011262 | 0.011597 |
| 0.011362 | 0.011329 | 0.011329 | 0.011496 | 0.011329 | 0.011429 | 0.011664 |
| 0.011362 | 0.011671 | 0.011731 | 0.011467 | 0.011173 | 0.011434 | 0.011215 |
| 0.011170 | 0.011683 | 0.011271 | 0.011417 | 0.011207 | 0.011315 | 0.011326 |
| 0.011468 | 0.011126 | 0.011283 | 0.011126 | 0.011168 | 0.011328 | 0.011344 |
| 0.011362 | 0.011257 | 0.011412 | 0.011342 | 0.011363 | 0.011497 | 0.011564 |
| 0.011564 | 0.011430 | 0.011533 | 0.011535 | 0.011670 | 0.011696 | 0.011362 |
| 0.011597 | 0.011463 | 0.011329 | 0.011429 | 0.011228 | 0.011463 | 0.011262 |
| 0.011329 | 0.011329 | 0.011295 | 0.011262 | 0.011295 | 0.011262 | 0.011362 |
| 0.011340 | 0.011340 | 0.011334 | 0.011368 | 0.011505 | 0.011436 | 0.011470 |
| 0.011469 | 0.011396 | 0.011134 | 0.011132 | 0.011331 | 0.011501 | 0.011501 |
| 0.011296 | 0.011365 | 0.011599 | 0.011567 | 0.011497 | 0.011531 | 0.011396 |
| 0.011396 | 0.011396 | 0.011396 | 0.011362 | 0.011900 | 0.011530 | 0.011597 |
| 0.011631 | 0.011701 | 0.011333 | 0.011407 | 0.011295 | 0.011295 | 0.011396 |
| 0.011497 | 0.011463 | 0.011530 | 0.011530 | 0.011610 | 0.011597 | 0.011303 |
| 0.011195 | 0.011199 | 0.011298 | 0.011264 | 0.011368 | 0.011209 | 0.011536 |
| 0.011334 | 0.011499 | 0.011251 | 0.011285 | 0.011329 | 0.011402 | 0.011295 |
| 0.011262 | 0.011262 | 0.011329 | 0.011295 | 0.011497 | 0.011463 | 0.011396 |
| 0.011497 | 0.011564 | 0.011295 | 0.011295 | 0.011329 | 0.011329 | 0.011330 |
| 0.011398 | 0.011329 | 0.011329 | 0.011363 | 0.011497 | 0.011564 | 0.011564 |
| 0.011430 | 0.011533 | 0.011535 | 0.011670 | 0.011696 | 0.011362 | 0.011530 |
| 0.011396 | 0.011396 | 0.011297 | 0.011478 | 0.011408 | 0.011435 | 0.011305 |
| 0.011473 | 0.011698 | 0.011484 | 0.011366 | 0.011262 | 0.011463 | 0.011329 |
| 0.011429 | 0.011362 | 0.011262 | 0.011363 | 0.011463 | 0.011466 | 0.011362 |
| 0.011262 | 0.011195 | 0.011329 | 0.011262 | 0.011195 | 0.011298 | 0.011463 |
| 0.011362 | 0.011228 | 0.011329 | 0.011362 | 0.011329 | 0.011262 | 0.011463 |
| 0.011329 | 0.011362 | 0.011362 | 0.011295 | 0.011362 | 0.011597 | 0.011262 |
| 0.011295 | 0.011698 | 0.011295 | 0.011329 | 0.011295 | 0.011664 | 0.011189 |
| 0.011678 | 0.011188 | 0.011211 | 0.011503 | 0.011508 | 0.011491 | 0.011102 |
| 0.011165 | 0.011463 | 0.011564 | 0.011671 | 0.011531 | 0.011669 | 0.011800 |
| 0.011699 | 0.011737 | 0.011698 | 0.011948 | 0.011664 | 0.012471 | 0.011700 |
| 0.012439 | 0.012139 | 0.012273 | 0.012612 | 0.011664 | 0.011362 | 0.011665 |
| 0.012069 | 0.012038 | 0.011631 | 0.011530 | 0.011598 | 0.011598 | 0.011567 |
| 0.011463 | 0.011467 | 0.011530 | 0.011497 | 0.011867 | 0.011933 | 0.011935 |
| 0.011834 | 0.011934 | 0.012038 | 0.011804 | 0.012070 | 0.012076 | 0.012137 |
| 0.012138 | 0.012171 | 0.012049 | 0.012138 | 0.012139 | 0.011329 | 0.011665 |
| 0.011766 | 0.012270 | 0.011738 | 0.012001 | 0.012474 | 0.011536 | 0.011430 |
| 0.011396 | 0.011396 | 0.011867 | 0.011924 | 0.012010 | 0.011731 | 0.011397 |

|          |          |          |          |          |          |          |
|----------|----------|----------|----------|----------|----------|----------|
| S120     | 0.011765 | 0.011765 | 0.012034 | 0.011799 | 0.011799 | 0.011866 |
| 0.011671 | 0.011603 | 0.011866 | 0.011362 | 0.011429 | 0.011397 | 0.011362 |
| 0.011329 | 0.011564 | 0.011295 | 0.011396 | 0.011463 | 0.011429 | 0.011396 |
| 0.011362 | 0.011396 | 0.011429 | 0.011363 | 0.011396 | 0.011396 | 0.011637 |
| 0.011564 | 0.011396 | 0.011295 | 0.011463 | 0.011463 | 0.011429 | 0.011463 |
| 0.011429 | 0.011530 | 0.011429 | 0.011429 | 0.011463 | 0.011429 | 0.011597 |
| 0.011295 | 0.011429 | 0.011463 | 0.011396 | 0.011429 | 0.011530 | 0.011463 |
| 0.011429 | 0.011597 | 0.011497 | 0.011698 | 0.011429 | 0.011698 | 0.011429 |
| 0.011396 | 0.011429 | 0.011564 | 0.011698 | 0.011731 | 0.011429 | 0.011530 |
| 0.011463 | 0.011530 | 0.011429 | 0.011664 | 0.011832 | 0.011429 | 0.011496 |
| 0.011396 | 0.011496 | 0.011463 | 0.011530 | 0.011262 | 0.011463 | 0.011463 |
| 0.011362 | 0.011396 | 0.011362 | 0.011396 | 0.011429 | 0.011464 | 0.011530 |
| 0.011463 | 0.011429 | 0.011496 | 0.011262 | 0.011463 | 0.011362 | 0.011429 |
| 0.011597 | 0.011530 | 0.011765 | 0.011597 | 0.011429 | 0.011664 | 0.011429 |
| 0.011542 | 0.011695 | 0.011588 | 0.011295 | 0.011284 | 0.011428 | 0.011415 |
| 0.012085 | 0.011467 | 0.011307 | 0.011664 | 0.011664 | 0.011329 | 0.011496 |
| 0.011496 | 0.011463 | 0.011530 | 0.011429 | 0.011530 | 0.011463 | 0.011463 |
| 0.011429 | 0.000000 | 0.011731 | 0.011597 | 0.011496 | 0.011463 | 0.011396 |
| 0.011362 | 0.011295 | 0.011429 | 0.011396 | 0.011530 | 0.011497 | 0.011429 |
| 0.011530 | 0.011597 | 0.011396 | 0.011396 | 0.011430 | 0.011429 | 0.011432 |
| 0.011500 | 0.011429 | 0.011429 | 0.011276 | 0.011386 | 0.011341 | 0.011430 |
| 0.011433 | 0.011369 | 0.011392 | 0.011405 | 0.011332 | 0.011368 | 0.011398 |
| 0.011600 | 0.011370 | 0.011473 | 0.011363 | 0.011371 | 0.011497 | 0.011396 |
| 0.011464 | 0.011465 | 0.011464 | 0.011564 | 0.011496 | 0.011866 | 0.011597 |
| 0.011631 | 0.011497 | 0.011429 | 0.011463 | 0.011329 | 0.011496 | 0.011362 |
| 0.011429 | 0.011429 | 0.011396 | 0.011362 | 0.011396 | 0.011362 | 0.011463 |
| 0.011429 | 0.011530 | 0.011463 | 0.011362 | 0.011464 | 0.011564 | 0.011533 |
| 0.011564 | 0.011463 | 0.011362 | 0.011263 | 0.011429 | 0.011362 | 0.011295 |
| 0.011366 | 0.011564 | 0.011362 | 0.011564 | 0.011329 | 0.011429 | 0.011396 |
| 0.011497 | 0.011396 | 0.011429 | 0.011396 | 0.011429 | 0.011295 | 0.011429 |
| 0.011463 | 0.011396 | 0.011463 | 0.011396 | 0.011429 | 0.011463 | 0.011698 |
| 0.011732 | 0.011664 | 0.011732 | 0.011532 | 0.011732 | 0.011429 | 0.011396 |
| 0.011297 | 0.011626 | 0.011472 | 0.011300 | 0.011739 | 0.011265 | 0.011375 |
| 0.011705 | 0.011638 | 0.011597 | 0.011799 | 0.011504 | 0.011664 | 0.011631 |
| 0.011564 | 0.011664 | 0.011593 | 0.011472 | 0.011521 | 0.011463 | 0.011534 |
| 0.011631 | 0.011532 | 0.011669 | 0.011737 | 0.011664 | 0.011732 | 0.011839 |
| 0.011568 | 0.011739 | 0.011669 | 0.011601 | 0.011867 | 0.011329 | 0.011532 |
| 0.011496 | 0.011429 | 0.011329 | 0.011329 | 0.011396 | 0.011396 | 0.011463 |
| 0.011396 | 0.011463 | 0.011362 | 0.011396 | 0.011396 | 0.011396 | 0.011463 |
| 0.011396 | 0.011765 | 0.011664 | 0.011698 | 0.011295 | 0.011396 | 0.011429 |
| 0.011429 | 0.011396 | 0.011463 | 0.011429 | 0.011362 | 0.011362 | 0.011362 |
| 0.011832 | 0.011463 | 0.011530 | 0.011329 | 0.011429 | 0.011597 | 0.011362 |
| 0.011362 | 0.011429 | 0.011396 | 0.011564 | 0.011362 | 0.011496 | 0.011631 |
| 0.011564 | 0.011396 | 0.011396 | 0.011329 | 0.011329 | 0.011496 | 0.011429 |
| 0.011329 | 0.011429 | 0.011295 | 0.011329 | 0.011463 | 0.011530 | 0.011362 |
| 0.011329 | 0.011463 | 0.011396 | 0.011295 | 0.011564 | 0.011295 | 0.011463 |
| 0.011539 | 0.011362 | 0.011597 | 0.011497 | 0.011463 | 0.011396 | 0.011496 |
| 0.011362 | 0.011698 | 0.011295 | 0.011496 | 0.011295 | 0.011295 | 0.011295 |
| 0.011530 | 0.011665 | 0.011429 | 0.011496 | 0.011329 | 0.011664 | 0.011295 |
| 0.011362 | 0.011362 | 0.011396 | 0.011496 | 0.011396 | 0.011496 | 0.011564 |
| 0.011564 | 0.011530 | 0.011429 | 0.011530 | 0.011496 | 0.011362 | 0.011329 |
| 0.011362 | 0.011362 | 0.011429 | 0.011295 | 0.011329 | 0.011496 | 0.011362 |
| 0.011329 | 0.011396 | 0.011530 | 0.011496 | 0.011463 | 0.011396 | 0.011396 |
| 0.011329 | 0.011396 | 0.011496 | 0.011362 | 0.011496 | 0.011597 | 0.011832 |
| 0.011396 | 0.011731 | 0.011371 | 0.017898 | 0.011387 | 0.011366 | 0.011653 |
| 0.011614 | 0.011658 | 0.011427 | 0.011408 | 0.011719 | 0.011681 | 0.011425 |
| 0.011487 | 0.011487 | 0.011255 | 0.011353 | 0.011294 | 0.011307 | 0.011318 |
| 0.011482 | 0.011470 | 0.011468 | 0.011325 | 0.011530 | 0.011564 | 0.011567 |
| 0.011438 | 0.011530 | 0.011530 | 0.011429 | 0.011463 | 0.011463 | 0.011430 |
| 0.011463 | 0.011396 | 0.011429 | 0.011463 | 0.011429 | 0.011362 | 0.011396 |

|          |          |          |          |          |          |          |
|----------|----------|----------|----------|----------|----------|----------|
| 0.011396 | 0.011463 | 0.011362 | 0.011463 | 0.011497 | 0.011530 | 0.011429 |
| 0.011396 | 0.011362 | 0.011698 | 0.011698 | 0.011497 | 0.011531 | 0.011564 |
| 0.011329 | 0.011329 | 0.011362 | 0.011463 | 0.011329 | 0.011564 | 0.011564 |
| 0.011597 | 0.011597 | 0.011530 | 0.011631 | 0.011732 | 0.011633 | 0.011463 |
| 0.011463 | 0.011530 | 0.011564 | 0.011396 | 0.011463 | 0.011429 | 0.011463 |
| 0.011531 | 0.011530 | 0.011564 | 0.011530 | 0.011431 | 0.011631 | 0.011597 |
| 0.011466 | 0.011362 | 0.011463 | 0.011564 | 0.011463 | 0.011530 | 0.011631 |
| 0.011799 | 0.011504 | 0.011664 | 0.011631 | 0.011564 | 0.011664 | 0.011363 |
| 0.011532 | 0.011430 | 0.011396 | 0.011396 | 0.011463 | 0.011362 | 0.011463 |
| 0.011497 | 0.011530 | 0.011429 | 0.011396 | 0.011362 | 0.011698 | 0.011698 |
| 0.011497 | 0.011531 | 0.011597 | 0.011530 | 0.012103 | 0.011596 | 0.011517 |
| 0.011587 | 0.011545 | 0.011657 | 0.011545 | 0.011655 | 0.011577 | 0.011543 |
| 0.012056 | 0.011441 | 0.011574 | 0.011510 | 0.011783 | 0.011638 | 0.011741 |
| 0.012080 | 0.011550 | 0.011703 | 0.011765 | 0.011631 | 0.011564 | 0.011668 |
| 0.011329 | 0.011496 | 0.011631 | 0.011597 | 0.011601 | 0.011530 | 0.011464 |
| 0.011429 | 0.011362 | 0.011396 | 0.011429 | 0.011329 | 0.011396 | 0.011295 |
| 0.011362 | 0.011396 | 0.011362 | 0.011329 | 0.011429 | 0.011362 | 0.011396 |
| 0.011396 | 0.011329 | 0.011396 | 0.011429 | 0.011329 | 0.011530 | 0.011564 |
| 0.011463 | 0.011463 | 0.011463 | 0.011463 | 0.011396 | 0.011731 | 0.011429 |
| 0.011408 | 0.011396 | 0.011564 | 0.011569 | 0.011496 | 0.011496 | 0.011496 |
| 0.011496 | 0.011429 | 0.011396 | 0.011429 | 0.011530 | 0.011530 | 0.011463 |
| 0.011463 | 0.011597 | 0.011698 | 0.011496 | 0.011698 | 0.011698 | 0.011563 |
| 0.011396 | 0.011463 | 0.011496 | 0.011832 | 0.011463 | 0.011496 | 0.011463 |
| 0.011496 | 0.011362 | 0.011362 | 0.011664 | 0.011664 | 0.011631 | 0.011429 |
| 0.011530 | 0.011597 | 0.011463 | 0.011530 | 0.011496 | 0.011362 | 0.011631 |
| 0.011463 | 0.011429 | 0.011362 | 0.011597 | 0.011429 | 0.011530 | 0.011765 |
| 0.011463 | 0.011739 | 0.011765 | 0.011467 | 0.011229 | 0.011468 | 0.011267 |
| 0.011170 | 0.011722 | 0.011341 | 0.011462 | 0.011255 | 0.011366 | 0.011379 |
| 0.011468 | 0.011323 | 0.011450 | 0.011324 | 0.011330 | 0.011529 | 0.011466 |
| 0.011475 | 0.011375 | 0.011412 | 0.011412 | 0.011465 | 0.011530 | 0.011597 |
| 0.011597 | 0.011464 | 0.011567 | 0.011569 | 0.011704 | 0.011732 | 0.011463 |
| 0.011631 | 0.011497 | 0.011429 | 0.011463 | 0.011329 | 0.011496 | 0.011362 |
| 0.011429 | 0.011429 | 0.011396 | 0.011362 | 0.011396 | 0.011362 | 0.011463 |
| 0.011444 | 0.011445 | 0.011437 | 0.011266 | 0.011607 | 0.011573 | 0.011572 |
| 0.011571 | 0.011296 | 0.011282 | 0.011276 | 0.011433 | 0.011602 | 0.011603 |
| 0.011396 | 0.011467 | 0.011700 | 0.011668 | 0.011598 | 0.011632 | 0.011564 |
| 0.011496 | 0.011564 | 0.011563 | 0.011463 | 0.011967 | 0.011631 | 0.011698 |
| 0.011732 | 0.011701 | 0.011435 | 0.011510 | 0.011396 | 0.011597 | 0.011564 |
| 0.011397 | 0.011631 | 0.011631 | 0.011631 | 0.011807 | 0.011765 | 0.011407 |
| 0.011297 | 0.011303 | 0.011400 | 0.011366 | 0.011402 | 0.011321 | 0.011570 |
| 0.011437 | 0.011543 | 0.011394 | 0.011435 | 0.011430 | 0.011505 | 0.011396 |
| 0.011362 | 0.011295 | 0.011429 | 0.011396 | 0.011530 | 0.011497 | 0.011429 |
| 0.011530 | 0.011597 | 0.011396 | 0.011396 | 0.011430 | 0.011429 | 0.011432 |
| 0.011500 | 0.011429 | 0.011429 | 0.011465 | 0.011530 | 0.011597 | 0.011597 |
| 0.011464 | 0.011567 | 0.011569 | 0.011704 | 0.011732 | 0.011463 | 0.011631 |
| 0.011564 | 0.011564 | 0.011398 | 0.011582 | 0.011512 | 0.011333 | 0.011375 |
| 0.011508 | 0.011698 | 0.011441 | 0.011468 | 0.011362 | 0.011564 | 0.011429 |
| 0.011530 | 0.011463 | 0.011362 | 0.011464 | 0.011564 | 0.011533 | 0.011463 |
| 0.011362 | 0.011263 | 0.011429 | 0.011362 | 0.011295 | 0.011366 | 0.011564 |
| 0.011463 | 0.011396 | 0.011429 | 0.011463 | 0.011429 | 0.011362 | 0.011497 |
| 0.011429 | 0.011463 | 0.011463 | 0.011396 | 0.011463 | 0.011698 | 0.011295 |
| 0.011396 | 0.011731 | 0.011396 | 0.011429 | 0.011396 | 0.011698 | 0.011274 |
| 0.011678 | 0.011273 | 0.011261 | 0.011503 | 0.011508 | 0.011491 | 0.011227 |
| 0.011218 | 0.011496 | 0.011597 | 0.011705 | 0.011565 | 0.011669 | 0.011834 |
| 0.011733 | 0.011770 | 0.011731 | 0.011949 | 0.011698 | 0.012572 | 0.011734 |
| 0.012473 | 0.012207 | 0.012375 | 0.012578 | 0.011698 | 0.011396 | 0.011698 |
| 0.012137 | 0.012038 | 0.011664 | 0.011564 | 0.011632 | 0.011632 | 0.011601 |
| 0.011496 | 0.011467 | 0.011564 | 0.011531 | 0.011901 | 0.011967 | 0.011968 |
| 0.011867 | 0.011968 | 0.012038 | 0.011804 | 0.012137 | 0.012144 | 0.012205 |
| 0.012205 | 0.012239 | 0.012152 | 0.012205 | 0.012207 | 0.011496 | 0.011732 |

|          |          |          |          |          |          |          |
|----------|----------|----------|----------|----------|----------|----------|
| 0.011800 | 0.012303 | 0.011806 | 0.012034 | 0.012508 | 0.011570 | 0.011464 |
| 0.011429 | 0.011429 | 0.011900 | 0.011965 | 0.012045 | 0.011765 | 0.011431 |
| S121     | 0.011900 | 0.011900 | 0.012303 | 0.012068 | 0.012068 | 0.012135 |
| 0.011977 | 0.011909 | 0.012135 | 0.011564 | 0.011631 | 0.011599 | 0.011564 |
| 0.011597 | 0.011765 | 0.011564 | 0.011597 | 0.011664 | 0.011631 | 0.011597 |
| 0.011564 | 0.011597 | 0.011698 | 0.011564 | 0.011598 | 0.011597 | 0.011943 |
| 0.011832 | 0.011597 | 0.011496 | 0.011731 | 0.011664 | 0.011631 | 0.011664 |
| 0.011631 | 0.011732 | 0.011631 | 0.011631 | 0.011664 | 0.011631 | 0.011799 |
| 0.011564 | 0.011631 | 0.011664 | 0.011597 | 0.011698 | 0.011732 | 0.011664 |
| 0.011631 | 0.011799 | 0.011699 | 0.011967 | 0.011631 | 0.011900 | 0.011631 |
| 0.011597 | 0.011698 | 0.011765 | 0.011900 | 0.012000 | 0.011698 | 0.011799 |
| 0.011664 | 0.011732 | 0.011631 | 0.011866 | 0.012102 | 0.011631 | 0.011698 |
| 0.011597 | 0.011698 | 0.011664 | 0.011664 | 0.011664 | 0.011664 | 0.011664 |
| 0.011564 | 0.011597 | 0.011564 | 0.011664 | 0.011631 | 0.011666 | 0.011731 |
| 0.011664 | 0.011631 | 0.011698 | 0.011597 | 0.011731 | 0.011564 | 0.011631 |
| 0.011799 | 0.011731 | 0.011967 | 0.011799 | 0.011631 | 0.011866 | 0.011631 |
| 0.011802 | 0.012032 | 0.011815 | 0.011490 | 0.011471 | 0.011649 | 0.011769 |
| 0.012378 | 0.011721 | 0.011513 | 0.011866 | 0.011866 | 0.011664 | 0.011765 |
| 0.011698 | 0.011463 | 0.011664 | 0.011631 | 0.011732 | 0.011664 | 0.011597 |
| 0.011564 | 0.011731 | 0.000000 | 0.011799 | 0.011698 | 0.011665 | 0.011598 |
| 0.011564 | 0.011564 | 0.011631 | 0.011597 | 0.011799 | 0.011766 | 0.011698 |
| 0.011799 | 0.011866 | 0.011597 | 0.011597 | 0.011631 | 0.011631 | 0.011634 |
| 0.011703 | 0.011631 | 0.011631 | 0.011528 | 0.011603 | 0.011551 | 0.011632 |
| 0.011636 | 0.011576 | 0.011577 | 0.011612 | 0.011536 | 0.011574 | 0.011601 |
| 0.011888 | 0.011646 | 0.011680 | 0.011565 | 0.011579 | 0.011700 | 0.011666 |
| 0.011733 | 0.011667 | 0.011666 | 0.011698 | 0.011631 | 0.012068 | 0.011867 |
| 0.011899 | 0.011766 | 0.011631 | 0.011732 | 0.011530 | 0.011765 | 0.011564 |
| 0.011631 | 0.011631 | 0.011597 | 0.011564 | 0.011597 | 0.011564 | 0.011665 |
| 0.011631 | 0.011732 | 0.011665 | 0.011564 | 0.011667 | 0.011766 | 0.011736 |
| 0.011766 | 0.011665 | 0.011564 | 0.011499 | 0.011631 | 0.011564 | 0.011497 |
| 0.011604 | 0.011766 | 0.011564 | 0.011766 | 0.011530 | 0.011631 | 0.011597 |
| 0.011698 | 0.011597 | 0.011631 | 0.011598 | 0.011631 | 0.011497 | 0.011631 |
| 0.011665 | 0.011597 | 0.011665 | 0.011597 | 0.011564 | 0.011665 | 0.011900 |
| 0.012001 | 0.011933 | 0.012001 | 0.011768 | 0.012001 | 0.011564 | 0.011597 |
| 0.011635 | 0.011869 | 0.011609 | 0.011540 | 0.011977 | 0.011504 | 0.011611 |
| 0.012011 | 0.011911 | 0.011765 | 0.011127 | 0.011675 | 0.011866 | 0.011833 |
| 0.011765 | 0.011933 | 0.011735 | 0.011637 | 0.011563 | 0.011665 | 0.011669 |
| 0.011833 | 0.011667 | 0.011872 | 0.011940 | 0.011799 | 0.011732 | 0.011975 |
| 0.011703 | 0.011943 | 0.011805 | 0.011804 | 0.011868 | 0.011530 | 0.011734 |
| 0.011698 | 0.011631 | 0.011530 | 0.011530 | 0.011597 | 0.011597 | 0.011664 |
| 0.011597 | 0.011664 | 0.011564 | 0.011664 | 0.011597 | 0.011597 | 0.011664 |
| 0.011597 | 0.012034 | 0.011933 | 0.011967 | 0.011496 | 0.011597 | 0.011631 |
| 0.011631 | 0.011597 | 0.011664 | 0.011698 | 0.011564 | 0.011564 | 0.011564 |
| 0.012101 | 0.011732 | 0.011732 | 0.011530 | 0.011631 | 0.011799 | 0.011564 |
| 0.011564 | 0.011631 | 0.011597 | 0.011765 | 0.011564 | 0.011698 | 0.011832 |
| 0.011765 | 0.011597 | 0.011597 | 0.011530 | 0.011530 | 0.011698 | 0.011631 |
| 0.011530 | 0.011631 | 0.011497 | 0.011530 | 0.011665 | 0.011799 | 0.011564 |
| 0.011531 | 0.011664 | 0.011598 | 0.011497 | 0.011832 | 0.011497 | 0.011664 |
| 0.011745 | 0.011564 | 0.011866 | 0.011698 | 0.011732 | 0.011597 | 0.011698 |
| 0.011564 | 0.011900 | 0.011496 | 0.011765 | 0.011564 | 0.011564 | 0.011496 |
| 0.011732 | 0.011934 | 0.011631 | 0.011698 | 0.011530 | 0.011933 | 0.011564 |
| 0.011564 | 0.011564 | 0.011597 | 0.011698 | 0.011597 | 0.011698 | 0.011765 |
| 0.011765 | 0.011732 | 0.011631 | 0.011732 | 0.011698 | 0.011564 | 0.011530 |
| 0.011564 | 0.011564 | 0.011631 | 0.011564 | 0.011530 | 0.011698 | 0.011564 |
| 0.011597 | 0.011597 | 0.011732 | 0.011765 | 0.011664 | 0.011597 | 0.011597 |
| 0.011664 | 0.011597 | 0.011698 | 0.011564 | 0.011698 | 0.011799 | 0.012101 |
| 0.011597 | 0.012001 | 0.011578 | 0.018088 | 0.011388 | 0.011549 | 0.011933 |
| 0.011891 | 0.011940 | 0.011479 | 0.011466 | 0.011885 | 0.011958 | 0.011546 |
| 0.011677 | 0.011732 | 0.011528 | 0.011479 | 0.011490 | 0.011455 | 0.011447 |
| 0.011717 | 0.011768 | 0.011653 | 0.011656 | 0.011732 | 0.011698 | 0.011737 |

|          |          |          |          |          |          |          |
|----------|----------|----------|----------|----------|----------|----------|
| 0.011644 | 0.011732 | 0.011732 | 0.011698 | 0.011665 | 0.011665 | 0.011631 |
| 0.011665 | 0.011597 | 0.011631 | 0.011665 | 0.011631 | 0.011564 | 0.011530 |
| 0.011530 | 0.011597 | 0.011564 | 0.011665 | 0.011698 | 0.011732 | 0.011564 |
| 0.011664 | 0.011631 | 0.011967 | 0.011967 | 0.011698 | 0.011733 | 0.011698 |
| 0.011530 | 0.011530 | 0.011564 | 0.011665 | 0.011530 | 0.011766 | 0.011766 |
| 0.011799 | 0.011765 | 0.011732 | 0.011833 | 0.012001 | 0.011835 | 0.011665 |
| 0.011665 | 0.011732 | 0.011766 | 0.011597 | 0.011665 | 0.011631 | 0.011665 |
| 0.011732 | 0.011732 | 0.011765 | 0.011732 | 0.011633 | 0.011833 | 0.011799 |
| 0.011670 | 0.011564 | 0.011665 | 0.011766 | 0.011598 | 0.011799 | 0.011832 |
| 0.011127 | 0.011675 | 0.011866 | 0.011833 | 0.011765 | 0.011933 | 0.011564 |
| 0.011734 | 0.011632 | 0.011530 | 0.011530 | 0.011597 | 0.011564 | 0.011665 |
| 0.011698 | 0.011732 | 0.011564 | 0.011664 | 0.011631 | 0.011967 | 0.011967 |
| 0.011698 | 0.011733 | 0.011732 | 0.011664 | 0.012339 | 0.011775 | 0.011658 |
| 0.011799 | 0.011754 | 0.011869 | 0.011753 | 0.011865 | 0.011439 | 0.011750 |
| 0.012297 | 0.011579 | 0.011711 | 0.011510 | 0.011783 | 0.011843 | 0.011945 |
| 0.012318 | 0.011814 | 0.011906 | 0.011967 | 0.011832 | 0.011832 | 0.011871 |
| 0.011530 | 0.011698 | 0.011832 | 0.011799 | 0.011804 | 0.011799 | 0.011768 |
| 0.011631 | 0.011564 | 0.011597 | 0.011631 | 0.011530 | 0.011597 | 0.011496 |
| 0.011631 | 0.011664 | 0.011564 | 0.011530 | 0.011631 | 0.011564 | 0.011597 |
| 0.011597 | 0.011530 | 0.011597 | 0.011631 | 0.011530 | 0.011732 | 0.011765 |
| 0.011664 | 0.011732 | 0.011664 | 0.011664 | 0.011597 | 0.012000 | 0.011631 |
| 0.011686 | 0.011597 | 0.011833 | 0.011841 | 0.011698 | 0.011698 | 0.011698 |
| 0.011698 | 0.011631 | 0.011597 | 0.011631 | 0.011732 | 0.011732 | 0.011664 |
| 0.011664 | 0.011799 | 0.011967 | 0.011698 | 0.011900 | 0.011900 | 0.011765 |
| 0.011597 | 0.011664 | 0.011698 | 0.012102 | 0.011665 | 0.011698 | 0.011664 |
| 0.011698 | 0.011631 | 0.011631 | 0.011934 | 0.011866 | 0.011900 | 0.011631 |
| 0.011732 | 0.011799 | 0.011664 | 0.011732 | 0.011698 | 0.011564 | 0.011900 |
| 0.011664 | 0.011631 | 0.011631 | 0.011799 | 0.011631 | 0.011732 | 0.011967 |
| 0.011664 | 0.012045 | 0.012034 | 0.011833 | 0.011399 | 0.011740 | 0.011473 |
| 0.011335 | 0.012073 | 0.011552 | 0.011775 | 0.011548 | 0.011518 | 0.011592 |
| 0.011723 | 0.011192 | 0.011561 | 0.011391 | 0.011492 | 0.011664 | 0.011709 |
| 0.011625 | 0.011650 | 0.011694 | 0.011624 | 0.011667 | 0.011799 | 0.011866 |
| 0.011866 | 0.011733 | 0.011838 | 0.011840 | 0.011976 | 0.011979 | 0.011664 |
| 0.011899 | 0.011766 | 0.011631 | 0.011732 | 0.011530 | 0.011765 | 0.011564 |
| 0.011631 | 0.011631 | 0.011597 | 0.011564 | 0.011597 | 0.011564 | 0.011665 |
| 0.011654 | 0.011655 | 0.011643 | 0.011677 | 0.011813 | 0.011778 | 0.011777 |
| 0.011776 | 0.011699 | 0.011540 | 0.011528 | 0.011636 | 0.011806 | 0.011807 |
| 0.011598 | 0.011670 | 0.011902 | 0.011872 | 0.011800 | 0.011834 | 0.011698 |
| 0.011698 | 0.011564 | 0.011564 | 0.011664 | 0.012203 | 0.011832 | 0.011900 |
| 0.011934 | 0.011986 | 0.011640 | 0.011719 | 0.011597 | 0.011732 | 0.011698 |
| 0.011800 | 0.011765 | 0.011832 | 0.011832 | 0.011768 | 0.011900 | 0.011615 |
| 0.011500 | 0.011510 | 0.011605 | 0.011570 | 0.011675 | 0.011433 | 0.011842 |
| 0.011643 | 0.011718 | 0.011489 | 0.011660 | 0.011632 | 0.011710 | 0.011598 |
| 0.011564 | 0.011564 | 0.011631 | 0.011597 | 0.011799 | 0.011766 | 0.011698 |
| 0.011799 | 0.011866 | 0.011597 | 0.011597 | 0.011631 | 0.011631 | 0.011634 |
| 0.011703 | 0.011631 | 0.011631 | 0.011667 | 0.011799 | 0.011866 | 0.011866 |
| 0.011733 | 0.011838 | 0.011840 | 0.011976 | 0.011979 | 0.011664 | 0.011832 |
| 0.011698 | 0.011698 | 0.011601 | 0.011722 | 0.011721 | 0.011707 | 0.011621 |
| 0.011784 | 0.011926 | 0.011738 | 0.011672 | 0.011564 | 0.011766 | 0.011631 |
| 0.011732 | 0.011665 | 0.011564 | 0.011667 | 0.011766 | 0.011736 | 0.011665 |
| 0.011564 | 0.011499 | 0.011631 | 0.011564 | 0.011497 | 0.011604 | 0.011766 |
| 0.011665 | 0.011597 | 0.011631 | 0.011665 | 0.011631 | 0.011564 | 0.011766 |
| 0.011631 | 0.011664 | 0.011664 | 0.011597 | 0.011664 | 0.011900 | 0.011564 |
| 0.011597 | 0.012000 | 0.011597 | 0.011631 | 0.011597 | 0.011967 | 0.011489 |
| 0.011904 | 0.011570 | 0.011512 | 0.011825 | 0.011875 | 0.011778 | 0.011437 |
| 0.011428 | 0.011765 | 0.011866 | 0.011977 | 0.011835 | 0.011940 | 0.012103 |
| 0.012003 | 0.012041 | 0.012000 | 0.012223 | 0.011967 | 0.012775 | 0.012004 |
| 0.012743 | 0.012444 | 0.012578 | 0.012849 | 0.011967 | 0.011665 | 0.011968 |
| 0.012373 | 0.012343 | 0.011933 | 0.011833 | 0.011901 | 0.011901 | 0.011872 |
| 0.011765 | 0.011739 | 0.011832 | 0.011800 | 0.012170 | 0.012236 | 0.012238 |

|          |          |          |           |          |          |          |
|----------|----------|----------|-----------|----------|----------|----------|
| 0.012137 | 0.012238 | 0.012342 | 0.012075  | 0.012374 | 0.012381 | 0.012441 |
| 0.012442 | 0.012475 | 0.012392 | 0.012442  | 0.012443 | 0.011631 | 0.011968 |
| 0.012070 | 0.012573 | 0.012044 | 0.012304  | 0.012778 | 0.011842 | 0.011733 |
| 0.011698 | 0.011698 | 0.012170 | 0.012254  | 0.012327 | 0.012034 | 0.011701 |
| S122     | 0.011832 | 0.011832 | 0.012169  | 0.011933 | 0.011933 | 0.012000 |
| 0.011841 | 0.011773 | 0.011933 | 0.011429  | 0.011496 | 0.011464 | 0.011429 |
| 0.011463 | 0.011564 | 0.011362 | 0.011463  | 0.011530 | 0.011496 | 0.011463 |
| 0.011429 | 0.011463 | 0.011564 | 0.011430  | 0.011463 | 0.011463 | 0.011807 |
| 0.011698 | 0.011463 | 0.011362 | 0.011597  | 0.011530 | 0.011497 | 0.011530 |
| 0.011496 | 0.011597 | 0.011496 | 0.011496  | 0.011530 | 0.011496 | 0.011664 |
| 0.011429 | 0.011496 | 0.011530 | 0.011463  | 0.011563 | 0.011597 | 0.011530 |
| 0.011496 | 0.011664 | 0.011564 | 0.011832  | 0.011496 | 0.011765 | 0.011496 |
| 0.011463 | 0.011564 | 0.011631 | 0.011765  | 0.011866 | 0.011564 | 0.011664 |
| 0.011530 | 0.011597 | 0.011496 | 0.011731  | 0.011967 | 0.011429 | 0.011564 |
| 0.011463 | 0.011564 | 0.011530 | 0.011597  | 0.011530 | 0.011530 | 0.011530 |
| 0.011429 | 0.011463 | 0.011429 | 0.011530  | 0.011496 | 0.011531 | 0.011597 |
| 0.011530 | 0.011496 | 0.011564 | 0.011463  | 0.011597 | 0.011429 | 0.011496 |
| 0.011664 | 0.011597 | 0.011832 | 0.011664  | 0.011496 | 0.011731 | 0.011429 |
| 0.011653 | 0.011845 | 0.011739 | 0.011412  | 0.011433 | 0.011539 | 0.011611 |
| 0.012268 | 0.011721 | 0.011431 | 0.011731  | 0.011731 | 0.011463 | 0.011631 |
| 0.011564 | 0.011530 | 0.011597 | 0.011496  | 0.011597 | 0.011530 | 0.011530 |
| 0.011496 | 0.011597 | 0.011799 | 0.000000  | 0.011564 | 0.011530 | 0.011463 |
| 0.011429 | 0.011429 | 0.011497 | 0.011463  | 0.011665 | 0.011631 | 0.011564 |
| 0.011665 | 0.011732 | 0.011463 | 0.011463  | 0.011497 | 0.011497 | 0.011499 |
| 0.011567 | 0.011497 | 0.011497 | 0.011384  | 0.011458 | 0.011411 | 0.011497 |
| 0.011500 | 0.011438 | 0.011503 | 0.011474  | 0.011400 | 0.011437 | 0.011465 |
| 0.011708 | 0.011508 | 0.011542 | 0.011430  | 0.011440 | 0.011565 | 0.011531 |
| 0.011598 | 0.011532 | 0.011531 | 0.011631  | 0.011564 | 0.011933 | 0.011732 |
| 0.011765 | 0.011631 | 0.011496 | 0.011597  | 0.011396 | 0.011631 | 0.011430 |
| 0.011496 | 0.011496 | 0.011463 | 0.011429  | 0.011463 | 0.011429 | 0.011530 |
| 0.011497 | 0.011597 | 0.011530 | 0.011429  | 0.011464 | 0.011631 | 0.011635 |
| 0.011631 | 0.011530 | 0.011429 | 0.011364  | 0.011497 | 0.011430 | 0.011363 |
| 0.011468 | 0.011631 | 0.011430 | 0.011631  | 0.011396 | 0.011497 | 0.011463 |
| 0.011564 | 0.011463 | 0.011497 | 0.011463  | 0.011497 | 0.011362 | 0.011497 |
| 0.011530 | 0.011463 | 0.011530 | 0.011463  | 0.011497 | 0.011530 | 0.011765 |
| 0.011866 | 0.011799 | 0.011866 | 0.011633  | 0.011866 | 0.011497 | 0.011463 |
| 0.011432 | 0.011707 | 0.011517 | 0.011369  | 0.011807 | 0.011367 | 0.011414 |
| 0.011875 | 0.011774 | 0.011664 | 0.011866  | 0.011572 | 0.011731 | 0.011698 |
| 0.011631 | 0.011799 | 0.011664 | 0.011431  | 0.011521 | 0.011530 | 0.011601 |
| 0.011698 | 0.011600 | 0.011736 | 0.011804  | 0.011732 | 0.011799 | 0.011907 |
| 0.011635 | 0.011807 | 0.011737 | 0.011669  | 0.011935 | 0.011396 | 0.011599 |
| 0.011496 | 0.011496 | 0.011396 | 0.011396  | 0.011463 | 0.011396 | 0.011530 |
| 0.011463 | 0.011530 | 0.011429 | 0.011530  | 0.011463 | 0.011463 | 0.011530 |
| 0.011463 | 0.011899 | 0.011799 | 0.011832  | 0.011362 | 0.011463 | 0.011496 |
| 0.011496 | 0.011463 | 0.011530 | 0.011564  | 0.011429 | 0.011429 | 0.011429 |
| 0.011967 | 0.011597 | 0.011597 | 0.011396  | 0.011496 | 0.011664 | 0.011429 |
| 0.011429 | 0.011496 | 0.011463 | 0.011631  | 0.011429 | 0.011564 | 0.011698 |
| 0.011631 | 0.011463 | 0.011463 | 0.011396  | 0.011396 | 0.011564 | 0.011496 |
| 0.011396 | 0.011496 | 0.011362 | 0.011396  | 0.011530 | 0.011665 | 0.011396 |
| 0.011396 | 0.011530 | 0.011463 | 0.011362  | 0.011698 | 0.011362 | 0.011463 |
| 0.011608 | 0.011429 | 0.011732 | 0.011564  | 0.011597 | 0.011463 | 0.011564 |
| 0.011429 | 0.011765 | 0.011362 | 0.011631  | 0.011362 | 0.011362 | 0.011362 |
| 0.011597 | 0.011799 | 0.011496 | 0.011564  | 0.011396 | 0.011799 | 0.011362 |
| 0.011429 | 0.011429 | 0.011463 | 0.011564  | 0.011463 | 0.011564 | 0.011631 |
| 0.011631 | 0.011597 | 0.011496 | 0.011597  | 0.011564 | 0.011429 | 0.011396 |
| 0.011429 | 0.011429 | 0.011496 | 0.011429  | 0.011396 | 0.011564 | 0.011429 |
| 0.011396 | 0.011463 | 0.011597 | 0.011631  | 0.011530 | 0.011463 | 0.011463 |
| 0.011530 | 0.011463 | 0.011564 | 0.011429  | 0.011564 | 0.011597 | 0.011967 |
| 0.011463 | 0.011866 | 0.011474 | 0.0117974 | 0.011387 | 0.011549 | 0.011828 |
| 0.011787 | 0.011834 | 0.011532 | 0.011582  | 0.011774 | 0.011854 | 0.011485 |

|          |          |          |          |          |          |          |
|----------|----------|----------|----------|----------|----------|----------|
| 0.011772 | 0.011671 | 0.011372 | 0.011479 | 0.011490 | 0.011455 | 0.011447 |
| 0.011717 | 0.011656 | 0.011653 | 0.011523 | 0.011597 | 0.011631 | 0.011635 |
| 0.011507 | 0.011597 | 0.011597 | 0.011564 | 0.011530 | 0.011530 | 0.011497 |
| 0.011530 | 0.011463 | 0.011496 | 0.011530 | 0.011497 | 0.011429 | 0.011463 |
| 0.011463 | 0.011530 | 0.011429 | 0.011530 | 0.011564 | 0.011597 | 0.011497 |
| 0.011530 | 0.011497 | 0.011833 | 0.011833 | 0.011564 | 0.011531 | 0.011631 |
| 0.011396 | 0.011396 | 0.011429 | 0.011463 | 0.011396 | 0.011631 | 0.011631 |
| 0.011665 | 0.011664 | 0.011597 | 0.011698 | 0.011866 | 0.011700 | 0.011530 |
| 0.011530 | 0.011597 | 0.011631 | 0.011463 | 0.011530 | 0.011497 | 0.011530 |
| 0.011598 | 0.011598 | 0.011631 | 0.011598 | 0.011498 | 0.011698 | 0.011665 |
| 0.011534 | 0.011429 | 0.011463 | 0.011631 | 0.011530 | 0.011665 | 0.011698 |
| 0.011866 | 0.011572 | 0.011731 | 0.011698 | 0.011631 | 0.011799 | 0.011430 |
| 0.011599 | 0.011430 | 0.011463 | 0.011463 | 0.011530 | 0.011429 | 0.011530 |
| 0.011564 | 0.011597 | 0.011497 | 0.011530 | 0.011497 | 0.011833 | 0.011833 |
| 0.011564 | 0.011531 | 0.011664 | 0.011597 | 0.012237 | 0.011632 | 0.011588 |
| 0.011658 | 0.011580 | 0.011728 | 0.011614 | 0.011690 | 0.011646 | 0.011577 |
| 0.012193 | 0.011510 | 0.011642 | 0.011579 | 0.011852 | 0.011706 | 0.011809 |
| 0.012216 | 0.011663 | 0.011770 | 0.011832 | 0.011698 | 0.011698 | 0.011736 |
| 0.011396 | 0.011564 | 0.011698 | 0.011664 | 0.011668 | 0.011664 | 0.011633 |
| 0.011496 | 0.011429 | 0.011463 | 0.011496 | 0.011396 | 0.011463 | 0.011362 |
| 0.011496 | 0.011530 | 0.011429 | 0.011396 | 0.011496 | 0.011429 | 0.011463 |
| 0.011463 | 0.011396 | 0.011463 | 0.011496 | 0.011396 | 0.011597 | 0.011631 |
| 0.011530 | 0.011597 | 0.011530 | 0.011530 | 0.011463 | 0.011866 | 0.011496 |
| 0.011547 | 0.011463 | 0.011698 | 0.011705 | 0.011564 | 0.011564 | 0.011564 |
| 0.011564 | 0.011496 | 0.011463 | 0.011496 | 0.011530 | 0.011597 | 0.011530 |
| 0.011530 | 0.011664 | 0.011832 | 0.011564 | 0.011765 | 0.011765 | 0.011631 |
| 0.011463 | 0.011530 | 0.011564 | 0.011967 | 0.011530 | 0.011564 | 0.011530 |
| 0.011564 | 0.011496 | 0.011496 | 0.011799 | 0.011732 | 0.011765 | 0.011496 |
| 0.011597 | 0.011664 | 0.011530 | 0.011597 | 0.011563 | 0.011429 | 0.011765 |
| 0.011530 | 0.011496 | 0.011496 | 0.011664 | 0.011496 | 0.011597 | 0.011832 |
| 0.011530 | 0.011909 | 0.011899 | 0.011710 | 0.011399 | 0.011604 | 0.011628 |
| 0.011335 | 0.011917 | 0.011446 | 0.011596 | 0.011499 | 0.011518 | 0.011538 |
| 0.011621 | 0.011389 | 0.011505 | 0.011258 | 0.011437 | 0.011529 | 0.011587 |
| 0.011588 | 0.011493 | 0.011483 | 0.011518 | 0.011532 | 0.011665 | 0.011732 |
| 0.011732 | 0.011598 | 0.011702 | 0.011670 | 0.011772 | 0.011838 | 0.011530 |
| 0.011765 | 0.011631 | 0.011496 | 0.011597 | 0.011396 | 0.011631 | 0.011430 |
| 0.011496 | 0.011496 | 0.011463 | 0.011429 | 0.011463 | 0.011429 | 0.011530 |
| 0.011479 | 0.011515 | 0.011505 | 0.011540 | 0.011676 | 0.011641 | 0.011640 |
| 0.011639 | 0.011564 | 0.011393 | 0.011384 | 0.011433 | 0.011670 | 0.011671 |
| 0.011464 | 0.011534 | 0.011767 | 0.011736 | 0.011665 | 0.011632 | 0.011631 |
| 0.011564 | 0.011631 | 0.011631 | 0.011530 | 0.012101 | 0.011698 | 0.011765 |
| 0.011799 | 0.011879 | 0.011504 | 0.011580 | 0.011463 | 0.011664 | 0.011631 |
| 0.011666 | 0.011698 | 0.011698 | 0.011698 | 0.011768 | 0.011832 | 0.011476 |
| 0.011364 | 0.011372 | 0.011469 | 0.011434 | 0.011538 | 0.011396 | 0.011706 |
| 0.011506 | 0.011630 | 0.011298 | 0.011547 | 0.011497 | 0.011573 | 0.011463 |
| 0.011429 | 0.011429 | 0.011497 | 0.011463 | 0.011665 | 0.011631 | 0.011564 |
| 0.011665 | 0.011732 | 0.011463 | 0.011463 | 0.011497 | 0.011497 | 0.011499 |
| 0.011567 | 0.011497 | 0.011497 | 0.011532 | 0.011665 | 0.011732 | 0.011732 |
| 0.011598 | 0.011702 | 0.011670 | 0.011772 | 0.011838 | 0.011530 | 0.011698 |
| 0.011631 | 0.011631 | 0.011466 | 0.011652 | 0.011512 | 0.011605 | 0.011481 |
| 0.011646 | 0.011881 | 0.011568 | 0.011536 | 0.011430 | 0.011631 | 0.011497 |
| 0.011597 | 0.011530 | 0.011429 | 0.011464 | 0.011631 | 0.011635 | 0.011530 |
| 0.011429 | 0.011364 | 0.011497 | 0.011430 | 0.011363 | 0.011468 | 0.011631 |
| 0.011530 | 0.011463 | 0.011496 | 0.011530 | 0.011497 | 0.011429 | 0.011631 |
| 0.011496 | 0.011530 | 0.011530 | 0.011463 | 0.011530 | 0.011765 | 0.011429 |
| 0.011463 | 0.011866 | 0.011463 | 0.011496 | 0.011463 | 0.011832 | 0.011403 |
| 0.011847 | 0.011443 | 0.011511 | 0.011664 | 0.011752 | 0.011634 | 0.011353 |
| 0.011480 | 0.011631 | 0.011731 | 0.011841 | 0.011700 | 0.011838 | 0.011968 |
| 0.011868 | 0.011906 | 0.011866 | 0.012120 | 0.011832 | 0.012707 | 0.011869 |
| 0.012608 | 0.012376 | 0.012510 | 0.012781 | 0.011832 | 0.011530 | 0.011833 |



|          |          |          |          |          |          |          |
|----------|----------|----------|----------|----------|----------|----------|
| 0.012272 | 0.012207 | 0.011799 | 0.011698 | 0.011766 | 0.011766 | 0.011737 |
| 0.011631 | 0.011637 | 0.011698 | 0.011665 | 0.012035 | 0.012101 | 0.012103 |
| 0.012002 | 0.012103 | 0.012207 | 0.011974 | 0.012272 | 0.012279 | 0.012339 |
| 0.012340 | 0.012374 | 0.012323 | 0.012340 | 0.012342 | 0.011564 | 0.011867 |
| 0.011935 | 0.012438 | 0.011942 | 0.012169 | 0.012643 | 0.011705 | 0.011598 |
| 0.011564 | 0.011564 | 0.012035 | 0.012089 | 0.012186 | 0.011900 | 0.011566 |
| s123     | 0.011732 | 0.011732 | 0.012068 | 0.011832 | 0.011832 | 0.011900 |
| 0.011705 | 0.011637 | 0.011899 | 0.011329 | 0.011396 | 0.011363 | 0.011329 |
| 0.011362 | 0.011530 | 0.011329 | 0.011362 | 0.011429 | 0.011396 | 0.011362 |
| 0.011329 | 0.011362 | 0.011463 | 0.011329 | 0.011363 | 0.011362 | 0.011671 |
| 0.011597 | 0.011362 | 0.011262 | 0.011496 | 0.011429 | 0.011396 | 0.011429 |
| 0.011396 | 0.011497 | 0.011396 | 0.011396 | 0.011429 | 0.011396 | 0.011564 |
| 0.011329 | 0.011396 | 0.011429 | 0.011362 | 0.011463 | 0.011496 | 0.011429 |
| 0.011396 | 0.011564 | 0.011463 | 0.011732 | 0.011396 | 0.011664 | 0.011396 |
| 0.011362 | 0.011463 | 0.011530 | 0.011664 | 0.011765 | 0.011463 | 0.011564 |
| 0.011429 | 0.011497 | 0.011396 | 0.011631 | 0.011866 | 0.011396 | 0.011463 |
| 0.011362 | 0.011463 | 0.011429 | 0.011497 | 0.011429 | 0.011429 | 0.011429 |
| 0.011329 | 0.011362 | 0.011329 | 0.011429 | 0.011396 | 0.011430 | 0.011496 |
| 0.011295 | 0.011396 | 0.011463 | 0.011362 | 0.011496 | 0.011329 | 0.011396 |
| 0.011564 | 0.011496 | 0.011732 | 0.011564 | 0.011396 | 0.011631 | 0.011396 |
| 0.011542 | 0.011770 | 0.011588 | 0.011295 | 0.011321 | 0.011428 | 0.011493 |
| 0.012158 | 0.011569 | 0.011307 | 0.011631 | 0.011631 | 0.011429 | 0.011530 |
| 0.011463 | 0.011429 | 0.011496 | 0.011396 | 0.011497 | 0.011429 | 0.011429 |
| 0.011396 | 0.011496 | 0.011698 | 0.011564 | 0.000000 | 0.011430 | 0.011362 |
| 0.011329 | 0.011329 | 0.011396 | 0.011362 | 0.011564 | 0.011530 | 0.011463 |
| 0.011564 | 0.011631 | 0.011362 | 0.011362 | 0.011396 | 0.011396 | 0.011398 |
| 0.011466 | 0.011396 | 0.011396 | 0.011276 | 0.011349 | 0.011306 | 0.011396 |
| 0.011399 | 0.011335 | 0.011392 | 0.011371 | 0.011298 | 0.011334 | 0.011364 |
| 0.011636 | 0.011405 | 0.011439 | 0.011329 | 0.011337 | 0.011464 | 0.011430 |
| 0.011497 | 0.011431 | 0.011430 | 0.011530 | 0.011463 | 0.011832 | 0.011631 |
| 0.011664 | 0.011530 | 0.011396 | 0.011497 | 0.011295 | 0.011530 | 0.011329 |
| 0.011396 | 0.011396 | 0.011362 | 0.011329 | 0.011362 | 0.011329 | 0.011430 |
| 0.011396 | 0.011497 | 0.011430 | 0.011329 | 0.011431 | 0.011530 | 0.011533 |
| 0.011530 | 0.011430 | 0.011329 | 0.011263 | 0.011396 | 0.011329 | 0.011262 |
| 0.011332 | 0.011531 | 0.011329 | 0.011530 | 0.011295 | 0.011262 | 0.011362 |
| 0.011463 | 0.011362 | 0.011396 | 0.011362 | 0.011396 | 0.011262 | 0.011396 |
| 0.011430 | 0.011362 | 0.011430 | 0.011362 | 0.011396 | 0.011430 | 0.011665 |
| 0.011765 | 0.011698 | 0.011766 | 0.011532 | 0.011766 | 0.011396 | 0.011362 |
| 0.011364 | 0.011707 | 0.011518 | 0.011300 | 0.011773 | 0.011231 | 0.011414 |
| 0.011773 | 0.011672 | 0.011564 | 0.011765 | 0.011470 | 0.011631 | 0.011597 |
| 0.011530 | 0.011698 | 0.011522 | 0.011390 | 0.011479 | 0.011430 | 0.011466 |
| 0.011597 | 0.011499 | 0.011635 | 0.011703 | 0.011631 | 0.011698 | 0.011806 |
| 0.011534 | 0.011705 | 0.011636 | 0.011567 | 0.011834 | 0.011295 | 0.011498 |
| 0.011463 | 0.011396 | 0.011295 | 0.011295 | 0.011362 | 0.011362 | 0.011429 |
| 0.011362 | 0.011429 | 0.011329 | 0.011429 | 0.011362 | 0.011362 | 0.011429 |
| 0.011362 | 0.011799 | 0.011698 | 0.011732 | 0.011262 | 0.011362 | 0.011396 |
| 0.011262 | 0.011362 | 0.011429 | 0.011463 | 0.011329 | 0.011329 | 0.011329 |
| 0.011866 | 0.011496 | 0.011497 | 0.011295 | 0.011396 | 0.011564 | 0.011329 |
| 0.011329 | 0.011396 | 0.011362 | 0.011530 | 0.011329 | 0.011463 | 0.011597 |
| 0.011530 | 0.011362 | 0.011362 | 0.011295 | 0.011295 | 0.011463 | 0.011396 |
| 0.011295 | 0.011396 | 0.011262 | 0.011295 | 0.011429 | 0.011564 | 0.011329 |
| 0.011295 | 0.011429 | 0.011363 | 0.011262 | 0.011597 | 0.011262 | 0.011429 |
| 0.011505 | 0.011329 | 0.011631 | 0.011463 | 0.011497 | 0.011362 | 0.011463 |
| 0.011329 | 0.011664 | 0.011262 | 0.011530 | 0.011329 | 0.011329 | 0.011262 |
| 0.011496 | 0.011698 | 0.011396 | 0.011463 | 0.011295 | 0.011698 | 0.011329 |
| 0.011329 | 0.011329 | 0.011362 | 0.011463 | 0.011362 | 0.011463 | 0.011530 |
| 0.011530 | 0.011497 | 0.011396 | 0.011497 | 0.011463 | 0.011329 | 0.011295 |
| 0.011329 | 0.011329 | 0.011396 | 0.011329 | 0.011295 | 0.011463 | 0.011329 |
| 0.011362 | 0.011362 | 0.011497 | 0.011530 | 0.011429 | 0.011362 | 0.011362 |
| 0.011429 | 0.011362 | 0.011463 | 0.011329 | 0.011463 | 0.011564 | 0.011866 |

|          |          |          |          |          |          |          |
|----------|----------|----------|----------|----------|----------|----------|
| 0.011362 | 0.011765 | 0.011371 | 0.017899 | 0.011388 | 0.011427 | 0.011723 |
| 0.011683 | 0.011729 | 0.011374 | 0.011292 | 0.011719 | 0.011751 | 0.011303 |
| 0.011630 | 0.011549 | 0.011255 | 0.011312 | 0.011372 | 0.011406 | 0.011361 |
| 0.011623 | 0.011544 | 0.011542 | 0.011391 | 0.011362 | 0.011530 | 0.011534 |
| 0.011404 | 0.011497 | 0.011497 | 0.011463 | 0.011429 | 0.011430 | 0.011396 |
| 0.011430 | 0.011362 | 0.011396 | 0.011430 | 0.011262 | 0.011329 | 0.011362 |
| 0.011362 | 0.011430 | 0.011329 | 0.011430 | 0.011463 | 0.011497 | 0.011396 |
| 0.011429 | 0.011396 | 0.011732 | 0.011732 | 0.011463 | 0.011497 | 0.011530 |
| 0.011295 | 0.011295 | 0.011329 | 0.011430 | 0.011295 | 0.011530 | 0.011530 |
| 0.011564 | 0.011564 | 0.011362 | 0.011597 | 0.011766 | 0.011599 | 0.011430 |
| 0.011430 | 0.011497 | 0.011530 | 0.011362 | 0.011430 | 0.011396 | 0.011430 |
| 0.011497 | 0.011497 | 0.011530 | 0.011497 | 0.011397 | 0.011597 | 0.011564 |
| 0.011433 | 0.011329 | 0.011430 | 0.011530 | 0.011430 | 0.011564 | 0.011597 |
| 0.011765 | 0.011470 | 0.011631 | 0.011597 | 0.011530 | 0.011698 | 0.011329 |
| 0.011498 | 0.011396 | 0.011362 | 0.011362 | 0.011430 | 0.011329 | 0.011430 |
| 0.011463 | 0.011497 | 0.011396 | 0.011429 | 0.011396 | 0.011732 | 0.011732 |
| 0.011463 | 0.011497 | 0.011564 | 0.011496 | 0.012069 | 0.011560 | 0.011482 |
| 0.011552 | 0.011511 | 0.011622 | 0.011510 | 0.011620 | 0.011543 | 0.011508 |
| 0.012022 | 0.011406 | 0.011540 | 0.011475 | 0.011749 | 0.011604 | 0.011707 |
| 0.012046 | 0.011588 | 0.011669 | 0.011732 | 0.011597 | 0.011597 | 0.011635 |
| 0.011295 | 0.011463 | 0.011597 | 0.011564 | 0.011567 | 0.011564 | 0.011532 |
| 0.011396 | 0.011329 | 0.011362 | 0.011396 | 0.011295 | 0.011362 | 0.011262 |
| 0.011396 | 0.011429 | 0.011329 | 0.011295 | 0.011396 | 0.011329 | 0.011362 |
| 0.011362 | 0.011295 | 0.011362 | 0.011396 | 0.011295 | 0.011497 | 0.011530 |
| 0.011429 | 0.011497 | 0.011429 | 0.011429 | 0.011362 | 0.011765 | 0.011396 |
| 0.011443 | 0.011362 | 0.011598 | 0.011603 | 0.011463 | 0.011463 | 0.011463 |
| 0.011463 | 0.011396 | 0.011362 | 0.011396 | 0.011497 | 0.011497 | 0.011295 |
| 0.011429 | 0.011564 | 0.011732 | 0.011463 | 0.011665 | 0.011665 | 0.011496 |
| 0.011362 | 0.011429 | 0.011463 | 0.011866 | 0.011430 | 0.011463 | 0.011295 |
| 0.011463 | 0.011396 | 0.011396 | 0.011698 | 0.011631 | 0.011665 | 0.011396 |
| 0.011497 | 0.011564 | 0.011429 | 0.011497 | 0.011463 | 0.011329 | 0.011664 |
| 0.011429 | 0.011396 | 0.011396 | 0.011564 | 0.011396 | 0.011496 | 0.011732 |
| 0.011429 | 0.011773 | 0.011799 | 0.011589 | 0.011399 | 0.011502 | 0.011267 |
| 0.011225 | 0.011800 | 0.011341 | 0.011507 | 0.011353 | 0.011467 | 0.011485 |
| 0.011621 | 0.011324 | 0.011450 | 0.011324 | 0.011330 | 0.011462 | 0.011425 |
| 0.011475 | 0.011336 | 0.011483 | 0.011412 | 0.011431 | 0.011564 | 0.011631 |
| 0.011631 | 0.011497 | 0.011601 | 0.011603 | 0.011738 | 0.011767 | 0.011429 |
| 0.011664 | 0.011530 | 0.011396 | 0.011497 | 0.011295 | 0.011530 | 0.011329 |
| 0.011396 | 0.011396 | 0.011362 | 0.011329 | 0.011362 | 0.011329 | 0.011430 |
| 0.011410 | 0.011410 | 0.011403 | 0.011437 | 0.011573 | 0.011538 | 0.011538 |
| 0.011537 | 0.011464 | 0.011282 | 0.011276 | 0.011399 | 0.011568 | 0.011569 |
| 0.011363 | 0.011433 | 0.011666 | 0.011635 | 0.011565 | 0.011599 | 0.011530 |
| 0.011463 | 0.011530 | 0.011530 | 0.011429 | 0.012001 | 0.011597 | 0.011665 |
| 0.011698 | 0.011772 | 0.011401 | 0.011372 | 0.011362 | 0.011564 | 0.011530 |
| 0.011565 | 0.011597 | 0.011597 | 0.011597 | 0.011768 | 0.011732 | 0.011372 |
| 0.011263 | 0.011268 | 0.011367 | 0.011332 | 0.011436 | 0.011284 | 0.011604 |
| 0.011403 | 0.011586 | 0.011298 | 0.011397 | 0.011396 | 0.011471 | 0.011362 |
| 0.011329 | 0.011329 | 0.011396 | 0.011362 | 0.011564 | 0.011530 | 0.011463 |
| 0.011564 | 0.011631 | 0.011362 | 0.011362 | 0.011396 | 0.011396 | 0.011398 |
| 0.011466 | 0.011396 | 0.011396 | 0.011431 | 0.011564 | 0.011631 | 0.011631 |
| 0.011497 | 0.011601 | 0.011603 | 0.011738 | 0.011767 | 0.011429 | 0.011597 |
| 0.011530 | 0.011530 | 0.011365 | 0.011547 | 0.011442 | 0.011503 | 0.011376 |
| 0.011508 | 0.011744 | 0.011526 | 0.011434 | 0.011329 | 0.011530 | 0.011396 |
| 0.011497 | 0.011430 | 0.011329 | 0.011431 | 0.011530 | 0.011533 | 0.011430 |
| 0.011329 | 0.011263 | 0.011396 | 0.011329 | 0.011262 | 0.011332 | 0.011531 |
| 0.011430 | 0.011362 | 0.011396 | 0.011430 | 0.011262 | 0.011329 | 0.011530 |
| 0.011396 | 0.011429 | 0.011429 | 0.011362 | 0.011429 | 0.011664 | 0.011329 |
| 0.011362 | 0.011765 | 0.011362 | 0.011396 | 0.011362 | 0.011732 | 0.011317 |
| 0.011791 | 0.011315 | 0.011411 | 0.011584 | 0.011630 | 0.011563 | 0.011269 |
| 0.011375 | 0.011530 | 0.011631 | 0.011739 | 0.011599 | 0.011737 | 0.011867 |

|          |          |          |          |          |          |          |
|----------|----------|----------|----------|----------|----------|----------|
| 0.011767 | 0.011770 | 0.011765 | 0.012017 | 0.011732 | 0.012606 | 0.011768 |
| 0.012473 | 0.012274 | 0.012409 | 0.012680 | 0.011731 | 0.011430 | 0.011732 |
| 0.012104 | 0.012106 | 0.011698 | 0.011597 | 0.011665 | 0.011665 | 0.011635 |
| 0.011530 | 0.011535 | 0.011597 | 0.011565 | 0.011935 | 0.012001 | 0.012002 |
| 0.011901 | 0.012002 | 0.012106 | 0.011872 | 0.012104 | 0.012110 | 0.012171 |
| 0.012172 | 0.012206 | 0.012152 | 0.012172 | 0.012173 | 0.011463 | 0.011732 |
| 0.011834 | 0.012337 | 0.011840 | 0.012068 | 0.012541 | 0.011604 | 0.011497 |
| 0.011463 | 0.011463 | 0.011934 | 0.011965 | 0.012081 | 0.011799 | 0.011465 |
| S124     | 0.011698 | 0.011698 | 0.012035 | 0.011799 | 0.011799 | 0.011866 |
| 0.011706 | 0.011638 | 0.011866 | 0.011295 | 0.011362 | 0.011330 | 0.011295 |
| 0.011329 | 0.011497 | 0.011295 | 0.011329 | 0.011396 | 0.011362 | 0.011329 |
| 0.011295 | 0.011329 | 0.011429 | 0.011295 | 0.011329 | 0.011329 | 0.011672 |
| 0.011564 | 0.011329 | 0.011228 | 0.011463 | 0.011396 | 0.011362 | 0.011396 |
| 0.011362 | 0.011463 | 0.011362 | 0.011362 | 0.011396 | 0.011362 | 0.011530 |
| 0.011295 | 0.011362 | 0.011396 | 0.011329 | 0.011429 | 0.011463 | 0.011396 |
| 0.011362 | 0.011530 | 0.011430 | 0.011698 | 0.011362 | 0.011631 | 0.011362 |
| 0.011329 | 0.011430 | 0.011497 | 0.011631 | 0.011732 | 0.011430 | 0.011530 |
| 0.011396 | 0.011463 | 0.011362 | 0.011597 | 0.011833 | 0.011362 | 0.011430 |
| 0.011329 | 0.011429 | 0.011396 | 0.011463 | 0.011396 | 0.011396 | 0.011396 |
| 0.011295 | 0.011329 | 0.011295 | 0.011396 | 0.011362 | 0.011397 | 0.011463 |
| 0.011396 | 0.011362 | 0.011430 | 0.011329 | 0.011463 | 0.011295 | 0.011362 |
| 0.011530 | 0.011463 | 0.011698 | 0.011530 | 0.011362 | 0.011597 | 0.011362 |
| 0.011542 | 0.011770 | 0.011589 | 0.011295 | 0.011284 | 0.011392 | 0.011454 |
| 0.012122 | 0.011569 | 0.011307 | 0.011597 | 0.011597 | 0.011396 | 0.011497 |
| 0.011430 | 0.011396 | 0.011463 | 0.011362 | 0.011463 | 0.011396 | 0.011396 |
| 0.011362 | 0.011463 | 0.011665 | 0.011530 | 0.011430 | 0.000000 | 0.011329 |
| 0.011295 | 0.011295 | 0.011363 | 0.011329 | 0.011530 | 0.011497 | 0.011430 |
| 0.011530 | 0.011598 | 0.011329 | 0.011329 | 0.011363 | 0.011362 | 0.011364 |
| 0.011432 | 0.011363 | 0.011363 | 0.011240 | 0.011313 | 0.011271 | 0.011363 |
| 0.011365 | 0.011301 | 0.011355 | 0.011336 | 0.011264 | 0.011300 | 0.011331 |
| 0.011600 | 0.011371 | 0.011405 | 0.011296 | 0.011302 | 0.011430 | 0.011397 |
| 0.011464 | 0.011397 | 0.011397 | 0.011497 | 0.011429 | 0.011799 | 0.011598 |
| 0.011631 | 0.011497 | 0.011362 | 0.011463 | 0.011262 | 0.011497 | 0.011295 |
| 0.011362 | 0.011362 | 0.011329 | 0.011295 | 0.011329 | 0.011295 | 0.011396 |
| 0.011363 | 0.011463 | 0.011396 | 0.011295 | 0.011397 | 0.011497 | 0.011500 |
| 0.011497 | 0.011396 | 0.011295 | 0.011229 | 0.011362 | 0.011295 | 0.011228 |
| 0.011332 | 0.011497 | 0.011295 | 0.011497 | 0.011262 | 0.011363 | 0.011329 |
| 0.011430 | 0.011329 | 0.011363 | 0.011329 | 0.011363 | 0.011228 | 0.011363 |
| 0.011396 | 0.011329 | 0.011396 | 0.011329 | 0.011362 | 0.011396 | 0.011631 |
| 0.011732 | 0.011665 | 0.011732 | 0.011499 | 0.011732 | 0.011362 | 0.011329 |
| 0.011364 | 0.011667 | 0.011426 | 0.011266 | 0.011739 | 0.011231 | 0.011375 |
| 0.011740 | 0.011638 | 0.011530 | 0.011732 | 0.011436 | 0.011597 | 0.011564 |
| 0.011497 | 0.011665 | 0.011522 | 0.011390 | 0.011438 | 0.011396 | 0.011466 |
| 0.011564 | 0.011465 | 0.011567 | 0.011669 | 0.011598 | 0.011665 | 0.011772 |
| 0.011500 | 0.011671 | 0.011602 | 0.011534 | 0.011801 | 0.011262 | 0.011465 |
| 0.011429 | 0.011362 | 0.011262 | 0.011262 | 0.011329 | 0.011329 | 0.011396 |
| 0.011329 | 0.011396 | 0.011295 | 0.011396 | 0.011329 | 0.011329 | 0.011396 |
| 0.011329 | 0.011765 | 0.011665 | 0.011698 | 0.011228 | 0.011329 | 0.011362 |
| 0.011362 | 0.011329 | 0.011396 | 0.011430 | 0.011295 | 0.011295 | 0.011295 |
| 0.011833 | 0.011463 | 0.011463 | 0.011262 | 0.011362 | 0.011530 | 0.011295 |
| 0.011295 | 0.011362 | 0.011329 | 0.011497 | 0.011295 | 0.011429 | 0.011564 |
| 0.011497 | 0.011329 | 0.011329 | 0.011262 | 0.011262 | 0.011430 | 0.011362 |
| 0.011262 | 0.011362 | 0.011228 | 0.011262 | 0.011396 | 0.011531 | 0.011295 |
| 0.011262 | 0.011396 | 0.011329 | 0.011228 | 0.011564 | 0.011228 | 0.011396 |
| 0.011471 | 0.011295 | 0.011597 | 0.011430 | 0.011463 | 0.011329 | 0.011429 |
| 0.011295 | 0.011631 | 0.011228 | 0.011497 | 0.011295 | 0.011295 | 0.011228 |
| 0.011463 | 0.011665 | 0.011362 | 0.011430 | 0.011262 | 0.011665 | 0.011295 |
| 0.011295 | 0.011295 | 0.011329 | 0.011430 | 0.011329 | 0.011429 | 0.011497 |
| 0.011497 | 0.011463 | 0.011362 | 0.011463 | 0.011429 | 0.011295 | 0.011262 |
| 0.011295 | 0.011295 | 0.011362 | 0.011295 | 0.011262 | 0.011430 | 0.011295 |

|          |          |          |          |          |          |          |
|----------|----------|----------|----------|----------|----------|----------|
| 0.011329 | 0.011329 | 0.011463 | 0.011497 | 0.011396 | 0.011329 | 0.011329 |
| 0.011396 | 0.011329 | 0.011429 | 0.011295 | 0.011430 | 0.011530 | 0.011833 |
| 0.011329 | 0.011732 | 0.011336 | 0.017864 | 0.011322 | 0.011611 | 0.011688 |
| 0.011649 | 0.011694 | 0.011480 | 0.011467 | 0.011775 | 0.011716 | 0.011425 |
| 0.011582 | 0.011671 | 0.011255 | 0.011354 | 0.011334 | 0.011406 | 0.011362 |
| 0.011577 | 0.011507 | 0.011505 | 0.011259 | 0.011463 | 0.011497 | 0.011500 |
| 0.011369 | 0.011463 | 0.011463 | 0.011430 | 0.011396 | 0.011396 | 0.011363 |
| 0.011396 | 0.011329 | 0.011362 | 0.011396 | 0.011363 | 0.011295 | 0.011329 |
| 0.011329 | 0.011396 | 0.011295 | 0.011396 | 0.011362 | 0.011463 | 0.011362 |
| 0.011396 | 0.011363 | 0.011699 | 0.011699 | 0.011430 | 0.011464 | 0.011497 |
| 0.011262 | 0.011262 | 0.011295 | 0.011396 | 0.011262 | 0.011497 | 0.011497 |
| 0.011530 | 0.011530 | 0.011463 | 0.011564 | 0.011732 | 0.011565 | 0.011396 |
| 0.011396 | 0.011463 | 0.011497 | 0.011329 | 0.011396 | 0.011362 | 0.011396 |
| 0.011464 | 0.011463 | 0.011497 | 0.011463 | 0.011363 | 0.011564 | 0.011530 |
| 0.011365 | 0.011295 | 0.011396 | 0.011497 | 0.011396 | 0.011531 | 0.011564 |
| 0.011732 | 0.011436 | 0.011597 | 0.011564 | 0.011497 | 0.011665 | 0.011296 |
| 0.011465 | 0.011363 | 0.011329 | 0.011329 | 0.011396 | 0.011295 | 0.011396 |
| 0.011362 | 0.011463 | 0.011362 | 0.011396 | 0.011363 | 0.011699 | 0.011699 |
| 0.011430 | 0.011464 | 0.011530 | 0.011463 | 0.012103 | 0.011525 | 0.011447 |
| 0.011517 | 0.011476 | 0.011587 | 0.011476 | 0.011550 | 0.011509 | 0.011474 |
| 0.012056 | 0.011372 | 0.011506 | 0.011441 | 0.011715 | 0.011570 | 0.011673 |
| 0.012080 | 0.011550 | 0.011635 | 0.011698 | 0.011564 | 0.011564 | 0.011601 |
| 0.011262 | 0.011430 | 0.011564 | 0.011530 | 0.011533 | 0.011530 | 0.011498 |
| 0.011362 | 0.011295 | 0.011329 | 0.011362 | 0.011262 | 0.011329 | 0.011228 |
| 0.011362 | 0.011396 | 0.011295 | 0.011262 | 0.011362 | 0.011295 | 0.011329 |
| 0.011329 | 0.011262 | 0.011329 | 0.011362 | 0.011262 | 0.011463 | 0.011497 |
| 0.011396 | 0.011463 | 0.011396 | 0.011396 | 0.011329 | 0.011732 | 0.011362 |
| 0.011408 | 0.011329 | 0.011564 | 0.011569 | 0.011430 | 0.011429 | 0.011429 |
| 0.011430 | 0.011362 | 0.011329 | 0.011362 | 0.011463 | 0.011463 | 0.011396 |
| 0.011396 | 0.011530 | 0.011698 | 0.011429 | 0.011631 | 0.011631 | 0.011497 |
| 0.011329 | 0.011396 | 0.011430 | 0.011833 | 0.011396 | 0.011430 | 0.011396 |
| 0.011430 | 0.011362 | 0.011362 | 0.011665 | 0.011598 | 0.011631 | 0.011362 |
| 0.011463 | 0.011530 | 0.011396 | 0.011463 | 0.011429 | 0.011295 | 0.011631 |
| 0.011396 | 0.011362 | 0.011362 | 0.011530 | 0.011362 | 0.011463 | 0.011698 |
| 0.011396 | 0.011774 | 0.011765 | 0.011589 | 0.011286 | 0.011468 | 0.011370 |
| 0.011390 | 0.011800 | 0.011306 | 0.011507 | 0.011304 | 0.011417 | 0.011432 |
| 0.011520 | 0.011258 | 0.011394 | 0.011259 | 0.011276 | 0.011462 | 0.011425 |
| 0.011437 | 0.011336 | 0.011448 | 0.011377 | 0.011397 | 0.011530 | 0.011598 |
| 0.011598 | 0.011464 | 0.011568 | 0.011569 | 0.011705 | 0.011732 | 0.011396 |
| 0.011631 | 0.011497 | 0.011362 | 0.011463 | 0.011262 | 0.011497 | 0.011295 |
| 0.011362 | 0.011362 | 0.011329 | 0.011295 | 0.011329 | 0.011295 | 0.011396 |
| 0.011375 | 0.011375 | 0.011369 | 0.011403 | 0.011539 | 0.011504 | 0.011504 |
| 0.011503 | 0.011430 | 0.011245 | 0.011240 | 0.011365 | 0.011535 | 0.011535 |
| 0.011329 | 0.011399 | 0.011633 | 0.011601 | 0.011531 | 0.011565 | 0.011497 |
| 0.011429 | 0.011497 | 0.011497 | 0.011396 | 0.011967 | 0.011564 | 0.011564 |
| 0.011665 | 0.011737 | 0.011367 | 0.011441 | 0.011329 | 0.011530 | 0.011497 |
| 0.011531 | 0.011564 | 0.011564 | 0.011564 | 0.011689 | 0.011698 | 0.011338 |
| 0.011229 | 0.011233 | 0.011333 | 0.011298 | 0.011402 | 0.011247 | 0.011570 |
| 0.011369 | 0.011543 | 0.011299 | 0.011398 | 0.011363 | 0.011437 | 0.011329 |
| 0.011295 | 0.011295 | 0.011363 | 0.011329 | 0.011530 | 0.011497 | 0.011430 |
| 0.011530 | 0.011598 | 0.011329 | 0.011329 | 0.011363 | 0.011362 | 0.011364 |
| 0.011432 | 0.011363 | 0.011363 | 0.011397 | 0.011530 | 0.011598 | 0.011598 |
| 0.011464 | 0.011568 | 0.011569 | 0.011705 | 0.011732 | 0.011396 | 0.011564 |
| 0.011497 | 0.011497 | 0.011331 | 0.011513 | 0.011443 | 0.011469 | 0.011341 |
| 0.011508 | 0.011698 | 0.011441 | 0.011400 | 0.011295 | 0.011497 | 0.011363 |
| 0.011463 | 0.011396 | 0.011295 | 0.011397 | 0.011497 | 0.011500 | 0.011396 |
| 0.011295 | 0.011229 | 0.011362 | 0.011295 | 0.011228 | 0.011332 | 0.011497 |
| 0.011396 | 0.011329 | 0.011362 | 0.011396 | 0.011363 | 0.011295 | 0.011497 |
| 0.011362 | 0.011396 | 0.011396 | 0.011329 | 0.011396 | 0.011631 | 0.011295 |
| 0.011329 | 0.011732 | 0.011329 | 0.011362 | 0.011329 | 0.011698 | 0.011317 |

|          |          |          |          |          |          |          |
|----------|----------|----------|----------|----------|----------|----------|
| 0.011791 | 0.011315 | 0.011361 | 0.011544 | 0.011630 | 0.011527 | 0.011269 |
| 0.011323 | 0.011497 | 0.011597 | 0.011706 | 0.011565 | 0.011703 | 0.011834 |
| 0.011733 | 0.011771 | 0.011732 | 0.011983 | 0.011698 | 0.012573 | 0.011734 |
| 0.012474 | 0.012241 | 0.012375 | 0.012647 | 0.011698 | 0.011396 | 0.011699 |
| 0.012138 | 0.012073 | 0.011665 | 0.011564 | 0.011632 | 0.011632 | 0.011601 |
| 0.011497 | 0.011501 | 0.011564 | 0.011531 | 0.011901 | 0.011900 | 0.011969 |
| 0.011868 | 0.011969 | 0.012072 | 0.011839 | 0.012138 | 0.012110 | 0.012205 |
| 0.012206 | 0.012240 | 0.012187 | 0.012206 | 0.012207 | 0.011429 | 0.011733 |
| 0.011801 | 0.012304 | 0.011806 | 0.012035 | 0.012508 | 0.011570 | 0.011464 |
| 0.011429 | 0.011429 | 0.011901 | 0.011966 | 0.012046 | 0.011765 | 0.011431 |
| s125     | 0.011631 | 0.011631 | 0.011967 | 0.011732 | 0.011732 | 0.011799 |
| 0.011638 | 0.011570 | 0.011732 | 0.011228 | 0.011295 | 0.011262 | 0.011228 |
| 0.011262 | 0.011430 | 0.011228 | 0.011262 | 0.011329 | 0.011295 | 0.011262 |
| 0.011228 | 0.011262 | 0.011362 | 0.011228 | 0.011195 | 0.011262 | 0.011604 |
| 0.011497 | 0.011262 | 0.011161 | 0.011396 | 0.011262 | 0.011295 | 0.011262 |
| 0.011295 | 0.011329 | 0.011295 | 0.011295 | 0.011329 | 0.011295 | 0.011463 |
| 0.011228 | 0.011295 | 0.011329 | 0.011262 | 0.011362 | 0.011396 | 0.011329 |
| 0.011295 | 0.011463 | 0.011363 | 0.011631 | 0.011295 | 0.011497 | 0.011295 |
| 0.011262 | 0.011363 | 0.011430 | 0.011497 | 0.011665 | 0.011362 | 0.011463 |
| 0.011262 | 0.011329 | 0.011295 | 0.011463 | 0.011766 | 0.011295 | 0.011362 |
| 0.011262 | 0.011362 | 0.011329 | 0.011396 | 0.011329 | 0.011329 | 0.011329 |
| 0.011228 | 0.011262 | 0.011228 | 0.011329 | 0.011295 | 0.011329 | 0.011396 |
| 0.011329 | 0.011295 | 0.011295 | 0.011262 | 0.011396 | 0.011161 | 0.011295 |
| 0.011463 | 0.011396 | 0.011631 | 0.011463 | 0.011295 | 0.011463 | 0.011295 |
| 0.011468 | 0.011695 | 0.011513 | 0.011216 | 0.011210 | 0.011318 | 0.011415 |
| 0.012048 | 0.011467 | 0.011225 | 0.011530 | 0.011530 | 0.011329 | 0.011430 |
| 0.011362 | 0.011329 | 0.011396 | 0.011295 | 0.011396 | 0.011262 | 0.011329 |
| 0.011295 | 0.011396 | 0.011598 | 0.011463 | 0.011362 | 0.011329 | 0.000000 |
| 0.011228 | 0.011228 | 0.011228 | 0.011262 | 0.011463 | 0.011430 | 0.011362 |
| 0.011463 | 0.011530 | 0.011262 | 0.011262 | 0.011295 | 0.011295 | 0.011297 |
| 0.011364 | 0.011295 | 0.011295 | 0.011132 | 0.011241 | 0.011201 | 0.011296 |
| 0.011297 | 0.011232 | 0.011282 | 0.011267 | 0.011196 | 0.011232 | 0.011263 |
| 0.011528 | 0.011302 | 0.011267 | 0.011228 | 0.011233 | 0.011363 | 0.011329 |
| 0.011397 | 0.011330 | 0.011329 | 0.011429 | 0.011362 | 0.011665 | 0.011531 |
| 0.011564 | 0.011430 | 0.011295 | 0.011396 | 0.011195 | 0.011429 | 0.011228 |
| 0.011295 | 0.011295 | 0.011262 | 0.011228 | 0.011262 | 0.011228 | 0.011329 |
| 0.011228 | 0.011329 | 0.011329 | 0.011228 | 0.011330 | 0.011430 | 0.011432 |
| 0.011362 | 0.011329 | 0.011228 | 0.011161 | 0.011295 | 0.011228 | 0.011161 |
| 0.011264 | 0.011362 | 0.011161 | 0.011362 | 0.011195 | 0.011295 | 0.011262 |
| 0.011295 | 0.011262 | 0.011228 | 0.011262 | 0.011295 | 0.011161 | 0.011228 |
| 0.011262 | 0.011262 | 0.011329 | 0.011262 | 0.011295 | 0.011329 | 0.011564 |
| 0.011665 | 0.011597 | 0.011665 | 0.011431 | 0.011665 | 0.011295 | 0.011262 |
| 0.011297 | 0.011545 | 0.011335 | 0.011198 | 0.011671 | 0.011163 | 0.011296 |
| 0.011637 | 0.011570 | 0.011463 | 0.011665 | 0.011368 | 0.011530 | 0.011430 |
| 0.011430 | 0.011597 | 0.011451 | 0.011307 | 0.011354 | 0.011329 | 0.011399 |
| 0.011497 | 0.011398 | 0.011534 | 0.011534 | 0.011530 | 0.011598 | 0.011704 |
| 0.011433 | 0.011536 | 0.011534 | 0.011466 | 0.011733 | 0.011195 | 0.011397 |
| 0.011295 | 0.011295 | 0.011195 | 0.011195 | 0.011195 | 0.011262 | 0.011329 |
| 0.011195 | 0.011262 | 0.011161 | 0.011329 | 0.011195 | 0.011262 | 0.011329 |
| 0.011262 | 0.011698 | 0.011598 | 0.011631 | 0.011161 | 0.011262 | 0.011295 |
| 0.011295 | 0.011262 | 0.011329 | 0.011362 | 0.011228 | 0.011228 | 0.011228 |
| 0.011765 | 0.011396 | 0.011396 | 0.011195 | 0.011295 | 0.011396 | 0.011228 |
| 0.011228 | 0.011295 | 0.011262 | 0.011362 | 0.011228 | 0.011362 | 0.011429 |
| 0.011430 | 0.011262 | 0.011262 | 0.011195 | 0.011195 | 0.011363 | 0.011295 |
| 0.011195 | 0.011295 | 0.011161 | 0.011195 | 0.011329 | 0.011463 | 0.011228 |
| 0.011195 | 0.011329 | 0.011262 | 0.011161 | 0.011497 | 0.011161 | 0.011329 |
| 0.011334 | 0.011228 | 0.011530 | 0.011363 | 0.011396 | 0.011262 | 0.011362 |
| 0.011228 | 0.011497 | 0.011161 | 0.011430 | 0.011228 | 0.011228 | 0.011161 |
| 0.011329 | 0.011598 | 0.011295 | 0.011362 | 0.011195 | 0.011598 | 0.011228 |
| 0.011228 | 0.011228 | 0.011262 | 0.011295 | 0.011262 | 0.011362 | 0.011430 |

|          |          |          |          |          |          |          |
|----------|----------|----------|----------|----------|----------|----------|
| 0.011430 | 0.011396 | 0.011295 | 0.011396 | 0.011295 | 0.011228 | 0.011195 |
| 0.011228 | 0.011228 | 0.011295 | 0.011228 | 0.011127 | 0.011362 | 0.011228 |
| 0.011262 | 0.011262 | 0.011396 | 0.011430 | 0.011329 | 0.011195 | 0.011262 |
| 0.011329 | 0.011262 | 0.011362 | 0.011228 | 0.011362 | 0.011463 | 0.011766 |
| 0.011262 | 0.011665 | 0.011267 | 0.017785 | 0.011257 | 0.011488 | 0.011618 |
| 0.011579 | 0.011623 | 0.011322 | 0.011292 | 0.011719 | 0.011647 | 0.011364 |
| 0.011487 | 0.011610 | 0.011177 | 0.011228 | 0.011216 | 0.011357 | 0.011275 |
| 0.011482 | 0.011433 | 0.011394 | 0.011126 | 0.011396 | 0.011430 | 0.011432 |
| 0.011232 | 0.011396 | 0.011396 | 0.011362 | 0.011329 | 0.011329 | 0.011295 |
| 0.011329 | 0.011262 | 0.011295 | 0.011329 | 0.011295 | 0.011228 | 0.011262 |
| 0.011262 | 0.011329 | 0.011228 | 0.011329 | 0.011362 | 0.011396 | 0.011295 |
| 0.011329 | 0.011295 | 0.011631 | 0.011631 | 0.011363 | 0.011397 | 0.011430 |
| 0.011195 | 0.011195 | 0.011228 | 0.011262 | 0.011195 | 0.011430 | 0.011430 |
| 0.011463 | 0.011463 | 0.011396 | 0.011497 | 0.011665 | 0.011498 | 0.011262 |
| 0.011329 | 0.011396 | 0.011362 | 0.011262 | 0.011329 | 0.011295 | 0.011329 |
| 0.011396 | 0.011396 | 0.011430 | 0.011329 | 0.011229 | 0.011497 | 0.011396 |
| 0.011331 | 0.011228 | 0.011329 | 0.011430 | 0.011329 | 0.011463 | 0.011497 |
| 0.011665 | 0.011368 | 0.011530 | 0.011430 | 0.011430 | 0.011597 | 0.011228 |
| 0.011397 | 0.011296 | 0.011262 | 0.011262 | 0.011329 | 0.011228 | 0.011329 |
| 0.011362 | 0.011396 | 0.011295 | 0.011329 | 0.011295 | 0.011631 | 0.011631 |
| 0.011363 | 0.011397 | 0.011463 | 0.011396 | 0.012036 | 0.011453 | 0.011377 |
| 0.011447 | 0.011407 | 0.011517 | 0.011407 | 0.011515 | 0.011440 | 0.011405 |
| 0.011988 | 0.011303 | 0.011437 | 0.011372 | 0.011646 | 0.011502 | 0.011537 |
| 0.012012 | 0.011475 | 0.011331 | 0.011329 | 0.011329 | 0.011362 | 0.011297 |
| 0.011195 | 0.011161 | 0.011362 | 0.011329 | 0.011331 | 0.011463 | 0.011431 |
| 0.011295 | 0.011161 | 0.011195 | 0.011295 | 0.011127 | 0.011262 | 0.011161 |
| 0.011295 | 0.011329 | 0.011228 | 0.011195 | 0.011295 | 0.011228 | 0.011262 |
| 0.011262 | 0.011195 | 0.011262 | 0.011295 | 0.011195 | 0.011329 | 0.011430 |
| 0.011329 | 0.011396 | 0.011329 | 0.011329 | 0.011262 | 0.011665 | 0.011295 |
| 0.011339 | 0.011262 | 0.011497 | 0.011501 | 0.011295 | 0.011362 | 0.011362 |
| 0.011362 | 0.011228 | 0.011262 | 0.011228 | 0.011396 | 0.011396 | 0.011329 |
| 0.011329 | 0.011463 | 0.011631 | 0.011362 | 0.011564 | 0.011564 | 0.011430 |
| 0.011262 | 0.011329 | 0.011362 | 0.011766 | 0.011329 | 0.011295 | 0.011329 |
| 0.011362 | 0.011295 | 0.011295 | 0.011598 | 0.011463 | 0.011564 | 0.011295 |
| 0.011396 | 0.011463 | 0.011329 | 0.011396 | 0.011362 | 0.011228 | 0.011564 |
| 0.011329 | 0.011295 | 0.011295 | 0.011463 | 0.011295 | 0.011396 | 0.011631 |
| 0.011329 | 0.011706 | 0.011698 | 0.011507 | 0.011229 | 0.011400 | 0.011267 |
| 0.011280 | 0.011722 | 0.011236 | 0.011462 | 0.011255 | 0.011417 | 0.011379 |
| 0.011468 | 0.011192 | 0.011339 | 0.011192 | 0.011222 | 0.011395 | 0.011344 |
| 0.011362 | 0.011218 | 0.011377 | 0.011307 | 0.011330 | 0.011463 | 0.011530 |
| 0.011530 | 0.011396 | 0.011500 | 0.011501 | 0.011636 | 0.011661 | 0.011329 |
| 0.011564 | 0.011430 | 0.011295 | 0.011396 | 0.011195 | 0.011429 | 0.011228 |
| 0.011295 | 0.011295 | 0.011262 | 0.011228 | 0.011262 | 0.011228 | 0.011329 |
| 0.011305 | 0.011305 | 0.011300 | 0.011334 | 0.011471 | 0.011368 | 0.011436 |
| 0.011435 | 0.011363 | 0.011171 | 0.011168 | 0.011297 | 0.011467 | 0.011467 |
| 0.011262 | 0.011331 | 0.011565 | 0.011533 | 0.011464 | 0.011498 | 0.011430 |
| 0.011362 | 0.011430 | 0.011429 | 0.011329 | 0.011900 | 0.011497 | 0.011564 |
| 0.011598 | 0.011666 | 0.011299 | 0.011372 | 0.011262 | 0.011463 | 0.011430 |
| 0.011464 | 0.011497 | 0.011497 | 0.011497 | 0.011650 | 0.011631 | 0.011268 |
| 0.011162 | 0.011164 | 0.011265 | 0.011230 | 0.011334 | 0.011172 | 0.011502 |
| 0.011300 | 0.011411 | 0.011156 | 0.011322 | 0.011296 | 0.011368 | 0.000000 |
| 0.011228 | 0.011228 | 0.011228 | 0.011262 | 0.011463 | 0.011430 | 0.011362 |
| 0.011463 | 0.011530 | 0.011262 | 0.011262 | 0.011295 | 0.011295 | 0.011297 |
| 0.011364 | 0.011295 | 0.011295 | 0.011330 | 0.011463 | 0.011530 | 0.011530 |
| 0.011396 | 0.011500 | 0.011501 | 0.011636 | 0.011661 | 0.011329 | 0.011497 |
| 0.011430 | 0.011430 | 0.011263 | 0.011443 | 0.011373 | 0.011401 | 0.011270 |
| 0.011370 | 0.011607 | 0.011399 | 0.011332 | 0.011161 | 0.011362 | 0.011228 |
| 0.011329 | 0.011329 | 0.011228 | 0.011330 | 0.011430 | 0.011432 | 0.011329 |
| 0.011228 | 0.011161 | 0.011295 | 0.011228 | 0.011161 | 0.011264 | 0.011362 |
| 0.011329 | 0.011262 | 0.011295 | 0.011329 | 0.011295 | 0.011228 | 0.011430 |

|          |          |          |          |          |          |          |
|----------|----------|----------|----------|----------|----------|----------|
| 0.011295 | 0.011329 | 0.011329 | 0.011262 | 0.011329 | 0.011564 | 0.011228 |
| 0.011262 | 0.011665 | 0.011262 | 0.011228 | 0.011262 | 0.011631 | 0.011232 |
| 0.011679 | 0.011230 | 0.011261 | 0.011463 | 0.011549 | 0.011455 | 0.011186 |
| 0.011218 | 0.011430 | 0.011530 | 0.011637 | 0.011498 | 0.011635 | 0.011766 |
| 0.011666 | 0.011703 | 0.011665 | 0.011915 | 0.011631 | 0.012506 | 0.011667 |
| 0.012406 | 0.012173 | 0.012307 | 0.012579 | 0.011631 | 0.011329 | 0.011631 |
| 0.012070 | 0.012005 | 0.011598 | 0.011497 | 0.011565 | 0.011565 | 0.011534 |
| 0.011430 | 0.011433 | 0.011497 | 0.011464 | 0.011834 | 0.011900 | 0.011901 |
| 0.011801 | 0.011901 | 0.012004 | 0.011771 | 0.012070 | 0.012076 | 0.012137 |
| 0.012138 | 0.012172 | 0.012118 | 0.012138 | 0.012139 | 0.011362 | 0.011665 |
| 0.011733 | 0.012237 | 0.011738 | 0.011968 | 0.012440 | 0.011502 | 0.011396 |
| 0.011362 | 0.011362 | 0.011833 | 0.011883 | 0.011975 | 0.011698 | 0.011363 |
| S126     | 0.011597 | 0.011597 | 0.011934 | 0.011698 | 0.011698 | 0.011765 |
| 0.011604 | 0.011536 | 0.011698 | 0.011195 | 0.011262 | 0.011228 | 0.011195 |
| 0.011228 | 0.011396 | 0.011195 | 0.011228 | 0.011295 | 0.011262 | 0.011228 |
| 0.011195 | 0.011228 | 0.011329 | 0.011195 | 0.011228 | 0.011228 | 0.011570 |
| 0.011463 | 0.011228 | 0.011127 | 0.011362 | 0.011295 | 0.011262 | 0.011295 |
| 0.011262 | 0.011362 | 0.011262 | 0.011262 | 0.011295 | 0.011262 | 0.011430 |
| 0.011195 | 0.011262 | 0.011295 | 0.011228 | 0.011329 | 0.011362 | 0.011295 |
| 0.011262 | 0.011430 | 0.011329 | 0.011597 | 0.011262 | 0.011530 | 0.011262 |
| 0.011228 | 0.011329 | 0.011396 | 0.011530 | 0.011631 | 0.011329 | 0.011430 |
| 0.011295 | 0.011362 | 0.011262 | 0.011497 | 0.011732 | 0.011262 | 0.011329 |
| 0.011228 | 0.011329 | 0.011295 | 0.011362 | 0.011295 | 0.011295 | 0.011295 |
| 0.011195 | 0.011228 | 0.011195 | 0.011295 | 0.011262 | 0.011296 | 0.011362 |
| 0.011295 | 0.011262 | 0.011329 | 0.011228 | 0.011362 | 0.011195 | 0.011262 |
| 0.011429 | 0.011362 | 0.011597 | 0.011430 | 0.011262 | 0.011497 | 0.011262 |
| 0.011394 | 0.011620 | 0.011475 | 0.011138 | 0.011172 | 0.011244 | 0.011336 |
| 0.012011 | 0.011416 | 0.011184 | 0.011497 | 0.011497 | 0.011295 | 0.011396 |
| 0.011329 | 0.011295 | 0.011362 | 0.011262 | 0.011362 | 0.011295 | 0.011295 |
| 0.011262 | 0.011362 | 0.011564 | 0.011429 | 0.011329 | 0.011295 | 0.011228 |
| 0.000000 | 0.011195 | 0.011262 | 0.011228 | 0.011429 | 0.011396 | 0.011329 |
| 0.011429 | 0.011497 | 0.011228 | 0.011228 | 0.011262 | 0.011262 | 0.011263 |
| 0.011331 | 0.011262 | 0.011262 | 0.011132 | 0.011205 | 0.011165 | 0.011262 |
| 0.011263 | 0.011198 | 0.011245 | 0.011233 | 0.011162 | 0.011197 | 0.011229 |
| 0.011492 | 0.011267 | 0.011301 | 0.011195 | 0.011199 | 0.011329 | 0.011296 |
| 0.011363 | 0.011296 | 0.011296 | 0.011396 | 0.011329 | 0.011698 | 0.011497 |
| 0.011530 | 0.011396 | 0.011262 | 0.011362 | 0.011161 | 0.011396 | 0.011195 |
| 0.011262 | 0.011262 | 0.011228 | 0.011195 | 0.011228 | 0.011195 | 0.011295 |
| 0.011262 | 0.011362 | 0.011295 | 0.011195 | 0.011296 | 0.011396 | 0.011398 |
| 0.011396 | 0.011295 | 0.011195 | 0.011128 | 0.011262 | 0.011195 | 0.011127 |
| 0.011230 | 0.011396 | 0.011195 | 0.011396 | 0.011161 | 0.011262 | 0.011228 |
| 0.011329 | 0.011228 | 0.011262 | 0.011228 | 0.011262 | 0.011127 | 0.011262 |
| 0.011295 | 0.011228 | 0.011295 | 0.011228 | 0.011262 | 0.011228 | 0.011530 |
| 0.011631 | 0.011564 | 0.011631 | 0.011397 | 0.011631 | 0.011262 | 0.011228 |
| 0.011263 | 0.011505 | 0.011380 | 0.011129 | 0.011637 | 0.011129 | 0.011257 |
| 0.011637 | 0.011536 | 0.011429 | 0.011631 | 0.011333 | 0.011497 | 0.011463 |
| 0.011396 | 0.011564 | 0.011416 | 0.011266 | 0.011312 | 0.011295 | 0.011365 |
| 0.011463 | 0.011364 | 0.011500 | 0.011568 | 0.011497 | 0.011564 | 0.011670 |
| 0.011399 | 0.011569 | 0.011500 | 0.011432 | 0.011700 | 0.011161 | 0.011364 |
| 0.011329 | 0.011262 | 0.011161 | 0.011161 | 0.011228 | 0.011228 | 0.011295 |
| 0.011228 | 0.011295 | 0.011195 | 0.011295 | 0.011228 | 0.011228 | 0.011295 |
| 0.011228 | 0.011665 | 0.011564 | 0.011597 | 0.011127 | 0.011228 | 0.011262 |
| 0.011262 | 0.011228 | 0.011295 | 0.011329 | 0.011195 | 0.011195 | 0.011195 |
| 0.011732 | 0.011362 | 0.011362 | 0.011161 | 0.011262 | 0.011430 | 0.011195 |
| 0.011195 | 0.011262 | 0.011228 | 0.011396 | 0.011195 | 0.011329 | 0.011463 |
| 0.011396 | 0.011228 | 0.011228 | 0.011161 | 0.011161 | 0.011329 | 0.011262 |
| 0.011161 | 0.011262 | 0.011127 | 0.011161 | 0.011295 | 0.011430 | 0.011195 |
| 0.011161 | 0.011295 | 0.011228 | 0.011127 | 0.011463 | 0.011127 | 0.011295 |
| 0.011368 | 0.011195 | 0.011497 | 0.011329 | 0.011362 | 0.011228 | 0.011329 |
| 0.011195 | 0.011530 | 0.011127 | 0.011396 | 0.011195 | 0.011195 | 0.011127 |

|          |          |          |          |          |          |          |
|----------|----------|----------|----------|----------|----------|----------|
| 0.011362 | 0.011564 | 0.011262 | 0.011329 | 0.011161 | 0.011564 | 0.011195 |
| 0.011195 | 0.011195 | 0.011228 | 0.011329 | 0.011228 | 0.011329 | 0.011396 |
| 0.011396 | 0.011362 | 0.011262 | 0.011362 | 0.011329 | 0.011195 | 0.011161 |
| 0.011195 | 0.011195 | 0.011262 | 0.011195 | 0.011161 | 0.011329 | 0.011195 |
| 0.011228 | 0.011228 | 0.011362 | 0.011396 | 0.011295 | 0.011228 | 0.011228 |
| 0.011295 | 0.011228 | 0.011329 | 0.011195 | 0.011329 | 0.011429 | 0.011732 |
| 0.011228 | 0.011631 | 0.011233 | 0.017747 | 0.011126 | 0.011366 | 0.011583 |
| 0.011545 | 0.011588 | 0.011217 | 0.011234 | 0.011609 | 0.011612 | 0.011242 |
| 0.011440 | 0.011487 | 0.011099 | 0.011144 | 0.011177 | 0.011258 | 0.011146 |
| 0.011436 | 0.011395 | 0.011357 | 0.011193 | 0.011362 | 0.011396 | 0.011398 |
| 0.011266 | 0.011362 | 0.011362 | 0.011329 | 0.011295 | 0.011295 | 0.011262 |
| 0.011295 | 0.011228 | 0.011262 | 0.011295 | 0.011262 | 0.011195 | 0.011228 |
| 0.011228 | 0.011295 | 0.011195 | 0.011295 | 0.011329 | 0.011362 | 0.011262 |
| 0.011295 | 0.011262 | 0.011597 | 0.011597 | 0.011329 | 0.011363 | 0.011396 |
| 0.011161 | 0.011161 | 0.011195 | 0.011295 | 0.011161 | 0.011396 | 0.011396 |
| 0.011429 | 0.011429 | 0.011362 | 0.011463 | 0.011631 | 0.011464 | 0.011295 |
| 0.011295 | 0.011362 | 0.011396 | 0.011228 | 0.011295 | 0.011262 | 0.011295 |
| 0.011363 | 0.011362 | 0.011396 | 0.011363 | 0.011262 | 0.011463 | 0.011429 |
| 0.011297 | 0.011195 | 0.011295 | 0.011396 | 0.011295 | 0.011430 | 0.011396 |
| 0.011631 | 0.011333 | 0.011497 | 0.011463 | 0.011396 | 0.011564 | 0.011195 |
| 0.011363 | 0.011262 | 0.011228 | 0.011228 | 0.011295 | 0.011195 | 0.011295 |
| 0.011329 | 0.011362 | 0.011262 | 0.011295 | 0.011262 | 0.011597 | 0.011597 |
| 0.011329 | 0.011363 | 0.011429 | 0.011362 | 0.012002 | 0.011417 | 0.011342 |
| 0.011412 | 0.011372 | 0.011482 | 0.011372 | 0.011480 | 0.011405 | 0.011371 |
| 0.011953 | 0.011268 | 0.011403 | 0.011337 | 0.011611 | 0.011468 | 0.011571 |
| 0.011978 | 0.011437 | 0.011297 | 0.011295 | 0.011295 | 0.011329 | 0.011263 |
| 0.011161 | 0.011195 | 0.011329 | 0.011295 | 0.011297 | 0.011429 | 0.011397 |
| 0.011262 | 0.011195 | 0.011228 | 0.011262 | 0.011161 | 0.011228 | 0.011127 |
| 0.011262 | 0.011295 | 0.011195 | 0.011161 | 0.011262 | 0.011195 | 0.011228 |
| 0.011228 | 0.011161 | 0.011228 | 0.011262 | 0.011161 | 0.011362 | 0.011396 |
| 0.011295 | 0.011362 | 0.011295 | 0.011295 | 0.011228 | 0.011631 | 0.011262 |
| 0.011304 | 0.011228 | 0.011463 | 0.011467 | 0.011329 | 0.011329 | 0.011329 |
| 0.011329 | 0.011262 | 0.011228 | 0.011262 | 0.011362 | 0.011362 | 0.011295 |
| 0.011295 | 0.011430 | 0.011597 | 0.011329 | 0.011530 | 0.011530 | 0.011396 |
| 0.011228 | 0.011295 | 0.011329 | 0.011732 | 0.011295 | 0.011329 | 0.011295 |
| 0.011329 | 0.011262 | 0.011262 | 0.011564 | 0.011497 | 0.011530 | 0.011262 |
| 0.011362 | 0.011430 | 0.011295 | 0.011362 | 0.011329 | 0.011195 | 0.011530 |
| 0.011295 | 0.011262 | 0.011262 | 0.011430 | 0.011262 | 0.011362 | 0.011598 |
| 0.011295 | 0.011672 | 0.011665 | 0.011426 | 0.011173 | 0.011366 | 0.011215 |
| 0.011170 | 0.011683 | 0.011201 | 0.011373 | 0.011158 | 0.011315 | 0.011273 |
| 0.011417 | 0.000000 | 0.011227 | 0.000000 | 0.011114 | 0.011261 | 0.011263 |
| 0.011286 | 0.011257 | 0.011342 | 0.011272 | 0.011296 | 0.011429 | 0.011497 |
| 0.011497 | 0.011363 | 0.011466 | 0.011467 | 0.011602 | 0.011626 | 0.011295 |
| 0.011530 | 0.011396 | 0.011262 | 0.011362 | 0.011161 | 0.011396 | 0.011195 |
| 0.011262 | 0.011262 | 0.011228 | 0.011195 | 0.011228 | 0.011195 | 0.011295 |
| 0.011270 | 0.011270 | 0.011266 | 0.011300 | 0.011437 | 0.011402 | 0.011402 |
| 0.011401 | 0.011329 | 0.011134 | 0.011132 | 0.011263 | 0.011433 | 0.011433 |
| 0.011228 | 0.011297 | 0.011531 | 0.011500 | 0.011430 | 0.011464 | 0.011396 |
| 0.011329 | 0.011396 | 0.011396 | 0.011295 | 0.011866 | 0.011463 | 0.011530 |
| 0.011564 | 0.011630 | 0.011265 | 0.011337 | 0.011228 | 0.011430 | 0.011396 |
| 0.011430 | 0.011463 | 0.011463 | 0.011463 | 0.011610 | 0.011597 | 0.011234 |
| 0.011128 | 0.011130 | 0.011231 | 0.011196 | 0.011299 | 0.011135 | 0.011468 |
| 0.011266 | 0.011411 | 0.011156 | 0.011285 | 0.011262 | 0.011334 | 0.011228 |
| 0.000000 | 0.011195 | 0.011262 | 0.011228 | 0.011429 | 0.011396 | 0.011329 |
| 0.011429 | 0.011497 | 0.011228 | 0.011228 | 0.011262 | 0.011262 | 0.011263 |
| 0.011331 | 0.011262 | 0.011262 | 0.011296 | 0.011429 | 0.011497 | 0.011497 |
| 0.011363 | 0.011466 | 0.011467 | 0.011602 | 0.011626 | 0.011295 | 0.011396 |
| 0.011396 | 0.011396 | 0.011229 | 0.011408 | 0.011338 | 0.011367 | 0.011235 |
| 0.011405 | 0.011561 | 0.011399 | 0.011298 | 0.011195 | 0.011396 | 0.011262 |
| 0.011362 | 0.011295 | 0.011195 | 0.011296 | 0.011396 | 0.011398 | 0.011295 |



|          |          |          |          |          |          |          |
|----------|----------|----------|----------|----------|----------|----------|
| 0.011195 | 0.011128 | 0.011262 | 0.011195 | 0.011127 | 0.011230 | 0.011396 |
| 0.011295 | 0.011228 | 0.011262 | 0.011295 | 0.011262 | 0.011195 | 0.011396 |
| 0.011262 | 0.011295 | 0.011295 | 0.011228 | 0.011295 | 0.011530 | 0.011195 |
| 0.011228 | 0.011631 | 0.011228 | 0.011262 | 0.011228 | 0.011597 | 0.011189 |
| 0.011622 | 0.011188 | 0.011211 | 0.011422 | 0.011508 | 0.011419 | 0.011144 |
| 0.011165 | 0.011396 | 0.011497 | 0.011603 | 0.011464 | 0.011601 | 0.011733 |
| 0.011632 | 0.011669 | 0.011631 | 0.011880 | 0.011597 | 0.012472 | 0.011633 |
| 0.012372 | 0.012139 | 0.012273 | 0.012545 | 0.011597 | 0.011295 | 0.011598 |
| 0.012036 | 0.011971 | 0.011564 | 0.011463 | 0.011531 | 0.011531 | 0.011500 |
| 0.011396 | 0.011399 | 0.011463 | 0.011430 | 0.011800 | 0.011866 | 0.011867 |
| 0.011767 | 0.011867 | 0.011970 | 0.011737 | 0.012036 | 0.012042 | 0.012104 |
| 0.012104 | 0.012138 | 0.012084 | 0.012104 | 0.012105 | 0.011329 | 0.011631 |
| 0.011699 | 0.012203 | 0.011704 | 0.011934 | 0.012406 | 0.011468 | 0.011363 |
| 0.011329 | 0.011329 | 0.011799 | 0.011842 | 0.011940 | 0.011665 | 0.011330 |
| S127     | 0.011597 | 0.011597 | 0.011866 | 0.011631 | 0.011631 | 0.011698 |
| 0.011536 | 0.011468 | 0.011631 | 0.011195 | 0.011262 | 0.011228 | 0.011195 |
| 0.011161 | 0.011396 | 0.011127 | 0.011228 | 0.011295 | 0.011262 | 0.011228 |
| 0.011195 | 0.011228 | 0.011262 | 0.011195 | 0.011228 | 0.011228 | 0.011502 |
| 0.011396 | 0.011228 | 0.011127 | 0.011295 | 0.011295 | 0.011262 | 0.011295 |
| 0.011262 | 0.011362 | 0.011262 | 0.011262 | 0.011295 | 0.011262 | 0.011429 |
| 0.011127 | 0.011262 | 0.011295 | 0.011228 | 0.011262 | 0.011362 | 0.011295 |
| 0.011262 | 0.011430 | 0.011329 | 0.011530 | 0.011262 | 0.011530 | 0.011262 |
| 0.011228 | 0.011262 | 0.011396 | 0.011530 | 0.011564 | 0.011262 | 0.011362 |
| 0.011295 | 0.011362 | 0.011262 | 0.011497 | 0.011665 | 0.011262 | 0.011329 |
| 0.011228 | 0.011329 | 0.011295 | 0.011362 | 0.011295 | 0.011295 | 0.011295 |
| 0.011195 | 0.011228 | 0.011195 | 0.011228 | 0.011262 | 0.011296 | 0.011362 |
| 0.011295 | 0.011262 | 0.011329 | 0.011228 | 0.011295 | 0.011195 | 0.011262 |
| 0.011429 | 0.011362 | 0.011597 | 0.011430 | 0.011262 | 0.011497 | 0.011262 |
| 0.011431 | 0.011583 | 0.011475 | 0.011177 | 0.011172 | 0.011281 | 0.011296 |
| 0.011938 | 0.011365 | 0.011184 | 0.011497 | 0.011497 | 0.011228 | 0.011329 |
| 0.011329 | 0.011295 | 0.011362 | 0.011262 | 0.011362 | 0.011295 | 0.011295 |
| 0.011262 | 0.011295 | 0.011564 | 0.011429 | 0.011329 | 0.011295 | 0.011228 |
| 0.011195 | 0.000000 | 0.011262 | 0.011228 | 0.011362 | 0.011329 | 0.011262 |
| 0.011362 | 0.011429 | 0.011228 | 0.011228 | 0.011262 | 0.011262 | 0.011263 |
| 0.011331 | 0.011262 | 0.011262 | 0.011132 | 0.011205 | 0.011165 | 0.011262 |
| 0.011263 | 0.011198 | 0.011245 | 0.011233 | 0.011162 | 0.011197 | 0.011229 |
| 0.011420 | 0.011267 | 0.011301 | 0.011195 | 0.011199 | 0.011329 | 0.011228 |
| 0.011296 | 0.011296 | 0.011296 | 0.011396 | 0.011329 | 0.011698 | 0.011430 |
| 0.011463 | 0.011329 | 0.011262 | 0.011295 | 0.011161 | 0.011329 | 0.011195 |
| 0.011262 | 0.011262 | 0.011228 | 0.011195 | 0.011228 | 0.011195 | 0.011295 |
| 0.011262 | 0.011362 | 0.011295 | 0.011195 | 0.011296 | 0.011396 | 0.011398 |
| 0.011396 | 0.011295 | 0.011195 | 0.011128 | 0.011262 | 0.011195 | 0.011127 |
| 0.011230 | 0.011396 | 0.011195 | 0.011396 | 0.011161 | 0.011262 | 0.011228 |
| 0.011329 | 0.011228 | 0.011262 | 0.011228 | 0.011262 | 0.011127 | 0.011262 |
| 0.011295 | 0.011228 | 0.011295 | 0.011228 | 0.011262 | 0.011295 | 0.011530 |
| 0.011564 | 0.011497 | 0.011564 | 0.011397 | 0.011564 | 0.011262 | 0.011228 |
| 0.011195 | 0.011464 | 0.011335 | 0.011163 | 0.011569 | 0.011129 | 0.011257 |
| 0.011569 | 0.011434 | 0.011429 | 0.011631 | 0.011333 | 0.011497 | 0.011463 |
| 0.011396 | 0.011564 | 0.011416 | 0.011266 | 0.011312 | 0.011295 | 0.011365 |
| 0.011463 | 0.011364 | 0.011500 | 0.011568 | 0.011497 | 0.011564 | 0.011670 |
| 0.011399 | 0.011569 | 0.011500 | 0.011432 | 0.011699 | 0.011161 | 0.011364 |
| 0.011329 | 0.011262 | 0.011161 | 0.011161 | 0.011228 | 0.011228 | 0.011295 |
| 0.011228 | 0.011295 | 0.011195 | 0.011228 | 0.011228 | 0.011228 | 0.011295 |
| 0.011228 | 0.011597 | 0.011497 | 0.011530 | 0.011127 | 0.011228 | 0.011262 |
| 0.011262 | 0.011228 | 0.011295 | 0.011262 | 0.011195 | 0.011195 | 0.011195 |
| 0.011665 | 0.011295 | 0.011362 | 0.011161 | 0.011262 | 0.011430 | 0.011195 |
| 0.011195 | 0.011262 | 0.011228 | 0.011396 | 0.011195 | 0.011329 | 0.011463 |
| 0.011396 | 0.011228 | 0.011228 | 0.011161 | 0.011161 | 0.011329 | 0.011262 |
| 0.011161 | 0.011262 | 0.011127 | 0.011161 | 0.011295 | 0.011363 | 0.011195 |
| 0.011161 | 0.011295 | 0.011228 | 0.011127 | 0.011396 | 0.011127 | 0.011295 |

|          |          |          |          |          |          |          |
|----------|----------|----------|----------|----------|----------|----------|
| 0.011368 | 0.011195 | 0.011430 | 0.011329 | 0.011295 | 0.011228 | 0.011329 |
| 0.011195 | 0.011530 | 0.011127 | 0.011329 | 0.011127 | 0.011127 | 0.011127 |
| 0.011362 | 0.011497 | 0.011262 | 0.011329 | 0.011161 | 0.011497 | 0.011127 |
| 0.011195 | 0.011195 | 0.011228 | 0.011329 | 0.011228 | 0.011329 | 0.011396 |
| 0.011396 | 0.011362 | 0.011262 | 0.011362 | 0.011329 | 0.011195 | 0.011161 |
| 0.011195 | 0.011195 | 0.011262 | 0.011127 | 0.011161 | 0.011329 | 0.011195 |
| 0.011161 | 0.011228 | 0.011362 | 0.011329 | 0.011295 | 0.011228 | 0.011228 |
| 0.011295 | 0.011228 | 0.011329 | 0.011195 | 0.011329 | 0.011429 | 0.011665 |
| 0.011228 | 0.011564 | 0.011233 | 0.017747 | 0.011257 | 0.011305 | 0.011514 |
| 0.011475 | 0.011517 | 0.011270 | 0.011234 | 0.011609 | 0.011543 | 0.011303 |
| 0.011392 | 0.011426 | 0.011138 | 0.011228 | 0.011138 | 0.011208 | 0.011232 |
| 0.011389 | 0.011321 | 0.011320 | 0.011126 | 0.011362 | 0.011396 | 0.011398 |
| 0.011266 | 0.011362 | 0.011362 | 0.011262 | 0.011295 | 0.011295 | 0.011262 |
| 0.011295 | 0.011228 | 0.011262 | 0.011295 | 0.011262 | 0.011195 | 0.011228 |
| 0.011228 | 0.011295 | 0.011195 | 0.011295 | 0.011329 | 0.011362 | 0.011262 |
| 0.011228 | 0.011195 | 0.011530 | 0.011530 | 0.011329 | 0.011363 | 0.011396 |
| 0.011161 | 0.011161 | 0.011195 | 0.011295 | 0.011161 | 0.011396 | 0.011396 |
| 0.011429 | 0.011429 | 0.011362 | 0.011463 | 0.011564 | 0.011464 | 0.011295 |
| 0.011295 | 0.011362 | 0.011396 | 0.011228 | 0.011295 | 0.011262 | 0.011295 |
| 0.011363 | 0.011362 | 0.011396 | 0.011362 | 0.011262 | 0.011463 | 0.011429 |
| 0.011297 | 0.011195 | 0.011295 | 0.011396 | 0.011295 | 0.011362 | 0.011463 |
| 0.011631 | 0.011333 | 0.011497 | 0.011463 | 0.011396 | 0.011564 | 0.011195 |
| 0.011363 | 0.011262 | 0.011228 | 0.011228 | 0.011295 | 0.011195 | 0.011295 |
| 0.011329 | 0.011362 | 0.011262 | 0.011228 | 0.011195 | 0.011530 | 0.011530 |
| 0.011329 | 0.011363 | 0.011429 | 0.011362 | 0.011935 | 0.011417 | 0.011342 |
| 0.011412 | 0.011372 | 0.011482 | 0.011372 | 0.011480 | 0.011405 | 0.011371 |
| 0.011884 | 0.011268 | 0.011403 | 0.011337 | 0.011611 | 0.011468 | 0.011571 |
| 0.011910 | 0.011362 | 0.011297 | 0.011295 | 0.011295 | 0.011262 | 0.011263 |
| 0.011161 | 0.011195 | 0.011329 | 0.011295 | 0.011297 | 0.011362 | 0.011330 |
| 0.011262 | 0.011195 | 0.011228 | 0.011262 | 0.011161 | 0.011228 | 0.011127 |
| 0.011195 | 0.011228 | 0.011195 | 0.011161 | 0.011262 | 0.011195 | 0.011228 |
| 0.011228 | 0.011161 | 0.011228 | 0.011262 | 0.011161 | 0.011362 | 0.011396 |
| 0.011295 | 0.011295 | 0.011295 | 0.011295 | 0.011228 | 0.011564 | 0.011262 |
| 0.011234 | 0.011228 | 0.011396 | 0.011400 | 0.011329 | 0.011329 | 0.011329 |
| 0.011329 | 0.011262 | 0.011228 | 0.011262 | 0.011362 | 0.011362 | 0.011295 |
| 0.011295 | 0.011429 | 0.011530 | 0.011329 | 0.011530 | 0.011530 | 0.011396 |
| 0.011228 | 0.011295 | 0.011329 | 0.011665 | 0.011295 | 0.011329 | 0.011295 |
| 0.011329 | 0.011195 | 0.011195 | 0.011497 | 0.011497 | 0.011463 | 0.011262 |
| 0.011362 | 0.011429 | 0.011295 | 0.011362 | 0.011329 | 0.011195 | 0.011463 |
| 0.011295 | 0.011262 | 0.011195 | 0.011429 | 0.011262 | 0.011362 | 0.011597 |
| 0.011295 | 0.011604 | 0.011597 | 0.011385 | 0.011117 | 0.011298 | 0.011163 |
| 0.011115 | 0.011605 | 0.011201 | 0.011328 | 0.011158 | 0.011315 | 0.011273 |
| 0.011366 | 0.011126 | 0.011338 | 0.011126 | 0.011222 | 0.011395 | 0.011344 |
| 0.011362 | 0.011257 | 0.011272 | 0.011272 | 0.011296 | 0.011362 | 0.011429 |
| 0.011429 | 0.011296 | 0.011398 | 0.011399 | 0.011535 | 0.011555 | 0.011295 |
| 0.011463 | 0.011329 | 0.011262 | 0.011295 | 0.011161 | 0.011329 | 0.011195 |
| 0.011262 | 0.011262 | 0.011228 | 0.011195 | 0.011228 | 0.011195 | 0.011295 |
| 0.011270 | 0.011270 | 0.011266 | 0.011300 | 0.011436 | 0.011402 | 0.011402 |
| 0.011401 | 0.011329 | 0.011134 | 0.011132 | 0.011263 | 0.011433 | 0.011433 |
| 0.011228 | 0.011297 | 0.011531 | 0.011499 | 0.011430 | 0.011464 | 0.011396 |
| 0.011329 | 0.011396 | 0.011396 | 0.011295 | 0.011799 | 0.011463 | 0.011530 |
| 0.011564 | 0.011559 | 0.011231 | 0.011337 | 0.011228 | 0.011430 | 0.011396 |
| 0.011430 | 0.011463 | 0.011463 | 0.011463 | 0.011610 | 0.011597 | 0.011234 |
| 0.011128 | 0.011130 | 0.011230 | 0.011196 | 0.011231 | 0.011135 | 0.011400 |
| 0.011266 | 0.011323 | 0.011156 | 0.011285 | 0.011262 | 0.011334 | 0.011228 |
| 0.011195 | 0.000000 | 0.011262 | 0.011228 | 0.011362 | 0.011329 | 0.011262 |
| 0.011362 | 0.011429 | 0.011228 | 0.011228 | 0.011262 | 0.011262 | 0.011263 |
| 0.011331 | 0.011262 | 0.011262 | 0.011296 | 0.011362 | 0.011429 | 0.011429 |
| 0.011296 | 0.011398 | 0.011399 | 0.011535 | 0.011555 | 0.011295 | 0.011463 |
| 0.011396 | 0.011396 | 0.011229 | 0.011408 | 0.011338 | 0.011367 | 0.011235 |

|          |          |          |          |          |          |          |
|----------|----------|----------|----------|----------|----------|----------|
| 0.011404 | 0.011561 | 0.011357 | 0.011298 | 0.011195 | 0.011396 | 0.011262 |
| 0.011362 | 0.011295 | 0.011195 | 0.011296 | 0.011396 | 0.011398 | 0.011295 |
| 0.011195 | 0.011128 | 0.011262 | 0.011195 | 0.011127 | 0.011230 | 0.011396 |
| 0.011295 | 0.011228 | 0.011262 | 0.011295 | 0.011262 | 0.011195 | 0.011329 |
| 0.011262 | 0.011295 | 0.011295 | 0.011228 | 0.011295 | 0.011530 | 0.011127 |
| 0.011228 | 0.011564 | 0.011228 | 0.011262 | 0.011228 | 0.011530 | 0.011189 |
| 0.011566 | 0.011188 | 0.011161 | 0.011342 | 0.011426 | 0.011347 | 0.011144 |
| 0.011113 | 0.011329 | 0.011430 | 0.011535 | 0.011397 | 0.011534 | 0.011665 |
| 0.011565 | 0.011601 | 0.011564 | 0.011812 | 0.011530 | 0.012405 | 0.011565 |
| 0.012304 | 0.012072 | 0.012206 | 0.012477 | 0.011530 | 0.011228 | 0.011530 |
| 0.011969 | 0.011903 | 0.011497 | 0.011396 | 0.011464 | 0.011464 | 0.011432 |
| 0.011329 | 0.011331 | 0.011396 | 0.011363 | 0.011733 | 0.011799 | 0.011800 |
| 0.011699 | 0.011800 | 0.011903 | 0.011669 | 0.011969 | 0.011974 | 0.012036 |
| 0.012037 | 0.012070 | 0.012015 | 0.012037 | 0.012038 | 0.011329 | 0.011564 |
| 0.011632 | 0.012136 | 0.011636 | 0.011867 | 0.012339 | 0.011400 | 0.011295 |
| 0.011262 | 0.011262 | 0.011732 | 0.011759 | 0.011869 | 0.011597 | 0.011262 |
| S128     | 0.011665 | 0.011665 | 0.012001 | 0.011765 | 0.011765 | 0.011833 |
| 0.011672 | 0.011604 | 0.011765 | 0.011262 | 0.011329 | 0.011296 | 0.011262 |
| 0.011295 | 0.011463 | 0.011262 | 0.011295 | 0.011362 | 0.011329 | 0.011295 |
| 0.011262 | 0.011295 | 0.011396 | 0.011262 | 0.011228 | 0.011295 | 0.011638 |
| 0.011530 | 0.011295 | 0.011195 | 0.011429 | 0.011295 | 0.011329 | 0.011295 |
| 0.011329 | 0.011362 | 0.011329 | 0.011329 | 0.011362 | 0.011329 | 0.011497 |
| 0.011262 | 0.011329 | 0.011362 | 0.011295 | 0.011396 | 0.011430 | 0.011362 |
| 0.011329 | 0.011497 | 0.011396 | 0.011665 | 0.011329 | 0.011530 | 0.011329 |
| 0.011295 | 0.011396 | 0.011463 | 0.011530 | 0.011698 | 0.011396 | 0.011497 |
| 0.011295 | 0.011362 | 0.011329 | 0.011497 | 0.011799 | 0.011329 | 0.011396 |
| 0.011295 | 0.011396 | 0.011362 | 0.011430 | 0.011362 | 0.011362 | 0.011362 |
| 0.011262 | 0.011295 | 0.011262 | 0.011362 | 0.011329 | 0.011363 | 0.011429 |
| 0.011362 | 0.011329 | 0.011262 | 0.011295 | 0.011429 | 0.011195 | 0.011329 |
| 0.011497 | 0.011429 | 0.011665 | 0.011497 | 0.011329 | 0.011497 | 0.011329 |
| 0.011505 | 0.011733 | 0.011551 | 0.011255 | 0.011247 | 0.011355 | 0.011454 |
| 0.012085 | 0.011467 | 0.011266 | 0.011564 | 0.011564 | 0.011362 | 0.011463 |
| 0.011396 | 0.011362 | 0.011429 | 0.011329 | 0.011430 | 0.011295 | 0.011362 |
| 0.011329 | 0.011429 | 0.011631 | 0.011497 | 0.011396 | 0.011363 | 0.011228 |
| 0.011262 | 0.011262 | 0.000000 | 0.011295 | 0.011497 | 0.011463 | 0.011396 |
| 0.011497 | 0.011564 | 0.011295 | 0.011295 | 0.011329 | 0.011329 | 0.011330 |
| 0.011398 | 0.011329 | 0.011329 | 0.011168 | 0.011277 | 0.011236 | 0.011329 |
| 0.011331 | 0.011266 | 0.011318 | 0.011302 | 0.011230 | 0.011266 | 0.011297 |
| 0.011564 | 0.011336 | 0.011301 | 0.011262 | 0.011268 | 0.011397 | 0.011363 |
| 0.011430 | 0.011364 | 0.011363 | 0.011463 | 0.011396 | 0.011698 | 0.011564 |
| 0.011597 | 0.011463 | 0.011329 | 0.011430 | 0.011228 | 0.011463 | 0.011262 |
| 0.011329 | 0.011329 | 0.011295 | 0.011262 | 0.011295 | 0.011262 | 0.011362 |
| 0.011262 | 0.011362 | 0.011362 | 0.011262 | 0.011363 | 0.011463 | 0.011466 |
| 0.011329 | 0.011362 | 0.011262 | 0.011195 | 0.011329 | 0.011262 | 0.011195 |
| 0.011298 | 0.011329 | 0.011195 | 0.011329 | 0.011228 | 0.011329 | 0.011295 |
| 0.011329 | 0.011295 | 0.011262 | 0.011295 | 0.011329 | 0.011195 | 0.011262 |
| 0.011295 | 0.011295 | 0.011362 | 0.011295 | 0.011329 | 0.011362 | 0.011597 |
| 0.011698 | 0.011631 | 0.011698 | 0.011465 | 0.011698 | 0.011329 | 0.011295 |
| 0.011330 | 0.011505 | 0.011380 | 0.011232 | 0.011671 | 0.011197 | 0.011336 |
| 0.011705 | 0.011604 | 0.011497 | 0.011698 | 0.011402 | 0.011564 | 0.011463 |
| 0.011463 | 0.011631 | 0.011487 | 0.011349 | 0.011396 | 0.011363 | 0.011433 |
| 0.011530 | 0.011431 | 0.011568 | 0.011568 | 0.011564 | 0.011631 | 0.011738 |
| 0.011466 | 0.011569 | 0.011568 | 0.011500 | 0.011767 | 0.011228 | 0.011431 |
| 0.011329 | 0.011329 | 0.011228 | 0.011228 | 0.011228 | 0.011295 | 0.011362 |
| 0.011228 | 0.011295 | 0.011195 | 0.011295 | 0.011228 | 0.011295 | 0.011362 |
| 0.011295 | 0.011732 | 0.011631 | 0.011665 | 0.011195 | 0.011295 | 0.011329 |
| 0.011329 | 0.011295 | 0.011362 | 0.011396 | 0.011262 | 0.011262 | 0.011262 |
| 0.011799 | 0.011430 | 0.011430 | 0.011228 | 0.011329 | 0.011430 | 0.011262 |
| 0.011262 | 0.011329 | 0.011295 | 0.011396 | 0.011262 | 0.011396 | 0.011463 |
| 0.011463 | 0.011295 | 0.011295 | 0.011228 | 0.011228 | 0.011396 | 0.011329 |

|          |          |          |          |          |          |          |
|----------|----------|----------|----------|----------|----------|----------|
| 0.011228 | 0.011329 | 0.011195 | 0.011228 | 0.011362 | 0.011497 | 0.011262 |
| 0.011228 | 0.011362 | 0.011296 | 0.011195 | 0.011530 | 0.011195 | 0.011362 |
| 0.011368 | 0.011262 | 0.011564 | 0.011396 | 0.011362 | 0.011295 | 0.011396 |
| 0.011262 | 0.011530 | 0.011195 | 0.011463 | 0.011262 | 0.011262 | 0.011195 |
| 0.011362 | 0.011631 | 0.011329 | 0.011396 | 0.011228 | 0.011631 | 0.011262 |
| 0.011262 | 0.011262 | 0.011295 | 0.011329 | 0.011295 | 0.011396 | 0.011463 |
| 0.011463 | 0.011430 | 0.011329 | 0.011430 | 0.011329 | 0.011262 | 0.011228 |
| 0.011262 | 0.011262 | 0.011329 | 0.011262 | 0.011161 | 0.011396 | 0.011262 |
| 0.011295 | 0.011295 | 0.011430 | 0.011463 | 0.011362 | 0.011228 | 0.011295 |
| 0.011362 | 0.011295 | 0.011396 | 0.011262 | 0.011396 | 0.011497 | 0.011799 |
| 0.011295 | 0.011698 | 0.011302 | 0.017823 | 0.011257 | 0.011427 | 0.011653 |
| 0.011614 | 0.011658 | 0.011374 | 0.011292 | 0.011719 | 0.011682 | 0.011364 |
| 0.011535 | 0.011610 | 0.011216 | 0.011270 | 0.011255 | 0.011356 | 0.011318 |
| 0.011529 | 0.011470 | 0.011431 | 0.011259 | 0.011430 | 0.011463 | 0.011466 |
| 0.011266 | 0.011430 | 0.011430 | 0.011396 | 0.011362 | 0.011363 | 0.011329 |
| 0.011362 | 0.011295 | 0.011329 | 0.011362 | 0.011329 | 0.011262 | 0.011295 |
| 0.011295 | 0.011362 | 0.011262 | 0.011363 | 0.011396 | 0.011430 | 0.011329 |
| 0.011362 | 0.011329 | 0.011665 | 0.011665 | 0.011396 | 0.011430 | 0.011463 |
| 0.011228 | 0.011228 | 0.011262 | 0.011295 | 0.011228 | 0.011463 | 0.011463 |
| 0.011497 | 0.011497 | 0.011430 | 0.011530 | 0.011698 | 0.011532 | 0.011295 |
| 0.011362 | 0.011430 | 0.011396 | 0.011295 | 0.011362 | 0.011329 | 0.011362 |
| 0.011430 | 0.011430 | 0.011463 | 0.011363 | 0.011262 | 0.011530 | 0.011429 |
| 0.011365 | 0.011262 | 0.011362 | 0.011463 | 0.011363 | 0.011497 | 0.011530 |
| 0.011698 | 0.011402 | 0.011564 | 0.011463 | 0.011463 | 0.011631 | 0.011262 |
| 0.011431 | 0.011329 | 0.011295 | 0.011295 | 0.011362 | 0.011262 | 0.011363 |
| 0.011396 | 0.011430 | 0.011329 | 0.011362 | 0.011329 | 0.011665 | 0.011665 |
| 0.011396 | 0.011430 | 0.011497 | 0.011429 | 0.012070 | 0.011489 | 0.011412 |
| 0.011482 | 0.011442 | 0.011552 | 0.011441 | 0.011550 | 0.011474 | 0.011440 |
| 0.012022 | 0.011337 | 0.011471 | 0.011406 | 0.011680 | 0.011537 | 0.011571 |
| 0.012047 | 0.011512 | 0.011365 | 0.011362 | 0.011362 | 0.011396 | 0.011331 |
| 0.011228 | 0.011195 | 0.011396 | 0.011362 | 0.011364 | 0.011497 | 0.011464 |
| 0.011329 | 0.011195 | 0.011228 | 0.011329 | 0.011161 | 0.011295 | 0.011195 |
| 0.011262 | 0.011295 | 0.011262 | 0.011228 | 0.011329 | 0.011262 | 0.011295 |
| 0.011295 | 0.011228 | 0.011295 | 0.011329 | 0.011228 | 0.011362 | 0.011463 |
| 0.011362 | 0.011362 | 0.011362 | 0.011362 | 0.011295 | 0.011698 | 0.011329 |
| 0.011373 | 0.011295 | 0.011531 | 0.011535 | 0.011329 | 0.011396 | 0.011396 |
| 0.011396 | 0.011262 | 0.011295 | 0.011262 | 0.011430 | 0.011430 | 0.011362 |
| 0.011362 | 0.011497 | 0.011665 | 0.011396 | 0.011598 | 0.011598 | 0.011463 |
| 0.011295 | 0.011362 | 0.011396 | 0.011799 | 0.011363 | 0.011329 | 0.011362 |
| 0.011396 | 0.011329 | 0.011329 | 0.011631 | 0.011497 | 0.011598 | 0.011329 |
| 0.011430 | 0.011497 | 0.011362 | 0.011430 | 0.011396 | 0.011262 | 0.011597 |
| 0.011362 | 0.011329 | 0.011329 | 0.011497 | 0.011329 | 0.011430 | 0.011665 |
| 0.011362 | 0.011740 | 0.011732 | 0.011548 | 0.011229 | 0.011434 | 0.011267 |
| 0.011225 | 0.011761 | 0.011271 | 0.011507 | 0.011304 | 0.011467 | 0.011432 |
| 0.011468 | 0.011258 | 0.011339 | 0.011192 | 0.011276 | 0.011395 | 0.011385 |
| 0.011399 | 0.011257 | 0.011412 | 0.011307 | 0.011364 | 0.011497 | 0.011564 |
| 0.011564 | 0.011430 | 0.011534 | 0.011535 | 0.011670 | 0.011696 | 0.011362 |
| 0.011597 | 0.011463 | 0.011329 | 0.011430 | 0.011228 | 0.011463 | 0.011262 |
| 0.011329 | 0.011329 | 0.011295 | 0.011262 | 0.011295 | 0.011262 | 0.011362 |
| 0.011340 | 0.011340 | 0.011266 | 0.011368 | 0.011505 | 0.011402 | 0.011470 |
| 0.011469 | 0.011396 | 0.011208 | 0.011204 | 0.011331 | 0.011501 | 0.011501 |
| 0.011296 | 0.011365 | 0.011599 | 0.011567 | 0.011497 | 0.011531 | 0.011463 |
| 0.011396 | 0.011463 | 0.011463 | 0.011362 | 0.011934 | 0.011530 | 0.011598 |
| 0.011631 | 0.011666 | 0.011333 | 0.011407 | 0.011295 | 0.011497 | 0.011463 |
| 0.011498 | 0.011530 | 0.011530 | 0.011530 | 0.011650 | 0.011665 | 0.011303 |
| 0.011196 | 0.011199 | 0.011299 | 0.011264 | 0.011368 | 0.011210 | 0.011536 |
| 0.011335 | 0.011411 | 0.011156 | 0.011360 | 0.011329 | 0.011402 | 0.011228 |
| 0.011262 | 0.011262 | 0.000000 | 0.011295 | 0.011497 | 0.011463 | 0.011396 |
| 0.011497 | 0.011564 | 0.011295 | 0.011295 | 0.011329 | 0.011329 | 0.011330 |
| 0.011398 | 0.011329 | 0.011329 | 0.011364 | 0.011497 | 0.011564 | 0.011564 |

|          |          |          |          |          |          |          |
|----------|----------|----------|----------|----------|----------|----------|
| 0.011430 | 0.011534 | 0.011535 | 0.011670 | 0.011696 | 0.011362 | 0.011530 |
| 0.011463 | 0.011463 | 0.011297 | 0.011478 | 0.011408 | 0.011435 | 0.011305 |
| 0.011405 | 0.011561 | 0.011441 | 0.011366 | 0.011195 | 0.011329 | 0.011262 |
| 0.011362 | 0.011362 | 0.011262 | 0.011363 | 0.011463 | 0.011466 | 0.011362 |
| 0.011262 | 0.011195 | 0.011329 | 0.011262 | 0.011195 | 0.011298 | 0.011329 |
| 0.011362 | 0.011295 | 0.011329 | 0.011362 | 0.011329 | 0.011262 | 0.011463 |
| 0.011329 | 0.011362 | 0.011362 | 0.011295 | 0.011362 | 0.011598 | 0.011262 |
| 0.011295 | 0.011698 | 0.011295 | 0.011262 | 0.011295 | 0.011665 | 0.011275 |
| 0.011735 | 0.011273 | 0.011311 | 0.011503 | 0.011589 | 0.011491 | 0.011227 |
| 0.011218 | 0.011463 | 0.011564 | 0.011671 | 0.011531 | 0.011669 | 0.011800 |
| 0.011699 | 0.011669 | 0.011698 | 0.011949 | 0.011665 | 0.012540 | 0.011700 |
| 0.012439 | 0.012207 | 0.012341 | 0.012613 | 0.011665 | 0.011363 | 0.011665 |
| 0.012103 | 0.012038 | 0.011631 | 0.011531 | 0.011598 | 0.011598 | 0.011568 |
| 0.011463 | 0.011467 | 0.011530 | 0.011497 | 0.011867 | 0.011934 | 0.011935 |
| 0.011834 | 0.011934 | 0.012038 | 0.011804 | 0.012104 | 0.012110 | 0.012171 |
| 0.012172 | 0.012205 | 0.012152 | 0.012172 | 0.012173 | 0.011396 | 0.011699 |
| 0.011767 | 0.012270 | 0.011772 | 0.012001 | 0.012474 | 0.011536 | 0.011430 |
| 0.011396 | 0.011396 | 0.011867 | 0.011883 | 0.012010 | 0.011732 | 0.011397 |
| S129     | 0.011631 | 0.011631 | 0.011967 | 0.011732 | 0.011732 | 0.011799 |
| 0.011604 | 0.011536 | 0.011732 | 0.011228 | 0.011295 | 0.011262 | 0.011228 |
| 0.011262 | 0.011429 | 0.011228 | 0.011262 | 0.011329 | 0.011295 | 0.011262 |
| 0.011228 | 0.011262 | 0.011362 | 0.011228 | 0.011262 | 0.011262 | 0.011570 |
| 0.011497 | 0.011262 | 0.011161 | 0.011396 | 0.011329 | 0.011295 | 0.011329 |
| 0.011295 | 0.011396 | 0.011295 | 0.011295 | 0.011329 | 0.011295 | 0.011463 |
| 0.011228 | 0.011295 | 0.011329 | 0.011262 | 0.011362 | 0.011396 | 0.011329 |
| 0.011295 | 0.011463 | 0.011363 | 0.011631 | 0.011295 | 0.011564 | 0.011295 |
| 0.011262 | 0.011362 | 0.011430 | 0.011564 | 0.011665 | 0.011362 | 0.011463 |
| 0.011329 | 0.011396 | 0.011295 | 0.011530 | 0.011766 | 0.011295 | 0.011362 |
| 0.011262 | 0.011362 | 0.011329 | 0.011396 | 0.011329 | 0.011329 | 0.011329 |
| 0.011228 | 0.011262 | 0.011228 | 0.011329 | 0.011295 | 0.011329 | 0.011396 |
| 0.011329 | 0.011295 | 0.011362 | 0.011262 | 0.011396 | 0.011228 | 0.011295 |
| 0.011463 | 0.011396 | 0.011631 | 0.011463 | 0.011295 | 0.011530 | 0.011295 |
| 0.011394 | 0.011620 | 0.011437 | 0.011138 | 0.011172 | 0.011281 | 0.011336 |
| 0.012011 | 0.011365 | 0.011143 | 0.011530 | 0.011530 | 0.011329 | 0.011430 |
| 0.011362 | 0.011329 | 0.011396 | 0.011295 | 0.011396 | 0.011329 | 0.011329 |
| 0.011295 | 0.011396 | 0.011597 | 0.011463 | 0.011362 | 0.011329 | 0.011262 |
| 0.011228 | 0.011228 | 0.011295 | 0.000000 | 0.011463 | 0.011429 | 0.011362 |
| 0.011463 | 0.011530 | 0.011262 | 0.011262 | 0.011295 | 0.011295 | 0.011297 |
| 0.011364 | 0.011295 | 0.011295 | 0.011168 | 0.011241 | 0.011200 | 0.011296 |
| 0.011297 | 0.011232 | 0.011245 | 0.011267 | 0.011196 | 0.011231 | 0.011263 |
| 0.011528 | 0.011301 | 0.011336 | 0.011228 | 0.011233 | 0.011363 | 0.011329 |
| 0.011396 | 0.011330 | 0.011329 | 0.011429 | 0.011362 | 0.011698 | 0.011530 |
| 0.011564 | 0.011430 | 0.011295 | 0.011396 | 0.011195 | 0.011429 | 0.011228 |
| 0.011295 | 0.011295 | 0.011262 | 0.011228 | 0.011262 | 0.011228 | 0.011329 |
| 0.011295 | 0.011396 | 0.011329 | 0.011228 | 0.011330 | 0.011430 | 0.011432 |
| 0.011430 | 0.011329 | 0.011228 | 0.011161 | 0.011295 | 0.011228 | 0.011161 |
| 0.011264 | 0.011430 | 0.011228 | 0.011430 | 0.011195 | 0.011295 | 0.011262 |
| 0.011362 | 0.011262 | 0.011295 | 0.011262 | 0.011295 | 0.011161 | 0.011295 |
| 0.011329 | 0.011262 | 0.011329 | 0.011262 | 0.011295 | 0.011329 | 0.011564 |
| 0.011665 | 0.011597 | 0.011665 | 0.011397 | 0.011665 | 0.011295 | 0.011262 |
| 0.011263 | 0.011545 | 0.011335 | 0.011163 | 0.011671 | 0.011163 | 0.011257 |
| 0.011637 | 0.011570 | 0.011463 | 0.011665 | 0.011368 | 0.011530 | 0.011497 |
| 0.011430 | 0.011597 | 0.011451 | 0.011307 | 0.011354 | 0.011329 | 0.011399 |
| 0.011497 | 0.011398 | 0.011534 | 0.011602 | 0.011530 | 0.011598 | 0.011704 |
| 0.011433 | 0.011603 | 0.011534 | 0.011466 | 0.011733 | 0.011195 | 0.011397 |
| 0.011362 | 0.011295 | 0.011195 | 0.011195 | 0.011262 | 0.011262 | 0.011329 |
| 0.011262 | 0.011329 | 0.011228 | 0.011329 | 0.011262 | 0.011262 | 0.011329 |
| 0.011262 | 0.011698 | 0.011597 | 0.011631 | 0.011161 | 0.011262 | 0.011295 |
| 0.011295 | 0.011262 | 0.011329 | 0.011362 | 0.011228 | 0.011228 | 0.011228 |
| 0.011765 | 0.011396 | 0.011396 | 0.011195 | 0.011295 | 0.011463 | 0.011228 |

|          |          |          |          |          |          |          |
|----------|----------|----------|----------|----------|----------|----------|
| 0.011228 | 0.011295 | 0.011262 | 0.011430 | 0.011228 | 0.011362 | 0.011497 |
| 0.011429 | 0.011262 | 0.011262 | 0.011195 | 0.011195 | 0.011362 | 0.011295 |
| 0.011195 | 0.011295 | 0.011161 | 0.011195 | 0.011329 | 0.011463 | 0.011228 |
| 0.011195 | 0.011329 | 0.011262 | 0.011161 | 0.011497 | 0.011161 | 0.011329 |
| 0.011403 | 0.011228 | 0.011530 | 0.011362 | 0.011396 | 0.011262 | 0.011362 |
| 0.011228 | 0.011564 | 0.011161 | 0.011430 | 0.011228 | 0.011228 | 0.011161 |
| 0.011396 | 0.011564 | 0.011295 | 0.011362 | 0.011195 | 0.011597 | 0.011228 |
| 0.011228 | 0.011228 | 0.011262 | 0.011362 | 0.011262 | 0.011362 | 0.011429 |
| 0.011430 | 0.011396 | 0.011295 | 0.011396 | 0.011362 | 0.011228 | 0.011195 |
| 0.011228 | 0.011228 | 0.011295 | 0.011228 | 0.011195 | 0.011295 | 0.011228 |
| 0.011262 | 0.011262 | 0.011396 | 0.011429 | 0.011329 | 0.011262 | 0.011262 |
| 0.011329 | 0.011262 | 0.011362 | 0.011228 | 0.011362 | 0.011463 | 0.011765 |
| 0.011262 | 0.011665 | 0.011233 | 0.017747 | 0.011126 | 0.011366 | 0.011583 |
| 0.011545 | 0.011588 | 0.011270 | 0.011234 | 0.011664 | 0.011612 | 0.011303 |
| 0.011440 | 0.011487 | 0.011099 | 0.011186 | 0.011216 | 0.011258 | 0.011189 |
| 0.011389 | 0.011395 | 0.011394 | 0.011259 | 0.011396 | 0.011430 | 0.011432 |
| 0.011301 | 0.011396 | 0.011396 | 0.011362 | 0.011329 | 0.011329 | 0.011295 |
| 0.011329 | 0.011262 | 0.011295 | 0.011329 | 0.011295 | 0.011228 | 0.011262 |
| 0.011262 | 0.011329 | 0.011228 | 0.011329 | 0.011362 | 0.011396 | 0.011295 |
| 0.011329 | 0.011295 | 0.011631 | 0.011631 | 0.011362 | 0.011396 | 0.011430 |
| 0.011195 | 0.011195 | 0.011228 | 0.011329 | 0.011195 | 0.011429 | 0.011429 |
| 0.011463 | 0.011463 | 0.011396 | 0.011497 | 0.011665 | 0.011498 | 0.011329 |
| 0.011329 | 0.011396 | 0.011429 | 0.011262 | 0.011329 | 0.011161 | 0.011329 |
| 0.011396 | 0.011396 | 0.011429 | 0.011396 | 0.011296 | 0.011497 | 0.011463 |
| 0.011331 | 0.011228 | 0.011329 | 0.011430 | 0.011329 | 0.011463 | 0.011497 |
| 0.011665 | 0.011368 | 0.011530 | 0.011497 | 0.011430 | 0.011597 | 0.011228 |
| 0.011397 | 0.011295 | 0.011262 | 0.011262 | 0.011329 | 0.011228 | 0.011329 |
| 0.011362 | 0.011396 | 0.011295 | 0.011329 | 0.011295 | 0.011631 | 0.011631 |
| 0.011362 | 0.011396 | 0.011463 | 0.011396 | 0.012036 | 0.011453 | 0.011377 |
| 0.011447 | 0.011407 | 0.011517 | 0.011407 | 0.011515 | 0.011440 | 0.011405 |
| 0.011988 | 0.011303 | 0.011437 | 0.011372 | 0.011646 | 0.011502 | 0.011605 |
| 0.012012 | 0.011475 | 0.011331 | 0.011329 | 0.011329 | 0.011362 | 0.011297 |
| 0.011195 | 0.011228 | 0.011362 | 0.011329 | 0.011331 | 0.011463 | 0.011431 |
| 0.011295 | 0.011228 | 0.011262 | 0.011295 | 0.011195 | 0.011262 | 0.011161 |
| 0.011295 | 0.011329 | 0.011228 | 0.011195 | 0.011295 | 0.011228 | 0.011262 |
| 0.011262 | 0.011195 | 0.011262 | 0.011295 | 0.011195 | 0.011396 | 0.011429 |
| 0.011329 | 0.011396 | 0.011329 | 0.011329 | 0.011262 | 0.011665 | 0.011295 |
| 0.011339 | 0.011262 | 0.011497 | 0.011501 | 0.011362 | 0.011362 | 0.011362 |
| 0.011362 | 0.011295 | 0.011262 | 0.011295 | 0.011396 | 0.011396 | 0.011329 |
| 0.011329 | 0.011463 | 0.011631 | 0.011362 | 0.011564 | 0.011564 | 0.011429 |
| 0.011262 | 0.011329 | 0.011362 | 0.011766 | 0.011329 | 0.011362 | 0.011329 |
| 0.011362 | 0.011295 | 0.011295 | 0.011598 | 0.011530 | 0.011564 | 0.011295 |
| 0.011396 | 0.011463 | 0.011329 | 0.011396 | 0.011362 | 0.011228 | 0.011564 |
| 0.011329 | 0.011295 | 0.011295 | 0.011463 | 0.011295 | 0.011396 | 0.011631 |
| 0.011329 | 0.011672 | 0.011698 | 0.011426 | 0.011173 | 0.011400 | 0.011215 |
| 0.011170 | 0.011644 | 0.011201 | 0.011373 | 0.011207 | 0.011315 | 0.011326 |
| 0.011366 | 0.011126 | 0.011283 | 0.000000 | 0.011168 | 0.011261 | 0.011303 |
| 0.011324 | 0.011218 | 0.011342 | 0.011272 | 0.011330 | 0.011463 | 0.011530 |
| 0.011530 | 0.011396 | 0.011500 | 0.011501 | 0.011636 | 0.011661 | 0.011329 |
| 0.011564 | 0.011430 | 0.011295 | 0.011396 | 0.011195 | 0.011429 | 0.011228 |
| 0.011295 | 0.011295 | 0.011262 | 0.011228 | 0.011262 | 0.011228 | 0.011329 |
| 0.011270 | 0.011270 | 0.011300 | 0.011334 | 0.011471 | 0.011436 | 0.011436 |
| 0.011435 | 0.011363 | 0.011134 | 0.011132 | 0.011297 | 0.011467 | 0.011467 |
| 0.011262 | 0.011331 | 0.011565 | 0.011533 | 0.011464 | 0.011498 | 0.011429 |
| 0.011362 | 0.011429 | 0.011429 | 0.011329 | 0.011900 | 0.011497 | 0.011564 |
| 0.011597 | 0.011666 | 0.011299 | 0.011372 | 0.011262 | 0.011463 | 0.011430 |
| 0.011464 | 0.011497 | 0.011497 | 0.011497 | 0.011650 | 0.011631 | 0.011268 |
| 0.011162 | 0.011164 | 0.011265 | 0.011230 | 0.011334 | 0.011172 | 0.011502 |
| 0.011300 | 0.011455 | 0.011203 | 0.011285 | 0.011296 | 0.011368 | 0.011262 |
| 0.011228 | 0.011228 | 0.011295 | 0.000000 | 0.011463 | 0.011429 | 0.011362 |

|          |          |          |          |          |          |          |
|----------|----------|----------|----------|----------|----------|----------|
| 0.011463 | 0.011530 | 0.011262 | 0.011262 | 0.011295 | 0.011295 | 0.011297 |
| 0.011364 | 0.011295 | 0.011295 | 0.011330 | 0.011463 | 0.011530 | 0.011530 |
| 0.011396 | 0.011500 | 0.011501 | 0.011636 | 0.011661 | 0.011329 | 0.011497 |
| 0.011430 | 0.011430 | 0.011263 | 0.011443 | 0.011373 | 0.011401 | 0.011235 |
| 0.011439 | 0.011561 | 0.011357 | 0.011332 | 0.011228 | 0.011430 | 0.011295 |
| 0.011396 | 0.011329 | 0.011228 | 0.011330 | 0.011430 | 0.011432 | 0.011329 |
| 0.011228 | 0.011161 | 0.011295 | 0.011228 | 0.011161 | 0.011264 | 0.011430 |
| 0.011329 | 0.011262 | 0.011295 | 0.011329 | 0.011295 | 0.011228 | 0.011430 |
| 0.011295 | 0.011329 | 0.011329 | 0.011262 | 0.011329 | 0.011564 | 0.011228 |
| 0.011262 | 0.011665 | 0.011262 | 0.011295 | 0.011262 | 0.011631 | 0.011146 |
| 0.011566 | 0.011145 | 0.011161 | 0.011422 | 0.011467 | 0.011419 | 0.011102 |
| 0.011113 | 0.011429 | 0.011530 | 0.011637 | 0.011498 | 0.011601 | 0.011766 |
| 0.011666 | 0.011703 | 0.011665 | 0.011880 | 0.011631 | 0.012506 | 0.011666 |
| 0.012405 | 0.012173 | 0.012307 | 0.012578 | 0.011631 | 0.011329 | 0.011631 |
| 0.012070 | 0.011971 | 0.011597 | 0.011497 | 0.011564 | 0.011564 | 0.011534 |
| 0.011429 | 0.011399 | 0.011497 | 0.011464 | 0.011833 | 0.011900 | 0.011901 |
| 0.011800 | 0.011901 | 0.012004 | 0.011737 | 0.012070 | 0.012076 | 0.012137 |
| 0.012138 | 0.012172 | 0.012084 | 0.012138 | 0.012139 | 0.011362 | 0.011665 |
| 0.011733 | 0.012237 | 0.011738 | 0.011967 | 0.012440 | 0.011502 | 0.011396 |
| 0.011362 | 0.011362 | 0.011833 | 0.011883 | 0.011975 | 0.011698 | 0.011363 |
| S130     | 0.011833 | 0.011833 | 0.011833 | 0.011597 | 0.011597 | 0.011665 |
| 0.011570 | 0.011502 | 0.011665 | 0.011430 | 0.011497 | 0.011464 | 0.011429 |
| 0.011396 | 0.011631 | 0.011362 | 0.011463 | 0.011530 | 0.011497 | 0.011463 |
| 0.011429 | 0.011463 | 0.011228 | 0.011430 | 0.011463 | 0.011463 | 0.011536 |
| 0.011430 | 0.011463 | 0.011362 | 0.011262 | 0.011530 | 0.011497 | 0.011530 |
| 0.011497 | 0.011597 | 0.011497 | 0.011497 | 0.011530 | 0.011497 | 0.011665 |
| 0.011362 | 0.011497 | 0.011530 | 0.011463 | 0.011497 | 0.011597 | 0.011530 |
| 0.011497 | 0.011665 | 0.011564 | 0.011564 | 0.011497 | 0.011765 | 0.011497 |
| 0.011463 | 0.011497 | 0.011631 | 0.011765 | 0.011598 | 0.011497 | 0.011597 |
| 0.011530 | 0.011597 | 0.011497 | 0.011732 | 0.011699 | 0.011497 | 0.011564 |
| 0.011463 | 0.011564 | 0.011530 | 0.011597 | 0.011530 | 0.011530 | 0.011530 |
| 0.011429 | 0.011463 | 0.011429 | 0.011463 | 0.011497 | 0.011531 | 0.011597 |
| 0.011530 | 0.011497 | 0.011564 | 0.011463 | 0.011530 | 0.011429 | 0.011497 |
| 0.011665 | 0.011597 | 0.011631 | 0.011665 | 0.011497 | 0.011732 | 0.011497 |
| 0.011691 | 0.011621 | 0.011739 | 0.011451 | 0.011433 | 0.011539 | 0.011257 |
| 0.011902 | 0.011365 | 0.011472 | 0.011732 | 0.011732 | 0.011463 | 0.011564 |
| 0.011564 | 0.011530 | 0.011597 | 0.011497 | 0.011597 | 0.011530 | 0.011530 |
| 0.011497 | 0.011530 | 0.011799 | 0.011665 | 0.011564 | 0.011530 | 0.011463 |
| 0.011429 | 0.011362 | 0.011497 | 0.011463 | 0.000000 | 0.011228 | 0.011161 |
| 0.011262 | 0.011329 | 0.011463 | 0.011463 | 0.011497 | 0.011497 | 0.011499 |
| 0.011567 | 0.011497 | 0.011497 | 0.011384 | 0.011458 | 0.011411 | 0.011497 |
| 0.011500 | 0.011438 | 0.011503 | 0.011474 | 0.011400 | 0.011437 | 0.011465 |
| 0.011456 | 0.011508 | 0.011542 | 0.011430 | 0.011440 | 0.011565 | 0.011464 |
| 0.011531 | 0.011532 | 0.011531 | 0.011631 | 0.011564 | 0.011934 | 0.011665 |
| 0.011497 | 0.011564 | 0.011497 | 0.011530 | 0.011396 | 0.011362 | 0.011430 |
| 0.011497 | 0.011497 | 0.011463 | 0.011429 | 0.011463 | 0.011429 | 0.011530 |
| 0.011497 | 0.011597 | 0.011530 | 0.011429 | 0.011532 | 0.011631 | 0.011635 |
| 0.011631 | 0.011530 | 0.011429 | 0.011364 | 0.011497 | 0.011429 | 0.011362 |
| 0.011332 | 0.011631 | 0.011430 | 0.011631 | 0.011396 | 0.011497 | 0.011463 |
| 0.011564 | 0.011463 | 0.011497 | 0.011463 | 0.011497 | 0.011362 | 0.011497 |
| 0.011530 | 0.011463 | 0.011530 | 0.011463 | 0.011497 | 0.011530 | 0.011765 |
| 0.011598 | 0.011530 | 0.011598 | 0.011633 | 0.011598 | 0.011497 | 0.011463 |
| 0.011432 | 0.011747 | 0.011609 | 0.011403 | 0.011603 | 0.011367 | 0.011532 |
| 0.011604 | 0.011502 | 0.011665 | 0.011866 | 0.011572 | 0.011732 | 0.011698 |
| 0.011631 | 0.011799 | 0.011664 | 0.011513 | 0.011563 | 0.011530 | 0.011602 |
| 0.011698 | 0.011600 | 0.011737 | 0.011805 | 0.011732 | 0.011799 | 0.011908 |
| 0.011636 | 0.011807 | 0.011738 | 0.011669 | 0.011935 | 0.011396 | 0.011600 |
| 0.011564 | 0.011497 | 0.011396 | 0.011396 | 0.011463 | 0.011463 | 0.011530 |
| 0.011463 | 0.011530 | 0.011429 | 0.011463 | 0.011463 | 0.011463 | 0.011530 |
| 0.011463 | 0.011631 | 0.011530 | 0.011564 | 0.011362 | 0.011463 | 0.011497 |

|          |          |          |          |          |          |          |
|----------|----------|----------|----------|----------|----------|----------|
| 0.011497 | 0.011463 | 0.011530 | 0.011497 | 0.011429 | 0.011429 | 0.011429 |
| 0.011698 | 0.011530 | 0.011597 | 0.011396 | 0.011497 | 0.011665 | 0.011429 |
| 0.011429 | 0.011497 | 0.011463 | 0.011631 | 0.011429 | 0.011362 | 0.011497 |
| 0.011430 | 0.011463 | 0.011463 | 0.011396 | 0.011396 | 0.011564 | 0.011497 |
| 0.011396 | 0.011497 | 0.011362 | 0.011396 | 0.011530 | 0.011396 | 0.011430 |
| 0.011396 | 0.011530 | 0.011464 | 0.011362 | 0.011430 | 0.011362 | 0.011530 |
| 0.011608 | 0.011430 | 0.011463 | 0.011564 | 0.011530 | 0.011463 | 0.011564 |
| 0.011429 | 0.011765 | 0.011362 | 0.011564 | 0.011362 | 0.011362 | 0.011362 |
| 0.011597 | 0.011531 | 0.011497 | 0.011564 | 0.011396 | 0.011530 | 0.011362 |
| 0.011429 | 0.011429 | 0.011463 | 0.011564 | 0.011463 | 0.011564 | 0.011631 |
| 0.011631 | 0.011597 | 0.011497 | 0.011598 | 0.011564 | 0.011429 | 0.011396 |
| 0.011429 | 0.011429 | 0.011497 | 0.011362 | 0.011396 | 0.011564 | 0.011429 |
| 0.011396 | 0.011463 | 0.011597 | 0.011564 | 0.011530 | 0.011463 | 0.011463 |
| 0.011530 | 0.011463 | 0.011564 | 0.011429 | 0.011564 | 0.011665 | 0.011698 |
| 0.011463 | 0.011598 | 0.011474 | 0.018012 | 0.011322 | 0.011672 | 0.011549 |
| 0.011510 | 0.011553 | 0.011584 | 0.011292 | 0.011665 | 0.011578 | 0.011668 |
| 0.011440 | 0.011304 | 0.011411 | 0.011479 | 0.011411 | 0.011554 | 0.011490 |
| 0.011389 | 0.011358 | 0.011357 | 0.011193 | 0.011597 | 0.011631 | 0.011635 |
| 0.011507 | 0.011597 | 0.011597 | 0.011497 | 0.011530 | 0.011531 | 0.011497 |
| 0.011530 | 0.011463 | 0.011497 | 0.011530 | 0.011497 | 0.011429 | 0.011463 |
| 0.011463 | 0.011530 | 0.011429 | 0.011530 | 0.011564 | 0.011597 | 0.011497 |
| 0.011463 | 0.011430 | 0.011564 | 0.011564 | 0.011564 | 0.011598 | 0.011631 |
| 0.011396 | 0.011396 | 0.011429 | 0.011530 | 0.011396 | 0.011631 | 0.011631 |
| 0.011665 | 0.011665 | 0.011597 | 0.011698 | 0.011598 | 0.011700 | 0.011530 |
| 0.011530 | 0.011597 | 0.011631 | 0.011463 | 0.011530 | 0.011497 | 0.011530 |
| 0.011598 | 0.011598 | 0.011631 | 0.011598 | 0.011498 | 0.011698 | 0.011665 |
| 0.011534 | 0.011429 | 0.011530 | 0.011631 | 0.011530 | 0.011597 | 0.011698 |
| 0.011866 | 0.011572 | 0.011732 | 0.011698 | 0.011631 | 0.011799 | 0.011430 |
| 0.011599 | 0.011497 | 0.011463 | 0.011463 | 0.011530 | 0.011429 | 0.011530 |
| 0.011564 | 0.011597 | 0.011497 | 0.011463 | 0.011430 | 0.011564 | 0.011564 |
| 0.011564 | 0.011598 | 0.011665 | 0.011597 | 0.012171 | 0.011668 | 0.011588 |
| 0.011658 | 0.011615 | 0.011728 | 0.011615 | 0.011725 | 0.011647 | 0.011612 |
| 0.012125 | 0.011510 | 0.011643 | 0.011579 | 0.011852 | 0.011707 | 0.011809 |
| 0.012149 | 0.011625 | 0.011534 | 0.011530 | 0.011530 | 0.011161 | 0.011500 |
| 0.011396 | 0.011429 | 0.011564 | 0.011530 | 0.011533 | 0.011396 | 0.011363 |
| 0.011497 | 0.011429 | 0.011463 | 0.011497 | 0.011396 | 0.011463 | 0.011362 |
| 0.011429 | 0.011463 | 0.011429 | 0.011396 | 0.011497 | 0.011429 | 0.011463 |
| 0.011463 | 0.011396 | 0.011463 | 0.011497 | 0.011396 | 0.011597 | 0.011631 |
| 0.011530 | 0.011530 | 0.011530 | 0.011530 | 0.011463 | 0.011598 | 0.011497 |
| 0.011199 | 0.011463 | 0.011430 | 0.011434 | 0.011564 | 0.011564 | 0.011564 |
| 0.011564 | 0.011497 | 0.011463 | 0.011497 | 0.011597 | 0.011597 | 0.011530 |
| 0.011530 | 0.011665 | 0.011564 | 0.011564 | 0.011766 | 0.011766 | 0.011631 |
| 0.011463 | 0.011530 | 0.011564 | 0.011699 | 0.011531 | 0.011564 | 0.011530 |
| 0.011564 | 0.011429 | 0.011429 | 0.011732 | 0.011732 | 0.011698 | 0.011497 |
| 0.011597 | 0.011665 | 0.011530 | 0.011597 | 0.011564 | 0.011429 | 0.011497 |
| 0.011530 | 0.011497 | 0.011429 | 0.011665 | 0.011497 | 0.011597 | 0.011631 |
| 0.011530 | 0.011638 | 0.011631 | 0.011385 | 0.011117 | 0.011536 | 0.011267 |
| 0.011445 | 0.011644 | 0.011446 | 0.011641 | 0.011499 | 0.011366 | 0.011326 |
| 0.011366 | 0.011258 | 0.011394 | 0.011192 | 0.011276 | 0.011395 | 0.011628 |
| 0.011625 | 0.011532 | 0.011518 | 0.011518 | 0.011532 | 0.011396 | 0.011463 |
| 0.011396 | 0.011531 | 0.011635 | 0.011297 | 0.011772 | 0.011802 | 0.011530 |
| 0.011497 | 0.011564 | 0.011497 | 0.011530 | 0.011396 | 0.011362 | 0.011430 |
| 0.011497 | 0.011497 | 0.011463 | 0.011429 | 0.011463 | 0.011429 | 0.011530 |
| 0.011514 | 0.011515 | 0.011505 | 0.011540 | 0.011676 | 0.011641 | 0.011641 |
| 0.011639 | 0.011564 | 0.011392 | 0.011384 | 0.011500 | 0.011670 | 0.011671 |
| 0.011464 | 0.011534 | 0.011767 | 0.011736 | 0.011666 | 0.011700 | 0.011631 |
| 0.011564 | 0.011631 | 0.011631 | 0.011530 | 0.011833 | 0.011698 | 0.011766 |
| 0.011799 | 0.011595 | 0.011504 | 0.011580 | 0.011463 | 0.011665 | 0.011631 |
| 0.011666 | 0.011698 | 0.011698 | 0.011698 | 0.011846 | 0.011833 | 0.011477 |
| 0.011365 | 0.011372 | 0.011469 | 0.011434 | 0.011470 | 0.011396 | 0.011434 |



|          |          |          |          |          |          |          |
|----------|----------|----------|----------|----------|----------|----------|
| 0.011506 | 0.011323 | 0.011394 | 0.011547 | 0.011497 | 0.011573 | 0.011463 |
| 0.011429 | 0.011362 | 0.011497 | 0.011463 | 0.000000 | 0.011228 | 0.011161 |
| 0.011262 | 0.011329 | 0.011463 | 0.011463 | 0.011497 | 0.011497 | 0.011499 |
| 0.011567 | 0.011497 | 0.011497 | 0.011532 | 0.011396 | 0.011463 | 0.011396 |
| 0.011531 | 0.011635 | 0.011297 | 0.011772 | 0.011802 | 0.011530 | 0.011698 |
| 0.011631 | 0.011631 | 0.011466 | 0.011652 | 0.011581 | 0.011605 | 0.011481 |
| 0.011646 | 0.011789 | 0.011653 | 0.011536 | 0.011430 | 0.011631 | 0.011497 |
| 0.011597 | 0.011530 | 0.011429 | 0.011532 | 0.011631 | 0.011635 | 0.011530 |
| 0.011429 | 0.011364 | 0.011497 | 0.011429 | 0.011362 | 0.011332 | 0.011631 |
| 0.011530 | 0.011463 | 0.011497 | 0.011530 | 0.011497 | 0.011429 | 0.011362 |
| 0.011497 | 0.011530 | 0.011530 | 0.011463 | 0.011530 | 0.011765 | 0.011362 |
| 0.011463 | 0.011598 | 0.011463 | 0.011497 | 0.011463 | 0.011564 | 0.011446 |
| 0.011566 | 0.011230 | 0.011211 | 0.011382 | 0.011467 | 0.011383 | 0.011269 |
| 0.011165 | 0.011362 | 0.011463 | 0.011569 | 0.011431 | 0.011568 | 0.011699 |
| 0.011599 | 0.011635 | 0.011597 | 0.011846 | 0.011564 | 0.012439 | 0.011599 |
| 0.012338 | 0.012106 | 0.012240 | 0.012511 | 0.011564 | 0.011463 | 0.011564 |
| 0.012204 | 0.011937 | 0.011530 | 0.011430 | 0.011497 | 0.011497 | 0.011466 |
| 0.011362 | 0.011365 | 0.011430 | 0.011396 | 0.011767 | 0.011833 | 0.011834 |
| 0.011733 | 0.011834 | 0.011937 | 0.011703 | 0.012205 | 0.012212 | 0.012272 |
| 0.012273 | 0.012306 | 0.012255 | 0.012273 | 0.012274 | 0.011564 | 0.011799 |
| 0.011867 | 0.012371 | 0.011874 | 0.011900 | 0.012373 | 0.011434 | 0.011329 |
| 0.011295 | 0.011295 | 0.011766 | 0.011800 | 0.011905 | 0.011631 | 0.011296 |
| S131     | 0.011799 | 0.011799 | 0.011799 | 0.011564 | 0.011564 | 0.011631 |
| 0.011536 | 0.011468 | 0.011631 | 0.011396 | 0.011463 | 0.011430 | 0.011396 |
| 0.011362 | 0.011597 | 0.011329 | 0.011429 | 0.011497 | 0.011463 | 0.011429 |
| 0.011396 | 0.011430 | 0.011195 | 0.011396 | 0.011430 | 0.011429 | 0.011502 |
| 0.011396 | 0.011430 | 0.011329 | 0.011228 | 0.011497 | 0.011463 | 0.011497 |
| 0.011463 | 0.011564 | 0.011463 | 0.011463 | 0.011497 | 0.011463 | 0.011631 |
| 0.011329 | 0.011463 | 0.011497 | 0.011430 | 0.011463 | 0.011564 | 0.011497 |
| 0.011463 | 0.011631 | 0.011531 | 0.011530 | 0.011463 | 0.011732 | 0.011463 |
| 0.011429 | 0.011463 | 0.011597 | 0.011732 | 0.011564 | 0.011463 | 0.011564 |
| 0.011497 | 0.011564 | 0.011463 | 0.011698 | 0.011665 | 0.011463 | 0.011530 |
| 0.011430 | 0.011530 | 0.011497 | 0.011564 | 0.011497 | 0.011497 | 0.011497 |
| 0.011396 | 0.011430 | 0.011396 | 0.011430 | 0.011463 | 0.011498 | 0.011564 |
| 0.011497 | 0.011463 | 0.011530 | 0.011429 | 0.011497 | 0.011396 | 0.011463 |
| 0.011631 | 0.011564 | 0.011598 | 0.011631 | 0.011463 | 0.011698 | 0.011463 |
| 0.011653 | 0.011583 | 0.011702 | 0.011373 | 0.011396 | 0.011502 | 0.011218 |
| 0.011865 | 0.011213 | 0.011431 | 0.011698 | 0.011698 | 0.011430 | 0.011530 |
| 0.011530 | 0.011497 | 0.011564 | 0.011463 | 0.011564 | 0.011497 | 0.011497 |
| 0.011463 | 0.011497 | 0.011766 | 0.011631 | 0.011530 | 0.011497 | 0.011430 |
| 0.011396 | 0.011329 | 0.011463 | 0.011429 | 0.011228 | 0.000000 | 0.011127 |
| 0.011161 | 0.011228 | 0.011429 | 0.011429 | 0.011463 | 0.011463 | 0.011465 |
| 0.011533 | 0.011463 | 0.011463 | 0.011348 | 0.011422 | 0.011376 | 0.011464 |
| 0.011467 | 0.011404 | 0.011466 | 0.011440 | 0.011366 | 0.011403 | 0.011432 |
| 0.011420 | 0.011474 | 0.011508 | 0.011396 | 0.011406 | 0.011531 | 0.011430 |
| 0.011497 | 0.011498 | 0.011497 | 0.011597 | 0.011530 | 0.011900 | 0.011631 |
| 0.011463 | 0.011530 | 0.011463 | 0.011497 | 0.011362 | 0.011329 | 0.011396 |
| 0.011463 | 0.011463 | 0.011429 | 0.011396 | 0.011429 | 0.011396 | 0.011497 |
| 0.011463 | 0.011564 | 0.011497 | 0.011396 | 0.011498 | 0.011597 | 0.011601 |
| 0.011598 | 0.011497 | 0.011396 | 0.011330 | 0.011463 | 0.011396 | 0.011329 |
| 0.011332 | 0.011598 | 0.011396 | 0.011598 | 0.011362 | 0.011463 | 0.011429 |
| 0.011530 | 0.011429 | 0.011463 | 0.011430 | 0.011463 | 0.011329 | 0.011463 |
| 0.011497 | 0.011429 | 0.011497 | 0.011429 | 0.011463 | 0.011497 | 0.011732 |
| 0.011564 | 0.011497 | 0.011564 | 0.011599 | 0.011564 | 0.011463 | 0.011429 |
| 0.011398 | 0.011667 | 0.011563 | 0.011369 | 0.011569 | 0.011333 | 0.011454 |
| 0.011570 | 0.011468 | 0.011631 | 0.011833 | 0.011538 | 0.011698 | 0.011665 |
| 0.011597 | 0.011765 | 0.011629 | 0.011431 | 0.011522 | 0.011497 | 0.011568 |
| 0.011665 | 0.011566 | 0.011703 | 0.011771 | 0.011698 | 0.011766 | 0.011874 |
| 0.011602 | 0.011773 | 0.011704 | 0.011635 | 0.011902 | 0.011362 | 0.011566 |
| 0.011530 | 0.011463 | 0.011362 | 0.011362 | 0.011429 | 0.011430 | 0.011497 |

|          |          |          |          |          |          |          |
|----------|----------|----------|----------|----------|----------|----------|
| 0.011430 | 0.011497 | 0.011396 | 0.011430 | 0.011430 | 0.011429 | 0.011497 |
| 0.011430 | 0.011597 | 0.011497 | 0.011530 | 0.011329 | 0.011429 | 0.011463 |
| 0.011463 | 0.011429 | 0.011497 | 0.011463 | 0.011396 | 0.011396 | 0.011396 |
| 0.011665 | 0.011497 | 0.011564 | 0.011362 | 0.011463 | 0.011631 | 0.011396 |
| 0.011396 | 0.011463 | 0.011429 | 0.011598 | 0.011396 | 0.011329 | 0.011463 |
| 0.011396 | 0.011430 | 0.011429 | 0.011362 | 0.011362 | 0.011530 | 0.011463 |
| 0.011362 | 0.011463 | 0.011329 | 0.011362 | 0.011497 | 0.011363 | 0.011396 |
| 0.011363 | 0.011497 | 0.011430 | 0.011329 | 0.011396 | 0.011329 | 0.011497 |
| 0.011574 | 0.011396 | 0.011430 | 0.011531 | 0.011497 | 0.011429 | 0.011530 |
| 0.011396 | 0.011732 | 0.011329 | 0.011530 | 0.011329 | 0.011329 | 0.011329 |
| 0.011564 | 0.011497 | 0.011463 | 0.011530 | 0.011362 | 0.011497 | 0.011329 |
| 0.011396 | 0.011396 | 0.011429 | 0.011530 | 0.011429 | 0.011530 | 0.011597 |
| 0.011597 | 0.011564 | 0.011463 | 0.011564 | 0.011530 | 0.011396 | 0.011362 |
| 0.011396 | 0.011396 | 0.011463 | 0.011329 | 0.011362 | 0.011530 | 0.011396 |
| 0.011362 | 0.011430 | 0.011564 | 0.011530 | 0.011497 | 0.011429 | 0.011430 |
| 0.011497 | 0.011430 | 0.011530 | 0.011396 | 0.011530 | 0.011631 | 0.011665 |
| 0.011429 | 0.011564 | 0.011440 | 0.017974 | 0.011322 | 0.011549 | 0.011514 |
| 0.011475 | 0.011518 | 0.011479 | 0.011234 | 0.011555 | 0.011544 | 0.011607 |
| 0.011392 | 0.011243 | 0.011372 | 0.011395 | 0.011372 | 0.011455 | 0.011404 |
| 0.011248 | 0.011321 | 0.011320 | 0.011259 | 0.011564 | 0.011598 | 0.011601 |
| 0.011473 | 0.011564 | 0.011564 | 0.011463 | 0.011497 | 0.011497 | 0.011463 |
| 0.011497 | 0.011429 | 0.011463 | 0.011497 | 0.011463 | 0.011396 | 0.011429 |
| 0.011429 | 0.011497 | 0.011396 | 0.011497 | 0.011530 | 0.011564 | 0.011463 |
| 0.011429 | 0.011396 | 0.011530 | 0.011530 | 0.011530 | 0.011565 | 0.011598 |
| 0.011362 | 0.011362 | 0.011396 | 0.011497 | 0.011362 | 0.011597 | 0.011597 |
| 0.011631 | 0.011631 | 0.011564 | 0.011665 | 0.011564 | 0.011666 | 0.011497 |
| 0.011497 | 0.011564 | 0.011597 | 0.011429 | 0.011497 | 0.011463 | 0.011497 |
| 0.011564 | 0.011564 | 0.011597 | 0.011564 | 0.011464 | 0.011665 | 0.011631 |
| 0.011501 | 0.011396 | 0.011497 | 0.011598 | 0.011497 | 0.011564 | 0.011665 |
| 0.011833 | 0.011538 | 0.011698 | 0.011665 | 0.011597 | 0.011765 | 0.011396 |
| 0.011565 | 0.011464 | 0.011429 | 0.011429 | 0.011497 | 0.011396 | 0.011497 |
| 0.011530 | 0.011564 | 0.011463 | 0.011429 | 0.011396 | 0.011530 | 0.011530 |
| 0.011530 | 0.011565 | 0.011631 | 0.011564 | 0.012137 | 0.011632 | 0.011553 |
| 0.011623 | 0.011580 | 0.011693 | 0.011580 | 0.011691 | 0.011612 | 0.011578 |
| 0.012091 | 0.011476 | 0.011608 | 0.011545 | 0.011818 | 0.011673 | 0.011775 |
| 0.012115 | 0.011588 | 0.011500 | 0.011497 | 0.011497 | 0.011127 | 0.011466 |
| 0.011362 | 0.011396 | 0.011530 | 0.011497 | 0.011500 | 0.011362 | 0.011330 |
| 0.011463 | 0.011396 | 0.011429 | 0.011463 | 0.011362 | 0.011430 | 0.011329 |
| 0.011396 | 0.011429 | 0.011396 | 0.011362 | 0.011463 | 0.011396 | 0.011429 |
| 0.011429 | 0.011362 | 0.011430 | 0.011463 | 0.011362 | 0.011564 | 0.011597 |
| 0.011497 | 0.011497 | 0.011497 | 0.011497 | 0.011429 | 0.011564 | 0.011463 |
| 0.011165 | 0.011430 | 0.011396 | 0.011400 | 0.011530 | 0.011530 | 0.011530 |
| 0.011530 | 0.011463 | 0.011429 | 0.011463 | 0.011564 | 0.011564 | 0.011497 |
| 0.011497 | 0.011631 | 0.011530 | 0.011530 | 0.011732 | 0.011732 | 0.011597 |
| 0.011429 | 0.011497 | 0.011530 | 0.011665 | 0.011497 | 0.011530 | 0.011497 |
| 0.011530 | 0.011396 | 0.011396 | 0.011698 | 0.011698 | 0.011665 | 0.011463 |
| 0.011564 | 0.011631 | 0.011497 | 0.011564 | 0.011530 | 0.011396 | 0.011463 |
| 0.011497 | 0.011463 | 0.011396 | 0.011631 | 0.011463 | 0.011564 | 0.011598 |
| 0.011497 | 0.011604 | 0.011598 | 0.011345 | 0.011173 | 0.011502 | 0.011215 |
| 0.011335 | 0.011605 | 0.011411 | 0.011552 | 0.011451 | 0.011417 | 0.011326 |
| 0.011264 | 0.011258 | 0.011394 | 0.011192 | 0.011276 | 0.011395 | 0.011587 |
| 0.011588 | 0.011493 | 0.011483 | 0.011483 | 0.011498 | 0.011362 | 0.011430 |
| 0.011362 | 0.011497 | 0.011601 | 0.011196 | 0.011738 | 0.011767 | 0.011497 |
| 0.011463 | 0.011530 | 0.011463 | 0.011497 | 0.011362 | 0.011329 | 0.011396 |
| 0.011463 | 0.011463 | 0.011429 | 0.011396 | 0.011429 | 0.011396 | 0.011497 |
| 0.011479 | 0.011480 | 0.011471 | 0.011505 | 0.011642 | 0.011607 | 0.011606 |
| 0.011605 | 0.011531 | 0.011356 | 0.011348 | 0.011467 | 0.011636 | 0.011637 |
| 0.011430 | 0.011500 | 0.011733 | 0.011702 | 0.011632 | 0.011666 | 0.011597 |
| 0.011530 | 0.011597 | 0.011597 | 0.011497 | 0.011800 | 0.011665 | 0.011732 |
| 0.011766 | 0.011559 | 0.011435 | 0.011545 | 0.011430 | 0.011631 | 0.011598 |

|          |          |          |          |          |          |          |
|----------|----------|----------|----------|----------|----------|----------|
| 0.011632 | 0.011665 | 0.011665 | 0.011665 | 0.011807 | 0.011799 | 0.011442 |
| 0.011331 | 0.011337 | 0.011435 | 0.011400 | 0.011436 | 0.011359 | 0.011400 |
| 0.011472 | 0.011279 | 0.011346 | 0.011510 | 0.011464 | 0.011539 | 0.011430 |
| 0.011396 | 0.011329 | 0.011463 | 0.011429 | 0.011228 | 0.000000 | 0.011127 |
| 0.011161 | 0.011228 | 0.011429 | 0.011429 | 0.011463 | 0.011463 | 0.011465 |
| 0.011533 | 0.011463 | 0.011463 | 0.011498 | 0.011362 | 0.011430 | 0.011362 |
| 0.011497 | 0.011601 | 0.011196 | 0.011738 | 0.011767 | 0.011497 | 0.011665 |
| 0.011598 | 0.011598 | 0.011432 | 0.011617 | 0.011547 | 0.011571 | 0.011446 |
| 0.011611 | 0.011698 | 0.011611 | 0.011502 | 0.011396 | 0.011598 | 0.011463 |
| 0.011564 | 0.011497 | 0.011396 | 0.011498 | 0.011597 | 0.011601 | 0.011497 |
| 0.011396 | 0.011330 | 0.011463 | 0.011396 | 0.011329 | 0.011332 | 0.011598 |
| 0.011497 | 0.011429 | 0.011463 | 0.011497 | 0.011463 | 0.011396 | 0.011329 |
| 0.011463 | 0.011497 | 0.011497 | 0.011429 | 0.011497 | 0.011732 | 0.011329 |
| 0.011430 | 0.011564 | 0.011429 | 0.011463 | 0.011429 | 0.011530 | 0.011403 |
| 0.011622 | 0.011273 | 0.011161 | 0.011342 | 0.011427 | 0.011347 | 0.011227 |
| 0.011113 | 0.011329 | 0.011430 | 0.011536 | 0.011397 | 0.011534 | 0.011666 |
| 0.011565 | 0.011601 | 0.011564 | 0.011812 | 0.011530 | 0.012405 | 0.011566 |
| 0.012305 | 0.012072 | 0.012206 | 0.012478 | 0.011530 | 0.011430 | 0.011531 |
| 0.012171 | 0.011903 | 0.011497 | 0.011396 | 0.011464 | 0.011464 | 0.011432 |
| 0.011329 | 0.011332 | 0.011396 | 0.011363 | 0.011733 | 0.011799 | 0.011800 |
| 0.011700 | 0.011800 | 0.011903 | 0.011669 | 0.012171 | 0.012178 | 0.012238 |
| 0.012239 | 0.012273 | 0.012220 | 0.012239 | 0.012241 | 0.011530 | 0.011766 |
| 0.011834 | 0.012338 | 0.011840 | 0.011867 | 0.012339 | 0.011400 | 0.011296 |
| 0.011262 | 0.011262 | 0.011732 | 0.011759 | 0.011869 | 0.011598 | 0.011262 |
| S132     | 0.011732 | 0.011732 | 0.011732 | 0.011497 | 0.011497 | 0.011564 |
| 0.011468 | 0.011400 | 0.011564 | 0.011329 | 0.011396 | 0.011363 | 0.011329 |
| 0.011295 | 0.011530 | 0.011262 | 0.011362 | 0.011429 | 0.011396 | 0.011362 |
| 0.011329 | 0.011362 | 0.011127 | 0.011329 | 0.011363 | 0.011362 | 0.011434 |
| 0.011329 | 0.011362 | 0.011262 | 0.011161 | 0.011429 | 0.011396 | 0.011430 |
| 0.011396 | 0.011497 | 0.011396 | 0.011396 | 0.011429 | 0.011396 | 0.011564 |
| 0.011262 | 0.011396 | 0.011429 | 0.011362 | 0.011396 | 0.011497 | 0.011429 |
| 0.011396 | 0.011564 | 0.011463 | 0.011463 | 0.011396 | 0.011665 | 0.011396 |
| 0.011362 | 0.011396 | 0.011530 | 0.011665 | 0.011497 | 0.011396 | 0.011497 |
| 0.011429 | 0.011497 | 0.011396 | 0.011631 | 0.011598 | 0.011396 | 0.011463 |
| 0.011362 | 0.011463 | 0.011430 | 0.011497 | 0.011429 | 0.011429 | 0.011429 |
| 0.011329 | 0.011362 | 0.011329 | 0.011362 | 0.011396 | 0.011430 | 0.011497 |
| 0.011430 | 0.011396 | 0.011463 | 0.011362 | 0.011429 | 0.011329 | 0.011396 |
| 0.011564 | 0.011497 | 0.011530 | 0.011564 | 0.011396 | 0.011631 | 0.011396 |
| 0.011579 | 0.011508 | 0.011626 | 0.011334 | 0.011321 | 0.011428 | 0.011139 |
| 0.011792 | 0.011213 | 0.011348 | 0.011631 | 0.011631 | 0.011362 | 0.011463 |
| 0.011463 | 0.011429 | 0.011497 | 0.011396 | 0.011497 | 0.011429 | 0.011429 |
| 0.011396 | 0.011429 | 0.011698 | 0.011564 | 0.011463 | 0.011430 | 0.011362 |
| 0.011329 | 0.011262 | 0.011396 | 0.011362 | 0.011161 | 0.011127 | 0.000000 |
| 0.011161 | 0.011228 | 0.011362 | 0.011362 | 0.011396 | 0.011396 | 0.011398 |
| 0.011466 | 0.011396 | 0.011396 | 0.011276 | 0.011349 | 0.011306 | 0.011396 |
| 0.011399 | 0.011335 | 0.011392 | 0.011371 | 0.011298 | 0.011334 | 0.011364 |
| 0.011348 | 0.011405 | 0.011439 | 0.011329 | 0.011337 | 0.011464 | 0.011363 |
| 0.011430 | 0.011431 | 0.011430 | 0.011530 | 0.011463 | 0.011833 | 0.011564 |
| 0.011396 | 0.011463 | 0.011396 | 0.011430 | 0.011295 | 0.011262 | 0.011329 |
| 0.011396 | 0.011396 | 0.011362 | 0.011329 | 0.011362 | 0.011329 | 0.011429 |
| 0.011396 | 0.011497 | 0.011430 | 0.011329 | 0.011431 | 0.011530 | 0.011533 |
| 0.011530 | 0.011430 | 0.011329 | 0.011263 | 0.011396 | 0.011329 | 0.011262 |
| 0.011264 | 0.011530 | 0.011329 | 0.011530 | 0.011295 | 0.011396 | 0.011362 |
| 0.011463 | 0.011362 | 0.011396 | 0.011362 | 0.011396 | 0.011262 | 0.011396 |
| 0.011430 | 0.011362 | 0.011429 | 0.011362 | 0.011396 | 0.011429 | 0.011665 |
| 0.011497 | 0.011430 | 0.011497 | 0.011532 | 0.011497 | 0.011396 | 0.011362 |
| 0.011330 | 0.011626 | 0.011472 | 0.011300 | 0.011501 | 0.011265 | 0.011414 |
| 0.011502 | 0.011400 | 0.011564 | 0.011766 | 0.011470 | 0.011631 | 0.011598 |
| 0.011530 | 0.011698 | 0.011558 | 0.011390 | 0.011438 | 0.011430 | 0.011500 |
| 0.011598 | 0.011499 | 0.011635 | 0.011703 | 0.011631 | 0.011698 | 0.011806 |

|          |          |          |          |          |          |          |
|----------|----------|----------|----------|----------|----------|----------|
| 0.011534 | 0.011705 | 0.011636 | 0.011568 | 0.011834 | 0.011295 | 0.011498 |
| 0.011463 | 0.011396 | 0.011295 | 0.011295 | 0.011362 | 0.011362 | 0.011429 |
| 0.011362 | 0.011430 | 0.011329 | 0.011362 | 0.011362 | 0.011362 | 0.011429 |
| 0.011362 | 0.011530 | 0.011430 | 0.011463 | 0.011262 | 0.011362 | 0.011396 |
| 0.011396 | 0.011362 | 0.011430 | 0.011396 | 0.011329 | 0.011329 | 0.011329 |
| 0.011598 | 0.011429 | 0.011497 | 0.011295 | 0.011396 | 0.011564 | 0.011329 |
| 0.011329 | 0.011396 | 0.011362 | 0.011530 | 0.011329 | 0.011262 | 0.011396 |
| 0.011329 | 0.011362 | 0.011362 | 0.011295 | 0.011295 | 0.011463 | 0.011396 |
| 0.011295 | 0.011396 | 0.011262 | 0.011295 | 0.011430 | 0.011295 | 0.011329 |
| 0.011295 | 0.011430 | 0.011363 | 0.011262 | 0.011329 | 0.011262 | 0.011430 |
| 0.011505 | 0.011329 | 0.011362 | 0.011463 | 0.011430 | 0.011362 | 0.011463 |
| 0.011329 | 0.011665 | 0.011262 | 0.011463 | 0.011262 | 0.011262 | 0.011262 |
| 0.011497 | 0.011430 | 0.011396 | 0.011463 | 0.011295 | 0.011430 | 0.011262 |
| 0.011329 | 0.011329 | 0.011362 | 0.011463 | 0.011362 | 0.011463 | 0.011530 |
| 0.011530 | 0.011497 | 0.011396 | 0.011497 | 0.011463 | 0.011329 | 0.011295 |
| 0.011329 | 0.011329 | 0.011396 | 0.011262 | 0.011295 | 0.011463 | 0.011329 |
| 0.011295 | 0.011362 | 0.011497 | 0.011463 | 0.011429 | 0.011362 | 0.011362 |
| 0.011429 | 0.011362 | 0.011463 | 0.011329 | 0.011463 | 0.011564 | 0.011598 |
| 0.011362 | 0.011497 | 0.011371 | 0.017898 | 0.011257 | 0.011549 | 0.011444 |
| 0.011406 | 0.011447 | 0.011427 | 0.011234 | 0.011500 | 0.011475 | 0.011546 |
| 0.011392 | 0.011182 | 0.011294 | 0.011353 | 0.011294 | 0.011406 | 0.011361 |
| 0.011248 | 0.011246 | 0.011246 | 0.011126 | 0.011497 | 0.011530 | 0.011534 |
| 0.011404 | 0.011497 | 0.011497 | 0.011396 | 0.011430 | 0.011430 | 0.011396 |
| 0.011430 | 0.011362 | 0.011396 | 0.011429 | 0.011396 | 0.011329 | 0.011362 |
| 0.011362 | 0.011429 | 0.011329 | 0.011430 | 0.011463 | 0.011497 | 0.011396 |
| 0.011362 | 0.011329 | 0.011463 | 0.011463 | 0.011463 | 0.011497 | 0.011530 |
| 0.011295 | 0.011295 | 0.011329 | 0.011430 | 0.011295 | 0.011530 | 0.011530 |
| 0.011564 | 0.011564 | 0.011497 | 0.011597 | 0.011497 | 0.011599 | 0.011430 |
| 0.011429 | 0.011497 | 0.011530 | 0.011362 | 0.011429 | 0.011396 | 0.011430 |
| 0.011497 | 0.011497 | 0.011530 | 0.011497 | 0.011397 | 0.011597 | 0.011564 |
| 0.011433 | 0.011329 | 0.011429 | 0.011530 | 0.011430 | 0.011497 | 0.011597 |
| 0.011766 | 0.011470 | 0.011631 | 0.011598 | 0.011530 | 0.011698 | 0.011329 |
| 0.011498 | 0.011396 | 0.011362 | 0.011362 | 0.011429 | 0.011329 | 0.011430 |
| 0.011463 | 0.011497 | 0.011396 | 0.011362 | 0.011329 | 0.011463 | 0.011463 |
| 0.011463 | 0.011497 | 0.011564 | 0.011497 | 0.012070 | 0.011560 | 0.011482 |
| 0.011552 | 0.011511 | 0.011623 | 0.011511 | 0.011620 | 0.011543 | 0.011508 |
| 0.012022 | 0.011406 | 0.011540 | 0.011475 | 0.011749 | 0.011605 | 0.011707 |
| 0.012046 | 0.011512 | 0.011432 | 0.011429 | 0.011429 | 0.000000 | 0.011398 |
| 0.011295 | 0.011329 | 0.011463 | 0.011429 | 0.011432 | 0.011295 | 0.011262 |
| 0.011396 | 0.011329 | 0.011362 | 0.011396 | 0.011295 | 0.011362 | 0.011262 |
| 0.011329 | 0.011362 | 0.011329 | 0.011295 | 0.011396 | 0.011329 | 0.011362 |
| 0.011362 | 0.011295 | 0.011362 | 0.011396 | 0.011295 | 0.011497 | 0.011530 |
| 0.011430 | 0.011430 | 0.011429 | 0.011430 | 0.011362 | 0.011497 | 0.011396 |
| 0.011095 | 0.011362 | 0.011329 | 0.011332 | 0.011463 | 0.011463 | 0.011463 |
| 0.011463 | 0.011396 | 0.011362 | 0.011396 | 0.011497 | 0.011497 | 0.011429 |
| 0.011429 | 0.011564 | 0.011463 | 0.011463 | 0.011665 | 0.011665 | 0.011530 |
| 0.011362 | 0.011429 | 0.011463 | 0.011598 | 0.011430 | 0.011463 | 0.011430 |
| 0.011463 | 0.011329 | 0.011329 | 0.011631 | 0.011631 | 0.011598 | 0.011396 |
| 0.011497 | 0.011564 | 0.011429 | 0.011497 | 0.011463 | 0.011329 | 0.011396 |
| 0.011429 | 0.011396 | 0.011329 | 0.011564 | 0.011396 | 0.011497 | 0.011530 |
| 0.011429 | 0.011536 | 0.011530 | 0.011263 | 0.000000 | 0.011434 | 0.011215 |
| 0.011335 | 0.011527 | 0.011341 | 0.011507 | 0.011353 | 0.011315 | 0.011273 |
| 0.011213 | 0.011192 | 0.011339 | 0.011126 | 0.011222 | 0.011328 | 0.011506 |
| 0.011512 | 0.011414 | 0.011412 | 0.011412 | 0.011431 | 0.011295 | 0.011362 |
| 0.011295 | 0.011430 | 0.011533 | 0.011196 | 0.011670 | 0.011696 | 0.011430 |
| 0.011396 | 0.011463 | 0.011396 | 0.011430 | 0.011295 | 0.011262 | 0.011329 |
| 0.011396 | 0.011396 | 0.011362 | 0.011329 | 0.011362 | 0.011329 | 0.011429 |
| 0.011409 | 0.011410 | 0.011403 | 0.011437 | 0.011573 | 0.011538 | 0.011538 |
| 0.011537 | 0.011464 | 0.011282 | 0.011276 | 0.011399 | 0.011568 | 0.011569 |
| 0.011363 | 0.011433 | 0.011666 | 0.011635 | 0.011565 | 0.011599 | 0.011530 |

|          |          |          |          |          |          |          |
|----------|----------|----------|----------|----------|----------|----------|
| 0.011463 | 0.011530 | 0.011530 | 0.011429 | 0.011732 | 0.011597 | 0.011665 |
| 0.011698 | 0.011488 | 0.011401 | 0.011476 | 0.011362 | 0.011564 | 0.011530 |
| 0.011565 | 0.011597 | 0.011597 | 0.011597 | 0.011728 | 0.011732 | 0.011372 |
| 0.011263 | 0.011268 | 0.011367 | 0.011332 | 0.011368 | 0.011284 | 0.011332 |
| 0.011403 | 0.011192 | 0.011251 | 0.011435 | 0.011396 | 0.011471 | 0.011362 |
| 0.011329 | 0.011262 | 0.011396 | 0.011362 | 0.011161 | 0.011127 | 0.000000 |
| 0.011161 | 0.011228 | 0.011362 | 0.011362 | 0.011396 | 0.011396 | 0.011398 |
| 0.011466 | 0.011396 | 0.011396 | 0.011431 | 0.011295 | 0.011362 | 0.011295 |
| 0.011430 | 0.011533 | 0.011196 | 0.011670 | 0.011696 | 0.011430 | 0.011597 |
| 0.011530 | 0.011530 | 0.011365 | 0.011547 | 0.011477 | 0.011503 | 0.011375 |
| 0.011542 | 0.011698 | 0.011526 | 0.011434 | 0.011329 | 0.011530 | 0.011396 |
| 0.011497 | 0.011430 | 0.011329 | 0.011431 | 0.011530 | 0.011533 | 0.011430 |
| 0.011329 | 0.011263 | 0.011396 | 0.011329 | 0.011262 | 0.011264 | 0.011530 |
| 0.011430 | 0.011362 | 0.011396 | 0.011429 | 0.011396 | 0.011329 | 0.011262 |
| 0.011396 | 0.011430 | 0.011429 | 0.011362 | 0.011429 | 0.011665 | 0.011262 |
| 0.011362 | 0.011497 | 0.011362 | 0.011396 | 0.011362 | 0.011463 | 0.011317 |
| 0.011510 | 0.011188 | 0.011161 | 0.011262 | 0.011345 | 0.011276 | 0.011144 |
| 0.011113 | 0.011262 | 0.011362 | 0.011468 | 0.011330 | 0.011466 | 0.011598 |
| 0.011498 | 0.011534 | 0.011497 | 0.011744 | 0.011463 | 0.012338 | 0.011498 |
| 0.012237 | 0.012004 | 0.012139 | 0.012410 | 0.011463 | 0.011362 | 0.011463 |
| 0.012103 | 0.011836 | 0.011430 | 0.011329 | 0.011396 | 0.011396 | 0.011365 |
| 0.011262 | 0.011264 | 0.011329 | 0.011296 | 0.011666 | 0.011732 | 0.011733 |
| 0.011632 | 0.011733 | 0.011836 | 0.011601 | 0.012104 | 0.012110 | 0.012171 |
| 0.012172 | 0.012205 | 0.012152 | 0.012172 | 0.012173 | 0.011463 | 0.011699 |
| 0.011766 | 0.012270 | 0.011772 | 0.011799 | 0.012272 | 0.011332 | 0.011228 |
| 0.011195 | 0.011195 | 0.011665 | 0.011677 | 0.011799 | 0.011530 | 0.011195 |
| S133     | 0.011833 | 0.011833 | 0.011833 | 0.011597 | 0.011597 | 0.011665 |
| 0.011570 | 0.011502 | 0.011665 | 0.011430 | 0.011497 | 0.011464 | 0.011429 |
| 0.011396 | 0.011631 | 0.011362 | 0.011463 | 0.011530 | 0.011497 | 0.011463 |
| 0.011429 | 0.011463 | 0.011228 | 0.011430 | 0.011463 | 0.011463 | 0.011536 |
| 0.011430 | 0.011463 | 0.011362 | 0.011262 | 0.011530 | 0.011497 | 0.011530 |
| 0.011497 | 0.011597 | 0.011497 | 0.011497 | 0.011530 | 0.011497 | 0.011665 |
| 0.011362 | 0.011497 | 0.011530 | 0.011463 | 0.011497 | 0.011597 | 0.011530 |
| 0.011497 | 0.011665 | 0.011564 | 0.011564 | 0.011497 | 0.011765 | 0.011497 |
| 0.011463 | 0.011497 | 0.011631 | 0.011765 | 0.011598 | 0.011497 | 0.011597 |
| 0.011530 | 0.011597 | 0.011497 | 0.011732 | 0.011699 | 0.011497 | 0.011564 |
| 0.011463 | 0.011564 | 0.011530 | 0.011597 | 0.011530 | 0.011530 | 0.011530 |
| 0.011429 | 0.011463 | 0.011429 | 0.011463 | 0.011497 | 0.011531 | 0.011597 |
| 0.011530 | 0.011497 | 0.011564 | 0.011463 | 0.011530 | 0.011429 | 0.011497 |
| 0.011665 | 0.011597 | 0.011631 | 0.011665 | 0.011497 | 0.011732 | 0.011497 |
| 0.011691 | 0.011621 | 0.011739 | 0.011412 | 0.011433 | 0.011539 | 0.011257 |
| 0.011902 | 0.011314 | 0.011472 | 0.011732 | 0.011732 | 0.011463 | 0.011564 |
| 0.011564 | 0.011530 | 0.011597 | 0.011497 | 0.011597 | 0.011530 | 0.011530 |
| 0.011497 | 0.011530 | 0.011799 | 0.011665 | 0.011564 | 0.011530 | 0.011463 |
| 0.011429 | 0.011362 | 0.011497 | 0.011463 | 0.011262 | 0.011161 | 0.011161 |
| 0.000000 | 0.011262 | 0.011463 | 0.011463 | 0.011497 | 0.011497 | 0.011499 |
| 0.011567 | 0.011497 | 0.011497 | 0.011384 | 0.011458 | 0.011411 | 0.011497 |
| 0.011500 | 0.011438 | 0.011503 | 0.011474 | 0.011400 | 0.011437 | 0.011465 |
| 0.011456 | 0.011508 | 0.011542 | 0.011430 | 0.011440 | 0.011565 | 0.011464 |
| 0.011531 | 0.011532 | 0.011531 | 0.011631 | 0.011564 | 0.011934 | 0.011665 |
| 0.011497 | 0.011564 | 0.011497 | 0.011530 | 0.011396 | 0.011362 | 0.011430 |
| 0.011497 | 0.011497 | 0.011463 | 0.011429 | 0.011463 | 0.011429 | 0.011530 |
| 0.011497 | 0.011597 | 0.011530 | 0.011429 | 0.011532 | 0.011631 | 0.011635 |
| 0.011631 | 0.011530 | 0.011429 | 0.011364 | 0.011497 | 0.011429 | 0.011362 |
| 0.011366 | 0.011631 | 0.011430 | 0.011631 | 0.011396 | 0.011497 | 0.011463 |
| 0.011564 | 0.011463 | 0.011497 | 0.011463 | 0.011497 | 0.011362 | 0.011497 |
| 0.011530 | 0.011463 | 0.011530 | 0.011463 | 0.011497 | 0.011530 | 0.011765 |
| 0.011598 | 0.011530 | 0.011598 | 0.011633 | 0.011598 | 0.011497 | 0.011463 |
| 0.011432 | 0.011747 | 0.011609 | 0.011403 | 0.011603 | 0.011367 | 0.011532 |
| 0.011604 | 0.011502 | 0.011665 | 0.011866 | 0.011572 | 0.011732 | 0.011698 |

|          |          |          |          |          |          |          |
|----------|----------|----------|----------|----------|----------|----------|
| 0.011631 | 0.011799 | 0.011664 | 0.011472 | 0.011563 | 0.011530 | 0.011602 |
| 0.011698 | 0.011600 | 0.011737 | 0.011805 | 0.011732 | 0.011799 | 0.011908 |
| 0.011636 | 0.011807 | 0.011738 | 0.011669 | 0.011935 | 0.011396 | 0.011600 |
| 0.011564 | 0.011497 | 0.011396 | 0.011396 | 0.011463 | 0.011463 | 0.011530 |
| 0.011463 | 0.011530 | 0.011429 | 0.011463 | 0.011463 | 0.011463 | 0.011530 |
| 0.011463 | 0.011631 | 0.011530 | 0.011564 | 0.011362 | 0.011463 | 0.011497 |
| 0.011497 | 0.011463 | 0.011530 | 0.011497 | 0.011429 | 0.011429 | 0.011429 |
| 0.011698 | 0.011530 | 0.011597 | 0.011396 | 0.011497 | 0.011665 | 0.011429 |
| 0.011429 | 0.011497 | 0.011463 | 0.011631 | 0.011429 | 0.011362 | 0.011497 |
| 0.011430 | 0.011463 | 0.011463 | 0.011396 | 0.011396 | 0.011564 | 0.011497 |
| 0.011396 | 0.011497 | 0.011362 | 0.011396 | 0.011530 | 0.011396 | 0.011430 |
| 0.011396 | 0.011530 | 0.011464 | 0.011362 | 0.011430 | 0.011362 | 0.011530 |
| 0.011608 | 0.011430 | 0.011463 | 0.011564 | 0.011530 | 0.011463 | 0.011564 |
| 0.011429 | 0.011765 | 0.011362 | 0.011564 | 0.011362 | 0.011362 | 0.011362 |
| 0.011597 | 0.011531 | 0.011497 | 0.011564 | 0.011396 | 0.011530 | 0.011362 |
| 0.011429 | 0.011429 | 0.011463 | 0.011564 | 0.011463 | 0.011564 | 0.011631 |
| 0.011631 | 0.011597 | 0.011497 | 0.011597 | 0.011564 | 0.011429 | 0.011396 |
| 0.011429 | 0.011429 | 0.011497 | 0.011362 | 0.011396 | 0.011564 | 0.011429 |
| 0.011396 | 0.011463 | 0.011597 | 0.011564 | 0.011530 | 0.011463 | 0.011463 |
| 0.011530 | 0.011463 | 0.011564 | 0.011429 | 0.011564 | 0.011665 | 0.011698 |
| 0.011463 | 0.011598 | 0.011474 | 0.018012 | 0.011387 | 0.011672 | 0.011549 |
| 0.011510 | 0.011553 | 0.011584 | 0.011350 | 0.011610 | 0.011578 | 0.011668 |
| 0.011487 | 0.011304 | 0.011411 | 0.011479 | 0.011411 | 0.011504 | 0.011447 |
| 0.011342 | 0.011358 | 0.011357 | 0.011193 | 0.011597 | 0.011631 | 0.011635 |
| 0.011507 | 0.011597 | 0.011597 | 0.011497 | 0.011530 | 0.011531 | 0.011497 |
| 0.011530 | 0.011463 | 0.011497 | 0.011530 | 0.011497 | 0.011429 | 0.011463 |
| 0.011463 | 0.011530 | 0.011429 | 0.011530 | 0.011564 | 0.011597 | 0.011497 |
| 0.011463 | 0.011430 | 0.011564 | 0.011564 | 0.011564 | 0.011598 | 0.011631 |
| 0.011396 | 0.011396 | 0.011429 | 0.011530 | 0.011396 | 0.011631 | 0.011631 |
| 0.011665 | 0.011665 | 0.011597 | 0.011698 | 0.011598 | 0.011700 | 0.011530 |
| 0.011530 | 0.011597 | 0.011631 | 0.011463 | 0.011530 | 0.011497 | 0.011530 |
| 0.011598 | 0.011598 | 0.011631 | 0.011598 | 0.011498 | 0.011698 | 0.011665 |
| 0.011534 | 0.011429 | 0.011530 | 0.011631 | 0.011530 | 0.011597 | 0.011698 |
| 0.011866 | 0.011572 | 0.011732 | 0.011698 | 0.011631 | 0.011799 | 0.011430 |
| 0.011599 | 0.011497 | 0.011463 | 0.011463 | 0.011530 | 0.011429 | 0.011530 |
| 0.011564 | 0.011597 | 0.011497 | 0.011463 | 0.011430 | 0.011564 | 0.011564 |
| 0.011564 | 0.011598 | 0.011665 | 0.011597 | 0.012171 | 0.011668 | 0.011588 |
| 0.011658 | 0.011615 | 0.011728 | 0.011615 | 0.011726 | 0.011647 | 0.011612 |
| 0.012125 | 0.011510 | 0.011643 | 0.011579 | 0.011852 | 0.011707 | 0.011809 |
| 0.012149 | 0.011625 | 0.011534 | 0.011530 | 0.011530 | 0.011161 | 0.011500 |
| 0.011396 | 0.011429 | 0.011564 | 0.011530 | 0.011533 | 0.011396 | 0.011363 |
| 0.011497 | 0.011429 | 0.011463 | 0.011497 | 0.011396 | 0.011463 | 0.011362 |
| 0.011429 | 0.011463 | 0.011429 | 0.011396 | 0.011497 | 0.011429 | 0.011463 |
| 0.011463 | 0.011396 | 0.011463 | 0.011497 | 0.011396 | 0.011597 | 0.011631 |
| 0.011530 | 0.011530 | 0.011530 | 0.011530 | 0.011463 | 0.011598 | 0.011497 |
| 0.011199 | 0.011463 | 0.011430 | 0.011434 | 0.011564 | 0.011564 | 0.011564 |
| 0.011564 | 0.011497 | 0.011463 | 0.011497 | 0.011597 | 0.011597 | 0.011530 |
| 0.011530 | 0.011665 | 0.011564 | 0.011564 | 0.011766 | 0.011766 | 0.011631 |
| 0.011463 | 0.011530 | 0.011564 | 0.011698 | 0.011531 | 0.011564 | 0.011530 |
| 0.011564 | 0.011429 | 0.011429 | 0.011732 | 0.011732 | 0.011698 | 0.011497 |
| 0.011597 | 0.011665 | 0.011530 | 0.011597 | 0.011564 | 0.011429 | 0.011497 |
| 0.011530 | 0.011497 | 0.011429 | 0.011665 | 0.011497 | 0.011597 | 0.011631 |
| 0.011530 | 0.011638 | 0.011631 | 0.011385 | 0.011229 | 0.011536 | 0.011318 |
| 0.011445 | 0.011644 | 0.011446 | 0.011596 | 0.011499 | 0.011467 | 0.011326 |
| 0.011315 | 0.011324 | 0.011450 | 0.011258 | 0.011330 | 0.011462 | 0.011628 |
| 0.011625 | 0.011532 | 0.011518 | 0.011518 | 0.011532 | 0.011396 | 0.011463 |
| 0.011396 | 0.011531 | 0.011635 | 0.011230 | 0.011772 | 0.011802 | 0.011530 |
| 0.011497 | 0.011564 | 0.011497 | 0.011530 | 0.011396 | 0.011362 | 0.011430 |
| 0.011497 | 0.011497 | 0.011463 | 0.011429 | 0.011463 | 0.011429 | 0.011530 |
| 0.011514 | 0.011515 | 0.011505 | 0.011540 | 0.011676 | 0.011641 | 0.011641 |

|          |          |          |          |          |          |          |
|----------|----------|----------|----------|----------|----------|----------|
| 0.011639 | 0.011564 | 0.011392 | 0.011384 | 0.011500 | 0.011670 | 0.011671 |
| 0.011464 | 0.011534 | 0.011767 | 0.011736 | 0.011665 | 0.011700 | 0.011631 |
| 0.011564 | 0.011631 | 0.011631 | 0.011530 | 0.011833 | 0.011698 | 0.011766 |
| 0.011799 | 0.011595 | 0.011504 | 0.011580 | 0.011463 | 0.011665 | 0.011631 |
| 0.011666 | 0.011698 | 0.011698 | 0.011698 | 0.011846 | 0.011833 | 0.011477 |
| 0.011365 | 0.011372 | 0.011469 | 0.011434 | 0.011470 | 0.011396 | 0.011434 |
| 0.011506 | 0.011323 | 0.011394 | 0.011547 | 0.011497 | 0.011573 | 0.011463 |
| 0.011429 | 0.011362 | 0.011497 | 0.011463 | 0.011262 | 0.011161 | 0.011161 |
| 0.000000 | 0.011262 | 0.011463 | 0.011463 | 0.011497 | 0.011497 | 0.011499 |
| 0.011567 | 0.011497 | 0.011497 | 0.011532 | 0.011396 | 0.011463 | 0.011396 |
| 0.011531 | 0.011635 | 0.011230 | 0.011772 | 0.011802 | 0.011530 | 0.011698 |
| 0.011631 | 0.011631 | 0.011466 | 0.011652 | 0.011581 | 0.011605 | 0.011481 |
| 0.011646 | 0.011789 | 0.011653 | 0.011536 | 0.011430 | 0.011631 | 0.011497 |
| 0.011597 | 0.011530 | 0.011429 | 0.011532 | 0.011631 | 0.011635 | 0.011530 |
| 0.011429 | 0.011364 | 0.011497 | 0.011429 | 0.011362 | 0.011366 | 0.011631 |
| 0.011530 | 0.011463 | 0.011497 | 0.011530 | 0.011497 | 0.011429 | 0.011362 |
| 0.011497 | 0.011530 | 0.011530 | 0.011463 | 0.011530 | 0.011765 | 0.011362 |
| 0.011463 | 0.011598 | 0.011463 | 0.011497 | 0.011463 | 0.011564 | 0.011446 |
| 0.011678 | 0.011315 | 0.011261 | 0.011382 | 0.011467 | 0.011383 | 0.011269 |
| 0.011218 | 0.011362 | 0.011463 | 0.011569 | 0.011430 | 0.011568 | 0.011699 |
| 0.011599 | 0.011635 | 0.011597 | 0.011846 | 0.011564 | 0.012439 | 0.011599 |
| 0.012338 | 0.012106 | 0.012240 | 0.012511 | 0.011564 | 0.011463 | 0.011564 |
| 0.012204 | 0.011937 | 0.011530 | 0.011430 | 0.011497 | 0.011497 | 0.011466 |
| 0.011362 | 0.011365 | 0.011430 | 0.011396 | 0.011766 | 0.011833 | 0.011834 |
| 0.011733 | 0.011834 | 0.011937 | 0.011703 | 0.012205 | 0.012212 | 0.012272 |
| 0.012273 | 0.012306 | 0.012255 | 0.012273 | 0.012274 | 0.011564 | 0.011799 |
| 0.011867 | 0.012371 | 0.011874 | 0.011900 | 0.012373 | 0.011434 | 0.011329 |
| 0.011295 | 0.011295 | 0.011766 | 0.011801 | 0.011905 | 0.011631 | 0.011296 |
| S134     | 0.011900 | 0.011900 | 0.011900 | 0.011665 | 0.011665 | 0.011732 |
| 0.011638 | 0.011570 | 0.011732 | 0.011497 | 0.011564 | 0.011531 | 0.011497 |
| 0.011463 | 0.011698 | 0.011429 | 0.011530 | 0.011597 | 0.011564 | 0.011530 |
| 0.011497 | 0.011530 | 0.011295 | 0.011497 | 0.011531 | 0.011530 | 0.011604 |
| 0.011497 | 0.011530 | 0.011429 | 0.011329 | 0.011597 | 0.011564 | 0.011597 |
| 0.011564 | 0.011665 | 0.011564 | 0.011564 | 0.011597 | 0.011564 | 0.011732 |
| 0.011429 | 0.011564 | 0.011597 | 0.011530 | 0.011564 | 0.011665 | 0.011597 |
| 0.011564 | 0.011732 | 0.011631 | 0.011631 | 0.011564 | 0.011833 | 0.011564 |
| 0.011530 | 0.011564 | 0.011698 | 0.011833 | 0.011665 | 0.011564 | 0.011665 |
| 0.011597 | 0.011665 | 0.011564 | 0.011799 | 0.011766 | 0.011564 | 0.011631 |
| 0.011530 | 0.011631 | 0.011597 | 0.011665 | 0.011597 | 0.011597 | 0.011597 |
| 0.011497 | 0.011530 | 0.011497 | 0.011530 | 0.011564 | 0.011599 | 0.011665 |
| 0.011597 | 0.011564 | 0.011631 | 0.011530 | 0.011597 | 0.011497 | 0.011564 |
| 0.011732 | 0.011665 | 0.011698 | 0.011732 | 0.011564 | 0.011799 | 0.011564 |
| 0.011765 | 0.011695 | 0.011815 | 0.011490 | 0.011508 | 0.011539 | 0.011336 |
| 0.011975 | 0.011314 | 0.011554 | 0.011799 | 0.011799 | 0.011530 | 0.011631 |
| 0.011631 | 0.011597 | 0.011665 | 0.011564 | 0.011665 | 0.011597 | 0.011597 |
| 0.011564 | 0.011597 | 0.011866 | 0.011732 | 0.011631 | 0.011598 | 0.011530 |
| 0.011497 | 0.011429 | 0.011564 | 0.011530 | 0.011329 | 0.011228 | 0.011228 |
| 0.011262 | 0.000000 | 0.011530 | 0.011530 | 0.011564 | 0.011564 | 0.011567 |
| 0.011635 | 0.011564 | 0.011564 | 0.011456 | 0.011530 | 0.011481 | 0.011564 |
| 0.011568 | 0.011507 | 0.011577 | 0.011543 | 0.011468 | 0.011505 | 0.011533 |
| 0.011528 | 0.011577 | 0.011611 | 0.011497 | 0.011510 | 0.011632 | 0.011531 |
| 0.011598 | 0.011599 | 0.011598 | 0.011698 | 0.011631 | 0.012001 | 0.011732 |
| 0.011564 | 0.011631 | 0.011564 | 0.011597 | 0.011463 | 0.011429 | 0.011497 |
| 0.011564 | 0.011564 | 0.011530 | 0.011497 | 0.011530 | 0.011497 | 0.011597 |
| 0.011564 | 0.011665 | 0.011597 | 0.011497 | 0.011532 | 0.011698 | 0.011702 |
| 0.011698 | 0.011598 | 0.011497 | 0.011364 | 0.011564 | 0.011497 | 0.011430 |
| 0.011434 | 0.011698 | 0.011497 | 0.011698 | 0.011463 | 0.011564 | 0.011530 |
| 0.011631 | 0.011530 | 0.011564 | 0.011530 | 0.011564 | 0.011430 | 0.011564 |
| 0.011597 | 0.011530 | 0.011597 | 0.011530 | 0.011564 | 0.011597 | 0.011833 |
| 0.011665 | 0.011597 | 0.011665 | 0.011701 | 0.011665 | 0.011564 | 0.011530 |

|          |          |          |          |          |          |          |
|----------|----------|----------|----------|----------|----------|----------|
| 0.011499 | 0.011707 | 0.011563 | 0.011403 | 0.011671 | 0.011435 | 0.011572 |
| 0.011672 | 0.011570 | 0.011732 | 0.011934 | 0.011641 | 0.011799 | 0.011766 |
| 0.011698 | 0.011866 | 0.011736 | 0.011555 | 0.011647 | 0.011598 | 0.011669 |
| 0.011766 | 0.011668 | 0.011804 | 0.011873 | 0.011799 | 0.011867 | 0.011975 |
| 0.011703 | 0.011875 | 0.011805 | 0.011737 | 0.012003 | 0.011463 | 0.011667 |
| 0.011631 | 0.011564 | 0.011463 | 0.011463 | 0.011530 | 0.011530 | 0.011597 |
| 0.011530 | 0.011597 | 0.011497 | 0.011530 | 0.011530 | 0.011530 | 0.011597 |
| 0.011530 | 0.011698 | 0.011598 | 0.011631 | 0.011429 | 0.011530 | 0.011564 |
| 0.011564 | 0.011530 | 0.011597 | 0.011564 | 0.011497 | 0.011497 | 0.011497 |
| 0.011765 | 0.011597 | 0.011665 | 0.011463 | 0.011564 | 0.011732 | 0.011497 |
| 0.011497 | 0.011564 | 0.011530 | 0.011698 | 0.011497 | 0.011430 | 0.011564 |
| 0.011497 | 0.011530 | 0.011530 | 0.011463 | 0.011463 | 0.011631 | 0.011564 |
| 0.011463 | 0.011564 | 0.011430 | 0.011463 | 0.011597 | 0.011463 | 0.011497 |
| 0.011464 | 0.011597 | 0.011531 | 0.011430 | 0.011497 | 0.011430 | 0.011597 |
| 0.011677 | 0.011497 | 0.011530 | 0.011631 | 0.011597 | 0.011530 | 0.011631 |
| 0.011497 | 0.011833 | 0.011429 | 0.011631 | 0.011430 | 0.011430 | 0.011429 |
| 0.011665 | 0.011598 | 0.011564 | 0.011631 | 0.011463 | 0.011598 | 0.011430 |
| 0.011497 | 0.011497 | 0.011530 | 0.011631 | 0.011530 | 0.011631 | 0.011698 |
| 0.011698 | 0.011665 | 0.011564 | 0.011665 | 0.011631 | 0.011497 | 0.011463 |
| 0.011497 | 0.011497 | 0.011564 | 0.011429 | 0.011463 | 0.011631 | 0.011497 |
| 0.011463 | 0.011530 | 0.011665 | 0.011631 | 0.011597 | 0.011530 | 0.011530 |
| 0.011597 | 0.011530 | 0.011631 | 0.011497 | 0.011631 | 0.011732 | 0.011766 |
| 0.011530 | 0.011665 | 0.011543 | 0.018087 | 0.011518 | 0.011794 | 0.011618 |
| 0.011579 | 0.011623 | 0.011584 | 0.011350 | 0.011719 | 0.011647 | 0.011789 |
| 0.011487 | 0.011426 | 0.011489 | 0.011563 | 0.011411 | 0.011603 | 0.011533 |
| 0.011342 | 0.011433 | 0.011431 | 0.011193 | 0.011665 | 0.011698 | 0.011703 |
| 0.011576 | 0.011665 | 0.011665 | 0.011564 | 0.011597 | 0.011598 | 0.011564 |
| 0.011597 | 0.011530 | 0.011564 | 0.011597 | 0.011564 | 0.011497 | 0.011530 |
| 0.011530 | 0.011597 | 0.011497 | 0.011597 | 0.011631 | 0.011665 | 0.011564 |
| 0.011530 | 0.011497 | 0.011631 | 0.011631 | 0.011631 | 0.011598 | 0.011698 |
| 0.011463 | 0.011463 | 0.011497 | 0.011597 | 0.011463 | 0.011698 | 0.011698 |
| 0.011732 | 0.011732 | 0.011665 | 0.011765 | 0.011665 | 0.011768 | 0.011597 |
| 0.011597 | 0.011665 | 0.011698 | 0.011530 | 0.011597 | 0.011564 | 0.011597 |
| 0.011665 | 0.011665 | 0.011698 | 0.011665 | 0.011565 | 0.011765 | 0.011732 |
| 0.011602 | 0.011497 | 0.011597 | 0.011698 | 0.011597 | 0.011665 | 0.011765 |
| 0.011934 | 0.011641 | 0.011799 | 0.011766 | 0.011698 | 0.011866 | 0.011497 |
| 0.011667 | 0.011564 | 0.011530 | 0.011530 | 0.011597 | 0.011497 | 0.011597 |
| 0.011631 | 0.011665 | 0.011564 | 0.011530 | 0.011497 | 0.011631 | 0.011631 |
| 0.011631 | 0.011598 | 0.011732 | 0.011665 | 0.012238 | 0.011739 | 0.011658 |
| 0.011728 | 0.011685 | 0.011798 | 0.011684 | 0.011796 | 0.011716 | 0.011681 |
| 0.012194 | 0.011580 | 0.011711 | 0.011648 | 0.011921 | 0.011775 | 0.011877 |
| 0.012217 | 0.011701 | 0.011601 | 0.011597 | 0.011597 | 0.011228 | 0.011567 |
| 0.011463 | 0.011497 | 0.011631 | 0.011597 | 0.011601 | 0.011463 | 0.011431 |
| 0.011564 | 0.011497 | 0.011530 | 0.011564 | 0.011463 | 0.011530 | 0.011429 |
| 0.011497 | 0.011530 | 0.011497 | 0.011463 | 0.011564 | 0.011497 | 0.011530 |
| 0.011530 | 0.011463 | 0.011530 | 0.011564 | 0.011463 | 0.011665 | 0.011698 |
| 0.011597 | 0.011597 | 0.011597 | 0.011597 | 0.011530 | 0.011665 | 0.011564 |
| 0.011269 | 0.011530 | 0.011497 | 0.011501 | 0.011631 | 0.011631 | 0.011631 |
| 0.011631 | 0.011564 | 0.011530 | 0.011564 | 0.011665 | 0.011665 | 0.011597 |
| 0.011597 | 0.011732 | 0.011631 | 0.011631 | 0.011833 | 0.011833 | 0.011698 |
| 0.011530 | 0.011597 | 0.011631 | 0.011766 | 0.011598 | 0.011631 | 0.011597 |
| 0.011631 | 0.011497 | 0.011497 | 0.011799 | 0.011799 | 0.011765 | 0.011564 |
| 0.011665 | 0.011732 | 0.011597 | 0.011665 | 0.011631 | 0.011497 | 0.011564 |
| 0.011597 | 0.011564 | 0.011497 | 0.011732 | 0.011564 | 0.011665 | 0.011698 |
| 0.011597 | 0.011706 | 0.011698 | 0.011467 | 0.011342 | 0.011604 | 0.011318 |
| 0.011554 | 0.011722 | 0.011517 | 0.011686 | 0.011597 | 0.011569 | 0.011485 |
| 0.011315 | 0.011455 | 0.011561 | 0.011390 | 0.011437 | 0.011596 | 0.011709 |
| 0.011701 | 0.011611 | 0.011589 | 0.011589 | 0.011599 | 0.011463 | 0.011530 |
| 0.011463 | 0.011598 | 0.011703 | 0.011297 | 0.011840 | 0.011838 | 0.011597 |
| 0.011564 | 0.011631 | 0.011564 | 0.011597 | 0.011463 | 0.011429 | 0.011497 |



|          |          |          |          |          |          |          |
|----------|----------|----------|----------|----------|----------|----------|
| 0.011564 | 0.011564 | 0.011530 | 0.011497 | 0.011530 | 0.011497 | 0.011597 |
| 0.011584 | 0.011585 | 0.011574 | 0.011608 | 0.011744 | 0.011709 | 0.011709 |
| 0.011708 | 0.011632 | 0.011466 | 0.011456 | 0.011568 | 0.011738 | 0.011739 |
| 0.011531 | 0.011602 | 0.011835 | 0.011804 | 0.011733 | 0.011767 | 0.011698 |
| 0.011631 | 0.011698 | 0.011698 | 0.011597 | 0.011900 | 0.011765 | 0.011833 |
| 0.011866 | 0.011595 | 0.011572 | 0.011649 | 0.011530 | 0.011698 | 0.011698 |
| 0.011733 | 0.011765 | 0.011765 | 0.011765 | 0.011886 | 0.011900 | 0.011546 |
| 0.011432 | 0.011441 | 0.011537 | 0.011502 | 0.011539 | 0.011471 | 0.011502 |
| 0.011575 | 0.011411 | 0.011394 | 0.011622 | 0.011564 | 0.011642 | 0.011530 |
| 0.011497 | 0.011429 | 0.011564 | 0.011530 | 0.011329 | 0.011228 | 0.011228 |
| 0.011262 | 0.000000 | 0.011530 | 0.011530 | 0.011564 | 0.011564 | 0.011567 |
| 0.011635 | 0.011564 | 0.011564 | 0.011599 | 0.011463 | 0.011530 | 0.011463 |
| 0.011598 | 0.011703 | 0.011297 | 0.011840 | 0.011838 | 0.011597 | 0.011765 |
| 0.011698 | 0.011698 | 0.011534 | 0.011721 | 0.011651 | 0.011673 | 0.011481 |
| 0.011714 | 0.011698 | 0.011653 | 0.011604 | 0.011497 | 0.011698 | 0.011564 |
| 0.011665 | 0.011597 | 0.011497 | 0.011532 | 0.011698 | 0.011702 | 0.011598 |
| 0.011497 | 0.011364 | 0.011564 | 0.011497 | 0.011430 | 0.011434 | 0.011698 |
| 0.011597 | 0.011530 | 0.011564 | 0.011597 | 0.011564 | 0.011497 | 0.011430 |
| 0.011564 | 0.011597 | 0.011597 | 0.011530 | 0.011597 | 0.011833 | 0.011429 |
| 0.011530 | 0.011665 | 0.011530 | 0.011564 | 0.011530 | 0.011631 | 0.011532 |
| 0.011678 | 0.011400 | 0.011261 | 0.011463 | 0.011549 | 0.011455 | 0.011353 |
| 0.011218 | 0.011430 | 0.011530 | 0.011637 | 0.011498 | 0.011635 | 0.011766 |
| 0.011666 | 0.011703 | 0.011665 | 0.011915 | 0.011631 | 0.012506 | 0.011667 |
| 0.012406 | 0.012173 | 0.012307 | 0.012579 | 0.011631 | 0.011530 | 0.011631 |
| 0.012272 | 0.012005 | 0.011598 | 0.011497 | 0.011565 | 0.011565 | 0.011534 |
| 0.011430 | 0.011433 | 0.011497 | 0.011464 | 0.011834 | 0.011900 | 0.011901 |
| 0.011801 | 0.011901 | 0.012004 | 0.011771 | 0.012272 | 0.012279 | 0.012340 |
| 0.012340 | 0.012374 | 0.012323 | 0.012340 | 0.012342 | 0.011631 | 0.011867 |
| 0.011935 | 0.012439 | 0.011942 | 0.011968 | 0.012440 | 0.011502 | 0.011396 |
| 0.011362 | 0.011362 | 0.011833 | 0.011883 | 0.011975 | 0.011698 | 0.011363 |
| S135     | 0.011631 | 0.011631 | 0.011967 | 0.011732 | 0.011732 | 0.011799 |
| 0.011638 | 0.011570 | 0.011732 | 0.011228 | 0.011295 | 0.011262 | 0.011228 |
| 0.011262 | 0.011429 | 0.011228 | 0.011262 | 0.011329 | 0.011295 | 0.011262 |
| 0.011228 | 0.011262 | 0.011362 | 0.011228 | 0.011262 | 0.011262 | 0.011604 |
| 0.011497 | 0.011262 | 0.011161 | 0.011396 | 0.011329 | 0.011295 | 0.011329 |
| 0.011295 | 0.011396 | 0.011295 | 0.011295 | 0.011329 | 0.011295 | 0.011463 |
| 0.011228 | 0.011295 | 0.011329 | 0.011262 | 0.011362 | 0.011396 | 0.011329 |
| 0.011295 | 0.011463 | 0.011363 | 0.011631 | 0.011295 | 0.011564 | 0.011295 |
| 0.011262 | 0.011362 | 0.011429 | 0.011564 | 0.011665 | 0.011362 | 0.011463 |
| 0.011329 | 0.011396 | 0.011295 | 0.011530 | 0.011765 | 0.011295 | 0.011362 |
| 0.011262 | 0.011362 | 0.011329 | 0.011396 | 0.011329 | 0.011329 | 0.011329 |
| 0.011228 | 0.011262 | 0.011228 | 0.011329 | 0.011295 | 0.011329 | 0.011396 |
| 0.011329 | 0.011295 | 0.011362 | 0.011262 | 0.011396 | 0.011228 | 0.011295 |
| 0.011463 | 0.011396 | 0.011631 | 0.011463 | 0.011295 | 0.011530 | 0.011295 |
| 0.011468 | 0.011695 | 0.011475 | 0.011177 | 0.011135 | 0.011318 | 0.011375 |
| 0.012011 | 0.011416 | 0.011143 | 0.011530 | 0.011530 | 0.011329 | 0.011429 |
| 0.011362 | 0.011329 | 0.011396 | 0.011295 | 0.011396 | 0.011329 | 0.011329 |
| 0.011295 | 0.011396 | 0.011597 | 0.011463 | 0.011362 | 0.011329 | 0.011262 |
| 0.011228 | 0.011228 | 0.011295 | 0.011262 | 0.011463 | 0.011429 | 0.011362 |
| 0.011463 | 0.011530 | 0.000000 | 0.000000 | 0.011094 | 0.011094 | 0.011094 |
| 0.011162 | 0.011295 | 0.011295 | 0.011168 | 0.011241 | 0.011200 | 0.011296 |
| 0.011297 | 0.011232 | 0.011245 | 0.011267 | 0.011196 | 0.011231 | 0.011263 |
| 0.011456 | 0.011301 | 0.011336 | 0.011228 | 0.011233 | 0.011363 | 0.011329 |
| 0.011396 | 0.011330 | 0.011329 | 0.011429 | 0.011362 | 0.011732 | 0.011530 |
| 0.011564 | 0.011429 | 0.011295 | 0.011396 | 0.011195 | 0.011429 | 0.011228 |
| 0.011295 | 0.011295 | 0.011262 | 0.011228 | 0.011262 | 0.011228 | 0.011329 |
| 0.011295 | 0.011396 | 0.011329 | 0.011228 | 0.011330 | 0.011429 | 0.011432 |
| 0.011430 | 0.011329 | 0.011228 | 0.011161 | 0.011295 | 0.011228 | 0.011161 |
| 0.011264 | 0.011430 | 0.011228 | 0.011430 | 0.011195 | 0.011295 | 0.011262 |
| 0.011362 | 0.011262 | 0.011295 | 0.011262 | 0.011295 | 0.011161 | 0.011295 |

|          |          |          |          |          |          |          |
|----------|----------|----------|----------|----------|----------|----------|
| 0.011329 | 0.011262 | 0.011329 | 0.011262 | 0.011295 | 0.011329 | 0.011564 |
| 0.011665 | 0.011597 | 0.011665 | 0.011431 | 0.011665 | 0.011295 | 0.011262 |
| 0.011297 | 0.011545 | 0.011380 | 0.011197 | 0.011671 | 0.011163 | 0.011257 |
| 0.011671 | 0.011502 | 0.011463 | 0.011665 | 0.011368 | 0.011530 | 0.011497 |
| 0.011429 | 0.011597 | 0.011451 | 0.011307 | 0.011270 | 0.011329 | 0.011399 |
| 0.011497 | 0.011398 | 0.011534 | 0.011602 | 0.011530 | 0.011598 | 0.011704 |
| 0.011433 | 0.011603 | 0.011534 | 0.011466 | 0.011733 | 0.011195 | 0.011397 |
| 0.011362 | 0.011295 | 0.011195 | 0.011195 | 0.011262 | 0.011262 | 0.011329 |
| 0.011262 | 0.011329 | 0.011228 | 0.011329 | 0.011262 | 0.011262 | 0.011329 |
| 0.011262 | 0.011698 | 0.011597 | 0.011631 | 0.011161 | 0.011262 | 0.011295 |
| 0.011295 | 0.011262 | 0.011329 | 0.011362 | 0.011228 | 0.011228 | 0.011228 |
| 0.011765 | 0.011396 | 0.011396 | 0.011195 | 0.011295 | 0.011463 | 0.011228 |
| 0.011228 | 0.011295 | 0.011262 | 0.011430 | 0.011228 | 0.011362 | 0.011497 |
| 0.011429 | 0.011262 | 0.011262 | 0.011195 | 0.011195 | 0.011362 | 0.011295 |
| 0.011195 | 0.011295 | 0.011161 | 0.011195 | 0.011329 | 0.011463 | 0.011228 |
| 0.011195 | 0.011329 | 0.011262 | 0.011161 | 0.011497 | 0.011161 | 0.011329 |
| 0.011403 | 0.011228 | 0.011530 | 0.011363 | 0.011396 | 0.011262 | 0.011362 |
| 0.011228 | 0.011564 | 0.011161 | 0.011429 | 0.011228 | 0.011228 | 0.011161 |
| 0.011396 | 0.011531 | 0.011295 | 0.011362 | 0.011195 | 0.011597 | 0.011228 |
| 0.011228 | 0.011228 | 0.011262 | 0.011362 | 0.011262 | 0.011362 | 0.011429 |
| 0.011429 | 0.011396 | 0.011295 | 0.011396 | 0.011362 | 0.011228 | 0.011195 |
| 0.011228 | 0.011228 | 0.011295 | 0.011228 | 0.011195 | 0.011362 | 0.011228 |
| 0.011262 | 0.011262 | 0.011396 | 0.011429 | 0.011329 | 0.011262 | 0.011262 |
| 0.011329 | 0.011262 | 0.011362 | 0.011228 | 0.011362 | 0.011463 | 0.011765 |
| 0.011262 | 0.011665 | 0.011267 | 0.017747 | 0.011191 | 0.011427 | 0.011618 |
| 0.011579 | 0.011623 | 0.011270 | 0.011234 | 0.011719 | 0.011647 | 0.011303 |
| 0.011440 | 0.011549 | 0.011177 | 0.011228 | 0.011255 | 0.011307 | 0.011232 |
| 0.011436 | 0.011395 | 0.011357 | 0.011193 | 0.011396 | 0.011430 | 0.011432 |
| 0.011301 | 0.011396 | 0.011396 | 0.011362 | 0.011329 | 0.011329 | 0.011295 |
| 0.011329 | 0.011262 | 0.011295 | 0.011329 | 0.011295 | 0.011228 | 0.011262 |
| 0.011262 | 0.011329 | 0.011228 | 0.011329 | 0.011362 | 0.011396 | 0.011295 |
| 0.011329 | 0.011295 | 0.011631 | 0.011631 | 0.011362 | 0.011396 | 0.011430 |
| 0.011195 | 0.011195 | 0.011228 | 0.011329 | 0.011195 | 0.011429 | 0.011429 |
| 0.011463 | 0.011463 | 0.011396 | 0.011497 | 0.011665 | 0.011498 | 0.011329 |
| 0.011329 | 0.011396 | 0.011429 | 0.011262 | 0.011329 | 0.011295 | 0.011329 |
| 0.011396 | 0.011396 | 0.011429 | 0.011396 | 0.011296 | 0.011497 | 0.011463 |
| 0.011331 | 0.011228 | 0.011329 | 0.011430 | 0.011329 | 0.011463 | 0.011497 |
| 0.011665 | 0.011368 | 0.011530 | 0.011497 | 0.011429 | 0.011597 | 0.011228 |
| 0.011397 | 0.011295 | 0.011262 | 0.011262 | 0.011329 | 0.011228 | 0.011329 |
| 0.011362 | 0.011396 | 0.011295 | 0.011329 | 0.011295 | 0.011631 | 0.011631 |
| 0.011362 | 0.011396 | 0.011463 | 0.011396 | 0.012036 | 0.011453 | 0.011377 |
| 0.011447 | 0.011407 | 0.011517 | 0.011407 | 0.011515 | 0.011440 | 0.011405 |
| 0.011987 | 0.011303 | 0.011437 | 0.011372 | 0.011646 | 0.011502 | 0.011605 |
| 0.012012 | 0.011475 | 0.011128 | 0.011127 | 0.011127 | 0.011362 | 0.011094 |
| 0.011195 | 0.011228 | 0.011161 | 0.011127 | 0.011128 | 0.011463 | 0.011431 |
| 0.011295 | 0.011228 | 0.011262 | 0.011295 | 0.011195 | 0.011262 | 0.011161 |
| 0.011295 | 0.011329 | 0.011228 | 0.011195 | 0.011295 | 0.011228 | 0.011262 |
| 0.011262 | 0.011195 | 0.011262 | 0.011295 | 0.011195 | 0.011396 | 0.011429 |
| 0.011329 | 0.011396 | 0.011329 | 0.011329 | 0.011262 | 0.011665 | 0.011295 |
| 0.011339 | 0.011262 | 0.011497 | 0.011501 | 0.011362 | 0.011362 | 0.011362 |
| 0.011362 | 0.011295 | 0.011262 | 0.011295 | 0.011396 | 0.011396 | 0.011329 |
| 0.011329 | 0.011463 | 0.011631 | 0.011362 | 0.011564 | 0.011564 | 0.011429 |
| 0.011262 | 0.011329 | 0.011362 | 0.011765 | 0.011329 | 0.011362 | 0.011329 |
| 0.011362 | 0.011295 | 0.011295 | 0.011598 | 0.011530 | 0.011564 | 0.011295 |
| 0.011396 | 0.011463 | 0.011329 | 0.011396 | 0.011362 | 0.011228 | 0.011564 |
| 0.011329 | 0.011295 | 0.011295 | 0.011463 | 0.011295 | 0.011396 | 0.011631 |
| 0.011329 | 0.011705 | 0.011698 | 0.011467 | 0.011173 | 0.011400 | 0.011215 |
| 0.011225 | 0.011683 | 0.011236 | 0.011373 | 0.011207 | 0.011315 | 0.011326 |
| 0.011417 | 0.011126 | 0.011283 | 0.011126 | 0.011168 | 0.011328 | 0.011385 |
| 0.011399 | 0.011257 | 0.011377 | 0.011272 | 0.011330 | 0.011463 | 0.011530 |

|          |          |          |          |          |          |          |
|----------|----------|----------|----------|----------|----------|----------|
| 0.011530 | 0.011396 | 0.011500 | 0.011501 | 0.011636 | 0.011661 | 0.011329 |
| 0.011564 | 0.011429 | 0.011295 | 0.011396 | 0.011195 | 0.011429 | 0.011228 |
| 0.011295 | 0.011295 | 0.011262 | 0.011228 | 0.011262 | 0.011228 | 0.011329 |
| 0.011305 | 0.011305 | 0.011300 | 0.011334 | 0.011471 | 0.011436 | 0.011436 |
| 0.011435 | 0.011363 | 0.011171 | 0.011168 | 0.011297 | 0.011467 | 0.011467 |
| 0.011262 | 0.011331 | 0.011565 | 0.011533 | 0.011464 | 0.011498 | 0.011429 |
| 0.011362 | 0.011429 | 0.011429 | 0.011329 | 0.011900 | 0.011497 | 0.011564 |
| 0.011597 | 0.011666 | 0.011299 | 0.011372 | 0.011262 | 0.011463 | 0.011430 |
| 0.011464 | 0.011497 | 0.011497 | 0.011497 | 0.011650 | 0.011631 | 0.011268 |
| 0.011162 | 0.011164 | 0.011265 | 0.011230 | 0.011334 | 0.011135 | 0.011502 |
| 0.011300 | 0.011367 | 0.011108 | 0.011322 | 0.011296 | 0.011368 | 0.011262 |
| 0.011228 | 0.011228 | 0.011295 | 0.011262 | 0.011463 | 0.011429 | 0.011362 |
| 0.011463 | 0.011530 | 0.000000 | 0.000000 | 0.011094 | 0.011094 | 0.011094 |
| 0.011162 | 0.011295 | 0.011295 | 0.011330 | 0.011463 | 0.011530 | 0.011530 |
| 0.011396 | 0.011500 | 0.011501 | 0.011636 | 0.011661 | 0.011329 | 0.011497 |
| 0.011430 | 0.011430 | 0.011263 | 0.011443 | 0.011373 | 0.011401 | 0.011270 |
| 0.011439 | 0.011652 | 0.011399 | 0.011332 | 0.011228 | 0.011430 | 0.011295 |
| 0.011396 | 0.011329 | 0.011228 | 0.011330 | 0.011429 | 0.011432 | 0.011329 |
| 0.011228 | 0.011161 | 0.011295 | 0.011228 | 0.011161 | 0.011264 | 0.011430 |
| 0.011329 | 0.011262 | 0.011295 | 0.011329 | 0.011295 | 0.011228 | 0.011430 |
| 0.011295 | 0.011329 | 0.011329 | 0.011262 | 0.011329 | 0.011564 | 0.011228 |
| 0.011262 | 0.011665 | 0.011262 | 0.011295 | 0.011262 | 0.011631 | 0.011146 |
| 0.011622 | 0.011188 | 0.011211 | 0.011422 | 0.011508 | 0.011455 | 0.011102 |
| 0.011165 | 0.011429 | 0.011530 | 0.011637 | 0.011498 | 0.011635 | 0.011766 |
| 0.011666 | 0.011703 | 0.011665 | 0.011914 | 0.011631 | 0.012506 | 0.011666 |
| 0.012405 | 0.012173 | 0.012307 | 0.012578 | 0.011631 | 0.011329 | 0.011631 |
| 0.012070 | 0.012004 | 0.011597 | 0.011497 | 0.011564 | 0.011564 | 0.011534 |
| 0.011429 | 0.011433 | 0.011497 | 0.011464 | 0.011833 | 0.011900 | 0.011901 |
| 0.011800 | 0.011901 | 0.012004 | 0.011770 | 0.012070 | 0.012076 | 0.012137 |
| 0.012138 | 0.012171 | 0.012118 | 0.012138 | 0.012139 | 0.011362 | 0.011665 |
| 0.011733 | 0.012236 | 0.011738 | 0.011967 | 0.012406 | 0.011502 | 0.011396 |
| 0.011362 | 0.011362 | 0.011833 | 0.011842 | 0.011975 | 0.011698 | 0.011363 |
| S136     | 0.011631 | 0.011631 | 0.011967 | 0.011732 | 0.011732 | 0.011799 |
| 0.011638 | 0.011570 | 0.011732 | 0.011228 | 0.011295 | 0.011262 | 0.011228 |
| 0.011262 | 0.011429 | 0.011228 | 0.011262 | 0.011329 | 0.011295 | 0.011262 |
| 0.011228 | 0.011262 | 0.011362 | 0.011228 | 0.011262 | 0.011262 | 0.011604 |
| 0.011497 | 0.011262 | 0.011161 | 0.011396 | 0.011329 | 0.011295 | 0.011329 |
| 0.011295 | 0.011396 | 0.011295 | 0.011295 | 0.011329 | 0.011295 | 0.011463 |
| 0.011228 | 0.011295 | 0.011329 | 0.011262 | 0.011362 | 0.011396 | 0.011329 |
| 0.011295 | 0.011463 | 0.011363 | 0.011631 | 0.011295 | 0.011564 | 0.011295 |
| 0.011262 | 0.011362 | 0.011429 | 0.011564 | 0.011665 | 0.011362 | 0.011463 |
| 0.011329 | 0.011396 | 0.011295 | 0.011530 | 0.011765 | 0.011295 | 0.011362 |
| 0.011262 | 0.011362 | 0.011329 | 0.011396 | 0.011329 | 0.011329 | 0.011329 |
| 0.011228 | 0.011262 | 0.011228 | 0.011329 | 0.011295 | 0.011329 | 0.011396 |
| 0.011329 | 0.011295 | 0.011362 | 0.011262 | 0.011396 | 0.011228 | 0.011295 |
| 0.011463 | 0.011396 | 0.011631 | 0.011463 | 0.011295 | 0.011530 | 0.011295 |
| 0.011468 | 0.011695 | 0.011475 | 0.011177 | 0.011135 | 0.011318 | 0.011375 |
| 0.012011 | 0.011416 | 0.011143 | 0.011530 | 0.011530 | 0.011329 | 0.011429 |
| 0.011362 | 0.011329 | 0.011396 | 0.011295 | 0.011396 | 0.011329 | 0.011329 |
| 0.011295 | 0.011396 | 0.011597 | 0.011463 | 0.011362 | 0.011329 | 0.011262 |
| 0.011228 | 0.011228 | 0.011295 | 0.011262 | 0.011463 | 0.011429 | 0.011362 |
| 0.011463 | 0.011530 | 0.000000 | 0.000000 | 0.011094 | 0.011094 | 0.011094 |
| 0.011162 | 0.011295 | 0.011295 | 0.011168 | 0.011241 | 0.011200 | 0.011296 |
| 0.011297 | 0.011232 | 0.011245 | 0.011267 | 0.011196 | 0.011231 | 0.011263 |
| 0.011456 | 0.011301 | 0.011336 | 0.011228 | 0.011233 | 0.011363 | 0.011329 |
| 0.011396 | 0.011330 | 0.011329 | 0.011429 | 0.011362 | 0.011732 | 0.011530 |
| 0.011564 | 0.011429 | 0.011295 | 0.011396 | 0.011195 | 0.011429 | 0.011228 |
| 0.011295 | 0.011295 | 0.011262 | 0.011228 | 0.011262 | 0.011228 | 0.011329 |
| 0.011295 | 0.011396 | 0.011329 | 0.011228 | 0.011330 | 0.011429 | 0.011432 |
| 0.011430 | 0.011329 | 0.011228 | 0.011161 | 0.011295 | 0.011228 | 0.011161 |

|          |          |          |          |          |          |          |
|----------|----------|----------|----------|----------|----------|----------|
| 0.011264 | 0.011430 | 0.011228 | 0.011430 | 0.011195 | 0.011295 | 0.011262 |
| 0.011362 | 0.011262 | 0.011295 | 0.011262 | 0.011295 | 0.011161 | 0.011295 |
| 0.011329 | 0.011262 | 0.011329 | 0.011262 | 0.011295 | 0.011329 | 0.011564 |
| 0.011665 | 0.011597 | 0.011665 | 0.011431 | 0.011665 | 0.011295 | 0.011262 |
| 0.011297 | 0.011545 | 0.011380 | 0.011197 | 0.011671 | 0.011163 | 0.011257 |
| 0.011671 | 0.011502 | 0.011463 | 0.011665 | 0.011368 | 0.011530 | 0.011497 |
| 0.011429 | 0.011597 | 0.011451 | 0.011307 | 0.011270 | 0.011329 | 0.011399 |
| 0.011497 | 0.011398 | 0.011534 | 0.011602 | 0.011530 | 0.011598 | 0.011704 |
| 0.011433 | 0.011603 | 0.011534 | 0.011466 | 0.011733 | 0.011195 | 0.011397 |
| 0.011362 | 0.011295 | 0.011195 | 0.011195 | 0.011262 | 0.011262 | 0.011329 |
| 0.011262 | 0.011329 | 0.011228 | 0.011329 | 0.011262 | 0.011262 | 0.011329 |
| 0.011262 | 0.011698 | 0.011597 | 0.011631 | 0.011161 | 0.011262 | 0.011295 |
| 0.011295 | 0.011262 | 0.011329 | 0.011362 | 0.011228 | 0.011228 | 0.011228 |
| 0.011765 | 0.011396 | 0.011396 | 0.011195 | 0.011295 | 0.011463 | 0.011228 |
| 0.011228 | 0.011295 | 0.011262 | 0.011430 | 0.011228 | 0.011362 | 0.011497 |
| 0.011429 | 0.011262 | 0.011262 | 0.011195 | 0.011195 | 0.011362 | 0.011295 |
| 0.011195 | 0.011295 | 0.011161 | 0.011195 | 0.011329 | 0.011463 | 0.011228 |
| 0.011195 | 0.011329 | 0.011262 | 0.011161 | 0.011497 | 0.011161 | 0.011329 |
| 0.011403 | 0.011228 | 0.011530 | 0.011363 | 0.011396 | 0.011262 | 0.011362 |
| 0.011228 | 0.011564 | 0.011161 | 0.011429 | 0.011228 | 0.011228 | 0.011161 |
| 0.011396 | 0.011531 | 0.011295 | 0.011362 | 0.011195 | 0.011597 | 0.011228 |
| 0.011228 | 0.011228 | 0.011262 | 0.011362 | 0.011262 | 0.011362 | 0.011429 |
| 0.011429 | 0.011396 | 0.011295 | 0.011396 | 0.011362 | 0.011228 | 0.011195 |
| 0.011228 | 0.011228 | 0.011295 | 0.011228 | 0.011195 | 0.011362 | 0.011228 |
| 0.011262 | 0.011262 | 0.011396 | 0.011429 | 0.011329 | 0.011262 | 0.011262 |
| 0.011329 | 0.011262 | 0.011362 | 0.011228 | 0.011362 | 0.011463 | 0.011765 |
| 0.011262 | 0.011665 | 0.011267 | 0.017747 | 0.011191 | 0.011427 | 0.011618 |
| 0.011579 | 0.011623 | 0.011270 | 0.011234 | 0.011719 | 0.011647 | 0.011303 |
| 0.011440 | 0.011549 | 0.011177 | 0.011228 | 0.011255 | 0.011307 | 0.011232 |
| 0.011436 | 0.011395 | 0.011357 | 0.011193 | 0.011396 | 0.011430 | 0.011432 |
| 0.011301 | 0.011396 | 0.011396 | 0.011362 | 0.011329 | 0.011329 | 0.011295 |
| 0.011329 | 0.011262 | 0.011295 | 0.011329 | 0.011295 | 0.011228 | 0.011262 |
| 0.011262 | 0.011329 | 0.011228 | 0.011329 | 0.011362 | 0.011396 | 0.011295 |
| 0.011329 | 0.011295 | 0.011631 | 0.011631 | 0.011362 | 0.011396 | 0.011430 |
| 0.011195 | 0.011195 | 0.011228 | 0.011329 | 0.011195 | 0.011429 | 0.011429 |
| 0.011463 | 0.011463 | 0.011396 | 0.011497 | 0.011665 | 0.011498 | 0.011329 |
| 0.011329 | 0.011396 | 0.011429 | 0.011262 | 0.011329 | 0.011295 | 0.011329 |
| 0.011396 | 0.011396 | 0.011429 | 0.011396 | 0.011296 | 0.011497 | 0.011463 |
| 0.011331 | 0.011228 | 0.011329 | 0.011430 | 0.011329 | 0.011463 | 0.011497 |
| 0.011665 | 0.011368 | 0.011530 | 0.011497 | 0.011429 | 0.011597 | 0.011228 |
| 0.011397 | 0.011295 | 0.011262 | 0.011262 | 0.011329 | 0.011228 | 0.011329 |
| 0.011362 | 0.011396 | 0.011295 | 0.011329 | 0.011295 | 0.011631 | 0.011631 |
| 0.011362 | 0.011396 | 0.011463 | 0.011396 | 0.012036 | 0.011453 | 0.011377 |
| 0.011447 | 0.011407 | 0.011517 | 0.011407 | 0.011515 | 0.011440 | 0.011405 |
| 0.011987 | 0.011303 | 0.011437 | 0.011372 | 0.011646 | 0.011502 | 0.011605 |
| 0.012012 | 0.011475 | 0.011128 | 0.011127 | 0.011127 | 0.011362 | 0.011094 |
| 0.011195 | 0.011228 | 0.011161 | 0.011127 | 0.011128 | 0.011463 | 0.011431 |
| 0.011295 | 0.011228 | 0.011262 | 0.011295 | 0.011195 | 0.011262 | 0.011161 |
| 0.011295 | 0.011329 | 0.011228 | 0.011195 | 0.011295 | 0.011228 | 0.011262 |
| 0.011262 | 0.011195 | 0.011262 | 0.011295 | 0.011195 | 0.011396 | 0.011429 |
| 0.011329 | 0.011396 | 0.011329 | 0.011329 | 0.011262 | 0.011665 | 0.011295 |
| 0.011339 | 0.011262 | 0.011497 | 0.011501 | 0.011362 | 0.011362 | 0.011362 |
| 0.011362 | 0.011295 | 0.011262 | 0.011295 | 0.011396 | 0.011396 | 0.011329 |
| 0.011329 | 0.011463 | 0.011631 | 0.011362 | 0.011564 | 0.011564 | 0.011429 |
| 0.011262 | 0.011329 | 0.011362 | 0.011765 | 0.011329 | 0.011362 | 0.011329 |
| 0.011362 | 0.011295 | 0.011295 | 0.011598 | 0.011530 | 0.011564 | 0.011295 |
| 0.011396 | 0.011463 | 0.011329 | 0.011396 | 0.011362 | 0.011228 | 0.011564 |
| 0.011329 | 0.011295 | 0.011295 | 0.011463 | 0.011295 | 0.011396 | 0.011631 |
| 0.011329 | 0.011705 | 0.011698 | 0.011467 | 0.011173 | 0.011400 | 0.011215 |
| 0.011225 | 0.011683 | 0.011236 | 0.011373 | 0.011207 | 0.011315 | 0.011326 |

|          |          |          |          |          |          |          |
|----------|----------|----------|----------|----------|----------|----------|
| 0.011417 | 0.011126 | 0.011283 | 0.011126 | 0.011168 | 0.011328 | 0.011385 |
| 0.011399 | 0.011257 | 0.011377 | 0.011272 | 0.011330 | 0.011463 | 0.011530 |
| 0.011530 | 0.011396 | 0.011500 | 0.011501 | 0.011636 | 0.011661 | 0.011329 |
| 0.011564 | 0.011429 | 0.011295 | 0.011396 | 0.011195 | 0.011429 | 0.011228 |
| 0.011295 | 0.011295 | 0.011262 | 0.011228 | 0.011262 | 0.011228 | 0.011329 |
| 0.011305 | 0.011305 | 0.011300 | 0.011334 | 0.011471 | 0.011436 | 0.011436 |
| 0.011435 | 0.011363 | 0.011171 | 0.011168 | 0.011297 | 0.011467 | 0.011467 |
| 0.011262 | 0.011331 | 0.011565 | 0.011533 | 0.011464 | 0.011498 | 0.011429 |
| 0.011362 | 0.011429 | 0.011429 | 0.011329 | 0.011900 | 0.011497 | 0.011564 |
| 0.011597 | 0.011666 | 0.011299 | 0.011372 | 0.011262 | 0.011463 | 0.011430 |
| 0.011464 | 0.011497 | 0.011497 | 0.011497 | 0.011650 | 0.011631 | 0.011268 |
| 0.011162 | 0.011164 | 0.011265 | 0.011230 | 0.011334 | 0.011135 | 0.011502 |
| 0.011300 | 0.011367 | 0.011108 | 0.011322 | 0.011296 | 0.011368 | 0.011262 |
| 0.011228 | 0.011228 | 0.011295 | 0.011262 | 0.011463 | 0.011429 | 0.011362 |
| 0.011463 | 0.011530 | 0.000000 | 0.000000 | 0.011094 | 0.011094 | 0.011094 |
| 0.011162 | 0.011295 | 0.011295 | 0.011330 | 0.011463 | 0.011530 | 0.011530 |
| 0.011396 | 0.011500 | 0.011501 | 0.011636 | 0.011661 | 0.011329 | 0.011497 |
| 0.011430 | 0.011430 | 0.011263 | 0.011443 | 0.011373 | 0.011401 | 0.011270 |
| 0.011439 | 0.011652 | 0.011399 | 0.011332 | 0.011228 | 0.011430 | 0.011295 |
| 0.011396 | 0.011329 | 0.011228 | 0.011330 | 0.011429 | 0.011432 | 0.011329 |
| 0.011228 | 0.011161 | 0.011295 | 0.011228 | 0.011161 | 0.011264 | 0.011430 |
| 0.011329 | 0.011262 | 0.011295 | 0.011329 | 0.011295 | 0.011228 | 0.011430 |
| 0.011295 | 0.011329 | 0.011329 | 0.011262 | 0.011329 | 0.011564 | 0.011228 |
| 0.011262 | 0.011665 | 0.011262 | 0.011295 | 0.011262 | 0.011631 | 0.011146 |
| 0.011622 | 0.011188 | 0.011211 | 0.011422 | 0.011508 | 0.011455 | 0.011102 |
| 0.011165 | 0.011429 | 0.011530 | 0.011637 | 0.011498 | 0.011635 | 0.011766 |
| 0.011666 | 0.011703 | 0.011665 | 0.011914 | 0.011631 | 0.012506 | 0.011666 |
| 0.012405 | 0.012173 | 0.012307 | 0.012578 | 0.011631 | 0.011329 | 0.011631 |
| 0.012070 | 0.012004 | 0.011597 | 0.011497 | 0.011564 | 0.011564 | 0.011534 |
| 0.011429 | 0.011433 | 0.011497 | 0.011464 | 0.011833 | 0.011900 | 0.011901 |
| 0.011800 | 0.011901 | 0.012004 | 0.011770 | 0.012070 | 0.012076 | 0.012137 |
| 0.012138 | 0.012171 | 0.012118 | 0.012138 | 0.012139 | 0.011362 | 0.011665 |
| 0.011733 | 0.012236 | 0.011738 | 0.011967 | 0.012406 | 0.011502 | 0.011396 |
| 0.011362 | 0.011362 | 0.011833 | 0.011842 | 0.011975 | 0.011698 | 0.011363 |
| S137     | 0.011665 | 0.011665 | 0.012001 | 0.011766 | 0.011766 | 0.011833 |
| 0.011672 | 0.011604 | 0.011766 | 0.011262 | 0.011329 | 0.011296 | 0.011262 |
| 0.011295 | 0.011463 | 0.011262 | 0.011295 | 0.011362 | 0.011329 | 0.011295 |
| 0.011262 | 0.011295 | 0.011396 | 0.011262 | 0.011295 | 0.011295 | 0.011638 |
| 0.011530 | 0.011295 | 0.011195 | 0.011430 | 0.011362 | 0.011329 | 0.011362 |
| 0.011329 | 0.011430 | 0.011329 | 0.011329 | 0.011362 | 0.011329 | 0.011497 |
| 0.011262 | 0.011329 | 0.011362 | 0.011295 | 0.011396 | 0.011430 | 0.011362 |
| 0.011329 | 0.011497 | 0.011396 | 0.011665 | 0.011329 | 0.011597 | 0.011329 |
| 0.011295 | 0.011396 | 0.011463 | 0.011597 | 0.011698 | 0.011396 | 0.011497 |
| 0.011362 | 0.011430 | 0.011329 | 0.011564 | 0.011799 | 0.011329 | 0.011396 |
| 0.011295 | 0.011396 | 0.011362 | 0.011430 | 0.011362 | 0.011362 | 0.011362 |
| 0.011262 | 0.011295 | 0.011262 | 0.011362 | 0.011329 | 0.011363 | 0.011430 |
| 0.011362 | 0.011329 | 0.011396 | 0.011295 | 0.011430 | 0.011262 | 0.011329 |
| 0.011497 | 0.011430 | 0.011665 | 0.011497 | 0.011329 | 0.011564 | 0.011329 |
| 0.011505 | 0.011733 | 0.011513 | 0.011217 | 0.011172 | 0.011355 | 0.011415 |
| 0.012048 | 0.011416 | 0.011143 | 0.011564 | 0.011564 | 0.011362 | 0.011463 |
| 0.011396 | 0.011362 | 0.011430 | 0.011329 | 0.011430 | 0.011362 | 0.011362 |
| 0.011329 | 0.011430 | 0.011631 | 0.011497 | 0.011396 | 0.011363 | 0.011295 |
| 0.011262 | 0.011262 | 0.011329 | 0.011295 | 0.011497 | 0.011463 | 0.011396 |
| 0.011497 | 0.011564 | 0.011094 | 0.011094 | 0.000000 | 0.000000 | 0.000000 |
| 0.011128 | 0.011329 | 0.011329 | 0.011204 | 0.011277 | 0.011236 | 0.011329 |
| 0.011331 | 0.011266 | 0.011282 | 0.011302 | 0.011230 | 0.011266 | 0.011297 |
| 0.011492 | 0.011336 | 0.011370 | 0.011262 | 0.011268 | 0.011397 | 0.011363 |
| 0.011430 | 0.011364 | 0.011363 | 0.011463 | 0.011396 | 0.011766 | 0.011564 |
| 0.011597 | 0.011463 | 0.011329 | 0.011430 | 0.011228 | 0.011463 | 0.011262 |
| 0.011329 | 0.011329 | 0.011295 | 0.011262 | 0.011295 | 0.011262 | 0.011362 |

|          |          |          |          |          |          |          |
|----------|----------|----------|----------|----------|----------|----------|
| 0.011329 | 0.011430 | 0.011362 | 0.011262 | 0.011363 | 0.011463 | 0.011466 |
| 0.011463 | 0.011363 | 0.011262 | 0.011195 | 0.011329 | 0.011262 | 0.011195 |
| 0.011298 | 0.011463 | 0.011262 | 0.011463 | 0.011228 | 0.011329 | 0.011295 |
| 0.011396 | 0.011295 | 0.011329 | 0.011295 | 0.011329 | 0.011195 | 0.011329 |
| 0.011362 | 0.011295 | 0.011362 | 0.011295 | 0.011329 | 0.011362 | 0.011598 |
| 0.011698 | 0.011631 | 0.011698 | 0.011465 | 0.011698 | 0.011329 | 0.011295 |
| 0.011330 | 0.011586 | 0.011380 | 0.011197 | 0.011705 | 0.011197 | 0.011296 |
| 0.011706 | 0.011536 | 0.011497 | 0.011698 | 0.011402 | 0.011564 | 0.011530 |
| 0.011463 | 0.011631 | 0.011487 | 0.011349 | 0.011312 | 0.011363 | 0.011433 |
| 0.011531 | 0.011431 | 0.011568 | 0.011636 | 0.011564 | 0.011631 | 0.011738 |
| 0.011466 | 0.011637 | 0.011568 | 0.011500 | 0.011767 | 0.011228 | 0.011431 |
| 0.011396 | 0.011329 | 0.011228 | 0.011228 | 0.011295 | 0.011295 | 0.011362 |
| 0.011295 | 0.011362 | 0.011262 | 0.011362 | 0.011295 | 0.011295 | 0.011362 |
| 0.011295 | 0.011732 | 0.011631 | 0.011665 | 0.011195 | 0.011295 | 0.011329 |
| 0.011329 | 0.011295 | 0.011362 | 0.011396 | 0.011262 | 0.011262 | 0.011262 |
| 0.011799 | 0.011430 | 0.011430 | 0.011228 | 0.011329 | 0.011497 | 0.011262 |
| 0.011262 | 0.011329 | 0.011295 | 0.011463 | 0.011262 | 0.011396 | 0.011530 |
| 0.011463 | 0.011295 | 0.011295 | 0.011228 | 0.011228 | 0.011396 | 0.011329 |
| 0.011228 | 0.011329 | 0.011195 | 0.011228 | 0.011362 | 0.011497 | 0.011262 |
| 0.011228 | 0.011362 | 0.011296 | 0.011195 | 0.011530 | 0.011195 | 0.011362 |
| 0.011437 | 0.011262 | 0.011564 | 0.011396 | 0.011430 | 0.011295 | 0.011396 |
| 0.011262 | 0.011597 | 0.011195 | 0.011463 | 0.011262 | 0.011262 | 0.011195 |
| 0.011430 | 0.011564 | 0.011329 | 0.011396 | 0.011228 | 0.011631 | 0.011262 |
| 0.011262 | 0.011262 | 0.011295 | 0.011396 | 0.011295 | 0.011396 | 0.011463 |
| 0.011463 | 0.011430 | 0.011329 | 0.011430 | 0.011396 | 0.011262 | 0.011228 |
| 0.011262 | 0.011262 | 0.011329 | 0.011262 | 0.011228 | 0.011396 | 0.011262 |
| 0.011295 | 0.011295 | 0.011430 | 0.011463 | 0.011362 | 0.011295 | 0.011295 |
| 0.011362 | 0.011295 | 0.011396 | 0.011262 | 0.011396 | 0.011497 | 0.011799 |
| 0.011295 | 0.011698 | 0.011302 | 0.017749 | 0.011191 | 0.011488 | 0.011653 |
| 0.011614 | 0.011658 | 0.011270 | 0.011234 | 0.011774 | 0.011682 | 0.011364 |
| 0.011440 | 0.011610 | 0.011216 | 0.011228 | 0.011255 | 0.011356 | 0.011275 |
| 0.011436 | 0.011433 | 0.011357 | 0.011193 | 0.011430 | 0.011463 | 0.011466 |
| 0.011335 | 0.011430 | 0.011430 | 0.011396 | 0.011362 | 0.011363 | 0.011329 |
| 0.011362 | 0.011295 | 0.011329 | 0.011362 | 0.011329 | 0.011262 | 0.011295 |
| 0.011295 | 0.011362 | 0.011262 | 0.011362 | 0.011396 | 0.011430 | 0.011329 |
| 0.011362 | 0.011329 | 0.011665 | 0.011665 | 0.011396 | 0.011430 | 0.011463 |
| 0.011228 | 0.011228 | 0.011262 | 0.011362 | 0.011228 | 0.011463 | 0.011463 |
| 0.011497 | 0.011497 | 0.011430 | 0.011530 | 0.011698 | 0.011532 | 0.011362 |
| 0.011362 | 0.011430 | 0.011463 | 0.011295 | 0.011362 | 0.011329 | 0.011362 |
| 0.011430 | 0.011430 | 0.011463 | 0.011430 | 0.011330 | 0.011530 | 0.011497 |
| 0.011365 | 0.011262 | 0.011362 | 0.011463 | 0.011362 | 0.011497 | 0.011530 |
| 0.011698 | 0.011402 | 0.011564 | 0.011530 | 0.011463 | 0.011631 | 0.011262 |
| 0.011431 | 0.011329 | 0.011295 | 0.011295 | 0.011362 | 0.011262 | 0.011362 |
| 0.011396 | 0.011430 | 0.011329 | 0.011362 | 0.011329 | 0.011665 | 0.011665 |
| 0.011396 | 0.011430 | 0.011497 | 0.011430 | 0.012070 | 0.011489 | 0.011412 |
| 0.011482 | 0.011442 | 0.011552 | 0.011441 | 0.011550 | 0.011474 | 0.011440 |
| 0.012022 | 0.011337 | 0.011471 | 0.011406 | 0.011680 | 0.011537 | 0.011639 |
| 0.012047 | 0.011512 | 0.011094 | 0.011161 | 0.011094 | 0.011396 | 0.000000 |
| 0.011228 | 0.011262 | 0.011195 | 0.011161 | 0.011094 | 0.011497 | 0.011464 |
| 0.011329 | 0.011262 | 0.011295 | 0.011329 | 0.011228 | 0.011295 | 0.011195 |
| 0.011329 | 0.011362 | 0.011262 | 0.011228 | 0.011329 | 0.011262 | 0.011295 |
| 0.011295 | 0.011228 | 0.011295 | 0.011329 | 0.011228 | 0.011430 | 0.011463 |
| 0.011362 | 0.011430 | 0.011362 | 0.011362 | 0.011295 | 0.011698 | 0.011329 |
| 0.011373 | 0.011295 | 0.011531 | 0.011535 | 0.011396 | 0.011396 | 0.011396 |
| 0.011396 | 0.011329 | 0.011295 | 0.011329 | 0.011430 | 0.011430 | 0.011362 |
| 0.011362 | 0.011497 | 0.011665 | 0.011396 | 0.011598 | 0.011598 | 0.011463 |
| 0.011295 | 0.011362 | 0.011396 | 0.011799 | 0.011363 | 0.011396 | 0.011362 |
| 0.011396 | 0.011329 | 0.011329 | 0.011631 | 0.011564 | 0.011598 | 0.011329 |
| 0.011430 | 0.011497 | 0.011362 | 0.011430 | 0.011396 | 0.011262 | 0.011597 |
| 0.011362 | 0.011329 | 0.011329 | 0.011497 | 0.011329 | 0.011430 | 0.011665 |

|          |          |          |          |          |          |          |
|----------|----------|----------|----------|----------|----------|----------|
| 0.011362 | 0.011740 | 0.011732 | 0.011507 | 0.011173 | 0.011434 | 0.011215 |
| 0.011280 | 0.011722 | 0.011271 | 0.011373 | 0.011255 | 0.011366 | 0.011326 |
| 0.011417 | 0.011126 | 0.011283 | 0.011126 | 0.011168 | 0.011328 | 0.011425 |
| 0.011437 | 0.011296 | 0.011412 | 0.011307 | 0.011364 | 0.011497 | 0.011564 |
| 0.011564 | 0.011430 | 0.011534 | 0.011535 | 0.011670 | 0.011696 | 0.011362 |
| 0.011597 | 0.011463 | 0.011329 | 0.011430 | 0.011228 | 0.011463 | 0.011262 |
| 0.011329 | 0.011329 | 0.011295 | 0.011262 | 0.011295 | 0.011262 | 0.011362 |
| 0.011340 | 0.011340 | 0.011334 | 0.011368 | 0.011505 | 0.011470 | 0.011470 |
| 0.011469 | 0.011396 | 0.011208 | 0.011204 | 0.011331 | 0.011501 | 0.011501 |
| 0.011296 | 0.011365 | 0.011599 | 0.011567 | 0.011497 | 0.011531 | 0.011463 |
| 0.011396 | 0.011463 | 0.011463 | 0.011362 | 0.011934 | 0.011530 | 0.011598 |
| 0.011631 | 0.011666 | 0.011333 | 0.011407 | 0.011295 | 0.011497 | 0.011463 |
| 0.011498 | 0.011530 | 0.011530 | 0.011530 | 0.011689 | 0.011665 | 0.011303 |
| 0.011196 | 0.011199 | 0.011299 | 0.011264 | 0.011368 | 0.011172 | 0.011536 |
| 0.011335 | 0.011367 | 0.011108 | 0.011360 | 0.011329 | 0.011402 | 0.011295 |
| 0.011262 | 0.011262 | 0.011329 | 0.011295 | 0.011497 | 0.011463 | 0.011396 |
| 0.011497 | 0.011564 | 0.011094 | 0.011094 | 0.000000 | 0.000000 | 0.000000 |
| 0.011128 | 0.011329 | 0.011329 | 0.011364 | 0.011497 | 0.011564 | 0.011564 |
| 0.011430 | 0.011534 | 0.011535 | 0.011670 | 0.011696 | 0.011362 | 0.011530 |
| 0.011463 | 0.011463 | 0.011297 | 0.011478 | 0.011408 | 0.011435 | 0.011305 |
| 0.011473 | 0.011698 | 0.011399 | 0.011366 | 0.011262 | 0.011463 | 0.011329 |
| 0.011430 | 0.011362 | 0.011262 | 0.011363 | 0.011463 | 0.011466 | 0.011363 |
| 0.011262 | 0.011195 | 0.011329 | 0.011262 | 0.011195 | 0.011298 | 0.011463 |
| 0.011362 | 0.011295 | 0.011329 | 0.011362 | 0.011329 | 0.011262 | 0.011463 |
| 0.011329 | 0.011362 | 0.011362 | 0.011295 | 0.011362 | 0.011598 | 0.011262 |
| 0.011295 | 0.011698 | 0.011295 | 0.011329 | 0.011295 | 0.011665 | 0.011146 |
| 0.011622 | 0.011230 | 0.011211 | 0.011463 | 0.011549 | 0.011491 | 0.011144 |
| 0.011165 | 0.011463 | 0.011564 | 0.011671 | 0.011532 | 0.011669 | 0.011800 |
| 0.011700 | 0.011737 | 0.011698 | 0.011949 | 0.011665 | 0.012540 | 0.011700 |
| 0.012439 | 0.012207 | 0.012341 | 0.012612 | 0.011665 | 0.011362 | 0.011665 |
| 0.012103 | 0.012038 | 0.011631 | 0.011531 | 0.011598 | 0.011598 | 0.011568 |
| 0.011463 | 0.011467 | 0.011530 | 0.011497 | 0.011867 | 0.011934 | 0.011935 |
| 0.011834 | 0.011935 | 0.012038 | 0.011804 | 0.012104 | 0.012110 | 0.012171 |
| 0.012172 | 0.012205 | 0.012152 | 0.012172 | 0.012173 | 0.011396 | 0.011699 |
| 0.011699 | 0.012270 | 0.011772 | 0.012001 | 0.012441 | 0.011536 | 0.011430 |
| 0.011396 | 0.011396 | 0.011867 | 0.011883 | 0.012010 | 0.011732 | 0.011397 |
| S138     | 0.011665 | 0.011665 | 0.012001 | 0.011765 | 0.011765 | 0.011833 |
| 0.011672 | 0.011604 | 0.011765 | 0.011262 | 0.011329 | 0.011296 | 0.011262 |
| 0.011295 | 0.011463 | 0.011262 | 0.011295 | 0.011362 | 0.011329 | 0.011295 |
| 0.011262 | 0.011295 | 0.011396 | 0.011262 | 0.011295 | 0.011295 | 0.011638 |
| 0.011530 | 0.011295 | 0.011195 | 0.011429 | 0.011362 | 0.011329 | 0.011362 |
| 0.011329 | 0.011429 | 0.011329 | 0.011329 | 0.011362 | 0.011329 | 0.011497 |
| 0.011262 | 0.011329 | 0.011362 | 0.011295 | 0.011396 | 0.011429 | 0.011362 |
| 0.011329 | 0.011497 | 0.011396 | 0.011665 | 0.011329 | 0.011597 | 0.011329 |
| 0.011295 | 0.011396 | 0.011463 | 0.011597 | 0.011698 | 0.011396 | 0.011497 |
| 0.011362 | 0.011429 | 0.011329 | 0.011564 | 0.011799 | 0.011329 | 0.011396 |
| 0.011295 | 0.011396 | 0.011362 | 0.011429 | 0.011362 | 0.011362 | 0.011362 |
| 0.011262 | 0.011295 | 0.011262 | 0.011362 | 0.011329 | 0.011363 | 0.011429 |
| 0.011362 | 0.011329 | 0.011396 | 0.011295 | 0.011429 | 0.011262 | 0.011329 |
| 0.011497 | 0.011429 | 0.011665 | 0.011497 | 0.011329 | 0.011564 | 0.011329 |
| 0.011505 | 0.011732 | 0.011513 | 0.011216 | 0.011172 | 0.011355 | 0.011414 |
| 0.012048 | 0.011416 | 0.011143 | 0.011564 | 0.011564 | 0.011362 | 0.011463 |
| 0.011396 | 0.011362 | 0.011429 | 0.011329 | 0.011429 | 0.011362 | 0.011362 |
| 0.011329 | 0.011429 | 0.011631 | 0.011497 | 0.011396 | 0.011362 | 0.011295 |
| 0.011262 | 0.011262 | 0.011329 | 0.011295 | 0.011497 | 0.011463 | 0.011396 |
| 0.011497 | 0.011564 | 0.011094 | 0.011094 | 0.000000 | 0.000000 | 0.000000 |
| 0.011128 | 0.011329 | 0.011329 | 0.011204 | 0.011277 | 0.011235 | 0.011329 |
| 0.011331 | 0.011266 | 0.011282 | 0.011302 | 0.011230 | 0.011266 | 0.011297 |
| 0.011492 | 0.011336 | 0.011370 | 0.011262 | 0.011268 | 0.011397 | 0.011363 |
| 0.011430 | 0.011363 | 0.011363 | 0.011463 | 0.011396 | 0.011765 | 0.011564 |

|          |          |          |          |          |          |          |
|----------|----------|----------|----------|----------|----------|----------|
| 0.011597 | 0.011463 | 0.011329 | 0.011429 | 0.011228 | 0.011463 | 0.011262 |
| 0.011329 | 0.011329 | 0.011295 | 0.011262 | 0.011295 | 0.011262 | 0.011362 |
| 0.011329 | 0.011429 | 0.011362 | 0.011262 | 0.011363 | 0.011463 | 0.011466 |
| 0.011463 | 0.011362 | 0.011262 | 0.011195 | 0.011329 | 0.011262 | 0.011195 |
| 0.011298 | 0.011463 | 0.011262 | 0.011463 | 0.011228 | 0.011329 | 0.011295 |
| 0.011396 | 0.011295 | 0.011329 | 0.011295 | 0.011329 | 0.011195 | 0.011329 |
| 0.011362 | 0.011295 | 0.011362 | 0.011295 | 0.011329 | 0.011362 | 0.011597 |
| 0.011698 | 0.011631 | 0.011698 | 0.011465 | 0.011698 | 0.011329 | 0.011295 |
| 0.011330 | 0.011586 | 0.011380 | 0.011197 | 0.011705 | 0.011197 | 0.011296 |
| 0.011705 | 0.011536 | 0.011497 | 0.011698 | 0.011402 | 0.011564 | 0.011530 |
| 0.011463 | 0.011631 | 0.011487 | 0.011349 | 0.011312 | 0.011362 | 0.011432 |
| 0.011530 | 0.011431 | 0.011567 | 0.011636 | 0.011564 | 0.011631 | 0.011738 |
| 0.011466 | 0.011637 | 0.011568 | 0.011500 | 0.011767 | 0.011228 | 0.011431 |
| 0.011396 | 0.011329 | 0.011228 | 0.011228 | 0.011295 | 0.011295 | 0.011362 |
| 0.011295 | 0.011362 | 0.011262 | 0.011362 | 0.011295 | 0.011295 | 0.011362 |
| 0.011295 | 0.011732 | 0.011631 | 0.011665 | 0.011195 | 0.011295 | 0.011329 |
| 0.011329 | 0.011295 | 0.011362 | 0.011396 | 0.011262 | 0.011262 | 0.011262 |
| 0.011799 | 0.011429 | 0.011429 | 0.011228 | 0.011329 | 0.011497 | 0.011262 |
| 0.011262 | 0.011329 | 0.011295 | 0.011463 | 0.011262 | 0.011396 | 0.011530 |
| 0.011463 | 0.011295 | 0.011295 | 0.011228 | 0.011228 | 0.011396 | 0.011329 |
| 0.011228 | 0.011329 | 0.011195 | 0.011228 | 0.011362 | 0.011497 | 0.011262 |
| 0.011228 | 0.011362 | 0.011296 | 0.011195 | 0.011530 | 0.011195 | 0.011362 |
| 0.011437 | 0.011262 | 0.011564 | 0.011396 | 0.011429 | 0.011295 | 0.011396 |
| 0.011262 | 0.011597 | 0.011195 | 0.011463 | 0.011262 | 0.011262 | 0.011195 |
| 0.011429 | 0.011564 | 0.011329 | 0.011396 | 0.011228 | 0.011631 | 0.011262 |
| 0.011262 | 0.011262 | 0.011295 | 0.011396 | 0.011295 | 0.011396 | 0.011463 |
| 0.011463 | 0.011429 | 0.011329 | 0.011430 | 0.011396 | 0.011262 | 0.011228 |
| 0.011262 | 0.011262 | 0.011329 | 0.011262 | 0.011228 | 0.011396 | 0.011262 |
| 0.011295 | 0.011295 | 0.011429 | 0.011463 | 0.011362 | 0.011295 | 0.011295 |
| 0.011362 | 0.011295 | 0.011396 | 0.011262 | 0.011396 | 0.011497 | 0.011799 |
| 0.011295 | 0.011698 | 0.011302 | 0.017747 | 0.011191 | 0.011488 | 0.011653 |
| 0.011614 | 0.011658 | 0.011270 | 0.011234 | 0.011774 | 0.011681 | 0.011364 |
| 0.011440 | 0.011610 | 0.011216 | 0.011228 | 0.011255 | 0.011356 | 0.011275 |
| 0.011436 | 0.011433 | 0.011357 | 0.011193 | 0.011429 | 0.011463 | 0.011466 |
| 0.011335 | 0.011429 | 0.011429 | 0.011396 | 0.011362 | 0.011363 | 0.011329 |
| 0.011362 | 0.011295 | 0.011329 | 0.011362 | 0.011329 | 0.011262 | 0.011295 |
| 0.011295 | 0.011362 | 0.011262 | 0.011362 | 0.011396 | 0.011429 | 0.011329 |
| 0.011362 | 0.011329 | 0.011665 | 0.011665 | 0.011396 | 0.011430 | 0.011463 |
| 0.011228 | 0.011228 | 0.011262 | 0.011362 | 0.011228 | 0.011463 | 0.011463 |
| 0.011497 | 0.011497 | 0.011429 | 0.011530 | 0.011698 | 0.011532 | 0.011362 |
| 0.011362 | 0.011429 | 0.011463 | 0.011295 | 0.011362 | 0.011329 | 0.011362 |
| 0.011430 | 0.011430 | 0.011463 | 0.011430 | 0.011330 | 0.011530 | 0.011497 |
| 0.011365 | 0.011262 | 0.011362 | 0.011463 | 0.011362 | 0.011497 | 0.011530 |
| 0.011698 | 0.011402 | 0.011564 | 0.011530 | 0.011463 | 0.011631 | 0.011262 |
| 0.011431 | 0.011329 | 0.011295 | 0.011295 | 0.011362 | 0.011262 | 0.011362 |
| 0.011396 | 0.011429 | 0.011329 | 0.011362 | 0.011329 | 0.011665 | 0.011665 |
| 0.011396 | 0.011430 | 0.011497 | 0.011430 | 0.012070 | 0.011489 | 0.011412 |
| 0.011482 | 0.011442 | 0.011552 | 0.011441 | 0.011550 | 0.011474 | 0.011439 |
| 0.012022 | 0.011337 | 0.011471 | 0.011406 | 0.011680 | 0.011536 | 0.011639 |
| 0.012046 | 0.011512 | 0.011094 | 0.011161 | 0.011094 | 0.011396 | 0.000000 |
| 0.011228 | 0.011262 | 0.011195 | 0.011161 | 0.011094 | 0.011497 | 0.011464 |
| 0.011329 | 0.011262 | 0.011295 | 0.011329 | 0.011228 | 0.011295 | 0.011195 |
| 0.011329 | 0.011362 | 0.011262 | 0.011228 | 0.011329 | 0.011262 | 0.011295 |
| 0.011295 | 0.011228 | 0.011295 | 0.011329 | 0.011228 | 0.011429 | 0.011463 |
| 0.011362 | 0.011429 | 0.011362 | 0.011362 | 0.011295 | 0.011698 | 0.011329 |
| 0.011373 | 0.011295 | 0.011531 | 0.011535 | 0.011396 | 0.011396 | 0.011396 |
| 0.011396 | 0.011329 | 0.011295 | 0.011329 | 0.011429 | 0.011429 | 0.011362 |
| 0.011362 | 0.011497 | 0.011665 | 0.011396 | 0.011597 | 0.011597 | 0.011463 |
| 0.011295 | 0.011362 | 0.011396 | 0.011799 | 0.011363 | 0.011396 | 0.011362 |
| 0.011396 | 0.011329 | 0.011329 | 0.011631 | 0.011564 | 0.011597 | 0.011329 |



|          |          |          |          |          |          |          |
|----------|----------|----------|----------|----------|----------|----------|
| 0.011429 | 0.011497 | 0.011362 | 0.011429 | 0.011396 | 0.011262 | 0.011597 |
| 0.011362 | 0.011329 | 0.011329 | 0.011497 | 0.011329 | 0.011429 | 0.011665 |
| 0.011362 | 0.011739 | 0.011732 | 0.011507 | 0.011173 | 0.011434 | 0.011215 |
| 0.011280 | 0.011722 | 0.011271 | 0.011373 | 0.011255 | 0.011366 | 0.011326 |
| 0.011417 | 0.011126 | 0.011283 | 0.011126 | 0.011168 | 0.011328 | 0.011425 |
| 0.011437 | 0.011296 | 0.011412 | 0.011307 | 0.011363 | 0.011497 | 0.011564 |
| 0.011564 | 0.011430 | 0.011533 | 0.011535 | 0.011670 | 0.011696 | 0.011362 |
| 0.011597 | 0.011463 | 0.011329 | 0.011429 | 0.011228 | 0.011463 | 0.011262 |
| 0.011329 | 0.011329 | 0.011295 | 0.011262 | 0.011295 | 0.011262 | 0.011362 |
| 0.011340 | 0.011340 | 0.011334 | 0.011368 | 0.011505 | 0.011470 | 0.011470 |
| 0.011469 | 0.011396 | 0.011208 | 0.011204 | 0.011331 | 0.011501 | 0.011501 |
| 0.011296 | 0.011365 | 0.011599 | 0.011567 | 0.011497 | 0.011531 | 0.011463 |
| 0.011396 | 0.011463 | 0.011463 | 0.011362 | 0.011934 | 0.011530 | 0.011598 |
| 0.011631 | 0.011666 | 0.011333 | 0.011407 | 0.011295 | 0.011497 | 0.011463 |
| 0.011498 | 0.011530 | 0.011530 | 0.011530 | 0.011689 | 0.011665 | 0.011303 |
| 0.011196 | 0.011199 | 0.011299 | 0.011264 | 0.011368 | 0.011172 | 0.011536 |
| 0.011335 | 0.011367 | 0.011108 | 0.011360 | 0.011329 | 0.011402 | 0.011295 |
| 0.011262 | 0.011262 | 0.011329 | 0.011295 | 0.011497 | 0.011463 | 0.011396 |
| 0.011497 | 0.011564 | 0.011094 | 0.011094 | 0.000000 | 0.000000 | 0.000000 |
| 0.011128 | 0.011329 | 0.011329 | 0.011363 | 0.011497 | 0.011564 | 0.011564 |
| 0.011430 | 0.011533 | 0.011535 | 0.011670 | 0.011696 | 0.011362 | 0.011530 |
| 0.011463 | 0.011463 | 0.011297 | 0.011478 | 0.011408 | 0.011435 | 0.011305 |
| 0.011473 | 0.011698 | 0.011399 | 0.011366 | 0.011262 | 0.011463 | 0.011329 |
| 0.011429 | 0.011362 | 0.011262 | 0.011363 | 0.011463 | 0.011466 | 0.011362 |
| 0.011262 | 0.011195 | 0.011329 | 0.011262 | 0.011195 | 0.011298 | 0.011463 |
| 0.011362 | 0.011295 | 0.011329 | 0.011362 | 0.011329 | 0.011262 | 0.011463 |
| 0.011329 | 0.011362 | 0.011362 | 0.011295 | 0.011362 | 0.011597 | 0.011262 |
| 0.011295 | 0.011698 | 0.011295 | 0.011329 | 0.011295 | 0.011665 | 0.011146 |
| 0.011622 | 0.011230 | 0.011211 | 0.011463 | 0.011549 | 0.011491 | 0.011144 |
| 0.011165 | 0.011463 | 0.011564 | 0.011671 | 0.011531 | 0.011669 | 0.011800 |
| 0.011699 | 0.011737 | 0.011698 | 0.011948 | 0.011665 | 0.012539 | 0.011700 |
| 0.012439 | 0.012207 | 0.012341 | 0.012612 | 0.011665 | 0.011362 | 0.011665 |
| 0.012103 | 0.012038 | 0.011631 | 0.011530 | 0.011598 | 0.011598 | 0.011568 |
| 0.011463 | 0.011467 | 0.011530 | 0.011497 | 0.011867 | 0.011934 | 0.011935 |
| 0.011834 | 0.011934 | 0.012038 | 0.011804 | 0.012104 | 0.012110 | 0.012171 |
| 0.012171 | 0.012205 | 0.012152 | 0.012172 | 0.012173 | 0.011396 | 0.011699 |
| 0.011699 | 0.012270 | 0.011772 | 0.012001 | 0.012440 | 0.011536 | 0.011430 |
| 0.011396 | 0.011396 | 0.011867 | 0.011883 | 0.012010 | 0.011732 | 0.011397 |
| S139     | 0.011668 | 0.011668 | 0.012007 | 0.011770 | 0.011770 | 0.011837 |
| 0.011675 | 0.011607 | 0.011770 | 0.011263 | 0.011330 | 0.011297 | 0.011263 |
| 0.011297 | 0.011465 | 0.011263 | 0.011297 | 0.011364 | 0.011330 | 0.011297 |
| 0.011263 | 0.011297 | 0.011398 | 0.011263 | 0.011297 | 0.011297 | 0.011641 |
| 0.011533 | 0.011297 | 0.011195 | 0.011432 | 0.011364 | 0.011330 | 0.011364 |
| 0.011330 | 0.011432 | 0.011330 | 0.011330 | 0.011364 | 0.011330 | 0.011499 |
| 0.011263 | 0.011330 | 0.011364 | 0.011297 | 0.011398 | 0.011432 | 0.011364 |
| 0.011330 | 0.011499 | 0.011398 | 0.011668 | 0.011330 | 0.011601 | 0.011330 |
| 0.011297 | 0.011398 | 0.011465 | 0.011601 | 0.011702 | 0.011398 | 0.011499 |
| 0.011364 | 0.011432 | 0.011330 | 0.011567 | 0.011803 | 0.011330 | 0.011398 |
| 0.011297 | 0.011398 | 0.011364 | 0.011432 | 0.011364 | 0.011364 | 0.011364 |
| 0.011263 | 0.011297 | 0.011263 | 0.011364 | 0.011330 | 0.011331 | 0.011432 |
| 0.011364 | 0.011330 | 0.011398 | 0.011297 | 0.011432 | 0.011263 | 0.011330 |
| 0.011465 | 0.011432 | 0.011668 | 0.011499 | 0.011330 | 0.011567 | 0.011330 |
| 0.011506 | 0.011733 | 0.011513 | 0.011217 | 0.011172 | 0.011355 | 0.011415 |
| 0.012049 | 0.011417 | 0.011143 | 0.011567 | 0.011533 | 0.011364 | 0.011432 |
| 0.011398 | 0.011364 | 0.011432 | 0.011330 | 0.011432 | 0.011364 | 0.011364 |
| 0.011330 | 0.011432 | 0.011634 | 0.011499 | 0.011398 | 0.011364 | 0.011297 |
| 0.011263 | 0.011263 | 0.011330 | 0.011297 | 0.011499 | 0.011465 | 0.011398 |
| 0.011499 | 0.011567 | 0.011094 | 0.011094 | 0.000000 | 0.000000 | 0.000000 |
| 0.011128 | 0.011330 | 0.011330 | 0.011204 | 0.011277 | 0.011237 | 0.011331 |
| 0.011333 | 0.011267 | 0.011283 | 0.011303 | 0.011231 | 0.011267 | 0.011298 |

|          |          |          |          |          |          |          |
|----------|----------|----------|----------|----------|----------|----------|
| 0.011495 | 0.011338 | 0.011372 | 0.011263 | 0.011269 | 0.011399 | 0.011365 |
| 0.011432 | 0.011365 | 0.011365 | 0.011465 | 0.011398 | 0.011770 | 0.011567 |
| 0.011601 | 0.011465 | 0.011330 | 0.011432 | 0.011229 | 0.011465 | 0.011263 |
| 0.011330 | 0.011330 | 0.011297 | 0.011263 | 0.011297 | 0.011263 | 0.011364 |
| 0.011330 | 0.011432 | 0.011364 | 0.011263 | 0.011365 | 0.011465 | 0.011468 |
| 0.011466 | 0.011364 | 0.011263 | 0.011196 | 0.011330 | 0.011263 | 0.011195 |
| 0.011299 | 0.011466 | 0.011263 | 0.011466 | 0.011229 | 0.011330 | 0.011297 |
| 0.011398 | 0.011297 | 0.011330 | 0.011297 | 0.011330 | 0.011195 | 0.011330 |
| 0.011364 | 0.011297 | 0.011364 | 0.011297 | 0.011330 | 0.011364 | 0.011601 |
| 0.011702 | 0.011634 | 0.011702 | 0.011467 | 0.011702 | 0.011330 | 0.011297 |
| 0.011332 | 0.011589 | 0.011383 | 0.011198 | 0.011709 | 0.011197 | 0.011298 |
| 0.011709 | 0.011539 | 0.011499 | 0.011702 | 0.011404 | 0.011567 | 0.011533 |
| 0.011465 | 0.011634 | 0.011489 | 0.011351 | 0.011314 | 0.011364 | 0.011435 |
| 0.011533 | 0.011433 | 0.011570 | 0.011639 | 0.011567 | 0.011635 | 0.011742 |
| 0.011469 | 0.011641 | 0.011571 | 0.011503 | 0.011771 | 0.011229 | 0.011433 |
| 0.011398 | 0.011330 | 0.011229 | 0.011229 | 0.011297 | 0.011297 | 0.011364 |
| 0.011297 | 0.011364 | 0.011263 | 0.011364 | 0.011297 | 0.011297 | 0.011364 |
| 0.011297 | 0.011736 | 0.011634 | 0.011668 | 0.011195 | 0.011297 | 0.011330 |
| 0.011330 | 0.011297 | 0.011364 | 0.011398 | 0.011263 | 0.011263 | 0.011263 |
| 0.011803 | 0.011432 | 0.011432 | 0.011229 | 0.011330 | 0.011499 | 0.011263 |
| 0.011263 | 0.011330 | 0.011297 | 0.011465 | 0.011263 | 0.011398 | 0.011533 |
| 0.011465 | 0.011297 | 0.011297 | 0.011229 | 0.011229 | 0.011330 | 0.011330 |
| 0.011229 | 0.011330 | 0.011195 | 0.011229 | 0.011364 | 0.011500 | 0.011263 |
| 0.011229 | 0.011364 | 0.011297 | 0.011195 | 0.011533 | 0.011195 | 0.011364 |
| 0.011439 | 0.011263 | 0.011567 | 0.011398 | 0.011432 | 0.011297 | 0.011398 |
| 0.011263 | 0.011601 | 0.011195 | 0.011465 | 0.011263 | 0.011263 | 0.011195 |
| 0.011398 | 0.011567 | 0.011330 | 0.011398 | 0.011229 | 0.011634 | 0.011263 |
| 0.011263 | 0.011263 | 0.011297 | 0.011398 | 0.011297 | 0.011398 | 0.011465 |
| 0.011465 | 0.011432 | 0.011330 | 0.011432 | 0.011398 | 0.011263 | 0.011229 |
| 0.011263 | 0.011263 | 0.011330 | 0.011263 | 0.011229 | 0.011398 | 0.011263 |
| 0.011297 | 0.011297 | 0.011432 | 0.011465 | 0.011364 | 0.011297 | 0.011297 |
| 0.011364 | 0.011297 | 0.011398 | 0.011263 | 0.011364 | 0.011499 | 0.011803 |
| 0.011297 | 0.011702 | 0.011302 | 0.017755 | 0.011191 | 0.011488 | 0.011654 |
| 0.011616 | 0.011659 | 0.011270 | 0.011235 | 0.011774 | 0.011685 | 0.011364 |
| 0.011440 | 0.011610 | 0.011216 | 0.011228 | 0.011256 | 0.011356 | 0.011276 |
| 0.011436 | 0.011433 | 0.011357 | 0.011193 | 0.011432 | 0.011466 | 0.011468 |
| 0.011337 | 0.011432 | 0.011432 | 0.011398 | 0.011364 | 0.011364 | 0.011331 |
| 0.011364 | 0.011297 | 0.011330 | 0.011364 | 0.011330 | 0.011263 | 0.011297 |
| 0.011297 | 0.011364 | 0.011263 | 0.011364 | 0.011398 | 0.011432 | 0.011330 |
| 0.011364 | 0.011330 | 0.011668 | 0.011668 | 0.011398 | 0.011432 | 0.011465 |
| 0.011229 | 0.011229 | 0.011263 | 0.011364 | 0.011229 | 0.011465 | 0.011465 |
| 0.011499 | 0.011499 | 0.011432 | 0.011533 | 0.011702 | 0.011534 | 0.011364 |
| 0.011364 | 0.011432 | 0.011465 | 0.011297 | 0.011364 | 0.011330 | 0.011364 |
| 0.011432 | 0.011432 | 0.011465 | 0.011432 | 0.011331 | 0.011533 | 0.011499 |
| 0.011367 | 0.011263 | 0.011364 | 0.011465 | 0.011364 | 0.011499 | 0.011533 |
| 0.011702 | 0.011404 | 0.011567 | 0.011533 | 0.011465 | 0.011634 | 0.011263 |
| 0.011433 | 0.011331 | 0.011297 | 0.011297 | 0.011364 | 0.011263 | 0.011364 |
| 0.011398 | 0.011432 | 0.011330 | 0.011364 | 0.011330 | 0.011668 | 0.011668 |
| 0.011398 | 0.011432 | 0.011499 | 0.011432 | 0.012076 | 0.011492 | 0.011379 |
| 0.011483 | 0.011444 | 0.011555 | 0.011409 | 0.011553 | 0.011477 | 0.011442 |
| 0.012028 | 0.011339 | 0.011474 | 0.011408 | 0.011684 | 0.011539 | 0.011642 |
| 0.012052 | 0.011515 | 0.011094 | 0.011162 | 0.011094 | 0.011398 | 0.000000 |
| 0.011229 | 0.011263 | 0.011195 | 0.011162 | 0.011094 | 0.011499 | 0.011467 |
| 0.011330 | 0.011263 | 0.011297 | 0.011330 | 0.011229 | 0.011297 | 0.011195 |
| 0.011330 | 0.011364 | 0.011263 | 0.011229 | 0.011330 | 0.011263 | 0.011297 |
| 0.011297 | 0.011229 | 0.011297 | 0.011330 | 0.011229 | 0.011432 | 0.011465 |
| 0.011364 | 0.011432 | 0.011364 | 0.011364 | 0.011297 | 0.011702 | 0.011330 |
| 0.011375 | 0.011297 | 0.011533 | 0.011538 | 0.011398 | 0.011398 | 0.011398 |
| 0.011398 | 0.011330 | 0.011297 | 0.011330 | 0.011432 | 0.011432 | 0.011364 |
| 0.011364 | 0.011499 | 0.011668 | 0.011398 | 0.011601 | 0.011601 | 0.011465 |

|          |          |          |          |          |          |          |
|----------|----------|----------|----------|----------|----------|----------|
| 0.011297 | 0.011364 | 0.011398 | 0.011803 | 0.011364 | 0.011398 | 0.011364 |
| 0.011398 | 0.011330 | 0.011330 | 0.011635 | 0.011533 | 0.011601 | 0.011330 |
| 0.011432 | 0.011499 | 0.011364 | 0.011432 | 0.011398 | 0.011263 | 0.011601 |
| 0.011364 | 0.011330 | 0.011330 | 0.011465 | 0.011330 | 0.011432 | 0.011668 |
| 0.011364 | 0.011744 | 0.011736 | 0.011508 | 0.011173 | 0.011436 | 0.011215 |
| 0.011280 | 0.011723 | 0.011271 | 0.011373 | 0.011256 | 0.011366 | 0.011326 |
| 0.011418 | 0.011126 | 0.011283 | 0.011126 | 0.011168 | 0.011329 | 0.011426 |
| 0.011437 | 0.011296 | 0.011413 | 0.011307 | 0.011365 | 0.011499 | 0.011567 |
| 0.011567 | 0.011432 | 0.011536 | 0.011537 | 0.011674 | 0.011700 | 0.011364 |
| 0.011601 | 0.011465 | 0.011330 | 0.011432 | 0.011229 | 0.011465 | 0.011263 |
| 0.011330 | 0.011330 | 0.011297 | 0.011263 | 0.011297 | 0.011263 | 0.011364 |
| 0.011341 | 0.011342 | 0.011336 | 0.011370 | 0.011508 | 0.011473 | 0.011472 |
| 0.011471 | 0.011398 | 0.011209 | 0.011205 | 0.011333 | 0.011503 | 0.011504 |
| 0.011297 | 0.011367 | 0.011602 | 0.011536 | 0.011500 | 0.011534 | 0.011465 |
| 0.011398 | 0.011465 | 0.011465 | 0.011330 | 0.011939 | 0.011533 | 0.011601 |
| 0.011634 | 0.011669 | 0.011335 | 0.011409 | 0.011297 | 0.011499 | 0.011466 |
| 0.011500 | 0.011533 | 0.011533 | 0.011533 | 0.011654 | 0.011668 | 0.011305 |
| 0.011196 | 0.011200 | 0.011300 | 0.011265 | 0.011370 | 0.011173 | 0.011539 |
| 0.011336 | 0.011368 | 0.011108 | 0.011362 | 0.011331 | 0.011404 | 0.011297 |
| 0.011263 | 0.011263 | 0.011330 | 0.011297 | 0.011499 | 0.011465 | 0.011398 |
| 0.011499 | 0.011567 | 0.011094 | 0.011094 | 0.000000 | 0.000000 | 0.000000 |
| 0.011128 | 0.011330 | 0.011330 | 0.011365 | 0.011499 | 0.011567 | 0.011567 |
| 0.011432 | 0.011536 | 0.011537 | 0.011674 | 0.011700 | 0.011364 | 0.011533 |
| 0.011466 | 0.011466 | 0.011298 | 0.011480 | 0.011410 | 0.011437 | 0.011307 |
| 0.011476 | 0.011703 | 0.011401 | 0.011368 | 0.011263 | 0.011466 | 0.011330 |
| 0.011432 | 0.011364 | 0.011263 | 0.011365 | 0.011465 | 0.011468 | 0.011364 |
| 0.011263 | 0.011196 | 0.011330 | 0.011263 | 0.011195 | 0.011299 | 0.011466 |
| 0.011364 | 0.011297 | 0.011330 | 0.011364 | 0.011330 | 0.011263 | 0.011466 |
| 0.011330 | 0.011364 | 0.011364 | 0.011297 | 0.011364 | 0.011601 | 0.011263 |
| 0.011297 | 0.011702 | 0.011297 | 0.011330 | 0.011297 | 0.011668 | 0.011146 |
| 0.011623 | 0.011230 | 0.011211 | 0.011463 | 0.011549 | 0.011491 | 0.011144 |
| 0.011165 | 0.011465 | 0.011567 | 0.011675 | 0.011534 | 0.011673 | 0.011804 |
| 0.011703 | 0.011741 | 0.011702 | 0.011954 | 0.011668 | 0.012548 | 0.011704 |
| 0.012413 | 0.012214 | 0.012348 | 0.012621 | 0.011668 | 0.011364 | 0.011668 |
| 0.012076 | 0.012044 | 0.011634 | 0.011533 | 0.011601 | 0.011601 | 0.011571 |
| 0.011465 | 0.011470 | 0.011533 | 0.011500 | 0.011872 | 0.011939 | 0.011940 |
| 0.011839 | 0.011906 | 0.012044 | 0.011809 | 0.012110 | 0.012116 | 0.012178 |
| 0.012178 | 0.012212 | 0.012159 | 0.012178 | 0.012179 | 0.011398 | 0.011702 |
| 0.011703 | 0.012277 | 0.011776 | 0.012007 | 0.012448 | 0.011538 | 0.011432 |
| 0.011398 | 0.011398 | 0.011871 | 0.011889 | 0.012011 | 0.011736 | 0.011399 |
| S140     | 0.011737 | 0.011737 | 0.012075 | 0.011838 | 0.011838 | 0.011906 |
| 0.011744 | 0.011676 | 0.011838 | 0.011331 | 0.011398 | 0.011365 | 0.011331 |
| 0.011364 | 0.011533 | 0.011331 | 0.011364 | 0.011432 | 0.011398 | 0.011364 |
| 0.011331 | 0.011364 | 0.011466 | 0.011331 | 0.011365 | 0.011364 | 0.011710 |
| 0.011601 | 0.011364 | 0.011263 | 0.011500 | 0.011432 | 0.011398 | 0.011432 |
| 0.011398 | 0.011500 | 0.011398 | 0.011398 | 0.011432 | 0.011398 | 0.011567 |
| 0.011331 | 0.011398 | 0.011432 | 0.011364 | 0.011466 | 0.011500 | 0.011432 |
| 0.011398 | 0.011567 | 0.011466 | 0.011736 | 0.011398 | 0.011669 | 0.011398 |
| 0.011364 | 0.011466 | 0.011533 | 0.011669 | 0.011770 | 0.011466 | 0.011567 |
| 0.011432 | 0.011500 | 0.011398 | 0.011635 | 0.011872 | 0.011398 | 0.011466 |
| 0.011364 | 0.011466 | 0.011432 | 0.011500 | 0.011432 | 0.011432 | 0.011432 |
| 0.011331 | 0.011364 | 0.011331 | 0.011432 | 0.011398 | 0.011399 | 0.011500 |
| 0.011432 | 0.011398 | 0.011466 | 0.011364 | 0.011500 | 0.011331 | 0.011398 |
| 0.011533 | 0.011500 | 0.011736 | 0.011567 | 0.011398 | 0.011635 | 0.011398 |
| 0.011580 | 0.011809 | 0.011589 | 0.011256 | 0.011247 | 0.011429 | 0.011494 |
| 0.012123 | 0.011417 | 0.011184 | 0.011635 | 0.011601 | 0.011432 | 0.011500 |
| 0.011466 | 0.011432 | 0.011500 | 0.011398 | 0.011500 | 0.011432 | 0.011432 |
| 0.011398 | 0.011500 | 0.011703 | 0.011567 | 0.011466 | 0.011432 | 0.011364 |
| 0.011331 | 0.011331 | 0.011398 | 0.011364 | 0.011567 | 0.011533 | 0.011466 |
| 0.011567 | 0.011635 | 0.011162 | 0.011162 | 0.011128 | 0.011128 | 0.011128 |

|          |          |          |          |          |          |          |
|----------|----------|----------|----------|----------|----------|----------|
| 0.000000 | 0.011398 | 0.011398 | 0.011276 | 0.011350 | 0.011307 | 0.011399 |
| 0.011401 | 0.011336 | 0.011357 | 0.011373 | 0.011300 | 0.011336 | 0.011366 |
| 0.011568 | 0.011407 | 0.011442 | 0.011331 | 0.011339 | 0.011467 | 0.011433 |
| 0.011500 | 0.011433 | 0.011433 | 0.011533 | 0.011466 | 0.011838 | 0.011635 |
| 0.011669 | 0.011533 | 0.011398 | 0.011500 | 0.011297 | 0.011533 | 0.011331 |
| 0.011398 | 0.011398 | 0.011364 | 0.011331 | 0.011364 | 0.011331 | 0.011432 |
| 0.011398 | 0.011500 | 0.011432 | 0.011331 | 0.011433 | 0.011533 | 0.011537 |
| 0.011534 | 0.011432 | 0.011331 | 0.011264 | 0.011398 | 0.011331 | 0.011263 |
| 0.011368 | 0.011534 | 0.011331 | 0.011534 | 0.011297 | 0.011398 | 0.011364 |
| 0.011466 | 0.011364 | 0.011398 | 0.011364 | 0.011398 | 0.011263 | 0.011398 |
| 0.011398 | 0.011364 | 0.011432 | 0.011364 | 0.011398 | 0.011432 | 0.011669 |
| 0.011770 | 0.011703 | 0.011770 | 0.011501 | 0.011770 | 0.011398 | 0.011364 |
| 0.011400 | 0.011672 | 0.011476 | 0.011267 | 0.011778 | 0.011266 | 0.011377 |
| 0.011778 | 0.011608 | 0.011567 | 0.011770 | 0.011473 | 0.011635 | 0.011601 |
| 0.011533 | 0.011703 | 0.011561 | 0.011393 | 0.011356 | 0.011432 | 0.011503 |
| 0.011601 | 0.011502 | 0.011639 | 0.011708 | 0.011635 | 0.011703 | 0.011811 |
| 0.011537 | 0.011710 | 0.011640 | 0.011537 | 0.011806 | 0.011297 | 0.011501 |
| 0.011466 | 0.011398 | 0.011297 | 0.011297 | 0.011364 | 0.011364 | 0.011432 |
| 0.011364 | 0.011432 | 0.011331 | 0.011432 | 0.011364 | 0.011364 | 0.011432 |
| 0.011364 | 0.011804 | 0.011703 | 0.011736 | 0.011263 | 0.011364 | 0.011398 |
| 0.011398 | 0.011364 | 0.011432 | 0.011466 | 0.011331 | 0.011331 | 0.011331 |
| 0.011872 | 0.011500 | 0.011500 | 0.011297 | 0.011398 | 0.011567 | 0.011331 |
| 0.011331 | 0.011398 | 0.011364 | 0.011534 | 0.011331 | 0.011466 | 0.011601 |
| 0.011533 | 0.011364 | 0.011364 | 0.011297 | 0.011297 | 0.011398 | 0.011398 |
| 0.011297 | 0.011398 | 0.011263 | 0.011297 | 0.011432 | 0.011568 | 0.011331 |
| 0.011297 | 0.011432 | 0.011365 | 0.011263 | 0.011601 | 0.011263 | 0.011432 |
| 0.011508 | 0.011331 | 0.011635 | 0.011466 | 0.011500 | 0.011364 | 0.011466 |
| 0.011331 | 0.011669 | 0.011263 | 0.011533 | 0.011331 | 0.011331 | 0.011263 |
| 0.011466 | 0.011635 | 0.011398 | 0.011466 | 0.011297 | 0.011703 | 0.011331 |
| 0.011331 | 0.011331 | 0.011364 | 0.011466 | 0.011364 | 0.011466 | 0.011533 |
| 0.011533 | 0.011500 | 0.011398 | 0.011500 | 0.011466 | 0.011331 | 0.011297 |
| 0.011331 | 0.011331 | 0.011398 | 0.011331 | 0.011297 | 0.011466 | 0.011331 |
| 0.011364 | 0.011364 | 0.011500 | 0.011533 | 0.011432 | 0.011364 | 0.011365 |
| 0.011432 | 0.011364 | 0.011466 | 0.011331 | 0.011432 | 0.011567 | 0.011872 |
| 0.011364 | 0.011770 | 0.011371 | 0.011798 | 0.011192 | 0.011549 | 0.011724 |
| 0.011686 | 0.011730 | 0.011323 | 0.011293 | 0.011829 | 0.011755 | 0.011425 |
| 0.011440 | 0.011671 | 0.011295 | 0.011270 | 0.011256 | 0.011406 | 0.011319 |
| 0.011436 | 0.011508 | 0.011394 | 0.011259 | 0.011500 | 0.011534 | 0.011537 |
| 0.011406 | 0.011500 | 0.011500 | 0.011466 | 0.011432 | 0.011432 | 0.011398 |
| 0.011432 | 0.011364 | 0.011398 | 0.011398 | 0.011398 | 0.011331 | 0.011364 |
| 0.011364 | 0.011432 | 0.011331 | 0.011432 | 0.011466 | 0.011500 | 0.011398 |
| 0.011432 | 0.011398 | 0.011736 | 0.011736 | 0.011466 | 0.011500 | 0.011534 |
| 0.011297 | 0.011297 | 0.011331 | 0.011432 | 0.011297 | 0.011533 | 0.011533 |
| 0.011567 | 0.011567 | 0.011500 | 0.011601 | 0.011770 | 0.011603 | 0.011432 |
| 0.011432 | 0.011500 | 0.011533 | 0.011364 | 0.011432 | 0.011398 | 0.011432 |
| 0.011500 | 0.011500 | 0.011533 | 0.011500 | 0.011399 | 0.011601 | 0.011567 |
| 0.011435 | 0.011331 | 0.011432 | 0.011534 | 0.011432 | 0.011567 | 0.011601 |
| 0.011770 | 0.011473 | 0.011635 | 0.011601 | 0.011533 | 0.011703 | 0.011331 |
| 0.011501 | 0.011399 | 0.011364 | 0.011364 | 0.011432 | 0.011331 | 0.011432 |
| 0.011466 | 0.011500 | 0.011398 | 0.011432 | 0.011398 | 0.011736 | 0.011736 |
| 0.011466 | 0.011500 | 0.011567 | 0.011500 | 0.012144 | 0.011564 | 0.011450 |
| 0.011519 | 0.011514 | 0.011627 | 0.011479 | 0.011624 | 0.011547 | 0.011512 |
| 0.012098 | 0.011409 | 0.011543 | 0.011478 | 0.011754 | 0.011608 | 0.011711 |
| 0.012122 | 0.011592 | 0.011162 | 0.011229 | 0.011162 | 0.011466 | 0.011128 |
| 0.011297 | 0.011331 | 0.011263 | 0.011229 | 0.011162 | 0.011567 | 0.011535 |
| 0.011398 | 0.011331 | 0.011364 | 0.011398 | 0.011297 | 0.011364 | 0.011263 |
| 0.011398 | 0.011432 | 0.011331 | 0.011297 | 0.011398 | 0.011331 | 0.011364 |
| 0.011364 | 0.011297 | 0.011364 | 0.011398 | 0.011297 | 0.011500 | 0.011533 |
| 0.011432 | 0.011500 | 0.011432 | 0.011432 | 0.011297 | 0.011770 | 0.011398 |
| 0.011446 | 0.011365 | 0.011602 | 0.011607 | 0.011466 | 0.011466 | 0.011466 |

|          |          |          |          |          |          |          |
|----------|----------|----------|----------|----------|----------|----------|
| 0.011466 | 0.011398 | 0.011364 | 0.011398 | 0.011500 | 0.011500 | 0.011432 |
| 0.011432 | 0.011567 | 0.011703 | 0.011466 | 0.011669 | 0.011669 | 0.011533 |
| 0.011364 | 0.011432 | 0.011466 | 0.011872 | 0.011432 | 0.011466 | 0.011432 |
| 0.011466 | 0.011398 | 0.011398 | 0.011703 | 0.011601 | 0.011669 | 0.011398 |
| 0.011500 | 0.011533 | 0.011432 | 0.011500 | 0.011466 | 0.011331 | 0.011669 |
| 0.011432 | 0.011398 | 0.011398 | 0.011533 | 0.011398 | 0.011500 | 0.011736 |
| 0.011432 | 0.011813 | 0.011804 | 0.011590 | 0.011173 | 0.011505 | 0.011215 |
| 0.011335 | 0.011801 | 0.011342 | 0.011418 | 0.011305 | 0.011417 | 0.011326 |
| 0.011469 | 0.011126 | 0.011283 | 0.011127 | 0.011168 | 0.011329 | 0.011507 |
| 0.011513 | 0.011376 | 0.011484 | 0.011378 | 0.011433 | 0.011567 | 0.011635 |
| 0.011635 | 0.011500 | 0.011605 | 0.011606 | 0.011743 | 0.011772 | 0.011432 |
| 0.011669 | 0.011533 | 0.011398 | 0.011500 | 0.011297 | 0.011533 | 0.011331 |
| 0.011398 | 0.011398 | 0.011364 | 0.011331 | 0.011364 | 0.011331 | 0.011432 |
| 0.011412 | 0.011413 | 0.011405 | 0.011439 | 0.011577 | 0.011542 | 0.011541 |
| 0.011540 | 0.011466 | 0.011283 | 0.011278 | 0.011401 | 0.011572 | 0.011573 |
| 0.011365 | 0.011435 | 0.011670 | 0.011605 | 0.011568 | 0.011568 | 0.011533 |
| 0.011466 | 0.011533 | 0.011533 | 0.011398 | 0.012007 | 0.011601 | 0.011669 |
| 0.011703 | 0.011742 | 0.011404 | 0.011479 | 0.011364 | 0.011567 | 0.011534 |
| 0.011568 | 0.011601 | 0.011601 | 0.011601 | 0.011694 | 0.011736 | 0.011375 |
| 0.011265 | 0.011269 | 0.011369 | 0.011334 | 0.011439 | 0.011211 | 0.011608 |
| 0.011406 | 0.011412 | 0.011156 | 0.011438 | 0.011399 | 0.011439 | 0.011364 |
| 0.011331 | 0.011331 | 0.011398 | 0.011364 | 0.011567 | 0.011533 | 0.011466 |
| 0.011567 | 0.011635 | 0.011162 | 0.011162 | 0.011128 | 0.011128 | 0.011128 |
| 0.000000 | 0.011398 | 0.011398 | 0.011433 | 0.011567 | 0.011635 | 0.011635 |
| 0.011500 | 0.011605 | 0.011606 | 0.011743 | 0.011772 | 0.011432 | 0.011601 |
| 0.011534 | 0.011534 | 0.011367 | 0.011551 | 0.011480 | 0.011506 | 0.011378 |
| 0.011511 | 0.011750 | 0.011487 | 0.011436 | 0.011331 | 0.011534 | 0.011398 |
| 0.011500 | 0.011432 | 0.011331 | 0.011433 | 0.011533 | 0.011537 | 0.011432 |
| 0.011331 | 0.011264 | 0.011398 | 0.011331 | 0.011263 | 0.011368 | 0.011534 |
| 0.011432 | 0.011364 | 0.011398 | 0.011398 | 0.011398 | 0.011331 | 0.011534 |
| 0.011398 | 0.011432 | 0.011432 | 0.011364 | 0.011432 | 0.011669 | 0.011331 |
| 0.011364 | 0.011770 | 0.011364 | 0.011398 | 0.011364 | 0.011736 | 0.011189 |
| 0.011680 | 0.011316 | 0.011211 | 0.011544 | 0.011631 | 0.011564 | 0.011186 |
| 0.011166 | 0.011533 | 0.011635 | 0.011744 | 0.011602 | 0.011741 | 0.011873 |
| 0.011772 | 0.011810 | 0.011770 | 0.012024 | 0.011736 | 0.012617 | 0.011772 |
| 0.012483 | 0.012283 | 0.012418 | 0.012691 | 0.011736 | 0.011432 | 0.011737 |
| 0.012144 | 0.012113 | 0.011703 | 0.011601 | 0.011670 | 0.011670 | 0.011639 |
| 0.011533 | 0.011538 | 0.011601 | 0.011568 | 0.011940 | 0.012007 | 0.012008 |
| 0.011907 | 0.011974 | 0.012113 | 0.011878 | 0.012179 | 0.012185 | 0.012246 |
| 0.012247 | 0.012281 | 0.012228 | 0.012247 | 0.012249 | 0.011466 | 0.011771 |
| 0.011771 | 0.012346 | 0.011845 | 0.012075 | 0.012518 | 0.011607 | 0.011500 |
| 0.011466 | 0.011466 | 0.011940 | 0.011973 | 0.012082 | 0.011804 | 0.011467 |
| S141     | 0.011665 | 0.011665 | 0.012001 | 0.011765 | 0.011765 | 0.011833 |
| 0.011638 | 0.011570 | 0.011765 | 0.011262 | 0.011329 | 0.011296 | 0.011262 |
| 0.011295 | 0.011463 | 0.011262 | 0.011295 | 0.011362 | 0.011329 | 0.011295 |
| 0.011262 | 0.011295 | 0.011396 | 0.011262 | 0.011295 | 0.011295 | 0.011604 |
| 0.011530 | 0.011295 | 0.011195 | 0.011429 | 0.011362 | 0.011329 | 0.011362 |
| 0.011329 | 0.011430 | 0.011329 | 0.011329 | 0.011362 | 0.011329 | 0.011497 |
| 0.011262 | 0.011329 | 0.011362 | 0.011295 | 0.011396 | 0.011429 | 0.011362 |
| 0.011329 | 0.011497 | 0.011396 | 0.011665 | 0.011329 | 0.011597 | 0.011329 |
| 0.011295 | 0.011396 | 0.011463 | 0.011597 | 0.011698 | 0.011396 | 0.011497 |
| 0.011362 | 0.011430 | 0.011329 | 0.011564 | 0.011799 | 0.011329 | 0.011396 |
| 0.011295 | 0.011396 | 0.011362 | 0.011430 | 0.011362 | 0.011362 | 0.011362 |
| 0.011262 | 0.011295 | 0.011262 | 0.011362 | 0.011329 | 0.011363 | 0.011429 |
| 0.011362 | 0.011329 | 0.011396 | 0.011295 | 0.011429 | 0.011262 | 0.011329 |
| 0.011497 | 0.011429 | 0.011665 | 0.011497 | 0.011262 | 0.011564 | 0.011329 |
| 0.011505 | 0.011733 | 0.011551 | 0.011255 | 0.011247 | 0.011355 | 0.011415 |
| 0.012085 | 0.011518 | 0.011266 | 0.011564 | 0.011564 | 0.011362 | 0.011463 |
| 0.011396 | 0.011362 | 0.011429 | 0.011329 | 0.011430 | 0.011362 | 0.011362 |
| 0.011329 | 0.011429 | 0.011631 | 0.011497 | 0.011396 | 0.011363 | 0.011295 |

|          |          |          |          |          |          |          |
|----------|----------|----------|----------|----------|----------|----------|
| 0.011262 | 0.011262 | 0.011329 | 0.011295 | 0.011497 | 0.011463 | 0.011396 |
| 0.011497 | 0.011564 | 0.011295 | 0.011295 | 0.011329 | 0.011329 | 0.011330 |
| 0.011398 | 0.000000 | 0.011329 | 0.011204 | 0.011277 | 0.011236 | 0.011329 |
| 0.011331 | 0.011266 | 0.011318 | 0.011302 | 0.011230 | 0.011266 | 0.011297 |
| 0.011564 | 0.011336 | 0.011370 | 0.011262 | 0.011268 | 0.011397 | 0.011363 |
| 0.011430 | 0.011363 | 0.011363 | 0.011463 | 0.011396 | 0.011766 | 0.011564 |
| 0.011597 | 0.011463 | 0.011329 | 0.011430 | 0.011228 | 0.011463 | 0.011262 |
| 0.011329 | 0.011329 | 0.011295 | 0.011262 | 0.011295 | 0.011262 | 0.011362 |
| 0.011329 | 0.011429 | 0.011362 | 0.011262 | 0.011363 | 0.011463 | 0.011466 |
| 0.011463 | 0.011362 | 0.011262 | 0.011195 | 0.011329 | 0.011262 | 0.011195 |
| 0.011298 | 0.011463 | 0.011262 | 0.011463 | 0.011228 | 0.011329 | 0.011295 |
| 0.011329 | 0.011295 | 0.011262 | 0.011295 | 0.011329 | 0.011195 | 0.011329 |
| 0.011362 | 0.011295 | 0.011362 | 0.011295 | 0.011329 | 0.011362 | 0.011597 |
| 0.011698 | 0.011631 | 0.011698 | 0.011465 | 0.011698 | 0.011329 | 0.011295 |
| 0.011330 | 0.011586 | 0.011289 | 0.011232 | 0.011705 | 0.011163 | 0.011296 |
| 0.011671 | 0.011604 | 0.011497 | 0.011698 | 0.011368 | 0.011564 | 0.011530 |
| 0.011463 | 0.011631 | 0.011487 | 0.011349 | 0.011396 | 0.011363 | 0.011432 |
| 0.011530 | 0.011431 | 0.011567 | 0.011636 | 0.011564 | 0.011631 | 0.011670 |
| 0.011466 | 0.011637 | 0.011568 | 0.011500 | 0.011767 | 0.011228 | 0.011431 |
| 0.011329 | 0.011329 | 0.011228 | 0.011228 | 0.011295 | 0.011295 | 0.011362 |
| 0.011295 | 0.011362 | 0.011262 | 0.011362 | 0.011295 | 0.011295 | 0.011362 |
| 0.011295 | 0.011732 | 0.011631 | 0.011665 | 0.011195 | 0.011295 | 0.011329 |
| 0.011329 | 0.011295 | 0.011362 | 0.011396 | 0.011262 | 0.011262 | 0.011262 |
| 0.011799 | 0.011430 | 0.011430 | 0.011228 | 0.011329 | 0.011497 | 0.011262 |
| 0.011262 | 0.011329 | 0.011295 | 0.011463 | 0.011262 | 0.011396 | 0.011530 |
| 0.011463 | 0.011295 | 0.011295 | 0.011228 | 0.011228 | 0.011396 | 0.011329 |
| 0.011228 | 0.011329 | 0.011195 | 0.011228 | 0.011362 | 0.011497 | 0.011262 |
| 0.011228 | 0.011362 | 0.011296 | 0.011195 | 0.011530 | 0.011195 | 0.011362 |
| 0.011437 | 0.011262 | 0.011564 | 0.011396 | 0.011430 | 0.011295 | 0.011396 |
| 0.011262 | 0.011597 | 0.011195 | 0.011463 | 0.011262 | 0.011262 | 0.011195 |
| 0.011429 | 0.011631 | 0.011329 | 0.011396 | 0.011228 | 0.011631 | 0.011262 |
| 0.011262 | 0.011262 | 0.011295 | 0.011396 | 0.011295 | 0.011396 | 0.011463 |
| 0.011463 | 0.011430 | 0.011329 | 0.011430 | 0.011396 | 0.011262 | 0.011228 |
| 0.011262 | 0.011262 | 0.011329 | 0.011262 | 0.011228 | 0.011396 | 0.011262 |
| 0.011295 | 0.011295 | 0.011430 | 0.011463 | 0.011362 | 0.011295 | 0.011295 |
| 0.011362 | 0.011295 | 0.011396 | 0.011262 | 0.011396 | 0.011497 | 0.011799 |
| 0.011295 | 0.011698 | 0.011302 | 0.017823 | 0.011322 | 0.011488 | 0.011653 |
| 0.011614 | 0.011658 | 0.011427 | 0.011350 | 0.011774 | 0.011682 | 0.011425 |
| 0.011535 | 0.011610 | 0.011177 | 0.011311 | 0.011294 | 0.011356 | 0.011318 |
| 0.011529 | 0.011470 | 0.011468 | 0.011259 | 0.011430 | 0.011463 | 0.011466 |
| 0.011335 | 0.011429 | 0.011429 | 0.011396 | 0.011362 | 0.011363 | 0.011329 |
| 0.011362 | 0.011295 | 0.011329 | 0.011362 | 0.011329 | 0.011262 | 0.011295 |
| 0.011295 | 0.011362 | 0.011262 | 0.011362 | 0.011396 | 0.011429 | 0.011329 |
| 0.011362 | 0.011329 | 0.011665 | 0.011665 | 0.011396 | 0.011430 | 0.011463 |
| 0.011228 | 0.011228 | 0.011262 | 0.011362 | 0.011228 | 0.011463 | 0.011463 |
| 0.011497 | 0.011497 | 0.011430 | 0.011530 | 0.011698 | 0.011532 | 0.011362 |
| 0.011362 | 0.011429 | 0.011463 | 0.011295 | 0.011362 | 0.011329 | 0.011362 |
| 0.011430 | 0.011430 | 0.011463 | 0.011430 | 0.011330 | 0.011463 | 0.011497 |
| 0.011365 | 0.011262 | 0.011362 | 0.011463 | 0.011362 | 0.011497 | 0.011530 |
| 0.011698 | 0.011368 | 0.011564 | 0.011530 | 0.011463 | 0.011631 | 0.011262 |
| 0.011431 | 0.011329 | 0.011295 | 0.011295 | 0.011362 | 0.011262 | 0.011362 |
| 0.011396 | 0.011429 | 0.011329 | 0.011362 | 0.011329 | 0.011665 | 0.011665 |
| 0.011396 | 0.011430 | 0.011497 | 0.011429 | 0.012070 | 0.011489 | 0.011412 |
| 0.011482 | 0.011442 | 0.011552 | 0.011441 | 0.011550 | 0.011474 | 0.011440 |
| 0.012022 | 0.011337 | 0.011471 | 0.011406 | 0.011680 | 0.011536 | 0.011639 |
| 0.012046 | 0.011512 | 0.011365 | 0.011362 | 0.011362 | 0.011396 | 0.011331 |
| 0.011228 | 0.011262 | 0.011396 | 0.011362 | 0.011364 | 0.011497 | 0.011464 |
| 0.011329 | 0.011262 | 0.011295 | 0.011329 | 0.011228 | 0.011295 | 0.011195 |
| 0.011329 | 0.011362 | 0.011262 | 0.011228 | 0.011329 | 0.011262 | 0.011295 |
| 0.011295 | 0.011228 | 0.011295 | 0.011329 | 0.011228 | 0.011430 | 0.011463 |

|          |          |          |          |          |          |          |
|----------|----------|----------|----------|----------|----------|----------|
| 0.011362 | 0.011430 | 0.011362 | 0.011362 | 0.011295 | 0.011698 | 0.011329 |
| 0.011373 | 0.011295 | 0.011531 | 0.011535 | 0.011396 | 0.011396 | 0.011396 |
| 0.011396 | 0.011329 | 0.011295 | 0.011329 | 0.011430 | 0.011430 | 0.011362 |
| 0.011362 | 0.011497 | 0.011665 | 0.011396 | 0.011598 | 0.011598 | 0.011463 |
| 0.011295 | 0.011362 | 0.011396 | 0.011799 | 0.011363 | 0.011396 | 0.011362 |
| 0.011396 | 0.011329 | 0.011329 | 0.011631 | 0.011564 | 0.011598 | 0.011329 |
| 0.011430 | 0.011429 | 0.011362 | 0.011430 | 0.011396 | 0.011262 | 0.011597 |
| 0.011362 | 0.011329 | 0.011329 | 0.011497 | 0.011329 | 0.011429 | 0.011665 |
| 0.011362 | 0.011706 | 0.011732 | 0.011548 | 0.011286 | 0.011434 | 0.011267 |
| 0.011335 | 0.011761 | 0.011271 | 0.011507 | 0.011304 | 0.011417 | 0.011326 |
| 0.011519 | 0.011258 | 0.011394 | 0.011258 | 0.011276 | 0.011462 | 0.011385 |
| 0.011399 | 0.011296 | 0.011412 | 0.011342 | 0.011364 | 0.011497 | 0.011564 |
| 0.011564 | 0.011430 | 0.011533 | 0.011535 | 0.011670 | 0.011661 | 0.011362 |
| 0.011597 | 0.011463 | 0.011329 | 0.011430 | 0.011228 | 0.011463 | 0.011262 |
| 0.011329 | 0.011329 | 0.011295 | 0.011262 | 0.011295 | 0.011262 | 0.011362 |
| 0.011340 | 0.011340 | 0.011334 | 0.011368 | 0.011505 | 0.011470 | 0.011470 |
| 0.011469 | 0.011396 | 0.011208 | 0.011204 | 0.011331 | 0.011433 | 0.011501 |
| 0.011296 | 0.011365 | 0.011599 | 0.011567 | 0.011497 | 0.011531 | 0.011463 |
| 0.011396 | 0.011463 | 0.011463 | 0.011362 | 0.011934 | 0.011530 | 0.011598 |
| 0.011631 | 0.011701 | 0.011333 | 0.011407 | 0.011295 | 0.011497 | 0.011463 |
| 0.011498 | 0.011530 | 0.011530 | 0.011530 | 0.011650 | 0.011665 | 0.011303 |
| 0.011196 | 0.011199 | 0.011299 | 0.011264 | 0.011368 | 0.011210 | 0.011536 |
| 0.011335 | 0.011499 | 0.011203 | 0.011360 | 0.011329 | 0.011402 | 0.011295 |
| 0.011262 | 0.011262 | 0.011329 | 0.011295 | 0.011497 | 0.011463 | 0.011396 |
| 0.011497 | 0.011564 | 0.011295 | 0.011295 | 0.011329 | 0.011329 | 0.011330 |
| 0.011398 | 0.000000 | 0.011329 | 0.011364 | 0.011497 | 0.011564 | 0.011564 |
| 0.011430 | 0.011533 | 0.011535 | 0.011670 | 0.011661 | 0.011362 | 0.011530 |
| 0.011463 | 0.011463 | 0.011297 | 0.011478 | 0.011408 | 0.011435 | 0.011305 |
| 0.011473 | 0.011652 | 0.011441 | 0.011366 | 0.011262 | 0.011463 | 0.011329 |
| 0.011429 | 0.011362 | 0.011262 | 0.011363 | 0.011463 | 0.011466 | 0.011362 |
| 0.011262 | 0.011195 | 0.011329 | 0.011262 | 0.011195 | 0.011298 | 0.011463 |
| 0.011362 | 0.011295 | 0.011329 | 0.011362 | 0.011329 | 0.011262 | 0.011463 |
| 0.011329 | 0.011362 | 0.011362 | 0.011295 | 0.011362 | 0.011598 | 0.011262 |
| 0.011295 | 0.011698 | 0.011295 | 0.011329 | 0.011295 | 0.011665 | 0.011274 |
| 0.011791 | 0.011273 | 0.011311 | 0.011503 | 0.011589 | 0.011491 | 0.011227 |
| 0.011270 | 0.011463 | 0.011564 | 0.011671 | 0.011531 | 0.011669 | 0.011800 |
| 0.011699 | 0.011737 | 0.011698 | 0.011880 | 0.011665 | 0.012472 | 0.011700 |
| 0.012439 | 0.012207 | 0.012307 | 0.012612 | 0.011665 | 0.011362 | 0.011665 |
| 0.012103 | 0.012038 | 0.011631 | 0.011463 | 0.011598 | 0.011598 | 0.011500 |
| 0.011463 | 0.011467 | 0.011530 | 0.011464 | 0.011867 | 0.011934 | 0.011935 |
| 0.011834 | 0.011934 | 0.012038 | 0.011804 | 0.012104 | 0.012110 | 0.012171 |
| 0.012172 | 0.012205 | 0.012152 | 0.012172 | 0.012173 | 0.011396 | 0.011699 |
| 0.011766 | 0.012270 | 0.011772 | 0.012001 | 0.012474 | 0.011536 | 0.011430 |
| 0.011396 | 0.011396 | 0.011867 | 0.011924 | 0.012010 | 0.011732 | 0.011397 |
| S142     | 0.011665 | 0.011665 | 0.012001 | 0.011765 | 0.011765 | 0.011833 |
| 0.011672 | 0.011604 | 0.011765 | 0.011262 | 0.011329 | 0.011296 | 0.011262 |
| 0.011295 | 0.011463 | 0.011262 | 0.011295 | 0.011362 | 0.011329 | 0.011295 |
| 0.011262 | 0.011295 | 0.011396 | 0.011262 | 0.011296 | 0.011295 | 0.011638 |
| 0.011530 | 0.011295 | 0.011195 | 0.011429 | 0.011362 | 0.011329 | 0.011362 |
| 0.011329 | 0.011430 | 0.011329 | 0.011329 | 0.011362 | 0.011329 | 0.011497 |
| 0.011262 | 0.011329 | 0.011362 | 0.011295 | 0.011396 | 0.011430 | 0.011362 |
| 0.011329 | 0.011497 | 0.011396 | 0.011665 | 0.011329 | 0.011597 | 0.011329 |
| 0.011295 | 0.011396 | 0.011463 | 0.011597 | 0.011698 | 0.011396 | 0.011497 |
| 0.011362 | 0.011430 | 0.011329 | 0.011564 | 0.011799 | 0.011329 | 0.011396 |
| 0.011295 | 0.011396 | 0.011362 | 0.011430 | 0.011362 | 0.011362 | 0.011362 |
| 0.011262 | 0.011295 | 0.011262 | 0.011362 | 0.011329 | 0.011363 | 0.011429 |
| 0.011362 | 0.011329 | 0.011396 | 0.011295 | 0.011429 | 0.011262 | 0.011329 |
| 0.011497 | 0.011429 | 0.011665 | 0.011497 | 0.011329 | 0.011564 | 0.011329 |
| 0.011505 | 0.011733 | 0.011551 | 0.011255 | 0.011247 | 0.011355 | 0.011454 |
| 0.012085 | 0.011518 | 0.011266 | 0.011564 | 0.011564 | 0.011362 | 0.011463 |

|          |          |          |          |          |          |          |
|----------|----------|----------|----------|----------|----------|----------|
| 0.011396 | 0.011362 | 0.011429 | 0.011329 | 0.011430 | 0.011362 | 0.011362 |
| 0.011329 | 0.011429 | 0.011631 | 0.011497 | 0.011396 | 0.011363 | 0.011295 |
| 0.011262 | 0.011262 | 0.011329 | 0.011295 | 0.011497 | 0.011463 | 0.011396 |
| 0.011497 | 0.011564 | 0.011295 | 0.011295 | 0.011329 | 0.011329 | 0.011330 |
| 0.011398 | 0.011329 | 0.000000 | 0.011204 | 0.011277 | 0.011236 | 0.011329 |
| 0.011331 | 0.011266 | 0.011318 | 0.011302 | 0.011230 | 0.011266 | 0.011297 |
| 0.011564 | 0.011336 | 0.011370 | 0.011262 | 0.011268 | 0.011397 | 0.011363 |
| 0.011430 | 0.011363 | 0.011363 | 0.011463 | 0.011396 | 0.011766 | 0.011564 |
| 0.011597 | 0.011463 | 0.011329 | 0.011430 | 0.011228 | 0.011463 | 0.011262 |
| 0.011329 | 0.011329 | 0.011295 | 0.011262 | 0.011295 | 0.011262 | 0.011094 |
| 0.011329 | 0.011430 | 0.011362 | 0.011262 | 0.011363 | 0.011463 | 0.011466 |
| 0.011463 | 0.011362 | 0.011262 | 0.011195 | 0.011329 | 0.011262 | 0.011195 |
| 0.011298 | 0.011463 | 0.011262 | 0.011463 | 0.011228 | 0.011329 | 0.011295 |
| 0.011396 | 0.011295 | 0.011329 | 0.011295 | 0.011329 | 0.011195 | 0.011329 |
| 0.011362 | 0.011295 | 0.011362 | 0.011295 | 0.011329 | 0.011362 | 0.011597 |
| 0.011698 | 0.011631 | 0.011698 | 0.011465 | 0.011698 | 0.011329 | 0.011295 |
| 0.011330 | 0.011586 | 0.011426 | 0.011232 | 0.011705 | 0.011163 | 0.011257 |
| 0.011705 | 0.011570 | 0.011497 | 0.011698 | 0.011402 | 0.011564 | 0.011530 |
| 0.011463 | 0.011631 | 0.011487 | 0.011349 | 0.011396 | 0.011363 | 0.011433 |
| 0.011530 | 0.011431 | 0.011568 | 0.011636 | 0.011564 | 0.011631 | 0.011738 |
| 0.011466 | 0.011637 | 0.011568 | 0.011500 | 0.011767 | 0.011228 | 0.011431 |
| 0.011396 | 0.011329 | 0.011228 | 0.011228 | 0.011295 | 0.011295 | 0.011362 |
| 0.011295 | 0.011362 | 0.011262 | 0.011362 | 0.011295 | 0.011295 | 0.011362 |
| 0.011295 | 0.011732 | 0.011631 | 0.011665 | 0.011195 | 0.011295 | 0.011329 |
| 0.011329 | 0.011295 | 0.011362 | 0.011396 | 0.011262 | 0.011262 | 0.011262 |
| 0.011799 | 0.011430 | 0.011430 | 0.011228 | 0.011329 | 0.011497 | 0.011262 |
| 0.011262 | 0.011329 | 0.011295 | 0.011463 | 0.011262 | 0.011396 | 0.011530 |
| 0.011463 | 0.011295 | 0.011295 | 0.011228 | 0.011228 | 0.011396 | 0.011329 |
| 0.011228 | 0.011329 | 0.011195 | 0.011228 | 0.011362 | 0.011497 | 0.011262 |
| 0.011161 | 0.011362 | 0.011296 | 0.011195 | 0.011530 | 0.011195 | 0.011295 |
| 0.011437 | 0.011262 | 0.011564 | 0.011396 | 0.011430 | 0.011295 | 0.011396 |
| 0.011262 | 0.011597 | 0.011195 | 0.011463 | 0.011262 | 0.011262 | 0.011195 |
| 0.011430 | 0.011631 | 0.011329 | 0.011396 | 0.011228 | 0.011631 | 0.011262 |
| 0.011262 | 0.011262 | 0.011295 | 0.011396 | 0.011295 | 0.011396 | 0.011463 |
| 0.011463 | 0.011430 | 0.011329 | 0.011430 | 0.011396 | 0.011262 | 0.011228 |
| 0.011262 | 0.011262 | 0.011329 | 0.011262 | 0.011228 | 0.011396 | 0.011262 |
| 0.011295 | 0.011295 | 0.011430 | 0.011463 | 0.011362 | 0.011295 | 0.011295 |
| 0.011362 | 0.011295 | 0.011396 | 0.011262 | 0.011396 | 0.011497 | 0.011799 |
| 0.011295 | 0.011698 | 0.011302 | 0.017823 | 0.011322 | 0.011549 | 0.011653 |
| 0.011614 | 0.011658 | 0.011322 | 0.011292 | 0.011774 | 0.011682 | 0.011425 |
| 0.011582 | 0.011610 | 0.011216 | 0.011311 | 0.011294 | 0.011307 | 0.011318 |
| 0.011529 | 0.011470 | 0.011468 | 0.011325 | 0.011430 | 0.011463 | 0.011466 |
| 0.011335 | 0.011430 | 0.011430 | 0.011396 | 0.011362 | 0.011363 | 0.011329 |
| 0.011362 | 0.011295 | 0.011329 | 0.011295 | 0.011329 | 0.011262 | 0.011295 |
| 0.011295 | 0.011362 | 0.011262 | 0.011362 | 0.011396 | 0.011430 | 0.011329 |
| 0.011362 | 0.011329 | 0.011665 | 0.011665 | 0.011396 | 0.011430 | 0.011463 |
| 0.011228 | 0.011228 | 0.011262 | 0.011362 | 0.011228 | 0.011463 | 0.011463 |
| 0.011497 | 0.011497 | 0.011430 | 0.011530 | 0.011698 | 0.011532 | 0.011362 |
| 0.011362 | 0.011430 | 0.011463 | 0.011295 | 0.011362 | 0.011329 | 0.011362 |
| 0.011430 | 0.011430 | 0.011463 | 0.011430 | 0.011330 | 0.011530 | 0.011497 |
| 0.011365 | 0.011262 | 0.011362 | 0.011463 | 0.011362 | 0.011497 | 0.011530 |
| 0.011698 | 0.011402 | 0.011564 | 0.011530 | 0.011463 | 0.011631 | 0.011262 |
| 0.011431 | 0.011329 | 0.011295 | 0.011295 | 0.011362 | 0.011262 | 0.011362 |
| 0.011396 | 0.011430 | 0.011329 | 0.011362 | 0.011329 | 0.011665 | 0.011665 |
| 0.011396 | 0.011430 | 0.011497 | 0.011430 | 0.012070 | 0.011489 | 0.011412 |
| 0.011482 | 0.011442 | 0.011552 | 0.011441 | 0.011550 | 0.011474 | 0.011440 |
| 0.012022 | 0.011337 | 0.011471 | 0.011406 | 0.011680 | 0.011537 | 0.011639 |
| 0.012047 | 0.011512 | 0.011365 | 0.011362 | 0.011362 | 0.011396 | 0.011331 |
| 0.011228 | 0.011262 | 0.011396 | 0.011362 | 0.011364 | 0.011497 | 0.011464 |
| 0.011329 | 0.011262 | 0.011295 | 0.011329 | 0.011228 | 0.011295 | 0.011195 |



|          |          |          |          |          |          |          |
|----------|----------|----------|----------|----------|----------|----------|
| 0.011329 | 0.011362 | 0.011262 | 0.011228 | 0.011329 | 0.011262 | 0.011295 |
| 0.011295 | 0.011228 | 0.011295 | 0.011329 | 0.011228 | 0.011430 | 0.011463 |
| 0.011362 | 0.011430 | 0.011362 | 0.011362 | 0.011295 | 0.011698 | 0.011329 |
| 0.011373 | 0.011295 | 0.011531 | 0.011535 | 0.011396 | 0.011396 | 0.011396 |
| 0.011396 | 0.011329 | 0.011295 | 0.011329 | 0.011430 | 0.011430 | 0.011362 |
| 0.011362 | 0.011497 | 0.011665 | 0.011396 | 0.011530 | 0.011530 | 0.011463 |
| 0.011295 | 0.011362 | 0.011396 | 0.011799 | 0.011363 | 0.011396 | 0.011362 |
| 0.011396 | 0.011329 | 0.011329 | 0.011631 | 0.011564 | 0.011598 | 0.011329 |
| 0.011430 | 0.011497 | 0.011362 | 0.011430 | 0.011396 | 0.011262 | 0.011597 |
| 0.011362 | 0.011329 | 0.011329 | 0.011497 | 0.011329 | 0.011430 | 0.011665 |
| 0.011362 | 0.011740 | 0.011732 | 0.011548 | 0.011286 | 0.011434 | 0.011267 |
| 0.011280 | 0.011761 | 0.011271 | 0.011507 | 0.011353 | 0.011467 | 0.011485 |
| 0.011519 | 0.011324 | 0.011394 | 0.011258 | 0.011330 | 0.011328 | 0.011425 |
| 0.011437 | 0.011336 | 0.011412 | 0.011342 | 0.011094 | 0.011497 | 0.011564 |
| 0.011564 | 0.011430 | 0.011533 | 0.011535 | 0.011670 | 0.011626 | 0.011329 |
| 0.011597 | 0.011463 | 0.011329 | 0.011430 | 0.011228 | 0.011463 | 0.011262 |
| 0.011329 | 0.011329 | 0.011295 | 0.011262 | 0.011295 | 0.011262 | 0.011094 |
| 0.011340 | 0.011340 | 0.011334 | 0.011368 | 0.011505 | 0.011470 | 0.011470 |
| 0.011469 | 0.011396 | 0.011134 | 0.011168 | 0.011331 | 0.011501 | 0.011501 |
| 0.011296 | 0.011365 | 0.011599 | 0.011567 | 0.011497 | 0.011531 | 0.011463 |
| 0.011396 | 0.011463 | 0.011463 | 0.011362 | 0.011934 | 0.011530 | 0.011598 |
| 0.011631 | 0.011701 | 0.011333 | 0.011407 | 0.011295 | 0.011497 | 0.011463 |
| 0.011498 | 0.011530 | 0.011530 | 0.011530 | 0.011650 | 0.011665 | 0.011303 |
| 0.011196 | 0.011199 | 0.011299 | 0.011264 | 0.011368 | 0.011210 | 0.011536 |
| 0.011335 | 0.011411 | 0.011108 | 0.011360 | 0.011329 | 0.011402 | 0.011295 |
| 0.011262 | 0.011262 | 0.011329 | 0.011295 | 0.011497 | 0.011463 | 0.011396 |
| 0.011497 | 0.011564 | 0.011295 | 0.011295 | 0.011329 | 0.011329 | 0.011330 |
| 0.011398 | 0.011329 | 0.000000 | 0.011094 | 0.011497 | 0.011564 | 0.011564 |
| 0.011430 | 0.011533 | 0.011535 | 0.011670 | 0.011626 | 0.011329 | 0.011530 |
| 0.011463 | 0.011463 | 0.011297 | 0.011478 | 0.011408 | 0.011435 | 0.011270 |
| 0.011439 | 0.011698 | 0.011399 | 0.011366 | 0.011262 | 0.011463 | 0.011329 |
| 0.011430 | 0.011362 | 0.011262 | 0.011363 | 0.011463 | 0.011466 | 0.011362 |
| 0.011262 | 0.011195 | 0.011329 | 0.011262 | 0.011195 | 0.011298 | 0.011463 |
| 0.011362 | 0.011295 | 0.011329 | 0.011295 | 0.011329 | 0.011262 | 0.011463 |
| 0.011329 | 0.011362 | 0.011362 | 0.011295 | 0.011362 | 0.011598 | 0.011262 |
| 0.011295 | 0.011698 | 0.011295 | 0.011329 | 0.011295 | 0.011665 | 0.011274 |
| 0.011735 | 0.011273 | 0.011311 | 0.011503 | 0.011589 | 0.011491 | 0.011227 |
| 0.011270 | 0.011463 | 0.011564 | 0.011671 | 0.011531 | 0.011669 | 0.011800 |
| 0.011699 | 0.011737 | 0.011698 | 0.011949 | 0.011665 | 0.012506 | 0.011700 |
| 0.012439 | 0.012173 | 0.012307 | 0.012612 | 0.011665 | 0.011362 | 0.011665 |
| 0.012103 | 0.012038 | 0.011631 | 0.011531 | 0.011598 | 0.011598 | 0.011568 |
| 0.011463 | 0.011467 | 0.011530 | 0.011497 | 0.011867 | 0.011934 | 0.011935 |
| 0.011834 | 0.011934 | 0.012038 | 0.011804 | 0.012104 | 0.012110 | 0.012171 |
| 0.012172 | 0.012205 | 0.012152 | 0.012172 | 0.012173 | 0.011396 | 0.011699 |
| 0.011766 | 0.012270 | 0.011772 | 0.012001 | 0.012474 | 0.011536 | 0.011430 |
| 0.011396 | 0.011396 | 0.011867 | 0.011924 | 0.012010 | 0.011732 | 0.011397 |
| S143     | 0.011564 | 0.011564 | 0.011672 | 0.011636 | 0.011636 | 0.011672 |
| 0.011533 | 0.011424 | 0.011636 | 0.011096 | 0.011204 | 0.011168 | 0.011132 |
| 0.011168 | 0.011348 | 0.011132 | 0.011168 | 0.011240 | 0.011204 | 0.011168 |
| 0.011132 | 0.011168 | 0.011276 | 0.011132 | 0.011132 | 0.011168 | 0.011497 |
| 0.011420 | 0.011168 | 0.000000 | 0.011312 | 0.011168 | 0.011204 | 0.011096 |
| 0.011168 | 0.011276 | 0.011204 | 0.011204 | 0.011240 | 0.011204 | 0.011384 |
| 0.011132 | 0.011204 | 0.011240 | 0.011168 | 0.011276 | 0.011312 | 0.011204 |
| 0.011204 | 0.011384 | 0.011276 | 0.011528 | 0.011204 | 0.011456 | 0.011204 |
| 0.011168 | 0.011276 | 0.011348 | 0.011456 | 0.011528 | 0.011240 | 0.011384 |
| 0.011204 | 0.011276 | 0.011204 | 0.011384 | 0.011600 | 0.011204 | 0.011276 |
| 0.011168 | 0.011276 | 0.011204 | 0.011312 | 0.011204 | 0.011240 | 0.011240 |
| 0.011132 | 0.011168 | 0.011096 | 0.011204 | 0.011204 | 0.011204 | 0.011312 |
| 0.011240 | 0.011168 | 0.011240 | 0.011132 | 0.011312 | 0.011096 | 0.011168 |
| 0.011348 | 0.011276 | 0.011492 | 0.011312 | 0.011204 | 0.011420 | 0.011204 |

|          |          |          |          |          |          |          |
|----------|----------|----------|----------|----------|----------|----------|
| 0.011331 | 0.011567 | 0.011372 | 0.011101 | 0.011099 | 0.011175 | 0.011305 |
| 0.011891 | 0.011376 | 0.011103 | 0.011456 | 0.011456 | 0.011240 | 0.011276 |
| 0.011276 | 0.011240 | 0.011312 | 0.011204 | 0.011312 | 0.011204 | 0.011240 |
| 0.011204 | 0.011276 | 0.011528 | 0.011384 | 0.011276 | 0.011240 | 0.011132 |
| 0.011132 | 0.011132 | 0.011168 | 0.011168 | 0.011384 | 0.011348 | 0.011276 |
| 0.011384 | 0.011456 | 0.011168 | 0.011168 | 0.011204 | 0.011204 | 0.011204 |
| 0.011276 | 0.011204 | 0.011204 | 0.000000 | 0.011134 | 0.011097 | 0.011204 |
| 0.011204 | 0.011132 | 0.011175 | 0.011168 | 0.011096 | 0.011132 | 0.011168 |
| 0.011425 | 0.011168 | 0.011205 | 0.011132 | 0.011132 | 0.011276 | 0.011240 |
| 0.011312 | 0.011240 | 0.011240 | 0.011276 | 0.011276 | 0.011600 | 0.011420 |
| 0.011492 | 0.011312 | 0.011204 | 0.011312 | 0.011096 | 0.011348 | 0.011132 |
| 0.011168 | 0.011204 | 0.011168 | 0.011132 | 0.011132 | 0.011132 | 0.011240 |
| 0.011132 | 0.011276 | 0.011240 | 0.011096 | 0.011241 | 0.011348 | 0.011314 |
| 0.011312 | 0.011240 | 0.011132 | 0.000000 | 0.011204 | 0.011132 | 0.000000 |
| 0.011169 | 0.011312 | 0.011096 | 0.011312 | 0.011096 | 0.011168 | 0.011168 |
| 0.011240 | 0.011168 | 0.011168 | 0.011168 | 0.011204 | 0.000000 | 0.011168 |
| 0.011168 | 0.011168 | 0.011240 | 0.011168 | 0.011204 | 0.011240 | 0.011492 |
| 0.011528 | 0.011420 | 0.011528 | 0.011349 | 0.011564 | 0.011204 | 0.011168 |
| 0.011205 | 0.011493 | 0.011307 | 0.011097 | 0.011569 | 0.000000 | 0.011187 |
| 0.011570 | 0.011496 | 0.011348 | 0.011600 | 0.011243 | 0.011456 | 0.011384 |
| 0.011348 | 0.011528 | 0.011362 | 0.011193 | 0.011238 | 0.011240 | 0.011314 |
| 0.011420 | 0.011313 | 0.011423 | 0.011495 | 0.011384 | 0.011528 | 0.011641 |
| 0.011348 | 0.011495 | 0.011420 | 0.011384 | 0.011672 | 0.011096 | 0.011312 |
| 0.011204 | 0.011204 | 0.011096 | 0.000000 | 0.011132 | 0.011168 | 0.011240 |
| 0.011132 | 0.011204 | 0.011096 | 0.011240 | 0.011132 | 0.011168 | 0.011240 |
| 0.011168 | 0.011600 | 0.011456 | 0.011492 | 0.000000 | 0.011168 | 0.011204 |
| 0.011204 | 0.011168 | 0.011204 | 0.011276 | 0.011132 | 0.011132 | 0.011132 |
| 0.011672 | 0.011276 | 0.011312 | 0.011096 | 0.011204 | 0.011348 | 0.011096 |
| 0.011096 | 0.011168 | 0.011168 | 0.011312 | 0.011132 | 0.011276 | 0.011348 |
| 0.011348 | 0.011132 | 0.011168 | 0.000000 | 0.011096 | 0.011204 | 0.011204 |
| 0.000000 | 0.011168 | 0.000000 | 0.011096 | 0.011240 | 0.011384 | 0.011132 |
| 0.011096 | 0.011240 | 0.011168 | 0.000000 | 0.011384 | 0.000000 | 0.011240 |
| 0.011280 | 0.011132 | 0.011420 | 0.011240 | 0.011312 | 0.011168 | 0.011276 |
| 0.011132 | 0.011456 | 0.000000 | 0.011276 | 0.011132 | 0.011132 | 0.000000 |
| 0.011168 | 0.011528 | 0.011204 | 0.011276 | 0.011096 | 0.011456 | 0.011132 |
| 0.011132 | 0.011132 | 0.011168 | 0.011240 | 0.011168 | 0.011276 | 0.011312 |
| 0.011312 | 0.011312 | 0.011204 | 0.011276 | 0.011240 | 0.011132 | 0.011096 |
| 0.011132 | 0.011132 | 0.011204 | 0.011132 | 0.000000 | 0.011276 | 0.011132 |
| 0.011168 | 0.011168 | 0.011240 | 0.011348 | 0.011240 | 0.011132 | 0.011168 |
| 0.011240 | 0.011096 | 0.011276 | 0.011132 | 0.011276 | 0.011384 | 0.011600 |
| 0.011168 | 0.011564 | 0.011169 | 0.017794 | 0.011127 | 0.011250 | 0.011499 |
| 0.011463 | 0.011499 | 0.011169 | 0.011181 | 0.011634 | 0.011536 | 0.011249 |
| 0.011405 | 0.011439 | 0.000000 | 0.011147 | 0.011141 | 0.011215 | 0.011105 |
| 0.011401 | 0.011329 | 0.011328 | 0.011128 | 0.011276 | 0.011348 | 0.011350 |
| 0.011170 | 0.011240 | 0.011312 | 0.011276 | 0.011240 | 0.011240 | 0.011204 |
| 0.011240 | 0.011168 | 0.011204 | 0.011240 | 0.011168 | 0.011132 | 0.011168 |
| 0.011168 | 0.011240 | 0.011132 | 0.011240 | 0.011240 | 0.011312 | 0.011204 |
| 0.011240 | 0.011204 | 0.011456 | 0.011456 | 0.011276 | 0.011312 | 0.011348 |
| 0.011096 | 0.011096 | 0.011132 | 0.011204 | 0.011096 | 0.011348 | 0.011348 |
| 0.011348 | 0.011348 | 0.011312 | 0.011384 | 0.011564 | 0.011385 | 0.011204 |
| 0.011240 | 0.011276 | 0.011312 | 0.011168 | 0.011204 | 0.011168 | 0.011240 |
| 0.011312 | 0.011312 | 0.011348 | 0.011276 | 0.011168 | 0.011420 | 0.011348 |
| 0.011242 | 0.011096 | 0.011240 | 0.011312 | 0.011204 | 0.011384 | 0.011420 |
| 0.011600 | 0.011243 | 0.011456 | 0.011384 | 0.011348 | 0.011528 | 0.011132 |
| 0.011313 | 0.011204 | 0.011168 | 0.011168 | 0.011240 | 0.011132 | 0.011240 |
| 0.011240 | 0.011312 | 0.011204 | 0.011240 | 0.011204 | 0.011456 | 0.011456 |
| 0.011276 | 0.011312 | 0.011348 | 0.011312 | 0.011960 | 0.011364 | 0.011249 |
| 0.011357 | 0.011320 | 0.011434 | 0.011283 | 0.011396 | 0.011354 | 0.011314 |
| 0.011905 | 0.011208 | 0.011352 | 0.011281 | 0.011572 | 0.011386 | 0.011497 |
| 0.011933 | 0.011379 | 0.011240 | 0.011240 | 0.011240 | 0.011276 | 0.011204 |

|          |          |          |          |          |          |          |
|----------|----------|----------|----------|----------|----------|----------|
| 0.011096 | 0.011096 | 0.011276 | 0.011240 | 0.011240 | 0.011384 | 0.011349 |
| 0.011204 | 0.011096 | 0.011132 | 0.011204 | 0.000000 | 0.011132 | 0.000000 |
| 0.011204 | 0.011240 | 0.011132 | 0.011096 | 0.011204 | 0.011132 | 0.011168 |
| 0.011168 | 0.011096 | 0.011168 | 0.011168 | 0.011096 | 0.011276 | 0.011348 |
| 0.011204 | 0.011312 | 0.011240 | 0.011204 | 0.011132 | 0.011528 | 0.011204 |
| 0.011246 | 0.011168 | 0.011420 | 0.011423 | 0.011240 | 0.011276 | 0.011240 |
| 0.011276 | 0.011168 | 0.011168 | 0.011168 | 0.011312 | 0.011312 | 0.011240 |
| 0.011240 | 0.011348 | 0.011528 | 0.011276 | 0.011384 | 0.011384 | 0.011348 |
| 0.011168 | 0.011240 | 0.011276 | 0.011636 | 0.011240 | 0.011240 | 0.011240 |
| 0.011240 | 0.011204 | 0.011204 | 0.011528 | 0.011348 | 0.011492 | 0.011204 |
| 0.011312 | 0.011384 | 0.011240 | 0.011312 | 0.011240 | 0.011132 | 0.011456 |
| 0.011240 | 0.011168 | 0.011204 | 0.011348 | 0.011204 | 0.011312 | 0.011564 |
| 0.011168 | 0.011570 | 0.011600 | 0.011396 | 0.011117 | 0.011312 | 0.011167 |
| 0.011117 | 0.011624 | 0.011133 | 0.011339 | 0.011162 | 0.011273 | 0.011279 |
| 0.011377 | 0.000000 | 0.011231 | 0.000000 | 0.011117 | 0.011266 | 0.011272 |
| 0.011296 | 0.011142 | 0.011282 | 0.011171 | 0.011241 | 0.011384 | 0.011456 |
| 0.011420 | 0.011312 | 0.011386 | 0.011423 | 0.011496 | 0.011553 | 0.011168 |
| 0.011492 | 0.011312 | 0.011204 | 0.011312 | 0.011096 | 0.011348 | 0.011132 |
| 0.011168 | 0.011204 | 0.011168 | 0.011132 | 0.011132 | 0.011132 | 0.011240 |
| 0.011206 | 0.011206 | 0.011204 | 0.011204 | 0.011384 | 0.011312 | 0.011349 |
| 0.011348 | 0.011240 | 0.000000 | 0.000000 | 0.011204 | 0.011384 | 0.011312 |
| 0.011168 | 0.011204 | 0.011492 | 0.011420 | 0.011384 | 0.011420 | 0.011348 |
| 0.011276 | 0.011348 | 0.011312 | 0.011204 | 0.011816 | 0.011384 | 0.011492 |
| 0.011528 | 0.011518 | 0.011206 | 0.011245 | 0.011168 | 0.011384 | 0.011348 |
| 0.011349 | 0.011348 | 0.011384 | 0.011384 | 0.011481 | 0.011564 | 0.011171 |
| 0.000000 | 0.000000 | 0.011169 | 0.011133 | 0.011206 | 0.000000 | 0.011387 |
| 0.011207 | 0.011335 | 0.000000 | 0.011219 | 0.011204 | 0.011276 | 0.011132 |
| 0.011132 | 0.011132 | 0.011168 | 0.011168 | 0.011384 | 0.011348 | 0.011276 |
| 0.011384 | 0.011456 | 0.011168 | 0.011168 | 0.011204 | 0.011204 | 0.011204 |
| 0.011276 | 0.011204 | 0.011204 | 0.011241 | 0.011384 | 0.011456 | 0.011420 |
| 0.011312 | 0.011386 | 0.011423 | 0.011496 | 0.011553 | 0.011168 | 0.011420 |
| 0.011348 | 0.011348 | 0.011169 | 0.011358 | 0.011282 | 0.011279 | 0.011173 |
| 0.011208 | 0.011552 | 0.011332 | 0.011206 | 0.011096 | 0.011312 | 0.011132 |
| 0.011276 | 0.011240 | 0.011096 | 0.011241 | 0.011348 | 0.011314 | 0.011240 |
| 0.011132 | 0.000000 | 0.011204 | 0.011132 | 0.000000 | 0.011169 | 0.011312 |
| 0.011240 | 0.011168 | 0.011204 | 0.011240 | 0.011168 | 0.011132 | 0.011348 |
| 0.011204 | 0.011240 | 0.011240 | 0.011168 | 0.011240 | 0.011456 | 0.011132 |
| 0.011168 | 0.011528 | 0.011168 | 0.011132 | 0.011132 | 0.011528 | 0.011105 |
| 0.011572 | 0.011103 | 0.011164 | 0.011349 | 0.011440 | 0.011359 | 0.000000 |
| 0.011115 | 0.011348 | 0.011456 | 0.011569 | 0.011420 | 0.011567 | 0.011708 |
| 0.011600 | 0.011602 | 0.011600 | 0.011865 | 0.011528 | 0.012392 | 0.011601 |
| 0.012248 | 0.012106 | 0.012215 | 0.012469 | 0.011528 | 0.011240 | 0.011564 |
| 0.011960 | 0.011963 | 0.011528 | 0.011420 | 0.011492 | 0.011492 | 0.011459 |
| 0.011348 | 0.011351 | 0.011420 | 0.011384 | 0.011744 | 0.011816 | 0.011780 |
| 0.011672 | 0.011780 | 0.011853 | 0.011675 | 0.011961 | 0.012003 | 0.012069 |
| 0.012069 | 0.012069 | 0.012002 | 0.012033 | 0.012035 | 0.011276 | 0.011564 |
| 0.011600 | 0.012104 | 0.011677 | 0.011852 | 0.012394 | 0.011424 | 0.011312 |
| 0.011276 | 0.011276 | 0.011708 | 0.011788 | 0.011866 | 0.011636 | 0.011277 |
| S144     | 0.011639 | 0.011639 | 0.011711 | 0.011675 | 0.011675 | 0.011747 |
| 0.011609 | 0.011499 | 0.011675 | 0.011169 | 0.011277 | 0.011241 | 0.011205 |
| 0.011241 | 0.011422 | 0.011205 | 0.011241 | 0.011313 | 0.011277 | 0.011241 |
| 0.011205 | 0.011241 | 0.011349 | 0.011205 | 0.011241 | 0.011205 | 0.011573 |
| 0.011458 | 0.011205 | 0.011133 | 0.011386 | 0.011277 | 0.011277 | 0.011241 |
| 0.011241 | 0.011386 | 0.011277 | 0.011277 | 0.011313 | 0.011277 | 0.011422 |
| 0.011169 | 0.011277 | 0.011313 | 0.011241 | 0.011349 | 0.011386 | 0.011277 |
| 0.011277 | 0.011458 | 0.011314 | 0.011603 | 0.011277 | 0.011530 | 0.011277 |
| 0.011241 | 0.011350 | 0.011422 | 0.011530 | 0.011603 | 0.011313 | 0.011458 |
| 0.011313 | 0.011386 | 0.011277 | 0.011530 | 0.011675 | 0.011277 | 0.011349 |
| 0.011241 | 0.011349 | 0.011241 | 0.011386 | 0.011313 | 0.011313 | 0.011313 |
| 0.011205 | 0.011241 | 0.011205 | 0.011277 | 0.011277 | 0.011278 | 0.011349 |

|          |          |          |          |          |          |          |
|----------|----------|----------|----------|----------|----------|----------|
| 0.011313 | 0.011241 | 0.011349 | 0.011241 | 0.011386 | 0.011205 | 0.011241 |
| 0.011422 | 0.011349 | 0.011603 | 0.011386 | 0.011277 | 0.011530 | 0.011277 |
| 0.011415 | 0.011617 | 0.011411 | 0.011142 | 0.011137 | 0.011217 | 0.011346 |
| 0.011899 | 0.011432 | 0.011146 | 0.011494 | 0.011422 | 0.011313 | 0.011349 |
| 0.011349 | 0.011277 | 0.011386 | 0.011277 | 0.011386 | 0.011313 | 0.011313 |
| 0.011277 | 0.011386 | 0.011603 | 0.011458 | 0.011349 | 0.011313 | 0.011241 |
| 0.011205 | 0.011205 | 0.011277 | 0.011241 | 0.011458 | 0.011422 | 0.011349 |
| 0.011458 | 0.011530 | 0.011241 | 0.011241 | 0.011277 | 0.011277 | 0.011277 |
| 0.011350 | 0.011277 | 0.011277 | 0.011134 | 0.000000 | 0.011169 | 0.011277 |
| 0.011277 | 0.011205 | 0.011175 | 0.011207 | 0.011169 | 0.011205 | 0.011241 |
| 0.011469 | 0.011278 | 0.011313 | 0.011205 | 0.011207 | 0.011349 | 0.011313 |
| 0.011386 | 0.011313 | 0.011313 | 0.011386 | 0.011349 | 0.011747 | 0.011494 |
| 0.011566 | 0.011422 | 0.011277 | 0.011386 | 0.011169 | 0.011386 | 0.011205 |
| 0.011241 | 0.011277 | 0.011241 | 0.011205 | 0.011205 | 0.011205 | 0.011313 |
| 0.011241 | 0.011313 | 0.011313 | 0.011205 | 0.011278 | 0.011422 | 0.011388 |
| 0.011386 | 0.011313 | 0.011205 | 0.011133 | 0.011277 | 0.011205 | 0.011133 |
| 0.011243 | 0.011386 | 0.011205 | 0.011386 | 0.011133 | 0.011277 | 0.011205 |
| 0.011349 | 0.011241 | 0.011277 | 0.011205 | 0.011241 | 0.011133 | 0.011277 |
| 0.011313 | 0.011241 | 0.011313 | 0.011241 | 0.011277 | 0.011313 | 0.011530 |
| 0.011603 | 0.011566 | 0.011603 | 0.011387 | 0.011639 | 0.011277 | 0.011241 |
| 0.011278 | 0.011543 | 0.011357 | 0.011134 | 0.011645 | 0.011097 | 0.011229 |
| 0.011646 | 0.011535 | 0.011349 | 0.011675 | 0.011318 | 0.011494 | 0.011494 |
| 0.011422 | 0.011530 | 0.011437 | 0.011236 | 0.011327 | 0.011313 | 0.011386 |
| 0.011458 | 0.011387 | 0.011461 | 0.011607 | 0.011458 | 0.011566 | 0.011717 |
| 0.011423 | 0.011608 | 0.011494 | 0.011458 | 0.011748 | 0.011169 | 0.011386 |
| 0.011313 | 0.011277 | 0.011169 | 0.011169 | 0.011241 | 0.011241 | 0.011313 |
| 0.011241 | 0.011313 | 0.011205 | 0.011313 | 0.011241 | 0.011241 | 0.011241 |
| 0.011241 | 0.011675 | 0.011530 | 0.011566 | 0.011133 | 0.011241 | 0.011277 |
| 0.011277 | 0.011205 | 0.011313 | 0.011349 | 0.011205 | 0.011205 | 0.011205 |
| 0.011747 | 0.011349 | 0.011386 | 0.011169 | 0.011241 | 0.011458 | 0.011169 |
| 0.011169 | 0.011241 | 0.011241 | 0.011386 | 0.011205 | 0.011349 | 0.011422 |
| 0.011422 | 0.011205 | 0.011241 | 0.011133 | 0.011169 | 0.011277 | 0.011277 |
| 0.011133 | 0.011241 | 0.011133 | 0.011133 | 0.011313 | 0.011458 | 0.011205 |
| 0.011169 | 0.011313 | 0.011241 | 0.011133 | 0.011458 | 0.011133 | 0.011313 |
| 0.011392 | 0.011205 | 0.011494 | 0.011350 | 0.011386 | 0.011241 | 0.011349 |
| 0.011205 | 0.011530 | 0.011133 | 0.011349 | 0.011205 | 0.011205 | 0.011133 |
| 0.011349 | 0.011567 | 0.011277 | 0.011349 | 0.011169 | 0.011530 | 0.011205 |
| 0.011205 | 0.011205 | 0.011205 | 0.011349 | 0.011241 | 0.011349 | 0.011422 |
| 0.011386 | 0.011313 | 0.011277 | 0.011386 | 0.011349 | 0.011205 | 0.011169 |
| 0.011205 | 0.011205 | 0.011277 | 0.011169 | 0.011169 | 0.011349 | 0.011205 |
| 0.011241 | 0.011241 | 0.011349 | 0.011422 | 0.011313 | 0.011241 | 0.011205 |
| 0.011277 | 0.011169 | 0.011349 | 0.011205 | 0.011349 | 0.011422 | 0.011675 |
| 0.011241 | 0.011566 | 0.011207 | 0.018067 | 0.011194 | 0.011323 | 0.011541 |
| 0.011504 | 0.011545 | 0.011280 | 0.011240 | 0.011636 | 0.011578 | 0.011316 |
| 0.011451 | 0.011440 | 0.011101 | 0.011194 | 0.011183 | 0.011165 | 0.011151 |
| 0.011446 | 0.011368 | 0.011372 | 0.011195 | 0.011313 | 0.011422 | 0.011424 |
| 0.011281 | 0.011313 | 0.011386 | 0.011349 | 0.011313 | 0.011314 | 0.011277 |
| 0.011313 | 0.011241 | 0.011205 | 0.011313 | 0.011277 | 0.011205 | 0.011241 |
| 0.011241 | 0.011313 | 0.011205 | 0.011313 | 0.011349 | 0.011386 | 0.011277 |
| 0.011313 | 0.011277 | 0.011530 | 0.011530 | 0.011350 | 0.011350 | 0.011422 |
| 0.011133 | 0.011169 | 0.011205 | 0.011313 | 0.011169 | 0.011422 | 0.011422 |
| 0.011386 | 0.011349 | 0.011386 | 0.011422 | 0.011639 | 0.011423 | 0.011313 |
| 0.011277 | 0.011349 | 0.011422 | 0.011241 | 0.011277 | 0.011241 | 0.011313 |
| 0.011350 | 0.011349 | 0.011386 | 0.011313 | 0.011278 | 0.011494 | 0.011458 |
| 0.011279 | 0.011169 | 0.011313 | 0.011386 | 0.011277 | 0.011458 | 0.011494 |
| 0.011675 | 0.011318 | 0.011494 | 0.011494 | 0.011422 | 0.011530 | 0.011205 |
| 0.011387 | 0.011277 | 0.011241 | 0.011241 | 0.011313 | 0.011205 | 0.011313 |
| 0.011349 | 0.011386 | 0.011277 | 0.011313 | 0.011277 | 0.011530 | 0.011530 |
| 0.011350 | 0.011350 | 0.011422 | 0.011386 | 0.012038 | 0.011404 | 0.011324 |
| 0.011434 | 0.011359 | 0.011509 | 0.011359 | 0.011435 | 0.011430 | 0.011353 |

|          |          |          |          |          |          |          |
|----------|----------|----------|----------|----------|----------|----------|
| 0.011985 | 0.011283 | 0.011428 | 0.011356 | 0.011612 | 0.011461 | 0.011610 |
| 0.012012 | 0.011457 | 0.011314 | 0.011313 | 0.011313 | 0.011349 | 0.011277 |
| 0.011169 | 0.011205 | 0.011349 | 0.011313 | 0.011314 | 0.011422 | 0.011387 |
| 0.011277 | 0.011205 | 0.011241 | 0.011277 | 0.011169 | 0.011241 | 0.011133 |
| 0.011277 | 0.011313 | 0.011205 | 0.011169 | 0.011277 | 0.011205 | 0.011241 |
| 0.011241 | 0.011169 | 0.011241 | 0.011277 | 0.011169 | 0.011386 | 0.011422 |
| 0.011277 | 0.011386 | 0.011313 | 0.011277 | 0.011169 | 0.011603 | 0.011277 |
| 0.011319 | 0.011241 | 0.011458 | 0.011462 | 0.011350 | 0.011313 | 0.011313 |
| 0.011349 | 0.011277 | 0.011241 | 0.011277 | 0.011386 | 0.011386 | 0.011313 |
| 0.011313 | 0.011422 | 0.011603 | 0.011313 | 0.011494 | 0.011494 | 0.011422 |
| 0.011241 | 0.011313 | 0.011349 | 0.011711 | 0.011313 | 0.011350 | 0.011313 |
| 0.011313 | 0.011277 | 0.011277 | 0.011530 | 0.011458 | 0.011494 | 0.011277 |
| 0.011386 | 0.011458 | 0.011313 | 0.011386 | 0.011313 | 0.011205 | 0.011530 |
| 0.011313 | 0.011241 | 0.011277 | 0.011422 | 0.011277 | 0.011386 | 0.011639 |
| 0.011241 | 0.011682 | 0.011675 | 0.011439 | 0.011173 | 0.011387 | 0.011219 |
| 0.011119 | 0.011664 | 0.011171 | 0.011385 | 0.011213 | 0.011273 | 0.011334 |
| 0.011428 | 0.011130 | 0.011287 | 0.011128 | 0.011173 | 0.011334 | 0.011315 |
| 0.011341 | 0.011225 | 0.011322 | 0.011210 | 0.011314 | 0.011422 | 0.011494 |
| 0.011494 | 0.011386 | 0.011497 | 0.011425 | 0.011571 | 0.011670 | 0.011241 |
| 0.011566 | 0.011422 | 0.011277 | 0.011386 | 0.011169 | 0.011386 | 0.011205 |
| 0.011241 | 0.011277 | 0.011241 | 0.011205 | 0.011205 | 0.011205 | 0.011313 |
| 0.011245 | 0.011281 | 0.011278 | 0.011313 | 0.011458 | 0.011386 | 0.011423 |
| 0.011422 | 0.011313 | 0.011138 | 0.011136 | 0.011277 | 0.011458 | 0.011422 |
| 0.011241 | 0.011313 | 0.011530 | 0.011494 | 0.011422 | 0.011494 | 0.011422 |
| 0.011313 | 0.011422 | 0.011422 | 0.011277 | 0.011892 | 0.011386 | 0.011530 |
| 0.011603 | 0.011598 | 0.011244 | 0.011283 | 0.011241 | 0.011458 | 0.011422 |
| 0.011459 | 0.011422 | 0.011422 | 0.011422 | 0.011611 | 0.011639 | 0.011245 |
| 0.011133 | 0.011134 | 0.011207 | 0.011206 | 0.011279 | 0.011139 | 0.011462 |
| 0.011282 | 0.011425 | 0.011160 | 0.011297 | 0.011277 | 0.011349 | 0.011241 |
| 0.011205 | 0.011205 | 0.011277 | 0.011241 | 0.011458 | 0.011422 | 0.011349 |
| 0.011458 | 0.011530 | 0.011241 | 0.011241 | 0.011277 | 0.011277 | 0.011277 |
| 0.011350 | 0.011277 | 0.011277 | 0.011314 | 0.011422 | 0.011494 | 0.011494 |
| 0.011386 | 0.011497 | 0.011425 | 0.011571 | 0.011670 | 0.011241 | 0.011494 |
| 0.011422 | 0.011422 | 0.011206 | 0.011433 | 0.011358 | 0.011390 | 0.011211 |
| 0.011357 | 0.011552 | 0.011381 | 0.011317 | 0.011205 | 0.011386 | 0.011241 |
| 0.011313 | 0.011313 | 0.011205 | 0.011278 | 0.011422 | 0.011388 | 0.011313 |
| 0.011205 | 0.011133 | 0.011277 | 0.011205 | 0.011133 | 0.011243 | 0.011386 |
| 0.011313 | 0.011241 | 0.011205 | 0.011313 | 0.011277 | 0.011205 | 0.011422 |
| 0.011277 | 0.011313 | 0.011313 | 0.011241 | 0.011313 | 0.011530 | 0.011169 |
| 0.011241 | 0.011603 | 0.011241 | 0.011241 | 0.011241 | 0.011603 | 0.011148 |
| 0.011624 | 0.011146 | 0.011215 | 0.011390 | 0.011482 | 0.011400 | 0.011104 |
| 0.011168 | 0.011422 | 0.011530 | 0.011645 | 0.011495 | 0.011606 | 0.011784 |
| 0.011675 | 0.011715 | 0.011675 | 0.011867 | 0.011566 | 0.012544 | 0.011604 |
| 0.012255 | 0.012148 | 0.012294 | 0.012476 | 0.011566 | 0.011313 | 0.011639 |
| 0.012038 | 0.012004 | 0.011603 | 0.011494 | 0.011566 | 0.011566 | 0.011533 |
| 0.011422 | 0.011389 | 0.011494 | 0.011458 | 0.011820 | 0.011892 | 0.011892 |
| 0.011747 | 0.011856 | 0.011930 | 0.011752 | 0.012074 | 0.012081 | 0.012147 |
| 0.012147 | 0.012183 | 0.012085 | 0.012147 | 0.012149 | 0.011349 | 0.011639 |
| 0.011675 | 0.012110 | 0.011754 | 0.011965 | 0.012510 | 0.011461 | 0.011386 |
| 0.011349 | 0.011349 | 0.011711 | 0.011833 | 0.011912 | 0.011675 | 0.011350 |
| s145     | 0.011586 | 0.011586 | 0.011656 | 0.011621 | 0.011621 | 0.011691 |
| 0.011557 | 0.011450 | 0.011621 | 0.011130 | 0.011236 | 0.011201 | 0.011165 |
| 0.011200 | 0.011376 | 0.011165 | 0.011200 | 0.011271 | 0.011236 | 0.011200 |
| 0.011165 | 0.011200 | 0.011306 | 0.011166 | 0.011201 | 0.011200 | 0.011521 |
| 0.011446 | 0.000000 | 0.011095 | 0.011341 | 0.011236 | 0.011236 | 0.011271 |
| 0.011201 | 0.011341 | 0.011236 | 0.011236 | 0.011271 | 0.011235 | 0.011376 |
| 0.011165 | 0.011235 | 0.011271 | 0.011200 | 0.011306 | 0.011341 | 0.011236 |
| 0.011236 | 0.011411 | 0.011306 | 0.011551 | 0.011236 | 0.011516 | 0.011236 |
| 0.011200 | 0.011306 | 0.011376 | 0.011516 | 0.011551 | 0.011271 | 0.011411 |
| 0.011271 | 0.011341 | 0.011236 | 0.011481 | 0.011691 | 0.011236 | 0.011306 |

|          |          |          |          |          |          |          |
|----------|----------|----------|----------|----------|----------|----------|
| 0.011200 | 0.011306 | 0.011201 | 0.011341 | 0.011271 | 0.011271 | 0.011271 |
| 0.011165 | 0.011200 | 0.011165 | 0.011271 | 0.011235 | 0.011271 | 0.011306 |
| 0.011271 | 0.011200 | 0.011306 | 0.011200 | 0.011341 | 0.011165 | 0.011200 |
| 0.011411 | 0.011341 | 0.011586 | 0.011376 | 0.011236 | 0.011481 | 0.011235 |
| 0.011410 | 0.011608 | 0.011413 | 0.011142 | 0.011138 | 0.011214 | 0.011347 |
| 0.012010 | 0.011433 | 0.011146 | 0.011481 | 0.011481 | 0.011271 | 0.011341 |
| 0.011306 | 0.011271 | 0.011341 | 0.011236 | 0.011341 | 0.011271 | 0.011271 |
| 0.011235 | 0.011341 | 0.011551 | 0.011411 | 0.011306 | 0.011271 | 0.011201 |
| 0.011165 | 0.011165 | 0.011236 | 0.011200 | 0.011411 | 0.011376 | 0.011306 |
| 0.011411 | 0.011481 | 0.011200 | 0.011200 | 0.011236 | 0.011235 | 0.011237 |
| 0.011307 | 0.011236 | 0.011236 | 0.011097 | 0.011169 | 0.000000 | 0.011235 |
| 0.011236 | 0.011167 | 0.000000 | 0.000000 | 0.011130 | 0.011165 | 0.011200 |
| 0.011458 | 0.011236 | 0.011274 | 0.011165 | 0.011168 | 0.011306 | 0.011271 |
| 0.011341 | 0.011271 | 0.011271 | 0.011306 | 0.011306 | 0.011691 | 0.011446 |
| 0.011516 | 0.011341 | 0.011236 | 0.011341 | 0.011130 | 0.011376 | 0.011165 |
| 0.011200 | 0.011236 | 0.011200 | 0.011165 | 0.011200 | 0.011165 | 0.011271 |
| 0.011236 | 0.011306 | 0.011271 | 0.011165 | 0.011236 | 0.011376 | 0.011378 |
| 0.011376 | 0.011271 | 0.011165 | 0.011096 | 0.011235 | 0.011165 | 0.011095 |
| 0.011202 | 0.011376 | 0.011165 | 0.011376 | 0.011130 | 0.011236 | 0.011200 |
| 0.011306 | 0.011200 | 0.011236 | 0.011201 | 0.011236 | 0.011095 | 0.011236 |
| 0.011271 | 0.011200 | 0.011271 | 0.011200 | 0.011235 | 0.011271 | 0.011516 |
| 0.011551 | 0.011516 | 0.011586 | 0.011377 | 0.011586 | 0.011235 | 0.011200 |
| 0.011237 | 0.011524 | 0.011345 | 0.011132 | 0.011592 | 0.011096 | 0.011225 |
| 0.011592 | 0.011521 | 0.011376 | 0.011621 | 0.011274 | 0.011481 | 0.011446 |
| 0.011376 | 0.011551 | 0.011388 | 0.011230 | 0.011275 | 0.011271 | 0.011341 |
| 0.011411 | 0.011342 | 0.011449 | 0.011555 | 0.011481 | 0.011516 | 0.011661 |
| 0.011377 | 0.011555 | 0.011481 | 0.011411 | 0.011692 | 0.011130 | 0.011341 |
| 0.011306 | 0.011236 | 0.011130 | 0.011130 | 0.011200 | 0.011200 | 0.011271 |
| 0.011200 | 0.011271 | 0.011165 | 0.011271 | 0.011200 | 0.011200 | 0.011271 |
| 0.011200 | 0.011621 | 0.011516 | 0.011551 | 0.011095 | 0.011200 | 0.011236 |
| 0.011236 | 0.011200 | 0.011236 | 0.011306 | 0.011165 | 0.011165 | 0.011165 |
| 0.011691 | 0.011306 | 0.011341 | 0.011130 | 0.011235 | 0.011411 | 0.011165 |
| 0.011165 | 0.011200 | 0.011200 | 0.011376 | 0.011165 | 0.011306 | 0.011411 |
| 0.011376 | 0.011165 | 0.011200 | 0.011095 | 0.011130 | 0.011306 | 0.011235 |
| 0.011095 | 0.011200 | 0.011095 | 0.011130 | 0.011271 | 0.011411 | 0.011165 |
| 0.011130 | 0.011271 | 0.011200 | 0.011095 | 0.011411 | 0.011095 | 0.011271 |
| 0.011346 | 0.011165 | 0.011446 | 0.011306 | 0.011341 | 0.011200 | 0.011306 |
| 0.011165 | 0.011516 | 0.011095 | 0.011341 | 0.011165 | 0.011165 | 0.011095 |
| 0.011341 | 0.011551 | 0.011236 | 0.011306 | 0.011130 | 0.011516 | 0.011165 |
| 0.011165 | 0.011165 | 0.011200 | 0.011306 | 0.011200 | 0.011306 | 0.011341 |
| 0.011341 | 0.011341 | 0.011235 | 0.011341 | 0.011306 | 0.011165 | 0.011130 |
| 0.011165 | 0.011165 | 0.011236 | 0.011165 | 0.011130 | 0.011306 | 0.011165 |
| 0.011200 | 0.011200 | 0.011341 | 0.011376 | 0.011271 | 0.011200 | 0.011165 |
| 0.011236 | 0.011130 | 0.011306 | 0.011165 | 0.011306 | 0.011411 | 0.011621 |
| 0.011200 | 0.011586 | 0.011204 | 0.018027 | 0.011194 | 0.011380 | 0.011534 |
| 0.011494 | 0.011538 | 0.011278 | 0.011241 | 0.011700 | 0.011565 | 0.011315 |
| 0.011453 | 0.011507 | 0.011101 | 0.011191 | 0.011182 | 0.011216 | 0.011150 |
| 0.011449 | 0.011370 | 0.011368 | 0.011128 | 0.011306 | 0.011376 | 0.011378 |
| 0.011238 | 0.011271 | 0.011341 | 0.011306 | 0.011271 | 0.011271 | 0.011236 |
| 0.011271 | 0.011200 | 0.011236 | 0.011271 | 0.011236 | 0.011165 | 0.011200 |
| 0.011200 | 0.011271 | 0.011165 | 0.011271 | 0.011306 | 0.011341 | 0.011236 |
| 0.011271 | 0.011236 | 0.011516 | 0.011516 | 0.011306 | 0.011306 | 0.011376 |
| 0.011130 | 0.011130 | 0.011165 | 0.011271 | 0.011130 | 0.011376 | 0.011376 |
| 0.011411 | 0.011376 | 0.011341 | 0.011446 | 0.011586 | 0.011447 | 0.011271 |
| 0.011236 | 0.011306 | 0.011376 | 0.011200 | 0.011271 | 0.011236 | 0.011271 |
| 0.011341 | 0.011341 | 0.011376 | 0.011341 | 0.011236 | 0.011446 | 0.011411 |
| 0.011237 | 0.011165 | 0.011271 | 0.011341 | 0.011236 | 0.011411 | 0.011446 |
| 0.011621 | 0.011274 | 0.011481 | 0.011446 | 0.011376 | 0.011551 | 0.011165 |
| 0.011342 | 0.011236 | 0.011200 | 0.011200 | 0.011271 | 0.011165 | 0.011271 |
| 0.011306 | 0.011341 | 0.011236 | 0.011271 | 0.011236 | 0.011516 | 0.011516 |

|          |          |          |          |          |          |          |
|----------|----------|----------|----------|----------|----------|----------|
| 0.011306 | 0.011306 | 0.011411 | 0.011341 | 0.011973 | 0.011393 | 0.011315 |
| 0.011387 | 0.011349 | 0.011458 | 0.011349 | 0.011423 | 0.011383 | 0.011344 |
| 0.011919 | 0.011239 | 0.011380 | 0.011311 | 0.011558 | 0.011413 | 0.011557 |
| 0.011946 | 0.011405 | 0.011272 | 0.011271 | 0.011271 | 0.011306 | 0.011237 |
| 0.011130 | 0.011165 | 0.011306 | 0.011271 | 0.011272 | 0.011411 | 0.011377 |
| 0.011235 | 0.011165 | 0.011200 | 0.011236 | 0.011130 | 0.011200 | 0.011095 |
| 0.011235 | 0.011271 | 0.011165 | 0.011130 | 0.011236 | 0.011165 | 0.011200 |
| 0.011200 | 0.011130 | 0.011200 | 0.011236 | 0.011130 | 0.011341 | 0.011376 |
| 0.011271 | 0.011341 | 0.011271 | 0.011271 | 0.011200 | 0.011551 | 0.011235 |
| 0.011275 | 0.011200 | 0.011446 | 0.011449 | 0.011306 | 0.011306 | 0.011306 |
| 0.011306 | 0.011236 | 0.011200 | 0.011236 | 0.011341 | 0.011341 | 0.011271 |
| 0.011271 | 0.011376 | 0.011551 | 0.011306 | 0.011481 | 0.011481 | 0.011376 |
| 0.011200 | 0.011271 | 0.011306 | 0.011691 | 0.011271 | 0.011306 | 0.011271 |
| 0.011306 | 0.011235 | 0.011235 | 0.011551 | 0.011446 | 0.011516 | 0.011236 |
| 0.011341 | 0.011411 | 0.011271 | 0.011341 | 0.011271 | 0.011165 | 0.011481 |
| 0.011271 | 0.011236 | 0.011235 | 0.011411 | 0.011236 | 0.011341 | 0.011586 |
| 0.011200 | 0.011628 | 0.011621 | 0.011441 | 0.011174 | 0.011344 | 0.011220 |
| 0.011175 | 0.011668 | 0.011170 | 0.011387 | 0.011214 | 0.011328 | 0.011337 |
| 0.011429 | 0.011130 | 0.011288 | 0.011128 | 0.011174 | 0.011335 | 0.011316 |
| 0.011337 | 0.011226 | 0.011318 | 0.011207 | 0.011271 | 0.011411 | 0.011481 |
| 0.011446 | 0.011341 | 0.011449 | 0.011450 | 0.011520 | 0.011615 | 0.011236 |
| 0.011516 | 0.011341 | 0.011236 | 0.011341 | 0.011130 | 0.011376 | 0.011165 |
| 0.011200 | 0.011236 | 0.011200 | 0.011165 | 0.011200 | 0.011165 | 0.011271 |
| 0.011241 | 0.011238 | 0.011237 | 0.011271 | 0.011411 | 0.011378 | 0.011377 |
| 0.011376 | 0.011271 | 0.011098 | 0.011097 | 0.011236 | 0.011411 | 0.011376 |
| 0.011200 | 0.011271 | 0.011446 | 0.011482 | 0.011411 | 0.011446 | 0.011376 |
| 0.011306 | 0.011376 | 0.011376 | 0.011271 | 0.011832 | 0.011411 | 0.011516 |
| 0.011516 | 0.011581 | 0.011238 | 0.011276 | 0.011200 | 0.011411 | 0.011376 |
| 0.011412 | 0.011411 | 0.011446 | 0.011446 | 0.011593 | 0.011586 | 0.011203 |
| 0.011096 | 0.011096 | 0.000000 | 0.011166 | 0.011237 | 0.011098 | 0.011414 |
| 0.011239 | 0.011371 | 0.011108 | 0.011251 | 0.011236 | 0.011306 | 0.011201 |
| 0.011165 | 0.011165 | 0.011236 | 0.011200 | 0.011411 | 0.011376 | 0.011306 |
| 0.011411 | 0.011481 | 0.011200 | 0.011200 | 0.011236 | 0.011235 | 0.011237 |
| 0.011307 | 0.011236 | 0.011236 | 0.011271 | 0.011411 | 0.011481 | 0.011446 |
| 0.011341 | 0.011449 | 0.011450 | 0.011520 | 0.011615 | 0.011236 | 0.011446 |
| 0.011376 | 0.011376 | 0.011201 | 0.011387 | 0.011312 | 0.011345 | 0.011206 |
| 0.011384 | 0.011537 | 0.011368 | 0.011238 | 0.011165 | 0.011376 | 0.011236 |
| 0.011306 | 0.011271 | 0.011165 | 0.011236 | 0.011376 | 0.011378 | 0.011271 |
| 0.011165 | 0.011096 | 0.011235 | 0.011165 | 0.011095 | 0.011202 | 0.011376 |
| 0.011271 | 0.011200 | 0.011236 | 0.011271 | 0.011236 | 0.011165 | 0.011376 |
| 0.011236 | 0.011271 | 0.011271 | 0.011200 | 0.011271 | 0.011481 | 0.011165 |
| 0.011200 | 0.011551 | 0.011200 | 0.011200 | 0.011200 | 0.011551 | 0.011149 |
| 0.011628 | 0.011147 | 0.011216 | 0.011392 | 0.011484 | 0.011398 | 0.011104 |
| 0.011169 | 0.011376 | 0.011481 | 0.011556 | 0.011446 | 0.011590 | 0.011727 |
| 0.011621 | 0.011659 | 0.011621 | 0.011844 | 0.011516 | 0.012464 | 0.011552 |
| 0.012253 | 0.012115 | 0.012221 | 0.012398 | 0.011586 | 0.011271 | 0.011586 |
| 0.011973 | 0.011975 | 0.011551 | 0.011446 | 0.011516 | 0.011516 | 0.011484 |
| 0.011376 | 0.011379 | 0.011446 | 0.011411 | 0.011797 | 0.011867 | 0.011867 |
| 0.011763 | 0.011867 | 0.011904 | 0.011730 | 0.012008 | 0.012014 | 0.012079 |
| 0.012079 | 0.012114 | 0.012022 | 0.012079 | 0.012045 | 0.011306 | 0.011621 |
| 0.011656 | 0.012148 | 0.011697 | 0.011937 | 0.012430 | 0.011450 | 0.011341 |
| 0.011306 | 0.011306 | 0.011797 | 0.011801 | 0.011899 | 0.011656 | 0.011306 |
| s146     | 0.011665 | 0.011665 | 0.011800 | 0.011766 | 0.011766 | 0.011834 |
| 0.011638 | 0.011536 | 0.011766 | 0.011262 | 0.011329 | 0.011296 | 0.011262 |
| 0.011296 | 0.011464 | 0.011262 | 0.011296 | 0.011363 | 0.011329 | 0.011296 |
| 0.011262 | 0.011296 | 0.011396 | 0.011262 | 0.011296 | 0.011296 | 0.011604 |
| 0.011531 | 0.011296 | 0.011195 | 0.011430 | 0.011363 | 0.011329 | 0.011363 |
| 0.011329 | 0.011430 | 0.011329 | 0.011329 | 0.011363 | 0.011329 | 0.011497 |
| 0.011262 | 0.011329 | 0.011363 | 0.011296 | 0.011396 | 0.011430 | 0.011363 |
| 0.011329 | 0.011497 | 0.011397 | 0.011665 | 0.011329 | 0.011598 | 0.011329 |

|          |          |          |          |          |          |          |
|----------|----------|----------|----------|----------|----------|----------|
| 0.011296 | 0.011396 | 0.011464 | 0.011598 | 0.011699 | 0.011396 | 0.011497 |
| 0.011363 | 0.011430 | 0.011329 | 0.011564 | 0.011800 | 0.011329 | 0.011396 |
| 0.011296 | 0.011396 | 0.011363 | 0.011430 | 0.011363 | 0.011363 | 0.011363 |
| 0.011262 | 0.011296 | 0.011262 | 0.011363 | 0.011329 | 0.011363 | 0.011430 |
| 0.011363 | 0.011329 | 0.011396 | 0.011296 | 0.011430 | 0.011262 | 0.011329 |
| 0.011497 | 0.011430 | 0.011665 | 0.011497 | 0.011329 | 0.011565 | 0.011329 |
| 0.011468 | 0.011695 | 0.011513 | 0.011216 | 0.011247 | 0.011355 | 0.011414 |
| 0.012085 | 0.011467 | 0.011225 | 0.011564 | 0.011564 | 0.011363 | 0.011464 |
| 0.011396 | 0.011363 | 0.011430 | 0.011329 | 0.011430 | 0.011363 | 0.011363 |
| 0.011329 | 0.011430 | 0.011632 | 0.011497 | 0.011396 | 0.011363 | 0.011296 |
| 0.011262 | 0.011262 | 0.011329 | 0.011296 | 0.011497 | 0.011464 | 0.011396 |
| 0.011497 | 0.011564 | 0.011296 | 0.011296 | 0.011329 | 0.011329 | 0.011331 |
| 0.011399 | 0.011329 | 0.011329 | 0.011204 | 0.011277 | 0.011235 | 0.000000 |
| 0.011331 | 0.011266 | 0.011318 | 0.011302 | 0.011230 | 0.011266 | 0.011297 |
| 0.011564 | 0.011336 | 0.011370 | 0.011262 | 0.011268 | 0.011397 | 0.011363 |
| 0.011430 | 0.011363 | 0.011363 | 0.011464 | 0.011396 | 0.011766 | 0.011531 |
| 0.011598 | 0.011464 | 0.011329 | 0.011430 | 0.011228 | 0.011464 | 0.011262 |
| 0.011329 | 0.011329 | 0.011296 | 0.011262 | 0.011296 | 0.011262 | 0.011363 |
| 0.011329 | 0.011430 | 0.011363 | 0.011262 | 0.011364 | 0.011464 | 0.011466 |
| 0.011464 | 0.011363 | 0.011262 | 0.011195 | 0.011329 | 0.011262 | 0.011195 |
| 0.011298 | 0.011464 | 0.011262 | 0.011464 | 0.011228 | 0.011329 | 0.011296 |
| 0.011396 | 0.011296 | 0.011329 | 0.011296 | 0.011329 | 0.011195 | 0.011329 |
| 0.011363 | 0.011296 | 0.011363 | 0.011296 | 0.011329 | 0.011363 | 0.011598 |
| 0.011699 | 0.011632 | 0.011699 | 0.011465 | 0.011699 | 0.011329 | 0.011296 |
| 0.011331 | 0.011586 | 0.011426 | 0.011232 | 0.011706 | 0.011197 | 0.011296 |
| 0.011672 | 0.011604 | 0.011497 | 0.011699 | 0.011402 | 0.011565 | 0.011531 |
| 0.011464 | 0.011632 | 0.011487 | 0.011349 | 0.011396 | 0.011363 | 0.011433 |
| 0.011531 | 0.011431 | 0.011568 | 0.011636 | 0.011564 | 0.011632 | 0.011739 |
| 0.011467 | 0.011638 | 0.011568 | 0.011500 | 0.011767 | 0.011228 | 0.011431 |
| 0.011396 | 0.011329 | 0.011228 | 0.011228 | 0.011296 | 0.011296 | 0.011363 |
| 0.011296 | 0.011363 | 0.011262 | 0.011363 | 0.011296 | 0.011296 | 0.011363 |
| 0.011296 | 0.011733 | 0.011632 | 0.011665 | 0.011195 | 0.011296 | 0.011329 |
| 0.011329 | 0.011296 | 0.011363 | 0.011396 | 0.011262 | 0.011262 | 0.011262 |
| 0.011800 | 0.011396 | 0.011430 | 0.011228 | 0.011329 | 0.011497 | 0.011262 |
| 0.011262 | 0.011329 | 0.011296 | 0.011464 | 0.011262 | 0.011396 | 0.011531 |
| 0.011464 | 0.011296 | 0.011296 | 0.011228 | 0.011228 | 0.011396 | 0.011329 |
| 0.011228 | 0.011329 | 0.011195 | 0.011228 | 0.011363 | 0.011497 | 0.011262 |
| 0.011228 | 0.011363 | 0.011296 | 0.011195 | 0.011531 | 0.011195 | 0.011363 |
| 0.011437 | 0.011262 | 0.011564 | 0.011396 | 0.011430 | 0.011296 | 0.011396 |
| 0.011262 | 0.011598 | 0.011195 | 0.011464 | 0.011262 | 0.011262 | 0.011195 |
| 0.011430 | 0.011632 | 0.011329 | 0.011396 | 0.011228 | 0.011632 | 0.011262 |
| 0.011262 | 0.011262 | 0.011296 | 0.011396 | 0.011296 | 0.011396 | 0.011464 |
| 0.011464 | 0.011430 | 0.011329 | 0.011430 | 0.011396 | 0.011262 | 0.011228 |
| 0.011262 | 0.011262 | 0.011329 | 0.011262 | 0.011228 | 0.011396 | 0.011262 |
| 0.011296 | 0.011296 | 0.011430 | 0.011464 | 0.011363 | 0.011296 | 0.011296 |
| 0.011363 | 0.011296 | 0.011396 | 0.011262 | 0.011396 | 0.011497 | 0.011733 |
| 0.011296 | 0.011699 | 0.011302 | 0.017823 | 0.011191 | 0.011488 | 0.011653 |
| 0.011614 | 0.011658 | 0.011322 | 0.011234 | 0.011719 | 0.011682 | 0.011364 |
| 0.011440 | 0.011610 | 0.011177 | 0.011228 | 0.011255 | 0.011356 | 0.011232 |
| 0.011482 | 0.011470 | 0.011431 | 0.011259 | 0.011430 | 0.011464 | 0.011466 |
| 0.011335 | 0.011430 | 0.011430 | 0.011396 | 0.011363 | 0.011363 | 0.011329 |
| 0.011363 | 0.011296 | 0.011329 | 0.011363 | 0.011329 | 0.011262 | 0.011296 |
| 0.011296 | 0.011363 | 0.011262 | 0.011363 | 0.011396 | 0.011430 | 0.011329 |
| 0.011363 | 0.011329 | 0.011665 | 0.011665 | 0.011397 | 0.011431 | 0.011464 |
| 0.011228 | 0.011228 | 0.011262 | 0.011363 | 0.011228 | 0.011464 | 0.011464 |
| 0.011497 | 0.011497 | 0.011430 | 0.011531 | 0.011699 | 0.011532 | 0.011363 |
| 0.011363 | 0.011430 | 0.011464 | 0.011296 | 0.011363 | 0.011329 | 0.011363 |
| 0.011430 | 0.011430 | 0.011464 | 0.011430 | 0.011330 | 0.011531 | 0.011497 |
| 0.011365 | 0.011262 | 0.011363 | 0.011464 | 0.011363 | 0.011497 | 0.011531 |
| 0.011699 | 0.011402 | 0.011565 | 0.011531 | 0.011464 | 0.011632 | 0.011262 |



|          |          |          |          |          |          |          |
|----------|----------|----------|----------|----------|----------|----------|
| 0.011431 | 0.011329 | 0.011296 | 0.011296 | 0.011363 | 0.011262 | 0.011363 |
| 0.011396 | 0.011430 | 0.011329 | 0.011363 | 0.011329 | 0.011665 | 0.011665 |
| 0.011397 | 0.011431 | 0.011497 | 0.011430 | 0.012070 | 0.011489 | 0.011412 |
| 0.011482 | 0.011442 | 0.011552 | 0.011442 | 0.011551 | 0.011475 | 0.011440 |
| 0.012023 | 0.011337 | 0.011472 | 0.011406 | 0.011680 | 0.011537 | 0.011639 |
| 0.012047 | 0.011512 | 0.011365 | 0.011363 | 0.011363 | 0.011396 | 0.011331 |
| 0.011228 | 0.011262 | 0.011396 | 0.011363 | 0.011365 | 0.011497 | 0.011465 |
| 0.011329 | 0.011262 | 0.011296 | 0.011329 | 0.011228 | 0.011296 | 0.011195 |
| 0.011329 | 0.011363 | 0.011262 | 0.011228 | 0.011329 | 0.011262 | 0.011296 |
| 0.011296 | 0.011228 | 0.011296 | 0.011329 | 0.011228 | 0.011430 | 0.011464 |
| 0.011363 | 0.011430 | 0.011363 | 0.011363 | 0.011296 | 0.011699 | 0.011329 |
| 0.011374 | 0.011296 | 0.011531 | 0.011535 | 0.011396 | 0.011396 | 0.011396 |
| 0.011396 | 0.011329 | 0.011296 | 0.011329 | 0.011430 | 0.011430 | 0.011363 |
| 0.011363 | 0.011497 | 0.011665 | 0.011396 | 0.011598 | 0.011598 | 0.011464 |
| 0.011296 | 0.011363 | 0.011396 | 0.011800 | 0.011363 | 0.011396 | 0.011363 |
| 0.011396 | 0.011329 | 0.011329 | 0.011632 | 0.011565 | 0.011598 | 0.011329 |
| 0.011430 | 0.011497 | 0.011363 | 0.011430 | 0.011396 | 0.011262 | 0.011598 |
| 0.011363 | 0.011329 | 0.011329 | 0.011497 | 0.011329 | 0.011430 | 0.011665 |
| 0.011296 | 0.011706 | 0.011733 | 0.011507 | 0.011173 | 0.011434 | 0.011215 |
| 0.011280 | 0.011722 | 0.011271 | 0.011462 | 0.011255 | 0.011366 | 0.011326 |
| 0.011468 | 0.011126 | 0.011283 | 0.011126 | 0.011168 | 0.011328 | 0.011344 |
| 0.011362 | 0.011296 | 0.011412 | 0.011342 | 0.011364 | 0.011497 | 0.011564 |
| 0.011531 | 0.011430 | 0.011534 | 0.011535 | 0.011671 | 0.011662 | 0.011329 |
| 0.011598 | 0.011464 | 0.011329 | 0.011430 | 0.011228 | 0.011464 | 0.011262 |
| 0.011329 | 0.011329 | 0.011296 | 0.011262 | 0.011296 | 0.011262 | 0.011363 |
| 0.011340 | 0.011340 | 0.011334 | 0.011368 | 0.011505 | 0.011470 | 0.011470 |
| 0.011469 | 0.011396 | 0.011171 | 0.011204 | 0.011331 | 0.011501 | 0.011501 |
| 0.011296 | 0.011365 | 0.011599 | 0.011567 | 0.011497 | 0.011531 | 0.011464 |
| 0.011396 | 0.011464 | 0.011464 | 0.011363 | 0.011935 | 0.011531 | 0.011598 |
| 0.011632 | 0.011702 | 0.011333 | 0.011372 | 0.011296 | 0.011497 | 0.011464 |
| 0.011498 | 0.011497 | 0.011531 | 0.011531 | 0.011689 | 0.011665 | 0.011303 |
| 0.011196 | 0.011199 | 0.011299 | 0.011264 | 0.011368 | 0.011210 | 0.011536 |
| 0.011335 | 0.011455 | 0.011203 | 0.011322 | 0.011329 | 0.011402 | 0.011296 |
| 0.011262 | 0.011262 | 0.011329 | 0.011296 | 0.011497 | 0.011464 | 0.011396 |
| 0.011497 | 0.011564 | 0.011296 | 0.011296 | 0.011329 | 0.011329 | 0.011331 |
| 0.011399 | 0.011329 | 0.011329 | 0.011364 | 0.011497 | 0.011564 | 0.011531 |
| 0.011430 | 0.011534 | 0.011535 | 0.011671 | 0.011662 | 0.011329 | 0.011531 |
| 0.011464 | 0.011464 | 0.011297 | 0.011478 | 0.011408 | 0.011435 | 0.011305 |
| 0.011474 | 0.011653 | 0.011441 | 0.011366 | 0.011262 | 0.011464 | 0.011329 |
| 0.011430 | 0.011363 | 0.011262 | 0.011364 | 0.011464 | 0.011466 | 0.011363 |
| 0.011262 | 0.011195 | 0.011329 | 0.011262 | 0.011195 | 0.011298 | 0.011464 |
| 0.011363 | 0.011296 | 0.011329 | 0.011363 | 0.011329 | 0.011262 | 0.011464 |
| 0.011329 | 0.011363 | 0.011363 | 0.011296 | 0.011363 | 0.011598 | 0.011262 |
| 0.011296 | 0.011699 | 0.011296 | 0.011329 | 0.011296 | 0.011665 | 0.011232 |
| 0.011622 | 0.011188 | 0.011211 | 0.011503 | 0.011549 | 0.011491 | 0.011186 |
| 0.011165 | 0.011464 | 0.011564 | 0.011671 | 0.011532 | 0.011669 | 0.011801 |
| 0.011700 | 0.011737 | 0.011699 | 0.011949 | 0.011665 | 0.012541 | 0.011700 |
| 0.012407 | 0.012207 | 0.012342 | 0.012613 | 0.011665 | 0.011363 | 0.011665 |
| 0.012104 | 0.012039 | 0.011632 | 0.011531 | 0.011598 | 0.011598 | 0.011568 |
| 0.011464 | 0.011467 | 0.011531 | 0.011497 | 0.011868 | 0.011935 | 0.011935 |
| 0.011835 | 0.011935 | 0.012038 | 0.011804 | 0.012104 | 0.012110 | 0.012172 |
| 0.012171 | 0.012205 | 0.012153 | 0.012172 | 0.012174 | 0.011396 | 0.011699 |
| 0.011766 | 0.012272 | 0.011772 | 0.012002 | 0.012475 | 0.011536 | 0.011430 |
| 0.011396 | 0.011396 | 0.011867 | 0.011924 | 0.012010 | 0.011733 | 0.011397 |
| s147     | 0.011670 | 0.011670 | 0.011772 | 0.011738 | 0.011738 | 0.011806 |
| 0.011643 | 0.011540 | 0.011738 | 0.011263 | 0.011331 | 0.011298 | 0.011263 |
| 0.011297 | 0.011467 | 0.011263 | 0.011297 | 0.011365 | 0.011331 | 0.011297 |
| 0.011263 | 0.011297 | 0.011399 | 0.011264 | 0.011298 | 0.011297 | 0.011608 |
| 0.011534 | 0.011297 | 0.011196 | 0.011433 | 0.011365 | 0.011331 | 0.011365 |
| 0.011331 | 0.011433 | 0.011331 | 0.011331 | 0.011365 | 0.011128 | 0.011501 |

|          |          |          |          |          |          |          |
|----------|----------|----------|----------|----------|----------|----------|
| 0.011263 | 0.011331 | 0.011365 | 0.011297 | 0.011399 | 0.011433 | 0.011365 |
| 0.011331 | 0.011501 | 0.011399 | 0.011636 | 0.011331 | 0.011602 | 0.011331 |
| 0.011297 | 0.011399 | 0.011467 | 0.011602 | 0.011670 | 0.011399 | 0.011500 |
| 0.011365 | 0.011433 | 0.011331 | 0.011500 | 0.011772 | 0.011331 | 0.011399 |
| 0.011297 | 0.011399 | 0.011365 | 0.011433 | 0.011365 | 0.011365 | 0.011365 |
| 0.011263 | 0.011297 | 0.011263 | 0.011365 | 0.011331 | 0.011366 | 0.011433 |
| 0.011365 | 0.011331 | 0.011399 | 0.011297 | 0.011433 | 0.011263 | 0.011297 |
| 0.011500 | 0.011433 | 0.011670 | 0.011264 | 0.011331 | 0.011568 | 0.011331 |
| 0.011322 | 0.011663 | 0.011551 | 0.011216 | 0.011247 | 0.011209 | 0.011414 |
| 0.012085 | 0.011518 | 0.011266 | 0.011568 | 0.011568 | 0.011365 | 0.011433 |
| 0.011399 | 0.011365 | 0.011433 | 0.011331 | 0.011433 | 0.011365 | 0.011365 |
| 0.011331 | 0.011433 | 0.011636 | 0.011500 | 0.011399 | 0.011365 | 0.011297 |
| 0.011263 | 0.011263 | 0.011331 | 0.011297 | 0.011500 | 0.011467 | 0.011399 |
| 0.011500 | 0.011568 | 0.011297 | 0.011297 | 0.011331 | 0.011331 | 0.011333 |
| 0.011401 | 0.011331 | 0.011331 | 0.011204 | 0.011277 | 0.011236 | 0.011331 |
| 0.000000 | 0.011266 | 0.011318 | 0.011302 | 0.011231 | 0.011266 | 0.011298 |
| 0.011564 | 0.011336 | 0.011370 | 0.011263 | 0.011268 | 0.011399 | 0.011365 |
| 0.011433 | 0.011365 | 0.011365 | 0.011467 | 0.011399 | 0.011772 | 0.011534 |
| 0.011602 | 0.011467 | 0.011331 | 0.011433 | 0.011230 | 0.011467 | 0.011263 |
| 0.011297 | 0.011331 | 0.011297 | 0.011263 | 0.011297 | 0.011263 | 0.011365 |
| 0.011331 | 0.011433 | 0.011365 | 0.011263 | 0.011366 | 0.011467 | 0.011469 |
| 0.011467 | 0.011365 | 0.011263 | 0.011196 | 0.011331 | 0.011263 | 0.011196 |
| 0.011300 | 0.011467 | 0.011263 | 0.011467 | 0.011230 | 0.011331 | 0.011297 |
| 0.011399 | 0.011297 | 0.011331 | 0.011297 | 0.011331 | 0.011196 | 0.011331 |
| 0.011365 | 0.011297 | 0.011365 | 0.011297 | 0.011331 | 0.011365 | 0.011602 |
| 0.011670 | 0.011602 | 0.011670 | 0.011468 | 0.011670 | 0.011331 | 0.011297 |
| 0.011333 | 0.011631 | 0.011384 | 0.011233 | 0.011676 | 0.011198 | 0.011298 |
| 0.011677 | 0.011608 | 0.011500 | 0.011704 | 0.011405 | 0.011568 | 0.011535 |
| 0.011467 | 0.011636 | 0.011491 | 0.011309 | 0.011397 | 0.011365 | 0.011436 |
| 0.011534 | 0.011434 | 0.011538 | 0.011641 | 0.011568 | 0.011636 | 0.011744 |
| 0.011470 | 0.011642 | 0.011572 | 0.011299 | 0.011772 | 0.011230 | 0.011434 |
| 0.011399 | 0.011331 | 0.011230 | 0.011230 | 0.011297 | 0.011297 | 0.011365 |
| 0.011297 | 0.011365 | 0.011263 | 0.011365 | 0.011297 | 0.011297 | 0.011365 |
| 0.011297 | 0.011704 | 0.011602 | 0.011636 | 0.011196 | 0.011297 | 0.011331 |
| 0.011331 | 0.011297 | 0.011365 | 0.011399 | 0.011263 | 0.011263 | 0.011263 |
| 0.011772 | 0.011399 | 0.011433 | 0.011230 | 0.011331 | 0.011501 | 0.011263 |
| 0.011263 | 0.011297 | 0.011297 | 0.011467 | 0.011263 | 0.011399 | 0.011534 |
| 0.011467 | 0.011297 | 0.011297 | 0.011230 | 0.011230 | 0.011399 | 0.011331 |
| 0.011230 | 0.011331 | 0.011196 | 0.011230 | 0.011162 | 0.011501 | 0.011263 |
| 0.011230 | 0.011162 | 0.011298 | 0.011196 | 0.011500 | 0.011196 | 0.011365 |
| 0.011440 | 0.011263 | 0.011534 | 0.011399 | 0.011297 | 0.011297 | 0.011399 |
| 0.011263 | 0.011602 | 0.011196 | 0.011433 | 0.011263 | 0.011263 | 0.011196 |
| 0.011433 | 0.011636 | 0.011331 | 0.011399 | 0.011230 | 0.011602 | 0.011263 |
| 0.011263 | 0.011263 | 0.011297 | 0.011399 | 0.011297 | 0.011399 | 0.011467 |
| 0.011230 | 0.011433 | 0.011331 | 0.011433 | 0.011399 | 0.011263 | 0.011230 |
| 0.011263 | 0.011263 | 0.011331 | 0.011263 | 0.011230 | 0.011399 | 0.011263 |
| 0.011297 | 0.011297 | 0.011433 | 0.011467 | 0.011365 | 0.011297 | 0.011297 |
| 0.011365 | 0.011263 | 0.011399 | 0.011263 | 0.011399 | 0.011500 | 0.011704 |
| 0.011297 | 0.011670 | 0.011304 | 0.017879 | 0.011126 | 0.011427 | 0.011622 |
| 0.011583 | 0.011627 | 0.011217 | 0.011350 | 0.011719 | 0.011651 | 0.011364 |
| 0.011535 | 0.011549 | 0.011177 | 0.011270 | 0.011255 | 0.011307 | 0.011275 |
| 0.011529 | 0.011470 | 0.011468 | 0.011259 | 0.011433 | 0.011467 | 0.011470 |
| 0.011337 | 0.011433 | 0.011433 | 0.011399 | 0.011365 | 0.011365 | 0.011331 |
| 0.011365 | 0.011297 | 0.011331 | 0.011365 | 0.011331 | 0.011263 | 0.011297 |
| 0.011297 | 0.011365 | 0.011263 | 0.011365 | 0.011399 | 0.011230 | 0.011331 |
| 0.011365 | 0.011331 | 0.011602 | 0.011602 | 0.011399 | 0.011433 | 0.011467 |
| 0.011230 | 0.011230 | 0.011263 | 0.011365 | 0.011230 | 0.011467 | 0.011467 |
| 0.011500 | 0.011500 | 0.011433 | 0.011534 | 0.011670 | 0.011536 | 0.011365 |
| 0.011365 | 0.011433 | 0.011467 | 0.011297 | 0.011365 | 0.011331 | 0.011365 |
| 0.011433 | 0.011433 | 0.011467 | 0.011433 | 0.011332 | 0.011534 | 0.011500 |

|          |          |          |          |          |          |          |
|----------|----------|----------|----------|----------|----------|----------|
| 0.011368 | 0.011263 | 0.011365 | 0.011467 | 0.011331 | 0.011501 | 0.011534 |
| 0.011704 | 0.011405 | 0.011568 | 0.011535 | 0.011467 | 0.011636 | 0.011264 |
| 0.011434 | 0.011331 | 0.011297 | 0.011297 | 0.011365 | 0.011263 | 0.011365 |
| 0.011399 | 0.011230 | 0.011331 | 0.011365 | 0.011331 | 0.011602 | 0.011602 |
| 0.011399 | 0.011433 | 0.011500 | 0.011433 | 0.012078 | 0.011493 | 0.011415 |
| 0.011273 | 0.011445 | 0.011556 | 0.011445 | 0.011519 | 0.011478 | 0.011440 |
| 0.012030 | 0.011339 | 0.011475 | 0.011409 | 0.011685 | 0.011541 | 0.011643 |
| 0.012054 | 0.011516 | 0.011367 | 0.011365 | 0.011365 | 0.011399 | 0.011333 |
| 0.011230 | 0.011263 | 0.011399 | 0.011365 | 0.011367 | 0.011500 | 0.011468 |
| 0.011331 | 0.011263 | 0.011297 | 0.011331 | 0.011230 | 0.011297 | 0.011196 |
| 0.011263 | 0.011297 | 0.011263 | 0.011230 | 0.011331 | 0.011263 | 0.011297 |
| 0.011297 | 0.011230 | 0.011297 | 0.011331 | 0.011230 | 0.011433 | 0.011331 |
| 0.011230 | 0.011297 | 0.011162 | 0.011297 | 0.011297 | 0.011670 | 0.011331 |
| 0.011376 | 0.011297 | 0.011534 | 0.011539 | 0.011399 | 0.011399 | 0.011399 |
| 0.011399 | 0.011331 | 0.011297 | 0.011331 | 0.011433 | 0.011433 | 0.011365 |
| 0.011365 | 0.011501 | 0.011636 | 0.011399 | 0.011602 | 0.011602 | 0.011467 |
| 0.011297 | 0.011365 | 0.011399 | 0.011772 | 0.011365 | 0.011399 | 0.011365 |
| 0.011399 | 0.011331 | 0.011331 | 0.011636 | 0.011568 | 0.011602 | 0.011331 |
| 0.011433 | 0.011501 | 0.011365 | 0.011433 | 0.011365 | 0.011263 | 0.011568 |
| 0.011365 | 0.011331 | 0.011331 | 0.011501 | 0.011331 | 0.011433 | 0.011670 |
| 0.011297 | 0.011711 | 0.011704 | 0.011507 | 0.011229 | 0.011437 | 0.011318 |
| 0.011225 | 0.011761 | 0.011273 | 0.011417 | 0.011304 | 0.011315 | 0.011326 |
| 0.011468 | 0.011126 | 0.011283 | 0.000000 | 0.011222 | 0.011261 | 0.011387 |
| 0.011402 | 0.011338 | 0.011415 | 0.011309 | 0.011366 | 0.011500 | 0.011568 |
| 0.011534 | 0.011433 | 0.011503 | 0.011539 | 0.011641 | 0.011702 | 0.011331 |
| 0.011602 | 0.011467 | 0.011331 | 0.011433 | 0.011230 | 0.011467 | 0.011263 |
| 0.011297 | 0.011331 | 0.011297 | 0.011263 | 0.011297 | 0.011263 | 0.011365 |
| 0.011340 | 0.011340 | 0.011334 | 0.011368 | 0.011505 | 0.011470 | 0.011470 |
| 0.011469 | 0.011399 | 0.011208 | 0.011204 | 0.011331 | 0.011501 | 0.011501 |
| 0.011297 | 0.011365 | 0.011602 | 0.011570 | 0.011500 | 0.011534 | 0.011467 |
| 0.011399 | 0.011467 | 0.011467 | 0.011365 | 0.011907 | 0.011501 | 0.011602 |
| 0.011636 | 0.011635 | 0.011336 | 0.011409 | 0.011297 | 0.011500 | 0.011467 |
| 0.011501 | 0.011500 | 0.011534 | 0.011534 | 0.011652 | 0.011670 | 0.011305 |
| 0.011197 | 0.011200 | 0.011300 | 0.011266 | 0.011336 | 0.011211 | 0.011505 |
| 0.011336 | 0.011456 | 0.011203 | 0.011360 | 0.011331 | 0.011402 | 0.011297 |
| 0.011263 | 0.011263 | 0.011331 | 0.011297 | 0.011500 | 0.011467 | 0.011399 |
| 0.011500 | 0.011568 | 0.011297 | 0.011297 | 0.011331 | 0.011331 | 0.011333 |
| 0.011401 | 0.011331 | 0.011331 | 0.011366 | 0.011500 | 0.011568 | 0.011534 |
| 0.011433 | 0.011503 | 0.011539 | 0.011641 | 0.011702 | 0.011331 | 0.011534 |
| 0.011467 | 0.011467 | 0.011299 | 0.011481 | 0.011410 | 0.011438 | 0.011307 |
| 0.011477 | 0.011705 | 0.011443 | 0.011369 | 0.011263 | 0.011467 | 0.011331 |
| 0.011433 | 0.011365 | 0.011263 | 0.011366 | 0.011467 | 0.011469 | 0.011365 |
| 0.011263 | 0.011196 | 0.011331 | 0.011263 | 0.011196 | 0.011300 | 0.011467 |
| 0.011365 | 0.011297 | 0.011331 | 0.011365 | 0.011331 | 0.011263 | 0.011467 |
| 0.011331 | 0.011365 | 0.011365 | 0.011297 | 0.011162 | 0.011501 | 0.011263 |
| 0.011297 | 0.011670 | 0.011297 | 0.011297 | 0.011297 | 0.011636 | 0.011274 |
| 0.011678 | 0.011273 | 0.011311 | 0.011503 | 0.011589 | 0.011494 | 0.011227 |
| 0.011218 | 0.011467 | 0.011568 | 0.011676 | 0.011535 | 0.011674 | 0.011806 |
| 0.011704 | 0.011742 | 0.011704 | 0.011955 | 0.011636 | 0.012552 | 0.011705 |
| 0.012383 | 0.012215 | 0.012352 | 0.012591 | 0.011670 | 0.011365 | 0.011670 |
| 0.012112 | 0.012047 | 0.011636 | 0.011535 | 0.011602 | 0.011602 | 0.011572 |
| 0.011467 | 0.011471 | 0.011534 | 0.011501 | 0.011874 | 0.011941 | 0.011941 |
| 0.011841 | 0.011942 | 0.011977 | 0.011810 | 0.012112 | 0.012118 | 0.012180 |
| 0.012180 | 0.012214 | 0.012161 | 0.012180 | 0.012182 | 0.011399 | 0.011704 |
| 0.011738 | 0.012281 | 0.011778 | 0.012009 | 0.012486 | 0.011539 | 0.011433 |
| 0.011399 | 0.011399 | 0.011874 | 0.011924 | 0.012010 | 0.011738 | 0.011400 |
| S148     | 0.011610 | 0.011610 | 0.011713 | 0.011679 | 0.011679 | 0.011748 |
| 0.011582 | 0.011477 | 0.011679 | 0.011198 | 0.011266 | 0.011232 | 0.011198 |
| 0.011232 | 0.011404 | 0.011198 | 0.011232 | 0.011301 | 0.011266 | 0.011232 |
| 0.011198 | 0.011232 | 0.011335 | 0.011198 | 0.011232 | 0.011232 | 0.011547 |

|          |          |          |          |          |          |          |
|----------|----------|----------|----------|----------|----------|----------|
| 0.011473 | 0.011232 | 0.011129 | 0.011369 | 0.011301 | 0.011266 | 0.011301 |
| 0.011266 | 0.011370 | 0.011266 | 0.011266 | 0.011301 | 0.011266 | 0.011438 |
| 0.011198 | 0.011266 | 0.011301 | 0.011232 | 0.011335 | 0.011369 | 0.011301 |
| 0.011266 | 0.011438 | 0.011335 | 0.011576 | 0.011266 | 0.011541 | 0.011266 |
| 0.011232 | 0.011335 | 0.011404 | 0.011541 | 0.011610 | 0.011335 | 0.011438 |
| 0.011301 | 0.011370 | 0.011266 | 0.011507 | 0.011713 | 0.011266 | 0.011335 |
| 0.011232 | 0.011335 | 0.011301 | 0.011370 | 0.011301 | 0.011301 | 0.011301 |
| 0.011198 | 0.011232 | 0.011198 | 0.011266 | 0.011266 | 0.011267 | 0.011369 |
| 0.011301 | 0.011266 | 0.011335 | 0.011232 | 0.011369 | 0.011198 | 0.011232 |
| 0.011404 | 0.011369 | 0.011610 | 0.011404 | 0.011266 | 0.011507 | 0.011266 |
| 0.011434 | 0.011625 | 0.011475 | 0.011177 | 0.011172 | 0.011283 | 0.011375 |
| 0.012011 | 0.011467 | 0.011184 | 0.011507 | 0.011507 | 0.011301 | 0.011335 |
| 0.011335 | 0.011301 | 0.011369 | 0.011266 | 0.011370 | 0.011301 | 0.011301 |
| 0.011266 | 0.011369 | 0.011576 | 0.011438 | 0.011335 | 0.011301 | 0.011232 |
| 0.011198 | 0.011198 | 0.011266 | 0.011232 | 0.011438 | 0.011404 | 0.011335 |
| 0.011438 | 0.011507 | 0.011232 | 0.011232 | 0.011266 | 0.011266 | 0.011267 |
| 0.011336 | 0.011266 | 0.011266 | 0.011132 | 0.011205 | 0.011167 | 0.011266 |
| 0.011266 | 0.000000 | 0.011246 | 0.011235 | 0.011164 | 0.011199 | 0.011233 |
| 0.011496 | 0.011270 | 0.011304 | 0.011198 | 0.011200 | 0.011335 | 0.011301 |
| 0.011370 | 0.011301 | 0.011301 | 0.011404 | 0.011335 | 0.011713 | 0.011473 |
| 0.011541 | 0.011404 | 0.011266 | 0.011370 | 0.011163 | 0.011404 | 0.011198 |
| 0.011232 | 0.011266 | 0.011232 | 0.011198 | 0.011198 | 0.011198 | 0.011301 |
| 0.011232 | 0.011369 | 0.011301 | 0.011198 | 0.011302 | 0.011404 | 0.011372 |
| 0.011404 | 0.011301 | 0.011198 | 0.011129 | 0.011266 | 0.011198 | 0.011129 |
| 0.011234 | 0.011404 | 0.011198 | 0.011404 | 0.011163 | 0.011266 | 0.011232 |
| 0.011335 | 0.011232 | 0.011266 | 0.011232 | 0.011266 | 0.011129 | 0.011266 |
| 0.011301 | 0.011232 | 0.011301 | 0.011232 | 0.011266 | 0.011301 | 0.011541 |
| 0.011610 | 0.011541 | 0.011610 | 0.011405 | 0.011610 | 0.011266 | 0.011232 |
| 0.011268 | 0.011558 | 0.011390 | 0.011166 | 0.011616 | 0.011130 | 0.011221 |
| 0.011616 | 0.011547 | 0.011438 | 0.011645 | 0.011340 | 0.011507 | 0.011473 |
| 0.011404 | 0.011576 | 0.011424 | 0.011272 | 0.011317 | 0.011301 | 0.011372 |
| 0.011473 | 0.011371 | 0.011476 | 0.011580 | 0.011438 | 0.011576 | 0.011685 |
| 0.011407 | 0.011581 | 0.011476 | 0.011441 | 0.011714 | 0.011163 | 0.011370 |
| 0.011301 | 0.011266 | 0.011163 | 0.011163 | 0.011232 | 0.011232 | 0.011301 |
| 0.011232 | 0.011301 | 0.011198 | 0.011301 | 0.011232 | 0.011232 | 0.011301 |
| 0.011232 | 0.011644 | 0.011541 | 0.011576 | 0.011129 | 0.011232 | 0.011266 |
| 0.011266 | 0.011232 | 0.011301 | 0.011335 | 0.011198 | 0.011198 | 0.011198 |
| 0.011713 | 0.011335 | 0.011370 | 0.011163 | 0.011266 | 0.011438 | 0.011163 |
| 0.011163 | 0.011232 | 0.011232 | 0.011404 | 0.011198 | 0.011335 | 0.011473 |
| 0.011404 | 0.011232 | 0.011232 | 0.011163 | 0.011163 | 0.011266 | 0.011266 |
| 0.011163 | 0.011266 | 0.011129 | 0.011163 | 0.011301 | 0.011438 | 0.011198 |
| 0.011163 | 0.011301 | 0.011232 | 0.011129 | 0.011438 | 0.011129 | 0.011301 |
| 0.011376 | 0.011198 | 0.011473 | 0.011335 | 0.011370 | 0.011232 | 0.011335 |
| 0.011198 | 0.011541 | 0.011129 | 0.011370 | 0.011198 | 0.011198 | 0.011129 |
| 0.011335 | 0.011576 | 0.011266 | 0.011335 | 0.011163 | 0.011541 | 0.011198 |
| 0.011198 | 0.011198 | 0.011232 | 0.011335 | 0.011232 | 0.011335 | 0.011404 |
| 0.011370 | 0.011369 | 0.011266 | 0.011370 | 0.011335 | 0.011198 | 0.011163 |
| 0.011198 | 0.011198 | 0.011266 | 0.011198 | 0.011163 | 0.011335 | 0.011198 |
| 0.011232 | 0.011232 | 0.011335 | 0.011404 | 0.011301 | 0.011232 | 0.011232 |
| 0.011301 | 0.011198 | 0.011335 | 0.011198 | 0.011335 | 0.011438 | 0.011644 |
| 0.011232 | 0.011610 | 0.011234 | 0.017802 | 0.011257 | 0.011427 | 0.011552 |
| 0.011517 | 0.011556 | 0.011322 | 0.011292 | 0.011719 | 0.011587 | 0.011364 |
| 0.011487 | 0.011548 | 0.011138 | 0.011228 | 0.011216 | 0.011307 | 0.011232 |
| 0.011482 | 0.011395 | 0.011394 | 0.011193 | 0.011370 | 0.011404 | 0.011406 |
| 0.011271 | 0.011369 | 0.011369 | 0.011335 | 0.011301 | 0.011301 | 0.011267 |
| 0.011301 | 0.011232 | 0.011266 | 0.011301 | 0.011266 | 0.011198 | 0.011232 |
| 0.011232 | 0.011301 | 0.011198 | 0.011301 | 0.011335 | 0.011369 | 0.011266 |
| 0.011301 | 0.011266 | 0.011507 | 0.011507 | 0.011335 | 0.011370 | 0.011404 |
| 0.011163 | 0.011163 | 0.011198 | 0.011301 | 0.011163 | 0.011404 | 0.011404 |
| 0.011438 | 0.011438 | 0.011370 | 0.011473 | 0.011610 | 0.011474 | 0.011301 |

|          |          |          |          |          |          |          |
|----------|----------|----------|----------|----------|----------|----------|
| 0.011301 | 0.011369 | 0.011404 | 0.011232 | 0.011266 | 0.011232 | 0.011301 |
| 0.011370 | 0.011369 | 0.011404 | 0.011370 | 0.011267 | 0.011473 | 0.011438 |
| 0.011303 | 0.011163 | 0.011301 | 0.011404 | 0.011266 | 0.011438 | 0.011473 |
| 0.011645 | 0.011340 | 0.011507 | 0.011473 | 0.011404 | 0.011576 | 0.011198 |
| 0.011370 | 0.011267 | 0.011232 | 0.011232 | 0.011301 | 0.011198 | 0.011301 |
| 0.011335 | 0.011369 | 0.011266 | 0.011301 | 0.011266 | 0.011507 | 0.011507 |
| 0.011335 | 0.011370 | 0.011404 | 0.011369 | 0.012024 | 0.011426 | 0.011312 |
| 0.011418 | 0.011380 | 0.011492 | 0.011344 | 0.011454 | 0.011413 | 0.011376 |
| 0.011975 | 0.011273 | 0.011411 | 0.011343 | 0.011624 | 0.011478 | 0.011582 |
| 0.011999 | 0.011446 | 0.011301 | 0.011301 | 0.011301 | 0.011335 | 0.011267 |
| 0.011163 | 0.011198 | 0.011335 | 0.011301 | 0.011301 | 0.011438 | 0.011405 |
| 0.011266 | 0.011198 | 0.011232 | 0.011266 | 0.011163 | 0.011232 | 0.011129 |
| 0.011266 | 0.011301 | 0.011198 | 0.011163 | 0.011266 | 0.011198 | 0.011232 |
| 0.011232 | 0.011163 | 0.011232 | 0.011266 | 0.011163 | 0.011370 | 0.011404 |
| 0.011266 | 0.011370 | 0.011301 | 0.011266 | 0.011232 | 0.011610 | 0.011266 |
| 0.011310 | 0.011232 | 0.011473 | 0.011477 | 0.011335 | 0.011335 | 0.011335 |
| 0.011335 | 0.011266 | 0.011232 | 0.011266 | 0.011370 | 0.011370 | 0.011301 |
| 0.011301 | 0.011438 | 0.011576 | 0.011335 | 0.011473 | 0.011473 | 0.011404 |
| 0.011232 | 0.011301 | 0.011335 | 0.011713 | 0.011301 | 0.011335 | 0.011301 |
| 0.011335 | 0.011266 | 0.011266 | 0.011576 | 0.011473 | 0.011541 | 0.011266 |
| 0.011370 | 0.011438 | 0.011301 | 0.011370 | 0.011301 | 0.011198 | 0.011507 |
| 0.011301 | 0.011232 | 0.011266 | 0.011404 | 0.011266 | 0.011369 | 0.011610 |
| 0.011232 | 0.011651 | 0.011644 | 0.011467 | 0.011229 | 0.011371 | 0.011267 |
| 0.011225 | 0.011683 | 0.011202 | 0.011417 | 0.011255 | 0.011366 | 0.011379 |
| 0.011468 | 0.011192 | 0.011339 | 0.011192 | 0.011222 | 0.011395 | 0.011347 |
| 0.011364 | 0.011259 | 0.011344 | 0.011238 | 0.011302 | 0.011438 | 0.011507 |
| 0.011473 | 0.011370 | 0.011475 | 0.011476 | 0.011581 | 0.011639 | 0.011232 |
| 0.011541 | 0.011404 | 0.011266 | 0.011370 | 0.011163 | 0.011404 | 0.011198 |
| 0.011232 | 0.011266 | 0.011232 | 0.011198 | 0.011198 | 0.011198 | 0.011301 |
| 0.011272 | 0.011273 | 0.011268 | 0.011303 | 0.011442 | 0.011405 | 0.011406 |
| 0.011406 | 0.011335 | 0.011135 | 0.011133 | 0.011266 | 0.011438 | 0.011439 |
| 0.011232 | 0.011301 | 0.011541 | 0.011473 | 0.011438 | 0.011473 | 0.011404 |
| 0.011335 | 0.011335 | 0.011404 | 0.011266 | 0.011851 | 0.011438 | 0.011542 |
| 0.011576 | 0.011607 | 0.011270 | 0.011344 | 0.011232 | 0.011438 | 0.011404 |
| 0.011439 | 0.011404 | 0.011438 | 0.011438 | 0.011582 | 0.011610 | 0.011238 |
| 0.011130 | 0.011131 | 0.011234 | 0.011199 | 0.011270 | 0.011137 | 0.011443 |
| 0.011270 | 0.011371 | 0.011108 | 0.011289 | 0.011266 | 0.011338 | 0.011232 |
| 0.011198 | 0.011198 | 0.011266 | 0.011232 | 0.011438 | 0.011404 | 0.011335 |
| 0.011438 | 0.011507 | 0.011232 | 0.011232 | 0.011266 | 0.011266 | 0.011267 |
| 0.011336 | 0.011266 | 0.011266 | 0.011302 | 0.011438 | 0.011507 | 0.011473 |
| 0.011370 | 0.011475 | 0.011476 | 0.011581 | 0.011639 | 0.011232 | 0.011473 |
| 0.011404 | 0.011404 | 0.011233 | 0.011416 | 0.011344 | 0.011374 | 0.011204 |
| 0.011413 | 0.011622 | 0.011364 | 0.011304 | 0.011198 | 0.011404 | 0.011232 |
| 0.011369 | 0.011301 | 0.011198 | 0.011302 | 0.011404 | 0.011372 | 0.011301 |
| 0.011198 | 0.011129 | 0.011266 | 0.011198 | 0.011129 | 0.011234 | 0.011404 |
| 0.011301 | 0.011232 | 0.011266 | 0.011301 | 0.011266 | 0.011198 | 0.011404 |
| 0.011266 | 0.011301 | 0.011301 | 0.011232 | 0.011301 | 0.011507 | 0.011198 |
| 0.011232 | 0.011610 | 0.011232 | 0.011232 | 0.011232 | 0.011576 | 0.011189 |
| 0.011678 | 0.011188 | 0.011261 | 0.011422 | 0.011508 | 0.011422 | 0.011144 |
| 0.011218 | 0.011404 | 0.011507 | 0.011616 | 0.011473 | 0.011614 | 0.011748 |
| 0.011645 | 0.011683 | 0.011644 | 0.011899 | 0.011576 | 0.012505 | 0.011645 |
| 0.012333 | 0.012163 | 0.012302 | 0.012544 | 0.011610 | 0.011301 | 0.011610 |
| 0.012024 | 0.011992 | 0.011576 | 0.011473 | 0.011541 | 0.011541 | 0.011510 |
| 0.011404 | 0.011407 | 0.011473 | 0.011438 | 0.011748 | 0.011816 | 0.011782 |
| 0.011679 | 0.011782 | 0.011853 | 0.011682 | 0.012059 | 0.012064 | 0.012127 |
| 0.012127 | 0.012162 | 0.012104 | 0.012127 | 0.012129 | 0.011335 | 0.011610 |
| 0.011679 | 0.012195 | 0.011719 | 0.011920 | 0.012438 | 0.011477 | 0.011369 |
| 0.011335 | 0.011335 | 0.011748 | 0.011814 | 0.011940 | 0.011679 | 0.011336 |
| S149     | 0.011688 | 0.011688 | 0.011761 | 0.011724 | 0.011724 | 0.011761 |
| 0.011658 | 0.011546 | 0.011724 | 0.011245 | 0.011282 | 0.011282 | 0.011245 |

|          |          |          |          |          |          |          |
|----------|----------|----------|----------|----------|----------|----------|
| 0.011282 | 0.011466 | 0.011245 | 0.011245 | 0.011355 | 0.011318 | 0.011245 |
| 0.011245 | 0.011282 | 0.011392 | 0.011245 | 0.011282 | 0.011208 | 0.011621 |
| 0.011503 | 0.000000 | 0.011171 | 0.011429 | 0.011318 | 0.011318 | 0.011208 |
| 0.011318 | 0.011429 | 0.011318 | 0.011318 | 0.011355 | 0.011318 | 0.011503 |
| 0.011208 | 0.011318 | 0.011355 | 0.011282 | 0.011392 | 0.011429 | 0.011355 |
| 0.011318 | 0.011503 | 0.011282 | 0.011651 | 0.011318 | 0.011577 | 0.011318 |
| 0.011282 | 0.011392 | 0.011429 | 0.011577 | 0.011687 | 0.011355 | 0.011503 |
| 0.011355 | 0.011429 | 0.011282 | 0.011540 | 0.011688 | 0.011318 | 0.011392 |
| 0.011282 | 0.011355 | 0.011319 | 0.011392 | 0.011318 | 0.011355 | 0.011355 |
| 0.011245 | 0.011245 | 0.011208 | 0.011282 | 0.011318 | 0.011318 | 0.011429 |
| 0.011318 | 0.011318 | 0.011392 | 0.011245 | 0.011429 | 0.011245 | 0.011245 |
| 0.011503 | 0.011392 | 0.011614 | 0.011429 | 0.011318 | 0.011577 | 0.011318 |
| 0.011496 | 0.011699 | 0.011524 | 0.011222 | 0.011213 | 0.011258 | 0.011428 |
| 0.011404 | 0.011519 | 0.011227 | 0.011540 | 0.011429 | 0.011318 | 0.011429 |
| 0.011392 | 0.011318 | 0.011429 | 0.011318 | 0.011392 | 0.011318 | 0.011355 |
| 0.011318 | 0.011392 | 0.011577 | 0.011503 | 0.011392 | 0.011355 | 0.011282 |
| 0.011245 | 0.011245 | 0.011318 | 0.011245 | 0.011503 | 0.011466 | 0.011392 |
| 0.011503 | 0.011577 | 0.011245 | 0.011245 | 0.011282 | 0.011282 | 0.011283 |
| 0.011357 | 0.011318 | 0.011318 | 0.011175 | 0.011175 | 0.000000 | 0.011318 |
| 0.011318 | 0.011246 | 0.000000 | 0.000000 | 0.011209 | 0.011247 | 0.011283 |
| 0.011482 | 0.011285 | 0.011319 | 0.011245 | 0.011245 | 0.011392 | 0.011355 |
| 0.011429 | 0.011355 | 0.011355 | 0.011429 | 0.011392 | 0.011798 | 0.011503 |
| 0.011614 | 0.011466 | 0.011318 | 0.011429 | 0.011208 | 0.011429 | 0.011208 |
| 0.011282 | 0.011282 | 0.011245 | 0.011245 | 0.011245 | 0.011245 | 0.011355 |
| 0.011282 | 0.011392 | 0.011282 | 0.011245 | 0.011356 | 0.011466 | 0.011432 |
| 0.011429 | 0.011355 | 0.011208 | 0.011171 | 0.011318 | 0.011208 | 0.011171 |
| 0.011284 | 0.011429 | 0.011245 | 0.011429 | 0.011171 | 0.011282 | 0.011245 |
| 0.011392 | 0.011282 | 0.011318 | 0.011245 | 0.011282 | 0.011171 | 0.011282 |
| 0.011318 | 0.011282 | 0.011355 | 0.011282 | 0.011318 | 0.011355 | 0.011429 |
| 0.011687 | 0.011540 | 0.011651 | 0.011466 | 0.011688 | 0.011318 | 0.011282 |
| 0.011319 | 0.011635 | 0.011363 | 0.011210 | 0.011695 | 0.011173 | 0.011317 |
| 0.011695 | 0.011544 | 0.011429 | 0.011651 | 0.011398 | 0.011540 | 0.011540 |
| 0.011466 | 0.011540 | 0.011414 | 0.011153 | 0.011243 | 0.011355 | 0.011358 |
| 0.011540 | 0.011431 | 0.011469 | 0.011618 | 0.011503 | 0.011614 | 0.011768 |
| 0.011431 | 0.011620 | 0.011581 | 0.011506 | 0.011725 | 0.011208 | 0.011393 |
| 0.011355 | 0.011282 | 0.011171 | 0.011171 | 0.011282 | 0.011282 | 0.011355 |
| 0.011282 | 0.011355 | 0.011245 | 0.011318 | 0.011282 | 0.011282 | 0.011282 |
| 0.011282 | 0.011724 | 0.011577 | 0.011614 | 0.011171 | 0.011282 | 0.011319 |
| 0.011318 | 0.011245 | 0.011355 | 0.011392 | 0.011245 | 0.011245 | 0.011245 |
| 0.011798 | 0.011355 | 0.011429 | 0.011208 | 0.011282 | 0.011503 | 0.011208 |
| 0.011208 | 0.011245 | 0.011282 | 0.011429 | 0.011245 | 0.011392 | 0.011466 |
| 0.011466 | 0.011282 | 0.011282 | 0.011208 | 0.011208 | 0.011355 | 0.011318 |
| 0.011208 | 0.011318 | 0.011171 | 0.011171 | 0.011355 | 0.011503 | 0.011245 |
| 0.011208 | 0.011355 | 0.011282 | 0.011171 | 0.011503 | 0.011171 | 0.011355 |
| 0.011437 | 0.011245 | 0.011540 | 0.011355 | 0.011429 | 0.011282 | 0.011392 |
| 0.011245 | 0.011577 | 0.011171 | 0.011392 | 0.011245 | 0.011245 | 0.011171 |
| 0.011392 | 0.011577 | 0.011282 | 0.011392 | 0.011208 | 0.011577 | 0.011245 |
| 0.011245 | 0.011245 | 0.011245 | 0.011392 | 0.011282 | 0.011392 | 0.011429 |
| 0.011429 | 0.011355 | 0.011318 | 0.011392 | 0.011392 | 0.011245 | 0.011208 |
| 0.011245 | 0.011245 | 0.011282 | 0.011208 | 0.011208 | 0.011355 | 0.011245 |
| 0.011245 | 0.011245 | 0.011392 | 0.011466 | 0.011318 | 0.011282 | 0.011282 |
| 0.011355 | 0.011245 | 0.011392 | 0.011245 | 0.011392 | 0.011466 | 0.011724 |
| 0.011282 | 0.011651 | 0.011283 | 0.018171 | 0.011261 | 0.011452 | 0.011624 |
| 0.011584 | 0.011624 | 0.011330 | 0.011296 | 0.011777 | 0.011657 | 0.011432 |
| 0.011500 | 0.011612 | 0.011182 | 0.011282 | 0.011265 | 0.011370 | 0.011242 |
| 0.011488 | 0.011442 | 0.011446 | 0.011198 | 0.011355 | 0.011466 | 0.011469 |
| 0.011249 | 0.011392 | 0.011392 | 0.011355 | 0.011319 | 0.011319 | 0.011319 |
| 0.011355 | 0.011282 | 0.011245 | 0.011355 | 0.011282 | 0.011245 | 0.011282 |
| 0.011282 | 0.011318 | 0.011208 | 0.011319 | 0.011392 | 0.011429 | 0.011318 |
| 0.011355 | 0.011318 | 0.011577 | 0.011577 | 0.011392 | 0.011430 | 0.011466 |

|          |          |          |          |          |          |          |
|----------|----------|----------|----------|----------|----------|----------|
| 0.011171 | 0.011208 | 0.011245 | 0.011355 | 0.011208 | 0.011466 | 0.011466 |
| 0.011429 | 0.011429 | 0.011392 | 0.011466 | 0.011687 | 0.011467 | 0.011355 |
| 0.011318 | 0.011429 | 0.011466 | 0.011282 | 0.011282 | 0.011245 | 0.011355 |
| 0.011392 | 0.011392 | 0.011429 | 0.011355 | 0.011319 | 0.011466 | 0.011466 |
| 0.011358 | 0.011208 | 0.011318 | 0.011466 | 0.011319 | 0.011503 | 0.011503 |
| 0.011651 | 0.011398 | 0.011540 | 0.011540 | 0.011466 | 0.011540 | 0.011245 |
| 0.011430 | 0.011319 | 0.011282 | 0.011282 | 0.011318 | 0.011208 | 0.011319 |
| 0.011392 | 0.011429 | 0.011318 | 0.011355 | 0.011318 | 0.011577 | 0.011577 |
| 0.011392 | 0.011430 | 0.011466 | 0.011429 | 0.012095 | 0.011455 | 0.011332 |
| 0.011486 | 0.011404 | 0.011525 | 0.011404 | 0.011446 | 0.011478 | 0.011398 |
| 0.012081 | 0.011327 | 0.011475 | 0.011403 | 0.011667 | 0.011509 | 0.011621 |
| 0.012069 | 0.011478 | 0.011320 | 0.011318 | 0.011318 | 0.011392 | 0.011283 |
| 0.011208 | 0.011208 | 0.011355 | 0.011318 | 0.011320 | 0.011466 | 0.011466 |
| 0.011282 | 0.011245 | 0.011282 | 0.011282 | 0.011208 | 0.011245 | 0.011171 |
| 0.011318 | 0.011355 | 0.011245 | 0.011208 | 0.011318 | 0.011245 | 0.011282 |
| 0.011282 | 0.011208 | 0.011282 | 0.011319 | 0.011208 | 0.011429 | 0.011466 |
| 0.011355 | 0.011429 | 0.011355 | 0.011355 | 0.011208 | 0.011687 | 0.011318 |
| 0.011329 | 0.011245 | 0.011503 | 0.011508 | 0.011392 | 0.011318 | 0.011355 |
| 0.011392 | 0.011319 | 0.011282 | 0.011319 | 0.011429 | 0.011429 | 0.011355 |
| 0.011355 | 0.011466 | 0.011651 | 0.011355 | 0.011503 | 0.011503 | 0.011466 |
| 0.011245 | 0.011318 | 0.011392 | 0.011725 | 0.011356 | 0.011392 | 0.011318 |
| 0.011355 | 0.011282 | 0.011282 | 0.011577 | 0.011503 | 0.011540 | 0.011318 |
| 0.011429 | 0.011503 | 0.011318 | 0.011429 | 0.011318 | 0.011245 | 0.011577 |
| 0.011355 | 0.011282 | 0.011282 | 0.011466 | 0.011318 | 0.011429 | 0.011688 |
| 0.011282 | 0.011733 | 0.011724 | 0.011519 | 0.011229 | 0.011392 | 0.011270 |
| 0.011235 | 0.011739 | 0.011246 | 0.011469 | 0.011308 | 0.011423 | 0.011439 |
| 0.011475 | 0.011262 | 0.011343 | 0.011192 | 0.011276 | 0.011402 | 0.011401 |
| 0.011423 | 0.011307 | 0.011402 | 0.011288 | 0.011357 | 0.011466 | 0.011540 |
| 0.011503 | 0.011430 | 0.011543 | 0.011470 | 0.011618 | 0.011682 | 0.011282 |
| 0.011614 | 0.011466 | 0.011318 | 0.011429 | 0.011208 | 0.011429 | 0.011208 |
| 0.011282 | 0.011282 | 0.011245 | 0.011245 | 0.011245 | 0.011245 | 0.011355 |
| 0.011286 | 0.011325 | 0.011319 | 0.011321 | 0.011508 | 0.011430 | 0.011469 |
| 0.011468 | 0.011318 | 0.011178 | 0.011175 | 0.011318 | 0.011503 | 0.011430 |
| 0.011282 | 0.011355 | 0.011614 | 0.011540 | 0.011466 | 0.011540 | 0.011466 |
| 0.011355 | 0.011466 | 0.011466 | 0.011355 | 0.011946 | 0.011429 | 0.011540 |
| 0.011651 | 0.011611 | 0.011285 | 0.011364 | 0.011245 | 0.011503 | 0.011466 |
| 0.011467 | 0.011466 | 0.011466 | 0.011466 | 0.011622 | 0.011688 | 0.011251 |
| 0.011172 | 0.011136 | 0.000000 | 0.011247 | 0.011286 | 0.011142 | 0.011508 |
| 0.011324 | 0.011445 | 0.011113 | 0.011307 | 0.011318 | 0.011396 | 0.011282 |
| 0.011245 | 0.011245 | 0.011318 | 0.011245 | 0.011503 | 0.011466 | 0.011392 |
| 0.011503 | 0.011577 | 0.011245 | 0.011245 | 0.011282 | 0.011282 | 0.011283 |
| 0.011357 | 0.011318 | 0.011318 | 0.011357 | 0.011466 | 0.011540 | 0.011503 |
| 0.011430 | 0.011543 | 0.011470 | 0.011618 | 0.011682 | 0.011282 | 0.011503 |
| 0.011466 | 0.011466 | 0.011246 | 0.011479 | 0.011365 | 0.011397 | 0.011291 |
| 0.011325 | 0.011562 | 0.011483 | 0.011359 | 0.011245 | 0.011429 | 0.011282 |
| 0.011392 | 0.011282 | 0.011245 | 0.011356 | 0.011466 | 0.011432 | 0.011355 |
| 0.011208 | 0.011171 | 0.011318 | 0.011208 | 0.011171 | 0.011284 | 0.011429 |
| 0.011355 | 0.011282 | 0.011245 | 0.011355 | 0.011282 | 0.011245 | 0.011429 |
| 0.011318 | 0.011355 | 0.011355 | 0.011282 | 0.011355 | 0.011540 | 0.011208 |
| 0.011282 | 0.011687 | 0.011282 | 0.011282 | 0.011282 | 0.011651 | 0.011191 |
| 0.011689 | 0.011235 | 0.011261 | 0.011474 | 0.011562 | 0.011477 | 0.011188 |
| 0.011218 | 0.011466 | 0.011577 | 0.011694 | 0.011540 | 0.011688 | 0.011835 |
| 0.011725 | 0.011766 | 0.011687 | 0.011990 | 0.011614 | 0.012538 | 0.011725 |
| 0.012353 | 0.012242 | 0.012393 | 0.012614 | 0.011577 | 0.011318 | 0.011688 |
| 0.012095 | 0.011873 | 0.011651 | 0.011540 | 0.011577 | 0.011577 | 0.011580 |
| 0.011466 | 0.011468 | 0.011503 | 0.011503 | 0.011836 | 0.011909 | 0.011909 |
| 0.011761 | 0.011909 | 0.011872 | 0.011799 | 0.012132 | 0.012139 | 0.012243 |
| 0.012206 | 0.012243 | 0.012169 | 0.012206 | 0.012132 | 0.011392 | 0.011688 |
| 0.011688 | 0.012205 | 0.011804 | 0.011909 | 0.011761 | 0.011506 | 0.011429 |
| 0.011392 | 0.011392 | 0.011835 | 0.011881 | 0.011970 | 0.011687 | 0.011392 |

|          |          |          |          |          |          |          |
|----------|----------|----------|----------|----------|----------|----------|
| S150     | 0.011647 | 0.011647 | 0.011750 | 0.011716 | 0.011716 | 0.011750 |
| 0.011619 | 0.011514 | 0.011716 | 0.011233 | 0.011302 | 0.011267 | 0.011233 |
| 0.011267 | 0.011440 | 0.011233 | 0.011267 | 0.011336 | 0.011302 | 0.011267 |
| 0.011233 | 0.011267 | 0.011371 | 0.011233 | 0.011267 | 0.011267 | 0.011584 |
| 0.011509 | 0.000000 | 0.011164 | 0.011405 | 0.011336 | 0.011302 | 0.011267 |
| 0.011302 | 0.011405 | 0.011302 | 0.011302 | 0.011336 | 0.011302 | 0.011474 |
| 0.011233 | 0.011302 | 0.011336 | 0.011267 | 0.011371 | 0.011405 | 0.011336 |
| 0.011302 | 0.011474 | 0.011371 | 0.011612 | 0.011302 | 0.011578 | 0.011302 |
| 0.011267 | 0.011371 | 0.011440 | 0.011578 | 0.011647 | 0.011371 | 0.011474 |
| 0.011336 | 0.011405 | 0.011302 | 0.011509 | 0.011716 | 0.011302 | 0.011371 |
| 0.011267 | 0.011371 | 0.011336 | 0.011405 | 0.011336 | 0.011336 | 0.011336 |
| 0.011233 | 0.011267 | 0.011198 | 0.011302 | 0.011302 | 0.011337 | 0.011405 |
| 0.011336 | 0.011302 | 0.011371 | 0.011267 | 0.011405 | 0.011233 | 0.011267 |
| 0.011474 | 0.011405 | 0.011612 | 0.011405 | 0.011302 | 0.011543 | 0.011302 |
| 0.011471 | 0.011663 | 0.011513 | 0.011216 | 0.011210 | 0.011283 | 0.011415 |
| 0.012048 | 0.011518 | 0.011225 | 0.011543 | 0.011543 | 0.011336 | 0.011405 |
| 0.011371 | 0.011336 | 0.011405 | 0.011302 | 0.011405 | 0.011336 | 0.011336 |
| 0.011302 | 0.011405 | 0.011612 | 0.011474 | 0.011371 | 0.011336 | 0.011267 |
| 0.011233 | 0.011233 | 0.011302 | 0.011267 | 0.011474 | 0.011440 | 0.011371 |
| 0.011474 | 0.011543 | 0.011267 | 0.011267 | 0.011302 | 0.011302 | 0.011303 |
| 0.011373 | 0.011302 | 0.011302 | 0.011168 | 0.011207 | 0.000000 | 0.011302 |
| 0.011302 | 0.011235 | 0.000000 | 0.000000 | 0.011200 | 0.011235 | 0.011268 |
| 0.011528 | 0.011306 | 0.011340 | 0.011233 | 0.011233 | 0.011371 | 0.011336 |
| 0.011405 | 0.011336 | 0.011336 | 0.011440 | 0.011371 | 0.011750 | 0.011509 |
| 0.011578 | 0.011440 | 0.011302 | 0.011405 | 0.011198 | 0.011440 | 0.011233 |
| 0.011267 | 0.011302 | 0.011267 | 0.011233 | 0.011267 | 0.011233 | 0.011336 |
| 0.011267 | 0.011405 | 0.011336 | 0.011233 | 0.011337 | 0.011440 | 0.011442 |
| 0.011440 | 0.011336 | 0.011233 | 0.011164 | 0.011302 | 0.011233 | 0.011164 |
| 0.011270 | 0.011440 | 0.011233 | 0.011440 | 0.011198 | 0.011267 | 0.011267 |
| 0.011371 | 0.011267 | 0.011302 | 0.011267 | 0.011302 | 0.011164 | 0.011302 |
| 0.011302 | 0.011267 | 0.011336 | 0.011267 | 0.011302 | 0.011336 | 0.011578 |
| 0.011647 | 0.011509 | 0.011647 | 0.011441 | 0.011647 | 0.011302 | 0.011267 |
| 0.011303 | 0.011602 | 0.011390 | 0.011201 | 0.011653 | 0.011165 | 0.011302 |
| 0.011653 | 0.011583 | 0.011474 | 0.011681 | 0.011376 | 0.011543 | 0.011509 |
| 0.011440 | 0.011612 | 0.011426 | 0.011230 | 0.011317 | 0.011336 | 0.011373 |
| 0.011509 | 0.011407 | 0.011512 | 0.011617 | 0.011543 | 0.011612 | 0.011722 |
| 0.011441 | 0.011618 | 0.011547 | 0.011477 | 0.011751 | 0.011198 | 0.011406 |
| 0.011371 | 0.011302 | 0.011198 | 0.011164 | 0.011267 | 0.011267 | 0.011336 |
| 0.011267 | 0.011336 | 0.011233 | 0.011336 | 0.011267 | 0.011267 | 0.011336 |
| 0.011267 | 0.011681 | 0.011578 | 0.011612 | 0.011164 | 0.011267 | 0.011302 |
| 0.011302 | 0.011267 | 0.011336 | 0.011371 | 0.011233 | 0.011233 | 0.011233 |
| 0.011750 | 0.011371 | 0.011405 | 0.011198 | 0.011302 | 0.011474 | 0.011233 |
| 0.011198 | 0.011267 | 0.011267 | 0.011440 | 0.011233 | 0.011371 | 0.011509 |
| 0.011440 | 0.011267 | 0.011267 | 0.011198 | 0.011198 | 0.011336 | 0.011302 |
| 0.011198 | 0.011302 | 0.011164 | 0.011198 | 0.011336 | 0.011474 | 0.011233 |
| 0.011198 | 0.011336 | 0.011267 | 0.011164 | 0.011474 | 0.011164 | 0.011336 |
| 0.011412 | 0.011233 | 0.011509 | 0.011336 | 0.011405 | 0.011267 | 0.011371 |
| 0.011233 | 0.011578 | 0.011164 | 0.011405 | 0.011233 | 0.011233 | 0.011164 |
| 0.011405 | 0.011613 | 0.011302 | 0.011371 | 0.011198 | 0.011578 | 0.011233 |
| 0.011233 | 0.011233 | 0.011267 | 0.011371 | 0.011267 | 0.011371 | 0.011440 |
| 0.011405 | 0.011405 | 0.011302 | 0.011405 | 0.011371 | 0.011233 | 0.011198 |
| 0.011233 | 0.011233 | 0.011302 | 0.011233 | 0.011198 | 0.011371 | 0.011233 |
| 0.011267 | 0.011267 | 0.011371 | 0.011440 | 0.011336 | 0.011267 | 0.011267 |
| 0.011336 | 0.011233 | 0.011371 | 0.011233 | 0.011371 | 0.011474 | 0.011681 |
| 0.011267 | 0.011647 | 0.011271 | 0.017841 | 0.011257 | 0.011427 | 0.011592 |
| 0.011552 | 0.011592 | 0.011322 | 0.011292 | 0.011774 | 0.011621 | 0.011425 |
| 0.011487 | 0.011610 | 0.011177 | 0.011270 | 0.011255 | 0.011356 | 0.011275 |
| 0.011483 | 0.011433 | 0.011431 | 0.011193 | 0.011405 | 0.011440 | 0.011442 |
| 0.011272 | 0.011405 | 0.011405 | 0.011371 | 0.011336 | 0.011336 | 0.011302 |
| 0.011336 | 0.011267 | 0.011302 | 0.011336 | 0.011267 | 0.011233 | 0.011267 |



|          |          |          |          |          |          |          |
|----------|----------|----------|----------|----------|----------|----------|
| 0.011267 | 0.011336 | 0.011233 | 0.011336 | 0.011371 | 0.011405 | 0.011302 |
| 0.011336 | 0.011302 | 0.011578 | 0.011578 | 0.011371 | 0.011406 | 0.011440 |
| 0.011198 | 0.011198 | 0.011233 | 0.011336 | 0.011198 | 0.011440 | 0.011440 |
| 0.011474 | 0.011474 | 0.011405 | 0.011509 | 0.011647 | 0.011510 | 0.011336 |
| 0.011336 | 0.011405 | 0.011440 | 0.011267 | 0.011336 | 0.011267 | 0.011336 |
| 0.011405 | 0.011405 | 0.011440 | 0.011405 | 0.011302 | 0.011509 | 0.011474 |
| 0.011339 | 0.011233 | 0.011336 | 0.011440 | 0.011302 | 0.011474 | 0.011509 |
| 0.011681 | 0.011376 | 0.011543 | 0.011509 | 0.011440 | 0.011612 | 0.011233 |
| 0.011406 | 0.011302 | 0.011267 | 0.011267 | 0.011336 | 0.011233 | 0.011336 |
| 0.011371 | 0.011405 | 0.011302 | 0.011336 | 0.011302 | 0.011578 | 0.011578 |
| 0.011371 | 0.011406 | 0.011474 | 0.011405 | 0.012062 | 0.011464 | 0.011350 |
| 0.011458 | 0.011417 | 0.011494 | 0.011416 | 0.011492 | 0.011450 | 0.011411 |
| 0.012013 | 0.011309 | 0.011448 | 0.011380 | 0.011662 | 0.011480 | 0.011619 |
| 0.012038 | 0.011448 | 0.011338 | 0.011336 | 0.011336 | 0.011371 | 0.011303 |
| 0.011198 | 0.011233 | 0.011371 | 0.011336 | 0.011338 | 0.011474 | 0.011441 |
| 0.011302 | 0.011233 | 0.011267 | 0.011302 | 0.011198 | 0.011233 | 0.011164 |
| 0.011302 | 0.011336 | 0.011233 | 0.011198 | 0.011302 | 0.011233 | 0.011267 |
| 0.011267 | 0.011198 | 0.011267 | 0.011302 | 0.011198 | 0.011405 | 0.011440 |
| 0.011336 | 0.011405 | 0.011336 | 0.011336 | 0.011267 | 0.011647 | 0.011302 |
| 0.011311 | 0.011267 | 0.011509 | 0.011513 | 0.011371 | 0.011371 | 0.011371 |
| 0.011371 | 0.011302 | 0.011267 | 0.011302 | 0.011405 | 0.011405 | 0.011336 |
| 0.011336 | 0.011474 | 0.011612 | 0.011371 | 0.011543 | 0.011543 | 0.011440 |
| 0.011267 | 0.011336 | 0.011371 | 0.011716 | 0.011336 | 0.011371 | 0.011336 |
| 0.011371 | 0.011302 | 0.011302 | 0.011612 | 0.011543 | 0.011578 | 0.011302 |
| 0.011405 | 0.011474 | 0.011336 | 0.011405 | 0.011336 | 0.011233 | 0.011543 |
| 0.011336 | 0.011302 | 0.011302 | 0.011474 | 0.011302 | 0.011405 | 0.011647 |
| 0.011267 | 0.011688 | 0.011681 | 0.011507 | 0.011229 | 0.011405 | 0.011267 |
| 0.011225 | 0.011722 | 0.011237 | 0.011462 | 0.011304 | 0.011417 | 0.011432 |
| 0.011468 | 0.011258 | 0.011339 | 0.011192 | 0.011276 | 0.011395 | 0.011387 |
| 0.011402 | 0.011298 | 0.011382 | 0.011275 | 0.011337 | 0.011474 | 0.011543 |
| 0.011509 | 0.011406 | 0.011512 | 0.011513 | 0.011617 | 0.011641 | 0.011302 |
| 0.011578 | 0.011440 | 0.011302 | 0.011405 | 0.011198 | 0.011440 | 0.011233 |
| 0.011267 | 0.011302 | 0.011267 | 0.011233 | 0.011267 | 0.011233 | 0.011336 |
| 0.011306 | 0.011309 | 0.011302 | 0.011339 | 0.011478 | 0.011440 | 0.011442 |
| 0.011442 | 0.011371 | 0.011171 | 0.011168 | 0.011302 | 0.011474 | 0.011440 |
| 0.011267 | 0.011336 | 0.011578 | 0.011544 | 0.011474 | 0.011509 | 0.011440 |
| 0.011371 | 0.011440 | 0.011440 | 0.011336 | 0.011889 | 0.011474 | 0.011578 |
| 0.011612 | 0.011647 | 0.011306 | 0.011380 | 0.011267 | 0.011474 | 0.011440 |
| 0.011475 | 0.011440 | 0.011509 | 0.011509 | 0.011583 | 0.011647 | 0.011239 |
| 0.011165 | 0.011132 | 0.000000 | 0.011235 | 0.011271 | 0.011137 | 0.011479 |
| 0.011306 | 0.011421 | 0.011109 | 0.011290 | 0.011302 | 0.011374 | 0.011267 |
| 0.011233 | 0.011233 | 0.011302 | 0.011267 | 0.011474 | 0.011440 | 0.011371 |
| 0.011474 | 0.011543 | 0.011267 | 0.011267 | 0.011302 | 0.011302 | 0.011303 |
| 0.011373 | 0.011302 | 0.011302 | 0.011337 | 0.011474 | 0.011543 | 0.011509 |
| 0.011406 | 0.011512 | 0.011513 | 0.011617 | 0.011641 | 0.011302 | 0.011509 |
| 0.011440 | 0.011440 | 0.011268 | 0.011453 | 0.011345 | 0.011410 | 0.011276 |
| 0.011379 | 0.011579 | 0.011452 | 0.011340 | 0.011233 | 0.011440 | 0.011267 |
| 0.011405 | 0.011336 | 0.011233 | 0.011337 | 0.011440 | 0.011442 | 0.011336 |
| 0.011233 | 0.011164 | 0.011302 | 0.011233 | 0.011164 | 0.011270 | 0.011440 |
| 0.011336 | 0.011267 | 0.011302 | 0.011336 | 0.011267 | 0.011233 | 0.011440 |
| 0.011302 | 0.011336 | 0.011336 | 0.011267 | 0.011336 | 0.011543 | 0.011233 |
| 0.011267 | 0.011647 | 0.011267 | 0.011267 | 0.011267 | 0.011612 | 0.011189 |
| 0.011679 | 0.011230 | 0.011261 | 0.011463 | 0.011549 | 0.011458 | 0.011186 |
| 0.011218 | 0.011440 | 0.011543 | 0.011652 | 0.011509 | 0.011651 | 0.011785 |
| 0.011682 | 0.011720 | 0.011681 | 0.011937 | 0.011612 | 0.012476 | 0.011682 |
| 0.012373 | 0.012202 | 0.012341 | 0.012585 | 0.011647 | 0.011336 | 0.011647 |
| 0.012027 | 0.012030 | 0.011612 | 0.011509 | 0.011578 | 0.011578 | 0.011547 |
| 0.011440 | 0.011443 | 0.011509 | 0.011474 | 0.011820 | 0.011889 | 0.011854 |
| 0.011785 | 0.011889 | 0.011925 | 0.011754 | 0.012062 | 0.012103 | 0.012166 |
| 0.012166 | 0.012166 | 0.012137 | 0.012131 | 0.012064 | 0.011371 | 0.011647 |

|          |          |          |          |          |          |          |
|----------|----------|----------|----------|----------|----------|----------|
| 0.011681 | 0.012269 | 0.011756 | 0.011923 | 0.012443 | 0.011513 | 0.011405 |
| 0.011371 | 0.011371 | 0.011854 | 0.011859 | 0.011983 | 0.011716 | 0.011372 |
| S151     | 0.011570 | 0.011570 | 0.011706 | 0.011672 | 0.011672 | 0.011740 |
| 0.011576 | 0.011473 | 0.011672 | 0.011162 | 0.011230 | 0.011196 | 0.011162 |
| 0.011196 | 0.011366 | 0.011162 | 0.011196 | 0.011264 | 0.011230 | 0.011196 |
| 0.011162 | 0.011196 | 0.011298 | 0.011162 | 0.011196 | 0.011196 | 0.011541 |
| 0.011434 | 0.011196 | 0.011094 | 0.011332 | 0.011230 | 0.011230 | 0.011264 |
| 0.011196 | 0.011332 | 0.011230 | 0.011230 | 0.011264 | 0.011230 | 0.011400 |
| 0.011162 | 0.011230 | 0.011264 | 0.011196 | 0.011298 | 0.011332 | 0.011230 |
| 0.011230 | 0.011400 | 0.011298 | 0.011570 | 0.011230 | 0.011502 | 0.011230 |
| 0.011196 | 0.011298 | 0.011366 | 0.011502 | 0.011570 | 0.011298 | 0.011400 |
| 0.011264 | 0.011332 | 0.011230 | 0.011468 | 0.011706 | 0.011230 | 0.011298 |
| 0.011196 | 0.011298 | 0.011264 | 0.011332 | 0.011264 | 0.011264 | 0.011264 |
| 0.011162 | 0.011196 | 0.011162 | 0.011264 | 0.011230 | 0.011264 | 0.011332 |
| 0.011264 | 0.011196 | 0.011298 | 0.011196 | 0.011332 | 0.011162 | 0.011230 |
| 0.011400 | 0.011332 | 0.011570 | 0.011400 | 0.011230 | 0.011468 | 0.011230 |
| 0.011398 | 0.011627 | 0.011404 | 0.011139 | 0.011136 | 0.011246 | 0.011339 |
| 0.011985 | 0.011370 | 0.011144 | 0.011468 | 0.011468 | 0.011264 | 0.011366 |
| 0.011298 | 0.011264 | 0.011332 | 0.011230 | 0.011332 | 0.011264 | 0.011264 |
| 0.011230 | 0.011332 | 0.011536 | 0.011400 | 0.011298 | 0.011264 | 0.011196 |
| 0.011162 | 0.011162 | 0.011230 | 0.011196 | 0.011400 | 0.011366 | 0.011298 |
| 0.011400 | 0.011468 | 0.011196 | 0.011196 | 0.011230 | 0.011230 | 0.011231 |
| 0.011300 | 0.011230 | 0.011230 | 0.011096 | 0.011169 | 0.011130 | 0.011230 |
| 0.011231 | 0.011164 | 0.011209 | 0.011200 | 0.000000 | 0.011163 | 0.011196 |
| 0.011456 | 0.011233 | 0.011268 | 0.011162 | 0.011165 | 0.011298 | 0.011264 |
| 0.011332 | 0.011265 | 0.011264 | 0.011332 | 0.011298 | 0.011672 | 0.011434 |
| 0.011502 | 0.011366 | 0.011230 | 0.011332 | 0.011128 | 0.011366 | 0.011162 |
| 0.011230 | 0.011230 | 0.011196 | 0.011162 | 0.011196 | 0.011162 | 0.011264 |
| 0.011230 | 0.011332 | 0.011264 | 0.011162 | 0.011265 | 0.011366 | 0.011368 |
| 0.011366 | 0.011264 | 0.011162 | 0.011094 | 0.011230 | 0.011162 | 0.011094 |
| 0.011198 | 0.011366 | 0.011162 | 0.011366 | 0.011128 | 0.011230 | 0.011196 |
| 0.011298 | 0.011196 | 0.011230 | 0.011196 | 0.011230 | 0.011094 | 0.011230 |
| 0.011264 | 0.011196 | 0.011264 | 0.011196 | 0.011230 | 0.011264 | 0.011502 |
| 0.011604 | 0.011536 | 0.011604 | 0.011367 | 0.011604 | 0.011230 | 0.011196 |
| 0.011231 | 0.011509 | 0.011292 | 0.011130 | 0.011610 | 0.011095 | 0.011220 |
| 0.011610 | 0.011507 | 0.011366 | 0.011604 | 0.011268 | 0.011468 | 0.011434 |
| 0.011366 | 0.011536 | 0.011382 | 0.011184 | 0.011270 | 0.011264 | 0.011334 |
| 0.011434 | 0.011333 | 0.011471 | 0.011540 | 0.011468 | 0.011536 | 0.011643 |
| 0.011367 | 0.011540 | 0.011468 | 0.011400 | 0.011673 | 0.011128 | 0.011332 |
| 0.011298 | 0.011230 | 0.011128 | 0.011128 | 0.011196 | 0.011196 | 0.011264 |
| 0.011196 | 0.011264 | 0.011162 | 0.011264 | 0.011196 | 0.011196 | 0.011264 |
| 0.011196 | 0.011638 | 0.011536 | 0.011570 | 0.011094 | 0.011196 | 0.011230 |
| 0.011230 | 0.011196 | 0.011264 | 0.011298 | 0.011162 | 0.011162 | 0.011162 |
| 0.011706 | 0.011298 | 0.011332 | 0.011128 | 0.011230 | 0.011400 | 0.011162 |
| 0.011162 | 0.011230 | 0.011196 | 0.011366 | 0.011162 | 0.011298 | 0.011400 |
| 0.011366 | 0.011162 | 0.011196 | 0.011094 | 0.011128 | 0.011298 | 0.011230 |
| 0.011094 | 0.011196 | 0.011094 | 0.011128 | 0.011264 | 0.011400 | 0.011162 |
| 0.011128 | 0.011264 | 0.011196 | 0.011094 | 0.011434 | 0.011094 | 0.011264 |
| 0.011337 | 0.011162 | 0.011468 | 0.011298 | 0.011332 | 0.011196 | 0.011298 |
| 0.011162 | 0.011502 | 0.011094 | 0.011366 | 0.011162 | 0.011162 | 0.011094 |
| 0.011332 | 0.011536 | 0.011230 | 0.011298 | 0.011128 | 0.011536 | 0.011162 |
| 0.011162 | 0.011162 | 0.011196 | 0.011298 | 0.011196 | 0.011298 | 0.011366 |
| 0.011366 | 0.011332 | 0.011230 | 0.011332 | 0.011298 | 0.011162 | 0.011128 |
| 0.011162 | 0.011162 | 0.011230 | 0.011162 | 0.011128 | 0.011298 | 0.011162 |
| 0.011196 | 0.011196 | 0.011332 | 0.011366 | 0.011264 | 0.011196 | 0.011196 |
| 0.011264 | 0.011162 | 0.011298 | 0.011162 | 0.011298 | 0.011400 | 0.011638 |
| 0.011196 | 0.011604 | 0.011200 | 0.017789 | 0.011127 | 0.011305 | 0.011554 |
| 0.011515 | 0.011558 | 0.011220 | 0.011178 | 0.011619 | 0.011584 | 0.011246 |
| 0.011397 | 0.011427 | 0.011100 | 0.011145 | 0.011179 | 0.011211 | 0.011147 |
| 0.011393 | 0.011362 | 0.011360 | 0.011195 | 0.011332 | 0.011366 | 0.011368 |

|          |          |          |          |          |          |          |
|----------|----------|----------|----------|----------|----------|----------|
| 0.011233 | 0.011298 | 0.011332 | 0.011298 | 0.011264 | 0.011264 | 0.011230 |
| 0.011264 | 0.011196 | 0.011230 | 0.011264 | 0.011230 | 0.011162 | 0.011196 |
| 0.011196 | 0.011264 | 0.011162 | 0.011264 | 0.011298 | 0.011332 | 0.011230 |
| 0.011264 | 0.011230 | 0.011570 | 0.011570 | 0.011298 | 0.011332 | 0.011366 |
| 0.011128 | 0.011128 | 0.011162 | 0.011264 | 0.011128 | 0.011366 | 0.011366 |
| 0.011400 | 0.011366 | 0.011332 | 0.011434 | 0.011604 | 0.011435 | 0.011264 |
| 0.011264 | 0.011298 | 0.011366 | 0.011196 | 0.011264 | 0.011230 | 0.011264 |
| 0.011332 | 0.011332 | 0.011366 | 0.011332 | 0.011231 | 0.011434 | 0.011400 |
| 0.011266 | 0.011162 | 0.011264 | 0.011332 | 0.011264 | 0.011400 | 0.011434 |
| 0.011604 | 0.011268 | 0.011468 | 0.011434 | 0.011366 | 0.011536 | 0.011162 |
| 0.011333 | 0.011230 | 0.011196 | 0.011196 | 0.011264 | 0.011162 | 0.011264 |
| 0.011298 | 0.011332 | 0.011230 | 0.011264 | 0.011230 | 0.011570 | 0.011570 |
| 0.011298 | 0.011332 | 0.011400 | 0.011332 | 0.011945 | 0.011383 | 0.011309 |
| 0.011377 | 0.011340 | 0.011448 | 0.011340 | 0.011447 | 0.011373 | 0.011337 |
| 0.011893 | 0.011234 | 0.011371 | 0.011303 | 0.011578 | 0.011437 | 0.011541 |
| 0.011919 | 0.011400 | 0.011266 | 0.011264 | 0.011264 | 0.011298 | 0.011231 |
| 0.011128 | 0.011162 | 0.011298 | 0.011264 | 0.011265 | 0.011400 | 0.011367 |
| 0.011230 | 0.011162 | 0.011196 | 0.011230 | 0.011128 | 0.011196 | 0.011094 |
| 0.011230 | 0.011264 | 0.011162 | 0.011128 | 0.011230 | 0.011162 | 0.011196 |
| 0.011196 | 0.011128 | 0.011196 | 0.011230 | 0.011128 | 0.011332 | 0.011366 |
| 0.011264 | 0.011332 | 0.011264 | 0.011264 | 0.011196 | 0.011570 | 0.011230 |
| 0.011270 | 0.011196 | 0.011434 | 0.011437 | 0.011298 | 0.011298 | 0.011298 |
| 0.011298 | 0.011230 | 0.011196 | 0.011230 | 0.011332 | 0.011332 | 0.011264 |
| 0.011264 | 0.011366 | 0.011570 | 0.011298 | 0.011502 | 0.011502 | 0.011366 |
| 0.011196 | 0.011264 | 0.011298 | 0.011706 | 0.011264 | 0.011298 | 0.011264 |
| 0.011298 | 0.011230 | 0.011230 | 0.011536 | 0.011434 | 0.011502 | 0.011230 |
| 0.011332 | 0.011400 | 0.011264 | 0.011332 | 0.011298 | 0.011162 | 0.011502 |
| 0.011264 | 0.011230 | 0.011230 | 0.011400 | 0.011230 | 0.011332 | 0.011570 |
| 0.011196 | 0.011645 | 0.011638 | 0.011431 | 0.011173 | 0.011335 | 0.011217 |
| 0.011115 | 0.011651 | 0.011167 | 0.011377 | 0.011209 | 0.011319 | 0.011276 |
| 0.011371 | 0.000000 | 0.011230 | 0.000000 | 0.011170 | 0.011265 | 0.011307 |
| 0.011327 | 0.011220 | 0.011309 | 0.011238 | 0.011265 | 0.011400 | 0.011468 |
| 0.011434 | 0.011332 | 0.011436 | 0.011403 | 0.011540 | 0.011597 | 0.011230 |
| 0.011502 | 0.011366 | 0.011230 | 0.011332 | 0.011128 | 0.011366 | 0.011162 |
| 0.011230 | 0.011230 | 0.011196 | 0.011162 | 0.011196 | 0.011162 | 0.011264 |
| 0.011236 | 0.011235 | 0.011233 | 0.011266 | 0.011403 | 0.011371 | 0.011370 |
| 0.011369 | 0.011298 | 0.011097 | 0.011096 | 0.011231 | 0.011403 | 0.011369 |
| 0.011196 | 0.011266 | 0.011502 | 0.011470 | 0.011400 | 0.011434 | 0.011366 |
| 0.011298 | 0.011366 | 0.011366 | 0.011264 | 0.011842 | 0.011434 | 0.011502 |
| 0.011536 | 0.011601 | 0.011233 | 0.011304 | 0.011196 | 0.011400 | 0.011366 |
| 0.011401 | 0.011400 | 0.011434 | 0.011434 | 0.011578 | 0.011570 | 0.011200 |
| 0.011095 | 0.011095 | 0.011198 | 0.011163 | 0.011266 | 0.011098 | 0.011438 |
| 0.011234 | 0.011368 | 0.000000 | 0.011248 | 0.011230 | 0.011300 | 0.011196 |
| 0.011162 | 0.011162 | 0.011230 | 0.011196 | 0.011400 | 0.011366 | 0.011298 |
| 0.011400 | 0.011468 | 0.011196 | 0.011196 | 0.011230 | 0.011230 | 0.011231 |
| 0.011300 | 0.011230 | 0.011230 | 0.011265 | 0.011400 | 0.011468 | 0.011434 |
| 0.011332 | 0.011436 | 0.011403 | 0.011540 | 0.011597 | 0.011230 | 0.011434 |
| 0.011366 | 0.011366 | 0.011197 | 0.011377 | 0.011306 | 0.011336 | 0.011166 |
| 0.011374 | 0.011522 | 0.011360 | 0.011267 | 0.011162 | 0.011366 | 0.011230 |
| 0.011332 | 0.011264 | 0.011162 | 0.011265 | 0.011366 | 0.011368 | 0.011264 |
| 0.011162 | 0.011094 | 0.011230 | 0.011162 | 0.011094 | 0.011198 | 0.011366 |
| 0.011264 | 0.011196 | 0.011230 | 0.011264 | 0.011230 | 0.011162 | 0.011366 |
| 0.011230 | 0.011264 | 0.011264 | 0.011196 | 0.011264 | 0.011502 | 0.011162 |
| 0.011196 | 0.011570 | 0.011196 | 0.011196 | 0.011196 | 0.011570 | 0.011104 |
| 0.011567 | 0.011145 | 0.011162 | 0.011383 | 0.011472 | 0.011387 | 0.000000 |
| 0.011114 | 0.011366 | 0.011468 | 0.011575 | 0.011435 | 0.011573 | 0.011706 |
| 0.011604 | 0.011641 | 0.011604 | 0.011854 | 0.011570 | 0.012455 | 0.011605 |
| 0.012285 | 0.012117 | 0.012219 | 0.012493 | 0.011570 | 0.011264 | 0.011570 |
| 0.011979 | 0.011947 | 0.011536 | 0.011434 | 0.011502 | 0.011502 | 0.011471 |
| 0.011366 | 0.011369 | 0.011434 | 0.011400 | 0.011774 | 0.011842 | 0.011842 |

|          |          |          |          |          |          |          |
|----------|----------|----------|----------|----------|----------|----------|
| 0.011741 | 0.011842 | 0.011946 | 0.011710 | 0.011979 | 0.011984 | 0.012047 |
| 0.012047 | 0.012081 | 0.012026 | 0.012047 | 0.012049 | 0.011298 | 0.011604 |
| 0.011672 | 0.012114 | 0.011677 | 0.011910 | 0.012388 | 0.011438 | 0.011332 |
| 0.011298 | 0.011298 | 0.011774 | 0.011801 | 0.011878 | 0.011638 | 0.011299 |
| S152     | 0.011608 | 0.011608 | 0.011711 | 0.011677 | 0.011677 | 0.011746 |
| 0.011580 | 0.011476 | 0.011677 | 0.011197 | 0.011266 | 0.011232 | 0.011197 |
| 0.011231 | 0.011403 | 0.011197 | 0.011231 | 0.011300 | 0.011266 | 0.011231 |
| 0.011197 | 0.011232 | 0.011334 | 0.011197 | 0.011232 | 0.011232 | 0.011545 |
| 0.011471 | 0.011232 | 0.011129 | 0.011368 | 0.011266 | 0.011266 | 0.011300 |
| 0.011232 | 0.011369 | 0.011266 | 0.011266 | 0.011300 | 0.011266 | 0.011437 |
| 0.011197 | 0.011266 | 0.011300 | 0.011231 | 0.011334 | 0.011368 | 0.011266 |
| 0.011266 | 0.011437 | 0.011334 | 0.011574 | 0.011266 | 0.011540 | 0.011266 |
| 0.011231 | 0.011334 | 0.011403 | 0.011540 | 0.011574 | 0.011334 | 0.011437 |
| 0.011266 | 0.011369 | 0.011266 | 0.011471 | 0.011711 | 0.011266 | 0.011334 |
| 0.011232 | 0.011334 | 0.011300 | 0.011368 | 0.011300 | 0.011300 | 0.011300 |
| 0.011197 | 0.011231 | 0.011197 | 0.011300 | 0.011266 | 0.011300 | 0.011368 |
| 0.011300 | 0.011231 | 0.011334 | 0.011231 | 0.011368 | 0.011197 | 0.011232 |
| 0.011437 | 0.011368 | 0.011608 | 0.011403 | 0.011266 | 0.011506 | 0.011266 |
| 0.011439 | 0.011632 | 0.011442 | 0.011179 | 0.011174 | 0.011286 | 0.011379 |
| 0.012023 | 0.011474 | 0.011186 | 0.011505 | 0.011506 | 0.011300 | 0.011369 |
| 0.011334 | 0.011300 | 0.011368 | 0.011266 | 0.011369 | 0.011300 | 0.011300 |
| 0.011266 | 0.011368 | 0.011574 | 0.011437 | 0.011334 | 0.011300 | 0.011232 |
| 0.011197 | 0.011197 | 0.011266 | 0.011231 | 0.011437 | 0.011403 | 0.011334 |
| 0.011437 | 0.011505 | 0.011231 | 0.011231 | 0.011266 | 0.011266 | 0.011267 |
| 0.011336 | 0.011266 | 0.011266 | 0.011132 | 0.011205 | 0.011165 | 0.011266 |
| 0.011266 | 0.011199 | 0.011247 | 0.011235 | 0.011163 | 0.000000 | 0.011232 |
| 0.011492 | 0.011267 | 0.011303 | 0.011197 | 0.011200 | 0.011334 | 0.011300 |
| 0.011369 | 0.011300 | 0.011300 | 0.011334 | 0.011334 | 0.011711 | 0.011471 |
| 0.011540 | 0.011403 | 0.011266 | 0.011369 | 0.011163 | 0.011403 | 0.011197 |
| 0.011232 | 0.011266 | 0.011231 | 0.011197 | 0.011231 | 0.011197 | 0.011300 |
| 0.011266 | 0.011368 | 0.011300 | 0.011197 | 0.011301 | 0.011403 | 0.011405 |
| 0.011403 | 0.011300 | 0.011197 | 0.011129 | 0.011266 | 0.011197 | 0.011129 |
| 0.011234 | 0.011403 | 0.011197 | 0.011403 | 0.011163 | 0.011266 | 0.011232 |
| 0.011334 | 0.011231 | 0.011266 | 0.011232 | 0.011266 | 0.011129 | 0.011266 |
| 0.011300 | 0.011231 | 0.011300 | 0.011231 | 0.011266 | 0.011300 | 0.011540 |
| 0.011608 | 0.011540 | 0.011608 | 0.011404 | 0.011608 | 0.011266 | 0.011231 |
| 0.011267 | 0.011554 | 0.011341 | 0.011165 | 0.011614 | 0.011130 | 0.011261 |
| 0.011615 | 0.011545 | 0.011403 | 0.011643 | 0.011304 | 0.011506 | 0.011471 |
| 0.011403 | 0.011574 | 0.011421 | 0.011269 | 0.011313 | 0.011300 | 0.011371 |
| 0.011471 | 0.011370 | 0.011474 | 0.011578 | 0.011506 | 0.011574 | 0.011682 |
| 0.011404 | 0.011578 | 0.011506 | 0.011437 | 0.011712 | 0.011163 | 0.011369 |
| 0.011334 | 0.011266 | 0.011163 | 0.011163 | 0.011232 | 0.011232 | 0.011300 |
| 0.011231 | 0.011300 | 0.011197 | 0.011300 | 0.011232 | 0.011231 | 0.011300 |
| 0.011232 | 0.011643 | 0.011540 | 0.011574 | 0.011129 | 0.011232 | 0.011266 |
| 0.011266 | 0.011231 | 0.011266 | 0.011334 | 0.011197 | 0.011197 | 0.011197 |
| 0.011711 | 0.011334 | 0.011368 | 0.011163 | 0.011266 | 0.011437 | 0.011197 |
| 0.011197 | 0.011231 | 0.011231 | 0.011403 | 0.011197 | 0.011334 | 0.011437 |
| 0.011403 | 0.011197 | 0.011231 | 0.011129 | 0.011163 | 0.011334 | 0.011266 |
| 0.011129 | 0.011231 | 0.011129 | 0.011163 | 0.011300 | 0.011437 | 0.011197 |
| 0.011163 | 0.011300 | 0.011231 | 0.011129 | 0.011437 | 0.000000 | 0.011300 |
| 0.011374 | 0.011197 | 0.011471 | 0.011334 | 0.011369 | 0.011232 | 0.011334 |
| 0.011197 | 0.011540 | 0.011129 | 0.011369 | 0.011197 | 0.011197 | 0.011129 |
| 0.011368 | 0.011574 | 0.011266 | 0.011334 | 0.011163 | 0.011540 | 0.011197 |
| 0.011197 | 0.011197 | 0.011231 | 0.011334 | 0.011231 | 0.011334 | 0.011403 |
| 0.011369 | 0.011368 | 0.011266 | 0.011369 | 0.011300 | 0.011197 | 0.011163 |
| 0.011197 | 0.011197 | 0.011266 | 0.011197 | 0.011163 | 0.011334 | 0.011197 |
| 0.011231 | 0.011232 | 0.011368 | 0.011403 | 0.011300 | 0.011231 | 0.011232 |
| 0.011300 | 0.011163 | 0.011334 | 0.011197 | 0.011334 | 0.011437 | 0.011643 |
| 0.011232 | 0.011608 | 0.011236 | 0.017889 | 0.011261 | 0.011367 | 0.011558 |
| 0.011519 | 0.011562 | 0.011327 | 0.011297 | 0.011676 | 0.011588 | 0.011370 |

|          |          |          |          |          |          |          |
|----------|----------|----------|----------|----------|----------|----------|
| 0.011494 | 0.011489 | 0.011139 | 0.011230 | 0.011218 | 0.011311 | 0.011234 |
| 0.011489 | 0.011400 | 0.011398 | 0.011195 | 0.011369 | 0.011403 | 0.011405 |
| 0.011269 | 0.011334 | 0.011368 | 0.011334 | 0.011300 | 0.011300 | 0.011266 |
| 0.011300 | 0.011231 | 0.011266 | 0.011300 | 0.011266 | 0.011197 | 0.011231 |
| 0.011231 | 0.011300 | 0.011197 | 0.011300 | 0.011334 | 0.011368 | 0.011266 |
| 0.011300 | 0.011266 | 0.011540 | 0.011540 | 0.011334 | 0.011369 | 0.011403 |
| 0.011163 | 0.011163 | 0.011197 | 0.011300 | 0.011163 | 0.011403 | 0.011403 |
| 0.011437 | 0.011403 | 0.011369 | 0.011471 | 0.011608 | 0.011473 | 0.011300 |
| 0.011300 | 0.011334 | 0.011403 | 0.011232 | 0.011300 | 0.011266 | 0.011300 |
| 0.011369 | 0.011368 | 0.011403 | 0.011369 | 0.011266 | 0.011471 | 0.011437 |
| 0.011302 | 0.011197 | 0.011300 | 0.011369 | 0.011266 | 0.011437 | 0.011471 |
| 0.011643 | 0.011304 | 0.011506 | 0.011471 | 0.011403 | 0.011574 | 0.011197 |
| 0.011369 | 0.011266 | 0.011231 | 0.011231 | 0.011300 | 0.011197 | 0.011300 |
| 0.011334 | 0.011368 | 0.011266 | 0.011300 | 0.011266 | 0.011540 | 0.011540 |
| 0.011334 | 0.011369 | 0.011437 | 0.011368 | 0.011986 | 0.011421 | 0.011347 |
| 0.011415 | 0.011377 | 0.011486 | 0.011378 | 0.011450 | 0.011410 | 0.011372 |
| 0.011935 | 0.011270 | 0.011408 | 0.011340 | 0.011617 | 0.011474 | 0.011580 |
| 0.011960 | 0.011441 | 0.011302 | 0.011300 | 0.011300 | 0.011334 | 0.011267 |
| 0.011163 | 0.011197 | 0.011334 | 0.011300 | 0.011302 | 0.011437 | 0.011404 |
| 0.011266 | 0.011197 | 0.011232 | 0.011266 | 0.011163 | 0.011232 | 0.011129 |
| 0.011266 | 0.011300 | 0.011197 | 0.011163 | 0.011266 | 0.011197 | 0.011232 |
| 0.011231 | 0.011163 | 0.011232 | 0.011266 | 0.011163 | 0.011369 | 0.011403 |
| 0.011300 | 0.011369 | 0.011300 | 0.011300 | 0.011231 | 0.011574 | 0.011266 |
| 0.011307 | 0.011232 | 0.011471 | 0.011475 | 0.011334 | 0.011334 | 0.011334 |
| 0.011334 | 0.011266 | 0.011231 | 0.011266 | 0.011368 | 0.011369 | 0.011300 |
| 0.011300 | 0.011403 | 0.011574 | 0.011334 | 0.011506 | 0.011506 | 0.011403 |
| 0.011231 | 0.011300 | 0.011334 | 0.011711 | 0.011300 | 0.011334 | 0.011300 |
| 0.011334 | 0.011266 | 0.011266 | 0.011574 | 0.011471 | 0.011540 | 0.011266 |
| 0.011369 | 0.011437 | 0.011300 | 0.011369 | 0.011300 | 0.011197 | 0.011505 |
| 0.011300 | 0.011266 | 0.011266 | 0.011437 | 0.011266 | 0.011368 | 0.011608 |
| 0.011231 | 0.011649 | 0.011643 | 0.011472 | 0.011230 | 0.011372 | 0.011270 |
| 0.011226 | 0.011691 | 0.011204 | 0.011423 | 0.011259 | 0.011371 | 0.011385 |
| 0.011475 | 0.011195 | 0.011344 | 0.011195 | 0.011225 | 0.011403 | 0.011351 |
| 0.011368 | 0.011261 | 0.011348 | 0.011240 | 0.011301 | 0.011437 | 0.011506 |
| 0.011471 | 0.011369 | 0.011474 | 0.011475 | 0.011579 | 0.011601 | 0.011266 |
| 0.011540 | 0.011403 | 0.011266 | 0.011369 | 0.011163 | 0.011403 | 0.011197 |
| 0.011232 | 0.011266 | 0.011231 | 0.011197 | 0.011231 | 0.011197 | 0.011300 |
| 0.011272 | 0.011270 | 0.011268 | 0.011300 | 0.011437 | 0.011405 | 0.011405 |
| 0.011403 | 0.011334 | 0.011134 | 0.011132 | 0.011266 | 0.011437 | 0.011403 |
| 0.011231 | 0.011300 | 0.011540 | 0.011507 | 0.011437 | 0.011471 | 0.011403 |
| 0.011334 | 0.011403 | 0.011403 | 0.011300 | 0.011848 | 0.011437 | 0.011540 |
| 0.011574 | 0.011606 | 0.011269 | 0.011342 | 0.011231 | 0.011437 | 0.011403 |
| 0.011438 | 0.011437 | 0.011471 | 0.011471 | 0.011620 | 0.011608 | 0.011237 |
| 0.011129 | 0.000000 | 0.011233 | 0.011199 | 0.011268 | 0.011136 | 0.011441 |
| 0.011270 | 0.011413 | 0.011156 | 0.011286 | 0.011266 | 0.011334 | 0.011232 |
| 0.011197 | 0.011197 | 0.011266 | 0.011231 | 0.011437 | 0.011403 | 0.011334 |
| 0.011437 | 0.011505 | 0.011231 | 0.011231 | 0.011266 | 0.011266 | 0.011267 |
| 0.011336 | 0.011266 | 0.011266 | 0.011301 | 0.011437 | 0.011506 | 0.011471 |
| 0.011369 | 0.011474 | 0.011475 | 0.011579 | 0.011601 | 0.011266 | 0.011471 |
| 0.011403 | 0.011403 | 0.011233 | 0.011415 | 0.011343 | 0.011373 | 0.011238 |
| 0.011412 | 0.011620 | 0.011404 | 0.011268 | 0.011197 | 0.011403 | 0.011266 |
| 0.011368 | 0.011300 | 0.011197 | 0.011301 | 0.011403 | 0.011405 | 0.011300 |
| 0.011197 | 0.011129 | 0.011266 | 0.011197 | 0.011129 | 0.011234 | 0.011403 |
| 0.011300 | 0.011231 | 0.011266 | 0.011300 | 0.011266 | 0.011197 | 0.011403 |
| 0.011266 | 0.011300 | 0.011300 | 0.011231 | 0.011300 | 0.011506 | 0.011197 |
| 0.011232 | 0.011574 | 0.011231 | 0.011232 | 0.011231 | 0.011574 | 0.011191 |
| 0.011680 | 0.011188 | 0.011264 | 0.011423 | 0.011514 | 0.011426 | 0.011145 |
| 0.011220 | 0.011403 | 0.011506 | 0.011614 | 0.011472 | 0.011612 | 0.011746 |
| 0.011643 | 0.011680 | 0.011643 | 0.011896 | 0.011574 | 0.012501 | 0.011644 |
| 0.012295 | 0.012160 | 0.012263 | 0.012505 | 0.011608 | 0.011300 | 0.011608 |

|          |          |          |          |          |          |          |
|----------|----------|----------|----------|----------|----------|----------|
| 0.012021 | 0.011989 | 0.011574 | 0.011471 | 0.011540 | 0.011540 | 0.011509 |
| 0.011403 | 0.011406 | 0.011471 | 0.011437 | 0.011814 | 0.011883 | 0.011883 |
| 0.011781 | 0.011883 | 0.011919 | 0.011749 | 0.012021 | 0.012027 | 0.012090 |
| 0.012090 | 0.012124 | 0.012035 | 0.012090 | 0.012092 | 0.011334 | 0.011643 |
| 0.011677 | 0.012157 | 0.011717 | 0.011952 | 0.012433 | 0.011476 | 0.011369 |
| 0.011334 | 0.011334 | 0.011814 | 0.011842 | 0.011914 | 0.011677 | 0.011335 |
| S153     | 0.011634 | 0.011634 | 0.011770 | 0.011736 | 0.011736 | 0.011804 |
| 0.011641 | 0.011539 | 0.011736 | 0.011229 | 0.011297 | 0.011196 | 0.011229 |
| 0.011263 | 0.011432 | 0.011229 | 0.011263 | 0.011330 | 0.011297 | 0.011263 |
| 0.011229 | 0.011263 | 0.011364 | 0.011229 | 0.011263 | 0.011263 | 0.011607 |
| 0.011499 | 0.011263 | 0.011162 | 0.011398 | 0.011297 | 0.011297 | 0.011330 |
| 0.011297 | 0.011398 | 0.011297 | 0.011297 | 0.011330 | 0.011297 | 0.011466 |
| 0.011229 | 0.011297 | 0.011330 | 0.011263 | 0.011364 | 0.011398 | 0.011330 |
| 0.011297 | 0.011466 | 0.011364 | 0.011634 | 0.011297 | 0.011567 | 0.011297 |
| 0.011263 | 0.011364 | 0.011432 | 0.011567 | 0.011634 | 0.011364 | 0.011466 |
| 0.011330 | 0.011398 | 0.011297 | 0.011533 | 0.011770 | 0.011297 | 0.011364 |
| 0.011263 | 0.011364 | 0.011330 | 0.011398 | 0.011330 | 0.011330 | 0.011330 |
| 0.011229 | 0.011263 | 0.011229 | 0.011330 | 0.011297 | 0.011331 | 0.011398 |
| 0.011330 | 0.011263 | 0.011364 | 0.011263 | 0.011398 | 0.011229 | 0.011297 |
| 0.011465 | 0.011398 | 0.011634 | 0.011432 | 0.011297 | 0.011533 | 0.011297 |
| 0.011470 | 0.011698 | 0.011477 | 0.011217 | 0.011210 | 0.011319 | 0.011416 |
| 0.012052 | 0.011521 | 0.011226 | 0.011533 | 0.011533 | 0.011330 | 0.011432 |
| 0.011364 | 0.011330 | 0.011398 | 0.011297 | 0.011398 | 0.011330 | 0.011330 |
| 0.011297 | 0.011398 | 0.011601 | 0.011465 | 0.011364 | 0.011331 | 0.011263 |
| 0.011229 | 0.011229 | 0.011297 | 0.011263 | 0.011465 | 0.011432 | 0.011364 |
| 0.011465 | 0.011533 | 0.011263 | 0.011263 | 0.011297 | 0.011297 | 0.011298 |
| 0.011366 | 0.011297 | 0.011297 | 0.011168 | 0.011241 | 0.011200 | 0.011297 |
| 0.011298 | 0.011233 | 0.011283 | 0.011268 | 0.011196 | 0.011232 | 0.000000 |
| 0.011528 | 0.011302 | 0.011336 | 0.011229 | 0.011234 | 0.011364 | 0.011330 |
| 0.011398 | 0.011331 | 0.011330 | 0.011398 | 0.011364 | 0.011736 | 0.011499 |
| 0.011567 | 0.011432 | 0.011297 | 0.011398 | 0.011195 | 0.011432 | 0.011229 |
| 0.011297 | 0.011297 | 0.011263 | 0.011229 | 0.011263 | 0.011229 | 0.011330 |
| 0.011297 | 0.011398 | 0.011330 | 0.011229 | 0.011331 | 0.011432 | 0.011434 |
| 0.011432 | 0.011330 | 0.011229 | 0.011162 | 0.011297 | 0.011229 | 0.011162 |
| 0.011265 | 0.011432 | 0.011229 | 0.011432 | 0.011195 | 0.011297 | 0.011263 |
| 0.011364 | 0.011263 | 0.011297 | 0.011263 | 0.011297 | 0.011162 | 0.011297 |
| 0.011330 | 0.011263 | 0.011330 | 0.011263 | 0.011297 | 0.011330 | 0.011567 |
| 0.011668 | 0.011601 | 0.011668 | 0.011433 | 0.011668 | 0.011297 | 0.011263 |
| 0.011298 | 0.011587 | 0.011382 | 0.011198 | 0.011675 | 0.011163 | 0.011258 |
| 0.011675 | 0.011572 | 0.011465 | 0.011668 | 0.011335 | 0.011533 | 0.011499 |
| 0.011432 | 0.011601 | 0.011453 | 0.011309 | 0.011355 | 0.011330 | 0.011401 |
| 0.011499 | 0.011399 | 0.011537 | 0.011605 | 0.011533 | 0.011601 | 0.011708 |
| 0.011435 | 0.011606 | 0.011536 | 0.011468 | 0.011737 | 0.011195 | 0.011399 |
| 0.011364 | 0.011297 | 0.011195 | 0.011195 | 0.011263 | 0.011263 | 0.011330 |
| 0.011263 | 0.011330 | 0.011229 | 0.011330 | 0.011263 | 0.011263 | 0.011330 |
| 0.011263 | 0.011702 | 0.011601 | 0.011634 | 0.011162 | 0.011263 | 0.011297 |
| 0.011297 | 0.011263 | 0.011330 | 0.011364 | 0.011229 | 0.011229 | 0.011229 |
| 0.011770 | 0.011364 | 0.011398 | 0.011195 | 0.011297 | 0.011466 | 0.011229 |
| 0.011229 | 0.011297 | 0.011263 | 0.011432 | 0.011229 | 0.011364 | 0.011465 |
| 0.011432 | 0.011263 | 0.011263 | 0.011195 | 0.011195 | 0.011364 | 0.011297 |
| 0.011195 | 0.011297 | 0.011162 | 0.011195 | 0.011330 | 0.011466 | 0.011229 |
| 0.011195 | 0.011330 | 0.011263 | 0.011162 | 0.011499 | 0.011162 | 0.011330 |
| 0.011404 | 0.000000 | 0.011533 | 0.011364 | 0.011398 | 0.011263 | 0.011364 |
| 0.011229 | 0.011567 | 0.011162 | 0.011432 | 0.011229 | 0.011229 | 0.011162 |
| 0.011398 | 0.011601 | 0.011297 | 0.011364 | 0.011195 | 0.011601 | 0.011229 |
| 0.011229 | 0.011229 | 0.011263 | 0.011364 | 0.011263 | 0.011364 | 0.011432 |
| 0.011398 | 0.011398 | 0.011297 | 0.011398 | 0.011364 | 0.011229 | 0.011195 |
| 0.011229 | 0.011229 | 0.011297 | 0.011229 | 0.011195 | 0.011364 | 0.011229 |
| 0.011263 | 0.011263 | 0.011398 | 0.011432 | 0.011330 | 0.011263 | 0.011263 |
| 0.011330 | 0.011229 | 0.011364 | 0.011229 | 0.011364 | 0.011465 | 0.011702 |

|          |          |          |          |          |          |          |
|----------|----------|----------|----------|----------|----------|----------|
| 0.011263 | 0.011668 | 0.011268 | 0.017820 | 0.011192 | 0.011367 | 0.011621 |
| 0.011582 | 0.011626 | 0.011376 | 0.011352 | 0.011668 | 0.011650 | 0.011305 |
| 0.011537 | 0.011488 | 0.011178 | 0.011271 | 0.011256 | 0.011259 | 0.011276 |
| 0.011532 | 0.011434 | 0.011433 | 0.011326 | 0.011398 | 0.011432 | 0.011434 |
| 0.011302 | 0.011398 | 0.011398 | 0.011364 | 0.011330 | 0.011331 | 0.011297 |
| 0.011330 | 0.011263 | 0.011297 | 0.011330 | 0.011297 | 0.011229 | 0.011263 |
| 0.011263 | 0.011330 | 0.011229 | 0.011331 | 0.011364 | 0.011398 | 0.011297 |
| 0.011330 | 0.011297 | 0.011634 | 0.011634 | 0.011364 | 0.011399 | 0.011432 |
| 0.011195 | 0.011195 | 0.011229 | 0.011330 | 0.011195 | 0.011432 | 0.011432 |
| 0.011465 | 0.011465 | 0.011398 | 0.011499 | 0.011668 | 0.011501 | 0.011330 |
| 0.011330 | 0.011364 | 0.011432 | 0.011263 | 0.011330 | 0.011297 | 0.011330 |
| 0.011398 | 0.011398 | 0.011432 | 0.011398 | 0.011297 | 0.011499 | 0.011465 |
| 0.011333 | 0.011229 | 0.011330 | 0.011398 | 0.011331 | 0.011466 | 0.011499 |
| 0.011668 | 0.011335 | 0.011533 | 0.011499 | 0.011432 | 0.011601 | 0.011229 |
| 0.011399 | 0.011297 | 0.011263 | 0.011263 | 0.011330 | 0.011229 | 0.011331 |
| 0.011364 | 0.011398 | 0.011297 | 0.011330 | 0.011297 | 0.011634 | 0.011634 |
| 0.011364 | 0.011399 | 0.011465 | 0.011398 | 0.012041 | 0.011454 | 0.011379 |
| 0.011448 | 0.011409 | 0.011518 | 0.011409 | 0.011517 | 0.011442 | 0.011406 |
| 0.011992 | 0.011303 | 0.011439 | 0.011372 | 0.011647 | 0.011505 | 0.011607 |
| 0.012017 | 0.011476 | 0.011332 | 0.011330 | 0.011330 | 0.011364 | 0.011298 |
| 0.011195 | 0.011229 | 0.011364 | 0.011330 | 0.011332 | 0.011465 | 0.011433 |
| 0.011297 | 0.011229 | 0.011263 | 0.011297 | 0.011195 | 0.011263 | 0.011162 |
| 0.011297 | 0.011330 | 0.011229 | 0.011195 | 0.011297 | 0.011229 | 0.011263 |
| 0.011263 | 0.011195 | 0.011263 | 0.011297 | 0.011195 | 0.011398 | 0.011432 |
| 0.011330 | 0.011398 | 0.011330 | 0.011330 | 0.011263 | 0.011634 | 0.011297 |
| 0.011340 | 0.011263 | 0.011499 | 0.011503 | 0.011364 | 0.011364 | 0.011364 |
| 0.011364 | 0.011297 | 0.011263 | 0.011297 | 0.011398 | 0.011398 | 0.011330 |
| 0.011330 | 0.011432 | 0.011634 | 0.011364 | 0.011567 | 0.011567 | 0.011432 |
| 0.011263 | 0.011330 | 0.011364 | 0.011770 | 0.011331 | 0.011364 | 0.011330 |
| 0.011364 | 0.011297 | 0.011297 | 0.011533 | 0.011533 | 0.011567 | 0.011297 |
| 0.011398 | 0.011466 | 0.011330 | 0.011398 | 0.011364 | 0.011229 | 0.011567 |
| 0.011330 | 0.011297 | 0.011297 | 0.011466 | 0.011297 | 0.011398 | 0.011635 |
| 0.011263 | 0.011709 | 0.011702 | 0.011509 | 0.011286 | 0.011402 | 0.011319 |
| 0.011170 | 0.011725 | 0.011237 | 0.011419 | 0.011306 | 0.011316 | 0.011381 |
| 0.011522 | 0.011127 | 0.011340 | 0.011193 | 0.011223 | 0.011398 | 0.011386 |
| 0.011401 | 0.011298 | 0.011379 | 0.011273 | 0.011331 | 0.011465 | 0.011533 |
| 0.011499 | 0.011398 | 0.011502 | 0.011503 | 0.011572 | 0.011629 | 0.011297 |
| 0.011567 | 0.011432 | 0.011297 | 0.011398 | 0.011195 | 0.011432 | 0.011229 |
| 0.011297 | 0.011297 | 0.011263 | 0.011229 | 0.011263 | 0.011229 | 0.011330 |
| 0.011305 | 0.011305 | 0.011301 | 0.011334 | 0.011471 | 0.011437 | 0.011436 |
| 0.011435 | 0.011364 | 0.011171 | 0.011168 | 0.011298 | 0.011468 | 0.011469 |
| 0.011263 | 0.011332 | 0.011567 | 0.011535 | 0.011466 | 0.011499 | 0.011432 |
| 0.011364 | 0.011432 | 0.011432 | 0.011330 | 0.011905 | 0.011499 | 0.011567 |
| 0.011601 | 0.011669 | 0.011300 | 0.011373 | 0.011263 | 0.011465 | 0.011432 |
| 0.011466 | 0.011465 | 0.011499 | 0.011499 | 0.011613 | 0.011634 | 0.011269 |
| 0.011162 | 0.011165 | 0.011265 | 0.000000 | 0.011335 | 0.011173 | 0.011504 |
| 0.011302 | 0.011456 | 0.011204 | 0.011323 | 0.011297 | 0.011368 | 0.011263 |
| 0.011229 | 0.011229 | 0.011297 | 0.011263 | 0.011465 | 0.011432 | 0.011364 |
| 0.011465 | 0.011533 | 0.011263 | 0.011263 | 0.011297 | 0.011297 | 0.011298 |
| 0.011366 | 0.011297 | 0.011297 | 0.011331 | 0.011465 | 0.011533 | 0.011499 |
| 0.011398 | 0.011502 | 0.011503 | 0.011572 | 0.011629 | 0.011297 | 0.011499 |
| 0.011432 | 0.011432 | 0.011230 | 0.011445 | 0.011375 | 0.011368 | 0.011236 |
| 0.011406 | 0.011611 | 0.011442 | 0.011334 | 0.011229 | 0.011432 | 0.011297 |
| 0.011398 | 0.011330 | 0.011229 | 0.011331 | 0.011432 | 0.011434 | 0.011330 |
| 0.011229 | 0.011162 | 0.011297 | 0.011229 | 0.011162 | 0.011265 | 0.011432 |
| 0.011330 | 0.011263 | 0.011297 | 0.011330 | 0.011297 | 0.011229 | 0.011432 |
| 0.011297 | 0.011330 | 0.011330 | 0.011263 | 0.011330 | 0.011567 | 0.011229 |
| 0.011263 | 0.011634 | 0.011263 | 0.011263 | 0.011263 | 0.011634 | 0.011233 |
| 0.011736 | 0.011231 | 0.011312 | 0.011463 | 0.011551 | 0.011457 | 0.011186 |
| 0.011271 | 0.011432 | 0.011533 | 0.011640 | 0.011500 | 0.011638 | 0.011770 |

|          |          |          |          |          |          |          |
|----------|----------|----------|----------|----------|----------|----------|
| 0.011668 | 0.011705 | 0.011668 | 0.011918 | 0.011634 | 0.012514 | 0.011669 |
| 0.012379 | 0.012178 | 0.012314 | 0.012587 | 0.011634 | 0.011330 | 0.011634 |
| 0.012075 | 0.012010 | 0.011601 | 0.011499 | 0.011567 | 0.011567 | 0.011537 |
| 0.011432 | 0.011435 | 0.011499 | 0.011466 | 0.011838 | 0.011905 | 0.011905 |
| 0.011805 | 0.011905 | 0.012009 | 0.011774 | 0.012075 | 0.012081 | 0.012143 |
| 0.012143 | 0.012177 | 0.012124 | 0.012143 | 0.012145 | 0.011364 | 0.011668 |
| 0.011736 | 0.012244 | 0.011742 | 0.011973 | 0.012448 | 0.011504 | 0.011398 |
| 0.011364 | 0.011364 | 0.011837 | 0.011883 | 0.011943 | 0.011702 | 0.011365 |
| S154     | 0.011924 | 0.011924 | 0.011744 | 0.011708 | 0.011708 | 0.011744 |
| 0.011534 | 0.011425 | 0.011708 | 0.011456 | 0.011564 | 0.011529 | 0.011492 |
| 0.011456 | 0.011708 | 0.011420 | 0.011528 | 0.011600 | 0.011564 | 0.011528 |
| 0.011492 | 0.011528 | 0.011348 | 0.011493 | 0.011529 | 0.011528 | 0.011498 |
| 0.011492 | 0.011528 | 0.011420 | 0.011384 | 0.011564 | 0.011564 | 0.011456 |
| 0.011528 | 0.011636 | 0.011564 | 0.011564 | 0.011600 | 0.011564 | 0.011744 |
| 0.011420 | 0.011564 | 0.011600 | 0.011528 | 0.011564 | 0.011672 | 0.011564 |
| 0.011564 | 0.011744 | 0.011637 | 0.011528 | 0.011564 | 0.011852 | 0.011564 |
| 0.011528 | 0.011564 | 0.011708 | 0.011852 | 0.011528 | 0.011528 | 0.011636 |
| 0.011600 | 0.011672 | 0.011564 | 0.011780 | 0.011600 | 0.011564 | 0.011636 |
| 0.011528 | 0.011636 | 0.011528 | 0.011672 | 0.011600 | 0.011600 | 0.011600 |
| 0.011492 | 0.011528 | 0.011456 | 0.011492 | 0.011564 | 0.011601 | 0.011636 |
| 0.011600 | 0.011528 | 0.011636 | 0.011528 | 0.011528 | 0.011492 | 0.011528 |
| 0.011744 | 0.011636 | 0.011564 | 0.011672 | 0.011564 | 0.011816 | 0.011564 |
| 0.011725 | 0.011573 | 0.011690 | 0.011388 | 0.011411 | 0.011565 | 0.011348 |
| 0.012052 | 0.011167 | 0.011448 | 0.011780 | 0.011780 | 0.011528 | 0.011564 |
| 0.011636 | 0.011600 | 0.011672 | 0.011564 | 0.011672 | 0.011600 | 0.011600 |
| 0.011564 | 0.011600 | 0.011888 | 0.011708 | 0.011636 | 0.011600 | 0.011528 |
| 0.011492 | 0.011420 | 0.011564 | 0.011528 | 0.011456 | 0.011420 | 0.011348 |
| 0.011456 | 0.011528 | 0.011456 | 0.011456 | 0.011492 | 0.011492 | 0.011495 |
| 0.011568 | 0.011564 | 0.011564 | 0.011425 | 0.011469 | 0.011458 | 0.011564 |
| 0.011564 | 0.011496 | 0.011482 | 0.011528 | 0.011456 | 0.011492 | 0.011528 |
| 0.000000 | 0.011564 | 0.011604 | 0.011492 | 0.011492 | 0.011636 | 0.011528 |
| 0.011600 | 0.011600 | 0.011600 | 0.011636 | 0.011636 | 0.012033 | 0.011708 |
| 0.011564 | 0.011564 | 0.011564 | 0.011564 | 0.011456 | 0.011420 | 0.011492 |
| 0.011528 | 0.011564 | 0.011528 | 0.011492 | 0.011528 | 0.011492 | 0.011600 |
| 0.011528 | 0.011636 | 0.011600 | 0.011456 | 0.011566 | 0.011672 | 0.011676 |
| 0.011708 | 0.011600 | 0.011492 | 0.011422 | 0.011564 | 0.011492 | 0.011420 |
| 0.011425 | 0.011708 | 0.011492 | 0.011708 | 0.011456 | 0.011528 | 0.011456 |
| 0.011636 | 0.011528 | 0.011564 | 0.011528 | 0.011564 | 0.011420 | 0.011564 |
| 0.011564 | 0.011528 | 0.011600 | 0.011528 | 0.011564 | 0.011600 | 0.011852 |
| 0.011528 | 0.011420 | 0.011528 | 0.011710 | 0.011564 | 0.011564 | 0.011528 |
| 0.011494 | 0.011797 | 0.011550 | 0.011465 | 0.011570 | 0.011425 | 0.011610 |
| 0.011570 | 0.011206 | 0.011672 | 0.011961 | 0.011610 | 0.011780 | 0.011780 |
| 0.011708 | 0.011852 | 0.011737 | 0.011500 | 0.011591 | 0.011600 | 0.011675 |
| 0.011744 | 0.011675 | 0.011713 | 0.011895 | 0.011816 | 0.011816 | 0.012004 |
| 0.011708 | 0.011895 | 0.011816 | 0.011744 | 0.012034 | 0.011456 | 0.011673 |
| 0.011636 | 0.011564 | 0.011456 | 0.011420 | 0.011528 | 0.011492 | 0.011600 |
| 0.011528 | 0.011600 | 0.011492 | 0.011528 | 0.011528 | 0.011528 | 0.011600 |
| 0.011528 | 0.011600 | 0.011456 | 0.011492 | 0.011420 | 0.011528 | 0.011564 |
| 0.011564 | 0.011456 | 0.011564 | 0.011528 | 0.011492 | 0.011492 | 0.011492 |
| 0.011672 | 0.011564 | 0.011672 | 0.011456 | 0.011564 | 0.011744 | 0.011492 |
| 0.011456 | 0.011528 | 0.011528 | 0.011708 | 0.011492 | 0.011420 | 0.011492 |
| 0.011492 | 0.011492 | 0.011528 | 0.011420 | 0.011456 | 0.011564 | 0.011564 |
| 0.011420 | 0.011528 | 0.011420 | 0.011420 | 0.011600 | 0.011384 | 0.011492 |
| 0.011456 | 0.011600 | 0.011528 | 0.011420 | 0.011384 | 0.011420 | 0.011600 |
| 0.011684 | 0.011492 | 0.011420 | 0.011600 | 0.011600 | 0.011528 | 0.011636 |
| 0.011492 | 0.011852 | 0.011420 | 0.011492 | 0.011420 | 0.011420 | 0.011420 |
| 0.011672 | 0.011240 | 0.011564 | 0.011636 | 0.011456 | 0.011456 | 0.011420 |
| 0.011492 | 0.011492 | 0.011492 | 0.011636 | 0.011492 | 0.011600 | 0.011672 |
| 0.011672 | 0.011672 | 0.011564 | 0.011672 | 0.011636 | 0.011492 | 0.011456 |
| 0.011492 | 0.011492 | 0.011564 | 0.011420 | 0.011456 | 0.011636 | 0.011492 |



|          |          |          |           |          |          |          |
|----------|----------|----------|-----------|----------|----------|----------|
| 0.011456 | 0.011528 | 0.011636 | 0.011636  | 0.011600 | 0.011528 | 0.011492 |
| 0.011600 | 0.011456 | 0.011636 | 0.011492  | 0.011636 | 0.011708 | 0.011600 |
| 0.011528 | 0.011564 | 0.011536 | 0.0117306 | 0.011262 | 0.011513 | 0.011504 |
| 0.011464 | 0.011504 | 0.011557 | 0.011425  | 0.011525 | 0.011536 | 0.011574 |
| 0.011457 | 0.011316 | 0.011428 | 0.011501  | 0.011387 | 0.011427 | 0.011421 |
| 0.011207 | 0.011371 | 0.011254 | 0.011399  | 0.011636 | 0.011708 | 0.011713 |
| 0.011573 | 0.011600 | 0.011672 | 0.011564  | 0.011600 | 0.011601 | 0.011564 |
| 0.011600 | 0.011528 | 0.011528 | 0.011600  | 0.011528 | 0.011492 | 0.011528 |
| 0.011528 | 0.011600 | 0.011492 | 0.011600  | 0.011600 | 0.011672 | 0.011564 |
| 0.011528 | 0.011492 | 0.011492 | 0.011492  | 0.011636 | 0.011637 | 0.011708 |
| 0.011420 | 0.011456 | 0.011492 | 0.011600  | 0.011456 | 0.011672 | 0.011672 |
| 0.011672 | 0.011672 | 0.011672 | 0.011708  | 0.011564 | 0.011710 | 0.011600 |
| 0.011564 | 0.011636 | 0.011708 | 0.011528  | 0.011600 | 0.011528 | 0.011600 |
| 0.011636 | 0.011636 | 0.011672 | 0.011672  | 0.011565 | 0.011780 | 0.011744 |
| 0.011604 | 0.011456 | 0.011600 | 0.011672  | 0.011564 | 0.011672 | 0.011780 |
| 0.011961 | 0.011610 | 0.011780 | 0.011780  | 0.011708 | 0.011852 | 0.011492 |
| 0.011674 | 0.011564 | 0.011528 | 0.011528  | 0.011600 | 0.011492 | 0.011600 |
| 0.011600 | 0.011672 | 0.011564 | 0.011528  | 0.011492 | 0.011492 | 0.011492 |
| 0.011636 | 0.011637 | 0.011744 | 0.011672  | 0.012250 | 0.011706 | 0.011662 |
| 0.011733 | 0.011653 | 0.011807 | 0.011692  | 0.011694 | 0.011723 | 0.011642 |
| 0.012200 | 0.011576 | 0.011718 | 0.011649  | 0.011865 | 0.011713 | 0.011898 |
| 0.012225 | 0.011694 | 0.011532 | 0.011528  | 0.011528 | 0.011348 | 0.011495 |
| 0.011456 | 0.011492 | 0.011564 | 0.011528  | 0.011531 | 0.011456 | 0.011421 |
| 0.011564 | 0.011492 | 0.011528 | 0.011564  | 0.011456 | 0.011492 | 0.011420 |
| 0.011492 | 0.011528 | 0.011492 | 0.011456  | 0.011564 | 0.011492 | 0.011528 |
| 0.011528 | 0.011456 | 0.011528 | 0.011564  | 0.011456 | 0.011636 | 0.011708 |
| 0.011600 | 0.011600 | 0.011600 | 0.011600  | 0.011492 | 0.011528 | 0.011564 |
| 0.011319 | 0.011528 | 0.011492 | 0.011496  | 0.011636 | 0.011636 | 0.011600 |
| 0.011636 | 0.011564 | 0.011528 | 0.011564  | 0.011672 | 0.011672 | 0.011600 |
| 0.011600 | 0.011708 | 0.011528 | 0.011636  | 0.011780 | 0.011780 | 0.011636 |
| 0.011528 | 0.011600 | 0.011636 | 0.011600  | 0.011601 | 0.011636 | 0.011600 |
| 0.011564 | 0.011492 | 0.011492 | 0.011780  | 0.011780 | 0.011744 | 0.011564 |
| 0.011672 | 0.011744 | 0.011600 | 0.011672  | 0.011600 | 0.011492 | 0.011456 |
| 0.011600 | 0.011564 | 0.011492 | 0.011744  | 0.011564 | 0.011672 | 0.011636 |
| 0.011528 | 0.011607 | 0.011600 | 0.011442  | 0.011231 | 0.011600 | 0.011274 |
| 0.011407 | 0.011669 | 0.011502 | 0.011576  | 0.011421 | 0.011382 | 0.011282 |
| 0.011325 | 0.011200 | 0.011346 | 0.011196  | 0.011289 | 0.011404 | 0.011660 |
| 0.011697 | 0.011558 | 0.011584 | 0.011544  | 0.011602 | 0.011456 | 0.011528 |
| 0.011492 | 0.011565 | 0.011676 | 0.011497  | 0.011787 | 0.011819 | 0.011564 |
| 0.011564 | 0.011564 | 0.011564 | 0.011564  | 0.011456 | 0.011420 | 0.011492 |
| 0.011528 | 0.011564 | 0.011528 | 0.011492  | 0.011528 | 0.011492 | 0.011600 |
| 0.011535 | 0.011568 | 0.011564 | 0.011600  | 0.011744 | 0.011709 | 0.011710 |
| 0.011708 | 0.011636 | 0.011437 | 0.011428  | 0.011564 | 0.011744 | 0.011673 |
| 0.011528 | 0.011600 | 0.011780 | 0.011817  | 0.011708 | 0.011780 | 0.011708 |
| 0.011636 | 0.011708 | 0.011672 | 0.011600  | 0.011817 | 0.011708 | 0.011816 |
| 0.011852 | 0.011519 | 0.011499 | 0.011615  | 0.011528 | 0.011744 | 0.011708 |
| 0.011746 | 0.011708 | 0.011744 | 0.011744  | 0.011902 | 0.011924 | 0.011539 |
| 0.011423 | 0.011429 | 0.011533 | 0.011496  | 0.011496 | 0.011453 | 0.011387 |
| 0.011574 | 0.011244 | 0.011409 | 0.011613  | 0.011564 | 0.011636 | 0.011528 |
| 0.011492 | 0.011420 | 0.011564 | 0.011528  | 0.011456 | 0.011420 | 0.011348 |
| 0.011456 | 0.011528 | 0.011456 | 0.011456  | 0.011492 | 0.011492 | 0.011495 |
| 0.011568 | 0.011564 | 0.011564 | 0.011602  | 0.011456 | 0.011528 | 0.011492 |
| 0.011565 | 0.011676 | 0.011497 | 0.011787  | 0.011819 | 0.011564 | 0.011780 |
| 0.011708 | 0.011708 | 0.011531 | 0.011730  | 0.011653 | 0.011681 | 0.011473 |
| 0.011614 | 0.011947 | 0.011694 | 0.011570  | 0.011492 | 0.011708 | 0.011528 |
| 0.011636 | 0.011600 | 0.011456 | 0.011566  | 0.011672 | 0.011676 | 0.011600 |
| 0.011492 | 0.011422 | 0.011564 | 0.011492  | 0.011420 | 0.011425 | 0.011708 |
| 0.011600 | 0.011528 | 0.011528 | 0.011600  | 0.011528 | 0.011492 | 0.011420 |
| 0.011564 | 0.011600 | 0.011600 | 0.011528  | 0.011600 | 0.011816 | 0.011420 |
| 0.011528 | 0.011528 | 0.011528 | 0.011528  | 0.011492 | 0.011528 | 0.011417 |

|          |          |          |          |          |          |          |
|----------|----------|----------|----------|----------|----------|----------|
| 0.011688 | 0.011365 | 0.011218 | 0.011393 | 0.011486 | 0.011437 | 0.011192 |
| 0.011169 | 0.011420 | 0.011528 | 0.011642 | 0.011493 | 0.011640 | 0.011781 |
| 0.011672 | 0.011711 | 0.011672 | 0.011939 | 0.011600 | 0.012466 | 0.011673 |
| 0.012322 | 0.012180 | 0.012289 | 0.012507 | 0.011564 | 0.011528 | 0.011636 |
| 0.012286 | 0.012036 | 0.011600 | 0.011492 | 0.011564 | 0.011564 | 0.011531 |
| 0.011420 | 0.011424 | 0.011492 | 0.011456 | 0.011817 | 0.011889 | 0.011852 |
| 0.011781 | 0.011853 | 0.011927 | 0.011749 | 0.012251 | 0.012294 | 0.012359 |
| 0.012359 | 0.012358 | 0.012293 | 0.012322 | 0.012325 | 0.011636 | 0.011852 |
| 0.011888 | 0.012394 | 0.011969 | 0.011853 | 0.012359 | 0.011388 | 0.011312 |
| 0.011276 | 0.011204 | 0.011817 | 0.011827 | 0.011912 | 0.011672 | 0.011349 |
| S155     | 0.011681 | 0.011681 | 0.011784 | 0.011750 | 0.011750 | 0.011819 |
| 0.011583 | 0.011549 | 0.011750 | 0.011267 | 0.011336 | 0.011302 | 0.011267 |
| 0.011301 | 0.011474 | 0.011267 | 0.011301 | 0.011370 | 0.011336 | 0.011301 |
| 0.011267 | 0.011302 | 0.011405 | 0.011267 | 0.011302 | 0.011301 | 0.011618 |
| 0.011543 | 0.011302 | 0.011198 | 0.011439 | 0.011336 | 0.011336 | 0.011370 |
| 0.011302 | 0.011439 | 0.011336 | 0.011336 | 0.011370 | 0.011336 | 0.011508 |
| 0.011267 | 0.011336 | 0.011370 | 0.011301 | 0.011405 | 0.011439 | 0.011336 |
| 0.011336 | 0.011508 | 0.011405 | 0.011646 | 0.011336 | 0.011612 | 0.011336 |
| 0.011301 | 0.011405 | 0.011474 | 0.011612 | 0.011646 | 0.011370 | 0.011508 |
| 0.011370 | 0.011439 | 0.011336 | 0.011577 | 0.011784 | 0.011336 | 0.011405 |
| 0.011302 | 0.011405 | 0.011336 | 0.011439 | 0.011302 | 0.011370 | 0.011370 |
| 0.011267 | 0.011301 | 0.011267 | 0.011370 | 0.011336 | 0.011371 | 0.011439 |
| 0.011370 | 0.011301 | 0.011405 | 0.011233 | 0.011439 | 0.011267 | 0.011302 |
| 0.011508 | 0.011439 | 0.011681 | 0.011474 | 0.011336 | 0.011577 | 0.011336 |
| 0.011441 | 0.011674 | 0.011483 | 0.011220 | 0.011212 | 0.011287 | 0.011422 |
| 0.012066 | 0.011528 | 0.011228 | 0.011577 | 0.011577 | 0.011370 | 0.011439 |
| 0.011405 | 0.011370 | 0.011439 | 0.011336 | 0.011439 | 0.011370 | 0.011370 |
| 0.011336 | 0.011370 | 0.011646 | 0.011508 | 0.011405 | 0.011371 | 0.011302 |
| 0.011267 | 0.011267 | 0.011336 | 0.011301 | 0.011508 | 0.011474 | 0.011405 |
| 0.011508 | 0.011577 | 0.011301 | 0.011301 | 0.011336 | 0.011336 | 0.011338 |
| 0.011407 | 0.011336 | 0.011336 | 0.011168 | 0.011278 | 0.011236 | 0.011336 |
| 0.011336 | 0.011270 | 0.011285 | 0.011306 | 0.011233 | 0.011267 | 0.011302 |
| 0.011564 | 0.000000 | 0.011375 | 0.011267 | 0.011271 | 0.011405 | 0.011371 |
| 0.011440 | 0.011370 | 0.011370 | 0.011405 | 0.011405 | 0.011784 | 0.011543 |
| 0.011612 | 0.011439 | 0.011336 | 0.011439 | 0.011233 | 0.011474 | 0.011267 |
| 0.011302 | 0.011336 | 0.011301 | 0.011267 | 0.011301 | 0.011267 | 0.011370 |
| 0.011336 | 0.011439 | 0.011370 | 0.011233 | 0.011372 | 0.011474 | 0.011442 |
| 0.011474 | 0.011370 | 0.011267 | 0.011199 | 0.011336 | 0.011267 | 0.011198 |
| 0.011304 | 0.011474 | 0.011267 | 0.011474 | 0.011233 | 0.011336 | 0.011302 |
| 0.011405 | 0.011301 | 0.011336 | 0.011302 | 0.011336 | 0.011198 | 0.011336 |
| 0.011370 | 0.011301 | 0.011370 | 0.011301 | 0.011336 | 0.011370 | 0.011612 |
| 0.011681 | 0.011612 | 0.011681 | 0.011441 | 0.011681 | 0.011336 | 0.011301 |
| 0.011337 | 0.011557 | 0.011437 | 0.011201 | 0.011687 | 0.011200 | 0.011303 |
| 0.011688 | 0.011618 | 0.011474 | 0.011715 | 0.011376 | 0.011577 | 0.011543 |
| 0.011474 | 0.011646 | 0.011495 | 0.011354 | 0.011357 | 0.011371 | 0.011442 |
| 0.011543 | 0.011441 | 0.011546 | 0.011651 | 0.011577 | 0.011646 | 0.011756 |
| 0.011475 | 0.011651 | 0.011577 | 0.011508 | 0.011785 | 0.011233 | 0.011440 |
| 0.011405 | 0.011336 | 0.011233 | 0.011233 | 0.011302 | 0.011302 | 0.011370 |
| 0.011301 | 0.011370 | 0.011267 | 0.011370 | 0.011302 | 0.011301 | 0.011370 |
| 0.011302 | 0.011715 | 0.011612 | 0.011646 | 0.011198 | 0.011302 | 0.011336 |
| 0.011336 | 0.011301 | 0.011336 | 0.011405 | 0.011267 | 0.011267 | 0.011267 |
| 0.011784 | 0.011405 | 0.011439 | 0.011233 | 0.011336 | 0.011508 | 0.011267 |
| 0.011267 | 0.011301 | 0.011301 | 0.011474 | 0.011267 | 0.011405 | 0.011508 |
| 0.011474 | 0.011267 | 0.011301 | 0.011198 | 0.011233 | 0.011405 | 0.011336 |
| 0.011198 | 0.011301 | 0.011198 | 0.011233 | 0.011370 | 0.011508 | 0.011267 |
| 0.011233 | 0.011370 | 0.011301 | 0.011198 | 0.011508 | 0.011198 | 0.011370 |
| 0.011447 | 0.011267 | 0.011543 | 0.011405 | 0.011439 | 0.011302 | 0.011405 |
| 0.011267 | 0.011612 | 0.011198 | 0.011439 | 0.011267 | 0.011267 | 0.011198 |
| 0.011439 | 0.011647 | 0.011336 | 0.011405 | 0.011233 | 0.011612 | 0.011267 |
| 0.011267 | 0.011267 | 0.011301 | 0.011405 | 0.011301 | 0.011405 | 0.011439 |

|          |          |          |          |          |          |          |
|----------|----------|----------|----------|----------|----------|----------|
| 0.011439 | 0.011439 | 0.011336 | 0.011440 | 0.011405 | 0.011267 | 0.011233 |
| 0.011267 | 0.011267 | 0.011336 | 0.011267 | 0.011233 | 0.011405 | 0.011267 |
| 0.011301 | 0.011302 | 0.011439 | 0.011474 | 0.011370 | 0.011301 | 0.011302 |
| 0.011370 | 0.011233 | 0.011405 | 0.011267 | 0.011405 | 0.011508 | 0.011715 |
| 0.011302 | 0.011681 | 0.011272 | 0.017969 | 0.011261 | 0.011370 | 0.011597 |
| 0.011557 | 0.011601 | 0.011328 | 0.011356 | 0.011738 | 0.011627 | 0.011373 |
| 0.011544 | 0.011555 | 0.011180 | 0.011274 | 0.011259 | 0.011313 | 0.011235 |
| 0.011539 | 0.011439 | 0.011438 | 0.011195 | 0.011439 | 0.011474 | 0.011477 |
| 0.011341 | 0.011370 | 0.011439 | 0.011405 | 0.011371 | 0.011371 | 0.011336 |
| 0.011370 | 0.011301 | 0.011336 | 0.011370 | 0.011336 | 0.011267 | 0.011301 |
| 0.011301 | 0.011370 | 0.011267 | 0.011371 | 0.011370 | 0.011439 | 0.011336 |
| 0.011370 | 0.011336 | 0.011612 | 0.011612 | 0.011405 | 0.011440 | 0.011474 |
| 0.011233 | 0.011233 | 0.011267 | 0.011370 | 0.011233 | 0.011474 | 0.011474 |
| 0.011474 | 0.011474 | 0.011439 | 0.011508 | 0.011681 | 0.011510 | 0.011370 |
| 0.011370 | 0.011405 | 0.011474 | 0.011302 | 0.011370 | 0.011336 | 0.011370 |
| 0.011440 | 0.011439 | 0.011474 | 0.011439 | 0.011337 | 0.011543 | 0.011508 |
| 0.011373 | 0.011233 | 0.011370 | 0.011439 | 0.011336 | 0.011508 | 0.011543 |
| 0.011715 | 0.011376 | 0.011577 | 0.011543 | 0.011474 | 0.011646 | 0.011267 |
| 0.011441 | 0.011336 | 0.011301 | 0.011301 | 0.011370 | 0.011267 | 0.011371 |
| 0.011370 | 0.011439 | 0.011336 | 0.011370 | 0.011336 | 0.011612 | 0.011612 |
| 0.011405 | 0.011440 | 0.011508 | 0.011439 | 0.012061 | 0.011496 | 0.011421 |
| 0.011489 | 0.011450 | 0.011561 | 0.011451 | 0.011524 | 0.011483 | 0.011444 |
| 0.012011 | 0.011342 | 0.011480 | 0.011413 | 0.011690 | 0.011546 | 0.011653 |
| 0.012036 | 0.011481 | 0.011373 | 0.011370 | 0.011370 | 0.011405 | 0.011338 |
| 0.011233 | 0.011267 | 0.011405 | 0.011370 | 0.011373 | 0.011508 | 0.011440 |
| 0.011336 | 0.011267 | 0.011302 | 0.011336 | 0.011233 | 0.011302 | 0.011198 |
| 0.011336 | 0.011370 | 0.011267 | 0.011233 | 0.011336 | 0.011267 | 0.011302 |
| 0.011301 | 0.011233 | 0.011302 | 0.011336 | 0.011233 | 0.011439 | 0.011474 |
| 0.011370 | 0.011439 | 0.011370 | 0.011370 | 0.011301 | 0.011646 | 0.011336 |
| 0.011380 | 0.011302 | 0.011543 | 0.011547 | 0.011405 | 0.011405 | 0.011405 |
| 0.011405 | 0.011336 | 0.011301 | 0.011336 | 0.011439 | 0.011439 | 0.011370 |
| 0.011370 | 0.011474 | 0.011646 | 0.011405 | 0.011577 | 0.011577 | 0.011474 |
| 0.011301 | 0.011370 | 0.011405 | 0.011784 | 0.011371 | 0.011405 | 0.011370 |
| 0.011370 | 0.011336 | 0.011336 | 0.011647 | 0.011543 | 0.011612 | 0.011336 |
| 0.011439 | 0.011508 | 0.011370 | 0.011439 | 0.011370 | 0.011267 | 0.011577 |
| 0.011370 | 0.011336 | 0.011336 | 0.011508 | 0.011336 | 0.011439 | 0.011681 |
| 0.011301 | 0.011723 | 0.011715 | 0.011516 | 0.011287 | 0.011443 | 0.011322 |
| 0.011227 | 0.011735 | 0.011240 | 0.011425 | 0.011310 | 0.011373 | 0.011387 |
| 0.011527 | 0.011196 | 0.011344 | 0.011195 | 0.011226 | 0.011403 | 0.011394 |
| 0.011409 | 0.011303 | 0.011385 | 0.011277 | 0.011372 | 0.011508 | 0.011577 |
| 0.011543 | 0.011440 | 0.011546 | 0.011547 | 0.011652 | 0.011714 | 0.011336 |
| 0.011612 | 0.011439 | 0.011336 | 0.011439 | 0.011233 | 0.011474 | 0.011267 |
| 0.011302 | 0.011336 | 0.011301 | 0.011267 | 0.011301 | 0.011267 | 0.011370 |
| 0.011344 | 0.011341 | 0.011339 | 0.011302 | 0.011509 | 0.011477 | 0.011475 |
| 0.011474 | 0.011336 | 0.011208 | 0.011205 | 0.011336 | 0.011508 | 0.011474 |
| 0.011301 | 0.011370 | 0.011577 | 0.011579 | 0.011508 | 0.011543 | 0.011474 |
| 0.011405 | 0.011474 | 0.011439 | 0.011370 | 0.011923 | 0.011508 | 0.011612 |
| 0.011646 | 0.011682 | 0.011340 | 0.011414 | 0.011301 | 0.011508 | 0.011474 |
| 0.011440 | 0.011508 | 0.011543 | 0.011543 | 0.011663 | 0.011681 | 0.011309 |
| 0.011199 | 0.011202 | 0.011304 | 0.011269 | 0.011339 | 0.011174 | 0.011513 |
| 0.011341 | 0.011459 | 0.011204 | 0.011325 | 0.011336 | 0.011405 | 0.011302 |
| 0.011267 | 0.011267 | 0.011336 | 0.011301 | 0.011508 | 0.011474 | 0.011405 |
| 0.011508 | 0.011577 | 0.011301 | 0.011301 | 0.011336 | 0.011336 | 0.011338 |
| 0.011407 | 0.011336 | 0.011336 | 0.011372 | 0.011508 | 0.011577 | 0.011543 |
| 0.011440 | 0.011546 | 0.011547 | 0.011652 | 0.011714 | 0.011336 | 0.011543 |
| 0.011474 | 0.011474 | 0.011303 | 0.011488 | 0.011416 | 0.011375 | 0.011276 |
| 0.011449 | 0.011671 | 0.011493 | 0.011339 | 0.011267 | 0.011474 | 0.011336 |
| 0.011439 | 0.011370 | 0.011233 | 0.011372 | 0.011474 | 0.011442 | 0.011370 |
| 0.011267 | 0.011199 | 0.011336 | 0.011267 | 0.011198 | 0.011304 | 0.011474 |
| 0.011370 | 0.011301 | 0.011336 | 0.011370 | 0.011336 | 0.011267 | 0.011474 |

|          |          |          |          |          |          |          |
|----------|----------|----------|----------|----------|----------|----------|
| 0.011336 | 0.011370 | 0.011370 | 0.011301 | 0.011370 | 0.011577 | 0.011267 |
| 0.011302 | 0.011646 | 0.011301 | 0.011302 | 0.011267 | 0.011646 | 0.011235 |
| 0.011740 | 0.011232 | 0.011316 | 0.011466 | 0.011559 | 0.011465 | 0.011188 |
| 0.011274 | 0.011474 | 0.011577 | 0.011687 | 0.011544 | 0.011650 | 0.011820 |
| 0.011715 | 0.011753 | 0.011715 | 0.011936 | 0.011646 | 0.012544 | 0.011716 |
| 0.012372 | 0.012167 | 0.012306 | 0.012584 | 0.011681 | 0.011370 | 0.011681 |
| 0.012096 | 0.012029 | 0.011646 | 0.011543 | 0.011612 | 0.011612 | 0.011581 |
| 0.011474 | 0.011443 | 0.011543 | 0.011508 | 0.011888 | 0.011957 | 0.011957 |
| 0.011855 | 0.011957 | 0.011959 | 0.011789 | 0.012096 | 0.012102 | 0.012165 |
| 0.012165 | 0.012200 | 0.012076 | 0.012165 | 0.012167 | 0.011405 | 0.011716 |
| 0.011750 | 0.012199 | 0.011791 | 0.012026 | 0.012511 | 0.011548 | 0.011439 |
| 0.011405 | 0.011405 | 0.011854 | 0.011884 | 0.011991 | 0.011750 | 0.011406 |
| S156     | 0.011715 | 0.011715 | 0.011818 | 0.011784 | 0.011784 | 0.011853 |
| 0.011688 | 0.011583 | 0.011784 | 0.011301 | 0.011370 | 0.011336 | 0.011301 |
| 0.011336 | 0.011508 | 0.011301 | 0.011336 | 0.011405 | 0.011370 | 0.011336 |
| 0.011301 | 0.011336 | 0.011439 | 0.011302 | 0.011267 | 0.011336 | 0.011653 |
| 0.011542 | 0.011336 | 0.011232 | 0.011473 | 0.011301 | 0.011370 | 0.011301 |
| 0.011370 | 0.011405 | 0.011370 | 0.011370 | 0.011405 | 0.011370 | 0.011473 |
| 0.011301 | 0.011370 | 0.011405 | 0.011336 | 0.011439 | 0.011473 | 0.011405 |
| 0.011370 | 0.011543 | 0.011405 | 0.011680 | 0.011370 | 0.011577 | 0.011370 |
| 0.011336 | 0.011439 | 0.011508 | 0.011577 | 0.011680 | 0.011439 | 0.011542 |
| 0.011336 | 0.011405 | 0.011370 | 0.011542 | 0.011784 | 0.011370 | 0.011439 |
| 0.011336 | 0.011439 | 0.011405 | 0.011473 | 0.011405 | 0.011405 | 0.011405 |
| 0.011301 | 0.011336 | 0.011301 | 0.011370 | 0.011370 | 0.011405 | 0.011473 |
| 0.011405 | 0.011336 | 0.011301 | 0.011336 | 0.011473 | 0.011232 | 0.011336 |
| 0.011542 | 0.011473 | 0.011715 | 0.011474 | 0.011370 | 0.011542 | 0.011370 |
| 0.011477 | 0.011671 | 0.011514 | 0.011219 | 0.011247 | 0.011399 | 0.011416 |
| 0.012088 | 0.011520 | 0.011226 | 0.011577 | 0.011577 | 0.011405 | 0.011473 |
| 0.011439 | 0.011370 | 0.011473 | 0.011370 | 0.011474 | 0.011336 | 0.011404 |
| 0.011370 | 0.011473 | 0.011680 | 0.011542 | 0.011439 | 0.011405 | 0.011267 |
| 0.011301 | 0.011301 | 0.011301 | 0.011336 | 0.011542 | 0.011508 | 0.011439 |
| 0.011542 | 0.011611 | 0.011336 | 0.011336 | 0.011370 | 0.011370 | 0.011372 |
| 0.011442 | 0.011370 | 0.011370 | 0.011205 | 0.011313 | 0.011274 | 0.011370 |
| 0.011370 | 0.011304 | 0.011319 | 0.011340 | 0.011268 | 0.011303 | 0.011336 |
| 0.011604 | 0.011375 | 0.000000 | 0.011301 | 0.011305 | 0.011439 | 0.011405 |
| 0.011474 | 0.011405 | 0.011405 | 0.011473 | 0.011439 | 0.011749 | 0.011577 |
| 0.011646 | 0.011508 | 0.011370 | 0.011474 | 0.011267 | 0.011473 | 0.011301 |
| 0.011336 | 0.011370 | 0.011336 | 0.011301 | 0.011336 | 0.011301 | 0.011405 |
| 0.011267 | 0.011405 | 0.011405 | 0.011301 | 0.011406 | 0.011508 | 0.011511 |
| 0.011439 | 0.011405 | 0.011301 | 0.011233 | 0.011370 | 0.011301 | 0.011233 |
| 0.011339 | 0.011439 | 0.011232 | 0.011439 | 0.011267 | 0.011370 | 0.011336 |
| 0.011370 | 0.011336 | 0.011301 | 0.011336 | 0.011370 | 0.011232 | 0.011301 |
| 0.011336 | 0.011336 | 0.011405 | 0.011336 | 0.011370 | 0.011405 | 0.011646 |
| 0.011715 | 0.011646 | 0.011715 | 0.011509 | 0.011715 | 0.011370 | 0.011336 |
| 0.011372 | 0.011642 | 0.011436 | 0.011271 | 0.011722 | 0.011235 | 0.011381 |
| 0.011722 | 0.011652 | 0.011508 | 0.011749 | 0.011410 | 0.011577 | 0.011508 |
| 0.011508 | 0.011646 | 0.011534 | 0.011357 | 0.011402 | 0.011405 | 0.011477 |
| 0.011577 | 0.011475 | 0.011546 | 0.011616 | 0.011611 | 0.011680 | 0.011790 |
| 0.011511 | 0.011617 | 0.011615 | 0.011545 | 0.011819 | 0.011267 | 0.011475 |
| 0.011370 | 0.011370 | 0.011267 | 0.011267 | 0.011267 | 0.011336 | 0.011405 |
| 0.011267 | 0.011336 | 0.011232 | 0.011336 | 0.011267 | 0.011336 | 0.011370 |
| 0.011336 | 0.011749 | 0.011646 | 0.011680 | 0.011232 | 0.011336 | 0.011370 |
| 0.011370 | 0.011336 | 0.011405 | 0.011439 | 0.011301 | 0.011301 | 0.011301 |
| 0.011818 | 0.011439 | 0.011473 | 0.011267 | 0.011370 | 0.011474 | 0.011301 |
| 0.011267 | 0.011336 | 0.011336 | 0.011405 | 0.011301 | 0.011439 | 0.011439 |
| 0.011508 | 0.011336 | 0.011336 | 0.011267 | 0.011267 | 0.011439 | 0.011370 |
| 0.011267 | 0.011370 | 0.011232 | 0.011267 | 0.011405 | 0.011542 | 0.011301 |
| 0.011267 | 0.011405 | 0.011336 | 0.011232 | 0.011542 | 0.011232 | 0.011405 |
| 0.011411 | 0.011301 | 0.011577 | 0.011439 | 0.011473 | 0.011336 | 0.011439 |
| 0.011301 | 0.011577 | 0.011232 | 0.011473 | 0.011301 | 0.011301 | 0.011232 |

|          |          |          |          |          |          |          |
|----------|----------|----------|----------|----------|----------|----------|
| 0.011404 | 0.011681 | 0.011370 | 0.011439 | 0.011267 | 0.011646 | 0.011301 |
| 0.011301 | 0.011301 | 0.011301 | 0.011370 | 0.011336 | 0.011439 | 0.011508 |
| 0.011474 | 0.011439 | 0.011370 | 0.011474 | 0.011370 | 0.011301 | 0.011267 |
| 0.011301 | 0.011301 | 0.011370 | 0.011301 | 0.011198 | 0.011439 | 0.011301 |
| 0.011336 | 0.011336 | 0.011473 | 0.011508 | 0.011405 | 0.011267 | 0.011336 |
| 0.011405 | 0.011267 | 0.011439 | 0.011301 | 0.011439 | 0.011508 | 0.011749 |
| 0.011336 | 0.011715 | 0.011342 | 0.017901 | 0.011192 | 0.011558 | 0.011665 |
| 0.011625 | 0.011670 | 0.011327 | 0.011293 | 0.011667 | 0.011694 | 0.011308 |
| 0.011536 | 0.011610 | 0.011179 | 0.011315 | 0.011258 | 0.011362 | 0.011278 |
| 0.011531 | 0.011471 | 0.011436 | 0.011193 | 0.011439 | 0.011508 | 0.011511 |
| 0.000000 | 0.011473 | 0.011473 | 0.011439 | 0.011405 | 0.011405 | 0.011370 |
| 0.011405 | 0.011336 | 0.011336 | 0.011405 | 0.011370 | 0.011301 | 0.011336 |
| 0.011336 | 0.011405 | 0.011301 | 0.011405 | 0.011439 | 0.011473 | 0.011370 |
| 0.011405 | 0.011370 | 0.011646 | 0.011646 | 0.011439 | 0.011474 | 0.011508 |
| 0.011232 | 0.011267 | 0.011301 | 0.011336 | 0.011267 | 0.011508 | 0.011508 |
| 0.011508 | 0.011508 | 0.011473 | 0.011542 | 0.011715 | 0.011544 | 0.011336 |
| 0.011370 | 0.011473 | 0.011439 | 0.011336 | 0.011405 | 0.011336 | 0.011405 |
| 0.011439 | 0.011439 | 0.011473 | 0.011370 | 0.011302 | 0.011577 | 0.011473 |
| 0.011408 | 0.011301 | 0.011405 | 0.011474 | 0.011370 | 0.011542 | 0.011577 |
| 0.011749 | 0.011410 | 0.011577 | 0.011508 | 0.011508 | 0.011646 | 0.011301 |
| 0.011475 | 0.011370 | 0.011336 | 0.011336 | 0.011405 | 0.011301 | 0.011405 |
| 0.011439 | 0.011473 | 0.011370 | 0.011405 | 0.011370 | 0.011646 | 0.011646 |
| 0.011439 | 0.011474 | 0.011542 | 0.011473 | 0.012129 | 0.011463 | 0.011458 |
| 0.011528 | 0.011452 | 0.011600 | 0.011487 | 0.011526 | 0.011520 | 0.011446 |
| 0.012081 | 0.011379 | 0.011517 | 0.011450 | 0.011730 | 0.011583 | 0.011618 |
| 0.012106 | 0.011524 | 0.011407 | 0.011405 | 0.011404 | 0.011439 | 0.011372 |
| 0.011267 | 0.011232 | 0.011439 | 0.011405 | 0.011407 | 0.011508 | 0.011509 |
| 0.011370 | 0.011232 | 0.011267 | 0.011370 | 0.011198 | 0.011336 | 0.011232 |
| 0.011370 | 0.011405 | 0.011301 | 0.011267 | 0.011370 | 0.011301 | 0.011336 |
| 0.011336 | 0.011267 | 0.011336 | 0.011370 | 0.011267 | 0.011405 | 0.011508 |
| 0.011405 | 0.011473 | 0.011405 | 0.011405 | 0.011267 | 0.011680 | 0.011370 |
| 0.011417 | 0.011336 | 0.011542 | 0.011547 | 0.011370 | 0.011439 | 0.011439 |
| 0.011439 | 0.011301 | 0.011336 | 0.011301 | 0.011473 | 0.011473 | 0.011405 |
| 0.011405 | 0.011508 | 0.011680 | 0.011439 | 0.011611 | 0.011611 | 0.011508 |
| 0.011336 | 0.011405 | 0.011439 | 0.011784 | 0.011405 | 0.011370 | 0.011405 |
| 0.011405 | 0.011370 | 0.011370 | 0.011646 | 0.011542 | 0.011611 | 0.011370 |
| 0.011474 | 0.011542 | 0.011405 | 0.011474 | 0.011405 | 0.011301 | 0.011611 |
| 0.011404 | 0.011370 | 0.011370 | 0.011542 | 0.011370 | 0.011473 | 0.011715 |
| 0.011336 | 0.011757 | 0.011749 | 0.011509 | 0.011229 | 0.011476 | 0.011319 |
| 0.011339 | 0.011724 | 0.011309 | 0.011464 | 0.011207 | 0.011418 | 0.011380 |
| 0.011470 | 0.011127 | 0.011340 | 0.011127 | 0.011169 | 0.011330 | 0.011348 |
| 0.011368 | 0.011220 | 0.011420 | 0.011348 | 0.011406 | 0.011508 | 0.011577 |
| 0.011577 | 0.011474 | 0.011580 | 0.011582 | 0.011686 | 0.011748 | 0.011370 |
| 0.011646 | 0.011508 | 0.011370 | 0.011474 | 0.011267 | 0.011473 | 0.011301 |
| 0.011336 | 0.011370 | 0.011336 | 0.011301 | 0.011336 | 0.011301 | 0.011405 |
| 0.011307 | 0.011378 | 0.011372 | 0.011407 | 0.011546 | 0.011406 | 0.011510 |
| 0.011509 | 0.011439 | 0.011246 | 0.011241 | 0.011370 | 0.011543 | 0.011543 |
| 0.011336 | 0.011405 | 0.011646 | 0.011612 | 0.011508 | 0.011577 | 0.011508 |
| 0.011405 | 0.011508 | 0.011508 | 0.011404 | 0.011956 | 0.011508 | 0.011612 |
| 0.011680 | 0.011718 | 0.011340 | 0.011415 | 0.011336 | 0.011542 | 0.011508 |
| 0.011543 | 0.011508 | 0.011542 | 0.011542 | 0.011743 | 0.011715 | 0.011345 |
| 0.011234 | 0.011238 | 0.011339 | 0.011304 | 0.011376 | 0.011252 | 0.011548 |
| 0.011376 | 0.011509 | 0.011207 | 0.011403 | 0.011370 | 0.011442 | 0.011267 |
| 0.011301 | 0.011301 | 0.011301 | 0.011336 | 0.011542 | 0.011508 | 0.011439 |
| 0.011542 | 0.011611 | 0.011336 | 0.011336 | 0.011370 | 0.011370 | 0.011372 |
| 0.011442 | 0.011370 | 0.011370 | 0.011406 | 0.011508 | 0.011577 | 0.011577 |
| 0.011474 | 0.011580 | 0.011582 | 0.011686 | 0.011748 | 0.011370 | 0.011577 |
| 0.011508 | 0.011508 | 0.011303 | 0.011522 | 0.011451 | 0.011479 | 0.011348 |
| 0.011378 | 0.011666 | 0.011451 | 0.011409 | 0.011232 | 0.011439 | 0.011267 |
| 0.011405 | 0.011405 | 0.011301 | 0.011406 | 0.011508 | 0.011511 | 0.011405 |

|          |          |          |          |          |          |          |
|----------|----------|----------|----------|----------|----------|----------|
| 0.011301 | 0.011233 | 0.011370 | 0.011301 | 0.011233 | 0.011339 | 0.011439 |
| 0.011405 | 0.011336 | 0.011336 | 0.011405 | 0.011370 | 0.011301 | 0.011508 |
| 0.011370 | 0.011405 | 0.011405 | 0.011336 | 0.011405 | 0.011611 | 0.011301 |
| 0.011336 | 0.011680 | 0.011336 | 0.011267 | 0.011336 | 0.011680 | 0.011232 |
| 0.011622 | 0.011230 | 0.011312 | 0.011463 | 0.011550 | 0.011459 | 0.011186 |
| 0.011271 | 0.011508 | 0.011611 | 0.011721 | 0.011578 | 0.011719 | 0.011853 |
| 0.011750 | 0.011788 | 0.011749 | 0.012006 | 0.011680 | 0.012612 | 0.011750 |
| 0.012405 | 0.012269 | 0.012408 | 0.012651 | 0.011680 | 0.011405 | 0.011715 |
| 0.012164 | 0.012098 | 0.011680 | 0.011577 | 0.011646 | 0.011646 | 0.011615 |
| 0.011508 | 0.011512 | 0.011577 | 0.011542 | 0.011922 | 0.011991 | 0.011956 |
| 0.011887 | 0.011991 | 0.012027 | 0.011857 | 0.012164 | 0.012171 | 0.012233 |
| 0.012233 | 0.012268 | 0.012211 | 0.012233 | 0.012236 | 0.011439 | 0.011715 |
| 0.011784 | 0.012336 | 0.011825 | 0.012025 | 0.012544 | 0.011547 | 0.011473 |
| 0.011439 | 0.011439 | 0.011922 | 0.011897 | 0.011986 | 0.011749 | 0.011440 |
| S157     | 0.011598 | 0.011598 | 0.011733 | 0.011699 | 0.011699 | 0.011766 |
| 0.011604 | 0.011502 | 0.011699 | 0.011195 | 0.011262 | 0.011229 | 0.011195 |
| 0.011228 | 0.011396 | 0.011195 | 0.011228 | 0.011296 | 0.011262 | 0.011161 |
| 0.011195 | 0.011228 | 0.011329 | 0.011195 | 0.011229 | 0.011228 | 0.011570 |
| 0.011464 | 0.011228 | 0.011128 | 0.011363 | 0.011296 | 0.011262 | 0.011296 |
| 0.011262 | 0.011363 | 0.011262 | 0.011262 | 0.011296 | 0.011262 | 0.011430 |
| 0.011195 | 0.011262 | 0.011296 | 0.011228 | 0.011329 | 0.011363 | 0.011296 |
| 0.011262 | 0.011430 | 0.011329 | 0.011598 | 0.011262 | 0.011531 | 0.011262 |
| 0.011228 | 0.011329 | 0.011396 | 0.011531 | 0.011632 | 0.011329 | 0.011430 |
| 0.011296 | 0.011363 | 0.011262 | 0.011497 | 0.011733 | 0.011262 | 0.011329 |
| 0.011228 | 0.011329 | 0.011296 | 0.011363 | 0.011296 | 0.011296 | 0.011296 |
| 0.011195 | 0.011228 | 0.011195 | 0.011296 | 0.011262 | 0.011296 | 0.011363 |
| 0.011296 | 0.011262 | 0.011329 | 0.011228 | 0.011363 | 0.011195 | 0.011262 |
| 0.011430 | 0.011363 | 0.011598 | 0.011430 | 0.011262 | 0.011497 | 0.011262 |
| 0.011431 | 0.011658 | 0.011475 | 0.011177 | 0.011172 | 0.011281 | 0.011375 |
| 0.012011 | 0.011467 | 0.011102 | 0.011497 | 0.011497 | 0.011296 | 0.011396 |
| 0.011329 | 0.011296 | 0.011363 | 0.011262 | 0.011363 | 0.011296 | 0.011296 |
| 0.011262 | 0.011363 | 0.011565 | 0.011430 | 0.011329 | 0.011296 | 0.011228 |
| 0.011195 | 0.011195 | 0.011262 | 0.011228 | 0.011430 | 0.011396 | 0.011329 |
| 0.011430 | 0.011497 | 0.011228 | 0.011228 | 0.011262 | 0.011262 | 0.011263 |
| 0.011331 | 0.011262 | 0.011262 | 0.011132 | 0.011205 | 0.011165 | 0.011262 |
| 0.011263 | 0.011198 | 0.011245 | 0.011233 | 0.011162 | 0.011197 | 0.011229 |
| 0.011492 | 0.011267 | 0.011301 | 0.000000 | 0.011199 | 0.011329 | 0.011296 |
| 0.011363 | 0.011296 | 0.011296 | 0.011396 | 0.011329 | 0.011699 | 0.011464 |
| 0.011531 | 0.011396 | 0.011262 | 0.011363 | 0.011161 | 0.011396 | 0.011195 |
| 0.011262 | 0.011262 | 0.011228 | 0.011195 | 0.011228 | 0.011195 | 0.011296 |
| 0.011262 | 0.011363 | 0.011296 | 0.011195 | 0.011296 | 0.011396 | 0.011399 |
| 0.011396 | 0.011296 | 0.011195 | 0.011128 | 0.011262 | 0.011195 | 0.011128 |
| 0.011162 | 0.011397 | 0.011195 | 0.011396 | 0.011161 | 0.011262 | 0.011228 |
| 0.011329 | 0.011228 | 0.011262 | 0.011228 | 0.011262 | 0.011128 | 0.011262 |
| 0.011296 | 0.011161 | 0.011296 | 0.011228 | 0.011262 | 0.011296 | 0.011531 |
| 0.011632 | 0.011564 | 0.011632 | 0.011398 | 0.011632 | 0.011262 | 0.011161 |
| 0.011263 | 0.011545 | 0.011335 | 0.011163 | 0.011638 | 0.011129 | 0.011257 |
| 0.011638 | 0.011536 | 0.011430 | 0.011632 | 0.011334 | 0.011497 | 0.011464 |
| 0.011396 | 0.011564 | 0.011416 | 0.011266 | 0.011270 | 0.011228 | 0.011365 |
| 0.011464 | 0.011364 | 0.011500 | 0.011568 | 0.011497 | 0.011565 | 0.011671 |
| 0.011399 | 0.011570 | 0.011501 | 0.011433 | 0.011700 | 0.011161 | 0.011364 |
| 0.011329 | 0.011262 | 0.011161 | 0.011161 | 0.011228 | 0.011228 | 0.011296 |
| 0.011228 | 0.011296 | 0.011195 | 0.011296 | 0.011228 | 0.011161 | 0.011296 |
| 0.011228 | 0.011665 | 0.011565 | 0.011598 | 0.011128 | 0.011228 | 0.011262 |
| 0.011262 | 0.011228 | 0.011296 | 0.011329 | 0.011195 | 0.011195 | 0.011195 |
| 0.011733 | 0.011329 | 0.011363 | 0.011161 | 0.011262 | 0.011430 | 0.011195 |
| 0.011195 | 0.011262 | 0.011228 | 0.011396 | 0.011195 | 0.011329 | 0.011464 |
| 0.011396 | 0.011228 | 0.011161 | 0.011161 | 0.011161 | 0.011329 | 0.011262 |
| 0.011161 | 0.011262 | 0.011128 | 0.011161 | 0.011296 | 0.011430 | 0.011195 |
| 0.011161 | 0.011296 | 0.011229 | 0.011128 | 0.011464 | 0.011128 | 0.011296 |

|          |          |          |          |          |          |          |
|----------|----------|----------|----------|----------|----------|----------|
| 0.011369 | 0.011195 | 0.011497 | 0.011329 | 0.011363 | 0.011228 | 0.011329 |
| 0.011195 | 0.011531 | 0.011128 | 0.011396 | 0.011195 | 0.011195 | 0.011128 |
| 0.011363 | 0.011565 | 0.011262 | 0.011329 | 0.011161 | 0.011565 | 0.011195 |
| 0.011195 | 0.011128 | 0.011228 | 0.011329 | 0.011228 | 0.011329 | 0.011396 |
| 0.011396 | 0.011363 | 0.011262 | 0.011363 | 0.011329 | 0.011195 | 0.011161 |
| 0.011195 | 0.011195 | 0.011262 | 0.011195 | 0.011161 | 0.011329 | 0.011195 |
| 0.011228 | 0.011228 | 0.011363 | 0.011396 | 0.011296 | 0.011228 | 0.011228 |
| 0.011296 | 0.011228 | 0.011329 | 0.011195 | 0.011329 | 0.011430 | 0.011665 |
| 0.011228 | 0.011632 | 0.011233 | 0.017710 | 0.011191 | 0.011366 | 0.011583 |
| 0.011545 | 0.011588 | 0.011322 | 0.011292 | 0.011664 | 0.011612 | 0.011303 |
| 0.011487 | 0.011487 | 0.011138 | 0.011228 | 0.011216 | 0.011258 | 0.011232 |
| 0.011482 | 0.011395 | 0.011394 | 0.011193 | 0.011363 | 0.011396 | 0.011399 |
| 0.011266 | 0.011363 | 0.011363 | 0.011329 | 0.011296 | 0.011296 | 0.011262 |
| 0.011296 | 0.011228 | 0.011262 | 0.011296 | 0.011262 | 0.011195 | 0.011228 |
| 0.011228 | 0.011296 | 0.011195 | 0.011296 | 0.011329 | 0.011363 | 0.011262 |
| 0.011296 | 0.011262 | 0.011598 | 0.011598 | 0.011329 | 0.011363 | 0.011396 |
| 0.011161 | 0.011161 | 0.011195 | 0.011296 | 0.011161 | 0.011396 | 0.011396 |
| 0.011430 | 0.011430 | 0.011363 | 0.011464 | 0.011632 | 0.011465 | 0.011296 |
| 0.011296 | 0.011363 | 0.011396 | 0.011228 | 0.011296 | 0.011262 | 0.011296 |
| 0.011363 | 0.011363 | 0.011396 | 0.011363 | 0.011262 | 0.011464 | 0.011430 |
| 0.011298 | 0.011195 | 0.011296 | 0.011396 | 0.011296 | 0.011430 | 0.011464 |
| 0.011632 | 0.011334 | 0.011497 | 0.011464 | 0.011396 | 0.011564 | 0.011195 |
| 0.011364 | 0.011262 | 0.011228 | 0.011228 | 0.011296 | 0.011195 | 0.011296 |
| 0.011329 | 0.011363 | 0.011262 | 0.011296 | 0.011262 | 0.011598 | 0.011598 |
| 0.011329 | 0.011363 | 0.011430 | 0.011363 | 0.012003 | 0.011418 | 0.011342 |
| 0.011412 | 0.011373 | 0.011482 | 0.011372 | 0.011480 | 0.011406 | 0.011371 |
| 0.011954 | 0.011268 | 0.011403 | 0.011337 | 0.011611 | 0.011469 | 0.011571 |
| 0.011979 | 0.011399 | 0.011297 | 0.011296 | 0.011296 | 0.011329 | 0.011263 |
| 0.011161 | 0.011195 | 0.011329 | 0.011296 | 0.011297 | 0.011430 | 0.011397 |
| 0.011262 | 0.011128 | 0.011228 | 0.011262 | 0.011161 | 0.011228 | 0.011128 |
| 0.011262 | 0.011296 | 0.011195 | 0.011161 | 0.011262 | 0.011195 | 0.011228 |
| 0.011228 | 0.011161 | 0.011228 | 0.011262 | 0.011161 | 0.011363 | 0.011396 |
| 0.011296 | 0.011363 | 0.011296 | 0.011296 | 0.011228 | 0.011632 | 0.011262 |
| 0.011304 | 0.011228 | 0.011464 | 0.011468 | 0.011329 | 0.011329 | 0.011329 |
| 0.011329 | 0.011262 | 0.011228 | 0.011262 | 0.011363 | 0.011363 | 0.011296 |
| 0.011296 | 0.011430 | 0.011598 | 0.011329 | 0.011531 | 0.011531 | 0.011396 |
| 0.011228 | 0.011296 | 0.011329 | 0.011733 | 0.011296 | 0.011329 | 0.011296 |
| 0.011329 | 0.011262 | 0.011262 | 0.011565 | 0.011497 | 0.011531 | 0.011262 |
| 0.011363 | 0.011430 | 0.011296 | 0.011363 | 0.011329 | 0.011195 | 0.011531 |
| 0.011296 | 0.011262 | 0.011262 | 0.011430 | 0.011262 | 0.011363 | 0.011598 |
| 0.011228 | 0.011672 | 0.011665 | 0.011467 | 0.011229 | 0.011366 | 0.011267 |
| 0.011170 | 0.011683 | 0.011201 | 0.011373 | 0.011255 | 0.011315 | 0.011326 |
| 0.011468 | 0.011126 | 0.011283 | 0.011126 | 0.011168 | 0.011328 | 0.011344 |
| 0.011362 | 0.011257 | 0.011342 | 0.011272 | 0.011296 | 0.011430 | 0.011497 |
| 0.011464 | 0.011363 | 0.011466 | 0.011467 | 0.011603 | 0.011626 | 0.011262 |
| 0.011531 | 0.011396 | 0.011262 | 0.011363 | 0.011161 | 0.011396 | 0.011195 |
| 0.011262 | 0.011262 | 0.011228 | 0.011195 | 0.011228 | 0.011195 | 0.011296 |
| 0.011270 | 0.011270 | 0.011197 | 0.011300 | 0.011437 | 0.011402 | 0.011402 |
| 0.011401 | 0.011329 | 0.011134 | 0.011132 | 0.011263 | 0.011433 | 0.011433 |
| 0.011228 | 0.011297 | 0.011531 | 0.011500 | 0.011430 | 0.011464 | 0.011396 |
| 0.011329 | 0.011396 | 0.011396 | 0.011296 | 0.011868 | 0.011464 | 0.011531 |
| 0.011565 | 0.011631 | 0.011265 | 0.011337 | 0.011228 | 0.011430 | 0.011396 |
| 0.011431 | 0.011430 | 0.011464 | 0.011464 | 0.011571 | 0.011598 | 0.011234 |
| 0.011128 | 0.011130 | 0.011231 | 0.011196 | 0.011300 | 0.011098 | 0.011468 |
| 0.011198 | 0.011367 | 0.011108 | 0.011248 | 0.011262 | 0.011334 | 0.011228 |
| 0.011195 | 0.011195 | 0.011262 | 0.011228 | 0.011430 | 0.011396 | 0.011329 |
| 0.011430 | 0.011497 | 0.011228 | 0.011228 | 0.011262 | 0.011262 | 0.011263 |
| 0.011331 | 0.011262 | 0.011262 | 0.011296 | 0.011430 | 0.011497 | 0.011464 |
| 0.011363 | 0.011466 | 0.011467 | 0.011603 | 0.011626 | 0.011262 | 0.011464 |
| 0.011396 | 0.011396 | 0.011229 | 0.011408 | 0.011338 | 0.011367 | 0.011235 |

|          |          |          |          |          |          |          |
|----------|----------|----------|----------|----------|----------|----------|
| 0.011405 | 0.011607 | 0.011399 | 0.011298 | 0.011195 | 0.011396 | 0.011262 |
| 0.011363 | 0.011296 | 0.011195 | 0.011296 | 0.011396 | 0.011399 | 0.011296 |
| 0.011195 | 0.011128 | 0.011262 | 0.011195 | 0.011128 | 0.011162 | 0.011397 |
| 0.011296 | 0.011228 | 0.011262 | 0.011296 | 0.011262 | 0.011195 | 0.011396 |
| 0.011262 | 0.011296 | 0.011296 | 0.011228 | 0.011296 | 0.011531 | 0.011195 |
| 0.011228 | 0.011632 | 0.011228 | 0.011262 | 0.011228 | 0.011598 | 0.011189 |
| 0.011678 | 0.011188 | 0.011261 | 0.011422 | 0.011508 | 0.011419 | 0.011144 |
| 0.011218 | 0.011396 | 0.011497 | 0.011603 | 0.011464 | 0.011602 | 0.011733 |
| 0.011632 | 0.011669 | 0.011632 | 0.011880 | 0.011598 | 0.012474 | 0.011633 |
| 0.012339 | 0.012139 | 0.012275 | 0.012546 | 0.011598 | 0.011296 | 0.011598 |
| 0.012037 | 0.011972 | 0.011565 | 0.011464 | 0.011531 | 0.011531 | 0.011501 |
| 0.011396 | 0.011400 | 0.011464 | 0.011430 | 0.011800 | 0.011867 | 0.011867 |
| 0.011768 | 0.011868 | 0.011970 | 0.011737 | 0.012037 | 0.012042 | 0.012104 |
| 0.012104 | 0.012138 | 0.012084 | 0.012104 | 0.012106 | 0.011329 | 0.011632 |
| 0.011699 | 0.012204 | 0.011705 | 0.011935 | 0.012408 | 0.011468 | 0.011363 |
| 0.011329 | 0.011329 | 0.011800 | 0.011800 | 0.011940 | 0.011665 | 0.011330 |
| S158     | 0.011613 | 0.011613 | 0.011717 | 0.011683 | 0.011683 | 0.011717 |
| 0.011550 | 0.011445 | 0.011683 | 0.011199 | 0.011268 | 0.011233 | 0.011129 |
| 0.011233 | 0.011406 | 0.011199 | 0.011233 | 0.011302 | 0.011268 | 0.011233 |
| 0.011199 | 0.011233 | 0.011337 | 0.011199 | 0.011233 | 0.011233 | 0.011515 |
| 0.011475 | 0.011233 | 0.011129 | 0.011371 | 0.011302 | 0.011268 | 0.011233 |
| 0.011268 | 0.011371 | 0.011268 | 0.011268 | 0.011302 | 0.011268 | 0.011440 |
| 0.011199 | 0.011268 | 0.011302 | 0.011233 | 0.011337 | 0.011371 | 0.011302 |
| 0.011268 | 0.011441 | 0.011337 | 0.011579 | 0.011268 | 0.011544 | 0.011268 |
| 0.011233 | 0.011337 | 0.011406 | 0.011544 | 0.011613 | 0.011337 | 0.011440 |
| 0.011302 | 0.011371 | 0.011268 | 0.011475 | 0.011683 | 0.011268 | 0.011337 |
| 0.011233 | 0.011337 | 0.011302 | 0.011371 | 0.011302 | 0.011302 | 0.011302 |
| 0.011199 | 0.011233 | 0.011164 | 0.011268 | 0.011268 | 0.011303 | 0.011371 |
| 0.011302 | 0.011268 | 0.011337 | 0.011233 | 0.011371 | 0.011199 | 0.011233 |
| 0.011440 | 0.011371 | 0.011579 | 0.011371 | 0.011268 | 0.011475 | 0.011268 |
| 0.011397 | 0.011589 | 0.011437 | 0.011099 | 0.011172 | 0.011283 | 0.011336 |
| 0.011719 | 0.011365 | 0.011143 | 0.011475 | 0.011475 | 0.011302 | 0.011371 |
| 0.011337 | 0.011302 | 0.011371 | 0.011268 | 0.011371 | 0.011302 | 0.011302 |
| 0.011268 | 0.011371 | 0.011579 | 0.011440 | 0.011337 | 0.011302 | 0.011233 |
| 0.011199 | 0.011199 | 0.011268 | 0.011233 | 0.011440 | 0.011406 | 0.011337 |
| 0.011440 | 0.011510 | 0.011233 | 0.011233 | 0.011268 | 0.011268 | 0.011269 |
| 0.011339 | 0.011268 | 0.011268 | 0.011132 | 0.011207 | 0.011168 | 0.011268 |
| 0.011268 | 0.011200 | 0.011245 | 0.011233 | 0.011165 | 0.011200 | 0.011234 |
| 0.011492 | 0.011271 | 0.011305 | 0.011199 | 0.000000 | 0.011337 | 0.011302 |
| 0.011371 | 0.011302 | 0.011302 | 0.011406 | 0.011337 | 0.011717 | 0.011475 |
| 0.011544 | 0.011406 | 0.011268 | 0.011371 | 0.011164 | 0.011406 | 0.011199 |
| 0.011233 | 0.011268 | 0.011233 | 0.011199 | 0.011233 | 0.011199 | 0.011302 |
| 0.011233 | 0.011371 | 0.011302 | 0.011199 | 0.011303 | 0.011406 | 0.011408 |
| 0.011406 | 0.011302 | 0.011199 | 0.011130 | 0.011268 | 0.011199 | 0.011129 |
| 0.011235 | 0.011406 | 0.011199 | 0.011406 | 0.011164 | 0.011233 | 0.011233 |
| 0.011337 | 0.011233 | 0.011268 | 0.011233 | 0.011268 | 0.011129 | 0.011268 |
| 0.011268 | 0.011233 | 0.011302 | 0.011233 | 0.011268 | 0.011302 | 0.011544 |
| 0.011613 | 0.011475 | 0.011613 | 0.011407 | 0.011613 | 0.011268 | 0.011233 |
| 0.011269 | 0.011562 | 0.011390 | 0.011166 | 0.011619 | 0.011130 | 0.011262 |
| 0.011585 | 0.011549 | 0.011406 | 0.011648 | 0.011341 | 0.011475 | 0.011475 |
| 0.011406 | 0.011544 | 0.011427 | 0.011188 | 0.011318 | 0.011302 | 0.011374 |
| 0.011475 | 0.011373 | 0.011443 | 0.011583 | 0.011510 | 0.011579 | 0.011688 |
| 0.011408 | 0.011584 | 0.011513 | 0.011443 | 0.011718 | 0.011164 | 0.011372 |
| 0.011337 | 0.011268 | 0.011164 | 0.011129 | 0.011233 | 0.011233 | 0.011302 |
| 0.011233 | 0.011302 | 0.011199 | 0.011302 | 0.011233 | 0.011233 | 0.011302 |
| 0.011233 | 0.011648 | 0.011544 | 0.011579 | 0.011129 | 0.011233 | 0.011268 |
| 0.011268 | 0.011233 | 0.011302 | 0.011337 | 0.011199 | 0.011199 | 0.011199 |
| 0.011717 | 0.011337 | 0.011371 | 0.011164 | 0.011268 | 0.011441 | 0.011199 |
| 0.011164 | 0.011233 | 0.011233 | 0.011406 | 0.011199 | 0.011337 | 0.011475 |
| 0.011406 | 0.011233 | 0.011233 | 0.011164 | 0.011164 | 0.011337 | 0.011268 |



|          |          |          |          |          |          |          |
|----------|----------|----------|----------|----------|----------|----------|
| 0.011164 | 0.011268 | 0.011129 | 0.011164 | 0.011302 | 0.011441 | 0.011199 |
| 0.011164 | 0.011302 | 0.011233 | 0.011129 | 0.011440 | 0.011129 | 0.011302 |
| 0.011377 | 0.011199 | 0.011475 | 0.011302 | 0.011371 | 0.011233 | 0.011337 |
| 0.011199 | 0.011544 | 0.011129 | 0.011371 | 0.011199 | 0.011199 | 0.011129 |
| 0.011371 | 0.011579 | 0.011268 | 0.011337 | 0.011164 | 0.011544 | 0.011199 |
| 0.011199 | 0.011199 | 0.011233 | 0.011337 | 0.011233 | 0.011337 | 0.011337 |
| 0.011371 | 0.011371 | 0.011268 | 0.011371 | 0.011337 | 0.011199 | 0.011164 |
| 0.011199 | 0.011199 | 0.011268 | 0.011199 | 0.011164 | 0.011337 | 0.011199 |
| 0.011233 | 0.011233 | 0.011337 | 0.011406 | 0.011302 | 0.011233 | 0.011233 |
| 0.011302 | 0.011199 | 0.011337 | 0.011199 | 0.011337 | 0.011406 | 0.011648 |
| 0.011233 | 0.011613 | 0.011236 | 0.017806 | 0.011126 | 0.011306 | 0.011557 |
| 0.011518 | 0.011558 | 0.011270 | 0.011234 | 0.011609 | 0.011587 | 0.011243 |
| 0.011392 | 0.011426 | 0.011099 | 0.011186 | 0.011217 | 0.011209 | 0.011147 |
| 0.011389 | 0.011395 | 0.011394 | 0.011259 | 0.011371 | 0.011406 | 0.011408 |
| 0.011272 | 0.011371 | 0.011371 | 0.011337 | 0.011302 | 0.011302 | 0.011268 |
| 0.011302 | 0.011233 | 0.011233 | 0.011302 | 0.011233 | 0.011199 | 0.011233 |
| 0.011233 | 0.011302 | 0.011199 | 0.011302 | 0.011337 | 0.011371 | 0.011268 |
| 0.011302 | 0.011268 | 0.011544 | 0.011544 | 0.011337 | 0.011372 | 0.011406 |
| 0.011164 | 0.011164 | 0.011199 | 0.011302 | 0.011164 | 0.011406 | 0.011406 |
| 0.011406 | 0.011406 | 0.011371 | 0.011440 | 0.011613 | 0.011442 | 0.011302 |
| 0.011268 | 0.011371 | 0.011406 | 0.011233 | 0.011302 | 0.011233 | 0.011302 |
| 0.011337 | 0.011337 | 0.011371 | 0.011371 | 0.011268 | 0.011475 | 0.011440 |
| 0.011304 | 0.011199 | 0.011302 | 0.011406 | 0.011268 | 0.011441 | 0.011475 |
| 0.011648 | 0.011341 | 0.011475 | 0.011475 | 0.011406 | 0.011544 | 0.011199 |
| 0.011372 | 0.011268 | 0.011233 | 0.011233 | 0.011302 | 0.011199 | 0.011302 |
| 0.011337 | 0.011371 | 0.011268 | 0.011302 | 0.011268 | 0.011544 | 0.011544 |
| 0.011337 | 0.011372 | 0.011440 | 0.011371 | 0.012029 | 0.011392 | 0.011350 |
| 0.011422 | 0.011346 | 0.011422 | 0.011382 | 0.011421 | 0.011416 | 0.011342 |
| 0.011980 | 0.011274 | 0.011413 | 0.011345 | 0.011627 | 0.011446 | 0.011586 |
| 0.012005 | 0.011449 | 0.011304 | 0.011302 | 0.011302 | 0.011337 | 0.011269 |
| 0.011164 | 0.011199 | 0.011337 | 0.011302 | 0.011304 | 0.011440 | 0.011407 |
| 0.011268 | 0.011199 | 0.011233 | 0.011268 | 0.011164 | 0.011199 | 0.011129 |
| 0.011268 | 0.011302 | 0.011129 | 0.011164 | 0.011268 | 0.011199 | 0.011233 |
| 0.011233 | 0.011164 | 0.011233 | 0.011268 | 0.011164 | 0.011371 | 0.011406 |
| 0.011302 | 0.011371 | 0.011302 | 0.011302 | 0.011164 | 0.011613 | 0.011268 |
| 0.011311 | 0.011233 | 0.011475 | 0.011479 | 0.011337 | 0.011337 | 0.011337 |
| 0.011337 | 0.011268 | 0.011233 | 0.011268 | 0.011371 | 0.011371 | 0.011233 |
| 0.011302 | 0.011440 | 0.011579 | 0.011337 | 0.011510 | 0.011510 | 0.011406 |
| 0.011233 | 0.011302 | 0.011337 | 0.011683 | 0.011302 | 0.011337 | 0.011302 |
| 0.011302 | 0.011268 | 0.011268 | 0.011544 | 0.011510 | 0.011510 | 0.011268 |
| 0.011371 | 0.011440 | 0.011302 | 0.011371 | 0.011302 | 0.011199 | 0.011510 |
| 0.011302 | 0.011268 | 0.011268 | 0.011440 | 0.011268 | 0.011371 | 0.011613 |
| 0.011233 | 0.011620 | 0.011648 | 0.011426 | 0.011117 | 0.011372 | 0.011163 |
| 0.011115 | 0.011644 | 0.011202 | 0.011373 | 0.011158 | 0.011264 | 0.011273 |
| 0.011417 | 0.000000 | 0.011227 | 0.000000 | 0.011114 | 0.011261 | 0.011306 |
| 0.011327 | 0.011219 | 0.011347 | 0.011240 | 0.011303 | 0.011440 | 0.011510 |
| 0.011475 | 0.011372 | 0.011478 | 0.011479 | 0.011583 | 0.011606 | 0.011268 |
| 0.011544 | 0.011406 | 0.011268 | 0.011371 | 0.011164 | 0.011406 | 0.011199 |
| 0.011233 | 0.011268 | 0.011233 | 0.011199 | 0.011233 | 0.011199 | 0.011302 |
| 0.011236 | 0.011273 | 0.011268 | 0.011305 | 0.011444 | 0.011407 | 0.011408 |
| 0.011408 | 0.011337 | 0.011134 | 0.011132 | 0.011268 | 0.011441 | 0.011406 |
| 0.011233 | 0.011302 | 0.011544 | 0.011510 | 0.011406 | 0.011475 | 0.011406 |
| 0.011337 | 0.011406 | 0.011406 | 0.011233 | 0.011856 | 0.011406 | 0.011510 |
| 0.011579 | 0.011611 | 0.011271 | 0.011345 | 0.011233 | 0.011441 | 0.011406 |
| 0.011441 | 0.011406 | 0.011440 | 0.011440 | 0.011584 | 0.011613 | 0.011239 |
| 0.011130 | 0.011132 | 0.011235 | 0.011200 | 0.011271 | 0.011137 | 0.011445 |
| 0.011272 | 0.011422 | 0.011159 | 0.011252 | 0.011268 | 0.011270 | 0.011233 |
| 0.011199 | 0.011199 | 0.011268 | 0.011233 | 0.011440 | 0.011406 | 0.011337 |
| 0.011440 | 0.011510 | 0.011233 | 0.011233 | 0.011268 | 0.011268 | 0.011269 |
| 0.011339 | 0.011268 | 0.011268 | 0.011303 | 0.011440 | 0.011510 | 0.011475 |

|          |          |          |          |          |          |          |
|----------|----------|----------|----------|----------|----------|----------|
| 0.011372 | 0.011478 | 0.011479 | 0.011583 | 0.011606 | 0.011268 | 0.011475 |
| 0.011406 | 0.011406 | 0.011234 | 0.011418 | 0.011346 | 0.011376 | 0.011241 |
| 0.011344 | 0.011580 | 0.011410 | 0.011305 | 0.011199 | 0.011406 | 0.011233 |
| 0.011371 | 0.011302 | 0.011199 | 0.011303 | 0.011406 | 0.011408 | 0.011302 |
| 0.011199 | 0.011130 | 0.011268 | 0.011199 | 0.011129 | 0.011235 | 0.011406 |
| 0.011302 | 0.011233 | 0.011233 | 0.011302 | 0.011233 | 0.011199 | 0.011406 |
| 0.011268 | 0.011302 | 0.011302 | 0.011233 | 0.011302 | 0.011510 | 0.011199 |
| 0.011233 | 0.011613 | 0.011233 | 0.011233 | 0.011233 | 0.011579 | 0.011146 |
| 0.011622 | 0.011145 | 0.011161 | 0.011422 | 0.011467 | 0.011422 | 0.000000 |
| 0.011113 | 0.011406 | 0.011510 | 0.011619 | 0.011476 | 0.011617 | 0.011752 |
| 0.011648 | 0.011687 | 0.011648 | 0.011904 | 0.011579 | 0.012445 | 0.011649 |
| 0.012306 | 0.012170 | 0.012309 | 0.012553 | 0.011579 | 0.011302 | 0.011613 |
| 0.012064 | 0.011998 | 0.011579 | 0.011475 | 0.011544 | 0.011544 | 0.011513 |
| 0.011406 | 0.011409 | 0.011475 | 0.011441 | 0.011787 | 0.011856 | 0.011821 |
| 0.011752 | 0.011856 | 0.011892 | 0.011721 | 0.012030 | 0.012070 | 0.012134 |
| 0.012134 | 0.012134 | 0.012104 | 0.012099 | 0.012101 | 0.011337 | 0.011614 |
| 0.011648 | 0.012237 | 0.011723 | 0.011890 | 0.012411 | 0.011444 | 0.011371 |
| 0.011337 | 0.011337 | 0.011821 | 0.011819 | 0.011914 | 0.011648 | 0.011338 |
| S159     | 0.011733 | 0.011733 | 0.011868 | 0.011834 | 0.011834 | 0.011902 |
| 0.011707 | 0.011605 | 0.011834 | 0.011329 | 0.011397 | 0.011363 | 0.011329 |
| 0.011363 | 0.011531 | 0.011329 | 0.011363 | 0.011430 | 0.011397 | 0.011363 |
| 0.011329 | 0.011363 | 0.011464 | 0.011330 | 0.011363 | 0.011363 | 0.011673 |
| 0.011598 | 0.011363 | 0.011262 | 0.011497 | 0.011430 | 0.011397 | 0.011430 |
| 0.011397 | 0.011498 | 0.011397 | 0.011397 | 0.011430 | 0.011397 | 0.011565 |
| 0.011329 | 0.011397 | 0.011430 | 0.011363 | 0.011464 | 0.011497 | 0.011430 |
| 0.011397 | 0.011565 | 0.011464 | 0.011733 | 0.011397 | 0.011666 | 0.011397 |
| 0.011363 | 0.011464 | 0.011531 | 0.011666 | 0.011767 | 0.011464 | 0.011565 |
| 0.011430 | 0.011498 | 0.011397 | 0.011632 | 0.011868 | 0.011397 | 0.011464 |
| 0.011363 | 0.011464 | 0.011430 | 0.011498 | 0.011430 | 0.011430 | 0.011430 |
| 0.011329 | 0.011363 | 0.011329 | 0.011430 | 0.011397 | 0.011431 | 0.011497 |
| 0.011430 | 0.011397 | 0.011464 | 0.011363 | 0.011497 | 0.011329 | 0.011397 |
| 0.011565 | 0.011497 | 0.011733 | 0.011531 | 0.011397 | 0.011632 | 0.011397 |
| 0.011542 | 0.011770 | 0.011588 | 0.011295 | 0.011321 | 0.011428 | 0.011493 |
| 0.012158 | 0.011518 | 0.011266 | 0.011632 | 0.011632 | 0.011430 | 0.011531 |
| 0.000000 | 0.011430 | 0.011497 | 0.011397 | 0.011498 | 0.011430 | 0.011430 |
| 0.011397 | 0.011497 | 0.011700 | 0.011565 | 0.011464 | 0.011430 | 0.011363 |
| 0.011329 | 0.011329 | 0.011397 | 0.011363 | 0.011565 | 0.011531 | 0.011464 |
| 0.011565 | 0.011632 | 0.011363 | 0.011363 | 0.011397 | 0.011397 | 0.011399 |
| 0.011467 | 0.011397 | 0.011397 | 0.011276 | 0.011349 | 0.011306 | 0.011397 |
| 0.011399 | 0.011335 | 0.011392 | 0.011371 | 0.011298 | 0.011334 | 0.011364 |
| 0.011636 | 0.011405 | 0.011439 | 0.011329 | 0.011337 | 0.000000 | 0.011430 |
| 0.011498 | 0.011431 | 0.011430 | 0.011531 | 0.011464 | 0.011834 | 0.011599 |
| 0.011666 | 0.011531 | 0.011397 | 0.011498 | 0.011296 | 0.011531 | 0.011329 |
| 0.011397 | 0.011397 | 0.011363 | 0.011329 | 0.011363 | 0.011329 | 0.011430 |
| 0.011397 | 0.011497 | 0.011430 | 0.011329 | 0.011432 | 0.011531 | 0.011534 |
| 0.011531 | 0.011430 | 0.011329 | 0.011263 | 0.011397 | 0.011329 | 0.011262 |
| 0.011366 | 0.011531 | 0.011329 | 0.011531 | 0.011296 | 0.011397 | 0.011363 |
| 0.011464 | 0.011363 | 0.011397 | 0.011363 | 0.011397 | 0.011262 | 0.011397 |
| 0.011430 | 0.011363 | 0.011094 | 0.011363 | 0.011397 | 0.011430 | 0.011666 |
| 0.011767 | 0.011699 | 0.011767 | 0.011533 | 0.011767 | 0.011397 | 0.011363 |
| 0.011398 | 0.011667 | 0.011426 | 0.011301 | 0.011774 | 0.011265 | 0.011336 |
| 0.011741 | 0.011673 | 0.011565 | 0.011767 | 0.011436 | 0.011632 | 0.011599 |
| 0.011531 | 0.011699 | 0.011559 | 0.011432 | 0.011480 | 0.011430 | 0.011501 |
| 0.011599 | 0.011499 | 0.011636 | 0.011705 | 0.011632 | 0.011700 | 0.011807 |
| 0.011535 | 0.011706 | 0.011636 | 0.011569 | 0.011835 | 0.011296 | 0.011499 |
| 0.011464 | 0.011397 | 0.011296 | 0.011296 | 0.011363 | 0.011363 | 0.011430 |
| 0.011363 | 0.011430 | 0.011329 | 0.011430 | 0.011363 | 0.011363 | 0.011430 |
| 0.011363 | 0.011800 | 0.011700 | 0.011733 | 0.011262 | 0.011363 | 0.011397 |
| 0.011397 | 0.011363 | 0.011430 | 0.011464 | 0.011329 | 0.011329 | 0.011329 |
| 0.011868 | 0.011464 | 0.011498 | 0.011296 | 0.011397 | 0.011565 | 0.011329 |

|          |          |          |          |          |          |          |
|----------|----------|----------|----------|----------|----------|----------|
| 0.011329 | 0.011397 | 0.011363 | 0.011531 | 0.011329 | 0.011464 | 0.011598 |
| 0.011531 | 0.011363 | 0.011363 | 0.011296 | 0.011296 | 0.011464 | 0.011397 |
| 0.011296 | 0.011329 | 0.011262 | 0.011296 | 0.011430 | 0.011565 | 0.011329 |
| 0.011296 | 0.011430 | 0.011363 | 0.011262 | 0.011598 | 0.011262 | 0.011430 |
| 0.011506 | 0.011329 | 0.011632 | 0.011464 | 0.011498 | 0.011363 | 0.011397 |
| 0.011329 | 0.011666 | 0.011262 | 0.011531 | 0.011329 | 0.011329 | 0.011262 |
| 0.011497 | 0.011700 | 0.011397 | 0.011464 | 0.011296 | 0.011700 | 0.011329 |
| 0.011329 | 0.011329 | 0.011363 | 0.011464 | 0.011363 | 0.011464 | 0.011531 |
| 0.011498 | 0.011498 | 0.011397 | 0.011498 | 0.011464 | 0.011329 | 0.011296 |
| 0.011329 | 0.011329 | 0.011397 | 0.011329 | 0.011296 | 0.011464 | 0.011329 |
| 0.011363 | 0.011363 | 0.011498 | 0.011531 | 0.011430 | 0.011363 | 0.011363 |
| 0.011430 | 0.011363 | 0.011464 | 0.011329 | 0.011464 | 0.011565 | 0.011800 |
| 0.011363 | 0.011767 | 0.011371 | 0.017864 | 0.011388 | 0.011488 | 0.011723 |
| 0.011683 | 0.011729 | 0.011427 | 0.011408 | 0.011829 | 0.011751 | 0.011485 |
| 0.011582 | 0.011610 | 0.011255 | 0.011312 | 0.011373 | 0.011406 | 0.011361 |
| 0.011623 | 0.011507 | 0.011542 | 0.011391 | 0.011498 | 0.011531 | 0.011501 |
| 0.011404 | 0.011497 | 0.011498 | 0.011464 | 0.011430 | 0.011431 | 0.011397 |
| 0.011430 | 0.011363 | 0.011397 | 0.011430 | 0.011397 | 0.011329 | 0.011363 |
| 0.011363 | 0.011430 | 0.011329 | 0.011430 | 0.011464 | 0.011497 | 0.011397 |
| 0.011430 | 0.011397 | 0.011733 | 0.011733 | 0.011464 | 0.011498 | 0.011531 |
| 0.011296 | 0.011296 | 0.011329 | 0.011430 | 0.011296 | 0.011531 | 0.011531 |
| 0.011565 | 0.011565 | 0.011498 | 0.011598 | 0.011767 | 0.011600 | 0.011430 |
| 0.011430 | 0.011497 | 0.011531 | 0.011363 | 0.011430 | 0.011397 | 0.011430 |
| 0.011498 | 0.011497 | 0.011531 | 0.011498 | 0.011397 | 0.011598 | 0.011565 |
| 0.011434 | 0.011329 | 0.011430 | 0.011531 | 0.011430 | 0.011565 | 0.011598 |
| 0.011767 | 0.011436 | 0.011632 | 0.011599 | 0.011531 | 0.011699 | 0.011329 |
| 0.011499 | 0.011397 | 0.011363 | 0.011363 | 0.011430 | 0.011329 | 0.011430 |
| 0.011464 | 0.011497 | 0.011397 | 0.011430 | 0.011397 | 0.011733 | 0.011733 |
| 0.011464 | 0.011498 | 0.011565 | 0.011497 | 0.012138 | 0.011561 | 0.011483 |
| 0.011553 | 0.011512 | 0.011623 | 0.011511 | 0.011621 | 0.011544 | 0.011509 |
| 0.012093 | 0.011407 | 0.011541 | 0.011476 | 0.011750 | 0.011606 | 0.011708 |
| 0.012116 | 0.011588 | 0.011433 | 0.011430 | 0.011430 | 0.011464 | 0.011399 |
| 0.011296 | 0.011329 | 0.011464 | 0.011430 | 0.011433 | 0.011565 | 0.011532 |
| 0.011397 | 0.011329 | 0.011363 | 0.011397 | 0.011296 | 0.011363 | 0.011262 |
| 0.011397 | 0.011430 | 0.011329 | 0.011296 | 0.011397 | 0.011329 | 0.011363 |
| 0.011363 | 0.011296 | 0.011363 | 0.011397 | 0.011296 | 0.011498 | 0.011531 |
| 0.011430 | 0.011498 | 0.011430 | 0.011430 | 0.011363 | 0.011767 | 0.011397 |
| 0.011444 | 0.011363 | 0.011598 | 0.011604 | 0.011464 | 0.011464 | 0.011464 |
| 0.011464 | 0.011397 | 0.011363 | 0.011397 | 0.011498 | 0.011498 | 0.011430 |
| 0.011430 | 0.011565 | 0.011733 | 0.011464 | 0.011666 | 0.011666 | 0.011531 |
| 0.011363 | 0.011430 | 0.011464 | 0.011868 | 0.011430 | 0.011464 | 0.011430 |
| 0.011464 | 0.011397 | 0.011397 | 0.011700 | 0.011632 | 0.011666 | 0.011397 |
| 0.011498 | 0.011565 | 0.011430 | 0.011498 | 0.011464 | 0.011329 | 0.011666 |
| 0.011430 | 0.011397 | 0.011397 | 0.011565 | 0.011397 | 0.011497 | 0.011733 |
| 0.011363 | 0.011775 | 0.011800 | 0.011548 | 0.011342 | 0.011502 | 0.011370 |
| 0.011280 | 0.011761 | 0.011341 | 0.011507 | 0.011353 | 0.011467 | 0.011485 |
| 0.011570 | 0.011324 | 0.011450 | 0.011324 | 0.011330 | 0.011462 | 0.011425 |
| 0.011475 | 0.011336 | 0.011483 | 0.011377 | 0.011432 | 0.011565 | 0.011632 |
| 0.011598 | 0.011498 | 0.011602 | 0.011604 | 0.011705 | 0.011768 | 0.011397 |
| 0.011666 | 0.011531 | 0.011397 | 0.011498 | 0.011296 | 0.011531 | 0.011329 |
| 0.011397 | 0.011397 | 0.011363 | 0.011329 | 0.011363 | 0.011329 | 0.011430 |
| 0.011410 | 0.011410 | 0.011403 | 0.011437 | 0.011573 | 0.011538 | 0.011538 |
| 0.011469 | 0.011464 | 0.011245 | 0.011240 | 0.011399 | 0.011569 | 0.011569 |
| 0.011363 | 0.011433 | 0.011666 | 0.011635 | 0.011565 | 0.011599 | 0.011531 |
| 0.011464 | 0.011531 | 0.011531 | 0.011430 | 0.012003 | 0.011599 | 0.011666 |
| 0.011699 | 0.011738 | 0.011402 | 0.011476 | 0.011363 | 0.011565 | 0.011531 |
| 0.011566 | 0.011565 | 0.011599 | 0.011599 | 0.011729 | 0.011733 | 0.011373 |
| 0.011263 | 0.011268 | 0.011367 | 0.011332 | 0.011437 | 0.011284 | 0.011605 |
| 0.011404 | 0.011587 | 0.011346 | 0.011397 | 0.011397 | 0.011471 | 0.011363 |
| 0.011329 | 0.011329 | 0.011397 | 0.011363 | 0.011565 | 0.011531 | 0.011464 |

|          |          |          |          |          |          |          |
|----------|----------|----------|----------|----------|----------|----------|
| 0.011565 | 0.011632 | 0.011363 | 0.011363 | 0.011397 | 0.011397 | 0.011399 |
| 0.011467 | 0.011397 | 0.011397 | 0.011432 | 0.011565 | 0.011632 | 0.011598 |
| 0.011498 | 0.011602 | 0.011604 | 0.011705 | 0.011768 | 0.011397 | 0.011598 |
| 0.011531 | 0.011531 | 0.011365 | 0.011548 | 0.011478 | 0.011504 | 0.011376 |
| 0.011543 | 0.011745 | 0.011568 | 0.011435 | 0.011329 | 0.011531 | 0.011397 |
| 0.011497 | 0.011430 | 0.011329 | 0.011432 | 0.011531 | 0.011534 | 0.011430 |
| 0.011329 | 0.011263 | 0.011397 | 0.011329 | 0.011262 | 0.011366 | 0.011531 |
| 0.011430 | 0.011363 | 0.011397 | 0.011430 | 0.011397 | 0.011329 | 0.011531 |
| 0.011397 | 0.011430 | 0.011430 | 0.011363 | 0.011430 | 0.011599 | 0.011329 |
| 0.011363 | 0.011767 | 0.011363 | 0.011363 | 0.011363 | 0.011733 | 0.011275 |
| 0.011791 | 0.011273 | 0.011311 | 0.011543 | 0.011589 | 0.011563 | 0.011227 |
| 0.011270 | 0.011531 | 0.011632 | 0.011740 | 0.011599 | 0.011738 | 0.011869 |
| 0.011767 | 0.011805 | 0.011767 | 0.012018 | 0.011733 | 0.012610 | 0.011768 |
| 0.012475 | 0.012275 | 0.012411 | 0.012682 | 0.011733 | 0.011430 | 0.011733 |
| 0.012172 | 0.012107 | 0.011699 | 0.011599 | 0.011666 | 0.011666 | 0.011636 |
| 0.011531 | 0.011536 | 0.011598 | 0.011565 | 0.011936 | 0.012003 | 0.012003 |
| 0.011903 | 0.012003 | 0.012106 | 0.011873 | 0.012173 | 0.012179 | 0.012240 |
| 0.012240 | 0.012274 | 0.012222 | 0.012240 | 0.012242 | 0.011464 | 0.011767 |
| 0.011834 | 0.012340 | 0.011807 | 0.012070 | 0.012544 | 0.011604 | 0.011498 |
| 0.011464 | 0.011464 | 0.011935 | 0.012006 | 0.012010 | 0.011800 | 0.011465 |
| S160     | 0.011699 | 0.011699 | 0.011767 | 0.011733 | 0.011733 | 0.011800 |
| 0.011639 | 0.011536 | 0.011733 | 0.011296 | 0.011363 | 0.011330 | 0.011296 |
| 0.011262 | 0.011497 | 0.011228 | 0.011329 | 0.011396 | 0.011363 | 0.011329 |
| 0.011296 | 0.011329 | 0.011363 | 0.011296 | 0.011330 | 0.011329 | 0.011604 |
| 0.011497 | 0.011329 | 0.011228 | 0.011396 | 0.011396 | 0.011363 | 0.011397 |
| 0.011363 | 0.011464 | 0.011363 | 0.011363 | 0.011396 | 0.011363 | 0.011531 |
| 0.011228 | 0.011363 | 0.011396 | 0.011329 | 0.011363 | 0.011464 | 0.011396 |
| 0.011363 | 0.011531 | 0.011430 | 0.011632 | 0.011363 | 0.011632 | 0.011363 |
| 0.011329 | 0.011363 | 0.011497 | 0.011632 | 0.011666 | 0.011363 | 0.011464 |
| 0.011396 | 0.011464 | 0.011363 | 0.011598 | 0.011767 | 0.011363 | 0.011430 |
| 0.011329 | 0.011430 | 0.011397 | 0.011464 | 0.011396 | 0.011396 | 0.011396 |
| 0.011296 | 0.011329 | 0.011296 | 0.011329 | 0.011363 | 0.011397 | 0.011464 |
| 0.011397 | 0.011363 | 0.011430 | 0.011329 | 0.011396 | 0.011296 | 0.011363 |
| 0.011531 | 0.011464 | 0.011699 | 0.011531 | 0.011363 | 0.011598 | 0.011363 |
| 0.011542 | 0.011695 | 0.011589 | 0.011256 | 0.011284 | 0.011392 | 0.011415 |
| 0.012011 | 0.011416 | 0.011266 | 0.011598 | 0.011598 | 0.011329 | 0.011430 |
| 0.011430 | 0.011396 | 0.011464 | 0.011363 | 0.011464 | 0.011396 | 0.011396 |
| 0.011363 | 0.011396 | 0.011666 | 0.011531 | 0.011430 | 0.011397 | 0.011329 |
| 0.011296 | 0.011228 | 0.011363 | 0.011329 | 0.011464 | 0.011430 | 0.011363 |
| 0.011464 | 0.011531 | 0.011329 | 0.011329 | 0.011363 | 0.011363 | 0.011365 |
| 0.011433 | 0.011363 | 0.011363 | 0.011240 | 0.011313 | 0.011271 | 0.011363 |
| 0.011365 | 0.011301 | 0.011355 | 0.011336 | 0.011264 | 0.011300 | 0.011330 |
| 0.011528 | 0.011371 | 0.011405 | 0.011296 | 0.011302 | 0.011430 | 0.000000 |
| 0.011094 | 0.011397 | 0.011396 | 0.011497 | 0.011430 | 0.011800 | 0.011498 |
| 0.011565 | 0.011430 | 0.011363 | 0.011397 | 0.011262 | 0.011430 | 0.011296 |
| 0.011363 | 0.011363 | 0.011329 | 0.011296 | 0.011329 | 0.011296 | 0.011396 |
| 0.011363 | 0.011464 | 0.011397 | 0.011296 | 0.011398 | 0.011497 | 0.011500 |
| 0.011498 | 0.011396 | 0.011296 | 0.011229 | 0.011363 | 0.011296 | 0.011228 |
| 0.011332 | 0.011498 | 0.011296 | 0.011498 | 0.011262 | 0.011363 | 0.011329 |
| 0.011430 | 0.011329 | 0.011363 | 0.011329 | 0.011363 | 0.011228 | 0.011363 |
| 0.011397 | 0.011329 | 0.011396 | 0.011329 | 0.011363 | 0.011396 | 0.011632 |
| 0.011666 | 0.011598 | 0.011666 | 0.011499 | 0.011666 | 0.011363 | 0.011329 |
| 0.011297 | 0.011586 | 0.011426 | 0.011266 | 0.011672 | 0.011231 | 0.011375 |
| 0.011672 | 0.011570 | 0.011531 | 0.011733 | 0.011436 | 0.011598 | 0.011565 |
| 0.011497 | 0.011665 | 0.011487 | 0.011225 | 0.011312 | 0.011397 | 0.011467 |
| 0.011565 | 0.011465 | 0.011602 | 0.011670 | 0.011598 | 0.011666 | 0.011773 |
| 0.011501 | 0.011672 | 0.011602 | 0.011534 | 0.011801 | 0.011262 | 0.011465 |
| 0.011430 | 0.011363 | 0.011262 | 0.011262 | 0.011329 | 0.011329 | 0.011396 |
| 0.011329 | 0.011397 | 0.011296 | 0.011329 | 0.011329 | 0.011329 | 0.011396 |
| 0.011329 | 0.011699 | 0.011598 | 0.011632 | 0.011228 | 0.011329 | 0.011363 |

|          |          |          |          |          |          |          |
|----------|----------|----------|----------|----------|----------|----------|
| 0.011363 | 0.011329 | 0.011397 | 0.011363 | 0.011296 | 0.011296 | 0.011296 |
| 0.011767 | 0.011363 | 0.011464 | 0.011262 | 0.011363 | 0.011531 | 0.011296 |
| 0.011296 | 0.011363 | 0.011329 | 0.011497 | 0.011296 | 0.011430 | 0.011565 |
| 0.011497 | 0.011329 | 0.011329 | 0.011262 | 0.011262 | 0.011430 | 0.011363 |
| 0.011262 | 0.011363 | 0.011228 | 0.011262 | 0.011396 | 0.011464 | 0.011296 |
| 0.011262 | 0.011396 | 0.011329 | 0.011228 | 0.011497 | 0.011228 | 0.011396 |
| 0.011471 | 0.011296 | 0.011531 | 0.011430 | 0.011397 | 0.011296 | 0.011430 |
| 0.011296 | 0.011632 | 0.011228 | 0.011430 | 0.011228 | 0.011228 | 0.011228 |
| 0.011464 | 0.011599 | 0.011363 | 0.011430 | 0.011262 | 0.011598 | 0.011228 |
| 0.011296 | 0.011296 | 0.011329 | 0.011430 | 0.011329 | 0.011430 | 0.011497 |
| 0.011497 | 0.011464 | 0.011363 | 0.011464 | 0.011430 | 0.011296 | 0.011262 |
| 0.011296 | 0.011296 | 0.011363 | 0.011228 | 0.011262 | 0.011430 | 0.011296 |
| 0.011262 | 0.011329 | 0.011464 | 0.011430 | 0.011396 | 0.011329 | 0.011329 |
| 0.011396 | 0.011329 | 0.011430 | 0.011296 | 0.011430 | 0.011531 | 0.011699 |
| 0.011329 | 0.011666 | 0.011336 | 0.011748 | 0.011191 | 0.011366 | 0.011618 |
| 0.011579 | 0.011623 | 0.011374 | 0.011408 | 0.011664 | 0.011647 | 0.011303 |
| 0.011440 | 0.011487 | 0.011255 | 0.011353 | 0.011177 | 0.011258 | 0.011318 |
| 0.011436 | 0.011433 | 0.011431 | 0.011259 | 0.011464 | 0.011497 | 0.011500 |
| 0.011370 | 0.011464 | 0.011464 | 0.011296 | 0.011397 | 0.011397 | 0.011363 |
| 0.011397 | 0.011329 | 0.011363 | 0.011396 | 0.011363 | 0.011296 | 0.011329 |
| 0.011329 | 0.011396 | 0.011296 | 0.011397 | 0.011430 | 0.011464 | 0.011363 |
| 0.011329 | 0.011296 | 0.011632 | 0.011632 | 0.011430 | 0.011464 | 0.011497 |
| 0.011262 | 0.011262 | 0.011296 | 0.011397 | 0.011262 | 0.011497 | 0.011497 |
| 0.011531 | 0.011531 | 0.011464 | 0.011565 | 0.011666 | 0.011566 | 0.011397 |
| 0.011396 | 0.011464 | 0.011497 | 0.011329 | 0.011396 | 0.011363 | 0.011397 |
| 0.011464 | 0.011464 | 0.011497 | 0.011464 | 0.011364 | 0.011565 | 0.011531 |
| 0.011400 | 0.011296 | 0.011396 | 0.011497 | 0.011397 | 0.011464 | 0.011565 |
| 0.011733 | 0.011436 | 0.011598 | 0.011565 | 0.011497 | 0.011665 | 0.011296 |
| 0.011465 | 0.011363 | 0.011329 | 0.011329 | 0.011396 | 0.011296 | 0.011397 |
| 0.011430 | 0.011464 | 0.011363 | 0.011329 | 0.011296 | 0.011632 | 0.011632 |
| 0.011430 | 0.011464 | 0.011531 | 0.011464 | 0.012037 | 0.011525 | 0.011448 |
| 0.011518 | 0.011477 | 0.011588 | 0.011477 | 0.011586 | 0.011509 | 0.011474 |
| 0.011989 | 0.011372 | 0.011506 | 0.011441 | 0.011715 | 0.011571 | 0.011673 |
| 0.012013 | 0.011475 | 0.011399 | 0.011396 | 0.011396 | 0.011363 | 0.011365 |
| 0.011262 | 0.011296 | 0.011430 | 0.011396 | 0.011399 | 0.011464 | 0.011431 |
| 0.011363 | 0.011296 | 0.011329 | 0.011363 | 0.011262 | 0.011329 | 0.011228 |
| 0.011296 | 0.011329 | 0.011296 | 0.011262 | 0.011363 | 0.011296 | 0.011329 |
| 0.011329 | 0.011262 | 0.011329 | 0.011363 | 0.011262 | 0.011464 | 0.011497 |
| 0.011397 | 0.011397 | 0.011396 | 0.011397 | 0.011329 | 0.011666 | 0.011363 |
| 0.011339 | 0.011329 | 0.011497 | 0.011502 | 0.011430 | 0.011430 | 0.011430 |
| 0.011430 | 0.011363 | 0.011329 | 0.011363 | 0.011464 | 0.011464 | 0.011396 |
| 0.011396 | 0.011531 | 0.011632 | 0.011430 | 0.011632 | 0.011632 | 0.011497 |
| 0.011329 | 0.011396 | 0.011430 | 0.011767 | 0.011397 | 0.011430 | 0.011397 |
| 0.011430 | 0.011296 | 0.011296 | 0.011531 | 0.011599 | 0.011497 | 0.011363 |
| 0.011464 | 0.011531 | 0.011396 | 0.011464 | 0.011430 | 0.011296 | 0.011565 |
| 0.011396 | 0.011363 | 0.011296 | 0.011531 | 0.011363 | 0.011464 | 0.011699 |
| 0.011329 | 0.011707 | 0.011699 | 0.011507 | 0.000000 | 0.011400 | 0.011215 |
| 0.011170 | 0.011683 | 0.011306 | 0.011418 | 0.011207 | 0.011366 | 0.011326 |
| 0.011468 | 0.011126 | 0.011394 | 0.011126 | 0.011276 | 0.011328 | 0.011466 |
| 0.011475 | 0.011375 | 0.011377 | 0.011377 | 0.011398 | 0.011464 | 0.011531 |
| 0.011497 | 0.011397 | 0.011500 | 0.011501 | 0.011637 | 0.011662 | 0.011363 |
| 0.011565 | 0.011430 | 0.011363 | 0.011397 | 0.011262 | 0.011430 | 0.011296 |
| 0.011363 | 0.011363 | 0.011329 | 0.011296 | 0.011329 | 0.011296 | 0.011396 |
| 0.011375 | 0.011375 | 0.011369 | 0.011403 | 0.011539 | 0.011504 | 0.011504 |
| 0.011503 | 0.011430 | 0.011245 | 0.011240 | 0.011365 | 0.011535 | 0.011535 |
| 0.011329 | 0.011399 | 0.011633 | 0.011601 | 0.011531 | 0.011565 | 0.011497 |
| 0.011430 | 0.011497 | 0.011497 | 0.011396 | 0.011902 | 0.011565 | 0.011632 |
| 0.011666 | 0.011631 | 0.011368 | 0.011441 | 0.011329 | 0.011531 | 0.011497 |
| 0.011532 | 0.011531 | 0.011565 | 0.011565 | 0.011729 | 0.011699 | 0.011338 |
| 0.011230 | 0.011234 | 0.011333 | 0.011298 | 0.011334 | 0.011247 | 0.011502 |

|          |          |          |          |          |          |          |
|----------|----------|----------|----------|----------|----------|----------|
| 0.011369 | 0.011323 | 0.011156 | 0.011397 | 0.011363 | 0.011437 | 0.011329 |
| 0.011296 | 0.011228 | 0.011363 | 0.011329 | 0.011464 | 0.011430 | 0.011363 |
| 0.011464 | 0.011531 | 0.011329 | 0.011329 | 0.011363 | 0.011363 | 0.011365 |
| 0.011433 | 0.011363 | 0.011363 | 0.011398 | 0.011464 | 0.011531 | 0.011497 |
| 0.011397 | 0.011500 | 0.011501 | 0.011637 | 0.011662 | 0.011363 | 0.011564 |
| 0.011497 | 0.011497 | 0.011331 | 0.011513 | 0.011443 | 0.011469 | 0.011341 |
| 0.011508 | 0.011699 | 0.011441 | 0.011401 | 0.011296 | 0.011498 | 0.011363 |
| 0.011464 | 0.011397 | 0.011296 | 0.011398 | 0.011497 | 0.011500 | 0.011396 |
| 0.011296 | 0.011229 | 0.011363 | 0.011296 | 0.011228 | 0.011332 | 0.011498 |
| 0.011397 | 0.011329 | 0.011363 | 0.011396 | 0.011363 | 0.011296 | 0.011430 |
| 0.011363 | 0.011397 | 0.011396 | 0.011329 | 0.011396 | 0.011632 | 0.011228 |
| 0.011329 | 0.011666 | 0.011329 | 0.011363 | 0.011329 | 0.011632 | 0.011275 |
| 0.011566 | 0.011273 | 0.011211 | 0.011423 | 0.011508 | 0.011455 | 0.011186 |
| 0.011165 | 0.011430 | 0.011531 | 0.011637 | 0.011498 | 0.011636 | 0.011767 |
| 0.011666 | 0.011703 | 0.011666 | 0.011880 | 0.011632 | 0.012508 | 0.011667 |
| 0.012373 | 0.012173 | 0.012309 | 0.012580 | 0.011632 | 0.011329 | 0.011632 |
| 0.012071 | 0.012006 | 0.011598 | 0.011498 | 0.011565 | 0.011565 | 0.011535 |
| 0.011430 | 0.011434 | 0.011497 | 0.011464 | 0.011834 | 0.011901 | 0.011901 |
| 0.011802 | 0.011902 | 0.012004 | 0.011771 | 0.012071 | 0.012077 | 0.012138 |
| 0.012138 | 0.012172 | 0.012119 | 0.012138 | 0.012140 | 0.011430 | 0.011666 |
| 0.011733 | 0.012238 | 0.011739 | 0.011969 | 0.012442 | 0.011502 | 0.011397 |
| 0.011363 | 0.011363 | 0.011834 | 0.011883 | 0.011975 | 0.011699 | 0.011364 |
| S161     | 0.011767 | 0.011767 | 0.011834 | 0.011800 | 0.011800 | 0.011868 |
| 0.011673 | 0.011571 | 0.011800 | 0.011363 | 0.011430 | 0.011397 | 0.011363 |
| 0.011329 | 0.011565 | 0.011296 | 0.011396 | 0.011464 | 0.011430 | 0.011396 |
| 0.011363 | 0.011397 | 0.011430 | 0.011363 | 0.011397 | 0.011396 | 0.011639 |
| 0.011565 | 0.011397 | 0.011296 | 0.011464 | 0.011464 | 0.011430 | 0.011464 |
| 0.011430 | 0.011531 | 0.011430 | 0.011430 | 0.011464 | 0.011430 | 0.011598 |
| 0.011296 | 0.011430 | 0.011464 | 0.011396 | 0.011430 | 0.011531 | 0.011464 |
| 0.011430 | 0.011599 | 0.011498 | 0.011699 | 0.011430 | 0.011699 | 0.011430 |
| 0.011396 | 0.011430 | 0.011565 | 0.011699 | 0.011733 | 0.011430 | 0.011531 |
| 0.011464 | 0.011531 | 0.011430 | 0.011665 | 0.011834 | 0.011430 | 0.011497 |
| 0.011397 | 0.011497 | 0.011464 | 0.011531 | 0.011464 | 0.011464 | 0.011464 |
| 0.011363 | 0.011396 | 0.011363 | 0.011397 | 0.011430 | 0.011465 | 0.011531 |
| 0.011464 | 0.011430 | 0.011497 | 0.011396 | 0.011464 | 0.011363 | 0.011430 |
| 0.011598 | 0.011531 | 0.011767 | 0.011598 | 0.011430 | 0.011666 | 0.011430 |
| 0.011617 | 0.011770 | 0.011664 | 0.011334 | 0.011359 | 0.011465 | 0.011493 |
| 0.012085 | 0.011518 | 0.011349 | 0.011666 | 0.011666 | 0.011396 | 0.011498 |
| 0.011497 | 0.011464 | 0.011531 | 0.011430 | 0.011531 | 0.011464 | 0.011464 |
| 0.011430 | 0.011464 | 0.011733 | 0.011598 | 0.011497 | 0.011464 | 0.011397 |
| 0.011363 | 0.011296 | 0.011430 | 0.011396 | 0.011531 | 0.011497 | 0.011430 |
| 0.011531 | 0.011598 | 0.011396 | 0.011396 | 0.011430 | 0.011430 | 0.011432 |
| 0.011500 | 0.011430 | 0.011430 | 0.011312 | 0.011386 | 0.011341 | 0.011430 |
| 0.011433 | 0.011370 | 0.011429 | 0.011405 | 0.011332 | 0.011369 | 0.011398 |
| 0.011600 | 0.011440 | 0.011474 | 0.011363 | 0.011371 | 0.011498 | 0.011094 |
| 0.000000 | 0.011465 | 0.011464 | 0.011565 | 0.011497 | 0.011868 | 0.011565 |
| 0.011632 | 0.011498 | 0.011430 | 0.011464 | 0.011329 | 0.011497 | 0.011363 |
| 0.011430 | 0.011430 | 0.011396 | 0.011363 | 0.011396 | 0.011363 | 0.011464 |
| 0.011430 | 0.011531 | 0.011464 | 0.011363 | 0.011465 | 0.011565 | 0.011568 |
| 0.011565 | 0.011464 | 0.011363 | 0.011297 | 0.011430 | 0.011363 | 0.011296 |
| 0.011400 | 0.011565 | 0.011363 | 0.011565 | 0.011329 | 0.011430 | 0.011397 |
| 0.011497 | 0.011396 | 0.011430 | 0.011397 | 0.011430 | 0.011296 | 0.011430 |
| 0.011464 | 0.011396 | 0.011464 | 0.011396 | 0.011430 | 0.011464 | 0.011699 |
| 0.011733 | 0.011666 | 0.011733 | 0.011566 | 0.011733 | 0.011430 | 0.011396 |
| 0.011365 | 0.011667 | 0.011518 | 0.011335 | 0.011740 | 0.011299 | 0.011454 |
| 0.011706 | 0.011638 | 0.011598 | 0.011800 | 0.011505 | 0.011666 | 0.011632 |
| 0.011565 | 0.011733 | 0.011559 | 0.011308 | 0.011396 | 0.011464 | 0.011535 |
| 0.011632 | 0.011533 | 0.011670 | 0.011738 | 0.011666 | 0.011733 | 0.011841 |
| 0.011569 | 0.011740 | 0.011670 | 0.011602 | 0.011869 | 0.011329 | 0.011532 |
| 0.011497 | 0.011430 | 0.011329 | 0.011329 | 0.011397 | 0.011397 | 0.011464 |

|          |          |          |          |          |          |          |
|----------|----------|----------|----------|----------|----------|----------|
| 0.011396 | 0.011464 | 0.011363 | 0.011397 | 0.011397 | 0.011396 | 0.011464 |
| 0.011397 | 0.011767 | 0.011666 | 0.011699 | 0.011296 | 0.011397 | 0.011430 |
| 0.011430 | 0.011396 | 0.011464 | 0.011430 | 0.011363 | 0.011363 | 0.011363 |
| 0.011834 | 0.011430 | 0.011531 | 0.011329 | 0.011430 | 0.011599 | 0.011363 |
| 0.011363 | 0.011430 | 0.011396 | 0.011565 | 0.011363 | 0.011497 | 0.011632 |
| 0.011565 | 0.011397 | 0.011396 | 0.011329 | 0.011329 | 0.011498 | 0.011430 |
| 0.011329 | 0.011430 | 0.011296 | 0.011329 | 0.011464 | 0.011531 | 0.011363 |
| 0.011330 | 0.011464 | 0.011397 | 0.011296 | 0.011565 | 0.011296 | 0.011464 |
| 0.011540 | 0.011363 | 0.011598 | 0.011498 | 0.011464 | 0.011329 | 0.011497 |
| 0.011363 | 0.011699 | 0.011296 | 0.011498 | 0.011296 | 0.011296 | 0.011296 |
| 0.011531 | 0.011666 | 0.011430 | 0.011497 | 0.011329 | 0.011666 | 0.011296 |
| 0.011363 | 0.011363 | 0.011396 | 0.011497 | 0.011396 | 0.011497 | 0.011565 |
| 0.011565 | 0.011531 | 0.011430 | 0.011531 | 0.011497 | 0.011363 | 0.011329 |
| 0.011363 | 0.011363 | 0.011430 | 0.011296 | 0.011329 | 0.011497 | 0.011363 |
| 0.011329 | 0.011397 | 0.011531 | 0.011497 | 0.011464 | 0.011396 | 0.011397 |
| 0.011464 | 0.011396 | 0.011497 | 0.011363 | 0.011497 | 0.011598 | 0.011767 |
| 0.011397 | 0.011733 | 0.011405 | 0.017823 | 0.011322 | 0.011488 | 0.011688 |
| 0.011649 | 0.011694 | 0.011479 | 0.011525 | 0.011774 | 0.011716 | 0.011425 |
| 0.011535 | 0.011610 | 0.011333 | 0.011437 | 0.011255 | 0.011357 | 0.011404 |
| 0.011530 | 0.011507 | 0.011505 | 0.011325 | 0.011531 | 0.011565 | 0.011568 |
| 0.011438 | 0.011531 | 0.011531 | 0.011363 | 0.011464 | 0.011464 | 0.011430 |
| 0.011464 | 0.011396 | 0.011430 | 0.011464 | 0.011430 | 0.011363 | 0.011396 |
| 0.011396 | 0.011464 | 0.011363 | 0.011464 | 0.011497 | 0.011531 | 0.011430 |
| 0.011397 | 0.011363 | 0.011699 | 0.011699 | 0.011498 | 0.011532 | 0.011565 |
| 0.011329 | 0.011329 | 0.011363 | 0.011464 | 0.011329 | 0.011565 | 0.011565 |
| 0.011598 | 0.011598 | 0.011531 | 0.011632 | 0.011733 | 0.011634 | 0.011464 |
| 0.011464 | 0.011531 | 0.011565 | 0.011397 | 0.011464 | 0.011430 | 0.011464 |
| 0.011531 | 0.011531 | 0.011565 | 0.011531 | 0.011431 | 0.011632 | 0.011598 |
| 0.011467 | 0.011363 | 0.011464 | 0.011565 | 0.011464 | 0.011531 | 0.011632 |
| 0.011800 | 0.011505 | 0.011666 | 0.011632 | 0.011565 | 0.011733 | 0.011363 |
| 0.011532 | 0.011430 | 0.011396 | 0.011396 | 0.011464 | 0.011363 | 0.011464 |
| 0.011497 | 0.011531 | 0.011430 | 0.011397 | 0.011363 | 0.011699 | 0.011699 |
| 0.011498 | 0.011532 | 0.011598 | 0.011531 | 0.012104 | 0.011597 | 0.011518 |
| 0.011588 | 0.011547 | 0.011658 | 0.011546 | 0.011656 | 0.011578 | 0.011543 |
| 0.012058 | 0.011441 | 0.011575 | 0.011510 | 0.011784 | 0.011639 | 0.011742 |
| 0.012081 | 0.011550 | 0.011467 | 0.011464 | 0.011464 | 0.011430 | 0.011433 |
| 0.011329 | 0.011363 | 0.011497 | 0.011464 | 0.011466 | 0.011531 | 0.011499 |
| 0.011430 | 0.011363 | 0.011397 | 0.011430 | 0.011329 | 0.011397 | 0.011296 |
| 0.011363 | 0.011397 | 0.011363 | 0.011329 | 0.011430 | 0.011363 | 0.011397 |
| 0.011396 | 0.011329 | 0.011397 | 0.011430 | 0.011329 | 0.011531 | 0.011565 |
| 0.011464 | 0.011464 | 0.011464 | 0.011464 | 0.011396 | 0.011733 | 0.011430 |
| 0.011409 | 0.011397 | 0.011565 | 0.011570 | 0.011498 | 0.011497 | 0.011497 |
| 0.011498 | 0.011430 | 0.011396 | 0.011430 | 0.011531 | 0.011531 | 0.011464 |
| 0.011464 | 0.011598 | 0.011699 | 0.011497 | 0.011700 | 0.011700 | 0.011565 |
| 0.011396 | 0.011464 | 0.011498 | 0.011834 | 0.011464 | 0.011498 | 0.011464 |
| 0.011497 | 0.011363 | 0.011363 | 0.011599 | 0.011666 | 0.011565 | 0.011430 |
| 0.011531 | 0.011598 | 0.011464 | 0.011531 | 0.011497 | 0.011363 | 0.011632 |
| 0.011464 | 0.011430 | 0.011363 | 0.011598 | 0.011430 | 0.011531 | 0.011767 |
| 0.011396 | 0.011741 | 0.011767 | 0.011589 | 0.011173 | 0.011468 | 0.011318 |
| 0.011280 | 0.011761 | 0.011376 | 0.011507 | 0.011304 | 0.011468 | 0.011432 |
| 0.011570 | 0.011258 | 0.011506 | 0.011258 | 0.011384 | 0.011462 | 0.011547 |
| 0.011550 | 0.011454 | 0.011448 | 0.011448 | 0.011465 | 0.011531 | 0.011598 |
| 0.011565 | 0.011464 | 0.011568 | 0.011569 | 0.011705 | 0.011733 | 0.011430 |
| 0.011632 | 0.011498 | 0.011430 | 0.011464 | 0.011329 | 0.011497 | 0.011363 |
| 0.011430 | 0.011430 | 0.011396 | 0.011363 | 0.011396 | 0.011363 | 0.011464 |
| 0.011445 | 0.011445 | 0.011437 | 0.011471 | 0.011608 | 0.011573 | 0.011573 |
| 0.011571 | 0.011497 | 0.011319 | 0.011312 | 0.011433 | 0.011603 | 0.011603 |
| 0.011397 | 0.011467 | 0.011700 | 0.011669 | 0.011598 | 0.011632 | 0.011565 |
| 0.011497 | 0.011565 | 0.011565 | 0.011464 | 0.011969 | 0.011632 | 0.011700 |
| 0.011733 | 0.011702 | 0.011436 | 0.011511 | 0.011396 | 0.011598 | 0.011565 |

|          |          |          |          |          |          |          |
|----------|----------|----------|----------|----------|----------|----------|
| 0.011600 | 0.011598 | 0.011632 | 0.011632 | 0.011808 | 0.011767 | 0.011407 |
| 0.011297 | 0.011303 | 0.011401 | 0.011366 | 0.011403 | 0.011322 | 0.011570 |
| 0.011438 | 0.011411 | 0.011251 | 0.011435 | 0.011430 | 0.011505 | 0.011397 |
| 0.011363 | 0.011296 | 0.011430 | 0.011396 | 0.011531 | 0.011497 | 0.011430 |
| 0.011531 | 0.011598 | 0.011396 | 0.011396 | 0.011430 | 0.011430 | 0.011432 |
| 0.011500 | 0.011430 | 0.011430 | 0.011465 | 0.011531 | 0.011598 | 0.011565 |
| 0.011464 | 0.011568 | 0.011569 | 0.011705 | 0.011733 | 0.011430 | 0.011632 |
| 0.011565 | 0.011565 | 0.011399 | 0.011583 | 0.011512 | 0.011538 | 0.011411 |
| 0.011577 | 0.011790 | 0.011526 | 0.011469 | 0.011363 | 0.011565 | 0.011430 |
| 0.011531 | 0.011464 | 0.011363 | 0.011465 | 0.011565 | 0.011568 | 0.011464 |
| 0.011363 | 0.011297 | 0.011430 | 0.011363 | 0.011296 | 0.011400 | 0.011565 |
| 0.011464 | 0.011396 | 0.011430 | 0.011464 | 0.011430 | 0.011363 | 0.011497 |
| 0.011430 | 0.011464 | 0.011464 | 0.011396 | 0.011464 | 0.011699 | 0.011296 |
| 0.011397 | 0.011733 | 0.011396 | 0.011430 | 0.011396 | 0.011699 | 0.011360 |
| 0.011679 | 0.011358 | 0.011311 | 0.011503 | 0.011590 | 0.011527 | 0.011269 |
| 0.011270 | 0.011497 | 0.011598 | 0.011705 | 0.011566 | 0.011704 | 0.011835 |
| 0.011734 | 0.011771 | 0.011733 | 0.011949 | 0.011699 | 0.012576 | 0.011734 |
| 0.012441 | 0.012241 | 0.012376 | 0.012648 | 0.011699 | 0.011397 | 0.011699 |
| 0.012138 | 0.012073 | 0.011666 | 0.011565 | 0.011632 | 0.011632 | 0.011602 |
| 0.011497 | 0.011502 | 0.011565 | 0.011531 | 0.011902 | 0.011969 | 0.011969 |
| 0.011869 | 0.011969 | 0.012072 | 0.011838 | 0.012139 | 0.012145 | 0.012206 |
| 0.012206 | 0.012240 | 0.012187 | 0.012206 | 0.012208 | 0.011497 | 0.011733 |
| 0.011801 | 0.012306 | 0.011807 | 0.012036 | 0.012509 | 0.011570 | 0.011464 |
| 0.011430 | 0.011430 | 0.011902 | 0.011965 | 0.012046 | 0.011767 | 0.011431 |
| S162     | 0.011701 | 0.011701 | 0.011836 | 0.011802 | 0.011802 | 0.011869 |
| 0.011708 | 0.011606 | 0.011802 | 0.011296 | 0.011363 | 0.011330 | 0.011296 |
| 0.011330 | 0.011498 | 0.011296 | 0.011330 | 0.011397 | 0.011364 | 0.011330 |
| 0.011296 | 0.011330 | 0.011431 | 0.011296 | 0.011330 | 0.011330 | 0.011674 |
| 0.011566 | 0.011330 | 0.011229 | 0.011465 | 0.011397 | 0.011363 | 0.011397 |
| 0.011364 | 0.011465 | 0.011363 | 0.011364 | 0.011397 | 0.011363 | 0.011532 |
| 0.011296 | 0.011363 | 0.011397 | 0.011330 | 0.011431 | 0.011465 | 0.011397 |
| 0.011364 | 0.011532 | 0.011431 | 0.011701 | 0.011363 | 0.011633 | 0.011363 |
| 0.011330 | 0.011431 | 0.011498 | 0.011633 | 0.011734 | 0.011431 | 0.011532 |
| 0.011397 | 0.011465 | 0.011364 | 0.011599 | 0.011836 | 0.011364 | 0.011431 |
| 0.011330 | 0.011431 | 0.011397 | 0.011465 | 0.011397 | 0.011397 | 0.011397 |
| 0.011296 | 0.011330 | 0.011296 | 0.011397 | 0.011363 | 0.011398 | 0.011465 |
| 0.011397 | 0.011363 | 0.011431 | 0.011330 | 0.011465 | 0.011296 | 0.011330 |
| 0.011532 | 0.011465 | 0.011701 | 0.011498 | 0.011364 | 0.011599 | 0.011363 |
| 0.011543 | 0.011772 | 0.011588 | 0.011295 | 0.011247 | 0.011392 | 0.011415 |
| 0.012085 | 0.011467 | 0.011266 | 0.011599 | 0.011599 | 0.011397 | 0.011498 |
| 0.011431 | 0.011397 | 0.011465 | 0.011363 | 0.011465 | 0.011397 | 0.011397 |
| 0.011363 | 0.011465 | 0.011667 | 0.011532 | 0.011431 | 0.011397 | 0.011330 |
| 0.011296 | 0.011296 | 0.011364 | 0.011330 | 0.011532 | 0.011498 | 0.011431 |
| 0.011532 | 0.011599 | 0.011330 | 0.011330 | 0.011364 | 0.011363 | 0.011365 |
| 0.011433 | 0.011363 | 0.011363 | 0.011240 | 0.011313 | 0.011271 | 0.011363 |
| 0.011365 | 0.011301 | 0.011355 | 0.011336 | 0.011265 | 0.011300 | 0.011331 |
| 0.011600 | 0.011370 | 0.011405 | 0.011296 | 0.011302 | 0.011431 | 0.011397 |
| 0.011465 | 0.000000 | 0.000000 | 0.011498 | 0.011431 | 0.011802 | 0.011566 |
| 0.011633 | 0.011498 | 0.011363 | 0.011465 | 0.011262 | 0.011498 | 0.011296 |
| 0.011364 | 0.011363 | 0.011330 | 0.011296 | 0.011330 | 0.011296 | 0.011397 |
| 0.011364 | 0.011465 | 0.011397 | 0.011229 | 0.011398 | 0.011498 | 0.011501 |
| 0.011498 | 0.011397 | 0.011296 | 0.011229 | 0.011363 | 0.011296 | 0.011229 |
| 0.011333 | 0.011498 | 0.011296 | 0.011498 | 0.011262 | 0.011364 | 0.011330 |
| 0.011431 | 0.011330 | 0.011364 | 0.011330 | 0.011364 | 0.011229 | 0.011364 |
| 0.011397 | 0.011330 | 0.011397 | 0.011330 | 0.011363 | 0.011397 | 0.011633 |
| 0.011734 | 0.011667 | 0.011734 | 0.011500 | 0.011735 | 0.011363 | 0.011330 |
| 0.011365 | 0.011668 | 0.011427 | 0.011267 | 0.011741 | 0.011231 | 0.011336 |
| 0.011742 | 0.011640 | 0.011532 | 0.011735 | 0.011437 | 0.011600 | 0.011566 |
| 0.011498 | 0.011667 | 0.011524 | 0.011391 | 0.011439 | 0.011397 | 0.011468 |
| 0.011566 | 0.011466 | 0.011603 | 0.011672 | 0.011599 | 0.011667 | 0.011774 |



|          |          |          |          |          |          |          |
|----------|----------|----------|----------|----------|----------|----------|
| 0.011502 | 0.011673 | 0.011604 | 0.011535 | 0.011803 | 0.011262 | 0.011466 |
| 0.011431 | 0.011364 | 0.011262 | 0.011262 | 0.011330 | 0.011330 | 0.011397 |
| 0.011330 | 0.011397 | 0.011296 | 0.011397 | 0.011330 | 0.011330 | 0.011397 |
| 0.011330 | 0.011768 | 0.011667 | 0.011701 | 0.011229 | 0.011330 | 0.011364 |
| 0.011364 | 0.011330 | 0.011397 | 0.011431 | 0.011296 | 0.011296 | 0.011296 |
| 0.011836 | 0.011431 | 0.011465 | 0.011262 | 0.011363 | 0.011532 | 0.011296 |
| 0.011296 | 0.011330 | 0.011330 | 0.011498 | 0.011296 | 0.011431 | 0.011566 |
| 0.011498 | 0.011330 | 0.011330 | 0.011262 | 0.011262 | 0.011431 | 0.011363 |
| 0.011262 | 0.011363 | 0.011229 | 0.011262 | 0.011397 | 0.011532 | 0.011296 |
| 0.011263 | 0.011397 | 0.011330 | 0.011229 | 0.011566 | 0.011229 | 0.011397 |
| 0.011472 | 0.011296 | 0.011599 | 0.011431 | 0.011465 | 0.011330 | 0.011431 |
| 0.011296 | 0.011633 | 0.011229 | 0.011498 | 0.011296 | 0.011296 | 0.011229 |
| 0.011465 | 0.011667 | 0.011364 | 0.011431 | 0.011262 | 0.011667 | 0.011296 |
| 0.011296 | 0.011296 | 0.011330 | 0.011431 | 0.011330 | 0.011431 | 0.011498 |
| 0.011465 | 0.011465 | 0.011363 | 0.011465 | 0.011431 | 0.011296 | 0.011262 |
| 0.011296 | 0.011296 | 0.011364 | 0.011296 | 0.011262 | 0.011431 | 0.011296 |
| 0.011330 | 0.011330 | 0.011465 | 0.011498 | 0.011397 | 0.011330 | 0.011330 |
| 0.011397 | 0.011330 | 0.011431 | 0.011296 | 0.011431 | 0.011532 | 0.011768 |
| 0.011330 | 0.011734 | 0.011337 | 0.017841 | 0.011322 | 0.011488 | 0.011690 |
| 0.011650 | 0.011695 | 0.011374 | 0.011350 | 0.011829 | 0.011718 | 0.011364 |
| 0.011487 | 0.011610 | 0.011255 | 0.011311 | 0.011333 | 0.011406 | 0.011361 |
| 0.011482 | 0.011470 | 0.011468 | 0.011259 | 0.011465 | 0.011498 | 0.011501 |
| 0.011370 | 0.011465 | 0.011465 | 0.011431 | 0.011397 | 0.011397 | 0.011364 |
| 0.011397 | 0.011330 | 0.011363 | 0.011397 | 0.011364 | 0.011296 | 0.011330 |
| 0.011330 | 0.011397 | 0.011296 | 0.011397 | 0.011431 | 0.011465 | 0.011363 |
| 0.011397 | 0.011364 | 0.011701 | 0.011701 | 0.011431 | 0.011465 | 0.011498 |
| 0.011262 | 0.011262 | 0.011296 | 0.011397 | 0.011262 | 0.011498 | 0.011498 |
| 0.011532 | 0.011532 | 0.011465 | 0.011566 | 0.011734 | 0.011567 | 0.011397 |
| 0.011397 | 0.011465 | 0.011498 | 0.011330 | 0.011397 | 0.011363 | 0.011397 |
| 0.011465 | 0.011465 | 0.011498 | 0.011465 | 0.011364 | 0.011566 | 0.011532 |
| 0.011400 | 0.011296 | 0.011397 | 0.011498 | 0.011397 | 0.011532 | 0.011566 |
| 0.011735 | 0.011437 | 0.011600 | 0.011566 | 0.011498 | 0.011667 | 0.011296 |
| 0.011466 | 0.011364 | 0.011330 | 0.011330 | 0.011397 | 0.011296 | 0.011397 |
| 0.011431 | 0.011465 | 0.011363 | 0.011397 | 0.011364 | 0.011701 | 0.011701 |
| 0.011431 | 0.011465 | 0.011532 | 0.011465 | 0.012106 | 0.011526 | 0.011449 |
| 0.011519 | 0.011478 | 0.011589 | 0.011478 | 0.011587 | 0.011510 | 0.011475 |
| 0.012060 | 0.011373 | 0.011507 | 0.011442 | 0.011717 | 0.011572 | 0.011675 |
| 0.012083 | 0.011551 | 0.011400 | 0.011397 | 0.011397 | 0.011431 | 0.011366 |
| 0.011262 | 0.011296 | 0.011431 | 0.011397 | 0.011399 | 0.011532 | 0.011499 |
| 0.011363 | 0.011296 | 0.011330 | 0.011363 | 0.011262 | 0.011330 | 0.011229 |
| 0.011363 | 0.011397 | 0.011296 | 0.011262 | 0.011364 | 0.011296 | 0.011330 |
| 0.011330 | 0.011262 | 0.011330 | 0.011364 | 0.011262 | 0.011465 | 0.011498 |
| 0.011397 | 0.011465 | 0.011397 | 0.011397 | 0.011330 | 0.011734 | 0.011363 |
| 0.011410 | 0.011330 | 0.011566 | 0.011571 | 0.011431 | 0.011431 | 0.011431 |
| 0.011431 | 0.011364 | 0.011330 | 0.011364 | 0.011465 | 0.011465 | 0.011397 |
| 0.011397 | 0.011532 | 0.011701 | 0.011431 | 0.011633 | 0.011633 | 0.011498 |
| 0.011330 | 0.011397 | 0.011431 | 0.011836 | 0.011397 | 0.011431 | 0.011397 |
| 0.011431 | 0.011363 | 0.011363 | 0.011667 | 0.011600 | 0.011633 | 0.011364 |
| 0.011465 | 0.011397 | 0.011397 | 0.011465 | 0.011431 | 0.011296 | 0.011633 |
| 0.011397 | 0.011363 | 0.011363 | 0.011532 | 0.011364 | 0.011465 | 0.011701 |
| 0.011330 | 0.011776 | 0.011768 | 0.011548 | 0.011286 | 0.011469 | 0.011267 |
| 0.011280 | 0.011761 | 0.011307 | 0.011507 | 0.011304 | 0.011417 | 0.011432 |
| 0.011519 | 0.011258 | 0.011394 | 0.011258 | 0.011276 | 0.011462 | 0.011426 |
| 0.011438 | 0.011297 | 0.011449 | 0.011307 | 0.011399 | 0.011532 | 0.011599 |
| 0.011566 | 0.011465 | 0.011569 | 0.011571 | 0.011673 | 0.011699 | 0.011364 |
| 0.011633 | 0.011498 | 0.011363 | 0.011465 | 0.011262 | 0.011498 | 0.011296 |
| 0.011364 | 0.011363 | 0.011330 | 0.011296 | 0.011330 | 0.011296 | 0.011397 |
| 0.011375 | 0.011375 | 0.011368 | 0.011403 | 0.011539 | 0.011504 | 0.011504 |
| 0.011503 | 0.011431 | 0.011245 | 0.011240 | 0.011365 | 0.011535 | 0.011535 |
| 0.011330 | 0.011399 | 0.011633 | 0.011601 | 0.011532 | 0.011566 | 0.011498 |

|          |          |          |          |          |          |          |
|----------|----------|----------|----------|----------|----------|----------|
| 0.011431 | 0.011498 | 0.011498 | 0.011397 | 0.011971 | 0.011566 | 0.011633 |
| 0.011667 | 0.011740 | 0.011368 | 0.011442 | 0.011330 | 0.011532 | 0.011498 |
| 0.011533 | 0.011532 | 0.011566 | 0.011566 | 0.011729 | 0.011701 | 0.011339 |
| 0.011230 | 0.011234 | 0.011333 | 0.011299 | 0.011403 | 0.011210 | 0.011571 |
| 0.011370 | 0.011499 | 0.011251 | 0.011398 | 0.011364 | 0.011437 | 0.011330 |
| 0.011296 | 0.011296 | 0.011364 | 0.011330 | 0.011532 | 0.011498 | 0.011431 |
| 0.011532 | 0.011599 | 0.011330 | 0.011330 | 0.011364 | 0.011363 | 0.011365 |
| 0.011433 | 0.011363 | 0.011363 | 0.011399 | 0.011532 | 0.011599 | 0.011566 |
| 0.011465 | 0.011569 | 0.011571 | 0.011673 | 0.011699 | 0.011364 | 0.011566 |
| 0.011498 | 0.011498 | 0.011331 | 0.011514 | 0.011443 | 0.011470 | 0.011341 |
| 0.011509 | 0.011655 | 0.011399 | 0.011401 | 0.011296 | 0.011498 | 0.011364 |
| 0.011465 | 0.011397 | 0.011229 | 0.011398 | 0.011498 | 0.011501 | 0.011397 |
| 0.011296 | 0.011229 | 0.011363 | 0.011296 | 0.011229 | 0.011333 | 0.011498 |
| 0.011397 | 0.011330 | 0.011363 | 0.011397 | 0.011364 | 0.011296 | 0.011498 |
| 0.011363 | 0.011397 | 0.011397 | 0.011330 | 0.011397 | 0.011633 | 0.011296 |
| 0.011330 | 0.011734 | 0.011330 | 0.011330 | 0.011330 | 0.011701 | 0.011275 |
| 0.011791 | 0.011273 | 0.011261 | 0.011503 | 0.011589 | 0.011528 | 0.011227 |
| 0.011218 | 0.011498 | 0.011599 | 0.011707 | 0.011567 | 0.011705 | 0.011836 |
| 0.011735 | 0.011773 | 0.011734 | 0.011985 | 0.011701 | 0.012579 | 0.011736 |
| 0.012444 | 0.012243 | 0.012379 | 0.012617 | 0.011701 | 0.011397 | 0.011701 |
| 0.012140 | 0.012075 | 0.011667 | 0.011566 | 0.011633 | 0.011633 | 0.011603 |
| 0.011498 | 0.011503 | 0.011566 | 0.011532 | 0.011903 | 0.011971 | 0.011970 |
| 0.011871 | 0.011971 | 0.012040 | 0.011840 | 0.012141 | 0.012147 | 0.012208 |
| 0.012208 | 0.012242 | 0.012190 | 0.012208 | 0.012210 | 0.011431 | 0.011735 |
| 0.011802 | 0.012309 | 0.011808 | 0.012038 | 0.012512 | 0.011571 | 0.011465 |
| 0.011431 | 0.011431 | 0.011903 | 0.011924 | 0.012045 | 0.011768 | 0.011432 |
| S163     | 0.011699 | 0.011699 | 0.011834 | 0.011800 | 0.011800 | 0.011867 |
| 0.011707 | 0.011604 | 0.011800 | 0.011296 | 0.011363 | 0.011329 | 0.011296 |
| 0.011329 | 0.011497 | 0.011296 | 0.011329 | 0.011396 | 0.011363 | 0.011329 |
| 0.011296 | 0.011329 | 0.011430 | 0.011296 | 0.011329 | 0.011329 | 0.011672 |
| 0.011564 | 0.011329 | 0.011228 | 0.011464 | 0.011396 | 0.011363 | 0.011396 |
| 0.011363 | 0.011464 | 0.011363 | 0.011363 | 0.011396 | 0.011363 | 0.011531 |
| 0.011296 | 0.011363 | 0.011396 | 0.011329 | 0.011430 | 0.011464 | 0.011396 |
| 0.011363 | 0.011531 | 0.011430 | 0.011699 | 0.011363 | 0.011632 | 0.011363 |
| 0.011329 | 0.011430 | 0.011497 | 0.011632 | 0.011733 | 0.011430 | 0.011531 |
| 0.011396 | 0.011464 | 0.011363 | 0.011598 | 0.011834 | 0.011363 | 0.011430 |
| 0.011329 | 0.011430 | 0.011396 | 0.011464 | 0.011396 | 0.011396 | 0.011396 |
| 0.011296 | 0.011329 | 0.011296 | 0.011396 | 0.011363 | 0.011397 | 0.011464 |
| 0.011396 | 0.011363 | 0.011430 | 0.011329 | 0.011464 | 0.011296 | 0.011363 |
| 0.011531 | 0.011464 | 0.011699 | 0.011531 | 0.011363 | 0.011598 | 0.011363 |
| 0.011542 | 0.011770 | 0.011588 | 0.011295 | 0.011247 | 0.011391 | 0.011415 |
| 0.012085 | 0.011467 | 0.011266 | 0.011598 | 0.011598 | 0.011396 | 0.011497 |
| 0.011430 | 0.011396 | 0.011464 | 0.011363 | 0.011464 | 0.011396 | 0.011396 |
| 0.011363 | 0.011464 | 0.011666 | 0.011531 | 0.011430 | 0.011397 | 0.011329 |
| 0.011296 | 0.011296 | 0.011363 | 0.011329 | 0.011531 | 0.011497 | 0.011430 |
| 0.011531 | 0.011598 | 0.011329 | 0.011329 | 0.011363 | 0.011363 | 0.011365 |
| 0.011433 | 0.011363 | 0.011363 | 0.011240 | 0.011313 | 0.011271 | 0.011363 |
| 0.011365 | 0.011301 | 0.011355 | 0.011336 | 0.011264 | 0.011300 | 0.011330 |
| 0.011600 | 0.011370 | 0.011405 | 0.011296 | 0.011302 | 0.011430 | 0.011396 |
| 0.011464 | 0.000000 | 0.000000 | 0.011497 | 0.011430 | 0.011800 | 0.011565 |
| 0.011632 | 0.011497 | 0.011363 | 0.011464 | 0.011262 | 0.011497 | 0.011296 |
| 0.011363 | 0.011363 | 0.011329 | 0.011296 | 0.011329 | 0.011296 | 0.011396 |
| 0.011363 | 0.011464 | 0.011396 | 0.011228 | 0.011398 | 0.011497 | 0.011500 |
| 0.011497 | 0.011396 | 0.011296 | 0.011229 | 0.011363 | 0.011296 | 0.011228 |
| 0.011332 | 0.011497 | 0.011296 | 0.011497 | 0.011262 | 0.011363 | 0.011329 |
| 0.011430 | 0.011329 | 0.011363 | 0.011329 | 0.011363 | 0.011228 | 0.011363 |
| 0.011396 | 0.011329 | 0.011396 | 0.011329 | 0.011363 | 0.011396 | 0.011632 |
| 0.011733 | 0.011665 | 0.011733 | 0.011499 | 0.011733 | 0.011363 | 0.011329 |
| 0.011364 | 0.011667 | 0.011426 | 0.011266 | 0.011740 | 0.011231 | 0.011336 |
| 0.011740 | 0.011638 | 0.011531 | 0.011733 | 0.011436 | 0.011598 | 0.011565 |

|          |          |          |          |          |          |          |
|----------|----------|----------|----------|----------|----------|----------|
| 0.011497 | 0.011665 | 0.011523 | 0.011390 | 0.011438 | 0.011396 | 0.011467 |
| 0.011565 | 0.011465 | 0.011602 | 0.011670 | 0.011598 | 0.011666 | 0.011773 |
| 0.011501 | 0.011672 | 0.011602 | 0.011534 | 0.011801 | 0.011262 | 0.011465 |
| 0.011430 | 0.011363 | 0.011262 | 0.011262 | 0.011329 | 0.011329 | 0.011396 |
| 0.011329 | 0.011396 | 0.011296 | 0.011396 | 0.011329 | 0.011329 | 0.011396 |
| 0.011329 | 0.011766 | 0.011666 | 0.011699 | 0.011228 | 0.011329 | 0.011363 |
| 0.011363 | 0.011329 | 0.011396 | 0.011430 | 0.011296 | 0.011296 | 0.011296 |
| 0.011834 | 0.011430 | 0.011464 | 0.011262 | 0.011363 | 0.011531 | 0.011296 |
| 0.011296 | 0.011363 | 0.011329 | 0.011497 | 0.011296 | 0.011430 | 0.011564 |
| 0.011497 | 0.011329 | 0.011329 | 0.011262 | 0.011262 | 0.011430 | 0.011363 |
| 0.011262 | 0.011363 | 0.011228 | 0.011262 | 0.011396 | 0.011531 | 0.011296 |
| 0.011262 | 0.011396 | 0.011329 | 0.011228 | 0.011565 | 0.011228 | 0.011396 |
| 0.011471 | 0.011296 | 0.011598 | 0.011430 | 0.011464 | 0.011329 | 0.011430 |
| 0.011296 | 0.011632 | 0.011228 | 0.011497 | 0.011296 | 0.011296 | 0.011228 |
| 0.011464 | 0.011666 | 0.011363 | 0.011430 | 0.011262 | 0.011666 | 0.011296 |
| 0.011296 | 0.011296 | 0.011329 | 0.011430 | 0.011329 | 0.011430 | 0.011497 |
| 0.011497 | 0.011464 | 0.011363 | 0.011464 | 0.011430 | 0.011296 | 0.011262 |
| 0.011296 | 0.011296 | 0.011363 | 0.011296 | 0.011262 | 0.011430 | 0.011296 |
| 0.011329 | 0.011329 | 0.011464 | 0.011497 | 0.011396 | 0.011329 | 0.011329 |
| 0.011396 | 0.011329 | 0.011430 | 0.011296 | 0.011430 | 0.011531 | 0.011766 |
| 0.011329 | 0.011733 | 0.011336 | 0.017823 | 0.011322 | 0.011488 | 0.011688 |
| 0.011648 | 0.011693 | 0.011374 | 0.011350 | 0.011829 | 0.011716 | 0.011364 |
| 0.011487 | 0.011610 | 0.011255 | 0.011311 | 0.011333 | 0.011406 | 0.011361 |
| 0.011482 | 0.011470 | 0.011468 | 0.011259 | 0.011464 | 0.011497 | 0.011500 |
| 0.011370 | 0.011464 | 0.011464 | 0.011430 | 0.011396 | 0.011397 | 0.011363 |
| 0.011396 | 0.011329 | 0.011363 | 0.011396 | 0.011363 | 0.011296 | 0.011329 |
| 0.011329 | 0.011396 | 0.011296 | 0.011397 | 0.011430 | 0.011464 | 0.011363 |
| 0.011396 | 0.011363 | 0.011699 | 0.011699 | 0.011430 | 0.011464 | 0.011497 |
| 0.011262 | 0.011262 | 0.011296 | 0.011396 | 0.011262 | 0.011497 | 0.011497 |
| 0.011531 | 0.011531 | 0.011464 | 0.011565 | 0.011733 | 0.011566 | 0.011396 |
| 0.011396 | 0.011464 | 0.011497 | 0.011329 | 0.011396 | 0.011363 | 0.011396 |
| 0.011464 | 0.011464 | 0.011497 | 0.011464 | 0.011364 | 0.011564 | 0.011531 |
| 0.011399 | 0.011296 | 0.011396 | 0.011497 | 0.011397 | 0.011531 | 0.011564 |
| 0.011733 | 0.011436 | 0.011598 | 0.011565 | 0.011497 | 0.011665 | 0.011296 |
| 0.011465 | 0.011363 | 0.011329 | 0.011329 | 0.011396 | 0.011296 | 0.011397 |
| 0.011430 | 0.011464 | 0.011363 | 0.011396 | 0.011363 | 0.011699 | 0.011699 |
| 0.011430 | 0.011464 | 0.011531 | 0.011464 | 0.012104 | 0.011525 | 0.011448 |
| 0.011517 | 0.011477 | 0.011588 | 0.011477 | 0.011586 | 0.011509 | 0.011474 |
| 0.012058 | 0.011372 | 0.011506 | 0.011441 | 0.011715 | 0.011571 | 0.011673 |
| 0.012081 | 0.011550 | 0.011399 | 0.011396 | 0.011396 | 0.011430 | 0.011365 |
| 0.011262 | 0.011296 | 0.011430 | 0.011396 | 0.011399 | 0.011531 | 0.011498 |
| 0.011363 | 0.011296 | 0.011329 | 0.011363 | 0.011262 | 0.011329 | 0.011228 |
| 0.011363 | 0.011396 | 0.011296 | 0.011262 | 0.011363 | 0.011296 | 0.011329 |
| 0.011329 | 0.011262 | 0.011329 | 0.011363 | 0.011262 | 0.011464 | 0.011497 |
| 0.011396 | 0.011464 | 0.011396 | 0.011396 | 0.011329 | 0.011733 | 0.011363 |
| 0.011409 | 0.011329 | 0.011564 | 0.011569 | 0.011430 | 0.011430 | 0.011430 |
| 0.011430 | 0.011363 | 0.011329 | 0.011363 | 0.011464 | 0.011464 | 0.011396 |
| 0.011396 | 0.011531 | 0.011699 | 0.011430 | 0.011632 | 0.011632 | 0.011497 |
| 0.011329 | 0.011396 | 0.011430 | 0.011834 | 0.011397 | 0.011430 | 0.011396 |
| 0.011430 | 0.011363 | 0.011363 | 0.011666 | 0.011598 | 0.011632 | 0.011363 |
| 0.011464 | 0.011397 | 0.011396 | 0.011464 | 0.011430 | 0.011296 | 0.011632 |
| 0.011396 | 0.011363 | 0.011363 | 0.011531 | 0.011363 | 0.011464 | 0.011699 |
| 0.011329 | 0.011775 | 0.011766 | 0.011548 | 0.011286 | 0.011468 | 0.011267 |
| 0.011280 | 0.011761 | 0.011306 | 0.011507 | 0.011304 | 0.011417 | 0.011432 |
| 0.011519 | 0.011258 | 0.011394 | 0.011258 | 0.011276 | 0.011462 | 0.011425 |
| 0.011437 | 0.011296 | 0.011448 | 0.011342 | 0.011398 | 0.011531 | 0.011598 |
| 0.011564 | 0.011464 | 0.011568 | 0.011569 | 0.011705 | 0.011697 | 0.011363 |
| 0.011632 | 0.011497 | 0.011363 | 0.011464 | 0.011262 | 0.011497 | 0.011296 |
| 0.011363 | 0.011363 | 0.011329 | 0.011296 | 0.011329 | 0.011296 | 0.011396 |
| 0.011375 | 0.011375 | 0.011368 | 0.011403 | 0.011539 | 0.011504 | 0.011504 |

|          |          |          |          |          |          |          |
|----------|----------|----------|----------|----------|----------|----------|
| 0.011503 | 0.011430 | 0.011245 | 0.011240 | 0.011365 | 0.011535 | 0.011535 |
| 0.011329 | 0.011399 | 0.011632 | 0.011601 | 0.011531 | 0.011565 | 0.011497 |
| 0.011430 | 0.011497 | 0.011497 | 0.011396 | 0.011969 | 0.011565 | 0.011632 |
| 0.011665 | 0.011738 | 0.011368 | 0.011441 | 0.011329 | 0.011531 | 0.011497 |
| 0.011532 | 0.011531 | 0.011565 | 0.011565 | 0.011729 | 0.011699 | 0.011338 |
| 0.011230 | 0.011234 | 0.011333 | 0.011298 | 0.011402 | 0.011210 | 0.011570 |
| 0.011369 | 0.011499 | 0.011251 | 0.011397 | 0.011363 | 0.011437 | 0.011329 |
| 0.011296 | 0.011296 | 0.011363 | 0.011329 | 0.011531 | 0.011497 | 0.011430 |
| 0.011531 | 0.011598 | 0.011329 | 0.011329 | 0.011363 | 0.011363 | 0.011365 |
| 0.011433 | 0.011363 | 0.011363 | 0.011398 | 0.011531 | 0.011598 | 0.011564 |
| 0.011464 | 0.011568 | 0.011569 | 0.011705 | 0.011697 | 0.011363 | 0.011564 |
| 0.011497 | 0.011497 | 0.011331 | 0.011513 | 0.011443 | 0.011469 | 0.011340 |
| 0.011508 | 0.011653 | 0.011399 | 0.011400 | 0.011296 | 0.011497 | 0.011363 |
| 0.011464 | 0.011396 | 0.011228 | 0.011398 | 0.011497 | 0.011500 | 0.011396 |
| 0.011296 | 0.011229 | 0.011363 | 0.011296 | 0.011228 | 0.011332 | 0.011497 |
| 0.011396 | 0.011329 | 0.011363 | 0.011396 | 0.011363 | 0.011296 | 0.011497 |
| 0.011363 | 0.011396 | 0.011396 | 0.011329 | 0.011396 | 0.011632 | 0.011296 |
| 0.011329 | 0.011733 | 0.011329 | 0.011363 | 0.011329 | 0.011699 | 0.011275 |
| 0.011791 | 0.011273 | 0.011261 | 0.011503 | 0.011589 | 0.011527 | 0.011227 |
| 0.011218 | 0.011497 | 0.011598 | 0.011705 | 0.011565 | 0.011703 | 0.011834 |
| 0.011733 | 0.011771 | 0.011733 | 0.011983 | 0.011699 | 0.012575 | 0.011734 |
| 0.012441 | 0.012241 | 0.012376 | 0.012647 | 0.011699 | 0.011396 | 0.011699 |
| 0.012138 | 0.012073 | 0.011665 | 0.011565 | 0.011632 | 0.011632 | 0.011602 |
| 0.011497 | 0.011501 | 0.011564 | 0.011531 | 0.011901 | 0.011969 | 0.011968 |
| 0.011869 | 0.011969 | 0.012072 | 0.011838 | 0.012138 | 0.012144 | 0.012205 |
| 0.012205 | 0.012239 | 0.012187 | 0.012206 | 0.012208 | 0.011430 | 0.011733 |
| 0.011800 | 0.012306 | 0.011806 | 0.012036 | 0.012509 | 0.011570 | 0.011464 |
| 0.011430 | 0.011430 | 0.011901 | 0.011924 | 0.012045 | 0.011766 | 0.011431 |
| S164     | 0.011664 | 0.011664 | 0.012135 | 0.011899 | 0.011899 | 0.011967 |
| 0.011773 | 0.011705 | 0.011967 | 0.011396 | 0.011463 | 0.011430 | 0.011396 |
| 0.011429 | 0.011597 | 0.011396 | 0.011429 | 0.011496 | 0.011463 | 0.011429 |
| 0.011396 | 0.011429 | 0.011530 | 0.011396 | 0.011430 | 0.011429 | 0.011739 |
| 0.011664 | 0.011429 | 0.011329 | 0.011564 | 0.011496 | 0.011463 | 0.011496 |
| 0.011463 | 0.011564 | 0.011463 | 0.011463 | 0.011496 | 0.011463 | 0.011631 |
| 0.011396 | 0.011463 | 0.011496 | 0.011429 | 0.011530 | 0.011563 | 0.011496 |
| 0.011463 | 0.011631 | 0.011463 | 0.011799 | 0.011463 | 0.011731 | 0.011463 |
| 0.011429 | 0.011530 | 0.011597 | 0.011731 | 0.011832 | 0.011530 | 0.011631 |
| 0.011496 | 0.011564 | 0.011463 | 0.011698 | 0.011933 | 0.011463 | 0.011530 |
| 0.011429 | 0.011530 | 0.011496 | 0.011564 | 0.011496 | 0.011496 | 0.011496 |
| 0.011396 | 0.011429 | 0.011396 | 0.011496 | 0.011463 | 0.011498 | 0.011564 |
| 0.011496 | 0.011396 | 0.011530 | 0.011429 | 0.011563 | 0.011396 | 0.011463 |
| 0.011631 | 0.011564 | 0.011799 | 0.011631 | 0.011463 | 0.011698 | 0.011463 |
| 0.011579 | 0.011807 | 0.011626 | 0.011295 | 0.011321 | 0.011465 | 0.011493 |
| 0.012158 | 0.011569 | 0.011307 | 0.011698 | 0.011698 | 0.011496 | 0.011597 |
| 0.011530 | 0.011429 | 0.011429 | 0.011463 | 0.011564 | 0.011496 | 0.011228 |
| 0.011262 | 0.011564 | 0.011698 | 0.011631 | 0.011530 | 0.011497 | 0.011429 |
| 0.011396 | 0.011396 | 0.011463 | 0.011429 | 0.011631 | 0.011597 | 0.011530 |
| 0.011631 | 0.011698 | 0.011429 | 0.011429 | 0.011463 | 0.011463 | 0.011465 |
| 0.011533 | 0.011463 | 0.011463 | 0.011276 | 0.011386 | 0.011306 | 0.011464 |
| 0.011467 | 0.011404 | 0.011429 | 0.011440 | 0.011332 | 0.011334 | 0.011398 |
| 0.011636 | 0.011405 | 0.011473 | 0.011396 | 0.011406 | 0.011531 | 0.011497 |
| 0.011565 | 0.011498 | 0.011497 | 0.000000 | 0.011396 | 0.011899 | 0.011698 |
| 0.011731 | 0.011597 | 0.011463 | 0.011564 | 0.011362 | 0.011597 | 0.011396 |
| 0.011463 | 0.011463 | 0.011429 | 0.011396 | 0.011429 | 0.011396 | 0.011497 |
| 0.011463 | 0.011564 | 0.011497 | 0.011396 | 0.011498 | 0.011597 | 0.011601 |
| 0.011597 | 0.011497 | 0.011396 | 0.011330 | 0.011463 | 0.011396 | 0.011329 |
| 0.011434 | 0.011597 | 0.011396 | 0.011597 | 0.011362 | 0.011463 | 0.011429 |
| 0.011530 | 0.011362 | 0.011463 | 0.011429 | 0.011463 | 0.011329 | 0.011463 |
| 0.011497 | 0.011429 | 0.011497 | 0.011429 | 0.011262 | 0.011497 | 0.011732 |
| 0.011832 | 0.011765 | 0.011833 | 0.011599 | 0.011833 | 0.011329 | 0.011429 |

|          |          |          |          |          |          |          |
|----------|----------|----------|----------|----------|----------|----------|
| 0.011465 | 0.011666 | 0.011517 | 0.011335 | 0.011841 | 0.011333 | 0.011414 |
| 0.011807 | 0.011740 | 0.011597 | 0.011765 | 0.011470 | 0.011698 | 0.011664 |
| 0.011597 | 0.011765 | 0.011451 | 0.011349 | 0.011437 | 0.011497 | 0.011500 |
| 0.011665 | 0.011364 | 0.011702 | 0.011771 | 0.011497 | 0.011698 | 0.011704 |
| 0.011399 | 0.011739 | 0.011534 | 0.011601 | 0.011834 | 0.011362 | 0.011532 |
| 0.011530 | 0.011463 | 0.011362 | 0.011362 | 0.011429 | 0.011429 | 0.011496 |
| 0.011429 | 0.011496 | 0.011396 | 0.011496 | 0.011429 | 0.011429 | 0.011496 |
| 0.011429 | 0.011866 | 0.011765 | 0.011799 | 0.011329 | 0.011429 | 0.011463 |
| 0.011463 | 0.011429 | 0.011496 | 0.011530 | 0.011396 | 0.011396 | 0.011396 |
| 0.011933 | 0.011563 | 0.011564 | 0.011362 | 0.011463 | 0.011631 | 0.011396 |
| 0.011396 | 0.011463 | 0.011429 | 0.011597 | 0.011396 | 0.011530 | 0.011664 |
| 0.011597 | 0.011429 | 0.011429 | 0.011362 | 0.011362 | 0.011530 | 0.011463 |
| 0.011362 | 0.011463 | 0.011329 | 0.011362 | 0.011496 | 0.011631 | 0.011396 |
| 0.011363 | 0.011496 | 0.011430 | 0.011329 | 0.011664 | 0.011329 | 0.011496 |
| 0.011505 | 0.011396 | 0.011698 | 0.011530 | 0.011564 | 0.011429 | 0.011530 |
| 0.011396 | 0.011731 | 0.011329 | 0.011597 | 0.011396 | 0.011396 | 0.011329 |
| 0.011563 | 0.011766 | 0.011463 | 0.011530 | 0.011362 | 0.011765 | 0.011396 |
| 0.011396 | 0.011396 | 0.011429 | 0.011530 | 0.011429 | 0.011530 | 0.011597 |
| 0.011597 | 0.011564 | 0.011463 | 0.011564 | 0.011530 | 0.011396 | 0.011362 |
| 0.011396 | 0.011396 | 0.011463 | 0.011396 | 0.011362 | 0.011530 | 0.011396 |
| 0.011429 | 0.011429 | 0.011564 | 0.011597 | 0.011496 | 0.011429 | 0.011429 |
| 0.011496 | 0.011429 | 0.011530 | 0.011396 | 0.011530 | 0.011631 | 0.011933 |
| 0.011429 | 0.011832 | 0.011405 | 0.017898 | 0.011322 | 0.011427 | 0.011758 |
| 0.011718 | 0.011764 | 0.011427 | 0.011408 | 0.011829 | 0.011785 | 0.011425 |
| 0.011582 | 0.011549 | 0.011294 | 0.011353 | 0.011411 | 0.011455 | 0.011318 |
| 0.011576 | 0.011544 | 0.011542 | 0.011457 | 0.011564 | 0.011463 | 0.011534 |
| 0.011438 | 0.011564 | 0.011564 | 0.011530 | 0.011496 | 0.011497 | 0.011463 |
| 0.011497 | 0.011362 | 0.011463 | 0.011497 | 0.011463 | 0.011396 | 0.011295 |
| 0.011295 | 0.011497 | 0.011396 | 0.011497 | 0.011530 | 0.011564 | 0.011329 |
| 0.011496 | 0.011463 | 0.011799 | 0.011799 | 0.011530 | 0.011564 | 0.011597 |
| 0.011362 | 0.011362 | 0.011396 | 0.011497 | 0.011362 | 0.011597 | 0.011597 |
| 0.011631 | 0.011597 | 0.011564 | 0.011664 | 0.011833 | 0.011666 | 0.011496 |
| 0.011497 | 0.011564 | 0.011597 | 0.011429 | 0.011497 | 0.011463 | 0.011496 |
| 0.011564 | 0.011564 | 0.011597 | 0.011564 | 0.011464 | 0.011665 | 0.011564 |
| 0.011500 | 0.011396 | 0.011497 | 0.011597 | 0.011497 | 0.011631 | 0.011664 |
| 0.011765 | 0.011470 | 0.011698 | 0.011664 | 0.011597 | 0.011765 | 0.011396 |
| 0.011565 | 0.011464 | 0.011295 | 0.011295 | 0.011497 | 0.011396 | 0.011497 |
| 0.011530 | 0.011564 | 0.011329 | 0.011496 | 0.011463 | 0.011799 | 0.011799 |
| 0.011530 | 0.011564 | 0.011496 | 0.011429 | 0.012170 | 0.011560 | 0.011412 |
| 0.011552 | 0.011511 | 0.011622 | 0.011476 | 0.011620 | 0.011508 | 0.011543 |
| 0.012056 | 0.011268 | 0.011403 | 0.011406 | 0.011680 | 0.011638 | 0.011740 |
| 0.012080 | 0.011550 | 0.011736 | 0.011799 | 0.011664 | 0.011664 | 0.011702 |
| 0.011362 | 0.011530 | 0.011664 | 0.011631 | 0.011635 | 0.011631 | 0.011599 |
| 0.011463 | 0.011396 | 0.011429 | 0.011463 | 0.011362 | 0.011429 | 0.011329 |
| 0.011463 | 0.011496 | 0.011396 | 0.011362 | 0.011463 | 0.011396 | 0.011429 |
| 0.011429 | 0.011362 | 0.011429 | 0.011463 | 0.011362 | 0.011564 | 0.011597 |
| 0.011496 | 0.011564 | 0.011496 | 0.011496 | 0.011429 | 0.011832 | 0.011463 |
| 0.011478 | 0.011429 | 0.011665 | 0.011637 | 0.011530 | 0.011530 | 0.011530 |
| 0.011530 | 0.011463 | 0.011429 | 0.011463 | 0.011564 | 0.011564 | 0.011496 |
| 0.011496 | 0.011631 | 0.011799 | 0.011530 | 0.011664 | 0.011664 | 0.011597 |
| 0.011429 | 0.011496 | 0.011530 | 0.011933 | 0.011497 | 0.011530 | 0.011496 |
| 0.011530 | 0.011463 | 0.011463 | 0.011765 | 0.011698 | 0.011731 | 0.011463 |
| 0.011564 | 0.011631 | 0.011496 | 0.011564 | 0.011530 | 0.011396 | 0.011731 |
| 0.011496 | 0.011463 | 0.011463 | 0.011631 | 0.011463 | 0.011563 | 0.011799 |
| 0.011496 | 0.011841 | 0.011866 | 0.011588 | 0.011286 | 0.011570 | 0.011318 |
| 0.011335 | 0.011800 | 0.011376 | 0.011551 | 0.011353 | 0.011467 | 0.011485 |
| 0.011621 | 0.011324 | 0.011450 | 0.011324 | 0.011330 | 0.011529 | 0.011506 |
| 0.011512 | 0.011375 | 0.011518 | 0.011412 | 0.011498 | 0.011631 | 0.011698 |
| 0.011698 | 0.011564 | 0.011669 | 0.011670 | 0.011806 | 0.011838 | 0.011496 |
| 0.011731 | 0.011597 | 0.011463 | 0.011564 | 0.011362 | 0.011597 | 0.011396 |

|          |          |          |          |          |          |          |
|----------|----------|----------|----------|----------|----------|----------|
| 0.011463 | 0.011463 | 0.011429 | 0.011396 | 0.011429 | 0.011396 | 0.011497 |
| 0.011444 | 0.011410 | 0.011471 | 0.011471 | 0.011607 | 0.011607 | 0.011572 |
| 0.011537 | 0.011531 | 0.011245 | 0.011240 | 0.011467 | 0.011636 | 0.011637 |
| 0.011430 | 0.011500 | 0.011733 | 0.011702 | 0.011632 | 0.011666 | 0.011463 |
| 0.011530 | 0.011530 | 0.011530 | 0.011497 | 0.012034 | 0.011664 | 0.011732 |
| 0.011765 | 0.011843 | 0.011469 | 0.011545 | 0.011429 | 0.011362 | 0.011463 |
| 0.011632 | 0.011530 | 0.011664 | 0.011664 | 0.011768 | 0.011664 | 0.011407 |
| 0.011331 | 0.011337 | 0.011400 | 0.011366 | 0.011470 | 0.011284 | 0.011672 |
| 0.011437 | 0.011543 | 0.011298 | 0.011360 | 0.011464 | 0.011505 | 0.011429 |
| 0.011396 | 0.011396 | 0.011463 | 0.011429 | 0.011631 | 0.011597 | 0.011530 |
| 0.011631 | 0.011698 | 0.011429 | 0.011429 | 0.011463 | 0.011463 | 0.011465 |
| 0.011533 | 0.011463 | 0.011463 | 0.011498 | 0.011631 | 0.011698 | 0.011698 |
| 0.011564 | 0.011669 | 0.011670 | 0.011806 | 0.011838 | 0.011496 | 0.011664 |
| 0.011463 | 0.011463 | 0.011432 | 0.011617 | 0.011547 | 0.011571 | 0.011375 |
| 0.011611 | 0.011698 | 0.011568 | 0.011502 | 0.011396 | 0.011597 | 0.011463 |
| 0.011564 | 0.011497 | 0.011396 | 0.011498 | 0.011597 | 0.011601 | 0.011497 |
| 0.011396 | 0.011330 | 0.011463 | 0.011396 | 0.011329 | 0.011434 | 0.011597 |
| 0.011497 | 0.011362 | 0.011463 | 0.011497 | 0.011463 | 0.011396 | 0.011598 |
| 0.011463 | 0.011496 | 0.011496 | 0.011429 | 0.011496 | 0.011731 | 0.011396 |
| 0.011429 | 0.011832 | 0.011429 | 0.011463 | 0.011429 | 0.011799 | 0.011317 |
| 0.011791 | 0.011273 | 0.011361 | 0.011543 | 0.011630 | 0.011599 | 0.011227 |
| 0.011323 | 0.011597 | 0.011698 | 0.011807 | 0.011666 | 0.011771 | 0.011935 |
| 0.011834 | 0.011838 | 0.011832 | 0.012051 | 0.011799 | 0.012606 | 0.011835 |
| 0.012574 | 0.012274 | 0.012408 | 0.012747 | 0.011799 | 0.011497 | 0.011799 |
| 0.012204 | 0.012139 | 0.011765 | 0.011665 | 0.011733 | 0.011733 | 0.011703 |
| 0.011597 | 0.011569 | 0.011664 | 0.011632 | 0.012002 | 0.012068 | 0.012069 |
| 0.011968 | 0.012069 | 0.012173 | 0.011906 | 0.012205 | 0.012211 | 0.012272 |
| 0.012272 | 0.012306 | 0.012152 | 0.012273 | 0.012274 | 0.011396 | 0.011799 |
| 0.011901 | 0.012404 | 0.011874 | 0.012135 | 0.012609 | 0.011671 | 0.011564 |
| 0.011530 | 0.011530 | 0.012001 | 0.011965 | 0.012116 | 0.011866 | 0.011532 |
| S165     | 0.011463 | 0.011463 | 0.012068 | 0.011832 | 0.011832 | 0.011900 |
| 0.011739 | 0.011671 | 0.011899 | 0.011329 | 0.011396 | 0.011363 | 0.011329 |
| 0.011362 | 0.011530 | 0.011329 | 0.011362 | 0.011429 | 0.011396 | 0.011362 |
| 0.011329 | 0.011362 | 0.011463 | 0.011329 | 0.011362 | 0.011362 | 0.011705 |
| 0.011597 | 0.011362 | 0.011262 | 0.011496 | 0.011429 | 0.011396 | 0.011429 |
| 0.011396 | 0.011496 | 0.011396 | 0.011396 | 0.011429 | 0.011396 | 0.011564 |
| 0.011329 | 0.011396 | 0.011429 | 0.011362 | 0.011463 | 0.011496 | 0.011429 |
| 0.011396 | 0.011564 | 0.011463 | 0.011731 | 0.011396 | 0.011664 | 0.011396 |
| 0.011362 | 0.011463 | 0.011530 | 0.011664 | 0.011765 | 0.011463 | 0.011564 |
| 0.011429 | 0.011496 | 0.011396 | 0.011631 | 0.011866 | 0.011396 | 0.011463 |
| 0.011362 | 0.011463 | 0.011429 | 0.011496 | 0.011429 | 0.011429 | 0.011429 |
| 0.011329 | 0.011362 | 0.011329 | 0.011429 | 0.011396 | 0.011430 | 0.011496 |
| 0.011429 | 0.011396 | 0.011463 | 0.011362 | 0.011496 | 0.011329 | 0.011396 |
| 0.011564 | 0.011496 | 0.011731 | 0.011564 | 0.011396 | 0.011631 | 0.011396 |
| 0.011542 | 0.011770 | 0.011588 | 0.011295 | 0.011321 | 0.011428 | 0.011493 |
| 0.012158 | 0.011518 | 0.011307 | 0.011631 | 0.011631 | 0.011429 | 0.011530 |
| 0.011463 | 0.011362 | 0.011295 | 0.011396 | 0.011496 | 0.011429 | 0.011295 |
| 0.011329 | 0.011496 | 0.011631 | 0.011564 | 0.011463 | 0.011429 | 0.011362 |
| 0.011329 | 0.011329 | 0.011396 | 0.011362 | 0.011564 | 0.011530 | 0.011463 |
| 0.011564 | 0.011631 | 0.011362 | 0.011362 | 0.011396 | 0.011396 | 0.011398 |
| 0.011466 | 0.011396 | 0.011396 | 0.011276 | 0.011349 | 0.011306 | 0.011396 |
| 0.011399 | 0.011335 | 0.011392 | 0.011371 | 0.011298 | 0.011334 | 0.011364 |
| 0.011636 | 0.011405 | 0.011439 | 0.011329 | 0.011337 | 0.011464 | 0.011430 |
| 0.011497 | 0.011431 | 0.011430 | 0.011396 | 0.000000 | 0.011832 | 0.011631 |
| 0.011664 | 0.011530 | 0.011396 | 0.011497 | 0.011295 | 0.011530 | 0.011329 |
| 0.011396 | 0.011396 | 0.011362 | 0.011329 | 0.011362 | 0.011329 | 0.011429 |
| 0.011396 | 0.011497 | 0.011429 | 0.011329 | 0.011431 | 0.011530 | 0.011533 |
| 0.011530 | 0.011430 | 0.011329 | 0.011263 | 0.011396 | 0.011329 | 0.011262 |
| 0.011366 | 0.011530 | 0.011329 | 0.011530 | 0.011295 | 0.011396 | 0.011362 |
| 0.011463 | 0.011362 | 0.011396 | 0.011362 | 0.011396 | 0.011262 | 0.011396 |

|          |          |          |          |          |          |          |
|----------|----------|----------|----------|----------|----------|----------|
| 0.011429 | 0.011362 | 0.011429 | 0.011362 | 0.011262 | 0.011429 | 0.011665 |
| 0.011765 | 0.011698 | 0.011765 | 0.011532 | 0.011765 | 0.011262 | 0.011362 |
| 0.011398 | 0.011707 | 0.011426 | 0.011300 | 0.011773 | 0.011265 | 0.011336 |
| 0.011773 | 0.011672 | 0.011530 | 0.011698 | 0.011197 | 0.011631 | 0.011597 |
| 0.011530 | 0.011698 | 0.011380 | 0.011225 | 0.011270 | 0.011429 | 0.011432 |
| 0.011597 | 0.011364 | 0.011601 | 0.011703 | 0.011497 | 0.011631 | 0.011670 |
| 0.011399 | 0.011671 | 0.011399 | 0.011567 | 0.011766 | 0.011295 | 0.011498 |
| 0.011463 | 0.011396 | 0.011295 | 0.011295 | 0.011362 | 0.011362 | 0.011429 |
| 0.011362 | 0.011429 | 0.011329 | 0.011429 | 0.011362 | 0.011362 | 0.011429 |
| 0.011362 | 0.011799 | 0.011698 | 0.011731 | 0.011262 | 0.011362 | 0.011396 |
| 0.011396 | 0.011362 | 0.011429 | 0.011463 | 0.011329 | 0.011329 | 0.011329 |
| 0.011866 | 0.011496 | 0.011496 | 0.011295 | 0.011396 | 0.011564 | 0.011329 |
| 0.011329 | 0.011396 | 0.011362 | 0.011530 | 0.011329 | 0.011463 | 0.011597 |
| 0.011530 | 0.011362 | 0.011362 | 0.011295 | 0.011295 | 0.011463 | 0.011396 |
| 0.011295 | 0.011396 | 0.011262 | 0.011295 | 0.011429 | 0.011564 | 0.011329 |
| 0.011295 | 0.011429 | 0.011363 | 0.011262 | 0.011597 | 0.011262 | 0.011429 |
| 0.011437 | 0.011329 | 0.011631 | 0.011463 | 0.011496 | 0.011362 | 0.011463 |
| 0.011329 | 0.011664 | 0.011262 | 0.011530 | 0.011329 | 0.011329 | 0.011262 |
| 0.011496 | 0.011698 | 0.011396 | 0.011463 | 0.011295 | 0.011698 | 0.011329 |
| 0.011329 | 0.011329 | 0.011362 | 0.011463 | 0.011362 | 0.011463 | 0.011530 |
| 0.011530 | 0.011496 | 0.011396 | 0.011496 | 0.011463 | 0.011329 | 0.011295 |
| 0.011329 | 0.011329 | 0.011396 | 0.011329 | 0.011295 | 0.011463 | 0.011329 |
| 0.011362 | 0.011362 | 0.011496 | 0.011530 | 0.011429 | 0.011362 | 0.011362 |
| 0.011429 | 0.011362 | 0.011463 | 0.011329 | 0.011463 | 0.011564 | 0.011866 |
| 0.011362 | 0.011765 | 0.011371 | 0.011789 | 0.011257 | 0.011488 | 0.011723 |
| 0.011683 | 0.011728 | 0.011374 | 0.011350 | 0.011774 | 0.011751 | 0.011364 |
| 0.011534 | 0.011549 | 0.011255 | 0.011311 | 0.011372 | 0.011356 | 0.011318 |
| 0.011529 | 0.011544 | 0.011542 | 0.011325 | 0.011496 | 0.011262 | 0.011466 |
| 0.011369 | 0.011497 | 0.011497 | 0.011463 | 0.011429 | 0.011430 | 0.011396 |
| 0.011429 | 0.011362 | 0.011396 | 0.011429 | 0.011396 | 0.011329 | 0.011228 |
| 0.011228 | 0.011429 | 0.011329 | 0.011430 | 0.011463 | 0.011497 | 0.011262 |
| 0.011429 | 0.011396 | 0.011732 | 0.011732 | 0.011463 | 0.011497 | 0.011530 |
| 0.011295 | 0.011295 | 0.011329 | 0.011429 | 0.011295 | 0.011530 | 0.011530 |
| 0.011564 | 0.011530 | 0.011496 | 0.011597 | 0.011765 | 0.011599 | 0.011429 |
| 0.011429 | 0.011497 | 0.011530 | 0.011362 | 0.011429 | 0.011396 | 0.011429 |
| 0.011497 | 0.011497 | 0.011530 | 0.011497 | 0.011397 | 0.011597 | 0.011564 |
| 0.011433 | 0.011329 | 0.011429 | 0.011530 | 0.011430 | 0.011564 | 0.011597 |
| 0.011698 | 0.011197 | 0.011631 | 0.011597 | 0.011530 | 0.011698 | 0.011329 |
| 0.011498 | 0.011396 | 0.011228 | 0.011228 | 0.011429 | 0.011329 | 0.011430 |
| 0.011463 | 0.011497 | 0.011262 | 0.011429 | 0.011396 | 0.011732 | 0.011732 |
| 0.011463 | 0.011497 | 0.011228 | 0.011161 | 0.012103 | 0.011489 | 0.011236 |
| 0.011517 | 0.011476 | 0.011552 | 0.011441 | 0.011550 | 0.011439 | 0.011508 |
| 0.011987 | 0.011164 | 0.011300 | 0.011337 | 0.011645 | 0.011570 | 0.011672 |
| 0.012012 | 0.011437 | 0.011669 | 0.011731 | 0.011597 | 0.011597 | 0.011635 |
| 0.011295 | 0.011463 | 0.011597 | 0.011564 | 0.011567 | 0.011564 | 0.011532 |
| 0.011396 | 0.011329 | 0.011362 | 0.011396 | 0.011295 | 0.011362 | 0.011262 |
| 0.011396 | 0.011429 | 0.011329 | 0.011295 | 0.011396 | 0.011329 | 0.011362 |
| 0.011362 | 0.011295 | 0.011362 | 0.011396 | 0.011295 | 0.011496 | 0.011530 |
| 0.011429 | 0.011496 | 0.011429 | 0.011429 | 0.011362 | 0.011765 | 0.011396 |
| 0.011408 | 0.011362 | 0.011598 | 0.011603 | 0.011463 | 0.011463 | 0.011463 |
| 0.011463 | 0.011396 | 0.011362 | 0.011396 | 0.011496 | 0.011496 | 0.011429 |
| 0.011429 | 0.011564 | 0.011731 | 0.011463 | 0.011664 | 0.011664 | 0.011530 |
| 0.011362 | 0.011429 | 0.011463 | 0.011866 | 0.011430 | 0.011463 | 0.011429 |
| 0.011463 | 0.011396 | 0.011396 | 0.011698 | 0.011631 | 0.011664 | 0.011396 |
| 0.011496 | 0.011564 | 0.011429 | 0.011496 | 0.011463 | 0.011329 | 0.011664 |
| 0.011429 | 0.011396 | 0.011396 | 0.011564 | 0.011396 | 0.011496 | 0.011732 |
| 0.011429 | 0.011807 | 0.011799 | 0.011548 | 0.011286 | 0.011502 | 0.011318 |
| 0.011335 | 0.011839 | 0.011341 | 0.011551 | 0.011353 | 0.011416 | 0.011432 |
| 0.011570 | 0.011258 | 0.011394 | 0.011258 | 0.011276 | 0.011462 | 0.011466 |
| 0.011475 | 0.011375 | 0.011483 | 0.011412 | 0.011431 | 0.011564 | 0.011631 |

|          |          |          |          |          |          |          |
|----------|----------|----------|----------|----------|----------|----------|
| 0.011631 | 0.011497 | 0.011601 | 0.011603 | 0.011738 | 0.011767 | 0.011429 |
| 0.011664 | 0.011530 | 0.011396 | 0.011497 | 0.011295 | 0.011530 | 0.011329 |
| 0.011396 | 0.011396 | 0.011362 | 0.011329 | 0.011362 | 0.011329 | 0.011429 |
| 0.011409 | 0.011410 | 0.011403 | 0.011437 | 0.011573 | 0.011538 | 0.011538 |
| 0.011537 | 0.011464 | 0.011245 | 0.011276 | 0.011399 | 0.011568 | 0.011569 |
| 0.011363 | 0.011433 | 0.011666 | 0.011635 | 0.011565 | 0.011599 | 0.011194 |
| 0.011463 | 0.011463 | 0.011463 | 0.011429 | 0.011967 | 0.011597 | 0.011664 |
| 0.011698 | 0.011772 | 0.011401 | 0.011476 | 0.011362 | 0.011429 | 0.011262 |
| 0.011565 | 0.011463 | 0.011597 | 0.011597 | 0.011689 | 0.011597 | 0.011372 |
| 0.011263 | 0.011233 | 0.011332 | 0.011332 | 0.011436 | 0.011209 | 0.011604 |
| 0.011403 | 0.011411 | 0.011108 | 0.011285 | 0.011396 | 0.011471 | 0.011362 |
| 0.011329 | 0.011329 | 0.011396 | 0.011362 | 0.011564 | 0.011530 | 0.011463 |
| 0.011564 | 0.011631 | 0.011362 | 0.011362 | 0.011396 | 0.011396 | 0.011398 |
| 0.011466 | 0.011396 | 0.011396 | 0.011431 | 0.011564 | 0.011631 | 0.011631 |
| 0.011497 | 0.011601 | 0.011603 | 0.011738 | 0.011767 | 0.011429 | 0.011597 |
| 0.011262 | 0.011262 | 0.011365 | 0.011547 | 0.011477 | 0.011503 | 0.011376 |
| 0.011542 | 0.011744 | 0.011568 | 0.011434 | 0.011329 | 0.011530 | 0.011396 |
| 0.011497 | 0.011429 | 0.011329 | 0.011431 | 0.011530 | 0.011533 | 0.011430 |
| 0.011329 | 0.011263 | 0.011396 | 0.011329 | 0.011262 | 0.011366 | 0.011530 |
| 0.011429 | 0.011362 | 0.011396 | 0.011429 | 0.011396 | 0.011329 | 0.011530 |
| 0.011396 | 0.011429 | 0.011429 | 0.011362 | 0.011429 | 0.011664 | 0.011329 |
| 0.011362 | 0.011765 | 0.011362 | 0.011396 | 0.011362 | 0.011731 | 0.011317 |
| 0.011791 | 0.011273 | 0.011311 | 0.011584 | 0.011630 | 0.011563 | 0.011227 |
| 0.011270 | 0.011530 | 0.011631 | 0.011739 | 0.011599 | 0.011737 | 0.011867 |
| 0.011767 | 0.011804 | 0.011765 | 0.012017 | 0.011732 | 0.012539 | 0.011768 |
| 0.012507 | 0.012207 | 0.012341 | 0.012680 | 0.011731 | 0.011430 | 0.011732 |
| 0.012137 | 0.012106 | 0.011698 | 0.011597 | 0.011665 | 0.011665 | 0.011635 |
| 0.011530 | 0.011535 | 0.011597 | 0.011565 | 0.011934 | 0.012000 | 0.012002 |
| 0.011901 | 0.012002 | 0.012105 | 0.011872 | 0.012137 | 0.012144 | 0.012205 |
| 0.012205 | 0.012239 | 0.012186 | 0.012205 | 0.012206 | 0.011127 | 0.011732 |
| 0.011834 | 0.012337 | 0.011806 | 0.012068 | 0.012541 | 0.011604 | 0.011497 |
| 0.011463 | 0.011463 | 0.011934 | 0.011842 | 0.012080 | 0.011799 | 0.011465 |
| S166     | 0.012101 | 0.012101 | 0.012438 | 0.012202 | 0.012202 | 0.012269 |
| 0.012045 | 0.011977 | 0.012269 | 0.011698 | 0.011765 | 0.011733 | 0.011698 |
| 0.011732 | 0.011900 | 0.011698 | 0.011664 | 0.011799 | 0.011765 | 0.011732 |
| 0.011698 | 0.011732 | 0.011832 | 0.011699 | 0.011665 | 0.011732 | 0.012011 |
| 0.011900 | 0.011732 | 0.011631 | 0.011866 | 0.011732 | 0.011765 | 0.011732 |
| 0.011765 | 0.011799 | 0.011765 | 0.011765 | 0.011732 | 0.011765 | 0.011933 |
| 0.011698 | 0.011698 | 0.011732 | 0.011731 | 0.011832 | 0.011799 | 0.011799 |
| 0.011765 | 0.011866 | 0.011833 | 0.012101 | 0.011698 | 0.011967 | 0.011698 |
| 0.011732 | 0.011833 | 0.011900 | 0.011967 | 0.012135 | 0.011832 | 0.011933 |
| 0.011731 | 0.011799 | 0.011765 | 0.011933 | 0.012236 | 0.011765 | 0.011832 |
| 0.011732 | 0.011832 | 0.011799 | 0.011866 | 0.011799 | 0.011799 | 0.011799 |
| 0.011698 | 0.011731 | 0.011698 | 0.011799 | 0.011765 | 0.011733 | 0.011866 |
| 0.011799 | 0.011765 | 0.011765 | 0.011731 | 0.011866 | 0.011631 | 0.011765 |
| 0.011933 | 0.011866 | 0.012101 | 0.011933 | 0.011765 | 0.011866 | 0.011765 |
| 0.011876 | 0.012107 | 0.011966 | 0.011607 | 0.011695 | 0.011760 | 0.011848 |
| 0.012525 | 0.011874 | 0.011719 | 0.011933 | 0.012000 | 0.011799 | 0.011900 |
| 0.011832 | 0.011799 | 0.011866 | 0.011765 | 0.011866 | 0.011732 | 0.011799 |
| 0.011765 | 0.011866 | 0.012068 | 0.011933 | 0.011832 | 0.011799 | 0.011665 |
| 0.011698 | 0.011698 | 0.011698 | 0.011698 | 0.011934 | 0.011900 | 0.011833 |
| 0.011934 | 0.012001 | 0.011732 | 0.011732 | 0.011766 | 0.011765 | 0.011770 |
| 0.011838 | 0.011766 | 0.011766 | 0.011600 | 0.011747 | 0.011691 | 0.011766 |
| 0.011772 | 0.011713 | 0.011798 | 0.011750 | 0.011672 | 0.011711 | 0.011736 |
| 0.012033 | 0.011784 | 0.011749 | 0.011699 | 0.011717 | 0.011834 | 0.011800 |
| 0.011868 | 0.011802 | 0.011800 | 0.011899 | 0.011832 | 0.000000 | 0.012001 |
| 0.011967 | 0.011900 | 0.011765 | 0.011866 | 0.011665 | 0.011832 | 0.011698 |
| 0.011765 | 0.011765 | 0.011732 | 0.011698 | 0.011732 | 0.011698 | 0.011799 |
| 0.011698 | 0.011799 | 0.011799 | 0.011698 | 0.011802 | 0.011900 | 0.011905 |
| 0.011833 | 0.011799 | 0.011698 | 0.011634 | 0.011765 | 0.011698 | 0.011631 |



|          |          |          |          |          |          |          |
|----------|----------|----------|----------|----------|----------|----------|
| 0.011740 | 0.011833 | 0.011631 | 0.011833 | 0.011665 | 0.011766 | 0.011732 |
| 0.011766 | 0.011732 | 0.011698 | 0.011732 | 0.011766 | 0.011631 | 0.011698 |
| 0.011732 | 0.011732 | 0.011799 | 0.011732 | 0.011765 | 0.011799 | 0.012034 |
| 0.012135 | 0.012068 | 0.012136 | 0.011903 | 0.012136 | 0.011765 | 0.011732 |
| 0.011770 | 0.012031 | 0.011792 | 0.011643 | 0.012146 | 0.011640 | 0.011769 |
| 0.012079 | 0.012047 | 0.011933 | 0.012135 | 0.011846 | 0.012001 | 0.011833 |
| 0.011765 | 0.012068 | 0.011913 | 0.011761 | 0.011899 | 0.011799 | 0.011872 |
| 0.011967 | 0.011870 | 0.012007 | 0.012008 | 0.012001 | 0.012068 | 0.012179 |
| 0.011906 | 0.012011 | 0.011941 | 0.011940 | 0.012171 | 0.011664 | 0.011869 |
| 0.011765 | 0.011765 | 0.011664 | 0.011664 | 0.011664 | 0.011732 | 0.011799 |
| 0.011664 | 0.011732 | 0.011631 | 0.011799 | 0.011664 | 0.011732 | 0.011731 |
| 0.011732 | 0.012168 | 0.012068 | 0.012101 | 0.011631 | 0.011732 | 0.011765 |
| 0.011765 | 0.011732 | 0.011799 | 0.011832 | 0.011698 | 0.011698 | 0.011698 |
| 0.012236 | 0.011866 | 0.011866 | 0.011664 | 0.011765 | 0.011799 | 0.011698 |
| 0.011698 | 0.011765 | 0.011732 | 0.011832 | 0.011698 | 0.011832 | 0.011899 |
| 0.011900 | 0.011732 | 0.011732 | 0.011664 | 0.011664 | 0.011833 | 0.011765 |
| 0.011664 | 0.011765 | 0.011631 | 0.011664 | 0.011799 | 0.011934 | 0.011698 |
| 0.011665 | 0.011799 | 0.011732 | 0.011631 | 0.011967 | 0.011631 | 0.011799 |
| 0.011779 | 0.011698 | 0.012001 | 0.011833 | 0.011866 | 0.011732 | 0.011765 |
| 0.011698 | 0.011967 | 0.011631 | 0.011900 | 0.011698 | 0.011698 | 0.011631 |
| 0.011799 | 0.012068 | 0.011765 | 0.011832 | 0.011664 | 0.012068 | 0.011698 |
| 0.011698 | 0.011698 | 0.011732 | 0.011765 | 0.011732 | 0.011832 | 0.011900 |
| 0.011900 | 0.011866 | 0.011765 | 0.011866 | 0.011765 | 0.011698 | 0.011664 |
| 0.011698 | 0.011698 | 0.011765 | 0.011698 | 0.011597 | 0.011832 | 0.011698 |
| 0.011732 | 0.011732 | 0.011866 | 0.011900 | 0.011799 | 0.011664 | 0.011732 |
| 0.011799 | 0.011731 | 0.011832 | 0.011698 | 0.011832 | 0.011933 | 0.012236 |
| 0.011732 | 0.012135 | 0.011681 | 0.018276 | 0.011649 | 0.011672 | 0.012107 |
| 0.012064 | 0.012116 | 0.011689 | 0.011814 | 0.011994 | 0.012131 | 0.011546 |
| 0.011914 | 0.011793 | 0.011606 | 0.011521 | 0.011724 | 0.011653 | 0.011619 |
| 0.011952 | 0.011842 | 0.011876 | 0.011920 | 0.011866 | 0.011900 | 0.011906 |
| 0.011713 | 0.011866 | 0.011866 | 0.011833 | 0.011799 | 0.011799 | 0.011766 |
| 0.011799 | 0.011732 | 0.011765 | 0.011799 | 0.011766 | 0.011698 | 0.011732 |
| 0.011732 | 0.011799 | 0.011698 | 0.011799 | 0.011833 | 0.011866 | 0.011765 |
| 0.011732 | 0.011766 | 0.012102 | 0.012102 | 0.011766 | 0.011800 | 0.011900 |
| 0.011665 | 0.011665 | 0.011698 | 0.011732 | 0.011665 | 0.011900 | 0.011900 |
| 0.011934 | 0.011933 | 0.011866 | 0.011967 | 0.012136 | 0.011970 | 0.011732 |
| 0.011799 | 0.011866 | 0.011833 | 0.011732 | 0.011799 | 0.011765 | 0.011732 |
| 0.011867 | 0.011867 | 0.011900 | 0.011799 | 0.011700 | 0.011967 | 0.011866 |
| 0.011805 | 0.011698 | 0.011799 | 0.011900 | 0.011799 | 0.011934 | 0.011967 |
| 0.012135 | 0.011846 | 0.012001 | 0.011833 | 0.011765 | 0.012068 | 0.011699 |
| 0.011802 | 0.011766 | 0.011732 | 0.011732 | 0.011799 | 0.011698 | 0.011799 |
| 0.011833 | 0.011866 | 0.011765 | 0.011732 | 0.011766 | 0.012102 | 0.012102 |
| 0.011766 | 0.011800 | 0.011933 | 0.011866 | 0.012507 | 0.011954 | 0.011834 |
| 0.011939 | 0.011893 | 0.011974 | 0.011857 | 0.012006 | 0.011923 | 0.011888 |
| 0.012469 | 0.011787 | 0.011917 | 0.011856 | 0.012128 | 0.011979 | 0.012013 |
| 0.012489 | 0.011927 | 0.012041 | 0.012101 | 0.011967 | 0.011967 | 0.012007 |
| 0.011664 | 0.011765 | 0.011967 | 0.011933 | 0.011939 | 0.011866 | 0.011903 |
| 0.011765 | 0.011631 | 0.011664 | 0.011765 | 0.011597 | 0.011732 | 0.011631 |
| 0.011765 | 0.011799 | 0.011698 | 0.011664 | 0.011765 | 0.011698 | 0.011732 |
| 0.011664 | 0.011664 | 0.011732 | 0.011765 | 0.011664 | 0.011799 | 0.011900 |
| 0.011799 | 0.011866 | 0.011799 | 0.011799 | 0.011732 | 0.012135 | 0.011698 |
| 0.011826 | 0.011732 | 0.011900 | 0.011909 | 0.011765 | 0.011832 | 0.011832 |
| 0.011833 | 0.011698 | 0.011732 | 0.011698 | 0.011866 | 0.011866 | 0.011799 |
| 0.011799 | 0.011933 | 0.012101 | 0.011832 | 0.012034 | 0.012034 | 0.011900 |
| 0.011731 | 0.011799 | 0.011833 | 0.012236 | 0.011799 | 0.011765 | 0.011799 |
| 0.011832 | 0.011765 | 0.011765 | 0.012068 | 0.011933 | 0.012034 | 0.011765 |
| 0.011866 | 0.011933 | 0.011799 | 0.011866 | 0.011765 | 0.011698 | 0.012034 |
| 0.011799 | 0.011765 | 0.011765 | 0.011933 | 0.011765 | 0.011866 | 0.012101 |
| 0.011799 | 0.012113 | 0.012169 | 0.011833 | 0.011737 | 0.011876 | 0.011731 |
| 0.011500 | 0.012151 | 0.011728 | 0.011909 | 0.011695 | 0.011773 | 0.011804 |

|          |          |          |          |          |          |          |
|----------|----------|----------|----------|----------|----------|----------|
| 0.011876 | 0.011653 | 0.011784 | 0.011655 | 0.011599 | 0.011864 | 0.011790 |
| 0.011776 | 0.011690 | 0.011871 | 0.011800 | 0.011802 | 0.011866 | 0.011934 |
| 0.012001 | 0.011867 | 0.011973 | 0.011976 | 0.012112 | 0.012156 | 0.011799 |
| 0.011967 | 0.011900 | 0.011765 | 0.011866 | 0.011665 | 0.011832 | 0.011698 |
| 0.011765 | 0.011765 | 0.011732 | 0.011698 | 0.011732 | 0.011698 | 0.011799 |
| 0.011759 | 0.011795 | 0.011711 | 0.011814 | 0.011950 | 0.011846 | 0.011846 |
| 0.011912 | 0.011834 | 0.011651 | 0.011600 | 0.011772 | 0.011942 | 0.011943 |
| 0.011733 | 0.011738 | 0.012037 | 0.012007 | 0.011935 | 0.011969 | 0.011899 |
| 0.011832 | 0.011900 | 0.011899 | 0.011799 | 0.012371 | 0.011967 | 0.012034 |
| 0.012068 | 0.012164 | 0.011777 | 0.011857 | 0.011732 | 0.011933 | 0.011900 |
| 0.011935 | 0.011967 | 0.011967 | 0.011967 | 0.012122 | 0.012101 | 0.011754 |
| 0.011635 | 0.011649 | 0.011741 | 0.011706 | 0.011812 | 0.011695 | 0.011978 |
| 0.011781 | 0.011894 | 0.011680 | 0.011735 | 0.011767 | 0.011779 | 0.011665 |
| 0.011698 | 0.011698 | 0.011698 | 0.011698 | 0.011934 | 0.011900 | 0.011833 |
| 0.011934 | 0.012001 | 0.011732 | 0.011732 | 0.011766 | 0.011765 | 0.011770 |
| 0.011838 | 0.011766 | 0.011766 | 0.011802 | 0.011866 | 0.011934 | 0.012001 |
| 0.011867 | 0.011973 | 0.011976 | 0.012112 | 0.012156 | 0.011799 | 0.011967 |
| 0.011900 | 0.011900 | 0.011737 | 0.011931 | 0.011860 | 0.011878 | 0.011761 |
| 0.011852 | 0.012246 | 0.011949 | 0.011808 | 0.011631 | 0.011833 | 0.011698 |
| 0.011799 | 0.011799 | 0.011698 | 0.011802 | 0.011900 | 0.011905 | 0.011799 |
| 0.011698 | 0.011634 | 0.011765 | 0.011698 | 0.011631 | 0.011740 | 0.011833 |
| 0.011799 | 0.011732 | 0.011765 | 0.011799 | 0.011766 | 0.011698 | 0.011900 |
| 0.011765 | 0.011799 | 0.011799 | 0.011732 | 0.011799 | 0.012034 | 0.011698 |
| 0.011732 | 0.012135 | 0.011732 | 0.011698 | 0.011731 | 0.012101 | 0.011703 |
| 0.012185 | 0.011698 | 0.011712 | 0.011906 | 0.011956 | 0.011850 | 0.011604 |
| 0.011742 | 0.011899 | 0.011933 | 0.012011 | 0.011902 | 0.012042 | 0.012171 |
| 0.012070 | 0.012109 | 0.012068 | 0.012394 | 0.012101 | 0.012977 | 0.012139 |
| 0.012878 | 0.012646 | 0.012780 | 0.013053 | 0.012101 | 0.011799 | 0.012035 |
| 0.012542 | 0.012343 | 0.012068 | 0.011967 | 0.012036 | 0.012036 | 0.012008 |
| 0.011899 | 0.011908 | 0.011967 | 0.011935 | 0.012305 | 0.012371 | 0.012373 |
| 0.012272 | 0.012372 | 0.012477 | 0.012245 | 0.012543 | 0.012551 | 0.012610 |
| 0.012611 | 0.012644 | 0.012597 | 0.012611 | 0.012613 | 0.011832 | 0.012136 |
| 0.012205 | 0.012708 | 0.012214 | 0.012438 | 0.012913 | 0.011978 | 0.011867 |
| 0.011832 | 0.011832 | 0.012304 | 0.012336 | 0.012468 | 0.012169 | 0.011835 |
| S167     | 0.011900 | 0.011900 | 0.012169 | 0.011934 | 0.011934 | 0.012001 |
| 0.011808 | 0.011740 | 0.011934 | 0.011497 | 0.011564 | 0.011498 | 0.011497 |
| 0.011463 | 0.011698 | 0.011430 | 0.011530 | 0.011598 | 0.011564 | 0.011530 |
| 0.011497 | 0.011530 | 0.011564 | 0.011497 | 0.011531 | 0.011530 | 0.011774 |
| 0.011698 | 0.011530 | 0.011430 | 0.011597 | 0.011598 | 0.011564 | 0.011598 |
| 0.011564 | 0.011665 | 0.011564 | 0.011564 | 0.011597 | 0.011564 | 0.011665 |
| 0.011430 | 0.011564 | 0.011598 | 0.011530 | 0.011564 | 0.011665 | 0.011598 |
| 0.011564 | 0.011732 | 0.011632 | 0.011833 | 0.011564 | 0.011833 | 0.011564 |
| 0.011530 | 0.011564 | 0.011698 | 0.011833 | 0.011867 | 0.011564 | 0.011665 |
| 0.011597 | 0.011665 | 0.011564 | 0.011799 | 0.011968 | 0.011564 | 0.011631 |
| 0.011530 | 0.011631 | 0.011598 | 0.011665 | 0.011597 | 0.011598 | 0.011598 |
| 0.011497 | 0.011530 | 0.011497 | 0.011531 | 0.011564 | 0.011599 | 0.011665 |
| 0.011598 | 0.011564 | 0.011631 | 0.011530 | 0.011597 | 0.011497 | 0.011564 |
| 0.011732 | 0.011665 | 0.011900 | 0.011732 | 0.011564 | 0.011799 | 0.011564 |
| 0.011728 | 0.011882 | 0.011777 | 0.011451 | 0.011471 | 0.011539 | 0.011612 |
| 0.012231 | 0.011620 | 0.011472 | 0.011799 | 0.011799 | 0.011530 | 0.011631 |
| 0.011631 | 0.011597 | 0.011665 | 0.011564 | 0.011665 | 0.011598 | 0.011597 |
| 0.011564 | 0.011597 | 0.011867 | 0.011732 | 0.011631 | 0.011598 | 0.011531 |
| 0.011497 | 0.011430 | 0.011564 | 0.011530 | 0.011665 | 0.011631 | 0.011564 |
| 0.011665 | 0.011732 | 0.011530 | 0.011530 | 0.011564 | 0.011564 | 0.011567 |
| 0.011635 | 0.011564 | 0.011564 | 0.011420 | 0.011494 | 0.011446 | 0.011531 |
| 0.011534 | 0.011473 | 0.011503 | 0.011509 | 0.011434 | 0.011471 | 0.011499 |
| 0.011708 | 0.011543 | 0.011577 | 0.011464 | 0.011475 | 0.011599 | 0.011498 |
| 0.011565 | 0.011566 | 0.011565 | 0.011698 | 0.011631 | 0.012001 | 0.000000 |
| 0.011766 | 0.011631 | 0.011564 | 0.011598 | 0.011463 | 0.011631 | 0.011497 |
| 0.011564 | 0.011564 | 0.011530 | 0.011497 | 0.011530 | 0.011497 | 0.011598 |

|          |          |          |          |          |          |          |
|----------|----------|----------|----------|----------|----------|----------|
| 0.011564 | 0.011665 | 0.011598 | 0.011497 | 0.011600 | 0.011699 | 0.011702 |
| 0.011699 | 0.011598 | 0.011497 | 0.011431 | 0.011564 | 0.011497 | 0.011430 |
| 0.011536 | 0.011699 | 0.011497 | 0.011699 | 0.011463 | 0.011564 | 0.011530 |
| 0.011631 | 0.011530 | 0.011564 | 0.011531 | 0.011564 | 0.011430 | 0.011564 |
| 0.011598 | 0.011530 | 0.011598 | 0.011530 | 0.011564 | 0.011598 | 0.011833 |
| 0.011867 | 0.011799 | 0.011867 | 0.011701 | 0.011867 | 0.011564 | 0.011530 |
| 0.011499 | 0.011545 | 0.011701 | 0.011472 | 0.011875 | 0.011435 | 0.011532 |
| 0.011841 | 0.011740 | 0.011732 | 0.011934 | 0.011641 | 0.011799 | 0.011766 |
| 0.011698 | 0.011866 | 0.011736 | 0.011555 | 0.011564 | 0.011598 | 0.011670 |
| 0.011766 | 0.011634 | 0.011805 | 0.011873 | 0.011799 | 0.011867 | 0.011976 |
| 0.011704 | 0.011841 | 0.011772 | 0.011737 | 0.011969 | 0.011463 | 0.011633 |
| 0.011631 | 0.011564 | 0.011463 | 0.011463 | 0.011530 | 0.011530 | 0.011597 |
| 0.011530 | 0.011598 | 0.011497 | 0.011530 | 0.011530 | 0.011530 | 0.011597 |
| 0.011530 | 0.011900 | 0.011799 | 0.011833 | 0.011430 | 0.011530 | 0.011564 |
| 0.011564 | 0.011530 | 0.011598 | 0.011564 | 0.011497 | 0.011497 | 0.011497 |
| 0.011967 | 0.011598 | 0.011665 | 0.011463 | 0.011564 | 0.011732 | 0.011497 |
| 0.011497 | 0.011564 | 0.011530 | 0.011699 | 0.011497 | 0.011631 | 0.011765 |
| 0.011698 | 0.011530 | 0.011530 | 0.011463 | 0.011463 | 0.011631 | 0.011564 |
| 0.011463 | 0.011564 | 0.011430 | 0.011463 | 0.011598 | 0.011665 | 0.011497 |
| 0.011464 | 0.011598 | 0.011531 | 0.011430 | 0.011698 | 0.011430 | 0.011598 |
| 0.011643 | 0.011497 | 0.011732 | 0.011631 | 0.011598 | 0.011530 | 0.011631 |
| 0.011497 | 0.011833 | 0.011430 | 0.011631 | 0.011430 | 0.011430 | 0.011430 |
| 0.011665 | 0.011800 | 0.011564 | 0.011631 | 0.011463 | 0.011799 | 0.011430 |
| 0.011497 | 0.011497 | 0.011530 | 0.011631 | 0.011530 | 0.011631 | 0.011698 |
| 0.011698 | 0.011665 | 0.011564 | 0.011665 | 0.011631 | 0.011497 | 0.011463 |
| 0.011497 | 0.011497 | 0.011564 | 0.011430 | 0.011463 | 0.011631 | 0.011497 |
| 0.011463 | 0.011530 | 0.011665 | 0.011564 | 0.011598 | 0.011530 | 0.011531 |
| 0.011598 | 0.011530 | 0.011631 | 0.011497 | 0.011631 | 0.011732 | 0.011967 |
| 0.011530 | 0.011867 | 0.011509 | 0.017975 | 0.011584 | 0.011488 | 0.011793 |
| 0.011753 | 0.011799 | 0.011532 | 0.011582 | 0.011940 | 0.011820 | 0.011668 |
| 0.011677 | 0.011732 | 0.011450 | 0.011521 | 0.011451 | 0.011554 | 0.011534 |
| 0.011623 | 0.011619 | 0.011616 | 0.011457 | 0.011665 | 0.011698 | 0.011703 |
| 0.011541 | 0.011665 | 0.011665 | 0.011564 | 0.011598 | 0.011598 | 0.011564 |
| 0.011598 | 0.011530 | 0.011564 | 0.011598 | 0.011564 | 0.011497 | 0.011530 |
| 0.011530 | 0.011598 | 0.011497 | 0.011598 | 0.011631 | 0.011665 | 0.011564 |
| 0.011530 | 0.011497 | 0.011833 | 0.011833 | 0.011631 | 0.011666 | 0.011699 |
| 0.011463 | 0.011463 | 0.011497 | 0.011598 | 0.011463 | 0.011698 | 0.011698 |
| 0.011732 | 0.011732 | 0.011665 | 0.011766 | 0.011867 | 0.011768 | 0.011598 |
| 0.011598 | 0.011665 | 0.011698 | 0.011530 | 0.011598 | 0.011564 | 0.011598 |
| 0.011665 | 0.011665 | 0.011698 | 0.011665 | 0.011565 | 0.011765 | 0.011732 |
| 0.011535 | 0.011497 | 0.011598 | 0.011699 | 0.011598 | 0.011463 | 0.011765 |
| 0.011934 | 0.011641 | 0.011799 | 0.011766 | 0.011698 | 0.011866 | 0.011497 |
| 0.011667 | 0.011565 | 0.011530 | 0.011530 | 0.011598 | 0.011497 | 0.011598 |
| 0.011631 | 0.011665 | 0.011564 | 0.011530 | 0.011497 | 0.011833 | 0.011833 |
| 0.011631 | 0.011666 | 0.011732 | 0.011665 | 0.012205 | 0.011668 | 0.011658 |
| 0.011658 | 0.011685 | 0.011763 | 0.011684 | 0.011761 | 0.011716 | 0.011647 |
| 0.012194 | 0.011545 | 0.011677 | 0.011579 | 0.011887 | 0.011775 | 0.011843 |
| 0.012183 | 0.011437 | 0.011703 | 0.011665 | 0.011698 | 0.011631 | 0.011669 |
| 0.011463 | 0.011564 | 0.011698 | 0.011665 | 0.011669 | 0.011665 | 0.011633 |
| 0.011564 | 0.011497 | 0.011530 | 0.011564 | 0.011463 | 0.011530 | 0.011430 |
| 0.011497 | 0.011530 | 0.011497 | 0.011463 | 0.011564 | 0.011497 | 0.011530 |
| 0.011530 | 0.011463 | 0.011530 | 0.011564 | 0.011463 | 0.011665 | 0.011698 |
| 0.011598 | 0.011598 | 0.011598 | 0.011598 | 0.011530 | 0.011867 | 0.011564 |
| 0.011548 | 0.011530 | 0.011665 | 0.011671 | 0.011631 | 0.011631 | 0.011631 |
| 0.011631 | 0.011564 | 0.011530 | 0.011564 | 0.011665 | 0.011665 | 0.011598 |
| 0.011597 | 0.011732 | 0.011833 | 0.011631 | 0.011833 | 0.011833 | 0.011698 |
| 0.011530 | 0.011598 | 0.011631 | 0.011968 | 0.011598 | 0.011631 | 0.011598 |
| 0.011631 | 0.011497 | 0.011497 | 0.011800 | 0.011800 | 0.011766 | 0.011564 |
| 0.011665 | 0.011732 | 0.011598 | 0.011665 | 0.011631 | 0.011497 | 0.011766 |
| 0.011597 | 0.011564 | 0.011497 | 0.011732 | 0.011564 | 0.011665 | 0.011900 |

|          |          |          |          |          |          |          |
|----------|----------|----------|----------|----------|----------|----------|
| 0.011597 | 0.011876 | 0.011900 | 0.011711 | 0.011399 | 0.011570 | 0.011473 |
| 0.011335 | 0.011917 | 0.011482 | 0.011641 | 0.011548 | 0.011671 | 0.011645 |
| 0.011672 | 0.011521 | 0.011729 | 0.011523 | 0.011545 | 0.011730 | 0.011669 |
| 0.011663 | 0.011572 | 0.011554 | 0.011553 | 0.011600 | 0.011665 | 0.011732 |
| 0.011665 | 0.011598 | 0.011703 | 0.011704 | 0.011840 | 0.011873 | 0.011598 |
| 0.011766 | 0.011631 | 0.011564 | 0.011598 | 0.011463 | 0.011631 | 0.011497 |
| 0.011564 | 0.011564 | 0.011530 | 0.011497 | 0.011530 | 0.011497 | 0.011598 |
| 0.011549 | 0.011550 | 0.011540 | 0.011574 | 0.011711 | 0.011675 | 0.011675 |
| 0.011674 | 0.011598 | 0.011430 | 0.011420 | 0.011535 | 0.011704 | 0.011705 |
| 0.011497 | 0.011568 | 0.011801 | 0.011770 | 0.011699 | 0.011733 | 0.011698 |
| 0.011631 | 0.011698 | 0.011698 | 0.011597 | 0.012102 | 0.011766 | 0.011833 |
| 0.011867 | 0.011880 | 0.011572 | 0.011615 | 0.011530 | 0.011732 | 0.011698 |
| 0.011733 | 0.011765 | 0.011766 | 0.011766 | 0.011807 | 0.011900 | 0.011511 |
| 0.011432 | 0.011441 | 0.011503 | 0.011468 | 0.011505 | 0.011396 | 0.011672 |
| 0.011541 | 0.011587 | 0.011441 | 0.011510 | 0.011531 | 0.011608 | 0.011531 |
| 0.011497 | 0.011430 | 0.011564 | 0.011530 | 0.011665 | 0.011631 | 0.011564 |
| 0.011665 | 0.011732 | 0.011530 | 0.011530 | 0.011564 | 0.011564 | 0.011567 |
| 0.011635 | 0.011564 | 0.011564 | 0.011600 | 0.011665 | 0.011732 | 0.011665 |
| 0.011598 | 0.011703 | 0.011704 | 0.011840 | 0.011873 | 0.011598 | 0.011765 |
| 0.011698 | 0.011698 | 0.011534 | 0.011652 | 0.011651 | 0.011673 | 0.011516 |
| 0.011715 | 0.011881 | 0.011568 | 0.011604 | 0.011497 | 0.011699 | 0.011564 |
| 0.011665 | 0.011598 | 0.011497 | 0.011600 | 0.011699 | 0.011702 | 0.011598 |
| 0.011497 | 0.011431 | 0.011564 | 0.011497 | 0.011430 | 0.011536 | 0.011699 |
| 0.011598 | 0.011530 | 0.011564 | 0.011598 | 0.011564 | 0.011497 | 0.011631 |
| 0.011564 | 0.011598 | 0.011597 | 0.011530 | 0.011598 | 0.011833 | 0.011430 |
| 0.011530 | 0.011867 | 0.011530 | 0.011564 | 0.011530 | 0.011833 | 0.011532 |
| 0.011904 | 0.011485 | 0.011411 | 0.011624 | 0.011753 | 0.011635 | 0.011478 |
| 0.011375 | 0.011631 | 0.011732 | 0.011807 | 0.011700 | 0.011839 | 0.011969 |
| 0.011834 | 0.011872 | 0.011866 | 0.012086 | 0.011833 | 0.012708 | 0.011835 |
| 0.012541 | 0.012342 | 0.012510 | 0.012782 | 0.011833 | 0.011531 | 0.011833 |
| 0.012272 | 0.012208 | 0.011799 | 0.011699 | 0.011733 | 0.011733 | 0.011737 |
| 0.011631 | 0.011637 | 0.011698 | 0.011632 | 0.012036 | 0.012035 | 0.012070 |
| 0.012003 | 0.012103 | 0.012173 | 0.011940 | 0.012273 | 0.012280 | 0.012340 |
| 0.012307 | 0.012341 | 0.012324 | 0.012307 | 0.012343 | 0.011631 | 0.011867 |
| 0.011901 | 0.012439 | 0.011942 | 0.012102 | 0.012643 | 0.011672 | 0.011598 |
| 0.011564 | 0.011564 | 0.012035 | 0.012006 | 0.012151 | 0.011900 | 0.011566 |
| S168     | 0.011933 | 0.011933 | 0.012001 | 0.011765 | 0.011765 | 0.011832 |
| 0.011671 | 0.011603 | 0.011832 | 0.011530 | 0.011597 | 0.011565 | 0.011530 |
| 0.011496 | 0.011731 | 0.011463 | 0.011564 | 0.011631 | 0.011597 | 0.011564 |
| 0.011530 | 0.011564 | 0.011396 | 0.011530 | 0.011564 | 0.011564 | 0.011637 |
| 0.011429 | 0.011564 | 0.011463 | 0.011429 | 0.011631 | 0.011597 | 0.011631 |
| 0.011597 | 0.011698 | 0.011597 | 0.011597 | 0.011631 | 0.011597 | 0.011765 |
| 0.011463 | 0.011597 | 0.011631 | 0.011564 | 0.011597 | 0.011698 | 0.011631 |
| 0.011597 | 0.011765 | 0.011665 | 0.011664 | 0.011597 | 0.011866 | 0.011597 |
| 0.011564 | 0.011597 | 0.011731 | 0.011866 | 0.011698 | 0.011597 | 0.011698 |
| 0.011631 | 0.011698 | 0.011597 | 0.011832 | 0.011799 | 0.011597 | 0.011664 |
| 0.011564 | 0.011664 | 0.011631 | 0.011698 | 0.011631 | 0.011631 | 0.011631 |
| 0.011530 | 0.011564 | 0.011530 | 0.011564 | 0.011597 | 0.011632 | 0.011698 |
| 0.011631 | 0.011597 | 0.011664 | 0.011563 | 0.011631 | 0.011530 | 0.011597 |
| 0.011765 | 0.011698 | 0.011732 | 0.011765 | 0.011597 | 0.011765 | 0.011597 |
| 0.011765 | 0.011695 | 0.011777 | 0.011529 | 0.011545 | 0.011649 | 0.011415 |
| 0.012085 | 0.011416 | 0.011596 | 0.011832 | 0.011832 | 0.011564 | 0.011664 |
| 0.011664 | 0.011631 | 0.011698 | 0.011597 | 0.011698 | 0.011631 | 0.011631 |
| 0.011597 | 0.011631 | 0.011899 | 0.011765 | 0.011664 | 0.011631 | 0.011564 |
| 0.011530 | 0.011463 | 0.011597 | 0.011564 | 0.011497 | 0.011463 | 0.011396 |
| 0.011497 | 0.011564 | 0.011564 | 0.011564 | 0.011597 | 0.011597 | 0.011601 |
| 0.011669 | 0.011597 | 0.011597 | 0.011492 | 0.011566 | 0.011516 | 0.011598 |
| 0.011602 | 0.011541 | 0.011614 | 0.011578 | 0.011502 | 0.011540 | 0.011567 |
| 0.011564 | 0.011612 | 0.011646 | 0.011531 | 0.011544 | 0.011666 | 0.011565 |
| 0.011632 | 0.011633 | 0.011632 | 0.011731 | 0.011664 | 0.011967 | 0.011766 |

|          |          |          |          |          |          |          |
|----------|----------|----------|----------|----------|----------|----------|
| 0.000000 | 0.011665 | 0.011597 | 0.011631 | 0.011497 | 0.011329 | 0.011530 |
| 0.011597 | 0.011597 | 0.011564 | 0.011530 | 0.011564 | 0.011530 | 0.011631 |
| 0.011597 | 0.011698 | 0.011631 | 0.011530 | 0.011633 | 0.011732 | 0.011736 |
| 0.011732 | 0.011631 | 0.011530 | 0.011465 | 0.011597 | 0.011530 | 0.011463 |
| 0.011468 | 0.011732 | 0.011530 | 0.011732 | 0.011497 | 0.011597 | 0.011564 |
| 0.011665 | 0.011564 | 0.011597 | 0.011564 | 0.011597 | 0.011463 | 0.011597 |
| 0.011631 | 0.011564 | 0.011631 | 0.011564 | 0.011597 | 0.011631 | 0.011866 |
| 0.011698 | 0.011631 | 0.011698 | 0.011734 | 0.011699 | 0.011597 | 0.011564 |
| 0.011533 | 0.011828 | 0.011609 | 0.011506 | 0.011705 | 0.011469 | 0.011611 |
| 0.011705 | 0.011604 | 0.011765 | 0.011967 | 0.011675 | 0.011832 | 0.011799 |
| 0.011731 | 0.011900 | 0.011771 | 0.011596 | 0.011731 | 0.011631 | 0.011703 |
| 0.011799 | 0.011701 | 0.011838 | 0.011906 | 0.011832 | 0.011900 | 0.012009 |
| 0.011737 | 0.011909 | 0.011839 | 0.011770 | 0.012036 | 0.011496 | 0.011700 |
| 0.011664 | 0.011597 | 0.011496 | 0.011496 | 0.011564 | 0.011564 | 0.011631 |
| 0.011564 | 0.011631 | 0.011530 | 0.011564 | 0.011496 | 0.011564 | 0.011631 |
| 0.011564 | 0.011732 | 0.011631 | 0.011664 | 0.011463 | 0.011564 | 0.011597 |
| 0.011597 | 0.011564 | 0.011631 | 0.011597 | 0.011530 | 0.011530 | 0.011530 |
| 0.011799 | 0.011631 | 0.011698 | 0.011496 | 0.011597 | 0.011765 | 0.011530 |
| 0.011530 | 0.011597 | 0.011564 | 0.011732 | 0.011530 | 0.011463 | 0.011597 |
| 0.011530 | 0.011564 | 0.011564 | 0.011496 | 0.011496 | 0.011664 | 0.011597 |
| 0.011496 | 0.011597 | 0.011463 | 0.011496 | 0.011631 | 0.011497 | 0.011530 |
| 0.011497 | 0.011631 | 0.011564 | 0.011463 | 0.011530 | 0.011463 | 0.011631 |
| 0.011711 | 0.011530 | 0.011564 | 0.011665 | 0.011631 | 0.011564 | 0.011664 |
| 0.011530 | 0.011866 | 0.011463 | 0.011664 | 0.011463 | 0.011463 | 0.011463 |
| 0.011698 | 0.011631 | 0.011597 | 0.011664 | 0.011496 | 0.011631 | 0.011463 |
| 0.011530 | 0.011530 | 0.011564 | 0.011664 | 0.011564 | 0.011664 | 0.011731 |
| 0.011731 | 0.011698 | 0.011597 | 0.011698 | 0.011664 | 0.011530 | 0.011496 |
| 0.011530 | 0.011530 | 0.011597 | 0.011463 | 0.011496 | 0.011664 | 0.011530 |
| 0.011496 | 0.011564 | 0.011698 | 0.011664 | 0.011631 | 0.011564 | 0.011564 |
| 0.011631 | 0.011564 | 0.011664 | 0.011530 | 0.011664 | 0.011765 | 0.011799 |
| 0.011564 | 0.011698 | 0.011578 | 0.018125 | 0.011649 | 0.011672 | 0.011653 |
| 0.011614 | 0.011658 | 0.011741 | 0.011582 | 0.011720 | 0.011682 | 0.011789 |
| 0.011724 | 0.011488 | 0.011489 | 0.011646 | 0.011529 | 0.011702 | 0.011619 |
| 0.011530 | 0.011321 | 0.011468 | 0.011391 | 0.011698 | 0.011732 | 0.011737 |
| 0.011610 | 0.011698 | 0.011698 | 0.011597 | 0.011631 | 0.011631 | 0.011598 |
| 0.011631 | 0.011564 | 0.011597 | 0.011631 | 0.011597 | 0.011530 | 0.011564 |
| 0.011564 | 0.011631 | 0.011530 | 0.011631 | 0.011665 | 0.011698 | 0.011597 |
| 0.011564 | 0.011530 | 0.011665 | 0.011665 | 0.011665 | 0.011699 | 0.011732 |
| 0.011497 | 0.011497 | 0.011530 | 0.011631 | 0.011497 | 0.011732 | 0.011732 |
| 0.011765 | 0.011765 | 0.011698 | 0.011799 | 0.011698 | 0.011801 | 0.011631 |
| 0.011631 | 0.011698 | 0.011732 | 0.011564 | 0.011631 | 0.011597 | 0.011631 |
| 0.011699 | 0.011698 | 0.011732 | 0.011698 | 0.011599 | 0.011799 | 0.011765 |
| 0.011636 | 0.011530 | 0.011631 | 0.011732 | 0.011631 | 0.011698 | 0.011799 |
| 0.011967 | 0.011675 | 0.011832 | 0.011799 | 0.011731 | 0.011900 | 0.011531 |
| 0.011700 | 0.011598 | 0.011564 | 0.011564 | 0.011631 | 0.011530 | 0.011631 |
| 0.011665 | 0.011698 | 0.011597 | 0.011564 | 0.011530 | 0.011665 | 0.011665 |
| 0.011665 | 0.011699 | 0.011765 | 0.011698 | 0.012271 | 0.011775 | 0.011693 |
| 0.011763 | 0.011719 | 0.011833 | 0.011718 | 0.011830 | 0.011750 | 0.011715 |
| 0.012228 | 0.011614 | 0.011745 | 0.011683 | 0.011955 | 0.011808 | 0.011911 |
| 0.012250 | 0.011739 | 0.011872 | 0.011933 | 0.011799 | 0.011530 | 0.011837 |
| 0.011496 | 0.011664 | 0.011799 | 0.011765 | 0.011770 | 0.011362 | 0.011464 |
| 0.011597 | 0.011530 | 0.011564 | 0.011597 | 0.011496 | 0.011564 | 0.011463 |
| 0.011530 | 0.011564 | 0.011530 | 0.011496 | 0.011597 | 0.011530 | 0.011564 |
| 0.011564 | 0.011496 | 0.011564 | 0.011597 | 0.011496 | 0.011698 | 0.011731 |
| 0.011631 | 0.011631 | 0.011631 | 0.011631 | 0.011564 | 0.011698 | 0.011597 |
| 0.011373 | 0.011564 | 0.011430 | 0.011433 | 0.011664 | 0.011664 | 0.011664 |
| 0.011664 | 0.011597 | 0.011564 | 0.011597 | 0.011698 | 0.011698 | 0.011631 |
| 0.011631 | 0.011765 | 0.011664 | 0.011664 | 0.011866 | 0.011866 | 0.011731 |
| 0.011563 | 0.011631 | 0.011664 | 0.011799 | 0.011631 | 0.011664 | 0.011631 |
| 0.011664 | 0.011530 | 0.011530 | 0.011832 | 0.011832 | 0.011799 | 0.011597 |

|          |          |          |          |          |          |          |
|----------|----------|----------|----------|----------|----------|----------|
| 0.011698 | 0.011765 | 0.011631 | 0.011698 | 0.011664 | 0.011530 | 0.011597 |
| 0.011631 | 0.011597 | 0.011530 | 0.011765 | 0.011597 | 0.011698 | 0.011732 |
| 0.011631 | 0.011739 | 0.011732 | 0.011345 | 0.011455 | 0.011638 | 0.011370 |
| 0.011555 | 0.011722 | 0.011552 | 0.011730 | 0.011597 | 0.011620 | 0.011591 |
| 0.011315 | 0.011587 | 0.011617 | 0.011522 | 0.011545 | 0.011797 | 0.011750 |
| 0.011738 | 0.011650 | 0.011624 | 0.011624 | 0.011633 | 0.011362 | 0.011430 |
| 0.011564 | 0.011632 | 0.011736 | 0.011535 | 0.011874 | 0.011908 | 0.011631 |
| 0.000000 | 0.011665 | 0.011597 | 0.011631 | 0.011497 | 0.011329 | 0.011530 |
| 0.011597 | 0.011597 | 0.011564 | 0.011530 | 0.011564 | 0.011530 | 0.011631 |
| 0.011619 | 0.011620 | 0.011608 | 0.011642 | 0.011779 | 0.011743 | 0.011743 |
| 0.011742 | 0.011665 | 0.011503 | 0.011492 | 0.011602 | 0.011772 | 0.011773 |
| 0.011565 | 0.011636 | 0.011868 | 0.011838 | 0.011766 | 0.011801 | 0.011731 |
| 0.011664 | 0.011731 | 0.011731 | 0.011631 | 0.011934 | 0.011799 | 0.011866 |
| 0.011900 | 0.011701 | 0.011606 | 0.011684 | 0.011564 | 0.011765 | 0.011732 |
| 0.011767 | 0.011799 | 0.011799 | 0.011799 | 0.011925 | 0.011933 | 0.011580 |
| 0.011466 | 0.011476 | 0.011571 | 0.011536 | 0.011573 | 0.011508 | 0.011536 |
| 0.011609 | 0.011499 | 0.011632 | 0.011660 | 0.011598 | 0.011676 | 0.011564 |
| 0.011530 | 0.011463 | 0.011597 | 0.011564 | 0.011497 | 0.011463 | 0.011396 |
| 0.011497 | 0.011564 | 0.011564 | 0.011564 | 0.011597 | 0.011597 | 0.011601 |
| 0.011669 | 0.011597 | 0.011597 | 0.011633 | 0.011362 | 0.011430 | 0.011564 |
| 0.011632 | 0.011736 | 0.011535 | 0.011874 | 0.011908 | 0.011631 | 0.011799 |
| 0.011732 | 0.011732 | 0.011567 | 0.011756 | 0.011686 | 0.011673 | 0.011586 |
| 0.011749 | 0.012017 | 0.011738 | 0.011638 | 0.011530 | 0.011732 | 0.011597 |
| 0.011698 | 0.011631 | 0.011530 | 0.011633 | 0.011732 | 0.011736 | 0.011631 |
| 0.011530 | 0.011465 | 0.011597 | 0.011530 | 0.011463 | 0.011468 | 0.011732 |
| 0.011631 | 0.011564 | 0.011597 | 0.011631 | 0.011597 | 0.011530 | 0.011463 |
| 0.011597 | 0.011631 | 0.011631 | 0.011564 | 0.011631 | 0.011866 | 0.011463 |
| 0.011564 | 0.011698 | 0.011564 | 0.011597 | 0.011563 | 0.011664 | 0.011617 |
| 0.011904 | 0.011485 | 0.011461 | 0.011342 | 0.011427 | 0.011347 | 0.011436 |
| 0.011428 | 0.011463 | 0.011564 | 0.011671 | 0.011532 | 0.011669 | 0.011800 |
| 0.011700 | 0.011737 | 0.011698 | 0.011949 | 0.011664 | 0.012539 | 0.011700 |
| 0.012439 | 0.012207 | 0.012341 | 0.012613 | 0.011664 | 0.011564 | 0.011665 |
| 0.012306 | 0.012038 | 0.011631 | 0.011530 | 0.011598 | 0.011598 | 0.011568 |
| 0.011463 | 0.011467 | 0.011530 | 0.011497 | 0.011867 | 0.011933 | 0.011935 |
| 0.011834 | 0.011935 | 0.012038 | 0.011804 | 0.012306 | 0.012313 | 0.012373 |
| 0.012374 | 0.012408 | 0.012357 | 0.012374 | 0.012376 | 0.011664 | 0.011900 |
| 0.011968 | 0.012472 | 0.011976 | 0.012001 | 0.012474 | 0.011536 | 0.011430 |
| 0.011396 | 0.011396 | 0.011867 | 0.011883 | 0.012010 | 0.011732 | 0.011397 |
| S169     | 0.011799 | 0.011799 | 0.012068 | 0.011833 | 0.011833 | 0.011900 |
| 0.011740 | 0.011672 | 0.011833 | 0.011396 | 0.011463 | 0.011430 | 0.011396 |
| 0.011362 | 0.011597 | 0.011329 | 0.011430 | 0.011497 | 0.011463 | 0.011430 |
| 0.011396 | 0.011430 | 0.011463 | 0.011396 | 0.011430 | 0.011430 | 0.011706 |
| 0.011597 | 0.011430 | 0.011329 | 0.011497 | 0.011497 | 0.011463 | 0.011497 |
| 0.011463 | 0.011564 | 0.011463 | 0.011463 | 0.011497 | 0.011463 | 0.011631 |
| 0.011329 | 0.011463 | 0.011497 | 0.011429 | 0.011463 | 0.011564 | 0.011497 |
| 0.011463 | 0.011631 | 0.011531 | 0.011732 | 0.011463 | 0.011732 | 0.011463 |
| 0.011429 | 0.011463 | 0.011598 | 0.011732 | 0.011766 | 0.011463 | 0.011295 |
| 0.011497 | 0.011564 | 0.011463 | 0.011698 | 0.011867 | 0.011463 | 0.011530 |
| 0.011430 | 0.011530 | 0.011497 | 0.011564 | 0.011497 | 0.011497 | 0.011497 |
| 0.011396 | 0.011429 | 0.011396 | 0.011430 | 0.011463 | 0.011498 | 0.011564 |
| 0.011497 | 0.011463 | 0.011530 | 0.011429 | 0.011497 | 0.011396 | 0.011463 |
| 0.011631 | 0.011564 | 0.011799 | 0.011631 | 0.011463 | 0.011698 | 0.011463 |
| 0.011654 | 0.011807 | 0.011702 | 0.011412 | 0.011396 | 0.011465 | 0.011533 |
| 0.012158 | 0.011518 | 0.011431 | 0.011698 | 0.011698 | 0.011429 | 0.011530 |
| 0.011530 | 0.011497 | 0.011564 | 0.011463 | 0.011564 | 0.011497 | 0.011497 |
| 0.011463 | 0.011497 | 0.011766 | 0.011631 | 0.011530 | 0.011497 | 0.011430 |
| 0.011396 | 0.011329 | 0.011463 | 0.011430 | 0.011564 | 0.011530 | 0.011463 |
| 0.011564 | 0.011631 | 0.011429 | 0.011429 | 0.011463 | 0.011463 | 0.011465 |
| 0.011533 | 0.011463 | 0.011463 | 0.011312 | 0.011422 | 0.011341 | 0.011464 |
| 0.011467 | 0.011404 | 0.011466 | 0.011440 | 0.011366 | 0.011403 | 0.011432 |

|          |          |          |          |          |          |          |
|----------|----------|----------|----------|----------|----------|----------|
| 0.011564 | 0.011439 | 0.011508 | 0.011396 | 0.011406 | 0.011531 | 0.011430 |
| 0.011498 | 0.011498 | 0.011497 | 0.011597 | 0.011530 | 0.011900 | 0.011631 |
| 0.011665 | 0.000000 | 0.011463 | 0.011228 | 0.011362 | 0.011530 | 0.011396 |
| 0.011463 | 0.011463 | 0.011430 | 0.011396 | 0.011430 | 0.011396 | 0.011497 |
| 0.011463 | 0.011564 | 0.011497 | 0.011396 | 0.011498 | 0.011598 | 0.011601 |
| 0.011598 | 0.011497 | 0.011396 | 0.011330 | 0.011463 | 0.011396 | 0.011329 |
| 0.011434 | 0.011598 | 0.011396 | 0.011598 | 0.011362 | 0.011463 | 0.011430 |
| 0.011530 | 0.011430 | 0.011463 | 0.011362 | 0.011396 | 0.011329 | 0.011463 |
| 0.011497 | 0.011430 | 0.011497 | 0.011429 | 0.011463 | 0.011497 | 0.011732 |
| 0.011698 | 0.011698 | 0.011766 | 0.011600 | 0.011766 | 0.011463 | 0.011430 |
| 0.011398 | 0.011586 | 0.011518 | 0.011369 | 0.011739 | 0.011333 | 0.011414 |
| 0.011773 | 0.011672 | 0.011631 | 0.011833 | 0.011538 | 0.011698 | 0.011665 |
| 0.011598 | 0.011765 | 0.011629 | 0.011390 | 0.011480 | 0.011497 | 0.011568 |
| 0.011665 | 0.011566 | 0.011703 | 0.011771 | 0.011698 | 0.011698 | 0.011874 |
| 0.011602 | 0.011773 | 0.011704 | 0.011635 | 0.011902 | 0.011362 | 0.011566 |
| 0.011530 | 0.011463 | 0.011362 | 0.011362 | 0.011430 | 0.011430 | 0.011497 |
| 0.011429 | 0.011497 | 0.011396 | 0.011430 | 0.011430 | 0.011430 | 0.011497 |
| 0.011430 | 0.011799 | 0.011698 | 0.011732 | 0.011329 | 0.011430 | 0.011463 |
| 0.011463 | 0.011430 | 0.011497 | 0.011195 | 0.011396 | 0.011396 | 0.011396 |
| 0.011866 | 0.011497 | 0.011564 | 0.011362 | 0.011463 | 0.011631 | 0.011396 |
| 0.011396 | 0.011463 | 0.011429 | 0.011598 | 0.011396 | 0.011530 | 0.011665 |
| 0.011597 | 0.011430 | 0.011430 | 0.011362 | 0.011362 | 0.011530 | 0.011463 |
| 0.011362 | 0.011463 | 0.011329 | 0.011362 | 0.011497 | 0.011564 | 0.011396 |
| 0.011363 | 0.011497 | 0.011430 | 0.011329 | 0.011597 | 0.011329 | 0.011497 |
| 0.011574 | 0.011396 | 0.011631 | 0.011530 | 0.011497 | 0.011430 | 0.011530 |
| 0.011396 | 0.011732 | 0.011329 | 0.011530 | 0.011329 | 0.011329 | 0.011329 |
| 0.011564 | 0.011699 | 0.011463 | 0.011530 | 0.011362 | 0.011698 | 0.011329 |
| 0.011396 | 0.011396 | 0.011430 | 0.011530 | 0.011362 | 0.011530 | 0.011597 |
| 0.011598 | 0.011564 | 0.011463 | 0.011564 | 0.011530 | 0.011396 | 0.011362 |
| 0.011396 | 0.011396 | 0.011463 | 0.011329 | 0.011362 | 0.011530 | 0.011396 |
| 0.011362 | 0.011430 | 0.011564 | 0.011530 | 0.011497 | 0.011429 | 0.011430 |
| 0.011497 | 0.011429 | 0.011530 | 0.011396 | 0.011530 | 0.011631 | 0.011866 |
| 0.011430 | 0.011766 | 0.011440 | 0.017974 | 0.011388 | 0.011549 | 0.011723 |
| 0.011683 | 0.011729 | 0.011584 | 0.011466 | 0.011884 | 0.011751 | 0.011607 |
| 0.011677 | 0.011610 | 0.011372 | 0.011479 | 0.011294 | 0.011455 | 0.011447 |
| 0.011623 | 0.011544 | 0.011542 | 0.011325 | 0.011564 | 0.011597 | 0.011601 |
| 0.011473 | 0.011564 | 0.011564 | 0.011463 | 0.011497 | 0.011497 | 0.011463 |
| 0.011497 | 0.011429 | 0.011463 | 0.011497 | 0.011463 | 0.011396 | 0.011429 |
| 0.011429 | 0.011497 | 0.011396 | 0.011497 | 0.011530 | 0.011564 | 0.011463 |
| 0.011430 | 0.011396 | 0.011732 | 0.011732 | 0.011531 | 0.011565 | 0.011598 |
| 0.011362 | 0.011362 | 0.011396 | 0.011497 | 0.011362 | 0.011598 | 0.011598 |
| 0.011631 | 0.011631 | 0.011564 | 0.011665 | 0.011766 | 0.011666 | 0.011497 |
| 0.011497 | 0.011564 | 0.011598 | 0.011430 | 0.011497 | 0.011463 | 0.011497 |
| 0.011564 | 0.011564 | 0.011597 | 0.011564 | 0.011464 | 0.011665 | 0.011631 |
| 0.011501 | 0.011396 | 0.011497 | 0.011598 | 0.011497 | 0.011564 | 0.011665 |
| 0.011833 | 0.011538 | 0.011698 | 0.011665 | 0.011598 | 0.011765 | 0.011396 |
| 0.011566 | 0.011464 | 0.011429 | 0.011429 | 0.011497 | 0.011396 | 0.011497 |
| 0.011530 | 0.011564 | 0.011463 | 0.011430 | 0.011396 | 0.011732 | 0.011732 |
| 0.011531 | 0.011565 | 0.011631 | 0.011564 | 0.012137 | 0.011632 | 0.011553 |
| 0.011623 | 0.011581 | 0.011693 | 0.011580 | 0.011691 | 0.011612 | 0.011578 |
| 0.012091 | 0.011476 | 0.011608 | 0.011545 | 0.011749 | 0.011673 | 0.011775 |
| 0.012115 | 0.011588 | 0.011534 | 0.011497 | 0.011530 | 0.011463 | 0.011500 |
| 0.011362 | 0.011396 | 0.011530 | 0.011497 | 0.011500 | 0.011564 | 0.011532 |
| 0.011463 | 0.011396 | 0.011430 | 0.011463 | 0.011362 | 0.011430 | 0.011329 |
| 0.011396 | 0.011430 | 0.011396 | 0.011362 | 0.011463 | 0.011396 | 0.011430 |
| 0.011429 | 0.011362 | 0.011430 | 0.011463 | 0.011362 | 0.011564 | 0.011597 |
| 0.011497 | 0.011497 | 0.011497 | 0.011497 | 0.011430 | 0.011766 | 0.011463 |
| 0.011443 | 0.011430 | 0.011598 | 0.011603 | 0.011531 | 0.011530 | 0.011530 |
| 0.011530 | 0.011463 | 0.011429 | 0.011463 | 0.011564 | 0.011564 | 0.011497 |
| 0.011497 | 0.011631 | 0.011732 | 0.011530 | 0.011732 | 0.011732 | 0.011597 |

|          |          |          |          |          |          |          |
|----------|----------|----------|----------|----------|----------|----------|
| 0.011429 | 0.011497 | 0.011530 | 0.011867 | 0.011497 | 0.011531 | 0.011497 |
| 0.011530 | 0.011396 | 0.011396 | 0.011699 | 0.011699 | 0.011665 | 0.011463 |
| 0.011564 | 0.011631 | 0.011497 | 0.011564 | 0.011530 | 0.011396 | 0.011665 |
| 0.011497 | 0.011463 | 0.011396 | 0.011631 | 0.011463 | 0.011564 | 0.011799 |
| 0.011497 | 0.011808 | 0.011799 | 0.011629 | 0.011286 | 0.011502 | 0.011370 |
| 0.011390 | 0.011839 | 0.011411 | 0.011596 | 0.011402 | 0.011569 | 0.011538 |
| 0.011519 | 0.011389 | 0.011506 | 0.011258 | 0.011491 | 0.011462 | 0.011587 |
| 0.011588 | 0.011493 | 0.011412 | 0.011412 | 0.011498 | 0.011564 | 0.011631 |
| 0.011631 | 0.011228 | 0.011331 | 0.011603 | 0.011670 | 0.011484 | 0.011497 |
| 0.011665 | 0.000000 | 0.011463 | 0.011228 | 0.011362 | 0.011530 | 0.011396 |
| 0.011463 | 0.011463 | 0.011430 | 0.011396 | 0.011430 | 0.011396 | 0.011497 |
| 0.011479 | 0.011410 | 0.011471 | 0.011505 | 0.011642 | 0.011607 | 0.011607 |
| 0.011605 | 0.011531 | 0.011319 | 0.011312 | 0.011467 | 0.011636 | 0.011637 |
| 0.011430 | 0.011501 | 0.011734 | 0.011703 | 0.011632 | 0.011666 | 0.011597 |
| 0.011530 | 0.011597 | 0.011597 | 0.011497 | 0.012001 | 0.011665 | 0.011732 |
| 0.011766 | 0.011701 | 0.011470 | 0.011511 | 0.011430 | 0.011631 | 0.011597 |
| 0.011632 | 0.011665 | 0.011665 | 0.011665 | 0.011768 | 0.011799 | 0.011442 |
| 0.011331 | 0.011337 | 0.011435 | 0.011400 | 0.011436 | 0.011322 | 0.011604 |
| 0.011472 | 0.011411 | 0.011203 | 0.011472 | 0.011464 | 0.011539 | 0.011430 |
| 0.011396 | 0.011329 | 0.011463 | 0.011430 | 0.011564 | 0.011530 | 0.011463 |
| 0.011564 | 0.011631 | 0.011429 | 0.011429 | 0.011463 | 0.011463 | 0.011465 |
| 0.011533 | 0.011463 | 0.011463 | 0.011498 | 0.011564 | 0.011631 | 0.011631 |
| 0.011228 | 0.011331 | 0.011603 | 0.011670 | 0.011484 | 0.011497 | 0.011665 |
| 0.011597 | 0.011597 | 0.011432 | 0.011617 | 0.011547 | 0.011571 | 0.011446 |
| 0.011611 | 0.011789 | 0.011483 | 0.011502 | 0.011396 | 0.011598 | 0.011463 |
| 0.011564 | 0.011497 | 0.011396 | 0.011498 | 0.011598 | 0.011601 | 0.011497 |
| 0.011396 | 0.011330 | 0.011463 | 0.011396 | 0.011329 | 0.011434 | 0.011598 |
| 0.011497 | 0.011429 | 0.011463 | 0.011497 | 0.011463 | 0.011396 | 0.011530 |
| 0.011463 | 0.011497 | 0.011497 | 0.011429 | 0.011497 | 0.011732 | 0.011329 |
| 0.011430 | 0.011766 | 0.011429 | 0.011463 | 0.011429 | 0.011732 | 0.011446 |
| 0.011791 | 0.011443 | 0.011411 | 0.011584 | 0.011671 | 0.011563 | 0.011395 |
| 0.011270 | 0.011530 | 0.011631 | 0.011739 | 0.011599 | 0.011737 | 0.011867 |
| 0.011767 | 0.011804 | 0.011765 | 0.012017 | 0.011732 | 0.012607 | 0.011768 |
| 0.012507 | 0.012275 | 0.012409 | 0.012680 | 0.011732 | 0.011430 | 0.011732 |
| 0.012171 | 0.012106 | 0.011698 | 0.011598 | 0.011666 | 0.011666 | 0.011635 |
| 0.011530 | 0.011535 | 0.011597 | 0.011565 | 0.011935 | 0.012001 | 0.012002 |
| 0.011902 | 0.012002 | 0.012106 | 0.011872 | 0.012172 | 0.012178 | 0.012239 |
| 0.012239 | 0.012273 | 0.012221 | 0.012240 | 0.012241 | 0.011530 | 0.011766 |
| 0.011834 | 0.012338 | 0.011840 | 0.012069 | 0.012541 | 0.011604 | 0.011497 |
| 0.011463 | 0.011463 | 0.011934 | 0.011924 | 0.012081 | 0.011799 | 0.011465 |
| S170     | 0.011664 | 0.011664 | 0.012001 | 0.011765 | 0.011765 | 0.011832 |
| 0.011671 | 0.011603 | 0.011799 | 0.011262 | 0.011329 | 0.011296 | 0.011262 |
| 0.011295 | 0.011463 | 0.011262 | 0.011295 | 0.011362 | 0.011329 | 0.011295 |
| 0.011262 | 0.011295 | 0.011396 | 0.011262 | 0.011295 | 0.011295 | 0.011637 |
| 0.011530 | 0.011295 | 0.011195 | 0.011429 | 0.011362 | 0.011329 | 0.011362 |
| 0.011329 | 0.011429 | 0.011329 | 0.011329 | 0.011362 | 0.011329 | 0.011497 |
| 0.011262 | 0.011329 | 0.011362 | 0.011295 | 0.011396 | 0.011429 | 0.011362 |
| 0.011329 | 0.011497 | 0.011396 | 0.011664 | 0.011329 | 0.011597 | 0.011329 |
| 0.011295 | 0.011396 | 0.011463 | 0.011597 | 0.011698 | 0.011396 | 0.011497 |
| 0.011362 | 0.011429 | 0.011329 | 0.011564 | 0.011799 | 0.011329 | 0.011396 |
| 0.011295 | 0.011396 | 0.011362 | 0.011429 | 0.011362 | 0.011362 | 0.011362 |
| 0.011262 | 0.011295 | 0.011262 | 0.011362 | 0.011329 | 0.011363 | 0.011429 |
| 0.011362 | 0.011329 | 0.011396 | 0.011295 | 0.011429 | 0.011262 | 0.011329 |
| 0.011496 | 0.011429 | 0.011664 | 0.011497 | 0.011329 | 0.011564 | 0.011329 |
| 0.011468 | 0.011695 | 0.011513 | 0.011216 | 0.011209 | 0.011355 | 0.011414 |
| 0.012048 | 0.011467 | 0.011225 | 0.011564 | 0.011564 | 0.011362 | 0.011463 |
| 0.011396 | 0.011362 | 0.011429 | 0.011329 | 0.011429 | 0.011362 | 0.011362 |
| 0.011329 | 0.011429 | 0.011631 | 0.011496 | 0.011396 | 0.011362 | 0.011295 |
| 0.011262 | 0.011262 | 0.011329 | 0.011295 | 0.011497 | 0.011463 | 0.011396 |
| 0.011497 | 0.011564 | 0.011295 | 0.011295 | 0.011329 | 0.011329 | 0.011330 |



|          |          |          |          |          |          |          |
|----------|----------|----------|----------|----------|----------|----------|
| 0.011398 | 0.011329 | 0.011329 | 0.011204 | 0.011277 | 0.011236 | 0.011329 |
| 0.011331 | 0.011266 | 0.011318 | 0.011302 | 0.011230 | 0.011266 | 0.011297 |
| 0.011564 | 0.011336 | 0.011370 | 0.011262 | 0.011268 | 0.011397 | 0.011363 |
| 0.011430 | 0.011363 | 0.011363 | 0.011463 | 0.011396 | 0.011765 | 0.011564 |
| 0.011597 | 0.011463 | 0.000000 | 0.011430 | 0.011228 | 0.011463 | 0.011262 |
| 0.011329 | 0.011329 | 0.011295 | 0.011262 | 0.011295 | 0.011262 | 0.011362 |
| 0.011329 | 0.011429 | 0.011362 | 0.011262 | 0.011363 | 0.011463 | 0.011466 |
| 0.011463 | 0.011362 | 0.011262 | 0.011195 | 0.011329 | 0.011262 | 0.011195 |
| 0.011298 | 0.011463 | 0.011262 | 0.011463 | 0.011228 | 0.011329 | 0.011295 |
| 0.011396 | 0.011295 | 0.011329 | 0.011295 | 0.011329 | 0.011195 | 0.011329 |
| 0.011362 | 0.011295 | 0.011362 | 0.011295 | 0.011329 | 0.011362 | 0.011597 |
| 0.011698 | 0.011631 | 0.011698 | 0.011465 | 0.011698 | 0.011329 | 0.011295 |
| 0.011330 | 0.011586 | 0.011472 | 0.011232 | 0.011705 | 0.011197 | 0.011336 |
| 0.011705 | 0.011604 | 0.011496 | 0.011698 | 0.011402 | 0.011564 | 0.011530 |
| 0.011463 | 0.011631 | 0.011487 | 0.011349 | 0.011396 | 0.011362 | 0.011432 |
| 0.011530 | 0.011431 | 0.011567 | 0.011635 | 0.011564 | 0.011631 | 0.011738 |
| 0.011466 | 0.011637 | 0.011568 | 0.011500 | 0.011767 | 0.011228 | 0.011431 |
| 0.011396 | 0.011329 | 0.011228 | 0.011228 | 0.011295 | 0.011295 | 0.011362 |
| 0.011295 | 0.011362 | 0.011262 | 0.011362 | 0.011295 | 0.011295 | 0.011362 |
| 0.011295 | 0.011732 | 0.011631 | 0.011664 | 0.011195 | 0.011295 | 0.011329 |
| 0.011329 | 0.011295 | 0.011362 | 0.011396 | 0.011262 | 0.011262 | 0.011262 |
| 0.011799 | 0.011429 | 0.011429 | 0.011228 | 0.011329 | 0.011497 | 0.011262 |
| 0.011262 | 0.011329 | 0.011295 | 0.011463 | 0.011262 | 0.011396 | 0.011530 |
| 0.011396 | 0.011295 | 0.011295 | 0.011228 | 0.011228 | 0.011396 | 0.011329 |
| 0.011228 | 0.011329 | 0.011195 | 0.011228 | 0.011362 | 0.011497 | 0.011262 |
| 0.011228 | 0.011362 | 0.011295 | 0.011195 | 0.011530 | 0.011195 | 0.011362 |
| 0.011437 | 0.011262 | 0.011564 | 0.011396 | 0.011429 | 0.011295 | 0.011396 |
| 0.011262 | 0.011597 | 0.011195 | 0.011463 | 0.011262 | 0.011262 | 0.011195 |
| 0.011429 | 0.011631 | 0.011329 | 0.011396 | 0.011228 | 0.011631 | 0.011262 |
| 0.011262 | 0.011262 | 0.011295 | 0.011396 | 0.011295 | 0.011396 | 0.011463 |
| 0.011463 | 0.011429 | 0.011329 | 0.011430 | 0.011396 | 0.011262 | 0.011228 |
| 0.011262 | 0.011262 | 0.011329 | 0.011262 | 0.011228 | 0.011396 | 0.011262 |
| 0.011295 | 0.011295 | 0.011429 | 0.011463 | 0.011362 | 0.011295 | 0.011295 |
| 0.011362 | 0.011295 | 0.011396 | 0.011262 | 0.011396 | 0.011497 | 0.011799 |
| 0.011295 | 0.011698 | 0.011302 | 0.017747 | 0.011126 | 0.011427 | 0.011653 |
| 0.011614 | 0.011658 | 0.011270 | 0.011234 | 0.011664 | 0.011682 | 0.011303 |
| 0.011440 | 0.011487 | 0.011177 | 0.011270 | 0.011216 | 0.011258 | 0.011275 |
| 0.011482 | 0.011433 | 0.011431 | 0.011259 | 0.011429 | 0.011463 | 0.011466 |
| 0.011335 | 0.011429 | 0.011429 | 0.011396 | 0.011362 | 0.011363 | 0.011329 |
| 0.011362 | 0.011295 | 0.011329 | 0.011362 | 0.011329 | 0.011262 | 0.011295 |
| 0.011295 | 0.011362 | 0.011262 | 0.011362 | 0.011396 | 0.011429 | 0.011329 |
| 0.011362 | 0.011329 | 0.011665 | 0.011665 | 0.011396 | 0.011430 | 0.011463 |
| 0.011228 | 0.011228 | 0.011262 | 0.011362 | 0.011228 | 0.011463 | 0.011463 |
| 0.011497 | 0.011496 | 0.011429 | 0.011530 | 0.011698 | 0.011532 | 0.011362 |
| 0.011362 | 0.011429 | 0.011463 | 0.011228 | 0.011362 | 0.011329 | 0.011362 |
| 0.011430 | 0.011430 | 0.011463 | 0.011430 | 0.011330 | 0.011530 | 0.011497 |
| 0.011365 | 0.011262 | 0.011362 | 0.011463 | 0.011362 | 0.011497 | 0.011530 |
| 0.011698 | 0.011402 | 0.011564 | 0.011530 | 0.011463 | 0.011631 | 0.011262 |
| 0.011431 | 0.011329 | 0.011295 | 0.011295 | 0.011362 | 0.011262 | 0.011362 |
| 0.011396 | 0.011429 | 0.011329 | 0.011362 | 0.011329 | 0.011665 | 0.011665 |
| 0.011396 | 0.011430 | 0.011496 | 0.011429 | 0.012069 | 0.011489 | 0.011412 |
| 0.011482 | 0.011442 | 0.011552 | 0.011441 | 0.011550 | 0.011405 | 0.011439 |
| 0.012022 | 0.011337 | 0.011471 | 0.011406 | 0.011680 | 0.011536 | 0.011639 |
| 0.012046 | 0.011475 | 0.011432 | 0.011497 | 0.011396 | 0.011396 | 0.011398 |
| 0.011228 | 0.011262 | 0.011396 | 0.011362 | 0.011364 | 0.011496 | 0.011464 |
| 0.011329 | 0.011262 | 0.011295 | 0.011329 | 0.011228 | 0.011295 | 0.011195 |
| 0.011329 | 0.011362 | 0.011262 | 0.011228 | 0.011329 | 0.011262 | 0.011295 |
| 0.011295 | 0.011228 | 0.011295 | 0.011329 | 0.011228 | 0.011429 | 0.011463 |
| 0.011362 | 0.011429 | 0.011362 | 0.011362 | 0.011295 | 0.011698 | 0.011329 |
| 0.011373 | 0.011295 | 0.011531 | 0.011535 | 0.011396 | 0.011396 | 0.011396 |

|          |          |          |          |          |          |          |
|----------|----------|----------|----------|----------|----------|----------|
| 0.011396 | 0.011329 | 0.011295 | 0.011329 | 0.011429 | 0.011429 | 0.011362 |
| 0.011362 | 0.011497 | 0.011664 | 0.011396 | 0.011597 | 0.011597 | 0.011463 |
| 0.011295 | 0.011362 | 0.011396 | 0.011799 | 0.011362 | 0.011396 | 0.011362 |
| 0.011396 | 0.011329 | 0.011329 | 0.011631 | 0.011564 | 0.011597 | 0.011329 |
| 0.011429 | 0.011497 | 0.011362 | 0.011429 | 0.011396 | 0.011262 | 0.011597 |
| 0.011362 | 0.011329 | 0.011329 | 0.011497 | 0.011329 | 0.011429 | 0.011665 |
| 0.011362 | 0.011739 | 0.011732 | 0.011507 | 0.011173 | 0.011434 | 0.011215 |
| 0.011225 | 0.011722 | 0.011271 | 0.011417 | 0.011255 | 0.011264 | 0.011273 |
| 0.011417 | 0.000000 | 0.011227 | 0.000000 | 0.011168 | 0.011261 | 0.011385 |
| 0.011399 | 0.011296 | 0.011412 | 0.011342 | 0.011364 | 0.011497 | 0.011564 |
| 0.011564 | 0.011430 | 0.011533 | 0.011535 | 0.011670 | 0.011661 | 0.011362 |
| 0.011597 | 0.011463 | 0.000000 | 0.011430 | 0.011228 | 0.011463 | 0.011262 |
| 0.011329 | 0.011329 | 0.011295 | 0.011262 | 0.011295 | 0.011262 | 0.011362 |
| 0.011340 | 0.011340 | 0.011334 | 0.011368 | 0.011505 | 0.011470 | 0.011470 |
| 0.011469 | 0.011396 | 0.011208 | 0.011204 | 0.011331 | 0.011501 | 0.011501 |
| 0.011296 | 0.011365 | 0.011599 | 0.011567 | 0.011497 | 0.011531 | 0.011463 |
| 0.011396 | 0.011463 | 0.011463 | 0.011362 | 0.011933 | 0.011530 | 0.011597 |
| 0.011631 | 0.011701 | 0.011333 | 0.011407 | 0.011295 | 0.011497 | 0.011463 |
| 0.011497 | 0.011530 | 0.011530 | 0.011530 | 0.011689 | 0.011664 | 0.011303 |
| 0.011195 | 0.011199 | 0.011299 | 0.011264 | 0.011368 | 0.011210 | 0.011536 |
| 0.011335 | 0.011499 | 0.011251 | 0.011360 | 0.011329 | 0.011402 | 0.011295 |
| 0.011262 | 0.011262 | 0.011329 | 0.011295 | 0.011497 | 0.011463 | 0.011396 |
| 0.011497 | 0.011564 | 0.011295 | 0.011295 | 0.011329 | 0.011329 | 0.011330 |
| 0.011398 | 0.011329 | 0.011329 | 0.011364 | 0.011497 | 0.011564 | 0.011564 |
| 0.011430 | 0.011533 | 0.011535 | 0.011670 | 0.011661 | 0.011362 | 0.011530 |
| 0.011463 | 0.011463 | 0.011297 | 0.011478 | 0.011408 | 0.011435 | 0.011305 |
| 0.011473 | 0.011698 | 0.011441 | 0.011366 | 0.011262 | 0.011463 | 0.011329 |
| 0.011429 | 0.011362 | 0.011262 | 0.011363 | 0.011463 | 0.011466 | 0.011362 |
| 0.011262 | 0.011195 | 0.011329 | 0.011262 | 0.011195 | 0.011298 | 0.011463 |
| 0.011362 | 0.011295 | 0.011329 | 0.011362 | 0.011329 | 0.011262 | 0.011463 |
| 0.011329 | 0.011362 | 0.011362 | 0.011295 | 0.011362 | 0.011597 | 0.011262 |
| 0.011295 | 0.011698 | 0.011295 | 0.011329 | 0.011295 | 0.011664 | 0.011189 |
| 0.011622 | 0.011230 | 0.011261 | 0.011422 | 0.011508 | 0.011455 | 0.011144 |
| 0.011165 | 0.011463 | 0.011564 | 0.011671 | 0.011531 | 0.011669 | 0.011800 |
| 0.011699 | 0.011737 | 0.011698 | 0.011949 | 0.011664 | 0.012539 | 0.011700 |
| 0.012439 | 0.012207 | 0.012341 | 0.012612 | 0.011664 | 0.011362 | 0.011665 |
| 0.012103 | 0.012038 | 0.011631 | 0.011530 | 0.011598 | 0.011598 | 0.011567 |
| 0.011463 | 0.011467 | 0.011530 | 0.011497 | 0.011867 | 0.011933 | 0.011935 |
| 0.011834 | 0.011934 | 0.012038 | 0.011804 | 0.012104 | 0.012110 | 0.012171 |
| 0.012172 | 0.012205 | 0.012152 | 0.012172 | 0.012173 | 0.011396 | 0.011699 |
| 0.011766 | 0.012270 | 0.011772 | 0.012001 | 0.012474 | 0.011536 | 0.011430 |
| 0.011396 | 0.011396 | 0.011867 | 0.011883 | 0.012010 | 0.011732 | 0.011397 |
| S171     | 0.011766 | 0.011766 | 0.012035 | 0.011799 | 0.011799 | 0.011866 |
| 0.011706 | 0.011638 | 0.011799 | 0.011363 | 0.011429 | 0.011397 | 0.011362 |
| 0.011329 | 0.011564 | 0.011295 | 0.011396 | 0.011463 | 0.011430 | 0.011396 |
| 0.011362 | 0.011396 | 0.011430 | 0.011363 | 0.011396 | 0.011396 | 0.011672 |
| 0.011564 | 0.011396 | 0.011295 | 0.011463 | 0.011463 | 0.011430 | 0.011463 |
| 0.011430 | 0.011530 | 0.011430 | 0.011430 | 0.011463 | 0.011430 | 0.011598 |
| 0.011295 | 0.011430 | 0.011463 | 0.011396 | 0.011430 | 0.011530 | 0.011463 |
| 0.011430 | 0.011598 | 0.011497 | 0.011698 | 0.011430 | 0.011698 | 0.011430 |
| 0.011396 | 0.011430 | 0.011564 | 0.011698 | 0.011732 | 0.011430 | 0.011262 |
| 0.011463 | 0.011530 | 0.011430 | 0.011665 | 0.011833 | 0.011430 | 0.011497 |
| 0.011396 | 0.011497 | 0.011463 | 0.011530 | 0.011463 | 0.011463 | 0.011463 |
| 0.011362 | 0.011396 | 0.011362 | 0.011396 | 0.011429 | 0.011464 | 0.011530 |
| 0.011463 | 0.011430 | 0.011497 | 0.011396 | 0.011463 | 0.011362 | 0.011430 |
| 0.011597 | 0.011530 | 0.011765 | 0.011598 | 0.011430 | 0.011665 | 0.011429 |
| 0.011616 | 0.011770 | 0.011664 | 0.011373 | 0.011359 | 0.011465 | 0.011493 |
| 0.012121 | 0.011518 | 0.011390 | 0.011665 | 0.011665 | 0.011396 | 0.011497 |
| 0.011497 | 0.011463 | 0.011530 | 0.011430 | 0.011530 | 0.011463 | 0.011463 |
| 0.011429 | 0.011463 | 0.011732 | 0.011597 | 0.011497 | 0.011463 | 0.011396 |

|          |          |          |          |          |          |          |
|----------|----------|----------|----------|----------|----------|----------|
| 0.011362 | 0.011295 | 0.011430 | 0.011396 | 0.011530 | 0.011497 | 0.011430 |
| 0.011530 | 0.011597 | 0.011396 | 0.011396 | 0.011430 | 0.011429 | 0.011432 |
| 0.011500 | 0.011430 | 0.011430 | 0.011312 | 0.011386 | 0.011341 | 0.011430 |
| 0.011433 | 0.011370 | 0.011429 | 0.011405 | 0.011332 | 0.011369 | 0.011398 |
| 0.011564 | 0.011439 | 0.011474 | 0.011363 | 0.011371 | 0.011498 | 0.011397 |
| 0.011464 | 0.011465 | 0.011464 | 0.011564 | 0.011497 | 0.011866 | 0.011598 |
| 0.011631 | 0.011228 | 0.011430 | 0.000000 | 0.011329 | 0.011497 | 0.011362 |
| 0.011430 | 0.011430 | 0.011396 | 0.011362 | 0.011396 | 0.011362 | 0.011463 |
| 0.011430 | 0.011530 | 0.011463 | 0.011362 | 0.011465 | 0.011564 | 0.011567 |
| 0.011564 | 0.011463 | 0.011362 | 0.011296 | 0.011430 | 0.011362 | 0.011295 |
| 0.011400 | 0.011564 | 0.011362 | 0.011564 | 0.011329 | 0.011430 | 0.011396 |
| 0.011497 | 0.011396 | 0.011430 | 0.011396 | 0.011430 | 0.011295 | 0.011430 |
| 0.011463 | 0.011396 | 0.011463 | 0.011396 | 0.011430 | 0.011463 | 0.011698 |
| 0.011665 | 0.011665 | 0.011732 | 0.011566 | 0.011732 | 0.011429 | 0.011396 |
| 0.011364 | 0.011626 | 0.011518 | 0.011335 | 0.011705 | 0.011299 | 0.011375 |
| 0.011739 | 0.011638 | 0.011597 | 0.011799 | 0.011504 | 0.011665 | 0.011631 |
| 0.011564 | 0.011732 | 0.011593 | 0.011431 | 0.011522 | 0.011463 | 0.011534 |
| 0.011631 | 0.011533 | 0.011669 | 0.011737 | 0.011665 | 0.011665 | 0.011840 |
| 0.011568 | 0.011739 | 0.011670 | 0.011602 | 0.011868 | 0.011329 | 0.011532 |
| 0.011497 | 0.011430 | 0.011329 | 0.011329 | 0.011396 | 0.011396 | 0.011463 |
| 0.011396 | 0.011463 | 0.011362 | 0.011396 | 0.011396 | 0.011396 | 0.011463 |
| 0.011396 | 0.011765 | 0.011665 | 0.011698 | 0.011295 | 0.011396 | 0.011430 |
| 0.011430 | 0.011396 | 0.011463 | 0.011161 | 0.011362 | 0.011362 | 0.011362 |
| 0.011833 | 0.011463 | 0.011530 | 0.011329 | 0.011429 | 0.011598 | 0.011362 |
| 0.011362 | 0.011429 | 0.011396 | 0.011564 | 0.011362 | 0.011497 | 0.011631 |
| 0.011564 | 0.011396 | 0.011396 | 0.011329 | 0.011329 | 0.011497 | 0.011429 |
| 0.011329 | 0.011429 | 0.011295 | 0.011329 | 0.011463 | 0.011531 | 0.011362 |
| 0.011329 | 0.011463 | 0.011396 | 0.011295 | 0.011564 | 0.011295 | 0.011463 |
| 0.011540 | 0.011362 | 0.011598 | 0.011497 | 0.011463 | 0.011396 | 0.011497 |
| 0.011362 | 0.011698 | 0.011295 | 0.011497 | 0.011295 | 0.011295 | 0.011295 |
| 0.011530 | 0.011665 | 0.011430 | 0.011497 | 0.011329 | 0.011665 | 0.011295 |
| 0.011362 | 0.011362 | 0.011396 | 0.011497 | 0.011329 | 0.011497 | 0.011564 |
| 0.011564 | 0.011530 | 0.011429 | 0.011531 | 0.011497 | 0.011362 | 0.011329 |
| 0.011362 | 0.011362 | 0.011430 | 0.011295 | 0.011329 | 0.011497 | 0.011362 |
| 0.011329 | 0.011396 | 0.011530 | 0.011497 | 0.011463 | 0.011396 | 0.011396 |
| 0.011463 | 0.011396 | 0.011497 | 0.011362 | 0.011497 | 0.011597 | 0.011833 |
| 0.011396 | 0.011732 | 0.011405 | 0.017937 | 0.011453 | 0.011549 | 0.011688 |
| 0.011649 | 0.011694 | 0.011584 | 0.011525 | 0.011885 | 0.011716 | 0.011546 |
| 0.011630 | 0.011610 | 0.011333 | 0.011437 | 0.011255 | 0.011505 | 0.011447 |
| 0.011576 | 0.011507 | 0.011505 | 0.011259 | 0.011530 | 0.011564 | 0.011568 |
| 0.011438 | 0.011530 | 0.011530 | 0.011430 | 0.011463 | 0.011463 | 0.011430 |
| 0.011463 | 0.011396 | 0.011430 | 0.011463 | 0.011430 | 0.011362 | 0.011396 |
| 0.011396 | 0.011463 | 0.011362 | 0.011463 | 0.011497 | 0.011530 | 0.011429 |
| 0.011396 | 0.011363 | 0.011698 | 0.011698 | 0.011497 | 0.011531 | 0.011564 |
| 0.011329 | 0.011329 | 0.011362 | 0.011463 | 0.011329 | 0.011564 | 0.011564 |
| 0.011597 | 0.011597 | 0.011530 | 0.011631 | 0.011732 | 0.011633 | 0.011463 |
| 0.011463 | 0.011530 | 0.011564 | 0.011396 | 0.011463 | 0.011430 | 0.011463 |
| 0.011531 | 0.011530 | 0.011564 | 0.011531 | 0.011431 | 0.011631 | 0.011597 |
| 0.011467 | 0.011362 | 0.011463 | 0.011564 | 0.011463 | 0.011531 | 0.011631 |
| 0.011799 | 0.011504 | 0.011665 | 0.011631 | 0.011564 | 0.011732 | 0.011363 |
| 0.011532 | 0.011430 | 0.011396 | 0.011396 | 0.011463 | 0.011362 | 0.011463 |
| 0.011497 | 0.011530 | 0.011429 | 0.011396 | 0.011363 | 0.011698 | 0.011698 |
| 0.011497 | 0.011531 | 0.011597 | 0.011530 | 0.012104 | 0.011596 | 0.011518 |
| 0.011588 | 0.011546 | 0.011658 | 0.011545 | 0.011655 | 0.011578 | 0.011543 |
| 0.012057 | 0.011441 | 0.011574 | 0.011510 | 0.011715 | 0.011639 | 0.011741 |
| 0.012081 | 0.011550 | 0.011500 | 0.011463 | 0.011497 | 0.011430 | 0.011466 |
| 0.011329 | 0.011362 | 0.011497 | 0.011463 | 0.011466 | 0.011530 | 0.011498 |
| 0.011429 | 0.011362 | 0.011396 | 0.011430 | 0.011329 | 0.011396 | 0.011295 |
| 0.011362 | 0.011396 | 0.011362 | 0.011329 | 0.011430 | 0.011362 | 0.011396 |
| 0.011396 | 0.011329 | 0.011396 | 0.011430 | 0.011329 | 0.011530 | 0.011564 |

|          |          |          |          |          |          |          |
|----------|----------|----------|----------|----------|----------|----------|
| 0.011463 | 0.011463 | 0.011463 | 0.011463 | 0.011396 | 0.011732 | 0.011430 |
| 0.011408 | 0.011396 | 0.011564 | 0.011569 | 0.011497 | 0.011497 | 0.011497 |
| 0.011497 | 0.011430 | 0.011396 | 0.011430 | 0.011530 | 0.011530 | 0.011463 |
| 0.011463 | 0.011598 | 0.011698 | 0.011497 | 0.011698 | 0.011698 | 0.011564 |
| 0.011396 | 0.011463 | 0.011497 | 0.011833 | 0.011463 | 0.011497 | 0.011463 |
| 0.011497 | 0.011362 | 0.011362 | 0.011665 | 0.011665 | 0.011631 | 0.011430 |
| 0.011530 | 0.011598 | 0.011463 | 0.011530 | 0.011497 | 0.011362 | 0.011631 |
| 0.011463 | 0.011430 | 0.011362 | 0.011598 | 0.011430 | 0.011530 | 0.011766 |
| 0.011463 | 0.011774 | 0.011766 | 0.011589 | 0.011286 | 0.011468 | 0.011370 |
| 0.011390 | 0.011800 | 0.011376 | 0.011552 | 0.011402 | 0.011518 | 0.011538 |
| 0.011519 | 0.011521 | 0.011561 | 0.011391 | 0.011492 | 0.011529 | 0.011547 |
| 0.011550 | 0.011454 | 0.011448 | 0.011412 | 0.011465 | 0.011530 | 0.011598 |
| 0.011597 | 0.011128 | 0.011229 | 0.011569 | 0.011636 | 0.011378 | 0.011463 |
| 0.011631 | 0.011228 | 0.011430 | 0.000000 | 0.011329 | 0.011497 | 0.011362 |
| 0.011430 | 0.011430 | 0.011396 | 0.011362 | 0.011396 | 0.011362 | 0.011463 |
| 0.011444 | 0.011410 | 0.011437 | 0.011471 | 0.011608 | 0.011573 | 0.011572 |
| 0.011571 | 0.011497 | 0.011319 | 0.011312 | 0.011433 | 0.011602 | 0.011603 |
| 0.011397 | 0.011467 | 0.011700 | 0.011669 | 0.011598 | 0.011632 | 0.011564 |
| 0.011497 | 0.011564 | 0.011564 | 0.011463 | 0.011968 | 0.011631 | 0.011699 |
| 0.011732 | 0.011701 | 0.011435 | 0.011511 | 0.011396 | 0.011597 | 0.011564 |
| 0.011599 | 0.011631 | 0.011631 | 0.011631 | 0.011768 | 0.011766 | 0.011407 |
| 0.011297 | 0.011303 | 0.011401 | 0.011366 | 0.011402 | 0.011284 | 0.011570 |
| 0.011438 | 0.011411 | 0.011251 | 0.011472 | 0.011430 | 0.011505 | 0.011396 |
| 0.011362 | 0.011295 | 0.011430 | 0.011396 | 0.011530 | 0.011497 | 0.011430 |
| 0.011530 | 0.011597 | 0.011396 | 0.011396 | 0.011430 | 0.011429 | 0.011432 |
| 0.011500 | 0.011430 | 0.011430 | 0.011465 | 0.011530 | 0.011598 | 0.011597 |
| 0.011128 | 0.011229 | 0.011569 | 0.011636 | 0.011378 | 0.011463 | 0.011631 |
| 0.011564 | 0.011564 | 0.011398 | 0.011582 | 0.011512 | 0.011537 | 0.011411 |
| 0.011577 | 0.011744 | 0.011483 | 0.011468 | 0.011362 | 0.011564 | 0.011430 |
| 0.011530 | 0.011463 | 0.011362 | 0.011465 | 0.011564 | 0.011567 | 0.011463 |
| 0.011362 | 0.011296 | 0.011430 | 0.011362 | 0.011295 | 0.011400 | 0.011564 |
| 0.011463 | 0.011396 | 0.011430 | 0.011463 | 0.011430 | 0.011362 | 0.011497 |
| 0.011430 | 0.011463 | 0.011463 | 0.011396 | 0.011463 | 0.011698 | 0.011295 |
| 0.011396 | 0.011732 | 0.011396 | 0.011430 | 0.011396 | 0.011698 | 0.011403 |
| 0.011791 | 0.011400 | 0.011361 | 0.011543 | 0.011630 | 0.011527 | 0.011353 |
| 0.011270 | 0.011497 | 0.011598 | 0.011705 | 0.011565 | 0.011703 | 0.011834 |
| 0.011733 | 0.011771 | 0.011732 | 0.011983 | 0.011698 | 0.012573 | 0.011734 |
| 0.012473 | 0.012241 | 0.012375 | 0.012647 | 0.011698 | 0.011396 | 0.011699 |
| 0.012137 | 0.012072 | 0.011665 | 0.011564 | 0.011632 | 0.011632 | 0.011602 |
| 0.011497 | 0.011501 | 0.011564 | 0.011531 | 0.011901 | 0.011967 | 0.011968 |
| 0.011868 | 0.011968 | 0.012072 | 0.011838 | 0.012138 | 0.012144 | 0.012205 |
| 0.012206 | 0.012239 | 0.012187 | 0.012206 | 0.012207 | 0.011497 | 0.011732 |
| 0.011800 | 0.012304 | 0.011806 | 0.012035 | 0.012508 | 0.011570 | 0.011464 |
| 0.011430 | 0.011429 | 0.011901 | 0.011883 | 0.012046 | 0.011765 | 0.011431 |
| S172     | 0.011564 | 0.011564 | 0.011900 | 0.011665 | 0.011665 | 0.011732 |
| 0.011570 | 0.011502 | 0.011665 | 0.011161 | 0.011228 | 0.011195 | 0.011161 |
| 0.011195 | 0.011362 | 0.011161 | 0.011195 | 0.011262 | 0.011228 | 0.011195 |
| 0.011161 | 0.011195 | 0.011295 | 0.011161 | 0.011195 | 0.011195 | 0.011536 |
| 0.011429 | 0.011195 | 0.011094 | 0.011329 | 0.011262 | 0.011228 | 0.011262 |
| 0.011228 | 0.011329 | 0.011228 | 0.011228 | 0.011262 | 0.011228 | 0.011396 |
| 0.011161 | 0.011228 | 0.011262 | 0.011195 | 0.011295 | 0.011329 | 0.011262 |
| 0.011228 | 0.011396 | 0.011295 | 0.011564 | 0.011228 | 0.011497 | 0.011228 |
| 0.011195 | 0.011295 | 0.011362 | 0.011497 | 0.011597 | 0.011295 | 0.011396 |
| 0.011262 | 0.011329 | 0.011228 | 0.011463 | 0.011698 | 0.011228 | 0.011295 |
| 0.011195 | 0.011295 | 0.011262 | 0.011329 | 0.011262 | 0.011262 | 0.011262 |
| 0.011161 | 0.011195 | 0.011161 | 0.011262 | 0.011228 | 0.011262 | 0.011329 |
| 0.011262 | 0.011228 | 0.011295 | 0.011195 | 0.011329 | 0.011161 | 0.011228 |
| 0.011396 | 0.011329 | 0.011564 | 0.011396 | 0.011228 | 0.011463 | 0.011228 |
| 0.011394 | 0.011620 | 0.011437 | 0.011138 | 0.011135 | 0.011244 | 0.011336 |
| 0.011975 | 0.011416 | 0.011143 | 0.011463 | 0.011463 | 0.011262 | 0.011362 |

|          |          |          |          |          |          |          |
|----------|----------|----------|----------|----------|----------|----------|
| 0.011295 | 0.011262 | 0.011329 | 0.011228 | 0.011329 | 0.011262 | 0.011262 |
| 0.011228 | 0.011329 | 0.011530 | 0.011396 | 0.011295 | 0.011262 | 0.011195 |
| 0.011161 | 0.011161 | 0.011228 | 0.011195 | 0.011396 | 0.011362 | 0.011295 |
| 0.011396 | 0.011463 | 0.011195 | 0.011195 | 0.011228 | 0.011228 | 0.011229 |
| 0.011297 | 0.011228 | 0.011228 | 0.011096 | 0.011169 | 0.011130 | 0.011228 |
| 0.011230 | 0.011163 | 0.011208 | 0.011198 | 0.011128 | 0.011163 | 0.011195 |
| 0.011456 | 0.011233 | 0.011267 | 0.011161 | 0.011164 | 0.011296 | 0.011262 |
| 0.011329 | 0.011262 | 0.011262 | 0.011362 | 0.011295 | 0.011665 | 0.011463 |
| 0.011497 | 0.011362 | 0.011228 | 0.011329 | 0.000000 | 0.011362 | 0.011161 |
| 0.011228 | 0.011228 | 0.011195 | 0.011094 | 0.011195 | 0.011094 | 0.011262 |
| 0.011228 | 0.011329 | 0.011262 | 0.011161 | 0.011262 | 0.011362 | 0.011364 |
| 0.011362 | 0.011262 | 0.011161 | 0.011094 | 0.011228 | 0.011161 | 0.011094 |
| 0.011196 | 0.011362 | 0.011161 | 0.011362 | 0.011127 | 0.011228 | 0.011195 |
| 0.011295 | 0.011195 | 0.011228 | 0.011195 | 0.011228 | 0.011094 | 0.011228 |
| 0.011262 | 0.011195 | 0.011262 | 0.011195 | 0.011228 | 0.011262 | 0.011497 |
| 0.011597 | 0.011530 | 0.011597 | 0.011363 | 0.011597 | 0.011228 | 0.011195 |
| 0.011229 | 0.011505 | 0.011335 | 0.011129 | 0.011603 | 0.011094 | 0.011218 |
| 0.011603 | 0.011502 | 0.011396 | 0.011597 | 0.011299 | 0.011463 | 0.011430 |
| 0.011362 | 0.011530 | 0.011380 | 0.011225 | 0.011270 | 0.011262 | 0.011331 |
| 0.011430 | 0.011330 | 0.011466 | 0.011534 | 0.011463 | 0.011530 | 0.011636 |
| 0.011365 | 0.011535 | 0.011466 | 0.011398 | 0.011666 | 0.011127 | 0.011330 |
| 0.011295 | 0.011228 | 0.011127 | 0.011127 | 0.011195 | 0.011195 | 0.011262 |
| 0.011195 | 0.011262 | 0.011161 | 0.011262 | 0.011195 | 0.011195 | 0.011262 |
| 0.011195 | 0.011631 | 0.011530 | 0.011564 | 0.011094 | 0.011195 | 0.011228 |
| 0.011228 | 0.011195 | 0.011262 | 0.011295 | 0.011161 | 0.011161 | 0.011161 |
| 0.011698 | 0.011329 | 0.011329 | 0.011127 | 0.011228 | 0.011396 | 0.011161 |
| 0.011161 | 0.011228 | 0.011195 | 0.011362 | 0.011161 | 0.011295 | 0.011429 |
| 0.011362 | 0.011195 | 0.011195 | 0.011127 | 0.011127 | 0.011295 | 0.011228 |
| 0.011127 | 0.011228 | 0.011094 | 0.011127 | 0.011262 | 0.011396 | 0.011161 |
| 0.011128 | 0.011262 | 0.011195 | 0.011094 | 0.011429 | 0.011094 | 0.011262 |
| 0.011334 | 0.011161 | 0.011463 | 0.011295 | 0.011329 | 0.011195 | 0.011295 |
| 0.011161 | 0.011497 | 0.011094 | 0.011362 | 0.011161 | 0.011161 | 0.011094 |
| 0.011329 | 0.011531 | 0.011228 | 0.011295 | 0.011127 | 0.011530 | 0.011161 |
| 0.011161 | 0.011161 | 0.011195 | 0.011295 | 0.011195 | 0.011295 | 0.011362 |
| 0.011362 | 0.011329 | 0.011228 | 0.011329 | 0.011295 | 0.011161 | 0.011127 |
| 0.011161 | 0.011161 | 0.011228 | 0.011161 | 0.011127 | 0.011295 | 0.011161 |
| 0.011195 | 0.011195 | 0.011329 | 0.011362 | 0.011262 | 0.011195 | 0.011195 |
| 0.011262 | 0.011195 | 0.011295 | 0.011161 | 0.011295 | 0.011396 | 0.011698 |
| 0.011195 | 0.011597 | 0.011198 | 0.017710 | 0.011191 | 0.011366 | 0.011548 |
| 0.011510 | 0.011553 | 0.011270 | 0.011234 | 0.011664 | 0.011578 | 0.011303 |
| 0.011440 | 0.011487 | 0.011099 | 0.011186 | 0.011177 | 0.011258 | 0.011189 |
| 0.011436 | 0.011358 | 0.011357 | 0.011126 | 0.011329 | 0.011362 | 0.011365 |
| 0.011232 | 0.011329 | 0.011329 | 0.011295 | 0.011262 | 0.011262 | 0.011228 |
| 0.011262 | 0.011195 | 0.011228 | 0.011262 | 0.011228 | 0.011161 | 0.011195 |
| 0.011195 | 0.011262 | 0.011161 | 0.011262 | 0.011295 | 0.011329 | 0.011228 |
| 0.011262 | 0.011228 | 0.011564 | 0.011564 | 0.011295 | 0.011329 | 0.011362 |
| 0.011127 | 0.011127 | 0.011161 | 0.011262 | 0.011127 | 0.011362 | 0.011362 |
| 0.011396 | 0.011396 | 0.011329 | 0.011429 | 0.011597 | 0.011431 | 0.011262 |
| 0.011262 | 0.011329 | 0.011362 | 0.011195 | 0.011262 | 0.011228 | 0.011262 |
| 0.011329 | 0.011329 | 0.011362 | 0.011329 | 0.011229 | 0.011430 | 0.011396 |
| 0.011263 | 0.011161 | 0.011262 | 0.011362 | 0.011262 | 0.011396 | 0.011429 |
| 0.011597 | 0.011299 | 0.011463 | 0.011430 | 0.011362 | 0.011530 | 0.011161 |
| 0.011330 | 0.011228 | 0.011195 | 0.011195 | 0.011262 | 0.011161 | 0.011262 |
| 0.011295 | 0.011329 | 0.011228 | 0.011262 | 0.011228 | 0.011564 | 0.011564 |
| 0.011295 | 0.011329 | 0.011396 | 0.011329 | 0.011968 | 0.011382 | 0.011306 |
| 0.011377 | 0.011338 | 0.011447 | 0.011337 | 0.011445 | 0.011371 | 0.011336 |
| 0.011919 | 0.011233 | 0.011369 | 0.011302 | 0.011577 | 0.011434 | 0.011537 |
| 0.011944 | 0.011399 | 0.011297 | 0.011262 | 0.011295 | 0.011295 | 0.011263 |
| 0.011127 | 0.011161 | 0.011295 | 0.011262 | 0.011263 | 0.011396 | 0.011363 |
| 0.011228 | 0.011161 | 0.011195 | 0.011228 | 0.011127 | 0.011195 | 0.011094 |

|          |          |          |          |          |          |          |
|----------|----------|----------|----------|----------|----------|----------|
| 0.011228 | 0.011262 | 0.011161 | 0.011127 | 0.011228 | 0.011161 | 0.011195 |
| 0.011195 | 0.011127 | 0.011195 | 0.011228 | 0.011127 | 0.011329 | 0.011362 |
| 0.011262 | 0.011329 | 0.011262 | 0.011262 | 0.011195 | 0.011597 | 0.011228 |
| 0.011269 | 0.011195 | 0.011430 | 0.011433 | 0.011295 | 0.011295 | 0.011295 |
| 0.011295 | 0.011228 | 0.011195 | 0.011228 | 0.011329 | 0.011329 | 0.011262 |
| 0.011262 | 0.011396 | 0.011564 | 0.011295 | 0.011497 | 0.011497 | 0.011362 |
| 0.011195 | 0.011262 | 0.011295 | 0.011698 | 0.011262 | 0.011295 | 0.011262 |
| 0.011295 | 0.011228 | 0.011228 | 0.011530 | 0.011463 | 0.011497 | 0.011228 |
| 0.011329 | 0.011396 | 0.011262 | 0.011329 | 0.011295 | 0.011161 | 0.011497 |
| 0.011262 | 0.011228 | 0.011228 | 0.011396 | 0.011228 | 0.011329 | 0.011564 |
| 0.011262 | 0.011638 | 0.011631 | 0.011426 | 0.011173 | 0.011332 | 0.011215 |
| 0.011170 | 0.011644 | 0.011166 | 0.011373 | 0.011207 | 0.011315 | 0.011326 |
| 0.011417 | 0.011126 | 0.011283 | 0.011126 | 0.011168 | 0.011328 | 0.011304 |
| 0.011324 | 0.011218 | 0.011307 | 0.011236 | 0.011262 | 0.011396 | 0.011463 |
| 0.011463 | 0.011329 | 0.011432 | 0.011433 | 0.011569 | 0.011590 | 0.011262 |
| 0.011497 | 0.011362 | 0.011228 | 0.011329 | 0.000000 | 0.011362 | 0.011161 |
| 0.011228 | 0.011228 | 0.011195 | 0.011094 | 0.011195 | 0.011094 | 0.011262 |
| 0.011235 | 0.011235 | 0.011231 | 0.011266 | 0.011402 | 0.011368 | 0.011367 |
| 0.011367 | 0.011296 | 0.011097 | 0.011096 | 0.011230 | 0.011399 | 0.011399 |
| 0.011195 | 0.011263 | 0.011498 | 0.011466 | 0.011396 | 0.011430 | 0.011362 |
| 0.011295 | 0.011362 | 0.011362 | 0.011262 | 0.011833 | 0.011430 | 0.011497 |
| 0.011530 | 0.011594 | 0.011231 | 0.011303 | 0.011195 | 0.011396 | 0.011362 |
| 0.011397 | 0.011429 | 0.011429 | 0.011429 | 0.011571 | 0.011564 | 0.011199 |
| 0.011094 | 0.011095 | 0.011196 | 0.011162 | 0.011265 | 0.011098 | 0.011434 |
| 0.011232 | 0.011323 | 0.011108 | 0.011248 | 0.011228 | 0.011300 | 0.011195 |
| 0.011161 | 0.011161 | 0.011228 | 0.011195 | 0.011396 | 0.011362 | 0.011295 |
| 0.011396 | 0.011463 | 0.011195 | 0.011195 | 0.011228 | 0.011228 | 0.011229 |
| 0.011297 | 0.011228 | 0.011228 | 0.011262 | 0.011396 | 0.011463 | 0.011463 |
| 0.011329 | 0.011432 | 0.011433 | 0.011569 | 0.011590 | 0.011262 | 0.011429 |
| 0.011362 | 0.011362 | 0.011196 | 0.011373 | 0.011303 | 0.011333 | 0.011200 |
| 0.011370 | 0.011561 | 0.011357 | 0.011264 | 0.011161 | 0.011362 | 0.011228 |
| 0.011329 | 0.011262 | 0.011161 | 0.011262 | 0.011362 | 0.011364 | 0.011262 |
| 0.011161 | 0.011094 | 0.011228 | 0.011161 | 0.011094 | 0.011196 | 0.011362 |
| 0.011262 | 0.011195 | 0.011228 | 0.011262 | 0.011228 | 0.011161 | 0.011362 |
| 0.011228 | 0.011262 | 0.011262 | 0.011195 | 0.011262 | 0.011497 | 0.011161 |
| 0.011195 | 0.011597 | 0.011195 | 0.011228 | 0.011195 | 0.011564 | 0.011146 |
| 0.011622 | 0.011145 | 0.011211 | 0.011382 | 0.011467 | 0.011383 | 0.011102 |
| 0.011165 | 0.011362 | 0.011463 | 0.011569 | 0.011430 | 0.011568 | 0.011699 |
| 0.011598 | 0.011635 | 0.011597 | 0.011846 | 0.011564 | 0.012438 | 0.011599 |
| 0.012338 | 0.012105 | 0.012240 | 0.012511 | 0.011564 | 0.011262 | 0.011564 |
| 0.012002 | 0.011937 | 0.011530 | 0.011430 | 0.011497 | 0.011497 | 0.011466 |
| 0.011362 | 0.011365 | 0.011429 | 0.011396 | 0.011766 | 0.011833 | 0.011834 |
| 0.011733 | 0.011833 | 0.011937 | 0.011703 | 0.012003 | 0.012008 | 0.012070 |
| 0.012070 | 0.012104 | 0.012050 | 0.012070 | 0.012072 | 0.011295 | 0.011598 |
| 0.011665 | 0.012169 | 0.011670 | 0.011900 | 0.012373 | 0.011434 | 0.011329 |
| 0.011295 | 0.011295 | 0.011766 | 0.011801 | 0.011904 | 0.011631 | 0.011296 |
| S173     | 0.011799 | 0.011799 | 0.011866 | 0.011631 | 0.011631 | 0.011698 |
| 0.011536 | 0.011468 | 0.011631 | 0.011396 | 0.011463 | 0.011430 | 0.011396 |
| 0.011362 | 0.011597 | 0.011329 | 0.011429 | 0.011496 | 0.011463 | 0.011429 |
| 0.011396 | 0.011429 | 0.011262 | 0.011396 | 0.011430 | 0.011429 | 0.011502 |
| 0.011161 | 0.011429 | 0.011329 | 0.011295 | 0.011496 | 0.011463 | 0.011497 |
| 0.011463 | 0.011564 | 0.011463 | 0.011463 | 0.011496 | 0.011463 | 0.011631 |
| 0.011329 | 0.011463 | 0.011496 | 0.011429 | 0.011463 | 0.011564 | 0.011496 |
| 0.011463 | 0.011631 | 0.011530 | 0.011530 | 0.011463 | 0.011732 | 0.011463 |
| 0.011429 | 0.011463 | 0.011597 | 0.011732 | 0.011564 | 0.011463 | 0.011564 |
| 0.011496 | 0.011564 | 0.011463 | 0.011698 | 0.011665 | 0.011463 | 0.011530 |
| 0.011429 | 0.011530 | 0.011497 | 0.011564 | 0.011496 | 0.011497 | 0.011497 |
| 0.011396 | 0.011429 | 0.011396 | 0.011429 | 0.011463 | 0.011498 | 0.011564 |
| 0.011497 | 0.011463 | 0.011530 | 0.011429 | 0.011496 | 0.011396 | 0.011463 |
| 0.011631 | 0.011564 | 0.011597 | 0.011631 | 0.011463 | 0.011631 | 0.011463 |

|          |          |          |          |          |          |          |
|----------|----------|----------|----------|----------|----------|----------|
| 0.011653 | 0.011583 | 0.011664 | 0.011412 | 0.011359 | 0.011502 | 0.011257 |
| 0.011902 | 0.011264 | 0.011390 | 0.011698 | 0.011698 | 0.011429 | 0.011530 |
| 0.011530 | 0.011496 | 0.011564 | 0.011463 | 0.011564 | 0.011496 | 0.011496 |
| 0.011463 | 0.011496 | 0.011765 | 0.011631 | 0.011530 | 0.011497 | 0.011429 |
| 0.011396 | 0.011329 | 0.011463 | 0.011429 | 0.011362 | 0.011329 | 0.011262 |
| 0.011362 | 0.011429 | 0.011429 | 0.011429 | 0.011463 | 0.011463 | 0.011465 |
| 0.011533 | 0.011463 | 0.011463 | 0.011348 | 0.011386 | 0.011376 | 0.011464 |
| 0.011467 | 0.011404 | 0.011429 | 0.011440 | 0.011366 | 0.011403 | 0.011432 |
| 0.011420 | 0.011474 | 0.011473 | 0.011396 | 0.011406 | 0.011531 | 0.011430 |
| 0.011497 | 0.011498 | 0.011497 | 0.011597 | 0.011530 | 0.011832 | 0.011631 |
| 0.011329 | 0.011530 | 0.011463 | 0.011497 | 0.011362 | 0.000000 | 0.011396 |
| 0.011463 | 0.011463 | 0.011429 | 0.011396 | 0.011429 | 0.011396 | 0.011497 |
| 0.011463 | 0.011564 | 0.011497 | 0.011396 | 0.011498 | 0.011597 | 0.011601 |
| 0.011597 | 0.011497 | 0.011396 | 0.011330 | 0.011463 | 0.011396 | 0.011329 |
| 0.011332 | 0.011598 | 0.011396 | 0.011597 | 0.011362 | 0.011463 | 0.011429 |
| 0.011530 | 0.011429 | 0.011463 | 0.011429 | 0.011463 | 0.011329 | 0.011463 |
| 0.011497 | 0.011429 | 0.011497 | 0.011429 | 0.011463 | 0.011497 | 0.011732 |
| 0.011564 | 0.011497 | 0.011564 | 0.011599 | 0.011564 | 0.011463 | 0.011429 |
| 0.011398 | 0.011667 | 0.011517 | 0.011369 | 0.011569 | 0.011333 | 0.011414 |
| 0.011569 | 0.011468 | 0.011631 | 0.011833 | 0.011538 | 0.011698 | 0.011665 |
| 0.011597 | 0.011765 | 0.011629 | 0.011513 | 0.011563 | 0.011497 | 0.011568 |
| 0.011665 | 0.011566 | 0.011703 | 0.011771 | 0.011698 | 0.011765 | 0.011873 |
| 0.011602 | 0.011773 | 0.011703 | 0.011635 | 0.011901 | 0.011362 | 0.011566 |
| 0.011530 | 0.011463 | 0.011362 | 0.011362 | 0.011429 | 0.011429 | 0.011496 |
| 0.011429 | 0.011497 | 0.011396 | 0.011429 | 0.011362 | 0.011429 | 0.011496 |
| 0.011429 | 0.011597 | 0.011497 | 0.011530 | 0.011329 | 0.011429 | 0.011463 |
| 0.011463 | 0.011429 | 0.011497 | 0.011463 | 0.011396 | 0.011396 | 0.011396 |
| 0.011665 | 0.011496 | 0.011564 | 0.011362 | 0.011463 | 0.011631 | 0.011396 |
| 0.011396 | 0.011463 | 0.011429 | 0.011597 | 0.011396 | 0.011329 | 0.011463 |
| 0.011396 | 0.011429 | 0.011429 | 0.011362 | 0.011362 | 0.011530 | 0.011463 |
| 0.011362 | 0.011463 | 0.011329 | 0.011362 | 0.011497 | 0.011363 | 0.011396 |
| 0.011363 | 0.011497 | 0.011430 | 0.011329 | 0.011396 | 0.011329 | 0.011497 |
| 0.011574 | 0.011396 | 0.011430 | 0.011530 | 0.011497 | 0.011429 | 0.011530 |
| 0.011396 | 0.011732 | 0.011329 | 0.011530 | 0.011329 | 0.011329 | 0.011329 |
| 0.011564 | 0.011497 | 0.011463 | 0.011530 | 0.011362 | 0.011497 | 0.011329 |
| 0.011396 | 0.011396 | 0.011429 | 0.011530 | 0.011429 | 0.011530 | 0.011597 |
| 0.011597 | 0.011564 | 0.011463 | 0.011564 | 0.011530 | 0.011396 | 0.011362 |
| 0.011396 | 0.011396 | 0.011463 | 0.011329 | 0.011362 | 0.011530 | 0.011396 |
| 0.011362 | 0.011429 | 0.011564 | 0.011530 | 0.011496 | 0.011429 | 0.011430 |
| 0.011496 | 0.011429 | 0.011530 | 0.011396 | 0.011530 | 0.011631 | 0.011665 |
| 0.011429 | 0.011564 | 0.011440 | 0.017936 | 0.011387 | 0.011672 | 0.011514 |
| 0.011475 | 0.011518 | 0.011636 | 0.011408 | 0.011610 | 0.011544 | 0.011668 |
| 0.011487 | 0.011365 | 0.011372 | 0.011479 | 0.011372 | 0.011554 | 0.011490 |
| 0.011342 | 0.011135 | 0.011320 | 0.011126 | 0.011564 | 0.011597 | 0.011601 |
| 0.011472 | 0.011564 | 0.011564 | 0.011463 | 0.011497 | 0.011497 | 0.011463 |
| 0.011497 | 0.011429 | 0.011463 | 0.011497 | 0.011463 | 0.011396 | 0.011429 |
| 0.011429 | 0.011497 | 0.011396 | 0.011497 | 0.011530 | 0.011564 | 0.011463 |
| 0.011429 | 0.011396 | 0.011530 | 0.011530 | 0.011530 | 0.011564 | 0.011597 |
| 0.011362 | 0.011362 | 0.011396 | 0.011497 | 0.011362 | 0.011597 | 0.011597 |
| 0.011631 | 0.011631 | 0.011564 | 0.011664 | 0.011564 | 0.011666 | 0.011497 |
| 0.011497 | 0.011564 | 0.011597 | 0.011429 | 0.011497 | 0.011463 | 0.011497 |
| 0.011564 | 0.011564 | 0.011597 | 0.011564 | 0.011464 | 0.011665 | 0.011631 |
| 0.011500 | 0.011396 | 0.011497 | 0.011597 | 0.011497 | 0.011564 | 0.011664 |
| 0.011833 | 0.011538 | 0.011698 | 0.011665 | 0.011597 | 0.011765 | 0.011396 |
| 0.011565 | 0.011463 | 0.011429 | 0.011429 | 0.011497 | 0.011396 | 0.011497 |
| 0.011530 | 0.011564 | 0.011463 | 0.011429 | 0.011396 | 0.011530 | 0.011530 |
| 0.011530 | 0.011564 | 0.011631 | 0.011564 | 0.012137 | 0.011632 | 0.011553 |
| 0.011623 | 0.011580 | 0.011693 | 0.011580 | 0.011690 | 0.011612 | 0.011577 |
| 0.012090 | 0.011476 | 0.011608 | 0.011544 | 0.011818 | 0.011672 | 0.011775 |
| 0.012114 | 0.011588 | 0.011669 | 0.011698 | 0.011664 | 0.011396 | 0.011635 |

|          |          |          |          |          |          |          |
|----------|----------|----------|----------|----------|----------|----------|
| 0.011362 | 0.011530 | 0.011664 | 0.011631 | 0.011635 | 0.011094 | 0.011330 |
| 0.011463 | 0.011396 | 0.011429 | 0.011463 | 0.011362 | 0.011429 | 0.011329 |
| 0.011396 | 0.011429 | 0.011396 | 0.011362 | 0.011463 | 0.011396 | 0.011429 |
| 0.011429 | 0.011362 | 0.011429 | 0.011463 | 0.011362 | 0.011564 | 0.011597 |
| 0.011497 | 0.011497 | 0.011496 | 0.011497 | 0.011429 | 0.011564 | 0.011463 |
| 0.011234 | 0.011429 | 0.011161 | 0.011162 | 0.011530 | 0.011530 | 0.011530 |
| 0.011530 | 0.011463 | 0.011429 | 0.011463 | 0.011564 | 0.011564 | 0.011496 |
| 0.011496 | 0.011631 | 0.011530 | 0.011530 | 0.011732 | 0.011732 | 0.011597 |
| 0.011429 | 0.011497 | 0.011530 | 0.011665 | 0.011497 | 0.011530 | 0.011497 |
| 0.011530 | 0.011396 | 0.011396 | 0.011698 | 0.011698 | 0.011665 | 0.011463 |
| 0.011564 | 0.011631 | 0.011496 | 0.011564 | 0.011530 | 0.011396 | 0.011463 |
| 0.011496 | 0.011463 | 0.011396 | 0.011631 | 0.011463 | 0.011564 | 0.011597 |
| 0.011496 | 0.011604 | 0.011597 | 0.011101 | 0.011229 | 0.011502 | 0.011112 |
| 0.011445 | 0.011566 | 0.011376 | 0.011551 | 0.011402 | 0.011417 | 0.011379 |
| 0.011111 | 0.011324 | 0.011394 | 0.011258 | 0.011330 | 0.011529 | 0.011547 |
| 0.011588 | 0.011454 | 0.011483 | 0.011483 | 0.011498 | 0.011094 | 0.011161 |
| 0.011430 | 0.011497 | 0.011601 | 0.011399 | 0.011738 | 0.011767 | 0.011497 |
| 0.011329 | 0.011530 | 0.011463 | 0.011497 | 0.011362 | 0.000000 | 0.011396 |
| 0.011463 | 0.011463 | 0.011429 | 0.011396 | 0.011429 | 0.011396 | 0.011497 |
| 0.011479 | 0.011480 | 0.011471 | 0.011505 | 0.011642 | 0.011607 | 0.011606 |
| 0.011605 | 0.011531 | 0.011356 | 0.011348 | 0.011467 | 0.011636 | 0.011637 |
| 0.011430 | 0.011500 | 0.011733 | 0.011702 | 0.011632 | 0.011666 | 0.011597 |
| 0.011530 | 0.011597 | 0.011597 | 0.011497 | 0.011799 | 0.011664 | 0.011732 |
| 0.011765 | 0.011559 | 0.011469 | 0.011545 | 0.011429 | 0.011631 | 0.011597 |
| 0.011632 | 0.011664 | 0.011664 | 0.011664 | 0.011807 | 0.011799 | 0.011442 |
| 0.011331 | 0.011337 | 0.011435 | 0.011400 | 0.011436 | 0.011359 | 0.011400 |
| 0.011472 | 0.011323 | 0.011441 | 0.011510 | 0.011464 | 0.011539 | 0.011429 |
| 0.011396 | 0.011329 | 0.011463 | 0.011429 | 0.011362 | 0.011329 | 0.011262 |
| 0.011362 | 0.011429 | 0.011429 | 0.011429 | 0.011463 | 0.011463 | 0.011465 |
| 0.011533 | 0.011463 | 0.011463 | 0.011498 | 0.011094 | 0.011161 | 0.011430 |
| 0.011497 | 0.011601 | 0.011399 | 0.011738 | 0.011767 | 0.011497 | 0.011664 |
| 0.011597 | 0.011597 | 0.011432 | 0.011617 | 0.011547 | 0.011537 | 0.011446 |
| 0.011611 | 0.011789 | 0.011568 | 0.011502 | 0.011396 | 0.011597 | 0.011463 |
| 0.011564 | 0.011497 | 0.011396 | 0.011498 | 0.011597 | 0.011601 | 0.011497 |
| 0.011396 | 0.011330 | 0.011463 | 0.011396 | 0.011329 | 0.011332 | 0.011598 |
| 0.011497 | 0.011429 | 0.011463 | 0.011497 | 0.011463 | 0.011396 | 0.011329 |
| 0.011463 | 0.011497 | 0.011497 | 0.011429 | 0.011496 | 0.011732 | 0.011329 |
| 0.011429 | 0.011564 | 0.011429 | 0.011463 | 0.011429 | 0.011530 | 0.011403 |
| 0.011622 | 0.011273 | 0.011261 | 0.000000 | 0.011142 | 0.011096 | 0.011227 |
| 0.011218 | 0.011329 | 0.011429 | 0.011535 | 0.011397 | 0.011534 | 0.011665 |
| 0.011565 | 0.011601 | 0.011564 | 0.011812 | 0.011530 | 0.012404 | 0.011566 |
| 0.012305 | 0.012072 | 0.012206 | 0.012477 | 0.011530 | 0.011430 | 0.011531 |
| 0.012171 | 0.011903 | 0.011497 | 0.011396 | 0.011464 | 0.011464 | 0.011432 |
| 0.011329 | 0.011332 | 0.011396 | 0.011363 | 0.011733 | 0.011799 | 0.011800 |
| 0.011699 | 0.011800 | 0.011903 | 0.011669 | 0.012171 | 0.012178 | 0.012238 |
| 0.012239 | 0.012273 | 0.012220 | 0.012239 | 0.012240 | 0.011530 | 0.011766 |
| 0.011834 | 0.012337 | 0.011840 | 0.011866 | 0.012339 | 0.011400 | 0.011296 |
| 0.011262 | 0.011262 | 0.011732 | 0.011759 | 0.011869 | 0.011597 | 0.011262 |
| s174     | 0.011598 | 0.011598 | 0.011934 | 0.011698 | 0.011698 | 0.011766 |
| 0.011604 | 0.011536 | 0.011698 | 0.011195 | 0.011262 | 0.011229 | 0.011195 |
| 0.011228 | 0.011396 | 0.011195 | 0.011228 | 0.011295 | 0.011262 | 0.011228 |
| 0.011195 | 0.011228 | 0.011329 | 0.011195 | 0.011228 | 0.011228 | 0.011570 |
| 0.011463 | 0.011228 | 0.011127 | 0.011362 | 0.011295 | 0.011262 | 0.011295 |
| 0.011262 | 0.011362 | 0.011262 | 0.011262 | 0.011295 | 0.011262 | 0.011430 |
| 0.011195 | 0.011262 | 0.011295 | 0.011228 | 0.011329 | 0.011362 | 0.011295 |
| 0.011262 | 0.011430 | 0.011329 | 0.011598 | 0.011262 | 0.011530 | 0.011262 |
| 0.011228 | 0.011329 | 0.011396 | 0.011530 | 0.011631 | 0.011329 | 0.011430 |
| 0.011295 | 0.011362 | 0.011262 | 0.011497 | 0.011732 | 0.011262 | 0.011329 |
| 0.011228 | 0.011329 | 0.011295 | 0.011362 | 0.011295 | 0.011295 | 0.011295 |
| 0.011195 | 0.011228 | 0.011195 | 0.011295 | 0.011262 | 0.011296 | 0.011362 |



|          |          |          |          |          |          |          |
|----------|----------|----------|----------|----------|----------|----------|
| 0.011295 | 0.011262 | 0.011329 | 0.011228 | 0.011362 | 0.011195 | 0.011262 |
| 0.011430 | 0.011362 | 0.011598 | 0.011430 | 0.011262 | 0.011497 | 0.011262 |
| 0.011394 | 0.011621 | 0.011438 | 0.011138 | 0.011098 | 0.011244 | 0.011296 |
| 0.011938 | 0.011365 | 0.011102 | 0.011497 | 0.011497 | 0.011295 | 0.011396 |
| 0.011329 | 0.011295 | 0.011362 | 0.011262 | 0.011362 | 0.011295 | 0.011295 |
| 0.011262 | 0.011362 | 0.011564 | 0.011430 | 0.011329 | 0.011295 | 0.011228 |
| 0.011195 | 0.011195 | 0.011262 | 0.011228 | 0.011430 | 0.011396 | 0.011329 |
| 0.011430 | 0.011497 | 0.011228 | 0.011228 | 0.011262 | 0.011262 | 0.011263 |
| 0.011331 | 0.011262 | 0.011262 | 0.011132 | 0.011205 | 0.011165 | 0.011262 |
| 0.011263 | 0.011198 | 0.011208 | 0.011233 | 0.011162 | 0.011197 | 0.011229 |
| 0.011492 | 0.011267 | 0.011301 | 0.011195 | 0.011199 | 0.011329 | 0.011296 |
| 0.011363 | 0.011296 | 0.011296 | 0.011396 | 0.011329 | 0.011698 | 0.011497 |
| 0.011530 | 0.011396 | 0.011262 | 0.011362 | 0.011161 | 0.011396 | 0.000000 |
| 0.011262 | 0.011262 | 0.011228 | 0.011195 | 0.011228 | 0.011195 | 0.011295 |
| 0.011262 | 0.011362 | 0.011295 | 0.011195 | 0.011296 | 0.011396 | 0.011398 |
| 0.011396 | 0.011295 | 0.011195 | 0.011128 | 0.011262 | 0.011195 | 0.011128 |
| 0.011230 | 0.011396 | 0.011195 | 0.011396 | 0.011161 | 0.011262 | 0.011228 |
| 0.011329 | 0.011228 | 0.011262 | 0.011228 | 0.011262 | 0.011127 | 0.011262 |
| 0.011295 | 0.011228 | 0.011295 | 0.011228 | 0.011262 | 0.011295 | 0.011530 |
| 0.011631 | 0.011564 | 0.011631 | 0.011397 | 0.011631 | 0.011262 | 0.011228 |
| 0.011263 | 0.011545 | 0.011335 | 0.011129 | 0.011637 | 0.011129 | 0.011257 |
| 0.011638 | 0.011536 | 0.011430 | 0.011631 | 0.011333 | 0.011497 | 0.011463 |
| 0.011396 | 0.011564 | 0.011416 | 0.011266 | 0.011228 | 0.011295 | 0.011365 |
| 0.011463 | 0.011364 | 0.011500 | 0.011568 | 0.011497 | 0.011564 | 0.011670 |
| 0.011399 | 0.011570 | 0.011501 | 0.011432 | 0.011700 | 0.011161 | 0.011364 |
| 0.011329 | 0.011262 | 0.011161 | 0.011161 | 0.011228 | 0.011228 | 0.011295 |
| 0.011228 | 0.011295 | 0.011195 | 0.011295 | 0.011228 | 0.011228 | 0.011295 |
| 0.011228 | 0.011665 | 0.011564 | 0.011598 | 0.011127 | 0.011228 | 0.011262 |
| 0.011262 | 0.011228 | 0.011295 | 0.011329 | 0.011195 | 0.011195 | 0.011195 |
| 0.011732 | 0.011362 | 0.011362 | 0.011161 | 0.011262 | 0.011430 | 0.011195 |
| 0.011195 | 0.011262 | 0.011228 | 0.011396 | 0.011195 | 0.011329 | 0.011463 |
| 0.011396 | 0.011228 | 0.011228 | 0.011161 | 0.011161 | 0.011329 | 0.011262 |
| 0.011161 | 0.011262 | 0.011127 | 0.011161 | 0.011295 | 0.011430 | 0.011195 |
| 0.011161 | 0.011295 | 0.011228 | 0.011127 | 0.011463 | 0.011127 | 0.011295 |
| 0.011368 | 0.011195 | 0.011497 | 0.011329 | 0.011362 | 0.011228 | 0.011329 |
| 0.011195 | 0.011530 | 0.011127 | 0.011396 | 0.011195 | 0.011195 | 0.011127 |
| 0.011362 | 0.011564 | 0.011262 | 0.011329 | 0.011161 | 0.011564 | 0.011195 |
| 0.011195 | 0.011195 | 0.011228 | 0.011329 | 0.011228 | 0.011329 | 0.011396 |
| 0.011396 | 0.011362 | 0.011262 | 0.011363 | 0.011329 | 0.011195 | 0.011161 |
| 0.011195 | 0.011195 | 0.011262 | 0.011195 | 0.011161 | 0.011329 | 0.011195 |
| 0.011228 | 0.011228 | 0.011362 | 0.011396 | 0.011295 | 0.011228 | 0.011228 |
| 0.011295 | 0.011228 | 0.011329 | 0.011195 | 0.011329 | 0.011430 | 0.011732 |
| 0.011228 | 0.011631 | 0.011198 | 0.017674 | 0.011126 | 0.011366 | 0.011549 |
| 0.011510 | 0.011553 | 0.011217 | 0.011176 | 0.011665 | 0.011578 | 0.011243 |
| 0.011392 | 0.011488 | 0.000000 | 0.011186 | 0.011177 | 0.011258 | 0.011189 |
| 0.011389 | 0.011321 | 0.011320 | 0.011126 | 0.011362 | 0.011396 | 0.011398 |
| 0.011266 | 0.011362 | 0.011362 | 0.011329 | 0.011295 | 0.011295 | 0.011262 |
| 0.011295 | 0.011228 | 0.011262 | 0.011295 | 0.011262 | 0.011195 | 0.011228 |
| 0.011228 | 0.011295 | 0.011195 | 0.011295 | 0.011329 | 0.011362 | 0.011262 |
| 0.011295 | 0.011262 | 0.011598 | 0.011598 | 0.011329 | 0.011363 | 0.011396 |
| 0.011161 | 0.011161 | 0.011195 | 0.011295 | 0.011161 | 0.011396 | 0.011396 |
| 0.011430 | 0.011430 | 0.011362 | 0.011463 | 0.011631 | 0.011464 | 0.011295 |
| 0.011295 | 0.011362 | 0.011396 | 0.011228 | 0.011295 | 0.011262 | 0.011295 |
| 0.011363 | 0.011363 | 0.011396 | 0.011363 | 0.011262 | 0.011463 | 0.011430 |
| 0.011297 | 0.011195 | 0.011295 | 0.011396 | 0.011295 | 0.011430 | 0.011463 |
| 0.011631 | 0.011333 | 0.011497 | 0.011463 | 0.011396 | 0.011564 | 0.011195 |
| 0.011363 | 0.011262 | 0.011228 | 0.011228 | 0.011295 | 0.011195 | 0.011295 |
| 0.011329 | 0.011362 | 0.011262 | 0.011295 | 0.011262 | 0.011598 | 0.011598 |
| 0.011329 | 0.011363 | 0.011430 | 0.011362 | 0.012002 | 0.011418 | 0.011342 |
| 0.011412 | 0.011372 | 0.011482 | 0.011372 | 0.011480 | 0.011405 | 0.011371 |

|          |          |          |          |          |          |          |
|----------|----------|----------|----------|----------|----------|----------|
| 0.011953 | 0.011268 | 0.011403 | 0.011337 | 0.011611 | 0.011469 | 0.011571 |
| 0.011979 | 0.011437 | 0.011331 | 0.011295 | 0.011329 | 0.011329 | 0.011297 |
| 0.011161 | 0.011195 | 0.011329 | 0.011295 | 0.011297 | 0.011430 | 0.011397 |
| 0.011262 | 0.011195 | 0.011228 | 0.011262 | 0.011161 | 0.011228 | 0.011127 |
| 0.011262 | 0.011295 | 0.011195 | 0.011161 | 0.011262 | 0.011195 | 0.011228 |
| 0.011228 | 0.011161 | 0.011228 | 0.011262 | 0.011161 | 0.011362 | 0.011396 |
| 0.011295 | 0.011362 | 0.011295 | 0.011295 | 0.011228 | 0.011631 | 0.011262 |
| 0.011304 | 0.011228 | 0.011464 | 0.011467 | 0.011329 | 0.011329 | 0.011329 |
| 0.011329 | 0.011262 | 0.011228 | 0.011262 | 0.011362 | 0.011362 | 0.011295 |
| 0.011295 | 0.011430 | 0.011598 | 0.011329 | 0.011530 | 0.011530 | 0.011396 |
| 0.011228 | 0.011295 | 0.011329 | 0.011732 | 0.011295 | 0.011329 | 0.011295 |
| 0.011329 | 0.011262 | 0.011262 | 0.011564 | 0.011497 | 0.011530 | 0.011262 |
| 0.011362 | 0.011430 | 0.011295 | 0.011362 | 0.011329 | 0.011195 | 0.011530 |
| 0.011295 | 0.011262 | 0.011262 | 0.011430 | 0.011262 | 0.011362 | 0.011598 |
| 0.011295 | 0.011672 | 0.011665 | 0.011385 | 0.011117 | 0.011366 | 0.011164 |
| 0.011170 | 0.011605 | 0.011166 | 0.011328 | 0.011158 | 0.011264 | 0.011273 |
| 0.011366 | 0.000000 | 0.011227 | 0.000000 | 0.011114 | 0.011261 | 0.011304 |
| 0.011324 | 0.011178 | 0.011307 | 0.011201 | 0.011296 | 0.011430 | 0.011497 |
| 0.011497 | 0.011363 | 0.011466 | 0.011467 | 0.011603 | 0.011626 | 0.011295 |
| 0.011530 | 0.011396 | 0.011262 | 0.011362 | 0.011161 | 0.011396 | 0.000000 |
| 0.011262 | 0.011262 | 0.011228 | 0.011195 | 0.011228 | 0.011195 | 0.011295 |
| 0.011270 | 0.011270 | 0.011266 | 0.011300 | 0.011437 | 0.011402 | 0.011402 |
| 0.011401 | 0.011329 | 0.011134 | 0.011132 | 0.011263 | 0.011433 | 0.011433 |
| 0.011228 | 0.011297 | 0.011532 | 0.011500 | 0.011430 | 0.011464 | 0.011396 |
| 0.011329 | 0.011396 | 0.011396 | 0.011295 | 0.011867 | 0.011463 | 0.011531 |
| 0.011564 | 0.011630 | 0.011265 | 0.011337 | 0.011228 | 0.011430 | 0.011396 |
| 0.011430 | 0.011463 | 0.011463 | 0.011463 | 0.011611 | 0.011598 | 0.011234 |
| 0.011128 | 0.011130 | 0.011231 | 0.011196 | 0.011299 | 0.011135 | 0.011468 |
| 0.011266 | 0.011411 | 0.011156 | 0.011285 | 0.011262 | 0.011334 | 0.011228 |
| 0.011195 | 0.011195 | 0.011262 | 0.011228 | 0.011430 | 0.011396 | 0.011329 |
| 0.011430 | 0.011497 | 0.011228 | 0.011228 | 0.011262 | 0.011262 | 0.011263 |
| 0.011331 | 0.011262 | 0.011262 | 0.011296 | 0.011430 | 0.011497 | 0.011497 |
| 0.011363 | 0.011466 | 0.011467 | 0.011603 | 0.011626 | 0.011295 | 0.011463 |
| 0.011396 | 0.011396 | 0.011229 | 0.011408 | 0.011338 | 0.011367 | 0.011235 |
| 0.011405 | 0.011607 | 0.011399 | 0.011298 | 0.011195 | 0.011396 | 0.011262 |
| 0.011362 | 0.011295 | 0.011195 | 0.011296 | 0.011396 | 0.011398 | 0.011295 |
| 0.011195 | 0.011128 | 0.011262 | 0.011195 | 0.011128 | 0.011230 | 0.011396 |
| 0.011295 | 0.011228 | 0.011262 | 0.011295 | 0.011262 | 0.011195 | 0.011396 |
| 0.011262 | 0.011295 | 0.011295 | 0.011228 | 0.011295 | 0.011530 | 0.011195 |
| 0.011228 | 0.011631 | 0.011228 | 0.011262 | 0.011228 | 0.011598 | 0.011103 |
| 0.011566 | 0.011103 | 0.011161 | 0.011342 | 0.011427 | 0.011383 | 0.000000 |
| 0.011113 | 0.011396 | 0.011497 | 0.011603 | 0.011464 | 0.011568 | 0.011733 |
| 0.011632 | 0.011669 | 0.011631 | 0.011846 | 0.011598 | 0.012472 | 0.011633 |
| 0.012372 | 0.012140 | 0.012274 | 0.012545 | 0.011598 | 0.011295 | 0.011598 |
| 0.012036 | 0.011971 | 0.011564 | 0.011463 | 0.011531 | 0.011531 | 0.011500 |
| 0.011396 | 0.011365 | 0.011463 | 0.011430 | 0.011800 | 0.011867 | 0.011868 |
| 0.011767 | 0.011867 | 0.011971 | 0.011703 | 0.012037 | 0.012042 | 0.012104 |
| 0.012104 | 0.012138 | 0.012050 | 0.012105 | 0.012106 | 0.011329 | 0.011632 |
| 0.011699 | 0.012203 | 0.011704 | 0.011934 | 0.012407 | 0.011468 | 0.011363 |
| 0.011329 | 0.011329 | 0.011800 | 0.011842 | 0.011940 | 0.011665 | 0.011330 |
| s175     | 0.011664 | 0.011664 | 0.012001 | 0.011765 | 0.011765 | 0.011832 |
| 0.011671 | 0.011603 | 0.011832 | 0.011262 | 0.011329 | 0.011296 | 0.011262 |
| 0.011295 | 0.011463 | 0.011262 | 0.011295 | 0.011362 | 0.011329 | 0.011295 |
| 0.011262 | 0.011295 | 0.011396 | 0.011262 | 0.011295 | 0.011295 | 0.011637 |
| 0.011530 | 0.011295 | 0.011194 | 0.011429 | 0.011362 | 0.011329 | 0.011362 |
| 0.011329 | 0.011429 | 0.011329 | 0.011329 | 0.011362 | 0.011329 | 0.011497 |
| 0.011262 | 0.011329 | 0.011362 | 0.011295 | 0.011396 | 0.011429 | 0.011362 |
| 0.011329 | 0.011497 | 0.011396 | 0.011664 | 0.011329 | 0.011597 | 0.011329 |
| 0.011295 | 0.011396 | 0.011463 | 0.011597 | 0.011698 | 0.011329 | 0.011496 |
| 0.011362 | 0.011429 | 0.011329 | 0.011564 | 0.011799 | 0.011329 | 0.011396 |

|          |          |          |          |          |          |          |
|----------|----------|----------|----------|----------|----------|----------|
| 0.011295 | 0.011396 | 0.011362 | 0.011429 | 0.011362 | 0.011362 | 0.011362 |
| 0.011262 | 0.011295 | 0.011262 | 0.011362 | 0.011329 | 0.011363 | 0.011429 |
| 0.011362 | 0.011329 | 0.011396 | 0.011295 | 0.011429 | 0.011262 | 0.011329 |
| 0.011496 | 0.011429 | 0.011664 | 0.011497 | 0.011329 | 0.011564 | 0.011329 |
| 0.011505 | 0.011733 | 0.011513 | 0.011216 | 0.011210 | 0.011355 | 0.011415 |
| 0.012048 | 0.011467 | 0.011184 | 0.011564 | 0.011564 | 0.011362 | 0.011463 |
| 0.011396 | 0.011362 | 0.011429 | 0.011329 | 0.011429 | 0.011362 | 0.011362 |
| 0.011329 | 0.011429 | 0.011631 | 0.011496 | 0.011396 | 0.011362 | 0.011295 |
| 0.011262 | 0.011262 | 0.011329 | 0.011295 | 0.011497 | 0.011463 | 0.011396 |
| 0.011497 | 0.011564 | 0.011295 | 0.011295 | 0.011329 | 0.011329 | 0.011330 |
| 0.011398 | 0.011329 | 0.011329 | 0.011168 | 0.011241 | 0.011200 | 0.011329 |
| 0.011297 | 0.011232 | 0.011282 | 0.011267 | 0.011230 | 0.011232 | 0.011297 |
| 0.011528 | 0.011302 | 0.011336 | 0.011262 | 0.011233 | 0.011397 | 0.011363 |
| 0.011430 | 0.011364 | 0.011363 | 0.011463 | 0.011396 | 0.011765 | 0.011564 |
| 0.011597 | 0.011463 | 0.011329 | 0.011430 | 0.011228 | 0.011463 | 0.011262 |
| 0.000000 | 0.011329 | 0.011295 | 0.011262 | 0.011295 | 0.011262 | 0.011362 |
| 0.011329 | 0.011430 | 0.011362 | 0.011262 | 0.011363 | 0.011463 | 0.011466 |
| 0.011463 | 0.011362 | 0.011262 | 0.011195 | 0.011329 | 0.011262 | 0.011195 |
| 0.011298 | 0.011463 | 0.011262 | 0.011463 | 0.011195 | 0.011329 | 0.011295 |
| 0.011396 | 0.011295 | 0.011329 | 0.011295 | 0.011329 | 0.011195 | 0.011329 |
| 0.011362 | 0.011295 | 0.011362 | 0.011295 | 0.011329 | 0.011362 | 0.011597 |
| 0.011698 | 0.011631 | 0.011698 | 0.011465 | 0.011698 | 0.011329 | 0.011295 |
| 0.011330 | 0.011626 | 0.011472 | 0.011232 | 0.011671 | 0.011197 | 0.011336 |
| 0.011705 | 0.011604 | 0.011496 | 0.011698 | 0.011402 | 0.011564 | 0.011530 |
| 0.011463 | 0.011631 | 0.011486 | 0.011307 | 0.011228 | 0.011362 | 0.011432 |
| 0.011530 | 0.011431 | 0.011567 | 0.011635 | 0.011564 | 0.011631 | 0.011738 |
| 0.011466 | 0.011637 | 0.011568 | 0.011500 | 0.011767 | 0.011228 | 0.011431 |
| 0.011396 | 0.011329 | 0.011228 | 0.011228 | 0.011295 | 0.011295 | 0.011362 |
| 0.011295 | 0.011362 | 0.011262 | 0.011362 | 0.011295 | 0.011295 | 0.011362 |
| 0.011295 | 0.011731 | 0.011631 | 0.011664 | 0.011194 | 0.011295 | 0.011329 |
| 0.011329 | 0.011295 | 0.011362 | 0.011396 | 0.011262 | 0.011262 | 0.011262 |
| 0.011799 | 0.011429 | 0.011429 | 0.011228 | 0.011329 | 0.011497 | 0.011262 |
| 0.011262 | 0.011329 | 0.011295 | 0.011463 | 0.011262 | 0.011396 | 0.011530 |
| 0.011463 | 0.011295 | 0.011295 | 0.011228 | 0.011228 | 0.011396 | 0.011329 |
| 0.011228 | 0.011329 | 0.011195 | 0.011228 | 0.011362 | 0.011497 | 0.011262 |
| 0.011228 | 0.011362 | 0.011295 | 0.011195 | 0.011530 | 0.011195 | 0.011362 |
| 0.011437 | 0.011262 | 0.011564 | 0.011396 | 0.011429 | 0.011295 | 0.011396 |
| 0.011262 | 0.011597 | 0.011194 | 0.011463 | 0.011262 | 0.011262 | 0.011194 |
| 0.011429 | 0.011631 | 0.011329 | 0.011396 | 0.011228 | 0.011631 | 0.011262 |
| 0.011262 | 0.011262 | 0.011295 | 0.011396 | 0.011295 | 0.011396 | 0.011463 |
| 0.011463 | 0.011429 | 0.011329 | 0.011430 | 0.011396 | 0.011262 | 0.011228 |
| 0.011262 | 0.011262 | 0.011329 | 0.011262 | 0.011228 | 0.011396 | 0.011262 |
| 0.011295 | 0.011295 | 0.011429 | 0.011463 | 0.011362 | 0.011295 | 0.011295 |
| 0.011362 | 0.011295 | 0.011396 | 0.011262 | 0.011396 | 0.011496 | 0.011799 |
| 0.011295 | 0.011698 | 0.011302 | 0.011785 | 0.011126 | 0.011427 | 0.011653 |
| 0.011614 | 0.011658 | 0.011270 | 0.011292 | 0.011719 | 0.011682 | 0.011364 |
| 0.011440 | 0.011548 | 0.011177 | 0.011228 | 0.011216 | 0.011307 | 0.011275 |
| 0.011482 | 0.011433 | 0.011394 | 0.011193 | 0.011429 | 0.011463 | 0.011466 |
| 0.011335 | 0.011430 | 0.011429 | 0.011396 | 0.011362 | 0.011362 | 0.011329 |
| 0.011362 | 0.011295 | 0.011329 | 0.011362 | 0.011329 | 0.011262 | 0.011295 |
| 0.011295 | 0.011362 | 0.011262 | 0.011363 | 0.011396 | 0.011430 | 0.011329 |
| 0.011362 | 0.011329 | 0.011665 | 0.011665 | 0.011396 | 0.011430 | 0.011463 |
| 0.011228 | 0.011228 | 0.011262 | 0.011362 | 0.011228 | 0.011463 | 0.011463 |
| 0.011497 | 0.011496 | 0.011429 | 0.011530 | 0.011698 | 0.011532 | 0.011362 |
| 0.011362 | 0.011430 | 0.011463 | 0.011295 | 0.011362 | 0.011329 | 0.011362 |
| 0.011430 | 0.011430 | 0.011463 | 0.011430 | 0.011330 | 0.011530 | 0.011497 |
| 0.011365 | 0.011262 | 0.011362 | 0.011463 | 0.011295 | 0.011497 | 0.011530 |
| 0.011698 | 0.011402 | 0.011564 | 0.011530 | 0.011463 | 0.011631 | 0.011262 |
| 0.011431 | 0.011329 | 0.011295 | 0.011295 | 0.011362 | 0.011262 | 0.011363 |
| 0.011396 | 0.011430 | 0.011329 | 0.011362 | 0.011329 | 0.011665 | 0.011665 |

|          |          |          |          |          |          |          |
|----------|----------|----------|----------|----------|----------|----------|
| 0.011396 | 0.011430 | 0.011429 | 0.011429 | 0.012069 | 0.011489 | 0.011412 |
| 0.011482 | 0.011442 | 0.011552 | 0.011441 | 0.011550 | 0.011474 | 0.011405 |
| 0.012022 | 0.011337 | 0.011471 | 0.011406 | 0.011680 | 0.011536 | 0.011639 |
| 0.012046 | 0.011512 | 0.011601 | 0.011664 | 0.011530 | 0.011530 | 0.011567 |
| 0.011228 | 0.011396 | 0.011530 | 0.011496 | 0.011499 | 0.011496 | 0.011464 |
| 0.011329 | 0.011262 | 0.011295 | 0.011329 | 0.011228 | 0.011295 | 0.011194 |
| 0.011329 | 0.011362 | 0.011262 | 0.011228 | 0.011329 | 0.011262 | 0.011295 |
| 0.011295 | 0.011228 | 0.011295 | 0.011329 | 0.011228 | 0.011429 | 0.011463 |
| 0.011362 | 0.011429 | 0.011362 | 0.011362 | 0.011295 | 0.011698 | 0.011329 |
| 0.011373 | 0.011295 | 0.011530 | 0.011535 | 0.011396 | 0.011396 | 0.011396 |
| 0.011396 | 0.011329 | 0.011295 | 0.011329 | 0.011429 | 0.011429 | 0.011362 |
| 0.011362 | 0.011497 | 0.011664 | 0.011396 | 0.011597 | 0.011597 | 0.011463 |
| 0.011295 | 0.011362 | 0.011396 | 0.011799 | 0.011362 | 0.011396 | 0.011362 |
| 0.011396 | 0.011329 | 0.011329 | 0.011631 | 0.011564 | 0.011597 | 0.011329 |
| 0.011429 | 0.011497 | 0.011362 | 0.011429 | 0.011396 | 0.011262 | 0.011597 |
| 0.011362 | 0.011262 | 0.011329 | 0.011497 | 0.011329 | 0.011429 | 0.011664 |
| 0.011362 | 0.011739 | 0.011732 | 0.011507 | 0.011173 | 0.011434 | 0.011215 |
| 0.011225 | 0.011722 | 0.011271 | 0.011373 | 0.011255 | 0.011366 | 0.011326 |
| 0.011468 | 0.000000 | 0.011283 | 0.000000 | 0.011168 | 0.011261 | 0.011425 |
| 0.011437 | 0.011336 | 0.011412 | 0.011342 | 0.011364 | 0.011497 | 0.011564 |
| 0.011564 | 0.011430 | 0.011534 | 0.011535 | 0.011670 | 0.011696 | 0.011362 |
| 0.011597 | 0.011463 | 0.011329 | 0.011430 | 0.011228 | 0.011463 | 0.011262 |
| 0.000000 | 0.011329 | 0.011295 | 0.011262 | 0.011295 | 0.011262 | 0.011362 |
| 0.011305 | 0.011305 | 0.011300 | 0.011334 | 0.011471 | 0.011436 | 0.011436 |
| 0.011435 | 0.011396 | 0.011171 | 0.011168 | 0.011297 | 0.011467 | 0.011467 |
| 0.011296 | 0.011331 | 0.011531 | 0.011567 | 0.011497 | 0.011531 | 0.011463 |
| 0.011396 | 0.011463 | 0.011463 | 0.011362 | 0.011933 | 0.011530 | 0.011597 |
| 0.011564 | 0.011630 | 0.011333 | 0.011407 | 0.011295 | 0.011497 | 0.011463 |
| 0.011497 | 0.011530 | 0.011530 | 0.011530 | 0.011611 | 0.011664 | 0.011303 |
| 0.011195 | 0.011199 | 0.011299 | 0.011264 | 0.011368 | 0.011172 | 0.011536 |
| 0.011300 | 0.011367 | 0.011108 | 0.011322 | 0.011329 | 0.011368 | 0.011295 |
| 0.011262 | 0.011262 | 0.011329 | 0.011295 | 0.011497 | 0.011463 | 0.011396 |
| 0.011497 | 0.011564 | 0.011295 | 0.011295 | 0.011329 | 0.011329 | 0.011330 |
| 0.011398 | 0.011329 | 0.011329 | 0.011364 | 0.011497 | 0.011564 | 0.011564 |
| 0.011430 | 0.011534 | 0.011535 | 0.011670 | 0.011696 | 0.011362 | 0.011530 |
| 0.011463 | 0.011463 | 0.011297 | 0.011443 | 0.011408 | 0.011435 | 0.011305 |
| 0.011473 | 0.011698 | 0.011483 | 0.011366 | 0.011262 | 0.011463 | 0.011329 |
| 0.011430 | 0.011362 | 0.011262 | 0.011363 | 0.011463 | 0.011466 | 0.011362 |
| 0.011262 | 0.011195 | 0.011329 | 0.011262 | 0.011195 | 0.011298 | 0.011463 |
| 0.011362 | 0.011295 | 0.011329 | 0.011362 | 0.011329 | 0.011262 | 0.011463 |
| 0.011329 | 0.011362 | 0.011362 | 0.011295 | 0.011362 | 0.011597 | 0.011262 |
| 0.011295 | 0.011698 | 0.011295 | 0.011329 | 0.011295 | 0.011664 | 0.011189 |
| 0.011622 | 0.011230 | 0.011261 | 0.011463 | 0.011549 | 0.011491 | 0.011186 |
| 0.011218 | 0.011463 | 0.011564 | 0.011671 | 0.011531 | 0.011669 | 0.011800 |
| 0.011699 | 0.011737 | 0.011698 | 0.011949 | 0.011664 | 0.012539 | 0.011700 |
| 0.012439 | 0.012207 | 0.012341 | 0.012613 | 0.011664 | 0.011363 | 0.011665 |
| 0.012103 | 0.012038 | 0.011631 | 0.011530 | 0.011598 | 0.011598 | 0.011567 |
| 0.011463 | 0.011467 | 0.011530 | 0.011497 | 0.011867 | 0.011933 | 0.011935 |
| 0.011834 | 0.011934 | 0.012038 | 0.011804 | 0.012104 | 0.012110 | 0.012171 |
| 0.012172 | 0.012205 | 0.012152 | 0.012172 | 0.012173 | 0.011396 | 0.011699 |
| 0.011767 | 0.012270 | 0.011772 | 0.012001 | 0.012474 | 0.011536 | 0.011430 |
| 0.011396 | 0.011396 | 0.011867 | 0.011883 | 0.011940 | 0.011732 | 0.011397 |
| s176     | 0.011664 | 0.011664 | 0.012001 | 0.011765 | 0.011765 | 0.011832 |
| 0.011671 | 0.011603 | 0.011832 | 0.011262 | 0.011329 | 0.011296 | 0.011262 |
| 0.011295 | 0.011463 | 0.011262 | 0.011295 | 0.011362 | 0.011329 | 0.011295 |
| 0.011262 | 0.011295 | 0.011396 | 0.011262 | 0.011295 | 0.011295 | 0.011637 |
| 0.011530 | 0.011295 | 0.011194 | 0.011429 | 0.011362 | 0.011329 | 0.011362 |
| 0.011329 | 0.011429 | 0.011329 | 0.011329 | 0.011362 | 0.011329 | 0.011496 |
| 0.011262 | 0.011329 | 0.011362 | 0.011295 | 0.011396 | 0.011429 | 0.011362 |
| 0.011329 | 0.011497 | 0.011396 | 0.011664 | 0.011329 | 0.011597 | 0.011329 |

|          |          |          |          |          |          |          |
|----------|----------|----------|----------|----------|----------|----------|
| 0.011295 | 0.011396 | 0.011463 | 0.011597 | 0.011698 | 0.011396 | 0.011496 |
| 0.011362 | 0.011429 | 0.011329 | 0.011564 | 0.011799 | 0.011329 | 0.011396 |
| 0.011295 | 0.011396 | 0.011362 | 0.011429 | 0.011362 | 0.011362 | 0.011362 |
| 0.011262 | 0.011295 | 0.011262 | 0.011362 | 0.011329 | 0.011363 | 0.011429 |
| 0.011362 | 0.011329 | 0.011396 | 0.011295 | 0.011429 | 0.011262 | 0.011329 |
| 0.011496 | 0.011429 | 0.011664 | 0.011497 | 0.011329 | 0.011564 | 0.011329 |
| 0.011505 | 0.011733 | 0.011513 | 0.011216 | 0.011172 | 0.011355 | 0.011414 |
| 0.012048 | 0.011467 | 0.011184 | 0.011564 | 0.011564 | 0.011362 | 0.011463 |
| 0.011396 | 0.011362 | 0.011429 | 0.011329 | 0.011429 | 0.011362 | 0.011362 |
| 0.011329 | 0.011429 | 0.011631 | 0.011496 | 0.011396 | 0.011362 | 0.011295 |
| 0.011262 | 0.011262 | 0.011329 | 0.011295 | 0.011497 | 0.011463 | 0.011396 |
| 0.011497 | 0.011564 | 0.011295 | 0.011295 | 0.011329 | 0.011329 | 0.011330 |
| 0.011398 | 0.011329 | 0.011329 | 0.011204 | 0.011277 | 0.011236 | 0.011329 |
| 0.011331 | 0.011266 | 0.011282 | 0.011302 | 0.011230 | 0.011266 | 0.011297 |
| 0.011564 | 0.011336 | 0.011370 | 0.011262 | 0.011268 | 0.011397 | 0.011363 |
| 0.011430 | 0.011363 | 0.011363 | 0.011463 | 0.011396 | 0.011765 | 0.011564 |
| 0.011597 | 0.011463 | 0.011329 | 0.011430 | 0.011228 | 0.011463 | 0.011262 |
| 0.011329 | 0.000000 | 0.011295 | 0.011262 | 0.011295 | 0.011262 | 0.011362 |
| 0.011329 | 0.011429 | 0.011362 | 0.011262 | 0.011363 | 0.011463 | 0.011466 |
| 0.011463 | 0.011362 | 0.011262 | 0.011195 | 0.011329 | 0.011262 | 0.011195 |
| 0.011298 | 0.011463 | 0.011262 | 0.011463 | 0.011228 | 0.011329 | 0.011295 |
| 0.011396 | 0.011295 | 0.011329 | 0.011295 | 0.011329 | 0.011195 | 0.011329 |
| 0.011362 | 0.011295 | 0.011362 | 0.011295 | 0.011329 | 0.011362 | 0.011597 |
| 0.011698 | 0.011631 | 0.011698 | 0.011465 | 0.011698 | 0.011329 | 0.011295 |
| 0.011330 | 0.011545 | 0.011380 | 0.011232 | 0.011705 | 0.011197 | 0.011296 |
| 0.011705 | 0.011604 | 0.011496 | 0.011698 | 0.011402 | 0.011564 | 0.011530 |
| 0.011463 | 0.011631 | 0.011486 | 0.011349 | 0.011354 | 0.011362 | 0.011432 |
| 0.011530 | 0.011431 | 0.011567 | 0.011635 | 0.011564 | 0.011631 | 0.011738 |
| 0.011466 | 0.011637 | 0.011568 | 0.011500 | 0.011767 | 0.011228 | 0.011431 |
| 0.011396 | 0.011329 | 0.011228 | 0.011228 | 0.011295 | 0.011295 | 0.011362 |
| 0.011295 | 0.011362 | 0.011262 | 0.011362 | 0.011295 | 0.011295 | 0.011362 |
| 0.011295 | 0.011731 | 0.011631 | 0.011664 | 0.011194 | 0.011295 | 0.011329 |
| 0.011329 | 0.011295 | 0.011362 | 0.011396 | 0.011262 | 0.011262 | 0.011262 |
| 0.011799 | 0.011429 | 0.011429 | 0.011228 | 0.011329 | 0.011497 | 0.011262 |
| 0.011262 | 0.011329 | 0.011295 | 0.011463 | 0.011262 | 0.011396 | 0.011530 |
| 0.011463 | 0.011295 | 0.011295 | 0.011228 | 0.011228 | 0.011396 | 0.011329 |
| 0.011228 | 0.011329 | 0.011195 | 0.011228 | 0.011362 | 0.011497 | 0.011262 |
| 0.011228 | 0.011362 | 0.011295 | 0.011195 | 0.011530 | 0.011195 | 0.011362 |
| 0.011437 | 0.011262 | 0.011564 | 0.011396 | 0.011429 | 0.011295 | 0.011396 |
| 0.011262 | 0.011597 | 0.011194 | 0.011463 | 0.011262 | 0.011262 | 0.011194 |
| 0.011429 | 0.011631 | 0.011329 | 0.011396 | 0.011228 | 0.011631 | 0.011262 |
| 0.011262 | 0.011262 | 0.011295 | 0.011396 | 0.011295 | 0.011396 | 0.011463 |
| 0.011463 | 0.011429 | 0.011329 | 0.011429 | 0.011396 | 0.011262 | 0.011228 |
| 0.011262 | 0.011262 | 0.011329 | 0.011262 | 0.011228 | 0.011396 | 0.011262 |
| 0.011295 | 0.011295 | 0.011429 | 0.011463 | 0.011362 | 0.011295 | 0.011295 |
| 0.011362 | 0.011295 | 0.011396 | 0.011262 | 0.011396 | 0.011496 | 0.011799 |
| 0.011295 | 0.011698 | 0.011302 | 0.011785 | 0.011191 | 0.011427 | 0.011653 |
| 0.011614 | 0.011658 | 0.011270 | 0.011234 | 0.011774 | 0.011682 | 0.011303 |
| 0.011487 | 0.011548 | 0.011216 | 0.011228 | 0.011294 | 0.011356 | 0.011232 |
| 0.011482 | 0.011433 | 0.011394 | 0.011259 | 0.011429 | 0.011463 | 0.011466 |
| 0.011335 | 0.011429 | 0.011429 | 0.011396 | 0.011362 | 0.011362 | 0.011329 |
| 0.011362 | 0.011295 | 0.011329 | 0.011362 | 0.011329 | 0.011262 | 0.011295 |
| 0.011295 | 0.011362 | 0.011262 | 0.011362 | 0.011396 | 0.011429 | 0.011329 |
| 0.011362 | 0.011329 | 0.011665 | 0.011665 | 0.011396 | 0.011430 | 0.011463 |
| 0.011228 | 0.011228 | 0.011262 | 0.011362 | 0.011228 | 0.011463 | 0.011463 |
| 0.011497 | 0.011496 | 0.011429 | 0.011530 | 0.011698 | 0.011532 | 0.011362 |
| 0.011362 | 0.011429 | 0.011463 | 0.011295 | 0.011362 | 0.011329 | 0.011362 |
| 0.011430 | 0.011430 | 0.011463 | 0.011430 | 0.011330 | 0.011530 | 0.011497 |
| 0.011365 | 0.011262 | 0.011362 | 0.011463 | 0.011362 | 0.011497 | 0.011530 |
| 0.011698 | 0.011402 | 0.011564 | 0.011530 | 0.011463 | 0.011631 | 0.011262 |

|          |          |          |          |          |          |          |
|----------|----------|----------|----------|----------|----------|----------|
| 0.011431 | 0.011329 | 0.011295 | 0.011295 | 0.011362 | 0.011262 | 0.011362 |
| 0.011396 | 0.011429 | 0.011329 | 0.011362 | 0.011329 | 0.011665 | 0.011665 |
| 0.011396 | 0.011430 | 0.011496 | 0.011429 | 0.012069 | 0.011489 | 0.011412 |
| 0.011482 | 0.011442 | 0.011552 | 0.011441 | 0.011550 | 0.011474 | 0.011439 |
| 0.012021 | 0.011337 | 0.011471 | 0.011406 | 0.011680 | 0.011536 | 0.011639 |
| 0.012046 | 0.011512 | 0.011601 | 0.011664 | 0.011530 | 0.011530 | 0.011567 |
| 0.011228 | 0.011396 | 0.011530 | 0.011496 | 0.011499 | 0.011496 | 0.011464 |
| 0.011329 | 0.011262 | 0.011295 | 0.011329 | 0.011228 | 0.011295 | 0.011194 |
| 0.011329 | 0.011362 | 0.011262 | 0.011228 | 0.011329 | 0.011262 | 0.011295 |
| 0.011295 | 0.011228 | 0.011295 | 0.011329 | 0.011228 | 0.011429 | 0.011463 |
| 0.011362 | 0.011429 | 0.011362 | 0.011362 | 0.011295 | 0.011698 | 0.011329 |
| 0.011373 | 0.011295 | 0.011530 | 0.011535 | 0.011396 | 0.011396 | 0.011396 |
| 0.011396 | 0.011329 | 0.011295 | 0.011329 | 0.011429 | 0.011429 | 0.011362 |
| 0.011362 | 0.011496 | 0.011664 | 0.011396 | 0.011597 | 0.011597 | 0.011463 |
| 0.011295 | 0.011362 | 0.011396 | 0.011799 | 0.011362 | 0.011396 | 0.011362 |
| 0.011396 | 0.011329 | 0.011329 | 0.011631 | 0.011564 | 0.011597 | 0.011329 |
| 0.011429 | 0.011496 | 0.011362 | 0.011429 | 0.011396 | 0.011262 | 0.011597 |
| 0.011362 | 0.011329 | 0.011329 | 0.011496 | 0.011329 | 0.011429 | 0.011664 |
| 0.011362 | 0.011739 | 0.011731 | 0.011507 | 0.011229 | 0.011434 | 0.011267 |
| 0.011225 | 0.011722 | 0.011271 | 0.011417 | 0.011255 | 0.011366 | 0.011379 |
| 0.011468 | 0.011126 | 0.011338 | 0.011192 | 0.011222 | 0.011395 | 0.011425 |
| 0.011437 | 0.011296 | 0.011412 | 0.011307 | 0.011364 | 0.011497 | 0.011564 |
| 0.011564 | 0.011430 | 0.011533 | 0.011535 | 0.011670 | 0.011696 | 0.011362 |
| 0.011597 | 0.011463 | 0.011329 | 0.011430 | 0.011228 | 0.011463 | 0.011262 |
| 0.011329 | 0.000000 | 0.011295 | 0.011262 | 0.011295 | 0.011262 | 0.011362 |
| 0.011340 | 0.011340 | 0.011334 | 0.011368 | 0.011505 | 0.011470 | 0.011470 |
| 0.011469 | 0.011396 | 0.011208 | 0.011204 | 0.011331 | 0.011501 | 0.011501 |
| 0.011296 | 0.011365 | 0.011599 | 0.011567 | 0.011497 | 0.011531 | 0.011463 |
| 0.011396 | 0.011463 | 0.011463 | 0.011362 | 0.011933 | 0.011530 | 0.011597 |
| 0.011631 | 0.011701 | 0.011299 | 0.011407 | 0.011295 | 0.011497 | 0.011463 |
| 0.011497 | 0.011530 | 0.011530 | 0.011530 | 0.011650 | 0.011664 | 0.011303 |
| 0.011195 | 0.011164 | 0.011298 | 0.011264 | 0.011368 | 0.011172 | 0.011536 |
| 0.011335 | 0.011455 | 0.011203 | 0.011360 | 0.011329 | 0.011402 | 0.011295 |
| 0.011262 | 0.011262 | 0.011329 | 0.011295 | 0.011497 | 0.011463 | 0.011396 |
| 0.011497 | 0.011564 | 0.011295 | 0.011295 | 0.011329 | 0.011329 | 0.011330 |
| 0.011398 | 0.011329 | 0.011329 | 0.011364 | 0.011497 | 0.011564 | 0.011564 |
| 0.011430 | 0.011533 | 0.011535 | 0.011670 | 0.011696 | 0.011362 | 0.011530 |
| 0.011463 | 0.011463 | 0.011297 | 0.011443 | 0.011408 | 0.011435 | 0.011305 |
| 0.011473 | 0.011698 | 0.011441 | 0.011366 | 0.011262 | 0.011463 | 0.011329 |
| 0.011429 | 0.011362 | 0.011262 | 0.011363 | 0.011463 | 0.011466 | 0.011362 |
| 0.011262 | 0.011195 | 0.011329 | 0.011262 | 0.011195 | 0.011298 | 0.011463 |
| 0.011362 | 0.011295 | 0.011329 | 0.011362 | 0.011329 | 0.011262 | 0.011463 |
| 0.011329 | 0.011362 | 0.011362 | 0.011295 | 0.011362 | 0.011597 | 0.011262 |
| 0.011295 | 0.011698 | 0.011295 | 0.011329 | 0.011295 | 0.011664 | 0.011189 |
| 0.011678 | 0.011230 | 0.011261 | 0.011463 | 0.011549 | 0.011491 | 0.011144 |
| 0.011218 | 0.011463 | 0.011564 | 0.011671 | 0.011531 | 0.011669 | 0.011800 |
| 0.011699 | 0.011737 | 0.011698 | 0.011949 | 0.011664 | 0.012539 | 0.011700 |
| 0.012439 | 0.012207 | 0.012341 | 0.012545 | 0.011664 | 0.011362 | 0.011665 |
| 0.012103 | 0.012038 | 0.011631 | 0.011530 | 0.011598 | 0.011598 | 0.011567 |
| 0.011463 | 0.011467 | 0.011530 | 0.011497 | 0.011867 | 0.011933 | 0.011935 |
| 0.011834 | 0.011934 | 0.012038 | 0.011804 | 0.012104 | 0.012110 | 0.012171 |
| 0.012172 | 0.012205 | 0.012152 | 0.012172 | 0.012173 | 0.011396 | 0.011699 |
| 0.011766 | 0.012270 | 0.011772 | 0.012001 | 0.012474 | 0.011536 | 0.011430 |
| 0.011396 | 0.011396 | 0.011867 | 0.011883 | 0.012010 | 0.011731 | 0.011397 |
| s177     | 0.011631 | 0.011631 | 0.011967 | 0.011732 | 0.011732 | 0.011799 |
| 0.011638 | 0.011570 | 0.011732 | 0.011228 | 0.011295 | 0.011262 | 0.011228 |
| 0.011262 | 0.011429 | 0.011228 | 0.011262 | 0.011329 | 0.011295 | 0.011262 |
| 0.011228 | 0.011262 | 0.011362 | 0.011228 | 0.011262 | 0.011262 | 0.011604 |
| 0.011497 | 0.011262 | 0.011161 | 0.011396 | 0.011329 | 0.011295 | 0.011329 |
| 0.011295 | 0.011396 | 0.011295 | 0.011295 | 0.011329 | 0.011295 | 0.011463 |

|          |          |          |          |          |          |          |
|----------|----------|----------|----------|----------|----------|----------|
| 0.011228 | 0.011295 | 0.011329 | 0.011262 | 0.011362 | 0.011396 | 0.011329 |
| 0.011295 | 0.011463 | 0.011363 | 0.011631 | 0.011295 | 0.011564 | 0.011295 |
| 0.011262 | 0.011362 | 0.011430 | 0.011564 | 0.011665 | 0.011362 | 0.011463 |
| 0.011329 | 0.011396 | 0.011295 | 0.011530 | 0.011766 | 0.011295 | 0.011362 |
| 0.011262 | 0.011362 | 0.011329 | 0.011396 | 0.011329 | 0.011329 | 0.011329 |
| 0.011228 | 0.011262 | 0.011228 | 0.011329 | 0.011295 | 0.011329 | 0.011396 |
| 0.011329 | 0.011295 | 0.011362 | 0.011262 | 0.011396 | 0.011228 | 0.011295 |
| 0.011463 | 0.011396 | 0.011631 | 0.011463 | 0.011295 | 0.011530 | 0.011295 |
| 0.011431 | 0.011658 | 0.011475 | 0.011177 | 0.011172 | 0.011281 | 0.011375 |
| 0.012011 | 0.011416 | 0.011184 | 0.011530 | 0.011530 | 0.011329 | 0.011430 |
| 0.011362 | 0.011329 | 0.011396 | 0.011295 | 0.011396 | 0.011329 | 0.011329 |
| 0.011295 | 0.011396 | 0.011597 | 0.011463 | 0.011362 | 0.011329 | 0.011262 |
| 0.011228 | 0.011228 | 0.011295 | 0.011262 | 0.011463 | 0.011429 | 0.011362 |
| 0.011463 | 0.011530 | 0.011262 | 0.011262 | 0.011295 | 0.011295 | 0.011297 |
| 0.011364 | 0.011295 | 0.011295 | 0.011168 | 0.011241 | 0.011200 | 0.011296 |
| 0.011297 | 0.011232 | 0.011245 | 0.011267 | 0.011196 | 0.011231 | 0.011263 |
| 0.011528 | 0.011301 | 0.011336 | 0.011228 | 0.011233 | 0.011363 | 0.011329 |
| 0.011396 | 0.011330 | 0.011329 | 0.011429 | 0.011362 | 0.011732 | 0.011530 |
| 0.011564 | 0.011430 | 0.011295 | 0.011396 | 0.011195 | 0.011429 | 0.011228 |
| 0.011295 | 0.011295 | 0.000000 | 0.011228 | 0.011262 | 0.011228 | 0.011329 |
| 0.011295 | 0.011396 | 0.011329 | 0.011228 | 0.011330 | 0.011430 | 0.011432 |
| 0.011430 | 0.011329 | 0.011228 | 0.011161 | 0.011295 | 0.011228 | 0.011161 |
| 0.011264 | 0.011430 | 0.011228 | 0.011430 | 0.011195 | 0.011295 | 0.011262 |
| 0.011362 | 0.011262 | 0.011295 | 0.011262 | 0.011295 | 0.011161 | 0.011295 |
| 0.011329 | 0.011262 | 0.011329 | 0.011262 | 0.011295 | 0.011329 | 0.011564 |
| 0.011665 | 0.011597 | 0.011665 | 0.011397 | 0.011665 | 0.011295 | 0.011262 |
| 0.011297 | 0.011505 | 0.011380 | 0.011163 | 0.011671 | 0.011163 | 0.011257 |
| 0.011671 | 0.011570 | 0.011463 | 0.011665 | 0.011368 | 0.011530 | 0.011497 |
| 0.011429 | 0.011597 | 0.011451 | 0.011266 | 0.011312 | 0.011329 | 0.011399 |
| 0.011497 | 0.011398 | 0.011534 | 0.011602 | 0.011530 | 0.011598 | 0.011704 |
| 0.011433 | 0.011603 | 0.011534 | 0.011466 | 0.011733 | 0.011195 | 0.011397 |
| 0.011362 | 0.011295 | 0.011195 | 0.011195 | 0.011262 | 0.011262 | 0.011329 |
| 0.011262 | 0.011329 | 0.011228 | 0.011329 | 0.011262 | 0.011262 | 0.011329 |
| 0.011262 | 0.011698 | 0.011597 | 0.011631 | 0.011161 | 0.011262 | 0.011295 |
| 0.011295 | 0.011262 | 0.011329 | 0.011362 | 0.011228 | 0.011228 | 0.011228 |
| 0.011765 | 0.011396 | 0.011396 | 0.011195 | 0.011295 | 0.011463 | 0.011228 |
| 0.011228 | 0.011295 | 0.011262 | 0.011430 | 0.011228 | 0.011362 | 0.011497 |
| 0.011429 | 0.011262 | 0.011262 | 0.011195 | 0.011195 | 0.011362 | 0.011295 |
| 0.011195 | 0.011295 | 0.011161 | 0.011195 | 0.011329 | 0.011463 | 0.011228 |
| 0.011195 | 0.011329 | 0.011262 | 0.011161 | 0.011497 | 0.011161 | 0.011329 |
| 0.011403 | 0.011228 | 0.011530 | 0.011362 | 0.011396 | 0.011262 | 0.011362 |
| 0.011228 | 0.011564 | 0.011161 | 0.011430 | 0.011228 | 0.011228 | 0.011161 |
| 0.011396 | 0.011564 | 0.011295 | 0.011362 | 0.011195 | 0.011597 | 0.011228 |
| 0.011228 | 0.011228 | 0.011262 | 0.011362 | 0.011262 | 0.011362 | 0.011429 |
| 0.011430 | 0.011396 | 0.011295 | 0.011396 | 0.011362 | 0.011228 | 0.011195 |
| 0.011228 | 0.011228 | 0.011295 | 0.011228 | 0.011195 | 0.011362 | 0.011228 |
| 0.011262 | 0.011262 | 0.011396 | 0.011429 | 0.011329 | 0.011262 | 0.011262 |
| 0.011329 | 0.011262 | 0.011362 | 0.011228 | 0.011362 | 0.011463 | 0.011765 |
| 0.011262 | 0.011665 | 0.011233 | 0.017747 | 0.011191 | 0.011305 | 0.011583 |
| 0.011545 | 0.011588 | 0.011217 | 0.011234 | 0.011609 | 0.011612 | 0.011242 |
| 0.011487 | 0.011426 | 0.011138 | 0.011144 | 0.011216 | 0.011208 | 0.011189 |
| 0.011482 | 0.011395 | 0.011394 | 0.011259 | 0.011396 | 0.011430 | 0.011432 |
| 0.011301 | 0.011396 | 0.011396 | 0.011362 | 0.011329 | 0.011329 | 0.011295 |
| 0.011329 | 0.011262 | 0.011295 | 0.011329 | 0.011295 | 0.011228 | 0.011262 |
| 0.011262 | 0.011329 | 0.011228 | 0.011329 | 0.011362 | 0.011396 | 0.011295 |
| 0.011329 | 0.011295 | 0.011631 | 0.011631 | 0.011362 | 0.011396 | 0.011430 |
| 0.011195 | 0.011195 | 0.011228 | 0.011329 | 0.011195 | 0.011429 | 0.011429 |
| 0.011463 | 0.011463 | 0.011396 | 0.011497 | 0.011665 | 0.011498 | 0.011329 |
| 0.011329 | 0.011396 | 0.011429 | 0.011262 | 0.011329 | 0.011295 | 0.011329 |
| 0.011396 | 0.011396 | 0.011429 | 0.011396 | 0.011296 | 0.011497 | 0.011463 |

|          |          |          |          |          |          |          |
|----------|----------|----------|----------|----------|----------|----------|
| 0.011331 | 0.011228 | 0.011329 | 0.011430 | 0.011329 | 0.011463 | 0.011497 |
| 0.011665 | 0.011368 | 0.011530 | 0.011497 | 0.011429 | 0.011597 | 0.011228 |
| 0.011397 | 0.011295 | 0.011262 | 0.011262 | 0.011329 | 0.011228 | 0.011329 |
| 0.011362 | 0.011396 | 0.011295 | 0.011329 | 0.011295 | 0.011631 | 0.011631 |
| 0.011362 | 0.011396 | 0.011463 | 0.011396 | 0.012036 | 0.011417 | 0.011342 |
| 0.011412 | 0.011407 | 0.011482 | 0.011372 | 0.011515 | 0.011440 | 0.011405 |
| 0.011988 | 0.011303 | 0.011437 | 0.011372 | 0.011646 | 0.011502 | 0.011605 |
| 0.012012 | 0.011437 | 0.011365 | 0.011329 | 0.011362 | 0.011362 | 0.011331 |
| 0.011195 | 0.011228 | 0.011362 | 0.011329 | 0.011331 | 0.011463 | 0.011431 |
| 0.011295 | 0.011228 | 0.011262 | 0.011295 | 0.011195 | 0.011262 | 0.011161 |
| 0.011295 | 0.011329 | 0.011228 | 0.011195 | 0.011295 | 0.011228 | 0.011262 |
| 0.011262 | 0.011195 | 0.011262 | 0.011295 | 0.011195 | 0.011396 | 0.011429 |
| 0.011329 | 0.011396 | 0.011329 | 0.011329 | 0.011262 | 0.011665 | 0.011295 |
| 0.011304 | 0.011262 | 0.011497 | 0.011501 | 0.011362 | 0.011362 | 0.011362 |
| 0.011362 | 0.011295 | 0.011262 | 0.011295 | 0.011396 | 0.011396 | 0.011329 |
| 0.011329 | 0.011463 | 0.011631 | 0.011362 | 0.011564 | 0.011564 | 0.011429 |
| 0.011262 | 0.011329 | 0.011362 | 0.011765 | 0.011329 | 0.011362 | 0.011329 |
| 0.011362 | 0.011295 | 0.011295 | 0.011598 | 0.011530 | 0.011564 | 0.011295 |
| 0.011396 | 0.011463 | 0.011329 | 0.011396 | 0.011362 | 0.011228 | 0.011564 |
| 0.011329 | 0.011295 | 0.011295 | 0.011463 | 0.011295 | 0.011396 | 0.011631 |
| 0.011329 | 0.011705 | 0.011698 | 0.011467 | 0.011173 | 0.011400 | 0.011215 |
| 0.011115 | 0.011683 | 0.011201 | 0.011417 | 0.011207 | 0.011366 | 0.011379 |
| 0.011417 | 0.011126 | 0.011339 | 0.011126 | 0.011168 | 0.011261 | 0.011344 |
| 0.011362 | 0.011257 | 0.011342 | 0.011272 | 0.011330 | 0.011463 | 0.011530 |
| 0.011530 | 0.011396 | 0.011500 | 0.011467 | 0.011636 | 0.011661 | 0.011329 |
| 0.011564 | 0.011430 | 0.011295 | 0.011396 | 0.011195 | 0.011429 | 0.011228 |
| 0.011295 | 0.011295 | 0.000000 | 0.011228 | 0.011262 | 0.011228 | 0.011329 |
| 0.011305 | 0.011305 | 0.011300 | 0.011334 | 0.011471 | 0.011436 | 0.011436 |
| 0.011435 | 0.011363 | 0.011171 | 0.011168 | 0.011297 | 0.011467 | 0.011467 |
| 0.011262 | 0.011331 | 0.011565 | 0.011533 | 0.011464 | 0.011498 | 0.011429 |
| 0.011362 | 0.011429 | 0.011429 | 0.011329 | 0.011900 | 0.011497 | 0.011564 |
| 0.011597 | 0.011666 | 0.011299 | 0.011372 | 0.011262 | 0.011463 | 0.011430 |
| 0.011464 | 0.011497 | 0.011497 | 0.011497 | 0.011650 | 0.011631 | 0.011268 |
| 0.011162 | 0.011164 | 0.011265 | 0.011230 | 0.011334 | 0.011135 | 0.011502 |
| 0.011300 | 0.011367 | 0.011156 | 0.011285 | 0.011296 | 0.011368 | 0.011262 |
| 0.011228 | 0.011228 | 0.011295 | 0.011262 | 0.011463 | 0.011429 | 0.011362 |
| 0.011463 | 0.011530 | 0.011262 | 0.011262 | 0.011295 | 0.011295 | 0.011297 |
| 0.011364 | 0.011295 | 0.011295 | 0.011330 | 0.011463 | 0.011530 | 0.011530 |
| 0.011396 | 0.011500 | 0.011467 | 0.011636 | 0.011661 | 0.011329 | 0.011497 |
| 0.011430 | 0.011430 | 0.011263 | 0.011443 | 0.011338 | 0.011401 | 0.011200 |
| 0.011439 | 0.011607 | 0.011441 | 0.011332 | 0.011228 | 0.011430 | 0.011295 |
| 0.011396 | 0.011329 | 0.011228 | 0.011330 | 0.011430 | 0.011432 | 0.011329 |
| 0.011228 | 0.011161 | 0.011295 | 0.011228 | 0.011161 | 0.011264 | 0.011430 |
| 0.011329 | 0.011262 | 0.011295 | 0.011329 | 0.011295 | 0.011228 | 0.011430 |
| 0.011228 | 0.011329 | 0.011329 | 0.011262 | 0.011329 | 0.011564 | 0.011228 |
| 0.011262 | 0.011665 | 0.011262 | 0.011295 | 0.011262 | 0.011631 | 0.011189 |
| 0.011622 | 0.011188 | 0.011211 | 0.011422 | 0.011508 | 0.011419 | 0.011144 |
| 0.011218 | 0.011429 | 0.011530 | 0.011603 | 0.011498 | 0.011601 | 0.011766 |
| 0.011666 | 0.011703 | 0.011665 | 0.011880 | 0.011631 | 0.012506 | 0.011666 |
| 0.012405 | 0.012173 | 0.012307 | 0.012578 | 0.011631 | 0.011329 | 0.011631 |
| 0.012070 | 0.011971 | 0.011597 | 0.011497 | 0.011564 | 0.011564 | 0.011534 |
| 0.011429 | 0.011399 | 0.011497 | 0.011464 | 0.011833 | 0.011900 | 0.011901 |
| 0.011800 | 0.011901 | 0.012004 | 0.011737 | 0.012070 | 0.012076 | 0.012137 |
| 0.012138 | 0.012172 | 0.012084 | 0.012138 | 0.012139 | 0.011362 | 0.011665 |
| 0.011733 | 0.012236 | 0.011738 | 0.011967 | 0.012440 | 0.011502 | 0.011396 |
| 0.011362 | 0.011362 | 0.011833 | 0.011842 | 0.011975 | 0.011698 | 0.011363 |
| s178     | 0.011597 | 0.011597 | 0.011933 | 0.011698 | 0.011698 | 0.011765 |
| 0.011603 | 0.011536 | 0.011765 | 0.011195 | 0.011262 | 0.011228 | 0.011194 |
| 0.011228 | 0.011396 | 0.011194 | 0.011228 | 0.011295 | 0.011262 | 0.011228 |
| 0.011194 | 0.011228 | 0.011329 | 0.011195 | 0.011228 | 0.011228 | 0.011569 |



|          |          |          |          |          |          |          |
|----------|----------|----------|----------|----------|----------|----------|
| 0.011463 | 0.011228 | 0.011127 | 0.011362 | 0.011295 | 0.011262 | 0.011295 |
| 0.011262 | 0.011362 | 0.011262 | 0.011262 | 0.011295 | 0.011262 | 0.011429 |
| 0.011194 | 0.011262 | 0.011295 | 0.011228 | 0.011329 | 0.011362 | 0.011295 |
| 0.011262 | 0.011429 | 0.011329 | 0.011597 | 0.011262 | 0.011530 | 0.011262 |
| 0.011228 | 0.011329 | 0.011396 | 0.011530 | 0.011631 | 0.011329 | 0.011429 |
| 0.011295 | 0.011362 | 0.011262 | 0.011496 | 0.011732 | 0.011262 | 0.011329 |
| 0.011228 | 0.011329 | 0.011295 | 0.011362 | 0.011295 | 0.011295 | 0.011295 |
| 0.011194 | 0.011228 | 0.011195 | 0.011295 | 0.011262 | 0.011296 | 0.011362 |
| 0.011295 | 0.011262 | 0.011329 | 0.011228 | 0.011362 | 0.011195 | 0.011262 |
| 0.011429 | 0.011362 | 0.011597 | 0.011429 | 0.011262 | 0.011497 | 0.011262 |
| 0.011431 | 0.011658 | 0.011475 | 0.011177 | 0.011172 | 0.011281 | 0.011375 |
| 0.012011 | 0.011467 | 0.011184 | 0.011496 | 0.011496 | 0.011295 | 0.011396 |
| 0.011329 | 0.011295 | 0.011362 | 0.011262 | 0.011362 | 0.011295 | 0.011295 |
| 0.011262 | 0.011362 | 0.011564 | 0.011429 | 0.011329 | 0.011295 | 0.011228 |
| 0.011195 | 0.011195 | 0.011262 | 0.011228 | 0.011429 | 0.011396 | 0.011329 |
| 0.011429 | 0.011497 | 0.011228 | 0.011228 | 0.011262 | 0.011262 | 0.011263 |
| 0.011331 | 0.011262 | 0.011262 | 0.011132 | 0.011205 | 0.011165 | 0.011262 |
| 0.011263 | 0.011198 | 0.011245 | 0.011233 | 0.011162 | 0.011197 | 0.011229 |
| 0.011492 | 0.011267 | 0.011301 | 0.011195 | 0.011199 | 0.011329 | 0.011296 |
| 0.011363 | 0.011296 | 0.011296 | 0.011396 | 0.011329 | 0.011698 | 0.011497 |
| 0.011530 | 0.011396 | 0.011262 | 0.011362 | 0.011094 | 0.011396 | 0.011195 |
| 0.011262 | 0.011262 | 0.011228 | 0.000000 | 0.011228 | 0.011127 | 0.011295 |
| 0.011262 | 0.011362 | 0.011295 | 0.011195 | 0.011296 | 0.011396 | 0.011398 |
| 0.011396 | 0.011295 | 0.011195 | 0.011128 | 0.011262 | 0.011195 | 0.011127 |
| 0.011230 | 0.011396 | 0.011195 | 0.011396 | 0.011161 | 0.011262 | 0.011228 |
| 0.011329 | 0.011228 | 0.011262 | 0.011228 | 0.011262 | 0.011127 | 0.011262 |
| 0.011295 | 0.011228 | 0.011295 | 0.011228 | 0.011262 | 0.011295 | 0.011530 |
| 0.011631 | 0.011564 | 0.011631 | 0.011397 | 0.011631 | 0.011262 | 0.011228 |
| 0.011263 | 0.011545 | 0.011380 | 0.011163 | 0.011637 | 0.011129 | 0.011257 |
| 0.011637 | 0.011536 | 0.011429 | 0.011631 | 0.011333 | 0.011497 | 0.011463 |
| 0.011396 | 0.011564 | 0.011415 | 0.011266 | 0.011312 | 0.011295 | 0.011365 |
| 0.011463 | 0.011364 | 0.011500 | 0.011568 | 0.011497 | 0.011564 | 0.011670 |
| 0.011399 | 0.011569 | 0.011500 | 0.011432 | 0.011699 | 0.011161 | 0.011363 |
| 0.011329 | 0.011262 | 0.011161 | 0.011161 | 0.011228 | 0.011228 | 0.011295 |
| 0.011228 | 0.011295 | 0.011195 | 0.011295 | 0.011228 | 0.011228 | 0.011295 |
| 0.011228 | 0.011664 | 0.011564 | 0.011597 | 0.011127 | 0.011228 | 0.011262 |
| 0.011262 | 0.011228 | 0.011295 | 0.011329 | 0.011194 | 0.011194 | 0.011194 |
| 0.011732 | 0.011362 | 0.011362 | 0.011161 | 0.011262 | 0.011429 | 0.011195 |
| 0.011194 | 0.011262 | 0.011228 | 0.011396 | 0.011194 | 0.011329 | 0.011463 |
| 0.011396 | 0.011228 | 0.011228 | 0.011161 | 0.011161 | 0.011329 | 0.011262 |
| 0.011161 | 0.011262 | 0.011127 | 0.011161 | 0.011295 | 0.011430 | 0.011195 |
| 0.011161 | 0.011295 | 0.011228 | 0.011127 | 0.011463 | 0.011127 | 0.011295 |
| 0.011368 | 0.011195 | 0.011497 | 0.011329 | 0.011362 | 0.011228 | 0.011329 |
| 0.011194 | 0.011530 | 0.011127 | 0.011396 | 0.011195 | 0.011195 | 0.011127 |
| 0.011362 | 0.011564 | 0.011262 | 0.011329 | 0.011161 | 0.011564 | 0.011195 |
| 0.011195 | 0.011194 | 0.011228 | 0.011329 | 0.011228 | 0.011329 | 0.011396 |
| 0.011396 | 0.011362 | 0.011262 | 0.011362 | 0.011329 | 0.011195 | 0.011161 |
| 0.011194 | 0.011195 | 0.011262 | 0.011194 | 0.011161 | 0.011329 | 0.011194 |
| 0.011228 | 0.011228 | 0.011362 | 0.011396 | 0.011295 | 0.011228 | 0.011228 |
| 0.011295 | 0.011228 | 0.011329 | 0.011194 | 0.011329 | 0.011429 | 0.011732 |
| 0.011228 | 0.011631 | 0.011233 | 0.017747 | 0.011257 | 0.011427 | 0.011583 |
| 0.011545 | 0.011588 | 0.011322 | 0.011292 | 0.011719 | 0.011612 | 0.011364 |
| 0.011487 | 0.011549 | 0.011138 | 0.011228 | 0.011216 | 0.011307 | 0.011232 |
| 0.011482 | 0.011395 | 0.011394 | 0.011193 | 0.011362 | 0.011396 | 0.011398 |
| 0.011266 | 0.011362 | 0.011362 | 0.011329 | 0.011295 | 0.011295 | 0.011262 |
| 0.011295 | 0.011228 | 0.011262 | 0.011295 | 0.011262 | 0.011195 | 0.011228 |
| 0.011228 | 0.011295 | 0.011195 | 0.011295 | 0.011329 | 0.011362 | 0.011262 |
| 0.011295 | 0.011262 | 0.011597 | 0.011597 | 0.011329 | 0.011363 | 0.011396 |
| 0.011161 | 0.011161 | 0.011195 | 0.011295 | 0.011161 | 0.011396 | 0.011396 |
| 0.011429 | 0.011429 | 0.011362 | 0.011463 | 0.011631 | 0.011464 | 0.011295 |

|          |          |          |          |          |          |          |
|----------|----------|----------|----------|----------|----------|----------|
| 0.011295 | 0.011362 | 0.011396 | 0.011228 | 0.011295 | 0.011262 | 0.011295 |
| 0.011363 | 0.011362 | 0.011396 | 0.011363 | 0.011262 | 0.011463 | 0.011429 |
| 0.011297 | 0.011195 | 0.011295 | 0.011396 | 0.011295 | 0.011430 | 0.011463 |
| 0.011631 | 0.011333 | 0.011497 | 0.011463 | 0.011396 | 0.011564 | 0.011195 |
| 0.011363 | 0.011262 | 0.011228 | 0.011228 | 0.011295 | 0.011195 | 0.011295 |
| 0.011329 | 0.011362 | 0.011262 | 0.011295 | 0.011262 | 0.011597 | 0.011597 |
| 0.011329 | 0.011363 | 0.011429 | 0.011362 | 0.012002 | 0.011417 | 0.011342 |
| 0.011412 | 0.011372 | 0.011482 | 0.011372 | 0.011480 | 0.011405 | 0.011370 |
| 0.011953 | 0.011268 | 0.011403 | 0.011337 | 0.011611 | 0.011468 | 0.011571 |
| 0.011978 | 0.011437 | 0.011398 | 0.011463 | 0.011329 | 0.011329 | 0.011364 |
| 0.011161 | 0.011195 | 0.011329 | 0.011295 | 0.011297 | 0.011429 | 0.011397 |
| 0.011262 | 0.011194 | 0.011228 | 0.011262 | 0.011161 | 0.011228 | 0.011127 |
| 0.011262 | 0.011295 | 0.011195 | 0.011161 | 0.011262 | 0.011194 | 0.011228 |
| 0.011228 | 0.011161 | 0.011228 | 0.011262 | 0.011161 | 0.011362 | 0.011396 |
| 0.011295 | 0.011362 | 0.011295 | 0.011295 | 0.011228 | 0.011631 | 0.011262 |
| 0.011304 | 0.011228 | 0.011463 | 0.011467 | 0.011329 | 0.011329 | 0.011329 |
| 0.011329 | 0.011262 | 0.011228 | 0.011262 | 0.011362 | 0.011362 | 0.011295 |
| 0.011295 | 0.011429 | 0.011597 | 0.011329 | 0.011530 | 0.011530 | 0.011396 |
| 0.011228 | 0.011295 | 0.011329 | 0.011732 | 0.011295 | 0.011329 | 0.011295 |
| 0.011329 | 0.011262 | 0.011262 | 0.011564 | 0.011497 | 0.011530 | 0.011194 |
| 0.011295 | 0.011429 | 0.011295 | 0.011295 | 0.011329 | 0.011195 | 0.011530 |
| 0.011295 | 0.011262 | 0.011262 | 0.011429 | 0.011194 | 0.011362 | 0.011597 |
| 0.011295 | 0.011671 | 0.011664 | 0.011467 | 0.011229 | 0.011366 | 0.011267 |
| 0.011225 | 0.011683 | 0.011201 | 0.011417 | 0.011255 | 0.011366 | 0.011379 |
| 0.011468 | 0.011192 | 0.011339 | 0.011192 | 0.011222 | 0.011395 | 0.011344 |
| 0.011362 | 0.011257 | 0.011342 | 0.011272 | 0.011296 | 0.011429 | 0.011497 |
| 0.011497 | 0.011363 | 0.011466 | 0.011467 | 0.011603 | 0.011625 | 0.011295 |
| 0.011530 | 0.011396 | 0.011262 | 0.011362 | 0.011094 | 0.011396 | 0.011195 |
| 0.011262 | 0.011262 | 0.011228 | 0.000000 | 0.011228 | 0.011127 | 0.011295 |
| 0.011270 | 0.011270 | 0.011266 | 0.011300 | 0.011436 | 0.011402 | 0.011402 |
| 0.011401 | 0.011329 | 0.011134 | 0.011132 | 0.011263 | 0.011433 | 0.011433 |
| 0.011228 | 0.011297 | 0.011531 | 0.011500 | 0.011430 | 0.011464 | 0.011396 |
| 0.011329 | 0.011396 | 0.011396 | 0.011295 | 0.011799 | 0.011463 | 0.011530 |
| 0.011564 | 0.011630 | 0.011265 | 0.011337 | 0.011228 | 0.011429 | 0.011396 |
| 0.011430 | 0.011463 | 0.011463 | 0.011463 | 0.011610 | 0.011597 | 0.011234 |
| 0.011128 | 0.011130 | 0.011230 | 0.011196 | 0.011299 | 0.011135 | 0.011468 |
| 0.011266 | 0.011367 | 0.011156 | 0.011285 | 0.011262 | 0.011334 | 0.011228 |
| 0.011195 | 0.011195 | 0.011262 | 0.011228 | 0.011429 | 0.011396 | 0.011329 |
| 0.011429 | 0.011497 | 0.011228 | 0.011228 | 0.011262 | 0.011262 | 0.011263 |
| 0.011331 | 0.011262 | 0.011262 | 0.011296 | 0.011429 | 0.011497 | 0.011497 |
| 0.011363 | 0.011466 | 0.011467 | 0.011603 | 0.011625 | 0.011295 | 0.011463 |
| 0.011396 | 0.011396 | 0.011229 | 0.011408 | 0.011338 | 0.011367 | 0.011235 |
| 0.011404 | 0.011607 | 0.011399 | 0.011298 | 0.011195 | 0.011396 | 0.011262 |
| 0.011362 | 0.011295 | 0.011195 | 0.011296 | 0.011396 | 0.011398 | 0.011295 |
| 0.011195 | 0.011128 | 0.011262 | 0.011195 | 0.011127 | 0.011230 | 0.011396 |
| 0.011295 | 0.011228 | 0.011262 | 0.011295 | 0.011262 | 0.011195 | 0.011396 |
| 0.011262 | 0.011295 | 0.011295 | 0.011228 | 0.011295 | 0.011463 | 0.011194 |
| 0.011228 | 0.011631 | 0.011228 | 0.011262 | 0.011228 | 0.011597 | 0.011189 |
| 0.011678 | 0.011188 | 0.011261 | 0.011422 | 0.011508 | 0.011419 | 0.011144 |
| 0.011218 | 0.011396 | 0.011497 | 0.011603 | 0.011464 | 0.011601 | 0.011733 |
| 0.011632 | 0.011669 | 0.011631 | 0.011880 | 0.011597 | 0.012472 | 0.011633 |
| 0.012372 | 0.012139 | 0.012273 | 0.012545 | 0.011597 | 0.011295 | 0.011598 |
| 0.012036 | 0.011971 | 0.011564 | 0.011463 | 0.011531 | 0.011531 | 0.011500 |
| 0.011396 | 0.011399 | 0.011463 | 0.011430 | 0.011800 | 0.011866 | 0.011867 |
| 0.011767 | 0.011867 | 0.011970 | 0.011737 | 0.012036 | 0.012042 | 0.012103 |
| 0.012104 | 0.012138 | 0.012084 | 0.012104 | 0.012105 | 0.011329 | 0.011631 |
| 0.011699 | 0.012202 | 0.011704 | 0.011934 | 0.012406 | 0.011468 | 0.011363 |
| 0.011329 | 0.011329 | 0.011799 | 0.011842 | 0.011940 | 0.011664 | 0.011330 |
| s179     | 0.011631 | 0.011631 | 0.011967 | 0.011731 | 0.011731 | 0.011799 |
| 0.011637 | 0.011569 | 0.011799 | 0.011228 | 0.011295 | 0.011262 | 0.011228 |

|          |          |          |          |          |          |          |
|----------|----------|----------|----------|----------|----------|----------|
| 0.011262 | 0.011429 | 0.011228 | 0.011262 | 0.011329 | 0.011295 | 0.011262 |
| 0.011228 | 0.011262 | 0.011362 | 0.011228 | 0.011262 | 0.011262 | 0.011603 |
| 0.011496 | 0.011262 | 0.011161 | 0.011396 | 0.011329 | 0.011295 | 0.011329 |
| 0.011295 | 0.011396 | 0.011295 | 0.011295 | 0.011329 | 0.011295 | 0.011463 |
| 0.011228 | 0.011295 | 0.011329 | 0.011262 | 0.011362 | 0.011396 | 0.011329 |
| 0.011295 | 0.011463 | 0.011362 | 0.011631 | 0.011295 | 0.011564 | 0.011295 |
| 0.011262 | 0.011362 | 0.011429 | 0.011564 | 0.011664 | 0.011362 | 0.011463 |
| 0.011329 | 0.011396 | 0.011295 | 0.011530 | 0.011765 | 0.011295 | 0.011362 |
| 0.011262 | 0.011362 | 0.011329 | 0.011396 | 0.011329 | 0.011329 | 0.011329 |
| 0.011228 | 0.011262 | 0.011228 | 0.011329 | 0.011295 | 0.011329 | 0.011396 |
| 0.011329 | 0.011295 | 0.011362 | 0.011262 | 0.011396 | 0.011228 | 0.011295 |
| 0.011463 | 0.011396 | 0.011631 | 0.011463 | 0.011295 | 0.011530 | 0.011295 |
| 0.011431 | 0.011658 | 0.011475 | 0.011177 | 0.011172 | 0.011281 | 0.011375 |
| 0.012011 | 0.011467 | 0.011184 | 0.011530 | 0.011530 | 0.011329 | 0.011429 |
| 0.011362 | 0.011329 | 0.011396 | 0.011295 | 0.011396 | 0.011329 | 0.011329 |
| 0.011295 | 0.011396 | 0.011597 | 0.011463 | 0.011362 | 0.011329 | 0.011262 |
| 0.011228 | 0.011228 | 0.011295 | 0.011262 | 0.011463 | 0.011429 | 0.011362 |
| 0.011463 | 0.011530 | 0.011262 | 0.011262 | 0.011295 | 0.011295 | 0.011297 |
| 0.011364 | 0.011295 | 0.011295 | 0.011132 | 0.011205 | 0.011200 | 0.011296 |
| 0.011297 | 0.011198 | 0.011245 | 0.011267 | 0.011196 | 0.011231 | 0.011263 |
| 0.011528 | 0.011301 | 0.011336 | 0.011228 | 0.011233 | 0.011363 | 0.011329 |
| 0.011396 | 0.011330 | 0.011329 | 0.011429 | 0.011362 | 0.011732 | 0.011530 |
| 0.011564 | 0.011430 | 0.011295 | 0.011396 | 0.011195 | 0.011429 | 0.011228 |
| 0.011295 | 0.011295 | 0.011262 | 0.011228 | 0.000000 | 0.011228 | 0.011329 |
| 0.011295 | 0.011396 | 0.011329 | 0.011228 | 0.011330 | 0.011430 | 0.011432 |
| 0.011430 | 0.011329 | 0.011228 | 0.011161 | 0.011295 | 0.011228 | 0.011161 |
| 0.011264 | 0.011430 | 0.011228 | 0.011430 | 0.011195 | 0.011295 | 0.011262 |
| 0.011362 | 0.011262 | 0.011295 | 0.011262 | 0.011295 | 0.011161 | 0.011295 |
| 0.011329 | 0.011262 | 0.011329 | 0.011262 | 0.011295 | 0.011329 | 0.011564 |
| 0.011664 | 0.011597 | 0.011665 | 0.011431 | 0.011665 | 0.011295 | 0.011262 |
| 0.011297 | 0.011586 | 0.011426 | 0.011197 | 0.011671 | 0.011163 | 0.011296 |
| 0.011671 | 0.011570 | 0.011463 | 0.011664 | 0.011367 | 0.011530 | 0.011497 |
| 0.011429 | 0.011597 | 0.011451 | 0.011307 | 0.011354 | 0.011329 | 0.011398 |
| 0.011497 | 0.011397 | 0.011533 | 0.011601 | 0.011530 | 0.011597 | 0.011704 |
| 0.011432 | 0.011603 | 0.011534 | 0.011466 | 0.011733 | 0.011194 | 0.011397 |
| 0.011362 | 0.011295 | 0.011194 | 0.011194 | 0.011262 | 0.011262 | 0.011329 |
| 0.011262 | 0.011329 | 0.011228 | 0.011329 | 0.011262 | 0.011262 | 0.011329 |
| 0.011262 | 0.011698 | 0.011597 | 0.011631 | 0.011161 | 0.011262 | 0.011295 |
| 0.011295 | 0.011262 | 0.011329 | 0.011362 | 0.011228 | 0.011228 | 0.011228 |
| 0.011765 | 0.011396 | 0.011396 | 0.011194 | 0.011295 | 0.011463 | 0.011161 |
| 0.011228 | 0.011295 | 0.011262 | 0.011429 | 0.011228 | 0.011362 | 0.011496 |
| 0.011429 | 0.011262 | 0.011262 | 0.011194 | 0.011194 | 0.011362 | 0.011295 |
| 0.011194 | 0.011295 | 0.011161 | 0.011194 | 0.011329 | 0.011463 | 0.011228 |
| 0.011195 | 0.011329 | 0.011262 | 0.011161 | 0.011496 | 0.011161 | 0.011329 |
| 0.011402 | 0.011228 | 0.011530 | 0.011362 | 0.011396 | 0.011262 | 0.011362 |
| 0.011228 | 0.011564 | 0.011161 | 0.011429 | 0.011228 | 0.011228 | 0.011161 |
| 0.011396 | 0.011597 | 0.011295 | 0.011362 | 0.011194 | 0.011597 | 0.011228 |
| 0.011228 | 0.011228 | 0.011262 | 0.011362 | 0.011262 | 0.011362 | 0.011429 |
| 0.011429 | 0.011396 | 0.011295 | 0.011396 | 0.011362 | 0.011228 | 0.011194 |
| 0.011228 | 0.011228 | 0.011295 | 0.011228 | 0.011194 | 0.011362 | 0.011228 |
| 0.011262 | 0.011262 | 0.011396 | 0.011429 | 0.011329 | 0.011262 | 0.011262 |
| 0.011329 | 0.011262 | 0.011362 | 0.011228 | 0.011362 | 0.011463 | 0.011765 |
| 0.011262 | 0.011664 | 0.011233 | 0.017747 | 0.011257 | 0.011427 | 0.011583 |
| 0.011579 | 0.011588 | 0.011322 | 0.011292 | 0.011719 | 0.011647 | 0.011364 |
| 0.011487 | 0.011548 | 0.011138 | 0.011228 | 0.011216 | 0.011307 | 0.011232 |
| 0.011482 | 0.011395 | 0.011394 | 0.011193 | 0.011396 | 0.011429 | 0.011432 |
| 0.011301 | 0.011396 | 0.011396 | 0.011362 | 0.011329 | 0.011329 | 0.011295 |
| 0.011329 | 0.011262 | 0.011295 | 0.011329 | 0.011295 | 0.011228 | 0.011262 |
| 0.011262 | 0.011329 | 0.011228 | 0.011329 | 0.011362 | 0.011396 | 0.011295 |
| 0.011329 | 0.011295 | 0.011631 | 0.011631 | 0.011362 | 0.011396 | 0.011430 |

|          |          |          |          |          |          |          |
|----------|----------|----------|----------|----------|----------|----------|
| 0.011195 | 0.011195 | 0.011228 | 0.011329 | 0.011195 | 0.011429 | 0.011429 |
| 0.011463 | 0.011463 | 0.011396 | 0.011497 | 0.011665 | 0.011498 | 0.011329 |
| 0.011329 | 0.011396 | 0.011429 | 0.011262 | 0.011329 | 0.011295 | 0.011329 |
| 0.011396 | 0.011396 | 0.011429 | 0.011396 | 0.011296 | 0.011497 | 0.011463 |
| 0.011331 | 0.011228 | 0.011329 | 0.011430 | 0.011329 | 0.011463 | 0.011496 |
| 0.011664 | 0.011367 | 0.011530 | 0.011497 | 0.011429 | 0.011597 | 0.011228 |
| 0.011397 | 0.011295 | 0.011262 | 0.011262 | 0.011329 | 0.011228 | 0.011329 |
| 0.011362 | 0.011396 | 0.011295 | 0.011329 | 0.011295 | 0.011631 | 0.011631 |
| 0.011362 | 0.011396 | 0.011463 | 0.011396 | 0.012035 | 0.011453 | 0.011377 |
| 0.011447 | 0.011407 | 0.011517 | 0.011406 | 0.011515 | 0.011439 | 0.011405 |
| 0.011987 | 0.011302 | 0.011437 | 0.011371 | 0.011645 | 0.011502 | 0.011604 |
| 0.012012 | 0.011475 | 0.011567 | 0.011631 | 0.011496 | 0.011496 | 0.011533 |
| 0.011194 | 0.011362 | 0.011496 | 0.011463 | 0.011466 | 0.011463 | 0.011431 |
| 0.011295 | 0.011228 | 0.011262 | 0.011295 | 0.011194 | 0.011262 | 0.011161 |
| 0.011295 | 0.011329 | 0.011228 | 0.011194 | 0.011295 | 0.011228 | 0.011262 |
| 0.011262 | 0.011194 | 0.011262 | 0.011295 | 0.011194 | 0.011396 | 0.011429 |
| 0.011329 | 0.011396 | 0.011329 | 0.011329 | 0.011262 | 0.011664 | 0.011295 |
| 0.011338 | 0.011262 | 0.011497 | 0.011501 | 0.011362 | 0.011362 | 0.011362 |
| 0.011362 | 0.011295 | 0.011262 | 0.011295 | 0.011396 | 0.011396 | 0.011329 |
| 0.011329 | 0.011463 | 0.011631 | 0.011362 | 0.011564 | 0.011564 | 0.011429 |
| 0.011262 | 0.011329 | 0.011362 | 0.011765 | 0.011329 | 0.011362 | 0.011329 |
| 0.011362 | 0.011295 | 0.011295 | 0.011597 | 0.011530 | 0.011564 | 0.011295 |
| 0.011396 | 0.011463 | 0.011329 | 0.011396 | 0.011362 | 0.011228 | 0.011564 |
| 0.011329 | 0.011228 | 0.011295 | 0.011463 | 0.011295 | 0.011396 | 0.011631 |
| 0.011329 | 0.011705 | 0.011698 | 0.011467 | 0.011229 | 0.011400 | 0.011267 |
| 0.011225 | 0.011683 | 0.011201 | 0.011417 | 0.011255 | 0.011366 | 0.011379 |
| 0.011468 | 0.011192 | 0.011338 | 0.011192 | 0.011222 | 0.011395 | 0.011344 |
| 0.011362 | 0.011257 | 0.011342 | 0.011272 | 0.011330 | 0.011463 | 0.011530 |
| 0.011530 | 0.011396 | 0.011500 | 0.011501 | 0.011636 | 0.011661 | 0.011329 |
| 0.011564 | 0.011430 | 0.011295 | 0.011396 | 0.011195 | 0.011429 | 0.011228 |
| 0.011295 | 0.011295 | 0.011262 | 0.011228 | 0.000000 | 0.011228 | 0.011329 |
| 0.011305 | 0.011305 | 0.011300 | 0.011334 | 0.011471 | 0.011436 | 0.011436 |
| 0.011435 | 0.011363 | 0.011171 | 0.011168 | 0.011297 | 0.011467 | 0.011467 |
| 0.011262 | 0.011331 | 0.011565 | 0.011533 | 0.011464 | 0.011498 | 0.011429 |
| 0.011362 | 0.011429 | 0.011429 | 0.011329 | 0.011900 | 0.011496 | 0.011564 |
| 0.011597 | 0.011665 | 0.011299 | 0.011372 | 0.011262 | 0.011463 | 0.011429 |
| 0.011464 | 0.011496 | 0.011496 | 0.011496 | 0.011650 | 0.011631 | 0.011268 |
| 0.011162 | 0.011164 | 0.011264 | 0.011230 | 0.011333 | 0.011172 | 0.011502 |
| 0.011300 | 0.011455 | 0.011203 | 0.011322 | 0.011296 | 0.011368 | 0.011262 |
| 0.011228 | 0.011228 | 0.011295 | 0.011262 | 0.011463 | 0.011429 | 0.011362 |
| 0.011463 | 0.011530 | 0.011262 | 0.011262 | 0.011295 | 0.011295 | 0.011297 |
| 0.011364 | 0.011295 | 0.011295 | 0.011330 | 0.011463 | 0.011530 | 0.011530 |
| 0.011396 | 0.011500 | 0.011501 | 0.011636 | 0.011661 | 0.011329 | 0.011496 |
| 0.011429 | 0.011429 | 0.011263 | 0.011443 | 0.011373 | 0.011401 | 0.011270 |
| 0.011439 | 0.011652 | 0.011399 | 0.011332 | 0.011228 | 0.011430 | 0.011295 |
| 0.011396 | 0.011329 | 0.011228 | 0.011330 | 0.011430 | 0.011432 | 0.011329 |
| 0.011228 | 0.011161 | 0.011295 | 0.011228 | 0.011161 | 0.011264 | 0.011430 |
| 0.011329 | 0.011262 | 0.011295 | 0.011329 | 0.011295 | 0.011228 | 0.011430 |
| 0.011295 | 0.011329 | 0.011329 | 0.011262 | 0.011329 | 0.011564 | 0.011228 |
| 0.011262 | 0.011664 | 0.011262 | 0.011295 | 0.011262 | 0.011631 | 0.011189 |
| 0.011678 | 0.011188 | 0.011261 | 0.011422 | 0.011508 | 0.011419 | 0.011144 |
| 0.011218 | 0.011429 | 0.011530 | 0.011637 | 0.011498 | 0.011635 | 0.011766 |
| 0.011666 | 0.011703 | 0.011664 | 0.011914 | 0.011631 | 0.012438 | 0.011666 |
| 0.012405 | 0.012105 | 0.012240 | 0.012578 | 0.011631 | 0.011329 | 0.011631 |
| 0.012070 | 0.012004 | 0.011597 | 0.011497 | 0.011564 | 0.011564 | 0.011534 |
| 0.011429 | 0.011433 | 0.011496 | 0.011464 | 0.011833 | 0.011900 | 0.011901 |
| 0.011733 | 0.011901 | 0.011970 | 0.011770 | 0.012070 | 0.012076 | 0.012137 |
| 0.012138 | 0.012172 | 0.012118 | 0.012138 | 0.012139 | 0.011362 | 0.011665 |
| 0.011733 | 0.012236 | 0.011738 | 0.011967 | 0.012440 | 0.011502 | 0.011396 |
| 0.011362 | 0.011362 | 0.011833 | 0.011883 | 0.011939 | 0.011698 | 0.011363 |

|          |          |          |          |          |          |          |
|----------|----------|----------|----------|----------|----------|----------|
| S180     | 0.011597 | 0.011597 | 0.011934 | 0.011698 | 0.011698 | 0.011765 |
| 0.011604 | 0.011536 | 0.011698 | 0.011195 | 0.011262 | 0.011228 | 0.011195 |
| 0.011228 | 0.011396 | 0.011195 | 0.011228 | 0.011295 | 0.011262 | 0.011228 |
| 0.011195 | 0.011228 | 0.011329 | 0.011195 | 0.011228 | 0.011228 | 0.011570 |
| 0.011463 | 0.011228 | 0.011127 | 0.011362 | 0.011295 | 0.011262 | 0.011295 |
| 0.011262 | 0.011362 | 0.011262 | 0.011262 | 0.011295 | 0.011262 | 0.011430 |
| 0.011195 | 0.011262 | 0.011295 | 0.011228 | 0.011329 | 0.011362 | 0.011295 |
| 0.011262 | 0.011430 | 0.011329 | 0.011597 | 0.011262 | 0.011530 | 0.011262 |
| 0.011228 | 0.011329 | 0.011396 | 0.011530 | 0.011631 | 0.011329 | 0.011429 |
| 0.011295 | 0.011362 | 0.011262 | 0.011497 | 0.011732 | 0.011262 | 0.011329 |
| 0.011228 | 0.011329 | 0.011295 | 0.011362 | 0.011295 | 0.011295 | 0.011295 |
| 0.011195 | 0.011228 | 0.011195 | 0.011295 | 0.011262 | 0.011296 | 0.011362 |
| 0.011295 | 0.011262 | 0.011329 | 0.011228 | 0.011362 | 0.011195 | 0.011262 |
| 0.011429 | 0.011362 | 0.011597 | 0.011430 | 0.011262 | 0.011497 | 0.011262 |
| 0.011431 | 0.011658 | 0.011475 | 0.011177 | 0.011172 | 0.011281 | 0.011375 |
| 0.012011 | 0.011467 | 0.011184 | 0.011497 | 0.011497 | 0.011295 | 0.011396 |
| 0.011329 | 0.011295 | 0.011362 | 0.011262 | 0.011362 | 0.011295 | 0.011295 |
| 0.011262 | 0.011362 | 0.011564 | 0.011429 | 0.011329 | 0.011295 | 0.011228 |
| 0.011195 | 0.011195 | 0.011262 | 0.011228 | 0.011429 | 0.011396 | 0.011329 |
| 0.011429 | 0.011497 | 0.011228 | 0.011228 | 0.011262 | 0.011262 | 0.011263 |
| 0.011331 | 0.011262 | 0.011262 | 0.011132 | 0.011205 | 0.011165 | 0.011262 |
| 0.011263 | 0.011198 | 0.011245 | 0.011233 | 0.011162 | 0.011197 | 0.011229 |
| 0.011492 | 0.011267 | 0.011301 | 0.011195 | 0.011199 | 0.011329 | 0.011296 |
| 0.011363 | 0.011296 | 0.011296 | 0.011396 | 0.011329 | 0.011698 | 0.011497 |
| 0.011530 | 0.011396 | 0.011262 | 0.011362 | 0.011094 | 0.011396 | 0.011195 |
| 0.011262 | 0.011262 | 0.011228 | 0.011127 | 0.011228 | 0.000000 | 0.011295 |
| 0.011262 | 0.011362 | 0.011295 | 0.011195 | 0.011296 | 0.011396 | 0.011398 |
| 0.011396 | 0.011295 | 0.011195 | 0.011128 | 0.011262 | 0.011195 | 0.011127 |
| 0.011230 | 0.011396 | 0.011195 | 0.011396 | 0.011161 | 0.011262 | 0.011228 |
| 0.011329 | 0.011228 | 0.011262 | 0.011228 | 0.011262 | 0.011127 | 0.011262 |
| 0.011295 | 0.011228 | 0.011295 | 0.011228 | 0.011262 | 0.011295 | 0.011530 |
| 0.011631 | 0.011564 | 0.011631 | 0.011397 | 0.011631 | 0.011262 | 0.011228 |
| 0.011263 | 0.011545 | 0.011380 | 0.011163 | 0.011637 | 0.011129 | 0.011257 |
| 0.011637 | 0.011536 | 0.011429 | 0.011631 | 0.011333 | 0.011497 | 0.011463 |
| 0.011396 | 0.011564 | 0.011416 | 0.011266 | 0.011312 | 0.011295 | 0.011365 |
| 0.011463 | 0.011364 | 0.011500 | 0.011568 | 0.011497 | 0.011564 | 0.011670 |
| 0.011399 | 0.011569 | 0.011500 | 0.011432 | 0.011700 | 0.011161 | 0.011364 |
| 0.011329 | 0.011262 | 0.011161 | 0.011161 | 0.011228 | 0.011228 | 0.011295 |
| 0.011228 | 0.011295 | 0.011195 | 0.011295 | 0.011228 | 0.011228 | 0.011295 |
| 0.011228 | 0.011665 | 0.011564 | 0.011597 | 0.011127 | 0.011228 | 0.011262 |
| 0.011262 | 0.011228 | 0.011295 | 0.011329 | 0.011195 | 0.011195 | 0.011195 |
| 0.011665 | 0.011362 | 0.011362 | 0.011161 | 0.011262 | 0.011430 | 0.011195 |
| 0.011195 | 0.011262 | 0.011228 | 0.011396 | 0.011195 | 0.011329 | 0.011463 |
| 0.011396 | 0.011228 | 0.011228 | 0.011161 | 0.011161 | 0.011329 | 0.011262 |
| 0.011161 | 0.011262 | 0.011127 | 0.011161 | 0.011295 | 0.011430 | 0.011195 |
| 0.011161 | 0.011295 | 0.011228 | 0.011127 | 0.011463 | 0.011127 | 0.011295 |
| 0.011368 | 0.011195 | 0.011497 | 0.011329 | 0.011362 | 0.011228 | 0.011329 |
| 0.011195 | 0.011530 | 0.011127 | 0.011396 | 0.011195 | 0.011195 | 0.011127 |
| 0.011362 | 0.011564 | 0.011262 | 0.011329 | 0.011161 | 0.011564 | 0.011195 |
| 0.011195 | 0.011195 | 0.011228 | 0.011329 | 0.011228 | 0.011329 | 0.011396 |
| 0.011396 | 0.011362 | 0.011262 | 0.011362 | 0.011329 | 0.011195 | 0.011161 |
| 0.011195 | 0.011195 | 0.011262 | 0.011195 | 0.011161 | 0.011329 | 0.011195 |
| 0.011228 | 0.011228 | 0.011362 | 0.011396 | 0.011295 | 0.011228 | 0.011228 |
| 0.011295 | 0.011228 | 0.011329 | 0.011195 | 0.011329 | 0.011429 | 0.011732 |
| 0.011228 | 0.011631 | 0.011233 | 0.017747 | 0.011257 | 0.011427 | 0.011583 |
| 0.011545 | 0.011588 | 0.011322 | 0.011292 | 0.011719 | 0.011612 | 0.011364 |
| 0.011487 | 0.011549 | 0.011138 | 0.011228 | 0.011216 | 0.011307 | 0.011232 |
| 0.011482 | 0.011395 | 0.011394 | 0.011126 | 0.011362 | 0.011396 | 0.011398 |
| 0.011266 | 0.011362 | 0.011362 | 0.011329 | 0.011295 | 0.011295 | 0.011262 |
| 0.011295 | 0.011228 | 0.011262 | 0.011295 | 0.011262 | 0.011195 | 0.011228 |

|          |          |          |          |          |          |          |
|----------|----------|----------|----------|----------|----------|----------|
| 0.011228 | 0.011295 | 0.011195 | 0.011295 | 0.011329 | 0.011362 | 0.011262 |
| 0.011295 | 0.011262 | 0.011597 | 0.011597 | 0.011329 | 0.011363 | 0.011396 |
| 0.011161 | 0.011161 | 0.011195 | 0.011295 | 0.011161 | 0.011396 | 0.011396 |
| 0.011429 | 0.011429 | 0.011362 | 0.011463 | 0.011631 | 0.011464 | 0.011295 |
| 0.011295 | 0.011362 | 0.011396 | 0.011228 | 0.011295 | 0.011262 | 0.011295 |
| 0.011363 | 0.011362 | 0.011396 | 0.011363 | 0.011262 | 0.011463 | 0.011429 |
| 0.011297 | 0.011195 | 0.011295 | 0.011396 | 0.011295 | 0.011430 | 0.011463 |
| 0.011631 | 0.011333 | 0.011497 | 0.011463 | 0.011396 | 0.011564 | 0.011195 |
| 0.011363 | 0.011262 | 0.011228 | 0.011228 | 0.011295 | 0.011195 | 0.011295 |
| 0.011329 | 0.011362 | 0.011262 | 0.011295 | 0.011262 | 0.011597 | 0.011597 |
| 0.011329 | 0.011363 | 0.011429 | 0.011362 | 0.012002 | 0.011417 | 0.011342 |
| 0.011412 | 0.011372 | 0.011482 | 0.011372 | 0.011480 | 0.011405 | 0.011371 |
| 0.011953 | 0.011268 | 0.011403 | 0.011337 | 0.011611 | 0.011468 | 0.011571 |
| 0.011978 | 0.011437 | 0.011297 | 0.011295 | 0.011295 | 0.011329 | 0.011263 |
| 0.011161 | 0.011195 | 0.011329 | 0.011295 | 0.011297 | 0.011429 | 0.011397 |
| 0.011262 | 0.011195 | 0.011228 | 0.011262 | 0.011161 | 0.011228 | 0.011127 |
| 0.011262 | 0.011295 | 0.011195 | 0.011161 | 0.011262 | 0.011195 | 0.011228 |
| 0.011228 | 0.011161 | 0.011228 | 0.011262 | 0.011161 | 0.011362 | 0.011396 |
| 0.011295 | 0.011362 | 0.011295 | 0.011295 | 0.011228 | 0.011631 | 0.011262 |
| 0.011304 | 0.011228 | 0.011463 | 0.011467 | 0.011329 | 0.011329 | 0.011329 |
| 0.011329 | 0.011262 | 0.011228 | 0.011262 | 0.011362 | 0.011362 | 0.011295 |
| 0.011295 | 0.011430 | 0.011597 | 0.011329 | 0.011530 | 0.011530 | 0.011396 |
| 0.011228 | 0.011295 | 0.011329 | 0.011732 | 0.011295 | 0.011329 | 0.011295 |
| 0.011329 | 0.011262 | 0.011262 | 0.011564 | 0.011497 | 0.011530 | 0.011262 |
| 0.011362 | 0.011430 | 0.011295 | 0.011362 | 0.011329 | 0.011195 | 0.011530 |
| 0.011295 | 0.011262 | 0.011262 | 0.011430 | 0.011262 | 0.011362 | 0.011597 |
| 0.011295 | 0.011672 | 0.011665 | 0.011467 | 0.011229 | 0.011366 | 0.011267 |
| 0.011225 | 0.011683 | 0.011201 | 0.011417 | 0.011255 | 0.011366 | 0.011379 |
| 0.011468 | 0.011192 | 0.011339 | 0.011192 | 0.011222 | 0.011395 | 0.011344 |
| 0.011362 | 0.011257 | 0.011342 | 0.011272 | 0.011296 | 0.011429 | 0.011497 |
| 0.011497 | 0.011363 | 0.011466 | 0.011467 | 0.011603 | 0.011625 | 0.011295 |
| 0.011530 | 0.011396 | 0.011262 | 0.011362 | 0.011094 | 0.011396 | 0.011195 |
| 0.011262 | 0.011262 | 0.011228 | 0.011127 | 0.011228 | 0.000000 | 0.011295 |
| 0.011270 | 0.011270 | 0.011266 | 0.011300 | 0.011436 | 0.011402 | 0.011402 |
| 0.011401 | 0.011329 | 0.011134 | 0.011132 | 0.011263 | 0.011433 | 0.011433 |
| 0.011228 | 0.011297 | 0.011531 | 0.011500 | 0.011430 | 0.011464 | 0.011396 |
| 0.011329 | 0.011396 | 0.011396 | 0.011295 | 0.011866 | 0.011463 | 0.011530 |
| 0.011564 | 0.011630 | 0.011265 | 0.011337 | 0.011228 | 0.011430 | 0.011396 |
| 0.011430 | 0.011463 | 0.011463 | 0.011463 | 0.011610 | 0.011597 | 0.011234 |
| 0.011128 | 0.011130 | 0.011231 | 0.011196 | 0.011299 | 0.011135 | 0.011468 |
| 0.011266 | 0.011367 | 0.011156 | 0.011285 | 0.011262 | 0.011334 | 0.011228 |
| 0.011195 | 0.011195 | 0.011262 | 0.011228 | 0.011429 | 0.011396 | 0.011329 |
| 0.011429 | 0.011497 | 0.011228 | 0.011228 | 0.011262 | 0.011262 | 0.011263 |
| 0.011331 | 0.011262 | 0.011262 | 0.011296 | 0.011429 | 0.011497 | 0.011497 |
| 0.011363 | 0.011466 | 0.011467 | 0.011603 | 0.011625 | 0.011295 | 0.011463 |
| 0.011396 | 0.011396 | 0.011229 | 0.011408 | 0.011338 | 0.011367 | 0.011235 |
| 0.011404 | 0.011607 | 0.011399 | 0.011298 | 0.011195 | 0.011396 | 0.011262 |
| 0.011362 | 0.011295 | 0.011195 | 0.011296 | 0.011396 | 0.011398 | 0.011295 |
| 0.011195 | 0.011128 | 0.011262 | 0.011195 | 0.011127 | 0.011230 | 0.011396 |
| 0.011295 | 0.011228 | 0.011262 | 0.011295 | 0.011262 | 0.011195 | 0.011396 |
| 0.011262 | 0.011295 | 0.011295 | 0.011228 | 0.011295 | 0.011530 | 0.011195 |
| 0.011228 | 0.011631 | 0.011228 | 0.011262 | 0.011228 | 0.011597 | 0.011189 |
| 0.011622 | 0.011188 | 0.011261 | 0.011422 | 0.011508 | 0.011419 | 0.011144 |
| 0.011218 | 0.011396 | 0.011497 | 0.011603 | 0.011464 | 0.011601 | 0.011733 |
| 0.011632 | 0.011669 | 0.011631 | 0.011880 | 0.011597 | 0.012472 | 0.011633 |
| 0.012372 | 0.012139 | 0.012273 | 0.012545 | 0.011597 | 0.011295 | 0.011598 |
| 0.012036 | 0.011971 | 0.011564 | 0.011463 | 0.011531 | 0.011531 | 0.011500 |
| 0.011396 | 0.011399 | 0.011463 | 0.011430 | 0.011800 | 0.011866 | 0.011867 |
| 0.011767 | 0.011867 | 0.011970 | 0.011737 | 0.012036 | 0.012042 | 0.012103 |
| 0.012104 | 0.012138 | 0.012084 | 0.012104 | 0.012105 | 0.011329 | 0.011631 |

|          |          |          |          |          |          |          |
|----------|----------|----------|----------|----------|----------|----------|
| 0.011699 | 0.012203 | 0.011704 | 0.011934 | 0.012406 | 0.011468 | 0.011363 |
| 0.011329 | 0.011329 | 0.011799 | 0.011842 | 0.011940 | 0.011665 | 0.011330 |
| S181     | 0.011698 | 0.011698 | 0.012035 | 0.011799 | 0.011799 | 0.011866 |
| 0.011706 | 0.011638 | 0.011799 | 0.011295 | 0.011362 | 0.011329 | 0.011295 |
| 0.011329 | 0.011497 | 0.011295 | 0.011329 | 0.011396 | 0.011362 | 0.011329 |
| 0.011295 | 0.011329 | 0.011429 | 0.011295 | 0.011329 | 0.011329 | 0.011672 |
| 0.011564 | 0.011329 | 0.011228 | 0.011463 | 0.011396 | 0.011362 | 0.011396 |
| 0.011362 | 0.011463 | 0.011362 | 0.011362 | 0.011396 | 0.011362 | 0.011530 |
| 0.011295 | 0.011362 | 0.011396 | 0.011329 | 0.011429 | 0.011463 | 0.011396 |
| 0.011362 | 0.011530 | 0.011430 | 0.011698 | 0.011362 | 0.011631 | 0.011362 |
| 0.011329 | 0.011430 | 0.011497 | 0.011631 | 0.011732 | 0.011430 | 0.011530 |
| 0.011396 | 0.011463 | 0.011362 | 0.011597 | 0.011833 | 0.011362 | 0.011430 |
| 0.011329 | 0.011429 | 0.011396 | 0.011463 | 0.011396 | 0.011396 | 0.011396 |
| 0.011295 | 0.011329 | 0.011295 | 0.011396 | 0.011362 | 0.011397 | 0.011463 |
| 0.011396 | 0.011362 | 0.011429 | 0.011329 | 0.011463 | 0.011295 | 0.011362 |
| 0.011530 | 0.011463 | 0.011698 | 0.011530 | 0.011362 | 0.011597 | 0.011362 |
| 0.011542 | 0.011770 | 0.011588 | 0.011295 | 0.011284 | 0.011391 | 0.011493 |
| 0.012121 | 0.011569 | 0.011307 | 0.011597 | 0.011597 | 0.011396 | 0.011497 |
| 0.011430 | 0.011396 | 0.011463 | 0.011362 | 0.011463 | 0.011396 | 0.011396 |
| 0.011362 | 0.011463 | 0.011665 | 0.011530 | 0.011430 | 0.011396 | 0.011329 |
| 0.011295 | 0.011295 | 0.011362 | 0.011329 | 0.011530 | 0.011497 | 0.011429 |
| 0.011530 | 0.011597 | 0.011329 | 0.011329 | 0.011362 | 0.011362 | 0.011364 |
| 0.011432 | 0.011362 | 0.011094 | 0.011240 | 0.011313 | 0.011271 | 0.011363 |
| 0.011365 | 0.011301 | 0.011355 | 0.011336 | 0.011264 | 0.011300 | 0.011330 |
| 0.011600 | 0.011370 | 0.011405 | 0.011296 | 0.011302 | 0.011430 | 0.011396 |
| 0.011464 | 0.011397 | 0.011396 | 0.011497 | 0.011429 | 0.011799 | 0.011598 |
| 0.011631 | 0.011497 | 0.011362 | 0.011463 | 0.011262 | 0.011497 | 0.011295 |
| 0.011362 | 0.011362 | 0.011329 | 0.011295 | 0.011329 | 0.011295 | 0.000000 |
| 0.011362 | 0.011463 | 0.011396 | 0.011295 | 0.011397 | 0.011497 | 0.011499 |
| 0.011497 | 0.011396 | 0.011295 | 0.011229 | 0.011362 | 0.011295 | 0.011228 |
| 0.011332 | 0.011497 | 0.011295 | 0.011497 | 0.011262 | 0.011362 | 0.011329 |
| 0.011430 | 0.011329 | 0.011362 | 0.011329 | 0.011362 | 0.011228 | 0.011362 |
| 0.011396 | 0.011329 | 0.011396 | 0.011329 | 0.011362 | 0.011396 | 0.011631 |
| 0.011732 | 0.011665 | 0.011732 | 0.011498 | 0.011732 | 0.011362 | 0.011329 |
| 0.011364 | 0.011626 | 0.011472 | 0.011266 | 0.011739 | 0.011197 | 0.011296 |
| 0.011739 | 0.011604 | 0.011530 | 0.011732 | 0.011436 | 0.011597 | 0.011564 |
| 0.011497 | 0.011664 | 0.011522 | 0.011390 | 0.011438 | 0.011396 | 0.011466 |
| 0.011564 | 0.011465 | 0.011601 | 0.011669 | 0.011598 | 0.011665 | 0.011772 |
| 0.011500 | 0.011671 | 0.011602 | 0.011534 | 0.011801 | 0.011262 | 0.011465 |
| 0.011429 | 0.011362 | 0.011262 | 0.011262 | 0.011329 | 0.011329 | 0.011396 |
| 0.011329 | 0.011396 | 0.011295 | 0.011396 | 0.011329 | 0.011329 | 0.011396 |
| 0.011329 | 0.011765 | 0.011665 | 0.011698 | 0.011228 | 0.011329 | 0.011362 |
| 0.011362 | 0.011329 | 0.011396 | 0.011430 | 0.011295 | 0.011295 | 0.011295 |
| 0.011833 | 0.011463 | 0.011463 | 0.011262 | 0.011362 | 0.011530 | 0.011295 |
| 0.011295 | 0.011362 | 0.011329 | 0.011497 | 0.011295 | 0.011429 | 0.011564 |
| 0.011497 | 0.011329 | 0.011329 | 0.011262 | 0.011262 | 0.011430 | 0.011362 |
| 0.011262 | 0.011362 | 0.011228 | 0.011262 | 0.011396 | 0.011531 | 0.011295 |
| 0.011195 | 0.011396 | 0.011329 | 0.011228 | 0.011564 | 0.011228 | 0.011329 |
| 0.011471 | 0.011295 | 0.011597 | 0.011430 | 0.011463 | 0.011329 | 0.011429 |
| 0.011295 | 0.011631 | 0.011228 | 0.011497 | 0.011295 | 0.011295 | 0.011228 |
| 0.011463 | 0.011665 | 0.011362 | 0.011430 | 0.011262 | 0.011665 | 0.011295 |
| 0.011295 | 0.011295 | 0.011329 | 0.011430 | 0.011329 | 0.011429 | 0.011497 |
| 0.011497 | 0.011463 | 0.011362 | 0.011463 | 0.011429 | 0.011295 | 0.011262 |
| 0.011295 | 0.011295 | 0.011362 | 0.011295 | 0.011262 | 0.011430 | 0.011295 |
| 0.011329 | 0.011329 | 0.011463 | 0.011497 | 0.011396 | 0.011329 | 0.011329 |
| 0.011396 | 0.011329 | 0.011429 | 0.011295 | 0.011429 | 0.011530 | 0.011833 |
| 0.011329 | 0.011732 | 0.011336 | 0.017861 | 0.011388 | 0.011549 | 0.011688 |
| 0.011648 | 0.011693 | 0.011374 | 0.011350 | 0.011829 | 0.011716 | 0.011485 |
| 0.011629 | 0.011671 | 0.011255 | 0.011353 | 0.011333 | 0.011356 | 0.011361 |
| 0.011576 | 0.011507 | 0.011505 | 0.011391 | 0.011463 | 0.011497 | 0.011500 |

|          |          |          |          |          |          |          |
|----------|----------|----------|----------|----------|----------|----------|
| 0.011369 | 0.011463 | 0.011463 | 0.011429 | 0.011396 | 0.011396 | 0.011363 |
| 0.011396 | 0.011329 | 0.011362 | 0.011329 | 0.011362 | 0.011295 | 0.011329 |
| 0.011329 | 0.011396 | 0.011295 | 0.011396 | 0.011430 | 0.011463 | 0.011362 |
| 0.011396 | 0.011362 | 0.011698 | 0.011698 | 0.011430 | 0.011464 | 0.011497 |
| 0.011262 | 0.011262 | 0.011295 | 0.011396 | 0.011262 | 0.011497 | 0.011497 |
| 0.011530 | 0.011530 | 0.011463 | 0.011564 | 0.011732 | 0.011565 | 0.011396 |
| 0.011396 | 0.011463 | 0.011497 | 0.011329 | 0.011396 | 0.011362 | 0.011396 |
| 0.011463 | 0.011463 | 0.011497 | 0.011463 | 0.011363 | 0.011564 | 0.011530 |
| 0.011399 | 0.011295 | 0.011396 | 0.011497 | 0.011396 | 0.011530 | 0.011564 |
| 0.011732 | 0.011436 | 0.011597 | 0.011564 | 0.011497 | 0.011664 | 0.011295 |
| 0.011464 | 0.011363 | 0.011329 | 0.011329 | 0.011396 | 0.011295 | 0.011396 |
| 0.011430 | 0.011463 | 0.011362 | 0.011396 | 0.011362 | 0.011698 | 0.011698 |
| 0.011430 | 0.011464 | 0.011530 | 0.011463 | 0.012103 | 0.011453 | 0.011447 |
| 0.011517 | 0.011407 | 0.011587 | 0.011476 | 0.011585 | 0.011509 | 0.011474 |
| 0.012056 | 0.011372 | 0.011506 | 0.011441 | 0.011715 | 0.011570 | 0.011673 |
| 0.012080 | 0.011550 | 0.011432 | 0.011429 | 0.011429 | 0.011429 | 0.011398 |
| 0.011262 | 0.011295 | 0.011429 | 0.011396 | 0.011398 | 0.011530 | 0.011498 |
| 0.011362 | 0.011295 | 0.011329 | 0.011362 | 0.011262 | 0.011329 | 0.011228 |
| 0.011362 | 0.011396 | 0.011295 | 0.011262 | 0.011362 | 0.011295 | 0.011329 |
| 0.011329 | 0.011262 | 0.011329 | 0.011362 | 0.011262 | 0.011463 | 0.011497 |
| 0.011396 | 0.011463 | 0.011396 | 0.011396 | 0.011329 | 0.011732 | 0.011362 |
| 0.011408 | 0.011329 | 0.011564 | 0.011569 | 0.011430 | 0.011429 | 0.011429 |
| 0.011430 | 0.011362 | 0.011329 | 0.011362 | 0.011463 | 0.011463 | 0.011396 |
| 0.011396 | 0.011530 | 0.011698 | 0.011429 | 0.011564 | 0.011564 | 0.011497 |
| 0.011329 | 0.011396 | 0.011430 | 0.011833 | 0.011396 | 0.011430 | 0.011396 |
| 0.011429 | 0.011362 | 0.011362 | 0.011665 | 0.011598 | 0.011631 | 0.011362 |
| 0.011463 | 0.011530 | 0.011396 | 0.011463 | 0.011429 | 0.011295 | 0.011631 |
| 0.011396 | 0.011362 | 0.011362 | 0.011530 | 0.011362 | 0.011463 | 0.011698 |
| 0.011396 | 0.011773 | 0.011765 | 0.011589 | 0.011342 | 0.011468 | 0.011318 |
| 0.011335 | 0.011800 | 0.011306 | 0.011551 | 0.011402 | 0.011518 | 0.011538 |
| 0.011570 | 0.011389 | 0.011450 | 0.011324 | 0.011384 | 0.011395 | 0.011466 |
| 0.011475 | 0.011375 | 0.011448 | 0.011377 | 0.011128 | 0.011530 | 0.011597 |
| 0.011597 | 0.011464 | 0.011567 | 0.011569 | 0.011704 | 0.011661 | 0.011396 |
| 0.011631 | 0.011497 | 0.011362 | 0.011463 | 0.011262 | 0.011497 | 0.011295 |
| 0.011362 | 0.011362 | 0.011329 | 0.011295 | 0.011329 | 0.011295 | 0.000000 |
| 0.011375 | 0.011375 | 0.011368 | 0.011403 | 0.011539 | 0.011504 | 0.011504 |
| 0.011503 | 0.011430 | 0.011171 | 0.011204 | 0.011365 | 0.011535 | 0.011535 |
| 0.011329 | 0.011399 | 0.011632 | 0.011601 | 0.011531 | 0.011565 | 0.011497 |
| 0.011429 | 0.011497 | 0.011497 | 0.011396 | 0.011967 | 0.011564 | 0.011631 |
| 0.011665 | 0.011737 | 0.011367 | 0.011441 | 0.011329 | 0.011530 | 0.011497 |
| 0.011531 | 0.011564 | 0.011564 | 0.011564 | 0.011689 | 0.011698 | 0.011338 |
| 0.011229 | 0.011233 | 0.011333 | 0.011298 | 0.011402 | 0.011247 | 0.011570 |
| 0.011369 | 0.011455 | 0.011156 | 0.011397 | 0.011363 | 0.011437 | 0.011329 |
| 0.011295 | 0.011295 | 0.011362 | 0.011329 | 0.011530 | 0.011497 | 0.011429 |
| 0.011530 | 0.011597 | 0.011329 | 0.011329 | 0.011362 | 0.011362 | 0.011364 |
| 0.011432 | 0.011362 | 0.011094 | 0.011128 | 0.011530 | 0.011597 | 0.011597 |
| 0.011464 | 0.011567 | 0.011569 | 0.011704 | 0.011661 | 0.011396 | 0.011564 |
| 0.011497 | 0.011497 | 0.011331 | 0.011513 | 0.011442 | 0.011469 | 0.011305 |
| 0.011473 | 0.011744 | 0.011441 | 0.011400 | 0.011295 | 0.011497 | 0.011362 |
| 0.011463 | 0.011396 | 0.011295 | 0.011397 | 0.011497 | 0.011499 | 0.011396 |
| 0.011295 | 0.011229 | 0.011362 | 0.011295 | 0.011228 | 0.011332 | 0.011497 |
| 0.011396 | 0.011329 | 0.011362 | 0.011329 | 0.011362 | 0.011295 | 0.011497 |
| 0.011362 | 0.011396 | 0.011396 | 0.011329 | 0.011396 | 0.011631 | 0.011295 |
| 0.011329 | 0.011732 | 0.011329 | 0.011362 | 0.011329 | 0.011698 | 0.011317 |
| 0.011791 | 0.011315 | 0.011361 | 0.011543 | 0.011630 | 0.011527 | 0.011269 |
| 0.011323 | 0.011497 | 0.011597 | 0.011705 | 0.011565 | 0.011703 | 0.011834 |
| 0.011733 | 0.011771 | 0.011732 | 0.011983 | 0.011698 | 0.012539 | 0.011734 |
| 0.012473 | 0.012207 | 0.012341 | 0.012646 | 0.011698 | 0.011396 | 0.011699 |
| 0.012137 | 0.012072 | 0.011665 | 0.011564 | 0.011632 | 0.011632 | 0.011601 |
| 0.011497 | 0.011501 | 0.011564 | 0.011531 | 0.011901 | 0.011967 | 0.011968 |



|          |          |          |          |          |          |          |
|----------|----------|----------|----------|----------|----------|----------|
| 0.011868 | 0.011968 | 0.012072 | 0.011838 | 0.012138 | 0.012144 | 0.012205 |
| 0.012205 | 0.012239 | 0.012186 | 0.012206 | 0.012207 | 0.011429 | 0.011732 |
| 0.011800 | 0.012304 | 0.011806 | 0.012035 | 0.012508 | 0.011570 | 0.011464 |
| 0.011429 | 0.011429 | 0.011900 | 0.011965 | 0.012045 | 0.011765 | 0.011431 |
| s182     | 0.011665 | 0.011665 | 0.012001 | 0.011765 | 0.011765 | 0.011833 |
| 0.011672 | 0.011604 | 0.011765 | 0.011262 | 0.011329 | 0.011296 | 0.011262 |
| 0.011295 | 0.011463 | 0.011262 | 0.011295 | 0.011362 | 0.011329 | 0.011295 |
| 0.011262 | 0.011295 | 0.011396 | 0.011262 | 0.011228 | 0.011295 | 0.011638 |
| 0.011530 | 0.011295 | 0.011195 | 0.011429 | 0.011295 | 0.011329 | 0.011295 |
| 0.011329 | 0.011362 | 0.011329 | 0.011329 | 0.011362 | 0.011329 | 0.011497 |
| 0.011262 | 0.011329 | 0.011362 | 0.011295 | 0.011396 | 0.011430 | 0.011362 |
| 0.011329 | 0.011497 | 0.011396 | 0.011665 | 0.011329 | 0.011530 | 0.011329 |
| 0.011295 | 0.011396 | 0.011463 | 0.011530 | 0.011698 | 0.011396 | 0.011497 |
| 0.011295 | 0.011362 | 0.011329 | 0.011497 | 0.011799 | 0.011329 | 0.011396 |
| 0.011295 | 0.011396 | 0.011362 | 0.011430 | 0.011362 | 0.011362 | 0.011362 |
| 0.011262 | 0.011295 | 0.011262 | 0.011362 | 0.011329 | 0.011363 | 0.011429 |
| 0.011362 | 0.011329 | 0.011329 | 0.011295 | 0.011429 | 0.011195 | 0.011329 |
| 0.011497 | 0.011429 | 0.011665 | 0.011497 | 0.011329 | 0.011497 | 0.011329 |
| 0.011468 | 0.011695 | 0.011513 | 0.011216 | 0.011210 | 0.011318 | 0.011415 |
| 0.012048 | 0.011467 | 0.011225 | 0.011564 | 0.011564 | 0.011362 | 0.011463 |
| 0.011396 | 0.011362 | 0.011429 | 0.011329 | 0.011430 | 0.011295 | 0.011362 |
| 0.011329 | 0.011429 | 0.011631 | 0.011497 | 0.011396 | 0.011363 | 0.011228 |
| 0.011262 | 0.011262 | 0.011262 | 0.011295 | 0.011497 | 0.011463 | 0.011396 |
| 0.011497 | 0.011564 | 0.011295 | 0.011295 | 0.011329 | 0.011329 | 0.011330 |
| 0.011398 | 0.011329 | 0.011329 | 0.011132 | 0.011241 | 0.011236 | 0.011329 |
| 0.011331 | 0.011232 | 0.011282 | 0.011267 | 0.011230 | 0.011266 | 0.011297 |
| 0.011528 | 0.011336 | 0.011267 | 0.011262 | 0.011233 | 0.011397 | 0.011363 |
| 0.011430 | 0.011364 | 0.011363 | 0.011463 | 0.011396 | 0.011698 | 0.011564 |
| 0.011597 | 0.011463 | 0.011329 | 0.011430 | 0.011228 | 0.011463 | 0.011262 |
| 0.011329 | 0.011329 | 0.011295 | 0.011262 | 0.011295 | 0.011262 | 0.011362 |
| 0.000000 | 0.011362 | 0.011362 | 0.011262 | 0.011363 | 0.011463 | 0.011466 |
| 0.011396 | 0.011362 | 0.011262 | 0.011195 | 0.011329 | 0.011262 | 0.011195 |
| 0.011298 | 0.011396 | 0.011195 | 0.011396 | 0.011228 | 0.011329 | 0.011295 |
| 0.011329 | 0.011295 | 0.011262 | 0.011295 | 0.011329 | 0.011195 | 0.011262 |
| 0.011295 | 0.011295 | 0.011362 | 0.011295 | 0.011329 | 0.011362 | 0.011597 |
| 0.011698 | 0.011631 | 0.011698 | 0.011465 | 0.011698 | 0.011329 | 0.011295 |
| 0.011330 | 0.011586 | 0.011426 | 0.011232 | 0.011705 | 0.011197 | 0.011296 |
| 0.011705 | 0.011604 | 0.011497 | 0.011698 | 0.011402 | 0.011564 | 0.011463 |
| 0.011463 | 0.011631 | 0.011487 | 0.011307 | 0.011312 | 0.011363 | 0.011433 |
| 0.011530 | 0.011431 | 0.011568 | 0.011568 | 0.011564 | 0.011631 | 0.011738 |
| 0.011466 | 0.011569 | 0.011568 | 0.011500 | 0.011767 | 0.011228 | 0.011431 |
| 0.011329 | 0.011329 | 0.011228 | 0.011228 | 0.011228 | 0.011295 | 0.011362 |
| 0.011228 | 0.011295 | 0.011195 | 0.011362 | 0.011228 | 0.011295 | 0.011362 |
| 0.011295 | 0.011732 | 0.011631 | 0.011665 | 0.011195 | 0.011295 | 0.011329 |
| 0.011329 | 0.011295 | 0.011362 | 0.011396 | 0.011262 | 0.011262 | 0.011262 |
| 0.011799 | 0.011430 | 0.011430 | 0.011228 | 0.011329 | 0.011430 | 0.011262 |
| 0.011262 | 0.011329 | 0.011295 | 0.011396 | 0.011262 | 0.011396 | 0.011463 |
| 0.011463 | 0.011295 | 0.011295 | 0.011228 | 0.011228 | 0.011396 | 0.011329 |
| 0.011228 | 0.011329 | 0.011195 | 0.011228 | 0.011362 | 0.011497 | 0.011262 |
| 0.011228 | 0.011362 | 0.011296 | 0.011195 | 0.011530 | 0.011195 | 0.011362 |
| 0.011368 | 0.011262 | 0.011564 | 0.011396 | 0.011430 | 0.011295 | 0.011396 |
| 0.011262 | 0.011530 | 0.011195 | 0.011463 | 0.011262 | 0.011262 | 0.011195 |
| 0.011362 | 0.011631 | 0.011329 | 0.011396 | 0.011228 | 0.011631 | 0.011262 |
| 0.011262 | 0.011262 | 0.011295 | 0.011329 | 0.011295 | 0.011396 | 0.011463 |
| 0.011463 | 0.011430 | 0.011329 | 0.011430 | 0.011329 | 0.011262 | 0.011228 |
| 0.011262 | 0.011262 | 0.011329 | 0.011262 | 0.011161 | 0.011396 | 0.011262 |
| 0.011295 | 0.011295 | 0.011430 | 0.011463 | 0.011362 | 0.011228 | 0.011295 |
| 0.011362 | 0.011295 | 0.011396 | 0.011262 | 0.011396 | 0.011497 | 0.011799 |
| 0.011295 | 0.011698 | 0.011267 | 0.011785 | 0.011191 | 0.011366 | 0.011618 |
| 0.011579 | 0.011623 | 0.011270 | 0.011234 | 0.011664 | 0.011647 | 0.011303 |

|          |          |          |          |          |          |          |
|----------|----------|----------|----------|----------|----------|----------|
| 0.011487 | 0.011549 | 0.011177 | 0.011186 | 0.011177 | 0.011307 | 0.011275 |
| 0.011482 | 0.011433 | 0.011394 | 0.011259 | 0.011430 | 0.011463 | 0.011466 |
| 0.011266 | 0.011430 | 0.011430 | 0.011396 | 0.011362 | 0.011363 | 0.011329 |
| 0.011362 | 0.011295 | 0.011329 | 0.011362 | 0.011329 | 0.011262 | 0.011295 |
| 0.011295 | 0.011362 | 0.011262 | 0.011363 | 0.011396 | 0.011430 | 0.011329 |
| 0.011362 | 0.011329 | 0.011665 | 0.011665 | 0.011396 | 0.011430 | 0.011463 |
| 0.011228 | 0.011228 | 0.011262 | 0.011295 | 0.011228 | 0.011463 | 0.011463 |
| 0.011497 | 0.011497 | 0.011430 | 0.011530 | 0.011698 | 0.011532 | 0.011295 |
| 0.011362 | 0.011430 | 0.011396 | 0.011295 | 0.011362 | 0.011329 | 0.011362 |
| 0.011430 | 0.011430 | 0.011463 | 0.011363 | 0.011262 | 0.011530 | 0.011429 |
| 0.011365 | 0.011262 | 0.011362 | 0.011463 | 0.011363 | 0.011497 | 0.011530 |
| 0.011698 | 0.011402 | 0.011564 | 0.011463 | 0.011463 | 0.011631 | 0.011262 |
| 0.011431 | 0.011329 | 0.011295 | 0.011295 | 0.011362 | 0.011262 | 0.011363 |
| 0.011396 | 0.011430 | 0.011329 | 0.011362 | 0.011329 | 0.011665 | 0.011665 |
| 0.011396 | 0.011430 | 0.011497 | 0.011429 | 0.012070 | 0.011489 | 0.011412 |
| 0.011482 | 0.011442 | 0.011552 | 0.011441 | 0.011550 | 0.011474 | 0.011440 |
| 0.012022 | 0.011337 | 0.011471 | 0.011406 | 0.011680 | 0.011537 | 0.011571 |
| 0.012047 | 0.011512 | 0.011365 | 0.011362 | 0.011362 | 0.011396 | 0.011331 |
| 0.011228 | 0.011195 | 0.011396 | 0.011362 | 0.011364 | 0.011497 | 0.011464 |
| 0.011329 | 0.011195 | 0.011228 | 0.011329 | 0.011161 | 0.011295 | 0.011195 |
| 0.011329 | 0.011362 | 0.011262 | 0.011228 | 0.011329 | 0.011262 | 0.011295 |
| 0.011295 | 0.011228 | 0.011295 | 0.011329 | 0.011228 | 0.011362 | 0.011463 |
| 0.011362 | 0.011430 | 0.011362 | 0.011362 | 0.011295 | 0.011698 | 0.011329 |
| 0.011373 | 0.011295 | 0.011531 | 0.011535 | 0.011329 | 0.011396 | 0.011396 |
| 0.011396 | 0.011262 | 0.011295 | 0.011262 | 0.011430 | 0.011430 | 0.011362 |
| 0.011362 | 0.011497 | 0.011665 | 0.011396 | 0.011598 | 0.011598 | 0.011463 |
| 0.011295 | 0.011362 | 0.011396 | 0.011799 | 0.011363 | 0.011329 | 0.011362 |
| 0.011396 | 0.011329 | 0.011329 | 0.011631 | 0.011497 | 0.011598 | 0.011329 |
| 0.011430 | 0.011497 | 0.011362 | 0.011430 | 0.011396 | 0.011262 | 0.011597 |
| 0.011362 | 0.011329 | 0.011329 | 0.011497 | 0.011329 | 0.011430 | 0.011665 |
| 0.011362 | 0.011740 | 0.011732 | 0.011507 | 0.011173 | 0.011400 | 0.011267 |
| 0.011225 | 0.011722 | 0.011236 | 0.011462 | 0.011255 | 0.011417 | 0.011379 |
| 0.011468 | 0.011126 | 0.011339 | 0.011126 | 0.011222 | 0.011328 | 0.011344 |
| 0.011362 | 0.011218 | 0.011377 | 0.011307 | 0.011364 | 0.011497 | 0.011564 |
| 0.011564 | 0.011430 | 0.011534 | 0.011535 | 0.011670 | 0.011696 | 0.011362 |
| 0.011597 | 0.011463 | 0.011329 | 0.011430 | 0.011228 | 0.011463 | 0.011262 |
| 0.011329 | 0.011329 | 0.011295 | 0.011262 | 0.011295 | 0.011262 | 0.011362 |
| 0.011305 | 0.011305 | 0.011300 | 0.011368 | 0.011505 | 0.011368 | 0.011470 |
| 0.011469 | 0.011396 | 0.011171 | 0.011168 | 0.011331 | 0.011501 | 0.011501 |
| 0.011296 | 0.011365 | 0.011599 | 0.011533 | 0.011497 | 0.011531 | 0.011463 |
| 0.011396 | 0.011463 | 0.011463 | 0.011362 | 0.011934 | 0.011530 | 0.011598 |
| 0.011631 | 0.011701 | 0.011333 | 0.011407 | 0.011295 | 0.011497 | 0.011463 |
| 0.011498 | 0.011530 | 0.011530 | 0.011530 | 0.011650 | 0.011665 | 0.011303 |
| 0.011196 | 0.011199 | 0.011299 | 0.011264 | 0.011368 | 0.011210 | 0.011536 |
| 0.011335 | 0.011367 | 0.011108 | 0.011360 | 0.011329 | 0.011402 | 0.011228 |
| 0.011262 | 0.011262 | 0.011262 | 0.011295 | 0.011497 | 0.011463 | 0.011396 |
| 0.011497 | 0.011564 | 0.011295 | 0.011295 | 0.011329 | 0.011329 | 0.011330 |
| 0.011398 | 0.011329 | 0.011329 | 0.011364 | 0.011497 | 0.011564 | 0.011564 |
| 0.011430 | 0.011534 | 0.011535 | 0.011670 | 0.011696 | 0.011362 | 0.011530 |
| 0.011463 | 0.011463 | 0.011297 | 0.011478 | 0.011408 | 0.011435 | 0.011305 |
| 0.011405 | 0.011653 | 0.011441 | 0.011366 | 0.011195 | 0.011396 | 0.000000 |
| 0.011362 | 0.011362 | 0.011262 | 0.011363 | 0.011463 | 0.011466 | 0.011362 |
| 0.011262 | 0.011195 | 0.011329 | 0.011262 | 0.011195 | 0.011298 | 0.011396 |
| 0.011362 | 0.011295 | 0.011329 | 0.011362 | 0.011329 | 0.011262 | 0.011463 |
| 0.011329 | 0.011362 | 0.011362 | 0.011295 | 0.011362 | 0.011598 | 0.011262 |
| 0.011295 | 0.011698 | 0.011295 | 0.011262 | 0.011295 | 0.011665 | 0.011232 |
| 0.011622 | 0.011230 | 0.011261 | 0.011463 | 0.011549 | 0.011455 | 0.011186 |
| 0.011218 | 0.011463 | 0.011564 | 0.011671 | 0.011531 | 0.011669 | 0.011800 |
| 0.011699 | 0.011737 | 0.011698 | 0.011949 | 0.011665 | 0.012540 | 0.011700 |
| 0.012439 | 0.012207 | 0.012341 | 0.012613 | 0.011665 | 0.011363 | 0.011665 |

|          |          |          |          |          |          |          |
|----------|----------|----------|----------|----------|----------|----------|
| 0.012103 | 0.012038 | 0.011631 | 0.011531 | 0.011598 | 0.011598 | 0.011568 |
| 0.011463 | 0.011467 | 0.011530 | 0.011497 | 0.011867 | 0.011934 | 0.011935 |
| 0.011801 | 0.011934 | 0.012038 | 0.011804 | 0.012104 | 0.012110 | 0.012171 |
| 0.012172 | 0.012205 | 0.012118 | 0.012172 | 0.012173 | 0.011396 | 0.011699 |
| 0.011767 | 0.012270 | 0.011772 | 0.012001 | 0.012474 | 0.011536 | 0.011430 |
| 0.011396 | 0.011396 | 0.011867 | 0.011924 | 0.011975 | 0.011732 | 0.011397 |
| s183     | 0.011766 | 0.011766 | 0.012102 | 0.011866 | 0.011866 | 0.011934 |
| 0.011774 | 0.011706 | 0.011866 | 0.011362 | 0.011429 | 0.011397 | 0.011362 |
| 0.011396 | 0.011564 | 0.011362 | 0.011396 | 0.011463 | 0.011430 | 0.011396 |
| 0.011362 | 0.011396 | 0.011497 | 0.011363 | 0.011329 | 0.011396 | 0.011740 |
| 0.011631 | 0.011396 | 0.011295 | 0.011530 | 0.011396 | 0.011430 | 0.011396 |
| 0.011430 | 0.011463 | 0.011430 | 0.011430 | 0.011463 | 0.011429 | 0.011597 |
| 0.011362 | 0.011429 | 0.011463 | 0.011396 | 0.011497 | 0.011530 | 0.011463 |
| 0.011430 | 0.011598 | 0.011497 | 0.011765 | 0.011429 | 0.011631 | 0.011429 |
| 0.011396 | 0.011497 | 0.011564 | 0.011631 | 0.011799 | 0.011497 | 0.011597 |
| 0.011396 | 0.011463 | 0.011430 | 0.011597 | 0.011900 | 0.011430 | 0.011497 |
| 0.011396 | 0.011497 | 0.011463 | 0.011530 | 0.011463 | 0.011463 | 0.011463 |
| 0.011362 | 0.011396 | 0.011362 | 0.011463 | 0.011429 | 0.011464 | 0.011530 |
| 0.011463 | 0.011429 | 0.011429 | 0.011396 | 0.011530 | 0.011295 | 0.011429 |
| 0.011597 | 0.011530 | 0.011765 | 0.011598 | 0.011430 | 0.011597 | 0.011429 |
| 0.011616 | 0.011845 | 0.011626 | 0.011334 | 0.011321 | 0.011465 | 0.011533 |
| 0.012195 | 0.011620 | 0.011348 | 0.011665 | 0.011665 | 0.011463 | 0.011564 |
| 0.011497 | 0.011463 | 0.011530 | 0.011430 | 0.011530 | 0.011396 | 0.011463 |
| 0.011429 | 0.011530 | 0.011732 | 0.011597 | 0.011497 | 0.011463 | 0.011329 |
| 0.011362 | 0.011362 | 0.011362 | 0.011396 | 0.011597 | 0.011564 | 0.011497 |
| 0.011597 | 0.011665 | 0.011396 | 0.011396 | 0.011430 | 0.011429 | 0.011432 |
| 0.011500 | 0.011429 | 0.011430 | 0.011276 | 0.011313 | 0.011306 | 0.011430 |
| 0.011433 | 0.011369 | 0.011392 | 0.011405 | 0.011332 | 0.011368 | 0.011398 |
| 0.011636 | 0.011439 | 0.011405 | 0.011363 | 0.011371 | 0.011497 | 0.011464 |
| 0.011531 | 0.011465 | 0.011464 | 0.011564 | 0.011497 | 0.011799 | 0.011665 |
| 0.011698 | 0.011564 | 0.011429 | 0.011530 | 0.011329 | 0.011564 | 0.011362 |
| 0.011430 | 0.011429 | 0.011396 | 0.011362 | 0.011396 | 0.011362 | 0.011463 |
| 0.011362 | 0.000000 | 0.011463 | 0.011362 | 0.011465 | 0.011564 | 0.011567 |
| 0.011497 | 0.011463 | 0.011362 | 0.011296 | 0.011429 | 0.011362 | 0.011295 |
| 0.011400 | 0.011497 | 0.011295 | 0.011497 | 0.011329 | 0.011430 | 0.011396 |
| 0.011429 | 0.011396 | 0.011362 | 0.011396 | 0.011430 | 0.011295 | 0.011362 |
| 0.011396 | 0.011396 | 0.011463 | 0.011396 | 0.011429 | 0.011463 | 0.011698 |
| 0.011799 | 0.011732 | 0.011799 | 0.011566 | 0.011799 | 0.011429 | 0.011396 |
| 0.011432 | 0.011667 | 0.011472 | 0.011335 | 0.011807 | 0.011299 | 0.011454 |
| 0.011807 | 0.011706 | 0.011597 | 0.011799 | 0.011504 | 0.011665 | 0.011564 |
| 0.011564 | 0.011732 | 0.011558 | 0.011431 | 0.011480 | 0.011463 | 0.011500 |
| 0.011631 | 0.011533 | 0.011669 | 0.011669 | 0.011665 | 0.011732 | 0.011840 |
| 0.011568 | 0.011671 | 0.011670 | 0.011601 | 0.011868 | 0.011329 | 0.011532 |
| 0.011429 | 0.011430 | 0.011329 | 0.011329 | 0.011329 | 0.011396 | 0.011463 |
| 0.011262 | 0.011396 | 0.011295 | 0.011463 | 0.011329 | 0.011396 | 0.011463 |
| 0.011396 | 0.011833 | 0.011732 | 0.011765 | 0.011295 | 0.011396 | 0.011430 |
| 0.011430 | 0.011396 | 0.011463 | 0.011497 | 0.011362 | 0.011362 | 0.011362 |
| 0.011900 | 0.011530 | 0.011530 | 0.011329 | 0.011429 | 0.011530 | 0.011362 |
| 0.011362 | 0.011429 | 0.011396 | 0.011497 | 0.011362 | 0.011497 | 0.011497 |
| 0.011564 | 0.011396 | 0.011396 | 0.011329 | 0.011329 | 0.011497 | 0.011429 |
| 0.011329 | 0.011429 | 0.011295 | 0.011329 | 0.011463 | 0.011598 | 0.011362 |
| 0.011329 | 0.011463 | 0.011396 | 0.011295 | 0.011631 | 0.011295 | 0.011463 |
| 0.011471 | 0.011362 | 0.011665 | 0.011497 | 0.011530 | 0.011396 | 0.011497 |
| 0.011362 | 0.011631 | 0.011295 | 0.011564 | 0.011362 | 0.011362 | 0.011295 |
| 0.011463 | 0.011732 | 0.011430 | 0.011497 | 0.011329 | 0.011732 | 0.011362 |
| 0.011362 | 0.011362 | 0.011396 | 0.011429 | 0.011396 | 0.011497 | 0.011564 |
| 0.011564 | 0.011530 | 0.011429 | 0.011530 | 0.011429 | 0.011362 | 0.011329 |
| 0.011362 | 0.011362 | 0.011430 | 0.011362 | 0.011262 | 0.011497 | 0.011362 |
| 0.011396 | 0.011396 | 0.011530 | 0.011564 | 0.011463 | 0.011329 | 0.011396 |
| 0.011463 | 0.011396 | 0.011497 | 0.011362 | 0.011497 | 0.011597 | 0.011900 |

|          |          |          |          |          |          |          |
|----------|----------|----------|----------|----------|----------|----------|
| 0.011396 | 0.011799 | 0.011405 | 0.017936 | 0.011322 | 0.011672 | 0.011758 |
| 0.011718 | 0.011764 | 0.011374 | 0.011350 | 0.011774 | 0.011785 | 0.011425 |
| 0.011582 | 0.011671 | 0.011294 | 0.011353 | 0.011333 | 0.011406 | 0.011447 |
| 0.011576 | 0.011544 | 0.011505 | 0.011325 | 0.011530 | 0.011564 | 0.011567 |
| 0.011369 | 0.011530 | 0.011530 | 0.011497 | 0.011463 | 0.011463 | 0.011430 |
| 0.011463 | 0.011396 | 0.011429 | 0.011463 | 0.011430 | 0.011362 | 0.011396 |
| 0.011396 | 0.011463 | 0.011362 | 0.011463 | 0.011497 | 0.011530 | 0.011429 |
| 0.011463 | 0.011430 | 0.011765 | 0.011765 | 0.011497 | 0.011531 | 0.011564 |
| 0.011329 | 0.011329 | 0.011362 | 0.011396 | 0.011329 | 0.011564 | 0.011564 |
| 0.011597 | 0.011597 | 0.011530 | 0.011631 | 0.011799 | 0.011633 | 0.011396 |
| 0.011463 | 0.011530 | 0.011497 | 0.011396 | 0.011463 | 0.011429 | 0.011463 |
| 0.011531 | 0.011530 | 0.011564 | 0.011396 | 0.011363 | 0.011631 | 0.011530 |
| 0.011467 | 0.011362 | 0.011463 | 0.011564 | 0.011463 | 0.011598 | 0.011631 |
| 0.011799 | 0.011504 | 0.011665 | 0.011564 | 0.011564 | 0.011732 | 0.011363 |
| 0.011498 | 0.011430 | 0.011396 | 0.011396 | 0.011463 | 0.011362 | 0.011463 |
| 0.011497 | 0.011530 | 0.011429 | 0.011463 | 0.011430 | 0.011765 | 0.011765 |
| 0.011497 | 0.011531 | 0.011597 | 0.011530 | 0.012171 | 0.011596 | 0.011482 |
| 0.011588 | 0.011546 | 0.011623 | 0.011545 | 0.011655 | 0.011578 | 0.011543 |
| 0.012125 | 0.011441 | 0.011574 | 0.011510 | 0.011784 | 0.011639 | 0.011673 |
| 0.012149 | 0.011588 | 0.011466 | 0.011463 | 0.011463 | 0.011497 | 0.011432 |
| 0.011329 | 0.011295 | 0.011497 | 0.011463 | 0.011466 | 0.011597 | 0.011565 |
| 0.011429 | 0.011295 | 0.011329 | 0.011429 | 0.011262 | 0.011396 | 0.011295 |
| 0.011429 | 0.011463 | 0.011362 | 0.011329 | 0.011430 | 0.011362 | 0.011396 |
| 0.011396 | 0.011329 | 0.011396 | 0.011430 | 0.011329 | 0.011463 | 0.011564 |
| 0.011463 | 0.011530 | 0.011463 | 0.011463 | 0.011396 | 0.011799 | 0.011429 |
| 0.011443 | 0.011396 | 0.011632 | 0.011637 | 0.011430 | 0.011497 | 0.011497 |
| 0.011497 | 0.011362 | 0.011396 | 0.011362 | 0.011530 | 0.011530 | 0.011463 |
| 0.011463 | 0.011597 | 0.011765 | 0.011497 | 0.011698 | 0.011698 | 0.011564 |
| 0.011396 | 0.011463 | 0.011497 | 0.011900 | 0.011463 | 0.011430 | 0.011463 |
| 0.011497 | 0.011429 | 0.011429 | 0.011732 | 0.011598 | 0.011698 | 0.011430 |
| 0.011530 | 0.011597 | 0.011463 | 0.011530 | 0.011497 | 0.011362 | 0.011698 |
| 0.011463 | 0.011429 | 0.011429 | 0.011597 | 0.011430 | 0.011530 | 0.011766 |
| 0.011463 | 0.011842 | 0.011833 | 0.011629 | 0.011342 | 0.011536 | 0.011318 |
| 0.011445 | 0.011839 | 0.011376 | 0.011596 | 0.011402 | 0.011518 | 0.011485 |
| 0.011570 | 0.011258 | 0.011283 | 0.011258 | 0.011330 | 0.011395 | 0.011466 |
| 0.011512 | 0.011336 | 0.011518 | 0.011448 | 0.011465 | 0.011597 | 0.011665 |
| 0.011665 | 0.011531 | 0.011635 | 0.011636 | 0.011772 | 0.011802 | 0.011463 |
| 0.011698 | 0.011564 | 0.011429 | 0.011530 | 0.011329 | 0.011564 | 0.011362 |
| 0.011430 | 0.011429 | 0.011396 | 0.011362 | 0.011396 | 0.011362 | 0.011463 |
| 0.011444 | 0.011445 | 0.011437 | 0.011471 | 0.011608 | 0.011504 | 0.011572 |
| 0.011571 | 0.011497 | 0.011319 | 0.011312 | 0.011433 | 0.011602 | 0.011603 |
| 0.011396 | 0.011467 | 0.011700 | 0.011669 | 0.011598 | 0.011632 | 0.011564 |
| 0.011497 | 0.011564 | 0.011564 | 0.011463 | 0.012035 | 0.011631 | 0.011698 |
| 0.011732 | 0.011808 | 0.011435 | 0.011511 | 0.011396 | 0.011597 | 0.011564 |
| 0.011599 | 0.011631 | 0.011631 | 0.011631 | 0.011768 | 0.011766 | 0.011373 |
| 0.011297 | 0.011268 | 0.011401 | 0.011332 | 0.011470 | 0.011284 | 0.011638 |
| 0.011438 | 0.011543 | 0.011298 | 0.011435 | 0.011430 | 0.011505 | 0.011329 |
| 0.011362 | 0.011362 | 0.011362 | 0.011396 | 0.011597 | 0.011564 | 0.011497 |
| 0.011597 | 0.011665 | 0.011396 | 0.011396 | 0.011430 | 0.011429 | 0.011432 |
| 0.011500 | 0.011429 | 0.011430 | 0.011465 | 0.011597 | 0.011665 | 0.011665 |
| 0.011531 | 0.011635 | 0.011636 | 0.011772 | 0.011802 | 0.011463 | 0.011631 |
| 0.011564 | 0.011564 | 0.011398 | 0.011582 | 0.011512 | 0.011537 | 0.011376 |
| 0.011508 | 0.011744 | 0.011484 | 0.011434 | 0.011295 | 0.011497 | 0.011362 |
| 0.000000 | 0.011463 | 0.011362 | 0.011465 | 0.011564 | 0.011567 | 0.011463 |
| 0.011362 | 0.011296 | 0.011429 | 0.011362 | 0.011295 | 0.011400 | 0.011497 |
| 0.011463 | 0.011396 | 0.011429 | 0.011463 | 0.011430 | 0.011362 | 0.011564 |
| 0.011429 | 0.011463 | 0.011463 | 0.011396 | 0.011463 | 0.011698 | 0.011362 |
| 0.011396 | 0.011799 | 0.011396 | 0.011295 | 0.011396 | 0.011765 | 0.011317 |
| 0.011735 | 0.011358 | 0.011361 | 0.011584 | 0.011671 | 0.011599 | 0.011311 |
| 0.011323 | 0.011564 | 0.011665 | 0.011773 | 0.011632 | 0.011771 | 0.011901 |

|          |          |          |          |          |          |          |
|----------|----------|----------|----------|----------|----------|----------|
| 0.011800 | 0.011838 | 0.011799 | 0.012051 | 0.011765 | 0.012641 | 0.011801 |
| 0.012540 | 0.012308 | 0.012442 | 0.012714 | 0.011765 | 0.011463 | 0.011766 |
| 0.012204 | 0.012140 | 0.011732 | 0.011631 | 0.011699 | 0.011699 | 0.011669 |
| 0.011564 | 0.011569 | 0.011631 | 0.011598 | 0.011968 | 0.012035 | 0.012036 |
| 0.011935 | 0.012035 | 0.012139 | 0.011906 | 0.012205 | 0.012212 | 0.012272 |
| 0.012273 | 0.012307 | 0.012255 | 0.012273 | 0.012274 | 0.011497 | 0.011800 |
| 0.011867 | 0.012371 | 0.011874 | 0.012102 | 0.012575 | 0.011638 | 0.011531 |
| 0.011497 | 0.011497 | 0.011968 | 0.012006 | 0.012116 | 0.011833 | 0.011498 |
| S184     | 0.011698 | 0.011698 | 0.012035 | 0.011799 | 0.011799 | 0.011866 |
| 0.011706 | 0.011638 | 0.011799 | 0.011295 | 0.011362 | 0.011329 | 0.011295 |
| 0.011329 | 0.011497 | 0.011295 | 0.011329 | 0.011396 | 0.011362 | 0.011329 |
| 0.011295 | 0.011329 | 0.011429 | 0.011296 | 0.011329 | 0.011329 | 0.011672 |
| 0.011564 | 0.011329 | 0.011228 | 0.011463 | 0.011396 | 0.011363 | 0.011396 |
| 0.011362 | 0.011463 | 0.011362 | 0.011362 | 0.011396 | 0.011362 | 0.011530 |
| 0.011295 | 0.011362 | 0.011396 | 0.011329 | 0.011430 | 0.011463 | 0.011396 |
| 0.011362 | 0.011531 | 0.011430 | 0.011698 | 0.011362 | 0.011631 | 0.011362 |
| 0.011329 | 0.011430 | 0.011497 | 0.011631 | 0.011732 | 0.011430 | 0.011530 |
| 0.011396 | 0.011463 | 0.011363 | 0.011597 | 0.011833 | 0.011362 | 0.011430 |
| 0.011329 | 0.011430 | 0.011396 | 0.011463 | 0.011396 | 0.011396 | 0.011396 |
| 0.011295 | 0.011329 | 0.011295 | 0.011396 | 0.011362 | 0.011397 | 0.011463 |
| 0.011396 | 0.011362 | 0.011430 | 0.011329 | 0.011463 | 0.011295 | 0.011362 |
| 0.011530 | 0.011463 | 0.011631 | 0.011530 | 0.011362 | 0.011598 | 0.011362 |
| 0.011542 | 0.011695 | 0.011551 | 0.011255 | 0.011247 | 0.011391 | 0.011493 |
| 0.012121 | 0.011518 | 0.011225 | 0.011597 | 0.011598 | 0.011396 | 0.011497 |
| 0.011430 | 0.011396 | 0.011463 | 0.011362 | 0.011463 | 0.011396 | 0.011396 |
| 0.011362 | 0.011463 | 0.011665 | 0.011530 | 0.011430 | 0.011396 | 0.011329 |
| 0.011295 | 0.011295 | 0.011362 | 0.011329 | 0.011530 | 0.011497 | 0.011430 |
| 0.011530 | 0.011597 | 0.011329 | 0.011329 | 0.011362 | 0.011362 | 0.011364 |
| 0.011432 | 0.011362 | 0.011362 | 0.011240 | 0.011313 | 0.011271 | 0.011363 |
| 0.011365 | 0.011301 | 0.011282 | 0.011336 | 0.011264 | 0.011300 | 0.011330 |
| 0.011600 | 0.011370 | 0.011405 | 0.011296 | 0.011302 | 0.011430 | 0.011397 |
| 0.011464 | 0.011397 | 0.011396 | 0.011497 | 0.011429 | 0.011799 | 0.011598 |
| 0.011631 | 0.011497 | 0.011362 | 0.011463 | 0.011262 | 0.011497 | 0.011295 |
| 0.011362 | 0.011362 | 0.011329 | 0.011295 | 0.011329 | 0.011295 | 0.011396 |
| 0.011362 | 0.011463 | 0.000000 | 0.011295 | 0.011397 | 0.011497 | 0.011500 |
| 0.011497 | 0.011396 | 0.011295 | 0.011229 | 0.011362 | 0.011295 | 0.011228 |
| 0.011332 | 0.011497 | 0.011295 | 0.011497 | 0.011262 | 0.011363 | 0.011329 |
| 0.011430 | 0.011329 | 0.011362 | 0.011329 | 0.011362 | 0.011228 | 0.011362 |
| 0.011396 | 0.011329 | 0.011396 | 0.011329 | 0.011362 | 0.011396 | 0.011631 |
| 0.011732 | 0.011665 | 0.011732 | 0.011498 | 0.011732 | 0.011362 | 0.011329 |
| 0.011364 | 0.011626 | 0.011426 | 0.011266 | 0.011739 | 0.011231 | 0.011336 |
| 0.011739 | 0.011638 | 0.011530 | 0.011732 | 0.011436 | 0.011598 | 0.011564 |
| 0.011497 | 0.011665 | 0.011522 | 0.011349 | 0.011396 | 0.011396 | 0.011466 |
| 0.011564 | 0.011465 | 0.011601 | 0.011670 | 0.011598 | 0.011665 | 0.011772 |
| 0.011500 | 0.011672 | 0.011602 | 0.011534 | 0.011801 | 0.011262 | 0.011465 |
| 0.011430 | 0.011362 | 0.011262 | 0.011262 | 0.011329 | 0.011329 | 0.011396 |
| 0.011329 | 0.011396 | 0.011295 | 0.011396 | 0.011329 | 0.011329 | 0.011396 |
| 0.011329 | 0.011765 | 0.011665 | 0.011698 | 0.011228 | 0.011329 | 0.011363 |
| 0.011362 | 0.011329 | 0.011396 | 0.011430 | 0.011295 | 0.011295 | 0.011295 |
| 0.011833 | 0.011463 | 0.011463 | 0.011262 | 0.011362 | 0.011531 | 0.011295 |
| 0.011295 | 0.011362 | 0.011329 | 0.011497 | 0.011295 | 0.011430 | 0.011564 |
| 0.011497 | 0.011329 | 0.011329 | 0.011262 | 0.011262 | 0.011430 | 0.011362 |
| 0.011262 | 0.011362 | 0.011228 | 0.011262 | 0.011396 | 0.011531 | 0.011295 |
| 0.011262 | 0.011396 | 0.011329 | 0.011228 | 0.011564 | 0.011228 | 0.011396 |
| 0.011471 | 0.011295 | 0.011598 | 0.011430 | 0.011463 | 0.011329 | 0.011430 |
| 0.011295 | 0.011631 | 0.011228 | 0.011497 | 0.011295 | 0.011295 | 0.011228 |
| 0.011463 | 0.011665 | 0.011363 | 0.011430 | 0.011262 | 0.011665 | 0.011295 |
| 0.011295 | 0.011295 | 0.011329 | 0.011430 | 0.011329 | 0.011430 | 0.011497 |
| 0.011497 | 0.011463 | 0.011362 | 0.011463 | 0.011430 | 0.011295 | 0.011262 |
| 0.011295 | 0.011295 | 0.011363 | 0.011295 | 0.011262 | 0.011430 | 0.011295 |

|          |          |          |          |          |          |          |
|----------|----------|----------|----------|----------|----------|----------|
| 0.011329 | 0.011329 | 0.011463 | 0.011497 | 0.011396 | 0.011329 | 0.011329 |
| 0.011396 | 0.011329 | 0.011430 | 0.011295 | 0.011430 | 0.011530 | 0.011833 |
| 0.011329 | 0.011732 | 0.011336 | 0.017861 | 0.011322 | 0.011427 | 0.011688 |
| 0.011648 | 0.011693 | 0.011427 | 0.011408 | 0.011719 | 0.011716 | 0.011364 |
| 0.011582 | 0.011548 | 0.011216 | 0.011312 | 0.011333 | 0.011356 | 0.011318 |
| 0.011576 | 0.011470 | 0.011468 | 0.011325 | 0.011463 | 0.011497 | 0.011500 |
| 0.011370 | 0.011463 | 0.011463 | 0.011430 | 0.011396 | 0.011396 | 0.011363 |
| 0.011396 | 0.011329 | 0.011362 | 0.011396 | 0.011363 | 0.011295 | 0.011329 |
| 0.011329 | 0.011396 | 0.011295 | 0.011396 | 0.011430 | 0.011463 | 0.011362 |
| 0.011396 | 0.011362 | 0.011698 | 0.011698 | 0.011430 | 0.011464 | 0.011497 |
| 0.011262 | 0.011262 | 0.011295 | 0.011396 | 0.011262 | 0.011497 | 0.011497 |
| 0.011530 | 0.011530 | 0.011463 | 0.011564 | 0.011732 | 0.011565 | 0.011396 |
| 0.011396 | 0.011463 | 0.011497 | 0.011329 | 0.011396 | 0.011362 | 0.011396 |
| 0.011463 | 0.011463 | 0.011497 | 0.011463 | 0.011363 | 0.011564 | 0.011530 |
| 0.011399 | 0.011295 | 0.011396 | 0.011497 | 0.011396 | 0.011530 | 0.011564 |
| 0.011732 | 0.011436 | 0.011598 | 0.011564 | 0.011497 | 0.011665 | 0.011295 |
| 0.011464 | 0.011363 | 0.011329 | 0.011329 | 0.011396 | 0.011295 | 0.011396 |
| 0.011430 | 0.011463 | 0.011362 | 0.011396 | 0.011362 | 0.011698 | 0.011698 |
| 0.011430 | 0.011464 | 0.011530 | 0.011463 | 0.012104 | 0.011525 | 0.011447 |
| 0.011517 | 0.011477 | 0.011588 | 0.011476 | 0.011585 | 0.011509 | 0.011474 |
| 0.012057 | 0.011372 | 0.011506 | 0.011441 | 0.011715 | 0.011571 | 0.011673 |
| 0.012081 | 0.011512 | 0.011398 | 0.011396 | 0.011396 | 0.011430 | 0.011364 |
| 0.011262 | 0.011295 | 0.011430 | 0.011396 | 0.011398 | 0.011530 | 0.011498 |
| 0.011362 | 0.011295 | 0.011329 | 0.011362 | 0.011262 | 0.011329 | 0.011228 |
| 0.011362 | 0.011396 | 0.011295 | 0.011262 | 0.011362 | 0.011295 | 0.011329 |
| 0.011329 | 0.011262 | 0.011329 | 0.011363 | 0.011262 | 0.011463 | 0.011497 |
| 0.011396 | 0.011463 | 0.011396 | 0.011396 | 0.011329 | 0.011732 | 0.011362 |
| 0.011408 | 0.011329 | 0.011564 | 0.011569 | 0.011430 | 0.011430 | 0.011362 |
| 0.011430 | 0.011363 | 0.011329 | 0.011363 | 0.011463 | 0.011463 | 0.011396 |
| 0.011396 | 0.011530 | 0.011698 | 0.011429 | 0.011631 | 0.011631 | 0.011497 |
| 0.011329 | 0.011396 | 0.011430 | 0.011833 | 0.011396 | 0.011430 | 0.011396 |
| 0.011430 | 0.011362 | 0.011362 | 0.011665 | 0.011598 | 0.011631 | 0.011362 |
| 0.011463 | 0.011530 | 0.011396 | 0.011463 | 0.011430 | 0.011295 | 0.011631 |
| 0.011396 | 0.011362 | 0.011362 | 0.011530 | 0.011362 | 0.011463 | 0.011698 |
| 0.011396 | 0.011774 | 0.011766 | 0.011548 | 0.011286 | 0.011468 | 0.011318 |
| 0.011225 | 0.011761 | 0.011306 | 0.011462 | 0.011304 | 0.011417 | 0.011432 |
| 0.011519 | 0.011258 | 0.011394 | 0.011258 | 0.011276 | 0.011462 | 0.011466 |
| 0.011475 | 0.011375 | 0.011448 | 0.011377 | 0.011397 | 0.011530 | 0.011598 |
| 0.011530 | 0.011464 | 0.011567 | 0.011569 | 0.011704 | 0.011696 | 0.011396 |
| 0.011631 | 0.011497 | 0.011362 | 0.011463 | 0.011262 | 0.011497 | 0.011295 |
| 0.011362 | 0.011362 | 0.011329 | 0.011295 | 0.011329 | 0.011295 | 0.011396 |
| 0.011375 | 0.011375 | 0.011368 | 0.011403 | 0.011539 | 0.011504 | 0.011504 |
| 0.011503 | 0.011430 | 0.011245 | 0.011240 | 0.011365 | 0.011535 | 0.011535 |
| 0.011329 | 0.011399 | 0.011633 | 0.011601 | 0.011531 | 0.011565 | 0.011497 |
| 0.011430 | 0.011497 | 0.011497 | 0.011396 | 0.011968 | 0.011564 | 0.011631 |
| 0.011665 | 0.011701 | 0.011367 | 0.011441 | 0.011329 | 0.011530 | 0.011497 |
| 0.011531 | 0.011564 | 0.011564 | 0.011564 | 0.011729 | 0.011698 | 0.011338 |
| 0.011229 | 0.011233 | 0.011333 | 0.011298 | 0.011402 | 0.011210 | 0.011570 |
| 0.011369 | 0.011499 | 0.011251 | 0.011397 | 0.011363 | 0.011437 | 0.011329 |
| 0.011295 | 0.011295 | 0.011362 | 0.011329 | 0.011530 | 0.011497 | 0.011430 |
| 0.011530 | 0.011597 | 0.011329 | 0.011329 | 0.011362 | 0.011362 | 0.011364 |
| 0.011432 | 0.011362 | 0.011362 | 0.011397 | 0.011530 | 0.011598 | 0.011530 |
| 0.011464 | 0.011567 | 0.011569 | 0.011704 | 0.011696 | 0.011396 | 0.011564 |
| 0.011497 | 0.011497 | 0.011331 | 0.011513 | 0.011442 | 0.011469 | 0.011341 |
| 0.011508 | 0.011698 | 0.011483 | 0.011400 | 0.011295 | 0.011497 | 0.011362 |
| 0.011463 | 0.000000 | 0.011295 | 0.011397 | 0.011497 | 0.011500 | 0.011396 |
| 0.011295 | 0.011229 | 0.011362 | 0.011295 | 0.011228 | 0.011332 | 0.011497 |
| 0.011396 | 0.011329 | 0.011362 | 0.011396 | 0.011363 | 0.011295 | 0.011497 |
| 0.011362 | 0.011396 | 0.011396 | 0.011329 | 0.011396 | 0.011631 | 0.011295 |
| 0.011329 | 0.011732 | 0.011329 | 0.011362 | 0.011329 | 0.011698 | 0.011232 |

|          |          |          |          |          |          |          |
|----------|----------|----------|----------|----------|----------|----------|
| 0.011735 | 0.011273 | 0.011311 | 0.011503 | 0.011589 | 0.011527 | 0.011186 |
| 0.011270 | 0.011497 | 0.011597 | 0.011705 | 0.011565 | 0.011703 | 0.011834 |
| 0.011733 | 0.011771 | 0.011732 | 0.011983 | 0.011698 | 0.012573 | 0.011734 |
| 0.012473 | 0.012241 | 0.012375 | 0.012646 | 0.011698 | 0.011396 | 0.011699 |
| 0.012137 | 0.012072 | 0.011665 | 0.011564 | 0.011632 | 0.011632 | 0.011602 |
| 0.011497 | 0.011501 | 0.011564 | 0.011531 | 0.011901 | 0.011967 | 0.011968 |
| 0.011868 | 0.011968 | 0.012072 | 0.011838 | 0.012138 | 0.012144 | 0.012205 |
| 0.012206 | 0.012239 | 0.012186 | 0.012206 | 0.012207 | 0.011429 | 0.011732 |
| 0.011800 | 0.012304 | 0.011806 | 0.012035 | 0.012508 | 0.011570 | 0.011464 |
| 0.011430 | 0.011429 | 0.011900 | 0.011965 | 0.012045 | 0.011765 | 0.011431 |
| s185     | 0.011597 | 0.011597 | 0.011934 | 0.011698 | 0.011698 | 0.011765 |
| 0.011604 | 0.011536 | 0.011698 | 0.011195 | 0.011262 | 0.011228 | 0.011195 |
| 0.011228 | 0.011396 | 0.011195 | 0.011228 | 0.011295 | 0.011262 | 0.011228 |
| 0.011195 | 0.011228 | 0.011329 | 0.011195 | 0.011228 | 0.011228 | 0.011570 |
| 0.011463 | 0.011228 | 0.011127 | 0.011362 | 0.011295 | 0.011262 | 0.011295 |
| 0.011262 | 0.011362 | 0.011262 | 0.011262 | 0.011295 | 0.011262 | 0.011430 |
| 0.011195 | 0.011262 | 0.011295 | 0.011228 | 0.011329 | 0.011362 | 0.011295 |
| 0.011262 | 0.011430 | 0.011329 | 0.011597 | 0.011262 | 0.011530 | 0.011262 |
| 0.011228 | 0.011329 | 0.011396 | 0.011530 | 0.011631 | 0.011329 | 0.011429 |
| 0.011295 | 0.011362 | 0.011262 | 0.011497 | 0.011732 | 0.011262 | 0.011329 |
| 0.011228 | 0.011329 | 0.011295 | 0.011362 | 0.011295 | 0.011295 | 0.011295 |
| 0.011195 | 0.011228 | 0.011195 | 0.011295 | 0.011262 | 0.011296 | 0.011362 |
| 0.011295 | 0.011262 | 0.011329 | 0.011228 | 0.011362 | 0.011195 | 0.011262 |
| 0.011429 | 0.011362 | 0.011597 | 0.011430 | 0.011262 | 0.011497 | 0.011262 |
| 0.011357 | 0.011658 | 0.011475 | 0.011177 | 0.011172 | 0.011207 | 0.011336 |
| 0.012011 | 0.011365 | 0.011184 | 0.011497 | 0.011497 | 0.011295 | 0.011396 |
| 0.011329 | 0.011295 | 0.011362 | 0.011262 | 0.011362 | 0.011295 | 0.011295 |
| 0.011262 | 0.011362 | 0.011564 | 0.011429 | 0.011329 | 0.011295 | 0.011228 |
| 0.011195 | 0.011195 | 0.011262 | 0.011228 | 0.011429 | 0.011396 | 0.011329 |
| 0.011429 | 0.011497 | 0.011228 | 0.011228 | 0.011262 | 0.011262 | 0.011263 |
| 0.011331 | 0.011262 | 0.011262 | 0.011096 | 0.011205 | 0.011165 | 0.011262 |
| 0.011263 | 0.011198 | 0.011245 | 0.011233 | 0.011162 | 0.011197 | 0.011229 |
| 0.011456 | 0.011233 | 0.011301 | 0.011195 | 0.011199 | 0.011329 | 0.011296 |
| 0.011363 | 0.011229 | 0.011228 | 0.011396 | 0.011329 | 0.011698 | 0.011497 |
| 0.011530 | 0.011396 | 0.011262 | 0.011362 | 0.011161 | 0.011396 | 0.011195 |
| 0.011262 | 0.011262 | 0.011228 | 0.011195 | 0.011228 | 0.011195 | 0.011295 |
| 0.011262 | 0.011362 | 0.011295 | 0.000000 | 0.011296 | 0.011396 | 0.011398 |
| 0.011396 | 0.011295 | 0.011195 | 0.011128 | 0.011262 | 0.011195 | 0.011127 |
| 0.011230 | 0.011396 | 0.011195 | 0.011396 | 0.011161 | 0.011262 | 0.011228 |
| 0.011329 | 0.011228 | 0.011262 | 0.011228 | 0.011262 | 0.011127 | 0.011262 |
| 0.011295 | 0.011228 | 0.011295 | 0.011228 | 0.011262 | 0.011295 | 0.011530 |
| 0.011631 | 0.011564 | 0.011631 | 0.011397 | 0.011631 | 0.011262 | 0.011228 |
| 0.011229 | 0.011505 | 0.011335 | 0.011163 | 0.011637 | 0.011129 | 0.011257 |
| 0.011637 | 0.011536 | 0.011429 | 0.011631 | 0.011333 | 0.011497 | 0.011463 |
| 0.011396 | 0.011564 | 0.011416 | 0.011266 | 0.011312 | 0.011295 | 0.011365 |
| 0.011463 | 0.011364 | 0.011500 | 0.011568 | 0.011497 | 0.011564 | 0.011670 |
| 0.011399 | 0.011569 | 0.011500 | 0.011432 | 0.011699 | 0.011161 | 0.011364 |
| 0.011329 | 0.011262 | 0.011161 | 0.011161 | 0.011228 | 0.011228 | 0.011295 |
| 0.011228 | 0.011295 | 0.011195 | 0.011295 | 0.011228 | 0.011228 | 0.011295 |
| 0.011228 | 0.011665 | 0.011564 | 0.011597 | 0.011127 | 0.011228 | 0.011262 |
| 0.011262 | 0.011228 | 0.011295 | 0.011329 | 0.011195 | 0.011195 | 0.011195 |
| 0.011732 | 0.011362 | 0.011362 | 0.011161 | 0.011262 | 0.011430 | 0.011195 |
| 0.011195 | 0.011262 | 0.011228 | 0.011396 | 0.011195 | 0.011329 | 0.011463 |
| 0.011396 | 0.011228 | 0.011228 | 0.011161 | 0.011161 | 0.011329 | 0.011262 |
| 0.011161 | 0.011262 | 0.011127 | 0.011161 | 0.011295 | 0.011430 | 0.011195 |
| 0.011161 | 0.011295 | 0.011228 | 0.011127 | 0.011463 | 0.011127 | 0.011295 |
| 0.011368 | 0.011195 | 0.011497 | 0.011329 | 0.011362 | 0.011228 | 0.011329 |
| 0.011195 | 0.011530 | 0.011127 | 0.011396 | 0.011195 | 0.011195 | 0.011127 |
| 0.011362 | 0.011564 | 0.011262 | 0.011329 | 0.011161 | 0.011564 | 0.011195 |
| 0.011195 | 0.011195 | 0.011228 | 0.011329 | 0.011228 | 0.011329 | 0.011396 |

|          |          |          |          |          |          |          |
|----------|----------|----------|----------|----------|----------|----------|
| 0.011396 | 0.011362 | 0.011262 | 0.011362 | 0.011329 | 0.011195 | 0.011161 |
| 0.011195 | 0.011195 | 0.011262 | 0.011195 | 0.011161 | 0.011329 | 0.011195 |
| 0.011228 | 0.011228 | 0.011362 | 0.011396 | 0.011295 | 0.011228 | 0.011228 |
| 0.011295 | 0.011228 | 0.011329 | 0.011195 | 0.011329 | 0.011429 | 0.011732 |
| 0.011228 | 0.011631 | 0.011233 | 0.017747 | 0.011126 | 0.011427 | 0.011583 |
| 0.011545 | 0.011588 | 0.011217 | 0.011234 | 0.011664 | 0.011612 | 0.011303 |
| 0.011440 | 0.011487 | 0.011138 | 0.011228 | 0.011216 | 0.011258 | 0.011232 |
| 0.011436 | 0.011395 | 0.011394 | 0.011126 | 0.011362 | 0.011396 | 0.011398 |
| 0.011266 | 0.011362 | 0.011362 | 0.011329 | 0.011295 | 0.011295 | 0.011262 |
| 0.011295 | 0.011228 | 0.011262 | 0.011295 | 0.011262 | 0.011195 | 0.011228 |
| 0.011228 | 0.011295 | 0.011195 | 0.011295 | 0.011329 | 0.011362 | 0.011262 |
| 0.011295 | 0.011262 | 0.011597 | 0.011597 | 0.011329 | 0.011363 | 0.011396 |
| 0.011161 | 0.011161 | 0.011195 | 0.011295 | 0.011161 | 0.011396 | 0.011396 |
| 0.011429 | 0.011429 | 0.011362 | 0.011463 | 0.011631 | 0.011464 | 0.011295 |
| 0.011295 | 0.011362 | 0.011396 | 0.011228 | 0.011295 | 0.011262 | 0.011295 |
| 0.011363 | 0.011362 | 0.011396 | 0.011362 | 0.011262 | 0.011463 | 0.011429 |
| 0.011297 | 0.011195 | 0.011295 | 0.011396 | 0.011295 | 0.011430 | 0.011463 |
| 0.011631 | 0.011333 | 0.011497 | 0.011463 | 0.011396 | 0.011564 | 0.011195 |
| 0.011363 | 0.011262 | 0.011228 | 0.011228 | 0.011295 | 0.011195 | 0.011295 |
| 0.011329 | 0.011362 | 0.011262 | 0.011295 | 0.011262 | 0.011597 | 0.011597 |
| 0.011329 | 0.011363 | 0.011429 | 0.011362 | 0.012002 | 0.011417 | 0.011342 |
| 0.011412 | 0.011372 | 0.011482 | 0.011372 | 0.011480 | 0.011405 | 0.011371 |
| 0.011953 | 0.011268 | 0.011403 | 0.011337 | 0.011611 | 0.011468 | 0.011571 |
| 0.011978 | 0.011437 | 0.011297 | 0.011295 | 0.011295 | 0.011329 | 0.011263 |
| 0.011161 | 0.011195 | 0.011329 | 0.011295 | 0.011297 | 0.011429 | 0.011397 |
| 0.011262 | 0.011195 | 0.011228 | 0.011262 | 0.011161 | 0.011228 | 0.011127 |
| 0.011262 | 0.011295 | 0.011195 | 0.011161 | 0.011262 | 0.011195 | 0.011228 |
| 0.011228 | 0.011161 | 0.011228 | 0.011262 | 0.011161 | 0.011362 | 0.011396 |
| 0.011295 | 0.011362 | 0.011295 | 0.011295 | 0.011228 | 0.011631 | 0.011262 |
| 0.011304 | 0.011228 | 0.011463 | 0.011467 | 0.011329 | 0.011329 | 0.011329 |
| 0.011329 | 0.011262 | 0.011228 | 0.011262 | 0.011362 | 0.011362 | 0.011295 |
| 0.011295 | 0.011429 | 0.011597 | 0.011329 | 0.011530 | 0.011530 | 0.011396 |
| 0.011228 | 0.011295 | 0.011329 | 0.011732 | 0.011295 | 0.011329 | 0.011295 |
| 0.011329 | 0.011262 | 0.011262 | 0.011564 | 0.011497 | 0.011530 | 0.011262 |
| 0.011362 | 0.011362 | 0.011295 | 0.011362 | 0.011329 | 0.011195 | 0.011530 |
| 0.011295 | 0.011262 | 0.011262 | 0.011429 | 0.011262 | 0.011362 | 0.011597 |
| 0.011295 | 0.011672 | 0.011665 | 0.011467 | 0.011117 | 0.011366 | 0.011163 |
| 0.011225 | 0.011683 | 0.011201 | 0.011417 | 0.011207 | 0.011315 | 0.011326 |
| 0.011366 | 0.011126 | 0.011227 | 0.000000 | 0.011168 | 0.011261 | 0.011303 |
| 0.011324 | 0.011218 | 0.011342 | 0.011236 | 0.011296 | 0.011429 | 0.011497 |
| 0.011497 | 0.011363 | 0.011466 | 0.011467 | 0.011602 | 0.011625 | 0.011295 |
| 0.011530 | 0.011396 | 0.011262 | 0.011362 | 0.011161 | 0.011396 | 0.011195 |
| 0.011262 | 0.011262 | 0.011228 | 0.011195 | 0.011228 | 0.011195 | 0.011295 |
| 0.011270 | 0.011270 | 0.011266 | 0.011300 | 0.011436 | 0.011402 | 0.011402 |
| 0.011401 | 0.011329 | 0.011097 | 0.011096 | 0.011263 | 0.011433 | 0.011433 |
| 0.011228 | 0.011297 | 0.011531 | 0.011499 | 0.011430 | 0.011464 | 0.011396 |
| 0.011329 | 0.011396 | 0.011396 | 0.011295 | 0.011866 | 0.011463 | 0.011530 |
| 0.011564 | 0.011630 | 0.011265 | 0.011337 | 0.011228 | 0.011430 | 0.011396 |
| 0.011430 | 0.011463 | 0.011463 | 0.011463 | 0.011571 | 0.011597 | 0.011234 |
| 0.011128 | 0.011130 | 0.011230 | 0.011196 | 0.011299 | 0.011135 | 0.011468 |
| 0.011266 | 0.011411 | 0.011108 | 0.011285 | 0.011262 | 0.011334 | 0.011228 |
| 0.011195 | 0.011195 | 0.011262 | 0.011228 | 0.011429 | 0.011396 | 0.011329 |
| 0.011429 | 0.011497 | 0.011228 | 0.011228 | 0.011262 | 0.011262 | 0.011263 |
| 0.011331 | 0.011262 | 0.011262 | 0.011296 | 0.011429 | 0.011497 | 0.011497 |
| 0.011363 | 0.011466 | 0.011467 | 0.011602 | 0.011625 | 0.011295 | 0.011463 |
| 0.011396 | 0.011396 | 0.011229 | 0.011408 | 0.011338 | 0.011367 | 0.011235 |
| 0.011404 | 0.011607 | 0.011357 | 0.011298 | 0.011195 | 0.011396 | 0.011262 |
| 0.011362 | 0.011295 | 0.000000 | 0.011296 | 0.011396 | 0.011398 | 0.011295 |
| 0.011195 | 0.011128 | 0.011262 | 0.011195 | 0.011127 | 0.011230 | 0.011396 |
| 0.011295 | 0.011228 | 0.011262 | 0.011295 | 0.011262 | 0.011195 | 0.011396 |



|          |          |          |          |          |          |          |
|----------|----------|----------|----------|----------|----------|----------|
| 0.011262 | 0.011295 | 0.011295 | 0.011228 | 0.011295 | 0.011530 | 0.011195 |
| 0.011228 | 0.011631 | 0.011228 | 0.011262 | 0.011228 | 0.011597 | 0.011189 |
| 0.011678 | 0.011188 | 0.011211 | 0.011422 | 0.011508 | 0.011419 | 0.011144 |
| 0.011113 | 0.011396 | 0.011497 | 0.011603 | 0.011464 | 0.011601 | 0.011733 |
| 0.011632 | 0.011669 | 0.011631 | 0.011880 | 0.011597 | 0.012405 | 0.011633 |
| 0.012372 | 0.012072 | 0.012206 | 0.012545 | 0.011597 | 0.011295 | 0.011598 |
| 0.012036 | 0.011971 | 0.011564 | 0.011463 | 0.011531 | 0.011531 | 0.011500 |
| 0.011396 | 0.011399 | 0.011463 | 0.011430 | 0.011800 | 0.011866 | 0.011867 |
| 0.011767 | 0.011867 | 0.011970 | 0.011737 | 0.012036 | 0.012042 | 0.012103 |
| 0.012104 | 0.012138 | 0.012084 | 0.012104 | 0.012105 | 0.011329 | 0.011631 |
| 0.011699 | 0.012203 | 0.011704 | 0.011934 | 0.012406 | 0.011468 | 0.011363 |
| 0.011329 | 0.011329 | 0.011799 | 0.011800 | 0.011939 | 0.011665 | 0.011330 |
| S186     | 0.011701 | 0.011701 | 0.012038 | 0.011802 | 0.011802 | 0.011869 |
| 0.011708 | 0.011640 | 0.011734 | 0.011296 | 0.011363 | 0.011330 | 0.011296 |
| 0.011330 | 0.011431 | 0.011296 | 0.011330 | 0.011363 | 0.011363 | 0.011330 |
| 0.011296 | 0.011330 | 0.011397 | 0.011296 | 0.011330 | 0.011330 | 0.011674 |
| 0.011566 | 0.011330 | 0.011229 | 0.011431 | 0.011397 | 0.011364 | 0.011397 |
| 0.011363 | 0.011465 | 0.011363 | 0.011363 | 0.011397 | 0.011363 | 0.011532 |
| 0.011296 | 0.011363 | 0.011397 | 0.011330 | 0.011431 | 0.011464 | 0.011397 |
| 0.011363 | 0.011532 | 0.011431 | 0.011700 | 0.011363 | 0.011633 | 0.011363 |
| 0.011330 | 0.011431 | 0.011498 | 0.011633 | 0.011734 | 0.011431 | 0.011532 |
| 0.011397 | 0.011465 | 0.011363 | 0.011599 | 0.011836 | 0.011296 | 0.011431 |
| 0.011330 | 0.011431 | 0.011330 | 0.011465 | 0.011397 | 0.011397 | 0.011397 |
| 0.011296 | 0.011330 | 0.011296 | 0.011397 | 0.011363 | 0.011398 | 0.011464 |
| 0.011397 | 0.011363 | 0.011431 | 0.011330 | 0.011464 | 0.011296 | 0.011363 |
| 0.011532 | 0.011464 | 0.011700 | 0.011532 | 0.011363 | 0.011599 | 0.011296 |
| 0.011544 | 0.011773 | 0.011590 | 0.011295 | 0.011248 | 0.011392 | 0.011455 |
| 0.012089 | 0.011569 | 0.011267 | 0.011599 | 0.011599 | 0.011397 | 0.011498 |
| 0.011431 | 0.011397 | 0.011464 | 0.011363 | 0.011465 | 0.011397 | 0.011397 |
| 0.011363 | 0.011464 | 0.011667 | 0.011464 | 0.011431 | 0.011397 | 0.011330 |
| 0.011296 | 0.011296 | 0.011363 | 0.011330 | 0.011532 | 0.011498 | 0.011431 |
| 0.011532 | 0.011532 | 0.011330 | 0.011330 | 0.011363 | 0.011363 | 0.011365 |
| 0.011433 | 0.011363 | 0.011363 | 0.011241 | 0.011278 | 0.011236 | 0.011364 |
| 0.011366 | 0.011302 | 0.011356 | 0.011337 | 0.011265 | 0.011301 | 0.011331 |
| 0.011566 | 0.011372 | 0.011406 | 0.011296 | 0.011303 | 0.011432 | 0.011398 |
| 0.011465 | 0.011398 | 0.011398 | 0.011498 | 0.011431 | 0.011802 | 0.011600 |
| 0.011633 | 0.011498 | 0.011363 | 0.011465 | 0.011262 | 0.011498 | 0.011296 |
| 0.011363 | 0.011363 | 0.011330 | 0.011296 | 0.011330 | 0.011296 | 0.011397 |
| 0.011363 | 0.011465 | 0.011397 | 0.011296 | 0.000000 | 0.011431 | 0.011467 |
| 0.011498 | 0.011364 | 0.011296 | 0.011229 | 0.011363 | 0.011296 | 0.011229 |
| 0.011333 | 0.011498 | 0.011296 | 0.011498 | 0.011262 | 0.011363 | 0.011330 |
| 0.011431 | 0.011330 | 0.011363 | 0.011330 | 0.011363 | 0.011229 | 0.011363 |
| 0.011397 | 0.011330 | 0.011397 | 0.011330 | 0.011363 | 0.011397 | 0.011633 |
| 0.011734 | 0.011667 | 0.011734 | 0.011500 | 0.011734 | 0.011363 | 0.011330 |
| 0.011365 | 0.011667 | 0.011426 | 0.011266 | 0.011673 | 0.011231 | 0.011336 |
| 0.011742 | 0.011640 | 0.011532 | 0.011734 | 0.011437 | 0.011599 | 0.011566 |
| 0.011498 | 0.011667 | 0.011488 | 0.011350 | 0.011397 | 0.011397 | 0.011434 |
| 0.011566 | 0.011466 | 0.011603 | 0.011672 | 0.011599 | 0.011667 | 0.011774 |
| 0.011502 | 0.011674 | 0.011604 | 0.011535 | 0.011803 | 0.011262 | 0.011466 |
| 0.011431 | 0.011363 | 0.011262 | 0.011262 | 0.011330 | 0.011262 | 0.011397 |
| 0.011330 | 0.011397 | 0.011296 | 0.011397 | 0.011330 | 0.011330 | 0.011397 |
| 0.011330 | 0.011768 | 0.011667 | 0.011701 | 0.011229 | 0.011330 | 0.011363 |
| 0.011363 | 0.011330 | 0.011397 | 0.011431 | 0.011296 | 0.011296 | 0.011296 |
| 0.011835 | 0.011464 | 0.011465 | 0.011262 | 0.011363 | 0.011532 | 0.011296 |
| 0.011296 | 0.011363 | 0.011330 | 0.011498 | 0.011262 | 0.011431 | 0.011566 |
| 0.011498 | 0.011330 | 0.011330 | 0.011262 | 0.011262 | 0.011431 | 0.011363 |
| 0.011262 | 0.011363 | 0.011229 | 0.011262 | 0.011397 | 0.011532 | 0.011262 |
| 0.011263 | 0.011397 | 0.011330 | 0.011229 | 0.011566 | 0.011229 | 0.011330 |
| 0.011473 | 0.011296 | 0.011599 | 0.011431 | 0.011465 | 0.011330 | 0.011431 |
| 0.011296 | 0.011633 | 0.011229 | 0.011498 | 0.011296 | 0.011296 | 0.011229 |

|          |          |          |          |          |          |          |
|----------|----------|----------|----------|----------|----------|----------|
| 0.011464 | 0.011667 | 0.011363 | 0.011431 | 0.011262 | 0.011667 | 0.011296 |
| 0.011296 | 0.011296 | 0.011330 | 0.011431 | 0.011330 | 0.011431 | 0.011498 |
| 0.011498 | 0.011465 | 0.011363 | 0.011465 | 0.011431 | 0.011296 | 0.011262 |
| 0.011296 | 0.011296 | 0.011363 | 0.011296 | 0.011262 | 0.011431 | 0.011296 |
| 0.011330 | 0.011330 | 0.011465 | 0.011498 | 0.011397 | 0.011330 | 0.011330 |
| 0.011397 | 0.011330 | 0.011431 | 0.011296 | 0.011431 | 0.011465 | 0.011802 |
| 0.011330 | 0.011734 | 0.011337 | 0.017849 | 0.011258 | 0.011491 | 0.011690 |
| 0.011651 | 0.011696 | 0.011374 | 0.011292 | 0.011778 | 0.011719 | 0.011427 |
| 0.011487 | 0.011613 | 0.011256 | 0.011355 | 0.011333 | 0.011358 | 0.011363 |
| 0.011529 | 0.011471 | 0.011470 | 0.011259 | 0.011465 | 0.011498 | 0.011501 |
| 0.011371 | 0.011464 | 0.011465 | 0.011431 | 0.011397 | 0.011397 | 0.011364 |
| 0.011397 | 0.011330 | 0.011363 | 0.011397 | 0.011363 | 0.011296 | 0.011330 |
| 0.011330 | 0.011397 | 0.011296 | 0.011397 | 0.011431 | 0.011464 | 0.011363 |
| 0.011397 | 0.011363 | 0.011700 | 0.011700 | 0.011431 | 0.011330 | 0.011498 |
| 0.011262 | 0.011262 | 0.011296 | 0.011397 | 0.011262 | 0.011498 | 0.011498 |
| 0.011532 | 0.011532 | 0.011465 | 0.011566 | 0.011734 | 0.011567 | 0.011397 |
| 0.011397 | 0.011464 | 0.011498 | 0.011330 | 0.011397 | 0.011363 | 0.011397 |
| 0.011465 | 0.011465 | 0.011498 | 0.011465 | 0.011364 | 0.011566 | 0.011532 |
| 0.011366 | 0.011296 | 0.011397 | 0.011498 | 0.011397 | 0.011532 | 0.011566 |
| 0.011734 | 0.011437 | 0.011599 | 0.011566 | 0.011498 | 0.011667 | 0.011296 |
| 0.011466 | 0.011296 | 0.011330 | 0.011330 | 0.011397 | 0.011296 | 0.011397 |
| 0.011431 | 0.011464 | 0.011363 | 0.011397 | 0.011363 | 0.011700 | 0.011700 |
| 0.011431 | 0.011330 | 0.011532 | 0.011465 | 0.012107 | 0.011526 | 0.011413 |
| 0.011519 | 0.011478 | 0.011589 | 0.011477 | 0.011587 | 0.011510 | 0.011476 |
| 0.012060 | 0.011373 | 0.011507 | 0.011442 | 0.011717 | 0.011572 | 0.011675 |
| 0.012084 | 0.011514 | 0.011400 | 0.011397 | 0.011397 | 0.011431 | 0.011365 |
| 0.011262 | 0.011296 | 0.011431 | 0.011397 | 0.011399 | 0.011532 | 0.011500 |
| 0.011363 | 0.011296 | 0.011330 | 0.011363 | 0.011262 | 0.011330 | 0.011229 |
| 0.011363 | 0.011397 | 0.011296 | 0.011262 | 0.011363 | 0.011296 | 0.011330 |
| 0.011330 | 0.011262 | 0.011330 | 0.011363 | 0.011262 | 0.011465 | 0.011498 |
| 0.011397 | 0.011465 | 0.011397 | 0.011397 | 0.011330 | 0.011734 | 0.011363 |
| 0.011375 | 0.011330 | 0.011566 | 0.011571 | 0.011431 | 0.011431 | 0.011431 |
| 0.011431 | 0.011363 | 0.011330 | 0.011363 | 0.011397 | 0.011431 | 0.011397 |
| 0.011397 | 0.011532 | 0.011700 | 0.011431 | 0.011633 | 0.011633 | 0.011498 |
| 0.011330 | 0.011397 | 0.011431 | 0.011836 | 0.011397 | 0.011431 | 0.011397 |
| 0.011431 | 0.011363 | 0.011363 | 0.011667 | 0.011600 | 0.011633 | 0.011363 |
| 0.011465 | 0.011532 | 0.011397 | 0.011465 | 0.011431 | 0.011296 | 0.011633 |
| 0.011397 | 0.011363 | 0.011363 | 0.011532 | 0.011363 | 0.011464 | 0.011701 |
| 0.011397 | 0.011776 | 0.011768 | 0.011550 | 0.011230 | 0.011469 | 0.011267 |
| 0.011281 | 0.011764 | 0.011307 | 0.011509 | 0.011354 | 0.011367 | 0.011434 |
| 0.011519 | 0.011259 | 0.011340 | 0.011193 | 0.011277 | 0.011397 | 0.011467 |
| 0.011476 | 0.011337 | 0.011449 | 0.011343 | 0.011398 | 0.011532 | 0.011599 |
| 0.011566 | 0.011465 | 0.011569 | 0.011570 | 0.011707 | 0.011734 | 0.011397 |
| 0.011633 | 0.011498 | 0.011363 | 0.011465 | 0.011262 | 0.011498 | 0.011296 |
| 0.011363 | 0.011363 | 0.011330 | 0.011296 | 0.011330 | 0.011296 | 0.011397 |
| 0.011376 | 0.011376 | 0.011370 | 0.011404 | 0.011541 | 0.011506 | 0.011506 |
| 0.011505 | 0.011431 | 0.011246 | 0.011241 | 0.011298 | 0.011536 | 0.011537 |
| 0.011330 | 0.011400 | 0.011634 | 0.011603 | 0.011533 | 0.011499 | 0.011498 |
| 0.011431 | 0.011498 | 0.011498 | 0.011397 | 0.011971 | 0.011566 | 0.011633 |
| 0.011599 | 0.011739 | 0.011368 | 0.011443 | 0.011330 | 0.011532 | 0.011498 |
| 0.011533 | 0.011566 | 0.011566 | 0.011566 | 0.011731 | 0.011701 | 0.011304 |
| 0.011230 | 0.011199 | 0.011334 | 0.011299 | 0.011403 | 0.011210 | 0.011572 |
| 0.011370 | 0.011500 | 0.011251 | 0.011361 | 0.011364 | 0.011438 | 0.011330 |
| 0.011296 | 0.011296 | 0.011363 | 0.011330 | 0.011532 | 0.011498 | 0.011431 |
| 0.011532 | 0.011532 | 0.011330 | 0.011330 | 0.011363 | 0.011363 | 0.011365 |
| 0.011433 | 0.011363 | 0.011363 | 0.011398 | 0.011532 | 0.011599 | 0.011566 |
| 0.011465 | 0.011569 | 0.011570 | 0.011707 | 0.011734 | 0.011397 | 0.011566 |
| 0.011498 | 0.011498 | 0.011332 | 0.011514 | 0.011374 | 0.011470 | 0.011341 |
| 0.011509 | 0.011698 | 0.011484 | 0.011401 | 0.011296 | 0.011498 | 0.011363 |
| 0.011465 | 0.011397 | 0.011296 | 0.000000 | 0.011431 | 0.011467 | 0.011364 |

|          |          |          |          |          |          |          |
|----------|----------|----------|----------|----------|----------|----------|
| 0.011296 | 0.011229 | 0.011363 | 0.011296 | 0.011229 | 0.011333 | 0.011498 |
| 0.011397 | 0.011330 | 0.011363 | 0.011397 | 0.011363 | 0.011296 | 0.011498 |
| 0.011363 | 0.011397 | 0.011397 | 0.011330 | 0.011397 | 0.011633 | 0.011296 |
| 0.011330 | 0.011734 | 0.011330 | 0.011363 | 0.011330 | 0.011700 | 0.011232 |
| 0.011678 | 0.011231 | 0.011261 | 0.011505 | 0.011591 | 0.011528 | 0.011228 |
| 0.011218 | 0.011498 | 0.011599 | 0.011708 | 0.011567 | 0.011705 | 0.011836 |
| 0.011735 | 0.011773 | 0.011734 | 0.011986 | 0.011701 | 0.012578 | 0.011736 |
| 0.012478 | 0.012245 | 0.012379 | 0.012652 | 0.011700 | 0.011397 | 0.011667 |
| 0.012141 | 0.012042 | 0.011667 | 0.011566 | 0.011634 | 0.011634 | 0.011603 |
| 0.011498 | 0.011469 | 0.011566 | 0.011533 | 0.011904 | 0.011971 | 0.011972 |
| 0.011871 | 0.011971 | 0.012075 | 0.011841 | 0.012141 | 0.012148 | 0.012209 |
| 0.012209 | 0.012209 | 0.012190 | 0.012176 | 0.012177 | 0.011431 | 0.011735 |
| 0.011803 | 0.012308 | 0.011809 | 0.012038 | 0.012513 | 0.011571 | 0.011465 |
| 0.011431 | 0.011431 | 0.011903 | 0.011928 | 0.012049 | 0.011768 | 0.011432 |
| S187     | 0.011799 | 0.011799 | 0.012136 | 0.011900 | 0.011900 | 0.011967 |
| 0.011808 | 0.011740 | 0.011900 | 0.011396 | 0.011463 | 0.011430 | 0.011396 |
| 0.011430 | 0.011598 | 0.011396 | 0.011430 | 0.011497 | 0.011463 | 0.011430 |
| 0.011396 | 0.011430 | 0.011530 | 0.011396 | 0.011396 | 0.011430 | 0.011774 |
| 0.011665 | 0.011430 | 0.011329 | 0.011564 | 0.011497 | 0.011463 | 0.011497 |
| 0.011463 | 0.011564 | 0.011463 | 0.011463 | 0.011497 | 0.011463 | 0.011631 |
| 0.011396 | 0.011463 | 0.011497 | 0.011430 | 0.011530 | 0.011564 | 0.011497 |
| 0.011463 | 0.011631 | 0.011531 | 0.011799 | 0.011463 | 0.011732 | 0.011463 |
| 0.011430 | 0.011530 | 0.011598 | 0.011732 | 0.011833 | 0.011530 | 0.011631 |
| 0.011497 | 0.011564 | 0.011463 | 0.011698 | 0.011934 | 0.011463 | 0.011530 |
| 0.011430 | 0.011530 | 0.011497 | 0.011564 | 0.011497 | 0.011497 | 0.011497 |
| 0.011396 | 0.011430 | 0.011396 | 0.011497 | 0.011463 | 0.011498 | 0.011564 |
| 0.011497 | 0.011463 | 0.011530 | 0.011429 | 0.011564 | 0.011396 | 0.011463 |
| 0.011631 | 0.011564 | 0.011799 | 0.011631 | 0.011463 | 0.011698 | 0.011463 |
| 0.011654 | 0.011882 | 0.011702 | 0.011412 | 0.011396 | 0.011391 | 0.011611 |
| 0.012231 | 0.011620 | 0.011431 | 0.011698 | 0.011698 | 0.011497 | 0.011598 |
| 0.011530 | 0.011497 | 0.011564 | 0.011463 | 0.011564 | 0.011497 | 0.011497 |
| 0.011463 | 0.011564 | 0.011766 | 0.011631 | 0.011530 | 0.011497 | 0.011430 |
| 0.011396 | 0.011396 | 0.011463 | 0.011430 | 0.011631 | 0.011597 | 0.011530 |
| 0.011631 | 0.011698 | 0.011429 | 0.011429 | 0.011463 | 0.011463 | 0.011465 |
| 0.011533 | 0.011463 | 0.011463 | 0.011348 | 0.011422 | 0.011376 | 0.011464 |
| 0.011467 | 0.011404 | 0.011466 | 0.011440 | 0.011366 | 0.011403 | 0.011432 |
| 0.011672 | 0.011474 | 0.011508 | 0.011396 | 0.011406 | 0.011531 | 0.011497 |
| 0.011565 | 0.011498 | 0.011497 | 0.011597 | 0.011530 | 0.011900 | 0.011699 |
| 0.011732 | 0.011598 | 0.011463 | 0.011564 | 0.011362 | 0.011597 | 0.011396 |
| 0.011463 | 0.011463 | 0.011430 | 0.011396 | 0.011430 | 0.011396 | 0.011497 |
| 0.011463 | 0.011564 | 0.011497 | 0.011396 | 0.011431 | 0.000000 | 0.011466 |
| 0.011598 | 0.011497 | 0.011396 | 0.011263 | 0.011463 | 0.011396 | 0.011329 |
| 0.011434 | 0.011598 | 0.011396 | 0.011598 | 0.011362 | 0.011463 | 0.011430 |
| 0.011530 | 0.011430 | 0.011463 | 0.011430 | 0.011463 | 0.011329 | 0.011463 |
| 0.011497 | 0.011430 | 0.011497 | 0.011429 | 0.011463 | 0.011497 | 0.011732 |
| 0.011833 | 0.011765 | 0.011833 | 0.011600 | 0.011833 | 0.011463 | 0.011430 |
| 0.011466 | 0.011586 | 0.011380 | 0.011266 | 0.011841 | 0.011333 | 0.011454 |
| 0.011841 | 0.011740 | 0.011631 | 0.011833 | 0.011538 | 0.011698 | 0.011665 |
| 0.011598 | 0.011765 | 0.011593 | 0.011472 | 0.011480 | 0.011497 | 0.011568 |
| 0.011665 | 0.011566 | 0.011703 | 0.011771 | 0.011698 | 0.011766 | 0.011874 |
| 0.011602 | 0.011773 | 0.011704 | 0.011635 | 0.011902 | 0.011362 | 0.011566 |
| 0.011530 | 0.011463 | 0.011362 | 0.011362 | 0.011430 | 0.011430 | 0.011497 |
| 0.011430 | 0.011497 | 0.011396 | 0.011497 | 0.011430 | 0.011430 | 0.011497 |
| 0.011430 | 0.011866 | 0.011766 | 0.011799 | 0.011329 | 0.011430 | 0.011463 |
| 0.011463 | 0.011430 | 0.011497 | 0.011530 | 0.011396 | 0.011396 | 0.011396 |
| 0.011934 | 0.011564 | 0.011564 | 0.011362 | 0.011463 | 0.011631 | 0.011396 |
| 0.011396 | 0.011463 | 0.011430 | 0.011598 | 0.011396 | 0.011530 | 0.011665 |
| 0.011597 | 0.011430 | 0.011430 | 0.011362 | 0.011362 | 0.011530 | 0.011463 |
| 0.011362 | 0.011463 | 0.011329 | 0.011362 | 0.011497 | 0.011631 | 0.011396 |
| 0.011363 | 0.011497 | 0.011430 | 0.011329 | 0.011665 | 0.011329 | 0.011497 |

|          |          |          |          |          |          |          |
|----------|----------|----------|----------|----------|----------|----------|
| 0.011540 | 0.011396 | 0.011698 | 0.011531 | 0.011564 | 0.011430 | 0.011530 |
| 0.011396 | 0.011732 | 0.011329 | 0.011598 | 0.011396 | 0.011396 | 0.011329 |
| 0.011564 | 0.011766 | 0.011463 | 0.011530 | 0.011362 | 0.011766 | 0.011396 |
| 0.011396 | 0.011396 | 0.011430 | 0.011530 | 0.011430 | 0.011195 | 0.011597 |
| 0.011598 | 0.011564 | 0.011463 | 0.011564 | 0.011530 | 0.011396 | 0.011362 |
| 0.011396 | 0.011396 | 0.011463 | 0.011396 | 0.011362 | 0.011530 | 0.011396 |
| 0.011430 | 0.011430 | 0.011564 | 0.011598 | 0.011497 | 0.011430 | 0.011430 |
| 0.011497 | 0.011430 | 0.011530 | 0.011396 | 0.011530 | 0.011631 | 0.011934 |
| 0.011430 | 0.011833 | 0.011440 | 0.017937 | 0.011453 | 0.011672 | 0.011793 |
| 0.011752 | 0.011799 | 0.011374 | 0.011408 | 0.011994 | 0.011820 | 0.011607 |
| 0.011582 | 0.011793 | 0.011372 | 0.011437 | 0.011333 | 0.011554 | 0.011490 |
| 0.011623 | 0.011619 | 0.011616 | 0.011325 | 0.011564 | 0.011598 | 0.011601 |
| 0.011473 | 0.011564 | 0.011564 | 0.011530 | 0.011497 | 0.011497 | 0.011463 |
| 0.011497 | 0.011430 | 0.011463 | 0.011497 | 0.011463 | 0.011396 | 0.011429 |
| 0.011429 | 0.011497 | 0.011396 | 0.011497 | 0.011530 | 0.011564 | 0.011463 |
| 0.011497 | 0.011463 | 0.011799 | 0.011799 | 0.011531 | 0.011531 | 0.011598 |
| 0.011362 | 0.011362 | 0.011396 | 0.011497 | 0.011362 | 0.011597 | 0.011597 |
| 0.011631 | 0.011631 | 0.011564 | 0.011665 | 0.011833 | 0.011667 | 0.011497 |
| 0.011497 | 0.011564 | 0.011598 | 0.011430 | 0.011497 | 0.011463 | 0.011497 |
| 0.011564 | 0.011564 | 0.011597 | 0.011564 | 0.011431 | 0.011665 | 0.011631 |
| 0.011501 | 0.011396 | 0.011497 | 0.011598 | 0.011497 | 0.011631 | 0.011665 |
| 0.011833 | 0.011538 | 0.011698 | 0.011665 | 0.011598 | 0.011765 | 0.011396 |
| 0.011566 | 0.011464 | 0.011429 | 0.011429 | 0.011497 | 0.011396 | 0.011497 |
| 0.011530 | 0.011564 | 0.011463 | 0.011497 | 0.011463 | 0.011799 | 0.011799 |
| 0.011531 | 0.011531 | 0.011631 | 0.011564 | 0.012205 | 0.011632 | 0.011518 |
| 0.011623 | 0.011581 | 0.011658 | 0.011545 | 0.011691 | 0.011612 | 0.011578 |
| 0.012160 | 0.011476 | 0.011608 | 0.011545 | 0.011818 | 0.011673 | 0.011775 |
| 0.012149 | 0.011626 | 0.011500 | 0.011497 | 0.011497 | 0.011530 | 0.011466 |
| 0.011362 | 0.011396 | 0.011530 | 0.011497 | 0.011500 | 0.011631 | 0.011599 |
| 0.011463 | 0.011396 | 0.011430 | 0.011463 | 0.011362 | 0.011430 | 0.011329 |
| 0.011463 | 0.011497 | 0.011396 | 0.011362 | 0.011463 | 0.011396 | 0.011430 |
| 0.011430 | 0.011362 | 0.011430 | 0.011463 | 0.011362 | 0.011564 | 0.011597 |
| 0.011497 | 0.011564 | 0.011497 | 0.011497 | 0.011430 | 0.011833 | 0.011463 |
| 0.011513 | 0.011430 | 0.011665 | 0.011671 | 0.011530 | 0.011530 | 0.011530 |
| 0.011530 | 0.011463 | 0.011430 | 0.011463 | 0.011564 | 0.011564 | 0.011497 |
| 0.011497 | 0.011631 | 0.011799 | 0.011530 | 0.011732 | 0.011732 | 0.011597 |
| 0.011430 | 0.011497 | 0.011530 | 0.011934 | 0.011497 | 0.011531 | 0.011497 |
| 0.011530 | 0.011463 | 0.011463 | 0.011766 | 0.011699 | 0.011732 | 0.011463 |
| 0.011564 | 0.011631 | 0.011497 | 0.011564 | 0.011530 | 0.011396 | 0.011732 |
| 0.011497 | 0.011463 | 0.011463 | 0.011631 | 0.011463 | 0.011564 | 0.011799 |
| 0.011497 | 0.011876 | 0.011866 | 0.011711 | 0.011512 | 0.011570 | 0.011370 |
| 0.011500 | 0.011917 | 0.011411 | 0.011641 | 0.011499 | 0.011620 | 0.011645 |
| 0.011621 | 0.011455 | 0.011617 | 0.011457 | 0.011491 | 0.011663 | 0.011587 |
| 0.011588 | 0.011493 | 0.011553 | 0.011483 | 0.011465 | 0.011631 | 0.011698 |
| 0.011698 | 0.011565 | 0.011669 | 0.011670 | 0.011772 | 0.011767 | 0.011497 |
| 0.011732 | 0.011598 | 0.011463 | 0.011564 | 0.011362 | 0.011597 | 0.011396 |
| 0.011463 | 0.011463 | 0.011430 | 0.011396 | 0.011430 | 0.011396 | 0.011497 |
| 0.011479 | 0.011480 | 0.011471 | 0.011505 | 0.011642 | 0.011607 | 0.011607 |
| 0.011605 | 0.011531 | 0.011356 | 0.011348 | 0.011467 | 0.011636 | 0.011637 |
| 0.011430 | 0.011501 | 0.011734 | 0.011702 | 0.011632 | 0.011666 | 0.011597 |
| 0.011530 | 0.011598 | 0.011597 | 0.011497 | 0.012068 | 0.011665 | 0.011732 |
| 0.011766 | 0.011844 | 0.011470 | 0.011545 | 0.011430 | 0.011631 | 0.011598 |
| 0.011632 | 0.011665 | 0.011665 | 0.011665 | 0.011807 | 0.011799 | 0.011442 |
| 0.011331 | 0.011337 | 0.011435 | 0.011400 | 0.011505 | 0.011359 | 0.011672 |
| 0.011472 | 0.011630 | 0.011156 | 0.011472 | 0.011464 | 0.011539 | 0.011430 |
| 0.011396 | 0.011396 | 0.011463 | 0.011430 | 0.011631 | 0.011597 | 0.011530 |
| 0.011631 | 0.011698 | 0.011429 | 0.011429 | 0.011463 | 0.011463 | 0.011465 |
| 0.011533 | 0.011463 | 0.011463 | 0.011465 | 0.011631 | 0.011698 | 0.011698 |
| 0.011565 | 0.011669 | 0.011670 | 0.011772 | 0.011767 | 0.011497 | 0.011665 |
| 0.011598 | 0.011598 | 0.011432 | 0.011617 | 0.011547 | 0.011571 | 0.011305 |

|          |          |          |          |          |          |          |
|----------|----------|----------|----------|----------|----------|----------|
| 0.011611 | 0.011652 | 0.011483 | 0.011502 | 0.011396 | 0.011598 | 0.011463 |
| 0.011564 | 0.011497 | 0.011396 | 0.011431 | 0.000000 | 0.011466 | 0.011497 |
| 0.011396 | 0.011263 | 0.011463 | 0.011396 | 0.011329 | 0.011434 | 0.011598 |
| 0.011497 | 0.011430 | 0.011463 | 0.011497 | 0.011463 | 0.011396 | 0.011597 |
| 0.011463 | 0.011497 | 0.011497 | 0.011430 | 0.011497 | 0.011732 | 0.011396 |
| 0.011430 | 0.011833 | 0.011430 | 0.011463 | 0.011430 | 0.011799 | 0.011446 |
| 0.011791 | 0.011443 | 0.011411 | 0.011664 | 0.011752 | 0.011634 | 0.011395 |
| 0.011375 | 0.011597 | 0.011698 | 0.011807 | 0.011666 | 0.011805 | 0.011935 |
| 0.011834 | 0.011872 | 0.011833 | 0.012086 | 0.011799 | 0.012674 | 0.011835 |
| 0.012574 | 0.012342 | 0.012476 | 0.012748 | 0.011799 | 0.011497 | 0.011799 |
| 0.012238 | 0.012174 | 0.011766 | 0.011665 | 0.011733 | 0.011733 | 0.011703 |
| 0.011597 | 0.011603 | 0.011665 | 0.011632 | 0.012002 | 0.012068 | 0.012069 |
| 0.011969 | 0.012069 | 0.012173 | 0.011940 | 0.012239 | 0.012246 | 0.012306 |
| 0.012307 | 0.012340 | 0.012289 | 0.012307 | 0.012308 | 0.011530 | 0.011833 |
| 0.011901 | 0.012405 | 0.011908 | 0.012136 | 0.012609 | 0.011672 | 0.011564 |
| 0.011530 | 0.011530 | 0.012001 | 0.012006 | 0.012116 | 0.011866 | 0.011532 |
| S188     | 0.011804 | 0.011804 | 0.012143 | 0.011905 | 0.011905 | 0.011973 |
| 0.011813 | 0.011744 | 0.011905 | 0.011398 | 0.011466 | 0.011433 | 0.011398 |
| 0.011432 | 0.011601 | 0.011398 | 0.011432 | 0.011499 | 0.011466 | 0.011432 |
| 0.011398 | 0.011432 | 0.011533 | 0.011365 | 0.011432 | 0.011432 | 0.011778 |
| 0.011669 | 0.011432 | 0.011331 | 0.011567 | 0.011499 | 0.011466 | 0.011500 |
| 0.011466 | 0.011533 | 0.011466 | 0.011466 | 0.011499 | 0.011466 | 0.011635 |
| 0.011398 | 0.011466 | 0.011499 | 0.011432 | 0.011533 | 0.011567 | 0.011499 |
| 0.011466 | 0.011635 | 0.011534 | 0.011804 | 0.011466 | 0.011736 | 0.011466 |
| 0.011432 | 0.011533 | 0.011601 | 0.011736 | 0.011838 | 0.011533 | 0.011635 |
| 0.011499 | 0.011533 | 0.011466 | 0.011702 | 0.011939 | 0.011466 | 0.011533 |
| 0.011432 | 0.011533 | 0.011499 | 0.011567 | 0.011466 | 0.011499 | 0.011499 |
| 0.011398 | 0.011432 | 0.011398 | 0.011500 | 0.011466 | 0.011500 | 0.011567 |
| 0.011500 | 0.011466 | 0.011533 | 0.011432 | 0.011567 | 0.011398 | 0.011466 |
| 0.011635 | 0.011567 | 0.011804 | 0.011635 | 0.011466 | 0.011702 | 0.011466 |
| 0.011620 | 0.011849 | 0.011629 | 0.011335 | 0.011359 | 0.011393 | 0.011575 |
| 0.012203 | 0.011570 | 0.011392 | 0.011702 | 0.011702 | 0.011499 | 0.011601 |
| 0.011533 | 0.011499 | 0.011567 | 0.011466 | 0.011567 | 0.011499 | 0.011499 |
| 0.011466 | 0.011533 | 0.011736 | 0.011635 | 0.011533 | 0.011500 | 0.011432 |
| 0.011398 | 0.011398 | 0.011466 | 0.011432 | 0.011635 | 0.011601 | 0.011533 |
| 0.011635 | 0.011702 | 0.011432 | 0.011432 | 0.011466 | 0.011466 | 0.011468 |
| 0.011537 | 0.011466 | 0.011466 | 0.011314 | 0.011388 | 0.011378 | 0.011466 |
| 0.011469 | 0.011372 | 0.011432 | 0.011442 | 0.011368 | 0.011405 | 0.011434 |
| 0.011676 | 0.011442 | 0.011511 | 0.011399 | 0.011408 | 0.011534 | 0.011500 |
| 0.011568 | 0.011501 | 0.011500 | 0.011601 | 0.011533 | 0.011905 | 0.011702 |
| 0.011736 | 0.011601 | 0.011466 | 0.011567 | 0.011364 | 0.011601 | 0.011398 |
| 0.011466 | 0.011466 | 0.011432 | 0.011398 | 0.011432 | 0.011398 | 0.011499 |
| 0.011466 | 0.011567 | 0.011500 | 0.011398 | 0.011467 | 0.011466 | 0.000000 |
| 0.011601 | 0.011500 | 0.011398 | 0.011297 | 0.011466 | 0.011398 | 0.011331 |
| 0.011401 | 0.011601 | 0.011398 | 0.011601 | 0.011364 | 0.011466 | 0.011432 |
| 0.011533 | 0.011432 | 0.011466 | 0.011432 | 0.011466 | 0.011331 | 0.011466 |
| 0.011500 | 0.011432 | 0.011499 | 0.011432 | 0.011466 | 0.011499 | 0.011736 |
| 0.011838 | 0.011770 | 0.011838 | 0.011603 | 0.011838 | 0.011466 | 0.011432 |
| 0.011468 | 0.011670 | 0.011473 | 0.011302 | 0.011846 | 0.011335 | 0.011457 |
| 0.011846 | 0.011745 | 0.011635 | 0.011804 | 0.011541 | 0.011635 | 0.011669 |
| 0.011601 | 0.011770 | 0.011633 | 0.011434 | 0.011567 | 0.011500 | 0.011571 |
| 0.011669 | 0.011570 | 0.011707 | 0.011776 | 0.011702 | 0.011770 | 0.011879 |
| 0.011605 | 0.011778 | 0.011708 | 0.011639 | 0.011907 | 0.011364 | 0.011569 |
| 0.011533 | 0.011466 | 0.011364 | 0.011364 | 0.011432 | 0.011432 | 0.011499 |
| 0.011432 | 0.011500 | 0.011398 | 0.011499 | 0.011432 | 0.011432 | 0.011499 |
| 0.011432 | 0.011871 | 0.011770 | 0.011804 | 0.011331 | 0.011432 | 0.011466 |
| 0.011466 | 0.011432 | 0.011500 | 0.011533 | 0.011398 | 0.011398 | 0.011398 |
| 0.011939 | 0.011567 | 0.011567 | 0.011364 | 0.011466 | 0.011601 | 0.011398 |
| 0.011398 | 0.011466 | 0.011432 | 0.011601 | 0.011398 | 0.011533 | 0.011668 |
| 0.011601 | 0.011432 | 0.011432 | 0.011364 | 0.011364 | 0.011533 | 0.011466 |

|          |          |          |          |          |          |          |
|----------|----------|----------|----------|----------|----------|----------|
| 0.011364 | 0.011466 | 0.011331 | 0.011364 | 0.011500 | 0.011635 | 0.011398 |
| 0.011365 | 0.011500 | 0.011432 | 0.011331 | 0.011669 | 0.011331 | 0.011500 |
| 0.011577 | 0.011398 | 0.011702 | 0.011534 | 0.011567 | 0.011432 | 0.011533 |
| 0.011398 | 0.011736 | 0.011331 | 0.011601 | 0.011398 | 0.011398 | 0.011331 |
| 0.011567 | 0.011770 | 0.011466 | 0.011533 | 0.011364 | 0.011770 | 0.011398 |
| 0.011398 | 0.011398 | 0.011432 | 0.011500 | 0.011432 | 0.011533 | 0.011601 |
| 0.011601 | 0.011567 | 0.011466 | 0.011567 | 0.011533 | 0.011398 | 0.011364 |
| 0.011398 | 0.011398 | 0.011466 | 0.011398 | 0.011364 | 0.011533 | 0.011398 |
| 0.011432 | 0.011432 | 0.011567 | 0.011601 | 0.011499 | 0.011432 | 0.011432 |
| 0.011466 | 0.011432 | 0.011533 | 0.011398 | 0.011533 | 0.011635 | 0.011939 |
| 0.011432 | 0.011838 | 0.011408 | 0.017940 | 0.011454 | 0.011673 | 0.011762 |
| 0.011756 | 0.011768 | 0.011480 | 0.011234 | 0.011886 | 0.011824 | 0.011547 |
| 0.011583 | 0.011733 | 0.011335 | 0.011440 | 0.011335 | 0.011456 | 0.011405 |
| 0.011577 | 0.011585 | 0.011583 | 0.011328 | 0.011567 | 0.011601 | 0.011605 |
| 0.011475 | 0.011567 | 0.011567 | 0.011533 | 0.011500 | 0.011500 | 0.011466 |
| 0.011499 | 0.011432 | 0.011466 | 0.011499 | 0.011466 | 0.011398 | 0.011432 |
| 0.011432 | 0.011499 | 0.011398 | 0.011500 | 0.011533 | 0.011567 | 0.011466 |
| 0.011499 | 0.011466 | 0.011804 | 0.011804 | 0.011534 | 0.011568 | 0.011601 |
| 0.011364 | 0.011364 | 0.011398 | 0.011500 | 0.011364 | 0.011601 | 0.011601 |
| 0.011635 | 0.011635 | 0.011567 | 0.011669 | 0.011838 | 0.011670 | 0.011500 |
| 0.011499 | 0.011567 | 0.011601 | 0.011432 | 0.011499 | 0.011466 | 0.011500 |
| 0.011567 | 0.011567 | 0.011601 | 0.011567 | 0.011433 | 0.011668 | 0.011635 |
| 0.011503 | 0.011398 | 0.011499 | 0.011601 | 0.011500 | 0.011635 | 0.011668 |
| 0.011804 | 0.011541 | 0.011635 | 0.011669 | 0.011601 | 0.011770 | 0.011398 |
| 0.011569 | 0.011466 | 0.011432 | 0.011432 | 0.011499 | 0.011398 | 0.011500 |
| 0.011533 | 0.011567 | 0.011466 | 0.011499 | 0.011466 | 0.011804 | 0.011804 |
| 0.011534 | 0.011568 | 0.011635 | 0.011567 | 0.012178 | 0.011636 | 0.011556 |
| 0.011627 | 0.011584 | 0.011662 | 0.011514 | 0.011695 | 0.011616 | 0.011581 |
| 0.012132 | 0.011478 | 0.011612 | 0.011513 | 0.011823 | 0.011677 | 0.011780 |
| 0.012156 | 0.011668 | 0.011503 | 0.011499 | 0.011499 | 0.011533 | 0.011468 |
| 0.011364 | 0.011398 | 0.011533 | 0.011499 | 0.011502 | 0.011635 | 0.011603 |
| 0.011466 | 0.011398 | 0.011432 | 0.011466 | 0.011364 | 0.011432 | 0.011331 |
| 0.011466 | 0.011499 | 0.011398 | 0.011364 | 0.011466 | 0.011398 | 0.011398 |
| 0.011432 | 0.011364 | 0.011432 | 0.011466 | 0.011364 | 0.011533 | 0.011601 |
| 0.011500 | 0.011567 | 0.011499 | 0.011500 | 0.011432 | 0.011838 | 0.011466 |
| 0.011516 | 0.011398 | 0.011669 | 0.011675 | 0.011533 | 0.011533 | 0.011533 |
| 0.011533 | 0.011466 | 0.011432 | 0.011466 | 0.011567 | 0.011567 | 0.011499 |
| 0.011499 | 0.011635 | 0.011804 | 0.011533 | 0.011736 | 0.011736 | 0.011601 |
| 0.011432 | 0.011499 | 0.011533 | 0.011939 | 0.011500 | 0.011533 | 0.011500 |
| 0.011499 | 0.011466 | 0.011466 | 0.011770 | 0.011703 | 0.011736 | 0.011466 |
| 0.011567 | 0.011635 | 0.011499 | 0.011567 | 0.011533 | 0.011398 | 0.011736 |
| 0.011432 | 0.011466 | 0.011466 | 0.011635 | 0.011466 | 0.011567 | 0.011804 |
| 0.011499 | 0.011881 | 0.011871 | 0.011671 | 0.011512 | 0.011539 | 0.011318 |
| 0.011445 | 0.011845 | 0.011378 | 0.011600 | 0.011500 | 0.011570 | 0.011539 |
| 0.011571 | 0.011390 | 0.011506 | 0.011391 | 0.011384 | 0.011597 | 0.011550 |
| 0.011553 | 0.011456 | 0.011521 | 0.011450 | 0.011501 | 0.011635 | 0.011702 |
| 0.011702 | 0.011568 | 0.011673 | 0.011674 | 0.011811 | 0.011806 | 0.011500 |
| 0.011736 | 0.011601 | 0.011466 | 0.011567 | 0.011364 | 0.011601 | 0.011398 |
| 0.011466 | 0.011466 | 0.011432 | 0.011398 | 0.011432 | 0.011398 | 0.011499 |
| 0.011482 | 0.011483 | 0.011474 | 0.011439 | 0.011646 | 0.011610 | 0.011610 |
| 0.011609 | 0.011500 | 0.011321 | 0.011314 | 0.011469 | 0.011640 | 0.011641 |
| 0.011433 | 0.011503 | 0.011738 | 0.011706 | 0.011636 | 0.011602 | 0.011601 |
| 0.011533 | 0.011601 | 0.011567 | 0.011499 | 0.012075 | 0.011635 | 0.011736 |
| 0.011770 | 0.011849 | 0.011472 | 0.011548 | 0.011432 | 0.011635 | 0.011601 |
| 0.011602 | 0.011668 | 0.011669 | 0.011669 | 0.011811 | 0.011804 | 0.011444 |
| 0.011333 | 0.011339 | 0.011437 | 0.011402 | 0.011507 | 0.011361 | 0.011676 |
| 0.011475 | 0.011635 | 0.011349 | 0.011513 | 0.011466 | 0.011542 | 0.011432 |
| 0.011398 | 0.011398 | 0.011466 | 0.011432 | 0.011635 | 0.011601 | 0.011533 |
| 0.011635 | 0.011702 | 0.011432 | 0.011432 | 0.011466 | 0.011466 | 0.011468 |
| 0.011537 | 0.011466 | 0.011466 | 0.011501 | 0.011635 | 0.011702 | 0.011702 |

|          |          |          |          |          |          |          |
|----------|----------|----------|----------|----------|----------|----------|
| 0.011568 | 0.011673 | 0.011674 | 0.011811 | 0.011806 | 0.011500 | 0.011668 |
| 0.011601 | 0.011601 | 0.011435 | 0.011621 | 0.011550 | 0.011540 | 0.011378 |
| 0.011580 | 0.011700 | 0.011527 | 0.011505 | 0.011398 | 0.011601 | 0.011466 |
| 0.011567 | 0.011500 | 0.011398 | 0.011467 | 0.011466 | 0.000000 | 0.011500 |
| 0.011398 | 0.011297 | 0.011466 | 0.011398 | 0.011331 | 0.011401 | 0.011601 |
| 0.011499 | 0.011432 | 0.011466 | 0.011499 | 0.011466 | 0.011398 | 0.011601 |
| 0.011466 | 0.011500 | 0.011499 | 0.011432 | 0.011499 | 0.011736 | 0.011398 |
| 0.011432 | 0.011838 | 0.011432 | 0.011466 | 0.011432 | 0.011804 | 0.011404 |
| 0.011848 | 0.011401 | 0.011361 | 0.011627 | 0.011712 | 0.011602 | 0.011353 |
| 0.011323 | 0.011601 | 0.011669 | 0.011778 | 0.011636 | 0.011775 | 0.011906 |
| 0.011805 | 0.011843 | 0.011804 | 0.012092 | 0.011770 | 0.012685 | 0.011840 |
| 0.012584 | 0.012350 | 0.012485 | 0.012758 | 0.011804 | 0.011500 | 0.011804 |
| 0.012246 | 0.012181 | 0.011770 | 0.011669 | 0.011737 | 0.011737 | 0.011707 |
| 0.011601 | 0.011606 | 0.011668 | 0.011635 | 0.012008 | 0.012075 | 0.012076 |
| 0.011975 | 0.012042 | 0.012180 | 0.011946 | 0.012212 | 0.012219 | 0.012280 |
| 0.012281 | 0.012314 | 0.012262 | 0.012281 | 0.012248 | 0.011533 | 0.011804 |
| 0.011873 | 0.012414 | 0.011913 | 0.012143 | 0.012619 | 0.011675 | 0.011568 |
| 0.011533 | 0.011533 | 0.012007 | 0.012054 | 0.012087 | 0.011871 | 0.011535 |
| S189     | 0.011799 | 0.011799 | 0.012136 | 0.011900 | 0.011900 | 0.011967 |
| 0.011808 | 0.011740 | 0.011900 | 0.011396 | 0.011463 | 0.011430 | 0.011396 |
| 0.011430 | 0.011598 | 0.011396 | 0.011430 | 0.011497 | 0.011463 | 0.011430 |
| 0.011396 | 0.011430 | 0.011530 | 0.011396 | 0.011363 | 0.011430 | 0.011774 |
| 0.011665 | 0.011396 | 0.011329 | 0.011564 | 0.011430 | 0.011463 | 0.011430 |
| 0.011463 | 0.011497 | 0.011463 | 0.011463 | 0.011497 | 0.011463 | 0.011631 |
| 0.011396 | 0.011463 | 0.011497 | 0.011430 | 0.011530 | 0.011564 | 0.011497 |
| 0.011463 | 0.011631 | 0.011531 | 0.011799 | 0.011463 | 0.011665 | 0.011463 |
| 0.011430 | 0.011531 | 0.011598 | 0.011665 | 0.011833 | 0.011530 | 0.011631 |
| 0.011430 | 0.011497 | 0.011463 | 0.011631 | 0.011934 | 0.011463 | 0.011530 |
| 0.011430 | 0.011530 | 0.011497 | 0.011564 | 0.011497 | 0.011497 | 0.011497 |
| 0.011396 | 0.011430 | 0.011396 | 0.011497 | 0.011463 | 0.011498 | 0.011564 |
| 0.011497 | 0.011463 | 0.011396 | 0.011430 | 0.011564 | 0.011329 | 0.011463 |
| 0.011631 | 0.011564 | 0.011799 | 0.011631 | 0.011463 | 0.011631 | 0.011463 |
| 0.011654 | 0.011882 | 0.011664 | 0.011373 | 0.011359 | 0.011502 | 0.011572 |
| 0.012231 | 0.011620 | 0.011390 | 0.011698 | 0.011698 | 0.011497 | 0.011598 |
| 0.011530 | 0.011497 | 0.011564 | 0.011463 | 0.011564 | 0.011430 | 0.011497 |
| 0.011463 | 0.011564 | 0.011766 | 0.011631 | 0.011530 | 0.011497 | 0.011362 |
| 0.011396 | 0.011396 | 0.011329 | 0.011430 | 0.011631 | 0.011598 | 0.011530 |
| 0.011631 | 0.011698 | 0.011430 | 0.011430 | 0.011463 | 0.011463 | 0.011466 |
| 0.011534 | 0.011463 | 0.011463 | 0.011312 | 0.011386 | 0.011376 | 0.011464 |
| 0.011467 | 0.011404 | 0.011429 | 0.011440 | 0.011366 | 0.011403 | 0.011432 |
| 0.011708 | 0.011474 | 0.011439 | 0.011396 | 0.011406 | 0.011531 | 0.011498 |
| 0.011565 | 0.011498 | 0.011497 | 0.011597 | 0.011530 | 0.011833 | 0.011699 |
| 0.011732 | 0.011598 | 0.011463 | 0.011564 | 0.011362 | 0.011597 | 0.011396 |
| 0.011463 | 0.011463 | 0.011430 | 0.011396 | 0.011430 | 0.011396 | 0.011497 |
| 0.011396 | 0.011497 | 0.011497 | 0.011396 | 0.011498 | 0.011598 | 0.011601 |
| 0.000000 | 0.011497 | 0.011396 | 0.011330 | 0.011463 | 0.011396 | 0.011329 |
| 0.011434 | 0.000000 | 0.011329 | 0.000000 | 0.011363 | 0.011463 | 0.011430 |
| 0.011463 | 0.011430 | 0.011396 | 0.011430 | 0.011463 | 0.011329 | 0.011396 |
| 0.011430 | 0.011430 | 0.011497 | 0.011430 | 0.011463 | 0.011497 | 0.011732 |
| 0.011833 | 0.011765 | 0.011833 | 0.011600 | 0.011833 | 0.011463 | 0.011430 |
| 0.011466 | 0.011667 | 0.011563 | 0.011369 | 0.011807 | 0.011333 | 0.011454 |
| 0.011842 | 0.011740 | 0.011631 | 0.011833 | 0.011538 | 0.011699 | 0.011598 |
| 0.011598 | 0.011765 | 0.011629 | 0.011514 | 0.011564 | 0.011497 | 0.011568 |
| 0.011665 | 0.011566 | 0.011703 | 0.011703 | 0.011699 | 0.011766 | 0.011874 |
| 0.011602 | 0.011705 | 0.011704 | 0.011635 | 0.011902 | 0.011362 | 0.011566 |
| 0.011463 | 0.011463 | 0.011362 | 0.011362 | 0.011362 | 0.011430 | 0.011497 |
| 0.011362 | 0.011430 | 0.011329 | 0.011497 | 0.011362 | 0.011430 | 0.011497 |
| 0.011430 | 0.011866 | 0.011766 | 0.011799 | 0.011329 | 0.011430 | 0.011463 |
| 0.011463 | 0.011430 | 0.011497 | 0.011530 | 0.011396 | 0.011396 | 0.011396 |
| 0.011934 | 0.011564 | 0.011564 | 0.011362 | 0.011463 | 0.011564 | 0.011396 |

|          |          |          |          |          |          |          |
|----------|----------|----------|----------|----------|----------|----------|
| 0.011396 | 0.011463 | 0.011430 | 0.011530 | 0.011396 | 0.011530 | 0.011597 |
| 0.011598 | 0.011430 | 0.011430 | 0.011362 | 0.011362 | 0.011531 | 0.011463 |
| 0.011362 | 0.011463 | 0.011329 | 0.011362 | 0.011497 | 0.011632 | 0.011396 |
| 0.011363 | 0.011497 | 0.011430 | 0.011329 | 0.011665 | 0.011329 | 0.011497 |
| 0.011506 | 0.011396 | 0.011698 | 0.011531 | 0.011564 | 0.011430 | 0.011530 |
| 0.011396 | 0.011665 | 0.011329 | 0.011598 | 0.011396 | 0.011396 | 0.011329 |
| 0.011497 | 0.011766 | 0.011463 | 0.011530 | 0.011362 | 0.011766 | 0.011396 |
| 0.011396 | 0.011396 | 0.011430 | 0.011463 | 0.011430 | 0.011530 | 0.011598 |
| 0.011598 | 0.011564 | 0.011463 | 0.011564 | 0.011463 | 0.011396 | 0.011362 |
| 0.011396 | 0.011396 | 0.011463 | 0.011396 | 0.011295 | 0.011530 | 0.011396 |
| 0.011430 | 0.011430 | 0.011564 | 0.011598 | 0.011497 | 0.011362 | 0.011430 |
| 0.011497 | 0.011430 | 0.011530 | 0.011396 | 0.011530 | 0.011631 | 0.011934 |
| 0.011430 | 0.011833 | 0.011440 | 0.017974 | 0.011322 | 0.011733 | 0.011793 |
| 0.011752 | 0.011799 | 0.011479 | 0.011408 | 0.011829 | 0.011820 | 0.011546 |
| 0.011629 | 0.011732 | 0.011294 | 0.011437 | 0.011333 | 0.011505 | 0.011491 |
| 0.011670 | 0.011582 | 0.011579 | 0.011193 | 0.011564 | 0.011598 | 0.011601 |
| 0.011404 | 0.011497 | 0.011564 | 0.011530 | 0.011497 | 0.011497 | 0.011463 |
| 0.011497 | 0.011430 | 0.011463 | 0.011497 | 0.011463 | 0.011396 | 0.011430 |
| 0.011430 | 0.011497 | 0.011396 | 0.011497 | 0.011530 | 0.011564 | 0.011463 |
| 0.011497 | 0.011463 | 0.011799 | 0.011799 | 0.011531 | 0.011565 | 0.011598 |
| 0.011362 | 0.011362 | 0.011396 | 0.011430 | 0.011362 | 0.011598 | 0.011598 |
| 0.011631 | 0.011631 | 0.011564 | 0.011665 | 0.011833 | 0.011667 | 0.011430 |
| 0.011497 | 0.011564 | 0.011530 | 0.011430 | 0.011497 | 0.011463 | 0.011497 |
| 0.011564 | 0.011564 | 0.011598 | 0.011497 | 0.011397 | 0.011665 | 0.011564 |
| 0.011501 | 0.011396 | 0.011497 | 0.011598 | 0.011497 | 0.011631 | 0.011665 |
| 0.011833 | 0.011538 | 0.011699 | 0.011598 | 0.011598 | 0.011765 | 0.011396 |
| 0.011566 | 0.011464 | 0.011430 | 0.011430 | 0.011497 | 0.011396 | 0.011497 |
| 0.011530 | 0.011564 | 0.011463 | 0.011497 | 0.011463 | 0.011799 | 0.011799 |
| 0.011531 | 0.011565 | 0.011631 | 0.011564 | 0.012205 | 0.011632 | 0.011553 |
| 0.011623 | 0.011581 | 0.011693 | 0.011580 | 0.011691 | 0.011612 | 0.011578 |
| 0.012160 | 0.011476 | 0.011608 | 0.011545 | 0.011818 | 0.011673 | 0.011707 |
| 0.012183 | 0.011663 | 0.011500 | 0.011497 | 0.011497 | 0.011530 | 0.011466 |
| 0.011362 | 0.011329 | 0.011530 | 0.011497 | 0.011500 | 0.011631 | 0.011599 |
| 0.011463 | 0.011329 | 0.011362 | 0.011463 | 0.011295 | 0.011430 | 0.011329 |
| 0.011463 | 0.011497 | 0.011396 | 0.011362 | 0.011463 | 0.011396 | 0.011430 |
| 0.011430 | 0.011362 | 0.011430 | 0.011463 | 0.011362 | 0.011497 | 0.011598 |
| 0.011497 | 0.011564 | 0.011497 | 0.011497 | 0.011430 | 0.011833 | 0.011463 |
| 0.011513 | 0.011430 | 0.011665 | 0.011671 | 0.011463 | 0.011530 | 0.011530 |
| 0.011531 | 0.011396 | 0.011430 | 0.011396 | 0.011564 | 0.011564 | 0.011497 |
| 0.011497 | 0.011631 | 0.011799 | 0.011530 | 0.011732 | 0.011732 | 0.011598 |
| 0.011430 | 0.011497 | 0.011531 | 0.011934 | 0.011497 | 0.011463 | 0.011497 |
| 0.011530 | 0.011463 | 0.011463 | 0.011766 | 0.011631 | 0.011732 | 0.011463 |
| 0.011564 | 0.011631 | 0.011497 | 0.011564 | 0.011530 | 0.011396 | 0.011732 |
| 0.011497 | 0.011463 | 0.011463 | 0.011631 | 0.011463 | 0.011564 | 0.011799 |
| 0.011497 | 0.011876 | 0.011866 | 0.011670 | 0.011342 | 0.011570 | 0.011318 |
| 0.011555 | 0.011878 | 0.011411 | 0.011596 | 0.011402 | 0.011518 | 0.011485 |
| 0.011570 | 0.011324 | 0.011394 | 0.011258 | 0.011384 | 0.011462 | 0.011466 |
| 0.011475 | 0.011336 | 0.011553 | 0.011448 | 0.011498 | 0.011631 | 0.011698 |
| 0.011698 | 0.011565 | 0.011669 | 0.011670 | 0.011806 | 0.011838 | 0.011497 |
| 0.011732 | 0.011598 | 0.011463 | 0.011564 | 0.011362 | 0.011597 | 0.011396 |
| 0.011463 | 0.011463 | 0.011430 | 0.011396 | 0.011430 | 0.011396 | 0.011497 |
| 0.011479 | 0.011480 | 0.011471 | 0.011505 | 0.011642 | 0.011538 | 0.011607 |
| 0.011605 | 0.011531 | 0.011319 | 0.011348 | 0.011467 | 0.011636 | 0.011637 |
| 0.011430 | 0.011501 | 0.011734 | 0.011703 | 0.011632 | 0.011666 | 0.011597 |
| 0.011530 | 0.011598 | 0.011597 | 0.011497 | 0.012069 | 0.011665 | 0.011732 |
| 0.011766 | 0.011808 | 0.011470 | 0.011545 | 0.011430 | 0.011631 | 0.011598 |
| 0.011632 | 0.011665 | 0.011665 | 0.011665 | 0.011807 | 0.011799 | 0.011442 |
| 0.011331 | 0.011337 | 0.011435 | 0.011400 | 0.011505 | 0.011359 | 0.011672 |
| 0.011472 | 0.011586 | 0.011346 | 0.011510 | 0.011464 | 0.011539 | 0.011362 |
| 0.011396 | 0.011396 | 0.011329 | 0.011430 | 0.011631 | 0.011598 | 0.011530 |



|          |          |          |          |          |          |          |
|----------|----------|----------|----------|----------|----------|----------|
| 0.011631 | 0.011698 | 0.011430 | 0.011430 | 0.011463 | 0.011463 | 0.011466 |
| 0.011534 | 0.011463 | 0.011463 | 0.011498 | 0.011631 | 0.011698 | 0.011698 |
| 0.011565 | 0.011669 | 0.011670 | 0.011806 | 0.011838 | 0.011497 | 0.011665 |
| 0.011598 | 0.011598 | 0.011432 | 0.011617 | 0.011547 | 0.011571 | 0.011446 |
| 0.011542 | 0.011835 | 0.011568 | 0.011502 | 0.011329 | 0.000000 | 0.011396 |
| 0.011497 | 0.011497 | 0.011396 | 0.011498 | 0.011598 | 0.011601 | 0.011497 |
| 0.011396 | 0.011330 | 0.011463 | 0.011396 | 0.011329 | 0.011434 | 0.000000 |
| 0.011497 | 0.011430 | 0.011463 | 0.011497 | 0.011463 | 0.011396 | 0.011597 |
| 0.011463 | 0.011497 | 0.011497 | 0.011430 | 0.011497 | 0.011732 | 0.011396 |
| 0.011430 | 0.011833 | 0.011430 | 0.011396 | 0.011430 | 0.011799 | 0.011403 |
| 0.011847 | 0.011400 | 0.011461 | 0.011624 | 0.011712 | 0.011635 | 0.011353 |
| 0.011323 | 0.011597 | 0.011698 | 0.011807 | 0.011666 | 0.011805 | 0.011935 |
| 0.011834 | 0.011872 | 0.011833 | 0.012086 | 0.011799 | 0.012675 | 0.011835 |
| 0.012574 | 0.012342 | 0.012476 | 0.012748 | 0.011799 | 0.011497 | 0.011800 |
| 0.012239 | 0.012174 | 0.011766 | 0.011665 | 0.011733 | 0.011733 | 0.011703 |
| 0.011597 | 0.011603 | 0.011665 | 0.011632 | 0.012002 | 0.012068 | 0.012070 |
| 0.011969 | 0.012069 | 0.012173 | 0.011940 | 0.012239 | 0.012246 | 0.012306 |
| 0.012307 | 0.012341 | 0.012289 | 0.012307 | 0.012309 | 0.011530 | 0.011833 |
| 0.011901 | 0.012405 | 0.011908 | 0.012136 | 0.012609 | 0.011672 | 0.011564 |
| 0.011530 | 0.011530 | 0.012002 | 0.012048 | 0.012151 | 0.011866 | 0.011532 |
| S190     | 0.011699 | 0.011699 | 0.012035 | 0.011799 | 0.011799 | 0.011867 |
| 0.011672 | 0.011570 | 0.011799 | 0.011295 | 0.011362 | 0.011329 | 0.011295 |
| 0.011329 | 0.011430 | 0.011295 | 0.011329 | 0.011396 | 0.011362 | 0.011329 |
| 0.011295 | 0.011329 | 0.011362 | 0.011296 | 0.011329 | 0.011329 | 0.011638 |
| 0.011564 | 0.011329 | 0.011228 | 0.011396 | 0.011396 | 0.011363 | 0.011396 |
| 0.011362 | 0.011463 | 0.011362 | 0.011362 | 0.011396 | 0.011362 | 0.011530 |
| 0.011295 | 0.011362 | 0.011396 | 0.011329 | 0.011430 | 0.011463 | 0.011396 |
| 0.011362 | 0.011531 | 0.011430 | 0.011698 | 0.011362 | 0.011631 | 0.011362 |
| 0.011329 | 0.011430 | 0.011497 | 0.011631 | 0.011732 | 0.011430 | 0.011530 |
| 0.011396 | 0.011463 | 0.011363 | 0.011598 | 0.011833 | 0.011362 | 0.011430 |
| 0.011329 | 0.011430 | 0.011396 | 0.011463 | 0.011396 | 0.011396 | 0.011396 |
| 0.011295 | 0.011329 | 0.011295 | 0.011396 | 0.011362 | 0.011397 | 0.011463 |
| 0.011396 | 0.011362 | 0.011430 | 0.011329 | 0.011463 | 0.011295 | 0.011362 |
| 0.011530 | 0.011463 | 0.011698 | 0.011531 | 0.011362 | 0.011598 | 0.011362 |
| 0.011542 | 0.011770 | 0.011588 | 0.011295 | 0.011284 | 0.011355 | 0.011493 |
| 0.012121 | 0.011518 | 0.011307 | 0.011598 | 0.011598 | 0.011396 | 0.011497 |
| 0.011430 | 0.011396 | 0.011463 | 0.011362 | 0.011463 | 0.011396 | 0.011396 |
| 0.011362 | 0.011463 | 0.011665 | 0.011530 | 0.011430 | 0.011396 | 0.011329 |
| 0.011295 | 0.011295 | 0.011362 | 0.011329 | 0.011530 | 0.011497 | 0.011430 |
| 0.011530 | 0.011598 | 0.011329 | 0.011329 | 0.011363 | 0.011362 | 0.011364 |
| 0.011432 | 0.011362 | 0.011362 | 0.011240 | 0.011313 | 0.011271 | 0.011363 |
| 0.011365 | 0.011301 | 0.011355 | 0.011336 | 0.011264 | 0.011300 | 0.011330 |
| 0.011600 | 0.011370 | 0.011405 | 0.011296 | 0.011302 | 0.011430 | 0.011396 |
| 0.011464 | 0.011397 | 0.011396 | 0.011497 | 0.011430 | 0.011799 | 0.011598 |
| 0.011631 | 0.011497 | 0.011362 | 0.011463 | 0.011262 | 0.011497 | 0.011295 |
| 0.011362 | 0.011362 | 0.011329 | 0.011295 | 0.011329 | 0.011295 | 0.011396 |
| 0.011362 | 0.011463 | 0.011396 | 0.011295 | 0.011364 | 0.011497 | 0.011500 |
| 0.011497 | 0.000000 | 0.011295 | 0.011229 | 0.011362 | 0.011295 | 0.011228 |
| 0.011332 | 0.011497 | 0.011295 | 0.011497 | 0.011262 | 0.011363 | 0.011329 |
| 0.011430 | 0.011329 | 0.011362 | 0.011329 | 0.011362 | 0.011228 | 0.011362 |
| 0.011396 | 0.011329 | 0.011396 | 0.011329 | 0.011362 | 0.011396 | 0.011631 |
| 0.011732 | 0.011665 | 0.011732 | 0.011498 | 0.011732 | 0.011362 | 0.011329 |
| 0.011364 | 0.011626 | 0.011472 | 0.011266 | 0.011739 | 0.011231 | 0.011336 |
| 0.011706 | 0.011638 | 0.011530 | 0.011732 | 0.011436 | 0.011598 | 0.011564 |
| 0.011497 | 0.011665 | 0.011522 | 0.011349 | 0.011396 | 0.011396 | 0.011466 |
| 0.011564 | 0.011465 | 0.011602 | 0.011670 | 0.011598 | 0.011665 | 0.011772 |
| 0.011500 | 0.011672 | 0.011602 | 0.011534 | 0.011801 | 0.011262 | 0.011465 |
| 0.011430 | 0.011362 | 0.011262 | 0.011262 | 0.011329 | 0.011329 | 0.011396 |
| 0.011329 | 0.011396 | 0.011295 | 0.011396 | 0.011329 | 0.011329 | 0.011396 |
| 0.011329 | 0.011766 | 0.011665 | 0.011698 | 0.011228 | 0.011329 | 0.011363 |

|          |          |          |          |          |          |          |
|----------|----------|----------|----------|----------|----------|----------|
| 0.011362 | 0.011329 | 0.011396 | 0.011430 | 0.011295 | 0.011295 | 0.011295 |
| 0.011833 | 0.011463 | 0.011463 | 0.011262 | 0.011362 | 0.011531 | 0.011295 |
| 0.011295 | 0.011362 | 0.011329 | 0.011497 | 0.011295 | 0.011430 | 0.011564 |
| 0.011497 | 0.011329 | 0.011329 | 0.011262 | 0.011262 | 0.011430 | 0.011362 |
| 0.011262 | 0.011362 | 0.011228 | 0.011262 | 0.011396 | 0.011531 | 0.011295 |
| 0.011262 | 0.011396 | 0.011329 | 0.011228 | 0.011564 | 0.011228 | 0.011396 |
| 0.011471 | 0.011295 | 0.011598 | 0.011430 | 0.011463 | 0.011329 | 0.011430 |
| 0.011295 | 0.011631 | 0.011228 | 0.011497 | 0.011295 | 0.011295 | 0.011228 |
| 0.011463 | 0.011665 | 0.011363 | 0.011430 | 0.011262 | 0.011665 | 0.011295 |
| 0.011295 | 0.011295 | 0.011329 | 0.011430 | 0.011329 | 0.011430 | 0.011497 |
| 0.011497 | 0.011463 | 0.011362 | 0.011463 | 0.011430 | 0.011295 | 0.011262 |
| 0.011295 | 0.011295 | 0.011363 | 0.011295 | 0.011262 | 0.011430 | 0.011295 |
| 0.011329 | 0.011329 | 0.011463 | 0.011497 | 0.011396 | 0.011329 | 0.011329 |
| 0.011396 | 0.011329 | 0.011430 | 0.011295 | 0.011430 | 0.011530 | 0.011766 |
| 0.011329 | 0.011732 | 0.011336 | 0.017861 | 0.011322 | 0.011549 | 0.011688 |
| 0.011648 | 0.011693 | 0.011322 | 0.011350 | 0.011829 | 0.011716 | 0.011485 |
| 0.011535 | 0.011671 | 0.011255 | 0.011353 | 0.011255 | 0.011406 | 0.011361 |
| 0.011576 | 0.011507 | 0.011505 | 0.011193 | 0.011463 | 0.011497 | 0.011500 |
| 0.011370 | 0.011463 | 0.011463 | 0.011430 | 0.011195 | 0.011195 | 0.011363 |
| 0.011396 | 0.011329 | 0.011362 | 0.011396 | 0.011363 | 0.011295 | 0.011329 |
| 0.011329 | 0.011396 | 0.011295 | 0.011396 | 0.011430 | 0.011463 | 0.011362 |
| 0.011396 | 0.011362 | 0.011698 | 0.011698 | 0.011430 | 0.011464 | 0.011497 |
| 0.011262 | 0.011262 | 0.011295 | 0.011396 | 0.011262 | 0.011497 | 0.011497 |
| 0.011530 | 0.011530 | 0.011463 | 0.011564 | 0.011732 | 0.011566 | 0.011396 |
| 0.011396 | 0.011463 | 0.011497 | 0.011329 | 0.011396 | 0.011362 | 0.011396 |
| 0.011463 | 0.011463 | 0.011497 | 0.011463 | 0.011363 | 0.011564 | 0.011530 |
| 0.011399 | 0.011295 | 0.011396 | 0.011497 | 0.011396 | 0.011531 | 0.011564 |
| 0.011732 | 0.011436 | 0.011598 | 0.011564 | 0.011497 | 0.011665 | 0.011296 |
| 0.011464 | 0.011363 | 0.011329 | 0.011329 | 0.011396 | 0.011295 | 0.011396 |
| 0.011430 | 0.011463 | 0.011362 | 0.011396 | 0.011362 | 0.011698 | 0.011698 |
| 0.011430 | 0.011464 | 0.011530 | 0.011463 | 0.012104 | 0.011525 | 0.011447 |
| 0.011517 | 0.011477 | 0.011588 | 0.011476 | 0.011586 | 0.011509 | 0.011474 |
| 0.012057 | 0.011372 | 0.011506 | 0.011441 | 0.011715 | 0.011571 | 0.011673 |
| 0.012081 | 0.011550 | 0.011399 | 0.011396 | 0.011396 | 0.011430 | 0.011364 |
| 0.011262 | 0.011295 | 0.011430 | 0.011396 | 0.011398 | 0.011530 | 0.011498 |
| 0.011362 | 0.011295 | 0.011329 | 0.011362 | 0.011262 | 0.011329 | 0.011228 |
| 0.011362 | 0.011396 | 0.011295 | 0.011262 | 0.011363 | 0.011295 | 0.011329 |
| 0.011329 | 0.011262 | 0.011329 | 0.011363 | 0.011262 | 0.011463 | 0.011497 |
| 0.011396 | 0.011463 | 0.011396 | 0.011396 | 0.011329 | 0.011732 | 0.011362 |
| 0.011408 | 0.011329 | 0.011564 | 0.011569 | 0.011430 | 0.011430 | 0.011430 |
| 0.011430 | 0.011363 | 0.011329 | 0.011363 | 0.011463 | 0.011463 | 0.011396 |
| 0.011396 | 0.011530 | 0.011698 | 0.011430 | 0.011631 | 0.011631 | 0.011497 |
| 0.011329 | 0.011396 | 0.011430 | 0.011833 | 0.011396 | 0.011430 | 0.011396 |
| 0.011430 | 0.011362 | 0.011362 | 0.011665 | 0.011598 | 0.011631 | 0.011362 |
| 0.011463 | 0.011530 | 0.011396 | 0.011463 | 0.011430 | 0.011295 | 0.011631 |
| 0.011396 | 0.011362 | 0.011362 | 0.011530 | 0.011362 | 0.011463 | 0.011699 |
| 0.011396 | 0.011740 | 0.011766 | 0.011588 | 0.011286 | 0.011468 | 0.011267 |
| 0.011335 | 0.011800 | 0.011306 | 0.011551 | 0.011402 | 0.011467 | 0.011485 |
| 0.011519 | 0.011258 | 0.011394 | 0.011192 | 0.011384 | 0.011462 | 0.011466 |
| 0.011475 | 0.011375 | 0.011448 | 0.011377 | 0.011397 | 0.011530 | 0.011598 |
| 0.011530 | 0.011464 | 0.011567 | 0.011569 | 0.011705 | 0.011732 | 0.011362 |
| 0.011631 | 0.011497 | 0.011362 | 0.011463 | 0.011262 | 0.011497 | 0.011295 |
| 0.011362 | 0.011362 | 0.011329 | 0.011295 | 0.011329 | 0.011295 | 0.011396 |
| 0.011375 | 0.011375 | 0.011368 | 0.011403 | 0.011539 | 0.011504 | 0.011504 |
| 0.011503 | 0.011430 | 0.011245 | 0.011240 | 0.011365 | 0.011535 | 0.011535 |
| 0.011329 | 0.011399 | 0.011632 | 0.011601 | 0.011531 | 0.011565 | 0.011497 |
| 0.011430 | 0.011497 | 0.011497 | 0.011396 | 0.011968 | 0.011564 | 0.011631 |
| 0.011665 | 0.011737 | 0.011367 | 0.011441 | 0.011329 | 0.011530 | 0.011497 |
| 0.011531 | 0.011564 | 0.011564 | 0.011564 | 0.011728 | 0.011698 | 0.011338 |
| 0.011229 | 0.011233 | 0.011333 | 0.011298 | 0.011402 | 0.011247 | 0.011570 |

|          |          |          |          |          |          |          |
|----------|----------|----------|----------|----------|----------|----------|
| 0.011369 | 0.011499 | 0.011251 | 0.011360 | 0.011363 | 0.011437 | 0.011329 |
| 0.011295 | 0.011295 | 0.011362 | 0.011329 | 0.011530 | 0.011497 | 0.011430 |
| 0.011530 | 0.011598 | 0.011329 | 0.011329 | 0.011363 | 0.011362 | 0.011364 |
| 0.011432 | 0.011362 | 0.011362 | 0.011397 | 0.011530 | 0.011598 | 0.011530 |
| 0.011464 | 0.011567 | 0.011569 | 0.011705 | 0.011732 | 0.011362 | 0.011564 |
| 0.011497 | 0.011497 | 0.011331 | 0.011513 | 0.011442 | 0.011469 | 0.011340 |
| 0.011473 | 0.011698 | 0.011483 | 0.011400 | 0.011295 | 0.011497 | 0.011362 |
| 0.011463 | 0.011396 | 0.011295 | 0.011364 | 0.011497 | 0.011500 | 0.000000 |
| 0.011295 | 0.011229 | 0.011362 | 0.011295 | 0.011228 | 0.011332 | 0.011497 |
| 0.011396 | 0.011329 | 0.011362 | 0.011396 | 0.011363 | 0.011295 | 0.011497 |
| 0.011362 | 0.011396 | 0.011396 | 0.011329 | 0.011396 | 0.011631 | 0.011295 |
| 0.011329 | 0.011732 | 0.011329 | 0.011362 | 0.011329 | 0.011698 | 0.011317 |
| 0.011679 | 0.011315 | 0.011361 | 0.011543 | 0.011630 | 0.011527 | 0.011269 |
| 0.011270 | 0.011497 | 0.011598 | 0.011705 | 0.011565 | 0.011703 | 0.011834 |
| 0.011733 | 0.011771 | 0.011732 | 0.011983 | 0.011698 | 0.012574 | 0.011734 |
| 0.012473 | 0.012241 | 0.012375 | 0.012646 | 0.011698 | 0.011396 | 0.011698 |
| 0.012137 | 0.012072 | 0.011665 | 0.011564 | 0.011632 | 0.011632 | 0.011602 |
| 0.011497 | 0.011501 | 0.011564 | 0.011531 | 0.011901 | 0.011968 | 0.011968 |
| 0.011868 | 0.011968 | 0.012072 | 0.011838 | 0.012138 | 0.012144 | 0.012205 |
| 0.012205 | 0.012239 | 0.012186 | 0.012205 | 0.012207 | 0.011430 | 0.011732 |
| 0.011800 | 0.012304 | 0.011806 | 0.012035 | 0.012508 | 0.011570 | 0.011464 |
| 0.011430 | 0.011430 | 0.011901 | 0.011965 | 0.012045 | 0.011766 | 0.011431 |
| S191     | 0.011597 | 0.011597 | 0.011934 | 0.011698 | 0.011698 | 0.011765 |
| 0.011604 | 0.011536 | 0.011698 | 0.011195 | 0.011262 | 0.011228 | 0.011195 |
| 0.011228 | 0.011396 | 0.011195 | 0.011228 | 0.011295 | 0.011262 | 0.011228 |
| 0.011195 | 0.011228 | 0.011329 | 0.011195 | 0.011228 | 0.011228 | 0.011570 |
| 0.011463 | 0.011228 | 0.011127 | 0.011362 | 0.011295 | 0.011262 | 0.011295 |
| 0.011262 | 0.011362 | 0.011262 | 0.011262 | 0.011295 | 0.011262 | 0.011430 |
| 0.011195 | 0.011262 | 0.011295 | 0.011228 | 0.011329 | 0.011362 | 0.011295 |
| 0.011262 | 0.011430 | 0.011329 | 0.011597 | 0.011262 | 0.011530 | 0.011262 |
| 0.011228 | 0.011329 | 0.011396 | 0.011530 | 0.011631 | 0.011329 | 0.011429 |
| 0.011295 | 0.011362 | 0.011262 | 0.011497 | 0.011732 | 0.011262 | 0.011329 |
| 0.011228 | 0.011329 | 0.011295 | 0.011362 | 0.011295 | 0.011295 | 0.011295 |
| 0.011195 | 0.011228 | 0.011195 | 0.011295 | 0.011262 | 0.011296 | 0.011362 |
| 0.011295 | 0.011262 | 0.011329 | 0.011228 | 0.011362 | 0.011195 | 0.011262 |
| 0.011429 | 0.011362 | 0.011597 | 0.011430 | 0.011262 | 0.011497 | 0.011262 |
| 0.011431 | 0.011658 | 0.011437 | 0.011138 | 0.011098 | 0.011281 | 0.011375 |
| 0.012011 | 0.011365 | 0.011143 | 0.011497 | 0.011497 | 0.011295 | 0.011396 |
| 0.011329 | 0.011295 | 0.011362 | 0.011262 | 0.011362 | 0.011295 | 0.011295 |
| 0.011262 | 0.011362 | 0.011564 | 0.011429 | 0.011329 | 0.011295 | 0.011228 |
| 0.011195 | 0.011195 | 0.011262 | 0.011228 | 0.011429 | 0.011396 | 0.011329 |
| 0.011429 | 0.011497 | 0.011228 | 0.011228 | 0.011262 | 0.011262 | 0.011263 |
| 0.011331 | 0.011262 | 0.011262 | 0.011132 | 0.011205 | 0.011165 | 0.011262 |
| 0.011263 | 0.011198 | 0.011208 | 0.011233 | 0.011162 | 0.011197 | 0.011229 |
| 0.011492 | 0.011267 | 0.011301 | 0.011195 | 0.011199 | 0.011329 | 0.011296 |
| 0.011363 | 0.011296 | 0.011296 | 0.011396 | 0.011329 | 0.011698 | 0.011497 |
| 0.011530 | 0.011396 | 0.011262 | 0.011362 | 0.011161 | 0.011396 | 0.011195 |
| 0.011262 | 0.011262 | 0.011228 | 0.011195 | 0.011228 | 0.011195 | 0.011295 |
| 0.011262 | 0.011362 | 0.011295 | 0.011195 | 0.011296 | 0.011396 | 0.011398 |
| 0.011396 | 0.011295 | 0.000000 | 0.011128 | 0.011262 | 0.000000 | 0.011127 |
| 0.011230 | 0.011396 | 0.011195 | 0.011396 | 0.011161 | 0.011262 | 0.011228 |
| 0.011329 | 0.011228 | 0.011262 | 0.011228 | 0.011262 | 0.011127 | 0.011262 |
| 0.011295 | 0.011228 | 0.011295 | 0.011228 | 0.011262 | 0.011295 | 0.011530 |
| 0.011631 | 0.011564 | 0.011631 | 0.011397 | 0.011631 | 0.011262 | 0.011228 |
| 0.011263 | 0.011505 | 0.011289 | 0.011163 | 0.011637 | 0.011129 | 0.011218 |
| 0.011637 | 0.011536 | 0.011429 | 0.011631 | 0.011333 | 0.011497 | 0.011463 |
| 0.011396 | 0.011564 | 0.011416 | 0.011266 | 0.011270 | 0.011295 | 0.011365 |
| 0.011463 | 0.011364 | 0.011500 | 0.011568 | 0.011497 | 0.011564 | 0.011670 |
| 0.011399 | 0.011569 | 0.011500 | 0.011432 | 0.011700 | 0.011161 | 0.011364 |
| 0.011329 | 0.011262 | 0.011161 | 0.011161 | 0.011228 | 0.011228 | 0.011295 |

|          |          |          |          |          |          |          |
|----------|----------|----------|----------|----------|----------|----------|
| 0.011228 | 0.011295 | 0.011195 | 0.011295 | 0.011228 | 0.011228 | 0.011295 |
| 0.011228 | 0.011665 | 0.011564 | 0.011597 | 0.011127 | 0.011228 | 0.011262 |
| 0.011262 | 0.011228 | 0.011295 | 0.011329 | 0.011195 | 0.011195 | 0.011195 |
| 0.011732 | 0.011362 | 0.011362 | 0.011161 | 0.011262 | 0.011430 | 0.011195 |
| 0.011195 | 0.011262 | 0.011228 | 0.011396 | 0.011195 | 0.011329 | 0.011463 |
| 0.011396 | 0.011228 | 0.011228 | 0.011161 | 0.011161 | 0.011262 | 0.011262 |
| 0.011161 | 0.011262 | 0.011127 | 0.011161 | 0.011295 | 0.011430 | 0.011195 |
| 0.011161 | 0.011295 | 0.011228 | 0.011127 | 0.011463 | 0.011127 | 0.011295 |
| 0.011368 | 0.011195 | 0.011497 | 0.011329 | 0.011362 | 0.011228 | 0.011329 |
| 0.011195 | 0.011530 | 0.011127 | 0.011396 | 0.011195 | 0.011195 | 0.011127 |
| 0.011362 | 0.011564 | 0.011262 | 0.011329 | 0.011161 | 0.011564 | 0.011195 |
| 0.011195 | 0.011195 | 0.011228 | 0.011329 | 0.011228 | 0.011329 | 0.011396 |
| 0.011396 | 0.011362 | 0.011262 | 0.011362 | 0.011329 | 0.011195 | 0.011161 |
| 0.011195 | 0.011195 | 0.011262 | 0.011195 | 0.011161 | 0.011329 | 0.011195 |
| 0.011228 | 0.011228 | 0.011362 | 0.011396 | 0.011295 | 0.011228 | 0.011228 |
| 0.011295 | 0.011228 | 0.011329 | 0.011195 | 0.011329 | 0.011429 | 0.011732 |
| 0.011228 | 0.011631 | 0.011233 | 0.017747 | 0.011126 | 0.011305 | 0.011583 |
| 0.011545 | 0.011588 | 0.011217 | 0.011176 | 0.011609 | 0.011612 | 0.011242 |
| 0.011392 | 0.011426 | 0.011138 | 0.011186 | 0.011216 | 0.011208 | 0.011146 |
| 0.011389 | 0.011395 | 0.011357 | 0.011259 | 0.011362 | 0.011396 | 0.011398 |
| 0.011266 | 0.011362 | 0.011362 | 0.011329 | 0.011295 | 0.011295 | 0.011262 |
| 0.011295 | 0.011228 | 0.011262 | 0.011295 | 0.011262 | 0.011195 | 0.011228 |
| 0.011228 | 0.011295 | 0.011195 | 0.011295 | 0.011329 | 0.011362 | 0.011262 |
| 0.011295 | 0.011262 | 0.011597 | 0.011597 | 0.011329 | 0.011363 | 0.011396 |
| 0.011161 | 0.011161 | 0.011195 | 0.011295 | 0.011161 | 0.011396 | 0.011396 |
| 0.011429 | 0.011429 | 0.011362 | 0.011463 | 0.011631 | 0.011464 | 0.011295 |
| 0.011295 | 0.011362 | 0.011396 | 0.011228 | 0.011295 | 0.011262 | 0.011295 |
| 0.011363 | 0.011362 | 0.011396 | 0.011363 | 0.011262 | 0.011463 | 0.011429 |
| 0.011297 | 0.011195 | 0.011295 | 0.011396 | 0.011295 | 0.011430 | 0.011463 |
| 0.011631 | 0.011333 | 0.011497 | 0.011463 | 0.011396 | 0.011564 | 0.011195 |
| 0.011363 | 0.011262 | 0.011228 | 0.011228 | 0.011295 | 0.011195 | 0.011295 |
| 0.011329 | 0.011362 | 0.011262 | 0.011295 | 0.011262 | 0.011597 | 0.011597 |
| 0.011329 | 0.011363 | 0.011429 | 0.011362 | 0.012002 | 0.011417 | 0.011342 |
| 0.011412 | 0.011372 | 0.011482 | 0.011372 | 0.011480 | 0.011405 | 0.011371 |
| 0.011953 | 0.011268 | 0.011403 | 0.011337 | 0.011611 | 0.011468 | 0.011571 |
| 0.011978 | 0.011437 | 0.011297 | 0.011295 | 0.011295 | 0.011329 | 0.011263 |
| 0.011161 | 0.011195 | 0.011329 | 0.011295 | 0.011297 | 0.011429 | 0.011397 |
| 0.011262 | 0.011195 | 0.011228 | 0.011262 | 0.011161 | 0.011228 | 0.011127 |
| 0.011262 | 0.011295 | 0.011195 | 0.011161 | 0.011262 | 0.011195 | 0.011228 |
| 0.011228 | 0.011161 | 0.011228 | 0.011262 | 0.011161 | 0.011362 | 0.011396 |
| 0.011295 | 0.011362 | 0.011295 | 0.011295 | 0.011228 | 0.011631 | 0.011262 |
| 0.011304 | 0.011228 | 0.011463 | 0.011467 | 0.011329 | 0.011329 | 0.011329 |
| 0.011329 | 0.011262 | 0.011228 | 0.011262 | 0.011362 | 0.011362 | 0.011295 |
| 0.011295 | 0.011430 | 0.011597 | 0.011329 | 0.011530 | 0.011530 | 0.011396 |
| 0.011228 | 0.011295 | 0.011329 | 0.011732 | 0.011295 | 0.011329 | 0.011295 |
| 0.011329 | 0.011262 | 0.011262 | 0.011564 | 0.011497 | 0.011530 | 0.011262 |
| 0.011362 | 0.011430 | 0.011295 | 0.011362 | 0.011329 | 0.011195 | 0.011530 |
| 0.011295 | 0.011262 | 0.011262 | 0.011430 | 0.011262 | 0.011362 | 0.011597 |
| 0.011295 | 0.011672 | 0.011665 | 0.011426 | 0.011117 | 0.011366 | 0.011163 |
| 0.011115 | 0.011683 | 0.011201 | 0.011373 | 0.011158 | 0.011264 | 0.011273 |
| 0.011366 | 0.000000 | 0.011227 | 0.000000 | 0.011114 | 0.011261 | 0.011344 |
| 0.011362 | 0.011257 | 0.011342 | 0.011272 | 0.011296 | 0.011429 | 0.011497 |
| 0.011497 | 0.011363 | 0.011466 | 0.011467 | 0.011603 | 0.011625 | 0.011295 |
| 0.011530 | 0.011396 | 0.011262 | 0.011362 | 0.011161 | 0.011396 | 0.011195 |
| 0.011262 | 0.011262 | 0.011228 | 0.011195 | 0.011228 | 0.011195 | 0.011295 |
| 0.011270 | 0.011270 | 0.011266 | 0.011300 | 0.011436 | 0.011402 | 0.011402 |
| 0.011401 | 0.011329 | 0.011134 | 0.011132 | 0.011263 | 0.011433 | 0.011433 |
| 0.011228 | 0.011297 | 0.011531 | 0.011500 | 0.011430 | 0.011464 | 0.011396 |
| 0.011329 | 0.011396 | 0.011396 | 0.011295 | 0.011866 | 0.011463 | 0.011530 |
| 0.011564 | 0.011630 | 0.011265 | 0.011337 | 0.011228 | 0.011430 | 0.011396 |

|          |          |          |          |          |          |          |
|----------|----------|----------|----------|----------|----------|----------|
| 0.011430 | 0.011463 | 0.011463 | 0.011463 | 0.011571 | 0.011597 | 0.011234 |
| 0.011128 | 0.011130 | 0.011231 | 0.011196 | 0.011299 | 0.011135 | 0.011468 |
| 0.011266 | 0.011367 | 0.011108 | 0.011285 | 0.011262 | 0.011334 | 0.011228 |
| 0.011195 | 0.011195 | 0.011262 | 0.011228 | 0.011429 | 0.011396 | 0.011329 |
| 0.011429 | 0.011497 | 0.011228 | 0.011228 | 0.011262 | 0.011262 | 0.011263 |
| 0.011331 | 0.011262 | 0.011262 | 0.011296 | 0.011429 | 0.011497 | 0.011497 |
| 0.011363 | 0.011466 | 0.011467 | 0.011603 | 0.011625 | 0.011295 | 0.011463 |
| 0.011396 | 0.011396 | 0.011229 | 0.011408 | 0.011338 | 0.011367 | 0.011235 |
| 0.011370 | 0.011607 | 0.011399 | 0.011298 | 0.011195 | 0.011396 | 0.011262 |
| 0.011362 | 0.011295 | 0.011195 | 0.011296 | 0.011396 | 0.011398 | 0.011295 |
| 0.000000 | 0.011128 | 0.011262 | 0.000000 | 0.011127 | 0.011230 | 0.011396 |
| 0.011295 | 0.011228 | 0.011262 | 0.011295 | 0.011262 | 0.011195 | 0.011396 |
| 0.011262 | 0.011295 | 0.011295 | 0.011228 | 0.011295 | 0.011530 | 0.011195 |
| 0.011228 | 0.011631 | 0.011228 | 0.011262 | 0.011228 | 0.011597 | 0.011103 |
| 0.011566 | 0.011145 | 0.011161 | 0.011422 | 0.011467 | 0.011419 | 0.000000 |
| 0.011113 | 0.011396 | 0.011497 | 0.011603 | 0.011464 | 0.011601 | 0.011733 |
| 0.011632 | 0.011669 | 0.011631 | 0.011880 | 0.011597 | 0.012472 | 0.011633 |
| 0.012372 | 0.012139 | 0.012273 | 0.012545 | 0.011597 | 0.011295 | 0.011598 |
| 0.012036 | 0.011971 | 0.011564 | 0.011463 | 0.011531 | 0.011531 | 0.011500 |
| 0.011396 | 0.011399 | 0.011463 | 0.011430 | 0.011800 | 0.011866 | 0.011867 |
| 0.011767 | 0.011867 | 0.011970 | 0.011737 | 0.012036 | 0.012042 | 0.012103 |
| 0.012104 | 0.012138 | 0.012084 | 0.012104 | 0.012105 | 0.011329 | 0.011631 |
| 0.011699 | 0.012203 | 0.011704 | 0.011934 | 0.012406 | 0.011468 | 0.011363 |
| 0.011329 | 0.011329 | 0.011799 | 0.011842 | 0.011940 | 0.011665 | 0.011330 |
| S192     | 0.011532 | 0.011532 | 0.011870 | 0.011633 | 0.011633 | 0.011701 |
| 0.011538 | 0.011470 | 0.011633 | 0.011128 | 0.011195 | 0.011162 | 0.011128 |
| 0.011161 | 0.011330 | 0.011128 | 0.011161 | 0.011229 | 0.011195 | 0.011161 |
| 0.011128 | 0.011161 | 0.011263 | 0.011128 | 0.011162 | 0.011161 | 0.011504 |
| 0.011397 | 0.011161 | 0.000000 | 0.011296 | 0.011229 | 0.011195 | 0.011229 |
| 0.011195 | 0.011296 | 0.011195 | 0.011195 | 0.011229 | 0.011195 | 0.011364 |
| 0.011128 | 0.011195 | 0.011229 | 0.011161 | 0.011263 | 0.011296 | 0.011229 |
| 0.011195 | 0.011364 | 0.011263 | 0.011532 | 0.011195 | 0.011465 | 0.011195 |
| 0.011161 | 0.011263 | 0.011330 | 0.011465 | 0.011566 | 0.011263 | 0.011364 |
| 0.011229 | 0.011296 | 0.011195 | 0.011431 | 0.011667 | 0.011195 | 0.011263 |
| 0.011161 | 0.011263 | 0.011229 | 0.011296 | 0.011195 | 0.011229 | 0.011229 |
| 0.011128 | 0.011161 | 0.011128 | 0.011229 | 0.011195 | 0.011229 | 0.011296 |
| 0.011229 | 0.011195 | 0.011263 | 0.011161 | 0.011296 | 0.011128 | 0.011195 |
| 0.011364 | 0.011296 | 0.011532 | 0.011364 | 0.011195 | 0.011431 | 0.011195 |
| 0.011358 | 0.011586 | 0.011401 | 0.011100 | 0.011098 | 0.011208 | 0.011298 |
| 0.011942 | 0.011365 | 0.011102 | 0.011431 | 0.011431 | 0.011229 | 0.011330 |
| 0.011263 | 0.011229 | 0.011296 | 0.011195 | 0.011296 | 0.011229 | 0.011229 |
| 0.011195 | 0.011263 | 0.011499 | 0.011364 | 0.011263 | 0.011229 | 0.011161 |
| 0.011128 | 0.011128 | 0.011195 | 0.011161 | 0.011364 | 0.011330 | 0.011263 |
| 0.011364 | 0.011364 | 0.011161 | 0.011161 | 0.011195 | 0.011195 | 0.011196 |
| 0.011264 | 0.011195 | 0.011195 | 0.000000 | 0.011133 | 0.011096 | 0.011195 |
| 0.011196 | 0.011129 | 0.011171 | 0.011164 | 0.011094 | 0.011129 | 0.011162 |
| 0.011422 | 0.011199 | 0.011233 | 0.011128 | 0.011130 | 0.011263 | 0.011229 |
| 0.011297 | 0.011229 | 0.011229 | 0.011330 | 0.011263 | 0.011634 | 0.011431 |
| 0.011465 | 0.011330 | 0.011195 | 0.011296 | 0.011094 | 0.011330 | 0.011128 |
| 0.011195 | 0.011195 | 0.011161 | 0.011128 | 0.011161 | 0.011128 | 0.011229 |
| 0.011195 | 0.011296 | 0.011229 | 0.011128 | 0.011229 | 0.011263 | 0.011297 |
| 0.011330 | 0.011229 | 0.011128 | 0.000000 | 0.011195 | 0.011128 | 0.000000 |
| 0.011162 | 0.011330 | 0.011128 | 0.011330 | 0.011094 | 0.011195 | 0.011161 |
| 0.011263 | 0.011161 | 0.011195 | 0.011161 | 0.011195 | 0.000000 | 0.011195 |
| 0.011229 | 0.011161 | 0.011229 | 0.011161 | 0.011195 | 0.011229 | 0.011465 |
| 0.011566 | 0.011498 | 0.011566 | 0.011331 | 0.011566 | 0.011195 | 0.011161 |
| 0.011196 | 0.011465 | 0.011289 | 0.011095 | 0.011571 | 0.000000 | 0.011179 |
| 0.011572 | 0.011470 | 0.011364 | 0.011566 | 0.011266 | 0.011431 | 0.011398 |
| 0.011330 | 0.011498 | 0.011346 | 0.011185 | 0.011229 | 0.011229 | 0.011298 |
| 0.011397 | 0.011297 | 0.011434 | 0.011502 | 0.011431 | 0.011499 | 0.011605 |

|          |          |          |          |          |          |          |
|----------|----------|----------|----------|----------|----------|----------|
| 0.011332 | 0.011503 | 0.011434 | 0.011366 | 0.011635 | 0.011094 | 0.011297 |
| 0.011263 | 0.011195 | 0.011094 | 0.011094 | 0.011161 | 0.011161 | 0.011229 |
| 0.011161 | 0.011229 | 0.011128 | 0.011229 | 0.011161 | 0.011161 | 0.011229 |
| 0.011161 | 0.011600 | 0.011499 | 0.011532 | 0.000000 | 0.011161 | 0.011195 |
| 0.011195 | 0.011161 | 0.011229 | 0.011263 | 0.011128 | 0.011128 | 0.011128 |
| 0.011667 | 0.011296 | 0.011296 | 0.011094 | 0.011195 | 0.011364 | 0.011128 |
| 0.011128 | 0.011195 | 0.011161 | 0.011330 | 0.011094 | 0.011263 | 0.011397 |
| 0.011330 | 0.011161 | 0.011161 | 0.011094 | 0.011094 | 0.011263 | 0.011195 |
| 0.011094 | 0.011195 | 0.000000 | 0.011094 | 0.011229 | 0.011364 | 0.011128 |
| 0.011094 | 0.011229 | 0.011162 | 0.000000 | 0.011397 | 0.000000 | 0.011229 |
| 0.011301 | 0.011128 | 0.011431 | 0.011263 | 0.011296 | 0.011161 | 0.011263 |
| 0.011128 | 0.011465 | 0.000000 | 0.011330 | 0.011128 | 0.011128 | 0.000000 |
| 0.011296 | 0.011499 | 0.011195 | 0.011263 | 0.011094 | 0.011499 | 0.011128 |
| 0.011128 | 0.011128 | 0.011161 | 0.011263 | 0.011161 | 0.011263 | 0.011330 |
| 0.011330 | 0.011296 | 0.011195 | 0.011296 | 0.011263 | 0.011128 | 0.011094 |
| 0.011128 | 0.011128 | 0.011195 | 0.011128 | 0.011094 | 0.011263 | 0.011128 |
| 0.011161 | 0.011161 | 0.011296 | 0.011330 | 0.011229 | 0.011161 | 0.011161 |
| 0.011195 | 0.011161 | 0.011263 | 0.011128 | 0.011263 | 0.011364 | 0.011667 |
| 0.011161 | 0.011566 | 0.011164 | 0.017704 | 0.011126 | 0.011306 | 0.011516 |
| 0.011477 | 0.011519 | 0.011217 | 0.011176 | 0.011612 | 0.011546 | 0.011243 |
| 0.011392 | 0.011428 | 0.000000 | 0.011144 | 0.011139 | 0.011209 | 0.011147 |
| 0.011389 | 0.011322 | 0.011321 | 0.011127 | 0.011296 | 0.011330 | 0.011332 |
| 0.011198 | 0.011296 | 0.011296 | 0.011263 | 0.011229 | 0.011229 | 0.011195 |
| 0.011229 | 0.011161 | 0.011195 | 0.011229 | 0.011195 | 0.011128 | 0.011161 |
| 0.011161 | 0.011229 | 0.011128 | 0.011229 | 0.011263 | 0.011296 | 0.011195 |
| 0.011229 | 0.011195 | 0.011532 | 0.011532 | 0.011263 | 0.011296 | 0.011330 |
| 0.011094 | 0.011094 | 0.011128 | 0.011229 | 0.011094 | 0.011330 | 0.011330 |
| 0.011364 | 0.011364 | 0.011296 | 0.011397 | 0.011566 | 0.011398 | 0.011229 |
| 0.011229 | 0.011296 | 0.011330 | 0.011161 | 0.011229 | 0.011195 | 0.011229 |
| 0.011296 | 0.011296 | 0.011330 | 0.011296 | 0.011196 | 0.011397 | 0.011364 |
| 0.011230 | 0.011128 | 0.011229 | 0.011330 | 0.011229 | 0.011364 | 0.011397 |
| 0.011566 | 0.011266 | 0.011431 | 0.011398 | 0.011330 | 0.011498 | 0.011128 |
| 0.011297 | 0.011195 | 0.011161 | 0.011161 | 0.011229 | 0.011128 | 0.011229 |
| 0.011263 | 0.011296 | 0.011195 | 0.011229 | 0.011195 | 0.011532 | 0.011532 |
| 0.011263 | 0.011296 | 0.011364 | 0.011296 | 0.011905 | 0.011347 | 0.011272 |
| 0.011343 | 0.011304 | 0.011378 | 0.011304 | 0.011412 | 0.011337 | 0.011303 |
| 0.011853 | 0.011199 | 0.011335 | 0.011269 | 0.011544 | 0.011402 | 0.011505 |
| 0.011880 | 0.011363 | 0.011230 | 0.011229 | 0.011229 | 0.011263 | 0.011196 |
| 0.011094 | 0.011128 | 0.011263 | 0.011229 | 0.011230 | 0.011364 | 0.011331 |
| 0.011195 | 0.011128 | 0.011161 | 0.011195 | 0.011094 | 0.011161 | 0.000000 |
| 0.011195 | 0.011229 | 0.011128 | 0.011094 | 0.011195 | 0.011128 | 0.011161 |
| 0.011161 | 0.011094 | 0.011161 | 0.011195 | 0.011094 | 0.011296 | 0.011330 |
| 0.011229 | 0.011296 | 0.011229 | 0.011229 | 0.011161 | 0.011566 | 0.011195 |
| 0.011235 | 0.011161 | 0.011398 | 0.011401 | 0.011263 | 0.011263 | 0.011263 |
| 0.011263 | 0.011195 | 0.011161 | 0.011195 | 0.011296 | 0.011296 | 0.011229 |
| 0.011229 | 0.011364 | 0.011532 | 0.011263 | 0.011465 | 0.011465 | 0.011330 |
| 0.011161 | 0.011229 | 0.011263 | 0.011667 | 0.011229 | 0.011263 | 0.011229 |
| 0.011263 | 0.011195 | 0.011195 | 0.011499 | 0.011431 | 0.011465 | 0.011195 |
| 0.011296 | 0.011364 | 0.011229 | 0.011296 | 0.011263 | 0.011128 | 0.011465 |
| 0.011229 | 0.011195 | 0.011195 | 0.011364 | 0.011195 | 0.011296 | 0.011532 |
| 0.011229 | 0.011606 | 0.011600 | 0.011386 | 0.011117 | 0.011299 | 0.011164 |
| 0.011115 | 0.011608 | 0.011131 | 0.011330 | 0.011158 | 0.011265 | 0.011274 |
| 0.011366 | 0.000000 | 0.011228 | 0.000000 | 0.011114 | 0.011262 | 0.011264 |
| 0.011287 | 0.011179 | 0.011272 | 0.011202 | 0.011229 | 0.011364 | 0.011431 |
| 0.011431 | 0.011297 | 0.011400 | 0.011401 | 0.011537 | 0.011556 | 0.011229 |
| 0.011465 | 0.011330 | 0.011195 | 0.011296 | 0.011094 | 0.011330 | 0.011128 |
| 0.011195 | 0.011195 | 0.011161 | 0.011128 | 0.011161 | 0.011128 | 0.011229 |
| 0.011201 | 0.011201 | 0.011198 | 0.011198 | 0.011369 | 0.011335 | 0.011334 |
| 0.011334 | 0.011229 | 0.000000 | 0.000000 | 0.011196 | 0.011366 | 0.011367 |
| 0.011162 | 0.011230 | 0.011466 | 0.011434 | 0.011364 | 0.011398 | 0.011330 |

|          |          |          |          |          |          |          |
|----------|----------|----------|----------|----------|----------|----------|
| 0.011263 | 0.011330 | 0.011330 | 0.011229 | 0.011802 | 0.011397 | 0.011465 |
| 0.011499 | 0.011561 | 0.011197 | 0.011269 | 0.011161 | 0.011364 | 0.011330 |
| 0.011331 | 0.011397 | 0.011397 | 0.011397 | 0.011534 | 0.011532 | 0.011165 |
| 0.000000 | 0.000000 | 0.011163 | 0.011129 | 0.011232 | 0.000000 | 0.011402 |
| 0.011198 | 0.011325 | 0.000000 | 0.011211 | 0.011195 | 0.011266 | 0.011161 |
| 0.011128 | 0.011128 | 0.011195 | 0.011161 | 0.011364 | 0.011330 | 0.011263 |
| 0.011364 | 0.011364 | 0.011161 | 0.011161 | 0.011195 | 0.011195 | 0.011196 |
| 0.011264 | 0.011195 | 0.011195 | 0.011229 | 0.011364 | 0.011431 | 0.011431 |
| 0.011297 | 0.011400 | 0.011401 | 0.011537 | 0.011556 | 0.011229 | 0.011397 |
| 0.011330 | 0.011330 | 0.011162 | 0.011340 | 0.011270 | 0.011265 | 0.011166 |
| 0.011337 | 0.011516 | 0.011314 | 0.011231 | 0.011128 | 0.011330 | 0.011195 |
| 0.011296 | 0.011229 | 0.011128 | 0.011229 | 0.011263 | 0.011297 | 0.011229 |
| 0.011128 | 0.000000 | 0.011195 | 0.011128 | 0.000000 | 0.011162 | 0.011330 |
| 0.011229 | 0.011161 | 0.011195 | 0.011229 | 0.011195 | 0.011128 | 0.011330 |
| 0.011195 | 0.011229 | 0.011229 | 0.011161 | 0.011229 | 0.011465 | 0.011128 |
| 0.011161 | 0.011566 | 0.011161 | 0.011195 | 0.011161 | 0.011532 | 0.011103 |
| 0.011566 | 0.011103 | 0.011161 | 0.011343 | 0.011428 | 0.011349 | 0.000000 |
| 0.011113 | 0.011330 | 0.011431 | 0.011537 | 0.011398 | 0.011536 | 0.011668 |
| 0.011567 | 0.011604 | 0.011566 | 0.011815 | 0.011532 | 0.012410 | 0.011568 |
| 0.012310 | 0.012076 | 0.012211 | 0.012483 | 0.011532 | 0.011229 | 0.011499 |
| 0.011972 | 0.011873 | 0.011499 | 0.011398 | 0.011465 | 0.011465 | 0.011434 |
| 0.011330 | 0.011333 | 0.011397 | 0.011364 | 0.011735 | 0.011802 | 0.011803 |
| 0.011702 | 0.011803 | 0.011907 | 0.011672 | 0.011939 | 0.011944 | 0.012006 |
| 0.012007 | 0.012041 | 0.011985 | 0.012007 | 0.012008 | 0.011263 | 0.011533 |
| 0.011634 | 0.012140 | 0.011639 | 0.011870 | 0.012345 | 0.011401 | 0.011296 |
| 0.011263 | 0.011263 | 0.011735 | 0.011763 | 0.011873 | 0.011600 | 0.011263 |
| S193     | 0.011665 | 0.011665 | 0.012001 | 0.011765 | 0.011765 | 0.011833 |
| 0.011672 | 0.011604 | 0.011765 | 0.011262 | 0.011329 | 0.011296 | 0.011262 |
| 0.011295 | 0.011463 | 0.011262 | 0.011295 | 0.011362 | 0.011329 | 0.011295 |
| 0.011262 | 0.011295 | 0.011396 | 0.011262 | 0.011295 | 0.011295 | 0.011638 |
| 0.011530 | 0.011295 | 0.011195 | 0.011429 | 0.011362 | 0.011329 | 0.011362 |
| 0.011329 | 0.011429 | 0.011329 | 0.011329 | 0.011362 | 0.011329 | 0.011497 |
| 0.011262 | 0.011329 | 0.011362 | 0.011295 | 0.011396 | 0.011429 | 0.011362 |
| 0.011329 | 0.011497 | 0.011396 | 0.011665 | 0.011329 | 0.011597 | 0.011329 |
| 0.011295 | 0.011396 | 0.011463 | 0.011597 | 0.011698 | 0.011396 | 0.011497 |
| 0.011295 | 0.011430 | 0.011329 | 0.011497 | 0.011799 | 0.011329 | 0.011396 |
| 0.011295 | 0.011396 | 0.011362 | 0.011429 | 0.011362 | 0.011362 | 0.011362 |
| 0.011262 | 0.011295 | 0.011262 | 0.011362 | 0.011329 | 0.011363 | 0.011429 |
| 0.011362 | 0.011329 | 0.011396 | 0.011295 | 0.011429 | 0.011262 | 0.011329 |
| 0.011497 | 0.011429 | 0.011665 | 0.011497 | 0.011329 | 0.011564 | 0.011329 |
| 0.011505 | 0.011732 | 0.011551 | 0.011255 | 0.011247 | 0.011355 | 0.011454 |
| 0.012085 | 0.011518 | 0.011266 | 0.011564 | 0.011564 | 0.011362 | 0.011463 |
| 0.011396 | 0.011362 | 0.011429 | 0.011329 | 0.011430 | 0.011362 | 0.011362 |
| 0.011329 | 0.011429 | 0.011631 | 0.011497 | 0.011396 | 0.011362 | 0.011295 |
| 0.011262 | 0.011262 | 0.011329 | 0.011295 | 0.011497 | 0.011463 | 0.011396 |
| 0.011497 | 0.011564 | 0.011295 | 0.011295 | 0.011329 | 0.011329 | 0.011330 |
| 0.011398 | 0.011329 | 0.011329 | 0.011204 | 0.011277 | 0.011235 | 0.011329 |
| 0.011331 | 0.011266 | 0.011318 | 0.011302 | 0.011230 | 0.011266 | 0.011297 |
| 0.011564 | 0.011336 | 0.011370 | 0.011262 | 0.011268 | 0.011397 | 0.011363 |
| 0.011430 | 0.011363 | 0.011363 | 0.011463 | 0.011396 | 0.011765 | 0.011564 |
| 0.011597 | 0.011463 | 0.011329 | 0.011430 | 0.011228 | 0.011463 | 0.011262 |
| 0.011329 | 0.011329 | 0.011295 | 0.011262 | 0.011295 | 0.011262 | 0.011362 |
| 0.011329 | 0.011429 | 0.011362 | 0.011262 | 0.011363 | 0.011463 | 0.011466 |
| 0.011463 | 0.011362 | 0.011262 | 0.011195 | 0.000000 | 0.011262 | 0.011195 |
| 0.011298 | 0.011463 | 0.011262 | 0.011463 | 0.011228 | 0.011329 | 0.011295 |
| 0.011396 | 0.011295 | 0.011329 | 0.011295 | 0.011329 | 0.011195 | 0.011329 |
| 0.011362 | 0.011295 | 0.011362 | 0.011295 | 0.011329 | 0.011362 | 0.011597 |
| 0.011698 | 0.011631 | 0.011698 | 0.011465 | 0.011698 | 0.011329 | 0.011295 |
| 0.011330 | 0.011586 | 0.011426 | 0.011232 | 0.011705 | 0.011197 | 0.011296 |
| 0.011705 | 0.011604 | 0.011497 | 0.011698 | 0.011402 | 0.011564 | 0.011530 |

|          |          |          |          |          |          |          |
|----------|----------|----------|----------|----------|----------|----------|
| 0.011463 | 0.011631 | 0.011487 | 0.011349 | 0.011396 | 0.011362 | 0.011432 |
| 0.011530 | 0.011431 | 0.011567 | 0.011636 | 0.011564 | 0.011631 | 0.011738 |
| 0.011466 | 0.011637 | 0.011568 | 0.011500 | 0.011767 | 0.011228 | 0.011431 |
| 0.011396 | 0.011329 | 0.011228 | 0.011228 | 0.011295 | 0.011295 | 0.011362 |
| 0.011295 | 0.011362 | 0.011262 | 0.011362 | 0.011295 | 0.011295 | 0.011362 |
| 0.011295 | 0.011732 | 0.011631 | 0.011665 | 0.011195 | 0.011295 | 0.011329 |
| 0.011329 | 0.011295 | 0.011362 | 0.011396 | 0.011262 | 0.011262 | 0.011262 |
| 0.011799 | 0.011429 | 0.011429 | 0.011228 | 0.011329 | 0.011497 | 0.011262 |
| 0.011262 | 0.011329 | 0.011295 | 0.011463 | 0.011262 | 0.011396 | 0.011530 |
| 0.011463 | 0.011295 | 0.011295 | 0.011228 | 0.011228 | 0.011396 | 0.011329 |
| 0.011228 | 0.011329 | 0.011195 | 0.011228 | 0.011362 | 0.011497 | 0.011262 |
| 0.011228 | 0.011362 | 0.011296 | 0.011195 | 0.011530 | 0.011195 | 0.011362 |
| 0.011437 | 0.011262 | 0.011564 | 0.011396 | 0.011429 | 0.011295 | 0.011396 |
| 0.011262 | 0.011597 | 0.011195 | 0.011463 | 0.011262 | 0.011262 | 0.011195 |
| 0.011429 | 0.011631 | 0.011329 | 0.011396 | 0.011228 | 0.011631 | 0.011262 |
| 0.011262 | 0.011262 | 0.011295 | 0.011396 | 0.011295 | 0.011396 | 0.011463 |
| 0.011463 | 0.011429 | 0.011329 | 0.011430 | 0.011329 | 0.011262 | 0.011228 |
| 0.011262 | 0.011262 | 0.011329 | 0.011262 | 0.011228 | 0.011396 | 0.011262 |
| 0.011295 | 0.011295 | 0.011429 | 0.011463 | 0.011362 | 0.011295 | 0.011295 |
| 0.011362 | 0.011295 | 0.011396 | 0.011262 | 0.011396 | 0.011497 | 0.011799 |
| 0.011295 | 0.011698 | 0.011302 | 0.017823 | 0.011387 | 0.011488 | 0.011653 |
| 0.011614 | 0.011658 | 0.011427 | 0.011408 | 0.011829 | 0.011681 | 0.011425 |
| 0.011582 | 0.011609 | 0.011216 | 0.011311 | 0.011294 | 0.011406 | 0.011318 |
| 0.011576 | 0.011470 | 0.011468 | 0.011193 | 0.011429 | 0.011463 | 0.011466 |
| 0.011335 | 0.011429 | 0.011429 | 0.011396 | 0.011362 | 0.011363 | 0.011329 |
| 0.011362 | 0.011295 | 0.011329 | 0.011362 | 0.011329 | 0.011262 | 0.011295 |
| 0.011295 | 0.011362 | 0.011262 | 0.011362 | 0.011396 | 0.011429 | 0.011329 |
| 0.011362 | 0.011329 | 0.011665 | 0.011665 | 0.011396 | 0.011430 | 0.011463 |
| 0.011228 | 0.011228 | 0.011262 | 0.011362 | 0.011228 | 0.011463 | 0.011463 |
| 0.011497 | 0.011497 | 0.011429 | 0.011530 | 0.011698 | 0.011532 | 0.011362 |
| 0.011362 | 0.011429 | 0.011463 | 0.011295 | 0.011362 | 0.011329 | 0.011362 |
| 0.011430 | 0.011430 | 0.011463 | 0.011430 | 0.011330 | 0.011530 | 0.011497 |
| 0.011365 | 0.011262 | 0.011362 | 0.011463 | 0.011362 | 0.011497 | 0.011530 |
| 0.011698 | 0.011402 | 0.011564 | 0.011530 | 0.011463 | 0.011631 | 0.011262 |
| 0.011431 | 0.011329 | 0.011295 | 0.011295 | 0.011362 | 0.011262 | 0.011362 |
| 0.011396 | 0.011429 | 0.011329 | 0.011362 | 0.011329 | 0.011665 | 0.011665 |
| 0.011396 | 0.011430 | 0.011497 | 0.011429 | 0.012070 | 0.011489 | 0.011412 |
| 0.011482 | 0.011442 | 0.011552 | 0.011441 | 0.011550 | 0.011474 | 0.011440 |
| 0.012022 | 0.011337 | 0.011471 | 0.011406 | 0.011680 | 0.011536 | 0.011639 |
| 0.012046 | 0.011512 | 0.011365 | 0.011362 | 0.011362 | 0.011396 | 0.011331 |
| 0.011228 | 0.011262 | 0.011396 | 0.011362 | 0.011364 | 0.011497 | 0.011464 |
| 0.011329 | 0.011262 | 0.011295 | 0.011329 | 0.011228 | 0.011295 | 0.011195 |
| 0.011329 | 0.011362 | 0.011262 | 0.011228 | 0.011329 | 0.011262 | 0.011295 |
| 0.011295 | 0.011228 | 0.011295 | 0.011329 | 0.011228 | 0.011429 | 0.011463 |
| 0.011362 | 0.011429 | 0.011362 | 0.011362 | 0.011295 | 0.011698 | 0.011329 |
| 0.011373 | 0.011295 | 0.011531 | 0.011535 | 0.011396 | 0.011396 | 0.011396 |
| 0.011396 | 0.011329 | 0.011295 | 0.011329 | 0.011429 | 0.011430 | 0.011362 |
| 0.011362 | 0.011497 | 0.011665 | 0.011396 | 0.011597 | 0.011597 | 0.011463 |
| 0.011295 | 0.011362 | 0.011396 | 0.011799 | 0.011363 | 0.011396 | 0.011362 |
| 0.011396 | 0.011329 | 0.011329 | 0.011631 | 0.011564 | 0.011597 | 0.011329 |
| 0.011430 | 0.011497 | 0.011362 | 0.011430 | 0.011396 | 0.011262 | 0.011597 |
| 0.011362 | 0.011329 | 0.011329 | 0.011497 | 0.011329 | 0.011429 | 0.011665 |
| 0.011362 | 0.011739 | 0.011732 | 0.011548 | 0.011342 | 0.011434 | 0.011318 |
| 0.011280 | 0.011761 | 0.011271 | 0.011507 | 0.011353 | 0.011467 | 0.011485 |
| 0.011570 | 0.011323 | 0.011394 | 0.011258 | 0.011330 | 0.011529 | 0.011425 |
| 0.011437 | 0.011336 | 0.011412 | 0.011342 | 0.011363 | 0.011497 | 0.011564 |
| 0.011564 | 0.011430 | 0.011533 | 0.011535 | 0.011670 | 0.011696 | 0.011362 |
| 0.011597 | 0.011463 | 0.011329 | 0.011430 | 0.011228 | 0.011463 | 0.011262 |
| 0.011329 | 0.011329 | 0.011295 | 0.011262 | 0.011295 | 0.011262 | 0.011362 |
| 0.011340 | 0.011340 | 0.011334 | 0.011368 | 0.011505 | 0.011470 | 0.011470 |



|          |          |          |          |          |          |          |
|----------|----------|----------|----------|----------|----------|----------|
| 0.011469 | 0.011396 | 0.011208 | 0.011204 | 0.011331 | 0.011501 | 0.011501 |
| 0.011296 | 0.011365 | 0.011599 | 0.011567 | 0.011497 | 0.011531 | 0.011463 |
| 0.011396 | 0.011463 | 0.011463 | 0.011362 | 0.011934 | 0.011530 | 0.011598 |
| 0.011631 | 0.011701 | 0.011333 | 0.011407 | 0.011295 | 0.011497 | 0.011463 |
| 0.011498 | 0.011530 | 0.011530 | 0.011530 | 0.011650 | 0.011665 | 0.011303 |
| 0.011196 | 0.011199 | 0.011299 | 0.011264 | 0.011368 | 0.011210 | 0.011536 |
| 0.011335 | 0.011499 | 0.011251 | 0.011360 | 0.011329 | 0.011402 | 0.011295 |
| 0.011262 | 0.011262 | 0.011329 | 0.011295 | 0.011497 | 0.011463 | 0.011396 |
| 0.011497 | 0.011564 | 0.011295 | 0.011295 | 0.011329 | 0.011329 | 0.011330 |
| 0.011398 | 0.011329 | 0.011329 | 0.011363 | 0.011497 | 0.011564 | 0.011564 |
| 0.011430 | 0.011533 | 0.011535 | 0.011670 | 0.011696 | 0.011362 | 0.011530 |
| 0.011463 | 0.011463 | 0.011297 | 0.011478 | 0.011408 | 0.011401 | 0.011305 |
| 0.011473 | 0.011652 | 0.011441 | 0.011366 | 0.011262 | 0.011463 | 0.011329 |
| 0.011429 | 0.011362 | 0.011262 | 0.011363 | 0.011463 | 0.011466 | 0.011362 |
| 0.011262 | 0.011195 | 0.000000 | 0.011262 | 0.011195 | 0.011298 | 0.011463 |
| 0.011362 | 0.011295 | 0.011329 | 0.011362 | 0.011329 | 0.011262 | 0.011463 |
| 0.011329 | 0.011362 | 0.011362 | 0.011295 | 0.011362 | 0.011597 | 0.011262 |
| 0.011295 | 0.011698 | 0.011295 | 0.011329 | 0.011295 | 0.011665 | 0.011274 |
| 0.011791 | 0.011273 | 0.011361 | 0.011503 | 0.011589 | 0.011491 | 0.011227 |
| 0.011323 | 0.011463 | 0.011564 | 0.011671 | 0.011531 | 0.011669 | 0.011800 |
| 0.011699 | 0.011737 | 0.011698 | 0.011948 | 0.011665 | 0.012539 | 0.011700 |
| 0.012439 | 0.012207 | 0.012341 | 0.012612 | 0.011665 | 0.011362 | 0.011665 |
| 0.012103 | 0.012038 | 0.011631 | 0.011530 | 0.011598 | 0.011598 | 0.011568 |
| 0.011463 | 0.011467 | 0.011530 | 0.011497 | 0.011867 | 0.011934 | 0.011935 |
| 0.011834 | 0.011934 | 0.012038 | 0.011804 | 0.012104 | 0.012110 | 0.012171 |
| 0.012171 | 0.012205 | 0.012152 | 0.012172 | 0.012173 | 0.011396 | 0.011699 |
| 0.011766 | 0.012270 | 0.011772 | 0.012001 | 0.012474 | 0.011536 | 0.011430 |
| 0.011396 | 0.011396 | 0.011867 | 0.011924 | 0.012010 | 0.011732 | 0.011397 |
| S194     | 0.011598 | 0.011598 | 0.011934 | 0.011698 | 0.011698 | 0.011766 |
| 0.011604 | 0.011536 | 0.011698 | 0.011195 | 0.011262 | 0.011229 | 0.011195 |
| 0.011228 | 0.011396 | 0.011195 | 0.011228 | 0.011295 | 0.011262 | 0.011228 |
| 0.011195 | 0.011228 | 0.011329 | 0.011195 | 0.011228 | 0.011228 | 0.011570 |
| 0.011463 | 0.011228 | 0.011127 | 0.011362 | 0.011295 | 0.011262 | 0.011295 |
| 0.011262 | 0.011362 | 0.011262 | 0.011262 | 0.011295 | 0.011262 | 0.011430 |
| 0.011195 | 0.011262 | 0.011295 | 0.011228 | 0.011329 | 0.011362 | 0.011295 |
| 0.011262 | 0.011430 | 0.011329 | 0.011597 | 0.011262 | 0.011530 | 0.011262 |
| 0.011228 | 0.011329 | 0.011396 | 0.011530 | 0.011631 | 0.011329 | 0.011430 |
| 0.011295 | 0.011362 | 0.011262 | 0.011497 | 0.011732 | 0.011262 | 0.011329 |
| 0.011228 | 0.011329 | 0.011295 | 0.011362 | 0.011295 | 0.011295 | 0.011295 |
| 0.011195 | 0.011228 | 0.011195 | 0.011295 | 0.011262 | 0.011296 | 0.011362 |
| 0.011295 | 0.011262 | 0.011329 | 0.011228 | 0.011362 | 0.011195 | 0.011262 |
| 0.011429 | 0.011362 | 0.011597 | 0.011430 | 0.011262 | 0.011497 | 0.011262 |
| 0.011431 | 0.011658 | 0.011437 | 0.011138 | 0.011098 | 0.011281 | 0.011375 |
| 0.012011 | 0.011365 | 0.011143 | 0.011497 | 0.011497 | 0.011295 | 0.011396 |
| 0.011329 | 0.011295 | 0.011362 | 0.011262 | 0.011362 | 0.011295 | 0.011295 |
| 0.011262 | 0.011362 | 0.011564 | 0.011430 | 0.011329 | 0.011295 | 0.011228 |
| 0.011195 | 0.011195 | 0.011262 | 0.011228 | 0.011429 | 0.011396 | 0.011329 |
| 0.011429 | 0.011497 | 0.011228 | 0.011228 | 0.011262 | 0.011262 | 0.011263 |
| 0.011331 | 0.011262 | 0.011262 | 0.011132 | 0.011205 | 0.011165 | 0.011262 |
| 0.011263 | 0.011198 | 0.011208 | 0.011233 | 0.011162 | 0.011197 | 0.011229 |
| 0.011492 | 0.011267 | 0.011301 | 0.011195 | 0.011199 | 0.011329 | 0.011296 |
| 0.011363 | 0.011296 | 0.011296 | 0.011396 | 0.011329 | 0.011698 | 0.011497 |
| 0.011530 | 0.011396 | 0.011262 | 0.011362 | 0.011161 | 0.011396 | 0.011195 |
| 0.011262 | 0.011262 | 0.011228 | 0.011195 | 0.011228 | 0.011195 | 0.011295 |
| 0.011262 | 0.011362 | 0.011295 | 0.011195 | 0.011296 | 0.011396 | 0.011398 |
| 0.011396 | 0.011295 | 0.000000 | 0.011128 | 0.011262 | 0.000000 | 0.011127 |
| 0.011230 | 0.011396 | 0.011195 | 0.011396 | 0.011161 | 0.011262 | 0.011228 |
| 0.011329 | 0.011228 | 0.011262 | 0.011228 | 0.011262 | 0.011127 | 0.011262 |
| 0.011295 | 0.011228 | 0.011295 | 0.011228 | 0.011262 | 0.011295 | 0.011530 |
| 0.011631 | 0.011564 | 0.011631 | 0.011397 | 0.011631 | 0.011262 | 0.011228 |

|          |          |          |          |          |          |          |
|----------|----------|----------|----------|----------|----------|----------|
| 0.011263 | 0.011505 | 0.011289 | 0.011163 | 0.011637 | 0.011129 | 0.011218 |
| 0.011637 | 0.011536 | 0.011429 | 0.011631 | 0.011333 | 0.011497 | 0.011463 |
| 0.011396 | 0.011564 | 0.011416 | 0.011266 | 0.011270 | 0.011295 | 0.011365 |
| 0.011463 | 0.011364 | 0.011500 | 0.011568 | 0.011497 | 0.011564 | 0.011670 |
| 0.011399 | 0.011569 | 0.011500 | 0.011432 | 0.011700 | 0.011161 | 0.011364 |
| 0.011329 | 0.011262 | 0.011161 | 0.011161 | 0.011228 | 0.011228 | 0.011295 |
| 0.011228 | 0.011295 | 0.011195 | 0.011295 | 0.011228 | 0.011228 | 0.011295 |
| 0.011228 | 0.011665 | 0.011564 | 0.011597 | 0.011127 | 0.011228 | 0.011262 |
| 0.011262 | 0.011228 | 0.011295 | 0.011329 | 0.011195 | 0.011195 | 0.011195 |
| 0.011732 | 0.011362 | 0.011362 | 0.011161 | 0.011262 | 0.011430 | 0.011195 |
| 0.011195 | 0.011262 | 0.011228 | 0.011396 | 0.011195 | 0.011329 | 0.011463 |
| 0.011396 | 0.011228 | 0.011228 | 0.011161 | 0.011161 | 0.011262 | 0.011262 |
| 0.011161 | 0.011262 | 0.011127 | 0.011161 | 0.011295 | 0.011430 | 0.011195 |
| 0.011161 | 0.011295 | 0.011228 | 0.011127 | 0.011463 | 0.011127 | 0.011295 |
| 0.011368 | 0.011195 | 0.011497 | 0.011329 | 0.011362 | 0.011228 | 0.011329 |
| 0.011195 | 0.011530 | 0.011127 | 0.011396 | 0.011195 | 0.011195 | 0.011127 |
| 0.011362 | 0.011564 | 0.011262 | 0.011329 | 0.011161 | 0.011564 | 0.011195 |
| 0.011195 | 0.011195 | 0.011228 | 0.011329 | 0.011228 | 0.011329 | 0.011396 |
| 0.011396 | 0.011362 | 0.011262 | 0.011362 | 0.011329 | 0.011195 | 0.011161 |
| 0.011195 | 0.011195 | 0.011262 | 0.011195 | 0.011161 | 0.011329 | 0.011195 |
| 0.011228 | 0.011228 | 0.011362 | 0.011396 | 0.011295 | 0.011228 | 0.011228 |
| 0.011295 | 0.011228 | 0.011329 | 0.011195 | 0.011329 | 0.011430 | 0.011732 |
| 0.011228 | 0.011631 | 0.011233 | 0.017748 | 0.011126 | 0.011305 | 0.011583 |
| 0.011545 | 0.011588 | 0.011217 | 0.011176 | 0.011609 | 0.011613 | 0.011242 |
| 0.011392 | 0.011426 | 0.011138 | 0.011186 | 0.011216 | 0.011208 | 0.011146 |
| 0.011389 | 0.011395 | 0.011357 | 0.011259 | 0.011362 | 0.011396 | 0.011398 |
| 0.011266 | 0.011362 | 0.011362 | 0.011329 | 0.011295 | 0.011295 | 0.011262 |
| 0.011295 | 0.011228 | 0.011262 | 0.011295 | 0.011262 | 0.011195 | 0.011228 |
| 0.011228 | 0.011295 | 0.011195 | 0.011295 | 0.011329 | 0.011362 | 0.011262 |
| 0.011295 | 0.011262 | 0.011597 | 0.011597 | 0.011329 | 0.011363 | 0.011396 |
| 0.011161 | 0.011161 | 0.011195 | 0.011295 | 0.011161 | 0.011396 | 0.011396 |
| 0.011429 | 0.011429 | 0.011362 | 0.011463 | 0.011631 | 0.011464 | 0.011295 |
| 0.011295 | 0.011362 | 0.011396 | 0.011228 | 0.011295 | 0.011262 | 0.011295 |
| 0.011363 | 0.011362 | 0.011396 | 0.011363 | 0.011262 | 0.011463 | 0.011430 |
| 0.011297 | 0.011195 | 0.011295 | 0.011396 | 0.011295 | 0.011430 | 0.011463 |
| 0.011631 | 0.011333 | 0.011497 | 0.011463 | 0.011396 | 0.011564 | 0.011195 |
| 0.011363 | 0.011262 | 0.011228 | 0.011228 | 0.011295 | 0.011195 | 0.011295 |
| 0.011329 | 0.011362 | 0.011262 | 0.011295 | 0.011262 | 0.011597 | 0.011597 |
| 0.011329 | 0.011363 | 0.011429 | 0.011362 | 0.012002 | 0.011418 | 0.011342 |
| 0.011412 | 0.011372 | 0.011482 | 0.011372 | 0.011480 | 0.011405 | 0.011371 |
| 0.011953 | 0.011268 | 0.011403 | 0.011337 | 0.011611 | 0.011468 | 0.011571 |
| 0.011978 | 0.011437 | 0.011297 | 0.011295 | 0.011295 | 0.011329 | 0.011263 |
| 0.011161 | 0.011195 | 0.011329 | 0.011295 | 0.011297 | 0.011429 | 0.011397 |
| 0.011262 | 0.011195 | 0.011228 | 0.011262 | 0.011161 | 0.011228 | 0.011127 |
| 0.011262 | 0.011295 | 0.011195 | 0.011161 | 0.011262 | 0.011195 | 0.011228 |
| 0.011228 | 0.011161 | 0.011228 | 0.011262 | 0.011161 | 0.011362 | 0.011396 |
| 0.011295 | 0.011362 | 0.011295 | 0.011295 | 0.011228 | 0.011631 | 0.011262 |
| 0.011304 | 0.011228 | 0.011463 | 0.011467 | 0.011329 | 0.011329 | 0.011329 |
| 0.011329 | 0.011262 | 0.011228 | 0.011262 | 0.011362 | 0.011362 | 0.011295 |
| 0.011295 | 0.011430 | 0.011597 | 0.011329 | 0.011530 | 0.011530 | 0.011396 |
| 0.011228 | 0.011295 | 0.011329 | 0.011732 | 0.011295 | 0.011329 | 0.011295 |
| 0.011329 | 0.011262 | 0.011262 | 0.011564 | 0.011497 | 0.011530 | 0.011262 |
| 0.011362 | 0.011430 | 0.011295 | 0.011362 | 0.011329 | 0.011195 | 0.011530 |
| 0.011295 | 0.011262 | 0.011262 | 0.011430 | 0.011262 | 0.011362 | 0.011598 |
| 0.011295 | 0.011672 | 0.011665 | 0.011426 | 0.011117 | 0.011366 | 0.011164 |
| 0.011115 | 0.011683 | 0.011201 | 0.011373 | 0.011158 | 0.011264 | 0.011273 |
| 0.011366 | 0.000000 | 0.011227 | 0.000000 | 0.011114 | 0.011261 | 0.011344 |
| 0.011362 | 0.011257 | 0.011342 | 0.011272 | 0.011296 | 0.011429 | 0.011497 |
| 0.011497 | 0.011363 | 0.011466 | 0.011467 | 0.011603 | 0.011626 | 0.011295 |
| 0.011530 | 0.011396 | 0.011262 | 0.011362 | 0.011161 | 0.011396 | 0.011195 |

|          |          |          |          |          |          |          |
|----------|----------|----------|----------|----------|----------|----------|
| 0.011262 | 0.011262 | 0.011228 | 0.011195 | 0.011228 | 0.011195 | 0.011295 |
| 0.011270 | 0.011270 | 0.011266 | 0.011300 | 0.011437 | 0.011402 | 0.011402 |
| 0.011401 | 0.011329 | 0.011134 | 0.011132 | 0.011263 | 0.011433 | 0.011433 |
| 0.011228 | 0.011297 | 0.011531 | 0.011500 | 0.011430 | 0.011464 | 0.011396 |
| 0.011329 | 0.011396 | 0.011396 | 0.011295 | 0.011867 | 0.011463 | 0.011530 |
| 0.011564 | 0.011630 | 0.011265 | 0.011337 | 0.011228 | 0.011430 | 0.011396 |
| 0.011430 | 0.011463 | 0.011463 | 0.011463 | 0.011571 | 0.011597 | 0.011234 |
| 0.011128 | 0.011130 | 0.011231 | 0.011196 | 0.011299 | 0.011135 | 0.011468 |
| 0.011266 | 0.011367 | 0.011108 | 0.011285 | 0.011262 | 0.011334 | 0.011228 |
| 0.011195 | 0.011195 | 0.011262 | 0.011228 | 0.011429 | 0.011396 | 0.011329 |
| 0.011429 | 0.011497 | 0.011228 | 0.011228 | 0.011262 | 0.011262 | 0.011263 |
| 0.011331 | 0.011262 | 0.011262 | 0.011296 | 0.011429 | 0.011497 | 0.011497 |
| 0.011363 | 0.011466 | 0.011467 | 0.011603 | 0.011626 | 0.011295 | 0.011463 |
| 0.011396 | 0.011396 | 0.011229 | 0.011408 | 0.011338 | 0.011367 | 0.011235 |
| 0.011370 | 0.011607 | 0.011399 | 0.011298 | 0.011195 | 0.011396 | 0.011262 |
| 0.011362 | 0.011295 | 0.011195 | 0.011296 | 0.011396 | 0.011398 | 0.011295 |
| 0.000000 | 0.011128 | 0.011262 | 0.000000 | 0.011127 | 0.011230 | 0.011396 |
| 0.011295 | 0.011228 | 0.011262 | 0.011295 | 0.011262 | 0.011195 | 0.011396 |
| 0.011262 | 0.011295 | 0.011295 | 0.011228 | 0.011295 | 0.011530 | 0.011195 |
| 0.011228 | 0.011631 | 0.011228 | 0.011262 | 0.011228 | 0.011597 | 0.011103 |
| 0.011566 | 0.011145 | 0.011161 | 0.011422 | 0.011467 | 0.011419 | 0.000000 |
| 0.011113 | 0.011396 | 0.011497 | 0.011603 | 0.011464 | 0.011601 | 0.011733 |
| 0.011632 | 0.011669 | 0.011631 | 0.011880 | 0.011597 | 0.012472 | 0.011633 |
| 0.012372 | 0.012139 | 0.012273 | 0.012545 | 0.011597 | 0.011295 | 0.011598 |
| 0.012036 | 0.011971 | 0.011564 | 0.011463 | 0.011531 | 0.011531 | 0.011500 |
| 0.011396 | 0.011399 | 0.011463 | 0.011430 | 0.011800 | 0.011866 | 0.011867 |
| 0.011767 | 0.011867 | 0.011970 | 0.011737 | 0.012037 | 0.012042 | 0.012104 |
| 0.012104 | 0.012138 | 0.012084 | 0.012104 | 0.012105 | 0.011329 | 0.011631 |
| 0.011666 | 0.012203 | 0.011704 | 0.011934 | 0.012407 | 0.011468 | 0.011363 |
| 0.011329 | 0.011329 | 0.011799 | 0.011842 | 0.011940 | 0.011665 | 0.011330 |
| S195     | 0.011531 | 0.011531 | 0.011867 | 0.011631 | 0.011631 | 0.011699 |
| 0.011536 | 0.011468 | 0.011631 | 0.011128 | 0.011195 | 0.011161 | 0.011127 |
| 0.011161 | 0.011329 | 0.011127 | 0.011161 | 0.011228 | 0.011195 | 0.011161 |
| 0.011127 | 0.011161 | 0.011262 | 0.011128 | 0.011161 | 0.011161 | 0.011502 |
| 0.011396 | 0.011161 | 0.000000 | 0.011295 | 0.011228 | 0.011195 | 0.011228 |
| 0.011195 | 0.011295 | 0.011195 | 0.011195 | 0.011228 | 0.011195 | 0.011363 |
| 0.011127 | 0.011195 | 0.011228 | 0.011161 | 0.011262 | 0.011295 | 0.011228 |
| 0.011195 | 0.011363 | 0.011262 | 0.011530 | 0.011195 | 0.011463 | 0.011195 |
| 0.011161 | 0.011262 | 0.011329 | 0.011463 | 0.011564 | 0.011262 | 0.011363 |
| 0.011228 | 0.011295 | 0.011195 | 0.011430 | 0.011665 | 0.011195 | 0.011262 |
| 0.011161 | 0.011262 | 0.011228 | 0.011295 | 0.011228 | 0.011228 | 0.011228 |
| 0.011127 | 0.011161 | 0.011127 | 0.011228 | 0.011195 | 0.011229 | 0.011295 |
| 0.011228 | 0.011195 | 0.011262 | 0.011161 | 0.011295 | 0.011128 | 0.011195 |
| 0.011362 | 0.011295 | 0.011530 | 0.011363 | 0.011195 | 0.011430 | 0.011195 |
| 0.011357 | 0.011583 | 0.011400 | 0.011099 | 0.011098 | 0.011208 | 0.011297 |
| 0.011939 | 0.011365 | 0.011102 | 0.011430 | 0.011430 | 0.011228 | 0.011329 |
| 0.011262 | 0.011228 | 0.011295 | 0.011195 | 0.011295 | 0.011228 | 0.011228 |
| 0.011195 | 0.011295 | 0.011497 | 0.011363 | 0.011262 | 0.011228 | 0.011161 |
| 0.011127 | 0.011127 | 0.011195 | 0.011161 | 0.011362 | 0.011329 | 0.011262 |
| 0.011362 | 0.011430 | 0.011161 | 0.011161 | 0.011195 | 0.011195 | 0.011195 |
| 0.011263 | 0.011195 | 0.011195 | 0.000000 | 0.011133 | 0.011095 | 0.011195 |
| 0.011196 | 0.011129 | 0.011171 | 0.011164 | 0.011094 | 0.011129 | 0.011162 |
| 0.011420 | 0.011198 | 0.011233 | 0.011128 | 0.011129 | 0.011262 | 0.011228 |
| 0.011296 | 0.011229 | 0.011228 | 0.011329 | 0.011262 | 0.011631 | 0.011430 |
| 0.011463 | 0.011329 | 0.011195 | 0.011295 | 0.011094 | 0.011329 | 0.011128 |
| 0.011195 | 0.011195 | 0.011161 | 0.011127 | 0.011161 | 0.011127 | 0.011228 |
| 0.011195 | 0.011295 | 0.011228 | 0.011127 | 0.011229 | 0.011329 | 0.011331 |
| 0.011329 | 0.011228 | 0.011127 | 0.000000 | 0.011195 | 0.011127 | 0.000000 |
| 0.011162 | 0.011329 | 0.011128 | 0.011329 | 0.011094 | 0.011195 | 0.011161 |
| 0.011262 | 0.011161 | 0.011195 | 0.011161 | 0.011195 | 0.000000 | 0.011195 |

|          |          |          |          |          |          |          |
|----------|----------|----------|----------|----------|----------|----------|
| 0.011228 | 0.011161 | 0.011228 | 0.011161 | 0.011195 | 0.011228 | 0.011463 |
| 0.011564 | 0.011497 | 0.011564 | 0.011330 | 0.011564 | 0.011195 | 0.011161 |
| 0.011195 | 0.011465 | 0.011289 | 0.011095 | 0.011569 | 0.000000 | 0.011178 |
| 0.011570 | 0.011468 | 0.011362 | 0.011564 | 0.011265 | 0.011430 | 0.011396 |
| 0.011329 | 0.011497 | 0.011345 | 0.011184 | 0.011228 | 0.011228 | 0.011297 |
| 0.011396 | 0.011296 | 0.011432 | 0.011500 | 0.011430 | 0.011497 | 0.011603 |
| 0.011331 | 0.011502 | 0.011433 | 0.011365 | 0.011633 | 0.011094 | 0.011296 |
| 0.011262 | 0.011195 | 0.011094 | 0.011094 | 0.011161 | 0.011161 | 0.011228 |
| 0.011161 | 0.011228 | 0.011127 | 0.011228 | 0.011161 | 0.011161 | 0.011228 |
| 0.011161 | 0.011598 | 0.011497 | 0.011531 | 0.000000 | 0.011161 | 0.011195 |
| 0.011195 | 0.011161 | 0.011228 | 0.011262 | 0.011127 | 0.011127 | 0.011127 |
| 0.011665 | 0.011295 | 0.011295 | 0.011094 | 0.011195 | 0.011363 | 0.011128 |
| 0.011127 | 0.011195 | 0.011161 | 0.011329 | 0.011127 | 0.011262 | 0.011396 |
| 0.011329 | 0.011161 | 0.011161 | 0.011094 | 0.011094 | 0.011262 | 0.011195 |
| 0.011094 | 0.011195 | 0.000000 | 0.011094 | 0.011228 | 0.011363 | 0.011128 |
| 0.011094 | 0.011228 | 0.011161 | 0.000000 | 0.011396 | 0.000000 | 0.011228 |
| 0.011300 | 0.011128 | 0.011430 | 0.011262 | 0.011295 | 0.011161 | 0.011262 |
| 0.011127 | 0.011463 | 0.000000 | 0.011329 | 0.011127 | 0.011127 | 0.000000 |
| 0.011295 | 0.011497 | 0.011195 | 0.011262 | 0.011094 | 0.011497 | 0.011127 |
| 0.011128 | 0.011127 | 0.011161 | 0.011262 | 0.011161 | 0.011262 | 0.011329 |
| 0.011329 | 0.011295 | 0.011195 | 0.011295 | 0.011262 | 0.011127 | 0.011094 |
| 0.011127 | 0.011127 | 0.011195 | 0.011127 | 0.011094 | 0.011262 | 0.011127 |
| 0.011161 | 0.011161 | 0.011295 | 0.011329 | 0.011228 | 0.011161 | 0.011161 |
| 0.011228 | 0.011161 | 0.011262 | 0.011127 | 0.011262 | 0.011363 | 0.011665 |
| 0.011161 | 0.011564 | 0.011164 | 0.017638 | 0.011126 | 0.011305 | 0.011514 |
| 0.011476 | 0.011518 | 0.011217 | 0.011176 | 0.011610 | 0.011544 | 0.011242 |
| 0.011392 | 0.011427 | 0.000000 | 0.011144 | 0.011138 | 0.011208 | 0.011146 |
| 0.011389 | 0.011321 | 0.011320 | 0.011126 | 0.011295 | 0.011329 | 0.011331 |
| 0.011198 | 0.011295 | 0.011295 | 0.011262 | 0.011228 | 0.011228 | 0.011195 |
| 0.011228 | 0.011161 | 0.011195 | 0.011228 | 0.011195 | 0.011128 | 0.011161 |
| 0.011161 | 0.011228 | 0.011127 | 0.011228 | 0.011262 | 0.011295 | 0.011195 |
| 0.011228 | 0.011195 | 0.011530 | 0.011530 | 0.011262 | 0.011296 | 0.011329 |
| 0.011094 | 0.011094 | 0.011127 | 0.011228 | 0.011094 | 0.011329 | 0.011329 |
| 0.011362 | 0.011362 | 0.011295 | 0.011396 | 0.011564 | 0.011397 | 0.011228 |
| 0.011228 | 0.011295 | 0.011329 | 0.011161 | 0.011228 | 0.011195 | 0.011228 |
| 0.011296 | 0.011295 | 0.011329 | 0.011295 | 0.011195 | 0.011396 | 0.011363 |
| 0.011230 | 0.011128 | 0.011228 | 0.011329 | 0.011228 | 0.011363 | 0.011396 |
| 0.011564 | 0.011265 | 0.011430 | 0.011396 | 0.011329 | 0.011497 | 0.011128 |
| 0.011296 | 0.011195 | 0.011161 | 0.011161 | 0.011228 | 0.011127 | 0.011228 |
| 0.011262 | 0.011295 | 0.011195 | 0.011228 | 0.011195 | 0.011530 | 0.011530 |
| 0.011262 | 0.011296 | 0.011362 | 0.011295 | 0.011935 | 0.011346 | 0.011271 |
| 0.011342 | 0.011303 | 0.011412 | 0.011303 | 0.011410 | 0.011336 | 0.011302 |
| 0.011885 | 0.011199 | 0.011334 | 0.011268 | 0.011543 | 0.011401 | 0.011503 |
| 0.011911 | 0.011362 | 0.011229 | 0.011228 | 0.011228 | 0.011262 | 0.011196 |
| 0.011094 | 0.011128 | 0.011262 | 0.011228 | 0.011229 | 0.011362 | 0.011330 |
| 0.011195 | 0.011127 | 0.011161 | 0.011195 | 0.011094 | 0.011161 | 0.000000 |
| 0.011195 | 0.011228 | 0.011127 | 0.011094 | 0.011195 | 0.011127 | 0.011161 |
| 0.011161 | 0.011094 | 0.011161 | 0.011195 | 0.011094 | 0.011295 | 0.011329 |
| 0.011228 | 0.011295 | 0.011228 | 0.011228 | 0.011161 | 0.011564 | 0.011195 |
| 0.011234 | 0.011161 | 0.011396 | 0.011400 | 0.011262 | 0.011262 | 0.011262 |
| 0.011262 | 0.011195 | 0.011161 | 0.011195 | 0.011295 | 0.011295 | 0.011228 |
| 0.011228 | 0.011363 | 0.011530 | 0.011262 | 0.011463 | 0.011463 | 0.011329 |
| 0.011161 | 0.011228 | 0.011262 | 0.011665 | 0.011228 | 0.011262 | 0.011228 |
| 0.011262 | 0.011195 | 0.011195 | 0.011497 | 0.011430 | 0.011463 | 0.011195 |
| 0.011295 | 0.011363 | 0.011228 | 0.011295 | 0.011262 | 0.011128 | 0.011463 |
| 0.011228 | 0.011195 | 0.011195 | 0.011363 | 0.011195 | 0.011295 | 0.011531 |
| 0.011228 | 0.011604 | 0.011598 | 0.011385 | 0.011117 | 0.011298 | 0.011164 |
| 0.011115 | 0.011566 | 0.011131 | 0.011328 | 0.011158 | 0.011264 | 0.011273 |
| 0.011366 | 0.000000 | 0.011227 | 0.000000 | 0.011114 | 0.011261 | 0.011263 |
| 0.011286 | 0.011178 | 0.011272 | 0.011201 | 0.011229 | 0.011362 | 0.011430 |

|          |          |          |          |          |          |          |
|----------|----------|----------|----------|----------|----------|----------|
| 0.011430 | 0.011296 | 0.011398 | 0.011399 | 0.011535 | 0.011555 | 0.011228 |
| 0.011463 | 0.011329 | 0.011195 | 0.011295 | 0.011094 | 0.011329 | 0.011128 |
| 0.011195 | 0.011195 | 0.011161 | 0.011127 | 0.011161 | 0.011127 | 0.011228 |
| 0.011200 | 0.011200 | 0.011197 | 0.011232 | 0.011368 | 0.011334 | 0.011333 |
| 0.011333 | 0.011262 | 0.000000 | 0.000000 | 0.011196 | 0.011365 | 0.011366 |
| 0.011161 | 0.011230 | 0.011464 | 0.011432 | 0.011363 | 0.011397 | 0.011329 |
| 0.011262 | 0.011329 | 0.011329 | 0.011228 | 0.011800 | 0.011396 | 0.011463 |
| 0.011497 | 0.011559 | 0.011197 | 0.011268 | 0.011161 | 0.011363 | 0.011329 |
| 0.011363 | 0.011396 | 0.011396 | 0.011396 | 0.011532 | 0.011531 | 0.011164 |
| 0.000000 | 0.000000 | 0.011163 | 0.011128 | 0.011231 | 0.000000 | 0.011400 |
| 0.011198 | 0.011323 | 0.000000 | 0.011210 | 0.011195 | 0.011266 | 0.011161 |
| 0.011127 | 0.011127 | 0.011195 | 0.011161 | 0.011362 | 0.011329 | 0.011262 |
| 0.011362 | 0.011430 | 0.011161 | 0.011161 | 0.011195 | 0.011195 | 0.011195 |
| 0.011263 | 0.011195 | 0.011195 | 0.011229 | 0.011362 | 0.011430 | 0.011430 |
| 0.011296 | 0.011398 | 0.011399 | 0.011535 | 0.011555 | 0.011228 | 0.011396 |
| 0.011329 | 0.011329 | 0.011162 | 0.011339 | 0.011269 | 0.011299 | 0.011165 |
| 0.011336 | 0.011516 | 0.011314 | 0.011230 | 0.011128 | 0.011329 | 0.011195 |
| 0.011295 | 0.011228 | 0.011127 | 0.011229 | 0.011329 | 0.011331 | 0.011228 |
| 0.011127 | 0.000000 | 0.011195 | 0.011127 | 0.000000 | 0.011162 | 0.011329 |
| 0.011228 | 0.011161 | 0.011195 | 0.011228 | 0.011195 | 0.011128 | 0.011329 |
| 0.011195 | 0.011228 | 0.011228 | 0.011161 | 0.011228 | 0.011463 | 0.011127 |
| 0.011161 | 0.011564 | 0.011161 | 0.011195 | 0.011161 | 0.011530 | 0.011103 |
| 0.011566 | 0.011103 | 0.011161 | 0.011342 | 0.011427 | 0.011347 | 0.000000 |
| 0.011113 | 0.011329 | 0.011396 | 0.011502 | 0.011363 | 0.011500 | 0.011632 |
| 0.011531 | 0.011568 | 0.011531 | 0.011812 | 0.011531 | 0.012405 | 0.011566 |
| 0.012305 | 0.012072 | 0.012206 | 0.012478 | 0.011530 | 0.011228 | 0.011531 |
| 0.011969 | 0.011904 | 0.011497 | 0.011396 | 0.011464 | 0.011464 | 0.011432 |
| 0.011329 | 0.011332 | 0.011396 | 0.011363 | 0.011733 | 0.011800 | 0.011800 |
| 0.011700 | 0.011800 | 0.011903 | 0.011669 | 0.011970 | 0.011975 | 0.012037 |
| 0.012037 | 0.012071 | 0.012016 | 0.012037 | 0.012038 | 0.011262 | 0.011564 |
| 0.011632 | 0.012136 | 0.011637 | 0.011867 | 0.012340 | 0.011400 | 0.011296 |
| 0.011262 | 0.011262 | 0.011733 | 0.011759 | 0.011870 | 0.011598 | 0.011263 |
| S196     | 0.011638 | 0.011638 | 0.011842 | 0.011604 | 0.011604 | 0.011672 |
| 0.011541 | 0.011473 | 0.011604 | 0.011230 | 0.011298 | 0.011264 | 0.011230 |
| 0.011264 | 0.011434 | 0.011230 | 0.011264 | 0.011332 | 0.011298 | 0.011196 |
| 0.011230 | 0.011264 | 0.011264 | 0.011230 | 0.011264 | 0.011264 | 0.011507 |
| 0.011400 | 0.011264 | 0.011162 | 0.011298 | 0.011332 | 0.011298 | 0.011332 |
| 0.011298 | 0.011400 | 0.011298 | 0.011298 | 0.011332 | 0.011298 | 0.011468 |
| 0.011230 | 0.011298 | 0.011332 | 0.011264 | 0.011366 | 0.011400 | 0.011332 |
| 0.011298 | 0.011468 | 0.011366 | 0.011468 | 0.011298 | 0.011570 | 0.011298 |
| 0.011264 | 0.011366 | 0.011434 | 0.011570 | 0.011570 | 0.011366 | 0.011468 |
| 0.011332 | 0.011400 | 0.011264 | 0.011536 | 0.011672 | 0.011298 | 0.011366 |
| 0.011264 | 0.011366 | 0.011332 | 0.011400 | 0.011298 | 0.011332 | 0.011332 |
| 0.011230 | 0.011264 | 0.011230 | 0.011332 | 0.011298 | 0.011298 | 0.011400 |
| 0.011298 | 0.011298 | 0.011366 | 0.011264 | 0.011400 | 0.011230 | 0.011298 |
| 0.011468 | 0.011400 | 0.011536 | 0.011434 | 0.011298 | 0.011536 | 0.011298 |
| 0.011472 | 0.011588 | 0.011517 | 0.011218 | 0.011173 | 0.011321 | 0.011299 |
| 0.011947 | 0.011369 | 0.011144 | 0.011536 | 0.011536 | 0.011332 | 0.011434 |
| 0.011366 | 0.011332 | 0.011400 | 0.011298 | 0.011400 | 0.011332 | 0.011332 |
| 0.011298 | 0.011366 | 0.011604 | 0.011468 | 0.011332 | 0.011332 | 0.011264 |
| 0.011230 | 0.011230 | 0.011298 | 0.011264 | 0.011332 | 0.011332 | 0.011264 |
| 0.011366 | 0.011434 | 0.011264 | 0.011264 | 0.011298 | 0.011298 | 0.011299 |
| 0.011368 | 0.011298 | 0.011298 | 0.011169 | 0.011243 | 0.011202 | 0.011298 |
| 0.011300 | 0.011234 | 0.011284 | 0.011270 | 0.011198 | 0.011234 | 0.011265 |
| 0.011425 | 0.011304 | 0.011339 | 0.011162 | 0.011235 | 0.011366 | 0.011332 |
| 0.011400 | 0.011333 | 0.011332 | 0.011434 | 0.011366 | 0.011740 | 0.011536 |
| 0.011468 | 0.011434 | 0.011298 | 0.011400 | 0.011196 | 0.011332 | 0.011230 |
| 0.011298 | 0.011298 | 0.011264 | 0.011230 | 0.011264 | 0.011230 | 0.011332 |
| 0.011298 | 0.011400 | 0.011332 | 0.011230 | 0.011333 | 0.011434 | 0.011401 |
| 0.011434 | 0.011332 | 0.011230 | 0.011162 | 0.011298 | 0.011230 | 0.011162 |

|          |          |          |          |          |          |          |
|----------|----------|----------|----------|----------|----------|----------|
| 0.000000 | 0.011434 | 0.011230 | 0.011434 | 0.011196 | 0.011264 | 0.011264 |
| 0.011366 | 0.011264 | 0.011298 | 0.011264 | 0.011298 | 0.011162 | 0.011298 |
| 0.011332 | 0.011196 | 0.011332 | 0.011264 | 0.011298 | 0.011332 | 0.011570 |
| 0.011570 | 0.011502 | 0.011570 | 0.011435 | 0.011570 | 0.011298 | 0.011196 |
| 0.011299 | 0.011591 | 0.011430 | 0.011199 | 0.011575 | 0.011164 | 0.011299 |
| 0.011575 | 0.011473 | 0.011468 | 0.011672 | 0.011371 | 0.011536 | 0.011502 |
| 0.011434 | 0.011604 | 0.011456 | 0.011311 | 0.011315 | 0.011230 | 0.011403 |
| 0.011502 | 0.011401 | 0.011539 | 0.011539 | 0.011502 | 0.011536 | 0.011711 |
| 0.011437 | 0.011541 | 0.011540 | 0.011471 | 0.011741 | 0.011196 | 0.011401 |
| 0.011366 | 0.011298 | 0.011196 | 0.011196 | 0.011264 | 0.011264 | 0.011332 |
| 0.011264 | 0.011332 | 0.011230 | 0.011332 | 0.011264 | 0.011196 | 0.011332 |
| 0.011264 | 0.011604 | 0.011502 | 0.011536 | 0.011162 | 0.011264 | 0.011298 |
| 0.011264 | 0.011264 | 0.011332 | 0.011366 | 0.011196 | 0.011196 | 0.011196 |
| 0.011672 | 0.011400 | 0.011400 | 0.011196 | 0.011298 | 0.011434 | 0.011230 |
| 0.011230 | 0.011298 | 0.011264 | 0.011434 | 0.011230 | 0.011264 | 0.011400 |
| 0.011332 | 0.011264 | 0.011162 | 0.011196 | 0.011196 | 0.011366 | 0.011298 |
| 0.011196 | 0.011298 | 0.011162 | 0.011196 | 0.011332 | 0.011366 | 0.011230 |
| 0.011196 | 0.011332 | 0.011264 | 0.011162 | 0.011400 | 0.011162 | 0.011332 |
| 0.011407 | 0.011230 | 0.011434 | 0.011366 | 0.011400 | 0.011264 | 0.011366 |
| 0.011230 | 0.011570 | 0.011162 | 0.011434 | 0.011230 | 0.011230 | 0.011162 |
| 0.011400 | 0.011502 | 0.011264 | 0.011366 | 0.011196 | 0.011502 | 0.011230 |
| 0.011230 | 0.011162 | 0.011264 | 0.011366 | 0.011264 | 0.011366 | 0.011434 |
| 0.011400 | 0.011400 | 0.011298 | 0.011400 | 0.011366 | 0.011230 | 0.011196 |
| 0.011230 | 0.011230 | 0.011264 | 0.011230 | 0.011196 | 0.011366 | 0.011230 |
| 0.011264 | 0.011264 | 0.011400 | 0.011434 | 0.011332 | 0.011264 | 0.011264 |
| 0.011298 | 0.011264 | 0.011332 | 0.011230 | 0.011366 | 0.011468 | 0.011672 |
| 0.011264 | 0.011570 | 0.011270 | 0.017851 | 0.011258 | 0.011434 | 0.011519 |
| 0.011480 | 0.011523 | 0.011378 | 0.011351 | 0.011616 | 0.011549 | 0.011429 |
| 0.011537 | 0.011431 | 0.011179 | 0.011273 | 0.011257 | 0.011359 | 0.011277 |
| 0.011392 | 0.011323 | 0.011322 | 0.011260 | 0.011366 | 0.011434 | 0.011436 |
| 0.011304 | 0.011400 | 0.011400 | 0.011366 | 0.011332 | 0.011332 | 0.011298 |
| 0.011332 | 0.011264 | 0.011298 | 0.011332 | 0.011264 | 0.011230 | 0.011264 |
| 0.011264 | 0.011332 | 0.011230 | 0.011298 | 0.011332 | 0.011400 | 0.011298 |
| 0.011332 | 0.011298 | 0.011536 | 0.011536 | 0.011366 | 0.011400 | 0.011434 |
| 0.011196 | 0.011196 | 0.011230 | 0.011332 | 0.011196 | 0.011434 | 0.011434 |
| 0.011468 | 0.011468 | 0.011366 | 0.011502 | 0.011570 | 0.011503 | 0.011332 |
| 0.011298 | 0.011400 | 0.011434 | 0.011264 | 0.011332 | 0.011298 | 0.011332 |
| 0.011400 | 0.011400 | 0.011434 | 0.011400 | 0.011265 | 0.011502 | 0.011468 |
| 0.011334 | 0.011230 | 0.011332 | 0.011400 | 0.011332 | 0.011468 | 0.011502 |
| 0.011672 | 0.011371 | 0.011536 | 0.011502 | 0.011434 | 0.011604 | 0.011230 |
| 0.011401 | 0.011298 | 0.011264 | 0.011264 | 0.011332 | 0.011230 | 0.011298 |
| 0.011332 | 0.011400 | 0.011298 | 0.011332 | 0.011298 | 0.011536 | 0.011536 |
| 0.011366 | 0.011400 | 0.011468 | 0.011400 | 0.012013 | 0.011458 | 0.011381 |
| 0.011452 | 0.011411 | 0.011451 | 0.011376 | 0.011521 | 0.011444 | 0.011409 |
| 0.011964 | 0.011305 | 0.011441 | 0.011375 | 0.011583 | 0.011508 | 0.011542 |
| 0.011989 | 0.011404 | 0.011334 | 0.011332 | 0.011332 | 0.011264 | 0.011300 |
| 0.011196 | 0.011230 | 0.011332 | 0.011332 | 0.011334 | 0.011366 | 0.011333 |
| 0.011298 | 0.011162 | 0.011264 | 0.011298 | 0.011196 | 0.011264 | 0.011162 |
| 0.011298 | 0.011332 | 0.011230 | 0.011196 | 0.011264 | 0.011230 | 0.011264 |
| 0.011264 | 0.011196 | 0.011264 | 0.011298 | 0.011196 | 0.011400 | 0.011434 |
| 0.011298 | 0.011400 | 0.011332 | 0.011332 | 0.011264 | 0.011570 | 0.011298 |
| 0.011236 | 0.011264 | 0.011400 | 0.011403 | 0.011366 | 0.011366 | 0.011366 |
| 0.011366 | 0.011298 | 0.011264 | 0.011298 | 0.011400 | 0.011400 | 0.011298 |
| 0.011298 | 0.011468 | 0.011536 | 0.011366 | 0.011570 | 0.011570 | 0.011434 |
| 0.011264 | 0.011332 | 0.011366 | 0.011672 | 0.011332 | 0.011366 | 0.011298 |
| 0.011366 | 0.011298 | 0.011298 | 0.011604 | 0.011536 | 0.011570 | 0.011298 |
| 0.011400 | 0.011468 | 0.011332 | 0.011400 | 0.011366 | 0.011230 | 0.011468 |
| 0.011298 | 0.011298 | 0.011298 | 0.011468 | 0.011298 | 0.011400 | 0.011536 |
| 0.011332 | 0.011610 | 0.011604 | 0.011388 | 0.011287 | 0.011404 | 0.011319 |
| 0.011283 | 0.011611 | 0.011238 | 0.011467 | 0.011307 | 0.011368 | 0.011381 |

|          |          |          |          |          |          |          |
|----------|----------|----------|----------|----------|----------|----------|
| 0.011369 | 0.011193 | 0.011340 | 0.011193 | 0.011223 | 0.011398 | 0.011388 |
| 0.011403 | 0.011299 | 0.011381 | 0.011310 | 0.011333 | 0.011366 | 0.011434 |
| 0.011434 | 0.011400 | 0.011505 | 0.011403 | 0.011643 | 0.011667 | 0.011332 |
| 0.011468 | 0.011434 | 0.011298 | 0.011400 | 0.011196 | 0.011332 | 0.011230 |
| 0.011298 | 0.011298 | 0.011264 | 0.011230 | 0.011264 | 0.011230 | 0.011332 |
| 0.011308 | 0.011308 | 0.011233 | 0.011303 | 0.011475 | 0.011440 | 0.011440 |
| 0.011439 | 0.011332 | 0.011172 | 0.011170 | 0.011300 | 0.011471 | 0.011472 |
| 0.011264 | 0.011334 | 0.011571 | 0.011539 | 0.011468 | 0.011503 | 0.011434 |
| 0.011366 | 0.011434 | 0.011434 | 0.011332 | 0.011808 | 0.011502 | 0.011570 |
| 0.011604 | 0.011565 | 0.011302 | 0.011376 | 0.011264 | 0.011468 | 0.011434 |
| 0.011435 | 0.011502 | 0.011502 | 0.011502 | 0.011617 | 0.011638 | 0.011271 |
| 0.011163 | 0.011165 | 0.011267 | 0.011232 | 0.011337 | 0.011136 | 0.011404 |
| 0.011234 | 0.011283 | 0.011157 | 0.011288 | 0.011298 | 0.011372 | 0.011264 |
| 0.011230 | 0.011230 | 0.011298 | 0.011264 | 0.011332 | 0.011332 | 0.011264 |
| 0.011366 | 0.011434 | 0.011264 | 0.011264 | 0.011298 | 0.011298 | 0.011299 |
| 0.011368 | 0.011298 | 0.011298 | 0.011333 | 0.011366 | 0.011434 | 0.011434 |
| 0.011400 | 0.011505 | 0.011403 | 0.011643 | 0.011667 | 0.011332 | 0.011502 |
| 0.011434 | 0.011434 | 0.011265 | 0.011447 | 0.011377 | 0.011370 | 0.011273 |
| 0.011443 | 0.011660 | 0.011446 | 0.011335 | 0.011230 | 0.011434 | 0.011298 |
| 0.011400 | 0.011332 | 0.011230 | 0.011333 | 0.011434 | 0.011401 | 0.011332 |
| 0.011230 | 0.011162 | 0.011298 | 0.011230 | 0.011162 | 0.000000 | 0.011434 |
| 0.011332 | 0.011264 | 0.011298 | 0.011332 | 0.011264 | 0.011230 | 0.011332 |
| 0.011298 | 0.011332 | 0.011332 | 0.011264 | 0.011332 | 0.011570 | 0.011230 |
| 0.011264 | 0.011570 | 0.011264 | 0.011298 | 0.011264 | 0.011468 | 0.011233 |
| 0.011739 | 0.011231 | 0.011312 | 0.011345 | 0.011430 | 0.011350 | 0.011187 |
| 0.011271 | 0.011332 | 0.011434 | 0.011507 | 0.011401 | 0.011539 | 0.011672 |
| 0.011571 | 0.011608 | 0.011570 | 0.011821 | 0.011502 | 0.012386 | 0.011571 |
| 0.012285 | 0.012049 | 0.012185 | 0.012459 | 0.011536 | 0.011332 | 0.011536 |
| 0.012081 | 0.011913 | 0.011502 | 0.011400 | 0.011468 | 0.011468 | 0.011402 |
| 0.011332 | 0.011335 | 0.011366 | 0.011366 | 0.011740 | 0.011808 | 0.011809 |
| 0.011707 | 0.011808 | 0.011879 | 0.011642 | 0.012048 | 0.012053 | 0.012115 |
| 0.012116 | 0.012150 | 0.012096 | 0.012116 | 0.012117 | 0.011366 | 0.011638 |
| 0.011741 | 0.012182 | 0.011746 | 0.011842 | 0.012320 | 0.011404 | 0.011298 |
| 0.011264 | 0.011264 | 0.011740 | 0.011685 | 0.011879 | 0.011570 | 0.011265 |
| S197     | 0.011799 | 0.011799 | 0.012136 | 0.011900 | 0.011900 | 0.011967 |
| 0.011808 | 0.011740 | 0.011900 | 0.011396 | 0.011463 | 0.011431 | 0.011396 |
| 0.011430 | 0.011598 | 0.011396 | 0.011430 | 0.011497 | 0.011463 | 0.011430 |
| 0.011396 | 0.011430 | 0.011530 | 0.011396 | 0.011363 | 0.011430 | 0.011774 |
| 0.011665 | 0.011396 | 0.011329 | 0.011564 | 0.011430 | 0.011463 | 0.011430 |
| 0.011463 | 0.011497 | 0.011463 | 0.011463 | 0.011497 | 0.011463 | 0.011631 |
| 0.011396 | 0.011463 | 0.011497 | 0.011430 | 0.011530 | 0.011564 | 0.011497 |
| 0.011463 | 0.011631 | 0.011531 | 0.011799 | 0.011463 | 0.011665 | 0.011463 |
| 0.011430 | 0.011531 | 0.011598 | 0.011665 | 0.011833 | 0.011531 | 0.011631 |
| 0.011430 | 0.011497 | 0.011463 | 0.011631 | 0.011934 | 0.011463 | 0.011530 |
| 0.011430 | 0.011530 | 0.011497 | 0.011564 | 0.011497 | 0.011497 | 0.011497 |
| 0.011396 | 0.011430 | 0.011396 | 0.011497 | 0.011463 | 0.011498 | 0.011564 |
| 0.011497 | 0.011463 | 0.011396 | 0.011430 | 0.011564 | 0.011329 | 0.011463 |
| 0.011631 | 0.011564 | 0.011799 | 0.011631 | 0.011463 | 0.011631 | 0.011463 |
| 0.011654 | 0.011882 | 0.011664 | 0.011373 | 0.011359 | 0.011502 | 0.011572 |
| 0.012231 | 0.011620 | 0.011390 | 0.011698 | 0.011698 | 0.011497 | 0.011598 |
| 0.011531 | 0.011497 | 0.011564 | 0.011463 | 0.011564 | 0.011430 | 0.011497 |
| 0.011463 | 0.011564 | 0.011766 | 0.011631 | 0.011531 | 0.011497 | 0.011362 |
| 0.011396 | 0.011396 | 0.011329 | 0.011430 | 0.011631 | 0.011598 | 0.011530 |
| 0.011631 | 0.011698 | 0.011430 | 0.011430 | 0.011463 | 0.011463 | 0.011466 |
| 0.011534 | 0.011463 | 0.011463 | 0.011312 | 0.011386 | 0.011376 | 0.011464 |
| 0.011467 | 0.011404 | 0.011429 | 0.011440 | 0.011366 | 0.011403 | 0.011432 |
| 0.011708 | 0.011474 | 0.011439 | 0.011397 | 0.011406 | 0.011531 | 0.011498 |
| 0.011565 | 0.011498 | 0.011497 | 0.011597 | 0.011530 | 0.011833 | 0.011699 |
| 0.011732 | 0.011598 | 0.011463 | 0.011564 | 0.011362 | 0.011598 | 0.011396 |
| 0.011463 | 0.011463 | 0.011430 | 0.011396 | 0.011430 | 0.011396 | 0.011497 |

|          |          |          |          |          |          |          |
|----------|----------|----------|----------|----------|----------|----------|
| 0.011396 | 0.011497 | 0.011497 | 0.011396 | 0.011498 | 0.011598 | 0.011601 |
| 0.000000 | 0.011497 | 0.011396 | 0.011330 | 0.011463 | 0.011396 | 0.011329 |
| 0.011434 | 0.000000 | 0.011329 | 0.000000 | 0.011363 | 0.011463 | 0.011430 |
| 0.011463 | 0.011430 | 0.011396 | 0.011430 | 0.011463 | 0.011329 | 0.011396 |
| 0.011430 | 0.011430 | 0.011497 | 0.011430 | 0.011463 | 0.011497 | 0.011732 |
| 0.011833 | 0.011766 | 0.011833 | 0.011600 | 0.011833 | 0.011463 | 0.011430 |
| 0.011466 | 0.011667 | 0.011563 | 0.011369 | 0.011807 | 0.011333 | 0.011454 |
| 0.011842 | 0.011740 | 0.011631 | 0.011833 | 0.011538 | 0.011699 | 0.011598 |
| 0.011598 | 0.011765 | 0.011629 | 0.011514 | 0.011564 | 0.011497 | 0.011568 |
| 0.011665 | 0.011566 | 0.011703 | 0.011704 | 0.011699 | 0.011766 | 0.011874 |
| 0.011602 | 0.011706 | 0.011704 | 0.011636 | 0.011902 | 0.011362 | 0.011566 |
| 0.011463 | 0.011463 | 0.011362 | 0.011362 | 0.011362 | 0.011430 | 0.011497 |
| 0.011362 | 0.011430 | 0.011329 | 0.011497 | 0.011362 | 0.011430 | 0.011497 |
| 0.011430 | 0.011866 | 0.011766 | 0.011799 | 0.011329 | 0.011430 | 0.011463 |
| 0.011463 | 0.011430 | 0.011497 | 0.011531 | 0.011396 | 0.011396 | 0.011396 |
| 0.011934 | 0.011564 | 0.011564 | 0.011362 | 0.011463 | 0.011564 | 0.011396 |
| 0.011396 | 0.011463 | 0.011430 | 0.011530 | 0.011396 | 0.011530 | 0.011597 |
| 0.011598 | 0.011430 | 0.011430 | 0.011362 | 0.011362 | 0.011531 | 0.011463 |
| 0.011362 | 0.011463 | 0.011329 | 0.011362 | 0.011497 | 0.011632 | 0.011396 |
| 0.011363 | 0.011497 | 0.011430 | 0.011329 | 0.011665 | 0.011329 | 0.011497 |
| 0.011506 | 0.011396 | 0.011698 | 0.011531 | 0.011564 | 0.011430 | 0.011530 |
| 0.011396 | 0.011665 | 0.011329 | 0.011598 | 0.011396 | 0.011396 | 0.011329 |
| 0.011497 | 0.011766 | 0.011463 | 0.011530 | 0.011362 | 0.011766 | 0.011396 |
| 0.011396 | 0.011396 | 0.011430 | 0.011463 | 0.011430 | 0.011530 | 0.011598 |
| 0.011598 | 0.011564 | 0.011463 | 0.011564 | 0.011463 | 0.011396 | 0.011362 |
| 0.011396 | 0.011396 | 0.011463 | 0.011396 | 0.011295 | 0.011530 | 0.011396 |
| 0.011430 | 0.011430 | 0.011564 | 0.011598 | 0.011497 | 0.011362 | 0.011430 |
| 0.011497 | 0.011430 | 0.011530 | 0.011396 | 0.011530 | 0.011631 | 0.011934 |
| 0.011430 | 0.011833 | 0.011440 | 0.017937 | 0.011322 | 0.011733 | 0.011793 |
| 0.011753 | 0.011799 | 0.011479 | 0.011408 | 0.011830 | 0.011820 | 0.011546 |
| 0.011630 | 0.011732 | 0.011294 | 0.011437 | 0.011333 | 0.011505 | 0.011491 |
| 0.011670 | 0.011582 | 0.011579 | 0.011193 | 0.011564 | 0.011598 | 0.011601 |
| 0.011404 | 0.011497 | 0.011564 | 0.011530 | 0.011497 | 0.011497 | 0.011463 |
| 0.011497 | 0.011430 | 0.011463 | 0.011497 | 0.011463 | 0.011396 | 0.011430 |
| 0.011430 | 0.011497 | 0.011396 | 0.011497 | 0.011530 | 0.011564 | 0.011463 |
| 0.011497 | 0.011463 | 0.011799 | 0.011799 | 0.011531 | 0.011565 | 0.011598 |
| 0.011362 | 0.011362 | 0.011396 | 0.011430 | 0.011362 | 0.011598 | 0.011598 |
| 0.011631 | 0.011631 | 0.011564 | 0.011665 | 0.011833 | 0.011667 | 0.011430 |
| 0.011497 | 0.011564 | 0.011530 | 0.011430 | 0.011497 | 0.011463 | 0.011497 |
| 0.011564 | 0.011564 | 0.011598 | 0.011497 | 0.011397 | 0.011665 | 0.011564 |
| 0.011501 | 0.011396 | 0.011497 | 0.011598 | 0.011497 | 0.011631 | 0.011665 |
| 0.011833 | 0.011538 | 0.011699 | 0.011598 | 0.011598 | 0.011765 | 0.011396 |
| 0.011566 | 0.011464 | 0.011430 | 0.011430 | 0.011497 | 0.011396 | 0.011497 |
| 0.011530 | 0.011564 | 0.011463 | 0.011497 | 0.011463 | 0.011799 | 0.011799 |
| 0.011531 | 0.011565 | 0.011631 | 0.011564 | 0.012205 | 0.011632 | 0.011553 |
| 0.011623 | 0.011581 | 0.011693 | 0.011580 | 0.011691 | 0.011612 | 0.011578 |
| 0.012160 | 0.011476 | 0.011609 | 0.011545 | 0.011818 | 0.011673 | 0.011707 |
| 0.012183 | 0.011663 | 0.011500 | 0.011497 | 0.011497 | 0.011530 | 0.011466 |
| 0.011362 | 0.011329 | 0.011530 | 0.011497 | 0.011500 | 0.011631 | 0.011599 |
| 0.011463 | 0.011329 | 0.011362 | 0.011463 | 0.011295 | 0.011430 | 0.011329 |
| 0.011463 | 0.011497 | 0.011396 | 0.011362 | 0.011463 | 0.011396 | 0.011430 |
| 0.011430 | 0.011362 | 0.011430 | 0.011463 | 0.011362 | 0.011497 | 0.011598 |
| 0.011497 | 0.011564 | 0.011497 | 0.011497 | 0.011430 | 0.011833 | 0.011463 |
| 0.011513 | 0.011430 | 0.011665 | 0.011671 | 0.011463 | 0.011530 | 0.011530 |
| 0.011531 | 0.011396 | 0.011430 | 0.011396 | 0.011564 | 0.011564 | 0.011497 |
| 0.011497 | 0.011631 | 0.011799 | 0.011530 | 0.011732 | 0.011732 | 0.011598 |
| 0.011430 | 0.011497 | 0.011531 | 0.011934 | 0.011497 | 0.011463 | 0.011497 |
| 0.011530 | 0.011463 | 0.011463 | 0.011766 | 0.011631 | 0.011732 | 0.011463 |
| 0.011564 | 0.011631 | 0.011497 | 0.011564 | 0.011530 | 0.011396 | 0.011732 |
| 0.011497 | 0.011463 | 0.011463 | 0.011631 | 0.011463 | 0.011564 | 0.011799 |



|          |          |          |          |          |          |          |
|----------|----------|----------|----------|----------|----------|----------|
| 0.011497 | 0.011876 | 0.011867 | 0.011670 | 0.011342 | 0.011570 | 0.011318 |
| 0.011555 | 0.011839 | 0.011412 | 0.011596 | 0.011402 | 0.011519 | 0.011485 |
| 0.011570 | 0.011324 | 0.011394 | 0.011258 | 0.011384 | 0.011462 | 0.011466 |
| 0.011475 | 0.011336 | 0.011554 | 0.011448 | 0.011499 | 0.011631 | 0.011698 |
| 0.011698 | 0.011565 | 0.011669 | 0.011670 | 0.011806 | 0.011838 | 0.011497 |
| 0.011732 | 0.011598 | 0.011463 | 0.011564 | 0.011362 | 0.011598 | 0.011396 |
| 0.011463 | 0.011463 | 0.011430 | 0.011396 | 0.011430 | 0.011396 | 0.011497 |
| 0.011479 | 0.011480 | 0.011471 | 0.011505 | 0.011642 | 0.011539 | 0.011607 |
| 0.011605 | 0.011531 | 0.011319 | 0.011348 | 0.011467 | 0.011636 | 0.011637 |
| 0.011430 | 0.011501 | 0.011734 | 0.011703 | 0.011632 | 0.011666 | 0.011598 |
| 0.011530 | 0.011598 | 0.011598 | 0.011497 | 0.012069 | 0.011665 | 0.011732 |
| 0.011766 | 0.011809 | 0.011470 | 0.011545 | 0.011430 | 0.011631 | 0.011598 |
| 0.011632 | 0.011665 | 0.011665 | 0.011665 | 0.011808 | 0.011799 | 0.011442 |
| 0.011331 | 0.011337 | 0.011435 | 0.011400 | 0.011505 | 0.011359 | 0.011672 |
| 0.011472 | 0.011587 | 0.011346 | 0.011510 | 0.011464 | 0.011539 | 0.011362 |
| 0.011396 | 0.011396 | 0.011329 | 0.011430 | 0.011631 | 0.011598 | 0.011530 |
| 0.011631 | 0.011698 | 0.011430 | 0.011430 | 0.011463 | 0.011463 | 0.011466 |
| 0.011534 | 0.011463 | 0.011463 | 0.011499 | 0.011631 | 0.011698 | 0.011698 |
| 0.011565 | 0.011669 | 0.011670 | 0.011806 | 0.011838 | 0.011497 | 0.011665 |
| 0.011598 | 0.011598 | 0.011432 | 0.011617 | 0.011547 | 0.011571 | 0.011446 |
| 0.011542 | 0.011835 | 0.011568 | 0.011502 | 0.011329 | 0.000000 | 0.011396 |
| 0.011497 | 0.011497 | 0.011396 | 0.011498 | 0.011598 | 0.011601 | 0.011497 |
| 0.011396 | 0.011330 | 0.011463 | 0.011396 | 0.011329 | 0.011434 | 0.000000 |
| 0.011497 | 0.011430 | 0.011463 | 0.011497 | 0.011463 | 0.011396 | 0.011598 |
| 0.011463 | 0.011497 | 0.011497 | 0.011430 | 0.011497 | 0.011732 | 0.011396 |
| 0.011430 | 0.011833 | 0.011430 | 0.011396 | 0.011430 | 0.011799 | 0.011403 |
| 0.011847 | 0.011400 | 0.011461 | 0.011624 | 0.011712 | 0.011635 | 0.011353 |
| 0.011323 | 0.011598 | 0.011665 | 0.011773 | 0.011633 | 0.011771 | 0.011901 |
| 0.011801 | 0.011839 | 0.011799 | 0.012086 | 0.011799 | 0.012675 | 0.011835 |
| 0.012574 | 0.012342 | 0.012476 | 0.012748 | 0.011799 | 0.011497 | 0.011800 |
| 0.012239 | 0.012174 | 0.011766 | 0.011665 | 0.011733 | 0.011733 | 0.011703 |
| 0.011598 | 0.011603 | 0.011665 | 0.011632 | 0.012002 | 0.012069 | 0.012070 |
| 0.011969 | 0.012069 | 0.012173 | 0.011940 | 0.012239 | 0.012246 | 0.012306 |
| 0.012307 | 0.012341 | 0.012289 | 0.012307 | 0.012309 | 0.011530 | 0.011833 |
| 0.011901 | 0.012405 | 0.011908 | 0.012136 | 0.012609 | 0.011672 | 0.011565 |
| 0.011530 | 0.011530 | 0.012002 | 0.012048 | 0.012151 | 0.011866 | 0.011532 |
| S198     | 0.011598 | 0.011598 | 0.011934 | 0.011698 | 0.011698 | 0.011766 |
| 0.011604 | 0.011536 | 0.011698 | 0.011195 | 0.011262 | 0.011229 | 0.011195 |
| 0.011228 | 0.011396 | 0.011195 | 0.011228 | 0.011295 | 0.011262 | 0.011228 |
| 0.011195 | 0.011228 | 0.011329 | 0.011195 | 0.011161 | 0.011228 | 0.011570 |
| 0.011463 | 0.011228 | 0.011127 | 0.011362 | 0.011228 | 0.011262 | 0.011228 |
| 0.011262 | 0.011295 | 0.011262 | 0.011262 | 0.011295 | 0.011262 | 0.011430 |
| 0.011195 | 0.011262 | 0.011295 | 0.011228 | 0.011329 | 0.011362 | 0.011295 |
| 0.011262 | 0.011430 | 0.011329 | 0.011597 | 0.011262 | 0.011463 | 0.011262 |
| 0.011228 | 0.011329 | 0.011396 | 0.011463 | 0.011631 | 0.011329 | 0.011430 |
| 0.011228 | 0.011295 | 0.011262 | 0.011429 | 0.011732 | 0.011262 | 0.011329 |
| 0.011228 | 0.011329 | 0.011295 | 0.011362 | 0.011295 | 0.011295 | 0.011295 |
| 0.011195 | 0.011228 | 0.011195 | 0.011295 | 0.011262 | 0.011296 | 0.011362 |
| 0.011295 | 0.011262 | 0.011262 | 0.011228 | 0.011362 | 0.011127 | 0.011262 |
| 0.011430 | 0.011362 | 0.011597 | 0.011430 | 0.011262 | 0.011430 | 0.011262 |
| 0.011431 | 0.011658 | 0.011475 | 0.011177 | 0.011172 | 0.011281 | 0.011375 |
| 0.012012 | 0.011416 | 0.011184 | 0.011497 | 0.011497 | 0.011295 | 0.011396 |
| 0.011329 | 0.011295 | 0.011362 | 0.011262 | 0.011362 | 0.011228 | 0.011295 |
| 0.011262 | 0.011362 | 0.011564 | 0.011430 | 0.011329 | 0.011295 | 0.011161 |
| 0.011195 | 0.011195 | 0.011195 | 0.011228 | 0.011430 | 0.011396 | 0.011329 |
| 0.011430 | 0.011497 | 0.011228 | 0.011228 | 0.011262 | 0.011262 | 0.011263 |
| 0.011331 | 0.011262 | 0.011262 | 0.011096 | 0.011205 | 0.011165 | 0.011262 |
| 0.011263 | 0.011198 | 0.011245 | 0.011233 | 0.011162 | 0.011197 | 0.011229 |
| 0.011492 | 0.011267 | 0.011232 | 0.011195 | 0.011199 | 0.011329 | 0.011296 |
| 0.011363 | 0.011296 | 0.011296 | 0.011396 | 0.011329 | 0.011631 | 0.011497 |

|          |          |          |          |          |          |          |
|----------|----------|----------|----------|----------|----------|----------|
| 0.011530 | 0.011396 | 0.011262 | 0.011362 | 0.011161 | 0.011396 | 0.011195 |
| 0.011262 | 0.011262 | 0.011228 | 0.011195 | 0.011228 | 0.011195 | 0.011295 |
| 0.011195 | 0.011295 | 0.011295 | 0.011195 | 0.011296 | 0.011396 | 0.011398 |
| 0.011329 | 0.011295 | 0.011195 | 0.011128 | 0.011262 | 0.011195 | 0.011128 |
| 0.011230 | 0.011329 | 0.000000 | 0.011329 | 0.011161 | 0.011262 | 0.011228 |
| 0.011262 | 0.011228 | 0.011195 | 0.011228 | 0.011262 | 0.011127 | 0.011195 |
| 0.011228 | 0.011228 | 0.011295 | 0.011228 | 0.011262 | 0.011295 | 0.011463 |
| 0.011631 | 0.011564 | 0.011631 | 0.011397 | 0.011631 | 0.011262 | 0.011228 |
| 0.011263 | 0.011505 | 0.011335 | 0.011163 | 0.011637 | 0.011129 | 0.011257 |
| 0.011638 | 0.011536 | 0.011430 | 0.011631 | 0.011333 | 0.011497 | 0.011396 |
| 0.011396 | 0.011564 | 0.011416 | 0.011225 | 0.011270 | 0.011295 | 0.011365 |
| 0.011463 | 0.011364 | 0.011500 | 0.011500 | 0.011497 | 0.011564 | 0.011670 |
| 0.011399 | 0.011502 | 0.011500 | 0.011432 | 0.011700 | 0.011161 | 0.011364 |
| 0.011262 | 0.011262 | 0.011161 | 0.011161 | 0.011161 | 0.011228 | 0.011295 |
| 0.011161 | 0.011228 | 0.011127 | 0.011295 | 0.011161 | 0.011228 | 0.011295 |
| 0.011228 | 0.011665 | 0.011564 | 0.011598 | 0.011127 | 0.011228 | 0.011262 |
| 0.011262 | 0.011228 | 0.011295 | 0.011329 | 0.011195 | 0.011195 | 0.011195 |
| 0.011732 | 0.011362 | 0.011362 | 0.011161 | 0.011262 | 0.011362 | 0.011195 |
| 0.011195 | 0.011262 | 0.011228 | 0.011329 | 0.011195 | 0.011329 | 0.011396 |
| 0.011396 | 0.011228 | 0.011228 | 0.011161 | 0.011161 | 0.011329 | 0.011262 |
| 0.011161 | 0.011262 | 0.011127 | 0.011161 | 0.011295 | 0.011430 | 0.011195 |
| 0.011161 | 0.011295 | 0.011228 | 0.011127 | 0.011463 | 0.011127 | 0.011295 |
| 0.011300 | 0.011195 | 0.011497 | 0.011329 | 0.011362 | 0.011228 | 0.011329 |
| 0.011195 | 0.011463 | 0.011127 | 0.011396 | 0.011195 | 0.011195 | 0.011127 |
| 0.011295 | 0.011564 | 0.011262 | 0.011329 | 0.011161 | 0.011564 | 0.011195 |
| 0.011195 | 0.011195 | 0.011228 | 0.011262 | 0.011228 | 0.011329 | 0.011396 |
| 0.011396 | 0.011362 | 0.011262 | 0.011363 | 0.011262 | 0.011195 | 0.011161 |
| 0.011195 | 0.011195 | 0.011262 | 0.011195 | 0.011094 | 0.011329 | 0.011195 |
| 0.011228 | 0.011228 | 0.011362 | 0.011396 | 0.011295 | 0.011161 | 0.011228 |
| 0.011295 | 0.011228 | 0.011329 | 0.011195 | 0.011329 | 0.011430 | 0.011732 |
| 0.011228 | 0.011631 | 0.011233 | 0.017748 | 0.011191 | 0.011366 | 0.011583 |
| 0.011545 | 0.011588 | 0.011270 | 0.011234 | 0.011664 | 0.011613 | 0.011303 |
| 0.011440 | 0.011549 | 0.011138 | 0.011186 | 0.011177 | 0.011307 | 0.011232 |
| 0.011436 | 0.011395 | 0.011357 | 0.011193 | 0.011362 | 0.011396 | 0.011398 |
| 0.011198 | 0.011362 | 0.011362 | 0.011329 | 0.011295 | 0.011295 | 0.011262 |
| 0.011295 | 0.011228 | 0.011262 | 0.011295 | 0.011262 | 0.011195 | 0.011228 |
| 0.011228 | 0.011295 | 0.011195 | 0.011295 | 0.011329 | 0.011362 | 0.011262 |
| 0.011295 | 0.011262 | 0.011598 | 0.011597 | 0.011329 | 0.011363 | 0.011396 |
| 0.011161 | 0.011161 | 0.011195 | 0.011195 | 0.011161 | 0.011396 | 0.011396 |
| 0.011430 | 0.011430 | 0.011362 | 0.011463 | 0.011631 | 0.011464 | 0.011228 |
| 0.011295 | 0.011362 | 0.011329 | 0.011228 | 0.011295 | 0.011262 | 0.011295 |
| 0.011363 | 0.011362 | 0.011396 | 0.011295 | 0.011195 | 0.011463 | 0.011362 |
| 0.011297 | 0.011195 | 0.011295 | 0.011396 | 0.011295 | 0.011430 | 0.011463 |
| 0.011631 | 0.011333 | 0.011497 | 0.011396 | 0.011396 | 0.011564 | 0.011195 |
| 0.011363 | 0.011262 | 0.011228 | 0.011228 | 0.011295 | 0.011195 | 0.011295 |
| 0.011329 | 0.011362 | 0.011262 | 0.011295 | 0.011262 | 0.011598 | 0.011597 |
| 0.011329 | 0.011363 | 0.011430 | 0.011362 | 0.011969 | 0.011418 | 0.011342 |
| 0.011412 | 0.011372 | 0.011482 | 0.011372 | 0.011480 | 0.011405 | 0.011371 |
| 0.011919 | 0.011268 | 0.011403 | 0.011337 | 0.011611 | 0.011468 | 0.011503 |
| 0.011944 | 0.011399 | 0.011297 | 0.011295 | 0.011295 | 0.011329 | 0.011263 |
| 0.011161 | 0.011127 | 0.011329 | 0.011295 | 0.011297 | 0.011430 | 0.011397 |
| 0.011262 | 0.011127 | 0.011161 | 0.011262 | 0.011094 | 0.011228 | 0.011127 |
| 0.011262 | 0.011295 | 0.011195 | 0.011161 | 0.011262 | 0.011195 | 0.011228 |
| 0.011228 | 0.011161 | 0.011228 | 0.011262 | 0.011161 | 0.011295 | 0.011396 |
| 0.011295 | 0.011362 | 0.011295 | 0.011295 | 0.011228 | 0.011631 | 0.011262 |
| 0.011304 | 0.011228 | 0.011464 | 0.011467 | 0.011262 | 0.011329 | 0.011329 |
| 0.011329 | 0.011195 | 0.011228 | 0.011195 | 0.011362 | 0.011362 | 0.011295 |
| 0.011295 | 0.011430 | 0.011597 | 0.011329 | 0.011530 | 0.011530 | 0.011396 |
| 0.011228 | 0.011295 | 0.011329 | 0.011732 | 0.011295 | 0.011262 | 0.011295 |
| 0.011329 | 0.011262 | 0.011262 | 0.011564 | 0.011430 | 0.011530 | 0.011262 |

|          |          |          |          |          |          |          |
|----------|----------|----------|----------|----------|----------|----------|
| 0.011362 | 0.011430 | 0.011295 | 0.011362 | 0.011329 | 0.011195 | 0.011530 |
| 0.011295 | 0.011262 | 0.011262 | 0.011430 | 0.011262 | 0.011362 | 0.011598 |
| 0.011295 | 0.011672 | 0.011665 | 0.011467 | 0.011173 | 0.011366 | 0.011215 |
| 0.011170 | 0.011683 | 0.011201 | 0.011417 | 0.011207 | 0.011366 | 0.011326 |
| 0.011417 | 0.011126 | 0.011283 | 0.011126 | 0.011168 | 0.011328 | 0.011304 |
| 0.011324 | 0.011178 | 0.011342 | 0.011272 | 0.011296 | 0.011430 | 0.011497 |
| 0.011497 | 0.011363 | 0.011466 | 0.011467 | 0.011603 | 0.011626 | 0.011295 |
| 0.011530 | 0.011396 | 0.011262 | 0.011362 | 0.011161 | 0.011396 | 0.011195 |
| 0.011262 | 0.011262 | 0.011228 | 0.011195 | 0.011228 | 0.011195 | 0.011295 |
| 0.011270 | 0.011270 | 0.011266 | 0.011300 | 0.011437 | 0.011333 | 0.011402 |
| 0.011401 | 0.011329 | 0.011134 | 0.011132 | 0.011263 | 0.011433 | 0.011400 |
| 0.011228 | 0.011297 | 0.011531 | 0.011500 | 0.011430 | 0.011464 | 0.011396 |
| 0.011329 | 0.011396 | 0.011396 | 0.011295 | 0.011867 | 0.011463 | 0.011497 |
| 0.011564 | 0.011630 | 0.011265 | 0.011337 | 0.011228 | 0.011430 | 0.011396 |
| 0.011430 | 0.011463 | 0.011463 | 0.011463 | 0.011611 | 0.011598 | 0.011234 |
| 0.011128 | 0.011130 | 0.011231 | 0.011196 | 0.011299 | 0.011135 | 0.011468 |
| 0.011266 | 0.011367 | 0.000000 | 0.011285 | 0.011262 | 0.011334 | 0.011161 |
| 0.011195 | 0.011195 | 0.011195 | 0.011228 | 0.011430 | 0.011396 | 0.011329 |
| 0.011430 | 0.011497 | 0.011228 | 0.011228 | 0.011262 | 0.011262 | 0.011263 |
| 0.011331 | 0.011262 | 0.011262 | 0.011296 | 0.011430 | 0.011497 | 0.011497 |
| 0.011363 | 0.011466 | 0.011467 | 0.011603 | 0.011626 | 0.011295 | 0.011463 |
| 0.011396 | 0.011396 | 0.011229 | 0.011408 | 0.011338 | 0.011367 | 0.011235 |
| 0.011336 | 0.011561 | 0.011357 | 0.011298 | 0.000000 | 0.011329 | 0.011195 |
| 0.011295 | 0.011295 | 0.011195 | 0.011296 | 0.011396 | 0.011398 | 0.011295 |
| 0.011195 | 0.011128 | 0.011262 | 0.011195 | 0.011128 | 0.011230 | 0.011329 |
| 0.011295 | 0.011228 | 0.011262 | 0.011295 | 0.011262 | 0.011195 | 0.011396 |
| 0.011262 | 0.011262 | 0.011295 | 0.011228 | 0.011295 | 0.011530 | 0.011195 |
| 0.011228 | 0.011631 | 0.011228 | 0.011195 | 0.011228 | 0.011597 | 0.011189 |
| 0.011622 | 0.011188 | 0.011211 | 0.011422 | 0.011508 | 0.011419 | 0.011144 |
| 0.011165 | 0.011396 | 0.011497 | 0.011603 | 0.011464 | 0.011601 | 0.011733 |
| 0.011632 | 0.011669 | 0.011631 | 0.011880 | 0.011598 | 0.012472 | 0.011633 |
| 0.012372 | 0.012139 | 0.012274 | 0.012545 | 0.011597 | 0.011295 | 0.011598 |
| 0.012002 | 0.011971 | 0.011564 | 0.011463 | 0.011531 | 0.011531 | 0.011500 |
| 0.011396 | 0.011399 | 0.011463 | 0.011430 | 0.011800 | 0.011867 | 0.011867 |
| 0.011767 | 0.011867 | 0.011971 | 0.011737 | 0.012003 | 0.012008 | 0.012070 |
| 0.012070 | 0.012104 | 0.012050 | 0.012071 | 0.012072 | 0.011329 | 0.011598 |
| 0.011699 | 0.012203 | 0.011670 | 0.011934 | 0.012407 | 0.011468 | 0.011363 |
| 0.011329 | 0.011329 | 0.011800 | 0.011842 | 0.011940 | 0.011665 | 0.011330 |
| S199     | 0.011799 | 0.011799 | 0.012136 | 0.011900 | 0.011900 | 0.011967 |
| 0.011808 | 0.011740 | 0.011900 | 0.011396 | 0.011463 | 0.011431 | 0.011396 |
| 0.011430 | 0.011598 | 0.011396 | 0.011430 | 0.011497 | 0.011463 | 0.011430 |
| 0.011396 | 0.011430 | 0.011530 | 0.011396 | 0.011363 | 0.011430 | 0.011774 |
| 0.011665 | 0.011396 | 0.011329 | 0.011564 | 0.011430 | 0.011463 | 0.011430 |
| 0.011463 | 0.011497 | 0.011463 | 0.011463 | 0.011497 | 0.011463 | 0.011631 |
| 0.011396 | 0.011463 | 0.011497 | 0.011430 | 0.011530 | 0.011564 | 0.011497 |
| 0.011463 | 0.011631 | 0.011531 | 0.011799 | 0.011463 | 0.011665 | 0.011463 |
| 0.011430 | 0.011531 | 0.011598 | 0.011665 | 0.011833 | 0.011530 | 0.011631 |
| 0.011430 | 0.011497 | 0.011463 | 0.011631 | 0.011934 | 0.011463 | 0.011530 |
| 0.011430 | 0.011530 | 0.011497 | 0.011564 | 0.011497 | 0.011497 | 0.011497 |
| 0.011396 | 0.011430 | 0.011396 | 0.011497 | 0.011463 | 0.011498 | 0.011564 |
| 0.011497 | 0.011463 | 0.011396 | 0.011430 | 0.011564 | 0.011329 | 0.011463 |
| 0.011631 | 0.011564 | 0.011799 | 0.011631 | 0.011463 | 0.011631 | 0.011463 |
| 0.011654 | 0.011882 | 0.011664 | 0.011373 | 0.011359 | 0.011502 | 0.011572 |
| 0.012231 | 0.011620 | 0.011390 | 0.011698 | 0.011698 | 0.011497 | 0.011598 |
| 0.011530 | 0.011497 | 0.011564 | 0.011463 | 0.011564 | 0.011430 | 0.011497 |
| 0.011463 | 0.011564 | 0.011766 | 0.011631 | 0.011530 | 0.011497 | 0.011362 |
| 0.011396 | 0.011396 | 0.011329 | 0.011430 | 0.011631 | 0.011598 | 0.011530 |
| 0.011631 | 0.011698 | 0.011430 | 0.011430 | 0.011463 | 0.011463 | 0.011466 |
| 0.011534 | 0.011463 | 0.011463 | 0.011312 | 0.011386 | 0.011376 | 0.011464 |
| 0.011467 | 0.011404 | 0.011429 | 0.011440 | 0.011366 | 0.011403 | 0.011432 |

|          |          |          |          |          |          |          |
|----------|----------|----------|----------|----------|----------|----------|
| 0.011708 | 0.011474 | 0.011439 | 0.011396 | 0.011406 | 0.011531 | 0.011498 |
| 0.011565 | 0.011498 | 0.011497 | 0.011597 | 0.011530 | 0.011833 | 0.011699 |
| 0.011732 | 0.011598 | 0.011463 | 0.011564 | 0.011362 | 0.011597 | 0.011396 |
| 0.011463 | 0.011463 | 0.011430 | 0.011396 | 0.011430 | 0.011396 | 0.011497 |
| 0.011396 | 0.011497 | 0.011497 | 0.011396 | 0.011498 | 0.011598 | 0.011601 |
| 0.000000 | 0.011497 | 0.011396 | 0.011330 | 0.011463 | 0.011396 | 0.011329 |
| 0.011434 | 0.000000 | 0.011329 | 0.000000 | 0.011363 | 0.011463 | 0.011430 |
| 0.011463 | 0.011430 | 0.011396 | 0.011430 | 0.011463 | 0.011329 | 0.011396 |
| 0.011430 | 0.011430 | 0.011497 | 0.011430 | 0.011463 | 0.011497 | 0.011732 |
| 0.011833 | 0.011766 | 0.011833 | 0.011600 | 0.011833 | 0.011463 | 0.011430 |
| 0.011466 | 0.011667 | 0.011563 | 0.011369 | 0.011807 | 0.011333 | 0.011454 |
| 0.011842 | 0.011740 | 0.011631 | 0.011833 | 0.011538 | 0.011699 | 0.011598 |
| 0.011598 | 0.011765 | 0.011629 | 0.011514 | 0.011564 | 0.011497 | 0.011568 |
| 0.011665 | 0.011566 | 0.011703 | 0.011704 | 0.011699 | 0.011766 | 0.011874 |
| 0.011602 | 0.011706 | 0.011704 | 0.011635 | 0.011902 | 0.011362 | 0.011566 |
| 0.011463 | 0.011463 | 0.011362 | 0.011362 | 0.011362 | 0.011430 | 0.011497 |
| 0.011362 | 0.011430 | 0.011329 | 0.011497 | 0.011362 | 0.011430 | 0.011497 |
| 0.011430 | 0.011866 | 0.011766 | 0.011799 | 0.011329 | 0.011430 | 0.011463 |
| 0.011463 | 0.011430 | 0.011497 | 0.011530 | 0.011396 | 0.011396 | 0.011396 |
| 0.011934 | 0.011564 | 0.011564 | 0.011362 | 0.011463 | 0.011564 | 0.011396 |
| 0.011396 | 0.011463 | 0.011430 | 0.011530 | 0.011396 | 0.011530 | 0.011597 |
| 0.011598 | 0.011430 | 0.011430 | 0.011362 | 0.011362 | 0.011531 | 0.011463 |
| 0.011362 | 0.011463 | 0.011329 | 0.011362 | 0.011497 | 0.011632 | 0.011396 |
| 0.011363 | 0.011497 | 0.011430 | 0.011329 | 0.011665 | 0.011329 | 0.011497 |
| 0.011506 | 0.011396 | 0.011698 | 0.011531 | 0.011564 | 0.011430 | 0.011530 |
| 0.011396 | 0.011665 | 0.011329 | 0.011598 | 0.011396 | 0.011396 | 0.011329 |
| 0.011497 | 0.011766 | 0.011463 | 0.011530 | 0.011362 | 0.011766 | 0.011396 |
| 0.011396 | 0.011396 | 0.011430 | 0.011463 | 0.011430 | 0.011530 | 0.011598 |
| 0.011598 | 0.011564 | 0.011463 | 0.011564 | 0.011463 | 0.011396 | 0.011362 |
| 0.011396 | 0.011396 | 0.011463 | 0.011396 | 0.011295 | 0.011530 | 0.011396 |
| 0.011430 | 0.011430 | 0.011564 | 0.011598 | 0.011497 | 0.011362 | 0.011430 |
| 0.011497 | 0.011430 | 0.011530 | 0.011396 | 0.011530 | 0.011631 | 0.011934 |
| 0.011430 | 0.011833 | 0.011440 | 0.017975 | 0.011322 | 0.011733 | 0.011793 |
| 0.011752 | 0.011799 | 0.011479 | 0.011408 | 0.011830 | 0.011820 | 0.011546 |
| 0.011629 | 0.011732 | 0.011294 | 0.011437 | 0.011333 | 0.011505 | 0.011491 |
| 0.011670 | 0.011582 | 0.011579 | 0.011193 | 0.011564 | 0.011598 | 0.011601 |
| 0.011404 | 0.011497 | 0.011564 | 0.011530 | 0.011497 | 0.011497 | 0.011463 |
| 0.011497 | 0.011430 | 0.011463 | 0.011497 | 0.011463 | 0.011396 | 0.011430 |
| 0.011430 | 0.011497 | 0.011396 | 0.011497 | 0.011530 | 0.011564 | 0.011463 |
| 0.011497 | 0.011463 | 0.011799 | 0.011799 | 0.011531 | 0.011565 | 0.011598 |
| 0.011362 | 0.011362 | 0.011396 | 0.011430 | 0.011362 | 0.011598 | 0.011598 |
| 0.011631 | 0.011631 | 0.011564 | 0.011665 | 0.011833 | 0.011667 | 0.011430 |
| 0.011497 | 0.011564 | 0.011530 | 0.011430 | 0.011497 | 0.011463 | 0.011497 |
| 0.011564 | 0.011564 | 0.011598 | 0.011497 | 0.011397 | 0.011665 | 0.011564 |
| 0.011501 | 0.011396 | 0.011497 | 0.011598 | 0.011497 | 0.011631 | 0.011665 |
| 0.011833 | 0.011538 | 0.011699 | 0.011598 | 0.011598 | 0.011765 | 0.011396 |
| 0.011566 | 0.011464 | 0.011430 | 0.011430 | 0.011497 | 0.011396 | 0.011497 |
| 0.011530 | 0.011564 | 0.011463 | 0.011497 | 0.011463 | 0.011799 | 0.011799 |
| 0.011531 | 0.011565 | 0.011631 | 0.011564 | 0.012205 | 0.011632 | 0.011553 |
| 0.011623 | 0.011581 | 0.011693 | 0.011580 | 0.011691 | 0.011612 | 0.011578 |
| 0.012160 | 0.011476 | 0.011609 | 0.011545 | 0.011818 | 0.011673 | 0.011707 |
| 0.012183 | 0.011663 | 0.011500 | 0.011497 | 0.011497 | 0.011530 | 0.011466 |
| 0.011362 | 0.011329 | 0.011530 | 0.011497 | 0.011500 | 0.011631 | 0.011599 |
| 0.011463 | 0.011329 | 0.011362 | 0.011463 | 0.011295 | 0.011430 | 0.011329 |
| 0.011463 | 0.011497 | 0.011396 | 0.011362 | 0.011463 | 0.011396 | 0.011430 |
| 0.011430 | 0.011362 | 0.011430 | 0.011463 | 0.011362 | 0.011497 | 0.011598 |
| 0.011497 | 0.011564 | 0.011497 | 0.011497 | 0.011430 | 0.011833 | 0.011463 |
| 0.011513 | 0.011430 | 0.011665 | 0.011671 | 0.011463 | 0.011530 | 0.011530 |
| 0.011531 | 0.011396 | 0.011430 | 0.011396 | 0.011564 | 0.011564 | 0.011497 |
| 0.011497 | 0.011631 | 0.011799 | 0.011530 | 0.011732 | 0.011732 | 0.011598 |

|          |          |          |          |          |          |          |
|----------|----------|----------|----------|----------|----------|----------|
| 0.011430 | 0.011497 | 0.011531 | 0.011934 | 0.011497 | 0.011463 | 0.011497 |
| 0.011530 | 0.011463 | 0.011463 | 0.011766 | 0.011631 | 0.011732 | 0.011463 |
| 0.011564 | 0.011631 | 0.011497 | 0.011564 | 0.011530 | 0.011396 | 0.011732 |
| 0.011497 | 0.011463 | 0.011463 | 0.011631 | 0.011463 | 0.011564 | 0.011799 |
| 0.011497 | 0.011876 | 0.011867 | 0.011670 | 0.011342 | 0.011570 | 0.011318 |
| 0.011555 | 0.011878 | 0.011412 | 0.011596 | 0.011402 | 0.011518 | 0.011485 |
| 0.011570 | 0.011324 | 0.011394 | 0.011258 | 0.011384 | 0.011462 | 0.011466 |
| 0.011475 | 0.011336 | 0.011554 | 0.011448 | 0.011499 | 0.011631 | 0.011698 |
| 0.011698 | 0.011565 | 0.011669 | 0.011670 | 0.011806 | 0.011838 | 0.011497 |
| 0.011732 | 0.011598 | 0.011463 | 0.011564 | 0.011362 | 0.011597 | 0.011396 |
| 0.011463 | 0.011463 | 0.011430 | 0.011396 | 0.011430 | 0.011396 | 0.011497 |
| 0.011479 | 0.011480 | 0.011471 | 0.011505 | 0.011642 | 0.011539 | 0.011607 |
| 0.011605 | 0.011531 | 0.011319 | 0.011348 | 0.011467 | 0.011636 | 0.011637 |
| 0.011430 | 0.011501 | 0.011734 | 0.011703 | 0.011632 | 0.011666 | 0.011598 |
| 0.011530 | 0.011598 | 0.011597 | 0.011497 | 0.012069 | 0.011665 | 0.011732 |
| 0.011766 | 0.011809 | 0.011470 | 0.011545 | 0.011430 | 0.011631 | 0.011598 |
| 0.011632 | 0.011665 | 0.011665 | 0.011665 | 0.011807 | 0.011799 | 0.011442 |
| 0.011331 | 0.011337 | 0.011435 | 0.011400 | 0.011505 | 0.011359 | 0.011672 |
| 0.011472 | 0.011587 | 0.011346 | 0.011510 | 0.011464 | 0.011539 | 0.011362 |
| 0.011396 | 0.011396 | 0.011329 | 0.011430 | 0.011631 | 0.011598 | 0.011530 |
| 0.011631 | 0.011698 | 0.011430 | 0.011430 | 0.011463 | 0.011463 | 0.011466 |
| 0.011534 | 0.011463 | 0.011463 | 0.011499 | 0.011631 | 0.011698 | 0.011698 |
| 0.011565 | 0.011669 | 0.011670 | 0.011806 | 0.011838 | 0.011497 | 0.011665 |
| 0.011598 | 0.011598 | 0.011432 | 0.011617 | 0.011547 | 0.011571 | 0.011446 |
| 0.011542 | 0.011835 | 0.011568 | 0.011502 | 0.011329 | 0.000000 | 0.011396 |
| 0.011497 | 0.011497 | 0.011396 | 0.011498 | 0.011598 | 0.011601 | 0.011497 |
| 0.011396 | 0.011330 | 0.011463 | 0.011396 | 0.011329 | 0.011434 | 0.000000 |
| 0.011497 | 0.011430 | 0.011463 | 0.011497 | 0.011463 | 0.011396 | 0.011598 |
| 0.011463 | 0.011463 | 0.011497 | 0.011430 | 0.011497 | 0.011732 | 0.011396 |
| 0.011430 | 0.011833 | 0.011430 | 0.011396 | 0.011430 | 0.011799 | 0.011403 |
| 0.011847 | 0.011400 | 0.011461 | 0.011624 | 0.011712 | 0.011635 | 0.011353 |
| 0.011323 | 0.011598 | 0.011698 | 0.011807 | 0.011666 | 0.011805 | 0.011935 |
| 0.011834 | 0.011872 | 0.011833 | 0.012086 | 0.011799 | 0.012675 | 0.011835 |
| 0.012574 | 0.012342 | 0.012476 | 0.012748 | 0.011799 | 0.011497 | 0.011800 |
| 0.012239 | 0.012174 | 0.011766 | 0.011665 | 0.011733 | 0.011733 | 0.011703 |
| 0.011598 | 0.011603 | 0.011665 | 0.011632 | 0.012002 | 0.012069 | 0.012070 |
| 0.011969 | 0.012069 | 0.012173 | 0.011940 | 0.012239 | 0.012246 | 0.012306 |
| 0.012307 | 0.012341 | 0.012289 | 0.012307 | 0.012309 | 0.011530 | 0.011833 |
| 0.011901 | 0.012405 | 0.011908 | 0.012136 | 0.012609 | 0.011672 | 0.011565 |
| 0.011530 | 0.011530 | 0.012002 | 0.012048 | 0.012151 | 0.011866 | 0.011532 |
| S200     | 0.011564 | 0.011564 | 0.011900 | 0.011664 | 0.011664 | 0.011732 |
| 0.011570 | 0.011502 | 0.011732 | 0.011161 | 0.011228 | 0.011195 | 0.011161 |
| 0.011195 | 0.011362 | 0.011161 | 0.011195 | 0.011262 | 0.011228 | 0.011195 |
| 0.011161 | 0.011195 | 0.011295 | 0.011161 | 0.011195 | 0.011161 | 0.011535 |
| 0.011429 | 0.011195 | 0.011094 | 0.011329 | 0.011262 | 0.011228 | 0.011262 |
| 0.011228 | 0.011329 | 0.011228 | 0.011228 | 0.011262 | 0.011228 | 0.011396 |
| 0.011161 | 0.011228 | 0.011262 | 0.011195 | 0.011295 | 0.011329 | 0.011262 |
| 0.011228 | 0.011396 | 0.011295 | 0.011564 | 0.011228 | 0.011429 | 0.011228 |
| 0.011195 | 0.011295 | 0.011362 | 0.011429 | 0.011597 | 0.011295 | 0.011396 |
| 0.011262 | 0.011329 | 0.011228 | 0.011463 | 0.011698 | 0.011228 | 0.011295 |
| 0.011195 | 0.011295 | 0.011262 | 0.011329 | 0.011262 | 0.011262 | 0.011262 |
| 0.011161 | 0.011195 | 0.011161 | 0.011262 | 0.011228 | 0.011262 | 0.011329 |
| 0.011262 | 0.011228 | 0.011295 | 0.011195 | 0.011329 | 0.011161 | 0.011228 |
| 0.011396 | 0.011329 | 0.011564 | 0.011396 | 0.011228 | 0.011463 | 0.011228 |
| 0.011394 | 0.011620 | 0.011400 | 0.011099 | 0.011098 | 0.011244 | 0.011296 |
| 0.011975 | 0.011365 | 0.011102 | 0.011463 | 0.011429 | 0.011262 | 0.011362 |
| 0.011295 | 0.011262 | 0.011329 | 0.011228 | 0.011329 | 0.011262 | 0.011262 |
| 0.011228 | 0.011329 | 0.011530 | 0.011396 | 0.011295 | 0.011262 | 0.011195 |
| 0.011161 | 0.011161 | 0.011228 | 0.011195 | 0.011396 | 0.011362 | 0.011295 |
| 0.011396 | 0.011463 | 0.011195 | 0.011195 | 0.011228 | 0.011228 | 0.011229 |

|          |          |          |          |          |          |          |
|----------|----------|----------|----------|----------|----------|----------|
| 0.011297 | 0.011228 | 0.011228 | 0.011096 | 0.011133 | 0.011130 | 0.011228 |
| 0.011230 | 0.011163 | 0.011171 | 0.011198 | 0.011128 | 0.011163 | 0.011195 |
| 0.011456 | 0.011233 | 0.011267 | 0.011161 | 0.011164 | 0.011296 | 0.011262 |
| 0.011329 | 0.011262 | 0.011262 | 0.011362 | 0.011295 | 0.011665 | 0.011463 |
| 0.011497 | 0.011362 | 0.011228 | 0.011329 | 0.011127 | 0.011362 | 0.011161 |
| 0.011195 | 0.011228 | 0.011195 | 0.011161 | 0.011195 | 0.011161 | 0.011262 |
| 0.011228 | 0.011329 | 0.011262 | 0.011161 | 0.011262 | 0.011362 | 0.011364 |
| 0.011363 | 0.011262 | 0.011161 | 0.011094 | 0.011228 | 0.011161 | 0.011094 |
| 0.011196 | 0.011363 | 0.011161 | 0.011363 | 0.000000 | 0.011228 | 0.011127 |
| 0.011295 | 0.011195 | 0.011228 | 0.011127 | 0.011161 | 0.011094 | 0.011228 |
| 0.011262 | 0.011195 | 0.011262 | 0.011195 | 0.011228 | 0.011262 | 0.011497 |
| 0.011597 | 0.011530 | 0.011598 | 0.011364 | 0.011598 | 0.011228 | 0.011195 |
| 0.011229 | 0.011505 | 0.011335 | 0.011129 | 0.011603 | 0.011094 | 0.011218 |
| 0.011603 | 0.011502 | 0.011396 | 0.011597 | 0.011299 | 0.011463 | 0.011430 |
| 0.011362 | 0.011530 | 0.011380 | 0.011225 | 0.011270 | 0.011262 | 0.011331 |
| 0.011430 | 0.011330 | 0.011466 | 0.011534 | 0.011463 | 0.011530 | 0.011636 |
| 0.011365 | 0.011535 | 0.011466 | 0.011398 | 0.011666 | 0.011127 | 0.011330 |
| 0.011295 | 0.011228 | 0.011127 | 0.011127 | 0.011195 | 0.011195 | 0.011262 |
| 0.011195 | 0.011262 | 0.011161 | 0.011262 | 0.011195 | 0.011195 | 0.011262 |
| 0.011195 | 0.011631 | 0.011530 | 0.011564 | 0.011094 | 0.011195 | 0.011228 |
| 0.011228 | 0.011127 | 0.011262 | 0.011295 | 0.011161 | 0.011161 | 0.011161 |
| 0.011698 | 0.011329 | 0.011329 | 0.011127 | 0.011228 | 0.011396 | 0.011161 |
| 0.011161 | 0.011228 | 0.011195 | 0.011362 | 0.011161 | 0.011295 | 0.011429 |
| 0.011362 | 0.011195 | 0.011195 | 0.011127 | 0.011127 | 0.011295 | 0.011228 |
| 0.011127 | 0.011228 | 0.011094 | 0.011127 | 0.011262 | 0.011396 | 0.011161 |
| 0.011128 | 0.011262 | 0.011195 | 0.011094 | 0.011429 | 0.011094 | 0.011262 |
| 0.011334 | 0.011161 | 0.011463 | 0.011295 | 0.011329 | 0.011195 | 0.011295 |
| 0.011161 | 0.011429 | 0.011094 | 0.011362 | 0.011161 | 0.011161 | 0.011094 |
| 0.011329 | 0.011530 | 0.011228 | 0.011295 | 0.011127 | 0.011530 | 0.011161 |
| 0.011161 | 0.011161 | 0.011195 | 0.011295 | 0.011195 | 0.011295 | 0.011362 |
| 0.011362 | 0.011262 | 0.011228 | 0.011329 | 0.011295 | 0.011161 | 0.011094 |
| 0.011161 | 0.011161 | 0.011228 | 0.011161 | 0.011127 | 0.011295 | 0.011161 |
| 0.011195 | 0.011195 | 0.011329 | 0.011362 | 0.011262 | 0.011195 | 0.011195 |
| 0.011262 | 0.011195 | 0.011295 | 0.011161 | 0.011295 | 0.011396 | 0.011698 |
| 0.011195 | 0.011597 | 0.011198 | 0.017711 | 0.011126 | 0.011366 | 0.011548 |
| 0.011510 | 0.011553 | 0.011217 | 0.011176 | 0.011610 | 0.011578 | 0.011242 |
| 0.011392 | 0.011426 | 0.000000 | 0.011186 | 0.011138 | 0.011208 | 0.011189 |
| 0.011389 | 0.011321 | 0.011357 | 0.011126 | 0.011329 | 0.011362 | 0.011365 |
| 0.011232 | 0.011329 | 0.011329 | 0.011295 | 0.011262 | 0.011262 | 0.011228 |
| 0.011262 | 0.011195 | 0.011161 | 0.011262 | 0.011228 | 0.011161 | 0.011195 |
| 0.011195 | 0.011262 | 0.011161 | 0.011262 | 0.011295 | 0.011329 | 0.011228 |
| 0.011262 | 0.011228 | 0.011564 | 0.011564 | 0.011295 | 0.011329 | 0.011362 |
| 0.011127 | 0.011127 | 0.011161 | 0.011262 | 0.011127 | 0.011362 | 0.011362 |
| 0.011396 | 0.011396 | 0.011295 | 0.011429 | 0.011598 | 0.011431 | 0.011262 |
| 0.011262 | 0.011329 | 0.011362 | 0.011195 | 0.011262 | 0.011228 | 0.011262 |
| 0.011329 | 0.011329 | 0.011362 | 0.011329 | 0.011229 | 0.011430 | 0.011396 |
| 0.011263 | 0.011161 | 0.011262 | 0.011362 | 0.011262 | 0.011396 | 0.011429 |
| 0.011597 | 0.011299 | 0.011463 | 0.011430 | 0.011362 | 0.011530 | 0.011161 |
| 0.011330 | 0.011228 | 0.011195 | 0.011195 | 0.011262 | 0.011161 | 0.011262 |
| 0.011295 | 0.011329 | 0.011228 | 0.011262 | 0.011228 | 0.011564 | 0.011564 |
| 0.011295 | 0.011329 | 0.011362 | 0.011329 | 0.011968 | 0.011382 | 0.011306 |
| 0.011377 | 0.011338 | 0.011447 | 0.011337 | 0.011445 | 0.011371 | 0.011336 |
| 0.011919 | 0.011233 | 0.011368 | 0.011302 | 0.011577 | 0.011434 | 0.011537 |
| 0.011944 | 0.011399 | 0.011500 | 0.011564 | 0.011429 | 0.011429 | 0.011466 |
| 0.011127 | 0.011295 | 0.011429 | 0.011396 | 0.011398 | 0.011396 | 0.011363 |
| 0.011228 | 0.011161 | 0.011195 | 0.011228 | 0.011127 | 0.011195 | 0.011094 |
| 0.011228 | 0.011262 | 0.011161 | 0.011127 | 0.011228 | 0.011161 | 0.011195 |
| 0.011195 | 0.011127 | 0.011195 | 0.011228 | 0.011127 | 0.011329 | 0.011362 |
| 0.011262 | 0.011329 | 0.011262 | 0.011262 | 0.011195 | 0.011597 | 0.011228 |
| 0.011269 | 0.011195 | 0.011430 | 0.011433 | 0.011295 | 0.011295 | 0.011295 |

|          |          |          |          |          |          |          |
|----------|----------|----------|----------|----------|----------|----------|
| 0.011295 | 0.011228 | 0.011195 | 0.011228 | 0.011329 | 0.011329 | 0.011262 |
| 0.011262 | 0.011396 | 0.011564 | 0.011228 | 0.011497 | 0.011497 | 0.011362 |
| 0.011195 | 0.011262 | 0.011295 | 0.011698 | 0.011262 | 0.011295 | 0.011262 |
| 0.011295 | 0.011228 | 0.011228 | 0.011463 | 0.011463 | 0.011429 | 0.011228 |
| 0.011329 | 0.011396 | 0.011262 | 0.011329 | 0.011295 | 0.011161 | 0.011497 |
| 0.011262 | 0.011127 | 0.011228 | 0.011396 | 0.011228 | 0.011329 | 0.011564 |
| 0.011262 | 0.011637 | 0.011631 | 0.011385 | 0.011117 | 0.011332 | 0.011164 |
| 0.011170 | 0.011605 | 0.011166 | 0.011328 | 0.011158 | 0.011264 | 0.011273 |
| 0.011366 | 0.000000 | 0.011227 | 0.000000 | 0.011114 | 0.011261 | 0.011263 |
| 0.011324 | 0.011178 | 0.011307 | 0.011236 | 0.011262 | 0.011396 | 0.011463 |
| 0.011463 | 0.011329 | 0.011432 | 0.011433 | 0.011569 | 0.011590 | 0.011262 |
| 0.011497 | 0.011362 | 0.011228 | 0.011329 | 0.011127 | 0.011362 | 0.011161 |
| 0.011195 | 0.011228 | 0.011195 | 0.011161 | 0.011195 | 0.011161 | 0.011262 |
| 0.011235 | 0.011235 | 0.011232 | 0.011266 | 0.011402 | 0.011368 | 0.011368 |
| 0.011367 | 0.011296 | 0.011097 | 0.011096 | 0.011230 | 0.011399 | 0.011400 |
| 0.011195 | 0.011263 | 0.011397 | 0.011466 | 0.011397 | 0.011430 | 0.011362 |
| 0.011295 | 0.011362 | 0.011362 | 0.011262 | 0.011833 | 0.011362 | 0.011497 |
| 0.011430 | 0.011594 | 0.011231 | 0.011303 | 0.011195 | 0.011396 | 0.011362 |
| 0.011397 | 0.011429 | 0.011429 | 0.011429 | 0.011571 | 0.011564 | 0.011199 |
| 0.011094 | 0.011095 | 0.011196 | 0.011162 | 0.011265 | 0.011098 | 0.011434 |
| 0.011232 | 0.011367 | 0.011108 | 0.011248 | 0.011228 | 0.011300 | 0.011195 |
| 0.011161 | 0.011161 | 0.011228 | 0.011195 | 0.011396 | 0.011362 | 0.011295 |
| 0.011396 | 0.011463 | 0.011195 | 0.011195 | 0.011228 | 0.011228 | 0.011229 |
| 0.011297 | 0.011228 | 0.011228 | 0.011262 | 0.011396 | 0.011463 | 0.011463 |
| 0.011329 | 0.011432 | 0.011433 | 0.011569 | 0.011590 | 0.011262 | 0.011429 |
| 0.011362 | 0.011362 | 0.011196 | 0.011373 | 0.011303 | 0.011333 | 0.011200 |
| 0.011370 | 0.011561 | 0.011357 | 0.011264 | 0.011161 | 0.011363 | 0.011228 |
| 0.011329 | 0.011262 | 0.011161 | 0.011262 | 0.011362 | 0.011364 | 0.011262 |
| 0.011161 | 0.011094 | 0.011228 | 0.011161 | 0.011094 | 0.011196 | 0.011363 |
| 0.011262 | 0.011195 | 0.011161 | 0.011262 | 0.011228 | 0.011161 | 0.011362 |
| 0.011228 | 0.011262 | 0.011262 | 0.011195 | 0.011262 | 0.011497 | 0.011161 |
| 0.011195 | 0.011597 | 0.011195 | 0.011228 | 0.011195 | 0.011564 | 0.011103 |
| 0.011566 | 0.011103 | 0.011161 | 0.011342 | 0.011427 | 0.011383 | 0.000000 |
| 0.011113 | 0.011362 | 0.011463 | 0.011569 | 0.011431 | 0.011568 | 0.011699 |
| 0.011599 | 0.011635 | 0.011597 | 0.011846 | 0.011564 | 0.012438 | 0.011599 |
| 0.012338 | 0.012106 | 0.012240 | 0.012511 | 0.011564 | 0.011262 | 0.011564 |
| 0.012002 | 0.011937 | 0.011530 | 0.011430 | 0.011497 | 0.011497 | 0.011466 |
| 0.011362 | 0.011365 | 0.011429 | 0.011396 | 0.011766 | 0.011833 | 0.011834 |
| 0.011733 | 0.011834 | 0.011937 | 0.011703 | 0.012003 | 0.012008 | 0.012070 |
| 0.012071 | 0.012104 | 0.012050 | 0.012071 | 0.012072 | 0.011295 | 0.011598 |
| 0.011666 | 0.012169 | 0.011670 | 0.011900 | 0.012373 | 0.011434 | 0.011329 |
| 0.011295 | 0.011295 | 0.011766 | 0.011801 | 0.011905 | 0.011631 | 0.011296 |
| S201     | 0.011665 | 0.011665 | 0.012001 | 0.011766 | 0.011766 | 0.011833 |
| 0.011672 | 0.011604 | 0.011766 | 0.011262 | 0.011329 | 0.011296 | 0.011262 |
| 0.011295 | 0.011463 | 0.011262 | 0.011295 | 0.011362 | 0.011329 | 0.011295 |
| 0.011262 | 0.011295 | 0.011396 | 0.011262 | 0.011296 | 0.011295 | 0.011638 |
| 0.011530 | 0.011295 | 0.011195 | 0.011430 | 0.011362 | 0.011329 | 0.011363 |
| 0.011329 | 0.011430 | 0.011329 | 0.011329 | 0.011362 | 0.011329 | 0.011497 |
| 0.011262 | 0.011329 | 0.011362 | 0.011295 | 0.011396 | 0.011430 | 0.011362 |
| 0.011329 | 0.011497 | 0.011396 | 0.011665 | 0.011329 | 0.011598 | 0.011329 |
| 0.011295 | 0.011396 | 0.011463 | 0.011598 | 0.011698 | 0.011396 | 0.011497 |
| 0.011362 | 0.011430 | 0.011329 | 0.011564 | 0.011799 | 0.011329 | 0.011396 |
| 0.011295 | 0.011396 | 0.011362 | 0.011430 | 0.011362 | 0.011362 | 0.011362 |
| 0.011262 | 0.011295 | 0.011262 | 0.011363 | 0.011329 | 0.011363 | 0.011430 |
| 0.011228 | 0.011329 | 0.011396 | 0.011295 | 0.011430 | 0.011262 | 0.011329 |
| 0.011497 | 0.011430 | 0.011665 | 0.011497 | 0.011329 | 0.011564 | 0.011329 |
| 0.011468 | 0.011695 | 0.011513 | 0.011216 | 0.011210 | 0.011318 | 0.011415 |
| 0.012048 | 0.011467 | 0.011225 | 0.011564 | 0.011564 | 0.011362 | 0.011463 |
| 0.011396 | 0.011362 | 0.011430 | 0.011329 | 0.011430 | 0.011362 | 0.011362 |
| 0.011329 | 0.011429 | 0.011631 | 0.011497 | 0.011262 | 0.011363 | 0.011295 |

|          |          |          |          |          |          |          |
|----------|----------|----------|----------|----------|----------|----------|
| 0.011262 | 0.011262 | 0.011329 | 0.011295 | 0.011497 | 0.011463 | 0.011396 |
| 0.011497 | 0.011564 | 0.011295 | 0.011295 | 0.011329 | 0.011329 | 0.011330 |
| 0.011398 | 0.011329 | 0.011329 | 0.011168 | 0.011277 | 0.011236 | 0.011329 |
| 0.011331 | 0.011266 | 0.011282 | 0.011267 | 0.011230 | 0.011266 | 0.011297 |
| 0.011528 | 0.011336 | 0.011370 | 0.011262 | 0.011233 | 0.011397 | 0.011363 |
| 0.011430 | 0.011364 | 0.011363 | 0.011463 | 0.011396 | 0.011766 | 0.011564 |
| 0.011597 | 0.011463 | 0.011329 | 0.011430 | 0.011228 | 0.011463 | 0.011262 |
| 0.011329 | 0.011329 | 0.011295 | 0.011262 | 0.011295 | 0.011262 | 0.011362 |
| 0.011329 | 0.011430 | 0.011363 | 0.011262 | 0.011363 | 0.011463 | 0.011466 |
| 0.011463 | 0.011363 | 0.011262 | 0.011195 | 0.011329 | 0.011262 | 0.011195 |
| 0.011264 | 0.011463 | 0.011262 | 0.011463 | 0.011228 | 0.000000 | 0.011295 |
| 0.011396 | 0.011295 | 0.011329 | 0.011295 | 0.011329 | 0.011195 | 0.011329 |
| 0.011363 | 0.011295 | 0.011362 | 0.011295 | 0.011329 | 0.011362 | 0.011597 |
| 0.011698 | 0.011631 | 0.011698 | 0.011465 | 0.011699 | 0.011329 | 0.011295 |
| 0.011330 | 0.011626 | 0.011426 | 0.011232 | 0.011705 | 0.011197 | 0.011336 |
| 0.011706 | 0.011604 | 0.011497 | 0.011699 | 0.011402 | 0.011564 | 0.011531 |
| 0.011463 | 0.011631 | 0.011487 | 0.011307 | 0.011354 | 0.011363 | 0.011433 |
| 0.011530 | 0.011431 | 0.011568 | 0.011636 | 0.011564 | 0.011631 | 0.011738 |
| 0.011466 | 0.011638 | 0.011568 | 0.011500 | 0.011767 | 0.011228 | 0.011431 |
| 0.011396 | 0.011329 | 0.011228 | 0.011228 | 0.011295 | 0.011295 | 0.011362 |
| 0.011295 | 0.011363 | 0.011262 | 0.011362 | 0.011295 | 0.011295 | 0.011362 |
| 0.011295 | 0.011732 | 0.011631 | 0.011665 | 0.011195 | 0.011295 | 0.011329 |
| 0.011195 | 0.011295 | 0.011363 | 0.011396 | 0.011262 | 0.011262 | 0.011262 |
| 0.011799 | 0.011430 | 0.011430 | 0.011228 | 0.011329 | 0.011497 | 0.011262 |
| 0.011262 | 0.011329 | 0.011295 | 0.011463 | 0.011262 | 0.011396 | 0.011530 |
| 0.011463 | 0.011295 | 0.011295 | 0.011228 | 0.011228 | 0.011396 | 0.011329 |
| 0.011228 | 0.011329 | 0.011195 | 0.011228 | 0.011363 | 0.011497 | 0.011262 |
| 0.011228 | 0.011362 | 0.011296 | 0.011195 | 0.011530 | 0.011195 | 0.011362 |
| 0.011437 | 0.011262 | 0.011564 | 0.011396 | 0.011430 | 0.011295 | 0.011396 |
| 0.011262 | 0.011598 | 0.011195 | 0.011463 | 0.011262 | 0.011262 | 0.011195 |
| 0.011430 | 0.011631 | 0.011329 | 0.011396 | 0.011228 | 0.011631 | 0.011262 |
| 0.011262 | 0.011262 | 0.011295 | 0.011396 | 0.011295 | 0.011396 | 0.011463 |
| 0.011463 | 0.011430 | 0.011329 | 0.011430 | 0.011396 | 0.011262 | 0.011228 |
| 0.011262 | 0.011262 | 0.011329 | 0.011262 | 0.011228 | 0.011396 | 0.011262 |
| 0.011295 | 0.011295 | 0.011430 | 0.011463 | 0.011362 | 0.011295 | 0.011295 |
| 0.011362 | 0.011295 | 0.011396 | 0.011262 | 0.011396 | 0.011497 | 0.011799 |
| 0.011295 | 0.011698 | 0.011267 | 0.017785 | 0.011322 | 0.011427 | 0.011618 |
| 0.011579 | 0.011623 | 0.011322 | 0.011234 | 0.011719 | 0.011647 | 0.011364 |
| 0.011535 | 0.011549 | 0.011177 | 0.011270 | 0.011255 | 0.011357 | 0.011275 |
| 0.011529 | 0.011433 | 0.011431 | 0.011193 | 0.011295 | 0.011463 | 0.011466 |
| 0.011335 | 0.011430 | 0.011430 | 0.011396 | 0.011363 | 0.011363 | 0.011329 |
| 0.011362 | 0.011295 | 0.011329 | 0.011362 | 0.000000 | 0.011262 | 0.011295 |
| 0.011295 | 0.011362 | 0.011262 | 0.011363 | 0.011396 | 0.011430 | 0.011329 |
| 0.011362 | 0.011329 | 0.011665 | 0.011665 | 0.011396 | 0.011430 | 0.011463 |
| 0.011228 | 0.011228 | 0.011262 | 0.011363 | 0.011228 | 0.011463 | 0.011463 |
| 0.011497 | 0.011497 | 0.011295 | 0.011530 | 0.011698 | 0.011532 | 0.011363 |
| 0.011362 | 0.011430 | 0.011463 | 0.011295 | 0.011362 | 0.011329 | 0.011363 |
| 0.011430 | 0.011430 | 0.011463 | 0.011430 | 0.011330 | 0.011530 | 0.011497 |
| 0.011365 | 0.011262 | 0.011362 | 0.011463 | 0.011363 | 0.011497 | 0.011530 |
| 0.011699 | 0.011402 | 0.011564 | 0.011531 | 0.011463 | 0.011631 | 0.011262 |
| 0.011431 | 0.011329 | 0.011295 | 0.011295 | 0.011362 | 0.011262 | 0.011363 |
| 0.011396 | 0.011430 | 0.011329 | 0.011362 | 0.011329 | 0.011665 | 0.011665 |
| 0.011396 | 0.011430 | 0.011497 | 0.011430 | 0.012070 | 0.011489 | 0.011412 |
| 0.011482 | 0.011442 | 0.011552 | 0.011441 | 0.011550 | 0.011474 | 0.011440 |
| 0.012022 | 0.011337 | 0.011471 | 0.011406 | 0.011680 | 0.011537 | 0.011639 |
| 0.012047 | 0.011513 | 0.011365 | 0.011362 | 0.011362 | 0.011396 | 0.011331 |
| 0.011228 | 0.011262 | 0.011396 | 0.011362 | 0.011364 | 0.011497 | 0.011464 |
| 0.011329 | 0.011262 | 0.011295 | 0.011329 | 0.011228 | 0.011295 | 0.011195 |
| 0.011329 | 0.011362 | 0.011262 | 0.011228 | 0.011329 | 0.011262 | 0.011295 |
| 0.011295 | 0.011228 | 0.011295 | 0.011329 | 0.011228 | 0.011430 | 0.011463 |



|          |          |          |          |          |          |          |
|----------|----------|----------|----------|----------|----------|----------|
| 0.011363 | 0.011430 | 0.011362 | 0.011363 | 0.011295 | 0.011698 | 0.011329 |
| 0.011373 | 0.011295 | 0.011531 | 0.011535 | 0.011396 | 0.011396 | 0.011396 |
| 0.011396 | 0.011329 | 0.011295 | 0.011329 | 0.011430 | 0.011430 | 0.011228 |
| 0.011362 | 0.011497 | 0.011665 | 0.011396 | 0.011598 | 0.011598 | 0.011463 |
| 0.011295 | 0.011362 | 0.011396 | 0.011799 | 0.011363 | 0.011396 | 0.011228 |
| 0.011396 | 0.011329 | 0.011329 | 0.011631 | 0.011564 | 0.011598 | 0.011329 |
| 0.011430 | 0.011497 | 0.011362 | 0.011430 | 0.011396 | 0.011262 | 0.011598 |
| 0.011362 | 0.011329 | 0.011329 | 0.011497 | 0.011329 | 0.011430 | 0.011665 |
| 0.011362 | 0.011740 | 0.011732 | 0.011507 | 0.011286 | 0.011400 | 0.011267 |
| 0.011225 | 0.011722 | 0.011236 | 0.011462 | 0.011304 | 0.011417 | 0.011432 |
| 0.011519 | 0.011258 | 0.011394 | 0.011258 | 0.011276 | 0.011462 | 0.011385 |
| 0.011399 | 0.011296 | 0.011377 | 0.011307 | 0.011364 | 0.011497 | 0.011564 |
| 0.011564 | 0.011430 | 0.011534 | 0.011535 | 0.011670 | 0.011696 | 0.011363 |
| 0.011597 | 0.011463 | 0.011329 | 0.011430 | 0.011228 | 0.011463 | 0.011262 |
| 0.011329 | 0.011329 | 0.011295 | 0.011262 | 0.011295 | 0.011262 | 0.011362 |
| 0.011340 | 0.011340 | 0.011300 | 0.011368 | 0.011505 | 0.011470 | 0.011470 |
| 0.011469 | 0.011396 | 0.011171 | 0.011168 | 0.011331 | 0.011501 | 0.011501 |
| 0.011296 | 0.011365 | 0.011599 | 0.011567 | 0.011497 | 0.011531 | 0.011463 |
| 0.011396 | 0.011463 | 0.011463 | 0.011362 | 0.011934 | 0.011530 | 0.011598 |
| 0.011631 | 0.011701 | 0.011333 | 0.011303 | 0.011295 | 0.011497 | 0.011463 |
| 0.011498 | 0.011530 | 0.011530 | 0.011530 | 0.011689 | 0.011665 | 0.011303 |
| 0.011196 | 0.011199 | 0.011299 | 0.011264 | 0.011368 | 0.011210 | 0.011536 |
| 0.011335 | 0.011499 | 0.011251 | 0.011360 | 0.011329 | 0.011402 | 0.011295 |
| 0.011262 | 0.011262 | 0.011329 | 0.011295 | 0.011497 | 0.011463 | 0.011396 |
| 0.011497 | 0.011564 | 0.011295 | 0.011295 | 0.011329 | 0.011329 | 0.011330 |
| 0.011398 | 0.011329 | 0.011329 | 0.011364 | 0.011497 | 0.011564 | 0.011564 |
| 0.011430 | 0.011534 | 0.011535 | 0.011670 | 0.011696 | 0.011363 | 0.011530 |
| 0.011463 | 0.011463 | 0.011297 | 0.011478 | 0.011408 | 0.011435 | 0.011305 |
| 0.011473 | 0.011698 | 0.011484 | 0.011366 | 0.011262 | 0.011463 | 0.011329 |
| 0.011430 | 0.011363 | 0.011262 | 0.011363 | 0.011463 | 0.011466 | 0.011363 |
| 0.011262 | 0.011195 | 0.011329 | 0.011262 | 0.011195 | 0.011264 | 0.011463 |
| 0.011362 | 0.011295 | 0.011329 | 0.011362 | 0.000000 | 0.011262 | 0.011463 |
| 0.011329 | 0.011363 | 0.011362 | 0.011295 | 0.011362 | 0.011598 | 0.011262 |
| 0.011295 | 0.011698 | 0.011295 | 0.011329 | 0.011295 | 0.011665 | 0.011232 |
| 0.011735 | 0.011230 | 0.011311 | 0.011463 | 0.011549 | 0.011455 | 0.011186 |
| 0.011270 | 0.011463 | 0.011564 | 0.011671 | 0.011532 | 0.011669 | 0.011800 |
| 0.011700 | 0.011737 | 0.011698 | 0.011949 | 0.011665 | 0.012540 | 0.011700 |
| 0.012439 | 0.012207 | 0.012341 | 0.012613 | 0.011665 | 0.011363 | 0.011665 |
| 0.012104 | 0.012038 | 0.011631 | 0.011531 | 0.011598 | 0.011598 | 0.011568 |
| 0.011463 | 0.011467 | 0.011530 | 0.011497 | 0.011867 | 0.011934 | 0.011935 |
| 0.011834 | 0.011935 | 0.012038 | 0.011804 | 0.012104 | 0.012110 | 0.012171 |
| 0.012172 | 0.012206 | 0.012118 | 0.012172 | 0.012173 | 0.011396 | 0.011699 |
| 0.011767 | 0.012270 | 0.011772 | 0.012001 | 0.012474 | 0.011536 | 0.011430 |
| 0.011396 | 0.011396 | 0.011867 | 0.011883 | 0.011975 | 0.011732 | 0.011397 |
| S202     | 0.011631 | 0.011631 | 0.011967 | 0.011732 | 0.011732 | 0.011799 |
| 0.011638 | 0.011570 | 0.011732 | 0.011228 | 0.011295 | 0.011262 | 0.011228 |
| 0.011262 | 0.011430 | 0.011228 | 0.011262 | 0.011329 | 0.011295 | 0.011262 |
| 0.011228 | 0.011262 | 0.011362 | 0.011228 | 0.011262 | 0.011262 | 0.011604 |
| 0.011497 | 0.011262 | 0.011161 | 0.011396 | 0.011329 | 0.011295 | 0.011329 |
| 0.011295 | 0.011396 | 0.011295 | 0.011295 | 0.011329 | 0.011295 | 0.011463 |
| 0.011228 | 0.011295 | 0.011329 | 0.011262 | 0.011362 | 0.011396 | 0.011329 |
| 0.011295 | 0.011463 | 0.011363 | 0.011631 | 0.011295 | 0.011497 | 0.011295 |
| 0.011262 | 0.011362 | 0.011430 | 0.011497 | 0.011665 | 0.011362 | 0.011463 |
| 0.011329 | 0.011396 | 0.011295 | 0.011530 | 0.011766 | 0.011295 | 0.011362 |
| 0.011262 | 0.011362 | 0.011329 | 0.011396 | 0.011329 | 0.011329 | 0.011329 |
| 0.011228 | 0.011262 | 0.011228 | 0.011329 | 0.011295 | 0.011329 | 0.011396 |
| 0.011329 | 0.011295 | 0.011362 | 0.011262 | 0.011329 | 0.011228 | 0.011295 |
| 0.011463 | 0.011396 | 0.011631 | 0.011463 | 0.011295 | 0.011530 | 0.011295 |
| 0.011468 | 0.011695 | 0.011475 | 0.011138 | 0.011172 | 0.011318 | 0.011375 |
| 0.012048 | 0.011416 | 0.011184 | 0.011530 | 0.011530 | 0.011329 | 0.011430 |

|          |          |          |          |          |          |          |
|----------|----------|----------|----------|----------|----------|----------|
| 0.011362 | 0.011329 | 0.011396 | 0.011295 | 0.011396 | 0.011329 | 0.011329 |
| 0.011295 | 0.011396 | 0.011597 | 0.011463 | 0.011362 | 0.011329 | 0.011262 |
| 0.011228 | 0.011228 | 0.011295 | 0.011262 | 0.011463 | 0.011429 | 0.011362 |
| 0.011463 | 0.011530 | 0.011262 | 0.011262 | 0.011295 | 0.011295 | 0.011297 |
| 0.011364 | 0.011295 | 0.011295 | 0.011168 | 0.011205 | 0.011200 | 0.011296 |
| 0.011297 | 0.011232 | 0.011245 | 0.011267 | 0.011196 | 0.011232 | 0.011263 |
| 0.011456 | 0.011302 | 0.011336 | 0.011228 | 0.011233 | 0.011363 | 0.011329 |
| 0.011397 | 0.011330 | 0.011329 | 0.011429 | 0.011362 | 0.011732 | 0.011530 |
| 0.011564 | 0.011430 | 0.011295 | 0.011396 | 0.011195 | 0.011429 | 0.011228 |
| 0.011295 | 0.011295 | 0.011262 | 0.011228 | 0.011262 | 0.011228 | 0.011329 |
| 0.011295 | 0.011396 | 0.011329 | 0.011228 | 0.011330 | 0.011430 | 0.011432 |
| 0.011430 | 0.011329 | 0.011228 | 0.011161 | 0.011295 | 0.011228 | 0.011161 |
| 0.011264 | 0.011430 | 0.011228 | 0.011430 | 0.011127 | 0.011295 | 0.000000 |
| 0.011362 | 0.011262 | 0.011295 | 0.011195 | 0.011228 | 0.011161 | 0.011295 |
| 0.011329 | 0.011262 | 0.011329 | 0.011262 | 0.011295 | 0.011329 | 0.011564 |
| 0.011665 | 0.011597 | 0.011665 | 0.011431 | 0.011665 | 0.011295 | 0.011262 |
| 0.011297 | 0.011586 | 0.011380 | 0.011197 | 0.011671 | 0.011163 | 0.011296 |
| 0.011671 | 0.011502 | 0.011463 | 0.011665 | 0.011368 | 0.011530 | 0.011497 |
| 0.011430 | 0.011597 | 0.011451 | 0.011266 | 0.011312 | 0.011329 | 0.011399 |
| 0.011497 | 0.011398 | 0.011534 | 0.011602 | 0.011530 | 0.011598 | 0.011704 |
| 0.011433 | 0.011603 | 0.011534 | 0.011466 | 0.011733 | 0.011195 | 0.011397 |
| 0.011362 | 0.011295 | 0.011195 | 0.011195 | 0.011262 | 0.011262 | 0.011329 |
| 0.011262 | 0.011329 | 0.011228 | 0.011329 | 0.011262 | 0.011262 | 0.011329 |
| 0.011262 | 0.011698 | 0.011598 | 0.011631 | 0.011161 | 0.011262 | 0.011295 |
| 0.011295 | 0.011195 | 0.011329 | 0.011362 | 0.011228 | 0.011228 | 0.011228 |
| 0.011765 | 0.011396 | 0.011396 | 0.011195 | 0.011295 | 0.011463 | 0.011228 |
| 0.011228 | 0.011295 | 0.011262 | 0.011430 | 0.011228 | 0.011362 | 0.011497 |
| 0.011430 | 0.011262 | 0.011262 | 0.011195 | 0.011195 | 0.011362 | 0.011228 |
| 0.011195 | 0.011228 | 0.011161 | 0.011195 | 0.011329 | 0.011463 | 0.011228 |
| 0.011195 | 0.011329 | 0.011262 | 0.011161 | 0.011497 | 0.011161 | 0.011329 |
| 0.011403 | 0.011228 | 0.011530 | 0.011363 | 0.011396 | 0.011262 | 0.011362 |
| 0.011228 | 0.011497 | 0.011161 | 0.011430 | 0.011228 | 0.011228 | 0.011161 |
| 0.011396 | 0.011531 | 0.011295 | 0.011362 | 0.011195 | 0.011598 | 0.011228 |
| 0.011228 | 0.011228 | 0.011262 | 0.011362 | 0.011262 | 0.011362 | 0.011430 |
| 0.011430 | 0.011329 | 0.011295 | 0.011396 | 0.011362 | 0.011228 | 0.011195 |
| 0.011228 | 0.011228 | 0.011295 | 0.011228 | 0.011195 | 0.011362 | 0.011228 |
| 0.011262 | 0.011262 | 0.011396 | 0.011430 | 0.011329 | 0.011262 | 0.011262 |
| 0.011329 | 0.011262 | 0.011362 | 0.011228 | 0.011362 | 0.011463 | 0.011765 |
| 0.011262 | 0.011665 | 0.011267 | 0.017785 | 0.011191 | 0.011427 | 0.011618 |
| 0.011579 | 0.011623 | 0.011322 | 0.011292 | 0.011664 | 0.011647 | 0.011303 |
| 0.011440 | 0.011487 | 0.011138 | 0.011270 | 0.011216 | 0.011258 | 0.011232 |
| 0.011436 | 0.011395 | 0.011431 | 0.011193 | 0.011396 | 0.011430 | 0.011432 |
| 0.011301 | 0.011396 | 0.011396 | 0.011362 | 0.011329 | 0.011329 | 0.011295 |
| 0.011329 | 0.011262 | 0.011228 | 0.011329 | 0.011295 | 0.011228 | 0.011262 |
| 0.011262 | 0.011329 | 0.011228 | 0.011329 | 0.011362 | 0.011396 | 0.011295 |
| 0.011329 | 0.011295 | 0.011631 | 0.011631 | 0.011363 | 0.011397 | 0.011430 |
| 0.011195 | 0.011195 | 0.011228 | 0.011329 | 0.011195 | 0.011430 | 0.011430 |
| 0.011463 | 0.011463 | 0.011396 | 0.011497 | 0.011665 | 0.011498 | 0.011329 |
| 0.011329 | 0.011396 | 0.011430 | 0.011262 | 0.011329 | 0.011295 | 0.011329 |
| 0.011396 | 0.011396 | 0.011429 | 0.011396 | 0.011296 | 0.011497 | 0.011463 |
| 0.011331 | 0.011228 | 0.011329 | 0.011430 | 0.011329 | 0.011463 | 0.011497 |
| 0.011665 | 0.011368 | 0.011530 | 0.011497 | 0.011430 | 0.011597 | 0.011228 |
| 0.011397 | 0.011295 | 0.011262 | 0.011262 | 0.011329 | 0.011228 | 0.011329 |
| 0.011362 | 0.011396 | 0.011295 | 0.011329 | 0.011295 | 0.011631 | 0.011631 |
| 0.011363 | 0.011397 | 0.011463 | 0.011396 | 0.012036 | 0.011453 | 0.011377 |
| 0.011447 | 0.011407 | 0.011517 | 0.011407 | 0.011515 | 0.011440 | 0.011405 |
| 0.011988 | 0.011303 | 0.011437 | 0.011372 | 0.011646 | 0.011502 | 0.011605 |
| 0.012012 | 0.011437 | 0.011331 | 0.011329 | 0.011329 | 0.011362 | 0.011297 |
| 0.011195 | 0.011228 | 0.011362 | 0.011329 | 0.011331 | 0.011463 | 0.011431 |
| 0.011295 | 0.011228 | 0.011262 | 0.011295 | 0.011195 | 0.011262 | 0.011161 |

|          |          |          |          |          |          |          |
|----------|----------|----------|----------|----------|----------|----------|
| 0.011295 | 0.011329 | 0.011228 | 0.011195 | 0.011295 | 0.011228 | 0.011262 |
| 0.011262 | 0.011195 | 0.011262 | 0.011295 | 0.011195 | 0.011396 | 0.011430 |
| 0.011329 | 0.011396 | 0.011329 | 0.011329 | 0.011262 | 0.011665 | 0.011295 |
| 0.011339 | 0.011262 | 0.011497 | 0.011501 | 0.011363 | 0.011362 | 0.011362 |
| 0.011362 | 0.011295 | 0.011262 | 0.011295 | 0.011396 | 0.011396 | 0.011329 |
| 0.011329 | 0.011463 | 0.011631 | 0.011295 | 0.011564 | 0.011564 | 0.011429 |
| 0.011262 | 0.011329 | 0.011362 | 0.011766 | 0.011329 | 0.011363 | 0.011329 |
| 0.011362 | 0.011295 | 0.011295 | 0.011530 | 0.011530 | 0.011497 | 0.011295 |
| 0.011396 | 0.011463 | 0.011329 | 0.011396 | 0.011362 | 0.011228 | 0.011564 |
| 0.011329 | 0.011295 | 0.011295 | 0.011463 | 0.011295 | 0.011396 | 0.011631 |
| 0.011329 | 0.011706 | 0.011698 | 0.011467 | 0.011173 | 0.011400 | 0.011215 |
| 0.011225 | 0.011683 | 0.011236 | 0.011417 | 0.011207 | 0.011315 | 0.011326 |
| 0.011468 | 0.011126 | 0.011283 | 0.011126 | 0.011168 | 0.011328 | 0.011344 |
| 0.011399 | 0.011257 | 0.011377 | 0.011307 | 0.011330 | 0.011463 | 0.011530 |
| 0.011530 | 0.011396 | 0.011500 | 0.011501 | 0.011636 | 0.011661 | 0.011329 |
| 0.011564 | 0.011430 | 0.011295 | 0.011396 | 0.011195 | 0.011429 | 0.011228 |
| 0.011295 | 0.011295 | 0.011262 | 0.011228 | 0.011262 | 0.011228 | 0.011329 |
| 0.011305 | 0.011305 | 0.011300 | 0.011334 | 0.011471 | 0.011436 | 0.011436 |
| 0.011435 | 0.011363 | 0.011171 | 0.011168 | 0.011297 | 0.011467 | 0.011467 |
| 0.011262 | 0.011331 | 0.011565 | 0.011533 | 0.011464 | 0.011498 | 0.011429 |
| 0.011362 | 0.011430 | 0.011429 | 0.011329 | 0.011900 | 0.011430 | 0.011564 |
| 0.011597 | 0.011666 | 0.011299 | 0.011372 | 0.011262 | 0.011463 | 0.011430 |
| 0.011464 | 0.011497 | 0.011497 | 0.011497 | 0.011650 | 0.011631 | 0.011268 |
| 0.011162 | 0.011164 | 0.011265 | 0.011230 | 0.011334 | 0.011135 | 0.011502 |
| 0.011300 | 0.011411 | 0.011156 | 0.011285 | 0.011296 | 0.011368 | 0.011262 |
| 0.011228 | 0.011228 | 0.011295 | 0.011262 | 0.011463 | 0.011429 | 0.011362 |
| 0.011463 | 0.011530 | 0.011262 | 0.011262 | 0.011295 | 0.011295 | 0.011297 |
| 0.011364 | 0.011295 | 0.011295 | 0.011330 | 0.011463 | 0.011530 | 0.011530 |
| 0.011396 | 0.011500 | 0.011501 | 0.011636 | 0.011661 | 0.011329 | 0.011497 |
| 0.011430 | 0.011430 | 0.011263 | 0.011443 | 0.011373 | 0.011401 | 0.011270 |
| 0.011439 | 0.011653 | 0.011441 | 0.011332 | 0.011228 | 0.011430 | 0.011295 |
| 0.011396 | 0.011329 | 0.011228 | 0.011330 | 0.011430 | 0.011432 | 0.011329 |
| 0.011228 | 0.011161 | 0.011295 | 0.011228 | 0.011161 | 0.011264 | 0.011430 |
| 0.011329 | 0.011262 | 0.011228 | 0.011329 | 0.011295 | 0.011228 | 0.011430 |
| 0.011295 | 0.011329 | 0.011329 | 0.011262 | 0.011329 | 0.011564 | 0.011228 |
| 0.011262 | 0.011665 | 0.011262 | 0.011295 | 0.011262 | 0.011631 | 0.011189 |
| 0.011678 | 0.011188 | 0.011211 | 0.011422 | 0.011508 | 0.011455 | 0.011102 |
| 0.011165 | 0.011429 | 0.011530 | 0.011637 | 0.011498 | 0.011635 | 0.011766 |
| 0.011666 | 0.011703 | 0.011665 | 0.011914 | 0.011631 | 0.012506 | 0.011667 |
| 0.012406 | 0.012173 | 0.012307 | 0.012579 | 0.011631 | 0.011329 | 0.011631 |
| 0.012070 | 0.012005 | 0.011597 | 0.011497 | 0.011565 | 0.011565 | 0.011534 |
| 0.011429 | 0.011433 | 0.011497 | 0.011464 | 0.011834 | 0.011900 | 0.011901 |
| 0.011801 | 0.011901 | 0.012004 | 0.011770 | 0.012070 | 0.012076 | 0.012137 |
| 0.012138 | 0.012172 | 0.012118 | 0.012138 | 0.012139 | 0.011362 | 0.011665 |
| 0.011733 | 0.012237 | 0.011738 | 0.011968 | 0.012440 | 0.011502 | 0.011396 |
| 0.011362 | 0.011362 | 0.011833 | 0.011842 | 0.011975 | 0.011698 | 0.011363 |
| S203     | 0.011732 | 0.011732 | 0.012068 | 0.011833 | 0.011833 | 0.011900 |
| 0.011706 | 0.011638 | 0.011833 | 0.011329 | 0.011396 | 0.011363 | 0.011329 |
| 0.011362 | 0.011530 | 0.011329 | 0.011362 | 0.011430 | 0.011396 | 0.011362 |
| 0.011329 | 0.011362 | 0.011463 | 0.011329 | 0.011295 | 0.011362 | 0.011672 |
| 0.011597 | 0.011362 | 0.011262 | 0.011497 | 0.011362 | 0.011396 | 0.011362 |
| 0.011396 | 0.011430 | 0.011396 | 0.011396 | 0.011430 | 0.011396 | 0.011564 |
| 0.011329 | 0.011396 | 0.011430 | 0.011362 | 0.011463 | 0.011497 | 0.011430 |
| 0.011396 | 0.011564 | 0.011463 | 0.011732 | 0.011396 | 0.011597 | 0.011396 |
| 0.011362 | 0.011463 | 0.011530 | 0.011597 | 0.011766 | 0.011463 | 0.011564 |
| 0.011362 | 0.011430 | 0.011396 | 0.011564 | 0.011867 | 0.011396 | 0.011463 |
| 0.011362 | 0.011463 | 0.011430 | 0.011497 | 0.011430 | 0.011430 | 0.011430 |
| 0.011329 | 0.011362 | 0.011329 | 0.011430 | 0.011396 | 0.011430 | 0.011497 |
| 0.011430 | 0.011396 | 0.011396 | 0.011362 | 0.011497 | 0.011262 | 0.011396 |
| 0.011564 | 0.011497 | 0.011732 | 0.011564 | 0.011329 | 0.011564 | 0.011396 |

|          |          |          |          |          |          |          |
|----------|----------|----------|----------|----------|----------|----------|
| 0.011579 | 0.011807 | 0.011626 | 0.011334 | 0.011321 | 0.011428 | 0.011533 |
| 0.012158 | 0.011569 | 0.011349 | 0.011631 | 0.011631 | 0.011429 | 0.011530 |
| 0.011463 | 0.011430 | 0.011497 | 0.011396 | 0.011497 | 0.011362 | 0.011429 |
| 0.011396 | 0.011497 | 0.011698 | 0.011564 | 0.011463 | 0.011430 | 0.011295 |
| 0.011329 | 0.011329 | 0.011329 | 0.011362 | 0.011564 | 0.011530 | 0.011463 |
| 0.011564 | 0.011631 | 0.011362 | 0.011362 | 0.011396 | 0.011396 | 0.011398 |
| 0.011466 | 0.011329 | 0.011396 | 0.011240 | 0.011349 | 0.011306 | 0.011396 |
| 0.011399 | 0.011335 | 0.011392 | 0.011371 | 0.011298 | 0.011334 | 0.011364 |
| 0.011636 | 0.011405 | 0.011370 | 0.011329 | 0.011337 | 0.011464 | 0.011430 |
| 0.011497 | 0.011431 | 0.011430 | 0.011530 | 0.011463 | 0.011766 | 0.011631 |
| 0.011665 | 0.011530 | 0.011396 | 0.011497 | 0.011295 | 0.011530 | 0.011329 |
| 0.011396 | 0.011396 | 0.011362 | 0.011329 | 0.011362 | 0.011329 | 0.011430 |
| 0.011329 | 0.011429 | 0.011430 | 0.011329 | 0.011431 | 0.011530 | 0.011533 |
| 0.011463 | 0.011430 | 0.011329 | 0.011263 | 0.011396 | 0.011329 | 0.011262 |
| 0.011366 | 0.011463 | 0.011262 | 0.011463 | 0.011295 | 0.011396 | 0.011362 |
| 0.000000 | 0.011362 | 0.011262 | 0.011362 | 0.011396 | 0.011262 | 0.011329 |
| 0.011362 | 0.011362 | 0.011430 | 0.011362 | 0.011396 | 0.011430 | 0.011665 |
| 0.011766 | 0.011698 | 0.011766 | 0.011532 | 0.011766 | 0.011396 | 0.011362 |
| 0.011398 | 0.011586 | 0.011289 | 0.011300 | 0.011773 | 0.011265 | 0.011375 |
| 0.011739 | 0.011672 | 0.011564 | 0.011766 | 0.011470 | 0.011631 | 0.011530 |
| 0.011530 | 0.011698 | 0.011558 | 0.011431 | 0.011480 | 0.011430 | 0.011500 |
| 0.011598 | 0.011499 | 0.011568 | 0.011636 | 0.011631 | 0.011699 | 0.011738 |
| 0.011534 | 0.011637 | 0.011636 | 0.011568 | 0.011834 | 0.011295 | 0.011498 |
| 0.011329 | 0.011396 | 0.011295 | 0.011295 | 0.011295 | 0.011362 | 0.011430 |
| 0.011295 | 0.011362 | 0.011262 | 0.011430 | 0.011295 | 0.011362 | 0.011429 |
| 0.011362 | 0.011799 | 0.011698 | 0.011732 | 0.011262 | 0.011362 | 0.011396 |
| 0.011396 | 0.011362 | 0.011430 | 0.011463 | 0.011329 | 0.011329 | 0.011329 |
| 0.011866 | 0.011497 | 0.011497 | 0.011295 | 0.011396 | 0.011497 | 0.011329 |
| 0.011329 | 0.011396 | 0.011362 | 0.011463 | 0.011329 | 0.011463 | 0.011530 |
| 0.011530 | 0.011362 | 0.011362 | 0.011295 | 0.011295 | 0.011463 | 0.011396 |
| 0.011295 | 0.011396 | 0.011262 | 0.011295 | 0.011430 | 0.011564 | 0.011329 |
| 0.011296 | 0.011430 | 0.011363 | 0.011262 | 0.011597 | 0.011262 | 0.011430 |
| 0.011437 | 0.011329 | 0.011631 | 0.011463 | 0.011497 | 0.011362 | 0.011463 |
| 0.011329 | 0.011597 | 0.011262 | 0.011530 | 0.011329 | 0.011329 | 0.011262 |
| 0.011429 | 0.011699 | 0.011396 | 0.011463 | 0.011295 | 0.011698 | 0.011329 |
| 0.011329 | 0.011329 | 0.011362 | 0.011396 | 0.011362 | 0.011463 | 0.011530 |
| 0.011530 | 0.011497 | 0.011396 | 0.011497 | 0.011396 | 0.011329 | 0.011295 |
| 0.011329 | 0.011329 | 0.011396 | 0.011329 | 0.011228 | 0.011463 | 0.011329 |
| 0.011362 | 0.011362 | 0.011497 | 0.011530 | 0.011430 | 0.011295 | 0.011363 |
| 0.011430 | 0.011362 | 0.011463 | 0.011329 | 0.011463 | 0.011564 | 0.011866 |
| 0.011362 | 0.011766 | 0.011371 | 0.017899 | 0.011322 | 0.011672 | 0.011723 |
| 0.011683 | 0.011729 | 0.011427 | 0.011408 | 0.011774 | 0.011751 | 0.011425 |
| 0.011582 | 0.011732 | 0.011255 | 0.011312 | 0.011294 | 0.011455 | 0.011404 |
| 0.011576 | 0.011544 | 0.011468 | 0.011126 | 0.011497 | 0.011530 | 0.011534 |
| 0.011335 | 0.011497 | 0.011497 | 0.011463 | 0.011430 | 0.011430 | 0.011396 |
| 0.011430 | 0.011362 | 0.011396 | 0.011430 | 0.011396 | 0.011329 | 0.011362 |
| 0.011362 | 0.011430 | 0.011329 | 0.011430 | 0.011463 | 0.011497 | 0.011396 |
| 0.011430 | 0.011396 | 0.011732 | 0.011732 | 0.011463 | 0.011497 | 0.011530 |
| 0.011295 | 0.011295 | 0.011329 | 0.011362 | 0.011295 | 0.011530 | 0.011530 |
| 0.011564 | 0.011564 | 0.011497 | 0.011597 | 0.011766 | 0.011599 | 0.011362 |
| 0.011430 | 0.011497 | 0.011463 | 0.011362 | 0.011430 | 0.011396 | 0.011430 |
| 0.011497 | 0.011497 | 0.011530 | 0.011430 | 0.011330 | 0.011597 | 0.011497 |
| 0.011433 | 0.011329 | 0.011430 | 0.011530 | 0.011430 | 0.011564 | 0.011597 |
| 0.011766 | 0.011470 | 0.011631 | 0.011530 | 0.011530 | 0.011698 | 0.011329 |
| 0.011498 | 0.011396 | 0.011362 | 0.011362 | 0.011430 | 0.011329 | 0.011430 |
| 0.011463 | 0.011497 | 0.011396 | 0.011430 | 0.011396 | 0.011732 | 0.011732 |
| 0.011463 | 0.011497 | 0.011564 | 0.011497 | 0.012137 | 0.011561 | 0.011482 |
| 0.011553 | 0.011511 | 0.011623 | 0.011511 | 0.011550 | 0.011543 | 0.011509 |
| 0.012091 | 0.011406 | 0.011540 | 0.011475 | 0.011749 | 0.011605 | 0.011639 |
| 0.012115 | 0.011588 | 0.011432 | 0.011430 | 0.011429 | 0.011463 | 0.011398 |

|          |          |          |          |          |          |          |
|----------|----------|----------|----------|----------|----------|----------|
| 0.011295 | 0.011262 | 0.011463 | 0.011430 | 0.011432 | 0.011564 | 0.011532 |
| 0.011396 | 0.011262 | 0.011295 | 0.011396 | 0.011228 | 0.011362 | 0.011262 |
| 0.011396 | 0.011430 | 0.011329 | 0.011295 | 0.011396 | 0.011329 | 0.011362 |
| 0.011362 | 0.011295 | 0.011362 | 0.011396 | 0.011295 | 0.011430 | 0.011530 |
| 0.011430 | 0.011497 | 0.011430 | 0.011430 | 0.011362 | 0.011766 | 0.011396 |
| 0.011443 | 0.011362 | 0.011598 | 0.011603 | 0.011396 | 0.011463 | 0.011463 |
| 0.011463 | 0.011329 | 0.011362 | 0.011329 | 0.011497 | 0.011497 | 0.011430 |
| 0.011430 | 0.011564 | 0.011732 | 0.011463 | 0.011665 | 0.011665 | 0.011530 |
| 0.011362 | 0.011430 | 0.011463 | 0.011867 | 0.011430 | 0.011396 | 0.011430 |
| 0.011463 | 0.011396 | 0.011396 | 0.011699 | 0.011564 | 0.011665 | 0.011396 |
| 0.011497 | 0.011497 | 0.011430 | 0.011497 | 0.011463 | 0.011329 | 0.011665 |
| 0.011429 | 0.011396 | 0.011396 | 0.011564 | 0.011396 | 0.011497 | 0.011732 |
| 0.011430 | 0.011774 | 0.011799 | 0.011629 | 0.011342 | 0.011502 | 0.011318 |
| 0.011445 | 0.011839 | 0.011341 | 0.011552 | 0.011304 | 0.011518 | 0.011326 |
| 0.011570 | 0.011258 | 0.011394 | 0.011258 | 0.011276 | 0.011462 | 0.011385 |
| 0.011437 | 0.011296 | 0.011483 | 0.011412 | 0.011431 | 0.011564 | 0.011631 |
| 0.011631 | 0.011497 | 0.011567 | 0.011569 | 0.011738 | 0.011732 | 0.011430 |
| 0.011665 | 0.011530 | 0.011396 | 0.011497 | 0.011295 | 0.011530 | 0.011329 |
| 0.011396 | 0.011396 | 0.011362 | 0.011329 | 0.011362 | 0.011329 | 0.011430 |
| 0.011410 | 0.011410 | 0.011403 | 0.011437 | 0.011573 | 0.011470 | 0.011538 |
| 0.011537 | 0.011464 | 0.011282 | 0.011276 | 0.011399 | 0.011501 | 0.011569 |
| 0.011363 | 0.011433 | 0.011666 | 0.011635 | 0.011565 | 0.011599 | 0.011530 |
| 0.011463 | 0.011530 | 0.011530 | 0.011429 | 0.012001 | 0.011598 | 0.011665 |
| 0.011698 | 0.011773 | 0.011401 | 0.011476 | 0.011362 | 0.011564 | 0.011530 |
| 0.011565 | 0.011597 | 0.011598 | 0.011598 | 0.011768 | 0.011732 | 0.011373 |
| 0.011263 | 0.011268 | 0.011367 | 0.011332 | 0.011436 | 0.011284 | 0.011604 |
| 0.011403 | 0.011543 | 0.011251 | 0.011435 | 0.011396 | 0.011471 | 0.011295 |
| 0.011329 | 0.011329 | 0.011329 | 0.011362 | 0.011564 | 0.011530 | 0.011463 |
| 0.011564 | 0.011631 | 0.011362 | 0.011362 | 0.011396 | 0.011396 | 0.011398 |
| 0.011466 | 0.011329 | 0.011396 | 0.011431 | 0.011564 | 0.011631 | 0.011631 |
| 0.011497 | 0.011567 | 0.011569 | 0.011738 | 0.011732 | 0.011430 | 0.011597 |
| 0.011530 | 0.011530 | 0.011365 | 0.011513 | 0.011477 | 0.011503 | 0.011376 |
| 0.011473 | 0.011653 | 0.011526 | 0.011434 | 0.011262 | 0.011463 | 0.011329 |
| 0.011429 | 0.011430 | 0.011329 | 0.011431 | 0.011530 | 0.011533 | 0.011430 |
| 0.011329 | 0.011263 | 0.011396 | 0.011329 | 0.011262 | 0.011366 | 0.011463 |
| 0.011430 | 0.011362 | 0.011396 | 0.011430 | 0.011396 | 0.011329 | 0.011530 |
| 0.011396 | 0.011430 | 0.011430 | 0.011362 | 0.011430 | 0.011665 | 0.011329 |
| 0.011362 | 0.011766 | 0.011362 | 0.011329 | 0.011362 | 0.011732 | 0.011360 |
| 0.011791 | 0.011358 | 0.011361 | 0.011584 | 0.011671 | 0.011563 | 0.011311 |
| 0.011323 | 0.011530 | 0.011631 | 0.011739 | 0.011599 | 0.011737 | 0.011867 |
| 0.011767 | 0.011804 | 0.011765 | 0.011949 | 0.011732 | 0.012539 | 0.011768 |
| 0.012507 | 0.012274 | 0.012375 | 0.012680 | 0.011732 | 0.011430 | 0.011732 |
| 0.012171 | 0.012106 | 0.011698 | 0.011530 | 0.011665 | 0.011665 | 0.011568 |
| 0.011530 | 0.011535 | 0.011597 | 0.011531 | 0.011935 | 0.012001 | 0.012002 |
| 0.011902 | 0.012002 | 0.012038 | 0.011872 | 0.012171 | 0.012178 | 0.012238 |
| 0.012239 | 0.012273 | 0.012221 | 0.012239 | 0.012241 | 0.011463 | 0.011766 |
| 0.011834 | 0.012338 | 0.011840 | 0.012069 | 0.012541 | 0.011604 | 0.011497 |
| 0.011463 | 0.011463 | 0.011934 | 0.012006 | 0.012081 | 0.011799 | 0.011465 |
| S204     | 0.011631 | 0.011631 | 0.011967 | 0.011732 | 0.011732 | 0.011799 |
| 0.011604 | 0.011536 | 0.011732 | 0.011228 | 0.011295 | 0.011262 | 0.011228 |
| 0.011262 | 0.011429 | 0.011228 | 0.011262 | 0.011329 | 0.011295 | 0.011262 |
| 0.011228 | 0.011262 | 0.011362 | 0.011228 | 0.011262 | 0.011262 | 0.011570 |
| 0.011497 | 0.011262 | 0.011161 | 0.011396 | 0.011329 | 0.011295 | 0.011329 |
| 0.011295 | 0.011396 | 0.011295 | 0.011295 | 0.011329 | 0.011295 | 0.011463 |
| 0.011228 | 0.011295 | 0.011329 | 0.011262 | 0.011362 | 0.011396 | 0.011329 |
| 0.011295 | 0.011463 | 0.011363 | 0.011631 | 0.011295 | 0.011564 | 0.011295 |
| 0.011262 | 0.011362 | 0.011429 | 0.011564 | 0.011665 | 0.011362 | 0.011463 |
| 0.011329 | 0.011396 | 0.011295 | 0.011530 | 0.011765 | 0.011295 | 0.011362 |
| 0.011262 | 0.011362 | 0.011329 | 0.011396 | 0.011329 | 0.011329 | 0.011329 |
| 0.011228 | 0.011262 | 0.011228 | 0.011329 | 0.011295 | 0.011329 | 0.011396 |

|          |          |          |          |          |          |          |
|----------|----------|----------|----------|----------|----------|----------|
| 0.011329 | 0.011295 | 0.011362 | 0.011262 | 0.011396 | 0.011228 | 0.011295 |
| 0.011463 | 0.011396 | 0.011631 | 0.011463 | 0.011295 | 0.011530 | 0.011295 |
| 0.011431 | 0.011658 | 0.011475 | 0.011138 | 0.011209 | 0.011318 | 0.011375 |
| 0.012048 | 0.011365 | 0.011184 | 0.011530 | 0.011530 | 0.011329 | 0.011430 |
| 0.011362 | 0.011329 | 0.011396 | 0.011295 | 0.011396 | 0.011329 | 0.011262 |
| 0.011228 | 0.011396 | 0.011597 | 0.011463 | 0.011362 | 0.011329 | 0.011262 |
| 0.011228 | 0.011228 | 0.011295 | 0.011262 | 0.011463 | 0.011429 | 0.011362 |
| 0.011463 | 0.011530 | 0.011262 | 0.011262 | 0.011295 | 0.011295 | 0.011297 |
| 0.011364 | 0.011295 | 0.011295 | 0.011168 | 0.011241 | 0.011200 | 0.011296 |
| 0.011297 | 0.011232 | 0.011282 | 0.011267 | 0.011196 | 0.011231 | 0.011263 |
| 0.011528 | 0.011301 | 0.011336 | 0.011228 | 0.011233 | 0.011363 | 0.011329 |
| 0.011396 | 0.011330 | 0.011329 | 0.011362 | 0.011362 | 0.011732 | 0.011530 |
| 0.011564 | 0.011430 | 0.011295 | 0.011396 | 0.011195 | 0.011429 | 0.011228 |
| 0.011295 | 0.011295 | 0.011262 | 0.011228 | 0.011262 | 0.011228 | 0.011329 |
| 0.011295 | 0.011396 | 0.011329 | 0.011228 | 0.011330 | 0.011430 | 0.011432 |
| 0.011430 | 0.011329 | 0.011228 | 0.011161 | 0.011295 | 0.011228 | 0.011161 |
| 0.011264 | 0.011430 | 0.011228 | 0.011430 | 0.011195 | 0.011295 | 0.011262 |
| 0.011362 | 0.000000 | 0.011295 | 0.011262 | 0.011295 | 0.011161 | 0.011295 |
| 0.011329 | 0.011262 | 0.011329 | 0.011262 | 0.011228 | 0.011329 | 0.011564 |
| 0.011665 | 0.011597 | 0.011665 | 0.011431 | 0.011665 | 0.011295 | 0.011262 |
| 0.011297 | 0.011586 | 0.011426 | 0.011197 | 0.011671 | 0.011163 | 0.011296 |
| 0.011637 | 0.011570 | 0.011463 | 0.011665 | 0.011368 | 0.011530 | 0.011497 |
| 0.011429 | 0.011597 | 0.011451 | 0.011225 | 0.011354 | 0.011329 | 0.011399 |
| 0.011497 | 0.011330 | 0.011534 | 0.011602 | 0.011463 | 0.011598 | 0.011704 |
| 0.011365 | 0.011603 | 0.011534 | 0.011466 | 0.011733 | 0.011195 | 0.011397 |
| 0.011362 | 0.011295 | 0.011195 | 0.011195 | 0.011262 | 0.011262 | 0.011329 |
| 0.011262 | 0.011329 | 0.011228 | 0.011329 | 0.011262 | 0.011262 | 0.011329 |
| 0.011262 | 0.011698 | 0.011597 | 0.011631 | 0.011161 | 0.011262 | 0.011295 |
| 0.011295 | 0.011262 | 0.011329 | 0.011362 | 0.011228 | 0.011228 | 0.011228 |
| 0.011765 | 0.011396 | 0.011396 | 0.011195 | 0.011295 | 0.011463 | 0.011228 |
| 0.011228 | 0.011295 | 0.011262 | 0.011430 | 0.011228 | 0.011362 | 0.011497 |
| 0.011429 | 0.011262 | 0.011262 | 0.011195 | 0.011195 | 0.011362 | 0.011295 |
| 0.011195 | 0.011295 | 0.011161 | 0.011195 | 0.011329 | 0.011463 | 0.011228 |
| 0.011195 | 0.011329 | 0.011262 | 0.011161 | 0.011497 | 0.011161 | 0.011329 |
| 0.011403 | 0.011228 | 0.011530 | 0.011362 | 0.011396 | 0.011262 | 0.011362 |
| 0.011228 | 0.011564 | 0.011161 | 0.011430 | 0.011228 | 0.011228 | 0.011161 |
| 0.011396 | 0.011598 | 0.011295 | 0.011362 | 0.011195 | 0.011597 | 0.011228 |
| 0.011228 | 0.011228 | 0.011262 | 0.011362 | 0.011262 | 0.011362 | 0.011429 |
| 0.011429 | 0.011396 | 0.011295 | 0.011396 | 0.011362 | 0.011228 | 0.011195 |
| 0.011228 | 0.011228 | 0.011295 | 0.011228 | 0.011195 | 0.011362 | 0.011228 |
| 0.011262 | 0.011262 | 0.011396 | 0.011429 | 0.011329 | 0.011262 | 0.011262 |
| 0.011329 | 0.011262 | 0.011362 | 0.011228 | 0.011362 | 0.011463 | 0.011765 |
| 0.011262 | 0.011665 | 0.011267 | 0.017785 | 0.011191 | 0.011305 | 0.011618 |
| 0.011579 | 0.011623 | 0.011270 | 0.011176 | 0.011609 | 0.011647 | 0.011242 |
| 0.011440 | 0.011426 | 0.011138 | 0.011228 | 0.011255 | 0.011258 | 0.011189 |
| 0.011436 | 0.011433 | 0.011431 | 0.011325 | 0.011396 | 0.011430 | 0.011432 |
| 0.011301 | 0.011396 | 0.011396 | 0.011362 | 0.011329 | 0.011329 | 0.011295 |
| 0.011329 | 0.000000 | 0.011295 | 0.011329 | 0.011295 | 0.011228 | 0.011262 |
| 0.011262 | 0.011329 | 0.011228 | 0.011329 | 0.011362 | 0.011396 | 0.011295 |
| 0.011329 | 0.011295 | 0.011631 | 0.011631 | 0.011362 | 0.011396 | 0.011430 |
| 0.011195 | 0.011195 | 0.011228 | 0.011329 | 0.011195 | 0.011429 | 0.011429 |
| 0.011463 | 0.011463 | 0.011396 | 0.011497 | 0.011665 | 0.011498 | 0.011329 |
| 0.011329 | 0.011396 | 0.011429 | 0.011262 | 0.011329 | 0.011295 | 0.011329 |
| 0.011396 | 0.011396 | 0.011429 | 0.011396 | 0.011296 | 0.011497 | 0.011396 |
| 0.011331 | 0.011228 | 0.011329 | 0.011430 | 0.011329 | 0.011463 | 0.011497 |
| 0.011665 | 0.011368 | 0.011530 | 0.011497 | 0.011429 | 0.011597 | 0.011228 |
| 0.011397 | 0.011295 | 0.011262 | 0.011262 | 0.011329 | 0.011228 | 0.011329 |
| 0.011362 | 0.011396 | 0.011295 | 0.011329 | 0.011295 | 0.011631 | 0.011631 |
| 0.011362 | 0.011396 | 0.011463 | 0.011396 | 0.012036 | 0.011453 | 0.011377 |
| 0.011447 | 0.011407 | 0.011517 | 0.011407 | 0.011515 | 0.011440 | 0.011405 |

|          |          |          |          |          |          |          |
|----------|----------|----------|----------|----------|----------|----------|
| 0.011987 | 0.011303 | 0.011437 | 0.011372 | 0.011646 | 0.011502 | 0.011605 |
| 0.012012 | 0.011475 | 0.011331 | 0.011329 | 0.011329 | 0.011362 | 0.011297 |
| 0.011195 | 0.011228 | 0.011362 | 0.011329 | 0.011331 | 0.011463 | 0.011431 |
| 0.011295 | 0.011228 | 0.011262 | 0.011295 | 0.011195 | 0.011262 | 0.011161 |
| 0.011295 | 0.011329 | 0.011228 | 0.011195 | 0.011295 | 0.011228 | 0.011262 |
| 0.011262 | 0.011195 | 0.011262 | 0.011295 | 0.011195 | 0.011396 | 0.011429 |
| 0.011329 | 0.011396 | 0.011329 | 0.011329 | 0.011262 | 0.011665 | 0.011295 |
| 0.011339 | 0.011262 | 0.011497 | 0.011501 | 0.011362 | 0.011362 | 0.011362 |
| 0.011362 | 0.011295 | 0.011262 | 0.011295 | 0.011396 | 0.011396 | 0.011329 |
| 0.011329 | 0.011463 | 0.011631 | 0.011362 | 0.011564 | 0.011564 | 0.011429 |
| 0.011262 | 0.011329 | 0.011362 | 0.011765 | 0.011329 | 0.011362 | 0.011329 |
| 0.011362 | 0.011295 | 0.011295 | 0.011598 | 0.011530 | 0.011564 | 0.011295 |
| 0.011396 | 0.011463 | 0.011329 | 0.011396 | 0.011362 | 0.011228 | 0.011564 |
| 0.011329 | 0.011295 | 0.011295 | 0.011463 | 0.011295 | 0.011396 | 0.011631 |
| 0.011329 | 0.011672 | 0.011698 | 0.011467 | 0.011229 | 0.011400 | 0.011215 |
| 0.011115 | 0.011683 | 0.011236 | 0.011373 | 0.011255 | 0.011366 | 0.011326 |
| 0.011417 | 0.011126 | 0.011283 | 0.011126 | 0.011168 | 0.011328 | 0.011344 |
| 0.011362 | 0.011257 | 0.011377 | 0.011307 | 0.011330 | 0.011463 | 0.011530 |
| 0.011530 | 0.011396 | 0.011500 | 0.011501 | 0.011636 | 0.011625 | 0.011329 |
| 0.011564 | 0.011430 | 0.011295 | 0.011396 | 0.011195 | 0.011429 | 0.011228 |
| 0.011295 | 0.011295 | 0.011262 | 0.011228 | 0.011262 | 0.011228 | 0.011329 |
| 0.011305 | 0.011305 | 0.011300 | 0.011334 | 0.011471 | 0.011436 | 0.011436 |
| 0.011435 | 0.011363 | 0.011134 | 0.011132 | 0.011297 | 0.011467 | 0.011467 |
| 0.011262 | 0.011331 | 0.011565 | 0.011533 | 0.011464 | 0.011498 | 0.011429 |
| 0.011362 | 0.011429 | 0.011429 | 0.011329 | 0.011900 | 0.011497 | 0.011564 |
| 0.011597 | 0.011666 | 0.011299 | 0.011372 | 0.011262 | 0.011396 | 0.011430 |
| 0.011464 | 0.011497 | 0.011497 | 0.011497 | 0.011650 | 0.011631 | 0.011268 |
| 0.011162 | 0.011164 | 0.011265 | 0.011230 | 0.011334 | 0.011172 | 0.011502 |
| 0.011300 | 0.011455 | 0.011156 | 0.011285 | 0.011296 | 0.011368 | 0.011262 |
| 0.011228 | 0.011228 | 0.011295 | 0.011262 | 0.011463 | 0.011429 | 0.011362 |
| 0.011463 | 0.011530 | 0.011262 | 0.011262 | 0.011295 | 0.011295 | 0.011297 |
| 0.011364 | 0.011295 | 0.011295 | 0.011330 | 0.011463 | 0.011530 | 0.011530 |
| 0.011396 | 0.011500 | 0.011501 | 0.011636 | 0.011625 | 0.011329 | 0.011497 |
| 0.011430 | 0.011430 | 0.011263 | 0.011443 | 0.011373 | 0.011401 | 0.011270 |
| 0.011439 | 0.011607 | 0.011399 | 0.011332 | 0.011228 | 0.011430 | 0.011295 |
| 0.011396 | 0.011329 | 0.011228 | 0.011330 | 0.011430 | 0.011432 | 0.011329 |
| 0.011228 | 0.011161 | 0.011295 | 0.011228 | 0.011161 | 0.011264 | 0.011430 |
| 0.011329 | 0.000000 | 0.011295 | 0.011329 | 0.011295 | 0.011228 | 0.011430 |
| 0.011295 | 0.011329 | 0.011329 | 0.011262 | 0.011329 | 0.011564 | 0.011228 |
| 0.011262 | 0.011665 | 0.011262 | 0.011295 | 0.011262 | 0.011631 | 0.011189 |
| 0.011678 | 0.011188 | 0.011211 | 0.011463 | 0.011508 | 0.011455 | 0.011144 |
| 0.011165 | 0.011429 | 0.011530 | 0.011637 | 0.011498 | 0.011635 | 0.011766 |
| 0.011666 | 0.011703 | 0.011665 | 0.011914 | 0.011631 | 0.012506 | 0.011666 |
| 0.012405 | 0.012173 | 0.012307 | 0.012578 | 0.011631 | 0.011329 | 0.011631 |
| 0.012070 | 0.012004 | 0.011597 | 0.011497 | 0.011564 | 0.011564 | 0.011534 |
| 0.011429 | 0.011433 | 0.011497 | 0.011464 | 0.011833 | 0.011900 | 0.011901 |
| 0.011800 | 0.011901 | 0.012004 | 0.011770 | 0.012070 | 0.012076 | 0.012137 |
| 0.012138 | 0.012171 | 0.012050 | 0.012138 | 0.012139 | 0.011362 | 0.011665 |
| 0.011733 | 0.012236 | 0.011738 | 0.011967 | 0.012440 | 0.011502 | 0.011396 |
| 0.011362 | 0.011362 | 0.011833 | 0.011842 | 0.011975 | 0.011698 | 0.011363 |
| S205     | 0.011665 | 0.011665 | 0.012001 | 0.011765 | 0.011765 | 0.011833 |
| 0.011638 | 0.011570 | 0.011765 | 0.011262 | 0.011329 | 0.011296 | 0.011262 |
| 0.011295 | 0.011463 | 0.011262 | 0.011295 | 0.011362 | 0.011329 | 0.011295 |
| 0.011262 | 0.011295 | 0.011396 | 0.011262 | 0.011228 | 0.011295 | 0.011604 |
| 0.011530 | 0.011295 | 0.011195 | 0.011429 | 0.011295 | 0.011329 | 0.011295 |
| 0.011329 | 0.011362 | 0.011329 | 0.011329 | 0.011362 | 0.011329 | 0.011497 |
| 0.011262 | 0.011329 | 0.011362 | 0.011295 | 0.011396 | 0.011430 | 0.011362 |
| 0.011329 | 0.011497 | 0.011396 | 0.011665 | 0.011329 | 0.011530 | 0.011329 |
| 0.011295 | 0.011396 | 0.011463 | 0.011530 | 0.011698 | 0.011396 | 0.011497 |
| 0.011295 | 0.011362 | 0.011329 | 0.011497 | 0.011799 | 0.011329 | 0.011396 |

|          |          |          |          |          |          |          |
|----------|----------|----------|----------|----------|----------|----------|
| 0.011295 | 0.011396 | 0.011362 | 0.011430 | 0.011362 | 0.011362 | 0.011362 |
| 0.011262 | 0.011295 | 0.011262 | 0.011362 | 0.011329 | 0.011363 | 0.011429 |
| 0.011362 | 0.011329 | 0.011329 | 0.011295 | 0.011429 | 0.011195 | 0.011329 |
| 0.011497 | 0.011429 | 0.011665 | 0.011497 | 0.011262 | 0.011497 | 0.011329 |
| 0.011505 | 0.011733 | 0.011551 | 0.011255 | 0.011247 | 0.011355 | 0.011454 |
| 0.012085 | 0.011518 | 0.011266 | 0.011564 | 0.011564 | 0.011362 | 0.011463 |
| 0.011396 | 0.011362 | 0.011429 | 0.011329 | 0.011430 | 0.011295 | 0.011362 |
| 0.011329 | 0.011429 | 0.011631 | 0.011497 | 0.011396 | 0.011363 | 0.011228 |
| 0.011262 | 0.011262 | 0.011262 | 0.011295 | 0.011497 | 0.011463 | 0.011396 |
| 0.011497 | 0.011564 | 0.011295 | 0.011295 | 0.011329 | 0.011329 | 0.011330 |
| 0.011398 | 0.011262 | 0.011329 | 0.011168 | 0.011277 | 0.011236 | 0.011329 |
| 0.011331 | 0.011266 | 0.011318 | 0.011302 | 0.011230 | 0.011266 | 0.011297 |
| 0.011564 | 0.011336 | 0.011301 | 0.011262 | 0.011268 | 0.011397 | 0.011363 |
| 0.011430 | 0.011364 | 0.011363 | 0.011463 | 0.011396 | 0.011698 | 0.011564 |
| 0.011597 | 0.011463 | 0.011329 | 0.011430 | 0.011228 | 0.011463 | 0.011262 |
| 0.011329 | 0.011329 | 0.011295 | 0.011262 | 0.011295 | 0.011262 | 0.011362 |
| 0.011262 | 0.011362 | 0.011362 | 0.011262 | 0.011363 | 0.011463 | 0.011466 |
| 0.011396 | 0.011362 | 0.011262 | 0.011195 | 0.011329 | 0.011262 | 0.011195 |
| 0.011298 | 0.011396 | 0.011195 | 0.011396 | 0.011228 | 0.011329 | 0.011295 |
| 0.011262 | 0.011295 | 0.000000 | 0.011295 | 0.011329 | 0.011195 | 0.011262 |
| 0.011295 | 0.011295 | 0.011362 | 0.011295 | 0.011329 | 0.011362 | 0.011597 |
| 0.011698 | 0.011631 | 0.011698 | 0.011465 | 0.011698 | 0.011329 | 0.011295 |
| 0.011330 | 0.011586 | 0.011289 | 0.011232 | 0.011705 | 0.011197 | 0.011336 |
| 0.011671 | 0.011604 | 0.011497 | 0.011698 | 0.011402 | 0.011564 | 0.011463 |
| 0.011463 | 0.011631 | 0.011487 | 0.011349 | 0.011396 | 0.011363 | 0.011433 |
| 0.011530 | 0.011431 | 0.011568 | 0.011568 | 0.011564 | 0.011631 | 0.011670 |
| 0.011466 | 0.011569 | 0.011568 | 0.011500 | 0.011767 | 0.011228 | 0.011431 |
| 0.011262 | 0.011329 | 0.011228 | 0.011228 | 0.011228 | 0.011295 | 0.011362 |
| 0.011228 | 0.011295 | 0.011195 | 0.011362 | 0.011228 | 0.011295 | 0.011362 |
| 0.011295 | 0.011732 | 0.011631 | 0.011665 | 0.011195 | 0.011295 | 0.011329 |
| 0.011329 | 0.011295 | 0.011362 | 0.011396 | 0.011262 | 0.011262 | 0.011262 |
| 0.011799 | 0.011430 | 0.011430 | 0.011228 | 0.011329 | 0.011430 | 0.011262 |
| 0.011262 | 0.011329 | 0.011295 | 0.011396 | 0.011262 | 0.011396 | 0.011463 |
| 0.011463 | 0.011295 | 0.011295 | 0.011228 | 0.011228 | 0.011396 | 0.011329 |
| 0.011228 | 0.011329 | 0.011195 | 0.011228 | 0.011362 | 0.011497 | 0.011262 |
| 0.011228 | 0.011362 | 0.011296 | 0.011195 | 0.011530 | 0.011195 | 0.011362 |
| 0.011368 | 0.011262 | 0.011564 | 0.011396 | 0.011430 | 0.011295 | 0.011396 |
| 0.011262 | 0.011530 | 0.011195 | 0.011463 | 0.011262 | 0.011262 | 0.011195 |
| 0.011362 | 0.011631 | 0.011329 | 0.011396 | 0.011228 | 0.011631 | 0.011262 |
| 0.011262 | 0.011262 | 0.011295 | 0.011329 | 0.011295 | 0.011396 | 0.011463 |
| 0.011463 | 0.011430 | 0.011329 | 0.011430 | 0.011329 | 0.011262 | 0.011228 |
| 0.011262 | 0.011262 | 0.011329 | 0.011262 | 0.011161 | 0.011396 | 0.011262 |
| 0.011295 | 0.011295 | 0.011430 | 0.011463 | 0.011362 | 0.011228 | 0.011295 |
| 0.011362 | 0.011295 | 0.011396 | 0.011262 | 0.011396 | 0.011497 | 0.011799 |
| 0.011295 | 0.011698 | 0.011302 | 0.011785 | 0.011191 | 0.011488 | 0.011653 |
| 0.011614 | 0.011658 | 0.011322 | 0.011292 | 0.011719 | 0.011682 | 0.011364 |
| 0.011487 | 0.011610 | 0.011216 | 0.011270 | 0.011216 | 0.011356 | 0.011318 |
| 0.011529 | 0.011470 | 0.011431 | 0.011193 | 0.011430 | 0.011463 | 0.011466 |
| 0.011266 | 0.011430 | 0.011430 | 0.011396 | 0.011362 | 0.011363 | 0.011329 |
| 0.011362 | 0.011295 | 0.011329 | 0.011362 | 0.011329 | 0.011262 | 0.011295 |
| 0.011295 | 0.011362 | 0.011262 | 0.011363 | 0.011396 | 0.011430 | 0.011329 |
| 0.011362 | 0.011329 | 0.011665 | 0.011665 | 0.011396 | 0.011430 | 0.011463 |
| 0.011228 | 0.011228 | 0.011262 | 0.011295 | 0.011228 | 0.011463 | 0.011463 |
| 0.011497 | 0.011497 | 0.011430 | 0.011530 | 0.011698 | 0.011532 | 0.011295 |
| 0.011362 | 0.011430 | 0.011396 | 0.011295 | 0.011362 | 0.011329 | 0.011362 |
| 0.011430 | 0.011430 | 0.011463 | 0.011363 | 0.011262 | 0.011530 | 0.011429 |
| 0.011365 | 0.011262 | 0.011362 | 0.011463 | 0.011363 | 0.011497 | 0.011530 |
| 0.011698 | 0.011402 | 0.011564 | 0.011463 | 0.011463 | 0.011631 | 0.011262 |
| 0.011431 | 0.011329 | 0.011295 | 0.011295 | 0.011362 | 0.011262 | 0.011363 |
| 0.011396 | 0.011430 | 0.011329 | 0.011362 | 0.011329 | 0.011665 | 0.011665 |



|          |          |          |          |          |          |          |
|----------|----------|----------|----------|----------|----------|----------|
| 0.011396 | 0.011430 | 0.011497 | 0.011429 | 0.012070 | 0.011489 | 0.011412 |
| 0.011482 | 0.011442 | 0.011552 | 0.011441 | 0.011550 | 0.011474 | 0.011440 |
| 0.012022 | 0.011337 | 0.011471 | 0.011406 | 0.011680 | 0.011537 | 0.011571 |
| 0.012047 | 0.011512 | 0.011365 | 0.011362 | 0.011362 | 0.011396 | 0.011331 |
| 0.011228 | 0.011195 | 0.011396 | 0.011362 | 0.011364 | 0.011497 | 0.011464 |
| 0.011329 | 0.011195 | 0.011228 | 0.011329 | 0.011161 | 0.011295 | 0.011195 |
| 0.011329 | 0.011362 | 0.011262 | 0.011228 | 0.011329 | 0.011262 | 0.011295 |
| 0.011295 | 0.011228 | 0.011295 | 0.011329 | 0.011228 | 0.011362 | 0.011463 |
| 0.011362 | 0.011430 | 0.011362 | 0.011362 | 0.011295 | 0.011698 | 0.011329 |
| 0.011373 | 0.011295 | 0.011531 | 0.011535 | 0.011329 | 0.011396 | 0.011396 |
| 0.011396 | 0.011262 | 0.011295 | 0.011262 | 0.011430 | 0.011430 | 0.011362 |
| 0.011362 | 0.011497 | 0.011665 | 0.011396 | 0.011598 | 0.011598 | 0.011463 |
| 0.011295 | 0.011362 | 0.011396 | 0.011799 | 0.011363 | 0.011329 | 0.011362 |
| 0.011396 | 0.011329 | 0.011329 | 0.011631 | 0.011497 | 0.011598 | 0.011329 |
| 0.011430 | 0.011430 | 0.011362 | 0.011430 | 0.011396 | 0.011262 | 0.011597 |
| 0.011362 | 0.011329 | 0.011329 | 0.011497 | 0.011329 | 0.011430 | 0.011665 |
| 0.011362 | 0.011706 | 0.011732 | 0.011548 | 0.011229 | 0.011434 | 0.011267 |
| 0.011280 | 0.011761 | 0.011271 | 0.011462 | 0.011304 | 0.011366 | 0.011220 |
| 0.011468 | 0.011126 | 0.011283 | 0.011126 | 0.011222 | 0.011328 | 0.011385 |
| 0.011399 | 0.011257 | 0.011342 | 0.011342 | 0.011364 | 0.011497 | 0.011564 |
| 0.011564 | 0.011430 | 0.011534 | 0.011535 | 0.011670 | 0.011696 | 0.011362 |
| 0.011597 | 0.011463 | 0.011329 | 0.011430 | 0.011228 | 0.011463 | 0.011262 |
| 0.011329 | 0.011329 | 0.011295 | 0.011262 | 0.011295 | 0.011262 | 0.011362 |
| 0.011340 | 0.011340 | 0.011334 | 0.011368 | 0.011505 | 0.011402 | 0.011470 |
| 0.011469 | 0.011396 | 0.011208 | 0.011204 | 0.011331 | 0.011433 | 0.011501 |
| 0.011296 | 0.011365 | 0.011599 | 0.011567 | 0.011497 | 0.011531 | 0.011463 |
| 0.011396 | 0.011463 | 0.011463 | 0.011362 | 0.011934 | 0.011530 | 0.011598 |
| 0.011631 | 0.011701 | 0.011333 | 0.011407 | 0.011295 | 0.011497 | 0.011463 |
| 0.011498 | 0.011530 | 0.011530 | 0.011530 | 0.011650 | 0.011665 | 0.011303 |
| 0.011196 | 0.011199 | 0.011299 | 0.011264 | 0.011368 | 0.011210 | 0.011536 |
| 0.011335 | 0.011455 | 0.011203 | 0.011360 | 0.011329 | 0.011402 | 0.011228 |
| 0.011262 | 0.011262 | 0.011262 | 0.011295 | 0.011497 | 0.011463 | 0.011396 |
| 0.011497 | 0.011564 | 0.011295 | 0.011295 | 0.011329 | 0.011329 | 0.011330 |
| 0.011398 | 0.011262 | 0.011329 | 0.011364 | 0.011497 | 0.011564 | 0.011564 |
| 0.011430 | 0.011534 | 0.011535 | 0.011670 | 0.011696 | 0.011362 | 0.011530 |
| 0.011463 | 0.011463 | 0.011297 | 0.011478 | 0.011408 | 0.011435 | 0.011305 |
| 0.011405 | 0.011653 | 0.011441 | 0.011366 | 0.011195 | 0.011396 | 0.011262 |
| 0.011362 | 0.011362 | 0.011262 | 0.011363 | 0.011463 | 0.011466 | 0.011362 |
| 0.011262 | 0.011195 | 0.011329 | 0.011262 | 0.011195 | 0.011298 | 0.011396 |
| 0.011362 | 0.011295 | 0.011329 | 0.011362 | 0.011329 | 0.011262 | 0.011463 |
| 0.011329 | 0.011362 | 0.011362 | 0.011295 | 0.011362 | 0.011598 | 0.011262 |
| 0.011295 | 0.011698 | 0.011295 | 0.011262 | 0.011295 | 0.011665 | 0.011275 |
| 0.011679 | 0.011273 | 0.011311 | 0.011503 | 0.011589 | 0.011491 | 0.011227 |
| 0.011218 | 0.011463 | 0.011564 | 0.011671 | 0.011531 | 0.011669 | 0.011800 |
| 0.011699 | 0.011737 | 0.011698 | 0.011880 | 0.011665 | 0.012472 | 0.011700 |
| 0.012439 | 0.012207 | 0.012307 | 0.012613 | 0.011665 | 0.011363 | 0.011665 |
| 0.012103 | 0.012038 | 0.011631 | 0.011463 | 0.011598 | 0.011598 | 0.011500 |
| 0.011463 | 0.011467 | 0.011530 | 0.011464 | 0.011867 | 0.011934 | 0.011935 |
| 0.011834 | 0.011934 | 0.012038 | 0.011804 | 0.012104 | 0.012110 | 0.012171 |
| 0.012172 | 0.012205 | 0.012152 | 0.012172 | 0.012173 | 0.011396 | 0.011699 |
| 0.011767 | 0.012270 | 0.011772 | 0.012001 | 0.012474 | 0.011536 | 0.011430 |
| 0.011396 | 0.011396 | 0.011867 | 0.011924 | 0.012010 | 0.011732 | 0.011397 |
| S206     | 0.011631 | 0.011631 | 0.011967 | 0.011732 | 0.011732 | 0.011799 |
| 0.011638 | 0.011570 | 0.011732 | 0.011228 | 0.011295 | 0.011262 | 0.011228 |
| 0.011262 | 0.011430 | 0.011228 | 0.011262 | 0.011329 | 0.011295 | 0.011262 |
| 0.011228 | 0.011262 | 0.011362 | 0.011228 | 0.011262 | 0.011262 | 0.011604 |
| 0.011497 | 0.011262 | 0.011161 | 0.011396 | 0.011329 | 0.011295 | 0.011329 |
| 0.011295 | 0.011396 | 0.011295 | 0.011295 | 0.011329 | 0.011295 | 0.011463 |
| 0.011228 | 0.011295 | 0.011329 | 0.011262 | 0.011362 | 0.011396 | 0.011329 |
| 0.011295 | 0.011463 | 0.011363 | 0.011631 | 0.011295 | 0.011497 | 0.011295 |

|          |          |          |          |          |          |          |
|----------|----------|----------|----------|----------|----------|----------|
| 0.011262 | 0.011363 | 0.011430 | 0.011497 | 0.011665 | 0.011362 | 0.011463 |
| 0.011329 | 0.011396 | 0.011295 | 0.011530 | 0.011766 | 0.011295 | 0.011362 |
| 0.011262 | 0.011362 | 0.011329 | 0.011396 | 0.011329 | 0.011329 | 0.011329 |
| 0.011228 | 0.011262 | 0.011228 | 0.011329 | 0.011295 | 0.011329 | 0.011396 |
| 0.011329 | 0.011295 | 0.011362 | 0.011262 | 0.011396 | 0.011228 | 0.011295 |
| 0.011463 | 0.011396 | 0.011631 | 0.011463 | 0.011295 | 0.011530 | 0.011295 |
| 0.011468 | 0.011695 | 0.011475 | 0.011177 | 0.011172 | 0.011318 | 0.011375 |
| 0.012048 | 0.011467 | 0.011184 | 0.011530 | 0.011530 | 0.011329 | 0.011430 |
| 0.011362 | 0.011329 | 0.011396 | 0.011295 | 0.011396 | 0.011329 | 0.011329 |
| 0.011295 | 0.011396 | 0.011598 | 0.011463 | 0.011362 | 0.011329 | 0.011262 |
| 0.011228 | 0.011228 | 0.011295 | 0.011262 | 0.011463 | 0.011430 | 0.011362 |
| 0.011463 | 0.011530 | 0.011262 | 0.011262 | 0.011295 | 0.011295 | 0.011297 |
| 0.011364 | 0.011295 | 0.011295 | 0.011168 | 0.011205 | 0.011201 | 0.011296 |
| 0.011297 | 0.011232 | 0.011245 | 0.011267 | 0.011196 | 0.011232 | 0.011263 |
| 0.011528 | 0.011302 | 0.011336 | 0.011228 | 0.011233 | 0.011363 | 0.011329 |
| 0.011397 | 0.011330 | 0.011329 | 0.011429 | 0.011362 | 0.011732 | 0.011531 |
| 0.011564 | 0.011362 | 0.011295 | 0.011396 | 0.011195 | 0.011429 | 0.011228 |
| 0.011295 | 0.011295 | 0.011262 | 0.011228 | 0.011262 | 0.011228 | 0.011329 |
| 0.011295 | 0.011396 | 0.011329 | 0.011228 | 0.011330 | 0.011430 | 0.011432 |
| 0.011430 | 0.011329 | 0.011228 | 0.011161 | 0.011295 | 0.011228 | 0.011161 |
| 0.011264 | 0.011430 | 0.011228 | 0.011430 | 0.011127 | 0.011295 | 0.011195 |
| 0.011362 | 0.011262 | 0.011295 | 0.000000 | 0.011094 | 0.011161 | 0.011295 |
| 0.011329 | 0.011262 | 0.011329 | 0.011262 | 0.011295 | 0.011329 | 0.011564 |
| 0.011665 | 0.011597 | 0.011665 | 0.011431 | 0.011665 | 0.011295 | 0.011262 |
| 0.011297 | 0.011586 | 0.011380 | 0.011198 | 0.011671 | 0.011163 | 0.011257 |
| 0.011672 | 0.011570 | 0.011463 | 0.011665 | 0.011368 | 0.011530 | 0.011497 |
| 0.011430 | 0.011597 | 0.011451 | 0.011266 | 0.011312 | 0.011329 | 0.011399 |
| 0.011497 | 0.011398 | 0.011534 | 0.011602 | 0.011530 | 0.011598 | 0.011704 |
| 0.011433 | 0.011604 | 0.011534 | 0.011466 | 0.011733 | 0.011195 | 0.011397 |
| 0.011362 | 0.011295 | 0.011195 | 0.011195 | 0.011262 | 0.011262 | 0.011329 |
| 0.011262 | 0.011329 | 0.011228 | 0.011329 | 0.011262 | 0.011262 | 0.011329 |
| 0.011262 | 0.011698 | 0.011598 | 0.011631 | 0.011161 | 0.011262 | 0.011295 |
| 0.011295 | 0.011195 | 0.011329 | 0.011362 | 0.011228 | 0.011228 | 0.011228 |
| 0.011765 | 0.011396 | 0.011396 | 0.011195 | 0.011295 | 0.011463 | 0.011228 |
| 0.011228 | 0.011295 | 0.011262 | 0.011430 | 0.011228 | 0.011362 | 0.011497 |
| 0.011430 | 0.011262 | 0.011262 | 0.011195 | 0.011195 | 0.011363 | 0.011295 |
| 0.011195 | 0.011295 | 0.011161 | 0.011195 | 0.011329 | 0.011463 | 0.011228 |
| 0.011195 | 0.011329 | 0.011262 | 0.011161 | 0.011497 | 0.011161 | 0.011329 |
| 0.011403 | 0.011228 | 0.011530 | 0.011363 | 0.011396 | 0.011262 | 0.011362 |
| 0.011228 | 0.011497 | 0.011161 | 0.011430 | 0.011228 | 0.011228 | 0.011161 |
| 0.011396 | 0.011598 | 0.011295 | 0.011362 | 0.011195 | 0.011598 | 0.011228 |
| 0.011228 | 0.011228 | 0.011262 | 0.011362 | 0.011262 | 0.011362 | 0.011430 |
| 0.011430 | 0.011329 | 0.011295 | 0.011396 | 0.011362 | 0.011228 | 0.011195 |
| 0.011228 | 0.011228 | 0.011295 | 0.011228 | 0.011195 | 0.011362 | 0.011228 |
| 0.011262 | 0.011262 | 0.011396 | 0.011430 | 0.011329 | 0.011262 | 0.011262 |
| 0.011329 | 0.011262 | 0.011362 | 0.011228 | 0.011362 | 0.011463 | 0.011766 |
| 0.011262 | 0.011665 | 0.011267 | 0.011786 | 0.011191 | 0.011427 | 0.011618 |
| 0.011579 | 0.011623 | 0.011270 | 0.011234 | 0.011719 | 0.011647 | 0.011364 |
| 0.011487 | 0.011487 | 0.011138 | 0.011270 | 0.011216 | 0.011258 | 0.011232 |
| 0.011483 | 0.011395 | 0.011431 | 0.011193 | 0.011396 | 0.011430 | 0.011432 |
| 0.011301 | 0.011396 | 0.011396 | 0.011362 | 0.011329 | 0.011329 | 0.011295 |
| 0.011329 | 0.011262 | 0.011228 | 0.011329 | 0.011295 | 0.011228 | 0.011262 |
| 0.011262 | 0.011329 | 0.011228 | 0.011329 | 0.011362 | 0.011396 | 0.011295 |
| 0.011329 | 0.011295 | 0.011631 | 0.011631 | 0.011363 | 0.011397 | 0.011430 |
| 0.011195 | 0.011195 | 0.011228 | 0.011329 | 0.011195 | 0.011430 | 0.011430 |
| 0.011463 | 0.011463 | 0.011396 | 0.011497 | 0.011665 | 0.011498 | 0.011329 |
| 0.011329 | 0.011396 | 0.011430 | 0.011262 | 0.011329 | 0.011295 | 0.011329 |
| 0.011396 | 0.011396 | 0.011430 | 0.011396 | 0.011296 | 0.011497 | 0.011463 |
| 0.011331 | 0.011228 | 0.011329 | 0.011430 | 0.011329 | 0.011463 | 0.011497 |
| 0.011665 | 0.011368 | 0.011530 | 0.011497 | 0.011430 | 0.011597 | 0.011228 |

|          |          |          |          |          |          |          |
|----------|----------|----------|----------|----------|----------|----------|
| 0.011397 | 0.011296 | 0.011262 | 0.011262 | 0.011329 | 0.011228 | 0.011329 |
| 0.011362 | 0.011396 | 0.011295 | 0.011329 | 0.011295 | 0.011631 | 0.011631 |
| 0.011363 | 0.011397 | 0.011463 | 0.011396 | 0.012036 | 0.011453 | 0.011377 |
| 0.011447 | 0.011407 | 0.011517 | 0.011407 | 0.011515 | 0.011440 | 0.011405 |
| 0.011988 | 0.011303 | 0.011437 | 0.011372 | 0.011646 | 0.011503 | 0.011605 |
| 0.012013 | 0.011475 | 0.011331 | 0.011329 | 0.011329 | 0.011362 | 0.011297 |
| 0.011195 | 0.011228 | 0.011362 | 0.011329 | 0.011331 | 0.011463 | 0.011431 |
| 0.011295 | 0.011228 | 0.011262 | 0.011295 | 0.011195 | 0.011262 | 0.011161 |
| 0.011295 | 0.011329 | 0.011228 | 0.011195 | 0.011295 | 0.011228 | 0.011262 |
| 0.011262 | 0.011195 | 0.011262 | 0.011295 | 0.011195 | 0.011396 | 0.011430 |
| 0.011329 | 0.011396 | 0.011329 | 0.011329 | 0.011262 | 0.011665 | 0.011295 |
| 0.011339 | 0.011262 | 0.011497 | 0.011501 | 0.011363 | 0.011362 | 0.011362 |
| 0.011363 | 0.011295 | 0.011262 | 0.011295 | 0.011396 | 0.011396 | 0.011329 |
| 0.011329 | 0.011463 | 0.011631 | 0.011295 | 0.011564 | 0.011564 | 0.011430 |
| 0.011262 | 0.011329 | 0.011363 | 0.011766 | 0.011329 | 0.011363 | 0.011329 |
| 0.011362 | 0.011295 | 0.011295 | 0.011530 | 0.011531 | 0.011497 | 0.011295 |
| 0.011396 | 0.011463 | 0.011329 | 0.011396 | 0.011362 | 0.011228 | 0.011564 |
| 0.011329 | 0.011295 | 0.011295 | 0.011463 | 0.011295 | 0.011396 | 0.011631 |
| 0.011329 | 0.011706 | 0.011698 | 0.011467 | 0.011173 | 0.011400 | 0.011267 |
| 0.011225 | 0.011683 | 0.011236 | 0.011373 | 0.011207 | 0.011315 | 0.011326 |
| 0.011468 | 0.000000 | 0.011283 | 0.000000 | 0.011168 | 0.011328 | 0.011344 |
| 0.011399 | 0.011257 | 0.011307 | 0.011307 | 0.011330 | 0.011463 | 0.011530 |
| 0.011530 | 0.011396 | 0.011500 | 0.011501 | 0.011636 | 0.011661 | 0.011329 |
| 0.011564 | 0.011362 | 0.011295 | 0.011396 | 0.011195 | 0.011429 | 0.011228 |
| 0.011295 | 0.011295 | 0.011262 | 0.011228 | 0.011262 | 0.011228 | 0.011329 |
| 0.011305 | 0.011305 | 0.011300 | 0.011334 | 0.011471 | 0.011436 | 0.011436 |
| 0.011435 | 0.011363 | 0.011171 | 0.011168 | 0.011297 | 0.011467 | 0.011467 |
| 0.011262 | 0.011331 | 0.011565 | 0.011533 | 0.011464 | 0.011498 | 0.011430 |
| 0.011362 | 0.011430 | 0.011429 | 0.011329 | 0.011900 | 0.011430 | 0.011564 |
| 0.011598 | 0.011666 | 0.011299 | 0.011372 | 0.011262 | 0.011463 | 0.011430 |
| 0.011464 | 0.011497 | 0.011497 | 0.011497 | 0.011650 | 0.011631 | 0.011268 |
| 0.011162 | 0.011164 | 0.011265 | 0.011230 | 0.011334 | 0.011135 | 0.011502 |
| 0.011300 | 0.011411 | 0.011156 | 0.011323 | 0.011296 | 0.011368 | 0.011262 |
| 0.011228 | 0.011228 | 0.011295 | 0.011262 | 0.011463 | 0.011430 | 0.011362 |
| 0.011463 | 0.011530 | 0.011262 | 0.011262 | 0.011295 | 0.011295 | 0.011297 |
| 0.011364 | 0.011295 | 0.011295 | 0.011330 | 0.011463 | 0.011530 | 0.011530 |
| 0.011396 | 0.011500 | 0.011501 | 0.011636 | 0.011661 | 0.011329 | 0.011497 |
| 0.011430 | 0.011430 | 0.011263 | 0.011443 | 0.011373 | 0.011401 | 0.011270 |
| 0.011439 | 0.011653 | 0.011399 | 0.011332 | 0.011228 | 0.011430 | 0.011295 |
| 0.011396 | 0.011329 | 0.011228 | 0.011330 | 0.011430 | 0.011432 | 0.011329 |
| 0.011228 | 0.011161 | 0.011295 | 0.011228 | 0.011161 | 0.011264 | 0.011430 |
| 0.011329 | 0.011262 | 0.011228 | 0.011329 | 0.011295 | 0.011228 | 0.011430 |
| 0.011295 | 0.011329 | 0.011329 | 0.011262 | 0.011329 | 0.011564 | 0.011228 |
| 0.011262 | 0.011665 | 0.011262 | 0.011295 | 0.011262 | 0.011631 | 0.011189 |
| 0.011622 | 0.011188 | 0.011261 | 0.011422 | 0.011508 | 0.011455 | 0.011144 |
| 0.011165 | 0.011430 | 0.011530 | 0.011637 | 0.011498 | 0.011635 | 0.011766 |
| 0.011666 | 0.011703 | 0.011665 | 0.011915 | 0.011631 | 0.012506 | 0.011667 |
| 0.012406 | 0.012173 | 0.012307 | 0.012579 | 0.011631 | 0.011329 | 0.011631 |
| 0.012070 | 0.012005 | 0.011598 | 0.011497 | 0.011565 | 0.011565 | 0.011534 |
| 0.011430 | 0.011433 | 0.011497 | 0.011464 | 0.011834 | 0.011900 | 0.011901 |
| 0.011801 | 0.011901 | 0.012004 | 0.011771 | 0.012070 | 0.012076 | 0.012137 |
| 0.012138 | 0.012172 | 0.012118 | 0.012138 | 0.012139 | 0.011362 | 0.011665 |
| 0.011733 | 0.012237 | 0.011738 | 0.011968 | 0.012440 | 0.011502 | 0.011396 |
| 0.011362 | 0.011362 | 0.011833 | 0.011883 | 0.011975 | 0.011698 | 0.011363 |
| S207     | 0.011665 | 0.011665 | 0.012001 | 0.011765 | 0.011765 | 0.011833 |
| 0.011672 | 0.011604 | 0.011765 | 0.011262 | 0.011329 | 0.011296 | 0.011262 |
| 0.011295 | 0.011463 | 0.011262 | 0.011295 | 0.011362 | 0.011329 | 0.011295 |
| 0.011262 | 0.011295 | 0.011396 | 0.011262 | 0.011296 | 0.011295 | 0.011638 |
| 0.011530 | 0.011295 | 0.011195 | 0.011429 | 0.011362 | 0.011329 | 0.011362 |
| 0.011329 | 0.011430 | 0.011329 | 0.011329 | 0.011362 | 0.011329 | 0.011497 |

|          |          |          |          |          |          |          |
|----------|----------|----------|----------|----------|----------|----------|
| 0.011262 | 0.011329 | 0.011362 | 0.011295 | 0.011396 | 0.011430 | 0.011362 |
| 0.011329 | 0.011497 | 0.011396 | 0.011665 | 0.011329 | 0.011530 | 0.011329 |
| 0.011295 | 0.011396 | 0.011463 | 0.011530 | 0.011698 | 0.011396 | 0.011497 |
| 0.011362 | 0.011430 | 0.011329 | 0.011564 | 0.011799 | 0.011329 | 0.011396 |
| 0.011295 | 0.011396 | 0.011362 | 0.011430 | 0.011362 | 0.011362 | 0.011362 |
| 0.011262 | 0.011295 | 0.011262 | 0.011362 | 0.011329 | 0.011363 | 0.011429 |
| 0.011362 | 0.011329 | 0.011396 | 0.011295 | 0.011429 | 0.011262 | 0.011329 |
| 0.011497 | 0.011429 | 0.011665 | 0.011497 | 0.011329 | 0.011564 | 0.011329 |
| 0.011505 | 0.011733 | 0.011513 | 0.011216 | 0.011210 | 0.011355 | 0.011415 |
| 0.012085 | 0.011467 | 0.011225 | 0.011564 | 0.011564 | 0.011362 | 0.011463 |
| 0.011396 | 0.011362 | 0.011429 | 0.011329 | 0.011430 | 0.011362 | 0.011362 |
| 0.011329 | 0.011429 | 0.011631 | 0.011497 | 0.011396 | 0.011363 | 0.011295 |
| 0.011262 | 0.011262 | 0.011329 | 0.011295 | 0.011497 | 0.011463 | 0.011396 |
| 0.011497 | 0.011564 | 0.011295 | 0.011295 | 0.011329 | 0.011329 | 0.011330 |
| 0.011398 | 0.011329 | 0.011329 | 0.011204 | 0.011241 | 0.011236 | 0.011329 |
| 0.011331 | 0.011266 | 0.011282 | 0.011302 | 0.011230 | 0.011266 | 0.011297 |
| 0.011564 | 0.011336 | 0.011370 | 0.011262 | 0.011268 | 0.011397 | 0.011363 |
| 0.011430 | 0.011364 | 0.011363 | 0.011463 | 0.011396 | 0.011766 | 0.011564 |
| 0.011597 | 0.011396 | 0.011329 | 0.011430 | 0.011228 | 0.011463 | 0.011262 |
| 0.011329 | 0.011329 | 0.011295 | 0.011262 | 0.011295 | 0.011262 | 0.011362 |
| 0.011329 | 0.011430 | 0.011362 | 0.011262 | 0.011363 | 0.011463 | 0.011466 |
| 0.011463 | 0.011362 | 0.011262 | 0.011195 | 0.011329 | 0.011262 | 0.011195 |
| 0.011298 | 0.011463 | 0.011262 | 0.011463 | 0.011161 | 0.011329 | 0.011228 |
| 0.011396 | 0.011295 | 0.011329 | 0.011094 | 0.000000 | 0.011195 | 0.011329 |
| 0.011362 | 0.011295 | 0.011362 | 0.011295 | 0.011329 | 0.011362 | 0.011597 |
| 0.011698 | 0.011631 | 0.011698 | 0.011465 | 0.011698 | 0.011329 | 0.011295 |
| 0.011330 | 0.011586 | 0.011426 | 0.011232 | 0.011705 | 0.011197 | 0.011296 |
| 0.011705 | 0.011604 | 0.011497 | 0.011698 | 0.011368 | 0.011564 | 0.011530 |
| 0.011463 | 0.011631 | 0.011487 | 0.011307 | 0.011354 | 0.011363 | 0.011432 |
| 0.011530 | 0.011431 | 0.011568 | 0.011636 | 0.011564 | 0.011631 | 0.011738 |
| 0.011466 | 0.011637 | 0.011568 | 0.011500 | 0.011767 | 0.011228 | 0.011431 |
| 0.011396 | 0.011329 | 0.011228 | 0.011228 | 0.011295 | 0.011295 | 0.011362 |
| 0.011295 | 0.011362 | 0.011262 | 0.011362 | 0.011295 | 0.011295 | 0.011362 |
| 0.011295 | 0.011732 | 0.011631 | 0.011665 | 0.011195 | 0.011295 | 0.011329 |
| 0.011329 | 0.011228 | 0.011362 | 0.011396 | 0.011262 | 0.011262 | 0.011262 |
| 0.011799 | 0.011430 | 0.011430 | 0.011228 | 0.011329 | 0.011497 | 0.011262 |
| 0.011262 | 0.011329 | 0.011295 | 0.011463 | 0.011262 | 0.011396 | 0.011530 |
| 0.011463 | 0.011295 | 0.011295 | 0.011228 | 0.011228 | 0.011396 | 0.011329 |
| 0.011228 | 0.011329 | 0.011195 | 0.011228 | 0.011362 | 0.011497 | 0.011262 |
| 0.011228 | 0.011362 | 0.011296 | 0.011195 | 0.011530 | 0.011195 | 0.011362 |
| 0.011437 | 0.011262 | 0.011564 | 0.011396 | 0.011430 | 0.011295 | 0.011396 |
| 0.011262 | 0.011530 | 0.011195 | 0.011463 | 0.011262 | 0.011262 | 0.011195 |
| 0.011430 | 0.011631 | 0.011329 | 0.011396 | 0.011228 | 0.011631 | 0.011262 |
| 0.011262 | 0.011262 | 0.011295 | 0.011396 | 0.011295 | 0.011396 | 0.011463 |
| 0.011463 | 0.011362 | 0.011329 | 0.011430 | 0.011396 | 0.011262 | 0.011228 |
| 0.011262 | 0.011262 | 0.011329 | 0.011262 | 0.011228 | 0.011396 | 0.011262 |
| 0.011295 | 0.011295 | 0.011430 | 0.011463 | 0.011362 | 0.011295 | 0.011295 |
| 0.011362 | 0.011295 | 0.011396 | 0.011262 | 0.011396 | 0.011497 | 0.011799 |
| 0.011295 | 0.011698 | 0.011302 | 0.017823 | 0.011191 | 0.011488 | 0.011653 |
| 0.011614 | 0.011658 | 0.011322 | 0.011234 | 0.011774 | 0.011682 | 0.011425 |
| 0.011534 | 0.011549 | 0.011177 | 0.011311 | 0.011255 | 0.011307 | 0.011275 |
| 0.011529 | 0.011433 | 0.011468 | 0.011193 | 0.011430 | 0.011463 | 0.011466 |
| 0.011335 | 0.011429 | 0.011430 | 0.011396 | 0.011362 | 0.011363 | 0.011329 |
| 0.011362 | 0.011295 | 0.011262 | 0.011362 | 0.011329 | 0.011262 | 0.011295 |
| 0.011295 | 0.011362 | 0.011262 | 0.011362 | 0.011396 | 0.011429 | 0.011329 |
| 0.011362 | 0.011329 | 0.011665 | 0.011665 | 0.011396 | 0.011430 | 0.011463 |
| 0.011228 | 0.011228 | 0.011262 | 0.011362 | 0.011228 | 0.011463 | 0.011463 |
| 0.011497 | 0.011497 | 0.011430 | 0.011530 | 0.011698 | 0.011532 | 0.011362 |
| 0.011362 | 0.011430 | 0.011463 | 0.011295 | 0.011362 | 0.011329 | 0.011362 |
| 0.011430 | 0.011430 | 0.011463 | 0.011430 | 0.011330 | 0.011530 | 0.011497 |

|          |          |          |          |          |          |          |
|----------|----------|----------|----------|----------|----------|----------|
| 0.011365 | 0.011262 | 0.011362 | 0.011463 | 0.011362 | 0.011497 | 0.011530 |
| 0.011698 | 0.011368 | 0.011564 | 0.011530 | 0.011463 | 0.011631 | 0.011262 |
| 0.011431 | 0.011329 | 0.011295 | 0.011295 | 0.011362 | 0.011262 | 0.011362 |
| 0.011396 | 0.011429 | 0.011329 | 0.011362 | 0.011329 | 0.011665 | 0.011665 |
| 0.011396 | 0.011430 | 0.011497 | 0.011430 | 0.012070 | 0.011489 | 0.011412 |
| 0.011482 | 0.011442 | 0.011552 | 0.011441 | 0.011550 | 0.011474 | 0.011440 |
| 0.012022 | 0.011337 | 0.011471 | 0.011406 | 0.011680 | 0.011537 | 0.011639 |
| 0.012046 | 0.011512 | 0.011365 | 0.011362 | 0.011362 | 0.011396 | 0.011331 |
| 0.011228 | 0.011262 | 0.011396 | 0.011362 | 0.011364 | 0.011497 | 0.011464 |
| 0.011329 | 0.011262 | 0.011295 | 0.011329 | 0.011228 | 0.011295 | 0.011195 |
| 0.011329 | 0.011362 | 0.011262 | 0.011228 | 0.011329 | 0.011262 | 0.011295 |
| 0.011295 | 0.011228 | 0.011295 | 0.011329 | 0.011228 | 0.011430 | 0.011463 |
| 0.011362 | 0.011430 | 0.011362 | 0.011362 | 0.011295 | 0.011698 | 0.011329 |
| 0.011373 | 0.011295 | 0.011531 | 0.011535 | 0.011396 | 0.011396 | 0.011396 |
| 0.011396 | 0.011329 | 0.011295 | 0.011329 | 0.011430 | 0.011430 | 0.011362 |
| 0.011362 | 0.011497 | 0.011665 | 0.011329 | 0.011598 | 0.011598 | 0.011463 |
| 0.011295 | 0.011362 | 0.011396 | 0.011799 | 0.011363 | 0.011396 | 0.011362 |
| 0.011396 | 0.011329 | 0.011329 | 0.011564 | 0.011564 | 0.011530 | 0.011329 |
| 0.011430 | 0.011497 | 0.011362 | 0.011430 | 0.011396 | 0.011262 | 0.011597 |
| 0.011362 | 0.011329 | 0.011329 | 0.011497 | 0.011329 | 0.011430 | 0.011665 |
| 0.011362 | 0.011740 | 0.011732 | 0.011507 | 0.011173 | 0.011434 | 0.011267 |
| 0.011280 | 0.011722 | 0.011271 | 0.011417 | 0.011255 | 0.011366 | 0.011379 |
| 0.011468 | 0.011126 | 0.011283 | 0.000000 | 0.011222 | 0.011328 | 0.011385 |
| 0.011437 | 0.011296 | 0.011342 | 0.011307 | 0.011364 | 0.011497 | 0.011564 |
| 0.011564 | 0.011430 | 0.011533 | 0.011535 | 0.011670 | 0.011696 | 0.011362 |
| 0.011597 | 0.011396 | 0.011329 | 0.011430 | 0.011228 | 0.011463 | 0.011262 |
| 0.011329 | 0.011329 | 0.011295 | 0.011262 | 0.011295 | 0.011262 | 0.011362 |
| 0.011340 | 0.011340 | 0.011334 | 0.011368 | 0.011505 | 0.011470 | 0.011470 |
| 0.011469 | 0.011396 | 0.011208 | 0.011204 | 0.011331 | 0.011501 | 0.011501 |
| 0.011296 | 0.011365 | 0.011599 | 0.011567 | 0.011497 | 0.011531 | 0.011463 |
| 0.011396 | 0.011463 | 0.011463 | 0.011362 | 0.011934 | 0.011463 | 0.011598 |
| 0.011631 | 0.011701 | 0.011333 | 0.011407 | 0.011295 | 0.011497 | 0.011463 |
| 0.011498 | 0.011530 | 0.011530 | 0.011530 | 0.011650 | 0.011665 | 0.011303 |
| 0.011196 | 0.011199 | 0.011299 | 0.011264 | 0.011368 | 0.011172 | 0.011536 |
| 0.011335 | 0.011455 | 0.011203 | 0.011360 | 0.011329 | 0.011402 | 0.011295 |
| 0.011262 | 0.011262 | 0.011329 | 0.011295 | 0.011497 | 0.011463 | 0.011396 |
| 0.011497 | 0.011564 | 0.011295 | 0.011295 | 0.011329 | 0.011329 | 0.011330 |
| 0.011398 | 0.011329 | 0.011329 | 0.011364 | 0.011497 | 0.011564 | 0.011564 |
| 0.011430 | 0.011533 | 0.011535 | 0.011670 | 0.011696 | 0.011362 | 0.011530 |
| 0.011463 | 0.011463 | 0.011297 | 0.011478 | 0.011408 | 0.011435 | 0.011305 |
| 0.011473 | 0.011653 | 0.011399 | 0.011366 | 0.011262 | 0.011463 | 0.011329 |
| 0.011430 | 0.011362 | 0.011262 | 0.011363 | 0.011463 | 0.011466 | 0.011362 |
| 0.011262 | 0.011195 | 0.011329 | 0.011262 | 0.011195 | 0.011298 | 0.011463 |
| 0.011362 | 0.011295 | 0.011262 | 0.011362 | 0.011329 | 0.011262 | 0.011463 |
| 0.011329 | 0.011362 | 0.011362 | 0.011295 | 0.011362 | 0.011598 | 0.011262 |
| 0.011295 | 0.011698 | 0.011295 | 0.011329 | 0.011295 | 0.011665 | 0.011232 |
| 0.011678 | 0.011230 | 0.011311 | 0.011463 | 0.011549 | 0.011491 | 0.011186 |
| 0.011165 | 0.011463 | 0.011564 | 0.011671 | 0.011531 | 0.011669 | 0.011800 |
| 0.011699 | 0.011737 | 0.011698 | 0.011949 | 0.011665 | 0.012540 | 0.011700 |
| 0.012439 | 0.012207 | 0.012341 | 0.012613 | 0.011665 | 0.011362 | 0.011665 |
| 0.012103 | 0.012038 | 0.011631 | 0.011531 | 0.011598 | 0.011598 | 0.011568 |
| 0.011463 | 0.011467 | 0.011530 | 0.011497 | 0.011867 | 0.011934 | 0.011935 |
| 0.011834 | 0.011934 | 0.012038 | 0.011804 | 0.012104 | 0.012110 | 0.012171 |
| 0.012172 | 0.012205 | 0.012152 | 0.012172 | 0.012173 | 0.011396 | 0.011699 |
| 0.011767 | 0.012270 | 0.011772 | 0.012001 | 0.012474 | 0.011536 | 0.011430 |
| 0.011396 | 0.011396 | 0.011867 | 0.011883 | 0.012010 | 0.011732 | 0.011397 |
| S208     | 0.011530 | 0.011530 | 0.011867 | 0.011631 | 0.011631 | 0.011698 |
| 0.011536 | 0.011468 | 0.011631 | 0.011127 | 0.011195 | 0.011161 | 0.011127 |
| 0.011161 | 0.011329 | 0.011127 | 0.011161 | 0.011228 | 0.011195 | 0.011161 |
| 0.011127 | 0.011161 | 0.011262 | 0.011128 | 0.011161 | 0.011161 | 0.011502 |

|          |          |          |          |          |          |          |
|----------|----------|----------|----------|----------|----------|----------|
| 0.011396 | 0.011161 | 0.000000 | 0.011295 | 0.011228 | 0.011195 | 0.011228 |
| 0.011195 | 0.011295 | 0.011195 | 0.011195 | 0.011228 | 0.011195 | 0.011362 |
| 0.011127 | 0.011195 | 0.011228 | 0.011161 | 0.011262 | 0.011295 | 0.011228 |
| 0.011195 | 0.011362 | 0.011262 | 0.011530 | 0.011195 | 0.011463 | 0.011195 |
| 0.011161 | 0.011262 | 0.011329 | 0.011463 | 0.011564 | 0.011262 | 0.011362 |
| 0.011228 | 0.011295 | 0.011195 | 0.011429 | 0.011665 | 0.011195 | 0.011262 |
| 0.011161 | 0.011262 | 0.011228 | 0.011295 | 0.011228 | 0.011228 | 0.011228 |
| 0.011127 | 0.011161 | 0.011127 | 0.011228 | 0.011195 | 0.011228 | 0.011295 |
| 0.011228 | 0.011195 | 0.011262 | 0.011161 | 0.011295 | 0.011127 | 0.011195 |
| 0.011362 | 0.011295 | 0.011530 | 0.011362 | 0.011195 | 0.011430 | 0.011195 |
| 0.011357 | 0.011583 | 0.011400 | 0.011099 | 0.011098 | 0.011207 | 0.011296 |
| 0.011938 | 0.011365 | 0.011102 | 0.011429 | 0.011430 | 0.011228 | 0.011329 |
| 0.011262 | 0.011228 | 0.011295 | 0.011195 | 0.011295 | 0.011228 | 0.011228 |
| 0.011195 | 0.011295 | 0.011497 | 0.011362 | 0.011262 | 0.011228 | 0.011161 |
| 0.011127 | 0.011127 | 0.011195 | 0.011161 | 0.011362 | 0.011329 | 0.011262 |
| 0.011362 | 0.011430 | 0.011161 | 0.011161 | 0.011195 | 0.011195 | 0.011195 |
| 0.011263 | 0.011195 | 0.011195 | 0.000000 | 0.011133 | 0.011095 | 0.011195 |
| 0.011196 | 0.011129 | 0.011171 | 0.011164 | 0.011094 | 0.011129 | 0.011162 |
| 0.011420 | 0.011198 | 0.011232 | 0.011128 | 0.011129 | 0.011262 | 0.011228 |
| 0.011296 | 0.011229 | 0.011228 | 0.011329 | 0.011262 | 0.011631 | 0.011430 |
| 0.011463 | 0.011329 | 0.011195 | 0.011295 | 0.011094 | 0.011329 | 0.011127 |
| 0.011195 | 0.011195 | 0.011161 | 0.011127 | 0.011161 | 0.011127 | 0.011228 |
| 0.011195 | 0.011295 | 0.011228 | 0.011127 | 0.011229 | 0.011329 | 0.011331 |
| 0.011329 | 0.011228 | 0.011127 | 0.000000 | 0.011195 | 0.011127 | 0.000000 |
| 0.011162 | 0.011329 | 0.011127 | 0.011329 | 0.011094 | 0.011195 | 0.011161 |
| 0.011262 | 0.011161 | 0.011195 | 0.011161 | 0.011195 | 0.000000 | 0.011195 |
| 0.011228 | 0.011161 | 0.011228 | 0.011161 | 0.011195 | 0.011228 | 0.011463 |
| 0.011564 | 0.011497 | 0.011564 | 0.011330 | 0.011564 | 0.011195 | 0.011161 |
| 0.011195 | 0.011464 | 0.011289 | 0.011095 | 0.011569 | 0.000000 | 0.011178 |
| 0.011570 | 0.011468 | 0.011362 | 0.011564 | 0.011265 | 0.011430 | 0.011396 |
| 0.011329 | 0.011497 | 0.011345 | 0.011184 | 0.011228 | 0.011228 | 0.011297 |
| 0.011396 | 0.011296 | 0.011432 | 0.011500 | 0.011430 | 0.011497 | 0.011602 |
| 0.011331 | 0.011502 | 0.011433 | 0.011365 | 0.011632 | 0.011094 | 0.011296 |
| 0.011262 | 0.011195 | 0.011094 | 0.011094 | 0.011161 | 0.011161 | 0.011228 |
| 0.011161 | 0.011228 | 0.011127 | 0.011228 | 0.011161 | 0.011161 | 0.011228 |
| 0.011161 | 0.011597 | 0.011497 | 0.011530 | 0.000000 | 0.011161 | 0.011195 |
| 0.011195 | 0.011161 | 0.011228 | 0.011262 | 0.011127 | 0.011127 | 0.011127 |
| 0.011665 | 0.011295 | 0.011295 | 0.011094 | 0.011195 | 0.011363 | 0.011127 |
| 0.011127 | 0.011195 | 0.011161 | 0.011329 | 0.011127 | 0.011262 | 0.011396 |
| 0.011329 | 0.011161 | 0.011161 | 0.011094 | 0.011094 | 0.011262 | 0.011195 |
| 0.011094 | 0.011195 | 0.000000 | 0.011094 | 0.011228 | 0.011363 | 0.011127 |
| 0.011094 | 0.011228 | 0.011161 | 0.000000 | 0.011396 | 0.000000 | 0.011228 |
| 0.011300 | 0.011127 | 0.011430 | 0.011262 | 0.011295 | 0.011161 | 0.011262 |
| 0.011127 | 0.011463 | 0.000000 | 0.011329 | 0.011127 | 0.011127 | 0.000000 |
| 0.011295 | 0.011497 | 0.011195 | 0.011262 | 0.011094 | 0.011497 | 0.011127 |
| 0.011127 | 0.011127 | 0.011161 | 0.011262 | 0.011161 | 0.011262 | 0.011329 |
| 0.011329 | 0.011295 | 0.011195 | 0.011295 | 0.011262 | 0.011127 | 0.011094 |
| 0.011127 | 0.011127 | 0.011195 | 0.011127 | 0.011094 | 0.011262 | 0.011127 |
| 0.011161 | 0.011161 | 0.011295 | 0.011329 | 0.011228 | 0.011161 | 0.011161 |
| 0.011228 | 0.011161 | 0.011262 | 0.011127 | 0.011262 | 0.011362 | 0.011665 |
| 0.011161 | 0.011564 | 0.011164 | 0.017673 | 0.011126 | 0.011305 | 0.011514 |
| 0.011475 | 0.011517 | 0.011217 | 0.011176 | 0.011609 | 0.011543 | 0.011242 |
| 0.011392 | 0.011426 | 0.000000 | 0.011144 | 0.011138 | 0.011208 | 0.011146 |
| 0.011389 | 0.011321 | 0.011320 | 0.011126 | 0.011295 | 0.011329 | 0.011331 |
| 0.011198 | 0.011295 | 0.011295 | 0.011262 | 0.011228 | 0.011228 | 0.011195 |
| 0.011228 | 0.011161 | 0.011195 | 0.011228 | 0.011195 | 0.011127 | 0.011161 |
| 0.011161 | 0.011228 | 0.011127 | 0.011228 | 0.011262 | 0.011295 | 0.011195 |
| 0.011228 | 0.011195 | 0.011530 | 0.011530 | 0.011262 | 0.011296 | 0.011329 |
| 0.011094 | 0.011094 | 0.011127 | 0.011228 | 0.011094 | 0.011329 | 0.011329 |
| 0.011362 | 0.011362 | 0.011295 | 0.011396 | 0.011564 | 0.011397 | 0.011228 |

|          |          |          |          |          |          |          |
|----------|----------|----------|----------|----------|----------|----------|
| 0.011228 | 0.011295 | 0.011329 | 0.011161 | 0.011228 | 0.011195 | 0.011228 |
| 0.011295 | 0.011295 | 0.011329 | 0.011295 | 0.011195 | 0.011396 | 0.011362 |
| 0.011230 | 0.011127 | 0.011228 | 0.011329 | 0.011228 | 0.011362 | 0.011396 |
| 0.011564 | 0.011265 | 0.011430 | 0.011396 | 0.011329 | 0.011497 | 0.011128 |
| 0.011296 | 0.011195 | 0.011161 | 0.011161 | 0.011228 | 0.011127 | 0.011228 |
| 0.011262 | 0.011295 | 0.011195 | 0.011228 | 0.011195 | 0.011530 | 0.011530 |
| 0.011262 | 0.011296 | 0.011362 | 0.011295 | 0.011935 | 0.011346 | 0.011271 |
| 0.011342 | 0.011303 | 0.011412 | 0.011303 | 0.011410 | 0.011336 | 0.011302 |
| 0.011884 | 0.011199 | 0.011334 | 0.011268 | 0.011542 | 0.011400 | 0.011503 |
| 0.011910 | 0.011362 | 0.011229 | 0.011228 | 0.011228 | 0.011262 | 0.011195 |
| 0.011094 | 0.011127 | 0.011262 | 0.011228 | 0.011229 | 0.011362 | 0.011330 |
| 0.011195 | 0.011127 | 0.011161 | 0.011195 | 0.011094 | 0.011161 | 0.000000 |
| 0.011195 | 0.011228 | 0.011127 | 0.011094 | 0.011195 | 0.011127 | 0.011161 |
| 0.011161 | 0.011094 | 0.011161 | 0.011195 | 0.011094 | 0.011295 | 0.011329 |
| 0.011228 | 0.011295 | 0.011228 | 0.011228 | 0.011161 | 0.011564 | 0.011195 |
| 0.011234 | 0.011161 | 0.011396 | 0.011400 | 0.011262 | 0.011262 | 0.011262 |
| 0.011262 | 0.011195 | 0.011161 | 0.011195 | 0.011295 | 0.011295 | 0.011228 |
| 0.011228 | 0.011362 | 0.011530 | 0.011262 | 0.011463 | 0.011463 | 0.011329 |
| 0.011161 | 0.011228 | 0.011262 | 0.011665 | 0.011228 | 0.011262 | 0.011228 |
| 0.011262 | 0.011195 | 0.011195 | 0.011497 | 0.011430 | 0.011463 | 0.011195 |
| 0.011295 | 0.011362 | 0.011228 | 0.011295 | 0.011262 | 0.011127 | 0.011463 |
| 0.011228 | 0.011195 | 0.011195 | 0.011362 | 0.011195 | 0.011295 | 0.011530 |
| 0.011228 | 0.011604 | 0.011597 | 0.011385 | 0.011117 | 0.011298 | 0.011164 |
| 0.011115 | 0.011605 | 0.011131 | 0.011328 | 0.011158 | 0.011264 | 0.011273 |
| 0.011366 | 0.000000 | 0.011227 | 0.000000 | 0.011114 | 0.011261 | 0.011263 |
| 0.011286 | 0.011178 | 0.011272 | 0.011201 | 0.011229 | 0.011362 | 0.011430 |
| 0.011430 | 0.011296 | 0.011398 | 0.011399 | 0.011535 | 0.011555 | 0.011228 |
| 0.011463 | 0.011329 | 0.011195 | 0.011295 | 0.011094 | 0.011329 | 0.011127 |
| 0.011195 | 0.011195 | 0.011161 | 0.011127 | 0.011161 | 0.011127 | 0.011228 |
| 0.011200 | 0.011200 | 0.011197 | 0.011231 | 0.011368 | 0.011333 | 0.011333 |
| 0.011333 | 0.011262 | 0.000000 | 0.000000 | 0.011196 | 0.011365 | 0.011366 |
| 0.011161 | 0.011230 | 0.011464 | 0.011432 | 0.011363 | 0.011397 | 0.011329 |
| 0.011262 | 0.011329 | 0.011329 | 0.011228 | 0.011799 | 0.011396 | 0.011463 |
| 0.011497 | 0.011559 | 0.011197 | 0.011268 | 0.011161 | 0.011362 | 0.011329 |
| 0.011363 | 0.011396 | 0.011396 | 0.011396 | 0.011532 | 0.011530 | 0.011164 |
| 0.000000 | 0.000000 | 0.011162 | 0.011128 | 0.011231 | 0.000000 | 0.011400 |
| 0.011198 | 0.011323 | 0.000000 | 0.011210 | 0.011195 | 0.011266 | 0.011161 |
| 0.011127 | 0.011127 | 0.011195 | 0.011161 | 0.011362 | 0.011329 | 0.011262 |
| 0.011362 | 0.011430 | 0.011161 | 0.011161 | 0.011195 | 0.011195 | 0.011195 |
| 0.011263 | 0.011195 | 0.011195 | 0.011229 | 0.011362 | 0.011430 | 0.011430 |
| 0.011296 | 0.011398 | 0.011399 | 0.011535 | 0.011555 | 0.011228 | 0.011396 |
| 0.011329 | 0.011329 | 0.011162 | 0.011339 | 0.011269 | 0.011299 | 0.011165 |
| 0.011336 | 0.011516 | 0.011314 | 0.011230 | 0.011127 | 0.011329 | 0.011195 |
| 0.011295 | 0.011228 | 0.011127 | 0.011229 | 0.011329 | 0.011331 | 0.011228 |
| 0.011127 | 0.000000 | 0.011195 | 0.011127 | 0.000000 | 0.011162 | 0.011329 |
| 0.011228 | 0.011161 | 0.011195 | 0.011228 | 0.011195 | 0.011127 | 0.011329 |
| 0.011195 | 0.011228 | 0.011228 | 0.011161 | 0.011228 | 0.011463 | 0.011127 |
| 0.011161 | 0.011564 | 0.011161 | 0.011195 | 0.011161 | 0.011530 | 0.011103 |
| 0.011566 | 0.011103 | 0.011161 | 0.011342 | 0.011427 | 0.011347 | 0.000000 |
| 0.011113 | 0.011329 | 0.011430 | 0.011535 | 0.011397 | 0.011534 | 0.011665 |
| 0.011565 | 0.011601 | 0.011564 | 0.011812 | 0.011530 | 0.012405 | 0.011565 |
| 0.012305 | 0.012072 | 0.012206 | 0.012477 | 0.011530 | 0.011228 | 0.011530 |
| 0.011969 | 0.011903 | 0.011497 | 0.011396 | 0.011464 | 0.011464 | 0.011432 |
| 0.011329 | 0.011331 | 0.011396 | 0.011363 | 0.011733 | 0.011799 | 0.011800 |
| 0.011700 | 0.011800 | 0.011903 | 0.011669 | 0.011969 | 0.011974 | 0.012036 |
| 0.012037 | 0.012071 | 0.012016 | 0.012037 | 0.012038 | 0.011262 | 0.011564 |
| 0.011632 | 0.012136 | 0.011636 | 0.011867 | 0.012339 | 0.011400 | 0.011296 |
| 0.011262 | 0.011262 | 0.011732 | 0.011759 | 0.011869 | 0.011597 | 0.011262 |
| S209     | 0.011665 | 0.011665 | 0.012001 | 0.011765 | 0.011765 | 0.011833 |
| 0.011672 | 0.011604 | 0.011765 | 0.011262 | 0.011329 | 0.011296 | 0.011262 |

|          |          |          |          |          |          |          |
|----------|----------|----------|----------|----------|----------|----------|
| 0.011295 | 0.011463 | 0.011262 | 0.011295 | 0.011362 | 0.011329 | 0.011295 |
| 0.011262 | 0.011295 | 0.011396 | 0.011262 | 0.011228 | 0.011295 | 0.011638 |
| 0.011530 | 0.011295 | 0.011195 | 0.011429 | 0.011295 | 0.011329 | 0.011295 |
| 0.011329 | 0.011362 | 0.011329 | 0.011329 | 0.011362 | 0.011329 | 0.011497 |
| 0.011262 | 0.011329 | 0.011362 | 0.011295 | 0.011396 | 0.011430 | 0.011362 |
| 0.011329 | 0.011497 | 0.011396 | 0.011665 | 0.011329 | 0.011530 | 0.011329 |
| 0.011295 | 0.011396 | 0.011463 | 0.011530 | 0.011698 | 0.011396 | 0.011497 |
| 0.011295 | 0.011362 | 0.011329 | 0.011497 | 0.011799 | 0.011329 | 0.011396 |
| 0.011295 | 0.011396 | 0.011362 | 0.011430 | 0.011362 | 0.011362 | 0.011362 |
| 0.011262 | 0.011295 | 0.011262 | 0.011362 | 0.011329 | 0.011363 | 0.011429 |
| 0.011362 | 0.011329 | 0.011329 | 0.011295 | 0.011429 | 0.011195 | 0.011329 |
| 0.011497 | 0.011429 | 0.011665 | 0.011497 | 0.011329 | 0.011497 | 0.011329 |
| 0.011468 | 0.011695 | 0.011513 | 0.011216 | 0.011210 | 0.011318 | 0.011415 |
| 0.012048 | 0.011416 | 0.011225 | 0.011564 | 0.011564 | 0.011362 | 0.011463 |
| 0.011396 | 0.011362 | 0.011429 | 0.011329 | 0.011430 | 0.011295 | 0.011362 |
| 0.011329 | 0.011429 | 0.011631 | 0.011497 | 0.011396 | 0.011363 | 0.011228 |
| 0.011262 | 0.011262 | 0.011262 | 0.011295 | 0.011497 | 0.011463 | 0.011396 |
| 0.011497 | 0.011564 | 0.011295 | 0.011295 | 0.011329 | 0.011329 | 0.011330 |
| 0.011398 | 0.011329 | 0.011329 | 0.011168 | 0.011277 | 0.011236 | 0.011329 |
| 0.011331 | 0.011266 | 0.011282 | 0.011302 | 0.011230 | 0.011266 | 0.011297 |
| 0.011564 | 0.011336 | 0.011301 | 0.011262 | 0.011268 | 0.011397 | 0.011363 |
| 0.011430 | 0.011364 | 0.011363 | 0.011463 | 0.011396 | 0.011698 | 0.011564 |
| 0.011597 | 0.011463 | 0.011329 | 0.011430 | 0.011228 | 0.011463 | 0.011262 |
| 0.011329 | 0.011329 | 0.011295 | 0.011262 | 0.011295 | 0.011262 | 0.011362 |
| 0.011262 | 0.011362 | 0.011362 | 0.011262 | 0.011363 | 0.011463 | 0.011466 |
| 0.011396 | 0.011362 | 0.011262 | 0.011195 | 0.011329 | 0.011262 | 0.011195 |
| 0.011298 | 0.011396 | 0.011195 | 0.011396 | 0.011228 | 0.011329 | 0.011295 |
| 0.011329 | 0.011295 | 0.011262 | 0.011295 | 0.011329 | 0.011195 | 0.000000 |
| 0.011295 | 0.011295 | 0.011362 | 0.011295 | 0.011329 | 0.011362 | 0.011597 |
| 0.011698 | 0.011631 | 0.011698 | 0.011431 | 0.011698 | 0.011329 | 0.011295 |
| 0.011330 | 0.011505 | 0.011426 | 0.011197 | 0.011705 | 0.011197 | 0.011257 |
| 0.011705 | 0.011604 | 0.011497 | 0.011698 | 0.011402 | 0.011564 | 0.011463 |
| 0.011463 | 0.011631 | 0.011487 | 0.011349 | 0.011396 | 0.011363 | 0.011432 |
| 0.011530 | 0.011431 | 0.011568 | 0.011568 | 0.011564 | 0.011631 | 0.011738 |
| 0.011466 | 0.011569 | 0.011568 | 0.011500 | 0.011767 | 0.011228 | 0.011431 |
| 0.011329 | 0.011329 | 0.011228 | 0.011228 | 0.011228 | 0.011295 | 0.011362 |
| 0.011228 | 0.011295 | 0.011195 | 0.011362 | 0.011228 | 0.011295 | 0.011362 |
| 0.011295 | 0.011732 | 0.011631 | 0.011665 | 0.011195 | 0.011295 | 0.011329 |
| 0.011329 | 0.011295 | 0.011362 | 0.011396 | 0.011262 | 0.011262 | 0.011262 |
| 0.011799 | 0.011430 | 0.011430 | 0.011228 | 0.011329 | 0.011430 | 0.011262 |
| 0.011262 | 0.011329 | 0.011295 | 0.011396 | 0.011262 | 0.011396 | 0.011463 |
| 0.011463 | 0.011295 | 0.011295 | 0.011228 | 0.011228 | 0.011396 | 0.011329 |
| 0.011228 | 0.011329 | 0.011195 | 0.011228 | 0.011362 | 0.011497 | 0.011262 |
| 0.011228 | 0.011362 | 0.011296 | 0.011195 | 0.011530 | 0.011195 | 0.011362 |
| 0.011368 | 0.011262 | 0.011564 | 0.011396 | 0.011430 | 0.011295 | 0.011396 |
| 0.011262 | 0.011530 | 0.011195 | 0.011463 | 0.011262 | 0.011262 | 0.011195 |
| 0.011329 | 0.011631 | 0.011329 | 0.011396 | 0.011228 | 0.011631 | 0.011262 |
| 0.011262 | 0.011262 | 0.011295 | 0.011329 | 0.011295 | 0.011396 | 0.011463 |
| 0.011463 | 0.011430 | 0.011329 | 0.011430 | 0.011329 | 0.011262 | 0.011228 |
| 0.011262 | 0.011262 | 0.011329 | 0.011262 | 0.011161 | 0.011396 | 0.011262 |
| 0.011295 | 0.011295 | 0.011430 | 0.011463 | 0.011362 | 0.011228 | 0.011295 |
| 0.011362 | 0.011295 | 0.011396 | 0.011262 | 0.011396 | 0.011497 | 0.011799 |
| 0.011295 | 0.011698 | 0.011267 | 0.017785 | 0.011257 | 0.011427 | 0.011618 |
| 0.011579 | 0.011623 | 0.011270 | 0.011234 | 0.011719 | 0.011647 | 0.011364 |
| 0.011440 | 0.011610 | 0.011177 | 0.011186 | 0.011216 | 0.011356 | 0.011275 |
| 0.011436 | 0.011433 | 0.011394 | 0.011193 | 0.011430 | 0.011463 | 0.011466 |
| 0.011266 | 0.011429 | 0.011430 | 0.011396 | 0.011362 | 0.011363 | 0.011329 |
| 0.011362 | 0.011295 | 0.011329 | 0.011362 | 0.011329 | 0.011262 | 0.011295 |
| 0.011295 | 0.011362 | 0.011262 | 0.011362 | 0.011396 | 0.011429 | 0.011329 |
| 0.011362 | 0.011329 | 0.011665 | 0.011665 | 0.011396 | 0.011430 | 0.011463 |



|          |          |          |          |          |          |          |
|----------|----------|----------|----------|----------|----------|----------|
| 0.011228 | 0.011228 | 0.011262 | 0.011295 | 0.011228 | 0.011463 | 0.011463 |
| 0.011497 | 0.011497 | 0.011430 | 0.011530 | 0.011698 | 0.011532 | 0.011295 |
| 0.011362 | 0.011430 | 0.011396 | 0.011295 | 0.011362 | 0.011329 | 0.011362 |
| 0.011430 | 0.011430 | 0.011463 | 0.011363 | 0.011262 | 0.011530 | 0.011429 |
| 0.011365 | 0.011262 | 0.011362 | 0.011463 | 0.011362 | 0.011497 | 0.011530 |
| 0.011698 | 0.011402 | 0.011564 | 0.011463 | 0.011463 | 0.011631 | 0.011262 |
| 0.011431 | 0.011329 | 0.011295 | 0.011295 | 0.011362 | 0.011262 | 0.011362 |
| 0.011396 | 0.011429 | 0.011329 | 0.011362 | 0.011329 | 0.011665 | 0.011665 |
| 0.011396 | 0.011430 | 0.011497 | 0.011430 | 0.012070 | 0.011489 | 0.011412 |
| 0.011482 | 0.011442 | 0.011552 | 0.011441 | 0.011550 | 0.011474 | 0.011440 |
| 0.012022 | 0.011337 | 0.011471 | 0.011406 | 0.011680 | 0.011537 | 0.011571 |
| 0.012046 | 0.011512 | 0.011365 | 0.011362 | 0.011362 | 0.011396 | 0.011331 |
| 0.011228 | 0.011195 | 0.011396 | 0.011362 | 0.011364 | 0.011497 | 0.011431 |
| 0.011329 | 0.011195 | 0.011228 | 0.011329 | 0.011161 | 0.011295 | 0.011195 |
| 0.011329 | 0.011362 | 0.011262 | 0.011228 | 0.011329 | 0.011262 | 0.011295 |
| 0.011295 | 0.011228 | 0.011295 | 0.011329 | 0.011228 | 0.011362 | 0.011463 |
| 0.011362 | 0.011430 | 0.011362 | 0.011362 | 0.011295 | 0.011698 | 0.011329 |
| 0.011373 | 0.011295 | 0.011531 | 0.011535 | 0.011329 | 0.011396 | 0.011396 |
| 0.011396 | 0.011262 | 0.011295 | 0.011262 | 0.011430 | 0.011430 | 0.011362 |
| 0.011362 | 0.011497 | 0.011665 | 0.011396 | 0.011598 | 0.011598 | 0.011463 |
| 0.011295 | 0.011362 | 0.011396 | 0.011799 | 0.011363 | 0.011329 | 0.011362 |
| 0.011396 | 0.011329 | 0.011329 | 0.011631 | 0.011497 | 0.011598 | 0.011329 |
| 0.011430 | 0.011497 | 0.011362 | 0.011430 | 0.011396 | 0.011262 | 0.011597 |
| 0.011362 | 0.011329 | 0.011329 | 0.011497 | 0.011329 | 0.011430 | 0.011665 |
| 0.011362 | 0.011740 | 0.011732 | 0.011507 | 0.011229 | 0.011434 | 0.011215 |
| 0.011225 | 0.011722 | 0.011236 | 0.011462 | 0.011255 | 0.011417 | 0.011379 |
| 0.011468 | 0.011192 | 0.011339 | 0.011192 | 0.011222 | 0.011395 | 0.011344 |
| 0.011362 | 0.011218 | 0.011377 | 0.011307 | 0.011364 | 0.011497 | 0.011564 |
| 0.011564 | 0.011430 | 0.011533 | 0.011535 | 0.011670 | 0.011696 | 0.011362 |
| 0.011597 | 0.011463 | 0.011329 | 0.011430 | 0.011228 | 0.011463 | 0.011262 |
| 0.011329 | 0.011329 | 0.011295 | 0.011262 | 0.011295 | 0.011262 | 0.011362 |
| 0.011340 | 0.011340 | 0.011334 | 0.011368 | 0.011505 | 0.011402 | 0.011470 |
| 0.011469 | 0.011396 | 0.011208 | 0.011204 | 0.011331 | 0.011501 | 0.011501 |
| 0.011296 | 0.011365 | 0.011599 | 0.011567 | 0.011497 | 0.011531 | 0.011463 |
| 0.011396 | 0.011463 | 0.011463 | 0.011362 | 0.011934 | 0.011530 | 0.011598 |
| 0.011631 | 0.011701 | 0.011333 | 0.011407 | 0.011295 | 0.011497 | 0.011463 |
| 0.011498 | 0.011530 | 0.011530 | 0.011530 | 0.011689 | 0.011665 | 0.011303 |
| 0.011196 | 0.011199 | 0.011299 | 0.011264 | 0.011368 | 0.011210 | 0.011536 |
| 0.011335 | 0.011455 | 0.011203 | 0.011360 | 0.011329 | 0.011402 | 0.011228 |
| 0.011262 | 0.011262 | 0.011262 | 0.011295 | 0.011497 | 0.011463 | 0.011396 |
| 0.011497 | 0.011564 | 0.011295 | 0.011295 | 0.011329 | 0.011329 | 0.011330 |
| 0.011398 | 0.011329 | 0.011329 | 0.011364 | 0.011497 | 0.011564 | 0.011564 |
| 0.011430 | 0.011533 | 0.011535 | 0.011670 | 0.011696 | 0.011362 | 0.011530 |
| 0.011463 | 0.011463 | 0.011297 | 0.011478 | 0.011408 | 0.011435 | 0.011200 |
| 0.011404 | 0.011607 | 0.011441 | 0.011366 | 0.011195 | 0.011396 | 0.011262 |
| 0.011362 | 0.011362 | 0.011262 | 0.011363 | 0.011463 | 0.011466 | 0.011362 |
| 0.011262 | 0.011195 | 0.011329 | 0.011262 | 0.011195 | 0.011298 | 0.011396 |
| 0.011362 | 0.011295 | 0.011329 | 0.011362 | 0.011329 | 0.011262 | 0.011463 |
| 0.011329 | 0.011362 | 0.011362 | 0.011295 | 0.011362 | 0.011598 | 0.011262 |
| 0.011295 | 0.011698 | 0.011295 | 0.011262 | 0.011295 | 0.011665 | 0.011232 |
| 0.011678 | 0.011230 | 0.011211 | 0.011463 | 0.011549 | 0.011455 | 0.011186 |
| 0.011165 | 0.011463 | 0.011564 | 0.011671 | 0.011531 | 0.011635 | 0.011800 |
| 0.011699 | 0.011737 | 0.011698 | 0.011914 | 0.011665 | 0.012540 | 0.011700 |
| 0.012439 | 0.012173 | 0.012341 | 0.012613 | 0.011665 | 0.011362 | 0.011665 |
| 0.012103 | 0.012005 | 0.011631 | 0.011531 | 0.011598 | 0.011598 | 0.011568 |
| 0.011463 | 0.011433 | 0.011530 | 0.011497 | 0.011867 | 0.011934 | 0.011935 |
| 0.011834 | 0.011934 | 0.012004 | 0.011770 | 0.012104 | 0.012110 | 0.012171 |
| 0.012172 | 0.012205 | 0.012118 | 0.012172 | 0.012173 | 0.011396 | 0.011699 |
| 0.011767 | 0.012270 | 0.011772 | 0.012001 | 0.012474 | 0.011536 | 0.011430 |
| 0.011396 | 0.011396 | 0.011867 | 0.011924 | 0.012010 | 0.011732 | 0.011397 |

|          |          |          |          |          |          |          |
|----------|----------|----------|----------|----------|----------|----------|
| S210     | 0.011698 | 0.011698 | 0.012035 | 0.011799 | 0.011799 | 0.011866 |
| 0.011706 | 0.011638 | 0.011799 | 0.011295 | 0.011362 | 0.011329 | 0.011295 |
| 0.011329 | 0.011497 | 0.011295 | 0.011329 | 0.011396 | 0.011362 | 0.011329 |
| 0.011295 | 0.011329 | 0.011429 | 0.011296 | 0.011262 | 0.011329 | 0.011672 |
| 0.011564 | 0.011329 | 0.011228 | 0.011463 | 0.011329 | 0.011363 | 0.011329 |
| 0.011362 | 0.011396 | 0.011362 | 0.011362 | 0.011396 | 0.011362 | 0.011530 |
| 0.011295 | 0.011362 | 0.011396 | 0.011329 | 0.011430 | 0.011463 | 0.011396 |
| 0.011362 | 0.011531 | 0.011430 | 0.011698 | 0.011362 | 0.011564 | 0.011362 |
| 0.011329 | 0.011430 | 0.011497 | 0.011564 | 0.011732 | 0.011430 | 0.011530 |
| 0.011329 | 0.011396 | 0.011363 | 0.011530 | 0.011833 | 0.011362 | 0.011430 |
| 0.011329 | 0.011430 | 0.011396 | 0.011463 | 0.011396 | 0.011396 | 0.011396 |
| 0.011295 | 0.011329 | 0.011295 | 0.011396 | 0.011362 | 0.011397 | 0.011463 |
| 0.011396 | 0.011362 | 0.011362 | 0.011329 | 0.011463 | 0.011228 | 0.011362 |
| 0.011530 | 0.011463 | 0.011698 | 0.011530 | 0.011362 | 0.011530 | 0.011362 |
| 0.011505 | 0.011658 | 0.011551 | 0.011255 | 0.011247 | 0.011355 | 0.011454 |
| 0.012085 | 0.011518 | 0.011266 | 0.011597 | 0.011598 | 0.011396 | 0.011497 |
| 0.011430 | 0.011396 | 0.011463 | 0.011362 | 0.011463 | 0.011329 | 0.011396 |
| 0.011362 | 0.011463 | 0.011665 | 0.011530 | 0.011430 | 0.011396 | 0.011262 |
| 0.011295 | 0.011295 | 0.011295 | 0.011329 | 0.011530 | 0.011497 | 0.011430 |
| 0.011530 | 0.011597 | 0.011329 | 0.011329 | 0.011362 | 0.011362 | 0.011364 |
| 0.011398 | 0.011362 | 0.011362 | 0.011168 | 0.011313 | 0.011271 | 0.011363 |
| 0.011365 | 0.011301 | 0.011318 | 0.011302 | 0.011264 | 0.011300 | 0.011330 |
| 0.011564 | 0.011370 | 0.011336 | 0.011296 | 0.011268 | 0.011430 | 0.011397 |
| 0.011464 | 0.011397 | 0.011396 | 0.011497 | 0.011429 | 0.011732 | 0.011598 |
| 0.011631 | 0.011497 | 0.011362 | 0.011463 | 0.011262 | 0.011497 | 0.011295 |
| 0.011362 | 0.011362 | 0.011329 | 0.011295 | 0.011329 | 0.011295 | 0.011396 |
| 0.011295 | 0.011396 | 0.011396 | 0.011295 | 0.011397 | 0.011497 | 0.011500 |
| 0.011430 | 0.011396 | 0.011295 | 0.011229 | 0.011362 | 0.011295 | 0.011228 |
| 0.011332 | 0.011430 | 0.011228 | 0.011430 | 0.011262 | 0.011363 | 0.011329 |
| 0.011362 | 0.011329 | 0.011295 | 0.011329 | 0.011362 | 0.011228 | 0.011295 |
| 0.000000 | 0.011329 | 0.011396 | 0.011329 | 0.011362 | 0.011396 | 0.011631 |
| 0.011732 | 0.011665 | 0.011732 | 0.011498 | 0.011732 | 0.011362 | 0.011329 |
| 0.011364 | 0.011626 | 0.011426 | 0.011266 | 0.011739 | 0.011231 | 0.011336 |
| 0.011739 | 0.011638 | 0.011530 | 0.011732 | 0.011436 | 0.011598 | 0.011497 |
| 0.011497 | 0.011665 | 0.011522 | 0.011390 | 0.011354 | 0.011396 | 0.011466 |
| 0.011564 | 0.011465 | 0.011601 | 0.011602 | 0.011598 | 0.011665 | 0.011772 |
| 0.011500 | 0.011603 | 0.011602 | 0.011534 | 0.011733 | 0.011262 | 0.011465 |
| 0.011362 | 0.011362 | 0.011262 | 0.011262 | 0.011262 | 0.011329 | 0.011396 |
| 0.011262 | 0.011329 | 0.011228 | 0.011396 | 0.011262 | 0.011329 | 0.011396 |
| 0.011329 | 0.011765 | 0.011665 | 0.011698 | 0.011228 | 0.011329 | 0.011363 |
| 0.011362 | 0.011329 | 0.011396 | 0.011430 | 0.011295 | 0.011295 | 0.011295 |
| 0.011833 | 0.011463 | 0.011463 | 0.011262 | 0.011362 | 0.011463 | 0.011295 |
| 0.011295 | 0.011362 | 0.011329 | 0.011430 | 0.011295 | 0.011430 | 0.011497 |
| 0.011497 | 0.011329 | 0.011329 | 0.011262 | 0.011262 | 0.011430 | 0.011362 |
| 0.011262 | 0.011362 | 0.011228 | 0.011262 | 0.011396 | 0.011531 | 0.011295 |
| 0.011262 | 0.011396 | 0.011329 | 0.011228 | 0.011564 | 0.011228 | 0.011396 |
| 0.011403 | 0.011295 | 0.011598 | 0.011430 | 0.011463 | 0.011329 | 0.011430 |
| 0.011295 | 0.011564 | 0.011228 | 0.011497 | 0.011295 | 0.011295 | 0.011228 |
| 0.011396 | 0.011665 | 0.011363 | 0.011430 | 0.011262 | 0.011665 | 0.011295 |
| 0.011295 | 0.011295 | 0.011329 | 0.011362 | 0.011329 | 0.011430 | 0.011497 |
| 0.011497 | 0.011463 | 0.011362 | 0.011463 | 0.011362 | 0.011295 | 0.011262 |
| 0.011295 | 0.011295 | 0.011363 | 0.011295 | 0.011195 | 0.011430 | 0.011295 |
| 0.011329 | 0.011329 | 0.011463 | 0.011497 | 0.011396 | 0.011262 | 0.011329 |
| 0.011396 | 0.011329 | 0.011430 | 0.011295 | 0.011430 | 0.011530 | 0.011833 |
| 0.011329 | 0.011732 | 0.011302 | 0.017823 | 0.011322 | 0.011427 | 0.011653 |
| 0.011614 | 0.011658 | 0.011374 | 0.011350 | 0.011719 | 0.011682 | 0.011303 |
| 0.011535 | 0.011549 | 0.011216 | 0.011270 | 0.011255 | 0.011356 | 0.011318 |
| 0.011529 | 0.011470 | 0.011431 | 0.011259 | 0.011463 | 0.011497 | 0.011500 |
| 0.011301 | 0.011463 | 0.011463 | 0.011430 | 0.011396 | 0.011396 | 0.011363 |
| 0.011396 | 0.011329 | 0.011362 | 0.011329 | 0.011363 | 0.011295 | 0.011329 |

|          |          |          |          |          |          |          |
|----------|----------|----------|----------|----------|----------|----------|
| 0.011329 | 0.011396 | 0.011295 | 0.011396 | 0.011430 | 0.011463 | 0.011362 |
| 0.011396 | 0.011362 | 0.011698 | 0.011698 | 0.011430 | 0.011464 | 0.011497 |
| 0.011262 | 0.011262 | 0.011295 | 0.011329 | 0.011262 | 0.011497 | 0.011497 |
| 0.011530 | 0.011530 | 0.011463 | 0.011564 | 0.011732 | 0.011565 | 0.011329 |
| 0.011396 | 0.011463 | 0.011430 | 0.011329 | 0.011396 | 0.011362 | 0.011396 |
| 0.011463 | 0.011463 | 0.011497 | 0.011396 | 0.011296 | 0.011564 | 0.011463 |
| 0.011399 | 0.011295 | 0.011396 | 0.011497 | 0.011396 | 0.011530 | 0.011564 |
| 0.011732 | 0.011436 | 0.011598 | 0.011497 | 0.011497 | 0.011665 | 0.011295 |
| 0.011464 | 0.011363 | 0.011329 | 0.011329 | 0.011396 | 0.011295 | 0.011396 |
| 0.011430 | 0.011463 | 0.011362 | 0.011396 | 0.011362 | 0.011698 | 0.011698 |
| 0.011430 | 0.011464 | 0.011530 | 0.011463 | 0.012104 | 0.011525 | 0.011447 |
| 0.011517 | 0.011477 | 0.011588 | 0.011476 | 0.011585 | 0.011509 | 0.011474 |
| 0.012057 | 0.011372 | 0.011506 | 0.011441 | 0.011715 | 0.011571 | 0.011605 |
| 0.012081 | 0.011512 | 0.011365 | 0.011396 | 0.011396 | 0.011430 | 0.011331 |
| 0.011262 | 0.011228 | 0.011430 | 0.011396 | 0.011364 | 0.011530 | 0.011498 |
| 0.011362 | 0.011228 | 0.011262 | 0.011362 | 0.011195 | 0.011329 | 0.011228 |
| 0.011362 | 0.011396 | 0.011295 | 0.011262 | 0.011362 | 0.011295 | 0.011329 |
| 0.011329 | 0.011262 | 0.011329 | 0.011363 | 0.011262 | 0.011396 | 0.011497 |
| 0.011396 | 0.011463 | 0.011396 | 0.011396 | 0.011329 | 0.011732 | 0.011362 |
| 0.011408 | 0.011329 | 0.011564 | 0.011569 | 0.011363 | 0.011430 | 0.011430 |
| 0.011430 | 0.011295 | 0.011329 | 0.011295 | 0.011463 | 0.011463 | 0.011396 |
| 0.011396 | 0.011530 | 0.011698 | 0.011429 | 0.011631 | 0.011631 | 0.011497 |
| 0.011329 | 0.011396 | 0.011430 | 0.011833 | 0.011396 | 0.011363 | 0.011396 |
| 0.011430 | 0.011362 | 0.011362 | 0.011665 | 0.011530 | 0.011631 | 0.011362 |
| 0.011463 | 0.011530 | 0.011396 | 0.011463 | 0.011430 | 0.011295 | 0.011631 |
| 0.011396 | 0.011362 | 0.011362 | 0.011530 | 0.011362 | 0.011463 | 0.011698 |
| 0.011396 | 0.011774 | 0.011766 | 0.011548 | 0.011286 | 0.011434 | 0.011318 |
| 0.011225 | 0.011761 | 0.011271 | 0.011507 | 0.011304 | 0.011467 | 0.011432 |
| 0.011519 | 0.011258 | 0.011394 | 0.011258 | 0.011276 | 0.011462 | 0.011385 |
| 0.011399 | 0.011257 | 0.011412 | 0.011342 | 0.011397 | 0.011530 | 0.011598 |
| 0.011597 | 0.011464 | 0.011567 | 0.011569 | 0.011704 | 0.011732 | 0.011396 |
| 0.011631 | 0.011497 | 0.011362 | 0.011463 | 0.011262 | 0.011497 | 0.011295 |
| 0.011362 | 0.011362 | 0.011329 | 0.011295 | 0.011329 | 0.011295 | 0.011396 |
| 0.011375 | 0.011375 | 0.011334 | 0.011403 | 0.011539 | 0.011436 | 0.011504 |
| 0.011503 | 0.011430 | 0.011208 | 0.011204 | 0.011365 | 0.011535 | 0.011535 |
| 0.011329 | 0.011399 | 0.011633 | 0.011601 | 0.011531 | 0.011565 | 0.011497 |
| 0.011430 | 0.011497 | 0.011497 | 0.011396 | 0.011968 | 0.011564 | 0.011631 |
| 0.011665 | 0.011737 | 0.011367 | 0.011441 | 0.011329 | 0.011530 | 0.011497 |
| 0.011531 | 0.011564 | 0.011564 | 0.011564 | 0.011729 | 0.011698 | 0.011338 |
| 0.011229 | 0.011233 | 0.011333 | 0.011298 | 0.011402 | 0.011210 | 0.011570 |
| 0.011369 | 0.011455 | 0.011203 | 0.011360 | 0.011363 | 0.011437 | 0.011262 |
| 0.011295 | 0.011295 | 0.011295 | 0.011329 | 0.011530 | 0.011497 | 0.011430 |
| 0.011530 | 0.011597 | 0.011329 | 0.011329 | 0.011362 | 0.011362 | 0.011364 |
| 0.011398 | 0.011362 | 0.011362 | 0.011397 | 0.011530 | 0.011598 | 0.011597 |
| 0.011464 | 0.011567 | 0.011569 | 0.011704 | 0.011732 | 0.011396 | 0.011564 |
| 0.011497 | 0.011497 | 0.011331 | 0.011513 | 0.011442 | 0.011469 | 0.011341 |
| 0.011439 | 0.011653 | 0.011441 | 0.011400 | 0.011228 | 0.011430 | 0.011295 |
| 0.011396 | 0.011396 | 0.011295 | 0.011397 | 0.011497 | 0.011500 | 0.011396 |
| 0.011295 | 0.011229 | 0.011362 | 0.011295 | 0.011228 | 0.011332 | 0.011430 |
| 0.011396 | 0.011329 | 0.011362 | 0.011329 | 0.011363 | 0.011295 | 0.011497 |
| 0.011362 | 0.011396 | 0.011396 | 0.011329 | 0.011396 | 0.011631 | 0.011295 |
| 0.011329 | 0.011732 | 0.011329 | 0.011295 | 0.011329 | 0.011698 | 0.011275 |
| 0.011735 | 0.011273 | 0.011311 | 0.011503 | 0.011589 | 0.011491 | 0.011227 |
| 0.011270 | 0.011497 | 0.011597 | 0.011705 | 0.011565 | 0.011703 | 0.011834 |
| 0.011733 | 0.011771 | 0.011732 | 0.011983 | 0.011698 | 0.012573 | 0.011734 |
| 0.012473 | 0.012241 | 0.012375 | 0.012646 | 0.011698 | 0.011396 | 0.011699 |
| 0.012137 | 0.012072 | 0.011665 | 0.011564 | 0.011632 | 0.011632 | 0.011602 |
| 0.011497 | 0.011501 | 0.011564 | 0.011531 | 0.011901 | 0.011967 | 0.011968 |
| 0.011868 | 0.011968 | 0.012072 | 0.011838 | 0.012138 | 0.012144 | 0.012205 |
| 0.012206 | 0.012239 | 0.012152 | 0.012138 | 0.012207 | 0.011429 | 0.011732 |

|          |          |          |          |          |          |          |
|----------|----------|----------|----------|----------|----------|----------|
| 0.011800 | 0.012304 | 0.011806 | 0.012035 | 0.012508 | 0.011570 | 0.011464 |
| 0.011430 | 0.011429 | 0.011900 | 0.011924 | 0.012010 | 0.011765 | 0.011431 |
| S211     | 0.011631 | 0.011631 | 0.011967 | 0.011732 | 0.011732 | 0.011799 |
| 0.011638 | 0.011570 | 0.011732 | 0.011228 | 0.011295 | 0.011262 | 0.011228 |
| 0.011262 | 0.011429 | 0.011228 | 0.011262 | 0.011329 | 0.011295 | 0.011195 |
| 0.011228 | 0.011262 | 0.011362 | 0.011228 | 0.011262 | 0.011262 | 0.011604 |
| 0.011497 | 0.011262 | 0.011161 | 0.011396 | 0.011329 | 0.011295 | 0.011329 |
| 0.011295 | 0.011396 | 0.011295 | 0.011295 | 0.011329 | 0.011295 | 0.011463 |
| 0.011228 | 0.011295 | 0.011329 | 0.011262 | 0.011362 | 0.011396 | 0.011329 |
| 0.011295 | 0.011463 | 0.011363 | 0.011631 | 0.011295 | 0.011564 | 0.011295 |
| 0.011262 | 0.011362 | 0.011430 | 0.011564 | 0.011665 | 0.011362 | 0.011463 |
| 0.011329 | 0.011396 | 0.011295 | 0.011530 | 0.011766 | 0.011295 | 0.011362 |
| 0.011262 | 0.011362 | 0.011329 | 0.011396 | 0.011329 | 0.011329 | 0.011329 |
| 0.011228 | 0.011262 | 0.011228 | 0.011329 | 0.011295 | 0.011329 | 0.011396 |
| 0.011329 | 0.011295 | 0.011362 | 0.011262 | 0.011396 | 0.011228 | 0.011295 |
| 0.011463 | 0.011396 | 0.011631 | 0.011463 | 0.011295 | 0.011530 | 0.011295 |
| 0.011468 | 0.011695 | 0.011513 | 0.011216 | 0.011209 | 0.011318 | 0.011414 |
| 0.012048 | 0.011467 | 0.011143 | 0.011530 | 0.011530 | 0.011329 | 0.011430 |
| 0.011362 | 0.011329 | 0.011396 | 0.011295 | 0.011396 | 0.011329 | 0.011329 |
| 0.011295 | 0.011396 | 0.011597 | 0.011463 | 0.011362 | 0.011329 | 0.011262 |
| 0.011228 | 0.011228 | 0.011295 | 0.011262 | 0.011463 | 0.011429 | 0.011362 |
| 0.011463 | 0.011530 | 0.011262 | 0.011262 | 0.011295 | 0.011295 | 0.011297 |
| 0.011364 | 0.011295 | 0.011295 | 0.011168 | 0.011241 | 0.011200 | 0.011296 |
| 0.011297 | 0.011232 | 0.011282 | 0.011267 | 0.011196 | 0.011231 | 0.011263 |
| 0.011528 | 0.011301 | 0.011336 | 0.011161 | 0.011233 | 0.011363 | 0.011329 |
| 0.011396 | 0.011330 | 0.011329 | 0.011429 | 0.011362 | 0.011732 | 0.011530 |
| 0.011564 | 0.011430 | 0.011295 | 0.011396 | 0.011195 | 0.011429 | 0.011228 |
| 0.011295 | 0.011295 | 0.011262 | 0.011228 | 0.011262 | 0.011228 | 0.011329 |
| 0.011295 | 0.011396 | 0.011329 | 0.011228 | 0.011330 | 0.011430 | 0.011432 |
| 0.011430 | 0.011329 | 0.011228 | 0.011161 | 0.011295 | 0.011228 | 0.011161 |
| 0.011196 | 0.011430 | 0.011228 | 0.011430 | 0.011195 | 0.011295 | 0.011262 |
| 0.011362 | 0.011262 | 0.011295 | 0.011262 | 0.011295 | 0.011161 | 0.011295 |
| 0.011329 | 0.000000 | 0.011329 | 0.011262 | 0.011295 | 0.011329 | 0.011564 |
| 0.011665 | 0.011597 | 0.011665 | 0.011431 | 0.011665 | 0.011295 | 0.011195 |
| 0.011297 | 0.011545 | 0.011335 | 0.011197 | 0.011671 | 0.011129 | 0.011257 |
| 0.011671 | 0.011570 | 0.011463 | 0.011665 | 0.011368 | 0.011530 | 0.011497 |
| 0.011430 | 0.011597 | 0.011451 | 0.011307 | 0.011312 | 0.011262 | 0.011399 |
| 0.011497 | 0.011398 | 0.011534 | 0.011602 | 0.011530 | 0.011598 | 0.011704 |
| 0.011433 | 0.011603 | 0.011534 | 0.011466 | 0.011733 | 0.011195 | 0.011397 |
| 0.011362 | 0.011295 | 0.011195 | 0.011195 | 0.011262 | 0.011262 | 0.011329 |
| 0.011262 | 0.011329 | 0.011228 | 0.011329 | 0.011262 | 0.011195 | 0.011329 |
| 0.011262 | 0.011698 | 0.011597 | 0.011631 | 0.011161 | 0.011262 | 0.011295 |
| 0.011295 | 0.011262 | 0.011329 | 0.011362 | 0.011228 | 0.011228 | 0.011228 |
| 0.011765 | 0.011396 | 0.011396 | 0.011195 | 0.011295 | 0.011463 | 0.011228 |
| 0.011228 | 0.011295 | 0.011262 | 0.011430 | 0.011228 | 0.011362 | 0.011497 |
| 0.011429 | 0.011262 | 0.011195 | 0.011195 | 0.011195 | 0.011362 | 0.011295 |
| 0.011195 | 0.011295 | 0.011161 | 0.011195 | 0.011329 | 0.011463 | 0.011228 |
| 0.011195 | 0.011329 | 0.011262 | 0.011161 | 0.011497 | 0.011161 | 0.011329 |
| 0.011403 | 0.011228 | 0.011530 | 0.011362 | 0.011396 | 0.011262 | 0.011362 |
| 0.011228 | 0.011564 | 0.011161 | 0.011430 | 0.011228 | 0.011228 | 0.011161 |
| 0.011396 | 0.011598 | 0.011295 | 0.011362 | 0.011195 | 0.011597 | 0.011228 |
| 0.011228 | 0.011161 | 0.011262 | 0.011362 | 0.011262 | 0.011362 | 0.011429 |
| 0.011430 | 0.011396 | 0.011295 | 0.011396 | 0.011362 | 0.011228 | 0.011195 |
| 0.011228 | 0.011228 | 0.011295 | 0.011228 | 0.011195 | 0.011362 | 0.011228 |
| 0.011262 | 0.011262 | 0.011396 | 0.011429 | 0.011329 | 0.011262 | 0.011262 |
| 0.011329 | 0.011262 | 0.011362 | 0.011228 | 0.011362 | 0.011463 | 0.011765 |
| 0.011262 | 0.011665 | 0.011267 | 0.017785 | 0.011257 | 0.011427 | 0.011618 |
| 0.011579 | 0.011623 | 0.011322 | 0.011292 | 0.011774 | 0.011647 | 0.011425 |
| 0.011487 | 0.011610 | 0.011177 | 0.011228 | 0.011255 | 0.011356 | 0.011275 |
| 0.011482 | 0.011433 | 0.011431 | 0.011193 | 0.011396 | 0.011430 | 0.011432 |

|          |          |          |          |          |          |          |
|----------|----------|----------|----------|----------|----------|----------|
| 0.011301 | 0.011396 | 0.011396 | 0.011362 | 0.011329 | 0.011329 | 0.011295 |
| 0.011329 | 0.011262 | 0.011295 | 0.011329 | 0.011295 | 0.011228 | 0.011262 |
| 0.011262 | 0.011329 | 0.011228 | 0.011329 | 0.011362 | 0.011396 | 0.011295 |
| 0.011329 | 0.011295 | 0.011631 | 0.011631 | 0.011362 | 0.011396 | 0.011430 |
| 0.011195 | 0.011195 | 0.011228 | 0.011329 | 0.011195 | 0.011429 | 0.011429 |
| 0.011463 | 0.011463 | 0.011396 | 0.011497 | 0.011665 | 0.011498 | 0.011329 |
| 0.011329 | 0.011396 | 0.011429 | 0.011262 | 0.011329 | 0.011295 | 0.011329 |
| 0.011396 | 0.011396 | 0.011429 | 0.011396 | 0.011296 | 0.011497 | 0.011463 |
| 0.011331 | 0.011228 | 0.011329 | 0.011430 | 0.011329 | 0.011463 | 0.011497 |
| 0.011665 | 0.011368 | 0.011530 | 0.011497 | 0.011430 | 0.011597 | 0.011228 |
| 0.011397 | 0.011295 | 0.011262 | 0.011262 | 0.011329 | 0.011228 | 0.011329 |
| 0.011362 | 0.011396 | 0.011295 | 0.011329 | 0.011295 | 0.011631 | 0.011631 |
| 0.011362 | 0.011396 | 0.011463 | 0.011396 | 0.012036 | 0.011453 | 0.011377 |
| 0.011447 | 0.011407 | 0.011517 | 0.011407 | 0.011515 | 0.011440 | 0.011405 |
| 0.011988 | 0.011303 | 0.011437 | 0.011372 | 0.011646 | 0.011502 | 0.011605 |
| 0.012012 | 0.011437 | 0.011331 | 0.011329 | 0.011329 | 0.011362 | 0.011297 |
| 0.011195 | 0.011228 | 0.011362 | 0.011329 | 0.011331 | 0.011463 | 0.011431 |
| 0.011295 | 0.011161 | 0.011262 | 0.011295 | 0.011195 | 0.011262 | 0.011161 |
| 0.011295 | 0.011329 | 0.011228 | 0.011195 | 0.011295 | 0.011228 | 0.011262 |
| 0.011262 | 0.011195 | 0.011262 | 0.011295 | 0.011195 | 0.011396 | 0.011429 |
| 0.011329 | 0.011396 | 0.011329 | 0.011329 | 0.011262 | 0.011665 | 0.011295 |
| 0.011339 | 0.011262 | 0.011497 | 0.011501 | 0.011362 | 0.011362 | 0.011362 |
| 0.011362 | 0.011295 | 0.011262 | 0.011295 | 0.011396 | 0.011396 | 0.011329 |
| 0.011329 | 0.011463 | 0.011631 | 0.011362 | 0.011564 | 0.011564 | 0.011429 |
| 0.011262 | 0.011329 | 0.011362 | 0.011766 | 0.011329 | 0.011362 | 0.011329 |
| 0.011362 | 0.011295 | 0.011295 | 0.011598 | 0.011530 | 0.011564 | 0.011295 |
| 0.011396 | 0.011463 | 0.011329 | 0.011396 | 0.011362 | 0.011228 | 0.011564 |
| 0.011329 | 0.011295 | 0.011295 | 0.011463 | 0.011295 | 0.011396 | 0.011631 |
| 0.011329 | 0.011706 | 0.011698 | 0.011507 | 0.011286 | 0.011400 | 0.011267 |
| 0.011225 | 0.011722 | 0.011236 | 0.011462 | 0.011304 | 0.011416 | 0.011432 |
| 0.011519 | 0.011192 | 0.011394 | 0.011258 | 0.011276 | 0.011462 | 0.011385 |
| 0.011399 | 0.011296 | 0.011377 | 0.011307 | 0.011330 | 0.011463 | 0.011530 |
| 0.011530 | 0.011396 | 0.011500 | 0.011501 | 0.011636 | 0.011661 | 0.011329 |
| 0.011564 | 0.011430 | 0.011295 | 0.011396 | 0.011195 | 0.011429 | 0.011228 |
| 0.011295 | 0.011295 | 0.011262 | 0.011228 | 0.011262 | 0.011228 | 0.011329 |
| 0.011305 | 0.011305 | 0.011231 | 0.011334 | 0.011471 | 0.011436 | 0.011436 |
| 0.011435 | 0.011363 | 0.011171 | 0.011168 | 0.011297 | 0.011467 | 0.011467 |
| 0.011262 | 0.011331 | 0.011565 | 0.011533 | 0.011464 | 0.011498 | 0.011429 |
| 0.011362 | 0.011429 | 0.011429 | 0.011329 | 0.011900 | 0.011497 | 0.011564 |
| 0.011597 | 0.011666 | 0.011265 | 0.011372 | 0.011262 | 0.011463 | 0.011430 |
| 0.011464 | 0.011497 | 0.011497 | 0.011497 | 0.011610 | 0.011631 | 0.011268 |
| 0.011162 | 0.011164 | 0.011265 | 0.011230 | 0.011334 | 0.011135 | 0.011502 |
| 0.011232 | 0.011411 | 0.011156 | 0.011285 | 0.011296 | 0.011368 | 0.011262 |
| 0.011228 | 0.011228 | 0.011295 | 0.011262 | 0.011463 | 0.011429 | 0.011362 |
| 0.011463 | 0.011530 | 0.011262 | 0.011262 | 0.011295 | 0.011295 | 0.011297 |
| 0.011364 | 0.011295 | 0.011295 | 0.011330 | 0.011463 | 0.011530 | 0.011530 |
| 0.011396 | 0.011500 | 0.011501 | 0.011636 | 0.011661 | 0.011329 | 0.011497 |
| 0.011430 | 0.011430 | 0.011263 | 0.011408 | 0.011373 | 0.011401 | 0.011235 |
| 0.011439 | 0.011652 | 0.011441 | 0.011332 | 0.011228 | 0.011430 | 0.011295 |
| 0.011396 | 0.011329 | 0.011228 | 0.011330 | 0.011430 | 0.011432 | 0.011329 |
| 0.011228 | 0.011161 | 0.011295 | 0.011228 | 0.011161 | 0.011196 | 0.011430 |
| 0.011329 | 0.011262 | 0.011295 | 0.011329 | 0.011295 | 0.011228 | 0.011430 |
| 0.011295 | 0.011329 | 0.011329 | 0.011262 | 0.011329 | 0.011564 | 0.011228 |
| 0.011262 | 0.011665 | 0.011262 | 0.011295 | 0.011262 | 0.011631 | 0.011232 |
| 0.011735 | 0.011230 | 0.011261 | 0.011463 | 0.011549 | 0.011455 | 0.011186 |
| 0.011218 | 0.011429 | 0.011530 | 0.011637 | 0.011498 | 0.011635 | 0.011766 |
| 0.011666 | 0.011703 | 0.011665 | 0.011914 | 0.011631 | 0.012506 | 0.011666 |
| 0.012405 | 0.012173 | 0.012307 | 0.012578 | 0.011631 | 0.011329 | 0.011631 |
| 0.012070 | 0.012004 | 0.011597 | 0.011497 | 0.011564 | 0.011564 | 0.011534 |
| 0.011429 | 0.011433 | 0.011497 | 0.011464 | 0.011833 | 0.011900 | 0.011901 |

|          |          |          |          |          |          |          |
|----------|----------|----------|----------|----------|----------|----------|
| 0.011800 | 0.011901 | 0.012004 | 0.011770 | 0.012070 | 0.012076 | 0.012137 |
| 0.012138 | 0.012172 | 0.012118 | 0.012138 | 0.012139 | 0.011362 | 0.011665 |
| 0.011733 | 0.012237 | 0.011738 | 0.011967 | 0.012440 | 0.011502 | 0.011396 |
| 0.011362 | 0.011362 | 0.011833 | 0.011800 | 0.011975 | 0.011698 | 0.011363 |
| S212     | 0.011698 | 0.011698 | 0.012035 | 0.011799 | 0.011799 | 0.011866 |
| 0.011672 | 0.011604 | 0.011799 | 0.011295 | 0.011362 | 0.011329 | 0.011295 |
| 0.011329 | 0.011497 | 0.011295 | 0.011329 | 0.011396 | 0.011362 | 0.011329 |
| 0.011295 | 0.011329 | 0.011429 | 0.011296 | 0.011329 | 0.011329 | 0.011638 |
| 0.011564 | 0.011329 | 0.011228 | 0.011463 | 0.011396 | 0.011362 | 0.011396 |
| 0.011362 | 0.011463 | 0.011362 | 0.011362 | 0.011396 | 0.011362 | 0.011530 |
| 0.011295 | 0.011362 | 0.011396 | 0.011329 | 0.011430 | 0.011463 | 0.011396 |
| 0.011362 | 0.011530 | 0.011430 | 0.011698 | 0.011362 | 0.011631 | 0.011362 |
| 0.011329 | 0.011430 | 0.011497 | 0.011631 | 0.011732 | 0.011430 | 0.011530 |
| 0.011396 | 0.011463 | 0.011362 | 0.011597 | 0.011833 | 0.011362 | 0.011430 |
| 0.011329 | 0.011429 | 0.011396 | 0.011463 | 0.011396 | 0.011396 | 0.011396 |
| 0.011295 | 0.011329 | 0.011295 | 0.011396 | 0.011362 | 0.011397 | 0.011463 |
| 0.011396 | 0.011362 | 0.011430 | 0.011329 | 0.011463 | 0.011295 | 0.011362 |
| 0.011530 | 0.011463 | 0.011698 | 0.011530 | 0.011362 | 0.011598 | 0.011362 |
| 0.011505 | 0.011733 | 0.011551 | 0.011255 | 0.011284 | 0.011391 | 0.011454 |
| 0.012121 | 0.011467 | 0.011225 | 0.011597 | 0.011597 | 0.011396 | 0.011497 |
| 0.011094 | 0.011396 | 0.011463 | 0.011362 | 0.011463 | 0.011396 | 0.011396 |
| 0.011362 | 0.011463 | 0.011665 | 0.011530 | 0.011430 | 0.011396 | 0.011329 |
| 0.011295 | 0.011295 | 0.011362 | 0.011329 | 0.011530 | 0.011497 | 0.011429 |
| 0.011530 | 0.011597 | 0.011329 | 0.011329 | 0.011362 | 0.011362 | 0.011364 |
| 0.011432 | 0.011362 | 0.011362 | 0.011240 | 0.011313 | 0.011271 | 0.011363 |
| 0.011365 | 0.011301 | 0.011355 | 0.011336 | 0.011264 | 0.011300 | 0.011330 |
| 0.011600 | 0.011370 | 0.011405 | 0.011296 | 0.011302 | 0.011094 | 0.011396 |
| 0.011464 | 0.011397 | 0.011396 | 0.011497 | 0.011429 | 0.011799 | 0.011598 |
| 0.011631 | 0.011497 | 0.011362 | 0.011463 | 0.011262 | 0.011497 | 0.011295 |
| 0.011362 | 0.011362 | 0.011329 | 0.011295 | 0.011329 | 0.011295 | 0.011396 |
| 0.011362 | 0.011463 | 0.011396 | 0.011295 | 0.011397 | 0.011497 | 0.011499 |
| 0.011497 | 0.011396 | 0.011295 | 0.011229 | 0.011362 | 0.011295 | 0.011228 |
| 0.011332 | 0.011497 | 0.011295 | 0.011497 | 0.011262 | 0.011362 | 0.011329 |
| 0.011430 | 0.011329 | 0.011362 | 0.011329 | 0.011362 | 0.011228 | 0.011362 |
| 0.011396 | 0.011329 | 0.000000 | 0.011329 | 0.011362 | 0.011396 | 0.011631 |
| 0.011732 | 0.011665 | 0.011732 | 0.011498 | 0.011732 | 0.011362 | 0.011329 |
| 0.011364 | 0.011626 | 0.011426 | 0.011266 | 0.011739 | 0.011231 | 0.011336 |
| 0.011705 | 0.011638 | 0.011530 | 0.011732 | 0.011402 | 0.011598 | 0.011564 |
| 0.011497 | 0.011665 | 0.011522 | 0.011390 | 0.011438 | 0.011396 | 0.011466 |
| 0.011564 | 0.011465 | 0.011601 | 0.011670 | 0.011598 | 0.011665 | 0.011772 |
| 0.011500 | 0.011671 | 0.011602 | 0.011534 | 0.011801 | 0.011262 | 0.011465 |
| 0.011429 | 0.011362 | 0.011262 | 0.011262 | 0.011329 | 0.011329 | 0.011396 |
| 0.011329 | 0.011396 | 0.011295 | 0.011396 | 0.011329 | 0.011329 | 0.011396 |
| 0.011329 | 0.011765 | 0.011665 | 0.011698 | 0.011228 | 0.011329 | 0.011362 |
| 0.011362 | 0.011329 | 0.011396 | 0.011430 | 0.011295 | 0.011295 | 0.011295 |
| 0.011833 | 0.011463 | 0.011463 | 0.011262 | 0.011362 | 0.011530 | 0.011295 |
| 0.011295 | 0.011362 | 0.011329 | 0.011497 | 0.011295 | 0.011430 | 0.011564 |
| 0.011497 | 0.011329 | 0.011329 | 0.011262 | 0.011262 | 0.011430 | 0.011362 |
| 0.011262 | 0.011295 | 0.011228 | 0.011262 | 0.011396 | 0.011531 | 0.011295 |
| 0.011262 | 0.011396 | 0.011329 | 0.011228 | 0.011564 | 0.011228 | 0.011396 |
| 0.011471 | 0.011295 | 0.011598 | 0.011430 | 0.011463 | 0.011329 | 0.011362 |
| 0.011295 | 0.011631 | 0.011228 | 0.011497 | 0.011295 | 0.011295 | 0.011228 |
| 0.011463 | 0.011665 | 0.011362 | 0.011430 | 0.011262 | 0.011665 | 0.011295 |
| 0.011295 | 0.011295 | 0.011329 | 0.011430 | 0.011329 | 0.011430 | 0.011497 |
| 0.011497 | 0.011463 | 0.011362 | 0.011463 | 0.011429 | 0.011295 | 0.011262 |
| 0.011295 | 0.011295 | 0.011362 | 0.011295 | 0.011262 | 0.011430 | 0.011295 |
| 0.011329 | 0.011329 | 0.011463 | 0.011497 | 0.011396 | 0.011329 | 0.011329 |
| 0.011396 | 0.011329 | 0.011429 | 0.011295 | 0.011430 | 0.011530 | 0.011833 |
| 0.011329 | 0.011732 | 0.011336 | 0.017823 | 0.011322 | 0.011488 | 0.011688 |
| 0.011648 | 0.011693 | 0.011374 | 0.011350 | 0.011829 | 0.011716 | 0.011485 |

|          |          |          |          |          |          |          |
|----------|----------|----------|----------|----------|----------|----------|
| 0.011534 | 0.011610 | 0.011216 | 0.011270 | 0.011333 | 0.011406 | 0.011318 |
| 0.011576 | 0.011470 | 0.011505 | 0.011325 | 0.011463 | 0.011497 | 0.011466 |
| 0.011369 | 0.011463 | 0.011463 | 0.011429 | 0.011396 | 0.011396 | 0.011363 |
| 0.011396 | 0.011329 | 0.011362 | 0.011396 | 0.011362 | 0.011295 | 0.011329 |
| 0.011329 | 0.011396 | 0.011295 | 0.011396 | 0.011430 | 0.011463 | 0.011362 |
| 0.011396 | 0.011362 | 0.011698 | 0.011698 | 0.011430 | 0.011464 | 0.011497 |
| 0.011262 | 0.011262 | 0.011295 | 0.011396 | 0.011262 | 0.011497 | 0.011497 |
| 0.011530 | 0.011530 | 0.011463 | 0.011564 | 0.011732 | 0.011565 | 0.011396 |
| 0.011396 | 0.011463 | 0.011497 | 0.011329 | 0.011396 | 0.011362 | 0.011396 |
| 0.011463 | 0.011463 | 0.011497 | 0.011463 | 0.011363 | 0.011564 | 0.011530 |
| 0.011399 | 0.011295 | 0.011396 | 0.011497 | 0.011396 | 0.011530 | 0.011564 |
| 0.011732 | 0.011402 | 0.011598 | 0.011564 | 0.011497 | 0.011665 | 0.011295 |
| 0.011464 | 0.011363 | 0.011329 | 0.011329 | 0.011396 | 0.011295 | 0.011396 |
| 0.011430 | 0.011463 | 0.011362 | 0.011396 | 0.011362 | 0.011698 | 0.011698 |
| 0.011430 | 0.011464 | 0.011530 | 0.011463 | 0.012103 | 0.011525 | 0.011447 |
| 0.011517 | 0.011476 | 0.011587 | 0.011476 | 0.011585 | 0.011509 | 0.011474 |
| 0.012056 | 0.011372 | 0.011506 | 0.011441 | 0.011715 | 0.011571 | 0.011673 |
| 0.012081 | 0.011550 | 0.011398 | 0.011396 | 0.011396 | 0.011429 | 0.011364 |
| 0.011262 | 0.011295 | 0.011430 | 0.011396 | 0.011398 | 0.011530 | 0.011498 |
| 0.011362 | 0.011295 | 0.011329 | 0.011362 | 0.011262 | 0.011329 | 0.011228 |
| 0.011362 | 0.011396 | 0.011295 | 0.011262 | 0.011362 | 0.011295 | 0.011329 |
| 0.011329 | 0.011262 | 0.011329 | 0.011362 | 0.011262 | 0.011463 | 0.011497 |
| 0.011396 | 0.011463 | 0.011396 | 0.011396 | 0.011329 | 0.011732 | 0.011362 |
| 0.011408 | 0.011329 | 0.011564 | 0.011569 | 0.011430 | 0.011429 | 0.011430 |
| 0.011430 | 0.011362 | 0.011329 | 0.011362 | 0.011463 | 0.011463 | 0.011396 |
| 0.011396 | 0.011530 | 0.011698 | 0.011429 | 0.011631 | 0.011631 | 0.011497 |
| 0.011329 | 0.011396 | 0.011430 | 0.011833 | 0.011396 | 0.011430 | 0.011396 |
| 0.011430 | 0.011362 | 0.011362 | 0.011665 | 0.011598 | 0.011631 | 0.011362 |
| 0.011463 | 0.011530 | 0.011396 | 0.011463 | 0.011430 | 0.011295 | 0.011631 |
| 0.011396 | 0.011362 | 0.011362 | 0.011530 | 0.011362 | 0.011463 | 0.011698 |
| 0.011396 | 0.011740 | 0.011765 | 0.011507 | 0.011286 | 0.011468 | 0.011318 |
| 0.011280 | 0.011722 | 0.011306 | 0.011462 | 0.011304 | 0.011416 | 0.011432 |
| 0.011519 | 0.011258 | 0.011394 | 0.011258 | 0.011276 | 0.011395 | 0.011385 |
| 0.011437 | 0.011296 | 0.011448 | 0.011377 | 0.011397 | 0.011530 | 0.011597 |
| 0.011597 | 0.011464 | 0.011567 | 0.011569 | 0.011704 | 0.011732 | 0.011396 |
| 0.011631 | 0.011497 | 0.011362 | 0.011463 | 0.011262 | 0.011497 | 0.011295 |
| 0.011362 | 0.011362 | 0.011329 | 0.011295 | 0.011329 | 0.011295 | 0.011396 |
| 0.011375 | 0.011375 | 0.011368 | 0.011403 | 0.011539 | 0.011504 | 0.011504 |
| 0.011435 | 0.011430 | 0.011208 | 0.011204 | 0.011365 | 0.011535 | 0.011535 |
| 0.011329 | 0.011399 | 0.011632 | 0.011601 | 0.011531 | 0.011565 | 0.011497 |
| 0.011429 | 0.011497 | 0.011497 | 0.011396 | 0.011967 | 0.011564 | 0.011631 |
| 0.011665 | 0.011737 | 0.011367 | 0.011441 | 0.011329 | 0.011530 | 0.011497 |
| 0.011531 | 0.011564 | 0.011564 | 0.011564 | 0.011689 | 0.011698 | 0.011338 |
| 0.011229 | 0.011233 | 0.011333 | 0.011298 | 0.011402 | 0.011247 | 0.011570 |
| 0.011369 | 0.011543 | 0.011298 | 0.011360 | 0.011363 | 0.011437 | 0.011329 |
| 0.011295 | 0.011295 | 0.011362 | 0.011329 | 0.011530 | 0.011497 | 0.011429 |
| 0.011530 | 0.011597 | 0.011329 | 0.011329 | 0.011362 | 0.011362 | 0.011364 |
| 0.011432 | 0.011362 | 0.011362 | 0.011397 | 0.011530 | 0.011597 | 0.011597 |
| 0.011464 | 0.011567 | 0.011569 | 0.011704 | 0.011732 | 0.011396 | 0.011564 |
| 0.011497 | 0.011497 | 0.011331 | 0.011513 | 0.011442 | 0.011469 | 0.011340 |
| 0.011508 | 0.011698 | 0.011526 | 0.011400 | 0.011295 | 0.011497 | 0.011362 |
| 0.011463 | 0.011396 | 0.011295 | 0.011397 | 0.011497 | 0.011499 | 0.011396 |
| 0.011295 | 0.011229 | 0.011362 | 0.011295 | 0.011228 | 0.011332 | 0.011497 |
| 0.011396 | 0.011329 | 0.011362 | 0.011396 | 0.011362 | 0.011295 | 0.011497 |
| 0.011362 | 0.011396 | 0.011396 | 0.011329 | 0.011396 | 0.011564 | 0.011295 |
| 0.011329 | 0.011732 | 0.011329 | 0.011362 | 0.011329 | 0.011698 | 0.011232 |
| 0.011735 | 0.011230 | 0.011261 | 0.011503 | 0.011549 | 0.011527 | 0.011186 |
| 0.011218 | 0.011497 | 0.011597 | 0.011705 | 0.011565 | 0.011703 | 0.011834 |
| 0.011733 | 0.011771 | 0.011732 | 0.011983 | 0.011698 | 0.012573 | 0.011734 |
| 0.012473 | 0.012241 | 0.012375 | 0.012646 | 0.011698 | 0.011396 | 0.011699 |

|          |          |          |          |          |          |          |
|----------|----------|----------|----------|----------|----------|----------|
| 0.012137 | 0.012072 | 0.011665 | 0.011564 | 0.011632 | 0.011632 | 0.011602 |
| 0.011497 | 0.011501 | 0.011564 | 0.011531 | 0.011901 | 0.011967 | 0.011968 |
| 0.011868 | 0.011968 | 0.012072 | 0.011838 | 0.012138 | 0.012144 | 0.012205 |
| 0.012205 | 0.012239 | 0.012186 | 0.012206 | 0.012207 | 0.011429 | 0.011732 |
| 0.011800 | 0.012304 | 0.011772 | 0.012035 | 0.012508 | 0.011570 | 0.011464 |
| 0.011429 | 0.011429 | 0.011900 | 0.011965 | 0.012010 | 0.011765 | 0.011431 |
| S213     | 0.011631 | 0.011631 | 0.011967 | 0.011732 | 0.011732 | 0.011799 |
| 0.011604 | 0.011536 | 0.011732 | 0.011228 | 0.011295 | 0.011262 | 0.011228 |
| 0.011262 | 0.011429 | 0.011228 | 0.011262 | 0.011329 | 0.011295 | 0.011262 |
| 0.011228 | 0.011262 | 0.011362 | 0.011228 | 0.011262 | 0.011262 | 0.011570 |
| 0.011497 | 0.011262 | 0.011161 | 0.011396 | 0.011329 | 0.011295 | 0.011329 |
| 0.011295 | 0.011396 | 0.011295 | 0.011295 | 0.011329 | 0.011295 | 0.011463 |
| 0.011228 | 0.011295 | 0.011329 | 0.011262 | 0.011362 | 0.011396 | 0.011329 |
| 0.011295 | 0.011463 | 0.011363 | 0.011631 | 0.011295 | 0.011564 | 0.011295 |
| 0.011262 | 0.011362 | 0.011429 | 0.011564 | 0.011665 | 0.011362 | 0.011463 |
| 0.011329 | 0.011396 | 0.011295 | 0.011530 | 0.011765 | 0.011295 | 0.011362 |
| 0.011262 | 0.011362 | 0.011329 | 0.011396 | 0.011329 | 0.011329 | 0.011329 |
| 0.011228 | 0.011262 | 0.011228 | 0.011329 | 0.011295 | 0.011329 | 0.011396 |
| 0.011329 | 0.011295 | 0.011362 | 0.011262 | 0.011396 | 0.011228 | 0.011295 |
| 0.011463 | 0.011396 | 0.011631 | 0.011463 | 0.011295 | 0.011530 | 0.011295 |
| 0.011431 | 0.011658 | 0.011475 | 0.011177 | 0.011210 | 0.011318 | 0.011375 |
| 0.012048 | 0.011416 | 0.011184 | 0.011530 | 0.011530 | 0.011329 | 0.011429 |
| 0.011362 | 0.011329 | 0.011396 | 0.011295 | 0.011396 | 0.011329 | 0.011329 |
| 0.011295 | 0.011396 | 0.011597 | 0.011463 | 0.011362 | 0.011329 | 0.011262 |
| 0.011228 | 0.011228 | 0.011295 | 0.011262 | 0.011463 | 0.011429 | 0.011362 |
| 0.011463 | 0.011530 | 0.011262 | 0.011262 | 0.011295 | 0.011295 | 0.011297 |
| 0.011364 | 0.011295 | 0.011295 | 0.011168 | 0.011241 | 0.011200 | 0.011296 |
| 0.011297 | 0.011232 | 0.011282 | 0.011267 | 0.011196 | 0.011231 | 0.011263 |
| 0.011528 | 0.011301 | 0.011336 | 0.011228 | 0.011233 | 0.011363 | 0.011329 |
| 0.011396 | 0.011330 | 0.011329 | 0.011429 | 0.011362 | 0.011732 | 0.011530 |
| 0.011564 | 0.011429 | 0.011295 | 0.011396 | 0.011195 | 0.011429 | 0.011228 |
| 0.011295 | 0.011295 | 0.011262 | 0.011228 | 0.011262 | 0.011228 | 0.011329 |
| 0.011295 | 0.011396 | 0.011329 | 0.011228 | 0.011330 | 0.011429 | 0.011432 |
| 0.011430 | 0.011329 | 0.011228 | 0.011161 | 0.011295 | 0.011228 | 0.011161 |
| 0.011264 | 0.011430 | 0.011228 | 0.011430 | 0.011195 | 0.011295 | 0.011262 |
| 0.011362 | 0.011262 | 0.011295 | 0.011262 | 0.011295 | 0.011161 | 0.011295 |
| 0.011329 | 0.011262 | 0.011329 | 0.000000 | 0.011295 | 0.011329 | 0.011564 |
| 0.011665 | 0.011597 | 0.011665 | 0.011431 | 0.011665 | 0.011295 | 0.011262 |
| 0.011297 | 0.011545 | 0.011380 | 0.011197 | 0.011671 | 0.011163 | 0.011257 |
| 0.011637 | 0.011570 | 0.011463 | 0.011665 | 0.011368 | 0.011530 | 0.011497 |
| 0.011429 | 0.011564 | 0.011451 | 0.011266 | 0.011354 | 0.011329 | 0.011399 |
| 0.011497 | 0.011398 | 0.011534 | 0.011602 | 0.011530 | 0.011598 | 0.011704 |
| 0.011433 | 0.011603 | 0.011534 | 0.011466 | 0.011733 | 0.011195 | 0.011397 |
| 0.011362 | 0.011295 | 0.011195 | 0.011195 | 0.011262 | 0.011262 | 0.011329 |
| 0.011262 | 0.011329 | 0.011228 | 0.011329 | 0.011262 | 0.011262 | 0.011329 |
| 0.011262 | 0.011698 | 0.011597 | 0.011631 | 0.011161 | 0.011262 | 0.011295 |
| 0.011295 | 0.011262 | 0.011329 | 0.011362 | 0.011228 | 0.011228 | 0.011228 |
| 0.011765 | 0.011396 | 0.011396 | 0.011195 | 0.011295 | 0.011463 | 0.011228 |
| 0.011228 | 0.011295 | 0.011262 | 0.011430 | 0.011228 | 0.011362 | 0.011497 |
| 0.011429 | 0.011262 | 0.011262 | 0.011195 | 0.011195 | 0.011362 | 0.011295 |
| 0.011195 | 0.011295 | 0.011161 | 0.011195 | 0.011329 | 0.011463 | 0.011228 |
| 0.011195 | 0.011329 | 0.011128 | 0.011161 | 0.011497 | 0.011161 | 0.011329 |
| 0.011403 | 0.011228 | 0.011530 | 0.011363 | 0.011396 | 0.011262 | 0.011362 |
| 0.011228 | 0.011564 | 0.011161 | 0.011429 | 0.011228 | 0.011228 | 0.011161 |
| 0.011396 | 0.011598 | 0.011295 | 0.011362 | 0.011195 | 0.011597 | 0.011228 |
| 0.011228 | 0.011228 | 0.011262 | 0.011362 | 0.011262 | 0.011362 | 0.011429 |
| 0.011429 | 0.011396 | 0.011295 | 0.011396 | 0.011362 | 0.011228 | 0.011195 |
| 0.011228 | 0.011228 | 0.011295 | 0.011228 | 0.011195 | 0.011362 | 0.011228 |
| 0.011262 | 0.011262 | 0.011396 | 0.011429 | 0.011329 | 0.011262 | 0.011262 |
| 0.011329 | 0.011262 | 0.011362 | 0.011228 | 0.011362 | 0.011463 | 0.011765 |



|          |          |          |          |          |          |          |
|----------|----------|----------|----------|----------|----------|----------|
| 0.011262 | 0.011665 | 0.011267 | 0.017747 | 0.011126 | 0.011305 | 0.011618 |
| 0.011579 | 0.011623 | 0.011270 | 0.011234 | 0.011609 | 0.011647 | 0.011242 |
| 0.011440 | 0.011426 | 0.011138 | 0.011186 | 0.011255 | 0.011208 | 0.011189 |
| 0.011436 | 0.011433 | 0.011431 | 0.011325 | 0.011396 | 0.011430 | 0.011432 |
| 0.011301 | 0.011396 | 0.011396 | 0.011362 | 0.011329 | 0.011329 | 0.011295 |
| 0.011329 | 0.011262 | 0.011295 | 0.011329 | 0.011295 | 0.011228 | 0.011262 |
| 0.011262 | 0.011329 | 0.011228 | 0.011329 | 0.011362 | 0.011396 | 0.011295 |
| 0.011329 | 0.011295 | 0.011631 | 0.011631 | 0.011362 | 0.011396 | 0.011430 |
| 0.011195 | 0.011195 | 0.011228 | 0.011329 | 0.011195 | 0.011429 | 0.011429 |
| 0.011463 | 0.011463 | 0.011396 | 0.011497 | 0.011665 | 0.011498 | 0.011329 |
| 0.011329 | 0.011396 | 0.011429 | 0.011262 | 0.011329 | 0.011295 | 0.011329 |
| 0.011396 | 0.011396 | 0.011429 | 0.011396 | 0.011296 | 0.011497 | 0.011463 |
| 0.011331 | 0.011228 | 0.011329 | 0.011430 | 0.011329 | 0.011463 | 0.011497 |
| 0.011665 | 0.011368 | 0.011530 | 0.011497 | 0.011429 | 0.011564 | 0.011228 |
| 0.011363 | 0.011295 | 0.011262 | 0.011262 | 0.011329 | 0.011228 | 0.011329 |
| 0.011362 | 0.011396 | 0.011295 | 0.011329 | 0.011295 | 0.011631 | 0.011631 |
| 0.011362 | 0.011396 | 0.011463 | 0.011396 | 0.012036 | 0.011453 | 0.011377 |
| 0.011447 | 0.011407 | 0.011517 | 0.011407 | 0.011515 | 0.011440 | 0.011405 |
| 0.011987 | 0.011303 | 0.011437 | 0.011372 | 0.011646 | 0.011502 | 0.011605 |
| 0.012012 | 0.011475 | 0.011331 | 0.011329 | 0.011329 | 0.011362 | 0.011297 |
| 0.011195 | 0.011228 | 0.011362 | 0.011329 | 0.011331 | 0.011463 | 0.011431 |
| 0.011295 | 0.011228 | 0.011262 | 0.011295 | 0.011195 | 0.011262 | 0.011161 |
| 0.011295 | 0.011329 | 0.011228 | 0.011195 | 0.011295 | 0.011228 | 0.011262 |
| 0.011262 | 0.011195 | 0.011262 | 0.011295 | 0.011195 | 0.011396 | 0.011429 |
| 0.011329 | 0.011396 | 0.011329 | 0.011329 | 0.011262 | 0.011665 | 0.011295 |
| 0.011339 | 0.011262 | 0.011497 | 0.011501 | 0.011362 | 0.011362 | 0.011362 |
| 0.011362 | 0.011295 | 0.011262 | 0.011295 | 0.011396 | 0.011396 | 0.011329 |
| 0.011329 | 0.011463 | 0.011631 | 0.011362 | 0.011564 | 0.011564 | 0.011429 |
| 0.011262 | 0.011329 | 0.011362 | 0.011765 | 0.011329 | 0.011362 | 0.011329 |
| 0.011362 | 0.011295 | 0.011295 | 0.011598 | 0.011530 | 0.011564 | 0.011295 |
| 0.011396 | 0.011463 | 0.011329 | 0.011396 | 0.011362 | 0.011228 | 0.011564 |
| 0.011329 | 0.011295 | 0.011295 | 0.011463 | 0.011295 | 0.011396 | 0.011631 |
| 0.011329 | 0.011672 | 0.011698 | 0.011467 | 0.011229 | 0.011400 | 0.011267 |
| 0.011115 | 0.011683 | 0.011236 | 0.011373 | 0.011255 | 0.011315 | 0.011273 |
| 0.011417 | 0.000000 | 0.011227 | 0.000000 | 0.011168 | 0.011261 | 0.011344 |
| 0.011362 | 0.011257 | 0.011377 | 0.011307 | 0.011330 | 0.011463 | 0.011530 |
| 0.011530 | 0.011396 | 0.011500 | 0.011501 | 0.011636 | 0.011625 | 0.011329 |
| 0.011564 | 0.011429 | 0.011295 | 0.011396 | 0.011195 | 0.011429 | 0.011228 |
| 0.011295 | 0.011295 | 0.011262 | 0.011228 | 0.011262 | 0.011228 | 0.011329 |
| 0.011305 | 0.011305 | 0.011300 | 0.011334 | 0.011471 | 0.011436 | 0.011436 |
| 0.011435 | 0.011363 | 0.011171 | 0.011168 | 0.011297 | 0.011467 | 0.011467 |
| 0.011262 | 0.011331 | 0.011565 | 0.011533 | 0.011464 | 0.011498 | 0.011429 |
| 0.011362 | 0.011429 | 0.011429 | 0.011329 | 0.011900 | 0.011497 | 0.011564 |
| 0.011597 | 0.011666 | 0.011299 | 0.011372 | 0.011262 | 0.011463 | 0.011430 |
| 0.011464 | 0.011497 | 0.011497 | 0.011497 | 0.011650 | 0.011631 | 0.011268 |
| 0.011162 | 0.011164 | 0.011265 | 0.011230 | 0.011334 | 0.011172 | 0.011502 |
| 0.011300 | 0.011455 | 0.011156 | 0.011285 | 0.011296 | 0.011368 | 0.011262 |
| 0.011228 | 0.011228 | 0.011295 | 0.011262 | 0.011463 | 0.011429 | 0.011362 |
| 0.011463 | 0.011530 | 0.011262 | 0.011262 | 0.011295 | 0.011295 | 0.011297 |
| 0.011364 | 0.011295 | 0.011295 | 0.011330 | 0.011463 | 0.011530 | 0.011530 |
| 0.011396 | 0.011500 | 0.011501 | 0.011636 | 0.011625 | 0.011329 | 0.011497 |
| 0.011430 | 0.011430 | 0.011229 | 0.011443 | 0.011373 | 0.011401 | 0.011270 |
| 0.011439 | 0.011607 | 0.011399 | 0.011332 | 0.011228 | 0.011430 | 0.011295 |
| 0.011396 | 0.011329 | 0.011228 | 0.011330 | 0.011429 | 0.011432 | 0.011329 |
| 0.011228 | 0.011161 | 0.011295 | 0.011228 | 0.011161 | 0.011264 | 0.011430 |
| 0.011329 | 0.011262 | 0.011295 | 0.011329 | 0.011295 | 0.011228 | 0.011430 |
| 0.011295 | 0.011329 | 0.011329 | 0.011262 | 0.011329 | 0.011564 | 0.011228 |
| 0.011262 | 0.011665 | 0.011262 | 0.011295 | 0.011262 | 0.011631 | 0.011146 |
| 0.011622 | 0.011188 | 0.011211 | 0.011463 | 0.011508 | 0.011455 | 0.011102 |
| 0.011165 | 0.011429 | 0.011530 | 0.011637 | 0.011498 | 0.011635 | 0.011766 |

|          |          |          |          |          |          |          |
|----------|----------|----------|----------|----------|----------|----------|
| 0.011666 | 0.011703 | 0.011665 | 0.011914 | 0.011631 | 0.012506 | 0.011666 |
| 0.012405 | 0.012173 | 0.012307 | 0.012578 | 0.011631 | 0.011329 | 0.011631 |
| 0.012070 | 0.012004 | 0.011597 | 0.011497 | 0.011564 | 0.011564 | 0.011534 |
| 0.011429 | 0.011433 | 0.011497 | 0.011464 | 0.011833 | 0.011900 | 0.011901 |
| 0.011800 | 0.011901 | 0.012004 | 0.011770 | 0.012070 | 0.012076 | 0.012137 |
| 0.012138 | 0.012171 | 0.012118 | 0.012138 | 0.012139 | 0.011362 | 0.011665 |
| 0.011733 | 0.012236 | 0.011738 | 0.011967 | 0.012440 | 0.011502 | 0.011396 |
| 0.011362 | 0.011362 | 0.011833 | 0.011883 | 0.011975 | 0.011698 | 0.011363 |
| S214     | 0.011530 | 0.011530 | 0.012001 | 0.011765 | 0.011765 | 0.011833 |
| 0.011638 | 0.011570 | 0.011765 | 0.011262 | 0.011329 | 0.011296 | 0.011262 |
| 0.011295 | 0.011463 | 0.011262 | 0.011295 | 0.011362 | 0.011329 | 0.011295 |
| 0.011262 | 0.011295 | 0.011396 | 0.011262 | 0.011295 | 0.011295 | 0.011604 |
| 0.011530 | 0.011295 | 0.011195 | 0.011429 | 0.011362 | 0.011329 | 0.011362 |
| 0.011329 | 0.011429 | 0.011329 | 0.011329 | 0.011362 | 0.011329 | 0.011497 |
| 0.011262 | 0.011329 | 0.011362 | 0.011295 | 0.011396 | 0.011429 | 0.011362 |
| 0.011329 | 0.011497 | 0.011396 | 0.011665 | 0.011329 | 0.011597 | 0.011329 |
| 0.011295 | 0.011396 | 0.011463 | 0.011597 | 0.011698 | 0.011396 | 0.011497 |
| 0.011362 | 0.011430 | 0.011329 | 0.011564 | 0.011799 | 0.011329 | 0.011396 |
| 0.011295 | 0.011396 | 0.011362 | 0.011429 | 0.011362 | 0.011362 | 0.011362 |
| 0.011262 | 0.011295 | 0.011262 | 0.011362 | 0.011329 | 0.011363 | 0.011429 |
| 0.011362 | 0.011329 | 0.011396 | 0.011295 | 0.011429 | 0.011262 | 0.011329 |
| 0.011497 | 0.011429 | 0.011665 | 0.011497 | 0.011329 | 0.011564 | 0.011329 |
| 0.011468 | 0.011695 | 0.011513 | 0.011177 | 0.011247 | 0.011355 | 0.011414 |
| 0.012085 | 0.011467 | 0.011225 | 0.011564 | 0.011564 | 0.011362 | 0.011463 |
| 0.011396 | 0.011295 | 0.011295 | 0.011329 | 0.011430 | 0.011362 | 0.011161 |
| 0.011195 | 0.011429 | 0.011564 | 0.011497 | 0.011396 | 0.011362 | 0.011295 |
| 0.011262 | 0.011262 | 0.011329 | 0.011295 | 0.011497 | 0.011463 | 0.011396 |
| 0.011497 | 0.011564 | 0.011295 | 0.011295 | 0.011329 | 0.011329 | 0.011330 |
| 0.011398 | 0.011329 | 0.011329 | 0.011204 | 0.011277 | 0.011235 | 0.011329 |
| 0.011331 | 0.011266 | 0.011318 | 0.011302 | 0.011230 | 0.011266 | 0.011297 |
| 0.011564 | 0.011336 | 0.011370 | 0.011262 | 0.011268 | 0.011397 | 0.011363 |
| 0.011430 | 0.011363 | 0.011363 | 0.011262 | 0.011262 | 0.011765 | 0.011564 |
| 0.011597 | 0.011463 | 0.011329 | 0.011430 | 0.011228 | 0.011463 | 0.011262 |
| 0.011329 | 0.011329 | 0.011295 | 0.011262 | 0.011295 | 0.011262 | 0.011362 |
| 0.011329 | 0.011429 | 0.011362 | 0.011262 | 0.011363 | 0.011463 | 0.011466 |
| 0.011463 | 0.011362 | 0.011262 | 0.011195 | 0.011329 | 0.011262 | 0.011195 |
| 0.011298 | 0.011463 | 0.011262 | 0.011463 | 0.011228 | 0.011329 | 0.011295 |
| 0.011396 | 0.011228 | 0.011329 | 0.011295 | 0.011329 | 0.011195 | 0.011329 |
| 0.011362 | 0.011295 | 0.011362 | 0.011295 | 0.000000 | 0.011362 | 0.011597 |
| 0.011698 | 0.011631 | 0.011698 | 0.011465 | 0.011698 | 0.011195 | 0.011295 |
| 0.011330 | 0.011626 | 0.011335 | 0.011232 | 0.011705 | 0.011197 | 0.011296 |
| 0.011671 | 0.011604 | 0.011463 | 0.011631 | 0.011333 | 0.011564 | 0.011530 |
| 0.011463 | 0.011631 | 0.011380 | 0.011266 | 0.011354 | 0.011362 | 0.011365 |
| 0.011530 | 0.011229 | 0.011567 | 0.011636 | 0.011362 | 0.011564 | 0.011602 |
| 0.011263 | 0.011637 | 0.011433 | 0.011500 | 0.011700 | 0.011228 | 0.011431 |
| 0.011396 | 0.011329 | 0.011228 | 0.011228 | 0.011295 | 0.011295 | 0.011362 |
| 0.011295 | 0.011362 | 0.011262 | 0.011362 | 0.011295 | 0.011295 | 0.011362 |
| 0.011295 | 0.011732 | 0.011631 | 0.011665 | 0.011195 | 0.011295 | 0.011329 |
| 0.011329 | 0.011295 | 0.011362 | 0.011396 | 0.011262 | 0.011262 | 0.011262 |
| 0.011799 | 0.011429 | 0.011429 | 0.011228 | 0.011329 | 0.011497 | 0.011262 |
| 0.011262 | 0.011329 | 0.011295 | 0.011463 | 0.011262 | 0.011396 | 0.011530 |
| 0.011463 | 0.011295 | 0.011295 | 0.011228 | 0.011228 | 0.011396 | 0.011329 |
| 0.011228 | 0.011329 | 0.011195 | 0.011228 | 0.011362 | 0.011497 | 0.011262 |
| 0.011228 | 0.011362 | 0.011296 | 0.011195 | 0.011530 | 0.011195 | 0.011362 |
| 0.011403 | 0.011262 | 0.011564 | 0.011396 | 0.011429 | 0.011295 | 0.011396 |
| 0.011262 | 0.011597 | 0.011195 | 0.011463 | 0.011262 | 0.011262 | 0.011195 |
| 0.011429 | 0.011631 | 0.011329 | 0.011396 | 0.011228 | 0.011631 | 0.011262 |
| 0.011262 | 0.011262 | 0.011295 | 0.011396 | 0.011295 | 0.011396 | 0.011463 |
| 0.011463 | 0.011429 | 0.011329 | 0.011430 | 0.011396 | 0.011262 | 0.011228 |
| 0.011262 | 0.011262 | 0.011329 | 0.011262 | 0.011228 | 0.011396 | 0.011262 |

|          |          |          |          |          |          |          |
|----------|----------|----------|----------|----------|----------|----------|
| 0.011295 | 0.011295 | 0.011429 | 0.011463 | 0.011362 | 0.011295 | 0.011295 |
| 0.011362 | 0.011295 | 0.011396 | 0.011262 | 0.011396 | 0.011497 | 0.011799 |
| 0.011295 | 0.011698 | 0.011302 | 0.017823 | 0.011191 | 0.011366 | 0.011653 |
| 0.011614 | 0.011658 | 0.011322 | 0.011292 | 0.011719 | 0.011682 | 0.011303 |
| 0.011487 | 0.011487 | 0.011177 | 0.011228 | 0.011294 | 0.011307 | 0.011232 |
| 0.011482 | 0.011470 | 0.011468 | 0.011325 | 0.011430 | 0.011329 | 0.011398 |
| 0.011335 | 0.011429 | 0.011429 | 0.011396 | 0.011362 | 0.011363 | 0.011329 |
| 0.011362 | 0.011228 | 0.011329 | 0.011362 | 0.011329 | 0.011262 | 0.011161 |
| 0.011161 | 0.011362 | 0.011262 | 0.011362 | 0.011396 | 0.011429 | 0.011195 |
| 0.011362 | 0.011329 | 0.011665 | 0.011665 | 0.011396 | 0.011430 | 0.011463 |
| 0.011228 | 0.011228 | 0.011262 | 0.011362 | 0.011228 | 0.011463 | 0.011463 |
| 0.011497 | 0.011463 | 0.011429 | 0.011530 | 0.011698 | 0.011532 | 0.011362 |
| 0.011362 | 0.011429 | 0.011463 | 0.011295 | 0.011362 | 0.011329 | 0.011362 |
| 0.011430 | 0.011430 | 0.011463 | 0.011430 | 0.011330 | 0.011530 | 0.011429 |
| 0.011365 | 0.011262 | 0.011362 | 0.011463 | 0.011362 | 0.011497 | 0.011530 |
| 0.011631 | 0.011333 | 0.011564 | 0.011530 | 0.011463 | 0.011631 | 0.011262 |
| 0.011431 | 0.011329 | 0.011161 | 0.011161 | 0.011362 | 0.011262 | 0.011362 |
| 0.011396 | 0.011429 | 0.011195 | 0.011362 | 0.011329 | 0.011665 | 0.011665 |
| 0.011396 | 0.011430 | 0.011362 | 0.011295 | 0.012036 | 0.011489 | 0.011306 |
| 0.011482 | 0.011442 | 0.011552 | 0.011407 | 0.011550 | 0.011405 | 0.011439 |
| 0.011987 | 0.011199 | 0.011334 | 0.011337 | 0.011611 | 0.011536 | 0.011639 |
| 0.011978 | 0.011475 | 0.011365 | 0.011362 | 0.011362 | 0.011396 | 0.011331 |
| 0.011228 | 0.011262 | 0.011396 | 0.011362 | 0.011364 | 0.011497 | 0.011464 |
| 0.011329 | 0.011262 | 0.011295 | 0.011329 | 0.011228 | 0.011295 | 0.011195 |
| 0.011329 | 0.011362 | 0.011262 | 0.011228 | 0.011329 | 0.011262 | 0.011295 |
| 0.011295 | 0.011228 | 0.011295 | 0.011329 | 0.011228 | 0.011429 | 0.011463 |
| 0.011362 | 0.011429 | 0.011362 | 0.011362 | 0.011295 | 0.011698 | 0.011329 |
| 0.011373 | 0.011295 | 0.011531 | 0.011535 | 0.011396 | 0.011396 | 0.011396 |
| 0.011396 | 0.011329 | 0.011295 | 0.011329 | 0.011429 | 0.011429 | 0.011362 |
| 0.011362 | 0.011497 | 0.011665 | 0.011396 | 0.011597 | 0.011597 | 0.011463 |
| 0.011295 | 0.011362 | 0.011396 | 0.011799 | 0.011363 | 0.011396 | 0.011362 |
| 0.011396 | 0.011329 | 0.011329 | 0.011631 | 0.011564 | 0.011597 | 0.011329 |
| 0.011430 | 0.011497 | 0.011362 | 0.011430 | 0.011396 | 0.011262 | 0.011597 |
| 0.011362 | 0.011329 | 0.011329 | 0.011497 | 0.011329 | 0.011429 | 0.011665 |
| 0.011362 | 0.011706 | 0.011732 | 0.011507 | 0.011229 | 0.011434 | 0.011267 |
| 0.011225 | 0.011722 | 0.011271 | 0.011462 | 0.011255 | 0.011366 | 0.011379 |
| 0.011519 | 0.011192 | 0.011339 | 0.011192 | 0.011222 | 0.011395 | 0.011385 |
| 0.011399 | 0.011296 | 0.011412 | 0.011342 | 0.011363 | 0.011497 | 0.011564 |
| 0.011564 | 0.011430 | 0.011533 | 0.011535 | 0.011670 | 0.011696 | 0.011362 |
| 0.011597 | 0.011463 | 0.011329 | 0.011430 | 0.011228 | 0.011463 | 0.011262 |
| 0.011329 | 0.011329 | 0.011295 | 0.011262 | 0.011295 | 0.011262 | 0.011362 |
| 0.011340 | 0.011340 | 0.011334 | 0.011368 | 0.011505 | 0.011470 | 0.011470 |
| 0.011469 | 0.011396 | 0.011171 | 0.011168 | 0.011331 | 0.011501 | 0.011501 |
| 0.011296 | 0.011365 | 0.011599 | 0.011567 | 0.011497 | 0.011531 | 0.011329 |
| 0.011396 | 0.011396 | 0.011396 | 0.011362 | 0.011900 | 0.011530 | 0.011598 |
| 0.011631 | 0.011701 | 0.011333 | 0.011407 | 0.011295 | 0.011295 | 0.011329 |
| 0.011498 | 0.011396 | 0.011530 | 0.011530 | 0.011610 | 0.011530 | 0.011303 |
| 0.011196 | 0.011199 | 0.011299 | 0.011264 | 0.011368 | 0.011210 | 0.011536 |
| 0.011335 | 0.011455 | 0.011156 | 0.011285 | 0.011329 | 0.011402 | 0.011295 |
| 0.011262 | 0.011262 | 0.011329 | 0.011295 | 0.011497 | 0.011463 | 0.011396 |
| 0.011497 | 0.011564 | 0.011295 | 0.011295 | 0.011329 | 0.011329 | 0.011330 |
| 0.011398 | 0.011329 | 0.011329 | 0.011363 | 0.011497 | 0.011564 | 0.011564 |
| 0.011430 | 0.011533 | 0.011535 | 0.011670 | 0.011696 | 0.011362 | 0.011530 |
| 0.011329 | 0.011329 | 0.011297 | 0.011478 | 0.011408 | 0.011435 | 0.011305 |
| 0.011473 | 0.011652 | 0.011484 | 0.011366 | 0.011262 | 0.011463 | 0.011329 |
| 0.011429 | 0.011362 | 0.011262 | 0.011363 | 0.011463 | 0.011466 | 0.011362 |
| 0.011262 | 0.011195 | 0.011329 | 0.011262 | 0.011195 | 0.011298 | 0.011463 |
| 0.011362 | 0.011228 | 0.011329 | 0.011362 | 0.011329 | 0.011262 | 0.011463 |
| 0.011329 | 0.011362 | 0.011362 | 0.011295 | 0.011362 | 0.011597 | 0.011262 |
| 0.011295 | 0.011698 | 0.011295 | 0.011329 | 0.011295 | 0.011665 | 0.011232 |

|          |          |          |          |          |          |          |
|----------|----------|----------|----------|----------|----------|----------|
| 0.011735 | 0.011230 | 0.011261 | 0.011503 | 0.011549 | 0.011491 | 0.011144 |
| 0.011218 | 0.011463 | 0.011564 | 0.011671 | 0.011531 | 0.011669 | 0.011800 |
| 0.011699 | 0.011737 | 0.011698 | 0.011949 | 0.011665 | 0.012472 | 0.011700 |
| 0.012439 | 0.012139 | 0.012273 | 0.012612 | 0.011665 | 0.011362 | 0.011665 |
| 0.012070 | 0.012038 | 0.011631 | 0.011530 | 0.011598 | 0.011598 | 0.011568 |
| 0.011463 | 0.011467 | 0.011530 | 0.011497 | 0.011867 | 0.011934 | 0.011935 |
| 0.011834 | 0.011934 | 0.012038 | 0.011804 | 0.012070 | 0.012076 | 0.012137 |
| 0.012138 | 0.012171 | 0.012050 | 0.012138 | 0.012139 | 0.011262 | 0.011665 |
| 0.011766 | 0.012270 | 0.011738 | 0.012001 | 0.012474 | 0.011536 | 0.011430 |
| 0.011396 | 0.011396 | 0.011867 | 0.011883 | 0.012010 | 0.011732 | 0.011397 |
| S215     | 0.011698 | 0.011698 | 0.012035 | 0.011799 | 0.011799 | 0.011866 |
| 0.011706 | 0.011638 | 0.011799 | 0.011295 | 0.011362 | 0.011329 | 0.011295 |
| 0.011329 | 0.011497 | 0.011295 | 0.011329 | 0.011396 | 0.011362 | 0.011329 |
| 0.011295 | 0.011329 | 0.011429 | 0.011295 | 0.011329 | 0.011329 | 0.011672 |
| 0.011564 | 0.011329 | 0.011228 | 0.011463 | 0.011396 | 0.011362 | 0.011396 |
| 0.011362 | 0.011463 | 0.011362 | 0.011362 | 0.011396 | 0.011362 | 0.011530 |
| 0.011295 | 0.011362 | 0.011396 | 0.011329 | 0.011429 | 0.011463 | 0.011396 |
| 0.011362 | 0.011530 | 0.011430 | 0.011698 | 0.011362 | 0.011631 | 0.011362 |
| 0.011329 | 0.011430 | 0.011497 | 0.011631 | 0.011732 | 0.011430 | 0.011530 |
| 0.011396 | 0.011463 | 0.011362 | 0.011597 | 0.011833 | 0.011362 | 0.011430 |
| 0.011329 | 0.011429 | 0.011396 | 0.011463 | 0.011396 | 0.011396 | 0.011396 |
| 0.011295 | 0.011329 | 0.011295 | 0.011396 | 0.011362 | 0.011397 | 0.011463 |
| 0.011396 | 0.011362 | 0.011430 | 0.011329 | 0.011463 | 0.011295 | 0.011362 |
| 0.011530 | 0.011463 | 0.011698 | 0.011530 | 0.011362 | 0.011597 | 0.011362 |
| 0.011542 | 0.011732 | 0.011588 | 0.011255 | 0.011284 | 0.011391 | 0.011454 |
| 0.012121 | 0.011518 | 0.011307 | 0.011597 | 0.011597 | 0.011396 | 0.011497 |
| 0.011430 | 0.011396 | 0.011463 | 0.011362 | 0.011463 | 0.011396 | 0.011396 |
| 0.011362 | 0.011463 | 0.011665 | 0.011530 | 0.011430 | 0.011396 | 0.011329 |
| 0.011228 | 0.011295 | 0.011362 | 0.011329 | 0.011530 | 0.011497 | 0.011429 |
| 0.011530 | 0.011597 | 0.011329 | 0.011329 | 0.011362 | 0.011362 | 0.011364 |
| 0.011432 | 0.011362 | 0.011362 | 0.011240 | 0.011313 | 0.011271 | 0.011363 |
| 0.011365 | 0.011301 | 0.011355 | 0.011336 | 0.011264 | 0.011300 | 0.011330 |
| 0.011600 | 0.011370 | 0.011405 | 0.011296 | 0.011302 | 0.011430 | 0.011396 |
| 0.011464 | 0.011397 | 0.011396 | 0.011497 | 0.011429 | 0.011799 | 0.011598 |
| 0.011631 | 0.011497 | 0.011362 | 0.011463 | 0.011262 | 0.011497 | 0.011295 |
| 0.011362 | 0.011362 | 0.011329 | 0.011295 | 0.011329 | 0.011295 | 0.011396 |
| 0.011362 | 0.011463 | 0.011396 | 0.011295 | 0.011397 | 0.011497 | 0.011499 |
| 0.011497 | 0.011396 | 0.011295 | 0.011229 | 0.011362 | 0.011295 | 0.011228 |
| 0.011332 | 0.011497 | 0.011295 | 0.011497 | 0.011262 | 0.011362 | 0.011329 |
| 0.011430 | 0.011329 | 0.011362 | 0.011329 | 0.011362 | 0.011228 | 0.011362 |
| 0.011396 | 0.011329 | 0.011396 | 0.011329 | 0.011362 | 0.000000 | 0.011631 |
| 0.011732 | 0.011665 | 0.011732 | 0.011498 | 0.011732 | 0.011362 | 0.011329 |
| 0.011364 | 0.011626 | 0.011426 | 0.011266 | 0.011739 | 0.011231 | 0.011375 |
| 0.011739 | 0.011638 | 0.011530 | 0.011732 | 0.011436 | 0.011597 | 0.011564 |
| 0.011497 | 0.011665 | 0.011522 | 0.011390 | 0.011438 | 0.011396 | 0.011466 |
| 0.011564 | 0.011465 | 0.011601 | 0.011669 | 0.011598 | 0.011665 | 0.011772 |
| 0.011500 | 0.011671 | 0.011602 | 0.011534 | 0.011801 | 0.011262 | 0.011465 |
| 0.011429 | 0.011362 | 0.011262 | 0.011262 | 0.011329 | 0.011262 | 0.011396 |
| 0.011329 | 0.011396 | 0.011295 | 0.011396 | 0.011329 | 0.011329 | 0.011396 |
| 0.011329 | 0.011765 | 0.011665 | 0.011698 | 0.011228 | 0.011329 | 0.011362 |
| 0.011362 | 0.011329 | 0.011396 | 0.011430 | 0.011295 | 0.011295 | 0.011295 |
| 0.011833 | 0.011463 | 0.011463 | 0.011262 | 0.011362 | 0.011530 | 0.011295 |
| 0.011295 | 0.011362 | 0.011329 | 0.011497 | 0.011295 | 0.011429 | 0.011564 |
| 0.011497 | 0.011329 | 0.011329 | 0.011262 | 0.011262 | 0.011430 | 0.011362 |
| 0.011262 | 0.011362 | 0.011228 | 0.011262 | 0.011396 | 0.011531 | 0.011295 |
| 0.011262 | 0.011396 | 0.011329 | 0.011228 | 0.011564 | 0.011228 | 0.011396 |
| 0.011471 | 0.011295 | 0.011597 | 0.011430 | 0.011463 | 0.011329 | 0.011429 |
| 0.011295 | 0.011631 | 0.011228 | 0.011497 | 0.011295 | 0.011295 | 0.011228 |
| 0.011463 | 0.011665 | 0.011362 | 0.011430 | 0.011262 | 0.011665 | 0.011295 |
| 0.011295 | 0.011295 | 0.011329 | 0.011430 | 0.011329 | 0.011429 | 0.011497 |

|          |          |          |          |          |          |          |
|----------|----------|----------|----------|----------|----------|----------|
| 0.011497 | 0.011463 | 0.011362 | 0.011463 | 0.011429 | 0.011295 | 0.011262 |
| 0.011295 | 0.011295 | 0.011362 | 0.011295 | 0.011262 | 0.011430 | 0.011295 |
| 0.011329 | 0.011329 | 0.011463 | 0.011497 | 0.011396 | 0.011329 | 0.011329 |
| 0.011396 | 0.011329 | 0.011429 | 0.011295 | 0.011430 | 0.011530 | 0.011833 |
| 0.011329 | 0.011732 | 0.011336 | 0.017861 | 0.011322 | 0.011366 | 0.011688 |
| 0.011648 | 0.011693 | 0.011322 | 0.011292 | 0.011719 | 0.011716 | 0.011303 |
| 0.011582 | 0.011548 | 0.011216 | 0.011270 | 0.011294 | 0.011356 | 0.011232 |
| 0.011529 | 0.011507 | 0.011468 | 0.011391 | 0.011463 | 0.011497 | 0.011500 |
| 0.011369 | 0.011463 | 0.011463 | 0.011429 | 0.011396 | 0.011396 | 0.011363 |
| 0.011396 | 0.011329 | 0.011362 | 0.011396 | 0.011362 | 0.011295 | 0.011329 |
| 0.011329 | 0.011396 | 0.011295 | 0.011396 | 0.011430 | 0.011463 | 0.011362 |
| 0.011396 | 0.011362 | 0.011698 | 0.011698 | 0.011430 | 0.011464 | 0.011497 |
| 0.011262 | 0.011262 | 0.011295 | 0.011396 | 0.011262 | 0.011497 | 0.011497 |
| 0.011530 | 0.011530 | 0.011463 | 0.011564 | 0.011732 | 0.011565 | 0.011396 |
| 0.011396 | 0.011463 | 0.011497 | 0.011329 | 0.011396 | 0.011362 | 0.011396 |
| 0.011463 | 0.011463 | 0.011497 | 0.011463 | 0.011363 | 0.011564 | 0.011530 |
| 0.011399 | 0.011295 | 0.011396 | 0.011497 | 0.011396 | 0.011530 | 0.011497 |
| 0.011732 | 0.011436 | 0.011597 | 0.011564 | 0.011497 | 0.011665 | 0.011295 |
| 0.011464 | 0.011363 | 0.011329 | 0.011329 | 0.011396 | 0.011295 | 0.011396 |
| 0.011430 | 0.011463 | 0.011362 | 0.011396 | 0.011362 | 0.011698 | 0.011698 |
| 0.011430 | 0.011464 | 0.011530 | 0.011463 | 0.012103 | 0.011525 | 0.011447 |
| 0.011517 | 0.011476 | 0.011587 | 0.011476 | 0.011585 | 0.011509 | 0.011474 |
| 0.012056 | 0.011372 | 0.011506 | 0.011441 | 0.011715 | 0.011570 | 0.011673 |
| 0.012080 | 0.011550 | 0.011398 | 0.011396 | 0.011396 | 0.011429 | 0.011364 |
| 0.011262 | 0.011295 | 0.011429 | 0.011396 | 0.011398 | 0.011530 | 0.011498 |
| 0.011362 | 0.011295 | 0.011329 | 0.011362 | 0.011262 | 0.011329 | 0.011228 |
| 0.011362 | 0.011396 | 0.011295 | 0.011262 | 0.011362 | 0.011295 | 0.011329 |
| 0.011329 | 0.011262 | 0.011329 | 0.011362 | 0.011262 | 0.011463 | 0.011497 |
| 0.011396 | 0.011463 | 0.011396 | 0.011396 | 0.011329 | 0.011732 | 0.011362 |
| 0.011408 | 0.011329 | 0.011564 | 0.011569 | 0.011430 | 0.011429 | 0.011429 |
| 0.011430 | 0.011362 | 0.011329 | 0.011362 | 0.011463 | 0.011463 | 0.011396 |
| 0.011396 | 0.011530 | 0.011698 | 0.011429 | 0.011564 | 0.011564 | 0.011497 |
| 0.011329 | 0.011396 | 0.011430 | 0.011833 | 0.011396 | 0.011430 | 0.011396 |
| 0.011430 | 0.011362 | 0.011362 | 0.011665 | 0.011598 | 0.011631 | 0.011362 |
| 0.011463 | 0.011530 | 0.011396 | 0.011463 | 0.011429 | 0.011295 | 0.011631 |
| 0.011396 | 0.011362 | 0.011362 | 0.011530 | 0.011362 | 0.011463 | 0.011698 |
| 0.011396 | 0.011774 | 0.011765 | 0.011548 | 0.011286 | 0.011468 | 0.011370 |
| 0.011225 | 0.011761 | 0.011306 | 0.011507 | 0.011304 | 0.011467 | 0.011432 |
| 0.011519 | 0.011258 | 0.011394 | 0.011258 | 0.011276 | 0.011462 | 0.011425 |
| 0.011437 | 0.011375 | 0.011448 | 0.011377 | 0.011397 | 0.011530 | 0.011597 |
| 0.011597 | 0.011464 | 0.011567 | 0.011569 | 0.011704 | 0.011696 | 0.011396 |
| 0.011631 | 0.011497 | 0.011362 | 0.011463 | 0.011262 | 0.011497 | 0.011295 |
| 0.011362 | 0.011362 | 0.011329 | 0.011295 | 0.011329 | 0.011295 | 0.011396 |
| 0.011375 | 0.011375 | 0.011368 | 0.011403 | 0.011539 | 0.011504 | 0.011504 |
| 0.011503 | 0.011430 | 0.011245 | 0.011240 | 0.011365 | 0.011535 | 0.011535 |
| 0.011329 | 0.011399 | 0.011632 | 0.011601 | 0.011531 | 0.011565 | 0.011497 |
| 0.011429 | 0.011497 | 0.011497 | 0.011396 | 0.011967 | 0.011564 | 0.011631 |
| 0.011665 | 0.011737 | 0.011367 | 0.011441 | 0.011329 | 0.011530 | 0.011497 |
| 0.011531 | 0.011564 | 0.011564 | 0.011564 | 0.011689 | 0.011698 | 0.011338 |
| 0.011229 | 0.011233 | 0.011333 | 0.011298 | 0.011402 | 0.011247 | 0.011570 |
| 0.011369 | 0.011543 | 0.011298 | 0.011397 | 0.011363 | 0.011437 | 0.011329 |
| 0.011228 | 0.011295 | 0.011362 | 0.011329 | 0.011530 | 0.011497 | 0.011429 |
| 0.011530 | 0.011597 | 0.011329 | 0.011329 | 0.011362 | 0.011362 | 0.011364 |
| 0.011432 | 0.011362 | 0.011362 | 0.011397 | 0.011530 | 0.011597 | 0.011597 |
| 0.011464 | 0.011567 | 0.011569 | 0.011704 | 0.011696 | 0.011396 | 0.011497 |
| 0.011497 | 0.011497 | 0.011331 | 0.011513 | 0.011442 | 0.011469 | 0.011340 |
| 0.011508 | 0.011607 | 0.011441 | 0.011400 | 0.011295 | 0.011497 | 0.011362 |
| 0.011463 | 0.011396 | 0.011295 | 0.011397 | 0.011497 | 0.011499 | 0.011396 |
| 0.011295 | 0.011229 | 0.011362 | 0.011295 | 0.011228 | 0.011332 | 0.011497 |
| 0.011396 | 0.011329 | 0.011362 | 0.011396 | 0.011362 | 0.011295 | 0.011497 |

|          |          |          |          |          |          |          |
|----------|----------|----------|----------|----------|----------|----------|
| 0.011362 | 0.011396 | 0.011396 | 0.011329 | 0.011396 | 0.011631 | 0.011295 |
| 0.011329 | 0.011732 | 0.011329 | 0.011362 | 0.011329 | 0.011698 | 0.011317 |
| 0.011735 | 0.011315 | 0.011311 | 0.011543 | 0.011630 | 0.011527 | 0.011269 |
| 0.011270 | 0.011497 | 0.011597 | 0.011705 | 0.011565 | 0.011703 | 0.011834 |
| 0.011733 | 0.011771 | 0.011732 | 0.011983 | 0.011698 | 0.012573 | 0.011734 |
| 0.012473 | 0.012241 | 0.012375 | 0.012646 | 0.011698 | 0.011396 | 0.011698 |
| 0.012137 | 0.012072 | 0.011665 | 0.011564 | 0.011632 | 0.011632 | 0.011601 |
| 0.011497 | 0.011501 | 0.011564 | 0.011531 | 0.011901 | 0.011967 | 0.011968 |
| 0.011868 | 0.011968 | 0.012072 | 0.011838 | 0.012138 | 0.012144 | 0.012205 |
| 0.012205 | 0.012239 | 0.012186 | 0.012205 | 0.012207 | 0.011429 | 0.011732 |
| 0.011800 | 0.012304 | 0.011806 | 0.012035 | 0.012508 | 0.011570 | 0.011464 |
| 0.011429 | 0.011429 | 0.011900 | 0.011965 | 0.012045 | 0.011765 | 0.011431 |
| S216     | 0.011934 | 0.011934 | 0.012270 | 0.012035 | 0.012035 | 0.012102 |
| 0.011944 | 0.011876 | 0.012035 | 0.011530 | 0.011597 | 0.011531 | 0.011530 |
| 0.011564 | 0.011732 | 0.011530 | 0.011564 | 0.011631 | 0.011597 | 0.011564 |
| 0.011530 | 0.011564 | 0.011665 | 0.011531 | 0.011564 | 0.011564 | 0.011910 |
| 0.011799 | 0.011564 | 0.011463 | 0.011698 | 0.011631 | 0.011598 | 0.011631 |
| 0.011597 | 0.011698 | 0.011597 | 0.011597 | 0.011631 | 0.011597 | 0.011765 |
| 0.011530 | 0.011597 | 0.011631 | 0.011564 | 0.011665 | 0.011698 | 0.011631 |
| 0.011597 | 0.011766 | 0.011665 | 0.011933 | 0.011597 | 0.011866 | 0.011597 |
| 0.011564 | 0.011665 | 0.011732 | 0.011866 | 0.011967 | 0.011665 | 0.011765 |
| 0.011631 | 0.011698 | 0.011597 | 0.011833 | 0.012068 | 0.011597 | 0.011665 |
| 0.011564 | 0.011665 | 0.011631 | 0.011698 | 0.011631 | 0.011631 | 0.011631 |
| 0.011530 | 0.011564 | 0.011530 | 0.011631 | 0.011597 | 0.011599 | 0.011698 |
| 0.011631 | 0.011597 | 0.011665 | 0.011564 | 0.011698 | 0.011530 | 0.011597 |
| 0.011765 | 0.011698 | 0.011934 | 0.011765 | 0.011597 | 0.011833 | 0.011597 |
| 0.011728 | 0.011957 | 0.011739 | 0.011451 | 0.011433 | 0.011539 | 0.011651 |
| 0.012305 | 0.011721 | 0.011390 | 0.011833 | 0.011833 | 0.011631 | 0.011732 |
| 0.011665 | 0.011631 | 0.011698 | 0.011597 | 0.011698 | 0.011631 | 0.011631 |
| 0.011597 | 0.011698 | 0.011900 | 0.011765 | 0.011665 | 0.011631 | 0.011564 |
| 0.011530 | 0.011530 | 0.011597 | 0.011564 | 0.011765 | 0.011732 | 0.011665 |
| 0.011765 | 0.011833 | 0.011564 | 0.011564 | 0.011598 | 0.011597 | 0.011601 |
| 0.011669 | 0.011597 | 0.011597 | 0.011492 | 0.011530 | 0.011516 | 0.011598 |
| 0.011602 | 0.011541 | 0.011429 | 0.011578 | 0.011502 | 0.011540 | 0.011567 |
| 0.011852 | 0.011612 | 0.011646 | 0.011531 | 0.011544 | 0.011666 | 0.011632 |
| 0.011699 | 0.011633 | 0.011632 | 0.011732 | 0.011665 | 0.012034 | 0.011833 |
| 0.011866 | 0.011732 | 0.011597 | 0.011698 | 0.011497 | 0.011732 | 0.011530 |
| 0.011597 | 0.011597 | 0.011564 | 0.011530 | 0.011564 | 0.011530 | 0.011631 |
| 0.011597 | 0.011698 | 0.011631 | 0.011530 | 0.011633 | 0.011732 | 0.011736 |
| 0.011732 | 0.011631 | 0.011530 | 0.011465 | 0.011597 | 0.011530 | 0.011463 |
| 0.011570 | 0.011732 | 0.011463 | 0.011732 | 0.011497 | 0.011597 | 0.011564 |
| 0.011665 | 0.011564 | 0.011597 | 0.011564 | 0.011597 | 0.011463 | 0.011597 |
| 0.011631 | 0.011564 | 0.011631 | 0.011564 | 0.011597 | 0.011631 | 0.000000 |
| 0.011967 | 0.011900 | 0.011967 | 0.011667 | 0.011967 | 0.011597 | 0.011564 |
| 0.011567 | 0.011869 | 0.011746 | 0.011438 | 0.011977 | 0.011469 | 0.011572 |
| 0.011977 | 0.011877 | 0.011765 | 0.011967 | 0.011675 | 0.011833 | 0.011799 |
| 0.011732 | 0.011900 | 0.011771 | 0.011596 | 0.011647 | 0.011631 | 0.011703 |
| 0.011530 | 0.011701 | 0.011838 | 0.011907 | 0.011833 | 0.011900 | 0.012009 |
| 0.011737 | 0.011909 | 0.011771 | 0.011771 | 0.012036 | 0.011497 | 0.011701 |
| 0.011665 | 0.011597 | 0.011497 | 0.011497 | 0.011564 | 0.011564 | 0.011631 |
| 0.011564 | 0.011631 | 0.011530 | 0.011631 | 0.011564 | 0.011564 | 0.011631 |
| 0.011564 | 0.012001 | 0.011900 | 0.011934 | 0.011463 | 0.011564 | 0.011597 |
| 0.011597 | 0.011564 | 0.011631 | 0.011665 | 0.011530 | 0.011530 | 0.011530 |
| 0.012068 | 0.011698 | 0.011698 | 0.011497 | 0.011597 | 0.011766 | 0.011530 |
| 0.011530 | 0.011597 | 0.011564 | 0.011732 | 0.011530 | 0.011665 | 0.011799 |
| 0.011732 | 0.011564 | 0.011564 | 0.011497 | 0.011497 | 0.011665 | 0.011597 |
| 0.011497 | 0.011597 | 0.011463 | 0.011497 | 0.011631 | 0.011766 | 0.011530 |
| 0.011497 | 0.011631 | 0.011564 | 0.011463 | 0.011799 | 0.011463 | 0.011631 |
| 0.011711 | 0.011530 | 0.011833 | 0.011665 | 0.011698 | 0.011564 | 0.011665 |
| 0.011530 | 0.011866 | 0.011463 | 0.011732 | 0.011530 | 0.011530 | 0.011463 |

|          |          |          |          |          |          |          |
|----------|----------|----------|----------|----------|----------|----------|
| 0.011698 | 0.011867 | 0.011597 | 0.011665 | 0.011497 | 0.011900 | 0.011530 |
| 0.011530 | 0.011530 | 0.011564 | 0.011665 | 0.011564 | 0.011665 | 0.011732 |
| 0.011732 | 0.011698 | 0.011597 | 0.011698 | 0.011665 | 0.011530 | 0.011497 |
| 0.011530 | 0.011530 | 0.011597 | 0.011530 | 0.011497 | 0.011665 | 0.011530 |
| 0.011564 | 0.011564 | 0.011698 | 0.011732 | 0.011631 | 0.011564 | 0.011564 |
| 0.011631 | 0.011564 | 0.011665 | 0.011530 | 0.011665 | 0.011765 | 0.012068 |
| 0.011564 | 0.011967 | 0.011509 | 0.018012 | 0.011453 | 0.011794 | 0.011862 |
| 0.011822 | 0.011869 | 0.011637 | 0.011641 | 0.011939 | 0.011889 | 0.011546 |
| 0.011819 | 0.011793 | 0.011333 | 0.011563 | 0.011451 | 0.011603 | 0.011577 |
| 0.011811 | 0.011582 | 0.011691 | 0.011391 | 0.011698 | 0.011732 | 0.011737 |
| 0.011610 | 0.011698 | 0.011698 | 0.011665 | 0.011631 | 0.011631 | 0.011598 |
| 0.011631 | 0.011564 | 0.011597 | 0.011631 | 0.011597 | 0.011530 | 0.011564 |
| 0.011564 | 0.011631 | 0.011530 | 0.011631 | 0.011665 | 0.011698 | 0.011597 |
| 0.011631 | 0.011597 | 0.011934 | 0.011934 | 0.011665 | 0.011699 | 0.011732 |
| 0.011497 | 0.011497 | 0.011530 | 0.011631 | 0.011497 | 0.011732 | 0.011732 |
| 0.011765 | 0.011765 | 0.011698 | 0.011799 | 0.011967 | 0.011801 | 0.011631 |
| 0.011631 | 0.011698 | 0.011732 | 0.011564 | 0.011631 | 0.011597 | 0.011631 |
| 0.011699 | 0.011698 | 0.011732 | 0.011699 | 0.011599 | 0.011799 | 0.011765 |
| 0.011636 | 0.011530 | 0.011631 | 0.011732 | 0.011631 | 0.011765 | 0.011396 |
| 0.011967 | 0.011675 | 0.011833 | 0.011799 | 0.011732 | 0.011900 | 0.011531 |
| 0.011700 | 0.011598 | 0.011564 | 0.011564 | 0.011631 | 0.011530 | 0.011631 |
| 0.011665 | 0.011698 | 0.011597 | 0.011631 | 0.011597 | 0.011934 | 0.011934 |
| 0.011665 | 0.011699 | 0.011765 | 0.011698 | 0.012339 | 0.011775 | 0.011694 |
| 0.011764 | 0.011719 | 0.011834 | 0.011719 | 0.011831 | 0.011750 | 0.011716 |
| 0.012297 | 0.011614 | 0.011746 | 0.011683 | 0.011956 | 0.011536 | 0.011911 |
| 0.012319 | 0.011776 | 0.011635 | 0.011631 | 0.011631 | 0.011665 | 0.011601 |
| 0.011497 | 0.011530 | 0.011665 | 0.011631 | 0.011635 | 0.011765 | 0.011700 |
| 0.011597 | 0.011530 | 0.011564 | 0.011597 | 0.011497 | 0.011564 | 0.011463 |
| 0.011597 | 0.011631 | 0.011530 | 0.011497 | 0.011597 | 0.011530 | 0.011564 |
| 0.011564 | 0.011497 | 0.011564 | 0.011597 | 0.011497 | 0.011698 | 0.011463 |
| 0.011631 | 0.011698 | 0.011631 | 0.011631 | 0.011564 | 0.011967 | 0.011597 |
| 0.011652 | 0.011564 | 0.011800 | 0.011807 | 0.011665 | 0.011665 | 0.011665 |
| 0.011665 | 0.011597 | 0.011564 | 0.011597 | 0.011698 | 0.011698 | 0.011631 |
| 0.011631 | 0.011765 | 0.011934 | 0.011665 | 0.011866 | 0.011866 | 0.011732 |
| 0.011564 | 0.011631 | 0.011665 | 0.012068 | 0.011632 | 0.011665 | 0.011631 |
| 0.011665 | 0.011597 | 0.011597 | 0.011900 | 0.011833 | 0.011866 | 0.011597 |
| 0.011698 | 0.011765 | 0.011631 | 0.011698 | 0.011665 | 0.011530 | 0.011866 |
| 0.011631 | 0.011597 | 0.011597 | 0.011765 | 0.011597 | 0.011698 | 0.011934 |
| 0.011631 | 0.012012 | 0.012001 | 0.011670 | 0.011399 | 0.011672 | 0.011525 |
| 0.011555 | 0.011878 | 0.011482 | 0.011641 | 0.011499 | 0.011620 | 0.011644 |
| 0.011672 | 0.011324 | 0.011617 | 0.011390 | 0.011437 | 0.011596 | 0.011263 |
| 0.011663 | 0.011532 | 0.011624 | 0.011553 | 0.011633 | 0.011765 | 0.011833 |
| 0.011833 | 0.011699 | 0.011804 | 0.011806 | 0.011942 | 0.011979 | 0.011631 |
| 0.011866 | 0.011732 | 0.011597 | 0.011698 | 0.011497 | 0.011732 | 0.011530 |
| 0.011597 | 0.011597 | 0.011564 | 0.011530 | 0.011564 | 0.011530 | 0.011631 |
| 0.011619 | 0.011620 | 0.011608 | 0.011642 | 0.011779 | 0.011744 | 0.011743 |
| 0.011742 | 0.011665 | 0.011503 | 0.011492 | 0.011602 | 0.011772 | 0.011773 |
| 0.011565 | 0.011636 | 0.011868 | 0.011838 | 0.011766 | 0.011801 | 0.011732 |
| 0.011665 | 0.011732 | 0.011732 | 0.011631 | 0.012203 | 0.011799 | 0.011866 |
| 0.011900 | 0.011986 | 0.011606 | 0.011684 | 0.011564 | 0.011765 | 0.011732 |
| 0.011767 | 0.011799 | 0.011799 | 0.011799 | 0.012004 | 0.011934 | 0.011581 |
| 0.011466 | 0.011476 | 0.011571 | 0.011536 | 0.011641 | 0.011508 | 0.011808 |
| 0.011609 | 0.011806 | 0.011489 | 0.011660 | 0.011598 | 0.011676 | 0.011564 |
| 0.011530 | 0.011530 | 0.011597 | 0.011564 | 0.011765 | 0.011732 | 0.011665 |
| 0.011765 | 0.011833 | 0.011564 | 0.011564 | 0.011598 | 0.011597 | 0.011601 |
| 0.011669 | 0.011597 | 0.011597 | 0.011633 | 0.011765 | 0.011833 | 0.011833 |
| 0.011699 | 0.011804 | 0.011806 | 0.011942 | 0.011979 | 0.011631 | 0.011396 |
| 0.011732 | 0.011732 | 0.011534 | 0.011756 | 0.011651 | 0.011673 | 0.011516 |
| 0.011714 | 0.011653 | 0.011356 | 0.011638 | 0.011463 | 0.011732 | 0.011597 |
| 0.011698 | 0.011631 | 0.011530 | 0.011633 | 0.011732 | 0.011736 | 0.011631 |

|          |          |          |          |          |          |          |
|----------|----------|----------|----------|----------|----------|----------|
| 0.011530 | 0.011465 | 0.011597 | 0.011530 | 0.011463 | 0.011570 | 0.011732 |
| 0.011631 | 0.011564 | 0.011597 | 0.011631 | 0.011597 | 0.011530 | 0.011732 |
| 0.011597 | 0.011631 | 0.011362 | 0.011564 | 0.011631 | 0.011866 | 0.011530 |
| 0.011564 | 0.011967 | 0.011564 | 0.011597 | 0.011564 | 0.011933 | 0.011403 |
| 0.011847 | 0.011400 | 0.011511 | 0.011624 | 0.011712 | 0.011706 | 0.011353 |
| 0.011428 | 0.011732 | 0.011833 | 0.011943 | 0.011767 | 0.011872 | 0.012036 |
| 0.011969 | 0.012008 | 0.011967 | 0.012154 | 0.011934 | 0.012809 | 0.011936 |
| 0.012709 | 0.012443 | 0.012611 | 0.012849 | 0.011933 | 0.011631 | 0.011934 |
| 0.012373 | 0.012241 | 0.011900 | 0.011799 | 0.011867 | 0.011867 | 0.011839 |
| 0.011732 | 0.011671 | 0.011799 | 0.011766 | 0.012136 | 0.012135 | 0.012204 |
| 0.012036 | 0.012103 | 0.012274 | 0.012007 | 0.012340 | 0.012313 | 0.012441 |
| 0.012441 | 0.012475 | 0.012357 | 0.012441 | 0.012409 | 0.011665 | 0.011968 |
| 0.012036 | 0.012472 | 0.012010 | 0.012270 | 0.012710 | 0.011773 | 0.011665 |
| 0.011665 | 0.011665 | 0.012136 | 0.012254 | 0.012292 | 0.012001 | 0.011633 |
| S217     | 0.012034 | 0.012034 | 0.012102 | 0.011866 | 0.011866 | 0.011934 |
| 0.011366 | 0.011298 | 0.011866 | 0.011631 | 0.011698 | 0.011666 | 0.011631 |
| 0.011597 | 0.011833 | 0.011564 | 0.011664 | 0.011732 | 0.011698 | 0.011664 |
| 0.011631 | 0.011664 | 0.011497 | 0.011632 | 0.011665 | 0.011664 | 0.011332 |
| 0.011631 | 0.011665 | 0.011564 | 0.011530 | 0.011665 | 0.011698 | 0.011732 |
| 0.011698 | 0.011799 | 0.011698 | 0.011698 | 0.011732 | 0.011698 | 0.011866 |
| 0.011564 | 0.011698 | 0.011732 | 0.011664 | 0.011698 | 0.011799 | 0.011732 |
| 0.011698 | 0.011866 | 0.011766 | 0.011362 | 0.011698 | 0.011967 | 0.011698 |
| 0.011664 | 0.011698 | 0.011833 | 0.011967 | 0.011463 | 0.011698 | 0.011732 |
| 0.011732 | 0.011799 | 0.011698 | 0.011933 | 0.011497 | 0.011698 | 0.011765 |
| 0.011664 | 0.011765 | 0.011732 | 0.011799 | 0.011732 | 0.011732 | 0.011732 |
| 0.011631 | 0.011664 | 0.011631 | 0.011665 | 0.011698 | 0.011733 | 0.011799 |
| 0.011732 | 0.011698 | 0.011765 | 0.011664 | 0.011530 | 0.011631 | 0.011698 |
| 0.011866 | 0.011799 | 0.011564 | 0.011866 | 0.011698 | 0.011933 | 0.011698 |
| 0.011913 | 0.011396 | 0.011928 | 0.011607 | 0.011620 | 0.011760 | 0.011533 |
| 0.012158 | 0.011467 | 0.011678 | 0.011933 | 0.011933 | 0.011664 | 0.011564 |
| 0.011765 | 0.011732 | 0.011799 | 0.011698 | 0.011799 | 0.011732 | 0.011732 |
| 0.011698 | 0.011732 | 0.012001 | 0.011866 | 0.011765 | 0.011732 | 0.011665 |
| 0.011631 | 0.011564 | 0.011698 | 0.011665 | 0.011598 | 0.011564 | 0.011497 |
| 0.011598 | 0.011665 | 0.011665 | 0.011665 | 0.011698 | 0.011698 | 0.011702 |
| 0.011770 | 0.011698 | 0.011698 | 0.011528 | 0.011603 | 0.011551 | 0.011699 |
| 0.011670 | 0.011610 | 0.011687 | 0.011647 | 0.011604 | 0.011608 | 0.011668 |
| 0.011528 | 0.011681 | 0.011715 | 0.011632 | 0.011613 | 0.011767 | 0.011666 |
| 0.011733 | 0.011734 | 0.011733 | 0.011832 | 0.011765 | 0.012135 | 0.011867 |
| 0.011698 | 0.011698 | 0.011698 | 0.011665 | 0.011597 | 0.011564 | 0.011631 |
| 0.011698 | 0.011698 | 0.011665 | 0.011631 | 0.011664 | 0.011631 | 0.011732 |
| 0.011698 | 0.011799 | 0.011732 | 0.011631 | 0.011734 | 0.011833 | 0.011838 |
| 0.011833 | 0.011732 | 0.011631 | 0.011566 | 0.011698 | 0.011631 | 0.011564 |
| 0.011570 | 0.011833 | 0.011631 | 0.011833 | 0.011597 | 0.011698 | 0.011665 |
| 0.011766 | 0.011665 | 0.011698 | 0.011665 | 0.011698 | 0.011564 | 0.011698 |
| 0.011732 | 0.011665 | 0.011732 | 0.011665 | 0.011698 | 0.011732 | 0.011967 |
| 0.000000 | 0.011329 | 0.011396 | 0.011836 | 0.011463 | 0.011698 | 0.011665 |
| 0.011635 | 0.011909 | 0.011792 | 0.011609 | 0.011399 | 0.011572 | 0.011769 |
| 0.011400 | 0.011638 | 0.011866 | 0.012068 | 0.011777 | 0.011933 | 0.011900 |
| 0.011833 | 0.012000 | 0.011842 | 0.011678 | 0.011773 | 0.011732 | 0.011805 |
| 0.011900 | 0.011802 | 0.011940 | 0.012008 | 0.011934 | 0.012001 | 0.012111 |
| 0.011839 | 0.012011 | 0.011873 | 0.011872 | 0.012137 | 0.011597 | 0.011802 |
| 0.011765 | 0.011698 | 0.011597 | 0.011597 | 0.011664 | 0.011664 | 0.011732 |
| 0.011664 | 0.011732 | 0.011631 | 0.011665 | 0.011664 | 0.011664 | 0.011732 |
| 0.011664 | 0.011429 | 0.011329 | 0.011362 | 0.011564 | 0.011664 | 0.011698 |
| 0.011698 | 0.011597 | 0.011732 | 0.011631 | 0.011631 | 0.011631 | 0.011631 |
| 0.011497 | 0.011732 | 0.011799 | 0.011597 | 0.011698 | 0.011866 | 0.011631 |
| 0.011631 | 0.011698 | 0.011664 | 0.011833 | 0.011631 | 0.011564 | 0.011698 |
| 0.011631 | 0.011664 | 0.011664 | 0.011597 | 0.011597 | 0.011765 | 0.011698 |
| 0.011597 | 0.011698 | 0.011564 | 0.011597 | 0.011732 | 0.011531 | 0.011631 |
| 0.011598 | 0.011732 | 0.011665 | 0.011564 | 0.011295 | 0.011564 | 0.011732 |



|          |          |          |          |          |          |          |
|----------|----------|----------|----------|----------|----------|----------|
| 0.011814 | 0.011631 | 0.011262 | 0.011766 | 0.011732 | 0.011664 | 0.011765 |
| 0.011631 | 0.011967 | 0.011564 | 0.011564 | 0.011564 | 0.011564 | 0.011564 |
| 0.011799 | 0.011665 | 0.011698 | 0.011765 | 0.011597 | 0.011329 | 0.011564 |
| 0.011631 | 0.011631 | 0.011664 | 0.011765 | 0.011664 | 0.011765 | 0.011833 |
| 0.011833 | 0.011799 | 0.011698 | 0.011799 | 0.011765 | 0.011631 | 0.011597 |
| 0.011631 | 0.011631 | 0.011698 | 0.011564 | 0.011597 | 0.011765 | 0.011631 |
| 0.011597 | 0.011664 | 0.011799 | 0.011765 | 0.011732 | 0.011664 | 0.011665 |
| 0.011732 | 0.011664 | 0.011765 | 0.011631 | 0.011765 | 0.011866 | 0.011564 |
| 0.011664 | 0.011463 | 0.011681 | 0.018201 | 0.011322 | 0.011672 | 0.011339 |
| 0.011302 | 0.011342 | 0.011899 | 0.011699 | 0.011500 | 0.011371 | 0.011668 |
| 0.011630 | 0.011488 | 0.011606 | 0.011688 | 0.011607 | 0.011603 | 0.011663 |
| 0.011389 | 0.011544 | 0.011394 | 0.011523 | 0.011799 | 0.011833 | 0.011805 |
| 0.011713 | 0.011799 | 0.011799 | 0.011698 | 0.011732 | 0.011732 | 0.011699 |
| 0.011732 | 0.011664 | 0.011698 | 0.011732 | 0.011698 | 0.011631 | 0.011665 |
| 0.011665 | 0.011732 | 0.011631 | 0.011732 | 0.011765 | 0.011799 | 0.011698 |
| 0.011664 | 0.011631 | 0.011429 | 0.011429 | 0.011766 | 0.011800 | 0.011833 |
| 0.011597 | 0.011597 | 0.011631 | 0.011732 | 0.011597 | 0.011833 | 0.011833 |
| 0.011866 | 0.011866 | 0.011799 | 0.011900 | 0.011463 | 0.011902 | 0.011732 |
| 0.011732 | 0.011799 | 0.011833 | 0.011665 | 0.011732 | 0.011698 | 0.011732 |
| 0.011800 | 0.011799 | 0.011833 | 0.011799 | 0.011700 | 0.011900 | 0.011866 |
| 0.011738 | 0.011631 | 0.011732 | 0.011833 | 0.011732 | 0.011799 | 0.011900 |
| 0.012068 | 0.011777 | 0.011933 | 0.011900 | 0.011833 | 0.012000 | 0.011631 |
| 0.011802 | 0.011699 | 0.011665 | 0.011665 | 0.011732 | 0.011631 | 0.011732 |
| 0.011765 | 0.011799 | 0.011698 | 0.011664 | 0.011631 | 0.011429 | 0.011429 |
| 0.011766 | 0.011800 | 0.011866 | 0.011799 | 0.012373 | 0.011846 | 0.011799 |
| 0.011869 | 0.011789 | 0.011939 | 0.011822 | 0.011936 | 0.011854 | 0.011784 |
| 0.012331 | 0.011718 | 0.011848 | 0.011787 | 0.012059 | 0.011911 | 0.012013 |
| 0.012353 | 0.011814 | 0.011906 | 0.011933 | 0.011900 | 0.011631 | 0.011871 |
| 0.011597 | 0.011765 | 0.011900 | 0.011866 | 0.011871 | 0.011597 | 0.011566 |
| 0.011698 | 0.011631 | 0.011664 | 0.011698 | 0.011597 | 0.011664 | 0.011564 |
| 0.011631 | 0.011664 | 0.011631 | 0.011597 | 0.011698 | 0.011631 | 0.011664 |
| 0.011664 | 0.011597 | 0.011664 | 0.011698 | 0.011597 | 0.011799 | 0.011833 |
| 0.011732 | 0.011732 | 0.011732 | 0.011732 | 0.011664 | 0.011463 | 0.011698 |
| 0.011478 | 0.011665 | 0.011632 | 0.011637 | 0.011698 | 0.011698 | 0.011765 |
| 0.011698 | 0.011698 | 0.011664 | 0.011698 | 0.011799 | 0.011799 | 0.011732 |
| 0.011732 | 0.011866 | 0.011362 | 0.011765 | 0.011967 | 0.011967 | 0.011832 |
| 0.011664 | 0.011732 | 0.011698 | 0.011564 | 0.011732 | 0.011698 | 0.011732 |
| 0.011765 | 0.011631 | 0.011631 | 0.011934 | 0.011934 | 0.011900 | 0.011698 |
| 0.011799 | 0.011866 | 0.011732 | 0.011799 | 0.011765 | 0.011631 | 0.011295 |
| 0.011732 | 0.011698 | 0.011631 | 0.011866 | 0.011698 | 0.011799 | 0.011564 |
| 0.011732 | 0.011434 | 0.011295 | 0.011589 | 0.011399 | 0.011740 | 0.011473 |
| 0.011555 | 0.011839 | 0.011657 | 0.011730 | 0.011646 | 0.011417 | 0.011379 |
| 0.011622 | 0.011324 | 0.011450 | 0.011324 | 0.011384 | 0.011462 | 0.011871 |
| 0.011852 | 0.011769 | 0.011730 | 0.011730 | 0.011734 | 0.011598 | 0.011665 |
| 0.011665 | 0.011665 | 0.011770 | 0.011637 | 0.011874 | 0.011908 | 0.011732 |
| 0.011698 | 0.011698 | 0.011698 | 0.011665 | 0.011597 | 0.011564 | 0.011631 |
| 0.011698 | 0.011698 | 0.011665 | 0.011631 | 0.011664 | 0.011631 | 0.011732 |
| 0.011689 | 0.011690 | 0.011677 | 0.011711 | 0.011847 | 0.011812 | 0.011811 |
| 0.011810 | 0.011766 | 0.011577 | 0.011564 | 0.011670 | 0.011840 | 0.011841 |
| 0.011666 | 0.011704 | 0.011969 | 0.011939 | 0.011834 | 0.011902 | 0.011832 |
| 0.011765 | 0.011833 | 0.011832 | 0.011732 | 0.011698 | 0.011866 | 0.011967 |
| 0.012001 | 0.011381 | 0.011640 | 0.011788 | 0.011665 | 0.011866 | 0.011833 |
| 0.011868 | 0.011900 | 0.011900 | 0.011900 | 0.011965 | 0.012034 | 0.011685 |
| 0.011567 | 0.011580 | 0.011673 | 0.011638 | 0.011675 | 0.011583 | 0.011230 |
| 0.011712 | 0.011455 | 0.011632 | 0.011735 | 0.011699 | 0.011745 | 0.011665 |
| 0.011631 | 0.011564 | 0.011698 | 0.011665 | 0.011598 | 0.011564 | 0.011497 |
| 0.011598 | 0.011665 | 0.011665 | 0.011665 | 0.011698 | 0.011698 | 0.011702 |
| 0.011770 | 0.011698 | 0.011698 | 0.011734 | 0.011598 | 0.011665 | 0.011665 |
| 0.011665 | 0.011770 | 0.011637 | 0.011874 | 0.011908 | 0.011732 | 0.011900 |
| 0.011833 | 0.011833 | 0.011669 | 0.011861 | 0.011755 | 0.011809 | 0.011691 |

|          |          |          |          |          |          |          |
|----------|----------|----------|----------|----------|----------|----------|
| 0.011852 | 0.012109 | 0.011865 | 0.011740 | 0.011631 | 0.011833 | 0.011698 |
| 0.011799 | 0.011732 | 0.011631 | 0.011734 | 0.011833 | 0.011838 | 0.011732 |
| 0.011631 | 0.011566 | 0.011698 | 0.011631 | 0.011564 | 0.011570 | 0.011833 |
| 0.011732 | 0.011664 | 0.011698 | 0.011732 | 0.011698 | 0.011631 | 0.011564 |
| 0.011698 | 0.011732 | 0.011732 | 0.011664 | 0.011732 | 0.011967 | 0.011564 |
| 0.011664 | 0.011463 | 0.011664 | 0.011698 | 0.011664 | 0.011362 | 0.011660 |
| 0.011904 | 0.011443 | 0.011461 | 0.011584 | 0.011671 | 0.011599 | 0.011395 |
| 0.011428 | 0.011564 | 0.011665 | 0.011773 | 0.011633 | 0.011771 | 0.011901 |
| 0.011801 | 0.011838 | 0.011799 | 0.012052 | 0.011765 | 0.012641 | 0.011802 |
| 0.012541 | 0.012309 | 0.012443 | 0.012715 | 0.011698 | 0.011665 | 0.011766 |
| 0.012407 | 0.012140 | 0.011732 | 0.011631 | 0.011699 | 0.011699 | 0.011635 |
| 0.011564 | 0.011569 | 0.011631 | 0.011598 | 0.011969 | 0.012035 | 0.012036 |
| 0.011935 | 0.012036 | 0.012140 | 0.011839 | 0.012408 | 0.012415 | 0.012475 |
| 0.012475 | 0.012509 | 0.012460 | 0.012476 | 0.012477 | 0.011765 | 0.012002 |
| 0.012070 | 0.012573 | 0.012078 | 0.012035 | 0.012508 | 0.011570 | 0.011464 |
| 0.011362 | 0.011430 | 0.011968 | 0.011965 | 0.012046 | 0.011765 | 0.011498 |
| S218     | 0.011967 | 0.011967 | 0.012034 | 0.011799 | 0.011799 | 0.011866 |
| 0.011298 | 0.011230 | 0.011799 | 0.011564 | 0.011631 | 0.011599 | 0.011564 |
| 0.011530 | 0.011765 | 0.011496 | 0.011597 | 0.011664 | 0.011631 | 0.011597 |
| 0.011564 | 0.011597 | 0.011429 | 0.011564 | 0.011598 | 0.011597 | 0.011264 |
| 0.011564 | 0.011597 | 0.011496 | 0.011463 | 0.011664 | 0.011631 | 0.011664 |
| 0.011631 | 0.011732 | 0.011631 | 0.011631 | 0.011664 | 0.011631 | 0.011799 |
| 0.011496 | 0.011631 | 0.011664 | 0.011597 | 0.011631 | 0.011732 | 0.011664 |
| 0.011631 | 0.011799 | 0.011699 | 0.011295 | 0.011631 | 0.011900 | 0.011631 |
| 0.011597 | 0.011631 | 0.011765 | 0.011900 | 0.011396 | 0.011631 | 0.011732 |
| 0.011664 | 0.011732 | 0.011631 | 0.011866 | 0.011429 | 0.011631 | 0.011698 |
| 0.011597 | 0.011698 | 0.011664 | 0.011732 | 0.011664 | 0.011664 | 0.011664 |
| 0.011564 | 0.011597 | 0.011564 | 0.011597 | 0.011631 | 0.011666 | 0.011732 |
| 0.011664 | 0.011631 | 0.011698 | 0.011597 | 0.011463 | 0.011564 | 0.011631 |
| 0.011799 | 0.011732 | 0.011496 | 0.011799 | 0.011631 | 0.011866 | 0.011631 |
| 0.011765 | 0.011247 | 0.011777 | 0.011490 | 0.011471 | 0.011612 | 0.011375 |
| 0.012011 | 0.011365 | 0.011513 | 0.011866 | 0.011866 | 0.011597 | 0.011496 |
| 0.011698 | 0.011664 | 0.011732 | 0.011631 | 0.011732 | 0.011664 | 0.011664 |
| 0.011631 | 0.011664 | 0.011933 | 0.011799 | 0.011698 | 0.011665 | 0.011597 |
| 0.011564 | 0.011497 | 0.011631 | 0.011597 | 0.011530 | 0.011497 | 0.011430 |
| 0.011530 | 0.011597 | 0.011597 | 0.011597 | 0.011631 | 0.011631 | 0.011634 |
| 0.011703 | 0.011631 | 0.011631 | 0.011420 | 0.011566 | 0.011516 | 0.011632 |
| 0.011602 | 0.011541 | 0.011540 | 0.011509 | 0.011536 | 0.011540 | 0.011601 |
| 0.011420 | 0.011612 | 0.011646 | 0.011564 | 0.011475 | 0.011699 | 0.011598 |
| 0.011666 | 0.011667 | 0.011665 | 0.011765 | 0.011698 | 0.012068 | 0.011799 |
| 0.011631 | 0.011698 | 0.011631 | 0.011665 | 0.011530 | 0.011497 | 0.011564 |
| 0.011631 | 0.011631 | 0.011597 | 0.011564 | 0.011597 | 0.011564 | 0.011665 |
| 0.011631 | 0.011732 | 0.011665 | 0.011564 | 0.011667 | 0.011765 | 0.011770 |
| 0.011765 | 0.011665 | 0.011564 | 0.011498 | 0.011631 | 0.011564 | 0.011497 |
| 0.011502 | 0.011766 | 0.011564 | 0.011766 | 0.011530 | 0.011631 | 0.011597 |
| 0.011698 | 0.011597 | 0.011631 | 0.011597 | 0.011631 | 0.011497 | 0.011631 |
| 0.011665 | 0.011597 | 0.011665 | 0.011597 | 0.011631 | 0.011665 | 0.011900 |
| 0.011329 | 0.000000 | 0.011329 | 0.011768 | 0.011396 | 0.011631 | 0.011597 |
| 0.011567 | 0.011909 | 0.011700 | 0.011540 | 0.011332 | 0.011503 | 0.011690 |
| 0.011332 | 0.011570 | 0.011799 | 0.012001 | 0.011709 | 0.011866 | 0.011833 |
| 0.011765 | 0.011933 | 0.011806 | 0.011719 | 0.011731 | 0.011665 | 0.011737 |
| 0.011833 | 0.011735 | 0.011872 | 0.011940 | 0.011866 | 0.011934 | 0.012043 |
| 0.011737 | 0.011943 | 0.011805 | 0.011804 | 0.012070 | 0.011530 | 0.011734 |
| 0.011698 | 0.011631 | 0.011530 | 0.011530 | 0.011597 | 0.011597 | 0.011664 |
| 0.011597 | 0.011664 | 0.011564 | 0.011597 | 0.011597 | 0.011597 | 0.011664 |
| 0.011597 | 0.011362 | 0.011262 | 0.011295 | 0.011496 | 0.011597 | 0.011631 |
| 0.011631 | 0.011530 | 0.011664 | 0.011631 | 0.011564 | 0.011564 | 0.011564 |
| 0.011429 | 0.011664 | 0.011732 | 0.011530 | 0.011631 | 0.011799 | 0.011564 |
| 0.011564 | 0.011631 | 0.011597 | 0.011765 | 0.011564 | 0.011497 | 0.011631 |
| 0.011564 | 0.011597 | 0.011597 | 0.011530 | 0.011530 | 0.011698 | 0.011631 |

|          |          |          |          |          |          |          |
|----------|----------|----------|----------|----------|----------|----------|
| 0.011530 | 0.011631 | 0.011497 | 0.011530 | 0.011665 | 0.011463 | 0.011564 |
| 0.011531 | 0.011664 | 0.011598 | 0.011497 | 0.011228 | 0.011497 | 0.011664 |
| 0.011745 | 0.011564 | 0.011195 | 0.011698 | 0.011664 | 0.011597 | 0.011698 |
| 0.011564 | 0.011900 | 0.011496 | 0.011497 | 0.011497 | 0.011497 | 0.011496 |
| 0.011732 | 0.011598 | 0.011631 | 0.011698 | 0.011530 | 0.011262 | 0.011497 |
| 0.011564 | 0.011564 | 0.011597 | 0.011698 | 0.011597 | 0.011698 | 0.011765 |
| 0.011765 | 0.011732 | 0.011631 | 0.011732 | 0.011698 | 0.011564 | 0.011530 |
| 0.011564 | 0.011564 | 0.011631 | 0.011496 | 0.011530 | 0.011698 | 0.011564 |
| 0.011530 | 0.011597 | 0.011732 | 0.011698 | 0.011664 | 0.011597 | 0.011597 |
| 0.011664 | 0.011597 | 0.011698 | 0.011564 | 0.011698 | 0.011799 | 0.011496 |
| 0.011597 | 0.011396 | 0.011612 | 0.018049 | 0.011322 | 0.011611 | 0.011269 |
| 0.011233 | 0.011201 | 0.011741 | 0.011466 | 0.011390 | 0.011302 | 0.011668 |
| 0.011582 | 0.011426 | 0.011450 | 0.011563 | 0.011450 | 0.011504 | 0.011576 |
| 0.011295 | 0.011395 | 0.011246 | 0.011325 | 0.011732 | 0.011765 | 0.011770 |
| 0.011644 | 0.011732 | 0.011732 | 0.011631 | 0.011665 | 0.011665 | 0.011631 |
| 0.011664 | 0.011597 | 0.011631 | 0.011665 | 0.011631 | 0.011564 | 0.011597 |
| 0.011597 | 0.011665 | 0.011564 | 0.011665 | 0.011698 | 0.011732 | 0.011631 |
| 0.011597 | 0.011564 | 0.011362 | 0.011362 | 0.011698 | 0.011733 | 0.011765 |
| 0.011530 | 0.011530 | 0.011564 | 0.011665 | 0.011530 | 0.011765 | 0.011765 |
| 0.011799 | 0.011799 | 0.011732 | 0.011832 | 0.011396 | 0.011835 | 0.011664 |
| 0.011665 | 0.011732 | 0.011765 | 0.011597 | 0.011665 | 0.011631 | 0.011664 |
| 0.011732 | 0.011732 | 0.011765 | 0.011732 | 0.011633 | 0.011833 | 0.011799 |
| 0.011670 | 0.011564 | 0.011665 | 0.011765 | 0.011665 | 0.011732 | 0.011832 |
| 0.012001 | 0.011709 | 0.011866 | 0.011833 | 0.011765 | 0.011933 | 0.011564 |
| 0.011734 | 0.011632 | 0.011597 | 0.011597 | 0.011665 | 0.011564 | 0.011665 |
| 0.011698 | 0.011732 | 0.011631 | 0.011597 | 0.011564 | 0.011362 | 0.011362 |
| 0.011698 | 0.011733 | 0.011799 | 0.011732 | 0.012305 | 0.011810 | 0.011728 |
| 0.011799 | 0.011754 | 0.011869 | 0.011753 | 0.011865 | 0.011785 | 0.011715 |
| 0.012262 | 0.011649 | 0.011780 | 0.011717 | 0.011990 | 0.011809 | 0.011945 |
| 0.012284 | 0.011776 | 0.011838 | 0.011866 | 0.011832 | 0.011564 | 0.011804 |
| 0.011530 | 0.011698 | 0.011832 | 0.011799 | 0.011804 | 0.011530 | 0.011498 |
| 0.011631 | 0.011564 | 0.011597 | 0.011631 | 0.011530 | 0.011597 | 0.011496 |
| 0.011564 | 0.011597 | 0.011564 | 0.011530 | 0.011631 | 0.011564 | 0.011597 |
| 0.011597 | 0.011530 | 0.011597 | 0.011631 | 0.011530 | 0.011732 | 0.011765 |
| 0.011664 | 0.011664 | 0.011664 | 0.011664 | 0.011597 | 0.011396 | 0.011631 |
| 0.011408 | 0.011597 | 0.011564 | 0.011569 | 0.011631 | 0.011631 | 0.011698 |
| 0.011698 | 0.011631 | 0.011597 | 0.011631 | 0.011732 | 0.011732 | 0.011664 |
| 0.011664 | 0.011799 | 0.011295 | 0.011698 | 0.011900 | 0.011900 | 0.011765 |
| 0.011597 | 0.011664 | 0.011698 | 0.011497 | 0.011665 | 0.011631 | 0.011664 |
| 0.011698 | 0.011564 | 0.011564 | 0.011866 | 0.011866 | 0.011833 | 0.011631 |
| 0.011732 | 0.011799 | 0.011664 | 0.011732 | 0.011698 | 0.011564 | 0.011228 |
| 0.011664 | 0.011631 | 0.011564 | 0.011799 | 0.011631 | 0.011732 | 0.011497 |
| 0.011664 | 0.011366 | 0.011362 | 0.011467 | 0.011342 | 0.011672 | 0.011370 |
| 0.011445 | 0.011683 | 0.011517 | 0.011596 | 0.011548 | 0.011366 | 0.011379 |
| 0.011468 | 0.011258 | 0.011450 | 0.011324 | 0.011330 | 0.011529 | 0.011709 |
| 0.011701 | 0.011611 | 0.011659 | 0.011659 | 0.011667 | 0.011530 | 0.011598 |
| 0.011597 | 0.011665 | 0.011770 | 0.011569 | 0.011908 | 0.011944 | 0.011664 |
| 0.011631 | 0.011698 | 0.011631 | 0.011665 | 0.011530 | 0.011497 | 0.011564 |
| 0.011631 | 0.011631 | 0.011597 | 0.011564 | 0.011597 | 0.011564 | 0.011665 |
| 0.011549 | 0.011620 | 0.011608 | 0.011642 | 0.011779 | 0.011743 | 0.011743 |
| 0.011742 | 0.011699 | 0.011429 | 0.011420 | 0.011602 | 0.011772 | 0.011773 |
| 0.011598 | 0.011636 | 0.011902 | 0.011871 | 0.011800 | 0.011834 | 0.011765 |
| 0.011698 | 0.011765 | 0.011765 | 0.011664 | 0.011631 | 0.011832 | 0.011900 |
| 0.011934 | 0.011309 | 0.011572 | 0.011718 | 0.011597 | 0.011799 | 0.011765 |
| 0.011800 | 0.011832 | 0.011832 | 0.011832 | 0.011846 | 0.011967 | 0.011615 |
| 0.011500 | 0.011510 | 0.011605 | 0.011570 | 0.011607 | 0.011545 | 0.011162 |
| 0.011643 | 0.011411 | 0.011632 | 0.011660 | 0.011632 | 0.011676 | 0.011597 |
| 0.011564 | 0.011497 | 0.011631 | 0.011597 | 0.011530 | 0.011497 | 0.011430 |
| 0.011530 | 0.011597 | 0.011597 | 0.011597 | 0.011631 | 0.011631 | 0.011634 |
| 0.011703 | 0.011631 | 0.011631 | 0.011667 | 0.011530 | 0.011598 | 0.011597 |

|          |          |          |          |          |          |          |
|----------|----------|----------|----------|----------|----------|----------|
| 0.011665 | 0.011770 | 0.011569 | 0.011908 | 0.011944 | 0.011664 | 0.011832 |
| 0.011765 | 0.011765 | 0.011601 | 0.011791 | 0.011720 | 0.011741 | 0.011621 |
| 0.011783 | 0.012017 | 0.011822 | 0.011672 | 0.011564 | 0.011766 | 0.011631 |
| 0.011732 | 0.011665 | 0.011564 | 0.011667 | 0.011765 | 0.011770 | 0.011665 |
| 0.011564 | 0.011498 | 0.011631 | 0.011564 | 0.011497 | 0.011502 | 0.011766 |
| 0.011664 | 0.011597 | 0.011631 | 0.011665 | 0.011631 | 0.011564 | 0.011497 |
| 0.011631 | 0.011664 | 0.011664 | 0.011597 | 0.011664 | 0.011900 | 0.011496 |
| 0.011597 | 0.011396 | 0.011597 | 0.011631 | 0.011597 | 0.011295 | 0.011532 |
| 0.011791 | 0.011358 | 0.011361 | 0.011423 | 0.011508 | 0.011455 | 0.011311 |
| 0.011323 | 0.011497 | 0.011597 | 0.011705 | 0.011565 | 0.011703 | 0.011834 |
| 0.011733 | 0.011771 | 0.011732 | 0.011983 | 0.011698 | 0.012573 | 0.011734 |
| 0.012473 | 0.012241 | 0.012375 | 0.012647 | 0.011564 | 0.011598 | 0.011699 |
| 0.012339 | 0.012072 | 0.011665 | 0.011564 | 0.011632 | 0.011632 | 0.011500 |
| 0.011497 | 0.011501 | 0.011564 | 0.011531 | 0.011901 | 0.011967 | 0.011968 |
| 0.011868 | 0.011968 | 0.012072 | 0.011838 | 0.012340 | 0.012347 | 0.012407 |
| 0.012408 | 0.012441 | 0.012391 | 0.012408 | 0.012409 | 0.011698 | 0.011934 |
| 0.012002 | 0.012506 | 0.012010 | 0.011934 | 0.012406 | 0.011502 | 0.011396 |
| 0.011295 | 0.011362 | 0.011901 | 0.011924 | 0.012010 | 0.011698 | 0.011431 |
| S219     | 0.012035 | 0.012035 | 0.012102 | 0.011867 | 0.011867 | 0.011934 |
| 0.011366 | 0.011298 | 0.011867 | 0.011631 | 0.011698 | 0.011666 | 0.011631 |
| 0.011597 | 0.011833 | 0.011564 | 0.011665 | 0.011732 | 0.011698 | 0.011665 |
| 0.011631 | 0.011665 | 0.011497 | 0.011632 | 0.011665 | 0.011665 | 0.011332 |
| 0.011631 | 0.011665 | 0.011564 | 0.011530 | 0.011732 | 0.011698 | 0.011732 |
| 0.011698 | 0.011799 | 0.011698 | 0.011698 | 0.011732 | 0.011698 | 0.011866 |
| 0.011564 | 0.011698 | 0.011732 | 0.011665 | 0.011698 | 0.011799 | 0.011732 |
| 0.011698 | 0.011867 | 0.011766 | 0.011362 | 0.011698 | 0.011967 | 0.011698 |
| 0.011665 | 0.011699 | 0.011833 | 0.011967 | 0.011463 | 0.011698 | 0.011799 |
| 0.011732 | 0.011799 | 0.011698 | 0.011933 | 0.011362 | 0.011698 | 0.011766 |
| 0.011665 | 0.011765 | 0.011732 | 0.011799 | 0.011732 | 0.011732 | 0.011732 |
| 0.011631 | 0.011665 | 0.011631 | 0.011665 | 0.011698 | 0.011733 | 0.011799 |
| 0.011732 | 0.011698 | 0.011765 | 0.011665 | 0.011530 | 0.011631 | 0.011698 |
| 0.011866 | 0.011799 | 0.011564 | 0.011866 | 0.011698 | 0.011934 | 0.011698 |
| 0.011913 | 0.011396 | 0.011928 | 0.011607 | 0.011620 | 0.011723 | 0.011493 |
| 0.012158 | 0.011416 | 0.011637 | 0.011933 | 0.011934 | 0.011665 | 0.011564 |
| 0.011766 | 0.011732 | 0.011799 | 0.011698 | 0.011799 | 0.011732 | 0.011732 |
| 0.011698 | 0.011732 | 0.012001 | 0.011866 | 0.011766 | 0.011732 | 0.011665 |
| 0.011631 | 0.011564 | 0.011698 | 0.011665 | 0.011598 | 0.011564 | 0.011497 |
| 0.011598 | 0.011665 | 0.011665 | 0.011665 | 0.011698 | 0.011698 | 0.011702 |
| 0.011770 | 0.011698 | 0.011698 | 0.011528 | 0.011603 | 0.011586 | 0.011699 |
| 0.011670 | 0.011610 | 0.011651 | 0.011647 | 0.011604 | 0.011608 | 0.011668 |
| 0.011528 | 0.011681 | 0.011715 | 0.011632 | 0.011613 | 0.011767 | 0.011666 |
| 0.011733 | 0.011734 | 0.011733 | 0.011833 | 0.011765 | 0.012136 | 0.011867 |
| 0.011698 | 0.011766 | 0.011698 | 0.011732 | 0.011597 | 0.011564 | 0.011631 |
| 0.011698 | 0.011698 | 0.011665 | 0.011631 | 0.011665 | 0.011631 | 0.011732 |
| 0.011698 | 0.011799 | 0.011732 | 0.011631 | 0.011734 | 0.011833 | 0.011838 |
| 0.011833 | 0.011732 | 0.011631 | 0.011566 | 0.011698 | 0.011631 | 0.011564 |
| 0.011570 | 0.011833 | 0.011631 | 0.011833 | 0.011598 | 0.011698 | 0.011665 |
| 0.011766 | 0.011665 | 0.011698 | 0.011665 | 0.011698 | 0.011564 | 0.011698 |
| 0.011732 | 0.011665 | 0.011732 | 0.011665 | 0.011698 | 0.011732 | 0.011967 |
| 0.011396 | 0.011329 | 0.000000 | 0.011836 | 0.011463 | 0.011698 | 0.011665 |
| 0.011635 | 0.011950 | 0.011655 | 0.011609 | 0.011399 | 0.011572 | 0.011769 |
| 0.011400 | 0.011638 | 0.011866 | 0.012068 | 0.011778 | 0.011934 | 0.011900 |
| 0.011833 | 0.012001 | 0.011878 | 0.011761 | 0.011815 | 0.011732 | 0.011805 |
| 0.011900 | 0.011803 | 0.011940 | 0.012008 | 0.011934 | 0.012001 | 0.012111 |
| 0.011839 | 0.012011 | 0.011873 | 0.011872 | 0.012138 | 0.011597 | 0.011802 |
| 0.011765 | 0.011698 | 0.011597 | 0.011597 | 0.011665 | 0.011665 | 0.011732 |
| 0.011665 | 0.011732 | 0.011631 | 0.011665 | 0.011665 | 0.011665 | 0.011732 |
| 0.011665 | 0.011429 | 0.011195 | 0.011228 | 0.011564 | 0.011665 | 0.011698 |
| 0.011698 | 0.011597 | 0.011732 | 0.011698 | 0.011631 | 0.011631 | 0.011631 |
| 0.011497 | 0.011732 | 0.011799 | 0.011597 | 0.011698 | 0.011867 | 0.011631 |

|          |          |          |          |          |          |          |
|----------|----------|----------|----------|----------|----------|----------|
| 0.011631 | 0.011698 | 0.011665 | 0.011833 | 0.011631 | 0.011564 | 0.011698 |
| 0.011631 | 0.011665 | 0.011665 | 0.011597 | 0.011597 | 0.011766 | 0.011698 |
| 0.011597 | 0.011698 | 0.011564 | 0.011597 | 0.011732 | 0.011531 | 0.011631 |
| 0.011598 | 0.011732 | 0.011665 | 0.011564 | 0.011295 | 0.011564 | 0.011732 |
| 0.011814 | 0.011631 | 0.011262 | 0.011766 | 0.011732 | 0.011665 | 0.011765 |
| 0.011631 | 0.011967 | 0.011564 | 0.011430 | 0.011564 | 0.011564 | 0.011564 |
| 0.011799 | 0.011665 | 0.011698 | 0.011766 | 0.011597 | 0.011195 | 0.011564 |
| 0.011631 | 0.011631 | 0.011665 | 0.011766 | 0.011665 | 0.011765 | 0.011833 |
| 0.011833 | 0.011799 | 0.011698 | 0.011799 | 0.011765 | 0.011631 | 0.011597 |
| 0.011631 | 0.011631 | 0.011698 | 0.011564 | 0.011597 | 0.011766 | 0.011631 |
| 0.011597 | 0.011665 | 0.011799 | 0.011766 | 0.011732 | 0.011665 | 0.011665 |
| 0.011732 | 0.011665 | 0.011765 | 0.011631 | 0.011765 | 0.011866 | 0.011564 |
| 0.011665 | 0.011463 | 0.011681 | 0.018201 | 0.011387 | 0.011733 | 0.011339 |
| 0.011302 | 0.011342 | 0.011951 | 0.011698 | 0.011390 | 0.011371 | 0.011728 |
| 0.011677 | 0.011427 | 0.011567 | 0.011730 | 0.011607 | 0.011554 | 0.011706 |
| 0.011342 | 0.011507 | 0.011394 | 0.011457 | 0.011799 | 0.011833 | 0.011838 |
| 0.011713 | 0.011799 | 0.011799 | 0.011698 | 0.011732 | 0.011732 | 0.011699 |
| 0.011732 | 0.011665 | 0.011698 | 0.011732 | 0.011698 | 0.011631 | 0.011665 |
| 0.011665 | 0.011732 | 0.011631 | 0.011732 | 0.011765 | 0.011799 | 0.011698 |
| 0.011665 | 0.011631 | 0.011429 | 0.011429 | 0.011766 | 0.011800 | 0.011833 |
| 0.011597 | 0.011597 | 0.011631 | 0.011732 | 0.011597 | 0.011833 | 0.011833 |
| 0.011866 | 0.011866 | 0.011799 | 0.011900 | 0.011463 | 0.011902 | 0.011732 |
| 0.011732 | 0.011799 | 0.011833 | 0.011665 | 0.011732 | 0.011698 | 0.011732 |
| 0.011800 | 0.011799 | 0.011833 | 0.011799 | 0.011700 | 0.011900 | 0.011866 |
| 0.011738 | 0.011631 | 0.011732 | 0.011833 | 0.011732 | 0.011799 | 0.011900 |
| 0.012068 | 0.011778 | 0.011934 | 0.011900 | 0.011833 | 0.012001 | 0.011632 |
| 0.011802 | 0.011699 | 0.011665 | 0.011665 | 0.011732 | 0.011631 | 0.011732 |
| 0.011765 | 0.011799 | 0.011698 | 0.011665 | 0.011631 | 0.011429 | 0.011429 |
| 0.011766 | 0.011800 | 0.011866 | 0.011799 | 0.012373 | 0.011882 | 0.011799 |
| 0.011869 | 0.011824 | 0.011939 | 0.011823 | 0.011936 | 0.011854 | 0.011785 |
| 0.012332 | 0.011718 | 0.011848 | 0.011787 | 0.012060 | 0.011911 | 0.012014 |
| 0.012353 | 0.011852 | 0.011737 | 0.011732 | 0.011732 | 0.011497 | 0.011702 |
| 0.011597 | 0.011631 | 0.011765 | 0.011732 | 0.011736 | 0.011598 | 0.011566 |
| 0.011698 | 0.011631 | 0.011665 | 0.011698 | 0.011597 | 0.011665 | 0.011564 |
| 0.011631 | 0.011665 | 0.011631 | 0.011597 | 0.011698 | 0.011631 | 0.011665 |
| 0.011665 | 0.011597 | 0.011665 | 0.011698 | 0.011597 | 0.011799 | 0.011833 |
| 0.011732 | 0.011732 | 0.011732 | 0.011732 | 0.011665 | 0.011463 | 0.011698 |
| 0.011478 | 0.011665 | 0.011632 | 0.011637 | 0.011698 | 0.011698 | 0.011765 |
| 0.011766 | 0.011698 | 0.011665 | 0.011698 | 0.011799 | 0.011799 | 0.011732 |
| 0.011732 | 0.011866 | 0.011362 | 0.011765 | 0.011967 | 0.011967 | 0.011833 |
| 0.011665 | 0.011732 | 0.011766 | 0.011564 | 0.011732 | 0.011698 | 0.011732 |
| 0.011765 | 0.011631 | 0.011631 | 0.011934 | 0.011934 | 0.011900 | 0.011698 |
| 0.011799 | 0.011866 | 0.011732 | 0.011799 | 0.011765 | 0.011631 | 0.011295 |
| 0.011732 | 0.011698 | 0.011631 | 0.011866 | 0.011698 | 0.011799 | 0.011564 |
| 0.011732 | 0.011434 | 0.011430 | 0.011589 | 0.011455 | 0.011740 | 0.011421 |
| 0.011555 | 0.011800 | 0.011657 | 0.011686 | 0.011646 | 0.011417 | 0.011432 |
| 0.011519 | 0.011324 | 0.011506 | 0.011390 | 0.011384 | 0.011596 | 0.011831 |
| 0.011814 | 0.011729 | 0.011730 | 0.011730 | 0.011734 | 0.011598 | 0.011665 |
| 0.011665 | 0.011733 | 0.011838 | 0.011637 | 0.011976 | 0.012015 | 0.011732 |
| 0.011698 | 0.011766 | 0.011698 | 0.011732 | 0.011597 | 0.011564 | 0.011631 |
| 0.011698 | 0.011698 | 0.011665 | 0.011631 | 0.011665 | 0.011631 | 0.011732 |
| 0.011689 | 0.011690 | 0.011677 | 0.011711 | 0.011847 | 0.011812 | 0.011811 |
| 0.011810 | 0.011766 | 0.011540 | 0.011528 | 0.011670 | 0.011840 | 0.011841 |
| 0.011666 | 0.011704 | 0.011969 | 0.011939 | 0.011868 | 0.011902 | 0.011833 |
| 0.011765 | 0.011833 | 0.011833 | 0.011732 | 0.011698 | 0.011900 | 0.011968 |
| 0.012001 | 0.011238 | 0.011640 | 0.011788 | 0.011665 | 0.011866 | 0.011833 |
| 0.011868 | 0.011900 | 0.011900 | 0.011900 | 0.011965 | 0.012035 | 0.011685 |
| 0.011568 | 0.011580 | 0.011673 | 0.011638 | 0.011675 | 0.011620 | 0.011230 |
| 0.011712 | 0.011499 | 0.011727 | 0.011735 | 0.011699 | 0.011745 | 0.011665 |
| 0.011631 | 0.011564 | 0.011698 | 0.011665 | 0.011598 | 0.011564 | 0.011497 |

|          |          |          |          |          |          |          |
|----------|----------|----------|----------|----------|----------|----------|
| 0.011598 | 0.011665 | 0.011665 | 0.011665 | 0.011698 | 0.011698 | 0.011702 |
| 0.011770 | 0.011698 | 0.011698 | 0.011734 | 0.011598 | 0.011665 | 0.011665 |
| 0.011733 | 0.011838 | 0.011637 | 0.011976 | 0.012015 | 0.011732 | 0.011900 |
| 0.011833 | 0.011833 | 0.011669 | 0.011861 | 0.011790 | 0.011809 | 0.011691 |
| 0.011852 | 0.012017 | 0.011865 | 0.011740 | 0.011631 | 0.011833 | 0.011698 |
| 0.011799 | 0.011732 | 0.011631 | 0.011734 | 0.011833 | 0.011838 | 0.011732 |
| 0.011631 | 0.011566 | 0.011698 | 0.011631 | 0.011564 | 0.011570 | 0.011833 |
| 0.011732 | 0.011665 | 0.011698 | 0.011732 | 0.011698 | 0.011631 | 0.011564 |
| 0.011698 | 0.011732 | 0.011732 | 0.011665 | 0.011732 | 0.011967 | 0.011564 |
| 0.011665 | 0.011463 | 0.011665 | 0.011698 | 0.011665 | 0.011362 | 0.011660 |
| 0.011960 | 0.011485 | 0.011411 | 0.011543 | 0.011630 | 0.011599 | 0.011436 |
| 0.011375 | 0.011564 | 0.011665 | 0.011773 | 0.011633 | 0.011771 | 0.011901 |
| 0.011801 | 0.011839 | 0.011799 | 0.012052 | 0.011766 | 0.012641 | 0.011802 |
| 0.012541 | 0.012309 | 0.012443 | 0.012715 | 0.011698 | 0.011665 | 0.011766 |
| 0.012407 | 0.012140 | 0.011732 | 0.011632 | 0.011699 | 0.011699 | 0.011636 |
| 0.011564 | 0.011569 | 0.011631 | 0.011598 | 0.011969 | 0.012035 | 0.012036 |
| 0.011936 | 0.012036 | 0.012140 | 0.011906 | 0.012408 | 0.012415 | 0.012475 |
| 0.012475 | 0.012509 | 0.012460 | 0.012476 | 0.012477 | 0.011765 | 0.012002 |
| 0.012070 | 0.012574 | 0.012078 | 0.012035 | 0.012508 | 0.011570 | 0.011464 |
| 0.011362 | 0.011430 | 0.011968 | 0.012006 | 0.012081 | 0.011766 | 0.011498 |
| S220     | 0.011802 | 0.011802 | 0.012106 | 0.011869 | 0.011869 | 0.011937 |
| 0.011811 | 0.011708 | 0.011869 | 0.011397 | 0.011431 | 0.011431 | 0.011397 |
| 0.011431 | 0.011599 | 0.011397 | 0.011431 | 0.011498 | 0.011465 | 0.011431 |
| 0.011397 | 0.011431 | 0.011532 | 0.011398 | 0.011431 | 0.011397 | 0.011776 |
| 0.011667 | 0.011431 | 0.011330 | 0.011566 | 0.011465 | 0.011465 | 0.011498 |
| 0.011465 | 0.011566 | 0.011397 | 0.011465 | 0.011363 | 0.011465 | 0.011633 |
| 0.011397 | 0.011465 | 0.011364 | 0.011364 | 0.011532 | 0.011566 | 0.011498 |
| 0.011465 | 0.011498 | 0.011532 | 0.011802 | 0.011330 | 0.011734 | 0.011330 |
| 0.011431 | 0.011532 | 0.011431 | 0.011734 | 0.011836 | 0.011532 | 0.011633 |
| 0.011498 | 0.011566 | 0.011431 | 0.011701 | 0.011937 | 0.011465 | 0.011532 |
| 0.011431 | 0.011498 | 0.011498 | 0.011532 | 0.011465 | 0.011431 | 0.011431 |
| 0.011397 | 0.011431 | 0.011397 | 0.011498 | 0.011465 | 0.011498 | 0.011566 |
| 0.011498 | 0.011465 | 0.011532 | 0.011397 | 0.011566 | 0.011397 | 0.011431 |
| 0.011633 | 0.011566 | 0.011802 | 0.011633 | 0.011465 | 0.011701 | 0.011397 |
| 0.011616 | 0.011845 | 0.011664 | 0.011412 | 0.011396 | 0.011502 | 0.011572 |
| 0.012231 | 0.011619 | 0.011307 | 0.011633 | 0.011599 | 0.011465 | 0.011600 |
| 0.011532 | 0.011498 | 0.011566 | 0.011465 | 0.011532 | 0.011465 | 0.011498 |
| 0.011465 | 0.011532 | 0.011768 | 0.011633 | 0.011532 | 0.011499 | 0.011431 |
| 0.011397 | 0.011397 | 0.011465 | 0.011397 | 0.011633 | 0.011599 | 0.011532 |
| 0.011633 | 0.011701 | 0.011431 | 0.011431 | 0.011465 | 0.011465 | 0.011467 |
| 0.011501 | 0.011465 | 0.011465 | 0.011349 | 0.011387 | 0.011377 | 0.011465 |
| 0.011468 | 0.011405 | 0.011466 | 0.011441 | 0.011367 | 0.011404 | 0.011433 |
| 0.011710 | 0.011441 | 0.011509 | 0.011398 | 0.011407 | 0.011533 | 0.011499 |
| 0.011566 | 0.011500 | 0.011499 | 0.011599 | 0.011532 | 0.011903 | 0.011701 |
| 0.011734 | 0.011600 | 0.011465 | 0.011566 | 0.011363 | 0.011599 | 0.011397 |
| 0.011465 | 0.011465 | 0.011397 | 0.011397 | 0.011431 | 0.011397 | 0.011498 |
| 0.011465 | 0.011566 | 0.011498 | 0.011397 | 0.011500 | 0.011600 | 0.011603 |
| 0.011600 | 0.011498 | 0.011397 | 0.011331 | 0.011465 | 0.011397 | 0.011330 |
| 0.011435 | 0.011600 | 0.011397 | 0.011600 | 0.011364 | 0.011465 | 0.011431 |
| 0.011532 | 0.011431 | 0.011465 | 0.011431 | 0.011465 | 0.011330 | 0.011431 |
| 0.011498 | 0.011431 | 0.011498 | 0.011431 | 0.011465 | 0.011498 | 0.011667 |
| 0.011836 | 0.011768 | 0.011836 | 0.000000 | 0.011836 | 0.011465 | 0.011431 |
| 0.011466 | 0.011788 | 0.011474 | 0.011335 | 0.011844 | 0.011334 | 0.011414 |
| 0.011844 | 0.011743 | 0.011566 | 0.011836 | 0.011540 | 0.011633 | 0.011667 |
| 0.011600 | 0.011667 | 0.011631 | 0.011391 | 0.011482 | 0.011499 | 0.011570 |
| 0.011667 | 0.011568 | 0.011671 | 0.011774 | 0.011667 | 0.011768 | 0.011877 |
| 0.011570 | 0.011776 | 0.011706 | 0.011638 | 0.011837 | 0.011363 | 0.011568 |
| 0.011532 | 0.011465 | 0.011330 | 0.011363 | 0.011431 | 0.011431 | 0.011431 |
| 0.011431 | 0.011498 | 0.011397 | 0.011498 | 0.011431 | 0.011431 | 0.011498 |
| 0.011431 | 0.011869 | 0.011768 | 0.011802 | 0.011330 | 0.011431 | 0.011465 |

|          |          |          |          |          |          |          |
|----------|----------|----------|----------|----------|----------|----------|
| 0.011465 | 0.011431 | 0.011498 | 0.011532 | 0.011397 | 0.011397 | 0.011397 |
| 0.011937 | 0.011566 | 0.011566 | 0.011364 | 0.011465 | 0.011633 | 0.011397 |
| 0.011397 | 0.011431 | 0.011431 | 0.011600 | 0.011397 | 0.011532 | 0.011667 |
| 0.011599 | 0.011431 | 0.011431 | 0.011364 | 0.011363 | 0.011532 | 0.011465 |
| 0.011364 | 0.011465 | 0.011330 | 0.011364 | 0.011498 | 0.011634 | 0.011397 |
| 0.011364 | 0.011498 | 0.011431 | 0.011330 | 0.011667 | 0.011330 | 0.011498 |
| 0.011576 | 0.011397 | 0.011701 | 0.011532 | 0.011566 | 0.011431 | 0.011397 |
| 0.011397 | 0.011734 | 0.011330 | 0.011600 | 0.011397 | 0.011397 | 0.011330 |
| 0.011532 | 0.011768 | 0.011431 | 0.011532 | 0.011363 | 0.011768 | 0.011397 |
| 0.011397 | 0.011397 | 0.011431 | 0.011532 | 0.011431 | 0.011532 | 0.011599 |
| 0.011600 | 0.011566 | 0.011397 | 0.011566 | 0.011532 | 0.011330 | 0.011364 |
| 0.011397 | 0.011330 | 0.011431 | 0.011397 | 0.011364 | 0.011498 | 0.011397 |
| 0.011431 | 0.011431 | 0.011566 | 0.011599 | 0.011498 | 0.011431 | 0.011431 |
| 0.011498 | 0.011431 | 0.011532 | 0.011397 | 0.011532 | 0.011566 | 0.011937 |
| 0.011431 | 0.011802 | 0.011440 | 0.017898 | 0.011322 | 0.011611 | 0.011793 |
| 0.011752 | 0.011799 | 0.011479 | 0.011408 | 0.011829 | 0.011820 | 0.011485 |
| 0.011629 | 0.011671 | 0.011333 | 0.011395 | 0.011372 | 0.011406 | 0.011490 |
| 0.011623 | 0.011619 | 0.011542 | 0.011325 | 0.011566 | 0.011600 | 0.011603 |
| 0.011474 | 0.011566 | 0.011532 | 0.011532 | 0.011465 | 0.011465 | 0.011465 |
| 0.011431 | 0.011431 | 0.011397 | 0.011498 | 0.011465 | 0.011397 | 0.011431 |
| 0.011431 | 0.011465 | 0.011397 | 0.011465 | 0.011532 | 0.011566 | 0.011465 |
| 0.011498 | 0.011465 | 0.011802 | 0.011802 | 0.011532 | 0.011567 | 0.011600 |
| 0.011363 | 0.011364 | 0.011397 | 0.011498 | 0.011364 | 0.011599 | 0.011599 |
| 0.011566 | 0.011566 | 0.011532 | 0.011599 | 0.011836 | 0.011601 | 0.011498 |
| 0.011431 | 0.011566 | 0.011599 | 0.011431 | 0.011498 | 0.011431 | 0.011431 |
| 0.011498 | 0.011498 | 0.011532 | 0.011566 | 0.011466 | 0.011633 | 0.011633 |
| 0.011502 | 0.011397 | 0.011498 | 0.011532 | 0.011498 | 0.011633 | 0.011633 |
| 0.011836 | 0.011540 | 0.011633 | 0.011667 | 0.011600 | 0.011667 | 0.011398 |
| 0.011567 | 0.011465 | 0.011431 | 0.011431 | 0.011465 | 0.011397 | 0.011465 |
| 0.011532 | 0.011566 | 0.011465 | 0.011498 | 0.011465 | 0.011802 | 0.011802 |
| 0.011532 | 0.011567 | 0.011633 | 0.011566 | 0.012209 | 0.011527 | 0.011519 |
| 0.011590 | 0.011513 | 0.011695 | 0.011582 | 0.011623 | 0.011580 | 0.011545 |
| 0.012164 | 0.011443 | 0.011576 | 0.011512 | 0.011786 | 0.011675 | 0.011778 |
| 0.012187 | 0.011628 | 0.011468 | 0.011498 | 0.011498 | 0.011532 | 0.011433 |
| 0.011363 | 0.011397 | 0.011532 | 0.011498 | 0.011467 | 0.011633 | 0.011599 |
| 0.011431 | 0.011397 | 0.011431 | 0.011431 | 0.011364 | 0.011431 | 0.011330 |
| 0.011465 | 0.011498 | 0.011397 | 0.011364 | 0.011465 | 0.011397 | 0.011431 |
| 0.011431 | 0.011363 | 0.011431 | 0.011465 | 0.011363 | 0.011566 | 0.011599 |
| 0.011498 | 0.011566 | 0.011498 | 0.011498 | 0.011431 | 0.011836 | 0.011465 |
| 0.011514 | 0.011431 | 0.011667 | 0.011673 | 0.011532 | 0.011465 | 0.011532 |
| 0.011532 | 0.011465 | 0.011431 | 0.011465 | 0.011566 | 0.011566 | 0.011498 |
| 0.011498 | 0.011600 | 0.011802 | 0.011532 | 0.011735 | 0.011735 | 0.011599 |
| 0.011431 | 0.011498 | 0.011532 | 0.011937 | 0.011499 | 0.011532 | 0.011498 |
| 0.011465 | 0.011431 | 0.011431 | 0.011768 | 0.011701 | 0.011735 | 0.011465 |
| 0.011566 | 0.011633 | 0.011498 | 0.011566 | 0.011532 | 0.011397 | 0.011734 |
| 0.011498 | 0.011465 | 0.011431 | 0.011633 | 0.011465 | 0.011566 | 0.011802 |
| 0.011498 | 0.011879 | 0.011869 | 0.011670 | 0.011399 | 0.011572 | 0.011370 |
| 0.011390 | 0.011917 | 0.011411 | 0.011462 | 0.011499 | 0.011417 | 0.011432 |
| 0.011621 | 0.011192 | 0.011394 | 0.011258 | 0.011276 | 0.011462 | 0.011547 |
| 0.011550 | 0.011454 | 0.011553 | 0.011483 | 0.011500 | 0.011633 | 0.011701 |
| 0.011701 | 0.011566 | 0.011671 | 0.011673 | 0.011809 | 0.011841 | 0.011465 |
| 0.011734 | 0.011600 | 0.011465 | 0.011566 | 0.011363 | 0.011599 | 0.011397 |
| 0.011465 | 0.011465 | 0.011397 | 0.011397 | 0.011431 | 0.011397 | 0.011498 |
| 0.011411 | 0.011482 | 0.011473 | 0.011473 | 0.011575 | 0.011609 | 0.011540 |
| 0.011607 | 0.011465 | 0.011357 | 0.011313 | 0.011468 | 0.011638 | 0.011605 |
| 0.011431 | 0.011502 | 0.011736 | 0.011705 | 0.011566 | 0.011668 | 0.011599 |
| 0.011532 | 0.011600 | 0.011599 | 0.011498 | 0.012072 | 0.011600 | 0.011667 |
| 0.011768 | 0.011740 | 0.011471 | 0.011547 | 0.011431 | 0.011633 | 0.011600 |
| 0.011601 | 0.011667 | 0.011599 | 0.011599 | 0.011692 | 0.011802 | 0.011443 |
| 0.011332 | 0.011338 | 0.011436 | 0.011401 | 0.011506 | 0.011323 | 0.011674 |

|          |          |          |          |          |          |          |
|----------|----------|----------|----------|----------|----------|----------|
| 0.011474 | 0.011545 | 0.011252 | 0.011474 | 0.011465 | 0.011541 | 0.011431 |
| 0.011397 | 0.011397 | 0.011465 | 0.011397 | 0.011633 | 0.011599 | 0.011532 |
| 0.011633 | 0.011701 | 0.011431 | 0.011431 | 0.011465 | 0.011465 | 0.011467 |
| 0.011501 | 0.011465 | 0.011465 | 0.011500 | 0.011633 | 0.011701 | 0.011701 |
| 0.011566 | 0.011671 | 0.011673 | 0.011809 | 0.011841 | 0.011465 | 0.011633 |
| 0.011600 | 0.011600 | 0.011366 | 0.011619 | 0.011548 | 0.011539 | 0.011411 |
| 0.011612 | 0.011835 | 0.011613 | 0.011504 | 0.011397 | 0.011600 | 0.011465 |
| 0.011566 | 0.011498 | 0.011397 | 0.011500 | 0.011600 | 0.011603 | 0.011498 |
| 0.011397 | 0.011331 | 0.011465 | 0.011397 | 0.011330 | 0.011435 | 0.011600 |
| 0.011431 | 0.011431 | 0.011397 | 0.011498 | 0.011465 | 0.011397 | 0.011566 |
| 0.011465 | 0.011498 | 0.011498 | 0.011431 | 0.011498 | 0.011633 | 0.011397 |
| 0.011431 | 0.011836 | 0.011431 | 0.011465 | 0.011431 | 0.011802 | 0.011360 |
| 0.011847 | 0.011400 | 0.011411 | 0.011624 | 0.011712 | 0.011634 | 0.011395 |
| 0.011375 | 0.011599 | 0.011701 | 0.011810 | 0.011667 | 0.011805 | 0.011937 |
| 0.011837 | 0.011875 | 0.011836 | 0.012086 | 0.011768 | 0.012579 | 0.011837 |
| 0.012478 | 0.012242 | 0.012380 | 0.012751 | 0.011802 | 0.011465 | 0.011802 |
| 0.012243 | 0.012005 | 0.011768 | 0.011667 | 0.011735 | 0.011735 | 0.011638 |
| 0.011599 | 0.011603 | 0.011667 | 0.011634 | 0.012005 | 0.012072 | 0.012073 |
| 0.011972 | 0.012072 | 0.012141 | 0.011940 | 0.012243 | 0.012249 | 0.012310 |
| 0.012311 | 0.012345 | 0.012289 | 0.012311 | 0.012310 | 0.011532 | 0.011836 |
| 0.011904 | 0.012376 | 0.011909 | 0.012106 | 0.011904 | 0.011672 | 0.011566 |
| 0.011532 | 0.011532 | 0.011971 | 0.012052 | 0.012155 | 0.011836 | 0.011533 |
| S221     | 0.012035 | 0.012035 | 0.012102 | 0.011867 | 0.011867 | 0.011934 |
| 0.011434 | 0.011366 | 0.011867 | 0.011631 | 0.011698 | 0.011666 | 0.011631 |
| 0.011598 | 0.011833 | 0.011564 | 0.011665 | 0.011732 | 0.011698 | 0.011665 |
| 0.011631 | 0.011665 | 0.011497 | 0.011632 | 0.011665 | 0.011665 | 0.011400 |
| 0.011631 | 0.011665 | 0.011564 | 0.011531 | 0.011732 | 0.011699 | 0.011732 |
| 0.011698 | 0.011799 | 0.011698 | 0.011698 | 0.011732 | 0.011698 | 0.011867 |
| 0.011564 | 0.011698 | 0.011732 | 0.011665 | 0.011698 | 0.011799 | 0.011732 |
| 0.011698 | 0.011867 | 0.011766 | 0.011430 | 0.011698 | 0.011967 | 0.011698 |
| 0.011665 | 0.011699 | 0.011833 | 0.011967 | 0.011396 | 0.011699 | 0.011799 |
| 0.011732 | 0.011799 | 0.011699 | 0.011934 | 0.011564 | 0.011698 | 0.011766 |
| 0.011665 | 0.011766 | 0.011732 | 0.011799 | 0.011732 | 0.011732 | 0.011732 |
| 0.011631 | 0.011665 | 0.011631 | 0.011665 | 0.011698 | 0.011733 | 0.011799 |
| 0.011732 | 0.011698 | 0.011766 | 0.011665 | 0.011597 | 0.011631 | 0.011698 |
| 0.011866 | 0.011799 | 0.011497 | 0.011867 | 0.011698 | 0.011934 | 0.011698 |
| 0.011914 | 0.011471 | 0.011928 | 0.011646 | 0.011620 | 0.011760 | 0.011533 |
| 0.012121 | 0.011366 | 0.011596 | 0.011934 | 0.011934 | 0.011665 | 0.011564 |
| 0.011766 | 0.011732 | 0.011799 | 0.011698 | 0.011799 | 0.011732 | 0.011732 |
| 0.011698 | 0.011732 | 0.012001 | 0.011866 | 0.011766 | 0.011732 | 0.011665 |
| 0.011631 | 0.011564 | 0.011698 | 0.011665 | 0.011598 | 0.011564 | 0.011497 |
| 0.011598 | 0.011665 | 0.011665 | 0.011665 | 0.011698 | 0.011698 | 0.011702 |
| 0.011770 | 0.011698 | 0.011698 | 0.011564 | 0.011639 | 0.011586 | 0.011699 |
| 0.011670 | 0.011610 | 0.011688 | 0.011647 | 0.011604 | 0.011608 | 0.011668 |
| 0.011564 | 0.011681 | 0.011715 | 0.011632 | 0.011613 | 0.011767 | 0.011666 |
| 0.011733 | 0.011735 | 0.011733 | 0.011833 | 0.011765 | 0.012136 | 0.011867 |
| 0.011699 | 0.011766 | 0.011698 | 0.011732 | 0.011597 | 0.011564 | 0.011631 |
| 0.011698 | 0.011698 | 0.011665 | 0.011631 | 0.011665 | 0.011631 | 0.011732 |
| 0.011698 | 0.011799 | 0.011732 | 0.011631 | 0.011734 | 0.011833 | 0.011838 |
| 0.011833 | 0.011732 | 0.011631 | 0.011566 | 0.011698 | 0.011631 | 0.011564 |
| 0.011570 | 0.011833 | 0.011631 | 0.011833 | 0.011598 | 0.011699 | 0.011665 |
| 0.011766 | 0.011665 | 0.011698 | 0.011665 | 0.011698 | 0.011564 | 0.011698 |
| 0.011732 | 0.011665 | 0.011732 | 0.011665 | 0.011698 | 0.011732 | 0.011967 |
| 0.011463 | 0.011396 | 0.011463 | 0.011836 | 0.000000 | 0.011698 | 0.011665 |
| 0.011635 | 0.011950 | 0.011746 | 0.011609 | 0.011467 | 0.011572 | 0.011769 |
| 0.011468 | 0.011639 | 0.011866 | 0.012069 | 0.011778 | 0.011934 | 0.011900 |
| 0.011833 | 0.012001 | 0.011878 | 0.011761 | 0.011731 | 0.011732 | 0.011805 |
| 0.011900 | 0.011803 | 0.011940 | 0.012009 | 0.011934 | 0.012001 | 0.012112 |
| 0.011839 | 0.012012 | 0.011873 | 0.011873 | 0.012138 | 0.011598 | 0.011802 |
| 0.011766 | 0.011698 | 0.011598 | 0.011598 | 0.011665 | 0.011665 | 0.011732 |



|          |          |          |          |          |          |          |
|----------|----------|----------|----------|----------|----------|----------|
| 0.011665 | 0.011732 | 0.011631 | 0.011665 | 0.011665 | 0.011665 | 0.011732 |
| 0.011665 | 0.011497 | 0.011396 | 0.011430 | 0.011564 | 0.011665 | 0.011699 |
| 0.011698 | 0.011598 | 0.011732 | 0.011699 | 0.011631 | 0.011631 | 0.011631 |
| 0.011564 | 0.011732 | 0.011799 | 0.011598 | 0.011698 | 0.011867 | 0.011631 |
| 0.011631 | 0.011698 | 0.011665 | 0.011833 | 0.011631 | 0.011564 | 0.011698 |
| 0.011631 | 0.011665 | 0.011665 | 0.011598 | 0.011597 | 0.011766 | 0.011698 |
| 0.011598 | 0.011698 | 0.011564 | 0.011598 | 0.011732 | 0.011531 | 0.011631 |
| 0.011598 | 0.011732 | 0.011665 | 0.011564 | 0.011262 | 0.011564 | 0.011732 |
| 0.011814 | 0.011631 | 0.011329 | 0.011766 | 0.011732 | 0.011665 | 0.011766 |
| 0.011631 | 0.011967 | 0.011564 | 0.011631 | 0.011564 | 0.011564 | 0.011564 |
| 0.011799 | 0.011665 | 0.011699 | 0.011766 | 0.011597 | 0.011396 | 0.011564 |
| 0.011631 | 0.011631 | 0.011665 | 0.011766 | 0.011665 | 0.011766 | 0.011833 |
| 0.011833 | 0.011799 | 0.011698 | 0.011799 | 0.011766 | 0.011631 | 0.011598 |
| 0.011631 | 0.011631 | 0.011699 | 0.011564 | 0.011598 | 0.011766 | 0.011631 |
| 0.011598 | 0.011665 | 0.011799 | 0.011766 | 0.011732 | 0.011665 | 0.011665 |
| 0.011732 | 0.011665 | 0.011766 | 0.011631 | 0.011766 | 0.011866 | 0.011497 |
| 0.011665 | 0.011396 | 0.011682 | 0.018201 | 0.011387 | 0.011733 | 0.011409 |
| 0.011372 | 0.011412 | 0.011846 | 0.011524 | 0.011500 | 0.011440 | 0.011789 |
| 0.011630 | 0.011488 | 0.011567 | 0.011647 | 0.011568 | 0.011653 | 0.011706 |
| 0.011342 | 0.011545 | 0.011394 | 0.011457 | 0.011799 | 0.011833 | 0.011838 |
| 0.011713 | 0.011799 | 0.011799 | 0.011698 | 0.011732 | 0.011733 | 0.011699 |
| 0.011732 | 0.011665 | 0.011698 | 0.011732 | 0.011699 | 0.011631 | 0.011665 |
| 0.011665 | 0.011732 | 0.011631 | 0.011732 | 0.011766 | 0.011799 | 0.011698 |
| 0.011665 | 0.011631 | 0.011362 | 0.011362 | 0.011766 | 0.011801 | 0.011833 |
| 0.011598 | 0.011598 | 0.011631 | 0.011732 | 0.011598 | 0.011833 | 0.011833 |
| 0.011866 | 0.011866 | 0.011799 | 0.011900 | 0.011396 | 0.011903 | 0.011732 |
| 0.011732 | 0.011799 | 0.011833 | 0.011665 | 0.011732 | 0.011698 | 0.011732 |
| 0.011800 | 0.011799 | 0.011833 | 0.011800 | 0.011700 | 0.011900 | 0.011866 |
| 0.011738 | 0.011631 | 0.011732 | 0.011833 | 0.011732 | 0.011799 | 0.011900 |
| 0.012069 | 0.011778 | 0.011934 | 0.011900 | 0.011833 | 0.012001 | 0.011632 |
| 0.011802 | 0.011699 | 0.011665 | 0.011665 | 0.011732 | 0.011631 | 0.011732 |
| 0.011766 | 0.011799 | 0.011698 | 0.011665 | 0.011631 | 0.011362 | 0.011362 |
| 0.011766 | 0.011801 | 0.011866 | 0.011799 | 0.012373 | 0.011883 | 0.011799 |
| 0.011869 | 0.011824 | 0.011939 | 0.011823 | 0.011936 | 0.011854 | 0.011785 |
| 0.012332 | 0.011718 | 0.011849 | 0.011787 | 0.012060 | 0.011911 | 0.012014 |
| 0.012353 | 0.011852 | 0.011737 | 0.011732 | 0.011732 | 0.011497 | 0.011703 |
| 0.011598 | 0.011631 | 0.011766 | 0.011732 | 0.011736 | 0.011598 | 0.011566 |
| 0.011698 | 0.011631 | 0.011665 | 0.011698 | 0.011598 | 0.011665 | 0.011564 |
| 0.011631 | 0.011665 | 0.011631 | 0.011598 | 0.011698 | 0.011631 | 0.011665 |
| 0.011665 | 0.011598 | 0.011665 | 0.011699 | 0.011597 | 0.011799 | 0.011833 |
| 0.011732 | 0.011732 | 0.011732 | 0.011732 | 0.011665 | 0.011396 | 0.011698 |
| 0.011478 | 0.011665 | 0.011632 | 0.011638 | 0.011699 | 0.011698 | 0.011766 |
| 0.011766 | 0.011699 | 0.011665 | 0.011699 | 0.011799 | 0.011799 | 0.011732 |
| 0.011732 | 0.011867 | 0.011430 | 0.011765 | 0.011968 | 0.011968 | 0.011833 |
| 0.011665 | 0.011732 | 0.011766 | 0.011362 | 0.011732 | 0.011699 | 0.011732 |
| 0.011766 | 0.011631 | 0.011631 | 0.011934 | 0.011934 | 0.011900 | 0.011698 |
| 0.011799 | 0.011867 | 0.011732 | 0.011799 | 0.011766 | 0.011631 | 0.011362 |
| 0.011732 | 0.011698 | 0.011631 | 0.011867 | 0.011698 | 0.011799 | 0.011631 |
| 0.011732 | 0.011502 | 0.011497 | 0.011589 | 0.011399 | 0.011740 | 0.011422 |
| 0.011610 | 0.011800 | 0.011657 | 0.011730 | 0.011597 | 0.011417 | 0.011432 |
| 0.011519 | 0.011324 | 0.011506 | 0.011390 | 0.011384 | 0.011596 | 0.011790 |
| 0.011852 | 0.011729 | 0.011730 | 0.011730 | 0.011735 | 0.011598 | 0.011665 |
| 0.011665 | 0.011733 | 0.011838 | 0.011637 | 0.011976 | 0.012015 | 0.011732 |
| 0.011699 | 0.011766 | 0.011698 | 0.011732 | 0.011597 | 0.011564 | 0.011631 |
| 0.011698 | 0.011698 | 0.011665 | 0.011631 | 0.011665 | 0.011631 | 0.011732 |
| 0.011689 | 0.011690 | 0.011677 | 0.011711 | 0.011847 | 0.011812 | 0.011812 |
| 0.011810 | 0.011767 | 0.011577 | 0.011564 | 0.011670 | 0.011840 | 0.011841 |
| 0.011666 | 0.011704 | 0.011970 | 0.011940 | 0.011868 | 0.011902 | 0.011833 |
| 0.011766 | 0.011833 | 0.011833 | 0.011732 | 0.011631 | 0.011900 | 0.011968 |
| 0.012001 | 0.011416 | 0.011640 | 0.011788 | 0.011665 | 0.011866 | 0.011833 |

|          |          |          |          |          |          |          |
|----------|----------|----------|----------|----------|----------|----------|
| 0.011868 | 0.011900 | 0.011900 | 0.011900 | 0.012044 | 0.012035 | 0.011685 |
| 0.011568 | 0.011580 | 0.011673 | 0.011638 | 0.011676 | 0.011620 | 0.011298 |
| 0.011712 | 0.011499 | 0.011632 | 0.011735 | 0.011699 | 0.011745 | 0.011665 |
| 0.011631 | 0.011564 | 0.011698 | 0.011665 | 0.011598 | 0.011564 | 0.011497 |
| 0.011598 | 0.011665 | 0.011665 | 0.011665 | 0.011698 | 0.011698 | 0.011702 |
| 0.011770 | 0.011698 | 0.011698 | 0.011735 | 0.011598 | 0.011665 | 0.011665 |
| 0.011733 | 0.011838 | 0.011637 | 0.011976 | 0.012015 | 0.011732 | 0.011900 |
| 0.011833 | 0.011833 | 0.011669 | 0.011861 | 0.011790 | 0.011810 | 0.011691 |
| 0.011853 | 0.012063 | 0.011865 | 0.011740 | 0.011631 | 0.011833 | 0.011698 |
| 0.011799 | 0.011732 | 0.011631 | 0.011734 | 0.011833 | 0.011838 | 0.011732 |
| 0.011631 | 0.011566 | 0.011698 | 0.011631 | 0.011564 | 0.011570 | 0.011833 |
| 0.011732 | 0.011665 | 0.011698 | 0.011732 | 0.011699 | 0.011631 | 0.011564 |
| 0.011698 | 0.011732 | 0.011732 | 0.011665 | 0.011732 | 0.011968 | 0.011564 |
| 0.011665 | 0.011396 | 0.011665 | 0.011698 | 0.011665 | 0.011430 | 0.011574 |
| 0.011848 | 0.011400 | 0.011361 | 0.011503 | 0.011590 | 0.011599 | 0.011395 |
| 0.011323 | 0.011564 | 0.011665 | 0.011774 | 0.011633 | 0.011771 | 0.011901 |
| 0.011801 | 0.011839 | 0.011799 | 0.012018 | 0.011766 | 0.012641 | 0.011802 |
| 0.012541 | 0.012309 | 0.012443 | 0.012715 | 0.011698 | 0.011665 | 0.011766 |
| 0.012407 | 0.012140 | 0.011732 | 0.011632 | 0.011699 | 0.011699 | 0.011670 |
| 0.011564 | 0.011569 | 0.011631 | 0.011599 | 0.011969 | 0.012035 | 0.012036 |
| 0.011936 | 0.012036 | 0.012140 | 0.011906 | 0.012408 | 0.012416 | 0.012475 |
| 0.012476 | 0.012510 | 0.012460 | 0.012476 | 0.012478 | 0.011765 | 0.012002 |
| 0.012070 | 0.012574 | 0.012078 | 0.012036 | 0.012508 | 0.011570 | 0.011464 |
| 0.011363 | 0.011430 | 0.011968 | 0.012007 | 0.012081 | 0.011766 | 0.011499 |
| S222     | 0.011530 | 0.011530 | 0.012001 | 0.011765 | 0.011765 | 0.011833 |
| 0.011672 | 0.011604 | 0.011765 | 0.011262 | 0.011329 | 0.011296 | 0.011262 |
| 0.011295 | 0.011463 | 0.011262 | 0.011295 | 0.011362 | 0.011329 | 0.011295 |
| 0.011262 | 0.011295 | 0.011396 | 0.011262 | 0.011295 | 0.011295 | 0.011638 |
| 0.011530 | 0.011295 | 0.011195 | 0.011429 | 0.011362 | 0.011329 | 0.011362 |
| 0.011329 | 0.011429 | 0.011329 | 0.011329 | 0.011362 | 0.011329 | 0.011497 |
| 0.011262 | 0.011329 | 0.011362 | 0.011295 | 0.011396 | 0.011429 | 0.011362 |
| 0.011329 | 0.011497 | 0.011396 | 0.011665 | 0.011329 | 0.011597 | 0.011329 |
| 0.011295 | 0.011396 | 0.011463 | 0.011597 | 0.011698 | 0.011396 | 0.011497 |
| 0.011362 | 0.011429 | 0.011329 | 0.011564 | 0.011799 | 0.011329 | 0.011396 |
| 0.011295 | 0.011396 | 0.011362 | 0.011429 | 0.011362 | 0.011362 | 0.011362 |
| 0.011262 | 0.011295 | 0.011262 | 0.011362 | 0.011329 | 0.011363 | 0.011429 |
| 0.011362 | 0.011329 | 0.011396 | 0.011295 | 0.011429 | 0.011262 | 0.011329 |
| 0.011497 | 0.011429 | 0.011665 | 0.011497 | 0.011329 | 0.011564 | 0.011329 |
| 0.011505 | 0.011732 | 0.011551 | 0.011216 | 0.011210 | 0.011355 | 0.011415 |
| 0.012048 | 0.011467 | 0.011184 | 0.011564 | 0.011564 | 0.011362 | 0.011463 |
| 0.011396 | 0.011295 | 0.011295 | 0.011329 | 0.011429 | 0.011362 | 0.011228 |
| 0.011262 | 0.011429 | 0.011564 | 0.011497 | 0.011396 | 0.011362 | 0.011295 |
| 0.011262 | 0.011262 | 0.011329 | 0.011295 | 0.011497 | 0.011463 | 0.011396 |
| 0.011497 | 0.011564 | 0.011295 | 0.011295 | 0.011329 | 0.011329 | 0.011330 |
| 0.011398 | 0.011329 | 0.011329 | 0.011204 | 0.011277 | 0.011235 | 0.011329 |
| 0.011331 | 0.011266 | 0.011318 | 0.011302 | 0.011230 | 0.011266 | 0.011297 |
| 0.011564 | 0.011336 | 0.011370 | 0.011262 | 0.011268 | 0.011397 | 0.011363 |
| 0.011430 | 0.011363 | 0.011363 | 0.011329 | 0.011262 | 0.011765 | 0.011564 |
| 0.011597 | 0.011463 | 0.011329 | 0.011429 | 0.011228 | 0.011463 | 0.011262 |
| 0.011329 | 0.011329 | 0.011295 | 0.011262 | 0.011295 | 0.011262 | 0.011362 |
| 0.011329 | 0.011429 | 0.011362 | 0.011262 | 0.011363 | 0.011463 | 0.011466 |
| 0.011463 | 0.011362 | 0.011262 | 0.011195 | 0.011329 | 0.011262 | 0.011195 |
| 0.011298 | 0.011463 | 0.011262 | 0.011463 | 0.011228 | 0.011329 | 0.011295 |
| 0.011396 | 0.011295 | 0.011329 | 0.011295 | 0.011329 | 0.011195 | 0.011329 |
| 0.011362 | 0.011295 | 0.011362 | 0.011295 | 0.011195 | 0.011362 | 0.011597 |
| 0.011698 | 0.011631 | 0.011698 | 0.011465 | 0.011698 | 0.000000 | 0.011295 |
| 0.011330 | 0.011626 | 0.011380 | 0.011232 | 0.011705 | 0.011197 | 0.011296 |
| 0.011705 | 0.011604 | 0.011463 | 0.011631 | 0.011333 | 0.011564 | 0.011530 |
| 0.011463 | 0.011631 | 0.011380 | 0.011225 | 0.011312 | 0.011362 | 0.011365 |
| 0.011530 | 0.011296 | 0.011567 | 0.011635 | 0.011430 | 0.011564 | 0.011602 |

|          |          |          |          |          |          |          |
|----------|----------|----------|----------|----------|----------|----------|
| 0.011331 | 0.011637 | 0.011433 | 0.011500 | 0.011699 | 0.011228 | 0.011431 |
| 0.011396 | 0.011329 | 0.011228 | 0.011228 | 0.011295 | 0.011295 | 0.011362 |
| 0.011295 | 0.011362 | 0.011262 | 0.011362 | 0.011295 | 0.011295 | 0.011362 |
| 0.011295 | 0.011732 | 0.011631 | 0.011665 | 0.011195 | 0.011295 | 0.011329 |
| 0.011329 | 0.011295 | 0.011362 | 0.011396 | 0.011262 | 0.011262 | 0.011262 |
| 0.011799 | 0.011429 | 0.011429 | 0.011228 | 0.011329 | 0.011497 | 0.011262 |
| 0.011262 | 0.011329 | 0.011295 | 0.011463 | 0.011262 | 0.011396 | 0.011530 |
| 0.011463 | 0.011295 | 0.011295 | 0.011228 | 0.011228 | 0.011396 | 0.011329 |
| 0.011228 | 0.011329 | 0.011195 | 0.011228 | 0.011362 | 0.011497 | 0.011262 |
| 0.011228 | 0.011362 | 0.011296 | 0.011195 | 0.011530 | 0.011195 | 0.011362 |
| 0.011403 | 0.011262 | 0.011564 | 0.011396 | 0.011429 | 0.011295 | 0.011396 |
| 0.011262 | 0.011597 | 0.011195 | 0.011463 | 0.011262 | 0.011262 | 0.011195 |
| 0.011429 | 0.011631 | 0.011329 | 0.011396 | 0.011228 | 0.011631 | 0.011262 |
| 0.011262 | 0.011262 | 0.011295 | 0.011396 | 0.011295 | 0.011396 | 0.011463 |
| 0.011463 | 0.011429 | 0.011329 | 0.011430 | 0.011396 | 0.011262 | 0.011228 |
| 0.011262 | 0.011262 | 0.011329 | 0.011262 | 0.011228 | 0.011396 | 0.011262 |
| 0.011295 | 0.011295 | 0.011429 | 0.011463 | 0.011362 | 0.011295 | 0.011295 |
| 0.011362 | 0.011295 | 0.011396 | 0.011262 | 0.011396 | 0.011497 | 0.011799 |
| 0.011295 | 0.011698 | 0.011302 | 0.011785 | 0.011191 | 0.011366 | 0.011653 |
| 0.011614 | 0.011658 | 0.011270 | 0.011292 | 0.011774 | 0.011681 | 0.011303 |
| 0.011487 | 0.011487 | 0.011216 | 0.011270 | 0.011294 | 0.011356 | 0.011275 |
| 0.011482 | 0.011433 | 0.011431 | 0.011325 | 0.011429 | 0.011329 | 0.011398 |
| 0.011335 | 0.011429 | 0.011429 | 0.011396 | 0.011362 | 0.011363 | 0.011329 |
| 0.011362 | 0.011295 | 0.011329 | 0.011362 | 0.011329 | 0.011262 | 0.011094 |
| 0.011094 | 0.011362 | 0.011262 | 0.011362 | 0.011396 | 0.011429 | 0.011127 |
| 0.011362 | 0.011329 | 0.011665 | 0.011665 | 0.011396 | 0.011430 | 0.011463 |
| 0.011228 | 0.011228 | 0.011262 | 0.011362 | 0.011228 | 0.011463 | 0.011463 |
| 0.011497 | 0.011463 | 0.011429 | 0.011530 | 0.011698 | 0.011532 | 0.011362 |
| 0.011362 | 0.011429 | 0.011463 | 0.011295 | 0.011362 | 0.011329 | 0.011362 |
| 0.011430 | 0.011430 | 0.011463 | 0.011430 | 0.011330 | 0.011530 | 0.011497 |
| 0.011365 | 0.011262 | 0.011362 | 0.011463 | 0.011362 | 0.011497 | 0.011530 |
| 0.011631 | 0.011333 | 0.011564 | 0.011530 | 0.011463 | 0.011631 | 0.011262 |
| 0.011431 | 0.011329 | 0.011094 | 0.011094 | 0.011362 | 0.011262 | 0.011362 |
| 0.011396 | 0.011429 | 0.011127 | 0.011362 | 0.011329 | 0.011665 | 0.011665 |
| 0.011396 | 0.011430 | 0.011362 | 0.011295 | 0.012036 | 0.011489 | 0.011306 |
| 0.011482 | 0.011442 | 0.011552 | 0.011407 | 0.011550 | 0.011405 | 0.011439 |
| 0.011987 | 0.011199 | 0.011334 | 0.011337 | 0.011611 | 0.011536 | 0.011639 |
| 0.011978 | 0.011437 | 0.011365 | 0.011362 | 0.011362 | 0.011396 | 0.011331 |
| 0.011228 | 0.011262 | 0.011396 | 0.011362 | 0.011364 | 0.011497 | 0.011464 |
| 0.011329 | 0.011262 | 0.011295 | 0.011329 | 0.011228 | 0.011295 | 0.011195 |
| 0.011329 | 0.011362 | 0.011262 | 0.011228 | 0.011329 | 0.011262 | 0.011295 |
| 0.011295 | 0.011228 | 0.011295 | 0.011329 | 0.011228 | 0.011429 | 0.011463 |
| 0.011362 | 0.011429 | 0.011362 | 0.011362 | 0.011295 | 0.011698 | 0.011329 |
| 0.011373 | 0.011295 | 0.011531 | 0.011535 | 0.011396 | 0.011396 | 0.011396 |
| 0.011396 | 0.011329 | 0.011295 | 0.011329 | 0.011429 | 0.011429 | 0.011362 |
| 0.011362 | 0.011497 | 0.011665 | 0.011396 | 0.011597 | 0.011597 | 0.011463 |
| 0.011295 | 0.011362 | 0.011396 | 0.011799 | 0.011363 | 0.011396 | 0.011362 |
| 0.011396 | 0.011329 | 0.011329 | 0.011631 | 0.011564 | 0.011597 | 0.011329 |
| 0.011429 | 0.011497 | 0.011362 | 0.011429 | 0.011396 | 0.011262 | 0.011597 |
| 0.011362 | 0.011329 | 0.011329 | 0.011497 | 0.011329 | 0.011429 | 0.011665 |
| 0.011362 | 0.011739 | 0.011732 | 0.011507 | 0.011173 | 0.011434 | 0.011267 |
| 0.011225 | 0.011722 | 0.011271 | 0.011462 | 0.011255 | 0.011366 | 0.011379 |
| 0.011468 | 0.011192 | 0.011339 | 0.011192 | 0.011222 | 0.011328 | 0.011425 |
| 0.011437 | 0.011296 | 0.011412 | 0.011307 | 0.011363 | 0.011497 | 0.011564 |
| 0.011564 | 0.011430 | 0.011533 | 0.011535 | 0.011670 | 0.011696 | 0.011362 |
| 0.011597 | 0.011463 | 0.011329 | 0.011429 | 0.011228 | 0.011463 | 0.011262 |
| 0.011329 | 0.011329 | 0.011295 | 0.011262 | 0.011295 | 0.011262 | 0.011362 |
| 0.011340 | 0.011340 | 0.011334 | 0.011368 | 0.011505 | 0.011470 | 0.011470 |
| 0.011469 | 0.011396 | 0.011208 | 0.011204 | 0.011331 | 0.011501 | 0.011501 |
| 0.011296 | 0.011365 | 0.011599 | 0.011567 | 0.011497 | 0.011531 | 0.011329 |

|          |          |          |          |          |          |          |
|----------|----------|----------|----------|----------|----------|----------|
| 0.011396 | 0.011396 | 0.011396 | 0.011362 | 0.011900 | 0.011530 | 0.011597 |
| 0.011631 | 0.011701 | 0.011333 | 0.011407 | 0.011295 | 0.011362 | 0.011329 |
| 0.011498 | 0.011396 | 0.011530 | 0.011530 | 0.011571 | 0.011530 | 0.011303 |
| 0.011196 | 0.011199 | 0.011299 | 0.011264 | 0.011368 | 0.011172 | 0.011536 |
| 0.011335 | 0.011411 | 0.011156 | 0.011285 | 0.011329 | 0.011402 | 0.011295 |
| 0.011262 | 0.011262 | 0.011329 | 0.011295 | 0.011497 | 0.011463 | 0.011396 |
| 0.011497 | 0.011564 | 0.011295 | 0.011295 | 0.011329 | 0.011329 | 0.011330 |
| 0.011398 | 0.011329 | 0.011329 | 0.011363 | 0.011497 | 0.011564 | 0.011564 |
| 0.011430 | 0.011533 | 0.011535 | 0.011670 | 0.011696 | 0.011362 | 0.011530 |
| 0.011329 | 0.011329 | 0.011297 | 0.011478 | 0.011408 | 0.011435 | 0.011305 |
| 0.011473 | 0.011652 | 0.011399 | 0.011366 | 0.011262 | 0.011463 | 0.011329 |
| 0.011429 | 0.011362 | 0.011262 | 0.011363 | 0.011463 | 0.011466 | 0.011362 |
| 0.011262 | 0.011195 | 0.011329 | 0.011262 | 0.011195 | 0.011298 | 0.011463 |
| 0.011362 | 0.011295 | 0.011329 | 0.011362 | 0.011329 | 0.011262 | 0.011463 |
| 0.011329 | 0.011362 | 0.011362 | 0.011295 | 0.011362 | 0.011597 | 0.011262 |
| 0.011295 | 0.011698 | 0.011295 | 0.011329 | 0.011295 | 0.011665 | 0.011232 |
| 0.011678 | 0.011188 | 0.011261 | 0.011422 | 0.011549 | 0.011491 | 0.011144 |
| 0.011218 | 0.011463 | 0.011564 | 0.011671 | 0.011531 | 0.011669 | 0.011800 |
| 0.011699 | 0.011737 | 0.011698 | 0.011948 | 0.011665 | 0.012472 | 0.011700 |
| 0.012439 | 0.012139 | 0.012273 | 0.012612 | 0.011665 | 0.011362 | 0.011665 |
| 0.012069 | 0.012038 | 0.011631 | 0.011530 | 0.011598 | 0.011598 | 0.011568 |
| 0.011463 | 0.011467 | 0.011530 | 0.011497 | 0.011867 | 0.011934 | 0.011935 |
| 0.011834 | 0.011934 | 0.012038 | 0.011804 | 0.012070 | 0.012076 | 0.012137 |
| 0.012138 | 0.012171 | 0.012118 | 0.012138 | 0.012139 | 0.011262 | 0.011665 |
| 0.011766 | 0.012270 | 0.011738 | 0.012001 | 0.012474 | 0.011536 | 0.011430 |
| 0.011396 | 0.011396 | 0.011867 | 0.011842 | 0.012010 | 0.011732 | 0.011397 |
| S223     | 0.011631 | 0.011631 | 0.011967 | 0.011732 | 0.011732 | 0.011799 |
| 0.011638 | 0.011570 | 0.011732 | 0.011228 | 0.011295 | 0.011262 | 0.011228 |
| 0.011262 | 0.011429 | 0.011228 | 0.011262 | 0.011329 | 0.011295 | 0.011195 |
| 0.011228 | 0.011262 | 0.011362 | 0.011228 | 0.011262 | 0.011262 | 0.011604 |
| 0.011497 | 0.011262 | 0.011161 | 0.011396 | 0.011329 | 0.011295 | 0.011329 |
| 0.011295 | 0.011396 | 0.011295 | 0.011295 | 0.011329 | 0.011295 | 0.011463 |
| 0.011228 | 0.011295 | 0.011329 | 0.011262 | 0.011362 | 0.011396 | 0.011329 |
| 0.011295 | 0.011463 | 0.011363 | 0.011631 | 0.011295 | 0.011564 | 0.011295 |
| 0.011262 | 0.011362 | 0.011430 | 0.011564 | 0.011665 | 0.011362 | 0.011463 |
| 0.011329 | 0.011396 | 0.011295 | 0.011530 | 0.011766 | 0.011295 | 0.011362 |
| 0.011262 | 0.011362 | 0.011329 | 0.011396 | 0.011329 | 0.011329 | 0.011329 |
| 0.011228 | 0.011262 | 0.011228 | 0.011329 | 0.011295 | 0.011329 | 0.011396 |
| 0.011329 | 0.011295 | 0.011362 | 0.011262 | 0.011396 | 0.011228 | 0.011295 |
| 0.011463 | 0.011329 | 0.011631 | 0.011463 | 0.011295 | 0.011530 | 0.011295 |
| 0.011468 | 0.011695 | 0.011513 | 0.011177 | 0.011209 | 0.011318 | 0.011414 |
| 0.012048 | 0.011467 | 0.011143 | 0.011530 | 0.011530 | 0.011329 | 0.011430 |
| 0.011362 | 0.011329 | 0.011396 | 0.011295 | 0.011396 | 0.011329 | 0.011329 |
| 0.011295 | 0.011396 | 0.011597 | 0.011463 | 0.011362 | 0.011329 | 0.011262 |
| 0.011228 | 0.011228 | 0.011295 | 0.011262 | 0.011463 | 0.011429 | 0.011362 |
| 0.011463 | 0.011530 | 0.011262 | 0.011262 | 0.011295 | 0.011295 | 0.011297 |
| 0.011364 | 0.011295 | 0.011295 | 0.011168 | 0.011241 | 0.011200 | 0.011296 |
| 0.011297 | 0.011232 | 0.011282 | 0.011267 | 0.011196 | 0.011231 | 0.011263 |
| 0.011528 | 0.011301 | 0.011336 | 0.011161 | 0.011233 | 0.011363 | 0.011329 |
| 0.011396 | 0.011330 | 0.011329 | 0.011429 | 0.011362 | 0.011732 | 0.011530 |
| 0.011564 | 0.011430 | 0.011295 | 0.011396 | 0.011195 | 0.011429 | 0.011228 |
| 0.011295 | 0.011295 | 0.011262 | 0.011228 | 0.011262 | 0.011228 | 0.011329 |
| 0.011295 | 0.011396 | 0.011329 | 0.011228 | 0.011330 | 0.011430 | 0.011432 |
| 0.011430 | 0.011329 | 0.011228 | 0.011161 | 0.011295 | 0.011228 | 0.011161 |
| 0.011196 | 0.011430 | 0.011228 | 0.011430 | 0.011195 | 0.011295 | 0.011262 |
| 0.011362 | 0.011262 | 0.011295 | 0.011262 | 0.011295 | 0.011161 | 0.011295 |
| 0.011329 | 0.011195 | 0.011329 | 0.011262 | 0.011295 | 0.011329 | 0.011564 |
| 0.011665 | 0.011597 | 0.011665 | 0.011431 | 0.011665 | 0.011295 | 0.000000 |
| 0.011297 | 0.011586 | 0.011380 | 0.011197 | 0.011671 | 0.011163 | 0.011296 |
| 0.011671 | 0.011570 | 0.011463 | 0.011665 | 0.011368 | 0.011530 | 0.011497 |

|          |          |          |          |          |          |          |
|----------|----------|----------|----------|----------|----------|----------|
| 0.011362 | 0.011597 | 0.011451 | 0.011266 | 0.011312 | 0.011262 | 0.011399 |
| 0.011497 | 0.011398 | 0.011534 | 0.011602 | 0.011530 | 0.011598 | 0.011704 |
| 0.011433 | 0.011603 | 0.011534 | 0.011466 | 0.011733 | 0.011195 | 0.011397 |
| 0.011362 | 0.011295 | 0.011195 | 0.011195 | 0.011262 | 0.011262 | 0.011329 |
| 0.011262 | 0.011329 | 0.011228 | 0.011329 | 0.011262 | 0.011195 | 0.011329 |
| 0.011262 | 0.011698 | 0.011597 | 0.011631 | 0.011161 | 0.011262 | 0.011295 |
| 0.011295 | 0.011262 | 0.011329 | 0.011362 | 0.011228 | 0.011228 | 0.011228 |
| 0.011765 | 0.011396 | 0.011396 | 0.011195 | 0.011295 | 0.011463 | 0.011228 |
| 0.011228 | 0.011295 | 0.011262 | 0.011430 | 0.011228 | 0.011362 | 0.011497 |
| 0.011429 | 0.011262 | 0.011195 | 0.011195 | 0.011195 | 0.011362 | 0.011295 |
| 0.011195 | 0.011295 | 0.011161 | 0.011195 | 0.011329 | 0.011463 | 0.011228 |
| 0.011195 | 0.011329 | 0.011262 | 0.011161 | 0.011497 | 0.011161 | 0.011329 |
| 0.011403 | 0.011228 | 0.011530 | 0.011362 | 0.011396 | 0.011262 | 0.011362 |
| 0.011228 | 0.011564 | 0.011161 | 0.011430 | 0.011228 | 0.011228 | 0.011161 |
| 0.011396 | 0.011598 | 0.011295 | 0.011362 | 0.011195 | 0.011597 | 0.011228 |
| 0.011228 | 0.011161 | 0.011262 | 0.011362 | 0.011262 | 0.011362 | 0.011429 |
| 0.011430 | 0.011396 | 0.011295 | 0.011396 | 0.011362 | 0.011228 | 0.011195 |
| 0.011228 | 0.011228 | 0.011295 | 0.011228 | 0.011195 | 0.011362 | 0.011228 |
| 0.011262 | 0.011262 | 0.011396 | 0.011429 | 0.011329 | 0.011262 | 0.011262 |
| 0.011329 | 0.011262 | 0.011362 | 0.011228 | 0.011362 | 0.011463 | 0.011765 |
| 0.011262 | 0.011665 | 0.011267 | 0.017785 | 0.011257 | 0.011427 | 0.011618 |
| 0.011579 | 0.011623 | 0.011374 | 0.011350 | 0.011719 | 0.011647 | 0.011364 |
| 0.011487 | 0.011548 | 0.011177 | 0.011270 | 0.011255 | 0.011307 | 0.011232 |
| 0.011482 | 0.011433 | 0.011431 | 0.011193 | 0.011396 | 0.011430 | 0.011432 |
| 0.011301 | 0.011396 | 0.011396 | 0.011362 | 0.011329 | 0.011329 | 0.011295 |
| 0.011329 | 0.011262 | 0.011295 | 0.011329 | 0.011295 | 0.011228 | 0.011262 |
| 0.011262 | 0.011329 | 0.011228 | 0.011329 | 0.011362 | 0.011396 | 0.011295 |
| 0.011329 | 0.011295 | 0.011631 | 0.011631 | 0.011362 | 0.011396 | 0.011430 |
| 0.011195 | 0.011195 | 0.011228 | 0.011329 | 0.011195 | 0.011429 | 0.011429 |
| 0.011463 | 0.011463 | 0.011396 | 0.011497 | 0.011665 | 0.011498 | 0.011329 |
| 0.011329 | 0.011396 | 0.011429 | 0.011262 | 0.011329 | 0.011295 | 0.011329 |
| 0.011396 | 0.011396 | 0.011429 | 0.011396 | 0.011296 | 0.011497 | 0.011463 |
| 0.011331 | 0.011228 | 0.011329 | 0.011430 | 0.011329 | 0.011463 | 0.011497 |
| 0.011665 | 0.011368 | 0.011530 | 0.011497 | 0.011362 | 0.011597 | 0.011228 |
| 0.011397 | 0.011295 | 0.011262 | 0.011262 | 0.011329 | 0.011228 | 0.011329 |
| 0.011362 | 0.011396 | 0.011295 | 0.011329 | 0.011295 | 0.011631 | 0.011631 |
| 0.011362 | 0.011396 | 0.011463 | 0.011396 | 0.012036 | 0.011453 | 0.011377 |
| 0.011447 | 0.011407 | 0.011517 | 0.011407 | 0.011515 | 0.011440 | 0.011405 |
| 0.011988 | 0.011303 | 0.011437 | 0.011372 | 0.011646 | 0.011502 | 0.011605 |
| 0.012012 | 0.011437 | 0.011331 | 0.011329 | 0.011329 | 0.011362 | 0.011297 |
| 0.011195 | 0.011228 | 0.011362 | 0.011329 | 0.011331 | 0.011463 | 0.011431 |
| 0.011295 | 0.011161 | 0.011262 | 0.011295 | 0.011195 | 0.011262 | 0.011161 |
| 0.011295 | 0.011329 | 0.011228 | 0.011195 | 0.011295 | 0.011228 | 0.011262 |
| 0.011262 | 0.011195 | 0.011262 | 0.011295 | 0.011195 | 0.011396 | 0.011429 |
| 0.011329 | 0.011396 | 0.011329 | 0.011329 | 0.011262 | 0.011665 | 0.011295 |
| 0.011339 | 0.011262 | 0.011497 | 0.011501 | 0.011362 | 0.011362 | 0.011295 |
| 0.011362 | 0.011295 | 0.011262 | 0.011295 | 0.011396 | 0.011396 | 0.011329 |
| 0.011329 | 0.011463 | 0.011631 | 0.011362 | 0.011564 | 0.011564 | 0.011429 |
| 0.011262 | 0.011329 | 0.011362 | 0.011766 | 0.011329 | 0.011362 | 0.011329 |
| 0.011362 | 0.011295 | 0.011295 | 0.011598 | 0.011530 | 0.011564 | 0.011295 |
| 0.011396 | 0.011463 | 0.011329 | 0.011396 | 0.011362 | 0.011228 | 0.011564 |
| 0.011329 | 0.011295 | 0.011295 | 0.011463 | 0.011295 | 0.011396 | 0.011631 |
| 0.011329 | 0.011706 | 0.011698 | 0.011507 | 0.011229 | 0.011400 | 0.011267 |
| 0.011225 | 0.011722 | 0.011236 | 0.011462 | 0.011255 | 0.011366 | 0.011379 |
| 0.011519 | 0.011192 | 0.011338 | 0.011192 | 0.011222 | 0.011395 | 0.011385 |
| 0.011399 | 0.011296 | 0.011377 | 0.011307 | 0.011330 | 0.011463 | 0.011530 |
| 0.011530 | 0.011396 | 0.011500 | 0.011501 | 0.011636 | 0.011661 | 0.011329 |
| 0.011564 | 0.011430 | 0.011295 | 0.011396 | 0.011195 | 0.011429 | 0.011228 |
| 0.011295 | 0.011295 | 0.011262 | 0.011228 | 0.011262 | 0.011228 | 0.011329 |
| 0.011305 | 0.011305 | 0.011231 | 0.011334 | 0.011471 | 0.011436 | 0.011436 |

|          |          |          |          |          |          |          |
|----------|----------|----------|----------|----------|----------|----------|
| 0.011435 | 0.011363 | 0.011171 | 0.011168 | 0.011297 | 0.011467 | 0.011467 |
| 0.011262 | 0.011331 | 0.011565 | 0.011533 | 0.011464 | 0.011498 | 0.011429 |
| 0.011362 | 0.011429 | 0.011429 | 0.011329 | 0.011900 | 0.011497 | 0.011564 |
| 0.011597 | 0.011666 | 0.011299 | 0.011372 | 0.011262 | 0.011463 | 0.011430 |
| 0.011464 | 0.011497 | 0.011497 | 0.011497 | 0.011610 | 0.011631 | 0.011268 |
| 0.011162 | 0.011164 | 0.011265 | 0.011230 | 0.011334 | 0.011135 | 0.011502 |
| 0.011232 | 0.011411 | 0.011156 | 0.011285 | 0.011296 | 0.011368 | 0.011262 |
| 0.011228 | 0.011228 | 0.011295 | 0.011262 | 0.011463 | 0.011429 | 0.011362 |
| 0.011463 | 0.011530 | 0.011262 | 0.011262 | 0.011295 | 0.011295 | 0.011297 |
| 0.011364 | 0.011295 | 0.011295 | 0.011330 | 0.011463 | 0.011530 | 0.011530 |
| 0.011396 | 0.011500 | 0.011501 | 0.011636 | 0.011661 | 0.011329 | 0.011497 |
| 0.011430 | 0.011430 | 0.011263 | 0.011443 | 0.011373 | 0.011401 | 0.011270 |
| 0.011439 | 0.011652 | 0.011441 | 0.011332 | 0.011228 | 0.011430 | 0.011295 |
| 0.011396 | 0.011329 | 0.011228 | 0.011330 | 0.011430 | 0.011432 | 0.011329 |
| 0.011228 | 0.011161 | 0.011295 | 0.011228 | 0.011161 | 0.011196 | 0.011430 |
| 0.011329 | 0.011262 | 0.011295 | 0.011329 | 0.011295 | 0.011228 | 0.011430 |
| 0.011295 | 0.011329 | 0.011329 | 0.011262 | 0.011329 | 0.011564 | 0.011228 |
| 0.011262 | 0.011665 | 0.011262 | 0.011295 | 0.011262 | 0.011631 | 0.011232 |
| 0.011735 | 0.011230 | 0.011261 | 0.011463 | 0.011549 | 0.011455 | 0.011144 |
| 0.011218 | 0.011429 | 0.011530 | 0.011637 | 0.011498 | 0.011635 | 0.011766 |
| 0.011666 | 0.011703 | 0.011665 | 0.011914 | 0.011631 | 0.012506 | 0.011666 |
| 0.012405 | 0.012173 | 0.012307 | 0.012578 | 0.011631 | 0.011329 | 0.011631 |
| 0.012070 | 0.012004 | 0.011597 | 0.011497 | 0.011564 | 0.011564 | 0.011534 |
| 0.011429 | 0.011433 | 0.011497 | 0.011464 | 0.011833 | 0.011900 | 0.011901 |
| 0.011800 | 0.011901 | 0.012004 | 0.011770 | 0.012070 | 0.012076 | 0.012137 |
| 0.012138 | 0.012172 | 0.012118 | 0.012138 | 0.012139 | 0.011362 | 0.011665 |
| 0.011733 | 0.012237 | 0.011738 | 0.011967 | 0.012440 | 0.011502 | 0.011396 |
| 0.011362 | 0.011362 | 0.011833 | 0.011842 | 0.011975 | 0.011698 | 0.011363 |
| S224     | 0.011668 | 0.011668 | 0.011871 | 0.011702 | 0.011702 | 0.011770 |
| 0.011607 | 0.011504 | 0.011702 | 0.011263 | 0.011330 | 0.011297 | 0.011263 |
| 0.011229 | 0.011465 | 0.011128 | 0.011297 | 0.011364 | 0.011330 | 0.011297 |
| 0.011263 | 0.011297 | 0.011330 | 0.011263 | 0.011297 | 0.011297 | 0.011573 |
| 0.011466 | 0.011297 | 0.011195 | 0.011364 | 0.011330 | 0.011330 | 0.011364 |
| 0.011330 | 0.011432 | 0.011330 | 0.011330 | 0.011364 | 0.011330 | 0.011499 |
| 0.011195 | 0.011330 | 0.011364 | 0.011263 | 0.011330 | 0.011432 | 0.011364 |
| 0.011330 | 0.011499 | 0.011398 | 0.011601 | 0.011330 | 0.011601 | 0.011330 |
| 0.011297 | 0.011331 | 0.011466 | 0.011601 | 0.011634 | 0.011330 | 0.011432 |
| 0.011364 | 0.011432 | 0.011330 | 0.011567 | 0.011736 | 0.011330 | 0.011398 |
| 0.011297 | 0.011398 | 0.011364 | 0.011432 | 0.011364 | 0.011330 | 0.011330 |
| 0.011263 | 0.011297 | 0.011263 | 0.011297 | 0.011330 | 0.011364 | 0.011432 |
| 0.011364 | 0.011330 | 0.011398 | 0.011297 | 0.011364 | 0.011263 | 0.011330 |
| 0.011499 | 0.011432 | 0.011668 | 0.011466 | 0.011297 | 0.011567 | 0.011297 |
| 0.011470 | 0.011660 | 0.011553 | 0.011256 | 0.011248 | 0.011319 | 0.011377 |
| 0.012015 | 0.011468 | 0.011267 | 0.011567 | 0.011567 | 0.000000 | 0.011398 |
| 0.011398 | 0.011364 | 0.011432 | 0.011330 | 0.011432 | 0.011263 | 0.011364 |
| 0.011330 | 0.011297 | 0.011635 | 0.011432 | 0.011364 | 0.011364 | 0.011297 |
| 0.011263 | 0.011195 | 0.011330 | 0.011263 | 0.011432 | 0.011398 | 0.011330 |
| 0.011432 | 0.011499 | 0.011297 | 0.011297 | 0.011330 | 0.011330 | 0.011332 |
| 0.011400 | 0.011330 | 0.011330 | 0.011205 | 0.011278 | 0.011237 | 0.011331 |
| 0.011333 | 0.011268 | 0.011319 | 0.011303 | 0.011231 | 0.011267 | 0.011298 |
| 0.011494 | 0.011337 | 0.011372 | 0.011263 | 0.011269 | 0.011398 | 0.011297 |
| 0.011365 | 0.011365 | 0.011364 | 0.011465 | 0.011398 | 0.011770 | 0.011499 |
| 0.011533 | 0.011398 | 0.011330 | 0.011364 | 0.011229 | 0.011398 | 0.011263 |
| 0.011330 | 0.011330 | 0.011297 | 0.011263 | 0.011297 | 0.011263 | 0.011364 |
| 0.011330 | 0.011432 | 0.011364 | 0.011229 | 0.011365 | 0.011466 | 0.011468 |
| 0.011466 | 0.011364 | 0.011263 | 0.011196 | 0.011330 | 0.011263 | 0.011195 |
| 0.011299 | 0.011466 | 0.011263 | 0.011466 | 0.011229 | 0.011330 | 0.011297 |
| 0.011398 | 0.011297 | 0.011330 | 0.011297 | 0.011330 | 0.011195 | 0.011330 |
| 0.011364 | 0.011297 | 0.011364 | 0.011297 | 0.011330 | 0.011364 | 0.011567 |
| 0.011635 | 0.011567 | 0.011635 | 0.011466 | 0.011635 | 0.011330 | 0.011297 |

|          |          |          |          |          |          |          |
|----------|----------|----------|----------|----------|----------|----------|
| 0.000000 | 0.011547 | 0.011428 | 0.011232 | 0.011641 | 0.011163 | 0.011337 |
| 0.011641 | 0.011539 | 0.011499 | 0.011702 | 0.011404 | 0.011567 | 0.011533 |
| 0.011465 | 0.011634 | 0.011489 | 0.011351 | 0.011356 | 0.011364 | 0.011435 |
| 0.011533 | 0.011433 | 0.011571 | 0.011639 | 0.011567 | 0.011635 | 0.011742 |
| 0.011469 | 0.011641 | 0.011571 | 0.011503 | 0.011771 | 0.011229 | 0.011433 |
| 0.011398 | 0.011330 | 0.011229 | 0.011229 | 0.011297 | 0.011297 | 0.011364 |
| 0.011297 | 0.011364 | 0.011263 | 0.011297 | 0.011297 | 0.011297 | 0.011364 |
| 0.011297 | 0.011668 | 0.011567 | 0.011601 | 0.011195 | 0.011297 | 0.011330 |
| 0.011330 | 0.011297 | 0.011364 | 0.011330 | 0.011263 | 0.011263 | 0.011263 |
| 0.011736 | 0.011364 | 0.011432 | 0.011229 | 0.011330 | 0.011499 | 0.011263 |
| 0.011263 | 0.011330 | 0.011297 | 0.011466 | 0.011263 | 0.011398 | 0.011533 |
| 0.011466 | 0.011297 | 0.011297 | 0.011229 | 0.011229 | 0.011398 | 0.011330 |
| 0.011229 | 0.011330 | 0.011195 | 0.011229 | 0.011364 | 0.011432 | 0.011263 |
| 0.011229 | 0.011364 | 0.011297 | 0.011195 | 0.011466 | 0.011195 | 0.011364 |
| 0.011439 | 0.011263 | 0.011499 | 0.011398 | 0.011364 | 0.011297 | 0.011398 |
| 0.011263 | 0.011601 | 0.011195 | 0.011398 | 0.011128 | 0.011128 | 0.011195 |
| 0.011432 | 0.011567 | 0.011330 | 0.011398 | 0.011229 | 0.011567 | 0.011128 |
| 0.011263 | 0.011263 | 0.011297 | 0.011398 | 0.011297 | 0.011398 | 0.011466 |
| 0.011432 | 0.011432 | 0.011297 | 0.011432 | 0.011398 | 0.011263 | 0.011229 |
| 0.011263 | 0.011263 | 0.011330 | 0.011195 | 0.011229 | 0.011398 | 0.011263 |
| 0.011162 | 0.011297 | 0.011432 | 0.011398 | 0.011364 | 0.011297 | 0.011297 |
| 0.011364 | 0.011297 | 0.011398 | 0.011263 | 0.011398 | 0.011499 | 0.011668 |
| 0.011297 | 0.011635 | 0.011303 | 0.017851 | 0.011323 | 0.011367 | 0.011585 |
| 0.011546 | 0.011590 | 0.011376 | 0.011410 | 0.011668 | 0.011615 | 0.011426 |
| 0.011489 | 0.011550 | 0.011217 | 0.011313 | 0.011217 | 0.011308 | 0.011319 |
| 0.011484 | 0.011397 | 0.011395 | 0.011193 | 0.011432 | 0.011466 | 0.011468 |
| 0.011337 | 0.011432 | 0.011432 | 0.011330 | 0.011330 | 0.011331 | 0.011331 |
| 0.011364 | 0.011297 | 0.011330 | 0.011364 | 0.011330 | 0.011263 | 0.011297 |
| 0.011297 | 0.011364 | 0.011263 | 0.011364 | 0.011398 | 0.011432 | 0.011330 |
| 0.011297 | 0.011263 | 0.011601 | 0.011601 | 0.011398 | 0.011432 | 0.011466 |
| 0.011229 | 0.011229 | 0.011263 | 0.011364 | 0.011229 | 0.011466 | 0.011466 |
| 0.011499 | 0.011499 | 0.011432 | 0.011533 | 0.011635 | 0.011534 | 0.011364 |
| 0.011364 | 0.011432 | 0.011465 | 0.011297 | 0.011364 | 0.011297 | 0.011364 |
| 0.011432 | 0.011432 | 0.011465 | 0.011432 | 0.011331 | 0.011533 | 0.011499 |
| 0.011367 | 0.011263 | 0.011364 | 0.011466 | 0.011364 | 0.011432 | 0.011533 |
| 0.011702 | 0.011404 | 0.011567 | 0.011533 | 0.011465 | 0.011634 | 0.011263 |
| 0.011433 | 0.011331 | 0.011297 | 0.011297 | 0.011364 | 0.011263 | 0.011364 |
| 0.011398 | 0.011432 | 0.011330 | 0.011297 | 0.011263 | 0.011601 | 0.011601 |
| 0.011398 | 0.011432 | 0.011499 | 0.011432 | 0.011974 | 0.011492 | 0.011414 |
| 0.011485 | 0.011444 | 0.011555 | 0.011444 | 0.011553 | 0.011477 | 0.011442 |
| 0.011924 | 0.011339 | 0.011474 | 0.011408 | 0.011684 | 0.011539 | 0.011642 |
| 0.011950 | 0.011439 | 0.011366 | 0.011330 | 0.011364 | 0.011330 | 0.011332 |
| 0.011229 | 0.011263 | 0.011398 | 0.011364 | 0.011366 | 0.011432 | 0.011398 |
| 0.011330 | 0.011263 | 0.011297 | 0.011330 | 0.011229 | 0.011297 | 0.011195 |
| 0.011263 | 0.011297 | 0.011263 | 0.011229 | 0.011330 | 0.011263 | 0.011297 |
| 0.011297 | 0.011229 | 0.011297 | 0.011330 | 0.011229 | 0.011432 | 0.011466 |
| 0.011364 | 0.011364 | 0.011364 | 0.011364 | 0.011297 | 0.011634 | 0.011330 |
| 0.011305 | 0.011297 | 0.011466 | 0.011470 | 0.011398 | 0.011398 | 0.011398 |
| 0.011398 | 0.011330 | 0.011297 | 0.011330 | 0.011432 | 0.011432 | 0.011364 |
| 0.011364 | 0.011499 | 0.011601 | 0.011398 | 0.011601 | 0.011601 | 0.011465 |
| 0.011297 | 0.011364 | 0.011398 | 0.011736 | 0.011364 | 0.011398 | 0.011364 |
| 0.011398 | 0.011263 | 0.011263 | 0.011567 | 0.011567 | 0.011533 | 0.011330 |
| 0.011432 | 0.011499 | 0.011364 | 0.011432 | 0.011398 | 0.011263 | 0.011533 |
| 0.011364 | 0.011330 | 0.011263 | 0.011499 | 0.011330 | 0.011432 | 0.011668 |
| 0.011297 | 0.011675 | 0.011668 | 0.011468 | 0.011174 | 0.011368 | 0.011268 |
| 0.011225 | 0.011686 | 0.011272 | 0.011374 | 0.011207 | 0.011316 | 0.011327 |
| 0.011418 | 0.011259 | 0.011396 | 0.011259 | 0.011277 | 0.011464 | 0.011427 |
| 0.011438 | 0.011337 | 0.011272 | 0.011343 | 0.011365 | 0.011432 | 0.011499 |
| 0.011499 | 0.011364 | 0.011468 | 0.011435 | 0.011538 | 0.011593 | 0.011330 |
| 0.011533 | 0.011398 | 0.011330 | 0.011364 | 0.011229 | 0.011398 | 0.011263 |

|          |          |          |          |          |          |          |
|----------|----------|----------|----------|----------|----------|----------|
| 0.011330 | 0.011330 | 0.011297 | 0.011263 | 0.011297 | 0.011263 | 0.011364 |
| 0.011341 | 0.011341 | 0.011336 | 0.011370 | 0.011507 | 0.011472 | 0.011472 |
| 0.011471 | 0.011398 | 0.011209 | 0.011205 | 0.011333 | 0.011503 | 0.011504 |
| 0.011297 | 0.011367 | 0.011602 | 0.011570 | 0.011500 | 0.011534 | 0.011466 |
| 0.011398 | 0.011466 | 0.011465 | 0.011364 | 0.011838 | 0.011533 | 0.011601 |
| 0.011634 | 0.011634 | 0.011335 | 0.011409 | 0.011297 | 0.011499 | 0.011466 |
| 0.011500 | 0.011533 | 0.011533 | 0.011533 | 0.011653 | 0.011634 | 0.011305 |
| 0.011196 | 0.011200 | 0.011300 | 0.011265 | 0.011301 | 0.011211 | 0.011471 |
| 0.011336 | 0.011369 | 0.011204 | 0.011362 | 0.011331 | 0.011404 | 0.011297 |
| 0.011263 | 0.011195 | 0.011330 | 0.011263 | 0.011432 | 0.011398 | 0.011330 |
| 0.011432 | 0.011499 | 0.011297 | 0.011297 | 0.011330 | 0.011330 | 0.011332 |
| 0.011400 | 0.011330 | 0.011330 | 0.011365 | 0.011432 | 0.011499 | 0.011499 |
| 0.011364 | 0.011468 | 0.011435 | 0.011538 | 0.011593 | 0.011330 | 0.011533 |
| 0.011466 | 0.011466 | 0.011298 | 0.011445 | 0.011409 | 0.011437 | 0.011306 |
| 0.011475 | 0.011653 | 0.011400 | 0.011368 | 0.011263 | 0.011466 | 0.011330 |
| 0.011432 | 0.011364 | 0.011229 | 0.011365 | 0.011466 | 0.011468 | 0.011364 |
| 0.011263 | 0.011196 | 0.011330 | 0.011263 | 0.011195 | 0.011299 | 0.011466 |
| 0.011364 | 0.011297 | 0.011330 | 0.011364 | 0.011330 | 0.011263 | 0.011364 |
| 0.011330 | 0.011364 | 0.011364 | 0.011297 | 0.011364 | 0.011601 | 0.011195 |
| 0.011297 | 0.011634 | 0.011297 | 0.011330 | 0.011297 | 0.011601 | 0.011275 |
| 0.011624 | 0.011274 | 0.011261 | 0.011424 | 0.011510 | 0.011420 | 0.011228 |
| 0.011218 | 0.011398 | 0.011499 | 0.011606 | 0.011466 | 0.011603 | 0.011736 |
| 0.011635 | 0.011673 | 0.011635 | 0.011883 | 0.011601 | 0.012447 | 0.011635 |
| 0.012346 | 0.012109 | 0.012247 | 0.012550 | 0.011601 | 0.011297 | 0.011601 |
| 0.012008 | 0.011805 | 0.011567 | 0.011466 | 0.011534 | 0.011534 | 0.011503 |
| 0.011398 | 0.011401 | 0.011466 | 0.011432 | 0.011804 | 0.011871 | 0.011872 |
| 0.011771 | 0.011871 | 0.011974 | 0.011739 | 0.012008 | 0.012013 | 0.012076 |
| 0.012076 | 0.012110 | 0.012053 | 0.012076 | 0.012076 | 0.011398 | 0.011635 |
| 0.011703 | 0.012176 | 0.011707 | 0.011939 | 0.011703 | 0.011469 | 0.011364 |
| 0.011330 | 0.011330 | 0.011804 | 0.011847 | 0.011945 | 0.011567 | 0.011331 |
| S225     | 0.012031 | 0.012031 | 0.011990 | 0.011950 | 0.011950 | 0.012031 |
| 0.011960 | 0.011837 | 0.011950 | 0.011505 | 0.011586 | 0.011586 | 0.011545 |
| 0.011505 | 0.011747 | 0.011464 | 0.011586 | 0.011667 | 0.011586 | 0.011586 |
| 0.011545 | 0.011545 | 0.011586 | 0.011505 | 0.011546 | 0.011545 | 0.011919 |
| 0.011748 | 0.011586 | 0.011464 | 0.011626 | 0.011545 | 0.011626 | 0.011626 |
| 0.011626 | 0.011667 | 0.011626 | 0.011626 | 0.011667 | 0.011626 | 0.011788 |
| 0.011464 | 0.011626 | 0.011667 | 0.011586 | 0.011626 | 0.011747 | 0.011667 |
| 0.011586 | 0.011788 | 0.011626 | 0.011909 | 0.011626 | 0.011909 | 0.011626 |
| 0.011586 | 0.011626 | 0.011707 | 0.011909 | 0.011869 | 0.011586 | 0.011667 |
| 0.011586 | 0.011626 | 0.011586 | 0.011747 | 0.012072 | 0.011586 | 0.011707 |
| 0.011586 | 0.011667 | 0.011667 | 0.011626 | 0.011586 | 0.011667 | 0.011667 |
| 0.011545 | 0.011545 | 0.011545 | 0.011545 | 0.011586 | 0.011586 | 0.011747 |
| 0.011667 | 0.011586 | 0.011626 | 0.011545 | 0.011626 | 0.011505 | 0.011586 |
| 0.011828 |          |          |          |          |          |          |



|          |          |          |          |          |          |          |
|----------|----------|----------|----------|----------|----------|----------|
| 0.011626 | 0.011545 | 0.011626 | 0.011545 | 0.011626 | 0.011626 | 0.011869 |
| 0.011909 | 0.011909 | 0.011950 | 0.011788 | 0.011950 | 0.011626 | 0.011586 |
| 0.011547 | 0.000000 | 0.011804 | 0.011509 | 0.011958 | 0.011470 | 0.011614 |
| 0.011960 | 0.011838 | 0.011828 | 0.011950 | 0.011675 | 0.011869 | 0.011788 |
| 0.011748 | 0.011950 | 0.011791 | 0.011620 | 0.011673 | 0.011626 | 0.011754 |
| 0.011748 | 0.011751 | 0.011876 | 0.011917 | 0.011747 | 0.011910 | 0.012122 |
| 0.011713 | 0.011918 | 0.011916 | 0.011793 | 0.011870 | 0.011505 | 0.011667 |
| 0.011586 | 0.011586 | 0.011464 | 0.011505 | 0.011545 | 0.011586 | 0.011667 |
| 0.011545 | 0.011586 | 0.011505 | 0.011545 | 0.011505 | 0.011586 | 0.011626 |
| 0.011545 | 0.011990 | 0.011869 | 0.011909 | 0.011464 | 0.011545 | 0.011626 |
| 0.011626 | 0.011586 | 0.011626 | 0.011586 | 0.011545 | 0.011545 | 0.011545 |
| 0.012112 | 0.011545 | 0.011667 | 0.011505 | 0.011586 | 0.011667 | 0.011545 |
| 0.011545 | 0.011586 | 0.011586 | 0.011707 | 0.011505 | 0.011707 | 0.011788 |
| 0.011748 | 0.011586 | 0.011545 | 0.011505 | 0.011505 | 0.011626 | 0.011586 |
| 0.011505 | 0.011626 | 0.011464 | 0.011505 | 0.011667 | 0.011748 | 0.011545 |
| 0.011505 | 0.011667 | 0.011586 | 0.011464 | 0.011748 | 0.011464 | 0.011667 |
| 0.011639 | 0.011545 | 0.011828 | 0.011626 | 0.011626 | 0.011586 | 0.011707 |
| 0.011545 | 0.011909 | 0.011464 | 0.011667 | 0.011464 | 0.011464 | 0.011464 |
| 0.011586 | 0.011869 | 0.011586 | 0.011707 | 0.011505 | 0.011869 | 0.011464 |
| 0.011505 | 0.011545 | 0.011586 | 0.011626 | 0.011586 | 0.011626 | 0.011788 |
| 0.011748 | 0.011667 | 0.011626 | 0.011707 | 0.011626 | 0.011505 | 0.011505 |
| 0.011545 | 0.011505 | 0.011586 | 0.011464 | 0.011464 | 0.011667 | 0.011545 |
| 0.011464 | 0.011586 | 0.011748 | 0.011586 | 0.011667 | 0.011545 | 0.011586 |
| 0.011667 | 0.011586 | 0.011667 | 0.011545 | 0.011667 | 0.011788 | 0.011909 |
| 0.011586 | 0.011910 | 0.011599 | 0.018526 | 0.011298 | 0.011518 | 0.011940 |
| 0.011890 | 0.011907 | 0.011500 | 0.011541 | 0.011930 | 0.011930 | 0.011508 |
| 0.011623 | 0.011746 | 0.011441 | 0.011562 | 0.011526 | 0.011425 | 0.011525 |
| 0.011724 | 0.011689 | 0.011728 | 0.011448 | 0.011707 | 0.011788 | 0.011791 |
| 0.011598 | 0.011707 | 0.011707 | 0.011586 | 0.011626 | 0.011627 | 0.011627 |
| 0.011667 | 0.011586 | 0.011626 | 0.011667 | 0.011626 | 0.011545 | 0.011586 |
| 0.011586 | 0.011545 | 0.011545 | 0.011626 | 0.011667 | 0.011707 | 0.011626 |
| 0.011545 | 0.011505 | 0.011909 | 0.011909 | 0.011667 | 0.011707 | 0.011788 |
| 0.011505 | 0.011505 | 0.011545 | 0.011586 | 0.011464 | 0.011788 | 0.011788 |
| 0.011748 | 0.011828 | 0.011626 | 0.011788 | 0.011950 | 0.011791 | 0.011586 |
| 0.011626 | 0.011667 | 0.011747 | 0.011545 | 0.011626 | 0.011545 | 0.011626 |
| 0.011748 | 0.011747 | 0.011788 | 0.011707 | 0.011587 | 0.011667 | 0.011707 |
| 0.011672 | 0.011545 | 0.011626 | 0.011707 | 0.011667 | 0.011464 | 0.011788 |
| 0.011950 | 0.011675 | 0.011869 | 0.011788 | 0.011748 | 0.011950 | 0.011545 |
| 0.011749 | 0.011626 | 0.011586 | 0.011586 | 0.011545 | 0.011545 | 0.011626 |
| 0.011667 | 0.011707 | 0.011626 | 0.011545 | 0.011505 | 0.011909 | 0.011909 |
| 0.011667 | 0.011707 | 0.011828 | 0.011667 | 0.012275 | 0.011792 | 0.011699 |
| 0.011782 | 0.011729 | 0.011824 | 0.011688 | 0.011861 | 0.011725 | 0.011726 |
| 0.012262 | 0.011643 | 0.011803 | 0.011685 | 0.011931 | 0.011799 | 0.011921 |
| 0.012288 | 0.011473 | 0.011590 | 0.011626 | 0.011586 | 0.011626 | 0.011590 |
| 0.011505 | 0.011464 | 0.011667 | 0.011626 | 0.011590 | 0.011707 | 0.011667 |
| 0.011586 | 0.011505 | 0.011545 | 0.011545 | 0.011464 | 0.011545 | 0.011464 |
| 0.011505 | 0.011545 | 0.011545 | 0.011505 | 0.011586 | 0.011545 | 0.011586 |
| 0.011586 | 0.011505 | 0.011545 | 0.011586 | 0.011505 | 0.011667 | 0.011747 |
| 0.011626 | 0.011626 | 0.011626 | 0.011667 | 0.011586 | 0.011869 | 0.011626 |
| 0.011607 | 0.011505 | 0.011748 | 0.011754 | 0.011667 | 0.011667 | 0.011626 |
| 0.011667 | 0.011586 | 0.011545 | 0.011586 | 0.011667 | 0.011667 | 0.011626 |
| 0.011626 | 0.011748 | 0.011909 | 0.011707 | 0.011869 | 0.011869 | 0.011788 |
| 0.011545 | 0.011667 | 0.011667 | 0.012112 | 0.011627 | 0.011667 | 0.011667 |
| 0.011667 | 0.011505 | 0.011505 | 0.011869 | 0.011748 | 0.011829 | 0.011586 |
| 0.011707 | 0.011788 | 0.011667 | 0.011707 | 0.011667 | 0.011505 | 0.011869 |
| 0.011626 | 0.011586 | 0.011505 | 0.011788 | 0.011586 | 0.011747 | 0.011991 |
| 0.011586 | 0.011919 | 0.011990 | 0.011701 | 0.011327 | 0.011674 | 0.011360 |
| 0.011330 | 0.011957 | 0.011526 | 0.011550 | 0.011414 | 0.011432 | 0.011382 |
| 0.011603 | 0.011220 | 0.011458 | 0.011217 | 0.011385 | 0.011467 | 0.011650 |
| 0.011652 | 0.011491 | 0.011611 | 0.011648 | 0.011628 | 0.011707 | 0.011788 |

|          |          |          |          |          |          |          |
|----------|----------|----------|----------|----------|----------|----------|
| 0.011667 | 0.011627 | 0.011752 | 0.011795 | 0.011877 | 0.011822 | 0.011586 |
| 0.011828 | 0.011586 | 0.011586 | 0.011626 | 0.011505 | 0.011667 | 0.011545 |
| 0.011626 | 0.011545 | 0.011505 | 0.011545 | 0.011586 | 0.011545 | 0.011626 |
| 0.011608 | 0.011649 | 0.011598 | 0.011637 | 0.011802 | 0.011719 | 0.011759 |
| 0.011756 | 0.011626 | 0.011503 | 0.011492 | 0.011631 | 0.011795 | 0.011755 |
| 0.011586 | 0.011590 | 0.011870 | 0.011833 | 0.011829 | 0.011870 | 0.011788 |
| 0.011667 | 0.011707 | 0.011667 | 0.011626 | 0.012274 | 0.011829 | 0.011910 |
| 0.011829 | 0.011915 | 0.011636 | 0.011724 | 0.011586 | 0.011667 | 0.011788 |
| 0.011790 | 0.011788 | 0.011788 | 0.011788 | 0.011804 | 0.012031 | 0.011562 |
| 0.011468 | 0.011478 | 0.011593 | 0.011551 | 0.011472 | 0.011513 | 0.011797 |
| 0.011640 | 0.011691 | 0.011514 | 0.011605 | 0.011586 | 0.011719 | 0.011545 |
| 0.011505 | 0.011464 | 0.011505 | 0.011545 | 0.011747 | 0.011667 | 0.011626 |
| 0.011747 | 0.011707 | 0.011545 | 0.011545 | 0.011586 | 0.011586 | 0.011589 |
| 0.011672 | 0.011586 | 0.011586 | 0.011628 | 0.011707 | 0.011788 | 0.011667 |
| 0.011627 | 0.011752 | 0.011795 | 0.011877 | 0.011822 | 0.011586 | 0.011788 |
| 0.011788 | 0.011788 | 0.011589 | 0.011724 | 0.011687 | 0.011714 | 0.011604 |
| 0.011762 | 0.011938 | 0.011703 | 0.011631 | 0.011505 | 0.011667 | 0.011586 |
| 0.011667 | 0.011626 | 0.011505 | 0.011667 | 0.011586 | 0.011670 | 0.011626 |
| 0.011505 | 0.011465 | 0.011586 | 0.011505 | 0.011465 | 0.011591 | 0.011667 |
| 0.011667 | 0.011586 | 0.011626 | 0.011667 | 0.011626 | 0.011545 | 0.011667 |
| 0.011586 | 0.011626 | 0.011626 | 0.011586 | 0.011626 | 0.011829 | 0.011464 |
| 0.011586 | 0.011869 | 0.011586 | 0.011586 | 0.011545 | 0.011909 | 0.011473 |
| 0.011808 | 0.011473 | 0.011414 | 0.011645 | 0.011651 | 0.011624 | 0.011410 |
| 0.011365 | 0.011667 | 0.011788 | 0.011877 | 0.011747 | 0.011871 | 0.012071 |
| 0.011950 | 0.011954 | 0.011950 | 0.012207 | 0.011828 | 0.012639 | 0.011910 |
| 0.012680 | 0.012355 | 0.012440 | 0.012803 | 0.011869 | 0.011505 | 0.011869 |
| 0.012356 | 0.012031 | 0.011869 | 0.011748 | 0.011788 | 0.011788 | 0.011793 |
| 0.011667 | 0.011670 | 0.011667 | 0.011707 | 0.012072 | 0.012193 | 0.012152 |
| 0.012114 | 0.012234 | 0.012233 | 0.012073 | 0.012316 | 0.012363 | 0.012438 |
| 0.012397 | 0.012438 | 0.012371 | 0.012438 | 0.012438 | 0.011707 | 0.011910 |
| 0.011869 | 0.012356 | 0.012037 | 0.012194 | 0.012031 | 0.011752 | 0.011667 |
| 0.011626 | 0.011626 | 0.012153 | 0.012104 | 0.012248 | 0.011950 | 0.011627 |
| S226     | 0.011792 | 0.011792 | 0.011929 | 0.011838 | 0.011838 | 0.011838 |
| 0.011663 | 0.011571 | 0.011838 | 0.011335 | 0.011472 | 0.011381 | 0.011380 |
| 0.011380 | 0.011609 | 0.011335 | 0.011380 | 0.011517 | 0.011335 | 0.011426 |
| 0.011289 | 0.011335 | 0.011472 | 0.011381 | 0.011289 | 0.011426 | 0.011663 |
| 0.011609 | 0.011380 | 0.011289 | 0.011472 | 0.011472 | 0.011426 | 0.011426 |
| 0.011426 | 0.011472 | 0.011426 | 0.011380 | 0.011472 | 0.011380 | 0.011609 |
| 0.011335 | 0.011426 | 0.011472 | 0.011335 | 0.011426 | 0.011563 | 0.011472 |
| 0.011472 | 0.011609 | 0.011518 | 0.011701 | 0.011472 | 0.011609 | 0.011472 |
| 0.011426 | 0.011426 | 0.011609 | 0.011609 | 0.011701 | 0.011426 | 0.011563 |
| 0.011472 | 0.011380 | 0.011472 | 0.011563 | 0.011792 | 0.011380 | 0.011472 |
| 0.011380 | 0.011472 | 0.011518 | 0.011609 | 0.011426 | 0.011426 | 0.011426 |
| 0.011380 | 0.011426 | 0.011380 | 0.011426 | 0.011426 | 0.011381 | 0.011609 |
| 0.011472 | 0.011380 | 0.011517 | 0.011426 | 0.011426 | 0.011335 | 0.011426 |
| 0.011609 | 0.011517 | 0.011838 | 0.011518 | 0.011380 | 0.011701 | 0.011426 |
| 0.011628 | 0.011783 | 0.011685 | 0.011326 | 0.011314 | 0.011461 | 0.011550 |
| 0.012413 | 0.011517 | 0.011346 | 0.011609 | 0.011609 | 0.011472 | 0.011563 |
| 0.011426 | 0.011380 | 0.011426 | 0.011472 | 0.011563 | 0.011472 | 0.011426 |
| 0.011426 | 0.011472 | 0.011609 | 0.011517 | 0.011518 | 0.011426 | 0.011335 |
| 0.011380 | 0.011335 | 0.011380 | 0.011335 | 0.011609 | 0.011563 | 0.011472 |
| 0.011609 | 0.011563 | 0.011380 | 0.011380 | 0.011380 | 0.011380 | 0.011383 |
| 0.011476 | 0.011289 | 0.011426 | 0.011307 | 0.011357 | 0.011345 | 0.011426 |
| 0.011384 | 0.011390 | 0.011363 | 0.011390 | 0.011292 | 0.011341 | 0.011382 |
| 0.011550 | 0.011437 | 0.011436 | 0.011335 | 0.011390 | 0.011426 | 0.011426 |
| 0.011518 | 0.011427 | 0.011426 | 0.011517 | 0.011426 | 0.011792 | 0.011701 |
| 0.011609 | 0.011518 | 0.011472 | 0.011518 | 0.011335 | 0.011517 | 0.011335 |
| 0.011472 | 0.011380 | 0.011380 | 0.011380 | 0.011426 | 0.011380 | 0.011472 |
| 0.011426 | 0.011472 | 0.011426 | 0.011335 | 0.011426 | 0.011380 | 0.011473 |
| 0.011563 | 0.011472 | 0.011289 | 0.011289 | 0.011426 | 0.011289 | 0.011289 |

|          |          |          |          |          |          |          |
|----------|----------|----------|----------|----------|----------|----------|
| 0.011430 | 0.011563 | 0.011335 | 0.011563 | 0.011335 | 0.011426 | 0.011380 |
| 0.011289 | 0.011426 | 0.011289 | 0.011380 | 0.011426 | 0.011289 | 0.011426 |
| 0.011426 | 0.011335 | 0.011426 | 0.011380 | 0.011335 | 0.011426 | 0.011746 |
| 0.011792 | 0.011700 | 0.011655 | 0.011474 | 0.011746 | 0.011380 | 0.011380 |
| 0.011428 | 0.011804 | 0.000000 | 0.011339 | 0.011663 | 0.011293 | 0.011368 |
| 0.011663 | 0.011617 | 0.011563 | 0.011655 | 0.011477 | 0.011563 | 0.011563 |
| 0.011655 | 0.011609 | 0.011533 | 0.011397 | 0.011511 | 0.011472 | 0.011519 |
| 0.011563 | 0.011473 | 0.011614 | 0.011750 | 0.011609 | 0.011747 | 0.011565 |
| 0.011523 | 0.011746 | 0.011707 | 0.011614 | 0.011609 | 0.011335 | 0.011517 |
| 0.011335 | 0.011335 | 0.011335 | 0.011289 | 0.011380 | 0.011380 | 0.011380 |
| 0.011335 | 0.011426 | 0.011335 | 0.011380 | 0.011335 | 0.011426 | 0.011517 |
| 0.011335 | 0.011792 | 0.011655 | 0.011609 | 0.011289 | 0.011426 | 0.011426 |
| 0.011472 | 0.011380 | 0.011426 | 0.011472 | 0.011380 | 0.011380 | 0.011380 |
| 0.011929 | 0.011472 | 0.011517 | 0.011335 | 0.011380 | 0.011380 | 0.011380 |
| 0.011380 | 0.011472 | 0.011426 | 0.011563 | 0.011335 | 0.011472 | 0.011609 |
| 0.011609 | 0.011426 | 0.011426 | 0.011335 | 0.011335 | 0.011472 | 0.011472 |
| 0.011335 | 0.011426 | 0.011289 | 0.011335 | 0.011426 | 0.011472 | 0.011335 |
| 0.011335 | 0.011335 | 0.011381 | 0.011289 | 0.011563 | 0.011289 | 0.011472 |
| 0.011473 | 0.011380 | 0.011609 | 0.011518 | 0.011472 | 0.011426 | 0.011518 |
| 0.011380 | 0.011609 | 0.011289 | 0.011426 | 0.011335 | 0.011335 | 0.011289 |
| 0.011472 | 0.011610 | 0.011472 | 0.011472 | 0.011335 | 0.011655 | 0.011335 |
| 0.011289 | 0.011335 | 0.011380 | 0.011380 | 0.011380 | 0.011426 | 0.011655 |
| 0.011472 | 0.011563 | 0.011335 | 0.011426 | 0.011517 | 0.011380 | 0.011335 |
| 0.011380 | 0.011380 | 0.011472 | 0.011335 | 0.011289 | 0.011518 | 0.011380 |
| 0.011380 | 0.011426 | 0.011380 | 0.011518 | 0.011472 | 0.011289 | 0.011289 |
| 0.011426 | 0.011426 | 0.011517 | 0.011380 | 0.011518 | 0.011472 | 0.011746 |
| 0.011380 | 0.011746 | 0.011390 | 0.017206 | 0.011468 | 0.011660 | 0.011682 |
| 0.011628 | 0.011737 | 0.011489 | 0.011453 | 0.011994 | 0.011720 | 0.011603 |
| 0.011618 | 0.011891 | 0.011278 | 0.011459 | 0.011324 | 0.011452 | 0.011468 |
| 0.011534 | 0.011475 | 0.011464 | 0.011328 | 0.011518 | 0.011518 | 0.011566 |
| 0.011431 | 0.011563 | 0.011517 | 0.011426 | 0.011518 | 0.011518 | 0.011335 |
| 0.011426 | 0.011426 | 0.011380 | 0.011472 | 0.011426 | 0.011335 | 0.011335 |
| 0.011335 | 0.011518 | 0.011335 | 0.011518 | 0.011472 | 0.011517 | 0.011335 |
| 0.011472 | 0.011380 | 0.011746 | 0.011746 | 0.011518 | 0.011563 | 0.011563 |
| 0.011289 | 0.011335 | 0.011380 | 0.011426 | 0.011289 | 0.011472 | 0.011472 |
| 0.011517 | 0.011563 | 0.011563 | 0.011563 | 0.011792 | 0.011565 | 0.011426 |
| 0.011335 | 0.011518 | 0.011472 | 0.011426 | 0.011472 | 0.011380 | 0.011472 |
| 0.011472 | 0.011472 | 0.011517 | 0.011518 | 0.011427 | 0.011609 | 0.011380 |
| 0.011476 | 0.011335 | 0.011517 | 0.011609 | 0.011518 | 0.011609 | 0.011655 |
| 0.011655 | 0.011477 | 0.011563 | 0.011563 | 0.011655 | 0.011609 | 0.011380 |
| 0.011565 | 0.011335 | 0.011335 | 0.011335 | 0.011518 | 0.011335 | 0.011518 |
| 0.011472 | 0.011517 | 0.011335 | 0.011472 | 0.011380 | 0.011746 | 0.011746 |
| 0.011518 | 0.011563 | 0.011563 | 0.011472 | 0.012205 | 0.011498 | 0.011531 |
| 0.011586 | 0.011484 | 0.011720 | 0.011571 | 0.011583 | 0.011575 | 0.011439 |
| 0.012129 | 0.011388 | 0.011525 | 0.011341 | 0.011807 | 0.011618 | 0.011799 |
| 0.012068 | 0.011671 | 0.011383 | 0.011426 | 0.011426 | 0.011472 | 0.011383 |
| 0.011335 | 0.011335 | 0.011426 | 0.011380 | 0.011383 | 0.011563 | 0.011565 |
| 0.011472 | 0.011335 | 0.011380 | 0.011426 | 0.011289 | 0.011289 | 0.011289 |
| 0.011380 | 0.011426 | 0.011380 | 0.011335 | 0.011426 | 0.011380 | 0.011380 |
| 0.011426 | 0.011335 | 0.011380 | 0.011380 | 0.011335 | 0.011472 | 0.011517 |
| 0.011426 | 0.011472 | 0.011426 | 0.011472 | 0.011380 | 0.011701 | 0.011426 |
| 0.011480 | 0.011380 | 0.011609 | 0.011609 | 0.011518 | 0.011563 | 0.011517 |
| 0.011563 | 0.011426 | 0.011380 | 0.011426 | 0.011518 | 0.011335 | 0.011472 |
| 0.011517 | 0.011701 | 0.011701 | 0.011517 | 0.011746 | 0.011746 | 0.011655 |
| 0.011426 | 0.011518 | 0.011563 | 0.011792 | 0.011472 | 0.011518 | 0.011472 |
| 0.011426 | 0.011380 | 0.011380 | 0.011655 | 0.011609 | 0.011609 | 0.011380 |
| 0.011563 | 0.011517 | 0.011426 | 0.011563 | 0.011517 | 0.011335 | 0.011609 |
| 0.011426 | 0.011472 | 0.011380 | 0.011563 | 0.011380 | 0.011517 | 0.011746 |
| 0.011380 | 0.011710 | 0.011701 | 0.011566 | 0.011358 | 0.011337 | 0.011330 |
| 0.011438 | 0.011700 | 0.011397 | 0.011484 | 0.011322 | 0.011604 | 0.011406 |

|          |          |          |          |          |          |          |
|----------|----------|----------|----------|----------|----------|----------|
| 0.011515 | 0.011316 | 0.011567 | 0.011402 | 0.011413 | 0.011574 | 0.011449 |
| 0.011631 | 0.011332 | 0.011447 | 0.011496 | 0.011474 | 0.011563 | 0.011609 |
| 0.011609 | 0.011518 | 0.011659 | 0.011660 | 0.011708 | 0.011731 | 0.011426 |
| 0.011609 | 0.011518 | 0.011472 | 0.011518 | 0.011335 | 0.011517 | 0.011335 |
| 0.011472 | 0.011380 | 0.011380 | 0.011380 | 0.011426 | 0.011380 | 0.011472 |
| 0.011396 | 0.011442 | 0.011433 | 0.011481 | 0.011622 | 0.011434 | 0.011619 |
| 0.011570 | 0.011426 | 0.011209 | 0.011306 | 0.011384 | 0.011476 | 0.011569 |
| 0.011426 | 0.011430 | 0.011610 | 0.011751 | 0.011518 | 0.011610 | 0.011517 |
| 0.011517 | 0.011472 | 0.011380 | 0.011472 | 0.011975 | 0.011518 | 0.011701 |
| 0.011701 | 0.011737 | 0.011431 | 0.011532 | 0.011335 | 0.011518 | 0.011518 |
| 0.011657 | 0.011609 | 0.011472 | 0.011472 | 0.011746 | 0.011701 | 0.011433 |
| 0.011289 | 0.011293 | 0.011382 | 0.011380 | 0.011477 | 0.011310 | 0.011565 |
| 0.011478 | 0.011525 | 0.011373 | 0.011415 | 0.011197 | 0.011528 | 0.011335 |
| 0.011380 | 0.011335 | 0.011380 | 0.011335 | 0.011609 | 0.011563 | 0.011472 |
| 0.011609 | 0.011563 | 0.011380 | 0.011380 | 0.011380 | 0.011380 | 0.011383 |
| 0.011476 | 0.011289 | 0.011426 | 0.011474 | 0.011563 | 0.011609 | 0.011609 |
| 0.011518 | 0.011659 | 0.011660 | 0.011708 | 0.011731 | 0.011426 | 0.011655 |
| 0.011518 | 0.011518 | 0.011429 | 0.011482 | 0.011390 | 0.011569 | 0.011388 |
| 0.011571 | 0.011693 | 0.011492 | 0.011431 | 0.011335 | 0.011563 | 0.011426 |
| 0.011472 | 0.011426 | 0.011335 | 0.011426 | 0.011380 | 0.011473 | 0.011472 |
| 0.011289 | 0.011289 | 0.011426 | 0.011289 | 0.011289 | 0.011430 | 0.011563 |
| 0.011426 | 0.011426 | 0.011380 | 0.011472 | 0.011426 | 0.011335 | 0.011472 |
| 0.011335 | 0.011472 | 0.011472 | 0.011426 | 0.011426 | 0.011701 | 0.011335 |
| 0.011380 | 0.011701 | 0.011426 | 0.011426 | 0.011426 | 0.011701 | 0.011349 |
| 0.011790 | 0.011298 | 0.011378 | 0.011514 | 0.011570 | 0.011554 | 0.011285 |
| 0.011260 | 0.011563 | 0.011701 | 0.011799 | 0.011656 | 0.011798 | 0.011839 |
| 0.011792 | 0.011929 | 0.011746 | 0.011987 | 0.011792 | 0.012434 | 0.011748 |
| 0.012663 | 0.012438 | 0.012484 | 0.012853 | 0.011792 | 0.011472 | 0.011792 |
| 0.012251 | 0.012255 | 0.011746 | 0.011563 | 0.011563 | 0.011563 | 0.011520 |
| 0.011563 | 0.011569 | 0.011563 | 0.011563 | 0.012021 | 0.012021 | 0.012113 |
| 0.011839 | 0.012067 | 0.012254 | 0.011982 | 0.012160 | 0.012118 | 0.012344 |
| 0.012251 | 0.012297 | 0.012221 | 0.012206 | 0.012254 | 0.011380 | 0.011792 |
| 0.011884 | 0.012388 | 0.011846 | 0.012021 | 0.012802 | 0.011476 | 0.011472 |
| 0.011426 | 0.011472 | 0.012067 | 0.012079 | 0.012172 | 0.011929 | 0.011427 |
| S227     | 0.011575 | 0.011575 | 0.011884 | 0.011643 | 0.011643 | 0.011712 |
| 0.011581 | 0.011477 | 0.011643 | 0.011163 | 0.011197 | 0.011198 | 0.011163 |
| 0.011197 | 0.011369 | 0.011163 | 0.011197 | 0.011266 | 0.011232 | 0.011197 |
| 0.011163 | 0.011197 | 0.011300 | 0.011163 | 0.011198 | 0.011163 | 0.011546 |
| 0.011437 | 0.011197 | 0.011095 | 0.011335 | 0.011232 | 0.011232 | 0.011266 |
| 0.011232 | 0.011335 | 0.011232 | 0.011232 | 0.011266 | 0.011232 | 0.011403 |
| 0.011163 | 0.011232 | 0.011266 | 0.011197 | 0.011300 | 0.011335 | 0.011266 |
| 0.011232 | 0.011403 | 0.011266 | 0.011575 | 0.011232 | 0.011472 | 0.011232 |
| 0.011197 | 0.011300 | 0.011335 | 0.011472 | 0.011609 | 0.011300 | 0.011403 |
| 0.011266 | 0.011335 | 0.011198 | 0.011472 | 0.011712 | 0.011232 | 0.011300 |
| 0.011197 | 0.011266 | 0.011266 | 0.011300 | 0.011232 | 0.011232 | 0.011232 |
| 0.011163 | 0.011163 | 0.011163 | 0.011266 | 0.011232 | 0.011266 | 0.011335 |
| 0.011266 | 0.011232 | 0.011300 | 0.011163 | 0.011335 | 0.011163 | 0.011197 |
| 0.011403 | 0.011335 | 0.011575 | 0.011403 | 0.011232 | 0.011472 | 0.011232 |
| 0.011399 | 0.011630 | 0.011444 | 0.011140 | 0.011136 | 0.011246 | 0.011300 |
| 0.011991 | 0.011419 | 0.011144 | 0.011437 | 0.011403 | 0.011232 | 0.011369 |
| 0.011300 | 0.011266 | 0.011335 | 0.011232 | 0.011300 | 0.011232 | 0.011266 |
| 0.011232 | 0.011300 | 0.011540 | 0.011369 | 0.011300 | 0.011266 | 0.011198 |
| 0.011129 | 0.011163 | 0.011232 | 0.011163 | 0.011403 | 0.011369 | 0.011300 |
| 0.011403 | 0.011403 | 0.011197 | 0.011197 | 0.011197 | 0.011197 | 0.011198 |
| 0.011267 | 0.011232 | 0.011232 | 0.011097 | 0.011134 | 0.011132 | 0.011232 |
| 0.011233 | 0.011166 | 0.011210 | 0.011201 | 0.011130 | 0.011165 | 0.011198 |
| 0.011465 | 0.011201 | 0.011271 | 0.011163 | 0.011166 | 0.011301 | 0.011266 |
| 0.011335 | 0.011267 | 0.011266 | 0.011335 | 0.011300 | 0.011643 | 0.011472 |
| 0.011506 | 0.011369 | 0.011232 | 0.011335 | 0.011129 | 0.011369 | 0.011129 |
| 0.011232 | 0.011232 | 0.011163 | 0.011163 | 0.011197 | 0.011163 | 0.011266 |

|          |          |          |          |          |          |          |
|----------|----------|----------|----------|----------|----------|----------|
| 0.011232 | 0.011335 | 0.011266 | 0.011163 | 0.011266 | 0.011266 | 0.011302 |
| 0.011369 | 0.011266 | 0.011163 | 0.011095 | 0.011232 | 0.011163 | 0.011095 |
| 0.011199 | 0.011369 | 0.011163 | 0.011369 | 0.011129 | 0.011232 | 0.011197 |
| 0.011300 | 0.011197 | 0.011232 | 0.011198 | 0.011232 | 0.011095 | 0.011197 |
| 0.011266 | 0.011197 | 0.011266 | 0.011197 | 0.011232 | 0.011266 | 0.011438 |
| 0.011609 | 0.011540 | 0.011609 | 0.011335 | 0.011609 | 0.011232 | 0.011197 |
| 0.011232 | 0.011509 | 0.011339 | 0.000000 | 0.011615 | 0.011095 | 0.011220 |
| 0.011615 | 0.011512 | 0.011369 | 0.011609 | 0.011305 | 0.011438 | 0.011438 |
| 0.011369 | 0.011472 | 0.011387 | 0.011187 | 0.011232 | 0.011266 | 0.011337 |
| 0.011438 | 0.011336 | 0.011475 | 0.011510 | 0.011403 | 0.011541 | 0.011649 |
| 0.011337 | 0.011511 | 0.011475 | 0.011406 | 0.011645 | 0.011129 | 0.011336 |
| 0.011300 | 0.011232 | 0.011095 | 0.011129 | 0.011197 | 0.011197 | 0.011266 |
| 0.011197 | 0.011266 | 0.011163 | 0.011266 | 0.011197 | 0.011197 | 0.011266 |
| 0.011197 | 0.011643 | 0.011541 | 0.011575 | 0.011095 | 0.011197 | 0.011232 |
| 0.011232 | 0.011197 | 0.011266 | 0.011300 | 0.011163 | 0.011163 | 0.011163 |
| 0.011712 | 0.011335 | 0.011335 | 0.011129 | 0.011232 | 0.011403 | 0.011163 |
| 0.011163 | 0.011197 | 0.011197 | 0.011369 | 0.011129 | 0.011300 | 0.011437 |
| 0.011369 | 0.011197 | 0.011197 | 0.011129 | 0.011129 | 0.011300 | 0.011232 |
| 0.011129 | 0.011232 | 0.011095 | 0.011129 | 0.011266 | 0.011403 | 0.011163 |
| 0.011129 | 0.011266 | 0.011198 | 0.011095 | 0.011438 | 0.011095 | 0.011266 |
| 0.011305 | 0.011163 | 0.011472 | 0.011300 | 0.011335 | 0.011197 | 0.011300 |
| 0.011163 | 0.011472 | 0.011095 | 0.011369 | 0.011163 | 0.011163 | 0.011095 |
| 0.011300 | 0.011540 | 0.011198 | 0.011300 | 0.011129 | 0.011541 | 0.011163 |
| 0.011129 | 0.011163 | 0.011197 | 0.011300 | 0.011197 | 0.011300 | 0.011369 |
| 0.011369 | 0.011335 | 0.011232 | 0.011335 | 0.011300 | 0.011163 | 0.011129 |
| 0.011163 | 0.011163 | 0.011198 | 0.011163 | 0.011129 | 0.011266 | 0.011163 |
| 0.011197 | 0.011197 | 0.011335 | 0.011369 | 0.011266 | 0.011197 | 0.011198 |
| 0.011266 | 0.011197 | 0.011266 | 0.011163 | 0.011300 | 0.011369 | 0.011712 |
| 0.011197 | 0.011575 | 0.011201 | 0.017626 | 0.011127 | 0.011370 | 0.011556 |
| 0.011517 | 0.011561 | 0.011272 | 0.011236 | 0.011620 | 0.011586 | 0.011246 |
| 0.011443 | 0.011434 | 0.000000 | 0.011188 | 0.011179 | 0.011211 | 0.011191 |
| 0.011439 | 0.011363 | 0.011362 | 0.011128 | 0.011335 | 0.011369 | 0.011337 |
| 0.011236 | 0.011335 | 0.011300 | 0.011300 | 0.011232 | 0.011232 | 0.011232 |
| 0.011232 | 0.011197 | 0.011197 | 0.011266 | 0.011232 | 0.011163 | 0.011197 |
| 0.011197 | 0.011232 | 0.011163 | 0.011232 | 0.011300 | 0.011335 | 0.011232 |
| 0.011266 | 0.011232 | 0.011575 | 0.011575 | 0.011300 | 0.011335 | 0.011369 |
| 0.011129 | 0.011129 | 0.011163 | 0.011232 | 0.011129 | 0.011369 | 0.011369 |
| 0.011369 | 0.011369 | 0.011300 | 0.011403 | 0.011609 | 0.011404 | 0.011266 |
| 0.011232 | 0.011335 | 0.011369 | 0.011197 | 0.011232 | 0.011197 | 0.011232 |
| 0.011300 | 0.011300 | 0.011335 | 0.011335 | 0.011232 | 0.011369 | 0.011403 |
| 0.011268 | 0.011163 | 0.011266 | 0.011369 | 0.011266 | 0.011403 | 0.011403 |
| 0.011609 | 0.011305 | 0.011438 | 0.011438 | 0.011369 | 0.011472 | 0.011163 |
| 0.011335 | 0.011232 | 0.011197 | 0.011197 | 0.011232 | 0.011163 | 0.011232 |
| 0.011300 | 0.011335 | 0.011232 | 0.011266 | 0.011232 | 0.011575 | 0.011575 |
| 0.011300 | 0.011335 | 0.011403 | 0.011335 | 0.011988 | 0.011353 | 0.011312 |
| 0.011384 | 0.011344 | 0.011456 | 0.011273 | 0.011454 | 0.011378 | 0.011342 |
| 0.011938 | 0.011237 | 0.011375 | 0.011308 | 0.011588 | 0.011443 | 0.011547 |
| 0.011964 | 0.011407 | 0.011233 | 0.011266 | 0.011232 | 0.011300 | 0.011198 |
| 0.011129 | 0.011163 | 0.011300 | 0.011266 | 0.011233 | 0.011403 | 0.011369 |
| 0.011197 | 0.011163 | 0.011197 | 0.011197 | 0.011129 | 0.011197 | 0.011095 |
| 0.011232 | 0.011266 | 0.011163 | 0.011129 | 0.011232 | 0.011163 | 0.011197 |
| 0.011197 | 0.011129 | 0.011197 | 0.011232 | 0.011129 | 0.011335 | 0.011369 |
| 0.011266 | 0.011335 | 0.011266 | 0.011266 | 0.011197 | 0.011609 | 0.011232 |
| 0.011274 | 0.011163 | 0.011438 | 0.011442 | 0.011300 | 0.011266 | 0.011300 |
| 0.011300 | 0.011232 | 0.011197 | 0.011232 | 0.011335 | 0.011335 | 0.011266 |
| 0.011266 | 0.011369 | 0.011575 | 0.011266 | 0.011506 | 0.011506 | 0.011369 |
| 0.011163 | 0.011266 | 0.011300 | 0.011712 | 0.011266 | 0.011300 | 0.011266 |
| 0.011266 | 0.011197 | 0.011197 | 0.011541 | 0.011472 | 0.011506 | 0.011232 |
| 0.011335 | 0.011403 | 0.011266 | 0.011335 | 0.011266 | 0.011163 | 0.011506 |
| 0.011232 | 0.011232 | 0.011197 | 0.011403 | 0.011232 | 0.011335 | 0.011575 |

|          |          |          |          |          |          |          |
|----------|----------|----------|----------|----------|----------|----------|
| 0.011266 | 0.011615 | 0.011643 | 0.011432 | 0.011176 | 0.011338 | 0.011165 |
| 0.011172 | 0.011655 | 0.011167 | 0.011333 | 0.011160 | 0.011268 | 0.011276 |
| 0.011420 | 0.000000 | 0.011230 | 0.000000 | 0.011115 | 0.011265 | 0.011267 |
| 0.011328 | 0.011180 | 0.011311 | 0.011239 | 0.011267 | 0.011403 | 0.011472 |
| 0.011472 | 0.011335 | 0.011440 | 0.011441 | 0.011580 | 0.011529 | 0.011232 |
| 0.011506 | 0.011369 | 0.011232 | 0.011335 | 0.011129 | 0.011369 | 0.011129 |
| 0.011232 | 0.011232 | 0.011163 | 0.011163 | 0.011197 | 0.011163 | 0.011266 |
| 0.011203 | 0.011239 | 0.011235 | 0.011235 | 0.011410 | 0.011339 | 0.011339 |
| 0.011373 | 0.011232 | 0.011098 | 0.011097 | 0.011233 | 0.011406 | 0.011372 |
| 0.011198 | 0.011268 | 0.011507 | 0.011474 | 0.011369 | 0.011438 | 0.011335 |
| 0.011300 | 0.011369 | 0.011369 | 0.011266 | 0.011850 | 0.011403 | 0.011438 |
| 0.011540 | 0.011569 | 0.011235 | 0.011272 | 0.011197 | 0.011403 | 0.011369 |
| 0.011369 | 0.011437 | 0.011403 | 0.011403 | 0.011542 | 0.011506 | 0.011202 |
| 0.011095 | 0.011096 | 0.011199 | 0.011164 | 0.011270 | 0.011099 | 0.011442 |
| 0.011236 | 0.011374 | 0.011109 | 0.011214 | 0.011232 | 0.011305 | 0.011198 |
| 0.011129 | 0.011163 | 0.011232 | 0.011163 | 0.011403 | 0.011369 | 0.011300 |
| 0.011403 | 0.011403 | 0.011197 | 0.011197 | 0.011197 | 0.011197 | 0.011198 |
| 0.011267 | 0.011232 | 0.011232 | 0.011267 | 0.011403 | 0.011472 | 0.011472 |
| 0.011335 | 0.011440 | 0.011441 | 0.011580 | 0.011529 | 0.011232 | 0.011403 |
| 0.011369 | 0.011369 | 0.011198 | 0.011380 | 0.011308 | 0.011304 | 0.011203 |
| 0.011376 | 0.011568 | 0.011361 | 0.011269 | 0.011163 | 0.011369 | 0.011232 |
| 0.011335 | 0.011266 | 0.011163 | 0.011266 | 0.011266 | 0.011302 | 0.011266 |
| 0.011163 | 0.011095 | 0.011232 | 0.011163 | 0.011095 | 0.011199 | 0.011369 |
| 0.011232 | 0.011197 | 0.011197 | 0.011266 | 0.011232 | 0.011163 | 0.011335 |
| 0.011232 | 0.011266 | 0.011266 | 0.011197 | 0.011266 | 0.011438 | 0.011163 |
| 0.011197 | 0.011609 | 0.011197 | 0.011232 | 0.011197 | 0.011575 | 0.011147 |
| 0.011628 | 0.011147 | 0.011212 | 0.011388 | 0.011475 | 0.011389 | 0.011103 |
| 0.011166 | 0.011369 | 0.011472 | 0.011580 | 0.011438 | 0.011542 | 0.011712 |
| 0.011610 | 0.011648 | 0.011609 | 0.011859 | 0.011540 | 0.012399 | 0.011610 |
| 0.012297 | 0.012091 | 0.012231 | 0.012539 | 0.011575 | 0.011232 | 0.011540 |
| 0.012023 | 0.011747 | 0.011541 | 0.011438 | 0.011507 | 0.011507 | 0.011440 |
| 0.011369 | 0.011370 | 0.011437 | 0.011404 | 0.011781 | 0.011850 | 0.011850 |
| 0.011748 | 0.011850 | 0.011919 | 0.011713 | 0.012023 | 0.012028 | 0.012092 |
| 0.012092 | 0.012126 | 0.012066 | 0.012092 | 0.012092 | 0.011300 | 0.011609 |
| 0.011610 | 0.012159 | 0.011682 | 0.011850 | 0.011644 | 0.011441 | 0.011335 |
| 0.011300 | 0.011300 | 0.011747 | 0.011776 | 0.011851 | 0.011609 | 0.011301 |
| S228     | 0.012045 | 0.012045 | 0.012113 | 0.011875 | 0.011875 | 0.011943 |
| 0.011369 | 0.011300 | 0.011807 | 0.011637 | 0.011705 | 0.011672 | 0.011637 |
| 0.011603 | 0.011773 | 0.011569 | 0.011671 | 0.011705 | 0.011705 | 0.011671 |
| 0.011637 | 0.011671 | 0.011501 | 0.011637 | 0.011671 | 0.011671 | 0.011335 |
| 0.011637 | 0.011671 | 0.011569 | 0.011535 | 0.011739 | 0.011705 | 0.011739 |
| 0.011705 | 0.011807 | 0.011705 | 0.011705 | 0.011739 | 0.011705 | 0.011875 |
| 0.011569 | 0.011705 | 0.011739 | 0.011671 | 0.011705 | 0.011807 | 0.011739 |
| 0.011637 | 0.011875 | 0.011773 | 0.011365 | 0.011705 | 0.011976 | 0.011705 |
| 0.011671 | 0.011705 | 0.011841 | 0.011976 | 0.011467 | 0.011671 | 0.011773 |
| 0.011739 | 0.011807 | 0.011705 | 0.011942 | 0.011501 | 0.011637 | 0.011773 |
| 0.011671 | 0.011773 | 0.011739 | 0.011807 | 0.011739 | 0.011739 | 0.011739 |
| 0.011637 | 0.011671 | 0.011637 | 0.011671 | 0.011705 | 0.011740 | 0.011807 |
| 0.011739 | 0.011705 | 0.011739 | 0.011671 | 0.011535 | 0.011637 | 0.011705 |
| 0.011875 | 0.011807 | 0.011569 | 0.011875 | 0.011705 | 0.011943 | 0.011637 |
| 0.011923 | 0.011400 | 0.011938 | 0.011653 | 0.011627 | 0.011768 | 0.011539 |
| 0.012171 | 0.011522 | 0.011684 | 0.011942 | 0.011942 | 0.011671 | 0.011569 |
| 0.011773 | 0.011739 | 0.011807 | 0.011705 | 0.011773 | 0.011739 | 0.011739 |
| 0.011705 | 0.011739 | 0.011977 | 0.011807 | 0.011773 | 0.011739 | 0.011671 |
| 0.011637 | 0.011569 | 0.011671 | 0.011671 | 0.011603 | 0.011569 | 0.011501 |
| 0.011603 | 0.011671 | 0.011671 | 0.011671 | 0.011705 | 0.011705 | 0.011709 |
| 0.011778 | 0.011705 | 0.011705 | 0.011569 | 0.011645 | 0.011592 | 0.011706 |
| 0.011676 | 0.011616 | 0.011695 | 0.011653 | 0.011610 | 0.011614 | 0.011675 |
| 0.011570 | 0.011687 | 0.011722 | 0.011638 | 0.011619 | 0.011774 | 0.011672 |
| 0.011740 | 0.011741 | 0.011740 | 0.011841 | 0.011773 | 0.012146 | 0.011875 |

|          |          |          |          |          |          |          |
|----------|----------|----------|----------|----------|----------|----------|
| 0.011705 | 0.011739 | 0.011705 | 0.011705 | 0.011603 | 0.011569 | 0.011637 |
| 0.011671 | 0.011705 | 0.011671 | 0.011637 | 0.011671 | 0.011637 | 0.011739 |
| 0.011705 | 0.011807 | 0.011739 | 0.011637 | 0.011673 | 0.011841 | 0.011846 |
| 0.011807 | 0.011739 | 0.011637 | 0.011571 | 0.011705 | 0.011637 | 0.011569 |
| 0.011575 | 0.011807 | 0.011637 | 0.011807 | 0.011603 | 0.011705 | 0.011671 |
| 0.011773 | 0.011671 | 0.011705 | 0.011671 | 0.011705 | 0.011569 | 0.011705 |
| 0.011739 | 0.011671 | 0.011739 | 0.011671 | 0.011705 | 0.011739 | 0.011977 |
| 0.011399 | 0.011332 | 0.011399 | 0.011844 | 0.011467 | 0.011705 | 0.011671 |
| 0.011641 | 0.011958 | 0.011663 | 0.011615 | 0.000000 | 0.011577 | 0.011696 |
| 0.011403 | 0.011644 | 0.011875 | 0.012011 | 0.011785 | 0.011943 | 0.011909 |
| 0.011841 | 0.012010 | 0.011887 | 0.011769 | 0.011779 | 0.011739 | 0.011813 |
| 0.011875 | 0.011810 | 0.011949 | 0.012018 | 0.011943 | 0.012011 | 0.012122 |
| 0.011847 | 0.012021 | 0.011882 | 0.011881 | 0.012149 | 0.011603 | 0.011810 |
| 0.011773 | 0.011705 | 0.011603 | 0.011603 | 0.011671 | 0.011603 | 0.011739 |
| 0.011671 | 0.011739 | 0.011637 | 0.011671 | 0.011671 | 0.011671 | 0.011739 |
| 0.011671 | 0.011433 | 0.011332 | 0.011365 | 0.011569 | 0.011671 | 0.011705 |
| 0.011705 | 0.011603 | 0.011739 | 0.011671 | 0.011637 | 0.011637 | 0.011637 |
| 0.011501 | 0.011739 | 0.011807 | 0.011603 | 0.011705 | 0.011875 | 0.011637 |
| 0.011637 | 0.011705 | 0.011671 | 0.011841 | 0.011603 | 0.011569 | 0.011705 |
| 0.011637 | 0.011671 | 0.011671 | 0.011603 | 0.011603 | 0.011739 | 0.011705 |
| 0.011603 | 0.011705 | 0.011569 | 0.011603 | 0.011739 | 0.011536 | 0.011603 |
| 0.011604 | 0.011739 | 0.011672 | 0.011569 | 0.011298 | 0.011569 | 0.011671 |
| 0.011787 | 0.011637 | 0.011264 | 0.011773 | 0.011739 | 0.011671 | 0.011773 |
| 0.011637 | 0.011976 | 0.011569 | 0.011569 | 0.011569 | 0.011569 | 0.011569 |
| 0.011807 | 0.011671 | 0.011705 | 0.011773 | 0.011603 | 0.011332 | 0.011569 |
| 0.011637 | 0.011637 | 0.011671 | 0.011773 | 0.011671 | 0.011773 | 0.011841 |
| 0.011841 | 0.011807 | 0.011705 | 0.011807 | 0.011773 | 0.011637 | 0.011603 |
| 0.011637 | 0.011637 | 0.011705 | 0.011569 | 0.011603 | 0.011773 | 0.011637 |
| 0.011603 | 0.011671 | 0.011773 | 0.011773 | 0.011739 | 0.011671 | 0.011671 |
| 0.011739 | 0.011671 | 0.011773 | 0.011637 | 0.011773 | 0.011807 | 0.011569 |
| 0.011671 | 0.011467 | 0.011688 | 0.018260 | 0.011524 | 0.011616 | 0.011342 |
| 0.011305 | 0.011345 | 0.011796 | 0.011642 | 0.011449 | 0.011374 | 0.011736 |
| 0.011730 | 0.011492 | 0.011613 | 0.011650 | 0.011611 | 0.011558 | 0.011757 |
| 0.011439 | 0.011550 | 0.011397 | 0.011596 | 0.011807 | 0.011841 | 0.011812 |
| 0.011720 | 0.011807 | 0.011807 | 0.011705 | 0.011739 | 0.011739 | 0.011705 |
| 0.011739 | 0.011671 | 0.011705 | 0.011739 | 0.011705 | 0.011637 | 0.011671 |
| 0.011671 | 0.011739 | 0.011637 | 0.011739 | 0.011773 | 0.011773 | 0.011705 |
| 0.011671 | 0.011637 | 0.011433 | 0.011433 | 0.011773 | 0.011740 | 0.011841 |
| 0.011603 | 0.011603 | 0.011637 | 0.011705 | 0.011603 | 0.011841 | 0.011841 |
| 0.011875 | 0.011875 | 0.011807 | 0.011908 | 0.011467 | 0.011911 | 0.011739 |
| 0.011739 | 0.011807 | 0.011841 | 0.011671 | 0.011739 | 0.011705 | 0.011739 |
| 0.011807 | 0.011807 | 0.011841 | 0.011807 | 0.011707 | 0.011841 | 0.011875 |
| 0.011745 | 0.011637 | 0.011705 | 0.011841 | 0.011739 | 0.011807 | 0.011875 |
| 0.012011 | 0.011785 | 0.011943 | 0.011909 | 0.011841 | 0.012010 | 0.011637 |
| 0.011809 | 0.011638 | 0.011671 | 0.011671 | 0.011739 | 0.011637 | 0.011739 |
| 0.011773 | 0.011773 | 0.011705 | 0.011671 | 0.011637 | 0.011433 | 0.011433 |
| 0.011773 | 0.011740 | 0.011874 | 0.011773 | 0.012387 | 0.011890 | 0.011807 |
| 0.011877 | 0.011832 | 0.011913 | 0.011831 | 0.011945 | 0.011862 | 0.011792 |
| 0.012345 | 0.011725 | 0.011857 | 0.011795 | 0.012070 | 0.011886 | 0.012024 |
| 0.012367 | 0.011823 | 0.011915 | 0.011908 | 0.011908 | 0.011637 | 0.011880 |
| 0.011603 | 0.011773 | 0.011908 | 0.011874 | 0.011880 | 0.011603 | 0.011571 |
| 0.011705 | 0.011637 | 0.011671 | 0.011705 | 0.011603 | 0.011671 | 0.011569 |
| 0.011637 | 0.011671 | 0.011637 | 0.011603 | 0.011705 | 0.011637 | 0.011671 |
| 0.011671 | 0.011603 | 0.011671 | 0.011705 | 0.011603 | 0.011807 | 0.011841 |
| 0.011739 | 0.011739 | 0.011739 | 0.011739 | 0.011671 | 0.011467 | 0.011705 |
| 0.011482 | 0.011671 | 0.011638 | 0.011643 | 0.011705 | 0.011705 | 0.011773 |
| 0.011773 | 0.011705 | 0.011671 | 0.011705 | 0.011739 | 0.011773 | 0.011739 |
| 0.011705 | 0.011875 | 0.011365 | 0.011773 | 0.011977 | 0.011977 | 0.011841 |
| 0.011671 | 0.011739 | 0.011773 | 0.011569 | 0.011739 | 0.011705 | 0.011739 |
| 0.011773 | 0.011637 | 0.011637 | 0.011943 | 0.011909 | 0.011909 | 0.011705 |

|          |          |          |          |          |          |          |
|----------|----------|----------|----------|----------|----------|----------|
| 0.011807 | 0.011841 | 0.011739 | 0.011807 | 0.011773 | 0.011637 | 0.011298 |
| 0.011739 | 0.011705 | 0.011637 | 0.011875 | 0.011705 | 0.011807 | 0.011569 |
| 0.011739 | 0.011438 | 0.011433 | 0.011636 | 0.011515 | 0.011747 | 0.011476 |
| 0.011448 | 0.011848 | 0.011664 | 0.011782 | 0.011704 | 0.011576 | 0.011597 |
| 0.011678 | 0.011457 | 0.011679 | 0.011526 | 0.011551 | 0.011669 | 0.011882 |
| 0.011861 | 0.011777 | 0.011737 | 0.011736 | 0.011742 | 0.011603 | 0.011671 |
| 0.011671 | 0.011706 | 0.011778 | 0.011608 | 0.011986 | 0.011953 | 0.011739 |
| 0.011705 | 0.011739 | 0.011705 | 0.011705 | 0.011603 | 0.011569 | 0.011637 |
| 0.011671 | 0.011705 | 0.011671 | 0.011637 | 0.011671 | 0.011637 | 0.011739 |
| 0.011696 | 0.011697 | 0.011683 | 0.011718 | 0.011856 | 0.011785 | 0.011819 |
| 0.011818 | 0.011740 | 0.011583 | 0.011570 | 0.011608 | 0.011848 | 0.011849 |
| 0.011672 | 0.011711 | 0.011979 | 0.011914 | 0.011876 | 0.011842 | 0.011841 |
| 0.011773 | 0.011841 | 0.011841 | 0.011739 | 0.011705 | 0.011909 | 0.011943 |
| 0.012011 | 0.011383 | 0.011646 | 0.011795 | 0.011671 | 0.011875 | 0.011841 |
| 0.011876 | 0.011908 | 0.011909 | 0.011909 | 0.012010 | 0.012011 | 0.011692 |
| 0.011573 | 0.011585 | 0.011680 | 0.011644 | 0.011682 | 0.011625 | 0.011232 |
| 0.011719 | 0.011503 | 0.011636 | 0.011742 | 0.011706 | 0.011752 | 0.011671 |
| 0.011637 | 0.011569 | 0.011671 | 0.011671 | 0.011603 | 0.011569 | 0.011501 |
| 0.011603 | 0.011671 | 0.011671 | 0.011671 | 0.011705 | 0.011705 | 0.011709 |
| 0.011778 | 0.011705 | 0.011705 | 0.011742 | 0.011603 | 0.011671 | 0.011671 |
| 0.011706 | 0.011778 | 0.011608 | 0.011986 | 0.011953 | 0.011739 | 0.011874 |
| 0.011841 | 0.011841 | 0.011675 | 0.011867 | 0.011692 | 0.011782 | 0.011662 |
| 0.011861 | 0.012070 | 0.011914 | 0.011746 | 0.011637 | 0.011807 | 0.011705 |
| 0.011807 | 0.011739 | 0.011637 | 0.011673 | 0.011841 | 0.011846 | 0.011739 |
| 0.011637 | 0.011571 | 0.011705 | 0.011637 | 0.011569 | 0.011575 | 0.011807 |
| 0.011739 | 0.011671 | 0.011705 | 0.011739 | 0.011705 | 0.011637 | 0.011569 |
| 0.011705 | 0.011739 | 0.011739 | 0.011671 | 0.011739 | 0.011977 | 0.011569 |
| 0.011671 | 0.011467 | 0.011671 | 0.011705 | 0.011671 | 0.011365 | 0.011709 |
| 0.011970 | 0.011534 | 0.011516 | 0.011590 | 0.011679 | 0.011605 | 0.011484 |
| 0.011484 | 0.011569 | 0.011671 | 0.011781 | 0.011639 | 0.011778 | 0.011910 |
| 0.011808 | 0.011847 | 0.011807 | 0.012062 | 0.011773 | 0.012657 | 0.011809 |
| 0.012556 | 0.012322 | 0.012457 | 0.012732 | 0.011705 | 0.011671 | 0.011773 |
| 0.012421 | 0.012151 | 0.011739 | 0.011637 | 0.011706 | 0.011706 | 0.011641 |
| 0.011569 | 0.011574 | 0.011637 | 0.011604 | 0.011978 | 0.012011 | 0.012046 |
| 0.011945 | 0.012046 | 0.012151 | 0.011915 | 0.012422 | 0.012430 | 0.012489 |
| 0.012490 | 0.012524 | 0.012475 | 0.012490 | 0.012492 | 0.011773 | 0.012011 |
| 0.012080 | 0.012589 | 0.012089 | 0.012045 | 0.012523 | 0.011575 | 0.011468 |
| 0.011365 | 0.011433 | 0.011977 | 0.012017 | 0.012056 | 0.011773 | 0.011503 |
| S229     | 0.011538 | 0.011538 | 0.011811 | 0.011640 | 0.011640 | 0.011708 |
| 0.011543 | 0.011440 | 0.011640 | 0.011129 | 0.011197 | 0.011163 | 0.011129 |
| 0.011163 | 0.011333 | 0.011129 | 0.011163 | 0.011231 | 0.011197 | 0.011163 |
| 0.011129 | 0.011163 | 0.011265 | 0.011129 | 0.011163 | 0.011163 | 0.011509 |
| 0.011401 | 0.011163 | 0.000000 | 0.011299 | 0.011231 | 0.011197 | 0.011231 |
| 0.011197 | 0.011299 | 0.011197 | 0.011197 | 0.011231 | 0.011197 | 0.011367 |
| 0.011129 | 0.011197 | 0.011231 | 0.011163 | 0.011265 | 0.011299 | 0.011231 |
| 0.011163 | 0.011367 | 0.011265 | 0.011538 | 0.011197 | 0.011469 | 0.011197 |
| 0.011163 | 0.011265 | 0.011333 | 0.011469 | 0.011572 | 0.011265 | 0.011367 |
| 0.011231 | 0.011299 | 0.011197 | 0.011435 | 0.011674 | 0.011197 | 0.011265 |
| 0.011163 | 0.011265 | 0.011231 | 0.011299 | 0.011231 | 0.011231 | 0.011231 |
| 0.011129 | 0.011163 | 0.011129 | 0.011231 | 0.011197 | 0.011231 | 0.011299 |
| 0.011231 | 0.011197 | 0.011265 | 0.011163 | 0.011299 | 0.011129 | 0.011197 |
| 0.011367 | 0.011299 | 0.011538 | 0.011333 | 0.011197 | 0.011435 | 0.011197 |
| 0.011362 | 0.011592 | 0.011405 | 0.011100 | 0.011098 | 0.011210 | 0.011300 |
| 0.011952 | 0.011371 | 0.011102 | 0.011435 | 0.011435 | 0.011197 | 0.011333 |
| 0.011265 | 0.011231 | 0.011299 | 0.011197 | 0.011265 | 0.011231 | 0.011231 |
| 0.011197 | 0.011265 | 0.011504 | 0.011367 | 0.011231 | 0.011231 | 0.011163 |
| 0.011129 | 0.011129 | 0.011197 | 0.011163 | 0.011367 | 0.011333 | 0.011265 |
| 0.011367 | 0.011435 | 0.011163 | 0.011163 | 0.011197 | 0.011197 | 0.011197 |
| 0.011266 | 0.011163 | 0.011163 | 0.000000 | 0.011097 | 0.011096 | 0.011197 |
| 0.011198 | 0.011130 | 0.011173 | 0.011165 | 0.011095 | 0.011130 | 0.011163 |



|          |          |          |          |          |          |          |
|----------|----------|----------|----------|----------|----------|----------|
| 0.011425 | 0.011200 | 0.011235 | 0.011129 | 0.011130 | 0.011265 | 0.011231 |
| 0.011299 | 0.011231 | 0.011231 | 0.011333 | 0.011265 | 0.011640 | 0.011435 |
| 0.011469 | 0.011333 | 0.011197 | 0.011299 | 0.011094 | 0.011333 | 0.011129 |
| 0.011197 | 0.011197 | 0.011163 | 0.011129 | 0.011163 | 0.011129 | 0.011197 |
| 0.011197 | 0.011299 | 0.011231 | 0.011129 | 0.011231 | 0.011333 | 0.011335 |
| 0.011333 | 0.011231 | 0.011129 | 0.000000 | 0.011197 | 0.011129 | 0.000000 |
| 0.011164 | 0.011333 | 0.011129 | 0.011333 | 0.011094 | 0.011197 | 0.011163 |
| 0.011265 | 0.011163 | 0.011197 | 0.011163 | 0.011197 | 0.000000 | 0.011197 |
| 0.011231 | 0.011129 | 0.011231 | 0.011163 | 0.011197 | 0.011231 | 0.011469 |
| 0.011572 | 0.011503 | 0.011572 | 0.011334 | 0.011572 | 0.011197 | 0.011163 |
| 0.011163 | 0.011470 | 0.011293 | 0.011095 | 0.011577 | 0.000000 | 0.011180 |
| 0.011578 | 0.011474 | 0.011367 | 0.011572 | 0.011268 | 0.011435 | 0.011367 |
| 0.011333 | 0.011503 | 0.011349 | 0.011186 | 0.011231 | 0.011231 | 0.011301 |
| 0.011367 | 0.011300 | 0.011438 | 0.011507 | 0.011435 | 0.011504 | 0.011611 |
| 0.011335 | 0.011508 | 0.011438 | 0.011369 | 0.011641 | 0.011094 | 0.011300 |
| 0.011265 | 0.011197 | 0.011094 | 0.011094 | 0.011163 | 0.011163 | 0.011231 |
| 0.011163 | 0.011231 | 0.011129 | 0.011231 | 0.011163 | 0.011163 | 0.011231 |
| 0.011163 | 0.011606 | 0.011504 | 0.011538 | 0.000000 | 0.011163 | 0.011197 |
| 0.011197 | 0.011163 | 0.011231 | 0.011265 | 0.011129 | 0.011129 | 0.011129 |
| 0.011674 | 0.011299 | 0.011299 | 0.011094 | 0.011197 | 0.011367 | 0.011129 |
| 0.011129 | 0.011197 | 0.011163 | 0.011333 | 0.011129 | 0.011265 | 0.011401 |
| 0.011333 | 0.011163 | 0.011163 | 0.011094 | 0.011094 | 0.011265 | 0.011197 |
| 0.011094 | 0.011197 | 0.000000 | 0.011094 | 0.011231 | 0.011367 | 0.011129 |
| 0.011094 | 0.011231 | 0.011163 | 0.000000 | 0.011401 | 0.000000 | 0.011197 |
| 0.011304 | 0.011129 | 0.011435 | 0.011265 | 0.011299 | 0.011163 | 0.011265 |
| 0.011129 | 0.011469 | 0.000000 | 0.011333 | 0.011129 | 0.011129 | 0.000000 |
| 0.011299 | 0.011504 | 0.011197 | 0.011265 | 0.011094 | 0.011504 | 0.011129 |
| 0.011129 | 0.011129 | 0.011163 | 0.011265 | 0.011163 | 0.011265 | 0.011333 |
| 0.011299 | 0.011299 | 0.011197 | 0.011299 | 0.011265 | 0.011129 | 0.011094 |
| 0.011129 | 0.011129 | 0.011197 | 0.011129 | 0.011094 | 0.011265 | 0.011129 |
| 0.011163 | 0.011163 | 0.011299 | 0.011333 | 0.011231 | 0.011163 | 0.011163 |
| 0.011231 | 0.011163 | 0.011265 | 0.011129 | 0.011265 | 0.011367 | 0.011606 |
| 0.011163 | 0.011572 | 0.011165 | 0.017781 | 0.011127 | 0.011308 | 0.011521 |
| 0.011482 | 0.011525 | 0.011220 | 0.011178 | 0.011618 | 0.011551 | 0.011246 |
| 0.011398 | 0.011432 | 0.000000 | 0.011145 | 0.011139 | 0.011211 | 0.011148 |
| 0.011394 | 0.011325 | 0.011324 | 0.011128 | 0.011265 | 0.011333 | 0.011335 |
| 0.011200 | 0.011299 | 0.011299 | 0.011265 | 0.011231 | 0.011231 | 0.011197 |
| 0.011231 | 0.011163 | 0.011197 | 0.011231 | 0.011197 | 0.011129 | 0.011163 |
| 0.011163 | 0.011231 | 0.011129 | 0.011231 | 0.011265 | 0.011299 | 0.011197 |
| 0.011231 | 0.011197 | 0.011538 | 0.011538 | 0.011265 | 0.011299 | 0.011333 |
| 0.011094 | 0.011094 | 0.011129 | 0.011231 | 0.011094 | 0.011333 | 0.011333 |
| 0.011367 | 0.011367 | 0.011299 | 0.011401 | 0.011572 | 0.011402 | 0.011231 |
| 0.011231 | 0.011299 | 0.011333 | 0.011163 | 0.011231 | 0.011197 | 0.011231 |
| 0.011299 | 0.011299 | 0.011333 | 0.011299 | 0.011197 | 0.011367 | 0.011367 |
| 0.011232 | 0.011129 | 0.011231 | 0.011333 | 0.011231 | 0.011367 | 0.011401 |
| 0.011572 | 0.011268 | 0.011435 | 0.011367 | 0.011333 | 0.011503 | 0.011129 |
| 0.011300 | 0.011197 | 0.011163 | 0.011163 | 0.011231 | 0.011129 | 0.011231 |
| 0.011265 | 0.011299 | 0.011197 | 0.011231 | 0.011197 | 0.011538 | 0.011538 |
| 0.011265 | 0.011299 | 0.011367 | 0.011299 | 0.011914 | 0.011350 | 0.011275 |
| 0.011346 | 0.011307 | 0.011417 | 0.011307 | 0.011416 | 0.011340 | 0.011305 |
| 0.011863 | 0.011201 | 0.011339 | 0.011271 | 0.011550 | 0.011406 | 0.011510 |
| 0.011889 | 0.011366 | 0.011232 | 0.011231 | 0.011231 | 0.011265 | 0.011198 |
| 0.011094 | 0.011129 | 0.011265 | 0.011231 | 0.011232 | 0.011367 | 0.011334 |
| 0.011197 | 0.011129 | 0.011163 | 0.011197 | 0.011094 | 0.011163 | 0.000000 |
| 0.011197 | 0.011231 | 0.011129 | 0.011094 | 0.011197 | 0.011129 | 0.011163 |
| 0.011163 | 0.011094 | 0.011163 | 0.011197 | 0.011094 | 0.011299 | 0.011333 |
| 0.011231 | 0.011299 | 0.011231 | 0.011231 | 0.011163 | 0.011572 | 0.011197 |
| 0.011237 | 0.011163 | 0.011401 | 0.011405 | 0.011265 | 0.011265 | 0.011265 |
| 0.011265 | 0.011197 | 0.011163 | 0.011197 | 0.011299 | 0.011299 | 0.011231 |
| 0.011231 | 0.011367 | 0.011538 | 0.011265 | 0.011435 | 0.011435 | 0.011333 |

|          |          |          |          |          |          |          |
|----------|----------|----------|----------|----------|----------|----------|
| 0.011163 | 0.011231 | 0.011265 | 0.011674 | 0.011231 | 0.011265 | 0.011231 |
| 0.011265 | 0.011197 | 0.011197 | 0.011504 | 0.011435 | 0.011469 | 0.011197 |
| 0.011299 | 0.011367 | 0.011231 | 0.011299 | 0.011265 | 0.011129 | 0.011469 |
| 0.011231 | 0.011197 | 0.011197 | 0.011367 | 0.011197 | 0.011299 | 0.011538 |
| 0.011163 | 0.011612 | 0.011606 | 0.011349 | 0.011118 | 0.011302 | 0.011165 |
| 0.011116 | 0.011614 | 0.011132 | 0.011332 | 0.011160 | 0.011266 | 0.011222 |
| 0.011372 | 0.000000 | 0.011174 | 0.000000 | 0.011115 | 0.011197 | 0.011266 |
| 0.011290 | 0.011180 | 0.011275 | 0.011203 | 0.011197 | 0.011367 | 0.011435 |
| 0.011435 | 0.011299 | 0.011403 | 0.011404 | 0.011542 | 0.011562 | 0.011197 |
| 0.011469 | 0.011333 | 0.011197 | 0.011299 | 0.011094 | 0.011333 | 0.011129 |
| 0.011197 | 0.011197 | 0.011163 | 0.011129 | 0.011163 | 0.011129 | 0.011197 |
| 0.011202 | 0.011202 | 0.011199 | 0.011234 | 0.011373 | 0.011337 | 0.011337 |
| 0.011337 | 0.011265 | 0.000000 | 0.000000 | 0.011198 | 0.011370 | 0.011370 |
| 0.011163 | 0.011232 | 0.011470 | 0.011403 | 0.011367 | 0.011402 | 0.011333 |
| 0.011265 | 0.011333 | 0.011333 | 0.011231 | 0.011777 | 0.011401 | 0.011470 |
| 0.011503 | 0.011567 | 0.011199 | 0.011271 | 0.011163 | 0.011367 | 0.011333 |
| 0.011368 | 0.011401 | 0.011401 | 0.011401 | 0.011538 | 0.011538 | 0.011166 |
| 0.000000 | 0.000000 | 0.011164 | 0.011129 | 0.011234 | 0.000000 | 0.011405 |
| 0.011200 | 0.011327 | 0.000000 | 0.011212 | 0.011197 | 0.011234 | 0.011163 |
| 0.011129 | 0.011129 | 0.011197 | 0.011163 | 0.011367 | 0.011333 | 0.011265 |
| 0.011367 | 0.011435 | 0.011163 | 0.011163 | 0.011197 | 0.011197 | 0.011197 |
| 0.011266 | 0.011163 | 0.011163 | 0.011197 | 0.011367 | 0.011435 | 0.011435 |
| 0.011299 | 0.011403 | 0.011404 | 0.011542 | 0.011562 | 0.011197 | 0.011401 |
| 0.011333 | 0.011333 | 0.011163 | 0.011342 | 0.011272 | 0.011268 | 0.011131 |
| 0.011340 | 0.011522 | 0.011316 | 0.011233 | 0.011129 | 0.011333 | 0.011197 |
| 0.011299 | 0.011231 | 0.011129 | 0.011231 | 0.011333 | 0.011335 | 0.011231 |
| 0.011129 | 0.000000 | 0.011197 | 0.011129 | 0.000000 | 0.011164 | 0.011333 |
| 0.011231 | 0.011163 | 0.011197 | 0.011231 | 0.011197 | 0.011129 | 0.011333 |
| 0.011197 | 0.011197 | 0.011231 | 0.011163 | 0.011231 | 0.011469 | 0.011129 |
| 0.011163 | 0.011572 | 0.011163 | 0.011197 | 0.011163 | 0.011538 | 0.011104 |
| 0.011576 | 0.011104 | 0.011162 | 0.011347 | 0.011433 | 0.011352 | 0.000000 |
| 0.011114 | 0.011333 | 0.011435 | 0.011543 | 0.011402 | 0.011541 | 0.011675 |
| 0.011573 | 0.011610 | 0.011572 | 0.011823 | 0.011538 | 0.012426 | 0.011573 |
| 0.012324 | 0.012087 | 0.012188 | 0.012499 | 0.011538 | 0.011231 | 0.011538 |
| 0.011948 | 0.011916 | 0.011503 | 0.011401 | 0.011470 | 0.011470 | 0.011438 |
| 0.011333 | 0.011336 | 0.011401 | 0.011367 | 0.011743 | 0.011811 | 0.011811 |
| 0.011709 | 0.011743 | 0.011916 | 0.011678 | 0.011949 | 0.011954 | 0.012017 |
| 0.012017 | 0.012052 | 0.011995 | 0.012017 | 0.012019 | 0.011265 | 0.011572 |
| 0.011641 | 0.012152 | 0.011645 | 0.011879 | 0.012359 | 0.011405 | 0.011265 |
| 0.011265 | 0.011265 | 0.011743 | 0.011770 | 0.011880 | 0.011606 | 0.011265 |
| S230     | 0.011651 | 0.011651 | 0.011729 | 0.011690 | 0.011690 | 0.011729 |
| 0.011738 | 0.011619 | 0.011729 | 0.011218 | 0.011296 | 0.011296 | 0.011257 |
| 0.011296 | 0.011454 | 0.011257 | 0.011218 | 0.011375 | 0.011296 | 0.011257 |
| 0.011257 | 0.011257 | 0.011375 | 0.011257 | 0.011297 | 0.011257 | 0.011698 |
| 0.011493 | 0.011296 | 0.011178 | 0.011414 | 0.011336 | 0.011296 | 0.011336 |
| 0.011336 | 0.011414 | 0.011336 | 0.011336 | 0.011296 | 0.011296 | 0.011532 |
| 0.011257 | 0.011336 | 0.011336 | 0.011296 | 0.011414 | 0.011414 | 0.011375 |
| 0.011296 | 0.011454 | 0.011336 | 0.011729 | 0.011296 | 0.011611 | 0.011296 |
| 0.011296 | 0.011414 | 0.011375 | 0.011611 | 0.011769 | 0.011414 | 0.011493 |
| 0.011375 | 0.011454 | 0.011296 | 0.011572 | 0.011887 | 0.011257 | 0.011414 |
| 0.011296 | 0.011375 | 0.011336 | 0.011414 | 0.011296 | 0.011375 | 0.011375 |
| 0.011257 | 0.011257 | 0.011257 | 0.011336 | 0.011296 | 0.011336 | 0.011414 |
| 0.011375 | 0.011336 | 0.011414 | 0.011257 | 0.011454 | 0.011257 | 0.011296 |
| 0.011493 | 0.011454 | 0.011729 | 0.011454 | 0.011336 | 0.011493 | 0.011257 |
| 0.011410 | 0.011809 | 0.011586 | 0.011197 | 0.011233 | 0.011359 | 0.011474 |
| 0.011444 | 0.011580 | 0.011253 | 0.011493 | 0.011532 | 0.011336 | 0.011493 |
| 0.011336 | 0.011336 | 0.011375 | 0.011336 | 0.011414 | 0.011336 | 0.011336 |
| 0.011336 | 0.011375 | 0.011611 | 0.011414 | 0.011414 | 0.011375 | 0.011296 |
| 0.011257 | 0.011257 | 0.011336 | 0.011257 | 0.011532 | 0.011454 | 0.011414 |
| 0.011532 | 0.011572 | 0.011257 | 0.011257 | 0.011296 | 0.011296 | 0.011298 |

|          |          |          |          |          |          |          |
|----------|----------|----------|----------|----------|----------|----------|
| 0.011377 | 0.011296 | 0.011257 | 0.011187 | 0.011229 | 0.011225 | 0.011296 |
| 0.011298 | 0.011221 | 0.011317 | 0.011302 | 0.011220 | 0.011261 | 0.011258 |
| 0.011610 | 0.011303 | 0.011381 | 0.011257 | 0.011262 | 0.011336 | 0.011375 |
| 0.011454 | 0.011336 | 0.011336 | 0.011414 | 0.011336 | 0.011769 | 0.011532 |
| 0.011611 | 0.011414 | 0.011336 | 0.011375 | 0.011218 | 0.011414 | 0.011257 |
| 0.011336 | 0.011296 | 0.011257 | 0.011257 | 0.011296 | 0.011257 | 0.011296 |
| 0.011296 | 0.011454 | 0.011336 | 0.011257 | 0.011336 | 0.011454 | 0.011457 |
| 0.011454 | 0.011336 | 0.011218 | 0.011179 | 0.011296 | 0.011218 | 0.011178 |
| 0.011299 | 0.011454 | 0.011257 | 0.011454 | 0.011218 | 0.011336 | 0.011296 |
| 0.011375 | 0.011296 | 0.011336 | 0.011257 | 0.011296 | 0.011178 | 0.011257 |
| 0.011336 | 0.011257 | 0.011336 | 0.011257 | 0.011296 | 0.011375 | 0.011572 |
| 0.011769 | 0.011690 | 0.011769 | 0.011414 | 0.011769 | 0.011296 | 0.011296 |
| 0.011337 | 0.011614 | 0.011368 | 0.011220 | 0.011696 | 0.011180 | 0.000000 |
| 0.011698 | 0.011658 | 0.011493 | 0.011690 | 0.011338 | 0.011611 | 0.011532 |
| 0.011414 | 0.011611 | 0.011518 | 0.011305 | 0.011407 | 0.011375 | 0.011457 |
| 0.011572 | 0.011415 | 0.011576 | 0.011614 | 0.011532 | 0.011651 | 0.011456 |
| 0.011378 | 0.011614 | 0.011537 | 0.011417 | 0.011729 | 0.011218 | 0.011455 |
| 0.011414 | 0.011296 | 0.011178 | 0.011218 | 0.011257 | 0.011257 | 0.011375 |
| 0.011296 | 0.011375 | 0.011257 | 0.011375 | 0.011257 | 0.011296 | 0.011296 |
| 0.011257 | 0.011808 | 0.011690 | 0.011729 | 0.011178 | 0.011296 | 0.011336 |
| 0.011336 | 0.011257 | 0.011336 | 0.011375 | 0.011257 | 0.011257 | 0.011257 |
| 0.011887 | 0.011414 | 0.011375 | 0.011218 | 0.011257 | 0.011493 | 0.011257 |
| 0.011257 | 0.011296 | 0.011296 | 0.011454 | 0.011218 | 0.011375 | 0.011532 |
| 0.011454 | 0.011257 | 0.011296 | 0.011218 | 0.011218 | 0.011414 | 0.011336 |
| 0.011218 | 0.011296 | 0.011178 | 0.011218 | 0.011336 | 0.011533 | 0.011257 |
| 0.011178 | 0.011336 | 0.011297 | 0.011178 | 0.011532 | 0.011178 | 0.011336 |
| 0.011459 | 0.011257 | 0.011611 | 0.011414 | 0.011375 | 0.011296 | 0.011336 |
| 0.011218 | 0.011611 | 0.011178 | 0.011493 | 0.011257 | 0.011257 | 0.011178 |
| 0.011414 | 0.011650 | 0.011296 | 0.011375 | 0.011218 | 0.011690 | 0.011257 |
| 0.011257 | 0.011257 | 0.011257 | 0.011414 | 0.011296 | 0.011375 | 0.011454 |
| 0.011414 | 0.011375 | 0.011336 | 0.011414 | 0.011414 | 0.011257 | 0.011178 |
| 0.011257 | 0.011257 | 0.011296 | 0.011257 | 0.011218 | 0.011296 | 0.011257 |
| 0.011296 | 0.011296 | 0.011414 | 0.011493 | 0.011375 | 0.011257 | 0.011257 |
| 0.011375 | 0.011257 | 0.011375 | 0.011257 | 0.011414 | 0.011414 | 0.011769 |
| 0.011296 | 0.011729 | 0.011302 | 0.018899 | 0.011286 | 0.011205 | 0.011630 |
| 0.011665 | 0.011677 | 0.011430 | 0.011331 | 0.011832 | 0.011744 | 0.011274 |
| 0.011549 | 0.011492 | 0.011198 | 0.011303 | 0.011287 | 0.011291 | 0.011313 |
| 0.011548 | 0.011405 | 0.011448 | 0.011364 | 0.011375 | 0.011414 | 0.011416 |
| 0.011341 | 0.011454 | 0.011375 | 0.011414 | 0.011336 | 0.011336 | 0.011336 |
| 0.011336 | 0.011296 | 0.011336 | 0.011336 | 0.011336 | 0.011218 | 0.011257 |
| 0.011257 | 0.011336 | 0.011257 | 0.011296 | 0.011414 | 0.011414 | 0.011296 |
| 0.011375 | 0.011296 | 0.011729 | 0.011729 | 0.011414 | 0.011297 | 0.011454 |
| 0.011218 | 0.011218 | 0.011257 | 0.011296 | 0.011218 | 0.011454 | 0.011454 |
| 0.011493 | 0.011493 | 0.011414 | 0.011532 | 0.011729 | 0.011534 | 0.011336 |
| 0.011375 | 0.011414 | 0.011414 | 0.011257 | 0.011375 | 0.011257 | 0.011296 |
| 0.011414 | 0.011414 | 0.011454 | 0.011414 | 0.011336 | 0.011493 | 0.011493 |
| 0.011378 | 0.011257 | 0.011375 | 0.011375 | 0.011336 | 0.011493 | 0.011532 |
| 0.011690 | 0.011338 | 0.011611 | 0.011532 | 0.011414 | 0.011611 | 0.011257 |
| 0.011415 | 0.011257 | 0.011257 | 0.011257 | 0.011336 | 0.011257 | 0.011296 |
| 0.011414 | 0.011414 | 0.011296 | 0.011375 | 0.011296 | 0.011729 | 0.011729 |
| 0.011414 | 0.011297 | 0.011454 | 0.011375 | 0.012085 | 0.011478 | 0.011430 |
| 0.011389 | 0.011425 | 0.011595 | 0.011343 | 0.011551 | 0.011422 | 0.011424 |
| 0.012022 | 0.011303 | 0.011460 | 0.011424 | 0.011704 | 0.011580 | 0.011617 |
| 0.012050 | 0.011458 | 0.011298 | 0.011296 | 0.011336 | 0.011414 | 0.011298 |
| 0.011218 | 0.011257 | 0.011336 | 0.011296 | 0.011298 | 0.011454 | 0.011454 |
| 0.011296 | 0.011257 | 0.011296 | 0.011296 | 0.011218 | 0.011296 | 0.011178 |
| 0.011336 | 0.011336 | 0.011218 | 0.011218 | 0.011296 | 0.011257 | 0.011257 |
| 0.011218 | 0.011218 | 0.011257 | 0.011257 | 0.011218 | 0.011414 | 0.011414 |
| 0.011296 | 0.011375 | 0.011296 | 0.011336 | 0.011257 | 0.011769 | 0.011336 |
| 0.011385 | 0.011257 | 0.011493 | 0.011495 | 0.011414 | 0.011375 | 0.011414 |

|          |          |          |          |          |          |          |
|----------|----------|----------|----------|----------|----------|----------|
| 0.011414 | 0.011336 | 0.011257 | 0.011336 | 0.011336 | 0.011414 | 0.011375 |
| 0.011375 | 0.011454 | 0.011729 | 0.011375 | 0.011572 | 0.011572 | 0.011454 |
| 0.011257 | 0.011375 | 0.011414 | 0.011887 | 0.011375 | 0.011414 | 0.011375 |
| 0.011414 | 0.011296 | 0.011296 | 0.011651 | 0.011572 | 0.011611 | 0.011336 |
| 0.011454 | 0.011532 | 0.011375 | 0.011454 | 0.011336 | 0.011257 | 0.011650 |
| 0.011336 | 0.011296 | 0.011296 | 0.011532 | 0.011336 | 0.011414 | 0.011650 |
| 0.011296 | 0.011818 | 0.011808 | 0.011534 | 0.011322 | 0.011457 | 0.011352 |
| 0.011125 | 0.011741 | 0.011265 | 0.011422 | 0.011341 | 0.011413 | 0.011365 |
| 0.011534 | 0.011213 | 0.011314 | 0.011212 | 0.011246 | 0.011371 | 0.011437 |
| 0.011459 | 0.011335 | 0.011390 | 0.011347 | 0.011297 | 0.011454 | 0.011532 |
| 0.011532 | 0.011375 | 0.011496 | 0.011576 | 0.011656 | 0.011597 | 0.011336 |
| 0.011611 | 0.011414 | 0.011336 | 0.011375 | 0.011218 | 0.011414 | 0.011257 |
| 0.011336 | 0.011296 | 0.011257 | 0.011257 | 0.011296 | 0.011257 | 0.011296 |
| 0.011347 | 0.011306 | 0.011300 | 0.011341 | 0.011460 | 0.011419 | 0.011379 |
| 0.011379 | 0.011336 | 0.011189 | 0.011187 | 0.011258 | 0.011496 | 0.011378 |
| 0.011257 | 0.011337 | 0.011533 | 0.011534 | 0.011493 | 0.011493 | 0.011414 |
| 0.011414 | 0.011454 | 0.011493 | 0.011375 | 0.011966 | 0.011532 | 0.011611 |
| 0.011611 | 0.011728 | 0.011299 | 0.011344 | 0.011257 | 0.011493 | 0.011414 |
| 0.011454 | 0.011414 | 0.011532 | 0.011532 | 0.011651 | 0.011611 | 0.011303 |
| 0.011179 | 0.011182 | 0.011298 | 0.011258 | 0.011339 | 0.011191 | 0.011575 |
| 0.011341 | 0.011524 | 0.011116 | 0.011322 | 0.011336 | 0.011421 | 0.011296 |
| 0.011257 | 0.011257 | 0.011336 | 0.011257 | 0.011532 | 0.011454 | 0.011414 |
| 0.011532 | 0.011572 | 0.011257 | 0.011257 | 0.011296 | 0.011296 | 0.011298 |
| 0.011377 | 0.011296 | 0.011257 | 0.011297 | 0.011454 | 0.011532 | 0.011532 |
| 0.011375 | 0.011496 | 0.011576 | 0.011656 | 0.011597 | 0.011336 | 0.011532 |
| 0.011414 | 0.011414 | 0.011258 | 0.011426 | 0.011345 | 0.011378 | 0.011223 |
| 0.011420 | 0.011623 | 0.011391 | 0.011338 | 0.011257 | 0.011454 | 0.011296 |
| 0.011454 | 0.011336 | 0.011257 | 0.011336 | 0.011454 | 0.011457 | 0.011336 |
| 0.011218 | 0.011179 | 0.011296 | 0.011218 | 0.011178 | 0.011299 | 0.011454 |
| 0.011336 | 0.011296 | 0.011336 | 0.011336 | 0.011336 | 0.011218 | 0.011336 |
| 0.011296 | 0.011375 | 0.011375 | 0.011296 | 0.011296 | 0.011532 | 0.011257 |
| 0.011296 | 0.011769 | 0.011296 | 0.011336 | 0.011296 | 0.011729 | 0.011260 |
| 0.011723 | 0.011210 | 0.011348 | 0.011485 | 0.011536 | 0.011437 | 0.011205 |
| 0.011296 | 0.011454 | 0.011532 | 0.011657 | 0.011493 | 0.011652 | 0.011769 |
| 0.011690 | 0.011772 | 0.011690 | 0.011938 | 0.011650 | 0.012518 | 0.011729 |
| 0.012400 | 0.012242 | 0.012364 | 0.012559 | 0.011650 | 0.011336 | 0.011572 |
| 0.012085 | 0.011769 | 0.011650 | 0.011493 | 0.011611 | 0.011611 | 0.011575 |
| 0.011454 | 0.011456 | 0.011532 | 0.011493 | 0.011808 | 0.011926 | 0.011926 |
| 0.011769 | 0.011926 | 0.012005 | 0.011809 | 0.012124 | 0.012131 | 0.012203 |
| 0.012203 | 0.012243 | 0.012134 | 0.012204 | 0.012203 | 0.011336 | 0.011651 |
| 0.011729 | 0.012084 | 0.011810 | 0.011887 | 0.011809 | 0.011533 | 0.011454 |
| 0.011414 | 0.011414 | 0.011848 | 0.011928 | 0.012004 | 0.011650 | 0.011415 |
| S231     | 0.012045 | 0.012045 | 0.012080 | 0.011841 | 0.011841 | 0.011909 |
| 0.011366 | 0.011298 | 0.011807 | 0.011638 | 0.011705 | 0.011673 | 0.011603 |
| 0.011569 | 0.011841 | 0.011569 | 0.011671 | 0.011705 | 0.011671 | 0.011671 |
| 0.011637 | 0.011671 | 0.011502 | 0.011638 | 0.011672 | 0.011671 | 0.011298 |
| 0.011637 | 0.011671 | 0.011569 | 0.011536 | 0.011739 | 0.011705 | 0.011739 |
| 0.011705 | 0.011807 | 0.011705 | 0.011705 | 0.011739 | 0.011705 | 0.011875 |
| 0.011569 | 0.011705 | 0.011739 | 0.011671 | 0.011705 | 0.011807 | 0.011739 |
| 0.011705 | 0.011875 | 0.011740 | 0.011366 | 0.011705 | 0.011943 | 0.011705 |
| 0.011671 | 0.011706 | 0.011841 | 0.011943 | 0.011468 | 0.011705 | 0.011807 |
| 0.011739 | 0.011807 | 0.011705 | 0.011943 | 0.011502 | 0.011705 | 0.011773 |
| 0.011671 | 0.011773 | 0.011739 | 0.011807 | 0.011671 | 0.011739 | 0.011739 |
| 0.011603 | 0.011671 | 0.011637 | 0.011671 | 0.011705 | 0.011707 | 0.011773 |
| 0.011739 | 0.011671 | 0.011773 | 0.011637 | 0.011535 | 0.011637 | 0.011705 |
| 0.011841 | 0.011807 | 0.011569 | 0.011875 | 0.011671 | 0.011909 | 0.011705 |
| 0.011918 | 0.011398 | 0.011933 | 0.011650 | 0.011589 | 0.011768 | 0.011536 |
| 0.012134 | 0.011419 | 0.011641 | 0.011943 | 0.011943 | 0.011671 | 0.011535 |
| 0.011739 | 0.011739 | 0.011807 | 0.011705 | 0.011807 | 0.011739 | 0.011671 |
| 0.011637 | 0.011705 | 0.012011 | 0.011875 | 0.011773 | 0.011740 | 0.011637 |

|          |          |          |          |          |          |          |
|----------|----------|----------|----------|----------|----------|----------|
| 0.011637 | 0.011569 | 0.011705 | 0.011637 | 0.011604 | 0.011570 | 0.011502 |
| 0.011604 | 0.011672 | 0.011671 | 0.011671 | 0.011706 | 0.011705 | 0.011709 |
| 0.011778 | 0.011671 | 0.011705 | 0.011570 | 0.011646 | 0.011592 | 0.011672 |
| 0.011677 | 0.011616 | 0.011695 | 0.011653 | 0.011610 | 0.011615 | 0.011675 |
| 0.011570 | 0.011688 | 0.011722 | 0.011638 | 0.011585 | 0.011741 | 0.011672 |
| 0.011706 | 0.011742 | 0.011740 | 0.011807 | 0.011773 | 0.012079 | 0.011841 |
| 0.011705 | 0.011773 | 0.011705 | 0.011739 | 0.011603 | 0.011569 | 0.011638 |
| 0.011705 | 0.011705 | 0.011671 | 0.011637 | 0.011671 | 0.011637 | 0.011739 |
| 0.011705 | 0.011807 | 0.011739 | 0.011637 | 0.011742 | 0.011841 | 0.011846 |
| 0.011842 | 0.011706 | 0.011637 | 0.011572 | 0.011705 | 0.011637 | 0.011570 |
| 0.011575 | 0.011842 | 0.011638 | 0.011842 | 0.011603 | 0.011706 | 0.011671 |
| 0.011739 | 0.011637 | 0.011671 | 0.011672 | 0.011705 | 0.011570 | 0.011705 |
| 0.011739 | 0.011671 | 0.011705 | 0.011637 | 0.011671 | 0.011739 | 0.011977 |
| 0.011400 | 0.011332 | 0.011400 | 0.011844 | 0.011468 | 0.011705 | 0.011671 |
| 0.011641 | 0.011960 | 0.011663 | 0.011615 | 0.011403 | 0.011578 | 0.011698 |
| 0.000000 | 0.011645 | 0.011875 | 0.012079 | 0.011751 | 0.011943 | 0.011909 |
| 0.011841 | 0.012011 | 0.011851 | 0.011812 | 0.011741 | 0.011740 | 0.011813 |
| 0.011909 | 0.011777 | 0.011950 | 0.012019 | 0.011909 | 0.011977 | 0.012020 |
| 0.011813 | 0.012022 | 0.011882 | 0.011881 | 0.012150 | 0.011603 | 0.011810 |
| 0.011739 | 0.011705 | 0.011603 | 0.011603 | 0.011671 | 0.011671 | 0.011739 |
| 0.011671 | 0.011739 | 0.011637 | 0.011671 | 0.011671 | 0.011637 | 0.011739 |
| 0.011671 | 0.011434 | 0.011332 | 0.011366 | 0.011569 | 0.011671 | 0.011671 |
| 0.011705 | 0.011603 | 0.011739 | 0.011705 | 0.011637 | 0.011637 | 0.011637 |
| 0.011501 | 0.011739 | 0.011807 | 0.011603 | 0.011705 | 0.011875 | 0.011637 |
| 0.011637 | 0.011671 | 0.011671 | 0.011841 | 0.011637 | 0.011570 | 0.011705 |
| 0.011637 | 0.011671 | 0.011671 | 0.011603 | 0.011603 | 0.011773 | 0.011705 |
| 0.011603 | 0.011705 | 0.011569 | 0.011603 | 0.011739 | 0.011536 | 0.011637 |
| 0.011604 | 0.011739 | 0.011638 | 0.011569 | 0.011298 | 0.011569 | 0.011739 |
| 0.011822 | 0.011637 | 0.011264 | 0.011774 | 0.011739 | 0.011637 | 0.011773 |
| 0.011637 | 0.011943 | 0.011569 | 0.011569 | 0.011569 | 0.011569 | 0.011569 |
| 0.011807 | 0.011672 | 0.011705 | 0.011773 | 0.011603 | 0.011332 | 0.011569 |
| 0.011637 | 0.011637 | 0.011671 | 0.011773 | 0.011671 | 0.011773 | 0.011841 |
| 0.011841 | 0.011807 | 0.011705 | 0.011807 | 0.011773 | 0.011637 | 0.011603 |
| 0.011637 | 0.011637 | 0.011705 | 0.011569 | 0.011603 | 0.011773 | 0.011637 |
| 0.011603 | 0.011671 | 0.011807 | 0.011773 | 0.011739 | 0.011671 | 0.011672 |
| 0.011705 | 0.011671 | 0.011739 | 0.011637 | 0.011773 | 0.011875 | 0.011569 |
| 0.011671 | 0.011468 | 0.011689 | 0.018290 | 0.011391 | 0.011801 | 0.011342 |
| 0.011305 | 0.011345 | 0.011905 | 0.011587 | 0.011559 | 0.011374 | 0.011796 |
| 0.011682 | 0.011615 | 0.011610 | 0.011735 | 0.011574 | 0.011657 | 0.011710 |
| 0.011391 | 0.011550 | 0.011398 | 0.011396 | 0.011807 | 0.011841 | 0.011847 |
| 0.011721 | 0.011807 | 0.011807 | 0.011705 | 0.011705 | 0.011706 | 0.011706 |
| 0.011705 | 0.011637 | 0.011705 | 0.011739 | 0.011706 | 0.011637 | 0.011671 |
| 0.011671 | 0.011739 | 0.011637 | 0.011740 | 0.011773 | 0.011807 | 0.011705 |
| 0.011637 | 0.011570 | 0.011434 | 0.011434 | 0.011774 | 0.011808 | 0.011842 |
| 0.011603 | 0.011603 | 0.011637 | 0.011739 | 0.011603 | 0.011841 | 0.011841 |
| 0.011875 | 0.011875 | 0.011807 | 0.011909 | 0.011468 | 0.011912 | 0.011739 |
| 0.011739 | 0.011807 | 0.011841 | 0.011671 | 0.011739 | 0.011705 | 0.011739 |
| 0.011808 | 0.011808 | 0.011841 | 0.011808 | 0.011707 | 0.011909 | 0.011841 |
| 0.011745 | 0.011637 | 0.011739 | 0.011842 | 0.011740 | 0.011808 | 0.011909 |
| 0.012079 | 0.011751 | 0.011943 | 0.011909 | 0.011841 | 0.012011 | 0.011638 |
| 0.011810 | 0.011706 | 0.011671 | 0.011671 | 0.011739 | 0.011637 | 0.011740 |
| 0.011773 | 0.011807 | 0.011705 | 0.011637 | 0.011570 | 0.011434 | 0.011434 |
| 0.011774 | 0.011808 | 0.011875 | 0.011807 | 0.012285 | 0.011892 | 0.011808 |
| 0.011879 | 0.011832 | 0.011949 | 0.011831 | 0.011946 | 0.011863 | 0.011758 |
| 0.012242 | 0.011726 | 0.011857 | 0.011795 | 0.012001 | 0.011921 | 0.012024 |
| 0.012264 | 0.011862 | 0.011915 | 0.011909 | 0.011909 | 0.011637 | 0.011881 |
| 0.011603 | 0.011773 | 0.011909 | 0.011875 | 0.011881 | 0.011603 | 0.011571 |
| 0.011705 | 0.011637 | 0.011671 | 0.011705 | 0.011603 | 0.011671 | 0.011569 |
| 0.011637 | 0.011671 | 0.011637 | 0.011603 | 0.011705 | 0.011637 | 0.011671 |
| 0.011671 | 0.011603 | 0.011671 | 0.011705 | 0.011603 | 0.011807 | 0.011841 |

|          |          |          |          |          |          |          |
|----------|----------|----------|----------|----------|----------|----------|
| 0.011739 | 0.011739 | 0.011739 | 0.011739 | 0.011671 | 0.011468 | 0.011705 |
| 0.011483 | 0.011671 | 0.011638 | 0.011644 | 0.011705 | 0.011705 | 0.011773 |
| 0.011773 | 0.011705 | 0.011671 | 0.011705 | 0.011807 | 0.011807 | 0.011705 |
| 0.011739 | 0.011875 | 0.011366 | 0.011773 | 0.011977 | 0.011977 | 0.011841 |
| 0.011671 | 0.011739 | 0.011773 | 0.011569 | 0.011740 | 0.011705 | 0.011739 |
| 0.011773 | 0.011637 | 0.011637 | 0.011944 | 0.011943 | 0.011909 | 0.011705 |
| 0.011773 | 0.011807 | 0.011739 | 0.011773 | 0.011739 | 0.011637 | 0.011264 |
| 0.011739 | 0.011671 | 0.011637 | 0.011841 | 0.011705 | 0.011807 | 0.011536 |
| 0.011739 | 0.011434 | 0.011434 | 0.011592 | 0.011402 | 0.011748 | 0.011424 |
| 0.011614 | 0.011805 | 0.011629 | 0.011735 | 0.011650 | 0.011471 | 0.011435 |
| 0.011523 | 0.011393 | 0.011510 | 0.011394 | 0.011441 | 0.011602 | 0.011877 |
| 0.011856 | 0.011773 | 0.011737 | 0.011702 | 0.011742 | 0.011604 | 0.011672 |
| 0.011672 | 0.011740 | 0.011847 | 0.011643 | 0.011986 | 0.012026 | 0.011739 |
| 0.011705 | 0.011773 | 0.011705 | 0.011739 | 0.011603 | 0.011569 | 0.011638 |
| 0.011705 | 0.011705 | 0.011671 | 0.011637 | 0.011671 | 0.011637 | 0.011739 |
| 0.011696 | 0.011697 | 0.011684 | 0.011684 | 0.011822 | 0.011786 | 0.011785 |
| 0.011784 | 0.011740 | 0.011583 | 0.011569 | 0.011677 | 0.011780 | 0.011850 |
| 0.011672 | 0.011711 | 0.011946 | 0.011949 | 0.011877 | 0.011911 | 0.011841 |
| 0.011773 | 0.011841 | 0.011841 | 0.011739 | 0.011705 | 0.011909 | 0.011943 |
| 0.011978 | 0.011384 | 0.011647 | 0.011796 | 0.011671 | 0.011841 | 0.011841 |
| 0.011809 | 0.011909 | 0.011909 | 0.011909 | 0.011977 | 0.012045 | 0.011692 |
| 0.011573 | 0.011586 | 0.011680 | 0.011644 | 0.011682 | 0.011551 | 0.011232 |
| 0.011720 | 0.011372 | 0.011593 | 0.011736 | 0.011706 | 0.011683 | 0.011637 |
| 0.011637 | 0.011569 | 0.011705 | 0.011637 | 0.011604 | 0.011570 | 0.011502 |
| 0.011604 | 0.011672 | 0.011671 | 0.011671 | 0.011706 | 0.011705 | 0.011709 |
| 0.011778 | 0.011671 | 0.011705 | 0.011742 | 0.011604 | 0.011672 | 0.011672 |
| 0.011740 | 0.011847 | 0.011643 | 0.011986 | 0.012026 | 0.011739 | 0.011909 |
| 0.011841 | 0.011841 | 0.011676 | 0.011870 | 0.011799 | 0.011784 | 0.011663 |
| 0.011827 | 0.011986 | 0.011747 | 0.011747 | 0.011638 | 0.011842 | 0.011705 |
| 0.011807 | 0.011739 | 0.011637 | 0.011742 | 0.011841 | 0.011846 | 0.011706 |
| 0.011637 | 0.011572 | 0.011705 | 0.011637 | 0.011570 | 0.011575 | 0.011842 |
| 0.011705 | 0.011637 | 0.011705 | 0.011739 | 0.011706 | 0.011637 | 0.011570 |
| 0.011705 | 0.011739 | 0.011705 | 0.011671 | 0.011739 | 0.011977 | 0.011569 |
| 0.011671 | 0.011468 | 0.011671 | 0.011705 | 0.011671 | 0.011366 | 0.011621 |
| 0.011911 | 0.011445 | 0.011464 | 0.011550 | 0.011593 | 0.011605 | 0.011397 |
| 0.011378 | 0.011569 | 0.011671 | 0.011782 | 0.011639 | 0.011779 | 0.011911 |
| 0.011809 | 0.011847 | 0.011807 | 0.011994 | 0.011739 | 0.012488 | 0.011776 |
| 0.012523 | 0.012220 | 0.012356 | 0.012699 | 0.011671 | 0.011672 | 0.011774 |
| 0.012320 | 0.012084 | 0.011740 | 0.011604 | 0.011706 | 0.011706 | 0.011608 |
| 0.011569 | 0.011575 | 0.011637 | 0.011604 | 0.011979 | 0.012012 | 0.012047 |
| 0.011911 | 0.012013 | 0.012152 | 0.011881 | 0.012320 | 0.012328 | 0.012388 |
| 0.012389 | 0.012389 | 0.012338 | 0.012355 | 0.012357 | 0.011773 | 0.011944 |
| 0.012081 | 0.012556 | 0.011986 | 0.012012 | 0.012490 | 0.011576 | 0.011468 |
| 0.011366 | 0.011434 | 0.011978 | 0.011894 | 0.012093 | 0.011773 | 0.011503 |
| S232     | 0.011945 | 0.011945 | 0.011809 | 0.011774 | 0.011774 | 0.011843 |
| 0.011611 | 0.011508 | 0.011774 | 0.011536 | 0.011604 | 0.011571 | 0.011536 |
| 0.011502 | 0.011740 | 0.011468 | 0.011570 | 0.011638 | 0.011604 | 0.011570 |
| 0.011536 | 0.011570 | 0.011400 | 0.011503 | 0.011571 | 0.011570 | 0.011576 |
| 0.011536 | 0.011570 | 0.011468 | 0.011434 | 0.011638 | 0.011604 | 0.011570 |
| 0.011604 | 0.011706 | 0.011604 | 0.011604 | 0.011638 | 0.011604 | 0.011774 |
| 0.011468 | 0.011604 | 0.011638 | 0.011570 | 0.011604 | 0.011706 | 0.011638 |
| 0.011604 | 0.011774 | 0.011673 | 0.011604 | 0.011604 | 0.011876 | 0.011604 |
| 0.011570 | 0.011604 | 0.011740 | 0.011876 | 0.011638 | 0.011604 | 0.011706 |
| 0.011638 | 0.011706 | 0.011570 | 0.011842 | 0.011707 | 0.011604 | 0.011672 |
| 0.011570 | 0.011672 | 0.011638 | 0.011706 | 0.011638 | 0.011638 | 0.011638 |
| 0.011536 | 0.011570 | 0.011536 | 0.011570 | 0.011604 | 0.011639 | 0.011706 |
| 0.011638 | 0.011604 | 0.011672 | 0.011570 | 0.011570 | 0.011536 | 0.011604 |
| 0.011774 | 0.011706 | 0.011638 | 0.011774 | 0.011604 | 0.011842 | 0.011604 |
| 0.011810 | 0.011664 | 0.011784 | 0.011454 | 0.011474 | 0.011655 | 0.011418 |
| 0.012095 | 0.011266 | 0.011518 | 0.011842 | 0.011842 | 0.011570 | 0.011672 |

|          |          |          |          |          |          |          |
|----------|----------|----------|----------|----------|----------|----------|
| 0.011672 | 0.011638 | 0.011706 | 0.011604 | 0.011706 | 0.011638 | 0.011638 |
| 0.011604 | 0.011638 | 0.011911 | 0.011774 | 0.011672 | 0.011638 | 0.011570 |
| 0.011536 | 0.011434 | 0.011604 | 0.011570 | 0.011502 | 0.011468 | 0.011400 |
| 0.011502 | 0.011570 | 0.011502 | 0.011502 | 0.011536 | 0.011536 | 0.011539 |
| 0.011608 | 0.011604 | 0.011570 | 0.011496 | 0.011535 | 0.011521 | 0.011604 |
| 0.011608 | 0.011547 | 0.011544 | 0.011583 | 0.011507 | 0.011545 | 0.011572 |
| 0.011206 | 0.011618 | 0.011652 | 0.011536 | 0.011549 | 0.011673 | 0.011570 |
| 0.011638 | 0.011640 | 0.011638 | 0.011740 | 0.011672 | 0.012047 | 0.011740 |
| 0.011604 | 0.011672 | 0.011604 | 0.011638 | 0.011502 | 0.011468 | 0.011536 |
| 0.011604 | 0.011604 | 0.011570 | 0.011536 | 0.011570 | 0.011536 | 0.011604 |
| 0.011604 | 0.011706 | 0.011638 | 0.011536 | 0.011640 | 0.011740 | 0.011745 |
| 0.011740 | 0.011638 | 0.011536 | 0.011470 | 0.011604 | 0.011536 | 0.011468 |
| 0.011473 | 0.011740 | 0.011536 | 0.011740 | 0.011502 | 0.011604 | 0.011502 |
| 0.011672 | 0.011570 | 0.011604 | 0.011570 | 0.011604 | 0.011468 | 0.011604 |
| 0.011638 | 0.011570 | 0.011638 | 0.011570 | 0.011604 | 0.011638 | 0.011877 |
| 0.011638 | 0.011570 | 0.011638 | 0.011743 | 0.011639 | 0.011604 | 0.011570 |
| 0.011539 | 0.011838 | 0.011617 | 0.011512 | 0.011644 | 0.011474 | 0.011658 |
| 0.011645 | 0.000000 | 0.011774 | 0.011979 | 0.011683 | 0.011842 | 0.011809 |
| 0.011706 | 0.011910 | 0.011781 | 0.011562 | 0.011656 | 0.011638 | 0.011711 |
| 0.011809 | 0.011675 | 0.011848 | 0.011917 | 0.011842 | 0.011911 | 0.012021 |
| 0.011746 | 0.011919 | 0.011848 | 0.011780 | 0.012048 | 0.011502 | 0.011708 |
| 0.011672 | 0.011604 | 0.011502 | 0.011502 | 0.011570 | 0.011570 | 0.011638 |
| 0.011570 | 0.011638 | 0.011536 | 0.011570 | 0.011570 | 0.011570 | 0.011638 |
| 0.011570 | 0.011672 | 0.011570 | 0.011604 | 0.011468 | 0.011570 | 0.011570 |
| 0.011604 | 0.011502 | 0.011638 | 0.011604 | 0.011536 | 0.011536 | 0.011536 |
| 0.011741 | 0.011604 | 0.011706 | 0.011502 | 0.011604 | 0.011775 | 0.011536 |
| 0.011536 | 0.011536 | 0.011570 | 0.011740 | 0.011536 | 0.011468 | 0.011604 |
| 0.011536 | 0.011570 | 0.011570 | 0.011502 | 0.011502 | 0.011672 | 0.011536 |
| 0.011502 | 0.011604 | 0.011468 | 0.011502 | 0.011638 | 0.011434 | 0.011536 |
| 0.011503 | 0.011638 | 0.011571 | 0.011468 | 0.011468 | 0.011468 | 0.011604 |
| 0.011719 | 0.011536 | 0.011502 | 0.011672 | 0.011638 | 0.011570 | 0.011672 |
| 0.011536 | 0.011876 | 0.011468 | 0.011604 | 0.011468 | 0.011468 | 0.011468 |
| 0.011706 | 0.011162 | 0.011570 | 0.011672 | 0.011502 | 0.011570 | 0.011468 |
| 0.011536 | 0.011536 | 0.011570 | 0.011672 | 0.011570 | 0.011672 | 0.011740 |
| 0.011740 | 0.011706 | 0.011604 | 0.011706 | 0.011672 | 0.011536 | 0.011502 |
| 0.011536 | 0.011536 | 0.011570 | 0.011468 | 0.011502 | 0.011672 | 0.011536 |
| 0.011502 | 0.011570 | 0.011706 | 0.011672 | 0.011638 | 0.011570 | 0.011570 |
| 0.011638 | 0.011570 | 0.011672 | 0.011536 | 0.011672 | 0.011774 | 0.011672 |
| 0.011570 | 0.011639 | 0.011584 | 0.018161 | 0.011325 | 0.011676 | 0.011590 |
| 0.011550 | 0.011593 | 0.011638 | 0.011468 | 0.011611 | 0.011619 | 0.011608 |
| 0.011539 | 0.011366 | 0.011493 | 0.011567 | 0.011494 | 0.011456 | 0.011496 |
| 0.011298 | 0.011436 | 0.011322 | 0.011462 | 0.011706 | 0.011740 | 0.011745 |
| 0.011616 | 0.011706 | 0.011706 | 0.011604 | 0.011638 | 0.011639 | 0.011605 |
| 0.011638 | 0.011570 | 0.011604 | 0.011638 | 0.011604 | 0.011536 | 0.011570 |
| 0.011570 | 0.011638 | 0.011536 | 0.011604 | 0.011672 | 0.011706 | 0.011604 |
| 0.011570 | 0.011536 | 0.011604 | 0.011604 | 0.011673 | 0.011707 | 0.011740 |
| 0.011502 | 0.011502 | 0.011536 | 0.011638 | 0.011502 | 0.011740 | 0.011740 |
| 0.011774 | 0.011774 | 0.011706 | 0.011808 | 0.011638 | 0.011777 | 0.011638 |
| 0.011638 | 0.011672 | 0.011740 | 0.011570 | 0.011638 | 0.011604 | 0.011638 |
| 0.011707 | 0.011706 | 0.011740 | 0.011706 | 0.011606 | 0.011808 | 0.011774 |
| 0.011644 | 0.011536 | 0.011638 | 0.011740 | 0.011638 | 0.011706 | 0.011808 |
| 0.011979 | 0.011683 | 0.011842 | 0.011809 | 0.011706 | 0.011910 | 0.011536 |
| 0.011708 | 0.011605 | 0.011570 | 0.011570 | 0.011638 | 0.011536 | 0.011604 |
| 0.011672 | 0.011706 | 0.011604 | 0.011570 | 0.011536 | 0.011604 | 0.011604 |
| 0.011673 | 0.011707 | 0.011774 | 0.011706 | 0.012286 | 0.011784 | 0.011666 |
| 0.011772 | 0.011728 | 0.011807 | 0.011727 | 0.011840 | 0.011759 | 0.011723 |
| 0.012243 | 0.011621 | 0.011754 | 0.011690 | 0.011966 | 0.011818 | 0.011921 |
| 0.012265 | 0.011747 | 0.011574 | 0.011570 | 0.011570 | 0.011400 | 0.011539 |
| 0.011502 | 0.011536 | 0.011604 | 0.011570 | 0.011574 | 0.011502 | 0.011469 |
| 0.011604 | 0.011536 | 0.011570 | 0.011604 | 0.011502 | 0.011570 | 0.011468 |

|          |          |          |          |          |          |          |
|----------|----------|----------|----------|----------|----------|----------|
| 0.011536 | 0.011570 | 0.011536 | 0.011502 | 0.011604 | 0.011536 | 0.011570 |
| 0.011570 | 0.011502 | 0.011570 | 0.011570 | 0.011502 | 0.011706 | 0.011740 |
| 0.011638 | 0.011638 | 0.011638 | 0.011638 | 0.011570 | 0.011638 | 0.011604 |
| 0.011378 | 0.011570 | 0.011536 | 0.011541 | 0.011672 | 0.011672 | 0.011672 |
| 0.011672 | 0.011604 | 0.011570 | 0.011604 | 0.011706 | 0.011706 | 0.011604 |
| 0.011638 | 0.011774 | 0.011604 | 0.011672 | 0.011843 | 0.011843 | 0.011706 |
| 0.011570 | 0.011638 | 0.011672 | 0.011707 | 0.011639 | 0.011672 | 0.011638 |
| 0.011672 | 0.011536 | 0.011536 | 0.011843 | 0.011843 | 0.011809 | 0.011604 |
| 0.011706 | 0.011740 | 0.011638 | 0.011706 | 0.011672 | 0.011536 | 0.011536 |
| 0.011638 | 0.011604 | 0.011536 | 0.011774 | 0.011604 | 0.011672 | 0.011673 |
| 0.011570 | 0.011680 | 0.011672 | 0.011512 | 0.011346 | 0.011645 | 0.011371 |
| 0.011447 | 0.011728 | 0.011557 | 0.011646 | 0.011504 | 0.011472 | 0.011382 |
| 0.011422 | 0.011259 | 0.011454 | 0.011260 | 0.011387 | 0.011532 | 0.011715 |
| 0.011746 | 0.011616 | 0.011631 | 0.011630 | 0.011606 | 0.011502 | 0.011570 |
| 0.011536 | 0.011639 | 0.011745 | 0.011541 | 0.011884 | 0.011882 | 0.011638 |
| 0.011604 | 0.011672 | 0.011604 | 0.011638 | 0.011502 | 0.011468 | 0.011536 |
| 0.011604 | 0.011604 | 0.011570 | 0.011536 | 0.011570 | 0.011536 | 0.011604 |
| 0.011625 | 0.011626 | 0.011615 | 0.011649 | 0.011787 | 0.011751 | 0.011751 |
| 0.011749 | 0.011672 | 0.011507 | 0.011496 | 0.011608 | 0.011780 | 0.011781 |
| 0.011570 | 0.011643 | 0.011878 | 0.011846 | 0.011775 | 0.011775 | 0.011740 |
| 0.011672 | 0.011740 | 0.011740 | 0.011638 | 0.011877 | 0.011808 | 0.011877 |
| 0.011911 | 0.011638 | 0.011543 | 0.011690 | 0.011570 | 0.011774 | 0.011740 |
| 0.011776 | 0.011774 | 0.011774 | 0.011774 | 0.011973 | 0.011945 | 0.011587 |
| 0.011471 | 0.011481 | 0.011577 | 0.011541 | 0.011579 | 0.011514 | 0.011473 |
| 0.011616 | 0.011327 | 0.011495 | 0.011667 | 0.011604 | 0.011683 | 0.011570 |
| 0.011536 | 0.011434 | 0.011604 | 0.011570 | 0.011502 | 0.011468 | 0.011400 |
| 0.011502 | 0.011570 | 0.011502 | 0.011502 | 0.011536 | 0.011536 | 0.011539 |
| 0.011608 | 0.011604 | 0.011570 | 0.011606 | 0.011502 | 0.011570 | 0.011536 |
| 0.011639 | 0.011745 | 0.011541 | 0.011884 | 0.011882 | 0.011638 | 0.011808 |
| 0.011740 | 0.011740 | 0.011574 | 0.011729 | 0.011693 | 0.011716 | 0.011485 |
| 0.011721 | 0.011984 | 0.011747 | 0.011645 | 0.011536 | 0.011740 | 0.011604 |
| 0.011706 | 0.011638 | 0.011536 | 0.011640 | 0.011740 | 0.011745 | 0.011638 |
| 0.011536 | 0.011470 | 0.011604 | 0.011536 | 0.011468 | 0.011473 | 0.011740 |
| 0.011638 | 0.011570 | 0.011604 | 0.011638 | 0.011604 | 0.011536 | 0.011468 |
| 0.011604 | 0.011638 | 0.011638 | 0.011570 | 0.011638 | 0.011877 | 0.011468 |
| 0.011570 | 0.011638 | 0.011570 | 0.011604 | 0.011570 | 0.011604 | 0.011493 |
| 0.011744 | 0.011447 | 0.011314 | 0.011467 | 0.011554 | 0.011495 | 0.011271 |
| 0.011273 | 0.011468 | 0.011570 | 0.011678 | 0.011537 | 0.011677 | 0.011809 |
| 0.011707 | 0.011745 | 0.011706 | 0.011958 | 0.011672 | 0.012524 | 0.011708 |
| 0.012422 | 0.012220 | 0.012356 | 0.012631 | 0.011672 | 0.011570 | 0.011673 |
| 0.012320 | 0.012051 | 0.011638 | 0.011537 | 0.011604 | 0.011604 | 0.011574 |
| 0.011468 | 0.011472 | 0.011536 | 0.011502 | 0.011877 | 0.011911 | 0.011945 |
| 0.011844 | 0.011843 | 0.012049 | 0.011813 | 0.012287 | 0.012294 | 0.012389 |
| 0.012389 | 0.012423 | 0.012373 | 0.012389 | 0.012392 | 0.011672 | 0.011911 |
| 0.011979 | 0.012422 | 0.011987 | 0.011945 | 0.012389 | 0.011472 | 0.011366 |
| 0.011332 | 0.011264 | 0.011877 | 0.011936 | 0.012021 | 0.011706 | 0.011401 |
| S233     | 0.011799 | 0.011799 | 0.012169 | 0.011933 | 0.011933 | 0.012000 |
| 0.011841 | 0.011773 | 0.012000 | 0.011429 | 0.011496 | 0.011464 | 0.011429 |
| 0.011463 | 0.011631 | 0.011429 | 0.011463 | 0.011530 | 0.011496 | 0.011463 |
| 0.011429 | 0.011463 | 0.011564 | 0.011430 | 0.011463 | 0.011396 | 0.011807 |
| 0.011698 | 0.011463 | 0.011362 | 0.011597 | 0.011530 | 0.011497 | 0.011530 |
| 0.011496 | 0.011597 | 0.011496 | 0.011496 | 0.011530 | 0.011496 | 0.011664 |
| 0.011429 | 0.011496 | 0.011530 | 0.011463 | 0.011564 | 0.011530 | 0.011530 |
| 0.011496 | 0.011664 | 0.011564 | 0.011832 | 0.011496 | 0.011765 | 0.011496 |
| 0.011463 | 0.011564 | 0.011631 | 0.011765 | 0.011866 | 0.011564 | 0.011664 |
| 0.011530 | 0.011597 | 0.011496 | 0.011731 | 0.011967 | 0.011496 | 0.011564 |
| 0.011463 | 0.011564 | 0.011530 | 0.011597 | 0.011530 | 0.011530 | 0.011530 |
| 0.011429 | 0.011463 | 0.011429 | 0.011530 | 0.011496 | 0.011531 | 0.011597 |
| 0.011530 | 0.011496 | 0.011564 | 0.011463 | 0.011597 | 0.011429 | 0.011496 |
| 0.011664 | 0.011597 | 0.011832 | 0.011664 | 0.011496 | 0.011731 | 0.011496 |



|          |          |          |          |          |          |          |
|----------|----------|----------|----------|----------|----------|----------|
| 0.011653 | 0.011882 | 0.011664 | 0.011334 | 0.011359 | 0.011539 | 0.011533 |
| 0.012231 | 0.011620 | 0.011348 | 0.011530 | 0.011530 | 0.011530 | 0.011631 |
| 0.011564 | 0.011496 | 0.011564 | 0.011496 | 0.011597 | 0.011530 | 0.011496 |
| 0.011463 | 0.011597 | 0.011765 | 0.011664 | 0.011564 | 0.011530 | 0.011463 |
| 0.011429 | 0.011429 | 0.011497 | 0.011463 | 0.011665 | 0.011631 | 0.011564 |
| 0.011665 | 0.011732 | 0.011463 | 0.011463 | 0.011497 | 0.011497 | 0.011499 |
| 0.011567 | 0.011497 | 0.011497 | 0.011348 | 0.011349 | 0.011376 | 0.011497 |
| 0.011500 | 0.011438 | 0.011429 | 0.011474 | 0.011366 | 0.011403 | 0.011465 |
| 0.011672 | 0.011474 | 0.011508 | 0.011430 | 0.011406 | 0.011565 | 0.011531 |
| 0.011598 | 0.011532 | 0.011531 | 0.011597 | 0.011530 | 0.011933 | 0.011732 |
| 0.011765 | 0.011631 | 0.011496 | 0.011597 | 0.011396 | 0.011631 | 0.011430 |
| 0.011496 | 0.011496 | 0.011463 | 0.011429 | 0.011463 | 0.011429 | 0.011530 |
| 0.011497 | 0.011597 | 0.011530 | 0.011429 | 0.011532 | 0.011631 | 0.011635 |
| 0.011631 | 0.011530 | 0.011429 | 0.011364 | 0.011497 | 0.011429 | 0.011362 |
| 0.011468 | 0.011631 | 0.011430 | 0.011631 | 0.011396 | 0.011497 | 0.011463 |
| 0.011564 | 0.011463 | 0.011497 | 0.011463 | 0.011497 | 0.011362 | 0.011497 |
| 0.011530 | 0.011463 | 0.011530 | 0.011463 | 0.011463 | 0.011530 | 0.011765 |
| 0.011866 | 0.011799 | 0.011866 | 0.011566 | 0.011866 | 0.011463 | 0.011463 |
| 0.011499 | 0.011828 | 0.011563 | 0.011369 | 0.011875 | 0.011367 | 0.011493 |
| 0.011875 | 0.011774 | 0.000000 | 0.011832 | 0.011572 | 0.011530 | 0.011698 |
| 0.011631 | 0.011597 | 0.011593 | 0.011266 | 0.011479 | 0.011530 | 0.011568 |
| 0.011698 | 0.011566 | 0.011601 | 0.011805 | 0.011698 | 0.011765 | 0.011873 |
| 0.011568 | 0.011807 | 0.011669 | 0.011635 | 0.011901 | 0.011396 | 0.011599 |
| 0.011564 | 0.011496 | 0.011396 | 0.011396 | 0.011463 | 0.011463 | 0.011530 |
| 0.011463 | 0.011530 | 0.011429 | 0.011530 | 0.011463 | 0.011463 | 0.011530 |
| 0.011463 | 0.011899 | 0.011799 | 0.011832 | 0.011362 | 0.011463 | 0.011496 |
| 0.011496 | 0.011463 | 0.011530 | 0.011564 | 0.011429 | 0.011429 | 0.011429 |
| 0.011967 | 0.011597 | 0.011597 | 0.011396 | 0.011496 | 0.011664 | 0.011429 |
| 0.011429 | 0.011496 | 0.011463 | 0.011631 | 0.011429 | 0.011564 | 0.011698 |
| 0.011631 | 0.011463 | 0.011463 | 0.011396 | 0.011396 | 0.011564 | 0.011496 |
| 0.011396 | 0.011496 | 0.011362 | 0.011396 | 0.011530 | 0.011665 | 0.011429 |
| 0.011396 | 0.011530 | 0.011463 | 0.011362 | 0.011698 | 0.011362 | 0.011530 |
| 0.011608 | 0.011429 | 0.011732 | 0.011564 | 0.011597 | 0.011463 | 0.011564 |
| 0.011429 | 0.011765 | 0.011362 | 0.011631 | 0.011429 | 0.011429 | 0.011362 |
| 0.011597 | 0.011799 | 0.011496 | 0.011564 | 0.011396 | 0.011799 | 0.011429 |
| 0.011429 | 0.011429 | 0.011463 | 0.011564 | 0.011463 | 0.011564 | 0.011631 |
| 0.011631 | 0.011597 | 0.011496 | 0.011597 | 0.011564 | 0.011429 | 0.011396 |
| 0.011429 | 0.011429 | 0.011496 | 0.011429 | 0.011396 | 0.011564 | 0.011429 |
| 0.011463 | 0.011463 | 0.011597 | 0.011631 | 0.011530 | 0.011463 | 0.011463 |
| 0.011530 | 0.011463 | 0.011564 | 0.011429 | 0.011564 | 0.011463 | 0.011967 |
| 0.011463 | 0.011866 | 0.011474 | 0.017898 | 0.011322 | 0.011549 | 0.011828 |
| 0.011787 | 0.011834 | 0.011479 | 0.011524 | 0.011829 | 0.011854 | 0.011546 |
| 0.011629 | 0.011610 | 0.011333 | 0.011437 | 0.011411 | 0.011455 | 0.011447 |
| 0.011623 | 0.011582 | 0.011616 | 0.011457 | 0.011597 | 0.011597 | 0.011635 |
| 0.011507 | 0.011597 | 0.011530 | 0.011564 | 0.011530 | 0.011530 | 0.011497 |
| 0.011463 | 0.011463 | 0.011295 | 0.011530 | 0.011497 | 0.011429 | 0.011429 |
| 0.011429 | 0.011530 | 0.011429 | 0.011530 | 0.011564 | 0.011597 | 0.011463 |
| 0.011530 | 0.011497 | 0.011833 | 0.011833 | 0.011564 | 0.011598 | 0.011631 |
| 0.011396 | 0.011396 | 0.011429 | 0.011530 | 0.011396 | 0.011631 | 0.011631 |
| 0.011463 | 0.000000 | 0.011597 | 0.011496 | 0.011866 | 0.011498 | 0.011530 |
| 0.011329 | 0.011597 | 0.011631 | 0.011463 | 0.011530 | 0.011497 | 0.011463 |
| 0.011396 | 0.011396 | 0.011429 | 0.011598 | 0.011498 | 0.011698 | 0.011665 |
| 0.011534 | 0.011429 | 0.011530 | 0.011631 | 0.011530 | 0.011665 | 0.011698 |
| 0.011832 | 0.011572 | 0.011530 | 0.011698 | 0.011631 | 0.011597 | 0.011430 |
| 0.011532 | 0.011497 | 0.011429 | 0.011429 | 0.011530 | 0.011429 | 0.011530 |
| 0.011564 | 0.011597 | 0.011463 | 0.011530 | 0.011497 | 0.011833 | 0.011833 |
| 0.011564 | 0.011598 | 0.011631 | 0.011564 | 0.012170 | 0.011453 | 0.011552 |
| 0.011623 | 0.011442 | 0.011693 | 0.011614 | 0.011550 | 0.011577 | 0.011439 |
| 0.012125 | 0.011441 | 0.011608 | 0.011510 | 0.011783 | 0.011672 | 0.011809 |
| 0.012148 | 0.011663 | 0.011770 | 0.011832 | 0.011698 | 0.011698 | 0.011736 |

|          |          |          |          |          |          |          |
|----------|----------|----------|----------|----------|----------|----------|
| 0.011396 | 0.011564 | 0.011698 | 0.011664 | 0.011668 | 0.011664 | 0.011633 |
| 0.011496 | 0.011429 | 0.011463 | 0.011496 | 0.011396 | 0.011463 | 0.011362 |
| 0.011496 | 0.011530 | 0.011429 | 0.011396 | 0.011496 | 0.011429 | 0.011463 |
| 0.011463 | 0.011396 | 0.011463 | 0.011496 | 0.011396 | 0.011597 | 0.011631 |
| 0.011530 | 0.011597 | 0.011530 | 0.011530 | 0.011463 | 0.011866 | 0.011496 |
| 0.011512 | 0.011463 | 0.011698 | 0.011705 | 0.011564 | 0.011564 | 0.011564 |
| 0.011564 | 0.011496 | 0.011463 | 0.011496 | 0.011597 | 0.011597 | 0.011530 |
| 0.011530 | 0.011664 | 0.011832 | 0.011563 | 0.011765 | 0.011765 | 0.011631 |
| 0.011463 | 0.011530 | 0.011564 | 0.011967 | 0.011530 | 0.011564 | 0.011530 |
| 0.011362 | 0.011496 | 0.011496 | 0.011799 | 0.011732 | 0.011765 | 0.011496 |
| 0.011597 | 0.011664 | 0.011530 | 0.011597 | 0.011564 | 0.011429 | 0.011765 |
| 0.011530 | 0.011496 | 0.011496 | 0.011664 | 0.011496 | 0.011597 | 0.011832 |
| 0.011530 | 0.011909 | 0.011899 | 0.011629 | 0.011286 | 0.011604 | 0.011421 |
| 0.011390 | 0.011878 | 0.011411 | 0.011551 | 0.011402 | 0.011518 | 0.011485 |
| 0.011672 | 0.011258 | 0.011450 | 0.011258 | 0.011330 | 0.011462 | 0.011506 |
| 0.011588 | 0.011454 | 0.011589 | 0.011518 | 0.011532 | 0.011665 | 0.011732 |
| 0.011732 | 0.011598 | 0.011669 | 0.011704 | 0.011840 | 0.011873 | 0.011530 |
| 0.011765 | 0.011631 | 0.011496 | 0.011597 | 0.011396 | 0.011631 | 0.011430 |
| 0.011496 | 0.011496 | 0.011463 | 0.011429 | 0.011463 | 0.011429 | 0.011530 |
| 0.011340 | 0.011445 | 0.011505 | 0.011505 | 0.011642 | 0.011641 | 0.011572 |
| 0.011639 | 0.011564 | 0.011319 | 0.011276 | 0.011500 | 0.011670 | 0.011671 |
| 0.011464 | 0.011534 | 0.011767 | 0.011736 | 0.011464 | 0.011699 | 0.011597 |
| 0.011564 | 0.011597 | 0.011597 | 0.011530 | 0.012034 | 0.011496 | 0.011564 |
| 0.011799 | 0.011843 | 0.011503 | 0.011545 | 0.011463 | 0.011631 | 0.011597 |
| 0.011666 | 0.011664 | 0.011496 | 0.011496 | 0.011846 | 0.011799 | 0.011476 |
| 0.011364 | 0.011337 | 0.011469 | 0.011434 | 0.011504 | 0.011359 | 0.011706 |
| 0.011506 | 0.011586 | 0.011346 | 0.011510 | 0.011497 | 0.011539 | 0.011463 |
| 0.011429 | 0.011429 | 0.011497 | 0.011463 | 0.011665 | 0.011631 | 0.011564 |
| 0.011665 | 0.011732 | 0.011463 | 0.011463 | 0.011497 | 0.011497 | 0.011499 |
| 0.011567 | 0.011497 | 0.011497 | 0.011532 | 0.011665 | 0.011732 | 0.011732 |
| 0.011598 | 0.011669 | 0.011704 | 0.011840 | 0.011873 | 0.011530 | 0.011698 |
| 0.011597 | 0.011597 | 0.011466 | 0.011582 | 0.011581 | 0.011605 | 0.011481 |
| 0.011646 | 0.011881 | 0.011610 | 0.011536 | 0.011430 | 0.011631 | 0.011497 |
| 0.011597 | 0.011530 | 0.011429 | 0.011532 | 0.011631 | 0.011635 | 0.011530 |
| 0.011429 | 0.011364 | 0.011497 | 0.011429 | 0.011362 | 0.011468 | 0.011631 |
| 0.011463 | 0.011463 | 0.011295 | 0.011530 | 0.011497 | 0.011429 | 0.011631 |
| 0.011496 | 0.011530 | 0.011530 | 0.011463 | 0.011530 | 0.011765 | 0.011429 |
| 0.011463 | 0.011866 | 0.011463 | 0.011496 | 0.011463 | 0.011832 | 0.011360 |
| 0.011791 | 0.011358 | 0.011411 | 0.011584 | 0.011712 | 0.011634 | 0.011311 |
| 0.011375 | 0.011631 | 0.011731 | 0.011841 | 0.011700 | 0.011838 | 0.011968 |
| 0.011868 | 0.011906 | 0.011866 | 0.012120 | 0.011832 | 0.012674 | 0.011869 |
| 0.012540 | 0.012342 | 0.012476 | 0.012781 | 0.011832 | 0.011530 | 0.011833 |
| 0.012204 | 0.012207 | 0.011799 | 0.011698 | 0.011766 | 0.011766 | 0.011669 |
| 0.011631 | 0.011637 | 0.011698 | 0.011665 | 0.012035 | 0.012101 | 0.012103 |
| 0.012002 | 0.012103 | 0.012207 | 0.011974 | 0.012205 | 0.012212 | 0.012272 |
| 0.012273 | 0.012307 | 0.012255 | 0.012273 | 0.012274 | 0.011530 | 0.011800 |
| 0.011935 | 0.012371 | 0.011874 | 0.012169 | 0.012643 | 0.011705 | 0.011598 |
| 0.011530 | 0.011563 | 0.012035 | 0.012047 | 0.012186 | 0.011899 | 0.011566 |
| S234     | 0.011967 | 0.011967 | 0.012371 | 0.012135 | 0.012135 | 0.012202 |
| 0.012045 | 0.011977 | 0.012202 | 0.011631 | 0.011698 | 0.011666 | 0.011631 |
| 0.011664 | 0.011832 | 0.011631 | 0.011664 | 0.011732 | 0.011698 | 0.011664 |
| 0.011631 | 0.011664 | 0.011765 | 0.011631 | 0.011665 | 0.011664 | 0.012011 |
| 0.011900 | 0.011664 | 0.011564 | 0.011799 | 0.011732 | 0.011698 | 0.011732 |
| 0.011698 | 0.011799 | 0.011698 | 0.011698 | 0.011732 | 0.011698 | 0.011866 |
| 0.011631 | 0.011698 | 0.011732 | 0.011664 | 0.011765 | 0.011799 | 0.011732 |
| 0.011698 | 0.011866 | 0.011766 | 0.012034 | 0.011698 | 0.011967 | 0.011698 |
| 0.011664 | 0.011765 | 0.011833 | 0.011967 | 0.012068 | 0.011765 | 0.011866 |
| 0.011732 | 0.011799 | 0.011698 | 0.011933 | 0.012169 | 0.011698 | 0.011765 |
| 0.011664 | 0.011765 | 0.011732 | 0.011732 | 0.011732 | 0.011732 | 0.011732 |
| 0.011631 | 0.011664 | 0.011631 | 0.011732 | 0.011698 | 0.011733 | 0.011799 |

|          |          |          |          |          |          |          |
|----------|----------|----------|----------|----------|----------|----------|
| 0.011732 | 0.011698 | 0.011765 | 0.011664 | 0.011799 | 0.011631 | 0.011698 |
| 0.011866 | 0.011799 | 0.012034 | 0.011866 | 0.011698 | 0.011933 | 0.011698 |
| 0.011876 | 0.012107 | 0.011891 | 0.011568 | 0.011545 | 0.011723 | 0.011848 |
| 0.012451 | 0.011772 | 0.011555 | 0.011933 | 0.011933 | 0.011732 | 0.011833 |
| 0.011765 | 0.011530 | 0.011732 | 0.011698 | 0.011799 | 0.011732 | 0.011664 |
| 0.011631 | 0.011799 | 0.011127 | 0.011866 | 0.011765 | 0.011732 | 0.011665 |
| 0.011631 | 0.011631 | 0.011698 | 0.011665 | 0.011866 | 0.011833 | 0.011766 |
| 0.011866 | 0.011934 | 0.011665 | 0.011665 | 0.011698 | 0.011698 | 0.011702 |
| 0.011770 | 0.011698 | 0.011698 | 0.011600 | 0.011675 | 0.011621 | 0.011699 |
| 0.011704 | 0.011645 | 0.011651 | 0.011681 | 0.011604 | 0.011643 | 0.011668 |
| 0.011961 | 0.011715 | 0.011749 | 0.011632 | 0.011648 | 0.011767 | 0.011733 |
| 0.011800 | 0.011735 | 0.011733 | 0.011765 | 0.011698 | 0.012135 | 0.011934 |
| 0.011967 | 0.011833 | 0.011698 | 0.011799 | 0.011597 | 0.011833 | 0.011631 |
| 0.011698 | 0.011698 | 0.011665 | 0.011631 | 0.011664 | 0.011631 | 0.011732 |
| 0.011698 | 0.011799 | 0.011732 | 0.011631 | 0.011734 | 0.011833 | 0.011804 |
| 0.011833 | 0.011732 | 0.011631 | 0.011566 | 0.011698 | 0.011631 | 0.011564 |
| 0.011672 | 0.011833 | 0.011631 | 0.011833 | 0.011597 | 0.011699 | 0.011665 |
| 0.011766 | 0.011665 | 0.011698 | 0.011665 | 0.011698 | 0.011564 | 0.011698 |
| 0.011732 | 0.011665 | 0.011732 | 0.011665 | 0.011631 | 0.011732 | 0.011967 |
| 0.012068 | 0.012001 | 0.012068 | 0.011836 | 0.012069 | 0.011631 | 0.011665 |
| 0.011702 | 0.011950 | 0.011655 | 0.011609 | 0.012011 | 0.011572 | 0.011690 |
| 0.012079 | 0.011979 | 0.011832 | 0.000000 | 0.011743 | 0.011933 | 0.011900 |
| 0.011832 | 0.012001 | 0.011807 | 0.011720 | 0.011605 | 0.011732 | 0.011737 |
| 0.011900 | 0.011735 | 0.011940 | 0.012008 | 0.011866 | 0.011799 | 0.012043 |
| 0.011771 | 0.012011 | 0.011873 | 0.011872 | 0.011935 | 0.011597 | 0.011802 |
| 0.011765 | 0.011698 | 0.011597 | 0.011597 | 0.011664 | 0.011664 | 0.011732 |
| 0.011664 | 0.011732 | 0.011631 | 0.011732 | 0.011664 | 0.011664 | 0.011732 |
| 0.011664 | 0.012101 | 0.012001 | 0.012034 | 0.011564 | 0.011664 | 0.011698 |
| 0.011698 | 0.011664 | 0.011732 | 0.011765 | 0.011631 | 0.011631 | 0.011631 |
| 0.012169 | 0.011799 | 0.011799 | 0.011597 | 0.011698 | 0.011866 | 0.011631 |
| 0.011631 | 0.011698 | 0.011664 | 0.011833 | 0.011631 | 0.011765 | 0.011900 |
| 0.011832 | 0.011664 | 0.011664 | 0.011597 | 0.011597 | 0.011765 | 0.011698 |
| 0.011597 | 0.011698 | 0.011564 | 0.011597 | 0.011732 | 0.011867 | 0.011631 |
| 0.011598 | 0.011732 | 0.011665 | 0.011564 | 0.011900 | 0.011564 | 0.011732 |
| 0.011814 | 0.011631 | 0.011933 | 0.011766 | 0.011799 | 0.011664 | 0.011765 |
| 0.011631 | 0.011967 | 0.011564 | 0.011833 | 0.011631 | 0.011631 | 0.011564 |
| 0.011732 | 0.012001 | 0.011698 | 0.011765 | 0.011597 | 0.012001 | 0.011631 |
| 0.011631 | 0.011631 | 0.011664 | 0.011765 | 0.011664 | 0.011765 | 0.011832 |
| 0.011833 | 0.011799 | 0.011698 | 0.011799 | 0.011765 | 0.011631 | 0.011597 |
| 0.011631 | 0.011631 | 0.011698 | 0.011631 | 0.011597 | 0.011765 | 0.011631 |
| 0.011664 | 0.011664 | 0.011799 | 0.011832 | 0.011732 | 0.011664 | 0.011665 |
| 0.011732 | 0.011664 | 0.011765 | 0.011631 | 0.011765 | 0.011866 | 0.012169 |
| 0.011664 | 0.012068 | 0.011647 | 0.018125 | 0.011453 | 0.011672 | 0.012003 |
| 0.011960 | 0.012011 | 0.011532 | 0.011524 | 0.011995 | 0.012027 | 0.011668 |
| 0.011725 | 0.011854 | 0.011607 | 0.011521 | 0.011529 | 0.011554 | 0.011534 |
| 0.011764 | 0.011843 | 0.011691 | 0.011722 | 0.011799 | 0.011766 | 0.011805 |
| 0.011713 | 0.011799 | 0.011799 | 0.011766 | 0.011732 | 0.011732 | 0.011699 |
| 0.011732 | 0.011664 | 0.011698 | 0.011732 | 0.011699 | 0.011631 | 0.011598 |
| 0.011598 | 0.011665 | 0.011631 | 0.011732 | 0.011766 | 0.011799 | 0.011631 |
| 0.011732 | 0.011698 | 0.012035 | 0.012035 | 0.011766 | 0.011800 | 0.011766 |
| 0.011597 | 0.011598 | 0.011631 | 0.011732 | 0.011598 | 0.011833 | 0.011833 |
| 0.011866 | 0.011832 | 0.011799 | 0.011900 | 0.012068 | 0.011902 | 0.011732 |
| 0.011732 | 0.011799 | 0.011833 | 0.011665 | 0.011732 | 0.011698 | 0.011732 |
| 0.011800 | 0.011799 | 0.011833 | 0.011800 | 0.011700 | 0.011900 | 0.011866 |
| 0.011738 | 0.011631 | 0.011732 | 0.011833 | 0.011665 | 0.011867 | 0.011900 |
| 0.000000 | 0.011743 | 0.011933 | 0.011900 | 0.011832 | 0.012001 | 0.011632 |
| 0.011802 | 0.011699 | 0.011598 | 0.011598 | 0.011665 | 0.011631 | 0.011732 |
| 0.011766 | 0.011799 | 0.011631 | 0.011732 | 0.011698 | 0.012035 | 0.012035 |
| 0.011766 | 0.011800 | 0.011799 | 0.011732 | 0.012406 | 0.011846 | 0.011729 |
| 0.011869 | 0.011823 | 0.011939 | 0.011822 | 0.011936 | 0.011509 | 0.011819 |

|          |          |          |          |          |          |          |
|----------|----------|----------|----------|----------|----------|----------|
| 0.012366 | 0.011649 | 0.011780 | 0.011579 | 0.011852 | 0.011911 | 0.012013 |
| 0.012387 | 0.011890 | 0.011973 | 0.012034 | 0.011900 | 0.011900 | 0.011939 |
| 0.011597 | 0.011765 | 0.011900 | 0.011866 | 0.011871 | 0.011866 | 0.011835 |
| 0.011698 | 0.011631 | 0.011664 | 0.011698 | 0.011597 | 0.011664 | 0.011564 |
| 0.011698 | 0.011732 | 0.011631 | 0.011597 | 0.011698 | 0.011631 | 0.011664 |
| 0.011664 | 0.011597 | 0.011664 | 0.011698 | 0.011597 | 0.011799 | 0.011832 |
| 0.011732 | 0.011799 | 0.011732 | 0.011732 | 0.011664 | 0.012068 | 0.011698 |
| 0.011756 | 0.011665 | 0.011900 | 0.011909 | 0.011766 | 0.011765 | 0.011765 |
| 0.011765 | 0.011698 | 0.011664 | 0.011698 | 0.011799 | 0.011799 | 0.011732 |
| 0.011732 | 0.011866 | 0.012034 | 0.011765 | 0.011967 | 0.011967 | 0.011832 |
| 0.011664 | 0.011732 | 0.011765 | 0.012169 | 0.011732 | 0.011766 | 0.011732 |
| 0.011765 | 0.011698 | 0.011698 | 0.012001 | 0.011934 | 0.011967 | 0.011698 |
| 0.011799 | 0.011866 | 0.011732 | 0.011799 | 0.011765 | 0.011631 | 0.011967 |
| 0.011732 | 0.011698 | 0.011698 | 0.011866 | 0.011698 | 0.011799 | 0.012034 |
| 0.011732 | 0.012113 | 0.012101 | 0.011914 | 0.011455 | 0.011808 | 0.011525 |
| 0.011445 | 0.012151 | 0.011622 | 0.011820 | 0.011646 | 0.011620 | 0.011645 |
| 0.011775 | 0.011258 | 0.011617 | 0.011457 | 0.011546 | 0.011731 | 0.011790 |
| 0.011701 | 0.011729 | 0.011765 | 0.011694 | 0.011735 | 0.011866 | 0.011934 |
| 0.011934 | 0.011800 | 0.011906 | 0.011908 | 0.012044 | 0.012015 | 0.011732 |
| 0.011967 | 0.011833 | 0.011698 | 0.011799 | 0.011597 | 0.011833 | 0.011631 |
| 0.011698 | 0.011698 | 0.011665 | 0.011631 | 0.011664 | 0.011631 | 0.011732 |
| 0.011724 | 0.011725 | 0.011711 | 0.011745 | 0.011882 | 0.011846 | 0.011846 |
| 0.011844 | 0.011767 | 0.011614 | 0.011600 | 0.011704 | 0.011874 | 0.011875 |
| 0.011666 | 0.011738 | 0.011970 | 0.011939 | 0.011868 | 0.011902 | 0.011765 |
| 0.011765 | 0.011631 | 0.011631 | 0.011732 | 0.012270 | 0.011900 | 0.011967 |
| 0.012001 | 0.012022 | 0.011708 | 0.011788 | 0.011665 | 0.011799 | 0.011765 |
| 0.011868 | 0.011832 | 0.011900 | 0.011900 | 0.011807 | 0.011967 | 0.011685 |
| 0.011567 | 0.011580 | 0.011673 | 0.011638 | 0.011744 | 0.011471 | 0.011910 |
| 0.011712 | 0.011762 | 0.011537 | 0.011697 | 0.011699 | 0.011779 | 0.011665 |
| 0.011631 | 0.011631 | 0.011698 | 0.011665 | 0.011866 | 0.011833 | 0.011766 |
| 0.011866 | 0.011934 | 0.011665 | 0.011665 | 0.011698 | 0.011698 | 0.011702 |
| 0.011770 | 0.011698 | 0.011698 | 0.011735 | 0.011866 | 0.011934 | 0.011934 |
| 0.011800 | 0.011906 | 0.011908 | 0.012044 | 0.012015 | 0.011732 | 0.011900 |
| 0.011765 | 0.011765 | 0.011669 | 0.011791 | 0.011790 | 0.011775 | 0.011691 |
| 0.011853 | 0.012018 | 0.011823 | 0.011740 | 0.011631 | 0.011833 | 0.011698 |
| 0.011799 | 0.011732 | 0.011631 | 0.011734 | 0.011833 | 0.011804 | 0.011732 |
| 0.011631 | 0.011566 | 0.011698 | 0.011631 | 0.011564 | 0.011672 | 0.011833 |
| 0.011732 | 0.011664 | 0.011698 | 0.011732 | 0.011699 | 0.011631 | 0.011833 |
| 0.011698 | 0.011732 | 0.011732 | 0.011664 | 0.011732 | 0.011967 | 0.011631 |
| 0.011664 | 0.012068 | 0.011664 | 0.011698 | 0.011664 | 0.012034 | 0.011532 |
| 0.011960 | 0.011656 | 0.011562 | 0.011906 | 0.011956 | 0.011850 | 0.011520 |
| 0.011480 | 0.011832 | 0.011933 | 0.012045 | 0.011902 | 0.012008 | 0.012171 |
| 0.012070 | 0.012109 | 0.012068 | 0.012291 | 0.012034 | 0.012843 | 0.012072 |
| 0.012810 | 0.012511 | 0.012645 | 0.012917 | 0.012034 | 0.011732 | 0.012035 |
| 0.012441 | 0.012410 | 0.012001 | 0.011900 | 0.011969 | 0.011969 | 0.011940 |
| 0.011832 | 0.011807 | 0.011900 | 0.011868 | 0.012238 | 0.012304 | 0.012305 |
| 0.012205 | 0.012305 | 0.012410 | 0.012143 | 0.012442 | 0.012449 | 0.012509 |
| 0.012509 | 0.012543 | 0.012460 | 0.012510 | 0.012511 | 0.011698 | 0.012035 |
| 0.012137 | 0.012640 | 0.012112 | 0.012371 | 0.012845 | 0.011910 | 0.011800 |
| 0.011765 | 0.011765 | 0.012237 | 0.012336 | 0.012398 | 0.012101 | 0.011768 |
| S235     | 0.011538 | 0.011538 | 0.012017 | 0.011846 | 0.011846 | 0.011914 |
| 0.011751 | 0.011682 | 0.011846 | 0.011333 | 0.011402 | 0.011368 | 0.011333 |
| 0.011367 | 0.011538 | 0.011333 | 0.011367 | 0.011436 | 0.011402 | 0.011367 |
| 0.011333 | 0.011368 | 0.011470 | 0.011334 | 0.011368 | 0.011368 | 0.011717 |
| 0.011607 | 0.011368 | 0.011265 | 0.011504 | 0.011436 | 0.011402 | 0.011436 |
| 0.011402 | 0.011504 | 0.011402 | 0.011402 | 0.011436 | 0.011402 | 0.011572 |
| 0.011333 | 0.011402 | 0.011436 | 0.011368 | 0.011470 | 0.011504 | 0.011436 |
| 0.011402 | 0.011573 | 0.011470 | 0.011743 | 0.011402 | 0.011675 | 0.011402 |
| 0.011367 | 0.011470 | 0.011538 | 0.011675 | 0.011777 | 0.011470 | 0.011572 |
| 0.011436 | 0.011504 | 0.011402 | 0.011641 | 0.011880 | 0.011402 | 0.011470 |

|          |          |          |          |          |          |          |
|----------|----------|----------|----------|----------|----------|----------|
| 0.011368 | 0.011470 | 0.011436 | 0.011504 | 0.011436 | 0.011436 | 0.011436 |
| 0.011333 | 0.011368 | 0.011333 | 0.011436 | 0.011402 | 0.011437 | 0.011504 |
| 0.011436 | 0.011402 | 0.011470 | 0.011367 | 0.011504 | 0.011333 | 0.011402 |
| 0.011572 | 0.011504 | 0.011743 | 0.011572 | 0.011402 | 0.011607 | 0.011402 |
| 0.011513 | 0.011783 | 0.011598 | 0.011339 | 0.011326 | 0.011434 | 0.011501 |
| 0.012178 | 0.011523 | 0.011310 | 0.011641 | 0.011641 | 0.011436 | 0.011538 |
| 0.011436 | 0.011436 | 0.011367 | 0.011402 | 0.011504 | 0.011436 | 0.011367 |
| 0.011402 | 0.011504 | 0.011675 | 0.011572 | 0.011470 | 0.011436 | 0.011368 |
| 0.011333 | 0.011333 | 0.011402 | 0.011368 | 0.011572 | 0.011538 | 0.011470 |
| 0.011572 | 0.011641 | 0.011368 | 0.011368 | 0.011402 | 0.011402 | 0.011404 |
| 0.011473 | 0.011368 | 0.011402 | 0.011243 | 0.011318 | 0.011274 | 0.011402 |
| 0.011405 | 0.011340 | 0.011398 | 0.011376 | 0.011268 | 0.011304 | 0.011335 |
| 0.011610 | 0.011376 | 0.011410 | 0.011334 | 0.011341 | 0.011436 | 0.011436 |
| 0.011505 | 0.011437 | 0.011436 | 0.011470 | 0.011197 | 0.011846 | 0.011641 |
| 0.011675 | 0.011538 | 0.011402 | 0.011504 | 0.011299 | 0.011538 | 0.011333 |
| 0.011402 | 0.011402 | 0.011368 | 0.011333 | 0.011367 | 0.011333 | 0.011436 |
| 0.011402 | 0.011504 | 0.011436 | 0.011333 | 0.011437 | 0.011538 | 0.011541 |
| 0.011538 | 0.011436 | 0.011333 | 0.011266 | 0.011402 | 0.011333 | 0.011265 |
| 0.011371 | 0.011538 | 0.011333 | 0.011538 | 0.011299 | 0.011402 | 0.011368 |
| 0.011470 | 0.011368 | 0.011402 | 0.011368 | 0.011368 | 0.011265 | 0.011402 |
| 0.011436 | 0.011368 | 0.011402 | 0.011368 | 0.011333 | 0.011436 | 0.011675 |
| 0.011777 | 0.011709 | 0.011778 | 0.011540 | 0.011778 | 0.011333 | 0.011368 |
| 0.011404 | 0.011675 | 0.011477 | 0.011305 | 0.011785 | 0.011268 | 0.011338 |
| 0.011751 | 0.011683 | 0.011572 | 0.011743 | 0.000000 | 0.011641 | 0.011607 |
| 0.011538 | 0.011709 | 0.011422 | 0.011186 | 0.011273 | 0.011436 | 0.011508 |
| 0.011607 | 0.011438 | 0.011576 | 0.011714 | 0.011572 | 0.011709 | 0.011750 |
| 0.011473 | 0.011682 | 0.011439 | 0.011542 | 0.011847 | 0.011299 | 0.011506 |
| 0.011470 | 0.011402 | 0.011299 | 0.011299 | 0.011367 | 0.011368 | 0.011436 |
| 0.011368 | 0.011436 | 0.011333 | 0.011436 | 0.011368 | 0.011367 | 0.011436 |
| 0.011368 | 0.011812 | 0.011709 | 0.011743 | 0.011265 | 0.011367 | 0.011402 |
| 0.011402 | 0.011367 | 0.011436 | 0.011470 | 0.011333 | 0.011333 | 0.011333 |
| 0.011880 | 0.011504 | 0.011504 | 0.011299 | 0.011402 | 0.011573 | 0.011333 |
| 0.011333 | 0.011402 | 0.011367 | 0.011538 | 0.011333 | 0.011470 | 0.011538 |
| 0.011538 | 0.011368 | 0.011367 | 0.011299 | 0.011299 | 0.011470 | 0.011402 |
| 0.011299 | 0.011402 | 0.011265 | 0.011299 | 0.011436 | 0.011539 | 0.011333 |
| 0.011299 | 0.011436 | 0.011368 | 0.011265 | 0.011607 | 0.011265 | 0.011436 |
| 0.011409 | 0.011333 | 0.011641 | 0.011470 | 0.011504 | 0.011367 | 0.011436 |
| 0.011333 | 0.011675 | 0.011265 | 0.011538 | 0.011333 | 0.011333 | 0.011265 |
| 0.011504 | 0.011710 | 0.011402 | 0.011470 | 0.011299 | 0.011709 | 0.011333 |
| 0.011333 | 0.011333 | 0.011367 | 0.011470 | 0.011367 | 0.011470 | 0.011538 |
| 0.011538 | 0.011504 | 0.011402 | 0.011504 | 0.011470 | 0.011333 | 0.011299 |
| 0.011333 | 0.011333 | 0.011402 | 0.011333 | 0.011299 | 0.011436 | 0.011333 |
| 0.011367 | 0.011368 | 0.011436 | 0.011538 | 0.011436 | 0.011367 | 0.011368 |
| 0.011436 | 0.011368 | 0.011470 | 0.011333 | 0.011470 | 0.011572 | 0.011812 |
| 0.011367 | 0.011778 | 0.011376 | 0.017990 | 0.011326 | 0.011435 | 0.011735 |
| 0.011694 | 0.011740 | 0.011327 | 0.011297 | 0.011792 | 0.011763 | 0.011372 |
| 0.011588 | 0.011498 | 0.011259 | 0.011316 | 0.011378 | 0.011413 | 0.011323 |
| 0.011587 | 0.011550 | 0.011551 | 0.011395 | 0.011504 | 0.011333 | 0.011403 |
| 0.011375 | 0.011504 | 0.011504 | 0.011470 | 0.011436 | 0.011436 | 0.011402 |
| 0.011402 | 0.011367 | 0.011402 | 0.011436 | 0.011402 | 0.011333 | 0.011299 |
| 0.011299 | 0.011436 | 0.011333 | 0.011436 | 0.011470 | 0.011504 | 0.011333 |
| 0.011436 | 0.011402 | 0.011743 | 0.011743 | 0.011470 | 0.011505 | 0.011504 |
| 0.011299 | 0.011299 | 0.011333 | 0.011436 | 0.011299 | 0.011538 | 0.011538 |
| 0.011572 | 0.011572 | 0.011504 | 0.011607 | 0.011743 | 0.011608 | 0.011436 |
| 0.011436 | 0.011504 | 0.011504 | 0.011368 | 0.011436 | 0.011402 | 0.011436 |
| 0.011504 | 0.011504 | 0.011538 | 0.011504 | 0.011403 | 0.011607 | 0.011572 |
| 0.011439 | 0.011333 | 0.011436 | 0.011504 | 0.011436 | 0.011573 | 0.011607 |
| 0.011743 | 0.000000 | 0.011641 | 0.011607 | 0.011538 | 0.011709 | 0.011334 |
| 0.011506 | 0.011402 | 0.011299 | 0.011299 | 0.011436 | 0.011333 | 0.011436 |
| 0.011470 | 0.011504 | 0.011333 | 0.011436 | 0.011402 | 0.011743 | 0.011743 |

|          |          |          |          |          |          |          |
|----------|----------|----------|----------|----------|----------|----------|
| 0.011470 | 0.011505 | 0.011299 | 0.011231 | 0.012087 | 0.011459 | 0.011311 |
| 0.011489 | 0.011448 | 0.011525 | 0.011448 | 0.011487 | 0.011481 | 0.011481 |
| 0.011934 | 0.011201 | 0.011339 | 0.011376 | 0.011691 | 0.011545 | 0.011683 |
| 0.011994 | 0.011405 | 0.011542 | 0.011504 | 0.011538 | 0.011538 | 0.011507 |
| 0.011299 | 0.011402 | 0.011538 | 0.011504 | 0.011507 | 0.011572 | 0.011540 |
| 0.011402 | 0.011333 | 0.011367 | 0.011402 | 0.011299 | 0.011368 | 0.011265 |
| 0.011402 | 0.011436 | 0.011333 | 0.011299 | 0.011402 | 0.011333 | 0.011367 |
| 0.011333 | 0.011299 | 0.011368 | 0.011368 | 0.011299 | 0.011504 | 0.011538 |
| 0.011436 | 0.011504 | 0.011436 | 0.011436 | 0.011367 | 0.011777 | 0.011402 |
| 0.011414 | 0.011368 | 0.011607 | 0.011612 | 0.011470 | 0.011470 | 0.011470 |
| 0.011470 | 0.011402 | 0.011333 | 0.011402 | 0.011504 | 0.011504 | 0.011436 |
| 0.011436 | 0.011572 | 0.011743 | 0.011470 | 0.011675 | 0.011675 | 0.011538 |
| 0.011367 | 0.011436 | 0.011470 | 0.011846 | 0.011436 | 0.011470 | 0.011436 |
| 0.011470 | 0.011402 | 0.011402 | 0.011709 | 0.011607 | 0.011675 | 0.011402 |
| 0.011504 | 0.011572 | 0.011436 | 0.011504 | 0.011470 | 0.011333 | 0.011675 |
| 0.011436 | 0.011402 | 0.011402 | 0.011572 | 0.011402 | 0.011504 | 0.011743 |
| 0.011367 | 0.011820 | 0.011812 | 0.011555 | 0.011287 | 0.011510 | 0.011373 |
| 0.011284 | 0.011849 | 0.011346 | 0.011559 | 0.011407 | 0.011472 | 0.011492 |
| 0.011575 | 0.011326 | 0.011456 | 0.011328 | 0.011333 | 0.011535 | 0.011470 |
| 0.011443 | 0.011379 | 0.011490 | 0.011383 | 0.011437 | 0.011572 | 0.011641 |
| 0.011641 | 0.011505 | 0.011610 | 0.011612 | 0.011750 | 0.011780 | 0.011436 |
| 0.011675 | 0.011538 | 0.011402 | 0.011504 | 0.011299 | 0.011538 | 0.011333 |
| 0.011402 | 0.011402 | 0.011368 | 0.011333 | 0.011367 | 0.011333 | 0.011436 |
| 0.011380 | 0.011380 | 0.011408 | 0.011408 | 0.011547 | 0.011547 | 0.011511 |
| 0.011511 | 0.011471 | 0.011211 | 0.011243 | 0.011405 | 0.011577 | 0.011578 |
| 0.011368 | 0.011439 | 0.011676 | 0.011645 | 0.011573 | 0.011608 | 0.011265 |
| 0.011470 | 0.011538 | 0.011538 | 0.011436 | 0.012017 | 0.011607 | 0.011675 |
| 0.011709 | 0.011785 | 0.011407 | 0.011483 | 0.011368 | 0.011504 | 0.011333 |
| 0.011573 | 0.011538 | 0.011572 | 0.011572 | 0.011769 | 0.011607 | 0.011378 |
| 0.011267 | 0.011201 | 0.011337 | 0.011337 | 0.011408 | 0.011212 | 0.011613 |
| 0.011409 | 0.011418 | 0.000000 | 0.011289 | 0.011402 | 0.011443 | 0.011368 |
| 0.011333 | 0.011333 | 0.011402 | 0.011368 | 0.011572 | 0.011538 | 0.011470 |
| 0.011572 | 0.011641 | 0.011368 | 0.011368 | 0.011402 | 0.011402 | 0.011404 |
| 0.011473 | 0.011368 | 0.011402 | 0.011437 | 0.011572 | 0.011641 | 0.011641 |
| 0.011505 | 0.011610 | 0.011612 | 0.011750 | 0.011780 | 0.011436 | 0.011607 |
| 0.011333 | 0.011333 | 0.011370 | 0.011555 | 0.011485 | 0.011510 | 0.011381 |
| 0.011551 | 0.011753 | 0.011573 | 0.011440 | 0.011333 | 0.011538 | 0.011402 |
| 0.011504 | 0.011436 | 0.011333 | 0.011437 | 0.011538 | 0.011541 | 0.011436 |
| 0.011333 | 0.011266 | 0.011402 | 0.011333 | 0.011265 | 0.011371 | 0.011538 |
| 0.011402 | 0.011367 | 0.011402 | 0.011436 | 0.011402 | 0.011333 | 0.011538 |
| 0.011402 | 0.011436 | 0.011436 | 0.011367 | 0.011436 | 0.011675 | 0.011333 |
| 0.011368 | 0.011777 | 0.011367 | 0.011402 | 0.011367 | 0.011743 | 0.011321 |
| 0.011744 | 0.011232 | 0.011364 | 0.011549 | 0.011638 | 0.011535 | 0.011272 |
| 0.011325 | 0.011538 | 0.011641 | 0.011751 | 0.011608 | 0.011748 | 0.011847 |
| 0.011779 | 0.011817 | 0.011777 | 0.012034 | 0.011743 | 0.012633 | 0.011780 |
| 0.012531 | 0.012295 | 0.012432 | 0.012708 | 0.011743 | 0.011436 | 0.011744 |
| 0.012121 | 0.012124 | 0.011709 | 0.011607 | 0.011676 | 0.011676 | 0.011645 |
| 0.011538 | 0.011543 | 0.011607 | 0.011573 | 0.011949 | 0.012017 | 0.012018 |
| 0.011916 | 0.012018 | 0.012123 | 0.011886 | 0.012122 | 0.012128 | 0.012190 |
| 0.012156 | 0.012225 | 0.012171 | 0.012191 | 0.012192 | 0.011197 | 0.011744 |
| 0.011847 | 0.012325 | 0.011852 | 0.012051 | 0.012567 | 0.011610 | 0.011505 |
| 0.011470 | 0.011470 | 0.011949 | 0.011811 | 0.012057 | 0.011812 | 0.011471 |
| S236     | 0.011900 | 0.011900 | 0.012236 | 0.012000 | 0.012000 | 0.012068 |
| 0.011909 | 0.011841 | 0.012068 | 0.011497 | 0.011564 | 0.011531 | 0.011496 |
| 0.011530 | 0.011698 | 0.011496 | 0.011530 | 0.011597 | 0.011564 | 0.011530 |
| 0.011496 | 0.011530 | 0.011631 | 0.011497 | 0.011531 | 0.011530 | 0.011875 |
| 0.011765 | 0.011530 | 0.011429 | 0.011664 | 0.011597 | 0.011564 | 0.011597 |
| 0.011564 | 0.011664 | 0.011564 | 0.011564 | 0.011597 | 0.011564 | 0.011732 |
| 0.011496 | 0.011564 | 0.011597 | 0.011530 | 0.011631 | 0.011597 | 0.011597 |
| 0.011564 | 0.011732 | 0.011631 | 0.011900 | 0.011564 | 0.011832 | 0.011564 |

|          |          |          |          |          |          |          |
|----------|----------|----------|----------|----------|----------|----------|
| 0.011530 | 0.011631 | 0.011698 | 0.011832 | 0.011933 | 0.011631 | 0.011732 |
| 0.011597 | 0.011665 | 0.011564 | 0.011731 | 0.012034 | 0.011564 | 0.011631 |
| 0.011530 | 0.011631 | 0.011597 | 0.011664 | 0.011597 | 0.011597 | 0.011597 |
| 0.011496 | 0.011530 | 0.011496 | 0.011597 | 0.011564 | 0.011599 | 0.011664 |
| 0.011597 | 0.011564 | 0.011631 | 0.011530 | 0.011664 | 0.011497 | 0.011564 |
| 0.011732 | 0.011664 | 0.011900 | 0.011732 | 0.011564 | 0.011799 | 0.011564 |
| 0.011765 | 0.011957 | 0.011777 | 0.011490 | 0.011471 | 0.011612 | 0.011651 |
| 0.012305 | 0.011721 | 0.011472 | 0.011597 | 0.011530 | 0.011597 | 0.011698 |
| 0.011631 | 0.011597 | 0.011664 | 0.011564 | 0.011665 | 0.011597 | 0.011597 |
| 0.011564 | 0.011664 | 0.011866 | 0.011731 | 0.011631 | 0.011597 | 0.011530 |
| 0.011497 | 0.011497 | 0.011564 | 0.011530 | 0.011732 | 0.011698 | 0.011631 |
| 0.011732 | 0.011799 | 0.011530 | 0.011530 | 0.011564 | 0.011564 | 0.011567 |
| 0.011635 | 0.011564 | 0.011564 | 0.011456 | 0.011494 | 0.011481 | 0.011565 |
| 0.011568 | 0.011507 | 0.011540 | 0.011543 | 0.011468 | 0.011506 | 0.011533 |
| 0.011780 | 0.011577 | 0.011577 | 0.011497 | 0.011475 | 0.011632 | 0.011598 |
| 0.011666 | 0.011600 | 0.011598 | 0.011698 | 0.011631 | 0.012001 | 0.011799 |
| 0.011832 | 0.011698 | 0.011564 | 0.011665 | 0.011463 | 0.011698 | 0.011497 |
| 0.011564 | 0.011564 | 0.011530 | 0.011497 | 0.011530 | 0.011497 | 0.011597 |
| 0.011564 | 0.011665 | 0.011598 | 0.011497 | 0.011599 | 0.011698 | 0.011635 |
| 0.011699 | 0.011598 | 0.011497 | 0.011431 | 0.011564 | 0.011497 | 0.011430 |
| 0.011536 | 0.011699 | 0.011497 | 0.011699 | 0.011463 | 0.011564 | 0.011530 |
| 0.011631 | 0.011530 | 0.011564 | 0.011530 | 0.011564 | 0.011430 | 0.011564 |
| 0.011598 | 0.011530 | 0.011598 | 0.011530 | 0.011564 | 0.011597 | 0.011833 |
| 0.011933 | 0.011866 | 0.011934 | 0.011633 | 0.011934 | 0.011564 | 0.011530 |
| 0.011567 | 0.011869 | 0.011563 | 0.011438 | 0.011943 | 0.011435 | 0.011611 |
| 0.011943 | 0.011842 | 0.011530 | 0.011933 | 0.011641 | 0.000000 | 0.011765 |
| 0.011698 | 0.011597 | 0.011735 | 0.011390 | 0.011605 | 0.011598 | 0.011669 |
| 0.011765 | 0.011667 | 0.011669 | 0.011873 | 0.011799 | 0.011866 | 0.011975 |
| 0.011703 | 0.011875 | 0.011805 | 0.011737 | 0.012002 | 0.011463 | 0.011667 |
| 0.011631 | 0.011564 | 0.011463 | 0.011463 | 0.011530 | 0.011530 | 0.011597 |
| 0.011530 | 0.011597 | 0.011496 | 0.011597 | 0.011530 | 0.011530 | 0.011597 |
| 0.011530 | 0.011967 | 0.011866 | 0.011900 | 0.011429 | 0.011530 | 0.011564 |
| 0.011564 | 0.011530 | 0.011597 | 0.011631 | 0.011496 | 0.011496 | 0.011496 |
| 0.012034 | 0.011664 | 0.011664 | 0.011463 | 0.011564 | 0.011732 | 0.011497 |
| 0.011496 | 0.011564 | 0.011530 | 0.011698 | 0.011496 | 0.011631 | 0.011765 |
| 0.011698 | 0.011530 | 0.011530 | 0.011463 | 0.011463 | 0.011631 | 0.011564 |
| 0.011463 | 0.011564 | 0.011429 | 0.011463 | 0.011597 | 0.011732 | 0.011497 |
| 0.011463 | 0.011597 | 0.011531 | 0.011429 | 0.011765 | 0.011429 | 0.011597 |
| 0.011677 | 0.011497 | 0.011799 | 0.011631 | 0.011664 | 0.011530 | 0.011631 |
| 0.011496 | 0.011832 | 0.011429 | 0.011698 | 0.011496 | 0.011496 | 0.011429 |
| 0.011664 | 0.011866 | 0.011564 | 0.011631 | 0.011463 | 0.011866 | 0.011496 |
| 0.011497 | 0.011496 | 0.011530 | 0.011631 | 0.011530 | 0.011631 | 0.011698 |
| 0.011698 | 0.011664 | 0.011564 | 0.011665 | 0.011631 | 0.011496 | 0.011463 |
| 0.011496 | 0.011496 | 0.011564 | 0.011496 | 0.011463 | 0.011631 | 0.011496 |
| 0.011530 | 0.011530 | 0.011664 | 0.011698 | 0.011597 | 0.011530 | 0.011530 |
| 0.011597 | 0.011530 | 0.011631 | 0.011496 | 0.011631 | 0.011530 | 0.012034 |
| 0.011530 | 0.011866 | 0.011543 | 0.011797 | 0.011387 | 0.011672 | 0.011898 |
| 0.011856 | 0.011905 | 0.011584 | 0.011582 | 0.011994 | 0.011924 | 0.011607 |
| 0.011772 | 0.011732 | 0.011411 | 0.011521 | 0.011529 | 0.011603 | 0.011533 |
| 0.011717 | 0.011693 | 0.011691 | 0.011523 | 0.011664 | 0.011698 | 0.011703 |
| 0.011575 | 0.011665 | 0.011597 | 0.011631 | 0.011597 | 0.011598 | 0.011564 |
| 0.011530 | 0.011530 | 0.011362 | 0.011598 | 0.011564 | 0.011497 | 0.011530 |
| 0.011530 | 0.011598 | 0.011497 | 0.011598 | 0.011631 | 0.011665 | 0.011564 |
| 0.011597 | 0.011564 | 0.011900 | 0.011900 | 0.011631 | 0.011666 | 0.011698 |
| 0.011463 | 0.011463 | 0.011497 | 0.011598 | 0.011463 | 0.011698 | 0.011698 |
| 0.011463 | 0.011530 | 0.011665 | 0.011497 | 0.011934 | 0.011498 | 0.011597 |
| 0.011396 | 0.011665 | 0.011698 | 0.011530 | 0.011598 | 0.011564 | 0.011530 |
| 0.011463 | 0.011463 | 0.011497 | 0.011665 | 0.011565 | 0.011765 | 0.011732 |
| 0.011602 | 0.011497 | 0.011597 | 0.011698 | 0.011598 | 0.011732 | 0.011765 |
| 0.011933 | 0.011641 | 0.000000 | 0.011765 | 0.011698 | 0.011597 | 0.011497 |

|          |          |          |          |          |          |          |
|----------|----------|----------|----------|----------|----------|----------|
| 0.011599 | 0.011564 | 0.011530 | 0.011530 | 0.011598 | 0.011497 | 0.011598 |
| 0.011631 | 0.011665 | 0.011564 | 0.011597 | 0.011564 | 0.011900 | 0.011900 |
| 0.011631 | 0.011666 | 0.011731 | 0.011664 | 0.012305 | 0.011489 | 0.011658 |
| 0.011728 | 0.011476 | 0.011798 | 0.011684 | 0.011655 | 0.011716 | 0.011474 |
| 0.012262 | 0.011579 | 0.011711 | 0.011648 | 0.011921 | 0.011774 | 0.011877 |
| 0.012284 | 0.011777 | 0.011838 | 0.011900 | 0.011765 | 0.011765 | 0.011804 |
| 0.011463 | 0.011631 | 0.011765 | 0.011731 | 0.011736 | 0.011731 | 0.011700 |
| 0.011564 | 0.011496 | 0.011530 | 0.011564 | 0.011463 | 0.011530 | 0.011429 |
| 0.011564 | 0.011597 | 0.011496 | 0.011463 | 0.011564 | 0.011496 | 0.011530 |
| 0.011530 | 0.011463 | 0.011530 | 0.011564 | 0.011463 | 0.011664 | 0.011698 |
| 0.011597 | 0.011664 | 0.011597 | 0.011597 | 0.011530 | 0.011933 | 0.011564 |
| 0.011617 | 0.011530 | 0.011766 | 0.011773 | 0.011631 | 0.011631 | 0.011631 |
| 0.011631 | 0.011564 | 0.011530 | 0.011564 | 0.011664 | 0.011664 | 0.011597 |
| 0.011597 | 0.011732 | 0.011900 | 0.011631 | 0.011833 | 0.011833 | 0.011698 |
| 0.011530 | 0.011597 | 0.011631 | 0.012034 | 0.011598 | 0.011631 | 0.011597 |
| 0.011429 | 0.011564 | 0.011564 | 0.011866 | 0.011799 | 0.011833 | 0.011564 |
| 0.011665 | 0.011732 | 0.011597 | 0.011665 | 0.011631 | 0.011497 | 0.011832 |
| 0.011597 | 0.011564 | 0.011564 | 0.011732 | 0.011564 | 0.011664 | 0.011900 |
| 0.011597 | 0.011977 | 0.011967 | 0.011751 | 0.011455 | 0.011672 | 0.011525 |
| 0.011500 | 0.011956 | 0.011482 | 0.011596 | 0.011499 | 0.011620 | 0.011591 |
| 0.011723 | 0.011389 | 0.011561 | 0.011324 | 0.011437 | 0.011529 | 0.011628 |
| 0.011701 | 0.011532 | 0.011659 | 0.011589 | 0.011600 | 0.011732 | 0.011799 |
| 0.011799 | 0.011666 | 0.011770 | 0.011772 | 0.011874 | 0.011944 | 0.011597 |
| 0.011832 | 0.011698 | 0.011564 | 0.011665 | 0.011463 | 0.011698 | 0.011497 |
| 0.011564 | 0.011564 | 0.011530 | 0.011497 | 0.011530 | 0.011497 | 0.011597 |
| 0.011410 | 0.011550 | 0.011574 | 0.011608 | 0.011745 | 0.011709 | 0.011641 |
| 0.011708 | 0.011632 | 0.011430 | 0.011384 | 0.011568 | 0.011738 | 0.011739 |
| 0.011531 | 0.011602 | 0.011835 | 0.011804 | 0.011464 | 0.011767 | 0.011698 |
| 0.011631 | 0.011698 | 0.011698 | 0.011597 | 0.012169 | 0.011497 | 0.011564 |
| 0.011866 | 0.011915 | 0.011572 | 0.011649 | 0.011530 | 0.011732 | 0.011698 |
| 0.011733 | 0.011765 | 0.011496 | 0.011496 | 0.011886 | 0.011900 | 0.011546 |
| 0.011432 | 0.011441 | 0.011537 | 0.011502 | 0.011607 | 0.011471 | 0.011774 |
| 0.011575 | 0.011674 | 0.011441 | 0.011622 | 0.011565 | 0.011642 | 0.011530 |
| 0.011497 | 0.011497 | 0.011564 | 0.011530 | 0.011732 | 0.011698 | 0.011631 |
| 0.011732 | 0.011799 | 0.011530 | 0.011530 | 0.011564 | 0.011564 | 0.011567 |
| 0.011635 | 0.011564 | 0.011564 | 0.011600 | 0.011732 | 0.011799 | 0.011799 |
| 0.011666 | 0.011770 | 0.011772 | 0.011874 | 0.011944 | 0.011597 | 0.011765 |
| 0.011698 | 0.011698 | 0.011534 | 0.011687 | 0.011651 | 0.011673 | 0.011551 |
| 0.011715 | 0.011972 | 0.011653 | 0.011604 | 0.011497 | 0.011699 | 0.011564 |
| 0.011665 | 0.011598 | 0.011497 | 0.011599 | 0.011698 | 0.011635 | 0.011598 |
| 0.011497 | 0.011431 | 0.011564 | 0.011497 | 0.011430 | 0.011536 | 0.011699 |
| 0.011530 | 0.011530 | 0.011362 | 0.011598 | 0.011564 | 0.011497 | 0.011698 |
| 0.011564 | 0.011597 | 0.011597 | 0.011530 | 0.011597 | 0.011833 | 0.011496 |
| 0.011530 | 0.011933 | 0.011530 | 0.011564 | 0.011530 | 0.011900 | 0.011489 |
| 0.011904 | 0.011528 | 0.011511 | 0.011745 | 0.011834 | 0.011706 | 0.011478 |
| 0.011480 | 0.011698 | 0.011799 | 0.011909 | 0.011767 | 0.011906 | 0.012036 |
| 0.011935 | 0.011974 | 0.011933 | 0.012188 | 0.011900 | 0.012775 | 0.011936 |
| 0.012608 | 0.012444 | 0.012578 | 0.012849 | 0.011899 | 0.011598 | 0.011900 |
| 0.012340 | 0.012275 | 0.011866 | 0.011766 | 0.011834 | 0.011834 | 0.011737 |
| 0.011698 | 0.011705 | 0.011765 | 0.011733 | 0.012103 | 0.012169 | 0.012171 |
| 0.012070 | 0.012170 | 0.012275 | 0.012042 | 0.012340 | 0.012347 | 0.012407 |
| 0.012408 | 0.012442 | 0.012392 | 0.012408 | 0.012410 | 0.011631 | 0.011934 |
| 0.012002 | 0.012505 | 0.012010 | 0.012236 | 0.012710 | 0.011773 | 0.011665 |
| 0.011597 | 0.011631 | 0.012102 | 0.012171 | 0.012222 | 0.011967 | 0.011633 |
| S237     | 0.011866 | 0.011866 | 0.012203 | 0.011967 | 0.011967 | 0.012034 |
| 0.011876 | 0.011807 | 0.012034 | 0.011463 | 0.011530 | 0.011498 | 0.011463 |
| 0.011497 | 0.011665 | 0.011463 | 0.011497 | 0.011564 | 0.011530 | 0.011497 |
| 0.011463 | 0.011497 | 0.011597 | 0.011463 | 0.011430 | 0.011497 | 0.011841 |
| 0.011732 | 0.011497 | 0.011396 | 0.011631 | 0.011497 | 0.011530 | 0.011497 |
| 0.011530 | 0.011564 | 0.011530 | 0.011463 | 0.011564 | 0.011530 | 0.011698 |



|          |          |          |          |          |          |          |
|----------|----------|----------|----------|----------|----------|----------|
| 0.011463 | 0.011530 | 0.011564 | 0.011497 | 0.011597 | 0.011631 | 0.011564 |
| 0.011530 | 0.011698 | 0.011598 | 0.011866 | 0.011530 | 0.011732 | 0.011530 |
| 0.011497 | 0.011598 | 0.011665 | 0.011732 | 0.011900 | 0.011597 | 0.011698 |
| 0.011497 | 0.011564 | 0.011530 | 0.011698 | 0.012001 | 0.011530 | 0.011597 |
| 0.011497 | 0.011597 | 0.011564 | 0.011631 | 0.011564 | 0.011564 | 0.011564 |
| 0.011463 | 0.011497 | 0.011463 | 0.011564 | 0.011530 | 0.011565 | 0.011631 |
| 0.011564 | 0.011530 | 0.011530 | 0.011497 | 0.011631 | 0.011396 | 0.011530 |
| 0.011698 | 0.011631 | 0.011866 | 0.011698 | 0.011530 | 0.011497 | 0.011530 |
| 0.011654 | 0.011882 | 0.011740 | 0.011373 | 0.011471 | 0.011539 | 0.011612 |
| 0.012305 | 0.011671 | 0.011472 | 0.011765 | 0.011765 | 0.011564 | 0.011665 |
| 0.011597 | 0.011564 | 0.011631 | 0.011530 | 0.011631 | 0.011497 | 0.011564 |
| 0.011530 | 0.011631 | 0.011833 | 0.011698 | 0.011597 | 0.011564 | 0.011430 |
| 0.011463 | 0.011463 | 0.011463 | 0.011497 | 0.011698 | 0.011665 | 0.011598 |
| 0.011698 | 0.011766 | 0.011497 | 0.011497 | 0.011530 | 0.011530 | 0.011533 |
| 0.011601 | 0.011530 | 0.011530 | 0.011384 | 0.011494 | 0.011446 | 0.011531 |
| 0.011535 | 0.011473 | 0.011540 | 0.011509 | 0.011434 | 0.011471 | 0.011499 |
| 0.011780 | 0.011543 | 0.011508 | 0.011464 | 0.011475 | 0.011599 | 0.011565 |
| 0.011632 | 0.011566 | 0.011565 | 0.011664 | 0.011597 | 0.011833 | 0.011766 |
| 0.011799 | 0.011665 | 0.011530 | 0.011631 | 0.011430 | 0.011665 | 0.011463 |
| 0.011530 | 0.011530 | 0.011497 | 0.011463 | 0.011497 | 0.011463 | 0.011564 |
| 0.011463 | 0.011564 | 0.011564 | 0.011463 | 0.011566 | 0.011665 | 0.011669 |
| 0.011598 | 0.011564 | 0.011463 | 0.011398 | 0.011530 | 0.011463 | 0.011396 |
| 0.011502 | 0.011598 | 0.011396 | 0.011598 | 0.011430 | 0.011531 | 0.011497 |
| 0.011530 | 0.011497 | 0.011463 | 0.011497 | 0.011530 | 0.011396 | 0.011463 |
| 0.011497 | 0.011497 | 0.011564 | 0.011497 | 0.011530 | 0.011564 | 0.011799 |
| 0.011900 | 0.011833 | 0.011900 | 0.011667 | 0.011900 | 0.011530 | 0.011497 |
| 0.011533 | 0.011788 | 0.011563 | 0.011438 | 0.011909 | 0.011367 | 0.011532 |
| 0.011909 | 0.011809 | 0.011698 | 0.011900 | 0.011607 | 0.011765 | 0.000000 |
| 0.011597 | 0.011833 | 0.011700 | 0.011514 | 0.011647 | 0.011564 | 0.011636 |
| 0.011732 | 0.011634 | 0.011770 | 0.011771 | 0.011765 | 0.011833 | 0.011941 |
| 0.011670 | 0.011773 | 0.011771 | 0.011703 | 0.011969 | 0.011429 | 0.011633 |
| 0.011530 | 0.011530 | 0.011429 | 0.011429 | 0.011429 | 0.011497 | 0.011564 |
| 0.011429 | 0.011497 | 0.011396 | 0.011564 | 0.011429 | 0.011497 | 0.011564 |
| 0.011497 | 0.011933 | 0.011833 | 0.011866 | 0.011396 | 0.011497 | 0.011530 |
| 0.011530 | 0.011497 | 0.011564 | 0.011597 | 0.011463 | 0.011463 | 0.011463 |
| 0.012001 | 0.011631 | 0.011631 | 0.011429 | 0.011530 | 0.011631 | 0.011463 |
| 0.011463 | 0.011530 | 0.011497 | 0.011597 | 0.011463 | 0.011597 | 0.011664 |
| 0.011665 | 0.011497 | 0.011497 | 0.011429 | 0.011429 | 0.011598 | 0.011530 |
| 0.011429 | 0.011530 | 0.011396 | 0.011429 | 0.011564 | 0.011699 | 0.011463 |
| 0.011430 | 0.011564 | 0.011497 | 0.011396 | 0.011732 | 0.011396 | 0.011564 |
| 0.011574 | 0.011463 | 0.011765 | 0.011598 | 0.011631 | 0.011497 | 0.011597 |
| 0.011463 | 0.011732 | 0.011396 | 0.011665 | 0.011463 | 0.011463 | 0.011396 |
| 0.011564 | 0.011833 | 0.011530 | 0.011597 | 0.011429 | 0.011833 | 0.011463 |
| 0.011463 | 0.011463 | 0.011497 | 0.011530 | 0.011497 | 0.011597 | 0.011665 |
| 0.011665 | 0.011631 | 0.011530 | 0.011631 | 0.011530 | 0.011463 | 0.011429 |
| 0.011463 | 0.011463 | 0.011530 | 0.011463 | 0.011362 | 0.011597 | 0.011463 |
| 0.011497 | 0.011497 | 0.011631 | 0.011665 | 0.011564 | 0.011429 | 0.011497 |
| 0.011564 | 0.011497 | 0.011597 | 0.011463 | 0.011597 | 0.011698 | 0.012001 |
| 0.011497 | 0.011900 | 0.011440 | 0.018050 | 0.011388 | 0.011611 | 0.011863 |
| 0.011822 | 0.011870 | 0.011584 | 0.011582 | 0.011829 | 0.011889 | 0.011546 |
| 0.011725 | 0.011732 | 0.011372 | 0.011395 | 0.011490 | 0.011455 | 0.011447 |
| 0.011670 | 0.011694 | 0.011654 | 0.011589 | 0.011631 | 0.011665 | 0.011669 |
| 0.011472 | 0.011631 | 0.011631 | 0.011598 | 0.011564 | 0.011564 | 0.011531 |
| 0.011564 | 0.011497 | 0.011530 | 0.011564 | 0.011531 | 0.011463 | 0.011497 |
| 0.011497 | 0.011564 | 0.011463 | 0.011564 | 0.011598 | 0.011631 | 0.011530 |
| 0.011564 | 0.011531 | 0.011867 | 0.011867 | 0.011530 | 0.011632 | 0.011665 |
| 0.011430 | 0.011430 | 0.011463 | 0.011497 | 0.011430 | 0.011598 | 0.011598 |
| 0.011698 | 0.011698 | 0.011631 | 0.011732 | 0.011900 | 0.011734 | 0.011497 |
| 0.011564 | 0.011631 | 0.011598 | 0.011497 | 0.011564 | 0.011530 | 0.011564 |
| 0.011632 | 0.011631 | 0.011665 | 0.011564 | 0.011464 | 0.011732 | 0.011631 |

|          |          |          |          |          |          |          |
|----------|----------|----------|----------|----------|----------|----------|
| 0.011568 | 0.011463 | 0.011564 | 0.011665 | 0.011564 | 0.011699 | 0.011732 |
| 0.011900 | 0.011607 | 0.011765 | 0.000000 | 0.011597 | 0.011833 | 0.011464 |
| 0.011633 | 0.011531 | 0.011497 | 0.011497 | 0.011564 | 0.011463 | 0.011564 |
| 0.011598 | 0.011631 | 0.011530 | 0.011564 | 0.011531 | 0.011867 | 0.011867 |
| 0.011530 | 0.011632 | 0.011698 | 0.011631 | 0.012272 | 0.011703 | 0.011623 |
| 0.011693 | 0.011650 | 0.011763 | 0.011649 | 0.011760 | 0.011681 | 0.011647 |
| 0.012228 | 0.011545 | 0.011677 | 0.011614 | 0.011887 | 0.011741 | 0.011775 |
| 0.012251 | 0.011739 | 0.011804 | 0.011866 | 0.011732 | 0.011732 | 0.011770 |
| 0.011429 | 0.011530 | 0.011732 | 0.011698 | 0.011702 | 0.011698 | 0.011667 |
| 0.011530 | 0.011396 | 0.011429 | 0.011530 | 0.011362 | 0.011497 | 0.011396 |
| 0.011530 | 0.011564 | 0.011463 | 0.011429 | 0.011530 | 0.011463 | 0.011497 |
| 0.011497 | 0.011429 | 0.011497 | 0.011530 | 0.011429 | 0.011564 | 0.011665 |
| 0.011564 | 0.011631 | 0.011564 | 0.011564 | 0.011497 | 0.011900 | 0.011530 |
| 0.011582 | 0.011497 | 0.011732 | 0.011739 | 0.011530 | 0.011597 | 0.011597 |
| 0.011598 | 0.011463 | 0.011497 | 0.011463 | 0.011631 | 0.011631 | 0.011564 |
| 0.011564 | 0.011698 | 0.011866 | 0.011597 | 0.011799 | 0.011799 | 0.011664 |
| 0.011497 | 0.011564 | 0.011598 | 0.012001 | 0.011564 | 0.011530 | 0.011564 |
| 0.011597 | 0.011530 | 0.011530 | 0.011833 | 0.011698 | 0.011799 | 0.011530 |
| 0.011631 | 0.011698 | 0.011564 | 0.011631 | 0.011597 | 0.011463 | 0.011799 |
| 0.011564 | 0.011530 | 0.011530 | 0.011698 | 0.011530 | 0.011631 | 0.011866 |
| 0.011564 | 0.011943 | 0.011933 | 0.011711 | 0.011455 | 0.011638 | 0.011525 |
| 0.011390 | 0.011917 | 0.011482 | 0.011686 | 0.011451 | 0.011569 | 0.011592 |
| 0.011723 | 0.011324 | 0.011561 | 0.011457 | 0.011438 | 0.011596 | 0.011587 |
| 0.011588 | 0.011454 | 0.011624 | 0.011553 | 0.011566 | 0.011698 | 0.011766 |
| 0.011766 | 0.011632 | 0.011737 | 0.011738 | 0.011874 | 0.011873 | 0.011564 |
| 0.011799 | 0.011665 | 0.011530 | 0.011631 | 0.011430 | 0.011665 | 0.011463 |
| 0.011530 | 0.011530 | 0.011497 | 0.011463 | 0.011497 | 0.011463 | 0.011564 |
| 0.011549 | 0.011550 | 0.011540 | 0.011574 | 0.011711 | 0.011607 | 0.011675 |
| 0.011674 | 0.011598 | 0.011430 | 0.011384 | 0.011535 | 0.011704 | 0.011705 |
| 0.011497 | 0.011568 | 0.011801 | 0.011770 | 0.011699 | 0.011733 | 0.011664 |
| 0.011597 | 0.011665 | 0.011664 | 0.011564 | 0.012136 | 0.011732 | 0.011799 |
| 0.011833 | 0.011915 | 0.011538 | 0.011615 | 0.011497 | 0.011698 | 0.011665 |
| 0.011700 | 0.011732 | 0.011732 | 0.011732 | 0.011886 | 0.011866 | 0.011511 |
| 0.011398 | 0.011407 | 0.011503 | 0.011468 | 0.011573 | 0.011433 | 0.011740 |
| 0.011541 | 0.011674 | 0.011489 | 0.011585 | 0.011531 | 0.011539 | 0.011430 |
| 0.011463 | 0.011463 | 0.011463 | 0.011497 | 0.011698 | 0.011665 | 0.011598 |
| 0.011698 | 0.011766 | 0.011497 | 0.011497 | 0.011530 | 0.011530 | 0.011533 |
| 0.011601 | 0.011530 | 0.011530 | 0.011566 | 0.011698 | 0.011766 | 0.011766 |
| 0.011632 | 0.011737 | 0.011738 | 0.011874 | 0.011873 | 0.011564 | 0.011732 |
| 0.011665 | 0.011665 | 0.011500 | 0.011687 | 0.011616 | 0.011639 | 0.011516 |
| 0.011611 | 0.011926 | 0.011568 | 0.011570 | 0.011396 | 0.011598 | 0.011463 |
| 0.011564 | 0.011564 | 0.011463 | 0.011566 | 0.011665 | 0.011669 | 0.011564 |
| 0.011463 | 0.011398 | 0.011530 | 0.011463 | 0.011396 | 0.011502 | 0.011598 |
| 0.011564 | 0.011497 | 0.011530 | 0.011564 | 0.011531 | 0.011463 | 0.011665 |
| 0.011530 | 0.011564 | 0.011564 | 0.011497 | 0.011564 | 0.011799 | 0.011463 |
| 0.011497 | 0.011900 | 0.011497 | 0.011463 | 0.011497 | 0.011866 | 0.011489 |
| 0.011960 | 0.011485 | 0.011461 | 0.011745 | 0.011793 | 0.011706 | 0.011395 |
| 0.011428 | 0.011664 | 0.011765 | 0.011875 | 0.011734 | 0.011873 | 0.012002 |
| 0.011902 | 0.011940 | 0.011900 | 0.012154 | 0.011866 | 0.012742 | 0.011903 |
| 0.012642 | 0.012410 | 0.012544 | 0.012816 | 0.011866 | 0.011564 | 0.011867 |
| 0.012306 | 0.012241 | 0.011833 | 0.011732 | 0.011800 | 0.011800 | 0.011771 |
| 0.011664 | 0.011671 | 0.011732 | 0.011699 | 0.012070 | 0.012135 | 0.012137 |
| 0.012036 | 0.012137 | 0.012241 | 0.012008 | 0.012307 | 0.012314 | 0.012374 |
| 0.012375 | 0.012408 | 0.012358 | 0.012375 | 0.012376 | 0.011597 | 0.011901 |
| 0.011969 | 0.012472 | 0.011976 | 0.012203 | 0.012677 | 0.011740 | 0.011632 |
| 0.011597 | 0.011597 | 0.012002 | 0.012130 | 0.012222 | 0.011933 | 0.011600 |
| S238     | 0.011799 | 0.011799 | 0.012135 | 0.011899 | 0.011899 | 0.011967 |
| 0.011807 | 0.011739 | 0.011967 | 0.011396 | 0.011463 | 0.011430 | 0.011396 |
| 0.011429 | 0.011597 | 0.011396 | 0.011362 | 0.011496 | 0.011463 | 0.011429 |
| 0.011396 | 0.011429 | 0.011530 | 0.011329 | 0.011430 | 0.011429 | 0.011773 |

|          |          |          |          |          |          |          |
|----------|----------|----------|----------|----------|----------|----------|
| 0.011664 | 0.011429 | 0.011329 | 0.011564 | 0.011496 | 0.011463 | 0.011497 |
| 0.011463 | 0.011564 | 0.011463 | 0.011463 | 0.011429 | 0.011463 | 0.011631 |
| 0.011396 | 0.011463 | 0.011429 | 0.011429 | 0.011530 | 0.011496 | 0.011496 |
| 0.011463 | 0.011564 | 0.011530 | 0.011799 | 0.011396 | 0.011732 | 0.011396 |
| 0.011429 | 0.011530 | 0.011597 | 0.011732 | 0.011832 | 0.011530 | 0.011631 |
| 0.011496 | 0.011564 | 0.011463 | 0.011698 | 0.011933 | 0.011463 | 0.011530 |
| 0.011429 | 0.011530 | 0.011497 | 0.011564 | 0.011496 | 0.011496 | 0.011496 |
| 0.011396 | 0.011429 | 0.011396 | 0.011497 | 0.011463 | 0.011498 | 0.011564 |
| 0.011497 | 0.011463 | 0.011530 | 0.011429 | 0.011564 | 0.011396 | 0.011463 |
| 0.011631 | 0.011564 | 0.011799 | 0.011631 | 0.011463 | 0.011631 | 0.011463 |
| 0.011616 | 0.011845 | 0.011702 | 0.011334 | 0.011396 | 0.011465 | 0.011572 |
| 0.012231 | 0.011721 | 0.011390 | 0.011631 | 0.011698 | 0.011496 | 0.011597 |
| 0.011530 | 0.011496 | 0.011564 | 0.011463 | 0.011564 | 0.011496 | 0.011496 |
| 0.011463 | 0.011564 | 0.011765 | 0.011631 | 0.011530 | 0.011497 | 0.011430 |
| 0.011396 | 0.011396 | 0.011463 | 0.011430 | 0.011631 | 0.011597 | 0.011530 |
| 0.011631 | 0.011698 | 0.011429 | 0.011429 | 0.011463 | 0.011463 | 0.011465 |
| 0.011533 | 0.011463 | 0.011463 | 0.011348 | 0.011422 | 0.011376 | 0.011464 |
| 0.011467 | 0.011404 | 0.011466 | 0.011440 | 0.011366 | 0.011403 | 0.011432 |
| 0.011708 | 0.011474 | 0.011508 | 0.011396 | 0.011406 | 0.011531 | 0.011497 |
| 0.011565 | 0.011498 | 0.011497 | 0.011597 | 0.011530 | 0.011765 | 0.011698 |
| 0.011731 | 0.011598 | 0.011463 | 0.011564 | 0.011362 | 0.011597 | 0.011396 |
| 0.011463 | 0.011463 | 0.011429 | 0.011396 | 0.011429 | 0.011396 | 0.011497 |
| 0.011463 | 0.011564 | 0.011497 | 0.011396 | 0.011498 | 0.011598 | 0.011601 |
| 0.011598 | 0.011497 | 0.011396 | 0.011330 | 0.011463 | 0.011396 | 0.011329 |
| 0.011434 | 0.011598 | 0.011396 | 0.011598 | 0.011362 | 0.011463 | 0.011430 |
| 0.011530 | 0.011429 | 0.011463 | 0.011430 | 0.011463 | 0.011329 | 0.011463 |
| 0.011497 | 0.011430 | 0.011497 | 0.011429 | 0.011463 | 0.011497 | 0.011732 |
| 0.011833 | 0.011765 | 0.011833 | 0.011600 | 0.011833 | 0.011463 | 0.011362 |
| 0.011465 | 0.011748 | 0.011655 | 0.011369 | 0.011841 | 0.011333 | 0.011414 |
| 0.011841 | 0.011706 | 0.011631 | 0.011832 | 0.011538 | 0.011698 | 0.011597 |
| 0.000000 | 0.011765 | 0.011629 | 0.011390 | 0.011479 | 0.011497 | 0.011568 |
| 0.011665 | 0.011566 | 0.011703 | 0.011771 | 0.011698 | 0.011765 | 0.011873 |
| 0.011602 | 0.011773 | 0.011636 | 0.011635 | 0.011868 | 0.011362 | 0.011566 |
| 0.011530 | 0.011463 | 0.011362 | 0.011362 | 0.011429 | 0.011429 | 0.011496 |
| 0.011429 | 0.011497 | 0.011396 | 0.011496 | 0.011429 | 0.011429 | 0.011429 |
| 0.011429 | 0.011866 | 0.011765 | 0.011799 | 0.011329 | 0.011429 | 0.011463 |
| 0.011463 | 0.011429 | 0.011497 | 0.011530 | 0.011396 | 0.011396 | 0.011396 |
| 0.011933 | 0.011564 | 0.011564 | 0.011362 | 0.011463 | 0.011564 | 0.011396 |
| 0.011396 | 0.011463 | 0.011429 | 0.011597 | 0.011396 | 0.011530 | 0.011664 |
| 0.011597 | 0.011429 | 0.011429 | 0.011362 | 0.011362 | 0.011530 | 0.011463 |
| 0.011362 | 0.011463 | 0.011329 | 0.011362 | 0.011497 | 0.011631 | 0.011396 |
| 0.011363 | 0.011496 | 0.011430 | 0.011329 | 0.011664 | 0.011329 | 0.011497 |
| 0.011574 | 0.011396 | 0.011698 | 0.011530 | 0.011564 | 0.011429 | 0.011463 |
| 0.011396 | 0.011732 | 0.011329 | 0.011597 | 0.011396 | 0.011396 | 0.011329 |
| 0.011564 | 0.011766 | 0.011463 | 0.011530 | 0.011362 | 0.011765 | 0.011396 |
| 0.011396 | 0.011396 | 0.011429 | 0.011530 | 0.011429 | 0.011530 | 0.011597 |
| 0.011597 | 0.011564 | 0.011463 | 0.011564 | 0.011530 | 0.011396 | 0.011362 |
| 0.011396 | 0.011396 | 0.011463 | 0.011396 | 0.011362 | 0.011530 | 0.011396 |
| 0.011429 | 0.011429 | 0.011564 | 0.011597 | 0.011496 | 0.011429 | 0.011429 |
| 0.011496 | 0.011429 | 0.011530 | 0.011396 | 0.011530 | 0.011631 | 0.011933 |
| 0.011429 | 0.011832 | 0.011371 | 0.017974 | 0.011453 | 0.011549 | 0.011793 |
| 0.011752 | 0.011799 | 0.011532 | 0.011582 | 0.011829 | 0.011820 | 0.011485 |
| 0.011677 | 0.011671 | 0.011333 | 0.011395 | 0.011451 | 0.011406 | 0.011361 |
| 0.011717 | 0.011619 | 0.011616 | 0.011325 | 0.011564 | 0.011597 | 0.011601 |
| 0.011472 | 0.011564 | 0.011564 | 0.011530 | 0.011497 | 0.011497 | 0.011463 |
| 0.011497 | 0.011429 | 0.011463 | 0.011497 | 0.011463 | 0.011396 | 0.011429 |
| 0.011429 | 0.011497 | 0.011396 | 0.011497 | 0.011530 | 0.011564 | 0.011463 |
| 0.011496 | 0.011463 | 0.011799 | 0.011799 | 0.011463 | 0.011497 | 0.011598 |
| 0.011362 | 0.011362 | 0.011396 | 0.011497 | 0.011362 | 0.011597 | 0.011597 |
| 0.011631 | 0.011631 | 0.011564 | 0.011664 | 0.011833 | 0.011599 | 0.011497 |

|          |          |          |          |          |          |          |
|----------|----------|----------|----------|----------|----------|----------|
| 0.011497 | 0.011564 | 0.011597 | 0.011430 | 0.011497 | 0.011463 | 0.011430 |
| 0.011564 | 0.011564 | 0.011597 | 0.011564 | 0.011464 | 0.011665 | 0.011631 |
| 0.011500 | 0.011396 | 0.011497 | 0.011598 | 0.011497 | 0.011631 | 0.011664 |
| 0.011832 | 0.011538 | 0.011698 | 0.011597 | 0.000000 | 0.011765 | 0.011396 |
| 0.011498 | 0.011464 | 0.011429 | 0.011429 | 0.011497 | 0.011396 | 0.011497 |
| 0.011530 | 0.011564 | 0.011463 | 0.011496 | 0.011463 | 0.011799 | 0.011799 |
| 0.011463 | 0.011497 | 0.011631 | 0.011564 | 0.012204 | 0.011596 | 0.011552 |
| 0.011623 | 0.011546 | 0.011693 | 0.011580 | 0.011655 | 0.011612 | 0.011543 |
| 0.012159 | 0.011475 | 0.011608 | 0.011544 | 0.011818 | 0.011672 | 0.011775 |
| 0.012182 | 0.011663 | 0.011736 | 0.011799 | 0.011664 | 0.011664 | 0.011702 |
| 0.011362 | 0.011530 | 0.011664 | 0.011631 | 0.011634 | 0.011631 | 0.011599 |
| 0.011463 | 0.011396 | 0.011429 | 0.011463 | 0.011362 | 0.011429 | 0.011329 |
| 0.011463 | 0.011496 | 0.011396 | 0.011362 | 0.011463 | 0.011396 | 0.011429 |
| 0.011362 | 0.011362 | 0.011429 | 0.011463 | 0.011362 | 0.011564 | 0.011597 |
| 0.011497 | 0.011564 | 0.011496 | 0.011497 | 0.011429 | 0.011832 | 0.011463 |
| 0.011512 | 0.011429 | 0.011665 | 0.011671 | 0.011530 | 0.011530 | 0.011530 |
| 0.011530 | 0.011463 | 0.011429 | 0.011463 | 0.011564 | 0.011564 | 0.011496 |
| 0.011496 | 0.011631 | 0.011799 | 0.011530 | 0.011732 | 0.011732 | 0.011597 |
| 0.011429 | 0.011496 | 0.011530 | 0.011933 | 0.011497 | 0.011530 | 0.011497 |
| 0.011530 | 0.011463 | 0.011463 | 0.011765 | 0.011698 | 0.011732 | 0.011463 |
| 0.011564 | 0.011631 | 0.011496 | 0.011564 | 0.011530 | 0.011396 | 0.011732 |
| 0.011496 | 0.011463 | 0.011463 | 0.011564 | 0.011463 | 0.011564 | 0.011799 |
| 0.011496 | 0.011875 | 0.011866 | 0.011670 | 0.011455 | 0.011570 | 0.011525 |
| 0.011335 | 0.011839 | 0.011411 | 0.011641 | 0.011451 | 0.011518 | 0.011591 |
| 0.011723 | 0.011324 | 0.011561 | 0.011324 | 0.011438 | 0.011596 | 0.011547 |
| 0.011550 | 0.011454 | 0.011518 | 0.011483 | 0.011498 | 0.011631 | 0.011698 |
| 0.011698 | 0.011565 | 0.011669 | 0.011670 | 0.011806 | 0.011838 | 0.011497 |
| 0.011731 | 0.011598 | 0.011463 | 0.011564 | 0.011362 | 0.011597 | 0.011396 |
| 0.011463 | 0.011463 | 0.011429 | 0.011396 | 0.011429 | 0.011396 | 0.011497 |
| 0.011444 | 0.011480 | 0.011403 | 0.011505 | 0.011642 | 0.011607 | 0.011538 |
| 0.011605 | 0.011531 | 0.011356 | 0.011312 | 0.011467 | 0.011636 | 0.011637 |
| 0.011430 | 0.011501 | 0.011734 | 0.011702 | 0.011632 | 0.011599 | 0.011597 |
| 0.011530 | 0.011597 | 0.011597 | 0.011496 | 0.012068 | 0.011664 | 0.011732 |
| 0.011766 | 0.011844 | 0.011435 | 0.011511 | 0.011429 | 0.011631 | 0.011597 |
| 0.011632 | 0.011664 | 0.011664 | 0.011664 | 0.011768 | 0.011799 | 0.011442 |
| 0.011331 | 0.011337 | 0.011435 | 0.011400 | 0.011504 | 0.011359 | 0.011672 |
| 0.011472 | 0.011543 | 0.011298 | 0.011510 | 0.011464 | 0.011471 | 0.011430 |
| 0.011396 | 0.011396 | 0.011463 | 0.011430 | 0.011631 | 0.011597 | 0.011530 |
| 0.011631 | 0.011698 | 0.011429 | 0.011429 | 0.011463 | 0.011463 | 0.011465 |
| 0.011533 | 0.011463 | 0.011463 | 0.011498 | 0.011631 | 0.011698 | 0.011698 |
| 0.011565 | 0.011669 | 0.011670 | 0.011806 | 0.011838 | 0.011497 | 0.011664 |
| 0.011597 | 0.011597 | 0.011432 | 0.011617 | 0.011547 | 0.011571 | 0.011411 |
| 0.011611 | 0.011789 | 0.011653 | 0.011502 | 0.011396 | 0.011598 | 0.011463 |
| 0.011564 | 0.011497 | 0.011396 | 0.011498 | 0.011598 | 0.011601 | 0.011497 |
| 0.011396 | 0.011330 | 0.011463 | 0.011396 | 0.011329 | 0.011434 | 0.011598 |
| 0.011497 | 0.011429 | 0.011463 | 0.011497 | 0.011463 | 0.011396 | 0.011597 |
| 0.011463 | 0.011497 | 0.011496 | 0.011429 | 0.011496 | 0.011732 | 0.011396 |
| 0.011429 | 0.011832 | 0.011429 | 0.011463 | 0.011429 | 0.011799 | 0.011403 |
| 0.011847 | 0.011400 | 0.011511 | 0.011624 | 0.011712 | 0.011599 | 0.011311 |
| 0.011480 | 0.011597 | 0.011631 | 0.011739 | 0.011599 | 0.011737 | 0.011867 |
| 0.011767 | 0.011804 | 0.011765 | 0.012086 | 0.011799 | 0.012674 | 0.011835 |
| 0.012507 | 0.012342 | 0.012476 | 0.012748 | 0.011799 | 0.011497 | 0.011732 |
| 0.012238 | 0.012106 | 0.011765 | 0.011665 | 0.011733 | 0.011733 | 0.011703 |
| 0.011597 | 0.011603 | 0.011664 | 0.011632 | 0.012002 | 0.012068 | 0.012069 |
| 0.011969 | 0.012069 | 0.012173 | 0.011940 | 0.012239 | 0.012246 | 0.012306 |
| 0.012307 | 0.012340 | 0.012289 | 0.012307 | 0.012308 | 0.011530 | 0.011833 |
| 0.011901 | 0.012404 | 0.011908 | 0.012135 | 0.012609 | 0.011671 | 0.011564 |
| 0.011530 | 0.011530 | 0.012001 | 0.011965 | 0.012151 | 0.011866 | 0.011532 |
| S239     | 0.011967 | 0.011967 | 0.012303 | 0.012068 | 0.012068 | 0.012135 |
| 0.011977 | 0.011909 | 0.012068 | 0.011564 | 0.011631 | 0.011599 | 0.011564 |

|          |          |          |          |          |          |          |
|----------|----------|----------|----------|----------|----------|----------|
| 0.011597 | 0.011765 | 0.011564 | 0.011597 | 0.011664 | 0.011631 | 0.011597 |
| 0.011564 | 0.011597 | 0.011698 | 0.011564 | 0.011598 | 0.011597 | 0.011943 |
| 0.011832 | 0.011597 | 0.011496 | 0.011732 | 0.011664 | 0.011631 | 0.011664 |
| 0.011631 | 0.011732 | 0.011631 | 0.011631 | 0.011664 | 0.011631 | 0.011799 |
| 0.011564 | 0.011631 | 0.011664 | 0.011597 | 0.011698 | 0.011664 | 0.011664 |
| 0.011631 | 0.011799 | 0.011699 | 0.011967 | 0.011631 | 0.011900 | 0.011631 |
| 0.011597 | 0.011698 | 0.011765 | 0.011900 | 0.012000 | 0.011698 | 0.011799 |
| 0.011664 | 0.011732 | 0.011631 | 0.011866 | 0.012101 | 0.011631 | 0.011698 |
| 0.011597 | 0.011698 | 0.011664 | 0.011664 | 0.011664 | 0.011664 | 0.011664 |
| 0.011564 | 0.011597 | 0.011564 | 0.011664 | 0.011631 | 0.011666 | 0.011732 |
| 0.011664 | 0.011631 | 0.011698 | 0.011597 | 0.011732 | 0.011564 | 0.011631 |
| 0.011799 | 0.011732 | 0.011967 | 0.011799 | 0.011631 | 0.011866 | 0.011631 |
| 0.011802 | 0.012032 | 0.011777 | 0.011529 | 0.011471 | 0.011649 | 0.011690 |
| 0.012341 | 0.011721 | 0.011472 | 0.011664 | 0.011597 | 0.011664 | 0.011765 |
| 0.011698 | 0.011664 | 0.011732 | 0.011631 | 0.011732 | 0.011664 | 0.011664 |
| 0.011631 | 0.011664 | 0.011933 | 0.011799 | 0.011698 | 0.011665 | 0.011597 |
| 0.011564 | 0.011564 | 0.011631 | 0.011597 | 0.011799 | 0.011765 | 0.011698 |
| 0.011799 | 0.011866 | 0.011597 | 0.011597 | 0.011631 | 0.011631 | 0.011634 |
| 0.011703 | 0.011631 | 0.011631 | 0.011528 | 0.011530 | 0.011551 | 0.011632 |
| 0.011636 | 0.011576 | 0.011540 | 0.011612 | 0.011536 | 0.011574 | 0.011601 |
| 0.011852 | 0.011646 | 0.011646 | 0.011564 | 0.011544 | 0.011699 | 0.011665 |
| 0.011733 | 0.011667 | 0.011665 | 0.011765 | 0.011698 | 0.012068 | 0.011866 |
| 0.011900 | 0.011765 | 0.011631 | 0.011732 | 0.011530 | 0.011765 | 0.011564 |
| 0.011631 | 0.011631 | 0.011597 | 0.011564 | 0.011597 | 0.011564 | 0.011664 |
| 0.011631 | 0.011732 | 0.011665 | 0.011564 | 0.011667 | 0.011765 | 0.011770 |
| 0.011765 | 0.011665 | 0.011564 | 0.011498 | 0.011631 | 0.011564 | 0.011497 |
| 0.011604 | 0.011765 | 0.011564 | 0.011765 | 0.011530 | 0.011631 | 0.011597 |
| 0.011698 | 0.011597 | 0.011631 | 0.011597 | 0.011631 | 0.011497 | 0.011631 |
| 0.011665 | 0.011597 | 0.011665 | 0.011564 | 0.011631 | 0.011665 | 0.011900 |
| 0.012000 | 0.011933 | 0.012001 | 0.011667 | 0.012001 | 0.011631 | 0.011597 |
| 0.011634 | 0.011950 | 0.011609 | 0.011472 | 0.012010 | 0.011503 | 0.011611 |
| 0.012011 | 0.011910 | 0.011597 | 0.012001 | 0.011709 | 0.011597 | 0.011833 |
| 0.011765 | 0.000000 | 0.011806 | 0.011513 | 0.011689 | 0.011665 | 0.011737 |
| 0.011833 | 0.011735 | 0.011736 | 0.011940 | 0.011866 | 0.011933 | 0.012043 |
| 0.011771 | 0.011943 | 0.011873 | 0.011804 | 0.012070 | 0.011530 | 0.011734 |
| 0.011698 | 0.011631 | 0.011530 | 0.011530 | 0.011597 | 0.011597 | 0.011664 |
| 0.011597 | 0.011664 | 0.011564 | 0.011664 | 0.011597 | 0.011597 | 0.011664 |
| 0.011597 | 0.012034 | 0.011933 | 0.011967 | 0.011496 | 0.011597 | 0.011631 |
| 0.011631 | 0.011597 | 0.011664 | 0.011698 | 0.011564 | 0.011564 | 0.011564 |
| 0.012101 | 0.011732 | 0.011732 | 0.011530 | 0.011631 | 0.011799 | 0.011564 |
| 0.011564 | 0.011631 | 0.011597 | 0.011765 | 0.011564 | 0.011698 | 0.011832 |
| 0.011765 | 0.011597 | 0.011597 | 0.011530 | 0.011530 | 0.011698 | 0.011631 |
| 0.011530 | 0.011631 | 0.011497 | 0.011530 | 0.011664 | 0.011799 | 0.011564 |
| 0.011531 | 0.011664 | 0.011564 | 0.011497 | 0.011832 | 0.011497 | 0.011664 |
| 0.011745 | 0.011564 | 0.011866 | 0.011698 | 0.011732 | 0.011597 | 0.011698 |
| 0.011564 | 0.011900 | 0.011496 | 0.011765 | 0.011564 | 0.011564 | 0.011496 |
| 0.011732 | 0.011900 | 0.011631 | 0.011698 | 0.011530 | 0.011933 | 0.011564 |
| 0.011564 | 0.011564 | 0.011597 | 0.011698 | 0.011597 | 0.011698 | 0.011765 |
| 0.011765 | 0.011732 | 0.011631 | 0.011732 | 0.011664 | 0.011564 | 0.011530 |
| 0.011564 | 0.011564 | 0.011631 | 0.011564 | 0.011530 | 0.011698 | 0.011564 |
| 0.011597 | 0.011597 | 0.011732 | 0.011765 | 0.011664 | 0.011597 | 0.011597 |
| 0.011664 | 0.011597 | 0.011698 | 0.011564 | 0.011698 | 0.011597 | 0.012101 |
| 0.011597 | 0.012000 | 0.011578 | 0.017974 | 0.011453 | 0.011794 | 0.011932 |
| 0.011891 | 0.011940 | 0.011636 | 0.011640 | 0.011994 | 0.011958 | 0.011668 |
| 0.011772 | 0.011793 | 0.011489 | 0.011563 | 0.011529 | 0.011603 | 0.011619 |
| 0.011717 | 0.011693 | 0.011728 | 0.011523 | 0.011732 | 0.011765 | 0.011770 |
| 0.011644 | 0.011732 | 0.011664 | 0.011698 | 0.011664 | 0.011665 | 0.011631 |
| 0.011597 | 0.011597 | 0.011429 | 0.011665 | 0.011631 | 0.011564 | 0.011597 |
| 0.011597 | 0.011597 | 0.011564 | 0.011665 | 0.011698 | 0.011732 | 0.011631 |
| 0.011664 | 0.011631 | 0.011967 | 0.011967 | 0.011698 | 0.011733 | 0.011765 |

|          |          |          |          |          |          |          |
|----------|----------|----------|----------|----------|----------|----------|
| 0.011530 | 0.011530 | 0.011564 | 0.011665 | 0.011530 | 0.011765 | 0.011765 |
| 0.011530 | 0.011597 | 0.011732 | 0.011564 | 0.012001 | 0.011565 | 0.011664 |
| 0.011463 | 0.011732 | 0.011765 | 0.011597 | 0.011665 | 0.011631 | 0.011597 |
| 0.011531 | 0.011530 | 0.011564 | 0.011732 | 0.011633 | 0.011833 | 0.011799 |
| 0.011670 | 0.011564 | 0.011665 | 0.011765 | 0.011665 | 0.011799 | 0.011832 |
| 0.012001 | 0.011709 | 0.011597 | 0.011833 | 0.011765 | 0.000000 | 0.011564 |
| 0.011667 | 0.011632 | 0.011597 | 0.011597 | 0.011597 | 0.011564 | 0.011665 |
| 0.011698 | 0.011732 | 0.011631 | 0.011664 | 0.011631 | 0.011967 | 0.011967 |
| 0.011698 | 0.011733 | 0.011799 | 0.011732 | 0.012372 | 0.011560 | 0.011728 |
| 0.011798 | 0.011546 | 0.011869 | 0.011753 | 0.011725 | 0.011785 | 0.011543 |
| 0.012331 | 0.011649 | 0.011780 | 0.011717 | 0.011990 | 0.011843 | 0.011945 |
| 0.012352 | 0.011852 | 0.011838 | 0.011866 | 0.011832 | 0.011832 | 0.011804 |
| 0.011530 | 0.011698 | 0.011832 | 0.011799 | 0.011804 | 0.011799 | 0.011768 |
| 0.011631 | 0.011564 | 0.011597 | 0.011631 | 0.011530 | 0.011597 | 0.011496 |
| 0.011631 | 0.011664 | 0.011564 | 0.011530 | 0.011631 | 0.011564 | 0.011597 |
| 0.011597 | 0.011530 | 0.011597 | 0.011631 | 0.011530 | 0.011732 | 0.011765 |
| 0.011664 | 0.011732 | 0.011664 | 0.011664 | 0.011597 | 0.012000 | 0.011631 |
| 0.011687 | 0.011597 | 0.011833 | 0.011841 | 0.011698 | 0.011698 | 0.011698 |
| 0.011698 | 0.011631 | 0.011597 | 0.011631 | 0.011732 | 0.011732 | 0.011664 |
| 0.011664 | 0.011799 | 0.011967 | 0.011698 | 0.011900 | 0.011900 | 0.011765 |
| 0.011597 | 0.011664 | 0.011698 | 0.012101 | 0.011665 | 0.011698 | 0.011664 |
| 0.011496 | 0.011631 | 0.011631 | 0.011933 | 0.011866 | 0.011900 | 0.011631 |
| 0.011732 | 0.011799 | 0.011664 | 0.011732 | 0.011698 | 0.011564 | 0.011900 |
| 0.011664 | 0.011631 | 0.011631 | 0.011799 | 0.011631 | 0.011732 | 0.011967 |
| 0.011664 | 0.012045 | 0.012034 | 0.011751 | 0.011455 | 0.011740 | 0.011628 |
| 0.011554 | 0.011995 | 0.011517 | 0.011685 | 0.011646 | 0.011671 | 0.011644 |
| 0.011723 | 0.011389 | 0.011617 | 0.011390 | 0.011491 | 0.011529 | 0.011668 |
| 0.011738 | 0.011572 | 0.011694 | 0.011624 | 0.011667 | 0.011799 | 0.011866 |
| 0.011866 | 0.011733 | 0.011838 | 0.011840 | 0.011942 | 0.011979 | 0.011664 |
| 0.011900 | 0.011765 | 0.011631 | 0.011732 | 0.011530 | 0.011765 | 0.011564 |
| 0.011631 | 0.011631 | 0.011597 | 0.011564 | 0.011597 | 0.011564 | 0.011664 |
| 0.011479 | 0.011620 | 0.011642 | 0.011677 | 0.011813 | 0.011778 | 0.011709 |
| 0.011776 | 0.011699 | 0.011466 | 0.011456 | 0.011636 | 0.011806 | 0.011807 |
| 0.011598 | 0.011670 | 0.011902 | 0.011871 | 0.011531 | 0.011834 | 0.011765 |
| 0.011698 | 0.011765 | 0.011765 | 0.011664 | 0.012236 | 0.011564 | 0.011631 |
| 0.011934 | 0.011986 | 0.011640 | 0.011718 | 0.011597 | 0.011799 | 0.011765 |
| 0.011800 | 0.011832 | 0.011564 | 0.011564 | 0.012043 | 0.011967 | 0.011615 |
| 0.011500 | 0.011510 | 0.011605 | 0.011570 | 0.011675 | 0.011545 | 0.011842 |
| 0.011643 | 0.011718 | 0.011536 | 0.011697 | 0.011632 | 0.011710 | 0.011597 |
| 0.011564 | 0.011564 | 0.011631 | 0.011597 | 0.011799 | 0.011765 | 0.011698 |
| 0.011799 | 0.011866 | 0.011597 | 0.011597 | 0.011631 | 0.011631 | 0.011634 |
| 0.011703 | 0.011631 | 0.011631 | 0.011667 | 0.011799 | 0.011866 | 0.011866 |
| 0.011733 | 0.011838 | 0.011840 | 0.011942 | 0.011979 | 0.011664 | 0.011832 |
| 0.011765 | 0.011765 | 0.011601 | 0.011756 | 0.011720 | 0.011741 | 0.011586 |
| 0.011714 | 0.012017 | 0.011653 | 0.011672 | 0.011564 | 0.011765 | 0.011631 |
| 0.011732 | 0.011665 | 0.011564 | 0.011667 | 0.011765 | 0.011770 | 0.011665 |
| 0.011564 | 0.011498 | 0.011631 | 0.011564 | 0.011497 | 0.011604 | 0.011765 |
| 0.011597 | 0.011597 | 0.011429 | 0.011665 | 0.011631 | 0.011564 | 0.011766 |
| 0.011631 | 0.011664 | 0.011664 | 0.011597 | 0.011664 | 0.011900 | 0.011564 |
| 0.011597 | 0.012000 | 0.011597 | 0.011631 | 0.011597 | 0.011967 | 0.011446 |
| 0.011903 | 0.011485 | 0.011511 | 0.011745 | 0.011834 | 0.011742 | 0.011436 |
| 0.011427 | 0.011765 | 0.011866 | 0.011977 | 0.011835 | 0.011940 | 0.012103 |
| 0.012002 | 0.012041 | 0.012000 | 0.012222 | 0.011967 | 0.012842 | 0.012004 |
| 0.012675 | 0.012511 | 0.012645 | 0.012849 | 0.011967 | 0.011665 | 0.011967 |
| 0.012407 | 0.012308 | 0.011933 | 0.011833 | 0.011901 | 0.011901 | 0.011804 |
| 0.011765 | 0.011738 | 0.011832 | 0.011800 | 0.012170 | 0.012236 | 0.012238 |
| 0.012137 | 0.012237 | 0.012342 | 0.012075 | 0.012407 | 0.012415 | 0.012474 |
| 0.012475 | 0.012509 | 0.012425 | 0.012475 | 0.012477 | 0.011698 | 0.012001 |
| 0.012069 | 0.012573 | 0.012078 | 0.012304 | 0.012777 | 0.011841 | 0.011733 |
| 0.011664 | 0.011698 | 0.012169 | 0.012295 | 0.012327 | 0.012034 | 0.011700 |

|          |          |          |          |          |          |          |
|----------|----------|----------|----------|----------|----------|----------|
| S240     | 0.011664 | 0.011664 | 0.012056 | 0.011842 | 0.011842 | 0.011913 |
| 0.011852 | 0.011780 | 0.011949 | 0.011416 | 0.011486 | 0.011452 | 0.011415 |
| 0.011451 | 0.011629 | 0.011415 | 0.011380 | 0.011486 | 0.011486 | 0.011451 |
| 0.011415 | 0.011451 | 0.011557 | 0.011416 | 0.011451 | 0.011451 | 0.011779 |
| 0.011664 | 0.011415 | 0.011344 | 0.011593 | 0.011486 | 0.011451 | 0.011522 |
| 0.011451 | 0.011593 | 0.011486 | 0.011486 | 0.011486 | 0.011486 | 0.011629 |
| 0.011415 | 0.011486 | 0.011522 | 0.011451 | 0.011557 | 0.011593 | 0.011486 |
| 0.011486 | 0.011664 | 0.011558 | 0.011842 | 0.011486 | 0.011771 | 0.011486 |
| 0.011451 | 0.011558 | 0.011593 | 0.011771 | 0.011842 | 0.011522 | 0.011664 |
| 0.011522 | 0.011593 | 0.011486 | 0.011735 | 0.011984 | 0.011451 | 0.011558 |
| 0.011415 | 0.011522 | 0.011486 | 0.011593 | 0.011486 | 0.011522 | 0.011522 |
| 0.011415 | 0.011451 | 0.011415 | 0.011522 | 0.011486 | 0.011488 | 0.011557 |
| 0.011522 | 0.011451 | 0.011558 | 0.011451 | 0.011593 | 0.011380 | 0.011486 |
| 0.011664 | 0.011593 | 0.011842 | 0.011664 | 0.011486 | 0.011735 | 0.011486 |
| 0.011687 | 0.011929 | 0.011659 | 0.011352 | 0.011378 | 0.011530 | 0.011644 |
| 0.012297 | 0.011656 | 0.011407 | 0.011735 | 0.011735 | 0.011522 | 0.011629 |
| 0.011558 | 0.011451 | 0.011451 | 0.011486 | 0.011558 | 0.011522 | 0.011415 |
| 0.011415 | 0.011593 | 0.011735 | 0.011664 | 0.011522 | 0.011522 | 0.011451 |
| 0.011416 | 0.011416 | 0.011487 | 0.011451 | 0.011664 | 0.011629 | 0.011558 |
| 0.011664 | 0.011736 | 0.011451 | 0.011451 | 0.011487 | 0.011487 | 0.011489 |
| 0.011561 | 0.011487 | 0.011487 | 0.011362 | 0.011437 | 0.011388 | 0.011487 |
| 0.011491 | 0.011424 | 0.011414 | 0.011426 | 0.011382 | 0.011421 | 0.011453 |
| 0.011737 | 0.011495 | 0.011534 | 0.011416 | 0.011427 | 0.011559 | 0.011487 |
| 0.011559 | 0.011524 | 0.011523 | 0.011451 | 0.011380 | 0.011913 | 0.011736 |
| 0.011771 | 0.011629 | 0.011487 | 0.011593 | 0.011380 | 0.011629 | 0.011416 |
| 0.011486 | 0.011486 | 0.011451 | 0.011415 | 0.011451 | 0.011416 | 0.011522 |
| 0.011487 | 0.011558 | 0.011522 | 0.011416 | 0.011488 | 0.011593 | 0.011633 |
| 0.011629 | 0.011522 | 0.011416 | 0.011346 | 0.011487 | 0.011416 | 0.011345 |
| 0.011456 | 0.011629 | 0.011416 | 0.011629 | 0.011380 | 0.011487 | 0.011451 |
| 0.011558 | 0.011451 | 0.011487 | 0.011451 | 0.011487 | 0.011345 | 0.011487 |
| 0.011522 | 0.011451 | 0.011522 | 0.011451 | 0.011380 | 0.011522 | 0.011771 |
| 0.011842 | 0.011806 | 0.011878 | 0.011631 | 0.011878 | 0.011380 | 0.011451 |
| 0.011489 | 0.011791 | 0.011533 | 0.011387 | 0.011887 | 0.011349 | 0.011518 |
| 0.011851 | 0.011781 | 0.011593 | 0.011807 | 0.011422 | 0.011735 | 0.011700 |
| 0.011629 | 0.011806 | 0.000000 | 0.011477 | 0.011524 | 0.011522 | 0.011096 |
| 0.011664 | 0.011487 | 0.011735 | 0.011807 | 0.011629 | 0.011700 | 0.011558 |
| 0.011525 | 0.011808 | 0.011595 | 0.011666 | 0.011843 | 0.011380 | 0.011523 |
| 0.011522 | 0.011451 | 0.011380 | 0.011380 | 0.011451 | 0.011451 | 0.011522 |
| 0.011451 | 0.011522 | 0.011415 | 0.011522 | 0.011451 | 0.011451 | 0.011522 |
| 0.011451 | 0.011913 | 0.011806 | 0.011842 | 0.011344 | 0.011451 | 0.011486 |
| 0.011486 | 0.011451 | 0.011486 | 0.011558 | 0.011415 | 0.011415 | 0.011415 |
| 0.011984 | 0.011593 | 0.011593 | 0.011380 | 0.011451 | 0.011664 | 0.011415 |
| 0.011415 | 0.011486 | 0.011451 | 0.011629 | 0.011415 | 0.011522 | 0.011629 |
| 0.011593 | 0.011415 | 0.011451 | 0.011344 | 0.011380 | 0.011558 | 0.011486 |
| 0.011344 | 0.011451 | 0.011344 | 0.011380 | 0.011522 | 0.011629 | 0.011415 |
| 0.011380 | 0.011486 | 0.011451 | 0.011344 | 0.011700 | 0.011344 | 0.011522 |
| 0.011594 | 0.011415 | 0.011735 | 0.011558 | 0.011593 | 0.011451 | 0.011522 |
| 0.011415 | 0.011771 | 0.011344 | 0.011629 | 0.011415 | 0.011415 | 0.011344 |
| 0.011593 | 0.011771 | 0.011486 | 0.011522 | 0.011380 | 0.011806 | 0.011415 |
| 0.011415 | 0.011415 | 0.011451 | 0.011558 | 0.011415 | 0.011522 | 0.011629 |
| 0.011629 | 0.011593 | 0.011486 | 0.011558 | 0.011557 | 0.011415 | 0.011380 |
| 0.011415 | 0.011415 | 0.011486 | 0.011415 | 0.011380 | 0.011522 | 0.011415 |
| 0.011451 | 0.011451 | 0.011558 | 0.011629 | 0.011522 | 0.011451 | 0.011380 |
| 0.011486 | 0.011451 | 0.011522 | 0.011415 | 0.011558 | 0.011629 | 0.011913 |
| 0.011451 | 0.011878 | 0.011389 | 0.018427 | 0.011465 | 0.011588 | 0.011837 |
| 0.011757 | 0.011844 | 0.011555 | 0.011485 | 0.012012 | 0.011865 | 0.011635 |
| 0.011658 | 0.011840 | 0.011391 | 0.011460 | 0.011474 | 0.011484 | 0.011429 |
| 0.011701 | 0.011655 | 0.011613 | 0.011402 | 0.011558 | 0.011451 | 0.011597 |
| 0.011488 | 0.011593 | 0.011558 | 0.011558 | 0.011522 | 0.011522 | 0.011487 |
| 0.011522 | 0.011451 | 0.011487 | 0.011522 | 0.011487 | 0.011416 | 0.011344 |

|          |          |          |          |          |          |          |
|----------|----------|----------|----------|----------|----------|----------|
| 0.011344 | 0.011522 | 0.011416 | 0.011522 | 0.011558 | 0.011593 | 0.011344 |
| 0.011522 | 0.011487 | 0.011842 | 0.011842 | 0.011558 | 0.011558 | 0.011593 |
| 0.011380 | 0.011380 | 0.011416 | 0.011522 | 0.011380 | 0.011629 | 0.011629 |
| 0.011664 | 0.011593 | 0.011593 | 0.011700 | 0.011878 | 0.011702 | 0.011522 |
| 0.011522 | 0.011558 | 0.011558 | 0.011451 | 0.011522 | 0.011487 | 0.011522 |
| 0.011594 | 0.011593 | 0.011629 | 0.011594 | 0.011488 | 0.011664 | 0.011593 |
| 0.011490 | 0.011416 | 0.011522 | 0.011558 | 0.011522 | 0.011665 | 0.011700 |
| 0.011807 | 0.011422 | 0.011735 | 0.011700 | 0.011629 | 0.011806 | 0.011416 |
| 0.011595 | 0.011416 | 0.011344 | 0.011344 | 0.011522 | 0.011416 | 0.011522 |
| 0.011558 | 0.011593 | 0.011344 | 0.011522 | 0.011487 | 0.011842 | 0.011842 |
| 0.011558 | 0.011558 | 0.011486 | 0.011415 | 0.012199 | 0.011653 | 0.011491 |
| 0.011643 | 0.011601 | 0.011706 | 0.011597 | 0.011713 | 0.011563 | 0.011568 |
| 0.012128 | 0.011383 | 0.011523 | 0.011455 | 0.011739 | 0.011666 | 0.011808 |
| 0.012164 | 0.011668 | 0.011776 | 0.011842 | 0.011700 | 0.011700 | 0.011740 |
| 0.011380 | 0.011558 | 0.011700 | 0.011664 | 0.011668 | 0.011664 | 0.011595 |
| 0.011486 | 0.011415 | 0.011451 | 0.011486 | 0.011380 | 0.011451 | 0.011344 |
| 0.011486 | 0.011522 | 0.011415 | 0.011380 | 0.011486 | 0.011415 | 0.011451 |
| 0.011451 | 0.011380 | 0.011451 | 0.011486 | 0.011380 | 0.011593 | 0.011629 |
| 0.011522 | 0.011593 | 0.011522 | 0.011522 | 0.011451 | 0.011842 | 0.011486 |
| 0.011526 | 0.011451 | 0.011665 | 0.011665 | 0.011558 | 0.011557 | 0.011557 |
| 0.011558 | 0.011486 | 0.011451 | 0.011486 | 0.011557 | 0.011593 | 0.011522 |
| 0.011522 | 0.011664 | 0.011842 | 0.011557 | 0.011735 | 0.011735 | 0.011629 |
| 0.011451 | 0.011522 | 0.011558 | 0.011984 | 0.011522 | 0.011558 | 0.011522 |
| 0.011558 | 0.011486 | 0.011486 | 0.011771 | 0.011664 | 0.011735 | 0.011486 |
| 0.011593 | 0.011664 | 0.011486 | 0.011593 | 0.011557 | 0.011415 | 0.011771 |
| 0.011522 | 0.011486 | 0.011486 | 0.011664 | 0.011486 | 0.011593 | 0.011806 |
| 0.011451 | 0.011923 | 0.011913 | 0.011751 | 0.011352 | 0.011600 | 0.011436 |
| 0.011418 | 0.011927 | 0.011433 | 0.011675 | 0.011473 | 0.011603 | 0.011624 |
| 0.011704 | 0.011415 | 0.011528 | 0.011340 | 0.011464 | 0.011553 | 0.011620 |
| 0.011618 | 0.011519 | 0.011584 | 0.011471 | 0.011524 | 0.011664 | 0.011736 |
| 0.011736 | 0.011594 | 0.011705 | 0.011706 | 0.011814 | 0.011848 | 0.011486 |
| 0.011771 | 0.011629 | 0.011487 | 0.011593 | 0.011380 | 0.011629 | 0.011416 |
| 0.011486 | 0.011486 | 0.011451 | 0.011415 | 0.011451 | 0.011416 | 0.011522 |
| 0.011504 | 0.011502 | 0.011496 | 0.011529 | 0.011673 | 0.011639 | 0.011639 |
| 0.011636 | 0.011523 | 0.011331 | 0.011326 | 0.011491 | 0.011670 | 0.011635 |
| 0.011452 | 0.011526 | 0.011702 | 0.011740 | 0.011665 | 0.011701 | 0.011451 |
| 0.011557 | 0.011558 | 0.011522 | 0.011522 | 0.012091 | 0.011700 | 0.011771 |
| 0.011771 | 0.011850 | 0.011494 | 0.011537 | 0.011415 | 0.011558 | 0.011451 |
| 0.011666 | 0.011593 | 0.011700 | 0.011700 | 0.011689 | 0.011735 | 0.011419 |
| 0.011344 | 0.011346 | 0.011416 | 0.011416 | 0.011523 | 0.011327 | 0.011701 |
| 0.011489 | 0.011588 | 0.011346 | 0.011516 | 0.011487 | 0.011529 | 0.011451 |
| 0.011416 | 0.011416 | 0.011487 | 0.011451 | 0.011664 | 0.011629 | 0.011558 |
| 0.011664 | 0.011736 | 0.011451 | 0.011451 | 0.011487 | 0.011487 | 0.011489 |
| 0.011561 | 0.011487 | 0.011487 | 0.011524 | 0.011664 | 0.011736 | 0.011736 |
| 0.011594 | 0.011705 | 0.011706 | 0.011814 | 0.011848 | 0.011486 | 0.011700 |
| 0.011451 | 0.011451 | 0.011454 | 0.011613 | 0.011463 | 0.011601 | 0.011431 |
| 0.011644 | 0.011835 | 0.011685 | 0.011492 | 0.011416 | 0.011629 | 0.011487 |
| 0.011558 | 0.011522 | 0.011416 | 0.011488 | 0.011593 | 0.011633 | 0.011522 |
| 0.011416 | 0.011346 | 0.011487 | 0.011416 | 0.011345 | 0.011456 | 0.011629 |
| 0.011522 | 0.011451 | 0.011487 | 0.011522 | 0.011487 | 0.011416 | 0.011522 |
| 0.011486 | 0.011522 | 0.011522 | 0.011451 | 0.011522 | 0.011771 | 0.011415 |
| 0.011415 | 0.011842 | 0.011451 | 0.011486 | 0.011451 | 0.011842 | 0.011422 |
| 0.011874 | 0.011459 | 0.011482 | 0.011698 | 0.011789 | 0.011670 | 0.011327 |
| 0.011393 | 0.011593 | 0.011700 | 0.011814 | 0.011666 | 0.011813 | 0.011950 |
| 0.011844 | 0.011915 | 0.011842 | 0.011998 | 0.011771 | 0.012590 | 0.011738 |
| 0.012484 | 0.012274 | 0.012380 | 0.012632 | 0.011842 | 0.011522 | 0.011807 |
| 0.012164 | 0.012203 | 0.011700 | 0.011664 | 0.011736 | 0.011736 | 0.011668 |
| 0.011593 | 0.011599 | 0.011664 | 0.011630 | 0.012021 | 0.012055 | 0.012093 |
| 0.011950 | 0.012057 | 0.012203 | 0.011955 | 0.012236 | 0.012208 | 0.012307 |
| 0.012308 | 0.012308 | 0.012217 | 0.012272 | 0.012310 | 0.011380 | 0.011843 |



|          |          |          |          |          |          |          |
|----------|----------|----------|----------|----------|----------|----------|
| 0.011915 | 0.012376 | 0.011922 | 0.012163 | 0.012700 | 0.011708 | 0.011594 |
| 0.011558 | 0.011557 | 0.012056 | 0.012056 | 0.012106 | 0.011913 | 0.011560 |
| S241     | 0.011596 | 0.011596 | 0.011926 | 0.011678 | 0.011678 | 0.011719 |
| 0.011771 | 0.011645 | 0.011719 | 0.011225 | 0.011349 | 0.011308 | 0.011225 |
| 0.011307 | 0.011472 | 0.011266 | 0.011266 | 0.011349 | 0.011349 | 0.011307 |
| 0.011266 | 0.011307 | 0.011431 | 0.011266 | 0.011308 | 0.011307 | 0.011729 |
| 0.011555 | 0.011225 | 0.011184 | 0.011472 | 0.011266 | 0.011349 | 0.011390 |
| 0.011307 | 0.011390 | 0.011349 | 0.011349 | 0.011307 | 0.011349 | 0.011472 |
| 0.011266 | 0.011349 | 0.011349 | 0.011307 | 0.011390 | 0.011431 | 0.011307 |
| 0.011307 | 0.011514 | 0.011431 | 0.011719 | 0.011307 | 0.011637 | 0.011307 |
| 0.011266 | 0.011390 | 0.011390 | 0.011637 | 0.011761 | 0.011349 | 0.011472 |
| 0.011349 | 0.011390 | 0.011349 | 0.011596 | 0.011843 | 0.011307 | 0.011431 |
| 0.011266 | 0.011390 | 0.011349 | 0.011431 | 0.011349 | 0.011390 | 0.011390 |
| 0.011266 | 0.011307 | 0.011266 | 0.011307 | 0.011266 | 0.011391 | 0.011431 |
| 0.011349 | 0.011307 | 0.011307 | 0.011307 | 0.011472 | 0.011225 | 0.011307 |
| 0.011555 | 0.011390 | 0.011719 | 0.011513 | 0.011307 | 0.011555 | 0.011307 |
| 0.011511 | 0.011834 | 0.011435 | 0.011250 | 0.011201 | 0.011379 | 0.011448 |
| 0.012245 | 0.011431 | 0.011162 | 0.011349 | 0.011431 | 0.011390 | 0.011513 |
| 0.011431 | 0.011349 | 0.011349 | 0.011307 | 0.011349 | 0.011390 | 0.011307 |
| 0.011307 | 0.011472 | 0.011637 | 0.011431 | 0.011390 | 0.011390 | 0.011307 |
| 0.011266 | 0.011266 | 0.011349 | 0.011307 | 0.011513 | 0.011431 | 0.011390 |
| 0.011472 | 0.011555 | 0.011307 | 0.011307 | 0.011349 | 0.011349 | 0.011351 |
| 0.011393 | 0.011349 | 0.011349 | 0.011193 | 0.011236 | 0.011230 | 0.011349 |
| 0.011309 | 0.011272 | 0.011153 | 0.011230 | 0.011184 | 0.011269 | 0.011309 |
| 0.011500 | 0.011354 | 0.011357 | 0.011266 | 0.011188 | 0.011432 | 0.011225 |
| 0.011308 | 0.011391 | 0.011390 | 0.011349 | 0.011225 | 0.011761 | 0.011555 |
| 0.011596 | 0.011390 | 0.011349 | 0.011431 | 0.011225 | 0.011513 | 0.011266 |
| 0.011307 | 0.011349 | 0.011266 | 0.011266 | 0.011307 | 0.011266 | 0.011390 |
| 0.011307 | 0.011431 | 0.011349 | 0.011266 | 0.011350 | 0.011472 | 0.011434 |
| 0.011514 | 0.011349 | 0.011266 | 0.011185 | 0.011349 | 0.011266 | 0.011184 |
| 0.011311 | 0.011514 | 0.011225 | 0.011514 | 0.011225 | 0.011307 | 0.011266 |
| 0.011431 | 0.011225 | 0.011349 | 0.011266 | 0.011307 | 0.011184 | 0.011349 |
| 0.011390 | 0.011307 | 0.011390 | 0.011266 | 0.011266 | 0.011390 | 0.011596 |
| 0.011678 | 0.011719 | 0.011761 | 0.011391 | 0.011761 | 0.011225 | 0.011266 |
| 0.011351 | 0.011620 | 0.011397 | 0.011187 | 0.011769 | 0.011186 | 0.011305 |
| 0.011812 | 0.011562 | 0.011266 | 0.011720 | 0.011186 | 0.011390 | 0.011514 |
| 0.011390 | 0.011513 | 0.011477 | 0.000000 | 0.011332 | 0.011390 | 0.011390 |
| 0.011514 | 0.011390 | 0.011472 | 0.011720 | 0.011555 | 0.011637 | 0.011390 |
| 0.011267 | 0.011721 | 0.011390 | 0.011472 | 0.011762 | 0.011184 | 0.011308 |
| 0.011431 | 0.011307 | 0.011225 | 0.011225 | 0.011307 | 0.011307 | 0.011390 |
| 0.011307 | 0.011390 | 0.011266 | 0.011349 | 0.011307 | 0.011307 | 0.011390 |
| 0.011307 | 0.011843 | 0.011637 | 0.011678 | 0.011184 | 0.011307 | 0.011307 |
| 0.011266 | 0.011307 | 0.011307 | 0.011390 | 0.011266 | 0.011266 | 0.011266 |
| 0.011802 | 0.011390 | 0.011431 | 0.011225 | 0.011307 | 0.011472 | 0.011266 |
| 0.011266 | 0.011349 | 0.011225 | 0.011390 | 0.011266 | 0.011390 | 0.011513 |
| 0.011472 | 0.011266 | 0.011307 | 0.011184 | 0.011184 | 0.011390 | 0.011307 |
| 0.011184 | 0.011307 | 0.011184 | 0.011225 | 0.011349 | 0.011513 | 0.011266 |
| 0.011225 | 0.011349 | 0.011266 | 0.011184 | 0.011596 | 0.011184 | 0.011349 |
| 0.011431 | 0.011266 | 0.011637 | 0.011431 | 0.011431 | 0.011307 | 0.011349 |
| 0.011266 | 0.011637 | 0.011184 | 0.011431 | 0.011266 | 0.011266 | 0.011184 |
| 0.011472 | 0.011514 | 0.011349 | 0.011349 | 0.011225 | 0.011637 | 0.011266 |
| 0.011225 | 0.011266 | 0.011266 | 0.011349 | 0.011266 | 0.011390 | 0.011472 |
| 0.011472 | 0.011431 | 0.011349 | 0.011431 | 0.011390 | 0.011266 | 0.011225 |
| 0.011225 | 0.011266 | 0.011349 | 0.011266 | 0.011225 | 0.011390 | 0.011266 |
| 0.011307 | 0.011307 | 0.011390 | 0.011472 | 0.011307 | 0.011307 | 0.011225 |
| 0.011349 | 0.011266 | 0.011390 | 0.011225 | 0.011390 | 0.011349 | 0.011843 |
| 0.011266 | 0.011720 | 0.011231 | 0.014140 | 0.011209 | 0.011390 | 0.011707 |
| 0.011658 | 0.011758 | 0.011301 | 0.011201 | 0.011694 | 0.011699 | 0.011405 |
| 0.011405 | 0.011527 | 0.011204 | 0.011161 | 0.011257 | 0.011340 | 0.011310 |
| 0.011456 | 0.011481 | 0.011478 | 0.011242 | 0.011431 | 0.011349 | 0.011351 |

|          |          |          |          |          |          |          |
|----------|----------|----------|----------|----------|----------|----------|
| 0.011349 | 0.011349 | 0.011390 | 0.011390 | 0.011349 | 0.011349 | 0.011349 |
| 0.011307 | 0.011225 | 0.011184 | 0.011349 | 0.011307 | 0.011266 | 0.011184 |
| 0.011184 | 0.011349 | 0.011225 | 0.011390 | 0.011390 | 0.011472 | 0.011184 |
| 0.011349 | 0.011307 | 0.011720 | 0.011720 | 0.011390 | 0.011349 | 0.011431 |
| 0.011225 | 0.011184 | 0.011225 | 0.011349 | 0.011225 | 0.011513 | 0.011513 |
| 0.011390 | 0.011266 | 0.011431 | 0.011390 | 0.011720 | 0.011432 | 0.011349 |
| 0.011225 | 0.011431 | 0.011431 | 0.011266 | 0.011390 | 0.011349 | 0.011266 |
| 0.011225 | 0.011225 | 0.011266 | 0.011431 | 0.011349 | 0.011555 | 0.011472 |
| 0.011309 | 0.011225 | 0.011349 | 0.011390 | 0.011390 | 0.011514 | 0.011555 |
| 0.011720 | 0.011186 | 0.011390 | 0.011514 | 0.011390 | 0.011513 | 0.011266 |
| 0.011432 | 0.011266 | 0.011184 | 0.011184 | 0.011349 | 0.011225 | 0.011390 |
| 0.011390 | 0.011472 | 0.011184 | 0.011349 | 0.011307 | 0.011720 | 0.011720 |
| 0.011390 | 0.011349 | 0.011349 | 0.011266 | 0.012134 | 0.011311 | 0.011349 |
| 0.011476 | 0.011309 | 0.011514 | 0.011431 | 0.011435 | 0.011475 | 0.011310 |
| 0.012051 | 0.011226 | 0.011307 | 0.011391 | 0.011680 | 0.011513 | 0.011721 |
| 0.012093 | 0.011486 | 0.011351 | 0.011390 | 0.011390 | 0.011390 | 0.011351 |
| 0.011184 | 0.011266 | 0.011431 | 0.011390 | 0.011351 | 0.011554 | 0.011391 |
| 0.011349 | 0.011266 | 0.011266 | 0.011307 | 0.011225 | 0.011307 | 0.011184 |
| 0.011349 | 0.011349 | 0.011184 | 0.011225 | 0.011307 | 0.011266 | 0.011307 |
| 0.011307 | 0.011225 | 0.011225 | 0.011349 | 0.011225 | 0.011390 | 0.011431 |
| 0.011349 | 0.011431 | 0.011349 | 0.011349 | 0.011266 | 0.011761 | 0.011349 |
| 0.011390 | 0.011307 | 0.011555 | 0.011555 | 0.011431 | 0.011390 | 0.011390 |
| 0.011390 | 0.011307 | 0.011266 | 0.011307 | 0.011390 | 0.011431 | 0.011349 |
| 0.011390 | 0.011513 | 0.011761 | 0.011431 | 0.011555 | 0.011555 | 0.011472 |
| 0.011307 | 0.011390 | 0.011390 | 0.011843 | 0.011349 | 0.011431 | 0.011349 |
| 0.011225 | 0.011307 | 0.011307 | 0.011637 | 0.011555 | 0.011596 | 0.011349 |
| 0.011472 | 0.011555 | 0.011307 | 0.011472 | 0.011390 | 0.011266 | 0.011678 |
| 0.011390 | 0.011349 | 0.011307 | 0.011472 | 0.011349 | 0.011390 | 0.011678 |
| 0.011266 | 0.011771 | 0.011720 | 0.011558 | 0.011127 | 0.011436 | 0.011254 |
| 0.011243 | 0.011594 | 0.011234 | 0.011338 | 0.011296 | 0.011444 | 0.011382 |
| 0.011487 | 0.011137 | 0.011328 | 0.000000 | 0.011126 | 0.011364 | 0.011363 |
| 0.011475 | 0.011305 | 0.011406 | 0.011322 | 0.011350 | 0.011554 | 0.011555 |
| 0.011637 | 0.011390 | 0.011432 | 0.011476 | 0.011643 | 0.011582 | 0.011307 |
| 0.011596 | 0.011390 | 0.011349 | 0.011431 | 0.011225 | 0.011513 | 0.011266 |
| 0.011307 | 0.011349 | 0.011266 | 0.011266 | 0.011307 | 0.011266 | 0.011390 |
| 0.011188 | 0.011274 | 0.011355 | 0.011352 | 0.011561 | 0.011522 | 0.011437 |
| 0.011477 | 0.011390 | 0.011151 | 0.011105 | 0.011351 | 0.011517 | 0.011435 |
| 0.011308 | 0.011393 | 0.011597 | 0.011558 | 0.011308 | 0.011473 | 0.011225 |
| 0.011431 | 0.011472 | 0.011431 | 0.011307 | 0.011926 | 0.011390 | 0.011514 |
| 0.011678 | 0.011676 | 0.011312 | 0.011357 | 0.011266 | 0.011431 | 0.011349 |
| 0.011432 | 0.011472 | 0.011431 | 0.011431 | 0.011650 | 0.011472 | 0.011309 |
| 0.011184 | 0.011184 | 0.011225 | 0.011267 | 0.011390 | 0.011191 | 0.011597 |
| 0.011350 | 0.011447 | 0.011162 | 0.011360 | 0.011308 | 0.011310 | 0.011307 |
| 0.011266 | 0.011266 | 0.011349 | 0.011307 | 0.011513 | 0.011431 | 0.011390 |
| 0.011472 | 0.011555 | 0.011307 | 0.011307 | 0.011349 | 0.011349 | 0.011351 |
| 0.011393 | 0.011349 | 0.011349 | 0.011350 | 0.011554 | 0.011555 | 0.011637 |
| 0.011390 | 0.011432 | 0.011476 | 0.011643 | 0.011582 | 0.011307 | 0.011513 |
| 0.011349 | 0.011349 | 0.011309 | 0.011447 | 0.011314 | 0.011437 | 0.011274 |
| 0.011526 | 0.011575 | 0.011425 | 0.011310 | 0.011225 | 0.011514 | 0.011307 |
| 0.011431 | 0.011349 | 0.011266 | 0.011350 | 0.011472 | 0.011434 | 0.011349 |
| 0.011266 | 0.011185 | 0.011349 | 0.011266 | 0.011184 | 0.011311 | 0.011514 |
| 0.011307 | 0.011225 | 0.011184 | 0.011349 | 0.011307 | 0.011266 | 0.011390 |
| 0.011349 | 0.011349 | 0.011349 | 0.011266 | 0.011349 | 0.011596 | 0.011266 |
| 0.011266 | 0.011761 | 0.011266 | 0.011349 | 0.011266 | 0.011719 | 0.011165 |
| 0.011520 | 0.011216 | 0.011121 | 0.011504 | 0.011614 | 0.011503 | 0.011162 |
| 0.011125 | 0.011390 | 0.011472 | 0.011556 | 0.011432 | 0.011600 | 0.011679 |
| 0.011597 | 0.011679 | 0.011596 | 0.011858 | 0.011596 | 0.012545 | 0.011473 |
| 0.012132 | 0.012177 | 0.012218 | 0.012426 | 0.011719 | 0.011307 | 0.011637 |
| 0.012010 | 0.012095 | 0.011472 | 0.011472 | 0.011514 | 0.011514 | 0.011433 |
| 0.011390 | 0.011394 | 0.011472 | 0.011431 | 0.011926 | 0.011967 | 0.011968 |

|          |          |          |          |          |          |          |
|----------|----------|----------|----------|----------|----------|----------|
| 0.011845 | 0.011967 | 0.012136 | 0.011849 | 0.012134 | 0.012142 | 0.012258 |
| 0.012217 | 0.012300 | 0.012152 | 0.012218 | 0.012219 | 0.011225 | 0.011761 |
| 0.011803 | 0.012298 | 0.011852 | 0.012009 | 0.012713 | 0.011561 | 0.011431 |
| 0.011431 | 0.011390 | 0.011967 | 0.011897 | 0.012018 | 0.011843 | 0.011432 |
| S242     | 0.011689 | 0.011689 | 0.011815 | 0.011731 | 0.011731 | 0.011731 |
| 0.011741 | 0.011656 | 0.011857 | 0.011270 | 0.011354 | 0.011354 | 0.011270 |
| 0.011354 | 0.011521 | 0.011312 | 0.011312 | 0.011395 | 0.011395 | 0.011270 |
| 0.011312 | 0.011354 | 0.011479 | 0.011270 | 0.011354 | 0.011354 | 0.011698 |
| 0.011605 | 0.011312 | 0.011228 | 0.011521 | 0.011354 | 0.011354 | 0.011437 |
| 0.011354 | 0.011479 | 0.011395 | 0.011395 | 0.011354 | 0.011395 | 0.011521 |
| 0.011312 | 0.011354 | 0.011395 | 0.011354 | 0.011479 | 0.011437 | 0.011354 |
| 0.011354 | 0.011563 | 0.011480 | 0.011773 | 0.011354 | 0.011689 | 0.011354 |
| 0.011312 | 0.011479 | 0.011479 | 0.011689 | 0.011689 | 0.011354 | 0.011563 |
| 0.011395 | 0.011521 | 0.011396 | 0.011563 | 0.011899 | 0.011354 | 0.011479 |
| 0.011312 | 0.011437 | 0.011395 | 0.011479 | 0.011395 | 0.011437 | 0.011437 |
| 0.011312 | 0.011312 | 0.011312 | 0.011354 | 0.011354 | 0.011355 | 0.011437 |
| 0.011354 | 0.011354 | 0.011354 | 0.011354 | 0.011479 | 0.011270 | 0.011354 |
| 0.011563 | 0.011479 | 0.011773 | 0.011605 | 0.011312 | 0.011605 | 0.011395 |
| 0.011429 | 0.011712 | 0.011432 | 0.011206 | 0.011246 | 0.011383 | 0.011453 |
| 0.012288 | 0.011507 | 0.011110 | 0.011647 | 0.011647 | 0.011395 | 0.011521 |
| 0.011479 | 0.011395 | 0.011437 | 0.011312 | 0.011354 | 0.011395 | 0.011395 |
| 0.011395 | 0.011521 | 0.011563 | 0.011521 | 0.011479 | 0.011438 | 0.011354 |
| 0.011312 | 0.011312 | 0.011396 | 0.011354 | 0.011563 | 0.011522 | 0.011438 |
| 0.011563 | 0.011647 | 0.011270 | 0.011270 | 0.011312 | 0.011312 | 0.011314 |
| 0.011356 | 0.011396 | 0.011396 | 0.011238 | 0.011327 | 0.011275 | 0.011396 |
| 0.011397 | 0.011317 | 0.011243 | 0.011317 | 0.011270 | 0.011313 | 0.011355 |
| 0.011591 | 0.011357 | 0.011402 | 0.011270 | 0.011318 | 0.011480 | 0.011312 |
| 0.011396 | 0.011439 | 0.011438 | 0.011437 | 0.011270 | 0.011899 | 0.011564 |
| 0.011731 | 0.011480 | 0.011396 | 0.011522 | 0.011270 | 0.011563 | 0.011228 |
| 0.011228 | 0.011354 | 0.011312 | 0.011312 | 0.011354 | 0.011312 | 0.011438 |
| 0.011312 | 0.011480 | 0.011396 | 0.011312 | 0.011397 | 0.011480 | 0.011567 |
| 0.011564 | 0.011396 | 0.011270 | 0.011229 | 0.011396 | 0.011270 | 0.011228 |
| 0.011315 | 0.011564 | 0.011270 | 0.011564 | 0.011270 | 0.011354 | 0.011312 |
| 0.011480 | 0.011354 | 0.011396 | 0.011312 | 0.011354 | 0.011228 | 0.011396 |
| 0.011354 | 0.011312 | 0.011438 | 0.011354 | 0.011354 | 0.011438 | 0.011647 |
| 0.011773 | 0.011731 | 0.011815 | 0.011482 | 0.011731 | 0.011312 | 0.011312 |
| 0.011356 | 0.011673 | 0.011511 | 0.011232 | 0.011779 | 0.011231 | 0.011407 |
| 0.011741 | 0.011656 | 0.011479 | 0.011605 | 0.011273 | 0.011605 | 0.011647 |
| 0.011479 | 0.011689 | 0.011524 | 0.011332 | 0.000000 | 0.011396 | 0.011438 |
| 0.011479 | 0.011438 | 0.011521 | 0.011773 | 0.011647 | 0.011689 | 0.011563 |
| 0.011439 | 0.011773 | 0.011563 | 0.011563 | 0.011773 | 0.011270 | 0.011354 |
| 0.011437 | 0.011354 | 0.011270 | 0.011270 | 0.011354 | 0.011354 | 0.011437 |
| 0.011354 | 0.011395 | 0.011312 | 0.011437 | 0.011354 | 0.011312 | 0.011437 |
| 0.011354 | 0.011815 | 0.011689 | 0.011773 | 0.011228 | 0.011312 | 0.011354 |
| 0.011354 | 0.011354 | 0.011354 | 0.011479 | 0.011312 | 0.011312 | 0.011312 |
| 0.011857 | 0.011395 | 0.011437 | 0.011270 | 0.011354 | 0.011605 | 0.011312 |
| 0.011312 | 0.011395 | 0.011312 | 0.011479 | 0.011312 | 0.011437 | 0.011563 |
| 0.011521 | 0.011312 | 0.011312 | 0.011228 | 0.011270 | 0.011354 | 0.011354 |
| 0.011228 | 0.011312 | 0.011228 | 0.011270 | 0.011437 | 0.011521 | 0.011312 |
| 0.011270 | 0.011395 | 0.011312 | 0.011228 | 0.011605 | 0.011228 | 0.011395 |
| 0.011479 | 0.011312 | 0.011647 | 0.011479 | 0.011521 | 0.011354 | 0.011395 |
| 0.011270 | 0.011689 | 0.011228 | 0.011521 | 0.011312 | 0.011312 | 0.011228 |
| 0.011479 | 0.011648 | 0.011396 | 0.011395 | 0.011270 | 0.011689 | 0.011312 |
| 0.011312 | 0.011270 | 0.011354 | 0.011479 | 0.011312 | 0.011395 | 0.011521 |
| 0.011563 | 0.011479 | 0.011395 | 0.011479 | 0.011437 | 0.011312 | 0.011270 |
| 0.011270 | 0.011312 | 0.011396 | 0.011312 | 0.011270 | 0.011312 | 0.011228 |
| 0.011354 | 0.011354 | 0.011437 | 0.011437 | 0.011395 | 0.011354 | 0.011270 |
| 0.011395 | 0.011312 | 0.011437 | 0.011270 | 0.011479 | 0.011521 | 0.011815 |
| 0.011354 | 0.011689 | 0.011319 | 0.012929 | 0.011136 | 0.011409 | 0.011672 |
| 0.011623 | 0.011723 | 0.011361 | 0.011340 | 0.011731 | 0.011664 | 0.011355 |

|          |          |          |          |          |          |          |
|----------|----------|----------|----------|----------|----------|----------|
| 0.011469 | 0.011560 | 0.011109 | 0.011211 | 0.011303 | 0.011294 | 0.011267 |
| 0.011579 | 0.011483 | 0.011519 | 0.011318 | 0.011479 | 0.011438 | 0.011440 |
| 0.011395 | 0.011354 | 0.011437 | 0.011480 | 0.011396 | 0.011396 | 0.011396 |
| 0.011438 | 0.011354 | 0.011354 | 0.011438 | 0.011354 | 0.011312 | 0.011270 |
| 0.011270 | 0.011396 | 0.011312 | 0.011438 | 0.011438 | 0.011521 | 0.011270 |
| 0.011354 | 0.011396 | 0.011689 | 0.011689 | 0.011438 | 0.011396 | 0.011480 |
| 0.011270 | 0.011270 | 0.011270 | 0.011396 | 0.011270 | 0.011522 | 0.011522 |
| 0.011521 | 0.011479 | 0.011521 | 0.011521 | 0.011689 | 0.011565 | 0.011396 |
| 0.011396 | 0.011438 | 0.011480 | 0.011312 | 0.011438 | 0.011396 | 0.011396 |
| 0.011480 | 0.011480 | 0.011480 | 0.011480 | 0.011396 | 0.011563 | 0.011522 |
| 0.011356 | 0.011312 | 0.011396 | 0.011480 | 0.011312 | 0.011564 | 0.011605 |
| 0.011605 | 0.011273 | 0.011605 | 0.011647 | 0.011479 | 0.011689 | 0.011312 |
| 0.011439 | 0.011312 | 0.011270 | 0.011270 | 0.011396 | 0.011312 | 0.011438 |
| 0.011438 | 0.011521 | 0.011270 | 0.011354 | 0.011396 | 0.011689 | 0.011689 |
| 0.011438 | 0.011396 | 0.011395 | 0.011354 | 0.012236 | 0.011522 | 0.011437 |
| 0.011567 | 0.011479 | 0.011647 | 0.011479 | 0.011521 | 0.011479 | 0.011355 |
| 0.012110 | 0.011312 | 0.011354 | 0.011396 | 0.011731 | 0.011479 | 0.011773 |
| 0.012152 | 0.011532 | 0.011610 | 0.011731 | 0.011563 | 0.011605 | 0.011610 |
| 0.011270 | 0.011479 | 0.011563 | 0.011521 | 0.011483 | 0.011605 | 0.011481 |
| 0.011312 | 0.011270 | 0.011270 | 0.011395 | 0.011270 | 0.011312 | 0.011228 |
| 0.011395 | 0.011437 | 0.011312 | 0.011270 | 0.011395 | 0.011312 | 0.011354 |
| 0.011354 | 0.011270 | 0.011354 | 0.011396 | 0.011270 | 0.011479 | 0.011521 |
| 0.011437 | 0.011521 | 0.011437 | 0.011437 | 0.011312 | 0.011689 | 0.011354 |
| 0.011437 | 0.011354 | 0.011605 | 0.011605 | 0.011479 | 0.011479 | 0.011479 |
| 0.011479 | 0.011354 | 0.011354 | 0.011354 | 0.011479 | 0.011479 | 0.011437 |
| 0.011437 | 0.011563 | 0.011773 | 0.011479 | 0.011689 | 0.011689 | 0.011521 |
| 0.011312 | 0.011395 | 0.011479 | 0.011815 | 0.011354 | 0.011479 | 0.011354 |
| 0.011395 | 0.011395 | 0.011395 | 0.011731 | 0.011605 | 0.011689 | 0.011395 |
| 0.011521 | 0.011563 | 0.011395 | 0.011521 | 0.011395 | 0.011312 | 0.011647 |
| 0.011437 | 0.011354 | 0.011395 | 0.011521 | 0.011395 | 0.011479 | 0.011731 |
| 0.011312 | 0.011783 | 0.011773 | 0.011517 | 0.011190 | 0.011484 | 0.011253 |
| 0.011253 | 0.011641 | 0.011280 | 0.011337 | 0.011177 | 0.011314 | 0.011325 |
| 0.011488 | 0.000000 | 0.011267 | 0.000000 | 0.011126 | 0.011294 | 0.011369 |
| 0.011390 | 0.011308 | 0.011410 | 0.011326 | 0.011397 | 0.011605 | 0.011647 |
| 0.011605 | 0.011480 | 0.011525 | 0.011568 | 0.011695 | 0.011725 | 0.011354 |
| 0.011731 | 0.011480 | 0.011396 | 0.011522 | 0.011270 | 0.011563 | 0.011228 |
| 0.011228 | 0.011354 | 0.011312 | 0.011312 | 0.011354 | 0.011312 | 0.011438 |
| 0.011319 | 0.011362 | 0.011358 | 0.011398 | 0.011609 | 0.011527 | 0.011569 |
| 0.011397 | 0.011396 | 0.011196 | 0.011194 | 0.011397 | 0.011523 | 0.011439 |
| 0.011354 | 0.011397 | 0.011564 | 0.011566 | 0.011564 | 0.011522 | 0.011354 |
| 0.011437 | 0.011521 | 0.011437 | 0.011396 | 0.011899 | 0.011563 | 0.011647 |
| 0.011605 | 0.011771 | 0.011359 | 0.011492 | 0.011312 | 0.011521 | 0.011437 |
| 0.011565 | 0.011521 | 0.011605 | 0.011605 | 0.011741 | 0.011647 | 0.011355 |
| 0.011228 | 0.011228 | 0.011312 | 0.011312 | 0.011396 | 0.011232 | 0.011605 |
| 0.011354 | 0.011525 | 0.011258 | 0.011360 | 0.011396 | 0.011397 | 0.011354 |
| 0.011312 | 0.011312 | 0.011396 | 0.011354 | 0.011563 | 0.011522 | 0.011438 |
| 0.011563 | 0.011647 | 0.011270 | 0.011270 | 0.011312 | 0.011312 | 0.011314 |
| 0.011356 | 0.011396 | 0.011396 | 0.011397 | 0.011605 | 0.011647 | 0.011605 |
| 0.011480 | 0.011525 | 0.011568 | 0.011695 | 0.011725 | 0.011354 | 0.011563 |
| 0.011437 | 0.011437 | 0.011314 | 0.011537 | 0.011407 | 0.011486 | 0.011280 |
| 0.011578 | 0.011643 | 0.011536 | 0.011356 | 0.011270 | 0.011564 | 0.011312 |
| 0.011480 | 0.011396 | 0.011312 | 0.011397 | 0.011480 | 0.011567 | 0.011396 |
| 0.011270 | 0.011229 | 0.011396 | 0.011270 | 0.011228 | 0.011315 | 0.011564 |
| 0.011438 | 0.011354 | 0.011354 | 0.011438 | 0.011354 | 0.011312 | 0.011438 |
| 0.011395 | 0.011395 | 0.011395 | 0.011312 | 0.011437 | 0.011689 | 0.011312 |
| 0.011312 | 0.011689 | 0.011312 | 0.011395 | 0.011312 | 0.011773 | 0.011163 |
| 0.011571 | 0.011164 | 0.011184 | 0.011500 | 0.011561 | 0.011551 | 0.011111 |
| 0.011193 | 0.011479 | 0.011521 | 0.011691 | 0.011523 | 0.011653 | 0.011859 |
| 0.011731 | 0.011815 | 0.011647 | 0.011826 | 0.011647 | 0.012697 | 0.011565 |
| 0.012320 | 0.012281 | 0.012366 | 0.012451 | 0.011815 | 0.011396 | 0.011732 |

|          |          |          |          |          |          |          |
|----------|----------|----------|----------|----------|----------|----------|
| 0.012111 | 0.012198 | 0.011605 | 0.011563 | 0.011648 | 0.011648 | 0.011609 |
| 0.011479 | 0.011442 | 0.011563 | 0.011480 | 0.012026 | 0.012025 | 0.011984 |
| 0.011943 | 0.012068 | 0.012155 | 0.011905 | 0.012280 | 0.012203 | 0.012363 |
| 0.012279 | 0.012364 | 0.012211 | 0.012195 | 0.012325 | 0.011312 | 0.011816 |
| 0.011816 | 0.012361 | 0.011951 | 0.012067 | 0.012826 | 0.011655 | 0.011522 |
| 0.011479 | 0.011479 | 0.011984 | 0.011946 | 0.012070 | 0.011857 | 0.011481 |
| S243     | 0.011698 | 0.011698 | 0.011934 | 0.011799 | 0.011799 | 0.011866 |
| 0.011706 | 0.011638 | 0.011866 | 0.011295 | 0.011362 | 0.011329 | 0.011295 |
| 0.011329 | 0.011497 | 0.011295 | 0.011329 | 0.011396 | 0.011362 | 0.011262 |
| 0.011295 | 0.011329 | 0.011429 | 0.011295 | 0.011329 | 0.011329 | 0.011672 |
| 0.011564 | 0.011329 | 0.011228 | 0.011463 | 0.011396 | 0.011362 | 0.011396 |
| 0.011362 | 0.011463 | 0.011362 | 0.011362 | 0.011396 | 0.011362 | 0.011530 |
| 0.011295 | 0.011362 | 0.011396 | 0.011329 | 0.011429 | 0.011463 | 0.011396 |
| 0.011362 | 0.011530 | 0.011430 | 0.011698 | 0.011362 | 0.011631 | 0.011362 |
| 0.011329 | 0.011430 | 0.011497 | 0.011631 | 0.011732 | 0.011430 | 0.011530 |
| 0.011396 | 0.011463 | 0.011362 | 0.011597 | 0.011833 | 0.011362 | 0.011430 |
| 0.011329 | 0.011429 | 0.011396 | 0.011463 | 0.011396 | 0.011396 | 0.011396 |
| 0.011295 | 0.011329 | 0.011295 | 0.011396 | 0.011362 | 0.011397 | 0.011463 |
| 0.011396 | 0.011362 | 0.011430 | 0.011329 | 0.011463 | 0.011295 | 0.011362 |
| 0.011530 | 0.011463 | 0.011698 | 0.011530 | 0.011362 | 0.011597 | 0.011362 |
| 0.011542 | 0.011770 | 0.011589 | 0.011295 | 0.011284 | 0.011392 | 0.011493 |
| 0.012122 | 0.011569 | 0.011225 | 0.011597 | 0.011597 | 0.011396 | 0.011497 |
| 0.011430 | 0.011396 | 0.011463 | 0.011362 | 0.011463 | 0.011396 | 0.011396 |
| 0.011362 | 0.011463 | 0.011665 | 0.011530 | 0.011430 | 0.011396 | 0.011329 |
| 0.011295 | 0.011295 | 0.011363 | 0.011329 | 0.011530 | 0.011497 | 0.011430 |
| 0.011530 | 0.011598 | 0.011329 | 0.011329 | 0.011363 | 0.011362 | 0.011364 |
| 0.011432 | 0.011363 | 0.011363 | 0.011240 | 0.011313 | 0.011271 | 0.011363 |
| 0.011365 | 0.011301 | 0.011355 | 0.011336 | 0.011264 | 0.011300 | 0.011330 |
| 0.011600 | 0.011371 | 0.011405 | 0.011228 | 0.011302 | 0.011430 | 0.011397 |
| 0.011464 | 0.011397 | 0.011396 | 0.011497 | 0.011429 | 0.011799 | 0.011598 |
| 0.011631 | 0.011497 | 0.011362 | 0.011463 | 0.011262 | 0.011497 | 0.011295 |
| 0.011362 | 0.011362 | 0.011329 | 0.011295 | 0.011329 | 0.011295 | 0.011396 |
| 0.011363 | 0.011463 | 0.011396 | 0.011295 | 0.011397 | 0.011497 | 0.011500 |
| 0.011497 | 0.011396 | 0.011295 | 0.011229 | 0.011362 | 0.011295 | 0.011228 |
| 0.011230 | 0.011497 | 0.011295 | 0.011497 | 0.011262 | 0.011363 | 0.011329 |
| 0.011430 | 0.011329 | 0.011363 | 0.011329 | 0.011363 | 0.011228 | 0.011363 |
| 0.011396 | 0.011262 | 0.011396 | 0.011329 | 0.011362 | 0.011396 | 0.011631 |
| 0.011732 | 0.011665 | 0.011732 | 0.011499 | 0.011732 | 0.011362 | 0.011262 |
| 0.011364 | 0.011626 | 0.011472 | 0.011266 | 0.011739 | 0.011231 | 0.011375 |
| 0.011740 | 0.011638 | 0.011530 | 0.011732 | 0.011436 | 0.011598 | 0.011564 |
| 0.011497 | 0.011665 | 0.011522 | 0.011390 | 0.011396 | 0.000000 | 0.011466 |
| 0.011564 | 0.011465 | 0.011601 | 0.011669 | 0.011597 | 0.011665 | 0.011772 |
| 0.011500 | 0.011671 | 0.011602 | 0.011534 | 0.011800 | 0.011262 | 0.011465 |
| 0.011429 | 0.011362 | 0.011262 | 0.011262 | 0.011329 | 0.011329 | 0.011396 |
| 0.011329 | 0.011396 | 0.011295 | 0.011396 | 0.011329 | 0.011262 | 0.011396 |
| 0.011329 | 0.011765 | 0.011665 | 0.011698 | 0.011228 | 0.011329 | 0.011362 |
| 0.011362 | 0.011329 | 0.011396 | 0.011430 | 0.011295 | 0.011295 | 0.011295 |
| 0.011833 | 0.011463 | 0.011463 | 0.011262 | 0.011362 | 0.011530 | 0.011295 |
| 0.011295 | 0.011362 | 0.011329 | 0.011497 | 0.011295 | 0.011430 | 0.011564 |
| 0.011497 | 0.011329 | 0.011127 | 0.011262 | 0.011262 | 0.011430 | 0.011362 |
| 0.011262 | 0.011362 | 0.011228 | 0.011262 | 0.011396 | 0.011531 | 0.011295 |
| 0.011262 | 0.011396 | 0.011329 | 0.011228 | 0.011564 | 0.011228 | 0.011396 |
| 0.011471 | 0.011295 | 0.011597 | 0.011430 | 0.011463 | 0.011329 | 0.011429 |
| 0.011295 | 0.011631 | 0.011228 | 0.011497 | 0.011295 | 0.011295 | 0.011228 |
| 0.011463 | 0.011665 | 0.011362 | 0.011430 | 0.011262 | 0.011665 | 0.011295 |
| 0.011295 | 0.011228 | 0.011329 | 0.011430 | 0.011329 | 0.011429 | 0.011497 |
| 0.011497 | 0.011463 | 0.011362 | 0.011463 | 0.011429 | 0.011295 | 0.011262 |
| 0.011295 | 0.011295 | 0.011362 | 0.011295 | 0.011262 | 0.011430 | 0.011295 |
| 0.011329 | 0.011329 | 0.011463 | 0.011497 | 0.011396 | 0.011329 | 0.011329 |
| 0.011396 | 0.011329 | 0.011429 | 0.011295 | 0.011430 | 0.011530 | 0.011765 |

|          |          |          |          |          |          |          |
|----------|----------|----------|----------|----------|----------|----------|
| 0.011329 | 0.011732 | 0.011336 | 0.017863 | 0.011322 | 0.011611 | 0.011688 |
| 0.011649 | 0.011694 | 0.011479 | 0.011408 | 0.011885 | 0.011716 | 0.011546 |
| 0.011630 | 0.011732 | 0.011255 | 0.011353 | 0.011334 | 0.011455 | 0.011361 |
| 0.011577 | 0.011507 | 0.011505 | 0.011193 | 0.011463 | 0.011497 | 0.011500 |
| 0.011369 | 0.011463 | 0.011463 | 0.011430 | 0.011396 | 0.011396 | 0.011363 |
| 0.011396 | 0.011329 | 0.011362 | 0.011396 | 0.011363 | 0.011295 | 0.011329 |
| 0.011329 | 0.011396 | 0.011295 | 0.011396 | 0.011430 | 0.011463 | 0.011362 |
| 0.011396 | 0.011363 | 0.011699 | 0.011699 | 0.011430 | 0.011464 | 0.011497 |
| 0.011262 | 0.011262 | 0.011295 | 0.011396 | 0.011262 | 0.011497 | 0.011497 |
| 0.011530 | 0.011530 | 0.011463 | 0.011564 | 0.011732 | 0.011565 | 0.011396 |
| 0.011396 | 0.011463 | 0.011497 | 0.011329 | 0.011396 | 0.011362 | 0.011396 |
| 0.011464 | 0.011463 | 0.011497 | 0.011464 | 0.011363 | 0.011564 | 0.011530 |
| 0.011399 | 0.011295 | 0.011396 | 0.011497 | 0.011396 | 0.011531 | 0.011564 |
| 0.011732 | 0.011436 | 0.011598 | 0.011564 | 0.011497 | 0.011665 | 0.011295 |
| 0.011465 | 0.011363 | 0.011329 | 0.011329 | 0.011396 | 0.011295 | 0.011396 |
| 0.011430 | 0.011463 | 0.011362 | 0.011396 | 0.011363 | 0.011699 | 0.011699 |
| 0.011430 | 0.011464 | 0.011530 | 0.011463 | 0.012103 | 0.011525 | 0.011447 |
| 0.011517 | 0.011476 | 0.011587 | 0.011476 | 0.011585 | 0.011509 | 0.011474 |
| 0.012056 | 0.011372 | 0.011506 | 0.011441 | 0.011715 | 0.011570 | 0.011673 |
| 0.012080 | 0.011513 | 0.011635 | 0.011698 | 0.011564 | 0.011564 | 0.011601 |
| 0.011262 | 0.011430 | 0.011564 | 0.011530 | 0.011533 | 0.011530 | 0.011498 |
| 0.011362 | 0.011228 | 0.011329 | 0.011362 | 0.011262 | 0.011329 | 0.011228 |
| 0.011362 | 0.011396 | 0.011295 | 0.011262 | 0.011362 | 0.011295 | 0.011329 |
| 0.011329 | 0.011262 | 0.011329 | 0.011362 | 0.011262 | 0.011463 | 0.011497 |
| 0.011396 | 0.011463 | 0.011396 | 0.011396 | 0.011329 | 0.011732 | 0.011362 |
| 0.011408 | 0.011329 | 0.011564 | 0.011569 | 0.011430 | 0.011429 | 0.011429 |
| 0.011430 | 0.011362 | 0.011329 | 0.011362 | 0.011463 | 0.011463 | 0.011396 |
| 0.011396 | 0.011530 | 0.011698 | 0.011429 | 0.011631 | 0.011631 | 0.011497 |
| 0.011329 | 0.011396 | 0.011430 | 0.011833 | 0.011396 | 0.011430 | 0.011396 |
| 0.011430 | 0.011362 | 0.011362 | 0.011665 | 0.011598 | 0.011631 | 0.011362 |
| 0.011463 | 0.011530 | 0.011396 | 0.011463 | 0.011429 | 0.011295 | 0.011631 |
| 0.011396 | 0.011362 | 0.011362 | 0.011530 | 0.011362 | 0.011463 | 0.011698 |
| 0.011329 | 0.011774 | 0.011765 | 0.011589 | 0.011342 | 0.011468 | 0.011370 |
| 0.011390 | 0.011800 | 0.011306 | 0.011552 | 0.011402 | 0.011519 | 0.011538 |
| 0.011570 | 0.011324 | 0.011506 | 0.011325 | 0.011384 | 0.011529 | 0.011466 |
| 0.011475 | 0.011375 | 0.011448 | 0.011377 | 0.011397 | 0.011530 | 0.011598 |
| 0.011598 | 0.011464 | 0.011568 | 0.011569 | 0.011705 | 0.011732 | 0.011396 |
| 0.011631 | 0.011497 | 0.011362 | 0.011463 | 0.011262 | 0.011497 | 0.011295 |
| 0.011362 | 0.011362 | 0.011329 | 0.011295 | 0.011329 | 0.011295 | 0.011396 |
| 0.011375 | 0.011375 | 0.011300 | 0.011403 | 0.011539 | 0.011504 | 0.011504 |
| 0.011503 | 0.011430 | 0.011245 | 0.011240 | 0.011365 | 0.011535 | 0.011535 |
| 0.011329 | 0.011399 | 0.011633 | 0.011601 | 0.011531 | 0.011565 | 0.011497 |
| 0.011429 | 0.011497 | 0.011497 | 0.011396 | 0.011967 | 0.011564 | 0.011631 |
| 0.011665 | 0.011737 | 0.011367 | 0.011441 | 0.011329 | 0.011530 | 0.011497 |
| 0.011531 | 0.011564 | 0.011564 | 0.011564 | 0.011689 | 0.011698 | 0.011338 |
| 0.011229 | 0.011233 | 0.011333 | 0.011298 | 0.011402 | 0.011210 | 0.011570 |
| 0.011300 | 0.011455 | 0.011203 | 0.011360 | 0.011363 | 0.011437 | 0.011329 |
| 0.011295 | 0.011295 | 0.011363 | 0.011329 | 0.011530 | 0.011497 | 0.011430 |
| 0.011530 | 0.011598 | 0.011329 | 0.011329 | 0.011363 | 0.011362 | 0.011364 |
| 0.011432 | 0.011363 | 0.011363 | 0.011397 | 0.011530 | 0.011598 | 0.011598 |
| 0.011464 | 0.011568 | 0.011569 | 0.011705 | 0.011732 | 0.011396 | 0.011564 |
| 0.011497 | 0.011497 | 0.011331 | 0.011513 | 0.011443 | 0.011469 | 0.011341 |
| 0.011508 | 0.011698 | 0.011526 | 0.011400 | 0.011295 | 0.011497 | 0.011363 |
| 0.011463 | 0.011396 | 0.011295 | 0.011397 | 0.011497 | 0.011500 | 0.011396 |
| 0.011295 | 0.011229 | 0.011362 | 0.011295 | 0.011228 | 0.011230 | 0.011497 |
| 0.011396 | 0.011329 | 0.011362 | 0.011396 | 0.011363 | 0.011295 | 0.011497 |
| 0.011362 | 0.011396 | 0.011396 | 0.011329 | 0.011396 | 0.011631 | 0.011295 |
| 0.011329 | 0.011732 | 0.011329 | 0.011362 | 0.011329 | 0.011698 | 0.011317 |
| 0.011791 | 0.011315 | 0.011361 | 0.011543 | 0.011630 | 0.011527 | 0.011269 |
| 0.011323 | 0.011497 | 0.011597 | 0.011705 | 0.011565 | 0.011703 | 0.011834 |

|          |          |          |          |          |          |          |
|----------|----------|----------|----------|----------|----------|----------|
| 0.011733 | 0.011771 | 0.011732 | 0.011983 | 0.011698 | 0.012573 | 0.011734 |
| 0.012473 | 0.012241 | 0.012375 | 0.012647 | 0.011698 | 0.011396 | 0.011699 |
| 0.012137 | 0.012073 | 0.011665 | 0.011564 | 0.011632 | 0.011632 | 0.011602 |
| 0.011497 | 0.011501 | 0.011564 | 0.011531 | 0.011901 | 0.011967 | 0.011969 |
| 0.011868 | 0.011968 | 0.012072 | 0.011838 | 0.012138 | 0.012144 | 0.012205 |
| 0.012206 | 0.012239 | 0.012187 | 0.012206 | 0.012207 | 0.011429 | 0.011733 |
| 0.011800 | 0.012304 | 0.011806 | 0.012035 | 0.012508 | 0.011570 | 0.011464 |
| 0.011429 | 0.011429 | 0.011901 | 0.011883 | 0.012046 | 0.011765 | 0.011431 |
| S244     | 0.011703 | 0.011703 | 0.011974 | 0.011838 | 0.011838 | 0.011906 |
| 0.011779 | 0.011711 | 0.011906 | 0.011365 | 0.011432 | 0.011399 | 0.011365 |
| 0.011398 | 0.011568 | 0.011365 | 0.011331 | 0.011466 | 0.011432 | 0.011398 |
| 0.011365 | 0.011398 | 0.011500 | 0.011365 | 0.011399 | 0.011398 | 0.011745 |
| 0.011635 | 0.011365 | 0.011297 | 0.011534 | 0.011466 | 0.011432 | 0.011466 |
| 0.011432 | 0.011534 | 0.011432 | 0.011432 | 0.011466 | 0.011432 | 0.011568 |
| 0.011365 | 0.011432 | 0.011466 | 0.011398 | 0.011500 | 0.011534 | 0.011466 |
| 0.011432 | 0.011602 | 0.011500 | 0.011771 | 0.011432 | 0.011703 | 0.011432 |
| 0.011398 | 0.011500 | 0.011568 | 0.011703 | 0.011805 | 0.011500 | 0.011602 |
| 0.011466 | 0.011534 | 0.011432 | 0.011669 | 0.011906 | 0.011432 | 0.011500 |
| 0.011398 | 0.011500 | 0.011432 | 0.011534 | 0.011466 | 0.011466 | 0.011466 |
| 0.011365 | 0.011398 | 0.011365 | 0.011466 | 0.011432 | 0.011467 | 0.011500 |
| 0.011466 | 0.011432 | 0.011500 | 0.011398 | 0.011534 | 0.011365 | 0.011432 |
| 0.011601 | 0.011534 | 0.011771 | 0.011602 | 0.011432 | 0.011669 | 0.011432 |
| 0.011621 | 0.011852 | 0.011631 | 0.011297 | 0.011324 | 0.011469 | 0.011577 |
| 0.012204 | 0.011626 | 0.011351 | 0.011669 | 0.011669 | 0.011466 | 0.011568 |
| 0.011500 | 0.011398 | 0.011466 | 0.011432 | 0.011534 | 0.011466 | 0.011398 |
| 0.011365 | 0.011534 | 0.011669 | 0.011601 | 0.011466 | 0.011466 | 0.011399 |
| 0.011365 | 0.011365 | 0.011433 | 0.011399 | 0.011602 | 0.011568 | 0.011500 |
| 0.011602 | 0.011669 | 0.011399 | 0.011399 | 0.011433 | 0.011432 | 0.011435 |
| 0.011503 | 0.011432 | 0.011433 | 0.011314 | 0.011386 | 0.011341 | 0.011433 |
| 0.011436 | 0.011372 | 0.011358 | 0.011373 | 0.011334 | 0.011371 | 0.011401 |
| 0.011675 | 0.011442 | 0.011477 | 0.011365 | 0.011374 | 0.011501 | 0.011467 |
| 0.011535 | 0.011468 | 0.011467 | 0.011500 | 0.011432 | 0.011872 | 0.011670 |
| 0.011703 | 0.011568 | 0.011432 | 0.011534 | 0.011331 | 0.011568 | 0.011365 |
| 0.011432 | 0.011432 | 0.011399 | 0.011365 | 0.011398 | 0.011365 | 0.011466 |
| 0.011433 | 0.011500 | 0.011466 | 0.011365 | 0.011434 | 0.011568 | 0.011571 |
| 0.011568 | 0.011466 | 0.011365 | 0.011298 | 0.011432 | 0.011365 | 0.011297 |
| 0.011403 | 0.011568 | 0.011365 | 0.011568 | 0.011331 | 0.011433 | 0.011399 |
| 0.011500 | 0.011399 | 0.011433 | 0.011399 | 0.011432 | 0.011297 | 0.011432 |
| 0.011466 | 0.011399 | 0.011466 | 0.011399 | 0.011365 | 0.011466 | 0.011703 |
| 0.011805 | 0.011737 | 0.011805 | 0.011570 | 0.011805 | 0.011365 | 0.011399 |
| 0.011435 | 0.011754 | 0.011519 | 0.011337 | 0.011813 | 0.011301 | 0.011457 |
| 0.011813 | 0.011711 | 0.011568 | 0.011737 | 0.011508 | 0.011669 | 0.011636 |
| 0.011568 | 0.011737 | 0.011096 | 0.011390 | 0.011438 | 0.011466 | 0.000000 |
| 0.011602 | 0.011468 | 0.011674 | 0.011742 | 0.011602 | 0.011635 | 0.011777 |
| 0.011504 | 0.011744 | 0.011606 | 0.011605 | 0.011806 | 0.011331 | 0.011536 |
| 0.011500 | 0.011432 | 0.011331 | 0.011331 | 0.011398 | 0.011398 | 0.011466 |
| 0.011398 | 0.011466 | 0.011365 | 0.011466 | 0.011398 | 0.011398 | 0.011466 |
| 0.011398 | 0.011838 | 0.011737 | 0.011737 | 0.011297 | 0.011398 | 0.011432 |
| 0.011432 | 0.011398 | 0.011466 | 0.011500 | 0.011365 | 0.011365 | 0.011365 |
| 0.011906 | 0.011534 | 0.011534 | 0.011331 | 0.011432 | 0.011602 | 0.011365 |
| 0.011365 | 0.011432 | 0.011398 | 0.011568 | 0.011365 | 0.011500 | 0.011635 |
| 0.011568 | 0.011398 | 0.011398 | 0.011331 | 0.011331 | 0.011500 | 0.011432 |
| 0.011331 | 0.011432 | 0.011297 | 0.011331 | 0.011466 | 0.011602 | 0.011365 |
| 0.011331 | 0.011466 | 0.011399 | 0.011297 | 0.011635 | 0.011297 | 0.011466 |
| 0.011509 | 0.011365 | 0.011669 | 0.011500 | 0.011534 | 0.011398 | 0.011500 |
| 0.011365 | 0.011703 | 0.011297 | 0.011568 | 0.011365 | 0.011365 | 0.011297 |
| 0.011534 | 0.011737 | 0.011432 | 0.011500 | 0.011331 | 0.011737 | 0.011365 |
| 0.011365 | 0.011365 | 0.011398 | 0.011500 | 0.011398 | 0.011500 | 0.011568 |
| 0.011568 | 0.011534 | 0.011432 | 0.011534 | 0.011500 | 0.011365 | 0.011331 |
| 0.011365 | 0.011365 | 0.011432 | 0.011365 | 0.011331 | 0.011500 | 0.011365 |

|          |          |          |          |          |          |          |
|----------|----------|----------|----------|----------|----------|----------|
| 0.011398 | 0.011398 | 0.011534 | 0.011568 | 0.011466 | 0.011398 | 0.011365 |
| 0.011432 | 0.011398 | 0.011500 | 0.011365 | 0.011500 | 0.011601 | 0.011839 |
| 0.011398 | 0.011805 | 0.011338 | 0.017997 | 0.011388 | 0.011556 | 0.011763 |
| 0.011723 | 0.011770 | 0.011427 | 0.011408 | 0.011895 | 0.011791 | 0.011491 |
| 0.011630 | 0.011679 | 0.011336 | 0.011356 | 0.011415 | 0.011410 | 0.011364 |
| 0.011623 | 0.011586 | 0.011546 | 0.011391 | 0.011534 | 0.011500 | 0.011572 |
| 0.011440 | 0.011534 | 0.011534 | 0.011500 | 0.011466 | 0.011466 | 0.011433 |
| 0.011466 | 0.011399 | 0.011432 | 0.011466 | 0.011433 | 0.011365 | 0.011331 |
| 0.011331 | 0.011466 | 0.011365 | 0.011466 | 0.011500 | 0.011534 | 0.011365 |
| 0.011466 | 0.011433 | 0.011771 | 0.011771 | 0.011500 | 0.011501 | 0.011568 |
| 0.011331 | 0.011331 | 0.011365 | 0.011466 | 0.011331 | 0.011568 | 0.011568 |
| 0.011602 | 0.011568 | 0.011534 | 0.011635 | 0.011805 | 0.011637 | 0.011466 |
| 0.011466 | 0.011534 | 0.011568 | 0.011399 | 0.011466 | 0.011432 | 0.011466 |
| 0.011534 | 0.011534 | 0.011568 | 0.011534 | 0.011434 | 0.011636 | 0.011602 |
| 0.011435 | 0.011365 | 0.011466 | 0.011568 | 0.011466 | 0.011602 | 0.011635 |
| 0.011737 | 0.011508 | 0.011669 | 0.011636 | 0.011568 | 0.011737 | 0.011365 |
| 0.011536 | 0.011433 | 0.011331 | 0.011331 | 0.011466 | 0.011365 | 0.011466 |
| 0.011500 | 0.011534 | 0.011365 | 0.011466 | 0.011433 | 0.011771 | 0.011771 |
| 0.011500 | 0.011501 | 0.011534 | 0.011466 | 0.012145 | 0.011600 | 0.011412 |
| 0.011592 | 0.011550 | 0.011624 | 0.011514 | 0.011660 | 0.011512 | 0.011546 |
| 0.012064 | 0.011374 | 0.011509 | 0.011444 | 0.011685 | 0.011609 | 0.011746 |
| 0.012122 | 0.011588 | 0.011708 | 0.011771 | 0.011635 | 0.011635 | 0.011673 |
| 0.011331 | 0.011500 | 0.011635 | 0.011601 | 0.011605 | 0.011601 | 0.011569 |
| 0.011432 | 0.011365 | 0.011398 | 0.011432 | 0.011331 | 0.011398 | 0.011297 |
| 0.011432 | 0.011466 | 0.011365 | 0.011331 | 0.011432 | 0.011365 | 0.011398 |
| 0.011398 | 0.011331 | 0.011398 | 0.011432 | 0.011331 | 0.011534 | 0.011568 |
| 0.011466 | 0.011534 | 0.011466 | 0.011466 | 0.011398 | 0.011805 | 0.011432 |
| 0.011478 | 0.011399 | 0.011636 | 0.011641 | 0.011500 | 0.011500 | 0.011500 |
| 0.011500 | 0.011432 | 0.011398 | 0.011432 | 0.011534 | 0.011534 | 0.011466 |
| 0.011466 | 0.011602 | 0.011771 | 0.011500 | 0.011703 | 0.011703 | 0.011568 |
| 0.011398 | 0.011466 | 0.011500 | 0.011906 | 0.011466 | 0.011500 | 0.011466 |
| 0.011500 | 0.011432 | 0.011432 | 0.011737 | 0.011669 | 0.011703 | 0.011432 |
| 0.011534 | 0.011602 | 0.011466 | 0.011534 | 0.011500 | 0.011365 | 0.011703 |
| 0.011466 | 0.011432 | 0.011432 | 0.011602 | 0.011432 | 0.011534 | 0.011771 |
| 0.011398 | 0.011848 | 0.011839 | 0.011676 | 0.011342 | 0.011540 | 0.011421 |
| 0.011394 | 0.011885 | 0.011379 | 0.011602 | 0.011406 | 0.011524 | 0.011544 |
| 0.011672 | 0.011394 | 0.011506 | 0.011324 | 0.011388 | 0.011529 | 0.011551 |
| 0.011554 | 0.011457 | 0.011522 | 0.011451 | 0.011468 | 0.011602 | 0.011670 |
| 0.011669 | 0.011535 | 0.011640 | 0.011641 | 0.011778 | 0.011809 | 0.011466 |
| 0.011703 | 0.011568 | 0.011432 | 0.011534 | 0.011331 | 0.011568 | 0.011365 |
| 0.011432 | 0.011432 | 0.011399 | 0.011365 | 0.011398 | 0.011365 | 0.011466 |
| 0.011448 | 0.011448 | 0.011440 | 0.011474 | 0.011612 | 0.011577 | 0.011576 |
| 0.011575 | 0.011467 | 0.011284 | 0.011314 | 0.011436 | 0.011607 | 0.011607 |
| 0.011399 | 0.011470 | 0.011671 | 0.011673 | 0.011603 | 0.011637 | 0.011500 |
| 0.011500 | 0.011500 | 0.011500 | 0.011466 | 0.012008 | 0.011635 | 0.011703 |
| 0.011737 | 0.011814 | 0.011438 | 0.011514 | 0.011398 | 0.011534 | 0.011500 |
| 0.011603 | 0.011568 | 0.011635 | 0.011635 | 0.011695 | 0.011703 | 0.011372 |
| 0.011299 | 0.011303 | 0.011369 | 0.011368 | 0.011473 | 0.011284 | 0.011642 |
| 0.011440 | 0.011587 | 0.011251 | 0.011435 | 0.011433 | 0.011509 | 0.011399 |
| 0.011365 | 0.011365 | 0.011433 | 0.011399 | 0.011602 | 0.011568 | 0.011500 |
| 0.011602 | 0.011669 | 0.011399 | 0.011399 | 0.011433 | 0.011432 | 0.011435 |
| 0.011503 | 0.011432 | 0.011433 | 0.011468 | 0.011602 | 0.011670 | 0.011669 |
| 0.011535 | 0.011640 | 0.011641 | 0.011778 | 0.011809 | 0.011466 | 0.011635 |
| 0.011500 | 0.011500 | 0.011401 | 0.011586 | 0.011515 | 0.011541 | 0.011413 |
| 0.011581 | 0.011751 | 0.011616 | 0.011471 | 0.011365 | 0.011568 | 0.011433 |
| 0.011500 | 0.011466 | 0.011365 | 0.011434 | 0.011568 | 0.011571 | 0.011466 |
| 0.011365 | 0.011298 | 0.011432 | 0.011365 | 0.011297 | 0.011403 | 0.011568 |
| 0.011466 | 0.011399 | 0.011432 | 0.011466 | 0.011433 | 0.011365 | 0.011568 |
| 0.011432 | 0.011466 | 0.011466 | 0.011398 | 0.011466 | 0.011703 | 0.011365 |
| 0.011398 | 0.011805 | 0.011398 | 0.011432 | 0.011398 | 0.011771 | 0.011360 |



|          |          |          |          |          |          |          |
|----------|----------|----------|----------|----------|----------|----------|
| 0.011847 | 0.011404 | 0.011411 | 0.011629 | 0.011718 | 0.011603 | 0.011271 |
| 0.011375 | 0.011568 | 0.011669 | 0.011779 | 0.011637 | 0.011776 | 0.011908 |
| 0.011806 | 0.011844 | 0.011805 | 0.012025 | 0.011737 | 0.012551 | 0.011739 |
| 0.012518 | 0.012216 | 0.012351 | 0.012659 | 0.011771 | 0.011466 | 0.011771 |
| 0.012179 | 0.012148 | 0.011737 | 0.011636 | 0.011704 | 0.011704 | 0.011674 |
| 0.011568 | 0.011573 | 0.011635 | 0.011602 | 0.011975 | 0.012042 | 0.012043 |
| 0.011942 | 0.012043 | 0.012148 | 0.011913 | 0.012180 | 0.012186 | 0.012248 |
| 0.012248 | 0.012282 | 0.012230 | 0.012248 | 0.012250 | 0.011432 | 0.011771 |
| 0.011874 | 0.012381 | 0.011846 | 0.012110 | 0.012587 | 0.011642 | 0.011534 |
| 0.011500 | 0.011500 | 0.011975 | 0.012007 | 0.012124 | 0.011839 | 0.011502 |
| S245     | 0.011866 | 0.011866 | 0.012068 | 0.011967 | 0.011967 | 0.012034 |
| 0.011876 | 0.011808 | 0.012034 | 0.011463 | 0.011530 | 0.011498 | 0.011463 |
| 0.011497 | 0.011665 | 0.011463 | 0.011497 | 0.011564 | 0.011530 | 0.011497 |
| 0.011463 | 0.011497 | 0.011597 | 0.011463 | 0.011497 | 0.011497 | 0.011841 |
| 0.011732 | 0.011497 | 0.011396 | 0.011631 | 0.011564 | 0.011530 | 0.011564 |
| 0.011530 | 0.011631 | 0.011530 | 0.011530 | 0.011564 | 0.011530 | 0.011698 |
| 0.011463 | 0.011530 | 0.011564 | 0.011497 | 0.011597 | 0.011631 | 0.011564 |
| 0.011530 | 0.011698 | 0.011598 | 0.011866 | 0.011530 | 0.011799 | 0.011530 |
| 0.011497 | 0.011598 | 0.011665 | 0.011799 | 0.011900 | 0.011597 | 0.011698 |
| 0.011564 | 0.011631 | 0.011530 | 0.011765 | 0.012001 | 0.011530 | 0.011597 |
| 0.011497 | 0.011597 | 0.011564 | 0.011631 | 0.011564 | 0.011564 | 0.011564 |
| 0.011463 | 0.011497 | 0.011463 | 0.011564 | 0.011530 | 0.011565 | 0.011631 |
| 0.011564 | 0.011530 | 0.011597 | 0.011497 | 0.011631 | 0.011463 | 0.011530 |
| 0.011698 | 0.011631 | 0.011866 | 0.011698 | 0.011530 | 0.011765 | 0.011530 |
| 0.011728 | 0.011957 | 0.011777 | 0.011490 | 0.011471 | 0.011539 | 0.011690 |
| 0.012305 | 0.011721 | 0.011472 | 0.011765 | 0.011765 | 0.011564 | 0.011665 |
| 0.011597 | 0.011564 | 0.011631 | 0.011530 | 0.011631 | 0.011564 | 0.011564 |
| 0.011530 | 0.011631 | 0.011833 | 0.011698 | 0.011597 | 0.011564 | 0.011497 |
| 0.011463 | 0.011463 | 0.011530 | 0.011497 | 0.011698 | 0.011665 | 0.011598 |
| 0.011698 | 0.011766 | 0.011497 | 0.011497 | 0.011531 | 0.011530 | 0.011533 |
| 0.011601 | 0.011530 | 0.011530 | 0.011420 | 0.011458 | 0.011411 | 0.011531 |
| 0.011534 | 0.011473 | 0.011540 | 0.011509 | 0.011434 | 0.011471 | 0.011499 |
| 0.011744 | 0.011543 | 0.011577 | 0.011464 | 0.011475 | 0.011599 | 0.011565 |
| 0.011632 | 0.011566 | 0.011565 | 0.011665 | 0.011597 | 0.011967 | 0.011766 |
| 0.011799 | 0.011665 | 0.011530 | 0.011631 | 0.011430 | 0.011665 | 0.011463 |
| 0.011530 | 0.011530 | 0.011497 | 0.011463 | 0.011497 | 0.011463 | 0.011564 |
| 0.011530 | 0.011631 | 0.011564 | 0.011463 | 0.011566 | 0.011665 | 0.011669 |
| 0.011665 | 0.011564 | 0.011463 | 0.011397 | 0.011530 | 0.011463 | 0.011396 |
| 0.011502 | 0.011665 | 0.011463 | 0.011665 | 0.011430 | 0.011530 | 0.011497 |
| 0.011598 | 0.011497 | 0.011530 | 0.011497 | 0.011530 | 0.011396 | 0.011530 |
| 0.011564 | 0.011497 | 0.011564 | 0.011497 | 0.011530 | 0.011564 | 0.011530 |
| 0.011900 | 0.011833 | 0.011900 | 0.011667 | 0.011900 | 0.011530 | 0.011497 |
| 0.011533 | 0.011748 | 0.011563 | 0.011438 | 0.011875 | 0.011367 | 0.011572 |
| 0.011909 | 0.011809 | 0.011698 | 0.011900 | 0.011607 | 0.011765 | 0.011732 |
| 0.011665 | 0.011833 | 0.011664 | 0.011514 | 0.011479 | 0.011564 | 0.011602 |
| 0.000000 | 0.011634 | 0.011770 | 0.011838 | 0.011765 | 0.011833 | 0.011941 |
| 0.011669 | 0.011841 | 0.011703 | 0.011703 | 0.011969 | 0.011429 | 0.011633 |
| 0.011597 | 0.011530 | 0.011429 | 0.011429 | 0.011497 | 0.011497 | 0.011564 |
| 0.011497 | 0.011564 | 0.011463 | 0.011564 | 0.011497 | 0.011497 | 0.011564 |
| 0.011497 | 0.011933 | 0.011833 | 0.011866 | 0.011396 | 0.011497 | 0.011530 |
| 0.011530 | 0.011497 | 0.011564 | 0.011597 | 0.011463 | 0.011463 | 0.011463 |
| 0.012001 | 0.011631 | 0.011631 | 0.011429 | 0.011530 | 0.011698 | 0.011463 |
| 0.011463 | 0.011530 | 0.011497 | 0.011665 | 0.011463 | 0.011597 | 0.011732 |
| 0.011665 | 0.011497 | 0.011497 | 0.011429 | 0.011429 | 0.011597 | 0.011530 |
| 0.011429 | 0.011530 | 0.011396 | 0.011429 | 0.011564 | 0.011699 | 0.011463 |
| 0.011430 | 0.011564 | 0.011497 | 0.011396 | 0.011732 | 0.011396 | 0.011564 |
| 0.011642 | 0.011463 | 0.011765 | 0.011598 | 0.011631 | 0.011497 | 0.011597 |
| 0.011463 | 0.011799 | 0.011396 | 0.011665 | 0.011463 | 0.011463 | 0.011396 |
| 0.011631 | 0.011833 | 0.011530 | 0.011597 | 0.011429 | 0.011833 | 0.011463 |
| 0.011463 | 0.011463 | 0.011497 | 0.011597 | 0.011497 | 0.011597 | 0.011665 |

|          |          |          |          |          |          |          |
|----------|----------|----------|----------|----------|----------|----------|
| 0.011665 | 0.011631 | 0.011530 | 0.011631 | 0.011597 | 0.011463 | 0.011429 |
| 0.011463 | 0.011463 | 0.011530 | 0.011463 | 0.011429 | 0.011597 | 0.011463 |
| 0.011497 | 0.011497 | 0.011631 | 0.011665 | 0.011564 | 0.011497 | 0.011497 |
| 0.011564 | 0.011497 | 0.011597 | 0.011463 | 0.011597 | 0.011698 | 0.011933 |
| 0.011497 | 0.011900 | 0.011509 | 0.017975 | 0.011388 | 0.011794 | 0.011863 |
| 0.011822 | 0.011869 | 0.011532 | 0.011525 | 0.012105 | 0.011889 | 0.011789 |
| 0.011772 | 0.011976 | 0.011450 | 0.011479 | 0.011451 | 0.011653 | 0.011534 |
| 0.011670 | 0.011693 | 0.011654 | 0.011325 | 0.011631 | 0.011665 | 0.011669 |
| 0.011541 | 0.011631 | 0.011631 | 0.011598 | 0.011564 | 0.011564 | 0.011531 |
| 0.011564 | 0.011497 | 0.011530 | 0.011564 | 0.011530 | 0.011463 | 0.011497 |
| 0.011497 | 0.011564 | 0.011463 | 0.011564 | 0.011598 | 0.011631 | 0.011530 |
| 0.011564 | 0.011530 | 0.011867 | 0.011867 | 0.011598 | 0.011632 | 0.011665 |
| 0.011430 | 0.011430 | 0.011463 | 0.011564 | 0.011430 | 0.011665 | 0.011665 |
| 0.011698 | 0.011698 | 0.011631 | 0.011732 | 0.011900 | 0.011734 | 0.011564 |
| 0.011564 | 0.011631 | 0.011665 | 0.011497 | 0.011564 | 0.011530 | 0.011564 |
| 0.011632 | 0.011631 | 0.011665 | 0.011632 | 0.011532 | 0.011732 | 0.011698 |
| 0.011568 | 0.011463 | 0.011564 | 0.011665 | 0.011564 | 0.011699 | 0.011463 |
| 0.011900 | 0.011607 | 0.011765 | 0.011732 | 0.011665 | 0.011833 | 0.011463 |
| 0.011633 | 0.011531 | 0.011497 | 0.011497 | 0.011564 | 0.011463 | 0.011564 |
| 0.011598 | 0.011631 | 0.011530 | 0.011564 | 0.011530 | 0.011867 | 0.011867 |
| 0.011598 | 0.011632 | 0.011698 | 0.011631 | 0.012271 | 0.011667 | 0.011588 |
| 0.011693 | 0.011650 | 0.011763 | 0.011649 | 0.011725 | 0.011681 | 0.011646 |
| 0.012228 | 0.011545 | 0.011677 | 0.011614 | 0.011887 | 0.011094 | 0.011843 |
| 0.012250 | 0.011701 | 0.011804 | 0.011866 | 0.011732 | 0.011732 | 0.011770 |
| 0.011429 | 0.011597 | 0.011732 | 0.011698 | 0.011702 | 0.011698 | 0.011667 |
| 0.011530 | 0.011463 | 0.011497 | 0.011530 | 0.011429 | 0.011497 | 0.011396 |
| 0.011530 | 0.011564 | 0.011463 | 0.011429 | 0.011530 | 0.011463 | 0.011497 |
| 0.011497 | 0.011429 | 0.011497 | 0.011530 | 0.011429 | 0.011631 | 0.011396 |
| 0.011564 | 0.011631 | 0.011564 | 0.011564 | 0.011497 | 0.011900 | 0.011530 |
| 0.011547 | 0.011497 | 0.011732 | 0.011739 | 0.011597 | 0.011597 | 0.011597 |
| 0.011597 | 0.011530 | 0.011497 | 0.011530 | 0.011631 | 0.011631 | 0.011497 |
| 0.011564 | 0.011698 | 0.011866 | 0.011597 | 0.011799 | 0.011799 | 0.011664 |
| 0.011497 | 0.011564 | 0.011597 | 0.012001 | 0.011497 | 0.011597 | 0.011564 |
| 0.011597 | 0.011530 | 0.011530 | 0.011833 | 0.011765 | 0.011799 | 0.011530 |
| 0.011631 | 0.011698 | 0.011497 | 0.011631 | 0.011597 | 0.011463 | 0.011799 |
| 0.011564 | 0.011530 | 0.011530 | 0.011698 | 0.011530 | 0.011631 | 0.011866 |
| 0.011497 | 0.011943 | 0.011933 | 0.011792 | 0.011286 | 0.011638 | 0.011576 |
| 0.011555 | 0.011995 | 0.011482 | 0.011730 | 0.011646 | 0.011722 | 0.011751 |
| 0.011621 | 0.011389 | 0.011673 | 0.011324 | 0.011545 | 0.011529 | 0.011385 |
| 0.011663 | 0.011572 | 0.011624 | 0.011553 | 0.011566 | 0.011698 | 0.011766 |
| 0.011766 | 0.011632 | 0.011737 | 0.011738 | 0.011874 | 0.011909 | 0.011564 |
| 0.011799 | 0.011665 | 0.011530 | 0.011631 | 0.011430 | 0.011665 | 0.011463 |
| 0.011530 | 0.011530 | 0.011497 | 0.011463 | 0.011497 | 0.011463 | 0.011564 |
| 0.011549 | 0.011550 | 0.011540 | 0.011574 | 0.011710 | 0.011675 | 0.011675 |
| 0.011674 | 0.011598 | 0.011430 | 0.011420 | 0.011534 | 0.011704 | 0.011705 |
| 0.011497 | 0.011568 | 0.011801 | 0.011770 | 0.011699 | 0.011733 | 0.011665 |
| 0.011597 | 0.011665 | 0.011664 | 0.011564 | 0.012135 | 0.011732 | 0.011799 |
| 0.011833 | 0.011915 | 0.011538 | 0.011615 | 0.011497 | 0.011698 | 0.011665 |
| 0.011700 | 0.011732 | 0.011732 | 0.011732 | 0.011807 | 0.011866 | 0.011477 |
| 0.011398 | 0.011372 | 0.011503 | 0.011468 | 0.011573 | 0.011359 | 0.011740 |
| 0.011540 | 0.011543 | 0.011298 | 0.011510 | 0.011531 | 0.011608 | 0.011497 |
| 0.011463 | 0.011463 | 0.011530 | 0.011497 | 0.011698 | 0.011665 | 0.011598 |
| 0.011698 | 0.011766 | 0.011497 | 0.011497 | 0.011531 | 0.011530 | 0.011533 |
| 0.011601 | 0.011530 | 0.011530 | 0.011566 | 0.011698 | 0.011766 | 0.011766 |
| 0.011632 | 0.011737 | 0.011738 | 0.011874 | 0.011909 | 0.011564 | 0.011463 |
| 0.011665 | 0.011665 | 0.011500 | 0.011652 | 0.011616 | 0.011639 | 0.011516 |
| 0.011680 | 0.011653 | 0.011357 | 0.011570 | 0.011463 | 0.011665 | 0.011530 |
| 0.011631 | 0.011564 | 0.011463 | 0.011566 | 0.011665 | 0.011669 | 0.011564 |
| 0.011463 | 0.011397 | 0.011530 | 0.011463 | 0.011396 | 0.011502 | 0.011665 |
| 0.011564 | 0.011497 | 0.011530 | 0.011564 | 0.011530 | 0.011463 | 0.011665 |

|          |          |          |          |          |          |          |
|----------|----------|----------|----------|----------|----------|----------|
| 0.011530 | 0.011564 | 0.011295 | 0.011497 | 0.011564 | 0.011799 | 0.011463 |
| 0.011497 | 0.011900 | 0.011497 | 0.011530 | 0.011497 | 0.011866 | 0.011446 |
| 0.011791 | 0.011528 | 0.011461 | 0.011745 | 0.011834 | 0.011706 | 0.011478 |
| 0.011375 | 0.011665 | 0.011765 | 0.011875 | 0.011734 | 0.011872 | 0.012002 |
| 0.011902 | 0.011940 | 0.011900 | 0.012154 | 0.011866 | 0.012742 | 0.011903 |
| 0.012642 | 0.012410 | 0.012544 | 0.012816 | 0.011866 | 0.011564 | 0.011867 |
| 0.012306 | 0.012241 | 0.011833 | 0.011732 | 0.011800 | 0.011800 | 0.011771 |
| 0.011665 | 0.011671 | 0.011732 | 0.011699 | 0.012069 | 0.012135 | 0.012137 |
| 0.012036 | 0.012137 | 0.012241 | 0.012008 | 0.012306 | 0.012313 | 0.012373 |
| 0.012374 | 0.012408 | 0.012357 | 0.012374 | 0.012376 | 0.011597 | 0.011901 |
| 0.011969 | 0.012472 | 0.011976 | 0.012203 | 0.012677 | 0.011740 | 0.011632 |
| 0.011597 | 0.011597 | 0.012069 | 0.012089 | 0.012222 | 0.011934 | 0.011599 |
| S246     | 0.011634 | 0.011634 | 0.011904 | 0.011870 | 0.011870 | 0.011937 |
| 0.011743 | 0.011674 | 0.011937 | 0.011364 | 0.011431 | 0.011398 | 0.011364 |
| 0.011397 | 0.011566 | 0.011364 | 0.011397 | 0.011465 | 0.011431 | 0.011397 |
| 0.011364 | 0.011397 | 0.011499 | 0.011364 | 0.011398 | 0.011397 | 0.011708 |
| 0.011633 | 0.011397 | 0.011296 | 0.011532 | 0.011465 | 0.011431 | 0.011465 |
| 0.011431 | 0.011532 | 0.011431 | 0.011431 | 0.011431 | 0.011431 | 0.011600 |
| 0.011364 | 0.011431 | 0.011465 | 0.011397 | 0.011499 | 0.011532 | 0.011465 |
| 0.011431 | 0.011600 | 0.011499 | 0.011769 | 0.011431 | 0.011701 | 0.011431 |
| 0.011397 | 0.011499 | 0.011566 | 0.011701 | 0.011802 | 0.011499 | 0.011600 |
| 0.011465 | 0.011532 | 0.011364 | 0.011667 | 0.011904 | 0.011397 | 0.011499 |
| 0.011397 | 0.011499 | 0.011465 | 0.011532 | 0.011465 | 0.011465 | 0.011465 |
| 0.011364 | 0.011397 | 0.011364 | 0.011465 | 0.011431 | 0.011466 | 0.011532 |
| 0.011465 | 0.011431 | 0.011499 | 0.011397 | 0.011532 | 0.011364 | 0.011431 |
| 0.011600 | 0.011532 | 0.011769 | 0.011600 | 0.011431 | 0.011667 | 0.011431 |
| 0.011580 | 0.011809 | 0.011627 | 0.011296 | 0.011360 | 0.011467 | 0.011534 |
| 0.012199 | 0.011570 | 0.011308 | 0.011667 | 0.011667 | 0.011465 | 0.011566 |
| 0.011499 | 0.011397 | 0.011397 | 0.011431 | 0.011532 | 0.011465 | 0.011263 |
| 0.011296 | 0.011532 | 0.011667 | 0.011600 | 0.011499 | 0.011465 | 0.011398 |
| 0.011364 | 0.011364 | 0.011431 | 0.011398 | 0.011600 | 0.011566 | 0.011499 |
| 0.011600 | 0.011668 | 0.011398 | 0.011398 | 0.011431 | 0.011431 | 0.011433 |
| 0.011502 | 0.011431 | 0.011431 | 0.011313 | 0.011387 | 0.011342 | 0.011431 |
| 0.011434 | 0.011371 | 0.011431 | 0.011407 | 0.011333 | 0.011370 | 0.011399 |
| 0.011675 | 0.011441 | 0.011475 | 0.011364 | 0.011373 | 0.011499 | 0.011465 |
| 0.011533 | 0.011466 | 0.011465 | 0.011364 | 0.011364 | 0.011870 | 0.011634 |
| 0.011701 | 0.011566 | 0.011431 | 0.011533 | 0.011330 | 0.011566 | 0.011364 |
| 0.011431 | 0.011431 | 0.011398 | 0.011364 | 0.011397 | 0.011364 | 0.011465 |
| 0.011431 | 0.011533 | 0.011465 | 0.011364 | 0.011466 | 0.011566 | 0.011570 |
| 0.011566 | 0.011465 | 0.011364 | 0.011297 | 0.011431 | 0.011364 | 0.011296 |
| 0.011401 | 0.011566 | 0.011364 | 0.011566 | 0.011330 | 0.011431 | 0.011398 |
| 0.011499 | 0.011330 | 0.011431 | 0.011398 | 0.011431 | 0.011296 | 0.011431 |
| 0.011465 | 0.011398 | 0.011465 | 0.011398 | 0.011229 | 0.011465 | 0.011701 |
| 0.011802 | 0.011735 | 0.011803 | 0.011568 | 0.011803 | 0.011296 | 0.011398 |
| 0.011433 | 0.011751 | 0.011473 | 0.011336 | 0.011810 | 0.011300 | 0.011415 |
| 0.011777 | 0.011675 | 0.011566 | 0.011735 | 0.011438 | 0.011667 | 0.011634 |
| 0.011566 | 0.011735 | 0.011487 | 0.011390 | 0.011438 | 0.011465 | 0.011468 |
| 0.011634 | 0.000000 | 0.011671 | 0.011738 | 0.011465 | 0.011667 | 0.011705 |
| 0.011366 | 0.011741 | 0.011536 | 0.011604 | 0.011803 | 0.011330 | 0.011534 |
| 0.011499 | 0.011431 | 0.011330 | 0.011330 | 0.011397 | 0.011397 | 0.011465 |
| 0.011397 | 0.011465 | 0.011364 | 0.011465 | 0.011397 | 0.011397 | 0.011465 |
| 0.011397 | 0.011836 | 0.011735 | 0.011769 | 0.011296 | 0.011397 | 0.011364 |
| 0.011431 | 0.011397 | 0.011465 | 0.011499 | 0.011364 | 0.011364 | 0.011364 |
| 0.011904 | 0.011499 | 0.011532 | 0.011330 | 0.011397 | 0.011600 | 0.011364 |
| 0.011364 | 0.011431 | 0.011397 | 0.011566 | 0.011364 | 0.011499 | 0.011633 |
| 0.011566 | 0.011397 | 0.011397 | 0.011330 | 0.011330 | 0.011499 | 0.011431 |
| 0.011330 | 0.011431 | 0.011296 | 0.011330 | 0.011465 | 0.011600 | 0.011364 |
| 0.011330 | 0.011465 | 0.011398 | 0.011296 | 0.011634 | 0.011296 | 0.011465 |
| 0.011506 | 0.011364 | 0.011667 | 0.011499 | 0.011532 | 0.011397 | 0.011465 |
| 0.011364 | 0.011701 | 0.011296 | 0.011566 | 0.011364 | 0.011364 | 0.011296 |

|          |          |          |          |          |          |          |
|----------|----------|----------|----------|----------|----------|----------|
| 0.011532 | 0.011735 | 0.011364 | 0.011499 | 0.011330 | 0.011735 | 0.011364 |
| 0.011364 | 0.011364 | 0.011397 | 0.011499 | 0.011397 | 0.011499 | 0.011566 |
| 0.011566 | 0.011532 | 0.011431 | 0.011532 | 0.011499 | 0.011364 | 0.011330 |
| 0.011364 | 0.011364 | 0.011364 | 0.011364 | 0.011330 | 0.011465 | 0.011364 |
| 0.011397 | 0.011397 | 0.011499 | 0.011566 | 0.011465 | 0.011397 | 0.011398 |
| 0.011465 | 0.011397 | 0.011465 | 0.011364 | 0.011499 | 0.011600 | 0.011836 |
| 0.011397 | 0.011802 | 0.011407 | 0.017928 | 0.011323 | 0.011491 | 0.011761 |
| 0.011720 | 0.011767 | 0.011323 | 0.011293 | 0.011777 | 0.011788 | 0.011365 |
| 0.011583 | 0.011550 | 0.011295 | 0.011270 | 0.011374 | 0.011357 | 0.011363 |
| 0.011578 | 0.011584 | 0.011544 | 0.011524 | 0.011532 | 0.011431 | 0.011502 |
| 0.011438 | 0.011532 | 0.011532 | 0.011499 | 0.011465 | 0.011465 | 0.011431 |
| 0.011465 | 0.011330 | 0.011431 | 0.011465 | 0.011431 | 0.011364 | 0.011263 |
| 0.011263 | 0.011465 | 0.011364 | 0.011398 | 0.011499 | 0.011532 | 0.011296 |
| 0.011465 | 0.011431 | 0.011769 | 0.011769 | 0.011499 | 0.011533 | 0.011566 |
| 0.011330 | 0.011330 | 0.011364 | 0.011465 | 0.011330 | 0.011566 | 0.011566 |
| 0.011600 | 0.011566 | 0.011532 | 0.011634 | 0.011803 | 0.011635 | 0.011465 |
| 0.011465 | 0.011499 | 0.011566 | 0.011398 | 0.011465 | 0.011431 | 0.011465 |
| 0.011533 | 0.011533 | 0.011566 | 0.011533 | 0.011432 | 0.011634 | 0.011533 |
| 0.011469 | 0.011364 | 0.011465 | 0.011533 | 0.011465 | 0.011600 | 0.011633 |
| 0.011735 | 0.011438 | 0.011667 | 0.011634 | 0.011566 | 0.011735 | 0.011364 |
| 0.011534 | 0.011432 | 0.011263 | 0.011263 | 0.011465 | 0.011364 | 0.011398 |
| 0.011499 | 0.011532 | 0.011296 | 0.011465 | 0.011431 | 0.011769 | 0.011769 |
| 0.011499 | 0.011533 | 0.011465 | 0.011397 | 0.012141 | 0.011596 | 0.011413 |
| 0.011588 | 0.011546 | 0.011658 | 0.011512 | 0.011655 | 0.011509 | 0.011510 |
| 0.012092 | 0.011303 | 0.011438 | 0.011441 | 0.011715 | 0.011640 | 0.011741 |
| 0.012083 | 0.011588 | 0.011706 | 0.011769 | 0.011634 | 0.011634 | 0.011671 |
| 0.011330 | 0.011499 | 0.011633 | 0.011600 | 0.011603 | 0.011600 | 0.011568 |
| 0.011431 | 0.011364 | 0.011397 | 0.011431 | 0.011330 | 0.011397 | 0.011296 |
| 0.011431 | 0.011465 | 0.011364 | 0.011330 | 0.011431 | 0.011364 | 0.011397 |
| 0.011397 | 0.011330 | 0.011397 | 0.011431 | 0.011330 | 0.011532 | 0.011566 |
| 0.011465 | 0.011532 | 0.011465 | 0.011465 | 0.011397 | 0.011802 | 0.011431 |
| 0.011479 | 0.011397 | 0.011633 | 0.011638 | 0.011499 | 0.011499 | 0.011499 |
| 0.011499 | 0.011431 | 0.011397 | 0.011431 | 0.011499 | 0.011532 | 0.011465 |
| 0.011465 | 0.011600 | 0.011769 | 0.011499 | 0.011701 | 0.011701 | 0.011566 |
| 0.011397 | 0.011465 | 0.011499 | 0.011904 | 0.011465 | 0.011499 | 0.011465 |
| 0.011499 | 0.011431 | 0.011431 | 0.011735 | 0.011600 | 0.011701 | 0.011431 |
| 0.011532 | 0.011600 | 0.011465 | 0.011532 | 0.011499 | 0.011364 | 0.011701 |
| 0.011465 | 0.011431 | 0.011431 | 0.011600 | 0.011431 | 0.011532 | 0.011769 |
| 0.011397 | 0.011811 | 0.011836 | 0.011631 | 0.011343 | 0.011538 | 0.011267 |
| 0.011336 | 0.011842 | 0.011378 | 0.011553 | 0.011403 | 0.011519 | 0.011486 |
| 0.011623 | 0.011324 | 0.011451 | 0.011325 | 0.011331 | 0.011396 | 0.011507 |
| 0.011513 | 0.011415 | 0.011520 | 0.011449 | 0.011467 | 0.011600 | 0.011668 |
| 0.011634 | 0.011533 | 0.011638 | 0.011639 | 0.011776 | 0.011771 | 0.011465 |
| 0.011701 | 0.011566 | 0.011431 | 0.011533 | 0.011330 | 0.011566 | 0.011364 |
| 0.011431 | 0.011431 | 0.011398 | 0.011364 | 0.011397 | 0.011364 | 0.011465 |
| 0.011446 | 0.011447 | 0.011438 | 0.011473 | 0.011610 | 0.011575 | 0.011574 |
| 0.011573 | 0.011499 | 0.011282 | 0.011277 | 0.011434 | 0.011536 | 0.011605 |
| 0.011398 | 0.011468 | 0.011702 | 0.011671 | 0.011600 | 0.011634 | 0.011431 |
| 0.011499 | 0.011499 | 0.011499 | 0.011465 | 0.012005 | 0.011634 | 0.011701 |
| 0.011735 | 0.011812 | 0.011437 | 0.011512 | 0.011397 | 0.011397 | 0.011431 |
| 0.011601 | 0.011465 | 0.011634 | 0.011634 | 0.011613 | 0.011634 | 0.011407 |
| 0.011298 | 0.011303 | 0.011401 | 0.011367 | 0.011472 | 0.011284 | 0.011639 |
| 0.011438 | 0.011499 | 0.011251 | 0.011398 | 0.011431 | 0.011507 | 0.011398 |
| 0.011364 | 0.011364 | 0.011431 | 0.011398 | 0.011600 | 0.011566 | 0.011499 |
| 0.011600 | 0.011668 | 0.011398 | 0.011398 | 0.011431 | 0.011431 | 0.011433 |
| 0.011502 | 0.011431 | 0.011431 | 0.011467 | 0.011600 | 0.011668 | 0.011634 |
| 0.011533 | 0.011638 | 0.011639 | 0.011776 | 0.011771 | 0.011465 | 0.011634 |
| 0.011431 | 0.011431 | 0.011400 | 0.011584 | 0.011479 | 0.011539 | 0.011377 |
| 0.011510 | 0.011747 | 0.011612 | 0.011470 | 0.011364 | 0.011566 | 0.011431 |
| 0.011533 | 0.011465 | 0.011364 | 0.011466 | 0.011566 | 0.011570 | 0.011465 |

|          |          |          |          |          |          |          |
|----------|----------|----------|----------|----------|----------|----------|
| 0.011364 | 0.011297 | 0.011431 | 0.011364 | 0.011296 | 0.011401 | 0.011566 |
| 0.011465 | 0.011330 | 0.011431 | 0.011465 | 0.011431 | 0.011364 | 0.011465 |
| 0.011431 | 0.011465 | 0.011465 | 0.011397 | 0.011465 | 0.011701 | 0.011364 |
| 0.011397 | 0.011802 | 0.011397 | 0.011431 | 0.011397 | 0.011769 | 0.011319 |
| 0.011850 | 0.011358 | 0.011362 | 0.011626 | 0.011672 | 0.011601 | 0.011270 |
| 0.011323 | 0.011566 | 0.011667 | 0.011776 | 0.011635 | 0.011774 | 0.011905 |
| 0.011803 | 0.011840 | 0.011802 | 0.012021 | 0.011769 | 0.012580 | 0.011804 |
| 0.012513 | 0.012245 | 0.012381 | 0.012687 | 0.011768 | 0.011465 | 0.011769 |
| 0.012176 | 0.012145 | 0.011735 | 0.011634 | 0.011702 | 0.011702 | 0.011672 |
| 0.011566 | 0.011571 | 0.011633 | 0.011600 | 0.011972 | 0.012005 | 0.012039 |
| 0.011905 | 0.012006 | 0.012143 | 0.011909 | 0.012176 | 0.012149 | 0.012244 |
| 0.012244 | 0.012278 | 0.012157 | 0.012244 | 0.012246 | 0.011364 | 0.011769 |
| 0.011871 | 0.012377 | 0.011844 | 0.012107 | 0.012582 | 0.011640 | 0.011533 |
| 0.011499 | 0.011498 | 0.011972 | 0.012007 | 0.012120 | 0.011768 | 0.011500 |
| S247     | 0.011872 | 0.011872 | 0.012245 | 0.012007 | 0.012007 | 0.012075 |
| 0.011916 | 0.011847 | 0.012075 | 0.011500 | 0.011567 | 0.011535 | 0.011500 |
| 0.011533 | 0.011703 | 0.011500 | 0.011533 | 0.011601 | 0.011567 | 0.011533 |
| 0.011500 | 0.011533 | 0.011635 | 0.011500 | 0.011534 | 0.011533 | 0.011881 |
| 0.011770 | 0.011533 | 0.011432 | 0.011669 | 0.011601 | 0.011567 | 0.011601 |
| 0.011567 | 0.011669 | 0.011567 | 0.011567 | 0.011601 | 0.011567 | 0.011736 |
| 0.011500 | 0.011567 | 0.011601 | 0.011533 | 0.011635 | 0.011635 | 0.011601 |
| 0.011567 | 0.011737 | 0.011635 | 0.011906 | 0.011567 | 0.011838 | 0.011567 |
| 0.011533 | 0.011635 | 0.011703 | 0.011838 | 0.011939 | 0.011635 | 0.011736 |
| 0.011601 | 0.011669 | 0.011567 | 0.011804 | 0.012041 | 0.011567 | 0.011635 |
| 0.011533 | 0.011635 | 0.011601 | 0.011669 | 0.011601 | 0.011601 | 0.011601 |
| 0.011500 | 0.011533 | 0.011500 | 0.011601 | 0.011567 | 0.011603 | 0.011669 |
| 0.011601 | 0.011567 | 0.011635 | 0.011533 | 0.011669 | 0.011500 | 0.011567 |
| 0.011736 | 0.011669 | 0.011906 | 0.011736 | 0.011567 | 0.011804 | 0.011567 |
| 0.011765 | 0.011995 | 0.011740 | 0.011493 | 0.011436 | 0.011617 | 0.011612 |
| 0.012278 | 0.011671 | 0.011431 | 0.011669 | 0.011669 | 0.011601 | 0.011703 |
| 0.011635 | 0.011601 | 0.011669 | 0.011567 | 0.011669 | 0.011601 | 0.011601 |
| 0.011567 | 0.011669 | 0.011872 | 0.011736 | 0.011635 | 0.011567 | 0.011534 |
| 0.011500 | 0.011500 | 0.011568 | 0.011534 | 0.011737 | 0.011703 | 0.011635 |
| 0.011737 | 0.011804 | 0.011534 | 0.011534 | 0.011568 | 0.011567 | 0.011570 |
| 0.011639 | 0.011567 | 0.011568 | 0.011423 | 0.011461 | 0.011449 | 0.011568 |
| 0.011538 | 0.011476 | 0.011469 | 0.011512 | 0.011471 | 0.011474 | 0.011537 |
| 0.011713 | 0.011546 | 0.011546 | 0.011500 | 0.011443 | 0.011636 | 0.011602 |
| 0.011670 | 0.011603 | 0.011602 | 0.011702 | 0.011601 | 0.012007 | 0.011805 |
| 0.011838 | 0.011703 | 0.011567 | 0.011669 | 0.011466 | 0.011703 | 0.011500 |
| 0.011567 | 0.011567 | 0.011534 | 0.011500 | 0.011533 | 0.011500 | 0.011601 |
| 0.011568 | 0.011669 | 0.011601 | 0.011500 | 0.011603 | 0.011703 | 0.011707 |
| 0.011703 | 0.011602 | 0.011500 | 0.011434 | 0.011567 | 0.011500 | 0.011432 |
| 0.011539 | 0.011703 | 0.011500 | 0.011703 | 0.011466 | 0.011568 | 0.011534 |
| 0.011568 | 0.011534 | 0.011568 | 0.011534 | 0.011568 | 0.011432 | 0.011568 |
| 0.011601 | 0.011534 | 0.011601 | 0.011534 | 0.011567 | 0.011601 | 0.011838 |
| 0.011940 | 0.011872 | 0.011940 | 0.011671 | 0.011940 | 0.011567 | 0.011534 |
| 0.011571 | 0.011876 | 0.011614 | 0.011475 | 0.011949 | 0.011438 | 0.011576 |
| 0.011950 | 0.011848 | 0.011601 | 0.011940 | 0.011576 | 0.011669 | 0.011770 |
| 0.011703 | 0.011736 | 0.011735 | 0.011472 | 0.011521 | 0.011601 | 0.011674 |
| 0.011770 | 0.011671 | 0.000000 | 0.011875 | 0.011804 | 0.011872 | 0.011979 |
| 0.011708 | 0.011881 | 0.011776 | 0.011741 | 0.012009 | 0.011466 | 0.011671 |
| 0.011635 | 0.011567 | 0.011466 | 0.011466 | 0.011533 | 0.011533 | 0.011601 |
| 0.011533 | 0.011601 | 0.011500 | 0.011601 | 0.011533 | 0.011533 | 0.011601 |
| 0.011533 | 0.011973 | 0.011872 | 0.011906 | 0.011432 | 0.011533 | 0.011567 |
| 0.011567 | 0.011533 | 0.011601 | 0.011635 | 0.011500 | 0.011500 | 0.011500 |
| 0.012041 | 0.011669 | 0.011669 | 0.011466 | 0.011567 | 0.011737 | 0.011500 |
| 0.011500 | 0.011567 | 0.011533 | 0.011703 | 0.011500 | 0.011635 | 0.011770 |
| 0.011703 | 0.011533 | 0.011533 | 0.011466 | 0.011466 | 0.011635 | 0.011567 |
| 0.011466 | 0.011567 | 0.011432 | 0.011466 | 0.011601 | 0.011737 | 0.011500 |
| 0.011466 | 0.011601 | 0.011534 | 0.011432 | 0.011770 | 0.011432 | 0.011601 |

|          |          |          |          |          |          |          |
|----------|----------|----------|----------|----------|----------|----------|
| 0.011681 | 0.011500 | 0.011804 | 0.011635 | 0.011669 | 0.011533 | 0.011635 |
| 0.011500 | 0.011838 | 0.011432 | 0.011703 | 0.011500 | 0.011500 | 0.011432 |
| 0.011669 | 0.011872 | 0.011567 | 0.011635 | 0.011466 | 0.011872 | 0.011500 |
| 0.011500 | 0.011500 | 0.011533 | 0.011635 | 0.011533 | 0.011635 | 0.011703 |
| 0.011703 | 0.011669 | 0.011567 | 0.011669 | 0.011635 | 0.011500 | 0.011466 |
| 0.011500 | 0.011500 | 0.011567 | 0.011500 | 0.011466 | 0.011635 | 0.011500 |
| 0.011533 | 0.011533 | 0.011669 | 0.011703 | 0.011601 | 0.011533 | 0.011534 |
| 0.011601 | 0.011533 | 0.011635 | 0.011500 | 0.011635 | 0.011601 | 0.012041 |
| 0.011533 | 0.011940 | 0.011547 | 0.018068 | 0.011388 | 0.011680 | 0.011904 |
| 0.011862 | 0.011911 | 0.011689 | 0.011466 | 0.011885 | 0.011930 | 0.011546 |
| 0.011725 | 0.011732 | 0.011372 | 0.011567 | 0.011533 | 0.011554 | 0.011538 |
| 0.011717 | 0.011623 | 0.011696 | 0.011457 | 0.011669 | 0.011669 | 0.011708 |
| 0.011576 | 0.011669 | 0.011635 | 0.011635 | 0.011601 | 0.011601 | 0.011568 |
| 0.011567 | 0.011533 | 0.011432 | 0.011601 | 0.011568 | 0.011500 | 0.011534 |
| 0.011534 | 0.011601 | 0.011500 | 0.011601 | 0.011635 | 0.011669 | 0.011567 |
| 0.011601 | 0.011568 | 0.011906 | 0.011906 | 0.011635 | 0.011670 | 0.011669 |
| 0.011466 | 0.011466 | 0.011500 | 0.011601 | 0.011466 | 0.011703 | 0.011703 |
| 0.011601 | 0.011601 | 0.011669 | 0.011635 | 0.011940 | 0.011637 | 0.011601 |
| 0.011466 | 0.011669 | 0.011703 | 0.011534 | 0.011601 | 0.011567 | 0.011567 |
| 0.011534 | 0.011534 | 0.011567 | 0.011669 | 0.011569 | 0.011737 | 0.011737 |
| 0.011606 | 0.011500 | 0.011601 | 0.011703 | 0.011601 | 0.011737 | 0.011770 |
| 0.011940 | 0.011576 | 0.011669 | 0.011770 | 0.011703 | 0.011736 | 0.011500 |
| 0.011637 | 0.011568 | 0.011534 | 0.011534 | 0.011601 | 0.011500 | 0.011601 |
| 0.011635 | 0.011669 | 0.011567 | 0.011601 | 0.011568 | 0.011906 | 0.011906 |
| 0.011635 | 0.011670 | 0.011702 | 0.011635 | 0.012314 | 0.011596 | 0.011659 |
| 0.011728 | 0.011615 | 0.011798 | 0.011686 | 0.000000 | 0.011715 | 0.011581 |
| 0.012263 | 0.011579 | 0.011711 | 0.011648 | 0.011921 | 0.011775 | 0.011878 |
| 0.012293 | 0.011776 | 0.011844 | 0.011906 | 0.011770 | 0.011770 | 0.011809 |
| 0.011466 | 0.011635 | 0.011770 | 0.011736 | 0.011741 | 0.011736 | 0.011705 |
| 0.011567 | 0.011500 | 0.011533 | 0.011567 | 0.011466 | 0.011533 | 0.011432 |
| 0.011567 | 0.011601 | 0.011500 | 0.011466 | 0.011567 | 0.011500 | 0.011533 |
| 0.011533 | 0.011466 | 0.011533 | 0.011567 | 0.011466 | 0.011669 | 0.011703 |
| 0.011601 | 0.011669 | 0.011601 | 0.011601 | 0.011533 | 0.011939 | 0.011567 |
| 0.011621 | 0.011534 | 0.011771 | 0.011778 | 0.011635 | 0.011635 | 0.011635 |
| 0.011635 | 0.011567 | 0.011533 | 0.011567 | 0.011669 | 0.011669 | 0.011601 |
| 0.011601 | 0.011736 | 0.011906 | 0.011635 | 0.011838 | 0.011838 | 0.011702 |
| 0.011533 | 0.011601 | 0.011635 | 0.012041 | 0.011602 | 0.011635 | 0.011601 |
| 0.011398 | 0.011567 | 0.011567 | 0.011872 | 0.011804 | 0.011838 | 0.011567 |
| 0.011669 | 0.011736 | 0.011601 | 0.011669 | 0.011635 | 0.011500 | 0.011838 |
| 0.011601 | 0.011567 | 0.011567 | 0.011736 | 0.011567 | 0.011669 | 0.011906 |
| 0.011601 | 0.011984 | 0.011973 | 0.011711 | 0.011399 | 0.011677 | 0.011421 |
| 0.011560 | 0.011924 | 0.011485 | 0.011596 | 0.011451 | 0.011468 | 0.011485 |
| 0.011672 | 0.011258 | 0.011450 | 0.011324 | 0.011384 | 0.011529 | 0.011588 |
| 0.011663 | 0.011493 | 0.011664 | 0.011593 | 0.011603 | 0.011737 | 0.011804 |
| 0.011804 | 0.011670 | 0.011775 | 0.011777 | 0.011914 | 0.011951 | 0.011601 |
| 0.011838 | 0.011703 | 0.011567 | 0.011669 | 0.011466 | 0.011703 | 0.011500 |
| 0.011567 | 0.011567 | 0.011534 | 0.011500 | 0.011533 | 0.011500 | 0.011601 |
| 0.011447 | 0.011518 | 0.011543 | 0.011578 | 0.011715 | 0.011680 | 0.011645 |
| 0.011678 | 0.011636 | 0.011395 | 0.011387 | 0.011538 | 0.011709 | 0.011710 |
| 0.011534 | 0.011572 | 0.011840 | 0.011809 | 0.011602 | 0.011772 | 0.011669 |
| 0.011635 | 0.011703 | 0.011702 | 0.011601 | 0.012177 | 0.011635 | 0.011703 |
| 0.011872 | 0.011955 | 0.011576 | 0.011654 | 0.011534 | 0.011737 | 0.011669 |
| 0.011738 | 0.011770 | 0.011635 | 0.011635 | 0.011813 | 0.011906 | 0.011547 |
| 0.011435 | 0.011441 | 0.011538 | 0.011505 | 0.011610 | 0.011471 | 0.011777 |
| 0.011576 | 0.011674 | 0.011441 | 0.011585 | 0.011568 | 0.011612 | 0.011534 |
| 0.011500 | 0.011500 | 0.011568 | 0.011534 | 0.011737 | 0.011703 | 0.011635 |
| 0.011737 | 0.011804 | 0.011534 | 0.011534 | 0.011568 | 0.011567 | 0.011570 |
| 0.011639 | 0.011567 | 0.011568 | 0.011603 | 0.011737 | 0.011804 | 0.011804 |
| 0.011670 | 0.011775 | 0.011777 | 0.011914 | 0.011951 | 0.011601 | 0.011770 |
| 0.011669 | 0.011669 | 0.011537 | 0.011656 | 0.011655 | 0.011643 | 0.011484 |

|          |          |          |          |          |          |          |
|----------|----------|----------|----------|----------|----------|----------|
| 0.011685 | 0.011933 | 0.011658 | 0.011608 | 0.011500 | 0.011703 | 0.011568 |
| 0.011669 | 0.011601 | 0.011500 | 0.011603 | 0.011703 | 0.011707 | 0.011602 |
| 0.011500 | 0.011434 | 0.011567 | 0.011500 | 0.011432 | 0.011539 | 0.011703 |
| 0.011567 | 0.011533 | 0.011432 | 0.011601 | 0.011568 | 0.011500 | 0.011703 |
| 0.011567 | 0.011601 | 0.011601 | 0.011533 | 0.011601 | 0.011838 | 0.011500 |
| 0.011533 | 0.011939 | 0.011533 | 0.011567 | 0.011533 | 0.011906 | 0.011406 |
| 0.011960 | 0.011443 | 0.011461 | 0.011669 | 0.011752 | 0.011711 | 0.011355 |
| 0.011428 | 0.011703 | 0.011804 | 0.011915 | 0.011772 | 0.011912 | 0.012043 |
| 0.011942 | 0.011980 | 0.011939 | 0.012162 | 0.011906 | 0.012787 | 0.011943 |
| 0.012653 | 0.012453 | 0.012588 | 0.012828 | 0.011906 | 0.011602 | 0.011906 |
| 0.012349 | 0.012284 | 0.011872 | 0.011771 | 0.011839 | 0.011839 | 0.011775 |
| 0.011703 | 0.011709 | 0.011770 | 0.011738 | 0.012110 | 0.012177 | 0.012179 |
| 0.012077 | 0.012178 | 0.012283 | 0.012048 | 0.012349 | 0.012323 | 0.012417 |
| 0.012418 | 0.012452 | 0.012401 | 0.012418 | 0.012419 | 0.011601 | 0.011940 |
| 0.012009 | 0.012516 | 0.012017 | 0.012245 | 0.012722 | 0.011779 | 0.011670 |
| 0.011635 | 0.011635 | 0.012110 | 0.012089 | 0.012230 | 0.011973 | 0.011637 |
| S248     | 0.011974 | 0.011974 | 0.012110 | 0.012008 | 0.012008 | 0.012076 |
| 0.011985 | 0.011916 | 0.012076 | 0.011568 | 0.011635 | 0.011603 | 0.011568 |
| 0.011601 | 0.011771 | 0.011568 | 0.011601 | 0.011669 | 0.011635 | 0.011601 |
| 0.011568 | 0.011601 | 0.011703 | 0.011568 | 0.011534 | 0.011601 | 0.011950 |
| 0.011838 | 0.011602 | 0.011500 | 0.011737 | 0.011601 | 0.011635 | 0.011602 |
| 0.011635 | 0.011669 | 0.011635 | 0.011635 | 0.011635 | 0.011635 | 0.011737 |
| 0.011568 | 0.011635 | 0.011669 | 0.011601 | 0.011703 | 0.011737 | 0.011669 |
| 0.011635 | 0.011805 | 0.011704 | 0.011974 | 0.011635 | 0.011601 | 0.011635 |
| 0.011601 | 0.011703 | 0.011771 | 0.011601 | 0.012008 | 0.011703 | 0.011805 |
| 0.011601 | 0.011669 | 0.011635 | 0.011804 | 0.012110 | 0.011601 | 0.011703 |
| 0.011601 | 0.011703 | 0.011669 | 0.011737 | 0.011669 | 0.011669 | 0.011669 |
| 0.011568 | 0.011601 | 0.011568 | 0.011669 | 0.011635 | 0.011671 | 0.011737 |
| 0.011669 | 0.011635 | 0.011635 | 0.011601 | 0.011737 | 0.011500 | 0.011635 |
| 0.011805 | 0.011737 | 0.011974 | 0.011805 | 0.011635 | 0.011805 | 0.011635 |
| 0.011805 | 0.012035 | 0.011894 | 0.011572 | 0.011512 | 0.011691 | 0.011693 |
| 0.012352 | 0.011724 | 0.011474 | 0.011872 | 0.011872 | 0.011669 | 0.011771 |
| 0.011703 | 0.011669 | 0.011737 | 0.011635 | 0.011737 | 0.011601 | 0.011669 |
| 0.011635 | 0.011737 | 0.011940 | 0.011804 | 0.011703 | 0.011669 | 0.011534 |
| 0.011568 | 0.011568 | 0.011568 | 0.011602 | 0.011805 | 0.011771 | 0.011703 |
| 0.011805 | 0.011873 | 0.011602 | 0.011602 | 0.011636 | 0.011636 | 0.011639 |
| 0.011708 | 0.011636 | 0.011636 | 0.011495 | 0.011607 | 0.011555 | 0.011636 |
| 0.011641 | 0.011580 | 0.011618 | 0.011617 | 0.011540 | 0.011578 | 0.011605 |
| 0.011895 | 0.011651 | 0.011616 | 0.011568 | 0.011583 | 0.011705 | 0.011670 |
| 0.011738 | 0.011672 | 0.011670 | 0.011771 | 0.011703 | 0.012008 | 0.011873 |
| 0.011906 | 0.011771 | 0.011635 | 0.011737 | 0.011534 | 0.011771 | 0.011568 |
| 0.011635 | 0.011635 | 0.011602 | 0.011568 | 0.011601 | 0.011568 | 0.011669 |
| 0.011568 | 0.011669 | 0.011670 | 0.011568 | 0.011672 | 0.011771 | 0.011776 |
| 0.011703 | 0.011670 | 0.011568 | 0.011502 | 0.011636 | 0.011568 | 0.011500 |
| 0.011539 | 0.011704 | 0.011500 | 0.011704 | 0.011534 | 0.011636 | 0.011602 |
| 0.011636 | 0.011602 | 0.011568 | 0.011602 | 0.011636 | 0.011500 | 0.011568 |
| 0.011602 | 0.011602 | 0.011670 | 0.011602 | 0.011636 | 0.011669 | 0.011907 |
| 0.012008 | 0.011940 | 0.012008 | 0.011774 | 0.012009 | 0.011635 | 0.011602 |
| 0.011639 | 0.011917 | 0.011750 | 0.011510 | 0.012018 | 0.011507 | 0.011614 |
| 0.012019 | 0.011917 | 0.011805 | 0.012008 | 0.011714 | 0.011873 | 0.011771 |
| 0.011771 | 0.011940 | 0.011807 | 0.011720 | 0.011773 | 0.011669 | 0.011742 |
| 0.011838 | 0.011738 | 0.011875 | 0.000000 | 0.011872 | 0.011805 | 0.012012 |
| 0.011777 | 0.000000 | 0.011879 | 0.011810 | 0.012077 | 0.011534 | 0.011739 |
| 0.011635 | 0.011635 | 0.011534 | 0.011534 | 0.011534 | 0.011601 | 0.011669 |
| 0.011534 | 0.011602 | 0.011500 | 0.011669 | 0.011534 | 0.011601 | 0.011669 |
| 0.011601 | 0.012042 | 0.011940 | 0.011974 | 0.011500 | 0.011602 | 0.011635 |
| 0.011635 | 0.011601 | 0.011669 | 0.011703 | 0.011568 | 0.011568 | 0.011568 |
| 0.012110 | 0.011737 | 0.011737 | 0.011534 | 0.011601 | 0.011737 | 0.011568 |
| 0.011568 | 0.011635 | 0.011601 | 0.011703 | 0.011568 | 0.011669 | 0.011737 |
| 0.011737 | 0.011601 | 0.011601 | 0.011534 | 0.011534 | 0.011703 | 0.011635 |

|          |          |          |          |          |          |          |
|----------|----------|----------|----------|----------|----------|----------|
| 0.011534 | 0.011635 | 0.011500 | 0.011534 | 0.011669 | 0.011805 | 0.011568 |
| 0.011534 | 0.011669 | 0.011602 | 0.011500 | 0.011838 | 0.011500 | 0.011669 |
| 0.011679 | 0.011568 | 0.011872 | 0.011703 | 0.011737 | 0.011602 | 0.011669 |
| 0.011568 | 0.011601 | 0.011500 | 0.011771 | 0.011568 | 0.011568 | 0.011500 |
| 0.011669 | 0.011941 | 0.011635 | 0.011703 | 0.011534 | 0.011940 | 0.011568 |
| 0.011568 | 0.011568 | 0.011601 | 0.011635 | 0.011601 | 0.011703 | 0.011771 |
| 0.011771 | 0.011737 | 0.011635 | 0.011737 | 0.011635 | 0.011568 | 0.011534 |
| 0.011568 | 0.011568 | 0.011635 | 0.011568 | 0.011466 | 0.011669 | 0.011568 |
| 0.011601 | 0.011601 | 0.011703 | 0.011771 | 0.011669 | 0.011534 | 0.011602 |
| 0.011669 | 0.011601 | 0.011669 | 0.011568 | 0.011703 | 0.011771 | 0.012042 |
| 0.011602 | 0.012008 | 0.011617 | 0.018109 | 0.011390 | 0.011991 | 0.011975 |
| 0.011932 | 0.011983 | 0.011587 | 0.011469 | 0.012110 | 0.012000 | 0.011671 |
| 0.011680 | 0.012043 | 0.011491 | 0.011525 | 0.011572 | 0.011755 | 0.011669 |
| 0.011815 | 0.011699 | 0.011658 | 0.011325 | 0.011737 | 0.011771 | 0.011776 |
| 0.011575 | 0.011737 | 0.011737 | 0.011703 | 0.011669 | 0.011670 | 0.011636 |
| 0.011669 | 0.011602 | 0.011635 | 0.011670 | 0.011636 | 0.011568 | 0.011602 |
| 0.011602 | 0.011670 | 0.011568 | 0.011670 | 0.011703 | 0.011737 | 0.011635 |
| 0.011669 | 0.011602 | 0.011974 | 0.011974 | 0.011703 | 0.011738 | 0.011771 |
| 0.011534 | 0.011534 | 0.011568 | 0.011602 | 0.011534 | 0.011771 | 0.011771 |
| 0.011805 | 0.011805 | 0.011737 | 0.011839 | 0.012008 | 0.011841 | 0.011602 |
| 0.011670 | 0.011703 | 0.011703 | 0.011602 | 0.011670 | 0.011636 | 0.011669 |
| 0.011738 | 0.011737 | 0.011771 | 0.011670 | 0.011501 | 0.011839 | 0.011737 |
| 0.011675 | 0.011568 | 0.011669 | 0.011737 | 0.011670 | 0.011805 | 0.011838 |
| 0.012008 | 0.011714 | 0.011873 | 0.011771 | 0.011771 | 0.011940 | 0.011568 |
| 0.011739 | 0.011636 | 0.011602 | 0.011602 | 0.011670 | 0.011568 | 0.011670 |
| 0.011703 | 0.011737 | 0.011635 | 0.011669 | 0.011602 | 0.011974 | 0.011974 |
| 0.011703 | 0.011738 | 0.011804 | 0.011737 | 0.012349 | 0.011811 | 0.011729 |
| 0.011799 | 0.011754 | 0.011869 | 0.011754 | 0.011865 | 0.011785 | 0.011720 |
| 0.012297 | 0.011649 | 0.011780 | 0.011717 | 0.011853 | 0.011845 | 0.011094 |
| 0.012325 | 0.011852 | 0.011912 | 0.011974 | 0.011838 | 0.011839 | 0.011878 |
| 0.011534 | 0.011635 | 0.011771 | 0.011737 | 0.011809 | 0.011804 | 0.011739 |
| 0.011635 | 0.011500 | 0.011534 | 0.011635 | 0.011466 | 0.011601 | 0.011500 |
| 0.011635 | 0.011669 | 0.011568 | 0.011534 | 0.011635 | 0.011568 | 0.011602 |
| 0.011601 | 0.011534 | 0.011601 | 0.011635 | 0.011534 | 0.011669 | 0.011771 |
| 0.011669 | 0.011737 | 0.011669 | 0.011669 | 0.011601 | 0.012008 | 0.011635 |
| 0.011689 | 0.011602 | 0.011839 | 0.011844 | 0.011635 | 0.011703 | 0.011703 |
| 0.011703 | 0.011568 | 0.011601 | 0.011568 | 0.011703 | 0.011737 | 0.011669 |
| 0.011669 | 0.011805 | 0.011974 | 0.011703 | 0.011906 | 0.011906 | 0.011771 |
| 0.011601 | 0.011669 | 0.011703 | 0.012110 | 0.011670 | 0.011635 | 0.011669 |
| 0.011703 | 0.011635 | 0.011635 | 0.011941 | 0.011805 | 0.011906 | 0.011635 |
| 0.011737 | 0.011805 | 0.011669 | 0.011737 | 0.011703 | 0.011568 | 0.011906 |
| 0.011669 | 0.011635 | 0.011635 | 0.011805 | 0.011635 | 0.011737 | 0.011974 |
| 0.011601 | 0.012053 | 0.012042 | 0.011754 | 0.011401 | 0.011746 | 0.011370 |
| 0.011728 | 0.011964 | 0.011591 | 0.011688 | 0.011550 | 0.011623 | 0.011541 |
| 0.011727 | 0.011391 | 0.011452 | 0.011260 | 0.011385 | 0.011397 | 0.011712 |
| 0.011703 | 0.011534 | 0.011735 | 0.011557 | 0.011672 | 0.011805 | 0.011873 |
| 0.011873 | 0.011738 | 0.011844 | 0.011846 | 0.011983 | 0.012023 | 0.011669 |
| 0.011906 | 0.011771 | 0.011635 | 0.011737 | 0.011534 | 0.011771 | 0.011568 |
| 0.011635 | 0.011635 | 0.011602 | 0.011568 | 0.011601 | 0.011568 | 0.011669 |
| 0.011659 | 0.011660 | 0.011647 | 0.011682 | 0.011819 | 0.011714 | 0.011783 |
| 0.011781 | 0.011704 | 0.011543 | 0.011496 | 0.011641 | 0.011812 | 0.011813 |
| 0.011603 | 0.011675 | 0.011909 | 0.011878 | 0.011806 | 0.011840 | 0.011771 |
| 0.011703 | 0.011771 | 0.011771 | 0.011669 | 0.012246 | 0.011839 | 0.011907 |
| 0.011941 | 0.011956 | 0.011645 | 0.011724 | 0.011601 | 0.011805 | 0.011771 |
| 0.011806 | 0.011838 | 0.011839 | 0.011839 | 0.011973 | 0.011974 | 0.011616 |
| 0.011502 | 0.011510 | 0.011606 | 0.011572 | 0.011678 | 0.011545 | 0.011844 |
| 0.011644 | 0.011762 | 0.011489 | 0.011697 | 0.011636 | 0.011716 | 0.011534 |
| 0.011568 | 0.011568 | 0.011568 | 0.011602 | 0.011805 | 0.011771 | 0.011703 |
| 0.011805 | 0.011873 | 0.011602 | 0.011602 | 0.011636 | 0.011636 | 0.011639 |
| 0.011708 | 0.011636 | 0.011636 | 0.011672 | 0.011805 | 0.011873 | 0.011873 |



|          |          |          |          |          |          |          |
|----------|----------|----------|----------|----------|----------|----------|
| 0.011738 | 0.011844 | 0.011846 | 0.011983 | 0.012023 | 0.011669 | 0.011838 |
| 0.011771 | 0.011771 | 0.011606 | 0.011762 | 0.011691 | 0.011747 | 0.011555 |
| 0.011720 | 0.012027 | 0.011699 | 0.011677 | 0.011500 | 0.011704 | 0.011568 |
| 0.011669 | 0.011670 | 0.011568 | 0.011672 | 0.011771 | 0.011776 | 0.011670 |
| 0.011568 | 0.011502 | 0.011636 | 0.011568 | 0.011500 | 0.011539 | 0.011704 |
| 0.011669 | 0.011602 | 0.011635 | 0.011670 | 0.011636 | 0.011568 | 0.011669 |
| 0.011635 | 0.011669 | 0.011669 | 0.011601 | 0.011669 | 0.011906 | 0.011568 |
| 0.011601 | 0.012008 | 0.011601 | 0.011568 | 0.011601 | 0.011974 | 0.011493 |
| 0.011851 | 0.011444 | 0.011463 | 0.011751 | 0.011837 | 0.011820 | 0.011482 |
| 0.011377 | 0.011737 | 0.011838 | 0.011950 | 0.011807 | 0.011879 | 0.012077 |
| 0.011976 | 0.012047 | 0.011974 | 0.012162 | 0.011906 | 0.012789 | 0.011977 |
| 0.012688 | 0.012454 | 0.012589 | 0.012829 | 0.011974 | 0.011670 | 0.011941 |
| 0.012350 | 0.012319 | 0.011906 | 0.011805 | 0.011874 | 0.011874 | 0.011844 |
| 0.011737 | 0.011744 | 0.011804 | 0.011772 | 0.012179 | 0.012211 | 0.012247 |
| 0.012112 | 0.012213 | 0.012352 | 0.012117 | 0.012384 | 0.012358 | 0.012452 |
| 0.012453 | 0.012487 | 0.012437 | 0.012453 | 0.012454 | 0.011703 | 0.011975 |
| 0.012078 | 0.012449 | 0.012052 | 0.012246 | 0.012723 | 0.011848 | 0.011738 |
| 0.011703 | 0.011703 | 0.012178 | 0.012254 | 0.012338 | 0.012042 | 0.011706 |
| S249     | 0.011765 | 0.011765 | 0.012135 | 0.012001 | 0.012001 | 0.012068 |
| 0.011875 | 0.011807 | 0.012068 | 0.011497 | 0.011564 | 0.011531 | 0.011497 |
| 0.011530 | 0.011698 | 0.011496 | 0.011530 | 0.011597 | 0.011564 | 0.011530 |
| 0.011497 | 0.011530 | 0.011631 | 0.011497 | 0.011531 | 0.011530 | 0.011841 |
| 0.011765 | 0.011530 | 0.011429 | 0.011664 | 0.011597 | 0.011564 | 0.011597 |
| 0.011564 | 0.011664 | 0.011564 | 0.011564 | 0.011597 | 0.011564 | 0.011732 |
| 0.011497 | 0.011564 | 0.011597 | 0.011530 | 0.011631 | 0.011664 | 0.011597 |
| 0.011564 | 0.011732 | 0.011631 | 0.011900 | 0.011564 | 0.011832 | 0.011564 |
| 0.011530 | 0.011631 | 0.011698 | 0.011832 | 0.011933 | 0.011631 | 0.011732 |
| 0.011597 | 0.011665 | 0.011564 | 0.011799 | 0.012034 | 0.011564 | 0.011631 |
| 0.011530 | 0.011631 | 0.011597 | 0.011664 | 0.011597 | 0.011597 | 0.011597 |
| 0.011496 | 0.011530 | 0.011497 | 0.011597 | 0.011564 | 0.011599 | 0.011664 |
| 0.011597 | 0.011564 | 0.011631 | 0.011530 | 0.011664 | 0.011497 | 0.011564 |
| 0.011732 | 0.011664 | 0.011900 | 0.011732 | 0.011564 | 0.011799 | 0.011564 |
| 0.011542 | 0.011770 | 0.011588 | 0.011255 | 0.011321 | 0.011465 | 0.011493 |
| 0.012158 | 0.011518 | 0.011307 | 0.011799 | 0.011799 | 0.011597 | 0.011698 |
| 0.011631 | 0.011530 | 0.011530 | 0.011564 | 0.011665 | 0.011597 | 0.011396 |
| 0.011429 | 0.011664 | 0.011799 | 0.011732 | 0.011631 | 0.011598 | 0.011530 |
| 0.011497 | 0.011497 | 0.011564 | 0.011530 | 0.011732 | 0.011698 | 0.011631 |
| 0.011732 | 0.011799 | 0.011530 | 0.011530 | 0.011564 | 0.011564 | 0.011567 |
| 0.011635 | 0.011564 | 0.011564 | 0.011384 | 0.011458 | 0.011481 | 0.011564 |
| 0.011568 | 0.011438 | 0.011503 | 0.011543 | 0.011468 | 0.011506 | 0.011533 |
| 0.011816 | 0.011577 | 0.011611 | 0.011497 | 0.011510 | 0.011632 | 0.011598 |
| 0.011666 | 0.011599 | 0.011598 | 0.011497 | 0.011497 | 0.012001 | 0.011799 |
| 0.011832 | 0.011698 | 0.011564 | 0.011665 | 0.011463 | 0.011698 | 0.011497 |
| 0.011564 | 0.011564 | 0.011530 | 0.011497 | 0.011530 | 0.011497 | 0.011598 |
| 0.011564 | 0.011665 | 0.011598 | 0.011497 | 0.011599 | 0.011698 | 0.011702 |
| 0.011699 | 0.011598 | 0.011497 | 0.011431 | 0.011564 | 0.011497 | 0.011430 |
| 0.011502 | 0.011699 | 0.011497 | 0.011699 | 0.011463 | 0.011564 | 0.011530 |
| 0.011631 | 0.011463 | 0.011564 | 0.011530 | 0.011564 | 0.011430 | 0.011564 |
| 0.011598 | 0.011530 | 0.011598 | 0.011530 | 0.011362 | 0.011598 | 0.011833 |
| 0.011934 | 0.011866 | 0.011934 | 0.011667 | 0.011934 | 0.011430 | 0.011530 |
| 0.011567 | 0.011747 | 0.011609 | 0.011403 | 0.011943 | 0.011435 | 0.011532 |
| 0.011909 | 0.011842 | 0.011698 | 0.011866 | 0.011572 | 0.011799 | 0.011765 |
| 0.011698 | 0.011866 | 0.011629 | 0.011555 | 0.011647 | 0.011597 | 0.011602 |
| 0.011765 | 0.011465 | 0.011804 | 0.011872 | 0.000000 | 0.011799 | 0.011840 |
| 0.011432 | 0.011875 | 0.011670 | 0.011737 | 0.011935 | 0.011463 | 0.011667 |
| 0.011631 | 0.011564 | 0.011463 | 0.011463 | 0.011530 | 0.011530 | 0.011597 |
| 0.011530 | 0.011597 | 0.011497 | 0.011597 | 0.011530 | 0.011530 | 0.011597 |
| 0.011530 | 0.011967 | 0.011866 | 0.011900 | 0.011429 | 0.011530 | 0.011564 |
| 0.011564 | 0.011530 | 0.011597 | 0.011631 | 0.011496 | 0.011496 | 0.011496 |
| 0.012034 | 0.011664 | 0.011664 | 0.011463 | 0.011564 | 0.011732 | 0.011497 |

|          |          |          |          |          |          |          |
|----------|----------|----------|----------|----------|----------|----------|
| 0.011496 | 0.011564 | 0.011530 | 0.011698 | 0.011497 | 0.011631 | 0.011765 |
| 0.011698 | 0.011530 | 0.011530 | 0.011463 | 0.011463 | 0.011631 | 0.011564 |
| 0.011463 | 0.011564 | 0.011429 | 0.011463 | 0.011597 | 0.011732 | 0.011497 |
| 0.011463 | 0.011597 | 0.011531 | 0.011429 | 0.011765 | 0.011429 | 0.011597 |
| 0.011642 | 0.011497 | 0.011799 | 0.011631 | 0.011664 | 0.011530 | 0.011631 |
| 0.011496 | 0.011832 | 0.011429 | 0.011698 | 0.011497 | 0.011497 | 0.011429 |
| 0.011664 | 0.011833 | 0.011564 | 0.011631 | 0.011463 | 0.011866 | 0.011497 |
| 0.011497 | 0.011496 | 0.011530 | 0.011631 | 0.011530 | 0.011631 | 0.011698 |
| 0.011698 | 0.011664 | 0.011564 | 0.011665 | 0.011631 | 0.011497 | 0.011463 |
| 0.011496 | 0.011497 | 0.011564 | 0.011497 | 0.011463 | 0.011631 | 0.011497 |
| 0.011530 | 0.011530 | 0.011664 | 0.011698 | 0.011597 | 0.011530 | 0.011530 |
| 0.011597 | 0.011530 | 0.011631 | 0.011497 | 0.011631 | 0.011732 | 0.011967 |
| 0.011530 | 0.011933 | 0.011405 | 0.017898 | 0.011257 | 0.011549 | 0.011758 |
| 0.011787 | 0.011764 | 0.011427 | 0.011292 | 0.011829 | 0.011854 | 0.011425 |
| 0.011582 | 0.011610 | 0.011255 | 0.011353 | 0.011372 | 0.011406 | 0.011318 |
| 0.011529 | 0.011544 | 0.011542 | 0.011391 | 0.011665 | 0.011564 | 0.011635 |
| 0.011575 | 0.011665 | 0.011665 | 0.011631 | 0.011597 | 0.011598 | 0.011564 |
| 0.011597 | 0.011463 | 0.011564 | 0.011598 | 0.011564 | 0.011497 | 0.011396 |
| 0.011396 | 0.011598 | 0.011497 | 0.011598 | 0.011631 | 0.011665 | 0.011429 |
| 0.011597 | 0.011564 | 0.011900 | 0.011900 | 0.011631 | 0.011666 | 0.011699 |
| 0.011463 | 0.011463 | 0.011497 | 0.011598 | 0.011463 | 0.011698 | 0.011698 |
| 0.011732 | 0.011698 | 0.011665 | 0.011765 | 0.011934 | 0.011768 | 0.011597 |
| 0.011598 | 0.011665 | 0.011698 | 0.011530 | 0.011598 | 0.011564 | 0.011597 |
| 0.011665 | 0.011665 | 0.011698 | 0.011665 | 0.011565 | 0.011765 | 0.011665 |
| 0.011602 | 0.011497 | 0.011598 | 0.011699 | 0.011598 | 0.011732 | 0.011765 |
| 0.011866 | 0.011572 | 0.011799 | 0.011765 | 0.011698 | 0.011866 | 0.011497 |
| 0.011667 | 0.011564 | 0.011396 | 0.011396 | 0.011598 | 0.011497 | 0.011598 |
| 0.011631 | 0.011665 | 0.011429 | 0.011597 | 0.011564 | 0.011900 | 0.011900 |
| 0.011631 | 0.011666 | 0.011597 | 0.011530 | 0.012271 | 0.011739 | 0.011553 |
| 0.011728 | 0.011684 | 0.011798 | 0.011649 | 0.011795 | 0.011646 | 0.011681 |
| 0.012228 | 0.011441 | 0.011574 | 0.011579 | 0.011852 | 0.011774 | 0.011877 |
| 0.012216 | 0.011739 | 0.011838 | 0.011900 | 0.011765 | 0.011765 | 0.011804 |
| 0.011463 | 0.011631 | 0.011765 | 0.011732 | 0.011736 | 0.011732 | 0.011700 |
| 0.011564 | 0.011497 | 0.011530 | 0.011564 | 0.011463 | 0.011530 | 0.011429 |
| 0.011564 | 0.011597 | 0.011497 | 0.011463 | 0.011564 | 0.011496 | 0.011530 |
| 0.011530 | 0.011463 | 0.011530 | 0.011564 | 0.011463 | 0.011664 | 0.011698 |
| 0.011597 | 0.011664 | 0.011597 | 0.011597 | 0.011530 | 0.011933 | 0.011564 |
| 0.011617 | 0.011530 | 0.011766 | 0.011773 | 0.011631 | 0.011631 | 0.011631 |
| 0.011631 | 0.011564 | 0.011530 | 0.011564 | 0.011664 | 0.011665 | 0.011597 |
| 0.011597 | 0.011732 | 0.011900 | 0.011631 | 0.011833 | 0.011833 | 0.011698 |
| 0.011530 | 0.011597 | 0.011631 | 0.012034 | 0.011598 | 0.011631 | 0.011597 |
| 0.011631 | 0.011564 | 0.011564 | 0.011866 | 0.011799 | 0.011833 | 0.011564 |
| 0.011665 | 0.011732 | 0.011597 | 0.011665 | 0.011631 | 0.011497 | 0.011832 |
| 0.011597 | 0.011564 | 0.011564 | 0.011732 | 0.011564 | 0.011664 | 0.011900 |
| 0.011530 | 0.011943 | 0.011967 | 0.011588 | 0.011286 | 0.011672 | 0.011318 |
| 0.011390 | 0.011800 | 0.011376 | 0.011551 | 0.011353 | 0.011467 | 0.011485 |
| 0.011570 | 0.011324 | 0.011450 | 0.011258 | 0.011330 | 0.011462 | 0.011466 |
| 0.011475 | 0.011375 | 0.011518 | 0.011448 | 0.011600 | 0.011732 | 0.011799 |
| 0.011799 | 0.011666 | 0.011770 | 0.011772 | 0.011874 | 0.011909 | 0.011597 |
| 0.011832 | 0.011698 | 0.011564 | 0.011665 | 0.011463 | 0.011698 | 0.011497 |
| 0.011564 | 0.011564 | 0.011530 | 0.011497 | 0.011530 | 0.011497 | 0.011598 |
| 0.011584 | 0.011585 | 0.011574 | 0.011608 | 0.011745 | 0.011709 | 0.011709 |
| 0.011708 | 0.011632 | 0.011429 | 0.011420 | 0.011568 | 0.011738 | 0.011739 |
| 0.011531 | 0.011602 | 0.011835 | 0.011804 | 0.011733 | 0.011767 | 0.011564 |
| 0.011631 | 0.011631 | 0.011631 | 0.011597 | 0.012135 | 0.011765 | 0.011833 |
| 0.011867 | 0.011915 | 0.011572 | 0.011615 | 0.011530 | 0.011530 | 0.011564 |
| 0.011733 | 0.011631 | 0.011765 | 0.011765 | 0.011807 | 0.011765 | 0.011546 |
| 0.011432 | 0.011441 | 0.011537 | 0.011502 | 0.011607 | 0.011471 | 0.011774 |
| 0.011575 | 0.011630 | 0.011346 | 0.011547 | 0.011565 | 0.011642 | 0.011530 |
| 0.011497 | 0.011497 | 0.011564 | 0.011530 | 0.011732 | 0.011698 | 0.011631 |

|          |          |          |          |          |          |          |
|----------|----------|----------|----------|----------|----------|----------|
| 0.011732 | 0.011799 | 0.011530 | 0.011530 | 0.011564 | 0.011564 | 0.011567 |
| 0.011635 | 0.011564 | 0.011564 | 0.011600 | 0.011732 | 0.011799 | 0.011799 |
| 0.011666 | 0.011770 | 0.011772 | 0.011874 | 0.011909 | 0.011597 | 0.011765 |
| 0.011564 | 0.011564 | 0.011534 | 0.011722 | 0.011651 | 0.011673 | 0.011516 |
| 0.011715 | 0.011835 | 0.011738 | 0.011570 | 0.011497 | 0.011699 | 0.011564 |
| 0.011665 | 0.011598 | 0.011497 | 0.011599 | 0.011698 | 0.011702 | 0.011598 |
| 0.011497 | 0.011431 | 0.011564 | 0.011497 | 0.011430 | 0.011502 | 0.011699 |
| 0.011597 | 0.011463 | 0.011564 | 0.011598 | 0.011564 | 0.011497 | 0.011698 |
| 0.011564 | 0.011597 | 0.011597 | 0.011530 | 0.011597 | 0.011833 | 0.011497 |
| 0.011530 | 0.011933 | 0.011530 | 0.011564 | 0.011530 | 0.011900 | 0.011317 |
| 0.011791 | 0.011315 | 0.011311 | 0.011583 | 0.011630 | 0.011563 | 0.011227 |
| 0.011270 | 0.011698 | 0.011799 | 0.011909 | 0.011767 | 0.011838 | 0.012036 |
| 0.011935 | 0.011974 | 0.011933 | 0.012120 | 0.011900 | 0.012708 | 0.011936 |
| 0.012675 | 0.012376 | 0.012510 | 0.012849 | 0.011900 | 0.011598 | 0.011900 |
| 0.012306 | 0.012241 | 0.011866 | 0.011766 | 0.011834 | 0.011834 | 0.011804 |
| 0.011698 | 0.011637 | 0.011765 | 0.011733 | 0.012103 | 0.012169 | 0.012170 |
| 0.012070 | 0.012170 | 0.012274 | 0.011974 | 0.012306 | 0.012313 | 0.012373 |
| 0.012374 | 0.012408 | 0.012221 | 0.012374 | 0.012376 | 0.011497 | 0.011901 |
| 0.012002 | 0.012506 | 0.011976 | 0.012236 | 0.012710 | 0.011773 | 0.011665 |
| 0.011631 | 0.011631 | 0.012102 | 0.012171 | 0.012186 | 0.011967 | 0.011633 |
| S250     | 0.011900 | 0.011900 | 0.012169 | 0.012034 | 0.012034 | 0.012102 |
| 0.011944 | 0.011876 | 0.012102 | 0.011564 | 0.011631 | 0.011599 | 0.011564 |
| 0.011597 | 0.011765 | 0.011564 | 0.011597 | 0.011665 | 0.011631 | 0.011597 |
| 0.011564 | 0.011597 | 0.011698 | 0.011564 | 0.011598 | 0.011597 | 0.011909 |
| 0.011833 | 0.011597 | 0.011497 | 0.011732 | 0.011665 | 0.011631 | 0.011665 |
| 0.011631 | 0.011732 | 0.011631 | 0.011631 | 0.011665 | 0.011631 | 0.011799 |
| 0.011564 | 0.011631 | 0.011665 | 0.011597 | 0.011698 | 0.011732 | 0.011665 |
| 0.011631 | 0.011799 | 0.011699 | 0.011967 | 0.011631 | 0.011900 | 0.011631 |
| 0.011597 | 0.011698 | 0.011765 | 0.011900 | 0.012001 | 0.011698 | 0.011732 |
| 0.011665 | 0.011732 | 0.011631 | 0.011866 | 0.012102 | 0.011631 | 0.011698 |
| 0.011597 | 0.011698 | 0.011665 | 0.011732 | 0.011665 | 0.011665 | 0.011665 |
| 0.011564 | 0.011597 | 0.011564 | 0.011665 | 0.011631 | 0.011666 | 0.011732 |
| 0.011665 | 0.011631 | 0.011698 | 0.011597 | 0.011732 | 0.011564 | 0.011631 |
| 0.011799 | 0.011732 | 0.011967 | 0.011799 | 0.011631 | 0.011866 | 0.011631 |
| 0.011802 | 0.012032 | 0.011853 | 0.011529 | 0.011583 | 0.011649 | 0.011769 |
| 0.012415 | 0.011772 | 0.011554 | 0.011866 | 0.011866 | 0.011664 | 0.011765 |
| 0.011698 | 0.011463 | 0.011665 | 0.011631 | 0.011732 | 0.011665 | 0.011597 |
| 0.011564 | 0.011732 | 0.011732 | 0.011799 | 0.011698 | 0.011665 | 0.011598 |
| 0.011564 | 0.011564 | 0.011631 | 0.011598 | 0.011799 | 0.011766 | 0.011698 |
| 0.011799 | 0.011867 | 0.011598 | 0.011598 | 0.011631 | 0.011631 | 0.011635 |
| 0.011703 | 0.011631 | 0.011631 | 0.011528 | 0.011566 | 0.011516 | 0.011632 |
| 0.011636 | 0.011576 | 0.011614 | 0.011612 | 0.011536 | 0.011574 | 0.011601 |
| 0.011816 | 0.011646 | 0.011680 | 0.011565 | 0.011579 | 0.011700 | 0.011666 |
| 0.011733 | 0.011667 | 0.011666 | 0.011698 | 0.011631 | 0.012068 | 0.011867 |
| 0.011900 | 0.011698 | 0.011631 | 0.011665 | 0.011530 | 0.011765 | 0.011564 |
| 0.011631 | 0.011631 | 0.011598 | 0.011564 | 0.011597 | 0.011564 | 0.011665 |
| 0.011631 | 0.011732 | 0.011665 | 0.011564 | 0.011667 | 0.011766 | 0.011770 |
| 0.011766 | 0.011665 | 0.011564 | 0.011499 | 0.011631 | 0.011564 | 0.011497 |
| 0.011536 | 0.011766 | 0.011564 | 0.011766 | 0.011530 | 0.011631 | 0.011598 |
| 0.011699 | 0.011598 | 0.011631 | 0.011598 | 0.011631 | 0.011497 | 0.011631 |
| 0.011665 | 0.011598 | 0.011665 | 0.011598 | 0.011564 | 0.011665 | 0.011900 |
| 0.012001 | 0.011934 | 0.012001 | 0.011768 | 0.012001 | 0.011564 | 0.011598 |
| 0.011635 | 0.011910 | 0.011747 | 0.011541 | 0.012011 | 0.011504 | 0.011651 |
| 0.011977 | 0.011911 | 0.011765 | 0.011799 | 0.011709 | 0.011866 | 0.011833 |
| 0.011765 | 0.011933 | 0.011700 | 0.011637 | 0.011689 | 0.011665 | 0.011635 |
| 0.011833 | 0.011667 | 0.011872 | 0.011805 | 0.011799 | 0.000000 | 0.011975 |
| 0.011703 | 0.011807 | 0.011805 | 0.011804 | 0.011868 | 0.011530 | 0.011734 |
| 0.011698 | 0.011631 | 0.011530 | 0.011530 | 0.011597 | 0.011597 | 0.011665 |
| 0.011597 | 0.011665 | 0.011564 | 0.011665 | 0.011597 | 0.011597 | 0.011664 |
| 0.011597 | 0.012034 | 0.011934 | 0.011967 | 0.011497 | 0.011597 | 0.011631 |

|          |          |          |          |          |          |          |
|----------|----------|----------|----------|----------|----------|----------|
| 0.011631 | 0.011597 | 0.011665 | 0.011631 | 0.011564 | 0.011564 | 0.011564 |
| 0.012102 | 0.011732 | 0.011732 | 0.011530 | 0.011631 | 0.011799 | 0.011564 |
| 0.011564 | 0.011631 | 0.011597 | 0.011766 | 0.011564 | 0.011698 | 0.011833 |
| 0.011765 | 0.011597 | 0.011597 | 0.011530 | 0.011530 | 0.011698 | 0.011631 |
| 0.011530 | 0.011631 | 0.011497 | 0.011530 | 0.011665 | 0.011799 | 0.011564 |
| 0.011531 | 0.011665 | 0.011598 | 0.011497 | 0.011833 | 0.011497 | 0.011665 |
| 0.011745 | 0.011564 | 0.011866 | 0.011698 | 0.011732 | 0.011597 | 0.011698 |
| 0.011564 | 0.011900 | 0.011497 | 0.011765 | 0.011564 | 0.011564 | 0.011497 |
| 0.011732 | 0.011934 | 0.011631 | 0.011698 | 0.011530 | 0.011934 | 0.011564 |
| 0.011564 | 0.011564 | 0.011597 | 0.011698 | 0.011530 | 0.011698 | 0.011765 |
| 0.011765 | 0.011732 | 0.011631 | 0.011732 | 0.011698 | 0.011564 | 0.011530 |
| 0.011564 | 0.011564 | 0.011631 | 0.011564 | 0.011530 | 0.011698 | 0.011564 |
| 0.011597 | 0.011597 | 0.011732 | 0.011765 | 0.011665 | 0.011597 | 0.011598 |
| 0.011665 | 0.011597 | 0.011698 | 0.011564 | 0.011698 | 0.011799 | 0.012034 |
| 0.011597 | 0.012001 | 0.011612 | 0.018164 | 0.011322 | 0.011856 | 0.011968 |
| 0.011926 | 0.011975 | 0.011584 | 0.011466 | 0.011994 | 0.011993 | 0.011729 |
| 0.011582 | 0.011915 | 0.011489 | 0.011563 | 0.011451 | 0.011702 | 0.011620 |
| 0.011764 | 0.011768 | 0.011765 | 0.011457 | 0.011732 | 0.011698 | 0.011771 |
| 0.011644 | 0.011732 | 0.011732 | 0.011698 | 0.011665 | 0.011665 | 0.011632 |
| 0.011665 | 0.011597 | 0.011631 | 0.011665 | 0.011631 | 0.011564 | 0.011530 |
| 0.011530 | 0.011665 | 0.011564 | 0.011665 | 0.011698 | 0.011732 | 0.011564 |
| 0.011665 | 0.011631 | 0.011968 | 0.011968 | 0.011699 | 0.011733 | 0.011699 |
| 0.011530 | 0.011530 | 0.011564 | 0.011665 | 0.011530 | 0.011766 | 0.011766 |
| 0.011799 | 0.011765 | 0.011732 | 0.011833 | 0.012001 | 0.011835 | 0.011665 |
| 0.011665 | 0.011732 | 0.011766 | 0.011598 | 0.011665 | 0.011631 | 0.011665 |
| 0.011733 | 0.011732 | 0.011766 | 0.011732 | 0.011633 | 0.011833 | 0.011799 |
| 0.011670 | 0.011564 | 0.011665 | 0.011766 | 0.011598 | 0.011799 | 0.011832 |
| 0.011799 | 0.011709 | 0.011866 | 0.011833 | 0.011765 | 0.011933 | 0.011564 |
| 0.011734 | 0.011632 | 0.011530 | 0.011530 | 0.011665 | 0.011564 | 0.011665 |
| 0.011698 | 0.011732 | 0.011564 | 0.011665 | 0.011631 | 0.011968 | 0.011968 |
| 0.011699 | 0.011733 | 0.011732 | 0.011665 | 0.012339 | 0.011811 | 0.011623 |
| 0.011799 | 0.011754 | 0.011833 | 0.011753 | 0.011865 | 0.011578 | 0.011750 |
| 0.012297 | 0.011579 | 0.011711 | 0.011510 | 0.000000 | 0.011843 | 0.011809 |
| 0.012319 | 0.011814 | 0.011906 | 0.011967 | 0.011833 | 0.011833 | 0.011872 |
| 0.011530 | 0.011698 | 0.011832 | 0.011799 | 0.011804 | 0.011799 | 0.011768 |
| 0.011631 | 0.011564 | 0.011597 | 0.011631 | 0.011530 | 0.011597 | 0.011497 |
| 0.011631 | 0.011665 | 0.011564 | 0.011530 | 0.011631 | 0.011564 | 0.011597 |
| 0.011597 | 0.011530 | 0.011597 | 0.011631 | 0.011530 | 0.011732 | 0.011765 |
| 0.011665 | 0.011732 | 0.011665 | 0.011665 | 0.011597 | 0.012001 | 0.011631 |
| 0.011652 | 0.011597 | 0.011833 | 0.011841 | 0.011698 | 0.011698 | 0.011698 |
| 0.011698 | 0.011631 | 0.011597 | 0.011631 | 0.011732 | 0.011732 | 0.011665 |
| 0.011664 | 0.011799 | 0.011967 | 0.011698 | 0.011900 | 0.011900 | 0.011765 |
| 0.011597 | 0.011665 | 0.011698 | 0.012102 | 0.011665 | 0.011698 | 0.011665 |
| 0.011698 | 0.011631 | 0.011631 | 0.011934 | 0.011867 | 0.011900 | 0.011631 |
| 0.011732 | 0.011799 | 0.011665 | 0.011732 | 0.011698 | 0.011564 | 0.011900 |
| 0.011664 | 0.011631 | 0.011631 | 0.011799 | 0.011631 | 0.011732 | 0.011967 |
| 0.011597 | 0.012011 | 0.012034 | 0.011833 | 0.011342 | 0.011740 | 0.011318 |
| 0.011610 | 0.012034 | 0.011587 | 0.011820 | 0.011597 | 0.011467 | 0.011538 |
| 0.011723 | 0.011324 | 0.011450 | 0.011324 | 0.011492 | 0.011529 | 0.011709 |
| 0.011625 | 0.011650 | 0.011730 | 0.011659 | 0.011667 | 0.011799 | 0.011867 |
| 0.011867 | 0.011666 | 0.011770 | 0.011840 | 0.011976 | 0.011944 | 0.011665 |
| 0.011900 | 0.011698 | 0.011631 | 0.011665 | 0.011530 | 0.011765 | 0.011564 |
| 0.011631 | 0.011631 | 0.011598 | 0.011564 | 0.011597 | 0.011564 | 0.011665 |
| 0.011654 | 0.011620 | 0.011643 | 0.011677 | 0.011813 | 0.011778 | 0.011777 |
| 0.011776 | 0.011699 | 0.011540 | 0.011528 | 0.011636 | 0.011806 | 0.011807 |
| 0.011598 | 0.011670 | 0.011902 | 0.011872 | 0.011800 | 0.011834 | 0.011698 |
| 0.011698 | 0.011564 | 0.011564 | 0.011665 | 0.012203 | 0.011833 | 0.011900 |
| 0.011934 | 0.011987 | 0.011640 | 0.011719 | 0.011597 | 0.011732 | 0.011698 |
| 0.011801 | 0.011765 | 0.011833 | 0.011833 | 0.011807 | 0.011900 | 0.011581 |
| 0.011500 | 0.011476 | 0.011605 | 0.011536 | 0.011675 | 0.011508 | 0.011842 |

|          |          |          |          |          |          |          |
|----------|----------|----------|----------|----------|----------|----------|
| 0.011643 | 0.011806 | 0.011584 | 0.011622 | 0.011632 | 0.011711 | 0.011598 |
| 0.011564 | 0.011564 | 0.011631 | 0.011598 | 0.011799 | 0.011766 | 0.011698 |
| 0.011799 | 0.011867 | 0.011598 | 0.011598 | 0.011631 | 0.011631 | 0.011635 |
| 0.011703 | 0.011631 | 0.011631 | 0.011667 | 0.011799 | 0.011867 | 0.011867 |
| 0.011666 | 0.011770 | 0.011840 | 0.011976 | 0.011944 | 0.011665 | 0.011833 |
| 0.011698 | 0.011698 | 0.011601 | 0.011791 | 0.011721 | 0.011742 | 0.011621 |
| 0.011784 | 0.012063 | 0.011823 | 0.011672 | 0.011564 | 0.011766 | 0.011631 |
| 0.011732 | 0.011665 | 0.011564 | 0.011667 | 0.011766 | 0.011770 | 0.011665 |
| 0.011564 | 0.011499 | 0.011631 | 0.011564 | 0.011497 | 0.011536 | 0.011766 |
| 0.011665 | 0.011597 | 0.011631 | 0.011665 | 0.011631 | 0.011564 | 0.011766 |
| 0.011631 | 0.011665 | 0.011665 | 0.011597 | 0.011665 | 0.011900 | 0.011564 |
| 0.011597 | 0.012001 | 0.011597 | 0.011631 | 0.011597 | 0.011967 | 0.011532 |
| 0.011847 | 0.011485 | 0.011411 | 0.011825 | 0.011875 | 0.011814 | 0.011478 |
| 0.011270 | 0.011765 | 0.011866 | 0.011977 | 0.011835 | 0.011974 | 0.012103 |
| 0.012003 | 0.012042 | 0.012001 | 0.012257 | 0.011933 | 0.012742 | 0.012004 |
| 0.012709 | 0.012410 | 0.012544 | 0.012849 | 0.011967 | 0.011665 | 0.011968 |
| 0.012373 | 0.012343 | 0.011933 | 0.011833 | 0.011901 | 0.011901 | 0.011872 |
| 0.011765 | 0.011773 | 0.011833 | 0.011800 | 0.012171 | 0.012236 | 0.012238 |
| 0.012137 | 0.012238 | 0.012342 | 0.012109 | 0.012374 | 0.012382 | 0.012441 |
| 0.012442 | 0.012476 | 0.012426 | 0.012442 | 0.012444 | 0.011631 | 0.011968 |
| 0.012070 | 0.012439 | 0.012044 | 0.012304 | 0.012778 | 0.011842 | 0.011733 |
| 0.011698 | 0.011698 | 0.012170 | 0.012254 | 0.012328 | 0.012034 | 0.011701 |
| S251     | 0.011941 | 0.011941 | 0.012247 | 0.012111 | 0.012111 | 0.012145 |
| 0.011986 | 0.011917 | 0.012179 | 0.011670 | 0.011738 | 0.011705 | 0.011670 |
| 0.011704 | 0.011873 | 0.011670 | 0.011704 | 0.011772 | 0.011738 | 0.011704 |
| 0.011670 | 0.011704 | 0.011805 | 0.011671 | 0.011704 | 0.011704 | 0.011951 |
| 0.011941 | 0.011704 | 0.011602 | 0.011839 | 0.011772 | 0.011738 | 0.011772 |
| 0.011738 | 0.011839 | 0.011738 | 0.011738 | 0.011738 | 0.011738 | 0.011907 |
| 0.011670 | 0.011738 | 0.011772 | 0.011704 | 0.011805 | 0.011839 | 0.011772 |
| 0.011738 | 0.011907 | 0.011806 | 0.012077 | 0.011738 | 0.012009 | 0.011738 |
| 0.011704 | 0.011806 | 0.011873 | 0.012009 | 0.012111 | 0.011806 | 0.011907 |
| 0.011772 | 0.011839 | 0.011738 | 0.011975 | 0.012213 | 0.011704 | 0.011806 |
| 0.011704 | 0.011805 | 0.011772 | 0.011839 | 0.011738 | 0.011772 | 0.011772 |
| 0.011670 | 0.011704 | 0.011670 | 0.011772 | 0.011738 | 0.011774 | 0.011839 |
| 0.011772 | 0.011738 | 0.011805 | 0.011704 | 0.011839 | 0.011670 | 0.011738 |
| 0.011907 | 0.011839 | 0.012077 | 0.011907 | 0.011670 | 0.011975 | 0.011738 |
| 0.011919 | 0.012152 | 0.011972 | 0.011652 | 0.011701 | 0.011804 | 0.011893 |
| 0.012539 | 0.012087 | 0.011724 | 0.011975 | 0.011975 | 0.011771 | 0.011873 |
| 0.011806 | 0.011704 | 0.011704 | 0.011738 | 0.011839 | 0.011772 | 0.011636 |
| 0.011670 | 0.011839 | 0.011975 | 0.011907 | 0.011806 | 0.011772 | 0.011704 |
| 0.011670 | 0.011670 | 0.011738 | 0.011704 | 0.011908 | 0.011874 | 0.011806 |
| 0.011908 | 0.011975 | 0.011704 | 0.011704 | 0.011738 | 0.011738 | 0.011742 |
| 0.011811 | 0.011670 | 0.011738 | 0.011641 | 0.011717 | 0.011661 | 0.011739 |
| 0.011744 | 0.011685 | 0.011768 | 0.011722 | 0.011643 | 0.011682 | 0.011708 |
| 0.012004 | 0.011756 | 0.011790 | 0.011671 | 0.011688 | 0.011807 | 0.011773 |
| 0.011841 | 0.011774 | 0.011773 | 0.011704 | 0.011670 | 0.012179 | 0.011976 |
| 0.012009 | 0.011874 | 0.011738 | 0.011840 | 0.011636 | 0.011873 | 0.011670 |
| 0.011738 | 0.011738 | 0.011704 | 0.011670 | 0.011704 | 0.011670 | 0.011772 |
| 0.011738 | 0.011840 | 0.011772 | 0.011670 | 0.011774 | 0.011874 | 0.011879 |
| 0.011874 | 0.011772 | 0.011670 | 0.011605 | 0.011738 | 0.011670 | 0.011603 |
| 0.011711 | 0.011874 | 0.011670 | 0.011874 | 0.011636 | 0.011738 | 0.011704 |
| 0.011738 | 0.011704 | 0.011670 | 0.011704 | 0.011738 | 0.011602 | 0.011738 |
| 0.011772 | 0.011704 | 0.011772 | 0.011704 | 0.011602 | 0.011772 | 0.012009 |
| 0.012111 | 0.012043 | 0.012111 | 0.011877 | 0.012112 | 0.011602 | 0.011704 |
| 0.011742 | 0.012122 | 0.011565 | 0.011649 | 0.012122 | 0.011611 | 0.011456 |
| 0.012020 | 0.012021 | 0.011873 | 0.012043 | 0.011750 | 0.011975 | 0.011941 |
| 0.011873 | 0.012043 | 0.011558 | 0.011390 | 0.011563 | 0.011772 | 0.011777 |
| 0.011941 | 0.011705 | 0.011979 | 0.012012 | 0.011840 | 0.011975 | 0.000000 |
| 0.011743 | 0.011843 | 0.011846 | 0.011913 | 0.012112 | 0.011636 | 0.011841 |
| 0.011738 | 0.011738 | 0.011636 | 0.011636 | 0.011704 | 0.011704 | 0.011772 |

|          |          |          |          |          |          |          |
|----------|----------|----------|----------|----------|----------|----------|
| 0.011704 | 0.011772 | 0.011670 | 0.011772 | 0.011704 | 0.011704 | 0.011771 |
| 0.011704 | 0.012145 | 0.012043 | 0.012077 | 0.011602 | 0.011704 | 0.011738 |
| 0.011738 | 0.011704 | 0.011738 | 0.011806 | 0.011670 | 0.011670 | 0.011670 |
| 0.012213 | 0.011839 | 0.011839 | 0.011636 | 0.011704 | 0.011907 | 0.011670 |
| 0.011670 | 0.011738 | 0.011704 | 0.011873 | 0.011670 | 0.011738 | 0.011873 |
| 0.011805 | 0.011704 | 0.011704 | 0.011636 | 0.011636 | 0.011806 | 0.011738 |
| 0.011636 | 0.011738 | 0.011602 | 0.011636 | 0.011772 | 0.011908 | 0.011670 |
| 0.011534 | 0.011771 | 0.011704 | 0.011602 | 0.011941 | 0.011602 | 0.011772 |
| 0.011610 | 0.011670 | 0.011975 | 0.011806 | 0.011839 | 0.011704 | 0.011772 |
| 0.011670 | 0.012009 | 0.011602 | 0.011873 | 0.011670 | 0.011670 | 0.011602 |
| 0.011839 | 0.012010 | 0.011738 | 0.011806 | 0.011636 | 0.012043 | 0.011670 |
| 0.011670 | 0.011670 | 0.011704 | 0.011806 | 0.011704 | 0.011805 | 0.011873 |
| 0.011873 | 0.011839 | 0.011738 | 0.011840 | 0.011805 | 0.011670 | 0.011636 |
| 0.011670 | 0.011670 | 0.011738 | 0.011670 | 0.011636 | 0.011772 | 0.011670 |
| 0.011704 | 0.011704 | 0.011805 | 0.011873 | 0.011772 | 0.011704 | 0.011704 |
| 0.011772 | 0.011704 | 0.011771 | 0.011670 | 0.011805 | 0.011873 | 0.012145 |
| 0.011704 | 0.012111 | 0.011722 | 0.018348 | 0.011989 | 0.011806 | 0.012082 |
| 0.012039 | 0.012090 | 0.011907 | 0.011940 | 0.012282 | 0.012106 | 0.011859 |
| 0.011970 | 0.011987 | 0.011650 | 0.011738 | 0.011770 | 0.011758 | 0.011713 |
| 0.012055 | 0.011926 | 0.011922 | 0.011656 | 0.011839 | 0.011738 | 0.011811 |
| 0.011541 | 0.011840 | 0.011840 | 0.011806 | 0.011772 | 0.011772 | 0.011738 |
| 0.011772 | 0.011704 | 0.011738 | 0.011772 | 0.011738 | 0.011670 | 0.011568 |
| 0.011568 | 0.011772 | 0.011670 | 0.011772 | 0.011806 | 0.011840 | 0.011602 |
| 0.011772 | 0.011738 | 0.012077 | 0.012077 | 0.011806 | 0.011841 | 0.011874 |
| 0.011636 | 0.011636 | 0.011670 | 0.011772 | 0.011636 | 0.011874 | 0.011874 |
| 0.011908 | 0.011873 | 0.011839 | 0.011941 | 0.012111 | 0.011944 | 0.011772 |
| 0.011772 | 0.011806 | 0.011874 | 0.011704 | 0.011772 | 0.011738 | 0.011772 |
| 0.011840 | 0.011840 | 0.011874 | 0.011840 | 0.011740 | 0.011908 | 0.011908 |
| 0.011778 | 0.011670 | 0.011772 | 0.011840 | 0.011772 | 0.011908 | 0.011941 |
| 0.012043 | 0.011750 | 0.011975 | 0.011941 | 0.011873 | 0.012043 | 0.011671 |
| 0.011842 | 0.011739 | 0.011568 | 0.011568 | 0.011772 | 0.011670 | 0.011772 |
| 0.011806 | 0.011840 | 0.011602 | 0.011772 | 0.011738 | 0.012077 | 0.012077 |
| 0.011806 | 0.011841 | 0.011772 | 0.011704 | 0.012452 | 0.011703 | 0.011518 |
| 0.011693 | 0.011650 | 0.011763 | 0.011615 | 0.011760 | 0.011612 | 0.011826 |
| 0.012193 | 0.011406 | 0.011540 | 0.011544 | 0.011818 | 0.011950 | 0.012015 |
| 0.012358 | 0.011701 | 0.012016 | 0.012077 | 0.011941 | 0.011941 | 0.011981 |
| 0.011636 | 0.011806 | 0.011941 | 0.011907 | 0.011913 | 0.011907 | 0.011808 |
| 0.011738 | 0.011670 | 0.011704 | 0.011738 | 0.011636 | 0.011704 | 0.011602 |
| 0.011738 | 0.011772 | 0.011670 | 0.011636 | 0.011738 | 0.011670 | 0.011704 |
| 0.011704 | 0.011636 | 0.011704 | 0.011738 | 0.011636 | 0.011839 | 0.011873 |
| 0.011772 | 0.011839 | 0.011772 | 0.011772 | 0.011704 | 0.012111 | 0.011738 |
| 0.011584 | 0.011704 | 0.011942 | 0.011741 | 0.011806 | 0.011805 | 0.011805 |
| 0.011806 | 0.011738 | 0.011704 | 0.011738 | 0.011805 | 0.011839 | 0.011772 |
| 0.011771 | 0.011907 | 0.012077 | 0.011805 | 0.011975 | 0.011975 | 0.011873 |
| 0.011704 | 0.011772 | 0.011806 | 0.012213 | 0.011738 | 0.011806 | 0.011772 |
| 0.011805 | 0.011738 | 0.011738 | 0.012043 | 0.011975 | 0.012009 | 0.011738 |
| 0.011839 | 0.011839 | 0.011772 | 0.011839 | 0.011805 | 0.011670 | 0.012009 |
| 0.011771 | 0.011738 | 0.011738 | 0.011907 | 0.011738 | 0.011839 | 0.012077 |
| 0.011704 | 0.012054 | 0.012145 | 0.012003 | 0.011916 | 0.011849 | 0.011576 |
| 0.011673 | 0.012123 | 0.011698 | 0.012006 | 0.011848 | 0.011986 | 0.011919 |
| 0.012142 | 0.011927 | 0.012017 | 0.011930 | 0.011877 | 0.012146 | 0.011878 |
| 0.011857 | 0.011774 | 0.011843 | 0.011771 | 0.011775 | 0.011907 | 0.011976 |
| 0.011975 | 0.011841 | 0.011947 | 0.011950 | 0.012087 | 0.012131 | 0.011772 |
| 0.012009 | 0.011874 | 0.011738 | 0.011840 | 0.011636 | 0.011873 | 0.011670 |
| 0.011738 | 0.011738 | 0.011704 | 0.011670 | 0.011704 | 0.011670 | 0.011772 |
| 0.011765 | 0.011766 | 0.011752 | 0.011786 | 0.011889 | 0.011888 | 0.011887 |
| 0.011885 | 0.011807 | 0.011431 | 0.011641 | 0.011744 | 0.011847 | 0.011916 |
| 0.011705 | 0.011778 | 0.012012 | 0.011981 | 0.011909 | 0.011943 | 0.011738 |
| 0.011805 | 0.011806 | 0.011805 | 0.011772 | 0.012315 | 0.011941 | 0.012009 |
| 0.012044 | 0.012067 | 0.011714 | 0.011795 | 0.011704 | 0.011772 | 0.011738 |

|          |          |          |          |          |          |          |
|----------|----------|----------|----------|----------|----------|----------|
| 0.011909 | 0.011805 | 0.011941 | 0.011941 | 0.012053 | 0.011874 | 0.011512 |
| 0.011399 | 0.011406 | 0.011503 | 0.011469 | 0.011574 | 0.011396 | 0.011742 |
| 0.011541 | 0.011674 | 0.011394 | 0.011510 | 0.011739 | 0.011820 | 0.011704 |
| 0.011670 | 0.011670 | 0.011738 | 0.011704 | 0.011908 | 0.011874 | 0.011806 |
| 0.011908 | 0.011975 | 0.011704 | 0.011704 | 0.011738 | 0.011738 | 0.011742 |
| 0.011811 | 0.011670 | 0.011738 | 0.011775 | 0.011907 | 0.011976 | 0.011975 |
| 0.011841 | 0.011947 | 0.011950 | 0.012087 | 0.012131 | 0.011772 | 0.011941 |
| 0.011738 | 0.011738 | 0.011709 | 0.011833 | 0.011832 | 0.011851 | 0.011661 |
| 0.011895 | 0.011796 | 0.011699 | 0.011712 | 0.011670 | 0.011874 | 0.011738 |
| 0.011840 | 0.011772 | 0.011670 | 0.011774 | 0.011874 | 0.011879 | 0.011772 |
| 0.011670 | 0.011605 | 0.011738 | 0.011670 | 0.011603 | 0.011711 | 0.011874 |
| 0.011772 | 0.011704 | 0.011738 | 0.011772 | 0.011738 | 0.011670 | 0.011772 |
| 0.011738 | 0.011772 | 0.011772 | 0.011704 | 0.011772 | 0.012009 | 0.011670 |
| 0.011704 | 0.012111 | 0.011704 | 0.011738 | 0.011704 | 0.012077 | 0.011754 |
| 0.012254 | 0.011746 | 0.011870 | 0.011996 | 0.012045 | 0.011930 | 0.011652 |
| 0.011855 | 0.011805 | 0.011907 | 0.012020 | 0.011876 | 0.012016 | 0.012147 |
| 0.012045 | 0.011944 | 0.012043 | 0.012198 | 0.012009 | 0.012688 | 0.012046 |
| 0.012792 | 0.012490 | 0.012591 | 0.012933 | 0.012077 | 0.011772 | 0.012010 |
| 0.012419 | 0.012388 | 0.011975 | 0.011806 | 0.011943 | 0.011943 | 0.011811 |
| 0.011805 | 0.011813 | 0.011873 | 0.011807 | 0.012282 | 0.012315 | 0.012350 |
| 0.012215 | 0.012316 | 0.012456 | 0.012220 | 0.012488 | 0.012462 | 0.012555 |
| 0.012556 | 0.012590 | 0.012507 | 0.012556 | 0.012558 | 0.011670 | 0.012078 |
| 0.012181 | 0.012689 | 0.012121 | 0.012417 | 0.012896 | 0.011951 | 0.011840 |
| 0.011805 | 0.011805 | 0.012282 | 0.012130 | 0.012446 | 0.012145 | 0.011808 |
| S252     | 0.011669 | 0.011669 | 0.012042 | 0.011906 | 0.011906 | 0.011974 |
| 0.011779 | 0.011711 | 0.011974 | 0.011399 | 0.011466 | 0.011433 | 0.011399 |
| 0.011432 | 0.011602 | 0.011398 | 0.011432 | 0.011466 | 0.011466 | 0.011432 |
| 0.011399 | 0.011432 | 0.011534 | 0.011399 | 0.011433 | 0.011432 | 0.011745 |
| 0.011669 | 0.011432 | 0.011331 | 0.011568 | 0.011500 | 0.011466 | 0.011500 |
| 0.011466 | 0.011568 | 0.011466 | 0.011466 | 0.011500 | 0.011466 | 0.011636 |
| 0.011399 | 0.011466 | 0.011500 | 0.011432 | 0.011534 | 0.011568 | 0.011500 |
| 0.011466 | 0.011636 | 0.011534 | 0.011805 | 0.011466 | 0.011737 | 0.011466 |
| 0.011432 | 0.011534 | 0.011602 | 0.011737 | 0.011839 | 0.011534 | 0.011635 |
| 0.011500 | 0.011568 | 0.011466 | 0.011703 | 0.011941 | 0.011466 | 0.011534 |
| 0.011432 | 0.011534 | 0.011500 | 0.011568 | 0.011500 | 0.011500 | 0.011500 |
| 0.011398 | 0.011432 | 0.011399 | 0.011500 | 0.011466 | 0.011501 | 0.011568 |
| 0.011500 | 0.011466 | 0.011534 | 0.011432 | 0.011568 | 0.011399 | 0.011466 |
| 0.011635 | 0.011568 | 0.011805 | 0.011636 | 0.011466 | 0.011703 | 0.011466 |
| 0.011582 | 0.011811 | 0.011629 | 0.011296 | 0.011360 | 0.011430 | 0.011535 |
| 0.012201 | 0.011572 | 0.011350 | 0.011703 | 0.011703 | 0.011500 | 0.011602 |
| 0.011534 | 0.011432 | 0.011432 | 0.011466 | 0.011568 | 0.011500 | 0.011297 |
| 0.011331 | 0.011568 | 0.011703 | 0.011635 | 0.011534 | 0.011500 | 0.011433 |
| 0.011399 | 0.011399 | 0.011466 | 0.011433 | 0.011636 | 0.011602 | 0.011534 |
| 0.011636 | 0.011703 | 0.011433 | 0.011433 | 0.011466 | 0.011466 | 0.011469 |
| 0.011537 | 0.011466 | 0.011466 | 0.011348 | 0.011423 | 0.011377 | 0.011467 |
| 0.011470 | 0.011407 | 0.011431 | 0.011441 | 0.011367 | 0.011404 | 0.011435 |
| 0.011708 | 0.011475 | 0.011511 | 0.011399 | 0.011408 | 0.011535 | 0.011501 |
| 0.011569 | 0.011502 | 0.011501 | 0.011399 | 0.011399 | 0.011906 | 0.011704 |
| 0.011737 | 0.011602 | 0.011466 | 0.011568 | 0.011365 | 0.011602 | 0.011399 |
| 0.011466 | 0.011466 | 0.011433 | 0.011399 | 0.011432 | 0.011399 | 0.011500 |
| 0.011466 | 0.011568 | 0.011500 | 0.011399 | 0.011502 | 0.011602 | 0.011605 |
| 0.011602 | 0.011500 | 0.011399 | 0.011332 | 0.011466 | 0.011399 | 0.011331 |
| 0.011437 | 0.011602 | 0.011399 | 0.011602 | 0.011365 | 0.011466 | 0.011433 |
| 0.011534 | 0.011365 | 0.011466 | 0.011433 | 0.011466 | 0.011331 | 0.011466 |
| 0.011500 | 0.011433 | 0.011500 | 0.011433 | 0.011263 | 0.011500 | 0.011737 |
| 0.011839 | 0.011737 | 0.011839 | 0.011570 | 0.011839 | 0.011331 | 0.011433 |
| 0.011469 | 0.011713 | 0.011523 | 0.011337 | 0.011847 | 0.011335 | 0.011378 |
| 0.011813 | 0.011746 | 0.011568 | 0.011771 | 0.011473 | 0.011703 | 0.011670 |
| 0.011602 | 0.011771 | 0.011525 | 0.011267 | 0.011439 | 0.011500 | 0.011504 |
| 0.011669 | 0.011366 | 0.011708 | 0.011777 | 0.011432 | 0.011703 | 0.011743 |

|          |          |          |          |          |          |          |
|----------|----------|----------|----------|----------|----------|----------|
| 0.000000 | 0.011779 | 0.011570 | 0.011637 | 0.011840 | 0.011365 | 0.011570 |
| 0.011534 | 0.011466 | 0.011365 | 0.011365 | 0.011432 | 0.011432 | 0.011500 |
| 0.011432 | 0.011500 | 0.011399 | 0.011500 | 0.011432 | 0.011432 | 0.011500 |
| 0.011432 | 0.011872 | 0.011771 | 0.011805 | 0.011331 | 0.011432 | 0.011466 |
| 0.011466 | 0.011432 | 0.011500 | 0.011534 | 0.011398 | 0.011398 | 0.011398 |
| 0.011940 | 0.011568 | 0.011568 | 0.011365 | 0.011466 | 0.011636 | 0.011399 |
| 0.011398 | 0.011466 | 0.011432 | 0.011602 | 0.011399 | 0.011534 | 0.011669 |
| 0.011602 | 0.011399 | 0.011432 | 0.011365 | 0.011365 | 0.011534 | 0.011466 |
| 0.011365 | 0.011432 | 0.011331 | 0.011365 | 0.011500 | 0.011636 | 0.011399 |
| 0.011365 | 0.011500 | 0.011432 | 0.011331 | 0.011669 | 0.011331 | 0.011500 |
| 0.011543 | 0.011399 | 0.011703 | 0.011534 | 0.011568 | 0.011432 | 0.011534 |
| 0.011398 | 0.011737 | 0.011331 | 0.011602 | 0.011399 | 0.011399 | 0.011331 |
| 0.011568 | 0.011737 | 0.011466 | 0.011534 | 0.011365 | 0.011771 | 0.011399 |
| 0.011399 | 0.011398 | 0.011432 | 0.011534 | 0.011432 | 0.011534 | 0.011602 |
| 0.011602 | 0.011568 | 0.011466 | 0.011568 | 0.011534 | 0.011399 | 0.011365 |
| 0.011398 | 0.011399 | 0.011466 | 0.011399 | 0.011365 | 0.011534 | 0.011399 |
| 0.011432 | 0.011432 | 0.011568 | 0.011602 | 0.011500 | 0.011432 | 0.011433 |
| 0.011500 | 0.011432 | 0.011534 | 0.011399 | 0.011534 | 0.011635 | 0.011873 |
| 0.011432 | 0.011839 | 0.011408 | 0.017935 | 0.011192 | 0.011305 | 0.011764 |
| 0.011723 | 0.011767 | 0.011377 | 0.011353 | 0.011724 | 0.011791 | 0.011305 |
| 0.011585 | 0.011487 | 0.011296 | 0.011271 | 0.011374 | 0.011309 | 0.011320 |
| 0.011580 | 0.011584 | 0.011582 | 0.011594 | 0.011568 | 0.011466 | 0.011538 |
| 0.011475 | 0.011534 | 0.011568 | 0.011534 | 0.011500 | 0.011500 | 0.011467 |
| 0.011500 | 0.011365 | 0.011466 | 0.011500 | 0.011466 | 0.011399 | 0.011297 |
| 0.011297 | 0.011500 | 0.011399 | 0.011500 | 0.011534 | 0.011568 | 0.011331 |
| 0.011500 | 0.011466 | 0.011805 | 0.011805 | 0.011534 | 0.011569 | 0.011602 |
| 0.011365 | 0.011365 | 0.011399 | 0.011500 | 0.011365 | 0.011602 | 0.011602 |
| 0.011636 | 0.011568 | 0.011568 | 0.011669 | 0.011839 | 0.011671 | 0.011500 |
| 0.011500 | 0.011568 | 0.011602 | 0.011433 | 0.011500 | 0.011466 | 0.011500 |
| 0.011568 | 0.011568 | 0.011602 | 0.011568 | 0.011468 | 0.011670 | 0.011568 |
| 0.011504 | 0.011399 | 0.011500 | 0.011602 | 0.011500 | 0.011636 | 0.011669 |
| 0.011771 | 0.011473 | 0.011703 | 0.011670 | 0.011602 | 0.011771 | 0.011399 |
| 0.011570 | 0.011467 | 0.011297 | 0.011297 | 0.011500 | 0.011399 | 0.011500 |
| 0.011534 | 0.011568 | 0.011331 | 0.011500 | 0.011466 | 0.011805 | 0.011805 |
| 0.011534 | 0.011569 | 0.011500 | 0.011432 | 0.012179 | 0.011634 | 0.011450 |
| 0.011625 | 0.011584 | 0.011695 | 0.011549 | 0.011694 | 0.011545 | 0.011578 |
| 0.012133 | 0.011338 | 0.011474 | 0.011477 | 0.011751 | 0.011675 | 0.011781 |
| 0.012123 | 0.011628 | 0.011742 | 0.011805 | 0.011669 | 0.011669 | 0.011708 |
| 0.011365 | 0.011534 | 0.011669 | 0.011635 | 0.011639 | 0.011635 | 0.011604 |
| 0.011466 | 0.011399 | 0.011432 | 0.011466 | 0.011365 | 0.011432 | 0.011331 |
| 0.011466 | 0.011500 | 0.011399 | 0.011365 | 0.011466 | 0.011398 | 0.011432 |
| 0.011432 | 0.011365 | 0.011432 | 0.011466 | 0.011365 | 0.011568 | 0.011602 |
| 0.011500 | 0.011568 | 0.011500 | 0.011500 | 0.011432 | 0.011839 | 0.011466 |
| 0.011514 | 0.011432 | 0.011670 | 0.011676 | 0.011534 | 0.011534 | 0.011534 |
| 0.011534 | 0.011466 | 0.011432 | 0.011466 | 0.011568 | 0.011568 | 0.011500 |
| 0.011500 | 0.011602 | 0.011805 | 0.011534 | 0.011737 | 0.011737 | 0.011602 |
| 0.011432 | 0.011500 | 0.011534 | 0.011940 | 0.011500 | 0.011534 | 0.011500 |
| 0.011534 | 0.011466 | 0.011466 | 0.011771 | 0.011669 | 0.011737 | 0.011466 |
| 0.011568 | 0.011635 | 0.011500 | 0.011568 | 0.011534 | 0.011399 | 0.011737 |
| 0.011500 | 0.011466 | 0.011466 | 0.011635 | 0.011466 | 0.011568 | 0.011805 |
| 0.011432 | 0.011848 | 0.011873 | 0.011591 | 0.011286 | 0.011574 | 0.011424 |
| 0.011225 | 0.011843 | 0.011378 | 0.011599 | 0.011355 | 0.011470 | 0.011435 |
| 0.011625 | 0.011193 | 0.011397 | 0.011194 | 0.011277 | 0.011398 | 0.011509 |
| 0.011515 | 0.011416 | 0.011522 | 0.011451 | 0.011502 | 0.011636 | 0.011704 |
| 0.011703 | 0.011569 | 0.011640 | 0.011641 | 0.011812 | 0.011844 | 0.011500 |
| 0.011737 | 0.011602 | 0.011466 | 0.011568 | 0.011365 | 0.011602 | 0.011399 |
| 0.011466 | 0.011466 | 0.011433 | 0.011399 | 0.011432 | 0.011399 | 0.011500 |
| 0.011481 | 0.011482 | 0.011475 | 0.011507 | 0.011644 | 0.011611 | 0.011611 |
| 0.011610 | 0.011535 | 0.011319 | 0.011312 | 0.011470 | 0.011641 | 0.011607 |
| 0.011433 | 0.011504 | 0.011739 | 0.011639 | 0.011637 | 0.011671 | 0.011466 |



|          |          |          |          |          |          |          |
|----------|----------|----------|----------|----------|----------|----------|
| 0.011534 | 0.011534 | 0.011534 | 0.011500 | 0.012042 | 0.011669 | 0.011737 |
| 0.011771 | 0.011850 | 0.011473 | 0.011548 | 0.011432 | 0.011432 | 0.011466 |
| 0.011637 | 0.011534 | 0.011669 | 0.011669 | 0.011734 | 0.011669 | 0.011445 |
| 0.011333 | 0.011339 | 0.011438 | 0.011403 | 0.011506 | 0.011360 | 0.011677 |
| 0.011475 | 0.011457 | 0.011204 | 0.011399 | 0.011467 | 0.011541 | 0.011433 |
| 0.011399 | 0.011399 | 0.011466 | 0.011433 | 0.011636 | 0.011602 | 0.011534 |
| 0.011636 | 0.011703 | 0.011433 | 0.011433 | 0.011466 | 0.011466 | 0.011469 |
| 0.011537 | 0.011466 | 0.011466 | 0.011502 | 0.011636 | 0.011704 | 0.011703 |
| 0.011569 | 0.011640 | 0.011641 | 0.011812 | 0.011844 | 0.011500 | 0.011669 |
| 0.011466 | 0.011466 | 0.011435 | 0.011622 | 0.011551 | 0.011575 | 0.011413 |
| 0.011616 | 0.011797 | 0.011531 | 0.011471 | 0.011399 | 0.011602 | 0.011466 |
| 0.011568 | 0.011500 | 0.011399 | 0.011502 | 0.011602 | 0.011605 | 0.011500 |
| 0.011399 | 0.011332 | 0.011466 | 0.011399 | 0.011331 | 0.011437 | 0.011602 |
| 0.011500 | 0.011365 | 0.011466 | 0.011500 | 0.011466 | 0.011399 | 0.011602 |
| 0.011466 | 0.011500 | 0.011500 | 0.011432 | 0.011500 | 0.011737 | 0.011399 |
| 0.011432 | 0.011839 | 0.011432 | 0.011466 | 0.011432 | 0.011805 | 0.011319 |
| 0.011791 | 0.011315 | 0.011363 | 0.011624 | 0.011674 | 0.011601 | 0.011228 |
| 0.011324 | 0.011602 | 0.011703 | 0.011813 | 0.011671 | 0.011776 | 0.011942 |
| 0.011840 | 0.011879 | 0.011839 | 0.012059 | 0.011805 | 0.012619 | 0.011841 |
| 0.012586 | 0.012284 | 0.012419 | 0.012727 | 0.011805 | 0.011500 | 0.011805 |
| 0.012214 | 0.012149 | 0.011771 | 0.011670 | 0.011738 | 0.011738 | 0.011708 |
| 0.011602 | 0.011573 | 0.011669 | 0.011636 | 0.012009 | 0.012076 | 0.012078 |
| 0.011976 | 0.012077 | 0.012182 | 0.011913 | 0.012214 | 0.012221 | 0.012282 |
| 0.012283 | 0.012283 | 0.012161 | 0.012249 | 0.012250 | 0.011399 | 0.011806 |
| 0.011908 | 0.012381 | 0.011881 | 0.012110 | 0.012588 | 0.011676 | 0.011568 |
| 0.011534 | 0.011534 | 0.012009 | 0.012052 | 0.012160 | 0.011873 | 0.011536 |
| S253     | 0.011943 | 0.011943 | 0.012045 | 0.012011 | 0.012011 | 0.012045 |
| 0.011988 | 0.011919 | 0.012079 | 0.011569 | 0.011637 | 0.011604 | 0.011569 |
| 0.011603 | 0.011773 | 0.011569 | 0.011603 | 0.011671 | 0.011637 | 0.011603 |
| 0.011569 | 0.011603 | 0.011705 | 0.011570 | 0.011536 | 0.011603 | 0.011953 |
| 0.011841 | 0.011603 | 0.011501 | 0.011739 | 0.011603 | 0.011637 | 0.011603 |
| 0.011637 | 0.011671 | 0.011637 | 0.011637 | 0.011637 | 0.011637 | 0.011739 |
| 0.011569 | 0.011637 | 0.011671 | 0.011603 | 0.011705 | 0.011739 | 0.011671 |
| 0.011637 | 0.011807 | 0.011706 | 0.011977 | 0.011637 | 0.011603 | 0.011637 |
| 0.011603 | 0.011705 | 0.011739 | 0.011603 | 0.012011 | 0.011705 | 0.011807 |
| 0.011603 | 0.011671 | 0.011637 | 0.011807 | 0.012113 | 0.011603 | 0.011705 |
| 0.011603 | 0.011705 | 0.011671 | 0.011739 | 0.011637 | 0.011671 | 0.011671 |
| 0.011569 | 0.011603 | 0.011569 | 0.011671 | 0.011637 | 0.011673 | 0.011739 |
| 0.011671 | 0.011637 | 0.011637 | 0.011603 | 0.011739 | 0.011501 | 0.011637 |
| 0.011807 | 0.011739 | 0.011977 | 0.011807 | 0.011637 | 0.011807 | 0.011637 |
| 0.011810 | 0.012043 | 0.011900 | 0.011574 | 0.011513 | 0.011693 | 0.011698 |
| 0.012355 | 0.011731 | 0.011477 | 0.011875 | 0.011875 | 0.011671 | 0.011773 |
| 0.011705 | 0.011671 | 0.011705 | 0.011637 | 0.011739 | 0.011603 | 0.011671 |
| 0.011637 | 0.011739 | 0.011943 | 0.011807 | 0.011705 | 0.011671 | 0.011536 |
| 0.011569 | 0.011569 | 0.011569 | 0.011603 | 0.011807 | 0.011773 | 0.011705 |
| 0.011807 | 0.011875 | 0.011603 | 0.011603 | 0.011637 | 0.011637 | 0.011641 |
| 0.011710 | 0.011637 | 0.011637 | 0.011495 | 0.011608 | 0.011555 | 0.011638 |
| 0.011642 | 0.011581 | 0.011620 | 0.011618 | 0.011540 | 0.011578 | 0.011606 |
| 0.011895 | 0.011651 | 0.011617 | 0.011570 | 0.011584 | 0.011706 | 0.011672 |
| 0.011740 | 0.011673 | 0.011672 | 0.011739 | 0.011671 | 0.012011 | 0.011841 |
| 0.011909 | 0.011773 | 0.011637 | 0.011739 | 0.011535 | 0.011773 | 0.011570 |
| 0.011637 | 0.011637 | 0.011603 | 0.011569 | 0.011603 | 0.011569 | 0.011671 |
| 0.011569 | 0.011671 | 0.011672 | 0.011569 | 0.011674 | 0.011773 | 0.011778 |
| 0.011705 | 0.011672 | 0.011569 | 0.011503 | 0.011637 | 0.011569 | 0.011502 |
| 0.011541 | 0.011706 | 0.011502 | 0.011706 | 0.011535 | 0.011638 | 0.011603 |
| 0.011637 | 0.011603 | 0.011569 | 0.011604 | 0.011637 | 0.011502 | 0.011569 |
| 0.011603 | 0.011603 | 0.011671 | 0.011603 | 0.011637 | 0.011671 | 0.011909 |
| 0.012011 | 0.011943 | 0.012011 | 0.011776 | 0.012012 | 0.011637 | 0.011603 |
| 0.011641 | 0.011918 | 0.011746 | 0.011511 | 0.012021 | 0.011508 | 0.011614 |
| 0.012022 | 0.011919 | 0.011807 | 0.012011 | 0.011682 | 0.011875 | 0.011773 |

|          |          |          |          |          |          |          |
|----------|----------|----------|----------|----------|----------|----------|
| 0.011773 | 0.011943 | 0.011808 | 0.011721 | 0.011773 | 0.011671 | 0.011744 |
| 0.011841 | 0.011741 | 0.011881 | 0.000000 | 0.011875 | 0.011807 | 0.011843 |
| 0.011779 | 0.000000 | 0.011881 | 0.011812 | 0.012079 | 0.011535 | 0.011739 |
| 0.011637 | 0.011603 | 0.011535 | 0.011535 | 0.011535 | 0.011603 | 0.011671 |
| 0.011535 | 0.011603 | 0.011501 | 0.011671 | 0.011535 | 0.011603 | 0.011671 |
| 0.011603 | 0.012045 | 0.011943 | 0.011977 | 0.011501 | 0.011603 | 0.011637 |
| 0.011637 | 0.011603 | 0.011637 | 0.011705 | 0.011569 | 0.011569 | 0.011569 |
| 0.012113 | 0.011705 | 0.011739 | 0.011535 | 0.011603 | 0.011739 | 0.011569 |
| 0.011569 | 0.011637 | 0.011603 | 0.011705 | 0.011569 | 0.011671 | 0.011739 |
| 0.011739 | 0.011603 | 0.011603 | 0.011535 | 0.011535 | 0.011705 | 0.011637 |
| 0.011535 | 0.011637 | 0.011501 | 0.011535 | 0.011671 | 0.011807 | 0.011569 |
| 0.011535 | 0.011671 | 0.011604 | 0.011501 | 0.011841 | 0.011501 | 0.011671 |
| 0.011678 | 0.011569 | 0.011875 | 0.011705 | 0.011739 | 0.011603 | 0.011671 |
| 0.011569 | 0.011603 | 0.011501 | 0.011773 | 0.011569 | 0.011569 | 0.011501 |
| 0.011671 | 0.011909 | 0.011637 | 0.011705 | 0.011535 | 0.011943 | 0.011569 |
| 0.011569 | 0.011569 | 0.011603 | 0.011637 | 0.011603 | 0.011705 | 0.011773 |
| 0.011773 | 0.011739 | 0.011637 | 0.011739 | 0.011637 | 0.011569 | 0.011535 |
| 0.011569 | 0.011569 | 0.011637 | 0.011569 | 0.011467 | 0.011671 | 0.011569 |
| 0.011603 | 0.011603 | 0.011705 | 0.011773 | 0.011671 | 0.011535 | 0.011603 |
| 0.011671 | 0.011603 | 0.011671 | 0.011569 | 0.011705 | 0.011773 | 0.012045 |
| 0.011603 | 0.012011 | 0.011618 | 0.018128 | 0.011394 | 0.011932 | 0.011977 |
| 0.011935 | 0.011985 | 0.011592 | 0.011473 | 0.012121 | 0.012002 | 0.011679 |
| 0.011686 | 0.012055 | 0.011494 | 0.011527 | 0.011574 | 0.011762 | 0.011670 |
| 0.011822 | 0.011700 | 0.011660 | 0.011325 | 0.011739 | 0.011739 | 0.011779 |
| 0.011576 | 0.011739 | 0.011739 | 0.011705 | 0.011671 | 0.011672 | 0.011637 |
| 0.011671 | 0.011603 | 0.011637 | 0.011671 | 0.011638 | 0.011570 | 0.011603 |
| 0.011603 | 0.011671 | 0.011569 | 0.011672 | 0.011705 | 0.011739 | 0.011637 |
| 0.011671 | 0.011603 | 0.011977 | 0.011977 | 0.011705 | 0.011740 | 0.011774 |
| 0.011535 | 0.011536 | 0.011569 | 0.011603 | 0.011536 | 0.011773 | 0.011773 |
| 0.011807 | 0.011807 | 0.011739 | 0.011841 | 0.012011 | 0.011843 | 0.011603 |
| 0.011671 | 0.011671 | 0.011705 | 0.011603 | 0.011671 | 0.011637 | 0.011671 |
| 0.011740 | 0.011739 | 0.011773 | 0.011672 | 0.011503 | 0.011841 | 0.011739 |
| 0.011677 | 0.011570 | 0.011671 | 0.011739 | 0.011672 | 0.011807 | 0.011841 |
| 0.012011 | 0.011682 | 0.011875 | 0.011773 | 0.011773 | 0.011943 | 0.011570 |
| 0.011742 | 0.011638 | 0.011603 | 0.011603 | 0.011671 | 0.011569 | 0.011672 |
| 0.011705 | 0.011739 | 0.011637 | 0.011671 | 0.011603 | 0.011977 | 0.011977 |
| 0.011705 | 0.011740 | 0.011773 | 0.011705 | 0.012352 | 0.011811 | 0.011730 |
| 0.011799 | 0.011756 | 0.011869 | 0.011754 | 0.011866 | 0.011786 | 0.011722 |
| 0.012299 | 0.011649 | 0.011781 | 0.011717 | 0.011853 | 0.011851 | 0.011094 |
| 0.012323 | 0.011852 | 0.011915 | 0.011977 | 0.011841 | 0.011841 | 0.011880 |
| 0.011535 | 0.011637 | 0.011773 | 0.011739 | 0.011812 | 0.011807 | 0.011741 |
| 0.011637 | 0.011501 | 0.011535 | 0.011637 | 0.011467 | 0.011603 | 0.011501 |
| 0.011637 | 0.011671 | 0.011569 | 0.011535 | 0.011637 | 0.011569 | 0.011603 |
| 0.011603 | 0.011535 | 0.011603 | 0.011637 | 0.011535 | 0.011671 | 0.011773 |
| 0.011671 | 0.011739 | 0.011671 | 0.011671 | 0.011603 | 0.012011 | 0.011637 |
| 0.011688 | 0.011603 | 0.011841 | 0.011842 | 0.011637 | 0.011705 | 0.011705 |
| 0.011705 | 0.011569 | 0.011603 | 0.011569 | 0.011705 | 0.011739 | 0.011671 |
| 0.011671 | 0.011807 | 0.011977 | 0.011705 | 0.011875 | 0.011875 | 0.011773 |
| 0.011603 | 0.011671 | 0.011705 | 0.012113 | 0.011672 | 0.011637 | 0.011671 |
| 0.011705 | 0.011637 | 0.011637 | 0.011943 | 0.011807 | 0.011909 | 0.011637 |
| 0.011739 | 0.011807 | 0.011637 | 0.011739 | 0.011705 | 0.011569 | 0.011909 |
| 0.011671 | 0.011637 | 0.011637 | 0.011807 | 0.011637 | 0.011739 | 0.011977 |
| 0.011603 | 0.012056 | 0.012045 | 0.011760 | 0.011404 | 0.011747 | 0.011370 |
| 0.011730 | 0.011966 | 0.011593 | 0.011694 | 0.011555 | 0.011629 | 0.011546 |
| 0.011733 | 0.011396 | 0.011456 | 0.011262 | 0.011389 | 0.011402 | 0.011717 |
| 0.011708 | 0.011538 | 0.011737 | 0.011558 | 0.011674 | 0.011807 | 0.011875 |
| 0.011841 | 0.011740 | 0.011847 | 0.011849 | 0.011986 | 0.012026 | 0.011671 |
| 0.011909 | 0.011773 | 0.011637 | 0.011739 | 0.011535 | 0.011773 | 0.011570 |
| 0.011637 | 0.011637 | 0.011603 | 0.011569 | 0.011603 | 0.011569 | 0.011671 |
| 0.011660 | 0.011660 | 0.011649 | 0.011682 | 0.011821 | 0.011716 | 0.011785 |

|          |          |          |          |          |          |          |
|----------|----------|----------|----------|----------|----------|----------|
| 0.011781 | 0.011706 | 0.011540 | 0.011496 | 0.011642 | 0.011813 | 0.011814 |
| 0.011604 | 0.011676 | 0.011877 | 0.011880 | 0.011808 | 0.011842 | 0.011739 |
| 0.011705 | 0.011773 | 0.011773 | 0.011671 | 0.012249 | 0.011841 | 0.011909 |
| 0.011909 | 0.011961 | 0.011646 | 0.011725 | 0.011569 | 0.011807 | 0.011739 |
| 0.011809 | 0.011807 | 0.011841 | 0.011841 | 0.011976 | 0.011977 | 0.011616 |
| 0.011502 | 0.011512 | 0.011606 | 0.011570 | 0.011677 | 0.011546 | 0.011843 |
| 0.011645 | 0.011762 | 0.011489 | 0.011697 | 0.011638 | 0.011717 | 0.011536 |
| 0.011569 | 0.011569 | 0.011569 | 0.011603 | 0.011807 | 0.011773 | 0.011705 |
| 0.011807 | 0.011875 | 0.011603 | 0.011603 | 0.011637 | 0.011637 | 0.011641 |
| 0.011710 | 0.011637 | 0.011637 | 0.011674 | 0.011807 | 0.011875 | 0.011841 |
| 0.011740 | 0.011847 | 0.011849 | 0.011986 | 0.012026 | 0.011671 | 0.011841 |
| 0.011739 | 0.011739 | 0.011607 | 0.011763 | 0.011693 | 0.011749 | 0.011555 |
| 0.011722 | 0.012026 | 0.011698 | 0.011644 | 0.011502 | 0.011706 | 0.011569 |
| 0.011671 | 0.011672 | 0.011569 | 0.011674 | 0.011773 | 0.011778 | 0.011672 |
| 0.011569 | 0.011503 | 0.011637 | 0.011569 | 0.011502 | 0.011541 | 0.011706 |
| 0.011671 | 0.011603 | 0.011637 | 0.011671 | 0.011638 | 0.011570 | 0.011671 |
| 0.011637 | 0.011671 | 0.011671 | 0.011603 | 0.011671 | 0.011909 | 0.011569 |
| 0.011603 | 0.012011 | 0.011603 | 0.011569 | 0.011603 | 0.011977 | 0.011494 |
| 0.011860 | 0.011448 | 0.011467 | 0.011753 | 0.011843 | 0.011822 | 0.011483 |
| 0.011380 | 0.011739 | 0.011841 | 0.011952 | 0.011809 | 0.011881 | 0.012081 |
| 0.011977 | 0.012045 | 0.011977 | 0.012130 | 0.011909 | 0.012794 | 0.011979 |
| 0.012659 | 0.012457 | 0.012594 | 0.012800 | 0.011977 | 0.011671 | 0.011944 |
| 0.012353 | 0.012322 | 0.011909 | 0.011807 | 0.011876 | 0.011876 | 0.011846 |
| 0.011739 | 0.011746 | 0.011807 | 0.011774 | 0.012182 | 0.012215 | 0.012250 |
| 0.012115 | 0.012216 | 0.012355 | 0.012120 | 0.012388 | 0.012396 | 0.012456 |
| 0.012456 | 0.012490 | 0.012406 | 0.012456 | 0.012459 | 0.011671 | 0.011978 |
| 0.012080 | 0.012453 | 0.012054 | 0.012215 | 0.012728 | 0.011850 | 0.011740 |
| 0.011705 | 0.011705 | 0.012182 | 0.012254 | 0.012341 | 0.012045 | 0.011707 |
| S254     | 0.011670 | 0.011670 | 0.012042 | 0.012008 | 0.012008 | 0.012076 |
| 0.011848 | 0.011779 | 0.012076 | 0.011500 | 0.011568 | 0.011535 | 0.011500 |
| 0.011534 | 0.011703 | 0.011500 | 0.011466 | 0.011602 | 0.011568 | 0.011534 |
| 0.011500 | 0.011534 | 0.011636 | 0.011501 | 0.011535 | 0.011534 | 0.011814 |
| 0.011771 | 0.011534 | 0.011432 | 0.011669 | 0.011568 | 0.011568 | 0.011602 |
| 0.011534 | 0.011670 | 0.011568 | 0.011568 | 0.011534 | 0.011568 | 0.011737 |
| 0.011500 | 0.011568 | 0.011534 | 0.011534 | 0.011636 | 0.011602 | 0.011568 |
| 0.011568 | 0.011670 | 0.011636 | 0.011839 | 0.011500 | 0.011839 | 0.011500 |
| 0.011534 | 0.011636 | 0.011703 | 0.011839 | 0.011839 | 0.011636 | 0.011737 |
| 0.011602 | 0.011670 | 0.011568 | 0.011805 | 0.011975 | 0.011568 | 0.011636 |
| 0.011534 | 0.011636 | 0.011602 | 0.011670 | 0.011602 | 0.011602 | 0.011602 |
| 0.011500 | 0.011534 | 0.011500 | 0.011602 | 0.011568 | 0.011603 | 0.011669 |
| 0.011602 | 0.011534 | 0.011636 | 0.011534 | 0.011602 | 0.011500 | 0.011568 |
| 0.011737 | 0.011669 | 0.011839 | 0.011737 | 0.011568 | 0.011805 | 0.011568 |
| 0.011659 | 0.011814 | 0.011707 | 0.011375 | 0.011474 | 0.011506 | 0.011616 |
| 0.012315 | 0.011729 | 0.011476 | 0.011737 | 0.011805 | 0.011602 | 0.011636 |
| 0.011636 | 0.011534 | 0.011500 | 0.011568 | 0.011670 | 0.011602 | 0.011466 |
| 0.011500 | 0.011669 | 0.011805 | 0.011737 | 0.011636 | 0.011602 | 0.011534 |
| 0.011500 | 0.011500 | 0.011568 | 0.011534 | 0.011738 | 0.011704 | 0.011636 |
| 0.011738 | 0.011805 | 0.011534 | 0.011534 | 0.011568 | 0.011568 | 0.011571 |
| 0.011640 | 0.011568 | 0.011568 | 0.011420 | 0.011494 | 0.011481 | 0.011568 |
| 0.011572 | 0.011476 | 0.011581 | 0.011547 | 0.011468 | 0.011506 | 0.011536 |
| 0.011816 | 0.011577 | 0.011615 | 0.011501 | 0.011513 | 0.011636 | 0.011602 |
| 0.011670 | 0.011604 | 0.011602 | 0.011534 | 0.011399 | 0.011941 | 0.011772 |
| 0.011839 | 0.011704 | 0.011568 | 0.011670 | 0.011466 | 0.011703 | 0.011501 |
| 0.011568 | 0.011568 | 0.011534 | 0.011500 | 0.011534 | 0.011500 | 0.011602 |
| 0.011568 | 0.011670 | 0.011602 | 0.011500 | 0.011604 | 0.011704 | 0.011708 |
| 0.011704 | 0.011602 | 0.011500 | 0.011434 | 0.011568 | 0.011500 | 0.011433 |
| 0.011540 | 0.011704 | 0.011500 | 0.011704 | 0.011466 | 0.011568 | 0.011534 |
| 0.011636 | 0.011534 | 0.011568 | 0.011534 | 0.011568 | 0.011433 | 0.011568 |
| 0.011602 | 0.011534 | 0.011602 | 0.011534 | 0.011433 | 0.011602 | 0.011771 |
| 0.011873 | 0.011805 | 0.011873 | 0.011706 | 0.011873 | 0.011433 | 0.011534 |

|          |          |          |          |          |          |          |
|----------|----------|----------|----------|----------|----------|----------|
| 0.011571 | 0.011916 | 0.011707 | 0.011475 | 0.011882 | 0.011438 | 0.011537 |
| 0.011882 | 0.011848 | 0.011669 | 0.011873 | 0.011439 | 0.011805 | 0.011771 |
| 0.011636 | 0.011873 | 0.011595 | 0.011390 | 0.011563 | 0.011602 | 0.011606 |
| 0.011703 | 0.011536 | 0.011776 | 0.011879 | 0.011670 | 0.011805 | 0.011846 |
| 0.011570 | 0.011881 | 0.000000 | 0.011737 | 0.011908 | 0.011466 | 0.011671 |
| 0.011636 | 0.011568 | 0.011466 | 0.011466 | 0.011534 | 0.011534 | 0.011602 |
| 0.011534 | 0.011602 | 0.011500 | 0.011602 | 0.011534 | 0.011534 | 0.011534 |
| 0.011534 | 0.011907 | 0.011805 | 0.011839 | 0.011432 | 0.011534 | 0.011568 |
| 0.011568 | 0.011534 | 0.011602 | 0.011636 | 0.011500 | 0.011500 | 0.011500 |
| 0.011974 | 0.011636 | 0.011670 | 0.011466 | 0.011568 | 0.011670 | 0.011500 |
| 0.011500 | 0.011568 | 0.011534 | 0.011703 | 0.011500 | 0.011636 | 0.011737 |
| 0.011703 | 0.011500 | 0.011534 | 0.011432 | 0.011466 | 0.011636 | 0.011568 |
| 0.011432 | 0.011534 | 0.011432 | 0.011466 | 0.011602 | 0.011737 | 0.011500 |
| 0.011467 | 0.011602 | 0.011534 | 0.011432 | 0.011703 | 0.011432 | 0.011602 |
| 0.011647 | 0.011500 | 0.011737 | 0.011636 | 0.011670 | 0.011534 | 0.011568 |
| 0.011500 | 0.011839 | 0.011432 | 0.011703 | 0.011500 | 0.011500 | 0.011432 |
| 0.011669 | 0.011873 | 0.011568 | 0.011636 | 0.011466 | 0.011805 | 0.011500 |
| 0.011500 | 0.011500 | 0.011534 | 0.011636 | 0.011534 | 0.011636 | 0.011703 |
| 0.011703 | 0.011670 | 0.011568 | 0.011670 | 0.011636 | 0.011500 | 0.011466 |
| 0.011500 | 0.011500 | 0.011568 | 0.011500 | 0.011466 | 0.011636 | 0.011500 |
| 0.011534 | 0.011534 | 0.011669 | 0.011703 | 0.011602 | 0.011534 | 0.011534 |
| 0.011602 | 0.011534 | 0.011636 | 0.011500 | 0.011636 | 0.011737 | 0.011907 |
| 0.011534 | 0.011873 | 0.011512 | 0.018108 | 0.011326 | 0.011488 | 0.011798 |
| 0.011793 | 0.011805 | 0.011484 | 0.011413 | 0.011894 | 0.011860 | 0.011430 |
| 0.011684 | 0.011549 | 0.011375 | 0.011441 | 0.011493 | 0.011410 | 0.011363 |
| 0.011724 | 0.011699 | 0.011696 | 0.011597 | 0.011670 | 0.011467 | 0.011640 |
| 0.011543 | 0.011636 | 0.011670 | 0.011636 | 0.011602 | 0.011602 | 0.011568 |
| 0.011602 | 0.011534 | 0.011568 | 0.011602 | 0.011568 | 0.011500 | 0.011399 |
| 0.011399 | 0.011602 | 0.011500 | 0.011602 | 0.011636 | 0.011670 | 0.011433 |
| 0.011602 | 0.011568 | 0.011839 | 0.011839 | 0.011636 | 0.011603 | 0.011704 |
| 0.011466 | 0.011467 | 0.011500 | 0.011602 | 0.011467 | 0.011704 | 0.011704 |
| 0.011738 | 0.011669 | 0.011670 | 0.011771 | 0.011873 | 0.011773 | 0.011602 |
| 0.011602 | 0.011670 | 0.011704 | 0.011534 | 0.011602 | 0.011568 | 0.011534 |
| 0.011670 | 0.011670 | 0.011704 | 0.011670 | 0.011570 | 0.011771 | 0.011738 |
| 0.011607 | 0.011500 | 0.011602 | 0.011670 | 0.011602 | 0.011738 | 0.011703 |
| 0.011873 | 0.011439 | 0.011805 | 0.011771 | 0.011636 | 0.011873 | 0.011501 |
| 0.011604 | 0.011569 | 0.011399 | 0.011399 | 0.011602 | 0.011500 | 0.011602 |
| 0.011636 | 0.011670 | 0.011433 | 0.011602 | 0.011568 | 0.011839 | 0.011839 |
| 0.011636 | 0.011603 | 0.011500 | 0.011432 | 0.012247 | 0.011703 | 0.011521 |
| 0.011693 | 0.011653 | 0.011763 | 0.011654 | 0.011762 | 0.011614 | 0.011681 |
| 0.012167 | 0.011407 | 0.011542 | 0.011545 | 0.011818 | 0.011674 | 0.011849 |
| 0.012191 | 0.011701 | 0.011845 | 0.011907 | 0.011771 | 0.011771 | 0.011810 |
| 0.011466 | 0.011636 | 0.011771 | 0.011737 | 0.011742 | 0.011737 | 0.011706 |
| 0.011568 | 0.011500 | 0.011534 | 0.011568 | 0.011466 | 0.011534 | 0.011432 |
| 0.011568 | 0.011602 | 0.011500 | 0.011466 | 0.011568 | 0.011500 | 0.011534 |
| 0.011466 | 0.011466 | 0.011534 | 0.011568 | 0.011466 | 0.011670 | 0.011636 |
| 0.011602 | 0.011670 | 0.011602 | 0.011602 | 0.011534 | 0.011839 | 0.011568 |
| 0.011618 | 0.011534 | 0.011771 | 0.011778 | 0.011568 | 0.011568 | 0.011636 |
| 0.011636 | 0.011568 | 0.011534 | 0.011568 | 0.011670 | 0.011670 | 0.011602 |
| 0.011602 | 0.011703 | 0.011839 | 0.011636 | 0.011839 | 0.011839 | 0.011703 |
| 0.011534 | 0.011602 | 0.011636 | 0.011975 | 0.011602 | 0.011568 | 0.011602 |
| 0.011636 | 0.011568 | 0.011568 | 0.011873 | 0.011771 | 0.011839 | 0.011568 |
| 0.011670 | 0.011737 | 0.011602 | 0.011670 | 0.011636 | 0.011500 | 0.011771 |
| 0.011602 | 0.011568 | 0.011568 | 0.011737 | 0.011568 | 0.011669 | 0.011839 |
| 0.011534 | 0.011916 | 0.011907 | 0.011717 | 0.011512 | 0.011677 | 0.011530 |
| 0.011335 | 0.011964 | 0.011485 | 0.011647 | 0.011504 | 0.011524 | 0.011598 |
| 0.011731 | 0.011261 | 0.011568 | 0.011328 | 0.011387 | 0.011604 | 0.011551 |
| 0.011592 | 0.011536 | 0.011628 | 0.011557 | 0.011604 | 0.011738 | 0.011805 |
| 0.011771 | 0.011671 | 0.011776 | 0.011778 | 0.011915 | 0.011916 | 0.011602 |
| 0.011839 | 0.011704 | 0.011568 | 0.011670 | 0.011466 | 0.011703 | 0.011501 |

|          |          |          |          |          |          |          |
|----------|----------|----------|----------|----------|----------|----------|
| 0.011568 | 0.011568 | 0.011534 | 0.011500 | 0.011534 | 0.011500 | 0.011602 |
| 0.011588 | 0.011585 | 0.011509 | 0.011608 | 0.011745 | 0.011714 | 0.011645 |
| 0.011712 | 0.011636 | 0.011466 | 0.011420 | 0.011572 | 0.011743 | 0.011710 |
| 0.011535 | 0.011606 | 0.011840 | 0.011810 | 0.011738 | 0.011772 | 0.011466 |
| 0.011636 | 0.011636 | 0.011636 | 0.011602 | 0.012076 | 0.011771 | 0.011839 |
| 0.011873 | 0.011851 | 0.011576 | 0.011652 | 0.011534 | 0.011602 | 0.011466 |
| 0.011739 | 0.011602 | 0.011771 | 0.011771 | 0.011814 | 0.011771 | 0.011550 |
| 0.011435 | 0.011408 | 0.011506 | 0.011505 | 0.011608 | 0.011433 | 0.011710 |
| 0.011579 | 0.011630 | 0.011394 | 0.011547 | 0.011568 | 0.011642 | 0.011534 |
| 0.011500 | 0.011500 | 0.011568 | 0.011534 | 0.011738 | 0.011704 | 0.011636 |
| 0.011738 | 0.011805 | 0.011534 | 0.011534 | 0.011568 | 0.011568 | 0.011571 |
| 0.011640 | 0.011568 | 0.011568 | 0.011604 | 0.011738 | 0.011805 | 0.011771 |
| 0.011671 | 0.011776 | 0.011778 | 0.011915 | 0.011916 | 0.011602 | 0.011703 |
| 0.011466 | 0.011466 | 0.011538 | 0.011727 | 0.011656 | 0.011678 | 0.011555 |
| 0.011720 | 0.011982 | 0.011744 | 0.011608 | 0.011500 | 0.011704 | 0.011568 |
| 0.011670 | 0.011602 | 0.011500 | 0.011604 | 0.011704 | 0.011708 | 0.011602 |
| 0.011500 | 0.011434 | 0.011568 | 0.011500 | 0.011433 | 0.011540 | 0.011704 |
| 0.011602 | 0.011534 | 0.011568 | 0.011602 | 0.011568 | 0.011500 | 0.011704 |
| 0.011568 | 0.011602 | 0.011534 | 0.011534 | 0.011602 | 0.011839 | 0.011500 |
| 0.011534 | 0.011839 | 0.011534 | 0.011568 | 0.011534 | 0.011839 | 0.011536 |
| 0.011904 | 0.011485 | 0.011516 | 0.011745 | 0.011800 | 0.011711 | 0.011440 |
| 0.011432 | 0.011703 | 0.011737 | 0.011847 | 0.011705 | 0.011845 | 0.011976 |
| 0.011874 | 0.011912 | 0.011873 | 0.012197 | 0.011907 | 0.012722 | 0.011943 |
| 0.012621 | 0.012386 | 0.012488 | 0.012830 | 0.011907 | 0.011602 | 0.011840 |
| 0.012282 | 0.012217 | 0.011873 | 0.011772 | 0.011840 | 0.011840 | 0.011811 |
| 0.011703 | 0.011710 | 0.011771 | 0.011738 | 0.012111 | 0.012178 | 0.012179 |
| 0.012078 | 0.012179 | 0.012284 | 0.012049 | 0.012282 | 0.012289 | 0.012350 |
| 0.012350 | 0.012384 | 0.012334 | 0.012350 | 0.012352 | 0.011399 | 0.011907 |
| 0.012009 | 0.012450 | 0.011983 | 0.012246 | 0.012724 | 0.011779 | 0.011670 |
| 0.011636 | 0.011636 | 0.012111 | 0.012130 | 0.012231 | 0.011975 | 0.011638 |
| S255     | 0.011838 | 0.011838 | 0.012075 | 0.011940 | 0.011940 | 0.012007 |
| 0.011847 | 0.011779 | 0.012007 | 0.011432 | 0.011500 | 0.011467 | 0.011432 |
| 0.011466 | 0.011635 | 0.011432 | 0.011466 | 0.011534 | 0.011500 | 0.011466 |
| 0.011432 | 0.011466 | 0.011567 | 0.011432 | 0.011466 | 0.011466 | 0.011813 |
| 0.011703 | 0.011466 | 0.011364 | 0.011601 | 0.011500 | 0.011500 | 0.011534 |
| 0.011466 | 0.011601 | 0.011500 | 0.011500 | 0.011533 | 0.011297 | 0.011669 |
| 0.011432 | 0.011500 | 0.011534 | 0.011466 | 0.011567 | 0.011601 | 0.011500 |
| 0.011500 | 0.011669 | 0.011568 | 0.011838 | 0.011500 | 0.011770 | 0.011500 |
| 0.011466 | 0.011568 | 0.011635 | 0.011770 | 0.011838 | 0.011567 | 0.011669 |
| 0.011533 | 0.011601 | 0.011500 | 0.011669 | 0.011974 | 0.011500 | 0.011567 |
| 0.011466 | 0.011567 | 0.011534 | 0.011601 | 0.011533 | 0.011534 | 0.011534 |
| 0.011432 | 0.011466 | 0.011432 | 0.011534 | 0.011500 | 0.011535 | 0.011601 |
| 0.011534 | 0.011466 | 0.011567 | 0.011466 | 0.011601 | 0.011432 | 0.011500 |
| 0.011669 | 0.011601 | 0.011838 | 0.011466 | 0.011500 | 0.011737 | 0.011500 |
| 0.011546 | 0.011927 | 0.011707 | 0.011454 | 0.011436 | 0.011394 | 0.011656 |
| 0.012277 | 0.011677 | 0.011476 | 0.011703 | 0.011737 | 0.011533 | 0.011635 |
| 0.011567 | 0.011533 | 0.011601 | 0.011500 | 0.011601 | 0.011534 | 0.011533 |
| 0.011500 | 0.011601 | 0.011804 | 0.011669 | 0.011567 | 0.011534 | 0.011466 |
| 0.011432 | 0.011432 | 0.011500 | 0.011466 | 0.011669 | 0.011635 | 0.011568 |
| 0.011669 | 0.011737 | 0.011466 | 0.011466 | 0.011500 | 0.011500 | 0.011503 |
| 0.011537 | 0.011500 | 0.011500 | 0.011384 | 0.011458 | 0.011411 | 0.011500 |
| 0.011299 | 0.011441 | 0.011506 | 0.011477 | 0.011400 | 0.011437 | 0.011468 |
| 0.011744 | 0.011508 | 0.011545 | 0.011433 | 0.011443 | 0.011569 | 0.011534 |
| 0.011602 | 0.011535 | 0.011534 | 0.011601 | 0.011567 | 0.011940 | 0.011737 |
| 0.011770 | 0.011635 | 0.011500 | 0.011602 | 0.011398 | 0.011635 | 0.011432 |
| 0.011500 | 0.011500 | 0.011466 | 0.011432 | 0.011466 | 0.011432 | 0.011534 |
| 0.011500 | 0.011601 | 0.011534 | 0.011432 | 0.011535 | 0.011635 | 0.011639 |
| 0.011635 | 0.011534 | 0.011432 | 0.011366 | 0.011500 | 0.011432 | 0.011365 |
| 0.011471 | 0.011636 | 0.011432 | 0.011635 | 0.011398 | 0.011500 | 0.011466 |
| 0.011568 | 0.011466 | 0.011500 | 0.011466 | 0.011500 | 0.011365 | 0.011500 |

|          |          |          |          |          |          |          |
|----------|----------|----------|----------|----------|----------|----------|
| 0.011534 | 0.011466 | 0.011534 | 0.011466 | 0.011500 | 0.011534 | 0.011771 |
| 0.011872 | 0.011804 | 0.011872 | 0.011638 | 0.011873 | 0.011500 | 0.011466 |
| 0.011503 | 0.011793 | 0.011614 | 0.011406 | 0.011881 | 0.011369 | 0.011417 |
| 0.011881 | 0.011780 | 0.011635 | 0.011872 | 0.011542 | 0.011737 | 0.011703 |
| 0.011635 | 0.011804 | 0.011666 | 0.011472 | 0.011563 | 0.011534 | 0.011605 |
| 0.011703 | 0.011604 | 0.011741 | 0.011810 | 0.011737 | 0.011804 | 0.011913 |
| 0.011637 | 0.011812 | 0.011737 | 0.000000 | 0.011941 | 0.011398 | 0.011603 |
| 0.011567 | 0.011500 | 0.011398 | 0.011398 | 0.011466 | 0.011466 | 0.011533 |
| 0.011466 | 0.011534 | 0.011432 | 0.011534 | 0.011466 | 0.011466 | 0.011533 |
| 0.011466 | 0.011906 | 0.011804 | 0.011838 | 0.011364 | 0.011466 | 0.011500 |
| 0.011500 | 0.011466 | 0.011534 | 0.011567 | 0.011432 | 0.011432 | 0.011432 |
| 0.011973 | 0.011601 | 0.011601 | 0.011398 | 0.011500 | 0.011669 | 0.011432 |
| 0.011432 | 0.011500 | 0.011466 | 0.011635 | 0.011432 | 0.011567 | 0.011669 |
| 0.011635 | 0.011432 | 0.011466 | 0.011364 | 0.011398 | 0.011567 | 0.011500 |
| 0.011364 | 0.011466 | 0.011364 | 0.011398 | 0.011263 | 0.011669 | 0.011432 |
| 0.011399 | 0.011331 | 0.011466 | 0.011364 | 0.011703 | 0.011364 | 0.011534 |
| 0.011612 | 0.011432 | 0.011736 | 0.011567 | 0.011466 | 0.011466 | 0.011567 |
| 0.011432 | 0.011770 | 0.011364 | 0.011635 | 0.011432 | 0.011432 | 0.011364 |
| 0.011601 | 0.011805 | 0.011500 | 0.011567 | 0.011398 | 0.011804 | 0.011432 |
| 0.011432 | 0.011432 | 0.011466 | 0.011567 | 0.011466 | 0.011567 | 0.011635 |
| 0.011432 | 0.011601 | 0.011500 | 0.011601 | 0.011567 | 0.011432 | 0.011398 |
| 0.011432 | 0.011432 | 0.011500 | 0.011432 | 0.011398 | 0.011567 | 0.011432 |
| 0.011466 | 0.011466 | 0.011601 | 0.011635 | 0.011534 | 0.011466 | 0.011466 |
| 0.011534 | 0.011466 | 0.011567 | 0.011432 | 0.011567 | 0.011669 | 0.011906 |
| 0.011466 | 0.011872 | 0.011477 | 0.018068 | 0.011392 | 0.011550 | 0.011833 |
| 0.011792 | 0.011840 | 0.011484 | 0.011589 | 0.011894 | 0.011860 | 0.011552 |
| 0.011779 | 0.011732 | 0.011414 | 0.011483 | 0.011454 | 0.011459 | 0.011493 |
| 0.011771 | 0.011661 | 0.011658 | 0.011463 | 0.011601 | 0.011635 | 0.011639 |
| 0.011509 | 0.011601 | 0.011601 | 0.011568 | 0.011534 | 0.011534 | 0.011500 |
| 0.011534 | 0.011466 | 0.011500 | 0.011534 | 0.011500 | 0.011432 | 0.011466 |
| 0.011466 | 0.011534 | 0.011432 | 0.011534 | 0.011568 | 0.011398 | 0.011500 |
| 0.011534 | 0.011500 | 0.011838 | 0.011838 | 0.011568 | 0.011602 | 0.011635 |
| 0.011398 | 0.011398 | 0.011432 | 0.011534 | 0.011398 | 0.011635 | 0.011635 |
| 0.011669 | 0.011635 | 0.011601 | 0.011703 | 0.011872 | 0.011705 | 0.011534 |
| 0.011534 | 0.011601 | 0.011635 | 0.011466 | 0.011534 | 0.011500 | 0.011534 |
| 0.011602 | 0.011602 | 0.011635 | 0.011602 | 0.011501 | 0.011703 | 0.011669 |
| 0.011538 | 0.011432 | 0.011534 | 0.011602 | 0.011534 | 0.011669 | 0.011703 |
| 0.011872 | 0.011542 | 0.011737 | 0.011703 | 0.011635 | 0.011804 | 0.011432 |
| 0.011603 | 0.011500 | 0.011466 | 0.011466 | 0.011534 | 0.011432 | 0.011534 |
| 0.011568 | 0.011398 | 0.011500 | 0.011534 | 0.011500 | 0.011838 | 0.011838 |
| 0.011568 | 0.011602 | 0.011669 | 0.011601 | 0.012212 | 0.011632 | 0.011556 |
| 0.000000 | 0.011617 | 0.011728 | 0.011583 | 0.011727 | 0.011614 | 0.011612 |
| 0.012166 | 0.011476 | 0.011644 | 0.011580 | 0.011852 | 0.011707 | 0.011814 |
| 0.012190 | 0.011663 | 0.011741 | 0.011838 | 0.011703 | 0.011703 | 0.011707 |
| 0.011398 | 0.011567 | 0.011703 | 0.011669 | 0.011639 | 0.011669 | 0.011637 |
| 0.011500 | 0.011432 | 0.011466 | 0.011500 | 0.011398 | 0.011466 | 0.011364 |
| 0.011432 | 0.011466 | 0.011432 | 0.011398 | 0.011500 | 0.011432 | 0.011466 |
| 0.011466 | 0.011398 | 0.011466 | 0.011500 | 0.011398 | 0.011601 | 0.011500 |
| 0.011398 | 0.011466 | 0.011331 | 0.011466 | 0.011466 | 0.011838 | 0.011500 |
| 0.011513 | 0.011466 | 0.011703 | 0.011709 | 0.011568 | 0.011567 | 0.011567 |
| 0.011500 | 0.011500 | 0.011466 | 0.011500 | 0.011533 | 0.011601 | 0.011534 |
| 0.011533 | 0.011635 | 0.011770 | 0.011567 | 0.011771 | 0.011771 | 0.011635 |
| 0.011466 | 0.011534 | 0.011500 | 0.011974 | 0.011534 | 0.011568 | 0.011534 |
| 0.011567 | 0.011500 | 0.011500 | 0.011805 | 0.011703 | 0.011771 | 0.011500 |
| 0.011601 | 0.011601 | 0.011534 | 0.011601 | 0.011567 | 0.011432 | 0.011770 |
| 0.011533 | 0.011500 | 0.011500 | 0.011669 | 0.011500 | 0.011601 | 0.011838 |
| 0.011466 | 0.011916 | 0.011906 | 0.011757 | 0.011399 | 0.011608 | 0.011530 |
| 0.011335 | 0.011963 | 0.011449 | 0.011692 | 0.011553 | 0.011626 | 0.011651 |
| 0.011627 | 0.011394 | 0.011567 | 0.011328 | 0.011496 | 0.011536 | 0.011633 |
| 0.011630 | 0.011536 | 0.011593 | 0.011486 | 0.011536 | 0.011669 | 0.011737 |

|          |          |          |          |          |          |          |
|----------|----------|----------|----------|----------|----------|----------|
| 0.011737 | 0.011602 | 0.011707 | 0.011709 | 0.011846 | 0.011880 | 0.011534 |
| 0.011770 | 0.011635 | 0.011500 | 0.011602 | 0.011398 | 0.011635 | 0.011432 |
| 0.011500 | 0.011500 | 0.011466 | 0.011432 | 0.011466 | 0.011432 | 0.011534 |
| 0.011517 | 0.011515 | 0.011509 | 0.011540 | 0.011676 | 0.011645 | 0.011644 |
| 0.011643 | 0.011568 | 0.011393 | 0.011384 | 0.011504 | 0.011675 | 0.011641 |
| 0.011467 | 0.011538 | 0.011772 | 0.011741 | 0.011602 | 0.011636 | 0.011635 |
| 0.011567 | 0.011635 | 0.011635 | 0.011534 | 0.012109 | 0.011703 | 0.011771 |
| 0.011805 | 0.011850 | 0.011507 | 0.011583 | 0.011466 | 0.011669 | 0.011635 |
| 0.011670 | 0.011703 | 0.011703 | 0.011703 | 0.011774 | 0.011838 | 0.011480 |
| 0.011367 | 0.011373 | 0.011472 | 0.011437 | 0.011539 | 0.011359 | 0.011710 |
| 0.011509 | 0.011630 | 0.011394 | 0.011510 | 0.011500 | 0.011505 | 0.011466 |
| 0.011432 | 0.011432 | 0.011500 | 0.011466 | 0.011669 | 0.011635 | 0.011568 |
| 0.011669 | 0.011737 | 0.011466 | 0.011466 | 0.011500 | 0.011500 | 0.011503 |
| 0.011537 | 0.011500 | 0.011500 | 0.011536 | 0.011669 | 0.011737 | 0.011737 |
| 0.011602 | 0.011707 | 0.011709 | 0.011846 | 0.011880 | 0.011534 | 0.011703 |
| 0.011635 | 0.011635 | 0.011469 | 0.011656 | 0.011585 | 0.011609 | 0.011484 |
| 0.011650 | 0.011842 | 0.011573 | 0.011539 | 0.011432 | 0.011635 | 0.011500 |
| 0.011601 | 0.011534 | 0.011432 | 0.011535 | 0.011635 | 0.011639 | 0.011534 |
| 0.011432 | 0.011366 | 0.011500 | 0.011432 | 0.011365 | 0.011471 | 0.011636 |
| 0.011534 | 0.011466 | 0.011500 | 0.011534 | 0.011500 | 0.011432 | 0.011635 |
| 0.011500 | 0.011534 | 0.011533 | 0.011466 | 0.011331 | 0.011703 | 0.011432 |
| 0.011466 | 0.011838 | 0.011466 | 0.011500 | 0.011466 | 0.011838 | 0.011493 |
| 0.011904 | 0.011485 | 0.011516 | 0.011705 | 0.011799 | 0.011675 | 0.011440 |
| 0.011432 | 0.011635 | 0.011737 | 0.011813 | 0.011705 | 0.011844 | 0.011975 |
| 0.011874 | 0.011912 | 0.011872 | 0.012128 | 0.011838 | 0.012720 | 0.011875 |
| 0.012585 | 0.012385 | 0.012486 | 0.012760 | 0.011838 | 0.011534 | 0.011839 |
| 0.012247 | 0.012216 | 0.011804 | 0.011703 | 0.011772 | 0.011772 | 0.011742 |
| 0.011635 | 0.011641 | 0.011703 | 0.011670 | 0.012043 | 0.012109 | 0.012111 |
| 0.012009 | 0.012110 | 0.012215 | 0.011980 | 0.012248 | 0.012254 | 0.012315 |
| 0.012316 | 0.012350 | 0.012298 | 0.012316 | 0.012317 | 0.011567 | 0.011873 |
| 0.011941 | 0.012380 | 0.011914 | 0.012177 | 0.012654 | 0.011710 | 0.011602 |
| 0.011567 | 0.011567 | 0.012042 | 0.012048 | 0.012195 | 0.011906 | 0.011569 |
| S256     | 0.012036 | 0.012036 | 0.012238 | 0.012204 | 0.012204 | 0.012272 |
| 0.012116 | 0.012047 | 0.012272 | 0.011699 | 0.011766 | 0.011734 | 0.011699 |
| 0.011733 | 0.011901 | 0.011699 | 0.011699 | 0.011800 | 0.011767 | 0.011733 |
| 0.011699 | 0.011733 | 0.011834 | 0.011700 | 0.011734 | 0.011733 | 0.012081 |
| 0.011969 | 0.011733 | 0.011632 | 0.011867 | 0.011800 | 0.011767 | 0.011800 |
| 0.011767 | 0.011868 | 0.011767 | 0.011767 | 0.011767 | 0.011766 | 0.011935 |
| 0.011699 | 0.011766 | 0.011767 | 0.011733 | 0.011834 | 0.011834 | 0.011800 |
| 0.011767 | 0.011902 | 0.011835 | 0.012103 | 0.011733 | 0.012036 | 0.011733 |
| 0.011733 | 0.011834 | 0.011901 | 0.012036 | 0.012137 | 0.011834 | 0.011935 |
| 0.011800 | 0.011868 | 0.011767 | 0.012002 | 0.012238 | 0.011767 | 0.011834 |
| 0.011733 | 0.011834 | 0.011800 | 0.011868 | 0.011800 | 0.011800 | 0.011800 |
| 0.011699 | 0.011733 | 0.011699 | 0.011800 | 0.011766 | 0.011802 | 0.011867 |
| 0.011800 | 0.011766 | 0.011834 | 0.011733 | 0.011867 | 0.011699 | 0.011767 |
| 0.011935 | 0.011867 | 0.012103 | 0.011935 | 0.011767 | 0.012002 | 0.011766 |
| 0.011951 | 0.012183 | 0.012005 | 0.011647 | 0.011695 | 0.011797 | 0.011888 |
| 0.012526 | 0.011824 | 0.011679 | 0.011969 | 0.012002 | 0.011800 | 0.011901 |
| 0.011834 | 0.011598 | 0.011800 | 0.011767 | 0.011868 | 0.011800 | 0.011733 |
| 0.011699 | 0.011867 | 0.011868 | 0.011935 | 0.011834 | 0.011801 | 0.011733 |
| 0.011700 | 0.011699 | 0.011767 | 0.011733 | 0.011935 | 0.011902 | 0.011834 |
| 0.011935 | 0.012003 | 0.011733 | 0.011733 | 0.011767 | 0.011767 | 0.011771 |
| 0.011806 | 0.011767 | 0.011767 | 0.011672 | 0.011748 | 0.011692 | 0.011767 |
| 0.011772 | 0.011714 | 0.011725 | 0.011751 | 0.011673 | 0.011712 | 0.011737 |
| 0.012034 | 0.011785 | 0.011819 | 0.011700 | 0.011718 | 0.011835 | 0.011801 |
| 0.011869 | 0.011803 | 0.011801 | 0.011834 | 0.011766 | 0.012171 | 0.011969 |
| 0.012036 | 0.011902 | 0.011767 | 0.011868 | 0.011666 | 0.011901 | 0.011700 |
| 0.011767 | 0.011767 | 0.011733 | 0.011699 | 0.011733 | 0.011700 | 0.011801 |
| 0.011767 | 0.011868 | 0.011801 | 0.011699 | 0.011803 | 0.011902 | 0.011907 |
| 0.011902 | 0.011801 | 0.011700 | 0.011635 | 0.011767 | 0.011700 | 0.011633 |

|          |          |          |          |          |          |          |
|----------|----------|----------|----------|----------|----------|----------|
| 0.011741 | 0.011902 | 0.011700 | 0.011902 | 0.011666 | 0.011767 | 0.011733 |
| 0.011834 | 0.011733 | 0.011767 | 0.011733 | 0.011767 | 0.011632 | 0.011767 |
| 0.011733 | 0.011733 | 0.011801 | 0.011733 | 0.011700 | 0.011801 | 0.012036 |
| 0.012137 | 0.012070 | 0.012138 | 0.011837 | 0.012138 | 0.011699 | 0.011733 |
| 0.011771 | 0.011870 | 0.011609 | 0.011645 | 0.012149 | 0.011641 | 0.011729 |
| 0.012150 | 0.012048 | 0.011901 | 0.011935 | 0.011847 | 0.012002 | 0.011969 |
| 0.011868 | 0.012070 | 0.011843 | 0.011762 | 0.011773 | 0.011800 | 0.011806 |
| 0.011969 | 0.011803 | 0.012009 | 0.012077 | 0.011935 | 0.011868 | 0.012112 |
| 0.011840 | 0.012079 | 0.011908 | 0.011941 | 0.000000 | 0.011666 | 0.011870 |
| 0.011834 | 0.011767 | 0.011666 | 0.011666 | 0.011733 | 0.011733 | 0.011800 |
| 0.011733 | 0.011800 | 0.011699 | 0.011800 | 0.011733 | 0.011733 | 0.011766 |
| 0.011733 | 0.012171 | 0.012070 | 0.012103 | 0.011632 | 0.011733 | 0.011767 |
| 0.011767 | 0.011733 | 0.011800 | 0.011834 | 0.011699 | 0.011699 | 0.011699 |
| 0.012238 | 0.011834 | 0.011868 | 0.011666 | 0.011766 | 0.011902 | 0.011699 |
| 0.011699 | 0.011766 | 0.011733 | 0.011901 | 0.011699 | 0.011834 | 0.011968 |
| 0.011901 | 0.011733 | 0.011733 | 0.011666 | 0.011666 | 0.011834 | 0.011766 |
| 0.011666 | 0.011766 | 0.011632 | 0.011666 | 0.011800 | 0.011935 | 0.011699 |
| 0.011666 | 0.011800 | 0.011734 | 0.011632 | 0.011969 | 0.011632 | 0.011800 |
| 0.011882 | 0.011699 | 0.012002 | 0.011834 | 0.011868 | 0.011733 | 0.011800 |
| 0.011699 | 0.012036 | 0.011632 | 0.011901 | 0.011699 | 0.011699 | 0.011632 |
| 0.011868 | 0.012070 | 0.011767 | 0.011834 | 0.011666 | 0.012070 | 0.011699 |
| 0.011699 | 0.011699 | 0.011733 | 0.011834 | 0.011733 | 0.011834 | 0.011901 |
| 0.011901 | 0.011868 | 0.011766 | 0.011868 | 0.011834 | 0.011699 | 0.011666 |
| 0.011699 | 0.011699 | 0.011767 | 0.011699 | 0.011666 | 0.011834 | 0.011699 |
| 0.011733 | 0.011733 | 0.011868 | 0.011834 | 0.011800 | 0.011733 | 0.011733 |
| 0.011800 | 0.011733 | 0.011834 | 0.011699 | 0.011834 | 0.011935 | 0.012171 |
| 0.011733 | 0.012137 | 0.011751 | 0.018322 | 0.011585 | 0.011795 | 0.012108 |
| 0.012065 | 0.012117 | 0.011847 | 0.011874 | 0.011996 | 0.012132 | 0.011547 |
| 0.011868 | 0.011855 | 0.011646 | 0.011689 | 0.011686 | 0.011653 | 0.011750 |
| 0.011859 | 0.011918 | 0.011877 | 0.011722 | 0.011868 | 0.011834 | 0.011908 |
| 0.011782 | 0.011868 | 0.011868 | 0.011834 | 0.011800 | 0.011801 | 0.011700 |
| 0.011801 | 0.011733 | 0.011767 | 0.011733 | 0.011767 | 0.011700 | 0.011666 |
| 0.011666 | 0.011801 | 0.011700 | 0.011801 | 0.011834 | 0.011868 | 0.011699 |
| 0.011800 | 0.011767 | 0.012104 | 0.012104 | 0.011834 | 0.011835 | 0.011834 |
| 0.011666 | 0.011666 | 0.011700 | 0.011801 | 0.011666 | 0.011902 | 0.011902 |
| 0.011935 | 0.011901 | 0.011868 | 0.011969 | 0.012138 | 0.011972 | 0.011801 |
| 0.011801 | 0.011868 | 0.011868 | 0.011733 | 0.011801 | 0.011767 | 0.011767 |
| 0.011869 | 0.011868 | 0.011902 | 0.011868 | 0.011769 | 0.011969 | 0.011935 |
| 0.011807 | 0.011700 | 0.011801 | 0.011902 | 0.011733 | 0.011936 | 0.011968 |
| 0.011935 | 0.011847 | 0.012002 | 0.011969 | 0.011868 | 0.012070 | 0.011700 |
| 0.011837 | 0.011768 | 0.011666 | 0.011666 | 0.011801 | 0.011700 | 0.011801 |
| 0.011834 | 0.011868 | 0.011699 | 0.011800 | 0.011767 | 0.012104 | 0.012104 |
| 0.011834 | 0.011835 | 0.011867 | 0.011800 | 0.012475 | 0.011918 | 0.011800 |
| 0.011940 | 0.011894 | 0.012010 | 0.011893 | 0.012006 | 0.011716 | 0.011889 |
| 0.012436 | 0.011718 | 0.011849 | 0.011648 | 0.011922 | 0.011980 | 0.012082 |
| 0.012455 | 0.011965 | 0.012009 | 0.012103 | 0.011969 | 0.011969 | 0.011975 |
| 0.011666 | 0.011834 | 0.011968 | 0.011935 | 0.011907 | 0.011935 | 0.011904 |
| 0.011766 | 0.011699 | 0.011733 | 0.011767 | 0.011666 | 0.011733 | 0.011632 |
| 0.011766 | 0.011800 | 0.011699 | 0.011666 | 0.011767 | 0.011699 | 0.011733 |
| 0.011699 | 0.011666 | 0.011733 | 0.011767 | 0.011666 | 0.011868 | 0.011901 |
| 0.011800 | 0.011868 | 0.011800 | 0.011800 | 0.011733 | 0.012137 | 0.011766 |
| 0.011827 | 0.011733 | 0.011969 | 0.011977 | 0.011834 | 0.011834 | 0.011834 |
| 0.011834 | 0.011767 | 0.011733 | 0.011767 | 0.011868 | 0.011868 | 0.011800 |
| 0.011800 | 0.011935 | 0.012103 | 0.011834 | 0.012036 | 0.012036 | 0.011901 |
| 0.011733 | 0.011800 | 0.011834 | 0.012238 | 0.011801 | 0.011834 | 0.011800 |
| 0.011834 | 0.011766 | 0.011766 | 0.012070 | 0.012003 | 0.012036 | 0.011767 |
| 0.011868 | 0.011935 | 0.011800 | 0.011868 | 0.011834 | 0.011699 | 0.012036 |
| 0.011800 | 0.011767 | 0.011766 | 0.011935 | 0.011767 | 0.011868 | 0.012104 |
| 0.011733 | 0.012184 | 0.012171 | 0.011997 | 0.011682 | 0.011877 | 0.011628 |
| 0.011610 | 0.012191 | 0.011728 | 0.011866 | 0.011598 | 0.011672 | 0.011699 |



|          |          |          |          |          |          |          |
|----------|----------|----------|----------|----------|----------|----------|
| 0.011878 | 0.011522 | 0.011674 | 0.011590 | 0.011546 | 0.011799 | 0.011832 |
| 0.011739 | 0.011809 | 0.011872 | 0.011801 | 0.011804 | 0.011935 | 0.012003 |
| 0.011969 | 0.011869 | 0.011975 | 0.011978 | 0.012114 | 0.012123 | 0.011800 |
| 0.012036 | 0.011902 | 0.011767 | 0.011868 | 0.011666 | 0.011901 | 0.011700 |
| 0.011767 | 0.011767 | 0.011733 | 0.011699 | 0.011733 | 0.011700 | 0.011801 |
| 0.011795 | 0.011796 | 0.011746 | 0.011815 | 0.011882 | 0.011916 | 0.011881 |
| 0.011913 | 0.011835 | 0.011688 | 0.011673 | 0.011772 | 0.011943 | 0.011944 |
| 0.011734 | 0.011806 | 0.012038 | 0.011974 | 0.011936 | 0.011970 | 0.011834 |
| 0.011834 | 0.011699 | 0.011699 | 0.011800 | 0.012340 | 0.011969 | 0.012036 |
| 0.012070 | 0.012095 | 0.011778 | 0.011858 | 0.011733 | 0.011868 | 0.011834 |
| 0.011937 | 0.011834 | 0.011969 | 0.011969 | 0.011887 | 0.012036 | 0.011754 |
| 0.011636 | 0.011650 | 0.011741 | 0.011706 | 0.011813 | 0.011583 | 0.011978 |
| 0.011781 | 0.011894 | 0.011680 | 0.011848 | 0.011767 | 0.011848 | 0.011733 |
| 0.011700 | 0.011699 | 0.011767 | 0.011733 | 0.011935 | 0.011902 | 0.011834 |
| 0.011935 | 0.012003 | 0.011733 | 0.011733 | 0.011767 | 0.011767 | 0.011771 |
| 0.011806 | 0.011767 | 0.011767 | 0.011804 | 0.011935 | 0.012003 | 0.011969 |
| 0.011869 | 0.011975 | 0.011978 | 0.012114 | 0.012123 | 0.011800 | 0.011969 |
| 0.011834 | 0.011834 | 0.011738 | 0.011862 | 0.011861 | 0.011879 | 0.011762 |
| 0.011923 | 0.011882 | 0.011823 | 0.011809 | 0.011700 | 0.011902 | 0.011767 |
| 0.011868 | 0.011801 | 0.011699 | 0.011803 | 0.011902 | 0.011907 | 0.011801 |
| 0.011700 | 0.011635 | 0.011767 | 0.011700 | 0.011633 | 0.011741 | 0.011902 |
| 0.011801 | 0.011733 | 0.011767 | 0.011733 | 0.011767 | 0.011700 | 0.011901 |
| 0.011767 | 0.011800 | 0.011800 | 0.011733 | 0.011800 | 0.011969 | 0.011699 |
| 0.011733 | 0.012137 | 0.011733 | 0.011767 | 0.011733 | 0.012103 | 0.011661 |
| 0.012187 | 0.011742 | 0.011613 | 0.011907 | 0.011998 | 0.011959 | 0.011563 |
| 0.011586 | 0.011901 | 0.011969 | 0.012080 | 0.011937 | 0.012077 | 0.012207 |
| 0.012105 | 0.012144 | 0.012103 | 0.012361 | 0.012103 | 0.012914 | 0.012140 |
| 0.012847 | 0.012580 | 0.012716 | 0.012988 | 0.012103 | 0.011801 | 0.012071 |
| 0.012510 | 0.012447 | 0.012070 | 0.011969 | 0.012037 | 0.012037 | 0.012009 |
| 0.011901 | 0.011910 | 0.011968 | 0.011936 | 0.012307 | 0.012373 | 0.012374 |
| 0.012274 | 0.012375 | 0.012479 | 0.012246 | 0.012511 | 0.012519 | 0.012578 |
| 0.012578 | 0.012612 | 0.012565 | 0.012579 | 0.012581 | 0.011766 | 0.012104 |
| 0.012206 | 0.012711 | 0.012181 | 0.012441 | 0.012916 | 0.011979 | 0.011868 |
| 0.011834 | 0.011834 | 0.012307 | 0.012378 | 0.012470 | 0.012171 | 0.011837 |
| S257     | 0.011564 | 0.011564 | 0.011900 | 0.011664 | 0.011664 | 0.011731 |
| 0.011569 | 0.011501 | 0.011731 | 0.011161 | 0.011228 | 0.011195 | 0.011161 |
| 0.011194 | 0.011362 | 0.011161 | 0.011194 | 0.011262 | 0.011228 | 0.011194 |
| 0.011161 | 0.011194 | 0.011295 | 0.011161 | 0.011195 | 0.011194 | 0.011535 |
| 0.011429 | 0.011194 | 0.011094 | 0.011329 | 0.011262 | 0.011228 | 0.011262 |
| 0.011228 | 0.011329 | 0.011228 | 0.011228 | 0.011262 | 0.011228 | 0.011396 |
| 0.011161 | 0.011228 | 0.011262 | 0.011194 | 0.011295 | 0.011329 | 0.011262 |
| 0.011228 | 0.011396 | 0.011295 | 0.011564 | 0.011228 | 0.011496 | 0.011228 |
| 0.011194 | 0.011295 | 0.011362 | 0.011496 | 0.011597 | 0.011295 | 0.011396 |
| 0.011262 | 0.011329 | 0.011228 | 0.011463 | 0.011698 | 0.011228 | 0.011295 |
| 0.011194 | 0.011295 | 0.011262 | 0.011329 | 0.011262 | 0.011262 | 0.011262 |
| 0.011161 | 0.011194 | 0.011161 | 0.011262 | 0.011228 | 0.011262 | 0.011329 |
| 0.011262 | 0.011228 | 0.011295 | 0.011194 | 0.011329 | 0.011161 | 0.011228 |
| 0.011396 | 0.011329 | 0.011564 | 0.011396 | 0.011228 | 0.011463 | 0.011228 |
| 0.011394 | 0.011620 | 0.011437 | 0.011138 | 0.011135 | 0.011244 | 0.011336 |
| 0.011975 | 0.011416 | 0.011143 | 0.011463 | 0.011463 | 0.011262 | 0.011362 |
| 0.011295 | 0.011262 | 0.011329 | 0.011228 | 0.011329 | 0.011262 | 0.011262 |
| 0.011228 | 0.011329 | 0.011530 | 0.011396 | 0.011295 | 0.011262 | 0.011195 |
| 0.011161 | 0.011161 | 0.011228 | 0.011195 | 0.011396 | 0.011362 | 0.011295 |
| 0.011396 | 0.011463 | 0.011195 | 0.011195 | 0.011228 | 0.011228 | 0.011229 |
| 0.011297 | 0.011228 | 0.011228 | 0.011096 | 0.011169 | 0.011130 | 0.011228 |
| 0.011230 | 0.011163 | 0.011208 | 0.011198 | 0.011128 | 0.011163 | 0.011195 |
| 0.011456 | 0.011233 | 0.011267 | 0.011161 | 0.011164 | 0.011296 | 0.011262 |
| 0.011329 | 0.011262 | 0.011262 | 0.011362 | 0.011295 | 0.011664 | 0.011463 |
| 0.011496 | 0.011362 | 0.011228 | 0.011329 | 0.011127 | 0.011362 | 0.011161 |
| 0.011228 | 0.011228 | 0.011195 | 0.011161 | 0.011194 | 0.011161 | 0.011262 |

|          |          |          |          |          |          |          |
|----------|----------|----------|----------|----------|----------|----------|
| 0.011228 | 0.011329 | 0.011262 | 0.011161 | 0.011262 | 0.011362 | 0.011364 |
| 0.011362 | 0.011262 | 0.011161 | 0.011094 | 0.011228 | 0.011161 | 0.011094 |
| 0.011196 | 0.011362 | 0.011161 | 0.011362 | 0.011127 | 0.011228 | 0.011195 |
| 0.011295 | 0.011195 | 0.011228 | 0.011195 | 0.011228 | 0.011094 | 0.011228 |
| 0.011262 | 0.011195 | 0.011262 | 0.011195 | 0.011228 | 0.011262 | 0.011497 |
| 0.011597 | 0.011530 | 0.011597 | 0.011363 | 0.011598 | 0.011228 | 0.011195 |
| 0.011229 | 0.011505 | 0.011335 | 0.011129 | 0.011603 | 0.011094 | 0.011218 |
| 0.011603 | 0.011502 | 0.011396 | 0.011597 | 0.011299 | 0.011463 | 0.011429 |
| 0.011362 | 0.011530 | 0.011380 | 0.011184 | 0.011270 | 0.011262 | 0.011331 |
| 0.011429 | 0.011330 | 0.011466 | 0.011534 | 0.011463 | 0.011530 | 0.011636 |
| 0.011365 | 0.011535 | 0.011466 | 0.011398 | 0.011666 | 0.000000 | 0.011330 |
| 0.011295 | 0.011228 | 0.011127 | 0.011127 | 0.011194 | 0.011194 | 0.011262 |
| 0.011194 | 0.011262 | 0.011161 | 0.011262 | 0.011194 | 0.011194 | 0.011262 |
| 0.011194 | 0.011631 | 0.011530 | 0.011564 | 0.011094 | 0.011194 | 0.011228 |
| 0.011228 | 0.011194 | 0.011262 | 0.011295 | 0.011161 | 0.011161 | 0.011161 |
| 0.011698 | 0.011329 | 0.011329 | 0.011127 | 0.011228 | 0.011396 | 0.011161 |
| 0.011161 | 0.011228 | 0.011194 | 0.011362 | 0.011161 | 0.011295 | 0.011429 |
| 0.011362 | 0.011194 | 0.011194 | 0.011127 | 0.011127 | 0.011295 | 0.011228 |
| 0.011127 | 0.011228 | 0.011094 | 0.011127 | 0.011262 | 0.011396 | 0.011161 |
| 0.011128 | 0.011262 | 0.011195 | 0.011094 | 0.011429 | 0.011094 | 0.011262 |
| 0.011334 | 0.011161 | 0.011463 | 0.011295 | 0.011329 | 0.011194 | 0.011295 |
| 0.011161 | 0.011496 | 0.011094 | 0.011362 | 0.011161 | 0.011161 | 0.011094 |
| 0.011329 | 0.011530 | 0.011228 | 0.011295 | 0.011127 | 0.011530 | 0.011161 |
| 0.011161 | 0.011161 | 0.011194 | 0.011295 | 0.011194 | 0.011295 | 0.011362 |
| 0.011362 | 0.011329 | 0.011228 | 0.011329 | 0.011295 | 0.011161 | 0.011127 |
| 0.011161 | 0.011161 | 0.011228 | 0.011161 | 0.011127 | 0.011295 | 0.011161 |
| 0.011194 | 0.011194 | 0.011329 | 0.011362 | 0.011262 | 0.011194 | 0.011195 |
| 0.011262 | 0.011194 | 0.011295 | 0.011161 | 0.011295 | 0.011396 | 0.011698 |
| 0.011194 | 0.011597 | 0.011198 | 0.017710 | 0.011191 | 0.011305 | 0.011548 |
| 0.011510 | 0.011553 | 0.011270 | 0.011234 | 0.011664 | 0.011578 | 0.011303 |
| 0.011440 | 0.011487 | 0.011099 | 0.011186 | 0.011177 | 0.011258 | 0.011189 |
| 0.011436 | 0.011358 | 0.011357 | 0.011193 | 0.011329 | 0.011362 | 0.011365 |
| 0.011232 | 0.011329 | 0.011329 | 0.011295 | 0.011262 | 0.011262 | 0.011228 |
| 0.011262 | 0.011195 | 0.011228 | 0.011262 | 0.011228 | 0.011161 | 0.011195 |
| 0.011195 | 0.011262 | 0.011161 | 0.011262 | 0.011295 | 0.011329 | 0.011228 |
| 0.011262 | 0.011228 | 0.011564 | 0.011564 | 0.011295 | 0.011329 | 0.011362 |
| 0.011127 | 0.011127 | 0.011161 | 0.011262 | 0.011127 | 0.011362 | 0.011362 |
| 0.011396 | 0.011396 | 0.011329 | 0.011429 | 0.011597 | 0.011430 | 0.011262 |
| 0.011262 | 0.011329 | 0.011362 | 0.011195 | 0.011262 | 0.011228 | 0.011262 |
| 0.011329 | 0.011329 | 0.011362 | 0.011329 | 0.011229 | 0.011429 | 0.011396 |
| 0.011263 | 0.011161 | 0.011262 | 0.011362 | 0.011262 | 0.011396 | 0.011429 |
| 0.011597 | 0.011299 | 0.011463 | 0.011429 | 0.011362 | 0.011530 | 0.011161 |
| 0.011330 | 0.011228 | 0.011195 | 0.011195 | 0.011262 | 0.011161 | 0.011262 |
| 0.011295 | 0.011329 | 0.011228 | 0.011262 | 0.011228 | 0.011564 | 0.011564 |
| 0.011295 | 0.011329 | 0.011396 | 0.011329 | 0.011968 | 0.011382 | 0.011306 |
| 0.011376 | 0.011338 | 0.011447 | 0.011337 | 0.011445 | 0.011370 | 0.011336 |
| 0.011918 | 0.011233 | 0.011368 | 0.011302 | 0.011576 | 0.011434 | 0.011536 |
| 0.011944 | 0.011399 | 0.011500 | 0.011564 | 0.011429 | 0.011429 | 0.011466 |
| 0.000000 | 0.011295 | 0.011429 | 0.011396 | 0.011398 | 0.011396 | 0.011363 |
| 0.011228 | 0.011161 | 0.011194 | 0.011228 | 0.011127 | 0.011194 | 0.011094 |
| 0.011228 | 0.011262 | 0.011161 | 0.011127 | 0.011228 | 0.011161 | 0.011194 |
| 0.011194 | 0.011127 | 0.011194 | 0.011228 | 0.011127 | 0.011329 | 0.011362 |
| 0.011262 | 0.011329 | 0.011262 | 0.011262 | 0.011194 | 0.011597 | 0.011228 |
| 0.011269 | 0.011195 | 0.011430 | 0.011433 | 0.011295 | 0.011295 | 0.011295 |
| 0.011295 | 0.011228 | 0.011194 | 0.011228 | 0.011329 | 0.011329 | 0.011262 |
| 0.011262 | 0.011396 | 0.011564 | 0.011295 | 0.011497 | 0.011497 | 0.011362 |
| 0.011194 | 0.011262 | 0.011295 | 0.011698 | 0.011262 | 0.011295 | 0.011262 |
| 0.011295 | 0.011228 | 0.011228 | 0.011530 | 0.011463 | 0.011496 | 0.011228 |
| 0.011329 | 0.011396 | 0.011262 | 0.011329 | 0.011295 | 0.011161 | 0.011496 |
| 0.011262 | 0.011228 | 0.011228 | 0.011396 | 0.011228 | 0.011329 | 0.011564 |

|          |          |          |          |          |          |          |
|----------|----------|----------|----------|----------|----------|----------|
| 0.011262 | 0.011637 | 0.011631 | 0.011426 | 0.011173 | 0.011332 | 0.011215 |
| 0.011115 | 0.011644 | 0.011166 | 0.011373 | 0.011207 | 0.011315 | 0.011326 |
| 0.011417 | 0.011126 | 0.011283 | 0.011126 | 0.011168 | 0.011328 | 0.011303 |
| 0.011324 | 0.011218 | 0.011307 | 0.011236 | 0.011262 | 0.011396 | 0.011463 |
| 0.011463 | 0.011329 | 0.011432 | 0.011433 | 0.011569 | 0.011590 | 0.011262 |
| 0.011496 | 0.011362 | 0.011228 | 0.011329 | 0.011127 | 0.011362 | 0.011161 |
| 0.011228 | 0.011228 | 0.011195 | 0.011161 | 0.011194 | 0.011161 | 0.011262 |
| 0.011235 | 0.011235 | 0.011231 | 0.011266 | 0.011402 | 0.011368 | 0.011367 |
| 0.011367 | 0.011296 | 0.011097 | 0.011096 | 0.011230 | 0.011399 | 0.011399 |
| 0.011195 | 0.011263 | 0.011498 | 0.011466 | 0.011396 | 0.011430 | 0.011362 |
| 0.011295 | 0.011362 | 0.011362 | 0.011262 | 0.011832 | 0.011429 | 0.011497 |
| 0.011530 | 0.011594 | 0.011231 | 0.011303 | 0.011195 | 0.011396 | 0.011362 |
| 0.011396 | 0.011429 | 0.011429 | 0.011429 | 0.011571 | 0.011564 | 0.011199 |
| 0.011094 | 0.011095 | 0.011196 | 0.011162 | 0.011265 | 0.011098 | 0.011434 |
| 0.011232 | 0.011367 | 0.000000 | 0.011248 | 0.011228 | 0.011300 | 0.011195 |
| 0.011161 | 0.011161 | 0.011228 | 0.011195 | 0.011396 | 0.011362 | 0.011295 |
| 0.011396 | 0.011463 | 0.011195 | 0.011195 | 0.011228 | 0.011228 | 0.011229 |
| 0.011297 | 0.011228 | 0.011228 | 0.011262 | 0.011396 | 0.011463 | 0.011463 |
| 0.011329 | 0.011432 | 0.011433 | 0.011569 | 0.011590 | 0.011262 | 0.011429 |
| 0.011362 | 0.011362 | 0.011196 | 0.011373 | 0.011303 | 0.011333 | 0.011200 |
| 0.011370 | 0.011561 | 0.011357 | 0.011264 | 0.011161 | 0.011362 | 0.011228 |
| 0.011329 | 0.011262 | 0.011161 | 0.011262 | 0.011362 | 0.011364 | 0.011262 |
| 0.011161 | 0.011094 | 0.011228 | 0.011161 | 0.011094 | 0.011196 | 0.011362 |
| 0.011262 | 0.011195 | 0.011228 | 0.011262 | 0.011228 | 0.011161 | 0.011362 |
| 0.011228 | 0.011262 | 0.011262 | 0.011194 | 0.011262 | 0.011496 | 0.011161 |
| 0.011194 | 0.011597 | 0.011194 | 0.011228 | 0.011194 | 0.011564 | 0.011146 |
| 0.011622 | 0.011145 | 0.011211 | 0.011382 | 0.011467 | 0.011383 | 0.011102 |
| 0.011165 | 0.011362 | 0.011463 | 0.011569 | 0.011430 | 0.011568 | 0.011699 |
| 0.011598 | 0.011635 | 0.011597 | 0.011846 | 0.011564 | 0.012438 | 0.011599 |
| 0.012338 | 0.012105 | 0.012240 | 0.012511 | 0.011564 | 0.011262 | 0.011564 |
| 0.012002 | 0.011937 | 0.011530 | 0.011429 | 0.011497 | 0.011497 | 0.011466 |
| 0.011362 | 0.011365 | 0.011429 | 0.011396 | 0.011766 | 0.011832 | 0.011834 |
| 0.011733 | 0.011833 | 0.011937 | 0.011703 | 0.012003 | 0.012008 | 0.012070 |
| 0.012070 | 0.012104 | 0.012050 | 0.012070 | 0.012072 | 0.011295 | 0.011598 |
| 0.011665 | 0.012169 | 0.011670 | 0.011900 | 0.012373 | 0.011434 | 0.011329 |
| 0.011295 | 0.011295 | 0.011766 | 0.011800 | 0.011904 | 0.011631 | 0.011296 |
| S258     | 0.011768 | 0.011768 | 0.011835 | 0.011802 | 0.011802 | 0.011869 |
| 0.011776 | 0.011708 | 0.011869 | 0.011363 | 0.011431 | 0.011398 | 0.011363 |
| 0.011397 | 0.011566 | 0.011363 | 0.011397 | 0.011464 | 0.011431 | 0.011397 |
| 0.011363 | 0.011397 | 0.011498 | 0.011364 | 0.011397 | 0.011397 | 0.011742 |
| 0.011633 | 0.011397 | 0.011296 | 0.011532 | 0.011465 | 0.011431 | 0.011465 |
| 0.011431 | 0.011532 | 0.011431 | 0.011431 | 0.011464 | 0.011431 | 0.011599 |
| 0.011363 | 0.011431 | 0.011465 | 0.011397 | 0.011498 | 0.011532 | 0.011465 |
| 0.011431 | 0.011599 | 0.011499 | 0.011768 | 0.011431 | 0.011700 | 0.011431 |
| 0.011397 | 0.011498 | 0.011566 | 0.011700 | 0.011802 | 0.011498 | 0.011599 |
| 0.011464 | 0.011532 | 0.011431 | 0.011667 | 0.011903 | 0.011431 | 0.011498 |
| 0.011397 | 0.011498 | 0.011465 | 0.011532 | 0.011464 | 0.011465 | 0.011465 |
| 0.011363 | 0.011397 | 0.011363 | 0.011465 | 0.011431 | 0.011466 | 0.011532 |
| 0.011465 | 0.011431 | 0.011498 | 0.011397 | 0.011532 | 0.011363 | 0.011431 |
| 0.011599 | 0.011532 | 0.011768 | 0.011599 | 0.011431 | 0.011667 | 0.011431 |
| 0.011544 | 0.011735 | 0.011590 | 0.011295 | 0.011322 | 0.011393 | 0.011495 |
| 0.012162 | 0.011622 | 0.011308 | 0.011667 | 0.011667 | 0.011464 | 0.011566 |
| 0.011498 | 0.011464 | 0.011532 | 0.011431 | 0.011532 | 0.011465 | 0.011464 |
| 0.011431 | 0.011532 | 0.011734 | 0.011599 | 0.011498 | 0.011465 | 0.011397 |
| 0.011364 | 0.011364 | 0.011431 | 0.011397 | 0.011600 | 0.011566 | 0.011498 |
| 0.011600 | 0.011667 | 0.011397 | 0.011397 | 0.011431 | 0.011431 | 0.011433 |
| 0.011501 | 0.011431 | 0.011431 | 0.011312 | 0.011386 | 0.011341 | 0.011431 |
| 0.011434 | 0.011370 | 0.011393 | 0.011406 | 0.011332 | 0.011369 | 0.011399 |
| 0.011673 | 0.011440 | 0.011475 | 0.011364 | 0.011372 | 0.011499 | 0.011465 |
| 0.011532 | 0.011466 | 0.011465 | 0.011532 | 0.011498 | 0.011869 | 0.011633 |

|          |          |          |          |          |          |          |
|----------|----------|----------|----------|----------|----------|----------|
| 0.011700 | 0.011566 | 0.011431 | 0.011532 | 0.011330 | 0.011566 | 0.011364 |
| 0.011431 | 0.011431 | 0.011397 | 0.011363 | 0.011397 | 0.011364 | 0.011465 |
| 0.011431 | 0.011532 | 0.011465 | 0.011364 | 0.011466 | 0.011566 | 0.011569 |
| 0.011566 | 0.011465 | 0.011364 | 0.011297 | 0.011431 | 0.011364 | 0.011296 |
| 0.011401 | 0.011566 | 0.011364 | 0.011566 | 0.011330 | 0.011431 | 0.011397 |
| 0.011498 | 0.011397 | 0.011431 | 0.011397 | 0.011431 | 0.011296 | 0.011431 |
| 0.011465 | 0.011397 | 0.011465 | 0.011397 | 0.011431 | 0.011465 | 0.011701 |
| 0.011802 | 0.011734 | 0.011802 | 0.011568 | 0.011802 | 0.011431 | 0.011397 |
| 0.011433 | 0.011667 | 0.011517 | 0.011336 | 0.011810 | 0.011300 | 0.011455 |
| 0.011810 | 0.011708 | 0.011599 | 0.011802 | 0.011506 | 0.011667 | 0.011633 |
| 0.011566 | 0.011734 | 0.011523 | 0.011308 | 0.011354 | 0.011465 | 0.011536 |
| 0.011633 | 0.011534 | 0.011671 | 0.011739 | 0.011667 | 0.011734 | 0.011841 |
| 0.011570 | 0.011739 | 0.011671 | 0.011603 | 0.011870 | 0.011330 | 0.000000 |
| 0.011498 | 0.011431 | 0.011330 | 0.011330 | 0.011397 | 0.011397 | 0.011464 |
| 0.011397 | 0.011465 | 0.011363 | 0.011465 | 0.011397 | 0.011397 | 0.011464 |
| 0.011397 | 0.011835 | 0.011734 | 0.011768 | 0.011296 | 0.011397 | 0.011431 |
| 0.011431 | 0.011397 | 0.011431 | 0.011498 | 0.011363 | 0.011363 | 0.011363 |
| 0.011903 | 0.011498 | 0.011532 | 0.011330 | 0.011431 | 0.011599 | 0.011363 |
| 0.011363 | 0.011431 | 0.011397 | 0.011566 | 0.011363 | 0.011498 | 0.011633 |
| 0.011566 | 0.011397 | 0.011397 | 0.011330 | 0.011330 | 0.011498 | 0.011431 |
| 0.011330 | 0.011431 | 0.011296 | 0.011330 | 0.011465 | 0.011600 | 0.011363 |
| 0.011330 | 0.011464 | 0.011397 | 0.011296 | 0.011633 | 0.011296 | 0.011465 |
| 0.011472 | 0.011363 | 0.011667 | 0.011498 | 0.011532 | 0.011397 | 0.011498 |
| 0.011363 | 0.011700 | 0.011296 | 0.011566 | 0.011363 | 0.011363 | 0.011296 |
| 0.011532 | 0.011735 | 0.011431 | 0.011498 | 0.011330 | 0.011734 | 0.011363 |
| 0.011363 | 0.011363 | 0.011397 | 0.011498 | 0.011397 | 0.011498 | 0.011566 |
| 0.011566 | 0.011532 | 0.011431 | 0.011532 | 0.011498 | 0.011363 | 0.011330 |
| 0.011363 | 0.011363 | 0.011431 | 0.011363 | 0.011330 | 0.011498 | 0.011363 |
| 0.011397 | 0.011397 | 0.011532 | 0.011566 | 0.011464 | 0.011397 | 0.011397 |
| 0.011465 | 0.011397 | 0.011498 | 0.011363 | 0.011498 | 0.011599 | 0.011835 |
| 0.011397 | 0.011802 | 0.011406 | 0.017885 | 0.011258 | 0.011429 | 0.011725 |
| 0.011685 | 0.011731 | 0.011323 | 0.011235 | 0.011833 | 0.011753 | 0.011366 |
| 0.011536 | 0.011490 | 0.011256 | 0.011312 | 0.011334 | 0.011358 | 0.011319 |
| 0.011626 | 0.011546 | 0.011544 | 0.011457 | 0.011532 | 0.011566 | 0.011570 |
| 0.011438 | 0.011532 | 0.011532 | 0.011498 | 0.011465 | 0.011465 | 0.011431 |
| 0.011465 | 0.011397 | 0.011431 | 0.011465 | 0.011431 | 0.011364 | 0.011397 |
| 0.011397 | 0.011465 | 0.011364 | 0.011465 | 0.011498 | 0.011532 | 0.011431 |
| 0.011465 | 0.011431 | 0.011768 | 0.011768 | 0.011498 | 0.011533 | 0.011566 |
| 0.011330 | 0.011330 | 0.011364 | 0.011465 | 0.011330 | 0.011566 | 0.011566 |
| 0.011600 | 0.011599 | 0.011532 | 0.011633 | 0.011802 | 0.011635 | 0.011465 |
| 0.011465 | 0.011498 | 0.011566 | 0.011330 | 0.011465 | 0.011431 | 0.011465 |
| 0.011532 | 0.011532 | 0.011566 | 0.011532 | 0.011432 | 0.011633 | 0.011600 |
| 0.011468 | 0.011364 | 0.011465 | 0.011566 | 0.011465 | 0.011600 | 0.011633 |
| 0.011802 | 0.011506 | 0.011667 | 0.011633 | 0.011566 | 0.011734 | 0.011364 |
| 0.011534 | 0.011431 | 0.011397 | 0.011397 | 0.011465 | 0.011364 | 0.011465 |
| 0.011498 | 0.011532 | 0.011431 | 0.011465 | 0.011431 | 0.011768 | 0.011768 |
| 0.011498 | 0.011533 | 0.011599 | 0.011532 | 0.012174 | 0.011596 | 0.011448 |
| 0.011587 | 0.011546 | 0.011587 | 0.011476 | 0.011655 | 0.011578 | 0.011544 |
| 0.012126 | 0.011441 | 0.011575 | 0.011510 | 0.011783 | 0.011641 | 0.011742 |
| 0.012150 | 0.011512 | 0.011705 | 0.011768 | 0.011633 | 0.011633 | 0.011671 |
| 0.011330 | 0.011498 | 0.011633 | 0.011599 | 0.011603 | 0.011599 | 0.011500 |
| 0.011431 | 0.011363 | 0.011397 | 0.011431 | 0.011330 | 0.011397 | 0.011296 |
| 0.011431 | 0.011464 | 0.011363 | 0.011330 | 0.011431 | 0.011363 | 0.011397 |
| 0.011397 | 0.011330 | 0.011397 | 0.011431 | 0.011330 | 0.011532 | 0.011566 |
| 0.011465 | 0.011532 | 0.011465 | 0.011465 | 0.011397 | 0.011802 | 0.011431 |
| 0.011479 | 0.011397 | 0.011633 | 0.011637 | 0.011498 | 0.011498 | 0.011498 |
| 0.011498 | 0.011431 | 0.011397 | 0.011431 | 0.011532 | 0.011532 | 0.011465 |
| 0.011464 | 0.011599 | 0.011768 | 0.011498 | 0.011667 | 0.011667 | 0.011566 |
| 0.011397 | 0.011465 | 0.011498 | 0.011903 | 0.011465 | 0.011498 | 0.011465 |
| 0.011498 | 0.011431 | 0.011431 | 0.011734 | 0.011667 | 0.011701 | 0.011431 |

|          |          |          |          |          |          |          |
|----------|----------|----------|----------|----------|----------|----------|
| 0.011532 | 0.011599 | 0.011431 | 0.011532 | 0.011498 | 0.011363 | 0.011700 |
| 0.011464 | 0.011431 | 0.011431 | 0.011599 | 0.011431 | 0.011532 | 0.011768 |
| 0.011397 | 0.011844 | 0.011835 | 0.011591 | 0.011400 | 0.011538 | 0.011370 |
| 0.011336 | 0.011763 | 0.011377 | 0.011464 | 0.011354 | 0.011520 | 0.011487 |
| 0.011624 | 0.011259 | 0.011452 | 0.011260 | 0.011331 | 0.011532 | 0.011467 |
| 0.011476 | 0.011376 | 0.011484 | 0.011449 | 0.011399 | 0.011600 | 0.011600 |
| 0.011633 | 0.011465 | 0.011637 | 0.011639 | 0.011707 | 0.011663 | 0.011465 |
| 0.011700 | 0.011566 | 0.011431 | 0.011532 | 0.011330 | 0.011566 | 0.011364 |
| 0.011431 | 0.011431 | 0.011397 | 0.011363 | 0.011397 | 0.011364 | 0.011465 |
| 0.011446 | 0.011445 | 0.011438 | 0.011472 | 0.011609 | 0.011574 | 0.011574 |
| 0.011571 | 0.011499 | 0.011319 | 0.011313 | 0.011434 | 0.011604 | 0.011605 |
| 0.011398 | 0.011468 | 0.011668 | 0.011670 | 0.011600 | 0.011634 | 0.011566 |
| 0.011498 | 0.011566 | 0.011566 | 0.011465 | 0.012038 | 0.011633 | 0.011701 |
| 0.011701 | 0.011811 | 0.011437 | 0.011511 | 0.011397 | 0.011566 | 0.011566 |
| 0.011601 | 0.011599 | 0.011633 | 0.011633 | 0.011770 | 0.011768 | 0.011407 |
| 0.011298 | 0.011303 | 0.011401 | 0.011366 | 0.011471 | 0.011284 | 0.011638 |
| 0.011438 | 0.011455 | 0.011203 | 0.011397 | 0.011431 | 0.011506 | 0.011397 |
| 0.011364 | 0.011364 | 0.011431 | 0.011397 | 0.011600 | 0.011566 | 0.011498 |
| 0.011600 | 0.011667 | 0.011397 | 0.011397 | 0.011431 | 0.011431 | 0.011433 |
| 0.011501 | 0.011431 | 0.011431 | 0.011399 | 0.011600 | 0.011600 | 0.011633 |
| 0.011465 | 0.011637 | 0.011639 | 0.011707 | 0.011663 | 0.011465 | 0.011633 |
| 0.011566 | 0.011566 | 0.011400 | 0.011584 | 0.011514 | 0.011539 | 0.011376 |
| 0.011579 | 0.011654 | 0.011610 | 0.011435 | 0.011364 | 0.011566 | 0.011431 |
| 0.011532 | 0.011465 | 0.011364 | 0.011466 | 0.011566 | 0.011569 | 0.011465 |
| 0.011364 | 0.011297 | 0.011431 | 0.011364 | 0.011296 | 0.011401 | 0.011566 |
| 0.011465 | 0.011397 | 0.011431 | 0.011465 | 0.011431 | 0.011364 | 0.011566 |
| 0.011431 | 0.011465 | 0.011465 | 0.011397 | 0.011465 | 0.011701 | 0.011363 |
| 0.011397 | 0.011802 | 0.011397 | 0.011431 | 0.011397 | 0.011768 | 0.011318 |
| 0.011681 | 0.011316 | 0.011413 | 0.011545 | 0.011632 | 0.011564 | 0.011270 |
| 0.011377 | 0.011498 | 0.011599 | 0.011707 | 0.011567 | 0.011705 | 0.011837 |
| 0.011735 | 0.011770 | 0.011734 | 0.011986 | 0.011700 | 0.012579 | 0.011736 |
| 0.012444 | 0.012244 | 0.012380 | 0.012652 | 0.011768 | 0.011397 | 0.011701 |
| 0.012141 | 0.012076 | 0.011667 | 0.011566 | 0.011634 | 0.011634 | 0.011671 |
| 0.011498 | 0.011503 | 0.011566 | 0.011532 | 0.011971 | 0.012038 | 0.012039 |
| 0.011938 | 0.012039 | 0.012143 | 0.011909 | 0.012209 | 0.012216 | 0.012276 |
| 0.012277 | 0.012310 | 0.012225 | 0.012277 | 0.012279 | 0.011498 | 0.011802 |
| 0.011870 | 0.012376 | 0.011877 | 0.012106 | 0.012581 | 0.011639 | 0.011532 |
| 0.011498 | 0.011498 | 0.011971 | 0.011924 | 0.012119 | 0.011835 | 0.011500 |
| S259     | 0.011732 | 0.011732 | 0.012068 | 0.011832 | 0.011832 | 0.011900 |
| 0.011705 | 0.011637 | 0.011899 | 0.011329 | 0.011396 | 0.011363 | 0.011329 |
| 0.011362 | 0.011496 | 0.011329 | 0.011362 | 0.011429 | 0.011396 | 0.011362 |
| 0.011329 | 0.011362 | 0.011463 | 0.011329 | 0.011295 | 0.011362 | 0.011671 |
| 0.011597 | 0.011362 | 0.011262 | 0.011496 | 0.011362 | 0.011396 | 0.011362 |
| 0.011396 | 0.011429 | 0.011396 | 0.011396 | 0.011429 | 0.011396 | 0.011564 |
| 0.011329 | 0.011396 | 0.011429 | 0.011362 | 0.011463 | 0.011496 | 0.011429 |
| 0.011396 | 0.011564 | 0.011463 | 0.011731 | 0.011396 | 0.011597 | 0.011396 |
| 0.011362 | 0.011463 | 0.011530 | 0.011597 | 0.011765 | 0.011463 | 0.011564 |
| 0.011362 | 0.011429 | 0.011396 | 0.011563 | 0.011866 | 0.011396 | 0.011463 |
| 0.011362 | 0.011463 | 0.011429 | 0.011496 | 0.011429 | 0.011429 | 0.011429 |
| 0.011329 | 0.011362 | 0.011329 | 0.011429 | 0.011396 | 0.011430 | 0.011496 |
| 0.011429 | 0.011396 | 0.011396 | 0.011362 | 0.011496 | 0.011262 | 0.011396 |
| 0.011564 | 0.011496 | 0.011731 | 0.011564 | 0.011329 | 0.011564 | 0.011396 |
| 0.011542 | 0.011733 | 0.011588 | 0.011295 | 0.011247 | 0.011391 | 0.011454 |
| 0.012048 | 0.011467 | 0.011225 | 0.011631 | 0.011631 | 0.011429 | 0.011530 |
| 0.011463 | 0.011429 | 0.011496 | 0.011396 | 0.011496 | 0.011362 | 0.011429 |
| 0.011396 | 0.011496 | 0.011698 | 0.011496 | 0.011463 | 0.011429 | 0.011295 |
| 0.011329 | 0.011329 | 0.011329 | 0.011362 | 0.011564 | 0.011530 | 0.011463 |
| 0.011564 | 0.011631 | 0.011362 | 0.011362 | 0.011396 | 0.011396 | 0.011398 |
| 0.011466 | 0.011329 | 0.011396 | 0.011204 | 0.011313 | 0.011306 | 0.011396 |
| 0.011399 | 0.011301 | 0.011355 | 0.011371 | 0.011298 | 0.011334 | 0.011364 |

|          |          |          |          |          |          |          |
|----------|----------|----------|----------|----------|----------|----------|
| 0.011636 | 0.011405 | 0.011370 | 0.011329 | 0.011337 | 0.011464 | 0.011430 |
| 0.011497 | 0.011431 | 0.011430 | 0.011530 | 0.011463 | 0.011765 | 0.011631 |
| 0.011664 | 0.011530 | 0.011396 | 0.011497 | 0.011295 | 0.011530 | 0.011329 |
| 0.011396 | 0.011396 | 0.011362 | 0.011329 | 0.011362 | 0.011329 | 0.011429 |
| 0.011329 | 0.011429 | 0.011430 | 0.011329 | 0.011431 | 0.011530 | 0.011533 |
| 0.011463 | 0.011430 | 0.011329 | 0.011263 | 0.011396 | 0.011329 | 0.011262 |
| 0.011366 | 0.011463 | 0.011262 | 0.011463 | 0.011295 | 0.011396 | 0.011362 |
| 0.011329 | 0.011362 | 0.011262 | 0.011362 | 0.011396 | 0.011262 | 0.011329 |
| 0.011362 | 0.011362 | 0.011429 | 0.011362 | 0.011396 | 0.011429 | 0.011665 |
| 0.011765 | 0.011698 | 0.011765 | 0.011532 | 0.011766 | 0.011396 | 0.011362 |
| 0.011398 | 0.011586 | 0.011335 | 0.011300 | 0.011773 | 0.011265 | 0.011414 |
| 0.011739 | 0.011672 | 0.011564 | 0.011765 | 0.011470 | 0.011631 | 0.011530 |
| 0.011530 | 0.011698 | 0.011522 | 0.011431 | 0.011437 | 0.011429 | 0.011500 |
| 0.011597 | 0.011499 | 0.011635 | 0.011635 | 0.011631 | 0.011698 | 0.011738 |
| 0.011534 | 0.011637 | 0.011636 | 0.011567 | 0.011834 | 0.011295 | 0.011498 |
| 0.000000 | 0.011396 | 0.011295 | 0.011295 | 0.011295 | 0.011362 | 0.011429 |
| 0.011295 | 0.011362 | 0.011262 | 0.011429 | 0.011295 | 0.011362 | 0.011429 |
| 0.011362 | 0.011799 | 0.011698 | 0.011731 | 0.011262 | 0.011362 | 0.011396 |
| 0.011396 | 0.011362 | 0.011429 | 0.011463 | 0.011329 | 0.011329 | 0.011329 |
| 0.011866 | 0.011496 | 0.011496 | 0.011295 | 0.011396 | 0.011496 | 0.011329 |
| 0.011329 | 0.011396 | 0.011362 | 0.011463 | 0.011329 | 0.011463 | 0.011530 |
| 0.011530 | 0.011362 | 0.011362 | 0.011295 | 0.011295 | 0.011463 | 0.011396 |
| 0.011295 | 0.011396 | 0.011262 | 0.011295 | 0.011429 | 0.011564 | 0.011329 |
| 0.011295 | 0.011429 | 0.011363 | 0.011262 | 0.011597 | 0.011262 | 0.011429 |
| 0.011437 | 0.011329 | 0.011631 | 0.011463 | 0.011496 | 0.011362 | 0.011463 |
| 0.011329 | 0.011597 | 0.011262 | 0.011530 | 0.011329 | 0.011329 | 0.011262 |
| 0.011429 | 0.011698 | 0.011396 | 0.011463 | 0.011295 | 0.011698 | 0.011329 |
| 0.011329 | 0.011329 | 0.011362 | 0.011396 | 0.011362 | 0.011463 | 0.011530 |
| 0.011530 | 0.011496 | 0.011396 | 0.011497 | 0.011396 | 0.011329 | 0.011295 |
| 0.011329 | 0.011329 | 0.011396 | 0.011329 | 0.011228 | 0.011463 | 0.011329 |
| 0.011362 | 0.011362 | 0.011496 | 0.011530 | 0.011429 | 0.011295 | 0.011362 |
| 0.011429 | 0.011362 | 0.011463 | 0.011329 | 0.011463 | 0.011564 | 0.011866 |
| 0.011362 | 0.011765 | 0.011336 | 0.011785 | 0.011191 | 0.011549 | 0.011688 |
| 0.011683 | 0.011693 | 0.011374 | 0.011292 | 0.011774 | 0.011751 | 0.011303 |
| 0.011487 | 0.011671 | 0.011255 | 0.011311 | 0.011255 | 0.011406 | 0.011361 |
| 0.011482 | 0.011470 | 0.011431 | 0.011193 | 0.011496 | 0.011530 | 0.011534 |
| 0.011335 | 0.011497 | 0.011497 | 0.011463 | 0.011429 | 0.011430 | 0.011396 |
| 0.011429 | 0.011362 | 0.011396 | 0.011429 | 0.011396 | 0.011329 | 0.011362 |
| 0.011362 | 0.011429 | 0.011329 | 0.011430 | 0.011463 | 0.011497 | 0.011396 |
| 0.011429 | 0.011396 | 0.011732 | 0.011732 | 0.011463 | 0.011497 | 0.011530 |
| 0.011295 | 0.011295 | 0.011329 | 0.011362 | 0.011295 | 0.011530 | 0.011530 |
| 0.011564 | 0.011564 | 0.011496 | 0.011597 | 0.011765 | 0.011599 | 0.011362 |
| 0.011429 | 0.011497 | 0.011463 | 0.011362 | 0.011429 | 0.011396 | 0.011429 |
| 0.011497 | 0.011497 | 0.011530 | 0.011430 | 0.011330 | 0.011597 | 0.011497 |
| 0.011433 | 0.011329 | 0.011429 | 0.011530 | 0.011430 | 0.011564 | 0.011597 |
| 0.011765 | 0.011470 | 0.011631 | 0.011530 | 0.011530 | 0.011698 | 0.011329 |
| 0.011498 | 0.011396 | 0.011362 | 0.011362 | 0.011429 | 0.011329 | 0.011430 |
| 0.011463 | 0.011497 | 0.011396 | 0.011429 | 0.011396 | 0.011732 | 0.011732 |
| 0.011463 | 0.011497 | 0.011564 | 0.011496 | 0.012136 | 0.011560 | 0.011482 |
| 0.011552 | 0.011511 | 0.011622 | 0.011510 | 0.011620 | 0.011543 | 0.011508 |
| 0.012090 | 0.011406 | 0.011540 | 0.011475 | 0.011749 | 0.011604 | 0.011638 |
| 0.012114 | 0.011588 | 0.011669 | 0.011731 | 0.011597 | 0.011597 | 0.011635 |
| 0.011295 | 0.011396 | 0.011597 | 0.011563 | 0.011567 | 0.011496 | 0.011532 |
| 0.011396 | 0.011262 | 0.011295 | 0.011396 | 0.011228 | 0.011362 | 0.011262 |
| 0.011396 | 0.011429 | 0.011329 | 0.011295 | 0.011396 | 0.011329 | 0.011362 |
| 0.011362 | 0.011295 | 0.011362 | 0.011396 | 0.011295 | 0.011429 | 0.011530 |
| 0.011429 | 0.011496 | 0.011429 | 0.011429 | 0.011362 | 0.011765 | 0.011396 |
| 0.011443 | 0.011362 | 0.011598 | 0.011603 | 0.011396 | 0.011463 | 0.011463 |
| 0.011463 | 0.011329 | 0.011362 | 0.011329 | 0.011496 | 0.011496 | 0.011429 |
| 0.011429 | 0.011564 | 0.011731 | 0.011463 | 0.011664 | 0.011664 | 0.011530 |

|          |          |          |          |          |          |          |
|----------|----------|----------|----------|----------|----------|----------|
| 0.011362 | 0.011429 | 0.011463 | 0.011866 | 0.011430 | 0.011396 | 0.011429 |
| 0.011463 | 0.011396 | 0.011396 | 0.011698 | 0.011564 | 0.011664 | 0.011396 |
| 0.011496 | 0.011496 | 0.011429 | 0.011496 | 0.011463 | 0.011329 | 0.011664 |
| 0.011429 | 0.011396 | 0.011396 | 0.011564 | 0.011396 | 0.011496 | 0.011732 |
| 0.011429 | 0.011773 | 0.011799 | 0.011548 | 0.011229 | 0.011502 | 0.011267 |
| 0.011335 | 0.011722 | 0.011306 | 0.011417 | 0.011255 | 0.011366 | 0.011220 |
| 0.011468 | 0.011126 | 0.011283 | 0.011126 | 0.011168 | 0.011328 | 0.011425 |
| 0.011437 | 0.011257 | 0.011448 | 0.011342 | 0.011431 | 0.011497 | 0.011631 |
| 0.011631 | 0.011497 | 0.011601 | 0.011603 | 0.011738 | 0.011767 | 0.011429 |
| 0.011664 | 0.011530 | 0.011396 | 0.011497 | 0.011295 | 0.011530 | 0.011329 |
| 0.011396 | 0.011396 | 0.011362 | 0.011329 | 0.011362 | 0.011329 | 0.011429 |
| 0.011409 | 0.011410 | 0.011403 | 0.011437 | 0.011573 | 0.011470 | 0.011538 |
| 0.011537 | 0.011464 | 0.011282 | 0.011276 | 0.011399 | 0.011501 | 0.011569 |
| 0.011363 | 0.011433 | 0.011666 | 0.011635 | 0.011565 | 0.011599 | 0.011530 |
| 0.011463 | 0.011530 | 0.011530 | 0.011429 | 0.012000 | 0.011597 | 0.011664 |
| 0.011698 | 0.011737 | 0.011401 | 0.011476 | 0.011362 | 0.011564 | 0.011530 |
| 0.011565 | 0.011597 | 0.011597 | 0.011597 | 0.011728 | 0.011732 | 0.011372 |
| 0.011263 | 0.011268 | 0.011366 | 0.011332 | 0.011436 | 0.011284 | 0.011604 |
| 0.011403 | 0.011455 | 0.011203 | 0.011435 | 0.011396 | 0.011471 | 0.011295 |
| 0.011329 | 0.011329 | 0.011329 | 0.011362 | 0.011564 | 0.011530 | 0.011463 |
| 0.011564 | 0.011631 | 0.011362 | 0.011362 | 0.011396 | 0.011396 | 0.011398 |
| 0.011466 | 0.011329 | 0.011396 | 0.011431 | 0.011497 | 0.011631 | 0.011631 |
| 0.011497 | 0.011601 | 0.011603 | 0.011738 | 0.011767 | 0.011429 | 0.011597 |
| 0.011530 | 0.011530 | 0.011365 | 0.011547 | 0.011477 | 0.011503 | 0.011375 |
| 0.011473 | 0.011744 | 0.011441 | 0.011434 | 0.011262 | 0.011463 | 0.011329 |
| 0.011429 | 0.011430 | 0.011329 | 0.011431 | 0.011530 | 0.011533 | 0.011430 |
| 0.011329 | 0.011263 | 0.011396 | 0.011329 | 0.011262 | 0.011366 | 0.011463 |
| 0.011429 | 0.011362 | 0.011396 | 0.011429 | 0.011396 | 0.011329 | 0.011530 |
| 0.011396 | 0.011429 | 0.011429 | 0.011362 | 0.011429 | 0.011664 | 0.011329 |
| 0.011362 | 0.011765 | 0.011362 | 0.011329 | 0.011362 | 0.011731 | 0.011232 |
| 0.011678 | 0.011230 | 0.011261 | 0.011463 | 0.011549 | 0.011527 | 0.011186 |
| 0.011218 | 0.011530 | 0.011631 | 0.011739 | 0.011599 | 0.011737 | 0.011867 |
| 0.011767 | 0.011804 | 0.011765 | 0.011914 | 0.011731 | 0.012539 | 0.011768 |
| 0.012507 | 0.012274 | 0.012375 | 0.012680 | 0.011731 | 0.011430 | 0.011732 |
| 0.012171 | 0.012106 | 0.011698 | 0.011530 | 0.011665 | 0.011665 | 0.011567 |
| 0.011530 | 0.011501 | 0.011597 | 0.011531 | 0.011934 | 0.012000 | 0.012002 |
| 0.011901 | 0.012002 | 0.012105 | 0.011872 | 0.012171 | 0.012178 | 0.012238 |
| 0.012239 | 0.012273 | 0.012220 | 0.012239 | 0.012240 | 0.011463 | 0.011766 |
| 0.011834 | 0.012337 | 0.011840 | 0.012068 | 0.012541 | 0.011603 | 0.011497 |
| 0.011463 | 0.011463 | 0.011934 | 0.012006 | 0.012045 | 0.011799 | 0.011465 |
| S260     | 0.011664 | 0.011664 | 0.012001 | 0.011765 | 0.011765 | 0.011832 |
| 0.011671 | 0.011603 | 0.011832 | 0.011262 | 0.011329 | 0.011296 | 0.011262 |
| 0.011295 | 0.011463 | 0.011262 | 0.011295 | 0.011362 | 0.011329 | 0.011295 |
| 0.011262 | 0.011295 | 0.011396 | 0.011262 | 0.011295 | 0.011295 | 0.011637 |
| 0.011530 | 0.011295 | 0.011194 | 0.011429 | 0.011362 | 0.011329 | 0.011362 |
| 0.011329 | 0.011429 | 0.011329 | 0.011329 | 0.011362 | 0.011329 | 0.011497 |
| 0.011262 | 0.011329 | 0.011362 | 0.011295 | 0.011396 | 0.011429 | 0.011362 |
| 0.011329 | 0.011497 | 0.011396 | 0.011664 | 0.011329 | 0.011597 | 0.011329 |
| 0.011295 | 0.011396 | 0.011429 | 0.011597 | 0.011698 | 0.011396 | 0.011496 |
| 0.011362 | 0.011429 | 0.011329 | 0.011564 | 0.011799 | 0.011329 | 0.011396 |
| 0.011295 | 0.011396 | 0.011362 | 0.011429 | 0.011362 | 0.011362 | 0.011362 |
| 0.011262 | 0.011295 | 0.011262 | 0.011362 | 0.011329 | 0.011363 | 0.011429 |
| 0.011362 | 0.011329 | 0.011396 | 0.011295 | 0.011429 | 0.011262 | 0.011329 |
| 0.011496 | 0.011429 | 0.011664 | 0.011497 | 0.011329 | 0.011564 | 0.011329 |
| 0.011468 | 0.011695 | 0.011513 | 0.011216 | 0.011210 | 0.011318 | 0.011415 |
| 0.012048 | 0.011467 | 0.011184 | 0.011564 | 0.011564 | 0.011362 | 0.011463 |
| 0.011396 | 0.011362 | 0.011429 | 0.011329 | 0.011429 | 0.011362 | 0.011362 |
| 0.011329 | 0.011429 | 0.011631 | 0.011496 | 0.011396 | 0.011362 | 0.011295 |
| 0.011262 | 0.011262 | 0.011329 | 0.011295 | 0.011497 | 0.011463 | 0.011396 |
| 0.011497 | 0.011564 | 0.011295 | 0.011295 | 0.011329 | 0.011329 | 0.011330 |

|          |          |          |          |          |          |          |
|----------|----------|----------|----------|----------|----------|----------|
| 0.011398 | 0.011329 | 0.011329 | 0.011204 | 0.011277 | 0.011236 | 0.011329 |
| 0.011331 | 0.011266 | 0.011282 | 0.011302 | 0.011230 | 0.011266 | 0.011297 |
| 0.011564 | 0.011336 | 0.011370 | 0.011262 | 0.011268 | 0.011397 | 0.011363 |
| 0.011430 | 0.011364 | 0.011363 | 0.011463 | 0.011396 | 0.011765 | 0.011564 |
| 0.011597 | 0.011463 | 0.011329 | 0.011430 | 0.011228 | 0.011463 | 0.011262 |
| 0.011329 | 0.011329 | 0.011295 | 0.011262 | 0.011295 | 0.011262 | 0.011362 |
| 0.011329 | 0.011430 | 0.011362 | 0.011262 | 0.011363 | 0.011463 | 0.011466 |
| 0.011463 | 0.011362 | 0.011262 | 0.011195 | 0.011329 | 0.011262 | 0.011195 |
| 0.011298 | 0.011463 | 0.011262 | 0.011463 | 0.011228 | 0.011329 | 0.011295 |
| 0.011396 | 0.011295 | 0.011329 | 0.011295 | 0.011329 | 0.011195 | 0.011329 |
| 0.011362 | 0.011295 | 0.011362 | 0.011295 | 0.011329 | 0.011362 | 0.011597 |
| 0.011698 | 0.011631 | 0.011698 | 0.011465 | 0.011698 | 0.011329 | 0.011295 |
| 0.011330 | 0.011586 | 0.011335 | 0.011232 | 0.011705 | 0.011197 | 0.011296 |
| 0.011705 | 0.011604 | 0.011496 | 0.011698 | 0.011402 | 0.011564 | 0.011530 |
| 0.011463 | 0.011631 | 0.011451 | 0.011307 | 0.011354 | 0.011362 | 0.011432 |
| 0.011530 | 0.011431 | 0.011567 | 0.011635 | 0.011564 | 0.011631 | 0.011738 |
| 0.011466 | 0.011603 | 0.011568 | 0.011500 | 0.011767 | 0.011228 | 0.011431 |
| 0.011396 | 0.000000 | 0.011228 | 0.011228 | 0.011295 | 0.011295 | 0.011362 |
| 0.011295 | 0.011362 | 0.011262 | 0.011362 | 0.011295 | 0.011295 | 0.011362 |
| 0.011295 | 0.011731 | 0.011631 | 0.011664 | 0.011194 | 0.011295 | 0.011329 |
| 0.011329 | 0.011295 | 0.011362 | 0.011396 | 0.011262 | 0.011262 | 0.011262 |
| 0.011799 | 0.011429 | 0.011429 | 0.011228 | 0.011329 | 0.011497 | 0.011262 |
| 0.011262 | 0.011329 | 0.011295 | 0.011463 | 0.011262 | 0.011396 | 0.011530 |
| 0.011463 | 0.011295 | 0.011295 | 0.011228 | 0.011228 | 0.011396 | 0.011329 |
| 0.011228 | 0.011329 | 0.011195 | 0.011228 | 0.011362 | 0.011497 | 0.011262 |
| 0.011195 | 0.011362 | 0.011295 | 0.011195 | 0.011530 | 0.011195 | 0.011362 |
| 0.011403 | 0.011262 | 0.011564 | 0.011396 | 0.011429 | 0.011295 | 0.011396 |
| 0.011262 | 0.011597 | 0.011194 | 0.011463 | 0.011262 | 0.011262 | 0.011194 |
| 0.011429 | 0.011631 | 0.011329 | 0.011396 | 0.011228 | 0.011631 | 0.011262 |
| 0.011262 | 0.011262 | 0.011295 | 0.011396 | 0.011295 | 0.011396 | 0.011463 |
| 0.011463 | 0.011429 | 0.011329 | 0.011429 | 0.011396 | 0.011262 | 0.011228 |
| 0.011262 | 0.011262 | 0.011329 | 0.011262 | 0.011228 | 0.011396 | 0.011262 |
| 0.011295 | 0.011295 | 0.011429 | 0.011463 | 0.011362 | 0.011295 | 0.011295 |
| 0.011362 | 0.011295 | 0.011396 | 0.011262 | 0.011396 | 0.011496 | 0.011799 |
| 0.011295 | 0.011698 | 0.011267 | 0.017785 | 0.011257 | 0.011488 | 0.011618 |
| 0.011579 | 0.011623 | 0.011322 | 0.011292 | 0.011774 | 0.011647 | 0.011425 |
| 0.011487 | 0.011610 | 0.011177 | 0.011228 | 0.011216 | 0.011356 | 0.011275 |
| 0.011482 | 0.011433 | 0.011394 | 0.011126 | 0.011429 | 0.011463 | 0.011432 |
| 0.011301 | 0.011429 | 0.011429 | 0.011396 | 0.011362 | 0.011362 | 0.011329 |
| 0.011362 | 0.011295 | 0.011329 | 0.011362 | 0.011329 | 0.011262 | 0.011295 |
| 0.011295 | 0.011362 | 0.011262 | 0.011362 | 0.011396 | 0.011429 | 0.011329 |
| 0.011362 | 0.011329 | 0.011665 | 0.011665 | 0.011396 | 0.011430 | 0.011463 |
| 0.011228 | 0.011228 | 0.011262 | 0.011362 | 0.011228 | 0.011463 | 0.011463 |
| 0.011497 | 0.011496 | 0.011429 | 0.011530 | 0.011698 | 0.011532 | 0.011362 |
| 0.011362 | 0.011430 | 0.011463 | 0.011295 | 0.011362 | 0.011329 | 0.011362 |
| 0.011430 | 0.011430 | 0.011463 | 0.011430 | 0.011330 | 0.011530 | 0.011497 |
| 0.011365 | 0.011262 | 0.011362 | 0.011463 | 0.011362 | 0.011497 | 0.011530 |
| 0.011698 | 0.011402 | 0.011564 | 0.011530 | 0.011463 | 0.011631 | 0.011262 |
| 0.011431 | 0.011329 | 0.011295 | 0.011295 | 0.011362 | 0.011262 | 0.011362 |
| 0.011396 | 0.011429 | 0.011329 | 0.011362 | 0.011329 | 0.011665 | 0.011665 |
| 0.011396 | 0.011430 | 0.011496 | 0.011429 | 0.012069 | 0.011453 | 0.011377 |
| 0.011447 | 0.011407 | 0.011517 | 0.011406 | 0.011515 | 0.011439 | 0.011439 |
| 0.011987 | 0.011302 | 0.011437 | 0.011371 | 0.011646 | 0.011536 | 0.011639 |
| 0.012046 | 0.011475 | 0.011601 | 0.011664 | 0.011530 | 0.011530 | 0.011567 |
| 0.011228 | 0.011396 | 0.011530 | 0.011496 | 0.011499 | 0.011496 | 0.011464 |
| 0.011329 | 0.011262 | 0.011295 | 0.011329 | 0.011228 | 0.011295 | 0.011194 |
| 0.011329 | 0.011362 | 0.011262 | 0.011228 | 0.011329 | 0.011262 | 0.011295 |
| 0.011295 | 0.011228 | 0.011295 | 0.011329 | 0.011228 | 0.011429 | 0.011463 |
| 0.011362 | 0.011429 | 0.011362 | 0.011362 | 0.011295 | 0.011698 | 0.011329 |
| 0.011338 | 0.011295 | 0.011530 | 0.011501 | 0.011396 | 0.011396 | 0.011396 |



|          |          |          |          |          |          |          |
|----------|----------|----------|----------|----------|----------|----------|
| 0.011396 | 0.011329 | 0.011295 | 0.011329 | 0.011429 | 0.011429 | 0.011362 |
| 0.011362 | 0.011497 | 0.011664 | 0.011396 | 0.011597 | 0.011597 | 0.011463 |
| 0.011295 | 0.011362 | 0.011396 | 0.011799 | 0.011362 | 0.011396 | 0.011362 |
| 0.011396 | 0.011329 | 0.011329 | 0.011631 | 0.011564 | 0.011597 | 0.011329 |
| 0.011429 | 0.011497 | 0.011362 | 0.011429 | 0.011396 | 0.011262 | 0.011597 |
| 0.011362 | 0.011329 | 0.011329 | 0.011497 | 0.011329 | 0.011429 | 0.011664 |
| 0.011362 | 0.011739 | 0.011732 | 0.011507 | 0.011229 | 0.011434 | 0.011215 |
| 0.011280 | 0.011722 | 0.011236 | 0.011417 | 0.011304 | 0.011417 | 0.011379 |
| 0.011468 | 0.011192 | 0.011339 | 0.011192 | 0.011222 | 0.011395 | 0.011385 |
| 0.011399 | 0.011296 | 0.011377 | 0.011307 | 0.011364 | 0.011497 | 0.011564 |
| 0.011564 | 0.011430 | 0.011533 | 0.011535 | 0.011670 | 0.011696 | 0.011362 |
| 0.011597 | 0.011463 | 0.011329 | 0.011430 | 0.011228 | 0.011463 | 0.011262 |
| 0.011329 | 0.011329 | 0.011295 | 0.011262 | 0.011295 | 0.011262 | 0.011362 |
| 0.011340 | 0.011340 | 0.011334 | 0.011368 | 0.011505 | 0.011470 | 0.011470 |
| 0.011469 | 0.011396 | 0.011171 | 0.011204 | 0.011331 | 0.011501 | 0.011501 |
| 0.011296 | 0.011365 | 0.011599 | 0.011567 | 0.011497 | 0.011531 | 0.011463 |
| 0.011396 | 0.011463 | 0.011463 | 0.011362 | 0.011933 | 0.011530 | 0.011597 |
| 0.011631 | 0.011665 | 0.011333 | 0.011407 | 0.011228 | 0.011497 | 0.011463 |
| 0.011497 | 0.011530 | 0.011530 | 0.011530 | 0.011650 | 0.011664 | 0.011268 |
| 0.011162 | 0.011164 | 0.011264 | 0.011230 | 0.011333 | 0.011172 | 0.011502 |
| 0.011300 | 0.011367 | 0.011108 | 0.011322 | 0.011329 | 0.011402 | 0.011295 |
| 0.011262 | 0.011262 | 0.011329 | 0.011295 | 0.011497 | 0.011463 | 0.011396 |
| 0.011497 | 0.011564 | 0.011295 | 0.011295 | 0.011329 | 0.011329 | 0.011330 |
| 0.011398 | 0.011329 | 0.011329 | 0.011364 | 0.011497 | 0.011564 | 0.011564 |
| 0.011430 | 0.011533 | 0.011535 | 0.011670 | 0.011696 | 0.011362 | 0.011530 |
| 0.011463 | 0.011463 | 0.011297 | 0.011478 | 0.011373 | 0.011435 | 0.011305 |
| 0.011473 | 0.011607 | 0.011357 | 0.011366 | 0.011262 | 0.011463 | 0.011329 |
| 0.011430 | 0.011362 | 0.011262 | 0.011363 | 0.011463 | 0.011466 | 0.011362 |
| 0.011262 | 0.011195 | 0.011329 | 0.011262 | 0.011195 | 0.011298 | 0.011463 |
| 0.011362 | 0.011295 | 0.011329 | 0.011362 | 0.011329 | 0.011262 | 0.011463 |
| 0.011329 | 0.011362 | 0.011362 | 0.011295 | 0.011362 | 0.011597 | 0.011262 |
| 0.011295 | 0.011698 | 0.011295 | 0.011329 | 0.011295 | 0.011664 | 0.011189 |
| 0.011678 | 0.011230 | 0.011261 | 0.011463 | 0.011549 | 0.011455 | 0.011186 |
| 0.011218 | 0.011463 | 0.011564 | 0.011671 | 0.011531 | 0.011635 | 0.011800 |
| 0.011699 | 0.011703 | 0.011698 | 0.011914 | 0.011664 | 0.012539 | 0.011700 |
| 0.012439 | 0.012207 | 0.012341 | 0.012613 | 0.011664 | 0.011362 | 0.011665 |
| 0.012103 | 0.012038 | 0.011631 | 0.011530 | 0.011598 | 0.011598 | 0.011567 |
| 0.011463 | 0.011433 | 0.011530 | 0.011497 | 0.011867 | 0.011933 | 0.011935 |
| 0.011834 | 0.011934 | 0.012038 | 0.011804 | 0.012104 | 0.012110 | 0.012171 |
| 0.012172 | 0.012205 | 0.012152 | 0.012172 | 0.012173 | 0.011396 | 0.011699 |
| 0.011767 | 0.012270 | 0.011772 | 0.012001 | 0.012474 | 0.011536 | 0.011430 |
| 0.011396 | 0.011396 | 0.011867 | 0.011883 | 0.012010 | 0.011732 | 0.011397 |
| S261     | 0.011564 | 0.011564 | 0.011866 | 0.011631 | 0.011631 | 0.011698 |
| 0.011569 | 0.011501 | 0.011698 | 0.011161 | 0.011228 | 0.011195 | 0.011161 |
| 0.011194 | 0.011362 | 0.011161 | 0.011194 | 0.011262 | 0.011228 | 0.011194 |
| 0.011161 | 0.011194 | 0.011295 | 0.011161 | 0.011195 | 0.011194 | 0.011535 |
| 0.011429 | 0.011194 | 0.011094 | 0.011329 | 0.011262 | 0.011228 | 0.011262 |
| 0.011228 | 0.011329 | 0.011228 | 0.011228 | 0.011262 | 0.011228 | 0.011396 |
| 0.011161 | 0.011228 | 0.011262 | 0.011194 | 0.011295 | 0.011329 | 0.011262 |
| 0.011228 | 0.011396 | 0.011295 | 0.011564 | 0.011228 | 0.011496 | 0.011228 |
| 0.011194 | 0.011295 | 0.011295 | 0.011496 | 0.011597 | 0.011295 | 0.011396 |
| 0.011262 | 0.011329 | 0.011228 | 0.011463 | 0.011698 | 0.011228 | 0.011295 |
| 0.011194 | 0.011295 | 0.011262 | 0.011329 | 0.011262 | 0.011262 | 0.011262 |
| 0.011161 | 0.011194 | 0.011161 | 0.011262 | 0.011228 | 0.011262 | 0.011329 |
| 0.011262 | 0.011228 | 0.011295 | 0.011194 | 0.011329 | 0.011161 | 0.011228 |
| 0.011396 | 0.011329 | 0.011564 | 0.011396 | 0.011228 | 0.011463 | 0.011228 |
| 0.011357 | 0.011583 | 0.011400 | 0.011099 | 0.011098 | 0.011207 | 0.011296 |
| 0.011938 | 0.011365 | 0.011102 | 0.011463 | 0.011463 | 0.011262 | 0.011362 |
| 0.011295 | 0.011262 | 0.011329 | 0.011228 | 0.011262 | 0.011262 | 0.011262 |
| 0.011228 | 0.011329 | 0.011530 | 0.011396 | 0.011295 | 0.011262 | 0.011195 |

|          |          |          |          |          |          |          |
|----------|----------|----------|----------|----------|----------|----------|
| 0.011161 | 0.011161 | 0.011228 | 0.011195 | 0.011396 | 0.011362 | 0.011295 |
| 0.011396 | 0.011463 | 0.011195 | 0.011195 | 0.011228 | 0.011228 | 0.011229 |
| 0.011297 | 0.011228 | 0.011228 | 0.011096 | 0.011169 | 0.011130 | 0.011228 |
| 0.011230 | 0.011163 | 0.011171 | 0.011198 | 0.011128 | 0.011163 | 0.011195 |
| 0.011456 | 0.011233 | 0.011267 | 0.011161 | 0.011164 | 0.011296 | 0.011262 |
| 0.011329 | 0.011262 | 0.011262 | 0.011362 | 0.011295 | 0.011664 | 0.011463 |
| 0.011496 | 0.011362 | 0.011228 | 0.011329 | 0.011127 | 0.011362 | 0.011161 |
| 0.011228 | 0.011228 | 0.011195 | 0.011161 | 0.011194 | 0.011161 | 0.011262 |
| 0.011228 | 0.011329 | 0.011262 | 0.011161 | 0.011262 | 0.011362 | 0.011364 |
| 0.011362 | 0.011262 | 0.011161 | 0.011094 | 0.011228 | 0.011161 | 0.011094 |
| 0.011196 | 0.011362 | 0.011161 | 0.011362 | 0.011127 | 0.011228 | 0.011195 |
| 0.011295 | 0.011195 | 0.011228 | 0.011195 | 0.011228 | 0.011094 | 0.011228 |
| 0.011262 | 0.011195 | 0.011262 | 0.011195 | 0.011228 | 0.011262 | 0.011497 |
| 0.011597 | 0.011530 | 0.011597 | 0.011330 | 0.011598 | 0.011228 | 0.011195 |
| 0.011229 | 0.011464 | 0.011335 | 0.011095 | 0.011603 | 0.011094 | 0.011178 |
| 0.011603 | 0.011502 | 0.011396 | 0.011597 | 0.011299 | 0.011463 | 0.011429 |
| 0.011362 | 0.011530 | 0.011380 | 0.011225 | 0.011270 | 0.011262 | 0.011331 |
| 0.011429 | 0.011330 | 0.011466 | 0.011534 | 0.011463 | 0.011530 | 0.011636 |
| 0.011365 | 0.011535 | 0.011466 | 0.011398 | 0.011666 | 0.011127 | 0.011330 |
| 0.011295 | 0.011228 | 0.000000 | 0.011127 | 0.011194 | 0.011194 | 0.011262 |
| 0.011194 | 0.011262 | 0.011161 | 0.011262 | 0.011194 | 0.011194 | 0.011262 |
| 0.011194 | 0.011631 | 0.011530 | 0.011564 | 0.011094 | 0.011194 | 0.011228 |
| 0.011228 | 0.011194 | 0.011262 | 0.011295 | 0.011161 | 0.011161 | 0.011161 |
| 0.011698 | 0.011329 | 0.011329 | 0.011127 | 0.011228 | 0.011396 | 0.011161 |
| 0.011161 | 0.011228 | 0.011194 | 0.011362 | 0.011161 | 0.011295 | 0.011429 |
| 0.011362 | 0.011194 | 0.011194 | 0.011127 | 0.011127 | 0.011295 | 0.011228 |
| 0.011127 | 0.011228 | 0.011094 | 0.011127 | 0.011262 | 0.011396 | 0.011161 |
| 0.011128 | 0.011262 | 0.011195 | 0.011094 | 0.011429 | 0.011094 | 0.011262 |
| 0.011334 | 0.011161 | 0.011463 | 0.011295 | 0.011329 | 0.011194 | 0.011295 |
| 0.011161 | 0.011496 | 0.011094 | 0.011362 | 0.011161 | 0.011161 | 0.011094 |
| 0.011329 | 0.011497 | 0.011228 | 0.011295 | 0.011127 | 0.011530 | 0.011161 |
| 0.011161 | 0.011161 | 0.011194 | 0.011295 | 0.011194 | 0.011295 | 0.011362 |
| 0.011362 | 0.011329 | 0.011228 | 0.011329 | 0.011295 | 0.011161 | 0.011127 |
| 0.011161 | 0.011161 | 0.011228 | 0.011161 | 0.011127 | 0.011295 | 0.011161 |
| 0.011194 | 0.011194 | 0.011329 | 0.011362 | 0.011262 | 0.011194 | 0.011195 |
| 0.011262 | 0.011194 | 0.011295 | 0.011161 | 0.011295 | 0.011396 | 0.011698 |
| 0.011194 | 0.011597 | 0.011164 | 0.017672 | 0.011126 | 0.011305 | 0.011514 |
| 0.011475 | 0.011517 | 0.011217 | 0.011176 | 0.011609 | 0.011543 | 0.011242 |
| 0.011392 | 0.011426 | 0.000000 | 0.011144 | 0.011138 | 0.011208 | 0.011146 |
| 0.011389 | 0.011321 | 0.011320 | 0.011126 | 0.011329 | 0.011362 | 0.011365 |
| 0.011232 | 0.011329 | 0.011329 | 0.011295 | 0.011262 | 0.011262 | 0.011228 |
| 0.011262 | 0.011195 | 0.011228 | 0.011262 | 0.011228 | 0.011161 | 0.011195 |
| 0.011195 | 0.011262 | 0.011161 | 0.011262 | 0.011295 | 0.011329 | 0.011228 |
| 0.011262 | 0.011228 | 0.011564 | 0.011564 | 0.011295 | 0.011329 | 0.011362 |
| 0.011127 | 0.011127 | 0.011161 | 0.011262 | 0.011127 | 0.011362 | 0.011362 |
| 0.011396 | 0.011396 | 0.011329 | 0.011429 | 0.011597 | 0.011430 | 0.011262 |
| 0.011262 | 0.011329 | 0.011362 | 0.011195 | 0.011262 | 0.011228 | 0.011262 |
| 0.011329 | 0.011329 | 0.011362 | 0.011329 | 0.011229 | 0.011429 | 0.011396 |
| 0.011263 | 0.011161 | 0.011262 | 0.011362 | 0.011262 | 0.011396 | 0.011429 |
| 0.011597 | 0.011299 | 0.011463 | 0.011429 | 0.011362 | 0.011530 | 0.011161 |
| 0.011330 | 0.011228 | 0.011195 | 0.011195 | 0.011262 | 0.011161 | 0.011262 |
| 0.011295 | 0.011329 | 0.011228 | 0.011262 | 0.011228 | 0.011564 | 0.011564 |
| 0.011295 | 0.011329 | 0.011396 | 0.011329 | 0.011968 | 0.011382 | 0.011306 |
| 0.011376 | 0.011338 | 0.011447 | 0.011337 | 0.011445 | 0.011370 | 0.011336 |
| 0.011918 | 0.011233 | 0.011368 | 0.011302 | 0.011576 | 0.011434 | 0.011536 |
| 0.011944 | 0.011399 | 0.011500 | 0.011564 | 0.011429 | 0.011429 | 0.011466 |
| 0.011127 | 0.011295 | 0.011429 | 0.011396 | 0.011398 | 0.011396 | 0.011363 |
| 0.011228 | 0.011161 | 0.011194 | 0.011228 | 0.011127 | 0.011194 | 0.011094 |
| 0.011228 | 0.011262 | 0.011161 | 0.011127 | 0.011228 | 0.011161 | 0.011194 |
| 0.011194 | 0.011127 | 0.011194 | 0.011228 | 0.011127 | 0.011329 | 0.011362 |

|          |          |          |          |          |          |          |
|----------|----------|----------|----------|----------|----------|----------|
| 0.011262 | 0.011329 | 0.011262 | 0.011262 | 0.011194 | 0.011597 | 0.011228 |
| 0.011269 | 0.011195 | 0.011430 | 0.011433 | 0.011295 | 0.011295 | 0.011295 |
| 0.011295 | 0.011228 | 0.011194 | 0.011228 | 0.011329 | 0.011329 | 0.011262 |
| 0.011262 | 0.011396 | 0.011564 | 0.011295 | 0.011497 | 0.011497 | 0.011362 |
| 0.011194 | 0.011262 | 0.011295 | 0.011698 | 0.011262 | 0.011295 | 0.011262 |
| 0.011295 | 0.011228 | 0.011228 | 0.011530 | 0.011463 | 0.011496 | 0.011228 |
| 0.011329 | 0.011396 | 0.011262 | 0.011329 | 0.011295 | 0.011161 | 0.011496 |
| 0.011262 | 0.011228 | 0.011228 | 0.011396 | 0.011228 | 0.011329 | 0.011564 |
| 0.011262 | 0.011637 | 0.011631 | 0.011385 | 0.011117 | 0.011332 | 0.011163 |
| 0.011115 | 0.011605 | 0.011131 | 0.011328 | 0.011158 | 0.011264 | 0.011273 |
| 0.011366 | 0.000000 | 0.011227 | 0.000000 | 0.011114 | 0.011261 | 0.011263 |
| 0.011286 | 0.011178 | 0.011272 | 0.011201 | 0.011262 | 0.011396 | 0.011463 |
| 0.011463 | 0.011329 | 0.011432 | 0.011433 | 0.011569 | 0.011590 | 0.011262 |
| 0.011496 | 0.011362 | 0.011228 | 0.011329 | 0.011127 | 0.011362 | 0.011161 |
| 0.011228 | 0.011228 | 0.011195 | 0.011161 | 0.011194 | 0.011161 | 0.011262 |
| 0.011235 | 0.011235 | 0.011231 | 0.011266 | 0.011402 | 0.011368 | 0.011367 |
| 0.011367 | 0.011296 | 0.011097 | 0.011096 | 0.011230 | 0.011399 | 0.011399 |
| 0.011195 | 0.011263 | 0.011498 | 0.011466 | 0.011396 | 0.011430 | 0.011362 |
| 0.011295 | 0.011362 | 0.011362 | 0.011262 | 0.011832 | 0.011429 | 0.011497 |
| 0.011530 | 0.011594 | 0.011231 | 0.011303 | 0.011195 | 0.011396 | 0.011362 |
| 0.011396 | 0.011429 | 0.011429 | 0.011429 | 0.011571 | 0.011564 | 0.011199 |
| 0.011094 | 0.011095 | 0.011196 | 0.011162 | 0.011265 | 0.011098 | 0.011434 |
| 0.011232 | 0.011367 | 0.011108 | 0.011248 | 0.011228 | 0.011300 | 0.011195 |
| 0.011161 | 0.011161 | 0.011228 | 0.011195 | 0.011396 | 0.011362 | 0.011295 |
| 0.011396 | 0.011463 | 0.011195 | 0.011195 | 0.011228 | 0.011228 | 0.011229 |
| 0.011297 | 0.011228 | 0.011228 | 0.011262 | 0.011396 | 0.011463 | 0.011463 |
| 0.011329 | 0.011432 | 0.011433 | 0.011569 | 0.011590 | 0.011262 | 0.011429 |
| 0.011362 | 0.011362 | 0.011196 | 0.011373 | 0.011303 | 0.011333 | 0.011165 |
| 0.011370 | 0.011516 | 0.011314 | 0.011264 | 0.011161 | 0.011362 | 0.011228 |
| 0.011329 | 0.011262 | 0.011161 | 0.011262 | 0.011362 | 0.011364 | 0.011262 |
| 0.011161 | 0.011094 | 0.011228 | 0.011161 | 0.011094 | 0.011196 | 0.011362 |
| 0.011262 | 0.011195 | 0.011228 | 0.011262 | 0.011228 | 0.011161 | 0.011362 |
| 0.011228 | 0.011262 | 0.011262 | 0.011194 | 0.011262 | 0.011496 | 0.011161 |
| 0.011194 | 0.011597 | 0.011194 | 0.011228 | 0.011194 | 0.011564 | 0.011103 |
| 0.011566 | 0.011103 | 0.011161 | 0.011342 | 0.011426 | 0.011347 | 0.000000 |
| 0.011113 | 0.011362 | 0.011463 | 0.011569 | 0.011430 | 0.011534 | 0.011699 |
| 0.011598 | 0.011635 | 0.011597 | 0.011812 | 0.011530 | 0.012404 | 0.011599 |
| 0.012304 | 0.012072 | 0.012206 | 0.012511 | 0.011564 | 0.011195 | 0.011564 |
| 0.012002 | 0.011903 | 0.011530 | 0.011429 | 0.011497 | 0.011497 | 0.011466 |
| 0.011362 | 0.011331 | 0.011429 | 0.011396 | 0.011766 | 0.011832 | 0.011834 |
| 0.011733 | 0.011833 | 0.011937 | 0.011669 | 0.012003 | 0.012008 | 0.012070 |
| 0.012070 | 0.012104 | 0.012015 | 0.012070 | 0.012072 | 0.011295 | 0.011598 |
| 0.011665 | 0.012169 | 0.011670 | 0.011900 | 0.012373 | 0.011434 | 0.011329 |
| 0.011295 | 0.011295 | 0.011766 | 0.011800 | 0.011904 | 0.011631 | 0.011296 |
| S262     | 0.011564 | 0.011564 | 0.011900 | 0.011664 | 0.011664 | 0.011731 |
| 0.011569 | 0.011501 | 0.011731 | 0.011161 | 0.011228 | 0.011195 | 0.011161 |
| 0.011194 | 0.011362 | 0.011161 | 0.011194 | 0.011262 | 0.011228 | 0.011194 |
| 0.011161 | 0.011194 | 0.011295 | 0.011161 | 0.011195 | 0.011194 | 0.011535 |
| 0.011429 | 0.011194 | 0.011094 | 0.011329 | 0.011262 | 0.011228 | 0.011262 |
| 0.011228 | 0.011329 | 0.011228 | 0.011228 | 0.011262 | 0.011228 | 0.011396 |
| 0.011161 | 0.011228 | 0.011262 | 0.011194 | 0.011295 | 0.011329 | 0.011262 |
| 0.011228 | 0.011396 | 0.011295 | 0.011564 | 0.011228 | 0.011496 | 0.011228 |
| 0.011194 | 0.011295 | 0.011362 | 0.011496 | 0.011597 | 0.011295 | 0.011396 |
| 0.011262 | 0.011329 | 0.011228 | 0.011463 | 0.011698 | 0.011228 | 0.011295 |
| 0.011194 | 0.011295 | 0.011262 | 0.011329 | 0.011262 | 0.011262 | 0.011262 |
| 0.011161 | 0.011194 | 0.011161 | 0.011262 | 0.011228 | 0.011262 | 0.011329 |
| 0.011262 | 0.011228 | 0.011295 | 0.011194 | 0.011329 | 0.011161 | 0.011228 |
| 0.011396 | 0.011329 | 0.011564 | 0.011396 | 0.011228 | 0.011463 | 0.011228 |
| 0.011357 | 0.011583 | 0.011400 | 0.011099 | 0.011098 | 0.011207 | 0.011296 |
| 0.011938 | 0.011365 | 0.011102 | 0.011463 | 0.011463 | 0.011262 | 0.011362 |

|          |          |          |          |          |          |          |
|----------|----------|----------|----------|----------|----------|----------|
| 0.011295 | 0.011262 | 0.011329 | 0.011228 | 0.011329 | 0.011262 | 0.011262 |
| 0.011228 | 0.011329 | 0.011530 | 0.011396 | 0.011295 | 0.011262 | 0.011195 |
| 0.011161 | 0.011161 | 0.011228 | 0.011195 | 0.011396 | 0.011362 | 0.011295 |
| 0.011396 | 0.011463 | 0.011195 | 0.011195 | 0.011228 | 0.011228 | 0.011229 |
| 0.011297 | 0.011228 | 0.011228 | 0.000000 | 0.011169 | 0.011130 | 0.011228 |
| 0.011230 | 0.011163 | 0.011171 | 0.011164 | 0.011128 | 0.011163 | 0.011195 |
| 0.011420 | 0.011233 | 0.011267 | 0.011161 | 0.011129 | 0.011296 | 0.011262 |
| 0.011329 | 0.011262 | 0.011262 | 0.011362 | 0.011295 | 0.011664 | 0.011463 |
| 0.011496 | 0.011362 | 0.011228 | 0.011329 | 0.011127 | 0.011362 | 0.011161 |
| 0.011228 | 0.011228 | 0.011195 | 0.011161 | 0.011194 | 0.011161 | 0.011262 |
| 0.011228 | 0.011329 | 0.011262 | 0.011161 | 0.011262 | 0.011362 | 0.011364 |
| 0.011362 | 0.011262 | 0.011161 | 0.011094 | 0.011228 | 0.011161 | 0.011094 |
| 0.011196 | 0.011362 | 0.011161 | 0.011362 | 0.011127 | 0.011228 | 0.011195 |
| 0.011295 | 0.011195 | 0.011228 | 0.011195 | 0.011228 | 0.011094 | 0.011228 |
| 0.011262 | 0.011195 | 0.011262 | 0.011195 | 0.011228 | 0.011262 | 0.011497 |
| 0.011597 | 0.011530 | 0.011597 | 0.011363 | 0.011598 | 0.011228 | 0.011195 |
| 0.011229 | 0.011505 | 0.011289 | 0.011129 | 0.011603 | 0.011094 | 0.011218 |
| 0.011603 | 0.011502 | 0.011396 | 0.011597 | 0.011299 | 0.011463 | 0.011429 |
| 0.011362 | 0.011530 | 0.011380 | 0.011225 | 0.011270 | 0.011262 | 0.011331 |
| 0.011429 | 0.011330 | 0.011466 | 0.011534 | 0.011463 | 0.011530 | 0.011636 |
| 0.011365 | 0.011535 | 0.011466 | 0.011398 | 0.011666 | 0.011127 | 0.011330 |
| 0.011295 | 0.011228 | 0.011127 | 0.000000 | 0.011194 | 0.011194 | 0.011262 |
| 0.011194 | 0.011262 | 0.011161 | 0.011262 | 0.011194 | 0.011194 | 0.011262 |
| 0.011194 | 0.011631 | 0.011530 | 0.011564 | 0.011094 | 0.011194 | 0.011228 |
| 0.011228 | 0.011194 | 0.011262 | 0.011295 | 0.011161 | 0.011161 | 0.011161 |
| 0.011698 | 0.011329 | 0.011329 | 0.011127 | 0.011228 | 0.011396 | 0.011161 |
| 0.011161 | 0.011228 | 0.011194 | 0.011362 | 0.011161 | 0.011295 | 0.011429 |
| 0.011362 | 0.011194 | 0.011194 | 0.011127 | 0.011127 | 0.011295 | 0.011228 |
| 0.011127 | 0.011228 | 0.011094 | 0.011127 | 0.011262 | 0.011396 | 0.011161 |
| 0.011128 | 0.011262 | 0.011195 | 0.011094 | 0.011429 | 0.011094 | 0.011262 |
| 0.011334 | 0.011161 | 0.011463 | 0.011295 | 0.011329 | 0.011194 | 0.011295 |
| 0.011161 | 0.011496 | 0.011094 | 0.011362 | 0.011161 | 0.011161 | 0.011094 |
| 0.011329 | 0.011530 | 0.011228 | 0.011295 | 0.011127 | 0.011530 | 0.011161 |
| 0.011161 | 0.011161 | 0.011194 | 0.011295 | 0.011194 | 0.011295 | 0.011362 |
| 0.011362 | 0.011329 | 0.011228 | 0.011329 | 0.011295 | 0.011161 | 0.011127 |
| 0.011161 | 0.011161 | 0.011228 | 0.011161 | 0.011127 | 0.011295 | 0.011161 |
| 0.011194 | 0.011194 | 0.011329 | 0.011362 | 0.011262 | 0.011194 | 0.011195 |
| 0.011262 | 0.011194 | 0.011295 | 0.011161 | 0.011295 | 0.011396 | 0.011698 |
| 0.011194 | 0.011597 | 0.011164 | 0.017672 | 0.011126 | 0.011305 | 0.011514 |
| 0.011475 | 0.011517 | 0.011217 | 0.011176 | 0.011609 | 0.011543 | 0.011242 |
| 0.011392 | 0.011426 | 0.000000 | 0.011144 | 0.011138 | 0.011208 | 0.011146 |
| 0.011389 | 0.011321 | 0.011320 | 0.011126 | 0.011329 | 0.011362 | 0.011365 |
| 0.011232 | 0.011329 | 0.011329 | 0.011295 | 0.011262 | 0.011262 | 0.011228 |
| 0.011262 | 0.011195 | 0.011228 | 0.011262 | 0.011228 | 0.011161 | 0.011195 |
| 0.011195 | 0.011262 | 0.011161 | 0.011262 | 0.011295 | 0.011329 | 0.011228 |
| 0.011262 | 0.011228 | 0.011564 | 0.011564 | 0.011295 | 0.011329 | 0.011362 |
| 0.011127 | 0.011127 | 0.011161 | 0.011262 | 0.011127 | 0.011362 | 0.011362 |
| 0.011396 | 0.011396 | 0.011329 | 0.011429 | 0.011597 | 0.011430 | 0.011262 |
| 0.011262 | 0.011329 | 0.011362 | 0.011195 | 0.011262 | 0.011228 | 0.011262 |
| 0.011329 | 0.011329 | 0.011362 | 0.011329 | 0.011229 | 0.011429 | 0.011396 |
| 0.011263 | 0.011161 | 0.011262 | 0.011362 | 0.011262 | 0.011396 | 0.011429 |
| 0.011597 | 0.011299 | 0.011463 | 0.011429 | 0.011362 | 0.011530 | 0.011161 |
| 0.011330 | 0.011228 | 0.011195 | 0.011195 | 0.011262 | 0.011161 | 0.011262 |
| 0.011295 | 0.011329 | 0.011228 | 0.011262 | 0.011228 | 0.011564 | 0.011564 |
| 0.011295 | 0.011329 | 0.011396 | 0.011329 | 0.011968 | 0.011382 | 0.011306 |
| 0.011376 | 0.011338 | 0.011447 | 0.011337 | 0.011445 | 0.011370 | 0.011336 |
| 0.011918 | 0.011233 | 0.011368 | 0.011302 | 0.011576 | 0.011434 | 0.011536 |
| 0.011944 | 0.011399 | 0.011500 | 0.011564 | 0.011429 | 0.011429 | 0.011466 |
| 0.011127 | 0.011295 | 0.011429 | 0.011396 | 0.011398 | 0.011396 | 0.011363 |
| 0.011228 | 0.011161 | 0.011194 | 0.011228 | 0.011127 | 0.011194 | 0.011094 |

|          |          |          |          |          |          |          |
|----------|----------|----------|----------|----------|----------|----------|
| 0.011228 | 0.011262 | 0.011161 | 0.011127 | 0.011228 | 0.011161 | 0.011194 |
| 0.011194 | 0.011127 | 0.011194 | 0.011228 | 0.011127 | 0.011329 | 0.011362 |
| 0.011262 | 0.011329 | 0.011262 | 0.011262 | 0.011194 | 0.011597 | 0.011228 |
| 0.011269 | 0.011195 | 0.011430 | 0.011433 | 0.011295 | 0.011295 | 0.011295 |
| 0.011295 | 0.011228 | 0.011194 | 0.011228 | 0.011329 | 0.011329 | 0.011262 |
| 0.011262 | 0.011396 | 0.011564 | 0.011295 | 0.011497 | 0.011497 | 0.011362 |
| 0.011194 | 0.011262 | 0.011295 | 0.011698 | 0.011262 | 0.011295 | 0.011262 |
| 0.011295 | 0.011228 | 0.011228 | 0.011530 | 0.011463 | 0.011496 | 0.011228 |
| 0.011329 | 0.011396 | 0.011262 | 0.011329 | 0.011295 | 0.011161 | 0.011496 |
| 0.011262 | 0.011228 | 0.011228 | 0.011396 | 0.011228 | 0.011329 | 0.011564 |
| 0.011262 | 0.011637 | 0.011631 | 0.011385 | 0.011117 | 0.011298 | 0.011163 |
| 0.011115 | 0.011605 | 0.011131 | 0.011328 | 0.011158 | 0.011264 | 0.011273 |
| 0.011366 | 0.000000 | 0.011227 | 0.000000 | 0.011114 | 0.011261 | 0.011263 |
| 0.011286 | 0.011178 | 0.011272 | 0.011201 | 0.011262 | 0.011396 | 0.011463 |
| 0.011463 | 0.011329 | 0.011432 | 0.011433 | 0.011569 | 0.011590 | 0.011262 |
| 0.011496 | 0.011362 | 0.011228 | 0.011329 | 0.011127 | 0.011362 | 0.011161 |
| 0.011228 | 0.011228 | 0.011195 | 0.011161 | 0.011194 | 0.011161 | 0.011262 |
| 0.011235 | 0.011235 | 0.011197 | 0.011266 | 0.011402 | 0.011368 | 0.011367 |
| 0.011367 | 0.011296 | 0.000000 | 0.000000 | 0.011230 | 0.011399 | 0.011399 |
| 0.011195 | 0.011263 | 0.011498 | 0.011466 | 0.011396 | 0.011430 | 0.011362 |
| 0.011295 | 0.011362 | 0.011362 | 0.011262 | 0.011832 | 0.011429 | 0.011497 |
| 0.011530 | 0.011594 | 0.011231 | 0.011303 | 0.011195 | 0.011396 | 0.011362 |
| 0.011396 | 0.011429 | 0.011429 | 0.011429 | 0.011571 | 0.011564 | 0.011199 |
| 0.011094 | 0.011095 | 0.011196 | 0.011162 | 0.011265 | 0.011098 | 0.011434 |
| 0.011232 | 0.011367 | 0.011108 | 0.011248 | 0.011228 | 0.011300 | 0.011195 |
| 0.011161 | 0.011161 | 0.011228 | 0.011195 | 0.011396 | 0.011362 | 0.011295 |
| 0.011396 | 0.011463 | 0.011195 | 0.011195 | 0.011228 | 0.011228 | 0.011229 |
| 0.011297 | 0.011228 | 0.011228 | 0.011262 | 0.011396 | 0.011463 | 0.011463 |
| 0.011329 | 0.011432 | 0.011433 | 0.011569 | 0.011590 | 0.011262 | 0.011429 |
| 0.011362 | 0.011362 | 0.011196 | 0.011373 | 0.011303 | 0.011333 | 0.011200 |
| 0.011370 | 0.011561 | 0.011357 | 0.011264 | 0.011161 | 0.011362 | 0.011228 |
| 0.011329 | 0.011262 | 0.011161 | 0.011262 | 0.011362 | 0.011364 | 0.011262 |
| 0.011161 | 0.011094 | 0.011228 | 0.011161 | 0.011094 | 0.011196 | 0.011362 |
| 0.011262 | 0.011195 | 0.011228 | 0.011262 | 0.011228 | 0.011161 | 0.011362 |
| 0.011228 | 0.011262 | 0.011262 | 0.011194 | 0.011262 | 0.011496 | 0.011161 |
| 0.011194 | 0.011597 | 0.011194 | 0.011228 | 0.011194 | 0.011564 | 0.011103 |
| 0.011566 | 0.011103 | 0.011161 | 0.011342 | 0.011426 | 0.011347 | 0.000000 |
| 0.011113 | 0.011362 | 0.011463 | 0.011569 | 0.011430 | 0.011568 | 0.011699 |
| 0.011598 | 0.011635 | 0.011597 | 0.011846 | 0.011564 | 0.012438 | 0.011599 |
| 0.012338 | 0.012105 | 0.012240 | 0.012511 | 0.011564 | 0.011262 | 0.011564 |
| 0.012002 | 0.011937 | 0.011530 | 0.011429 | 0.011497 | 0.011497 | 0.011466 |
| 0.011362 | 0.011365 | 0.011429 | 0.011396 | 0.011766 | 0.011832 | 0.011834 |
| 0.011733 | 0.011833 | 0.011937 | 0.011703 | 0.012003 | 0.012008 | 0.012070 |
| 0.012070 | 0.012104 | 0.012015 | 0.012070 | 0.012072 | 0.011295 | 0.011598 |
| 0.011665 | 0.012169 | 0.011670 | 0.011900 | 0.012373 | 0.011434 | 0.011329 |
| 0.011295 | 0.011295 | 0.011766 | 0.011800 | 0.011869 | 0.011631 | 0.011296 |
| S263     | 0.011631 | 0.011631 | 0.011967 | 0.011732 | 0.011732 | 0.011799 |
| 0.011637 | 0.011569 | 0.011799 | 0.011228 | 0.011295 | 0.011262 | 0.011228 |
| 0.011262 | 0.011429 | 0.011228 | 0.011262 | 0.011329 | 0.011295 | 0.011262 |
| 0.011228 | 0.011262 | 0.011362 | 0.011228 | 0.011195 | 0.011262 | 0.011603 |
| 0.011496 | 0.011262 | 0.011161 | 0.011396 | 0.011262 | 0.011295 | 0.011262 |
| 0.011295 | 0.011329 | 0.011295 | 0.011295 | 0.011329 | 0.011295 | 0.011463 |
| 0.011228 | 0.011295 | 0.011329 | 0.011262 | 0.011362 | 0.011396 | 0.011329 |
| 0.011295 | 0.011463 | 0.011362 | 0.011631 | 0.011295 | 0.011496 | 0.011295 |
| 0.011262 | 0.011362 | 0.011429 | 0.011496 | 0.011664 | 0.011362 | 0.011463 |
| 0.011262 | 0.011329 | 0.011295 | 0.011463 | 0.011765 | 0.011295 | 0.011362 |
| 0.011262 | 0.011362 | 0.011329 | 0.011396 | 0.011329 | 0.011329 | 0.011329 |
| 0.011228 | 0.011262 | 0.011228 | 0.011329 | 0.011295 | 0.011329 | 0.011396 |
| 0.011329 | 0.011295 | 0.011295 | 0.011262 | 0.011396 | 0.011161 | 0.011295 |
| 0.011463 | 0.011396 | 0.011631 | 0.011463 | 0.011295 | 0.011463 | 0.011295 |

|          |          |          |          |          |          |          |
|----------|----------|----------|----------|----------|----------|----------|
| 0.011431 | 0.011658 | 0.011475 | 0.011177 | 0.011210 | 0.011281 | 0.011375 |
| 0.012048 | 0.011416 | 0.011184 | 0.011530 | 0.011530 | 0.011329 | 0.011429 |
| 0.011362 | 0.011329 | 0.011396 | 0.011295 | 0.011396 | 0.011262 | 0.011329 |
| 0.011295 | 0.011396 | 0.011597 | 0.011463 | 0.011362 | 0.011329 | 0.011195 |
| 0.011228 | 0.011228 | 0.011228 | 0.011262 | 0.011463 | 0.011429 | 0.011362 |
| 0.011463 | 0.011530 | 0.011262 | 0.011262 | 0.011295 | 0.011295 | 0.011297 |
| 0.011364 | 0.011295 | 0.011295 | 0.011132 | 0.011241 | 0.011200 | 0.011296 |
| 0.011297 | 0.011232 | 0.011282 | 0.011267 | 0.011196 | 0.011232 | 0.011263 |
| 0.011528 | 0.011302 | 0.011267 | 0.011228 | 0.011233 | 0.011363 | 0.011329 |
| 0.011397 | 0.011330 | 0.011329 | 0.011429 | 0.011362 | 0.011664 | 0.011530 |
| 0.011564 | 0.011430 | 0.011295 | 0.011396 | 0.011195 | 0.011429 | 0.011228 |
| 0.011295 | 0.011295 | 0.011262 | 0.011228 | 0.011262 | 0.011228 | 0.011329 |
| 0.011228 | 0.011329 | 0.011329 | 0.011228 | 0.011330 | 0.011430 | 0.011432 |
| 0.011362 | 0.011329 | 0.011228 | 0.011161 | 0.011295 | 0.011228 | 0.011161 |
| 0.011264 | 0.011362 | 0.011161 | 0.011362 | 0.011195 | 0.011295 | 0.011262 |
| 0.011295 | 0.011262 | 0.011228 | 0.011262 | 0.011295 | 0.011161 | 0.011228 |
| 0.011262 | 0.011262 | 0.011329 | 0.011262 | 0.011295 | 0.011329 | 0.011564 |
| 0.011664 | 0.011597 | 0.011665 | 0.011431 | 0.011665 | 0.011295 | 0.011262 |
| 0.011297 | 0.011545 | 0.011380 | 0.011197 | 0.011671 | 0.011163 | 0.011257 |
| 0.011671 | 0.011570 | 0.011463 | 0.011664 | 0.011367 | 0.011530 | 0.011429 |
| 0.011429 | 0.011597 | 0.011451 | 0.011307 | 0.011354 | 0.011329 | 0.011398 |
| 0.011497 | 0.011397 | 0.011533 | 0.011534 | 0.011530 | 0.011597 | 0.011704 |
| 0.011432 | 0.011535 | 0.011534 | 0.011466 | 0.011733 | 0.011194 | 0.011397 |
| 0.011295 | 0.011295 | 0.011194 | 0.011194 | 0.000000 | 0.011262 | 0.011329 |
| 0.011194 | 0.011262 | 0.011161 | 0.011329 | 0.011194 | 0.011262 | 0.011329 |
| 0.011262 | 0.011698 | 0.011597 | 0.011631 | 0.011161 | 0.011262 | 0.011295 |
| 0.011295 | 0.011262 | 0.011329 | 0.011362 | 0.011228 | 0.011228 | 0.011228 |
| 0.011765 | 0.011396 | 0.011396 | 0.011194 | 0.011295 | 0.011396 | 0.011228 |
| 0.011228 | 0.011295 | 0.011262 | 0.011362 | 0.011228 | 0.011362 | 0.011429 |
| 0.011429 | 0.011262 | 0.011262 | 0.011194 | 0.011194 | 0.011362 | 0.011295 |
| 0.011194 | 0.011295 | 0.011161 | 0.011194 | 0.011329 | 0.011463 | 0.011228 |
| 0.011195 | 0.011329 | 0.011262 | 0.011161 | 0.011496 | 0.011161 | 0.011329 |
| 0.011334 | 0.011228 | 0.011530 | 0.011362 | 0.011396 | 0.011262 | 0.011362 |
| 0.011228 | 0.011496 | 0.011161 | 0.011429 | 0.011228 | 0.011228 | 0.011161 |
| 0.011329 | 0.011597 | 0.011295 | 0.011362 | 0.011194 | 0.011597 | 0.011228 |
| 0.011228 | 0.011228 | 0.011262 | 0.011295 | 0.011262 | 0.011362 | 0.011429 |
| 0.011429 | 0.011396 | 0.011295 | 0.011396 | 0.011295 | 0.011228 | 0.011194 |
| 0.011228 | 0.011228 | 0.011295 | 0.011228 | 0.011127 | 0.011362 | 0.011228 |
| 0.011262 | 0.011262 | 0.011396 | 0.011429 | 0.011329 | 0.011194 | 0.011262 |
| 0.011329 | 0.011262 | 0.011362 | 0.011228 | 0.011362 | 0.011463 | 0.011765 |
| 0.011262 | 0.011664 | 0.011267 | 0.017748 | 0.011191 | 0.011366 | 0.011583 |
| 0.011545 | 0.011588 | 0.011270 | 0.011234 | 0.011664 | 0.011613 | 0.011242 |
| 0.011440 | 0.011487 | 0.011138 | 0.011186 | 0.011177 | 0.011307 | 0.011232 |
| 0.011436 | 0.011433 | 0.011394 | 0.011259 | 0.011396 | 0.011429 | 0.011432 |
| 0.011232 | 0.011396 | 0.011396 | 0.011362 | 0.011329 | 0.011329 | 0.011295 |
| 0.011329 | 0.011262 | 0.011295 | 0.011329 | 0.011295 | 0.011228 | 0.011262 |
| 0.011262 | 0.011329 | 0.011228 | 0.011262 | 0.011362 | 0.011396 | 0.011295 |
| 0.011329 | 0.011295 | 0.011631 | 0.011631 | 0.011362 | 0.011396 | 0.011430 |
| 0.011195 | 0.011195 | 0.011228 | 0.011262 | 0.011195 | 0.011430 | 0.011430 |
| 0.011463 | 0.011463 | 0.011396 | 0.011497 | 0.011665 | 0.011498 | 0.011262 |
| 0.011329 | 0.011396 | 0.011362 | 0.011262 | 0.011329 | 0.011295 | 0.011329 |
| 0.011396 | 0.011396 | 0.011429 | 0.011329 | 0.011229 | 0.011497 | 0.011396 |
| 0.011331 | 0.011228 | 0.011329 | 0.011430 | 0.011329 | 0.011463 | 0.011496 |
| 0.011664 | 0.011367 | 0.011530 | 0.011429 | 0.011429 | 0.011597 | 0.011228 |
| 0.011397 | 0.011295 | 0.011262 | 0.011262 | 0.011329 | 0.011228 | 0.011262 |
| 0.011362 | 0.011396 | 0.011295 | 0.011329 | 0.011295 | 0.011631 | 0.011631 |
| 0.011362 | 0.011396 | 0.011463 | 0.011396 | 0.012036 | 0.011453 | 0.011377 |
| 0.011447 | 0.011407 | 0.011517 | 0.011406 | 0.011515 | 0.011439 | 0.011405 |
| 0.011987 | 0.011302 | 0.011437 | 0.011371 | 0.011645 | 0.011502 | 0.011536 |
| 0.012012 | 0.011475 | 0.011567 | 0.011631 | 0.011496 | 0.011497 | 0.011533 |

|          |          |          |          |          |          |          |
|----------|----------|----------|----------|----------|----------|----------|
| 0.011194 | 0.011295 | 0.011496 | 0.011463 | 0.011466 | 0.011463 | 0.011431 |
| 0.011295 | 0.011161 | 0.011194 | 0.011295 | 0.011127 | 0.011262 | 0.011161 |
| 0.011295 | 0.011329 | 0.011228 | 0.011194 | 0.011295 | 0.011228 | 0.011262 |
| 0.011262 | 0.011194 | 0.011262 | 0.011295 | 0.011194 | 0.011329 | 0.011429 |
| 0.011329 | 0.011396 | 0.011329 | 0.011329 | 0.011262 | 0.011664 | 0.011295 |
| 0.011338 | 0.011262 | 0.011497 | 0.011501 | 0.011295 | 0.011362 | 0.011362 |
| 0.011362 | 0.011228 | 0.011262 | 0.011228 | 0.011396 | 0.011396 | 0.011329 |
| 0.011329 | 0.011463 | 0.011631 | 0.011362 | 0.011564 | 0.011564 | 0.011429 |
| 0.011262 | 0.011329 | 0.011362 | 0.011765 | 0.011329 | 0.011295 | 0.011329 |
| 0.011362 | 0.011295 | 0.011295 | 0.011597 | 0.011463 | 0.011564 | 0.011295 |
| 0.011396 | 0.011463 | 0.011329 | 0.011396 | 0.011362 | 0.011228 | 0.011564 |
| 0.011329 | 0.011295 | 0.011295 | 0.011463 | 0.011295 | 0.011396 | 0.011631 |
| 0.011329 | 0.011705 | 0.011698 | 0.011467 | 0.011173 | 0.011400 | 0.011215 |
| 0.011170 | 0.011722 | 0.011236 | 0.011417 | 0.011207 | 0.011366 | 0.011326 |
| 0.011417 | 0.011126 | 0.011283 | 0.011126 | 0.011168 | 0.011328 | 0.011303 |
| 0.011324 | 0.011178 | 0.011342 | 0.011307 | 0.011330 | 0.011463 | 0.011530 |
| 0.011530 | 0.011396 | 0.011500 | 0.011501 | 0.011636 | 0.011661 | 0.011329 |
| 0.011564 | 0.011430 | 0.011295 | 0.011396 | 0.011195 | 0.011429 | 0.011228 |
| 0.011295 | 0.011295 | 0.011262 | 0.011228 | 0.011262 | 0.011228 | 0.011329 |
| 0.011305 | 0.011305 | 0.011300 | 0.011334 | 0.011471 | 0.011368 | 0.011436 |
| 0.011435 | 0.011363 | 0.011171 | 0.011168 | 0.011297 | 0.011467 | 0.011467 |
| 0.011262 | 0.011331 | 0.011565 | 0.011533 | 0.011464 | 0.011498 | 0.011429 |
| 0.011362 | 0.011429 | 0.011429 | 0.011329 | 0.011900 | 0.011497 | 0.011564 |
| 0.011597 | 0.011665 | 0.011299 | 0.011372 | 0.011262 | 0.011463 | 0.011429 |
| 0.011464 | 0.011496 | 0.011496 | 0.011496 | 0.011571 | 0.011631 | 0.011268 |
| 0.011162 | 0.011164 | 0.011264 | 0.011230 | 0.011333 | 0.011172 | 0.011502 |
| 0.011300 | 0.011411 | 0.011156 | 0.011322 | 0.011296 | 0.011368 | 0.011195 |
| 0.011228 | 0.011228 | 0.011228 | 0.011262 | 0.011463 | 0.011429 | 0.011362 |
| 0.011463 | 0.011530 | 0.011262 | 0.011262 | 0.011295 | 0.011295 | 0.011297 |
| 0.011364 | 0.011295 | 0.011295 | 0.011330 | 0.011463 | 0.011530 | 0.011530 |
| 0.011396 | 0.011500 | 0.011501 | 0.011636 | 0.011661 | 0.011329 | 0.011496 |
| 0.011429 | 0.011429 | 0.011263 | 0.011443 | 0.011373 | 0.011401 | 0.011270 |
| 0.011370 | 0.011607 | 0.011399 | 0.011332 | 0.011161 | 0.011362 | 0.011228 |
| 0.011329 | 0.011329 | 0.011228 | 0.011330 | 0.011430 | 0.011432 | 0.011329 |
| 0.011228 | 0.011161 | 0.011295 | 0.011228 | 0.011161 | 0.011264 | 0.011362 |
| 0.011329 | 0.011262 | 0.011295 | 0.011329 | 0.011295 | 0.011228 | 0.011430 |
| 0.011295 | 0.011329 | 0.011329 | 0.011262 | 0.011329 | 0.011564 | 0.011228 |
| 0.011262 | 0.011664 | 0.011262 | 0.011228 | 0.011262 | 0.011631 | 0.011189 |
| 0.011622 | 0.011188 | 0.011211 | 0.011422 | 0.011508 | 0.011455 | 0.011144 |
| 0.011165 | 0.011429 | 0.011530 | 0.011637 | 0.011498 | 0.011635 | 0.011766 |
| 0.011666 | 0.011703 | 0.011664 | 0.011914 | 0.011631 | 0.012505 | 0.011667 |
| 0.012406 | 0.012173 | 0.012307 | 0.012579 | 0.011631 | 0.011329 | 0.011631 |
| 0.012070 | 0.012005 | 0.011597 | 0.011497 | 0.011565 | 0.011565 | 0.011534 |
| 0.011429 | 0.011433 | 0.011496 | 0.011464 | 0.011834 | 0.011900 | 0.011901 |
| 0.011800 | 0.011901 | 0.012004 | 0.011770 | 0.012070 | 0.012076 | 0.012137 |
| 0.012138 | 0.012172 | 0.012118 | 0.012138 | 0.012139 | 0.011362 | 0.011665 |
| 0.011733 | 0.012236 | 0.011738 | 0.011967 | 0.012440 | 0.011502 | 0.011396 |
| 0.011362 | 0.011362 | 0.011833 | 0.011842 | 0.011975 | 0.011698 | 0.011363 |
| S264     | 0.011631 | 0.011631 | 0.011967 | 0.011732 | 0.011732 | 0.011799 |
| 0.011637 | 0.011569 | 0.011731 | 0.011228 | 0.011295 | 0.011262 | 0.011228 |
| 0.011262 | 0.011362 | 0.011228 | 0.011262 | 0.011329 | 0.011295 | 0.011262 |
| 0.011228 | 0.011262 | 0.011362 | 0.011228 | 0.011262 | 0.011262 | 0.011603 |
| 0.011496 | 0.011262 | 0.011161 | 0.011396 | 0.011329 | 0.011295 | 0.011329 |
| 0.011295 | 0.011396 | 0.011295 | 0.011295 | 0.011329 | 0.011295 | 0.011463 |
| 0.011228 | 0.011295 | 0.011329 | 0.011262 | 0.011362 | 0.011396 | 0.011329 |
| 0.011295 | 0.011463 | 0.011362 | 0.011631 | 0.011295 | 0.011564 | 0.011295 |
| 0.011262 | 0.011362 | 0.011429 | 0.011564 | 0.011664 | 0.011362 | 0.011463 |
| 0.011329 | 0.011396 | 0.011295 | 0.011530 | 0.011765 | 0.011228 | 0.011362 |
| 0.011262 | 0.011362 | 0.011329 | 0.011396 | 0.011329 | 0.011329 | 0.011329 |
| 0.011228 | 0.011262 | 0.011228 | 0.011329 | 0.011295 | 0.011329 | 0.011396 |

|          |          |          |          |          |          |          |
|----------|----------|----------|----------|----------|----------|----------|
| 0.011329 | 0.011295 | 0.011362 | 0.011262 | 0.011396 | 0.011228 | 0.011295 |
| 0.011463 | 0.011396 | 0.011631 | 0.011463 | 0.011295 | 0.011530 | 0.011228 |
| 0.011468 | 0.011695 | 0.011513 | 0.011216 | 0.011210 | 0.011318 | 0.011415 |
| 0.012048 | 0.011518 | 0.011225 | 0.011530 | 0.011530 | 0.011329 | 0.011429 |
| 0.011362 | 0.011329 | 0.011396 | 0.011295 | 0.011396 | 0.011329 | 0.011329 |
| 0.011295 | 0.011396 | 0.011597 | 0.011396 | 0.011362 | 0.011329 | 0.011262 |
| 0.011228 | 0.011228 | 0.011295 | 0.011262 | 0.011463 | 0.011430 | 0.011362 |
| 0.011463 | 0.011530 | 0.011262 | 0.011262 | 0.011295 | 0.011295 | 0.011297 |
| 0.011364 | 0.011295 | 0.011295 | 0.011168 | 0.011241 | 0.011200 | 0.011296 |
| 0.011297 | 0.011232 | 0.011282 | 0.011267 | 0.011196 | 0.011232 | 0.011263 |
| 0.011492 | 0.011302 | 0.011336 | 0.011228 | 0.011233 | 0.011363 | 0.011329 |
| 0.011397 | 0.011330 | 0.011329 | 0.011429 | 0.011362 | 0.011732 | 0.011530 |
| 0.011564 | 0.011430 | 0.011295 | 0.011396 | 0.011195 | 0.011429 | 0.011228 |
| 0.011295 | 0.011295 | 0.011262 | 0.011228 | 0.011262 | 0.011228 | 0.011329 |
| 0.011295 | 0.011396 | 0.011329 | 0.011228 | 0.011262 | 0.011430 | 0.011432 |
| 0.011430 | 0.011329 | 0.011228 | 0.011161 | 0.011295 | 0.011228 | 0.011161 |
| 0.011264 | 0.011430 | 0.011228 | 0.011430 | 0.011195 | 0.011295 | 0.011262 |
| 0.011362 | 0.011262 | 0.011295 | 0.011262 | 0.011295 | 0.011161 | 0.011295 |
| 0.011329 | 0.011262 | 0.011329 | 0.011262 | 0.011295 | 0.011262 | 0.011564 |
| 0.011664 | 0.011597 | 0.011665 | 0.011431 | 0.011665 | 0.011295 | 0.011262 |
| 0.011297 | 0.011586 | 0.011380 | 0.011197 | 0.011603 | 0.011163 | 0.011257 |
| 0.011671 | 0.011570 | 0.011463 | 0.011664 | 0.011368 | 0.011530 | 0.011497 |
| 0.011429 | 0.011597 | 0.011451 | 0.011307 | 0.011354 | 0.011329 | 0.011398 |
| 0.011497 | 0.011397 | 0.011533 | 0.011601 | 0.011530 | 0.011597 | 0.011704 |
| 0.011432 | 0.011603 | 0.011534 | 0.011466 | 0.011733 | 0.011194 | 0.011397 |
| 0.011362 | 0.011295 | 0.011194 | 0.011194 | 0.011262 | 0.000000 | 0.011329 |
| 0.011262 | 0.011329 | 0.011228 | 0.011329 | 0.011262 | 0.011262 | 0.011329 |
| 0.011262 | 0.011698 | 0.011597 | 0.011631 | 0.011161 | 0.011262 | 0.011295 |
| 0.011295 | 0.011262 | 0.011329 | 0.011362 | 0.011228 | 0.011228 | 0.011228 |
| 0.011765 | 0.011396 | 0.011396 | 0.011194 | 0.011295 | 0.011463 | 0.011228 |
| 0.011228 | 0.011295 | 0.011262 | 0.011429 | 0.011228 | 0.011362 | 0.011496 |
| 0.011429 | 0.011262 | 0.011262 | 0.011194 | 0.011194 | 0.011362 | 0.011295 |
| 0.011194 | 0.011295 | 0.011161 | 0.011195 | 0.011329 | 0.011463 | 0.011195 |
| 0.011195 | 0.011329 | 0.011262 | 0.011161 | 0.011496 | 0.011161 | 0.011262 |
| 0.011403 | 0.011228 | 0.011530 | 0.011362 | 0.011396 | 0.011262 | 0.011362 |
| 0.011228 | 0.011564 | 0.011161 | 0.011429 | 0.011228 | 0.011228 | 0.011161 |
| 0.011396 | 0.011598 | 0.011295 | 0.011362 | 0.011194 | 0.011597 | 0.011228 |
| 0.011228 | 0.011228 | 0.011262 | 0.011362 | 0.011262 | 0.011362 | 0.011429 |
| 0.011429 | 0.011396 | 0.011295 | 0.011396 | 0.011362 | 0.011228 | 0.011194 |
| 0.011228 | 0.011228 | 0.011295 | 0.011228 | 0.011194 | 0.011362 | 0.011228 |
| 0.011262 | 0.011262 | 0.011396 | 0.011429 | 0.011329 | 0.011262 | 0.011262 |
| 0.011329 | 0.011262 | 0.011362 | 0.011228 | 0.011362 | 0.011396 | 0.011765 |
| 0.011262 | 0.011664 | 0.011267 | 0.017785 | 0.011322 | 0.011366 | 0.011618 |
| 0.011579 | 0.011623 | 0.011322 | 0.011292 | 0.011664 | 0.011647 | 0.011303 |
| 0.011534 | 0.011426 | 0.011177 | 0.011228 | 0.011255 | 0.011307 | 0.011232 |
| 0.011529 | 0.011433 | 0.011431 | 0.011325 | 0.011396 | 0.011429 | 0.011432 |
| 0.011301 | 0.011396 | 0.011396 | 0.011362 | 0.011329 | 0.011329 | 0.011295 |
| 0.011329 | 0.011262 | 0.011295 | 0.011329 | 0.011295 | 0.011228 | 0.011262 |
| 0.011262 | 0.011329 | 0.011228 | 0.011329 | 0.011362 | 0.011396 | 0.011295 |
| 0.011329 | 0.011295 | 0.011631 | 0.011631 | 0.011362 | 0.011329 | 0.011430 |
| 0.011195 | 0.011195 | 0.011228 | 0.011329 | 0.011195 | 0.011430 | 0.011430 |
| 0.011463 | 0.011463 | 0.011396 | 0.011497 | 0.011665 | 0.011498 | 0.011329 |
| 0.011329 | 0.011396 | 0.011430 | 0.011262 | 0.011329 | 0.011295 | 0.011329 |
| 0.011396 | 0.011396 | 0.011429 | 0.011396 | 0.011296 | 0.011497 | 0.011463 |
| 0.011331 | 0.011228 | 0.011329 | 0.011430 | 0.011329 | 0.011463 | 0.011496 |
| 0.011664 | 0.011368 | 0.011530 | 0.011497 | 0.011429 | 0.011597 | 0.011228 |
| 0.011397 | 0.011228 | 0.011262 | 0.011262 | 0.011329 | 0.011228 | 0.011329 |
| 0.011362 | 0.011396 | 0.011295 | 0.011329 | 0.011295 | 0.011631 | 0.011631 |
| 0.011362 | 0.011329 | 0.011463 | 0.011396 | 0.012035 | 0.011453 | 0.011377 |
| 0.011447 | 0.011407 | 0.011517 | 0.011406 | 0.011515 | 0.011439 | 0.011405 |



|          |          |          |          |          |          |          |
|----------|----------|----------|----------|----------|----------|----------|
| 0.011987 | 0.011302 | 0.011437 | 0.011371 | 0.011645 | 0.011502 | 0.011605 |
| 0.012012 | 0.011475 | 0.011567 | 0.011631 | 0.011496 | 0.011497 | 0.011533 |
| 0.011194 | 0.011362 | 0.011496 | 0.011463 | 0.011466 | 0.011463 | 0.011431 |
| 0.011295 | 0.011228 | 0.011262 | 0.011295 | 0.011194 | 0.011262 | 0.011161 |
| 0.011295 | 0.011329 | 0.011228 | 0.011194 | 0.011295 | 0.011228 | 0.011262 |
| 0.011262 | 0.011194 | 0.011262 | 0.011295 | 0.011194 | 0.011396 | 0.011429 |
| 0.011329 | 0.011396 | 0.011329 | 0.011329 | 0.011262 | 0.011664 | 0.011295 |
| 0.011338 | 0.011262 | 0.011497 | 0.011501 | 0.011362 | 0.011362 | 0.011362 |
| 0.011362 | 0.011295 | 0.011262 | 0.011295 | 0.011329 | 0.011396 | 0.011329 |
| 0.011329 | 0.011463 | 0.011631 | 0.011362 | 0.011497 | 0.011497 | 0.011429 |
| 0.011262 | 0.011329 | 0.011362 | 0.011765 | 0.011329 | 0.011362 | 0.011329 |
| 0.011362 | 0.011295 | 0.011295 | 0.011597 | 0.011530 | 0.011564 | 0.011295 |
| 0.011396 | 0.011463 | 0.011329 | 0.011396 | 0.011362 | 0.011228 | 0.011564 |
| 0.011329 | 0.011295 | 0.011295 | 0.011463 | 0.011295 | 0.011396 | 0.011631 |
| 0.011329 | 0.011705 | 0.011698 | 0.011507 | 0.011286 | 0.011400 | 0.011318 |
| 0.011170 | 0.011722 | 0.011236 | 0.011462 | 0.011304 | 0.011366 | 0.011432 |
| 0.011519 | 0.011258 | 0.011394 | 0.011258 | 0.011276 | 0.011462 | 0.011385 |
| 0.011399 | 0.011296 | 0.011377 | 0.011307 | 0.011330 | 0.011463 | 0.011530 |
| 0.011530 | 0.011396 | 0.011500 | 0.011501 | 0.011636 | 0.011625 | 0.011329 |
| 0.011564 | 0.011430 | 0.011295 | 0.011396 | 0.011195 | 0.011429 | 0.011228 |
| 0.011295 | 0.011295 | 0.011262 | 0.011228 | 0.011262 | 0.011228 | 0.011329 |
| 0.011305 | 0.011305 | 0.011300 | 0.011334 | 0.011471 | 0.011436 | 0.011436 |
| 0.011435 | 0.011363 | 0.011171 | 0.011168 | 0.011230 | 0.011467 | 0.011467 |
| 0.011262 | 0.011331 | 0.011565 | 0.011533 | 0.011464 | 0.011430 | 0.011429 |
| 0.011362 | 0.011429 | 0.011429 | 0.011329 | 0.011900 | 0.011497 | 0.011564 |
| 0.011597 | 0.011665 | 0.011299 | 0.011372 | 0.011262 | 0.011463 | 0.011429 |
| 0.011464 | 0.011496 | 0.011496 | 0.011496 | 0.011650 | 0.011631 | 0.011268 |
| 0.011162 | 0.011164 | 0.011264 | 0.011230 | 0.011333 | 0.011172 | 0.011502 |
| 0.011300 | 0.011455 | 0.011203 | 0.011322 | 0.011296 | 0.011368 | 0.011262 |
| 0.011228 | 0.011228 | 0.011295 | 0.011262 | 0.011463 | 0.011430 | 0.011362 |
| 0.011463 | 0.011530 | 0.011262 | 0.011262 | 0.011295 | 0.011295 | 0.011297 |
| 0.011364 | 0.011295 | 0.011295 | 0.011330 | 0.011463 | 0.011530 | 0.011530 |
| 0.011396 | 0.011500 | 0.011501 | 0.011636 | 0.011625 | 0.011329 | 0.011496 |
| 0.011429 | 0.011429 | 0.011263 | 0.011443 | 0.011303 | 0.011401 | 0.011270 |
| 0.011439 | 0.011607 | 0.011441 | 0.011332 | 0.011228 | 0.011430 | 0.011295 |
| 0.011396 | 0.011329 | 0.011228 | 0.011262 | 0.011430 | 0.011432 | 0.011329 |
| 0.011228 | 0.011161 | 0.011295 | 0.011228 | 0.011161 | 0.011264 | 0.011430 |
| 0.011329 | 0.011262 | 0.011295 | 0.011329 | 0.011295 | 0.011228 | 0.011430 |
| 0.011295 | 0.011329 | 0.011329 | 0.011262 | 0.011329 | 0.011564 | 0.011228 |
| 0.011262 | 0.011664 | 0.011262 | 0.011295 | 0.011262 | 0.011631 | 0.011232 |
| 0.011735 | 0.011230 | 0.011311 | 0.011463 | 0.011549 | 0.011455 | 0.011186 |
| 0.011270 | 0.011429 | 0.011530 | 0.011637 | 0.011498 | 0.011635 | 0.011766 |
| 0.011666 | 0.011703 | 0.011664 | 0.011914 | 0.011631 | 0.012505 | 0.011667 |
| 0.012406 | 0.012173 | 0.012307 | 0.012579 | 0.011631 | 0.011329 | 0.011631 |
| 0.012070 | 0.012005 | 0.011597 | 0.011497 | 0.011565 | 0.011565 | 0.011534 |
| 0.011429 | 0.011433 | 0.011496 | 0.011464 | 0.011834 | 0.011900 | 0.011901 |
| 0.011800 | 0.011901 | 0.012004 | 0.011770 | 0.012070 | 0.012076 | 0.012137 |
| 0.012138 | 0.012172 | 0.012118 | 0.012138 | 0.012139 | 0.011362 | 0.011665 |
| 0.011733 | 0.012236 | 0.011738 | 0.011967 | 0.012440 | 0.011502 | 0.011396 |
| 0.011362 | 0.011362 | 0.011833 | 0.011883 | 0.011975 | 0.011698 | 0.011363 |
| S265     | 0.011698 | 0.011698 | 0.012034 | 0.011799 | 0.011799 | 0.011866 |
| 0.011705 | 0.011637 | 0.011866 | 0.011295 | 0.011362 | 0.011329 | 0.011295 |
| 0.011329 | 0.011496 | 0.011295 | 0.011329 | 0.011396 | 0.011362 | 0.011329 |
| 0.011295 | 0.011329 | 0.011429 | 0.011295 | 0.011329 | 0.011329 | 0.011671 |
| 0.011564 | 0.011329 | 0.011228 | 0.011463 | 0.011396 | 0.011362 | 0.011396 |
| 0.011362 | 0.011463 | 0.011295 | 0.011362 | 0.011329 | 0.011362 | 0.011530 |
| 0.011295 | 0.011362 | 0.011329 | 0.011194 | 0.011429 | 0.011463 | 0.011396 |
| 0.011362 | 0.011463 | 0.011430 | 0.011698 | 0.011295 | 0.011631 | 0.011295 |
| 0.011329 | 0.011429 | 0.011429 | 0.011631 | 0.011731 | 0.011429 | 0.011530 |
| 0.011396 | 0.011463 | 0.011362 | 0.011597 | 0.011832 | 0.011362 | 0.011429 |

|          |          |          |          |          |          |          |
|----------|----------|----------|----------|----------|----------|----------|
| 0.011329 | 0.011429 | 0.011396 | 0.011463 | 0.011396 | 0.011262 | 0.011262 |
| 0.011295 | 0.011329 | 0.011295 | 0.011396 | 0.011362 | 0.011397 | 0.011463 |
| 0.011396 | 0.011362 | 0.011429 | 0.011329 | 0.011463 | 0.011295 | 0.011362 |
| 0.011530 | 0.011463 | 0.011698 | 0.011530 | 0.011362 | 0.011597 | 0.011295 |
| 0.011542 | 0.011733 | 0.011588 | 0.011256 | 0.011284 | 0.011391 | 0.011454 |
| 0.012121 | 0.011467 | 0.011307 | 0.011597 | 0.011597 | 0.011396 | 0.011496 |
| 0.011429 | 0.011396 | 0.011463 | 0.011362 | 0.011463 | 0.011396 | 0.011396 |
| 0.011362 | 0.011463 | 0.011664 | 0.011530 | 0.011429 | 0.011396 | 0.011329 |
| 0.011295 | 0.011295 | 0.011362 | 0.011329 | 0.011530 | 0.011497 | 0.011429 |
| 0.011530 | 0.011597 | 0.011329 | 0.011329 | 0.011362 | 0.011362 | 0.011364 |
| 0.011432 | 0.011362 | 0.011362 | 0.011240 | 0.011313 | 0.011271 | 0.011363 |
| 0.011365 | 0.011301 | 0.011355 | 0.011336 | 0.011264 | 0.011300 | 0.011330 |
| 0.011600 | 0.011370 | 0.011405 | 0.011296 | 0.011302 | 0.011430 | 0.011396 |
| 0.011464 | 0.011397 | 0.011396 | 0.011496 | 0.011429 | 0.011799 | 0.011597 |
| 0.011631 | 0.011497 | 0.011362 | 0.011463 | 0.011262 | 0.011496 | 0.011295 |
| 0.011362 | 0.011362 | 0.011329 | 0.011295 | 0.011329 | 0.011295 | 0.011396 |
| 0.011362 | 0.011463 | 0.011396 | 0.011295 | 0.011397 | 0.011497 | 0.011499 |
| 0.011497 | 0.011396 | 0.011295 | 0.011229 | 0.011362 | 0.011295 | 0.011228 |
| 0.011332 | 0.011497 | 0.011295 | 0.011497 | 0.011262 | 0.011362 | 0.011329 |
| 0.011430 | 0.011329 | 0.011362 | 0.011329 | 0.011362 | 0.011228 | 0.011362 |
| 0.011396 | 0.011329 | 0.011396 | 0.011329 | 0.011362 | 0.011396 | 0.011631 |
| 0.011732 | 0.011664 | 0.011732 | 0.011431 | 0.011732 | 0.011362 | 0.011329 |
| 0.011364 | 0.011667 | 0.011380 | 0.011266 | 0.011739 | 0.011231 | 0.011375 |
| 0.011739 | 0.011638 | 0.011530 | 0.011732 | 0.011436 | 0.011597 | 0.011564 |
| 0.011496 | 0.011664 | 0.011522 | 0.011390 | 0.011437 | 0.011396 | 0.011466 |
| 0.011564 | 0.011465 | 0.011601 | 0.011669 | 0.011597 | 0.011665 | 0.011772 |
| 0.011500 | 0.011671 | 0.011602 | 0.011533 | 0.011800 | 0.011262 | 0.011464 |
| 0.011429 | 0.011362 | 0.011262 | 0.011262 | 0.011329 | 0.011329 | 0.000000 |
| 0.011329 | 0.011396 | 0.011295 | 0.011396 | 0.011329 | 0.011329 | 0.011396 |
| 0.011329 | 0.011698 | 0.011664 | 0.011698 | 0.011228 | 0.011329 | 0.011362 |
| 0.011362 | 0.011329 | 0.011396 | 0.011429 | 0.011295 | 0.011295 | 0.011295 |
| 0.011832 | 0.011463 | 0.011463 | 0.011262 | 0.011362 | 0.011530 | 0.011295 |
| 0.011295 | 0.011362 | 0.011329 | 0.011497 | 0.011295 | 0.011429 | 0.011564 |
| 0.011496 | 0.011329 | 0.011329 | 0.011262 | 0.011262 | 0.011429 | 0.011362 |
| 0.011262 | 0.011362 | 0.011228 | 0.011262 | 0.011396 | 0.011530 | 0.011295 |
| 0.011262 | 0.011396 | 0.011329 | 0.011228 | 0.011564 | 0.011228 | 0.011396 |
| 0.011471 | 0.011295 | 0.011597 | 0.011430 | 0.011463 | 0.011329 | 0.011362 |
| 0.011295 | 0.011631 | 0.011228 | 0.011496 | 0.011295 | 0.011295 | 0.011228 |
| 0.011463 | 0.011665 | 0.011362 | 0.011429 | 0.011262 | 0.011664 | 0.011295 |
| 0.011295 | 0.011295 | 0.011329 | 0.011429 | 0.011329 | 0.011429 | 0.011496 |
| 0.011496 | 0.011463 | 0.011228 | 0.011463 | 0.011429 | 0.011228 | 0.011262 |
| 0.011295 | 0.011228 | 0.011362 | 0.011295 | 0.011262 | 0.011429 | 0.011295 |
| 0.011329 | 0.011329 | 0.011463 | 0.011496 | 0.011396 | 0.011329 | 0.011329 |
| 0.011396 | 0.011329 | 0.011429 | 0.011295 | 0.011429 | 0.011530 | 0.011832 |
| 0.011329 | 0.011732 | 0.011336 | 0.017861 | 0.011257 | 0.011427 | 0.011688 |
| 0.011648 | 0.011693 | 0.011374 | 0.011292 | 0.011774 | 0.011716 | 0.011364 |
| 0.011582 | 0.011610 | 0.011216 | 0.011311 | 0.011333 | 0.011356 | 0.011275 |
| 0.011529 | 0.011507 | 0.011505 | 0.011391 | 0.011463 | 0.011497 | 0.011500 |
| 0.011369 | 0.011463 | 0.011463 | 0.011429 | 0.011396 | 0.011396 | 0.011363 |
| 0.011396 | 0.011329 | 0.011362 | 0.011396 | 0.011362 | 0.011295 | 0.011329 |
| 0.011329 | 0.011396 | 0.011295 | 0.011396 | 0.011429 | 0.011463 | 0.011362 |
| 0.011396 | 0.011362 | 0.011698 | 0.011698 | 0.011430 | 0.011464 | 0.011497 |
| 0.011262 | 0.011262 | 0.011295 | 0.011396 | 0.011262 | 0.011497 | 0.011497 |
| 0.011530 | 0.011530 | 0.011463 | 0.011564 | 0.011732 | 0.011565 | 0.011396 |
| 0.011396 | 0.011463 | 0.011497 | 0.011329 | 0.011396 | 0.011362 | 0.011396 |
| 0.011463 | 0.011463 | 0.011497 | 0.011463 | 0.011363 | 0.011564 | 0.011530 |
| 0.011399 | 0.011295 | 0.011396 | 0.011430 | 0.011396 | 0.011530 | 0.011564 |
| 0.011732 | 0.011436 | 0.011597 | 0.011564 | 0.011496 | 0.011664 | 0.011295 |
| 0.011464 | 0.011363 | 0.011329 | 0.011329 | 0.011396 | 0.011295 | 0.011396 |
| 0.011429 | 0.011463 | 0.011362 | 0.011396 | 0.011362 | 0.011698 | 0.011698 |

|          |          |          |          |          |          |          |
|----------|----------|----------|----------|----------|----------|----------|
| 0.011430 | 0.011464 | 0.011530 | 0.011463 | 0.012103 | 0.011524 | 0.011447 |
| 0.011517 | 0.011476 | 0.011587 | 0.011476 | 0.011585 | 0.011508 | 0.011474 |
| 0.012056 | 0.011372 | 0.011505 | 0.011441 | 0.011714 | 0.011570 | 0.011673 |
| 0.012080 | 0.011512 | 0.011635 | 0.011698 | 0.011564 | 0.011564 | 0.011601 |
| 0.011262 | 0.011429 | 0.011564 | 0.011530 | 0.011533 | 0.011530 | 0.011498 |
| 0.011362 | 0.011295 | 0.011329 | 0.011362 | 0.011262 | 0.011329 | 0.011228 |
| 0.011362 | 0.011396 | 0.011295 | 0.011262 | 0.011362 | 0.011295 | 0.011329 |
| 0.011329 | 0.011262 | 0.011329 | 0.011362 | 0.011262 | 0.011463 | 0.011496 |
| 0.011396 | 0.011463 | 0.011396 | 0.011396 | 0.011329 | 0.011731 | 0.011362 |
| 0.011408 | 0.011329 | 0.011564 | 0.011569 | 0.011429 | 0.011362 | 0.011429 |
| 0.011429 | 0.011362 | 0.011329 | 0.011362 | 0.011463 | 0.011463 | 0.011396 |
| 0.011396 | 0.011530 | 0.011698 | 0.011429 | 0.011631 | 0.011631 | 0.011496 |
| 0.011329 | 0.011396 | 0.011429 | 0.011832 | 0.011396 | 0.011429 | 0.011396 |
| 0.011429 | 0.011362 | 0.011362 | 0.011664 | 0.011597 | 0.011631 | 0.011362 |
| 0.011463 | 0.011530 | 0.011396 | 0.011463 | 0.011429 | 0.011295 | 0.011631 |
| 0.011396 | 0.011362 | 0.011362 | 0.011530 | 0.011362 | 0.011463 | 0.011698 |
| 0.011396 | 0.011773 | 0.011765 | 0.011548 | 0.011286 | 0.011468 | 0.011318 |
| 0.011225 | 0.011761 | 0.011306 | 0.011462 | 0.011304 | 0.011366 | 0.011432 |
| 0.011468 | 0.011126 | 0.011394 | 0.011192 | 0.011222 | 0.011395 | 0.011466 |
| 0.011475 | 0.011375 | 0.011448 | 0.011377 | 0.011397 | 0.011530 | 0.011597 |
| 0.011597 | 0.011464 | 0.011567 | 0.011569 | 0.011670 | 0.011732 | 0.011396 |
| 0.011631 | 0.011497 | 0.011362 | 0.011463 | 0.011262 | 0.011496 | 0.011295 |
| 0.011362 | 0.011362 | 0.011329 | 0.011295 | 0.011329 | 0.011295 | 0.011396 |
| 0.011375 | 0.011375 | 0.011368 | 0.011403 | 0.011539 | 0.011504 | 0.011504 |
| 0.011503 | 0.011430 | 0.011245 | 0.011240 | 0.011365 | 0.011535 | 0.011535 |
| 0.011329 | 0.011399 | 0.011632 | 0.011601 | 0.011531 | 0.011565 | 0.011496 |
| 0.011429 | 0.011496 | 0.011496 | 0.011396 | 0.011967 | 0.011564 | 0.011631 |
| 0.011665 | 0.011701 | 0.011367 | 0.011441 | 0.011329 | 0.011530 | 0.011496 |
| 0.011531 | 0.011564 | 0.011564 | 0.011564 | 0.011610 | 0.011698 | 0.011338 |
| 0.011229 | 0.011233 | 0.011332 | 0.011298 | 0.011402 | 0.011247 | 0.011570 |
| 0.011369 | 0.011499 | 0.011251 | 0.011360 | 0.011363 | 0.011437 | 0.011329 |
| 0.011295 | 0.011295 | 0.011362 | 0.011329 | 0.011530 | 0.011497 | 0.011429 |
| 0.011530 | 0.011597 | 0.011329 | 0.011329 | 0.011362 | 0.011362 | 0.011364 |
| 0.011432 | 0.011362 | 0.011362 | 0.011397 | 0.011530 | 0.011597 | 0.011597 |
| 0.011464 | 0.011567 | 0.011569 | 0.011670 | 0.011732 | 0.011396 | 0.011564 |
| 0.011496 | 0.011496 | 0.011263 | 0.011513 | 0.011442 | 0.011469 | 0.011340 |
| 0.011508 | 0.011698 | 0.011399 | 0.011400 | 0.011295 | 0.011497 | 0.011362 |
| 0.011463 | 0.011396 | 0.011295 | 0.011397 | 0.011497 | 0.011499 | 0.011396 |
| 0.011295 | 0.011229 | 0.011362 | 0.011295 | 0.011228 | 0.011332 | 0.011497 |
| 0.011396 | 0.011329 | 0.011362 | 0.011396 | 0.011362 | 0.011295 | 0.011497 |
| 0.011329 | 0.011396 | 0.011396 | 0.011329 | 0.011396 | 0.011631 | 0.011295 |
| 0.011329 | 0.011731 | 0.011329 | 0.011362 | 0.011329 | 0.011698 | 0.011317 |
| 0.011735 | 0.011315 | 0.011261 | 0.011543 | 0.011630 | 0.011527 | 0.011269 |
| 0.011270 | 0.011496 | 0.011597 | 0.011671 | 0.011565 | 0.011703 | 0.011834 |
| 0.011733 | 0.011770 | 0.011731 | 0.011983 | 0.011698 | 0.012573 | 0.011734 |
| 0.012473 | 0.012241 | 0.012375 | 0.012646 | 0.011698 | 0.011396 | 0.011698 |
| 0.012137 | 0.012072 | 0.011664 | 0.011564 | 0.011632 | 0.011632 | 0.011601 |
| 0.011496 | 0.011501 | 0.011564 | 0.011531 | 0.011901 | 0.011967 | 0.011968 |
| 0.011867 | 0.011968 | 0.012072 | 0.011838 | 0.012138 | 0.012144 | 0.012205 |
| 0.012205 | 0.012239 | 0.012186 | 0.012205 | 0.012207 | 0.011429 | 0.011732 |
| 0.011800 | 0.012303 | 0.011806 | 0.012034 | 0.012508 | 0.011570 | 0.011464 |
| 0.011429 | 0.011429 | 0.011900 | 0.011924 | 0.012045 | 0.011765 | 0.011431 |
| S266     | 0.011631 | 0.011631 | 0.011967 | 0.011732 | 0.011732 | 0.011799 |
| 0.011637 | 0.011569 | 0.011799 | 0.011228 | 0.011295 | 0.011262 | 0.011228 |
| 0.011262 | 0.011429 | 0.011228 | 0.011262 | 0.011329 | 0.011295 | 0.011262 |
| 0.011228 | 0.011262 | 0.011362 | 0.011228 | 0.011195 | 0.011262 | 0.011603 |
| 0.011496 | 0.011262 | 0.011161 | 0.011396 | 0.011262 | 0.011295 | 0.011262 |
| 0.011295 | 0.011329 | 0.011295 | 0.011295 | 0.011329 | 0.011295 | 0.011463 |
| 0.011228 | 0.011295 | 0.011329 | 0.011262 | 0.011362 | 0.011396 | 0.011329 |
| 0.011295 | 0.011463 | 0.011362 | 0.011631 | 0.011295 | 0.011496 | 0.011295 |

|          |          |          |          |          |          |          |
|----------|----------|----------|----------|----------|----------|----------|
| 0.011262 | 0.011362 | 0.011429 | 0.011496 | 0.011664 | 0.011362 | 0.011463 |
| 0.011262 | 0.011329 | 0.011295 | 0.011463 | 0.011765 | 0.011295 | 0.011362 |
| 0.011262 | 0.011362 | 0.011329 | 0.011396 | 0.011329 | 0.011329 | 0.011329 |
| 0.011228 | 0.011262 | 0.011228 | 0.011329 | 0.011295 | 0.011329 | 0.011396 |
| 0.011329 | 0.011295 | 0.011295 | 0.011262 | 0.011396 | 0.011161 | 0.011295 |
| 0.011463 | 0.011396 | 0.011631 | 0.011463 | 0.011295 | 0.011463 | 0.011295 |
| 0.011468 | 0.011695 | 0.011513 | 0.011216 | 0.011210 | 0.011318 | 0.011415 |
| 0.012048 | 0.011467 | 0.011225 | 0.011530 | 0.011530 | 0.011329 | 0.011429 |
| 0.011362 | 0.011329 | 0.011396 | 0.011295 | 0.011396 | 0.011262 | 0.011329 |
| 0.011295 | 0.011396 | 0.011597 | 0.011463 | 0.011362 | 0.011329 | 0.011195 |
| 0.011228 | 0.011228 | 0.011228 | 0.011262 | 0.011463 | 0.011430 | 0.011362 |
| 0.011463 | 0.011530 | 0.011262 | 0.011262 | 0.011295 | 0.011295 | 0.011297 |
| 0.011364 | 0.011295 | 0.011295 | 0.011132 | 0.011241 | 0.011200 | 0.011296 |
| 0.011297 | 0.011232 | 0.011282 | 0.011267 | 0.011196 | 0.011231 | 0.011263 |
| 0.011528 | 0.011301 | 0.011267 | 0.011228 | 0.011233 | 0.011363 | 0.011329 |
| 0.011396 | 0.011330 | 0.011329 | 0.011429 | 0.011362 | 0.011664 | 0.011530 |
| 0.011564 | 0.011429 | 0.011295 | 0.011396 | 0.011195 | 0.011429 | 0.011228 |
| 0.011295 | 0.011295 | 0.011262 | 0.011228 | 0.011262 | 0.011228 | 0.011329 |
| 0.011228 | 0.011262 | 0.011329 | 0.011228 | 0.011330 | 0.011430 | 0.011432 |
| 0.011362 | 0.011329 | 0.011228 | 0.011161 | 0.011295 | 0.011228 | 0.011161 |
| 0.011264 | 0.011362 | 0.011161 | 0.011362 | 0.011195 | 0.011295 | 0.011262 |
| 0.011295 | 0.011262 | 0.011228 | 0.011262 | 0.011295 | 0.011161 | 0.011228 |
| 0.011262 | 0.011262 | 0.011329 | 0.011262 | 0.011295 | 0.011329 | 0.011564 |
| 0.011664 | 0.011597 | 0.011665 | 0.011431 | 0.011665 | 0.011295 | 0.011262 |
| 0.011297 | 0.011545 | 0.011335 | 0.011197 | 0.011671 | 0.011163 | 0.011296 |
| 0.011671 | 0.011570 | 0.011463 | 0.011664 | 0.011368 | 0.011530 | 0.011429 |
| 0.011429 | 0.011597 | 0.011451 | 0.011307 | 0.011354 | 0.011329 | 0.011398 |
| 0.011497 | 0.011397 | 0.011533 | 0.011534 | 0.011530 | 0.011597 | 0.011704 |
| 0.011432 | 0.011535 | 0.011534 | 0.011466 | 0.011733 | 0.011194 | 0.011397 |
| 0.011295 | 0.011295 | 0.011194 | 0.011194 | 0.011194 | 0.011262 | 0.011329 |
| 0.000000 | 0.011262 | 0.011161 | 0.011329 | 0.011194 | 0.011262 | 0.011329 |
| 0.011262 | 0.011698 | 0.011597 | 0.011631 | 0.011161 | 0.011262 | 0.011295 |
| 0.011295 | 0.011262 | 0.011329 | 0.011362 | 0.011228 | 0.011228 | 0.011228 |
| 0.011765 | 0.011396 | 0.011396 | 0.011194 | 0.011295 | 0.011396 | 0.011228 |
| 0.011228 | 0.011295 | 0.011262 | 0.011362 | 0.011228 | 0.011362 | 0.011362 |
| 0.011429 | 0.011262 | 0.011262 | 0.011195 | 0.011194 | 0.011362 | 0.011295 |
| 0.011195 | 0.011295 | 0.011161 | 0.011195 | 0.011329 | 0.011463 | 0.011228 |
| 0.011195 | 0.011329 | 0.011262 | 0.011161 | 0.011496 | 0.011161 | 0.011329 |
| 0.011334 | 0.011228 | 0.011530 | 0.011362 | 0.011396 | 0.011262 | 0.011362 |
| 0.011228 | 0.011496 | 0.011161 | 0.011429 | 0.011228 | 0.011228 | 0.011161 |
| 0.011329 | 0.011598 | 0.011295 | 0.011362 | 0.011194 | 0.011597 | 0.011228 |
| 0.011228 | 0.011228 | 0.011262 | 0.011295 | 0.011262 | 0.011362 | 0.011429 |
| 0.011429 | 0.011396 | 0.011295 | 0.011396 | 0.011295 | 0.011228 | 0.011194 |
| 0.011228 | 0.011228 | 0.011295 | 0.011228 | 0.011127 | 0.011362 | 0.011228 |
| 0.011262 | 0.011262 | 0.011396 | 0.011429 | 0.011329 | 0.011194 | 0.011262 |
| 0.011329 | 0.011262 | 0.011362 | 0.011228 | 0.011362 | 0.011463 | 0.011765 |
| 0.011262 | 0.011664 | 0.011267 | 0.011785 | 0.011257 | 0.011488 | 0.011618 |
| 0.011579 | 0.011623 | 0.011322 | 0.011292 | 0.011719 | 0.011647 | 0.011364 |
| 0.011487 | 0.011610 | 0.011177 | 0.011228 | 0.011216 | 0.011356 | 0.011275 |
| 0.011482 | 0.011433 | 0.011394 | 0.011259 | 0.011396 | 0.011429 | 0.011432 |
| 0.011232 | 0.011396 | 0.011396 | 0.011362 | 0.011329 | 0.011329 | 0.011295 |
| 0.011329 | 0.011262 | 0.011295 | 0.011329 | 0.011295 | 0.011228 | 0.011262 |
| 0.011262 | 0.011329 | 0.011228 | 0.011329 | 0.011362 | 0.011396 | 0.011295 |
| 0.011329 | 0.011295 | 0.011631 | 0.011631 | 0.011362 | 0.011396 | 0.011430 |
| 0.011195 | 0.011195 | 0.011228 | 0.011262 | 0.011195 | 0.011429 | 0.011429 |
| 0.011463 | 0.011463 | 0.011396 | 0.011496 | 0.011665 | 0.011498 | 0.011262 |
| 0.011329 | 0.011396 | 0.011362 | 0.011262 | 0.011329 | 0.011295 | 0.011329 |
| 0.011396 | 0.011396 | 0.011429 | 0.011262 | 0.011229 | 0.011497 | 0.011396 |
| 0.011331 | 0.011228 | 0.011329 | 0.011430 | 0.011329 | 0.011463 | 0.011496 |
| 0.011664 | 0.011368 | 0.011530 | 0.011429 | 0.011429 | 0.011597 | 0.011228 |

|          |          |          |          |          |          |          |
|----------|----------|----------|----------|----------|----------|----------|
| 0.011397 | 0.011296 | 0.011262 | 0.011262 | 0.011329 | 0.011228 | 0.011329 |
| 0.011362 | 0.011396 | 0.011295 | 0.011329 | 0.011295 | 0.011631 | 0.011631 |
| 0.011362 | 0.011396 | 0.011463 | 0.011396 | 0.012035 | 0.011453 | 0.011377 |
| 0.011447 | 0.011407 | 0.011517 | 0.011406 | 0.011515 | 0.011439 | 0.011405 |
| 0.011987 | 0.011302 | 0.011437 | 0.011371 | 0.011645 | 0.011502 | 0.011536 |
| 0.012012 | 0.011475 | 0.011567 | 0.011631 | 0.011496 | 0.011497 | 0.011533 |
| 0.011194 | 0.011295 | 0.011496 | 0.011463 | 0.011466 | 0.011463 | 0.011431 |
| 0.011295 | 0.011161 | 0.011194 | 0.011295 | 0.011127 | 0.011262 | 0.011161 |
| 0.011295 | 0.011329 | 0.011228 | 0.011194 | 0.011295 | 0.011228 | 0.011262 |
| 0.011262 | 0.011194 | 0.011262 | 0.011295 | 0.011194 | 0.011329 | 0.011429 |
| 0.011329 | 0.011396 | 0.011329 | 0.011329 | 0.011262 | 0.011664 | 0.011295 |
| 0.011338 | 0.011262 | 0.011497 | 0.011501 | 0.011295 | 0.011362 | 0.011362 |
| 0.011362 | 0.011228 | 0.011262 | 0.011228 | 0.011396 | 0.011396 | 0.011329 |
| 0.011329 | 0.011463 | 0.011631 | 0.011362 | 0.011564 | 0.011564 | 0.011429 |
| 0.011262 | 0.011329 | 0.011362 | 0.011765 | 0.011329 | 0.011295 | 0.011329 |
| 0.011362 | 0.011295 | 0.011295 | 0.011597 | 0.011463 | 0.011564 | 0.011295 |
| 0.011396 | 0.011463 | 0.011329 | 0.011396 | 0.011362 | 0.011228 | 0.011564 |
| 0.011329 | 0.011295 | 0.011295 | 0.011463 | 0.011295 | 0.011396 | 0.011631 |
| 0.011329 | 0.011705 | 0.011698 | 0.011507 | 0.011229 | 0.011400 | 0.011267 |
| 0.011280 | 0.011722 | 0.011236 | 0.011462 | 0.011255 | 0.011416 | 0.011379 |
| 0.011468 | 0.011126 | 0.011227 | 0.011192 | 0.011222 | 0.011395 | 0.011344 |
| 0.011362 | 0.011218 | 0.011377 | 0.011307 | 0.011330 | 0.011463 | 0.011530 |
| 0.011530 | 0.011396 | 0.011500 | 0.011501 | 0.011636 | 0.011661 | 0.011329 |
| 0.011564 | 0.011429 | 0.011295 | 0.011396 | 0.011195 | 0.011429 | 0.011228 |
| 0.011295 | 0.011295 | 0.011262 | 0.011228 | 0.011262 | 0.011228 | 0.011329 |
| 0.011305 | 0.011305 | 0.011300 | 0.011334 | 0.011471 | 0.011368 | 0.011436 |
| 0.011435 | 0.011363 | 0.011134 | 0.011168 | 0.011297 | 0.011467 | 0.011467 |
| 0.011262 | 0.011331 | 0.011565 | 0.011533 | 0.011464 | 0.011498 | 0.011429 |
| 0.011362 | 0.011429 | 0.011429 | 0.011329 | 0.011900 | 0.011496 | 0.011564 |
| 0.011597 | 0.011665 | 0.011299 | 0.011372 | 0.011262 | 0.011463 | 0.011429 |
| 0.011464 | 0.011496 | 0.011496 | 0.011496 | 0.011610 | 0.011631 | 0.011268 |
| 0.011162 | 0.011164 | 0.011264 | 0.011230 | 0.011333 | 0.011172 | 0.011502 |
| 0.011300 | 0.011411 | 0.011108 | 0.011322 | 0.011296 | 0.011368 | 0.011195 |
| 0.011228 | 0.011228 | 0.011228 | 0.011262 | 0.011463 | 0.011430 | 0.011362 |
| 0.011463 | 0.011530 | 0.011262 | 0.011262 | 0.011295 | 0.011295 | 0.011297 |
| 0.011364 | 0.011295 | 0.011295 | 0.011330 | 0.011463 | 0.011530 | 0.011530 |
| 0.011396 | 0.011500 | 0.011501 | 0.011636 | 0.011661 | 0.011329 | 0.011496 |
| 0.011429 | 0.011429 | 0.011263 | 0.011443 | 0.011373 | 0.011401 | 0.011270 |
| 0.011370 | 0.011561 | 0.011357 | 0.011332 | 0.011161 | 0.011362 | 0.011228 |
| 0.011262 | 0.011329 | 0.011228 | 0.011330 | 0.011430 | 0.011432 | 0.011329 |
| 0.011228 | 0.011161 | 0.011295 | 0.011228 | 0.011161 | 0.011264 | 0.011362 |
| 0.011329 | 0.011262 | 0.011295 | 0.011329 | 0.011295 | 0.011228 | 0.011430 |
| 0.011295 | 0.011329 | 0.011329 | 0.011262 | 0.011329 | 0.011564 | 0.011228 |
| 0.011262 | 0.011664 | 0.011262 | 0.011161 | 0.011262 | 0.011631 | 0.011232 |
| 0.011678 | 0.011230 | 0.011261 | 0.011463 | 0.011549 | 0.011455 | 0.011186 |
| 0.011218 | 0.011429 | 0.011530 | 0.011637 | 0.011498 | 0.011635 | 0.011766 |
| 0.011666 | 0.011703 | 0.011664 | 0.011914 | 0.011631 | 0.012505 | 0.011666 |
| 0.012405 | 0.012173 | 0.012307 | 0.012578 | 0.011631 | 0.011329 | 0.011631 |
| 0.012070 | 0.012004 | 0.011597 | 0.011497 | 0.011565 | 0.011565 | 0.011534 |
| 0.011429 | 0.011433 | 0.011496 | 0.011464 | 0.011833 | 0.011900 | 0.011901 |
| 0.011800 | 0.011901 | 0.012004 | 0.011770 | 0.012070 | 0.012076 | 0.012137 |
| 0.012138 | 0.012171 | 0.012118 | 0.012138 | 0.012139 | 0.011362 | 0.011665 |
| 0.011733 | 0.012236 | 0.011738 | 0.011967 | 0.012440 | 0.011502 | 0.011396 |
| 0.011362 | 0.011362 | 0.011833 | 0.011883 | 0.011975 | 0.011698 | 0.011363 |
| S267     | 0.011698 | 0.011698 | 0.012034 | 0.011799 | 0.011799 | 0.011866 |
| 0.011705 | 0.011637 | 0.011866 | 0.011295 | 0.011362 | 0.011329 | 0.011295 |
| 0.011329 | 0.011497 | 0.011295 | 0.011329 | 0.011396 | 0.011362 | 0.011329 |
| 0.011295 | 0.011329 | 0.011429 | 0.011295 | 0.011262 | 0.011329 | 0.011671 |
| 0.011564 | 0.011329 | 0.011228 | 0.011463 | 0.011329 | 0.011362 | 0.011329 |
| 0.011362 | 0.011396 | 0.011362 | 0.011362 | 0.011396 | 0.011362 | 0.011530 |

|          |          |          |          |          |          |          |
|----------|----------|----------|----------|----------|----------|----------|
| 0.011295 | 0.011362 | 0.011396 | 0.011329 | 0.011429 | 0.011463 | 0.011396 |
| 0.011362 | 0.011530 | 0.011430 | 0.011698 | 0.011362 | 0.011564 | 0.011362 |
| 0.011329 | 0.011430 | 0.011497 | 0.011564 | 0.011732 | 0.011429 | 0.011530 |
| 0.011329 | 0.011396 | 0.011362 | 0.011530 | 0.011833 | 0.011362 | 0.011429 |
| 0.011329 | 0.011429 | 0.011396 | 0.011463 | 0.011396 | 0.011396 | 0.011396 |
| 0.011295 | 0.011329 | 0.011295 | 0.011396 | 0.011362 | 0.011397 | 0.011463 |
| 0.011329 | 0.011362 | 0.011362 | 0.011329 | 0.011463 | 0.011228 | 0.011362 |
| 0.011530 | 0.011463 | 0.011698 | 0.011530 | 0.011362 | 0.011530 | 0.011362 |
| 0.011542 | 0.011770 | 0.011588 | 0.011295 | 0.011284 | 0.011355 | 0.011493 |
| 0.012121 | 0.011518 | 0.011307 | 0.011597 | 0.011597 | 0.011396 | 0.011497 |
| 0.011429 | 0.011396 | 0.011463 | 0.011362 | 0.011463 | 0.011329 | 0.011396 |
| 0.011362 | 0.011463 | 0.011664 | 0.011530 | 0.011429 | 0.011396 | 0.011262 |
| 0.011295 | 0.011295 | 0.011295 | 0.011329 | 0.011530 | 0.011497 | 0.011430 |
| 0.011530 | 0.011597 | 0.011329 | 0.011329 | 0.011362 | 0.011362 | 0.011364 |
| 0.011432 | 0.011362 | 0.011362 | 0.011204 | 0.011313 | 0.011271 | 0.011363 |
| 0.011365 | 0.011301 | 0.011355 | 0.011336 | 0.011264 | 0.011300 | 0.011330 |
| 0.011600 | 0.011370 | 0.011336 | 0.011296 | 0.011302 | 0.011430 | 0.011397 |
| 0.011464 | 0.011397 | 0.011396 | 0.011496 | 0.011429 | 0.011732 | 0.011598 |
| 0.011631 | 0.011497 | 0.011362 | 0.011463 | 0.011262 | 0.011497 | 0.011295 |
| 0.011362 | 0.011362 | 0.011329 | 0.011295 | 0.011329 | 0.011295 | 0.011396 |
| 0.011295 | 0.011396 | 0.011396 | 0.011295 | 0.011397 | 0.011497 | 0.011500 |
| 0.011430 | 0.011396 | 0.011295 | 0.011229 | 0.011362 | 0.011295 | 0.011228 |
| 0.011332 | 0.011430 | 0.011228 | 0.011430 | 0.011262 | 0.011363 | 0.011329 |
| 0.011362 | 0.011329 | 0.011295 | 0.011329 | 0.011362 | 0.011228 | 0.011295 |
| 0.011329 | 0.011329 | 0.011396 | 0.011329 | 0.011362 | 0.011396 | 0.011631 |
| 0.011732 | 0.011664 | 0.011732 | 0.011498 | 0.011732 | 0.011362 | 0.011329 |
| 0.011364 | 0.011586 | 0.011426 | 0.011266 | 0.011739 | 0.011231 | 0.011375 |
| 0.011739 | 0.011638 | 0.011530 | 0.011732 | 0.011436 | 0.011597 | 0.011497 |
| 0.011497 | 0.011664 | 0.011522 | 0.011390 | 0.011395 | 0.011396 | 0.011466 |
| 0.011564 | 0.011465 | 0.011601 | 0.011602 | 0.011597 | 0.011665 | 0.011772 |
| 0.011500 | 0.011603 | 0.011602 | 0.011534 | 0.011800 | 0.011262 | 0.011465 |
| 0.011362 | 0.011362 | 0.011262 | 0.011262 | 0.011262 | 0.011329 | 0.011396 |
| 0.011262 | 0.000000 | 0.011228 | 0.011396 | 0.011262 | 0.011329 | 0.011396 |
| 0.011329 | 0.011765 | 0.011664 | 0.011698 | 0.011228 | 0.011329 | 0.011362 |
| 0.011362 | 0.011329 | 0.011396 | 0.011429 | 0.011295 | 0.011295 | 0.011295 |
| 0.011832 | 0.011463 | 0.011463 | 0.011262 | 0.011362 | 0.011463 | 0.011295 |
| 0.011295 | 0.011362 | 0.011329 | 0.011429 | 0.011295 | 0.011429 | 0.011496 |
| 0.011497 | 0.011329 | 0.011329 | 0.011262 | 0.011262 | 0.011430 | 0.011362 |
| 0.011262 | 0.011362 | 0.011228 | 0.011262 | 0.011396 | 0.011530 | 0.011295 |
| 0.011262 | 0.011396 | 0.011329 | 0.011228 | 0.011564 | 0.011228 | 0.011396 |
| 0.011403 | 0.011295 | 0.011597 | 0.011430 | 0.011463 | 0.011262 | 0.011429 |
| 0.011295 | 0.011564 | 0.011228 | 0.011497 | 0.011295 | 0.011295 | 0.011228 |
| 0.011396 | 0.011665 | 0.011362 | 0.011429 | 0.011262 | 0.011664 | 0.011295 |
| 0.011295 | 0.011295 | 0.011329 | 0.011362 | 0.011329 | 0.011429 | 0.011497 |
| 0.011497 | 0.011463 | 0.011362 | 0.011463 | 0.011362 | 0.011295 | 0.011262 |
| 0.011295 | 0.011295 | 0.011362 | 0.011295 | 0.011194 | 0.011429 | 0.011295 |
| 0.011329 | 0.011329 | 0.011463 | 0.011497 | 0.011396 | 0.011262 | 0.011329 |
| 0.011396 | 0.011329 | 0.011429 | 0.011295 | 0.011429 | 0.011530 | 0.011832 |
| 0.011329 | 0.011732 | 0.011336 | 0.017861 | 0.011322 | 0.011549 | 0.011688 |
| 0.011648 | 0.011693 | 0.011374 | 0.011292 | 0.011774 | 0.011716 | 0.011425 |
| 0.011535 | 0.011732 | 0.011255 | 0.011228 | 0.011216 | 0.011455 | 0.011361 |
| 0.011529 | 0.011507 | 0.011431 | 0.011193 | 0.011463 | 0.011497 | 0.011500 |
| 0.011301 | 0.011463 | 0.011463 | 0.011430 | 0.011396 | 0.011396 | 0.011363 |
| 0.011396 | 0.011329 | 0.011362 | 0.011396 | 0.011363 | 0.011295 | 0.011329 |
| 0.011329 | 0.011396 | 0.011295 | 0.011396 | 0.011430 | 0.011463 | 0.011362 |
| 0.011396 | 0.011362 | 0.011698 | 0.011698 | 0.011362 | 0.011464 | 0.011497 |
| 0.011262 | 0.011262 | 0.011295 | 0.011329 | 0.011262 | 0.011497 | 0.011497 |
| 0.011530 | 0.011530 | 0.011463 | 0.011564 | 0.011732 | 0.011565 | 0.011329 |
| 0.011396 | 0.011463 | 0.011430 | 0.011329 | 0.011396 | 0.011362 | 0.011396 |
| 0.011463 | 0.011463 | 0.011497 | 0.011396 | 0.011296 | 0.011564 | 0.011463 |

|          |          |          |          |          |          |          |
|----------|----------|----------|----------|----------|----------|----------|
| 0.011399 | 0.011295 | 0.011396 | 0.011497 | 0.011396 | 0.011530 | 0.011564 |
| 0.011732 | 0.011436 | 0.011597 | 0.011497 | 0.011497 | 0.011664 | 0.011295 |
| 0.011464 | 0.011363 | 0.011329 | 0.011329 | 0.011396 | 0.011295 | 0.011396 |
| 0.011430 | 0.011463 | 0.011362 | 0.011396 | 0.011362 | 0.011698 | 0.011698 |
| 0.011362 | 0.011464 | 0.011530 | 0.011463 | 0.012103 | 0.011525 | 0.011447 |
| 0.011517 | 0.011476 | 0.011587 | 0.011476 | 0.011585 | 0.011508 | 0.011474 |
| 0.012056 | 0.011372 | 0.011505 | 0.011441 | 0.011714 | 0.011570 | 0.011605 |
| 0.012080 | 0.011550 | 0.011635 | 0.011698 | 0.011564 | 0.011564 | 0.011601 |
| 0.011262 | 0.011362 | 0.011564 | 0.011530 | 0.011533 | 0.011530 | 0.011498 |
| 0.011362 | 0.011228 | 0.011262 | 0.011362 | 0.011194 | 0.011329 | 0.011228 |
| 0.011362 | 0.011396 | 0.011295 | 0.011262 | 0.011362 | 0.011295 | 0.011329 |
| 0.011329 | 0.011262 | 0.011329 | 0.011362 | 0.011262 | 0.011396 | 0.011497 |
| 0.011396 | 0.011463 | 0.011396 | 0.011396 | 0.011329 | 0.011732 | 0.011362 |
| 0.011408 | 0.011329 | 0.011564 | 0.011569 | 0.011362 | 0.011429 | 0.011429 |
| 0.011429 | 0.011295 | 0.011329 | 0.011295 | 0.011463 | 0.011463 | 0.011396 |
| 0.011396 | 0.011530 | 0.011698 | 0.011429 | 0.011631 | 0.011631 | 0.011496 |
| 0.011329 | 0.011396 | 0.011429 | 0.011833 | 0.011396 | 0.011362 | 0.011329 |
| 0.011429 | 0.011362 | 0.011362 | 0.011665 | 0.011530 | 0.011631 | 0.011362 |
| 0.011463 | 0.011530 | 0.011396 | 0.011463 | 0.011429 | 0.011295 | 0.011631 |
| 0.011396 | 0.011362 | 0.011362 | 0.011530 | 0.011362 | 0.011463 | 0.011698 |
| 0.011396 | 0.011773 | 0.011765 | 0.011589 | 0.011286 | 0.011468 | 0.011318 |
| 0.011390 | 0.011800 | 0.011306 | 0.011552 | 0.011304 | 0.011518 | 0.011432 |
| 0.011519 | 0.011258 | 0.011394 | 0.011258 | 0.011276 | 0.011462 | 0.011385 |
| 0.011399 | 0.011296 | 0.011448 | 0.011377 | 0.011397 | 0.011530 | 0.011598 |
| 0.011597 | 0.011464 | 0.011567 | 0.011569 | 0.011704 | 0.011732 | 0.011396 |
| 0.011631 | 0.011497 | 0.011362 | 0.011463 | 0.011262 | 0.011497 | 0.011295 |
| 0.011362 | 0.011362 | 0.011329 | 0.011295 | 0.011329 | 0.011295 | 0.011396 |
| 0.011375 | 0.011375 | 0.011368 | 0.011403 | 0.011539 | 0.011436 | 0.011504 |
| 0.011503 | 0.011430 | 0.011208 | 0.011240 | 0.011365 | 0.011535 | 0.011535 |
| 0.011329 | 0.011399 | 0.011633 | 0.011601 | 0.011531 | 0.011565 | 0.011496 |
| 0.011429 | 0.011497 | 0.011496 | 0.011396 | 0.011967 | 0.011564 | 0.011631 |
| 0.011665 | 0.011737 | 0.011333 | 0.011441 | 0.011329 | 0.011530 | 0.011497 |
| 0.011531 | 0.011564 | 0.011564 | 0.011564 | 0.011729 | 0.011698 | 0.011338 |
| 0.011229 | 0.011233 | 0.011333 | 0.011298 | 0.011402 | 0.011210 | 0.011570 |
| 0.011369 | 0.011367 | 0.011108 | 0.011360 | 0.011363 | 0.011437 | 0.011262 |
| 0.011295 | 0.011295 | 0.011295 | 0.011329 | 0.011530 | 0.011497 | 0.011430 |
| 0.011530 | 0.011597 | 0.011329 | 0.011329 | 0.011362 | 0.011362 | 0.011364 |
| 0.011432 | 0.011362 | 0.011362 | 0.011397 | 0.011530 | 0.011598 | 0.011597 |
| 0.011464 | 0.011567 | 0.011569 | 0.011704 | 0.011732 | 0.011396 | 0.011564 |
| 0.011497 | 0.011497 | 0.011331 | 0.011513 | 0.011442 | 0.011469 | 0.011341 |
| 0.011439 | 0.011653 | 0.011483 | 0.011400 | 0.011228 | 0.011430 | 0.011295 |
| 0.011396 | 0.011396 | 0.011295 | 0.011397 | 0.011497 | 0.011500 | 0.011396 |
| 0.011295 | 0.011229 | 0.011362 | 0.011295 | 0.011228 | 0.011332 | 0.011430 |
| 0.011396 | 0.011329 | 0.011362 | 0.011396 | 0.011363 | 0.011295 | 0.011497 |
| 0.011362 | 0.011396 | 0.011396 | 0.011329 | 0.011396 | 0.011631 | 0.011295 |
| 0.011329 | 0.011732 | 0.011329 | 0.011295 | 0.011329 | 0.011698 | 0.011317 |
| 0.011735 | 0.011315 | 0.011311 | 0.011543 | 0.011630 | 0.011527 | 0.011269 |
| 0.011270 | 0.011496 | 0.011597 | 0.011705 | 0.011565 | 0.011703 | 0.011834 |
| 0.011733 | 0.011770 | 0.011732 | 0.011983 | 0.011698 | 0.012573 | 0.011734 |
| 0.012473 | 0.012241 | 0.012375 | 0.012646 | 0.011698 | 0.011396 | 0.011699 |
| 0.012137 | 0.012072 | 0.011664 | 0.011564 | 0.011632 | 0.011632 | 0.011601 |
| 0.011496 | 0.011501 | 0.011564 | 0.011531 | 0.011901 | 0.011967 | 0.011968 |
| 0.011868 | 0.011968 | 0.012072 | 0.011838 | 0.012138 | 0.012144 | 0.012205 |
| 0.012206 | 0.012239 | 0.012186 | 0.012206 | 0.012207 | 0.011429 | 0.011732 |
| 0.011800 | 0.012303 | 0.011806 | 0.012034 | 0.012508 | 0.011570 | 0.011464 |
| 0.011429 | 0.011429 | 0.011900 | 0.011924 | 0.012045 | 0.011765 | 0.011431 |
| S268     | 0.011597 | 0.011597 | 0.011933 | 0.011698 | 0.011698 | 0.011765 |
| 0.011603 | 0.011535 | 0.011765 | 0.011195 | 0.011262 | 0.011228 | 0.011194 |
| 0.011228 | 0.011396 | 0.011194 | 0.011228 | 0.011295 | 0.011262 | 0.011228 |
| 0.011194 | 0.011228 | 0.011329 | 0.011195 | 0.011161 | 0.011228 | 0.011569 |

|          |          |          |          |          |          |          |
|----------|----------|----------|----------|----------|----------|----------|
| 0.011463 | 0.011228 | 0.011127 | 0.011362 | 0.011228 | 0.011262 | 0.011228 |
| 0.011262 | 0.011295 | 0.011262 | 0.011262 | 0.011295 | 0.011262 | 0.011429 |
| 0.011194 | 0.011262 | 0.011295 | 0.011228 | 0.011329 | 0.011362 | 0.011295 |
| 0.011262 | 0.011429 | 0.011329 | 0.011597 | 0.011262 | 0.011463 | 0.011262 |
| 0.011228 | 0.011329 | 0.011396 | 0.011463 | 0.011631 | 0.011329 | 0.011429 |
| 0.011228 | 0.011295 | 0.011262 | 0.011429 | 0.011732 | 0.011262 | 0.011329 |
| 0.011228 | 0.011329 | 0.011295 | 0.011362 | 0.011295 | 0.011295 | 0.011295 |
| 0.011194 | 0.011228 | 0.011194 | 0.011295 | 0.011262 | 0.011296 | 0.011362 |
| 0.011295 | 0.011262 | 0.011262 | 0.011228 | 0.011362 | 0.011127 | 0.011262 |
| 0.011429 | 0.011362 | 0.011597 | 0.011429 | 0.011262 | 0.011429 | 0.011262 |
| 0.011431 | 0.011658 | 0.011475 | 0.011177 | 0.011172 | 0.011281 | 0.011375 |
| 0.012011 | 0.011416 | 0.011184 | 0.011496 | 0.011496 | 0.011295 | 0.011396 |
| 0.011329 | 0.011295 | 0.011362 | 0.011262 | 0.011362 | 0.011228 | 0.011295 |
| 0.011262 | 0.011362 | 0.011564 | 0.011429 | 0.011329 | 0.011295 | 0.011161 |
| 0.011195 | 0.011195 | 0.011195 | 0.011228 | 0.011429 | 0.011396 | 0.011329 |
| 0.011429 | 0.011497 | 0.011228 | 0.011228 | 0.011262 | 0.011262 | 0.011263 |
| 0.011331 | 0.011262 | 0.011262 | 0.011096 | 0.011205 | 0.011165 | 0.011262 |
| 0.011263 | 0.011198 | 0.011245 | 0.011233 | 0.011162 | 0.011197 | 0.011229 |
| 0.011492 | 0.011267 | 0.011232 | 0.011195 | 0.011199 | 0.011329 | 0.011296 |
| 0.011363 | 0.011296 | 0.011296 | 0.011396 | 0.011329 | 0.011631 | 0.011497 |
| 0.011530 | 0.011396 | 0.011262 | 0.011362 | 0.011161 | 0.011396 | 0.011195 |
| 0.011262 | 0.011262 | 0.011228 | 0.011195 | 0.011228 | 0.011195 | 0.011295 |
| 0.011195 | 0.011295 | 0.011295 | 0.011195 | 0.011296 | 0.011396 | 0.011398 |
| 0.011329 | 0.011295 | 0.011195 | 0.011128 | 0.011262 | 0.011195 | 0.011127 |
| 0.011230 | 0.011329 | 0.011127 | 0.011329 | 0.011161 | 0.011262 | 0.011228 |
| 0.011262 | 0.011228 | 0.011195 | 0.011228 | 0.011262 | 0.011127 | 0.011195 |
| 0.011228 | 0.011228 | 0.011295 | 0.011228 | 0.011262 | 0.011295 | 0.011530 |
| 0.011631 | 0.011564 | 0.011631 | 0.011397 | 0.011631 | 0.011262 | 0.011228 |
| 0.011263 | 0.011505 | 0.011335 | 0.011163 | 0.011637 | 0.011129 | 0.011257 |
| 0.011637 | 0.011536 | 0.011429 | 0.011631 | 0.011333 | 0.011496 | 0.011396 |
| 0.011396 | 0.011564 | 0.011415 | 0.011266 | 0.011312 | 0.011295 | 0.011365 |
| 0.011463 | 0.011364 | 0.011500 | 0.011500 | 0.011497 | 0.011564 | 0.011670 |
| 0.011399 | 0.011501 | 0.011500 | 0.011432 | 0.011699 | 0.011161 | 0.011363 |
| 0.011262 | 0.011262 | 0.011161 | 0.011161 | 0.011161 | 0.011228 | 0.011295 |
| 0.011161 | 0.011228 | 0.000000 | 0.011295 | 0.011094 | 0.011228 | 0.011295 |
| 0.011228 | 0.011664 | 0.011564 | 0.011597 | 0.011127 | 0.011228 | 0.011262 |
| 0.011262 | 0.011228 | 0.011295 | 0.011329 | 0.011194 | 0.011194 | 0.011194 |
| 0.011731 | 0.011362 | 0.011362 | 0.011161 | 0.011262 | 0.011362 | 0.011194 |
| 0.011194 | 0.011262 | 0.011228 | 0.011329 | 0.011194 | 0.011329 | 0.011396 |
| 0.011396 | 0.011228 | 0.011228 | 0.011161 | 0.011161 | 0.011329 | 0.011262 |
| 0.011161 | 0.011262 | 0.011127 | 0.011161 | 0.011295 | 0.011430 | 0.011195 |
| 0.011161 | 0.011295 | 0.011228 | 0.011127 | 0.011463 | 0.011127 | 0.011295 |
| 0.011300 | 0.011195 | 0.011496 | 0.011329 | 0.011362 | 0.011228 | 0.011329 |
| 0.011194 | 0.011463 | 0.011127 | 0.011396 | 0.011194 | 0.011194 | 0.011127 |
| 0.011295 | 0.011564 | 0.011262 | 0.011329 | 0.011161 | 0.011564 | 0.011194 |
| 0.011194 | 0.011194 | 0.011228 | 0.011262 | 0.011228 | 0.011329 | 0.011396 |
| 0.011396 | 0.011362 | 0.011262 | 0.011362 | 0.011262 | 0.011194 | 0.011161 |
| 0.011194 | 0.011194 | 0.011262 | 0.011194 | 0.011094 | 0.011329 | 0.011194 |
| 0.011228 | 0.011228 | 0.011362 | 0.011396 | 0.011295 | 0.011161 | 0.011228 |
| 0.011295 | 0.011228 | 0.011329 | 0.011194 | 0.011329 | 0.011429 | 0.011731 |
| 0.011228 | 0.011631 | 0.011233 | 0.017747 | 0.011191 | 0.011366 | 0.011583 |
| 0.011545 | 0.011588 | 0.011270 | 0.011234 | 0.011664 | 0.011612 | 0.011303 |
| 0.011440 | 0.011549 | 0.011138 | 0.011186 | 0.011177 | 0.011307 | 0.011232 |
| 0.011436 | 0.011395 | 0.011357 | 0.011193 | 0.011362 | 0.011396 | 0.011398 |
| 0.011198 | 0.011362 | 0.011362 | 0.011329 | 0.011295 | 0.011295 | 0.011262 |
| 0.011295 | 0.011228 | 0.011262 | 0.011295 | 0.011262 | 0.011195 | 0.011228 |
| 0.011228 | 0.011295 | 0.011195 | 0.011295 | 0.011329 | 0.011362 | 0.011262 |
| 0.011295 | 0.011262 | 0.011597 | 0.011597 | 0.011329 | 0.011363 | 0.011396 |
| 0.011161 | 0.011161 | 0.011195 | 0.011228 | 0.011161 | 0.011396 | 0.011396 |
| 0.011429 | 0.011429 | 0.011362 | 0.011463 | 0.011631 | 0.011464 | 0.011228 |



|          |          |          |          |          |          |          |
|----------|----------|----------|----------|----------|----------|----------|
| 0.011295 | 0.011362 | 0.011329 | 0.011228 | 0.011295 | 0.011262 | 0.011295 |
| 0.011363 | 0.011362 | 0.011396 | 0.011295 | 0.011195 | 0.011463 | 0.011362 |
| 0.011297 | 0.011195 | 0.011295 | 0.011396 | 0.011295 | 0.011430 | 0.011463 |
| 0.011631 | 0.011333 | 0.011496 | 0.011396 | 0.011396 | 0.011564 | 0.011195 |
| 0.011363 | 0.011262 | 0.011228 | 0.011228 | 0.011295 | 0.011195 | 0.011295 |
| 0.011329 | 0.011362 | 0.011262 | 0.011295 | 0.011262 | 0.011597 | 0.011597 |
| 0.011329 | 0.011363 | 0.011429 | 0.011362 | 0.012002 | 0.011417 | 0.011341 |
| 0.011412 | 0.011372 | 0.011482 | 0.011372 | 0.011480 | 0.011405 | 0.011370 |
| 0.011953 | 0.011268 | 0.011403 | 0.011337 | 0.011611 | 0.011468 | 0.011502 |
| 0.011978 | 0.011437 | 0.011533 | 0.011597 | 0.011463 | 0.011463 | 0.011499 |
| 0.011161 | 0.011262 | 0.011463 | 0.011429 | 0.011432 | 0.011429 | 0.011397 |
| 0.011262 | 0.011127 | 0.011161 | 0.011262 | 0.011094 | 0.011228 | 0.011127 |
| 0.011262 | 0.011295 | 0.011194 | 0.011161 | 0.011262 | 0.011194 | 0.011228 |
| 0.011228 | 0.011161 | 0.011228 | 0.011262 | 0.011161 | 0.011295 | 0.011396 |
| 0.011295 | 0.011362 | 0.011295 | 0.011295 | 0.011228 | 0.011631 | 0.011262 |
| 0.011304 | 0.011228 | 0.011463 | 0.011467 | 0.011262 | 0.011329 | 0.011329 |
| 0.011329 | 0.011194 | 0.011228 | 0.011194 | 0.011362 | 0.011362 | 0.011295 |
| 0.011295 | 0.011429 | 0.011597 | 0.011329 | 0.011530 | 0.011530 | 0.011396 |
| 0.011228 | 0.011295 | 0.011329 | 0.011732 | 0.011295 | 0.011262 | 0.011295 |
| 0.011329 | 0.011262 | 0.011262 | 0.011564 | 0.011429 | 0.011530 | 0.011262 |
| 0.011362 | 0.011429 | 0.011295 | 0.011362 | 0.011329 | 0.011194 | 0.011530 |
| 0.011295 | 0.011262 | 0.011262 | 0.011429 | 0.011262 | 0.011362 | 0.011597 |
| 0.011295 | 0.011671 | 0.011664 | 0.011467 | 0.011173 | 0.011366 | 0.011215 |
| 0.011225 | 0.011683 | 0.011201 | 0.011417 | 0.011207 | 0.011366 | 0.011326 |
| 0.011417 | 0.011126 | 0.011283 | 0.011126 | 0.011168 | 0.011328 | 0.011304 |
| 0.011324 | 0.011178 | 0.011342 | 0.011272 | 0.011296 | 0.011429 | 0.011497 |
| 0.011497 | 0.011363 | 0.011466 | 0.011467 | 0.011603 | 0.011625 | 0.011295 |
| 0.011530 | 0.011396 | 0.011262 | 0.011362 | 0.011161 | 0.011396 | 0.011195 |
| 0.011262 | 0.011262 | 0.011228 | 0.011195 | 0.011228 | 0.011195 | 0.011295 |
| 0.011270 | 0.011270 | 0.011266 | 0.011300 | 0.011436 | 0.011333 | 0.011402 |
| 0.011401 | 0.011329 | 0.011134 | 0.011132 | 0.011263 | 0.011433 | 0.011433 |
| 0.011228 | 0.011297 | 0.011531 | 0.011500 | 0.011430 | 0.011464 | 0.011396 |
| 0.011329 | 0.011396 | 0.011396 | 0.011295 | 0.011866 | 0.011463 | 0.011530 |
| 0.011564 | 0.011630 | 0.011265 | 0.011337 | 0.011228 | 0.011429 | 0.011396 |
| 0.011430 | 0.011463 | 0.011463 | 0.011463 | 0.011610 | 0.011597 | 0.011234 |
| 0.011128 | 0.011130 | 0.011230 | 0.011196 | 0.011299 | 0.011135 | 0.011468 |
| 0.011266 | 0.011367 | 0.011108 | 0.011285 | 0.011262 | 0.011334 | 0.011161 |
| 0.011195 | 0.011195 | 0.011195 | 0.011228 | 0.011429 | 0.011396 | 0.011329 |
| 0.011429 | 0.011497 | 0.011228 | 0.011228 | 0.011262 | 0.011262 | 0.011263 |
| 0.011331 | 0.011262 | 0.011262 | 0.011296 | 0.011429 | 0.011497 | 0.011497 |
| 0.011363 | 0.011466 | 0.011467 | 0.011603 | 0.011625 | 0.011295 | 0.011463 |
| 0.011396 | 0.011396 | 0.011229 | 0.011408 | 0.011338 | 0.011367 | 0.011235 |
| 0.011336 | 0.011561 | 0.011357 | 0.011298 | 0.011127 | 0.011329 | 0.011195 |
| 0.011295 | 0.011295 | 0.011195 | 0.011296 | 0.011396 | 0.011398 | 0.011295 |
| 0.011195 | 0.011128 | 0.011262 | 0.011195 | 0.011127 | 0.011230 | 0.011329 |
| 0.011295 | 0.011228 | 0.011262 | 0.011295 | 0.011262 | 0.011195 | 0.011396 |
| 0.011262 | 0.011295 | 0.011295 | 0.011228 | 0.011295 | 0.011530 | 0.011194 |
| 0.011228 | 0.011631 | 0.011228 | 0.011194 | 0.011228 | 0.011597 | 0.011189 |
| 0.011622 | 0.011188 | 0.011211 | 0.011422 | 0.011508 | 0.011419 | 0.011144 |
| 0.011165 | 0.011396 | 0.011496 | 0.011603 | 0.011464 | 0.011601 | 0.011733 |
| 0.011632 | 0.011669 | 0.011631 | 0.011880 | 0.011597 | 0.012472 | 0.011633 |
| 0.012372 | 0.012139 | 0.012273 | 0.012545 | 0.011597 | 0.011295 | 0.011598 |
| 0.012036 | 0.011971 | 0.011564 | 0.011463 | 0.011531 | 0.011531 | 0.011500 |
| 0.011396 | 0.011399 | 0.011463 | 0.011430 | 0.011800 | 0.011866 | 0.011867 |
| 0.011766 | 0.011867 | 0.011970 | 0.011737 | 0.012036 | 0.012042 | 0.012103 |
| 0.012104 | 0.012138 | 0.012084 | 0.012104 | 0.012105 | 0.011329 | 0.011631 |
| 0.011699 | 0.012202 | 0.011704 | 0.011933 | 0.012406 | 0.011468 | 0.011363 |
| 0.011329 | 0.011329 | 0.011799 | 0.011842 | 0.011940 | 0.011664 | 0.011330 |
| S269     | 0.011698 | 0.011698 | 0.011967 | 0.011732 | 0.011732 | 0.011799 |
| 0.011637 | 0.011569 | 0.011799 | 0.011295 | 0.011362 | 0.011329 | 0.011295 |

|          |          |          |          |          |          |          |
|----------|----------|----------|----------|----------|----------|----------|
| 0.011262 | 0.011496 | 0.011228 | 0.011329 | 0.011396 | 0.011362 | 0.011329 |
| 0.011295 | 0.011329 | 0.011362 | 0.011295 | 0.011329 | 0.011329 | 0.011603 |
| 0.011496 | 0.011329 | 0.011228 | 0.011396 | 0.011396 | 0.011362 | 0.011396 |
| 0.011362 | 0.011463 | 0.011362 | 0.011362 | 0.011396 | 0.011362 | 0.011530 |
| 0.011228 | 0.011362 | 0.011396 | 0.011329 | 0.011362 | 0.011463 | 0.011396 |
| 0.011362 | 0.011530 | 0.011430 | 0.011631 | 0.011362 | 0.011631 | 0.011362 |
| 0.011329 | 0.011362 | 0.011497 | 0.011631 | 0.011664 | 0.011362 | 0.011463 |
| 0.011396 | 0.011463 | 0.011362 | 0.011597 | 0.011765 | 0.011362 | 0.011429 |
| 0.011329 | 0.011429 | 0.011396 | 0.011463 | 0.011396 | 0.011396 | 0.011396 |
| 0.011295 | 0.011329 | 0.011295 | 0.011329 | 0.011362 | 0.011397 | 0.011463 |
| 0.011396 | 0.011362 | 0.011429 | 0.011329 | 0.011396 | 0.011295 | 0.011362 |
| 0.011530 | 0.011463 | 0.011698 | 0.011530 | 0.011362 | 0.011597 | 0.011362 |
| 0.011505 | 0.011658 | 0.011551 | 0.011216 | 0.011247 | 0.011391 | 0.011375 |
| 0.012011 | 0.011416 | 0.011266 | 0.011597 | 0.011597 | 0.011329 | 0.011429 |
| 0.011429 | 0.011396 | 0.011463 | 0.011362 | 0.011463 | 0.011396 | 0.011396 |
| 0.011362 | 0.011396 | 0.011664 | 0.011530 | 0.011429 | 0.011396 | 0.011329 |
| 0.011295 | 0.011228 | 0.011295 | 0.011329 | 0.011463 | 0.011430 | 0.011362 |
| 0.011463 | 0.011530 | 0.011329 | 0.011329 | 0.011362 | 0.011362 | 0.011364 |
| 0.011432 | 0.011362 | 0.011362 | 0.011240 | 0.011313 | 0.011271 | 0.011363 |
| 0.011365 | 0.011301 | 0.011318 | 0.011336 | 0.011264 | 0.011300 | 0.011330 |
| 0.011528 | 0.011370 | 0.011336 | 0.011296 | 0.011302 | 0.011430 | 0.011329 |
| 0.011397 | 0.011397 | 0.011396 | 0.011496 | 0.011429 | 0.011799 | 0.011530 |
| 0.011564 | 0.011430 | 0.011362 | 0.011396 | 0.011262 | 0.011429 | 0.011295 |
| 0.011362 | 0.011362 | 0.011329 | 0.011295 | 0.011329 | 0.011295 | 0.011396 |
| 0.011362 | 0.011463 | 0.011396 | 0.011295 | 0.011397 | 0.011497 | 0.011499 |
| 0.011497 | 0.011396 | 0.011295 | 0.011229 | 0.011362 | 0.011295 | 0.011228 |
| 0.011332 | 0.011497 | 0.011295 | 0.011497 | 0.011262 | 0.011362 | 0.011329 |
| 0.011430 | 0.011329 | 0.011362 | 0.011329 | 0.011362 | 0.011228 | 0.011362 |
| 0.011396 | 0.011329 | 0.011396 | 0.011329 | 0.011362 | 0.011396 | 0.011631 |
| 0.011665 | 0.011597 | 0.011665 | 0.011498 | 0.011665 | 0.011362 | 0.011329 |
| 0.011297 | 0.011545 | 0.011380 | 0.011266 | 0.011671 | 0.011231 | 0.011375 |
| 0.011671 | 0.011570 | 0.011530 | 0.011732 | 0.011436 | 0.011597 | 0.011564 |
| 0.011496 | 0.011664 | 0.011522 | 0.011349 | 0.011437 | 0.011396 | 0.011466 |
| 0.011564 | 0.011465 | 0.011601 | 0.011669 | 0.011597 | 0.011665 | 0.011772 |
| 0.011500 | 0.011671 | 0.011602 | 0.011534 | 0.011800 | 0.011262 | 0.011465 |
| 0.011429 | 0.011362 | 0.011262 | 0.011262 | 0.011329 | 0.011329 | 0.011396 |
| 0.011329 | 0.011396 | 0.011295 | 0.000000 | 0.011329 | 0.011329 | 0.011396 |
| 0.011329 | 0.011698 | 0.011597 | 0.011631 | 0.011228 | 0.011329 | 0.011362 |
| 0.011362 | 0.011329 | 0.011396 | 0.011362 | 0.011295 | 0.011295 | 0.011295 |
| 0.011765 | 0.011396 | 0.011463 | 0.011262 | 0.011362 | 0.011530 | 0.011295 |
| 0.011295 | 0.011362 | 0.011329 | 0.011497 | 0.011295 | 0.011429 | 0.011564 |
| 0.011496 | 0.011329 | 0.011329 | 0.011262 | 0.011262 | 0.011429 | 0.011362 |
| 0.011262 | 0.011362 | 0.011228 | 0.011262 | 0.011396 | 0.011463 | 0.011295 |
| 0.011262 | 0.011396 | 0.011329 | 0.011228 | 0.011496 | 0.011228 | 0.011396 |
| 0.011471 | 0.011295 | 0.011530 | 0.011430 | 0.011329 | 0.011329 | 0.011429 |
| 0.011295 | 0.011631 | 0.011228 | 0.011429 | 0.011228 | 0.011228 | 0.011228 |
| 0.011463 | 0.011598 | 0.011362 | 0.011429 | 0.011262 | 0.011597 | 0.011228 |
| 0.011295 | 0.011295 | 0.011329 | 0.011429 | 0.011329 | 0.011429 | 0.011496 |
| 0.011497 | 0.011463 | 0.011362 | 0.011463 | 0.011429 | 0.011295 | 0.011262 |
| 0.011295 | 0.011295 | 0.011362 | 0.011228 | 0.011262 | 0.011429 | 0.011295 |
| 0.011262 | 0.011329 | 0.011463 | 0.011429 | 0.011396 | 0.011329 | 0.011329 |
| 0.011396 | 0.011329 | 0.011429 | 0.011295 | 0.011429 | 0.011530 | 0.011765 |
| 0.011329 | 0.011664 | 0.011336 | 0.017823 | 0.011322 | 0.011366 | 0.011618 |
| 0.011579 | 0.011623 | 0.011427 | 0.011350 | 0.011609 | 0.011647 | 0.011303 |
| 0.011440 | 0.011426 | 0.011216 | 0.011353 | 0.011216 | 0.011208 | 0.011275 |
| 0.011436 | 0.011395 | 0.011394 | 0.011259 | 0.011463 | 0.011497 | 0.011500 |
| 0.011301 | 0.011463 | 0.011463 | 0.011362 | 0.011396 | 0.011396 | 0.011362 |
| 0.011396 | 0.011329 | 0.011362 | 0.011396 | 0.011362 | 0.011295 | 0.011329 |
| 0.011329 | 0.011396 | 0.011295 | 0.011396 | 0.011430 | 0.011463 | 0.011362 |
| 0.011329 | 0.011295 | 0.011631 | 0.011631 | 0.011430 | 0.011464 | 0.011497 |

|          |          |          |          |          |          |          |
|----------|----------|----------|----------|----------|----------|----------|
| 0.011262 | 0.011262 | 0.011295 | 0.011396 | 0.011262 | 0.011497 | 0.011497 |
| 0.011530 | 0.011530 | 0.011463 | 0.011564 | 0.011665 | 0.011565 | 0.011396 |
| 0.011396 | 0.011463 | 0.011497 | 0.011329 | 0.011396 | 0.011362 | 0.011396 |
| 0.011463 | 0.011463 | 0.011497 | 0.011463 | 0.011363 | 0.011564 | 0.011530 |
| 0.011399 | 0.011295 | 0.011396 | 0.011497 | 0.011396 | 0.011463 | 0.011564 |
| 0.011732 | 0.011436 | 0.011597 | 0.011564 | 0.011496 | 0.011664 | 0.011295 |
| 0.011464 | 0.011363 | 0.011329 | 0.011329 | 0.011396 | 0.011295 | 0.011396 |
| 0.011430 | 0.011463 | 0.011362 | 0.011329 | 0.011295 | 0.011631 | 0.011631 |
| 0.011430 | 0.011464 | 0.011530 | 0.011463 | 0.012036 | 0.011525 | 0.011447 |
| 0.011517 | 0.011476 | 0.011587 | 0.011476 | 0.011585 | 0.011508 | 0.011474 |
| 0.011987 | 0.011372 | 0.011505 | 0.011441 | 0.011714 | 0.011570 | 0.011673 |
| 0.012012 | 0.011475 | 0.011635 | 0.011698 | 0.011564 | 0.011497 | 0.011601 |
| 0.011262 | 0.011429 | 0.011564 | 0.011530 | 0.011533 | 0.011463 | 0.011431 |
| 0.011362 | 0.011295 | 0.011329 | 0.011362 | 0.011262 | 0.011329 | 0.011228 |
| 0.011228 | 0.011262 | 0.011295 | 0.011262 | 0.011362 | 0.011295 | 0.011329 |
| 0.011329 | 0.011262 | 0.011329 | 0.011362 | 0.011262 | 0.011463 | 0.011496 |
| 0.011396 | 0.011329 | 0.011396 | 0.011396 | 0.011329 | 0.011664 | 0.011362 |
| 0.011338 | 0.011329 | 0.011497 | 0.011501 | 0.011430 | 0.011429 | 0.011429 |
| 0.011429 | 0.011362 | 0.011329 | 0.011362 | 0.011463 | 0.011463 | 0.011396 |
| 0.011396 | 0.011530 | 0.011631 | 0.011429 | 0.011631 | 0.011631 | 0.011496 |
| 0.011329 | 0.011396 | 0.011429 | 0.011765 | 0.011396 | 0.011430 | 0.011396 |
| 0.011429 | 0.011295 | 0.011295 | 0.011597 | 0.011597 | 0.011564 | 0.011362 |
| 0.011463 | 0.011530 | 0.011396 | 0.011463 | 0.011429 | 0.011295 | 0.011564 |
| 0.011396 | 0.011362 | 0.011295 | 0.011530 | 0.011362 | 0.011463 | 0.011698 |
| 0.011396 | 0.011705 | 0.011698 | 0.011467 | 0.011229 | 0.011400 | 0.011215 |
| 0.011170 | 0.011683 | 0.011306 | 0.011373 | 0.011255 | 0.011417 | 0.011326 |
| 0.011417 | 0.011258 | 0.011394 | 0.011258 | 0.011276 | 0.011462 | 0.011425 |
| 0.011437 | 0.011336 | 0.011377 | 0.011377 | 0.011397 | 0.011463 | 0.011530 |
| 0.011530 | 0.011396 | 0.011500 | 0.011501 | 0.011636 | 0.011661 | 0.011396 |
| 0.011564 | 0.011430 | 0.011362 | 0.011396 | 0.011262 | 0.011429 | 0.011295 |
| 0.011362 | 0.011362 | 0.011329 | 0.011295 | 0.011329 | 0.011295 | 0.011396 |
| 0.011375 | 0.011375 | 0.011300 | 0.011403 | 0.011539 | 0.011504 | 0.011504 |
| 0.011503 | 0.011430 | 0.011245 | 0.011240 | 0.011365 | 0.011535 | 0.011535 |
| 0.011329 | 0.011399 | 0.011632 | 0.011601 | 0.011531 | 0.011565 | 0.011496 |
| 0.011429 | 0.011496 | 0.011496 | 0.011396 | 0.011900 | 0.011564 | 0.011631 |
| 0.011665 | 0.011665 | 0.011367 | 0.011441 | 0.011329 | 0.011530 | 0.011496 |
| 0.011531 | 0.011564 | 0.011564 | 0.011564 | 0.011729 | 0.011698 | 0.011338 |
| 0.011229 | 0.011233 | 0.011333 | 0.011298 | 0.011333 | 0.011247 | 0.011502 |
| 0.011369 | 0.011455 | 0.011298 | 0.011397 | 0.011363 | 0.011437 | 0.011329 |
| 0.011295 | 0.011228 | 0.011295 | 0.011329 | 0.011463 | 0.011430 | 0.011362 |
| 0.011463 | 0.011530 | 0.011329 | 0.011329 | 0.011362 | 0.011362 | 0.011364 |
| 0.011432 | 0.011362 | 0.011362 | 0.011397 | 0.011463 | 0.011530 | 0.011530 |
| 0.011396 | 0.011500 | 0.011501 | 0.011636 | 0.011661 | 0.011396 | 0.011564 |
| 0.011496 | 0.011496 | 0.011331 | 0.011513 | 0.011442 | 0.011469 | 0.011340 |
| 0.011508 | 0.011607 | 0.011483 | 0.011400 | 0.011295 | 0.011497 | 0.011362 |
| 0.011463 | 0.011396 | 0.011295 | 0.011397 | 0.011497 | 0.011499 | 0.011396 |
| 0.011295 | 0.011229 | 0.011362 | 0.011295 | 0.011228 | 0.011332 | 0.011497 |
| 0.011396 | 0.011329 | 0.011362 | 0.011396 | 0.011362 | 0.011295 | 0.011430 |
| 0.011362 | 0.011396 | 0.011396 | 0.011329 | 0.011396 | 0.011631 | 0.011228 |
| 0.011329 | 0.011664 | 0.011329 | 0.011362 | 0.011329 | 0.011631 | 0.011274 |
| 0.011679 | 0.011273 | 0.011211 | 0.011422 | 0.011508 | 0.011419 | 0.011227 |
| 0.011165 | 0.011429 | 0.011530 | 0.011637 | 0.011498 | 0.011635 | 0.011766 |
| 0.011666 | 0.011703 | 0.011664 | 0.011915 | 0.011631 | 0.012505 | 0.011667 |
| 0.012406 | 0.012173 | 0.012307 | 0.012579 | 0.011631 | 0.011329 | 0.011631 |
| 0.012070 | 0.012005 | 0.011597 | 0.011497 | 0.011565 | 0.011565 | 0.011534 |
| 0.011429 | 0.011433 | 0.011496 | 0.011464 | 0.011834 | 0.011900 | 0.011901 |
| 0.011800 | 0.011901 | 0.012004 | 0.011771 | 0.012070 | 0.012076 | 0.012137 |
| 0.012138 | 0.012172 | 0.012118 | 0.012138 | 0.012139 | 0.011429 | 0.011665 |
| 0.011733 | 0.012236 | 0.011738 | 0.011967 | 0.012440 | 0.011502 | 0.011396 |
| 0.011362 | 0.011362 | 0.011833 | 0.011883 | 0.011975 | 0.011698 | 0.011363 |

|          |          |          |          |          |          |          |
|----------|----------|----------|----------|----------|----------|----------|
| S270     | 0.011631 | 0.011631 | 0.011967 | 0.011732 | 0.011732 | 0.011799 |
| 0.011637 | 0.011569 | 0.011799 | 0.011228 | 0.011295 | 0.011262 | 0.011228 |
| 0.011262 | 0.011429 | 0.011228 | 0.011262 | 0.011329 | 0.011295 | 0.011262 |
| 0.011228 | 0.011262 | 0.011362 | 0.011228 | 0.011195 | 0.011262 | 0.011603 |
| 0.011463 | 0.011262 | 0.011161 | 0.011396 | 0.011262 | 0.011295 | 0.011262 |
| 0.011295 | 0.011329 | 0.011295 | 0.011295 | 0.011329 | 0.011295 | 0.011463 |
| 0.011228 | 0.011295 | 0.011329 | 0.011262 | 0.011362 | 0.011396 | 0.011329 |
| 0.011295 | 0.011463 | 0.011362 | 0.011631 | 0.011295 | 0.011496 | 0.011295 |
| 0.011262 | 0.011362 | 0.011429 | 0.011496 | 0.011664 | 0.011362 | 0.011463 |
| 0.011262 | 0.011329 | 0.011295 | 0.011463 | 0.011765 | 0.011295 | 0.011362 |
| 0.011262 | 0.011362 | 0.011329 | 0.011396 | 0.011329 | 0.011329 | 0.011329 |
| 0.011228 | 0.011262 | 0.011228 | 0.011329 | 0.011295 | 0.011329 | 0.011396 |
| 0.011329 | 0.011295 | 0.011295 | 0.011262 | 0.011396 | 0.011161 | 0.011295 |
| 0.011463 | 0.011396 | 0.011631 | 0.011463 | 0.011295 | 0.011396 | 0.011295 |
| 0.011468 | 0.011695 | 0.011513 | 0.011216 | 0.011210 | 0.011318 | 0.011415 |
| 0.012048 | 0.011416 | 0.011225 | 0.011530 | 0.011530 | 0.011329 | 0.011429 |
| 0.011362 | 0.011329 | 0.011396 | 0.011295 | 0.011396 | 0.011262 | 0.011329 |
| 0.011295 | 0.011396 | 0.011597 | 0.011463 | 0.011362 | 0.011329 | 0.011195 |
| 0.011228 | 0.011228 | 0.011228 | 0.011262 | 0.011463 | 0.011430 | 0.011362 |
| 0.011463 | 0.011530 | 0.011262 | 0.011262 | 0.011295 | 0.011295 | 0.011297 |
| 0.011364 | 0.011295 | 0.011295 | 0.011132 | 0.011241 | 0.011200 | 0.011296 |
| 0.011297 | 0.011232 | 0.011282 | 0.011267 | 0.011196 | 0.011232 | 0.011263 |
| 0.011528 | 0.011302 | 0.011267 | 0.011228 | 0.011233 | 0.011363 | 0.011329 |
| 0.011397 | 0.011330 | 0.011329 | 0.011429 | 0.011362 | 0.011664 | 0.011530 |
| 0.011496 | 0.011430 | 0.011295 | 0.011396 | 0.011195 | 0.011362 | 0.011228 |
| 0.011295 | 0.011295 | 0.011262 | 0.011228 | 0.011262 | 0.011228 | 0.011329 |
| 0.011228 | 0.011329 | 0.011329 | 0.011228 | 0.011330 | 0.011430 | 0.011432 |
| 0.011362 | 0.011329 | 0.011228 | 0.011161 | 0.011295 | 0.011228 | 0.011161 |
| 0.011264 | 0.011362 | 0.011161 | 0.011362 | 0.011195 | 0.011295 | 0.011262 |
| 0.011295 | 0.011262 | 0.011228 | 0.011262 | 0.011295 | 0.011161 | 0.011228 |
| 0.011262 | 0.011262 | 0.011329 | 0.011262 | 0.011295 | 0.011329 | 0.011564 |
| 0.011664 | 0.011597 | 0.011665 | 0.011431 | 0.011665 | 0.011295 | 0.011262 |
| 0.011297 | 0.011505 | 0.011335 | 0.011197 | 0.011671 | 0.011163 | 0.011257 |
| 0.011671 | 0.011570 | 0.011463 | 0.011664 | 0.011368 | 0.011530 | 0.011429 |
| 0.011429 | 0.011597 | 0.011451 | 0.011307 | 0.011354 | 0.011329 | 0.011398 |
| 0.011497 | 0.011397 | 0.011533 | 0.011534 | 0.011530 | 0.011597 | 0.011704 |
| 0.011432 | 0.011535 | 0.011534 | 0.011466 | 0.011733 | 0.011194 | 0.011397 |
| 0.011295 | 0.011295 | 0.011194 | 0.011194 | 0.011194 | 0.011262 | 0.011329 |
| 0.011194 | 0.011262 | 0.011094 | 0.011329 | 0.000000 | 0.011262 | 0.011329 |
| 0.011262 | 0.011698 | 0.011597 | 0.011631 | 0.011161 | 0.011262 | 0.011295 |
| 0.011295 | 0.011262 | 0.011329 | 0.011362 | 0.011228 | 0.011228 | 0.011228 |
| 0.011765 | 0.011396 | 0.011396 | 0.011194 | 0.011295 | 0.011396 | 0.011228 |
| 0.011228 | 0.011295 | 0.011262 | 0.011362 | 0.011228 | 0.011362 | 0.011429 |
| 0.011429 | 0.011262 | 0.011262 | 0.011194 | 0.011194 | 0.011362 | 0.011295 |
| 0.011194 | 0.011295 | 0.011161 | 0.011195 | 0.011329 | 0.011463 | 0.011228 |
| 0.011195 | 0.011329 | 0.011262 | 0.011161 | 0.011496 | 0.011161 | 0.011329 |
| 0.011334 | 0.011228 | 0.011530 | 0.011362 | 0.011396 | 0.011262 | 0.011362 |
| 0.011228 | 0.011496 | 0.011161 | 0.011429 | 0.011228 | 0.011228 | 0.011161 |
| 0.011329 | 0.011598 | 0.011295 | 0.011362 | 0.011194 | 0.011597 | 0.011228 |
| 0.011228 | 0.011228 | 0.011262 | 0.011295 | 0.011262 | 0.011362 | 0.011429 |
| 0.011429 | 0.011396 | 0.011295 | 0.011396 | 0.011295 | 0.011228 | 0.011194 |
| 0.011228 | 0.011228 | 0.011295 | 0.011228 | 0.011127 | 0.011362 | 0.011228 |
| 0.011262 | 0.011262 | 0.011396 | 0.011429 | 0.011329 | 0.011194 | 0.011262 |
| 0.011329 | 0.011262 | 0.011362 | 0.011228 | 0.011362 | 0.011463 | 0.011765 |
| 0.011262 | 0.011664 | 0.011267 | 0.011785 | 0.011257 | 0.011427 | 0.011618 |
| 0.011579 | 0.011623 | 0.011322 | 0.011292 | 0.011719 | 0.011647 | 0.011364 |
| 0.011487 | 0.011610 | 0.011177 | 0.011228 | 0.011216 | 0.011356 | 0.011275 |
| 0.011482 | 0.011358 | 0.011394 | 0.011193 | 0.011396 | 0.011429 | 0.011432 |
| 0.011232 | 0.011396 | 0.011396 | 0.011362 | 0.011329 | 0.011329 | 0.011295 |
| 0.011329 | 0.011262 | 0.011295 | 0.011329 | 0.011295 | 0.011228 | 0.011262 |

|          |          |          |          |          |          |          |
|----------|----------|----------|----------|----------|----------|----------|
| 0.011262 | 0.011329 | 0.011228 | 0.011329 | 0.011362 | 0.011396 | 0.011295 |
| 0.011329 | 0.011295 | 0.011631 | 0.011631 | 0.011362 | 0.011396 | 0.011430 |
| 0.011195 | 0.011195 | 0.011228 | 0.011262 | 0.011195 | 0.011430 | 0.011430 |
| 0.011463 | 0.011463 | 0.011396 | 0.011497 | 0.011665 | 0.011498 | 0.011262 |
| 0.011329 | 0.011396 | 0.011362 | 0.011262 | 0.011329 | 0.011295 | 0.011329 |
| 0.011396 | 0.011396 | 0.011429 | 0.011329 | 0.011229 | 0.011497 | 0.011396 |
| 0.011331 | 0.011228 | 0.011329 | 0.011430 | 0.011329 | 0.011463 | 0.011496 |
| 0.011664 | 0.011368 | 0.011530 | 0.011429 | 0.011429 | 0.011597 | 0.011228 |
| 0.011397 | 0.011296 | 0.011262 | 0.011262 | 0.011329 | 0.011228 | 0.011329 |
| 0.011362 | 0.011396 | 0.011295 | 0.011329 | 0.011295 | 0.011631 | 0.011631 |
| 0.011362 | 0.011396 | 0.011463 | 0.011396 | 0.012035 | 0.011453 | 0.011377 |
| 0.011447 | 0.011407 | 0.011517 | 0.011406 | 0.011515 | 0.011439 | 0.011405 |
| 0.011987 | 0.011302 | 0.011437 | 0.011371 | 0.011645 | 0.011502 | 0.011536 |
| 0.012012 | 0.011475 | 0.011567 | 0.011631 | 0.011496 | 0.011497 | 0.011533 |
| 0.011194 | 0.011295 | 0.011496 | 0.011463 | 0.011466 | 0.011396 | 0.011431 |
| 0.011295 | 0.011161 | 0.011194 | 0.011295 | 0.011127 | 0.011262 | 0.011161 |
| 0.011295 | 0.011329 | 0.011228 | 0.011194 | 0.011295 | 0.011228 | 0.011262 |
| 0.011262 | 0.011194 | 0.011262 | 0.011295 | 0.011194 | 0.011329 | 0.011429 |
| 0.011329 | 0.011396 | 0.011329 | 0.011329 | 0.011262 | 0.011664 | 0.011295 |
| 0.011338 | 0.011262 | 0.011463 | 0.011467 | 0.011295 | 0.011362 | 0.011362 |
| 0.011362 | 0.011228 | 0.011262 | 0.011228 | 0.011396 | 0.011396 | 0.011329 |
| 0.011329 | 0.011463 | 0.011631 | 0.011362 | 0.011564 | 0.011564 | 0.011429 |
| 0.011262 | 0.011329 | 0.011362 | 0.011765 | 0.011329 | 0.011295 | 0.011329 |
| 0.011362 | 0.011295 | 0.011295 | 0.011597 | 0.011463 | 0.011564 | 0.011295 |
| 0.011396 | 0.011463 | 0.011329 | 0.011396 | 0.011362 | 0.011228 | 0.011564 |
| 0.011329 | 0.011295 | 0.011295 | 0.011463 | 0.011295 | 0.011396 | 0.011631 |
| 0.011329 | 0.011705 | 0.011698 | 0.011426 | 0.011229 | 0.011400 | 0.011215 |
| 0.011280 | 0.011722 | 0.011236 | 0.011462 | 0.011255 | 0.011417 | 0.011379 |
| 0.011366 | 0.011192 | 0.011283 | 0.011126 | 0.011222 | 0.011395 | 0.011344 |
| 0.011362 | 0.011218 | 0.011377 | 0.011307 | 0.011330 | 0.011396 | 0.011463 |
| 0.011530 | 0.011396 | 0.011500 | 0.011501 | 0.011636 | 0.011661 | 0.011329 |
| 0.011496 | 0.011430 | 0.011295 | 0.011396 | 0.011195 | 0.011362 | 0.011228 |
| 0.011295 | 0.011295 | 0.011262 | 0.011228 | 0.011262 | 0.011228 | 0.011329 |
| 0.011305 | 0.011305 | 0.011300 | 0.011334 | 0.011471 | 0.011368 | 0.011436 |
| 0.011435 | 0.011363 | 0.011171 | 0.011168 | 0.011297 | 0.011467 | 0.011467 |
| 0.011262 | 0.011331 | 0.011565 | 0.011533 | 0.011464 | 0.011498 | 0.011429 |
| 0.011362 | 0.011429 | 0.011429 | 0.011329 | 0.011900 | 0.011497 | 0.011564 |
| 0.011597 | 0.011665 | 0.011299 | 0.011372 | 0.011262 | 0.011463 | 0.011429 |
| 0.011464 | 0.011496 | 0.011496 | 0.011496 | 0.011610 | 0.011631 | 0.011268 |
| 0.011162 | 0.011164 | 0.011264 | 0.011230 | 0.011333 | 0.011172 | 0.011502 |
| 0.011300 | 0.011411 | 0.011156 | 0.011322 | 0.011296 | 0.011368 | 0.011195 |
| 0.011228 | 0.011228 | 0.011228 | 0.011262 | 0.011463 | 0.011430 | 0.011362 |
| 0.011463 | 0.011530 | 0.011262 | 0.011262 | 0.011295 | 0.011295 | 0.011297 |
| 0.011364 | 0.011295 | 0.011295 | 0.011330 | 0.011396 | 0.011463 | 0.011530 |
| 0.011396 | 0.011500 | 0.011501 | 0.011636 | 0.011661 | 0.011329 | 0.011496 |
| 0.011429 | 0.011429 | 0.011263 | 0.011443 | 0.011373 | 0.011367 | 0.011270 |
| 0.011370 | 0.011607 | 0.011357 | 0.011332 | 0.011161 | 0.011362 | 0.011228 |
| 0.011329 | 0.011329 | 0.011228 | 0.011330 | 0.011430 | 0.011432 | 0.011329 |
| 0.011228 | 0.011161 | 0.011295 | 0.011228 | 0.011161 | 0.011264 | 0.011362 |
| 0.011329 | 0.011262 | 0.011295 | 0.011329 | 0.011295 | 0.011228 | 0.011430 |
| 0.011295 | 0.011329 | 0.011329 | 0.011262 | 0.011329 | 0.011564 | 0.011228 |
| 0.011262 | 0.011664 | 0.011262 | 0.011228 | 0.011262 | 0.011631 | 0.011232 |
| 0.011678 | 0.011230 | 0.011261 | 0.011382 | 0.011467 | 0.011383 | 0.011186 |
| 0.011218 | 0.011429 | 0.011530 | 0.011637 | 0.011498 | 0.011635 | 0.011766 |
| 0.011666 | 0.011703 | 0.011664 | 0.011914 | 0.011631 | 0.012505 | 0.011667 |
| 0.012406 | 0.012173 | 0.012307 | 0.012579 | 0.011631 | 0.011329 | 0.011631 |
| 0.012070 | 0.012005 | 0.011597 | 0.011497 | 0.011565 | 0.011565 | 0.011534 |
| 0.011429 | 0.011433 | 0.011496 | 0.011464 | 0.011834 | 0.011900 | 0.011901 |
| 0.011800 | 0.011901 | 0.012004 | 0.011770 | 0.012070 | 0.012076 | 0.012137 |
| 0.012138 | 0.012172 | 0.012118 | 0.012138 | 0.012139 | 0.011362 | 0.011665 |

|          |          |          |          |          |          |          |
|----------|----------|----------|----------|----------|----------|----------|
| 0.011733 | 0.012236 | 0.011738 | 0.011967 | 0.012440 | 0.011502 | 0.011396 |
| 0.011362 | 0.011362 | 0.011833 | 0.011883 | 0.011975 | 0.011698 | 0.011363 |
| S271     | 0.011631 | 0.011631 | 0.011967 | 0.011731 | 0.011731 | 0.011799 |
| 0.011603 | 0.011535 | 0.011799 | 0.011228 | 0.011295 | 0.011262 | 0.011228 |
| 0.011262 | 0.011429 | 0.011228 | 0.011262 | 0.011329 | 0.011295 | 0.011194 |
| 0.011228 | 0.011262 | 0.011362 | 0.011228 | 0.011262 | 0.011262 | 0.011569 |
| 0.011496 | 0.011262 | 0.011161 | 0.011396 | 0.011329 | 0.011295 | 0.011329 |
| 0.011295 | 0.011396 | 0.011295 | 0.011295 | 0.011329 | 0.011295 | 0.011463 |
| 0.011228 | 0.011295 | 0.011329 | 0.011262 | 0.011362 | 0.011396 | 0.011329 |
| 0.011295 | 0.011463 | 0.011362 | 0.011631 | 0.011295 | 0.011564 | 0.011295 |
| 0.011262 | 0.011362 | 0.011429 | 0.011564 | 0.011664 | 0.011362 | 0.011463 |
| 0.011329 | 0.011396 | 0.011295 | 0.011530 | 0.011765 | 0.011295 | 0.011362 |
| 0.011262 | 0.011362 | 0.011329 | 0.011396 | 0.011329 | 0.011329 | 0.011329 |
| 0.011228 | 0.011262 | 0.011228 | 0.011329 | 0.011295 | 0.011329 | 0.011396 |
| 0.011329 | 0.011295 | 0.011362 | 0.011262 | 0.011396 | 0.011228 | 0.011295 |
| 0.011463 | 0.011396 | 0.011631 | 0.011463 | 0.011295 | 0.011530 | 0.011295 |
| 0.011468 | 0.011695 | 0.011513 | 0.011216 | 0.011209 | 0.011318 | 0.011414 |
| 0.012048 | 0.011467 | 0.011143 | 0.011530 | 0.011530 | 0.011329 | 0.011429 |
| 0.011362 | 0.011329 | 0.011396 | 0.011295 | 0.011396 | 0.011329 | 0.011329 |
| 0.011295 | 0.011396 | 0.011597 | 0.011463 | 0.011362 | 0.011329 | 0.011262 |
| 0.011228 | 0.011228 | 0.011295 | 0.011262 | 0.011463 | 0.011429 | 0.011362 |
| 0.011463 | 0.011530 | 0.011262 | 0.011262 | 0.011295 | 0.011295 | 0.011297 |
| 0.011364 | 0.011295 | 0.011295 | 0.011168 | 0.011241 | 0.011200 | 0.011296 |
| 0.011297 | 0.011232 | 0.011282 | 0.011267 | 0.011196 | 0.011231 | 0.011263 |
| 0.011528 | 0.011301 | 0.011336 | 0.011161 | 0.011233 | 0.011363 | 0.011329 |
| 0.011396 | 0.011330 | 0.011329 | 0.011429 | 0.011362 | 0.011732 | 0.011530 |
| 0.011564 | 0.011430 | 0.011295 | 0.011396 | 0.011195 | 0.011429 | 0.011228 |
| 0.011295 | 0.011295 | 0.011262 | 0.011228 | 0.011262 | 0.011228 | 0.011329 |
| 0.011295 | 0.011396 | 0.011329 | 0.011228 | 0.011330 | 0.011430 | 0.011432 |
| 0.011430 | 0.011329 | 0.011228 | 0.011161 | 0.011295 | 0.011228 | 0.011161 |
| 0.011196 | 0.011430 | 0.011228 | 0.011430 | 0.011195 | 0.011295 | 0.011262 |
| 0.011362 | 0.011262 | 0.011295 | 0.011262 | 0.011295 | 0.011161 | 0.011295 |
| 0.011329 | 0.011195 | 0.011329 | 0.011262 | 0.011295 | 0.011329 | 0.011564 |
| 0.011664 | 0.011597 | 0.011665 | 0.011431 | 0.011665 | 0.011295 | 0.011195 |
| 0.011297 | 0.011586 | 0.011426 | 0.011197 | 0.011671 | 0.011163 | 0.011296 |
| 0.011637 | 0.011570 | 0.011463 | 0.011664 | 0.011367 | 0.011530 | 0.011497 |
| 0.011429 | 0.011597 | 0.011451 | 0.011307 | 0.011312 | 0.011262 | 0.011398 |
| 0.011497 | 0.011397 | 0.011533 | 0.011601 | 0.011530 | 0.011597 | 0.011704 |
| 0.011432 | 0.011603 | 0.011534 | 0.011466 | 0.011733 | 0.011194 | 0.011397 |
| 0.011362 | 0.011295 | 0.011194 | 0.011194 | 0.011262 | 0.011262 | 0.011329 |
| 0.011262 | 0.011329 | 0.011228 | 0.011329 | 0.011262 | 0.000000 | 0.011329 |
| 0.011262 | 0.011698 | 0.011597 | 0.011631 | 0.011161 | 0.011262 | 0.011295 |
| 0.011295 | 0.011262 | 0.011329 | 0.011362 | 0.011228 | 0.011228 | 0.011228 |
| 0.011765 | 0.011396 | 0.011396 | 0.011194 | 0.011295 | 0.011463 | 0.011228 |
| 0.011228 | 0.011295 | 0.011262 | 0.011429 | 0.011228 | 0.011362 | 0.011496 |
| 0.011429 | 0.011262 | 0.011194 | 0.011194 | 0.011194 | 0.011362 | 0.011295 |
| 0.011194 | 0.011295 | 0.011161 | 0.011194 | 0.011329 | 0.011463 | 0.011228 |
| 0.011195 | 0.011329 | 0.011262 | 0.011161 | 0.011496 | 0.011161 | 0.011329 |
| 0.011402 | 0.011228 | 0.011530 | 0.011362 | 0.011396 | 0.011262 | 0.011362 |
| 0.011228 | 0.011564 | 0.011161 | 0.011429 | 0.011228 | 0.011228 | 0.011161 |
| 0.011396 | 0.011597 | 0.011295 | 0.011362 | 0.011194 | 0.011597 | 0.011228 |
| 0.011228 | 0.011161 | 0.011262 | 0.011362 | 0.011262 | 0.011362 | 0.011429 |
| 0.011429 | 0.011396 | 0.011295 | 0.011396 | 0.011362 | 0.011228 | 0.011194 |
| 0.011228 | 0.011228 | 0.011295 | 0.011228 | 0.011194 | 0.011362 | 0.011228 |
| 0.011262 | 0.011262 | 0.011396 | 0.011429 | 0.011329 | 0.011262 | 0.011262 |
| 0.011329 | 0.011262 | 0.011362 | 0.011228 | 0.011362 | 0.011463 | 0.011765 |
| 0.011262 | 0.011664 | 0.011267 | 0.017785 | 0.011322 | 0.011427 | 0.011618 |
| 0.011579 | 0.011623 | 0.011322 | 0.011292 | 0.011774 | 0.011647 | 0.011425 |
| 0.011534 | 0.011548 | 0.011177 | 0.011228 | 0.011255 | 0.011356 | 0.011275 |
| 0.011529 | 0.011433 | 0.011431 | 0.011259 | 0.011396 | 0.011429 | 0.011432 |

|          |          |          |          |          |          |          |
|----------|----------|----------|----------|----------|----------|----------|
| 0.011301 | 0.011396 | 0.011396 | 0.011362 | 0.011329 | 0.011329 | 0.011295 |
| 0.011329 | 0.011262 | 0.011295 | 0.011329 | 0.011295 | 0.011228 | 0.011262 |
| 0.011262 | 0.011329 | 0.011228 | 0.011329 | 0.011362 | 0.011396 | 0.011295 |
| 0.011329 | 0.011295 | 0.011631 | 0.011631 | 0.011362 | 0.011396 | 0.011430 |
| 0.011195 | 0.011195 | 0.011228 | 0.011329 | 0.011195 | 0.011362 | 0.011362 |
| 0.011463 | 0.011463 | 0.011396 | 0.011497 | 0.011665 | 0.011498 | 0.011329 |
| 0.011329 | 0.011396 | 0.011429 | 0.011262 | 0.011329 | 0.011295 | 0.011329 |
| 0.011396 | 0.011396 | 0.011429 | 0.011396 | 0.011296 | 0.011497 | 0.011463 |
| 0.011331 | 0.011228 | 0.011329 | 0.011430 | 0.011329 | 0.011463 | 0.011496 |
| 0.011664 | 0.011367 | 0.011530 | 0.011497 | 0.011429 | 0.011597 | 0.011228 |
| 0.011397 | 0.011295 | 0.011262 | 0.011262 | 0.011329 | 0.011228 | 0.011329 |
| 0.011362 | 0.011396 | 0.011295 | 0.011329 | 0.011295 | 0.011631 | 0.011631 |
| 0.011362 | 0.011396 | 0.011463 | 0.011396 | 0.012035 | 0.011453 | 0.011377 |
| 0.011447 | 0.011407 | 0.011517 | 0.011406 | 0.011515 | 0.011439 | 0.011405 |
| 0.011987 | 0.011302 | 0.011437 | 0.011371 | 0.011645 | 0.011502 | 0.011604 |
| 0.012012 | 0.011437 | 0.011567 | 0.011631 | 0.011496 | 0.011496 | 0.011533 |
| 0.011194 | 0.011362 | 0.011496 | 0.011463 | 0.011466 | 0.011463 | 0.011431 |
| 0.011295 | 0.011161 | 0.011262 | 0.011295 | 0.011194 | 0.011262 | 0.011161 |
| 0.011295 | 0.011329 | 0.011228 | 0.011194 | 0.011295 | 0.011228 | 0.011262 |
| 0.011262 | 0.011194 | 0.011262 | 0.011295 | 0.011194 | 0.011396 | 0.011429 |
| 0.011329 | 0.011396 | 0.011329 | 0.011329 | 0.011262 | 0.011664 | 0.011295 |
| 0.011338 | 0.011262 | 0.011497 | 0.011501 | 0.011362 | 0.011362 | 0.011362 |
| 0.011362 | 0.011295 | 0.011262 | 0.011295 | 0.011396 | 0.011396 | 0.011329 |
| 0.011329 | 0.011463 | 0.011631 | 0.011362 | 0.011564 | 0.011564 | 0.011429 |
| 0.011262 | 0.011329 | 0.011362 | 0.011765 | 0.011329 | 0.011362 | 0.011329 |
| 0.011362 | 0.011295 | 0.011295 | 0.011597 | 0.011530 | 0.011564 | 0.011295 |
| 0.011396 | 0.011463 | 0.011329 | 0.011396 | 0.011362 | 0.011228 | 0.011564 |
| 0.011329 | 0.011295 | 0.011295 | 0.011463 | 0.011295 | 0.011396 | 0.011631 |
| 0.011329 | 0.011671 | 0.011698 | 0.011507 | 0.011286 | 0.011400 | 0.011318 |
| 0.011225 | 0.011722 | 0.011236 | 0.011462 | 0.011304 | 0.011416 | 0.011432 |
| 0.011519 | 0.011258 | 0.011394 | 0.011258 | 0.011276 | 0.011462 | 0.011385 |
| 0.011399 | 0.011296 | 0.011377 | 0.011307 | 0.011330 | 0.011463 | 0.011530 |
| 0.011530 | 0.011396 | 0.011500 | 0.011501 | 0.011636 | 0.011661 | 0.011329 |
| 0.011564 | 0.011430 | 0.011295 | 0.011396 | 0.011195 | 0.011429 | 0.011228 |
| 0.011295 | 0.011295 | 0.011262 | 0.011228 | 0.011262 | 0.011228 | 0.011329 |
| 0.011305 | 0.011305 | 0.011231 | 0.011334 | 0.011471 | 0.011436 | 0.011436 |
| 0.011435 | 0.011363 | 0.011171 | 0.011132 | 0.011297 | 0.011467 | 0.011467 |
| 0.011262 | 0.011331 | 0.011565 | 0.011533 | 0.011464 | 0.011498 | 0.011429 |
| 0.011362 | 0.011429 | 0.011429 | 0.011329 | 0.011900 | 0.011496 | 0.011564 |
| 0.011597 | 0.011665 | 0.011299 | 0.011372 | 0.011262 | 0.011463 | 0.011429 |
| 0.011464 | 0.011496 | 0.011496 | 0.011496 | 0.011610 | 0.011631 | 0.011268 |
| 0.011162 | 0.011164 | 0.011264 | 0.011230 | 0.011333 | 0.011135 | 0.011502 |
| 0.011163 | 0.011411 | 0.011156 | 0.011248 | 0.011296 | 0.011368 | 0.011262 |
| 0.011228 | 0.011228 | 0.011295 | 0.011262 | 0.011463 | 0.011429 | 0.011362 |
| 0.011463 | 0.011530 | 0.011262 | 0.011262 | 0.011295 | 0.011295 | 0.011297 |
| 0.011364 | 0.011295 | 0.011295 | 0.011330 | 0.011463 | 0.011530 | 0.011530 |
| 0.011396 | 0.011500 | 0.011501 | 0.011636 | 0.011661 | 0.011329 | 0.011496 |
| 0.011429 | 0.011429 | 0.011263 | 0.011443 | 0.011373 | 0.011401 | 0.011270 |
| 0.011439 | 0.011652 | 0.011441 | 0.011332 | 0.011228 | 0.011430 | 0.011295 |
| 0.011396 | 0.011329 | 0.011228 | 0.011330 | 0.011430 | 0.011432 | 0.011329 |
| 0.011228 | 0.011161 | 0.011295 | 0.011228 | 0.011161 | 0.011196 | 0.011430 |
| 0.011329 | 0.011262 | 0.011295 | 0.011329 | 0.011295 | 0.011228 | 0.011430 |
| 0.011295 | 0.011329 | 0.011329 | 0.011262 | 0.011329 | 0.011564 | 0.011228 |
| 0.011262 | 0.011664 | 0.011262 | 0.011295 | 0.011262 | 0.011631 | 0.011232 |
| 0.011735 | 0.011230 | 0.011261 | 0.011463 | 0.011549 | 0.011455 | 0.011186 |
| 0.011218 | 0.011429 | 0.011530 | 0.011637 | 0.011498 | 0.011635 | 0.011766 |
| 0.011666 | 0.011703 | 0.011664 | 0.011914 | 0.011631 | 0.012505 | 0.011666 |
| 0.012405 | 0.012173 | 0.012307 | 0.012578 | 0.011631 | 0.011329 | 0.011631 |
| 0.012070 | 0.012004 | 0.011597 | 0.011497 | 0.011564 | 0.011564 | 0.011534 |
| 0.011429 | 0.011433 | 0.011496 | 0.011464 | 0.011833 | 0.011900 | 0.011901 |

|          |          |          |          |          |          |          |
|----------|----------|----------|----------|----------|----------|----------|
| 0.011800 | 0.011901 | 0.012004 | 0.011770 | 0.012070 | 0.012076 | 0.012137 |
| 0.012138 | 0.012172 | 0.012118 | 0.012138 | 0.012139 | 0.011362 | 0.011665 |
| 0.011733 | 0.012236 | 0.011738 | 0.011967 | 0.012440 | 0.011502 | 0.011396 |
| 0.011362 | 0.011362 | 0.011833 | 0.011842 | 0.011975 | 0.011698 | 0.011363 |
| S272     | 0.011698 | 0.011698 | 0.012034 | 0.011799 | 0.011799 | 0.011866 |
| 0.011705 | 0.011637 | 0.011866 | 0.011295 | 0.011362 | 0.011329 | 0.011295 |
| 0.011329 | 0.011496 | 0.011295 | 0.011262 | 0.011396 | 0.011362 | 0.011329 |
| 0.011295 | 0.011329 | 0.011429 | 0.011295 | 0.011329 | 0.011329 | 0.011671 |
| 0.011564 | 0.011329 | 0.011228 | 0.011463 | 0.011396 | 0.011362 | 0.011396 |
| 0.011362 | 0.011463 | 0.011362 | 0.011362 | 0.011329 | 0.011362 | 0.011530 |
| 0.011295 | 0.011362 | 0.011329 | 0.011329 | 0.011429 | 0.011396 | 0.011396 |
| 0.011362 | 0.011463 | 0.011430 | 0.011698 | 0.011295 | 0.011631 | 0.011295 |
| 0.011329 | 0.011429 | 0.011496 | 0.011631 | 0.011731 | 0.011429 | 0.011530 |
| 0.011396 | 0.011463 | 0.011362 | 0.011597 | 0.011832 | 0.011362 | 0.011429 |
| 0.011329 | 0.011429 | 0.011396 | 0.011463 | 0.011396 | 0.011396 | 0.011396 |
| 0.011295 | 0.011329 | 0.011295 | 0.011396 | 0.011362 | 0.011397 | 0.011463 |
| 0.011396 | 0.011362 | 0.011429 | 0.011329 | 0.011463 | 0.011295 | 0.011362 |
| 0.011530 | 0.011463 | 0.011698 | 0.011530 | 0.011362 | 0.011597 | 0.011362 |
| 0.011542 | 0.011770 | 0.011513 | 0.011255 | 0.011210 | 0.011355 | 0.011415 |
| 0.012085 | 0.011416 | 0.011225 | 0.011530 | 0.011597 | 0.011396 | 0.011496 |
| 0.011429 | 0.011329 | 0.011463 | 0.011362 | 0.011463 | 0.011396 | 0.011396 |
| 0.011362 | 0.011463 | 0.011664 | 0.011530 | 0.011429 | 0.011396 | 0.011329 |
| 0.011295 | 0.011295 | 0.011362 | 0.011329 | 0.011530 | 0.011497 | 0.011429 |
| 0.011530 | 0.011597 | 0.011329 | 0.011329 | 0.011362 | 0.011362 | 0.011364 |
| 0.011432 | 0.011362 | 0.011362 | 0.011240 | 0.011241 | 0.011271 | 0.011363 |
| 0.011365 | 0.011301 | 0.011282 | 0.011336 | 0.011264 | 0.011300 | 0.011330 |
| 0.011600 | 0.011370 | 0.011370 | 0.011296 | 0.011302 | 0.011430 | 0.011396 |
| 0.011464 | 0.011397 | 0.011396 | 0.011496 | 0.011429 | 0.011731 | 0.011597 |
| 0.011631 | 0.011497 | 0.011362 | 0.011463 | 0.011262 | 0.011496 | 0.011295 |
| 0.011362 | 0.011362 | 0.011329 | 0.011295 | 0.011329 | 0.011295 | 0.011396 |
| 0.011362 | 0.011463 | 0.011396 | 0.011295 | 0.011397 | 0.011497 | 0.011499 |
| 0.011497 | 0.011396 | 0.011295 | 0.011229 | 0.011362 | 0.011295 | 0.011228 |
| 0.011332 | 0.011497 | 0.011295 | 0.011497 | 0.011262 | 0.011362 | 0.011329 |
| 0.011429 | 0.011329 | 0.011362 | 0.011329 | 0.011362 | 0.011228 | 0.011362 |
| 0.011396 | 0.011329 | 0.011396 | 0.011329 | 0.011362 | 0.011396 | 0.011631 |
| 0.011732 | 0.011664 | 0.011732 | 0.011498 | 0.011732 | 0.011362 | 0.011329 |
| 0.011364 | 0.011626 | 0.011517 | 0.011266 | 0.011739 | 0.011231 | 0.011296 |
| 0.011739 | 0.011638 | 0.011530 | 0.011732 | 0.011436 | 0.011597 | 0.011564 |
| 0.011429 | 0.011664 | 0.011522 | 0.011390 | 0.011437 | 0.011396 | 0.011466 |
| 0.011564 | 0.011465 | 0.011601 | 0.011669 | 0.011597 | 0.011664 | 0.011771 |
| 0.011500 | 0.011671 | 0.011534 | 0.011533 | 0.011766 | 0.011262 | 0.011464 |
| 0.011429 | 0.011362 | 0.011262 | 0.011262 | 0.011329 | 0.011329 | 0.011396 |
| 0.011329 | 0.011396 | 0.011295 | 0.011396 | 0.011329 | 0.011329 | 0.000000 |
| 0.011329 | 0.011765 | 0.011664 | 0.011698 | 0.011228 | 0.011329 | 0.011362 |
| 0.011362 | 0.011329 | 0.011396 | 0.011429 | 0.011295 | 0.011295 | 0.011295 |
| 0.011832 | 0.011463 | 0.011463 | 0.011262 | 0.011362 | 0.011463 | 0.011295 |
| 0.011295 | 0.011362 | 0.011329 | 0.011496 | 0.011295 | 0.011429 | 0.011564 |
| 0.011496 | 0.011329 | 0.011329 | 0.011262 | 0.011262 | 0.011429 | 0.011362 |
| 0.011262 | 0.011362 | 0.011228 | 0.011262 | 0.011396 | 0.011530 | 0.011295 |
| 0.011262 | 0.011396 | 0.011329 | 0.011228 | 0.011564 | 0.011228 | 0.011396 |
| 0.011471 | 0.011295 | 0.011597 | 0.011430 | 0.011463 | 0.011329 | 0.011362 |
| 0.011295 | 0.011631 | 0.011228 | 0.011496 | 0.011295 | 0.011295 | 0.011228 |
| 0.011463 | 0.011665 | 0.011362 | 0.011429 | 0.011262 | 0.011664 | 0.011295 |
| 0.011295 | 0.011295 | 0.011329 | 0.011429 | 0.011329 | 0.011429 | 0.011496 |
| 0.011496 | 0.011463 | 0.011362 | 0.011463 | 0.011429 | 0.011295 | 0.011262 |
| 0.011295 | 0.011295 | 0.011362 | 0.011295 | 0.011262 | 0.011429 | 0.011295 |
| 0.011329 | 0.011329 | 0.011463 | 0.011496 | 0.011396 | 0.011329 | 0.011329 |
| 0.011396 | 0.011329 | 0.011429 | 0.011295 | 0.011429 | 0.011530 | 0.011832 |
| 0.011329 | 0.011731 | 0.011336 | 0.017823 | 0.011191 | 0.011549 | 0.011688 |
| 0.011648 | 0.011693 | 0.011374 | 0.011234 | 0.011719 | 0.011716 | 0.011425 |



|          |          |          |          |          |          |          |
|----------|----------|----------|----------|----------|----------|----------|
| 0.011392 | 0.011549 | 0.011216 | 0.011311 | 0.011294 | 0.011356 | 0.011318 |
| 0.011436 | 0.011433 | 0.011505 | 0.011259 | 0.011463 | 0.011497 | 0.011500 |
| 0.011369 | 0.011463 | 0.011463 | 0.011429 | 0.011396 | 0.011396 | 0.011362 |
| 0.011396 | 0.011329 | 0.011362 | 0.011396 | 0.011362 | 0.011295 | 0.011329 |
| 0.011329 | 0.011396 | 0.011295 | 0.011396 | 0.011429 | 0.011463 | 0.011362 |
| 0.011396 | 0.011362 | 0.011698 | 0.011698 | 0.011429 | 0.011396 | 0.011497 |
| 0.011262 | 0.011262 | 0.011295 | 0.011396 | 0.011262 | 0.011497 | 0.011497 |
| 0.011530 | 0.011530 | 0.011463 | 0.011564 | 0.011732 | 0.011565 | 0.011396 |
| 0.011396 | 0.011463 | 0.011497 | 0.011329 | 0.011396 | 0.011362 | 0.011329 |
| 0.011463 | 0.011463 | 0.011497 | 0.011463 | 0.011363 | 0.011564 | 0.011530 |
| 0.011399 | 0.011295 | 0.011396 | 0.011497 | 0.011396 | 0.011530 | 0.011564 |
| 0.011732 | 0.011436 | 0.011597 | 0.011564 | 0.011429 | 0.011664 | 0.011295 |
| 0.011397 | 0.011363 | 0.011329 | 0.011329 | 0.011396 | 0.011295 | 0.011396 |
| 0.011429 | 0.011463 | 0.011362 | 0.011396 | 0.011362 | 0.011698 | 0.011698 |
| 0.011429 | 0.011396 | 0.011530 | 0.011463 | 0.012103 | 0.011524 | 0.011447 |
| 0.011517 | 0.011476 | 0.011587 | 0.011476 | 0.011585 | 0.011508 | 0.011474 |
| 0.012056 | 0.011372 | 0.011505 | 0.011440 | 0.011714 | 0.011570 | 0.011672 |
| 0.012080 | 0.011550 | 0.011635 | 0.011698 | 0.011564 | 0.011564 | 0.011601 |
| 0.011262 | 0.011429 | 0.011563 | 0.011530 | 0.011533 | 0.011530 | 0.011498 |
| 0.011362 | 0.011295 | 0.011329 | 0.011362 | 0.011262 | 0.011329 | 0.011228 |
| 0.011362 | 0.011396 | 0.011295 | 0.011262 | 0.011362 | 0.011295 | 0.011329 |
| 0.011262 | 0.011262 | 0.011329 | 0.011362 | 0.011262 | 0.011463 | 0.011496 |
| 0.011396 | 0.011463 | 0.011396 | 0.011396 | 0.011329 | 0.011731 | 0.011362 |
| 0.011408 | 0.011329 | 0.011564 | 0.011569 | 0.011429 | 0.011429 | 0.011429 |
| 0.011429 | 0.011362 | 0.011329 | 0.011362 | 0.011463 | 0.011463 | 0.011396 |
| 0.011396 | 0.011530 | 0.011698 | 0.011429 | 0.011631 | 0.011631 | 0.011496 |
| 0.011329 | 0.011396 | 0.011429 | 0.011832 | 0.011396 | 0.011429 | 0.011396 |
| 0.011429 | 0.011362 | 0.011362 | 0.011664 | 0.011597 | 0.011631 | 0.011362 |
| 0.011463 | 0.011530 | 0.011396 | 0.011463 | 0.011429 | 0.011295 | 0.011631 |
| 0.011396 | 0.011362 | 0.011362 | 0.011530 | 0.011362 | 0.011463 | 0.011698 |
| 0.011396 | 0.011773 | 0.011765 | 0.011507 | 0.011229 | 0.011468 | 0.011267 |
| 0.011335 | 0.011683 | 0.011271 | 0.011462 | 0.011255 | 0.011315 | 0.011326 |
| 0.011417 | 0.011126 | 0.011283 | 0.011126 | 0.011222 | 0.011328 | 0.011385 |
| 0.011475 | 0.011296 | 0.011448 | 0.011377 | 0.011397 | 0.011530 | 0.011597 |
| 0.011597 | 0.011464 | 0.011567 | 0.011569 | 0.011704 | 0.011732 | 0.011396 |
| 0.011631 | 0.011497 | 0.011362 | 0.011463 | 0.011262 | 0.011496 | 0.011295 |
| 0.011362 | 0.011362 | 0.011329 | 0.011295 | 0.011329 | 0.011295 | 0.011396 |
| 0.011375 | 0.011375 | 0.011300 | 0.011403 | 0.011539 | 0.011504 | 0.011436 |
| 0.011503 | 0.011430 | 0.011208 | 0.011168 | 0.011365 | 0.011534 | 0.011535 |
| 0.011329 | 0.011399 | 0.011599 | 0.011601 | 0.011531 | 0.011565 | 0.011496 |
| 0.011429 | 0.011496 | 0.011496 | 0.011396 | 0.011967 | 0.011564 | 0.011631 |
| 0.011665 | 0.011736 | 0.011367 | 0.011441 | 0.011329 | 0.011530 | 0.011496 |
| 0.011531 | 0.011563 | 0.011564 | 0.011564 | 0.011689 | 0.011698 | 0.011338 |
| 0.011229 | 0.011233 | 0.011332 | 0.011298 | 0.011402 | 0.011247 | 0.011570 |
| 0.011369 | 0.011543 | 0.011298 | 0.011360 | 0.011363 | 0.011437 | 0.011329 |
| 0.011295 | 0.011295 | 0.011362 | 0.011329 | 0.011530 | 0.011497 | 0.011429 |
| 0.011530 | 0.011597 | 0.011329 | 0.011329 | 0.011362 | 0.011362 | 0.011364 |
| 0.011432 | 0.011362 | 0.011362 | 0.011397 | 0.011530 | 0.011597 | 0.011597 |
| 0.011464 | 0.011567 | 0.011569 | 0.011704 | 0.011732 | 0.011396 | 0.011564 |
| 0.011496 | 0.011496 | 0.011331 | 0.011513 | 0.011442 | 0.011469 | 0.011305 |
| 0.011508 | 0.011652 | 0.011484 | 0.011400 | 0.011295 | 0.011497 | 0.011362 |
| 0.011463 | 0.011396 | 0.011295 | 0.011397 | 0.011497 | 0.011499 | 0.011396 |
| 0.011295 | 0.011229 | 0.011362 | 0.011295 | 0.011228 | 0.011332 | 0.011497 |
| 0.011396 | 0.011329 | 0.011362 | 0.011396 | 0.011362 | 0.011295 | 0.011497 |
| 0.011362 | 0.011396 | 0.011396 | 0.011329 | 0.011396 | 0.011631 | 0.011295 |
| 0.011329 | 0.011731 | 0.011329 | 0.011362 | 0.011329 | 0.011698 | 0.011146 |
| 0.011566 | 0.011230 | 0.011211 | 0.011422 | 0.011508 | 0.011491 | 0.011144 |
| 0.011165 | 0.011496 | 0.011530 | 0.011637 | 0.011498 | 0.011635 | 0.011766 |
| 0.011666 | 0.011703 | 0.011664 | 0.011983 | 0.011698 | 0.012572 | 0.011734 |
| 0.012473 | 0.012241 | 0.012375 | 0.012646 | 0.011698 | 0.011396 | 0.011631 |

|          |          |          |          |          |          |          |
|----------|----------|----------|----------|----------|----------|----------|
| 0.012137 | 0.012004 | 0.011664 | 0.011564 | 0.011632 | 0.011632 | 0.011601 |
| 0.011496 | 0.011501 | 0.011564 | 0.011531 | 0.011901 | 0.011967 | 0.011968 |
| 0.011867 | 0.011968 | 0.012072 | 0.011838 | 0.012137 | 0.012144 | 0.012205 |
| 0.012205 | 0.012239 | 0.012186 | 0.012205 | 0.012207 | 0.011429 | 0.011732 |
| 0.011733 | 0.012303 | 0.011806 | 0.012034 | 0.012508 | 0.011570 | 0.011464 |
| 0.011429 | 0.011429 | 0.011900 | 0.011965 | 0.012045 | 0.011765 | 0.011431 |
| S273     | 0.011631 | 0.011631 | 0.011967 | 0.011732 | 0.011732 | 0.011799 |
| 0.011637 | 0.011569 | 0.011799 | 0.011228 | 0.011295 | 0.011262 | 0.011228 |
| 0.011262 | 0.011429 | 0.011228 | 0.011262 | 0.011329 | 0.011094 | 0.011262 |
| 0.011228 | 0.000000 | 0.011362 | 0.011228 | 0.011262 | 0.011262 | 0.011603 |
| 0.011496 | 0.011262 | 0.011161 | 0.011396 | 0.011329 | 0.011295 | 0.011329 |
| 0.011295 | 0.011396 | 0.011295 | 0.011295 | 0.011329 | 0.011295 | 0.011463 |
| 0.011228 | 0.011295 | 0.011329 | 0.011262 | 0.011362 | 0.011396 | 0.011329 |
| 0.011295 | 0.011463 | 0.011362 | 0.011631 | 0.011295 | 0.011564 | 0.011295 |
| 0.011262 | 0.011362 | 0.011429 | 0.011564 | 0.011664 | 0.011362 | 0.011463 |
| 0.011329 | 0.011396 | 0.011295 | 0.011530 | 0.011765 | 0.011295 | 0.011362 |
| 0.011262 | 0.011362 | 0.011329 | 0.011396 | 0.011329 | 0.011329 | 0.011329 |
| 0.011228 | 0.011262 | 0.011228 | 0.011329 | 0.011295 | 0.011329 | 0.011396 |
| 0.011329 | 0.011295 | 0.011362 | 0.011262 | 0.011396 | 0.011228 | 0.011295 |
| 0.011463 | 0.011396 | 0.011631 | 0.011463 | 0.011295 | 0.011530 | 0.011295 |
| 0.011468 | 0.011695 | 0.011513 | 0.011216 | 0.011210 | 0.011318 | 0.011415 |
| 0.012048 | 0.011467 | 0.011225 | 0.011530 | 0.011530 | 0.011329 | 0.011429 |
| 0.011362 | 0.011329 | 0.011396 | 0.011295 | 0.011396 | 0.011329 | 0.011329 |
| 0.011295 | 0.011396 | 0.011597 | 0.011463 | 0.011362 | 0.011329 | 0.011262 |
| 0.011228 | 0.011228 | 0.011295 | 0.011262 | 0.011463 | 0.011430 | 0.011362 |
| 0.011463 | 0.011530 | 0.011262 | 0.011262 | 0.011295 | 0.011295 | 0.011297 |
| 0.011364 | 0.011295 | 0.011295 | 0.011168 | 0.011241 | 0.011200 | 0.011296 |
| 0.011297 | 0.011232 | 0.011282 | 0.011267 | 0.011196 | 0.011232 | 0.011263 |
| 0.011528 | 0.011302 | 0.011336 | 0.011228 | 0.011233 | 0.011363 | 0.011329 |
| 0.011397 | 0.011330 | 0.011329 | 0.011429 | 0.011362 | 0.011732 | 0.011530 |
| 0.011564 | 0.011430 | 0.011295 | 0.011396 | 0.011195 | 0.011429 | 0.011228 |
| 0.011295 | 0.011295 | 0.011262 | 0.011228 | 0.011262 | 0.011228 | 0.011329 |
| 0.011295 | 0.011396 | 0.011329 | 0.011228 | 0.011330 | 0.011430 | 0.011432 |
| 0.011430 | 0.011329 | 0.011228 | 0.011161 | 0.011295 | 0.011228 | 0.011161 |
| 0.011264 | 0.011430 | 0.011228 | 0.011430 | 0.011195 | 0.011295 | 0.011262 |
| 0.011362 | 0.011262 | 0.011295 | 0.011262 | 0.011295 | 0.011161 | 0.011295 |
| 0.011329 | 0.011262 | 0.011329 | 0.011262 | 0.011295 | 0.011329 | 0.011564 |
| 0.011664 | 0.011597 | 0.011665 | 0.011431 | 0.011665 | 0.011295 | 0.011262 |
| 0.011297 | 0.011545 | 0.011335 | 0.011197 | 0.011671 | 0.011163 | 0.011257 |
| 0.011671 | 0.011570 | 0.011463 | 0.011664 | 0.011368 | 0.011530 | 0.011497 |
| 0.011429 | 0.011597 | 0.011451 | 0.011307 | 0.011354 | 0.011329 | 0.011398 |
| 0.011497 | 0.011397 | 0.011533 | 0.011601 | 0.011530 | 0.011597 | 0.011704 |
| 0.011432 | 0.011603 | 0.011534 | 0.011466 | 0.011733 | 0.011194 | 0.011397 |
| 0.011362 | 0.011295 | 0.011194 | 0.011194 | 0.011262 | 0.011262 | 0.011329 |
| 0.011262 | 0.011329 | 0.011228 | 0.011329 | 0.011262 | 0.011262 | 0.011329 |
| 0.000000 | 0.011698 | 0.011597 | 0.011631 | 0.011161 | 0.011262 | 0.011295 |
| 0.011295 | 0.011262 | 0.011329 | 0.011362 | 0.011228 | 0.011228 | 0.011228 |
| 0.011765 | 0.011396 | 0.011396 | 0.011194 | 0.011295 | 0.011463 | 0.011228 |
| 0.011228 | 0.011295 | 0.011262 | 0.011429 | 0.011228 | 0.011362 | 0.011496 |
| 0.011429 | 0.011262 | 0.011262 | 0.011194 | 0.011194 | 0.011362 | 0.011295 |
| 0.011194 | 0.011295 | 0.011161 | 0.011195 | 0.011329 | 0.011463 | 0.011228 |
| 0.011195 | 0.011329 | 0.011262 | 0.011161 | 0.011496 | 0.011161 | 0.011329 |
| 0.011403 | 0.011228 | 0.011530 | 0.011362 | 0.011396 | 0.011262 | 0.011362 |
| 0.011228 | 0.011564 | 0.011161 | 0.011429 | 0.011228 | 0.011228 | 0.011161 |
| 0.011396 | 0.011598 | 0.011295 | 0.011362 | 0.011194 | 0.011597 | 0.011228 |
| 0.011228 | 0.011228 | 0.011262 | 0.011362 | 0.011262 | 0.011362 | 0.011429 |
| 0.011429 | 0.011396 | 0.011295 | 0.011396 | 0.011362 | 0.011228 | 0.011194 |
| 0.011228 | 0.011228 | 0.011295 | 0.011228 | 0.011194 | 0.011362 | 0.011228 |
| 0.011262 | 0.011262 | 0.011396 | 0.011429 | 0.011329 | 0.011262 | 0.011262 |
| 0.011329 | 0.011262 | 0.011362 | 0.011228 | 0.011362 | 0.011463 | 0.011765 |

|          |          |          |          |          |          |          |
|----------|----------|----------|----------|----------|----------|----------|
| 0.011262 | 0.011664 | 0.011267 | 0.017785 | 0.011191 | 0.011488 | 0.011618 |
| 0.011579 | 0.011623 | 0.011374 | 0.011350 | 0.011774 | 0.011647 | 0.011425 |
| 0.011534 | 0.011610 | 0.011177 | 0.011270 | 0.011255 | 0.011356 | 0.011275 |
| 0.011482 | 0.011433 | 0.011431 | 0.011126 | 0.011396 | 0.011429 | 0.011432 |
| 0.011301 | 0.011396 | 0.011396 | 0.011362 | 0.011329 | 0.011329 | 0.011295 |
| 0.011329 | 0.011262 | 0.011295 | 0.011329 | 0.011295 | 0.011228 | 0.011262 |
| 0.011262 | 0.011329 | 0.011228 | 0.011329 | 0.011362 | 0.011396 | 0.011295 |
| 0.011329 | 0.011295 | 0.011631 | 0.011631 | 0.011362 | 0.011396 | 0.011430 |
| 0.011195 | 0.011195 | 0.011228 | 0.011329 | 0.011195 | 0.011430 | 0.011430 |
| 0.011463 | 0.011463 | 0.011396 | 0.011497 | 0.011665 | 0.011498 | 0.011329 |
| 0.011329 | 0.011396 | 0.011430 | 0.011262 | 0.011329 | 0.011295 | 0.011329 |
| 0.011396 | 0.011396 | 0.011429 | 0.011396 | 0.011296 | 0.011497 | 0.011463 |
| 0.011331 | 0.011228 | 0.011329 | 0.011430 | 0.011329 | 0.011463 | 0.011496 |
| 0.011664 | 0.011368 | 0.011530 | 0.011497 | 0.011429 | 0.011597 | 0.011228 |
| 0.011397 | 0.011296 | 0.011262 | 0.011262 | 0.011329 | 0.011228 | 0.011329 |
| 0.011362 | 0.011396 | 0.011295 | 0.011329 | 0.011295 | 0.011631 | 0.011631 |
| 0.011362 | 0.011396 | 0.011463 | 0.011396 | 0.012035 | 0.011453 | 0.011377 |
| 0.011447 | 0.011407 | 0.011517 | 0.011406 | 0.011515 | 0.011439 | 0.011405 |
| 0.011987 | 0.011302 | 0.011437 | 0.011371 | 0.011645 | 0.011502 | 0.011605 |
| 0.012012 | 0.011475 | 0.011567 | 0.011631 | 0.011496 | 0.011497 | 0.011533 |
| 0.011194 | 0.011362 | 0.011496 | 0.011463 | 0.011466 | 0.011463 | 0.011431 |
| 0.011295 | 0.011228 | 0.011262 | 0.011295 | 0.011194 | 0.011262 | 0.011161 |
| 0.011295 | 0.011329 | 0.011228 | 0.011194 | 0.011295 | 0.011228 | 0.011262 |
| 0.011262 | 0.011194 | 0.011262 | 0.011295 | 0.011194 | 0.011396 | 0.011429 |
| 0.011329 | 0.011396 | 0.011329 | 0.011329 | 0.011262 | 0.011664 | 0.011295 |
| 0.011338 | 0.011262 | 0.011497 | 0.011501 | 0.011362 | 0.011362 | 0.011362 |
| 0.011362 | 0.011295 | 0.011262 | 0.011295 | 0.011396 | 0.011396 | 0.011329 |
| 0.011329 | 0.011463 | 0.011631 | 0.011362 | 0.011564 | 0.011564 | 0.011429 |
| 0.011262 | 0.011329 | 0.011362 | 0.011765 | 0.011329 | 0.011362 | 0.011329 |
| 0.011362 | 0.011295 | 0.011295 | 0.011597 | 0.011530 | 0.011564 | 0.011295 |
| 0.011396 | 0.011463 | 0.011329 | 0.011396 | 0.011362 | 0.011228 | 0.011564 |
| 0.011329 | 0.011295 | 0.011295 | 0.011463 | 0.011295 | 0.011396 | 0.011631 |
| 0.011329 | 0.011705 | 0.011698 | 0.011507 | 0.011229 | 0.011400 | 0.011318 |
| 0.011280 | 0.011722 | 0.011236 | 0.011462 | 0.011304 | 0.011417 | 0.011432 |
| 0.011468 | 0.011192 | 0.011394 | 0.011192 | 0.011276 | 0.011395 | 0.011385 |
| 0.011399 | 0.011296 | 0.011377 | 0.011307 | 0.011330 | 0.011463 | 0.011530 |
| 0.011530 | 0.011396 | 0.011500 | 0.011501 | 0.011636 | 0.011661 | 0.011329 |
| 0.011564 | 0.011430 | 0.011295 | 0.011396 | 0.011195 | 0.011429 | 0.011228 |
| 0.011295 | 0.011295 | 0.011262 | 0.011228 | 0.011262 | 0.011228 | 0.011329 |
| 0.011305 | 0.011305 | 0.011300 | 0.011334 | 0.011471 | 0.011436 | 0.011436 |
| 0.011435 | 0.011363 | 0.011171 | 0.011168 | 0.011297 | 0.011467 | 0.011467 |
| 0.011262 | 0.011331 | 0.011565 | 0.011533 | 0.011464 | 0.011498 | 0.011429 |
| 0.011362 | 0.011429 | 0.011429 | 0.011329 | 0.011900 | 0.011497 | 0.011564 |
| 0.011597 | 0.011665 | 0.011299 | 0.011337 | 0.011262 | 0.011463 | 0.011429 |
| 0.011464 | 0.011496 | 0.011496 | 0.011496 | 0.011650 | 0.011631 | 0.011268 |
| 0.011162 | 0.011164 | 0.011264 | 0.011230 | 0.011333 | 0.011172 | 0.011502 |
| 0.011300 | 0.011411 | 0.011156 | 0.011322 | 0.011296 | 0.011368 | 0.011262 |
| 0.011228 | 0.011228 | 0.011295 | 0.011262 | 0.011463 | 0.011430 | 0.011362 |
| 0.011463 | 0.011530 | 0.011262 | 0.011262 | 0.011295 | 0.011295 | 0.011297 |
| 0.011364 | 0.011295 | 0.011295 | 0.011330 | 0.011463 | 0.011530 | 0.011530 |
| 0.011396 | 0.011500 | 0.011501 | 0.011636 | 0.011661 | 0.011329 | 0.011496 |
| 0.011429 | 0.011429 | 0.011263 | 0.011443 | 0.011373 | 0.011401 | 0.011270 |
| 0.011439 | 0.011653 | 0.011357 | 0.011332 | 0.011228 | 0.011430 | 0.011295 |
| 0.011396 | 0.011329 | 0.011228 | 0.011330 | 0.011430 | 0.011432 | 0.011329 |
| 0.011228 | 0.011161 | 0.011295 | 0.011228 | 0.011161 | 0.011264 | 0.011430 |
| 0.011329 | 0.011262 | 0.011295 | 0.011329 | 0.011295 | 0.011228 | 0.011430 |
| 0.011295 | 0.011329 | 0.011329 | 0.011262 | 0.011329 | 0.011564 | 0.011228 |
| 0.011262 | 0.011664 | 0.011262 | 0.011295 | 0.011262 | 0.011631 | 0.011232 |
| 0.011679 | 0.011230 | 0.011261 | 0.011463 | 0.011549 | 0.011455 | 0.011186 |
| 0.011218 | 0.011429 | 0.011530 | 0.011637 | 0.011498 | 0.011635 | 0.011766 |

|          |          |          |          |          |          |          |
|----------|----------|----------|----------|----------|----------|----------|
| 0.011666 | 0.011703 | 0.011664 | 0.011914 | 0.011631 | 0.012505 | 0.011667 |
| 0.012406 | 0.012173 | 0.012307 | 0.012579 | 0.011631 | 0.011329 | 0.011631 |
| 0.012070 | 0.012005 | 0.011597 | 0.011497 | 0.011565 | 0.011565 | 0.011534 |
| 0.011429 | 0.011433 | 0.011496 | 0.011464 | 0.011834 | 0.011900 | 0.011901 |
| 0.011800 | 0.011901 | 0.012004 | 0.011770 | 0.012070 | 0.012076 | 0.012137 |
| 0.012138 | 0.012172 | 0.012118 | 0.012138 | 0.012139 | 0.011362 | 0.011665 |
| 0.011733 | 0.012236 | 0.011738 | 0.011967 | 0.012440 | 0.011502 | 0.011396 |
| 0.011362 | 0.011362 | 0.011833 | 0.011842 | 0.011975 | 0.011698 | 0.011363 |
| S274     | 0.012068 | 0.012068 | 0.012135 | 0.011900 | 0.011900 | 0.011967 |
| 0.011400 | 0.011332 | 0.011967 | 0.011665 | 0.011731 | 0.011700 | 0.011664 |
| 0.011631 | 0.011866 | 0.011597 | 0.011698 | 0.011765 | 0.011731 | 0.011698 |
| 0.011664 | 0.011698 | 0.011530 | 0.011665 | 0.011698 | 0.011698 | 0.011366 |
| 0.011664 | 0.011698 | 0.011597 | 0.011564 | 0.011765 | 0.011732 | 0.011765 |
| 0.011731 | 0.011832 | 0.011731 | 0.011731 | 0.011765 | 0.011731 | 0.011899 |
| 0.011597 | 0.011731 | 0.011765 | 0.011698 | 0.011664 | 0.011832 | 0.011765 |
| 0.011731 | 0.011900 | 0.011799 | 0.011396 | 0.011731 | 0.012000 | 0.011731 |
| 0.011698 | 0.011665 | 0.011866 | 0.012000 | 0.011496 | 0.011732 | 0.011832 |
| 0.011765 | 0.011832 | 0.011732 | 0.011967 | 0.011530 | 0.011731 | 0.011799 |
| 0.011698 | 0.011799 | 0.011765 | 0.011832 | 0.011765 | 0.011765 | 0.011765 |
| 0.011664 | 0.011698 | 0.011664 | 0.011698 | 0.011731 | 0.011767 | 0.011832 |
| 0.011765 | 0.011731 | 0.011799 | 0.011698 | 0.011564 | 0.011664 | 0.011731 |
| 0.011899 | 0.011832 | 0.011597 | 0.011900 | 0.011731 | 0.011967 | 0.011731 |
| 0.011950 | 0.011434 | 0.011966 | 0.011685 | 0.011620 | 0.011796 | 0.011533 |
| 0.012158 | 0.011569 | 0.011678 | 0.011967 | 0.011967 | 0.011698 | 0.011597 |
| 0.011799 | 0.011765 | 0.011832 | 0.011731 | 0.011832 | 0.011765 | 0.011765 |
| 0.011731 | 0.011765 | 0.012034 | 0.011899 | 0.011799 | 0.011765 | 0.011698 |
| 0.011665 | 0.011597 | 0.011732 | 0.011698 | 0.011631 | 0.011597 | 0.011530 |
| 0.011631 | 0.011698 | 0.011698 | 0.011698 | 0.011732 | 0.011732 | 0.011736 |
| 0.011804 | 0.011732 | 0.011732 | 0.011600 | 0.011675 | 0.011621 | 0.011733 |
| 0.011704 | 0.011644 | 0.011724 | 0.011681 | 0.011638 | 0.011643 | 0.011702 |
| 0.011600 | 0.011715 | 0.011749 | 0.011665 | 0.011648 | 0.011800 | 0.011699 |
| 0.011767 | 0.011768 | 0.011766 | 0.011866 | 0.011799 | 0.012168 | 0.011900 |
| 0.011732 | 0.011799 | 0.011732 | 0.011765 | 0.011631 | 0.011597 | 0.011665 |
| 0.011731 | 0.011731 | 0.011698 | 0.011664 | 0.011698 | 0.011665 | 0.011765 |
| 0.011732 | 0.011833 | 0.011765 | 0.011665 | 0.011768 | 0.011866 | 0.011871 |
| 0.011866 | 0.011766 | 0.011665 | 0.011600 | 0.011732 | 0.011665 | 0.011598 |
| 0.011604 | 0.011866 | 0.011665 | 0.011866 | 0.011631 | 0.011732 | 0.011698 |
| 0.011799 | 0.011698 | 0.011732 | 0.011698 | 0.011732 | 0.011597 | 0.011732 |
| 0.011765 | 0.011698 | 0.011765 | 0.011698 | 0.011732 | 0.011765 | 0.012001 |
| 0.011429 | 0.011362 | 0.011429 | 0.011869 | 0.011497 | 0.011732 | 0.011698 |
| 0.011668 | 0.011990 | 0.011792 | 0.011643 | 0.011433 | 0.011606 | 0.011808 |
| 0.011434 | 0.011672 | 0.011899 | 0.012101 | 0.011812 | 0.011967 | 0.011933 |
| 0.011866 | 0.012034 | 0.011913 | 0.011843 | 0.011815 | 0.011765 | 0.011838 |
| 0.011933 | 0.011836 | 0.011973 | 0.012042 | 0.011967 | 0.012034 | 0.012145 |
| 0.011872 | 0.012045 | 0.011907 | 0.011906 | 0.012171 | 0.011631 | 0.011835 |
| 0.011799 | 0.011731 | 0.011631 | 0.011631 | 0.011698 | 0.011698 | 0.011698 |
| 0.011698 | 0.011765 | 0.011664 | 0.011698 | 0.011698 | 0.011698 | 0.011765 |
| 0.011698 | 0.000000 | 0.011362 | 0.011396 | 0.011597 | 0.011698 | 0.011732 |
| 0.011731 | 0.011631 | 0.011765 | 0.011732 | 0.011664 | 0.011664 | 0.011664 |
| 0.011530 | 0.011765 | 0.011832 | 0.011631 | 0.011731 | 0.011900 | 0.011664 |
| 0.011664 | 0.011731 | 0.011698 | 0.011866 | 0.011664 | 0.011597 | 0.011731 |
| 0.011664 | 0.011698 | 0.011698 | 0.011631 | 0.011631 | 0.011799 | 0.011731 |
| 0.011631 | 0.011731 | 0.011597 | 0.011631 | 0.011765 | 0.011564 | 0.011664 |
| 0.011631 | 0.011765 | 0.011699 | 0.011597 | 0.011329 | 0.011597 | 0.011765 |
| 0.011848 | 0.011664 | 0.011295 | 0.011799 | 0.011765 | 0.011698 | 0.011799 |
| 0.011664 | 0.012000 | 0.011597 | 0.011597 | 0.011597 | 0.011597 | 0.011597 |
| 0.011832 | 0.011698 | 0.011732 | 0.011799 | 0.011631 | 0.011362 | 0.011597 |
| 0.011664 | 0.011664 | 0.011698 | 0.011799 | 0.011698 | 0.011799 | 0.011866 |
| 0.011866 | 0.011832 | 0.011731 | 0.011832 | 0.011799 | 0.011664 | 0.011631 |
| 0.011664 | 0.011664 | 0.011732 | 0.011597 | 0.011631 | 0.011799 | 0.011664 |

|          |          |          |          |          |          |          |
|----------|----------|----------|----------|----------|----------|----------|
| 0.011631 | 0.011698 | 0.011832 | 0.011799 | 0.011765 | 0.011698 | 0.011698 |
| 0.011765 | 0.011698 | 0.011799 | 0.011664 | 0.011799 | 0.011899 | 0.011597 |
| 0.011698 | 0.011496 | 0.011716 | 0.018201 | 0.011584 | 0.011794 | 0.011374 |
| 0.011337 | 0.011377 | 0.011951 | 0.011756 | 0.011609 | 0.011405 | 0.011789 |
| 0.011772 | 0.011671 | 0.011645 | 0.011772 | 0.011646 | 0.011702 | 0.011792 |
| 0.011483 | 0.011544 | 0.011394 | 0.011523 | 0.011832 | 0.011866 | 0.011872 |
| 0.011747 | 0.011833 | 0.011832 | 0.011732 | 0.011765 | 0.011766 | 0.011732 |
| 0.011765 | 0.011698 | 0.011732 | 0.011765 | 0.011732 | 0.011665 | 0.011698 |
| 0.011698 | 0.011765 | 0.011665 | 0.011765 | 0.011799 | 0.011833 | 0.011731 |
| 0.011698 | 0.011665 | 0.011463 | 0.011463 | 0.011799 | 0.011834 | 0.011866 |
| 0.011631 | 0.011631 | 0.011665 | 0.011765 | 0.011631 | 0.011866 | 0.011866 |
| 0.011900 | 0.011899 | 0.011832 | 0.011933 | 0.011497 | 0.011936 | 0.011765 |
| 0.011765 | 0.011833 | 0.011866 | 0.011698 | 0.011765 | 0.011732 | 0.011765 |
| 0.011833 | 0.011833 | 0.011866 | 0.011833 | 0.011734 | 0.011933 | 0.011900 |
| 0.011771 | 0.011665 | 0.011765 | 0.011866 | 0.011765 | 0.011833 | 0.011933 |
| 0.012101 | 0.011812 | 0.011967 | 0.011933 | 0.011866 | 0.012034 | 0.011665 |
| 0.011835 | 0.011733 | 0.011698 | 0.011698 | 0.011765 | 0.011665 | 0.011765 |
| 0.011799 | 0.011833 | 0.011731 | 0.011698 | 0.011665 | 0.011463 | 0.011463 |
| 0.011799 | 0.011834 | 0.011899 | 0.011832 | 0.012406 | 0.011918 | 0.011834 |
| 0.011904 | 0.011858 | 0.011974 | 0.011857 | 0.011970 | 0.011888 | 0.011819 |
| 0.012365 | 0.011752 | 0.011882 | 0.011821 | 0.012093 | 0.011945 | 0.012047 |
| 0.012386 | 0.011852 | 0.012007 | 0.012068 | 0.011933 | 0.011664 | 0.011973 |
| 0.011631 | 0.011799 | 0.011933 | 0.011899 | 0.011905 | 0.011631 | 0.011599 |
| 0.011731 | 0.011664 | 0.011698 | 0.011731 | 0.011631 | 0.011698 | 0.011597 |
| 0.011664 | 0.011698 | 0.011664 | 0.011631 | 0.011731 | 0.011664 | 0.011698 |
| 0.011698 | 0.011631 | 0.011698 | 0.011732 | 0.011631 | 0.011832 | 0.011866 |
| 0.011765 | 0.011765 | 0.011765 | 0.011765 | 0.011698 | 0.011496 | 0.011731 |
| 0.011512 | 0.011698 | 0.011665 | 0.011671 | 0.011732 | 0.011731 | 0.011799 |
| 0.011799 | 0.011732 | 0.011698 | 0.011732 | 0.011832 | 0.011832 | 0.011765 |
| 0.011765 | 0.011899 | 0.011396 | 0.011799 | 0.012000 | 0.012000 | 0.011866 |
| 0.011698 | 0.011765 | 0.011799 | 0.011597 | 0.011766 | 0.011732 | 0.011765 |
| 0.011799 | 0.011664 | 0.011664 | 0.011967 | 0.011967 | 0.011933 | 0.011731 |
| 0.011832 | 0.011899 | 0.011765 | 0.011832 | 0.011799 | 0.011664 | 0.011329 |
| 0.011765 | 0.011731 | 0.011664 | 0.011899 | 0.011731 | 0.011832 | 0.011597 |
| 0.011765 | 0.011467 | 0.011463 | 0.011629 | 0.011568 | 0.011706 | 0.011576 |
| 0.011609 | 0.011839 | 0.011692 | 0.011775 | 0.011743 | 0.011569 | 0.011591 |
| 0.011672 | 0.011521 | 0.011673 | 0.011589 | 0.011545 | 0.011730 | 0.011912 |
| 0.011889 | 0.011768 | 0.011765 | 0.011729 | 0.011768 | 0.011631 | 0.011698 |
| 0.011698 | 0.011766 | 0.011872 | 0.011670 | 0.012010 | 0.012050 | 0.011765 |
| 0.011732 | 0.011799 | 0.011732 | 0.011765 | 0.011631 | 0.011597 | 0.011665 |
| 0.011731 | 0.011731 | 0.011698 | 0.011664 | 0.011698 | 0.011665 | 0.011765 |
| 0.011724 | 0.011725 | 0.011711 | 0.011745 | 0.011881 | 0.011846 | 0.011845 |
| 0.011844 | 0.011800 | 0.011614 | 0.011600 | 0.011704 | 0.011874 | 0.011875 |
| 0.011699 | 0.011738 | 0.012003 | 0.011973 | 0.011901 | 0.011935 | 0.011866 |
| 0.011799 | 0.011866 | 0.011866 | 0.011765 | 0.011732 | 0.011933 | 0.012000 |
| 0.012034 | 0.011380 | 0.011606 | 0.011822 | 0.011698 | 0.011900 | 0.011866 |
| 0.011901 | 0.011933 | 0.011933 | 0.011933 | 0.012004 | 0.012068 | 0.011685 |
| 0.011601 | 0.011614 | 0.011707 | 0.011672 | 0.011709 | 0.011620 | 0.011264 |
| 0.011746 | 0.011499 | 0.011727 | 0.011735 | 0.011733 | 0.011779 | 0.011698 |
| 0.011665 | 0.011597 | 0.011732 | 0.011698 | 0.011631 | 0.011597 | 0.011530 |
| 0.011631 | 0.011698 | 0.011698 | 0.011698 | 0.011732 | 0.011732 | 0.011736 |
| 0.011804 | 0.011732 | 0.011732 | 0.011768 | 0.011631 | 0.011698 | 0.011698 |
| 0.011766 | 0.011872 | 0.011670 | 0.012010 | 0.012050 | 0.011765 | 0.011933 |
| 0.011866 | 0.011866 | 0.011703 | 0.011896 | 0.011825 | 0.011843 | 0.011726 |
| 0.011887 | 0.012154 | 0.011907 | 0.011774 | 0.011665 | 0.011866 | 0.011732 |
| 0.011833 | 0.011765 | 0.011665 | 0.011768 | 0.011866 | 0.011871 | 0.011766 |
| 0.011665 | 0.011600 | 0.011732 | 0.011665 | 0.011598 | 0.011604 | 0.011866 |
| 0.011765 | 0.011698 | 0.011732 | 0.011765 | 0.011732 | 0.011665 | 0.011597 |
| 0.011731 | 0.011765 | 0.011765 | 0.011698 | 0.011765 | 0.012000 | 0.011597 |
| 0.011698 | 0.011496 | 0.011698 | 0.011731 | 0.011698 | 0.011396 | 0.011703 |

|          |          |          |          |          |          |          |
|----------|----------|----------|----------|----------|----------|----------|
| 0.012016 | 0.011528 | 0.011561 | 0.011584 | 0.011671 | 0.011635 | 0.011478 |
| 0.011532 | 0.011597 | 0.011698 | 0.011807 | 0.011666 | 0.011805 | 0.011935 |
| 0.011834 | 0.011872 | 0.011832 | 0.012086 | 0.011799 | 0.012674 | 0.011835 |
| 0.012574 | 0.012342 | 0.012476 | 0.012748 | 0.011731 | 0.011698 | 0.011799 |
| 0.012440 | 0.012174 | 0.011765 | 0.011665 | 0.011733 | 0.011733 | 0.011669 |
| 0.011597 | 0.011603 | 0.011664 | 0.011632 | 0.012002 | 0.012068 | 0.012069 |
| 0.011969 | 0.012069 | 0.012173 | 0.011940 | 0.012441 | 0.012449 | 0.012508 |
| 0.012509 | 0.012543 | 0.012494 | 0.012509 | 0.012511 | 0.011799 | 0.012035 |
| 0.012103 | 0.012606 | 0.012112 | 0.012068 | 0.012541 | 0.011604 | 0.011497 |
| 0.011396 | 0.011463 | 0.012002 | 0.012006 | 0.012116 | 0.011799 | 0.011532 |
| S275     | 0.011967 | 0.011967 | 0.012034 | 0.011799 | 0.011799 | 0.011866 |
| 0.011298 | 0.011230 | 0.011866 | 0.011564 | 0.011631 | 0.011599 | 0.011564 |
| 0.011530 | 0.011765 | 0.011496 | 0.011597 | 0.011664 | 0.011631 | 0.011597 |
| 0.011564 | 0.011597 | 0.011429 | 0.011564 | 0.011598 | 0.011597 | 0.011264 |
| 0.011564 | 0.011597 | 0.011496 | 0.011463 | 0.011664 | 0.011631 | 0.011664 |
| 0.011631 | 0.011732 | 0.011631 | 0.011631 | 0.011664 | 0.011631 | 0.011799 |
| 0.011497 | 0.011631 | 0.011664 | 0.011597 | 0.011631 | 0.011732 | 0.011664 |
| 0.011631 | 0.011799 | 0.011699 | 0.011295 | 0.011631 | 0.011900 | 0.011631 |
| 0.011597 | 0.011631 | 0.011765 | 0.011900 | 0.011396 | 0.011631 | 0.011732 |
| 0.011664 | 0.011732 | 0.011631 | 0.011866 | 0.011295 | 0.011631 | 0.011698 |
| 0.011597 | 0.011698 | 0.011664 | 0.011732 | 0.011664 | 0.011664 | 0.011664 |
| 0.011564 | 0.011597 | 0.011564 | 0.011597 | 0.011631 | 0.011666 | 0.011731 |
| 0.011664 | 0.011631 | 0.011698 | 0.011597 | 0.011463 | 0.011564 | 0.011631 |
| 0.011799 | 0.011731 | 0.011496 | 0.011799 | 0.011631 | 0.011866 | 0.011631 |
| 0.011839 | 0.011322 | 0.011853 | 0.011529 | 0.011545 | 0.011649 | 0.011454 |
| 0.012085 | 0.011365 | 0.011554 | 0.011866 | 0.011866 | 0.011597 | 0.011496 |
| 0.011698 | 0.011664 | 0.011731 | 0.011631 | 0.011732 | 0.011664 | 0.011664 |
| 0.011631 | 0.011664 | 0.011933 | 0.011799 | 0.011698 | 0.011665 | 0.011598 |
| 0.011564 | 0.011497 | 0.011631 | 0.011597 | 0.011530 | 0.011497 | 0.011430 |
| 0.011530 | 0.011598 | 0.011597 | 0.011597 | 0.011631 | 0.011631 | 0.011634 |
| 0.011703 | 0.011631 | 0.011631 | 0.011456 | 0.011530 | 0.011516 | 0.011632 |
| 0.011602 | 0.011541 | 0.011577 | 0.011578 | 0.011536 | 0.011540 | 0.011601 |
| 0.011456 | 0.011612 | 0.011646 | 0.011565 | 0.011544 | 0.011700 | 0.011598 |
| 0.011666 | 0.011667 | 0.011666 | 0.011765 | 0.011698 | 0.012068 | 0.011799 |
| 0.011631 | 0.011698 | 0.011631 | 0.011665 | 0.011530 | 0.011497 | 0.011564 |
| 0.011631 | 0.011631 | 0.011597 | 0.011564 | 0.011597 | 0.011564 | 0.011665 |
| 0.011631 | 0.011732 | 0.011665 | 0.011564 | 0.011667 | 0.011766 | 0.011770 |
| 0.011766 | 0.011665 | 0.011564 | 0.011499 | 0.011631 | 0.011564 | 0.011497 |
| 0.011502 | 0.011766 | 0.011564 | 0.011766 | 0.011530 | 0.011631 | 0.011598 |
| 0.011698 | 0.011597 | 0.011631 | 0.011598 | 0.011631 | 0.011497 | 0.011631 |
| 0.011665 | 0.011597 | 0.011665 | 0.011597 | 0.011631 | 0.011665 | 0.011900 |
| 0.011329 | 0.011262 | 0.011195 | 0.011768 | 0.011396 | 0.011631 | 0.011597 |
| 0.011567 | 0.011869 | 0.011655 | 0.011541 | 0.011332 | 0.011504 | 0.011690 |
| 0.011332 | 0.011570 | 0.011799 | 0.012001 | 0.011709 | 0.011866 | 0.011833 |
| 0.011765 | 0.011933 | 0.011806 | 0.011637 | 0.011689 | 0.011665 | 0.011737 |
| 0.011833 | 0.011735 | 0.011872 | 0.011940 | 0.011866 | 0.011934 | 0.012043 |
| 0.011771 | 0.011943 | 0.011805 | 0.011804 | 0.012070 | 0.011530 | 0.011734 |
| 0.011698 | 0.011631 | 0.011530 | 0.011530 | 0.011597 | 0.011597 | 0.011664 |
| 0.011597 | 0.011664 | 0.011564 | 0.011597 | 0.011597 | 0.011597 | 0.011664 |
| 0.011597 | 0.011362 | 0.000000 | 0.011161 | 0.011496 | 0.011597 | 0.011631 |
| 0.011631 | 0.011530 | 0.011664 | 0.011631 | 0.011564 | 0.011564 | 0.011564 |
| 0.011429 | 0.011664 | 0.011732 | 0.011530 | 0.011631 | 0.011799 | 0.011564 |
| 0.011564 | 0.011631 | 0.011597 | 0.011765 | 0.011564 | 0.011497 | 0.011631 |
| 0.011564 | 0.011597 | 0.011597 | 0.011530 | 0.011530 | 0.011698 | 0.011631 |
| 0.011530 | 0.011631 | 0.011497 | 0.011530 | 0.011665 | 0.011463 | 0.011564 |
| 0.011531 | 0.011664 | 0.011598 | 0.011497 | 0.011228 | 0.011497 | 0.011664 |
| 0.011745 | 0.011564 | 0.011195 | 0.011698 | 0.011664 | 0.011597 | 0.011698 |
| 0.011564 | 0.011900 | 0.011496 | 0.011362 | 0.011497 | 0.011497 | 0.011496 |
| 0.011732 | 0.011598 | 0.011631 | 0.011698 | 0.011530 | 0.011127 | 0.011497 |
| 0.011564 | 0.011564 | 0.011597 | 0.011698 | 0.011597 | 0.011698 | 0.011765 |

|          |          |          |          |          |          |          |
|----------|----------|----------|----------|----------|----------|----------|
| 0.011765 | 0.011732 | 0.011631 | 0.011732 | 0.011698 | 0.011564 | 0.011530 |
| 0.011564 | 0.011564 | 0.011631 | 0.011497 | 0.011530 | 0.011698 | 0.011564 |
| 0.011530 | 0.011597 | 0.011732 | 0.011698 | 0.011664 | 0.011597 | 0.011597 |
| 0.011664 | 0.011597 | 0.011698 | 0.011564 | 0.011698 | 0.011799 | 0.011496 |
| 0.011597 | 0.011396 | 0.011612 | 0.018125 | 0.011322 | 0.011611 | 0.011270 |
| 0.011233 | 0.011271 | 0.011794 | 0.011524 | 0.011390 | 0.011302 | 0.011668 |
| 0.011630 | 0.011365 | 0.011489 | 0.011647 | 0.011529 | 0.011505 | 0.011576 |
| 0.011295 | 0.011433 | 0.011320 | 0.011457 | 0.011732 | 0.011765 | 0.011771 |
| 0.011644 | 0.011732 | 0.011732 | 0.011631 | 0.011665 | 0.011665 | 0.011631 |
| 0.011665 | 0.011597 | 0.011631 | 0.011665 | 0.011631 | 0.011564 | 0.011597 |
| 0.011597 | 0.011665 | 0.011564 | 0.011665 | 0.011698 | 0.011732 | 0.011631 |
| 0.011597 | 0.011564 | 0.011362 | 0.011362 | 0.011698 | 0.011733 | 0.011766 |
| 0.011530 | 0.011530 | 0.011564 | 0.011665 | 0.011530 | 0.011766 | 0.011766 |
| 0.011799 | 0.011799 | 0.011732 | 0.011833 | 0.011396 | 0.011835 | 0.011665 |
| 0.011665 | 0.011732 | 0.011766 | 0.011598 | 0.011665 | 0.011631 | 0.011665 |
| 0.011732 | 0.011732 | 0.011765 | 0.011732 | 0.011633 | 0.011833 | 0.011799 |
| 0.011670 | 0.011564 | 0.011665 | 0.011766 | 0.011665 | 0.011732 | 0.011832 |
| 0.012001 | 0.011709 | 0.011866 | 0.011833 | 0.011765 | 0.011933 | 0.011564 |
| 0.011734 | 0.011632 | 0.011597 | 0.011597 | 0.011665 | 0.011564 | 0.011665 |
| 0.011698 | 0.011732 | 0.011631 | 0.011597 | 0.011564 | 0.011362 | 0.011362 |
| 0.011698 | 0.011733 | 0.011799 | 0.011731 | 0.012305 | 0.011810 | 0.011728 |
| 0.011799 | 0.011754 | 0.011869 | 0.011753 | 0.011865 | 0.011785 | 0.011715 |
| 0.012262 | 0.011649 | 0.011780 | 0.011717 | 0.011990 | 0.011843 | 0.011945 |
| 0.012284 | 0.011777 | 0.011906 | 0.011967 | 0.011832 | 0.011564 | 0.011871 |
| 0.011530 | 0.011698 | 0.011832 | 0.011799 | 0.011804 | 0.011530 | 0.011498 |
| 0.011631 | 0.011564 | 0.011597 | 0.011631 | 0.011530 | 0.011597 | 0.011496 |
| 0.011564 | 0.011597 | 0.011564 | 0.011530 | 0.011631 | 0.011564 | 0.011597 |
| 0.011597 | 0.011530 | 0.011597 | 0.011631 | 0.011530 | 0.011732 | 0.011765 |
| 0.011664 | 0.011664 | 0.011664 | 0.011664 | 0.011597 | 0.011396 | 0.011631 |
| 0.011408 | 0.011597 | 0.011564 | 0.011569 | 0.011631 | 0.011631 | 0.011698 |
| 0.011698 | 0.011631 | 0.011597 | 0.011631 | 0.011732 | 0.011732 | 0.011664 |
| 0.011664 | 0.011799 | 0.011295 | 0.011698 | 0.011900 | 0.011900 | 0.011765 |
| 0.011597 | 0.011664 | 0.011698 | 0.011497 | 0.011665 | 0.011631 | 0.011664 |
| 0.011698 | 0.011564 | 0.011564 | 0.011866 | 0.011866 | 0.011833 | 0.011631 |
| 0.011732 | 0.011799 | 0.011664 | 0.011732 | 0.011698 | 0.011564 | 0.011228 |
| 0.011664 | 0.011631 | 0.011564 | 0.011799 | 0.011631 | 0.011732 | 0.011497 |
| 0.011664 | 0.011366 | 0.011362 | 0.011507 | 0.011399 | 0.011672 | 0.011370 |
| 0.011445 | 0.011722 | 0.011587 | 0.011596 | 0.011597 | 0.011417 | 0.011379 |
| 0.011468 | 0.011192 | 0.011450 | 0.011258 | 0.011330 | 0.011529 | 0.011790 |
| 0.011776 | 0.011690 | 0.011659 | 0.011659 | 0.011667 | 0.011530 | 0.011598 |
| 0.011598 | 0.011666 | 0.011770 | 0.011569 | 0.011908 | 0.011944 | 0.011664 |
| 0.011631 | 0.011698 | 0.011631 | 0.011665 | 0.011530 | 0.011497 | 0.011564 |
| 0.011631 | 0.011631 | 0.011597 | 0.011564 | 0.011597 | 0.011564 | 0.011665 |
| 0.011619 | 0.011620 | 0.011608 | 0.011642 | 0.011779 | 0.011744 | 0.011743 |
| 0.011742 | 0.011699 | 0.011466 | 0.011456 | 0.011602 | 0.011772 | 0.011773 |
| 0.011598 | 0.011636 | 0.011902 | 0.011872 | 0.011800 | 0.011834 | 0.011765 |
| 0.011698 | 0.011765 | 0.011765 | 0.011664 | 0.011631 | 0.011832 | 0.011900 |
| 0.011934 | 0.011167 | 0.011572 | 0.011719 | 0.011597 | 0.011799 | 0.011765 |
| 0.011800 | 0.011832 | 0.011832 | 0.011832 | 0.011925 | 0.011967 | 0.011615 |
| 0.011500 | 0.011510 | 0.011605 | 0.011570 | 0.011607 | 0.011545 | 0.011162 |
| 0.011643 | 0.011367 | 0.011584 | 0.011660 | 0.011632 | 0.011676 | 0.011598 |
| 0.011564 | 0.011497 | 0.011631 | 0.011597 | 0.011530 | 0.011497 | 0.011430 |
| 0.011530 | 0.011598 | 0.011597 | 0.011597 | 0.011631 | 0.011631 | 0.011634 |
| 0.011703 | 0.011631 | 0.011631 | 0.011667 | 0.011530 | 0.011598 | 0.011598 |
| 0.011666 | 0.011770 | 0.011569 | 0.011908 | 0.011944 | 0.011664 | 0.011832 |
| 0.011765 | 0.011765 | 0.011601 | 0.011791 | 0.011721 | 0.011741 | 0.011621 |
| 0.011784 | 0.011972 | 0.011780 | 0.011672 | 0.011564 | 0.011766 | 0.011631 |
| 0.011732 | 0.011665 | 0.011564 | 0.011667 | 0.011766 | 0.011770 | 0.011665 |
| 0.011564 | 0.011499 | 0.011631 | 0.011564 | 0.011497 | 0.011502 | 0.011766 |
| 0.011665 | 0.011597 | 0.011631 | 0.011665 | 0.011631 | 0.011564 | 0.011497 |

|          |          |          |          |          |          |          |
|----------|----------|----------|----------|----------|----------|----------|
| 0.011631 | 0.011664 | 0.011664 | 0.011597 | 0.011664 | 0.011900 | 0.011497 |
| 0.011597 | 0.011396 | 0.011597 | 0.011631 | 0.011597 | 0.011295 | 0.011574 |
| 0.011791 | 0.011400 | 0.011361 | 0.011463 | 0.011549 | 0.011527 | 0.011353 |
| 0.011323 | 0.011497 | 0.011597 | 0.011706 | 0.011565 | 0.011703 | 0.011834 |
| 0.011733 | 0.011771 | 0.011732 | 0.011983 | 0.011698 | 0.012573 | 0.011734 |
| 0.012473 | 0.012241 | 0.012375 | 0.012647 | 0.011631 | 0.011598 | 0.011699 |
| 0.012340 | 0.012073 | 0.011665 | 0.011564 | 0.011632 | 0.011632 | 0.011568 |
| 0.011497 | 0.011501 | 0.011564 | 0.011531 | 0.011901 | 0.011967 | 0.011969 |
| 0.011868 | 0.011969 | 0.012072 | 0.011839 | 0.012340 | 0.012348 | 0.012407 |
| 0.012408 | 0.012442 | 0.012392 | 0.012408 | 0.012410 | 0.011698 | 0.011934 |
| 0.012002 | 0.012505 | 0.012010 | 0.011968 | 0.012440 | 0.011502 | 0.011397 |
| 0.011295 | 0.011362 | 0.011901 | 0.011924 | 0.012010 | 0.011698 | 0.011431 |
| S276     | 0.012001 | 0.012001 | 0.012068 | 0.011833 | 0.011833 | 0.011900 |
| 0.011332 | 0.011264 | 0.011900 | 0.011597 | 0.011664 | 0.011632 | 0.011597 |
| 0.011564 | 0.011799 | 0.011530 | 0.011631 | 0.011698 | 0.011664 | 0.011631 |
| 0.011597 | 0.011631 | 0.011463 | 0.011598 | 0.011631 | 0.011631 | 0.011298 |
| 0.011597 | 0.011631 | 0.011530 | 0.011497 | 0.011698 | 0.011665 | 0.011698 |
| 0.011664 | 0.011765 | 0.011664 | 0.011664 | 0.011698 | 0.011664 | 0.011832 |
| 0.011530 | 0.011664 | 0.011698 | 0.011631 | 0.011664 | 0.011765 | 0.011698 |
| 0.011664 | 0.011833 | 0.011732 | 0.011329 | 0.011664 | 0.011933 | 0.011664 |
| 0.011631 | 0.011665 | 0.011799 | 0.011933 | 0.011429 | 0.011664 | 0.011765 |
| 0.011698 | 0.011765 | 0.011664 | 0.011899 | 0.011329 | 0.011664 | 0.011732 |
| 0.011631 | 0.011731 | 0.011698 | 0.011765 | 0.011698 | 0.011698 | 0.011698 |
| 0.011597 | 0.011631 | 0.011597 | 0.011631 | 0.011664 | 0.011700 | 0.011765 |
| 0.011698 | 0.011664 | 0.011732 | 0.011631 | 0.011496 | 0.011597 | 0.011664 |
| 0.011832 | 0.011765 | 0.011530 | 0.011832 | 0.011664 | 0.011900 | 0.011664 |
| 0.011876 | 0.011359 | 0.011890 | 0.011529 | 0.011583 | 0.011686 | 0.011493 |
| 0.012121 | 0.011365 | 0.011596 | 0.011899 | 0.011900 | 0.011631 | 0.011530 |
| 0.011732 | 0.011698 | 0.011765 | 0.011664 | 0.011765 | 0.011698 | 0.011698 |
| 0.011664 | 0.011698 | 0.011967 | 0.011832 | 0.011732 | 0.011698 | 0.011631 |
| 0.011597 | 0.011530 | 0.011665 | 0.011631 | 0.011564 | 0.011530 | 0.011463 |
| 0.011564 | 0.011631 | 0.011631 | 0.011631 | 0.011665 | 0.011665 | 0.011668 |
| 0.011736 | 0.011665 | 0.011665 | 0.011492 | 0.011566 | 0.011551 | 0.011665 |
| 0.011636 | 0.011576 | 0.011614 | 0.011612 | 0.011570 | 0.011574 | 0.011634 |
| 0.011492 | 0.011646 | 0.011680 | 0.011598 | 0.011579 | 0.011733 | 0.011632 |
| 0.011699 | 0.011701 | 0.011699 | 0.011799 | 0.011731 | 0.012101 | 0.011833 |
| 0.011664 | 0.011732 | 0.011664 | 0.011698 | 0.011564 | 0.011530 | 0.011598 |
| 0.011664 | 0.011664 | 0.011631 | 0.011597 | 0.011631 | 0.011597 | 0.011698 |
| 0.011665 | 0.011765 | 0.011698 | 0.011597 | 0.011701 | 0.011799 | 0.011804 |
| 0.011799 | 0.011698 | 0.011597 | 0.011532 | 0.011665 | 0.011597 | 0.011531 |
| 0.011536 | 0.011799 | 0.011598 | 0.011799 | 0.011564 | 0.011665 | 0.011631 |
| 0.011732 | 0.011631 | 0.011665 | 0.011631 | 0.011665 | 0.011530 | 0.011665 |
| 0.011698 | 0.011631 | 0.011698 | 0.011631 | 0.011665 | 0.011698 | 0.011934 |
| 0.011362 | 0.011295 | 0.011228 | 0.011802 | 0.011430 | 0.011665 | 0.011631 |
| 0.011601 | 0.011909 | 0.011609 | 0.011575 | 0.011365 | 0.011538 | 0.011729 |
| 0.011366 | 0.011604 | 0.011832 | 0.012034 | 0.011743 | 0.011900 | 0.011866 |
| 0.011799 | 0.011967 | 0.011842 | 0.011678 | 0.011773 | 0.011698 | 0.011737 |
| 0.011866 | 0.011769 | 0.011906 | 0.011974 | 0.011900 | 0.011967 | 0.012077 |
| 0.011805 | 0.011977 | 0.011839 | 0.011838 | 0.012103 | 0.011564 | 0.011768 |
| 0.011731 | 0.011664 | 0.011564 | 0.011564 | 0.011631 | 0.011631 | 0.011698 |
| 0.011631 | 0.011698 | 0.011597 | 0.011631 | 0.011631 | 0.011631 | 0.011698 |
| 0.011631 | 0.011396 | 0.011161 | 0.000000 | 0.011530 | 0.011631 | 0.011664 |
| 0.011664 | 0.011564 | 0.011698 | 0.011664 | 0.011597 | 0.011597 | 0.011597 |
| 0.011463 | 0.011698 | 0.011765 | 0.011564 | 0.011664 | 0.011833 | 0.011597 |
| 0.011597 | 0.011664 | 0.011631 | 0.011799 | 0.011597 | 0.011530 | 0.011664 |
| 0.011597 | 0.011631 | 0.011631 | 0.011564 | 0.011564 | 0.011732 | 0.011664 |
| 0.011564 | 0.011664 | 0.011530 | 0.011564 | 0.011698 | 0.011497 | 0.011597 |
| 0.011564 | 0.011698 | 0.011631 | 0.011530 | 0.011262 | 0.011530 | 0.011698 |
| 0.011779 | 0.011597 | 0.011228 | 0.011732 | 0.011698 | 0.011631 | 0.011732 |
| 0.011597 | 0.011933 | 0.011530 | 0.011396 | 0.011530 | 0.011530 | 0.011530 |



|          |          |          |          |          |          |          |
|----------|----------|----------|----------|----------|----------|----------|
| 0.011765 | 0.011631 | 0.011664 | 0.011732 | 0.011564 | 0.011161 | 0.011530 |
| 0.011597 | 0.011597 | 0.011631 | 0.011732 | 0.011631 | 0.011732 | 0.011799 |
| 0.011799 | 0.011765 | 0.011664 | 0.011765 | 0.011731 | 0.011597 | 0.011564 |
| 0.011597 | 0.011597 | 0.011664 | 0.011530 | 0.011564 | 0.011732 | 0.011597 |
| 0.011564 | 0.011631 | 0.011765 | 0.011732 | 0.011698 | 0.011631 | 0.011631 |
| 0.011698 | 0.011631 | 0.011731 | 0.011597 | 0.011732 | 0.011832 | 0.011530 |
| 0.011631 | 0.011429 | 0.011647 | 0.018163 | 0.011257 | 0.011672 | 0.011304 |
| 0.011268 | 0.011306 | 0.011899 | 0.011640 | 0.011335 | 0.011336 | 0.011607 |
| 0.011630 | 0.011427 | 0.011528 | 0.011688 | 0.011568 | 0.011554 | 0.011620 |
| 0.011295 | 0.011470 | 0.011357 | 0.011457 | 0.011765 | 0.011799 | 0.011804 |
| 0.011679 | 0.011765 | 0.011765 | 0.011665 | 0.011698 | 0.011698 | 0.011665 |
| 0.011698 | 0.011631 | 0.011664 | 0.011698 | 0.011665 | 0.011597 | 0.011631 |
| 0.011631 | 0.011698 | 0.011597 | 0.011698 | 0.011732 | 0.011765 | 0.011664 |
| 0.011631 | 0.011598 | 0.011396 | 0.011396 | 0.011732 | 0.011766 | 0.011799 |
| 0.011564 | 0.011564 | 0.011597 | 0.011698 | 0.011564 | 0.011799 | 0.011799 |
| 0.011833 | 0.011832 | 0.011765 | 0.011866 | 0.011430 | 0.011869 | 0.011698 |
| 0.011698 | 0.011765 | 0.011799 | 0.011631 | 0.011698 | 0.011665 | 0.011698 |
| 0.011766 | 0.011766 | 0.011799 | 0.011766 | 0.011666 | 0.011866 | 0.011833 |
| 0.011704 | 0.011597 | 0.011698 | 0.011799 | 0.011698 | 0.011766 | 0.011866 |
| 0.012034 | 0.011743 | 0.011900 | 0.011866 | 0.011799 | 0.011967 | 0.011598 |
| 0.011768 | 0.011665 | 0.011631 | 0.011631 | 0.011698 | 0.011597 | 0.011698 |
| 0.011732 | 0.011765 | 0.011664 | 0.011631 | 0.011598 | 0.011396 | 0.011396 |
| 0.011732 | 0.011766 | 0.011832 | 0.011765 | 0.012339 | 0.011846 | 0.011764 |
| 0.011834 | 0.011788 | 0.011904 | 0.011788 | 0.011900 | 0.011819 | 0.011750 |
| 0.012297 | 0.011683 | 0.011814 | 0.011752 | 0.012025 | 0.011877 | 0.011979 |
| 0.012318 | 0.011814 | 0.011939 | 0.012000 | 0.011866 | 0.011597 | 0.011905 |
| 0.011564 | 0.011732 | 0.011866 | 0.011832 | 0.011837 | 0.011564 | 0.011532 |
| 0.011664 | 0.011597 | 0.011631 | 0.011664 | 0.011564 | 0.011631 | 0.011530 |
| 0.011597 | 0.011631 | 0.011597 | 0.011564 | 0.011664 | 0.011597 | 0.011631 |
| 0.011631 | 0.011564 | 0.011631 | 0.011664 | 0.011564 | 0.011765 | 0.011799 |
| 0.011698 | 0.011698 | 0.011698 | 0.011698 | 0.011631 | 0.011429 | 0.011664 |
| 0.011443 | 0.011631 | 0.011598 | 0.011603 | 0.011664 | 0.011664 | 0.011732 |
| 0.011732 | 0.011664 | 0.011631 | 0.011664 | 0.011765 | 0.011765 | 0.011698 |
| 0.011698 | 0.011832 | 0.011329 | 0.011731 | 0.011933 | 0.011933 | 0.011799 |
| 0.011631 | 0.011698 | 0.011732 | 0.011530 | 0.011698 | 0.011664 | 0.011698 |
| 0.011732 | 0.011597 | 0.011597 | 0.011900 | 0.011900 | 0.011866 | 0.011664 |
| 0.011765 | 0.011832 | 0.011698 | 0.011765 | 0.011731 | 0.011597 | 0.011262 |
| 0.011698 | 0.011664 | 0.011597 | 0.011832 | 0.011664 | 0.011765 | 0.011530 |
| 0.011698 | 0.011400 | 0.011396 | 0.011548 | 0.011399 | 0.011706 | 0.011318 |
| 0.011500 | 0.011761 | 0.011622 | 0.011596 | 0.011548 | 0.011366 | 0.011326 |
| 0.011519 | 0.011192 | 0.011394 | 0.011258 | 0.011276 | 0.011462 | 0.011790 |
| 0.011814 | 0.011690 | 0.011694 | 0.011694 | 0.011701 | 0.011564 | 0.011631 |
| 0.011631 | 0.011699 | 0.011804 | 0.011603 | 0.011942 | 0.011979 | 0.011698 |
| 0.011664 | 0.011732 | 0.011664 | 0.011698 | 0.011564 | 0.011530 | 0.011598 |
| 0.011664 | 0.011664 | 0.011631 | 0.011597 | 0.011631 | 0.011597 | 0.011698 |
| 0.011654 | 0.011655 | 0.011642 | 0.011677 | 0.011813 | 0.011778 | 0.011777 |
| 0.011776 | 0.011733 | 0.011503 | 0.011492 | 0.011636 | 0.011806 | 0.011807 |
| 0.011632 | 0.011670 | 0.011936 | 0.011905 | 0.011834 | 0.011868 | 0.011799 |
| 0.011732 | 0.011799 | 0.011799 | 0.011698 | 0.011664 | 0.011866 | 0.011933 |
| 0.011967 | 0.011203 | 0.011606 | 0.011753 | 0.011631 | 0.011832 | 0.011799 |
| 0.011834 | 0.011866 | 0.011866 | 0.011866 | 0.011965 | 0.012000 | 0.011650 |
| 0.011533 | 0.011545 | 0.011639 | 0.011604 | 0.011641 | 0.011583 | 0.011196 |
| 0.011678 | 0.011455 | 0.011680 | 0.011697 | 0.011666 | 0.011710 | 0.011631 |
| 0.011597 | 0.011530 | 0.011665 | 0.011631 | 0.011564 | 0.011530 | 0.011463 |
| 0.011564 | 0.011631 | 0.011631 | 0.011631 | 0.011665 | 0.011665 | 0.011668 |
| 0.011736 | 0.011665 | 0.011665 | 0.011701 | 0.011564 | 0.011631 | 0.011631 |
| 0.011699 | 0.011804 | 0.011603 | 0.011942 | 0.011979 | 0.011698 | 0.011866 |
| 0.011799 | 0.011799 | 0.011635 | 0.011826 | 0.011755 | 0.011775 | 0.011656 |
| 0.011818 | 0.012017 | 0.011822 | 0.011706 | 0.011598 | 0.011799 | 0.011665 |
| 0.011765 | 0.011698 | 0.011597 | 0.011701 | 0.011799 | 0.011804 | 0.011698 |

|          |          |          |          |          |          |          |
|----------|----------|----------|----------|----------|----------|----------|
| 0.011597 | 0.011532 | 0.011665 | 0.011597 | 0.011531 | 0.011536 | 0.011799 |
| 0.011698 | 0.011631 | 0.011664 | 0.011698 | 0.011665 | 0.011597 | 0.011530 |
| 0.011664 | 0.011698 | 0.011698 | 0.011631 | 0.011698 | 0.011933 | 0.011530 |
| 0.011631 | 0.011429 | 0.011631 | 0.011664 | 0.011631 | 0.011329 | 0.011617 |
| 0.011847 | 0.011443 | 0.011361 | 0.011503 | 0.011590 | 0.011563 | 0.011353 |
| 0.011323 | 0.011530 | 0.011631 | 0.011740 | 0.011599 | 0.011737 | 0.011868 |
| 0.011767 | 0.011805 | 0.011765 | 0.012018 | 0.011732 | 0.012607 | 0.011768 |
| 0.012507 | 0.012275 | 0.012409 | 0.012681 | 0.011664 | 0.011631 | 0.011732 |
| 0.012373 | 0.012106 | 0.011698 | 0.011598 | 0.011666 | 0.011666 | 0.011602 |
| 0.011530 | 0.011535 | 0.011597 | 0.011565 | 0.011935 | 0.012001 | 0.012002 |
| 0.011902 | 0.012002 | 0.012106 | 0.011872 | 0.012374 | 0.012381 | 0.012441 |
| 0.012442 | 0.012475 | 0.012426 | 0.012442 | 0.012443 | 0.011731 | 0.011968 |
| 0.012036 | 0.012539 | 0.012044 | 0.012001 | 0.012474 | 0.011536 | 0.011430 |
| 0.011329 | 0.011396 | 0.011934 | 0.011965 | 0.012046 | 0.011732 | 0.011465 |
| S277     | 0.011530 | 0.011530 | 0.011866 | 0.011631 | 0.011631 | 0.011698 |
| 0.011535 | 0.011468 | 0.011698 | 0.011127 | 0.011194 | 0.011161 | 0.011127 |
| 0.011161 | 0.011329 | 0.011127 | 0.011161 | 0.011228 | 0.011194 | 0.011161 |
| 0.011127 | 0.011161 | 0.011262 | 0.011127 | 0.011161 | 0.011161 | 0.011501 |
| 0.011396 | 0.011161 | 0.000000 | 0.011295 | 0.011228 | 0.011195 | 0.011228 |
| 0.011194 | 0.011295 | 0.011194 | 0.011194 | 0.011228 | 0.011194 | 0.011362 |
| 0.011127 | 0.011194 | 0.011228 | 0.011161 | 0.011262 | 0.011295 | 0.011228 |
| 0.011194 | 0.011362 | 0.011262 | 0.011530 | 0.011194 | 0.011463 | 0.011194 |
| 0.011161 | 0.011262 | 0.011329 | 0.011463 | 0.011564 | 0.011262 | 0.011362 |
| 0.011228 | 0.011295 | 0.011195 | 0.011429 | 0.011664 | 0.011194 | 0.011262 |
| 0.011161 | 0.011262 | 0.011228 | 0.011295 | 0.011228 | 0.011228 | 0.011228 |
| 0.011127 | 0.011161 | 0.011127 | 0.011228 | 0.011194 | 0.011228 | 0.011295 |
| 0.011228 | 0.011194 | 0.011262 | 0.011161 | 0.011295 | 0.011127 | 0.011194 |
| 0.011362 | 0.011295 | 0.011530 | 0.011362 | 0.011194 | 0.011429 | 0.011194 |
| 0.011357 | 0.011583 | 0.011400 | 0.011099 | 0.011098 | 0.011207 | 0.011296 |
| 0.011938 | 0.011365 | 0.011102 | 0.011429 | 0.011429 | 0.011228 | 0.011329 |
| 0.011262 | 0.011228 | 0.011295 | 0.011194 | 0.011295 | 0.011228 | 0.011228 |
| 0.011194 | 0.011295 | 0.011496 | 0.011362 | 0.011262 | 0.011228 | 0.011161 |
| 0.011127 | 0.011127 | 0.011195 | 0.011161 | 0.011362 | 0.011329 | 0.011262 |
| 0.011362 | 0.011429 | 0.011161 | 0.011161 | 0.011195 | 0.011195 | 0.011195 |
| 0.011263 | 0.011195 | 0.011195 | 0.000000 | 0.011133 | 0.011095 | 0.011195 |
| 0.011196 | 0.011129 | 0.011171 | 0.011164 | 0.011094 | 0.011129 | 0.011162 |
| 0.011420 | 0.011198 | 0.011232 | 0.011128 | 0.011129 | 0.011262 | 0.011228 |
| 0.011296 | 0.011229 | 0.011228 | 0.011329 | 0.011262 | 0.011631 | 0.011430 |
| 0.011463 | 0.011329 | 0.011195 | 0.011295 | 0.011094 | 0.011329 | 0.011127 |
| 0.011194 | 0.011194 | 0.011161 | 0.011127 | 0.011161 | 0.011127 | 0.011228 |
| 0.011195 | 0.011295 | 0.011228 | 0.011127 | 0.011229 | 0.011329 | 0.011331 |
| 0.011329 | 0.011228 | 0.011127 | 0.000000 | 0.011195 | 0.011127 | 0.000000 |
| 0.011162 | 0.011329 | 0.011127 | 0.011329 | 0.011094 | 0.011195 | 0.011161 |
| 0.011262 | 0.011161 | 0.011195 | 0.011161 | 0.011195 | 0.000000 | 0.011195 |
| 0.011228 | 0.011161 | 0.011228 | 0.011161 | 0.011195 | 0.011228 | 0.011463 |
| 0.011564 | 0.011496 | 0.011564 | 0.011330 | 0.011564 | 0.011195 | 0.011161 |
| 0.011195 | 0.011464 | 0.011289 | 0.011095 | 0.011569 | 0.000000 | 0.011178 |
| 0.011569 | 0.011468 | 0.011362 | 0.011564 | 0.011265 | 0.011429 | 0.011396 |
| 0.011329 | 0.011496 | 0.011344 | 0.011184 | 0.011228 | 0.011228 | 0.011297 |
| 0.011396 | 0.011296 | 0.011432 | 0.011500 | 0.011429 | 0.011497 | 0.011602 |
| 0.011331 | 0.011501 | 0.011432 | 0.011364 | 0.011632 | 0.011094 | 0.011296 |
| 0.011262 | 0.011194 | 0.011094 | 0.011094 | 0.011161 | 0.011161 | 0.011228 |
| 0.011161 | 0.011228 | 0.011127 | 0.011228 | 0.011161 | 0.011161 | 0.011228 |
| 0.011161 | 0.011597 | 0.011496 | 0.011530 | 0.000000 | 0.011161 | 0.011195 |
| 0.011194 | 0.011161 | 0.011228 | 0.011262 | 0.011127 | 0.011127 | 0.011127 |
| 0.011664 | 0.011295 | 0.011295 | 0.011094 | 0.011194 | 0.011362 | 0.011127 |
| 0.011127 | 0.011194 | 0.011161 | 0.011329 | 0.011127 | 0.011262 | 0.011396 |
| 0.011329 | 0.011161 | 0.011161 | 0.011094 | 0.011094 | 0.011262 | 0.011194 |
| 0.011094 | 0.011194 | 0.000000 | 0.011094 | 0.011228 | 0.011362 | 0.011127 |
| 0.011094 | 0.011228 | 0.011161 | 0.000000 | 0.011396 | 0.000000 | 0.011228 |

|          |          |          |          |          |          |          |
|----------|----------|----------|----------|----------|----------|----------|
| 0.011300 | 0.011127 | 0.011429 | 0.011262 | 0.011295 | 0.011161 | 0.011262 |
| 0.011127 | 0.011463 | 0.000000 | 0.011329 | 0.011127 | 0.011127 | 0.000000 |
| 0.011295 | 0.011497 | 0.011195 | 0.011262 | 0.011094 | 0.011496 | 0.011127 |
| 0.011127 | 0.011127 | 0.011161 | 0.011262 | 0.011161 | 0.011262 | 0.011329 |
| 0.011329 | 0.011295 | 0.011194 | 0.011295 | 0.011262 | 0.011127 | 0.011094 |
| 0.011127 | 0.011127 | 0.011195 | 0.011127 | 0.011094 | 0.011262 | 0.011127 |
| 0.011161 | 0.011161 | 0.011295 | 0.011329 | 0.011228 | 0.011161 | 0.011161 |
| 0.011228 | 0.011161 | 0.011262 | 0.011127 | 0.011262 | 0.011362 | 0.011664 |
| 0.011161 | 0.011564 | 0.011164 | 0.017672 | 0.011126 | 0.011305 | 0.011514 |
| 0.011475 | 0.011517 | 0.011217 | 0.011176 | 0.011609 | 0.011543 | 0.011242 |
| 0.011392 | 0.011426 | 0.000000 | 0.011144 | 0.011138 | 0.011208 | 0.011146 |
| 0.011389 | 0.011321 | 0.011320 | 0.011126 | 0.011295 | 0.011329 | 0.011331 |
| 0.011198 | 0.011295 | 0.011295 | 0.011262 | 0.011228 | 0.011228 | 0.011195 |
| 0.011228 | 0.011161 | 0.011195 | 0.011228 | 0.011195 | 0.011127 | 0.011161 |
| 0.011161 | 0.011228 | 0.011127 | 0.011228 | 0.011262 | 0.011295 | 0.011195 |
| 0.011228 | 0.011195 | 0.011530 | 0.011530 | 0.011262 | 0.011296 | 0.011329 |
| 0.011094 | 0.011094 | 0.011127 | 0.011228 | 0.011094 | 0.011329 | 0.011329 |
| 0.011362 | 0.011362 | 0.011295 | 0.011396 | 0.011564 | 0.011397 | 0.011228 |
| 0.011228 | 0.011295 | 0.011329 | 0.011161 | 0.011228 | 0.011195 | 0.011228 |
| 0.011295 | 0.011295 | 0.011329 | 0.011295 | 0.011195 | 0.011396 | 0.011362 |
| 0.011230 | 0.011127 | 0.011228 | 0.011329 | 0.011228 | 0.011362 | 0.011396 |
| 0.011564 | 0.011265 | 0.011429 | 0.011396 | 0.011329 | 0.011496 | 0.011128 |
| 0.011296 | 0.011195 | 0.011161 | 0.011161 | 0.011228 | 0.011127 | 0.011228 |
| 0.011262 | 0.011295 | 0.011195 | 0.011228 | 0.011195 | 0.011530 | 0.011530 |
| 0.011262 | 0.011296 | 0.011362 | 0.011295 | 0.011934 | 0.011346 | 0.011271 |
| 0.011341 | 0.011303 | 0.011411 | 0.011303 | 0.011410 | 0.011336 | 0.011302 |
| 0.011884 | 0.011199 | 0.011334 | 0.011268 | 0.011542 | 0.011400 | 0.011502 |
| 0.011910 | 0.011362 | 0.011466 | 0.011530 | 0.011396 | 0.011396 | 0.011432 |
| 0.011094 | 0.011262 | 0.011396 | 0.011362 | 0.011364 | 0.011362 | 0.011330 |
| 0.011194 | 0.011127 | 0.011161 | 0.011194 | 0.011094 | 0.011161 | 0.000000 |
| 0.011194 | 0.011228 | 0.011127 | 0.011094 | 0.011194 | 0.011127 | 0.011161 |
| 0.011161 | 0.011094 | 0.011161 | 0.011195 | 0.011094 | 0.011295 | 0.011329 |
| 0.011228 | 0.011295 | 0.011228 | 0.011228 | 0.011161 | 0.011564 | 0.011194 |
| 0.011234 | 0.011161 | 0.011396 | 0.011399 | 0.011262 | 0.011262 | 0.011262 |
| 0.011262 | 0.011195 | 0.011161 | 0.011195 | 0.011295 | 0.011295 | 0.011228 |
| 0.011228 | 0.011362 | 0.011530 | 0.011262 | 0.011463 | 0.011463 | 0.011329 |
| 0.011161 | 0.011228 | 0.011262 | 0.011664 | 0.011228 | 0.011262 | 0.011228 |
| 0.011262 | 0.011194 | 0.011194 | 0.011497 | 0.011429 | 0.011463 | 0.011194 |
| 0.011295 | 0.011362 | 0.011228 | 0.011295 | 0.011262 | 0.011127 | 0.011463 |
| 0.011228 | 0.011194 | 0.011194 | 0.011362 | 0.011194 | 0.011295 | 0.011530 |
| 0.011228 | 0.011603 | 0.011597 | 0.011385 | 0.011117 | 0.011298 | 0.011163 |
| 0.011115 | 0.011605 | 0.011131 | 0.011328 | 0.011158 | 0.011264 | 0.011273 |
| 0.011366 | 0.000000 | 0.011227 | 0.000000 | 0.011114 | 0.011261 | 0.011263 |
| 0.011286 | 0.011178 | 0.011272 | 0.011201 | 0.011229 | 0.011362 | 0.011429 |
| 0.011429 | 0.011296 | 0.011398 | 0.011399 | 0.011535 | 0.011555 | 0.011228 |
| 0.011463 | 0.011329 | 0.011195 | 0.011295 | 0.011094 | 0.011329 | 0.011127 |
| 0.011194 | 0.011194 | 0.011161 | 0.011127 | 0.011161 | 0.011127 | 0.011228 |
| 0.011200 | 0.011200 | 0.011197 | 0.011231 | 0.011368 | 0.011333 | 0.011333 |
| 0.011333 | 0.011262 | 0.000000 | 0.000000 | 0.011196 | 0.011365 | 0.011366 |
| 0.011161 | 0.011230 | 0.011464 | 0.011432 | 0.011363 | 0.011397 | 0.011329 |
| 0.011262 | 0.011329 | 0.011329 | 0.011228 | 0.011799 | 0.011396 | 0.011463 |
| 0.011497 | 0.011558 | 0.011197 | 0.011268 | 0.011161 | 0.011362 | 0.011329 |
| 0.011363 | 0.011396 | 0.011396 | 0.011396 | 0.011532 | 0.011530 | 0.011164 |
| 0.000000 | 0.000000 | 0.011162 | 0.011128 | 0.011231 | 0.000000 | 0.011400 |
| 0.011197 | 0.011323 | 0.000000 | 0.011210 | 0.011195 | 0.011265 | 0.011161 |
| 0.011127 | 0.011127 | 0.011195 | 0.011161 | 0.011362 | 0.011329 | 0.011262 |
| 0.011362 | 0.011429 | 0.011161 | 0.011161 | 0.011195 | 0.011195 | 0.011195 |
| 0.011263 | 0.011195 | 0.011195 | 0.011229 | 0.011362 | 0.011429 | 0.011429 |
| 0.011296 | 0.011398 | 0.011399 | 0.011535 | 0.011555 | 0.011228 | 0.011396 |
| 0.011329 | 0.011329 | 0.011162 | 0.011339 | 0.011269 | 0.011299 | 0.011165 |

|          |          |          |          |          |          |          |
|----------|----------|----------|----------|----------|----------|----------|
| 0.011336 | 0.011516 | 0.011314 | 0.011230 | 0.011127 | 0.011329 | 0.011195 |
| 0.011295 | 0.011228 | 0.011127 | 0.011229 | 0.011329 | 0.011331 | 0.011228 |
| 0.011127 | 0.000000 | 0.011195 | 0.011127 | 0.000000 | 0.011162 | 0.011329 |
| 0.011228 | 0.011161 | 0.011195 | 0.011228 | 0.011195 | 0.011127 | 0.011329 |
| 0.011194 | 0.011228 | 0.011228 | 0.011161 | 0.011228 | 0.011463 | 0.011127 |
| 0.011161 | 0.011564 | 0.011161 | 0.011194 | 0.011161 | 0.011530 | 0.011103 |
| 0.011566 | 0.011103 | 0.011161 | 0.011342 | 0.011426 | 0.011347 | 0.000000 |
| 0.011113 | 0.011329 | 0.011429 | 0.011535 | 0.011397 | 0.011534 | 0.011665 |
| 0.011565 | 0.011601 | 0.011564 | 0.011812 | 0.011530 | 0.012404 | 0.011565 |
| 0.012304 | 0.012072 | 0.012206 | 0.012477 | 0.011530 | 0.011228 | 0.011530 |
| 0.011969 | 0.011903 | 0.011496 | 0.011396 | 0.011464 | 0.011464 | 0.011432 |
| 0.011329 | 0.011331 | 0.011396 | 0.011363 | 0.011733 | 0.011799 | 0.011800 |
| 0.011699 | 0.011800 | 0.011903 | 0.011669 | 0.011969 | 0.011974 | 0.012036 |
| 0.012037 | 0.012070 | 0.012015 | 0.012037 | 0.012038 | 0.011262 | 0.011564 |
| 0.011632 | 0.012135 | 0.011636 | 0.011866 | 0.012339 | 0.011400 | 0.011295 |
| 0.011262 | 0.011262 | 0.011732 | 0.011759 | 0.011869 | 0.011597 | 0.011262 |
| S278     | 0.011631 | 0.011631 | 0.011967 | 0.011732 | 0.011732 | 0.011799 |
| 0.011637 | 0.011569 | 0.011799 | 0.011228 | 0.011295 | 0.011262 | 0.011228 |
| 0.011262 | 0.011429 | 0.011228 | 0.011262 | 0.011329 | 0.011295 | 0.011262 |
| 0.011228 | 0.011262 | 0.011362 | 0.011228 | 0.011262 | 0.011262 | 0.011603 |
| 0.011496 | 0.011262 | 0.011161 | 0.011396 | 0.011329 | 0.011295 | 0.011329 |
| 0.011295 | 0.011396 | 0.011295 | 0.011295 | 0.011329 | 0.011295 | 0.011463 |
| 0.011228 | 0.011295 | 0.011329 | 0.011262 | 0.011362 | 0.011396 | 0.011329 |
| 0.011295 | 0.011463 | 0.011362 | 0.011631 | 0.011295 | 0.011564 | 0.011295 |
| 0.011262 | 0.011362 | 0.011429 | 0.011564 | 0.011664 | 0.011362 | 0.011463 |
| 0.011329 | 0.011396 | 0.011295 | 0.011530 | 0.011765 | 0.011295 | 0.011362 |
| 0.011262 | 0.011362 | 0.011329 | 0.011396 | 0.011329 | 0.011329 | 0.011329 |
| 0.011228 | 0.011262 | 0.011228 | 0.011329 | 0.011295 | 0.011329 | 0.011396 |
| 0.011329 | 0.011295 | 0.011362 | 0.011262 | 0.011396 | 0.011228 | 0.011295 |
| 0.011463 | 0.011396 | 0.011631 | 0.011463 | 0.011295 | 0.011530 | 0.011295 |
| 0.011468 | 0.011695 | 0.011513 | 0.011216 | 0.011210 | 0.011318 | 0.011415 |
| 0.012048 | 0.011467 | 0.011184 | 0.011530 | 0.011530 | 0.011329 | 0.011429 |
| 0.011362 | 0.011329 | 0.011396 | 0.011295 | 0.011396 | 0.011329 | 0.011329 |
| 0.011295 | 0.011396 | 0.011597 | 0.011463 | 0.011362 | 0.011329 | 0.011262 |
| 0.011228 | 0.011228 | 0.011295 | 0.011262 | 0.011463 | 0.011429 | 0.011362 |
| 0.011463 | 0.011530 | 0.011262 | 0.011262 | 0.011295 | 0.011295 | 0.011297 |
| 0.011364 | 0.011295 | 0.011295 | 0.011168 | 0.011241 | 0.011200 | 0.011296 |
| 0.011297 | 0.011232 | 0.011282 | 0.011267 | 0.011196 | 0.011232 | 0.011263 |
| 0.011528 | 0.011302 | 0.011336 | 0.011228 | 0.011233 | 0.011363 | 0.011329 |
| 0.011397 | 0.011330 | 0.011329 | 0.011429 | 0.011362 | 0.011732 | 0.011530 |
| 0.011564 | 0.011430 | 0.011295 | 0.011396 | 0.011195 | 0.011429 | 0.011228 |
| 0.011295 | 0.011295 | 0.011262 | 0.011228 | 0.011262 | 0.011228 | 0.011329 |
| 0.011295 | 0.011396 | 0.011329 | 0.011228 | 0.011330 | 0.011430 | 0.011432 |
| 0.011430 | 0.011329 | 0.011228 | 0.011161 | 0.011295 | 0.011228 | 0.011161 |
| 0.011264 | 0.011430 | 0.011228 | 0.011430 | 0.011195 | 0.011295 | 0.011262 |
| 0.011362 | 0.011262 | 0.011295 | 0.011262 | 0.011295 | 0.011161 | 0.011295 |
| 0.011329 | 0.011262 | 0.011329 | 0.011262 | 0.011295 | 0.011329 | 0.011564 |
| 0.011664 | 0.011597 | 0.011665 | 0.011431 | 0.011665 | 0.011295 | 0.011262 |
| 0.011297 | 0.011545 | 0.011426 | 0.011197 | 0.011671 | 0.011163 | 0.011296 |
| 0.011671 | 0.011570 | 0.011463 | 0.011664 | 0.011367 | 0.011530 | 0.011497 |
| 0.011429 | 0.011597 | 0.011451 | 0.011307 | 0.011312 | 0.011329 | 0.011398 |
| 0.011497 | 0.011397 | 0.011533 | 0.011602 | 0.011530 | 0.011597 | 0.011704 |
| 0.011432 | 0.011603 | 0.011534 | 0.011466 | 0.011733 | 0.011194 | 0.011397 |
| 0.011362 | 0.011295 | 0.011194 | 0.011194 | 0.011262 | 0.011262 | 0.011329 |
| 0.011262 | 0.011329 | 0.011228 | 0.011329 | 0.011262 | 0.011262 | 0.011329 |
| 0.011262 | 0.011698 | 0.011597 | 0.011631 | 0.011161 | 0.000000 | 0.011295 |
| 0.011295 | 0.011262 | 0.011329 | 0.011362 | 0.011228 | 0.011228 | 0.011228 |
| 0.011765 | 0.011396 | 0.011396 | 0.011194 | 0.011295 | 0.011463 | 0.011228 |
| 0.011228 | 0.011295 | 0.011262 | 0.011429 | 0.011228 | 0.011362 | 0.011496 |
| 0.011429 | 0.011262 | 0.011262 | 0.011194 | 0.011194 | 0.011362 | 0.011295 |

|          |          |          |          |          |          |          |
|----------|----------|----------|----------|----------|----------|----------|
| 0.011194 | 0.011295 | 0.011161 | 0.011194 | 0.011329 | 0.011463 | 0.011228 |
| 0.011195 | 0.011329 | 0.011262 | 0.011161 | 0.011496 | 0.011161 | 0.011329 |
| 0.011403 | 0.011228 | 0.011530 | 0.011362 | 0.011396 | 0.011262 | 0.011362 |
| 0.011228 | 0.011564 | 0.011161 | 0.011429 | 0.011228 | 0.011228 | 0.011161 |
| 0.011396 | 0.011597 | 0.011295 | 0.011362 | 0.011194 | 0.011597 | 0.011228 |
| 0.011228 | 0.011228 | 0.011262 | 0.011362 | 0.011262 | 0.011362 | 0.011429 |
| 0.011429 | 0.011396 | 0.011295 | 0.011396 | 0.011362 | 0.011228 | 0.011194 |
| 0.011228 | 0.011228 | 0.011295 | 0.011228 | 0.011194 | 0.011362 | 0.011228 |
| 0.011262 | 0.011262 | 0.011396 | 0.011429 | 0.011329 | 0.011262 | 0.011262 |
| 0.011329 | 0.011262 | 0.011362 | 0.011228 | 0.011362 | 0.011463 | 0.011765 |
| 0.011262 | 0.011664 | 0.011267 | 0.017747 | 0.011257 | 0.011488 | 0.011618 |
| 0.011579 | 0.011623 | 0.011322 | 0.011234 | 0.011774 | 0.011647 | 0.011425 |
| 0.011487 | 0.011610 | 0.011177 | 0.011228 | 0.011216 | 0.011356 | 0.011275 |
| 0.011482 | 0.011433 | 0.011394 | 0.011193 | 0.011396 | 0.011429 | 0.011432 |
| 0.011301 | 0.011396 | 0.011396 | 0.011362 | 0.011329 | 0.011329 | 0.011295 |
| 0.011329 | 0.011262 | 0.011295 | 0.011329 | 0.011295 | 0.011228 | 0.011262 |
| 0.011262 | 0.011329 | 0.011228 | 0.011329 | 0.011362 | 0.011396 | 0.011295 |
| 0.011329 | 0.011295 | 0.011631 | 0.011631 | 0.011362 | 0.011396 | 0.011430 |
| 0.011195 | 0.011195 | 0.011228 | 0.011329 | 0.011195 | 0.011430 | 0.011430 |
| 0.011463 | 0.011463 | 0.011396 | 0.011497 | 0.011665 | 0.011498 | 0.011329 |
| 0.011329 | 0.011396 | 0.011430 | 0.011262 | 0.011329 | 0.011295 | 0.011329 |
| 0.011396 | 0.011396 | 0.011429 | 0.011396 | 0.011296 | 0.011497 | 0.011463 |
| 0.011331 | 0.011228 | 0.011329 | 0.011430 | 0.011329 | 0.011463 | 0.011496 |
| 0.011664 | 0.011367 | 0.011530 | 0.011497 | 0.011429 | 0.011597 | 0.011228 |
| 0.011397 | 0.011295 | 0.011262 | 0.011262 | 0.011329 | 0.011228 | 0.011329 |
| 0.011362 | 0.011396 | 0.011295 | 0.011329 | 0.011295 | 0.011631 | 0.011631 |
| 0.011362 | 0.011396 | 0.011463 | 0.011396 | 0.012036 | 0.011453 | 0.011377 |
| 0.011447 | 0.011407 | 0.011517 | 0.011406 | 0.011515 | 0.011439 | 0.011405 |
| 0.011987 | 0.011302 | 0.011437 | 0.011371 | 0.011645 | 0.011502 | 0.011605 |
| 0.012012 | 0.011475 | 0.011567 | 0.011631 | 0.011496 | 0.011497 | 0.011533 |
| 0.011194 | 0.011362 | 0.011496 | 0.011463 | 0.011466 | 0.011463 | 0.011431 |
| 0.011295 | 0.011228 | 0.011262 | 0.011295 | 0.011194 | 0.011262 | 0.011161 |
| 0.011295 | 0.011329 | 0.011228 | 0.011194 | 0.011295 | 0.011228 | 0.011262 |
| 0.011262 | 0.011194 | 0.011262 | 0.011295 | 0.011194 | 0.011396 | 0.011429 |
| 0.011329 | 0.011396 | 0.011329 | 0.011329 | 0.011262 | 0.011664 | 0.011295 |
| 0.011338 | 0.011262 | 0.011497 | 0.011501 | 0.011362 | 0.011362 | 0.011362 |
| 0.011362 | 0.011295 | 0.011262 | 0.011295 | 0.011396 | 0.011396 | 0.011329 |
| 0.011329 | 0.011463 | 0.011631 | 0.011362 | 0.011564 | 0.011564 | 0.011429 |
| 0.011262 | 0.011329 | 0.011362 | 0.011765 | 0.011329 | 0.011362 | 0.011329 |
| 0.011362 | 0.011295 | 0.011295 | 0.011597 | 0.011530 | 0.011564 | 0.011295 |
| 0.011396 | 0.011463 | 0.011329 | 0.011396 | 0.011362 | 0.011228 | 0.011564 |
| 0.011329 | 0.011295 | 0.011295 | 0.011463 | 0.011295 | 0.011396 | 0.011631 |
| 0.011329 | 0.011705 | 0.011698 | 0.011507 | 0.011229 | 0.011400 | 0.011215 |
| 0.011280 | 0.011722 | 0.011236 | 0.011417 | 0.011304 | 0.011417 | 0.011379 |
| 0.011468 | 0.011192 | 0.011339 | 0.011192 | 0.011222 | 0.011395 | 0.011385 |
| 0.011399 | 0.011296 | 0.011377 | 0.011307 | 0.011330 | 0.011463 | 0.011530 |
| 0.011530 | 0.011396 | 0.011500 | 0.011501 | 0.011636 | 0.011661 | 0.011329 |
| 0.011564 | 0.011430 | 0.011295 | 0.011396 | 0.011195 | 0.011429 | 0.011228 |
| 0.011295 | 0.011295 | 0.011262 | 0.011228 | 0.011262 | 0.011228 | 0.011329 |
| 0.011305 | 0.011305 | 0.011300 | 0.011334 | 0.011471 | 0.011436 | 0.011436 |
| 0.011435 | 0.011363 | 0.011171 | 0.011168 | 0.011297 | 0.011467 | 0.011467 |
| 0.011262 | 0.011331 | 0.011565 | 0.011533 | 0.011464 | 0.011498 | 0.011429 |
| 0.011362 | 0.011429 | 0.011429 | 0.011329 | 0.011900 | 0.011497 | 0.011564 |
| 0.011597 | 0.011665 | 0.011299 | 0.011372 | 0.011262 | 0.011463 | 0.011429 |
| 0.011464 | 0.011496 | 0.011496 | 0.011496 | 0.011571 | 0.011631 | 0.011268 |
| 0.011162 | 0.011164 | 0.011264 | 0.011230 | 0.011333 | 0.011135 | 0.011502 |
| 0.011300 | 0.011411 | 0.011108 | 0.011322 | 0.011296 | 0.011368 | 0.011262 |
| 0.011228 | 0.011228 | 0.011295 | 0.011262 | 0.011463 | 0.011429 | 0.011362 |
| 0.011463 | 0.011530 | 0.011262 | 0.011262 | 0.011295 | 0.011295 | 0.011297 |
| 0.011364 | 0.011295 | 0.011295 | 0.011330 | 0.011463 | 0.011530 | 0.011530 |

|          |          |          |          |          |          |          |
|----------|----------|----------|----------|----------|----------|----------|
| 0.011396 | 0.011500 | 0.011501 | 0.011636 | 0.011661 | 0.011329 | 0.011496 |
| 0.011429 | 0.011429 | 0.011263 | 0.011443 | 0.011373 | 0.011401 | 0.011235 |
| 0.011405 | 0.011607 | 0.011441 | 0.011298 | 0.011228 | 0.011430 | 0.011295 |
| 0.011396 | 0.011329 | 0.011228 | 0.011330 | 0.011430 | 0.011432 | 0.011329 |
| 0.011228 | 0.011161 | 0.011295 | 0.011228 | 0.011161 | 0.011264 | 0.011430 |
| 0.011329 | 0.011262 | 0.011295 | 0.011329 | 0.011295 | 0.011228 | 0.011430 |
| 0.011295 | 0.011329 | 0.011329 | 0.011262 | 0.011329 | 0.011564 | 0.011228 |
| 0.011262 | 0.011664 | 0.011262 | 0.011295 | 0.011262 | 0.011631 | 0.011189 |
| 0.011678 | 0.011230 | 0.011261 | 0.011463 | 0.011549 | 0.011455 | 0.011186 |
| 0.011218 | 0.011429 | 0.011530 | 0.011637 | 0.011498 | 0.011635 | 0.011766 |
| 0.011666 | 0.011703 | 0.011664 | 0.011914 | 0.011631 | 0.012505 | 0.011667 |
| 0.012406 | 0.012173 | 0.012307 | 0.012579 | 0.011631 | 0.011329 | 0.011631 |
| 0.012070 | 0.012005 | 0.011597 | 0.011497 | 0.011565 | 0.011565 | 0.011534 |
| 0.011429 | 0.011433 | 0.011496 | 0.011464 | 0.011834 | 0.011900 | 0.011901 |
| 0.011800 | 0.011901 | 0.012004 | 0.011770 | 0.012070 | 0.012076 | 0.012137 |
| 0.012138 | 0.012172 | 0.012118 | 0.012138 | 0.012139 | 0.011362 | 0.011665 |
| 0.011733 | 0.012236 | 0.011738 | 0.011967 | 0.012440 | 0.011502 | 0.011396 |
| 0.011362 | 0.011362 | 0.011833 | 0.011883 | 0.011975 | 0.011698 | 0.011363 |
| S279     | 0.011664 | 0.011664 | 0.012001 | 0.011765 | 0.011765 | 0.011832 |
| 0.011637 | 0.011569 | 0.011832 | 0.011262 | 0.011329 | 0.011296 | 0.011262 |
| 0.011295 | 0.011463 | 0.011262 | 0.011295 | 0.011362 | 0.011329 | 0.011295 |
| 0.011262 | 0.011295 | 0.011396 | 0.011262 | 0.011295 | 0.011295 | 0.011603 |
| 0.011530 | 0.011295 | 0.011195 | 0.011429 | 0.011362 | 0.011329 | 0.011362 |
| 0.011329 | 0.011429 | 0.011329 | 0.011329 | 0.011362 | 0.011329 | 0.011497 |
| 0.011262 | 0.011329 | 0.011362 | 0.011295 | 0.011396 | 0.011429 | 0.011362 |
| 0.011329 | 0.011497 | 0.011396 | 0.011664 | 0.011329 | 0.011597 | 0.011329 |
| 0.011295 | 0.011396 | 0.011463 | 0.011597 | 0.011698 | 0.011396 | 0.011497 |
| 0.011362 | 0.011430 | 0.011262 | 0.011564 | 0.011799 | 0.011329 | 0.011396 |
| 0.011295 | 0.011396 | 0.011362 | 0.011429 | 0.011362 | 0.011362 | 0.011362 |
| 0.011262 | 0.011295 | 0.011262 | 0.011362 | 0.011329 | 0.011363 | 0.011429 |
| 0.011362 | 0.011329 | 0.011396 | 0.011295 | 0.011429 | 0.011262 | 0.011329 |
| 0.011496 | 0.011429 | 0.011664 | 0.011497 | 0.011329 | 0.011564 | 0.011329 |
| 0.011505 | 0.011733 | 0.011551 | 0.011256 | 0.011247 | 0.011355 | 0.011454 |
| 0.012085 | 0.011569 | 0.011266 | 0.011564 | 0.011564 | 0.011362 | 0.011463 |
| 0.011396 | 0.011362 | 0.011429 | 0.011329 | 0.011430 | 0.011362 | 0.011362 |
| 0.011329 | 0.011429 | 0.011631 | 0.011496 | 0.011396 | 0.011362 | 0.011295 |
| 0.011262 | 0.011262 | 0.011329 | 0.011295 | 0.011497 | 0.011463 | 0.011396 |
| 0.011497 | 0.011564 | 0.011295 | 0.011295 | 0.011329 | 0.011329 | 0.011330 |
| 0.011398 | 0.011329 | 0.011329 | 0.011204 | 0.011277 | 0.011236 | 0.011329 |
| 0.011331 | 0.011266 | 0.011319 | 0.011302 | 0.011230 | 0.011266 | 0.011297 |
| 0.011564 | 0.011336 | 0.011370 | 0.011262 | 0.011268 | 0.011397 | 0.011363 |
| 0.011430 | 0.011364 | 0.011363 | 0.011463 | 0.011396 | 0.011765 | 0.011564 |
| 0.011597 | 0.011463 | 0.011329 | 0.011430 | 0.011228 | 0.011463 | 0.011262 |
| 0.011329 | 0.011329 | 0.011295 | 0.011262 | 0.011295 | 0.011262 | 0.011362 |
| 0.011329 | 0.011430 | 0.011363 | 0.011262 | 0.011363 | 0.011463 | 0.011466 |
| 0.011463 | 0.011363 | 0.011262 | 0.011195 | 0.011329 | 0.011262 | 0.011195 |
| 0.011298 | 0.011463 | 0.011262 | 0.011463 | 0.011228 | 0.011329 | 0.011295 |
| 0.011396 | 0.011295 | 0.011329 | 0.011295 | 0.011329 | 0.011195 | 0.011329 |
| 0.011363 | 0.011295 | 0.011362 | 0.011295 | 0.011329 | 0.011362 | 0.011597 |
| 0.011698 | 0.011631 | 0.011698 | 0.011465 | 0.011699 | 0.011329 | 0.011295 |
| 0.011330 | 0.011626 | 0.011426 | 0.011232 | 0.011705 | 0.011197 | 0.011336 |
| 0.011671 | 0.011570 | 0.011496 | 0.011698 | 0.011402 | 0.011564 | 0.011530 |
| 0.011463 | 0.011631 | 0.011486 | 0.011307 | 0.011354 | 0.011362 | 0.011432 |
| 0.011530 | 0.011364 | 0.011567 | 0.011635 | 0.011564 | 0.011631 | 0.011738 |
| 0.011466 | 0.011637 | 0.011568 | 0.011500 | 0.011767 | 0.011228 | 0.011431 |
| 0.011396 | 0.011329 | 0.011228 | 0.011228 | 0.011295 | 0.011295 | 0.011362 |
| 0.011295 | 0.011362 | 0.011262 | 0.011362 | 0.011295 | 0.011295 | 0.011362 |
| 0.011295 | 0.011732 | 0.011631 | 0.011664 | 0.011195 | 0.011295 | 0.000000 |
| 0.011329 | 0.011295 | 0.011362 | 0.011396 | 0.011262 | 0.011262 | 0.011262 |
| 0.011799 | 0.011429 | 0.011429 | 0.011228 | 0.011329 | 0.011497 | 0.011262 |

|          |          |          |          |          |          |          |
|----------|----------|----------|----------|----------|----------|----------|
| 0.011262 | 0.011329 | 0.011295 | 0.011463 | 0.011262 | 0.011396 | 0.011530 |
| 0.011463 | 0.011295 | 0.011295 | 0.011228 | 0.011228 | 0.011396 | 0.011329 |
| 0.011228 | 0.011329 | 0.011195 | 0.011228 | 0.011362 | 0.011497 | 0.011262 |
| 0.011228 | 0.011362 | 0.011295 | 0.011195 | 0.011530 | 0.011195 | 0.011362 |
| 0.011437 | 0.011262 | 0.011564 | 0.011396 | 0.011429 | 0.011295 | 0.011396 |
| 0.011262 | 0.011597 | 0.011195 | 0.011463 | 0.011262 | 0.011262 | 0.011195 |
| 0.011429 | 0.011631 | 0.011262 | 0.011396 | 0.011228 | 0.011631 | 0.011262 |
| 0.011262 | 0.011262 | 0.011295 | 0.011396 | 0.011295 | 0.011396 | 0.011463 |
| 0.011463 | 0.011429 | 0.011329 | 0.011430 | 0.011396 | 0.011262 | 0.011228 |
| 0.011262 | 0.011262 | 0.011262 | 0.011262 | 0.011228 | 0.011396 | 0.011262 |
| 0.011295 | 0.011295 | 0.011429 | 0.011463 | 0.011362 | 0.011295 | 0.011295 |
| 0.011362 | 0.011295 | 0.011396 | 0.011262 | 0.011396 | 0.011497 | 0.011799 |
| 0.011295 | 0.011698 | 0.011302 | 0.017823 | 0.011388 | 0.011427 | 0.011653 |
| 0.011614 | 0.011658 | 0.011270 | 0.011234 | 0.011719 | 0.011682 | 0.011364 |
| 0.011582 | 0.011487 | 0.011216 | 0.011270 | 0.011294 | 0.011258 | 0.011275 |
| 0.011576 | 0.011470 | 0.011468 | 0.011325 | 0.011429 | 0.011463 | 0.011466 |
| 0.011335 | 0.011430 | 0.011429 | 0.011396 | 0.011362 | 0.011363 | 0.011329 |
| 0.011362 | 0.011295 | 0.011329 | 0.011362 | 0.011329 | 0.011262 | 0.011295 |
| 0.011295 | 0.011362 | 0.011262 | 0.011295 | 0.011396 | 0.011430 | 0.011329 |
| 0.011362 | 0.011329 | 0.011665 | 0.011665 | 0.011396 | 0.011430 | 0.011463 |
| 0.011228 | 0.011228 | 0.011262 | 0.011363 | 0.011228 | 0.011463 | 0.011463 |
| 0.011497 | 0.011496 | 0.011429 | 0.011530 | 0.011698 | 0.011532 | 0.011362 |
| 0.011362 | 0.011430 | 0.011463 | 0.011295 | 0.011362 | 0.011329 | 0.011362 |
| 0.011430 | 0.011430 | 0.011463 | 0.011430 | 0.011330 | 0.011530 | 0.011497 |
| 0.011365 | 0.011262 | 0.011362 | 0.011463 | 0.011363 | 0.011497 | 0.011530 |
| 0.011698 | 0.011402 | 0.011564 | 0.011530 | 0.011463 | 0.011631 | 0.011262 |
| 0.011431 | 0.011329 | 0.011295 | 0.011295 | 0.011362 | 0.011262 | 0.011295 |
| 0.011396 | 0.011430 | 0.011329 | 0.011362 | 0.011329 | 0.011665 | 0.011665 |
| 0.011396 | 0.011430 | 0.011496 | 0.011429 | 0.012069 | 0.011489 | 0.011412 |
| 0.011482 | 0.011442 | 0.011552 | 0.011441 | 0.011550 | 0.011474 | 0.011440 |
| 0.012022 | 0.011337 | 0.011471 | 0.011406 | 0.011680 | 0.011536 | 0.011639 |
| 0.012046 | 0.011513 | 0.011601 | 0.011664 | 0.011530 | 0.011530 | 0.011567 |
| 0.011228 | 0.011396 | 0.011530 | 0.011496 | 0.011499 | 0.011496 | 0.011464 |
| 0.011329 | 0.011262 | 0.011295 | 0.011329 | 0.011228 | 0.011295 | 0.011195 |
| 0.011329 | 0.011362 | 0.011262 | 0.011228 | 0.011329 | 0.011262 | 0.011295 |
| 0.011295 | 0.011228 | 0.011295 | 0.011329 | 0.011228 | 0.011429 | 0.011463 |
| 0.011362 | 0.011429 | 0.011362 | 0.011362 | 0.011295 | 0.011698 | 0.011329 |
| 0.011373 | 0.011295 | 0.011531 | 0.011535 | 0.011396 | 0.011396 | 0.011396 |
| 0.011396 | 0.011329 | 0.011295 | 0.011329 | 0.011429 | 0.011429 | 0.011362 |
| 0.011362 | 0.011497 | 0.011664 | 0.011396 | 0.011597 | 0.011597 | 0.011463 |
| 0.011295 | 0.011362 | 0.011396 | 0.011799 | 0.011362 | 0.011396 | 0.011362 |
| 0.011396 | 0.011329 | 0.011329 | 0.011631 | 0.011564 | 0.011597 | 0.011329 |
| 0.011430 | 0.011497 | 0.011362 | 0.011430 | 0.011396 | 0.011262 | 0.011597 |
| 0.011362 | 0.011329 | 0.011329 | 0.011497 | 0.011329 | 0.011429 | 0.011665 |
| 0.011362 | 0.011705 | 0.011732 | 0.011548 | 0.011342 | 0.011434 | 0.011267 |
| 0.011225 | 0.011761 | 0.011271 | 0.011507 | 0.011353 | 0.011468 | 0.011485 |
| 0.011570 | 0.011258 | 0.011450 | 0.011258 | 0.011330 | 0.011395 | 0.011425 |
| 0.011437 | 0.011336 | 0.011413 | 0.011342 | 0.011364 | 0.011497 | 0.011564 |
| 0.011564 | 0.011430 | 0.011534 | 0.011535 | 0.011670 | 0.011626 | 0.011362 |
| 0.011597 | 0.011463 | 0.011329 | 0.011430 | 0.011228 | 0.011463 | 0.011262 |
| 0.011329 | 0.011329 | 0.011295 | 0.011262 | 0.011295 | 0.011262 | 0.011362 |
| 0.011340 | 0.011340 | 0.011334 | 0.011368 | 0.011505 | 0.011470 | 0.011470 |
| 0.011469 | 0.011396 | 0.011208 | 0.011204 | 0.011331 | 0.011501 | 0.011501 |
| 0.011296 | 0.011365 | 0.011599 | 0.011567 | 0.011497 | 0.011531 | 0.011463 |
| 0.011396 | 0.011463 | 0.011463 | 0.011362 | 0.011934 | 0.011530 | 0.011598 |
| 0.011631 | 0.011701 | 0.011333 | 0.011407 | 0.011295 | 0.011497 | 0.011463 |
| 0.011498 | 0.011530 | 0.011530 | 0.011530 | 0.011650 | 0.011664 | 0.011303 |
| 0.011196 | 0.011199 | 0.011299 | 0.011264 | 0.011368 | 0.011210 | 0.011536 |
| 0.011335 | 0.011411 | 0.011203 | 0.011322 | 0.011329 | 0.011402 | 0.011295 |
| 0.011262 | 0.011262 | 0.011329 | 0.011295 | 0.011497 | 0.011463 | 0.011396 |

|          |          |          |          |          |          |          |
|----------|----------|----------|----------|----------|----------|----------|
| 0.011497 | 0.011564 | 0.011295 | 0.011295 | 0.011329 | 0.011329 | 0.011330 |
| 0.011398 | 0.011329 | 0.011329 | 0.011364 | 0.011497 | 0.011564 | 0.011564 |
| 0.011430 | 0.011534 | 0.011535 | 0.011670 | 0.011626 | 0.011362 | 0.011530 |
| 0.011463 | 0.011463 | 0.011297 | 0.011478 | 0.011373 | 0.011435 | 0.011270 |
| 0.011439 | 0.011698 | 0.011484 | 0.011366 | 0.011262 | 0.011463 | 0.011329 |
| 0.011430 | 0.011363 | 0.011262 | 0.011363 | 0.011463 | 0.011466 | 0.011363 |
| 0.011262 | 0.011195 | 0.011329 | 0.011262 | 0.011195 | 0.011298 | 0.011463 |
| 0.011362 | 0.011295 | 0.011329 | 0.011362 | 0.011329 | 0.011262 | 0.011463 |
| 0.011329 | 0.011362 | 0.011362 | 0.011295 | 0.011362 | 0.011597 | 0.011262 |
| 0.011295 | 0.011698 | 0.011295 | 0.011329 | 0.011295 | 0.011664 | 0.011275 |
| 0.011735 | 0.011273 | 0.011361 | 0.011503 | 0.011589 | 0.011491 | 0.011228 |
| 0.011323 | 0.011463 | 0.011564 | 0.011671 | 0.011532 | 0.011669 | 0.011800 |
| 0.011700 | 0.011737 | 0.011698 | 0.011949 | 0.011664 | 0.012539 | 0.011700 |
| 0.012439 | 0.012207 | 0.012341 | 0.012613 | 0.011664 | 0.011363 | 0.011665 |
| 0.012104 | 0.012038 | 0.011631 | 0.011530 | 0.011598 | 0.011598 | 0.011567 |
| 0.011463 | 0.011467 | 0.011530 | 0.011497 | 0.011867 | 0.011933 | 0.011935 |
| 0.011834 | 0.011935 | 0.012038 | 0.011804 | 0.012104 | 0.012110 | 0.012171 |
| 0.012172 | 0.012206 | 0.012152 | 0.012172 | 0.012173 | 0.011396 | 0.011699 |
| 0.011767 | 0.012270 | 0.011772 | 0.012001 | 0.012474 | 0.011536 | 0.011430 |
| 0.011396 | 0.011396 | 0.011867 | 0.011924 | 0.012010 | 0.011664 | 0.011397 |
| S280     | 0.011664 | 0.011664 | 0.012001 | 0.011765 | 0.011765 | 0.011832 |
| 0.011671 | 0.011603 | 0.011832 | 0.011262 | 0.011329 | 0.011296 | 0.011262 |
| 0.011295 | 0.011463 | 0.011262 | 0.011295 | 0.011362 | 0.011329 | 0.011295 |
| 0.011262 | 0.011295 | 0.011396 | 0.011262 | 0.011295 | 0.011295 | 0.011637 |
| 0.011530 | 0.011295 | 0.011194 | 0.011429 | 0.011362 | 0.011329 | 0.011362 |
| 0.011329 | 0.011429 | 0.011329 | 0.011329 | 0.011362 | 0.011329 | 0.011497 |
| 0.011262 | 0.011329 | 0.011362 | 0.011295 | 0.011396 | 0.011429 | 0.011362 |
| 0.011329 | 0.011497 | 0.011396 | 0.011664 | 0.011329 | 0.011597 | 0.011329 |
| 0.011295 | 0.011396 | 0.011463 | 0.011597 | 0.011698 | 0.011396 | 0.011496 |
| 0.011362 | 0.011429 | 0.011329 | 0.011564 | 0.011799 | 0.011329 | 0.011396 |
| 0.011295 | 0.011396 | 0.011362 | 0.011429 | 0.011362 | 0.011362 | 0.011362 |
| 0.011262 | 0.011295 | 0.011262 | 0.011362 | 0.011329 | 0.011363 | 0.011429 |
| 0.011228 | 0.011329 | 0.011396 | 0.011295 | 0.011429 | 0.011262 | 0.011329 |
| 0.011496 | 0.011429 | 0.011664 | 0.011497 | 0.011329 | 0.011564 | 0.011329 |
| 0.011505 | 0.011733 | 0.011551 | 0.011255 | 0.011247 | 0.011355 | 0.011454 |
| 0.012085 | 0.011518 | 0.011266 | 0.011564 | 0.011564 | 0.011362 | 0.011463 |
| 0.011396 | 0.011362 | 0.011429 | 0.011329 | 0.011429 | 0.011362 | 0.011362 |
| 0.011329 | 0.011429 | 0.011631 | 0.011496 | 0.011262 | 0.011362 | 0.011295 |
| 0.011262 | 0.011262 | 0.011329 | 0.011295 | 0.011497 | 0.011463 | 0.011396 |
| 0.011497 | 0.011564 | 0.011295 | 0.011295 | 0.011329 | 0.011329 | 0.011330 |
| 0.011398 | 0.011329 | 0.011329 | 0.011204 | 0.011277 | 0.011236 | 0.011329 |
| 0.011331 | 0.011266 | 0.011318 | 0.011302 | 0.011230 | 0.011266 | 0.011297 |
| 0.011564 | 0.011336 | 0.011370 | 0.011262 | 0.011268 | 0.011397 | 0.011363 |
| 0.011430 | 0.011364 | 0.011363 | 0.011463 | 0.011396 | 0.011765 | 0.011564 |
| 0.011597 | 0.011463 | 0.011329 | 0.011430 | 0.011228 | 0.011463 | 0.011262 |
| 0.011329 | 0.011329 | 0.011295 | 0.011262 | 0.011295 | 0.011262 | 0.011362 |
| 0.011329 | 0.011430 | 0.011362 | 0.011262 | 0.011363 | 0.011463 | 0.011466 |
| 0.011463 | 0.011362 | 0.011262 | 0.011195 | 0.011329 | 0.011262 | 0.011195 |
| 0.011264 | 0.011463 | 0.011262 | 0.011463 | 0.011228 | 0.011195 | 0.011295 |
| 0.011396 | 0.011295 | 0.011329 | 0.011295 | 0.011329 | 0.011195 | 0.011329 |
| 0.011362 | 0.011295 | 0.011362 | 0.011295 | 0.011329 | 0.011362 | 0.011597 |
| 0.011698 | 0.011631 | 0.011698 | 0.011465 | 0.011698 | 0.011329 | 0.011295 |
| 0.011330 | 0.011626 | 0.011472 | 0.011232 | 0.011705 | 0.011197 | 0.011336 |
| 0.011705 | 0.011604 | 0.011496 | 0.011698 | 0.011402 | 0.011564 | 0.011530 |
| 0.011463 | 0.011631 | 0.011486 | 0.011266 | 0.011354 | 0.011362 | 0.011432 |
| 0.011530 | 0.011431 | 0.011567 | 0.011635 | 0.011564 | 0.011631 | 0.011738 |
| 0.011466 | 0.011637 | 0.011568 | 0.011500 | 0.011767 | 0.011228 | 0.011431 |
| 0.011396 | 0.011329 | 0.011228 | 0.011228 | 0.011295 | 0.011295 | 0.011362 |
| 0.011295 | 0.011362 | 0.011262 | 0.011362 | 0.011295 | 0.011295 | 0.011362 |
| 0.011295 | 0.011731 | 0.011631 | 0.011664 | 0.011194 | 0.011295 | 0.011329 |



|          |          |          |          |          |          |          |
|----------|----------|----------|----------|----------|----------|----------|
| 0.000000 | 0.011295 | 0.011362 | 0.011396 | 0.011262 | 0.011262 | 0.011262 |
| 0.011799 | 0.011429 | 0.011429 | 0.011228 | 0.011329 | 0.011497 | 0.011262 |
| 0.011262 | 0.011329 | 0.011295 | 0.011463 | 0.011262 | 0.011396 | 0.011530 |
| 0.011463 | 0.011295 | 0.011295 | 0.011228 | 0.011228 | 0.011396 | 0.011329 |
| 0.011228 | 0.011329 | 0.011195 | 0.011228 | 0.011362 | 0.011497 | 0.011262 |
| 0.011228 | 0.011362 | 0.011295 | 0.011195 | 0.011530 | 0.011195 | 0.011362 |
| 0.011437 | 0.011262 | 0.011564 | 0.011396 | 0.011429 | 0.011295 | 0.011396 |
| 0.011262 | 0.011597 | 0.011194 | 0.011463 | 0.011262 | 0.011262 | 0.011194 |
| 0.011429 | 0.011631 | 0.011329 | 0.011396 | 0.011228 | 0.011631 | 0.011262 |
| 0.011262 | 0.011262 | 0.011295 | 0.011396 | 0.011295 | 0.011396 | 0.011463 |
| 0.011463 | 0.011429 | 0.011329 | 0.011430 | 0.011396 | 0.011262 | 0.011228 |
| 0.011262 | 0.011262 | 0.011329 | 0.011262 | 0.011228 | 0.011396 | 0.011262 |
| 0.011295 | 0.011295 | 0.011429 | 0.011396 | 0.011362 | 0.011295 | 0.011295 |
| 0.011362 | 0.011295 | 0.011396 | 0.011262 | 0.011396 | 0.011496 | 0.011799 |
| 0.011295 | 0.011698 | 0.011302 | 0.017747 | 0.011322 | 0.011366 | 0.011653 |
| 0.011614 | 0.011658 | 0.011322 | 0.011292 | 0.011719 | 0.011682 | 0.011303 |
| 0.011582 | 0.011487 | 0.011216 | 0.011312 | 0.011294 | 0.011356 | 0.011318 |
| 0.011576 | 0.011470 | 0.011468 | 0.011325 | 0.011295 | 0.011463 | 0.011466 |
| 0.011335 | 0.011430 | 0.011429 | 0.011396 | 0.011362 | 0.011362 | 0.011329 |
| 0.011362 | 0.011295 | 0.011329 | 0.011362 | 0.011195 | 0.011262 | 0.011295 |
| 0.011295 | 0.011362 | 0.011262 | 0.011363 | 0.011396 | 0.011430 | 0.011329 |
| 0.011362 | 0.011329 | 0.011665 | 0.011665 | 0.011396 | 0.011430 | 0.011463 |
| 0.011228 | 0.011228 | 0.011262 | 0.011362 | 0.011228 | 0.011463 | 0.011463 |
| 0.011497 | 0.011496 | 0.011295 | 0.011530 | 0.011698 | 0.011532 | 0.011362 |
| 0.011362 | 0.011430 | 0.011463 | 0.011295 | 0.011362 | 0.011329 | 0.011362 |
| 0.011430 | 0.011430 | 0.011463 | 0.011430 | 0.011330 | 0.011530 | 0.011497 |
| 0.011365 | 0.011262 | 0.011362 | 0.011463 | 0.011363 | 0.011497 | 0.011530 |
| 0.011698 | 0.011402 | 0.011564 | 0.011530 | 0.011463 | 0.011631 | 0.011262 |
| 0.011431 | 0.011329 | 0.011295 | 0.011295 | 0.011362 | 0.011262 | 0.011363 |
| 0.011396 | 0.011430 | 0.011329 | 0.011362 | 0.011329 | 0.011665 | 0.011665 |
| 0.011396 | 0.011430 | 0.011496 | 0.011429 | 0.012069 | 0.011489 | 0.011412 |
| 0.011482 | 0.011442 | 0.011552 | 0.011441 | 0.011550 | 0.011474 | 0.011439 |
| 0.012022 | 0.011337 | 0.011471 | 0.011406 | 0.011680 | 0.011536 | 0.011639 |
| 0.012046 | 0.011512 | 0.011601 | 0.011664 | 0.011530 | 0.011530 | 0.011567 |
| 0.011228 | 0.011396 | 0.011530 | 0.011496 | 0.011499 | 0.011496 | 0.011464 |
| 0.011329 | 0.011262 | 0.011295 | 0.011329 | 0.011228 | 0.011295 | 0.011194 |
| 0.011329 | 0.011362 | 0.011262 | 0.011228 | 0.011329 | 0.011262 | 0.011295 |
| 0.011295 | 0.011228 | 0.011295 | 0.011329 | 0.011228 | 0.011429 | 0.011463 |
| 0.011362 | 0.011429 | 0.011362 | 0.011362 | 0.011295 | 0.011698 | 0.011329 |
| 0.011373 | 0.011295 | 0.011530 | 0.011535 | 0.011396 | 0.011396 | 0.011396 |
| 0.011396 | 0.011329 | 0.011295 | 0.011329 | 0.011429 | 0.011429 | 0.011228 |
| 0.011362 | 0.011497 | 0.011664 | 0.011396 | 0.011597 | 0.011597 | 0.011463 |
| 0.011295 | 0.011362 | 0.011396 | 0.011799 | 0.011362 | 0.011396 | 0.011228 |
| 0.011396 | 0.011329 | 0.011329 | 0.011631 | 0.011564 | 0.011597 | 0.011329 |
| 0.011429 | 0.011497 | 0.011362 | 0.011429 | 0.011396 | 0.011262 | 0.011597 |
| 0.011362 | 0.011329 | 0.011329 | 0.011497 | 0.011329 | 0.011429 | 0.011664 |
| 0.011362 | 0.011739 | 0.011732 | 0.011548 | 0.011286 | 0.011434 | 0.011318 |
| 0.011170 | 0.011761 | 0.011271 | 0.011507 | 0.011353 | 0.011467 | 0.011485 |
| 0.011570 | 0.011258 | 0.011450 | 0.011258 | 0.011330 | 0.011462 | 0.011425 |
| 0.011437 | 0.011336 | 0.011412 | 0.011342 | 0.011364 | 0.011497 | 0.011564 |
| 0.011564 | 0.011430 | 0.011534 | 0.011535 | 0.011670 | 0.011696 | 0.011362 |
| 0.011597 | 0.011463 | 0.011329 | 0.011430 | 0.011228 | 0.011463 | 0.011262 |
| 0.011329 | 0.011329 | 0.011295 | 0.011262 | 0.011295 | 0.011262 | 0.011362 |
| 0.011340 | 0.011340 | 0.011334 | 0.011368 | 0.011505 | 0.011470 | 0.011470 |
| 0.011469 | 0.011396 | 0.011208 | 0.011204 | 0.011331 | 0.011501 | 0.011501 |
| 0.011296 | 0.011365 | 0.011599 | 0.011567 | 0.011497 | 0.011531 | 0.011463 |
| 0.011396 | 0.011463 | 0.011463 | 0.011362 | 0.011933 | 0.011530 | 0.011597 |
| 0.011631 | 0.011701 | 0.011333 | 0.011303 | 0.011295 | 0.011497 | 0.011463 |
| 0.011497 | 0.011530 | 0.011530 | 0.011530 | 0.011689 | 0.011664 | 0.011303 |
| 0.011195 | 0.011199 | 0.011299 | 0.011264 | 0.011368 | 0.011210 | 0.011536 |

|          |          |          |          |          |          |          |
|----------|----------|----------|----------|----------|----------|----------|
| 0.011335 | 0.011455 | 0.011203 | 0.011360 | 0.011329 | 0.011402 | 0.011295 |
| 0.011262 | 0.011262 | 0.011329 | 0.011295 | 0.011497 | 0.011463 | 0.011396 |
| 0.011497 | 0.011564 | 0.011295 | 0.011295 | 0.011329 | 0.011329 | 0.011330 |
| 0.011398 | 0.011329 | 0.011329 | 0.011364 | 0.011497 | 0.011564 | 0.011564 |
| 0.011430 | 0.011534 | 0.011535 | 0.011670 | 0.011696 | 0.011362 | 0.011530 |
| 0.011463 | 0.011463 | 0.011297 | 0.011478 | 0.011408 | 0.011435 | 0.011305 |
| 0.011473 | 0.011653 | 0.011441 | 0.011366 | 0.011262 | 0.011463 | 0.011329 |
| 0.011430 | 0.011362 | 0.011262 | 0.011363 | 0.011463 | 0.011466 | 0.011362 |
| 0.011262 | 0.011195 | 0.011329 | 0.011262 | 0.011195 | 0.011264 | 0.011463 |
| 0.011362 | 0.011295 | 0.011329 | 0.011362 | 0.011195 | 0.011262 | 0.011463 |
| 0.011329 | 0.011362 | 0.011362 | 0.011295 | 0.011362 | 0.011597 | 0.011262 |
| 0.011295 | 0.011698 | 0.011295 | 0.011329 | 0.011295 | 0.011664 | 0.011275 |
| 0.011735 | 0.011273 | 0.011361 | 0.011503 | 0.011589 | 0.011491 | 0.011227 |
| 0.011323 | 0.011463 | 0.011564 | 0.011671 | 0.011531 | 0.011669 | 0.011800 |
| 0.011699 | 0.011737 | 0.011698 | 0.011949 | 0.011664 | 0.012539 | 0.011700 |
| 0.012439 | 0.012207 | 0.012341 | 0.012613 | 0.011664 | 0.011363 | 0.011665 |
| 0.012103 | 0.012038 | 0.011631 | 0.011530 | 0.011598 | 0.011598 | 0.011567 |
| 0.011463 | 0.011467 | 0.011530 | 0.011497 | 0.011867 | 0.011933 | 0.011935 |
| 0.011834 | 0.011934 | 0.012038 | 0.011804 | 0.012104 | 0.012110 | 0.012171 |
| 0.012172 | 0.012205 | 0.012152 | 0.012172 | 0.012173 | 0.011396 | 0.011699 |
| 0.011767 | 0.012270 | 0.011772 | 0.012001 | 0.012474 | 0.011536 | 0.011430 |
| 0.011396 | 0.011396 | 0.011867 | 0.011883 | 0.012010 | 0.011732 | 0.011397 |
| S281     | 0.011631 | 0.011631 | 0.011967 | 0.011731 | 0.011731 | 0.011799 |
| 0.011569 | 0.011502 | 0.011799 | 0.011228 | 0.011295 | 0.011262 | 0.011228 |
| 0.011262 | 0.011429 | 0.011228 | 0.011262 | 0.011329 | 0.011295 | 0.011262 |
| 0.011228 | 0.011262 | 0.011362 | 0.011228 | 0.011262 | 0.011262 | 0.011535 |
| 0.011496 | 0.011262 | 0.011161 | 0.011396 | 0.011329 | 0.011295 | 0.011329 |
| 0.011295 | 0.011396 | 0.011295 | 0.011295 | 0.011329 | 0.011295 | 0.011463 |
| 0.011228 | 0.011295 | 0.011329 | 0.011262 | 0.011362 | 0.011396 | 0.011329 |
| 0.011295 | 0.011463 | 0.011362 | 0.011564 | 0.011295 | 0.011496 | 0.011295 |
| 0.011262 | 0.011362 | 0.011429 | 0.011496 | 0.011597 | 0.011362 | 0.011463 |
| 0.011329 | 0.011396 | 0.011295 | 0.011530 | 0.011698 | 0.011295 | 0.011362 |
| 0.011262 | 0.011362 | 0.011329 | 0.011396 | 0.011329 | 0.011329 | 0.011329 |
| 0.011228 | 0.011262 | 0.011228 | 0.011329 | 0.011295 | 0.011329 | 0.011396 |
| 0.011329 | 0.011295 | 0.011362 | 0.011262 | 0.011329 | 0.011228 | 0.011295 |
| 0.011463 | 0.011396 | 0.011564 | 0.011463 | 0.011295 | 0.011530 | 0.011295 |
| 0.011468 | 0.011620 | 0.011475 | 0.011177 | 0.011172 | 0.011318 | 0.011375 |
| 0.012048 | 0.011314 | 0.011184 | 0.011530 | 0.011530 | 0.011329 | 0.011429 |
| 0.011362 | 0.011329 | 0.011396 | 0.011295 | 0.011396 | 0.011329 | 0.011329 |
| 0.011295 | 0.011396 | 0.011597 | 0.011463 | 0.011362 | 0.011329 | 0.011262 |
| 0.011228 | 0.011228 | 0.011295 | 0.011262 | 0.011463 | 0.011429 | 0.011362 |
| 0.011463 | 0.011530 | 0.011262 | 0.011262 | 0.011295 | 0.011295 | 0.011297 |
| 0.011364 | 0.011295 | 0.011295 | 0.011168 | 0.011205 | 0.011200 | 0.011296 |
| 0.011297 | 0.011232 | 0.011245 | 0.011267 | 0.011196 | 0.011231 | 0.011263 |
| 0.011456 | 0.011301 | 0.011336 | 0.011228 | 0.011233 | 0.011363 | 0.011329 |
| 0.011396 | 0.011330 | 0.011329 | 0.011429 | 0.011362 | 0.011732 | 0.011530 |
| 0.011564 | 0.011430 | 0.011295 | 0.011396 | 0.011195 | 0.011429 | 0.011228 |
| 0.011295 | 0.011295 | 0.011262 | 0.011228 | 0.011262 | 0.011228 | 0.011329 |
| 0.011295 | 0.011396 | 0.011329 | 0.011228 | 0.011330 | 0.011430 | 0.011432 |
| 0.011430 | 0.011329 | 0.011228 | 0.011161 | 0.011295 | 0.011228 | 0.011161 |
| 0.011264 | 0.011430 | 0.011228 | 0.011430 | 0.011127 | 0.011295 | 0.011195 |
| 0.011362 | 0.011262 | 0.011295 | 0.011195 | 0.011228 | 0.011161 | 0.011295 |
| 0.011329 | 0.011262 | 0.011329 | 0.011262 | 0.011295 | 0.011329 | 0.011564 |
| 0.011597 | 0.011530 | 0.011597 | 0.011431 | 0.011598 | 0.011295 | 0.011262 |
| 0.011297 | 0.011586 | 0.011380 | 0.011197 | 0.011603 | 0.011163 | 0.011257 |
| 0.011603 | 0.011502 | 0.011463 | 0.011664 | 0.011367 | 0.011530 | 0.011497 |
| 0.011429 | 0.011597 | 0.011451 | 0.011307 | 0.011354 | 0.011329 | 0.011398 |
| 0.011497 | 0.011397 | 0.011533 | 0.011601 | 0.011530 | 0.011597 | 0.011704 |
| 0.011432 | 0.011603 | 0.011534 | 0.011466 | 0.011733 | 0.011194 | 0.011397 |
| 0.011362 | 0.011295 | 0.011194 | 0.011194 | 0.011262 | 0.011262 | 0.011329 |

|          |          |          |          |          |          |          |
|----------|----------|----------|----------|----------|----------|----------|
| 0.011262 | 0.011329 | 0.011228 | 0.011329 | 0.011262 | 0.011262 | 0.011329 |
| 0.011262 | 0.011631 | 0.011530 | 0.011564 | 0.011161 | 0.011262 | 0.011295 |
| 0.011295 | 0.000000 | 0.011329 | 0.011362 | 0.011228 | 0.011228 | 0.011228 |
| 0.011698 | 0.011396 | 0.011396 | 0.011194 | 0.011295 | 0.011463 | 0.011228 |
| 0.011228 | 0.011295 | 0.011262 | 0.011429 | 0.011228 | 0.011362 | 0.011496 |
| 0.011429 | 0.011262 | 0.011262 | 0.011194 | 0.011194 | 0.011362 | 0.011295 |
| 0.011194 | 0.011295 | 0.011161 | 0.011194 | 0.011329 | 0.011396 | 0.011228 |
| 0.011195 | 0.011329 | 0.011262 | 0.011161 | 0.011429 | 0.011161 | 0.011329 |
| 0.011402 | 0.011228 | 0.011463 | 0.011362 | 0.011396 | 0.011262 | 0.011362 |
| 0.011228 | 0.011496 | 0.011161 | 0.011362 | 0.011228 | 0.011228 | 0.011161 |
| 0.011396 | 0.011530 | 0.011295 | 0.011362 | 0.011194 | 0.011530 | 0.011228 |
| 0.011228 | 0.011228 | 0.011262 | 0.011362 | 0.011262 | 0.011362 | 0.011429 |
| 0.011429 | 0.011329 | 0.011295 | 0.011396 | 0.011362 | 0.011228 | 0.011194 |
| 0.011228 | 0.011228 | 0.011295 | 0.011228 | 0.011194 | 0.011362 | 0.011228 |
| 0.011262 | 0.011262 | 0.011396 | 0.011429 | 0.011329 | 0.011262 | 0.011262 |
| 0.011329 | 0.011262 | 0.011362 | 0.011228 | 0.011362 | 0.011463 | 0.011698 |
| 0.011262 | 0.011597 | 0.011267 | 0.017747 | 0.011191 | 0.011366 | 0.011548 |
| 0.011510 | 0.011553 | 0.011270 | 0.011234 | 0.011664 | 0.011578 | 0.011303 |
| 0.011440 | 0.011487 | 0.011138 | 0.011228 | 0.011216 | 0.011258 | 0.011275 |
| 0.011342 | 0.011395 | 0.011357 | 0.011259 | 0.011396 | 0.011429 | 0.011432 |
| 0.011301 | 0.011396 | 0.011396 | 0.011362 | 0.011329 | 0.011329 | 0.011295 |
| 0.011329 | 0.011262 | 0.011228 | 0.011329 | 0.011295 | 0.011228 | 0.011262 |
| 0.011262 | 0.011329 | 0.011228 | 0.011329 | 0.011362 | 0.011396 | 0.011295 |
| 0.011329 | 0.011295 | 0.011564 | 0.011564 | 0.011362 | 0.011396 | 0.011430 |
| 0.011195 | 0.011195 | 0.011228 | 0.011329 | 0.011195 | 0.011429 | 0.011429 |
| 0.011463 | 0.011463 | 0.011396 | 0.011497 | 0.011597 | 0.011498 | 0.011329 |
| 0.011329 | 0.011396 | 0.011429 | 0.011262 | 0.011329 | 0.011295 | 0.011329 |
| 0.011396 | 0.011396 | 0.011429 | 0.011396 | 0.011296 | 0.011497 | 0.011463 |
| 0.011331 | 0.011228 | 0.011329 | 0.011430 | 0.011329 | 0.011463 | 0.011496 |
| 0.011664 | 0.011367 | 0.011530 | 0.011497 | 0.011429 | 0.011597 | 0.011228 |
| 0.011397 | 0.011295 | 0.011262 | 0.011262 | 0.011329 | 0.011228 | 0.011329 |
| 0.011362 | 0.011396 | 0.011295 | 0.011329 | 0.011295 | 0.011564 | 0.011564 |
| 0.011362 | 0.011396 | 0.011463 | 0.011396 | 0.012035 | 0.011453 | 0.011377 |
| 0.011447 | 0.011407 | 0.011517 | 0.011406 | 0.011515 | 0.011439 | 0.011405 |
| 0.011987 | 0.011302 | 0.011437 | 0.011371 | 0.011645 | 0.011502 | 0.011604 |
| 0.012012 | 0.011475 | 0.011567 | 0.011631 | 0.011496 | 0.011496 | 0.011533 |
| 0.011194 | 0.011362 | 0.011496 | 0.011463 | 0.011466 | 0.011463 | 0.011431 |
| 0.011295 | 0.011228 | 0.011262 | 0.011295 | 0.011194 | 0.011262 | 0.011161 |
| 0.011295 | 0.011329 | 0.011228 | 0.011194 | 0.011295 | 0.011228 | 0.011262 |
| 0.011262 | 0.011194 | 0.011262 | 0.011295 | 0.011194 | 0.011396 | 0.011429 |
| 0.011329 | 0.011396 | 0.011329 | 0.011329 | 0.011262 | 0.011597 | 0.011295 |
| 0.011338 | 0.011262 | 0.011497 | 0.011501 | 0.011362 | 0.011362 | 0.011362 |
| 0.011362 | 0.011295 | 0.011262 | 0.011295 | 0.011396 | 0.011396 | 0.011329 |
| 0.011329 | 0.011463 | 0.011564 | 0.011295 | 0.011564 | 0.011564 | 0.011429 |
| 0.011262 | 0.011329 | 0.011362 | 0.011698 | 0.011329 | 0.011362 | 0.011329 |
| 0.011362 | 0.011295 | 0.011295 | 0.011530 | 0.011530 | 0.011496 | 0.011295 |
| 0.011396 | 0.011463 | 0.011329 | 0.011396 | 0.011362 | 0.011228 | 0.011496 |
| 0.011329 | 0.011295 | 0.011295 | 0.011463 | 0.011295 | 0.011396 | 0.011564 |
| 0.011329 | 0.011637 | 0.011631 | 0.011467 | 0.011229 | 0.011400 | 0.011215 |
| 0.011170 | 0.011683 | 0.011236 | 0.011373 | 0.011255 | 0.011315 | 0.011326 |
| 0.011468 | 0.011126 | 0.011283 | 0.011126 | 0.011168 | 0.011328 | 0.011344 |
| 0.011399 | 0.011257 | 0.011377 | 0.011307 | 0.011330 | 0.011463 | 0.011530 |
| 0.011530 | 0.011396 | 0.011500 | 0.011501 | 0.011636 | 0.011661 | 0.011329 |
| 0.011564 | 0.011430 | 0.011295 | 0.011396 | 0.011195 | 0.011429 | 0.011228 |
| 0.011295 | 0.011295 | 0.011262 | 0.011228 | 0.011262 | 0.011228 | 0.011329 |
| 0.011305 | 0.011305 | 0.011300 | 0.011334 | 0.011471 | 0.011436 | 0.011436 |
| 0.011435 | 0.011363 | 0.011171 | 0.011168 | 0.011297 | 0.011467 | 0.011467 |
| 0.011262 | 0.011331 | 0.011565 | 0.011533 | 0.011464 | 0.011498 | 0.011429 |
| 0.011362 | 0.011429 | 0.011429 | 0.011329 | 0.011832 | 0.011429 | 0.011564 |
| 0.011597 | 0.011594 | 0.011231 | 0.011372 | 0.011262 | 0.011463 | 0.011429 |

|          |          |          |          |          |          |          |
|----------|----------|----------|----------|----------|----------|----------|
| 0.011464 | 0.011496 | 0.011496 | 0.011496 | 0.011610 | 0.011631 | 0.011268 |
| 0.011162 | 0.011164 | 0.011264 | 0.011230 | 0.011333 | 0.011172 | 0.011434 |
| 0.011300 | 0.011367 | 0.011203 | 0.011322 | 0.011296 | 0.011368 | 0.011262 |
| 0.011228 | 0.011228 | 0.011295 | 0.011262 | 0.011463 | 0.011429 | 0.011362 |
| 0.011463 | 0.011530 | 0.011262 | 0.011262 | 0.011295 | 0.011295 | 0.011297 |
| 0.011364 | 0.011295 | 0.011295 | 0.011330 | 0.011463 | 0.011530 | 0.011530 |
| 0.011396 | 0.011500 | 0.011501 | 0.011636 | 0.011661 | 0.011329 | 0.011496 |
| 0.011429 | 0.011429 | 0.011263 | 0.011443 | 0.011373 | 0.011401 | 0.011270 |
| 0.011439 | 0.011652 | 0.011441 | 0.011332 | 0.011228 | 0.011430 | 0.011295 |
| 0.011396 | 0.011329 | 0.011228 | 0.011330 | 0.011430 | 0.011432 | 0.011329 |
| 0.011228 | 0.011161 | 0.011295 | 0.011228 | 0.011161 | 0.011264 | 0.011430 |
| 0.011329 | 0.011262 | 0.011228 | 0.011329 | 0.011295 | 0.011228 | 0.011430 |
| 0.011295 | 0.011329 | 0.011329 | 0.011262 | 0.011329 | 0.011564 | 0.011228 |
| 0.011262 | 0.011597 | 0.011262 | 0.011295 | 0.011262 | 0.011564 | 0.011189 |
| 0.011678 | 0.011188 | 0.011211 | 0.011422 | 0.011508 | 0.011455 | 0.011144 |
| 0.011165 | 0.011429 | 0.011530 | 0.011637 | 0.011498 | 0.011635 | 0.011766 |
| 0.011666 | 0.011703 | 0.011664 | 0.011914 | 0.011631 | 0.012505 | 0.011666 |
| 0.012405 | 0.012173 | 0.012307 | 0.012578 | 0.011631 | 0.011329 | 0.011631 |
| 0.012070 | 0.012004 | 0.011597 | 0.011497 | 0.011564 | 0.011564 | 0.011534 |
| 0.011429 | 0.011433 | 0.011496 | 0.011464 | 0.011833 | 0.011900 | 0.011901 |
| 0.011800 | 0.011901 | 0.012004 | 0.011770 | 0.012070 | 0.012076 | 0.012137 |
| 0.012138 | 0.012172 | 0.012118 | 0.012138 | 0.012139 | 0.011362 | 0.011665 |
| 0.011733 | 0.012236 | 0.011704 | 0.011900 | 0.012373 | 0.011434 | 0.011329 |
| 0.011295 | 0.011295 | 0.011833 | 0.011883 | 0.011975 | 0.011698 | 0.011363 |
| S282     | 0.011698 | 0.011698 | 0.012034 | 0.011799 | 0.011799 | 0.011866 |
| 0.011705 | 0.011637 | 0.011866 | 0.011295 | 0.011362 | 0.011329 | 0.011295 |
| 0.011329 | 0.011497 | 0.011295 | 0.011329 | 0.011396 | 0.011362 | 0.011329 |
| 0.011295 | 0.011329 | 0.011429 | 0.011295 | 0.011329 | 0.011329 | 0.011671 |
| 0.011564 | 0.011329 | 0.011228 | 0.011463 | 0.011396 | 0.011362 | 0.011396 |
| 0.011362 | 0.011463 | 0.011362 | 0.011362 | 0.011396 | 0.011362 | 0.011530 |
| 0.011295 | 0.011362 | 0.011396 | 0.011329 | 0.011429 | 0.011463 | 0.011396 |
| 0.011362 | 0.011530 | 0.011430 | 0.011698 | 0.011362 | 0.011631 | 0.011362 |
| 0.011329 | 0.011430 | 0.011497 | 0.011631 | 0.011732 | 0.011429 | 0.011530 |
| 0.011396 | 0.011463 | 0.011362 | 0.011597 | 0.011833 | 0.011362 | 0.011429 |
| 0.011329 | 0.011429 | 0.011396 | 0.011463 | 0.011396 | 0.011396 | 0.011396 |
| 0.011295 | 0.011329 | 0.011295 | 0.011396 | 0.011362 | 0.011397 | 0.011463 |
| 0.011396 | 0.011362 | 0.011429 | 0.011329 | 0.011463 | 0.011295 | 0.011362 |
| 0.011530 | 0.011463 | 0.011698 | 0.011530 | 0.011362 | 0.011597 | 0.011362 |
| 0.011542 | 0.011770 | 0.011588 | 0.011295 | 0.011284 | 0.011391 | 0.011454 |
| 0.012121 | 0.011569 | 0.011307 | 0.011597 | 0.011597 | 0.011396 | 0.011497 |
| 0.011429 | 0.011396 | 0.011463 | 0.011362 | 0.011463 | 0.011396 | 0.011396 |
| 0.011362 | 0.011463 | 0.011664 | 0.011530 | 0.011429 | 0.011396 | 0.011329 |
| 0.011295 | 0.011295 | 0.011362 | 0.011329 | 0.011530 | 0.011497 | 0.011430 |
| 0.011530 | 0.011597 | 0.011329 | 0.011329 | 0.011362 | 0.011362 | 0.011364 |
| 0.011432 | 0.011362 | 0.011362 | 0.011204 | 0.011313 | 0.011236 | 0.011363 |
| 0.011365 | 0.011301 | 0.011355 | 0.011336 | 0.011264 | 0.011266 | 0.011330 |
| 0.011564 | 0.011336 | 0.011405 | 0.011296 | 0.011302 | 0.011430 | 0.011397 |
| 0.011464 | 0.011397 | 0.011396 | 0.011496 | 0.011429 | 0.011799 | 0.011598 |
| 0.011631 | 0.011497 | 0.011362 | 0.011463 | 0.011262 | 0.011497 | 0.011295 |
| 0.011362 | 0.011362 | 0.011329 | 0.011295 | 0.011329 | 0.011295 | 0.011396 |
| 0.011362 | 0.011463 | 0.011396 | 0.011295 | 0.011397 | 0.011497 | 0.011500 |
| 0.011497 | 0.011396 | 0.011295 | 0.011229 | 0.011362 | 0.011295 | 0.011228 |
| 0.011332 | 0.011497 | 0.011295 | 0.011497 | 0.011262 | 0.011363 | 0.011329 |
| 0.011430 | 0.011329 | 0.011362 | 0.011329 | 0.011362 | 0.011228 | 0.011362 |
| 0.011396 | 0.011329 | 0.011396 | 0.011329 | 0.011362 | 0.011396 | 0.011631 |
| 0.011732 | 0.011664 | 0.011732 | 0.011498 | 0.011732 | 0.011362 | 0.011329 |
| 0.011364 | 0.011626 | 0.011426 | 0.011266 | 0.011739 | 0.011231 | 0.011336 |
| 0.011739 | 0.011638 | 0.011530 | 0.011732 | 0.011436 | 0.011597 | 0.011564 |
| 0.011497 | 0.011664 | 0.011486 | 0.011307 | 0.011354 | 0.011396 | 0.011466 |
| 0.011564 | 0.011465 | 0.011601 | 0.011669 | 0.011597 | 0.011665 | 0.011738 |

|          |          |          |          |          |          |          |
|----------|----------|----------|----------|----------|----------|----------|
| 0.011500 | 0.011637 | 0.011602 | 0.011534 | 0.011800 | 0.011262 | 0.011431 |
| 0.011429 | 0.011362 | 0.011262 | 0.011262 | 0.011329 | 0.011329 | 0.011396 |
| 0.011329 | 0.011396 | 0.011295 | 0.011396 | 0.011329 | 0.011329 | 0.011396 |
| 0.011329 | 0.011765 | 0.011664 | 0.011698 | 0.011228 | 0.011329 | 0.011362 |
| 0.011362 | 0.011329 | 0.000000 | 0.011429 | 0.011295 | 0.011295 | 0.011295 |
| 0.011832 | 0.011463 | 0.011463 | 0.011262 | 0.011362 | 0.011530 | 0.011295 |
| 0.011295 | 0.011362 | 0.011329 | 0.011497 | 0.011295 | 0.011429 | 0.011564 |
| 0.011497 | 0.011329 | 0.011329 | 0.011262 | 0.011262 | 0.011430 | 0.011362 |
| 0.011262 | 0.011362 | 0.011228 | 0.011262 | 0.011396 | 0.011530 | 0.011295 |
| 0.011262 | 0.011396 | 0.011329 | 0.011228 | 0.011564 | 0.011228 | 0.011396 |
| 0.011437 | 0.011295 | 0.011597 | 0.011430 | 0.011463 | 0.011329 | 0.011429 |
| 0.011295 | 0.011631 | 0.011228 | 0.011497 | 0.011295 | 0.011295 | 0.011228 |
| 0.011463 | 0.011665 | 0.011362 | 0.011429 | 0.011262 | 0.011664 | 0.011295 |
| 0.011295 | 0.011295 | 0.011329 | 0.011429 | 0.011329 | 0.011429 | 0.011497 |
| 0.011497 | 0.011463 | 0.011362 | 0.011463 | 0.011429 | 0.011295 | 0.011262 |
| 0.011295 | 0.011295 | 0.011362 | 0.011295 | 0.011262 | 0.011429 | 0.011295 |
| 0.011329 | 0.011329 | 0.011463 | 0.011497 | 0.011396 | 0.011329 | 0.011329 |
| 0.011396 | 0.011329 | 0.011429 | 0.011295 | 0.011429 | 0.011530 | 0.011832 |
| 0.011329 | 0.011732 | 0.011336 | 0.017861 | 0.011257 | 0.011488 | 0.011688 |
| 0.011648 | 0.011693 | 0.011427 | 0.011466 | 0.011774 | 0.011716 | 0.011364 |
| 0.011582 | 0.011549 | 0.011255 | 0.011353 | 0.011333 | 0.011357 | 0.011361 |
| 0.011576 | 0.011507 | 0.011505 | 0.011259 | 0.011463 | 0.011497 | 0.011500 |
| 0.011335 | 0.011463 | 0.011463 | 0.011430 | 0.011396 | 0.011396 | 0.011295 |
| 0.011396 | 0.011329 | 0.011362 | 0.011396 | 0.011363 | 0.011295 | 0.011329 |
| 0.011329 | 0.011396 | 0.011295 | 0.011396 | 0.011430 | 0.011463 | 0.011362 |
| 0.011396 | 0.011362 | 0.011698 | 0.011698 | 0.011430 | 0.011464 | 0.011497 |
| 0.011262 | 0.011262 | 0.011295 | 0.011396 | 0.011262 | 0.011497 | 0.011497 |
| 0.011530 | 0.011530 | 0.011463 | 0.011564 | 0.011732 | 0.011565 | 0.011396 |
| 0.011396 | 0.011463 | 0.011497 | 0.011329 | 0.011396 | 0.011362 | 0.011396 |
| 0.011463 | 0.011463 | 0.011497 | 0.011463 | 0.011363 | 0.011564 | 0.011530 |
| 0.011399 | 0.011295 | 0.011396 | 0.011497 | 0.011396 | 0.011530 | 0.011564 |
| 0.011732 | 0.011436 | 0.011597 | 0.011564 | 0.011497 | 0.011664 | 0.011295 |
| 0.011464 | 0.011363 | 0.011329 | 0.011329 | 0.011396 | 0.011295 | 0.011396 |
| 0.011430 | 0.011463 | 0.011362 | 0.011396 | 0.011362 | 0.011698 | 0.011698 |
| 0.011430 | 0.011464 | 0.011530 | 0.011463 | 0.012103 | 0.011489 | 0.011412 |
| 0.011482 | 0.011442 | 0.011552 | 0.011441 | 0.011550 | 0.011474 | 0.011474 |
| 0.012022 | 0.011337 | 0.011471 | 0.011406 | 0.011680 | 0.011570 | 0.011639 |
| 0.012046 | 0.011512 | 0.011635 | 0.011698 | 0.011564 | 0.011564 | 0.011601 |
| 0.011262 | 0.011429 | 0.011564 | 0.011530 | 0.011533 | 0.011530 | 0.011498 |
| 0.011362 | 0.011295 | 0.011329 | 0.011362 | 0.011262 | 0.011329 | 0.011228 |
| 0.011362 | 0.011396 | 0.011295 | 0.011262 | 0.011362 | 0.011295 | 0.011329 |
| 0.011329 | 0.011262 | 0.011329 | 0.011362 | 0.011262 | 0.011463 | 0.011497 |
| 0.011396 | 0.011463 | 0.011396 | 0.011396 | 0.011329 | 0.011732 | 0.011362 |
| 0.011373 | 0.011329 | 0.011564 | 0.011535 | 0.011430 | 0.011429 | 0.011429 |
| 0.011429 | 0.011362 | 0.011329 | 0.011362 | 0.011463 | 0.011463 | 0.011396 |
| 0.011396 | 0.011530 | 0.011698 | 0.011429 | 0.011631 | 0.011631 | 0.011496 |
| 0.011329 | 0.011396 | 0.011429 | 0.011833 | 0.011396 | 0.011430 | 0.011396 |
| 0.011429 | 0.011362 | 0.011362 | 0.011665 | 0.011597 | 0.011631 | 0.011362 |
| 0.011463 | 0.011530 | 0.011396 | 0.011463 | 0.011429 | 0.011295 | 0.011631 |
| 0.011396 | 0.011362 | 0.011362 | 0.011530 | 0.011362 | 0.011463 | 0.011698 |
| 0.011396 | 0.011773 | 0.011765 | 0.011589 | 0.011229 | 0.011468 | 0.011318 |
| 0.011335 | 0.011800 | 0.011306 | 0.011507 | 0.011304 | 0.011417 | 0.011432 |
| 0.011570 | 0.011192 | 0.011394 | 0.011192 | 0.011276 | 0.011328 | 0.011425 |
| 0.011437 | 0.011336 | 0.011448 | 0.011377 | 0.011397 | 0.011530 | 0.011598 |
| 0.011597 | 0.011464 | 0.011567 | 0.011569 | 0.011704 | 0.011732 | 0.011396 |
| 0.011631 | 0.011497 | 0.011362 | 0.011463 | 0.011262 | 0.011497 | 0.011295 |
| 0.011362 | 0.011362 | 0.011329 | 0.011295 | 0.011329 | 0.011295 | 0.011396 |
| 0.011375 | 0.011340 | 0.011368 | 0.011403 | 0.011539 | 0.011504 | 0.011504 |
| 0.011469 | 0.011430 | 0.011208 | 0.011204 | 0.011365 | 0.011535 | 0.011535 |
| 0.011329 | 0.011399 | 0.011633 | 0.011601 | 0.011531 | 0.011565 | 0.011496 |

|          |          |          |          |          |          |          |
|----------|----------|----------|----------|----------|----------|----------|
| 0.011429 | 0.011497 | 0.011496 | 0.011396 | 0.011967 | 0.011564 | 0.011631 |
| 0.011665 | 0.011737 | 0.011367 | 0.011441 | 0.011329 | 0.011530 | 0.011497 |
| 0.011531 | 0.011564 | 0.011564 | 0.011564 | 0.011729 | 0.011698 | 0.011303 |
| 0.011229 | 0.011199 | 0.011299 | 0.011264 | 0.011368 | 0.011172 | 0.011570 |
| 0.011335 | 0.011455 | 0.011203 | 0.011360 | 0.011363 | 0.011437 | 0.011329 |
| 0.011295 | 0.011295 | 0.011362 | 0.011329 | 0.011530 | 0.011497 | 0.011430 |
| 0.011530 | 0.011597 | 0.011329 | 0.011329 | 0.011362 | 0.011362 | 0.011364 |
| 0.011432 | 0.011362 | 0.011362 | 0.011397 | 0.011530 | 0.011598 | 0.011597 |
| 0.011464 | 0.011567 | 0.011569 | 0.011704 | 0.011732 | 0.011396 | 0.011564 |
| 0.011497 | 0.011497 | 0.011331 | 0.011443 | 0.011442 | 0.011469 | 0.011305 |
| 0.011508 | 0.011607 | 0.011483 | 0.000000 | 0.011295 | 0.011497 | 0.011362 |
| 0.011463 | 0.011396 | 0.011295 | 0.011397 | 0.011497 | 0.011500 | 0.011396 |
| 0.011295 | 0.011229 | 0.011362 | 0.011295 | 0.011228 | 0.011332 | 0.011497 |
| 0.011396 | 0.011329 | 0.011362 | 0.011396 | 0.011363 | 0.011295 | 0.011497 |
| 0.011362 | 0.011396 | 0.011396 | 0.011329 | 0.011396 | 0.011631 | 0.011295 |
| 0.011329 | 0.011732 | 0.011329 | 0.011362 | 0.011329 | 0.011698 | 0.011317 |
| 0.011791 | 0.011315 | 0.011361 | 0.011543 | 0.011630 | 0.011527 | 0.011269 |
| 0.011270 | 0.011496 | 0.011597 | 0.011705 | 0.011565 | 0.011703 | 0.011834 |
| 0.011733 | 0.011737 | 0.011732 | 0.011983 | 0.011698 | 0.012573 | 0.011734 |
| 0.012473 | 0.012241 | 0.012375 | 0.012646 | 0.011698 | 0.011396 | 0.011699 |
| 0.012137 | 0.012072 | 0.011664 | 0.011564 | 0.011632 | 0.011632 | 0.011601 |
| 0.011496 | 0.011501 | 0.011564 | 0.011531 | 0.011901 | 0.011967 | 0.011968 |
| 0.011868 | 0.011968 | 0.012072 | 0.011838 | 0.012138 | 0.012144 | 0.012205 |
| 0.012206 | 0.012239 | 0.012186 | 0.012206 | 0.012207 | 0.011429 | 0.011732 |
| 0.011800 | 0.012303 | 0.011806 | 0.012034 | 0.012508 | 0.011570 | 0.011464 |
| 0.011429 | 0.011429 | 0.011900 | 0.011924 | 0.012045 | 0.011765 | 0.011431 |
| S283     | 0.011732 | 0.011732 | 0.012001 | 0.011765 | 0.011765 | 0.011832 |
| 0.011671 | 0.011603 | 0.011832 | 0.011329 | 0.011396 | 0.011363 | 0.011329 |
| 0.011295 | 0.011530 | 0.011262 | 0.011362 | 0.011429 | 0.011396 | 0.011362 |
| 0.011329 | 0.011362 | 0.011396 | 0.011329 | 0.011363 | 0.011362 | 0.011637 |
| 0.011530 | 0.011362 | 0.011262 | 0.011429 | 0.011429 | 0.011396 | 0.011429 |
| 0.011396 | 0.011497 | 0.011396 | 0.011329 | 0.011429 | 0.011396 | 0.011564 |
| 0.011262 | 0.011396 | 0.011429 | 0.011362 | 0.011396 | 0.011496 | 0.011429 |
| 0.011396 | 0.011564 | 0.011463 | 0.011664 | 0.011396 | 0.011664 | 0.011396 |
| 0.011362 | 0.011396 | 0.011530 | 0.011664 | 0.011698 | 0.011396 | 0.011228 |
| 0.011429 | 0.011497 | 0.011396 | 0.011631 | 0.011799 | 0.011396 | 0.011463 |
| 0.011362 | 0.011463 | 0.011429 | 0.011497 | 0.011429 | 0.011429 | 0.011429 |
| 0.011329 | 0.011362 | 0.011329 | 0.011362 | 0.011396 | 0.011430 | 0.011496 |
| 0.011429 | 0.011396 | 0.011463 | 0.011362 | 0.011429 | 0.011329 | 0.011396 |
| 0.011564 | 0.011496 | 0.011732 | 0.011564 | 0.011396 | 0.011631 | 0.011396 |
| 0.011579 | 0.011733 | 0.011626 | 0.011334 | 0.011321 | 0.011428 | 0.011454 |
| 0.012085 | 0.011467 | 0.011349 | 0.011631 | 0.011631 | 0.011362 | 0.011463 |
| 0.011463 | 0.011429 | 0.011496 | 0.011396 | 0.011497 | 0.011429 | 0.011429 |
| 0.011396 | 0.011429 | 0.011698 | 0.011564 | 0.011463 | 0.011430 | 0.011362 |
| 0.011329 | 0.011262 | 0.011396 | 0.011362 | 0.011497 | 0.011463 | 0.011396 |
| 0.011497 | 0.011564 | 0.011362 | 0.011362 | 0.011396 | 0.011396 | 0.011398 |
| 0.011466 | 0.011396 | 0.011396 | 0.011276 | 0.011349 | 0.011306 | 0.011396 |
| 0.011399 | 0.011335 | 0.011392 | 0.011371 | 0.011298 | 0.011334 | 0.011364 |
| 0.011528 | 0.011405 | 0.011439 | 0.011329 | 0.011337 | 0.011464 | 0.011363 |
| 0.011430 | 0.011431 | 0.011430 | 0.011530 | 0.011463 | 0.011832 | 0.011564 |
| 0.011597 | 0.011195 | 0.011396 | 0.011161 | 0.011295 | 0.011463 | 0.011329 |
| 0.011396 | 0.011396 | 0.011362 | 0.011329 | 0.011362 | 0.011329 | 0.011430 |
| 0.011396 | 0.011497 | 0.011430 | 0.011329 | 0.011431 | 0.011530 | 0.011533 |
| 0.011530 | 0.011430 | 0.011329 | 0.011263 | 0.011396 | 0.011329 | 0.011262 |
| 0.011366 | 0.011531 | 0.011329 | 0.011530 | 0.011295 | 0.011396 | 0.011362 |
| 0.011463 | 0.011362 | 0.011396 | 0.011362 | 0.011396 | 0.011262 | 0.011396 |
| 0.011430 | 0.011362 | 0.011430 | 0.011362 | 0.011396 | 0.011430 | 0.011665 |
| 0.011631 | 0.011631 | 0.011698 | 0.011532 | 0.011699 | 0.011396 | 0.011362 |
| 0.011330 | 0.011586 | 0.011472 | 0.011300 | 0.011671 | 0.011265 | 0.011375 |
| 0.011705 | 0.011604 | 0.011564 | 0.011765 | 0.011470 | 0.011631 | 0.011597 |

|          |          |          |          |          |          |          |
|----------|----------|----------|----------|----------|----------|----------|
| 0.011530 | 0.011698 | 0.011558 | 0.011390 | 0.011479 | 0.011430 | 0.011500 |
| 0.011597 | 0.011499 | 0.011635 | 0.011703 | 0.011631 | 0.011631 | 0.011806 |
| 0.011534 | 0.011705 | 0.011636 | 0.011567 | 0.011834 | 0.011295 | 0.011498 |
| 0.011463 | 0.011396 | 0.011295 | 0.011295 | 0.011362 | 0.011362 | 0.011429 |
| 0.011362 | 0.011429 | 0.011329 | 0.011362 | 0.011362 | 0.011362 | 0.011429 |
| 0.011362 | 0.011732 | 0.011631 | 0.011664 | 0.011262 | 0.011362 | 0.011396 |
| 0.011396 | 0.011362 | 0.011429 | 0.000000 | 0.011329 | 0.011329 | 0.011329 |
| 0.011799 | 0.011429 | 0.011497 | 0.011295 | 0.011396 | 0.011564 | 0.011329 |
| 0.011329 | 0.011396 | 0.011362 | 0.011530 | 0.011329 | 0.011463 | 0.011597 |
| 0.011530 | 0.011362 | 0.011362 | 0.011295 | 0.011295 | 0.011463 | 0.011396 |
| 0.011295 | 0.011396 | 0.011262 | 0.011295 | 0.011429 | 0.011497 | 0.011329 |
| 0.011295 | 0.011429 | 0.011363 | 0.011262 | 0.011530 | 0.011262 | 0.011429 |
| 0.011505 | 0.011329 | 0.011564 | 0.011463 | 0.011429 | 0.011362 | 0.011463 |
| 0.011329 | 0.011664 | 0.011262 | 0.011463 | 0.011262 | 0.011262 | 0.011262 |
| 0.011496 | 0.011631 | 0.011396 | 0.011463 | 0.011295 | 0.011631 | 0.011262 |
| 0.011329 | 0.011329 | 0.011362 | 0.011463 | 0.011295 | 0.011463 | 0.011530 |
| 0.011530 | 0.011497 | 0.011396 | 0.011497 | 0.011463 | 0.011329 | 0.011295 |
| 0.011329 | 0.011329 | 0.011396 | 0.011262 | 0.011295 | 0.011463 | 0.011329 |
| 0.011295 | 0.011362 | 0.011497 | 0.011463 | 0.011429 | 0.011362 | 0.011362 |
| 0.011429 | 0.011362 | 0.011463 | 0.011329 | 0.011463 | 0.011564 | 0.011799 |
| 0.011362 | 0.011698 | 0.011371 | 0.017899 | 0.011388 | 0.011549 | 0.011653 |
| 0.011614 | 0.011658 | 0.011532 | 0.011466 | 0.011829 | 0.011682 | 0.011546 |
| 0.011582 | 0.011610 | 0.011294 | 0.011395 | 0.011216 | 0.011455 | 0.011404 |
| 0.011529 | 0.011470 | 0.011468 | 0.011259 | 0.011497 | 0.011530 | 0.011534 |
| 0.011404 | 0.011497 | 0.011497 | 0.011396 | 0.011429 | 0.011430 | 0.011396 |
| 0.011430 | 0.011362 | 0.011396 | 0.011430 | 0.011396 | 0.011329 | 0.011362 |
| 0.011362 | 0.011430 | 0.011329 | 0.011430 | 0.011463 | 0.011497 | 0.011396 |
| 0.011362 | 0.011329 | 0.011665 | 0.011665 | 0.011463 | 0.011497 | 0.011530 |
| 0.011295 | 0.011295 | 0.011329 | 0.011430 | 0.011295 | 0.011530 | 0.011530 |
| 0.011564 | 0.011564 | 0.011497 | 0.011597 | 0.011698 | 0.011599 | 0.011430 |
| 0.011430 | 0.011497 | 0.011530 | 0.011362 | 0.011430 | 0.011396 | 0.011430 |
| 0.011497 | 0.011497 | 0.011530 | 0.011497 | 0.011397 | 0.011597 | 0.011564 |
| 0.011433 | 0.011329 | 0.011430 | 0.011530 | 0.011430 | 0.011497 | 0.011597 |
| 0.011765 | 0.011470 | 0.011631 | 0.011597 | 0.011530 | 0.011698 | 0.011329 |
| 0.011498 | 0.011396 | 0.011362 | 0.011362 | 0.011430 | 0.011329 | 0.011430 |
| 0.011463 | 0.011497 | 0.011396 | 0.011362 | 0.011329 | 0.011665 | 0.011665 |
| 0.011463 | 0.011497 | 0.011564 | 0.011496 | 0.012069 | 0.011560 | 0.011482 |
| 0.011552 | 0.011511 | 0.011622 | 0.011510 | 0.011620 | 0.011543 | 0.011508 |
| 0.012022 | 0.011406 | 0.011540 | 0.011475 | 0.011680 | 0.011604 | 0.011707 |
| 0.012046 | 0.011513 | 0.011669 | 0.011732 | 0.011597 | 0.011530 | 0.011635 |
| 0.011295 | 0.011463 | 0.011597 | 0.011564 | 0.011567 | 0.011496 | 0.011464 |
| 0.011396 | 0.011329 | 0.011362 | 0.011396 | 0.011295 | 0.011362 | 0.011262 |
| 0.011329 | 0.011362 | 0.011329 | 0.011295 | 0.011396 | 0.011329 | 0.011362 |
| 0.011362 | 0.011295 | 0.011362 | 0.011396 | 0.011295 | 0.011497 | 0.011530 |
| 0.011429 | 0.011429 | 0.011429 | 0.011429 | 0.011362 | 0.011698 | 0.011396 |
| 0.011373 | 0.011362 | 0.011531 | 0.011535 | 0.011463 | 0.011463 | 0.011463 |
| 0.011463 | 0.011396 | 0.011362 | 0.011396 | 0.011497 | 0.011497 | 0.011429 |
| 0.011429 | 0.011564 | 0.011664 | 0.011463 | 0.011665 | 0.011665 | 0.011530 |
| 0.011362 | 0.011429 | 0.011463 | 0.011799 | 0.011430 | 0.011463 | 0.011429 |
| 0.011463 | 0.011329 | 0.011329 | 0.011631 | 0.011631 | 0.011597 | 0.011396 |
| 0.011497 | 0.011564 | 0.011429 | 0.011497 | 0.011463 | 0.011329 | 0.011597 |
| 0.011429 | 0.011396 | 0.011329 | 0.011564 | 0.011396 | 0.011496 | 0.011732 |
| 0.011429 | 0.011739 | 0.011732 | 0.011548 | 0.011230 | 0.011434 | 0.011318 |
| 0.011390 | 0.011761 | 0.011341 | 0.011507 | 0.011353 | 0.011467 | 0.011485 |
| 0.011468 | 0.011455 | 0.011506 | 0.011258 | 0.011438 | 0.011395 | 0.011506 |
| 0.011512 | 0.011414 | 0.011413 | 0.011377 | 0.011431 | 0.011497 | 0.011564 |
| 0.011564 | 0.011161 | 0.011263 | 0.011535 | 0.011603 | 0.011413 | 0.011429 |
| 0.011597 | 0.011195 | 0.011396 | 0.011161 | 0.011295 | 0.011463 | 0.011329 |
| 0.011396 | 0.011396 | 0.011362 | 0.011329 | 0.011362 | 0.011329 | 0.011430 |
| 0.011410 | 0.011375 | 0.011403 | 0.011437 | 0.011573 | 0.011538 | 0.011538 |

|          |          |          |          |          |          |          |
|----------|----------|----------|----------|----------|----------|----------|
| 0.011537 | 0.011464 | 0.011282 | 0.011276 | 0.011399 | 0.011568 | 0.011569 |
| 0.011363 | 0.011433 | 0.011666 | 0.011635 | 0.011565 | 0.011599 | 0.011530 |
| 0.011463 | 0.011530 | 0.011530 | 0.011429 | 0.011934 | 0.011597 | 0.011665 |
| 0.011698 | 0.011666 | 0.011401 | 0.011476 | 0.011362 | 0.011564 | 0.011530 |
| 0.011565 | 0.011597 | 0.011597 | 0.011597 | 0.011729 | 0.011732 | 0.011372 |
| 0.011263 | 0.011268 | 0.011367 | 0.011332 | 0.011368 | 0.011284 | 0.011536 |
| 0.011403 | 0.011411 | 0.011251 | 0.011435 | 0.011396 | 0.011471 | 0.011362 |
| 0.011329 | 0.011262 | 0.011396 | 0.011362 | 0.011497 | 0.011463 | 0.011396 |
| 0.011497 | 0.011564 | 0.011362 | 0.011362 | 0.011396 | 0.011396 | 0.011398 |
| 0.011466 | 0.011396 | 0.011396 | 0.011431 | 0.011497 | 0.011564 | 0.011564 |
| 0.011161 | 0.011263 | 0.011535 | 0.011603 | 0.011413 | 0.011429 | 0.011597 |
| 0.011530 | 0.011530 | 0.011365 | 0.011547 | 0.011477 | 0.011503 | 0.011376 |
| 0.011542 | 0.011744 | 0.011483 | 0.011434 | 0.011329 | 0.011530 | 0.011396 |
| 0.011497 | 0.011430 | 0.011329 | 0.011431 | 0.011530 | 0.011533 | 0.011430 |
| 0.011329 | 0.011263 | 0.011396 | 0.011329 | 0.011262 | 0.011366 | 0.011531 |
| 0.011430 | 0.011362 | 0.011396 | 0.011430 | 0.011396 | 0.011329 | 0.011463 |
| 0.011396 | 0.011429 | 0.011429 | 0.011362 | 0.011429 | 0.011664 | 0.011262 |
| 0.011362 | 0.011698 | 0.011362 | 0.011396 | 0.011362 | 0.011664 | 0.011360 |
| 0.011735 | 0.011358 | 0.011311 | 0.011503 | 0.011589 | 0.011491 | 0.011311 |
| 0.011218 | 0.011463 | 0.011564 | 0.011671 | 0.011532 | 0.011669 | 0.011800 |
| 0.011700 | 0.011737 | 0.011698 | 0.011949 | 0.011664 | 0.012539 | 0.011700 |
| 0.012439 | 0.012207 | 0.012341 | 0.012613 | 0.011664 | 0.011363 | 0.011665 |
| 0.012104 | 0.012038 | 0.011631 | 0.011530 | 0.011598 | 0.011598 | 0.011567 |
| 0.011463 | 0.011467 | 0.011530 | 0.011497 | 0.011867 | 0.011933 | 0.011935 |
| 0.011834 | 0.011935 | 0.012038 | 0.011804 | 0.012104 | 0.012110 | 0.012171 |
| 0.012172 | 0.012206 | 0.012152 | 0.012172 | 0.012173 | 0.011463 | 0.011699 |
| 0.011767 | 0.012270 | 0.011772 | 0.012001 | 0.012474 | 0.011536 | 0.011430 |
| 0.011396 | 0.011396 | 0.011867 | 0.011883 | 0.012010 | 0.011732 | 0.011397 |
| S284     | 0.011597 | 0.011597 | 0.011933 | 0.011698 | 0.011698 | 0.011765 |
| 0.011603 | 0.011535 | 0.011765 | 0.011195 | 0.011262 | 0.011228 | 0.011194 |
| 0.011228 | 0.011396 | 0.011194 | 0.011228 | 0.011295 | 0.011262 | 0.011228 |
| 0.011194 | 0.011228 | 0.011329 | 0.011195 | 0.011228 | 0.011228 | 0.011569 |
| 0.011463 | 0.011228 | 0.011127 | 0.011362 | 0.011295 | 0.011262 | 0.011295 |
| 0.011262 | 0.011362 | 0.011262 | 0.011262 | 0.011295 | 0.011262 | 0.011429 |
| 0.011194 | 0.011262 | 0.011295 | 0.011228 | 0.011329 | 0.011362 | 0.011295 |
| 0.011262 | 0.011429 | 0.011329 | 0.011597 | 0.011262 | 0.011530 | 0.011262 |
| 0.011228 | 0.011329 | 0.011396 | 0.011530 | 0.011631 | 0.011329 | 0.011429 |
| 0.011295 | 0.011362 | 0.011262 | 0.011496 | 0.011732 | 0.011262 | 0.011329 |
| 0.011228 | 0.011329 | 0.011295 | 0.011362 | 0.011295 | 0.011295 | 0.011295 |
| 0.011194 | 0.011228 | 0.011194 | 0.011295 | 0.011262 | 0.011296 | 0.011362 |
| 0.011295 | 0.011262 | 0.011329 | 0.011228 | 0.011362 | 0.011194 | 0.011262 |
| 0.011429 | 0.011362 | 0.011597 | 0.011429 | 0.011262 | 0.011496 | 0.011262 |
| 0.011394 | 0.011620 | 0.011475 | 0.011138 | 0.011172 | 0.011244 | 0.011336 |
| 0.012011 | 0.011467 | 0.011184 | 0.011496 | 0.011496 | 0.011295 | 0.011396 |
| 0.011329 | 0.011295 | 0.011362 | 0.011262 | 0.011362 | 0.011295 | 0.011295 |
| 0.011262 | 0.011362 | 0.011564 | 0.011429 | 0.011329 | 0.011295 | 0.011228 |
| 0.011195 | 0.011195 | 0.011262 | 0.011228 | 0.011429 | 0.011396 | 0.011329 |
| 0.011429 | 0.011497 | 0.011228 | 0.011228 | 0.011262 | 0.011262 | 0.011263 |
| 0.011331 | 0.011262 | 0.011262 | 0.011132 | 0.011205 | 0.011165 | 0.011262 |
| 0.011263 | 0.011198 | 0.011245 | 0.011233 | 0.011162 | 0.011197 | 0.011229 |
| 0.011492 | 0.011267 | 0.011301 | 0.011195 | 0.011199 | 0.011329 | 0.011296 |
| 0.011363 | 0.011296 | 0.011296 | 0.011396 | 0.011329 | 0.011698 | 0.011497 |
| 0.011530 | 0.011396 | 0.011262 | 0.011362 | 0.011161 | 0.011396 | 0.011195 |
| 0.011262 | 0.011262 | 0.011228 | 0.011194 | 0.011228 | 0.011195 | 0.011295 |
| 0.011262 | 0.011362 | 0.011295 | 0.011195 | 0.011296 | 0.011396 | 0.011398 |
| 0.011396 | 0.011295 | 0.011195 | 0.011128 | 0.011262 | 0.011195 | 0.011127 |
| 0.011196 | 0.011396 | 0.011195 | 0.011396 | 0.011161 | 0.011262 | 0.011228 |
| 0.011329 | 0.011228 | 0.011262 | 0.011228 | 0.011262 | 0.011127 | 0.011262 |
| 0.011295 | 0.011228 | 0.011295 | 0.011228 | 0.011262 | 0.011295 | 0.011530 |
| 0.011631 | 0.011564 | 0.011631 | 0.011397 | 0.011631 | 0.011262 | 0.011228 |



|          |          |          |          |          |          |          |
|----------|----------|----------|----------|----------|----------|----------|
| 0.011263 | 0.011545 | 0.011380 | 0.011163 | 0.011637 | 0.011129 | 0.011257 |
| 0.011637 | 0.011536 | 0.011429 | 0.011631 | 0.011333 | 0.011496 | 0.011463 |
| 0.011396 | 0.011564 | 0.011415 | 0.011266 | 0.011312 | 0.011295 | 0.011365 |
| 0.011463 | 0.011364 | 0.011500 | 0.011568 | 0.011496 | 0.011564 | 0.011670 |
| 0.011398 | 0.011569 | 0.011500 | 0.011432 | 0.011699 | 0.011161 | 0.011363 |
| 0.011329 | 0.011262 | 0.011161 | 0.011161 | 0.011228 | 0.011228 | 0.011295 |
| 0.011228 | 0.011295 | 0.011194 | 0.011295 | 0.011228 | 0.011228 | 0.011295 |
| 0.011228 | 0.011664 | 0.011564 | 0.011597 | 0.011127 | 0.011228 | 0.011262 |
| 0.011262 | 0.011228 | 0.011295 | 0.011329 | 0.000000 | 0.000000 | 0.000000 |
| 0.011731 | 0.011362 | 0.011362 | 0.011161 | 0.011262 | 0.011429 | 0.011194 |
| 0.011194 | 0.011262 | 0.011228 | 0.011396 | 0.011194 | 0.011329 | 0.011463 |
| 0.011396 | 0.011228 | 0.011228 | 0.011161 | 0.011161 | 0.011329 | 0.011262 |
| 0.011161 | 0.011262 | 0.011127 | 0.011161 | 0.011295 | 0.011430 | 0.011195 |
| 0.011161 | 0.011295 | 0.011228 | 0.011127 | 0.011463 | 0.011127 | 0.011295 |
| 0.011368 | 0.011194 | 0.011496 | 0.011329 | 0.011362 | 0.011228 | 0.011329 |
| 0.011194 | 0.011530 | 0.011127 | 0.011396 | 0.011194 | 0.011194 | 0.011127 |
| 0.011362 | 0.011564 | 0.011262 | 0.011329 | 0.011161 | 0.011564 | 0.011194 |
| 0.011194 | 0.011194 | 0.011228 | 0.011329 | 0.011228 | 0.011329 | 0.011396 |
| 0.011396 | 0.011362 | 0.011262 | 0.011362 | 0.011329 | 0.011194 | 0.011161 |
| 0.011194 | 0.011194 | 0.011262 | 0.011194 | 0.011161 | 0.011329 | 0.011194 |
| 0.011228 | 0.011228 | 0.011362 | 0.011396 | 0.011295 | 0.011228 | 0.011228 |
| 0.011295 | 0.011228 | 0.011329 | 0.011194 | 0.011329 | 0.011429 | 0.011731 |
| 0.011228 | 0.011631 | 0.011233 | 0.017747 | 0.011126 | 0.011366 | 0.011583 |
| 0.011545 | 0.011588 | 0.011270 | 0.011234 | 0.011664 | 0.011612 | 0.011303 |
| 0.011440 | 0.011487 | 0.011099 | 0.011186 | 0.011216 | 0.011258 | 0.011189 |
| 0.011482 | 0.011395 | 0.011394 | 0.011193 | 0.011362 | 0.011396 | 0.011398 |
| 0.011266 | 0.011362 | 0.011362 | 0.011329 | 0.011295 | 0.011295 | 0.011262 |
| 0.011295 | 0.011228 | 0.011262 | 0.011295 | 0.011262 | 0.011195 | 0.011228 |
| 0.011228 | 0.011295 | 0.011195 | 0.011295 | 0.011329 | 0.011362 | 0.011262 |
| 0.011295 | 0.011262 | 0.011597 | 0.011597 | 0.011329 | 0.011363 | 0.011396 |
| 0.011161 | 0.011161 | 0.011195 | 0.011295 | 0.011161 | 0.011396 | 0.011396 |
| 0.011429 | 0.011429 | 0.011362 | 0.011463 | 0.011631 | 0.011464 | 0.011295 |
| 0.011295 | 0.011362 | 0.011396 | 0.011228 | 0.011295 | 0.011262 | 0.011295 |
| 0.011363 | 0.011362 | 0.011396 | 0.011362 | 0.011262 | 0.011463 | 0.011429 |
| 0.011297 | 0.011195 | 0.011295 | 0.011396 | 0.011295 | 0.011430 | 0.011463 |
| 0.011631 | 0.011333 | 0.011496 | 0.011463 | 0.011396 | 0.011564 | 0.011195 |
| 0.011363 | 0.011262 | 0.011228 | 0.011228 | 0.011295 | 0.011195 | 0.011295 |
| 0.011329 | 0.011362 | 0.011262 | 0.011295 | 0.011262 | 0.011597 | 0.011597 |
| 0.011329 | 0.011363 | 0.011429 | 0.011362 | 0.012002 | 0.011417 | 0.011341 |
| 0.011412 | 0.011372 | 0.011482 | 0.011372 | 0.011480 | 0.011405 | 0.011370 |
| 0.011953 | 0.011268 | 0.011403 | 0.011337 | 0.011611 | 0.011468 | 0.011570 |
| 0.011978 | 0.011437 | 0.011533 | 0.011597 | 0.011463 | 0.011463 | 0.011499 |
| 0.011161 | 0.011329 | 0.011463 | 0.011429 | 0.011432 | 0.011429 | 0.011397 |
| 0.011262 | 0.011194 | 0.011228 | 0.011262 | 0.011161 | 0.011228 | 0.011127 |
| 0.011262 | 0.011295 | 0.011194 | 0.011161 | 0.011194 | 0.011194 | 0.011228 |
| 0.011228 | 0.011161 | 0.011228 | 0.011262 | 0.011161 | 0.011362 | 0.011396 |
| 0.011295 | 0.011362 | 0.011295 | 0.011295 | 0.011228 | 0.011631 | 0.011262 |
| 0.011304 | 0.011228 | 0.011463 | 0.011467 | 0.011329 | 0.011329 | 0.011329 |
| 0.011329 | 0.011262 | 0.011228 | 0.011262 | 0.011362 | 0.011362 | 0.011295 |
| 0.011295 | 0.011429 | 0.011597 | 0.011329 | 0.011530 | 0.011530 | 0.011362 |
| 0.011228 | 0.011295 | 0.011329 | 0.011732 | 0.011295 | 0.011329 | 0.011295 |
| 0.011329 | 0.011262 | 0.011262 | 0.011564 | 0.011497 | 0.011530 | 0.011262 |
| 0.011362 | 0.011429 | 0.011295 | 0.011362 | 0.011329 | 0.011194 | 0.011530 |
| 0.011295 | 0.011262 | 0.011262 | 0.011429 | 0.011262 | 0.011362 | 0.011597 |
| 0.011295 | 0.011671 | 0.011664 | 0.011426 | 0.011173 | 0.011366 | 0.011215 |
| 0.011170 | 0.011683 | 0.011201 | 0.011373 | 0.011207 | 0.011264 | 0.011273 |
| 0.011468 | 0.000000 | 0.011227 | 0.000000 | 0.011114 | 0.011261 | 0.011303 |
| 0.011324 | 0.011257 | 0.011342 | 0.011272 | 0.011296 | 0.011429 | 0.011497 |
| 0.011497 | 0.011363 | 0.011466 | 0.011467 | 0.011602 | 0.011625 | 0.011295 |
| 0.011530 | 0.011396 | 0.011262 | 0.011362 | 0.011161 | 0.011396 | 0.011195 |

|          |          |          |          |          |          |          |
|----------|----------|----------|----------|----------|----------|----------|
| 0.011262 | 0.011262 | 0.011228 | 0.011194 | 0.011228 | 0.011195 | 0.011295 |
| 0.011270 | 0.011270 | 0.011266 | 0.011300 | 0.011436 | 0.011402 | 0.011402 |
| 0.011401 | 0.011329 | 0.011134 | 0.011132 | 0.011263 | 0.011433 | 0.011433 |
| 0.011228 | 0.011297 | 0.011531 | 0.011499 | 0.011430 | 0.011464 | 0.011396 |
| 0.011329 | 0.011396 | 0.011396 | 0.011295 | 0.011866 | 0.011463 | 0.011530 |
| 0.011564 | 0.011630 | 0.011265 | 0.011337 | 0.011228 | 0.011429 | 0.011396 |
| 0.011430 | 0.011463 | 0.011463 | 0.011463 | 0.011610 | 0.011597 | 0.011234 |
| 0.011128 | 0.011130 | 0.011230 | 0.011196 | 0.011299 | 0.011135 | 0.011468 |
| 0.011266 | 0.011411 | 0.011156 | 0.011285 | 0.011262 | 0.011334 | 0.011228 |
| 0.011195 | 0.011195 | 0.011262 | 0.011228 | 0.011429 | 0.011396 | 0.011329 |
| 0.011429 | 0.011497 | 0.011228 | 0.011228 | 0.011262 | 0.011262 | 0.011263 |
| 0.011331 | 0.011262 | 0.011262 | 0.011296 | 0.011429 | 0.011497 | 0.011497 |
| 0.011363 | 0.011466 | 0.011467 | 0.011602 | 0.011625 | 0.011295 | 0.011463 |
| 0.011396 | 0.011396 | 0.011229 | 0.011408 | 0.011338 | 0.011367 | 0.011235 |
| 0.011404 | 0.011607 | 0.011399 | 0.011298 | 0.011195 | 0.011396 | 0.011262 |
| 0.011362 | 0.011295 | 0.011195 | 0.011296 | 0.011396 | 0.011398 | 0.011295 |
| 0.011195 | 0.011128 | 0.011262 | 0.011195 | 0.011127 | 0.011196 | 0.011396 |
| 0.011295 | 0.011228 | 0.011262 | 0.011295 | 0.011262 | 0.011195 | 0.011396 |
| 0.011262 | 0.011295 | 0.011295 | 0.011228 | 0.011295 | 0.011530 | 0.011194 |
| 0.011228 | 0.011631 | 0.011228 | 0.011262 | 0.011228 | 0.011597 | 0.011189 |
| 0.011622 | 0.011145 | 0.011211 | 0.011422 | 0.011508 | 0.011419 | 0.011144 |
| 0.011165 | 0.011396 | 0.011496 | 0.011603 | 0.011464 | 0.011601 | 0.011733 |
| 0.011632 | 0.011669 | 0.011631 | 0.011880 | 0.011597 | 0.012471 | 0.011633 |
| 0.012372 | 0.012139 | 0.012273 | 0.012545 | 0.011597 | 0.011295 | 0.011598 |
| 0.012036 | 0.011971 | 0.011564 | 0.011463 | 0.011531 | 0.011531 | 0.011500 |
| 0.011396 | 0.011399 | 0.011463 | 0.011430 | 0.011800 | 0.011866 | 0.011867 |
| 0.011766 | 0.011867 | 0.011970 | 0.011737 | 0.012036 | 0.012042 | 0.012103 |
| 0.012104 | 0.012138 | 0.012084 | 0.012104 | 0.012105 | 0.011329 | 0.011631 |
| 0.011699 | 0.012202 | 0.011704 | 0.011933 | 0.012406 | 0.011468 | 0.011363 |
| 0.011329 | 0.011329 | 0.011799 | 0.011842 | 0.011940 | 0.011664 | 0.011330 |
| S285     | 0.011597 | 0.011597 | 0.011933 | 0.011698 | 0.011698 | 0.011765 |
| 0.011603 | 0.011535 | 0.011765 | 0.011195 | 0.011262 | 0.011228 | 0.011194 |
| 0.011228 | 0.011396 | 0.011194 | 0.011228 | 0.011295 | 0.011262 | 0.011228 |
| 0.011194 | 0.011228 | 0.011329 | 0.011195 | 0.011228 | 0.011228 | 0.011569 |
| 0.011463 | 0.011228 | 0.011127 | 0.011362 | 0.011295 | 0.011262 | 0.011295 |
| 0.011262 | 0.011362 | 0.011262 | 0.011262 | 0.011295 | 0.011262 | 0.011429 |
| 0.011194 | 0.011262 | 0.011295 | 0.011228 | 0.011329 | 0.011362 | 0.011295 |
| 0.011262 | 0.011429 | 0.011329 | 0.011597 | 0.011262 | 0.011530 | 0.011262 |
| 0.011228 | 0.011329 | 0.011396 | 0.011530 | 0.011631 | 0.011329 | 0.011429 |
| 0.011295 | 0.011362 | 0.011262 | 0.011496 | 0.011732 | 0.011262 | 0.011329 |
| 0.011228 | 0.011329 | 0.011295 | 0.011362 | 0.011295 | 0.011295 | 0.011295 |
| 0.011194 | 0.011228 | 0.011194 | 0.011295 | 0.011262 | 0.011296 | 0.011362 |
| 0.011295 | 0.011262 | 0.011329 | 0.011228 | 0.011362 | 0.011194 | 0.011262 |
| 0.011429 | 0.011362 | 0.011597 | 0.011429 | 0.011262 | 0.011496 | 0.011262 |
| 0.011394 | 0.011620 | 0.011475 | 0.011138 | 0.011172 | 0.011244 | 0.011336 |
| 0.012011 | 0.011467 | 0.011184 | 0.011496 | 0.011496 | 0.011295 | 0.011396 |
| 0.011329 | 0.011295 | 0.011362 | 0.011262 | 0.011362 | 0.011295 | 0.011295 |
| 0.011262 | 0.011362 | 0.011564 | 0.011429 | 0.011329 | 0.011295 | 0.011228 |
| 0.011195 | 0.011195 | 0.011262 | 0.011228 | 0.011429 | 0.011396 | 0.011329 |
| 0.011429 | 0.011497 | 0.011228 | 0.011228 | 0.011262 | 0.011262 | 0.011263 |
| 0.011331 | 0.011262 | 0.011262 | 0.011132 | 0.011205 | 0.011165 | 0.011262 |
| 0.011263 | 0.011198 | 0.011245 | 0.011233 | 0.011162 | 0.011197 | 0.011229 |
| 0.011492 | 0.011267 | 0.011301 | 0.011195 | 0.011199 | 0.011329 | 0.011296 |
| 0.011363 | 0.011296 | 0.011296 | 0.011396 | 0.011329 | 0.011698 | 0.011497 |
| 0.011530 | 0.011396 | 0.011262 | 0.011362 | 0.011161 | 0.011396 | 0.011195 |
| 0.011262 | 0.011262 | 0.011228 | 0.011194 | 0.011228 | 0.011195 | 0.011295 |
| 0.011262 | 0.011362 | 0.011295 | 0.011195 | 0.011296 | 0.011396 | 0.011398 |
| 0.011396 | 0.011295 | 0.011195 | 0.011128 | 0.011262 | 0.011195 | 0.011127 |
| 0.011196 | 0.011396 | 0.011195 | 0.011396 | 0.011161 | 0.011262 | 0.011228 |
| 0.011329 | 0.011228 | 0.011262 | 0.011228 | 0.011262 | 0.011127 | 0.011262 |

|          |          |          |          |          |          |          |
|----------|----------|----------|----------|----------|----------|----------|
| 0.011295 | 0.011228 | 0.011295 | 0.011228 | 0.011262 | 0.011295 | 0.011530 |
| 0.011631 | 0.011564 | 0.011631 | 0.011397 | 0.011631 | 0.011262 | 0.011228 |
| 0.011263 | 0.011545 | 0.011380 | 0.011163 | 0.011637 | 0.011129 | 0.011257 |
| 0.011637 | 0.011536 | 0.011429 | 0.011631 | 0.011333 | 0.011496 | 0.011463 |
| 0.011396 | 0.011564 | 0.011415 | 0.011266 | 0.011312 | 0.011295 | 0.011365 |
| 0.011463 | 0.011364 | 0.011500 | 0.011568 | 0.011496 | 0.011564 | 0.011670 |
| 0.011398 | 0.011569 | 0.011500 | 0.011432 | 0.011699 | 0.011161 | 0.011363 |
| 0.011329 | 0.011262 | 0.011161 | 0.011161 | 0.011228 | 0.011228 | 0.011295 |
| 0.011228 | 0.011295 | 0.011194 | 0.011295 | 0.011228 | 0.011228 | 0.011295 |
| 0.011228 | 0.011664 | 0.011564 | 0.011597 | 0.011127 | 0.011228 | 0.011262 |
| 0.011262 | 0.011228 | 0.011295 | 0.011329 | 0.000000 | 0.000000 | 0.000000 |
| 0.011731 | 0.011362 | 0.011362 | 0.011161 | 0.011262 | 0.011429 | 0.011194 |
| 0.011194 | 0.011262 | 0.011228 | 0.011396 | 0.011194 | 0.011329 | 0.011463 |
| 0.011396 | 0.011228 | 0.011228 | 0.011161 | 0.011161 | 0.011329 | 0.011262 |
| 0.011161 | 0.011262 | 0.011127 | 0.011161 | 0.011295 | 0.011430 | 0.011195 |
| 0.011161 | 0.011295 | 0.011228 | 0.011127 | 0.011463 | 0.011127 | 0.011295 |
| 0.011368 | 0.011194 | 0.011496 | 0.011329 | 0.011362 | 0.011228 | 0.011329 |
| 0.011194 | 0.011530 | 0.011127 | 0.011396 | 0.011194 | 0.011194 | 0.011127 |
| 0.011362 | 0.011564 | 0.011262 | 0.011329 | 0.011161 | 0.011564 | 0.011194 |
| 0.011194 | 0.011194 | 0.011228 | 0.011329 | 0.011228 | 0.011329 | 0.011396 |
| 0.011396 | 0.011362 | 0.011262 | 0.011362 | 0.011329 | 0.011194 | 0.011161 |
| 0.011194 | 0.011194 | 0.011262 | 0.011194 | 0.011161 | 0.011329 | 0.011194 |
| 0.011228 | 0.011228 | 0.011362 | 0.011396 | 0.011295 | 0.011228 | 0.011228 |
| 0.011295 | 0.011228 | 0.011329 | 0.011194 | 0.011329 | 0.011429 | 0.011731 |
| 0.011228 | 0.011631 | 0.011233 | 0.017747 | 0.011126 | 0.011366 | 0.011583 |
| 0.011545 | 0.011588 | 0.011270 | 0.011234 | 0.011664 | 0.011612 | 0.011303 |
| 0.011440 | 0.011487 | 0.011099 | 0.011186 | 0.011216 | 0.011258 | 0.011189 |
| 0.011482 | 0.011395 | 0.011394 | 0.011193 | 0.011362 | 0.011396 | 0.011398 |
| 0.011266 | 0.011362 | 0.011362 | 0.011329 | 0.011295 | 0.011295 | 0.011262 |
| 0.011295 | 0.011228 | 0.011262 | 0.011295 | 0.011262 | 0.011195 | 0.011228 |
| 0.011228 | 0.011295 | 0.011195 | 0.011295 | 0.011329 | 0.011362 | 0.011262 |
| 0.011295 | 0.011262 | 0.011597 | 0.011597 | 0.011329 | 0.011363 | 0.011396 |
| 0.011161 | 0.011161 | 0.011195 | 0.011295 | 0.011161 | 0.011396 | 0.011396 |
| 0.011429 | 0.011429 | 0.011362 | 0.011463 | 0.011631 | 0.011464 | 0.011295 |
| 0.011295 | 0.011362 | 0.011396 | 0.011228 | 0.011295 | 0.011262 | 0.011295 |
| 0.011363 | 0.011362 | 0.011396 | 0.011362 | 0.011262 | 0.011463 | 0.011429 |
| 0.011297 | 0.011195 | 0.011295 | 0.011396 | 0.011295 | 0.011430 | 0.011463 |
| 0.011631 | 0.011333 | 0.011496 | 0.011463 | 0.011396 | 0.011564 | 0.011195 |
| 0.011363 | 0.011262 | 0.011228 | 0.011228 | 0.011295 | 0.011195 | 0.011295 |
| 0.011329 | 0.011362 | 0.011262 | 0.011295 | 0.011262 | 0.011597 | 0.011597 |
| 0.011329 | 0.011363 | 0.011429 | 0.011362 | 0.012002 | 0.011417 | 0.011341 |
| 0.011412 | 0.011372 | 0.011482 | 0.011372 | 0.011480 | 0.011405 | 0.011370 |
| 0.011953 | 0.011268 | 0.011403 | 0.011337 | 0.011611 | 0.011468 | 0.011570 |
| 0.011978 | 0.011437 | 0.011533 | 0.011597 | 0.011463 | 0.011463 | 0.011499 |
| 0.011161 | 0.011329 | 0.011463 | 0.011429 | 0.011432 | 0.011429 | 0.011397 |
| 0.011262 | 0.011194 | 0.011228 | 0.011262 | 0.011161 | 0.011228 | 0.011127 |
| 0.011262 | 0.011295 | 0.011194 | 0.011161 | 0.011194 | 0.011194 | 0.011228 |
| 0.011228 | 0.011161 | 0.011228 | 0.011262 | 0.011161 | 0.011362 | 0.011396 |
| 0.011295 | 0.011362 | 0.011295 | 0.011295 | 0.011228 | 0.011631 | 0.011262 |
| 0.011304 | 0.011228 | 0.011463 | 0.011467 | 0.011329 | 0.011329 | 0.011329 |
| 0.011329 | 0.011262 | 0.011228 | 0.011262 | 0.011362 | 0.011362 | 0.011295 |
| 0.011295 | 0.011429 | 0.011597 | 0.011329 | 0.011530 | 0.011530 | 0.011362 |
| 0.011228 | 0.011295 | 0.011329 | 0.011732 | 0.011295 | 0.011329 | 0.011295 |
| 0.011329 | 0.011262 | 0.011262 | 0.011564 | 0.011497 | 0.011530 | 0.011262 |
| 0.011362 | 0.011429 | 0.011295 | 0.011362 | 0.011329 | 0.011194 | 0.011530 |
| 0.011295 | 0.011262 | 0.011262 | 0.011429 | 0.011262 | 0.011362 | 0.011597 |
| 0.011295 | 0.011671 | 0.011664 | 0.011426 | 0.011173 | 0.011366 | 0.011215 |
| 0.011170 | 0.011683 | 0.011201 | 0.011373 | 0.011207 | 0.011264 | 0.011273 |
| 0.011468 | 0.000000 | 0.011227 | 0.000000 | 0.011114 | 0.011261 | 0.011303 |
| 0.011324 | 0.011257 | 0.011342 | 0.011272 | 0.011296 | 0.011429 | 0.011497 |

|          |          |          |          |          |          |          |
|----------|----------|----------|----------|----------|----------|----------|
| 0.011497 | 0.011363 | 0.011466 | 0.011467 | 0.011602 | 0.011625 | 0.011295 |
| 0.011530 | 0.011396 | 0.011262 | 0.011362 | 0.011161 | 0.011396 | 0.011195 |
| 0.011262 | 0.011262 | 0.011228 | 0.011194 | 0.011228 | 0.011195 | 0.011295 |
| 0.011270 | 0.011270 | 0.011266 | 0.011300 | 0.011436 | 0.011402 | 0.011402 |
| 0.011401 | 0.011329 | 0.011134 | 0.011132 | 0.011263 | 0.011433 | 0.011433 |
| 0.011228 | 0.011297 | 0.011531 | 0.011499 | 0.011430 | 0.011464 | 0.011396 |
| 0.011329 | 0.011396 | 0.011396 | 0.011295 | 0.011866 | 0.011463 | 0.011530 |
| 0.011564 | 0.011630 | 0.011265 | 0.011337 | 0.011228 | 0.011429 | 0.011396 |
| 0.011430 | 0.011463 | 0.011463 | 0.011463 | 0.011610 | 0.011597 | 0.011234 |
| 0.011128 | 0.011130 | 0.011230 | 0.011196 | 0.011299 | 0.011135 | 0.011468 |
| 0.011266 | 0.011411 | 0.011156 | 0.011285 | 0.011262 | 0.011334 | 0.011228 |
| 0.011195 | 0.011195 | 0.011262 | 0.011228 | 0.011429 | 0.011396 | 0.011329 |
| 0.011429 | 0.011497 | 0.011228 | 0.011228 | 0.011262 | 0.011262 | 0.011263 |
| 0.011331 | 0.011262 | 0.011262 | 0.011296 | 0.011429 | 0.011497 | 0.011497 |
| 0.011363 | 0.011466 | 0.011467 | 0.011602 | 0.011625 | 0.011295 | 0.011463 |
| 0.011396 | 0.011396 | 0.011229 | 0.011408 | 0.011338 | 0.011367 | 0.011235 |
| 0.011404 | 0.011607 | 0.011399 | 0.011298 | 0.011195 | 0.011396 | 0.011262 |
| 0.011362 | 0.011295 | 0.011195 | 0.011296 | 0.011396 | 0.011398 | 0.011295 |
| 0.011195 | 0.011128 | 0.011262 | 0.011195 | 0.011127 | 0.011196 | 0.011396 |
| 0.011295 | 0.011228 | 0.011262 | 0.011295 | 0.011262 | 0.011195 | 0.011396 |
| 0.011262 | 0.011295 | 0.011295 | 0.011228 | 0.011295 | 0.011530 | 0.011194 |
| 0.011228 | 0.011631 | 0.011228 | 0.011262 | 0.011228 | 0.011597 | 0.011189 |
| 0.011622 | 0.011145 | 0.011211 | 0.011422 | 0.011508 | 0.011419 | 0.011144 |
| 0.011165 | 0.011396 | 0.011496 | 0.011603 | 0.011464 | 0.011601 | 0.011733 |
| 0.011632 | 0.011669 | 0.011631 | 0.011880 | 0.011597 | 0.012471 | 0.011633 |
| 0.012372 | 0.012139 | 0.012273 | 0.012545 | 0.011597 | 0.011295 | 0.011598 |
| 0.012036 | 0.011971 | 0.011564 | 0.011463 | 0.011531 | 0.011531 | 0.011500 |
| 0.011396 | 0.011399 | 0.011463 | 0.011430 | 0.011800 | 0.011866 | 0.011867 |
| 0.011766 | 0.011867 | 0.011970 | 0.011737 | 0.012036 | 0.012042 | 0.012103 |
| 0.012104 | 0.012138 | 0.012084 | 0.012104 | 0.012105 | 0.011329 | 0.011631 |
| 0.011699 | 0.012202 | 0.011704 | 0.011933 | 0.012406 | 0.011468 | 0.011363 |
| 0.011329 | 0.011329 | 0.011799 | 0.011842 | 0.011940 | 0.011664 | 0.011330 |
| S286     | 0.011597 | 0.011597 | 0.011933 | 0.011698 | 0.011698 | 0.011765 |
| 0.011603 | 0.011535 | 0.011765 | 0.011195 | 0.011262 | 0.011228 | 0.011194 |
| 0.011228 | 0.011396 | 0.011194 | 0.011228 | 0.011295 | 0.011262 | 0.011228 |
| 0.011194 | 0.011228 | 0.011329 | 0.011195 | 0.011228 | 0.011228 | 0.011569 |
| 0.011463 | 0.011228 | 0.011127 | 0.011362 | 0.011295 | 0.011262 | 0.011295 |
| 0.011262 | 0.011362 | 0.011262 | 0.011262 | 0.011295 | 0.011262 | 0.011429 |
| 0.011194 | 0.011262 | 0.011295 | 0.011228 | 0.011329 | 0.011362 | 0.011295 |
| 0.011262 | 0.011429 | 0.011329 | 0.011597 | 0.011262 | 0.011530 | 0.011262 |
| 0.011228 | 0.011329 | 0.011396 | 0.011530 | 0.011631 | 0.011329 | 0.011429 |
| 0.011295 | 0.011362 | 0.011262 | 0.011496 | 0.011732 | 0.011262 | 0.011329 |
| 0.011228 | 0.011329 | 0.011295 | 0.011362 | 0.011295 | 0.011295 | 0.011295 |
| 0.011194 | 0.011228 | 0.011194 | 0.011295 | 0.011262 | 0.011296 | 0.011362 |
| 0.011295 | 0.011262 | 0.011329 | 0.011228 | 0.011362 | 0.011194 | 0.011262 |
| 0.011429 | 0.011362 | 0.011597 | 0.011429 | 0.011262 | 0.011496 | 0.011262 |
| 0.011394 | 0.011620 | 0.011475 | 0.011138 | 0.011172 | 0.011244 | 0.011336 |
| 0.012011 | 0.011467 | 0.011184 | 0.011496 | 0.011496 | 0.011295 | 0.011396 |
| 0.011329 | 0.011295 | 0.011362 | 0.011262 | 0.011362 | 0.011295 | 0.011295 |
| 0.011262 | 0.011362 | 0.011564 | 0.011429 | 0.011329 | 0.011295 | 0.011228 |
| 0.011195 | 0.011195 | 0.011262 | 0.011228 | 0.011429 | 0.011396 | 0.011329 |
| 0.011429 | 0.011497 | 0.011228 | 0.011228 | 0.011262 | 0.011262 | 0.011263 |
| 0.011331 | 0.011262 | 0.011262 | 0.011132 | 0.011205 | 0.011165 | 0.011262 |
| 0.011263 | 0.011198 | 0.011245 | 0.011233 | 0.011162 | 0.011197 | 0.011229 |
| 0.011492 | 0.011267 | 0.011301 | 0.011195 | 0.011199 | 0.011329 | 0.011296 |
| 0.011363 | 0.011296 | 0.011296 | 0.011396 | 0.011329 | 0.011698 | 0.011497 |
| 0.011530 | 0.011396 | 0.011262 | 0.011362 | 0.011161 | 0.011396 | 0.011195 |
| 0.011262 | 0.011262 | 0.011228 | 0.011194 | 0.011228 | 0.011195 | 0.011295 |
| 0.011262 | 0.011362 | 0.011295 | 0.011195 | 0.011296 | 0.011396 | 0.011398 |
| 0.011396 | 0.011295 | 0.011195 | 0.011128 | 0.011262 | 0.011195 | 0.011127 |

|          |          |          |          |          |          |          |
|----------|----------|----------|----------|----------|----------|----------|
| 0.011196 | 0.011396 | 0.011195 | 0.011396 | 0.011161 | 0.011262 | 0.011228 |
| 0.011329 | 0.011228 | 0.011262 | 0.011228 | 0.011262 | 0.011127 | 0.011262 |
| 0.011295 | 0.011228 | 0.011295 | 0.011228 | 0.011262 | 0.011295 | 0.011530 |
| 0.011631 | 0.011564 | 0.011631 | 0.011397 | 0.011631 | 0.011262 | 0.011228 |
| 0.011263 | 0.011545 | 0.011380 | 0.011163 | 0.011637 | 0.011129 | 0.011257 |
| 0.011637 | 0.011536 | 0.011429 | 0.011631 | 0.011333 | 0.011496 | 0.011463 |
| 0.011396 | 0.011564 | 0.011415 | 0.011266 | 0.011312 | 0.011295 | 0.011365 |
| 0.011463 | 0.011364 | 0.011500 | 0.011568 | 0.011496 | 0.011564 | 0.011670 |
| 0.011398 | 0.011569 | 0.011500 | 0.011432 | 0.011699 | 0.011161 | 0.011363 |
| 0.011329 | 0.011262 | 0.011161 | 0.011161 | 0.011228 | 0.011228 | 0.011295 |
| 0.011228 | 0.011295 | 0.011194 | 0.011295 | 0.011228 | 0.011228 | 0.011295 |
| 0.011228 | 0.011664 | 0.011564 | 0.011597 | 0.011127 | 0.011228 | 0.011262 |
| 0.011262 | 0.011228 | 0.011295 | 0.011329 | 0.000000 | 0.000000 | 0.000000 |
| 0.011731 | 0.011362 | 0.011362 | 0.011161 | 0.011262 | 0.011429 | 0.011194 |
| 0.011194 | 0.011262 | 0.011228 | 0.011396 | 0.011194 | 0.011329 | 0.011463 |
| 0.011396 | 0.011228 | 0.011228 | 0.011161 | 0.011161 | 0.011329 | 0.011262 |
| 0.011161 | 0.011262 | 0.011127 | 0.011161 | 0.011295 | 0.011430 | 0.011195 |
| 0.011161 | 0.011295 | 0.011228 | 0.011127 | 0.011463 | 0.011127 | 0.011295 |
| 0.011368 | 0.011194 | 0.011496 | 0.011329 | 0.011362 | 0.011228 | 0.011329 |
| 0.011194 | 0.011530 | 0.011127 | 0.011396 | 0.011194 | 0.011194 | 0.011127 |
| 0.011362 | 0.011564 | 0.011262 | 0.011329 | 0.011161 | 0.011564 | 0.011194 |
| 0.011194 | 0.011194 | 0.011228 | 0.011329 | 0.011228 | 0.011329 | 0.011396 |
| 0.011396 | 0.011362 | 0.011262 | 0.011362 | 0.011329 | 0.011194 | 0.011161 |
| 0.011194 | 0.011194 | 0.011262 | 0.011194 | 0.011161 | 0.011329 | 0.011194 |
| 0.011228 | 0.011228 | 0.011362 | 0.011396 | 0.011295 | 0.011228 | 0.011228 |
| 0.011295 | 0.011228 | 0.011329 | 0.011194 | 0.011329 | 0.011429 | 0.011731 |
| 0.011228 | 0.011631 | 0.011233 | 0.017747 | 0.011126 | 0.011366 | 0.011583 |
| 0.011545 | 0.011588 | 0.011270 | 0.011234 | 0.011664 | 0.011612 | 0.011303 |
| 0.011440 | 0.011487 | 0.011099 | 0.011186 | 0.011216 | 0.011258 | 0.011189 |
| 0.011482 | 0.011395 | 0.011394 | 0.011193 | 0.011362 | 0.011396 | 0.011398 |
| 0.011266 | 0.011362 | 0.011362 | 0.011329 | 0.011295 | 0.011295 | 0.011262 |
| 0.011295 | 0.011228 | 0.011262 | 0.011295 | 0.011262 | 0.011195 | 0.011228 |
| 0.011228 | 0.011295 | 0.011195 | 0.011295 | 0.011329 | 0.011362 | 0.011262 |
| 0.011295 | 0.011262 | 0.011597 | 0.011597 | 0.011329 | 0.011363 | 0.011396 |
| 0.011161 | 0.011161 | 0.011195 | 0.011295 | 0.011161 | 0.011396 | 0.011396 |
| 0.011429 | 0.011429 | 0.011362 | 0.011463 | 0.011631 | 0.011464 | 0.011295 |
| 0.011295 | 0.011362 | 0.011396 | 0.011228 | 0.011295 | 0.011262 | 0.011295 |
| 0.011363 | 0.011362 | 0.011396 | 0.011362 | 0.011262 | 0.011463 | 0.011429 |
| 0.011297 | 0.011195 | 0.011295 | 0.011396 | 0.011295 | 0.011430 | 0.011463 |
| 0.011631 | 0.011333 | 0.011496 | 0.011463 | 0.011396 | 0.011564 | 0.011195 |
| 0.011363 | 0.011262 | 0.011228 | 0.011228 | 0.011295 | 0.011195 | 0.011295 |
| 0.011329 | 0.011362 | 0.011262 | 0.011295 | 0.011262 | 0.011597 | 0.011597 |
| 0.011329 | 0.011363 | 0.011429 | 0.011362 | 0.012002 | 0.011417 | 0.011341 |
| 0.011412 | 0.011372 | 0.011482 | 0.011372 | 0.011480 | 0.011405 | 0.011370 |
| 0.011953 | 0.011268 | 0.011403 | 0.011337 | 0.011611 | 0.011468 | 0.011570 |
| 0.011978 | 0.011437 | 0.011533 | 0.011597 | 0.011463 | 0.011463 | 0.011499 |
| 0.011161 | 0.011329 | 0.011463 | 0.011429 | 0.011432 | 0.011429 | 0.011397 |
| 0.011262 | 0.011194 | 0.011228 | 0.011262 | 0.011161 | 0.011228 | 0.011127 |
| 0.011262 | 0.011295 | 0.011194 | 0.011161 | 0.011194 | 0.011194 | 0.011228 |
| 0.011228 | 0.011161 | 0.011228 | 0.011262 | 0.011161 | 0.011362 | 0.011396 |
| 0.011295 | 0.011362 | 0.011295 | 0.011295 | 0.011228 | 0.011631 | 0.011262 |
| 0.011304 | 0.011228 | 0.011463 | 0.011467 | 0.011329 | 0.011329 | 0.011329 |
| 0.011329 | 0.011262 | 0.011228 | 0.011262 | 0.011362 | 0.011362 | 0.011295 |
| 0.011295 | 0.011429 | 0.011597 | 0.011329 | 0.011530 | 0.011530 | 0.011362 |
| 0.011228 | 0.011295 | 0.011329 | 0.011732 | 0.011295 | 0.011329 | 0.011295 |
| 0.011329 | 0.011262 | 0.011262 | 0.011564 | 0.011497 | 0.011530 | 0.011262 |
| 0.011362 | 0.011429 | 0.011295 | 0.011362 | 0.011329 | 0.011194 | 0.011530 |
| 0.011295 | 0.011262 | 0.011262 | 0.011429 | 0.011262 | 0.011362 | 0.011597 |
| 0.011295 | 0.011671 | 0.011664 | 0.011426 | 0.011173 | 0.011366 | 0.011215 |
| 0.011170 | 0.011683 | 0.011201 | 0.011373 | 0.011207 | 0.011264 | 0.011273 |

|          |          |          |          |          |          |          |
|----------|----------|----------|----------|----------|----------|----------|
| 0.011468 | 0.000000 | 0.011227 | 0.000000 | 0.011114 | 0.011261 | 0.011303 |
| 0.011324 | 0.011257 | 0.011342 | 0.011272 | 0.011296 | 0.011429 | 0.011497 |
| 0.011497 | 0.011363 | 0.011466 | 0.011467 | 0.011602 | 0.011625 | 0.011295 |
| 0.011530 | 0.011396 | 0.011262 | 0.011362 | 0.011161 | 0.011396 | 0.011195 |
| 0.011262 | 0.011262 | 0.011228 | 0.011194 | 0.011228 | 0.011195 | 0.011295 |
| 0.011270 | 0.011270 | 0.011266 | 0.011300 | 0.011436 | 0.011402 | 0.011402 |
| 0.011401 | 0.011329 | 0.011134 | 0.011132 | 0.011263 | 0.011433 | 0.011433 |
| 0.011228 | 0.011297 | 0.011531 | 0.011499 | 0.011430 | 0.011464 | 0.011396 |
| 0.011329 | 0.011396 | 0.011396 | 0.011295 | 0.011866 | 0.011463 | 0.011530 |
| 0.011564 | 0.011630 | 0.011265 | 0.011337 | 0.011228 | 0.011429 | 0.011396 |
| 0.011430 | 0.011463 | 0.011463 | 0.011463 | 0.011610 | 0.011597 | 0.011234 |
| 0.011128 | 0.011130 | 0.011230 | 0.011196 | 0.011299 | 0.011135 | 0.011468 |
| 0.011266 | 0.011411 | 0.011156 | 0.011285 | 0.011262 | 0.011334 | 0.011228 |
| 0.011195 | 0.011195 | 0.011262 | 0.011228 | 0.011429 | 0.011396 | 0.011329 |
| 0.011429 | 0.011497 | 0.011228 | 0.011228 | 0.011262 | 0.011262 | 0.011263 |
| 0.011331 | 0.011262 | 0.011262 | 0.011296 | 0.011429 | 0.011497 | 0.011497 |
| 0.011363 | 0.011466 | 0.011467 | 0.011602 | 0.011625 | 0.011295 | 0.011463 |
| 0.011396 | 0.011396 | 0.011229 | 0.011408 | 0.011338 | 0.011367 | 0.011235 |
| 0.011404 | 0.011607 | 0.011399 | 0.011298 | 0.011195 | 0.011396 | 0.011262 |
| 0.011362 | 0.011295 | 0.011195 | 0.011296 | 0.011396 | 0.011398 | 0.011295 |
| 0.011195 | 0.011128 | 0.011262 | 0.011195 | 0.011127 | 0.011196 | 0.011396 |
| 0.011295 | 0.011228 | 0.011262 | 0.011295 | 0.011262 | 0.011195 | 0.011396 |
| 0.011262 | 0.011295 | 0.011295 | 0.011228 | 0.011295 | 0.011530 | 0.011194 |
| 0.011228 | 0.011631 | 0.011228 | 0.011262 | 0.011228 | 0.011597 | 0.011189 |
| 0.011622 | 0.011145 | 0.011211 | 0.011422 | 0.011508 | 0.011419 | 0.011144 |
| 0.011165 | 0.011396 | 0.011496 | 0.011603 | 0.011464 | 0.011601 | 0.011733 |
| 0.011632 | 0.011669 | 0.011631 | 0.011880 | 0.011597 | 0.012471 | 0.011633 |
| 0.012372 | 0.012139 | 0.012273 | 0.012545 | 0.011597 | 0.011295 | 0.011598 |
| 0.012036 | 0.011971 | 0.011564 | 0.011463 | 0.011531 | 0.011531 | 0.011500 |
| 0.011396 | 0.011399 | 0.011463 | 0.011430 | 0.011800 | 0.011866 | 0.011867 |
| 0.011766 | 0.011867 | 0.011970 | 0.011737 | 0.012036 | 0.012042 | 0.012103 |
| 0.012104 | 0.012138 | 0.012084 | 0.012104 | 0.012105 | 0.011329 | 0.011631 |
| 0.011699 | 0.012202 | 0.011704 | 0.011933 | 0.012406 | 0.011468 | 0.011363 |
| 0.011329 | 0.011329 | 0.011799 | 0.011842 | 0.011940 | 0.011664 | 0.011330 |
| S287     | 0.012135 | 0.012135 | 0.012135 | 0.011900 | 0.011900 | 0.011967 |
| 0.011400 | 0.011332 | 0.011967 | 0.011732 | 0.011799 | 0.011767 | 0.011731 |
| 0.011698 | 0.011933 | 0.011664 | 0.011765 | 0.011832 | 0.011799 | 0.011765 |
| 0.011731 | 0.011765 | 0.011597 | 0.011699 | 0.011732 | 0.011765 | 0.011366 |
| 0.011732 | 0.011765 | 0.011664 | 0.011631 | 0.011832 | 0.011799 | 0.011832 |
| 0.011799 | 0.011832 | 0.011799 | 0.011799 | 0.011832 | 0.011799 | 0.011967 |
| 0.011664 | 0.011799 | 0.011832 | 0.011765 | 0.011799 | 0.011899 | 0.011832 |
| 0.011799 | 0.011967 | 0.011867 | 0.011463 | 0.011799 | 0.012068 | 0.011799 |
| 0.011765 | 0.011799 | 0.011933 | 0.012068 | 0.011564 | 0.011799 | 0.011900 |
| 0.011832 | 0.011900 | 0.011799 | 0.012034 | 0.011597 | 0.011799 | 0.011866 |
| 0.011765 | 0.011866 | 0.011832 | 0.011899 | 0.011832 | 0.011832 | 0.011832 |
| 0.011731 | 0.011765 | 0.011731 | 0.011765 | 0.011799 | 0.011834 | 0.011899 |
| 0.011832 | 0.011799 | 0.011866 | 0.011765 | 0.011631 | 0.011731 | 0.011799 |
| 0.011967 | 0.011899 | 0.011664 | 0.011967 | 0.011799 | 0.012034 | 0.011799 |
| 0.011988 | 0.011471 | 0.012004 | 0.011724 | 0.011695 | 0.011870 | 0.011572 |
| 0.012231 | 0.011620 | 0.011719 | 0.012034 | 0.012034 | 0.011765 | 0.011664 |
| 0.011866 | 0.011832 | 0.011899 | 0.011799 | 0.011900 | 0.011832 | 0.011832 |
| 0.011799 | 0.011832 | 0.012101 | 0.011967 | 0.011866 | 0.011833 | 0.011765 |
| 0.011732 | 0.011665 | 0.011799 | 0.011765 | 0.011698 | 0.011665 | 0.011598 |
| 0.011698 | 0.011765 | 0.011765 | 0.011765 | 0.011799 | 0.011799 | 0.011803 |
| 0.011872 | 0.011799 | 0.011799 | 0.011672 | 0.011747 | 0.011691 | 0.011800 |
| 0.011772 | 0.011713 | 0.011798 | 0.011750 | 0.011706 | 0.011711 | 0.011770 |
| 0.011672 | 0.011784 | 0.011818 | 0.011733 | 0.011717 | 0.011868 | 0.011767 |
| 0.011834 | 0.011836 | 0.011834 | 0.011933 | 0.011866 | 0.012236 | 0.011967 |
| 0.011799 | 0.011866 | 0.011799 | 0.011833 | 0.011698 | 0.011665 | 0.011732 |
| 0.011799 | 0.011799 | 0.011765 | 0.011732 | 0.011765 | 0.011665 | 0.011833 |

|          |          |          |          |          |          |          |
|----------|----------|----------|----------|----------|----------|----------|
| 0.011799 | 0.011900 | 0.011833 | 0.011732 | 0.011835 | 0.011934 | 0.011939 |
| 0.011934 | 0.011833 | 0.011732 | 0.011667 | 0.011799 | 0.011732 | 0.011665 |
| 0.011672 | 0.011934 | 0.011732 | 0.011934 | 0.011698 | 0.011799 | 0.011765 |
| 0.011866 | 0.011765 | 0.011799 | 0.011765 | 0.011799 | 0.011665 | 0.011799 |
| 0.011833 | 0.011765 | 0.011833 | 0.011765 | 0.011799 | 0.011833 | 0.012068 |
| 0.011497 | 0.011429 | 0.011497 | 0.011937 | 0.011564 | 0.011799 | 0.011765 |
| 0.011736 | 0.012112 | 0.011929 | 0.011712 | 0.011501 | 0.011674 | 0.011887 |
| 0.011501 | 0.011741 | 0.011967 | 0.012169 | 0.011880 | 0.012034 | 0.012001 |
| 0.011933 | 0.012101 | 0.011984 | 0.011802 | 0.011857 | 0.011833 | 0.011906 |
| 0.012001 | 0.011904 | 0.012041 | 0.012110 | 0.012034 | 0.012102 | 0.012213 |
| 0.011940 | 0.012113 | 0.011974 | 0.011973 | 0.012238 | 0.011698 | 0.011903 |
| 0.011866 | 0.011799 | 0.011698 | 0.011698 | 0.011765 | 0.011765 | 0.011832 |
| 0.011765 | 0.011832 | 0.011731 | 0.011765 | 0.011765 | 0.011765 | 0.011832 |
| 0.011765 | 0.011530 | 0.011429 | 0.011463 | 0.011664 | 0.011765 | 0.011799 |
| 0.011799 | 0.011698 | 0.011832 | 0.011799 | 0.011731 | 0.011731 | 0.011731 |
| 0.000000 | 0.011832 | 0.011899 | 0.011698 | 0.011799 | 0.011967 | 0.011731 |
| 0.011731 | 0.011799 | 0.011765 | 0.011933 | 0.011731 | 0.011664 | 0.011799 |
| 0.011732 | 0.011765 | 0.011765 | 0.011698 | 0.011698 | 0.011866 | 0.011799 |
| 0.011698 | 0.011799 | 0.011664 | 0.011698 | 0.011832 | 0.011631 | 0.011732 |
| 0.011699 | 0.011832 | 0.011766 | 0.011664 | 0.011396 | 0.011664 | 0.011832 |
| 0.011916 | 0.011732 | 0.011362 | 0.011866 | 0.011832 | 0.011765 | 0.011866 |
| 0.011731 | 0.012068 | 0.011664 | 0.011664 | 0.011664 | 0.011664 | 0.011664 |
| 0.011899 | 0.011766 | 0.011799 | 0.011866 | 0.011698 | 0.011429 | 0.011664 |
| 0.011731 | 0.011731 | 0.011698 | 0.011866 | 0.011765 | 0.011866 | 0.011933 |
| 0.011933 | 0.011899 | 0.011799 | 0.011900 | 0.011866 | 0.011731 | 0.011698 |
| 0.011731 | 0.011731 | 0.011799 | 0.011664 | 0.011698 | 0.011866 | 0.011731 |
| 0.011698 | 0.011765 | 0.011899 | 0.011866 | 0.011832 | 0.011765 | 0.011765 |
| 0.011832 | 0.011765 | 0.011866 | 0.011731 | 0.011866 | 0.011967 | 0.011664 |
| 0.011765 | 0.011564 | 0.011785 | 0.018276 | 0.011584 | 0.011794 | 0.011444 |
| 0.011406 | 0.011447 | 0.012003 | 0.011815 | 0.011664 | 0.011474 | 0.011850 |
| 0.011724 | 0.011671 | 0.011645 | 0.011814 | 0.011724 | 0.011751 | 0.011835 |
| 0.011529 | 0.011619 | 0.011468 | 0.011589 | 0.011900 | 0.011933 | 0.011940 |
| 0.011816 | 0.011900 | 0.011900 | 0.011799 | 0.011832 | 0.011833 | 0.011799 |
| 0.011833 | 0.011765 | 0.011799 | 0.011833 | 0.011799 | 0.011732 | 0.011765 |
| 0.011765 | 0.011833 | 0.011732 | 0.011833 | 0.011866 | 0.011900 | 0.011799 |
| 0.011765 | 0.011732 | 0.011530 | 0.011530 | 0.011866 | 0.011901 | 0.011934 |
| 0.011698 | 0.011698 | 0.011732 | 0.011833 | 0.011698 | 0.011934 | 0.011934 |
| 0.011967 | 0.011967 | 0.011900 | 0.012000 | 0.011564 | 0.012003 | 0.011833 |
| 0.011833 | 0.011900 | 0.011934 | 0.011765 | 0.011833 | 0.011799 | 0.011833 |
| 0.011900 | 0.011900 | 0.011933 | 0.011900 | 0.011801 | 0.012001 | 0.011967 |
| 0.011839 | 0.011732 | 0.011833 | 0.011934 | 0.011833 | 0.011833 | 0.012000 |
| 0.012169 | 0.011880 | 0.012034 | 0.012001 | 0.011933 | 0.012101 | 0.011732 |
| 0.011903 | 0.011800 | 0.011765 | 0.011765 | 0.011833 | 0.011732 | 0.011833 |
| 0.011866 | 0.011900 | 0.011799 | 0.011765 | 0.011732 | 0.011530 | 0.011530 |
| 0.011866 | 0.011901 | 0.011967 | 0.011899 | 0.012474 | 0.011989 | 0.011904 |
| 0.011974 | 0.011927 | 0.012044 | 0.011926 | 0.012041 | 0.011957 | 0.011888 |
| 0.012434 | 0.011822 | 0.011951 | 0.011890 | 0.012162 | 0.012013 | 0.012115 |
| 0.012455 | 0.011965 | 0.012075 | 0.012135 | 0.012000 | 0.011732 | 0.012040 |
| 0.011698 | 0.011866 | 0.012000 | 0.011967 | 0.011973 | 0.011698 | 0.011599 |
| 0.011799 | 0.011731 | 0.011765 | 0.011799 | 0.011698 | 0.011765 | 0.011664 |
| 0.011731 | 0.011765 | 0.011731 | 0.011698 | 0.011799 | 0.011731 | 0.011765 |
| 0.011765 | 0.011698 | 0.011765 | 0.011799 | 0.011698 | 0.011832 | 0.011933 |
| 0.011832 | 0.011832 | 0.011832 | 0.011832 | 0.011765 | 0.011564 | 0.011799 |
| 0.011582 | 0.011765 | 0.011732 | 0.011739 | 0.011799 | 0.011799 | 0.011866 |
| 0.011866 | 0.011799 | 0.011765 | 0.011799 | 0.011899 | 0.011900 | 0.011832 |
| 0.011832 | 0.011967 | 0.011463 | 0.011866 | 0.012068 | 0.012068 | 0.011933 |
| 0.011765 | 0.011832 | 0.011866 | 0.011664 | 0.011833 | 0.011799 | 0.011832 |
| 0.011866 | 0.011731 | 0.011731 | 0.012034 | 0.012034 | 0.012000 | 0.011799 |
| 0.011900 | 0.011967 | 0.011832 | 0.011900 | 0.011866 | 0.011731 | 0.011396 |
| 0.011832 | 0.011799 | 0.011731 | 0.011967 | 0.011799 | 0.011899 | 0.011665 |

|          |          |          |          |          |          |          |
|----------|----------|----------|----------|----------|----------|----------|
| 0.011832 | 0.011467 | 0.011530 | 0.011670 | 0.011624 | 0.011842 | 0.011576 |
| 0.011774 | 0.011800 | 0.011763 | 0.011775 | 0.011744 | 0.011569 | 0.011591 |
| 0.011723 | 0.011521 | 0.011673 | 0.011589 | 0.011545 | 0.011730 | 0.011912 |
| 0.011927 | 0.011768 | 0.011835 | 0.011800 | 0.011836 | 0.011698 | 0.011766 |
| 0.011766 | 0.011834 | 0.011940 | 0.011738 | 0.012078 | 0.012121 | 0.011832 |
| 0.011799 | 0.011866 | 0.011799 | 0.011833 | 0.011698 | 0.011665 | 0.011732 |
| 0.011799 | 0.011799 | 0.011765 | 0.011732 | 0.011765 | 0.011665 | 0.011833 |
| 0.011794 | 0.011795 | 0.011780 | 0.011814 | 0.011950 | 0.011914 | 0.011914 |
| 0.011912 | 0.011867 | 0.011688 | 0.011672 | 0.011772 | 0.011941 | 0.011943 |
| 0.011767 | 0.011805 | 0.012071 | 0.012041 | 0.011969 | 0.012003 | 0.011933 |
| 0.011866 | 0.011933 | 0.011933 | 0.011832 | 0.011799 | 0.012000 | 0.012068 |
| 0.012102 | 0.011487 | 0.011742 | 0.011892 | 0.011765 | 0.011967 | 0.011933 |
| 0.011969 | 0.012000 | 0.012000 | 0.012000 | 0.012122 | 0.012135 | 0.011789 |
| 0.011669 | 0.011683 | 0.011775 | 0.011740 | 0.011778 | 0.011732 | 0.011332 |
| 0.011815 | 0.011543 | 0.011775 | 0.011810 | 0.011800 | 0.011847 | 0.011765 |
| 0.011732 | 0.011665 | 0.011799 | 0.011765 | 0.011698 | 0.011665 | 0.011598 |
| 0.011698 | 0.011765 | 0.011765 | 0.011765 | 0.011799 | 0.011799 | 0.011803 |
| 0.011872 | 0.011799 | 0.011799 | 0.011836 | 0.011698 | 0.011766 | 0.011766 |
| 0.011834 | 0.011940 | 0.011738 | 0.012078 | 0.012121 | 0.011832 | 0.012000 |
| 0.011933 | 0.011933 | 0.011770 | 0.011965 | 0.011894 | 0.011912 | 0.011796 |
| 0.011956 | 0.012154 | 0.012034 | 0.011842 | 0.011732 | 0.011934 | 0.011799 |
| 0.011900 | 0.011833 | 0.011732 | 0.011835 | 0.011934 | 0.011939 | 0.011833 |
| 0.011732 | 0.011667 | 0.011799 | 0.011732 | 0.011665 | 0.011672 | 0.011934 |
| 0.011833 | 0.011765 | 0.011799 | 0.011833 | 0.011799 | 0.011732 | 0.011665 |
| 0.011799 | 0.011832 | 0.011832 | 0.011765 | 0.011832 | 0.012000 | 0.011664 |
| 0.011765 | 0.011564 | 0.011765 | 0.011799 | 0.011765 | 0.011463 | 0.011746 |
| 0.011904 | 0.011570 | 0.011612 | 0.011664 | 0.011712 | 0.011706 | 0.011520 |
| 0.011585 | 0.011597 | 0.011698 | 0.011808 | 0.011666 | 0.011805 | 0.011935 |
| 0.011834 | 0.011872 | 0.011833 | 0.012086 | 0.011799 | 0.012674 | 0.011835 |
| 0.012574 | 0.012342 | 0.012476 | 0.012816 | 0.011799 | 0.011766 | 0.011800 |
| 0.012508 | 0.012174 | 0.011765 | 0.011665 | 0.011733 | 0.011733 | 0.011669 |
| 0.011597 | 0.011569 | 0.011664 | 0.011632 | 0.012070 | 0.012135 | 0.012137 |
| 0.012036 | 0.012137 | 0.012241 | 0.012008 | 0.012509 | 0.012517 | 0.012576 |
| 0.012577 | 0.012610 | 0.012563 | 0.012577 | 0.012579 | 0.011866 | 0.012102 |
| 0.012171 | 0.012674 | 0.012180 | 0.012136 | 0.012609 | 0.011672 | 0.011565 |
| 0.011463 | 0.011530 | 0.012069 | 0.012130 | 0.012186 | 0.011866 | 0.011599 |
| S288     | 0.011765 | 0.011765 | 0.012034 | 0.011799 | 0.011799 | 0.011866 |
| 0.011705 | 0.011637 | 0.011866 | 0.011362 | 0.011429 | 0.011363 | 0.011362 |
| 0.011329 | 0.011564 | 0.011295 | 0.011396 | 0.011463 | 0.011429 | 0.011396 |
| 0.011362 | 0.011396 | 0.011429 | 0.011363 | 0.011396 | 0.011396 | 0.011671 |
| 0.011564 | 0.011396 | 0.011295 | 0.011463 | 0.011463 | 0.011429 | 0.011463 |
| 0.011429 | 0.011530 | 0.011429 | 0.011429 | 0.011463 | 0.011429 | 0.011597 |
| 0.011295 | 0.011429 | 0.011463 | 0.011396 | 0.011429 | 0.011530 | 0.011463 |
| 0.011429 | 0.011597 | 0.011497 | 0.011698 | 0.011429 | 0.011698 | 0.011429 |
| 0.011396 | 0.011429 | 0.011564 | 0.011698 | 0.011732 | 0.011429 | 0.011530 |
| 0.011463 | 0.011530 | 0.011429 | 0.011664 | 0.011832 | 0.011429 | 0.011496 |
| 0.011396 | 0.011496 | 0.011463 | 0.011530 | 0.011463 | 0.011463 | 0.011463 |
| 0.011362 | 0.011396 | 0.011362 | 0.011329 | 0.011429 | 0.011464 | 0.011530 |
| 0.011463 | 0.011429 | 0.011496 | 0.011396 | 0.011463 | 0.011362 | 0.011429 |
| 0.011597 | 0.011530 | 0.011765 | 0.011597 | 0.011429 | 0.011664 | 0.011429 |
| 0.011579 | 0.011733 | 0.011626 | 0.011334 | 0.011321 | 0.011391 | 0.011454 |
| 0.012085 | 0.011518 | 0.011307 | 0.011664 | 0.011664 | 0.011396 | 0.011497 |
| 0.011496 | 0.011463 | 0.011530 | 0.011429 | 0.011530 | 0.011463 | 0.011463 |
| 0.011429 | 0.011463 | 0.011732 | 0.011597 | 0.011496 | 0.011463 | 0.011396 |
| 0.011362 | 0.011295 | 0.011430 | 0.011396 | 0.011530 | 0.011497 | 0.011429 |
| 0.011530 | 0.011597 | 0.011396 | 0.011396 | 0.011430 | 0.011429 | 0.011432 |
| 0.011500 | 0.011430 | 0.011430 | 0.011276 | 0.011349 | 0.011306 | 0.011396 |
| 0.011399 | 0.011335 | 0.011355 | 0.011371 | 0.011298 | 0.011334 | 0.011364 |
| 0.011564 | 0.011405 | 0.011439 | 0.011329 | 0.011337 | 0.011464 | 0.011363 |
| 0.011430 | 0.011431 | 0.011430 | 0.011563 | 0.011496 | 0.011866 | 0.011598 |



|          |          |          |          |          |          |          |
|----------|----------|----------|----------|----------|----------|----------|
| 0.011631 | 0.011497 | 0.011429 | 0.011463 | 0.011329 | 0.011496 | 0.011362 |
| 0.011429 | 0.011429 | 0.011396 | 0.011362 | 0.011396 | 0.011362 | 0.011463 |
| 0.011430 | 0.011530 | 0.011463 | 0.011362 | 0.011464 | 0.011564 | 0.011567 |
| 0.011564 | 0.011463 | 0.011362 | 0.011296 | 0.011429 | 0.011362 | 0.011295 |
| 0.011400 | 0.011564 | 0.011362 | 0.011564 | 0.011329 | 0.011430 | 0.011396 |
| 0.011497 | 0.011396 | 0.011430 | 0.011396 | 0.011430 | 0.011295 | 0.011430 |
| 0.011463 | 0.011396 | 0.011463 | 0.011396 | 0.011429 | 0.011463 | 0.011698 |
| 0.011732 | 0.011664 | 0.011732 | 0.011566 | 0.011732 | 0.011429 | 0.011396 |
| 0.011364 | 0.011545 | 0.011472 | 0.011335 | 0.011739 | 0.011299 | 0.011414 |
| 0.011739 | 0.011604 | 0.011597 | 0.011799 | 0.011504 | 0.011664 | 0.011631 |
| 0.011564 | 0.011732 | 0.011593 | 0.011390 | 0.011395 | 0.011463 | 0.011534 |
| 0.011631 | 0.011499 | 0.011669 | 0.011737 | 0.011664 | 0.011732 | 0.011839 |
| 0.011568 | 0.011705 | 0.011636 | 0.011601 | 0.011834 | 0.011329 | 0.011498 |
| 0.011496 | 0.011429 | 0.011329 | 0.011329 | 0.011396 | 0.011396 | 0.011463 |
| 0.011396 | 0.011463 | 0.011362 | 0.011396 | 0.011396 | 0.011396 | 0.011463 |
| 0.011396 | 0.011765 | 0.011664 | 0.011698 | 0.011295 | 0.011396 | 0.011429 |
| 0.011429 | 0.011396 | 0.011463 | 0.011429 | 0.011362 | 0.011362 | 0.011362 |
| 0.011832 | 0.000000 | 0.011530 | 0.011329 | 0.011429 | 0.011597 | 0.011362 |
| 0.011362 | 0.011429 | 0.011396 | 0.011564 | 0.011362 | 0.011496 | 0.011631 |
| 0.011564 | 0.011396 | 0.011396 | 0.011329 | 0.011329 | 0.011497 | 0.011429 |
| 0.011329 | 0.011429 | 0.011295 | 0.011329 | 0.011463 | 0.011530 | 0.011362 |
| 0.011329 | 0.011463 | 0.011396 | 0.011295 | 0.011564 | 0.011295 | 0.011463 |
| 0.011505 | 0.011362 | 0.011597 | 0.011497 | 0.011463 | 0.011396 | 0.011496 |
| 0.011362 | 0.011698 | 0.011295 | 0.011497 | 0.011295 | 0.011295 | 0.011295 |
| 0.011530 | 0.011665 | 0.011429 | 0.011496 | 0.011329 | 0.011664 | 0.011295 |
| 0.011362 | 0.011362 | 0.011396 | 0.011496 | 0.011396 | 0.011496 | 0.011564 |
| 0.011564 | 0.011530 | 0.011429 | 0.011530 | 0.011496 | 0.011362 | 0.011329 |
| 0.011362 | 0.011362 | 0.011429 | 0.011295 | 0.011329 | 0.011496 | 0.011362 |
| 0.011329 | 0.011396 | 0.011530 | 0.011496 | 0.011463 | 0.011396 | 0.011396 |
| 0.011463 | 0.011396 | 0.011496 | 0.011362 | 0.011496 | 0.011597 | 0.011832 |
| 0.011396 | 0.011732 | 0.011371 | 0.017861 | 0.011257 | 0.011427 | 0.011653 |
| 0.011614 | 0.011658 | 0.011532 | 0.011466 | 0.011719 | 0.011682 | 0.011425 |
| 0.011535 | 0.011548 | 0.011255 | 0.011395 | 0.011294 | 0.011356 | 0.011404 |
| 0.011576 | 0.011433 | 0.011468 | 0.011259 | 0.011530 | 0.011564 | 0.011567 |
| 0.011404 | 0.011530 | 0.011530 | 0.011429 | 0.011463 | 0.011463 | 0.011430 |
| 0.011463 | 0.011396 | 0.011429 | 0.011463 | 0.011430 | 0.011362 | 0.011396 |
| 0.011396 | 0.011463 | 0.011362 | 0.011463 | 0.011497 | 0.011530 | 0.011429 |
| 0.011329 | 0.011362 | 0.011698 | 0.011698 | 0.011497 | 0.011531 | 0.011564 |
| 0.011329 | 0.011329 | 0.011362 | 0.011463 | 0.011329 | 0.011564 | 0.011564 |
| 0.011597 | 0.011597 | 0.011530 | 0.011631 | 0.011732 | 0.011633 | 0.011463 |
| 0.011463 | 0.011530 | 0.011564 | 0.011396 | 0.011463 | 0.011429 | 0.011463 |
| 0.011531 | 0.011530 | 0.011564 | 0.011531 | 0.011431 | 0.011631 | 0.011530 |
| 0.011467 | 0.011362 | 0.011463 | 0.011564 | 0.011463 | 0.011530 | 0.011631 |
| 0.011799 | 0.011504 | 0.011664 | 0.011631 | 0.011564 | 0.011732 | 0.011363 |
| 0.011532 | 0.011430 | 0.011396 | 0.011396 | 0.011463 | 0.011362 | 0.011463 |
| 0.011497 | 0.011530 | 0.011429 | 0.011329 | 0.011362 | 0.011698 | 0.011698 |
| 0.011497 | 0.011531 | 0.011597 | 0.011530 | 0.012069 | 0.011560 | 0.011517 |
| 0.011552 | 0.011546 | 0.011622 | 0.011545 | 0.011620 | 0.011577 | 0.011508 |
| 0.012056 | 0.011406 | 0.011574 | 0.011475 | 0.011749 | 0.011638 | 0.011707 |
| 0.012046 | 0.011475 | 0.011703 | 0.011765 | 0.011631 | 0.011564 | 0.011668 |
| 0.011329 | 0.011497 | 0.011631 | 0.011597 | 0.011601 | 0.011530 | 0.011498 |
| 0.011429 | 0.011362 | 0.011396 | 0.011429 | 0.011329 | 0.011396 | 0.011295 |
| 0.011362 | 0.011396 | 0.011362 | 0.011329 | 0.011429 | 0.011362 | 0.011396 |
| 0.011396 | 0.011329 | 0.011396 | 0.011429 | 0.011329 | 0.011530 | 0.011564 |
| 0.011463 | 0.011463 | 0.011463 | 0.011463 | 0.011396 | 0.011732 | 0.011429 |
| 0.011408 | 0.011396 | 0.011530 | 0.011535 | 0.011497 | 0.011496 | 0.011496 |
| 0.011497 | 0.011429 | 0.011396 | 0.011429 | 0.011530 | 0.011530 | 0.011463 |
| 0.011463 | 0.011597 | 0.011698 | 0.011496 | 0.011698 | 0.011698 | 0.011564 |
| 0.011396 | 0.011463 | 0.011497 | 0.011832 | 0.011463 | 0.011497 | 0.011463 |
| 0.011496 | 0.011362 | 0.011362 | 0.011665 | 0.011665 | 0.011631 | 0.011429 |

|          |          |          |          |          |          |          |
|----------|----------|----------|----------|----------|----------|----------|
| 0.011530 | 0.011597 | 0.011463 | 0.011530 | 0.011496 | 0.011362 | 0.011631 |
| 0.011463 | 0.011429 | 0.011362 | 0.011597 | 0.011429 | 0.011530 | 0.011765 |
| 0.011463 | 0.011773 | 0.011765 | 0.011507 | 0.011229 | 0.011434 | 0.011267 |
| 0.011280 | 0.011722 | 0.011341 | 0.011417 | 0.011255 | 0.011366 | 0.011273 |
| 0.011519 | 0.011192 | 0.011339 | 0.011192 | 0.011222 | 0.011395 | 0.011506 |
| 0.011512 | 0.011414 | 0.011412 | 0.011412 | 0.011465 | 0.011530 | 0.011597 |
| 0.011597 | 0.011464 | 0.011567 | 0.011569 | 0.011704 | 0.011732 | 0.011463 |
| 0.011631 | 0.011497 | 0.011429 | 0.011463 | 0.011329 | 0.011496 | 0.011362 |
| 0.011429 | 0.011429 | 0.011396 | 0.011362 | 0.011396 | 0.011362 | 0.011463 |
| 0.011409 | 0.011410 | 0.011403 | 0.011437 | 0.011573 | 0.011538 | 0.011538 |
| 0.011537 | 0.011464 | 0.011282 | 0.011276 | 0.011399 | 0.011568 | 0.011569 |
| 0.011363 | 0.011433 | 0.011666 | 0.011635 | 0.011565 | 0.011599 | 0.011564 |
| 0.011496 | 0.011564 | 0.011564 | 0.011463 | 0.011967 | 0.011631 | 0.011698 |
| 0.011732 | 0.011737 | 0.011435 | 0.011476 | 0.011396 | 0.011597 | 0.011564 |
| 0.011598 | 0.011631 | 0.011631 | 0.011631 | 0.011728 | 0.011765 | 0.011372 |
| 0.011297 | 0.011303 | 0.011367 | 0.011332 | 0.011402 | 0.011284 | 0.011536 |
| 0.011403 | 0.011411 | 0.011251 | 0.011397 | 0.011396 | 0.011471 | 0.011396 |
| 0.011362 | 0.011295 | 0.011430 | 0.011396 | 0.011530 | 0.011497 | 0.011429 |
| 0.011530 | 0.011597 | 0.011396 | 0.011396 | 0.011430 | 0.011429 | 0.011432 |
| 0.011500 | 0.011430 | 0.011430 | 0.011465 | 0.011530 | 0.011597 | 0.011597 |
| 0.011464 | 0.011567 | 0.011569 | 0.011704 | 0.011732 | 0.011463 | 0.011631 |
| 0.011564 | 0.011564 | 0.011398 | 0.011547 | 0.011512 | 0.011537 | 0.011375 |
| 0.011577 | 0.011789 | 0.011483 | 0.011468 | 0.011362 | 0.011564 | 0.011430 |
| 0.011530 | 0.011463 | 0.011362 | 0.011464 | 0.011564 | 0.011567 | 0.011463 |
| 0.011362 | 0.011296 | 0.011429 | 0.011362 | 0.011295 | 0.011400 | 0.011564 |
| 0.011463 | 0.011396 | 0.011429 | 0.011463 | 0.011430 | 0.011362 | 0.011497 |
| 0.011429 | 0.011463 | 0.011463 | 0.011396 | 0.011463 | 0.011698 | 0.011295 |
| 0.011396 | 0.011732 | 0.011396 | 0.011429 | 0.011396 | 0.011698 | 0.011317 |
| 0.011678 | 0.011273 | 0.011161 | 0.011463 | 0.011549 | 0.011491 | 0.011269 |
| 0.011218 | 0.011496 | 0.011597 | 0.011671 | 0.011565 | 0.011703 | 0.011834 |
| 0.011699 | 0.011737 | 0.011731 | 0.011949 | 0.011698 | 0.012573 | 0.011700 |
| 0.012473 | 0.012207 | 0.012375 | 0.012646 | 0.011698 | 0.011396 | 0.011699 |
| 0.012137 | 0.012072 | 0.011664 | 0.011564 | 0.011598 | 0.011598 | 0.011601 |
| 0.011496 | 0.011501 | 0.011564 | 0.011497 | 0.011901 | 0.011967 | 0.011935 |
| 0.011868 | 0.011968 | 0.012038 | 0.011804 | 0.012138 | 0.012144 | 0.012205 |
| 0.012172 | 0.012205 | 0.012186 | 0.012172 | 0.012207 | 0.011496 | 0.011732 |
| 0.011766 | 0.012303 | 0.011806 | 0.012034 | 0.012508 | 0.011536 | 0.011430 |
| 0.011429 | 0.011429 | 0.011900 | 0.011924 | 0.012010 | 0.011765 | 0.011431 |
| S289     | 0.011765 | 0.011765 | 0.012101 | 0.011866 | 0.011866 | 0.011933 |
| 0.011773 | 0.011705 | 0.011933 | 0.011362 | 0.011429 | 0.011397 | 0.011362 |
| 0.011396 | 0.011564 | 0.011362 | 0.011396 | 0.011463 | 0.011429 | 0.011396 |
| 0.011362 | 0.011396 | 0.011496 | 0.011363 | 0.011396 | 0.011396 | 0.011739 |
| 0.011631 | 0.011396 | 0.011295 | 0.011530 | 0.011463 | 0.011429 | 0.011463 |
| 0.011429 | 0.011530 | 0.011429 | 0.011429 | 0.011463 | 0.011429 | 0.011597 |
| 0.011362 | 0.011429 | 0.011463 | 0.011396 | 0.011496 | 0.011530 | 0.011463 |
| 0.011429 | 0.011530 | 0.011497 | 0.011765 | 0.011429 | 0.011698 | 0.011429 |
| 0.011396 | 0.011497 | 0.011564 | 0.011698 | 0.011799 | 0.011497 | 0.011597 |
| 0.011463 | 0.011530 | 0.011429 | 0.011664 | 0.011900 | 0.011429 | 0.011497 |
| 0.011396 | 0.011496 | 0.011463 | 0.011530 | 0.011463 | 0.011463 | 0.011463 |
| 0.011362 | 0.011396 | 0.011362 | 0.011463 | 0.011396 | 0.011464 | 0.011530 |
| 0.011463 | 0.011429 | 0.011496 | 0.011396 | 0.011530 | 0.011362 | 0.011429 |
| 0.011597 | 0.011530 | 0.011765 | 0.011597 | 0.011429 | 0.011664 | 0.011429 |
| 0.011616 | 0.011845 | 0.011664 | 0.011373 | 0.011359 | 0.011428 | 0.011572 |
| 0.012195 | 0.011620 | 0.011348 | 0.011664 | 0.011664 | 0.011463 | 0.011564 |
| 0.011497 | 0.011463 | 0.011530 | 0.011429 | 0.011530 | 0.011463 | 0.011463 |
| 0.011429 | 0.011530 | 0.011732 | 0.011597 | 0.011497 | 0.011463 | 0.011396 |
| 0.011362 | 0.011362 | 0.011430 | 0.011396 | 0.011597 | 0.011564 | 0.011497 |
| 0.011597 | 0.011665 | 0.011396 | 0.011396 | 0.011430 | 0.011429 | 0.011432 |
| 0.011500 | 0.011430 | 0.011430 | 0.011312 | 0.011386 | 0.011341 | 0.011430 |
| 0.011433 | 0.011370 | 0.011429 | 0.011405 | 0.011332 | 0.011368 | 0.011398 |

|          |          |          |          |          |          |          |
|----------|----------|----------|----------|----------|----------|----------|
| 0.011672 | 0.011439 | 0.011473 | 0.011363 | 0.011371 | 0.011498 | 0.011464 |
| 0.011531 | 0.011465 | 0.011464 | 0.011564 | 0.011496 | 0.011866 | 0.011665 |
| 0.011698 | 0.011564 | 0.011429 | 0.011530 | 0.011329 | 0.011564 | 0.011362 |
| 0.011429 | 0.011429 | 0.011396 | 0.011362 | 0.011396 | 0.011362 | 0.011463 |
| 0.011430 | 0.011530 | 0.011463 | 0.011362 | 0.011465 | 0.011564 | 0.011567 |
| 0.011564 | 0.011463 | 0.011362 | 0.011296 | 0.011429 | 0.011362 | 0.011295 |
| 0.011400 | 0.011564 | 0.011362 | 0.011564 | 0.011329 | 0.011430 | 0.011396 |
| 0.011497 | 0.011396 | 0.011430 | 0.011396 | 0.011430 | 0.011295 | 0.011430 |
| 0.011463 | 0.011396 | 0.011463 | 0.011396 | 0.011429 | 0.011463 | 0.011698 |
| 0.011799 | 0.011732 | 0.011799 | 0.011566 | 0.011799 | 0.011429 | 0.011396 |
| 0.011432 | 0.011667 | 0.011517 | 0.011335 | 0.011807 | 0.011299 | 0.011375 |
| 0.011807 | 0.011706 | 0.011597 | 0.011799 | 0.011504 | 0.011664 | 0.011631 |
| 0.011564 | 0.011732 | 0.011593 | 0.011431 | 0.011437 | 0.011463 | 0.011534 |
| 0.011631 | 0.011532 | 0.011669 | 0.011737 | 0.011664 | 0.011732 | 0.011839 |
| 0.011568 | 0.011739 | 0.011670 | 0.011601 | 0.011868 | 0.011329 | 0.011532 |
| 0.011496 | 0.011429 | 0.011329 | 0.011329 | 0.011396 | 0.011396 | 0.011463 |
| 0.011396 | 0.011463 | 0.011362 | 0.011463 | 0.011396 | 0.011396 | 0.011463 |
| 0.011396 | 0.011832 | 0.011732 | 0.011765 | 0.011295 | 0.011396 | 0.011429 |
| 0.011429 | 0.011396 | 0.011463 | 0.011497 | 0.011362 | 0.011362 | 0.011362 |
| 0.011899 | 0.011530 | 0.000000 | 0.011329 | 0.011429 | 0.011597 | 0.011362 |
| 0.011362 | 0.011429 | 0.011396 | 0.011564 | 0.011362 | 0.011496 | 0.011631 |
| 0.011564 | 0.011396 | 0.011396 | 0.011329 | 0.011329 | 0.011497 | 0.011429 |
| 0.011329 | 0.011429 | 0.011295 | 0.011329 | 0.011463 | 0.011598 | 0.011362 |
| 0.011329 | 0.011463 | 0.011396 | 0.011295 | 0.011631 | 0.011295 | 0.011463 |
| 0.011539 | 0.011362 | 0.011664 | 0.011497 | 0.011530 | 0.011396 | 0.011496 |
| 0.011362 | 0.011698 | 0.011295 | 0.011564 | 0.011362 | 0.011362 | 0.011295 |
| 0.011530 | 0.011732 | 0.011429 | 0.011228 | 0.011329 | 0.011732 | 0.011362 |
| 0.011362 | 0.011362 | 0.011396 | 0.011497 | 0.011396 | 0.011496 | 0.011564 |
| 0.011564 | 0.011530 | 0.011429 | 0.011530 | 0.011496 | 0.011362 | 0.011329 |
| 0.011362 | 0.011362 | 0.011429 | 0.011362 | 0.011329 | 0.011497 | 0.011362 |
| 0.011396 | 0.011396 | 0.011530 | 0.011564 | 0.011463 | 0.011396 | 0.011396 |
| 0.011463 | 0.011396 | 0.011496 | 0.011362 | 0.011496 | 0.011597 | 0.011900 |
| 0.011396 | 0.011799 | 0.011405 | 0.017936 | 0.011322 | 0.011549 | 0.011758 |
| 0.011718 | 0.011764 | 0.011427 | 0.011350 | 0.011774 | 0.011785 | 0.011425 |
| 0.011629 | 0.011732 | 0.011333 | 0.011311 | 0.011372 | 0.011455 | 0.011404 |
| 0.011623 | 0.011582 | 0.011542 | 0.011325 | 0.011530 | 0.011564 | 0.011567 |
| 0.011438 | 0.011530 | 0.011530 | 0.011497 | 0.011463 | 0.011463 | 0.011430 |
| 0.011463 | 0.011396 | 0.011429 | 0.011463 | 0.011430 | 0.011362 | 0.011396 |
| 0.011396 | 0.011463 | 0.011362 | 0.011463 | 0.011497 | 0.011530 | 0.011429 |
| 0.011463 | 0.011430 | 0.011765 | 0.011765 | 0.011497 | 0.011531 | 0.011564 |
| 0.011329 | 0.011329 | 0.011362 | 0.011463 | 0.011329 | 0.011564 | 0.011564 |
| 0.011597 | 0.011597 | 0.011530 | 0.011631 | 0.011799 | 0.011633 | 0.011463 |
| 0.011463 | 0.011530 | 0.011564 | 0.011396 | 0.011463 | 0.011430 | 0.011463 |
| 0.011531 | 0.011530 | 0.011564 | 0.011531 | 0.011431 | 0.011631 | 0.011597 |
| 0.011467 | 0.011362 | 0.011463 | 0.011564 | 0.011463 | 0.011598 | 0.011631 |
| 0.011799 | 0.011504 | 0.011664 | 0.011631 | 0.011564 | 0.011732 | 0.011363 |
| 0.011532 | 0.011430 | 0.011396 | 0.011396 | 0.011463 | 0.011362 | 0.011463 |
| 0.011497 | 0.011530 | 0.011429 | 0.011463 | 0.011430 | 0.011765 | 0.011765 |
| 0.011497 | 0.011531 | 0.011597 | 0.011530 | 0.012170 | 0.011560 | 0.011517 |
| 0.011587 | 0.011511 | 0.011657 | 0.011545 | 0.011620 | 0.011543 | 0.011543 |
| 0.012125 | 0.011406 | 0.011574 | 0.011510 | 0.011783 | 0.011638 | 0.011741 |
| 0.012148 | 0.011588 | 0.011703 | 0.011765 | 0.011631 | 0.011631 | 0.011668 |
| 0.011329 | 0.011497 | 0.011631 | 0.011597 | 0.011601 | 0.011597 | 0.011565 |
| 0.011429 | 0.011362 | 0.011396 | 0.011429 | 0.011329 | 0.011396 | 0.011295 |
| 0.011429 | 0.011463 | 0.011362 | 0.011329 | 0.011429 | 0.011362 | 0.011396 |
| 0.011396 | 0.011329 | 0.011396 | 0.011429 | 0.011329 | 0.011530 | 0.011564 |
| 0.011463 | 0.011530 | 0.011463 | 0.011463 | 0.011396 | 0.011799 | 0.011429 |
| 0.011478 | 0.011396 | 0.011631 | 0.011637 | 0.011497 | 0.011496 | 0.011496 |
| 0.011497 | 0.011429 | 0.011396 | 0.011429 | 0.011530 | 0.011530 | 0.011463 |
| 0.011463 | 0.011597 | 0.011765 | 0.011463 | 0.011698 | 0.011698 | 0.011564 |

|          |          |          |          |          |          |          |
|----------|----------|----------|----------|----------|----------|----------|
| 0.011396 | 0.011463 | 0.011497 | 0.011900 | 0.011463 | 0.011497 | 0.011463 |
| 0.011496 | 0.011429 | 0.011429 | 0.011732 | 0.011665 | 0.011698 | 0.011429 |
| 0.011530 | 0.011597 | 0.011463 | 0.011530 | 0.011496 | 0.011362 | 0.011698 |
| 0.011463 | 0.011429 | 0.011429 | 0.011597 | 0.011429 | 0.011262 | 0.011765 |
| 0.011463 | 0.011841 | 0.011832 | 0.011670 | 0.011286 | 0.011536 | 0.011370 |
| 0.011335 | 0.011878 | 0.011376 | 0.011596 | 0.011304 | 0.011467 | 0.011432 |
| 0.011570 | 0.011192 | 0.011394 | 0.011258 | 0.011276 | 0.011395 | 0.011466 |
| 0.011512 | 0.011454 | 0.011518 | 0.011448 | 0.011465 | 0.011597 | 0.011665 |
| 0.011665 | 0.011531 | 0.011635 | 0.011636 | 0.011772 | 0.011802 | 0.011463 |
| 0.011698 | 0.011564 | 0.011429 | 0.011530 | 0.011329 | 0.011564 | 0.011362 |
| 0.011429 | 0.011429 | 0.011396 | 0.011362 | 0.011396 | 0.011362 | 0.011463 |
| 0.011444 | 0.011200 | 0.011437 | 0.011471 | 0.011608 | 0.011573 | 0.011572 |
| 0.011571 | 0.011497 | 0.011282 | 0.011312 | 0.011433 | 0.011602 | 0.011603 |
| 0.011396 | 0.011467 | 0.011700 | 0.011669 | 0.011598 | 0.011632 | 0.011564 |
| 0.011496 | 0.011564 | 0.011564 | 0.011463 | 0.012034 | 0.011631 | 0.011698 |
| 0.011732 | 0.011808 | 0.011435 | 0.011476 | 0.011396 | 0.011597 | 0.011564 |
| 0.011598 | 0.011631 | 0.011631 | 0.011631 | 0.011807 | 0.011765 | 0.011407 |
| 0.011297 | 0.011303 | 0.011401 | 0.011366 | 0.011470 | 0.011284 | 0.011638 |
| 0.011437 | 0.011499 | 0.011251 | 0.011397 | 0.011430 | 0.011505 | 0.011396 |
| 0.011362 | 0.011362 | 0.011430 | 0.011396 | 0.011597 | 0.011564 | 0.011497 |
| 0.011597 | 0.011665 | 0.011396 | 0.011396 | 0.011430 | 0.011429 | 0.011432 |
| 0.011500 | 0.011430 | 0.011430 | 0.011465 | 0.011597 | 0.011665 | 0.011665 |
| 0.011531 | 0.011635 | 0.011636 | 0.011772 | 0.011802 | 0.011463 | 0.011631 |
| 0.011564 | 0.011564 | 0.011398 | 0.011547 | 0.011512 | 0.011537 | 0.011411 |
| 0.011577 | 0.011744 | 0.011484 | 0.011434 | 0.011362 | 0.011564 | 0.011430 |
| 0.011530 | 0.011463 | 0.011362 | 0.011465 | 0.011564 | 0.011567 | 0.011463 |
| 0.011362 | 0.011296 | 0.011429 | 0.011362 | 0.011295 | 0.011400 | 0.011564 |
| 0.011463 | 0.011396 | 0.011429 | 0.011463 | 0.011430 | 0.011362 | 0.011564 |
| 0.011429 | 0.011463 | 0.011463 | 0.011396 | 0.011463 | 0.011698 | 0.011362 |
| 0.011396 | 0.011799 | 0.011396 | 0.011429 | 0.011396 | 0.011765 | 0.011360 |
| 0.011791 | 0.011358 | 0.011411 | 0.011584 | 0.011671 | 0.011599 | 0.011353 |
| 0.011375 | 0.011564 | 0.011664 | 0.011773 | 0.011632 | 0.011771 | 0.011901 |
| 0.011800 | 0.011838 | 0.011799 | 0.012051 | 0.011765 | 0.012640 | 0.011801 |
| 0.012540 | 0.012308 | 0.012442 | 0.012714 | 0.011765 | 0.011463 | 0.011766 |
| 0.012205 | 0.012140 | 0.011732 | 0.011631 | 0.011699 | 0.011699 | 0.011669 |
| 0.011564 | 0.011569 | 0.011631 | 0.011598 | 0.011968 | 0.012034 | 0.012036 |
| 0.011935 | 0.012035 | 0.012139 | 0.011906 | 0.012205 | 0.012144 | 0.012272 |
| 0.012273 | 0.012307 | 0.012255 | 0.012273 | 0.012274 | 0.011496 | 0.011800 |
| 0.011868 | 0.012337 | 0.011874 | 0.012102 | 0.012575 | 0.011638 | 0.011531 |
| 0.011496 | 0.011496 | 0.011968 | 0.012006 | 0.012116 | 0.011832 | 0.011498 |
| S290     | 0.011564 | 0.011564 | 0.011900 | 0.011664 | 0.011664 | 0.011732 |
| 0.011569 | 0.011502 | 0.011731 | 0.011161 | 0.011228 | 0.011195 | 0.011161 |
| 0.011194 | 0.011362 | 0.011161 | 0.011194 | 0.011262 | 0.011228 | 0.011194 |
| 0.011161 | 0.011194 | 0.011295 | 0.011161 | 0.011195 | 0.011194 | 0.011535 |
| 0.011429 | 0.011195 | 0.011094 | 0.011329 | 0.011262 | 0.011228 | 0.011262 |
| 0.011228 | 0.011329 | 0.011228 | 0.011228 | 0.011262 | 0.011228 | 0.011396 |
| 0.011161 | 0.011228 | 0.011262 | 0.011194 | 0.011295 | 0.011329 | 0.011262 |
| 0.011228 | 0.011396 | 0.011295 | 0.011564 | 0.011228 | 0.011496 | 0.011228 |
| 0.011194 | 0.011295 | 0.011362 | 0.011496 | 0.011597 | 0.011295 | 0.011396 |
| 0.011262 | 0.011329 | 0.011228 | 0.011463 | 0.011698 | 0.011228 | 0.011295 |
| 0.011194 | 0.011295 | 0.011262 | 0.011329 | 0.011262 | 0.011262 | 0.011262 |
| 0.011161 | 0.011194 | 0.011161 | 0.011262 | 0.011228 | 0.011262 | 0.011329 |
| 0.011262 | 0.011228 | 0.011295 | 0.011194 | 0.011329 | 0.011161 | 0.011228 |
| 0.011396 | 0.011329 | 0.011564 | 0.011396 | 0.011228 | 0.011463 | 0.011228 |
| 0.011394 | 0.011620 | 0.011437 | 0.011138 | 0.011135 | 0.011244 | 0.011336 |
| 0.011975 | 0.011416 | 0.011143 | 0.011463 | 0.011463 | 0.011262 | 0.011362 |
| 0.011295 | 0.011262 | 0.011329 | 0.011228 | 0.011329 | 0.011262 | 0.011262 |
| 0.011228 | 0.011329 | 0.011530 | 0.011396 | 0.011295 | 0.011262 | 0.011195 |
| 0.011161 | 0.011161 | 0.011228 | 0.011195 | 0.011396 | 0.011362 | 0.011295 |
| 0.011396 | 0.011463 | 0.011195 | 0.011195 | 0.011228 | 0.011228 | 0.011229 |

|          |          |          |          |          |          |          |
|----------|----------|----------|----------|----------|----------|----------|
| 0.011297 | 0.011228 | 0.011228 | 0.011096 | 0.011169 | 0.011130 | 0.011228 |
| 0.011230 | 0.011163 | 0.011208 | 0.011198 | 0.011128 | 0.011163 | 0.011195 |
| 0.011456 | 0.011233 | 0.011267 | 0.011161 | 0.011164 | 0.011296 | 0.011262 |
| 0.011329 | 0.011262 | 0.011262 | 0.011362 | 0.011295 | 0.011664 | 0.011463 |
| 0.011496 | 0.011362 | 0.011228 | 0.011329 | 0.011127 | 0.011362 | 0.011161 |
| 0.011228 | 0.011228 | 0.011195 | 0.011161 | 0.011194 | 0.011161 | 0.011262 |
| 0.011228 | 0.011329 | 0.011262 | 0.011161 | 0.011262 | 0.011362 | 0.011364 |
| 0.011362 | 0.011262 | 0.011161 | 0.011094 | 0.011228 | 0.011161 | 0.011094 |
| 0.011196 | 0.011362 | 0.011161 | 0.011362 | 0.011127 | 0.011228 | 0.011195 |
| 0.011295 | 0.011195 | 0.011228 | 0.011195 | 0.011228 | 0.011094 | 0.011228 |
| 0.011262 | 0.011195 | 0.011262 | 0.011195 | 0.011228 | 0.011262 | 0.011497 |
| 0.011597 | 0.011530 | 0.011597 | 0.011364 | 0.011598 | 0.011228 | 0.011195 |
| 0.011229 | 0.011505 | 0.011335 | 0.011129 | 0.011603 | 0.011094 | 0.011218 |
| 0.011603 | 0.011502 | 0.011396 | 0.011597 | 0.011299 | 0.011463 | 0.011429 |
| 0.011362 | 0.011530 | 0.011380 | 0.011225 | 0.011270 | 0.011262 | 0.011331 |
| 0.011429 | 0.011330 | 0.011466 | 0.011534 | 0.011463 | 0.011530 | 0.011636 |
| 0.011365 | 0.011535 | 0.011466 | 0.011398 | 0.011666 | 0.011127 | 0.011330 |
| 0.011295 | 0.011228 | 0.011127 | 0.011127 | 0.011194 | 0.011194 | 0.011262 |
| 0.011194 | 0.011262 | 0.011161 | 0.011262 | 0.011194 | 0.011194 | 0.011262 |
| 0.011194 | 0.011631 | 0.011530 | 0.011564 | 0.011094 | 0.011194 | 0.011228 |
| 0.011228 | 0.011194 | 0.011262 | 0.011295 | 0.011161 | 0.011161 | 0.011161 |
| 0.011698 | 0.011329 | 0.011329 | 0.000000 | 0.011228 | 0.011396 | 0.011161 |
| 0.011161 | 0.011228 | 0.011194 | 0.011362 | 0.011161 | 0.011295 | 0.011429 |
| 0.011362 | 0.011194 | 0.011194 | 0.011127 | 0.011127 | 0.011295 | 0.011228 |
| 0.011127 | 0.011228 | 0.011094 | 0.011127 | 0.011262 | 0.011396 | 0.011161 |
| 0.011128 | 0.011262 | 0.011195 | 0.011094 | 0.011429 | 0.011094 | 0.011262 |
| 0.011334 | 0.011161 | 0.011463 | 0.011295 | 0.011329 | 0.011194 | 0.011295 |
| 0.011161 | 0.011496 | 0.011094 | 0.011362 | 0.011161 | 0.011161 | 0.011094 |
| 0.011329 | 0.011530 | 0.011228 | 0.011295 | 0.011127 | 0.011530 | 0.011161 |
| 0.011161 | 0.011161 | 0.011194 | 0.011295 | 0.011194 | 0.011295 | 0.011362 |
| 0.011362 | 0.011329 | 0.011228 | 0.011329 | 0.011295 | 0.011161 | 0.011127 |
| 0.011161 | 0.011161 | 0.011228 | 0.011161 | 0.011127 | 0.011295 | 0.011161 |
| 0.011194 | 0.011194 | 0.011329 | 0.011362 | 0.011262 | 0.011194 | 0.011195 |
| 0.011262 | 0.011194 | 0.011295 | 0.011161 | 0.011295 | 0.011396 | 0.011698 |
| 0.011194 | 0.011597 | 0.011198 | 0.017710 | 0.011191 | 0.011366 | 0.011548 |
| 0.011510 | 0.011553 | 0.011270 | 0.011234 | 0.011664 | 0.011578 | 0.011303 |
| 0.011440 | 0.011487 | 0.011099 | 0.011186 | 0.011177 | 0.011258 | 0.011189 |
| 0.011436 | 0.011358 | 0.011357 | 0.011126 | 0.011329 | 0.011362 | 0.011365 |
| 0.011232 | 0.011329 | 0.011329 | 0.011295 | 0.011262 | 0.011262 | 0.011228 |
| 0.011262 | 0.011195 | 0.011228 | 0.011262 | 0.011228 | 0.011161 | 0.011195 |
| 0.011195 | 0.011262 | 0.011161 | 0.011262 | 0.011295 | 0.011329 | 0.011228 |
| 0.011262 | 0.011228 | 0.011564 | 0.011564 | 0.011295 | 0.011329 | 0.011362 |
| 0.011127 | 0.011127 | 0.011161 | 0.011262 | 0.011127 | 0.011362 | 0.011362 |
| 0.011396 | 0.011396 | 0.011329 | 0.011429 | 0.011597 | 0.011431 | 0.011262 |
| 0.011262 | 0.011329 | 0.011362 | 0.011195 | 0.011262 | 0.011228 | 0.011262 |
| 0.011329 | 0.011329 | 0.011362 | 0.011329 | 0.011229 | 0.011429 | 0.011396 |
| 0.011263 | 0.011161 | 0.011262 | 0.011362 | 0.011262 | 0.011396 | 0.011429 |
| 0.011597 | 0.011299 | 0.011463 | 0.011429 | 0.011362 | 0.011530 | 0.011161 |
| 0.011330 | 0.011228 | 0.011195 | 0.011195 | 0.011262 | 0.011161 | 0.011262 |
| 0.011295 | 0.011329 | 0.011228 | 0.011262 | 0.011228 | 0.011564 | 0.011564 |
| 0.011295 | 0.011329 | 0.011396 | 0.011329 | 0.011968 | 0.011382 | 0.011306 |
| 0.011377 | 0.011338 | 0.011447 | 0.011337 | 0.011445 | 0.011370 | 0.011336 |
| 0.011918 | 0.011233 | 0.011368 | 0.011302 | 0.011577 | 0.011434 | 0.011536 |
| 0.011944 | 0.011399 | 0.011500 | 0.011564 | 0.011429 | 0.011429 | 0.011466 |
| 0.011127 | 0.011295 | 0.011429 | 0.011396 | 0.011398 | 0.011396 | 0.011363 |
| 0.011228 | 0.011161 | 0.011194 | 0.011228 | 0.011127 | 0.011194 | 0.011094 |
| 0.011228 | 0.011262 | 0.011161 | 0.011127 | 0.011228 | 0.011161 | 0.011194 |
| 0.011194 | 0.011127 | 0.011194 | 0.011228 | 0.011127 | 0.011329 | 0.011362 |
| 0.011262 | 0.011329 | 0.011262 | 0.011262 | 0.011194 | 0.011597 | 0.011228 |
| 0.011269 | 0.011195 | 0.011430 | 0.011433 | 0.011295 | 0.011295 | 0.011295 |

|          |          |          |          |          |          |          |
|----------|----------|----------|----------|----------|----------|----------|
| 0.011295 | 0.011228 | 0.011194 | 0.011228 | 0.011329 | 0.011329 | 0.011262 |
| 0.011262 | 0.011396 | 0.011564 | 0.011295 | 0.011497 | 0.011497 | 0.011362 |
| 0.011194 | 0.011262 | 0.011295 | 0.011698 | 0.011262 | 0.011295 | 0.011262 |
| 0.011295 | 0.011228 | 0.011228 | 0.011530 | 0.011463 | 0.011497 | 0.011228 |
| 0.011329 | 0.011396 | 0.011262 | 0.011329 | 0.011295 | 0.011161 | 0.011496 |
| 0.011262 | 0.011228 | 0.011228 | 0.011396 | 0.011228 | 0.011329 | 0.011564 |
| 0.011262 | 0.011637 | 0.011631 | 0.011426 | 0.011173 | 0.011332 | 0.011215 |
| 0.011170 | 0.011644 | 0.011166 | 0.011373 | 0.011207 | 0.011315 | 0.011326 |
| 0.011417 | 0.011126 | 0.011283 | 0.011126 | 0.011168 | 0.011328 | 0.011303 |
| 0.011324 | 0.011218 | 0.011307 | 0.011236 | 0.011262 | 0.011396 | 0.011463 |
| 0.011463 | 0.011329 | 0.011432 | 0.011433 | 0.011569 | 0.011590 | 0.011262 |
| 0.011496 | 0.011362 | 0.011228 | 0.011329 | 0.011127 | 0.011362 | 0.011161 |
| 0.011228 | 0.011228 | 0.011195 | 0.011161 | 0.011194 | 0.011161 | 0.011262 |
| 0.011235 | 0.011235 | 0.011231 | 0.011266 | 0.011334 | 0.011368 | 0.011367 |
| 0.011367 | 0.011296 | 0.000000 | 0.011096 | 0.011230 | 0.011399 | 0.011399 |
| 0.011195 | 0.011263 | 0.011498 | 0.011466 | 0.011396 | 0.011430 | 0.011362 |
| 0.011295 | 0.011362 | 0.011362 | 0.011262 | 0.011832 | 0.011429 | 0.011497 |
| 0.011530 | 0.011594 | 0.011231 | 0.011303 | 0.011195 | 0.011396 | 0.011362 |
| 0.011397 | 0.011429 | 0.011429 | 0.011429 | 0.011532 | 0.011564 | 0.011199 |
| 0.011094 | 0.011095 | 0.011196 | 0.011162 | 0.011265 | 0.011098 | 0.011434 |
| 0.011232 | 0.011367 | 0.011108 | 0.011248 | 0.011228 | 0.011300 | 0.011195 |
| 0.011161 | 0.011161 | 0.011228 | 0.011195 | 0.011396 | 0.011362 | 0.011295 |
| 0.011396 | 0.011463 | 0.011195 | 0.011195 | 0.011228 | 0.011228 | 0.011229 |
| 0.011297 | 0.011228 | 0.011228 | 0.011262 | 0.011396 | 0.011463 | 0.011463 |
| 0.011329 | 0.011432 | 0.011433 | 0.011569 | 0.011590 | 0.011262 | 0.011429 |
| 0.011362 | 0.011362 | 0.011196 | 0.011373 | 0.011303 | 0.011333 | 0.011200 |
| 0.011370 | 0.011516 | 0.011357 | 0.011264 | 0.011161 | 0.011362 | 0.011228 |
| 0.011329 | 0.011262 | 0.011161 | 0.011262 | 0.011362 | 0.011364 | 0.011262 |
| 0.011161 | 0.011094 | 0.011228 | 0.011161 | 0.011094 | 0.011196 | 0.011362 |
| 0.011262 | 0.011195 | 0.011228 | 0.011262 | 0.011228 | 0.011161 | 0.011362 |
| 0.011228 | 0.011262 | 0.011262 | 0.011194 | 0.011262 | 0.011497 | 0.011161 |
| 0.011194 | 0.011597 | 0.011194 | 0.011228 | 0.011194 | 0.011564 | 0.011146 |
| 0.011622 | 0.011145 | 0.011211 | 0.011382 | 0.011467 | 0.011383 | 0.011102 |
| 0.011165 | 0.011362 | 0.011463 | 0.011569 | 0.011430 | 0.011568 | 0.011699 |
| 0.011598 | 0.011635 | 0.011597 | 0.011846 | 0.011564 | 0.012438 | 0.011599 |
| 0.012338 | 0.012105 | 0.012240 | 0.012511 | 0.011564 | 0.011262 | 0.011564 |
| 0.012002 | 0.011937 | 0.011530 | 0.011430 | 0.011497 | 0.011497 | 0.011466 |
| 0.011362 | 0.011365 | 0.011429 | 0.011396 | 0.011766 | 0.011832 | 0.011834 |
| 0.011733 | 0.011833 | 0.011937 | 0.011703 | 0.012003 | 0.012008 | 0.012070 |
| 0.012070 | 0.012104 | 0.012050 | 0.012071 | 0.012072 | 0.011295 | 0.011598 |
| 0.011666 | 0.012169 | 0.011670 | 0.011900 | 0.012373 | 0.011434 | 0.011329 |
| 0.011295 | 0.011295 | 0.011766 | 0.011800 | 0.011904 | 0.011631 | 0.011296 |
| S291     | 0.011664 | 0.011664 | 0.012000 | 0.011765 | 0.011765 | 0.011832 |
| 0.011671 | 0.011603 | 0.011832 | 0.011262 | 0.011329 | 0.011296 | 0.011262 |
| 0.011295 | 0.011463 | 0.011262 | 0.011295 | 0.011362 | 0.011329 | 0.011295 |
| 0.011262 | 0.011295 | 0.011396 | 0.011262 | 0.011295 | 0.011295 | 0.011637 |
| 0.011530 | 0.011295 | 0.011194 | 0.011429 | 0.011362 | 0.011329 | 0.011362 |
| 0.011329 | 0.011429 | 0.011329 | 0.011329 | 0.011362 | 0.011329 | 0.011496 |
| 0.011262 | 0.011329 | 0.011362 | 0.011295 | 0.011396 | 0.011429 | 0.011362 |
| 0.011329 | 0.011497 | 0.011396 | 0.011664 | 0.011329 | 0.011597 | 0.011329 |
| 0.011295 | 0.011396 | 0.011463 | 0.011597 | 0.011698 | 0.011396 | 0.011496 |
| 0.011362 | 0.011429 | 0.011329 | 0.011563 | 0.011799 | 0.011329 | 0.011396 |
| 0.011295 | 0.011396 | 0.011362 | 0.011429 | 0.011362 | 0.011362 | 0.011362 |
| 0.011262 | 0.011295 | 0.011262 | 0.011362 | 0.011329 | 0.011363 | 0.011429 |
| 0.011362 | 0.011329 | 0.011396 | 0.011295 | 0.011429 | 0.011262 | 0.011329 |
| 0.011496 | 0.011429 | 0.011664 | 0.011496 | 0.011329 | 0.011564 | 0.011329 |
| 0.011505 | 0.011732 | 0.011513 | 0.011216 | 0.011210 | 0.011355 | 0.011414 |
| 0.012085 | 0.011518 | 0.011225 | 0.011563 | 0.011564 | 0.011362 | 0.011463 |
| 0.011396 | 0.011362 | 0.011429 | 0.011329 | 0.011429 | 0.011362 | 0.011362 |
| 0.011329 | 0.011429 | 0.011631 | 0.011496 | 0.011396 | 0.011362 | 0.011295 |

|          |          |          |          |          |          |          |
|----------|----------|----------|----------|----------|----------|----------|
| 0.011262 | 0.011262 | 0.011329 | 0.011295 | 0.011497 | 0.011463 | 0.011396 |
| 0.011497 | 0.011564 | 0.011295 | 0.011295 | 0.011329 | 0.011329 | 0.011330 |
| 0.011398 | 0.011329 | 0.011329 | 0.011204 | 0.011241 | 0.011235 | 0.011329 |
| 0.011331 | 0.011266 | 0.011282 | 0.011302 | 0.011230 | 0.011266 | 0.011297 |
| 0.011564 | 0.011336 | 0.011370 | 0.011262 | 0.011268 | 0.011397 | 0.011363 |
| 0.011430 | 0.011363 | 0.011363 | 0.011463 | 0.011396 | 0.011765 | 0.011564 |
| 0.011597 | 0.011463 | 0.011329 | 0.011429 | 0.011228 | 0.011463 | 0.011262 |
| 0.011329 | 0.011329 | 0.011295 | 0.011262 | 0.011295 | 0.011262 | 0.011362 |
| 0.011329 | 0.011429 | 0.011362 | 0.011262 | 0.011363 | 0.011463 | 0.011466 |
| 0.011463 | 0.011362 | 0.011262 | 0.011195 | 0.011329 | 0.011262 | 0.011195 |
| 0.011298 | 0.011463 | 0.011262 | 0.011463 | 0.011228 | 0.011329 | 0.011295 |
| 0.011396 | 0.011295 | 0.011329 | 0.011295 | 0.011329 | 0.011195 | 0.011329 |
| 0.011362 | 0.011295 | 0.011362 | 0.011295 | 0.011329 | 0.011362 | 0.011597 |
| 0.011698 | 0.011631 | 0.011698 | 0.011465 | 0.011698 | 0.011329 | 0.011295 |
| 0.011330 | 0.011586 | 0.011380 | 0.011232 | 0.011705 | 0.011197 | 0.011257 |
| 0.011705 | 0.011604 | 0.011496 | 0.011698 | 0.011402 | 0.011564 | 0.011530 |
| 0.011463 | 0.011631 | 0.011451 | 0.011307 | 0.011354 | 0.011362 | 0.011432 |
| 0.011530 | 0.011397 | 0.011567 | 0.011601 | 0.011564 | 0.011631 | 0.011704 |
| 0.011466 | 0.011603 | 0.011568 | 0.011500 | 0.011766 | 0.011228 | 0.011431 |
| 0.011396 | 0.011329 | 0.011228 | 0.011228 | 0.011295 | 0.011295 | 0.011362 |
| 0.011295 | 0.011362 | 0.011262 | 0.011362 | 0.011295 | 0.011295 | 0.011362 |
| 0.011295 | 0.011731 | 0.011631 | 0.011664 | 0.011194 | 0.011295 | 0.011329 |
| 0.011329 | 0.011295 | 0.011362 | 0.011396 | 0.011262 | 0.011262 | 0.011262 |
| 0.011799 | 0.011429 | 0.011429 | 0.011228 | 0.000000 | 0.011497 | 0.011262 |
| 0.011262 | 0.011329 | 0.011295 | 0.011463 | 0.011262 | 0.011396 | 0.011530 |
| 0.011463 | 0.011295 | 0.011295 | 0.011228 | 0.011228 | 0.011396 | 0.011329 |
| 0.011228 | 0.011329 | 0.011194 | 0.011228 | 0.011362 | 0.011497 | 0.011262 |
| 0.011228 | 0.011362 | 0.011295 | 0.011194 | 0.011530 | 0.011195 | 0.011362 |
| 0.011402 | 0.011262 | 0.011564 | 0.011396 | 0.011429 | 0.011295 | 0.011396 |
| 0.011262 | 0.011597 | 0.011194 | 0.011463 | 0.011262 | 0.011262 | 0.011194 |
| 0.011429 | 0.011631 | 0.011329 | 0.011396 | 0.011228 | 0.011631 | 0.011262 |
| 0.011262 | 0.011262 | 0.011295 | 0.011396 | 0.011295 | 0.011396 | 0.011463 |
| 0.011463 | 0.011429 | 0.011329 | 0.011429 | 0.011396 | 0.011262 | 0.011228 |
| 0.011262 | 0.011262 | 0.011329 | 0.011262 | 0.011228 | 0.011396 | 0.011262 |
| 0.011295 | 0.011295 | 0.011429 | 0.011463 | 0.011362 | 0.011295 | 0.011295 |
| 0.011362 | 0.011295 | 0.011396 | 0.011262 | 0.011396 | 0.011496 | 0.011799 |
| 0.011295 | 0.011698 | 0.011302 | 0.017823 | 0.011322 | 0.011549 | 0.011653 |
| 0.011614 | 0.011658 | 0.011374 | 0.011350 | 0.011774 | 0.011682 | 0.011425 |
| 0.011534 | 0.011610 | 0.011177 | 0.011311 | 0.011255 | 0.011356 | 0.011318 |
| 0.011529 | 0.011433 | 0.011468 | 0.011193 | 0.011429 | 0.011463 | 0.011466 |
| 0.011301 | 0.011429 | 0.011429 | 0.011396 | 0.011362 | 0.011362 | 0.011329 |
| 0.011362 | 0.011295 | 0.011329 | 0.011362 | 0.011329 | 0.011262 | 0.011295 |
| 0.011295 | 0.011362 | 0.011262 | 0.011362 | 0.011396 | 0.011429 | 0.011329 |
| 0.011362 | 0.011329 | 0.011665 | 0.011665 | 0.011396 | 0.011430 | 0.011463 |
| 0.011228 | 0.011228 | 0.011262 | 0.011362 | 0.011228 | 0.011463 | 0.011463 |
| 0.011497 | 0.011496 | 0.011429 | 0.011530 | 0.011698 | 0.011532 | 0.011362 |
| 0.011362 | 0.011429 | 0.011463 | 0.011295 | 0.011362 | 0.011329 | 0.011362 |
| 0.011430 | 0.011430 | 0.011463 | 0.011430 | 0.011330 | 0.011530 | 0.011497 |
| 0.011331 | 0.011262 | 0.011362 | 0.011463 | 0.011362 | 0.011497 | 0.011530 |
| 0.011698 | 0.011402 | 0.011564 | 0.011530 | 0.011463 | 0.011631 | 0.011262 |
| 0.011431 | 0.011329 | 0.011295 | 0.011295 | 0.011362 | 0.011262 | 0.011362 |
| 0.011396 | 0.011429 | 0.011329 | 0.011362 | 0.011329 | 0.011665 | 0.011665 |
| 0.011396 | 0.011430 | 0.011496 | 0.011429 | 0.012069 | 0.011453 | 0.011377 |
| 0.011447 | 0.011407 | 0.011517 | 0.011406 | 0.011515 | 0.011439 | 0.011439 |
| 0.011987 | 0.011302 | 0.011437 | 0.011371 | 0.011645 | 0.011536 | 0.011604 |
| 0.012012 | 0.011475 | 0.011601 | 0.011664 | 0.011530 | 0.011530 | 0.011567 |
| 0.011228 | 0.011396 | 0.011530 | 0.011496 | 0.011499 | 0.011496 | 0.011464 |
| 0.011329 | 0.011262 | 0.011295 | 0.011329 | 0.011228 | 0.011295 | 0.011194 |
| 0.011329 | 0.011362 | 0.011262 | 0.011228 | 0.011329 | 0.011262 | 0.011295 |
| 0.011295 | 0.011228 | 0.011295 | 0.011329 | 0.011228 | 0.011429 | 0.011463 |

|          |          |          |          |          |          |          |
|----------|----------|----------|----------|----------|----------|----------|
| 0.011362 | 0.011429 | 0.011362 | 0.011362 | 0.011295 | 0.011698 | 0.011329 |
| 0.011338 | 0.011295 | 0.011530 | 0.011501 | 0.011396 | 0.011396 | 0.011396 |
| 0.011396 | 0.011329 | 0.011295 | 0.011329 | 0.011429 | 0.011429 | 0.011362 |
| 0.011362 | 0.011496 | 0.011664 | 0.011396 | 0.011597 | 0.011597 | 0.011463 |
| 0.011295 | 0.011362 | 0.011396 | 0.011799 | 0.011362 | 0.011396 | 0.011362 |
| 0.011396 | 0.011329 | 0.011329 | 0.011631 | 0.011564 | 0.011597 | 0.011329 |
| 0.011429 | 0.011496 | 0.011362 | 0.011429 | 0.011396 | 0.011262 | 0.011597 |
| 0.011362 | 0.011329 | 0.011329 | 0.011496 | 0.011329 | 0.011429 | 0.011664 |
| 0.011362 | 0.011739 | 0.011731 | 0.011507 | 0.011286 | 0.011434 | 0.011267 |
| 0.011335 | 0.011722 | 0.011271 | 0.011462 | 0.011304 | 0.011416 | 0.011432 |
| 0.011519 | 0.011258 | 0.011394 | 0.011258 | 0.011276 | 0.011462 | 0.011385 |
| 0.011437 | 0.011296 | 0.011412 | 0.011342 | 0.011363 | 0.011497 | 0.011564 |
| 0.011564 | 0.011430 | 0.011533 | 0.011535 | 0.011670 | 0.011696 | 0.011362 |
| 0.011597 | 0.011463 | 0.011329 | 0.011429 | 0.011228 | 0.011463 | 0.011262 |
| 0.011329 | 0.011329 | 0.011295 | 0.011262 | 0.011295 | 0.011262 | 0.011362 |
| 0.011340 | 0.011340 | 0.011334 | 0.011368 | 0.011505 | 0.011470 | 0.011470 |
| 0.011469 | 0.011396 | 0.011171 | 0.011204 | 0.011331 | 0.011501 | 0.011501 |
| 0.011296 | 0.011365 | 0.011599 | 0.011567 | 0.011497 | 0.011531 | 0.011463 |
| 0.011396 | 0.011463 | 0.011463 | 0.011362 | 0.011933 | 0.011530 | 0.011597 |
| 0.011631 | 0.011701 | 0.011333 | 0.011407 | 0.011295 | 0.011497 | 0.011463 |
| 0.011497 | 0.011530 | 0.011530 | 0.011530 | 0.011689 | 0.011664 | 0.011268 |
| 0.011162 | 0.011164 | 0.011264 | 0.011230 | 0.011333 | 0.011172 | 0.011502 |
| 0.011300 | 0.011411 | 0.011203 | 0.011322 | 0.011329 | 0.011402 | 0.011295 |
| 0.011262 | 0.011262 | 0.011329 | 0.011295 | 0.011497 | 0.011463 | 0.011396 |
| 0.011497 | 0.011564 | 0.011295 | 0.011295 | 0.011329 | 0.011329 | 0.011330 |
| 0.011398 | 0.011329 | 0.011329 | 0.011363 | 0.011497 | 0.011564 | 0.011564 |
| 0.011430 | 0.011533 | 0.011535 | 0.011670 | 0.011696 | 0.011362 | 0.011530 |
| 0.011463 | 0.011463 | 0.011297 | 0.011478 | 0.011408 | 0.011435 | 0.011305 |
| 0.011473 | 0.011653 | 0.011441 | 0.011366 | 0.011262 | 0.011463 | 0.011329 |
| 0.011429 | 0.011362 | 0.011262 | 0.011363 | 0.011463 | 0.011466 | 0.011362 |
| 0.011262 | 0.011195 | 0.011329 | 0.011262 | 0.011195 | 0.011298 | 0.011463 |
| 0.011362 | 0.011295 | 0.011329 | 0.011362 | 0.011329 | 0.011262 | 0.011463 |
| 0.011329 | 0.011362 | 0.011362 | 0.011295 | 0.011362 | 0.011597 | 0.011262 |
| 0.011295 | 0.011698 | 0.011295 | 0.011329 | 0.011295 | 0.011664 | 0.011232 |
| 0.011735 | 0.011230 | 0.011311 | 0.011463 | 0.011549 | 0.011491 | 0.011186 |
| 0.011270 | 0.011463 | 0.011564 | 0.011671 | 0.011531 | 0.011669 | 0.011800 |
| 0.011699 | 0.011703 | 0.011698 | 0.011914 | 0.011664 | 0.012539 | 0.011700 |
| 0.012439 | 0.012207 | 0.012341 | 0.012612 | 0.011664 | 0.011362 | 0.011665 |
| 0.012103 | 0.012038 | 0.011631 | 0.011530 | 0.011598 | 0.011598 | 0.011567 |
| 0.011463 | 0.011467 | 0.011530 | 0.011497 | 0.011867 | 0.011933 | 0.011935 |
| 0.011834 | 0.011934 | 0.012038 | 0.011804 | 0.012104 | 0.012110 | 0.012171 |
| 0.012171 | 0.012205 | 0.012152 | 0.012172 | 0.012173 | 0.011396 | 0.011699 |
| 0.011766 | 0.012270 | 0.011772 | 0.011967 | 0.012474 | 0.011502 | 0.011430 |
| 0.011396 | 0.011396 | 0.011867 | 0.011883 | 0.012010 | 0.011731 | 0.011397 |
| S292     | 0.011833 | 0.011833 | 0.012169 | 0.011933 | 0.011933 | 0.012001 |
| 0.011841 | 0.011773 | 0.012000 | 0.011430 | 0.011496 | 0.011464 | 0.011429 |
| 0.011463 | 0.011631 | 0.011429 | 0.011396 | 0.011530 | 0.011497 | 0.011463 |
| 0.011429 | 0.011463 | 0.011564 | 0.011430 | 0.011396 | 0.011463 | 0.011807 |
| 0.011698 | 0.011463 | 0.011362 | 0.011597 | 0.011463 | 0.011497 | 0.011463 |
| 0.011497 | 0.011396 | 0.011497 | 0.011497 | 0.011463 | 0.011497 | 0.011665 |
| 0.011429 | 0.011497 | 0.011463 | 0.011463 | 0.011564 | 0.011530 | 0.011530 |
| 0.011497 | 0.011598 | 0.011564 | 0.011833 | 0.011429 | 0.011698 | 0.011429 |
| 0.011463 | 0.011564 | 0.011631 | 0.011698 | 0.011866 | 0.011564 | 0.011665 |
| 0.011463 | 0.011262 | 0.011497 | 0.011664 | 0.011967 | 0.011497 | 0.011564 |
| 0.011463 | 0.011496 | 0.011530 | 0.011597 | 0.011530 | 0.011530 | 0.011530 |
| 0.011429 | 0.011463 | 0.011429 | 0.011530 | 0.011497 | 0.011531 | 0.011597 |
| 0.011530 | 0.011497 | 0.011497 | 0.011463 | 0.011597 | 0.011362 | 0.011497 |
| 0.011664 | 0.011597 | 0.011832 | 0.011597 | 0.011497 | 0.011664 | 0.011497 |
| 0.011654 | 0.011882 | 0.011740 | 0.011373 | 0.011359 | 0.011465 | 0.011572 |
| 0.012231 | 0.011518 | 0.011431 | 0.011664 | 0.011732 | 0.011530 | 0.011631 |



|          |          |          |          |          |          |          |
|----------|----------|----------|----------|----------|----------|----------|
| 0.011564 | 0.011530 | 0.011597 | 0.011497 | 0.011597 | 0.011463 | 0.011530 |
| 0.011496 | 0.011597 | 0.011799 | 0.011664 | 0.011564 | 0.011530 | 0.011396 |
| 0.011430 | 0.011430 | 0.011430 | 0.011463 | 0.011665 | 0.011631 | 0.011564 |
| 0.011665 | 0.011732 | 0.011463 | 0.011463 | 0.011497 | 0.011497 | 0.011499 |
| 0.011567 | 0.011497 | 0.011497 | 0.011348 | 0.011458 | 0.011411 | 0.011497 |
| 0.011501 | 0.011438 | 0.011503 | 0.011474 | 0.011400 | 0.011437 | 0.011466 |
| 0.011744 | 0.011508 | 0.011474 | 0.011430 | 0.011441 | 0.011565 | 0.011531 |
| 0.011599 | 0.011532 | 0.011531 | 0.011631 | 0.011564 | 0.011799 | 0.011732 |
| 0.011765 | 0.011631 | 0.011497 | 0.011598 | 0.011396 | 0.011631 | 0.011430 |
| 0.011497 | 0.011497 | 0.011463 | 0.011429 | 0.011463 | 0.011430 | 0.011530 |
| 0.011430 | 0.011530 | 0.011531 | 0.011430 | 0.011532 | 0.011631 | 0.011601 |
| 0.011564 | 0.011531 | 0.011430 | 0.011364 | 0.011497 | 0.011430 | 0.011363 |
| 0.011434 | 0.011564 | 0.011362 | 0.011564 | 0.011396 | 0.011497 | 0.011463 |
| 0.011497 | 0.011463 | 0.011430 | 0.011463 | 0.011497 | 0.011363 | 0.011430 |
| 0.011463 | 0.011463 | 0.011530 | 0.011463 | 0.011497 | 0.011530 | 0.011766 |
| 0.011866 | 0.011799 | 0.011867 | 0.011633 | 0.011867 | 0.011497 | 0.011463 |
| 0.011499 | 0.011667 | 0.011380 | 0.011403 | 0.011875 | 0.011367 | 0.011493 |
| 0.011875 | 0.011775 | 0.011664 | 0.011866 | 0.011573 | 0.011732 | 0.011631 |
| 0.011564 | 0.011799 | 0.011664 | 0.011472 | 0.011605 | 0.011530 | 0.011602 |
| 0.011698 | 0.011600 | 0.011737 | 0.011737 | 0.011732 | 0.011799 | 0.011907 |
| 0.011636 | 0.011739 | 0.011670 | 0.011669 | 0.011902 | 0.011396 | 0.011599 |
| 0.011496 | 0.011497 | 0.011396 | 0.011396 | 0.011396 | 0.011463 | 0.011530 |
| 0.011396 | 0.011463 | 0.011362 | 0.011530 | 0.011396 | 0.011463 | 0.011463 |
| 0.011463 | 0.011900 | 0.011799 | 0.011833 | 0.011362 | 0.011463 | 0.011497 |
| 0.011497 | 0.011463 | 0.011530 | 0.011564 | 0.011429 | 0.011429 | 0.011429 |
| 0.011967 | 0.011597 | 0.011597 | 0.011396 | 0.011497 | 0.000000 | 0.011430 |
| 0.011429 | 0.011496 | 0.011463 | 0.011564 | 0.011429 | 0.011564 | 0.011631 |
| 0.011631 | 0.011463 | 0.011463 | 0.011396 | 0.011396 | 0.011564 | 0.011497 |
| 0.011396 | 0.011497 | 0.011362 | 0.011396 | 0.011530 | 0.011665 | 0.011430 |
| 0.011396 | 0.011530 | 0.011463 | 0.011362 | 0.011698 | 0.011362 | 0.011530 |
| 0.011540 | 0.011430 | 0.011732 | 0.011564 | 0.011597 | 0.011463 | 0.011497 |
| 0.011429 | 0.011698 | 0.011362 | 0.011497 | 0.011429 | 0.011429 | 0.011362 |
| 0.011530 | 0.011799 | 0.011497 | 0.011564 | 0.011396 | 0.011799 | 0.011429 |
| 0.011430 | 0.011429 | 0.011463 | 0.011228 | 0.011463 | 0.011564 | 0.011631 |
| 0.011564 | 0.011597 | 0.011497 | 0.011598 | 0.011496 | 0.011429 | 0.011396 |
| 0.011429 | 0.011429 | 0.011497 | 0.011429 | 0.011329 | 0.011564 | 0.011429 |
| 0.011463 | 0.011463 | 0.011597 | 0.011631 | 0.011530 | 0.011396 | 0.011463 |
| 0.011530 | 0.011463 | 0.011564 | 0.011429 | 0.011564 | 0.011665 | 0.011967 |
| 0.011463 | 0.011866 | 0.011474 | 0.017974 | 0.011257 | 0.011672 | 0.011828 |
| 0.011787 | 0.011834 | 0.011427 | 0.011350 | 0.011829 | 0.011855 | 0.011425 |
| 0.011535 | 0.011793 | 0.011372 | 0.011437 | 0.011412 | 0.011505 | 0.011361 |
| 0.011529 | 0.011619 | 0.011542 | 0.011325 | 0.011597 | 0.011631 | 0.011635 |
| 0.011438 | 0.011598 | 0.011597 | 0.011564 | 0.011530 | 0.011531 | 0.011497 |
| 0.011530 | 0.011463 | 0.011497 | 0.011530 | 0.011497 | 0.011430 | 0.011463 |
| 0.011463 | 0.011530 | 0.011430 | 0.011531 | 0.011564 | 0.011598 | 0.011497 |
| 0.011530 | 0.011497 | 0.011833 | 0.011833 | 0.011564 | 0.011531 | 0.011631 |
| 0.011396 | 0.011396 | 0.011430 | 0.011463 | 0.011396 | 0.011631 | 0.011631 |
| 0.011665 | 0.011664 | 0.011597 | 0.011698 | 0.011867 | 0.011700 | 0.011463 |
| 0.011530 | 0.011598 | 0.011564 | 0.011463 | 0.011530 | 0.011430 | 0.011463 |
| 0.011598 | 0.011598 | 0.011631 | 0.011531 | 0.011431 | 0.011698 | 0.011597 |
| 0.011534 | 0.011430 | 0.011530 | 0.011631 | 0.011531 | 0.011665 | 0.011698 |
| 0.011866 | 0.011573 | 0.011732 | 0.011631 | 0.011564 | 0.011799 | 0.011430 |
| 0.011532 | 0.011497 | 0.011463 | 0.011463 | 0.011530 | 0.011430 | 0.011531 |
| 0.011564 | 0.011598 | 0.011497 | 0.011530 | 0.011497 | 0.011833 | 0.011833 |
| 0.011564 | 0.011531 | 0.011664 | 0.011597 | 0.012238 | 0.011668 | 0.011588 |
| 0.011658 | 0.011615 | 0.011728 | 0.011614 | 0.011725 | 0.011647 | 0.011612 |
| 0.012194 | 0.011510 | 0.011643 | 0.011579 | 0.011852 | 0.011706 | 0.011741 |
| 0.012216 | 0.011701 | 0.011770 | 0.011833 | 0.011698 | 0.011698 | 0.011736 |
| 0.011396 | 0.011497 | 0.011698 | 0.011664 | 0.011668 | 0.011664 | 0.011633 |
| 0.011496 | 0.011362 | 0.011396 | 0.011497 | 0.011329 | 0.011463 | 0.011362 |

|          |          |          |          |          |          |          |
|----------|----------|----------|----------|----------|----------|----------|
| 0.011497 | 0.011530 | 0.011429 | 0.011396 | 0.011497 | 0.011429 | 0.011463 |
| 0.011396 | 0.011396 | 0.011463 | 0.011497 | 0.011396 | 0.011396 | 0.011631 |
| 0.011530 | 0.011597 | 0.011530 | 0.011530 | 0.011463 | 0.011866 | 0.011497 |
| 0.011547 | 0.011463 | 0.011699 | 0.011705 | 0.011497 | 0.011564 | 0.011564 |
| 0.011564 | 0.011430 | 0.011463 | 0.011430 | 0.011597 | 0.011597 | 0.011530 |
| 0.011530 | 0.011665 | 0.011832 | 0.011564 | 0.011766 | 0.011766 | 0.011631 |
| 0.011463 | 0.011530 | 0.011564 | 0.011967 | 0.011530 | 0.011497 | 0.011530 |
| 0.011564 | 0.011497 | 0.011497 | 0.011799 | 0.011665 | 0.011766 | 0.011497 |
| 0.011597 | 0.011665 | 0.011530 | 0.011597 | 0.011564 | 0.011430 | 0.011765 |
| 0.011530 | 0.011497 | 0.011497 | 0.011665 | 0.011497 | 0.011597 | 0.011833 |
| 0.011530 | 0.011909 | 0.011900 | 0.011629 | 0.011342 | 0.011604 | 0.011370 |
| 0.011445 | 0.011839 | 0.011447 | 0.011596 | 0.011353 | 0.011519 | 0.011432 |
| 0.011519 | 0.011192 | 0.011394 | 0.011258 | 0.011276 | 0.011462 | 0.011547 |
| 0.011550 | 0.011414 | 0.011589 | 0.011483 | 0.011532 | 0.011665 | 0.011732 |
| 0.011732 | 0.011598 | 0.011703 | 0.011704 | 0.011840 | 0.011838 | 0.011530 |
| 0.011765 | 0.011631 | 0.011497 | 0.011598 | 0.011396 | 0.011631 | 0.011430 |
| 0.011497 | 0.011497 | 0.011463 | 0.011429 | 0.011463 | 0.011430 | 0.011530 |
| 0.011514 | 0.011515 | 0.011437 | 0.011540 | 0.011676 | 0.011573 | 0.011573 |
| 0.011640 | 0.011565 | 0.011393 | 0.011348 | 0.011501 | 0.011670 | 0.011671 |
| 0.011464 | 0.011535 | 0.011767 | 0.011737 | 0.011666 | 0.011700 | 0.011631 |
| 0.011564 | 0.011631 | 0.011631 | 0.011530 | 0.012102 | 0.011665 | 0.011766 |
| 0.011799 | 0.011879 | 0.011504 | 0.011545 | 0.011463 | 0.011665 | 0.011631 |
| 0.011666 | 0.011698 | 0.011698 | 0.011698 | 0.011807 | 0.011833 | 0.011477 |
| 0.011365 | 0.011372 | 0.011469 | 0.011434 | 0.011539 | 0.011396 | 0.011706 |
| 0.011506 | 0.011674 | 0.011441 | 0.011547 | 0.011497 | 0.011574 | 0.011396 |
| 0.011430 | 0.011430 | 0.011430 | 0.011463 | 0.011665 | 0.011631 | 0.011564 |
| 0.011665 | 0.011732 | 0.011463 | 0.011463 | 0.011497 | 0.011497 | 0.011499 |
| 0.011567 | 0.011497 | 0.011497 | 0.011532 | 0.011665 | 0.011732 | 0.011732 |
| 0.011598 | 0.011703 | 0.011704 | 0.011840 | 0.011838 | 0.011530 | 0.011698 |
| 0.011631 | 0.011631 | 0.011466 | 0.011617 | 0.011582 | 0.011605 | 0.011481 |
| 0.011577 | 0.011789 | 0.011611 | 0.011536 | 0.011362 | 0.011564 | 0.011430 |
| 0.011530 | 0.011531 | 0.011430 | 0.011532 | 0.011631 | 0.011601 | 0.011531 |
| 0.011430 | 0.011364 | 0.011497 | 0.011430 | 0.011363 | 0.011434 | 0.011564 |
| 0.011530 | 0.011463 | 0.011497 | 0.011530 | 0.011497 | 0.011430 | 0.011631 |
| 0.011497 | 0.011530 | 0.011530 | 0.011463 | 0.011530 | 0.011765 | 0.011429 |
| 0.011463 | 0.011866 | 0.011463 | 0.011429 | 0.011463 | 0.011833 | 0.011403 |
| 0.011622 | 0.011400 | 0.011311 | 0.011664 | 0.011712 | 0.011670 | 0.011353 |
| 0.011270 | 0.011631 | 0.011665 | 0.011773 | 0.011633 | 0.011737 | 0.011901 |
| 0.011801 | 0.011838 | 0.011799 | 0.012086 | 0.011832 | 0.012708 | 0.011869 |
| 0.012608 | 0.012376 | 0.012510 | 0.012782 | 0.011832 | 0.011531 | 0.011766 |
| 0.012272 | 0.012140 | 0.011799 | 0.011698 | 0.011767 | 0.011767 | 0.011737 |
| 0.011631 | 0.011603 | 0.011698 | 0.011666 | 0.012036 | 0.012102 | 0.012103 |
| 0.012003 | 0.012103 | 0.012207 | 0.011974 | 0.012273 | 0.012280 | 0.012340 |
| 0.012341 | 0.012374 | 0.012323 | 0.012341 | 0.012342 | 0.011564 | 0.011867 |
| 0.011935 | 0.012371 | 0.011942 | 0.012169 | 0.012643 | 0.011706 | 0.011598 |
| 0.011564 | 0.011564 | 0.012035 | 0.012089 | 0.012187 | 0.011900 | 0.011566 |
| S293     | 0.011597 | 0.011597 | 0.011933 | 0.011698 | 0.011698 | 0.011765 |
| 0.011603 | 0.011535 | 0.011765 | 0.011195 | 0.011262 | 0.011229 | 0.011194 |
| 0.011228 | 0.011396 | 0.011194 | 0.011228 | 0.011295 | 0.011262 | 0.011228 |
| 0.011194 | 0.011228 | 0.011329 | 0.011195 | 0.011228 | 0.011228 | 0.011569 |
| 0.011463 | 0.011228 | 0.011127 | 0.011362 | 0.011295 | 0.011262 | 0.011295 |
| 0.011262 | 0.011362 | 0.011262 | 0.011262 | 0.011295 | 0.011262 | 0.011429 |
| 0.011194 | 0.011262 | 0.011295 | 0.011228 | 0.011329 | 0.011362 | 0.011295 |
| 0.011262 | 0.011429 | 0.011329 | 0.011597 | 0.011262 | 0.011530 | 0.011262 |
| 0.011228 | 0.011329 | 0.011396 | 0.011530 | 0.011631 | 0.011329 | 0.011429 |
| 0.011295 | 0.011362 | 0.011262 | 0.011496 | 0.011732 | 0.011262 | 0.011329 |
| 0.011228 | 0.011329 | 0.011295 | 0.011362 | 0.011295 | 0.011295 | 0.011295 |
| 0.011194 | 0.011228 | 0.011194 | 0.011295 | 0.011262 | 0.011296 | 0.011362 |
| 0.011295 | 0.011262 | 0.011329 | 0.011228 | 0.011362 | 0.011195 | 0.011262 |
| 0.011429 | 0.011362 | 0.011597 | 0.011429 | 0.011262 | 0.011497 | 0.011262 |

|          |          |          |          |          |          |          |
|----------|----------|----------|----------|----------|----------|----------|
| 0.011394 | 0.011620 | 0.011437 | 0.011138 | 0.011135 | 0.011244 | 0.011336 |
| 0.011975 | 0.011416 | 0.011143 | 0.011496 | 0.011496 | 0.011295 | 0.011396 |
| 0.011329 | 0.011295 | 0.011362 | 0.011262 | 0.011362 | 0.011295 | 0.011295 |
| 0.011262 | 0.011362 | 0.011564 | 0.011429 | 0.011329 | 0.011295 | 0.011228 |
| 0.011195 | 0.011195 | 0.011262 | 0.011228 | 0.011429 | 0.011396 | 0.011329 |
| 0.011429 | 0.011497 | 0.011228 | 0.011228 | 0.011262 | 0.011262 | 0.011263 |
| 0.011331 | 0.011262 | 0.011262 | 0.011096 | 0.011169 | 0.011165 | 0.011262 |
| 0.011263 | 0.011163 | 0.011208 | 0.011233 | 0.011162 | 0.011197 | 0.011229 |
| 0.011492 | 0.011267 | 0.011301 | 0.011195 | 0.011199 | 0.011329 | 0.011296 |
| 0.011363 | 0.011296 | 0.011296 | 0.011396 | 0.011329 | 0.011698 | 0.011497 |
| 0.011530 | 0.011396 | 0.011262 | 0.011362 | 0.011161 | 0.011396 | 0.011195 |
| 0.011262 | 0.011262 | 0.011228 | 0.011195 | 0.011161 | 0.011195 | 0.011295 |
| 0.011262 | 0.011362 | 0.011295 | 0.011195 | 0.011296 | 0.011396 | 0.011398 |
| 0.011396 | 0.011295 | 0.011195 | 0.011128 | 0.011262 | 0.011195 | 0.011128 |
| 0.011230 | 0.011396 | 0.011195 | 0.011396 | 0.011161 | 0.011262 | 0.011228 |
| 0.011329 | 0.011228 | 0.011262 | 0.011228 | 0.011262 | 0.011127 | 0.011262 |
| 0.011295 | 0.011228 | 0.011295 | 0.011228 | 0.011262 | 0.011295 | 0.011530 |
| 0.011631 | 0.011564 | 0.011631 | 0.011397 | 0.011631 | 0.011262 | 0.011228 |
| 0.011263 | 0.011545 | 0.011380 | 0.011163 | 0.011637 | 0.011129 | 0.011257 |
| 0.011637 | 0.011536 | 0.011429 | 0.011631 | 0.011333 | 0.011497 | 0.011463 |
| 0.011396 | 0.011564 | 0.011415 | 0.011266 | 0.011312 | 0.011295 | 0.011365 |
| 0.011463 | 0.011364 | 0.011500 | 0.011568 | 0.011497 | 0.011564 | 0.011670 |
| 0.011399 | 0.011569 | 0.011500 | 0.011432 | 0.011699 | 0.011161 | 0.011363 |
| 0.011329 | 0.011262 | 0.011161 | 0.011161 | 0.011228 | 0.011228 | 0.011295 |
| 0.011228 | 0.011295 | 0.011194 | 0.011295 | 0.011228 | 0.011228 | 0.011295 |
| 0.011228 | 0.011664 | 0.011564 | 0.011597 | 0.011127 | 0.011228 | 0.011262 |
| 0.011262 | 0.011228 | 0.011295 | 0.011329 | 0.011194 | 0.011194 | 0.011194 |
| 0.011731 | 0.011362 | 0.011362 | 0.011161 | 0.011262 | 0.011430 | 0.000000 |
| 0.011194 | 0.011262 | 0.011228 | 0.011396 | 0.011194 | 0.011329 | 0.011463 |
| 0.011396 | 0.011228 | 0.011228 | 0.011161 | 0.011161 | 0.011329 | 0.011262 |
| 0.011161 | 0.011262 | 0.011127 | 0.011161 | 0.011295 | 0.011430 | 0.011195 |
| 0.011161 | 0.011295 | 0.011228 | 0.011127 | 0.011463 | 0.011127 | 0.011295 |
| 0.011368 | 0.011195 | 0.011497 | 0.011329 | 0.011362 | 0.011228 | 0.011329 |
| 0.011194 | 0.011530 | 0.011127 | 0.011396 | 0.011194 | 0.011194 | 0.011127 |
| 0.011362 | 0.011564 | 0.011262 | 0.011329 | 0.011161 | 0.011564 | 0.011194 |
| 0.011195 | 0.011194 | 0.011228 | 0.011329 | 0.011228 | 0.011329 | 0.011396 |
| 0.011396 | 0.011362 | 0.011262 | 0.011362 | 0.011329 | 0.011194 | 0.011161 |
| 0.011194 | 0.011194 | 0.011262 | 0.011194 | 0.011161 | 0.011329 | 0.011194 |
| 0.011228 | 0.011228 | 0.011362 | 0.011396 | 0.011295 | 0.011228 | 0.011228 |
| 0.011295 | 0.011228 | 0.011329 | 0.011194 | 0.011329 | 0.011429 | 0.011732 |
| 0.011228 | 0.011631 | 0.011198 | 0.017710 | 0.011126 | 0.011366 | 0.011548 |
| 0.011545 | 0.011553 | 0.011270 | 0.011234 | 0.011664 | 0.011613 | 0.011303 |
| 0.011440 | 0.011487 | 0.011099 | 0.011186 | 0.011177 | 0.011258 | 0.011189 |
| 0.011436 | 0.011358 | 0.011357 | 0.011193 | 0.011362 | 0.011396 | 0.011398 |
| 0.011266 | 0.011362 | 0.011362 | 0.011329 | 0.011295 | 0.011295 | 0.011262 |
| 0.011295 | 0.011228 | 0.011262 | 0.011295 | 0.011262 | 0.011195 | 0.011228 |
| 0.011228 | 0.011295 | 0.011195 | 0.011295 | 0.011329 | 0.011362 | 0.011262 |
| 0.011295 | 0.011262 | 0.011597 | 0.011597 | 0.011329 | 0.011363 | 0.011396 |
| 0.011161 | 0.011161 | 0.011195 | 0.011295 | 0.011161 | 0.011396 | 0.011396 |
| 0.011429 | 0.011429 | 0.011362 | 0.011463 | 0.011631 | 0.011464 | 0.011295 |
| 0.011295 | 0.011362 | 0.011396 | 0.011228 | 0.011295 | 0.011262 | 0.011295 |
| 0.011363 | 0.011362 | 0.011396 | 0.011363 | 0.011262 | 0.011463 | 0.011430 |
| 0.011297 | 0.011195 | 0.011295 | 0.011396 | 0.011295 | 0.011430 | 0.011463 |
| 0.011631 | 0.011333 | 0.011497 | 0.011463 | 0.011396 | 0.011564 | 0.011195 |
| 0.011363 | 0.011262 | 0.011228 | 0.011228 | 0.011295 | 0.011195 | 0.011295 |
| 0.011329 | 0.011362 | 0.011262 | 0.011295 | 0.011262 | 0.011597 | 0.011597 |
| 0.011329 | 0.011363 | 0.011429 | 0.011362 | 0.012002 | 0.011417 | 0.011341 |
| 0.011412 | 0.011372 | 0.011482 | 0.011372 | 0.011480 | 0.011405 | 0.011370 |
| 0.011953 | 0.011268 | 0.011403 | 0.011337 | 0.011611 | 0.011468 | 0.011571 |
| 0.011978 | 0.011437 | 0.011533 | 0.011597 | 0.011463 | 0.011463 | 0.011499 |

|          |          |          |          |          |          |          |
|----------|----------|----------|----------|----------|----------|----------|
| 0.011161 | 0.011329 | 0.011463 | 0.011429 | 0.011432 | 0.011429 | 0.011397 |
| 0.011262 | 0.011194 | 0.011228 | 0.011262 | 0.011161 | 0.011228 | 0.011127 |
| 0.011262 | 0.011295 | 0.011194 | 0.011161 | 0.011262 | 0.011194 | 0.011228 |
| 0.011228 | 0.011161 | 0.011228 | 0.011262 | 0.011161 | 0.011362 | 0.011396 |
| 0.011295 | 0.011362 | 0.011295 | 0.011295 | 0.011228 | 0.011631 | 0.011262 |
| 0.011304 | 0.011228 | 0.011463 | 0.011467 | 0.011329 | 0.011329 | 0.011329 |
| 0.011329 | 0.011262 | 0.011228 | 0.011262 | 0.011362 | 0.011362 | 0.011295 |
| 0.011295 | 0.011429 | 0.011597 | 0.011329 | 0.011530 | 0.011530 | 0.011396 |
| 0.011228 | 0.011295 | 0.011329 | 0.011732 | 0.011295 | 0.011329 | 0.011295 |
| 0.011329 | 0.011262 | 0.011262 | 0.011564 | 0.011429 | 0.011530 | 0.011262 |
| 0.011362 | 0.011429 | 0.011295 | 0.011362 | 0.011329 | 0.011195 | 0.011530 |
| 0.011295 | 0.011194 | 0.011262 | 0.011429 | 0.011262 | 0.011362 | 0.011597 |
| 0.011295 | 0.011671 | 0.011664 | 0.011426 | 0.011173 | 0.011366 | 0.011215 |
| 0.011170 | 0.011644 | 0.011166 | 0.011373 | 0.011207 | 0.011264 | 0.011273 |
| 0.011417 | 0.000000 | 0.011227 | 0.000000 | 0.011114 | 0.011261 | 0.011303 |
| 0.011324 | 0.011218 | 0.011307 | 0.011236 | 0.011296 | 0.011429 | 0.011497 |
| 0.011497 | 0.011363 | 0.011466 | 0.011467 | 0.011603 | 0.011626 | 0.011295 |
| 0.011530 | 0.011396 | 0.011262 | 0.011362 | 0.011161 | 0.011396 | 0.011195 |
| 0.011262 | 0.011262 | 0.011228 | 0.011195 | 0.011161 | 0.011195 | 0.011295 |
| 0.011270 | 0.011270 | 0.011266 | 0.011300 | 0.011437 | 0.011402 | 0.011402 |
| 0.011401 | 0.011329 | 0.011134 | 0.011132 | 0.011263 | 0.011433 | 0.011433 |
| 0.011228 | 0.011297 | 0.011531 | 0.011500 | 0.011430 | 0.011464 | 0.011396 |
| 0.011329 | 0.011396 | 0.011396 | 0.011295 | 0.011866 | 0.011463 | 0.011530 |
| 0.011564 | 0.011630 | 0.011265 | 0.011337 | 0.011228 | 0.011429 | 0.011396 |
| 0.011430 | 0.011463 | 0.011463 | 0.011463 | 0.011611 | 0.011597 | 0.011234 |
| 0.011128 | 0.011130 | 0.011230 | 0.011196 | 0.011299 | 0.011135 | 0.011468 |
| 0.011266 | 0.011411 | 0.011156 | 0.011285 | 0.011262 | 0.011334 | 0.011228 |
| 0.011195 | 0.011195 | 0.011262 | 0.011228 | 0.011429 | 0.011396 | 0.011329 |
| 0.011429 | 0.011497 | 0.011228 | 0.011228 | 0.011262 | 0.011262 | 0.011263 |
| 0.011331 | 0.011262 | 0.011262 | 0.011296 | 0.011429 | 0.011497 | 0.011497 |
| 0.011363 | 0.011466 | 0.011467 | 0.011603 | 0.011626 | 0.011295 | 0.011463 |
| 0.011396 | 0.011396 | 0.011229 | 0.011408 | 0.011338 | 0.011367 | 0.011235 |
| 0.011405 | 0.011607 | 0.011399 | 0.011298 | 0.011195 | 0.011396 | 0.011262 |
| 0.011362 | 0.011295 | 0.011195 | 0.011296 | 0.011396 | 0.011398 | 0.011295 |
| 0.011195 | 0.011128 | 0.011262 | 0.011195 | 0.011128 | 0.011230 | 0.011396 |
| 0.011295 | 0.011228 | 0.011262 | 0.011295 | 0.011262 | 0.011195 | 0.011396 |
| 0.011262 | 0.011295 | 0.011295 | 0.011228 | 0.011295 | 0.011530 | 0.011194 |
| 0.011228 | 0.011631 | 0.011228 | 0.011262 | 0.011228 | 0.011597 | 0.011146 |
| 0.011622 | 0.011145 | 0.011211 | 0.011382 | 0.011467 | 0.011383 | 0.011102 |
| 0.011165 | 0.011396 | 0.011496 | 0.011603 | 0.011464 | 0.011601 | 0.011733 |
| 0.011632 | 0.011669 | 0.011631 | 0.011880 | 0.011597 | 0.012472 | 0.011633 |
| 0.012372 | 0.012139 | 0.012273 | 0.012545 | 0.011597 | 0.011295 | 0.011598 |
| 0.012036 | 0.011971 | 0.011564 | 0.011463 | 0.011531 | 0.011531 | 0.011500 |
| 0.011396 | 0.011399 | 0.011463 | 0.011396 | 0.011800 | 0.011866 | 0.011867 |
| 0.011699 | 0.011867 | 0.011970 | 0.011737 | 0.012037 | 0.012042 | 0.012104 |
| 0.012104 | 0.012138 | 0.012084 | 0.012104 | 0.012106 | 0.011329 | 0.011631 |
| 0.011699 | 0.012202 | 0.011704 | 0.011933 | 0.012406 | 0.011468 | 0.011363 |
| 0.011329 | 0.011329 | 0.011799 | 0.011842 | 0.011904 | 0.011664 | 0.011330 |
| S294     | 0.011597 | 0.011597 | 0.011933 | 0.011698 | 0.011698 | 0.011765 |
| 0.011603 | 0.011535 | 0.011765 | 0.011195 | 0.011262 | 0.011228 | 0.011194 |
| 0.011228 | 0.011396 | 0.011194 | 0.011228 | 0.011295 | 0.011262 | 0.011228 |
| 0.011194 | 0.011228 | 0.011329 | 0.011195 | 0.011228 | 0.011228 | 0.011569 |
| 0.011463 | 0.011228 | 0.011127 | 0.011362 | 0.011295 | 0.011262 | 0.011295 |
| 0.011262 | 0.011362 | 0.011262 | 0.011262 | 0.011295 | 0.011262 | 0.011429 |
| 0.011194 | 0.011262 | 0.011295 | 0.011228 | 0.011329 | 0.011362 | 0.011295 |
| 0.011262 | 0.011429 | 0.011329 | 0.011597 | 0.011262 | 0.011530 | 0.011262 |
| 0.011228 | 0.011329 | 0.011396 | 0.011530 | 0.011631 | 0.011329 | 0.011429 |
| 0.011295 | 0.011362 | 0.011262 | 0.011496 | 0.011732 | 0.011262 | 0.011329 |
| 0.011228 | 0.011329 | 0.011295 | 0.011362 | 0.011295 | 0.011295 | 0.011295 |
| 0.011194 | 0.011228 | 0.011194 | 0.011295 | 0.011262 | 0.011296 | 0.011362 |

|          |          |          |          |          |          |          |
|----------|----------|----------|----------|----------|----------|----------|
| 0.011295 | 0.011262 | 0.011329 | 0.011228 | 0.011362 | 0.011194 | 0.011262 |
| 0.011429 | 0.011362 | 0.011597 | 0.011429 | 0.011262 | 0.011496 | 0.011262 |
| 0.011394 | 0.011620 | 0.011437 | 0.011138 | 0.011135 | 0.011244 | 0.011336 |
| 0.011975 | 0.011416 | 0.011143 | 0.011496 | 0.011496 | 0.011295 | 0.011396 |
| 0.011329 | 0.011295 | 0.011362 | 0.011262 | 0.011362 | 0.011295 | 0.011295 |
| 0.011262 | 0.011362 | 0.011564 | 0.011429 | 0.011329 | 0.011295 | 0.011228 |
| 0.011195 | 0.011195 | 0.011262 | 0.011228 | 0.011429 | 0.011396 | 0.011329 |
| 0.011429 | 0.011497 | 0.011228 | 0.011228 | 0.011262 | 0.011262 | 0.011263 |
| 0.011331 | 0.011262 | 0.011262 | 0.011096 | 0.011169 | 0.011165 | 0.011262 |
| 0.011263 | 0.011163 | 0.011208 | 0.011198 | 0.011162 | 0.011197 | 0.011229 |
| 0.011456 | 0.011267 | 0.011267 | 0.011195 | 0.011164 | 0.011329 | 0.011296 |
| 0.011363 | 0.011296 | 0.011296 | 0.011396 | 0.011329 | 0.011698 | 0.011497 |
| 0.011530 | 0.011396 | 0.011262 | 0.011362 | 0.011161 | 0.011396 | 0.011195 |
| 0.011262 | 0.011262 | 0.011228 | 0.011194 | 0.011228 | 0.011195 | 0.011295 |
| 0.011262 | 0.011362 | 0.011295 | 0.011195 | 0.011296 | 0.011396 | 0.011398 |
| 0.011396 | 0.011295 | 0.011195 | 0.011128 | 0.011262 | 0.011195 | 0.011127 |
| 0.011230 | 0.011396 | 0.011195 | 0.011396 | 0.011161 | 0.011262 | 0.011228 |
| 0.011329 | 0.011228 | 0.011262 | 0.011228 | 0.011262 | 0.011127 | 0.011262 |
| 0.011295 | 0.011228 | 0.011295 | 0.011228 | 0.011262 | 0.011295 | 0.011530 |
| 0.011631 | 0.011564 | 0.011631 | 0.011397 | 0.011631 | 0.011262 | 0.011228 |
| 0.011263 | 0.011545 | 0.011380 | 0.011163 | 0.011637 | 0.011129 | 0.011257 |
| 0.011637 | 0.011536 | 0.011429 | 0.011631 | 0.011333 | 0.011496 | 0.011463 |
| 0.011396 | 0.011564 | 0.011415 | 0.011266 | 0.011312 | 0.011295 | 0.011365 |
| 0.011463 | 0.011364 | 0.011500 | 0.011568 | 0.011496 | 0.011564 | 0.011670 |
| 0.011398 | 0.011569 | 0.011500 | 0.011432 | 0.011699 | 0.011161 | 0.011363 |
| 0.011329 | 0.011262 | 0.011161 | 0.011161 | 0.011228 | 0.011228 | 0.011295 |
| 0.011228 | 0.011295 | 0.011194 | 0.011295 | 0.011228 | 0.011228 | 0.011295 |
| 0.011228 | 0.011664 | 0.011564 | 0.011597 | 0.011127 | 0.011228 | 0.011262 |
| 0.011262 | 0.011228 | 0.011295 | 0.011329 | 0.011194 | 0.011194 | 0.011194 |
| 0.011731 | 0.011362 | 0.011362 | 0.011161 | 0.011262 | 0.011429 | 0.011194 |
| 0.000000 | 0.011262 | 0.011228 | 0.011396 | 0.011194 | 0.011329 | 0.011463 |
| 0.011396 | 0.011228 | 0.011228 | 0.011161 | 0.011161 | 0.011329 | 0.011262 |
| 0.011161 | 0.011262 | 0.011127 | 0.011161 | 0.011295 | 0.011430 | 0.011195 |
| 0.011161 | 0.011295 | 0.011228 | 0.011127 | 0.011463 | 0.011127 | 0.011295 |
| 0.011368 | 0.011194 | 0.011496 | 0.011329 | 0.011362 | 0.011228 | 0.011329 |
| 0.011194 | 0.011530 | 0.011127 | 0.011396 | 0.011194 | 0.011194 | 0.011127 |
| 0.011362 | 0.011564 | 0.011262 | 0.011329 | 0.011161 | 0.011564 | 0.011194 |
| 0.011194 | 0.011194 | 0.011228 | 0.011329 | 0.011228 | 0.011329 | 0.011396 |
| 0.011396 | 0.011362 | 0.011262 | 0.011362 | 0.011329 | 0.011194 | 0.011161 |
| 0.011194 | 0.011194 | 0.011262 | 0.011194 | 0.011161 | 0.011329 | 0.011194 |
| 0.011228 | 0.011228 | 0.011362 | 0.011396 | 0.011295 | 0.011228 | 0.011228 |
| 0.011295 | 0.011228 | 0.011329 | 0.011194 | 0.011329 | 0.011429 | 0.011731 |
| 0.011228 | 0.011631 | 0.011198 | 0.017710 | 0.011191 | 0.011366 | 0.011548 |
| 0.011510 | 0.011553 | 0.011270 | 0.011234 | 0.011664 | 0.011578 | 0.011303 |
| 0.011440 | 0.011487 | 0.011099 | 0.011186 | 0.011177 | 0.011258 | 0.011189 |
| 0.011436 | 0.011358 | 0.011357 | 0.011126 | 0.011362 | 0.011396 | 0.011398 |
| 0.011266 | 0.011362 | 0.011362 | 0.011329 | 0.011295 | 0.011295 | 0.011262 |
| 0.011295 | 0.011228 | 0.011262 | 0.011295 | 0.011262 | 0.011195 | 0.011228 |
| 0.011228 | 0.011295 | 0.011195 | 0.011295 | 0.011329 | 0.011362 | 0.011262 |
| 0.011295 | 0.011262 | 0.011597 | 0.011597 | 0.011329 | 0.011363 | 0.011396 |
| 0.011161 | 0.011161 | 0.011195 | 0.011295 | 0.011161 | 0.011396 | 0.011396 |
| 0.011429 | 0.011429 | 0.011362 | 0.011463 | 0.011631 | 0.011464 | 0.011295 |
| 0.011295 | 0.011362 | 0.011396 | 0.011228 | 0.011295 | 0.011262 | 0.011295 |
| 0.011363 | 0.011362 | 0.011396 | 0.011362 | 0.011262 | 0.011463 | 0.011429 |
| 0.011297 | 0.011195 | 0.011295 | 0.011396 | 0.011295 | 0.011430 | 0.011463 |
| 0.011631 | 0.011333 | 0.011496 | 0.011463 | 0.011396 | 0.011564 | 0.011195 |
| 0.011363 | 0.011262 | 0.011228 | 0.011228 | 0.011295 | 0.011195 | 0.011295 |
| 0.011329 | 0.011362 | 0.011262 | 0.011295 | 0.011262 | 0.011597 | 0.011597 |
| 0.011329 | 0.011363 | 0.011429 | 0.011362 | 0.012002 | 0.011417 | 0.011341 |
| 0.011412 | 0.011372 | 0.011482 | 0.011372 | 0.011480 | 0.011405 | 0.011370 |

|          |          |          |          |          |          |          |
|----------|----------|----------|----------|----------|----------|----------|
| 0.011953 | 0.011268 | 0.011403 | 0.011337 | 0.011611 | 0.011468 | 0.011570 |
| 0.011978 | 0.011437 | 0.011533 | 0.011597 | 0.011463 | 0.011463 | 0.011499 |
| 0.011161 | 0.011329 | 0.011463 | 0.011429 | 0.011432 | 0.011429 | 0.011397 |
| 0.011262 | 0.011194 | 0.011228 | 0.011262 | 0.011161 | 0.011228 | 0.011127 |
| 0.011262 | 0.011295 | 0.011194 | 0.011161 | 0.011262 | 0.011194 | 0.011228 |
| 0.011228 | 0.011161 | 0.011228 | 0.011262 | 0.011161 | 0.011362 | 0.011396 |
| 0.011295 | 0.011362 | 0.011295 | 0.011295 | 0.011228 | 0.011631 | 0.011262 |
| 0.011304 | 0.011228 | 0.011463 | 0.011467 | 0.011329 | 0.011329 | 0.011329 |
| 0.011329 | 0.011262 | 0.011228 | 0.011262 | 0.011362 | 0.011362 | 0.011295 |
| 0.011295 | 0.011429 | 0.011597 | 0.011329 | 0.011530 | 0.011530 | 0.011396 |
| 0.011228 | 0.011295 | 0.011329 | 0.011732 | 0.011295 | 0.011329 | 0.011295 |
| 0.011329 | 0.011262 | 0.011262 | 0.011564 | 0.011497 | 0.011530 | 0.011262 |
| 0.011362 | 0.011429 | 0.011295 | 0.011362 | 0.011329 | 0.011194 | 0.011530 |
| 0.011295 | 0.011262 | 0.011262 | 0.011429 | 0.011262 | 0.011362 | 0.011597 |
| 0.011295 | 0.011671 | 0.011664 | 0.011426 | 0.011173 | 0.011332 | 0.011215 |
| 0.011170 | 0.011644 | 0.011166 | 0.011373 | 0.011207 | 0.011315 | 0.011326 |
| 0.011417 | 0.011126 | 0.011283 | 0.011126 | 0.011168 | 0.011328 | 0.011303 |
| 0.011324 | 0.011218 | 0.011307 | 0.011236 | 0.011296 | 0.011429 | 0.011497 |
| 0.011497 | 0.011363 | 0.011466 | 0.011467 | 0.011602 | 0.011625 | 0.011295 |
| 0.011530 | 0.011396 | 0.011262 | 0.011362 | 0.011161 | 0.011396 | 0.011195 |
| 0.011262 | 0.011262 | 0.011228 | 0.011194 | 0.011228 | 0.011195 | 0.011295 |
| 0.011235 | 0.011235 | 0.011231 | 0.011300 | 0.011436 | 0.011368 | 0.011402 |
| 0.011401 | 0.011329 | 0.011097 | 0.011096 | 0.011263 | 0.011433 | 0.011433 |
| 0.011228 | 0.011297 | 0.011531 | 0.011466 | 0.011430 | 0.011464 | 0.011396 |
| 0.011329 | 0.011396 | 0.011396 | 0.011295 | 0.011866 | 0.011463 | 0.011530 |
| 0.011564 | 0.011630 | 0.011265 | 0.011337 | 0.011228 | 0.011429 | 0.011396 |
| 0.011430 | 0.011463 | 0.011463 | 0.011463 | 0.011610 | 0.011597 | 0.011234 |
| 0.011128 | 0.011130 | 0.011230 | 0.011196 | 0.011299 | 0.011135 | 0.011468 |
| 0.011266 | 0.011411 | 0.011156 | 0.011285 | 0.011262 | 0.011334 | 0.011228 |
| 0.011195 | 0.011195 | 0.011262 | 0.011228 | 0.011429 | 0.011396 | 0.011329 |
| 0.011429 | 0.011497 | 0.011228 | 0.011228 | 0.011262 | 0.011262 | 0.011263 |
| 0.011331 | 0.011262 | 0.011262 | 0.011296 | 0.011429 | 0.011497 | 0.011497 |
| 0.011363 | 0.011466 | 0.011467 | 0.011602 | 0.011625 | 0.011295 | 0.011463 |
| 0.011396 | 0.011396 | 0.011229 | 0.011408 | 0.011338 | 0.011367 | 0.011235 |
| 0.011404 | 0.011607 | 0.011399 | 0.011298 | 0.011195 | 0.011396 | 0.011262 |
| 0.011362 | 0.011295 | 0.011195 | 0.011296 | 0.011396 | 0.011398 | 0.011295 |
| 0.011195 | 0.011128 | 0.011262 | 0.011195 | 0.011127 | 0.011230 | 0.011396 |
| 0.011295 | 0.011228 | 0.011262 | 0.011295 | 0.011262 | 0.011195 | 0.011396 |
| 0.011262 | 0.011295 | 0.011295 | 0.011228 | 0.011295 | 0.011530 | 0.011194 |
| 0.011228 | 0.011631 | 0.011228 | 0.011262 | 0.011228 | 0.011597 | 0.011146 |
| 0.011622 | 0.011145 | 0.011211 | 0.011382 | 0.011467 | 0.011383 | 0.011102 |
| 0.011165 | 0.011396 | 0.011496 | 0.011603 | 0.011464 | 0.011601 | 0.011733 |
| 0.011632 | 0.011669 | 0.011631 | 0.011880 | 0.011597 | 0.012471 | 0.011633 |
| 0.012372 | 0.012139 | 0.012273 | 0.012545 | 0.011597 | 0.011295 | 0.011598 |
| 0.012036 | 0.011971 | 0.011564 | 0.011463 | 0.011531 | 0.011531 | 0.011500 |
| 0.011396 | 0.011399 | 0.011463 | 0.011430 | 0.011800 | 0.011866 | 0.011867 |
| 0.011766 | 0.011867 | 0.011970 | 0.011737 | 0.012036 | 0.012042 | 0.012103 |
| 0.012104 | 0.012138 | 0.012050 | 0.012104 | 0.012105 | 0.011329 | 0.011631 |
| 0.011699 | 0.012202 | 0.011704 | 0.011933 | 0.012406 | 0.011468 | 0.011363 |
| 0.011329 | 0.011329 | 0.011799 | 0.011842 | 0.011904 | 0.011664 | 0.011330 |
| S295     | 0.011664 | 0.011664 | 0.012000 | 0.011765 | 0.011765 | 0.011832 |
| 0.011637 | 0.011569 | 0.011832 | 0.011262 | 0.011329 | 0.011296 | 0.011262 |
| 0.011295 | 0.011463 | 0.011262 | 0.011295 | 0.011362 | 0.011329 | 0.011295 |
| 0.011262 | 0.011295 | 0.011396 | 0.011262 | 0.011295 | 0.011295 | 0.011603 |
| 0.011530 | 0.011295 | 0.011194 | 0.011429 | 0.011362 | 0.011329 | 0.011362 |
| 0.011329 | 0.011429 | 0.011329 | 0.011329 | 0.011362 | 0.011329 | 0.011496 |
| 0.011262 | 0.011329 | 0.011362 | 0.011295 | 0.011396 | 0.011429 | 0.011362 |
| 0.011329 | 0.011496 | 0.011396 | 0.011664 | 0.011329 | 0.011597 | 0.011329 |
| 0.011295 | 0.011396 | 0.011463 | 0.011597 | 0.011698 | 0.011396 | 0.011496 |
| 0.011362 | 0.011429 | 0.011329 | 0.011563 | 0.011799 | 0.011329 | 0.011396 |

|          |          |          |          |          |          |          |
|----------|----------|----------|----------|----------|----------|----------|
| 0.011295 | 0.011396 | 0.011362 | 0.011429 | 0.011362 | 0.011362 | 0.011362 |
| 0.011262 | 0.011295 | 0.011262 | 0.011362 | 0.011329 | 0.011363 | 0.011429 |
| 0.011362 | 0.011329 | 0.011396 | 0.011295 | 0.011429 | 0.011262 | 0.011329 |
| 0.011496 | 0.011429 | 0.011664 | 0.011496 | 0.011329 | 0.011564 | 0.011329 |
| 0.011431 | 0.011658 | 0.011437 | 0.011138 | 0.011172 | 0.011318 | 0.011336 |
| 0.012011 | 0.011416 | 0.011143 | 0.011563 | 0.011564 | 0.011362 | 0.011429 |
| 0.011396 | 0.011362 | 0.011429 | 0.011329 | 0.011429 | 0.011362 | 0.011362 |
| 0.011329 | 0.011429 | 0.011631 | 0.011496 | 0.011396 | 0.011362 | 0.011295 |
| 0.011262 | 0.011262 | 0.011329 | 0.011295 | 0.011497 | 0.011463 | 0.011396 |
| 0.011497 | 0.011564 | 0.011295 | 0.011295 | 0.011329 | 0.011329 | 0.011330 |
| 0.011398 | 0.011329 | 0.011329 | 0.011168 | 0.011241 | 0.011200 | 0.011329 |
| 0.011297 | 0.011232 | 0.011245 | 0.011267 | 0.011230 | 0.011231 | 0.011297 |
| 0.011528 | 0.011301 | 0.011336 | 0.011262 | 0.011233 | 0.011397 | 0.011363 |
| 0.011430 | 0.011330 | 0.011363 | 0.011463 | 0.011396 | 0.011765 | 0.011564 |
| 0.011597 | 0.011463 | 0.011329 | 0.011429 | 0.011228 | 0.011463 | 0.011262 |
| 0.011329 | 0.011329 | 0.011295 | 0.011262 | 0.011295 | 0.011262 | 0.011362 |
| 0.011329 | 0.011429 | 0.011362 | 0.011262 | 0.011363 | 0.011463 | 0.011466 |
| 0.011463 | 0.011362 | 0.011262 | 0.011195 | 0.011329 | 0.011262 | 0.011195 |
| 0.011298 | 0.011463 | 0.011262 | 0.011463 | 0.011228 | 0.011329 | 0.011295 |
| 0.011396 | 0.011295 | 0.011329 | 0.011295 | 0.011329 | 0.011195 | 0.011329 |
| 0.011362 | 0.011295 | 0.011362 | 0.011295 | 0.011329 | 0.011362 | 0.011597 |
| 0.011698 | 0.011631 | 0.011698 | 0.011431 | 0.011698 | 0.011329 | 0.011295 |
| 0.011330 | 0.011586 | 0.011472 | 0.011197 | 0.011705 | 0.011197 | 0.011296 |
| 0.011671 | 0.011536 | 0.011496 | 0.011698 | 0.011402 | 0.011564 | 0.011530 |
| 0.011463 | 0.011631 | 0.011486 | 0.011349 | 0.011395 | 0.011362 | 0.011432 |
| 0.011530 | 0.011431 | 0.011567 | 0.011635 | 0.011564 | 0.011631 | 0.011738 |
| 0.011466 | 0.011637 | 0.011568 | 0.011500 | 0.011766 | 0.011228 | 0.011431 |
| 0.011396 | 0.011329 | 0.011228 | 0.011228 | 0.011295 | 0.011295 | 0.011362 |
| 0.011295 | 0.011362 | 0.011262 | 0.011362 | 0.011295 | 0.011295 | 0.011362 |
| 0.011295 | 0.011731 | 0.011631 | 0.011664 | 0.011194 | 0.011295 | 0.011329 |
| 0.011329 | 0.011295 | 0.011362 | 0.011396 | 0.011262 | 0.011262 | 0.011262 |
| 0.011799 | 0.011429 | 0.011429 | 0.011228 | 0.011329 | 0.011496 | 0.011262 |
| 0.011262 | 0.000000 | 0.011295 | 0.011463 | 0.011262 | 0.011396 | 0.011530 |
| 0.011463 | 0.011295 | 0.011295 | 0.011228 | 0.011228 | 0.011396 | 0.011262 |
| 0.011228 | 0.011329 | 0.011194 | 0.011228 | 0.011362 | 0.011497 | 0.011262 |
| 0.011228 | 0.011362 | 0.011295 | 0.011194 | 0.011530 | 0.011195 | 0.011362 |
| 0.011437 | 0.011262 | 0.011564 | 0.011396 | 0.011429 | 0.011295 | 0.011396 |
| 0.011262 | 0.011597 | 0.011194 | 0.011463 | 0.011262 | 0.011262 | 0.011194 |
| 0.011429 | 0.011530 | 0.011329 | 0.011396 | 0.011228 | 0.011631 | 0.011262 |
| 0.011262 | 0.011262 | 0.011295 | 0.011396 | 0.011295 | 0.011396 | 0.011463 |
| 0.011463 | 0.011429 | 0.011329 | 0.011429 | 0.011396 | 0.011262 | 0.011228 |
| 0.011262 | 0.011262 | 0.011329 | 0.011262 | 0.011228 | 0.011396 | 0.011262 |
| 0.011295 | 0.011295 | 0.011429 | 0.011463 | 0.011362 | 0.011295 | 0.011295 |
| 0.011362 | 0.011295 | 0.011396 | 0.011262 | 0.011396 | 0.011496 | 0.011799 |
| 0.011295 | 0.011698 | 0.011267 | 0.011785 | 0.011191 | 0.011366 | 0.011618 |
| 0.011579 | 0.011623 | 0.011270 | 0.011234 | 0.011664 | 0.011647 | 0.011303 |
| 0.011440 | 0.011487 | 0.011099 | 0.011186 | 0.011216 | 0.011258 | 0.011189 |
| 0.011436 | 0.011395 | 0.011394 | 0.011193 | 0.011429 | 0.011463 | 0.011466 |
| 0.011335 | 0.011429 | 0.011429 | 0.011396 | 0.011362 | 0.011362 | 0.011329 |
| 0.011362 | 0.011295 | 0.011329 | 0.011362 | 0.011329 | 0.011262 | 0.011295 |
| 0.011295 | 0.011362 | 0.011262 | 0.011362 | 0.011396 | 0.011429 | 0.011329 |
| 0.011362 | 0.011329 | 0.011665 | 0.011665 | 0.011396 | 0.011430 | 0.011463 |
| 0.011228 | 0.011228 | 0.011262 | 0.011362 | 0.011228 | 0.011463 | 0.011463 |
| 0.011497 | 0.011496 | 0.011429 | 0.011530 | 0.011698 | 0.011531 | 0.011362 |
| 0.011362 | 0.011429 | 0.011463 | 0.011295 | 0.011362 | 0.011329 | 0.011362 |
| 0.011430 | 0.011430 | 0.011463 | 0.011430 | 0.011330 | 0.011530 | 0.011497 |
| 0.011365 | 0.011262 | 0.011362 | 0.011463 | 0.011362 | 0.011497 | 0.011530 |
| 0.011698 | 0.011402 | 0.011564 | 0.011530 | 0.011463 | 0.011631 | 0.011262 |
| 0.011431 | 0.011329 | 0.011295 | 0.011295 | 0.011362 | 0.011262 | 0.011362 |
| 0.011396 | 0.011429 | 0.011329 | 0.011362 | 0.011329 | 0.011665 | 0.011665 |

|          |          |          |          |          |          |          |
|----------|----------|----------|----------|----------|----------|----------|
| 0.011396 | 0.011430 | 0.011496 | 0.011429 | 0.012069 | 0.011489 | 0.011412 |
| 0.011482 | 0.011441 | 0.011552 | 0.011441 | 0.011550 | 0.011474 | 0.011439 |
| 0.012021 | 0.011337 | 0.011471 | 0.011406 | 0.011680 | 0.011536 | 0.011638 |
| 0.012046 | 0.011512 | 0.011601 | 0.011664 | 0.011530 | 0.011530 | 0.011567 |
| 0.011228 | 0.011396 | 0.011530 | 0.011496 | 0.011499 | 0.011496 | 0.011464 |
| 0.011329 | 0.011262 | 0.011295 | 0.011329 | 0.011228 | 0.011295 | 0.011194 |
| 0.011329 | 0.011362 | 0.011262 | 0.011228 | 0.011329 | 0.011262 | 0.011295 |
| 0.011295 | 0.011228 | 0.011295 | 0.011329 | 0.011228 | 0.011429 | 0.011463 |
| 0.011362 | 0.011429 | 0.011362 | 0.011362 | 0.011295 | 0.011698 | 0.011329 |
| 0.011373 | 0.011295 | 0.011530 | 0.011535 | 0.011396 | 0.011396 | 0.011396 |
| 0.011396 | 0.011329 | 0.011295 | 0.011329 | 0.011429 | 0.011429 | 0.011362 |
| 0.011362 | 0.011496 | 0.011664 | 0.011396 | 0.011597 | 0.011597 | 0.011463 |
| 0.011295 | 0.011362 | 0.011396 | 0.011799 | 0.011362 | 0.011396 | 0.011362 |
| 0.011396 | 0.011329 | 0.011329 | 0.011631 | 0.011564 | 0.011597 | 0.011329 |
| 0.011429 | 0.011463 | 0.011362 | 0.011429 | 0.011396 | 0.011262 | 0.011597 |
| 0.011362 | 0.011329 | 0.011329 | 0.011496 | 0.011329 | 0.011429 | 0.011664 |
| 0.011362 | 0.011705 | 0.011731 | 0.011426 | 0.011173 | 0.011434 | 0.011215 |
| 0.011170 | 0.011644 | 0.011236 | 0.011373 | 0.011207 | 0.011315 | 0.011326 |
| 0.011417 | 0.011126 | 0.011283 | 0.011126 | 0.011168 | 0.011328 | 0.011344 |
| 0.011362 | 0.011257 | 0.011377 | 0.011307 | 0.011363 | 0.011497 | 0.011564 |
| 0.011564 | 0.011430 | 0.011533 | 0.011535 | 0.011670 | 0.011696 | 0.011362 |
| 0.011597 | 0.011463 | 0.011329 | 0.011429 | 0.011228 | 0.011463 | 0.011262 |
| 0.011329 | 0.011329 | 0.011295 | 0.011262 | 0.011295 | 0.011262 | 0.011362 |
| 0.011305 | 0.011305 | 0.011300 | 0.011334 | 0.011471 | 0.011436 | 0.011436 |
| 0.011435 | 0.011396 | 0.011134 | 0.011132 | 0.011297 | 0.011467 | 0.011467 |
| 0.011296 | 0.011331 | 0.011565 | 0.011533 | 0.011497 | 0.011498 | 0.011463 |
| 0.011396 | 0.011463 | 0.011463 | 0.011362 | 0.011933 | 0.011530 | 0.011597 |
| 0.011631 | 0.011701 | 0.011333 | 0.011407 | 0.011295 | 0.011497 | 0.011463 |
| 0.011497 | 0.011530 | 0.011530 | 0.011530 | 0.011650 | 0.011664 | 0.011303 |
| 0.011195 | 0.011199 | 0.011298 | 0.011264 | 0.011368 | 0.011209 | 0.011536 |
| 0.011334 | 0.011455 | 0.011203 | 0.011285 | 0.011329 | 0.011368 | 0.011295 |
| 0.011262 | 0.011262 | 0.011329 | 0.011295 | 0.011497 | 0.011463 | 0.011396 |
| 0.011497 | 0.011564 | 0.011295 | 0.011295 | 0.011329 | 0.011329 | 0.011330 |
| 0.011398 | 0.011329 | 0.011329 | 0.011363 | 0.011497 | 0.011564 | 0.011564 |
| 0.011430 | 0.011533 | 0.011535 | 0.011670 | 0.011696 | 0.011362 | 0.011530 |
| 0.011463 | 0.011463 | 0.011263 | 0.011478 | 0.011408 | 0.011435 | 0.011270 |
| 0.011473 | 0.011652 | 0.011441 | 0.011366 | 0.011262 | 0.011463 | 0.011329 |
| 0.011429 | 0.011362 | 0.011262 | 0.011363 | 0.011463 | 0.011466 | 0.011362 |
| 0.011262 | 0.011195 | 0.011329 | 0.011262 | 0.011195 | 0.011298 | 0.011463 |
| 0.011362 | 0.011295 | 0.011329 | 0.011362 | 0.011329 | 0.011262 | 0.011463 |
| 0.011329 | 0.011362 | 0.011362 | 0.011295 | 0.011362 | 0.011597 | 0.011262 |
| 0.011295 | 0.011698 | 0.011295 | 0.011329 | 0.011295 | 0.011664 | 0.011146 |
| 0.011622 | 0.011145 | 0.011211 | 0.011422 | 0.011467 | 0.011455 | 0.011102 |
| 0.011165 | 0.011463 | 0.011564 | 0.011671 | 0.011531 | 0.011635 | 0.011800 |
| 0.011699 | 0.011737 | 0.011698 | 0.011914 | 0.011664 | 0.012539 | 0.011700 |
| 0.012439 | 0.012207 | 0.012341 | 0.012612 | 0.011664 | 0.011362 | 0.011665 |
| 0.012103 | 0.012004 | 0.011631 | 0.011530 | 0.011598 | 0.011598 | 0.011567 |
| 0.011463 | 0.011433 | 0.011530 | 0.011497 | 0.011867 | 0.011933 | 0.011935 |
| 0.011834 | 0.011867 | 0.012038 | 0.011770 | 0.012104 | 0.012110 | 0.012171 |
| 0.012171 | 0.012205 | 0.012118 | 0.012172 | 0.012173 | 0.011396 | 0.011699 |
| 0.011766 | 0.012202 | 0.011772 | 0.012001 | 0.012474 | 0.011536 | 0.011430 |
| 0.011396 | 0.011396 | 0.011867 | 0.011883 | 0.011975 | 0.011731 | 0.011397 |
| S296     | 0.011631 | 0.011631 | 0.011967 | 0.011731 | 0.011731 | 0.011799 |
| 0.011637 | 0.011569 | 0.011799 | 0.011228 | 0.011295 | 0.011262 | 0.011228 |
| 0.011262 | 0.011429 | 0.011228 | 0.011262 | 0.011329 | 0.011295 | 0.011262 |
| 0.011228 | 0.011262 | 0.011362 | 0.011228 | 0.011262 | 0.011262 | 0.011603 |
| 0.011496 | 0.011262 | 0.011161 | 0.011396 | 0.011329 | 0.011295 | 0.011329 |
| 0.011295 | 0.011396 | 0.011295 | 0.011295 | 0.011329 | 0.011295 | 0.011463 |
| 0.011228 | 0.011295 | 0.011329 | 0.011262 | 0.011362 | 0.011396 | 0.011329 |
| 0.011295 | 0.011463 | 0.011362 | 0.011631 | 0.011295 | 0.011564 | 0.011295 |



|          |          |          |          |          |          |          |
|----------|----------|----------|----------|----------|----------|----------|
| 0.011262 | 0.011362 | 0.011429 | 0.011564 | 0.011664 | 0.011362 | 0.011463 |
| 0.011329 | 0.011396 | 0.011295 | 0.011530 | 0.011765 | 0.011295 | 0.011362 |
| 0.011262 | 0.011362 | 0.011329 | 0.011396 | 0.011329 | 0.011329 | 0.011329 |
| 0.011228 | 0.011262 | 0.011228 | 0.011329 | 0.011295 | 0.011329 | 0.011396 |
| 0.011329 | 0.011295 | 0.011362 | 0.011262 | 0.011396 | 0.011228 | 0.011295 |
| 0.011463 | 0.011396 | 0.011631 | 0.011463 | 0.011295 | 0.011530 | 0.011295 |
| 0.011468 | 0.011695 | 0.011513 | 0.011216 | 0.011210 | 0.011318 | 0.011414 |
| 0.012048 | 0.011518 | 0.011184 | 0.011530 | 0.011530 | 0.011329 | 0.011429 |
| 0.011362 | 0.011329 | 0.011396 | 0.011295 | 0.011396 | 0.011329 | 0.011329 |
| 0.011295 | 0.011396 | 0.011597 | 0.011463 | 0.011362 | 0.011329 | 0.011262 |
| 0.011228 | 0.011228 | 0.011295 | 0.011262 | 0.011463 | 0.011429 | 0.011362 |
| 0.011463 | 0.011530 | 0.011262 | 0.011262 | 0.011295 | 0.011295 | 0.011297 |
| 0.011364 | 0.011295 | 0.011295 | 0.011168 | 0.011241 | 0.011200 | 0.011296 |
| 0.011297 | 0.011232 | 0.011282 | 0.011267 | 0.011196 | 0.011231 | 0.011263 |
| 0.011528 | 0.011301 | 0.011336 | 0.011228 | 0.011233 | 0.011363 | 0.011329 |
| 0.011396 | 0.011330 | 0.011329 | 0.011429 | 0.011362 | 0.011732 | 0.011530 |
| 0.011564 | 0.011429 | 0.011295 | 0.011396 | 0.011195 | 0.011429 | 0.011228 |
| 0.011295 | 0.011295 | 0.011262 | 0.011228 | 0.011262 | 0.011228 | 0.011329 |
| 0.011295 | 0.011396 | 0.011329 | 0.011228 | 0.011330 | 0.011430 | 0.011432 |
| 0.011430 | 0.011329 | 0.011228 | 0.011161 | 0.011295 | 0.011228 | 0.011161 |
| 0.011264 | 0.011430 | 0.011228 | 0.011430 | 0.011195 | 0.011295 | 0.011262 |
| 0.011362 | 0.011262 | 0.011295 | 0.011262 | 0.011295 | 0.011161 | 0.011295 |
| 0.011329 | 0.011262 | 0.011329 | 0.011262 | 0.011295 | 0.011329 | 0.011564 |
| 0.011664 | 0.011597 | 0.011665 | 0.011431 | 0.011665 | 0.011295 | 0.011262 |
| 0.011297 | 0.011586 | 0.011426 | 0.011197 | 0.011671 | 0.011163 | 0.011296 |
| 0.011671 | 0.011570 | 0.011463 | 0.011664 | 0.011367 | 0.011530 | 0.011497 |
| 0.011429 | 0.011597 | 0.011451 | 0.011225 | 0.011312 | 0.011329 | 0.011398 |
| 0.011497 | 0.011397 | 0.011533 | 0.011601 | 0.011530 | 0.011597 | 0.011704 |
| 0.011432 | 0.011603 | 0.011534 | 0.011466 | 0.011733 | 0.011194 | 0.011397 |
| 0.011362 | 0.011295 | 0.011194 | 0.011194 | 0.011262 | 0.011262 | 0.011329 |
| 0.011262 | 0.011329 | 0.011228 | 0.011329 | 0.011262 | 0.011262 | 0.011329 |
| 0.011262 | 0.011698 | 0.011597 | 0.011631 | 0.011161 | 0.011262 | 0.011295 |
| 0.011295 | 0.011262 | 0.011329 | 0.011362 | 0.011228 | 0.011228 | 0.011228 |
| 0.011765 | 0.011396 | 0.011396 | 0.011194 | 0.011295 | 0.011463 | 0.011228 |
| 0.011228 | 0.011295 | 0.000000 | 0.011429 | 0.011228 | 0.011362 | 0.011496 |
| 0.011429 | 0.011262 | 0.011262 | 0.011194 | 0.011194 | 0.011362 | 0.011295 |
| 0.011194 | 0.011295 | 0.011161 | 0.011194 | 0.011329 | 0.011463 | 0.011228 |
| 0.011195 | 0.011329 | 0.011262 | 0.011161 | 0.011496 | 0.011161 | 0.011329 |
| 0.011402 | 0.011228 | 0.011530 | 0.011362 | 0.011396 | 0.011262 | 0.011362 |
| 0.011228 | 0.011564 | 0.011161 | 0.011429 | 0.011228 | 0.011228 | 0.011161 |
| 0.011396 | 0.011597 | 0.011295 | 0.011362 | 0.011194 | 0.011597 | 0.011228 |
| 0.011228 | 0.011228 | 0.011262 | 0.011362 | 0.011262 | 0.011362 | 0.011429 |
| 0.011429 | 0.011396 | 0.011295 | 0.011396 | 0.011362 | 0.011228 | 0.011194 |
| 0.011228 | 0.011228 | 0.011295 | 0.011228 | 0.011194 | 0.011362 | 0.011228 |
| 0.011262 | 0.011262 | 0.011396 | 0.011429 | 0.011329 | 0.011262 | 0.011262 |
| 0.011329 | 0.011262 | 0.011362 | 0.011228 | 0.011362 | 0.011463 | 0.011765 |
| 0.011262 | 0.011664 | 0.011267 | 0.011785 | 0.011322 | 0.011366 | 0.011618 |
| 0.011579 | 0.011623 | 0.011322 | 0.011350 | 0.011774 | 0.011647 | 0.011425 |
| 0.011534 | 0.011548 | 0.011177 | 0.011270 | 0.011255 | 0.011356 | 0.011275 |
| 0.011529 | 0.011433 | 0.011431 | 0.011259 | 0.011396 | 0.011429 | 0.011432 |
| 0.011301 | 0.011396 | 0.011396 | 0.011362 | 0.011329 | 0.011329 | 0.011295 |
| 0.011329 | 0.011262 | 0.011295 | 0.011329 | 0.011295 | 0.011228 | 0.011262 |
| 0.011262 | 0.011329 | 0.011228 | 0.011329 | 0.011362 | 0.011396 | 0.011295 |
| 0.011329 | 0.011295 | 0.011631 | 0.011631 | 0.011362 | 0.011396 | 0.011430 |
| 0.011195 | 0.011195 | 0.011228 | 0.011329 | 0.011195 | 0.011429 | 0.011429 |
| 0.011463 | 0.011463 | 0.011396 | 0.011496 | 0.011665 | 0.011498 | 0.011329 |
| 0.011329 | 0.011396 | 0.011429 | 0.011262 | 0.011329 | 0.011295 | 0.011329 |
| 0.011396 | 0.011396 | 0.011429 | 0.011396 | 0.011296 | 0.011497 | 0.011463 |
| 0.011331 | 0.011228 | 0.011329 | 0.011430 | 0.011329 | 0.011463 | 0.011496 |
| 0.011664 | 0.011367 | 0.011530 | 0.011497 | 0.011429 | 0.011597 | 0.011228 |

|          |          |          |          |          |          |          |
|----------|----------|----------|----------|----------|----------|----------|
| 0.011397 | 0.011295 | 0.011262 | 0.011262 | 0.011329 | 0.011228 | 0.011329 |
| 0.011362 | 0.011396 | 0.011295 | 0.011329 | 0.011295 | 0.011631 | 0.011631 |
| 0.011362 | 0.011396 | 0.011463 | 0.011396 | 0.012035 | 0.011417 | 0.011377 |
| 0.011412 | 0.011407 | 0.011517 | 0.011406 | 0.011515 | 0.011439 | 0.011405 |
| 0.011987 | 0.011302 | 0.011437 | 0.011337 | 0.011645 | 0.011502 | 0.011604 |
| 0.012012 | 0.011437 | 0.011567 | 0.011631 | 0.011496 | 0.011497 | 0.011533 |
| 0.011194 | 0.011362 | 0.011496 | 0.011463 | 0.011466 | 0.011463 | 0.011431 |
| 0.011295 | 0.011228 | 0.011262 | 0.011295 | 0.011194 | 0.011262 | 0.011161 |
| 0.011295 | 0.011329 | 0.011228 | 0.011194 | 0.011295 | 0.011228 | 0.011262 |
| 0.011262 | 0.011194 | 0.011262 | 0.011295 | 0.011194 | 0.011396 | 0.011429 |
| 0.011329 | 0.011396 | 0.011329 | 0.011329 | 0.011262 | 0.011664 | 0.011295 |
| 0.011338 | 0.011262 | 0.011497 | 0.011501 | 0.011362 | 0.011362 | 0.011362 |
| 0.011362 | 0.011295 | 0.011262 | 0.011295 | 0.011396 | 0.011396 | 0.011329 |
| 0.011329 | 0.011463 | 0.011631 | 0.011362 | 0.011564 | 0.011564 | 0.011429 |
| 0.011262 | 0.011329 | 0.011362 | 0.011765 | 0.011329 | 0.011362 | 0.011329 |
| 0.011362 | 0.011295 | 0.011295 | 0.011597 | 0.011530 | 0.011564 | 0.011295 |
| 0.011396 | 0.011463 | 0.011329 | 0.011396 | 0.011362 | 0.011228 | 0.011564 |
| 0.011329 | 0.011295 | 0.011295 | 0.011463 | 0.011295 | 0.011396 | 0.011631 |
| 0.011329 | 0.011705 | 0.011698 | 0.011507 | 0.011229 | 0.011400 | 0.011318 |
| 0.011170 | 0.011722 | 0.011236 | 0.011462 | 0.011304 | 0.011416 | 0.011432 |
| 0.011468 | 0.011258 | 0.011394 | 0.011258 | 0.011276 | 0.011395 | 0.011385 |
| 0.011399 | 0.011296 | 0.011377 | 0.011307 | 0.011330 | 0.011463 | 0.011530 |
| 0.011530 | 0.011396 | 0.011500 | 0.011501 | 0.011636 | 0.011661 | 0.011329 |
| 0.011564 | 0.011429 | 0.011295 | 0.011396 | 0.011195 | 0.011429 | 0.011228 |
| 0.011295 | 0.011295 | 0.011262 | 0.011228 | 0.011262 | 0.011228 | 0.011329 |
| 0.011305 | 0.011305 | 0.011300 | 0.011334 | 0.011471 | 0.011436 | 0.011436 |
| 0.011435 | 0.011363 | 0.011171 | 0.011168 | 0.011297 | 0.011467 | 0.011467 |
| 0.011262 | 0.011331 | 0.011565 | 0.011533 | 0.011464 | 0.011498 | 0.011429 |
| 0.011362 | 0.011429 | 0.011429 | 0.011329 | 0.011900 | 0.011496 | 0.011564 |
| 0.011597 | 0.011665 | 0.011299 | 0.011372 | 0.011262 | 0.011463 | 0.011429 |
| 0.011464 | 0.011496 | 0.011496 | 0.011496 | 0.011610 | 0.011631 | 0.011268 |
| 0.011162 | 0.011164 | 0.011264 | 0.011230 | 0.011333 | 0.011135 | 0.011502 |
| 0.011300 | 0.011455 | 0.011108 | 0.011285 | 0.011296 | 0.011368 | 0.011262 |
| 0.011228 | 0.011228 | 0.011295 | 0.011262 | 0.011463 | 0.011429 | 0.011362 |
| 0.011463 | 0.011530 | 0.011262 | 0.011262 | 0.011295 | 0.011295 | 0.011297 |
| 0.011364 | 0.011295 | 0.011295 | 0.011330 | 0.011463 | 0.011530 | 0.011530 |
| 0.011396 | 0.011500 | 0.011501 | 0.011636 | 0.011661 | 0.011329 | 0.011496 |
| 0.011429 | 0.011429 | 0.011263 | 0.011443 | 0.011373 | 0.011401 | 0.011270 |
| 0.011439 | 0.011653 | 0.011441 | 0.011332 | 0.011228 | 0.011430 | 0.011295 |
| 0.011396 | 0.011329 | 0.011228 | 0.011330 | 0.011430 | 0.011432 | 0.011329 |
| 0.011228 | 0.011161 | 0.011295 | 0.011228 | 0.011161 | 0.011264 | 0.011430 |
| 0.011329 | 0.011262 | 0.011295 | 0.011329 | 0.011295 | 0.011228 | 0.011430 |
| 0.011295 | 0.011329 | 0.011329 | 0.011262 | 0.011329 | 0.011564 | 0.011228 |
| 0.011262 | 0.011664 | 0.011262 | 0.011295 | 0.011262 | 0.011631 | 0.011232 |
| 0.011678 | 0.011188 | 0.011311 | 0.011422 | 0.011549 | 0.011455 | 0.011186 |
| 0.011270 | 0.011429 | 0.011530 | 0.011637 | 0.011498 | 0.011635 | 0.011766 |
| 0.011666 | 0.011703 | 0.011664 | 0.011914 | 0.011631 | 0.012505 | 0.011666 |
| 0.012405 | 0.012173 | 0.012307 | 0.012578 | 0.011631 | 0.011329 | 0.011631 |
| 0.012070 | 0.012004 | 0.011597 | 0.011497 | 0.011565 | 0.011565 | 0.011534 |
| 0.011429 | 0.011433 | 0.011496 | 0.011464 | 0.011833 | 0.011900 | 0.011901 |
| 0.011800 | 0.011901 | 0.012004 | 0.011770 | 0.012070 | 0.012076 | 0.012137 |
| 0.012138 | 0.012171 | 0.012118 | 0.012138 | 0.012139 | 0.011362 | 0.011665 |
| 0.011733 | 0.012236 | 0.011738 | 0.011967 | 0.012440 | 0.011502 | 0.011396 |
| 0.011362 | 0.011362 | 0.011833 | 0.011842 | 0.011975 | 0.011698 | 0.011363 |
| S297     | 0.011799 | 0.011799 | 0.012135 | 0.011900 | 0.011900 | 0.011967 |
| 0.011807 | 0.011739 | 0.011967 | 0.011396 | 0.011463 | 0.011430 | 0.011396 |
| 0.011429 | 0.011597 | 0.011396 | 0.011429 | 0.011497 | 0.011463 | 0.011429 |
| 0.011396 | 0.011429 | 0.011530 | 0.011396 | 0.011363 | 0.011429 | 0.011773 |
| 0.011664 | 0.011429 | 0.011329 | 0.011564 | 0.011429 | 0.011463 | 0.011429 |
| 0.011463 | 0.011497 | 0.011463 | 0.011463 | 0.011497 | 0.011463 | 0.011631 |

|          |          |          |          |          |          |          |
|----------|----------|----------|----------|----------|----------|----------|
| 0.011396 | 0.011463 | 0.011497 | 0.011429 | 0.011530 | 0.011564 | 0.011497 |
| 0.011463 | 0.011631 | 0.011531 | 0.011799 | 0.011463 | 0.011664 | 0.011463 |
| 0.011429 | 0.011530 | 0.011597 | 0.011664 | 0.011832 | 0.011530 | 0.011631 |
| 0.011429 | 0.011497 | 0.011463 | 0.011631 | 0.011933 | 0.011463 | 0.011530 |
| 0.011429 | 0.011530 | 0.011497 | 0.011564 | 0.011497 | 0.011497 | 0.011497 |
| 0.011396 | 0.011429 | 0.011396 | 0.011497 | 0.011463 | 0.011498 | 0.011564 |
| 0.011497 | 0.011463 | 0.011463 | 0.011429 | 0.011564 | 0.011329 | 0.011463 |
| 0.011631 | 0.011564 | 0.011799 | 0.011631 | 0.011463 | 0.011631 | 0.011463 |
| 0.011616 | 0.011845 | 0.011626 | 0.011412 | 0.011359 | 0.011502 | 0.011533 |
| 0.012195 | 0.011620 | 0.011349 | 0.011698 | 0.011698 | 0.011496 | 0.011597 |
| 0.011530 | 0.011497 | 0.011564 | 0.011463 | 0.011564 | 0.011429 | 0.011496 |
| 0.011463 | 0.011564 | 0.011765 | 0.011631 | 0.011530 | 0.011497 | 0.011362 |
| 0.011396 | 0.011396 | 0.011396 | 0.011430 | 0.011631 | 0.011598 | 0.011530 |
| 0.011631 | 0.011698 | 0.011430 | 0.011430 | 0.011463 | 0.011463 | 0.011465 |
| 0.011534 | 0.011463 | 0.011463 | 0.011312 | 0.011386 | 0.011376 | 0.011464 |
| 0.011467 | 0.011404 | 0.011429 | 0.011440 | 0.011366 | 0.011403 | 0.011432 |
| 0.011708 | 0.011474 | 0.011405 | 0.011396 | 0.011406 | 0.011531 | 0.011497 |
| 0.011565 | 0.011498 | 0.011497 | 0.011597 | 0.011530 | 0.011832 | 0.011699 |
| 0.011732 | 0.011598 | 0.011463 | 0.011564 | 0.011362 | 0.011597 | 0.011396 |
| 0.011463 | 0.011463 | 0.011430 | 0.011396 | 0.011429 | 0.011396 | 0.011497 |
| 0.011396 | 0.011497 | 0.011497 | 0.011396 | 0.011498 | 0.011598 | 0.011601 |
| 0.011530 | 0.011497 | 0.011396 | 0.011330 | 0.011463 | 0.011396 | 0.011329 |
| 0.011434 | 0.011530 | 0.011329 | 0.011530 | 0.011362 | 0.011463 | 0.011430 |
| 0.011463 | 0.011430 | 0.011396 | 0.011430 | 0.011463 | 0.011329 | 0.011396 |
| 0.011430 | 0.011430 | 0.011497 | 0.011430 | 0.011463 | 0.011497 | 0.011732 |
| 0.011833 | 0.011765 | 0.011833 | 0.011600 | 0.011833 | 0.011463 | 0.011430 |
| 0.011466 | 0.011707 | 0.011563 | 0.011369 | 0.011841 | 0.011333 | 0.011454 |
| 0.011841 | 0.011740 | 0.011631 | 0.011833 | 0.011538 | 0.011698 | 0.011597 |
| 0.011597 | 0.011765 | 0.011629 | 0.011390 | 0.011479 | 0.011497 | 0.011568 |
| 0.011665 | 0.011566 | 0.011703 | 0.011703 | 0.011698 | 0.011766 | 0.011873 |
| 0.011602 | 0.011705 | 0.011703 | 0.011635 | 0.011901 | 0.011362 | 0.011566 |
| 0.011463 | 0.011463 | 0.011362 | 0.011362 | 0.011362 | 0.011429 | 0.011497 |
| 0.011362 | 0.011429 | 0.011329 | 0.011497 | 0.011362 | 0.011429 | 0.011496 |
| 0.011429 | 0.011866 | 0.011765 | 0.011799 | 0.011329 | 0.011429 | 0.011463 |
| 0.011463 | 0.011429 | 0.011497 | 0.011530 | 0.011396 | 0.011396 | 0.011396 |
| 0.011933 | 0.011564 | 0.011564 | 0.011362 | 0.011463 | 0.011564 | 0.011396 |
| 0.011396 | 0.011463 | 0.011429 | 0.000000 | 0.011396 | 0.011530 | 0.011597 |
| 0.011597 | 0.011429 | 0.011429 | 0.011362 | 0.011362 | 0.011530 | 0.011463 |
| 0.011362 | 0.011463 | 0.011329 | 0.011362 | 0.011497 | 0.011631 | 0.011396 |
| 0.011363 | 0.011497 | 0.011430 | 0.011329 | 0.011664 | 0.011329 | 0.011497 |
| 0.011505 | 0.011396 | 0.011698 | 0.011530 | 0.011564 | 0.011429 | 0.011530 |
| 0.011396 | 0.011664 | 0.011329 | 0.011597 | 0.011396 | 0.011396 | 0.011329 |
| 0.011496 | 0.011766 | 0.011463 | 0.011530 | 0.011362 | 0.011765 | 0.011396 |
| 0.011396 | 0.011396 | 0.011429 | 0.011463 | 0.011429 | 0.011530 | 0.011597 |
| 0.011597 | 0.011564 | 0.011463 | 0.011564 | 0.011463 | 0.011396 | 0.011362 |
| 0.011396 | 0.011396 | 0.011463 | 0.011396 | 0.011295 | 0.011530 | 0.011396 |
| 0.011429 | 0.011429 | 0.011564 | 0.011597 | 0.011497 | 0.011362 | 0.011430 |
| 0.011497 | 0.011429 | 0.011530 | 0.011396 | 0.011530 | 0.011631 | 0.011933 |
| 0.011429 | 0.011833 | 0.011440 | 0.017937 | 0.011387 | 0.011611 | 0.011793 |
| 0.011752 | 0.011799 | 0.011479 | 0.011350 | 0.011829 | 0.011820 | 0.011546 |
| 0.011629 | 0.011671 | 0.011333 | 0.011437 | 0.011412 | 0.011455 | 0.011448 |
| 0.011623 | 0.011582 | 0.011579 | 0.011325 | 0.011564 | 0.011597 | 0.011601 |
| 0.011404 | 0.011564 | 0.011564 | 0.011530 | 0.011497 | 0.011497 | 0.011463 |
| 0.011497 | 0.011429 | 0.011463 | 0.011497 | 0.011463 | 0.011396 | 0.011430 |
| 0.011430 | 0.011497 | 0.011396 | 0.011497 | 0.011530 | 0.011564 | 0.011463 |
| 0.011497 | 0.011463 | 0.011799 | 0.011799 | 0.011530 | 0.011565 | 0.011598 |
| 0.011362 | 0.011362 | 0.011396 | 0.011430 | 0.011362 | 0.011598 | 0.011598 |
| 0.011631 | 0.011631 | 0.011564 | 0.011665 | 0.011833 | 0.011666 | 0.011430 |
| 0.011497 | 0.011564 | 0.011530 | 0.011430 | 0.011497 | 0.011463 | 0.011497 |
| 0.011564 | 0.011564 | 0.011598 | 0.011430 | 0.011397 | 0.011665 | 0.011564 |

|          |          |          |          |          |          |          |
|----------|----------|----------|----------|----------|----------|----------|
| 0.011501 | 0.011396 | 0.011497 | 0.011598 | 0.011497 | 0.011631 | 0.011664 |
| 0.011833 | 0.011538 | 0.011698 | 0.011597 | 0.011597 | 0.011765 | 0.011396 |
| 0.011566 | 0.011464 | 0.011430 | 0.011430 | 0.011497 | 0.011396 | 0.011497 |
| 0.011530 | 0.011564 | 0.011463 | 0.011497 | 0.011463 | 0.011799 | 0.011799 |
| 0.011530 | 0.011565 | 0.011631 | 0.011564 | 0.012204 | 0.011632 | 0.011553 |
| 0.011623 | 0.011580 | 0.011693 | 0.011580 | 0.011690 | 0.011612 | 0.011577 |
| 0.012159 | 0.011476 | 0.011608 | 0.011544 | 0.011818 | 0.011672 | 0.011707 |
| 0.012182 | 0.011663 | 0.011736 | 0.011799 | 0.011664 | 0.011664 | 0.011702 |
| 0.011362 | 0.011463 | 0.011664 | 0.011631 | 0.011635 | 0.011631 | 0.011599 |
| 0.011463 | 0.011329 | 0.011362 | 0.011463 | 0.011295 | 0.011429 | 0.011329 |
| 0.011463 | 0.011497 | 0.011396 | 0.011362 | 0.011463 | 0.011396 | 0.011429 |
| 0.011429 | 0.011362 | 0.011429 | 0.011463 | 0.011362 | 0.011497 | 0.011597 |
| 0.011497 | 0.011564 | 0.011497 | 0.011497 | 0.011429 | 0.011832 | 0.011463 |
| 0.011512 | 0.011429 | 0.011665 | 0.011671 | 0.011463 | 0.011530 | 0.011530 |
| 0.011530 | 0.011396 | 0.011429 | 0.011396 | 0.011564 | 0.011564 | 0.011497 |
| 0.011496 | 0.011631 | 0.011799 | 0.011530 | 0.011732 | 0.011732 | 0.011597 |
| 0.011429 | 0.011497 | 0.011530 | 0.011933 | 0.011497 | 0.011463 | 0.011497 |
| 0.011530 | 0.011463 | 0.011463 | 0.011766 | 0.011631 | 0.011732 | 0.011463 |
| 0.011564 | 0.011631 | 0.011497 | 0.011564 | 0.011530 | 0.011396 | 0.011732 |
| 0.011496 | 0.011463 | 0.011463 | 0.011631 | 0.011463 | 0.011564 | 0.011799 |
| 0.011496 | 0.011875 | 0.011866 | 0.011629 | 0.011399 | 0.011570 | 0.011421 |
| 0.011445 | 0.011878 | 0.011376 | 0.011596 | 0.011402 | 0.011518 | 0.011538 |
| 0.011621 | 0.011258 | 0.011506 | 0.011324 | 0.011384 | 0.011596 | 0.011466 |
| 0.011512 | 0.011336 | 0.011553 | 0.011483 | 0.011498 | 0.011631 | 0.011698 |
| 0.011698 | 0.011565 | 0.011669 | 0.011670 | 0.011806 | 0.011838 | 0.011497 |
| 0.011732 | 0.011598 | 0.011463 | 0.011564 | 0.011362 | 0.011597 | 0.011396 |
| 0.011463 | 0.011463 | 0.011430 | 0.011396 | 0.011429 | 0.011396 | 0.011497 |
| 0.011479 | 0.011480 | 0.011471 | 0.011505 | 0.011642 | 0.011538 | 0.011607 |
| 0.011605 | 0.011531 | 0.011356 | 0.011348 | 0.011467 | 0.011636 | 0.011637 |
| 0.011430 | 0.011501 | 0.011734 | 0.011703 | 0.011632 | 0.011666 | 0.011597 |
| 0.011530 | 0.011597 | 0.011597 | 0.011497 | 0.012068 | 0.011665 | 0.011732 |
| 0.011766 | 0.011844 | 0.011469 | 0.011545 | 0.011429 | 0.011631 | 0.011597 |
| 0.011632 | 0.011664 | 0.011665 | 0.011665 | 0.011847 | 0.011799 | 0.011442 |
| 0.011331 | 0.011337 | 0.011435 | 0.011400 | 0.011504 | 0.011359 | 0.011672 |
| 0.011472 | 0.011543 | 0.011298 | 0.011510 | 0.011464 | 0.011539 | 0.011362 |
| 0.011396 | 0.011396 | 0.011396 | 0.011430 | 0.011631 | 0.011598 | 0.011530 |
| 0.011631 | 0.011698 | 0.011430 | 0.011430 | 0.011463 | 0.011463 | 0.011465 |
| 0.011534 | 0.011463 | 0.011463 | 0.011498 | 0.011631 | 0.011698 | 0.011698 |
| 0.011565 | 0.011669 | 0.011670 | 0.011806 | 0.011838 | 0.011497 | 0.011664 |
| 0.011597 | 0.011597 | 0.011432 | 0.011582 | 0.011547 | 0.011571 | 0.011446 |
| 0.011542 | 0.011653 | 0.011568 | 0.011502 | 0.011329 | 0.011530 | 0.011396 |
| 0.011497 | 0.011497 | 0.011396 | 0.011498 | 0.011598 | 0.011601 | 0.011497 |
| 0.011396 | 0.011330 | 0.011463 | 0.011396 | 0.011329 | 0.011434 | 0.011530 |
| 0.011497 | 0.011429 | 0.011463 | 0.011497 | 0.011463 | 0.011396 | 0.011598 |
| 0.011463 | 0.011497 | 0.011497 | 0.011429 | 0.011497 | 0.011732 | 0.011396 |
| 0.011429 | 0.011832 | 0.011429 | 0.011396 | 0.011429 | 0.011799 | 0.011403 |
| 0.011791 | 0.011358 | 0.011411 | 0.011624 | 0.011671 | 0.011599 | 0.011353 |
| 0.011375 | 0.011597 | 0.011698 | 0.011807 | 0.011666 | 0.011805 | 0.011935 |
| 0.011834 | 0.011872 | 0.011832 | 0.012086 | 0.011799 | 0.012674 | 0.011835 |
| 0.012574 | 0.012342 | 0.012476 | 0.012748 | 0.011799 | 0.011497 | 0.011800 |
| 0.012238 | 0.012174 | 0.011765 | 0.011665 | 0.011733 | 0.011733 | 0.011703 |
| 0.011597 | 0.011603 | 0.011664 | 0.011632 | 0.012002 | 0.012068 | 0.012070 |
| 0.011969 | 0.012069 | 0.012173 | 0.011940 | 0.012239 | 0.012246 | 0.012306 |
| 0.012307 | 0.012341 | 0.012289 | 0.012307 | 0.012308 | 0.011530 | 0.011833 |
| 0.011901 | 0.012404 | 0.011908 | 0.012135 | 0.012609 | 0.011672 | 0.011564 |
| 0.011530 | 0.011530 | 0.012002 | 0.012006 | 0.012151 | 0.011866 | 0.011532 |
| S298     | 0.011597 | 0.011597 | 0.011933 | 0.011698 | 0.011698 | 0.011765 |
| 0.011603 | 0.011535 | 0.011765 | 0.011195 | 0.011262 | 0.011228 | 0.011194 |
| 0.011228 | 0.011396 | 0.011194 | 0.011228 | 0.011295 | 0.011262 | 0.011228 |
| 0.011194 | 0.011228 | 0.011329 | 0.011195 | 0.011228 | 0.011228 | 0.011569 |

|          |          |          |          |          |          |          |
|----------|----------|----------|----------|----------|----------|----------|
| 0.011463 | 0.011228 | 0.011127 | 0.011362 | 0.011295 | 0.011262 | 0.011295 |
| 0.011262 | 0.011362 | 0.011262 | 0.011262 | 0.011295 | 0.011262 | 0.011429 |
| 0.011194 | 0.011262 | 0.011295 | 0.011228 | 0.011329 | 0.011362 | 0.011295 |
| 0.011262 | 0.011429 | 0.011329 | 0.011597 | 0.011262 | 0.011530 | 0.011262 |
| 0.011228 | 0.011329 | 0.011396 | 0.011530 | 0.011631 | 0.011329 | 0.011429 |
| 0.011295 | 0.011362 | 0.011262 | 0.011496 | 0.011732 | 0.011262 | 0.011329 |
| 0.011228 | 0.011329 | 0.011295 | 0.011362 | 0.011295 | 0.011295 | 0.011295 |
| 0.011194 | 0.011228 | 0.011194 | 0.011295 | 0.011262 | 0.011296 | 0.011362 |
| 0.011295 | 0.011262 | 0.011329 | 0.011228 | 0.011362 | 0.011194 | 0.011262 |
| 0.011429 | 0.011362 | 0.011597 | 0.011429 | 0.011262 | 0.011496 | 0.011262 |
| 0.011431 | 0.011658 | 0.011475 | 0.011177 | 0.011172 | 0.011244 | 0.011375 |
| 0.012011 | 0.011416 | 0.011184 | 0.011496 | 0.011496 | 0.011295 | 0.011396 |
| 0.011329 | 0.011295 | 0.011362 | 0.011262 | 0.011362 | 0.011295 | 0.011295 |
| 0.011262 | 0.011362 | 0.011564 | 0.011429 | 0.011329 | 0.011295 | 0.011228 |
| 0.011195 | 0.011195 | 0.011262 | 0.011228 | 0.011429 | 0.011396 | 0.011329 |
| 0.011429 | 0.011497 | 0.011228 | 0.011228 | 0.011262 | 0.011262 | 0.011263 |
| 0.011331 | 0.011262 | 0.011262 | 0.011132 | 0.011205 | 0.011165 | 0.011262 |
| 0.011263 | 0.011198 | 0.011245 | 0.011233 | 0.011162 | 0.011197 | 0.011229 |
| 0.011492 | 0.011267 | 0.011301 | 0.011195 | 0.011199 | 0.011329 | 0.011296 |
| 0.011363 | 0.011296 | 0.011296 | 0.011396 | 0.011329 | 0.011698 | 0.011497 |
| 0.011530 | 0.011396 | 0.011262 | 0.011362 | 0.011161 | 0.011396 | 0.011195 |
| 0.011262 | 0.011262 | 0.011228 | 0.011194 | 0.011228 | 0.011195 | 0.011295 |
| 0.011262 | 0.011362 | 0.011295 | 0.011195 | 0.011262 | 0.011396 | 0.011398 |
| 0.011396 | 0.011295 | 0.011195 | 0.011094 | 0.011262 | 0.011195 | 0.011127 |
| 0.011230 | 0.011396 | 0.011195 | 0.011396 | 0.011161 | 0.011262 | 0.011228 |
| 0.011329 | 0.011228 | 0.011262 | 0.011228 | 0.011262 | 0.011127 | 0.011262 |
| 0.011295 | 0.011228 | 0.011295 | 0.011228 | 0.011262 | 0.011295 | 0.011530 |
| 0.011631 | 0.011564 | 0.011631 | 0.011397 | 0.011631 | 0.011262 | 0.011228 |
| 0.011263 | 0.011505 | 0.011335 | 0.011129 | 0.011603 | 0.011129 | 0.011218 |
| 0.011637 | 0.011536 | 0.011429 | 0.011631 | 0.011333 | 0.011496 | 0.011463 |
| 0.011396 | 0.011564 | 0.011415 | 0.011266 | 0.011312 | 0.011295 | 0.011365 |
| 0.011463 | 0.011364 | 0.011500 | 0.011568 | 0.011497 | 0.011564 | 0.011670 |
| 0.011399 | 0.011569 | 0.011500 | 0.011432 | 0.011699 | 0.011161 | 0.011363 |
| 0.011329 | 0.011262 | 0.011161 | 0.011161 | 0.011228 | 0.011228 | 0.011295 |
| 0.011228 | 0.011295 | 0.011194 | 0.011295 | 0.011228 | 0.011228 | 0.011295 |
| 0.011228 | 0.011664 | 0.011564 | 0.011597 | 0.011127 | 0.011228 | 0.011262 |
| 0.011262 | 0.011228 | 0.011295 | 0.011329 | 0.011194 | 0.011194 | 0.011194 |
| 0.011731 | 0.011362 | 0.011362 | 0.011161 | 0.011262 | 0.011429 | 0.011194 |
| 0.011194 | 0.011262 | 0.011228 | 0.011396 | 0.000000 | 0.011329 | 0.011463 |
| 0.011396 | 0.011228 | 0.011228 | 0.011161 | 0.011161 | 0.011329 | 0.011262 |
| 0.011161 | 0.011262 | 0.011127 | 0.011161 | 0.011295 | 0.011430 | 0.011195 |
| 0.011161 | 0.011295 | 0.011228 | 0.011127 | 0.011463 | 0.011127 | 0.011295 |
| 0.011368 | 0.011195 | 0.011496 | 0.011329 | 0.011362 | 0.011228 | 0.011329 |
| 0.011194 | 0.011530 | 0.011127 | 0.011396 | 0.011194 | 0.011194 | 0.011127 |
| 0.011362 | 0.011564 | 0.011262 | 0.011329 | 0.011161 | 0.011564 | 0.011194 |
| 0.011194 | 0.011194 | 0.011228 | 0.011329 | 0.011228 | 0.011329 | 0.011396 |
| 0.011396 | 0.011362 | 0.011262 | 0.011362 | 0.011329 | 0.011194 | 0.011161 |
| 0.011194 | 0.011194 | 0.011262 | 0.011194 | 0.011161 | 0.011329 | 0.011194 |
| 0.011228 | 0.011228 | 0.011362 | 0.011396 | 0.011295 | 0.011228 | 0.011228 |
| 0.011295 | 0.011228 | 0.011329 | 0.011194 | 0.011329 | 0.011429 | 0.011732 |
| 0.011228 | 0.011631 | 0.011233 | 0.017747 | 0.011257 | 0.011366 | 0.011583 |
| 0.011545 | 0.011588 | 0.011217 | 0.011176 | 0.011664 | 0.011612 | 0.011303 |
| 0.011440 | 0.011487 | 0.011138 | 0.011186 | 0.011177 | 0.011258 | 0.011232 |
| 0.011436 | 0.011395 | 0.011394 | 0.011193 | 0.011362 | 0.011396 | 0.011398 |
| 0.011266 | 0.011362 | 0.011362 | 0.011329 | 0.011295 | 0.011295 | 0.011262 |
| 0.011295 | 0.011228 | 0.011262 | 0.011295 | 0.011262 | 0.011195 | 0.011228 |
| 0.011228 | 0.011295 | 0.011195 | 0.011295 | 0.011329 | 0.011362 | 0.011262 |
| 0.011295 | 0.011262 | 0.011597 | 0.011597 | 0.011329 | 0.011329 | 0.011396 |
| 0.011161 | 0.011161 | 0.011195 | 0.011295 | 0.011161 | 0.011396 | 0.011396 |
| 0.011429 | 0.011429 | 0.011362 | 0.011463 | 0.011631 | 0.011464 | 0.011295 |

|          |          |          |          |          |          |          |
|----------|----------|----------|----------|----------|----------|----------|
| 0.011295 | 0.011362 | 0.011396 | 0.011228 | 0.011295 | 0.011262 | 0.011295 |
| 0.011363 | 0.011362 | 0.011396 | 0.011363 | 0.011262 | 0.011463 | 0.011429 |
| 0.011297 | 0.011195 | 0.011295 | 0.011396 | 0.011295 | 0.011430 | 0.011463 |
| 0.011631 | 0.011333 | 0.011496 | 0.011463 | 0.011396 | 0.011564 | 0.011195 |
| 0.011363 | 0.011262 | 0.011228 | 0.011228 | 0.011295 | 0.011195 | 0.011295 |
| 0.011329 | 0.011362 | 0.011262 | 0.011295 | 0.011262 | 0.011597 | 0.011597 |
| 0.011329 | 0.011329 | 0.011429 | 0.011362 | 0.012002 | 0.011417 | 0.011341 |
| 0.011412 | 0.011372 | 0.011482 | 0.011372 | 0.011480 | 0.011405 | 0.011370 |
| 0.011953 | 0.011268 | 0.011403 | 0.011337 | 0.011611 | 0.011468 | 0.011570 |
| 0.011978 | 0.011437 | 0.011533 | 0.011597 | 0.011463 | 0.011463 | 0.011499 |
| 0.011161 | 0.011329 | 0.011463 | 0.011429 | 0.011432 | 0.011429 | 0.011397 |
| 0.011262 | 0.011194 | 0.011228 | 0.011262 | 0.011161 | 0.011228 | 0.011127 |
| 0.011262 | 0.011295 | 0.011194 | 0.011161 | 0.011262 | 0.011194 | 0.011228 |
| 0.011228 | 0.011161 | 0.011228 | 0.011262 | 0.011161 | 0.011362 | 0.011396 |
| 0.011295 | 0.011362 | 0.011295 | 0.011295 | 0.011228 | 0.011631 | 0.011262 |
| 0.011304 | 0.011228 | 0.011463 | 0.011467 | 0.011329 | 0.011329 | 0.011329 |
| 0.011329 | 0.011262 | 0.011228 | 0.011262 | 0.011362 | 0.011362 | 0.011295 |
| 0.011295 | 0.011429 | 0.011597 | 0.011329 | 0.011530 | 0.011530 | 0.011396 |
| 0.011228 | 0.011295 | 0.011329 | 0.011732 | 0.011295 | 0.011329 | 0.011295 |
| 0.011329 | 0.011262 | 0.011262 | 0.011564 | 0.011497 | 0.011530 | 0.011262 |
| 0.011362 | 0.011429 | 0.011295 | 0.011362 | 0.011329 | 0.011194 | 0.011530 |
| 0.011295 | 0.011262 | 0.011262 | 0.011429 | 0.011262 | 0.011362 | 0.011597 |
| 0.011295 | 0.011671 | 0.011664 | 0.011467 | 0.011229 | 0.011366 | 0.011163 |
| 0.011170 | 0.011683 | 0.011201 | 0.011417 | 0.011255 | 0.011366 | 0.011379 |
| 0.011417 | 0.011192 | 0.011339 | 0.011192 | 0.011222 | 0.011328 | 0.011344 |
| 0.011362 | 0.011257 | 0.011342 | 0.011272 | 0.011296 | 0.011429 | 0.011497 |
| 0.011497 | 0.011363 | 0.011466 | 0.011467 | 0.011602 | 0.011626 | 0.011295 |
| 0.011530 | 0.011396 | 0.011262 | 0.011362 | 0.011161 | 0.011396 | 0.011195 |
| 0.011262 | 0.011262 | 0.011228 | 0.011194 | 0.011228 | 0.011195 | 0.011295 |
| 0.011270 | 0.011270 | 0.011266 | 0.011300 | 0.011437 | 0.011402 | 0.011402 |
| 0.011401 | 0.011329 | 0.011134 | 0.011132 | 0.011263 | 0.011433 | 0.011433 |
| 0.011228 | 0.011297 | 0.011531 | 0.011500 | 0.011430 | 0.011464 | 0.011396 |
| 0.011329 | 0.011396 | 0.011396 | 0.011295 | 0.011866 | 0.011463 | 0.011530 |
| 0.011564 | 0.011630 | 0.011265 | 0.011303 | 0.011228 | 0.011429 | 0.011396 |
| 0.011430 | 0.011463 | 0.011463 | 0.011463 | 0.011571 | 0.011597 | 0.011234 |
| 0.011128 | 0.011130 | 0.011230 | 0.011196 | 0.011299 | 0.011135 | 0.011468 |
| 0.011266 | 0.011411 | 0.000000 | 0.011285 | 0.011262 | 0.011334 | 0.011228 |
| 0.011195 | 0.011195 | 0.011262 | 0.011228 | 0.011429 | 0.011396 | 0.011329 |
| 0.011429 | 0.011497 | 0.011228 | 0.011228 | 0.011262 | 0.011262 | 0.011263 |
| 0.011331 | 0.011262 | 0.011262 | 0.011296 | 0.011429 | 0.011497 | 0.011497 |
| 0.011363 | 0.011466 | 0.011467 | 0.011602 | 0.011626 | 0.011295 | 0.011463 |
| 0.011396 | 0.011396 | 0.011229 | 0.011408 | 0.011338 | 0.011367 | 0.011200 |
| 0.011405 | 0.011561 | 0.011357 | 0.011298 | 0.011195 | 0.011396 | 0.011262 |
| 0.011362 | 0.011295 | 0.011195 | 0.011262 | 0.011396 | 0.011398 | 0.011295 |
| 0.011195 | 0.011094 | 0.011262 | 0.011195 | 0.011127 | 0.011230 | 0.011396 |
| 0.011295 | 0.011228 | 0.011262 | 0.011295 | 0.011262 | 0.011195 | 0.011396 |
| 0.011262 | 0.011295 | 0.011295 | 0.011228 | 0.011295 | 0.011530 | 0.011194 |
| 0.011228 | 0.011631 | 0.011228 | 0.011262 | 0.011228 | 0.011597 | 0.011189 |
| 0.011622 | 0.011188 | 0.011211 | 0.011422 | 0.011508 | 0.011419 | 0.011144 |
| 0.011165 | 0.011396 | 0.011496 | 0.011603 | 0.011464 | 0.011601 | 0.011733 |
| 0.011632 | 0.011669 | 0.011631 | 0.011880 | 0.011597 | 0.012472 | 0.011633 |
| 0.012372 | 0.012139 | 0.012273 | 0.012545 | 0.011597 | 0.011295 | 0.011598 |
| 0.012036 | 0.011971 | 0.011564 | 0.011463 | 0.011531 | 0.011531 | 0.011500 |
| 0.011396 | 0.011399 | 0.011463 | 0.011430 | 0.011800 | 0.011866 | 0.011867 |
| 0.011766 | 0.011867 | 0.011970 | 0.011737 | 0.012036 | 0.012042 | 0.012104 |
| 0.012104 | 0.012138 | 0.012084 | 0.012104 | 0.012105 | 0.011329 | 0.011631 |
| 0.011699 | 0.012202 | 0.011704 | 0.011933 | 0.012406 | 0.011468 | 0.011363 |
| 0.011329 | 0.011329 | 0.011799 | 0.011842 | 0.011940 | 0.011664 | 0.011330 |
| S299     | 0.011732 | 0.011732 | 0.011799 | 0.011564 | 0.011564 | 0.011631 |
| 0.011536 | 0.011468 | 0.011631 | 0.011329 | 0.011396 | 0.011363 | 0.011329 |

|          |          |          |          |          |          |          |
|----------|----------|----------|----------|----------|----------|----------|
| 0.011362 | 0.011530 | 0.011329 | 0.011362 | 0.011429 | 0.011396 | 0.011362 |
| 0.011329 | 0.011362 | 0.011262 | 0.011329 | 0.011363 | 0.011362 | 0.011502 |
| 0.011396 | 0.011362 | 0.011262 | 0.011295 | 0.011429 | 0.011396 | 0.011429 |
| 0.011396 | 0.011496 | 0.011396 | 0.011396 | 0.011429 | 0.011396 | 0.011564 |
| 0.011329 | 0.011396 | 0.011429 | 0.011362 | 0.011463 | 0.011496 | 0.011429 |
| 0.011396 | 0.011564 | 0.011463 | 0.011530 | 0.011396 | 0.011664 | 0.011396 |
| 0.011362 | 0.011463 | 0.011530 | 0.011664 | 0.011564 | 0.011463 | 0.011564 |
| 0.011429 | 0.011497 | 0.011396 | 0.011631 | 0.011665 | 0.011396 | 0.011463 |
| 0.011362 | 0.011463 | 0.011429 | 0.011496 | 0.011429 | 0.011429 | 0.011429 |
| 0.011329 | 0.011362 | 0.011329 | 0.011429 | 0.011396 | 0.011430 | 0.011496 |
| 0.011429 | 0.011396 | 0.011463 | 0.011362 | 0.011496 | 0.011329 | 0.011396 |
| 0.011564 | 0.011496 | 0.011530 | 0.011564 | 0.011396 | 0.011631 | 0.011396 |
| 0.011579 | 0.011583 | 0.011626 | 0.011334 | 0.011321 | 0.011428 | 0.011296 |
| 0.011938 | 0.011365 | 0.011348 | 0.011631 | 0.011631 | 0.011429 | 0.011530 |
| 0.011463 | 0.011429 | 0.011496 | 0.011396 | 0.011497 | 0.011429 | 0.011429 |
| 0.011396 | 0.011496 | 0.011698 | 0.011564 | 0.011463 | 0.011429 | 0.011362 |
| 0.011329 | 0.011329 | 0.011396 | 0.011362 | 0.011362 | 0.011329 | 0.011262 |
| 0.011362 | 0.011430 | 0.011362 | 0.011362 | 0.011396 | 0.011396 | 0.011398 |
| 0.011466 | 0.011396 | 0.011396 | 0.011276 | 0.011349 | 0.011306 | 0.011396 |
| 0.011399 | 0.011335 | 0.011392 | 0.011371 | 0.011298 | 0.011334 | 0.011364 |
| 0.011420 | 0.011405 | 0.011439 | 0.011329 | 0.011337 | 0.011464 | 0.011430 |
| 0.011497 | 0.011431 | 0.011430 | 0.011530 | 0.011463 | 0.011832 | 0.011631 |
| 0.011463 | 0.011530 | 0.011396 | 0.011497 | 0.011295 | 0.011329 | 0.011329 |
| 0.011396 | 0.011396 | 0.011362 | 0.011329 | 0.011362 | 0.011329 | 0.011429 |
| 0.011396 | 0.011497 | 0.011430 | 0.011329 | 0.011431 | 0.011530 | 0.011533 |
| 0.011530 | 0.011430 | 0.011329 | 0.011263 | 0.011396 | 0.011329 | 0.011262 |
| 0.011264 | 0.011530 | 0.011329 | 0.011530 | 0.011295 | 0.011396 | 0.011362 |
| 0.011463 | 0.011362 | 0.011396 | 0.011362 | 0.011396 | 0.011262 | 0.011396 |
| 0.011430 | 0.011362 | 0.011430 | 0.011362 | 0.011396 | 0.011429 | 0.011665 |
| 0.011564 | 0.011497 | 0.011564 | 0.011532 | 0.011564 | 0.011396 | 0.011362 |
| 0.011398 | 0.011707 | 0.011472 | 0.011300 | 0.011569 | 0.011265 | 0.011375 |
| 0.011570 | 0.011468 | 0.011564 | 0.011765 | 0.011470 | 0.011631 | 0.011597 |
| 0.011530 | 0.011698 | 0.011522 | 0.011390 | 0.011437 | 0.011430 | 0.011500 |
| 0.011597 | 0.011499 | 0.011635 | 0.011669 | 0.011631 | 0.011698 | 0.011738 |
| 0.011534 | 0.011671 | 0.011636 | 0.011567 | 0.011834 | 0.011295 | 0.011498 |
| 0.011463 | 0.011396 | 0.011295 | 0.011295 | 0.011362 | 0.011362 | 0.011429 |
| 0.011362 | 0.011429 | 0.011329 | 0.011429 | 0.011362 | 0.011362 | 0.011429 |
| 0.011362 | 0.011597 | 0.011497 | 0.011530 | 0.011262 | 0.011362 | 0.011396 |
| 0.011396 | 0.011362 | 0.011429 | 0.011463 | 0.011329 | 0.011329 | 0.011329 |
| 0.011664 | 0.011496 | 0.011496 | 0.011295 | 0.011396 | 0.011564 | 0.011329 |
| 0.011329 | 0.011396 | 0.011362 | 0.011530 | 0.011329 | 0.000000 | 0.011329 |
| 0.011262 | 0.011362 | 0.011362 | 0.011295 | 0.011295 | 0.011463 | 0.011396 |
| 0.011295 | 0.011396 | 0.011262 | 0.011295 | 0.011429 | 0.011362 | 0.011329 |
| 0.011295 | 0.011429 | 0.011363 | 0.011262 | 0.011396 | 0.011262 | 0.011429 |
| 0.011471 | 0.011329 | 0.011429 | 0.011463 | 0.011496 | 0.011362 | 0.011463 |
| 0.011329 | 0.011664 | 0.011262 | 0.011530 | 0.011329 | 0.011329 | 0.011262 |
| 0.011496 | 0.011497 | 0.011396 | 0.011463 | 0.011295 | 0.011497 | 0.011329 |
| 0.011329 | 0.011329 | 0.011362 | 0.011463 | 0.011362 | 0.011463 | 0.011530 |
| 0.011530 | 0.011429 | 0.011396 | 0.011497 | 0.011463 | 0.011329 | 0.011295 |
| 0.011329 | 0.011329 | 0.011396 | 0.011329 | 0.011295 | 0.011463 | 0.011329 |
| 0.011362 | 0.011362 | 0.011496 | 0.011530 | 0.011429 | 0.011362 | 0.011362 |
| 0.011429 | 0.011362 | 0.011463 | 0.011329 | 0.011463 | 0.011564 | 0.011665 |
| 0.011362 | 0.011564 | 0.011371 | 0.017899 | 0.011257 | 0.011611 | 0.011514 |
| 0.011475 | 0.011518 | 0.011479 | 0.011292 | 0.011555 | 0.011544 | 0.011546 |
| 0.011440 | 0.011365 | 0.011294 | 0.011395 | 0.011372 | 0.011455 | 0.011404 |
| 0.011389 | 0.011321 | 0.011320 | 0.011193 | 0.011497 | 0.011530 | 0.011534 |
| 0.011369 | 0.011497 | 0.011497 | 0.011463 | 0.011429 | 0.011430 | 0.011396 |
| 0.011429 | 0.011362 | 0.011396 | 0.011430 | 0.011396 | 0.011329 | 0.011362 |
| 0.011362 | 0.011430 | 0.011329 | 0.011430 | 0.011463 | 0.011497 | 0.011396 |
| 0.011429 | 0.011396 | 0.011530 | 0.011530 | 0.011463 | 0.011497 | 0.011530 |

|          |          |          |          |          |          |          |
|----------|----------|----------|----------|----------|----------|----------|
| 0.011295 | 0.011295 | 0.011329 | 0.011430 | 0.011295 | 0.011530 | 0.011530 |
| 0.011564 | 0.011564 | 0.011497 | 0.011597 | 0.011564 | 0.011599 | 0.011429 |
| 0.011430 | 0.011497 | 0.011530 | 0.011362 | 0.011430 | 0.011396 | 0.011429 |
| 0.011497 | 0.011497 | 0.011530 | 0.011497 | 0.011397 | 0.011564 | 0.011564 |
| 0.011433 | 0.011329 | 0.011429 | 0.011530 | 0.011430 | 0.011564 | 0.011597 |
| 0.011765 | 0.011470 | 0.011631 | 0.011597 | 0.011530 | 0.011698 | 0.011329 |
| 0.011498 | 0.011396 | 0.011362 | 0.011362 | 0.011430 | 0.011329 | 0.011430 |
| 0.011463 | 0.011497 | 0.011396 | 0.011429 | 0.011396 | 0.011530 | 0.011530 |
| 0.011463 | 0.011497 | 0.011564 | 0.011497 | 0.012137 | 0.011524 | 0.011447 |
| 0.011517 | 0.011476 | 0.011587 | 0.011476 | 0.011585 | 0.011508 | 0.011508 |
| 0.012056 | 0.011372 | 0.011505 | 0.011441 | 0.011714 | 0.011604 | 0.011673 |
| 0.012080 | 0.011550 | 0.011669 | 0.011732 | 0.011597 | 0.011396 | 0.011635 |
| 0.011295 | 0.011463 | 0.011597 | 0.011564 | 0.011567 | 0.011362 | 0.011262 |
| 0.011396 | 0.011329 | 0.011362 | 0.011396 | 0.011295 | 0.011362 | 0.011262 |
| 0.011396 | 0.011429 | 0.011329 | 0.011295 | 0.011396 | 0.011329 | 0.011362 |
| 0.011362 | 0.011295 | 0.011362 | 0.011396 | 0.011295 | 0.011496 | 0.011530 |
| 0.011429 | 0.011496 | 0.011429 | 0.011429 | 0.011362 | 0.011564 | 0.011396 |
| 0.011199 | 0.011362 | 0.011396 | 0.011365 | 0.011463 | 0.011463 | 0.011463 |
| 0.011463 | 0.011396 | 0.011362 | 0.011396 | 0.011496 | 0.011496 | 0.011429 |
| 0.011429 | 0.011564 | 0.011530 | 0.011463 | 0.011664 | 0.011664 | 0.011530 |
| 0.011362 | 0.011429 | 0.011463 | 0.011665 | 0.011430 | 0.011463 | 0.011429 |
| 0.011463 | 0.011396 | 0.011396 | 0.011698 | 0.011631 | 0.011664 | 0.011396 |
| 0.011497 | 0.011564 | 0.011429 | 0.011497 | 0.011463 | 0.011329 | 0.011463 |
| 0.011429 | 0.011396 | 0.011396 | 0.011564 | 0.011396 | 0.011496 | 0.011530 |
| 0.011429 | 0.011603 | 0.011597 | 0.011385 | 0.011230 | 0.011502 | 0.011267 |
| 0.011390 | 0.011527 | 0.011341 | 0.011551 | 0.011451 | 0.011366 | 0.011379 |
| 0.011366 | 0.011192 | 0.011339 | 0.011126 | 0.011222 | 0.011328 | 0.011506 |
| 0.011512 | 0.011414 | 0.011483 | 0.011342 | 0.011431 | 0.011362 | 0.011430 |
| 0.011430 | 0.011497 | 0.011601 | 0.011399 | 0.011738 | 0.011767 | 0.011429 |
| 0.011463 | 0.011530 | 0.011396 | 0.011497 | 0.011295 | 0.011329 | 0.011329 |
| 0.011396 | 0.011396 | 0.011362 | 0.011329 | 0.011362 | 0.011329 | 0.011429 |
| 0.011409 | 0.011410 | 0.011403 | 0.011437 | 0.011573 | 0.011538 | 0.011538 |
| 0.011537 | 0.011464 | 0.011245 | 0.011276 | 0.011399 | 0.011568 | 0.011569 |
| 0.011363 | 0.011433 | 0.011666 | 0.011635 | 0.011565 | 0.011599 | 0.011530 |
| 0.011463 | 0.011530 | 0.011530 | 0.011429 | 0.011799 | 0.011597 | 0.011665 |
| 0.011698 | 0.011559 | 0.011401 | 0.011476 | 0.011362 | 0.011564 | 0.011530 |
| 0.011565 | 0.011597 | 0.011597 | 0.011597 | 0.011728 | 0.011732 | 0.011338 |
| 0.011229 | 0.011233 | 0.011332 | 0.011298 | 0.011402 | 0.011247 | 0.011366 |
| 0.011369 | 0.011279 | 0.011298 | 0.011397 | 0.011396 | 0.011471 | 0.011362 |
| 0.011329 | 0.011329 | 0.011396 | 0.011362 | 0.011362 | 0.011329 | 0.011262 |
| 0.011362 | 0.011430 | 0.011362 | 0.011362 | 0.011396 | 0.011396 | 0.011398 |
| 0.011466 | 0.011396 | 0.011396 | 0.011431 | 0.011362 | 0.011430 | 0.011430 |
| 0.011497 | 0.011601 | 0.011399 | 0.011738 | 0.011767 | 0.011429 | 0.011597 |
| 0.011530 | 0.011530 | 0.011365 | 0.011478 | 0.011477 | 0.011503 | 0.011270 |
| 0.011542 | 0.011698 | 0.011526 | 0.011434 | 0.011329 | 0.011530 | 0.011396 |
| 0.011497 | 0.011430 | 0.011329 | 0.011431 | 0.011530 | 0.011533 | 0.011430 |
| 0.011329 | 0.011263 | 0.011396 | 0.011329 | 0.011262 | 0.011264 | 0.011530 |
| 0.011429 | 0.011362 | 0.011396 | 0.011430 | 0.011396 | 0.011329 | 0.011329 |
| 0.011396 | 0.011429 | 0.011429 | 0.011362 | 0.011429 | 0.011664 | 0.011329 |
| 0.011362 | 0.011564 | 0.011362 | 0.011396 | 0.011362 | 0.011530 | 0.011360 |
| 0.011566 | 0.011230 | 0.011311 | 0.011342 | 0.011427 | 0.011347 | 0.011186 |
| 0.011270 | 0.011262 | 0.011362 | 0.011468 | 0.011330 | 0.011466 | 0.011598 |
| 0.011498 | 0.011567 | 0.011496 | 0.011744 | 0.011463 | 0.012337 | 0.011498 |
| 0.012237 | 0.012004 | 0.012139 | 0.012410 | 0.011530 | 0.011430 | 0.011463 |
| 0.012103 | 0.011836 | 0.011429 | 0.011329 | 0.011396 | 0.011396 | 0.011365 |
| 0.011262 | 0.011264 | 0.011329 | 0.011296 | 0.011733 | 0.011799 | 0.011800 |
| 0.011699 | 0.011800 | 0.011903 | 0.011669 | 0.012171 | 0.012178 | 0.012238 |
| 0.012239 | 0.012273 | 0.012220 | 0.012239 | 0.012241 | 0.011463 | 0.011766 |
| 0.011834 | 0.012337 | 0.011840 | 0.011866 | 0.012339 | 0.011400 | 0.011296 |
| 0.011262 | 0.011262 | 0.011732 | 0.011718 | 0.011869 | 0.011597 | 0.011262 |



|          |          |          |          |          |          |          |
|----------|----------|----------|----------|----------|----------|----------|
| S300     | 0.011866 | 0.011866 | 0.011933 | 0.011698 | 0.011698 | 0.011765 |
| 0.011671 | 0.011603 | 0.011765 | 0.011463 | 0.011530 | 0.011498 | 0.011463 |
| 0.011496 | 0.011664 | 0.011463 | 0.011496 | 0.011564 | 0.011530 | 0.011496 |
| 0.011463 | 0.011496 | 0.011396 | 0.011463 | 0.011430 | 0.011496 | 0.011637 |
| 0.011530 | 0.011496 | 0.011396 | 0.011429 | 0.011496 | 0.011530 | 0.011496 |
| 0.011530 | 0.011564 | 0.011530 | 0.011530 | 0.011564 | 0.011530 | 0.011698 |
| 0.011463 | 0.011530 | 0.011564 | 0.011496 | 0.011597 | 0.011631 | 0.011564 |
| 0.011530 | 0.011698 | 0.011598 | 0.011664 | 0.011530 | 0.011731 | 0.011530 |
| 0.011496 | 0.011597 | 0.011664 | 0.011731 | 0.011698 | 0.011597 | 0.011698 |
| 0.011496 | 0.011564 | 0.011530 | 0.011698 | 0.011799 | 0.011530 | 0.011597 |
| 0.011496 | 0.011597 | 0.011564 | 0.011631 | 0.011564 | 0.011564 | 0.011564 |
| 0.011463 | 0.011496 | 0.011463 | 0.011564 | 0.011530 | 0.011565 | 0.011631 |
| 0.011564 | 0.011530 | 0.011530 | 0.011496 | 0.011631 | 0.011396 | 0.011530 |
| 0.011698 | 0.011631 | 0.011664 | 0.011698 | 0.011530 | 0.011698 | 0.011530 |
| 0.011728 | 0.011733 | 0.011739 | 0.011490 | 0.011433 | 0.011575 | 0.011415 |
| 0.012048 | 0.011416 | 0.011472 | 0.011765 | 0.011765 | 0.011564 | 0.011664 |
| 0.011597 | 0.011564 | 0.011631 | 0.011530 | 0.011631 | 0.011496 | 0.011564 |
| 0.011530 | 0.011631 | 0.011832 | 0.011698 | 0.011597 | 0.011564 | 0.011429 |
| 0.011463 | 0.011463 | 0.011463 | 0.011497 | 0.011497 | 0.011463 | 0.011396 |
| 0.011497 | 0.011564 | 0.011497 | 0.011497 | 0.011530 | 0.011530 | 0.011533 |
| 0.011601 | 0.011530 | 0.011530 | 0.011348 | 0.011422 | 0.011411 | 0.011531 |
| 0.011534 | 0.011473 | 0.011466 | 0.011509 | 0.011400 | 0.011437 | 0.011465 |
| 0.011492 | 0.011508 | 0.011439 | 0.011464 | 0.011475 | 0.011598 | 0.011565 |
| 0.011632 | 0.011566 | 0.011564 | 0.011664 | 0.011597 | 0.011899 | 0.011765 |
| 0.011597 | 0.011665 | 0.011530 | 0.011631 | 0.011429 | 0.011463 | 0.011463 |
| 0.011530 | 0.011530 | 0.011497 | 0.011463 | 0.011496 | 0.011463 | 0.011564 |
| 0.011463 | 0.011497 | 0.011564 | 0.011463 | 0.011566 | 0.011665 | 0.011668 |
| 0.011597 | 0.011564 | 0.011463 | 0.011397 | 0.011530 | 0.011463 | 0.011396 |
| 0.011400 | 0.011597 | 0.011396 | 0.011597 | 0.011429 | 0.011530 | 0.011497 |
| 0.011530 | 0.011497 | 0.011463 | 0.011497 | 0.011530 | 0.011396 | 0.011463 |
| 0.011497 | 0.011497 | 0.011564 | 0.011497 | 0.011530 | 0.011564 | 0.011799 |
| 0.011698 | 0.011631 | 0.011698 | 0.011667 | 0.011698 | 0.011530 | 0.011497 |
| 0.011533 | 0.011788 | 0.011609 | 0.011437 | 0.011705 | 0.011401 | 0.011532 |
| 0.011705 | 0.011604 | 0.011698 | 0.011900 | 0.011538 | 0.011765 | 0.011664 |
| 0.011664 | 0.011832 | 0.011629 | 0.011513 | 0.011563 | 0.011564 | 0.011635 |
| 0.011732 | 0.011633 | 0.011770 | 0.011737 | 0.011765 | 0.011833 | 0.011873 |
| 0.011669 | 0.011739 | 0.011737 | 0.011669 | 0.011968 | 0.011429 | 0.011633 |
| 0.011530 | 0.011530 | 0.011429 | 0.011429 | 0.011429 | 0.011496 | 0.011564 |
| 0.011362 | 0.011496 | 0.011396 | 0.011564 | 0.011429 | 0.011496 | 0.011564 |
| 0.011496 | 0.011731 | 0.011631 | 0.011664 | 0.011396 | 0.011496 | 0.011530 |
| 0.011530 | 0.011496 | 0.011564 | 0.011597 | 0.011463 | 0.011463 | 0.011463 |
| 0.011799 | 0.011631 | 0.011631 | 0.011429 | 0.011530 | 0.011631 | 0.011463 |
| 0.011463 | 0.011530 | 0.011496 | 0.011597 | 0.011463 | 0.011329 | 0.000000 |
| 0.011396 | 0.011496 | 0.011496 | 0.011429 | 0.011429 | 0.011597 | 0.011530 |
| 0.011429 | 0.011530 | 0.011396 | 0.011429 | 0.011564 | 0.011463 | 0.011463 |
| 0.011430 | 0.011564 | 0.011497 | 0.011396 | 0.011530 | 0.011396 | 0.011564 |
| 0.011539 | 0.011463 | 0.011564 | 0.011597 | 0.011631 | 0.011496 | 0.011597 |
| 0.011463 | 0.011731 | 0.011396 | 0.011664 | 0.011463 | 0.011463 | 0.011396 |
| 0.011564 | 0.011631 | 0.011530 | 0.011597 | 0.011429 | 0.011631 | 0.011463 |
| 0.011463 | 0.011463 | 0.011429 | 0.011530 | 0.011496 | 0.011597 | 0.011664 |
| 0.011664 | 0.011631 | 0.011530 | 0.011631 | 0.011530 | 0.011463 | 0.011429 |
| 0.011463 | 0.011463 | 0.011530 | 0.011463 | 0.011362 | 0.011597 | 0.011463 |
| 0.011496 | 0.011496 | 0.011631 | 0.011664 | 0.011564 | 0.011429 | 0.011497 |
| 0.011564 | 0.011496 | 0.011597 | 0.011463 | 0.011597 | 0.011698 | 0.011799 |
| 0.011496 | 0.011698 | 0.011509 | 0.018012 | 0.011453 | 0.011733 | 0.011653 |
| 0.011614 | 0.011658 | 0.011636 | 0.011408 | 0.011665 | 0.011682 | 0.011668 |
| 0.011534 | 0.011426 | 0.011450 | 0.011521 | 0.011490 | 0.011702 | 0.011533 |
| 0.011436 | 0.011433 | 0.011431 | 0.011391 | 0.011631 | 0.011665 | 0.011669 |
| 0.011438 | 0.011631 | 0.011631 | 0.011597 | 0.011564 | 0.011564 | 0.011530 |
| 0.011564 | 0.011496 | 0.011530 | 0.011564 | 0.011530 | 0.011463 | 0.011497 |

|          |          |          |          |          |          |          |
|----------|----------|----------|----------|----------|----------|----------|
| 0.011497 | 0.011564 | 0.011463 | 0.011564 | 0.011597 | 0.011631 | 0.011530 |
| 0.011564 | 0.011530 | 0.011665 | 0.011665 | 0.011597 | 0.011632 | 0.011665 |
| 0.011362 | 0.011429 | 0.011463 | 0.011497 | 0.011429 | 0.011665 | 0.011665 |
| 0.011698 | 0.011698 | 0.011631 | 0.011732 | 0.011698 | 0.011734 | 0.011497 |
| 0.011564 | 0.011631 | 0.011597 | 0.011497 | 0.011564 | 0.011530 | 0.011564 |
| 0.011631 | 0.011631 | 0.011665 | 0.011497 | 0.011464 | 0.011732 | 0.011631 |
| 0.011568 | 0.011463 | 0.011564 | 0.011665 | 0.011564 | 0.011698 | 0.011731 |
| 0.011900 | 0.011538 | 0.011765 | 0.011664 | 0.011664 | 0.011832 | 0.011463 |
| 0.011633 | 0.011531 | 0.011497 | 0.011497 | 0.011564 | 0.011463 | 0.011564 |
| 0.011597 | 0.011631 | 0.011530 | 0.011564 | 0.011530 | 0.011665 | 0.011665 |
| 0.011597 | 0.011632 | 0.011698 | 0.011631 | 0.012271 | 0.011632 | 0.011588 |
| 0.011623 | 0.011580 | 0.011693 | 0.011614 | 0.011690 | 0.011612 | 0.011612 |
| 0.012159 | 0.011476 | 0.011608 | 0.011544 | 0.011818 | 0.011706 | 0.011740 |
| 0.012216 | 0.011663 | 0.011804 | 0.011866 | 0.011732 | 0.011530 | 0.011770 |
| 0.011429 | 0.011530 | 0.011731 | 0.011698 | 0.011702 | 0.011496 | 0.011397 |
| 0.011530 | 0.011396 | 0.011429 | 0.011530 | 0.011362 | 0.011496 | 0.011396 |
| 0.011530 | 0.011564 | 0.011463 | 0.011429 | 0.011530 | 0.011463 | 0.011496 |
| 0.011496 | 0.011429 | 0.011496 | 0.011530 | 0.011429 | 0.011564 | 0.011664 |
| 0.011564 | 0.011631 | 0.011564 | 0.011564 | 0.011496 | 0.011698 | 0.011530 |
| 0.011338 | 0.011497 | 0.011530 | 0.011501 | 0.011530 | 0.011597 | 0.011597 |
| 0.011597 | 0.011463 | 0.011496 | 0.011463 | 0.011631 | 0.011631 | 0.011564 |
| 0.011563 | 0.011698 | 0.011664 | 0.011597 | 0.011799 | 0.011799 | 0.011664 |
| 0.011496 | 0.011564 | 0.011597 | 0.011732 | 0.011564 | 0.011530 | 0.011564 |
| 0.011597 | 0.011530 | 0.011530 | 0.011832 | 0.011698 | 0.011799 | 0.011530 |
| 0.011631 | 0.011698 | 0.011564 | 0.011631 | 0.011597 | 0.011463 | 0.011597 |
| 0.011564 | 0.011530 | 0.011530 | 0.011698 | 0.011530 | 0.011631 | 0.011664 |
| 0.011563 | 0.011739 | 0.011732 | 0.011507 | 0.011286 | 0.011638 | 0.011370 |
| 0.011500 | 0.011644 | 0.011446 | 0.011730 | 0.011548 | 0.011569 | 0.011538 |
| 0.011468 | 0.011324 | 0.011394 | 0.011324 | 0.011330 | 0.011596 | 0.011587 |
| 0.011625 | 0.011454 | 0.011624 | 0.011553 | 0.011566 | 0.011497 | 0.011564 |
| 0.011564 | 0.011632 | 0.011736 | 0.011535 | 0.011874 | 0.011873 | 0.011564 |
| 0.011597 | 0.011665 | 0.011530 | 0.011631 | 0.011429 | 0.011463 | 0.011463 |
| 0.011530 | 0.011530 | 0.011497 | 0.011463 | 0.011496 | 0.011463 | 0.011564 |
| 0.011514 | 0.011515 | 0.011540 | 0.011540 | 0.011676 | 0.011607 | 0.011675 |
| 0.011639 | 0.011598 | 0.011356 | 0.011348 | 0.011534 | 0.011704 | 0.011705 |
| 0.011497 | 0.011568 | 0.011801 | 0.011770 | 0.011699 | 0.011733 | 0.011664 |
| 0.011597 | 0.011664 | 0.011664 | 0.011564 | 0.011933 | 0.011732 | 0.011799 |
| 0.011833 | 0.011701 | 0.011538 | 0.011615 | 0.011497 | 0.011698 | 0.011664 |
| 0.011699 | 0.011731 | 0.011731 | 0.011731 | 0.011886 | 0.011866 | 0.011476 |
| 0.011364 | 0.011337 | 0.011469 | 0.011434 | 0.011504 | 0.011359 | 0.011502 |
| 0.011506 | 0.011367 | 0.011394 | 0.011510 | 0.011531 | 0.011573 | 0.011429 |
| 0.011463 | 0.011463 | 0.011463 | 0.011497 | 0.011497 | 0.011463 | 0.011396 |
| 0.011497 | 0.011564 | 0.011497 | 0.011497 | 0.011530 | 0.011530 | 0.011533 |
| 0.011601 | 0.011530 | 0.011530 | 0.011566 | 0.011497 | 0.011564 | 0.011564 |
| 0.011632 | 0.011736 | 0.011535 | 0.011874 | 0.011873 | 0.011564 | 0.011732 |
| 0.011664 | 0.011664 | 0.011500 | 0.011582 | 0.011616 | 0.011639 | 0.011446 |
| 0.011611 | 0.011789 | 0.011653 | 0.011570 | 0.011396 | 0.011597 | 0.011463 |
| 0.011497 | 0.011564 | 0.011463 | 0.011566 | 0.011665 | 0.011668 | 0.011564 |
| 0.011463 | 0.011397 | 0.011530 | 0.011463 | 0.011396 | 0.011400 | 0.011597 |
| 0.011564 | 0.011496 | 0.011530 | 0.011564 | 0.011530 | 0.011463 | 0.011463 |
| 0.011530 | 0.011564 | 0.011564 | 0.011496 | 0.011564 | 0.011799 | 0.011463 |
| 0.011496 | 0.011698 | 0.011496 | 0.011396 | 0.011496 | 0.011664 | 0.011489 |
| 0.011678 | 0.011315 | 0.011361 | 0.011423 | 0.011549 | 0.011455 | 0.011311 |
| 0.011323 | 0.011396 | 0.011496 | 0.011603 | 0.011464 | 0.011601 | 0.011733 |
| 0.011632 | 0.011703 | 0.011631 | 0.011880 | 0.011597 | 0.012472 | 0.011633 |
| 0.012372 | 0.012139 | 0.012273 | 0.012545 | 0.011664 | 0.011564 | 0.011598 |
| 0.012238 | 0.011971 | 0.011564 | 0.011463 | 0.011531 | 0.011531 | 0.011500 |
| 0.011396 | 0.011399 | 0.011463 | 0.011430 | 0.011867 | 0.011933 | 0.011935 |
| 0.011834 | 0.011934 | 0.012038 | 0.011804 | 0.012306 | 0.012313 | 0.012373 |
| 0.012374 | 0.012408 | 0.012357 | 0.012374 | 0.012375 | 0.011597 | 0.011900 |

|          |          |          |          |          |          |          |
|----------|----------|----------|----------|----------|----------|----------|
| 0.011968 | 0.012472 | 0.011976 | 0.012001 | 0.012474 | 0.011536 | 0.011430 |
| 0.011396 | 0.011396 | 0.011867 | 0.011842 | 0.012010 | 0.011732 | 0.011397 |
| S301     | 0.011799 | 0.011799 | 0.011866 | 0.011631 | 0.011631 | 0.011698 |
| 0.011604 | 0.011536 | 0.011698 | 0.011396 | 0.011463 | 0.011430 | 0.011396 |
| 0.011429 | 0.011597 | 0.011396 | 0.011429 | 0.011496 | 0.011463 | 0.011429 |
| 0.011396 | 0.011429 | 0.011329 | 0.011396 | 0.011430 | 0.011429 | 0.011570 |
| 0.011463 | 0.011429 | 0.011329 | 0.011362 | 0.011496 | 0.011463 | 0.011497 |
| 0.011463 | 0.011564 | 0.011463 | 0.011463 | 0.011496 | 0.011463 | 0.011631 |
| 0.011396 | 0.011463 | 0.011496 | 0.011429 | 0.011530 | 0.011564 | 0.011496 |
| 0.011463 | 0.011631 | 0.011530 | 0.011597 | 0.011463 | 0.011731 | 0.011463 |
| 0.011429 | 0.011530 | 0.011597 | 0.011731 | 0.011631 | 0.011530 | 0.011631 |
| 0.011496 | 0.011564 | 0.011463 | 0.011698 | 0.011732 | 0.011463 | 0.011530 |
| 0.011429 | 0.011530 | 0.011497 | 0.011564 | 0.011496 | 0.011496 | 0.011496 |
| 0.011396 | 0.011429 | 0.011396 | 0.011497 | 0.011463 | 0.011498 | 0.011564 |
| 0.011497 | 0.011463 | 0.011530 | 0.011429 | 0.011564 | 0.011396 | 0.011463 |
| 0.011631 | 0.011564 | 0.011597 | 0.011631 | 0.011463 | 0.011698 | 0.011463 |
| 0.011653 | 0.011658 | 0.011702 | 0.011412 | 0.011396 | 0.011502 | 0.011375 |
| 0.012011 | 0.011467 | 0.011431 | 0.011698 | 0.011698 | 0.011496 | 0.011597 |
| 0.011530 | 0.011496 | 0.011564 | 0.011463 | 0.011564 | 0.011496 | 0.011496 |
| 0.011463 | 0.011564 | 0.011765 | 0.011631 | 0.011530 | 0.011497 | 0.011430 |
| 0.011396 | 0.011396 | 0.011463 | 0.011429 | 0.011430 | 0.011396 | 0.011329 |
| 0.011430 | 0.011497 | 0.011429 | 0.011429 | 0.011463 | 0.011463 | 0.011465 |
| 0.011533 | 0.011463 | 0.011463 | 0.011348 | 0.011422 | 0.011376 | 0.011464 |
| 0.011467 | 0.011404 | 0.011466 | 0.011440 | 0.011366 | 0.011403 | 0.011432 |
| 0.011492 | 0.011474 | 0.011508 | 0.011396 | 0.011406 | 0.011531 | 0.011497 |
| 0.011565 | 0.011498 | 0.011497 | 0.011597 | 0.011530 | 0.011900 | 0.011698 |
| 0.011530 | 0.011597 | 0.011396 | 0.011564 | 0.011362 | 0.011396 | 0.011396 |
| 0.011463 | 0.011463 | 0.011429 | 0.011396 | 0.011429 | 0.011396 | 0.011497 |
| 0.011463 | 0.011564 | 0.011497 | 0.011396 | 0.011498 | 0.011597 | 0.011601 |
| 0.011598 | 0.011497 | 0.011396 | 0.011330 | 0.011463 | 0.011396 | 0.011329 |
| 0.011332 | 0.011598 | 0.011396 | 0.011598 | 0.011362 | 0.011463 | 0.011430 |
| 0.011530 | 0.011429 | 0.011463 | 0.011430 | 0.011463 | 0.011329 | 0.011463 |
| 0.011497 | 0.011429 | 0.011497 | 0.011429 | 0.011463 | 0.011497 | 0.011732 |
| 0.011631 | 0.011564 | 0.011631 | 0.011599 | 0.011631 | 0.011463 | 0.011429 |
| 0.011466 | 0.011748 | 0.011609 | 0.011369 | 0.011637 | 0.011333 | 0.011454 |
| 0.011637 | 0.011536 | 0.011631 | 0.011832 | 0.011538 | 0.011698 | 0.011665 |
| 0.011597 | 0.011765 | 0.011593 | 0.011472 | 0.011521 | 0.011497 | 0.011568 |
| 0.011665 | 0.011566 | 0.011703 | 0.011737 | 0.011698 | 0.011765 | 0.011805 |
| 0.011602 | 0.011739 | 0.011703 | 0.011635 | 0.011901 | 0.011362 | 0.011566 |
| 0.011530 | 0.011463 | 0.011362 | 0.011362 | 0.011429 | 0.011429 | 0.011496 |
| 0.011429 | 0.011497 | 0.011396 | 0.011496 | 0.011429 | 0.011429 | 0.011496 |
| 0.011429 | 0.011664 | 0.011564 | 0.011597 | 0.011329 | 0.011429 | 0.011463 |
| 0.011463 | 0.011429 | 0.011497 | 0.011530 | 0.011396 | 0.011396 | 0.011396 |
| 0.011732 | 0.011564 | 0.011564 | 0.011362 | 0.011463 | 0.011631 | 0.011396 |
| 0.011396 | 0.011463 | 0.011429 | 0.011597 | 0.011396 | 0.011262 | 0.011396 |
| 0.000000 | 0.011429 | 0.011429 | 0.011362 | 0.011362 | 0.011530 | 0.011463 |
| 0.011362 | 0.011463 | 0.011329 | 0.011362 | 0.011497 | 0.011430 | 0.011396 |
| 0.011363 | 0.011496 | 0.011430 | 0.011329 | 0.011463 | 0.011329 | 0.011497 |
| 0.011539 | 0.011396 | 0.011497 | 0.011530 | 0.011564 | 0.011429 | 0.011530 |
| 0.011396 | 0.011731 | 0.011329 | 0.011597 | 0.011396 | 0.011396 | 0.011329 |
| 0.011564 | 0.011564 | 0.011463 | 0.011530 | 0.011362 | 0.011564 | 0.011396 |
| 0.011396 | 0.011396 | 0.011429 | 0.011530 | 0.011429 | 0.011530 | 0.011597 |
| 0.011597 | 0.011564 | 0.011463 | 0.011564 | 0.011530 | 0.011396 | 0.011362 |
| 0.011396 | 0.011396 | 0.011463 | 0.011396 | 0.011362 | 0.011530 | 0.011396 |
| 0.011429 | 0.011429 | 0.011564 | 0.011597 | 0.011496 | 0.011429 | 0.011429 |
| 0.011496 | 0.011429 | 0.011530 | 0.011396 | 0.011530 | 0.011631 | 0.011732 |
| 0.011429 | 0.011631 | 0.011440 | 0.017936 | 0.011388 | 0.011672 | 0.011584 |
| 0.011545 | 0.011588 | 0.011584 | 0.011408 | 0.011610 | 0.011613 | 0.011668 |
| 0.011535 | 0.011427 | 0.011372 | 0.011479 | 0.011451 | 0.011505 | 0.011490 |
| 0.011483 | 0.011395 | 0.011394 | 0.011325 | 0.011564 | 0.011597 | 0.011601 |

|          |          |          |          |          |          |          |
|----------|----------|----------|----------|----------|----------|----------|
| 0.011438 | 0.011564 | 0.011564 | 0.011530 | 0.011497 | 0.011497 | 0.011463 |
| 0.011497 | 0.011429 | 0.011463 | 0.011429 | 0.011463 | 0.011396 | 0.011429 |
| 0.011429 | 0.011497 | 0.011396 | 0.011497 | 0.011530 | 0.011564 | 0.011463 |
| 0.011496 | 0.011463 | 0.011598 | 0.011598 | 0.011530 | 0.011565 | 0.011598 |
| 0.011362 | 0.011362 | 0.011396 | 0.011497 | 0.011362 | 0.011597 | 0.011597 |
| 0.011631 | 0.011631 | 0.011564 | 0.011664 | 0.011631 | 0.011666 | 0.011497 |
| 0.011497 | 0.011564 | 0.011597 | 0.011362 | 0.011497 | 0.011463 | 0.011497 |
| 0.011564 | 0.011564 | 0.011597 | 0.011564 | 0.011464 | 0.011665 | 0.011631 |
| 0.011500 | 0.011396 | 0.011497 | 0.011598 | 0.011497 | 0.011631 | 0.011664 |
| 0.011832 | 0.011538 | 0.011698 | 0.011665 | 0.011597 | 0.011765 | 0.011396 |
| 0.011566 | 0.011464 | 0.011429 | 0.011429 | 0.011497 | 0.011396 | 0.011497 |
| 0.011530 | 0.011564 | 0.011463 | 0.011496 | 0.011463 | 0.011598 | 0.011598 |
| 0.011530 | 0.011565 | 0.011631 | 0.011564 | 0.012204 | 0.011596 | 0.011517 |
| 0.011587 | 0.011546 | 0.011657 | 0.011545 | 0.011655 | 0.011508 | 0.011577 |
| 0.012125 | 0.011441 | 0.011574 | 0.011510 | 0.011783 | 0.011672 | 0.011741 |
| 0.012148 | 0.011625 | 0.011736 | 0.011799 | 0.011664 | 0.011463 | 0.011702 |
| 0.011362 | 0.011530 | 0.011664 | 0.011631 | 0.011635 | 0.011429 | 0.011330 |
| 0.011463 | 0.011396 | 0.011429 | 0.011463 | 0.011362 | 0.011429 | 0.011329 |
| 0.011463 | 0.011496 | 0.011396 | 0.011362 | 0.011463 | 0.011396 | 0.011429 |
| 0.011429 | 0.011362 | 0.011429 | 0.011463 | 0.011362 | 0.011564 | 0.011597 |
| 0.011497 | 0.011564 | 0.011496 | 0.011497 | 0.011429 | 0.011631 | 0.011463 |
| 0.011269 | 0.011429 | 0.011463 | 0.011433 | 0.011530 | 0.011530 | 0.011530 |
| 0.011463 | 0.011463 | 0.011429 | 0.011463 | 0.011564 | 0.011564 | 0.011496 |
| 0.011496 | 0.011631 | 0.011597 | 0.011530 | 0.011732 | 0.011732 | 0.011597 |
| 0.011429 | 0.011496 | 0.011463 | 0.011732 | 0.011497 | 0.011530 | 0.011497 |
| 0.011530 | 0.011463 | 0.011463 | 0.011765 | 0.011698 | 0.011732 | 0.011463 |
| 0.011564 | 0.011631 | 0.011496 | 0.011564 | 0.011530 | 0.011396 | 0.011530 |
| 0.011496 | 0.011463 | 0.011463 | 0.011631 | 0.011463 | 0.011564 | 0.011597 |
| 0.011496 | 0.011671 | 0.011664 | 0.011467 | 0.011342 | 0.011570 | 0.011370 |
| 0.011445 | 0.011605 | 0.011411 | 0.011641 | 0.011548 | 0.011417 | 0.011379 |
| 0.011468 | 0.011324 | 0.011450 | 0.011258 | 0.011330 | 0.011529 | 0.011587 |
| 0.011588 | 0.011493 | 0.011553 | 0.011483 | 0.011498 | 0.011430 | 0.011497 |
| 0.011497 | 0.011565 | 0.011669 | 0.011467 | 0.011806 | 0.011838 | 0.011497 |
| 0.011530 | 0.011597 | 0.011396 | 0.011564 | 0.011362 | 0.011396 | 0.011396 |
| 0.011463 | 0.011463 | 0.011429 | 0.011396 | 0.011429 | 0.011396 | 0.011497 |
| 0.011479 | 0.011480 | 0.011471 | 0.011505 | 0.011642 | 0.011607 | 0.011606 |
| 0.011605 | 0.011531 | 0.011319 | 0.011348 | 0.011467 | 0.011636 | 0.011637 |
| 0.011430 | 0.011500 | 0.011734 | 0.011702 | 0.011632 | 0.011666 | 0.011597 |
| 0.011530 | 0.011597 | 0.011597 | 0.011497 | 0.011866 | 0.011664 | 0.011732 |
| 0.011766 | 0.011630 | 0.011469 | 0.011545 | 0.011429 | 0.011631 | 0.011597 |
| 0.011632 | 0.011664 | 0.011664 | 0.011664 | 0.011847 | 0.011799 | 0.011407 |
| 0.011297 | 0.011303 | 0.011401 | 0.011366 | 0.011470 | 0.011321 | 0.011434 |
| 0.011437 | 0.011367 | 0.011394 | 0.011472 | 0.011464 | 0.011539 | 0.011430 |
| 0.011396 | 0.011396 | 0.011463 | 0.011429 | 0.011430 | 0.011396 | 0.011329 |
| 0.011430 | 0.011497 | 0.011429 | 0.011429 | 0.011463 | 0.011463 | 0.011465 |
| 0.011533 | 0.011463 | 0.011463 | 0.011498 | 0.011430 | 0.011497 | 0.011497 |
| 0.011565 | 0.011669 | 0.011467 | 0.011806 | 0.011838 | 0.011497 | 0.011664 |
| 0.011597 | 0.011597 | 0.011432 | 0.011547 | 0.011547 | 0.011571 | 0.011375 |
| 0.011611 | 0.011789 | 0.011526 | 0.011502 | 0.011396 | 0.011598 | 0.011463 |
| 0.011564 | 0.011497 | 0.011396 | 0.011498 | 0.011597 | 0.011601 | 0.011497 |
| 0.011396 | 0.011330 | 0.011463 | 0.011396 | 0.011329 | 0.011332 | 0.011598 |
| 0.011497 | 0.011429 | 0.011463 | 0.011429 | 0.011463 | 0.011396 | 0.011396 |
| 0.011463 | 0.011497 | 0.011496 | 0.011429 | 0.011496 | 0.011732 | 0.011396 |
| 0.011429 | 0.011631 | 0.011429 | 0.011463 | 0.011429 | 0.011597 | 0.011446 |
| 0.011735 | 0.011315 | 0.011411 | 0.011423 | 0.011508 | 0.011419 | 0.011269 |
| 0.011375 | 0.011329 | 0.011429 | 0.011535 | 0.011397 | 0.011534 | 0.011665 |
| 0.011565 | 0.011635 | 0.011564 | 0.011812 | 0.011530 | 0.012404 | 0.011566 |
| 0.012305 | 0.012072 | 0.012206 | 0.012477 | 0.011597 | 0.011497 | 0.011531 |
| 0.012171 | 0.011903 | 0.011497 | 0.011396 | 0.011464 | 0.011464 | 0.011432 |
| 0.011329 | 0.011332 | 0.011396 | 0.011363 | 0.011800 | 0.011866 | 0.011867 |

|          |          |          |          |          |          |          |
|----------|----------|----------|----------|----------|----------|----------|
| 0.011767 | 0.011867 | 0.011971 | 0.011737 | 0.012239 | 0.012246 | 0.012306 |
| 0.012307 | 0.012340 | 0.012289 | 0.012307 | 0.012308 | 0.011530 | 0.011833 |
| 0.011901 | 0.012404 | 0.011908 | 0.011934 | 0.012407 | 0.011468 | 0.011363 |
| 0.011329 | 0.011329 | 0.011800 | 0.011800 | 0.011940 | 0.011664 | 0.011330 |
| S302     | 0.011631 | 0.011631 | 0.011967 | 0.011732 | 0.011732 | 0.011799 |
| 0.011637 | 0.011569 | 0.011799 | 0.011228 | 0.011295 | 0.011262 | 0.011228 |
| 0.011262 | 0.011429 | 0.011228 | 0.011262 | 0.011329 | 0.011295 | 0.011262 |
| 0.011228 | 0.011262 | 0.011362 | 0.011228 | 0.011228 | 0.011262 | 0.011603 |
| 0.011496 | 0.011262 | 0.011161 | 0.011396 | 0.011329 | 0.011295 | 0.011329 |
| 0.011295 | 0.011329 | 0.011295 | 0.011295 | 0.011329 | 0.011295 | 0.011463 |
| 0.011228 | 0.011295 | 0.011329 | 0.011262 | 0.011362 | 0.011396 | 0.011329 |
| 0.011295 | 0.011463 | 0.011362 | 0.011631 | 0.011295 | 0.011564 | 0.011295 |
| 0.011262 | 0.011362 | 0.011429 | 0.011564 | 0.011664 | 0.011362 | 0.011463 |
| 0.011329 | 0.011396 | 0.011295 | 0.011530 | 0.011765 | 0.011295 | 0.011362 |
| 0.011262 | 0.011362 | 0.011329 | 0.011396 | 0.011329 | 0.011329 | 0.011329 |
| 0.011228 | 0.011262 | 0.011228 | 0.011329 | 0.011295 | 0.011329 | 0.011396 |
| 0.011329 | 0.011295 | 0.011362 | 0.011262 | 0.011396 | 0.011228 | 0.011295 |
| 0.011463 | 0.011396 | 0.011631 | 0.011463 | 0.011295 | 0.011530 | 0.011295 |
| 0.011468 | 0.011695 | 0.011513 | 0.011216 | 0.011210 | 0.011318 | 0.011415 |
| 0.012048 | 0.011518 | 0.011225 | 0.011530 | 0.011530 | 0.011329 | 0.011429 |
| 0.011362 | 0.011329 | 0.011396 | 0.011295 | 0.011396 | 0.011329 | 0.011329 |
| 0.011295 | 0.011396 | 0.011597 | 0.011463 | 0.011362 | 0.011329 | 0.011262 |
| 0.011228 | 0.011228 | 0.011295 | 0.011262 | 0.011463 | 0.011430 | 0.011362 |
| 0.011463 | 0.011530 | 0.011262 | 0.011262 | 0.011295 | 0.011295 | 0.011297 |
| 0.011364 | 0.011295 | 0.011295 | 0.011132 | 0.011205 | 0.011165 | 0.011296 |
| 0.011297 | 0.011232 | 0.011282 | 0.011267 | 0.011162 | 0.011197 | 0.011263 |
| 0.011492 | 0.011267 | 0.011336 | 0.011228 | 0.011233 | 0.011363 | 0.011329 |
| 0.011397 | 0.011330 | 0.011329 | 0.011429 | 0.011362 | 0.011732 | 0.011530 |
| 0.011564 | 0.011430 | 0.011295 | 0.011396 | 0.011195 | 0.011429 | 0.011228 |
| 0.011295 | 0.011295 | 0.011262 | 0.011228 | 0.011262 | 0.011228 | 0.011329 |
| 0.011295 | 0.011396 | 0.011329 | 0.011228 | 0.011330 | 0.011430 | 0.011432 |
| 0.011430 | 0.011329 | 0.011228 | 0.011161 | 0.011295 | 0.011228 | 0.011161 |
| 0.011264 | 0.011430 | 0.011228 | 0.011430 | 0.011195 | 0.011295 | 0.011262 |
| 0.011362 | 0.011262 | 0.011295 | 0.011262 | 0.011295 | 0.011161 | 0.011295 |
| 0.011329 | 0.011262 | 0.011329 | 0.011262 | 0.011295 | 0.011329 | 0.011564 |
| 0.011664 | 0.011597 | 0.011665 | 0.011431 | 0.011665 | 0.011295 | 0.011262 |
| 0.011297 | 0.011586 | 0.011426 | 0.011197 | 0.011671 | 0.011163 | 0.011257 |
| 0.011671 | 0.011570 | 0.011463 | 0.011664 | 0.011368 | 0.011530 | 0.011497 |
| 0.011429 | 0.011597 | 0.011415 | 0.011266 | 0.011312 | 0.011329 | 0.011398 |
| 0.011497 | 0.011397 | 0.011533 | 0.011601 | 0.011530 | 0.011597 | 0.011704 |
| 0.011399 | 0.011603 | 0.011500 | 0.011432 | 0.011733 | 0.011194 | 0.011397 |
| 0.011362 | 0.011295 | 0.011194 | 0.011194 | 0.011262 | 0.011262 | 0.011329 |
| 0.011262 | 0.011329 | 0.011228 | 0.011329 | 0.011262 | 0.011262 | 0.011329 |
| 0.011262 | 0.011698 | 0.011597 | 0.011631 | 0.011161 | 0.011262 | 0.011295 |
| 0.011295 | 0.011262 | 0.011329 | 0.011362 | 0.011228 | 0.011228 | 0.011228 |
| 0.011765 | 0.011396 | 0.011396 | 0.011194 | 0.011295 | 0.011463 | 0.011228 |
| 0.011228 | 0.011295 | 0.011262 | 0.011429 | 0.011228 | 0.011362 | 0.011496 |
| 0.011429 | 0.000000 | 0.011262 | 0.011194 | 0.011194 | 0.011362 | 0.011295 |
| 0.011194 | 0.011161 | 0.011161 | 0.011195 | 0.011329 | 0.011463 | 0.011228 |
| 0.011195 | 0.011329 | 0.011262 | 0.011161 | 0.011496 | 0.011161 | 0.011329 |
| 0.011403 | 0.011228 | 0.011530 | 0.011362 | 0.011396 | 0.011262 | 0.011362 |
| 0.011228 | 0.011564 | 0.011161 | 0.011429 | 0.011228 | 0.011228 | 0.011161 |
| 0.011396 | 0.011598 | 0.011295 | 0.011362 | 0.011194 | 0.011597 | 0.011228 |
| 0.011228 | 0.011228 | 0.011262 | 0.011362 | 0.011262 | 0.011362 | 0.011429 |
| 0.011429 | 0.011396 | 0.011295 | 0.011396 | 0.011362 | 0.011228 | 0.011194 |
| 0.011228 | 0.011228 | 0.011295 | 0.011228 | 0.011194 | 0.011362 | 0.011228 |
| 0.011262 | 0.011262 | 0.011396 | 0.011429 | 0.011329 | 0.011262 | 0.011262 |
| 0.011329 | 0.011262 | 0.011362 | 0.011228 | 0.011362 | 0.011463 | 0.011765 |
| 0.011262 | 0.011664 | 0.011267 | 0.011785 | 0.011322 | 0.011366 | 0.011618 |
| 0.011579 | 0.011623 | 0.011374 | 0.011350 | 0.011719 | 0.011647 | 0.011364 |

|          |          |          |          |          |          |          |
|----------|----------|----------|----------|----------|----------|----------|
| 0.011534 | 0.011487 | 0.011177 | 0.011270 | 0.011255 | 0.011307 | 0.011275 |
| 0.011529 | 0.011433 | 0.011431 | 0.011259 | 0.011396 | 0.011429 | 0.011432 |
| 0.011266 | 0.011396 | 0.011396 | 0.011362 | 0.011329 | 0.011329 | 0.011295 |
| 0.011329 | 0.011262 | 0.011295 | 0.011329 | 0.011295 | 0.011228 | 0.011262 |
| 0.011262 | 0.011329 | 0.011228 | 0.011329 | 0.011362 | 0.011396 | 0.011295 |
| 0.011329 | 0.011295 | 0.011631 | 0.011631 | 0.011362 | 0.011396 | 0.011430 |
| 0.011195 | 0.011195 | 0.011228 | 0.011329 | 0.011195 | 0.011430 | 0.011430 |
| 0.011463 | 0.011463 | 0.011396 | 0.011497 | 0.011665 | 0.011498 | 0.011329 |
| 0.011329 | 0.011396 | 0.011430 | 0.011262 | 0.011329 | 0.011295 | 0.011329 |
| 0.011396 | 0.011396 | 0.011429 | 0.011396 | 0.011296 | 0.011497 | 0.011463 |
| 0.011331 | 0.011228 | 0.011329 | 0.011430 | 0.011329 | 0.011463 | 0.011496 |
| 0.011664 | 0.011368 | 0.011530 | 0.011497 | 0.011429 | 0.011597 | 0.011228 |
| 0.011397 | 0.011296 | 0.011262 | 0.011262 | 0.011329 | 0.011228 | 0.011329 |
| 0.011362 | 0.011396 | 0.011295 | 0.011329 | 0.011295 | 0.011631 | 0.011631 |
| 0.011362 | 0.011396 | 0.011463 | 0.011396 | 0.012035 | 0.011417 | 0.011377 |
| 0.011412 | 0.011407 | 0.011482 | 0.011372 | 0.011480 | 0.011439 | 0.011370 |
| 0.011987 | 0.011268 | 0.011403 | 0.011337 | 0.011611 | 0.011468 | 0.011605 |
| 0.012012 | 0.011437 | 0.011567 | 0.011631 | 0.011496 | 0.011497 | 0.011533 |
| 0.011194 | 0.011362 | 0.011496 | 0.011463 | 0.011466 | 0.011463 | 0.011431 |
| 0.011295 | 0.011228 | 0.011262 | 0.011295 | 0.011194 | 0.011262 | 0.011161 |
| 0.011295 | 0.011329 | 0.011228 | 0.011194 | 0.011295 | 0.011228 | 0.011262 |
| 0.011262 | 0.011194 | 0.011262 | 0.011295 | 0.011194 | 0.011329 | 0.011429 |
| 0.011329 | 0.011396 | 0.011329 | 0.011329 | 0.011262 | 0.011664 | 0.011295 |
| 0.011304 | 0.011262 | 0.011497 | 0.011501 | 0.011362 | 0.011362 | 0.011362 |
| 0.011362 | 0.011295 | 0.011262 | 0.011295 | 0.011396 | 0.011396 | 0.011329 |
| 0.011329 | 0.011463 | 0.011631 | 0.011362 | 0.011564 | 0.011564 | 0.011429 |
| 0.011262 | 0.011329 | 0.011362 | 0.011765 | 0.011329 | 0.011362 | 0.011329 |
| 0.011362 | 0.011295 | 0.011295 | 0.011597 | 0.011530 | 0.011564 | 0.011295 |
| 0.011396 | 0.011463 | 0.011329 | 0.011396 | 0.011362 | 0.011228 | 0.011564 |
| 0.011329 | 0.011295 | 0.011295 | 0.011463 | 0.011295 | 0.011396 | 0.011631 |
| 0.011329 | 0.011705 | 0.011698 | 0.011507 | 0.011229 | 0.011400 | 0.011318 |
| 0.011170 | 0.011722 | 0.011236 | 0.011462 | 0.011304 | 0.011417 | 0.011432 |
| 0.011519 | 0.011258 | 0.011394 | 0.011258 | 0.011276 | 0.011462 | 0.011385 |
| 0.011399 | 0.011296 | 0.011377 | 0.011307 | 0.011330 | 0.011463 | 0.011530 |
| 0.011530 | 0.011396 | 0.011500 | 0.011467 | 0.011636 | 0.011661 | 0.011329 |
| 0.011564 | 0.011430 | 0.011295 | 0.011396 | 0.011195 | 0.011429 | 0.011228 |
| 0.011295 | 0.011295 | 0.011262 | 0.011228 | 0.011262 | 0.011228 | 0.011329 |
| 0.011305 | 0.011270 | 0.011300 | 0.011300 | 0.011436 | 0.011436 | 0.011436 |
| 0.011435 | 0.011363 | 0.011134 | 0.011132 | 0.011297 | 0.011467 | 0.011467 |
| 0.011262 | 0.011331 | 0.011565 | 0.011533 | 0.011464 | 0.011498 | 0.011429 |
| 0.011362 | 0.011429 | 0.011429 | 0.011329 | 0.011900 | 0.011497 | 0.011564 |
| 0.011597 | 0.011665 | 0.011299 | 0.011372 | 0.011262 | 0.011463 | 0.011429 |
| 0.011464 | 0.011496 | 0.011496 | 0.011496 | 0.011650 | 0.011631 | 0.011268 |
| 0.011162 | 0.011164 | 0.011264 | 0.011230 | 0.011299 | 0.011098 | 0.011502 |
| 0.011300 | 0.011367 | 0.011108 | 0.011285 | 0.011296 | 0.011334 | 0.011262 |
| 0.011228 | 0.011228 | 0.011295 | 0.011262 | 0.011463 | 0.011430 | 0.011362 |
| 0.011463 | 0.011530 | 0.011262 | 0.011262 | 0.011295 | 0.011295 | 0.011297 |
| 0.011364 | 0.011295 | 0.011295 | 0.011330 | 0.011463 | 0.011530 | 0.011530 |
| 0.011396 | 0.011500 | 0.011467 | 0.011636 | 0.011661 | 0.011329 | 0.011496 |
| 0.011429 | 0.011429 | 0.011263 | 0.011443 | 0.011373 | 0.011401 | 0.011270 |
| 0.011439 | 0.011607 | 0.011399 | 0.011332 | 0.011228 | 0.011430 | 0.011295 |
| 0.011396 | 0.011329 | 0.011228 | 0.011330 | 0.011430 | 0.011432 | 0.011329 |
| 0.011228 | 0.011161 | 0.011295 | 0.011228 | 0.011161 | 0.011264 | 0.011430 |
| 0.011329 | 0.011262 | 0.011295 | 0.011329 | 0.011295 | 0.011228 | 0.011430 |
| 0.011295 | 0.011329 | 0.011329 | 0.011262 | 0.011329 | 0.011564 | 0.011228 |
| 0.011262 | 0.011664 | 0.011262 | 0.011295 | 0.011262 | 0.011631 | 0.011232 |
| 0.011678 | 0.011188 | 0.011311 | 0.011422 | 0.011549 | 0.011455 | 0.011186 |
| 0.011270 | 0.011429 | 0.011530 | 0.011637 | 0.011498 | 0.011635 | 0.011766 |
| 0.011666 | 0.011703 | 0.011664 | 0.011914 | 0.011631 | 0.012505 | 0.011667 |
| 0.012406 | 0.012173 | 0.012307 | 0.012579 | 0.011631 | 0.011329 | 0.011631 |

|          |          |          |          |          |          |          |
|----------|----------|----------|----------|----------|----------|----------|
| 0.012070 | 0.012005 | 0.011597 | 0.011497 | 0.011565 | 0.011565 | 0.011534 |
| 0.011429 | 0.011433 | 0.011496 | 0.011464 | 0.011834 | 0.011900 | 0.011901 |
| 0.011800 | 0.011901 | 0.012004 | 0.011770 | 0.012070 | 0.012076 | 0.012137 |
| 0.012138 | 0.012172 | 0.012118 | 0.012138 | 0.012139 | 0.011362 | 0.011665 |
| 0.011733 | 0.012236 | 0.011738 | 0.011967 | 0.012440 | 0.011502 | 0.011396 |
| 0.011362 | 0.011362 | 0.011833 | 0.011800 | 0.011975 | 0.011698 | 0.011363 |
| S303     | 0.011631 | 0.011631 | 0.011967 | 0.011731 | 0.011731 | 0.011799 |
| 0.011637 | 0.011569 | 0.011799 | 0.011228 | 0.011295 | 0.011262 | 0.011228 |
| 0.011262 | 0.011429 | 0.011228 | 0.011262 | 0.011329 | 0.011295 | 0.011194 |
| 0.011228 | 0.011262 | 0.011362 | 0.011228 | 0.011262 | 0.011262 | 0.011603 |
| 0.011496 | 0.011262 | 0.011161 | 0.011396 | 0.011329 | 0.011295 | 0.011329 |
| 0.011295 | 0.011396 | 0.011295 | 0.011295 | 0.011329 | 0.011295 | 0.011463 |
| 0.011228 | 0.011295 | 0.011329 | 0.011262 | 0.011362 | 0.011396 | 0.011329 |
| 0.011295 | 0.011463 | 0.011362 | 0.011631 | 0.011295 | 0.011564 | 0.011295 |
| 0.011262 | 0.011362 | 0.011429 | 0.011564 | 0.011664 | 0.011362 | 0.011463 |
| 0.011329 | 0.011396 | 0.011295 | 0.011530 | 0.011765 | 0.011295 | 0.011362 |
| 0.011262 | 0.011362 | 0.011329 | 0.011396 | 0.011329 | 0.011329 | 0.011329 |
| 0.011228 | 0.011262 | 0.011228 | 0.011329 | 0.011295 | 0.011329 | 0.011396 |
| 0.011329 | 0.011295 | 0.011362 | 0.011262 | 0.011396 | 0.011228 | 0.011295 |
| 0.011463 | 0.011396 | 0.011631 | 0.011463 | 0.011295 | 0.011530 | 0.011295 |
| 0.011468 | 0.011695 | 0.011513 | 0.011216 | 0.011209 | 0.011318 | 0.011414 |
| 0.012048 | 0.011518 | 0.011143 | 0.011530 | 0.011530 | 0.011329 | 0.011429 |
| 0.011362 | 0.011329 | 0.011396 | 0.011295 | 0.011396 | 0.011329 | 0.011329 |
| 0.011295 | 0.011396 | 0.011597 | 0.011463 | 0.011362 | 0.011329 | 0.011262 |
| 0.011228 | 0.011228 | 0.011295 | 0.011262 | 0.011463 | 0.011429 | 0.011362 |
| 0.011463 | 0.011530 | 0.011262 | 0.011262 | 0.011295 | 0.011295 | 0.011297 |
| 0.011364 | 0.011295 | 0.011295 | 0.011168 | 0.011241 | 0.011200 | 0.011296 |
| 0.011297 | 0.011232 | 0.011282 | 0.011267 | 0.011196 | 0.011231 | 0.011263 |
| 0.011528 | 0.011301 | 0.011336 | 0.011161 | 0.011233 | 0.011363 | 0.011329 |
| 0.011396 | 0.011330 | 0.011329 | 0.011429 | 0.011362 | 0.011732 | 0.011530 |
| 0.011564 | 0.011430 | 0.011295 | 0.011396 | 0.011195 | 0.011429 | 0.011228 |
| 0.011295 | 0.011295 | 0.011262 | 0.011228 | 0.011262 | 0.011228 | 0.011329 |
| 0.011295 | 0.011396 | 0.011329 | 0.011228 | 0.011330 | 0.011430 | 0.011432 |
| 0.011430 | 0.011329 | 0.011228 | 0.011161 | 0.011295 | 0.011228 | 0.011161 |
| 0.011162 | 0.011430 | 0.011228 | 0.011430 | 0.011195 | 0.011295 | 0.011262 |
| 0.011362 | 0.011262 | 0.011295 | 0.011262 | 0.011295 | 0.011161 | 0.011295 |
| 0.011329 | 0.011195 | 0.011329 | 0.011262 | 0.011295 | 0.011329 | 0.011564 |
| 0.011664 | 0.011597 | 0.011665 | 0.011431 | 0.011665 | 0.011295 | 0.011195 |
| 0.011297 | 0.011545 | 0.011426 | 0.011197 | 0.011671 | 0.011163 | 0.011296 |
| 0.011671 | 0.011570 | 0.011463 | 0.011664 | 0.011367 | 0.011530 | 0.011497 |
| 0.011429 | 0.011597 | 0.011451 | 0.011307 | 0.011312 | 0.011127 | 0.011398 |
| 0.011497 | 0.011397 | 0.011533 | 0.011601 | 0.011530 | 0.011597 | 0.011704 |
| 0.011432 | 0.011603 | 0.011534 | 0.011466 | 0.011733 | 0.011194 | 0.011397 |
| 0.011362 | 0.011295 | 0.011194 | 0.011194 | 0.011262 | 0.011262 | 0.011329 |
| 0.011262 | 0.011329 | 0.011228 | 0.011329 | 0.011262 | 0.011194 | 0.011329 |
| 0.011262 | 0.011698 | 0.011597 | 0.011631 | 0.011161 | 0.011262 | 0.011295 |
| 0.011295 | 0.011262 | 0.011329 | 0.011362 | 0.011228 | 0.011228 | 0.011228 |
| 0.011765 | 0.011396 | 0.011396 | 0.011194 | 0.011295 | 0.011463 | 0.011228 |
| 0.011228 | 0.011295 | 0.011262 | 0.011429 | 0.011228 | 0.011362 | 0.011496 |
| 0.011429 | 0.011262 | 0.000000 | 0.011194 | 0.011194 | 0.011362 | 0.011295 |
| 0.011194 | 0.011295 | 0.011161 | 0.011194 | 0.011329 | 0.011463 | 0.011228 |
| 0.011195 | 0.011329 | 0.011262 | 0.011161 | 0.011496 | 0.011161 | 0.011329 |
| 0.011402 | 0.011228 | 0.011530 | 0.011362 | 0.011396 | 0.011262 | 0.011362 |
| 0.011228 | 0.011564 | 0.011161 | 0.011429 | 0.011228 | 0.011228 | 0.011161 |
| 0.011396 | 0.011597 | 0.011295 | 0.011362 | 0.011194 | 0.011597 | 0.011228 |
| 0.011228 | 0.011161 | 0.011262 | 0.011362 | 0.011262 | 0.011362 | 0.011429 |
| 0.011429 | 0.011396 | 0.011295 | 0.011396 | 0.011362 | 0.011228 | 0.011194 |
| 0.011228 | 0.011228 | 0.011295 | 0.011228 | 0.011194 | 0.011362 | 0.011228 |
| 0.011262 | 0.011262 | 0.011396 | 0.011429 | 0.011329 | 0.011262 | 0.011262 |
| 0.011329 | 0.011262 | 0.011362 | 0.011228 | 0.011362 | 0.011463 | 0.011765 |

|          |          |          |          |          |          |          |
|----------|----------|----------|----------|----------|----------|----------|
| 0.011262 | 0.011664 | 0.011267 | 0.017785 | 0.011322 | 0.011488 | 0.011618 |
| 0.011579 | 0.011623 | 0.011374 | 0.011292 | 0.011774 | 0.011647 | 0.011425 |
| 0.011534 | 0.011610 | 0.011177 | 0.011270 | 0.011255 | 0.011356 | 0.011275 |
| 0.011529 | 0.011433 | 0.011431 | 0.011193 | 0.011396 | 0.011429 | 0.011432 |
| 0.011301 | 0.011396 | 0.011396 | 0.011362 | 0.011329 | 0.011329 | 0.011295 |
| 0.011329 | 0.011262 | 0.011295 | 0.011329 | 0.011295 | 0.011228 | 0.011262 |
| 0.011262 | 0.011329 | 0.011228 | 0.011329 | 0.011362 | 0.011396 | 0.011295 |
| 0.011329 | 0.011295 | 0.011631 | 0.011631 | 0.011362 | 0.011396 | 0.011430 |
| 0.011195 | 0.011195 | 0.011228 | 0.011329 | 0.011195 | 0.011429 | 0.011429 |
| 0.011463 | 0.011463 | 0.011396 | 0.011497 | 0.011665 | 0.011498 | 0.011329 |
| 0.011329 | 0.011396 | 0.011429 | 0.011262 | 0.011329 | 0.011295 | 0.011329 |
| 0.011396 | 0.011396 | 0.011429 | 0.011396 | 0.011296 | 0.011497 | 0.011463 |
| 0.011331 | 0.011228 | 0.011329 | 0.011430 | 0.011329 | 0.011463 | 0.011496 |
| 0.011664 | 0.011367 | 0.011530 | 0.011497 | 0.011429 | 0.011597 | 0.011228 |
| 0.011397 | 0.011295 | 0.011262 | 0.011262 | 0.011329 | 0.011228 | 0.011329 |
| 0.011362 | 0.011396 | 0.011295 | 0.011329 | 0.011295 | 0.011631 | 0.011631 |
| 0.011362 | 0.011396 | 0.011463 | 0.011396 | 0.012035 | 0.011453 | 0.011377 |
| 0.011447 | 0.011407 | 0.011517 | 0.011406 | 0.011515 | 0.011439 | 0.011405 |
| 0.011987 | 0.011302 | 0.011437 | 0.011371 | 0.011645 | 0.011502 | 0.011604 |
| 0.012012 | 0.011437 | 0.011567 | 0.011631 | 0.011496 | 0.011496 | 0.011533 |
| 0.011194 | 0.011362 | 0.011496 | 0.011463 | 0.011466 | 0.011463 | 0.011431 |
| 0.011295 | 0.011161 | 0.011262 | 0.011295 | 0.011194 | 0.011262 | 0.011161 |
| 0.011295 | 0.011329 | 0.011228 | 0.011194 | 0.011295 | 0.011228 | 0.011262 |
| 0.011262 | 0.011194 | 0.011262 | 0.011295 | 0.011194 | 0.011396 | 0.011429 |
| 0.011329 | 0.011396 | 0.011329 | 0.011329 | 0.011262 | 0.011664 | 0.011295 |
| 0.011338 | 0.011262 | 0.011497 | 0.011501 | 0.011362 | 0.011362 | 0.011362 |
| 0.011362 | 0.011295 | 0.011262 | 0.011295 | 0.011396 | 0.011396 | 0.011329 |
| 0.011329 | 0.011463 | 0.011631 | 0.011362 | 0.011564 | 0.011564 | 0.011429 |
| 0.011262 | 0.011329 | 0.011362 | 0.011765 | 0.011329 | 0.011362 | 0.011329 |
| 0.011362 | 0.011295 | 0.011295 | 0.011597 | 0.011530 | 0.011564 | 0.011295 |
| 0.011396 | 0.011463 | 0.011329 | 0.011396 | 0.011362 | 0.011228 | 0.011564 |
| 0.011329 | 0.011295 | 0.011295 | 0.011463 | 0.011295 | 0.011396 | 0.011631 |
| 0.011329 | 0.011705 | 0.011698 | 0.011507 | 0.011286 | 0.011400 | 0.011267 |
| 0.011280 | 0.011722 | 0.011236 | 0.011462 | 0.011304 | 0.011416 | 0.011432 |
| 0.011519 | 0.011258 | 0.011394 | 0.011258 | 0.011276 | 0.011462 | 0.011385 |
| 0.011399 | 0.011296 | 0.011377 | 0.011307 | 0.011330 | 0.011463 | 0.011530 |
| 0.011530 | 0.011396 | 0.011500 | 0.011501 | 0.011636 | 0.011661 | 0.011329 |
| 0.011564 | 0.011430 | 0.011295 | 0.011396 | 0.011195 | 0.011429 | 0.011228 |
| 0.011295 | 0.011295 | 0.011262 | 0.011228 | 0.011262 | 0.011228 | 0.011329 |
| 0.011305 | 0.011305 | 0.011231 | 0.011334 | 0.011471 | 0.011436 | 0.011436 |
| 0.011435 | 0.011363 | 0.011171 | 0.011168 | 0.011297 | 0.011467 | 0.011467 |
| 0.011262 | 0.011331 | 0.011565 | 0.011533 | 0.011464 | 0.011498 | 0.011429 |
| 0.011362 | 0.011429 | 0.011429 | 0.011329 | 0.011900 | 0.011496 | 0.011564 |
| 0.011597 | 0.011665 | 0.011299 | 0.011372 | 0.011262 | 0.011463 | 0.011429 |
| 0.011464 | 0.011496 | 0.011496 | 0.011496 | 0.011610 | 0.011631 | 0.011268 |
| 0.011162 | 0.011164 | 0.011264 | 0.011230 | 0.011333 | 0.011135 | 0.011502 |
| 0.011232 | 0.011411 | 0.011156 | 0.011285 | 0.011296 | 0.011368 | 0.011262 |
| 0.011228 | 0.011228 | 0.011295 | 0.011262 | 0.011463 | 0.011429 | 0.011362 |
| 0.011463 | 0.011530 | 0.011262 | 0.011262 | 0.011295 | 0.011295 | 0.011297 |
| 0.011364 | 0.011295 | 0.011295 | 0.011330 | 0.011463 | 0.011530 | 0.011530 |
| 0.011396 | 0.011500 | 0.011501 | 0.011636 | 0.011661 | 0.011329 | 0.011496 |
| 0.011429 | 0.011429 | 0.011263 | 0.011443 | 0.011373 | 0.011401 | 0.011270 |
| 0.011439 | 0.011652 | 0.011441 | 0.011332 | 0.011228 | 0.011430 | 0.011295 |
| 0.011396 | 0.011329 | 0.011228 | 0.011330 | 0.011430 | 0.011432 | 0.011329 |
| 0.011228 | 0.011161 | 0.011295 | 0.011228 | 0.011161 | 0.011162 | 0.011430 |
| 0.011329 | 0.011262 | 0.011295 | 0.011329 | 0.011295 | 0.011228 | 0.011430 |
| 0.011295 | 0.011329 | 0.011329 | 0.011262 | 0.011329 | 0.011564 | 0.011228 |
| 0.011262 | 0.011664 | 0.011262 | 0.011295 | 0.011262 | 0.011631 | 0.011232 |
| 0.011735 | 0.011230 | 0.011311 | 0.011463 | 0.011549 | 0.011455 | 0.011186 |
| 0.011270 | 0.011429 | 0.011530 | 0.011637 | 0.011498 | 0.011635 | 0.011766 |



|          |          |          |          |          |          |          |
|----------|----------|----------|----------|----------|----------|----------|
| 0.011666 | 0.011703 | 0.011664 | 0.011914 | 0.011631 | 0.012505 | 0.011666 |
| 0.012405 | 0.012173 | 0.012307 | 0.012578 | 0.011631 | 0.011329 | 0.011631 |
| 0.012070 | 0.012004 | 0.011597 | 0.011497 | 0.011564 | 0.011564 | 0.011534 |
| 0.011429 | 0.011433 | 0.011496 | 0.011464 | 0.011833 | 0.011900 | 0.011901 |
| 0.011800 | 0.011901 | 0.012004 | 0.011770 | 0.012070 | 0.012076 | 0.012137 |
| 0.012138 | 0.012172 | 0.012118 | 0.012138 | 0.012139 | 0.011362 | 0.011665 |
| 0.011733 | 0.012236 | 0.011738 | 0.011967 | 0.012440 | 0.011502 | 0.011396 |
| 0.011362 | 0.011362 | 0.011833 | 0.011842 | 0.011975 | 0.011698 | 0.011363 |
| S304     | 0.011564 | 0.011564 | 0.011900 | 0.011664 | 0.011664 | 0.011732 |
| 0.011569 | 0.011502 | 0.011732 | 0.011161 | 0.011228 | 0.011195 | 0.011161 |
| 0.011194 | 0.011362 | 0.011161 | 0.011194 | 0.011262 | 0.011228 | 0.011194 |
| 0.011161 | 0.011194 | 0.011295 | 0.011161 | 0.011195 | 0.011194 | 0.011535 |
| 0.011429 | 0.011194 | 0.011094 | 0.011329 | 0.011262 | 0.011228 | 0.011262 |
| 0.011228 | 0.011329 | 0.011228 | 0.011228 | 0.011262 | 0.011228 | 0.011396 |
| 0.011161 | 0.011228 | 0.011262 | 0.011195 | 0.011295 | 0.011329 | 0.011262 |
| 0.011228 | 0.011396 | 0.011295 | 0.011564 | 0.011228 | 0.011496 | 0.011228 |
| 0.011194 | 0.011295 | 0.011362 | 0.011496 | 0.011597 | 0.011295 | 0.011396 |
| 0.011262 | 0.011329 | 0.011228 | 0.011463 | 0.011698 | 0.011228 | 0.011295 |
| 0.011194 | 0.011295 | 0.011262 | 0.011329 | 0.011262 | 0.011262 | 0.011262 |
| 0.011161 | 0.011195 | 0.011161 | 0.011262 | 0.011228 | 0.011262 | 0.011329 |
| 0.011262 | 0.011228 | 0.011295 | 0.011194 | 0.011329 | 0.011161 | 0.011228 |
| 0.011396 | 0.011329 | 0.011564 | 0.011396 | 0.011228 | 0.011463 | 0.011228 |
| 0.011394 | 0.011620 | 0.011437 | 0.011138 | 0.011135 | 0.011244 | 0.011336 |
| 0.011975 | 0.011416 | 0.011143 | 0.011463 | 0.011463 | 0.011262 | 0.011362 |
| 0.011295 | 0.011262 | 0.011329 | 0.011228 | 0.011329 | 0.011262 | 0.011262 |
| 0.011228 | 0.011329 | 0.011530 | 0.011396 | 0.011295 | 0.011262 | 0.011195 |
| 0.011161 | 0.011161 | 0.011228 | 0.011195 | 0.011396 | 0.011362 | 0.011295 |
| 0.011396 | 0.011463 | 0.011195 | 0.011195 | 0.011228 | 0.011228 | 0.011229 |
| 0.011297 | 0.011228 | 0.011228 | 0.000000 | 0.011133 | 0.011095 | 0.011228 |
| 0.011230 | 0.011163 | 0.011208 | 0.011198 | 0.011094 | 0.011129 | 0.011195 |
| 0.011420 | 0.011198 | 0.011267 | 0.011161 | 0.011164 | 0.011296 | 0.011262 |
| 0.011329 | 0.011262 | 0.011262 | 0.011362 | 0.011295 | 0.011664 | 0.011463 |
| 0.011496 | 0.011362 | 0.011228 | 0.011329 | 0.011127 | 0.011362 | 0.011161 |
| 0.011228 | 0.011228 | 0.011195 | 0.011161 | 0.011194 | 0.011161 | 0.011262 |
| 0.011228 | 0.011329 | 0.011262 | 0.011161 | 0.011262 | 0.011362 | 0.011364 |
| 0.011362 | 0.011262 | 0.011161 | 0.011094 | 0.011228 | 0.011161 | 0.011094 |
| 0.011196 | 0.011362 | 0.011161 | 0.011362 | 0.011127 | 0.011228 | 0.011195 |
| 0.011295 | 0.011195 | 0.011228 | 0.011195 | 0.011228 | 0.011094 | 0.011228 |
| 0.011262 | 0.011195 | 0.011262 | 0.011195 | 0.011228 | 0.011262 | 0.011497 |
| 0.011597 | 0.011530 | 0.011597 | 0.011364 | 0.011598 | 0.011228 | 0.011195 |
| 0.011229 | 0.011505 | 0.011335 | 0.011129 | 0.011603 | 0.011094 | 0.011218 |
| 0.011603 | 0.011502 | 0.011396 | 0.011597 | 0.011299 | 0.011463 | 0.011429 |
| 0.011362 | 0.011530 | 0.011344 | 0.011184 | 0.011228 | 0.011262 | 0.011331 |
| 0.011429 | 0.011330 | 0.011466 | 0.011534 | 0.011463 | 0.011530 | 0.011636 |
| 0.011365 | 0.011535 | 0.011432 | 0.011364 | 0.011666 | 0.011127 | 0.011330 |
| 0.011295 | 0.011228 | 0.011127 | 0.011127 | 0.011194 | 0.011194 | 0.011262 |
| 0.011195 | 0.011262 | 0.011161 | 0.011262 | 0.011194 | 0.011194 | 0.011262 |
| 0.011194 | 0.011631 | 0.011530 | 0.011564 | 0.011094 | 0.011194 | 0.011228 |
| 0.011228 | 0.011194 | 0.011262 | 0.011295 | 0.011161 | 0.011161 | 0.011161 |
| 0.011698 | 0.011329 | 0.011329 | 0.011127 | 0.011228 | 0.011396 | 0.011161 |
| 0.011161 | 0.011228 | 0.011194 | 0.011362 | 0.011161 | 0.011295 | 0.011429 |
| 0.011362 | 0.011194 | 0.011194 | 0.000000 | 0.011127 | 0.011295 | 0.011228 |
| 0.000000 | 0.011228 | 0.011094 | 0.011127 | 0.011262 | 0.011362 | 0.011161 |
| 0.011094 | 0.011262 | 0.011195 | 0.011094 | 0.011429 | 0.011094 | 0.011262 |
| 0.011334 | 0.011161 | 0.011463 | 0.011295 | 0.011329 | 0.011194 | 0.011295 |
| 0.011161 | 0.011496 | 0.011094 | 0.011362 | 0.011161 | 0.011161 | 0.011094 |
| 0.011329 | 0.011530 | 0.011228 | 0.011295 | 0.011127 | 0.011530 | 0.011161 |
| 0.011161 | 0.011161 | 0.011194 | 0.011295 | 0.011194 | 0.011295 | 0.011362 |
| 0.011362 | 0.011329 | 0.011228 | 0.011329 | 0.011295 | 0.011161 | 0.011127 |
| 0.011161 | 0.011161 | 0.011228 | 0.011161 | 0.011127 | 0.011295 | 0.011161 |

|          |          |          |          |          |          |          |
|----------|----------|----------|----------|----------|----------|----------|
| 0.011194 | 0.011194 | 0.011329 | 0.011362 | 0.011262 | 0.011194 | 0.011195 |
| 0.011262 | 0.011195 | 0.011295 | 0.011161 | 0.011295 | 0.011396 | 0.011698 |
| 0.011194 | 0.011597 | 0.011198 | 0.017710 | 0.011191 | 0.011305 | 0.011548 |
| 0.011510 | 0.011553 | 0.011270 | 0.011234 | 0.011664 | 0.011578 | 0.011303 |
| 0.011440 | 0.011426 | 0.011099 | 0.011186 | 0.011177 | 0.011258 | 0.011146 |
| 0.011436 | 0.011358 | 0.011357 | 0.011193 | 0.011329 | 0.011362 | 0.011365 |
| 0.011198 | 0.011329 | 0.011329 | 0.011295 | 0.011262 | 0.011262 | 0.011228 |
| 0.011262 | 0.011195 | 0.011228 | 0.011262 | 0.011228 | 0.011161 | 0.011195 |
| 0.011195 | 0.011262 | 0.011161 | 0.011262 | 0.011295 | 0.011329 | 0.011228 |
| 0.011262 | 0.011228 | 0.011564 | 0.011564 | 0.011295 | 0.011329 | 0.011362 |
| 0.011127 | 0.011127 | 0.011161 | 0.011262 | 0.011127 | 0.011362 | 0.011362 |
| 0.011396 | 0.011396 | 0.011329 | 0.011429 | 0.011597 | 0.011431 | 0.011262 |
| 0.011262 | 0.011329 | 0.011362 | 0.011195 | 0.011262 | 0.011228 | 0.011262 |
| 0.011329 | 0.011329 | 0.011362 | 0.011329 | 0.011229 | 0.011430 | 0.011396 |
| 0.011263 | 0.011161 | 0.011262 | 0.011362 | 0.011262 | 0.011396 | 0.011429 |
| 0.011597 | 0.011299 | 0.011463 | 0.011429 | 0.011362 | 0.011530 | 0.011161 |
| 0.011330 | 0.011228 | 0.011195 | 0.011195 | 0.011262 | 0.011161 | 0.011262 |
| 0.011295 | 0.011329 | 0.011228 | 0.011262 | 0.011228 | 0.011564 | 0.011564 |
| 0.011295 | 0.011329 | 0.011396 | 0.011329 | 0.011968 | 0.011346 | 0.011306 |
| 0.011341 | 0.011303 | 0.011411 | 0.011337 | 0.011410 | 0.011336 | 0.011302 |
| 0.011918 | 0.011199 | 0.011334 | 0.011268 | 0.011542 | 0.011400 | 0.011536 |
| 0.011944 | 0.011362 | 0.011500 | 0.011564 | 0.011429 | 0.011429 | 0.011466 |
| 0.011127 | 0.011295 | 0.011429 | 0.011396 | 0.011398 | 0.011396 | 0.011363 |
| 0.011228 | 0.011161 | 0.011194 | 0.011228 | 0.011127 | 0.011194 | 0.011094 |
| 0.011228 | 0.011262 | 0.011161 | 0.011127 | 0.011228 | 0.011161 | 0.011194 |
| 0.011194 | 0.011127 | 0.011194 | 0.011228 | 0.011127 | 0.011329 | 0.011362 |
| 0.011262 | 0.011329 | 0.011262 | 0.011262 | 0.011194 | 0.011597 | 0.011228 |
| 0.011234 | 0.011195 | 0.011430 | 0.011433 | 0.011295 | 0.011295 | 0.011295 |
| 0.011295 | 0.011228 | 0.011194 | 0.011228 | 0.011329 | 0.011329 | 0.011262 |
| 0.011262 | 0.011396 | 0.011564 | 0.011295 | 0.011497 | 0.011497 | 0.011362 |
| 0.011194 | 0.011262 | 0.011295 | 0.011698 | 0.011262 | 0.011295 | 0.011262 |
| 0.011295 | 0.011228 | 0.011228 | 0.011530 | 0.011463 | 0.011497 | 0.011228 |
| 0.011329 | 0.011396 | 0.011262 | 0.011329 | 0.011295 | 0.011161 | 0.011496 |
| 0.011262 | 0.011228 | 0.011228 | 0.011396 | 0.011228 | 0.011329 | 0.011564 |
| 0.011262 | 0.011637 | 0.011631 | 0.011426 | 0.011117 | 0.011332 | 0.011215 |
| 0.011115 | 0.011644 | 0.011166 | 0.011373 | 0.011207 | 0.011315 | 0.011326 |
| 0.011417 | 0.011126 | 0.011283 | 0.011126 | 0.011168 | 0.011328 | 0.011304 |
| 0.011324 | 0.011218 | 0.011307 | 0.011236 | 0.011262 | 0.011396 | 0.011463 |
| 0.011463 | 0.011329 | 0.011432 | 0.011433 | 0.011569 | 0.011590 | 0.011262 |
| 0.011496 | 0.011362 | 0.011228 | 0.011329 | 0.011127 | 0.011362 | 0.011161 |
| 0.011228 | 0.011228 | 0.011195 | 0.011161 | 0.011194 | 0.011161 | 0.011262 |
| 0.011200 | 0.011200 | 0.011231 | 0.011231 | 0.011368 | 0.011368 | 0.011367 |
| 0.011367 | 0.011296 | 0.000000 | 0.000000 | 0.011230 | 0.011399 | 0.011399 |
| 0.011195 | 0.011263 | 0.011498 | 0.011466 | 0.011396 | 0.011430 | 0.011362 |
| 0.011295 | 0.011362 | 0.011362 | 0.011262 | 0.011832 | 0.011429 | 0.011497 |
| 0.011530 | 0.011594 | 0.011231 | 0.011303 | 0.011195 | 0.011396 | 0.011362 |
| 0.011397 | 0.011429 | 0.011429 | 0.011429 | 0.011571 | 0.011564 | 0.011199 |
| 0.011094 | 0.011095 | 0.011196 | 0.011162 | 0.011231 | 0.000000 | 0.011434 |
| 0.011232 | 0.011323 | 0.000000 | 0.011210 | 0.011228 | 0.011266 | 0.011195 |
| 0.011161 | 0.011161 | 0.011228 | 0.011195 | 0.011396 | 0.011362 | 0.011295 |
| 0.011396 | 0.011463 | 0.011195 | 0.011195 | 0.011228 | 0.011228 | 0.011229 |
| 0.011297 | 0.011228 | 0.011228 | 0.011262 | 0.011396 | 0.011463 | 0.011463 |
| 0.011329 | 0.011432 | 0.011433 | 0.011569 | 0.011590 | 0.011262 | 0.011429 |
| 0.011362 | 0.011362 | 0.011196 | 0.011373 | 0.011303 | 0.011333 | 0.011200 |
| 0.011370 | 0.011561 | 0.011357 | 0.011264 | 0.011161 | 0.011362 | 0.011228 |
| 0.011329 | 0.011262 | 0.011161 | 0.011262 | 0.011362 | 0.011364 | 0.011262 |
| 0.011161 | 0.011094 | 0.011228 | 0.011161 | 0.011094 | 0.011196 | 0.011362 |
| 0.011262 | 0.011195 | 0.011228 | 0.011262 | 0.011228 | 0.011161 | 0.011363 |
| 0.011228 | 0.011262 | 0.011262 | 0.011194 | 0.011262 | 0.011497 | 0.011161 |
| 0.011194 | 0.011597 | 0.011194 | 0.011228 | 0.011194 | 0.011564 | 0.011146 |

|          |          |          |          |          |          |          |
|----------|----------|----------|----------|----------|----------|----------|
| 0.011566 | 0.011103 | 0.011211 | 0.011342 | 0.011467 | 0.011383 | 0.011102 |
| 0.011165 | 0.011362 | 0.011463 | 0.011569 | 0.011430 | 0.011568 | 0.011699 |
| 0.011598 | 0.011635 | 0.011597 | 0.011846 | 0.011564 | 0.012438 | 0.011599 |
| 0.012338 | 0.012106 | 0.012240 | 0.012511 | 0.011564 | 0.011262 | 0.011564 |
| 0.012002 | 0.011937 | 0.011530 | 0.011430 | 0.011497 | 0.011497 | 0.011466 |
| 0.011362 | 0.011365 | 0.011429 | 0.011396 | 0.011766 | 0.011832 | 0.011834 |
| 0.011733 | 0.011833 | 0.011937 | 0.011703 | 0.012003 | 0.012008 | 0.012070 |
| 0.012070 | 0.012104 | 0.012050 | 0.012071 | 0.012072 | 0.011295 | 0.011598 |
| 0.011666 | 0.012169 | 0.011670 | 0.011900 | 0.012373 | 0.011434 | 0.011329 |
| 0.011295 | 0.011295 | 0.011766 | 0.011759 | 0.011904 | 0.011631 | 0.011296 |
| S305     | 0.011564 | 0.011564 | 0.011900 | 0.011664 | 0.011664 | 0.011732 |
| 0.011569 | 0.011501 | 0.011731 | 0.011161 | 0.011228 | 0.011195 | 0.011161 |
| 0.011194 | 0.011362 | 0.011161 | 0.011194 | 0.011262 | 0.011228 | 0.011194 |
| 0.011161 | 0.011194 | 0.011295 | 0.011161 | 0.011195 | 0.011194 | 0.011535 |
| 0.011429 | 0.011194 | 0.011094 | 0.011329 | 0.011262 | 0.011228 | 0.011262 |
| 0.011228 | 0.011329 | 0.011228 | 0.011228 | 0.011262 | 0.011228 | 0.011396 |
| 0.011161 | 0.011228 | 0.011262 | 0.011194 | 0.011295 | 0.011329 | 0.011262 |
| 0.011228 | 0.011396 | 0.011295 | 0.011564 | 0.011228 | 0.011496 | 0.011228 |
| 0.011194 | 0.011295 | 0.011362 | 0.011496 | 0.011597 | 0.011295 | 0.011396 |
| 0.011262 | 0.011329 | 0.011228 | 0.011463 | 0.011698 | 0.011228 | 0.011295 |
| 0.011194 | 0.011295 | 0.011262 | 0.011329 | 0.011262 | 0.011262 | 0.011262 |
| 0.011161 | 0.011194 | 0.011161 | 0.011262 | 0.011228 | 0.011262 | 0.011329 |
| 0.011262 | 0.011228 | 0.011295 | 0.011194 | 0.011329 | 0.011161 | 0.011228 |
| 0.011396 | 0.011329 | 0.011564 | 0.011396 | 0.011228 | 0.011463 | 0.011228 |
| 0.011394 | 0.011620 | 0.011437 | 0.011138 | 0.011135 | 0.011244 | 0.011336 |
| 0.011975 | 0.011365 | 0.011143 | 0.011463 | 0.011463 | 0.011262 | 0.011362 |
| 0.011295 | 0.011262 | 0.011329 | 0.011228 | 0.011329 | 0.011262 | 0.011262 |
| 0.011228 | 0.011329 | 0.011530 | 0.011396 | 0.011295 | 0.011262 | 0.011195 |
| 0.011161 | 0.011161 | 0.011228 | 0.011195 | 0.011396 | 0.011362 | 0.011295 |
| 0.011396 | 0.011463 | 0.011195 | 0.011195 | 0.011228 | 0.011228 | 0.011229 |
| 0.011297 | 0.011228 | 0.011228 | 0.011096 | 0.011169 | 0.011130 | 0.011228 |
| 0.011230 | 0.011163 | 0.011208 | 0.011198 | 0.011128 | 0.011163 | 0.011195 |
| 0.011456 | 0.011233 | 0.011267 | 0.011161 | 0.011164 | 0.011296 | 0.011262 |
| 0.011329 | 0.011262 | 0.011262 | 0.011362 | 0.011295 | 0.011664 | 0.011463 |
| 0.011496 | 0.011362 | 0.011228 | 0.011329 | 0.011127 | 0.011362 | 0.011161 |
| 0.011228 | 0.011228 | 0.011195 | 0.011161 | 0.011194 | 0.011161 | 0.011262 |
| 0.011228 | 0.011329 | 0.011262 | 0.011161 | 0.011262 | 0.011362 | 0.011364 |
| 0.011362 | 0.011262 | 0.011161 | 0.011094 | 0.011228 | 0.011161 | 0.011094 |
| 0.011196 | 0.011362 | 0.011161 | 0.011362 | 0.011127 | 0.011228 | 0.011195 |
| 0.011295 | 0.011195 | 0.011228 | 0.011195 | 0.011228 | 0.011094 | 0.011228 |
| 0.011262 | 0.011195 | 0.011262 | 0.011195 | 0.011228 | 0.011262 | 0.011497 |
| 0.011597 | 0.011530 | 0.011597 | 0.011363 | 0.011597 | 0.011228 | 0.011195 |
| 0.011229 | 0.011505 | 0.011335 | 0.011129 | 0.011603 | 0.011094 | 0.011218 |
| 0.011603 | 0.011502 | 0.011396 | 0.011597 | 0.011299 | 0.011463 | 0.011429 |
| 0.011362 | 0.011530 | 0.011380 | 0.011184 | 0.011270 | 0.011262 | 0.011331 |
| 0.011429 | 0.011330 | 0.011466 | 0.011534 | 0.011463 | 0.011530 | 0.011636 |
| 0.011365 | 0.011535 | 0.011466 | 0.011398 | 0.011666 | 0.011127 | 0.011330 |
| 0.011295 | 0.011228 | 0.011127 | 0.011127 | 0.011194 | 0.011194 | 0.011262 |
| 0.011194 | 0.011262 | 0.011161 | 0.011262 | 0.011194 | 0.011194 | 0.011262 |
| 0.011194 | 0.011631 | 0.011530 | 0.011564 | 0.011094 | 0.011194 | 0.011228 |
| 0.011228 | 0.011194 | 0.011262 | 0.011295 | 0.011161 | 0.011161 | 0.011161 |
| 0.011698 | 0.011329 | 0.011329 | 0.011127 | 0.011228 | 0.011396 | 0.011161 |
| 0.011161 | 0.011228 | 0.011194 | 0.011362 | 0.011161 | 0.011295 | 0.011429 |
| 0.011362 | 0.011194 | 0.011194 | 0.011127 | 0.000000 | 0.011295 | 0.011228 |
| 0.011127 | 0.011228 | 0.011094 | 0.011127 | 0.011262 | 0.011396 | 0.011161 |
| 0.011128 | 0.011262 | 0.011195 | 0.011094 | 0.011429 | 0.011094 | 0.011262 |
| 0.011334 | 0.011161 | 0.011463 | 0.011295 | 0.011329 | 0.011194 | 0.011295 |
| 0.011161 | 0.011496 | 0.011094 | 0.011362 | 0.011161 | 0.011161 | 0.011094 |
| 0.011329 | 0.011530 | 0.011228 | 0.011295 | 0.011127 | 0.011530 | 0.011161 |
| 0.011161 | 0.011161 | 0.011194 | 0.011295 | 0.011194 | 0.011295 | 0.011362 |

|          |          |          |          |          |          |          |
|----------|----------|----------|----------|----------|----------|----------|
| 0.011362 | 0.011329 | 0.011228 | 0.011329 | 0.011295 | 0.011161 | 0.011127 |
| 0.011161 | 0.011161 | 0.011228 | 0.011161 | 0.011127 | 0.011295 | 0.011161 |
| 0.011194 | 0.011194 | 0.011329 | 0.011362 | 0.011262 | 0.011194 | 0.011195 |
| 0.011262 | 0.011194 | 0.011295 | 0.011161 | 0.011295 | 0.011396 | 0.011698 |
| 0.011194 | 0.011597 | 0.011198 | 0.017710 | 0.011126 | 0.011305 | 0.011548 |
| 0.011510 | 0.011553 | 0.011217 | 0.011176 | 0.011609 | 0.011578 | 0.011242 |
| 0.011392 | 0.011426 | 0.011099 | 0.011144 | 0.011177 | 0.011208 | 0.011146 |
| 0.011389 | 0.011358 | 0.011357 | 0.011193 | 0.011329 | 0.011362 | 0.011365 |
| 0.011232 | 0.011329 | 0.011329 | 0.011295 | 0.011262 | 0.011262 | 0.011228 |
| 0.011262 | 0.011195 | 0.011228 | 0.011262 | 0.011228 | 0.011161 | 0.011195 |
| 0.011195 | 0.011262 | 0.011161 | 0.011262 | 0.011295 | 0.011329 | 0.011228 |
| 0.011262 | 0.011228 | 0.011564 | 0.011564 | 0.011295 | 0.011329 | 0.011362 |
| 0.011127 | 0.011127 | 0.011161 | 0.011262 | 0.011127 | 0.011362 | 0.011362 |
| 0.011396 | 0.011396 | 0.011329 | 0.011429 | 0.011597 | 0.011430 | 0.011262 |
| 0.011262 | 0.011329 | 0.011362 | 0.011195 | 0.011262 | 0.011228 | 0.011262 |
| 0.011329 | 0.011329 | 0.011362 | 0.011329 | 0.011229 | 0.011430 | 0.011396 |
| 0.011263 | 0.011161 | 0.011262 | 0.011362 | 0.011262 | 0.011396 | 0.011429 |
| 0.011597 | 0.011299 | 0.011463 | 0.011429 | 0.011362 | 0.011530 | 0.011161 |
| 0.011330 | 0.011228 | 0.011195 | 0.011195 | 0.011262 | 0.011161 | 0.011262 |
| 0.011295 | 0.011329 | 0.011228 | 0.011262 | 0.011228 | 0.011564 | 0.011564 |
| 0.011295 | 0.011329 | 0.011396 | 0.011329 | 0.011968 | 0.011382 | 0.011306 |
| 0.011376 | 0.011338 | 0.011447 | 0.011337 | 0.011445 | 0.011370 | 0.011336 |
| 0.011918 | 0.011233 | 0.011368 | 0.011302 | 0.011576 | 0.011434 | 0.011536 |
| 0.011944 | 0.011399 | 0.011500 | 0.011564 | 0.011429 | 0.011429 | 0.011466 |
| 0.011127 | 0.011295 | 0.011429 | 0.011396 | 0.011398 | 0.011396 | 0.011363 |
| 0.011228 | 0.011161 | 0.011194 | 0.011228 | 0.011127 | 0.011194 | 0.011094 |
| 0.011228 | 0.011262 | 0.011161 | 0.011127 | 0.011228 | 0.011161 | 0.011194 |
| 0.011194 | 0.011127 | 0.011194 | 0.011228 | 0.011127 | 0.011329 | 0.011362 |
| 0.011262 | 0.011329 | 0.011262 | 0.011262 | 0.011194 | 0.011597 | 0.011228 |
| 0.011269 | 0.011195 | 0.011430 | 0.011433 | 0.011295 | 0.011295 | 0.011295 |
| 0.011295 | 0.011228 | 0.011194 | 0.011228 | 0.011329 | 0.011329 | 0.011262 |
| 0.011262 | 0.011396 | 0.011564 | 0.011295 | 0.011497 | 0.011497 | 0.011362 |
| 0.011194 | 0.011262 | 0.011295 | 0.011698 | 0.011262 | 0.011295 | 0.011262 |
| 0.011295 | 0.011228 | 0.011228 | 0.011530 | 0.011463 | 0.011496 | 0.011228 |
| 0.011329 | 0.011396 | 0.011262 | 0.011329 | 0.011295 | 0.011161 | 0.011496 |
| 0.011262 | 0.011228 | 0.011228 | 0.011396 | 0.011228 | 0.011329 | 0.011564 |
| 0.011262 | 0.011637 | 0.011631 | 0.011385 | 0.011117 | 0.011332 | 0.011215 |
| 0.011115 | 0.011644 | 0.011166 | 0.011373 | 0.011207 | 0.011264 | 0.011273 |
| 0.011366 | 0.000000 | 0.011227 | 0.000000 | 0.011114 | 0.011261 | 0.011304 |
| 0.011324 | 0.011218 | 0.011307 | 0.011236 | 0.011262 | 0.011396 | 0.011463 |
| 0.011463 | 0.011329 | 0.011432 | 0.011433 | 0.011569 | 0.011590 | 0.011262 |
| 0.011496 | 0.011362 | 0.011228 | 0.011329 | 0.011127 | 0.011362 | 0.011161 |
| 0.011228 | 0.011228 | 0.011195 | 0.011161 | 0.011194 | 0.011161 | 0.011262 |
| 0.011235 | 0.011235 | 0.011231 | 0.011266 | 0.011402 | 0.011368 | 0.011367 |
| 0.011367 | 0.011296 | 0.000000 | 0.011096 | 0.011230 | 0.011399 | 0.011399 |
| 0.011195 | 0.011263 | 0.011498 | 0.011466 | 0.011396 | 0.011430 | 0.011362 |
| 0.011295 | 0.011362 | 0.011362 | 0.011262 | 0.011832 | 0.011429 | 0.011497 |
| 0.011530 | 0.011594 | 0.011231 | 0.011303 | 0.011195 | 0.011396 | 0.011362 |
| 0.011396 | 0.011429 | 0.011429 | 0.011429 | 0.011571 | 0.011564 | 0.011199 |
| 0.011094 | 0.011095 | 0.011196 | 0.011162 | 0.011265 | 0.011098 | 0.011434 |
| 0.011232 | 0.011323 | 0.000000 | 0.011248 | 0.011228 | 0.011300 | 0.011195 |
| 0.011161 | 0.011161 | 0.011228 | 0.011195 | 0.011396 | 0.011362 | 0.011295 |
| 0.011396 | 0.011463 | 0.011195 | 0.011195 | 0.011228 | 0.011228 | 0.011229 |
| 0.011297 | 0.011228 | 0.011228 | 0.011262 | 0.011396 | 0.011463 | 0.011463 |
| 0.011329 | 0.011432 | 0.011433 | 0.011569 | 0.011590 | 0.011262 | 0.011429 |
| 0.011362 | 0.011362 | 0.011196 | 0.011373 | 0.011303 | 0.011333 | 0.011200 |
| 0.011370 | 0.011561 | 0.011314 | 0.011230 | 0.011161 | 0.011362 | 0.011228 |
| 0.011329 | 0.011262 | 0.011161 | 0.011262 | 0.011362 | 0.011364 | 0.011262 |
| 0.011161 | 0.011094 | 0.011228 | 0.011161 | 0.011094 | 0.011196 | 0.011362 |
| 0.011262 | 0.011195 | 0.011228 | 0.011262 | 0.011228 | 0.011161 | 0.011362 |

|          |          |          |          |          |          |          |
|----------|----------|----------|----------|----------|----------|----------|
| 0.011228 | 0.011262 | 0.011262 | 0.011194 | 0.011262 | 0.011496 | 0.011161 |
| 0.011194 | 0.011597 | 0.011194 | 0.011228 | 0.011194 | 0.011564 | 0.011103 |
| 0.011566 | 0.011103 | 0.011161 | 0.011382 | 0.011467 | 0.011383 | 0.000000 |
| 0.011113 | 0.011362 | 0.011463 | 0.011569 | 0.011430 | 0.011568 | 0.011699 |
| 0.011598 | 0.011635 | 0.011597 | 0.011846 | 0.011564 | 0.012438 | 0.011599 |
| 0.012338 | 0.012105 | 0.012240 | 0.012511 | 0.011564 | 0.011262 | 0.011564 |
| 0.012002 | 0.011937 | 0.011530 | 0.011429 | 0.011497 | 0.011497 | 0.011466 |
| 0.011362 | 0.011365 | 0.011429 | 0.011396 | 0.011766 | 0.011832 | 0.011834 |
| 0.011733 | 0.011833 | 0.011937 | 0.011703 | 0.012003 | 0.012008 | 0.012070 |
| 0.012070 | 0.012104 | 0.012050 | 0.012070 | 0.012072 | 0.011295 | 0.011598 |
| 0.011665 | 0.012169 | 0.011670 | 0.011900 | 0.012373 | 0.011434 | 0.011329 |
| 0.011295 | 0.011295 | 0.011766 | 0.011801 | 0.011904 | 0.011631 | 0.011296 |
| S306     | 0.011732 | 0.011732 | 0.012068 | 0.011832 | 0.011832 | 0.011900 |
| 0.011739 | 0.011671 | 0.011900 | 0.011329 | 0.011396 | 0.011363 | 0.011329 |
| 0.011362 | 0.011530 | 0.011329 | 0.011362 | 0.011429 | 0.011396 | 0.011362 |
| 0.011329 | 0.011362 | 0.011463 | 0.011329 | 0.011363 | 0.011362 | 0.011705 |
| 0.011597 | 0.011362 | 0.011262 | 0.011496 | 0.011429 | 0.011396 | 0.011430 |
| 0.011396 | 0.011497 | 0.011396 | 0.011396 | 0.011429 | 0.011396 | 0.011564 |
| 0.011329 | 0.011396 | 0.011429 | 0.011362 | 0.011463 | 0.011497 | 0.011429 |
| 0.011396 | 0.011564 | 0.011463 | 0.011732 | 0.011396 | 0.011664 | 0.011396 |
| 0.011362 | 0.011463 | 0.011530 | 0.011664 | 0.011765 | 0.011463 | 0.011564 |
| 0.011429 | 0.011497 | 0.011396 | 0.011631 | 0.011866 | 0.011396 | 0.011463 |
| 0.011362 | 0.011463 | 0.011429 | 0.011497 | 0.011429 | 0.011429 | 0.011429 |
| 0.011329 | 0.011362 | 0.011329 | 0.011430 | 0.011396 | 0.011430 | 0.011496 |
| 0.011430 | 0.011396 | 0.011463 | 0.011362 | 0.011496 | 0.011329 | 0.011396 |
| 0.011564 | 0.011496 | 0.011732 | 0.011564 | 0.011396 | 0.011631 | 0.011396 |
| 0.011505 | 0.011733 | 0.011513 | 0.011216 | 0.011210 | 0.011355 | 0.011454 |
| 0.012085 | 0.011416 | 0.011225 | 0.011631 | 0.011631 | 0.011429 | 0.011530 |
| 0.011463 | 0.011429 | 0.011496 | 0.011396 | 0.011497 | 0.011429 | 0.011429 |
| 0.011396 | 0.011496 | 0.011698 | 0.011564 | 0.011463 | 0.011430 | 0.011363 |
| 0.011329 | 0.011329 | 0.011396 | 0.011362 | 0.011564 | 0.011530 | 0.011463 |
| 0.011564 | 0.011631 | 0.011362 | 0.011362 | 0.011396 | 0.011396 | 0.011330 |
| 0.011398 | 0.011396 | 0.011396 | 0.011204 | 0.011277 | 0.011306 | 0.011396 |
| 0.011399 | 0.011266 | 0.011355 | 0.011336 | 0.011298 | 0.011334 | 0.011364 |
| 0.011564 | 0.011405 | 0.011439 | 0.011329 | 0.011337 | 0.011464 | 0.011430 |
| 0.011498 | 0.011431 | 0.011430 | 0.011530 | 0.011463 | 0.011833 | 0.011631 |
| 0.011664 | 0.011530 | 0.011396 | 0.011497 | 0.011295 | 0.011530 | 0.011329 |
| 0.011396 | 0.011396 | 0.011362 | 0.011329 | 0.011362 | 0.011329 | 0.011430 |
| 0.011396 | 0.011497 | 0.011430 | 0.011329 | 0.011431 | 0.011530 | 0.011533 |
| 0.011531 | 0.011430 | 0.011262 | 0.011263 | 0.011396 | 0.011262 | 0.011262 |
| 0.011366 | 0.011531 | 0.011329 | 0.011531 | 0.011295 | 0.011396 | 0.011362 |
| 0.011463 | 0.011362 | 0.011396 | 0.011363 | 0.011396 | 0.011262 | 0.011396 |
| 0.011430 | 0.011362 | 0.011430 | 0.011362 | 0.011396 | 0.011430 | 0.011665 |
| 0.011765 | 0.011698 | 0.011766 | 0.011532 | 0.011766 | 0.011396 | 0.011362 |
| 0.011398 | 0.011626 | 0.011472 | 0.011300 | 0.011739 | 0.011265 | 0.011414 |
| 0.011773 | 0.011672 | 0.011564 | 0.011765 | 0.011470 | 0.011631 | 0.011598 |
| 0.011530 | 0.011698 | 0.011558 | 0.011390 | 0.011354 | 0.011430 | 0.011500 |
| 0.011597 | 0.011499 | 0.011635 | 0.011703 | 0.011631 | 0.011698 | 0.011806 |
| 0.011534 | 0.011705 | 0.011636 | 0.011567 | 0.011834 | 0.011295 | 0.011498 |
| 0.011463 | 0.011396 | 0.011295 | 0.011295 | 0.011362 | 0.011362 | 0.011429 |
| 0.011362 | 0.011430 | 0.011329 | 0.011429 | 0.011362 | 0.011362 | 0.011429 |
| 0.011362 | 0.011799 | 0.011698 | 0.011732 | 0.011262 | 0.011362 | 0.011396 |
| 0.011396 | 0.011362 | 0.011430 | 0.011463 | 0.011329 | 0.011329 | 0.011329 |
| 0.011866 | 0.011497 | 0.011497 | 0.011295 | 0.011396 | 0.011564 | 0.011329 |
| 0.011329 | 0.011396 | 0.011362 | 0.011530 | 0.011329 | 0.011463 | 0.011597 |
| 0.011530 | 0.011362 | 0.011362 | 0.011295 | 0.011295 | 0.000000 | 0.011396 |
| 0.011295 | 0.011396 | 0.011262 | 0.011295 | 0.011430 | 0.011564 | 0.011329 |
| 0.011295 | 0.011429 | 0.011363 | 0.011262 | 0.011597 | 0.011262 | 0.011429 |
| 0.011505 | 0.011329 | 0.011631 | 0.011463 | 0.011497 | 0.011362 | 0.011463 |
| 0.011329 | 0.011664 | 0.011262 | 0.011530 | 0.011329 | 0.011329 | 0.011262 |

|          |          |          |          |          |          |          |
|----------|----------|----------|----------|----------|----------|----------|
| 0.011497 | 0.011698 | 0.011396 | 0.011463 | 0.011295 | 0.011698 | 0.011329 |
| 0.011329 | 0.011329 | 0.011362 | 0.011463 | 0.011362 | 0.011463 | 0.011530 |
| 0.011530 | 0.011497 | 0.011396 | 0.011497 | 0.011463 | 0.011329 | 0.011295 |
| 0.011329 | 0.011329 | 0.011396 | 0.011329 | 0.011295 | 0.011463 | 0.011329 |
| 0.011362 | 0.011362 | 0.011497 | 0.011530 | 0.011429 | 0.011362 | 0.011362 |
| 0.011429 | 0.011362 | 0.011463 | 0.011329 | 0.011463 | 0.011564 | 0.011866 |
| 0.011362 | 0.011765 | 0.011302 | 0.017823 | 0.011257 | 0.011366 | 0.011653 |
| 0.011614 | 0.011658 | 0.011270 | 0.011234 | 0.011719 | 0.011751 | 0.011364 |
| 0.011487 | 0.011549 | 0.011216 | 0.011186 | 0.011294 | 0.011307 | 0.011189 |
| 0.011482 | 0.011470 | 0.011431 | 0.011325 | 0.011497 | 0.011530 | 0.011534 |
| 0.011404 | 0.011497 | 0.011497 | 0.011463 | 0.011430 | 0.011430 | 0.011396 |
| 0.011430 | 0.011362 | 0.011396 | 0.011430 | 0.011396 | 0.011329 | 0.011362 |
| 0.011362 | 0.011430 | 0.011329 | 0.011430 | 0.011463 | 0.011497 | 0.011396 |
| 0.011429 | 0.011396 | 0.011732 | 0.011732 | 0.011463 | 0.011497 | 0.011531 |
| 0.011295 | 0.011295 | 0.011329 | 0.011430 | 0.011295 | 0.011530 | 0.011530 |
| 0.011564 | 0.011564 | 0.011497 | 0.011597 | 0.011766 | 0.011599 | 0.011430 |
| 0.011430 | 0.011497 | 0.011530 | 0.011362 | 0.011430 | 0.011396 | 0.011430 |
| 0.011497 | 0.011497 | 0.011530 | 0.011497 | 0.011397 | 0.011597 | 0.011564 |
| 0.011433 | 0.011329 | 0.011430 | 0.011531 | 0.011430 | 0.011564 | 0.011597 |
| 0.011765 | 0.011470 | 0.011631 | 0.011598 | 0.011530 | 0.011698 | 0.011329 |
| 0.011498 | 0.011396 | 0.011362 | 0.011362 | 0.011430 | 0.011329 | 0.011430 |
| 0.011463 | 0.011497 | 0.011396 | 0.011429 | 0.011396 | 0.011732 | 0.011732 |
| 0.011463 | 0.011497 | 0.011564 | 0.011496 | 0.012137 | 0.011525 | 0.011482 |
| 0.011552 | 0.011511 | 0.011622 | 0.011510 | 0.011620 | 0.011543 | 0.011508 |
| 0.012090 | 0.011406 | 0.011540 | 0.011475 | 0.011749 | 0.011604 | 0.011707 |
| 0.012114 | 0.011588 | 0.011601 | 0.011732 | 0.011597 | 0.011597 | 0.011567 |
| 0.011295 | 0.011463 | 0.011597 | 0.011564 | 0.011499 | 0.011564 | 0.011532 |
| 0.011396 | 0.011329 | 0.011362 | 0.011396 | 0.011295 | 0.011362 | 0.011262 |
| 0.011396 | 0.011429 | 0.011329 | 0.011295 | 0.011396 | 0.011329 | 0.011362 |
| 0.011362 | 0.011295 | 0.011362 | 0.011396 | 0.011295 | 0.011497 | 0.011530 |
| 0.011430 | 0.011497 | 0.011429 | 0.011430 | 0.011362 | 0.011765 | 0.011396 |
| 0.011443 | 0.011362 | 0.011598 | 0.011603 | 0.011463 | 0.011463 | 0.011463 |
| 0.011463 | 0.011396 | 0.011362 | 0.011396 | 0.011497 | 0.011497 | 0.011429 |
| 0.011429 | 0.011564 | 0.011732 | 0.011463 | 0.011665 | 0.011665 | 0.011530 |
| 0.011362 | 0.011429 | 0.011463 | 0.011866 | 0.011430 | 0.011463 | 0.011430 |
| 0.011463 | 0.011396 | 0.011396 | 0.011698 | 0.011631 | 0.011665 | 0.011396 |
| 0.011497 | 0.011564 | 0.011429 | 0.011497 | 0.011463 | 0.011329 | 0.011664 |
| 0.011429 | 0.011396 | 0.011396 | 0.011564 | 0.011396 | 0.011497 | 0.011732 |
| 0.011429 | 0.011807 | 0.011799 | 0.011507 | 0.011173 | 0.011502 | 0.011267 |
| 0.011170 | 0.011761 | 0.011271 | 0.011462 | 0.011304 | 0.011315 | 0.011379 |
| 0.011468 | 0.011126 | 0.011283 | 0.011126 | 0.011222 | 0.011395 | 0.011425 |
| 0.011437 | 0.011336 | 0.011413 | 0.011342 | 0.011431 | 0.011564 | 0.011631 |
| 0.011631 | 0.011497 | 0.011601 | 0.011603 | 0.011738 | 0.011767 | 0.011430 |
| 0.011664 | 0.011530 | 0.011396 | 0.011497 | 0.011295 | 0.011530 | 0.011329 |
| 0.011396 | 0.011396 | 0.011362 | 0.011329 | 0.011362 | 0.011329 | 0.011430 |
| 0.011410 | 0.011410 | 0.011403 | 0.011437 | 0.011574 | 0.011539 | 0.011538 |
| 0.011537 | 0.011464 | 0.011282 | 0.011276 | 0.011399 | 0.011569 | 0.011569 |
| 0.011363 | 0.011433 | 0.011666 | 0.011635 | 0.011565 | 0.011599 | 0.011530 |
| 0.011463 | 0.011530 | 0.011530 | 0.011429 | 0.012001 | 0.011597 | 0.011665 |
| 0.011698 | 0.011772 | 0.011401 | 0.011476 | 0.011362 | 0.011564 | 0.011530 |
| 0.011565 | 0.011597 | 0.011597 | 0.011597 | 0.011729 | 0.011732 | 0.011372 |
| 0.011263 | 0.011268 | 0.011367 | 0.011332 | 0.011436 | 0.011284 | 0.011604 |
| 0.011403 | 0.011499 | 0.011203 | 0.011435 | 0.011397 | 0.011471 | 0.011363 |
| 0.011329 | 0.011329 | 0.011396 | 0.011362 | 0.011564 | 0.011530 | 0.011463 |
| 0.011564 | 0.011631 | 0.011362 | 0.011362 | 0.011396 | 0.011396 | 0.011330 |
| 0.011398 | 0.011396 | 0.011396 | 0.011431 | 0.011564 | 0.011631 | 0.011631 |
| 0.011497 | 0.011601 | 0.011603 | 0.011738 | 0.011767 | 0.011430 | 0.011597 |
| 0.011530 | 0.011530 | 0.011365 | 0.011513 | 0.011477 | 0.011503 | 0.011376 |
| 0.011542 | 0.011698 | 0.011526 | 0.011434 | 0.011329 | 0.011531 | 0.011396 |
| 0.011497 | 0.011430 | 0.011329 | 0.011431 | 0.011530 | 0.011533 | 0.011430 |

|          |          |          |          |          |          |          |
|----------|----------|----------|----------|----------|----------|----------|
| 0.011262 | 0.011263 | 0.011396 | 0.011262 | 0.011262 | 0.011366 | 0.011531 |
| 0.011430 | 0.011362 | 0.011396 | 0.011430 | 0.011396 | 0.011329 | 0.011530 |
| 0.011396 | 0.011430 | 0.011429 | 0.011362 | 0.011429 | 0.011665 | 0.011329 |
| 0.011362 | 0.011765 | 0.011362 | 0.011396 | 0.011362 | 0.011732 | 0.011189 |
| 0.011679 | 0.011230 | 0.011261 | 0.011503 | 0.011589 | 0.011491 | 0.011144 |
| 0.011218 | 0.011530 | 0.011631 | 0.011739 | 0.011599 | 0.011737 | 0.011867 |
| 0.011767 | 0.011804 | 0.011765 | 0.012017 | 0.011732 | 0.012607 | 0.011768 |
| 0.012507 | 0.012275 | 0.012409 | 0.012680 | 0.011732 | 0.011430 | 0.011732 |
| 0.012171 | 0.012106 | 0.011698 | 0.011598 | 0.011666 | 0.011666 | 0.011635 |
| 0.011530 | 0.011535 | 0.011597 | 0.011565 | 0.011935 | 0.012001 | 0.012002 |
| 0.011901 | 0.012002 | 0.012106 | 0.011872 | 0.012172 | 0.012178 | 0.012239 |
| 0.012239 | 0.012273 | 0.012221 | 0.012240 | 0.012241 | 0.011463 | 0.011766 |
| 0.011834 | 0.012337 | 0.011840 | 0.012068 | 0.012541 | 0.011604 | 0.011497 |
| 0.011463 | 0.011463 | 0.011934 | 0.011965 | 0.012010 | 0.011799 | 0.011465 |
| S307     | 0.011664 | 0.011664 | 0.012001 | 0.011765 | 0.011765 | 0.011832 |
| 0.011671 | 0.011603 | 0.011832 | 0.011262 | 0.011329 | 0.011296 | 0.011262 |
| 0.011295 | 0.011463 | 0.011262 | 0.011295 | 0.011362 | 0.011329 | 0.011295 |
| 0.011262 | 0.011295 | 0.011396 | 0.011262 | 0.011295 | 0.011295 | 0.011637 |
| 0.011530 | 0.011295 | 0.011194 | 0.011429 | 0.011362 | 0.011329 | 0.011362 |
| 0.011329 | 0.011429 | 0.011329 | 0.011329 | 0.011362 | 0.011329 | 0.011496 |
| 0.011262 | 0.011329 | 0.011362 | 0.011295 | 0.011396 | 0.011429 | 0.011362 |
| 0.011329 | 0.011497 | 0.011396 | 0.011664 | 0.011329 | 0.011597 | 0.011329 |
| 0.011295 | 0.011396 | 0.011463 | 0.011597 | 0.011698 | 0.011396 | 0.011496 |
| 0.011362 | 0.011429 | 0.011329 | 0.011564 | 0.011799 | 0.011329 | 0.011396 |
| 0.011295 | 0.011396 | 0.011362 | 0.011429 | 0.011362 | 0.011362 | 0.011362 |
| 0.011262 | 0.011295 | 0.011262 | 0.011362 | 0.011329 | 0.011363 | 0.011429 |
| 0.011362 | 0.011329 | 0.011396 | 0.011295 | 0.011362 | 0.011262 | 0.011329 |
| 0.011496 | 0.011429 | 0.011664 | 0.011496 | 0.011329 | 0.011564 | 0.011329 |
| 0.011468 | 0.011695 | 0.011551 | 0.011216 | 0.011247 | 0.011355 | 0.011415 |
| 0.012085 | 0.011569 | 0.011266 | 0.011564 | 0.011564 | 0.011362 | 0.011463 |
| 0.011396 | 0.011362 | 0.011429 | 0.011329 | 0.011429 | 0.011362 | 0.011362 |
| 0.011329 | 0.011429 | 0.011631 | 0.011496 | 0.011396 | 0.011362 | 0.011295 |
| 0.011262 | 0.011262 | 0.011329 | 0.011295 | 0.011497 | 0.011463 | 0.011396 |
| 0.011497 | 0.011564 | 0.011295 | 0.011295 | 0.011329 | 0.011329 | 0.011330 |
| 0.011398 | 0.011329 | 0.011329 | 0.011204 | 0.011277 | 0.011235 | 0.011329 |
| 0.011331 | 0.011266 | 0.011318 | 0.011302 | 0.011230 | 0.011266 | 0.011297 |
| 0.011564 | 0.011336 | 0.011370 | 0.011262 | 0.011268 | 0.011397 | 0.011363 |
| 0.011430 | 0.011363 | 0.011363 | 0.011463 | 0.011396 | 0.011765 | 0.011564 |
| 0.011597 | 0.011463 | 0.011329 | 0.011429 | 0.011228 | 0.011463 | 0.011262 |
| 0.011329 | 0.011329 | 0.011295 | 0.011262 | 0.011295 | 0.011262 | 0.011362 |
| 0.011329 | 0.011429 | 0.011362 | 0.011262 | 0.011363 | 0.011463 | 0.011466 |
| 0.011463 | 0.011362 | 0.011262 | 0.011195 | 0.011329 | 0.011262 | 0.011195 |
| 0.011298 | 0.011463 | 0.011262 | 0.011463 | 0.011228 | 0.011329 | 0.011228 |
| 0.011396 | 0.011295 | 0.011329 | 0.011295 | 0.011329 | 0.011195 | 0.011329 |
| 0.011362 | 0.011295 | 0.011362 | 0.011295 | 0.011329 | 0.011362 | 0.011597 |
| 0.011698 | 0.011631 | 0.011698 | 0.011465 | 0.011698 | 0.011329 | 0.011295 |
| 0.011330 | 0.011586 | 0.011472 | 0.011232 | 0.011705 | 0.011197 | 0.011336 |
| 0.011705 | 0.011536 | 0.011496 | 0.011698 | 0.011402 | 0.011564 | 0.011530 |
| 0.011463 | 0.011631 | 0.011486 | 0.011307 | 0.011354 | 0.011362 | 0.011432 |
| 0.011530 | 0.011431 | 0.011567 | 0.011635 | 0.011564 | 0.011631 | 0.011738 |
| 0.011466 | 0.011637 | 0.011568 | 0.011500 | 0.011766 | 0.011228 | 0.011431 |
| 0.011396 | 0.011329 | 0.011228 | 0.011228 | 0.011295 | 0.011295 | 0.011362 |
| 0.011295 | 0.011362 | 0.011262 | 0.011362 | 0.011295 | 0.011295 | 0.011362 |
| 0.011295 | 0.011731 | 0.011631 | 0.011664 | 0.011194 | 0.011295 | 0.011329 |
| 0.011329 | 0.011295 | 0.011362 | 0.011396 | 0.011262 | 0.011262 | 0.011262 |
| 0.011799 | 0.011429 | 0.011429 | 0.011228 | 0.011329 | 0.011497 | 0.011262 |
| 0.011262 | 0.011262 | 0.011295 | 0.011463 | 0.011262 | 0.011396 | 0.011530 |
| 0.011463 | 0.011295 | 0.011295 | 0.011228 | 0.011228 | 0.011396 | 0.000000 |
| 0.011228 | 0.011262 | 0.011195 | 0.011228 | 0.011362 | 0.011497 | 0.011262 |
| 0.011228 | 0.011362 | 0.011295 | 0.011195 | 0.011530 | 0.011195 | 0.011362 |

|          |          |          |          |          |          |          |
|----------|----------|----------|----------|----------|----------|----------|
| 0.011437 | 0.011262 | 0.011564 | 0.011396 | 0.011429 | 0.011295 | 0.011396 |
| 0.011262 | 0.011597 | 0.011194 | 0.011463 | 0.011262 | 0.011262 | 0.011194 |
| 0.011429 | 0.011564 | 0.011329 | 0.011396 | 0.011228 | 0.011631 | 0.011262 |
| 0.011262 | 0.011262 | 0.011295 | 0.011396 | 0.011295 | 0.011396 | 0.011463 |
| 0.011463 | 0.011429 | 0.011329 | 0.011429 | 0.011396 | 0.011262 | 0.011228 |
| 0.011262 | 0.011262 | 0.011329 | 0.011262 | 0.011228 | 0.011396 | 0.011262 |
| 0.011295 | 0.011295 | 0.011429 | 0.011463 | 0.011362 | 0.011295 | 0.011295 |
| 0.011362 | 0.011295 | 0.011396 | 0.011262 | 0.011396 | 0.011496 | 0.011799 |
| 0.011295 | 0.011698 | 0.011302 | 0.017823 | 0.011257 | 0.011488 | 0.011653 |
| 0.011614 | 0.011658 | 0.011374 | 0.011408 | 0.011719 | 0.011682 | 0.011364 |
| 0.011582 | 0.011610 | 0.011177 | 0.011270 | 0.011294 | 0.011356 | 0.011275 |
| 0.011576 | 0.011470 | 0.011468 | 0.011193 | 0.011429 | 0.011463 | 0.011466 |
| 0.011335 | 0.011429 | 0.011429 | 0.011396 | 0.011362 | 0.011362 | 0.011329 |
| 0.011362 | 0.011295 | 0.011329 | 0.011362 | 0.011329 | 0.011262 | 0.011295 |
| 0.011295 | 0.011362 | 0.011262 | 0.011362 | 0.011396 | 0.011429 | 0.011329 |
| 0.011362 | 0.011329 | 0.011665 | 0.011665 | 0.011396 | 0.011430 | 0.011463 |
| 0.011228 | 0.011228 | 0.011262 | 0.011362 | 0.011228 | 0.011463 | 0.011463 |
| 0.011497 | 0.011496 | 0.011429 | 0.011530 | 0.011698 | 0.011532 | 0.011362 |
| 0.011362 | 0.011429 | 0.011463 | 0.011295 | 0.011362 | 0.011329 | 0.011362 |
| 0.011430 | 0.011430 | 0.011463 | 0.011430 | 0.011330 | 0.011530 | 0.011497 |
| 0.011365 | 0.011262 | 0.011362 | 0.011463 | 0.011362 | 0.011497 | 0.011530 |
| 0.011698 | 0.011402 | 0.011564 | 0.011530 | 0.011463 | 0.011631 | 0.011262 |
| 0.011431 | 0.011329 | 0.011295 | 0.011295 | 0.011362 | 0.011262 | 0.011362 |
| 0.011396 | 0.011429 | 0.011329 | 0.011362 | 0.011329 | 0.011665 | 0.011665 |
| 0.011396 | 0.011430 | 0.011496 | 0.011429 | 0.012069 | 0.011489 | 0.011412 |
| 0.011482 | 0.011441 | 0.011552 | 0.011441 | 0.011550 | 0.011474 | 0.011439 |
| 0.012021 | 0.011337 | 0.011471 | 0.011406 | 0.011680 | 0.011536 | 0.011638 |
| 0.012046 | 0.011475 | 0.011601 | 0.011664 | 0.011530 | 0.011530 | 0.011567 |
| 0.011228 | 0.011396 | 0.011530 | 0.011496 | 0.011499 | 0.011496 | 0.011464 |
| 0.011329 | 0.011262 | 0.011295 | 0.011329 | 0.011228 | 0.011295 | 0.011194 |
| 0.011329 | 0.011362 | 0.011262 | 0.011228 | 0.011329 | 0.011262 | 0.011295 |
| 0.011295 | 0.011228 | 0.011295 | 0.011329 | 0.011228 | 0.011429 | 0.011463 |
| 0.011362 | 0.011429 | 0.011362 | 0.011362 | 0.011295 | 0.011698 | 0.011329 |
| 0.011373 | 0.011295 | 0.011530 | 0.011535 | 0.011396 | 0.011396 | 0.011396 |
| 0.011396 | 0.011329 | 0.011295 | 0.011329 | 0.011429 | 0.011429 | 0.011362 |
| 0.011362 | 0.011496 | 0.011664 | 0.011396 | 0.011597 | 0.011597 | 0.011463 |
| 0.011295 | 0.011362 | 0.011396 | 0.011799 | 0.011362 | 0.011396 | 0.011362 |
| 0.011396 | 0.011329 | 0.011329 | 0.011631 | 0.011564 | 0.011597 | 0.011329 |
| 0.011429 | 0.011496 | 0.011362 | 0.011429 | 0.011396 | 0.011262 | 0.011597 |
| 0.011362 | 0.011329 | 0.011329 | 0.011496 | 0.011329 | 0.011429 | 0.011664 |
| 0.011362 | 0.011739 | 0.011731 | 0.011507 | 0.011286 | 0.011434 | 0.011370 |
| 0.011280 | 0.011761 | 0.011271 | 0.011417 | 0.011255 | 0.011366 | 0.011379 |
| 0.011519 | 0.011192 | 0.011338 | 0.011192 | 0.011222 | 0.011395 | 0.011385 |
| 0.011399 | 0.011336 | 0.011412 | 0.011342 | 0.011364 | 0.011497 | 0.011564 |
| 0.011564 | 0.011430 | 0.011500 | 0.011535 | 0.011670 | 0.011696 | 0.011362 |
| 0.011597 | 0.011463 | 0.011329 | 0.011429 | 0.011228 | 0.011463 | 0.011262 |
| 0.011329 | 0.011329 | 0.011295 | 0.011262 | 0.011295 | 0.011262 | 0.011362 |
| 0.011340 | 0.011340 | 0.011334 | 0.011368 | 0.011505 | 0.011470 | 0.011470 |
| 0.011469 | 0.011396 | 0.011208 | 0.011204 | 0.011331 | 0.011501 | 0.011501 |
| 0.011296 | 0.011365 | 0.011599 | 0.011567 | 0.011497 | 0.011531 | 0.011463 |
| 0.011396 | 0.011463 | 0.011463 | 0.011362 | 0.011933 | 0.011530 | 0.011597 |
| 0.011631 | 0.011701 | 0.011333 | 0.011407 | 0.011295 | 0.011497 | 0.011463 |
| 0.011497 | 0.011530 | 0.011530 | 0.011530 | 0.011689 | 0.011664 | 0.011303 |
| 0.011195 | 0.011199 | 0.011298 | 0.011264 | 0.011368 | 0.011172 | 0.011536 |
| 0.011335 | 0.011455 | 0.011203 | 0.011322 | 0.011329 | 0.011402 | 0.011295 |
| 0.011262 | 0.011262 | 0.011329 | 0.011295 | 0.011497 | 0.011463 | 0.011396 |
| 0.011497 | 0.011564 | 0.011295 | 0.011295 | 0.011329 | 0.011329 | 0.011330 |
| 0.011398 | 0.011329 | 0.011329 | 0.011364 | 0.011497 | 0.011564 | 0.011564 |
| 0.011430 | 0.011500 | 0.011535 | 0.011670 | 0.011696 | 0.011362 | 0.011530 |
| 0.011463 | 0.011463 | 0.011297 | 0.011478 | 0.011408 | 0.011435 | 0.011305 |



|          |          |          |          |          |          |          |
|----------|----------|----------|----------|----------|----------|----------|
| 0.011473 | 0.011698 | 0.011484 | 0.011366 | 0.011262 | 0.011463 | 0.011329 |
| 0.011429 | 0.011362 | 0.011262 | 0.011363 | 0.011463 | 0.011466 | 0.011362 |
| 0.011262 | 0.011195 | 0.011329 | 0.011262 | 0.011195 | 0.011298 | 0.011463 |
| 0.011362 | 0.011295 | 0.011329 | 0.011362 | 0.011329 | 0.011262 | 0.011463 |
| 0.011329 | 0.011362 | 0.011362 | 0.011295 | 0.011362 | 0.011597 | 0.011262 |
| 0.011295 | 0.011698 | 0.011295 | 0.011329 | 0.011295 | 0.011664 | 0.011274 |
| 0.011735 | 0.011273 | 0.011361 | 0.011503 | 0.011589 | 0.011491 | 0.011227 |
| 0.011323 | 0.011463 | 0.011564 | 0.011671 | 0.011531 | 0.011669 | 0.011800 |
| 0.011699 | 0.011737 | 0.011698 | 0.011949 | 0.011664 | 0.012539 | 0.011700 |
| 0.012439 | 0.012207 | 0.012341 | 0.012612 | 0.011664 | 0.011362 | 0.011665 |
| 0.012103 | 0.012038 | 0.011631 | 0.011530 | 0.011598 | 0.011598 | 0.011567 |
| 0.011463 | 0.011467 | 0.011530 | 0.011497 | 0.011867 | 0.011933 | 0.011935 |
| 0.011834 | 0.011867 | 0.012038 | 0.011804 | 0.012104 | 0.012110 | 0.012171 |
| 0.012171 | 0.012205 | 0.012152 | 0.012172 | 0.012173 | 0.011396 | 0.011699 |
| 0.011766 | 0.012202 | 0.011772 | 0.012001 | 0.012474 | 0.011536 | 0.011430 |
| 0.011396 | 0.011396 | 0.011867 | 0.011883 | 0.012010 | 0.011732 | 0.011397 |
| S308     | 0.011564 | 0.011564 | 0.011900 | 0.011664 | 0.011664 | 0.011732 |
| 0.011569 | 0.011502 | 0.011732 | 0.011161 | 0.011228 | 0.011195 | 0.011161 |
| 0.011194 | 0.011362 | 0.011161 | 0.011194 | 0.011262 | 0.011228 | 0.011194 |
| 0.011161 | 0.011194 | 0.011295 | 0.011161 | 0.011195 | 0.011194 | 0.011535 |
| 0.011429 | 0.011194 | 0.011094 | 0.011329 | 0.011262 | 0.011228 | 0.011262 |
| 0.011228 | 0.011329 | 0.011228 | 0.011228 | 0.011262 | 0.011228 | 0.011396 |
| 0.011161 | 0.011228 | 0.011262 | 0.011195 | 0.011295 | 0.011329 | 0.011262 |
| 0.011228 | 0.011396 | 0.011295 | 0.011564 | 0.011228 | 0.011496 | 0.011228 |
| 0.011194 | 0.011295 | 0.011362 | 0.011496 | 0.011597 | 0.011295 | 0.011396 |
| 0.011262 | 0.011329 | 0.011228 | 0.011463 | 0.011698 | 0.011228 | 0.011295 |
| 0.011194 | 0.011295 | 0.011262 | 0.011329 | 0.011262 | 0.011262 | 0.011262 |
| 0.011161 | 0.011195 | 0.011161 | 0.011262 | 0.011228 | 0.011262 | 0.011329 |
| 0.011262 | 0.011228 | 0.011295 | 0.011194 | 0.011329 | 0.011161 | 0.011228 |
| 0.011396 | 0.011329 | 0.011564 | 0.011396 | 0.011228 | 0.011463 | 0.011228 |
| 0.011394 | 0.011620 | 0.011437 | 0.011138 | 0.011135 | 0.011244 | 0.011336 |
| 0.011975 | 0.011416 | 0.011143 | 0.011463 | 0.011463 | 0.011262 | 0.011362 |
| 0.011295 | 0.011262 | 0.011329 | 0.011228 | 0.011329 | 0.011262 | 0.011262 |
| 0.011228 | 0.011329 | 0.011530 | 0.011396 | 0.011295 | 0.011262 | 0.011195 |
| 0.011161 | 0.011161 | 0.011228 | 0.011195 | 0.011396 | 0.011362 | 0.011295 |
| 0.011396 | 0.011463 | 0.011195 | 0.011195 | 0.011228 | 0.011228 | 0.011229 |
| 0.011297 | 0.011228 | 0.011228 | 0.000000 | 0.011133 | 0.011095 | 0.011228 |
| 0.011230 | 0.011163 | 0.011208 | 0.011198 | 0.011094 | 0.011129 | 0.011195 |
| 0.011420 | 0.011198 | 0.011267 | 0.011161 | 0.011164 | 0.011296 | 0.011262 |
| 0.011329 | 0.011262 | 0.011262 | 0.011362 | 0.011295 | 0.011664 | 0.011463 |
| 0.011496 | 0.011362 | 0.011228 | 0.011329 | 0.011127 | 0.011362 | 0.011161 |
| 0.011228 | 0.011228 | 0.011195 | 0.011161 | 0.011194 | 0.011161 | 0.011262 |
| 0.011228 | 0.011329 | 0.011262 | 0.011161 | 0.011262 | 0.011362 | 0.011364 |
| 0.011362 | 0.011262 | 0.011161 | 0.011094 | 0.011228 | 0.011161 | 0.011094 |
| 0.011196 | 0.011362 | 0.011161 | 0.011362 | 0.011127 | 0.011228 | 0.011195 |
| 0.011295 | 0.011195 | 0.011228 | 0.011195 | 0.011228 | 0.011094 | 0.011228 |
| 0.011262 | 0.011195 | 0.011262 | 0.011195 | 0.011228 | 0.011262 | 0.011497 |
| 0.011597 | 0.011530 | 0.011597 | 0.011364 | 0.011598 | 0.011228 | 0.011195 |
| 0.011229 | 0.011505 | 0.011335 | 0.011129 | 0.011603 | 0.011094 | 0.011218 |
| 0.011603 | 0.011502 | 0.011396 | 0.011597 | 0.011299 | 0.011463 | 0.011429 |
| 0.011362 | 0.011530 | 0.011344 | 0.011184 | 0.011228 | 0.011262 | 0.011331 |
| 0.011429 | 0.011330 | 0.011466 | 0.011534 | 0.011463 | 0.011530 | 0.011636 |
| 0.011365 | 0.011535 | 0.011432 | 0.011364 | 0.011666 | 0.011127 | 0.011330 |
| 0.011295 | 0.011228 | 0.011127 | 0.011127 | 0.011194 | 0.011194 | 0.011262 |
| 0.011195 | 0.011262 | 0.011161 | 0.011262 | 0.011194 | 0.011194 | 0.011262 |
| 0.011194 | 0.011631 | 0.011530 | 0.011564 | 0.011094 | 0.011194 | 0.011228 |
| 0.011228 | 0.011194 | 0.011262 | 0.011295 | 0.011161 | 0.011161 | 0.011161 |
| 0.011698 | 0.011329 | 0.011329 | 0.011127 | 0.011228 | 0.011396 | 0.011161 |
| 0.011161 | 0.011228 | 0.011194 | 0.011362 | 0.011161 | 0.011295 | 0.011429 |
| 0.011362 | 0.011194 | 0.011194 | 0.000000 | 0.011127 | 0.011295 | 0.011228 |

|          |          |          |          |          |          |          |
|----------|----------|----------|----------|----------|----------|----------|
| 0.000000 | 0.011228 | 0.011094 | 0.011127 | 0.011262 | 0.011362 | 0.011161 |
| 0.011094 | 0.011262 | 0.011195 | 0.011094 | 0.011429 | 0.011094 | 0.011262 |
| 0.011334 | 0.011161 | 0.011463 | 0.011295 | 0.011329 | 0.011194 | 0.011295 |
| 0.011161 | 0.011496 | 0.011094 | 0.011362 | 0.011161 | 0.011161 | 0.011094 |
| 0.011329 | 0.011530 | 0.011228 | 0.011295 | 0.011127 | 0.011530 | 0.011161 |
| 0.011161 | 0.011161 | 0.011194 | 0.011295 | 0.011194 | 0.011295 | 0.011362 |
| 0.011362 | 0.011329 | 0.011228 | 0.011329 | 0.011295 | 0.011161 | 0.011127 |
| 0.011161 | 0.011161 | 0.011228 | 0.011161 | 0.011127 | 0.011295 | 0.011161 |
| 0.011194 | 0.011194 | 0.011329 | 0.011362 | 0.011262 | 0.011194 | 0.011195 |
| 0.011262 | 0.011195 | 0.011295 | 0.011161 | 0.011295 | 0.011396 | 0.011698 |
| 0.011194 | 0.011597 | 0.011198 | 0.017710 | 0.011191 | 0.011305 | 0.011548 |
| 0.011510 | 0.011553 | 0.011270 | 0.011234 | 0.011664 | 0.011578 | 0.011303 |
| 0.011440 | 0.011426 | 0.011099 | 0.011186 | 0.011177 | 0.011258 | 0.011146 |
| 0.011436 | 0.011358 | 0.011357 | 0.011193 | 0.011329 | 0.011362 | 0.011365 |
| 0.011198 | 0.011329 | 0.011329 | 0.011295 | 0.011262 | 0.011262 | 0.011228 |
| 0.011262 | 0.011195 | 0.011228 | 0.011262 | 0.011228 | 0.011161 | 0.011195 |
| 0.011195 | 0.011262 | 0.011161 | 0.011262 | 0.011295 | 0.011329 | 0.011228 |
| 0.011262 | 0.011228 | 0.011564 | 0.011564 | 0.011295 | 0.011329 | 0.011362 |
| 0.011127 | 0.011127 | 0.011161 | 0.011262 | 0.011127 | 0.011362 | 0.011362 |
| 0.011396 | 0.011396 | 0.011329 | 0.011429 | 0.011597 | 0.011431 | 0.011262 |
| 0.011262 | 0.011329 | 0.011362 | 0.011195 | 0.011262 | 0.011228 | 0.011262 |
| 0.011329 | 0.011329 | 0.011362 | 0.011329 | 0.011229 | 0.011430 | 0.011396 |
| 0.011263 | 0.011161 | 0.011262 | 0.011362 | 0.011262 | 0.011396 | 0.011429 |
| 0.011597 | 0.011299 | 0.011463 | 0.011429 | 0.011362 | 0.011530 | 0.011161 |
| 0.011330 | 0.011228 | 0.011195 | 0.011195 | 0.011262 | 0.011161 | 0.011262 |
| 0.011295 | 0.011329 | 0.011228 | 0.011262 | 0.011228 | 0.011564 | 0.011564 |
| 0.011295 | 0.011329 | 0.011396 | 0.011329 | 0.011968 | 0.011346 | 0.011306 |
| 0.011341 | 0.011303 | 0.011411 | 0.011337 | 0.011410 | 0.011336 | 0.011302 |
| 0.011918 | 0.011199 | 0.011334 | 0.011268 | 0.011542 | 0.011400 | 0.011536 |
| 0.011944 | 0.011362 | 0.011500 | 0.011564 | 0.011429 | 0.011429 | 0.011466 |
| 0.011127 | 0.011295 | 0.011429 | 0.011396 | 0.011398 | 0.011396 | 0.011363 |
| 0.011228 | 0.011161 | 0.011194 | 0.011228 | 0.011127 | 0.011194 | 0.011094 |
| 0.011228 | 0.011262 | 0.011161 | 0.011127 | 0.011228 | 0.011161 | 0.011194 |
| 0.011194 | 0.011127 | 0.011194 | 0.011228 | 0.011127 | 0.011329 | 0.011362 |
| 0.011262 | 0.011329 | 0.011262 | 0.011262 | 0.011194 | 0.011597 | 0.011228 |
| 0.011234 | 0.011195 | 0.011430 | 0.011433 | 0.011295 | 0.011295 | 0.011295 |
| 0.011295 | 0.011228 | 0.011194 | 0.011228 | 0.011329 | 0.011329 | 0.011262 |
| 0.011262 | 0.011396 | 0.011564 | 0.011295 | 0.011497 | 0.011497 | 0.011362 |
| 0.011194 | 0.011262 | 0.011295 | 0.011698 | 0.011262 | 0.011295 | 0.011262 |
| 0.011295 | 0.011228 | 0.011228 | 0.011530 | 0.011463 | 0.011497 | 0.011228 |
| 0.011329 | 0.011396 | 0.011262 | 0.011329 | 0.011295 | 0.011161 | 0.011496 |
| 0.011262 | 0.011228 | 0.011228 | 0.011396 | 0.011228 | 0.011329 | 0.011564 |
| 0.011262 | 0.011637 | 0.011631 | 0.011426 | 0.011117 | 0.011332 | 0.011215 |
| 0.011115 | 0.011644 | 0.011166 | 0.011373 | 0.011207 | 0.011315 | 0.011326 |
| 0.011417 | 0.011126 | 0.011283 | 0.011126 | 0.011168 | 0.011328 | 0.011304 |
| 0.011324 | 0.011218 | 0.011307 | 0.011236 | 0.011262 | 0.011396 | 0.011463 |
| 0.011463 | 0.011329 | 0.011432 | 0.011433 | 0.011569 | 0.011590 | 0.011262 |
| 0.011496 | 0.011362 | 0.011228 | 0.011329 | 0.011127 | 0.011362 | 0.011161 |
| 0.011228 | 0.011228 | 0.011195 | 0.011161 | 0.011194 | 0.011161 | 0.011262 |
| 0.011200 | 0.011200 | 0.011231 | 0.011231 | 0.011368 | 0.011368 | 0.011367 |
| 0.011367 | 0.011296 | 0.000000 | 0.000000 | 0.011230 | 0.011399 | 0.011399 |
| 0.011195 | 0.011263 | 0.011498 | 0.011466 | 0.011396 | 0.011430 | 0.011362 |
| 0.011295 | 0.011362 | 0.011362 | 0.011262 | 0.011832 | 0.011429 | 0.011497 |
| 0.011530 | 0.011594 | 0.011231 | 0.011303 | 0.011195 | 0.011396 | 0.011362 |
| 0.011397 | 0.011429 | 0.011429 | 0.011429 | 0.011571 | 0.011564 | 0.011199 |
| 0.011094 | 0.011095 | 0.011196 | 0.011162 | 0.011231 | 0.000000 | 0.011434 |
| 0.011232 | 0.011323 | 0.000000 | 0.011210 | 0.011228 | 0.011266 | 0.011195 |
| 0.011161 | 0.011161 | 0.011228 | 0.011195 | 0.011396 | 0.011362 | 0.011295 |
| 0.011396 | 0.011463 | 0.011195 | 0.011195 | 0.011228 | 0.011228 | 0.011229 |
| 0.011297 | 0.011228 | 0.011228 | 0.011262 | 0.011396 | 0.011463 | 0.011463 |

|          |          |          |          |          |          |          |
|----------|----------|----------|----------|----------|----------|----------|
| 0.011329 | 0.011432 | 0.011433 | 0.011569 | 0.011590 | 0.011262 | 0.011429 |
| 0.011362 | 0.011362 | 0.011196 | 0.011373 | 0.011303 | 0.011333 | 0.011200 |
| 0.011370 | 0.011561 | 0.011357 | 0.011264 | 0.011161 | 0.011362 | 0.011228 |
| 0.011329 | 0.011262 | 0.011161 | 0.011262 | 0.011362 | 0.011364 | 0.011262 |
| 0.011161 | 0.011094 | 0.011228 | 0.011161 | 0.011094 | 0.011196 | 0.011362 |
| 0.011262 | 0.011195 | 0.011228 | 0.011262 | 0.011228 | 0.011161 | 0.011363 |
| 0.011228 | 0.011262 | 0.011262 | 0.011194 | 0.011262 | 0.011497 | 0.011161 |
| 0.011194 | 0.011597 | 0.011194 | 0.011228 | 0.011194 | 0.011564 | 0.011146 |
| 0.011566 | 0.011103 | 0.011211 | 0.011342 | 0.011467 | 0.011383 | 0.011102 |
| 0.011165 | 0.011362 | 0.011463 | 0.011569 | 0.011430 | 0.011568 | 0.011699 |
| 0.011598 | 0.011635 | 0.011597 | 0.011846 | 0.011564 | 0.012438 | 0.011599 |
| 0.012338 | 0.012106 | 0.012240 | 0.012511 | 0.011564 | 0.011262 | 0.011564 |
| 0.012002 | 0.011937 | 0.011530 | 0.011430 | 0.011497 | 0.011497 | 0.011466 |
| 0.011362 | 0.011365 | 0.011429 | 0.011396 | 0.011766 | 0.011832 | 0.011834 |
| 0.011733 | 0.011833 | 0.011937 | 0.011703 | 0.012003 | 0.012008 | 0.012070 |
| 0.012070 | 0.012104 | 0.012050 | 0.012071 | 0.012072 | 0.011295 | 0.011598 |
| 0.011666 | 0.012169 | 0.011670 | 0.011900 | 0.012373 | 0.011434 | 0.011329 |
| 0.011295 | 0.011295 | 0.011766 | 0.011759 | 0.011904 | 0.011631 | 0.011296 |
| S309     | 0.011664 | 0.011664 | 0.012000 | 0.011765 | 0.011765 | 0.011832 |
| 0.011671 | 0.011603 | 0.011832 | 0.011262 | 0.011329 | 0.011296 | 0.011262 |
| 0.011295 | 0.011463 | 0.011262 | 0.011295 | 0.011362 | 0.011329 | 0.011295 |
| 0.011262 | 0.011295 | 0.011396 | 0.011262 | 0.011262 | 0.011295 | 0.011637 |
| 0.011530 | 0.011295 | 0.011194 | 0.011429 | 0.011362 | 0.011329 | 0.011362 |
| 0.011329 | 0.011429 | 0.011329 | 0.011329 | 0.011362 | 0.011329 | 0.011496 |
| 0.011262 | 0.011329 | 0.011362 | 0.011295 | 0.011396 | 0.011429 | 0.011362 |
| 0.011329 | 0.011497 | 0.011396 | 0.011664 | 0.011329 | 0.011597 | 0.011329 |
| 0.011295 | 0.011396 | 0.011463 | 0.011597 | 0.011698 | 0.011396 | 0.011496 |
| 0.011362 | 0.011429 | 0.011329 | 0.011563 | 0.011799 | 0.011329 | 0.011396 |
| 0.011295 | 0.011396 | 0.011362 | 0.011429 | 0.011362 | 0.011362 | 0.011362 |
| 0.011262 | 0.011295 | 0.011262 | 0.011362 | 0.011329 | 0.011363 | 0.011429 |
| 0.011362 | 0.011329 | 0.011396 | 0.011295 | 0.011362 | 0.011262 | 0.011329 |
| 0.011496 | 0.011429 | 0.011664 | 0.011496 | 0.011329 | 0.011564 | 0.011329 |
| 0.011505 | 0.011732 | 0.011551 | 0.011255 | 0.011247 | 0.011355 | 0.011454 |
| 0.012085 | 0.011518 | 0.011266 | 0.011563 | 0.011564 | 0.011362 | 0.011463 |
| 0.011329 | 0.011362 | 0.011429 | 0.011329 | 0.011429 | 0.011362 | 0.011362 |
| 0.011329 | 0.011429 | 0.011631 | 0.011496 | 0.011396 | 0.011362 | 0.011295 |
| 0.011262 | 0.011262 | 0.011329 | 0.011295 | 0.011497 | 0.011463 | 0.011396 |
| 0.011497 | 0.011564 | 0.011295 | 0.011295 | 0.011329 | 0.011329 | 0.011330 |
| 0.011398 | 0.011329 | 0.011329 | 0.011168 | 0.011241 | 0.011200 | 0.011329 |
| 0.011331 | 0.011266 | 0.011318 | 0.011302 | 0.011196 | 0.011231 | 0.011297 |
| 0.011528 | 0.011301 | 0.011370 | 0.011262 | 0.011268 | 0.011329 | 0.011363 |
| 0.011430 | 0.011363 | 0.011363 | 0.011463 | 0.011396 | 0.011765 | 0.011564 |
| 0.011597 | 0.011463 | 0.011329 | 0.011429 | 0.011228 | 0.011463 | 0.011262 |
| 0.011329 | 0.011329 | 0.011295 | 0.011262 | 0.011295 | 0.011262 | 0.011362 |
| 0.011329 | 0.011429 | 0.011362 | 0.011262 | 0.011363 | 0.011463 | 0.011466 |
| 0.011463 | 0.011362 | 0.011262 | 0.011195 | 0.011329 | 0.011262 | 0.011195 |
| 0.011298 | 0.011463 | 0.011262 | 0.011463 | 0.011228 | 0.011329 | 0.011228 |
| 0.011396 | 0.011295 | 0.011329 | 0.011295 | 0.011329 | 0.011195 | 0.011329 |
| 0.011362 | 0.011295 | 0.011295 | 0.011295 | 0.011329 | 0.011362 | 0.011597 |
| 0.011698 | 0.011631 | 0.011698 | 0.011465 | 0.011698 | 0.011329 | 0.011295 |
| 0.011330 | 0.011626 | 0.011426 | 0.011232 | 0.011705 | 0.011197 | 0.011296 |
| 0.011705 | 0.011604 | 0.011496 | 0.011698 | 0.011402 | 0.011564 | 0.011530 |
| 0.011463 | 0.011631 | 0.011451 | 0.011307 | 0.011312 | 0.011362 | 0.011432 |
| 0.011530 | 0.011431 | 0.011567 | 0.011635 | 0.011564 | 0.011631 | 0.011738 |
| 0.011432 | 0.011637 | 0.011534 | 0.011466 | 0.011766 | 0.011228 | 0.011431 |
| 0.011396 | 0.011329 | 0.011228 | 0.011228 | 0.011295 | 0.011295 | 0.011362 |
| 0.011295 | 0.011362 | 0.011262 | 0.011362 | 0.011295 | 0.011295 | 0.011362 |
| 0.011295 | 0.011731 | 0.011631 | 0.011664 | 0.011194 | 0.011295 | 0.011329 |
| 0.011329 | 0.011295 | 0.011362 | 0.011396 | 0.011262 | 0.011262 | 0.011262 |
| 0.011799 | 0.011429 | 0.011429 | 0.011228 | 0.011329 | 0.011497 | 0.011262 |

|          |          |          |          |          |          |          |
|----------|----------|----------|----------|----------|----------|----------|
| 0.011262 | 0.011329 | 0.011295 | 0.011463 | 0.011262 | 0.011396 | 0.011530 |
| 0.011463 | 0.011161 | 0.011295 | 0.011228 | 0.011228 | 0.011396 | 0.011262 |
| 0.011228 | 0.000000 | 0.011194 | 0.011228 | 0.011362 | 0.011497 | 0.011262 |
| 0.011228 | 0.011362 | 0.011295 | 0.011194 | 0.011530 | 0.011195 | 0.011362 |
| 0.011437 | 0.011262 | 0.011564 | 0.011396 | 0.011429 | 0.011295 | 0.011396 |
| 0.011262 | 0.011597 | 0.011194 | 0.011463 | 0.011262 | 0.011262 | 0.011194 |
| 0.011429 | 0.011631 | 0.011329 | 0.011396 | 0.011228 | 0.011631 | 0.011262 |
| 0.011262 | 0.011262 | 0.011295 | 0.011396 | 0.011295 | 0.011396 | 0.011463 |
| 0.011463 | 0.011429 | 0.011329 | 0.011429 | 0.011396 | 0.011262 | 0.011228 |
| 0.011262 | 0.011262 | 0.011329 | 0.011262 | 0.011228 | 0.011396 | 0.011262 |
| 0.011295 | 0.011295 | 0.011429 | 0.011463 | 0.011362 | 0.011295 | 0.011295 |
| 0.011362 | 0.011295 | 0.011396 | 0.011262 | 0.011396 | 0.011496 | 0.011799 |
| 0.011295 | 0.011698 | 0.011302 | 0.017823 | 0.011387 | 0.011427 | 0.011653 |
| 0.011614 | 0.011658 | 0.011374 | 0.011350 | 0.011829 | 0.011682 | 0.011485 |
| 0.011582 | 0.011549 | 0.011216 | 0.011270 | 0.011294 | 0.011406 | 0.011318 |
| 0.011576 | 0.011470 | 0.011468 | 0.011259 | 0.011429 | 0.011463 | 0.011466 |
| 0.011301 | 0.011429 | 0.011429 | 0.011396 | 0.011362 | 0.011362 | 0.011329 |
| 0.011362 | 0.011295 | 0.011329 | 0.011362 | 0.011329 | 0.011262 | 0.011295 |
| 0.011295 | 0.011362 | 0.011262 | 0.011362 | 0.011396 | 0.011429 | 0.011329 |
| 0.011362 | 0.011329 | 0.011665 | 0.011665 | 0.011396 | 0.011430 | 0.011463 |
| 0.011228 | 0.011228 | 0.011262 | 0.011362 | 0.011228 | 0.011463 | 0.011463 |
| 0.011497 | 0.011496 | 0.011429 | 0.011530 | 0.011698 | 0.011532 | 0.011362 |
| 0.011362 | 0.011429 | 0.011463 | 0.011295 | 0.011362 | 0.011329 | 0.011362 |
| 0.011430 | 0.011430 | 0.011463 | 0.011430 | 0.011330 | 0.011530 | 0.011497 |
| 0.011365 | 0.011262 | 0.011362 | 0.011463 | 0.011362 | 0.011497 | 0.011530 |
| 0.011698 | 0.011402 | 0.011564 | 0.011530 | 0.011463 | 0.011631 | 0.011262 |
| 0.011431 | 0.011329 | 0.011295 | 0.011295 | 0.011362 | 0.011262 | 0.011362 |
| 0.011396 | 0.011429 | 0.011329 | 0.011362 | 0.011329 | 0.011665 | 0.011665 |
| 0.011396 | 0.011430 | 0.011496 | 0.011429 | 0.012069 | 0.011453 | 0.011412 |
| 0.011447 | 0.011441 | 0.011517 | 0.011406 | 0.011515 | 0.011474 | 0.011405 |
| 0.012021 | 0.011302 | 0.011437 | 0.011371 | 0.011645 | 0.011502 | 0.011638 |
| 0.012046 | 0.011437 | 0.011601 | 0.011664 | 0.011530 | 0.011530 | 0.011567 |
| 0.011228 | 0.011396 | 0.011530 | 0.011496 | 0.011499 | 0.011496 | 0.011464 |
| 0.011329 | 0.011262 | 0.011295 | 0.011329 | 0.011228 | 0.011295 | 0.011194 |
| 0.011329 | 0.011362 | 0.011262 | 0.011228 | 0.011329 | 0.011262 | 0.011295 |
| 0.011295 | 0.011228 | 0.011295 | 0.011329 | 0.011228 | 0.011429 | 0.011463 |
| 0.011362 | 0.011429 | 0.011362 | 0.011362 | 0.011295 | 0.011698 | 0.011329 |
| 0.011338 | 0.011295 | 0.011530 | 0.011535 | 0.011396 | 0.011396 | 0.011396 |
| 0.011396 | 0.011329 | 0.011295 | 0.011329 | 0.011429 | 0.011429 | 0.011362 |
| 0.011362 | 0.011496 | 0.011664 | 0.011396 | 0.011597 | 0.011597 | 0.011463 |
| 0.011295 | 0.011362 | 0.011396 | 0.011799 | 0.011362 | 0.011396 | 0.011362 |
| 0.011396 | 0.011329 | 0.011329 | 0.011631 | 0.011564 | 0.011597 | 0.011329 |
| 0.011429 | 0.011496 | 0.011362 | 0.011429 | 0.011396 | 0.011262 | 0.011597 |
| 0.011362 | 0.011329 | 0.011329 | 0.011496 | 0.011329 | 0.011429 | 0.011664 |
| 0.011362 | 0.011739 | 0.011731 | 0.011548 | 0.011286 | 0.011434 | 0.011370 |
| 0.011225 | 0.011761 | 0.011271 | 0.011507 | 0.011353 | 0.011467 | 0.011485 |
| 0.011570 | 0.011323 | 0.011450 | 0.011324 | 0.011330 | 0.011529 | 0.011425 |
| 0.011437 | 0.011336 | 0.011412 | 0.011342 | 0.011363 | 0.011497 | 0.011564 |
| 0.011564 | 0.011430 | 0.011533 | 0.011501 | 0.011670 | 0.011696 | 0.011362 |
| 0.011597 | 0.011463 | 0.011329 | 0.011429 | 0.011228 | 0.011463 | 0.011262 |
| 0.011329 | 0.011329 | 0.011295 | 0.011262 | 0.011295 | 0.011262 | 0.011362 |
| 0.011340 | 0.011305 | 0.011334 | 0.011334 | 0.011471 | 0.011470 | 0.011470 |
| 0.011401 | 0.011396 | 0.011171 | 0.011168 | 0.011331 | 0.011501 | 0.011501 |
| 0.011296 | 0.011365 | 0.011599 | 0.011567 | 0.011497 | 0.011531 | 0.011463 |
| 0.011396 | 0.011463 | 0.011463 | 0.011362 | 0.011933 | 0.011530 | 0.011597 |
| 0.011631 | 0.011701 | 0.011333 | 0.011407 | 0.011295 | 0.011497 | 0.011463 |
| 0.011497 | 0.011530 | 0.011530 | 0.011530 | 0.011689 | 0.011664 | 0.011303 |
| 0.011195 | 0.011199 | 0.011298 | 0.011264 | 0.011333 | 0.011098 | 0.011536 |
| 0.011335 | 0.011367 | 0.011108 | 0.011285 | 0.011329 | 0.011368 | 0.011295 |
| 0.011262 | 0.011262 | 0.011329 | 0.011295 | 0.011497 | 0.011463 | 0.011396 |

|          |          |          |          |          |          |          |
|----------|----------|----------|----------|----------|----------|----------|
| 0.011497 | 0.011564 | 0.011295 | 0.011295 | 0.011329 | 0.011329 | 0.011330 |
| 0.011398 | 0.011329 | 0.011329 | 0.011363 | 0.011497 | 0.011564 | 0.011564 |
| 0.011430 | 0.011533 | 0.011501 | 0.011670 | 0.011696 | 0.011362 | 0.011530 |
| 0.011463 | 0.011463 | 0.011297 | 0.011478 | 0.011408 | 0.011435 | 0.011305 |
| 0.011473 | 0.011652 | 0.011441 | 0.011366 | 0.011262 | 0.011463 | 0.011329 |
| 0.011429 | 0.011362 | 0.011262 | 0.011363 | 0.011463 | 0.011466 | 0.011362 |
| 0.011262 | 0.011195 | 0.011329 | 0.011262 | 0.011195 | 0.011298 | 0.011463 |
| 0.011362 | 0.011295 | 0.011329 | 0.011362 | 0.011329 | 0.011262 | 0.011463 |
| 0.011329 | 0.011362 | 0.011362 | 0.011295 | 0.011362 | 0.011597 | 0.011262 |
| 0.011295 | 0.011698 | 0.011295 | 0.011329 | 0.011295 | 0.011664 | 0.011274 |
| 0.011734 | 0.011230 | 0.011311 | 0.011463 | 0.011589 | 0.011491 | 0.011227 |
| 0.011270 | 0.011463 | 0.011564 | 0.011671 | 0.011531 | 0.011669 | 0.011800 |
| 0.011699 | 0.011737 | 0.011698 | 0.011949 | 0.011664 | 0.012539 | 0.011700 |
| 0.012439 | 0.012207 | 0.012341 | 0.012612 | 0.011664 | 0.011362 | 0.011665 |
| 0.012103 | 0.012038 | 0.011631 | 0.011530 | 0.011598 | 0.011598 | 0.011567 |
| 0.011463 | 0.011467 | 0.011530 | 0.011497 | 0.011867 | 0.011933 | 0.011935 |
| 0.011834 | 0.011934 | 0.012038 | 0.011804 | 0.012104 | 0.012110 | 0.012171 |
| 0.012171 | 0.012205 | 0.012152 | 0.012172 | 0.012173 | 0.011396 | 0.011699 |
| 0.011766 | 0.012270 | 0.011772 | 0.012001 | 0.012474 | 0.011536 | 0.011430 |
| 0.011396 | 0.011396 | 0.011867 | 0.011800 | 0.012010 | 0.011731 | 0.011397 |
| S310     | 0.011530 | 0.011530 | 0.011765 | 0.011631 | 0.011631 | 0.011698 |
| 0.011536 | 0.011468 | 0.011698 | 0.011127 | 0.011195 | 0.011161 | 0.011127 |
| 0.011161 | 0.011329 | 0.011127 | 0.011161 | 0.011228 | 0.011195 | 0.011161 |
| 0.011127 | 0.011161 | 0.011262 | 0.011128 | 0.011161 | 0.011161 | 0.011502 |
| 0.011396 | 0.011161 | 0.000000 | 0.011295 | 0.011228 | 0.011195 | 0.011228 |
| 0.011195 | 0.011295 | 0.011195 | 0.011195 | 0.011228 | 0.011194 | 0.011362 |
| 0.011127 | 0.011194 | 0.011228 | 0.011161 | 0.011262 | 0.011295 | 0.011228 |
| 0.011195 | 0.011362 | 0.011262 | 0.011530 | 0.011195 | 0.011463 | 0.011195 |
| 0.011161 | 0.011262 | 0.011329 | 0.011463 | 0.011564 | 0.011262 | 0.011362 |
| 0.011228 | 0.011295 | 0.011195 | 0.011429 | 0.011665 | 0.011195 | 0.011262 |
| 0.011161 | 0.011262 | 0.011228 | 0.011295 | 0.011228 | 0.011228 | 0.011228 |
| 0.011127 | 0.011161 | 0.011127 | 0.011228 | 0.011194 | 0.011229 | 0.011295 |
| 0.011228 | 0.011194 | 0.011262 | 0.011161 | 0.011295 | 0.011127 | 0.011195 |
| 0.011362 | 0.011295 | 0.011530 | 0.011362 | 0.011195 | 0.011429 | 0.011195 |
| 0.011357 | 0.011583 | 0.011400 | 0.011099 | 0.011098 | 0.011207 | 0.011296 |
| 0.011938 | 0.011365 | 0.011102 | 0.011429 | 0.011429 | 0.011228 | 0.011329 |
| 0.011262 | 0.011228 | 0.011295 | 0.011195 | 0.011295 | 0.011228 | 0.011228 |
| 0.011195 | 0.011295 | 0.011497 | 0.011362 | 0.011262 | 0.011228 | 0.011161 |
| 0.011127 | 0.011127 | 0.011195 | 0.011161 | 0.011362 | 0.011329 | 0.011262 |
| 0.011362 | 0.011430 | 0.011161 | 0.011161 | 0.011195 | 0.011195 | 0.011195 |
| 0.011263 | 0.011195 | 0.011195 | 0.000000 | 0.011133 | 0.011095 | 0.011195 |
| 0.011196 | 0.011129 | 0.011171 | 0.011164 | 0.011094 | 0.011129 | 0.011162 |
| 0.011420 | 0.011198 | 0.011232 | 0.011128 | 0.011129 | 0.011262 | 0.011228 |
| 0.011296 | 0.011229 | 0.011228 | 0.011329 | 0.011262 | 0.011631 | 0.011430 |
| 0.011463 | 0.011329 | 0.011195 | 0.011295 | 0.011094 | 0.011329 | 0.011127 |
| 0.011195 | 0.011195 | 0.011161 | 0.011127 | 0.011161 | 0.011127 | 0.011228 |
| 0.011195 | 0.011295 | 0.011228 | 0.011127 | 0.011229 | 0.011329 | 0.011331 |
| 0.011329 | 0.011228 | 0.011127 | 0.000000 | 0.011195 | 0.011127 | 0.000000 |
| 0.011162 | 0.011329 | 0.011127 | 0.011329 | 0.011094 | 0.011195 | 0.011161 |
| 0.011262 | 0.011161 | 0.011195 | 0.011161 | 0.011195 | 0.000000 | 0.011195 |
| 0.011228 | 0.011161 | 0.011228 | 0.011161 | 0.011195 | 0.011228 | 0.011463 |
| 0.011564 | 0.011497 | 0.011564 | 0.011330 | 0.011564 | 0.011195 | 0.011161 |
| 0.011195 | 0.011464 | 0.011289 | 0.011095 | 0.011569 | 0.000000 | 0.011178 |
| 0.011569 | 0.011468 | 0.011362 | 0.011564 | 0.011265 | 0.011429 | 0.011396 |
| 0.011329 | 0.011497 | 0.011344 | 0.011184 | 0.011228 | 0.011228 | 0.011297 |
| 0.011396 | 0.011296 | 0.011432 | 0.011500 | 0.011429 | 0.011497 | 0.011602 |
| 0.011331 | 0.011501 | 0.011432 | 0.011364 | 0.011632 | 0.011094 | 0.011296 |
| 0.011262 | 0.011195 | 0.011094 | 0.011094 | 0.011161 | 0.011161 | 0.011228 |
| 0.011161 | 0.011228 | 0.011127 | 0.011228 | 0.011161 | 0.011161 | 0.011228 |
| 0.011161 | 0.011597 | 0.011497 | 0.011530 | 0.000000 | 0.011161 | 0.011195 |

|          |          |          |          |          |          |          |
|----------|----------|----------|----------|----------|----------|----------|
| 0.011195 | 0.011161 | 0.011228 | 0.011262 | 0.011127 | 0.011127 | 0.011127 |
| 0.011664 | 0.011295 | 0.011295 | 0.011094 | 0.011194 | 0.011362 | 0.011127 |
| 0.011127 | 0.011194 | 0.011161 | 0.011329 | 0.011127 | 0.011262 | 0.011396 |
| 0.011329 | 0.011161 | 0.011161 | 0.011094 | 0.011094 | 0.011262 | 0.011195 |
| 0.011094 | 0.011194 | 0.000000 | 0.011094 | 0.011228 | 0.011362 | 0.011127 |
| 0.011094 | 0.011228 | 0.011161 | 0.000000 | 0.011396 | 0.000000 | 0.011228 |
| 0.011300 | 0.011127 | 0.011429 | 0.011262 | 0.011295 | 0.011161 | 0.011262 |
| 0.011127 | 0.011463 | 0.000000 | 0.011329 | 0.011127 | 0.011127 | 0.000000 |
| 0.011295 | 0.011497 | 0.011195 | 0.011262 | 0.011094 | 0.011497 | 0.011127 |
| 0.011127 | 0.011127 | 0.011161 | 0.011262 | 0.011161 | 0.011262 | 0.011329 |
| 0.011329 | 0.011295 | 0.011195 | 0.011295 | 0.011262 | 0.011127 | 0.011094 |
| 0.011127 | 0.011127 | 0.011195 | 0.011127 | 0.011094 | 0.011262 | 0.011127 |
| 0.011161 | 0.011161 | 0.011295 | 0.011329 | 0.011228 | 0.011161 | 0.011161 |
| 0.011228 | 0.011161 | 0.011262 | 0.011127 | 0.011262 | 0.011362 | 0.011597 |
| 0.011161 | 0.011564 | 0.011164 | 0.017672 | 0.011126 | 0.011305 | 0.011514 |
| 0.011475 | 0.011517 | 0.011217 | 0.011176 | 0.011609 | 0.011543 | 0.011242 |
| 0.011392 | 0.011426 | 0.000000 | 0.011144 | 0.011138 | 0.011208 | 0.011146 |
| 0.011389 | 0.011321 | 0.011320 | 0.011126 | 0.011295 | 0.011329 | 0.011331 |
| 0.011198 | 0.011295 | 0.011295 | 0.011262 | 0.011228 | 0.011228 | 0.011195 |
| 0.011228 | 0.011161 | 0.011195 | 0.011228 | 0.011195 | 0.011127 | 0.011161 |
| 0.011161 | 0.011228 | 0.011127 | 0.011228 | 0.011262 | 0.011295 | 0.011195 |
| 0.011228 | 0.011195 | 0.011530 | 0.011530 | 0.011262 | 0.011296 | 0.011329 |
| 0.011094 | 0.011094 | 0.011127 | 0.011228 | 0.011094 | 0.011329 | 0.011329 |
| 0.011362 | 0.011362 | 0.011295 | 0.011396 | 0.011564 | 0.011397 | 0.011228 |
| 0.011228 | 0.011295 | 0.011329 | 0.011161 | 0.011228 | 0.011195 | 0.011228 |
| 0.011295 | 0.011295 | 0.011329 | 0.011295 | 0.011195 | 0.011396 | 0.011362 |
| 0.011230 | 0.011127 | 0.011228 | 0.011329 | 0.011228 | 0.011362 | 0.011396 |
| 0.011564 | 0.011265 | 0.011429 | 0.011396 | 0.011329 | 0.011497 | 0.011128 |
| 0.011296 | 0.011195 | 0.011161 | 0.011161 | 0.011228 | 0.011127 | 0.011228 |
| 0.011262 | 0.011295 | 0.011195 | 0.011228 | 0.011195 | 0.011530 | 0.011530 |
| 0.011262 | 0.011296 | 0.011362 | 0.011295 | 0.011934 | 0.011346 | 0.011271 |
| 0.011341 | 0.011303 | 0.011411 | 0.011303 | 0.011410 | 0.011336 | 0.011302 |
| 0.011884 | 0.011199 | 0.011334 | 0.011268 | 0.011542 | 0.011400 | 0.011502 |
| 0.011910 | 0.011362 | 0.011466 | 0.011530 | 0.011396 | 0.011396 | 0.011432 |
| 0.011094 | 0.011262 | 0.011396 | 0.011362 | 0.011364 | 0.011362 | 0.011330 |
| 0.011195 | 0.011127 | 0.011161 | 0.011195 | 0.011094 | 0.011161 | 0.000000 |
| 0.011194 | 0.011228 | 0.011127 | 0.011094 | 0.011195 | 0.011127 | 0.011161 |
| 0.011161 | 0.011094 | 0.011161 | 0.011195 | 0.011094 | 0.011295 | 0.011329 |
| 0.011228 | 0.011295 | 0.011228 | 0.011228 | 0.011161 | 0.011564 | 0.011194 |
| 0.011234 | 0.011161 | 0.011396 | 0.011399 | 0.011262 | 0.011262 | 0.011262 |
| 0.011262 | 0.011195 | 0.011161 | 0.011195 | 0.011295 | 0.011295 | 0.011228 |
| 0.011228 | 0.011362 | 0.011530 | 0.011262 | 0.011463 | 0.011463 | 0.011329 |
| 0.011161 | 0.011228 | 0.011262 | 0.011665 | 0.011228 | 0.011262 | 0.011228 |
| 0.011262 | 0.011194 | 0.011194 | 0.011497 | 0.011430 | 0.011463 | 0.011195 |
| 0.011295 | 0.011362 | 0.011228 | 0.011295 | 0.011262 | 0.011127 | 0.011463 |
| 0.011228 | 0.011195 | 0.011194 | 0.011362 | 0.011195 | 0.011295 | 0.011530 |
| 0.011161 | 0.011603 | 0.011597 | 0.011385 | 0.011117 | 0.011298 | 0.011163 |
| 0.011115 | 0.011605 | 0.011131 | 0.011328 | 0.011158 | 0.011264 | 0.011273 |
| 0.011366 | 0.000000 | 0.011227 | 0.000000 | 0.011114 | 0.011261 | 0.011263 |
| 0.011286 | 0.011178 | 0.011272 | 0.011201 | 0.011229 | 0.011362 | 0.011430 |
| 0.011430 | 0.011296 | 0.011398 | 0.011399 | 0.011535 | 0.011555 | 0.011228 |
| 0.011463 | 0.011329 | 0.011195 | 0.011295 | 0.011094 | 0.011329 | 0.011127 |
| 0.011195 | 0.011195 | 0.011161 | 0.011127 | 0.011161 | 0.011127 | 0.011228 |
| 0.011200 | 0.011200 | 0.011197 | 0.011231 | 0.011368 | 0.011333 | 0.011333 |
| 0.011333 | 0.011262 | 0.000000 | 0.000000 | 0.011196 | 0.011365 | 0.011366 |
| 0.011161 | 0.011230 | 0.011464 | 0.011432 | 0.011363 | 0.011397 | 0.011329 |
| 0.011262 | 0.011329 | 0.011329 | 0.011228 | 0.011799 | 0.011396 | 0.011463 |
| 0.011497 | 0.011559 | 0.011197 | 0.011268 | 0.011161 | 0.011362 | 0.011329 |
| 0.011363 | 0.011396 | 0.011396 | 0.011396 | 0.011532 | 0.011530 | 0.011164 |
| 0.000000 | 0.000000 | 0.011162 | 0.011128 | 0.011231 | 0.000000 | 0.011400 |

|          |          |          |          |          |          |          |
|----------|----------|----------|----------|----------|----------|----------|
| 0.011197 | 0.011323 | 0.000000 | 0.011210 | 0.011195 | 0.011265 | 0.011161 |
| 0.011127 | 0.011127 | 0.011195 | 0.011161 | 0.011362 | 0.011329 | 0.011262 |
| 0.011362 | 0.011430 | 0.011161 | 0.011161 | 0.011195 | 0.011195 | 0.011195 |
| 0.011263 | 0.011195 | 0.011195 | 0.011229 | 0.011362 | 0.011430 | 0.011430 |
| 0.011296 | 0.011398 | 0.011399 | 0.011535 | 0.011555 | 0.011228 | 0.011396 |
| 0.011329 | 0.011329 | 0.011162 | 0.011339 | 0.011269 | 0.011299 | 0.011165 |
| 0.011336 | 0.011516 | 0.011314 | 0.011230 | 0.011127 | 0.011329 | 0.011195 |
| 0.011295 | 0.011228 | 0.011127 | 0.011229 | 0.011329 | 0.011331 | 0.011228 |
| 0.011127 | 0.000000 | 0.011195 | 0.011127 | 0.000000 | 0.011162 | 0.011329 |
| 0.011228 | 0.011161 | 0.011195 | 0.011228 | 0.011195 | 0.011127 | 0.011329 |
| 0.011195 | 0.011228 | 0.011228 | 0.011161 | 0.011228 | 0.011463 | 0.011127 |
| 0.011161 | 0.011564 | 0.011161 | 0.011195 | 0.011161 | 0.011530 | 0.011103 |
| 0.011566 | 0.011103 | 0.011161 | 0.011342 | 0.011426 | 0.011347 | 0.000000 |
| 0.011113 | 0.011329 | 0.011429 | 0.011535 | 0.011397 | 0.011534 | 0.011666 |
| 0.011565 | 0.011601 | 0.011564 | 0.011812 | 0.011530 | 0.012404 | 0.011565 |
| 0.012304 | 0.012072 | 0.012206 | 0.012477 | 0.011530 | 0.011228 | 0.011531 |
| 0.011969 | 0.011903 | 0.011497 | 0.011396 | 0.011464 | 0.011464 | 0.011432 |
| 0.011329 | 0.011332 | 0.011396 | 0.011363 | 0.011733 | 0.011799 | 0.011800 |
| 0.011699 | 0.011800 | 0.011903 | 0.011669 | 0.011969 | 0.011974 | 0.012036 |
| 0.012037 | 0.012070 | 0.012015 | 0.012037 | 0.012038 | 0.011262 | 0.011564 |
| 0.011632 | 0.012135 | 0.011636 | 0.011866 | 0.012339 | 0.011400 | 0.011295 |
| 0.011262 | 0.011262 | 0.011732 | 0.011759 | 0.011869 | 0.011597 | 0.011262 |
| S311     | 0.011564 | 0.011564 | 0.011799 | 0.011664 | 0.011664 | 0.011732 |
| 0.011569 | 0.011502 | 0.011732 | 0.011161 | 0.011228 | 0.011195 | 0.011161 |
| 0.011194 | 0.011362 | 0.011161 | 0.011194 | 0.011262 | 0.011228 | 0.011194 |
| 0.011161 | 0.011195 | 0.011295 | 0.011161 | 0.011195 | 0.011195 | 0.011535 |
| 0.011429 | 0.011195 | 0.011094 | 0.011329 | 0.011262 | 0.011228 | 0.011262 |
| 0.011228 | 0.011329 | 0.011228 | 0.011228 | 0.011262 | 0.011228 | 0.011396 |
| 0.011161 | 0.011228 | 0.011262 | 0.011195 | 0.011295 | 0.011329 | 0.011262 |
| 0.011228 | 0.011396 | 0.011295 | 0.011564 | 0.011228 | 0.011496 | 0.011228 |
| 0.011194 | 0.011295 | 0.011362 | 0.011496 | 0.011597 | 0.011295 | 0.011396 |
| 0.011262 | 0.011329 | 0.011228 | 0.011463 | 0.011698 | 0.011228 | 0.011295 |
| 0.011195 | 0.011295 | 0.011262 | 0.011329 | 0.011262 | 0.011262 | 0.011262 |
| 0.011161 | 0.011195 | 0.011161 | 0.011262 | 0.011228 | 0.011262 | 0.011329 |
| 0.011262 | 0.011228 | 0.011295 | 0.011195 | 0.011329 | 0.011161 | 0.011228 |
| 0.011396 | 0.011329 | 0.011564 | 0.011396 | 0.011228 | 0.011463 | 0.011228 |
| 0.011394 | 0.011620 | 0.011437 | 0.011138 | 0.011135 | 0.011244 | 0.011336 |
| 0.011975 | 0.011365 | 0.011102 | 0.011463 | 0.011463 | 0.011262 | 0.011362 |
| 0.011295 | 0.011262 | 0.011329 | 0.011228 | 0.011329 | 0.011262 | 0.011262 |
| 0.011228 | 0.011329 | 0.011530 | 0.011396 | 0.011295 | 0.011262 | 0.011195 |
| 0.011161 | 0.011161 | 0.011228 | 0.011195 | 0.011396 | 0.011362 | 0.011295 |
| 0.011396 | 0.011463 | 0.011195 | 0.011195 | 0.011228 | 0.011228 | 0.011229 |
| 0.011297 | 0.011228 | 0.011228 | 0.011096 | 0.011133 | 0.011130 | 0.011228 |
| 0.011230 | 0.011163 | 0.011171 | 0.011198 | 0.011128 | 0.011163 | 0.011195 |
| 0.011420 | 0.011233 | 0.011267 | 0.011161 | 0.011164 | 0.011296 | 0.011262 |
| 0.011329 | 0.011262 | 0.011262 | 0.011362 | 0.011295 | 0.011664 | 0.011463 |
| 0.011496 | 0.011362 | 0.011228 | 0.011329 | 0.011127 | 0.011362 | 0.011161 |
| 0.011228 | 0.011228 | 0.011195 | 0.011161 | 0.011194 | 0.011161 | 0.011262 |
| 0.011228 | 0.011329 | 0.011262 | 0.011161 | 0.011262 | 0.011362 | 0.011364 |
| 0.011362 | 0.011262 | 0.011161 | 0.011094 | 0.011228 | 0.011161 | 0.011094 |
| 0.011196 | 0.011362 | 0.011161 | 0.011362 | 0.011127 | 0.011228 | 0.011195 |
| 0.011295 | 0.011195 | 0.011228 | 0.011195 | 0.011228 | 0.011094 | 0.011228 |
| 0.011262 | 0.011195 | 0.011262 | 0.011195 | 0.011228 | 0.011262 | 0.011497 |
| 0.011597 | 0.011530 | 0.011597 | 0.011364 | 0.011598 | 0.011228 | 0.011195 |
| 0.011229 | 0.011505 | 0.011335 | 0.011129 | 0.011603 | 0.011094 | 0.011218 |
| 0.011603 | 0.011502 | 0.011396 | 0.011597 | 0.011299 | 0.011463 | 0.011429 |
| 0.011362 | 0.011530 | 0.011380 | 0.011225 | 0.011270 | 0.011262 | 0.011331 |
| 0.011429 | 0.011330 | 0.011466 | 0.011534 | 0.011463 | 0.011530 | 0.011636 |
| 0.011365 | 0.011535 | 0.011466 | 0.011398 | 0.011666 | 0.011127 | 0.011330 |
| 0.011295 | 0.011228 | 0.011127 | 0.011127 | 0.011194 | 0.011195 | 0.011262 |

|          |          |          |          |          |          |          |
|----------|----------|----------|----------|----------|----------|----------|
| 0.011195 | 0.011262 | 0.011161 | 0.011262 | 0.011195 | 0.011194 | 0.011262 |
| 0.011195 | 0.011631 | 0.011530 | 0.011564 | 0.011094 | 0.011194 | 0.011228 |
| 0.011228 | 0.011194 | 0.011262 | 0.011295 | 0.011161 | 0.011161 | 0.011161 |
| 0.011698 | 0.011329 | 0.011329 | 0.011127 | 0.011228 | 0.011396 | 0.011161 |
| 0.011161 | 0.011228 | 0.011194 | 0.011362 | 0.011161 | 0.011295 | 0.011429 |
| 0.011362 | 0.011195 | 0.011194 | 0.011127 | 0.011127 | 0.011295 | 0.011228 |
| 0.011127 | 0.011228 | 0.011094 | 0.000000 | 0.011262 | 0.011396 | 0.011161 |
| 0.011128 | 0.011262 | 0.011195 | 0.011094 | 0.011429 | 0.011094 | 0.011262 |
| 0.011334 | 0.011161 | 0.011463 | 0.011295 | 0.011329 | 0.011194 | 0.011295 |
| 0.011161 | 0.011496 | 0.011094 | 0.011362 | 0.011161 | 0.011161 | 0.011094 |
| 0.011329 | 0.011530 | 0.011228 | 0.011295 | 0.011127 | 0.011530 | 0.011161 |
| 0.011161 | 0.011161 | 0.011194 | 0.011295 | 0.011194 | 0.011295 | 0.011362 |
| 0.011362 | 0.011329 | 0.011228 | 0.011329 | 0.011295 | 0.011161 | 0.011127 |
| 0.011161 | 0.011161 | 0.011228 | 0.011161 | 0.011127 | 0.011295 | 0.011161 |
| 0.011194 | 0.011195 | 0.011329 | 0.011362 | 0.011262 | 0.011194 | 0.011195 |
| 0.011262 | 0.011195 | 0.011295 | 0.011161 | 0.011295 | 0.011396 | 0.011631 |
| 0.011194 | 0.011597 | 0.011198 | 0.017710 | 0.011126 | 0.011366 | 0.011548 |
| 0.011510 | 0.011553 | 0.011270 | 0.011234 | 0.011609 | 0.011578 | 0.011242 |
| 0.011440 | 0.011426 | 0.000000 | 0.011186 | 0.011177 | 0.011258 | 0.011189 |
| 0.011436 | 0.011321 | 0.011357 | 0.011126 | 0.011329 | 0.011362 | 0.011365 |
| 0.011232 | 0.011329 | 0.011329 | 0.011295 | 0.011262 | 0.011262 | 0.011228 |
| 0.011262 | 0.011195 | 0.011228 | 0.011262 | 0.011228 | 0.011161 | 0.011195 |
| 0.011195 | 0.011262 | 0.011161 | 0.011262 | 0.011295 | 0.011329 | 0.011228 |
| 0.011262 | 0.011228 | 0.011564 | 0.011564 | 0.011295 | 0.011329 | 0.011362 |
| 0.011127 | 0.011127 | 0.011161 | 0.011262 | 0.011127 | 0.011362 | 0.011362 |
| 0.011396 | 0.011396 | 0.011329 | 0.011429 | 0.011597 | 0.011431 | 0.011262 |
| 0.011262 | 0.011329 | 0.011362 | 0.011195 | 0.011262 | 0.011228 | 0.011262 |
| 0.011329 | 0.011329 | 0.011362 | 0.011329 | 0.011229 | 0.011430 | 0.011396 |
| 0.011263 | 0.011161 | 0.011262 | 0.011362 | 0.011262 | 0.011396 | 0.011429 |
| 0.011597 | 0.011299 | 0.011463 | 0.011429 | 0.011362 | 0.011530 | 0.011161 |
| 0.011330 | 0.011228 | 0.011195 | 0.011195 | 0.011262 | 0.011161 | 0.011262 |
| 0.011295 | 0.011329 | 0.011228 | 0.011262 | 0.011228 | 0.011564 | 0.011564 |
| 0.011295 | 0.011329 | 0.011396 | 0.011329 | 0.011968 | 0.011382 | 0.011306 |
| 0.011376 | 0.011338 | 0.011447 | 0.011337 | 0.011445 | 0.011370 | 0.011336 |
| 0.011918 | 0.011233 | 0.011368 | 0.011302 | 0.011576 | 0.011434 | 0.011536 |
| 0.011944 | 0.011399 | 0.011500 | 0.011564 | 0.011429 | 0.011429 | 0.011466 |
| 0.011127 | 0.011295 | 0.011429 | 0.011396 | 0.011398 | 0.011396 | 0.011363 |
| 0.011228 | 0.011161 | 0.011194 | 0.011228 | 0.011127 | 0.011195 | 0.011094 |
| 0.011228 | 0.011262 | 0.011161 | 0.011127 | 0.011228 | 0.011161 | 0.011194 |
| 0.011194 | 0.011127 | 0.011195 | 0.011228 | 0.011127 | 0.011329 | 0.011362 |
| 0.011262 | 0.011329 | 0.011262 | 0.011262 | 0.011194 | 0.011597 | 0.011228 |
| 0.011269 | 0.011195 | 0.011430 | 0.011433 | 0.011295 | 0.011295 | 0.011295 |
| 0.011295 | 0.011228 | 0.011194 | 0.011228 | 0.011329 | 0.011329 | 0.011262 |
| 0.011262 | 0.011396 | 0.011564 | 0.011295 | 0.011497 | 0.011497 | 0.011362 |
| 0.011194 | 0.011262 | 0.011295 | 0.011698 | 0.011262 | 0.011295 | 0.011262 |
| 0.011295 | 0.011228 | 0.011228 | 0.011530 | 0.011463 | 0.011497 | 0.011228 |
| 0.011329 | 0.011396 | 0.011262 | 0.011329 | 0.011295 | 0.011161 | 0.011496 |
| 0.011262 | 0.011228 | 0.011228 | 0.011396 | 0.011228 | 0.011329 | 0.011564 |
| 0.011194 | 0.011637 | 0.011631 | 0.011385 | 0.011117 | 0.011332 | 0.011163 |
| 0.011170 | 0.011605 | 0.011166 | 0.011328 | 0.011158 | 0.011264 | 0.011273 |
| 0.011366 | 0.000000 | 0.011227 | 0.000000 | 0.011114 | 0.011261 | 0.011304 |
| 0.011324 | 0.011218 | 0.011307 | 0.011236 | 0.011262 | 0.011396 | 0.011463 |
| 0.011463 | 0.011329 | 0.011432 | 0.011433 | 0.011569 | 0.011590 | 0.011262 |
| 0.011496 | 0.011362 | 0.011228 | 0.011329 | 0.011127 | 0.011362 | 0.011161 |
| 0.011228 | 0.011228 | 0.011195 | 0.011161 | 0.011194 | 0.011161 | 0.011262 |
| 0.011235 | 0.011235 | 0.011231 | 0.011266 | 0.011402 | 0.011368 | 0.011367 |
| 0.011367 | 0.011296 | 0.011097 | 0.011096 | 0.011230 | 0.011399 | 0.011399 |
| 0.011195 | 0.011263 | 0.011498 | 0.011466 | 0.011396 | 0.011430 | 0.011362 |
| 0.011295 | 0.011362 | 0.011362 | 0.011262 | 0.011833 | 0.011429 | 0.011497 |
| 0.011530 | 0.011594 | 0.011231 | 0.011303 | 0.011195 | 0.011396 | 0.011362 |



|          |          |          |          |          |          |          |
|----------|----------|----------|----------|----------|----------|----------|
| 0.011397 | 0.011429 | 0.011429 | 0.011429 | 0.011571 | 0.011564 | 0.011199 |
| 0.011094 | 0.011095 | 0.011196 | 0.011162 | 0.011265 | 0.011098 | 0.011434 |
| 0.011232 | 0.011367 | 0.011108 | 0.011248 | 0.011228 | 0.011300 | 0.011195 |
| 0.011161 | 0.011161 | 0.011228 | 0.011195 | 0.011396 | 0.011362 | 0.011295 |
| 0.011396 | 0.011463 | 0.011195 | 0.011195 | 0.011228 | 0.011228 | 0.011229 |
| 0.011297 | 0.011228 | 0.011228 | 0.011262 | 0.011396 | 0.011463 | 0.011463 |
| 0.011329 | 0.011432 | 0.011433 | 0.011569 | 0.011590 | 0.011262 | 0.011429 |
| 0.011362 | 0.011362 | 0.011196 | 0.011373 | 0.011303 | 0.011333 | 0.011200 |
| 0.011370 | 0.011516 | 0.011314 | 0.011264 | 0.011161 | 0.011362 | 0.011228 |
| 0.011329 | 0.011262 | 0.011161 | 0.011262 | 0.011362 | 0.011364 | 0.011262 |
| 0.011161 | 0.011094 | 0.011228 | 0.011161 | 0.011094 | 0.011196 | 0.011362 |
| 0.011262 | 0.011195 | 0.011228 | 0.011262 | 0.011228 | 0.011161 | 0.011362 |
| 0.011228 | 0.011262 | 0.011262 | 0.011194 | 0.011262 | 0.011497 | 0.011161 |
| 0.011195 | 0.011597 | 0.011194 | 0.011228 | 0.011194 | 0.011564 | 0.011103 |
| 0.011566 | 0.011103 | 0.011161 | 0.011342 | 0.011426 | 0.011383 | 0.000000 |
| 0.011113 | 0.011362 | 0.011463 | 0.011569 | 0.011430 | 0.011568 | 0.011699 |
| 0.011598 | 0.011635 | 0.011597 | 0.011846 | 0.011564 | 0.012438 | 0.011599 |
| 0.012338 | 0.012105 | 0.012240 | 0.012511 | 0.011564 | 0.011262 | 0.011564 |
| 0.012002 | 0.011937 | 0.011530 | 0.011430 | 0.011497 | 0.011497 | 0.011466 |
| 0.011362 | 0.011365 | 0.011429 | 0.011396 | 0.011766 | 0.011832 | 0.011834 |
| 0.011733 | 0.011833 | 0.011937 | 0.011703 | 0.012003 | 0.012008 | 0.012070 |
| 0.012070 | 0.012104 | 0.012050 | 0.012070 | 0.012072 | 0.011295 | 0.011598 |
| 0.011665 | 0.012169 | 0.011670 | 0.011900 | 0.012373 | 0.011434 | 0.011329 |
| 0.011295 | 0.011295 | 0.011766 | 0.011801 | 0.011904 | 0.011631 | 0.011296 |
| S312     | 0.011698 | 0.011698 | 0.011933 | 0.011799 | 0.011799 | 0.011866 |
| 0.011705 | 0.011637 | 0.011866 | 0.011295 | 0.011362 | 0.011329 | 0.011295 |
| 0.011329 | 0.011497 | 0.011295 | 0.011329 | 0.011396 | 0.011362 | 0.011329 |
| 0.011295 | 0.011329 | 0.011429 | 0.011295 | 0.011329 | 0.011329 | 0.011671 |
| 0.011564 | 0.011329 | 0.011228 | 0.011463 | 0.011396 | 0.011362 | 0.011396 |
| 0.011362 | 0.011463 | 0.011362 | 0.011362 | 0.011396 | 0.011161 | 0.011530 |
| 0.011295 | 0.011362 | 0.011396 | 0.011329 | 0.011429 | 0.011463 | 0.011396 |
| 0.011362 | 0.011530 | 0.011430 | 0.011698 | 0.011362 | 0.011631 | 0.011362 |
| 0.011329 | 0.011430 | 0.011497 | 0.011631 | 0.011732 | 0.011429 | 0.011530 |
| 0.011396 | 0.011463 | 0.011362 | 0.011530 | 0.011833 | 0.011362 | 0.011429 |
| 0.011329 | 0.011429 | 0.011396 | 0.011463 | 0.011396 | 0.011396 | 0.011396 |
| 0.011295 | 0.011329 | 0.011295 | 0.011396 | 0.011362 | 0.011397 | 0.011463 |
| 0.011396 | 0.011362 | 0.011429 | 0.011329 | 0.011463 | 0.011295 | 0.011362 |
| 0.011530 | 0.011463 | 0.011698 | 0.011329 | 0.011362 | 0.011597 | 0.011362 |
| 0.011394 | 0.011770 | 0.011588 | 0.011295 | 0.011284 | 0.011244 | 0.011493 |
| 0.012121 | 0.011569 | 0.011307 | 0.011597 | 0.011597 | 0.011396 | 0.011497 |
| 0.011429 | 0.011396 | 0.011463 | 0.011362 | 0.011463 | 0.011396 | 0.011396 |
| 0.011362 | 0.011463 | 0.011665 | 0.011530 | 0.011429 | 0.011396 | 0.011329 |
| 0.011295 | 0.011295 | 0.011362 | 0.011329 | 0.011530 | 0.011497 | 0.011430 |
| 0.011530 | 0.011597 | 0.011329 | 0.011329 | 0.011362 | 0.011362 | 0.011364 |
| 0.011432 | 0.011362 | 0.011362 | 0.011240 | 0.011313 | 0.011271 | 0.011363 |
| 0.011162 | 0.011301 | 0.011355 | 0.011336 | 0.011264 | 0.011300 | 0.011330 |
| 0.011600 | 0.011370 | 0.011405 | 0.011296 | 0.011302 | 0.011430 | 0.011396 |
| 0.011464 | 0.011397 | 0.011396 | 0.011496 | 0.011429 | 0.011799 | 0.011598 |
| 0.011631 | 0.011497 | 0.011362 | 0.011463 | 0.011262 | 0.011497 | 0.011295 |
| 0.011362 | 0.011362 | 0.011329 | 0.011295 | 0.011329 | 0.011295 | 0.011396 |
| 0.011362 | 0.011463 | 0.011396 | 0.011295 | 0.011397 | 0.011497 | 0.011500 |
| 0.011497 | 0.011396 | 0.011295 | 0.011229 | 0.011362 | 0.011295 | 0.011228 |
| 0.011332 | 0.011497 | 0.011295 | 0.011497 | 0.011262 | 0.011363 | 0.011329 |
| 0.011430 | 0.011329 | 0.011362 | 0.011329 | 0.011362 | 0.011228 | 0.011362 |
| 0.011396 | 0.011329 | 0.011396 | 0.011329 | 0.011362 | 0.011396 | 0.011631 |
| 0.011732 | 0.011665 | 0.011732 | 0.011498 | 0.011732 | 0.011362 | 0.011329 |
| 0.011364 | 0.011667 | 0.011426 | 0.011266 | 0.011739 | 0.011231 | 0.011336 |
| 0.011739 | 0.011638 | 0.011530 | 0.011732 | 0.011436 | 0.011597 | 0.011564 |
| 0.011497 | 0.011664 | 0.011522 | 0.011349 | 0.011437 | 0.011396 | 0.011466 |
| 0.011564 | 0.011465 | 0.011601 | 0.011669 | 0.011597 | 0.011665 | 0.011772 |

|          |          |          |          |          |          |          |
|----------|----------|----------|----------|----------|----------|----------|
| 0.011500 | 0.011671 | 0.011602 | 0.011263 | 0.011800 | 0.011262 | 0.011465 |
| 0.011429 | 0.011362 | 0.011262 | 0.011262 | 0.011329 | 0.011329 | 0.011396 |
| 0.011329 | 0.011396 | 0.011295 | 0.011396 | 0.011329 | 0.011329 | 0.011396 |
| 0.011329 | 0.011765 | 0.011665 | 0.011698 | 0.011228 | 0.011329 | 0.011362 |
| 0.011362 | 0.011329 | 0.011396 | 0.011429 | 0.011295 | 0.011295 | 0.011295 |
| 0.011832 | 0.011463 | 0.011463 | 0.011262 | 0.011362 | 0.011530 | 0.011295 |
| 0.011295 | 0.011362 | 0.011329 | 0.011497 | 0.011295 | 0.011429 | 0.011564 |
| 0.011497 | 0.011329 | 0.011329 | 0.011262 | 0.011262 | 0.011430 | 0.011362 |
| 0.011262 | 0.011362 | 0.011228 | 0.011262 | 0.000000 | 0.011530 | 0.011295 |
| 0.011262 | 0.011195 | 0.011329 | 0.011228 | 0.011564 | 0.011228 | 0.011396 |
| 0.011471 | 0.011295 | 0.011597 | 0.011430 | 0.011329 | 0.011329 | 0.011429 |
| 0.011295 | 0.011631 | 0.011228 | 0.011497 | 0.011295 | 0.011295 | 0.011228 |
| 0.011463 | 0.011665 | 0.011362 | 0.011429 | 0.011262 | 0.011665 | 0.011295 |
| 0.011295 | 0.011295 | 0.011329 | 0.011429 | 0.011329 | 0.011429 | 0.011497 |
| 0.011295 | 0.011463 | 0.011362 | 0.011463 | 0.011429 | 0.011295 | 0.011262 |
| 0.011295 | 0.011295 | 0.011362 | 0.011295 | 0.011262 | 0.011429 | 0.011295 |
| 0.011329 | 0.011329 | 0.011463 | 0.011497 | 0.011396 | 0.011329 | 0.011329 |
| 0.011396 | 0.011329 | 0.011429 | 0.011295 | 0.011429 | 0.011530 | 0.011765 |
| 0.011329 | 0.011732 | 0.011336 | 0.017861 | 0.011191 | 0.011488 | 0.011688 |
| 0.011648 | 0.011693 | 0.011270 | 0.011408 | 0.011829 | 0.011716 | 0.011485 |
| 0.011582 | 0.011671 | 0.011255 | 0.011353 | 0.011294 | 0.011406 | 0.011361 |
| 0.011576 | 0.011507 | 0.011505 | 0.011259 | 0.011463 | 0.011497 | 0.011500 |
| 0.011369 | 0.011463 | 0.011463 | 0.011430 | 0.011396 | 0.011396 | 0.011363 |
| 0.011396 | 0.011329 | 0.011362 | 0.011396 | 0.011363 | 0.011295 | 0.011329 |
| 0.011329 | 0.011396 | 0.011295 | 0.011396 | 0.011430 | 0.011262 | 0.011362 |
| 0.011396 | 0.011362 | 0.011698 | 0.011698 | 0.011430 | 0.011464 | 0.011497 |
| 0.011262 | 0.011262 | 0.011295 | 0.011396 | 0.011262 | 0.011497 | 0.011497 |
| 0.011530 | 0.011530 | 0.011463 | 0.011564 | 0.011732 | 0.011565 | 0.011396 |
| 0.011396 | 0.011463 | 0.011497 | 0.011329 | 0.011396 | 0.011362 | 0.011396 |
| 0.011463 | 0.011463 | 0.011497 | 0.011463 | 0.011363 | 0.011564 | 0.011530 |
| 0.011399 | 0.011295 | 0.011396 | 0.011497 | 0.011396 | 0.011530 | 0.011564 |
| 0.011732 | 0.011436 | 0.011597 | 0.011564 | 0.011497 | 0.011664 | 0.011295 |
| 0.011464 | 0.011363 | 0.011329 | 0.011329 | 0.011396 | 0.011295 | 0.011396 |
| 0.011430 | 0.011262 | 0.011362 | 0.011396 | 0.011362 | 0.011698 | 0.011698 |
| 0.011430 | 0.011464 | 0.011530 | 0.011463 | 0.012103 | 0.011525 | 0.011447 |
| 0.011236 | 0.011476 | 0.011587 | 0.011476 | 0.011585 | 0.011508 | 0.011474 |
| 0.012056 | 0.011372 | 0.011505 | 0.011441 | 0.011714 | 0.011570 | 0.011673 |
| 0.012080 | 0.011550 | 0.011635 | 0.011698 | 0.011564 | 0.011564 | 0.011601 |
| 0.011262 | 0.011429 | 0.011564 | 0.011530 | 0.011533 | 0.011530 | 0.011498 |
| 0.011362 | 0.011295 | 0.011329 | 0.011362 | 0.011262 | 0.011329 | 0.011228 |
| 0.011295 | 0.011329 | 0.011295 | 0.011262 | 0.011362 | 0.011295 | 0.011329 |
| 0.011329 | 0.011262 | 0.011329 | 0.011362 | 0.011262 | 0.011463 | 0.011362 |
| 0.011262 | 0.011329 | 0.011195 | 0.011329 | 0.011329 | 0.011732 | 0.011362 |
| 0.011408 | 0.011329 | 0.011564 | 0.011569 | 0.011430 | 0.011429 | 0.011429 |
| 0.011429 | 0.011362 | 0.011329 | 0.011362 | 0.011396 | 0.011463 | 0.011396 |
| 0.011396 | 0.011530 | 0.011698 | 0.011429 | 0.011631 | 0.011631 | 0.011497 |
| 0.011329 | 0.011396 | 0.011429 | 0.011833 | 0.011396 | 0.011430 | 0.011396 |
| 0.011429 | 0.011362 | 0.011362 | 0.011665 | 0.011598 | 0.011631 | 0.011362 |
| 0.011463 | 0.011530 | 0.011396 | 0.011463 | 0.011429 | 0.011295 | 0.011631 |
| 0.011396 | 0.011362 | 0.011362 | 0.011530 | 0.011362 | 0.011463 | 0.011698 |
| 0.011329 | 0.011773 | 0.011765 | 0.011589 | 0.011229 | 0.011468 | 0.011370 |
| 0.011280 | 0.011800 | 0.011306 | 0.011507 | 0.011402 | 0.011366 | 0.011379 |
| 0.011468 | 0.011192 | 0.011339 | 0.011126 | 0.011330 | 0.011328 | 0.011466 |
| 0.011475 | 0.011375 | 0.011448 | 0.011377 | 0.011397 | 0.011530 | 0.011598 |
| 0.011597 | 0.011464 | 0.011567 | 0.011569 | 0.011704 | 0.011732 | 0.011396 |
| 0.011631 | 0.011497 | 0.011362 | 0.011463 | 0.011262 | 0.011497 | 0.011295 |
| 0.011362 | 0.011362 | 0.011329 | 0.011295 | 0.011329 | 0.011295 | 0.011396 |
| 0.011375 | 0.011375 | 0.011368 | 0.011403 | 0.011539 | 0.011504 | 0.011504 |
| 0.011503 | 0.011430 | 0.011245 | 0.011240 | 0.011365 | 0.011535 | 0.011535 |
| 0.011329 | 0.011399 | 0.011632 | 0.011601 | 0.011464 | 0.011565 | 0.011496 |

|          |          |          |          |          |          |          |
|----------|----------|----------|----------|----------|----------|----------|
| 0.011429 | 0.011497 | 0.011496 | 0.011396 | 0.011967 | 0.011564 | 0.011631 |
| 0.011665 | 0.011701 | 0.011367 | 0.011441 | 0.011329 | 0.011530 | 0.011497 |
| 0.011531 | 0.011564 | 0.011564 | 0.011564 | 0.011689 | 0.011698 | 0.011338 |
| 0.011229 | 0.011233 | 0.011333 | 0.011298 | 0.011402 | 0.011247 | 0.011570 |
| 0.011369 | 0.011499 | 0.011251 | 0.011397 | 0.011363 | 0.011437 | 0.011329 |
| 0.011295 | 0.011295 | 0.011362 | 0.011329 | 0.011530 | 0.011497 | 0.011430 |
| 0.011530 | 0.011597 | 0.011329 | 0.011329 | 0.011362 | 0.011362 | 0.011364 |
| 0.011432 | 0.011362 | 0.011362 | 0.011397 | 0.011530 | 0.011598 | 0.011597 |
| 0.011464 | 0.011567 | 0.011569 | 0.011704 | 0.011732 | 0.011396 | 0.011564 |
| 0.011497 | 0.011497 | 0.011331 | 0.011513 | 0.011442 | 0.011469 | 0.011340 |
| 0.011508 | 0.011744 | 0.011483 | 0.011400 | 0.011295 | 0.011497 | 0.011362 |
| 0.011463 | 0.011396 | 0.011295 | 0.011397 | 0.011497 | 0.011500 | 0.011396 |
| 0.011295 | 0.011229 | 0.011362 | 0.011295 | 0.011228 | 0.011332 | 0.011497 |
| 0.011396 | 0.011329 | 0.011362 | 0.011396 | 0.011363 | 0.011295 | 0.011497 |
| 0.011362 | 0.011396 | 0.011396 | 0.011329 | 0.011195 | 0.011564 | 0.011295 |
| 0.011329 | 0.011732 | 0.011329 | 0.011362 | 0.011329 | 0.011698 | 0.011317 |
| 0.011678 | 0.011315 | 0.011361 | 0.011543 | 0.011630 | 0.011527 | 0.011269 |
| 0.011270 | 0.011496 | 0.011597 | 0.011705 | 0.011565 | 0.011703 | 0.011834 |
| 0.011733 | 0.011770 | 0.011732 | 0.011983 | 0.011698 | 0.012573 | 0.011734 |
| 0.012473 | 0.012241 | 0.012375 | 0.012646 | 0.011698 | 0.011396 | 0.011699 |
| 0.012137 | 0.012072 | 0.011664 | 0.011564 | 0.011632 | 0.011632 | 0.011601 |
| 0.011496 | 0.011501 | 0.011564 | 0.011531 | 0.011901 | 0.011967 | 0.011968 |
| 0.011868 | 0.011968 | 0.012072 | 0.011838 | 0.012138 | 0.012144 | 0.012205 |
| 0.012205 | 0.012239 | 0.012186 | 0.012206 | 0.012207 | 0.011429 | 0.011732 |
| 0.011800 | 0.012304 | 0.011806 | 0.012035 | 0.012508 | 0.011570 | 0.011464 |
| 0.011429 | 0.011429 | 0.011900 | 0.011965 | 0.012045 | 0.011765 | 0.011431 |
| S313     | 0.011833 | 0.011833 | 0.011800 | 0.011665 | 0.011665 | 0.011732 |
| 0.011502 | 0.011434 | 0.011732 | 0.011430 | 0.011497 | 0.011464 | 0.011430 |
| 0.011396 | 0.011631 | 0.011362 | 0.011463 | 0.011530 | 0.011497 | 0.011463 |
| 0.011430 | 0.011463 | 0.011295 | 0.011430 | 0.011464 | 0.011463 | 0.011468 |
| 0.011430 | 0.011463 | 0.011362 | 0.011329 | 0.011497 | 0.011497 | 0.011530 |
| 0.011463 | 0.011598 | 0.011497 | 0.011497 | 0.011530 | 0.011497 | 0.011665 |
| 0.011362 | 0.011497 | 0.011530 | 0.011463 | 0.011497 | 0.011598 | 0.011497 |
| 0.011497 | 0.011665 | 0.011564 | 0.011497 | 0.011497 | 0.011766 | 0.011497 |
| 0.011463 | 0.011497 | 0.011631 | 0.011766 | 0.011531 | 0.011497 | 0.011530 |
| 0.011530 | 0.011598 | 0.011497 | 0.011732 | 0.011632 | 0.011497 | 0.011564 |
| 0.011463 | 0.011564 | 0.011530 | 0.011598 | 0.011530 | 0.011530 | 0.011530 |
| 0.011430 | 0.011463 | 0.011430 | 0.011463 | 0.011497 | 0.011532 | 0.011598 |
| 0.011530 | 0.011497 | 0.011564 | 0.011463 | 0.011463 | 0.011430 | 0.011497 |
| 0.011665 | 0.011598 | 0.011564 | 0.011665 | 0.011497 | 0.011732 | 0.011497 |
| 0.011691 | 0.011509 | 0.011740 | 0.011412 | 0.011434 | 0.011539 | 0.011297 |
| 0.011939 | 0.000000 | 0.011390 | 0.011732 | 0.011732 | 0.011463 | 0.011564 |
| 0.011564 | 0.011530 | 0.011598 | 0.011497 | 0.011598 | 0.011530 | 0.011530 |
| 0.011497 | 0.011530 | 0.011799 | 0.011665 | 0.011564 | 0.011531 | 0.011463 |
| 0.011430 | 0.011363 | 0.011497 | 0.011463 | 0.011396 | 0.011363 | 0.011295 |
| 0.011396 | 0.011463 | 0.011463 | 0.011463 | 0.011497 | 0.011497 | 0.011500 |
| 0.011568 | 0.011497 | 0.011497 | 0.011384 | 0.011458 | 0.011411 | 0.011497 |
| 0.011501 | 0.011438 | 0.011503 | 0.011474 | 0.011400 | 0.011437 | 0.011466 |
| 0.011384 | 0.011508 | 0.011542 | 0.011430 | 0.011441 | 0.011565 | 0.011464 |
| 0.011531 | 0.011532 | 0.011531 | 0.011631 | 0.011564 | 0.011934 | 0.011665 |
| 0.011497 | 0.011564 | 0.011497 | 0.011531 | 0.011396 | 0.011363 | 0.011430 |
| 0.011497 | 0.011497 | 0.011463 | 0.011430 | 0.011463 | 0.011430 | 0.011531 |
| 0.011497 | 0.011598 | 0.011531 | 0.011430 | 0.011532 | 0.011631 | 0.011635 |
| 0.011632 | 0.011531 | 0.011430 | 0.011364 | 0.011497 | 0.011430 | 0.011363 |
| 0.011366 | 0.011632 | 0.011430 | 0.011632 | 0.011396 | 0.011497 | 0.011463 |
| 0.011564 | 0.011463 | 0.011497 | 0.011463 | 0.011497 | 0.011363 | 0.011497 |
| 0.011531 | 0.011463 | 0.011531 | 0.011463 | 0.011497 | 0.011531 | 0.011766 |
| 0.011531 | 0.011463 | 0.011531 | 0.011634 | 0.011531 | 0.011497 | 0.011463 |
| 0.011432 | 0.011748 | 0.011472 | 0.011403 | 0.011536 | 0.011367 | 0.011533 |
| 0.011536 | 0.011434 | 0.011665 | 0.011867 | 0.011539 | 0.011732 | 0.011699 |

|          |          |          |          |          |          |          |
|----------|----------|----------|----------|----------|----------|----------|
| 0.011631 | 0.011799 | 0.011629 | 0.011513 | 0.011521 | 0.011531 | 0.011602 |
| 0.011699 | 0.011600 | 0.011737 | 0.011805 | 0.011732 | 0.011799 | 0.011908 |
| 0.011636 | 0.011807 | 0.011737 | 0.011669 | 0.011935 | 0.011396 | 0.011600 |
| 0.011564 | 0.011497 | 0.011396 | 0.011396 | 0.011463 | 0.011463 | 0.011530 |
| 0.011463 | 0.011530 | 0.011430 | 0.011463 | 0.011463 | 0.011463 | 0.011530 |
| 0.011463 | 0.011564 | 0.011463 | 0.011497 | 0.011362 | 0.011463 | 0.011497 |
| 0.011497 | 0.011396 | 0.011530 | 0.011497 | 0.011430 | 0.011430 | 0.011430 |
| 0.011631 | 0.011530 | 0.011598 | 0.011396 | 0.011497 | 0.011665 | 0.011430 |
| 0.011430 | 0.011497 | 0.011463 | 0.011631 | 0.011430 | 0.011362 | 0.011463 |
| 0.011430 | 0.011463 | 0.011463 | 0.011362 | 0.011396 | 0.011564 | 0.011497 |
| 0.011362 | 0.011497 | 0.011362 | 0.011396 | 0.011530 | 0.000000 | 0.011430 |
| 0.011396 | 0.011530 | 0.011464 | 0.011362 | 0.011363 | 0.011362 | 0.011530 |
| 0.011608 | 0.011430 | 0.011396 | 0.011564 | 0.011530 | 0.011463 | 0.011564 |
| 0.011430 | 0.011766 | 0.011362 | 0.011497 | 0.011362 | 0.011362 | 0.011362 |
| 0.011598 | 0.011464 | 0.011497 | 0.011564 | 0.011396 | 0.011463 | 0.011362 |
| 0.011430 | 0.011430 | 0.011463 | 0.011564 | 0.011463 | 0.011564 | 0.011631 |
| 0.011631 | 0.011598 | 0.011497 | 0.011598 | 0.011564 | 0.011430 | 0.011396 |
| 0.011430 | 0.011430 | 0.011497 | 0.011362 | 0.011396 | 0.011564 | 0.011430 |
| 0.011396 | 0.011463 | 0.011598 | 0.011564 | 0.011530 | 0.011463 | 0.011463 |
| 0.011530 | 0.011463 | 0.011564 | 0.011430 | 0.011564 | 0.011665 | 0.011564 |
| 0.011463 | 0.011531 | 0.011475 | 0.017941 | 0.011257 | 0.011611 | 0.011479 |
| 0.011441 | 0.011483 | 0.011585 | 0.011351 | 0.011555 | 0.011509 | 0.011607 |
| 0.011487 | 0.011365 | 0.011373 | 0.011479 | 0.011334 | 0.011455 | 0.011490 |
| 0.011201 | 0.011358 | 0.011246 | 0.011259 | 0.011598 | 0.011631 | 0.011636 |
| 0.011507 | 0.011598 | 0.011598 | 0.011497 | 0.011530 | 0.011531 | 0.011497 |
| 0.011530 | 0.011463 | 0.011497 | 0.011531 | 0.011497 | 0.011430 | 0.011463 |
| 0.011463 | 0.011531 | 0.011430 | 0.011531 | 0.011564 | 0.011598 | 0.011497 |
| 0.011463 | 0.011430 | 0.011497 | 0.011497 | 0.011564 | 0.011599 | 0.011632 |
| 0.011396 | 0.011396 | 0.011430 | 0.011531 | 0.011396 | 0.011631 | 0.011631 |
| 0.011665 | 0.011665 | 0.011598 | 0.011699 | 0.011531 | 0.011700 | 0.011531 |
| 0.011531 | 0.011598 | 0.011631 | 0.011463 | 0.011531 | 0.011497 | 0.011531 |
| 0.011598 | 0.011598 | 0.011631 | 0.011598 | 0.011498 | 0.011699 | 0.011665 |
| 0.011535 | 0.011430 | 0.011531 | 0.011632 | 0.011531 | 0.011598 | 0.011698 |
| 0.011867 | 0.011539 | 0.011732 | 0.011699 | 0.011631 | 0.011799 | 0.011430 |
| 0.011600 | 0.011497 | 0.011463 | 0.011463 | 0.011531 | 0.011430 | 0.011531 |
| 0.011564 | 0.011598 | 0.011497 | 0.011463 | 0.011430 | 0.011497 | 0.011497 |
| 0.011564 | 0.011599 | 0.011665 | 0.011598 | 0.012171 | 0.011667 | 0.011588 |
| 0.011658 | 0.011615 | 0.011728 | 0.011615 | 0.011725 | 0.011647 | 0.011612 |
| 0.012125 | 0.011510 | 0.011642 | 0.011579 | 0.011852 | 0.011706 | 0.011809 |
| 0.012149 | 0.011625 | 0.011771 | 0.011833 | 0.011698 | 0.011430 | 0.011737 |
| 0.011396 | 0.011564 | 0.011698 | 0.011665 | 0.011669 | 0.011396 | 0.011364 |
| 0.011497 | 0.011430 | 0.011463 | 0.011497 | 0.011396 | 0.011463 | 0.011362 |
| 0.011430 | 0.011463 | 0.011430 | 0.011396 | 0.011497 | 0.011430 | 0.011463 |
| 0.011463 | 0.011396 | 0.011463 | 0.011497 | 0.011396 | 0.011598 | 0.011631 |
| 0.011530 | 0.011530 | 0.011530 | 0.011530 | 0.011463 | 0.011531 | 0.011497 |
| 0.011269 | 0.011463 | 0.011430 | 0.011434 | 0.011564 | 0.011564 | 0.011564 |
| 0.011564 | 0.011497 | 0.011463 | 0.011497 | 0.011598 | 0.011598 | 0.011530 |
| 0.011530 | 0.011665 | 0.011497 | 0.011564 | 0.011766 | 0.011766 | 0.011631 |
| 0.011463 | 0.011530 | 0.011564 | 0.011631 | 0.011531 | 0.011564 | 0.011530 |
| 0.011564 | 0.011430 | 0.011430 | 0.011732 | 0.011732 | 0.011698 | 0.011497 |
| 0.011598 | 0.011665 | 0.011530 | 0.011598 | 0.011564 | 0.011430 | 0.011430 |
| 0.011530 | 0.011497 | 0.011430 | 0.011665 | 0.011497 | 0.011598 | 0.011564 |
| 0.011463 | 0.011570 | 0.011564 | 0.011386 | 0.011173 | 0.011536 | 0.011267 |
| 0.011390 | 0.011567 | 0.011447 | 0.011462 | 0.011402 | 0.011315 | 0.011273 |
| 0.011264 | 0.011192 | 0.011339 | 0.011193 | 0.011222 | 0.011396 | 0.011628 |
| 0.011626 | 0.011533 | 0.011518 | 0.011518 | 0.011532 | 0.011396 | 0.011464 |
| 0.011463 | 0.011531 | 0.011635 | 0.011433 | 0.011773 | 0.011803 | 0.011530 |
| 0.011497 | 0.011564 | 0.011497 | 0.011531 | 0.011396 | 0.011363 | 0.011430 |
| 0.011497 | 0.011497 | 0.011463 | 0.011430 | 0.011463 | 0.011430 | 0.011531 |
| 0.011514 | 0.011515 | 0.011506 | 0.011540 | 0.011676 | 0.011641 | 0.011641 |

|          |          |          |          |          |          |          |
|----------|----------|----------|----------|----------|----------|----------|
| 0.011639 | 0.011565 | 0.011392 | 0.011384 | 0.011501 | 0.011670 | 0.011671 |
| 0.011464 | 0.011535 | 0.011768 | 0.011736 | 0.011666 | 0.011700 | 0.011631 |
| 0.011564 | 0.011631 | 0.011631 | 0.011530 | 0.011766 | 0.011698 | 0.011766 |
| 0.011800 | 0.011523 | 0.011436 | 0.011580 | 0.011463 | 0.011665 | 0.011631 |
| 0.011666 | 0.011698 | 0.011698 | 0.011698 | 0.011768 | 0.011833 | 0.011477 |
| 0.011365 | 0.011372 | 0.011469 | 0.011434 | 0.011470 | 0.011359 | 0.011366 |
| 0.011506 | 0.000000 | 0.011394 | 0.011547 | 0.011498 | 0.011573 | 0.011463 |
| 0.011430 | 0.011363 | 0.011497 | 0.011463 | 0.011396 | 0.011363 | 0.011295 |
| 0.011396 | 0.011463 | 0.011463 | 0.011463 | 0.011497 | 0.011497 | 0.011500 |
| 0.011568 | 0.011497 | 0.011497 | 0.011532 | 0.011396 | 0.011464 | 0.011463 |
| 0.011531 | 0.011635 | 0.011433 | 0.011773 | 0.011803 | 0.011530 | 0.011698 |
| 0.011631 | 0.011631 | 0.011466 | 0.011652 | 0.011582 | 0.011605 | 0.011446 |
| 0.011612 | 0.011744 | 0.011569 | 0.011536 | 0.011430 | 0.011632 | 0.011497 |
| 0.011598 | 0.011531 | 0.011430 | 0.011532 | 0.011631 | 0.011635 | 0.011531 |
| 0.011430 | 0.011364 | 0.011497 | 0.011430 | 0.011363 | 0.011366 | 0.011632 |
| 0.011530 | 0.011463 | 0.011497 | 0.011531 | 0.011497 | 0.011430 | 0.011363 |
| 0.011497 | 0.011530 | 0.011530 | 0.011463 | 0.011530 | 0.011766 | 0.011362 |
| 0.011463 | 0.011531 | 0.011463 | 0.011497 | 0.011463 | 0.011497 | 0.011403 |
| 0.011622 | 0.011315 | 0.011211 | 0.011342 | 0.011427 | 0.011383 | 0.011269 |
| 0.011165 | 0.011362 | 0.011463 | 0.011570 | 0.011431 | 0.011568 | 0.011700 |
| 0.011599 | 0.011636 | 0.011598 | 0.011847 | 0.011564 | 0.012439 | 0.011600 |
| 0.012339 | 0.012106 | 0.012241 | 0.012512 | 0.011564 | 0.011463 | 0.011565 |
| 0.012205 | 0.011938 | 0.011530 | 0.011430 | 0.011498 | 0.011498 | 0.011466 |
| 0.011362 | 0.011366 | 0.011430 | 0.011397 | 0.011767 | 0.011766 | 0.011834 |
| 0.011733 | 0.011834 | 0.011937 | 0.011636 | 0.012206 | 0.012212 | 0.012273 |
| 0.012273 | 0.012307 | 0.012255 | 0.012274 | 0.012275 | 0.011564 | 0.011800 |
| 0.011868 | 0.012372 | 0.011874 | 0.011766 | 0.012239 | 0.011298 | 0.011195 |
| 0.011228 | 0.011228 | 0.011766 | 0.011800 | 0.011905 | 0.011631 | 0.011229 |
| S314     | 0.011597 | 0.011597 | 0.011833 | 0.011698 | 0.011698 | 0.011765 |
| 0.011604 | 0.011536 | 0.011732 | 0.011195 | 0.011262 | 0.011229 | 0.011195 |
| 0.011228 | 0.011362 | 0.011195 | 0.011228 | 0.011295 | 0.011262 | 0.011228 |
| 0.011195 | 0.011228 | 0.011329 | 0.011195 | 0.011228 | 0.011228 | 0.011570 |
| 0.011463 | 0.011228 | 0.011127 | 0.011362 | 0.011295 | 0.011262 | 0.011295 |
| 0.011262 | 0.011362 | 0.011262 | 0.011262 | 0.011295 | 0.011262 | 0.011429 |
| 0.011195 | 0.011262 | 0.011295 | 0.011228 | 0.011329 | 0.011362 | 0.011295 |
| 0.011262 | 0.011430 | 0.011329 | 0.011597 | 0.011262 | 0.011530 | 0.011262 |
| 0.011228 | 0.011329 | 0.011396 | 0.011530 | 0.011631 | 0.011329 | 0.011429 |
| 0.011295 | 0.011362 | 0.011262 | 0.011497 | 0.011732 | 0.011228 | 0.011329 |
| 0.011228 | 0.011329 | 0.011295 | 0.011362 | 0.011295 | 0.011295 | 0.011295 |
| 0.011195 | 0.011228 | 0.011195 | 0.011295 | 0.011262 | 0.011296 | 0.011362 |
| 0.011295 | 0.011262 | 0.011329 | 0.011228 | 0.011362 | 0.011195 | 0.011262 |
| 0.011429 | 0.011362 | 0.011597 | 0.011430 | 0.011262 | 0.011497 | 0.011228 |
| 0.011394 | 0.011621 | 0.011475 | 0.011138 | 0.011172 | 0.011281 | 0.011336 |
| 0.012012 | 0.011467 | 0.011184 | 0.011497 | 0.011497 | 0.011295 | 0.011396 |
| 0.011329 | 0.011295 | 0.011362 | 0.011262 | 0.011362 | 0.011295 | 0.011295 |
| 0.011262 | 0.011362 | 0.011564 | 0.011396 | 0.011329 | 0.011295 | 0.011228 |
| 0.011195 | 0.011195 | 0.011262 | 0.011228 | 0.011430 | 0.011396 | 0.011329 |
| 0.011430 | 0.011497 | 0.011228 | 0.011228 | 0.011262 | 0.011262 | 0.011263 |
| 0.011331 | 0.011262 | 0.011262 | 0.011132 | 0.011205 | 0.011165 | 0.011262 |
| 0.011263 | 0.011198 | 0.011245 | 0.011233 | 0.011162 | 0.011197 | 0.011229 |
| 0.011492 | 0.011267 | 0.011301 | 0.011195 | 0.011199 | 0.011329 | 0.011296 |
| 0.011363 | 0.011296 | 0.011296 | 0.011396 | 0.011329 | 0.011698 | 0.011497 |
| 0.011530 | 0.011396 | 0.011262 | 0.011362 | 0.011161 | 0.011396 | 0.011195 |
| 0.011262 | 0.011262 | 0.011228 | 0.011195 | 0.011228 | 0.011195 | 0.011295 |
| 0.011262 | 0.011362 | 0.011295 | 0.011195 | 0.011262 | 0.011396 | 0.011398 |
| 0.011396 | 0.011295 | 0.011195 | 0.011128 | 0.011262 | 0.011195 | 0.011128 |
| 0.011230 | 0.011396 | 0.011195 | 0.011396 | 0.011161 | 0.011262 | 0.011228 |
| 0.011329 | 0.011228 | 0.011262 | 0.011228 | 0.011262 | 0.011127 | 0.011262 |
| 0.011295 | 0.011228 | 0.011295 | 0.011228 | 0.011262 | 0.011295 | 0.011530 |
| 0.011631 | 0.011564 | 0.011631 | 0.011397 | 0.011631 | 0.011262 | 0.011228 |

|          |          |          |          |          |          |          |
|----------|----------|----------|----------|----------|----------|----------|
| 0.011263 | 0.011545 | 0.011335 | 0.011163 | 0.011603 | 0.011129 | 0.011257 |
| 0.011637 | 0.011536 | 0.011429 | 0.011631 | 0.011333 | 0.011497 | 0.011463 |
| 0.011396 | 0.011564 | 0.011415 | 0.011266 | 0.011312 | 0.011295 | 0.011365 |
| 0.011463 | 0.011364 | 0.011500 | 0.011568 | 0.011497 | 0.011564 | 0.011670 |
| 0.011399 | 0.011569 | 0.011500 | 0.011432 | 0.011699 | 0.011161 | 0.011363 |
| 0.011329 | 0.011262 | 0.011161 | 0.011161 | 0.011228 | 0.011195 | 0.011295 |
| 0.011228 | 0.011295 | 0.011195 | 0.011295 | 0.011228 | 0.011228 | 0.011295 |
| 0.011228 | 0.011664 | 0.011564 | 0.011597 | 0.011127 | 0.011228 | 0.011262 |
| 0.011262 | 0.011228 | 0.011295 | 0.011329 | 0.011195 | 0.011195 | 0.011195 |
| 0.011732 | 0.011362 | 0.011362 | 0.011161 | 0.011262 | 0.011430 | 0.011195 |
| 0.011195 | 0.011262 | 0.011228 | 0.011396 | 0.011195 | 0.011329 | 0.011463 |
| 0.011396 | 0.011228 | 0.011228 | 0.011161 | 0.011161 | 0.011329 | 0.011262 |
| 0.011161 | 0.011262 | 0.011127 | 0.011161 | 0.011295 | 0.011430 | 0.000000 |
| 0.011161 | 0.011295 | 0.011228 | 0.011127 | 0.011463 | 0.011127 | 0.011262 |
| 0.011368 | 0.011195 | 0.011497 | 0.011329 | 0.011362 | 0.011228 | 0.011329 |
| 0.011195 | 0.011530 | 0.011127 | 0.011396 | 0.011195 | 0.011195 | 0.011127 |
| 0.011362 | 0.011564 | 0.011262 | 0.011329 | 0.011161 | 0.011564 | 0.011195 |
| 0.011195 | 0.011195 | 0.011228 | 0.011329 | 0.011228 | 0.011329 | 0.011396 |
| 0.011396 | 0.011362 | 0.011262 | 0.011362 | 0.011329 | 0.011195 | 0.011161 |
| 0.011195 | 0.011195 | 0.011262 | 0.011195 | 0.011161 | 0.011329 | 0.011195 |
| 0.011228 | 0.011228 | 0.011362 | 0.011396 | 0.011295 | 0.011228 | 0.011228 |
| 0.011295 | 0.011228 | 0.011329 | 0.011195 | 0.011329 | 0.011396 | 0.011665 |
| 0.011228 | 0.011631 | 0.011233 | 0.017749 | 0.011191 | 0.011366 | 0.011583 |
| 0.011545 | 0.011588 | 0.011270 | 0.011292 | 0.011665 | 0.011613 | 0.011303 |
| 0.011487 | 0.011488 | 0.011099 | 0.011186 | 0.011216 | 0.011258 | 0.011189 |
| 0.011483 | 0.011395 | 0.011394 | 0.011193 | 0.011362 | 0.011396 | 0.011398 |
| 0.011266 | 0.011362 | 0.011362 | 0.011329 | 0.011295 | 0.011295 | 0.011262 |
| 0.011295 | 0.011228 | 0.011262 | 0.011295 | 0.011262 | 0.011195 | 0.011228 |
| 0.011228 | 0.011295 | 0.011195 | 0.011295 | 0.011329 | 0.011362 | 0.011262 |
| 0.011295 | 0.011262 | 0.011598 | 0.011598 | 0.011329 | 0.011329 | 0.011396 |
| 0.011161 | 0.011161 | 0.011195 | 0.011295 | 0.011161 | 0.011396 | 0.011396 |
| 0.011430 | 0.011429 | 0.011362 | 0.011463 | 0.011631 | 0.011464 | 0.011295 |
| 0.011295 | 0.011362 | 0.011396 | 0.011228 | 0.011295 | 0.011262 | 0.011295 |
| 0.011363 | 0.011363 | 0.011396 | 0.011363 | 0.011262 | 0.011463 | 0.011430 |
| 0.011297 | 0.011195 | 0.011295 | 0.011396 | 0.011295 | 0.011430 | 0.011463 |
| 0.011631 | 0.011333 | 0.011497 | 0.011463 | 0.011396 | 0.011564 | 0.011195 |
| 0.011363 | 0.011228 | 0.011228 | 0.011228 | 0.011295 | 0.011195 | 0.011295 |
| 0.011329 | 0.011362 | 0.011262 | 0.011295 | 0.011262 | 0.011598 | 0.011598 |
| 0.011329 | 0.011329 | 0.011429 | 0.011362 | 0.012002 | 0.011417 | 0.011342 |
| 0.011412 | 0.011372 | 0.011482 | 0.011372 | 0.011480 | 0.011405 | 0.011371 |
| 0.011953 | 0.011268 | 0.011403 | 0.011337 | 0.011611 | 0.011468 | 0.011571 |
| 0.011978 | 0.011437 | 0.011534 | 0.011597 | 0.011463 | 0.011463 | 0.011500 |
| 0.011161 | 0.011329 | 0.011463 | 0.011429 | 0.011432 | 0.011429 | 0.011397 |
| 0.011262 | 0.011195 | 0.011228 | 0.011262 | 0.011161 | 0.011228 | 0.011127 |
| 0.011262 | 0.011295 | 0.011195 | 0.011161 | 0.011262 | 0.011195 | 0.011228 |
| 0.011228 | 0.011161 | 0.011228 | 0.011262 | 0.011161 | 0.011362 | 0.011396 |
| 0.011295 | 0.011362 | 0.011295 | 0.011295 | 0.011228 | 0.011631 | 0.011262 |
| 0.011304 | 0.011228 | 0.011463 | 0.011467 | 0.011329 | 0.011329 | 0.011329 |
| 0.011329 | 0.011262 | 0.011228 | 0.011262 | 0.011329 | 0.011362 | 0.011295 |
| 0.011295 | 0.011429 | 0.011597 | 0.011329 | 0.011530 | 0.011530 | 0.011396 |
| 0.011228 | 0.011295 | 0.011329 | 0.011732 | 0.011295 | 0.011329 | 0.011295 |
| 0.011329 | 0.011262 | 0.011262 | 0.011564 | 0.011497 | 0.011530 | 0.011262 |
| 0.011362 | 0.011429 | 0.011295 | 0.011362 | 0.011329 | 0.011195 | 0.011530 |
| 0.011295 | 0.011262 | 0.011262 | 0.011429 | 0.011262 | 0.011362 | 0.011597 |
| 0.011228 | 0.011671 | 0.011665 | 0.011426 | 0.011230 | 0.011366 | 0.011267 |
| 0.011170 | 0.011683 | 0.011201 | 0.011373 | 0.011207 | 0.011315 | 0.011326 |
| 0.011468 | 0.011126 | 0.011283 | 0.011126 | 0.011168 | 0.011328 | 0.011304 |
| 0.011324 | 0.011257 | 0.011342 | 0.011272 | 0.011296 | 0.011430 | 0.011497 |
| 0.011497 | 0.011363 | 0.011466 | 0.011467 | 0.011603 | 0.011626 | 0.011295 |
| 0.011530 | 0.011396 | 0.011262 | 0.011362 | 0.011161 | 0.011396 | 0.011195 |

|          |          |          |          |          |          |          |
|----------|----------|----------|----------|----------|----------|----------|
| 0.011262 | 0.011262 | 0.011228 | 0.011195 | 0.011228 | 0.011195 | 0.011295 |
| 0.011270 | 0.011270 | 0.011266 | 0.011300 | 0.011437 | 0.011402 | 0.011402 |
| 0.011401 | 0.011329 | 0.011134 | 0.011132 | 0.011230 | 0.011433 | 0.011433 |
| 0.011228 | 0.011297 | 0.011531 | 0.011500 | 0.011430 | 0.011430 | 0.011396 |
| 0.011329 | 0.011396 | 0.011396 | 0.011295 | 0.011866 | 0.011463 | 0.011530 |
| 0.011564 | 0.011630 | 0.011265 | 0.011337 | 0.011228 | 0.011430 | 0.011396 |
| 0.011430 | 0.011463 | 0.011463 | 0.011463 | 0.011610 | 0.011597 | 0.011234 |
| 0.011128 | 0.011130 | 0.011230 | 0.011196 | 0.011299 | 0.011135 | 0.011468 |
| 0.011266 | 0.011411 | 0.011156 | 0.011285 | 0.011262 | 0.011334 | 0.011228 |
| 0.011195 | 0.011195 | 0.011262 | 0.011228 | 0.011430 | 0.011396 | 0.011329 |
| 0.011430 | 0.011497 | 0.011228 | 0.011228 | 0.011262 | 0.011262 | 0.011263 |
| 0.011331 | 0.011262 | 0.011262 | 0.011296 | 0.011430 | 0.011497 | 0.011497 |
| 0.011363 | 0.011466 | 0.011467 | 0.011603 | 0.011626 | 0.011295 | 0.011463 |
| 0.011396 | 0.011396 | 0.011229 | 0.011408 | 0.011304 | 0.011367 | 0.011235 |
| 0.011405 | 0.011607 | 0.011399 | 0.011298 | 0.011195 | 0.011396 | 0.011262 |
| 0.011362 | 0.011295 | 0.011195 | 0.011262 | 0.011396 | 0.011398 | 0.011295 |
| 0.011195 | 0.011128 | 0.011262 | 0.011195 | 0.011128 | 0.011230 | 0.011396 |
| 0.011295 | 0.011228 | 0.011262 | 0.011295 | 0.011262 | 0.011195 | 0.011396 |
| 0.011262 | 0.011295 | 0.011295 | 0.011228 | 0.011295 | 0.011530 | 0.011195 |
| 0.011228 | 0.011631 | 0.011228 | 0.011262 | 0.011228 | 0.011597 | 0.011189 |
| 0.011679 | 0.011188 | 0.011261 | 0.011423 | 0.011508 | 0.011419 | 0.011144 |
| 0.011218 | 0.011396 | 0.011497 | 0.011603 | 0.011464 | 0.011601 | 0.011733 |
| 0.011632 | 0.011669 | 0.011631 | 0.011880 | 0.011597 | 0.012472 | 0.011633 |
| 0.012372 | 0.012139 | 0.012274 | 0.012545 | 0.011597 | 0.011295 | 0.011598 |
| 0.012036 | 0.011971 | 0.011564 | 0.011463 | 0.011531 | 0.011531 | 0.011500 |
| 0.011396 | 0.011399 | 0.011463 | 0.011430 | 0.011800 | 0.011866 | 0.011867 |
| 0.011767 | 0.011867 | 0.011971 | 0.011737 | 0.012037 | 0.012042 | 0.012104 |
| 0.012104 | 0.012138 | 0.012084 | 0.012104 | 0.012106 | 0.011329 | 0.011631 |
| 0.011699 | 0.012203 | 0.011704 | 0.011934 | 0.012407 | 0.011468 | 0.011363 |
| 0.011329 | 0.011329 | 0.011800 | 0.011842 | 0.011940 | 0.011665 | 0.011330 |
| S315     | 0.011564 | 0.011564 | 0.011800 | 0.011665 | 0.011665 | 0.011732 |
| 0.011570 | 0.011502 | 0.011732 | 0.011161 | 0.011228 | 0.011195 | 0.011161 |
| 0.011195 | 0.011363 | 0.011161 | 0.011195 | 0.011262 | 0.011228 | 0.011195 |
| 0.011161 | 0.011195 | 0.011295 | 0.011161 | 0.011195 | 0.011195 | 0.011536 |
| 0.011430 | 0.011195 | 0.011094 | 0.011329 | 0.011262 | 0.011228 | 0.011262 |
| 0.011228 | 0.011329 | 0.011228 | 0.011228 | 0.011262 | 0.011228 | 0.011396 |
| 0.011161 | 0.011228 | 0.011262 | 0.011195 | 0.011295 | 0.011329 | 0.011262 |
| 0.011228 | 0.011396 | 0.011296 | 0.011564 | 0.011228 | 0.011497 | 0.011228 |
| 0.011195 | 0.011295 | 0.011329 | 0.011497 | 0.011598 | 0.011295 | 0.011396 |
| 0.011262 | 0.011329 | 0.011228 | 0.011463 | 0.011699 | 0.011228 | 0.011295 |
| 0.011195 | 0.011295 | 0.011262 | 0.011329 | 0.011262 | 0.011262 | 0.011262 |
| 0.011161 | 0.011195 | 0.011161 | 0.011262 | 0.011228 | 0.011262 | 0.011329 |
| 0.011262 | 0.011228 | 0.011295 | 0.011195 | 0.011329 | 0.011161 | 0.011228 |
| 0.011396 | 0.011329 | 0.011564 | 0.011396 | 0.011228 | 0.011463 | 0.011228 |
| 0.011394 | 0.011621 | 0.011438 | 0.011139 | 0.011135 | 0.011244 | 0.011336 |
| 0.011976 | 0.011417 | 0.011143 | 0.011463 | 0.011463 | 0.011262 | 0.011363 |
| 0.011295 | 0.011262 | 0.011329 | 0.011228 | 0.011329 | 0.011262 | 0.011262 |
| 0.011228 | 0.011329 | 0.011531 | 0.011396 | 0.011295 | 0.011262 | 0.011195 |
| 0.011161 | 0.011161 | 0.011228 | 0.011195 | 0.011396 | 0.011363 | 0.011295 |
| 0.011396 | 0.011464 | 0.011195 | 0.011195 | 0.011228 | 0.011228 | 0.011229 |
| 0.011297 | 0.011228 | 0.011161 | 0.011096 | 0.011169 | 0.011130 | 0.011228 |
| 0.011230 | 0.011163 | 0.011208 | 0.011198 | 0.011128 | 0.011163 | 0.011195 |
| 0.011456 | 0.011233 | 0.011267 | 0.011161 | 0.011164 | 0.011296 | 0.011262 |
| 0.011330 | 0.011263 | 0.011262 | 0.011363 | 0.011295 | 0.011665 | 0.011464 |
| 0.011497 | 0.011363 | 0.011228 | 0.011329 | 0.011128 | 0.011363 | 0.011161 |
| 0.011228 | 0.011228 | 0.011195 | 0.011161 | 0.011195 | 0.011161 | 0.011195 |
| 0.011228 | 0.011329 | 0.011262 | 0.011161 | 0.011263 | 0.011363 | 0.011365 |
| 0.011363 | 0.011262 | 0.011161 | 0.011094 | 0.011228 | 0.011161 | 0.011094 |
| 0.011196 | 0.011363 | 0.011161 | 0.011363 | 0.011128 | 0.011228 | 0.011195 |
| 0.011296 | 0.011195 | 0.011228 | 0.011195 | 0.011228 | 0.011094 | 0.011228 |

|          |          |          |          |          |          |          |
|----------|----------|----------|----------|----------|----------|----------|
| 0.011262 | 0.011195 | 0.011262 | 0.011195 | 0.011228 | 0.011262 | 0.011497 |
| 0.011598 | 0.011531 | 0.011598 | 0.011364 | 0.011598 | 0.011228 | 0.011195 |
| 0.011229 | 0.011505 | 0.011335 | 0.011129 | 0.011604 | 0.011094 | 0.011178 |
| 0.011604 | 0.011503 | 0.011396 | 0.011598 | 0.011299 | 0.011463 | 0.011430 |
| 0.011363 | 0.011531 | 0.011380 | 0.011225 | 0.011270 | 0.011262 | 0.011331 |
| 0.011430 | 0.011330 | 0.011466 | 0.011534 | 0.011463 | 0.011531 | 0.011534 |
| 0.011365 | 0.011535 | 0.011467 | 0.011399 | 0.011666 | 0.011128 | 0.011330 |
| 0.011295 | 0.011195 | 0.011128 | 0.011128 | 0.011195 | 0.011195 | 0.011262 |
| 0.011195 | 0.011262 | 0.011161 | 0.011262 | 0.011195 | 0.011195 | 0.011262 |
| 0.011195 | 0.011631 | 0.011531 | 0.011564 | 0.011094 | 0.011195 | 0.011228 |
| 0.011228 | 0.011195 | 0.011262 | 0.011295 | 0.011161 | 0.011161 | 0.011161 |
| 0.011699 | 0.011329 | 0.011329 | 0.011128 | 0.011228 | 0.011396 | 0.011161 |
| 0.011161 | 0.011228 | 0.011195 | 0.011363 | 0.011161 | 0.011295 | 0.011430 |
| 0.011363 | 0.011195 | 0.011195 | 0.011094 | 0.011128 | 0.011295 | 0.011228 |
| 0.011094 | 0.011228 | 0.011094 | 0.011128 | 0.011262 | 0.011396 | 0.011161 |
| 0.000000 | 0.011262 | 0.011195 | 0.011094 | 0.011430 | 0.011094 | 0.011262 |
| 0.011334 | 0.011161 | 0.011463 | 0.011295 | 0.011329 | 0.011195 | 0.011295 |
| 0.011161 | 0.011497 | 0.011094 | 0.011363 | 0.011161 | 0.011161 | 0.011094 |
| 0.011329 | 0.011531 | 0.011228 | 0.011295 | 0.011128 | 0.011531 | 0.011161 |
| 0.011161 | 0.011161 | 0.011195 | 0.011295 | 0.011195 | 0.011295 | 0.011363 |
| 0.011363 | 0.011329 | 0.011228 | 0.011329 | 0.011295 | 0.011161 | 0.011128 |
| 0.011161 | 0.011161 | 0.011228 | 0.011161 | 0.011128 | 0.011295 | 0.011161 |
| 0.011195 | 0.011195 | 0.011329 | 0.011363 | 0.011262 | 0.011195 | 0.011195 |
| 0.011262 | 0.011195 | 0.011295 | 0.011161 | 0.011295 | 0.011396 | 0.011631 |
| 0.011195 | 0.011598 | 0.011198 | 0.017717 | 0.011191 | 0.011366 | 0.011549 |
| 0.011510 | 0.011553 | 0.011270 | 0.011235 | 0.011665 | 0.011579 | 0.011304 |
| 0.011440 | 0.011488 | 0.011099 | 0.011186 | 0.011178 | 0.011258 | 0.011189 |
| 0.011436 | 0.011358 | 0.011357 | 0.011193 | 0.011329 | 0.011363 | 0.011365 |
| 0.011232 | 0.011329 | 0.011329 | 0.011295 | 0.011262 | 0.011262 | 0.011228 |
| 0.011262 | 0.011195 | 0.011228 | 0.011195 | 0.011228 | 0.011161 | 0.011195 |
| 0.011195 | 0.011262 | 0.011161 | 0.011262 | 0.011296 | 0.011329 | 0.011228 |
| 0.011262 | 0.011228 | 0.011564 | 0.011564 | 0.011296 | 0.011330 | 0.011363 |
| 0.011128 | 0.011128 | 0.011161 | 0.011262 | 0.011128 | 0.011363 | 0.011363 |
| 0.011396 | 0.011396 | 0.011329 | 0.011430 | 0.011598 | 0.011431 | 0.011262 |
| 0.011262 | 0.011329 | 0.011363 | 0.011195 | 0.011262 | 0.011228 | 0.011262 |
| 0.011329 | 0.011329 | 0.011363 | 0.011329 | 0.011229 | 0.011430 | 0.011396 |
| 0.011264 | 0.011161 | 0.011262 | 0.011363 | 0.011262 | 0.011396 | 0.011430 |
| 0.011598 | 0.011299 | 0.011463 | 0.011430 | 0.011363 | 0.011531 | 0.011161 |
| 0.011330 | 0.011228 | 0.011195 | 0.011195 | 0.011262 | 0.011161 | 0.011262 |
| 0.011296 | 0.011329 | 0.011228 | 0.011262 | 0.011228 | 0.011564 | 0.011564 |
| 0.011296 | 0.011330 | 0.011396 | 0.011329 | 0.011969 | 0.011382 | 0.011306 |
| 0.011377 | 0.011338 | 0.011447 | 0.011337 | 0.011445 | 0.011371 | 0.011336 |
| 0.011919 | 0.011233 | 0.011368 | 0.011302 | 0.011577 | 0.011435 | 0.011537 |
| 0.011944 | 0.011399 | 0.011500 | 0.011564 | 0.011430 | 0.011430 | 0.011466 |
| 0.011128 | 0.011295 | 0.011430 | 0.011396 | 0.011398 | 0.011396 | 0.011364 |
| 0.011228 | 0.011161 | 0.011195 | 0.011228 | 0.011128 | 0.011195 | 0.011094 |
| 0.011228 | 0.011262 | 0.011161 | 0.011128 | 0.011228 | 0.011161 | 0.011195 |
| 0.011195 | 0.011128 | 0.011195 | 0.011228 | 0.011128 | 0.011329 | 0.011363 |
| 0.011262 | 0.011329 | 0.011262 | 0.011262 | 0.011195 | 0.011598 | 0.011228 |
| 0.011269 | 0.011195 | 0.011430 | 0.011433 | 0.011296 | 0.011295 | 0.011295 |
| 0.011295 | 0.011228 | 0.011195 | 0.011228 | 0.011329 | 0.011329 | 0.011262 |
| 0.011262 | 0.011396 | 0.011564 | 0.011295 | 0.011497 | 0.011497 | 0.011363 |
| 0.011195 | 0.011262 | 0.011295 | 0.011699 | 0.011262 | 0.011296 | 0.011262 |
| 0.011295 | 0.011228 | 0.011228 | 0.011531 | 0.011464 | 0.011497 | 0.011228 |
| 0.011329 | 0.011396 | 0.011262 | 0.011329 | 0.011295 | 0.011161 | 0.011497 |
| 0.011262 | 0.011228 | 0.011228 | 0.011396 | 0.011228 | 0.011329 | 0.011564 |
| 0.011195 | 0.011638 | 0.011631 | 0.011426 | 0.011173 | 0.011332 | 0.011215 |
| 0.011170 | 0.011645 | 0.011166 | 0.011373 | 0.011207 | 0.011315 | 0.011326 |
| 0.011418 | 0.011126 | 0.011283 | 0.011126 | 0.011168 | 0.011329 | 0.011304 |
| 0.011324 | 0.011218 | 0.011307 | 0.011237 | 0.011195 | 0.011396 | 0.011464 |



|          |          |          |          |          |          |          |
|----------|----------|----------|----------|----------|----------|----------|
| 0.011464 | 0.011329 | 0.011432 | 0.011433 | 0.011569 | 0.011591 | 0.011262 |
| 0.011497 | 0.011363 | 0.011228 | 0.011329 | 0.011128 | 0.011363 | 0.011161 |
| 0.011228 | 0.011228 | 0.011195 | 0.011161 | 0.011195 | 0.011161 | 0.011195 |
| 0.011235 | 0.011235 | 0.011232 | 0.011266 | 0.011403 | 0.011368 | 0.011368 |
| 0.011367 | 0.011296 | 0.000000 | 0.011096 | 0.011230 | 0.011399 | 0.011400 |
| 0.011195 | 0.011264 | 0.011498 | 0.011466 | 0.011397 | 0.011431 | 0.011363 |
| 0.011295 | 0.011363 | 0.011363 | 0.011262 | 0.011833 | 0.011430 | 0.011497 |
| 0.011531 | 0.011595 | 0.011231 | 0.011303 | 0.011161 | 0.011396 | 0.011363 |
| 0.011397 | 0.011430 | 0.011430 | 0.011430 | 0.011572 | 0.011564 | 0.011199 |
| 0.011094 | 0.011095 | 0.011196 | 0.011162 | 0.011265 | 0.011098 | 0.011434 |
| 0.011232 | 0.011323 | 0.000000 | 0.011248 | 0.011229 | 0.011300 | 0.011195 |
| 0.011161 | 0.011161 | 0.011228 | 0.011195 | 0.011396 | 0.011363 | 0.011295 |
| 0.011396 | 0.011464 | 0.011195 | 0.011195 | 0.011228 | 0.011228 | 0.011229 |
| 0.011297 | 0.011228 | 0.011161 | 0.011195 | 0.011396 | 0.011464 | 0.011464 |
| 0.011329 | 0.011432 | 0.011433 | 0.011569 | 0.011591 | 0.011262 | 0.011430 |
| 0.011363 | 0.011363 | 0.011196 | 0.011374 | 0.011304 | 0.011333 | 0.011201 |
| 0.011370 | 0.011562 | 0.011314 | 0.011264 | 0.011161 | 0.011363 | 0.011228 |
| 0.011329 | 0.011262 | 0.011161 | 0.011263 | 0.011363 | 0.011365 | 0.011262 |
| 0.011161 | 0.011094 | 0.011228 | 0.011161 | 0.011094 | 0.011196 | 0.011363 |
| 0.011262 | 0.011195 | 0.011228 | 0.011195 | 0.011228 | 0.011161 | 0.011363 |
| 0.011228 | 0.011262 | 0.011262 | 0.011195 | 0.011262 | 0.011497 | 0.011161 |
| 0.011195 | 0.011598 | 0.011195 | 0.011228 | 0.011195 | 0.011564 | 0.011146 |
| 0.011623 | 0.011145 | 0.011211 | 0.011383 | 0.011468 | 0.011384 | 0.011102 |
| 0.011165 | 0.011363 | 0.011463 | 0.011570 | 0.011431 | 0.011568 | 0.011700 |
| 0.011599 | 0.011635 | 0.011598 | 0.011847 | 0.011564 | 0.012440 | 0.011600 |
| 0.012339 | 0.012107 | 0.012241 | 0.012512 | 0.011564 | 0.011262 | 0.011565 |
| 0.012003 | 0.011938 | 0.011531 | 0.011430 | 0.011498 | 0.011498 | 0.011466 |
| 0.011363 | 0.011366 | 0.011430 | 0.011397 | 0.011767 | 0.011833 | 0.011834 |
| 0.011734 | 0.011834 | 0.011938 | 0.011703 | 0.012004 | 0.012009 | 0.012071 |
| 0.012071 | 0.012105 | 0.012051 | 0.012072 | 0.012073 | 0.011295 | 0.011598 |
| 0.011666 | 0.012170 | 0.011671 | 0.011901 | 0.012374 | 0.011434 | 0.011329 |
| 0.011295 | 0.011295 | 0.011767 | 0.011800 | 0.011905 | 0.011631 | 0.011296 |
| S316     | 0.011698 | 0.011698 | 0.011933 | 0.011799 | 0.011799 | 0.011866 |
| 0.011705 | 0.011637 | 0.011866 | 0.011295 | 0.011362 | 0.011329 | 0.011295 |
| 0.011329 | 0.011496 | 0.011295 | 0.011329 | 0.011396 | 0.011362 | 0.011329 |
| 0.011295 | 0.011329 | 0.011429 | 0.011295 | 0.011329 | 0.011329 | 0.011671 |
| 0.011564 | 0.011329 | 0.011228 | 0.011463 | 0.011396 | 0.011362 | 0.011396 |
| 0.011362 | 0.011463 | 0.011362 | 0.011362 | 0.011396 | 0.011161 | 0.011530 |
| 0.011295 | 0.011362 | 0.011396 | 0.011329 | 0.011429 | 0.011463 | 0.011396 |
| 0.011362 | 0.011530 | 0.011430 | 0.011698 | 0.011362 | 0.011631 | 0.011362 |
| 0.011329 | 0.011429 | 0.011497 | 0.011631 | 0.011732 | 0.011429 | 0.011530 |
| 0.011396 | 0.011463 | 0.011362 | 0.011530 | 0.011832 | 0.011362 | 0.011429 |
| 0.011329 | 0.011429 | 0.011396 | 0.011463 | 0.011396 | 0.011396 | 0.011396 |
| 0.011295 | 0.011329 | 0.011295 | 0.011396 | 0.011362 | 0.011397 | 0.011463 |
| 0.011396 | 0.011362 | 0.011429 | 0.011329 | 0.011463 | 0.011295 | 0.011362 |
| 0.011530 | 0.011463 | 0.011698 | 0.011329 | 0.011362 | 0.011597 | 0.011362 |
| 0.011394 | 0.011770 | 0.011588 | 0.011295 | 0.011284 | 0.011244 | 0.011493 |
| 0.012121 | 0.011569 | 0.011307 | 0.011597 | 0.011597 | 0.011396 | 0.011497 |
| 0.011429 | 0.011396 | 0.011463 | 0.011362 | 0.011463 | 0.011396 | 0.011396 |
| 0.011362 | 0.011463 | 0.011664 | 0.011530 | 0.011429 | 0.011396 | 0.011329 |
| 0.011295 | 0.011295 | 0.011362 | 0.011329 | 0.011530 | 0.011497 | 0.011430 |
| 0.011530 | 0.011597 | 0.011329 | 0.011329 | 0.011362 | 0.011362 | 0.011364 |
| 0.011432 | 0.011362 | 0.011362 | 0.011240 | 0.011313 | 0.011271 | 0.011363 |
| 0.011162 | 0.011301 | 0.011355 | 0.011336 | 0.011264 | 0.011300 | 0.011330 |
| 0.011600 | 0.011370 | 0.011405 | 0.011296 | 0.011302 | 0.011430 | 0.011396 |
| 0.011464 | 0.011397 | 0.011396 | 0.011496 | 0.011429 | 0.011799 | 0.011598 |
| 0.011631 | 0.011497 | 0.011362 | 0.011463 | 0.011262 | 0.011497 | 0.011295 |
| 0.011362 | 0.011362 | 0.011329 | 0.011295 | 0.011329 | 0.011295 | 0.011396 |
| 0.011362 | 0.011463 | 0.011396 | 0.011295 | 0.011397 | 0.011497 | 0.011500 |
| 0.011497 | 0.011396 | 0.011295 | 0.011229 | 0.011362 | 0.011295 | 0.011228 |

|          |          |          |          |          |          |          |
|----------|----------|----------|----------|----------|----------|----------|
| 0.011332 | 0.011497 | 0.011295 | 0.011497 | 0.011262 | 0.011362 | 0.011329 |
| 0.011430 | 0.011329 | 0.011362 | 0.011329 | 0.011362 | 0.011228 | 0.011362 |
| 0.011396 | 0.011329 | 0.011396 | 0.011329 | 0.011362 | 0.011396 | 0.011631 |
| 0.011732 | 0.011664 | 0.011732 | 0.011498 | 0.011732 | 0.011362 | 0.011329 |
| 0.011364 | 0.011667 | 0.011335 | 0.011266 | 0.011739 | 0.011231 | 0.011336 |
| 0.011739 | 0.011638 | 0.011530 | 0.011732 | 0.011436 | 0.011597 | 0.011564 |
| 0.011496 | 0.011664 | 0.011486 | 0.011349 | 0.011395 | 0.011396 | 0.011466 |
| 0.011564 | 0.011465 | 0.011601 | 0.011669 | 0.011597 | 0.011665 | 0.011771 |
| 0.011500 | 0.011671 | 0.011602 | 0.011331 | 0.011800 | 0.011262 | 0.011464 |
| 0.011429 | 0.011362 | 0.011262 | 0.011262 | 0.011329 | 0.011329 | 0.011396 |
| 0.011329 | 0.011396 | 0.011295 | 0.011396 | 0.011329 | 0.011329 | 0.011396 |
| 0.011329 | 0.011765 | 0.011664 | 0.011698 | 0.011228 | 0.011329 | 0.011362 |
| 0.011362 | 0.011329 | 0.011396 | 0.011429 | 0.011295 | 0.011295 | 0.011295 |
| 0.011832 | 0.011463 | 0.011463 | 0.011262 | 0.011362 | 0.011530 | 0.011295 |
| 0.011295 | 0.011362 | 0.011329 | 0.011497 | 0.011295 | 0.011429 | 0.011564 |
| 0.011496 | 0.011329 | 0.011329 | 0.011262 | 0.011262 | 0.011429 | 0.011362 |
| 0.011262 | 0.011362 | 0.011228 | 0.011262 | 0.011195 | 0.011530 | 0.011295 |
| 0.011262 | 0.000000 | 0.011329 | 0.011228 | 0.011564 | 0.011228 | 0.011396 |
| 0.011437 | 0.011295 | 0.011597 | 0.011429 | 0.011329 | 0.011329 | 0.011429 |
| 0.011295 | 0.011631 | 0.011228 | 0.011497 | 0.011295 | 0.011295 | 0.011228 |
| 0.011463 | 0.011665 | 0.011362 | 0.011429 | 0.011262 | 0.011664 | 0.011295 |
| 0.011295 | 0.011295 | 0.011329 | 0.011429 | 0.011329 | 0.011429 | 0.011496 |
| 0.011295 | 0.011463 | 0.011362 | 0.011463 | 0.011429 | 0.011295 | 0.011262 |
| 0.011295 | 0.011295 | 0.011362 | 0.011295 | 0.011262 | 0.011429 | 0.011295 |
| 0.011329 | 0.011329 | 0.011463 | 0.011496 | 0.011396 | 0.011329 | 0.011329 |
| 0.011396 | 0.011329 | 0.011429 | 0.011295 | 0.011429 | 0.011530 | 0.011765 |
| 0.011329 | 0.011732 | 0.011336 | 0.017861 | 0.011191 | 0.011427 | 0.011688 |
| 0.011648 | 0.011693 | 0.011270 | 0.011350 | 0.011829 | 0.011716 | 0.011364 |
| 0.011582 | 0.011548 | 0.011255 | 0.011311 | 0.011294 | 0.011406 | 0.011361 |
| 0.011576 | 0.011507 | 0.011505 | 0.011325 | 0.011463 | 0.011497 | 0.011500 |
| 0.011369 | 0.011463 | 0.011463 | 0.011430 | 0.011396 | 0.011396 | 0.011363 |
| 0.011396 | 0.011329 | 0.011362 | 0.011396 | 0.011362 | 0.011295 | 0.011329 |
| 0.011329 | 0.011396 | 0.011295 | 0.011396 | 0.011430 | 0.011262 | 0.011362 |
| 0.011396 | 0.011362 | 0.011698 | 0.011698 | 0.011430 | 0.011464 | 0.011497 |
| 0.011262 | 0.011262 | 0.011295 | 0.011396 | 0.011262 | 0.011497 | 0.011497 |
| 0.011530 | 0.011530 | 0.011463 | 0.011564 | 0.011732 | 0.011565 | 0.011396 |
| 0.011396 | 0.011463 | 0.011497 | 0.011329 | 0.011396 | 0.011362 | 0.011396 |
| 0.011463 | 0.011463 | 0.011497 | 0.011463 | 0.011363 | 0.011564 | 0.011530 |
| 0.011399 | 0.011295 | 0.011396 | 0.011497 | 0.011396 | 0.011530 | 0.011564 |
| 0.011732 | 0.011436 | 0.011597 | 0.011564 | 0.011496 | 0.011664 | 0.011295 |
| 0.011464 | 0.011363 | 0.011329 | 0.011329 | 0.011396 | 0.011295 | 0.011396 |
| 0.011430 | 0.011262 | 0.011362 | 0.011396 | 0.011362 | 0.011698 | 0.011698 |
| 0.011430 | 0.011464 | 0.011530 | 0.011463 | 0.012103 | 0.011524 | 0.011412 |
| 0.011306 | 0.011476 | 0.011552 | 0.011441 | 0.011585 | 0.011508 | 0.011474 |
| 0.012056 | 0.011372 | 0.011505 | 0.011441 | 0.011714 | 0.011570 | 0.011673 |
| 0.012080 | 0.011512 | 0.011635 | 0.011698 | 0.011564 | 0.011564 | 0.011601 |
| 0.011262 | 0.011429 | 0.011564 | 0.011530 | 0.011533 | 0.011530 | 0.011498 |
| 0.011362 | 0.011295 | 0.011329 | 0.011362 | 0.011262 | 0.011329 | 0.011228 |
| 0.011295 | 0.011329 | 0.011295 | 0.011262 | 0.011362 | 0.011295 | 0.011329 |
| 0.011329 | 0.011262 | 0.011329 | 0.011362 | 0.011262 | 0.011463 | 0.011362 |
| 0.011262 | 0.011329 | 0.011195 | 0.011329 | 0.011329 | 0.011732 | 0.011362 |
| 0.011373 | 0.011329 | 0.011564 | 0.011569 | 0.011429 | 0.011429 | 0.011429 |
| 0.011429 | 0.011362 | 0.011329 | 0.011362 | 0.011463 | 0.011463 | 0.011396 |
| 0.011396 | 0.011530 | 0.011698 | 0.011429 | 0.011631 | 0.011631 | 0.011496 |
| 0.011329 | 0.011396 | 0.011429 | 0.011832 | 0.011396 | 0.011429 | 0.011396 |
| 0.011429 | 0.011362 | 0.011362 | 0.011665 | 0.011597 | 0.011631 | 0.011362 |
| 0.011463 | 0.011530 | 0.011396 | 0.011463 | 0.011429 | 0.011295 | 0.011631 |
| 0.011396 | 0.011362 | 0.011362 | 0.011530 | 0.011362 | 0.011463 | 0.011698 |
| 0.011329 | 0.011773 | 0.011765 | 0.011588 | 0.011286 | 0.011468 | 0.011370 |
| 0.011280 | 0.011800 | 0.011306 | 0.011507 | 0.011402 | 0.011416 | 0.011432 |

|          |          |          |          |          |          |          |
|----------|----------|----------|----------|----------|----------|----------|
| 0.011519 | 0.011258 | 0.011394 | 0.011192 | 0.011330 | 0.011395 | 0.011466 |
| 0.011475 | 0.011375 | 0.011448 | 0.011377 | 0.011397 | 0.011530 | 0.011597 |
| 0.011597 | 0.011464 | 0.011567 | 0.011569 | 0.011670 | 0.011732 | 0.011396 |
| 0.011631 | 0.011497 | 0.011362 | 0.011463 | 0.011262 | 0.011497 | 0.011295 |
| 0.011362 | 0.011362 | 0.011329 | 0.011295 | 0.011329 | 0.011295 | 0.011396 |
| 0.011375 | 0.011375 | 0.011368 | 0.011403 | 0.011539 | 0.011504 | 0.011504 |
| 0.011503 | 0.011430 | 0.011245 | 0.011240 | 0.011365 | 0.011534 | 0.011535 |
| 0.011329 | 0.011399 | 0.011632 | 0.011601 | 0.011531 | 0.011565 | 0.011496 |
| 0.011429 | 0.011497 | 0.011496 | 0.011396 | 0.011967 | 0.011564 | 0.011631 |
| 0.011665 | 0.011701 | 0.011367 | 0.011441 | 0.011329 | 0.011530 | 0.011497 |
| 0.011531 | 0.011564 | 0.011564 | 0.011564 | 0.011689 | 0.011698 | 0.011338 |
| 0.011229 | 0.011233 | 0.011332 | 0.011298 | 0.011402 | 0.011247 | 0.011570 |
| 0.011369 | 0.011455 | 0.011203 | 0.011360 | 0.011363 | 0.011437 | 0.011329 |
| 0.011295 | 0.011295 | 0.011362 | 0.011329 | 0.011530 | 0.011497 | 0.011430 |
| 0.011530 | 0.011597 | 0.011329 | 0.011329 | 0.011362 | 0.011362 | 0.011364 |
| 0.011432 | 0.011362 | 0.011362 | 0.011397 | 0.011530 | 0.011597 | 0.011597 |
| 0.011464 | 0.011567 | 0.011569 | 0.011670 | 0.011732 | 0.011396 | 0.011564 |
| 0.011497 | 0.011497 | 0.011331 | 0.011513 | 0.011442 | 0.011469 | 0.011340 |
| 0.011508 | 0.011744 | 0.011441 | 0.011400 | 0.011295 | 0.011497 | 0.011362 |
| 0.011463 | 0.011396 | 0.011295 | 0.011397 | 0.011497 | 0.011500 | 0.011396 |
| 0.011295 | 0.011229 | 0.011362 | 0.011295 | 0.011228 | 0.011332 | 0.011497 |
| 0.011396 | 0.011329 | 0.011362 | 0.011396 | 0.011362 | 0.011295 | 0.011497 |
| 0.011362 | 0.011396 | 0.011396 | 0.011329 | 0.011195 | 0.011564 | 0.011295 |
| 0.011329 | 0.011732 | 0.011329 | 0.011362 | 0.011329 | 0.011698 | 0.011317 |
| 0.011734 | 0.011315 | 0.011361 | 0.011543 | 0.011630 | 0.011527 | 0.011269 |
| 0.011270 | 0.011496 | 0.011597 | 0.011705 | 0.011565 | 0.011703 | 0.011766 |
| 0.011733 | 0.011770 | 0.011732 | 0.011983 | 0.011698 | 0.012573 | 0.011734 |
| 0.012473 | 0.012241 | 0.012375 | 0.012646 | 0.011698 | 0.011396 | 0.011699 |
| 0.012137 | 0.012072 | 0.011664 | 0.011564 | 0.011632 | 0.011632 | 0.011601 |
| 0.011496 | 0.011501 | 0.011564 | 0.011531 | 0.011901 | 0.011967 | 0.011968 |
| 0.011867 | 0.011968 | 0.012072 | 0.011838 | 0.012138 | 0.012144 | 0.012205 |
| 0.012205 | 0.012239 | 0.012186 | 0.012205 | 0.012207 | 0.011429 | 0.011732 |
| 0.011800 | 0.012303 | 0.011806 | 0.012034 | 0.012508 | 0.011570 | 0.011464 |
| 0.011429 | 0.011429 | 0.011900 | 0.011924 | 0.012045 | 0.011765 | 0.011431 |
| S317     | 0.011632 | 0.011632 | 0.011867 | 0.011732 | 0.011732 | 0.011800 |
| 0.011604 | 0.011536 | 0.011800 | 0.011228 | 0.011295 | 0.011262 | 0.011228 |
| 0.011262 | 0.011430 | 0.011228 | 0.011262 | 0.011329 | 0.011295 | 0.011262 |
| 0.011228 | 0.011262 | 0.011363 | 0.011228 | 0.011262 | 0.011262 | 0.011570 |
| 0.011497 | 0.011262 | 0.011161 | 0.011396 | 0.011329 | 0.011295 | 0.011329 |
| 0.011295 | 0.011396 | 0.011295 | 0.011295 | 0.011329 | 0.011295 | 0.011463 |
| 0.011228 | 0.011295 | 0.011329 | 0.011262 | 0.011363 | 0.011396 | 0.011329 |
| 0.011295 | 0.011463 | 0.011363 | 0.011631 | 0.011295 | 0.011564 | 0.011295 |
| 0.011262 | 0.011363 | 0.011430 | 0.011564 | 0.011665 | 0.011363 | 0.011463 |
| 0.011329 | 0.011396 | 0.011295 | 0.011531 | 0.011766 | 0.011295 | 0.011363 |
| 0.011262 | 0.011363 | 0.011329 | 0.011396 | 0.011329 | 0.011329 | 0.011329 |
| 0.011228 | 0.011262 | 0.011228 | 0.011329 | 0.011295 | 0.011330 | 0.011396 |
| 0.011329 | 0.011295 | 0.011363 | 0.011262 | 0.011396 | 0.011228 | 0.011295 |
| 0.011463 | 0.011396 | 0.011631 | 0.011463 | 0.011228 | 0.011531 | 0.011295 |
| 0.011394 | 0.011621 | 0.011476 | 0.011139 | 0.011210 | 0.011318 | 0.011336 |
| 0.012049 | 0.011468 | 0.011143 | 0.011531 | 0.011531 | 0.011329 | 0.011430 |
| 0.011363 | 0.011329 | 0.011396 | 0.011295 | 0.011396 | 0.011329 | 0.011329 |
| 0.011295 | 0.011396 | 0.011598 | 0.011463 | 0.011363 | 0.011329 | 0.011262 |
| 0.011228 | 0.011228 | 0.011296 | 0.011262 | 0.011464 | 0.011430 | 0.011363 |
| 0.011464 | 0.011531 | 0.011262 | 0.011262 | 0.011296 | 0.011296 | 0.011297 |
| 0.011365 | 0.011296 | 0.011296 | 0.011168 | 0.011241 | 0.011200 | 0.011296 |
| 0.011298 | 0.011232 | 0.011282 | 0.011267 | 0.011196 | 0.011231 | 0.011263 |
| 0.011528 | 0.011301 | 0.011336 | 0.011229 | 0.011233 | 0.011363 | 0.011329 |
| 0.011397 | 0.011330 | 0.011329 | 0.011430 | 0.011363 | 0.011732 | 0.011531 |
| 0.011564 | 0.011430 | 0.011295 | 0.011396 | 0.011195 | 0.011430 | 0.011228 |
| 0.011295 | 0.011295 | 0.011262 | 0.011228 | 0.011262 | 0.011228 | 0.011329 |

|          |          |          |          |          |          |          |
|----------|----------|----------|----------|----------|----------|----------|
| 0.011296 | 0.011396 | 0.011329 | 0.011228 | 0.011330 | 0.011430 | 0.011432 |
| 0.011430 | 0.011329 | 0.011228 | 0.011162 | 0.011296 | 0.011228 | 0.011161 |
| 0.011264 | 0.011430 | 0.011228 | 0.011430 | 0.011195 | 0.011296 | 0.011262 |
| 0.011363 | 0.011262 | 0.011296 | 0.011262 | 0.011296 | 0.011161 | 0.011296 |
| 0.011329 | 0.011262 | 0.011329 | 0.011128 | 0.011296 | 0.011329 | 0.011564 |
| 0.011665 | 0.011598 | 0.011665 | 0.011431 | 0.011665 | 0.011296 | 0.011262 |
| 0.011297 | 0.011586 | 0.011381 | 0.011198 | 0.011672 | 0.011163 | 0.011297 |
| 0.011638 | 0.011571 | 0.011463 | 0.011665 | 0.011368 | 0.011531 | 0.011497 |
| 0.011430 | 0.011564 | 0.011451 | 0.011266 | 0.011312 | 0.011329 | 0.011399 |
| 0.011497 | 0.011398 | 0.011534 | 0.011602 | 0.011531 | 0.011598 | 0.011704 |
| 0.011432 | 0.011604 | 0.011534 | 0.011466 | 0.011734 | 0.011195 | 0.011397 |
| 0.011363 | 0.011295 | 0.011195 | 0.011195 | 0.011262 | 0.011262 | 0.011329 |
| 0.011262 | 0.011329 | 0.011228 | 0.011329 | 0.011262 | 0.011262 | 0.011329 |
| 0.011262 | 0.011699 | 0.011598 | 0.011631 | 0.011161 | 0.011262 | 0.011295 |
| 0.011295 | 0.011262 | 0.011329 | 0.011363 | 0.011228 | 0.011228 | 0.011228 |
| 0.011766 | 0.011396 | 0.011396 | 0.011195 | 0.011295 | 0.011463 | 0.011228 |
| 0.011228 | 0.011295 | 0.011262 | 0.011430 | 0.011228 | 0.011363 | 0.011497 |
| 0.011430 | 0.011262 | 0.011262 | 0.011195 | 0.011195 | 0.011363 | 0.011295 |
| 0.011195 | 0.011295 | 0.011161 | 0.011195 | 0.011329 | 0.011464 | 0.011228 |
| 0.011195 | 0.011329 | 0.000000 | 0.011161 | 0.011497 | 0.011161 | 0.011329 |
| 0.011403 | 0.011228 | 0.011531 | 0.011363 | 0.011396 | 0.011262 | 0.011363 |
| 0.011228 | 0.011564 | 0.011161 | 0.011430 | 0.011228 | 0.011228 | 0.011161 |
| 0.011396 | 0.011598 | 0.011295 | 0.011363 | 0.011195 | 0.011598 | 0.011228 |
| 0.011228 | 0.011228 | 0.011262 | 0.011363 | 0.011262 | 0.011363 | 0.011430 |
| 0.011430 | 0.011396 | 0.011295 | 0.011396 | 0.011363 | 0.011228 | 0.011195 |
| 0.011228 | 0.011228 | 0.011295 | 0.011228 | 0.011195 | 0.011363 | 0.011228 |
| 0.011262 | 0.011262 | 0.011396 | 0.011430 | 0.011329 | 0.011262 | 0.011262 |
| 0.011329 | 0.011262 | 0.011363 | 0.011228 | 0.011363 | 0.011463 | 0.011699 |
| 0.011262 | 0.011665 | 0.011268 | 0.017756 | 0.011126 | 0.011305 | 0.011619 |
| 0.011580 | 0.011624 | 0.011270 | 0.011293 | 0.011610 | 0.011648 | 0.011243 |
| 0.011488 | 0.011426 | 0.011099 | 0.011228 | 0.011256 | 0.011209 | 0.011189 |
| 0.011483 | 0.011433 | 0.011431 | 0.011259 | 0.011396 | 0.011430 | 0.011433 |
| 0.011301 | 0.011396 | 0.011396 | 0.011363 | 0.011329 | 0.011329 | 0.011296 |
| 0.011329 | 0.011262 | 0.011295 | 0.011329 | 0.011296 | 0.011228 | 0.011262 |
| 0.011262 | 0.011329 | 0.011228 | 0.011329 | 0.011363 | 0.011396 | 0.011295 |
| 0.011329 | 0.011296 | 0.011632 | 0.011632 | 0.011363 | 0.011397 | 0.011430 |
| 0.011195 | 0.011195 | 0.011228 | 0.011329 | 0.011195 | 0.011430 | 0.011430 |
| 0.011464 | 0.011463 | 0.011396 | 0.011497 | 0.011665 | 0.011498 | 0.011329 |
| 0.011329 | 0.011396 | 0.011430 | 0.011262 | 0.011329 | 0.011296 | 0.011329 |
| 0.011397 | 0.011396 | 0.011430 | 0.011397 | 0.011296 | 0.011497 | 0.011464 |
| 0.011331 | 0.011228 | 0.011329 | 0.011430 | 0.011329 | 0.011464 | 0.011497 |
| 0.011665 | 0.011368 | 0.011531 | 0.011497 | 0.011430 | 0.011564 | 0.011228 |
| 0.011397 | 0.011296 | 0.011262 | 0.011262 | 0.011329 | 0.011228 | 0.011329 |
| 0.011363 | 0.011396 | 0.011295 | 0.011329 | 0.011296 | 0.011632 | 0.011632 |
| 0.011363 | 0.011397 | 0.011463 | 0.011396 | 0.012037 | 0.011417 | 0.011377 |
| 0.011447 | 0.011373 | 0.011517 | 0.011407 | 0.011480 | 0.011440 | 0.011370 |
| 0.011988 | 0.011303 | 0.011437 | 0.011372 | 0.011645 | 0.011502 | 0.011605 |
| 0.012013 | 0.011437 | 0.011568 | 0.011631 | 0.011497 | 0.011497 | 0.011534 |
| 0.011195 | 0.011363 | 0.011497 | 0.011463 | 0.011466 | 0.011463 | 0.011431 |
| 0.011295 | 0.011228 | 0.011262 | 0.011295 | 0.011195 | 0.011262 | 0.011161 |
| 0.011295 | 0.011329 | 0.011228 | 0.011195 | 0.011295 | 0.011228 | 0.011262 |
| 0.011262 | 0.011195 | 0.011262 | 0.011295 | 0.011195 | 0.011396 | 0.011430 |
| 0.011329 | 0.011396 | 0.011329 | 0.011329 | 0.011262 | 0.011665 | 0.011295 |
| 0.011339 | 0.011262 | 0.011497 | 0.011502 | 0.011363 | 0.011363 | 0.011363 |
| 0.011363 | 0.011295 | 0.011262 | 0.011295 | 0.011396 | 0.011396 | 0.011329 |
| 0.011329 | 0.011430 | 0.011631 | 0.011363 | 0.011564 | 0.011564 | 0.011430 |
| 0.011262 | 0.011329 | 0.011363 | 0.011766 | 0.011329 | 0.011363 | 0.011329 |
| 0.011363 | 0.011295 | 0.011295 | 0.011598 | 0.011531 | 0.011564 | 0.011295 |
| 0.011396 | 0.011463 | 0.011329 | 0.011396 | 0.011363 | 0.011228 | 0.011564 |
| 0.011329 | 0.011295 | 0.011295 | 0.011463 | 0.011295 | 0.011396 | 0.011632 |

|          |          |          |          |          |          |          |
|----------|----------|----------|----------|----------|----------|----------|
| 0.011262 | 0.011672 | 0.011699 | 0.011426 | 0.011173 | 0.011400 | 0.011267 |
| 0.011115 | 0.011645 | 0.011236 | 0.011329 | 0.011207 | 0.011264 | 0.011273 |
| 0.011418 | 0.000000 | 0.011228 | 0.000000 | 0.011114 | 0.011262 | 0.011304 |
| 0.011324 | 0.011218 | 0.011342 | 0.011307 | 0.011330 | 0.011464 | 0.011531 |
| 0.011531 | 0.011397 | 0.011500 | 0.011501 | 0.011637 | 0.011662 | 0.011329 |
| 0.011564 | 0.011430 | 0.011295 | 0.011396 | 0.011195 | 0.011430 | 0.011228 |
| 0.011295 | 0.011295 | 0.011262 | 0.011228 | 0.011262 | 0.011228 | 0.011329 |
| 0.011270 | 0.011305 | 0.011300 | 0.011334 | 0.011471 | 0.011436 | 0.011436 |
| 0.011435 | 0.011363 | 0.011171 | 0.011168 | 0.011298 | 0.011467 | 0.011468 |
| 0.011262 | 0.011331 | 0.011566 | 0.011534 | 0.011464 | 0.011498 | 0.011430 |
| 0.011363 | 0.011430 | 0.011430 | 0.011329 | 0.011901 | 0.011497 | 0.011564 |
| 0.011598 | 0.011666 | 0.011299 | 0.011372 | 0.011262 | 0.011464 | 0.011430 |
| 0.011464 | 0.011497 | 0.011497 | 0.011497 | 0.011650 | 0.011631 | 0.011269 |
| 0.011162 | 0.011164 | 0.011265 | 0.011230 | 0.011333 | 0.011172 | 0.011502 |
| 0.011301 | 0.011411 | 0.011156 | 0.011285 | 0.011296 | 0.011368 | 0.011262 |
| 0.011228 | 0.011228 | 0.011296 | 0.011262 | 0.011464 | 0.011430 | 0.011363 |
| 0.011464 | 0.011531 | 0.011262 | 0.011262 | 0.011296 | 0.011296 | 0.011297 |
| 0.011365 | 0.011296 | 0.011296 | 0.011330 | 0.011464 | 0.011531 | 0.011531 |
| 0.011397 | 0.011500 | 0.011501 | 0.011637 | 0.011662 | 0.011329 | 0.011497 |
| 0.011430 | 0.011430 | 0.011263 | 0.011443 | 0.011373 | 0.011401 | 0.011271 |
| 0.011439 | 0.011653 | 0.011442 | 0.011332 | 0.011228 | 0.011430 | 0.011296 |
| 0.011396 | 0.011329 | 0.011228 | 0.011330 | 0.011430 | 0.011432 | 0.011329 |
| 0.011228 | 0.011162 | 0.011296 | 0.011228 | 0.011161 | 0.011264 | 0.011430 |
| 0.011329 | 0.011262 | 0.011295 | 0.011329 | 0.011296 | 0.011228 | 0.011430 |
| 0.011295 | 0.011329 | 0.011329 | 0.011262 | 0.011329 | 0.011564 | 0.011228 |
| 0.011262 | 0.011665 | 0.011262 | 0.011295 | 0.011262 | 0.011631 | 0.011146 |
| 0.011622 | 0.011145 | 0.011261 | 0.011422 | 0.011468 | 0.011419 | 0.011102 |
| 0.011218 | 0.011430 | 0.011531 | 0.011638 | 0.011498 | 0.011636 | 0.011767 |
| 0.011666 | 0.011703 | 0.011665 | 0.011915 | 0.011631 | 0.012507 | 0.011667 |
| 0.012407 | 0.012174 | 0.012308 | 0.012580 | 0.011631 | 0.011329 | 0.011632 |
| 0.012071 | 0.012006 | 0.011598 | 0.011497 | 0.011565 | 0.011565 | 0.011534 |
| 0.011430 | 0.011434 | 0.011497 | 0.011464 | 0.011834 | 0.011901 | 0.011902 |
| 0.011801 | 0.011902 | 0.012005 | 0.011771 | 0.012071 | 0.012077 | 0.012138 |
| 0.012139 | 0.012173 | 0.012119 | 0.012139 | 0.012140 | 0.011363 | 0.011666 |
| 0.011734 | 0.012237 | 0.011739 | 0.011968 | 0.012442 | 0.011502 | 0.011397 |
| 0.011363 | 0.011363 | 0.011834 | 0.011842 | 0.011976 | 0.011699 | 0.011364 |
| S318     | 0.011530 | 0.011530 | 0.011765 | 0.011631 | 0.011631 | 0.011698 |
| 0.011536 | 0.011468 | 0.011698 | 0.011127 | 0.011195 | 0.011161 | 0.011127 |
| 0.011161 | 0.011329 | 0.011127 | 0.011161 | 0.011228 | 0.011195 | 0.011161 |
| 0.011127 | 0.011161 | 0.011262 | 0.011128 | 0.011161 | 0.011161 | 0.011502 |
| 0.011396 | 0.011161 | 0.000000 | 0.011295 | 0.011228 | 0.011195 | 0.011228 |
| 0.011195 | 0.011295 | 0.011195 | 0.011195 | 0.011228 | 0.011194 | 0.011362 |
| 0.011127 | 0.011194 | 0.011228 | 0.011161 | 0.011262 | 0.011295 | 0.011228 |
| 0.011195 | 0.011362 | 0.011262 | 0.011530 | 0.011195 | 0.011463 | 0.011195 |
| 0.011161 | 0.011262 | 0.011329 | 0.011463 | 0.011564 | 0.011262 | 0.011362 |
| 0.011228 | 0.011295 | 0.011195 | 0.011429 | 0.011665 | 0.011195 | 0.011262 |
| 0.011161 | 0.011262 | 0.011228 | 0.011295 | 0.011228 | 0.011228 | 0.011228 |
| 0.011127 | 0.011161 | 0.011127 | 0.011228 | 0.011194 | 0.011229 | 0.011295 |
| 0.011228 | 0.011194 | 0.011262 | 0.011161 | 0.011295 | 0.011127 | 0.011195 |
| 0.011362 | 0.011295 | 0.011530 | 0.011362 | 0.011195 | 0.011429 | 0.011195 |
| 0.011357 | 0.011583 | 0.011400 | 0.011099 | 0.011098 | 0.011207 | 0.011296 |
| 0.011938 | 0.011365 | 0.011102 | 0.011429 | 0.011429 | 0.011228 | 0.011329 |
| 0.011262 | 0.011228 | 0.011295 | 0.011195 | 0.011295 | 0.011228 | 0.011228 |
| 0.011195 | 0.011295 | 0.011497 | 0.011362 | 0.011262 | 0.011228 | 0.011161 |
| 0.011127 | 0.011127 | 0.011195 | 0.011161 | 0.011362 | 0.011329 | 0.011262 |
| 0.011362 | 0.011430 | 0.011161 | 0.011161 | 0.011195 | 0.011195 | 0.011195 |
| 0.011263 | 0.011195 | 0.011195 | 0.000000 | 0.011133 | 0.011095 | 0.011195 |
| 0.011196 | 0.011129 | 0.011171 | 0.011164 | 0.011094 | 0.011129 | 0.011162 |
| 0.011420 | 0.011198 | 0.011232 | 0.011128 | 0.011129 | 0.011262 | 0.011228 |
| 0.011296 | 0.011229 | 0.011228 | 0.011329 | 0.011262 | 0.011631 | 0.011430 |

|          |          |          |          |          |          |          |
|----------|----------|----------|----------|----------|----------|----------|
| 0.011463 | 0.011329 | 0.011195 | 0.011295 | 0.011094 | 0.011329 | 0.011127 |
| 0.011195 | 0.011195 | 0.011161 | 0.011127 | 0.011161 | 0.011127 | 0.011228 |
| 0.011195 | 0.011295 | 0.011228 | 0.011127 | 0.011229 | 0.011329 | 0.011331 |
| 0.011329 | 0.011228 | 0.011127 | 0.000000 | 0.011195 | 0.011127 | 0.000000 |
| 0.011162 | 0.011329 | 0.011127 | 0.011329 | 0.011094 | 0.011195 | 0.011161 |
| 0.011262 | 0.011161 | 0.011195 | 0.011161 | 0.011195 | 0.000000 | 0.011195 |
| 0.011228 | 0.011161 | 0.011228 | 0.011161 | 0.011195 | 0.011228 | 0.011463 |
| 0.011564 | 0.011497 | 0.011564 | 0.011330 | 0.011564 | 0.011195 | 0.011161 |
| 0.011195 | 0.011464 | 0.011289 | 0.011095 | 0.011569 | 0.000000 | 0.011178 |
| 0.011569 | 0.011468 | 0.011362 | 0.011564 | 0.011265 | 0.011429 | 0.011396 |
| 0.011329 | 0.011497 | 0.011344 | 0.011184 | 0.011228 | 0.011228 | 0.011297 |
| 0.011396 | 0.011296 | 0.011432 | 0.011500 | 0.011429 | 0.011497 | 0.011602 |
| 0.011331 | 0.011501 | 0.011432 | 0.011364 | 0.011632 | 0.011094 | 0.011296 |
| 0.011262 | 0.011195 | 0.011094 | 0.011094 | 0.011161 | 0.011161 | 0.011228 |
| 0.011161 | 0.011228 | 0.011127 | 0.011228 | 0.011161 | 0.011161 | 0.011228 |
| 0.011161 | 0.011597 | 0.011497 | 0.011530 | 0.000000 | 0.011161 | 0.011195 |
| 0.011195 | 0.011161 | 0.011228 | 0.011262 | 0.011127 | 0.011127 | 0.011127 |
| 0.011664 | 0.011295 | 0.011295 | 0.011094 | 0.011194 | 0.011362 | 0.011127 |
| 0.011127 | 0.011194 | 0.011161 | 0.011329 | 0.011127 | 0.011262 | 0.011396 |
| 0.011329 | 0.011161 | 0.011161 | 0.011094 | 0.011094 | 0.011262 | 0.011195 |
| 0.011094 | 0.011194 | 0.000000 | 0.011094 | 0.011228 | 0.011362 | 0.011127 |
| 0.011094 | 0.011228 | 0.011161 | 0.000000 | 0.011396 | 0.000000 | 0.011228 |
| 0.011300 | 0.011127 | 0.011429 | 0.011262 | 0.011295 | 0.011161 | 0.011262 |
| 0.011127 | 0.011463 | 0.000000 | 0.011329 | 0.011127 | 0.011127 | 0.000000 |
| 0.011295 | 0.011497 | 0.011195 | 0.011262 | 0.011094 | 0.011497 | 0.011127 |
| 0.011127 | 0.011127 | 0.011161 | 0.011262 | 0.011161 | 0.011262 | 0.011329 |
| 0.011329 | 0.011295 | 0.011195 | 0.011295 | 0.011262 | 0.011127 | 0.011094 |
| 0.011127 | 0.011127 | 0.011195 | 0.011127 | 0.011094 | 0.011262 | 0.011127 |
| 0.011161 | 0.011161 | 0.011295 | 0.011329 | 0.011228 | 0.011161 | 0.011161 |
| 0.011228 | 0.011161 | 0.011262 | 0.011127 | 0.011262 | 0.011362 | 0.011597 |
| 0.011161 | 0.011564 | 0.011164 | 0.017672 | 0.011126 | 0.011305 | 0.011514 |
| 0.011475 | 0.011517 | 0.011217 | 0.011176 | 0.011609 | 0.011543 | 0.011242 |
| 0.011392 | 0.011426 | 0.000000 | 0.011144 | 0.011138 | 0.011208 | 0.011146 |
| 0.011389 | 0.011321 | 0.011320 | 0.011126 | 0.011295 | 0.011329 | 0.011331 |
| 0.011198 | 0.011295 | 0.011295 | 0.011262 | 0.011228 | 0.011228 | 0.011195 |
| 0.011228 | 0.011161 | 0.011195 | 0.011228 | 0.011195 | 0.011127 | 0.011161 |
| 0.011161 | 0.011228 | 0.011127 | 0.011228 | 0.011262 | 0.011295 | 0.011195 |
| 0.011228 | 0.011195 | 0.011530 | 0.011530 | 0.011262 | 0.011296 | 0.011329 |
| 0.011094 | 0.011094 | 0.011127 | 0.011228 | 0.011094 | 0.011329 | 0.011329 |
| 0.011362 | 0.011362 | 0.011295 | 0.011396 | 0.011564 | 0.011397 | 0.011228 |
| 0.011228 | 0.011295 | 0.011329 | 0.011161 | 0.011228 | 0.011195 | 0.011228 |
| 0.011295 | 0.011295 | 0.011329 | 0.011295 | 0.011195 | 0.011396 | 0.011362 |
| 0.011230 | 0.011127 | 0.011228 | 0.011329 | 0.011228 | 0.011362 | 0.011396 |
| 0.011564 | 0.011265 | 0.011429 | 0.011396 | 0.011329 | 0.011497 | 0.011128 |
| 0.011296 | 0.011195 | 0.011161 | 0.011161 | 0.011228 | 0.011127 | 0.011228 |
| 0.011262 | 0.011295 | 0.011195 | 0.011228 | 0.011195 | 0.011530 | 0.011530 |
| 0.011262 | 0.011296 | 0.011362 | 0.011295 | 0.011934 | 0.011346 | 0.011271 |
| 0.011341 | 0.011303 | 0.011411 | 0.011303 | 0.011410 | 0.011336 | 0.011302 |
| 0.011884 | 0.011199 | 0.011334 | 0.011268 | 0.011542 | 0.011400 | 0.011502 |
| 0.011910 | 0.011362 | 0.011466 | 0.011530 | 0.011396 | 0.011396 | 0.011432 |
| 0.011094 | 0.011262 | 0.011396 | 0.011362 | 0.011364 | 0.011362 | 0.011330 |
| 0.011195 | 0.011127 | 0.011161 | 0.011195 | 0.011094 | 0.011161 | 0.000000 |
| 0.011194 | 0.011228 | 0.011127 | 0.011094 | 0.011195 | 0.011127 | 0.011161 |
| 0.011161 | 0.011094 | 0.011161 | 0.011195 | 0.011094 | 0.011295 | 0.011329 |
| 0.011228 | 0.011295 | 0.011228 | 0.011228 | 0.011161 | 0.011564 | 0.011194 |
| 0.011234 | 0.011161 | 0.011396 | 0.011399 | 0.011262 | 0.011262 | 0.011262 |
| 0.011262 | 0.011195 | 0.011161 | 0.011195 | 0.011295 | 0.011295 | 0.011228 |
| 0.011228 | 0.011362 | 0.011530 | 0.011262 | 0.011463 | 0.011463 | 0.011329 |
| 0.011161 | 0.011228 | 0.011262 | 0.011665 | 0.011228 | 0.011262 | 0.011228 |
| 0.011262 | 0.011194 | 0.011194 | 0.011497 | 0.011430 | 0.011463 | 0.011195 |

|          |          |          |          |          |          |          |
|----------|----------|----------|----------|----------|----------|----------|
| 0.011295 | 0.011362 | 0.011228 | 0.011295 | 0.011262 | 0.011127 | 0.011463 |
| 0.011228 | 0.011195 | 0.011194 | 0.011362 | 0.011195 | 0.011295 | 0.011530 |
| 0.011161 | 0.011603 | 0.011597 | 0.011385 | 0.011117 | 0.011298 | 0.011163 |
| 0.011115 | 0.011605 | 0.011131 | 0.011328 | 0.011158 | 0.011264 | 0.011273 |
| 0.011366 | 0.000000 | 0.011227 | 0.000000 | 0.011114 | 0.011261 | 0.011263 |
| 0.011286 | 0.011178 | 0.011272 | 0.011201 | 0.011229 | 0.011362 | 0.011430 |
| 0.011430 | 0.011296 | 0.011398 | 0.011399 | 0.011535 | 0.011555 | 0.011228 |
| 0.011463 | 0.011329 | 0.011195 | 0.011295 | 0.011094 | 0.011329 | 0.011127 |
| 0.011195 | 0.011195 | 0.011161 | 0.011127 | 0.011161 | 0.011127 | 0.011228 |
| 0.011200 | 0.011200 | 0.011197 | 0.011231 | 0.011368 | 0.011333 | 0.011333 |
| 0.011333 | 0.011262 | 0.000000 | 0.000000 | 0.011196 | 0.011365 | 0.011366 |
| 0.011161 | 0.011230 | 0.011464 | 0.011432 | 0.011363 | 0.011397 | 0.011329 |
| 0.011262 | 0.011329 | 0.011329 | 0.011228 | 0.011799 | 0.011396 | 0.011463 |
| 0.011497 | 0.011559 | 0.011197 | 0.011268 | 0.011161 | 0.011362 | 0.011329 |
| 0.011363 | 0.011396 | 0.011396 | 0.011396 | 0.011532 | 0.011530 | 0.011164 |
| 0.000000 | 0.000000 | 0.011162 | 0.011128 | 0.011231 | 0.000000 | 0.011400 |
| 0.011197 | 0.011323 | 0.000000 | 0.011210 | 0.011195 | 0.011265 | 0.011161 |
| 0.011127 | 0.011127 | 0.011195 | 0.011161 | 0.011362 | 0.011329 | 0.011262 |
| 0.011362 | 0.011430 | 0.011161 | 0.011161 | 0.011195 | 0.011195 | 0.011195 |
| 0.011263 | 0.011195 | 0.011195 | 0.011229 | 0.011362 | 0.011430 | 0.011430 |
| 0.011296 | 0.011398 | 0.011399 | 0.011535 | 0.011555 | 0.011228 | 0.011396 |
| 0.011329 | 0.011329 | 0.011162 | 0.011339 | 0.011269 | 0.011299 | 0.011165 |
| 0.011336 | 0.011516 | 0.011314 | 0.011230 | 0.011127 | 0.011329 | 0.011195 |
| 0.011295 | 0.011228 | 0.011127 | 0.011229 | 0.011329 | 0.011331 | 0.011228 |
| 0.011127 | 0.000000 | 0.011195 | 0.011127 | 0.000000 | 0.011162 | 0.011329 |
| 0.011228 | 0.011161 | 0.011195 | 0.011228 | 0.011195 | 0.011127 | 0.011329 |
| 0.011195 | 0.011228 | 0.011228 | 0.011161 | 0.011228 | 0.011463 | 0.011127 |
| 0.011161 | 0.011564 | 0.011161 | 0.011195 | 0.011161 | 0.011530 | 0.011103 |
| 0.011566 | 0.011103 | 0.011161 | 0.011342 | 0.011426 | 0.011347 | 0.000000 |
| 0.011113 | 0.011329 | 0.011429 | 0.011535 | 0.011397 | 0.011534 | 0.011666 |
| 0.011565 | 0.011601 | 0.011564 | 0.011812 | 0.011530 | 0.012404 | 0.011565 |
| 0.012304 | 0.012072 | 0.012206 | 0.012477 | 0.011530 | 0.011228 | 0.011531 |
| 0.011969 | 0.011903 | 0.011497 | 0.011396 | 0.011464 | 0.011464 | 0.011432 |
| 0.011329 | 0.011332 | 0.011396 | 0.011363 | 0.011733 | 0.011799 | 0.011800 |
| 0.011699 | 0.011800 | 0.011903 | 0.011669 | 0.011969 | 0.011974 | 0.012036 |
| 0.012037 | 0.012070 | 0.012015 | 0.012037 | 0.012038 | 0.011262 | 0.011564 |
| 0.011632 | 0.012135 | 0.011636 | 0.011866 | 0.012339 | 0.011400 | 0.011295 |
| 0.011262 | 0.011262 | 0.011732 | 0.011759 | 0.011869 | 0.011597 | 0.011262 |
| S319     | 0.011866 | 0.011866 | 0.011933 | 0.011698 | 0.011698 | 0.011765 |
| 0.011264 | 0.011196 | 0.011765 | 0.011463 | 0.011530 | 0.011498 | 0.011463 |
| 0.011429 | 0.011664 | 0.011396 | 0.011496 | 0.011564 | 0.011530 | 0.011496 |
| 0.011463 | 0.011496 | 0.011329 | 0.011463 | 0.011497 | 0.011496 | 0.011230 |
| 0.011463 | 0.011496 | 0.011396 | 0.011362 | 0.011564 | 0.011530 | 0.011564 |
| 0.011530 | 0.011631 | 0.011530 | 0.011530 | 0.011564 | 0.011530 | 0.011698 |
| 0.011396 | 0.011530 | 0.011564 | 0.011496 | 0.011530 | 0.011631 | 0.011564 |
| 0.011530 | 0.011698 | 0.011598 | 0.011262 | 0.011530 | 0.011799 | 0.011530 |
| 0.011496 | 0.011530 | 0.011664 | 0.011799 | 0.011262 | 0.011530 | 0.011631 |
| 0.011564 | 0.011631 | 0.011530 | 0.011765 | 0.011396 | 0.011530 | 0.011597 |
| 0.011496 | 0.011597 | 0.011564 | 0.011631 | 0.011564 | 0.011564 | 0.011564 |
| 0.011463 | 0.011496 | 0.011463 | 0.011497 | 0.011530 | 0.011565 | 0.011631 |
| 0.011564 | 0.011530 | 0.011597 | 0.011496 | 0.011429 | 0.011463 | 0.011530 |
| 0.011698 | 0.011631 | 0.011396 | 0.011698 | 0.011530 | 0.011765 | 0.011530 |
| 0.011728 | 0.011284 | 0.011739 | 0.011451 | 0.011433 | 0.011539 | 0.011336 |
| 0.011975 | 0.011264 | 0.011472 | 0.011765 | 0.011765 | 0.011496 | 0.011396 |
| 0.011597 | 0.011564 | 0.011631 | 0.011530 | 0.011631 | 0.011564 | 0.011564 |
| 0.011530 | 0.011564 | 0.011832 | 0.011698 | 0.011597 | 0.011564 | 0.011497 |
| 0.011463 | 0.011396 | 0.011530 | 0.011497 | 0.011430 | 0.011396 | 0.011329 |
| 0.011430 | 0.011497 | 0.011497 | 0.011497 | 0.011530 | 0.011530 | 0.011533 |
| 0.011601 | 0.011530 | 0.011530 | 0.011384 | 0.011458 | 0.011411 | 0.011531 |
| 0.011500 | 0.011438 | 0.011503 | 0.011474 | 0.011434 | 0.011437 | 0.011499 |

|          |          |          |          |          |          |          |
|----------|----------|----------|----------|----------|----------|----------|
| 0.011384 | 0.011508 | 0.011542 | 0.011464 | 0.011440 | 0.011598 | 0.011497 |
| 0.011565 | 0.011566 | 0.011565 | 0.011664 | 0.011597 | 0.011967 | 0.011698 |
| 0.011530 | 0.011597 | 0.011530 | 0.011564 | 0.011429 | 0.011396 | 0.011463 |
| 0.011530 | 0.011530 | 0.011497 | 0.011463 | 0.011496 | 0.011463 | 0.011564 |
| 0.011530 | 0.011631 | 0.011564 | 0.011463 | 0.011566 | 0.011665 | 0.011669 |
| 0.011665 | 0.011564 | 0.011463 | 0.011397 | 0.011530 | 0.011463 | 0.011396 |
| 0.011400 | 0.011665 | 0.011463 | 0.011665 | 0.011429 | 0.011530 | 0.011497 |
| 0.011597 | 0.011497 | 0.011530 | 0.011497 | 0.011530 | 0.011396 | 0.011530 |
| 0.011564 | 0.011497 | 0.011564 | 0.011497 | 0.011530 | 0.011564 | 0.011799 |
| 0.011295 | 0.011228 | 0.011295 | 0.011667 | 0.011262 | 0.011530 | 0.011497 |
| 0.011466 | 0.011748 | 0.011563 | 0.011438 | 0.011298 | 0.011401 | 0.011532 |
| 0.011298 | 0.011468 | 0.011698 | 0.011900 | 0.011607 | 0.011765 | 0.011732 |
| 0.011664 | 0.011832 | 0.011700 | 0.011596 | 0.011605 | 0.011564 | 0.011635 |
| 0.011732 | 0.011634 | 0.011770 | 0.011838 | 0.011765 | 0.011833 | 0.011941 |
| 0.011669 | 0.011841 | 0.011703 | 0.011703 | 0.011969 | 0.011429 | 0.011633 |
| 0.011597 | 0.011530 | 0.011429 | 0.011429 | 0.011496 | 0.011496 | 0.011564 |
| 0.011496 | 0.011564 | 0.011463 | 0.011496 | 0.011496 | 0.011496 | 0.011564 |
| 0.011496 | 0.011329 | 0.011228 | 0.011262 | 0.011396 | 0.011496 | 0.011530 |
| 0.011530 | 0.011429 | 0.011564 | 0.011530 | 0.011463 | 0.011463 | 0.011463 |
| 0.011396 | 0.011564 | 0.011631 | 0.011429 | 0.011530 | 0.011698 | 0.011463 |
| 0.011463 | 0.011530 | 0.011496 | 0.011664 | 0.011463 | 0.011396 | 0.011530 |
| 0.011463 | 0.011496 | 0.011496 | 0.011429 | 0.011429 | 0.011597 | 0.011530 |
| 0.011429 | 0.011530 | 0.011396 | 0.011429 | 0.011564 | 0.011363 | 0.011463 |
| 0.011430 | 0.011564 | 0.011497 | 0.011396 | 0.000000 | 0.011396 | 0.011564 |
| 0.011642 | 0.011463 | 0.011161 | 0.011597 | 0.011564 | 0.011496 | 0.011597 |
| 0.011463 | 0.011799 | 0.011396 | 0.011463 | 0.011396 | 0.011396 | 0.011396 |
| 0.011631 | 0.011497 | 0.011530 | 0.011597 | 0.011429 | 0.011228 | 0.011396 |
| 0.011463 | 0.011463 | 0.011496 | 0.011597 | 0.011496 | 0.011597 | 0.011664 |
| 0.011664 | 0.011631 | 0.011530 | 0.011631 | 0.011597 | 0.011463 | 0.011429 |
| 0.011463 | 0.011463 | 0.011530 | 0.011396 | 0.011429 | 0.011597 | 0.011463 |
| 0.011429 | 0.011496 | 0.011631 | 0.011597 | 0.011564 | 0.011496 | 0.011497 |
| 0.011564 | 0.011496 | 0.011597 | 0.011463 | 0.011597 | 0.011698 | 0.011362 |
| 0.011496 | 0.011262 | 0.011509 | 0.018012 | 0.011322 | 0.011611 | 0.011235 |
| 0.011199 | 0.011236 | 0.011636 | 0.011408 | 0.011390 | 0.011267 | 0.011668 |
| 0.011487 | 0.011426 | 0.011411 | 0.011521 | 0.011372 | 0.011504 | 0.011533 |
| 0.011201 | 0.011358 | 0.011209 | 0.011259 | 0.011631 | 0.011665 | 0.011669 |
| 0.011541 | 0.011631 | 0.011631 | 0.011530 | 0.011564 | 0.011564 | 0.011530 |
| 0.011564 | 0.011496 | 0.011530 | 0.011564 | 0.011530 | 0.011463 | 0.011497 |
| 0.011497 | 0.011564 | 0.011463 | 0.011564 | 0.011597 | 0.011631 | 0.011530 |
| 0.011496 | 0.011463 | 0.011228 | 0.011228 | 0.011597 | 0.011632 | 0.011665 |
| 0.011429 | 0.011429 | 0.011463 | 0.011564 | 0.011429 | 0.011665 | 0.011665 |
| 0.011698 | 0.011698 | 0.011631 | 0.011732 | 0.011262 | 0.011734 | 0.011564 |
| 0.011564 | 0.011631 | 0.011665 | 0.011497 | 0.011564 | 0.011530 | 0.011564 |
| 0.011631 | 0.011631 | 0.011665 | 0.011631 | 0.011532 | 0.011732 | 0.011698 |
| 0.011568 | 0.011463 | 0.011564 | 0.011665 | 0.011564 | 0.011631 | 0.011731 |
| 0.011900 | 0.011607 | 0.011765 | 0.011732 | 0.011664 | 0.011832 | 0.011463 |
| 0.011633 | 0.011531 | 0.011497 | 0.011497 | 0.011564 | 0.011463 | 0.011564 |
| 0.011597 | 0.011631 | 0.011530 | 0.011496 | 0.011463 | 0.011228 | 0.011228 |
| 0.011597 | 0.011632 | 0.011698 | 0.011631 | 0.012204 | 0.011703 | 0.011623 |
| 0.011693 | 0.011650 | 0.011763 | 0.011649 | 0.011760 | 0.011681 | 0.011612 |
| 0.012159 | 0.011545 | 0.011677 | 0.011613 | 0.011887 | 0.011740 | 0.011843 |
| 0.012182 | 0.011663 | 0.011804 | 0.011866 | 0.011732 | 0.011463 | 0.011770 |
| 0.011429 | 0.011597 | 0.011731 | 0.011698 | 0.011702 | 0.011429 | 0.011397 |
| 0.011530 | 0.011463 | 0.011496 | 0.011530 | 0.011429 | 0.011496 | 0.011396 |
| 0.011463 | 0.011496 | 0.011463 | 0.011429 | 0.011530 | 0.011463 | 0.011496 |
| 0.011496 | 0.011429 | 0.011496 | 0.011530 | 0.011429 | 0.011631 | 0.011664 |
| 0.011564 | 0.011564 | 0.011564 | 0.011564 | 0.011496 | 0.011262 | 0.011530 |
| 0.011304 | 0.011497 | 0.011463 | 0.011467 | 0.011530 | 0.011530 | 0.011597 |
| 0.011597 | 0.011530 | 0.011496 | 0.011530 | 0.011631 | 0.011631 | 0.011564 |
| 0.011564 | 0.011698 | 0.011262 | 0.011597 | 0.011799 | 0.011799 | 0.011664 |



|          |          |          |          |          |          |          |
|----------|----------|----------|----------|----------|----------|----------|
| 0.011496 | 0.011564 | 0.011597 | 0.011362 | 0.011564 | 0.011530 | 0.011564 |
| 0.011597 | 0.011463 | 0.011463 | 0.011765 | 0.011765 | 0.011732 | 0.011530 |
| 0.011631 | 0.011698 | 0.011564 | 0.011631 | 0.011597 | 0.011463 | 0.011194 |
| 0.011564 | 0.011530 | 0.011463 | 0.011698 | 0.011530 | 0.011631 | 0.011463 |
| 0.011564 | 0.011332 | 0.011329 | 0.011426 | 0.011286 | 0.011570 | 0.011267 |
| 0.011445 | 0.011644 | 0.011482 | 0.011596 | 0.011499 | 0.011366 | 0.011379 |
| 0.011366 | 0.011258 | 0.011450 | 0.011324 | 0.011330 | 0.011529 | 0.011669 |
| 0.011663 | 0.011572 | 0.011553 | 0.011553 | 0.011566 | 0.011430 | 0.011497 |
| 0.011497 | 0.011565 | 0.011669 | 0.011467 | 0.011806 | 0.011838 | 0.011564 |
| 0.011530 | 0.011597 | 0.011530 | 0.011564 | 0.011429 | 0.011396 | 0.011463 |
| 0.011530 | 0.011530 | 0.011497 | 0.011463 | 0.011496 | 0.011463 | 0.011564 |
| 0.011514 | 0.011515 | 0.011505 | 0.011540 | 0.011676 | 0.011641 | 0.011641 |
| 0.011639 | 0.011598 | 0.011393 | 0.011384 | 0.011500 | 0.011670 | 0.011671 |
| 0.011497 | 0.011534 | 0.011801 | 0.011770 | 0.011699 | 0.011733 | 0.011664 |
| 0.011597 | 0.011664 | 0.011664 | 0.011564 | 0.011496 | 0.011732 | 0.011799 |
| 0.011833 | 0.011274 | 0.011469 | 0.011615 | 0.011497 | 0.011698 | 0.011664 |
| 0.011699 | 0.011731 | 0.011732 | 0.011732 | 0.011846 | 0.011866 | 0.011511 |
| 0.011398 | 0.011406 | 0.011503 | 0.011468 | 0.011504 | 0.011433 | 0.011128 |
| 0.011540 | 0.011236 | 0.011441 | 0.011547 | 0.011531 | 0.011573 | 0.011497 |
| 0.011463 | 0.011396 | 0.011530 | 0.011497 | 0.011430 | 0.011396 | 0.011329 |
| 0.011430 | 0.011497 | 0.011497 | 0.011497 | 0.011530 | 0.011530 | 0.011533 |
| 0.011601 | 0.011530 | 0.011530 | 0.011566 | 0.011430 | 0.011497 | 0.011497 |
| 0.011565 | 0.011669 | 0.011467 | 0.011806 | 0.011838 | 0.011564 | 0.011732 |
| 0.011664 | 0.011664 | 0.011500 | 0.011687 | 0.011616 | 0.011639 | 0.011481 |
| 0.011680 | 0.011835 | 0.011653 | 0.011570 | 0.011463 | 0.011665 | 0.011530 |
| 0.011631 | 0.011564 | 0.011463 | 0.011566 | 0.011665 | 0.011669 | 0.011564 |
| 0.011463 | 0.011397 | 0.011530 | 0.011463 | 0.011396 | 0.011400 | 0.011665 |
| 0.011564 | 0.011496 | 0.011530 | 0.011564 | 0.011530 | 0.011463 | 0.011396 |
| 0.011463 | 0.011564 | 0.011564 | 0.011496 | 0.011564 | 0.011799 | 0.011396 |
| 0.011496 | 0.011262 | 0.011496 | 0.011530 | 0.011496 | 0.011262 | 0.011489 |
| 0.011679 | 0.011315 | 0.011261 | 0.011382 | 0.011467 | 0.011419 | 0.011269 |
| 0.011218 | 0.011396 | 0.011497 | 0.011604 | 0.011464 | 0.011602 | 0.011733 |
| 0.011632 | 0.011669 | 0.011631 | 0.011881 | 0.011597 | 0.012472 | 0.011633 |
| 0.012372 | 0.012140 | 0.012274 | 0.012545 | 0.011530 | 0.011497 | 0.011598 |
| 0.012238 | 0.011971 | 0.011564 | 0.011463 | 0.011531 | 0.011531 | 0.011500 |
| 0.011396 | 0.011399 | 0.011463 | 0.011430 | 0.011800 | 0.011866 | 0.011868 |
| 0.011767 | 0.011867 | 0.011971 | 0.011737 | 0.012239 | 0.012246 | 0.012306 |
| 0.012307 | 0.012340 | 0.012289 | 0.012307 | 0.012308 | 0.011597 | 0.011833 |
| 0.011901 | 0.012404 | 0.011908 | 0.011867 | 0.012339 | 0.011400 | 0.011296 |
| 0.011195 | 0.011262 | 0.011800 | 0.011801 | 0.011905 | 0.011597 | 0.011330 |
| S320     | 0.011530 | 0.011530 | 0.011765 | 0.011631 | 0.011631 | 0.011698 |
| 0.011536 | 0.011468 | 0.011698 | 0.011127 | 0.011195 | 0.011161 | 0.011127 |
| 0.011161 | 0.011329 | 0.011127 | 0.011161 | 0.011228 | 0.011195 | 0.011161 |
| 0.011127 | 0.011161 | 0.011262 | 0.011128 | 0.011161 | 0.011161 | 0.011502 |
| 0.011396 | 0.011161 | 0.000000 | 0.011295 | 0.011228 | 0.011195 | 0.011228 |
| 0.011195 | 0.011295 | 0.011195 | 0.011195 | 0.011228 | 0.011195 | 0.011362 |
| 0.011127 | 0.011195 | 0.011228 | 0.011161 | 0.011262 | 0.011295 | 0.011228 |
| 0.011195 | 0.011362 | 0.011262 | 0.011530 | 0.011195 | 0.011463 | 0.011195 |
| 0.011161 | 0.011262 | 0.011329 | 0.011463 | 0.011564 | 0.011262 | 0.011362 |
| 0.011195 | 0.011295 | 0.011195 | 0.011396 | 0.011665 | 0.011195 | 0.011262 |
| 0.011161 | 0.011262 | 0.011228 | 0.011295 | 0.011228 | 0.011228 | 0.011228 |
| 0.011127 | 0.011161 | 0.011127 | 0.011228 | 0.011195 | 0.011229 | 0.011295 |
| 0.011228 | 0.011195 | 0.011262 | 0.011161 | 0.011295 | 0.011127 | 0.011195 |
| 0.011362 | 0.011295 | 0.011530 | 0.011362 | 0.011195 | 0.011429 | 0.011195 |
| 0.011357 | 0.011583 | 0.011400 | 0.011099 | 0.011098 | 0.011207 | 0.011296 |
| 0.011938 | 0.011365 | 0.011102 | 0.011429 | 0.011429 | 0.011228 | 0.011329 |
| 0.011262 | 0.011228 | 0.011295 | 0.011195 | 0.011295 | 0.011228 | 0.011228 |
| 0.011195 | 0.011295 | 0.011497 | 0.011362 | 0.011262 | 0.011228 | 0.011161 |
| 0.011127 | 0.011127 | 0.011195 | 0.011161 | 0.011362 | 0.011329 | 0.011262 |
| 0.011362 | 0.011430 | 0.011161 | 0.011161 | 0.011195 | 0.011195 | 0.011195 |

|          |          |          |          |          |          |          |
|----------|----------|----------|----------|----------|----------|----------|
| 0.011263 | 0.011195 | 0.011195 | 0.000000 | 0.011133 | 0.011095 | 0.011195 |
| 0.011196 | 0.011129 | 0.011171 | 0.011164 | 0.011094 | 0.000000 | 0.011162 |
| 0.011420 | 0.011198 | 0.011232 | 0.011128 | 0.011129 | 0.011262 | 0.011228 |
| 0.011296 | 0.011229 | 0.011228 | 0.011329 | 0.011262 | 0.011631 | 0.011430 |
| 0.011463 | 0.011329 | 0.011195 | 0.011295 | 0.011094 | 0.011329 | 0.011127 |
| 0.011195 | 0.011195 | 0.011161 | 0.011127 | 0.011161 | 0.011127 | 0.011228 |
| 0.011195 | 0.011295 | 0.011228 | 0.011127 | 0.011229 | 0.011329 | 0.011331 |
| 0.011329 | 0.011228 | 0.011127 | 0.000000 | 0.011195 | 0.011127 | 0.000000 |
| 0.011162 | 0.011329 | 0.011127 | 0.011329 | 0.011094 | 0.011195 | 0.011161 |
| 0.011262 | 0.011161 | 0.011195 | 0.011161 | 0.011195 | 0.000000 | 0.011195 |
| 0.011228 | 0.011161 | 0.011228 | 0.011161 | 0.011195 | 0.011228 | 0.011463 |
| 0.011564 | 0.011497 | 0.011564 | 0.011330 | 0.011564 | 0.011195 | 0.011161 |
| 0.011195 | 0.011464 | 0.011289 | 0.011095 | 0.011569 | 0.000000 | 0.011178 |
| 0.011569 | 0.011468 | 0.011362 | 0.011564 | 0.011265 | 0.011429 | 0.011396 |
| 0.011329 | 0.011497 | 0.011344 | 0.011184 | 0.011228 | 0.011228 | 0.011297 |
| 0.011396 | 0.011296 | 0.011432 | 0.011500 | 0.011429 | 0.011497 | 0.011602 |
| 0.011331 | 0.011501 | 0.011432 | 0.011364 | 0.011632 | 0.011094 | 0.011296 |
| 0.011262 | 0.011195 | 0.011094 | 0.011094 | 0.011161 | 0.011161 | 0.011228 |
| 0.011161 | 0.011228 | 0.011127 | 0.011228 | 0.011161 | 0.011161 | 0.011228 |
| 0.011161 | 0.011597 | 0.011497 | 0.011530 | 0.000000 | 0.011161 | 0.011195 |
| 0.011195 | 0.011161 | 0.011228 | 0.011262 | 0.011127 | 0.011127 | 0.011127 |
| 0.011664 | 0.011295 | 0.011295 | 0.011094 | 0.011195 | 0.011362 | 0.011127 |
| 0.011127 | 0.011195 | 0.011161 | 0.011329 | 0.011127 | 0.011262 | 0.011396 |
| 0.011329 | 0.011161 | 0.011161 | 0.011094 | 0.011094 | 0.011262 | 0.011195 |
| 0.011094 | 0.011195 | 0.000000 | 0.011094 | 0.011228 | 0.011362 | 0.011127 |
| 0.011094 | 0.011228 | 0.011161 | 0.000000 | 0.011396 | 0.000000 | 0.011228 |
| 0.011300 | 0.011127 | 0.011429 | 0.011262 | 0.011295 | 0.011161 | 0.011262 |
| 0.011127 | 0.011463 | 0.000000 | 0.011329 | 0.011127 | 0.011127 | 0.000000 |
| 0.011295 | 0.011497 | 0.011195 | 0.011262 | 0.011094 | 0.011497 | 0.011127 |
| 0.011127 | 0.011127 | 0.011161 | 0.011262 | 0.011161 | 0.011262 | 0.011329 |
| 0.011329 | 0.011295 | 0.011195 | 0.011295 | 0.011228 | 0.011127 | 0.011094 |
| 0.011127 | 0.011127 | 0.011195 | 0.011127 | 0.011094 | 0.011262 | 0.011127 |
| 0.011161 | 0.011161 | 0.011295 | 0.011329 | 0.011228 | 0.011161 | 0.011161 |
| 0.011228 | 0.011161 | 0.011262 | 0.011127 | 0.011262 | 0.011362 | 0.011597 |
| 0.011161 | 0.011564 | 0.011164 | 0.017672 | 0.011126 | 0.011305 | 0.011514 |
| 0.011475 | 0.011517 | 0.011217 | 0.011176 | 0.011609 | 0.011543 | 0.011242 |
| 0.011392 | 0.011426 | 0.000000 | 0.011144 | 0.011138 | 0.011208 | 0.011146 |
| 0.011389 | 0.011321 | 0.011320 | 0.011126 | 0.011295 | 0.011329 | 0.011331 |
| 0.011198 | 0.011295 | 0.011295 | 0.011262 | 0.011228 | 0.011228 | 0.011195 |
| 0.011228 | 0.011161 | 0.011195 | 0.011228 | 0.011195 | 0.011127 | 0.011161 |
| 0.011161 | 0.011228 | 0.011127 | 0.011228 | 0.011262 | 0.011295 | 0.011195 |
| 0.011228 | 0.011195 | 0.011530 | 0.011530 | 0.011262 | 0.011296 | 0.011329 |
| 0.011094 | 0.011094 | 0.011127 | 0.011228 | 0.011094 | 0.011329 | 0.011329 |
| 0.011362 | 0.011362 | 0.011295 | 0.011396 | 0.011564 | 0.011397 | 0.011228 |
| 0.011228 | 0.011295 | 0.011329 | 0.011161 | 0.011228 | 0.011195 | 0.011228 |
| 0.011295 | 0.011295 | 0.011329 | 0.011295 | 0.011195 | 0.011396 | 0.011362 |
| 0.011230 | 0.011127 | 0.011228 | 0.011329 | 0.011228 | 0.011362 | 0.011396 |
| 0.011564 | 0.011265 | 0.011429 | 0.011396 | 0.011329 | 0.011497 | 0.011128 |
| 0.011296 | 0.011195 | 0.011161 | 0.011161 | 0.011228 | 0.011127 | 0.011228 |
| 0.011262 | 0.011295 | 0.011195 | 0.011228 | 0.011195 | 0.011530 | 0.011530 |
| 0.011262 | 0.011296 | 0.011362 | 0.011295 | 0.011934 | 0.011346 | 0.011271 |
| 0.011341 | 0.011303 | 0.011411 | 0.011303 | 0.011410 | 0.011336 | 0.011302 |
| 0.011884 | 0.011199 | 0.011334 | 0.011268 | 0.011542 | 0.011400 | 0.011502 |
| 0.011910 | 0.011362 | 0.011466 | 0.011530 | 0.011396 | 0.011396 | 0.011432 |
| 0.011094 | 0.011262 | 0.011396 | 0.011362 | 0.011364 | 0.011362 | 0.011330 |
| 0.011195 | 0.011127 | 0.011161 | 0.011195 | 0.011094 | 0.011161 | 0.000000 |
| 0.011195 | 0.011228 | 0.011127 | 0.011094 | 0.011195 | 0.011127 | 0.011161 |
| 0.011161 | 0.011094 | 0.011161 | 0.011195 | 0.011094 | 0.011295 | 0.011329 |
| 0.011228 | 0.011295 | 0.011228 | 0.011228 | 0.011161 | 0.011564 | 0.011195 |
| 0.011234 | 0.011161 | 0.011396 | 0.011399 | 0.011262 | 0.011262 | 0.011262 |

|          |          |          |          |          |          |          |
|----------|----------|----------|----------|----------|----------|----------|
| 0.011262 | 0.011195 | 0.011161 | 0.011195 | 0.011295 | 0.011295 | 0.011228 |
| 0.011228 | 0.011362 | 0.011530 | 0.011262 | 0.011463 | 0.011463 | 0.011329 |
| 0.011161 | 0.011228 | 0.011262 | 0.011665 | 0.011228 | 0.011262 | 0.011228 |
| 0.011262 | 0.011195 | 0.011195 | 0.011497 | 0.011430 | 0.011463 | 0.011195 |
| 0.011295 | 0.011362 | 0.011228 | 0.011295 | 0.011262 | 0.011127 | 0.011463 |
| 0.011228 | 0.011195 | 0.011195 | 0.011362 | 0.011195 | 0.011295 | 0.011530 |
| 0.011161 | 0.011603 | 0.011597 | 0.011385 | 0.011117 | 0.011298 | 0.011164 |
| 0.011115 | 0.011605 | 0.011131 | 0.011328 | 0.011158 | 0.011264 | 0.011273 |
| 0.011366 | 0.000000 | 0.011227 | 0.000000 | 0.011114 | 0.011261 | 0.011263 |
| 0.011286 | 0.011178 | 0.011272 | 0.011201 | 0.011229 | 0.011362 | 0.011430 |
| 0.011430 | 0.011296 | 0.011398 | 0.011399 | 0.011535 | 0.011555 | 0.011228 |
| 0.011463 | 0.011329 | 0.011195 | 0.011295 | 0.011094 | 0.011329 | 0.011127 |
| 0.011195 | 0.011195 | 0.011161 | 0.011127 | 0.011161 | 0.011127 | 0.011228 |
| 0.011200 | 0.011200 | 0.011197 | 0.011231 | 0.011368 | 0.011333 | 0.011333 |
| 0.011333 | 0.011262 | 0.000000 | 0.000000 | 0.011196 | 0.011365 | 0.011366 |
| 0.011161 | 0.011230 | 0.011464 | 0.011432 | 0.011363 | 0.011397 | 0.011329 |
| 0.011262 | 0.011329 | 0.011329 | 0.011228 | 0.011799 | 0.011396 | 0.011463 |
| 0.011497 | 0.011559 | 0.011197 | 0.011268 | 0.011161 | 0.011362 | 0.011329 |
| 0.011363 | 0.011396 | 0.011396 | 0.011396 | 0.011532 | 0.011530 | 0.011164 |
| 0.000000 | 0.000000 | 0.011162 | 0.011128 | 0.011231 | 0.000000 | 0.011400 |
| 0.011197 | 0.011323 | 0.000000 | 0.011210 | 0.011195 | 0.011266 | 0.011161 |
| 0.011127 | 0.011127 | 0.011195 | 0.011161 | 0.011362 | 0.011329 | 0.011262 |
| 0.011362 | 0.011430 | 0.011161 | 0.011161 | 0.011195 | 0.011195 | 0.011195 |
| 0.011263 | 0.011195 | 0.011195 | 0.011229 | 0.011362 | 0.011430 | 0.011430 |
| 0.011296 | 0.011398 | 0.011399 | 0.011535 | 0.011555 | 0.011228 | 0.011396 |
| 0.011329 | 0.011329 | 0.011162 | 0.011339 | 0.011269 | 0.011299 | 0.011165 |
| 0.011336 | 0.011516 | 0.011314 | 0.011230 | 0.011127 | 0.011329 | 0.011195 |
| 0.011295 | 0.011228 | 0.011127 | 0.011229 | 0.011329 | 0.011331 | 0.011228 |
| 0.011127 | 0.000000 | 0.011195 | 0.011127 | 0.000000 | 0.011162 | 0.011329 |
| 0.011228 | 0.011161 | 0.011195 | 0.011228 | 0.011195 | 0.011127 | 0.011329 |
| 0.011195 | 0.011228 | 0.011228 | 0.011161 | 0.011228 | 0.011463 | 0.011127 |
| 0.011161 | 0.011564 | 0.011161 | 0.011195 | 0.011161 | 0.011530 | 0.011103 |
| 0.011566 | 0.011103 | 0.011161 | 0.011342 | 0.011427 | 0.011347 | 0.000000 |
| 0.011113 | 0.011329 | 0.011429 | 0.011535 | 0.011397 | 0.011534 | 0.011666 |
| 0.011565 | 0.011601 | 0.011564 | 0.011812 | 0.011530 | 0.012405 | 0.011565 |
| 0.012304 | 0.012072 | 0.012206 | 0.012477 | 0.011530 | 0.011228 | 0.011531 |
| 0.011969 | 0.011903 | 0.011497 | 0.011396 | 0.011464 | 0.011464 | 0.011432 |
| 0.011329 | 0.011332 | 0.011396 | 0.011363 | 0.011733 | 0.011799 | 0.011800 |
| 0.011699 | 0.011800 | 0.011903 | 0.011669 | 0.011969 | 0.011974 | 0.012036 |
| 0.012037 | 0.012070 | 0.012015 | 0.012037 | 0.012038 | 0.011262 | 0.011564 |
| 0.011632 | 0.012135 | 0.011636 | 0.011866 | 0.012339 | 0.011400 | 0.011295 |
| 0.011262 | 0.011262 | 0.011732 | 0.011759 | 0.011869 | 0.011597 | 0.011262 |
| S321     | 0.011698 | 0.011698 | 0.011933 | 0.011799 | 0.011799 | 0.011866 |
| 0.011705 | 0.011637 | 0.011799 | 0.011295 | 0.011362 | 0.011329 | 0.011295 |
| 0.011329 | 0.011429 | 0.011295 | 0.011329 | 0.011329 | 0.011362 | 0.011329 |
| 0.011295 | 0.011329 | 0.011429 | 0.011295 | 0.011329 | 0.011329 | 0.011671 |
| 0.011564 | 0.011329 | 0.011228 | 0.011463 | 0.011396 | 0.011362 | 0.011396 |
| 0.011362 | 0.011463 | 0.011362 | 0.011362 | 0.011396 | 0.011362 | 0.011530 |
| 0.011295 | 0.011362 | 0.011396 | 0.011329 | 0.011429 | 0.011463 | 0.011396 |
| 0.011362 | 0.011530 | 0.011430 | 0.011698 | 0.011362 | 0.011631 | 0.011362 |
| 0.011329 | 0.011430 | 0.011497 | 0.011631 | 0.011732 | 0.011429 | 0.011530 |
| 0.011396 | 0.011463 | 0.011362 | 0.011597 | 0.011833 | 0.011295 | 0.011429 |
| 0.011329 | 0.011429 | 0.011396 | 0.011463 | 0.011396 | 0.011396 | 0.011396 |
| 0.011295 | 0.011329 | 0.011295 | 0.011396 | 0.011362 | 0.011397 | 0.011463 |
| 0.011396 | 0.011362 | 0.011429 | 0.011329 | 0.011463 | 0.011295 | 0.011362 |
| 0.011530 | 0.011463 | 0.011698 | 0.011530 | 0.011362 | 0.011597 | 0.011295 |
| 0.011542 | 0.011770 | 0.011588 | 0.011295 | 0.011284 | 0.011391 | 0.011493 |
| 0.012121 | 0.011620 | 0.011307 | 0.011597 | 0.011597 | 0.011396 | 0.011497 |
| 0.011429 | 0.011396 | 0.011463 | 0.011362 | 0.011463 | 0.011396 | 0.011396 |
| 0.011362 | 0.011463 | 0.011664 | 0.011463 | 0.011429 | 0.011396 | 0.011329 |

|          |          |          |          |          |          |          |
|----------|----------|----------|----------|----------|----------|----------|
| 0.011295 | 0.011295 | 0.011362 | 0.011329 | 0.011530 | 0.011497 | 0.011430 |
| 0.011530 | 0.011597 | 0.011329 | 0.011329 | 0.011362 | 0.011362 | 0.011364 |
| 0.011432 | 0.011362 | 0.011295 | 0.011240 | 0.011313 | 0.011271 | 0.011363 |
| 0.011365 | 0.011301 | 0.011355 | 0.011336 | 0.011264 | 0.011300 | 0.011330 |
| 0.011600 | 0.011370 | 0.011405 | 0.011296 | 0.011302 | 0.011430 | 0.011396 |
| 0.011464 | 0.011397 | 0.011396 | 0.011496 | 0.011429 | 0.011799 | 0.011598 |
| 0.011631 | 0.011497 | 0.011362 | 0.011463 | 0.011262 | 0.011497 | 0.011295 |
| 0.011362 | 0.011362 | 0.011329 | 0.011295 | 0.011329 | 0.011295 | 0.011329 |
| 0.011362 | 0.011463 | 0.011396 | 0.011295 | 0.011330 | 0.011497 | 0.011500 |
| 0.011497 | 0.011396 | 0.011295 | 0.011229 | 0.011362 | 0.011295 | 0.011228 |
| 0.011332 | 0.011497 | 0.011295 | 0.011497 | 0.011262 | 0.011362 | 0.011329 |
| 0.011430 | 0.011329 | 0.011362 | 0.011329 | 0.011362 | 0.011228 | 0.011362 |
| 0.011396 | 0.011329 | 0.011396 | 0.011329 | 0.011362 | 0.011396 | 0.011631 |
| 0.011732 | 0.011664 | 0.011732 | 0.011498 | 0.011732 | 0.011362 | 0.011329 |
| 0.011364 | 0.011667 | 0.011472 | 0.011266 | 0.011671 | 0.011197 | 0.011336 |
| 0.011739 | 0.011604 | 0.011530 | 0.011732 | 0.011436 | 0.011597 | 0.011564 |
| 0.011497 | 0.011664 | 0.011522 | 0.011349 | 0.011395 | 0.011396 | 0.011466 |
| 0.011564 | 0.011465 | 0.011601 | 0.011669 | 0.011597 | 0.011665 | 0.011772 |
| 0.011500 | 0.011671 | 0.011602 | 0.011534 | 0.011800 | 0.011262 | 0.011465 |
| 0.011429 | 0.011362 | 0.011262 | 0.011262 | 0.011329 | 0.011262 | 0.011396 |
| 0.011329 | 0.011396 | 0.011295 | 0.011396 | 0.011329 | 0.011329 | 0.011396 |
| 0.011329 | 0.011765 | 0.011664 | 0.011698 | 0.011228 | 0.011329 | 0.011362 |
| 0.011362 | 0.011329 | 0.011396 | 0.011429 | 0.011295 | 0.011295 | 0.011295 |
| 0.011832 | 0.011463 | 0.011463 | 0.011262 | 0.011362 | 0.011530 | 0.011295 |
| 0.011295 | 0.011362 | 0.011329 | 0.011497 | 0.011295 | 0.011429 | 0.011564 |
| 0.011497 | 0.011329 | 0.011329 | 0.011262 | 0.011262 | 0.011429 | 0.011362 |
| 0.011262 | 0.011362 | 0.011228 | 0.011262 | 0.011396 | 0.011530 | 0.011262 |
| 0.011262 | 0.011396 | 0.011329 | 0.011228 | 0.011564 | 0.011228 | 0.000000 |
| 0.011471 | 0.011295 | 0.011597 | 0.011429 | 0.011463 | 0.011329 | 0.011429 |
| 0.011295 | 0.011631 | 0.011228 | 0.011497 | 0.011295 | 0.011295 | 0.011228 |
| 0.011463 | 0.011665 | 0.011362 | 0.011429 | 0.011262 | 0.011664 | 0.011295 |
| 0.011295 | 0.011295 | 0.011329 | 0.011429 | 0.011329 | 0.011429 | 0.011497 |
| 0.011497 | 0.011463 | 0.011362 | 0.011463 | 0.011429 | 0.011295 | 0.011262 |
| 0.011295 | 0.011295 | 0.011362 | 0.011295 | 0.011262 | 0.011429 | 0.011295 |
| 0.011329 | 0.011329 | 0.011463 | 0.011497 | 0.011396 | 0.011329 | 0.011329 |
| 0.011396 | 0.011329 | 0.011429 | 0.011295 | 0.011429 | 0.011463 | 0.011765 |
| 0.011329 | 0.011732 | 0.011336 | 0.017861 | 0.011322 | 0.011366 | 0.011688 |
| 0.011648 | 0.011693 | 0.011427 | 0.011408 | 0.011664 | 0.011716 | 0.011303 |
| 0.011629 | 0.011487 | 0.011255 | 0.011353 | 0.011333 | 0.011258 | 0.011318 |
| 0.011623 | 0.011507 | 0.011505 | 0.011457 | 0.011463 | 0.011497 | 0.011500 |
| 0.011369 | 0.011463 | 0.011463 | 0.011430 | 0.011396 | 0.011396 | 0.011363 |
| 0.011396 | 0.011329 | 0.011362 | 0.011396 | 0.011362 | 0.011295 | 0.011329 |
| 0.011329 | 0.011396 | 0.011295 | 0.011396 | 0.011430 | 0.011463 | 0.011362 |
| 0.011396 | 0.011362 | 0.011698 | 0.011698 | 0.011430 | 0.011397 | 0.011497 |
| 0.011262 | 0.011262 | 0.011295 | 0.011396 | 0.011262 | 0.011497 | 0.011497 |
| 0.011530 | 0.011530 | 0.011463 | 0.011564 | 0.011732 | 0.011565 | 0.011396 |
| 0.011396 | 0.011463 | 0.011497 | 0.011329 | 0.011396 | 0.011362 | 0.011396 |
| 0.011463 | 0.011463 | 0.011497 | 0.011463 | 0.011363 | 0.011564 | 0.011530 |
| 0.011331 | 0.011295 | 0.011396 | 0.011497 | 0.011396 | 0.011530 | 0.011564 |
| 0.011732 | 0.011436 | 0.011597 | 0.011564 | 0.011497 | 0.011664 | 0.011295 |
| 0.011464 | 0.011296 | 0.011329 | 0.011329 | 0.011396 | 0.011295 | 0.011396 |
| 0.011430 | 0.011463 | 0.011362 | 0.011396 | 0.011362 | 0.011698 | 0.011698 |
| 0.011430 | 0.011397 | 0.011530 | 0.011463 | 0.012103 | 0.011524 | 0.011447 |
| 0.011517 | 0.011476 | 0.011587 | 0.011476 | 0.011585 | 0.011508 | 0.011474 |
| 0.012056 | 0.011372 | 0.011505 | 0.011441 | 0.011714 | 0.011570 | 0.011673 |
| 0.012080 | 0.011550 | 0.011635 | 0.011698 | 0.011564 | 0.011564 | 0.011601 |
| 0.011262 | 0.011429 | 0.011564 | 0.011530 | 0.011533 | 0.011530 | 0.011498 |
| 0.011362 | 0.011295 | 0.011329 | 0.011362 | 0.011262 | 0.011329 | 0.011228 |
| 0.011362 | 0.011396 | 0.011295 | 0.011262 | 0.011362 | 0.011295 | 0.011329 |
| 0.011329 | 0.011262 | 0.011329 | 0.011362 | 0.011262 | 0.011463 | 0.011497 |

|          |          |          |          |          |          |          |
|----------|----------|----------|----------|----------|----------|----------|
| 0.011396 | 0.011463 | 0.011396 | 0.011396 | 0.011329 | 0.011732 | 0.011362 |
| 0.011408 | 0.011329 | 0.011564 | 0.011569 | 0.011430 | 0.011429 | 0.011429 |
| 0.011429 | 0.011362 | 0.011329 | 0.011362 | 0.011396 | 0.011463 | 0.011396 |
| 0.011396 | 0.011530 | 0.011698 | 0.011429 | 0.011564 | 0.011564 | 0.011496 |
| 0.011329 | 0.011396 | 0.011429 | 0.011833 | 0.011396 | 0.011430 | 0.011396 |
| 0.011429 | 0.011362 | 0.011362 | 0.011665 | 0.011597 | 0.011631 | 0.011362 |
| 0.011463 | 0.011530 | 0.011396 | 0.011463 | 0.011429 | 0.011295 | 0.011631 |
| 0.011396 | 0.011362 | 0.011362 | 0.011530 | 0.011362 | 0.011463 | 0.011698 |
| 0.011329 | 0.011773 | 0.011765 | 0.011589 | 0.011399 | 0.011468 | 0.011370 |
| 0.011170 | 0.011800 | 0.011306 | 0.011551 | 0.011402 | 0.011467 | 0.011538 |
| 0.011621 | 0.011258 | 0.011506 | 0.011324 | 0.011384 | 0.011462 | 0.011466 |
| 0.011475 | 0.011375 | 0.011448 | 0.011377 | 0.011330 | 0.011530 | 0.011598 |
| 0.011597 | 0.011464 | 0.011567 | 0.011569 | 0.011704 | 0.011696 | 0.011396 |
| 0.011631 | 0.011497 | 0.011362 | 0.011463 | 0.011262 | 0.011497 | 0.011295 |
| 0.011362 | 0.011362 | 0.011329 | 0.011295 | 0.011329 | 0.011295 | 0.011329 |
| 0.011375 | 0.011375 | 0.011368 | 0.011403 | 0.011539 | 0.011504 | 0.011504 |
| 0.011503 | 0.011430 | 0.011245 | 0.011240 | 0.011297 | 0.011535 | 0.011535 |
| 0.011329 | 0.011331 | 0.011632 | 0.011601 | 0.011531 | 0.011498 | 0.011496 |
| 0.011429 | 0.011497 | 0.011496 | 0.011396 | 0.011967 | 0.011564 | 0.011631 |
| 0.011665 | 0.011737 | 0.011367 | 0.011441 | 0.011329 | 0.011530 | 0.011497 |
| 0.011531 | 0.011564 | 0.011564 | 0.011564 | 0.011650 | 0.011698 | 0.011338 |
| 0.011229 | 0.011233 | 0.011332 | 0.011298 | 0.011402 | 0.011247 | 0.011570 |
| 0.011369 | 0.011499 | 0.011251 | 0.011397 | 0.011363 | 0.011437 | 0.011329 |
| 0.011295 | 0.011295 | 0.011362 | 0.011329 | 0.011530 | 0.011497 | 0.011430 |
| 0.011530 | 0.011597 | 0.011329 | 0.011329 | 0.011362 | 0.011362 | 0.011364 |
| 0.011432 | 0.011362 | 0.011295 | 0.011330 | 0.011530 | 0.011598 | 0.011597 |
| 0.011464 | 0.011567 | 0.011569 | 0.011704 | 0.011696 | 0.011396 | 0.011564 |
| 0.011497 | 0.011497 | 0.011331 | 0.011513 | 0.011373 | 0.011469 | 0.011305 |
| 0.011473 | 0.011698 | 0.011526 | 0.011400 | 0.011295 | 0.011497 | 0.011362 |
| 0.011463 | 0.011396 | 0.011295 | 0.011330 | 0.011497 | 0.011500 | 0.011396 |
| 0.011295 | 0.011229 | 0.011362 | 0.011295 | 0.011228 | 0.011332 | 0.011497 |
| 0.011396 | 0.011329 | 0.011362 | 0.011396 | 0.011362 | 0.011295 | 0.011497 |
| 0.011362 | 0.011396 | 0.011396 | 0.011329 | 0.011396 | 0.011631 | 0.011295 |
| 0.011329 | 0.011732 | 0.011329 | 0.011362 | 0.011329 | 0.011698 | 0.011317 |
| 0.011847 | 0.011315 | 0.011411 | 0.011543 | 0.011630 | 0.011527 | 0.011269 |
| 0.011375 | 0.011496 | 0.011597 | 0.011705 | 0.011565 | 0.011703 | 0.011834 |
| 0.011733 | 0.011770 | 0.011732 | 0.011983 | 0.011698 | 0.012573 | 0.011734 |
| 0.012473 | 0.012241 | 0.012375 | 0.012646 | 0.011698 | 0.011396 | 0.011699 |
| 0.012137 | 0.012072 | 0.011664 | 0.011564 | 0.011632 | 0.011632 | 0.011601 |
| 0.011496 | 0.011501 | 0.011564 | 0.011531 | 0.011901 | 0.011967 | 0.011968 |
| 0.011867 | 0.011968 | 0.012072 | 0.011838 | 0.012138 | 0.012144 | 0.012205 |
| 0.012205 | 0.012239 | 0.012186 | 0.012205 | 0.012207 | 0.011429 | 0.011732 |
| 0.011800 | 0.012303 | 0.011806 | 0.012034 | 0.012508 | 0.011570 | 0.011464 |
| 0.011429 | 0.011429 | 0.011900 | 0.011965 | 0.012045 | 0.011765 | 0.011431 |
| S322     | 0.011642 | 0.011642 | 0.011882 | 0.011813 | 0.011813 | 0.011882 |
| 0.011788 | 0.011718 | 0.011916 | 0.011368 | 0.011437 | 0.011403 | 0.011368 |
| 0.011402 | 0.011574 | 0.011368 | 0.011402 | 0.011471 | 0.011437 | 0.011402 |
| 0.011368 | 0.011403 | 0.011505 | 0.011368 | 0.011334 | 0.011402 | 0.011753 |
| 0.011608 | 0.011403 | 0.011300 | 0.011539 | 0.011402 | 0.011437 | 0.011403 |
| 0.011437 | 0.011471 | 0.011437 | 0.011437 | 0.011437 | 0.011437 | 0.011608 |
| 0.011368 | 0.011437 | 0.011471 | 0.011402 | 0.011505 | 0.011539 | 0.011471 |
| 0.011437 | 0.011608 | 0.011506 | 0.011779 | 0.011437 | 0.011642 | 0.011437 |
| 0.011402 | 0.011505 | 0.011540 | 0.011642 | 0.011814 | 0.011505 | 0.011608 |
| 0.011402 | 0.011471 | 0.011437 | 0.011608 | 0.011917 | 0.011403 | 0.011505 |
| 0.011368 | 0.011505 | 0.011471 | 0.011539 | 0.011437 | 0.011471 | 0.011471 |
| 0.011368 | 0.011402 | 0.011368 | 0.011471 | 0.011437 | 0.011472 | 0.011539 |
| 0.011471 | 0.011437 | 0.011437 | 0.011402 | 0.011539 | 0.011266 | 0.011437 |
| 0.011608 | 0.011539 | 0.011779 | 0.011608 | 0.011437 | 0.011608 | 0.011437 |
| 0.011628 | 0.011861 | 0.011677 | 0.011380 | 0.011365 | 0.011474 | 0.011583 |
| 0.012218 | 0.011479 | 0.011313 | 0.011676 | 0.011676 | 0.011471 | 0.011574 |

|          |          |          |          |          |          |          |
|----------|----------|----------|----------|----------|----------|----------|
| 0.011505 | 0.011471 | 0.011471 | 0.011437 | 0.011540 | 0.011402 | 0.011437 |
| 0.011437 | 0.011539 | 0.011745 | 0.011608 | 0.011505 | 0.011471 | 0.011334 |
| 0.011368 | 0.011368 | 0.011368 | 0.011403 | 0.011608 | 0.011574 | 0.011505 |
| 0.011608 | 0.011677 | 0.011403 | 0.011403 | 0.011437 | 0.011437 | 0.011439 |
| 0.011508 | 0.011437 | 0.011437 | 0.011280 | 0.011392 | 0.011346 | 0.011437 |
| 0.011440 | 0.011376 | 0.011437 | 0.011412 | 0.011337 | 0.011374 | 0.011404 |
| 0.011684 | 0.011447 | 0.011411 | 0.011369 | 0.011377 | 0.011506 | 0.011471 |
| 0.011540 | 0.011472 | 0.011471 | 0.011505 | 0.011437 | 0.011779 | 0.011643 |
| 0.011711 | 0.011574 | 0.011437 | 0.011540 | 0.011334 | 0.011574 | 0.011368 |
| 0.011437 | 0.011437 | 0.011403 | 0.011368 | 0.011402 | 0.011368 | 0.011471 |
| 0.011368 | 0.011471 | 0.011471 | 0.011368 | 0.011473 | 0.011540 | 0.011577 |
| 0.011506 | 0.011471 | 0.011368 | 0.011301 | 0.011437 | 0.011368 | 0.011300 |
| 0.011407 | 0.011506 | 0.011300 | 0.011506 | 0.011334 | 0.011437 | 0.011403 |
| 0.011437 | 0.011403 | 0.011368 | 0.011403 | 0.011437 | 0.011300 | 0.011368 |
| 0.011403 | 0.011403 | 0.011471 | 0.011403 | 0.011403 | 0.011471 | 0.011711 |
| 0.011814 | 0.011745 | 0.011814 | 0.011576 | 0.011814 | 0.011403 | 0.011403 |
| 0.011439 | 0.011639 | 0.011473 | 0.011305 | 0.011787 | 0.011304 | 0.011459 |
| 0.011822 | 0.011719 | 0.011608 | 0.011814 | 0.011409 | 0.011677 | 0.011574 |
| 0.011574 | 0.011745 | 0.011594 | 0.011431 | 0.011479 | 0.011471 | 0.011509 |
| 0.011642 | 0.011506 | 0.011681 | 0.011679 | 0.011642 | 0.011745 | 0.011610 |
| 0.011543 | 0.011678 | 0.011647 | 0.011612 | 0.011882 | 0.011334 | 0.011472 |
| 0.011437 | 0.011403 | 0.011334 | 0.011334 | 0.011334 | 0.011403 | 0.011471 |
| 0.011334 | 0.011403 | 0.011300 | 0.011471 | 0.011334 | 0.011402 | 0.011471 |
| 0.011403 | 0.011848 | 0.011745 | 0.011779 | 0.011300 | 0.011403 | 0.011437 |
| 0.011437 | 0.011402 | 0.011437 | 0.011505 | 0.011368 | 0.011368 | 0.011368 |
| 0.011916 | 0.011505 | 0.011539 | 0.011334 | 0.011402 | 0.011540 | 0.011368 |
| 0.011368 | 0.011437 | 0.011402 | 0.011505 | 0.011368 | 0.011471 | 0.011539 |
| 0.011539 | 0.011403 | 0.011402 | 0.011334 | 0.011334 | 0.011505 | 0.011437 |
| 0.011334 | 0.011437 | 0.011300 | 0.011334 | 0.011471 | 0.011608 | 0.011368 |
| 0.011334 | 0.011437 | 0.011403 | 0.011300 | 0.011642 | 0.011300 | 0.011471 |
| 0.000000 | 0.011368 | 0.011676 | 0.011505 | 0.011539 | 0.011403 | 0.011471 |
| 0.011368 | 0.011642 | 0.011300 | 0.011574 | 0.011368 | 0.011368 | 0.011300 |
| 0.011471 | 0.011711 | 0.011437 | 0.011471 | 0.011334 | 0.011745 | 0.011368 |
| 0.011368 | 0.011368 | 0.011402 | 0.011437 | 0.011368 | 0.011471 | 0.011574 |
| 0.011574 | 0.011539 | 0.011437 | 0.011505 | 0.011437 | 0.011368 | 0.011334 |
| 0.011368 | 0.011368 | 0.011437 | 0.011368 | 0.011266 | 0.011471 | 0.011368 |
| 0.011402 | 0.011403 | 0.011505 | 0.011574 | 0.011471 | 0.011334 | 0.011368 |
| 0.011471 | 0.011402 | 0.011471 | 0.011368 | 0.011505 | 0.011574 | 0.011848 |
| 0.011403 | 0.011814 | 0.011412 | 0.018043 | 0.011260 | 0.011621 | 0.011772 |
| 0.011695 | 0.011778 | 0.011485 | 0.011414 | 0.011910 | 0.011799 | 0.011555 |
| 0.011498 | 0.011806 | 0.011339 | 0.011357 | 0.011379 | 0.011466 | 0.011413 |
| 0.011542 | 0.011555 | 0.011552 | 0.011330 | 0.011540 | 0.011437 | 0.011509 |
| 0.011373 | 0.011540 | 0.011505 | 0.011505 | 0.011471 | 0.011471 | 0.011437 |
| 0.011471 | 0.011403 | 0.011437 | 0.011471 | 0.011437 | 0.011368 | 0.011368 |
| 0.011368 | 0.011471 | 0.011368 | 0.011471 | 0.011505 | 0.011540 | 0.011402 |
| 0.011471 | 0.011437 | 0.011780 | 0.011780 | 0.011505 | 0.011540 | 0.011574 |
| 0.011334 | 0.011334 | 0.011368 | 0.011403 | 0.011334 | 0.011574 | 0.011574 |
| 0.011608 | 0.011608 | 0.011540 | 0.011642 | 0.011814 | 0.011644 | 0.011403 |
| 0.011471 | 0.011505 | 0.011471 | 0.011403 | 0.011471 | 0.011437 | 0.011471 |
| 0.011540 | 0.011540 | 0.011574 | 0.011471 | 0.011369 | 0.011642 | 0.011505 |
| 0.011475 | 0.011368 | 0.011471 | 0.011540 | 0.011471 | 0.011608 | 0.011642 |
| 0.011814 | 0.011409 | 0.011677 | 0.011574 | 0.011574 | 0.011745 | 0.011369 |
| 0.011541 | 0.011369 | 0.011368 | 0.011368 | 0.011471 | 0.011368 | 0.011471 |
| 0.011505 | 0.011540 | 0.011402 | 0.011471 | 0.011437 | 0.011780 | 0.011780 |
| 0.011505 | 0.011540 | 0.011539 | 0.011471 | 0.012192 | 0.011602 | 0.011518 |
| 0.011594 | 0.011552 | 0.011660 | 0.011546 | 0.011661 | 0.011584 | 0.011517 |
| 0.012134 | 0.011410 | 0.011546 | 0.011515 | 0.011792 | 0.011650 | 0.011681 |
| 0.012158 | 0.011626 | 0.011715 | 0.011779 | 0.011642 | 0.011642 | 0.011681 |
| 0.011334 | 0.011437 | 0.011642 | 0.011608 | 0.011612 | 0.011608 | 0.011541 |
| 0.011437 | 0.011300 | 0.011334 | 0.011437 | 0.011266 | 0.011403 | 0.011300 |

|          |          |          |          |          |          |          |
|----------|----------|----------|----------|----------|----------|----------|
| 0.011437 | 0.011471 | 0.011368 | 0.011334 | 0.011437 | 0.011368 | 0.011403 |
| 0.011402 | 0.011334 | 0.011403 | 0.011437 | 0.011334 | 0.011471 | 0.011574 |
| 0.011471 | 0.011539 | 0.011471 | 0.011471 | 0.011402 | 0.011814 | 0.011437 |
| 0.011480 | 0.011403 | 0.011608 | 0.011609 | 0.011437 | 0.011505 | 0.011505 |
| 0.011505 | 0.011368 | 0.011402 | 0.011368 | 0.011505 | 0.011540 | 0.011471 |
| 0.011471 | 0.011608 | 0.011779 | 0.011505 | 0.011677 | 0.011677 | 0.011574 |
| 0.011402 | 0.011471 | 0.011505 | 0.011916 | 0.011471 | 0.011437 | 0.011471 |
| 0.011505 | 0.011437 | 0.011437 | 0.011711 | 0.011437 | 0.011677 | 0.011437 |
| 0.011540 | 0.011608 | 0.011437 | 0.011540 | 0.011505 | 0.011368 | 0.011711 |
| 0.011471 | 0.011437 | 0.011437 | 0.011608 | 0.011437 | 0.011539 | 0.011745 |
| 0.011402 | 0.011857 | 0.011848 | 0.011601 | 0.011235 | 0.011545 | 0.011375 |
| 0.011457 | 0.011816 | 0.011383 | 0.011610 | 0.011361 | 0.011479 | 0.011443 |
| 0.011480 | 0.011265 | 0.011405 | 0.011197 | 0.011282 | 0.011408 | 0.011433 |
| 0.011522 | 0.011342 | 0.011527 | 0.011455 | 0.011473 | 0.011608 | 0.011677 |
| 0.011642 | 0.011540 | 0.011646 | 0.011648 | 0.011787 | 0.011818 | 0.011471 |
| 0.011711 | 0.011574 | 0.011437 | 0.011540 | 0.011334 | 0.011574 | 0.011368 |
| 0.011437 | 0.011437 | 0.011403 | 0.011368 | 0.011402 | 0.011368 | 0.011471 |
| 0.011452 | 0.011452 | 0.011444 | 0.011479 | 0.011618 | 0.011513 | 0.011582 |
| 0.011581 | 0.011506 | 0.011322 | 0.011317 | 0.011440 | 0.011613 | 0.011614 |
| 0.011403 | 0.011474 | 0.011678 | 0.011680 | 0.011609 | 0.011643 | 0.011505 |
| 0.011505 | 0.011574 | 0.011574 | 0.011471 | 0.012054 | 0.011642 | 0.011711 |
| 0.011711 | 0.011824 | 0.011443 | 0.011519 | 0.011368 | 0.011574 | 0.011437 |
| 0.011609 | 0.011574 | 0.011642 | 0.011642 | 0.011663 | 0.011745 | 0.011411 |
| 0.011300 | 0.011306 | 0.011405 | 0.011369 | 0.011476 | 0.011325 | 0.011645 |
| 0.011442 | 0.011544 | 0.011251 | 0.011472 | 0.011437 | 0.011514 | 0.011334 |
| 0.011368 | 0.011368 | 0.011368 | 0.011403 | 0.011608 | 0.011574 | 0.011505 |
| 0.011608 | 0.011677 | 0.011403 | 0.011403 | 0.011437 | 0.011437 | 0.011439 |
| 0.011508 | 0.011437 | 0.011437 | 0.011473 | 0.011608 | 0.011677 | 0.011642 |
| 0.011540 | 0.011646 | 0.011648 | 0.011787 | 0.011818 | 0.011471 | 0.011642 |
| 0.011437 | 0.011437 | 0.011405 | 0.011557 | 0.011450 | 0.011512 | 0.011381 |
| 0.011517 | 0.011662 | 0.011534 | 0.011441 | 0.011300 | 0.011506 | 0.011368 |
| 0.011471 | 0.011471 | 0.011368 | 0.011473 | 0.011540 | 0.011577 | 0.011471 |
| 0.011368 | 0.011301 | 0.011437 | 0.011368 | 0.011300 | 0.011407 | 0.011506 |
| 0.011471 | 0.011403 | 0.011437 | 0.011471 | 0.011437 | 0.011368 | 0.011471 |
| 0.011437 | 0.011471 | 0.011471 | 0.011402 | 0.011471 | 0.011711 | 0.011368 |
| 0.011368 | 0.011814 | 0.011402 | 0.011368 | 0.011402 | 0.011779 | 0.011280 |
| 0.011640 | 0.011278 | 0.011266 | 0.011554 | 0.011643 | 0.011609 | 0.011274 |
| 0.011222 | 0.011539 | 0.011642 | 0.011752 | 0.011609 | 0.011750 | 0.011883 |
| 0.011780 | 0.011849 | 0.011779 | 0.012001 | 0.011745 | 0.012568 | 0.011781 |
| 0.012432 | 0.012229 | 0.012366 | 0.012677 | 0.011779 | 0.011471 | 0.011746 |
| 0.012192 | 0.012127 | 0.011676 | 0.011608 | 0.011677 | 0.011677 | 0.011646 |
| 0.011539 | 0.011545 | 0.011608 | 0.011574 | 0.011952 | 0.011985 | 0.012020 |
| 0.011883 | 0.011986 | 0.012125 | 0.011888 | 0.012227 | 0.012234 | 0.012296 |
| 0.012296 | 0.012330 | 0.012244 | 0.012296 | 0.012298 | 0.011437 | 0.011814 |
| 0.011883 | 0.012397 | 0.011855 | 0.012088 | 0.012605 | 0.011649 | 0.011540 |
| 0.011505 | 0.011505 | 0.011986 | 0.012048 | 0.011993 | 0.011848 | 0.011507 |
| S323     | 0.011597 | 0.011597 | 0.011933 | 0.011698 | 0.011698 | 0.011765 |
| 0.011603 | 0.011536 | 0.011765 | 0.011195 | 0.011262 | 0.011161 | 0.011195 |
| 0.011228 | 0.011396 | 0.011194 | 0.011228 | 0.011295 | 0.011262 | 0.011228 |
| 0.011195 | 0.011228 | 0.011329 | 0.011195 | 0.011228 | 0.011228 | 0.011569 |
| 0.011463 | 0.011228 | 0.011127 | 0.011362 | 0.011295 | 0.011262 | 0.011295 |
| 0.011262 | 0.011362 | 0.011262 | 0.011262 | 0.011295 | 0.011262 | 0.011429 |
| 0.011195 | 0.011262 | 0.011295 | 0.011228 | 0.011329 | 0.011362 | 0.011295 |
| 0.011262 | 0.011430 | 0.011329 | 0.011597 | 0.011262 | 0.011530 | 0.011262 |
| 0.011228 | 0.011329 | 0.011396 | 0.011530 | 0.011631 | 0.011329 | 0.011429 |
| 0.011295 | 0.011362 | 0.011262 | 0.011496 | 0.011732 | 0.011262 | 0.011329 |
| 0.011228 | 0.011329 | 0.011295 | 0.011362 | 0.011295 | 0.011295 | 0.011295 |
| 0.011194 | 0.011228 | 0.011195 | 0.011295 | 0.011262 | 0.011296 | 0.011362 |
| 0.011295 | 0.011262 | 0.011329 | 0.011228 | 0.011362 | 0.011195 | 0.011262 |
| 0.011429 | 0.011362 | 0.011597 | 0.011429 | 0.011262 | 0.011497 | 0.011262 |

|          |          |          |          |          |          |          |
|----------|----------|----------|----------|----------|----------|----------|
| 0.011431 | 0.011658 | 0.011475 | 0.011177 | 0.011172 | 0.011281 | 0.011375 |
| 0.012012 | 0.011467 | 0.011184 | 0.011496 | 0.011497 | 0.011295 | 0.011396 |
| 0.011329 | 0.011295 | 0.011362 | 0.011262 | 0.011362 | 0.011295 | 0.011295 |
| 0.011262 | 0.011362 | 0.011564 | 0.011429 | 0.011329 | 0.011295 | 0.011228 |
| 0.011195 | 0.011195 | 0.011262 | 0.011228 | 0.011430 | 0.011396 | 0.011329 |
| 0.011430 | 0.011497 | 0.011228 | 0.011228 | 0.011262 | 0.011262 | 0.011263 |
| 0.011331 | 0.011262 | 0.011262 | 0.011132 | 0.011205 | 0.011165 | 0.011262 |
| 0.011263 | 0.011198 | 0.011245 | 0.011233 | 0.011162 | 0.011197 | 0.000000 |
| 0.011492 | 0.011267 | 0.011301 | 0.011195 | 0.011199 | 0.011329 | 0.011296 |
| 0.011363 | 0.011296 | 0.011296 | 0.011396 | 0.011329 | 0.011698 | 0.011497 |
| 0.011530 | 0.011396 | 0.011262 | 0.011362 | 0.011161 | 0.011396 | 0.011195 |
| 0.011262 | 0.011262 | 0.011228 | 0.011195 | 0.011228 | 0.011195 | 0.011295 |
| 0.011262 | 0.011362 | 0.011295 | 0.011195 | 0.011296 | 0.011396 | 0.011398 |
| 0.011396 | 0.011295 | 0.011195 | 0.011128 | 0.011262 | 0.011195 | 0.011128 |
| 0.011230 | 0.011396 | 0.011195 | 0.011396 | 0.011161 | 0.011262 | 0.011228 |
| 0.011329 | 0.011228 | 0.011262 | 0.011228 | 0.011262 | 0.011127 | 0.011262 |
| 0.011295 | 0.011228 | 0.011295 | 0.011228 | 0.011262 | 0.011295 | 0.011530 |
| 0.011631 | 0.011564 | 0.011631 | 0.011397 | 0.011631 | 0.011262 | 0.011228 |
| 0.011263 | 0.011545 | 0.011380 | 0.011163 | 0.011637 | 0.011129 | 0.011257 |
| 0.011637 | 0.011536 | 0.011429 | 0.011631 | 0.011333 | 0.011497 | 0.011463 |
| 0.011396 | 0.011564 | 0.011415 | 0.011266 | 0.011312 | 0.011295 | 0.011365 |
| 0.011463 | 0.011364 | 0.011500 | 0.011568 | 0.011497 | 0.011564 | 0.011670 |
| 0.011399 | 0.011569 | 0.011500 | 0.011432 | 0.011699 | 0.011161 | 0.011363 |
| 0.011329 | 0.011262 | 0.011161 | 0.011161 | 0.011228 | 0.011228 | 0.011295 |
| 0.011228 | 0.011295 | 0.011195 | 0.011295 | 0.011228 | 0.011228 | 0.011295 |
| 0.011228 | 0.011664 | 0.011564 | 0.011597 | 0.011127 | 0.011228 | 0.011262 |
| 0.011262 | 0.011228 | 0.011295 | 0.011329 | 0.011194 | 0.011194 | 0.011194 |
| 0.011732 | 0.011362 | 0.011362 | 0.011161 | 0.011262 | 0.011430 | 0.011195 |
| 0.011194 | 0.011262 | 0.011228 | 0.011396 | 0.011195 | 0.011329 | 0.011463 |
| 0.011396 | 0.011228 | 0.011228 | 0.011161 | 0.011161 | 0.011329 | 0.011262 |
| 0.011161 | 0.011262 | 0.011127 | 0.011161 | 0.011295 | 0.011430 | 0.011195 |
| 0.011161 | 0.011295 | 0.011228 | 0.011127 | 0.011463 | 0.011127 | 0.011295 |
| 0.011368 | 0.000000 | 0.011497 | 0.011329 | 0.011362 | 0.011228 | 0.011329 |
| 0.011194 | 0.011530 | 0.011127 | 0.011396 | 0.011195 | 0.011195 | 0.011127 |
| 0.011362 | 0.011564 | 0.011262 | 0.011329 | 0.011161 | 0.011564 | 0.011195 |
| 0.011195 | 0.011194 | 0.011228 | 0.011329 | 0.011228 | 0.011329 | 0.011396 |
| 0.011396 | 0.011362 | 0.011262 | 0.011362 | 0.011329 | 0.011195 | 0.011161 |
| 0.011194 | 0.011195 | 0.011262 | 0.011195 | 0.011161 | 0.011329 | 0.011195 |
| 0.011228 | 0.011228 | 0.011362 | 0.011396 | 0.011295 | 0.011228 | 0.011228 |
| 0.011295 | 0.011228 | 0.011329 | 0.011195 | 0.011329 | 0.011429 | 0.011732 |
| 0.011228 | 0.011631 | 0.011233 | 0.017748 | 0.011191 | 0.011366 | 0.011583 |
| 0.011545 | 0.011588 | 0.011322 | 0.011292 | 0.011664 | 0.011613 | 0.011303 |
| 0.011487 | 0.011487 | 0.011138 | 0.011228 | 0.011216 | 0.011258 | 0.011232 |
| 0.011483 | 0.011395 | 0.011394 | 0.011259 | 0.011362 | 0.011396 | 0.011398 |
| 0.011266 | 0.011362 | 0.011362 | 0.011329 | 0.011295 | 0.011295 | 0.011262 |
| 0.011295 | 0.011228 | 0.011262 | 0.011295 | 0.011262 | 0.011195 | 0.011228 |
| 0.011228 | 0.011295 | 0.011195 | 0.011295 | 0.011329 | 0.011362 | 0.011262 |
| 0.011295 | 0.011262 | 0.011598 | 0.011597 | 0.011329 | 0.011363 | 0.011396 |
| 0.011161 | 0.011161 | 0.011195 | 0.011295 | 0.011161 | 0.011396 | 0.011396 |
| 0.011430 | 0.011429 | 0.011362 | 0.011463 | 0.011631 | 0.011464 | 0.011295 |
| 0.011295 | 0.011362 | 0.011396 | 0.011228 | 0.011295 | 0.011262 | 0.011295 |
| 0.011363 | 0.011362 | 0.011396 | 0.011363 | 0.011262 | 0.011463 | 0.011430 |
| 0.011297 | 0.011195 | 0.011295 | 0.011396 | 0.011295 | 0.011430 | 0.011463 |
| 0.011631 | 0.011333 | 0.011497 | 0.011463 | 0.011396 | 0.011564 | 0.011195 |
| 0.011363 | 0.011262 | 0.011228 | 0.011228 | 0.011295 | 0.011195 | 0.011295 |
| 0.011329 | 0.011362 | 0.011262 | 0.011295 | 0.011262 | 0.011598 | 0.011597 |
| 0.011329 | 0.011363 | 0.011429 | 0.011362 | 0.012002 | 0.011417 | 0.011342 |
| 0.011412 | 0.011372 | 0.011482 | 0.011372 | 0.011480 | 0.011405 | 0.011371 |
| 0.011953 | 0.011268 | 0.011403 | 0.011337 | 0.011611 | 0.011468 | 0.011571 |
| 0.011978 | 0.011437 | 0.011533 | 0.011597 | 0.011463 | 0.011463 | 0.011499 |



|          |          |          |          |          |          |          |
|----------|----------|----------|----------|----------|----------|----------|
| 0.011161 | 0.011329 | 0.011463 | 0.011429 | 0.011432 | 0.011429 | 0.011397 |
| 0.011262 | 0.011195 | 0.011228 | 0.011262 | 0.011161 | 0.011228 | 0.011127 |
| 0.011262 | 0.011295 | 0.011195 | 0.011161 | 0.011262 | 0.011194 | 0.011228 |
| 0.011228 | 0.011161 | 0.011228 | 0.011262 | 0.011161 | 0.011362 | 0.011396 |
| 0.011295 | 0.011362 | 0.011295 | 0.011295 | 0.011228 | 0.011631 | 0.011262 |
| 0.011304 | 0.011228 | 0.011463 | 0.011467 | 0.011329 | 0.011329 | 0.011329 |
| 0.011329 | 0.011262 | 0.011228 | 0.011262 | 0.011362 | 0.011362 | 0.011295 |
| 0.011295 | 0.011429 | 0.011597 | 0.011329 | 0.011530 | 0.011530 | 0.011396 |
| 0.011228 | 0.011295 | 0.011329 | 0.011732 | 0.011295 | 0.011329 | 0.011295 |
| 0.011329 | 0.011262 | 0.011262 | 0.011497 | 0.011497 | 0.011530 | 0.011262 |
| 0.011362 | 0.011429 | 0.011295 | 0.011362 | 0.011329 | 0.011195 | 0.011530 |
| 0.011295 | 0.011262 | 0.011262 | 0.011429 | 0.011262 | 0.011362 | 0.011597 |
| 0.011295 | 0.011671 | 0.011664 | 0.011467 | 0.011230 | 0.011366 | 0.011267 |
| 0.011170 | 0.011683 | 0.011201 | 0.011418 | 0.011255 | 0.011315 | 0.011379 |
| 0.011468 | 0.011126 | 0.011339 | 0.011192 | 0.011222 | 0.011395 | 0.011344 |
| 0.011362 | 0.011257 | 0.011342 | 0.011272 | 0.011296 | 0.011429 | 0.011497 |
| 0.011497 | 0.011363 | 0.011466 | 0.011467 | 0.011569 | 0.011626 | 0.011295 |
| 0.011530 | 0.011396 | 0.011262 | 0.011362 | 0.011161 | 0.011396 | 0.011195 |
| 0.011262 | 0.011262 | 0.011228 | 0.011195 | 0.011228 | 0.011195 | 0.011295 |
| 0.011270 | 0.011270 | 0.011266 | 0.011300 | 0.011437 | 0.011402 | 0.011402 |
| 0.011401 | 0.011329 | 0.011134 | 0.011132 | 0.011263 | 0.011433 | 0.011433 |
| 0.011228 | 0.011297 | 0.011531 | 0.011500 | 0.011430 | 0.011464 | 0.011396 |
| 0.011329 | 0.011396 | 0.011396 | 0.011295 | 0.011866 | 0.011463 | 0.011530 |
| 0.011564 | 0.011630 | 0.011265 | 0.011337 | 0.011228 | 0.011429 | 0.011396 |
| 0.011430 | 0.011463 | 0.011463 | 0.011463 | 0.011571 | 0.011597 | 0.011234 |
| 0.011128 | 0.011130 | 0.011230 | 0.000000 | 0.011299 | 0.011135 | 0.011468 |
| 0.011266 | 0.011411 | 0.011156 | 0.011285 | 0.011262 | 0.011334 | 0.011228 |
| 0.011195 | 0.011195 | 0.011262 | 0.011228 | 0.011430 | 0.011396 | 0.011329 |
| 0.011430 | 0.011497 | 0.011228 | 0.011228 | 0.011262 | 0.011262 | 0.011263 |
| 0.011331 | 0.011262 | 0.011262 | 0.011296 | 0.011429 | 0.011497 | 0.011497 |
| 0.011363 | 0.011466 | 0.011467 | 0.011569 | 0.011626 | 0.011295 | 0.011463 |
| 0.011396 | 0.011396 | 0.011196 | 0.011408 | 0.011338 | 0.011333 | 0.011235 |
| 0.011405 | 0.011607 | 0.011399 | 0.011298 | 0.011195 | 0.011396 | 0.011262 |
| 0.011362 | 0.011295 | 0.011195 | 0.011296 | 0.011396 | 0.011398 | 0.011295 |
| 0.011195 | 0.011128 | 0.011262 | 0.011195 | 0.011128 | 0.011230 | 0.011396 |
| 0.011295 | 0.011228 | 0.011262 | 0.011295 | 0.011262 | 0.011195 | 0.011396 |
| 0.011262 | 0.011295 | 0.011295 | 0.011228 | 0.011295 | 0.011530 | 0.011195 |
| 0.011228 | 0.011631 | 0.011228 | 0.011262 | 0.011228 | 0.011597 | 0.011189 |
| 0.011679 | 0.011188 | 0.011261 | 0.011423 | 0.011508 | 0.011419 | 0.011144 |
| 0.011218 | 0.011396 | 0.011497 | 0.011603 | 0.011464 | 0.011601 | 0.011733 |
| 0.011632 | 0.011669 | 0.011631 | 0.011880 | 0.011597 | 0.012472 | 0.011633 |
| 0.012372 | 0.012139 | 0.012274 | 0.012545 | 0.011597 | 0.011295 | 0.011598 |
| 0.012036 | 0.011971 | 0.011564 | 0.011463 | 0.011531 | 0.011531 | 0.011500 |
| 0.011396 | 0.011399 | 0.011463 | 0.011430 | 0.011800 | 0.011866 | 0.011867 |
| 0.011767 | 0.011867 | 0.011971 | 0.011737 | 0.012037 | 0.012042 | 0.012104 |
| 0.012104 | 0.012138 | 0.012084 | 0.012104 | 0.012106 | 0.011329 | 0.011632 |
| 0.011699 | 0.012202 | 0.011704 | 0.011934 | 0.012407 | 0.011468 | 0.011363 |
| 0.011329 | 0.011329 | 0.011800 | 0.011842 | 0.011940 | 0.011664 | 0.011330 |
| S324     | 0.011900 | 0.011900 | 0.011866 | 0.011732 | 0.011732 | 0.011799 |
| 0.011230 | 0.011162 | 0.011799 | 0.011497 | 0.011564 | 0.011531 | 0.011496 |
| 0.011463 | 0.011698 | 0.011429 | 0.011530 | 0.011597 | 0.011564 | 0.011530 |
| 0.011496 | 0.011530 | 0.011362 | 0.011497 | 0.011531 | 0.011530 | 0.011196 |
| 0.011497 | 0.011530 | 0.011429 | 0.011396 | 0.011597 | 0.011564 | 0.011597 |
| 0.011564 | 0.011664 | 0.011564 | 0.011564 | 0.011597 | 0.011564 | 0.011732 |
| 0.011429 | 0.011564 | 0.011597 | 0.011530 | 0.011564 | 0.011664 | 0.011597 |
| 0.011564 | 0.011732 | 0.011631 | 0.011228 | 0.011564 | 0.011832 | 0.011564 |
| 0.011530 | 0.011564 | 0.011698 | 0.011832 | 0.011329 | 0.011564 | 0.011664 |
| 0.011597 | 0.011664 | 0.011564 | 0.011799 | 0.011362 | 0.011564 | 0.011631 |
| 0.011530 | 0.011631 | 0.011597 | 0.011664 | 0.011597 | 0.011597 | 0.011597 |
| 0.011496 | 0.011530 | 0.011496 | 0.011530 | 0.011564 | 0.011599 | 0.011664 |

|          |          |          |          |          |          |          |
|----------|----------|----------|----------|----------|----------|----------|
| 0.011597 | 0.011564 | 0.011631 | 0.011530 | 0.011396 | 0.011497 | 0.011564 |
| 0.011732 | 0.011664 | 0.011429 | 0.011732 | 0.011564 | 0.011799 | 0.011564 |
| 0.011765 | 0.011247 | 0.011777 | 0.011490 | 0.011471 | 0.011612 | 0.011375 |
| 0.012011 | 0.011365 | 0.011513 | 0.011799 | 0.011799 | 0.011530 | 0.011429 |
| 0.011631 | 0.011597 | 0.011664 | 0.011564 | 0.011664 | 0.011597 | 0.011597 |
| 0.011564 | 0.011597 | 0.011866 | 0.011732 | 0.011631 | 0.011597 | 0.011530 |
| 0.011497 | 0.011430 | 0.011564 | 0.011530 | 0.011463 | 0.011430 | 0.011362 |
| 0.011463 | 0.011530 | 0.011530 | 0.011530 | 0.011564 | 0.011564 | 0.011567 |
| 0.011635 | 0.011564 | 0.011564 | 0.011420 | 0.011494 | 0.011446 | 0.011564 |
| 0.011534 | 0.011473 | 0.011540 | 0.011509 | 0.011468 | 0.011471 | 0.011533 |
| 0.011420 | 0.011543 | 0.011577 | 0.011497 | 0.011475 | 0.011632 | 0.011531 |
| 0.011598 | 0.011599 | 0.011598 | 0.011698 | 0.011631 | 0.012001 | 0.011732 |
| 0.011564 | 0.011631 | 0.011564 | 0.011598 | 0.011463 | 0.011430 | 0.011497 |
| 0.011564 | 0.011564 | 0.011530 | 0.011497 | 0.011530 | 0.011497 | 0.011597 |
| 0.011564 | 0.011665 | 0.011598 | 0.011497 | 0.011599 | 0.011698 | 0.011702 |
| 0.011698 | 0.011598 | 0.011497 | 0.011431 | 0.011564 | 0.011497 | 0.011430 |
| 0.011434 | 0.011698 | 0.011497 | 0.011698 | 0.011463 | 0.011564 | 0.011530 |
| 0.011631 | 0.011530 | 0.011564 | 0.011530 | 0.011564 | 0.011430 | 0.011564 |
| 0.011598 | 0.011530 | 0.011598 | 0.011530 | 0.011564 | 0.011597 | 0.011833 |
| 0.011262 | 0.011195 | 0.011262 | 0.011701 | 0.011329 | 0.011564 | 0.011530 |
| 0.011499 | 0.011828 | 0.011609 | 0.011472 | 0.011264 | 0.011435 | 0.011611 |
| 0.011264 | 0.011502 | 0.011732 | 0.011933 | 0.011641 | 0.011799 | 0.011765 |
| 0.011698 | 0.011866 | 0.011735 | 0.011637 | 0.011647 | 0.011597 | 0.011669 |
| 0.011765 | 0.011667 | 0.011804 | 0.011872 | 0.011799 | 0.011866 | 0.011975 |
| 0.011703 | 0.011875 | 0.011737 | 0.011736 | 0.012002 | 0.011463 | 0.011667 |
| 0.011631 | 0.011564 | 0.011463 | 0.011463 | 0.011530 | 0.011530 | 0.011597 |
| 0.011530 | 0.011597 | 0.011496 | 0.011530 | 0.011530 | 0.011530 | 0.011597 |
| 0.011530 | 0.011295 | 0.011195 | 0.011228 | 0.011429 | 0.011530 | 0.011564 |
| 0.011564 | 0.011463 | 0.011597 | 0.011564 | 0.011496 | 0.011496 | 0.011496 |
| 0.011362 | 0.011597 | 0.011664 | 0.011463 | 0.011564 | 0.011732 | 0.011497 |
| 0.011496 | 0.011564 | 0.011530 | 0.011698 | 0.011496 | 0.011429 | 0.011564 |
| 0.011497 | 0.011530 | 0.011530 | 0.011463 | 0.011463 | 0.011631 | 0.011564 |
| 0.011463 | 0.011564 | 0.011429 | 0.011463 | 0.011597 | 0.011396 | 0.011497 |
| 0.011463 | 0.011597 | 0.011531 | 0.011429 | 0.011161 | 0.011429 | 0.011597 |
| 0.011676 | 0.011497 | 0.000000 | 0.011631 | 0.011597 | 0.011530 | 0.011631 |
| 0.011496 | 0.011832 | 0.011429 | 0.011429 | 0.011429 | 0.011429 | 0.011429 |
| 0.011664 | 0.011530 | 0.011564 | 0.011631 | 0.011463 | 0.011195 | 0.011429 |
| 0.011497 | 0.011496 | 0.011530 | 0.011631 | 0.011530 | 0.011631 | 0.011698 |
| 0.011698 | 0.011664 | 0.011564 | 0.011665 | 0.011631 | 0.011496 | 0.011463 |
| 0.011496 | 0.011496 | 0.011564 | 0.011429 | 0.011463 | 0.011631 | 0.011496 |
| 0.011463 | 0.011530 | 0.011664 | 0.011631 | 0.011597 | 0.011530 | 0.011530 |
| 0.011597 | 0.011530 | 0.011631 | 0.011496 | 0.011631 | 0.011732 | 0.011362 |
| 0.011530 | 0.011329 | 0.011543 | 0.018050 | 0.011257 | 0.011611 | 0.011200 |
| 0.011164 | 0.011201 | 0.011741 | 0.011524 | 0.011390 | 0.011233 | 0.011668 |
| 0.011582 | 0.011426 | 0.011450 | 0.011563 | 0.011450 | 0.011504 | 0.011576 |
| 0.011295 | 0.011395 | 0.011246 | 0.011391 | 0.011664 | 0.011698 | 0.011703 |
| 0.011575 | 0.011665 | 0.011665 | 0.011564 | 0.011597 | 0.011598 | 0.011564 |
| 0.011597 | 0.011530 | 0.011564 | 0.011598 | 0.011564 | 0.011497 | 0.011530 |
| 0.011530 | 0.011598 | 0.011497 | 0.011598 | 0.011631 | 0.011665 | 0.011564 |
| 0.011530 | 0.011497 | 0.011295 | 0.011295 | 0.011631 | 0.011666 | 0.011698 |
| 0.011463 | 0.011463 | 0.011497 | 0.011598 | 0.011463 | 0.011698 | 0.011698 |
| 0.011732 | 0.011732 | 0.011664 | 0.011765 | 0.011329 | 0.011767 | 0.011597 |
| 0.011598 | 0.011665 | 0.011698 | 0.011530 | 0.011598 | 0.011564 | 0.011597 |
| 0.011665 | 0.011665 | 0.011698 | 0.011665 | 0.011565 | 0.011765 | 0.011732 |
| 0.011602 | 0.011497 | 0.011597 | 0.011698 | 0.011598 | 0.011665 | 0.011765 |
| 0.011933 | 0.011641 | 0.011799 | 0.011765 | 0.011698 | 0.011866 | 0.011497 |
| 0.011667 | 0.011564 | 0.011530 | 0.011530 | 0.011598 | 0.011497 | 0.011598 |
| 0.011631 | 0.011665 | 0.011564 | 0.011530 | 0.011497 | 0.011295 | 0.011295 |
| 0.011631 | 0.011666 | 0.011732 | 0.011664 | 0.012238 | 0.011739 | 0.011658 |
| 0.011728 | 0.011684 | 0.011798 | 0.011684 | 0.011795 | 0.011715 | 0.011646 |

|          |          |          |          |          |          |          |
|----------|----------|----------|----------|----------|----------|----------|
| 0.012193 | 0.011579 | 0.011711 | 0.011648 | 0.011921 | 0.011774 | 0.011877 |
| 0.012216 | 0.011701 | 0.011838 | 0.011900 | 0.011765 | 0.011497 | 0.011804 |
| 0.011463 | 0.011631 | 0.011765 | 0.011732 | 0.011736 | 0.011463 | 0.011431 |
| 0.011564 | 0.011496 | 0.011530 | 0.011564 | 0.011463 | 0.011530 | 0.011429 |
| 0.011496 | 0.011530 | 0.011496 | 0.011463 | 0.011564 | 0.011496 | 0.011530 |
| 0.011530 | 0.011463 | 0.011530 | 0.011564 | 0.011463 | 0.011664 | 0.011698 |
| 0.011597 | 0.011597 | 0.011597 | 0.011597 | 0.011530 | 0.011329 | 0.011564 |
| 0.011339 | 0.011530 | 0.011497 | 0.011501 | 0.011564 | 0.011564 | 0.011631 |
| 0.011631 | 0.011564 | 0.011530 | 0.011564 | 0.011664 | 0.011664 | 0.011597 |
| 0.011597 | 0.011732 | 0.011228 | 0.011631 | 0.011833 | 0.011833 | 0.011698 |
| 0.011530 | 0.011597 | 0.011631 | 0.011429 | 0.011598 | 0.011564 | 0.011597 |
| 0.011631 | 0.011496 | 0.011496 | 0.011799 | 0.011799 | 0.011765 | 0.011564 |
| 0.011664 | 0.011732 | 0.011597 | 0.011664 | 0.011631 | 0.011497 | 0.011161 |
| 0.011597 | 0.011564 | 0.011496 | 0.011732 | 0.011564 | 0.011664 | 0.011430 |
| 0.011530 | 0.011298 | 0.011295 | 0.011467 | 0.011342 | 0.011604 | 0.011370 |
| 0.011445 | 0.011683 | 0.011517 | 0.011596 | 0.011548 | 0.011315 | 0.011326 |
| 0.011468 | 0.011192 | 0.011394 | 0.011258 | 0.011276 | 0.011462 | 0.011709 |
| 0.011701 | 0.011611 | 0.011589 | 0.011589 | 0.011600 | 0.011463 | 0.011531 |
| 0.011530 | 0.011598 | 0.011703 | 0.011501 | 0.011840 | 0.011873 | 0.011597 |
| 0.011564 | 0.011631 | 0.011564 | 0.011598 | 0.011463 | 0.011430 | 0.011497 |
| 0.011564 | 0.011564 | 0.011530 | 0.011497 | 0.011530 | 0.011497 | 0.011597 |
| 0.011549 | 0.011550 | 0.011540 | 0.011574 | 0.011710 | 0.011675 | 0.011675 |
| 0.011673 | 0.011632 | 0.011429 | 0.011420 | 0.011534 | 0.011704 | 0.011705 |
| 0.011531 | 0.011568 | 0.011835 | 0.011804 | 0.011733 | 0.011767 | 0.011698 |
| 0.011631 | 0.011698 | 0.011698 | 0.011597 | 0.011564 | 0.011765 | 0.011833 |
| 0.011866 | 0.011238 | 0.011504 | 0.011649 | 0.011530 | 0.011732 | 0.011698 |
| 0.011733 | 0.011765 | 0.011765 | 0.011765 | 0.011846 | 0.011900 | 0.011546 |
| 0.011432 | 0.011441 | 0.011537 | 0.011502 | 0.011538 | 0.011471 | 0.011094 |
| 0.011575 | 0.011323 | 0.011537 | 0.011585 | 0.011565 | 0.011608 | 0.011530 |
| 0.011497 | 0.011430 | 0.011564 | 0.011530 | 0.011463 | 0.011430 | 0.011362 |
| 0.011463 | 0.011530 | 0.011530 | 0.011530 | 0.011564 | 0.011564 | 0.011567 |
| 0.011635 | 0.011564 | 0.011564 | 0.011600 | 0.011463 | 0.011531 | 0.011530 |
| 0.011598 | 0.011703 | 0.011501 | 0.011840 | 0.011873 | 0.011597 | 0.011765 |
| 0.011698 | 0.011698 | 0.011534 | 0.011721 | 0.011651 | 0.011673 | 0.011551 |
| 0.011715 | 0.011926 | 0.011738 | 0.011604 | 0.011497 | 0.011698 | 0.011564 |
| 0.011665 | 0.011598 | 0.011497 | 0.011599 | 0.011698 | 0.011702 | 0.011598 |
| 0.011497 | 0.011431 | 0.011564 | 0.011497 | 0.011430 | 0.011434 | 0.011698 |
| 0.011597 | 0.011530 | 0.011564 | 0.011598 | 0.011564 | 0.011497 | 0.011430 |
| 0.011564 | 0.011597 | 0.011597 | 0.011530 | 0.011597 | 0.011832 | 0.011429 |
| 0.011530 | 0.011329 | 0.011530 | 0.011564 | 0.011530 | 0.011228 | 0.011532 |
| 0.011791 | 0.011358 | 0.011361 | 0.011423 | 0.011508 | 0.011455 | 0.011311 |
| 0.011323 | 0.011429 | 0.011530 | 0.011637 | 0.011498 | 0.011635 | 0.011767 |
| 0.011666 | 0.011703 | 0.011665 | 0.011915 | 0.011631 | 0.012506 | 0.011667 |
| 0.012406 | 0.012173 | 0.012307 | 0.012579 | 0.011564 | 0.011530 | 0.011632 |
| 0.012272 | 0.012005 | 0.011597 | 0.011497 | 0.011565 | 0.011565 | 0.011500 |
| 0.011429 | 0.011433 | 0.011497 | 0.011464 | 0.011834 | 0.011900 | 0.011901 |
| 0.011800 | 0.011901 | 0.012004 | 0.011771 | 0.012273 | 0.012279 | 0.012340 |
| 0.012340 | 0.012374 | 0.012323 | 0.012340 | 0.012342 | 0.011631 | 0.011867 |
| 0.011935 | 0.012438 | 0.011942 | 0.011900 | 0.012373 | 0.011434 | 0.011329 |
| 0.011228 | 0.011295 | 0.011833 | 0.011842 | 0.011940 | 0.011631 | 0.011364 |
| S325     | 0.011732 | 0.011732 | 0.011967 | 0.011833 | 0.011833 | 0.011900 |
| 0.011740 | 0.011672 | 0.011900 | 0.011329 | 0.011396 | 0.011363 | 0.011329 |
| 0.011362 | 0.011530 | 0.011329 | 0.011362 | 0.011429 | 0.011396 | 0.011362 |
| 0.011329 | 0.011362 | 0.011463 | 0.011329 | 0.011363 | 0.011362 | 0.011706 |
| 0.011597 | 0.011362 | 0.011262 | 0.011497 | 0.011430 | 0.011396 | 0.011430 |
| 0.011396 | 0.011497 | 0.011396 | 0.011396 | 0.011429 | 0.011396 | 0.011564 |
| 0.011329 | 0.011396 | 0.011430 | 0.011362 | 0.011463 | 0.011497 | 0.011430 |
| 0.011396 | 0.011564 | 0.011463 | 0.011732 | 0.011396 | 0.011665 | 0.011396 |
| 0.011362 | 0.011463 | 0.011530 | 0.011665 | 0.011765 | 0.011463 | 0.011564 |
| 0.011429 | 0.011497 | 0.011396 | 0.011631 | 0.011866 | 0.011396 | 0.011463 |

|          |          |          |          |          |          |          |
|----------|----------|----------|----------|----------|----------|----------|
| 0.011362 | 0.011463 | 0.011430 | 0.011497 | 0.011429 | 0.011430 | 0.011430 |
| 0.011329 | 0.011362 | 0.011329 | 0.011430 | 0.011396 | 0.011431 | 0.011497 |
| 0.011430 | 0.011396 | 0.011463 | 0.011362 | 0.011497 | 0.011329 | 0.011396 |
| 0.011564 | 0.011497 | 0.011732 | 0.011564 | 0.011396 | 0.011631 | 0.011396 |
| 0.011542 | 0.011770 | 0.011589 | 0.011295 | 0.011284 | 0.011392 | 0.011493 |
| 0.012122 | 0.011569 | 0.011266 | 0.011631 | 0.011631 | 0.011430 | 0.011530 |
| 0.011463 | 0.011429 | 0.011497 | 0.011396 | 0.011497 | 0.011430 | 0.011430 |
| 0.011396 | 0.011497 | 0.011698 | 0.011564 | 0.011463 | 0.011430 | 0.011363 |
| 0.011329 | 0.011329 | 0.011396 | 0.011362 | 0.011564 | 0.011531 | 0.011463 |
| 0.011564 | 0.011631 | 0.011363 | 0.011363 | 0.011396 | 0.011396 | 0.011398 |
| 0.011466 | 0.011396 | 0.011396 | 0.011240 | 0.011350 | 0.011306 | 0.011396 |
| 0.011399 | 0.011335 | 0.011355 | 0.011336 | 0.011298 | 0.011334 | 0.011364 |
| 0.011600 | 0.011405 | 0.011439 | 0.011329 | 0.011302 | 0.011464 | 0.011430 |
| 0.011498 | 0.011431 | 0.011430 | 0.011530 | 0.011463 | 0.011833 | 0.011631 |
| 0.011665 | 0.011530 | 0.011396 | 0.011497 | 0.011295 | 0.011530 | 0.011329 |
| 0.011396 | 0.011396 | 0.011362 | 0.011329 | 0.011362 | 0.011329 | 0.011430 |
| 0.011396 | 0.011497 | 0.011430 | 0.011329 | 0.011431 | 0.011531 | 0.011534 |
| 0.011531 | 0.011430 | 0.011329 | 0.011263 | 0.011396 | 0.011329 | 0.011262 |
| 0.011366 | 0.011531 | 0.011329 | 0.011531 | 0.011295 | 0.011396 | 0.011363 |
| 0.011463 | 0.011362 | 0.011396 | 0.011363 | 0.011396 | 0.011262 | 0.011396 |
| 0.011430 | 0.011362 | 0.011430 | 0.011363 | 0.011396 | 0.011430 | 0.011665 |
| 0.011766 | 0.011698 | 0.011766 | 0.011532 | 0.011766 | 0.011396 | 0.011362 |
| 0.011398 | 0.011626 | 0.011518 | 0.011300 | 0.011773 | 0.011265 | 0.011414 |
| 0.011774 | 0.011672 | 0.011564 | 0.011766 | 0.011470 | 0.011631 | 0.011598 |
| 0.011530 | 0.011698 | 0.011558 | 0.011431 | 0.011479 | 0.011430 | 0.011500 |
| 0.011598 | 0.011499 | 0.011635 | 0.011703 | 0.011631 | 0.011698 | 0.011806 |
| 0.011534 | 0.011705 | 0.011636 | 0.011567 | 0.011834 | 0.011295 | 0.011498 |
| 0.011463 | 0.011396 | 0.011295 | 0.011295 | 0.011362 | 0.011362 | 0.011430 |
| 0.011362 | 0.011430 | 0.011329 | 0.011430 | 0.011362 | 0.011362 | 0.011430 |
| 0.011362 | 0.011799 | 0.011698 | 0.011732 | 0.011262 | 0.011362 | 0.011396 |
| 0.011396 | 0.011362 | 0.011430 | 0.011463 | 0.011329 | 0.011329 | 0.011329 |
| 0.011866 | 0.011497 | 0.011497 | 0.011295 | 0.011396 | 0.011564 | 0.011329 |
| 0.011329 | 0.011396 | 0.011362 | 0.011530 | 0.011329 | 0.011463 | 0.011597 |
| 0.011530 | 0.011362 | 0.011362 | 0.011295 | 0.011295 | 0.011463 | 0.011396 |
| 0.011295 | 0.011396 | 0.011262 | 0.011295 | 0.011430 | 0.011564 | 0.011329 |
| 0.011295 | 0.011429 | 0.011363 | 0.011262 | 0.011597 | 0.011262 | 0.011429 |
| 0.011505 | 0.011329 | 0.011631 | 0.000000 | 0.011497 | 0.011362 | 0.011463 |
| 0.011329 | 0.011665 | 0.011262 | 0.011530 | 0.011329 | 0.011329 | 0.011262 |
| 0.011497 | 0.011699 | 0.011396 | 0.011463 | 0.011295 | 0.011698 | 0.011329 |
| 0.011329 | 0.011329 | 0.011362 | 0.011463 | 0.011362 | 0.011463 | 0.011530 |
| 0.011530 | 0.011497 | 0.011396 | 0.011497 | 0.011463 | 0.011329 | 0.011295 |
| 0.011329 | 0.011329 | 0.011396 | 0.011329 | 0.011295 | 0.011463 | 0.011329 |
| 0.011362 | 0.011362 | 0.011497 | 0.011530 | 0.011429 | 0.011362 | 0.011362 |
| 0.011430 | 0.011362 | 0.011463 | 0.011329 | 0.011463 | 0.011564 | 0.011799 |
| 0.011362 | 0.011766 | 0.011371 | 0.017826 | 0.011388 | 0.011550 | 0.011723 |
| 0.011683 | 0.011694 | 0.011479 | 0.011408 | 0.011885 | 0.011751 | 0.011546 |
| 0.011582 | 0.011732 | 0.011255 | 0.011353 | 0.011334 | 0.011455 | 0.011361 |
| 0.011577 | 0.011507 | 0.011505 | 0.011259 | 0.011497 | 0.011530 | 0.011534 |
| 0.011404 | 0.011497 | 0.011497 | 0.011463 | 0.011430 | 0.011430 | 0.011396 |
| 0.011430 | 0.011362 | 0.011396 | 0.011430 | 0.011396 | 0.011329 | 0.011363 |
| 0.011363 | 0.011430 | 0.011329 | 0.011430 | 0.011463 | 0.011497 | 0.011396 |
| 0.011430 | 0.011396 | 0.011732 | 0.011732 | 0.011463 | 0.011497 | 0.011531 |
| 0.011295 | 0.011295 | 0.011329 | 0.011430 | 0.011295 | 0.011531 | 0.011531 |
| 0.011564 | 0.011564 | 0.011497 | 0.011598 | 0.011766 | 0.011599 | 0.011430 |
| 0.011430 | 0.011497 | 0.011530 | 0.011363 | 0.011430 | 0.011396 | 0.011430 |
| 0.011497 | 0.011497 | 0.011530 | 0.011497 | 0.011397 | 0.011598 | 0.011564 |
| 0.011433 | 0.011329 | 0.011430 | 0.011531 | 0.011430 | 0.011564 | 0.011597 |
| 0.011766 | 0.011470 | 0.011631 | 0.011598 | 0.011530 | 0.011698 | 0.011329 |
| 0.011498 | 0.011396 | 0.011363 | 0.011363 | 0.011430 | 0.011329 | 0.011430 |
| 0.011463 | 0.011497 | 0.011396 | 0.011430 | 0.011396 | 0.011732 | 0.011732 |

|          |          |          |          |          |          |          |
|----------|----------|----------|----------|----------|----------|----------|
| 0.011463 | 0.011497 | 0.011564 | 0.011497 | 0.012137 | 0.011560 | 0.011482 |
| 0.011552 | 0.011511 | 0.011623 | 0.011511 | 0.011620 | 0.011543 | 0.011474 |
| 0.012091 | 0.011406 | 0.011540 | 0.011475 | 0.011749 | 0.011605 | 0.011707 |
| 0.012114 | 0.011588 | 0.011669 | 0.011732 | 0.011598 | 0.011598 | 0.011635 |
| 0.011295 | 0.011463 | 0.011597 | 0.011564 | 0.011567 | 0.011564 | 0.011532 |
| 0.011396 | 0.011329 | 0.011362 | 0.011396 | 0.011295 | 0.011362 | 0.011262 |
| 0.011396 | 0.011429 | 0.011329 | 0.011295 | 0.011396 | 0.011329 | 0.011362 |
| 0.011362 | 0.011295 | 0.011362 | 0.011396 | 0.011295 | 0.011497 | 0.011530 |
| 0.011430 | 0.011497 | 0.011430 | 0.011430 | 0.011362 | 0.011765 | 0.011396 |
| 0.011443 | 0.011362 | 0.011598 | 0.011603 | 0.011463 | 0.011463 | 0.011463 |
| 0.011463 | 0.011396 | 0.011362 | 0.011396 | 0.011497 | 0.011497 | 0.011430 |
| 0.011429 | 0.011564 | 0.011732 | 0.011463 | 0.011665 | 0.011665 | 0.011530 |
| 0.011362 | 0.011430 | 0.011463 | 0.011866 | 0.011430 | 0.011463 | 0.011430 |
| 0.011463 | 0.011396 | 0.011396 | 0.011698 | 0.011631 | 0.011665 | 0.011396 |
| 0.011497 | 0.011564 | 0.011429 | 0.011497 | 0.011463 | 0.011329 | 0.011665 |
| 0.011429 | 0.011396 | 0.011396 | 0.011564 | 0.011396 | 0.011497 | 0.011732 |
| 0.011362 | 0.011808 | 0.011799 | 0.011589 | 0.011342 | 0.011502 | 0.011370 |
| 0.011335 | 0.011800 | 0.011306 | 0.011552 | 0.011353 | 0.011468 | 0.011485 |
| 0.011570 | 0.011324 | 0.011450 | 0.011325 | 0.011330 | 0.011462 | 0.011425 |
| 0.011475 | 0.011375 | 0.011483 | 0.011413 | 0.011431 | 0.011564 | 0.011631 |
| 0.011631 | 0.011497 | 0.011601 | 0.011603 | 0.011739 | 0.011767 | 0.011430 |
| 0.011665 | 0.011530 | 0.011396 | 0.011497 | 0.011295 | 0.011530 | 0.011329 |
| 0.011396 | 0.011396 | 0.011362 | 0.011329 | 0.011362 | 0.011329 | 0.011430 |
| 0.011375 | 0.011410 | 0.011403 | 0.011437 | 0.011574 | 0.011539 | 0.011538 |
| 0.011537 | 0.011464 | 0.011245 | 0.011240 | 0.011399 | 0.011569 | 0.011569 |
| 0.011363 | 0.011433 | 0.011666 | 0.011635 | 0.011565 | 0.011599 | 0.011530 |
| 0.011463 | 0.011530 | 0.011530 | 0.011430 | 0.012001 | 0.011597 | 0.011665 |
| 0.011699 | 0.011773 | 0.011401 | 0.011476 | 0.011362 | 0.011564 | 0.011530 |
| 0.011565 | 0.011597 | 0.011597 | 0.011597 | 0.011768 | 0.011732 | 0.011372 |
| 0.011263 | 0.011268 | 0.011367 | 0.011332 | 0.011436 | 0.011284 | 0.011604 |
| 0.011403 | 0.011587 | 0.011346 | 0.011435 | 0.011397 | 0.011471 | 0.011363 |
| 0.011329 | 0.011329 | 0.011396 | 0.011362 | 0.011564 | 0.011531 | 0.011463 |
| 0.011564 | 0.011631 | 0.011363 | 0.011363 | 0.011396 | 0.011396 | 0.011398 |
| 0.011466 | 0.011396 | 0.011396 | 0.011431 | 0.011564 | 0.011631 | 0.011631 |
| 0.011497 | 0.011601 | 0.011603 | 0.011739 | 0.011767 | 0.011430 | 0.011598 |
| 0.011530 | 0.011530 | 0.011365 | 0.011548 | 0.011477 | 0.011503 | 0.011376 |
| 0.011542 | 0.011790 | 0.011568 | 0.011434 | 0.011329 | 0.011531 | 0.011396 |
| 0.011497 | 0.011430 | 0.011329 | 0.011431 | 0.011531 | 0.011534 | 0.011430 |
| 0.011329 | 0.011263 | 0.011396 | 0.011329 | 0.011262 | 0.011366 | 0.011531 |
| 0.011430 | 0.011362 | 0.011396 | 0.011430 | 0.011396 | 0.011329 | 0.011531 |
| 0.011396 | 0.011430 | 0.011430 | 0.011362 | 0.011430 | 0.011665 | 0.011329 |
| 0.011362 | 0.011765 | 0.011362 | 0.011396 | 0.011362 | 0.011732 | 0.011275 |
| 0.011791 | 0.011273 | 0.011361 | 0.011503 | 0.011590 | 0.011527 | 0.011269 |
| 0.011323 | 0.011530 | 0.011631 | 0.011739 | 0.011599 | 0.011737 | 0.011868 |
| 0.011767 | 0.011805 | 0.011765 | 0.012017 | 0.011732 | 0.012607 | 0.011768 |
| 0.012507 | 0.012275 | 0.012409 | 0.012681 | 0.011732 | 0.011430 | 0.011732 |
| 0.012171 | 0.012106 | 0.011698 | 0.011598 | 0.011666 | 0.011666 | 0.011635 |
| 0.011530 | 0.011535 | 0.011597 | 0.011565 | 0.011867 | 0.011934 | 0.011935 |
| 0.011834 | 0.011935 | 0.012038 | 0.011805 | 0.012172 | 0.012178 | 0.012239 |
| 0.012239 | 0.012273 | 0.012221 | 0.012240 | 0.012241 | 0.011463 | 0.011766 |
| 0.011834 | 0.012338 | 0.011840 | 0.012069 | 0.012542 | 0.011604 | 0.011497 |
| 0.011463 | 0.011463 | 0.011934 | 0.012007 | 0.012081 | 0.011799 | 0.011465 |
| s326     | 0.011765 | 0.011765 | 0.012034 | 0.011799 | 0.011799 | 0.011866 |
| 0.011705 | 0.011637 | 0.011866 | 0.011362 | 0.011429 | 0.011397 | 0.011362 |
| 0.011329 | 0.011564 | 0.011295 | 0.011396 | 0.011463 | 0.011429 | 0.011396 |
| 0.011362 | 0.011396 | 0.011429 | 0.011363 | 0.011396 | 0.011396 | 0.011671 |
| 0.011564 | 0.011396 | 0.011295 | 0.011463 | 0.011463 | 0.011429 | 0.011463 |
| 0.011429 | 0.011530 | 0.011429 | 0.011429 | 0.011463 | 0.011295 | 0.011597 |
| 0.011295 | 0.011429 | 0.011463 | 0.011396 | 0.011429 | 0.011530 | 0.011463 |
| 0.011429 | 0.011597 | 0.011497 | 0.011698 | 0.011429 | 0.011698 | 0.011429 |

|          |          |          |          |          |          |          |
|----------|----------|----------|----------|----------|----------|----------|
| 0.011396 | 0.011430 | 0.011564 | 0.011698 | 0.011732 | 0.011429 | 0.011530 |
| 0.011463 | 0.011530 | 0.011429 | 0.011597 | 0.011833 | 0.011429 | 0.011497 |
| 0.011329 | 0.011496 | 0.011463 | 0.011530 | 0.011463 | 0.011463 | 0.011463 |
| 0.011362 | 0.011396 | 0.011362 | 0.011396 | 0.011429 | 0.011464 | 0.011530 |
| 0.011463 | 0.011429 | 0.011496 | 0.011396 | 0.011463 | 0.011362 | 0.011429 |
| 0.011597 | 0.011530 | 0.011765 | 0.011463 | 0.011429 | 0.011664 | 0.011429 |
| 0.011542 | 0.011770 | 0.011664 | 0.011373 | 0.011359 | 0.011391 | 0.011493 |
| 0.012121 | 0.011518 | 0.011390 | 0.011664 | 0.011664 | 0.011396 | 0.011497 |
| 0.011497 | 0.011463 | 0.011530 | 0.011429 | 0.011530 | 0.011463 | 0.011463 |
| 0.011429 | 0.011463 | 0.011732 | 0.011597 | 0.011497 | 0.011463 | 0.011396 |
| 0.011362 | 0.011295 | 0.011362 | 0.011396 | 0.011530 | 0.011497 | 0.011430 |
| 0.011530 | 0.011597 | 0.011396 | 0.011396 | 0.011430 | 0.011429 | 0.011432 |
| 0.011500 | 0.011430 | 0.011430 | 0.011312 | 0.011386 | 0.011341 | 0.011430 |
| 0.011297 | 0.011370 | 0.011429 | 0.011405 | 0.011332 | 0.011369 | 0.011398 |
| 0.011600 | 0.011439 | 0.011473 | 0.011363 | 0.011371 | 0.011498 | 0.011397 |
| 0.011464 | 0.011465 | 0.011464 | 0.011564 | 0.011496 | 0.011866 | 0.011598 |
| 0.011631 | 0.011497 | 0.011429 | 0.011463 | 0.011329 | 0.011497 | 0.011362 |
| 0.011429 | 0.011429 | 0.011396 | 0.011362 | 0.011396 | 0.011362 | 0.011463 |
| 0.011430 | 0.011530 | 0.011463 | 0.011362 | 0.011465 | 0.011564 | 0.011567 |
| 0.011564 | 0.011463 | 0.011362 | 0.011296 | 0.011429 | 0.011362 | 0.011295 |
| 0.011400 | 0.011564 | 0.011362 | 0.011564 | 0.011329 | 0.011430 | 0.011396 |
| 0.011497 | 0.011396 | 0.011430 | 0.011396 | 0.011430 | 0.011295 | 0.011430 |
| 0.011463 | 0.011396 | 0.011463 | 0.011396 | 0.011429 | 0.011463 | 0.011698 |
| 0.011732 | 0.011664 | 0.011732 | 0.011566 | 0.011732 | 0.011429 | 0.011396 |
| 0.011364 | 0.011626 | 0.011472 | 0.011335 | 0.011739 | 0.011299 | 0.011375 |
| 0.011739 | 0.011638 | 0.011597 | 0.011799 | 0.011504 | 0.011664 | 0.011631 |
| 0.011564 | 0.011732 | 0.011593 | 0.011431 | 0.011521 | 0.011463 | 0.011534 |
| 0.011631 | 0.011532 | 0.011669 | 0.011737 | 0.011664 | 0.011732 | 0.011839 |
| 0.011568 | 0.011739 | 0.011670 | 0.011466 | 0.011868 | 0.011329 | 0.011532 |
| 0.011496 | 0.011429 | 0.011329 | 0.011329 | 0.011396 | 0.011396 | 0.011463 |
| 0.011396 | 0.011463 | 0.011362 | 0.011329 | 0.011396 | 0.011396 | 0.011463 |
| 0.011396 | 0.011765 | 0.011664 | 0.011698 | 0.011295 | 0.011396 | 0.011429 |
| 0.011429 | 0.011396 | 0.011463 | 0.011429 | 0.011362 | 0.011362 | 0.011362 |
| 0.011832 | 0.011463 | 0.011530 | 0.011329 | 0.011429 | 0.011597 | 0.011362 |
| 0.011362 | 0.011429 | 0.011396 | 0.011564 | 0.011362 | 0.011496 | 0.011631 |
| 0.011564 | 0.011396 | 0.011396 | 0.011329 | 0.011329 | 0.011497 | 0.011429 |
| 0.011329 | 0.011429 | 0.011295 | 0.011329 | 0.011329 | 0.011530 | 0.011362 |
| 0.011329 | 0.011329 | 0.011396 | 0.011295 | 0.011564 | 0.011295 | 0.011463 |
| 0.011539 | 0.011362 | 0.011597 | 0.011497 | 0.000000 | 0.011396 | 0.011496 |
| 0.011362 | 0.011698 | 0.011295 | 0.011497 | 0.011295 | 0.011295 | 0.011295 |
| 0.011530 | 0.011665 | 0.011429 | 0.011497 | 0.011329 | 0.011664 | 0.011295 |
| 0.011362 | 0.011362 | 0.011396 | 0.011497 | 0.011396 | 0.011496 | 0.011564 |
| 0.011429 | 0.011530 | 0.011429 | 0.011530 | 0.011496 | 0.011362 | 0.011329 |
| 0.011362 | 0.011362 | 0.011429 | 0.011295 | 0.011329 | 0.011497 | 0.011362 |
| 0.011329 | 0.011396 | 0.011530 | 0.011497 | 0.011463 | 0.011396 | 0.011396 |
| 0.011463 | 0.011396 | 0.011496 | 0.011362 | 0.011496 | 0.011597 | 0.011832 |
| 0.011396 | 0.011732 | 0.011405 | 0.017936 | 0.011387 | 0.011427 | 0.011688 |
| 0.011648 | 0.011693 | 0.011479 | 0.011466 | 0.011719 | 0.011716 | 0.011546 |
| 0.011535 | 0.011548 | 0.011333 | 0.011395 | 0.011294 | 0.011356 | 0.011404 |
| 0.011529 | 0.011507 | 0.011505 | 0.011325 | 0.011530 | 0.011564 | 0.011568 |
| 0.011438 | 0.011530 | 0.011530 | 0.011430 | 0.011463 | 0.011463 | 0.011430 |
| 0.011463 | 0.011396 | 0.011429 | 0.011463 | 0.011430 | 0.011362 | 0.011396 |
| 0.011396 | 0.011463 | 0.011362 | 0.011463 | 0.011497 | 0.011396 | 0.011429 |
| 0.011396 | 0.011362 | 0.011698 | 0.011698 | 0.011497 | 0.011531 | 0.011564 |
| 0.011329 | 0.011329 | 0.011362 | 0.011463 | 0.011329 | 0.011564 | 0.011564 |
| 0.011597 | 0.011597 | 0.011530 | 0.011631 | 0.011732 | 0.011633 | 0.011463 |
| 0.011463 | 0.011530 | 0.011564 | 0.011396 | 0.011463 | 0.011430 | 0.011463 |
| 0.011531 | 0.011530 | 0.011564 | 0.011531 | 0.011431 | 0.011631 | 0.011597 |
| 0.011467 | 0.011362 | 0.011463 | 0.011564 | 0.011463 | 0.011530 | 0.011631 |
| 0.011799 | 0.011504 | 0.011664 | 0.011631 | 0.011564 | 0.011732 | 0.011329 |

|          |          |          |          |          |          |          |
|----------|----------|----------|----------|----------|----------|----------|
| 0.011532 | 0.011430 | 0.011396 | 0.011396 | 0.011463 | 0.011362 | 0.011463 |
| 0.011497 | 0.011396 | 0.011429 | 0.011396 | 0.011362 | 0.011698 | 0.011698 |
| 0.011497 | 0.011531 | 0.011597 | 0.011530 | 0.012103 | 0.011596 | 0.011517 |
| 0.011447 | 0.011546 | 0.011658 | 0.011545 | 0.011655 | 0.011577 | 0.011543 |
| 0.012056 | 0.011441 | 0.011574 | 0.011510 | 0.011783 | 0.011638 | 0.011741 |
| 0.012080 | 0.011550 | 0.011703 | 0.011765 | 0.011631 | 0.011564 | 0.011668 |
| 0.011329 | 0.011497 | 0.011631 | 0.011597 | 0.011601 | 0.011530 | 0.011498 |
| 0.011429 | 0.011362 | 0.011396 | 0.011429 | 0.011329 | 0.011396 | 0.011295 |
| 0.011161 | 0.011127 | 0.011295 | 0.011329 | 0.011362 | 0.011362 | 0.011396 |
| 0.011396 | 0.011329 | 0.011396 | 0.011429 | 0.011329 | 0.011530 | 0.011362 |
| 0.011262 | 0.000000 | 0.011262 | 0.011329 | 0.011396 | 0.011732 | 0.011429 |
| 0.011408 | 0.011396 | 0.011564 | 0.011569 | 0.011497 | 0.011496 | 0.011496 |
| 0.011497 | 0.011429 | 0.011396 | 0.011429 | 0.011530 | 0.011530 | 0.011463 |
| 0.011463 | 0.011597 | 0.011698 | 0.011496 | 0.011698 | 0.011698 | 0.011564 |
| 0.011396 | 0.011463 | 0.011497 | 0.011833 | 0.011463 | 0.011497 | 0.011463 |
| 0.011496 | 0.011362 | 0.011362 | 0.011665 | 0.011665 | 0.011631 | 0.011429 |
| 0.011530 | 0.011597 | 0.011463 | 0.011530 | 0.011496 | 0.011362 | 0.011631 |
| 0.011463 | 0.011429 | 0.011362 | 0.011597 | 0.011429 | 0.011530 | 0.011765 |
| 0.011463 | 0.011773 | 0.011765 | 0.011589 | 0.011286 | 0.011468 | 0.011370 |
| 0.011280 | 0.011800 | 0.011376 | 0.011552 | 0.011402 | 0.011467 | 0.011432 |
| 0.011468 | 0.011389 | 0.011506 | 0.011324 | 0.011491 | 0.011529 | 0.011547 |
| 0.011550 | 0.011454 | 0.011448 | 0.011448 | 0.011465 | 0.011530 | 0.011598 |
| 0.011597 | 0.011464 | 0.011567 | 0.011569 | 0.011704 | 0.011732 | 0.011463 |
| 0.011631 | 0.011497 | 0.011429 | 0.011463 | 0.011329 | 0.011497 | 0.011362 |
| 0.011429 | 0.011429 | 0.011396 | 0.011362 | 0.011396 | 0.011362 | 0.011463 |
| 0.011444 | 0.011445 | 0.011368 | 0.011471 | 0.011608 | 0.011573 | 0.011572 |
| 0.011571 | 0.011497 | 0.011319 | 0.011312 | 0.011433 | 0.011602 | 0.011603 |
| 0.011396 | 0.011467 | 0.011700 | 0.011669 | 0.011598 | 0.011632 | 0.011564 |
| 0.011496 | 0.011564 | 0.011564 | 0.011463 | 0.011967 | 0.011631 | 0.011698 |
| 0.011732 | 0.011701 | 0.011435 | 0.011511 | 0.011396 | 0.011597 | 0.011564 |
| 0.011598 | 0.011631 | 0.011631 | 0.011631 | 0.011807 | 0.011765 | 0.011407 |
| 0.011297 | 0.011303 | 0.011401 | 0.011366 | 0.011402 | 0.011321 | 0.011570 |
| 0.011437 | 0.011499 | 0.011346 | 0.011472 | 0.011430 | 0.011505 | 0.011396 |
| 0.011362 | 0.011295 | 0.011362 | 0.011396 | 0.011530 | 0.011497 | 0.011430 |
| 0.011530 | 0.011597 | 0.011396 | 0.011396 | 0.011430 | 0.011429 | 0.011432 |
| 0.011500 | 0.011430 | 0.011430 | 0.011465 | 0.011530 | 0.011598 | 0.011597 |
| 0.011464 | 0.011567 | 0.011569 | 0.011704 | 0.011732 | 0.011463 | 0.011631 |
| 0.011564 | 0.011564 | 0.011398 | 0.011582 | 0.011477 | 0.011537 | 0.011375 |
| 0.011542 | 0.011653 | 0.011441 | 0.011468 | 0.011362 | 0.011564 | 0.011430 |
| 0.011530 | 0.011463 | 0.011362 | 0.011465 | 0.011564 | 0.011567 | 0.011463 |
| 0.011362 | 0.011296 | 0.011429 | 0.011362 | 0.011295 | 0.011400 | 0.011564 |
| 0.011463 | 0.011396 | 0.011429 | 0.011463 | 0.011430 | 0.011362 | 0.011497 |
| 0.011429 | 0.011463 | 0.011463 | 0.011396 | 0.011262 | 0.011564 | 0.011295 |
| 0.011329 | 0.011732 | 0.011396 | 0.011429 | 0.011396 | 0.011698 | 0.011360 |
| 0.011679 | 0.011400 | 0.011311 | 0.011543 | 0.011630 | 0.011527 | 0.011311 |
| 0.011218 | 0.011496 | 0.011597 | 0.011705 | 0.011565 | 0.011703 | 0.011834 |
| 0.011733 | 0.011770 | 0.011732 | 0.011983 | 0.011698 | 0.012573 | 0.011734 |
| 0.012473 | 0.012241 | 0.012375 | 0.012646 | 0.011698 | 0.011396 | 0.011699 |
| 0.012137 | 0.012072 | 0.011664 | 0.011564 | 0.011632 | 0.011632 | 0.011601 |
| 0.011496 | 0.011501 | 0.011564 | 0.011531 | 0.011901 | 0.011967 | 0.011968 |
| 0.011868 | 0.011968 | 0.012072 | 0.011838 | 0.012138 | 0.012144 | 0.012205 |
| 0.012206 | 0.012239 | 0.012186 | 0.012206 | 0.012207 | 0.011496 | 0.011732 |
| 0.011800 | 0.012303 | 0.011806 | 0.012034 | 0.012508 | 0.011570 | 0.011464 |
| 0.011429 | 0.011429 | 0.011900 | 0.011965 | 0.012045 | 0.011765 | 0.011431 |
| s327     | 0.011631 | 0.011631 | 0.011967 | 0.011732 | 0.011732 | 0.011799 |
| 0.011603 | 0.011535 | 0.011799 | 0.011228 | 0.011295 | 0.011262 | 0.011228 |
| 0.011262 | 0.011429 | 0.011228 | 0.011262 | 0.011329 | 0.011295 | 0.011262 |
| 0.011228 | 0.011262 | 0.011362 | 0.011228 | 0.011262 | 0.011262 | 0.011569 |
| 0.011496 | 0.011262 | 0.011161 | 0.011396 | 0.011329 | 0.011295 | 0.011329 |
| 0.011295 | 0.011396 | 0.011295 | 0.011295 | 0.011329 | 0.011295 | 0.011463 |

|          |          |          |          |          |          |          |
|----------|----------|----------|----------|----------|----------|----------|
| 0.011228 | 0.011295 | 0.011329 | 0.011262 | 0.011362 | 0.011396 | 0.011329 |
| 0.011295 | 0.011463 | 0.011362 | 0.011631 | 0.011295 | 0.011564 | 0.011295 |
| 0.011262 | 0.011362 | 0.011429 | 0.011564 | 0.011664 | 0.011362 | 0.011463 |
| 0.011329 | 0.011396 | 0.011295 | 0.011530 | 0.011765 | 0.011295 | 0.011362 |
| 0.011262 | 0.011362 | 0.011329 | 0.011396 | 0.011329 | 0.011329 | 0.011329 |
| 0.011228 | 0.011262 | 0.011228 | 0.011329 | 0.011295 | 0.011329 | 0.011396 |
| 0.011262 | 0.011295 | 0.011362 | 0.011262 | 0.011396 | 0.011228 | 0.011295 |
| 0.011463 | 0.011396 | 0.011631 | 0.011463 | 0.011295 | 0.011530 | 0.011295 |
| 0.011431 | 0.011658 | 0.011475 | 0.011177 | 0.011210 | 0.011281 | 0.011375 |
| 0.012048 | 0.011467 | 0.011184 | 0.011530 | 0.011530 | 0.011329 | 0.011429 |
| 0.011362 | 0.011329 | 0.011396 | 0.011295 | 0.011396 | 0.011329 | 0.011329 |
| 0.011295 | 0.011396 | 0.011597 | 0.011463 | 0.011362 | 0.011329 | 0.011262 |
| 0.011228 | 0.011228 | 0.011295 | 0.011262 | 0.011463 | 0.011429 | 0.011362 |
| 0.011463 | 0.011530 | 0.011262 | 0.011262 | 0.011295 | 0.011295 | 0.011297 |
| 0.011364 | 0.011295 | 0.011295 | 0.011168 | 0.011241 | 0.011200 | 0.011296 |
| 0.011297 | 0.011232 | 0.011282 | 0.011267 | 0.011196 | 0.011232 | 0.011263 |
| 0.011528 | 0.011302 | 0.011336 | 0.011228 | 0.011233 | 0.011363 | 0.011296 |
| 0.011329 | 0.011330 | 0.011329 | 0.011429 | 0.011362 | 0.011732 | 0.011530 |
| 0.011564 | 0.011430 | 0.011295 | 0.011396 | 0.011195 | 0.011429 | 0.011228 |
| 0.011295 | 0.011295 | 0.011262 | 0.011228 | 0.011262 | 0.011228 | 0.011329 |
| 0.011295 | 0.011396 | 0.011329 | 0.011228 | 0.011330 | 0.011430 | 0.011432 |
| 0.011430 | 0.011329 | 0.011228 | 0.011161 | 0.011295 | 0.011228 | 0.011161 |
| 0.011264 | 0.011430 | 0.011228 | 0.011430 | 0.011195 | 0.011295 | 0.011262 |
| 0.011362 | 0.011262 | 0.011295 | 0.011262 | 0.011295 | 0.011161 | 0.011295 |
| 0.011329 | 0.011262 | 0.011329 | 0.011262 | 0.011295 | 0.011329 | 0.011564 |
| 0.011664 | 0.011597 | 0.011665 | 0.011431 | 0.011665 | 0.011295 | 0.011262 |
| 0.011297 | 0.011586 | 0.011426 | 0.011197 | 0.011671 | 0.011163 | 0.011296 |
| 0.011637 | 0.011570 | 0.011463 | 0.011664 | 0.011367 | 0.011530 | 0.011497 |
| 0.011429 | 0.011597 | 0.011451 | 0.011307 | 0.011354 | 0.011329 | 0.011398 |
| 0.011497 | 0.011397 | 0.011533 | 0.011602 | 0.011530 | 0.011597 | 0.011704 |
| 0.011432 | 0.011603 | 0.011534 | 0.011466 | 0.011733 | 0.011194 | 0.011397 |
| 0.011362 | 0.011295 | 0.011194 | 0.011194 | 0.011262 | 0.011262 | 0.011329 |
| 0.011262 | 0.011262 | 0.011228 | 0.011329 | 0.011262 | 0.011262 | 0.011329 |
| 0.011262 | 0.011698 | 0.011597 | 0.011631 | 0.011161 | 0.011262 | 0.011295 |
| 0.011295 | 0.011262 | 0.011329 | 0.011362 | 0.011228 | 0.011228 | 0.011228 |
| 0.011765 | 0.011396 | 0.011396 | 0.011194 | 0.011295 | 0.011463 | 0.011228 |
| 0.011228 | 0.011295 | 0.011262 | 0.011429 | 0.011228 | 0.011362 | 0.011496 |
| 0.011429 | 0.011262 | 0.011262 | 0.011194 | 0.011194 | 0.011362 | 0.011295 |
| 0.011194 | 0.011295 | 0.011161 | 0.011194 | 0.011329 | 0.011463 | 0.011228 |
| 0.011195 | 0.011329 | 0.011262 | 0.011161 | 0.011496 | 0.011161 | 0.011329 |
| 0.011403 | 0.011228 | 0.011530 | 0.011362 | 0.011396 | 0.000000 | 0.011362 |
| 0.011228 | 0.011564 | 0.011161 | 0.011429 | 0.011228 | 0.011228 | 0.011161 |
| 0.011396 | 0.011597 | 0.011295 | 0.011362 | 0.011194 | 0.011597 | 0.011228 |
| 0.011228 | 0.011228 | 0.011262 | 0.011362 | 0.011262 | 0.011362 | 0.011429 |
| 0.011429 | 0.011396 | 0.011295 | 0.011396 | 0.011362 | 0.011228 | 0.011194 |
| 0.011228 | 0.011228 | 0.011295 | 0.011228 | 0.011194 | 0.011362 | 0.011228 |
| 0.011262 | 0.011262 | 0.011396 | 0.011429 | 0.011329 | 0.011262 | 0.011262 |
| 0.011329 | 0.011262 | 0.011362 | 0.011228 | 0.011362 | 0.011463 | 0.011765 |
| 0.011262 | 0.011664 | 0.011267 | 0.017785 | 0.011257 | 0.011427 | 0.011618 |
| 0.011579 | 0.011623 | 0.011322 | 0.011292 | 0.011719 | 0.011647 | 0.011364 |
| 0.011487 | 0.011548 | 0.011138 | 0.011228 | 0.011255 | 0.011307 | 0.011232 |
| 0.011482 | 0.011433 | 0.011431 | 0.011193 | 0.011396 | 0.011429 | 0.011432 |
| 0.011301 | 0.011396 | 0.011396 | 0.011362 | 0.011329 | 0.011329 | 0.011295 |
| 0.011329 | 0.011262 | 0.011295 | 0.011329 | 0.011295 | 0.011228 | 0.011262 |
| 0.011262 | 0.011329 | 0.011228 | 0.011329 | 0.011362 | 0.011396 | 0.011295 |
| 0.011329 | 0.011295 | 0.011631 | 0.011631 | 0.011295 | 0.011396 | 0.011430 |
| 0.011195 | 0.011195 | 0.011228 | 0.011329 | 0.011195 | 0.011430 | 0.011430 |
| 0.011463 | 0.011463 | 0.011396 | 0.011497 | 0.011665 | 0.011498 | 0.011329 |
| 0.011329 | 0.011396 | 0.011430 | 0.011262 | 0.011329 | 0.011295 | 0.011329 |
| 0.011396 | 0.011396 | 0.011429 | 0.011396 | 0.011296 | 0.011497 | 0.011463 |



|          |          |          |          |          |          |          |
|----------|----------|----------|----------|----------|----------|----------|
| 0.011331 | 0.011228 | 0.011329 | 0.011430 | 0.011329 | 0.011463 | 0.011496 |
| 0.011664 | 0.011367 | 0.011530 | 0.011497 | 0.011429 | 0.011597 | 0.011228 |
| 0.011397 | 0.011295 | 0.011262 | 0.011262 | 0.011329 | 0.011228 | 0.011329 |
| 0.011362 | 0.011396 | 0.011295 | 0.011329 | 0.011295 | 0.011631 | 0.011631 |
| 0.011295 | 0.011396 | 0.011463 | 0.011396 | 0.012036 | 0.011453 | 0.011377 |
| 0.011447 | 0.011407 | 0.011517 | 0.011406 | 0.011515 | 0.011439 | 0.011405 |
| 0.011987 | 0.011302 | 0.011437 | 0.011371 | 0.011645 | 0.011502 | 0.011605 |
| 0.012012 | 0.011475 | 0.011567 | 0.011631 | 0.011496 | 0.011497 | 0.011533 |
| 0.011194 | 0.011362 | 0.011496 | 0.011463 | 0.011466 | 0.011463 | 0.011431 |
| 0.011295 | 0.011228 | 0.011262 | 0.011295 | 0.011194 | 0.011262 | 0.011161 |
| 0.011295 | 0.011329 | 0.011228 | 0.011194 | 0.011295 | 0.011228 | 0.011262 |
| 0.011262 | 0.011194 | 0.011262 | 0.011295 | 0.011194 | 0.011396 | 0.011429 |
| 0.011329 | 0.011396 | 0.011329 | 0.011329 | 0.011262 | 0.011664 | 0.011295 |
| 0.011338 | 0.011262 | 0.011497 | 0.011501 | 0.011362 | 0.011362 | 0.011362 |
| 0.011362 | 0.011295 | 0.011262 | 0.011295 | 0.011396 | 0.011396 | 0.011329 |
| 0.011329 | 0.011463 | 0.011631 | 0.011362 | 0.011564 | 0.011564 | 0.011429 |
| 0.011262 | 0.011329 | 0.011362 | 0.011765 | 0.011329 | 0.011362 | 0.011262 |
| 0.011362 | 0.011295 | 0.011295 | 0.011597 | 0.011530 | 0.011564 | 0.011295 |
| 0.011396 | 0.011463 | 0.011329 | 0.011396 | 0.011362 | 0.011228 | 0.011564 |
| 0.011329 | 0.011295 | 0.011295 | 0.011463 | 0.011295 | 0.011396 | 0.011631 |
| 0.011329 | 0.011671 | 0.011698 | 0.011467 | 0.011229 | 0.011400 | 0.011267 |
| 0.011225 | 0.011683 | 0.011236 | 0.011417 | 0.011255 | 0.011366 | 0.011379 |
| 0.011468 | 0.011192 | 0.011339 | 0.011192 | 0.011222 | 0.011395 | 0.011344 |
| 0.011362 | 0.011257 | 0.011377 | 0.011307 | 0.011330 | 0.011463 | 0.011530 |
| 0.011530 | 0.011396 | 0.011500 | 0.011501 | 0.011636 | 0.011661 | 0.011329 |
| 0.011564 | 0.011430 | 0.011295 | 0.011396 | 0.011195 | 0.011429 | 0.011228 |
| 0.011295 | 0.011295 | 0.011262 | 0.011228 | 0.011262 | 0.011228 | 0.011329 |
| 0.011305 | 0.011305 | 0.011300 | 0.011334 | 0.011471 | 0.011436 | 0.011436 |
| 0.011435 | 0.011363 | 0.011171 | 0.011132 | 0.011297 | 0.011467 | 0.011467 |
| 0.011262 | 0.011331 | 0.011565 | 0.011533 | 0.011464 | 0.011498 | 0.011429 |
| 0.011362 | 0.011429 | 0.011429 | 0.011329 | 0.011900 | 0.011497 | 0.011564 |
| 0.011597 | 0.011665 | 0.011299 | 0.011372 | 0.011262 | 0.011463 | 0.011429 |
| 0.011464 | 0.011496 | 0.011496 | 0.011496 | 0.011650 | 0.011631 | 0.011268 |
| 0.011162 | 0.011164 | 0.011264 | 0.011230 | 0.011333 | 0.011172 | 0.011502 |
| 0.011300 | 0.011455 | 0.011203 | 0.011285 | 0.011296 | 0.011368 | 0.011262 |
| 0.011228 | 0.011228 | 0.011295 | 0.011262 | 0.011463 | 0.011429 | 0.011362 |
| 0.011463 | 0.011530 | 0.011262 | 0.011262 | 0.011295 | 0.011295 | 0.011297 |
| 0.011364 | 0.011295 | 0.011295 | 0.011330 | 0.011463 | 0.011530 | 0.011530 |
| 0.011396 | 0.011500 | 0.011501 | 0.011636 | 0.011661 | 0.011329 | 0.011496 |
| 0.011429 | 0.011429 | 0.011263 | 0.011443 | 0.011373 | 0.011401 | 0.011270 |
| 0.011439 | 0.011653 | 0.011441 | 0.011332 | 0.011228 | 0.011430 | 0.011295 |
| 0.011396 | 0.011329 | 0.011228 | 0.011330 | 0.011430 | 0.011432 | 0.011329 |
| 0.011228 | 0.011161 | 0.011295 | 0.011228 | 0.011161 | 0.011264 | 0.011430 |
| 0.011329 | 0.011262 | 0.011295 | 0.011329 | 0.011295 | 0.011228 | 0.011430 |
| 0.011295 | 0.011329 | 0.011329 | 0.011262 | 0.011329 | 0.011564 | 0.011228 |
| 0.011262 | 0.011664 | 0.011262 | 0.011295 | 0.011262 | 0.011631 | 0.011189 |
| 0.011678 | 0.011188 | 0.011261 | 0.011463 | 0.011508 | 0.011455 | 0.011144 |
| 0.011218 | 0.011429 | 0.011530 | 0.011637 | 0.011498 | 0.011635 | 0.011766 |
| 0.011666 | 0.011703 | 0.011664 | 0.011914 | 0.011631 | 0.012505 | 0.011667 |
| 0.012406 | 0.012173 | 0.012307 | 0.012579 | 0.011631 | 0.011329 | 0.011631 |
| 0.012070 | 0.012005 | 0.011597 | 0.011497 | 0.011565 | 0.011565 | 0.011534 |
| 0.011429 | 0.011433 | 0.011496 | 0.011464 | 0.011834 | 0.011900 | 0.011901 |
| 0.011800 | 0.011901 | 0.012004 | 0.011770 | 0.012070 | 0.012076 | 0.012137 |
| 0.012138 | 0.012172 | 0.012118 | 0.012138 | 0.012139 | 0.011362 | 0.011665 |
| 0.011733 | 0.012236 | 0.011738 | 0.011967 | 0.012440 | 0.011502 | 0.011396 |
| 0.011362 | 0.011362 | 0.011833 | 0.011883 | 0.011975 | 0.011698 | 0.011363 |
| S328     | 0.011732 | 0.011732 | 0.012068 | 0.011832 | 0.011832 | 0.011900 |
| 0.011739 | 0.011671 | 0.011899 | 0.011329 | 0.011396 | 0.011363 | 0.011329 |
| 0.011362 | 0.011530 | 0.011329 | 0.011295 | 0.011429 | 0.011396 | 0.011362 |
| 0.011329 | 0.011362 | 0.011463 | 0.011329 | 0.011363 | 0.011362 | 0.011705 |

|          |          |          |          |          |          |          |
|----------|----------|----------|----------|----------|----------|----------|
| 0.011597 | 0.011362 | 0.011262 | 0.011496 | 0.011429 | 0.011396 | 0.011429 |
| 0.011396 | 0.011496 | 0.011329 | 0.011396 | 0.011094 | 0.011396 | 0.011564 |
| 0.011329 | 0.011396 | 0.011161 | 0.011295 | 0.011463 | 0.011429 | 0.011429 |
| 0.011396 | 0.011295 | 0.011463 | 0.011731 | 0.011127 | 0.011664 | 0.011127 |
| 0.011362 | 0.011463 | 0.011396 | 0.011664 | 0.011765 | 0.011463 | 0.011564 |
| 0.011429 | 0.011497 | 0.011396 | 0.011631 | 0.011866 | 0.011396 | 0.011463 |
| 0.011362 | 0.011463 | 0.011429 | 0.011496 | 0.011429 | 0.011362 | 0.011362 |
| 0.011329 | 0.011362 | 0.011329 | 0.011429 | 0.011396 | 0.011430 | 0.011496 |
| 0.011429 | 0.011396 | 0.011463 | 0.011362 | 0.011496 | 0.011329 | 0.011396 |
| 0.011564 | 0.011496 | 0.011731 | 0.011564 | 0.011396 | 0.011631 | 0.011329 |
| 0.011542 | 0.011770 | 0.011588 | 0.011334 | 0.011321 | 0.011391 | 0.011493 |
| 0.012158 | 0.011569 | 0.011266 | 0.011564 | 0.011631 | 0.011429 | 0.011530 |
| 0.011396 | 0.011429 | 0.011496 | 0.011396 | 0.011497 | 0.011429 | 0.011429 |
| 0.011396 | 0.011496 | 0.011698 | 0.011564 | 0.011463 | 0.011429 | 0.011362 |
| 0.011329 | 0.011329 | 0.011396 | 0.011362 | 0.011564 | 0.011530 | 0.011463 |
| 0.011564 | 0.011631 | 0.011362 | 0.011362 | 0.011396 | 0.011396 | 0.011398 |
| 0.011466 | 0.011396 | 0.011396 | 0.011276 | 0.011349 | 0.011306 | 0.011396 |
| 0.011399 | 0.011335 | 0.011392 | 0.011371 | 0.011298 | 0.011334 | 0.011364 |
| 0.011636 | 0.011405 | 0.011439 | 0.011329 | 0.011337 | 0.011397 | 0.011430 |
| 0.011497 | 0.011431 | 0.011430 | 0.011530 | 0.011463 | 0.011765 | 0.011631 |
| 0.011664 | 0.011530 | 0.011396 | 0.011497 | 0.011295 | 0.011530 | 0.011329 |
| 0.011396 | 0.011396 | 0.011362 | 0.011329 | 0.011362 | 0.011329 | 0.011429 |
| 0.011396 | 0.011497 | 0.011430 | 0.011329 | 0.011431 | 0.011530 | 0.011533 |
| 0.011530 | 0.011430 | 0.011329 | 0.011263 | 0.011396 | 0.011329 | 0.011262 |
| 0.011366 | 0.011530 | 0.011329 | 0.011530 | 0.011295 | 0.011396 | 0.011362 |
| 0.011463 | 0.011362 | 0.011396 | 0.011362 | 0.011396 | 0.011262 | 0.011396 |
| 0.011430 | 0.011362 | 0.011362 | 0.011362 | 0.011396 | 0.011429 | 0.011665 |
| 0.011765 | 0.011698 | 0.011765 | 0.011397 | 0.011766 | 0.011396 | 0.011362 |
| 0.011398 | 0.011707 | 0.011518 | 0.011300 | 0.011773 | 0.011265 | 0.011336 |
| 0.011773 | 0.011672 | 0.011564 | 0.011765 | 0.011436 | 0.011631 | 0.011597 |
| 0.011463 | 0.011698 | 0.011522 | 0.011349 | 0.011395 | 0.011429 | 0.011500 |
| 0.011597 | 0.011465 | 0.011635 | 0.011669 | 0.011631 | 0.011698 | 0.011772 |
| 0.011534 | 0.011671 | 0.011568 | 0.011567 | 0.011800 | 0.011295 | 0.011498 |
| 0.011463 | 0.011396 | 0.011295 | 0.011295 | 0.011362 | 0.011362 | 0.011362 |
| 0.011362 | 0.011429 | 0.011329 | 0.011429 | 0.011362 | 0.011362 | 0.011362 |
| 0.011362 | 0.011799 | 0.011698 | 0.011732 | 0.011262 | 0.011362 | 0.011396 |
| 0.011396 | 0.011362 | 0.011429 | 0.011463 | 0.011329 | 0.011329 | 0.011329 |
| 0.011866 | 0.011496 | 0.011496 | 0.011295 | 0.011396 | 0.011497 | 0.011329 |
| 0.011329 | 0.011396 | 0.011362 | 0.011530 | 0.011329 | 0.011463 | 0.011597 |
| 0.011530 | 0.011362 | 0.011362 | 0.011295 | 0.011295 | 0.011463 | 0.011396 |
| 0.011295 | 0.011396 | 0.011262 | 0.011295 | 0.011429 | 0.011564 | 0.011329 |
| 0.011295 | 0.011429 | 0.011363 | 0.011262 | 0.011597 | 0.011262 | 0.011429 |
| 0.011471 | 0.011329 | 0.011631 | 0.011463 | 0.011496 | 0.011362 | 0.000000 |
| 0.011329 | 0.011664 | 0.011262 | 0.011530 | 0.011329 | 0.011329 | 0.011262 |
| 0.011496 | 0.011698 | 0.011396 | 0.011463 | 0.011295 | 0.011698 | 0.011329 |
| 0.011329 | 0.011329 | 0.011362 | 0.011463 | 0.011362 | 0.011463 | 0.011530 |
| 0.011530 | 0.011496 | 0.011329 | 0.011497 | 0.011463 | 0.011262 | 0.011295 |
| 0.011329 | 0.011262 | 0.011396 | 0.011329 | 0.011295 | 0.011463 | 0.011329 |
| 0.011362 | 0.011362 | 0.011496 | 0.011530 | 0.011429 | 0.011362 | 0.011362 |
| 0.011429 | 0.011362 | 0.011463 | 0.011329 | 0.011463 | 0.011564 | 0.011866 |
| 0.011362 | 0.011765 | 0.011371 | 0.017861 | 0.011387 | 0.011672 | 0.011723 |
| 0.011683 | 0.011729 | 0.011479 | 0.011408 | 0.011884 | 0.011751 | 0.011546 |
| 0.011534 | 0.011732 | 0.011255 | 0.011395 | 0.011372 | 0.011455 | 0.011404 |
| 0.011623 | 0.011507 | 0.011542 | 0.011126 | 0.011497 | 0.011530 | 0.011500 |
| 0.011369 | 0.011497 | 0.011497 | 0.011463 | 0.011429 | 0.011430 | 0.011396 |
| 0.011429 | 0.011362 | 0.011396 | 0.011430 | 0.011396 | 0.011329 | 0.011362 |
| 0.011362 | 0.011430 | 0.011329 | 0.011430 | 0.011463 | 0.011497 | 0.011396 |
| 0.011429 | 0.011396 | 0.011732 | 0.011732 | 0.011463 | 0.011430 | 0.011530 |
| 0.011295 | 0.011295 | 0.011329 | 0.011430 | 0.011295 | 0.011530 | 0.011530 |
| 0.011564 | 0.011564 | 0.011497 | 0.011597 | 0.011765 | 0.011599 | 0.011429 |

|          |          |          |          |          |          |          |
|----------|----------|----------|----------|----------|----------|----------|
| 0.011430 | 0.011430 | 0.011530 | 0.011362 | 0.011430 | 0.011396 | 0.011362 |
| 0.011497 | 0.011497 | 0.011530 | 0.011497 | 0.011397 | 0.011597 | 0.011564 |
| 0.011433 | 0.011329 | 0.011429 | 0.011463 | 0.011430 | 0.011564 | 0.011597 |
| 0.011765 | 0.011436 | 0.011631 | 0.011597 | 0.011463 | 0.011698 | 0.011329 |
| 0.011431 | 0.011396 | 0.011362 | 0.011362 | 0.011430 | 0.011329 | 0.011430 |
| 0.011463 | 0.011497 | 0.011396 | 0.011429 | 0.011396 | 0.011732 | 0.011732 |
| 0.011463 | 0.011430 | 0.011564 | 0.011496 | 0.012137 | 0.011489 | 0.011412 |
| 0.011482 | 0.011442 | 0.011587 | 0.011476 | 0.011550 | 0.011474 | 0.011508 |
| 0.012056 | 0.011337 | 0.011471 | 0.011406 | 0.011680 | 0.011604 | 0.011673 |
| 0.012080 | 0.011512 | 0.011669 | 0.011732 | 0.011597 | 0.011597 | 0.011635 |
| 0.011295 | 0.011463 | 0.011597 | 0.011564 | 0.011567 | 0.011564 | 0.011532 |
| 0.011396 | 0.011329 | 0.011362 | 0.011396 | 0.011295 | 0.011362 | 0.011262 |
| 0.011396 | 0.011429 | 0.011329 | 0.011295 | 0.011396 | 0.011329 | 0.011362 |
| 0.011295 | 0.011295 | 0.011362 | 0.011396 | 0.011295 | 0.011496 | 0.011530 |
| 0.011429 | 0.011496 | 0.011429 | 0.011429 | 0.011362 | 0.011765 | 0.011396 |
| 0.011408 | 0.011362 | 0.011598 | 0.011569 | 0.011463 | 0.011396 | 0.011463 |
| 0.011463 | 0.011396 | 0.011362 | 0.011396 | 0.011496 | 0.011496 | 0.011429 |
| 0.011429 | 0.011564 | 0.011731 | 0.011463 | 0.011664 | 0.011664 | 0.011530 |
| 0.011362 | 0.011429 | 0.011463 | 0.011866 | 0.011430 | 0.011463 | 0.011429 |
| 0.011463 | 0.011396 | 0.011396 | 0.011698 | 0.011631 | 0.011664 | 0.011396 |
| 0.011497 | 0.011564 | 0.011429 | 0.011497 | 0.011463 | 0.011329 | 0.011664 |
| 0.011429 | 0.011396 | 0.011396 | 0.011564 | 0.011396 | 0.011496 | 0.011732 |
| 0.011429 | 0.011807 | 0.011799 | 0.011548 | 0.011342 | 0.011502 | 0.011267 |
| 0.011445 | 0.011761 | 0.011341 | 0.011507 | 0.011353 | 0.011213 | 0.011485 |
| 0.011570 | 0.011258 | 0.011450 | 0.011324 | 0.011330 | 0.011529 | 0.011425 |
| 0.011475 | 0.011336 | 0.011483 | 0.011412 | 0.011431 | 0.011564 | 0.011631 |
| 0.011631 | 0.011497 | 0.011601 | 0.011603 | 0.011738 | 0.011767 | 0.011429 |
| 0.011664 | 0.011530 | 0.011396 | 0.011497 | 0.011295 | 0.011530 | 0.011329 |
| 0.011396 | 0.011396 | 0.011362 | 0.011329 | 0.011362 | 0.011329 | 0.011429 |
| 0.011409 | 0.011410 | 0.011334 | 0.011437 | 0.011573 | 0.011538 | 0.011470 |
| 0.011537 | 0.011464 | 0.011245 | 0.011240 | 0.011399 | 0.011568 | 0.011569 |
| 0.011363 | 0.011433 | 0.011666 | 0.011635 | 0.011565 | 0.011599 | 0.011530 |
| 0.011463 | 0.011530 | 0.011530 | 0.011429 | 0.012001 | 0.011597 | 0.011665 |
| 0.011698 | 0.011772 | 0.011401 | 0.011476 | 0.011362 | 0.011564 | 0.011530 |
| 0.011565 | 0.011597 | 0.011597 | 0.011597 | 0.011650 | 0.011732 | 0.011338 |
| 0.011229 | 0.011233 | 0.011333 | 0.011298 | 0.011402 | 0.011247 | 0.011570 |
| 0.011369 | 0.011499 | 0.011251 | 0.011360 | 0.011396 | 0.011471 | 0.011362 |
| 0.011329 | 0.011329 | 0.011396 | 0.011362 | 0.011564 | 0.011530 | 0.011463 |
| 0.011564 | 0.011631 | 0.011362 | 0.011362 | 0.011396 | 0.011396 | 0.011398 |
| 0.011466 | 0.011396 | 0.011396 | 0.011431 | 0.011564 | 0.011631 | 0.011631 |
| 0.011497 | 0.011601 | 0.011603 | 0.011738 | 0.011767 | 0.011429 | 0.011597 |
| 0.011530 | 0.011530 | 0.011297 | 0.011547 | 0.011477 | 0.011503 | 0.011375 |
| 0.011542 | 0.011698 | 0.011526 | 0.011434 | 0.011329 | 0.011530 | 0.011396 |
| 0.011497 | 0.011430 | 0.011329 | 0.011431 | 0.011530 | 0.011533 | 0.011430 |
| 0.011329 | 0.011263 | 0.011396 | 0.011329 | 0.011262 | 0.011366 | 0.011530 |
| 0.011429 | 0.011362 | 0.011396 | 0.011430 | 0.011396 | 0.011329 | 0.011497 |
| 0.011396 | 0.011429 | 0.011429 | 0.011362 | 0.011429 | 0.011664 | 0.011329 |
| 0.011362 | 0.011765 | 0.011362 | 0.011396 | 0.011362 | 0.011731 | 0.011317 |
| 0.011735 | 0.011273 | 0.011361 | 0.011503 | 0.011589 | 0.011563 | 0.011269 |
| 0.011323 | 0.011530 | 0.011564 | 0.011671 | 0.011531 | 0.011669 | 0.011800 |
| 0.011699 | 0.011703 | 0.011698 | 0.012017 | 0.011732 | 0.012606 | 0.011768 |
| 0.012507 | 0.012274 | 0.012408 | 0.012680 | 0.011731 | 0.011430 | 0.011665 |
| 0.012171 | 0.012038 | 0.011698 | 0.011597 | 0.011665 | 0.011665 | 0.011635 |
| 0.011530 | 0.011535 | 0.011597 | 0.011565 | 0.011935 | 0.012001 | 0.012002 |
| 0.011901 | 0.012002 | 0.012106 | 0.011872 | 0.012171 | 0.012178 | 0.012238 |
| 0.012239 | 0.012273 | 0.012221 | 0.012239 | 0.012241 | 0.011463 | 0.011766 |
| 0.011834 | 0.012337 | 0.011806 | 0.012068 | 0.012541 | 0.011604 | 0.011497 |
| 0.011463 | 0.011463 | 0.011934 | 0.011924 | 0.012045 | 0.011799 | 0.011465 |
| S329     | 0.011597 | 0.011597 | 0.011933 | 0.011698 | 0.011698 | 0.011765 |
| 0.011603 | 0.011535 | 0.011765 | 0.011195 | 0.011262 | 0.011228 | 0.011194 |

|          |          |          |          |          |          |          |
|----------|----------|----------|----------|----------|----------|----------|
| 0.011228 | 0.011396 | 0.011194 | 0.011228 | 0.011295 | 0.011262 | 0.011228 |
| 0.011194 | 0.011228 | 0.011329 | 0.011195 | 0.011228 | 0.011228 | 0.011569 |
| 0.011463 | 0.011228 | 0.011127 | 0.011362 | 0.011295 | 0.011262 | 0.011295 |
| 0.011262 | 0.011362 | 0.011262 | 0.011262 | 0.011295 | 0.011262 | 0.011429 |
| 0.011194 | 0.011262 | 0.011295 | 0.011228 | 0.011329 | 0.011362 | 0.011295 |
| 0.011262 | 0.011429 | 0.011329 | 0.011597 | 0.011262 | 0.011530 | 0.011262 |
| 0.011228 | 0.011329 | 0.011396 | 0.011530 | 0.011631 | 0.011329 | 0.011429 |
| 0.011295 | 0.011362 | 0.011262 | 0.011496 | 0.011732 | 0.011262 | 0.011329 |
| 0.011228 | 0.011329 | 0.011295 | 0.011362 | 0.011295 | 0.011295 | 0.011295 |
| 0.011194 | 0.011228 | 0.011194 | 0.011295 | 0.011262 | 0.011296 | 0.011362 |
| 0.011295 | 0.011262 | 0.011329 | 0.011228 | 0.011362 | 0.011194 | 0.011262 |
| 0.011429 | 0.011362 | 0.011597 | 0.011429 | 0.011262 | 0.011496 | 0.011262 |
| 0.011431 | 0.011658 | 0.011475 | 0.011177 | 0.011172 | 0.011281 | 0.011375 |
| 0.012011 | 0.011467 | 0.011184 | 0.011496 | 0.011496 | 0.011295 | 0.011396 |
| 0.011329 | 0.011295 | 0.011362 | 0.011262 | 0.011362 | 0.011295 | 0.011295 |
| 0.011262 | 0.011362 | 0.011564 | 0.011429 | 0.011329 | 0.011295 | 0.011228 |
| 0.011195 | 0.011195 | 0.011262 | 0.011228 | 0.011429 | 0.011396 | 0.011329 |
| 0.011429 | 0.011497 | 0.011228 | 0.011228 | 0.011262 | 0.011262 | 0.011263 |
| 0.011331 | 0.011262 | 0.011262 | 0.011132 | 0.011205 | 0.011165 | 0.011262 |
| 0.011263 | 0.011198 | 0.011245 | 0.011233 | 0.011162 | 0.011197 | 0.011229 |
| 0.011492 | 0.011267 | 0.011301 | 0.011195 | 0.011199 | 0.011329 | 0.011296 |
| 0.011363 | 0.011296 | 0.011296 | 0.011396 | 0.011329 | 0.011698 | 0.011497 |
| 0.011530 | 0.011396 | 0.011262 | 0.011362 | 0.011161 | 0.011396 | 0.011195 |
| 0.011262 | 0.011262 | 0.011228 | 0.011194 | 0.011228 | 0.011195 | 0.011295 |
| 0.011262 | 0.011362 | 0.011295 | 0.011195 | 0.011296 | 0.011396 | 0.011398 |
| 0.011396 | 0.011295 | 0.011195 | 0.011128 | 0.011262 | 0.011195 | 0.011127 |
| 0.011230 | 0.011396 | 0.011195 | 0.011396 | 0.011161 | 0.011262 | 0.011228 |
| 0.011329 | 0.011228 | 0.011262 | 0.011228 | 0.011262 | 0.011127 | 0.011262 |
| 0.011295 | 0.011228 | 0.011295 | 0.011228 | 0.011262 | 0.011295 | 0.011530 |
| 0.011631 | 0.011564 | 0.011631 | 0.011397 | 0.011631 | 0.011262 | 0.011228 |
| 0.011263 | 0.011545 | 0.011380 | 0.011163 | 0.011637 | 0.011129 | 0.011218 |
| 0.011637 | 0.011536 | 0.011429 | 0.011631 | 0.011333 | 0.011496 | 0.011463 |
| 0.011396 | 0.011564 | 0.011415 | 0.011266 | 0.011270 | 0.011295 | 0.011365 |
| 0.011463 | 0.011364 | 0.011500 | 0.011568 | 0.011496 | 0.011564 | 0.011670 |
| 0.011398 | 0.011569 | 0.011500 | 0.011432 | 0.011699 | 0.011161 | 0.011363 |
| 0.011329 | 0.011262 | 0.011161 | 0.011161 | 0.011228 | 0.011228 | 0.011295 |
| 0.011228 | 0.011295 | 0.011194 | 0.011295 | 0.011228 | 0.011228 | 0.011295 |
| 0.011228 | 0.011664 | 0.011564 | 0.011597 | 0.011127 | 0.011228 | 0.011262 |
| 0.011262 | 0.011228 | 0.011295 | 0.011329 | 0.011194 | 0.011194 | 0.011194 |
| 0.011731 | 0.011362 | 0.011362 | 0.011161 | 0.011262 | 0.011429 | 0.011194 |
| 0.011194 | 0.011262 | 0.011228 | 0.011396 | 0.011194 | 0.011329 | 0.011463 |
| 0.011396 | 0.011228 | 0.011228 | 0.011161 | 0.011161 | 0.011329 | 0.011262 |
| 0.011161 | 0.011262 | 0.011127 | 0.011161 | 0.011295 | 0.011430 | 0.011195 |
| 0.011161 | 0.011295 | 0.011228 | 0.011127 | 0.011463 | 0.011127 | 0.011295 |
| 0.011368 | 0.011194 | 0.011496 | 0.011329 | 0.011362 | 0.011228 | 0.011329 |
| 0.000000 | 0.011530 | 0.011127 | 0.011396 | 0.011194 | 0.011194 | 0.011127 |
| 0.011362 | 0.011564 | 0.011262 | 0.011329 | 0.011161 | 0.011564 | 0.011194 |
| 0.011194 | 0.011194 | 0.011228 | 0.011329 | 0.011228 | 0.011329 | 0.011396 |
| 0.011396 | 0.011362 | 0.011262 | 0.011362 | 0.011329 | 0.011194 | 0.011161 |
| 0.011194 | 0.011194 | 0.011262 | 0.011194 | 0.011161 | 0.011329 | 0.011194 |
| 0.011228 | 0.011228 | 0.011362 | 0.011396 | 0.011295 | 0.011228 | 0.011228 |
| 0.011295 | 0.011228 | 0.011329 | 0.011194 | 0.011329 | 0.011429 | 0.011731 |
| 0.011228 | 0.011631 | 0.011233 | 0.017747 | 0.011191 | 0.011305 | 0.011583 |
| 0.011545 | 0.011588 | 0.011270 | 0.011234 | 0.011609 | 0.011612 | 0.011242 |
| 0.011487 | 0.011426 | 0.011138 | 0.011228 | 0.011216 | 0.011208 | 0.011232 |
| 0.011482 | 0.011395 | 0.011394 | 0.011259 | 0.011362 | 0.011396 | 0.011398 |
| 0.011266 | 0.011362 | 0.011362 | 0.011329 | 0.011295 | 0.011295 | 0.011262 |
| 0.011295 | 0.011228 | 0.011262 | 0.011295 | 0.011262 | 0.011195 | 0.011228 |
| 0.011228 | 0.011295 | 0.011195 | 0.011295 | 0.011329 | 0.011362 | 0.011262 |
| 0.011295 | 0.011262 | 0.011597 | 0.011597 | 0.011329 | 0.011363 | 0.011396 |

|          |          |          |          |          |          |          |
|----------|----------|----------|----------|----------|----------|----------|
| 0.011161 | 0.011161 | 0.011195 | 0.011295 | 0.011161 | 0.011396 | 0.011396 |
| 0.011429 | 0.011429 | 0.011362 | 0.011463 | 0.011631 | 0.011464 | 0.011295 |
| 0.011295 | 0.011362 | 0.011396 | 0.011228 | 0.011295 | 0.011262 | 0.011295 |
| 0.011363 | 0.011362 | 0.011396 | 0.011362 | 0.011262 | 0.011463 | 0.011429 |
| 0.011297 | 0.011195 | 0.011295 | 0.011396 | 0.011295 | 0.011430 | 0.011463 |
| 0.011631 | 0.011333 | 0.011496 | 0.011463 | 0.011396 | 0.011564 | 0.011195 |
| 0.011363 | 0.011262 | 0.011228 | 0.011228 | 0.011295 | 0.011195 | 0.011295 |
| 0.011329 | 0.011362 | 0.011262 | 0.011295 | 0.011262 | 0.011597 | 0.011597 |
| 0.011329 | 0.011363 | 0.011429 | 0.011362 | 0.012002 | 0.011417 | 0.011341 |
| 0.011412 | 0.011372 | 0.011482 | 0.011372 | 0.011480 | 0.011405 | 0.011370 |
| 0.011953 | 0.011268 | 0.011403 | 0.011337 | 0.011611 | 0.011468 | 0.011570 |
| 0.011978 | 0.011437 | 0.011533 | 0.011597 | 0.011463 | 0.011463 | 0.011499 |
| 0.011161 | 0.011329 | 0.011463 | 0.011429 | 0.011432 | 0.011429 | 0.011397 |
| 0.011262 | 0.011194 | 0.011228 | 0.011262 | 0.011161 | 0.011228 | 0.011127 |
| 0.011262 | 0.011295 | 0.011194 | 0.011161 | 0.011262 | 0.011194 | 0.011228 |
| 0.011228 | 0.011161 | 0.011228 | 0.011262 | 0.011161 | 0.011362 | 0.011396 |
| 0.011295 | 0.011362 | 0.011295 | 0.011295 | 0.011228 | 0.011631 | 0.011262 |
| 0.011304 | 0.011228 | 0.011463 | 0.011467 | 0.011329 | 0.011329 | 0.011329 |
| 0.011329 | 0.011262 | 0.011228 | 0.011262 | 0.011362 | 0.011362 | 0.011295 |
| 0.011295 | 0.011429 | 0.011597 | 0.011329 | 0.011530 | 0.011530 | 0.011396 |
| 0.011228 | 0.011295 | 0.011329 | 0.011732 | 0.011295 | 0.011329 | 0.011295 |
| 0.011329 | 0.011262 | 0.011262 | 0.011564 | 0.011497 | 0.011530 | 0.011262 |
| 0.011362 | 0.011429 | 0.011295 | 0.011362 | 0.011329 | 0.011194 | 0.011530 |
| 0.011295 | 0.011262 | 0.011262 | 0.011429 | 0.011262 | 0.011362 | 0.011597 |
| 0.011295 | 0.011671 | 0.011664 | 0.011467 | 0.011229 | 0.011366 | 0.011267 |
| 0.011115 | 0.011683 | 0.011201 | 0.011417 | 0.011255 | 0.011315 | 0.011379 |
| 0.011468 | 0.000000 | 0.011338 | 0.011126 | 0.011222 | 0.011395 | 0.011344 |
| 0.011362 | 0.011257 | 0.011342 | 0.011272 | 0.011296 | 0.011429 | 0.011497 |
| 0.011497 | 0.011363 | 0.011466 | 0.011467 | 0.011602 | 0.011625 | 0.011295 |
| 0.011530 | 0.011396 | 0.011262 | 0.011362 | 0.011161 | 0.011396 | 0.011195 |
| 0.011262 | 0.011262 | 0.011228 | 0.011194 | 0.011228 | 0.011195 | 0.011295 |
| 0.011270 | 0.011270 | 0.011266 | 0.011300 | 0.011436 | 0.011402 | 0.011402 |
| 0.011401 | 0.011329 | 0.011134 | 0.011132 | 0.011263 | 0.011433 | 0.011433 |
| 0.011228 | 0.011297 | 0.011531 | 0.011499 | 0.011430 | 0.011464 | 0.011396 |
| 0.011329 | 0.011396 | 0.011396 | 0.011295 | 0.011866 | 0.011463 | 0.011530 |
| 0.011564 | 0.011630 | 0.011265 | 0.011337 | 0.011228 | 0.011429 | 0.011396 |
| 0.011430 | 0.011463 | 0.011463 | 0.011463 | 0.011571 | 0.011597 | 0.011234 |
| 0.011128 | 0.011130 | 0.011230 | 0.011196 | 0.011299 | 0.011135 | 0.011468 |
| 0.011266 | 0.011411 | 0.011156 | 0.011285 | 0.011262 | 0.011334 | 0.011228 |
| 0.011195 | 0.011195 | 0.011262 | 0.011228 | 0.011429 | 0.011396 | 0.011329 |
| 0.011429 | 0.011497 | 0.011228 | 0.011228 | 0.011262 | 0.011262 | 0.011263 |
| 0.011331 | 0.011262 | 0.011262 | 0.011296 | 0.011429 | 0.011497 | 0.011497 |
| 0.011363 | 0.011466 | 0.011467 | 0.011602 | 0.011625 | 0.011295 | 0.011463 |
| 0.011396 | 0.011396 | 0.011229 | 0.011408 | 0.011303 | 0.011367 | 0.011235 |
| 0.011404 | 0.011561 | 0.011399 | 0.011298 | 0.011195 | 0.011396 | 0.011262 |
| 0.011362 | 0.011295 | 0.011195 | 0.011296 | 0.011396 | 0.011398 | 0.011295 |
| 0.011195 | 0.011128 | 0.011262 | 0.011195 | 0.011127 | 0.011230 | 0.011396 |
| 0.011295 | 0.011228 | 0.011262 | 0.011295 | 0.011262 | 0.011195 | 0.011396 |
| 0.011262 | 0.011295 | 0.011295 | 0.011228 | 0.011295 | 0.011530 | 0.011194 |
| 0.011228 | 0.011631 | 0.011228 | 0.011262 | 0.011228 | 0.011597 | 0.011189 |
| 0.011678 | 0.011188 | 0.011261 | 0.011422 | 0.011508 | 0.011419 | 0.011144 |
| 0.011218 | 0.011396 | 0.011496 | 0.011603 | 0.011464 | 0.011601 | 0.011733 |
| 0.011632 | 0.011669 | 0.011631 | 0.011880 | 0.011597 | 0.012471 | 0.011633 |
| 0.012372 | 0.012139 | 0.012273 | 0.012545 | 0.011597 | 0.011295 | 0.011598 |
| 0.012036 | 0.011971 | 0.011564 | 0.011463 | 0.011531 | 0.011531 | 0.011500 |
| 0.011396 | 0.011399 | 0.011463 | 0.011430 | 0.011800 | 0.011866 | 0.011867 |
| 0.011766 | 0.011867 | 0.011970 | 0.011737 | 0.012036 | 0.012042 | 0.012103 |
| 0.012104 | 0.012138 | 0.012084 | 0.012104 | 0.012105 | 0.011329 | 0.011631 |
| 0.011699 | 0.012202 | 0.011704 | 0.011933 | 0.012406 | 0.011468 | 0.011363 |
| 0.011329 | 0.011329 | 0.011799 | 0.011842 | 0.011939 | 0.011664 | 0.011330 |

|          |          |          |          |          |          |          |
|----------|----------|----------|----------|----------|----------|----------|
| S330     | 0.011933 | 0.011933 | 0.012270 | 0.012034 | 0.012034 | 0.012101 |
| 0.011909 | 0.011841 | 0.012101 | 0.011530 | 0.011597 | 0.011565 | 0.011530 |
| 0.011564 | 0.011732 | 0.011530 | 0.011564 | 0.011631 | 0.011597 | 0.011564 |
| 0.011530 | 0.011564 | 0.011664 | 0.011531 | 0.011497 | 0.011564 | 0.011875 |
| 0.011799 | 0.011564 | 0.011463 | 0.011698 | 0.011564 | 0.011597 | 0.011564 |
| 0.011597 | 0.011631 | 0.011597 | 0.011597 | 0.011631 | 0.011597 | 0.011765 |
| 0.011530 | 0.011597 | 0.011631 | 0.011564 | 0.011664 | 0.011698 | 0.011631 |
| 0.011597 | 0.011765 | 0.011665 | 0.011933 | 0.011597 | 0.000000 | 0.011597 |
| 0.011564 | 0.011665 | 0.011732 | 0.000000 | 0.011967 | 0.011664 | 0.011765 |
| 0.011564 | 0.011631 | 0.011597 | 0.011765 | 0.012068 | 0.011597 | 0.011664 |
| 0.011564 | 0.011664 | 0.011631 | 0.011698 | 0.011631 | 0.011631 | 0.011631 |
| 0.011530 | 0.011564 | 0.011530 | 0.011631 | 0.011597 | 0.011632 | 0.011698 |
| 0.011631 | 0.011597 | 0.011597 | 0.011564 | 0.011698 | 0.011463 | 0.011530 |
| 0.011765 | 0.011698 | 0.011933 | 0.011765 | 0.011597 | 0.011765 | 0.011597 |
| 0.011765 | 0.011994 | 0.011777 | 0.011451 | 0.011508 | 0.011649 | 0.011690 |
| 0.012341 | 0.011670 | 0.011431 | 0.011832 | 0.011832 | 0.011631 | 0.011732 |
| 0.011664 | 0.011631 | 0.011698 | 0.011597 | 0.011698 | 0.011564 | 0.011631 |
| 0.011597 | 0.011698 | 0.011900 | 0.011765 | 0.011664 | 0.011631 | 0.011497 |
| 0.011530 | 0.011530 | 0.011530 | 0.011564 | 0.011765 | 0.011732 | 0.011665 |
| 0.011765 | 0.011833 | 0.011564 | 0.011564 | 0.011597 | 0.011597 | 0.011601 |
| 0.011669 | 0.011597 | 0.011597 | 0.011456 | 0.011530 | 0.011516 | 0.011598 |
| 0.011602 | 0.011541 | 0.011577 | 0.011578 | 0.011502 | 0.011540 | 0.011567 |
| 0.011852 | 0.011612 | 0.011577 | 0.011531 | 0.011544 | 0.011666 | 0.011632 |
| 0.011699 | 0.011633 | 0.011632 | 0.011731 | 0.011664 | 0.011967 | 0.011833 |
| 0.011866 | 0.011732 | 0.011597 | 0.011698 | 0.011497 | 0.011732 | 0.011530 |
| 0.011597 | 0.011597 | 0.011564 | 0.011530 | 0.011564 | 0.011530 | 0.011631 |
| 0.011530 | 0.011631 | 0.011631 | 0.011530 | 0.011633 | 0.011732 | 0.011736 |
| 0.011665 | 0.011631 | 0.011530 | 0.011465 | 0.011597 | 0.011530 | 0.011463 |
| 0.011570 | 0.011665 | 0.011463 | 0.011665 | 0.011429 | 0.011598 | 0.011497 |
| 0.011597 | 0.011564 | 0.011530 | 0.011497 | 0.011530 | 0.011463 | 0.011530 |
| 0.011564 | 0.011564 | 0.011631 | 0.011564 | 0.011597 | 0.011631 | 0.011866 |
| 0.011967 | 0.011900 | 0.011967 | 0.011734 | 0.011967 | 0.011597 | 0.011564 |
| 0.011601 | 0.011909 | 0.011609 | 0.011472 | 0.011976 | 0.011469 | 0.011611 |
| 0.011943 | 0.011876 | 0.011765 | 0.011967 | 0.011675 | 0.011832 | 0.011732 |
| 0.011732 | 0.011900 | 0.011771 | 0.011637 | 0.011689 | 0.011631 | 0.011703 |
| 0.011799 | 0.011701 | 0.011838 | 0.011601 | 0.011832 | 0.011900 | 0.012009 |
| 0.011737 | 0.011603 | 0.011839 | 0.011770 | 0.012036 | 0.011496 | 0.011700 |
| 0.011597 | 0.011597 | 0.011496 | 0.011496 | 0.011496 | 0.011564 | 0.011631 |
| 0.011496 | 0.011564 | 0.011463 | 0.011631 | 0.011496 | 0.011564 | 0.011631 |
| 0.011564 | 0.012000 | 0.011900 | 0.011933 | 0.011463 | 0.011564 | 0.011597 |
| 0.011597 | 0.011496 | 0.011631 | 0.011664 | 0.011530 | 0.011530 | 0.011530 |
| 0.012068 | 0.011698 | 0.011698 | 0.011496 | 0.011597 | 0.011698 | 0.011530 |
| 0.011530 | 0.011597 | 0.011564 | 0.011664 | 0.011530 | 0.011664 | 0.011731 |
| 0.011731 | 0.011564 | 0.011564 | 0.011496 | 0.011496 | 0.011664 | 0.011597 |
| 0.011496 | 0.011597 | 0.011463 | 0.011496 | 0.011631 | 0.011766 | 0.011530 |
| 0.011497 | 0.011631 | 0.011564 | 0.011463 | 0.011799 | 0.011463 | 0.011631 |
| 0.011642 | 0.011530 | 0.011832 | 0.011665 | 0.011698 | 0.011564 | 0.011664 |
| 0.011530 | 0.000000 | 0.011463 | 0.011732 | 0.011530 | 0.011530 | 0.011463 |
| 0.011631 | 0.011900 | 0.011597 | 0.011664 | 0.011496 | 0.011900 | 0.011530 |
| 0.011530 | 0.011530 | 0.011564 | 0.011597 | 0.011564 | 0.011664 | 0.011731 |
| 0.011732 | 0.011631 | 0.011597 | 0.011698 | 0.011597 | 0.011530 | 0.011496 |
| 0.011530 | 0.011530 | 0.011597 | 0.011530 | 0.011429 | 0.011664 | 0.011530 |
| 0.011564 | 0.011564 | 0.011698 | 0.011732 | 0.011631 | 0.011496 | 0.011564 |
| 0.011631 | 0.011564 | 0.011664 | 0.011530 | 0.011664 | 0.011765 | 0.012068 |
| 0.011564 | 0.011967 | 0.011578 | 0.018087 | 0.011518 | 0.011733 | 0.011932 |
| 0.011891 | 0.011940 | 0.011532 | 0.011466 | 0.011939 | 0.011958 | 0.011485 |
| 0.011677 | 0.011793 | 0.011450 | 0.011479 | 0.011450 | 0.011554 | 0.011576 |
| 0.011670 | 0.011731 | 0.011690 | 0.011523 | 0.011698 | 0.011732 | 0.011737 |
| 0.011541 | 0.011698 | 0.011698 | 0.011665 | 0.011631 | 0.011631 | 0.011598 |
| 0.011631 | 0.011564 | 0.011530 | 0.011631 | 0.011598 | 0.011530 | 0.011564 |

|          |          |          |          |          |          |          |
|----------|----------|----------|----------|----------|----------|----------|
| 0.011564 | 0.011631 | 0.011530 | 0.011631 | 0.011665 | 0.011698 | 0.011597 |
| 0.011631 | 0.011597 | 0.011934 | 0.011934 | 0.011665 | 0.011699 | 0.011732 |
| 0.011497 | 0.011497 | 0.011530 | 0.011564 | 0.011497 | 0.011732 | 0.011732 |
| 0.011765 | 0.011765 | 0.011698 | 0.011799 | 0.011967 | 0.011801 | 0.011564 |
| 0.011631 | 0.011698 | 0.011665 | 0.011564 | 0.011631 | 0.011597 | 0.011631 |
| 0.011699 | 0.011698 | 0.011732 | 0.011631 | 0.011464 | 0.011799 | 0.011698 |
| 0.011636 | 0.011530 | 0.011631 | 0.011732 | 0.011631 | 0.011766 | 0.011799 |
| 0.011967 | 0.011675 | 0.011832 | 0.011732 | 0.011732 | 0.011900 | 0.011531 |
| 0.011700 | 0.011598 | 0.011564 | 0.011564 | 0.011631 | 0.011530 | 0.011631 |
| 0.011665 | 0.011698 | 0.011597 | 0.011631 | 0.011597 | 0.011934 | 0.011934 |
| 0.011665 | 0.011699 | 0.011765 | 0.011698 | 0.012339 | 0.011775 | 0.011693 |
| 0.011763 | 0.011719 | 0.011833 | 0.011718 | 0.011830 | 0.011750 | 0.011715 |
| 0.012297 | 0.011614 | 0.011745 | 0.011683 | 0.011956 | 0.011808 | 0.011638 |
| 0.012318 | 0.011814 | 0.011872 | 0.011933 | 0.011799 | 0.011799 | 0.011837 |
| 0.011496 | 0.011597 | 0.011731 | 0.011698 | 0.011770 | 0.011765 | 0.011734 |
| 0.011597 | 0.011463 | 0.011496 | 0.011530 | 0.011429 | 0.011564 | 0.011463 |
| 0.011597 | 0.011631 | 0.011530 | 0.011496 | 0.011597 | 0.011530 | 0.011564 |
| 0.011564 | 0.011496 | 0.011564 | 0.011597 | 0.011496 | 0.011631 | 0.011731 |
| 0.011631 | 0.011698 | 0.011631 | 0.011631 | 0.011564 | 0.011967 | 0.011597 |
| 0.011652 | 0.011564 | 0.011799 | 0.011807 | 0.011597 | 0.011664 | 0.011664 |
| 0.011664 | 0.011530 | 0.011564 | 0.011530 | 0.011698 | 0.011698 | 0.011631 |
| 0.011631 | 0.011765 | 0.011933 | 0.011597 | 0.011866 | 0.011866 | 0.011731 |
| 0.011564 | 0.011631 | 0.011664 | 0.012068 | 0.011631 | 0.011597 | 0.011631 |
| 0.011664 | 0.011597 | 0.011597 | 0.011832 | 0.011765 | 0.011799 | 0.011597 |
| 0.011698 | 0.011765 | 0.011631 | 0.011698 | 0.011664 | 0.011530 | 0.011866 |
| 0.011631 | 0.011597 | 0.011597 | 0.011765 | 0.011597 | 0.011698 | 0.011933 |
| 0.011631 | 0.011977 | 0.012000 | 0.011792 | 0.011455 | 0.011706 | 0.011421 |
| 0.011500 | 0.011956 | 0.011552 | 0.011596 | 0.011499 | 0.011671 | 0.011591 |
| 0.011723 | 0.011389 | 0.011561 | 0.011324 | 0.011437 | 0.011529 | 0.011628 |
| 0.011663 | 0.011493 | 0.011694 | 0.011624 | 0.011633 | 0.011765 | 0.011833 |
| 0.011833 | 0.011699 | 0.011804 | 0.011806 | 0.011942 | 0.011979 | 0.011631 |
| 0.011866 | 0.011732 | 0.011597 | 0.011698 | 0.011497 | 0.011732 | 0.011530 |
| 0.011597 | 0.011597 | 0.011564 | 0.011530 | 0.011564 | 0.011530 | 0.011631 |
| 0.011619 | 0.011620 | 0.011608 | 0.011642 | 0.011779 | 0.011675 | 0.011743 |
| 0.011742 | 0.011665 | 0.011503 | 0.011492 | 0.011602 | 0.011772 | 0.011773 |
| 0.011565 | 0.011636 | 0.011868 | 0.011838 | 0.011767 | 0.011801 | 0.011731 |
| 0.011664 | 0.011732 | 0.011731 | 0.011631 | 0.012202 | 0.011732 | 0.011866 |
| 0.011900 | 0.011915 | 0.011606 | 0.011684 | 0.011564 | 0.011765 | 0.011732 |
| 0.011767 | 0.011799 | 0.011799 | 0.011799 | 0.011925 | 0.011933 | 0.011581 |
| 0.011466 | 0.011476 | 0.011571 | 0.011536 | 0.011641 | 0.011508 | 0.011808 |
| 0.011609 | 0.011674 | 0.011441 | 0.011622 | 0.011598 | 0.011676 | 0.011497 |
| 0.011530 | 0.011530 | 0.011530 | 0.011564 | 0.011765 | 0.011732 | 0.011665 |
| 0.011765 | 0.011833 | 0.011564 | 0.011564 | 0.011597 | 0.011597 | 0.011601 |
| 0.011669 | 0.011597 | 0.011597 | 0.011633 | 0.011765 | 0.011833 | 0.011833 |
| 0.011699 | 0.011804 | 0.011806 | 0.011942 | 0.011979 | 0.011631 | 0.011799 |
| 0.011732 | 0.011732 | 0.011567 | 0.011756 | 0.011651 | 0.011707 | 0.011516 |
| 0.011646 | 0.011926 | 0.011695 | 0.011638 | 0.011463 | 0.011665 | 0.011530 |
| 0.011631 | 0.011631 | 0.011530 | 0.011633 | 0.011732 | 0.011736 | 0.011631 |
| 0.011530 | 0.011465 | 0.011597 | 0.011530 | 0.011463 | 0.011570 | 0.011665 |
| 0.011631 | 0.011564 | 0.011530 | 0.011631 | 0.011598 | 0.011530 | 0.011732 |
| 0.011597 | 0.011631 | 0.011631 | 0.011564 | 0.011631 | 0.011866 | 0.011530 |
| 0.011564 | 0.011967 | 0.011564 | 0.011530 | 0.011564 | 0.011933 | 0.011446 |
| 0.011960 | 0.011485 | 0.011461 | 0.011745 | 0.011793 | 0.011778 | 0.011395 |
| 0.011427 | 0.011731 | 0.011832 | 0.011943 | 0.011801 | 0.011872 | 0.012069 |
| 0.011969 | 0.012007 | 0.011967 | 0.012188 | 0.011933 | 0.012809 | 0.011970 |
| 0.012709 | 0.012477 | 0.012611 | 0.012883 | 0.011933 | 0.011631 | 0.011934 |
| 0.012373 | 0.012309 | 0.011900 | 0.011799 | 0.011867 | 0.011867 | 0.011838 |
| 0.011731 | 0.011739 | 0.011799 | 0.011766 | 0.012137 | 0.012202 | 0.012204 |
| 0.012103 | 0.012204 | 0.012308 | 0.012075 | 0.012374 | 0.012381 | 0.012441 |
| 0.012442 | 0.012475 | 0.012426 | 0.012442 | 0.012443 | 0.011664 | 0.011968 |

|          |          |          |          |          |          |          |
|----------|----------|----------|----------|----------|----------|----------|
| 0.012036 | 0.012539 | 0.012010 | 0.012203 | 0.012676 | 0.011807 | 0.011699 |
| 0.011664 | 0.011664 | 0.012136 | 0.012254 | 0.012292 | 0.012000 | 0.011667 |
| S331     | 0.011530 | 0.011530 | 0.011866 | 0.011631 | 0.011631 | 0.011698 |
| 0.011535 | 0.011468 | 0.011698 | 0.011127 | 0.011194 | 0.011161 | 0.011127 |
| 0.011161 | 0.011329 | 0.011127 | 0.011161 | 0.011228 | 0.011194 | 0.011161 |
| 0.011127 | 0.011161 | 0.011262 | 0.011127 | 0.011161 | 0.011161 | 0.011501 |
| 0.011396 | 0.011161 | 0.000000 | 0.011295 | 0.011228 | 0.011195 | 0.011228 |
| 0.011194 | 0.011295 | 0.011194 | 0.011194 | 0.011228 | 0.011194 | 0.011362 |
| 0.011127 | 0.011194 | 0.011228 | 0.011161 | 0.011262 | 0.011295 | 0.011228 |
| 0.011194 | 0.011362 | 0.011262 | 0.011530 | 0.011194 | 0.011463 | 0.011194 |
| 0.011161 | 0.011262 | 0.011329 | 0.011463 | 0.011564 | 0.011262 | 0.011362 |
| 0.011228 | 0.011295 | 0.011195 | 0.011429 | 0.011664 | 0.011194 | 0.011262 |
| 0.011161 | 0.011262 | 0.011228 | 0.011295 | 0.011228 | 0.011228 | 0.011228 |
| 0.011127 | 0.011161 | 0.011127 | 0.011228 | 0.011194 | 0.011228 | 0.011295 |
| 0.011228 | 0.011194 | 0.011262 | 0.011161 | 0.011295 | 0.011127 | 0.011194 |
| 0.011362 | 0.011295 | 0.011530 | 0.011362 | 0.011194 | 0.011429 | 0.011194 |
| 0.011357 | 0.011583 | 0.011400 | 0.011099 | 0.011098 | 0.011207 | 0.011296 |
| 0.011938 | 0.011365 | 0.011102 | 0.011429 | 0.011429 | 0.011228 | 0.011329 |
| 0.011262 | 0.011228 | 0.011295 | 0.011194 | 0.011295 | 0.011228 | 0.011228 |
| 0.011194 | 0.011295 | 0.011496 | 0.011362 | 0.011262 | 0.011228 | 0.011161 |
| 0.011127 | 0.011127 | 0.011195 | 0.011161 | 0.011362 | 0.011329 | 0.011262 |
| 0.011362 | 0.011429 | 0.011161 | 0.011161 | 0.011195 | 0.011195 | 0.011195 |
| 0.011263 | 0.011195 | 0.011195 | 0.000000 | 0.011133 | 0.011095 | 0.011195 |
| 0.011196 | 0.011129 | 0.011171 | 0.011164 | 0.011094 | 0.011129 | 0.011162 |
| 0.011420 | 0.011198 | 0.011232 | 0.011128 | 0.011129 | 0.011262 | 0.011228 |
| 0.011296 | 0.011229 | 0.011228 | 0.011329 | 0.011262 | 0.011631 | 0.011430 |
| 0.011463 | 0.011329 | 0.011195 | 0.011295 | 0.011094 | 0.011329 | 0.011127 |
| 0.011194 | 0.011194 | 0.011161 | 0.011127 | 0.011161 | 0.011127 | 0.011228 |
| 0.011195 | 0.011295 | 0.011228 | 0.011127 | 0.011229 | 0.011329 | 0.011331 |
| 0.011329 | 0.011228 | 0.011127 | 0.000000 | 0.011195 | 0.011127 | 0.000000 |
| 0.011162 | 0.011329 | 0.011127 | 0.011329 | 0.011094 | 0.011195 | 0.011161 |
| 0.011262 | 0.011161 | 0.011195 | 0.011161 | 0.011195 | 0.000000 | 0.011195 |
| 0.011228 | 0.011161 | 0.011228 | 0.011161 | 0.011195 | 0.011228 | 0.011463 |
| 0.011564 | 0.011496 | 0.011564 | 0.011330 | 0.011564 | 0.011195 | 0.011161 |
| 0.011195 | 0.011464 | 0.011289 | 0.011095 | 0.011569 | 0.000000 | 0.011178 |
| 0.011569 | 0.011468 | 0.011362 | 0.011564 | 0.011265 | 0.011429 | 0.011396 |
| 0.011329 | 0.011496 | 0.011344 | 0.011184 | 0.011228 | 0.011228 | 0.011297 |
| 0.011396 | 0.011296 | 0.011432 | 0.011500 | 0.011429 | 0.011497 | 0.011602 |
| 0.011331 | 0.011501 | 0.011432 | 0.011364 | 0.011632 | 0.011094 | 0.011296 |
| 0.011262 | 0.011194 | 0.011094 | 0.011094 | 0.011161 | 0.011161 | 0.011228 |
| 0.011161 | 0.011228 | 0.011127 | 0.011228 | 0.011161 | 0.011161 | 0.011228 |
| 0.011161 | 0.011597 | 0.011496 | 0.011530 | 0.000000 | 0.011161 | 0.011195 |
| 0.011194 | 0.011161 | 0.011228 | 0.011262 | 0.011127 | 0.011127 | 0.011127 |
| 0.011664 | 0.011295 | 0.011295 | 0.011094 | 0.011194 | 0.011362 | 0.011127 |
| 0.011127 | 0.011194 | 0.011161 | 0.011329 | 0.011127 | 0.011262 | 0.011396 |
| 0.011329 | 0.011161 | 0.011161 | 0.011094 | 0.011094 | 0.011262 | 0.011194 |
| 0.011094 | 0.011194 | 0.000000 | 0.011094 | 0.011228 | 0.011362 | 0.011127 |
| 0.011094 | 0.011228 | 0.011161 | 0.000000 | 0.011396 | 0.000000 | 0.011228 |
| 0.011300 | 0.011127 | 0.011429 | 0.011262 | 0.011295 | 0.011161 | 0.011262 |
| 0.011127 | 0.011463 | 0.000000 | 0.011329 | 0.011127 | 0.011127 | 0.000000 |
| 0.011295 | 0.011497 | 0.011195 | 0.011262 | 0.011094 | 0.011496 | 0.011127 |
| 0.011127 | 0.011127 | 0.011161 | 0.011262 | 0.011161 | 0.011262 | 0.011329 |
| 0.011329 | 0.011295 | 0.011194 | 0.011295 | 0.011262 | 0.011127 | 0.011094 |
| 0.011127 | 0.011127 | 0.011195 | 0.011127 | 0.011094 | 0.011262 | 0.011127 |
| 0.011161 | 0.011161 | 0.011295 | 0.011329 | 0.011228 | 0.011161 | 0.011161 |
| 0.011228 | 0.011161 | 0.011262 | 0.011127 | 0.011262 | 0.011362 | 0.011664 |
| 0.011161 | 0.011564 | 0.011164 | 0.017672 | 0.011126 | 0.011305 | 0.011514 |
| 0.011475 | 0.011517 | 0.011217 | 0.011176 | 0.011609 | 0.011543 | 0.011242 |
| 0.011392 | 0.011426 | 0.000000 | 0.011144 | 0.011138 | 0.011208 | 0.011146 |
| 0.011389 | 0.011321 | 0.011320 | 0.011126 | 0.011295 | 0.011329 | 0.011331 |



|          |          |          |          |          |          |          |
|----------|----------|----------|----------|----------|----------|----------|
| 0.011198 | 0.011295 | 0.011295 | 0.011262 | 0.011228 | 0.011228 | 0.011195 |
| 0.011228 | 0.011161 | 0.011195 | 0.011228 | 0.011195 | 0.011127 | 0.011161 |
| 0.011161 | 0.011228 | 0.011127 | 0.011228 | 0.011262 | 0.011295 | 0.011195 |
| 0.011228 | 0.011195 | 0.011530 | 0.011530 | 0.011262 | 0.011296 | 0.011329 |
| 0.011094 | 0.011094 | 0.011127 | 0.011228 | 0.011094 | 0.011329 | 0.011329 |
| 0.011362 | 0.011362 | 0.011295 | 0.011396 | 0.011564 | 0.011397 | 0.011228 |
| 0.011228 | 0.011295 | 0.011329 | 0.011161 | 0.011228 | 0.011195 | 0.011228 |
| 0.011295 | 0.011295 | 0.011329 | 0.011295 | 0.011195 | 0.011396 | 0.011362 |
| 0.011230 | 0.011127 | 0.011228 | 0.011329 | 0.011228 | 0.011362 | 0.011396 |
| 0.011564 | 0.011265 | 0.011429 | 0.011396 | 0.011329 | 0.011496 | 0.011128 |
| 0.011296 | 0.011195 | 0.011161 | 0.011161 | 0.011228 | 0.011127 | 0.011228 |
| 0.011262 | 0.011295 | 0.011195 | 0.011228 | 0.011195 | 0.011530 | 0.011530 |
| 0.011262 | 0.011296 | 0.011362 | 0.011295 | 0.011934 | 0.011346 | 0.011271 |
| 0.011341 | 0.011303 | 0.011411 | 0.011303 | 0.011410 | 0.011336 | 0.011302 |
| 0.011884 | 0.011199 | 0.011334 | 0.011268 | 0.011542 | 0.011400 | 0.011502 |
| 0.011910 | 0.011362 | 0.011466 | 0.011530 | 0.011396 | 0.011396 | 0.011432 |
| 0.011094 | 0.011262 | 0.011396 | 0.011362 | 0.011364 | 0.011362 | 0.011330 |
| 0.011194 | 0.011127 | 0.011161 | 0.011194 | 0.011094 | 0.011161 | 0.000000 |
| 0.011194 | 0.011228 | 0.011127 | 0.011094 | 0.011194 | 0.011127 | 0.011161 |
| 0.011161 | 0.011094 | 0.011161 | 0.011195 | 0.011094 | 0.011295 | 0.011329 |
| 0.011228 | 0.011295 | 0.011228 | 0.011228 | 0.011161 | 0.011564 | 0.011194 |
| 0.011234 | 0.011161 | 0.011396 | 0.011399 | 0.011262 | 0.011262 | 0.011262 |
| 0.011262 | 0.011195 | 0.011161 | 0.011195 | 0.011295 | 0.011295 | 0.011228 |
| 0.011228 | 0.011362 | 0.011530 | 0.011262 | 0.011463 | 0.011463 | 0.011329 |
| 0.011161 | 0.011228 | 0.011262 | 0.011664 | 0.011228 | 0.011262 | 0.011228 |
| 0.011262 | 0.011194 | 0.011194 | 0.011497 | 0.011429 | 0.011463 | 0.011194 |
| 0.011295 | 0.011362 | 0.011228 | 0.011295 | 0.011262 | 0.011127 | 0.011463 |
| 0.011228 | 0.011194 | 0.011194 | 0.011362 | 0.011194 | 0.011295 | 0.011530 |
| 0.011228 | 0.011603 | 0.011597 | 0.011385 | 0.011117 | 0.011298 | 0.011163 |
| 0.011115 | 0.011605 | 0.011131 | 0.011328 | 0.011158 | 0.011264 | 0.011273 |
| 0.011366 | 0.000000 | 0.011227 | 0.000000 | 0.011114 | 0.011261 | 0.011263 |
| 0.011286 | 0.011178 | 0.011272 | 0.011201 | 0.011229 | 0.011362 | 0.011429 |
| 0.011429 | 0.011296 | 0.011398 | 0.011399 | 0.011535 | 0.011555 | 0.011228 |
| 0.011463 | 0.011329 | 0.011195 | 0.011295 | 0.011094 | 0.011329 | 0.011127 |
| 0.011194 | 0.011194 | 0.011161 | 0.011127 | 0.011161 | 0.011127 | 0.011228 |
| 0.011200 | 0.011200 | 0.011197 | 0.011231 | 0.011368 | 0.011333 | 0.011333 |
| 0.011333 | 0.011262 | 0.000000 | 0.000000 | 0.011196 | 0.011365 | 0.011366 |
| 0.011161 | 0.011230 | 0.011464 | 0.011432 | 0.011363 | 0.011397 | 0.011329 |
| 0.011262 | 0.011329 | 0.011329 | 0.011228 | 0.011799 | 0.011396 | 0.011463 |
| 0.011497 | 0.011558 | 0.011197 | 0.011268 | 0.011161 | 0.011362 | 0.011329 |
| 0.011363 | 0.011396 | 0.011396 | 0.011396 | 0.011532 | 0.011530 | 0.011164 |
| 0.000000 | 0.000000 | 0.011162 | 0.011128 | 0.011231 | 0.000000 | 0.011400 |
| 0.011197 | 0.011323 | 0.000000 | 0.011210 | 0.011195 | 0.011265 | 0.011161 |
| 0.011127 | 0.011127 | 0.011195 | 0.011161 | 0.011362 | 0.011329 | 0.011262 |
| 0.011362 | 0.011429 | 0.011161 | 0.011161 | 0.011195 | 0.011195 | 0.011195 |
| 0.011263 | 0.011195 | 0.011195 | 0.011229 | 0.011362 | 0.011429 | 0.011429 |
| 0.011296 | 0.011398 | 0.011399 | 0.011535 | 0.011555 | 0.011228 | 0.011396 |
| 0.011329 | 0.011329 | 0.011162 | 0.011339 | 0.011269 | 0.011299 | 0.011165 |
| 0.011336 | 0.011516 | 0.011314 | 0.011230 | 0.011127 | 0.011329 | 0.011195 |
| 0.011295 | 0.011228 | 0.011127 | 0.011229 | 0.011329 | 0.011331 | 0.011228 |
| 0.011127 | 0.000000 | 0.011195 | 0.011127 | 0.000000 | 0.011162 | 0.011329 |
| 0.011228 | 0.011161 | 0.011195 | 0.011228 | 0.011195 | 0.011127 | 0.011329 |
| 0.011194 | 0.011228 | 0.011228 | 0.011161 | 0.011228 | 0.011463 | 0.011127 |
| 0.011161 | 0.011564 | 0.011161 | 0.011194 | 0.011161 | 0.011530 | 0.011103 |
| 0.011566 | 0.011103 | 0.011161 | 0.011342 | 0.011426 | 0.011347 | 0.000000 |
| 0.011113 | 0.011329 | 0.011429 | 0.011535 | 0.011397 | 0.011534 | 0.011665 |
| 0.011565 | 0.011601 | 0.011564 | 0.011812 | 0.011530 | 0.012404 | 0.011565 |
| 0.012304 | 0.012072 | 0.012206 | 0.012477 | 0.011530 | 0.011228 | 0.011530 |
| 0.011969 | 0.011903 | 0.011496 | 0.011396 | 0.011464 | 0.011464 | 0.011432 |
| 0.011329 | 0.011331 | 0.011396 | 0.011363 | 0.011733 | 0.011799 | 0.011800 |

|          |          |          |          |          |          |          |
|----------|----------|----------|----------|----------|----------|----------|
| 0.011699 | 0.011800 | 0.011903 | 0.011669 | 0.011969 | 0.011974 | 0.012036 |
| 0.012037 | 0.012070 | 0.012015 | 0.012037 | 0.012038 | 0.011262 | 0.011564 |
| 0.011632 | 0.012135 | 0.011636 | 0.011866 | 0.012339 | 0.011400 | 0.011295 |
| 0.011262 | 0.011262 | 0.011732 | 0.011759 | 0.011869 | 0.011597 | 0.011262 |
| S332     | 0.011799 | 0.011799 | 0.012068 | 0.011832 | 0.011832 | 0.011900 |
| 0.011536 | 0.011468 | 0.011900 | 0.011396 | 0.011463 | 0.011430 | 0.011396 |
| 0.011362 | 0.011597 | 0.011329 | 0.011429 | 0.011496 | 0.011463 | 0.011429 |
| 0.011396 | 0.011429 | 0.011463 | 0.011396 | 0.011430 | 0.011429 | 0.011502 |
| 0.011597 | 0.011429 | 0.011329 | 0.011496 | 0.011497 | 0.011463 | 0.011497 |
| 0.011463 | 0.011564 | 0.011463 | 0.011463 | 0.011496 | 0.011463 | 0.011631 |
| 0.011329 | 0.011463 | 0.011497 | 0.011429 | 0.011463 | 0.011564 | 0.011497 |
| 0.011463 | 0.011631 | 0.011531 | 0.011530 | 0.011463 | 0.011732 | 0.011463 |
| 0.011429 | 0.011463 | 0.011597 | 0.011732 | 0.011631 | 0.011463 | 0.011564 |
| 0.011496 | 0.011429 | 0.011463 | 0.011698 | 0.011530 | 0.011463 | 0.011530 |
| 0.011429 | 0.011530 | 0.011497 | 0.011564 | 0.011496 | 0.011497 | 0.011497 |
| 0.011396 | 0.011429 | 0.011396 | 0.011430 | 0.011463 | 0.011498 | 0.011564 |
| 0.011497 | 0.011463 | 0.011530 | 0.011429 | 0.011362 | 0.011396 | 0.011463 |
| 0.011631 | 0.011564 | 0.011732 | 0.011631 | 0.011463 | 0.011698 | 0.011463 |
| 0.011616 | 0.011546 | 0.011664 | 0.011295 | 0.011321 | 0.011465 | 0.011415 |
| 0.012085 | 0.011314 | 0.011307 | 0.011698 | 0.011698 | 0.011429 | 0.011463 |
| 0.011530 | 0.011496 | 0.011564 | 0.011463 | 0.011564 | 0.011497 | 0.011496 |
| 0.011463 | 0.011496 | 0.011765 | 0.011631 | 0.011530 | 0.011497 | 0.011430 |
| 0.011396 | 0.011329 | 0.011463 | 0.011430 | 0.011564 | 0.011530 | 0.011463 |
| 0.011564 | 0.011631 | 0.011429 | 0.011429 | 0.011463 | 0.011463 | 0.011465 |
| 0.011533 | 0.011463 | 0.011463 | 0.011276 | 0.011349 | 0.011341 | 0.011464 |
| 0.011433 | 0.011370 | 0.011392 | 0.011405 | 0.011366 | 0.011369 | 0.011432 |
| 0.011492 | 0.011439 | 0.011473 | 0.011396 | 0.011371 | 0.011531 | 0.011430 |
| 0.011498 | 0.011498 | 0.011497 | 0.011597 | 0.011530 | 0.011900 | 0.011631 |
| 0.011664 | 0.011530 | 0.011463 | 0.011497 | 0.011362 | 0.011530 | 0.011396 |
| 0.011463 | 0.011463 | 0.011430 | 0.011396 | 0.011429 | 0.011396 | 0.011497 |
| 0.011463 | 0.011564 | 0.011497 | 0.011396 | 0.011498 | 0.011598 | 0.011601 |
| 0.011598 | 0.011497 | 0.011396 | 0.011330 | 0.011463 | 0.011396 | 0.011329 |
| 0.011434 | 0.011598 | 0.011396 | 0.011598 | 0.011362 | 0.011463 | 0.011430 |
| 0.011530 | 0.011430 | 0.011463 | 0.011430 | 0.011463 | 0.011329 | 0.011463 |
| 0.011497 | 0.011430 | 0.011497 | 0.011429 | 0.011463 | 0.011497 | 0.011732 |
| 0.011564 | 0.011497 | 0.011430 | 0.011600 | 0.011631 | 0.011463 | 0.011430 |
| 0.011398 | 0.011667 | 0.011426 | 0.011369 | 0.011569 | 0.011333 | 0.011493 |
| 0.011569 | 0.011604 | 0.011631 | 0.011833 | 0.011538 | 0.011698 | 0.011665 |
| 0.011597 | 0.011765 | 0.011629 | 0.011431 | 0.011521 | 0.011497 | 0.011568 |
| 0.011665 | 0.011566 | 0.011703 | 0.011771 | 0.011698 | 0.011765 | 0.011873 |
| 0.011602 | 0.011773 | 0.011703 | 0.011635 | 0.011901 | 0.011362 | 0.011566 |
| 0.011530 | 0.011463 | 0.011362 | 0.011362 | 0.011429 | 0.011429 | 0.011496 |
| 0.011429 | 0.011497 | 0.011396 | 0.011429 | 0.011429 | 0.011429 | 0.011496 |
| 0.011429 | 0.011597 | 0.011362 | 0.011396 | 0.011329 | 0.011429 | 0.011463 |
| 0.011463 | 0.011362 | 0.011497 | 0.011463 | 0.011396 | 0.011396 | 0.011396 |
| 0.011664 | 0.011497 | 0.011564 | 0.011362 | 0.011463 | 0.011497 | 0.011396 |
| 0.011396 | 0.011463 | 0.011429 | 0.011597 | 0.011396 | 0.011530 | 0.011664 |
| 0.011597 | 0.011429 | 0.011429 | 0.011362 | 0.011362 | 0.011530 | 0.011463 |
| 0.011362 | 0.011463 | 0.011329 | 0.011362 | 0.011497 | 0.011497 | 0.011396 |
| 0.011363 | 0.011497 | 0.011430 | 0.011329 | 0.011463 | 0.011329 | 0.011497 |
| 0.011574 | 0.011396 | 0.011429 | 0.011530 | 0.011497 | 0.011429 | 0.011530 |
| 0.011396 | 0.011732 | 0.011329 | 0.000000 | 0.011329 | 0.011329 | 0.011329 |
| 0.011564 | 0.011631 | 0.011463 | 0.011530 | 0.011362 | 0.011362 | 0.011329 |
| 0.011396 | 0.011396 | 0.011429 | 0.011396 | 0.011429 | 0.011530 | 0.011597 |
| 0.011597 | 0.011564 | 0.011463 | 0.011564 | 0.011530 | 0.011396 | 0.011362 |
| 0.011396 | 0.011396 | 0.011463 | 0.011329 | 0.011362 | 0.011530 | 0.011396 |
| 0.011362 | 0.011429 | 0.011564 | 0.011530 | 0.011496 | 0.011429 | 0.011430 |
| 0.011497 | 0.011429 | 0.011530 | 0.011396 | 0.011530 | 0.011631 | 0.011732 |
| 0.011429 | 0.011631 | 0.011440 | 0.017899 | 0.011191 | 0.011427 | 0.011514 |
| 0.011475 | 0.011518 | 0.011479 | 0.011408 | 0.011664 | 0.011544 | 0.011303 |

|          |          |          |          |          |          |          |
|----------|----------|----------|----------|----------|----------|----------|
| 0.011535 | 0.011487 | 0.011255 | 0.011437 | 0.011333 | 0.011307 | 0.011361 |
| 0.011342 | 0.011433 | 0.011394 | 0.011325 | 0.011564 | 0.011597 | 0.011601 |
| 0.011472 | 0.011564 | 0.011564 | 0.011463 | 0.011497 | 0.011497 | 0.011463 |
| 0.011497 | 0.011429 | 0.011463 | 0.011497 | 0.011463 | 0.011396 | 0.011429 |
| 0.011429 | 0.011497 | 0.011396 | 0.011497 | 0.011530 | 0.011564 | 0.011463 |
| 0.011429 | 0.011396 | 0.011598 | 0.011597 | 0.011530 | 0.011565 | 0.011598 |
| 0.011362 | 0.011362 | 0.011396 | 0.011497 | 0.011362 | 0.011598 | 0.011598 |
| 0.011631 | 0.011631 | 0.011564 | 0.011665 | 0.011631 | 0.011666 | 0.011497 |
| 0.011497 | 0.011564 | 0.011598 | 0.011430 | 0.011497 | 0.011463 | 0.011497 |
| 0.011564 | 0.011564 | 0.011597 | 0.011564 | 0.011464 | 0.011665 | 0.011631 |
| 0.011500 | 0.011396 | 0.011497 | 0.011598 | 0.011497 | 0.011564 | 0.011664 |
| 0.011833 | 0.011538 | 0.011698 | 0.011665 | 0.011597 | 0.011765 | 0.011396 |
| 0.011566 | 0.011464 | 0.011429 | 0.011429 | 0.011497 | 0.011396 | 0.011497 |
| 0.011530 | 0.011564 | 0.011463 | 0.011429 | 0.011396 | 0.011598 | 0.011597 |
| 0.011530 | 0.011565 | 0.011631 | 0.011564 | 0.012137 | 0.011632 | 0.011553 |
| 0.011623 | 0.011580 | 0.011693 | 0.011580 | 0.011690 | 0.011612 | 0.011543 |
| 0.012090 | 0.011475 | 0.011608 | 0.011544 | 0.011818 | 0.011672 | 0.011775 |
| 0.012114 | 0.011588 | 0.011736 | 0.011799 | 0.011664 | 0.011597 | 0.011702 |
| 0.011362 | 0.011530 | 0.011664 | 0.011631 | 0.011635 | 0.011564 | 0.011532 |
| 0.011463 | 0.011396 | 0.011429 | 0.011463 | 0.011362 | 0.011429 | 0.011329 |
| 0.011396 | 0.011429 | 0.011396 | 0.011362 | 0.011463 | 0.011396 | 0.011429 |
| 0.011429 | 0.011362 | 0.011429 | 0.011463 | 0.011362 | 0.011564 | 0.011597 |
| 0.011497 | 0.011497 | 0.011497 | 0.011497 | 0.011429 | 0.011631 | 0.011463 |
| 0.011443 | 0.011429 | 0.011598 | 0.011603 | 0.011530 | 0.011530 | 0.011530 |
| 0.011530 | 0.011463 | 0.011429 | 0.011463 | 0.011564 | 0.011564 | 0.011497 |
| 0.011496 | 0.011631 | 0.011530 | 0.011530 | 0.011732 | 0.011732 | 0.011597 |
| 0.011429 | 0.011497 | 0.011530 | 0.011732 | 0.011497 | 0.011530 | 0.011497 |
| 0.011530 | 0.011396 | 0.011396 | 0.011698 | 0.011698 | 0.011665 | 0.011463 |
| 0.011564 | 0.011631 | 0.011496 | 0.011564 | 0.011530 | 0.011396 | 0.011463 |
| 0.011496 | 0.011463 | 0.011396 | 0.011631 | 0.011463 | 0.011564 | 0.011665 |
| 0.011496 | 0.011603 | 0.011597 | 0.011467 | 0.011229 | 0.011502 | 0.011267 |
| 0.011225 | 0.011683 | 0.011411 | 0.011283 | 0.011255 | 0.011315 | 0.011220 |
| 0.011417 | 0.011126 | 0.011283 | 0.011126 | 0.011168 | 0.011328 | 0.011587 |
| 0.011588 | 0.011454 | 0.011483 | 0.011448 | 0.011498 | 0.011564 | 0.011631 |
| 0.011631 | 0.011497 | 0.011601 | 0.011603 | 0.011738 | 0.011767 | 0.011497 |
| 0.011664 | 0.011530 | 0.011463 | 0.011497 | 0.011362 | 0.011530 | 0.011396 |
| 0.011463 | 0.011463 | 0.011430 | 0.011396 | 0.011429 | 0.011396 | 0.011497 |
| 0.011444 | 0.011445 | 0.011437 | 0.011471 | 0.011608 | 0.011573 | 0.011572 |
| 0.011571 | 0.011531 | 0.011282 | 0.011276 | 0.011433 | 0.011602 | 0.011603 |
| 0.011430 | 0.011467 | 0.011734 | 0.011703 | 0.011632 | 0.011666 | 0.011597 |
| 0.011530 | 0.011597 | 0.011597 | 0.011497 | 0.011866 | 0.011664 | 0.011732 |
| 0.011766 | 0.011416 | 0.011401 | 0.011545 | 0.011429 | 0.011631 | 0.011597 |
| 0.011632 | 0.011664 | 0.011664 | 0.011664 | 0.011768 | 0.011799 | 0.011442 |
| 0.011331 | 0.011337 | 0.011435 | 0.011400 | 0.011436 | 0.011359 | 0.011400 |
| 0.011472 | 0.011455 | 0.011394 | 0.011472 | 0.011464 | 0.011505 | 0.011430 |
| 0.011396 | 0.011329 | 0.011463 | 0.011430 | 0.011564 | 0.011530 | 0.011463 |
| 0.011564 | 0.011631 | 0.011429 | 0.011429 | 0.011463 | 0.011463 | 0.011465 |
| 0.011533 | 0.011463 | 0.011463 | 0.011498 | 0.011564 | 0.011631 | 0.011631 |
| 0.011497 | 0.011601 | 0.011603 | 0.011738 | 0.011767 | 0.011497 | 0.011664 |
| 0.011597 | 0.011597 | 0.011432 | 0.011617 | 0.011547 | 0.011571 | 0.011446 |
| 0.011611 | 0.011789 | 0.011568 | 0.011502 | 0.011396 | 0.011598 | 0.011463 |
| 0.011564 | 0.011497 | 0.011396 | 0.011498 | 0.011598 | 0.011601 | 0.011497 |
| 0.011396 | 0.011330 | 0.011463 | 0.011396 | 0.011329 | 0.011434 | 0.011598 |
| 0.011497 | 0.011429 | 0.011463 | 0.011497 | 0.011463 | 0.011396 | 0.011530 |
| 0.011463 | 0.011497 | 0.011496 | 0.011429 | 0.011497 | 0.011732 | 0.011329 |
| 0.011429 | 0.011631 | 0.011429 | 0.011463 | 0.011429 | 0.011530 | 0.011317 |
| 0.011678 | 0.011315 | 0.011211 | 0.011463 | 0.011549 | 0.011563 | 0.011269 |
| 0.011165 | 0.011530 | 0.011631 | 0.011739 | 0.011599 | 0.011703 | 0.011867 |
| 0.011767 | 0.011804 | 0.011765 | 0.011983 | 0.011732 | 0.012607 | 0.011768 |
| 0.012507 | 0.012275 | 0.012409 | 0.012680 | 0.011732 | 0.011430 | 0.011732 |

|          |          |          |          |          |          |          |
|----------|----------|----------|----------|----------|----------|----------|
| 0.012171 | 0.012106 | 0.011698 | 0.011598 | 0.011666 | 0.011666 | 0.011601 |
| 0.011530 | 0.011501 | 0.011597 | 0.011565 | 0.011935 | 0.012001 | 0.012002 |
| 0.011901 | 0.012002 | 0.012106 | 0.011872 | 0.012172 | 0.012178 | 0.012239 |
| 0.012239 | 0.012273 | 0.012221 | 0.012240 | 0.012241 | 0.011530 | 0.011766 |
| 0.011834 | 0.012337 | 0.011840 | 0.012001 | 0.012474 | 0.011536 | 0.011430 |
| 0.011396 | 0.011396 | 0.011934 | 0.011965 | 0.012045 | 0.011799 | 0.011465 |
| S333     | 0.011597 | 0.011597 | 0.011866 | 0.011631 | 0.011631 | 0.011698 |
| 0.011535 | 0.011468 | 0.011698 | 0.011195 | 0.011262 | 0.011228 | 0.011194 |
| 0.011161 | 0.011396 | 0.000000 | 0.011228 | 0.011295 | 0.011262 | 0.011228 |
| 0.011194 | 0.011228 | 0.011262 | 0.011195 | 0.011228 | 0.011228 | 0.011501 |
| 0.011396 | 0.011228 | 0.011127 | 0.011295 | 0.011295 | 0.011262 | 0.011295 |
| 0.011262 | 0.011362 | 0.011262 | 0.011262 | 0.011295 | 0.011262 | 0.011429 |
| 0.011127 | 0.011262 | 0.011295 | 0.011228 | 0.011262 | 0.011362 | 0.011295 |
| 0.011262 | 0.011429 | 0.011329 | 0.011530 | 0.011262 | 0.011530 | 0.011262 |
| 0.011228 | 0.011262 | 0.011396 | 0.011530 | 0.011564 | 0.011262 | 0.011362 |
| 0.011295 | 0.011362 | 0.011262 | 0.011496 | 0.011664 | 0.011262 | 0.011329 |
| 0.011228 | 0.011329 | 0.011295 | 0.011362 | 0.011295 | 0.011295 | 0.011295 |
| 0.011194 | 0.011228 | 0.011194 | 0.011228 | 0.011262 | 0.011296 | 0.011362 |
| 0.011295 | 0.011262 | 0.011329 | 0.011228 | 0.011295 | 0.011194 | 0.011262 |
| 0.011429 | 0.011362 | 0.011597 | 0.011429 | 0.011262 | 0.011496 | 0.011262 |
| 0.011431 | 0.011583 | 0.011475 | 0.011177 | 0.011172 | 0.011281 | 0.011296 |
| 0.011938 | 0.011365 | 0.011184 | 0.011496 | 0.011496 | 0.011161 | 0.011329 |
| 0.011329 | 0.011295 | 0.011362 | 0.011262 | 0.011362 | 0.011295 | 0.011295 |
| 0.011262 | 0.011295 | 0.011564 | 0.011362 | 0.011329 | 0.011295 | 0.011228 |
| 0.011195 | 0.011127 | 0.011262 | 0.011228 | 0.011362 | 0.011329 | 0.011262 |
| 0.011362 | 0.011430 | 0.011228 | 0.011228 | 0.011262 | 0.011262 | 0.011263 |
| 0.011331 | 0.011262 | 0.011262 | 0.011132 | 0.011205 | 0.011165 | 0.011262 |
| 0.011263 | 0.011198 | 0.011245 | 0.011233 | 0.011162 | 0.011197 | 0.011229 |
| 0.011420 | 0.011267 | 0.011301 | 0.011195 | 0.011199 | 0.011329 | 0.011228 |
| 0.011296 | 0.011296 | 0.011296 | 0.011396 | 0.011329 | 0.011698 | 0.011430 |
| 0.011463 | 0.011329 | 0.011262 | 0.011295 | 0.011161 | 0.011329 | 0.011195 |
| 0.011262 | 0.011262 | 0.011228 | 0.011195 | 0.011228 | 0.011195 | 0.011295 |
| 0.011262 | 0.011362 | 0.011295 | 0.011195 | 0.011296 | 0.011396 | 0.011398 |
| 0.011396 | 0.011295 | 0.011195 | 0.011128 | 0.011262 | 0.011195 | 0.011127 |
| 0.011230 | 0.011396 | 0.011195 | 0.011396 | 0.011161 | 0.011262 | 0.011228 |
| 0.011329 | 0.011228 | 0.011262 | 0.011228 | 0.011262 | 0.011127 | 0.011262 |
| 0.011295 | 0.011228 | 0.011295 | 0.011228 | 0.011262 | 0.011295 | 0.011530 |
| 0.011564 | 0.011497 | 0.011564 | 0.011397 | 0.011564 | 0.011262 | 0.011228 |
| 0.011128 | 0.011464 | 0.011335 | 0.011163 | 0.011569 | 0.011129 | 0.011257 |
| 0.011569 | 0.011468 | 0.011429 | 0.011631 | 0.011333 | 0.011496 | 0.011463 |
| 0.011396 | 0.011564 | 0.011415 | 0.011266 | 0.011312 | 0.011295 | 0.011365 |
| 0.011463 | 0.011364 | 0.011500 | 0.011568 | 0.011497 | 0.011564 | 0.011670 |
| 0.011399 | 0.011569 | 0.011500 | 0.011432 | 0.011699 | 0.011161 | 0.011363 |
| 0.011329 | 0.011262 | 0.011161 | 0.011161 | 0.011228 | 0.011228 | 0.011295 |
| 0.011228 | 0.011295 | 0.011194 | 0.011228 | 0.011228 | 0.011228 | 0.011295 |
| 0.011228 | 0.011597 | 0.011497 | 0.011530 | 0.011127 | 0.011228 | 0.011262 |
| 0.011262 | 0.011228 | 0.011295 | 0.011262 | 0.011194 | 0.011194 | 0.011194 |
| 0.011664 | 0.011295 | 0.011362 | 0.011161 | 0.011262 | 0.011429 | 0.011194 |
| 0.011194 | 0.011262 | 0.011228 | 0.011396 | 0.011194 | 0.011329 | 0.011463 |
| 0.011396 | 0.011228 | 0.011228 | 0.011161 | 0.011161 | 0.011329 | 0.011262 |
| 0.011161 | 0.011262 | 0.011127 | 0.011161 | 0.011295 | 0.011362 | 0.011195 |
| 0.011161 | 0.011295 | 0.011228 | 0.011127 | 0.011396 | 0.011127 | 0.011295 |
| 0.011368 | 0.011195 | 0.011429 | 0.011329 | 0.011295 | 0.011228 | 0.011329 |
| 0.011194 | 0.011530 | 0.011127 | 0.011329 | 0.000000 | 0.000000 | 0.011127 |
| 0.011362 | 0.011497 | 0.011262 | 0.011329 | 0.011161 | 0.011497 | 0.000000 |
| 0.011194 | 0.011194 | 0.011228 | 0.011329 | 0.011228 | 0.011329 | 0.011396 |
| 0.011396 | 0.011362 | 0.011262 | 0.011362 | 0.011329 | 0.011194 | 0.011161 |
| 0.011194 | 0.011194 | 0.011262 | 0.011127 | 0.011161 | 0.011329 | 0.011194 |
| 0.011094 | 0.011228 | 0.011362 | 0.011329 | 0.011295 | 0.011228 | 0.011228 |
| 0.011295 | 0.011228 | 0.011329 | 0.011194 | 0.011329 | 0.011429 | 0.011664 |

|          |          |          |          |          |          |          |
|----------|----------|----------|----------|----------|----------|----------|
| 0.011228 | 0.011564 | 0.011233 | 0.017710 | 0.011191 | 0.011366 | 0.011514 |
| 0.011475 | 0.011517 | 0.011322 | 0.011292 | 0.011609 | 0.011543 | 0.011303 |
| 0.011392 | 0.011487 | 0.011138 | 0.011228 | 0.011138 | 0.011258 | 0.011232 |
| 0.011389 | 0.011321 | 0.011320 | 0.000000 | 0.011362 | 0.011396 | 0.011398 |
| 0.011266 | 0.011362 | 0.011362 | 0.011262 | 0.011295 | 0.011295 | 0.011262 |
| 0.011295 | 0.011228 | 0.011262 | 0.011295 | 0.011262 | 0.011195 | 0.011228 |
| 0.011228 | 0.011295 | 0.011195 | 0.011295 | 0.011329 | 0.011362 | 0.011262 |
| 0.011228 | 0.011195 | 0.011530 | 0.011530 | 0.011329 | 0.011363 | 0.011396 |
| 0.011161 | 0.011161 | 0.011195 | 0.011295 | 0.011161 | 0.011396 | 0.011396 |
| 0.011429 | 0.011429 | 0.011362 | 0.011463 | 0.011564 | 0.011464 | 0.011295 |
| 0.011295 | 0.011362 | 0.011396 | 0.011228 | 0.011295 | 0.011262 | 0.011295 |
| 0.011363 | 0.011362 | 0.011396 | 0.011363 | 0.011262 | 0.011463 | 0.011430 |
| 0.011297 | 0.011195 | 0.011295 | 0.011396 | 0.011295 | 0.011362 | 0.011463 |
| 0.011631 | 0.011333 | 0.011496 | 0.011463 | 0.011396 | 0.011564 | 0.011195 |
| 0.011363 | 0.011262 | 0.011228 | 0.011228 | 0.011295 | 0.011195 | 0.011295 |
| 0.011329 | 0.011362 | 0.011262 | 0.011228 | 0.011195 | 0.011530 | 0.011530 |
| 0.011329 | 0.011363 | 0.011429 | 0.011362 | 0.011935 | 0.011417 | 0.011341 |
| 0.011412 | 0.011372 | 0.011482 | 0.011372 | 0.011480 | 0.011405 | 0.011370 |
| 0.011884 | 0.011268 | 0.011403 | 0.011337 | 0.011611 | 0.011468 | 0.011570 |
| 0.011910 | 0.011362 | 0.011533 | 0.011597 | 0.011463 | 0.011396 | 0.011499 |
| 0.011161 | 0.011329 | 0.011463 | 0.011429 | 0.011432 | 0.011362 | 0.011330 |
| 0.011262 | 0.011194 | 0.011228 | 0.011262 | 0.011161 | 0.011228 | 0.011127 |
| 0.011194 | 0.011228 | 0.011194 | 0.011161 | 0.011262 | 0.011194 | 0.011228 |
| 0.011228 | 0.011161 | 0.011228 | 0.011262 | 0.011161 | 0.011362 | 0.011396 |
| 0.011295 | 0.011295 | 0.011295 | 0.011295 | 0.011228 | 0.011564 | 0.011262 |
| 0.011234 | 0.011228 | 0.011396 | 0.011399 | 0.011329 | 0.011329 | 0.011329 |
| 0.011329 | 0.011262 | 0.011228 | 0.011262 | 0.011362 | 0.011362 | 0.011295 |
| 0.011295 | 0.011429 | 0.011530 | 0.011329 | 0.011530 | 0.011530 | 0.011396 |
| 0.011228 | 0.011295 | 0.011329 | 0.011664 | 0.011295 | 0.011329 | 0.011295 |
| 0.011329 | 0.011194 | 0.011194 | 0.011497 | 0.011497 | 0.011463 | 0.011262 |
| 0.011362 | 0.011429 | 0.011295 | 0.011362 | 0.011329 | 0.011194 | 0.011463 |
| 0.011295 | 0.011262 | 0.011194 | 0.011429 | 0.011262 | 0.011362 | 0.011597 |
| 0.011295 | 0.011603 | 0.011597 | 0.011385 | 0.000000 | 0.011298 | 0.011164 |
| 0.011170 | 0.011605 | 0.011201 | 0.011284 | 0.011109 | 0.011264 | 0.011220 |
| 0.011315 | 0.011126 | 0.011283 | 0.011126 | 0.011168 | 0.011328 | 0.011344 |
| 0.011362 | 0.011257 | 0.011201 | 0.011272 | 0.011296 | 0.011362 | 0.011430 |
| 0.011430 | 0.011296 | 0.011398 | 0.011365 | 0.011467 | 0.011555 | 0.011295 |
| 0.011463 | 0.011329 | 0.011262 | 0.011295 | 0.011161 | 0.011329 | 0.011195 |
| 0.011262 | 0.011262 | 0.011228 | 0.011195 | 0.011228 | 0.011195 | 0.011295 |
| 0.011270 | 0.011270 | 0.011266 | 0.011300 | 0.011436 | 0.011402 | 0.011402 |
| 0.011401 | 0.011329 | 0.011134 | 0.011132 | 0.011263 | 0.011433 | 0.011433 |
| 0.011228 | 0.011297 | 0.011531 | 0.011499 | 0.011430 | 0.011464 | 0.011396 |
| 0.011329 | 0.011396 | 0.011396 | 0.011295 | 0.011799 | 0.011463 | 0.011530 |
| 0.011564 | 0.011559 | 0.011265 | 0.011337 | 0.011228 | 0.011429 | 0.011396 |
| 0.011430 | 0.011463 | 0.011463 | 0.011463 | 0.011571 | 0.011597 | 0.011234 |
| 0.011128 | 0.011130 | 0.011230 | 0.011196 | 0.011231 | 0.011135 | 0.011400 |
| 0.011266 | 0.011323 | 0.011156 | 0.011285 | 0.011262 | 0.011334 | 0.011228 |
| 0.011195 | 0.011127 | 0.011262 | 0.011228 | 0.011362 | 0.011329 | 0.011262 |
| 0.011362 | 0.011430 | 0.011228 | 0.011228 | 0.011262 | 0.011262 | 0.011263 |
| 0.011331 | 0.011262 | 0.011262 | 0.011296 | 0.011362 | 0.011430 | 0.011430 |
| 0.011296 | 0.011398 | 0.011365 | 0.011467 | 0.011555 | 0.011295 | 0.011463 |
| 0.011396 | 0.011396 | 0.011229 | 0.011408 | 0.011338 | 0.011367 | 0.011235 |
| 0.011404 | 0.011561 | 0.011357 | 0.011298 | 0.011195 | 0.011396 | 0.011262 |
| 0.011362 | 0.011295 | 0.011195 | 0.011296 | 0.011396 | 0.011398 | 0.011295 |
| 0.011195 | 0.011128 | 0.011262 | 0.011195 | 0.011127 | 0.011230 | 0.011396 |
| 0.011295 | 0.011228 | 0.011262 | 0.011295 | 0.011262 | 0.011195 | 0.011329 |
| 0.011262 | 0.011295 | 0.011295 | 0.011228 | 0.011295 | 0.011530 | 0.011127 |
| 0.011228 | 0.011564 | 0.011228 | 0.011262 | 0.011228 | 0.011530 | 0.011189 |
| 0.011510 | 0.011188 | 0.011161 | 0.011342 | 0.011427 | 0.011347 | 0.011144 |
| 0.011113 | 0.011329 | 0.011429 | 0.011535 | 0.011397 | 0.011534 | 0.011665 |

|          |          |          |          |          |          |          |
|----------|----------|----------|----------|----------|----------|----------|
| 0.011565 | 0.011601 | 0.011564 | 0.011812 | 0.011530 | 0.012404 | 0.011565 |
| 0.012305 | 0.012072 | 0.012206 | 0.012477 | 0.011530 | 0.011228 | 0.011530 |
| 0.011969 | 0.011903 | 0.011497 | 0.011396 | 0.011464 | 0.011464 | 0.011432 |
| 0.011329 | 0.011332 | 0.011396 | 0.011363 | 0.011733 | 0.011799 | 0.011800 |
| 0.011699 | 0.011800 | 0.011903 | 0.011669 | 0.011969 | 0.011974 | 0.012036 |
| 0.012037 | 0.012070 | 0.012015 | 0.012037 | 0.012038 | 0.011329 | 0.011564 |
| 0.011632 | 0.012135 | 0.011636 | 0.011866 | 0.012339 | 0.011400 | 0.011296 |
| 0.011262 | 0.011262 | 0.011732 | 0.011759 | 0.011869 | 0.011597 | 0.011262 |
| S334     | 0.011597 | 0.011597 | 0.011866 | 0.011631 | 0.011631 | 0.011698 |
| 0.011535 | 0.011468 | 0.011698 | 0.011195 | 0.011262 | 0.011228 | 0.011194 |
| 0.011161 | 0.011396 | 0.000000 | 0.011228 | 0.011295 | 0.011262 | 0.011228 |
| 0.011194 | 0.011228 | 0.011262 | 0.011195 | 0.011228 | 0.011228 | 0.011501 |
| 0.011396 | 0.011228 | 0.011127 | 0.011295 | 0.011295 | 0.011262 | 0.011295 |
| 0.011262 | 0.011362 | 0.011262 | 0.011262 | 0.011295 | 0.011262 | 0.011429 |
| 0.011127 | 0.011262 | 0.011295 | 0.011228 | 0.011262 | 0.011362 | 0.011295 |
| 0.011262 | 0.011429 | 0.011329 | 0.011530 | 0.011262 | 0.011530 | 0.011262 |
| 0.011228 | 0.011262 | 0.011396 | 0.011530 | 0.011564 | 0.011262 | 0.011362 |
| 0.011295 | 0.011362 | 0.011262 | 0.011496 | 0.011664 | 0.011262 | 0.011329 |
| 0.011228 | 0.011329 | 0.011295 | 0.011362 | 0.011295 | 0.011295 | 0.011295 |
| 0.011194 | 0.011228 | 0.011194 | 0.011228 | 0.011262 | 0.011296 | 0.011362 |
| 0.011295 | 0.011262 | 0.011329 | 0.011228 | 0.011295 | 0.011194 | 0.011262 |
| 0.011429 | 0.011362 | 0.011597 | 0.011429 | 0.011262 | 0.011496 | 0.011262 |
| 0.011431 | 0.011583 | 0.011475 | 0.011177 | 0.011172 | 0.011281 | 0.011296 |
| 0.011938 | 0.011365 | 0.011184 | 0.011496 | 0.011496 | 0.011161 | 0.011329 |
| 0.011329 | 0.011295 | 0.011362 | 0.011262 | 0.011362 | 0.011295 | 0.011295 |
| 0.011262 | 0.011295 | 0.011564 | 0.011362 | 0.011329 | 0.011295 | 0.011228 |
| 0.011195 | 0.011127 | 0.011262 | 0.011228 | 0.011362 | 0.011329 | 0.011262 |
| 0.011362 | 0.011430 | 0.011228 | 0.011228 | 0.011262 | 0.011262 | 0.011263 |
| 0.011331 | 0.011262 | 0.011262 | 0.011132 | 0.011205 | 0.011165 | 0.011262 |
| 0.011263 | 0.011198 | 0.011245 | 0.011233 | 0.011162 | 0.011197 | 0.011229 |
| 0.011420 | 0.011267 | 0.011301 | 0.011195 | 0.011199 | 0.011329 | 0.011228 |
| 0.011296 | 0.011296 | 0.011296 | 0.011396 | 0.011329 | 0.011698 | 0.011430 |
| 0.011463 | 0.011329 | 0.011262 | 0.011295 | 0.011161 | 0.011329 | 0.011195 |
| 0.011262 | 0.011262 | 0.011228 | 0.011195 | 0.011228 | 0.011195 | 0.011295 |
| 0.011262 | 0.011362 | 0.011295 | 0.011195 | 0.011296 | 0.011396 | 0.011398 |
| 0.011396 | 0.011295 | 0.011195 | 0.011128 | 0.011262 | 0.011195 | 0.011127 |
| 0.011230 | 0.011396 | 0.011195 | 0.011396 | 0.011161 | 0.011262 | 0.011228 |
| 0.011329 | 0.011228 | 0.011262 | 0.011228 | 0.011262 | 0.011127 | 0.011262 |
| 0.011295 | 0.011228 | 0.011295 | 0.011228 | 0.011262 | 0.011295 | 0.011530 |
| 0.011564 | 0.011497 | 0.011564 | 0.011397 | 0.011564 | 0.011262 | 0.011228 |
| 0.011128 | 0.011464 | 0.011335 | 0.011163 | 0.011569 | 0.011129 | 0.011257 |
| 0.011569 | 0.011468 | 0.011429 | 0.011631 | 0.011333 | 0.011496 | 0.011463 |
| 0.011396 | 0.011564 | 0.011415 | 0.011266 | 0.011312 | 0.011295 | 0.011365 |
| 0.011463 | 0.011364 | 0.011500 | 0.011568 | 0.011497 | 0.011564 | 0.011670 |
| 0.011399 | 0.011569 | 0.011500 | 0.011432 | 0.011699 | 0.011161 | 0.011363 |
| 0.011329 | 0.011262 | 0.011161 | 0.011161 | 0.011228 | 0.011228 | 0.011295 |
| 0.011228 | 0.011295 | 0.011194 | 0.011228 | 0.011228 | 0.011228 | 0.011295 |
| 0.011228 | 0.011597 | 0.011497 | 0.011530 | 0.011127 | 0.011228 | 0.011262 |
| 0.011262 | 0.011228 | 0.011295 | 0.011262 | 0.011194 | 0.011194 | 0.011194 |
| 0.011664 | 0.011295 | 0.011362 | 0.011161 | 0.011262 | 0.011429 | 0.011194 |
| 0.011194 | 0.011262 | 0.011228 | 0.011396 | 0.011194 | 0.011329 | 0.011463 |
| 0.011396 | 0.011228 | 0.011228 | 0.011161 | 0.011161 | 0.011329 | 0.011262 |
| 0.011161 | 0.011262 | 0.011127 | 0.011161 | 0.011295 | 0.011362 | 0.011195 |
| 0.011161 | 0.011295 | 0.011228 | 0.011127 | 0.011396 | 0.011127 | 0.011295 |
| 0.011368 | 0.011195 | 0.011429 | 0.011329 | 0.011295 | 0.011228 | 0.011329 |
| 0.011194 | 0.011530 | 0.011127 | 0.011329 | 0.000000 | 0.000000 | 0.011127 |
| 0.011362 | 0.011497 | 0.011262 | 0.011329 | 0.011161 | 0.011497 | 0.000000 |
| 0.011194 | 0.011194 | 0.011228 | 0.011329 | 0.011228 | 0.011329 | 0.011396 |
| 0.011396 | 0.011362 | 0.011262 | 0.011362 | 0.011329 | 0.011194 | 0.011161 |
| 0.011194 | 0.011194 | 0.011262 | 0.011127 | 0.011161 | 0.011329 | 0.011194 |

|          |          |          |          |          |          |          |
|----------|----------|----------|----------|----------|----------|----------|
| 0.011094 | 0.011228 | 0.011362 | 0.011329 | 0.011295 | 0.011228 | 0.011228 |
| 0.011295 | 0.011228 | 0.011329 | 0.011194 | 0.011329 | 0.011429 | 0.011664 |
| 0.011228 | 0.011564 | 0.011233 | 0.017710 | 0.011191 | 0.011366 | 0.011514 |
| 0.011475 | 0.011517 | 0.011322 | 0.011292 | 0.011609 | 0.011543 | 0.011303 |
| 0.011392 | 0.011487 | 0.011138 | 0.011228 | 0.011138 | 0.011258 | 0.011232 |
| 0.011389 | 0.011321 | 0.011320 | 0.000000 | 0.011362 | 0.011396 | 0.011398 |
| 0.011266 | 0.011362 | 0.011362 | 0.011262 | 0.011295 | 0.011295 | 0.011262 |
| 0.011295 | 0.011228 | 0.011262 | 0.011295 | 0.011262 | 0.011195 | 0.011228 |
| 0.011228 | 0.011295 | 0.011195 | 0.011295 | 0.011329 | 0.011362 | 0.011262 |
| 0.011228 | 0.011195 | 0.011530 | 0.011530 | 0.011329 | 0.011363 | 0.011396 |
| 0.011161 | 0.011161 | 0.011195 | 0.011295 | 0.011161 | 0.011396 | 0.011396 |
| 0.011429 | 0.011429 | 0.011362 | 0.011463 | 0.011564 | 0.011464 | 0.011295 |
| 0.011295 | 0.011362 | 0.011396 | 0.011228 | 0.011295 | 0.011262 | 0.011295 |
| 0.011363 | 0.011362 | 0.011396 | 0.011363 | 0.011262 | 0.011463 | 0.011430 |
| 0.011297 | 0.011195 | 0.011295 | 0.011396 | 0.011295 | 0.011362 | 0.011463 |
| 0.011631 | 0.011333 | 0.011496 | 0.011463 | 0.011396 | 0.011564 | 0.011195 |
| 0.011363 | 0.011262 | 0.011228 | 0.011228 | 0.011295 | 0.011195 | 0.011295 |
| 0.011329 | 0.011362 | 0.011262 | 0.011228 | 0.011195 | 0.011530 | 0.011530 |
| 0.011329 | 0.011363 | 0.011429 | 0.011362 | 0.011935 | 0.011417 | 0.011341 |
| 0.011412 | 0.011372 | 0.011482 | 0.011372 | 0.011480 | 0.011405 | 0.011370 |
| 0.011884 | 0.011268 | 0.011403 | 0.011337 | 0.011611 | 0.011468 | 0.011570 |
| 0.011910 | 0.011362 | 0.011533 | 0.011597 | 0.011463 | 0.011396 | 0.011499 |
| 0.011161 | 0.011329 | 0.011463 | 0.011429 | 0.011432 | 0.011362 | 0.011330 |
| 0.011262 | 0.011194 | 0.011228 | 0.011262 | 0.011161 | 0.011228 | 0.011127 |
| 0.011194 | 0.011228 | 0.011194 | 0.011161 | 0.011262 | 0.011194 | 0.011228 |
| 0.011228 | 0.011161 | 0.011228 | 0.011262 | 0.011161 | 0.011362 | 0.011396 |
| 0.011295 | 0.011295 | 0.011295 | 0.011295 | 0.011228 | 0.011564 | 0.011262 |
| 0.011234 | 0.011228 | 0.011396 | 0.011399 | 0.011329 | 0.011329 | 0.011329 |
| 0.011329 | 0.011262 | 0.011228 | 0.011262 | 0.011362 | 0.011362 | 0.011295 |
| 0.011295 | 0.011429 | 0.011530 | 0.011329 | 0.011530 | 0.011530 | 0.011396 |
| 0.011228 | 0.011295 | 0.011329 | 0.011664 | 0.011295 | 0.011329 | 0.011295 |
| 0.011329 | 0.011194 | 0.011194 | 0.011497 | 0.011497 | 0.011463 | 0.011262 |
| 0.011362 | 0.011429 | 0.011295 | 0.011362 | 0.011329 | 0.011194 | 0.011463 |
| 0.011295 | 0.011262 | 0.011194 | 0.011429 | 0.011262 | 0.011362 | 0.011597 |
| 0.011295 | 0.011603 | 0.011597 | 0.011385 | 0.000000 | 0.011298 | 0.011164 |
| 0.011170 | 0.011605 | 0.011201 | 0.011284 | 0.011109 | 0.011264 | 0.011220 |
| 0.011315 | 0.011126 | 0.011283 | 0.011126 | 0.011168 | 0.011328 | 0.011344 |
| 0.011362 | 0.011257 | 0.011201 | 0.011272 | 0.011296 | 0.011362 | 0.011430 |
| 0.011430 | 0.011296 | 0.011398 | 0.011365 | 0.011467 | 0.011555 | 0.011295 |
| 0.011463 | 0.011329 | 0.011262 | 0.011295 | 0.011161 | 0.011329 | 0.011195 |
| 0.011262 | 0.011262 | 0.011228 | 0.011195 | 0.011228 | 0.011195 | 0.011295 |
| 0.011270 | 0.011270 | 0.011266 | 0.011300 | 0.011436 | 0.011402 | 0.011402 |
| 0.011401 | 0.011329 | 0.011134 | 0.011132 | 0.011263 | 0.011433 | 0.011433 |
| 0.011228 | 0.011297 | 0.011531 | 0.011499 | 0.011430 | 0.011464 | 0.011396 |
| 0.011329 | 0.011396 | 0.011396 | 0.011295 | 0.011799 | 0.011463 | 0.011530 |
| 0.011564 | 0.011559 | 0.011265 | 0.011337 | 0.011228 | 0.011429 | 0.011396 |
| 0.011430 | 0.011463 | 0.011463 | 0.011463 | 0.011571 | 0.011597 | 0.011234 |
| 0.011128 | 0.011130 | 0.011230 | 0.011196 | 0.011231 | 0.011135 | 0.011400 |
| 0.011266 | 0.011323 | 0.011156 | 0.011285 | 0.011262 | 0.011334 | 0.011228 |
| 0.011195 | 0.011127 | 0.011262 | 0.011228 | 0.011362 | 0.011329 | 0.011262 |
| 0.011362 | 0.011430 | 0.011228 | 0.011228 | 0.011262 | 0.011262 | 0.011263 |
| 0.011331 | 0.011262 | 0.011262 | 0.011296 | 0.011362 | 0.011430 | 0.011430 |
| 0.011296 | 0.011398 | 0.011365 | 0.011467 | 0.011555 | 0.011295 | 0.011463 |
| 0.011396 | 0.011396 | 0.011229 | 0.011408 | 0.011338 | 0.011367 | 0.011235 |
| 0.011404 | 0.011561 | 0.011357 | 0.011298 | 0.011195 | 0.011396 | 0.011262 |
| 0.011362 | 0.011295 | 0.011195 | 0.011296 | 0.011396 | 0.011398 | 0.011295 |
| 0.011195 | 0.011128 | 0.011262 | 0.011195 | 0.011127 | 0.011230 | 0.011396 |
| 0.011295 | 0.011228 | 0.011262 | 0.011295 | 0.011262 | 0.011195 | 0.011329 |
| 0.011262 | 0.011295 | 0.011295 | 0.011228 | 0.011295 | 0.011530 | 0.011127 |
| 0.011228 | 0.011564 | 0.011228 | 0.011262 | 0.011228 | 0.011530 | 0.011189 |

|          |          |          |          |          |          |          |
|----------|----------|----------|----------|----------|----------|----------|
| 0.011510 | 0.011188 | 0.011161 | 0.011342 | 0.011427 | 0.011347 | 0.011144 |
| 0.011113 | 0.011329 | 0.011429 | 0.011535 | 0.011397 | 0.011534 | 0.011665 |
| 0.011565 | 0.011601 | 0.011564 | 0.011812 | 0.011530 | 0.012404 | 0.011565 |
| 0.012305 | 0.012072 | 0.012206 | 0.012477 | 0.011530 | 0.011228 | 0.011530 |
| 0.011969 | 0.011903 | 0.011497 | 0.011396 | 0.011464 | 0.011464 | 0.011432 |
| 0.011329 | 0.011332 | 0.011396 | 0.011363 | 0.011733 | 0.011799 | 0.011800 |
| 0.011699 | 0.011800 | 0.011903 | 0.011669 | 0.011969 | 0.011974 | 0.012036 |
| 0.012037 | 0.012070 | 0.012015 | 0.012037 | 0.012038 | 0.011329 | 0.011564 |
| 0.011632 | 0.012135 | 0.011636 | 0.011866 | 0.012339 | 0.011400 | 0.011296 |
| 0.011262 | 0.011262 | 0.011732 | 0.011759 | 0.011869 | 0.011597 | 0.011262 |
| S335     | 0.011530 | 0.011530 | 0.011866 | 0.011631 | 0.011631 | 0.011698 |
| 0.011535 | 0.011468 | 0.011698 | 0.011127 | 0.011194 | 0.011161 | 0.011127 |
| 0.011161 | 0.011329 | 0.011127 | 0.011161 | 0.011228 | 0.011194 | 0.011161 |
| 0.011127 | 0.011161 | 0.011262 | 0.011127 | 0.011161 | 0.011161 | 0.011501 |
| 0.011396 | 0.011161 | 0.000000 | 0.011295 | 0.011228 | 0.011195 | 0.011228 |
| 0.011194 | 0.011295 | 0.011194 | 0.011194 | 0.011228 | 0.011194 | 0.011362 |
| 0.011127 | 0.011194 | 0.011228 | 0.011161 | 0.011262 | 0.011295 | 0.011228 |
| 0.011194 | 0.011362 | 0.011262 | 0.011530 | 0.011194 | 0.011463 | 0.011194 |
| 0.011161 | 0.011262 | 0.011329 | 0.011463 | 0.011564 | 0.011262 | 0.011362 |
| 0.011228 | 0.011295 | 0.011195 | 0.011429 | 0.011664 | 0.011194 | 0.011262 |
| 0.011161 | 0.011262 | 0.011228 | 0.011295 | 0.011228 | 0.011228 | 0.011228 |
| 0.011127 | 0.011161 | 0.011127 | 0.011228 | 0.011194 | 0.011228 | 0.011295 |
| 0.011228 | 0.011194 | 0.011262 | 0.011161 | 0.011295 | 0.011127 | 0.011194 |
| 0.011362 | 0.011295 | 0.011530 | 0.011362 | 0.011194 | 0.011429 | 0.011194 |
| 0.011357 | 0.011583 | 0.011400 | 0.011099 | 0.011098 | 0.011207 | 0.011296 |
| 0.011938 | 0.011365 | 0.011102 | 0.011429 | 0.011429 | 0.011228 | 0.011329 |
| 0.011262 | 0.011228 | 0.011295 | 0.011194 | 0.011295 | 0.011228 | 0.011228 |
| 0.011194 | 0.011295 | 0.011496 | 0.011362 | 0.011262 | 0.011228 | 0.011161 |
| 0.011127 | 0.011127 | 0.011195 | 0.011161 | 0.011362 | 0.011329 | 0.011262 |
| 0.011362 | 0.011429 | 0.011161 | 0.011161 | 0.011195 | 0.011195 | 0.011195 |
| 0.011263 | 0.011195 | 0.011195 | 0.000000 | 0.011133 | 0.011095 | 0.011195 |
| 0.011196 | 0.011129 | 0.011171 | 0.011164 | 0.011094 | 0.011129 | 0.011162 |
| 0.011420 | 0.011198 | 0.011232 | 0.011128 | 0.011129 | 0.011262 | 0.011228 |
| 0.011296 | 0.011229 | 0.011228 | 0.011329 | 0.011262 | 0.011631 | 0.011430 |
| 0.011463 | 0.011329 | 0.011195 | 0.011295 | 0.011094 | 0.011329 | 0.011127 |
| 0.011194 | 0.011194 | 0.011161 | 0.011127 | 0.011161 | 0.011127 | 0.011228 |
| 0.011195 | 0.011295 | 0.011228 | 0.011127 | 0.011229 | 0.011329 | 0.011331 |
| 0.011329 | 0.011228 | 0.011127 | 0.000000 | 0.011195 | 0.011127 | 0.000000 |
| 0.011162 | 0.011329 | 0.011127 | 0.011329 | 0.011094 | 0.011195 | 0.011161 |
| 0.011262 | 0.011161 | 0.011195 | 0.011161 | 0.011195 | 0.000000 | 0.011195 |
| 0.011228 | 0.011161 | 0.011228 | 0.011161 | 0.011195 | 0.011228 | 0.011463 |
| 0.011564 | 0.011496 | 0.011564 | 0.011330 | 0.011564 | 0.011195 | 0.011161 |
| 0.011195 | 0.011464 | 0.011289 | 0.011095 | 0.011569 | 0.000000 | 0.011178 |
| 0.011569 | 0.011468 | 0.011362 | 0.011564 | 0.011265 | 0.011429 | 0.011396 |
| 0.011329 | 0.011496 | 0.011344 | 0.011184 | 0.011228 | 0.011228 | 0.011297 |
| 0.011396 | 0.011296 | 0.011432 | 0.011500 | 0.011429 | 0.011497 | 0.011602 |
| 0.011331 | 0.011501 | 0.011432 | 0.011364 | 0.011632 | 0.011094 | 0.011296 |
| 0.011262 | 0.011194 | 0.011094 | 0.011094 | 0.011161 | 0.011161 | 0.011228 |
| 0.011161 | 0.011228 | 0.011127 | 0.011228 | 0.011161 | 0.011161 | 0.011228 |
| 0.011161 | 0.011597 | 0.011496 | 0.011530 | 0.000000 | 0.011161 | 0.011195 |
| 0.011194 | 0.011161 | 0.011228 | 0.011262 | 0.011127 | 0.011127 | 0.011127 |
| 0.011664 | 0.011295 | 0.011295 | 0.011094 | 0.011194 | 0.011362 | 0.011127 |
| 0.011127 | 0.011194 | 0.011161 | 0.011329 | 0.011127 | 0.011262 | 0.011396 |
| 0.011329 | 0.011161 | 0.011161 | 0.011094 | 0.011094 | 0.011262 | 0.011194 |
| 0.011094 | 0.011194 | 0.000000 | 0.011094 | 0.011228 | 0.011362 | 0.011127 |
| 0.011094 | 0.011228 | 0.011161 | 0.000000 | 0.011396 | 0.000000 | 0.011228 |
| 0.011300 | 0.011127 | 0.011429 | 0.011262 | 0.011295 | 0.011161 | 0.011262 |
| 0.011127 | 0.011463 | 0.000000 | 0.011329 | 0.011127 | 0.011127 | 0.000000 |
| 0.011295 | 0.011497 | 0.011195 | 0.011262 | 0.011094 | 0.011496 | 0.011127 |
| 0.011127 | 0.011127 | 0.011161 | 0.011262 | 0.011161 | 0.011262 | 0.011329 |



|          |          |          |          |          |          |          |
|----------|----------|----------|----------|----------|----------|----------|
| 0.011329 | 0.011295 | 0.011194 | 0.011295 | 0.011262 | 0.011127 | 0.011094 |
| 0.011127 | 0.011127 | 0.011195 | 0.011127 | 0.011094 | 0.011262 | 0.011127 |
| 0.011161 | 0.011161 | 0.011295 | 0.011329 | 0.011228 | 0.011161 | 0.011161 |
| 0.011228 | 0.011161 | 0.011262 | 0.011127 | 0.011262 | 0.011362 | 0.011664 |
| 0.011161 | 0.011564 | 0.011164 | 0.017672 | 0.011126 | 0.011305 | 0.011514 |
| 0.011475 | 0.011517 | 0.011217 | 0.011176 | 0.011609 | 0.011543 | 0.011242 |
| 0.011392 | 0.011426 | 0.000000 | 0.011144 | 0.011138 | 0.011208 | 0.011146 |
| 0.011389 | 0.011321 | 0.011320 | 0.011126 | 0.011295 | 0.011329 | 0.011331 |
| 0.011198 | 0.011295 | 0.011295 | 0.011262 | 0.011228 | 0.011228 | 0.011195 |
| 0.011228 | 0.011161 | 0.011195 | 0.011228 | 0.011195 | 0.011127 | 0.011161 |
| 0.011161 | 0.011228 | 0.011127 | 0.011228 | 0.011262 | 0.011295 | 0.011195 |
| 0.011228 | 0.011195 | 0.011530 | 0.011530 | 0.011262 | 0.011296 | 0.011329 |
| 0.011094 | 0.011094 | 0.011127 | 0.011228 | 0.011094 | 0.011329 | 0.011329 |
| 0.011362 | 0.011362 | 0.011295 | 0.011396 | 0.011564 | 0.011397 | 0.011228 |
| 0.011228 | 0.011295 | 0.011329 | 0.011161 | 0.011228 | 0.011195 | 0.011228 |
| 0.011295 | 0.011295 | 0.011329 | 0.011295 | 0.011195 | 0.011396 | 0.011362 |
| 0.011230 | 0.011127 | 0.011228 | 0.011329 | 0.011228 | 0.011362 | 0.011396 |
| 0.011564 | 0.011265 | 0.011429 | 0.011396 | 0.011329 | 0.011496 | 0.011128 |
| 0.011296 | 0.011195 | 0.011161 | 0.011161 | 0.011228 | 0.011127 | 0.011228 |
| 0.011262 | 0.011295 | 0.011195 | 0.011228 | 0.011195 | 0.011530 | 0.011530 |
| 0.011262 | 0.011296 | 0.011362 | 0.011295 | 0.011934 | 0.011346 | 0.011271 |
| 0.011341 | 0.011303 | 0.011411 | 0.011303 | 0.011410 | 0.011336 | 0.011302 |
| 0.011884 | 0.011199 | 0.011334 | 0.011268 | 0.011542 | 0.011400 | 0.011502 |
| 0.011910 | 0.011362 | 0.011466 | 0.011530 | 0.011396 | 0.011396 | 0.011432 |
| 0.011094 | 0.011262 | 0.011396 | 0.011362 | 0.011364 | 0.011362 | 0.011330 |
| 0.011194 | 0.011127 | 0.011161 | 0.011194 | 0.011094 | 0.011161 | 0.000000 |
| 0.011194 | 0.011228 | 0.011127 | 0.011094 | 0.011194 | 0.011127 | 0.011161 |
| 0.011161 | 0.011094 | 0.011161 | 0.011195 | 0.011094 | 0.011295 | 0.011329 |
| 0.011228 | 0.011295 | 0.011228 | 0.011228 | 0.011161 | 0.011564 | 0.011194 |
| 0.011234 | 0.011161 | 0.011396 | 0.011399 | 0.011262 | 0.011262 | 0.011262 |
| 0.011262 | 0.011195 | 0.011161 | 0.011195 | 0.011295 | 0.011295 | 0.011228 |
| 0.011228 | 0.011362 | 0.011530 | 0.011262 | 0.011463 | 0.011463 | 0.011329 |
| 0.011161 | 0.011228 | 0.011262 | 0.011664 | 0.011228 | 0.011262 | 0.011228 |
| 0.011262 | 0.011194 | 0.011194 | 0.011497 | 0.011429 | 0.011463 | 0.011194 |
| 0.011295 | 0.011362 | 0.011228 | 0.011295 | 0.011262 | 0.011127 | 0.011463 |
| 0.011228 | 0.011194 | 0.011194 | 0.011362 | 0.011194 | 0.011295 | 0.011530 |
| 0.011228 | 0.011603 | 0.011597 | 0.011385 | 0.011117 | 0.011298 | 0.011163 |
| 0.011115 | 0.011605 | 0.011131 | 0.011328 | 0.011158 | 0.011264 | 0.011273 |
| 0.011366 | 0.000000 | 0.011227 | 0.000000 | 0.011114 | 0.011261 | 0.011263 |
| 0.011286 | 0.011178 | 0.011272 | 0.011201 | 0.011229 | 0.011362 | 0.011429 |
| 0.011429 | 0.011296 | 0.011398 | 0.011399 | 0.011535 | 0.011555 | 0.011228 |
| 0.011463 | 0.011329 | 0.011195 | 0.011295 | 0.011094 | 0.011329 | 0.011127 |
| 0.011194 | 0.011194 | 0.011161 | 0.011127 | 0.011161 | 0.011127 | 0.011228 |
| 0.011200 | 0.011200 | 0.011197 | 0.011231 | 0.011368 | 0.011333 | 0.011333 |
| 0.011333 | 0.011262 | 0.000000 | 0.000000 | 0.011196 | 0.011365 | 0.011366 |
| 0.011161 | 0.011230 | 0.011464 | 0.011432 | 0.011363 | 0.011397 | 0.011329 |
| 0.011262 | 0.011329 | 0.011329 | 0.011228 | 0.011799 | 0.011396 | 0.011463 |
| 0.011497 | 0.011558 | 0.011197 | 0.011268 | 0.011161 | 0.011362 | 0.011329 |
| 0.011363 | 0.011396 | 0.011396 | 0.011396 | 0.011532 | 0.011530 | 0.011164 |
| 0.000000 | 0.000000 | 0.011162 | 0.011128 | 0.011231 | 0.000000 | 0.011400 |
| 0.011197 | 0.011323 | 0.000000 | 0.011210 | 0.011195 | 0.011265 | 0.011161 |
| 0.011127 | 0.011127 | 0.011195 | 0.011161 | 0.011362 | 0.011329 | 0.011262 |
| 0.011362 | 0.011429 | 0.011161 | 0.011161 | 0.011195 | 0.011195 | 0.011195 |
| 0.011263 | 0.011195 | 0.011195 | 0.011229 | 0.011362 | 0.011429 | 0.011429 |
| 0.011296 | 0.011398 | 0.011399 | 0.011535 | 0.011555 | 0.011228 | 0.011396 |
| 0.011329 | 0.011329 | 0.011162 | 0.011339 | 0.011269 | 0.011299 | 0.011165 |
| 0.011336 | 0.011516 | 0.011314 | 0.011230 | 0.011127 | 0.011329 | 0.011195 |
| 0.011295 | 0.011228 | 0.011127 | 0.011229 | 0.011329 | 0.011331 | 0.011228 |
| 0.011127 | 0.000000 | 0.011195 | 0.011127 | 0.000000 | 0.011162 | 0.011329 |
| 0.011228 | 0.011161 | 0.011195 | 0.011228 | 0.011195 | 0.011127 | 0.011329 |

|          |          |          |          |          |          |          |
|----------|----------|----------|----------|----------|----------|----------|
| 0.011194 | 0.011228 | 0.011228 | 0.011161 | 0.011228 | 0.011463 | 0.011127 |
| 0.011161 | 0.011564 | 0.011161 | 0.011194 | 0.011161 | 0.011530 | 0.011103 |
| 0.011566 | 0.011103 | 0.011161 | 0.011342 | 0.011426 | 0.011347 | 0.000000 |
| 0.011113 | 0.011329 | 0.011429 | 0.011535 | 0.011397 | 0.011534 | 0.011665 |
| 0.011565 | 0.011601 | 0.011564 | 0.011812 | 0.011530 | 0.012404 | 0.011565 |
| 0.012304 | 0.012072 | 0.012206 | 0.012477 | 0.011530 | 0.011228 | 0.011530 |
| 0.011969 | 0.011903 | 0.011496 | 0.011396 | 0.011464 | 0.011464 | 0.011432 |
| 0.011329 | 0.011331 | 0.011396 | 0.011363 | 0.011733 | 0.011799 | 0.011800 |
| 0.011699 | 0.011800 | 0.011903 | 0.011669 | 0.011969 | 0.011974 | 0.012036 |
| 0.012037 | 0.012070 | 0.012015 | 0.012037 | 0.012038 | 0.011262 | 0.011564 |
| 0.011632 | 0.012135 | 0.011636 | 0.011866 | 0.012339 | 0.011400 | 0.011295 |
| 0.011262 | 0.011262 | 0.011732 | 0.011759 | 0.011869 | 0.011597 | 0.011262 |
| S336     | 0.011765 | 0.011765 | 0.012101 | 0.011866 | 0.011866 | 0.011933 |
| 0.011773 | 0.011705 | 0.011933 | 0.011362 | 0.011429 | 0.011397 | 0.011362 |
| 0.011396 | 0.011564 | 0.011362 | 0.011396 | 0.011463 | 0.011429 | 0.011396 |
| 0.011362 | 0.011396 | 0.011496 | 0.011363 | 0.011329 | 0.011396 | 0.011739 |
| 0.011631 | 0.011396 | 0.011295 | 0.011530 | 0.011396 | 0.011429 | 0.011396 |
| 0.011429 | 0.011463 | 0.011429 | 0.011429 | 0.011463 | 0.011429 | 0.011597 |
| 0.011362 | 0.011429 | 0.011463 | 0.011396 | 0.011496 | 0.011530 | 0.011463 |
| 0.011429 | 0.011597 | 0.011497 | 0.011765 | 0.011429 | 0.011631 | 0.011429 |
| 0.011396 | 0.011497 | 0.011564 | 0.011631 | 0.011799 | 0.011496 | 0.011597 |
| 0.011396 | 0.011463 | 0.011429 | 0.011597 | 0.011900 | 0.011429 | 0.011496 |
| 0.011396 | 0.011496 | 0.011463 | 0.011530 | 0.011463 | 0.011463 | 0.011463 |
| 0.011362 | 0.011396 | 0.011362 | 0.011463 | 0.011429 | 0.011464 | 0.011530 |
| 0.011463 | 0.011429 | 0.011429 | 0.011396 | 0.011530 | 0.011295 | 0.011429 |
| 0.011597 | 0.011530 | 0.011765 | 0.011597 | 0.011429 | 0.011597 | 0.011429 |
| 0.011542 | 0.011770 | 0.011588 | 0.011295 | 0.011284 | 0.011391 | 0.011493 |
| 0.012121 | 0.011518 | 0.011307 | 0.011664 | 0.011664 | 0.011463 | 0.011564 |
| 0.011496 | 0.011463 | 0.011530 | 0.011429 | 0.011530 | 0.011396 | 0.011463 |
| 0.011429 | 0.011530 | 0.011732 | 0.011597 | 0.011496 | 0.011463 | 0.011329 |
| 0.011362 | 0.011362 | 0.011362 | 0.011396 | 0.011597 | 0.011564 | 0.011497 |
| 0.011597 | 0.011665 | 0.011396 | 0.011396 | 0.011430 | 0.011429 | 0.011398 |
| 0.011466 | 0.011429 | 0.011430 | 0.011168 | 0.011349 | 0.011341 | 0.011430 |
| 0.011433 | 0.011335 | 0.011392 | 0.011405 | 0.011332 | 0.011368 | 0.011398 |
| 0.011672 | 0.011439 | 0.011404 | 0.011363 | 0.011371 | 0.011497 | 0.011464 |
| 0.011531 | 0.011465 | 0.011464 | 0.011563 | 0.011496 | 0.011799 | 0.011665 |
| 0.011698 | 0.011564 | 0.011429 | 0.011530 | 0.011329 | 0.011564 | 0.011362 |
| 0.011429 | 0.011429 | 0.011396 | 0.011362 | 0.011396 | 0.011362 | 0.011463 |
| 0.011362 | 0.011463 | 0.011463 | 0.011362 | 0.011464 | 0.011564 | 0.011567 |
| 0.011497 | 0.011463 | 0.011362 | 0.011296 | 0.011429 | 0.011362 | 0.011295 |
| 0.011400 | 0.011497 | 0.011295 | 0.011497 | 0.011329 | 0.011430 | 0.011396 |
| 0.011429 | 0.011396 | 0.011362 | 0.011396 | 0.011430 | 0.011295 | 0.011329 |
| 0.011396 | 0.011396 | 0.011463 | 0.011396 | 0.011429 | 0.011463 | 0.011698 |
| 0.011799 | 0.011732 | 0.011799 | 0.011532 | 0.011799 | 0.011429 | 0.011396 |
| 0.011432 | 0.011586 | 0.011472 | 0.011300 | 0.011807 | 0.011299 | 0.011414 |
| 0.011807 | 0.011706 | 0.011597 | 0.011732 | 0.011504 | 0.011664 | 0.011564 |
| 0.011564 | 0.011732 | 0.011593 | 0.011472 | 0.011479 | 0.011463 | 0.011534 |
| 0.011631 | 0.011532 | 0.011669 | 0.011669 | 0.011664 | 0.011732 | 0.011839 |
| 0.011568 | 0.011671 | 0.011669 | 0.011601 | 0.011868 | 0.011329 | 0.011532 |
| 0.011429 | 0.011429 | 0.011329 | 0.011329 | 0.011329 | 0.011396 | 0.011463 |
| 0.011329 | 0.011396 | 0.011295 | 0.011463 | 0.011329 | 0.011396 | 0.011463 |
| 0.011396 | 0.011832 | 0.011732 | 0.011765 | 0.011295 | 0.011396 | 0.011429 |
| 0.011429 | 0.011396 | 0.011463 | 0.011496 | 0.011362 | 0.011362 | 0.011362 |
| 0.011899 | 0.011530 | 0.011530 | 0.011329 | 0.011429 | 0.011530 | 0.011362 |
| 0.011362 | 0.011429 | 0.011396 | 0.011496 | 0.011362 | 0.011496 | 0.011564 |
| 0.011564 | 0.011396 | 0.011396 | 0.011329 | 0.011329 | 0.011497 | 0.011429 |
| 0.011329 | 0.011429 | 0.011295 | 0.011329 | 0.011463 | 0.011598 | 0.011362 |
| 0.011329 | 0.011463 | 0.011396 | 0.011295 | 0.011631 | 0.011295 | 0.011463 |
| 0.011471 | 0.011362 | 0.011664 | 0.011497 | 0.011530 | 0.011396 | 0.011496 |
| 0.011362 | 0.011631 | 0.011295 | 0.011564 | 0.011362 | 0.011362 | 0.011295 |

|          |          |          |          |          |          |          |
|----------|----------|----------|----------|----------|----------|----------|
| 0.000000 | 0.011732 | 0.011429 | 0.011496 | 0.011329 | 0.011732 | 0.011362 |
| 0.011362 | 0.011362 | 0.011396 | 0.011429 | 0.011396 | 0.011496 | 0.011564 |
| 0.011564 | 0.011530 | 0.011429 | 0.011530 | 0.011429 | 0.011362 | 0.011329 |
| 0.011362 | 0.011362 | 0.011429 | 0.011362 | 0.011262 | 0.011496 | 0.011362 |
| 0.011396 | 0.011396 | 0.011530 | 0.011564 | 0.011463 | 0.011329 | 0.011396 |
| 0.011463 | 0.011396 | 0.011496 | 0.011362 | 0.011496 | 0.011597 | 0.011900 |
| 0.011396 | 0.011799 | 0.011336 | 0.017785 | 0.011257 | 0.011427 | 0.011688 |
| 0.011648 | 0.011693 | 0.011322 | 0.011350 | 0.011719 | 0.011751 | 0.011364 |
| 0.011534 | 0.011610 | 0.011255 | 0.011270 | 0.011294 | 0.011356 | 0.011318 |
| 0.011529 | 0.011507 | 0.011468 | 0.011391 | 0.011530 | 0.011564 | 0.011567 |
| 0.011369 | 0.011530 | 0.011530 | 0.011497 | 0.011463 | 0.011463 | 0.011430 |
| 0.011463 | 0.011396 | 0.011429 | 0.011463 | 0.011430 | 0.011362 | 0.011396 |
| 0.011396 | 0.011463 | 0.011362 | 0.011463 | 0.011497 | 0.011530 | 0.011429 |
| 0.011463 | 0.011430 | 0.011765 | 0.011765 | 0.011497 | 0.011531 | 0.011564 |
| 0.011329 | 0.011329 | 0.011362 | 0.011396 | 0.011329 | 0.011564 | 0.011564 |
| 0.011597 | 0.011597 | 0.011530 | 0.011631 | 0.011799 | 0.011633 | 0.011396 |
| 0.011463 | 0.011530 | 0.011497 | 0.011396 | 0.011463 | 0.011429 | 0.011463 |
| 0.011531 | 0.011530 | 0.011564 | 0.011463 | 0.011363 | 0.011631 | 0.011530 |
| 0.011467 | 0.011362 | 0.011463 | 0.011564 | 0.011463 | 0.011598 | 0.011631 |
| 0.011732 | 0.011504 | 0.011664 | 0.011564 | 0.011564 | 0.011732 | 0.011363 |
| 0.011532 | 0.011430 | 0.011396 | 0.011396 | 0.011463 | 0.011362 | 0.011463 |
| 0.011497 | 0.011530 | 0.011429 | 0.011463 | 0.011430 | 0.011765 | 0.011765 |
| 0.011497 | 0.011531 | 0.011597 | 0.011530 | 0.012170 | 0.011596 | 0.011482 |
| 0.011552 | 0.011546 | 0.011657 | 0.011545 | 0.011655 | 0.011577 | 0.011543 |
| 0.012125 | 0.011441 | 0.011574 | 0.011510 | 0.011783 | 0.011638 | 0.011672 |
| 0.012148 | 0.011626 | 0.011669 | 0.011765 | 0.011631 | 0.011631 | 0.011635 |
| 0.011329 | 0.011429 | 0.011631 | 0.011597 | 0.011567 | 0.011597 | 0.011532 |
| 0.011429 | 0.011295 | 0.011329 | 0.011429 | 0.011262 | 0.011396 | 0.011295 |
| 0.011429 | 0.011463 | 0.011362 | 0.011329 | 0.011429 | 0.011362 | 0.011396 |
| 0.011396 | 0.011329 | 0.011396 | 0.011362 | 0.011329 | 0.011463 | 0.011564 |
| 0.011463 | 0.011530 | 0.011463 | 0.011463 | 0.011396 | 0.011799 | 0.011429 |
| 0.011478 | 0.011396 | 0.011631 | 0.011637 | 0.011429 | 0.011496 | 0.011496 |
| 0.011497 | 0.011362 | 0.011396 | 0.011362 | 0.011530 | 0.011530 | 0.011463 |
| 0.011463 | 0.011597 | 0.011765 | 0.011496 | 0.011698 | 0.011698 | 0.011564 |
| 0.011396 | 0.011463 | 0.011497 | 0.011900 | 0.011463 | 0.011429 | 0.011463 |
| 0.011496 | 0.011429 | 0.011429 | 0.011732 | 0.011597 | 0.011698 | 0.011429 |
| 0.011530 | 0.011597 | 0.011463 | 0.011530 | 0.011496 | 0.011362 | 0.011698 |
| 0.011463 | 0.011429 | 0.011429 | 0.011597 | 0.011429 | 0.011530 | 0.011765 |
| 0.011463 | 0.011841 | 0.011832 | 0.011548 | 0.011229 | 0.011536 | 0.011370 |
| 0.011225 | 0.011800 | 0.011306 | 0.011551 | 0.011353 | 0.011467 | 0.011432 |
| 0.011519 | 0.011192 | 0.011394 | 0.011192 | 0.011276 | 0.011395 | 0.011425 |
| 0.011437 | 0.011296 | 0.011448 | 0.011377 | 0.011465 | 0.011597 | 0.011665 |
| 0.011665 | 0.011531 | 0.011635 | 0.011636 | 0.011772 | 0.011767 | 0.011463 |
| 0.011698 | 0.011564 | 0.011429 | 0.011530 | 0.011329 | 0.011564 | 0.011362 |
| 0.011429 | 0.011429 | 0.011396 | 0.011362 | 0.011396 | 0.011362 | 0.011463 |
| 0.011409 | 0.011445 | 0.011437 | 0.011471 | 0.011608 | 0.011504 | 0.011572 |
| 0.011571 | 0.011497 | 0.011245 | 0.011276 | 0.011433 | 0.011602 | 0.011603 |
| 0.011396 | 0.011467 | 0.011700 | 0.011669 | 0.011598 | 0.011632 | 0.011564 |
| 0.011496 | 0.011564 | 0.011564 | 0.011463 | 0.012034 | 0.011631 | 0.011698 |
| 0.011732 | 0.011808 | 0.011435 | 0.011511 | 0.011396 | 0.011597 | 0.011564 |
| 0.011598 | 0.011631 | 0.011631 | 0.011631 | 0.011807 | 0.011765 | 0.011407 |
| 0.011297 | 0.011303 | 0.011401 | 0.011366 | 0.011470 | 0.011321 | 0.011638 |
| 0.011437 | 0.011455 | 0.011203 | 0.011472 | 0.011430 | 0.011505 | 0.011329 |
| 0.011362 | 0.011362 | 0.011362 | 0.011396 | 0.011597 | 0.011564 | 0.011497 |
| 0.011597 | 0.011665 | 0.011396 | 0.011396 | 0.011430 | 0.011429 | 0.011398 |
| 0.011466 | 0.011429 | 0.011430 | 0.011465 | 0.011597 | 0.011665 | 0.011665 |
| 0.011531 | 0.011635 | 0.011636 | 0.011772 | 0.011767 | 0.011463 | 0.011631 |
| 0.011564 | 0.011564 | 0.011398 | 0.011582 | 0.011512 | 0.011537 | 0.011375 |
| 0.011473 | 0.011744 | 0.011568 | 0.011468 | 0.011295 | 0.011497 | 0.011362 |
| 0.011463 | 0.011463 | 0.011362 | 0.011464 | 0.011564 | 0.011567 | 0.011463 |

|          |          |          |          |          |          |          |
|----------|----------|----------|----------|----------|----------|----------|
| 0.011362 | 0.011296 | 0.011429 | 0.011362 | 0.011295 | 0.011400 | 0.011497 |
| 0.011463 | 0.011396 | 0.011429 | 0.011463 | 0.011430 | 0.011362 | 0.011564 |
| 0.011429 | 0.011463 | 0.011463 | 0.011396 | 0.011463 | 0.011698 | 0.011362 |
| 0.011396 | 0.011799 | 0.011396 | 0.011362 | 0.011396 | 0.011765 | 0.011274 |
| 0.011678 | 0.011273 | 0.011311 | 0.011543 | 0.011630 | 0.011527 | 0.011227 |
| 0.011270 | 0.011564 | 0.011664 | 0.011773 | 0.011632 | 0.011737 | 0.011901 |
| 0.011800 | 0.011838 | 0.011799 | 0.012017 | 0.011765 | 0.012640 | 0.011801 |
| 0.012540 | 0.012274 | 0.012442 | 0.012714 | 0.011765 | 0.011463 | 0.011766 |
| 0.012204 | 0.012106 | 0.011732 | 0.011597 | 0.011699 | 0.011699 | 0.011669 |
| 0.011564 | 0.011535 | 0.011631 | 0.011598 | 0.011968 | 0.012034 | 0.012036 |
| 0.011935 | 0.012035 | 0.012106 | 0.011872 | 0.012205 | 0.012212 | 0.012272 |
| 0.012273 | 0.012307 | 0.012221 | 0.012273 | 0.012274 | 0.011496 | 0.011800 |
| 0.011867 | 0.012371 | 0.011874 | 0.012102 | 0.012575 | 0.011637 | 0.011531 |
| 0.011496 | 0.011496 | 0.011968 | 0.012048 | 0.012081 | 0.011832 | 0.011498 |
| S337     | 0.011967 | 0.011967 | 0.012001 | 0.011766 | 0.011766 | 0.011833 |
| 0.011638 | 0.011570 | 0.011833 | 0.011564 | 0.011631 | 0.011599 | 0.011564 |
| 0.011530 | 0.011766 | 0.011497 | 0.011597 | 0.011665 | 0.011631 | 0.011597 |
| 0.011564 | 0.011598 | 0.011430 | 0.011564 | 0.011598 | 0.011564 | 0.011604 |
| 0.011564 | 0.011598 | 0.011497 | 0.011463 | 0.011665 | 0.011631 | 0.011597 |
| 0.011631 | 0.011732 | 0.011631 | 0.011631 | 0.011665 | 0.011631 | 0.011799 |
| 0.011497 | 0.011631 | 0.011665 | 0.011598 | 0.011631 | 0.011732 | 0.011665 |
| 0.011631 | 0.011799 | 0.011699 | 0.011631 | 0.011631 | 0.011900 | 0.011631 |
| 0.011597 | 0.011631 | 0.011732 | 0.011900 | 0.011665 | 0.011631 | 0.011732 |
| 0.011665 | 0.011732 | 0.011598 | 0.011866 | 0.011766 | 0.011631 | 0.011698 |
| 0.011598 | 0.011698 | 0.011665 | 0.011698 | 0.011665 | 0.011665 | 0.011665 |
| 0.011564 | 0.011598 | 0.011564 | 0.011598 | 0.011631 | 0.011666 | 0.011732 |
| 0.011665 | 0.011631 | 0.011698 | 0.011597 | 0.011598 | 0.011564 | 0.011597 |
| 0.011799 | 0.011732 | 0.011698 | 0.011799 | 0.011631 | 0.011866 | 0.011631 |
| 0.011839 | 0.011695 | 0.011815 | 0.011490 | 0.011508 | 0.011686 | 0.011454 |
| 0.012121 | 0.011264 | 0.011554 | 0.011866 | 0.011833 | 0.011598 | 0.011698 |
| 0.011698 | 0.011665 | 0.011732 | 0.011631 | 0.011698 | 0.011665 | 0.011665 |
| 0.011631 | 0.011665 | 0.011934 | 0.011799 | 0.011698 | 0.011665 | 0.011598 |
| 0.011564 | 0.011497 | 0.011631 | 0.011564 | 0.011531 | 0.011497 | 0.011430 |
| 0.011531 | 0.011598 | 0.011531 | 0.011531 | 0.011564 | 0.011564 | 0.011567 |
| 0.011635 | 0.011631 | 0.011631 | 0.011528 | 0.011567 | 0.011551 | 0.011632 |
| 0.011636 | 0.011576 | 0.011577 | 0.011613 | 0.011536 | 0.011574 | 0.011601 |
| 0.011240 | 0.011647 | 0.011681 | 0.011565 | 0.011579 | 0.011700 | 0.011599 |
| 0.011666 | 0.011667 | 0.011666 | 0.011766 | 0.011698 | 0.012068 | 0.011800 |
| 0.011631 | 0.011699 | 0.011631 | 0.011665 | 0.011531 | 0.011497 | 0.011564 |
| 0.011631 | 0.011631 | 0.011564 | 0.011564 | 0.011597 | 0.011564 | 0.011665 |
| 0.011631 | 0.011732 | 0.011665 | 0.011564 | 0.011667 | 0.011766 | 0.011770 |
| 0.011766 | 0.011665 | 0.011564 | 0.011499 | 0.011631 | 0.011564 | 0.011497 |
| 0.011502 | 0.011766 | 0.011564 | 0.011766 | 0.011530 | 0.011631 | 0.011531 |
| 0.011699 | 0.011598 | 0.011631 | 0.011598 | 0.011631 | 0.011497 | 0.011631 |
| 0.011665 | 0.011598 | 0.011665 | 0.011598 | 0.011631 | 0.011665 | 0.011867 |
| 0.011665 | 0.011598 | 0.011665 | 0.011768 | 0.011665 | 0.011631 | 0.011598 |
| 0.011567 | 0.011869 | 0.011610 | 0.011540 | 0.011671 | 0.011504 | 0.011650 |
| 0.011672 | 0.011162 | 0.011799 | 0.012001 | 0.011710 | 0.011866 | 0.011833 |
| 0.011766 | 0.011900 | 0.011771 | 0.011514 | 0.011648 | 0.011665 | 0.011737 |
| 0.011833 | 0.011735 | 0.011872 | 0.011941 | 0.011833 | 0.011934 | 0.012010 |
| 0.011737 | 0.011909 | 0.011873 | 0.011805 | 0.012070 | 0.011530 | 0.011735 |
| 0.011698 | 0.011631 | 0.011497 | 0.011530 | 0.011597 | 0.011598 | 0.011665 |
| 0.011598 | 0.011665 | 0.011564 | 0.011598 | 0.011598 | 0.011597 | 0.011665 |
| 0.011598 | 0.011698 | 0.011598 | 0.011631 | 0.011497 | 0.011597 | 0.011631 |
| 0.011631 | 0.011530 | 0.011665 | 0.011631 | 0.011564 | 0.011564 | 0.011564 |
| 0.011766 | 0.011665 | 0.011732 | 0.011530 | 0.011631 | 0.011799 | 0.011564 |
| 0.011564 | 0.011530 | 0.011597 | 0.011766 | 0.011564 | 0.011497 | 0.011631 |
| 0.011564 | 0.011598 | 0.011597 | 0.011530 | 0.011530 | 0.011698 | 0.011564 |
| 0.011530 | 0.011631 | 0.011497 | 0.011530 | 0.011665 | 0.011464 | 0.011564 |
| 0.011531 | 0.011665 | 0.011598 | 0.011497 | 0.011497 | 0.011497 | 0.011665 |

|          |          |          |          |          |          |          |
|----------|----------|----------|----------|----------|----------|----------|
| 0.011711 | 0.011564 | 0.011530 | 0.011699 | 0.011665 | 0.011597 | 0.011698 |
| 0.011564 | 0.011900 | 0.011497 | 0.011631 | 0.011497 | 0.011497 | 0.011497 |
| 0.011732 | 0.000000 | 0.011598 | 0.011698 | 0.011530 | 0.011598 | 0.011497 |
| 0.011564 | 0.011564 | 0.011597 | 0.011698 | 0.011597 | 0.011698 | 0.011766 |
| 0.011766 | 0.011732 | 0.011631 | 0.011732 | 0.011698 | 0.011564 | 0.011530 |
| 0.011564 | 0.011564 | 0.011598 | 0.011497 | 0.011530 | 0.011665 | 0.011564 |
| 0.011530 | 0.011598 | 0.011732 | 0.011698 | 0.011665 | 0.011597 | 0.011598 |
| 0.011665 | 0.011598 | 0.011698 | 0.011564 | 0.011698 | 0.011799 | 0.011766 |
| 0.011597 | 0.011665 | 0.011612 | 0.018125 | 0.011387 | 0.011672 | 0.011618 |
| 0.011579 | 0.011623 | 0.011636 | 0.011466 | 0.011609 | 0.011647 | 0.011668 |
| 0.011534 | 0.011365 | 0.011528 | 0.011563 | 0.011529 | 0.011455 | 0.011490 |
| 0.011295 | 0.011470 | 0.011357 | 0.011457 | 0.011732 | 0.011766 | 0.011771 |
| 0.011610 | 0.011732 | 0.011732 | 0.011631 | 0.011665 | 0.011665 | 0.011632 |
| 0.011665 | 0.011598 | 0.011631 | 0.011665 | 0.011631 | 0.011564 | 0.011598 |
| 0.011598 | 0.011631 | 0.011564 | 0.011631 | 0.011699 | 0.011732 | 0.011631 |
| 0.011598 | 0.011564 | 0.011632 | 0.011632 | 0.011699 | 0.011733 | 0.011766 |
| 0.011531 | 0.011531 | 0.011564 | 0.011665 | 0.011531 | 0.011766 | 0.011766 |
| 0.011799 | 0.011799 | 0.011698 | 0.011833 | 0.011665 | 0.011835 | 0.011665 |
| 0.011665 | 0.011732 | 0.011766 | 0.011598 | 0.011665 | 0.011598 | 0.011665 |
| 0.011733 | 0.011732 | 0.011766 | 0.011733 | 0.011633 | 0.011833 | 0.011800 |
| 0.011670 | 0.011564 | 0.011665 | 0.011766 | 0.011665 | 0.011732 | 0.011799 |
| 0.012001 | 0.011710 | 0.011866 | 0.011833 | 0.011766 | 0.011900 | 0.011565 |
| 0.011734 | 0.011632 | 0.011598 | 0.011598 | 0.011631 | 0.011564 | 0.011631 |
| 0.011699 | 0.011732 | 0.011631 | 0.011598 | 0.011564 | 0.011632 | 0.011632 |
| 0.011699 | 0.011733 | 0.011799 | 0.011732 | 0.012306 | 0.011775 | 0.011694 |
| 0.011764 | 0.011719 | 0.011834 | 0.011719 | 0.011831 | 0.011750 | 0.011750 |
| 0.012229 | 0.011614 | 0.011746 | 0.011683 | 0.011956 | 0.011843 | 0.011945 |
| 0.012285 | 0.011739 | 0.011839 | 0.011900 | 0.011766 | 0.011564 | 0.011804 |
| 0.011530 | 0.011698 | 0.011766 | 0.011732 | 0.011736 | 0.011530 | 0.011498 |
| 0.011631 | 0.011564 | 0.011597 | 0.011597 | 0.011530 | 0.011598 | 0.011497 |
| 0.011564 | 0.011597 | 0.011564 | 0.011530 | 0.011631 | 0.011564 | 0.011597 |
| 0.011597 | 0.011530 | 0.011598 | 0.011631 | 0.011530 | 0.011732 | 0.011766 |
| 0.011665 | 0.011665 | 0.011665 | 0.011665 | 0.011597 | 0.011665 | 0.011631 |
| 0.011374 | 0.011598 | 0.011564 | 0.011535 | 0.011698 | 0.011698 | 0.011698 |
| 0.011698 | 0.011631 | 0.011597 | 0.011631 | 0.011732 | 0.011732 | 0.011665 |
| 0.011665 | 0.011799 | 0.011631 | 0.011698 | 0.011900 | 0.011900 | 0.011766 |
| 0.011597 | 0.011665 | 0.011698 | 0.011766 | 0.011665 | 0.011698 | 0.011665 |
| 0.011698 | 0.011564 | 0.011564 | 0.011867 | 0.011867 | 0.011833 | 0.011631 |
| 0.011732 | 0.011799 | 0.011665 | 0.011732 | 0.011698 | 0.011564 | 0.011564 |
| 0.011665 | 0.011631 | 0.011564 | 0.011799 | 0.011631 | 0.011732 | 0.011699 |
| 0.011665 | 0.011706 | 0.011698 | 0.011548 | 0.011399 | 0.011673 | 0.011370 |
| 0.011445 | 0.011761 | 0.011587 | 0.011685 | 0.011548 | 0.011518 | 0.011379 |
| 0.011417 | 0.011258 | 0.011450 | 0.011258 | 0.011437 | 0.011529 | 0.011750 |
| 0.011776 | 0.011650 | 0.011659 | 0.011659 | 0.011667 | 0.011531 | 0.011598 |
| 0.011598 | 0.011666 | 0.011771 | 0.011569 | 0.011908 | 0.011944 | 0.011665 |
| 0.011631 | 0.011699 | 0.011631 | 0.011665 | 0.011531 | 0.011497 | 0.011564 |
| 0.011631 | 0.011631 | 0.011564 | 0.011564 | 0.011597 | 0.011564 | 0.011665 |
| 0.011654 | 0.011655 | 0.011643 | 0.011677 | 0.011813 | 0.011778 | 0.011778 |
| 0.011776 | 0.011666 | 0.011504 | 0.011529 | 0.011636 | 0.011806 | 0.011807 |
| 0.011599 | 0.011670 | 0.011903 | 0.011872 | 0.011801 | 0.011835 | 0.011766 |
| 0.011698 | 0.011766 | 0.011766 | 0.011665 | 0.011900 | 0.011833 | 0.011900 |
| 0.011934 | 0.011666 | 0.011572 | 0.011719 | 0.011598 | 0.011799 | 0.011766 |
| 0.011801 | 0.011833 | 0.011833 | 0.011833 | 0.012005 | 0.011967 | 0.011581 |
| 0.011466 | 0.011476 | 0.011571 | 0.011536 | 0.011573 | 0.011508 | 0.011468 |
| 0.011609 | 0.011324 | 0.011442 | 0.011660 | 0.011632 | 0.011711 | 0.011598 |
| 0.011564 | 0.011497 | 0.011631 | 0.011564 | 0.011531 | 0.011497 | 0.011430 |
| 0.011531 | 0.011598 | 0.011531 | 0.011531 | 0.011564 | 0.011564 | 0.011567 |
| 0.011635 | 0.011631 | 0.011631 | 0.011667 | 0.011531 | 0.011598 | 0.011598 |
| 0.011666 | 0.011771 | 0.011569 | 0.011908 | 0.011944 | 0.011665 | 0.011799 |
| 0.011766 | 0.011766 | 0.011602 | 0.011792 | 0.011721 | 0.011742 | 0.011516 |

|          |          |          |          |          |          |          |
|----------|----------|----------|----------|----------|----------|----------|
| 0.011715 | 0.011926 | 0.011696 | 0.011672 | 0.011564 | 0.011766 | 0.011631 |
| 0.011732 | 0.011665 | 0.011564 | 0.011667 | 0.011766 | 0.011770 | 0.011665 |
| 0.011564 | 0.011499 | 0.011631 | 0.011564 | 0.011497 | 0.011502 | 0.011766 |
| 0.011665 | 0.011598 | 0.011631 | 0.011665 | 0.011631 | 0.011564 | 0.011497 |
| 0.011631 | 0.011665 | 0.011665 | 0.011597 | 0.011665 | 0.011866 | 0.011497 |
| 0.011598 | 0.011665 | 0.011597 | 0.011631 | 0.011597 | 0.011631 | 0.011489 |
| 0.011735 | 0.011485 | 0.011311 | 0.011503 | 0.011589 | 0.011527 | 0.011269 |
| 0.011270 | 0.011497 | 0.011598 | 0.011706 | 0.011566 | 0.011703 | 0.011834 |
| 0.011734 | 0.011737 | 0.011732 | 0.011983 | 0.011665 | 0.012540 | 0.011735 |
| 0.012440 | 0.012208 | 0.012342 | 0.012648 | 0.011698 | 0.011564 | 0.011699 |
| 0.012340 | 0.012072 | 0.011665 | 0.011564 | 0.011632 | 0.011632 | 0.011602 |
| 0.011497 | 0.011501 | 0.011564 | 0.011531 | 0.011902 | 0.011968 | 0.011969 |
| 0.011868 | 0.011902 | 0.012039 | 0.011838 | 0.012341 | 0.012348 | 0.012408 |
| 0.012409 | 0.012442 | 0.012391 | 0.012409 | 0.012410 | 0.011698 | 0.011935 |
| 0.012003 | 0.012439 | 0.012010 | 0.011934 | 0.012408 | 0.011502 | 0.011397 |
| 0.011362 | 0.011295 | 0.011901 | 0.011925 | 0.012046 | 0.011766 | 0.011431 |
| S338     | 0.011664 | 0.011664 | 0.011933 | 0.011765 | 0.011765 | 0.011832 |
| 0.011671 | 0.011603 | 0.011832 | 0.011262 | 0.011329 | 0.011296 | 0.011262 |
| 0.011295 | 0.011463 | 0.011262 | 0.011295 | 0.011362 | 0.011329 | 0.011295 |
| 0.011262 | 0.011295 | 0.011396 | 0.011262 | 0.011295 | 0.011295 | 0.011637 |
| 0.011530 | 0.011295 | 0.011195 | 0.011429 | 0.011362 | 0.011329 | 0.011362 |
| 0.011329 | 0.011429 | 0.011329 | 0.011329 | 0.011362 | 0.011329 | 0.011497 |
| 0.011262 | 0.011329 | 0.011362 | 0.011295 | 0.011396 | 0.011429 | 0.011362 |
| 0.011329 | 0.011497 | 0.011396 | 0.011664 | 0.011329 | 0.011597 | 0.011329 |
| 0.011295 | 0.011396 | 0.011463 | 0.011597 | 0.011698 | 0.011396 | 0.011497 |
| 0.011362 | 0.011430 | 0.000000 | 0.011564 | 0.011799 | 0.011329 | 0.011396 |
| 0.011295 | 0.011396 | 0.011295 | 0.011429 | 0.011362 | 0.011362 | 0.011362 |
| 0.011262 | 0.011295 | 0.011262 | 0.011362 | 0.011329 | 0.011363 | 0.011429 |
| 0.011362 | 0.011329 | 0.011396 | 0.011295 | 0.011429 | 0.011262 | 0.011329 |
| 0.011496 | 0.011429 | 0.011664 | 0.011497 | 0.011329 | 0.011564 | 0.011329 |
| 0.011468 | 0.011695 | 0.011513 | 0.011216 | 0.011210 | 0.011318 | 0.011415 |
| 0.012048 | 0.011518 | 0.011225 | 0.011564 | 0.011564 | 0.011362 | 0.011463 |
| 0.011396 | 0.011362 | 0.011429 | 0.011329 | 0.011430 | 0.011362 | 0.011362 |
| 0.011329 | 0.011429 | 0.011631 | 0.011496 | 0.011396 | 0.011362 | 0.011295 |
| 0.011262 | 0.011262 | 0.011329 | 0.011295 | 0.011497 | 0.011463 | 0.011396 |
| 0.011497 | 0.011564 | 0.011295 | 0.011295 | 0.011329 | 0.011329 | 0.011330 |
| 0.011398 | 0.011329 | 0.011329 | 0.011204 | 0.011277 | 0.011236 | 0.011329 |
| 0.011331 | 0.011266 | 0.011282 | 0.011302 | 0.011230 | 0.011266 | 0.011297 |
| 0.011564 | 0.011336 | 0.011370 | 0.011262 | 0.011268 | 0.011397 | 0.011363 |
| 0.011430 | 0.011364 | 0.011363 | 0.011463 | 0.011396 | 0.011765 | 0.011564 |
| 0.011597 | 0.011463 | 0.011329 | 0.011430 | 0.011228 | 0.011463 | 0.011262 |
| 0.011329 | 0.011329 | 0.011295 | 0.011262 | 0.011295 | 0.011262 | 0.011362 |
| 0.011329 | 0.011430 | 0.011363 | 0.011262 | 0.011363 | 0.011463 | 0.011466 |
| 0.011463 | 0.011363 | 0.011262 | 0.011195 | 0.011329 | 0.011262 | 0.011195 |
| 0.011264 | 0.011463 | 0.011262 | 0.011463 | 0.011228 | 0.011329 | 0.011295 |
| 0.011396 | 0.011295 | 0.011329 | 0.011295 | 0.011329 | 0.011195 | 0.011329 |
| 0.011363 | 0.011295 | 0.011362 | 0.011295 | 0.011329 | 0.011362 | 0.011597 |
| 0.011698 | 0.011631 | 0.011698 | 0.011431 | 0.011699 | 0.011329 | 0.011295 |
| 0.011330 | 0.011586 | 0.011472 | 0.011198 | 0.011705 | 0.011197 | 0.011296 |
| 0.011705 | 0.011570 | 0.011496 | 0.011698 | 0.011402 | 0.011564 | 0.011530 |
| 0.011463 | 0.011631 | 0.011486 | 0.011349 | 0.011396 | 0.011362 | 0.011432 |
| 0.011530 | 0.011364 | 0.011567 | 0.011635 | 0.011564 | 0.011631 | 0.011738 |
| 0.011466 | 0.011637 | 0.011568 | 0.011500 | 0.011767 | 0.011228 | 0.011431 |
| 0.011396 | 0.011329 | 0.011228 | 0.011228 | 0.011295 | 0.011295 | 0.011362 |
| 0.011295 | 0.011362 | 0.011262 | 0.011362 | 0.011295 | 0.011295 | 0.011362 |
| 0.011295 | 0.011732 | 0.011631 | 0.011664 | 0.011195 | 0.011295 | 0.011262 |
| 0.011329 | 0.011295 | 0.011362 | 0.011396 | 0.011262 | 0.011262 | 0.011262 |
| 0.011799 | 0.011429 | 0.011429 | 0.011228 | 0.011329 | 0.011497 | 0.011262 |
| 0.011262 | 0.011329 | 0.011295 | 0.011463 | 0.011262 | 0.011396 | 0.011530 |
| 0.011463 | 0.011295 | 0.011295 | 0.011228 | 0.011228 | 0.011396 | 0.011329 |

|          |          |          |          |          |          |          |
|----------|----------|----------|----------|----------|----------|----------|
| 0.011228 | 0.011329 | 0.011195 | 0.011228 | 0.011362 | 0.011497 | 0.011262 |
| 0.011228 | 0.011362 | 0.011295 | 0.011195 | 0.011530 | 0.011195 | 0.011362 |
| 0.011437 | 0.011262 | 0.011564 | 0.011396 | 0.011429 | 0.011295 | 0.011396 |
| 0.011262 | 0.011597 | 0.011195 | 0.011463 | 0.011262 | 0.011262 | 0.011195 |
| 0.011429 | 0.011598 | 0.000000 | 0.011396 | 0.011228 | 0.011631 | 0.011262 |
| 0.011262 | 0.011262 | 0.011295 | 0.011396 | 0.011295 | 0.011396 | 0.011463 |
| 0.011463 | 0.011429 | 0.011329 | 0.011430 | 0.011396 | 0.011262 | 0.011228 |
| 0.011262 | 0.011262 | 0.000000 | 0.011262 | 0.011228 | 0.011396 | 0.011262 |
| 0.011295 | 0.011295 | 0.011429 | 0.011463 | 0.011362 | 0.011295 | 0.011295 |
| 0.011295 | 0.011295 | 0.011396 | 0.011262 | 0.011396 | 0.011497 | 0.011799 |
| 0.011295 | 0.011698 | 0.011267 | 0.017785 | 0.011257 | 0.011427 | 0.011618 |
| 0.011579 | 0.011623 | 0.011322 | 0.011234 | 0.011719 | 0.011647 | 0.011364 |
| 0.011487 | 0.011549 | 0.011177 | 0.011270 | 0.011255 | 0.011307 | 0.011275 |
| 0.011529 | 0.011433 | 0.011431 | 0.011259 | 0.011429 | 0.011463 | 0.011466 |
| 0.011335 | 0.011430 | 0.011429 | 0.011396 | 0.011362 | 0.011363 | 0.011329 |
| 0.011362 | 0.011295 | 0.011329 | 0.011362 | 0.011329 | 0.011262 | 0.011295 |
| 0.011295 | 0.011362 | 0.011262 | 0.011161 | 0.011396 | 0.011430 | 0.011329 |
| 0.011362 | 0.011329 | 0.011665 | 0.011665 | 0.011396 | 0.011430 | 0.011463 |
| 0.011228 | 0.011228 | 0.011262 | 0.011363 | 0.011228 | 0.011463 | 0.011463 |
| 0.011497 | 0.011496 | 0.011429 | 0.011530 | 0.011698 | 0.011532 | 0.011362 |
| 0.011362 | 0.011430 | 0.011463 | 0.011295 | 0.011362 | 0.011329 | 0.011362 |
| 0.011430 | 0.011430 | 0.011463 | 0.011430 | 0.011330 | 0.011530 | 0.011497 |
| 0.011365 | 0.011262 | 0.011362 | 0.011463 | 0.011363 | 0.011497 | 0.011530 |
| 0.011698 | 0.011402 | 0.011564 | 0.011530 | 0.011463 | 0.011631 | 0.011262 |
| 0.011431 | 0.011329 | 0.011295 | 0.011295 | 0.011362 | 0.011262 | 0.011161 |
| 0.011396 | 0.011430 | 0.011329 | 0.011362 | 0.011329 | 0.011665 | 0.011665 |
| 0.011396 | 0.011430 | 0.011496 | 0.011429 | 0.012069 | 0.011489 | 0.011412 |
| 0.011482 | 0.011442 | 0.011552 | 0.011441 | 0.011550 | 0.011474 | 0.011440 |
| 0.012022 | 0.011337 | 0.011471 | 0.011406 | 0.011680 | 0.011536 | 0.011639 |
| 0.012046 | 0.011513 | 0.011601 | 0.011664 | 0.011530 | 0.011530 | 0.011567 |
| 0.011228 | 0.011396 | 0.011530 | 0.011496 | 0.011499 | 0.011496 | 0.011464 |
| 0.011329 | 0.011262 | 0.011295 | 0.011329 | 0.011228 | 0.011295 | 0.011195 |
| 0.011329 | 0.011362 | 0.011262 | 0.011228 | 0.011329 | 0.011262 | 0.011295 |
| 0.011295 | 0.011228 | 0.011295 | 0.011329 | 0.011228 | 0.011429 | 0.011463 |
| 0.011362 | 0.011429 | 0.011362 | 0.011362 | 0.011295 | 0.011698 | 0.011329 |
| 0.011373 | 0.011295 | 0.011531 | 0.011535 | 0.011396 | 0.011396 | 0.011396 |
| 0.011396 | 0.011329 | 0.011295 | 0.011329 | 0.011429 | 0.011429 | 0.011362 |
| 0.011362 | 0.011429 | 0.011664 | 0.011396 | 0.011597 | 0.011597 | 0.011463 |
| 0.011295 | 0.011362 | 0.011396 | 0.011799 | 0.011362 | 0.011396 | 0.011362 |
| 0.011396 | 0.011329 | 0.011329 | 0.011631 | 0.011564 | 0.011597 | 0.011329 |
| 0.011430 | 0.011497 | 0.011362 | 0.011430 | 0.011396 | 0.011262 | 0.011597 |
| 0.011362 | 0.011329 | 0.011329 | 0.011497 | 0.011329 | 0.011429 | 0.011665 |
| 0.011362 | 0.011739 | 0.011732 | 0.011507 | 0.011229 | 0.011434 | 0.011215 |
| 0.011225 | 0.011722 | 0.011236 | 0.011462 | 0.011304 | 0.011366 | 0.011379 |
| 0.011519 | 0.011192 | 0.011339 | 0.011192 | 0.011222 | 0.011194 | 0.011385 |
| 0.011399 | 0.011296 | 0.011377 | 0.011307 | 0.011364 | 0.011497 | 0.011564 |
| 0.011564 | 0.011430 | 0.011534 | 0.011535 | 0.011670 | 0.011661 | 0.011362 |
| 0.011597 | 0.011463 | 0.011329 | 0.011430 | 0.011228 | 0.011463 | 0.011262 |
| 0.011329 | 0.011329 | 0.011295 | 0.011262 | 0.011295 | 0.011262 | 0.011362 |
| 0.011340 | 0.011340 | 0.011334 | 0.011368 | 0.011505 | 0.011470 | 0.011470 |
| 0.011469 | 0.011329 | 0.011208 | 0.011204 | 0.011331 | 0.011501 | 0.011501 |
| 0.011296 | 0.011365 | 0.011599 | 0.011567 | 0.011497 | 0.011531 | 0.011463 |
| 0.011396 | 0.011463 | 0.011463 | 0.011362 | 0.011934 | 0.011530 | 0.011598 |
| 0.011631 | 0.011701 | 0.011333 | 0.011407 | 0.011295 | 0.011497 | 0.011463 |
| 0.011498 | 0.011530 | 0.011530 | 0.011530 | 0.011650 | 0.011664 | 0.011303 |
| 0.011196 | 0.011199 | 0.011299 | 0.011264 | 0.011368 | 0.011210 | 0.011536 |
| 0.011335 | 0.011499 | 0.011251 | 0.011360 | 0.011329 | 0.011402 | 0.011295 |
| 0.011262 | 0.011262 | 0.011329 | 0.011295 | 0.011497 | 0.011463 | 0.011396 |
| 0.011497 | 0.011564 | 0.011295 | 0.011295 | 0.011329 | 0.011329 | 0.011330 |
| 0.011398 | 0.011329 | 0.011329 | 0.011364 | 0.011497 | 0.011564 | 0.011564 |

|          |          |          |          |          |          |          |
|----------|----------|----------|----------|----------|----------|----------|
| 0.011430 | 0.011534 | 0.011535 | 0.011670 | 0.011661 | 0.011362 | 0.011530 |
| 0.011463 | 0.011463 | 0.011297 | 0.011478 | 0.011408 | 0.011435 | 0.011270 |
| 0.011439 | 0.011653 | 0.011484 | 0.011366 | 0.011262 | 0.011463 | 0.011329 |
| 0.011430 | 0.011363 | 0.011262 | 0.011363 | 0.011463 | 0.011466 | 0.011363 |
| 0.011262 | 0.011195 | 0.011329 | 0.011262 | 0.011195 | 0.011264 | 0.011463 |
| 0.011362 | 0.011295 | 0.011329 | 0.011362 | 0.011329 | 0.011262 | 0.011463 |
| 0.011329 | 0.011362 | 0.011362 | 0.011295 | 0.011362 | 0.011597 | 0.011262 |
| 0.011295 | 0.011698 | 0.011295 | 0.011329 | 0.011295 | 0.011664 | 0.011232 |
| 0.011679 | 0.011188 | 0.011261 | 0.011463 | 0.011549 | 0.011455 | 0.011186 |
| 0.011218 | 0.011463 | 0.011564 | 0.011671 | 0.011532 | 0.011635 | 0.011800 |
| 0.011700 | 0.011737 | 0.011698 | 0.011915 | 0.011664 | 0.012539 | 0.011700 |
| 0.012439 | 0.012207 | 0.012341 | 0.012613 | 0.011664 | 0.011363 | 0.011665 |
| 0.012104 | 0.012005 | 0.011631 | 0.011530 | 0.011598 | 0.011598 | 0.011567 |
| 0.011463 | 0.011433 | 0.011530 | 0.011497 | 0.011867 | 0.011933 | 0.011935 |
| 0.011834 | 0.011935 | 0.012038 | 0.011771 | 0.012104 | 0.012110 | 0.012171 |
| 0.012172 | 0.012206 | 0.012118 | 0.012172 | 0.012173 | 0.011396 | 0.011699 |
| 0.011767 | 0.012270 | 0.011772 | 0.012001 | 0.012474 | 0.011536 | 0.011430 |
| 0.011396 | 0.011396 | 0.011867 | 0.011924 | 0.012010 | 0.011664 | 0.011397 |
| S339     | 0.011732 | 0.011732 | 0.012068 | 0.011832 | 0.011832 | 0.011900 |
| 0.011739 | 0.011671 | 0.011900 | 0.011329 | 0.011396 | 0.011363 | 0.011329 |
| 0.011362 | 0.011530 | 0.011329 | 0.011362 | 0.011429 | 0.011396 | 0.011362 |
| 0.011329 | 0.011362 | 0.011463 | 0.011329 | 0.011363 | 0.011362 | 0.011705 |
| 0.011597 | 0.011362 | 0.011262 | 0.011496 | 0.011429 | 0.011396 | 0.011429 |
| 0.011396 | 0.011497 | 0.011396 | 0.011396 | 0.011429 | 0.011396 | 0.011564 |
| 0.011329 | 0.011396 | 0.011429 | 0.011362 | 0.011463 | 0.011496 | 0.011429 |
| 0.011396 | 0.011564 | 0.011463 | 0.011732 | 0.011396 | 0.011664 | 0.011396 |
| 0.011362 | 0.011463 | 0.011530 | 0.011664 | 0.011765 | 0.011463 | 0.011564 |
| 0.011429 | 0.011497 | 0.011396 | 0.011631 | 0.011866 | 0.011396 | 0.011463 |
| 0.011362 | 0.011463 | 0.011429 | 0.011497 | 0.011429 | 0.011429 | 0.011429 |
| 0.011329 | 0.011362 | 0.011329 | 0.011429 | 0.011362 | 0.011430 | 0.011496 |
| 0.011429 | 0.011396 | 0.011463 | 0.011362 | 0.011496 | 0.011329 | 0.011396 |
| 0.011564 | 0.011496 | 0.011732 | 0.011564 | 0.011396 | 0.011631 | 0.011396 |
| 0.011579 | 0.011807 | 0.011626 | 0.011334 | 0.011321 | 0.011391 | 0.011533 |
| 0.012158 | 0.011620 | 0.011307 | 0.011631 | 0.011631 | 0.011429 | 0.011530 |
| 0.011463 | 0.011429 | 0.011496 | 0.011396 | 0.011497 | 0.011429 | 0.011429 |
| 0.011396 | 0.011496 | 0.011698 | 0.011564 | 0.011463 | 0.011430 | 0.011362 |
| 0.011329 | 0.011329 | 0.011396 | 0.011362 | 0.011564 | 0.011530 | 0.011463 |
| 0.011564 | 0.011631 | 0.011362 | 0.011362 | 0.011396 | 0.011396 | 0.011398 |
| 0.011466 | 0.011396 | 0.011396 | 0.011276 | 0.011349 | 0.011306 | 0.011396 |
| 0.011399 | 0.011335 | 0.011392 | 0.011371 | 0.011298 | 0.011334 | 0.011364 |
| 0.011636 | 0.011405 | 0.011439 | 0.011329 | 0.011337 | 0.011464 | 0.011430 |
| 0.011497 | 0.011431 | 0.011430 | 0.011530 | 0.011463 | 0.011832 | 0.011631 |
| 0.011664 | 0.011530 | 0.011396 | 0.011497 | 0.011295 | 0.011530 | 0.011329 |
| 0.011396 | 0.011396 | 0.011362 | 0.011329 | 0.011362 | 0.011329 | 0.011430 |
| 0.011396 | 0.011497 | 0.011430 | 0.011329 | 0.011431 | 0.011530 | 0.011533 |
| 0.011530 | 0.011430 | 0.011329 | 0.011263 | 0.011396 | 0.011329 | 0.011262 |
| 0.011366 | 0.011530 | 0.011329 | 0.011530 | 0.011295 | 0.011396 | 0.011362 |
| 0.011463 | 0.011362 | 0.011396 | 0.011362 | 0.011396 | 0.011262 | 0.011396 |
| 0.011430 | 0.011362 | 0.011430 | 0.011362 | 0.011396 | 0.011430 | 0.011665 |
| 0.011765 | 0.011698 | 0.011766 | 0.011532 | 0.011766 | 0.011396 | 0.011362 |
| 0.011398 | 0.011707 | 0.011472 | 0.011300 | 0.011773 | 0.011265 | 0.011375 |
| 0.011773 | 0.011672 | 0.011564 | 0.011765 | 0.011470 | 0.011631 | 0.011597 |
| 0.011530 | 0.011698 | 0.011522 | 0.011349 | 0.011395 | 0.011430 | 0.011500 |
| 0.011597 | 0.011499 | 0.011635 | 0.011703 | 0.011631 | 0.011698 | 0.011806 |
| 0.011534 | 0.011705 | 0.011636 | 0.011567 | 0.011834 | 0.011295 | 0.011498 |
| 0.011463 | 0.011396 | 0.011295 | 0.011295 | 0.011362 | 0.011362 | 0.011429 |
| 0.011362 | 0.011429 | 0.011329 | 0.011429 | 0.011362 | 0.011362 | 0.011429 |
| 0.011362 | 0.011799 | 0.011698 | 0.011732 | 0.011262 | 0.011362 | 0.011396 |
| 0.011396 | 0.011362 | 0.011429 | 0.011463 | 0.011329 | 0.011329 | 0.011329 |
| 0.011866 | 0.011496 | 0.011228 | 0.011295 | 0.011396 | 0.011564 | 0.011329 |



|          |          |          |          |          |          |          |
|----------|----------|----------|----------|----------|----------|----------|
| 0.011329 | 0.011396 | 0.011362 | 0.011530 | 0.011329 | 0.011463 | 0.011597 |
| 0.011530 | 0.011362 | 0.011362 | 0.011295 | 0.011295 | 0.011463 | 0.011396 |
| 0.011295 | 0.011396 | 0.011262 | 0.011295 | 0.011429 | 0.011564 | 0.011329 |
| 0.011295 | 0.011429 | 0.011363 | 0.011262 | 0.011597 | 0.011262 | 0.011429 |
| 0.011471 | 0.011329 | 0.011631 | 0.011463 | 0.011497 | 0.011362 | 0.011463 |
| 0.011329 | 0.011664 | 0.011262 | 0.011530 | 0.011329 | 0.011329 | 0.011262 |
| 0.011496 | 0.011698 | 0.011396 | 0.000000 | 0.011295 | 0.011698 | 0.011329 |
| 0.011329 | 0.011329 | 0.011362 | 0.011463 | 0.011362 | 0.011463 | 0.011530 |
| 0.011530 | 0.011497 | 0.011396 | 0.011497 | 0.011463 | 0.011329 | 0.011295 |
| 0.011329 | 0.011329 | 0.011396 | 0.011329 | 0.011295 | 0.011463 | 0.011329 |
| 0.011362 | 0.011362 | 0.011496 | 0.011530 | 0.011429 | 0.011362 | 0.011362 |
| 0.011429 | 0.011362 | 0.011463 | 0.011329 | 0.011463 | 0.011564 | 0.011866 |
| 0.011362 | 0.011765 | 0.011371 | 0.017899 | 0.011257 | 0.011488 | 0.011723 |
| 0.011683 | 0.011729 | 0.011427 | 0.011350 | 0.011774 | 0.011751 | 0.011364 |
| 0.011629 | 0.011610 | 0.011294 | 0.011311 | 0.011372 | 0.011406 | 0.011404 |
| 0.011623 | 0.011544 | 0.011542 | 0.011325 | 0.011497 | 0.011530 | 0.011534 |
| 0.011404 | 0.011497 | 0.011497 | 0.011463 | 0.011429 | 0.011430 | 0.011396 |
| 0.011430 | 0.011362 | 0.011396 | 0.011430 | 0.011396 | 0.011329 | 0.011362 |
| 0.011362 | 0.011430 | 0.011329 | 0.011430 | 0.011463 | 0.011497 | 0.011396 |
| 0.011429 | 0.011396 | 0.011732 | 0.011732 | 0.011463 | 0.011497 | 0.011530 |
| 0.011295 | 0.011295 | 0.011329 | 0.011430 | 0.011295 | 0.011530 | 0.011530 |
| 0.011564 | 0.011564 | 0.011497 | 0.011597 | 0.011766 | 0.011599 | 0.011430 |
| 0.011430 | 0.011497 | 0.011530 | 0.011362 | 0.011430 | 0.011396 | 0.011430 |
| 0.011497 | 0.011497 | 0.011530 | 0.011497 | 0.011397 | 0.011597 | 0.011564 |
| 0.011433 | 0.011329 | 0.011430 | 0.011530 | 0.011430 | 0.011564 | 0.011597 |
| 0.011765 | 0.011470 | 0.011631 | 0.011597 | 0.011530 | 0.011698 | 0.011329 |
| 0.011498 | 0.011396 | 0.011362 | 0.011362 | 0.011430 | 0.011329 | 0.011430 |
| 0.011463 | 0.011497 | 0.011396 | 0.011429 | 0.011396 | 0.011732 | 0.011732 |
| 0.011463 | 0.011497 | 0.011564 | 0.011496 | 0.012137 | 0.011560 | 0.011447 |
| 0.011552 | 0.011511 | 0.011587 | 0.011476 | 0.011620 | 0.011543 | 0.011508 |
| 0.012090 | 0.011406 | 0.011540 | 0.011475 | 0.011749 | 0.011604 | 0.011707 |
| 0.012114 | 0.011550 | 0.011669 | 0.011732 | 0.011597 | 0.011597 | 0.011635 |
| 0.011295 | 0.011463 | 0.011597 | 0.011564 | 0.011567 | 0.011564 | 0.011532 |
| 0.011396 | 0.011329 | 0.011362 | 0.011396 | 0.011295 | 0.011362 | 0.011262 |
| 0.011396 | 0.011429 | 0.011329 | 0.011295 | 0.011396 | 0.011329 | 0.011362 |
| 0.011362 | 0.011295 | 0.011362 | 0.011396 | 0.011295 | 0.011497 | 0.011530 |
| 0.011429 | 0.011497 | 0.011429 | 0.011429 | 0.011362 | 0.011765 | 0.011396 |
| 0.011408 | 0.011362 | 0.011598 | 0.011569 | 0.011463 | 0.011463 | 0.011463 |
| 0.011463 | 0.011396 | 0.011362 | 0.011396 | 0.011497 | 0.011497 | 0.011429 |
| 0.011429 | 0.011564 | 0.011732 | 0.011429 | 0.011665 | 0.011665 | 0.011530 |
| 0.011362 | 0.011429 | 0.011463 | 0.011866 | 0.011430 | 0.011463 | 0.011429 |
| 0.011463 | 0.011396 | 0.011396 | 0.011631 | 0.011631 | 0.011597 | 0.011396 |
| 0.011497 | 0.011564 | 0.011429 | 0.011497 | 0.011463 | 0.011329 | 0.011664 |
| 0.011429 | 0.011396 | 0.011396 | 0.011564 | 0.011396 | 0.011228 | 0.011732 |
| 0.011429 | 0.011807 | 0.011799 | 0.011629 | 0.011342 | 0.011502 | 0.011370 |
| 0.011335 | 0.011839 | 0.011341 | 0.011552 | 0.011304 | 0.011467 | 0.011432 |
| 0.011570 | 0.011258 | 0.011394 | 0.011258 | 0.011276 | 0.011395 | 0.011466 |
| 0.011512 | 0.011414 | 0.011483 | 0.011412 | 0.011431 | 0.011564 | 0.011631 |
| 0.011631 | 0.011497 | 0.011601 | 0.011603 | 0.011738 | 0.011767 | 0.011429 |
| 0.011664 | 0.011530 | 0.011396 | 0.011497 | 0.011295 | 0.011530 | 0.011329 |
| 0.011396 | 0.011396 | 0.011362 | 0.011329 | 0.011362 | 0.011329 | 0.011430 |
| 0.011410 | 0.011165 | 0.011403 | 0.011437 | 0.011573 | 0.011538 | 0.011538 |
| 0.011537 | 0.011464 | 0.011245 | 0.011276 | 0.011399 | 0.011568 | 0.011569 |
| 0.011363 | 0.011433 | 0.011666 | 0.011635 | 0.011565 | 0.011599 | 0.011530 |
| 0.011463 | 0.011530 | 0.011530 | 0.011429 | 0.012001 | 0.011597 | 0.011665 |
| 0.011698 | 0.011772 | 0.011401 | 0.011441 | 0.011362 | 0.011564 | 0.011530 |
| 0.011565 | 0.011597 | 0.011597 | 0.011597 | 0.011768 | 0.011732 | 0.011372 |
| 0.011263 | 0.011268 | 0.011367 | 0.011332 | 0.011436 | 0.011284 | 0.011604 |
| 0.011403 | 0.011499 | 0.011203 | 0.011360 | 0.011396 | 0.011471 | 0.011362 |
| 0.011329 | 0.011329 | 0.011396 | 0.011362 | 0.011564 | 0.011530 | 0.011463 |

|          |          |          |          |          |          |          |
|----------|----------|----------|----------|----------|----------|----------|
| 0.011564 | 0.011631 | 0.011362 | 0.011362 | 0.011396 | 0.011396 | 0.011398 |
| 0.011466 | 0.011396 | 0.011396 | 0.011431 | 0.011564 | 0.011631 | 0.011631 |
| 0.011497 | 0.011601 | 0.011603 | 0.011738 | 0.011767 | 0.011429 | 0.011597 |
| 0.011530 | 0.011530 | 0.011365 | 0.011547 | 0.011477 | 0.011503 | 0.011376 |
| 0.011542 | 0.011744 | 0.011526 | 0.011434 | 0.011329 | 0.011530 | 0.011396 |
| 0.011497 | 0.011430 | 0.011329 | 0.011431 | 0.011530 | 0.011533 | 0.011430 |
| 0.011329 | 0.011263 | 0.011396 | 0.011329 | 0.011262 | 0.011366 | 0.011530 |
| 0.011430 | 0.011362 | 0.011396 | 0.011430 | 0.011396 | 0.011329 | 0.011530 |
| 0.011396 | 0.011429 | 0.011429 | 0.011362 | 0.011429 | 0.011664 | 0.011329 |
| 0.011362 | 0.011765 | 0.011362 | 0.011396 | 0.011362 | 0.011732 | 0.011317 |
| 0.011791 | 0.011315 | 0.011411 | 0.011543 | 0.011630 | 0.011563 | 0.011311 |
| 0.011375 | 0.011530 | 0.011631 | 0.011739 | 0.011599 | 0.011737 | 0.011867 |
| 0.011767 | 0.011804 | 0.011765 | 0.012017 | 0.011732 | 0.012606 | 0.011768 |
| 0.012507 | 0.012274 | 0.012409 | 0.012680 | 0.011731 | 0.011430 | 0.011732 |
| 0.012171 | 0.012106 | 0.011698 | 0.011597 | 0.011665 | 0.011665 | 0.011635 |
| 0.011530 | 0.011535 | 0.011597 | 0.011565 | 0.011935 | 0.012001 | 0.012002 |
| 0.011901 | 0.012002 | 0.012106 | 0.011872 | 0.012171 | 0.012178 | 0.012238 |
| 0.012239 | 0.012273 | 0.012221 | 0.012239 | 0.012241 | 0.011463 | 0.011766 |
| 0.011834 | 0.012303 | 0.011840 | 0.012068 | 0.012541 | 0.011604 | 0.011497 |
| 0.011463 | 0.011463 | 0.011934 | 0.011965 | 0.012081 | 0.011799 | 0.011465 |
| S340     | 0.011564 | 0.011564 | 0.011900 | 0.011664 | 0.011664 | 0.011732 |
| 0.011569 | 0.011501 | 0.011731 | 0.011161 | 0.011228 | 0.011195 | 0.011161 |
| 0.011194 | 0.011362 | 0.011161 | 0.011194 | 0.011262 | 0.011228 | 0.011194 |
| 0.011161 | 0.011194 | 0.011295 | 0.011161 | 0.011195 | 0.011194 | 0.011535 |
| 0.011429 | 0.011194 | 0.011094 | 0.011329 | 0.011262 | 0.011228 | 0.011262 |
| 0.011228 | 0.011329 | 0.011228 | 0.011228 | 0.011262 | 0.011228 | 0.011396 |
| 0.011161 | 0.011228 | 0.011262 | 0.011194 | 0.011295 | 0.011329 | 0.011262 |
| 0.011228 | 0.011396 | 0.011295 | 0.011564 | 0.011228 | 0.011496 | 0.011228 |
| 0.011194 | 0.011295 | 0.011362 | 0.011496 | 0.011597 | 0.011295 | 0.011396 |
| 0.011262 | 0.011329 | 0.011228 | 0.011463 | 0.011698 | 0.011228 | 0.011295 |
| 0.011194 | 0.011295 | 0.011262 | 0.011329 | 0.011262 | 0.011262 | 0.011262 |
| 0.011161 | 0.011194 | 0.011161 | 0.011262 | 0.011228 | 0.011262 | 0.011329 |
| 0.011262 | 0.011228 | 0.011295 | 0.011194 | 0.011329 | 0.011161 | 0.011228 |
| 0.011396 | 0.011329 | 0.011564 | 0.011396 | 0.011228 | 0.011463 | 0.011228 |
| 0.011394 | 0.011620 | 0.011437 | 0.011138 | 0.011135 | 0.011244 | 0.011336 |
| 0.011975 | 0.011365 | 0.011102 | 0.011463 | 0.011463 | 0.011262 | 0.011362 |
| 0.011295 | 0.011262 | 0.011329 | 0.011228 | 0.011329 | 0.011262 | 0.011262 |
| 0.011228 | 0.011329 | 0.011530 | 0.011396 | 0.011295 | 0.011262 | 0.011195 |
| 0.011161 | 0.011161 | 0.011228 | 0.011195 | 0.011396 | 0.011362 | 0.011295 |
| 0.011396 | 0.011463 | 0.011195 | 0.011195 | 0.011228 | 0.011228 | 0.011229 |
| 0.011297 | 0.011228 | 0.011228 | 0.011096 | 0.011169 | 0.011130 | 0.011228 |
| 0.011230 | 0.011163 | 0.011208 | 0.011198 | 0.011128 | 0.011163 | 0.011195 |
| 0.011456 | 0.011233 | 0.011267 | 0.011161 | 0.011164 | 0.011296 | 0.011262 |
| 0.011329 | 0.011262 | 0.011262 | 0.011362 | 0.011295 | 0.011664 | 0.011463 |
| 0.011496 | 0.011362 | 0.011228 | 0.011329 | 0.011127 | 0.011362 | 0.011161 |
| 0.011228 | 0.011228 | 0.011195 | 0.011161 | 0.011194 | 0.011161 | 0.011262 |
| 0.011228 | 0.011329 | 0.011262 | 0.011161 | 0.011262 | 0.011362 | 0.011364 |
| 0.011362 | 0.011262 | 0.011161 | 0.011094 | 0.011228 | 0.011161 | 0.011094 |
| 0.011196 | 0.011362 | 0.011161 | 0.011362 | 0.011127 | 0.011228 | 0.011195 |
| 0.011295 | 0.011195 | 0.011228 | 0.011195 | 0.011228 | 0.011094 | 0.011228 |
| 0.011262 | 0.011195 | 0.011262 | 0.011195 | 0.011228 | 0.011262 | 0.011497 |
| 0.011597 | 0.011530 | 0.011597 | 0.011363 | 0.011597 | 0.011228 | 0.011195 |
| 0.011229 | 0.011505 | 0.011335 | 0.011129 | 0.011603 | 0.011094 | 0.011218 |
| 0.011603 | 0.011502 | 0.011396 | 0.011597 | 0.011299 | 0.011463 | 0.011429 |
| 0.011362 | 0.011530 | 0.011380 | 0.011225 | 0.011270 | 0.011262 | 0.011331 |
| 0.011429 | 0.011330 | 0.011466 | 0.011534 | 0.011463 | 0.011530 | 0.011636 |
| 0.011365 | 0.011535 | 0.011466 | 0.011398 | 0.011666 | 0.011127 | 0.011330 |
| 0.011295 | 0.011228 | 0.011127 | 0.011127 | 0.011194 | 0.011194 | 0.011262 |
| 0.011194 | 0.011262 | 0.011161 | 0.011262 | 0.011194 | 0.011194 | 0.011262 |
| 0.011194 | 0.011631 | 0.011530 | 0.011564 | 0.011094 | 0.011194 | 0.011228 |

|          |          |          |          |          |          |          |
|----------|----------|----------|----------|----------|----------|----------|
| 0.011228 | 0.011194 | 0.011262 | 0.011295 | 0.011161 | 0.011161 | 0.011161 |
| 0.011698 | 0.011329 | 0.011329 | 0.011127 | 0.011228 | 0.011396 | 0.011161 |
| 0.011161 | 0.011228 | 0.011194 | 0.011362 | 0.011161 | 0.011295 | 0.011429 |
| 0.011362 | 0.011194 | 0.011194 | 0.011127 | 0.011127 | 0.011295 | 0.011228 |
| 0.011127 | 0.011228 | 0.011094 | 0.011127 | 0.011262 | 0.011396 | 0.011161 |
| 0.011128 | 0.011262 | 0.011195 | 0.011094 | 0.011429 | 0.011094 | 0.011262 |
| 0.011334 | 0.011161 | 0.011463 | 0.011295 | 0.011329 | 0.011194 | 0.011295 |
| 0.011161 | 0.011496 | 0.011094 | 0.011362 | 0.011161 | 0.011161 | 0.011094 |
| 0.011329 | 0.011530 | 0.011228 | 0.011295 | 0.000000 | 0.011530 | 0.011161 |
| 0.011161 | 0.011161 | 0.011194 | 0.011295 | 0.011194 | 0.011295 | 0.011362 |
| 0.011362 | 0.011262 | 0.011228 | 0.011329 | 0.011295 | 0.011161 | 0.011127 |
| 0.011094 | 0.011161 | 0.011228 | 0.011161 | 0.011127 | 0.011295 | 0.011161 |
| 0.011194 | 0.011194 | 0.011329 | 0.011362 | 0.011262 | 0.011194 | 0.011195 |
| 0.011262 | 0.011194 | 0.011295 | 0.011161 | 0.011295 | 0.011396 | 0.011698 |
| 0.011194 | 0.011597 | 0.011198 | 0.017672 | 0.011126 | 0.011366 | 0.011548 |
| 0.011510 | 0.011553 | 0.011217 | 0.011176 | 0.011664 | 0.011578 | 0.011303 |
| 0.011392 | 0.011487 | 0.011099 | 0.011144 | 0.011138 | 0.011258 | 0.011146 |
| 0.011389 | 0.011358 | 0.011320 | 0.011126 | 0.011329 | 0.011362 | 0.011365 |
| 0.011232 | 0.011329 | 0.011329 | 0.011295 | 0.011262 | 0.011262 | 0.011228 |
| 0.011262 | 0.011195 | 0.011228 | 0.011262 | 0.011228 | 0.011161 | 0.011195 |
| 0.011195 | 0.011262 | 0.011161 | 0.011262 | 0.011295 | 0.011329 | 0.011228 |
| 0.011262 | 0.011228 | 0.011564 | 0.011564 | 0.011295 | 0.011329 | 0.011362 |
| 0.011127 | 0.011127 | 0.011161 | 0.011262 | 0.011127 | 0.011362 | 0.011362 |
| 0.011396 | 0.011396 | 0.011329 | 0.011429 | 0.011597 | 0.011430 | 0.011262 |
| 0.011262 | 0.011329 | 0.011362 | 0.011195 | 0.011262 | 0.011228 | 0.011262 |
| 0.011329 | 0.011329 | 0.011362 | 0.011329 | 0.011229 | 0.011430 | 0.011396 |
| 0.011263 | 0.011161 | 0.011262 | 0.011362 | 0.011262 | 0.011396 | 0.011429 |
| 0.011597 | 0.011299 | 0.011463 | 0.011429 | 0.011362 | 0.011530 | 0.011161 |
| 0.011330 | 0.011228 | 0.011195 | 0.011195 | 0.011262 | 0.011161 | 0.011262 |
| 0.011295 | 0.011329 | 0.011228 | 0.011262 | 0.011228 | 0.011564 | 0.011564 |
| 0.011295 | 0.011329 | 0.011396 | 0.011329 | 0.011968 | 0.011382 | 0.011306 |
| 0.011376 | 0.011338 | 0.011447 | 0.011337 | 0.011445 | 0.011370 | 0.011336 |
| 0.011918 | 0.011233 | 0.011368 | 0.011302 | 0.011576 | 0.011434 | 0.011536 |
| 0.011944 | 0.011399 | 0.011500 | 0.011564 | 0.011429 | 0.011429 | 0.011466 |
| 0.011127 | 0.011295 | 0.011429 | 0.011396 | 0.011398 | 0.011396 | 0.011363 |
| 0.011228 | 0.011161 | 0.011194 | 0.011228 | 0.011127 | 0.011194 | 0.011094 |
| 0.011228 | 0.011262 | 0.011161 | 0.011127 | 0.011228 | 0.011161 | 0.011194 |
| 0.011194 | 0.011127 | 0.011194 | 0.011228 | 0.011127 | 0.011329 | 0.011362 |
| 0.011262 | 0.011329 | 0.011262 | 0.011262 | 0.011194 | 0.011597 | 0.011228 |
| 0.011269 | 0.011195 | 0.011430 | 0.011433 | 0.011295 | 0.011295 | 0.011295 |
| 0.011295 | 0.011228 | 0.011194 | 0.011228 | 0.011329 | 0.011329 | 0.011262 |
| 0.011262 | 0.011396 | 0.011564 | 0.011295 | 0.011497 | 0.011497 | 0.011362 |
| 0.011194 | 0.011262 | 0.011295 | 0.011698 | 0.011262 | 0.011295 | 0.011262 |
| 0.011295 | 0.011228 | 0.011228 | 0.011530 | 0.011463 | 0.011496 | 0.011228 |
| 0.011329 | 0.011396 | 0.011262 | 0.011329 | 0.011295 | 0.011161 | 0.011496 |
| 0.011262 | 0.011228 | 0.011228 | 0.011396 | 0.011228 | 0.011329 | 0.011564 |
| 0.011262 | 0.011637 | 0.011631 | 0.011426 | 0.011117 | 0.011332 | 0.011163 |
| 0.011170 | 0.011644 | 0.011166 | 0.011328 | 0.011207 | 0.011315 | 0.011273 |
| 0.011366 | 0.000000 | 0.011227 | 0.000000 | 0.011114 | 0.011261 | 0.011304 |
| 0.011324 | 0.011218 | 0.011307 | 0.011236 | 0.011262 | 0.011396 | 0.011463 |
| 0.011463 | 0.011329 | 0.011432 | 0.011433 | 0.011569 | 0.011590 | 0.011262 |
| 0.011496 | 0.011362 | 0.011228 | 0.011329 | 0.011127 | 0.011362 | 0.011161 |
| 0.011228 | 0.011228 | 0.011195 | 0.011161 | 0.011194 | 0.011161 | 0.011262 |
| 0.011235 | 0.011235 | 0.011231 | 0.011266 | 0.011402 | 0.011368 | 0.011367 |
| 0.011367 | 0.011296 | 0.011097 | 0.011096 | 0.011230 | 0.011399 | 0.011399 |
| 0.011195 | 0.011263 | 0.011498 | 0.011466 | 0.011396 | 0.011430 | 0.011362 |
| 0.011295 | 0.011362 | 0.011362 | 0.011262 | 0.011832 | 0.011429 | 0.011497 |
| 0.011530 | 0.011594 | 0.011163 | 0.011303 | 0.011195 | 0.011396 | 0.011362 |
| 0.011396 | 0.011429 | 0.011429 | 0.011429 | 0.011571 | 0.011564 | 0.011199 |
| 0.011094 | 0.011095 | 0.011196 | 0.011162 | 0.011265 | 0.011098 | 0.011434 |

|          |          |          |          |          |          |          |
|----------|----------|----------|----------|----------|----------|----------|
| 0.011232 | 0.011367 | 0.011108 | 0.011248 | 0.011228 | 0.011300 | 0.011195 |
| 0.011161 | 0.011161 | 0.011228 | 0.011195 | 0.011396 | 0.011362 | 0.011295 |
| 0.011396 | 0.011463 | 0.011195 | 0.011195 | 0.011228 | 0.011228 | 0.011229 |
| 0.011297 | 0.011228 | 0.011228 | 0.011262 | 0.011396 | 0.011463 | 0.011463 |
| 0.011329 | 0.011432 | 0.011433 | 0.011569 | 0.011590 | 0.011262 | 0.011429 |
| 0.011362 | 0.011362 | 0.011196 | 0.011373 | 0.011303 | 0.011333 | 0.011165 |
| 0.011370 | 0.011561 | 0.011314 | 0.011264 | 0.011161 | 0.011362 | 0.011228 |
| 0.011329 | 0.011262 | 0.011161 | 0.011262 | 0.011362 | 0.011364 | 0.011262 |
| 0.011161 | 0.011094 | 0.011228 | 0.011161 | 0.011094 | 0.011196 | 0.011362 |
| 0.011262 | 0.011195 | 0.011228 | 0.011262 | 0.011228 | 0.011161 | 0.011362 |
| 0.011228 | 0.011262 | 0.011262 | 0.011194 | 0.011262 | 0.011496 | 0.011161 |
| 0.011194 | 0.011597 | 0.011194 | 0.011228 | 0.011194 | 0.011564 | 0.011103 |
| 0.011566 | 0.011145 | 0.011161 | 0.011382 | 0.011467 | 0.011383 | 0.011102 |
| 0.011113 | 0.011362 | 0.011463 | 0.011569 | 0.011430 | 0.011568 | 0.011699 |
| 0.011598 | 0.011635 | 0.011597 | 0.011846 | 0.011564 | 0.012438 | 0.011599 |
| 0.012338 | 0.012105 | 0.012240 | 0.012511 | 0.011564 | 0.011262 | 0.011564 |
| 0.012002 | 0.011937 | 0.011530 | 0.011429 | 0.011497 | 0.011497 | 0.011466 |
| 0.011362 | 0.011365 | 0.011429 | 0.011396 | 0.011766 | 0.011832 | 0.011834 |
| 0.011733 | 0.011833 | 0.011937 | 0.011703 | 0.012003 | 0.012008 | 0.012070 |
| 0.012070 | 0.012104 | 0.012050 | 0.012070 | 0.012072 | 0.011295 | 0.011598 |
| 0.011665 | 0.012169 | 0.011670 | 0.011900 | 0.012373 | 0.011434 | 0.011329 |
| 0.011295 | 0.011295 | 0.011766 | 0.011801 | 0.011904 | 0.011631 | 0.011296 |
| S341     | 0.011967 | 0.011967 | 0.012034 | 0.011799 | 0.011799 | 0.011866 |
| 0.011298 | 0.011230 | 0.011866 | 0.011564 | 0.011631 | 0.011599 | 0.011564 |
| 0.011530 | 0.011765 | 0.011496 | 0.011597 | 0.011664 | 0.011631 | 0.011597 |
| 0.011564 | 0.011597 | 0.011429 | 0.011564 | 0.011598 | 0.011597 | 0.011264 |
| 0.011564 | 0.011597 | 0.011496 | 0.011463 | 0.011664 | 0.011631 | 0.011664 |
| 0.011631 | 0.011732 | 0.011631 | 0.011631 | 0.011664 | 0.011631 | 0.011799 |
| 0.011497 | 0.011631 | 0.011664 | 0.011597 | 0.011631 | 0.011732 | 0.011664 |
| 0.011631 | 0.011799 | 0.011699 | 0.011295 | 0.011631 | 0.011900 | 0.011631 |
| 0.011597 | 0.011631 | 0.011765 | 0.011900 | 0.011396 | 0.011631 | 0.011732 |
| 0.011664 | 0.011732 | 0.011631 | 0.011866 | 0.011295 | 0.011631 | 0.011698 |
| 0.011597 | 0.011698 | 0.011664 | 0.011732 | 0.011664 | 0.011664 | 0.011664 |
| 0.011564 | 0.011597 | 0.011564 | 0.011597 | 0.011631 | 0.011666 | 0.011731 |
| 0.011664 | 0.011631 | 0.011698 | 0.011597 | 0.011463 | 0.011564 | 0.011631 |
| 0.011799 | 0.011731 | 0.011496 | 0.011799 | 0.011631 | 0.011866 | 0.011631 |
| 0.011839 | 0.011322 | 0.011853 | 0.011529 | 0.011545 | 0.011649 | 0.011454 |
| 0.012085 | 0.011365 | 0.011554 | 0.011866 | 0.011866 | 0.011597 | 0.011496 |
| 0.011698 | 0.011664 | 0.011731 | 0.011631 | 0.011732 | 0.011664 | 0.011664 |
| 0.011631 | 0.011664 | 0.011933 | 0.011799 | 0.011698 | 0.011665 | 0.011598 |
| 0.011564 | 0.011497 | 0.011631 | 0.011597 | 0.011530 | 0.011497 | 0.011430 |
| 0.011530 | 0.011598 | 0.011597 | 0.011597 | 0.011631 | 0.011631 | 0.011634 |
| 0.011703 | 0.011631 | 0.011631 | 0.011456 | 0.011530 | 0.011516 | 0.011632 |
| 0.011602 | 0.011541 | 0.011577 | 0.011578 | 0.011536 | 0.011540 | 0.011601 |
| 0.011456 | 0.011612 | 0.011646 | 0.011565 | 0.011544 | 0.011700 | 0.011598 |
| 0.011666 | 0.011667 | 0.011666 | 0.011765 | 0.011698 | 0.012068 | 0.011799 |
| 0.011631 | 0.011698 | 0.011631 | 0.011665 | 0.011530 | 0.011497 | 0.011564 |
| 0.011631 | 0.011631 | 0.011597 | 0.011564 | 0.011597 | 0.011564 | 0.011665 |
| 0.011631 | 0.011732 | 0.011665 | 0.011564 | 0.011667 | 0.011766 | 0.011770 |
| 0.011766 | 0.011665 | 0.011564 | 0.011499 | 0.011631 | 0.011564 | 0.011497 |
| 0.011502 | 0.011766 | 0.011564 | 0.011766 | 0.011530 | 0.011631 | 0.011598 |
| 0.011698 | 0.011597 | 0.011631 | 0.011598 | 0.011631 | 0.011497 | 0.011631 |
| 0.011665 | 0.011597 | 0.011665 | 0.011597 | 0.011631 | 0.011665 | 0.011900 |
| 0.011329 | 0.011262 | 0.011195 | 0.011768 | 0.011396 | 0.011631 | 0.011597 |
| 0.011567 | 0.011869 | 0.011655 | 0.011541 | 0.011332 | 0.011504 | 0.011690 |
| 0.011332 | 0.011570 | 0.011799 | 0.012001 | 0.011709 | 0.011866 | 0.011833 |
| 0.011765 | 0.011933 | 0.011806 | 0.011637 | 0.011689 | 0.011665 | 0.011737 |
| 0.011833 | 0.011735 | 0.011872 | 0.011940 | 0.011866 | 0.011934 | 0.012043 |
| 0.011771 | 0.011943 | 0.011805 | 0.011804 | 0.012070 | 0.011530 | 0.011734 |
| 0.011698 | 0.011631 | 0.011530 | 0.011530 | 0.011597 | 0.011597 | 0.011664 |

|          |          |          |          |          |          |          |
|----------|----------|----------|----------|----------|----------|----------|
| 0.011597 | 0.011664 | 0.011564 | 0.011597 | 0.011597 | 0.011597 | 0.011664 |
| 0.011597 | 0.011362 | 0.011127 | 0.011161 | 0.011496 | 0.011597 | 0.011631 |
| 0.011631 | 0.011530 | 0.011664 | 0.011631 | 0.011564 | 0.011564 | 0.011564 |
| 0.011429 | 0.011664 | 0.011732 | 0.011530 | 0.011631 | 0.011799 | 0.011564 |
| 0.011564 | 0.011631 | 0.011597 | 0.011765 | 0.011564 | 0.011497 | 0.011631 |
| 0.011564 | 0.011597 | 0.011597 | 0.011530 | 0.011530 | 0.011698 | 0.011631 |
| 0.011530 | 0.011631 | 0.011497 | 0.011530 | 0.011665 | 0.011463 | 0.011564 |
| 0.011531 | 0.011664 | 0.011598 | 0.011497 | 0.011228 | 0.011497 | 0.011664 |
| 0.011745 | 0.011564 | 0.011195 | 0.011698 | 0.011664 | 0.011597 | 0.011698 |
| 0.011564 | 0.011900 | 0.011496 | 0.011362 | 0.011497 | 0.011497 | 0.011496 |
| 0.011732 | 0.011598 | 0.011631 | 0.011698 | 0.011530 | 0.000000 | 0.011497 |
| 0.011564 | 0.011564 | 0.011597 | 0.011698 | 0.011597 | 0.011698 | 0.011765 |
| 0.011765 | 0.011732 | 0.011631 | 0.011732 | 0.011698 | 0.011564 | 0.011530 |
| 0.011564 | 0.011564 | 0.011631 | 0.011497 | 0.011530 | 0.011698 | 0.011564 |
| 0.011530 | 0.011597 | 0.011732 | 0.011698 | 0.011664 | 0.011597 | 0.011597 |
| 0.011664 | 0.011597 | 0.011698 | 0.011564 | 0.011698 | 0.011799 | 0.011496 |
| 0.011597 | 0.011396 | 0.011612 | 0.018088 | 0.011257 | 0.011611 | 0.011270 |
| 0.011233 | 0.011271 | 0.011794 | 0.011582 | 0.011335 | 0.011302 | 0.011607 |
| 0.011630 | 0.011365 | 0.011489 | 0.011647 | 0.011529 | 0.011505 | 0.011620 |
| 0.011295 | 0.011433 | 0.011320 | 0.011457 | 0.011732 | 0.011765 | 0.011771 |
| 0.011644 | 0.011732 | 0.011732 | 0.011631 | 0.011665 | 0.011665 | 0.011631 |
| 0.011665 | 0.011597 | 0.011631 | 0.011665 | 0.011631 | 0.011564 | 0.011597 |
| 0.011597 | 0.011665 | 0.011564 | 0.011665 | 0.011698 | 0.011732 | 0.011631 |
| 0.011597 | 0.011564 | 0.011362 | 0.011362 | 0.011698 | 0.011733 | 0.011766 |
| 0.011530 | 0.011530 | 0.011564 | 0.011665 | 0.011530 | 0.011766 | 0.011766 |
| 0.011799 | 0.011799 | 0.011732 | 0.011833 | 0.011396 | 0.011835 | 0.011665 |
| 0.011665 | 0.011732 | 0.011766 | 0.011598 | 0.011665 | 0.011631 | 0.011665 |
| 0.011732 | 0.011732 | 0.011765 | 0.011732 | 0.011633 | 0.011833 | 0.011799 |
| 0.011670 | 0.011564 | 0.011665 | 0.011766 | 0.011665 | 0.011732 | 0.011832 |
| 0.012001 | 0.011709 | 0.011866 | 0.011833 | 0.011765 | 0.011933 | 0.011564 |
| 0.011734 | 0.011632 | 0.011597 | 0.011597 | 0.011665 | 0.011564 | 0.011665 |
| 0.011698 | 0.011732 | 0.011631 | 0.011597 | 0.011564 | 0.011362 | 0.011362 |
| 0.011698 | 0.011733 | 0.011799 | 0.011731 | 0.012305 | 0.011810 | 0.011728 |
| 0.011799 | 0.011754 | 0.011869 | 0.011753 | 0.011865 | 0.011785 | 0.011715 |
| 0.012262 | 0.011649 | 0.011780 | 0.011717 | 0.011990 | 0.011843 | 0.011945 |
| 0.012284 | 0.011777 | 0.011906 | 0.011967 | 0.011832 | 0.011564 | 0.011871 |
| 0.011530 | 0.011698 | 0.011832 | 0.011799 | 0.011804 | 0.011530 | 0.011498 |
| 0.011631 | 0.011564 | 0.011597 | 0.011631 | 0.011530 | 0.011597 | 0.011496 |
| 0.011564 | 0.011597 | 0.011564 | 0.011530 | 0.011631 | 0.011564 | 0.011597 |
| 0.011597 | 0.011530 | 0.011597 | 0.011631 | 0.011530 | 0.011732 | 0.011765 |
| 0.011664 | 0.011664 | 0.011664 | 0.011664 | 0.011597 | 0.011396 | 0.011631 |
| 0.011408 | 0.011597 | 0.011564 | 0.011569 | 0.011631 | 0.011631 | 0.011698 |
| 0.011698 | 0.011631 | 0.011597 | 0.011631 | 0.011732 | 0.011732 | 0.011664 |
| 0.011664 | 0.011799 | 0.011295 | 0.011698 | 0.011900 | 0.011900 | 0.011765 |
| 0.011597 | 0.011664 | 0.011698 | 0.011497 | 0.011665 | 0.011631 | 0.011664 |
| 0.011698 | 0.011564 | 0.011564 | 0.011866 | 0.011866 | 0.011833 | 0.011631 |
| 0.011732 | 0.011799 | 0.011664 | 0.011732 | 0.011698 | 0.011564 | 0.011228 |
| 0.011664 | 0.011631 | 0.011564 | 0.011799 | 0.011631 | 0.011732 | 0.011497 |
| 0.011664 | 0.011366 | 0.011362 | 0.011507 | 0.011342 | 0.011672 | 0.011370 |
| 0.011445 | 0.011722 | 0.011587 | 0.011596 | 0.011597 | 0.011417 | 0.011379 |
| 0.011468 | 0.011192 | 0.011450 | 0.011258 | 0.011330 | 0.011462 | 0.011790 |
| 0.011776 | 0.011690 | 0.011659 | 0.011659 | 0.011667 | 0.011530 | 0.011598 |
| 0.011598 | 0.011666 | 0.011770 | 0.011569 | 0.011908 | 0.011944 | 0.011664 |
| 0.011631 | 0.011698 | 0.011631 | 0.011665 | 0.011530 | 0.011497 | 0.011564 |
| 0.011631 | 0.011631 | 0.011597 | 0.011564 | 0.011597 | 0.011564 | 0.011665 |
| 0.011619 | 0.011620 | 0.011608 | 0.011642 | 0.011779 | 0.011744 | 0.011743 |
| 0.011742 | 0.011699 | 0.011466 | 0.011456 | 0.011602 | 0.011772 | 0.011773 |
| 0.011598 | 0.011636 | 0.011902 | 0.011872 | 0.011800 | 0.011834 | 0.011765 |
| 0.011698 | 0.011765 | 0.011765 | 0.011664 | 0.011631 | 0.011832 | 0.011900 |
| 0.011934 | 0.011096 | 0.011572 | 0.011719 | 0.011597 | 0.011799 | 0.011765 |

|          |          |          |          |          |          |          |
|----------|----------|----------|----------|----------|----------|----------|
| 0.011800 | 0.011832 | 0.011832 | 0.011832 | 0.011925 | 0.011967 | 0.011615 |
| 0.011500 | 0.011510 | 0.011605 | 0.011570 | 0.011607 | 0.011545 | 0.011162 |
| 0.011643 | 0.011367 | 0.011584 | 0.011660 | 0.011632 | 0.011676 | 0.011598 |
| 0.011564 | 0.011497 | 0.011631 | 0.011597 | 0.011530 | 0.011497 | 0.011430 |
| 0.011530 | 0.011598 | 0.011597 | 0.011597 | 0.011631 | 0.011631 | 0.011634 |
| 0.011703 | 0.011631 | 0.011631 | 0.011667 | 0.011530 | 0.011598 | 0.011598 |
| 0.011666 | 0.011770 | 0.011569 | 0.011908 | 0.011944 | 0.011664 | 0.011832 |
| 0.011765 | 0.011765 | 0.011601 | 0.011791 | 0.011721 | 0.011741 | 0.011621 |
| 0.011784 | 0.011972 | 0.011738 | 0.011672 | 0.011564 | 0.011766 | 0.011631 |
| 0.011732 | 0.011665 | 0.011564 | 0.011667 | 0.011766 | 0.011770 | 0.011665 |
| 0.011564 | 0.011499 | 0.011631 | 0.011564 | 0.011497 | 0.011502 | 0.011766 |
| 0.011665 | 0.011597 | 0.011631 | 0.011665 | 0.011631 | 0.011564 | 0.011497 |
| 0.011631 | 0.011664 | 0.011664 | 0.011597 | 0.011664 | 0.011900 | 0.011497 |
| 0.011597 | 0.011396 | 0.011597 | 0.011631 | 0.011597 | 0.011295 | 0.011574 |
| 0.011791 | 0.011400 | 0.011361 | 0.011463 | 0.011549 | 0.011527 | 0.011353 |
| 0.011323 | 0.011497 | 0.011597 | 0.011706 | 0.011565 | 0.011703 | 0.011834 |
| 0.011733 | 0.011771 | 0.011732 | 0.011983 | 0.011698 | 0.012573 | 0.011734 |
| 0.012473 | 0.012241 | 0.012375 | 0.012647 | 0.011631 | 0.011598 | 0.011699 |
| 0.012340 | 0.012073 | 0.011665 | 0.011564 | 0.011632 | 0.011632 | 0.011568 |
| 0.011497 | 0.011501 | 0.011564 | 0.011531 | 0.011901 | 0.011967 | 0.011969 |
| 0.011868 | 0.011969 | 0.012072 | 0.011839 | 0.012340 | 0.012348 | 0.012407 |
| 0.012408 | 0.012442 | 0.012392 | 0.012408 | 0.012410 | 0.011698 | 0.011934 |
| 0.012002 | 0.012505 | 0.012010 | 0.011968 | 0.012440 | 0.011502 | 0.011397 |
| 0.011295 | 0.011362 | 0.011901 | 0.011924 | 0.012010 | 0.011698 | 0.011431 |
| S342     | 0.011597 | 0.011597 | 0.011866 | 0.011631 | 0.011631 | 0.011698 |
| 0.011535 | 0.011468 | 0.011698 | 0.011195 | 0.011262 | 0.011228 | 0.011194 |
| 0.011161 | 0.011396 | 0.000000 | 0.011228 | 0.011295 | 0.011262 | 0.011228 |
| 0.011194 | 0.011228 | 0.011262 | 0.011195 | 0.011228 | 0.011228 | 0.011501 |
| 0.011396 | 0.011228 | 0.011127 | 0.011295 | 0.011295 | 0.011262 | 0.011295 |
| 0.011262 | 0.011362 | 0.011262 | 0.011262 | 0.011295 | 0.011262 | 0.011429 |
| 0.011127 | 0.011262 | 0.011295 | 0.011228 | 0.011262 | 0.011362 | 0.011295 |
| 0.011262 | 0.011429 | 0.011329 | 0.011530 | 0.011262 | 0.011530 | 0.011262 |
| 0.011228 | 0.011262 | 0.011396 | 0.011530 | 0.011564 | 0.011262 | 0.011362 |
| 0.011295 | 0.011362 | 0.011262 | 0.011496 | 0.011664 | 0.011262 | 0.011329 |
| 0.011228 | 0.011329 | 0.011295 | 0.011362 | 0.011295 | 0.011295 | 0.011295 |
| 0.011194 | 0.011228 | 0.011194 | 0.011228 | 0.011262 | 0.011296 | 0.011362 |
| 0.011295 | 0.011262 | 0.011329 | 0.011228 | 0.011295 | 0.011194 | 0.011262 |
| 0.011429 | 0.011362 | 0.011597 | 0.011429 | 0.011262 | 0.011496 | 0.011262 |
| 0.011431 | 0.011583 | 0.011475 | 0.011177 | 0.011172 | 0.011281 | 0.011296 |
| 0.011938 | 0.011365 | 0.011184 | 0.011496 | 0.011496 | 0.011161 | 0.011329 |
| 0.011329 | 0.011295 | 0.011362 | 0.011262 | 0.011362 | 0.011295 | 0.011295 |
| 0.011262 | 0.011295 | 0.011564 | 0.011362 | 0.011329 | 0.011295 | 0.011228 |
| 0.011195 | 0.011127 | 0.011262 | 0.011228 | 0.011362 | 0.011329 | 0.011262 |
| 0.011362 | 0.011430 | 0.011228 | 0.011228 | 0.011262 | 0.011262 | 0.011263 |
| 0.011331 | 0.011262 | 0.011262 | 0.011132 | 0.011205 | 0.011165 | 0.011262 |
| 0.011263 | 0.011198 | 0.011245 | 0.011233 | 0.011162 | 0.011197 | 0.011229 |
| 0.011420 | 0.011267 | 0.011301 | 0.011195 | 0.011199 | 0.011329 | 0.011228 |
| 0.011296 | 0.011296 | 0.011296 | 0.011396 | 0.011329 | 0.011698 | 0.011430 |
| 0.011463 | 0.011329 | 0.011262 | 0.011295 | 0.011161 | 0.011329 | 0.011195 |
| 0.011262 | 0.011262 | 0.011228 | 0.011195 | 0.011228 | 0.011195 | 0.011295 |
| 0.011262 | 0.011362 | 0.011295 | 0.011195 | 0.011296 | 0.011396 | 0.011398 |
| 0.011396 | 0.011295 | 0.011195 | 0.011128 | 0.011262 | 0.011195 | 0.011127 |
| 0.011230 | 0.011396 | 0.011195 | 0.011396 | 0.011161 | 0.011262 | 0.011228 |
| 0.011329 | 0.011228 | 0.011262 | 0.011228 | 0.011262 | 0.011127 | 0.011262 |
| 0.011295 | 0.011228 | 0.011295 | 0.011228 | 0.011262 | 0.011295 | 0.011530 |
| 0.011564 | 0.011497 | 0.011564 | 0.011397 | 0.011564 | 0.011262 | 0.011228 |
| 0.011128 | 0.011464 | 0.011335 | 0.011163 | 0.011569 | 0.011129 | 0.011257 |
| 0.011569 | 0.011468 | 0.011429 | 0.011631 | 0.011333 | 0.011496 | 0.011463 |
| 0.011396 | 0.011564 | 0.011415 | 0.011266 | 0.011312 | 0.011295 | 0.011365 |
| 0.011463 | 0.011364 | 0.011500 | 0.011568 | 0.011497 | 0.011564 | 0.011670 |

|          |          |          |          |          |          |          |
|----------|----------|----------|----------|----------|----------|----------|
| 0.011399 | 0.011569 | 0.011500 | 0.011432 | 0.011699 | 0.011161 | 0.011363 |
| 0.011329 | 0.011262 | 0.011161 | 0.011161 | 0.011228 | 0.011228 | 0.011295 |
| 0.011228 | 0.011295 | 0.011194 | 0.011228 | 0.011228 | 0.011228 | 0.011295 |
| 0.011228 | 0.011597 | 0.011497 | 0.011530 | 0.011127 | 0.011228 | 0.011262 |
| 0.011262 | 0.011228 | 0.011295 | 0.011262 | 0.011194 | 0.011194 | 0.011194 |
| 0.011664 | 0.011295 | 0.011362 | 0.011161 | 0.011262 | 0.011429 | 0.011194 |
| 0.011194 | 0.011262 | 0.011228 | 0.011396 | 0.011194 | 0.011329 | 0.011463 |
| 0.011396 | 0.011228 | 0.011228 | 0.011161 | 0.011161 | 0.011329 | 0.011262 |
| 0.011161 | 0.011262 | 0.011127 | 0.011161 | 0.011295 | 0.011362 | 0.011195 |
| 0.011161 | 0.011295 | 0.011228 | 0.011127 | 0.011396 | 0.011127 | 0.011295 |
| 0.011368 | 0.011195 | 0.011429 | 0.011329 | 0.011295 | 0.011228 | 0.011329 |
| 0.011194 | 0.011530 | 0.011127 | 0.011329 | 0.000000 | 0.000000 | 0.011127 |
| 0.011362 | 0.011497 | 0.011262 | 0.011329 | 0.011161 | 0.011497 | 0.000000 |
| 0.011194 | 0.011194 | 0.011228 | 0.011329 | 0.011228 | 0.011329 | 0.011396 |
| 0.011396 | 0.011362 | 0.011262 | 0.011362 | 0.011329 | 0.011194 | 0.011161 |
| 0.011194 | 0.011194 | 0.011262 | 0.011127 | 0.011161 | 0.011329 | 0.011194 |
| 0.011094 | 0.011228 | 0.011362 | 0.011329 | 0.011295 | 0.011228 | 0.011228 |
| 0.011295 | 0.011228 | 0.011329 | 0.011194 | 0.011329 | 0.011429 | 0.011664 |
| 0.011228 | 0.011564 | 0.011233 | 0.017710 | 0.011191 | 0.011366 | 0.011514 |
| 0.011475 | 0.011517 | 0.011322 | 0.011292 | 0.011609 | 0.011543 | 0.011303 |
| 0.011392 | 0.011487 | 0.011138 | 0.011228 | 0.011138 | 0.011258 | 0.011232 |
| 0.011389 | 0.011321 | 0.011320 | 0.000000 | 0.011362 | 0.011396 | 0.011398 |
| 0.011266 | 0.011362 | 0.011362 | 0.011262 | 0.011295 | 0.011295 | 0.011262 |
| 0.011295 | 0.011228 | 0.011262 | 0.011295 | 0.011262 | 0.011195 | 0.011228 |
| 0.011228 | 0.011295 | 0.011195 | 0.011295 | 0.011329 | 0.011362 | 0.011262 |
| 0.011228 | 0.011195 | 0.011530 | 0.011530 | 0.011329 | 0.011363 | 0.011396 |
| 0.011161 | 0.011161 | 0.011195 | 0.011295 | 0.011161 | 0.011396 | 0.011396 |
| 0.011429 | 0.011429 | 0.011362 | 0.011463 | 0.011564 | 0.011464 | 0.011295 |
| 0.011295 | 0.011362 | 0.011396 | 0.011228 | 0.011295 | 0.011262 | 0.011295 |
| 0.011363 | 0.011362 | 0.011396 | 0.011363 | 0.011262 | 0.011463 | 0.011430 |
| 0.011297 | 0.011195 | 0.011295 | 0.011396 | 0.011295 | 0.011362 | 0.011463 |
| 0.011631 | 0.011333 | 0.011496 | 0.011463 | 0.011396 | 0.011564 | 0.011195 |
| 0.011363 | 0.011262 | 0.011228 | 0.011228 | 0.011295 | 0.011195 | 0.011295 |
| 0.011329 | 0.011362 | 0.011262 | 0.011228 | 0.011195 | 0.011530 | 0.011530 |
| 0.011329 | 0.011363 | 0.011429 | 0.011362 | 0.011935 | 0.011417 | 0.011341 |
| 0.011412 | 0.011372 | 0.011482 | 0.011372 | 0.011480 | 0.011405 | 0.011370 |
| 0.011884 | 0.011268 | 0.011403 | 0.011337 | 0.011611 | 0.011468 | 0.011570 |
| 0.011910 | 0.011362 | 0.011533 | 0.011597 | 0.011463 | 0.011396 | 0.011499 |
| 0.011161 | 0.011329 | 0.011463 | 0.011429 | 0.011432 | 0.011362 | 0.011330 |
| 0.011262 | 0.011194 | 0.011228 | 0.011262 | 0.011161 | 0.011228 | 0.011127 |
| 0.011194 | 0.011228 | 0.011194 | 0.011161 | 0.011262 | 0.011194 | 0.011228 |
| 0.011228 | 0.011161 | 0.011228 | 0.011262 | 0.011161 | 0.011362 | 0.011396 |
| 0.011295 | 0.011295 | 0.011295 | 0.011295 | 0.011228 | 0.011564 | 0.011262 |
| 0.011234 | 0.011228 | 0.011396 | 0.011399 | 0.011329 | 0.011329 | 0.011329 |
| 0.011329 | 0.011262 | 0.011228 | 0.011262 | 0.011362 | 0.011362 | 0.011295 |
| 0.011295 | 0.011429 | 0.011530 | 0.011329 | 0.011530 | 0.011530 | 0.011396 |
| 0.011228 | 0.011295 | 0.011329 | 0.011664 | 0.011295 | 0.011329 | 0.011295 |
| 0.011329 | 0.011194 | 0.011194 | 0.011497 | 0.011497 | 0.011463 | 0.011262 |
| 0.011362 | 0.011429 | 0.011295 | 0.011362 | 0.011329 | 0.011194 | 0.011463 |
| 0.011295 | 0.011262 | 0.011194 | 0.011429 | 0.011262 | 0.011362 | 0.011597 |
| 0.011295 | 0.011603 | 0.011597 | 0.011385 | 0.000000 | 0.011298 | 0.011164 |
| 0.011170 | 0.011605 | 0.011201 | 0.011284 | 0.011109 | 0.011264 | 0.011220 |
| 0.011315 | 0.011126 | 0.011283 | 0.011126 | 0.011168 | 0.011328 | 0.011344 |
| 0.011362 | 0.011257 | 0.011201 | 0.011272 | 0.011296 | 0.011362 | 0.011430 |
| 0.011430 | 0.011296 | 0.011398 | 0.011365 | 0.011467 | 0.011555 | 0.011295 |
| 0.011463 | 0.011329 | 0.011262 | 0.011295 | 0.011161 | 0.011329 | 0.011195 |
| 0.011262 | 0.011262 | 0.011228 | 0.011195 | 0.011228 | 0.011195 | 0.011295 |
| 0.011270 | 0.011270 | 0.011266 | 0.011300 | 0.011436 | 0.011402 | 0.011402 |
| 0.011401 | 0.011329 | 0.011134 | 0.011132 | 0.011263 | 0.011433 | 0.011433 |
| 0.011228 | 0.011297 | 0.011531 | 0.011499 | 0.011430 | 0.011464 | 0.011396 |

|          |          |          |          |          |          |          |
|----------|----------|----------|----------|----------|----------|----------|
| 0.011329 | 0.011396 | 0.011396 | 0.011295 | 0.011799 | 0.011463 | 0.011530 |
| 0.011564 | 0.011559 | 0.011265 | 0.011337 | 0.011228 | 0.011429 | 0.011396 |
| 0.011430 | 0.011463 | 0.011463 | 0.011463 | 0.011571 | 0.011597 | 0.011234 |
| 0.011128 | 0.011130 | 0.011230 | 0.011196 | 0.011231 | 0.011135 | 0.011400 |
| 0.011266 | 0.011323 | 0.011156 | 0.011285 | 0.011262 | 0.011334 | 0.011228 |
| 0.011195 | 0.011127 | 0.011262 | 0.011228 | 0.011362 | 0.011329 | 0.011262 |
| 0.011362 | 0.011430 | 0.011228 | 0.011228 | 0.011262 | 0.011262 | 0.011263 |
| 0.011331 | 0.011262 | 0.011262 | 0.011296 | 0.011362 | 0.011430 | 0.011430 |
| 0.011296 | 0.011398 | 0.011365 | 0.011467 | 0.011555 | 0.011295 | 0.011463 |
| 0.011396 | 0.011396 | 0.011229 | 0.011408 | 0.011338 | 0.011367 | 0.011235 |
| 0.011404 | 0.011561 | 0.011357 | 0.011298 | 0.011195 | 0.011396 | 0.011262 |
| 0.011362 | 0.011295 | 0.011195 | 0.011296 | 0.011396 | 0.011398 | 0.011295 |
| 0.011195 | 0.011128 | 0.011262 | 0.011195 | 0.011127 | 0.011230 | 0.011396 |
| 0.011295 | 0.011228 | 0.011262 | 0.011295 | 0.011262 | 0.011195 | 0.011329 |
| 0.011262 | 0.011295 | 0.011295 | 0.011228 | 0.011295 | 0.011530 | 0.011127 |
| 0.011228 | 0.011564 | 0.011228 | 0.011262 | 0.011228 | 0.011530 | 0.011189 |
| 0.011510 | 0.011188 | 0.011161 | 0.011342 | 0.011427 | 0.011347 | 0.011144 |
| 0.011113 | 0.011329 | 0.011429 | 0.011535 | 0.011397 | 0.011534 | 0.011665 |
| 0.011565 | 0.011601 | 0.011564 | 0.011812 | 0.011530 | 0.012404 | 0.011565 |
| 0.012305 | 0.012072 | 0.012206 | 0.012477 | 0.011530 | 0.011228 | 0.011530 |
| 0.011969 | 0.011903 | 0.011497 | 0.011396 | 0.011464 | 0.011464 | 0.011432 |
| 0.011329 | 0.011332 | 0.011396 | 0.011363 | 0.011733 | 0.011799 | 0.011800 |
| 0.011699 | 0.011800 | 0.011903 | 0.011669 | 0.011969 | 0.011974 | 0.012036 |
| 0.012037 | 0.012070 | 0.012015 | 0.012037 | 0.012038 | 0.011329 | 0.011564 |
| 0.011632 | 0.012135 | 0.011636 | 0.011866 | 0.012339 | 0.011400 | 0.011296 |
| 0.011262 | 0.011262 | 0.011732 | 0.011759 | 0.011869 | 0.011597 | 0.011262 |
| S343     | 0.011597 | 0.011597 | 0.011933 | 0.011698 | 0.011698 | 0.011765 |
| 0.011603 | 0.011535 | 0.011765 | 0.011195 | 0.011262 | 0.011229 | 0.011194 |
| 0.011228 | 0.011396 | 0.011194 | 0.011228 | 0.011295 | 0.011262 | 0.011228 |
| 0.011194 | 0.011228 | 0.011329 | 0.011195 | 0.011228 | 0.011228 | 0.011569 |
| 0.011463 | 0.011228 | 0.011127 | 0.011362 | 0.011295 | 0.011262 | 0.011295 |
| 0.011262 | 0.011362 | 0.011262 | 0.011262 | 0.011295 | 0.011262 | 0.011429 |
| 0.011194 | 0.011262 | 0.011295 | 0.011228 | 0.011329 | 0.011362 | 0.011295 |
| 0.011262 | 0.011429 | 0.011329 | 0.011597 | 0.011262 | 0.011530 | 0.011262 |
| 0.011228 | 0.011329 | 0.011396 | 0.011530 | 0.011631 | 0.011329 | 0.011429 |
| 0.011295 | 0.011362 | 0.011262 | 0.011496 | 0.011732 | 0.011262 | 0.011329 |
| 0.011228 | 0.011329 | 0.011295 | 0.011362 | 0.011295 | 0.011295 | 0.011295 |
| 0.011194 | 0.011228 | 0.011194 | 0.011295 | 0.011262 | 0.011296 | 0.011362 |
| 0.011295 | 0.011262 | 0.011329 | 0.011228 | 0.011362 | 0.011195 | 0.011262 |
| 0.011429 | 0.011362 | 0.011597 | 0.011429 | 0.011262 | 0.011497 | 0.011262 |
| 0.011431 | 0.011658 | 0.011475 | 0.011177 | 0.011172 | 0.011244 | 0.011375 |
| 0.012011 | 0.011365 | 0.011184 | 0.011496 | 0.011496 | 0.011295 | 0.011396 |
| 0.011329 | 0.011295 | 0.011362 | 0.011262 | 0.011362 | 0.011295 | 0.011295 |
| 0.011262 | 0.011362 | 0.011564 | 0.011429 | 0.011329 | 0.011295 | 0.011228 |
| 0.011195 | 0.011195 | 0.011262 | 0.011228 | 0.011429 | 0.011396 | 0.011329 |
| 0.011429 | 0.011497 | 0.011228 | 0.011228 | 0.011262 | 0.011262 | 0.011263 |
| 0.011331 | 0.011262 | 0.011262 | 0.011132 | 0.011205 | 0.011165 | 0.011262 |
| 0.011263 | 0.011198 | 0.011245 | 0.011233 | 0.011162 | 0.011197 | 0.011229 |
| 0.011492 | 0.011267 | 0.011301 | 0.011195 | 0.011199 | 0.011329 | 0.011296 |
| 0.011363 | 0.011296 | 0.011296 | 0.011396 | 0.011329 | 0.011698 | 0.011497 |
| 0.011530 | 0.011396 | 0.011262 | 0.011362 | 0.011161 | 0.011396 | 0.011195 |
| 0.011262 | 0.011262 | 0.011228 | 0.011195 | 0.011228 | 0.011195 | 0.011295 |
| 0.011262 | 0.011362 | 0.011295 | 0.011195 | 0.011296 | 0.011396 | 0.011398 |
| 0.011396 | 0.011295 | 0.011195 | 0.011128 | 0.011262 | 0.011195 | 0.011128 |
| 0.011230 | 0.011396 | 0.011195 | 0.011396 | 0.011161 | 0.011262 | 0.011228 |
| 0.011329 | 0.011228 | 0.011262 | 0.011228 | 0.011262 | 0.011127 | 0.011262 |
| 0.011295 | 0.011228 | 0.011295 | 0.011228 | 0.011262 | 0.011295 | 0.011530 |
| 0.011631 | 0.011564 | 0.011631 | 0.011397 | 0.011631 | 0.011262 | 0.011228 |
| 0.011263 | 0.011505 | 0.011289 | 0.011129 | 0.011637 | 0.011129 | 0.011257 |
| 0.011637 | 0.011536 | 0.011429 | 0.011631 | 0.011333 | 0.011497 | 0.011463 |



|          |          |          |          |          |          |          |
|----------|----------|----------|----------|----------|----------|----------|
| 0.011396 | 0.011564 | 0.011415 | 0.011225 | 0.011312 | 0.011295 | 0.011365 |
| 0.011463 | 0.011364 | 0.011500 | 0.011568 | 0.011497 | 0.011564 | 0.011670 |
| 0.011399 | 0.011569 | 0.011500 | 0.011432 | 0.011699 | 0.011161 | 0.011363 |
| 0.011329 | 0.011262 | 0.011161 | 0.011161 | 0.011228 | 0.011228 | 0.011295 |
| 0.011228 | 0.011295 | 0.011194 | 0.011295 | 0.011228 | 0.011228 | 0.011295 |
| 0.011228 | 0.011664 | 0.011564 | 0.011597 | 0.011127 | 0.011228 | 0.011262 |
| 0.011262 | 0.011228 | 0.011295 | 0.011329 | 0.011194 | 0.011194 | 0.011194 |
| 0.011731 | 0.011362 | 0.011362 | 0.011161 | 0.011262 | 0.011430 | 0.011195 |
| 0.011194 | 0.011262 | 0.011228 | 0.011396 | 0.011194 | 0.011329 | 0.011463 |
| 0.011396 | 0.011228 | 0.011228 | 0.011161 | 0.011161 | 0.011329 | 0.011262 |
| 0.011161 | 0.011262 | 0.011127 | 0.011161 | 0.011295 | 0.011430 | 0.011195 |
| 0.011161 | 0.011295 | 0.011228 | 0.011127 | 0.011463 | 0.011127 | 0.011295 |
| 0.011368 | 0.011195 | 0.011497 | 0.011329 | 0.011362 | 0.011228 | 0.011329 |
| 0.011194 | 0.011530 | 0.011127 | 0.011396 | 0.011194 | 0.011194 | 0.011127 |
| 0.011362 | 0.011564 | 0.011262 | 0.011329 | 0.011161 | 0.011564 | 0.011194 |
| 0.000000 | 0.011194 | 0.011228 | 0.011329 | 0.011228 | 0.011329 | 0.011396 |
| 0.011396 | 0.011362 | 0.011262 | 0.011362 | 0.011329 | 0.011194 | 0.011161 |
| 0.011194 | 0.011194 | 0.011262 | 0.011194 | 0.011161 | 0.011329 | 0.011194 |
| 0.011228 | 0.011228 | 0.011362 | 0.011396 | 0.011295 | 0.011228 | 0.011228 |
| 0.011295 | 0.011228 | 0.011329 | 0.011194 | 0.011329 | 0.011429 | 0.011732 |
| 0.011228 | 0.011631 | 0.011233 | 0.017748 | 0.011191 | 0.011366 | 0.011583 |
| 0.011545 | 0.011588 | 0.011217 | 0.011176 | 0.011664 | 0.011613 | 0.011303 |
| 0.011392 | 0.011487 | 0.011138 | 0.011186 | 0.011177 | 0.011258 | 0.011189 |
| 0.011389 | 0.011395 | 0.011394 | 0.011193 | 0.011362 | 0.011396 | 0.011398 |
| 0.011266 | 0.011362 | 0.011362 | 0.011329 | 0.011295 | 0.011295 | 0.011262 |
| 0.011295 | 0.011228 | 0.011262 | 0.011295 | 0.011262 | 0.011195 | 0.011228 |
| 0.011228 | 0.011295 | 0.011195 | 0.011295 | 0.011329 | 0.011362 | 0.011262 |
| 0.011295 | 0.011262 | 0.011597 | 0.011597 | 0.011329 | 0.011363 | 0.011396 |
| 0.011161 | 0.011161 | 0.011195 | 0.011295 | 0.011161 | 0.011396 | 0.011396 |
| 0.011429 | 0.011429 | 0.011362 | 0.011463 | 0.011631 | 0.011464 | 0.011295 |
| 0.011295 | 0.011362 | 0.011396 | 0.011228 | 0.011295 | 0.011262 | 0.011295 |
| 0.011363 | 0.011362 | 0.011396 | 0.011363 | 0.011262 | 0.011463 | 0.011430 |
| 0.011297 | 0.011127 | 0.011295 | 0.011396 | 0.011295 | 0.011430 | 0.011463 |
| 0.011631 | 0.011333 | 0.011497 | 0.011463 | 0.011396 | 0.011564 | 0.011195 |
| 0.011363 | 0.011262 | 0.011228 | 0.011228 | 0.011295 | 0.011195 | 0.011295 |
| 0.011329 | 0.011362 | 0.011262 | 0.011295 | 0.011262 | 0.011597 | 0.011597 |
| 0.011329 | 0.011363 | 0.011429 | 0.011362 | 0.012002 | 0.011417 | 0.011341 |
| 0.011412 | 0.011372 | 0.011482 | 0.011372 | 0.011480 | 0.011405 | 0.011370 |
| 0.011953 | 0.011268 | 0.011403 | 0.011337 | 0.011611 | 0.011468 | 0.011571 |
| 0.011978 | 0.011437 | 0.011533 | 0.011597 | 0.011463 | 0.011463 | 0.011499 |
| 0.011161 | 0.011329 | 0.011463 | 0.011429 | 0.011432 | 0.011429 | 0.011397 |
| 0.011262 | 0.011194 | 0.011228 | 0.011262 | 0.011161 | 0.011228 | 0.011127 |
| 0.011262 | 0.011295 | 0.011194 | 0.011161 | 0.011262 | 0.011194 | 0.011228 |
| 0.011228 | 0.011161 | 0.011228 | 0.011262 | 0.011161 | 0.011362 | 0.011396 |
| 0.011295 | 0.011362 | 0.011295 | 0.011295 | 0.011228 | 0.011631 | 0.011262 |
| 0.011304 | 0.011228 | 0.011463 | 0.011467 | 0.011329 | 0.011329 | 0.011329 |
| 0.011329 | 0.011262 | 0.011228 | 0.011262 | 0.011362 | 0.011362 | 0.011295 |
| 0.011295 | 0.011429 | 0.011597 | 0.011329 | 0.011530 | 0.011530 | 0.011396 |
| 0.011228 | 0.011295 | 0.011329 | 0.011732 | 0.011295 | 0.011329 | 0.011295 |
| 0.011329 | 0.011262 | 0.011262 | 0.011564 | 0.011497 | 0.011530 | 0.011262 |
| 0.011362 | 0.011429 | 0.011295 | 0.011362 | 0.011329 | 0.011195 | 0.011530 |
| 0.011295 | 0.011262 | 0.011262 | 0.011429 | 0.011262 | 0.011362 | 0.011597 |
| 0.011295 | 0.011671 | 0.011664 | 0.011467 | 0.011229 | 0.011366 | 0.011215 |
| 0.011170 | 0.011683 | 0.011201 | 0.011417 | 0.011255 | 0.011366 | 0.011326 |
| 0.011366 | 0.011126 | 0.011283 | 0.011126 | 0.011222 | 0.011328 | 0.011344 |
| 0.011362 | 0.011257 | 0.011342 | 0.011272 | 0.011296 | 0.011429 | 0.011497 |
| 0.011497 | 0.011363 | 0.011466 | 0.011467 | 0.011603 | 0.011626 | 0.011295 |
| 0.011530 | 0.011396 | 0.011262 | 0.011362 | 0.011161 | 0.011396 | 0.011195 |
| 0.011262 | 0.011262 | 0.011228 | 0.011195 | 0.011228 | 0.011195 | 0.011295 |
| 0.011270 | 0.011270 | 0.011266 | 0.011300 | 0.011437 | 0.011402 | 0.011402 |

|          |          |          |          |          |          |          |
|----------|----------|----------|----------|----------|----------|----------|
| 0.011401 | 0.011329 | 0.011134 | 0.011132 | 0.011263 | 0.011433 | 0.011433 |
| 0.011228 | 0.011297 | 0.011531 | 0.011500 | 0.011430 | 0.011464 | 0.011396 |
| 0.011329 | 0.011396 | 0.011396 | 0.011295 | 0.011866 | 0.011463 | 0.011530 |
| 0.011564 | 0.011630 | 0.011265 | 0.011337 | 0.011228 | 0.011429 | 0.011396 |
| 0.011430 | 0.011463 | 0.011463 | 0.011463 | 0.011611 | 0.011597 | 0.011234 |
| 0.011128 | 0.011130 | 0.011230 | 0.011196 | 0.011299 | 0.011135 | 0.011468 |
| 0.011266 | 0.011411 | 0.011108 | 0.011285 | 0.011262 | 0.011334 | 0.011228 |
| 0.011195 | 0.011195 | 0.011262 | 0.011228 | 0.011429 | 0.011396 | 0.011329 |
| 0.011429 | 0.011497 | 0.011228 | 0.011228 | 0.011262 | 0.011262 | 0.011263 |
| 0.011331 | 0.011262 | 0.011262 | 0.011296 | 0.011429 | 0.011497 | 0.011497 |
| 0.011363 | 0.011466 | 0.011467 | 0.011603 | 0.011626 | 0.011295 | 0.011463 |
| 0.011396 | 0.011396 | 0.011229 | 0.011408 | 0.011303 | 0.011333 | 0.011200 |
| 0.011405 | 0.011516 | 0.011357 | 0.011298 | 0.011195 | 0.011396 | 0.011262 |
| 0.011362 | 0.011295 | 0.011195 | 0.011296 | 0.011396 | 0.011398 | 0.011295 |
| 0.011195 | 0.011128 | 0.011262 | 0.011195 | 0.011128 | 0.011230 | 0.011396 |
| 0.011295 | 0.011228 | 0.011262 | 0.011295 | 0.011262 | 0.011195 | 0.011396 |
| 0.011262 | 0.011295 | 0.011295 | 0.011228 | 0.011295 | 0.011530 | 0.011194 |
| 0.011228 | 0.011631 | 0.011228 | 0.011262 | 0.011228 | 0.011597 | 0.011146 |
| 0.011566 | 0.011188 | 0.011161 | 0.011422 | 0.011508 | 0.011419 | 0.011102 |
| 0.011113 | 0.011396 | 0.011496 | 0.011603 | 0.011464 | 0.011601 | 0.011733 |
| 0.011632 | 0.011669 | 0.011631 | 0.011880 | 0.011597 | 0.012472 | 0.011633 |
| 0.012372 | 0.012139 | 0.012273 | 0.012545 | 0.011597 | 0.011295 | 0.011598 |
| 0.012036 | 0.011971 | 0.011564 | 0.011463 | 0.011531 | 0.011531 | 0.011500 |
| 0.011396 | 0.011399 | 0.011463 | 0.011430 | 0.011800 | 0.011866 | 0.011867 |
| 0.011767 | 0.011867 | 0.011970 | 0.011737 | 0.012037 | 0.012042 | 0.012104 |
| 0.012104 | 0.012138 | 0.012084 | 0.012104 | 0.012106 | 0.011329 | 0.011631 |
| 0.011699 | 0.012202 | 0.011704 | 0.011933 | 0.012406 | 0.011468 | 0.011363 |
| 0.011329 | 0.011329 | 0.011799 | 0.011842 | 0.011940 | 0.011664 | 0.011330 |
| S344     | 0.011597 | 0.011597 | 0.011933 | 0.011698 | 0.011698 | 0.011765 |
| 0.011603 | 0.011535 | 0.011765 | 0.011195 | 0.011262 | 0.011228 | 0.011194 |
| 0.011228 | 0.011396 | 0.011194 | 0.011228 | 0.011295 | 0.011262 | 0.011161 |
| 0.011194 | 0.011228 | 0.011329 | 0.011195 | 0.011228 | 0.011228 | 0.011569 |
| 0.011463 | 0.011228 | 0.011127 | 0.011362 | 0.011295 | 0.011262 | 0.011295 |
| 0.011262 | 0.011362 | 0.011262 | 0.011194 | 0.011295 | 0.011262 | 0.011429 |
| 0.011194 | 0.011262 | 0.011295 | 0.011228 | 0.011329 | 0.011362 | 0.011295 |
| 0.011262 | 0.011429 | 0.011329 | 0.011597 | 0.011262 | 0.011530 | 0.011262 |
| 0.011228 | 0.011329 | 0.011396 | 0.011530 | 0.011631 | 0.011329 | 0.011429 |
| 0.011295 | 0.011362 | 0.011262 | 0.011496 | 0.011732 | 0.011262 | 0.011329 |
| 0.011228 | 0.011329 | 0.011295 | 0.011362 | 0.011295 | 0.011295 | 0.011295 |
| 0.011194 | 0.011228 | 0.011194 | 0.011295 | 0.011262 | 0.011296 | 0.011362 |
| 0.011295 | 0.011262 | 0.011329 | 0.011228 | 0.011362 | 0.011194 | 0.011262 |
| 0.011429 | 0.011362 | 0.011597 | 0.011429 | 0.011262 | 0.011496 | 0.011262 |
| 0.011431 | 0.011658 | 0.011475 | 0.011177 | 0.011172 | 0.011281 | 0.011375 |
| 0.012011 | 0.011467 | 0.011102 | 0.011496 | 0.011496 | 0.011295 | 0.011396 |
| 0.011329 | 0.011295 | 0.011362 | 0.011262 | 0.011362 | 0.011295 | 0.011295 |
| 0.011262 | 0.011362 | 0.011564 | 0.011429 | 0.011329 | 0.011295 | 0.011228 |
| 0.011195 | 0.011195 | 0.011262 | 0.011228 | 0.011429 | 0.011396 | 0.011329 |
| 0.011429 | 0.011497 | 0.011228 | 0.011228 | 0.011262 | 0.011262 | 0.011263 |
| 0.011331 | 0.011262 | 0.011262 | 0.011132 | 0.011205 | 0.011165 | 0.011262 |
| 0.011263 | 0.011198 | 0.011245 | 0.011233 | 0.011162 | 0.011197 | 0.011229 |
| 0.011492 | 0.011267 | 0.011301 | 0.011128 | 0.011199 | 0.011329 | 0.011296 |
| 0.011363 | 0.011296 | 0.011296 | 0.011396 | 0.011329 | 0.011698 | 0.011497 |
| 0.011530 | 0.011396 | 0.011262 | 0.011362 | 0.011161 | 0.011396 | 0.011195 |
| 0.011262 | 0.011262 | 0.011228 | 0.011194 | 0.011228 | 0.011195 | 0.011295 |
| 0.011262 | 0.011362 | 0.011295 | 0.011195 | 0.011296 | 0.011396 | 0.011398 |
| 0.011396 | 0.011295 | 0.011195 | 0.011128 | 0.011262 | 0.011195 | 0.011127 |
| 0.011162 | 0.011396 | 0.011195 | 0.011396 | 0.011161 | 0.011262 | 0.011228 |
| 0.011329 | 0.011228 | 0.011262 | 0.011228 | 0.011262 | 0.011127 | 0.011262 |
| 0.011295 | 0.011161 | 0.011295 | 0.011228 | 0.011262 | 0.011295 | 0.011530 |
| 0.011631 | 0.011564 | 0.011631 | 0.011397 | 0.011631 | 0.011262 | 0.011161 |

|          |          |          |          |          |          |          |
|----------|----------|----------|----------|----------|----------|----------|
| 0.011263 | 0.011545 | 0.011335 | 0.011163 | 0.011637 | 0.011129 | 0.011257 |
| 0.011637 | 0.011536 | 0.011429 | 0.011631 | 0.011333 | 0.011496 | 0.011463 |
| 0.011396 | 0.011564 | 0.011415 | 0.011266 | 0.011270 | 0.011228 | 0.011365 |
| 0.011463 | 0.011364 | 0.011500 | 0.011568 | 0.011496 | 0.011564 | 0.011670 |
| 0.011398 | 0.011569 | 0.011500 | 0.011432 | 0.011699 | 0.011161 | 0.011363 |
| 0.011329 | 0.011262 | 0.011161 | 0.011161 | 0.011228 | 0.011228 | 0.011295 |
| 0.011228 | 0.011295 | 0.011194 | 0.011295 | 0.011228 | 0.011161 | 0.011295 |
| 0.011228 | 0.011664 | 0.011564 | 0.011597 | 0.011127 | 0.011228 | 0.011262 |
| 0.011262 | 0.011228 | 0.011295 | 0.011329 | 0.011194 | 0.011194 | 0.011194 |
| 0.011731 | 0.011362 | 0.011362 | 0.011161 | 0.011262 | 0.011429 | 0.011194 |
| 0.011194 | 0.011262 | 0.011228 | 0.011396 | 0.011194 | 0.011329 | 0.011463 |
| 0.011396 | 0.011228 | 0.011161 | 0.011161 | 0.011161 | 0.011329 | 0.011262 |
| 0.011161 | 0.011262 | 0.011127 | 0.011161 | 0.011295 | 0.011430 | 0.011195 |
| 0.011161 | 0.011295 | 0.011228 | 0.011127 | 0.011463 | 0.011127 | 0.011295 |
| 0.011368 | 0.011194 | 0.011496 | 0.011329 | 0.011362 | 0.011228 | 0.011329 |
| 0.011194 | 0.011530 | 0.011127 | 0.011396 | 0.011194 | 0.011194 | 0.011127 |
| 0.011362 | 0.011564 | 0.011262 | 0.011329 | 0.011161 | 0.011564 | 0.011194 |
| 0.011194 | 0.000000 | 0.011228 | 0.011329 | 0.011228 | 0.011329 | 0.011396 |
| 0.011396 | 0.011362 | 0.011262 | 0.011362 | 0.011329 | 0.011194 | 0.011161 |
| 0.011194 | 0.011194 | 0.011262 | 0.011194 | 0.011161 | 0.011329 | 0.011194 |
| 0.011228 | 0.011228 | 0.011362 | 0.011396 | 0.011295 | 0.011228 | 0.011228 |
| 0.011295 | 0.011228 | 0.011329 | 0.011194 | 0.011329 | 0.011429 | 0.011731 |
| 0.011228 | 0.011631 | 0.011233 | 0.017747 | 0.011191 | 0.011366 | 0.011583 |
| 0.011545 | 0.011588 | 0.011322 | 0.011292 | 0.011664 | 0.011612 | 0.011303 |
| 0.011487 | 0.011487 | 0.011138 | 0.011228 | 0.011216 | 0.011258 | 0.011232 |
| 0.011482 | 0.011395 | 0.011394 | 0.011193 | 0.011362 | 0.011396 | 0.011398 |
| 0.011266 | 0.011362 | 0.011362 | 0.011329 | 0.011295 | 0.011295 | 0.011262 |
| 0.011295 | 0.011228 | 0.011262 | 0.011295 | 0.011262 | 0.011195 | 0.011228 |
| 0.011228 | 0.011295 | 0.011195 | 0.011295 | 0.011329 | 0.011362 | 0.011262 |
| 0.011295 | 0.011262 | 0.011597 | 0.011597 | 0.011329 | 0.011363 | 0.011396 |
| 0.011161 | 0.011161 | 0.011195 | 0.011295 | 0.011161 | 0.011396 | 0.011396 |
| 0.011429 | 0.011429 | 0.011362 | 0.011463 | 0.011631 | 0.011464 | 0.011295 |
| 0.011295 | 0.011362 | 0.011396 | 0.011228 | 0.011295 | 0.011262 | 0.011295 |
| 0.011363 | 0.011362 | 0.011396 | 0.011362 | 0.011262 | 0.011463 | 0.011429 |
| 0.011297 | 0.011195 | 0.011295 | 0.011396 | 0.011295 | 0.011430 | 0.011463 |
| 0.011631 | 0.011333 | 0.011496 | 0.011463 | 0.011396 | 0.011564 | 0.011195 |
| 0.011363 | 0.011262 | 0.011228 | 0.011228 | 0.011295 | 0.011195 | 0.011295 |
| 0.011329 | 0.011362 | 0.011262 | 0.011295 | 0.011262 | 0.011597 | 0.011597 |
| 0.011329 | 0.011363 | 0.011429 | 0.011362 | 0.012002 | 0.011417 | 0.011341 |
| 0.011412 | 0.011372 | 0.011482 | 0.011372 | 0.011480 | 0.011405 | 0.011370 |
| 0.011953 | 0.011268 | 0.011403 | 0.011337 | 0.011611 | 0.011468 | 0.011570 |
| 0.011978 | 0.011399 | 0.011533 | 0.011597 | 0.011463 | 0.011463 | 0.011499 |
| 0.011161 | 0.011329 | 0.011463 | 0.011429 | 0.011432 | 0.011429 | 0.011397 |
| 0.011262 | 0.011127 | 0.011228 | 0.011262 | 0.011161 | 0.011228 | 0.011127 |
| 0.011262 | 0.011295 | 0.011194 | 0.011161 | 0.011262 | 0.011194 | 0.011228 |
| 0.011228 | 0.011161 | 0.011228 | 0.011262 | 0.011161 | 0.011362 | 0.011396 |
| 0.011295 | 0.011362 | 0.011295 | 0.011295 | 0.011228 | 0.011631 | 0.011262 |
| 0.011304 | 0.011228 | 0.011463 | 0.011467 | 0.011329 | 0.011329 | 0.011329 |
| 0.011329 | 0.011262 | 0.011228 | 0.011262 | 0.011362 | 0.011362 | 0.011295 |
| 0.011295 | 0.011429 | 0.011597 | 0.011329 | 0.011530 | 0.011530 | 0.011396 |
| 0.011228 | 0.011295 | 0.011329 | 0.011732 | 0.011295 | 0.011329 | 0.011295 |
| 0.011329 | 0.011262 | 0.011262 | 0.011564 | 0.011497 | 0.011530 | 0.011262 |
| 0.011362 | 0.011429 | 0.011295 | 0.011362 | 0.011329 | 0.011194 | 0.011530 |
| 0.011228 | 0.011262 | 0.011262 | 0.011429 | 0.011262 | 0.011362 | 0.011597 |
| 0.011295 | 0.011671 | 0.011664 | 0.011467 | 0.011229 | 0.011366 | 0.011267 |
| 0.011170 | 0.011683 | 0.011201 | 0.011373 | 0.011255 | 0.011315 | 0.011326 |
| 0.011468 | 0.011126 | 0.011283 | 0.011126 | 0.011168 | 0.011328 | 0.011344 |
| 0.011362 | 0.011257 | 0.011342 | 0.011272 | 0.011296 | 0.011429 | 0.011497 |
| 0.011497 | 0.011363 | 0.011466 | 0.011467 | 0.011602 | 0.011625 | 0.011295 |
| 0.011530 | 0.011396 | 0.011262 | 0.011362 | 0.011161 | 0.011396 | 0.011195 |

|          |          |          |          |          |          |          |
|----------|----------|----------|----------|----------|----------|----------|
| 0.011262 | 0.011262 | 0.011228 | 0.011194 | 0.011228 | 0.011195 | 0.011295 |
| 0.011270 | 0.011270 | 0.011197 | 0.011300 | 0.011436 | 0.011402 | 0.011402 |
| 0.011401 | 0.011329 | 0.011134 | 0.011132 | 0.011263 | 0.011433 | 0.011433 |
| 0.011228 | 0.011297 | 0.011531 | 0.011499 | 0.011430 | 0.011464 | 0.011396 |
| 0.011329 | 0.011396 | 0.011396 | 0.011295 | 0.011866 | 0.011463 | 0.011530 |
| 0.011564 | 0.011630 | 0.011265 | 0.011337 | 0.011228 | 0.011429 | 0.011396 |
| 0.011430 | 0.011463 | 0.011463 | 0.011463 | 0.011532 | 0.011597 | 0.011234 |
| 0.011128 | 0.011130 | 0.011230 | 0.011196 | 0.011299 | 0.011098 | 0.011468 |
| 0.011197 | 0.011367 | 0.011108 | 0.011248 | 0.011262 | 0.011334 | 0.011228 |
| 0.011195 | 0.011195 | 0.011262 | 0.011228 | 0.011429 | 0.011396 | 0.011329 |
| 0.011429 | 0.011497 | 0.011228 | 0.011228 | 0.011262 | 0.011262 | 0.011263 |
| 0.011331 | 0.011262 | 0.011262 | 0.011296 | 0.011429 | 0.011497 | 0.011497 |
| 0.011363 | 0.011466 | 0.011467 | 0.011602 | 0.011625 | 0.011295 | 0.011463 |
| 0.011396 | 0.011396 | 0.011229 | 0.011408 | 0.011338 | 0.011367 | 0.011200 |
| 0.011404 | 0.011607 | 0.011399 | 0.011298 | 0.011195 | 0.011396 | 0.011262 |
| 0.011362 | 0.011295 | 0.011195 | 0.011296 | 0.011396 | 0.011398 | 0.011295 |
| 0.011195 | 0.011128 | 0.011262 | 0.011195 | 0.011127 | 0.011162 | 0.011396 |
| 0.011295 | 0.011228 | 0.011262 | 0.011295 | 0.011262 | 0.011195 | 0.011396 |
| 0.011262 | 0.011295 | 0.011295 | 0.011228 | 0.011295 | 0.011530 | 0.011194 |
| 0.011228 | 0.011631 | 0.011228 | 0.011262 | 0.011228 | 0.011597 | 0.011189 |
| 0.011678 | 0.011188 | 0.011261 | 0.011422 | 0.011508 | 0.011419 | 0.011144 |
| 0.011218 | 0.011396 | 0.011496 | 0.011603 | 0.011464 | 0.011601 | 0.011733 |
| 0.011632 | 0.011669 | 0.011631 | 0.011880 | 0.011597 | 0.012471 | 0.011633 |
| 0.012372 | 0.012139 | 0.012273 | 0.012545 | 0.011597 | 0.011295 | 0.011598 |
| 0.012036 | 0.011971 | 0.011564 | 0.011463 | 0.011531 | 0.011531 | 0.011500 |
| 0.011396 | 0.011399 | 0.011463 | 0.011430 | 0.011800 | 0.011866 | 0.011867 |
| 0.011766 | 0.011867 | 0.011970 | 0.011737 | 0.012036 | 0.012042 | 0.012103 |
| 0.012104 | 0.012138 | 0.012084 | 0.012104 | 0.012105 | 0.011329 | 0.011631 |
| 0.011699 | 0.012202 | 0.011704 | 0.011933 | 0.012406 | 0.011468 | 0.011363 |
| 0.011329 | 0.011329 | 0.011799 | 0.011800 | 0.011939 | 0.011664 | 0.011330 |
| S345     | 0.011631 | 0.011631 | 0.011967 | 0.011731 | 0.011731 | 0.011799 |
| 0.011637 | 0.011569 | 0.011799 | 0.011228 | 0.011295 | 0.011262 | 0.011228 |
| 0.011262 | 0.011429 | 0.011228 | 0.011262 | 0.011329 | 0.011295 | 0.011262 |
| 0.011228 | 0.011262 | 0.011362 | 0.011228 | 0.011262 | 0.011262 | 0.011603 |
| 0.011496 | 0.011262 | 0.011161 | 0.011396 | 0.011329 | 0.011295 | 0.011329 |
| 0.011295 | 0.011329 | 0.011295 | 0.011295 | 0.011329 | 0.011295 | 0.011463 |
| 0.011228 | 0.011295 | 0.011329 | 0.011262 | 0.011362 | 0.011396 | 0.011329 |
| 0.011295 | 0.011463 | 0.011362 | 0.011631 | 0.011295 | 0.011564 | 0.011295 |
| 0.011262 | 0.011362 | 0.011429 | 0.011564 | 0.011664 | 0.011362 | 0.011463 |
| 0.011329 | 0.011396 | 0.011295 | 0.011530 | 0.011765 | 0.011295 | 0.011362 |
| 0.011262 | 0.011362 | 0.011329 | 0.011396 | 0.011329 | 0.011329 | 0.011329 |
| 0.011228 | 0.011262 | 0.011228 | 0.011329 | 0.011295 | 0.011329 | 0.011396 |
| 0.011329 | 0.011295 | 0.011362 | 0.011262 | 0.011396 | 0.011228 | 0.011295 |
| 0.011463 | 0.011396 | 0.011631 | 0.011463 | 0.011295 | 0.011530 | 0.011295 |
| 0.011468 | 0.011695 | 0.011475 | 0.011216 | 0.011172 | 0.011318 | 0.011375 |
| 0.012011 | 0.011467 | 0.011184 | 0.011530 | 0.011530 | 0.011329 | 0.011429 |
| 0.011362 | 0.011329 | 0.011396 | 0.011295 | 0.011396 | 0.011329 | 0.011329 |
| 0.011295 | 0.011396 | 0.011597 | 0.011463 | 0.011362 | 0.011329 | 0.011262 |
| 0.011228 | 0.011228 | 0.011295 | 0.011262 | 0.011463 | 0.011429 | 0.011362 |
| 0.011463 | 0.011530 | 0.011262 | 0.011262 | 0.011295 | 0.011295 | 0.011297 |
| 0.011364 | 0.011295 | 0.011295 | 0.011168 | 0.011205 | 0.011200 | 0.011296 |
| 0.011297 | 0.011232 | 0.011245 | 0.011267 | 0.011196 | 0.011231 | 0.011263 |
| 0.011492 | 0.011301 | 0.011301 | 0.011228 | 0.011233 | 0.011363 | 0.011329 |
| 0.011396 | 0.011330 | 0.011329 | 0.011429 | 0.011362 | 0.011732 | 0.011530 |
| 0.011564 | 0.011430 | 0.011295 | 0.011396 | 0.011195 | 0.011429 | 0.011228 |
| 0.011295 | 0.011295 | 0.011262 | 0.011228 | 0.011262 | 0.011228 | 0.011329 |
| 0.011295 | 0.011396 | 0.011329 | 0.011228 | 0.011330 | 0.011430 | 0.011432 |
| 0.011430 | 0.011329 | 0.011228 | 0.011161 | 0.011295 | 0.011228 | 0.011161 |
| 0.011264 | 0.011430 | 0.011228 | 0.011430 | 0.011195 | 0.011295 | 0.011262 |
| 0.011362 | 0.011262 | 0.011295 | 0.011262 | 0.011295 | 0.011161 | 0.011295 |

|          |          |          |          |          |          |          |
|----------|----------|----------|----------|----------|----------|----------|
| 0.011329 | 0.011262 | 0.011329 | 0.011262 | 0.011295 | 0.011329 | 0.011564 |
| 0.011664 | 0.011597 | 0.011665 | 0.011431 | 0.011665 | 0.011295 | 0.011262 |
| 0.011297 | 0.011586 | 0.011380 | 0.011197 | 0.011671 | 0.011163 | 0.011257 |
| 0.011671 | 0.011570 | 0.011463 | 0.011664 | 0.011367 | 0.011530 | 0.011497 |
| 0.011429 | 0.011597 | 0.011451 | 0.011266 | 0.011354 | 0.011329 | 0.011398 |
| 0.011497 | 0.011397 | 0.011533 | 0.011601 | 0.011530 | 0.011597 | 0.011704 |
| 0.011432 | 0.011603 | 0.011534 | 0.011466 | 0.011733 | 0.011194 | 0.011397 |
| 0.011362 | 0.011295 | 0.011194 | 0.011194 | 0.011262 | 0.011262 | 0.011329 |
| 0.011262 | 0.011329 | 0.011228 | 0.011329 | 0.011262 | 0.011262 | 0.011329 |
| 0.011262 | 0.011698 | 0.011597 | 0.011631 | 0.011161 | 0.011262 | 0.011295 |
| 0.011295 | 0.011262 | 0.011329 | 0.011362 | 0.011228 | 0.011228 | 0.011228 |
| 0.011698 | 0.011396 | 0.011396 | 0.011194 | 0.011295 | 0.011463 | 0.011228 |
| 0.011228 | 0.011295 | 0.011262 | 0.011429 | 0.011228 | 0.011362 | 0.011429 |
| 0.011429 | 0.011262 | 0.011262 | 0.011194 | 0.011194 | 0.011362 | 0.011295 |
| 0.011194 | 0.011295 | 0.011161 | 0.011194 | 0.011329 | 0.011463 | 0.011228 |
| 0.011195 | 0.011329 | 0.011262 | 0.011161 | 0.011496 | 0.011161 | 0.011329 |
| 0.011402 | 0.011228 | 0.011530 | 0.011362 | 0.011396 | 0.011262 | 0.011362 |
| 0.011228 | 0.011564 | 0.011161 | 0.011429 | 0.011228 | 0.011228 | 0.011161 |
| 0.011396 | 0.011597 | 0.011295 | 0.011362 | 0.011194 | 0.011597 | 0.011228 |
| 0.011228 | 0.011228 | 0.000000 | 0.011362 | 0.011262 | 0.011362 | 0.011429 |
| 0.011429 | 0.011396 | 0.011295 | 0.011396 | 0.011362 | 0.011228 | 0.011194 |
| 0.011228 | 0.011228 | 0.011295 | 0.011228 | 0.011194 | 0.011362 | 0.011228 |
| 0.011262 | 0.011262 | 0.011396 | 0.011429 | 0.011329 | 0.011262 | 0.011262 |
| 0.011329 | 0.011262 | 0.011362 | 0.011228 | 0.011362 | 0.011463 | 0.011765 |
| 0.011262 | 0.011664 | 0.011267 | 0.017747 | 0.011257 | 0.011427 | 0.011618 |
| 0.011579 | 0.011623 | 0.011374 | 0.011292 | 0.011719 | 0.011647 | 0.011364 |
| 0.011487 | 0.011487 | 0.011177 | 0.011270 | 0.011255 | 0.011356 | 0.011275 |
| 0.011482 | 0.011395 | 0.011431 | 0.011193 | 0.011396 | 0.011429 | 0.011432 |
| 0.011301 | 0.011396 | 0.011396 | 0.011362 | 0.011329 | 0.011329 | 0.011295 |
| 0.011329 | 0.011262 | 0.011295 | 0.011329 | 0.011295 | 0.011228 | 0.011262 |
| 0.011262 | 0.011329 | 0.011228 | 0.011329 | 0.011362 | 0.011396 | 0.011295 |
| 0.011329 | 0.011295 | 0.011631 | 0.011631 | 0.011362 | 0.011396 | 0.011430 |
| 0.011127 | 0.011195 | 0.011228 | 0.011329 | 0.011195 | 0.011429 | 0.011429 |
| 0.011463 | 0.011463 | 0.011396 | 0.011497 | 0.011665 | 0.011498 | 0.011329 |
| 0.011329 | 0.011396 | 0.011429 | 0.011262 | 0.011329 | 0.011295 | 0.011329 |
| 0.011396 | 0.011396 | 0.011429 | 0.011396 | 0.011296 | 0.011497 | 0.011463 |
| 0.011331 | 0.011228 | 0.011329 | 0.011430 | 0.011329 | 0.011463 | 0.011496 |
| 0.011664 | 0.011367 | 0.011530 | 0.011497 | 0.011429 | 0.011597 | 0.011228 |
| 0.011397 | 0.011295 | 0.011262 | 0.011262 | 0.011329 | 0.011228 | 0.011329 |
| 0.011362 | 0.011396 | 0.011295 | 0.011329 | 0.011295 | 0.011631 | 0.011631 |
| 0.011362 | 0.011396 | 0.011463 | 0.011396 | 0.012035 | 0.011453 | 0.011377 |
| 0.011447 | 0.011407 | 0.011517 | 0.011406 | 0.011515 | 0.011439 | 0.011405 |
| 0.011987 | 0.011302 | 0.011437 | 0.011371 | 0.011645 | 0.011502 | 0.011604 |
| 0.012012 | 0.011475 | 0.011567 | 0.011631 | 0.011496 | 0.011496 | 0.011533 |
| 0.011194 | 0.011362 | 0.011496 | 0.011463 | 0.011466 | 0.011463 | 0.011431 |
| 0.011295 | 0.011228 | 0.011262 | 0.011295 | 0.011194 | 0.011262 | 0.011161 |
| 0.011295 | 0.011329 | 0.011228 | 0.011194 | 0.011295 | 0.011228 | 0.011262 |
| 0.011262 | 0.011194 | 0.011262 | 0.011295 | 0.011194 | 0.011329 | 0.011429 |
| 0.011329 | 0.011396 | 0.011329 | 0.011329 | 0.011262 | 0.011664 | 0.011295 |
| 0.011338 | 0.011262 | 0.011497 | 0.011501 | 0.011362 | 0.011362 | 0.011362 |
| 0.011362 | 0.011295 | 0.011262 | 0.011295 | 0.011396 | 0.011396 | 0.011329 |
| 0.011329 | 0.011463 | 0.011631 | 0.011362 | 0.011564 | 0.011564 | 0.011429 |
| 0.011262 | 0.011329 | 0.011362 | 0.011698 | 0.011329 | 0.011362 | 0.011329 |
| 0.011362 | 0.011295 | 0.011295 | 0.011597 | 0.011530 | 0.011564 | 0.011295 |
| 0.011396 | 0.011463 | 0.011329 | 0.011396 | 0.011362 | 0.011228 | 0.011564 |
| 0.011329 | 0.011295 | 0.011295 | 0.011463 | 0.011295 | 0.011396 | 0.011631 |
| 0.011329 | 0.011705 | 0.011698 | 0.011467 | 0.011229 | 0.011400 | 0.011267 |
| 0.011280 | 0.011683 | 0.011201 | 0.011417 | 0.011255 | 0.011366 | 0.011379 |
| 0.011468 | 0.011192 | 0.011339 | 0.011192 | 0.011222 | 0.011328 | 0.011344 |
| 0.011399 | 0.011257 | 0.011377 | 0.011307 | 0.011330 | 0.011463 | 0.011530 |

|          |          |          |          |          |          |          |
|----------|----------|----------|----------|----------|----------|----------|
| 0.011530 | 0.011396 | 0.011500 | 0.011501 | 0.011636 | 0.011626 | 0.011329 |
| 0.011564 | 0.011430 | 0.011295 | 0.011396 | 0.011195 | 0.011429 | 0.011228 |
| 0.011295 | 0.011295 | 0.011262 | 0.011228 | 0.011262 | 0.011228 | 0.011329 |
| 0.011305 | 0.011305 | 0.011300 | 0.011334 | 0.011471 | 0.011436 | 0.011436 |
| 0.011435 | 0.011363 | 0.011171 | 0.011132 | 0.011297 | 0.011467 | 0.011467 |
| 0.011262 | 0.011331 | 0.011565 | 0.011533 | 0.011464 | 0.011498 | 0.011429 |
| 0.011362 | 0.011429 | 0.011429 | 0.011329 | 0.011900 | 0.011496 | 0.011564 |
| 0.011597 | 0.011665 | 0.011299 | 0.011372 | 0.011262 | 0.011463 | 0.011429 |
| 0.011464 | 0.011496 | 0.011496 | 0.011496 | 0.011610 | 0.011631 | 0.011268 |
| 0.011162 | 0.011164 | 0.011264 | 0.011230 | 0.011333 | 0.011172 | 0.011502 |
| 0.011300 | 0.011411 | 0.011156 | 0.011322 | 0.011296 | 0.011368 | 0.011262 |
| 0.011228 | 0.011228 | 0.011295 | 0.011262 | 0.011463 | 0.011429 | 0.011362 |
| 0.011463 | 0.011530 | 0.011262 | 0.011262 | 0.011295 | 0.011295 | 0.011297 |
| 0.011364 | 0.011295 | 0.011295 | 0.011330 | 0.011463 | 0.011530 | 0.011530 |
| 0.011396 | 0.011500 | 0.011501 | 0.011636 | 0.011626 | 0.011329 | 0.011496 |
| 0.011429 | 0.011429 | 0.011263 | 0.011408 | 0.011373 | 0.011401 | 0.011235 |
| 0.011439 | 0.011607 | 0.011441 | 0.011332 | 0.011228 | 0.011430 | 0.011295 |
| 0.011396 | 0.011329 | 0.011228 | 0.011330 | 0.011430 | 0.011432 | 0.011329 |
| 0.011228 | 0.011161 | 0.011295 | 0.011228 | 0.011161 | 0.011264 | 0.011430 |
| 0.011329 | 0.011262 | 0.011295 | 0.011329 | 0.011295 | 0.011228 | 0.011430 |
| 0.011295 | 0.011329 | 0.011329 | 0.011262 | 0.011329 | 0.011564 | 0.011228 |
| 0.011262 | 0.011664 | 0.011262 | 0.011295 | 0.011262 | 0.011631 | 0.011189 |
| 0.011678 | 0.011188 | 0.011261 | 0.011422 | 0.011508 | 0.011419 | 0.011144 |
| 0.011218 | 0.011429 | 0.011530 | 0.011637 | 0.011498 | 0.011635 | 0.011766 |
| 0.011666 | 0.011703 | 0.011664 | 0.011914 | 0.011631 | 0.012505 | 0.011666 |
| 0.012405 | 0.012173 | 0.012307 | 0.012578 | 0.011631 | 0.011329 | 0.011631 |
| 0.012070 | 0.012004 | 0.011597 | 0.011497 | 0.011564 | 0.011564 | 0.011534 |
| 0.011429 | 0.011433 | 0.011496 | 0.011464 | 0.011833 | 0.011900 | 0.011901 |
| 0.011800 | 0.011901 | 0.012004 | 0.011770 | 0.012070 | 0.012076 | 0.012137 |
| 0.012138 | 0.012172 | 0.012118 | 0.012138 | 0.012139 | 0.011362 | 0.011665 |
| 0.011733 | 0.012236 | 0.011738 | 0.011967 | 0.012440 | 0.011502 | 0.011396 |
| 0.011362 | 0.011362 | 0.011833 | 0.011842 | 0.011975 | 0.011698 | 0.011363 |
| S346     | 0.011732 | 0.011732 | 0.012068 | 0.011832 | 0.011832 | 0.011900 |
| 0.011739 | 0.011671 | 0.011899 | 0.011329 | 0.011396 | 0.011363 | 0.011329 |
| 0.011362 | 0.011530 | 0.011329 | 0.011362 | 0.011429 | 0.011396 | 0.011362 |
| 0.011329 | 0.011362 | 0.011463 | 0.011329 | 0.011295 | 0.011362 | 0.011705 |
| 0.011597 | 0.011362 | 0.011262 | 0.011496 | 0.011362 | 0.011396 | 0.011362 |
| 0.011396 | 0.011295 | 0.011396 | 0.011396 | 0.011429 | 0.011396 | 0.011564 |
| 0.011329 | 0.011396 | 0.011429 | 0.011362 | 0.011463 | 0.011496 | 0.011429 |
| 0.011396 | 0.011564 | 0.011463 | 0.011732 | 0.011396 | 0.011597 | 0.011396 |
| 0.011362 | 0.011463 | 0.011530 | 0.011597 | 0.011765 | 0.011463 | 0.011564 |
| 0.011362 | 0.011094 | 0.011396 | 0.011564 | 0.011866 | 0.011396 | 0.011463 |
| 0.011362 | 0.011463 | 0.011429 | 0.011497 | 0.011429 | 0.011429 | 0.011429 |
| 0.011329 | 0.011362 | 0.011329 | 0.011429 | 0.011396 | 0.011430 | 0.011496 |
| 0.011429 | 0.011396 | 0.011396 | 0.011362 | 0.011496 | 0.011262 | 0.011396 |
| 0.011564 | 0.011496 | 0.011732 | 0.011497 | 0.011396 | 0.011564 | 0.011396 |
| 0.011542 | 0.011770 | 0.011626 | 0.011255 | 0.011247 | 0.011428 | 0.011454 |
| 0.012121 | 0.011416 | 0.011307 | 0.011631 | 0.011631 | 0.011429 | 0.011530 |
| 0.011463 | 0.011429 | 0.011496 | 0.011396 | 0.011497 | 0.011362 | 0.011429 |
| 0.011396 | 0.011496 | 0.011698 | 0.011564 | 0.011463 | 0.011430 | 0.011295 |
| 0.011329 | 0.011329 | 0.011329 | 0.011362 | 0.011564 | 0.011530 | 0.011463 |
| 0.011564 | 0.011631 | 0.011362 | 0.011362 | 0.011396 | 0.011396 | 0.011398 |
| 0.011466 | 0.011396 | 0.011396 | 0.011240 | 0.011349 | 0.011306 | 0.011396 |
| 0.011399 | 0.011335 | 0.011392 | 0.011371 | 0.011298 | 0.011334 | 0.011364 |
| 0.011636 | 0.011405 | 0.011370 | 0.011329 | 0.011337 | 0.011464 | 0.011430 |
| 0.011497 | 0.011431 | 0.011430 | 0.011530 | 0.011463 | 0.011765 | 0.011631 |
| 0.011664 | 0.011530 | 0.011396 | 0.011497 | 0.011295 | 0.011530 | 0.011329 |
| 0.011396 | 0.011396 | 0.011362 | 0.011329 | 0.011362 | 0.011329 | 0.011430 |
| 0.011329 | 0.011429 | 0.011430 | 0.011329 | 0.011431 | 0.011530 | 0.011500 |
| 0.011463 | 0.011430 | 0.011329 | 0.011263 | 0.011396 | 0.011329 | 0.011262 |

|          |          |          |          |          |          |          |
|----------|----------|----------|----------|----------|----------|----------|
| 0.011366 | 0.011463 | 0.011262 | 0.011463 | 0.011295 | 0.011396 | 0.011362 |
| 0.011396 | 0.011362 | 0.011329 | 0.011362 | 0.011396 | 0.011262 | 0.011329 |
| 0.011362 | 0.011362 | 0.011430 | 0.011362 | 0.011396 | 0.011430 | 0.011665 |
| 0.011765 | 0.011698 | 0.011766 | 0.011532 | 0.011766 | 0.011396 | 0.011362 |
| 0.011398 | 0.011626 | 0.011380 | 0.011300 | 0.011773 | 0.011265 | 0.011414 |
| 0.011773 | 0.011672 | 0.011564 | 0.011765 | 0.011470 | 0.011631 | 0.011530 |
| 0.011530 | 0.011698 | 0.011558 | 0.011349 | 0.011479 | 0.011430 | 0.011500 |
| 0.011597 | 0.011499 | 0.011635 | 0.011635 | 0.011631 | 0.011698 | 0.011806 |
| 0.011534 | 0.011637 | 0.011636 | 0.011567 | 0.011834 | 0.011295 | 0.011498 |
| 0.011396 | 0.011396 | 0.011295 | 0.011295 | 0.011295 | 0.011362 | 0.011429 |
| 0.011295 | 0.011362 | 0.011262 | 0.011429 | 0.011295 | 0.011362 | 0.011429 |
| 0.011362 | 0.011799 | 0.011698 | 0.011732 | 0.011262 | 0.011362 | 0.011396 |
| 0.011396 | 0.011362 | 0.011429 | 0.011463 | 0.011329 | 0.011329 | 0.011329 |
| 0.011866 | 0.011496 | 0.011497 | 0.011295 | 0.011396 | 0.011228 | 0.011329 |
| 0.011329 | 0.011396 | 0.011362 | 0.011463 | 0.011329 | 0.011463 | 0.011530 |
| 0.011530 | 0.011362 | 0.011362 | 0.011295 | 0.011295 | 0.011463 | 0.011396 |
| 0.011295 | 0.011396 | 0.011262 | 0.011295 | 0.011429 | 0.011564 | 0.011329 |
| 0.011295 | 0.011429 | 0.011363 | 0.011262 | 0.011597 | 0.011262 | 0.011429 |
| 0.011437 | 0.011329 | 0.011631 | 0.011463 | 0.011497 | 0.011362 | 0.011463 |
| 0.011329 | 0.011597 | 0.011262 | 0.011396 | 0.011329 | 0.011329 | 0.011262 |
| 0.011429 | 0.011698 | 0.011396 | 0.011463 | 0.011295 | 0.011698 | 0.011329 |
| 0.011329 | 0.011329 | 0.011362 | 0.000000 | 0.011362 | 0.011463 | 0.011530 |
| 0.011463 | 0.011497 | 0.011396 | 0.011497 | 0.011396 | 0.011329 | 0.011295 |
| 0.011329 | 0.011329 | 0.011396 | 0.011329 | 0.011228 | 0.011463 | 0.011329 |
| 0.011362 | 0.011362 | 0.011497 | 0.011530 | 0.011429 | 0.011295 | 0.011362 |
| 0.011429 | 0.011362 | 0.011463 | 0.011329 | 0.011463 | 0.011564 | 0.011866 |
| 0.011362 | 0.011765 | 0.011371 | 0.017861 | 0.011191 | 0.011488 | 0.011723 |
| 0.011683 | 0.011693 | 0.011322 | 0.011234 | 0.011719 | 0.011751 | 0.011303 |
| 0.011487 | 0.011610 | 0.011255 | 0.011353 | 0.011333 | 0.011356 | 0.011275 |
| 0.011436 | 0.011507 | 0.011468 | 0.011391 | 0.011497 | 0.011530 | 0.011534 |
| 0.011335 | 0.011497 | 0.011497 | 0.011463 | 0.011429 | 0.011430 | 0.011396 |
| 0.011430 | 0.011362 | 0.011396 | 0.011430 | 0.011396 | 0.011329 | 0.011362 |
| 0.011362 | 0.011430 | 0.011329 | 0.011430 | 0.011463 | 0.011497 | 0.011396 |
| 0.011429 | 0.011396 | 0.011732 | 0.011732 | 0.011463 | 0.011497 | 0.011530 |
| 0.011295 | 0.011295 | 0.011329 | 0.011362 | 0.011295 | 0.011530 | 0.011530 |
| 0.011564 | 0.011564 | 0.011497 | 0.011597 | 0.011766 | 0.011599 | 0.011362 |
| 0.011430 | 0.011497 | 0.011463 | 0.011362 | 0.011430 | 0.011396 | 0.011430 |
| 0.011497 | 0.011497 | 0.011530 | 0.011430 | 0.011330 | 0.011597 | 0.011497 |
| 0.011433 | 0.011329 | 0.011430 | 0.011530 | 0.011430 | 0.011564 | 0.011597 |
| 0.011765 | 0.011470 | 0.011631 | 0.011530 | 0.011530 | 0.011698 | 0.011329 |
| 0.011498 | 0.011396 | 0.011362 | 0.011362 | 0.011430 | 0.011329 | 0.011430 |
| 0.011463 | 0.011497 | 0.011396 | 0.011429 | 0.011396 | 0.011732 | 0.011732 |
| 0.011463 | 0.011497 | 0.011564 | 0.011496 | 0.012137 | 0.011560 | 0.011482 |
| 0.011552 | 0.011511 | 0.011622 | 0.011510 | 0.011620 | 0.011543 | 0.011508 |
| 0.012090 | 0.011406 | 0.011540 | 0.011475 | 0.011749 | 0.011604 | 0.011639 |
| 0.012114 | 0.011588 | 0.011669 | 0.011732 | 0.011597 | 0.011597 | 0.011635 |
| 0.011295 | 0.011396 | 0.011597 | 0.011564 | 0.011567 | 0.011564 | 0.011532 |
| 0.011396 | 0.011262 | 0.011295 | 0.011396 | 0.011228 | 0.011362 | 0.011262 |
| 0.011396 | 0.011429 | 0.011329 | 0.011295 | 0.011396 | 0.011329 | 0.011362 |
| 0.011362 | 0.011295 | 0.011362 | 0.011396 | 0.011295 | 0.011295 | 0.011530 |
| 0.011429 | 0.011497 | 0.011429 | 0.011429 | 0.011362 | 0.011765 | 0.011396 |
| 0.011443 | 0.011362 | 0.011598 | 0.011603 | 0.011396 | 0.011463 | 0.011463 |
| 0.011463 | 0.011329 | 0.011362 | 0.011329 | 0.011497 | 0.011497 | 0.011429 |
| 0.011429 | 0.011564 | 0.011732 | 0.011463 | 0.011665 | 0.011665 | 0.011530 |
| 0.011362 | 0.011429 | 0.011463 | 0.011866 | 0.011430 | 0.011396 | 0.011429 |
| 0.011463 | 0.011396 | 0.011396 | 0.011698 | 0.011564 | 0.011665 | 0.011396 |
| 0.011497 | 0.011564 | 0.011429 | 0.011497 | 0.011463 | 0.011329 | 0.011664 |
| 0.011429 | 0.011396 | 0.011396 | 0.011564 | 0.011396 | 0.011496 | 0.011732 |
| 0.011429 | 0.011807 | 0.011799 | 0.011507 | 0.011229 | 0.011468 | 0.011267 |
| 0.011280 | 0.011722 | 0.011306 | 0.011462 | 0.011255 | 0.011417 | 0.011326 |

|          |          |          |          |          |          |          |
|----------|----------|----------|----------|----------|----------|----------|
| 0.011417 | 0.011126 | 0.011283 | 0.011126 | 0.011168 | 0.011328 | 0.011466 |
| 0.011475 | 0.011296 | 0.011483 | 0.011377 | 0.011431 | 0.011564 | 0.011631 |
| 0.011631 | 0.011497 | 0.011601 | 0.011603 | 0.011738 | 0.011732 | 0.011429 |
| 0.011664 | 0.011530 | 0.011396 | 0.011497 | 0.011295 | 0.011530 | 0.011329 |
| 0.011396 | 0.011396 | 0.011362 | 0.011329 | 0.011362 | 0.011329 | 0.011430 |
| 0.011410 | 0.011410 | 0.011403 | 0.011437 | 0.011573 | 0.011470 | 0.011538 |
| 0.011537 | 0.011464 | 0.011282 | 0.011276 | 0.011399 | 0.011568 | 0.011569 |
| 0.011363 | 0.011433 | 0.011666 | 0.011635 | 0.011565 | 0.011599 | 0.011530 |
| 0.011463 | 0.011530 | 0.011530 | 0.011429 | 0.012001 | 0.011564 | 0.011665 |
| 0.011698 | 0.011772 | 0.011401 | 0.011441 | 0.011362 | 0.011564 | 0.011530 |
| 0.011565 | 0.011597 | 0.011597 | 0.011597 | 0.011768 | 0.011732 | 0.011372 |
| 0.011263 | 0.011268 | 0.011367 | 0.011332 | 0.011436 | 0.011284 | 0.011604 |
| 0.011403 | 0.011543 | 0.011298 | 0.011435 | 0.011396 | 0.011471 | 0.011295 |
| 0.011329 | 0.011329 | 0.011329 | 0.011362 | 0.011564 | 0.011530 | 0.011463 |
| 0.011564 | 0.011631 | 0.011362 | 0.011362 | 0.011396 | 0.011396 | 0.011398 |
| 0.011466 | 0.011396 | 0.011396 | 0.011431 | 0.011564 | 0.011631 | 0.011631 |
| 0.011497 | 0.011601 | 0.011603 | 0.011738 | 0.011732 | 0.011429 | 0.011597 |
| 0.011530 | 0.011530 | 0.011365 | 0.011547 | 0.011442 | 0.011503 | 0.011376 |
| 0.011473 | 0.011698 | 0.011483 | 0.011434 | 0.011262 | 0.011463 | 0.011329 |
| 0.011429 | 0.011430 | 0.011329 | 0.011431 | 0.011530 | 0.011500 | 0.011430 |
| 0.011329 | 0.011263 | 0.011396 | 0.011329 | 0.011262 | 0.011366 | 0.011463 |
| 0.011430 | 0.011362 | 0.011396 | 0.011430 | 0.011396 | 0.011329 | 0.011530 |
| 0.011396 | 0.011429 | 0.011429 | 0.011362 | 0.011429 | 0.011664 | 0.011329 |
| 0.011362 | 0.011765 | 0.011362 | 0.011329 | 0.011362 | 0.011732 | 0.011275 |
| 0.011678 | 0.011273 | 0.011211 | 0.011543 | 0.011589 | 0.011563 | 0.011227 |
| 0.011165 | 0.011530 | 0.011631 | 0.011739 | 0.011599 | 0.011703 | 0.011867 |
| 0.011767 | 0.011804 | 0.011765 | 0.011983 | 0.011732 | 0.012606 | 0.011768 |
| 0.012507 | 0.012274 | 0.012409 | 0.012680 | 0.011731 | 0.011430 | 0.011732 |
| 0.012171 | 0.012106 | 0.011698 | 0.011597 | 0.011665 | 0.011665 | 0.011635 |
| 0.011530 | 0.011501 | 0.011597 | 0.011565 | 0.011935 | 0.012001 | 0.012002 |
| 0.011901 | 0.012002 | 0.012106 | 0.011872 | 0.012171 | 0.012178 | 0.012238 |
| 0.012239 | 0.012273 | 0.012221 | 0.012239 | 0.012241 | 0.011463 | 0.011766 |
| 0.011834 | 0.012337 | 0.011840 | 0.012068 | 0.012541 | 0.011604 | 0.011497 |
| 0.011463 | 0.011463 | 0.011934 | 0.012006 | 0.012081 | 0.011799 | 0.011465 |
| S347     | 0.011631 | 0.011631 | 0.011967 | 0.011731 | 0.011731 | 0.011799 |
| 0.011637 | 0.011569 | 0.011799 | 0.011228 | 0.011295 | 0.011262 | 0.011228 |
| 0.011262 | 0.011429 | 0.011228 | 0.011262 | 0.011329 | 0.011295 | 0.011262 |
| 0.011228 | 0.011262 | 0.011362 | 0.011228 | 0.011262 | 0.011262 | 0.011603 |
| 0.011496 | 0.011262 | 0.011161 | 0.011396 | 0.011329 | 0.011295 | 0.011329 |
| 0.011295 | 0.011396 | 0.011295 | 0.011295 | 0.011329 | 0.011295 | 0.011463 |
| 0.011228 | 0.011295 | 0.011329 | 0.011262 | 0.011362 | 0.011396 | 0.011329 |
| 0.011295 | 0.011463 | 0.011362 | 0.011631 | 0.011295 | 0.011564 | 0.011295 |
| 0.011262 | 0.011362 | 0.011429 | 0.011564 | 0.011664 | 0.011362 | 0.011396 |
| 0.011329 | 0.011396 | 0.011295 | 0.011530 | 0.011765 | 0.011295 | 0.011362 |
| 0.011262 | 0.011362 | 0.011329 | 0.011396 | 0.011329 | 0.011329 | 0.011329 |
| 0.011228 | 0.011262 | 0.011228 | 0.011329 | 0.011295 | 0.011329 | 0.011396 |
| 0.011329 | 0.011295 | 0.011362 | 0.011262 | 0.011396 | 0.011228 | 0.011295 |
| 0.011463 | 0.011396 | 0.011631 | 0.011463 | 0.011295 | 0.011530 | 0.011295 |
| 0.011468 | 0.011695 | 0.011513 | 0.011216 | 0.011210 | 0.011318 | 0.011414 |
| 0.012048 | 0.011518 | 0.011225 | 0.011530 | 0.011530 | 0.011329 | 0.011429 |
| 0.011362 | 0.011329 | 0.011396 | 0.011295 | 0.011396 | 0.011329 | 0.011329 |
| 0.011295 | 0.011396 | 0.011597 | 0.011463 | 0.011362 | 0.011329 | 0.011262 |
| 0.011228 | 0.011228 | 0.011295 | 0.011262 | 0.011463 | 0.011429 | 0.011362 |
| 0.011463 | 0.011530 | 0.011262 | 0.011262 | 0.011295 | 0.011295 | 0.011297 |
| 0.011364 | 0.011295 | 0.011295 | 0.011168 | 0.011241 | 0.011200 | 0.011296 |
| 0.011297 | 0.011232 | 0.011282 | 0.011267 | 0.011196 | 0.011231 | 0.011263 |
| 0.011492 | 0.011301 | 0.011336 | 0.011228 | 0.011233 | 0.011363 | 0.011329 |
| 0.011396 | 0.011330 | 0.011329 | 0.011429 | 0.011362 | 0.011732 | 0.011530 |
| 0.011564 | 0.011362 | 0.011295 | 0.011329 | 0.011195 | 0.011429 | 0.011228 |
| 0.011295 | 0.011295 | 0.011262 | 0.011228 | 0.011262 | 0.011228 | 0.011329 |



|          |          |          |          |          |          |          |
|----------|----------|----------|----------|----------|----------|----------|
| 0.011295 | 0.011396 | 0.011329 | 0.011228 | 0.011330 | 0.011430 | 0.011432 |
| 0.011430 | 0.011329 | 0.011228 | 0.011161 | 0.011295 | 0.011228 | 0.011161 |
| 0.011264 | 0.011430 | 0.011228 | 0.011430 | 0.011195 | 0.011295 | 0.011262 |
| 0.011362 | 0.011262 | 0.011295 | 0.011262 | 0.011295 | 0.011161 | 0.011295 |
| 0.011329 | 0.011262 | 0.011329 | 0.011262 | 0.011295 | 0.011329 | 0.011564 |
| 0.011664 | 0.011597 | 0.011665 | 0.011431 | 0.011665 | 0.011295 | 0.011262 |
| 0.011297 | 0.011586 | 0.011380 | 0.011197 | 0.011671 | 0.011163 | 0.011296 |
| 0.011671 | 0.011570 | 0.011463 | 0.011664 | 0.011367 | 0.011530 | 0.011497 |
| 0.011429 | 0.011597 | 0.011415 | 0.011266 | 0.011312 | 0.011329 | 0.011398 |
| 0.011497 | 0.011397 | 0.011533 | 0.011601 | 0.011530 | 0.011530 | 0.011704 |
| 0.011432 | 0.011603 | 0.011534 | 0.011466 | 0.011733 | 0.011194 | 0.011397 |
| 0.011362 | 0.011295 | 0.011194 | 0.011194 | 0.011262 | 0.011262 | 0.011329 |
| 0.011262 | 0.011329 | 0.011228 | 0.011329 | 0.011262 | 0.011262 | 0.011329 |
| 0.011262 | 0.011698 | 0.011597 | 0.011631 | 0.011161 | 0.011262 | 0.011295 |
| 0.011295 | 0.011262 | 0.011329 | 0.011295 | 0.011228 | 0.011228 | 0.011228 |
| 0.011765 | 0.011396 | 0.011396 | 0.011194 | 0.011295 | 0.011463 | 0.011228 |
| 0.011228 | 0.011295 | 0.011262 | 0.011429 | 0.011228 | 0.011362 | 0.011496 |
| 0.011429 | 0.011262 | 0.011262 | 0.011194 | 0.011194 | 0.011362 | 0.011295 |
| 0.011194 | 0.011295 | 0.011161 | 0.011194 | 0.011329 | 0.011463 | 0.011228 |
| 0.011195 | 0.011329 | 0.011262 | 0.011161 | 0.011496 | 0.011161 | 0.011329 |
| 0.011368 | 0.011228 | 0.011530 | 0.011362 | 0.011396 | 0.011262 | 0.011362 |
| 0.011228 | 0.011564 | 0.011161 | 0.011429 | 0.011228 | 0.011228 | 0.011161 |
| 0.011396 | 0.011597 | 0.011295 | 0.011362 | 0.011194 | 0.011597 | 0.011228 |
| 0.011228 | 0.011228 | 0.011262 | 0.011362 | 0.000000 | 0.011362 | 0.011429 |
| 0.011429 | 0.011396 | 0.011295 | 0.011396 | 0.011362 | 0.011228 | 0.011194 |
| 0.011228 | 0.011228 | 0.011295 | 0.011228 | 0.011194 | 0.011362 | 0.011228 |
| 0.011262 | 0.011262 | 0.011396 | 0.011429 | 0.011329 | 0.011262 | 0.011262 |
| 0.011329 | 0.011262 | 0.011362 | 0.011228 | 0.011362 | 0.011463 | 0.011765 |
| 0.011262 | 0.011664 | 0.011267 | 0.017785 | 0.011257 | 0.011366 | 0.011618 |
| 0.011579 | 0.011623 | 0.011322 | 0.011234 | 0.011719 | 0.011647 | 0.011364 |
| 0.011534 | 0.011487 | 0.011177 | 0.011228 | 0.011177 | 0.011356 | 0.011232 |
| 0.011529 | 0.011433 | 0.011431 | 0.011325 | 0.011396 | 0.011429 | 0.011432 |
| 0.011301 | 0.011396 | 0.011396 | 0.011362 | 0.011329 | 0.011329 | 0.011295 |
| 0.011329 | 0.011262 | 0.011295 | 0.011329 | 0.011295 | 0.011228 | 0.011262 |
| 0.011262 | 0.011329 | 0.011228 | 0.011329 | 0.011362 | 0.011396 | 0.011295 |
| 0.011329 | 0.011295 | 0.011631 | 0.011631 | 0.011362 | 0.011396 | 0.011430 |
| 0.011195 | 0.011195 | 0.011228 | 0.011329 | 0.011195 | 0.011429 | 0.011429 |
| 0.011463 | 0.011463 | 0.011396 | 0.011496 | 0.011665 | 0.011464 | 0.011329 |
| 0.011329 | 0.011396 | 0.011429 | 0.011262 | 0.011329 | 0.011295 | 0.011329 |
| 0.011396 | 0.011396 | 0.011429 | 0.011396 | 0.011296 | 0.011497 | 0.011463 |
| 0.011297 | 0.011228 | 0.011329 | 0.011430 | 0.011329 | 0.011463 | 0.011496 |
| 0.011664 | 0.011367 | 0.011530 | 0.011497 | 0.011429 | 0.011597 | 0.011228 |
| 0.011397 | 0.011295 | 0.011262 | 0.011262 | 0.011329 | 0.011228 | 0.011329 |
| 0.011362 | 0.011396 | 0.011295 | 0.011329 | 0.011295 | 0.011631 | 0.011631 |
| 0.011362 | 0.011396 | 0.011463 | 0.011396 | 0.012035 | 0.011453 | 0.011341 |
| 0.011447 | 0.011407 | 0.011482 | 0.011372 | 0.011515 | 0.011439 | 0.011405 |
| 0.011987 | 0.011302 | 0.011437 | 0.011371 | 0.011576 | 0.011502 | 0.011604 |
| 0.012012 | 0.011437 | 0.011567 | 0.011631 | 0.011496 | 0.011497 | 0.011533 |
| 0.011194 | 0.011362 | 0.011496 | 0.011463 | 0.011466 | 0.011463 | 0.011431 |
| 0.011295 | 0.011228 | 0.011262 | 0.011295 | 0.011194 | 0.011262 | 0.011161 |
| 0.011295 | 0.011329 | 0.011228 | 0.011194 | 0.011295 | 0.011228 | 0.011262 |
| 0.011262 | 0.011194 | 0.011262 | 0.011295 | 0.011194 | 0.011396 | 0.011429 |
| 0.011329 | 0.011396 | 0.011329 | 0.011329 | 0.011262 | 0.011664 | 0.011295 |
| 0.011338 | 0.011262 | 0.011497 | 0.011501 | 0.011362 | 0.011362 | 0.011362 |
| 0.011362 | 0.011295 | 0.011262 | 0.011295 | 0.011396 | 0.011396 | 0.011329 |
| 0.011329 | 0.011463 | 0.011631 | 0.011362 | 0.011564 | 0.011564 | 0.011429 |
| 0.011262 | 0.011329 | 0.011362 | 0.011765 | 0.011329 | 0.011362 | 0.011329 |
| 0.011362 | 0.011295 | 0.011295 | 0.011597 | 0.011530 | 0.011564 | 0.011295 |
| 0.011396 | 0.011463 | 0.011329 | 0.011396 | 0.011362 | 0.011228 | 0.011564 |
| 0.011329 | 0.011295 | 0.011295 | 0.011463 | 0.011295 | 0.011396 | 0.011631 |

|          |          |          |          |          |          |          |
|----------|----------|----------|----------|----------|----------|----------|
| 0.011329 | 0.011705 | 0.011698 | 0.011507 | 0.011286 | 0.011400 | 0.011318 |
| 0.011225 | 0.011722 | 0.011236 | 0.011462 | 0.011304 | 0.011366 | 0.011432 |
| 0.011519 | 0.011258 | 0.011394 | 0.011258 | 0.011276 | 0.011462 | 0.011385 |
| 0.011399 | 0.011296 | 0.011377 | 0.011307 | 0.011330 | 0.011463 | 0.011530 |
| 0.011530 | 0.011329 | 0.011432 | 0.011501 | 0.011636 | 0.011590 | 0.011329 |
| 0.011564 | 0.011362 | 0.011295 | 0.011329 | 0.011195 | 0.011429 | 0.011228 |
| 0.011295 | 0.011295 | 0.011262 | 0.011228 | 0.011262 | 0.011228 | 0.011329 |
| 0.011305 | 0.011270 | 0.011300 | 0.011334 | 0.011471 | 0.011436 | 0.011436 |
| 0.011435 | 0.011363 | 0.011171 | 0.011168 | 0.011297 | 0.011467 | 0.011467 |
| 0.011262 | 0.011331 | 0.011565 | 0.011533 | 0.011464 | 0.011498 | 0.011429 |
| 0.011362 | 0.011429 | 0.011429 | 0.011329 | 0.011900 | 0.011496 | 0.011564 |
| 0.011597 | 0.011665 | 0.011299 | 0.011372 | 0.011262 | 0.011463 | 0.011429 |
| 0.011464 | 0.011496 | 0.011496 | 0.011496 | 0.011610 | 0.011631 | 0.011268 |
| 0.011162 | 0.011164 | 0.011264 | 0.011230 | 0.011333 | 0.011172 | 0.011502 |
| 0.011300 | 0.011367 | 0.011108 | 0.011285 | 0.011296 | 0.011368 | 0.011262 |
| 0.011228 | 0.011228 | 0.011295 | 0.011262 | 0.011463 | 0.011429 | 0.011362 |
| 0.011463 | 0.011530 | 0.011262 | 0.011262 | 0.011295 | 0.011295 | 0.011297 |
| 0.011364 | 0.011295 | 0.011295 | 0.011330 | 0.011463 | 0.011530 | 0.011530 |
| 0.011329 | 0.011432 | 0.011501 | 0.011636 | 0.011590 | 0.011329 | 0.011496 |
| 0.011429 | 0.011429 | 0.011263 | 0.011443 | 0.011373 | 0.011401 | 0.011270 |
| 0.011439 | 0.011607 | 0.011441 | 0.011332 | 0.011228 | 0.011430 | 0.011295 |
| 0.011396 | 0.011329 | 0.011228 | 0.011330 | 0.011430 | 0.011432 | 0.011329 |
| 0.011228 | 0.011161 | 0.011295 | 0.011228 | 0.011161 | 0.011264 | 0.011430 |
| 0.011329 | 0.011262 | 0.011295 | 0.011329 | 0.011295 | 0.011228 | 0.011430 |
| 0.011295 | 0.011329 | 0.011329 | 0.011262 | 0.011329 | 0.011564 | 0.011228 |
| 0.011262 | 0.011664 | 0.011262 | 0.011295 | 0.011262 | 0.011631 | 0.011232 |
| 0.011735 | 0.011230 | 0.011311 | 0.011463 | 0.011549 | 0.011455 | 0.011186 |
| 0.011270 | 0.011429 | 0.011530 | 0.011637 | 0.011498 | 0.011635 | 0.011766 |
| 0.011666 | 0.011703 | 0.011664 | 0.011914 | 0.011631 | 0.012505 | 0.011666 |
| 0.012405 | 0.012173 | 0.012307 | 0.012578 | 0.011631 | 0.011329 | 0.011631 |
| 0.012070 | 0.012004 | 0.011597 | 0.011497 | 0.011565 | 0.011565 | 0.011534 |
| 0.011429 | 0.011433 | 0.011496 | 0.011464 | 0.011833 | 0.011900 | 0.011901 |
| 0.011800 | 0.011901 | 0.012004 | 0.011770 | 0.012070 | 0.012076 | 0.012137 |
| 0.012138 | 0.012171 | 0.012118 | 0.012138 | 0.012139 | 0.011362 | 0.011665 |
| 0.011733 | 0.012236 | 0.011738 | 0.011967 | 0.012440 | 0.011502 | 0.011396 |
| 0.011362 | 0.011362 | 0.011833 | 0.011800 | 0.011975 | 0.011698 | 0.011363 |
| S348     | 0.011732 | 0.011732 | 0.012068 | 0.011832 | 0.011832 | 0.011900 |
| 0.011739 | 0.011671 | 0.011899 | 0.011329 | 0.011396 | 0.011363 | 0.011329 |
| 0.011362 | 0.011530 | 0.011329 | 0.011362 | 0.011429 | 0.011396 | 0.011362 |
| 0.011329 | 0.011362 | 0.011463 | 0.011329 | 0.011329 | 0.011362 | 0.011705 |
| 0.011597 | 0.011362 | 0.011262 | 0.011496 | 0.011429 | 0.011396 | 0.011429 |
| 0.011396 | 0.011496 | 0.011396 | 0.011396 | 0.011429 | 0.011396 | 0.011564 |
| 0.011329 | 0.011396 | 0.011429 | 0.011362 | 0.011463 | 0.011496 | 0.011429 |
| 0.011396 | 0.011564 | 0.011463 | 0.011731 | 0.011396 | 0.011664 | 0.011396 |
| 0.011362 | 0.011463 | 0.011530 | 0.011664 | 0.011765 | 0.011463 | 0.011564 |
| 0.011429 | 0.011497 | 0.011396 | 0.011631 | 0.011866 | 0.011396 | 0.011463 |
| 0.011362 | 0.011463 | 0.011429 | 0.011496 | 0.011429 | 0.011429 | 0.011429 |
| 0.011329 | 0.011362 | 0.011329 | 0.011429 | 0.011396 | 0.011430 | 0.011496 |
| 0.011429 | 0.011396 | 0.011463 | 0.011362 | 0.011496 | 0.011329 | 0.011396 |
| 0.011564 | 0.011496 | 0.011731 | 0.011564 | 0.011396 | 0.011631 | 0.011396 |
| 0.011579 | 0.011807 | 0.011626 | 0.011334 | 0.011321 | 0.011428 | 0.011533 |
| 0.012158 | 0.011670 | 0.011348 | 0.011631 | 0.011631 | 0.011429 | 0.011530 |
| 0.011463 | 0.011429 | 0.011496 | 0.011396 | 0.011497 | 0.011429 | 0.011429 |
| 0.011396 | 0.011496 | 0.011698 | 0.011564 | 0.011463 | 0.011429 | 0.011362 |
| 0.011329 | 0.011329 | 0.011396 | 0.011362 | 0.011564 | 0.011530 | 0.011463 |
| 0.011564 | 0.011631 | 0.011362 | 0.011362 | 0.011396 | 0.011396 | 0.011398 |
| 0.011466 | 0.011396 | 0.011396 | 0.011276 | 0.011349 | 0.011306 | 0.011396 |
| 0.011399 | 0.011335 | 0.011392 | 0.011371 | 0.011298 | 0.011334 | 0.011364 |
| 0.011600 | 0.011405 | 0.011439 | 0.011329 | 0.011337 | 0.011464 | 0.011430 |
| 0.011497 | 0.011431 | 0.011430 | 0.011530 | 0.011463 | 0.011832 | 0.011631 |

|          |          |          |          |          |          |          |
|----------|----------|----------|----------|----------|----------|----------|
| 0.011664 | 0.011530 | 0.011396 | 0.011497 | 0.011295 | 0.011530 | 0.011329 |
| 0.011396 | 0.011396 | 0.011362 | 0.011329 | 0.011362 | 0.011329 | 0.011429 |
| 0.011396 | 0.011497 | 0.011430 | 0.011329 | 0.011431 | 0.011195 | 0.011533 |
| 0.011530 | 0.011430 | 0.011329 | 0.011263 | 0.011396 | 0.011329 | 0.011262 |
| 0.011366 | 0.011530 | 0.011329 | 0.011530 | 0.011295 | 0.011396 | 0.011362 |
| 0.011463 | 0.011362 | 0.011396 | 0.011362 | 0.011396 | 0.011262 | 0.011396 |
| 0.011430 | 0.011362 | 0.011430 | 0.011362 | 0.011396 | 0.011429 | 0.011665 |
| 0.011765 | 0.011698 | 0.011765 | 0.011532 | 0.011766 | 0.011396 | 0.011362 |
| 0.011398 | 0.011626 | 0.011426 | 0.011300 | 0.011773 | 0.011265 | 0.011375 |
| 0.011773 | 0.011672 | 0.011564 | 0.011765 | 0.011470 | 0.011631 | 0.011597 |
| 0.011530 | 0.011698 | 0.011522 | 0.011390 | 0.011395 | 0.011429 | 0.011500 |
| 0.011597 | 0.011499 | 0.011635 | 0.011703 | 0.011631 | 0.011698 | 0.011805 |
| 0.011534 | 0.011705 | 0.011636 | 0.011567 | 0.011834 | 0.011295 | 0.011498 |
| 0.011463 | 0.011396 | 0.011295 | 0.011295 | 0.011362 | 0.011362 | 0.011429 |
| 0.011362 | 0.011429 | 0.011329 | 0.011429 | 0.011362 | 0.011362 | 0.011429 |
| 0.011362 | 0.011799 | 0.011698 | 0.011732 | 0.011262 | 0.011362 | 0.011396 |
| 0.011396 | 0.011362 | 0.011429 | 0.011463 | 0.011329 | 0.011329 | 0.011329 |
| 0.011866 | 0.011496 | 0.011496 | 0.011295 | 0.011396 | 0.011564 | 0.011329 |
| 0.011329 | 0.011396 | 0.011362 | 0.011530 | 0.011329 | 0.011463 | 0.011597 |
| 0.011530 | 0.011362 | 0.011362 | 0.011295 | 0.011295 | 0.011463 | 0.011396 |
| 0.011295 | 0.011396 | 0.011262 | 0.011295 | 0.011429 | 0.011564 | 0.011329 |
| 0.011295 | 0.011429 | 0.011363 | 0.011262 | 0.011597 | 0.011262 | 0.011429 |
| 0.011471 | 0.011329 | 0.011631 | 0.011463 | 0.011496 | 0.011362 | 0.011463 |
| 0.011329 | 0.011664 | 0.011262 | 0.011530 | 0.011329 | 0.011329 | 0.011262 |
| 0.011496 | 0.011698 | 0.011396 | 0.011463 | 0.011295 | 0.011698 | 0.011329 |
| 0.011329 | 0.011329 | 0.011362 | 0.011463 | 0.011362 | 0.000000 | 0.011530 |
| 0.011530 | 0.011496 | 0.011396 | 0.011497 | 0.011463 | 0.011329 | 0.011295 |
| 0.011329 | 0.011329 | 0.011396 | 0.011329 | 0.011295 | 0.011463 | 0.011329 |
| 0.011362 | 0.011362 | 0.011496 | 0.011530 | 0.011429 | 0.011362 | 0.011362 |
| 0.011429 | 0.011362 | 0.011463 | 0.011329 | 0.011463 | 0.011564 | 0.011866 |
| 0.011362 | 0.011765 | 0.011371 | 0.017861 | 0.011322 | 0.011488 | 0.011723 |
| 0.011683 | 0.011729 | 0.011427 | 0.011466 | 0.011884 | 0.011751 | 0.011485 |
| 0.011629 | 0.011671 | 0.011294 | 0.011353 | 0.011372 | 0.011455 | 0.011404 |
| 0.011670 | 0.011544 | 0.011542 | 0.011391 | 0.011497 | 0.011530 | 0.011534 |
| 0.011404 | 0.011497 | 0.011497 | 0.011463 | 0.011429 | 0.011430 | 0.011396 |
| 0.011429 | 0.011362 | 0.011396 | 0.011430 | 0.011396 | 0.011329 | 0.011362 |
| 0.011362 | 0.011430 | 0.011329 | 0.011430 | 0.011463 | 0.011497 | 0.011396 |
| 0.011429 | 0.011396 | 0.011732 | 0.011732 | 0.011463 | 0.011497 | 0.011530 |
| 0.011295 | 0.011295 | 0.011329 | 0.011430 | 0.011295 | 0.011530 | 0.011530 |
| 0.011564 | 0.011564 | 0.011497 | 0.011597 | 0.011765 | 0.011599 | 0.011429 |
| 0.011430 | 0.011497 | 0.011530 | 0.011362 | 0.011430 | 0.011396 | 0.011429 |
| 0.011497 | 0.011497 | 0.011530 | 0.011497 | 0.011397 | 0.011597 | 0.011564 |
| 0.011433 | 0.011329 | 0.011429 | 0.011530 | 0.011430 | 0.011564 | 0.011597 |
| 0.011765 | 0.011470 | 0.011631 | 0.011597 | 0.011530 | 0.011698 | 0.011329 |
| 0.011498 | 0.011396 | 0.011362 | 0.011362 | 0.011430 | 0.011329 | 0.011430 |
| 0.011463 | 0.011497 | 0.011396 | 0.011429 | 0.011396 | 0.011732 | 0.011732 |
| 0.011463 | 0.011497 | 0.011564 | 0.011496 | 0.012137 | 0.011560 | 0.011447 |
| 0.011552 | 0.011511 | 0.011587 | 0.011476 | 0.011620 | 0.011543 | 0.011508 |
| 0.012090 | 0.011406 | 0.011540 | 0.011475 | 0.011749 | 0.011604 | 0.011707 |
| 0.012080 | 0.011550 | 0.011669 | 0.011732 | 0.011597 | 0.011597 | 0.011635 |
| 0.011295 | 0.011463 | 0.011597 | 0.011564 | 0.011567 | 0.011564 | 0.011532 |
| 0.011396 | 0.011329 | 0.011362 | 0.011396 | 0.011295 | 0.011362 | 0.011262 |
| 0.011396 | 0.011429 | 0.011329 | 0.011295 | 0.011396 | 0.011329 | 0.011362 |
| 0.011362 | 0.011295 | 0.011362 | 0.011396 | 0.011295 | 0.011496 | 0.011530 |
| 0.011429 | 0.011496 | 0.011429 | 0.011429 | 0.011362 | 0.011765 | 0.011396 |
| 0.011443 | 0.011362 | 0.011598 | 0.011603 | 0.011463 | 0.011463 | 0.011463 |
| 0.011463 | 0.011396 | 0.011362 | 0.011396 | 0.011496 | 0.011496 | 0.011429 |
| 0.011429 | 0.011564 | 0.011731 | 0.011463 | 0.011664 | 0.011664 | 0.011530 |
| 0.011362 | 0.011429 | 0.011463 | 0.011866 | 0.011430 | 0.011463 | 0.011429 |
| 0.011463 | 0.011396 | 0.011396 | 0.011698 | 0.011631 | 0.011664 | 0.011396 |

|          |          |          |          |          |          |          |
|----------|----------|----------|----------|----------|----------|----------|
| 0.011497 | 0.011564 | 0.011429 | 0.011497 | 0.011463 | 0.011329 | 0.011664 |
| 0.011429 | 0.011396 | 0.011396 | 0.011564 | 0.011396 | 0.011496 | 0.011732 |
| 0.011429 | 0.011807 | 0.011799 | 0.011629 | 0.011399 | 0.011502 | 0.011421 |
| 0.011390 | 0.011839 | 0.011341 | 0.011551 | 0.011402 | 0.011518 | 0.011538 |
| 0.011672 | 0.011324 | 0.011506 | 0.011324 | 0.011384 | 0.011529 | 0.011506 |
| 0.011512 | 0.011414 | 0.011483 | 0.011412 | 0.011397 | 0.011564 | 0.011631 |
| 0.011631 | 0.011497 | 0.011601 | 0.011603 | 0.011704 | 0.011732 | 0.011429 |
| 0.011664 | 0.011530 | 0.011396 | 0.011497 | 0.011295 | 0.011530 | 0.011329 |
| 0.011396 | 0.011396 | 0.011362 | 0.011329 | 0.011362 | 0.011329 | 0.011429 |
| 0.011409 | 0.011410 | 0.011403 | 0.011437 | 0.011573 | 0.011538 | 0.011538 |
| 0.011537 | 0.011464 | 0.011282 | 0.011276 | 0.011399 | 0.011568 | 0.011569 |
| 0.011363 | 0.011433 | 0.011666 | 0.011635 | 0.011565 | 0.011599 | 0.011530 |
| 0.011463 | 0.011530 | 0.011530 | 0.011429 | 0.012001 | 0.011597 | 0.011665 |
| 0.011698 | 0.011772 | 0.011401 | 0.011476 | 0.011362 | 0.011564 | 0.011530 |
| 0.011565 | 0.011597 | 0.011597 | 0.011597 | 0.011728 | 0.011732 | 0.011372 |
| 0.011263 | 0.011268 | 0.011367 | 0.011332 | 0.011436 | 0.011284 | 0.011604 |
| 0.011403 | 0.011543 | 0.011203 | 0.011397 | 0.011396 | 0.011471 | 0.011362 |
| 0.011329 | 0.011329 | 0.011396 | 0.011362 | 0.011564 | 0.011530 | 0.011463 |
| 0.011564 | 0.011631 | 0.011362 | 0.011362 | 0.011396 | 0.011396 | 0.011398 |
| 0.011466 | 0.011396 | 0.011396 | 0.011397 | 0.011564 | 0.011631 | 0.011631 |
| 0.011497 | 0.011601 | 0.011603 | 0.011704 | 0.011732 | 0.011429 | 0.011597 |
| 0.011530 | 0.011530 | 0.011365 | 0.011547 | 0.011477 | 0.011503 | 0.011340 |
| 0.011542 | 0.011698 | 0.011526 | 0.011434 | 0.011329 | 0.011530 | 0.011396 |
| 0.011497 | 0.011430 | 0.011329 | 0.011431 | 0.011195 | 0.011533 | 0.011430 |
| 0.011329 | 0.011263 | 0.011396 | 0.011329 | 0.011262 | 0.011366 | 0.011530 |
| 0.011429 | 0.011362 | 0.011396 | 0.011430 | 0.011396 | 0.011329 | 0.011530 |
| 0.011396 | 0.011429 | 0.011429 | 0.011362 | 0.011429 | 0.011664 | 0.011329 |
| 0.011362 | 0.011765 | 0.011362 | 0.011396 | 0.011362 | 0.011731 | 0.011360 |
| 0.011847 | 0.011358 | 0.011461 | 0.011584 | 0.011671 | 0.011563 | 0.011311 |
| 0.011427 | 0.011530 | 0.011631 | 0.011739 | 0.011599 | 0.011737 | 0.011867 |
| 0.011767 | 0.011804 | 0.011765 | 0.012017 | 0.011732 | 0.012606 | 0.011768 |
| 0.012507 | 0.012274 | 0.012408 | 0.012680 | 0.011731 | 0.011430 | 0.011732 |
| 0.012171 | 0.012106 | 0.011698 | 0.011597 | 0.011665 | 0.011665 | 0.011635 |
| 0.011530 | 0.011535 | 0.011597 | 0.011565 | 0.011935 | 0.012001 | 0.012002 |
| 0.011901 | 0.012002 | 0.012106 | 0.011872 | 0.012171 | 0.012178 | 0.012238 |
| 0.012239 | 0.012273 | 0.012221 | 0.012239 | 0.012241 | 0.011463 | 0.011766 |
| 0.011834 | 0.012337 | 0.011840 | 0.012068 | 0.012541 | 0.011604 | 0.011497 |
| 0.011463 | 0.011463 | 0.011934 | 0.011924 | 0.012045 | 0.011799 | 0.011465 |
| S349     | 0.011799 | 0.011799 | 0.012135 | 0.011900 | 0.011900 | 0.011967 |
| 0.011807 | 0.011739 | 0.011967 | 0.011396 | 0.011463 | 0.011430 | 0.011396 |
| 0.011429 | 0.011597 | 0.011396 | 0.011429 | 0.011496 | 0.011463 | 0.011429 |
| 0.011396 | 0.011429 | 0.011530 | 0.011396 | 0.011430 | 0.011429 | 0.011773 |
| 0.011664 | 0.011429 | 0.011329 | 0.011564 | 0.011496 | 0.011463 | 0.011497 |
| 0.011463 | 0.011564 | 0.011463 | 0.011463 | 0.011496 | 0.011463 | 0.011631 |
| 0.011396 | 0.011463 | 0.011496 | 0.011429 | 0.011530 | 0.011564 | 0.011496 |
| 0.011463 | 0.011631 | 0.011530 | 0.011799 | 0.011463 | 0.011731 | 0.011463 |
| 0.011429 | 0.011530 | 0.011597 | 0.011731 | 0.011832 | 0.011530 | 0.011631 |
| 0.011496 | 0.011564 | 0.011463 | 0.011698 | 0.011933 | 0.011463 | 0.011530 |
| 0.011429 | 0.011530 | 0.011497 | 0.011564 | 0.011496 | 0.011496 | 0.011496 |
| 0.011396 | 0.011429 | 0.011396 | 0.011497 | 0.011463 | 0.011498 | 0.011564 |
| 0.011497 | 0.011463 | 0.011530 | 0.011429 | 0.011564 | 0.011396 | 0.011463 |
| 0.011631 | 0.011564 | 0.011799 | 0.011631 | 0.011463 | 0.011698 | 0.011463 |
| 0.011653 | 0.011882 | 0.011702 | 0.011373 | 0.011396 | 0.011502 | 0.011611 |
| 0.012231 | 0.011620 | 0.011431 | 0.011698 | 0.011698 | 0.011496 | 0.011597 |
| 0.011530 | 0.011496 | 0.011564 | 0.011463 | 0.011564 | 0.011496 | 0.011496 |
| 0.011463 | 0.011564 | 0.011765 | 0.011631 | 0.011530 | 0.011497 | 0.011430 |
| 0.011396 | 0.011396 | 0.011463 | 0.011429 | 0.011631 | 0.011597 | 0.011530 |
| 0.011631 | 0.011698 | 0.011429 | 0.011429 | 0.011463 | 0.011463 | 0.011465 |
| 0.011533 | 0.011463 | 0.011463 | 0.011312 | 0.011422 | 0.011341 | 0.011464 |
| 0.011467 | 0.011404 | 0.011429 | 0.011440 | 0.011366 | 0.011403 | 0.011432 |

|          |          |          |          |          |          |          |
|----------|----------|----------|----------|----------|----------|----------|
| 0.011672 | 0.011439 | 0.011508 | 0.011396 | 0.011337 | 0.011531 | 0.011497 |
| 0.011565 | 0.011498 | 0.011497 | 0.011597 | 0.011530 | 0.011900 | 0.011698 |
| 0.011731 | 0.011597 | 0.011463 | 0.011564 | 0.011362 | 0.011597 | 0.011396 |
| 0.011463 | 0.011463 | 0.011429 | 0.011396 | 0.011429 | 0.011396 | 0.011497 |
| 0.011463 | 0.011564 | 0.011497 | 0.011396 | 0.011498 | 0.011597 | 0.011601 |
| 0.011598 | 0.011497 | 0.011396 | 0.011330 | 0.011463 | 0.011396 | 0.011329 |
| 0.011434 | 0.011598 | 0.011396 | 0.011598 | 0.011362 | 0.011463 | 0.011430 |
| 0.011530 | 0.011429 | 0.011463 | 0.011430 | 0.011463 | 0.011329 | 0.011463 |
| 0.011497 | 0.011429 | 0.011497 | 0.011429 | 0.011463 | 0.011497 | 0.011732 |
| 0.011833 | 0.011765 | 0.011833 | 0.011599 | 0.011833 | 0.011463 | 0.011429 |
| 0.011466 | 0.011788 | 0.011655 | 0.011369 | 0.011841 | 0.011333 | 0.011454 |
| 0.011841 | 0.011740 | 0.011631 | 0.011832 | 0.011538 | 0.011698 | 0.011665 |
| 0.011597 | 0.011765 | 0.011629 | 0.011472 | 0.011521 | 0.011497 | 0.011568 |
| 0.011665 | 0.011566 | 0.011703 | 0.011771 | 0.011698 | 0.011765 | 0.011873 |
| 0.011602 | 0.011773 | 0.011703 | 0.011635 | 0.011901 | 0.011362 | 0.011566 |
| 0.011530 | 0.011463 | 0.011362 | 0.011362 | 0.011429 | 0.011429 | 0.011496 |
| 0.011429 | 0.011497 | 0.011396 | 0.011496 | 0.011429 | 0.011429 | 0.011496 |
| 0.011429 | 0.011866 | 0.011765 | 0.011799 | 0.011329 | 0.011429 | 0.011463 |
| 0.011463 | 0.011429 | 0.011497 | 0.011530 | 0.011396 | 0.011396 | 0.011396 |
| 0.011933 | 0.011564 | 0.011564 | 0.011362 | 0.011463 | 0.011631 | 0.011396 |
| 0.011396 | 0.011463 | 0.011429 | 0.011597 | 0.011396 | 0.011530 | 0.011664 |
| 0.011597 | 0.011429 | 0.011429 | 0.011362 | 0.011362 | 0.011530 | 0.011463 |
| 0.011362 | 0.011463 | 0.011329 | 0.011362 | 0.011497 | 0.011631 | 0.011396 |
| 0.011363 | 0.011496 | 0.011430 | 0.011329 | 0.011664 | 0.011329 | 0.011497 |
| 0.011574 | 0.011396 | 0.011698 | 0.011530 | 0.011564 | 0.011429 | 0.011530 |
| 0.011396 | 0.011731 | 0.011329 | 0.011597 | 0.011396 | 0.011396 | 0.011329 |
| 0.011564 | 0.011766 | 0.011463 | 0.011530 | 0.011362 | 0.011765 | 0.011396 |
| 0.011396 | 0.011396 | 0.011429 | 0.011530 | 0.011429 | 0.011530 | 0.000000 |
| 0.011597 | 0.011564 | 0.011463 | 0.011564 | 0.011530 | 0.011396 | 0.011362 |
| 0.011396 | 0.011396 | 0.011463 | 0.011396 | 0.011362 | 0.011530 | 0.011396 |
| 0.011429 | 0.011429 | 0.011564 | 0.011597 | 0.011496 | 0.011429 | 0.011429 |
| 0.011496 | 0.011429 | 0.011530 | 0.011396 | 0.011530 | 0.011631 | 0.011933 |
| 0.011429 | 0.011832 | 0.011440 | 0.017974 | 0.011518 | 0.011611 | 0.011793 |
| 0.011752 | 0.011799 | 0.011532 | 0.011350 | 0.011939 | 0.011751 | 0.011607 |
| 0.011724 | 0.011793 | 0.011372 | 0.011479 | 0.011451 | 0.011554 | 0.011404 |
| 0.011670 | 0.011619 | 0.011616 | 0.011325 | 0.011564 | 0.011597 | 0.011601 |
| 0.011472 | 0.011564 | 0.011564 | 0.011530 | 0.011497 | 0.011497 | 0.011463 |
| 0.011497 | 0.011429 | 0.011463 | 0.011497 | 0.011463 | 0.011396 | 0.011429 |
| 0.011429 | 0.011497 | 0.011396 | 0.011497 | 0.011530 | 0.011564 | 0.011463 |
| 0.011496 | 0.011463 | 0.011799 | 0.011799 | 0.011530 | 0.011565 | 0.011598 |
| 0.011362 | 0.011362 | 0.011396 | 0.011497 | 0.011362 | 0.011597 | 0.011597 |
| 0.011631 | 0.011631 | 0.011564 | 0.011664 | 0.011833 | 0.011666 | 0.011497 |
| 0.011497 | 0.011564 | 0.011597 | 0.011430 | 0.011497 | 0.011463 | 0.011497 |
| 0.011564 | 0.011564 | 0.011597 | 0.011564 | 0.011464 | 0.011665 | 0.011631 |
| 0.011500 | 0.011396 | 0.011497 | 0.011598 | 0.011497 | 0.011631 | 0.011664 |
| 0.011832 | 0.011538 | 0.011698 | 0.011665 | 0.011597 | 0.011765 | 0.011396 |
| 0.011566 | 0.011464 | 0.011429 | 0.011429 | 0.011497 | 0.011396 | 0.011497 |
| 0.011530 | 0.011564 | 0.011463 | 0.011496 | 0.011463 | 0.011799 | 0.011799 |
| 0.011530 | 0.011565 | 0.011631 | 0.011564 | 0.012204 | 0.011632 | 0.011552 |
| 0.011623 | 0.011580 | 0.011622 | 0.011580 | 0.011690 | 0.011612 | 0.011577 |
| 0.012159 | 0.011475 | 0.011608 | 0.011544 | 0.011818 | 0.011672 | 0.011775 |
| 0.012182 | 0.011663 | 0.011736 | 0.011799 | 0.011664 | 0.011664 | 0.011702 |
| 0.011362 | 0.011530 | 0.011664 | 0.011631 | 0.011635 | 0.011631 | 0.011599 |
| 0.011463 | 0.011396 | 0.011429 | 0.011463 | 0.011362 | 0.011429 | 0.011329 |
| 0.011463 | 0.011496 | 0.011329 | 0.011362 | 0.011463 | 0.011396 | 0.011429 |
| 0.011429 | 0.011362 | 0.011429 | 0.011463 | 0.011362 | 0.011564 | 0.011597 |
| 0.011497 | 0.011564 | 0.011496 | 0.011497 | 0.011429 | 0.011832 | 0.011463 |
| 0.011512 | 0.011429 | 0.011665 | 0.011671 | 0.011530 | 0.011530 | 0.011530 |
| 0.011530 | 0.011463 | 0.011429 | 0.011463 | 0.011564 | 0.011564 | 0.011496 |
| 0.011496 | 0.011631 | 0.011799 | 0.011530 | 0.011732 | 0.011732 | 0.011597 |

|          |          |          |          |          |          |          |
|----------|----------|----------|----------|----------|----------|----------|
| 0.011429 | 0.011228 | 0.011530 | 0.011933 | 0.011497 | 0.011530 | 0.011497 |
| 0.011530 | 0.011463 | 0.011463 | 0.011765 | 0.011698 | 0.011732 | 0.011463 |
| 0.011564 | 0.011631 | 0.011496 | 0.011564 | 0.011530 | 0.011396 | 0.011731 |
| 0.011496 | 0.011463 | 0.011463 | 0.011631 | 0.011463 | 0.011564 | 0.011799 |
| 0.011496 | 0.011875 | 0.011866 | 0.011711 | 0.011342 | 0.011570 | 0.011473 |
| 0.011390 | 0.011917 | 0.011411 | 0.011686 | 0.011499 | 0.011620 | 0.011644 |
| 0.011723 | 0.011455 | 0.011561 | 0.011324 | 0.011330 | 0.011596 | 0.011587 |
| 0.011588 | 0.011493 | 0.011553 | 0.011483 | 0.011498 | 0.011631 | 0.011698 |
| 0.011698 | 0.011564 | 0.011669 | 0.011670 | 0.011806 | 0.011838 | 0.011497 |
| 0.011731 | 0.011597 | 0.011463 | 0.011564 | 0.011362 | 0.011597 | 0.011396 |
| 0.011463 | 0.011463 | 0.011429 | 0.011396 | 0.011429 | 0.011396 | 0.011497 |
| 0.011479 | 0.011445 | 0.011471 | 0.011505 | 0.011642 | 0.011607 | 0.011572 |
| 0.011605 | 0.011531 | 0.011319 | 0.011312 | 0.011467 | 0.011636 | 0.011637 |
| 0.011430 | 0.011500 | 0.011734 | 0.011702 | 0.011632 | 0.011666 | 0.011597 |
| 0.011530 | 0.011597 | 0.011597 | 0.011429 | 0.012068 | 0.011664 | 0.011732 |
| 0.011766 | 0.011843 | 0.011469 | 0.011545 | 0.011429 | 0.011631 | 0.011597 |
| 0.011632 | 0.011664 | 0.011664 | 0.011664 | 0.011846 | 0.011799 | 0.011442 |
| 0.011331 | 0.011337 | 0.011435 | 0.011400 | 0.011504 | 0.011359 | 0.011672 |
| 0.011472 | 0.011674 | 0.011441 | 0.011510 | 0.011464 | 0.011471 | 0.011430 |
| 0.011396 | 0.011396 | 0.011463 | 0.011429 | 0.011631 | 0.011597 | 0.011530 |
| 0.011631 | 0.011698 | 0.011429 | 0.011429 | 0.011463 | 0.011463 | 0.011465 |
| 0.011533 | 0.011463 | 0.011463 | 0.011498 | 0.011631 | 0.011698 | 0.011698 |
| 0.011564 | 0.011669 | 0.011670 | 0.011806 | 0.011838 | 0.011497 | 0.011664 |
| 0.011597 | 0.011597 | 0.011432 | 0.011617 | 0.011547 | 0.011571 | 0.011411 |
| 0.011611 | 0.011789 | 0.011611 | 0.011502 | 0.011396 | 0.011598 | 0.011463 |
| 0.011564 | 0.011497 | 0.011396 | 0.011498 | 0.011597 | 0.011601 | 0.011497 |
| 0.011396 | 0.011330 | 0.011463 | 0.011396 | 0.011329 | 0.011434 | 0.011598 |
| 0.011497 | 0.011429 | 0.011463 | 0.011497 | 0.011463 | 0.011396 | 0.011598 |
| 0.011463 | 0.011497 | 0.011496 | 0.011429 | 0.011496 | 0.011732 | 0.011396 |
| 0.011429 | 0.011832 | 0.011429 | 0.011463 | 0.011429 | 0.011799 | 0.011446 |
| 0.011960 | 0.011443 | 0.011461 | 0.011664 | 0.011752 | 0.011634 | 0.011353 |
| 0.011375 | 0.011597 | 0.011698 | 0.011807 | 0.011666 | 0.011805 | 0.011935 |
| 0.011834 | 0.011872 | 0.011832 | 0.012086 | 0.011799 | 0.012674 | 0.011835 |
| 0.012574 | 0.012342 | 0.012476 | 0.012748 | 0.011799 | 0.011497 | 0.011799 |
| 0.012238 | 0.012173 | 0.011765 | 0.011665 | 0.011733 | 0.011733 | 0.011703 |
| 0.011597 | 0.011603 | 0.011664 | 0.011632 | 0.012002 | 0.012068 | 0.012069 |
| 0.011969 | 0.012069 | 0.012173 | 0.011940 | 0.012239 | 0.012246 | 0.012306 |
| 0.012307 | 0.012340 | 0.012289 | 0.012307 | 0.012308 | 0.011530 | 0.011833 |
| 0.011901 | 0.012404 | 0.011908 | 0.012135 | 0.012609 | 0.011672 | 0.011564 |
| 0.011530 | 0.011530 | 0.012001 | 0.012006 | 0.012151 | 0.011866 | 0.011532 |
| S350     | 0.011799 | 0.011799 | 0.012135 | 0.011900 | 0.011900 | 0.011967 |
| 0.011807 | 0.011739 | 0.011967 | 0.011396 | 0.011463 | 0.011430 | 0.011396 |
| 0.011429 | 0.011597 | 0.011396 | 0.011429 | 0.011496 | 0.011463 | 0.011429 |
| 0.011396 | 0.011429 | 0.011530 | 0.011396 | 0.011430 | 0.011429 | 0.011773 |
| 0.011664 | 0.011429 | 0.011329 | 0.011564 | 0.011497 | 0.011463 | 0.011497 |
| 0.011463 | 0.011496 | 0.011463 | 0.011463 | 0.011496 | 0.011262 | 0.011631 |
| 0.011396 | 0.011463 | 0.011497 | 0.011429 | 0.011530 | 0.011564 | 0.011497 |
| 0.011463 | 0.011631 | 0.011530 | 0.011799 | 0.011463 | 0.011732 | 0.011463 |
| 0.011429 | 0.011530 | 0.011597 | 0.011732 | 0.011832 | 0.011530 | 0.011631 |
| 0.011496 | 0.011497 | 0.011463 | 0.011631 | 0.011933 | 0.011463 | 0.011530 |
| 0.011429 | 0.011530 | 0.011497 | 0.011564 | 0.011496 | 0.011497 | 0.011497 |
| 0.011396 | 0.011429 | 0.011396 | 0.011497 | 0.011463 | 0.011430 | 0.011564 |
| 0.011497 | 0.011463 | 0.011530 | 0.011429 | 0.011564 | 0.011396 | 0.011463 |
| 0.011631 | 0.011564 | 0.011799 | 0.011094 | 0.011463 | 0.011698 | 0.011463 |
| 0.011505 | 0.011882 | 0.011664 | 0.011334 | 0.011359 | 0.011355 | 0.011572 |
| 0.012195 | 0.011620 | 0.011390 | 0.011698 | 0.011698 | 0.011496 | 0.011597 |
| 0.011530 | 0.011496 | 0.011564 | 0.011463 | 0.011564 | 0.011497 | 0.011496 |
| 0.011463 | 0.011564 | 0.011765 | 0.011631 | 0.011530 | 0.011497 | 0.011430 |
| 0.011396 | 0.011396 | 0.011463 | 0.011430 | 0.011631 | 0.011597 | 0.011530 |
| 0.011631 | 0.011698 | 0.011429 | 0.011429 | 0.011463 | 0.011463 | 0.011465 |

|          |          |          |          |          |          |          |
|----------|----------|----------|----------|----------|----------|----------|
| 0.011533 | 0.011463 | 0.011463 | 0.011312 | 0.011386 | 0.011341 | 0.011464 |
| 0.011230 | 0.011370 | 0.011429 | 0.011405 | 0.011366 | 0.011369 | 0.011398 |
| 0.011672 | 0.011439 | 0.011474 | 0.011396 | 0.011371 | 0.011498 | 0.011497 |
| 0.011565 | 0.011465 | 0.011497 | 0.011597 | 0.011530 | 0.011900 | 0.011698 |
| 0.011731 | 0.011598 | 0.011463 | 0.011564 | 0.011362 | 0.011597 | 0.011396 |
| 0.011463 | 0.011463 | 0.011430 | 0.011396 | 0.011429 | 0.011396 | 0.011497 |
| 0.011463 | 0.011564 | 0.011497 | 0.011396 | 0.011498 | 0.011598 | 0.011601 |
| 0.011598 | 0.011497 | 0.011396 | 0.011330 | 0.011463 | 0.011396 | 0.011329 |
| 0.011400 | 0.011598 | 0.011396 | 0.011598 | 0.011362 | 0.011463 | 0.011430 |
| 0.011530 | 0.011429 | 0.011463 | 0.011430 | 0.011463 | 0.011329 | 0.011463 |
| 0.011497 | 0.011430 | 0.011497 | 0.011429 | 0.011463 | 0.011497 | 0.011732 |
| 0.011833 | 0.011765 | 0.011833 | 0.011600 | 0.011833 | 0.011463 | 0.011430 |
| 0.011432 | 0.011748 | 0.011472 | 0.011369 | 0.011841 | 0.011299 | 0.011414 |
| 0.011841 | 0.011740 | 0.011631 | 0.011833 | 0.011538 | 0.011698 | 0.011665 |
| 0.011597 | 0.011765 | 0.011629 | 0.011472 | 0.011563 | 0.011497 | 0.011568 |
| 0.011665 | 0.011566 | 0.011703 | 0.011771 | 0.011698 | 0.011765 | 0.011873 |
| 0.011602 | 0.011773 | 0.011703 | 0.011432 | 0.011901 | 0.011362 | 0.011566 |
| 0.011530 | 0.011463 | 0.011362 | 0.011362 | 0.011429 | 0.011429 | 0.011496 |
| 0.011429 | 0.011497 | 0.011396 | 0.011497 | 0.011429 | 0.011429 | 0.011496 |
| 0.011429 | 0.011866 | 0.011765 | 0.011799 | 0.011329 | 0.011429 | 0.011463 |
| 0.011463 | 0.011429 | 0.011497 | 0.011530 | 0.011396 | 0.011396 | 0.011396 |
| 0.011933 | 0.011564 | 0.011564 | 0.011362 | 0.011463 | 0.011564 | 0.011396 |
| 0.011396 | 0.011463 | 0.011429 | 0.011597 | 0.011396 | 0.011530 | 0.011664 |
| 0.011597 | 0.011429 | 0.011429 | 0.011362 | 0.011362 | 0.011530 | 0.011463 |
| 0.011362 | 0.011463 | 0.011329 | 0.011362 | 0.011295 | 0.011631 | 0.011396 |
| 0.011363 | 0.011295 | 0.011430 | 0.011329 | 0.011664 | 0.011329 | 0.011497 |
| 0.011574 | 0.011396 | 0.011698 | 0.011530 | 0.011429 | 0.011429 | 0.011530 |
| 0.011396 | 0.011732 | 0.011329 | 0.011597 | 0.011396 | 0.011396 | 0.011329 |
| 0.011564 | 0.011766 | 0.011463 | 0.011530 | 0.011362 | 0.011765 | 0.011396 |
| 0.011396 | 0.011396 | 0.011429 | 0.011463 | 0.011429 | 0.011530 | 0.011597 |
| 0.000000 | 0.011564 | 0.011463 | 0.011564 | 0.011530 | 0.011396 | 0.011362 |
| 0.011396 | 0.011396 | 0.011463 | 0.011396 | 0.011362 | 0.011530 | 0.011396 |
| 0.011429 | 0.011429 | 0.011564 | 0.011597 | 0.011496 | 0.011429 | 0.011430 |
| 0.011497 | 0.011429 | 0.011530 | 0.011396 | 0.011530 | 0.011631 | 0.011933 |
| 0.011429 | 0.011832 | 0.011440 | 0.017974 | 0.011257 | 0.011549 | 0.011793 |
| 0.011752 | 0.011799 | 0.011427 | 0.011466 | 0.011885 | 0.011820 | 0.011485 |
| 0.011630 | 0.011671 | 0.011333 | 0.011437 | 0.011373 | 0.011455 | 0.011404 |
| 0.011623 | 0.011582 | 0.011579 | 0.011325 | 0.011564 | 0.011597 | 0.011601 |
| 0.011472 | 0.011564 | 0.011564 | 0.011530 | 0.011497 | 0.011497 | 0.011463 |
| 0.011497 | 0.011429 | 0.011463 | 0.011497 | 0.011463 | 0.011396 | 0.011429 |
| 0.011429 | 0.011497 | 0.011396 | 0.011497 | 0.011530 | 0.011362 | 0.011463 |
| 0.011497 | 0.011463 | 0.011799 | 0.011799 | 0.011530 | 0.011565 | 0.011598 |
| 0.011362 | 0.011362 | 0.011396 | 0.011497 | 0.011362 | 0.011597 | 0.011597 |
| 0.011631 | 0.011631 | 0.011564 | 0.011665 | 0.011833 | 0.011666 | 0.011497 |
| 0.011497 | 0.011564 | 0.011598 | 0.011430 | 0.011497 | 0.011463 | 0.011497 |
| 0.011564 | 0.011564 | 0.011597 | 0.011564 | 0.011464 | 0.011665 | 0.011631 |
| 0.011500 | 0.011396 | 0.011497 | 0.011598 | 0.011497 | 0.011631 | 0.011664 |
| 0.011833 | 0.011538 | 0.011698 | 0.011665 | 0.011597 | 0.011765 | 0.011396 |
| 0.011566 | 0.011464 | 0.011429 | 0.011429 | 0.011497 | 0.011396 | 0.011497 |
| 0.011530 | 0.011362 | 0.011463 | 0.011497 | 0.011463 | 0.011799 | 0.011799 |
| 0.011530 | 0.011565 | 0.011631 | 0.011564 | 0.012204 | 0.011632 | 0.011553 |
| 0.011412 | 0.011580 | 0.011693 | 0.011580 | 0.011690 | 0.011612 | 0.011577 |
| 0.012159 | 0.011475 | 0.011608 | 0.011544 | 0.011818 | 0.011672 | 0.011775 |
| 0.012182 | 0.011663 | 0.011736 | 0.011799 | 0.011664 | 0.011664 | 0.011702 |
| 0.011362 | 0.011530 | 0.011664 | 0.011631 | 0.011635 | 0.011631 | 0.011599 |
| 0.011463 | 0.011396 | 0.011429 | 0.011463 | 0.011362 | 0.011429 | 0.011329 |
| 0.011396 | 0.011429 | 0.011396 | 0.011362 | 0.011463 | 0.011396 | 0.011429 |
| 0.011429 | 0.011362 | 0.011429 | 0.011463 | 0.011362 | 0.011496 | 0.011463 |
| 0.011295 | 0.011429 | 0.011295 | 0.011429 | 0.011429 | 0.011832 | 0.011463 |
| 0.011512 | 0.011429 | 0.011665 | 0.011671 | 0.011530 | 0.011530 | 0.011530 |

|          |          |          |          |          |          |          |
|----------|----------|----------|----------|----------|----------|----------|
| 0.011530 | 0.011463 | 0.011429 | 0.011463 | 0.011564 | 0.011564 | 0.011497 |
| 0.011496 | 0.011631 | 0.011799 | 0.011530 | 0.011732 | 0.011732 | 0.011597 |
| 0.011429 | 0.011497 | 0.011530 | 0.011933 | 0.011497 | 0.011530 | 0.011497 |
| 0.011530 | 0.011463 | 0.011463 | 0.011765 | 0.011698 | 0.011732 | 0.011463 |
| 0.011564 | 0.011631 | 0.011496 | 0.011564 | 0.011530 | 0.011396 | 0.011732 |
| 0.011496 | 0.011463 | 0.011463 | 0.011631 | 0.011463 | 0.011564 | 0.011799 |
| 0.011496 | 0.011875 | 0.011866 | 0.011670 | 0.011399 | 0.011570 | 0.011422 |
| 0.011335 | 0.011878 | 0.011411 | 0.011552 | 0.011499 | 0.011519 | 0.011485 |
| 0.011570 | 0.011258 | 0.011450 | 0.011258 | 0.011384 | 0.011462 | 0.011587 |
| 0.011588 | 0.011493 | 0.011553 | 0.011483 | 0.011498 | 0.011631 | 0.011698 |
| 0.011698 | 0.011565 | 0.011669 | 0.011670 | 0.011806 | 0.011838 | 0.011497 |
| 0.011731 | 0.011598 | 0.011463 | 0.011564 | 0.011362 | 0.011597 | 0.011396 |
| 0.011463 | 0.011463 | 0.011430 | 0.011396 | 0.011429 | 0.011396 | 0.011497 |
| 0.011444 | 0.011445 | 0.011437 | 0.011471 | 0.011608 | 0.011573 | 0.011572 |
| 0.011571 | 0.011531 | 0.011319 | 0.011312 | 0.011433 | 0.011602 | 0.011603 |
| 0.011397 | 0.011467 | 0.011700 | 0.011669 | 0.011598 | 0.011632 | 0.011597 |
| 0.011530 | 0.011597 | 0.011597 | 0.011497 | 0.012068 | 0.011664 | 0.011732 |
| 0.011766 | 0.011808 | 0.011469 | 0.011511 | 0.011429 | 0.011631 | 0.011597 |
| 0.011632 | 0.011664 | 0.011664 | 0.011664 | 0.011807 | 0.011799 | 0.011442 |
| 0.011331 | 0.011337 | 0.011435 | 0.011400 | 0.011504 | 0.011359 | 0.011672 |
| 0.011472 | 0.011630 | 0.011346 | 0.011472 | 0.011464 | 0.011505 | 0.011430 |
| 0.011396 | 0.011396 | 0.011463 | 0.011430 | 0.011631 | 0.011597 | 0.011530 |
| 0.011631 | 0.011698 | 0.011429 | 0.011429 | 0.011463 | 0.011463 | 0.011465 |
| 0.011533 | 0.011463 | 0.011463 | 0.011498 | 0.011631 | 0.011698 | 0.011698 |
| 0.011565 | 0.011669 | 0.011670 | 0.011806 | 0.011838 | 0.011497 | 0.011664 |
| 0.011597 | 0.011597 | 0.011398 | 0.011582 | 0.011547 | 0.011571 | 0.011411 |
| 0.011611 | 0.011744 | 0.011483 | 0.011502 | 0.011396 | 0.011598 | 0.011463 |
| 0.011564 | 0.011497 | 0.011396 | 0.011498 | 0.011598 | 0.011601 | 0.011497 |
| 0.011396 | 0.011330 | 0.011463 | 0.011396 | 0.011329 | 0.011400 | 0.011598 |
| 0.011497 | 0.011429 | 0.011463 | 0.011497 | 0.011463 | 0.011396 | 0.011597 |
| 0.011463 | 0.011497 | 0.011496 | 0.011429 | 0.011295 | 0.011665 | 0.011396 |
| 0.011429 | 0.011832 | 0.011429 | 0.011463 | 0.011429 | 0.011799 | 0.011403 |
| 0.011848 | 0.011400 | 0.011411 | 0.011624 | 0.011712 | 0.011634 | 0.011353 |
| 0.011323 | 0.011597 | 0.011698 | 0.011807 | 0.011666 | 0.011805 | 0.011935 |
| 0.011834 | 0.011872 | 0.011832 | 0.012086 | 0.011799 | 0.012674 | 0.011835 |
| 0.012574 | 0.012342 | 0.012476 | 0.012748 | 0.011799 | 0.011497 | 0.011799 |
| 0.012238 | 0.012174 | 0.011765 | 0.011665 | 0.011733 | 0.011733 | 0.011703 |
| 0.011597 | 0.011603 | 0.011664 | 0.011632 | 0.012002 | 0.012068 | 0.012069 |
| 0.011969 | 0.012069 | 0.012173 | 0.011940 | 0.012239 | 0.012246 | 0.012306 |
| 0.012307 | 0.012340 | 0.012289 | 0.012307 | 0.012308 | 0.011530 | 0.011833 |
| 0.011901 | 0.012404 | 0.011908 | 0.012135 | 0.012609 | 0.011672 | 0.011564 |
| 0.011530 | 0.011530 | 0.012001 | 0.011965 | 0.012116 | 0.011866 | 0.011532 |
| S351     | 0.011765 | 0.011765 | 0.012101 | 0.011866 | 0.011866 | 0.011933 |
| 0.011773 | 0.011705 | 0.011933 | 0.011362 | 0.011429 | 0.011397 | 0.011362 |
| 0.011396 | 0.011564 | 0.011362 | 0.011396 | 0.011463 | 0.011429 | 0.011396 |
| 0.011362 | 0.011396 | 0.011496 | 0.011363 | 0.011396 | 0.011396 | 0.011739 |
| 0.011631 | 0.011396 | 0.011295 | 0.011530 | 0.011463 | 0.011429 | 0.011463 |
| 0.011429 | 0.011530 | 0.011429 | 0.011429 | 0.011463 | 0.011429 | 0.011597 |
| 0.011362 | 0.011429 | 0.011463 | 0.011396 | 0.011496 | 0.011530 | 0.011463 |
| 0.011429 | 0.011597 | 0.011497 | 0.011765 | 0.011429 | 0.011631 | 0.011429 |
| 0.011396 | 0.011497 | 0.011564 | 0.011631 | 0.011799 | 0.011497 | 0.011597 |
| 0.011463 | 0.011463 | 0.011429 | 0.011664 | 0.011900 | 0.011429 | 0.011497 |
| 0.011396 | 0.011496 | 0.011463 | 0.011530 | 0.011463 | 0.011463 | 0.011463 |
| 0.011362 | 0.011396 | 0.011362 | 0.011463 | 0.011429 | 0.011464 | 0.011530 |
| 0.011463 | 0.011429 | 0.011496 | 0.011396 | 0.011530 | 0.011362 | 0.011429 |
| 0.011597 | 0.011530 | 0.011765 | 0.011597 | 0.011429 | 0.011664 | 0.011429 |
| 0.011616 | 0.011845 | 0.011588 | 0.011334 | 0.011284 | 0.011465 | 0.011493 |
| 0.012158 | 0.011569 | 0.011266 | 0.011664 | 0.011664 | 0.011463 | 0.011564 |
| 0.011497 | 0.011463 | 0.011530 | 0.011429 | 0.011530 | 0.011463 | 0.011463 |
| 0.011429 | 0.011530 | 0.011732 | 0.011597 | 0.011497 | 0.011463 | 0.011396 |



|          |          |          |          |          |          |          |
|----------|----------|----------|----------|----------|----------|----------|
| 0.011362 | 0.011362 | 0.011430 | 0.011396 | 0.011597 | 0.011564 | 0.011497 |
| 0.011597 | 0.011665 | 0.011396 | 0.011396 | 0.011430 | 0.011429 | 0.011432 |
| 0.011500 | 0.011430 | 0.011430 | 0.011312 | 0.011313 | 0.011341 | 0.011430 |
| 0.011433 | 0.011369 | 0.011355 | 0.011405 | 0.011332 | 0.011368 | 0.011398 |
| 0.011672 | 0.011439 | 0.011439 | 0.011363 | 0.011371 | 0.011498 | 0.011464 |
| 0.011531 | 0.011465 | 0.011464 | 0.011564 | 0.011496 | 0.011866 | 0.011665 |
| 0.011698 | 0.011564 | 0.011429 | 0.011530 | 0.011329 | 0.011564 | 0.011362 |
| 0.011429 | 0.011429 | 0.011396 | 0.011362 | 0.011396 | 0.011362 | 0.011463 |
| 0.011430 | 0.011530 | 0.011463 | 0.011362 | 0.011465 | 0.011564 | 0.011567 |
| 0.011564 | 0.011463 | 0.011362 | 0.011296 | 0.011429 | 0.011362 | 0.011295 |
| 0.011400 | 0.011564 | 0.011362 | 0.011564 | 0.011262 | 0.011430 | 0.011329 |
| 0.011497 | 0.011396 | 0.011430 | 0.011329 | 0.011362 | 0.011295 | 0.011430 |
| 0.011463 | 0.011396 | 0.011463 | 0.011396 | 0.011429 | 0.011463 | 0.011698 |
| 0.011799 | 0.011732 | 0.011799 | 0.011566 | 0.011799 | 0.011429 | 0.011396 |
| 0.011432 | 0.011667 | 0.011563 | 0.011335 | 0.011807 | 0.011299 | 0.011375 |
| 0.011807 | 0.011706 | 0.011597 | 0.011799 | 0.011504 | 0.011664 | 0.011631 |
| 0.011564 | 0.011732 | 0.011593 | 0.011431 | 0.011479 | 0.011463 | 0.011534 |
| 0.011631 | 0.011532 | 0.011669 | 0.011737 | 0.011664 | 0.011732 | 0.011839 |
| 0.011568 | 0.011739 | 0.011670 | 0.011601 | 0.011868 | 0.011329 | 0.011532 |
| 0.011496 | 0.011429 | 0.011329 | 0.011329 | 0.011396 | 0.011396 | 0.011463 |
| 0.011396 | 0.011463 | 0.011362 | 0.011463 | 0.011396 | 0.011396 | 0.011463 |
| 0.011396 | 0.011832 | 0.011732 | 0.011765 | 0.011295 | 0.011396 | 0.011429 |
| 0.011429 | 0.011329 | 0.011463 | 0.011497 | 0.011362 | 0.011362 | 0.011362 |
| 0.011899 | 0.011530 | 0.011530 | 0.011329 | 0.011429 | 0.011597 | 0.011362 |
| 0.011362 | 0.011429 | 0.011396 | 0.011564 | 0.011362 | 0.011429 | 0.011631 |
| 0.011564 | 0.011396 | 0.011396 | 0.011329 | 0.011329 | 0.011497 | 0.011429 |
| 0.011329 | 0.011429 | 0.011295 | 0.011329 | 0.011463 | 0.011598 | 0.011362 |
| 0.011329 | 0.011463 | 0.011396 | 0.011295 | 0.011631 | 0.011295 | 0.011463 |
| 0.011539 | 0.011362 | 0.011664 | 0.011497 | 0.011530 | 0.011396 | 0.011496 |
| 0.011362 | 0.011631 | 0.011295 | 0.011564 | 0.011362 | 0.011362 | 0.011295 |
| 0.011530 | 0.011732 | 0.011429 | 0.011497 | 0.011262 | 0.011732 | 0.011362 |
| 0.011362 | 0.011362 | 0.011396 | 0.011497 | 0.011396 | 0.011496 | 0.011564 |
| 0.011564 | 0.000000 | 0.011429 | 0.011530 | 0.011496 | 0.011362 | 0.011329 |
| 0.011295 | 0.011362 | 0.011429 | 0.011362 | 0.011329 | 0.011497 | 0.011362 |
| 0.011396 | 0.011396 | 0.011530 | 0.011564 | 0.011463 | 0.011396 | 0.011396 |
| 0.011463 | 0.011396 | 0.011496 | 0.011362 | 0.011496 | 0.011597 | 0.011900 |
| 0.011396 | 0.011799 | 0.011405 | 0.017861 | 0.011257 | 0.011672 | 0.011758 |
| 0.011718 | 0.011764 | 0.011374 | 0.011292 | 0.011829 | 0.011785 | 0.011546 |
| 0.011582 | 0.011671 | 0.011294 | 0.011353 | 0.011333 | 0.011455 | 0.011404 |
| 0.011576 | 0.011507 | 0.011542 | 0.011193 | 0.011530 | 0.011564 | 0.011567 |
| 0.011438 | 0.011530 | 0.011530 | 0.011497 | 0.011463 | 0.011463 | 0.011430 |
| 0.011463 | 0.011396 | 0.011362 | 0.011463 | 0.011430 | 0.011362 | 0.011396 |
| 0.011396 | 0.011463 | 0.011362 | 0.011463 | 0.011497 | 0.011530 | 0.011429 |
| 0.011463 | 0.011430 | 0.011765 | 0.011765 | 0.011497 | 0.011531 | 0.011564 |
| 0.011329 | 0.011329 | 0.011362 | 0.011463 | 0.011329 | 0.011564 | 0.011564 |
| 0.011597 | 0.011597 | 0.011530 | 0.011631 | 0.011799 | 0.011633 | 0.011463 |
| 0.011463 | 0.011530 | 0.011564 | 0.011396 | 0.011463 | 0.011430 | 0.011463 |
| 0.011531 | 0.011530 | 0.011564 | 0.011531 | 0.011431 | 0.011631 | 0.011597 |
| 0.011467 | 0.011362 | 0.011463 | 0.011564 | 0.011463 | 0.011598 | 0.011631 |
| 0.011799 | 0.011504 | 0.011664 | 0.011631 | 0.011564 | 0.011732 | 0.011363 |
| 0.011532 | 0.011430 | 0.011396 | 0.011396 | 0.011463 | 0.011362 | 0.011463 |
| 0.011497 | 0.011530 | 0.011429 | 0.011463 | 0.011430 | 0.011765 | 0.011765 |
| 0.011497 | 0.011531 | 0.011597 | 0.011530 | 0.012170 | 0.011596 | 0.011482 |
| 0.011587 | 0.011546 | 0.011622 | 0.011545 | 0.011655 | 0.011577 | 0.011543 |
| 0.012125 | 0.011441 | 0.011574 | 0.011510 | 0.011783 | 0.011638 | 0.011741 |
| 0.012148 | 0.011588 | 0.011703 | 0.011765 | 0.011631 | 0.011631 | 0.011668 |
| 0.011329 | 0.011497 | 0.011631 | 0.011597 | 0.011601 | 0.011597 | 0.011565 |
| 0.011429 | 0.011362 | 0.011396 | 0.011429 | 0.011329 | 0.011396 | 0.011295 |
| 0.011429 | 0.011463 | 0.011362 | 0.011329 | 0.011429 | 0.011362 | 0.011396 |
| 0.011396 | 0.011329 | 0.011396 | 0.011429 | 0.011329 | 0.011530 | 0.011564 |

|          |          |          |          |          |          |          |
|----------|----------|----------|----------|----------|----------|----------|
| 0.011463 | 0.011530 | 0.011463 | 0.011463 | 0.011396 | 0.011799 | 0.011429 |
| 0.011478 | 0.011396 | 0.011631 | 0.011637 | 0.011497 | 0.011496 | 0.011496 |
| 0.011497 | 0.011429 | 0.011396 | 0.011429 | 0.011530 | 0.011530 | 0.011463 |
| 0.011463 | 0.011597 | 0.011765 | 0.011429 | 0.011698 | 0.011698 | 0.011564 |
| 0.011396 | 0.011463 | 0.011497 | 0.011900 | 0.011463 | 0.011497 | 0.011463 |
| 0.011496 | 0.011429 | 0.011429 | 0.011664 | 0.011665 | 0.011631 | 0.011429 |
| 0.011463 | 0.011530 | 0.011463 | 0.011463 | 0.011496 | 0.011295 | 0.011698 |
| 0.011463 | 0.011429 | 0.011429 | 0.011597 | 0.011429 | 0.011530 | 0.011765 |
| 0.011463 | 0.011841 | 0.011832 | 0.011589 | 0.011173 | 0.011536 | 0.011318 |
| 0.011445 | 0.011800 | 0.011341 | 0.011462 | 0.011304 | 0.011467 | 0.011432 |
| 0.011570 | 0.011192 | 0.011394 | 0.011192 | 0.011276 | 0.011261 | 0.011466 |
| 0.011550 | 0.011375 | 0.011518 | 0.011377 | 0.011465 | 0.011597 | 0.011665 |
| 0.011665 | 0.011531 | 0.011635 | 0.011636 | 0.011772 | 0.011802 | 0.011463 |
| 0.011698 | 0.011564 | 0.011429 | 0.011530 | 0.011329 | 0.011564 | 0.011362 |
| 0.011429 | 0.011429 | 0.011396 | 0.011362 | 0.011396 | 0.011362 | 0.011463 |
| 0.011444 | 0.011445 | 0.011437 | 0.011471 | 0.011608 | 0.011573 | 0.011572 |
| 0.011571 | 0.011497 | 0.011319 | 0.011312 | 0.011433 | 0.011602 | 0.011603 |
| 0.011396 | 0.011467 | 0.011700 | 0.011669 | 0.011598 | 0.011632 | 0.011564 |
| 0.011496 | 0.011564 | 0.011564 | 0.011463 | 0.012034 | 0.011564 | 0.011698 |
| 0.011732 | 0.011808 | 0.011299 | 0.011511 | 0.011396 | 0.011597 | 0.011564 |
| 0.011598 | 0.011631 | 0.011631 | 0.011631 | 0.011807 | 0.011765 | 0.011372 |
| 0.011297 | 0.011268 | 0.011401 | 0.011366 | 0.011470 | 0.011284 | 0.011638 |
| 0.011403 | 0.011586 | 0.011298 | 0.011435 | 0.011430 | 0.011505 | 0.011396 |
| 0.011362 | 0.011362 | 0.011430 | 0.011396 | 0.011597 | 0.011564 | 0.011497 |
| 0.011597 | 0.011665 | 0.011396 | 0.011396 | 0.011430 | 0.011429 | 0.011432 |
| 0.011500 | 0.011430 | 0.011430 | 0.011465 | 0.011597 | 0.011665 | 0.011665 |
| 0.011531 | 0.011635 | 0.011636 | 0.011772 | 0.011802 | 0.011463 | 0.011631 |
| 0.011564 | 0.011564 | 0.011398 | 0.011582 | 0.011512 | 0.011537 | 0.011340 |
| 0.011542 | 0.011744 | 0.011568 | 0.011468 | 0.011362 | 0.011564 | 0.011430 |
| 0.011530 | 0.011463 | 0.011362 | 0.011465 | 0.011564 | 0.011567 | 0.011463 |
| 0.011362 | 0.011296 | 0.011429 | 0.011362 | 0.011295 | 0.011400 | 0.011564 |
| 0.011463 | 0.011396 | 0.011362 | 0.011463 | 0.011430 | 0.011362 | 0.011564 |
| 0.011429 | 0.011463 | 0.011463 | 0.011396 | 0.011463 | 0.011698 | 0.011362 |
| 0.011396 | 0.011799 | 0.011396 | 0.011429 | 0.011396 | 0.011765 | 0.011275 |
| 0.011679 | 0.011315 | 0.011361 | 0.011543 | 0.011630 | 0.011563 | 0.011269 |
| 0.011270 | 0.011564 | 0.011664 | 0.011773 | 0.011633 | 0.011771 | 0.011901 |
| 0.011800 | 0.011838 | 0.011799 | 0.012051 | 0.011765 | 0.012640 | 0.011801 |
| 0.012540 | 0.012308 | 0.012442 | 0.012714 | 0.011765 | 0.011463 | 0.011766 |
| 0.012205 | 0.012140 | 0.011732 | 0.011631 | 0.011699 | 0.011699 | 0.011635 |
| 0.011564 | 0.011569 | 0.011631 | 0.011598 | 0.011968 | 0.012034 | 0.012036 |
| 0.011935 | 0.012035 | 0.012139 | 0.011906 | 0.012205 | 0.012212 | 0.012272 |
| 0.012273 | 0.012307 | 0.012255 | 0.012273 | 0.012274 | 0.011496 | 0.011800 |
| 0.011868 | 0.012371 | 0.011874 | 0.012102 | 0.012575 | 0.011638 | 0.011531 |
| 0.011496 | 0.011496 | 0.011968 | 0.012006 | 0.012116 | 0.011832 | 0.011498 |
| S352     | 0.011664 | 0.011664 | 0.012001 | 0.011765 | 0.011765 | 0.011832 |
| 0.011671 | 0.011603 | 0.011832 | 0.011262 | 0.011329 | 0.011296 | 0.011262 |
| 0.011295 | 0.011463 | 0.011262 | 0.011295 | 0.011362 | 0.011329 | 0.011295 |
| 0.011262 | 0.011295 | 0.011396 | 0.011262 | 0.011295 | 0.011295 | 0.011637 |
| 0.011530 | 0.011295 | 0.011194 | 0.011429 | 0.011362 | 0.011329 | 0.011362 |
| 0.011329 | 0.011429 | 0.011262 | 0.011329 | 0.011295 | 0.011329 | 0.011496 |
| 0.011262 | 0.011329 | 0.011295 | 0.011094 | 0.011396 | 0.011429 | 0.011362 |
| 0.011329 | 0.011429 | 0.011396 | 0.011664 | 0.011262 | 0.011597 | 0.011262 |
| 0.011295 | 0.011396 | 0.011396 | 0.011597 | 0.011698 | 0.011396 | 0.011496 |
| 0.011362 | 0.011429 | 0.011329 | 0.011563 | 0.011799 | 0.011329 | 0.011396 |
| 0.011295 | 0.011396 | 0.011362 | 0.011429 | 0.011362 | 0.011161 | 0.011161 |
| 0.011262 | 0.011295 | 0.011262 | 0.011362 | 0.011329 | 0.011363 | 0.011429 |
| 0.011362 | 0.011329 | 0.011396 | 0.011295 | 0.011429 | 0.011262 | 0.011329 |
| 0.011496 | 0.011429 | 0.011664 | 0.011496 | 0.011329 | 0.011564 | 0.011262 |
| 0.011505 | 0.011732 | 0.011551 | 0.011255 | 0.011247 | 0.011355 | 0.011454 |
| 0.012085 | 0.011467 | 0.011266 | 0.011563 | 0.011564 | 0.011362 | 0.011463 |

|          |          |          |          |          |          |          |
|----------|----------|----------|----------|----------|----------|----------|
| 0.011396 | 0.011362 | 0.011429 | 0.011329 | 0.011429 | 0.011362 | 0.011362 |
| 0.011329 | 0.011429 | 0.011631 | 0.011496 | 0.011396 | 0.011362 | 0.011295 |
| 0.011262 | 0.011262 | 0.011329 | 0.011295 | 0.011497 | 0.011463 | 0.011396 |
| 0.011497 | 0.011564 | 0.011295 | 0.011295 | 0.011329 | 0.011329 | 0.011330 |
| 0.011398 | 0.011329 | 0.011329 | 0.011204 | 0.011277 | 0.011235 | 0.011329 |
| 0.011331 | 0.011266 | 0.011318 | 0.011302 | 0.011230 | 0.011266 | 0.011297 |
| 0.011564 | 0.011336 | 0.011370 | 0.011262 | 0.011268 | 0.011397 | 0.011363 |
| 0.011430 | 0.011363 | 0.011363 | 0.011463 | 0.011396 | 0.011765 | 0.011564 |
| 0.011597 | 0.011463 | 0.011329 | 0.011429 | 0.011228 | 0.011463 | 0.011262 |
| 0.011329 | 0.011329 | 0.011295 | 0.011262 | 0.011295 | 0.011262 | 0.011362 |
| 0.011329 | 0.011429 | 0.011362 | 0.011262 | 0.011363 | 0.011463 | 0.011466 |
| 0.011463 | 0.011362 | 0.011262 | 0.011195 | 0.011329 | 0.011262 | 0.011195 |
| 0.011298 | 0.011463 | 0.011262 | 0.011463 | 0.011228 | 0.011329 | 0.011295 |
| 0.011396 | 0.011295 | 0.011329 | 0.011295 | 0.011329 | 0.011195 | 0.011329 |
| 0.011362 | 0.011295 | 0.011362 | 0.011295 | 0.011329 | 0.011362 | 0.011597 |
| 0.011698 | 0.011631 | 0.011698 | 0.011397 | 0.011698 | 0.011329 | 0.011295 |
| 0.011297 | 0.011626 | 0.011335 | 0.011232 | 0.011705 | 0.011197 | 0.011336 |
| 0.011705 | 0.011604 | 0.011496 | 0.011698 | 0.011402 | 0.011564 | 0.011530 |
| 0.011463 | 0.011631 | 0.011486 | 0.011349 | 0.011395 | 0.011362 | 0.011432 |
| 0.011530 | 0.011431 | 0.011567 | 0.011635 | 0.011564 | 0.011631 | 0.011738 |
| 0.011466 | 0.011637 | 0.011568 | 0.011500 | 0.011766 | 0.011228 | 0.011431 |
| 0.011396 | 0.011329 | 0.011228 | 0.011228 | 0.011295 | 0.011295 | 0.011228 |
| 0.011295 | 0.011362 | 0.011262 | 0.011362 | 0.011295 | 0.011295 | 0.011362 |
| 0.011295 | 0.011731 | 0.011631 | 0.011664 | 0.011194 | 0.011295 | 0.011329 |
| 0.011329 | 0.011295 | 0.011362 | 0.011396 | 0.011262 | 0.011262 | 0.011262 |
| 0.011799 | 0.011429 | 0.011429 | 0.011228 | 0.011329 | 0.011497 | 0.011262 |
| 0.011262 | 0.011329 | 0.011295 | 0.011463 | 0.011262 | 0.011396 | 0.011530 |
| 0.011463 | 0.011295 | 0.011295 | 0.011228 | 0.011228 | 0.011396 | 0.011329 |
| 0.011228 | 0.011329 | 0.011195 | 0.011228 | 0.011362 | 0.011497 | 0.011262 |
| 0.011228 | 0.011362 | 0.011295 | 0.011195 | 0.011530 | 0.011195 | 0.011362 |
| 0.011437 | 0.011262 | 0.011564 | 0.011396 | 0.011429 | 0.011295 | 0.011329 |
| 0.011262 | 0.011597 | 0.011194 | 0.011463 | 0.011262 | 0.011262 | 0.011194 |
| 0.011429 | 0.011631 | 0.011329 | 0.011396 | 0.011228 | 0.011631 | 0.011262 |
| 0.011262 | 0.011262 | 0.011295 | 0.011396 | 0.011295 | 0.011396 | 0.011463 |
| 0.011463 | 0.011429 | 0.000000 | 0.011429 | 0.011396 | 0.011194 | 0.011228 |
| 0.011262 | 0.011194 | 0.011329 | 0.011262 | 0.011228 | 0.011396 | 0.011262 |
| 0.011295 | 0.011295 | 0.011429 | 0.011463 | 0.011362 | 0.011295 | 0.011295 |
| 0.011362 | 0.011295 | 0.011396 | 0.011262 | 0.011396 | 0.011496 | 0.011799 |
| 0.011295 | 0.011698 | 0.011302 | 0.017823 | 0.011191 | 0.011488 | 0.011653 |
| 0.011614 | 0.011658 | 0.011427 | 0.011292 | 0.011774 | 0.011681 | 0.011364 |
| 0.011534 | 0.011610 | 0.011216 | 0.011311 | 0.011294 | 0.011356 | 0.011318 |
| 0.011482 | 0.011470 | 0.011468 | 0.011325 | 0.011429 | 0.011463 | 0.011466 |
| 0.011335 | 0.011429 | 0.011429 | 0.011396 | 0.011362 | 0.011362 | 0.011329 |
| 0.011362 | 0.011295 | 0.011329 | 0.011362 | 0.011329 | 0.011262 | 0.011295 |
| 0.011295 | 0.011362 | 0.011262 | 0.011362 | 0.011396 | 0.011429 | 0.011329 |
| 0.011362 | 0.011329 | 0.011665 | 0.011665 | 0.011396 | 0.011430 | 0.011463 |
| 0.011228 | 0.011228 | 0.011262 | 0.011362 | 0.011228 | 0.011463 | 0.011463 |
| 0.011497 | 0.011496 | 0.011429 | 0.011530 | 0.011698 | 0.011532 | 0.011362 |
| 0.011362 | 0.011429 | 0.011463 | 0.011295 | 0.011362 | 0.011329 | 0.011362 |
| 0.011430 | 0.011430 | 0.011463 | 0.011430 | 0.011330 | 0.011530 | 0.011497 |
| 0.011365 | 0.011262 | 0.011362 | 0.011396 | 0.011362 | 0.011497 | 0.011530 |
| 0.011698 | 0.011402 | 0.011564 | 0.011530 | 0.011463 | 0.011631 | 0.011262 |
| 0.011431 | 0.011329 | 0.011295 | 0.011295 | 0.011362 | 0.011262 | 0.011362 |
| 0.011396 | 0.011429 | 0.011329 | 0.011362 | 0.011329 | 0.011665 | 0.011665 |
| 0.011396 | 0.011430 | 0.011496 | 0.011429 | 0.012069 | 0.011489 | 0.011412 |
| 0.011482 | 0.011441 | 0.011552 | 0.011441 | 0.011550 | 0.011474 | 0.011439 |
| 0.012021 | 0.011337 | 0.011471 | 0.011406 | 0.011680 | 0.011536 | 0.011638 |
| 0.012046 | 0.011512 | 0.011601 | 0.011664 | 0.011530 | 0.011530 | 0.011567 |
| 0.011228 | 0.011396 | 0.011530 | 0.011496 | 0.011499 | 0.011496 | 0.011464 |
| 0.011329 | 0.011262 | 0.011295 | 0.011329 | 0.011228 | 0.011295 | 0.011194 |

|          |          |          |          |          |          |          |
|----------|----------|----------|----------|----------|----------|----------|
| 0.011329 | 0.011362 | 0.011262 | 0.011228 | 0.011329 | 0.011262 | 0.011295 |
| 0.011295 | 0.011228 | 0.011295 | 0.011329 | 0.011228 | 0.011429 | 0.011463 |
| 0.011362 | 0.011429 | 0.011362 | 0.011362 | 0.011295 | 0.011698 | 0.011329 |
| 0.011373 | 0.011295 | 0.011530 | 0.011535 | 0.011396 | 0.011329 | 0.011396 |
| 0.011396 | 0.011329 | 0.011295 | 0.011329 | 0.011429 | 0.011429 | 0.011362 |
| 0.011362 | 0.011496 | 0.011664 | 0.011396 | 0.011597 | 0.011597 | 0.011463 |
| 0.011295 | 0.011362 | 0.011396 | 0.011799 | 0.011362 | 0.011396 | 0.011362 |
| 0.011396 | 0.011329 | 0.011329 | 0.011631 | 0.011564 | 0.011597 | 0.011329 |
| 0.011429 | 0.011496 | 0.011362 | 0.011429 | 0.011396 | 0.011262 | 0.011597 |
| 0.011362 | 0.011329 | 0.011329 | 0.011496 | 0.011329 | 0.011429 | 0.011664 |
| 0.011362 | 0.011739 | 0.011731 | 0.011548 | 0.011342 | 0.011434 | 0.011267 |
| 0.011280 | 0.011761 | 0.011271 | 0.011417 | 0.011353 | 0.011315 | 0.011379 |
| 0.011468 | 0.011126 | 0.011339 | 0.011126 | 0.011222 | 0.011328 | 0.011425 |
| 0.011437 | 0.011336 | 0.011412 | 0.011342 | 0.011363 | 0.011497 | 0.011564 |
| 0.011564 | 0.011430 | 0.011533 | 0.011535 | 0.011670 | 0.011696 | 0.011362 |
| 0.011597 | 0.011463 | 0.011329 | 0.011429 | 0.011228 | 0.011463 | 0.011262 |
| 0.011329 | 0.011329 | 0.011295 | 0.011262 | 0.011295 | 0.011262 | 0.011362 |
| 0.011305 | 0.011305 | 0.011334 | 0.011368 | 0.011505 | 0.011470 | 0.011470 |
| 0.011469 | 0.011396 | 0.011171 | 0.011168 | 0.011331 | 0.011501 | 0.011501 |
| 0.011296 | 0.011365 | 0.011599 | 0.011567 | 0.011497 | 0.011531 | 0.011463 |
| 0.011396 | 0.011463 | 0.011463 | 0.011362 | 0.011933 | 0.011530 | 0.011597 |
| 0.011631 | 0.011665 | 0.011333 | 0.011407 | 0.011295 | 0.011497 | 0.011463 |
| 0.011497 | 0.011530 | 0.011530 | 0.011530 | 0.011610 | 0.011664 | 0.011303 |
| 0.011195 | 0.011199 | 0.011298 | 0.011264 | 0.011368 | 0.011209 | 0.011536 |
| 0.011335 | 0.011499 | 0.011251 | 0.011360 | 0.011329 | 0.011402 | 0.011295 |
| 0.011262 | 0.011262 | 0.011329 | 0.011295 | 0.011497 | 0.011463 | 0.011396 |
| 0.011497 | 0.011564 | 0.011295 | 0.011295 | 0.011329 | 0.011329 | 0.011330 |
| 0.011398 | 0.011329 | 0.011329 | 0.011363 | 0.011497 | 0.011564 | 0.011564 |
| 0.011430 | 0.011533 | 0.011535 | 0.011670 | 0.011696 | 0.011362 | 0.011530 |
| 0.011463 | 0.011463 | 0.011229 | 0.011408 | 0.011408 | 0.011435 | 0.011270 |
| 0.011473 | 0.011653 | 0.011399 | 0.011366 | 0.011262 | 0.011463 | 0.011329 |
| 0.011429 | 0.011362 | 0.011262 | 0.011363 | 0.011463 | 0.011466 | 0.011362 |
| 0.011262 | 0.011195 | 0.011329 | 0.011262 | 0.011195 | 0.011298 | 0.011463 |
| 0.011362 | 0.011295 | 0.011329 | 0.011362 | 0.011329 | 0.011262 | 0.011463 |
| 0.011329 | 0.011362 | 0.011362 | 0.011295 | 0.011362 | 0.011597 | 0.011262 |
| 0.011295 | 0.011698 | 0.011295 | 0.011329 | 0.011295 | 0.011664 | 0.011274 |
| 0.011734 | 0.011273 | 0.011261 | 0.011503 | 0.011589 | 0.011491 | 0.011227 |
| 0.011218 | 0.011463 | 0.011564 | 0.011671 | 0.011531 | 0.011669 | 0.011800 |
| 0.011699 | 0.011737 | 0.011698 | 0.011949 | 0.011664 | 0.012539 | 0.011700 |
| 0.012439 | 0.012207 | 0.012341 | 0.012612 | 0.011664 | 0.011362 | 0.011665 |
| 0.012103 | 0.012038 | 0.011631 | 0.011530 | 0.011598 | 0.011598 | 0.011567 |
| 0.011463 | 0.011467 | 0.011530 | 0.011497 | 0.011867 | 0.011933 | 0.011935 |
| 0.011834 | 0.011934 | 0.012038 | 0.011804 | 0.012104 | 0.012110 | 0.012171 |
| 0.012171 | 0.012205 | 0.012152 | 0.012172 | 0.012173 | 0.011396 | 0.011699 |
| 0.011766 | 0.012270 | 0.011772 | 0.012001 | 0.012474 | 0.011536 | 0.011430 |
| 0.011396 | 0.011396 | 0.011867 | 0.011924 | 0.012010 | 0.011732 | 0.011397 |
| S353     | 0.011765 | 0.011765 | 0.012102 | 0.011866 | 0.011866 | 0.011933 |
| 0.011773 | 0.011705 | 0.011933 | 0.011362 | 0.011429 | 0.011397 | 0.011362 |
| 0.011396 | 0.011564 | 0.011362 | 0.011396 | 0.011463 | 0.011429 | 0.011396 |
| 0.011362 | 0.011396 | 0.011496 | 0.011363 | 0.011396 | 0.011396 | 0.011739 |
| 0.011631 | 0.011396 | 0.011295 | 0.011530 | 0.011463 | 0.011430 | 0.011463 |
| 0.011429 | 0.011530 | 0.011429 | 0.011430 | 0.011463 | 0.011429 | 0.011597 |
| 0.011362 | 0.011429 | 0.011463 | 0.011396 | 0.011497 | 0.011530 | 0.011463 |
| 0.011429 | 0.011598 | 0.011497 | 0.011765 | 0.011429 | 0.011698 | 0.011429 |
| 0.011396 | 0.011497 | 0.011564 | 0.011698 | 0.011799 | 0.011497 | 0.011597 |
| 0.011463 | 0.011530 | 0.011430 | 0.011664 | 0.011900 | 0.011429 | 0.011497 |
| 0.011396 | 0.011497 | 0.011463 | 0.011530 | 0.011463 | 0.011463 | 0.011463 |
| 0.011362 | 0.011396 | 0.011362 | 0.011463 | 0.011429 | 0.011464 | 0.011530 |
| 0.011463 | 0.011429 | 0.011497 | 0.011396 | 0.011530 | 0.011362 | 0.011429 |
| 0.011597 | 0.011530 | 0.011765 | 0.011597 | 0.011430 | 0.011665 | 0.011429 |

|          |          |          |          |          |          |          |
|----------|----------|----------|----------|----------|----------|----------|
| 0.011617 | 0.011845 | 0.011588 | 0.011373 | 0.011359 | 0.011465 | 0.011572 |
| 0.012195 | 0.011620 | 0.011390 | 0.011664 | 0.011665 | 0.011463 | 0.011564 |
| 0.011497 | 0.011463 | 0.011530 | 0.011429 | 0.011530 | 0.011463 | 0.011463 |
| 0.011429 | 0.011530 | 0.011732 | 0.011597 | 0.011497 | 0.011463 | 0.011396 |
| 0.011362 | 0.011362 | 0.011430 | 0.011396 | 0.011598 | 0.011564 | 0.011497 |
| 0.011597 | 0.011665 | 0.011396 | 0.011396 | 0.011430 | 0.011430 | 0.011432 |
| 0.011500 | 0.011430 | 0.011430 | 0.011276 | 0.011386 | 0.011341 | 0.011430 |
| 0.011433 | 0.011370 | 0.011392 | 0.011405 | 0.011332 | 0.011369 | 0.011398 |
| 0.011672 | 0.011440 | 0.011474 | 0.011363 | 0.011371 | 0.011498 | 0.011464 |
| 0.011531 | 0.011465 | 0.011464 | 0.011564 | 0.011496 | 0.011866 | 0.011665 |
| 0.011698 | 0.011564 | 0.011430 | 0.011531 | 0.011329 | 0.011564 | 0.011363 |
| 0.011430 | 0.011429 | 0.011396 | 0.011362 | 0.011396 | 0.011362 | 0.011463 |
| 0.011430 | 0.011530 | 0.011463 | 0.011362 | 0.011465 | 0.011564 | 0.011567 |
| 0.011564 | 0.011463 | 0.011362 | 0.011296 | 0.011430 | 0.011362 | 0.011295 |
| 0.011400 | 0.011564 | 0.011363 | 0.011564 | 0.011329 | 0.011430 | 0.011396 |
| 0.011497 | 0.011396 | 0.011430 | 0.011396 | 0.011430 | 0.011295 | 0.011430 |
| 0.011463 | 0.011396 | 0.011463 | 0.011396 | 0.011430 | 0.011463 | 0.011698 |
| 0.011799 | 0.011732 | 0.011799 | 0.011566 | 0.011799 | 0.011430 | 0.011396 |
| 0.011432 | 0.011707 | 0.011426 | 0.011335 | 0.011807 | 0.011299 | 0.011414 |
| 0.011807 | 0.011706 | 0.011597 | 0.011799 | 0.011504 | 0.011665 | 0.011631 |
| 0.011564 | 0.011732 | 0.011558 | 0.011431 | 0.011479 | 0.011463 | 0.011534 |
| 0.011631 | 0.011532 | 0.011669 | 0.011737 | 0.011665 | 0.011732 | 0.011840 |
| 0.011568 | 0.011739 | 0.011670 | 0.011601 | 0.011868 | 0.011329 | 0.011532 |
| 0.011497 | 0.011429 | 0.011329 | 0.011329 | 0.011396 | 0.011396 | 0.011463 |
| 0.011396 | 0.011463 | 0.011362 | 0.011463 | 0.011396 | 0.011396 | 0.011463 |
| 0.011396 | 0.011832 | 0.011732 | 0.011765 | 0.011295 | 0.011396 | 0.011430 |
| 0.011430 | 0.011396 | 0.011463 | 0.011497 | 0.011362 | 0.011362 | 0.011362 |
| 0.011900 | 0.011530 | 0.011530 | 0.011329 | 0.011429 | 0.011598 | 0.011362 |
| 0.011362 | 0.011429 | 0.011396 | 0.011564 | 0.011362 | 0.011497 | 0.011631 |
| 0.011564 | 0.011396 | 0.011396 | 0.011329 | 0.011329 | 0.011497 | 0.011429 |
| 0.011329 | 0.011429 | 0.011295 | 0.011329 | 0.011463 | 0.011598 | 0.011362 |
| 0.011329 | 0.011463 | 0.011396 | 0.011295 | 0.011631 | 0.011295 | 0.011463 |
| 0.011505 | 0.011362 | 0.011665 | 0.011497 | 0.011530 | 0.011396 | 0.011497 |
| 0.011362 | 0.011698 | 0.011295 | 0.011564 | 0.011362 | 0.011362 | 0.011295 |
| 0.011530 | 0.011732 | 0.011430 | 0.011497 | 0.011329 | 0.011732 | 0.011362 |
| 0.011362 | 0.011362 | 0.011396 | 0.011497 | 0.011396 | 0.011497 | 0.011564 |
| 0.011564 | 0.011530 | 0.011429 | 0.000000 | 0.011497 | 0.011362 | 0.011329 |
| 0.011362 | 0.011362 | 0.011430 | 0.011362 | 0.011329 | 0.011497 | 0.011362 |
| 0.011396 | 0.011396 | 0.011530 | 0.011564 | 0.011463 | 0.011396 | 0.011396 |
| 0.011463 | 0.011396 | 0.011497 | 0.011362 | 0.011497 | 0.011597 | 0.011900 |
| 0.011396 | 0.011799 | 0.011405 | 0.017937 | 0.011388 | 0.011427 | 0.011758 |
| 0.011718 | 0.011764 | 0.011374 | 0.011350 | 0.011830 | 0.011785 | 0.011364 |
| 0.011630 | 0.011549 | 0.011333 | 0.011395 | 0.011333 | 0.011455 | 0.011448 |
| 0.011623 | 0.011582 | 0.011579 | 0.011523 | 0.011530 | 0.011564 | 0.011568 |
| 0.011438 | 0.011530 | 0.011530 | 0.011497 | 0.011463 | 0.011463 | 0.011430 |
| 0.011463 | 0.011396 | 0.011430 | 0.011463 | 0.011430 | 0.011363 | 0.011396 |
| 0.011396 | 0.011463 | 0.011362 | 0.011463 | 0.011497 | 0.011530 | 0.011429 |
| 0.011463 | 0.011430 | 0.011766 | 0.011766 | 0.011497 | 0.011531 | 0.011564 |
| 0.011329 | 0.011329 | 0.011362 | 0.011463 | 0.011329 | 0.011564 | 0.011564 |
| 0.011598 | 0.011597 | 0.011530 | 0.011631 | 0.011799 | 0.011633 | 0.011463 |
| 0.011463 | 0.011530 | 0.011564 | 0.011396 | 0.011463 | 0.011430 | 0.011463 |
| 0.011531 | 0.011530 | 0.011564 | 0.011531 | 0.011431 | 0.011631 | 0.011598 |
| 0.011467 | 0.011363 | 0.011463 | 0.011564 | 0.011463 | 0.011598 | 0.011631 |
| 0.011799 | 0.011504 | 0.011665 | 0.011631 | 0.011564 | 0.011732 | 0.011363 |
| 0.011532 | 0.011363 | 0.011396 | 0.011396 | 0.011463 | 0.011362 | 0.011463 |
| 0.011497 | 0.011530 | 0.011429 | 0.011463 | 0.011430 | 0.011766 | 0.011766 |
| 0.011497 | 0.011531 | 0.011597 | 0.011530 | 0.012171 | 0.011596 | 0.011482 |
| 0.011588 | 0.011546 | 0.011658 | 0.011510 | 0.011655 | 0.011578 | 0.011543 |
| 0.012125 | 0.011441 | 0.011574 | 0.011510 | 0.011783 | 0.011638 | 0.011741 |
| 0.012148 | 0.011588 | 0.011703 | 0.011765 | 0.011631 | 0.011631 | 0.011668 |

|          |          |          |          |          |          |          |
|----------|----------|----------|----------|----------|----------|----------|
| 0.011329 | 0.011497 | 0.011631 | 0.011597 | 0.011601 | 0.011597 | 0.011566 |
| 0.011429 | 0.011362 | 0.011396 | 0.011429 | 0.011329 | 0.011329 | 0.011295 |
| 0.011429 | 0.011463 | 0.011362 | 0.011329 | 0.011362 | 0.011362 | 0.011396 |
| 0.011396 | 0.011329 | 0.011396 | 0.011430 | 0.011329 | 0.011530 | 0.011564 |
| 0.011463 | 0.011530 | 0.011463 | 0.011463 | 0.011396 | 0.011799 | 0.011429 |
| 0.011443 | 0.011396 | 0.011631 | 0.011637 | 0.011497 | 0.011497 | 0.011497 |
| 0.011497 | 0.011430 | 0.011396 | 0.011430 | 0.011530 | 0.011530 | 0.011463 |
| 0.011463 | 0.011597 | 0.011765 | 0.011496 | 0.011698 | 0.011698 | 0.011564 |
| 0.011396 | 0.011463 | 0.011497 | 0.011900 | 0.011463 | 0.011497 | 0.011463 |
| 0.011497 | 0.011429 | 0.011429 | 0.011732 | 0.011665 | 0.011698 | 0.011430 |
| 0.011530 | 0.011597 | 0.011463 | 0.011530 | 0.011497 | 0.011362 | 0.011698 |
| 0.011463 | 0.011429 | 0.011429 | 0.011597 | 0.011430 | 0.011530 | 0.011765 |
| 0.011463 | 0.011841 | 0.011832 | 0.011670 | 0.011399 | 0.011536 | 0.011422 |
| 0.011280 | 0.011878 | 0.011376 | 0.011641 | 0.011500 | 0.011518 | 0.011592 |
| 0.011672 | 0.011389 | 0.011561 | 0.011391 | 0.011438 | 0.011664 | 0.011547 |
| 0.011550 | 0.011454 | 0.011518 | 0.011448 | 0.011465 | 0.011597 | 0.011665 |
| 0.011665 | 0.011531 | 0.011635 | 0.011637 | 0.011772 | 0.011803 | 0.011463 |
| 0.011698 | 0.011564 | 0.011430 | 0.011531 | 0.011329 | 0.011564 | 0.011363 |
| 0.011430 | 0.011429 | 0.011396 | 0.011362 | 0.011396 | 0.011362 | 0.011463 |
| 0.011410 | 0.011410 | 0.011437 | 0.011471 | 0.011608 | 0.011573 | 0.011538 |
| 0.011537 | 0.011497 | 0.011282 | 0.011276 | 0.011433 | 0.011603 | 0.011603 |
| 0.011397 | 0.011467 | 0.011700 | 0.011669 | 0.011598 | 0.011632 | 0.011564 |
| 0.011497 | 0.011564 | 0.011564 | 0.011463 | 0.012035 | 0.011631 | 0.011698 |
| 0.011732 | 0.011772 | 0.011435 | 0.011511 | 0.011329 | 0.011597 | 0.011564 |
| 0.011599 | 0.011631 | 0.011631 | 0.011631 | 0.011807 | 0.011765 | 0.011407 |
| 0.011297 | 0.011303 | 0.011401 | 0.011366 | 0.011470 | 0.011321 | 0.011638 |
| 0.011438 | 0.011586 | 0.011346 | 0.011435 | 0.011430 | 0.011505 | 0.011396 |
| 0.011362 | 0.011362 | 0.011430 | 0.011396 | 0.011598 | 0.011564 | 0.011497 |
| 0.011597 | 0.011665 | 0.011396 | 0.011396 | 0.011430 | 0.011430 | 0.011432 |
| 0.011500 | 0.011430 | 0.011430 | 0.011465 | 0.011597 | 0.011665 | 0.011665 |
| 0.011531 | 0.011635 | 0.011637 | 0.011772 | 0.011803 | 0.011463 | 0.011631 |
| 0.011564 | 0.011564 | 0.011398 | 0.011582 | 0.011442 | 0.011503 | 0.011411 |
| 0.011577 | 0.011698 | 0.011526 | 0.011468 | 0.011363 | 0.011564 | 0.011430 |
| 0.011530 | 0.011463 | 0.011362 | 0.011465 | 0.011564 | 0.011567 | 0.011463 |
| 0.011362 | 0.011296 | 0.011430 | 0.011362 | 0.011295 | 0.011400 | 0.011564 |
| 0.011463 | 0.011396 | 0.011430 | 0.011463 | 0.011430 | 0.011363 | 0.011564 |
| 0.011429 | 0.011463 | 0.011463 | 0.011396 | 0.011463 | 0.011698 | 0.011362 |
| 0.011396 | 0.011799 | 0.011396 | 0.011429 | 0.011396 | 0.011765 | 0.011403 |
| 0.011904 | 0.011400 | 0.011411 | 0.011624 | 0.011712 | 0.011599 | 0.011353 |
| 0.011323 | 0.011564 | 0.011664 | 0.011773 | 0.011633 | 0.011771 | 0.011901 |
| 0.011801 | 0.011838 | 0.011799 | 0.012052 | 0.011765 | 0.012640 | 0.011802 |
| 0.012541 | 0.012308 | 0.012443 | 0.012714 | 0.011765 | 0.011463 | 0.011766 |
| 0.012205 | 0.012140 | 0.011732 | 0.011631 | 0.011699 | 0.011699 | 0.011669 |
| 0.011564 | 0.011569 | 0.011631 | 0.011598 | 0.011969 | 0.012034 | 0.012036 |
| 0.011935 | 0.012036 | 0.012140 | 0.011906 | 0.012205 | 0.012212 | 0.012272 |
| 0.012273 | 0.012307 | 0.012255 | 0.012273 | 0.012275 | 0.011496 | 0.011800 |
| 0.011868 | 0.012371 | 0.011874 | 0.012102 | 0.012575 | 0.011638 | 0.011531 |
| 0.011496 | 0.011496 | 0.011968 | 0.012006 | 0.012116 | 0.011832 | 0.011498 |
| S354     | 0.011732 | 0.011732 | 0.012068 | 0.011832 | 0.011832 | 0.011900 |
| 0.011739 | 0.011671 | 0.011899 | 0.011329 | 0.011396 | 0.011363 | 0.011329 |
| 0.011362 | 0.011530 | 0.011329 | 0.011362 | 0.011429 | 0.011396 | 0.011362 |
| 0.011329 | 0.011362 | 0.011463 | 0.011329 | 0.011295 | 0.011362 | 0.011705 |
| 0.011597 | 0.011362 | 0.011262 | 0.011496 | 0.011362 | 0.011396 | 0.011362 |
| 0.011396 | 0.011429 | 0.011396 | 0.011396 | 0.011429 | 0.011396 | 0.011564 |
| 0.011329 | 0.011396 | 0.011429 | 0.011362 | 0.011463 | 0.011496 | 0.011429 |
| 0.011396 | 0.011564 | 0.011463 | 0.011731 | 0.011396 | 0.011597 | 0.011396 |
| 0.011362 | 0.011463 | 0.011530 | 0.011597 | 0.011765 | 0.011463 | 0.011564 |
| 0.011094 | 0.011429 | 0.011396 | 0.011362 | 0.011866 | 0.011396 | 0.011463 |
| 0.011362 | 0.011463 | 0.011429 | 0.011496 | 0.011429 | 0.011429 | 0.011429 |
| 0.011329 | 0.011362 | 0.011329 | 0.011429 | 0.011396 | 0.011430 | 0.011496 |

|          |          |          |          |          |          |          |
|----------|----------|----------|----------|----------|----------|----------|
| 0.011429 | 0.011396 | 0.011396 | 0.011362 | 0.011496 | 0.011262 | 0.011396 |
| 0.011564 | 0.011496 | 0.011731 | 0.011564 | 0.011396 | 0.011564 | 0.011396 |
| 0.011579 | 0.011807 | 0.011626 | 0.011334 | 0.011321 | 0.011428 | 0.011533 |
| 0.012158 | 0.011569 | 0.011348 | 0.011631 | 0.011631 | 0.011429 | 0.011530 |
| 0.011463 | 0.011429 | 0.011496 | 0.011396 | 0.011496 | 0.011362 | 0.011429 |
| 0.011396 | 0.011496 | 0.011698 | 0.011564 | 0.011463 | 0.011429 | 0.011295 |
| 0.011329 | 0.011329 | 0.011329 | 0.011362 | 0.011564 | 0.011530 | 0.011463 |
| 0.011564 | 0.011631 | 0.011362 | 0.011362 | 0.011396 | 0.011396 | 0.011398 |
| 0.011466 | 0.011396 | 0.011396 | 0.011240 | 0.011349 | 0.011306 | 0.011396 |
| 0.011399 | 0.011335 | 0.011392 | 0.011371 | 0.011298 | 0.011300 | 0.011364 |
| 0.011636 | 0.011405 | 0.011370 | 0.011329 | 0.011337 | 0.011464 | 0.011430 |
| 0.011497 | 0.011431 | 0.011430 | 0.011530 | 0.011463 | 0.011765 | 0.011631 |
| 0.011664 | 0.011530 | 0.011396 | 0.011497 | 0.011295 | 0.011530 | 0.011329 |
| 0.011396 | 0.011396 | 0.011362 | 0.011329 | 0.011362 | 0.011329 | 0.011429 |
| 0.011329 | 0.011429 | 0.011430 | 0.011329 | 0.011431 | 0.011530 | 0.011533 |
| 0.011463 | 0.011430 | 0.011329 | 0.011263 | 0.011329 | 0.011329 | 0.011262 |
| 0.011366 | 0.011463 | 0.011262 | 0.011463 | 0.011295 | 0.011396 | 0.011362 |
| 0.011396 | 0.011362 | 0.011329 | 0.011362 | 0.011396 | 0.011262 | 0.011329 |
| 0.011362 | 0.011362 | 0.011429 | 0.011362 | 0.011396 | 0.011429 | 0.011665 |
| 0.011765 | 0.011698 | 0.011765 | 0.011532 | 0.011766 | 0.011396 | 0.011362 |
| 0.011398 | 0.011626 | 0.011517 | 0.011300 | 0.011773 | 0.011265 | 0.011414 |
| 0.011773 | 0.011672 | 0.011564 | 0.011765 | 0.011470 | 0.011631 | 0.011530 |
| 0.011530 | 0.011664 | 0.011557 | 0.011390 | 0.011437 | 0.011429 | 0.011500 |
| 0.011597 | 0.011499 | 0.011635 | 0.011635 | 0.011631 | 0.011698 | 0.011805 |
| 0.011534 | 0.011637 | 0.011636 | 0.011567 | 0.011834 | 0.011295 | 0.011498 |
| 0.011396 | 0.011396 | 0.011295 | 0.011295 | 0.011295 | 0.011362 | 0.011429 |
| 0.011295 | 0.011362 | 0.011262 | 0.011429 | 0.011295 | 0.011362 | 0.011429 |
| 0.011362 | 0.011799 | 0.011698 | 0.011731 | 0.011262 | 0.011362 | 0.011396 |
| 0.011396 | 0.011362 | 0.011429 | 0.011463 | 0.011329 | 0.011329 | 0.011329 |
| 0.011866 | 0.011496 | 0.011496 | 0.011295 | 0.011396 | 0.011496 | 0.011329 |
| 0.011329 | 0.011396 | 0.011362 | 0.011463 | 0.011329 | 0.011463 | 0.011530 |
| 0.011530 | 0.011362 | 0.011362 | 0.011295 | 0.011295 | 0.011463 | 0.011396 |
| 0.011295 | 0.011396 | 0.011262 | 0.011295 | 0.011429 | 0.011564 | 0.011329 |
| 0.011295 | 0.011429 | 0.011363 | 0.011262 | 0.011597 | 0.011228 | 0.011429 |
| 0.011437 | 0.011329 | 0.011631 | 0.011463 | 0.011496 | 0.011362 | 0.011463 |
| 0.011329 | 0.011597 | 0.011262 | 0.011530 | 0.011329 | 0.011329 | 0.011262 |
| 0.011429 | 0.011698 | 0.011396 | 0.011463 | 0.011295 | 0.011698 | 0.011329 |
| 0.011329 | 0.011329 | 0.011362 | 0.011396 | 0.011362 | 0.011463 | 0.011530 |
| 0.011530 | 0.011496 | 0.011396 | 0.011497 | 0.000000 | 0.011329 | 0.011295 |
| 0.011329 | 0.011329 | 0.011396 | 0.011329 | 0.011228 | 0.011463 | 0.011329 |
| 0.011362 | 0.011362 | 0.011496 | 0.011530 | 0.011429 | 0.011295 | 0.011362 |
| 0.011429 | 0.011362 | 0.011463 | 0.011329 | 0.011463 | 0.011564 | 0.011866 |
| 0.011362 | 0.011765 | 0.011371 | 0.017898 | 0.011387 | 0.011488 | 0.011723 |
| 0.011683 | 0.011728 | 0.011427 | 0.011466 | 0.011774 | 0.011751 | 0.011425 |
| 0.011629 | 0.011610 | 0.011294 | 0.011311 | 0.011333 | 0.011455 | 0.011361 |
| 0.011623 | 0.011544 | 0.011505 | 0.011325 | 0.011496 | 0.011530 | 0.011534 |
| 0.011335 | 0.011497 | 0.011497 | 0.011463 | 0.011429 | 0.011430 | 0.011396 |
| 0.011429 | 0.011362 | 0.011396 | 0.011429 | 0.011396 | 0.011329 | 0.011362 |
| 0.011362 | 0.011429 | 0.011329 | 0.011430 | 0.011463 | 0.011497 | 0.011396 |
| 0.011429 | 0.011396 | 0.011732 | 0.011732 | 0.011463 | 0.011497 | 0.011530 |
| 0.011295 | 0.011295 | 0.011329 | 0.011362 | 0.011295 | 0.011530 | 0.011530 |
| 0.011564 | 0.011564 | 0.011496 | 0.011597 | 0.011765 | 0.011599 | 0.011362 |
| 0.011429 | 0.011497 | 0.011463 | 0.011362 | 0.011429 | 0.011396 | 0.011429 |
| 0.011497 | 0.011497 | 0.011530 | 0.011430 | 0.011330 | 0.011597 | 0.011497 |
| 0.011433 | 0.011329 | 0.011429 | 0.011530 | 0.011430 | 0.011564 | 0.011597 |
| 0.011765 | 0.011470 | 0.011631 | 0.011530 | 0.011530 | 0.011664 | 0.011329 |
| 0.011498 | 0.011396 | 0.011362 | 0.011362 | 0.011429 | 0.011329 | 0.011430 |
| 0.011463 | 0.011497 | 0.011396 | 0.011429 | 0.011396 | 0.011732 | 0.011732 |
| 0.011463 | 0.011497 | 0.011564 | 0.011496 | 0.012136 | 0.011524 | 0.011447 |
| 0.011517 | 0.011511 | 0.011622 | 0.011476 | 0.011620 | 0.011543 | 0.011508 |

|          |          |          |          |          |          |          |
|----------|----------|----------|----------|----------|----------|----------|
| 0.012090 | 0.011406 | 0.011540 | 0.011475 | 0.011749 | 0.011604 | 0.011638 |
| 0.012114 | 0.011550 | 0.011669 | 0.011731 | 0.011597 | 0.011597 | 0.011635 |
| 0.011295 | 0.011396 | 0.011597 | 0.011563 | 0.011567 | 0.011564 | 0.011532 |
| 0.011396 | 0.011262 | 0.011295 | 0.011396 | 0.011228 | 0.011362 | 0.011262 |
| 0.011396 | 0.011429 | 0.011329 | 0.011295 | 0.011396 | 0.011329 | 0.011362 |
| 0.011362 | 0.011295 | 0.011362 | 0.011396 | 0.011295 | 0.011429 | 0.011530 |
| 0.011429 | 0.011496 | 0.011429 | 0.011429 | 0.011362 | 0.011765 | 0.011396 |
| 0.011408 | 0.011362 | 0.011598 | 0.011603 | 0.011396 | 0.011463 | 0.011463 |
| 0.011463 | 0.011329 | 0.011362 | 0.011329 | 0.011496 | 0.011496 | 0.011429 |
| 0.011429 | 0.011564 | 0.011731 | 0.011463 | 0.011664 | 0.011664 | 0.011530 |
| 0.011362 | 0.011429 | 0.011463 | 0.011866 | 0.011430 | 0.011396 | 0.011429 |
| 0.011463 | 0.011396 | 0.011396 | 0.011698 | 0.011564 | 0.011664 | 0.011396 |
| 0.011496 | 0.011564 | 0.011429 | 0.011496 | 0.011463 | 0.011329 | 0.011664 |
| 0.011429 | 0.011396 | 0.011396 | 0.011564 | 0.011396 | 0.011496 | 0.011732 |
| 0.011429 | 0.011807 | 0.011799 | 0.011629 | 0.011342 | 0.011502 | 0.011421 |
| 0.011335 | 0.011839 | 0.011341 | 0.011596 | 0.011353 | 0.011569 | 0.011538 |
| 0.011570 | 0.011324 | 0.011505 | 0.011324 | 0.011330 | 0.011529 | 0.011466 |
| 0.011475 | 0.011336 | 0.011483 | 0.011412 | 0.011431 | 0.011564 | 0.011631 |
| 0.011631 | 0.011497 | 0.011601 | 0.011603 | 0.011738 | 0.011767 | 0.011429 |
| 0.011664 | 0.011530 | 0.011396 | 0.011497 | 0.011295 | 0.011530 | 0.011329 |
| 0.011396 | 0.011396 | 0.011362 | 0.011329 | 0.011362 | 0.011329 | 0.011429 |
| 0.011409 | 0.011410 | 0.011403 | 0.011437 | 0.011573 | 0.011470 | 0.011538 |
| 0.011537 | 0.011464 | 0.011282 | 0.011276 | 0.011399 | 0.011568 | 0.011569 |
| 0.011363 | 0.011433 | 0.011666 | 0.011635 | 0.011565 | 0.011599 | 0.011530 |
| 0.011463 | 0.011530 | 0.011530 | 0.011429 | 0.012000 | 0.011597 | 0.011664 |
| 0.011698 | 0.011772 | 0.011401 | 0.011476 | 0.011362 | 0.011564 | 0.011530 |
| 0.011565 | 0.011597 | 0.011597 | 0.011597 | 0.011768 | 0.011732 | 0.011372 |
| 0.011263 | 0.011233 | 0.011366 | 0.011332 | 0.011402 | 0.011247 | 0.011604 |
| 0.011403 | 0.011455 | 0.011251 | 0.011397 | 0.011396 | 0.011471 | 0.011295 |
| 0.011329 | 0.011329 | 0.011329 | 0.011362 | 0.011564 | 0.011530 | 0.011463 |
| 0.011564 | 0.011631 | 0.011362 | 0.011362 | 0.011396 | 0.011396 | 0.011398 |
| 0.011466 | 0.011396 | 0.011396 | 0.011431 | 0.011564 | 0.011631 | 0.011631 |
| 0.011497 | 0.011601 | 0.011603 | 0.011738 | 0.011767 | 0.011429 | 0.011597 |
| 0.011530 | 0.011530 | 0.011365 | 0.011547 | 0.011442 | 0.011503 | 0.011375 |
| 0.011473 | 0.011698 | 0.011484 | 0.011434 | 0.011262 | 0.011463 | 0.011329 |
| 0.011429 | 0.011430 | 0.011329 | 0.011431 | 0.011530 | 0.011533 | 0.011430 |
| 0.011329 | 0.011263 | 0.011329 | 0.011329 | 0.011262 | 0.011366 | 0.011463 |
| 0.011429 | 0.011362 | 0.011396 | 0.011429 | 0.011396 | 0.011329 | 0.011530 |
| 0.011396 | 0.011429 | 0.011429 | 0.011362 | 0.011429 | 0.011664 | 0.011329 |
| 0.011362 | 0.011765 | 0.011362 | 0.011329 | 0.011362 | 0.011731 | 0.011360 |
| 0.011791 | 0.011358 | 0.011361 | 0.011583 | 0.011671 | 0.011563 | 0.011311 |
| 0.011375 | 0.011530 | 0.011631 | 0.011705 | 0.011599 | 0.011737 | 0.011867 |
| 0.011767 | 0.011804 | 0.011765 | 0.012017 | 0.011731 | 0.012606 | 0.011768 |
| 0.012507 | 0.012274 | 0.012408 | 0.012680 | 0.011731 | 0.011430 | 0.011732 |
| 0.012171 | 0.012106 | 0.011698 | 0.011597 | 0.011665 | 0.011665 | 0.011635 |
| 0.011530 | 0.011535 | 0.011597 | 0.011565 | 0.011934 | 0.012000 | 0.012002 |
| 0.011901 | 0.012002 | 0.012105 | 0.011872 | 0.012171 | 0.012178 | 0.012238 |
| 0.012239 | 0.012273 | 0.012220 | 0.012239 | 0.012240 | 0.011463 | 0.011766 |
| 0.011834 | 0.012337 | 0.011840 | 0.012068 | 0.012541 | 0.011603 | 0.011497 |
| 0.011463 | 0.011463 | 0.011934 | 0.011965 | 0.012080 | 0.011799 | 0.011465 |
| S355     | 0.011597 | 0.011597 | 0.011933 | 0.011698 | 0.011698 | 0.011765 |
| 0.011603 | 0.011535 | 0.011765 | 0.011195 | 0.011262 | 0.011228 | 0.011194 |
| 0.011228 | 0.011396 | 0.011194 | 0.011228 | 0.011295 | 0.011262 | 0.011228 |
| 0.011194 | 0.011228 | 0.011329 | 0.011195 | 0.011228 | 0.011228 | 0.011569 |
| 0.011463 | 0.011228 | 0.011127 | 0.011362 | 0.011295 | 0.011262 | 0.011295 |
| 0.011262 | 0.011362 | 0.011194 | 0.011262 | 0.011228 | 0.011262 | 0.011429 |
| 0.011194 | 0.011262 | 0.011228 | 0.011161 | 0.011329 | 0.011362 | 0.011295 |
| 0.011262 | 0.011362 | 0.011329 | 0.011597 | 0.011194 | 0.011530 | 0.011194 |
| 0.011228 | 0.011329 | 0.011329 | 0.011530 | 0.011564 | 0.011329 | 0.011429 |
| 0.011295 | 0.011362 | 0.011262 | 0.011496 | 0.011732 | 0.011262 | 0.011329 |



|          |          |          |          |          |          |          |
|----------|----------|----------|----------|----------|----------|----------|
| 0.011228 | 0.011329 | 0.011295 | 0.011362 | 0.011295 | 0.011228 | 0.011228 |
| 0.011194 | 0.011228 | 0.011194 | 0.011295 | 0.011262 | 0.011296 | 0.011362 |
| 0.011295 | 0.011262 | 0.011329 | 0.011228 | 0.011362 | 0.011194 | 0.011262 |
| 0.011429 | 0.011362 | 0.011597 | 0.011429 | 0.011262 | 0.011496 | 0.011194 |
| 0.011431 | 0.011658 | 0.011475 | 0.011177 | 0.011172 | 0.011281 | 0.011375 |
| 0.012011 | 0.011467 | 0.011184 | 0.011496 | 0.011496 | 0.011295 | 0.011396 |
| 0.011329 | 0.011295 | 0.011362 | 0.011262 | 0.011362 | 0.011295 | 0.011295 |
| 0.011262 | 0.011362 | 0.011564 | 0.011429 | 0.011329 | 0.011295 | 0.011228 |
| 0.011195 | 0.011195 | 0.011262 | 0.011228 | 0.011429 | 0.011396 | 0.011329 |
| 0.011429 | 0.011497 | 0.011228 | 0.011228 | 0.011262 | 0.011262 | 0.011263 |
| 0.011331 | 0.011262 | 0.011262 | 0.011132 | 0.011205 | 0.011165 | 0.011262 |
| 0.011263 | 0.011198 | 0.011245 | 0.011233 | 0.011162 | 0.011197 | 0.011229 |
| 0.011492 | 0.011267 | 0.011301 | 0.011195 | 0.011199 | 0.011329 | 0.011296 |
| 0.011363 | 0.011296 | 0.011296 | 0.011396 | 0.011329 | 0.011698 | 0.011497 |
| 0.011530 | 0.011396 | 0.011262 | 0.011362 | 0.011161 | 0.011396 | 0.011195 |
| 0.011262 | 0.011262 | 0.011228 | 0.011195 | 0.011228 | 0.011195 | 0.011295 |
| 0.011262 | 0.011362 | 0.011295 | 0.011195 | 0.011296 | 0.011396 | 0.011398 |
| 0.011396 | 0.011295 | 0.011195 | 0.011128 | 0.011262 | 0.011195 | 0.011127 |
| 0.011230 | 0.011396 | 0.011195 | 0.011396 | 0.011161 | 0.011262 | 0.011228 |
| 0.011329 | 0.011228 | 0.011262 | 0.011228 | 0.011262 | 0.011127 | 0.011262 |
| 0.011295 | 0.011228 | 0.011295 | 0.011228 | 0.011262 | 0.011295 | 0.011530 |
| 0.011631 | 0.011564 | 0.011631 | 0.011330 | 0.011631 | 0.011262 | 0.011228 |
| 0.011263 | 0.011505 | 0.011380 | 0.011163 | 0.011637 | 0.011129 | 0.011257 |
| 0.011637 | 0.011536 | 0.011429 | 0.011631 | 0.011333 | 0.011496 | 0.011463 |
| 0.011396 | 0.011564 | 0.011415 | 0.011266 | 0.011312 | 0.011295 | 0.011365 |
| 0.011463 | 0.011364 | 0.011500 | 0.011568 | 0.011497 | 0.011564 | 0.011670 |
| 0.011399 | 0.011569 | 0.011500 | 0.011432 | 0.011699 | 0.011161 | 0.011363 |
| 0.011329 | 0.011262 | 0.011161 | 0.011161 | 0.011228 | 0.011228 | 0.011228 |
| 0.011228 | 0.011295 | 0.011194 | 0.011295 | 0.011228 | 0.011228 | 0.011295 |
| 0.011228 | 0.011664 | 0.011564 | 0.011597 | 0.011127 | 0.011228 | 0.011262 |
| 0.011262 | 0.011228 | 0.011295 | 0.011329 | 0.011194 | 0.011194 | 0.011194 |
| 0.011731 | 0.011362 | 0.011362 | 0.011161 | 0.011262 | 0.011429 | 0.011194 |
| 0.011194 | 0.011262 | 0.011228 | 0.011396 | 0.011194 | 0.011329 | 0.011463 |
| 0.011396 | 0.011228 | 0.011228 | 0.011161 | 0.011161 | 0.011329 | 0.011262 |
| 0.011161 | 0.011262 | 0.011127 | 0.011161 | 0.011295 | 0.011430 | 0.011195 |
| 0.011161 | 0.011295 | 0.011228 | 0.011127 | 0.011463 | 0.011127 | 0.011295 |
| 0.011368 | 0.011195 | 0.011496 | 0.011329 | 0.011362 | 0.011228 | 0.011262 |
| 0.011194 | 0.011530 | 0.011127 | 0.011396 | 0.011194 | 0.011194 | 0.011127 |
| 0.011362 | 0.011564 | 0.011262 | 0.011329 | 0.011161 | 0.011564 | 0.011194 |
| 0.011194 | 0.011194 | 0.011228 | 0.011329 | 0.011228 | 0.011329 | 0.011396 |
| 0.011396 | 0.011362 | 0.011194 | 0.011362 | 0.011329 | 0.000000 | 0.011161 |
| 0.011194 | 0.000000 | 0.011262 | 0.011194 | 0.011161 | 0.011329 | 0.011194 |
| 0.011228 | 0.011228 | 0.011362 | 0.011396 | 0.011295 | 0.011228 | 0.011228 |
| 0.011295 | 0.011228 | 0.011329 | 0.011194 | 0.011329 | 0.011429 | 0.011664 |
| 0.011228 | 0.011631 | 0.011233 | 0.017747 | 0.011257 | 0.011427 | 0.011583 |
| 0.011545 | 0.011588 | 0.011322 | 0.011234 | 0.011719 | 0.011612 | 0.011364 |
| 0.011487 | 0.011549 | 0.011138 | 0.011228 | 0.011216 | 0.011307 | 0.011232 |
| 0.011482 | 0.011395 | 0.011394 | 0.011193 | 0.011362 | 0.011396 | 0.011398 |
| 0.011266 | 0.011362 | 0.011362 | 0.011329 | 0.011295 | 0.011295 | 0.011262 |
| 0.011295 | 0.011228 | 0.011262 | 0.011295 | 0.011262 | 0.011195 | 0.011228 |
| 0.011228 | 0.011295 | 0.011195 | 0.011295 | 0.011329 | 0.011362 | 0.011262 |
| 0.011295 | 0.011195 | 0.011597 | 0.011597 | 0.011329 | 0.011363 | 0.011396 |
| 0.011161 | 0.011161 | 0.011195 | 0.011295 | 0.011161 | 0.011396 | 0.011396 |
| 0.011429 | 0.011429 | 0.011362 | 0.011463 | 0.011631 | 0.011464 | 0.011295 |
| 0.011295 | 0.011362 | 0.011396 | 0.011228 | 0.011295 | 0.011262 | 0.011295 |
| 0.011363 | 0.011362 | 0.011396 | 0.011363 | 0.011262 | 0.011463 | 0.011429 |
| 0.011297 | 0.011195 | 0.011295 | 0.011329 | 0.011295 | 0.011430 | 0.011463 |
| 0.011631 | 0.011333 | 0.011496 | 0.011463 | 0.011396 | 0.011564 | 0.011195 |
| 0.011363 | 0.011262 | 0.011228 | 0.011228 | 0.011295 | 0.011195 | 0.011295 |
| 0.011329 | 0.011362 | 0.011262 | 0.011295 | 0.011195 | 0.011597 | 0.011597 |

|          |          |          |          |          |          |          |
|----------|----------|----------|----------|----------|----------|----------|
| 0.011329 | 0.011363 | 0.011429 | 0.011362 | 0.012002 | 0.011417 | 0.011341 |
| 0.011412 | 0.011372 | 0.011482 | 0.011372 | 0.011480 | 0.011405 | 0.011370 |
| 0.011953 | 0.011268 | 0.011403 | 0.011337 | 0.011611 | 0.011468 | 0.011570 |
| 0.011978 | 0.011437 | 0.011533 | 0.011597 | 0.011463 | 0.011463 | 0.011499 |
| 0.011161 | 0.011329 | 0.011463 | 0.011429 | 0.011432 | 0.011429 | 0.011397 |
| 0.011262 | 0.011194 | 0.011228 | 0.011262 | 0.011161 | 0.011228 | 0.011127 |
| 0.011262 | 0.011295 | 0.011194 | 0.011161 | 0.011262 | 0.011194 | 0.011228 |
| 0.011228 | 0.011161 | 0.011228 | 0.011262 | 0.011161 | 0.011362 | 0.011396 |
| 0.011295 | 0.011362 | 0.011295 | 0.011295 | 0.011228 | 0.011564 | 0.011262 |
| 0.011304 | 0.011228 | 0.011463 | 0.011467 | 0.011329 | 0.011262 | 0.011329 |
| 0.011262 | 0.011262 | 0.011228 | 0.011262 | 0.011362 | 0.011362 | 0.011295 |
| 0.011295 | 0.011429 | 0.011597 | 0.011329 | 0.011530 | 0.011530 | 0.011396 |
| 0.011228 | 0.011295 | 0.011262 | 0.011732 | 0.011295 | 0.011329 | 0.011295 |
| 0.011329 | 0.011262 | 0.011262 | 0.011564 | 0.011497 | 0.011530 | 0.011262 |
| 0.011362 | 0.011429 | 0.011295 | 0.011362 | 0.011329 | 0.011194 | 0.011530 |
| 0.011295 | 0.011262 | 0.011262 | 0.011429 | 0.011262 | 0.011362 | 0.011597 |
| 0.011295 | 0.011671 | 0.011664 | 0.011467 | 0.011229 | 0.011366 | 0.011215 |
| 0.011225 | 0.011683 | 0.011201 | 0.011417 | 0.011255 | 0.011264 | 0.011379 |
| 0.011468 | 0.011126 | 0.011339 | 0.011192 | 0.011222 | 0.011395 | 0.011344 |
| 0.011362 | 0.011257 | 0.011342 | 0.011272 | 0.011296 | 0.011429 | 0.011497 |
| 0.011497 | 0.011363 | 0.011466 | 0.011467 | 0.011603 | 0.011625 | 0.011295 |
| 0.011530 | 0.011396 | 0.011262 | 0.011362 | 0.011161 | 0.011396 | 0.011195 |
| 0.011262 | 0.011262 | 0.011228 | 0.011195 | 0.011228 | 0.011195 | 0.011295 |
| 0.011270 | 0.011270 | 0.011266 | 0.011300 | 0.011436 | 0.011402 | 0.011333 |
| 0.011401 | 0.011329 | 0.011134 | 0.011096 | 0.011263 | 0.011433 | 0.011433 |
| 0.011228 | 0.011297 | 0.011531 | 0.011500 | 0.011430 | 0.011464 | 0.011396 |
| 0.011329 | 0.011396 | 0.011396 | 0.011295 | 0.011866 | 0.011463 | 0.011530 |
| 0.011564 | 0.011630 | 0.011265 | 0.011337 | 0.011228 | 0.011429 | 0.011396 |
| 0.011430 | 0.011463 | 0.011463 | 0.011463 | 0.011571 | 0.011597 | 0.011234 |
| 0.011128 | 0.011130 | 0.011230 | 0.011196 | 0.011299 | 0.011135 | 0.011468 |
| 0.011266 | 0.011411 | 0.011156 | 0.011285 | 0.011262 | 0.011334 | 0.011228 |
| 0.011195 | 0.011195 | 0.011262 | 0.011228 | 0.011429 | 0.011396 | 0.011329 |
| 0.011429 | 0.011497 | 0.011228 | 0.011228 | 0.011262 | 0.011262 | 0.011263 |
| 0.011331 | 0.011262 | 0.011262 | 0.011296 | 0.011429 | 0.011497 | 0.011497 |
| 0.011363 | 0.011466 | 0.011467 | 0.011603 | 0.011625 | 0.011295 | 0.011463 |
| 0.011396 | 0.011396 | 0.011162 | 0.011408 | 0.011338 | 0.011367 | 0.011235 |
| 0.011404 | 0.011561 | 0.011399 | 0.011298 | 0.011195 | 0.011396 | 0.011262 |
| 0.011362 | 0.011295 | 0.011195 | 0.011296 | 0.011396 | 0.011398 | 0.011295 |
| 0.011195 | 0.011128 | 0.011262 | 0.011195 | 0.011127 | 0.011230 | 0.011396 |
| 0.011295 | 0.011228 | 0.011262 | 0.011295 | 0.011262 | 0.011195 | 0.011396 |
| 0.011262 | 0.011295 | 0.011295 | 0.011228 | 0.011295 | 0.011530 | 0.011194 |
| 0.011228 | 0.011564 | 0.011228 | 0.011262 | 0.011228 | 0.011597 | 0.011189 |
| 0.011678 | 0.011188 | 0.011261 | 0.011422 | 0.011508 | 0.011419 | 0.011144 |
| 0.011218 | 0.011396 | 0.011496 | 0.011603 | 0.011464 | 0.011601 | 0.011733 |
| 0.011632 | 0.011669 | 0.011631 | 0.011880 | 0.011597 | 0.012472 | 0.011633 |
| 0.012372 | 0.012139 | 0.012273 | 0.012545 | 0.011597 | 0.011295 | 0.011598 |
| 0.012036 | 0.011971 | 0.011564 | 0.011463 | 0.011531 | 0.011531 | 0.011500 |
| 0.011396 | 0.011399 | 0.011463 | 0.011430 | 0.011800 | 0.011866 | 0.011867 |
| 0.011766 | 0.011867 | 0.011970 | 0.011737 | 0.012036 | 0.012042 | 0.012103 |
| 0.012104 | 0.012138 | 0.012084 | 0.012104 | 0.012105 | 0.011329 | 0.011631 |
| 0.011699 | 0.012202 | 0.011704 | 0.011933 | 0.012406 | 0.011468 | 0.011363 |
| 0.011329 | 0.011329 | 0.011799 | 0.011842 | 0.011940 | 0.011664 | 0.011330 |
| S356     | 0.011564 | 0.011564 | 0.011900 | 0.011664 | 0.011664 | 0.011732 |
| 0.011569 | 0.011502 | 0.011731 | 0.011161 | 0.011228 | 0.011195 | 0.011161 |
| 0.011194 | 0.011362 | 0.011161 | 0.011194 | 0.011262 | 0.011228 | 0.011194 |
| 0.011161 | 0.011194 | 0.011295 | 0.011161 | 0.011195 | 0.011194 | 0.011535 |
| 0.011429 | 0.011195 | 0.011094 | 0.011329 | 0.011262 | 0.011228 | 0.011262 |
| 0.011228 | 0.011329 | 0.011228 | 0.011228 | 0.011262 | 0.011228 | 0.011396 |
| 0.011161 | 0.011228 | 0.011262 | 0.011194 | 0.011295 | 0.011329 | 0.011262 |
| 0.011228 | 0.011396 | 0.011295 | 0.011564 | 0.011228 | 0.011496 | 0.011228 |

|          |          |          |          |          |          |          |
|----------|----------|----------|----------|----------|----------|----------|
| 0.011194 | 0.011295 | 0.011362 | 0.011496 | 0.011597 | 0.011295 | 0.011396 |
| 0.011262 | 0.011329 | 0.011228 | 0.011463 | 0.011698 | 0.011228 | 0.011295 |
| 0.011194 | 0.011295 | 0.011262 | 0.011329 | 0.011262 | 0.011262 | 0.011262 |
| 0.011161 | 0.011194 | 0.011161 | 0.011262 | 0.011228 | 0.011262 | 0.011329 |
| 0.011262 | 0.011228 | 0.011295 | 0.011194 | 0.011329 | 0.011161 | 0.011228 |
| 0.011396 | 0.011329 | 0.011564 | 0.011396 | 0.011228 | 0.011463 | 0.011228 |
| 0.011394 | 0.011620 | 0.011437 | 0.011138 | 0.011135 | 0.011244 | 0.011336 |
| 0.011975 | 0.011416 | 0.011143 | 0.011463 | 0.011463 | 0.011262 | 0.011362 |
| 0.011295 | 0.011262 | 0.011329 | 0.011228 | 0.011329 | 0.011262 | 0.011262 |
| 0.011228 | 0.011329 | 0.011530 | 0.011396 | 0.011295 | 0.011262 | 0.011195 |
| 0.011161 | 0.011161 | 0.011228 | 0.011195 | 0.011396 | 0.011362 | 0.011295 |
| 0.011396 | 0.011463 | 0.011195 | 0.011195 | 0.011228 | 0.011228 | 0.011229 |
| 0.011297 | 0.011228 | 0.011228 | 0.011096 | 0.011169 | 0.011130 | 0.011228 |
| 0.011230 | 0.011163 | 0.011208 | 0.011198 | 0.011128 | 0.011163 | 0.011195 |
| 0.011456 | 0.011233 | 0.011267 | 0.011161 | 0.011164 | 0.011296 | 0.011262 |
| 0.011329 | 0.011262 | 0.011262 | 0.011362 | 0.011295 | 0.011664 | 0.011463 |
| 0.011496 | 0.011362 | 0.011228 | 0.011329 | 0.011127 | 0.011362 | 0.011161 |
| 0.011228 | 0.011228 | 0.011195 | 0.011161 | 0.011194 | 0.011161 | 0.011262 |
| 0.011228 | 0.011329 | 0.011262 | 0.011161 | 0.011262 | 0.011362 | 0.011364 |
| 0.011362 | 0.011262 | 0.011161 | 0.011094 | 0.011228 | 0.011161 | 0.011094 |
| 0.011196 | 0.011362 | 0.011161 | 0.011362 | 0.011094 | 0.011228 | 0.011195 |
| 0.011295 | 0.011195 | 0.011228 | 0.011195 | 0.011228 | 0.011094 | 0.011228 |
| 0.011262 | 0.011195 | 0.011262 | 0.011195 | 0.011228 | 0.011262 | 0.011497 |
| 0.011597 | 0.011530 | 0.011597 | 0.011364 | 0.011598 | 0.011228 | 0.011195 |
| 0.011229 | 0.011505 | 0.011335 | 0.011129 | 0.011603 | 0.011094 | 0.011178 |
| 0.011603 | 0.011502 | 0.011396 | 0.011597 | 0.011299 | 0.011463 | 0.011429 |
| 0.011362 | 0.011530 | 0.011380 | 0.011225 | 0.011270 | 0.011262 | 0.011331 |
| 0.011429 | 0.011330 | 0.011466 | 0.011534 | 0.011463 | 0.011530 | 0.011636 |
| 0.011365 | 0.011535 | 0.011466 | 0.011398 | 0.011666 | 0.011127 | 0.011330 |
| 0.011295 | 0.011228 | 0.011127 | 0.011127 | 0.011194 | 0.011194 | 0.011262 |
| 0.011194 | 0.011262 | 0.011161 | 0.011262 | 0.011194 | 0.011194 | 0.011262 |
| 0.011194 | 0.011631 | 0.011530 | 0.011564 | 0.011094 | 0.011194 | 0.011228 |
| 0.011228 | 0.011194 | 0.011262 | 0.011295 | 0.011161 | 0.011161 | 0.011161 |
| 0.011698 | 0.011329 | 0.011329 | 0.011127 | 0.011228 | 0.011396 | 0.011161 |
| 0.011161 | 0.011228 | 0.011194 | 0.011362 | 0.011161 | 0.011295 | 0.011429 |
| 0.011362 | 0.011194 | 0.011194 | 0.011127 | 0.011127 | 0.011295 | 0.011228 |
| 0.011127 | 0.011228 | 0.011094 | 0.011127 | 0.011262 | 0.011396 | 0.011161 |
| 0.011128 | 0.011262 | 0.011195 | 0.011094 | 0.011429 | 0.011094 | 0.011262 |
| 0.011334 | 0.011161 | 0.011463 | 0.011295 | 0.011329 | 0.011194 | 0.011295 |
| 0.011161 | 0.011496 | 0.011094 | 0.011362 | 0.011161 | 0.011161 | 0.011094 |
| 0.011329 | 0.011530 | 0.011228 | 0.011295 | 0.011127 | 0.011530 | 0.011161 |
| 0.011161 | 0.011161 | 0.011194 | 0.011295 | 0.011194 | 0.011295 | 0.011362 |
| 0.011362 | 0.011329 | 0.011228 | 0.011329 | 0.011295 | 0.011161 | 0.000000 |
| 0.011161 | 0.011161 | 0.011228 | 0.011161 | 0.011127 | 0.011295 | 0.011161 |
| 0.011194 | 0.011194 | 0.011329 | 0.011362 | 0.011262 | 0.011194 | 0.011195 |
| 0.011262 | 0.011194 | 0.011295 | 0.011161 | 0.011295 | 0.011396 | 0.011698 |
| 0.011194 | 0.011597 | 0.011198 | 0.017710 | 0.011191 | 0.011366 | 0.011548 |
| 0.011510 | 0.011553 | 0.011270 | 0.011234 | 0.011664 | 0.011578 | 0.011303 |
| 0.011440 | 0.011487 | 0.011099 | 0.011186 | 0.011177 | 0.011258 | 0.011189 |
| 0.011436 | 0.011358 | 0.011357 | 0.011126 | 0.011329 | 0.011362 | 0.011365 |
| 0.011232 | 0.011329 | 0.011329 | 0.011295 | 0.011262 | 0.011262 | 0.011228 |
| 0.011262 | 0.011195 | 0.011228 | 0.011262 | 0.011228 | 0.011161 | 0.011195 |
| 0.011195 | 0.011262 | 0.011161 | 0.011262 | 0.011295 | 0.011329 | 0.011228 |
| 0.011262 | 0.011228 | 0.011564 | 0.011564 | 0.011295 | 0.011329 | 0.011362 |
| 0.011127 | 0.011127 | 0.011161 | 0.011262 | 0.011127 | 0.011362 | 0.011362 |
| 0.011396 | 0.011396 | 0.011329 | 0.011429 | 0.011597 | 0.011431 | 0.011262 |
| 0.011262 | 0.011329 | 0.011362 | 0.011195 | 0.011262 | 0.011228 | 0.011262 |
| 0.011329 | 0.011329 | 0.011362 | 0.011329 | 0.011229 | 0.011429 | 0.011396 |
| 0.011263 | 0.011161 | 0.011262 | 0.011362 | 0.011262 | 0.011396 | 0.011429 |
| 0.011597 | 0.011299 | 0.011463 | 0.011429 | 0.011362 | 0.011530 | 0.011161 |

|          |          |          |          |          |          |          |
|----------|----------|----------|----------|----------|----------|----------|
| 0.011330 | 0.011228 | 0.011195 | 0.011195 | 0.011262 | 0.011161 | 0.011262 |
| 0.011295 | 0.011329 | 0.011228 | 0.011262 | 0.011228 | 0.011564 | 0.011564 |
| 0.011295 | 0.011329 | 0.011396 | 0.011329 | 0.011968 | 0.011382 | 0.011306 |
| 0.011377 | 0.011338 | 0.011447 | 0.011337 | 0.011445 | 0.011370 | 0.011336 |
| 0.011918 | 0.011233 | 0.011368 | 0.011302 | 0.011577 | 0.011434 | 0.011536 |
| 0.011944 | 0.011399 | 0.011500 | 0.011564 | 0.011429 | 0.011429 | 0.011466 |
| 0.011127 | 0.011295 | 0.011429 | 0.011396 | 0.011398 | 0.011396 | 0.011363 |
| 0.011228 | 0.011161 | 0.011194 | 0.011228 | 0.011127 | 0.011194 | 0.011094 |
| 0.011228 | 0.011262 | 0.011161 | 0.011127 | 0.011228 | 0.011161 | 0.011194 |
| 0.011194 | 0.011127 | 0.011194 | 0.011228 | 0.011127 | 0.011329 | 0.011362 |
| 0.011262 | 0.011329 | 0.011262 | 0.011262 | 0.011194 | 0.011597 | 0.011228 |
| 0.011269 | 0.011195 | 0.011430 | 0.011433 | 0.011295 | 0.011295 | 0.011295 |
| 0.011295 | 0.011228 | 0.011194 | 0.011228 | 0.011329 | 0.011329 | 0.011262 |
| 0.011262 | 0.011396 | 0.011564 | 0.011295 | 0.011497 | 0.011497 | 0.011362 |
| 0.011194 | 0.011262 | 0.011295 | 0.011698 | 0.011262 | 0.011295 | 0.011262 |
| 0.011295 | 0.011228 | 0.011228 | 0.011530 | 0.011463 | 0.011497 | 0.011228 |
| 0.011329 | 0.011396 | 0.011262 | 0.011329 | 0.011295 | 0.011161 | 0.011496 |
| 0.011262 | 0.011161 | 0.011228 | 0.011396 | 0.011228 | 0.011329 | 0.011564 |
| 0.011262 | 0.011637 | 0.011631 | 0.011426 | 0.011173 | 0.011332 | 0.011215 |
| 0.011170 | 0.011644 | 0.011166 | 0.011373 | 0.011207 | 0.011315 | 0.011326 |
| 0.011417 | 0.011126 | 0.011283 | 0.011126 | 0.011168 | 0.011328 | 0.011303 |
| 0.011324 | 0.011218 | 0.011307 | 0.011236 | 0.011262 | 0.011396 | 0.011463 |
| 0.011463 | 0.011329 | 0.011432 | 0.011433 | 0.011569 | 0.011590 | 0.011262 |
| 0.011496 | 0.011362 | 0.011228 | 0.011329 | 0.011127 | 0.011362 | 0.011161 |
| 0.011228 | 0.011228 | 0.011195 | 0.011161 | 0.011194 | 0.011161 | 0.011262 |
| 0.011235 | 0.011235 | 0.011231 | 0.011266 | 0.011402 | 0.011368 | 0.011367 |
| 0.011367 | 0.011296 | 0.011097 | 0.011096 | 0.011230 | 0.011399 | 0.011399 |
| 0.011195 | 0.011263 | 0.011430 | 0.011466 | 0.011396 | 0.011430 | 0.011362 |
| 0.011295 | 0.011362 | 0.011362 | 0.011262 | 0.011832 | 0.011429 | 0.011497 |
| 0.011463 | 0.011594 | 0.011231 | 0.011303 | 0.011195 | 0.011396 | 0.011362 |
| 0.011397 | 0.011429 | 0.011429 | 0.011429 | 0.011571 | 0.011564 | 0.011199 |
| 0.011094 | 0.011095 | 0.011196 | 0.011162 | 0.011265 | 0.000000 | 0.011434 |
| 0.011232 | 0.011323 | 0.000000 | 0.011248 | 0.011228 | 0.011300 | 0.011195 |
| 0.011161 | 0.011161 | 0.011228 | 0.011195 | 0.011396 | 0.011362 | 0.011295 |
| 0.011396 | 0.011463 | 0.011195 | 0.011195 | 0.011228 | 0.011228 | 0.011229 |
| 0.011297 | 0.011228 | 0.011228 | 0.011262 | 0.011396 | 0.011463 | 0.011463 |
| 0.011329 | 0.011432 | 0.011433 | 0.011569 | 0.011590 | 0.011262 | 0.011429 |
| 0.011362 | 0.011362 | 0.011196 | 0.011373 | 0.011303 | 0.011333 | 0.011165 |
| 0.011370 | 0.011516 | 0.011314 | 0.011264 | 0.011161 | 0.011362 | 0.011228 |
| 0.011329 | 0.011262 | 0.011161 | 0.011262 | 0.011362 | 0.011364 | 0.011262 |
| 0.011161 | 0.011094 | 0.011228 | 0.011161 | 0.011094 | 0.011196 | 0.011362 |
| 0.011262 | 0.011195 | 0.011228 | 0.011262 | 0.011228 | 0.011161 | 0.011362 |
| 0.011228 | 0.011262 | 0.011262 | 0.011194 | 0.011262 | 0.011497 | 0.011161 |
| 0.011194 | 0.011597 | 0.011194 | 0.011228 | 0.011194 | 0.011564 | 0.011146 |
| 0.011622 | 0.011145 | 0.011211 | 0.011382 | 0.011467 | 0.011383 | 0.011102 |
| 0.011165 | 0.011362 | 0.011463 | 0.011569 | 0.011430 | 0.011568 | 0.011699 |
| 0.011598 | 0.011635 | 0.011597 | 0.011846 | 0.011564 | 0.012438 | 0.011599 |
| 0.012338 | 0.012105 | 0.012240 | 0.012511 | 0.011564 | 0.011262 | 0.011564 |
| 0.012002 | 0.011937 | 0.011530 | 0.011430 | 0.011497 | 0.011497 | 0.011466 |
| 0.011362 | 0.011365 | 0.011429 | 0.011396 | 0.011766 | 0.011832 | 0.011834 |
| 0.011733 | 0.011833 | 0.011937 | 0.011703 | 0.012003 | 0.012008 | 0.012070 |
| 0.012070 | 0.012104 | 0.012050 | 0.012071 | 0.012072 | 0.011295 | 0.011598 |
| 0.011666 | 0.012169 | 0.011670 | 0.011900 | 0.012373 | 0.011434 | 0.011329 |
| 0.011295 | 0.011295 | 0.011766 | 0.011759 | 0.011904 | 0.011631 | 0.011296 |
| s357     | 0.011597 | 0.011597 | 0.011933 | 0.011698 | 0.011698 | 0.011765 |
| 0.011603 | 0.011535 | 0.011765 | 0.011195 | 0.011262 | 0.011228 | 0.011194 |
| 0.011228 | 0.011396 | 0.011194 | 0.011228 | 0.011295 | 0.011262 | 0.011228 |
| 0.011194 | 0.011228 | 0.011329 | 0.011195 | 0.011228 | 0.011228 | 0.011569 |
| 0.011463 | 0.011228 | 0.011127 | 0.011362 | 0.011295 | 0.011262 | 0.011295 |
| 0.011262 | 0.011362 | 0.011262 | 0.011262 | 0.011295 | 0.011262 | 0.011429 |

|          |          |          |          |          |          |          |
|----------|----------|----------|----------|----------|----------|----------|
| 0.011194 | 0.011262 | 0.011295 | 0.011228 | 0.011329 | 0.011362 | 0.011295 |
| 0.011262 | 0.011429 | 0.011329 | 0.011597 | 0.011262 | 0.011530 | 0.011262 |
| 0.011228 | 0.011329 | 0.011396 | 0.011530 | 0.011631 | 0.011329 | 0.011429 |
| 0.011295 | 0.011362 | 0.011262 | 0.011496 | 0.011732 | 0.011262 | 0.011329 |
| 0.011228 | 0.011329 | 0.011295 | 0.011362 | 0.011295 | 0.011295 | 0.011295 |
| 0.011194 | 0.011228 | 0.011194 | 0.011295 | 0.011262 | 0.011296 | 0.011362 |
| 0.011295 | 0.011262 | 0.011329 | 0.011228 | 0.011362 | 0.011194 | 0.011262 |
| 0.011429 | 0.011362 | 0.011597 | 0.011429 | 0.011262 | 0.011496 | 0.011262 |
| 0.011431 | 0.011658 | 0.011475 | 0.011177 | 0.011172 | 0.011281 | 0.011375 |
| 0.012011 | 0.011416 | 0.011143 | 0.011496 | 0.011496 | 0.011295 | 0.011396 |
| 0.011329 | 0.011295 | 0.011362 | 0.011262 | 0.011362 | 0.011295 | 0.011295 |
| 0.011262 | 0.011362 | 0.011564 | 0.011429 | 0.011329 | 0.011295 | 0.011228 |
| 0.011195 | 0.011195 | 0.011262 | 0.011228 | 0.011429 | 0.011396 | 0.011329 |
| 0.011429 | 0.011497 | 0.011228 | 0.011228 | 0.011262 | 0.011262 | 0.011263 |
| 0.011331 | 0.011262 | 0.011262 | 0.011132 | 0.011205 | 0.011165 | 0.011262 |
| 0.011263 | 0.011198 | 0.011245 | 0.011233 | 0.011162 | 0.011197 | 0.011229 |
| 0.011492 | 0.011267 | 0.011301 | 0.011195 | 0.011199 | 0.011329 | 0.011296 |
| 0.011363 | 0.011296 | 0.011296 | 0.011396 | 0.011329 | 0.011698 | 0.011497 |
| 0.011530 | 0.011396 | 0.011262 | 0.011362 | 0.011161 | 0.011396 | 0.011195 |
| 0.011262 | 0.011262 | 0.011228 | 0.011194 | 0.011228 | 0.011195 | 0.011295 |
| 0.011262 | 0.011362 | 0.011295 | 0.011195 | 0.011296 | 0.011396 | 0.011398 |
| 0.011396 | 0.011295 | 0.011195 | 0.011128 | 0.011262 | 0.011195 | 0.011127 |
| 0.011230 | 0.011396 | 0.011195 | 0.011396 | 0.011161 | 0.011262 | 0.011228 |
| 0.011329 | 0.011228 | 0.011262 | 0.011228 | 0.011262 | 0.011127 | 0.011262 |
| 0.011295 | 0.011228 | 0.011295 | 0.011228 | 0.011262 | 0.011295 | 0.011530 |
| 0.011631 | 0.011564 | 0.011631 | 0.011397 | 0.011631 | 0.011262 | 0.011228 |
| 0.011263 | 0.011545 | 0.011380 | 0.011163 | 0.011637 | 0.011129 | 0.011257 |
| 0.011637 | 0.011536 | 0.011429 | 0.011631 | 0.011333 | 0.011496 | 0.011463 |
| 0.011396 | 0.011564 | 0.011415 | 0.011225 | 0.011270 | 0.011295 | 0.011365 |
| 0.011463 | 0.011364 | 0.011500 | 0.011568 | 0.011496 | 0.011564 | 0.011670 |
| 0.011398 | 0.011569 | 0.011500 | 0.011432 | 0.011699 | 0.011161 | 0.011363 |
| 0.011329 | 0.011262 | 0.011161 | 0.011161 | 0.011228 | 0.011228 | 0.011295 |
| 0.011228 | 0.011295 | 0.011194 | 0.011295 | 0.011228 | 0.011228 | 0.011295 |
| 0.011228 | 0.011664 | 0.011564 | 0.011597 | 0.011127 | 0.011228 | 0.011262 |
| 0.011262 | 0.011228 | 0.011295 | 0.011329 | 0.011194 | 0.011194 | 0.011194 |
| 0.011731 | 0.011362 | 0.011362 | 0.011161 | 0.011262 | 0.011429 | 0.011194 |
| 0.011194 | 0.011262 | 0.011228 | 0.011396 | 0.011194 | 0.011329 | 0.011463 |
| 0.011396 | 0.011228 | 0.011228 | 0.011161 | 0.011161 | 0.011329 | 0.011262 |
| 0.011161 | 0.011262 | 0.011127 | 0.011161 | 0.011295 | 0.011430 | 0.011195 |
| 0.011161 | 0.011295 | 0.011228 | 0.011127 | 0.011463 | 0.011127 | 0.011295 |
| 0.011368 | 0.011194 | 0.011496 | 0.011329 | 0.011362 | 0.011228 | 0.011329 |
| 0.011194 | 0.011530 | 0.011127 | 0.011396 | 0.011194 | 0.011194 | 0.011127 |
| 0.011362 | 0.011564 | 0.011262 | 0.011329 | 0.011094 | 0.011564 | 0.011194 |
| 0.011194 | 0.011194 | 0.011228 | 0.011329 | 0.011228 | 0.011329 | 0.011396 |
| 0.011396 | 0.011295 | 0.011262 | 0.011362 | 0.011329 | 0.011194 | 0.011161 |
| 0.000000 | 0.011194 | 0.011262 | 0.011194 | 0.011161 | 0.011329 | 0.011194 |
| 0.011228 | 0.011228 | 0.011362 | 0.011396 | 0.011295 | 0.011228 | 0.011228 |
| 0.011295 | 0.011228 | 0.011329 | 0.011194 | 0.011329 | 0.011429 | 0.011731 |
| 0.011228 | 0.011631 | 0.011233 | 0.017710 | 0.011191 | 0.011366 | 0.011583 |
| 0.011545 | 0.011588 | 0.011270 | 0.011234 | 0.011719 | 0.011612 | 0.011364 |
| 0.011440 | 0.011549 | 0.011138 | 0.011186 | 0.011177 | 0.011307 | 0.011189 |
| 0.011436 | 0.011395 | 0.011357 | 0.011193 | 0.011362 | 0.011396 | 0.011398 |
| 0.011266 | 0.011362 | 0.011362 | 0.011329 | 0.011295 | 0.011295 | 0.011262 |
| 0.011295 | 0.011228 | 0.011262 | 0.011295 | 0.011262 | 0.011195 | 0.011228 |
| 0.011228 | 0.011295 | 0.011195 | 0.011295 | 0.011329 | 0.011362 | 0.011262 |
| 0.011295 | 0.011262 | 0.011597 | 0.011597 | 0.011329 | 0.011363 | 0.011396 |
| 0.011161 | 0.011161 | 0.011195 | 0.011295 | 0.011161 | 0.011396 | 0.011396 |
| 0.011429 | 0.011429 | 0.011362 | 0.011463 | 0.011631 | 0.011464 | 0.011295 |
| 0.011295 | 0.011362 | 0.011396 | 0.011228 | 0.011295 | 0.011262 | 0.011295 |
| 0.011363 | 0.011362 | 0.011396 | 0.011362 | 0.011262 | 0.011463 | 0.011429 |

|          |          |          |          |          |          |          |
|----------|----------|----------|----------|----------|----------|----------|
| 0.011297 | 0.011195 | 0.011295 | 0.011396 | 0.011295 | 0.011430 | 0.011463 |
| 0.011631 | 0.011333 | 0.011496 | 0.011463 | 0.011396 | 0.011564 | 0.011195 |
| 0.011363 | 0.011262 | 0.011228 | 0.011228 | 0.011295 | 0.011195 | 0.011295 |
| 0.011329 | 0.011362 | 0.011262 | 0.011295 | 0.011262 | 0.011597 | 0.011597 |
| 0.011329 | 0.011363 | 0.011429 | 0.011362 | 0.012002 | 0.011417 | 0.011341 |
| 0.011412 | 0.011372 | 0.011482 | 0.011372 | 0.011480 | 0.011405 | 0.011370 |
| 0.011953 | 0.011268 | 0.011403 | 0.011337 | 0.011611 | 0.011468 | 0.011570 |
| 0.011978 | 0.011437 | 0.011533 | 0.011597 | 0.011463 | 0.011463 | 0.011499 |
| 0.011161 | 0.011329 | 0.011463 | 0.011429 | 0.011432 | 0.011429 | 0.011397 |
| 0.011262 | 0.011194 | 0.011228 | 0.011262 | 0.011161 | 0.011228 | 0.011127 |
| 0.011262 | 0.011295 | 0.011194 | 0.011161 | 0.011262 | 0.011194 | 0.011228 |
| 0.011228 | 0.011161 | 0.011228 | 0.011262 | 0.011161 | 0.011362 | 0.011396 |
| 0.011295 | 0.011362 | 0.011295 | 0.011295 | 0.011228 | 0.011631 | 0.011262 |
| 0.011304 | 0.011228 | 0.011463 | 0.011467 | 0.011329 | 0.011329 | 0.011329 |
| 0.011329 | 0.011262 | 0.011228 | 0.011262 | 0.011362 | 0.011362 | 0.011295 |
| 0.011295 | 0.011429 | 0.011597 | 0.011329 | 0.011530 | 0.011530 | 0.011396 |
| 0.011228 | 0.011295 | 0.011329 | 0.011732 | 0.011295 | 0.011329 | 0.011295 |
| 0.011329 | 0.011262 | 0.011262 | 0.011564 | 0.011497 | 0.011530 | 0.011262 |
| 0.011362 | 0.011429 | 0.011295 | 0.011362 | 0.011329 | 0.011194 | 0.011530 |
| 0.011295 | 0.011262 | 0.011262 | 0.011429 | 0.011262 | 0.011362 | 0.011597 |
| 0.011295 | 0.011671 | 0.011664 | 0.011467 | 0.011173 | 0.011366 | 0.011215 |
| 0.011170 | 0.011683 | 0.011201 | 0.011373 | 0.011255 | 0.011366 | 0.011326 |
| 0.011417 | 0.011126 | 0.011283 | 0.011126 | 0.011168 | 0.011328 | 0.011344 |
| 0.011362 | 0.011257 | 0.011342 | 0.011272 | 0.011296 | 0.011429 | 0.011497 |
| 0.011497 | 0.011363 | 0.011466 | 0.011467 | 0.011602 | 0.011625 | 0.011295 |
| 0.011530 | 0.011396 | 0.011262 | 0.011362 | 0.011161 | 0.011396 | 0.011195 |
| 0.011262 | 0.011262 | 0.011228 | 0.011194 | 0.011228 | 0.011195 | 0.011295 |
| 0.011270 | 0.011270 | 0.011266 | 0.011300 | 0.011436 | 0.011402 | 0.011402 |
| 0.011401 | 0.011329 | 0.011134 | 0.011132 | 0.011263 | 0.011433 | 0.011433 |
| 0.011228 | 0.011297 | 0.011531 | 0.011499 | 0.011430 | 0.011464 | 0.011396 |
| 0.011329 | 0.011396 | 0.011396 | 0.011295 | 0.011866 | 0.011463 | 0.011530 |
| 0.011564 | 0.011630 | 0.011197 | 0.011337 | 0.011228 | 0.011429 | 0.011396 |
| 0.011430 | 0.011463 | 0.011463 | 0.011463 | 0.011610 | 0.011597 | 0.011234 |
| 0.011128 | 0.011130 | 0.011230 | 0.011196 | 0.011299 | 0.011135 | 0.011468 |
| 0.011266 | 0.011411 | 0.011156 | 0.011285 | 0.011262 | 0.011334 | 0.011228 |
| 0.011195 | 0.011195 | 0.011262 | 0.011228 | 0.011429 | 0.011396 | 0.011329 |
| 0.011429 | 0.011497 | 0.011228 | 0.011228 | 0.011262 | 0.011262 | 0.011263 |
| 0.011331 | 0.011262 | 0.011262 | 0.011296 | 0.011429 | 0.011497 | 0.011497 |
| 0.011363 | 0.011466 | 0.011467 | 0.011602 | 0.011625 | 0.011295 | 0.011463 |
| 0.011396 | 0.011396 | 0.011229 | 0.011408 | 0.011338 | 0.011367 | 0.011200 |
| 0.011404 | 0.011607 | 0.011357 | 0.011298 | 0.011195 | 0.011396 | 0.011262 |
| 0.011362 | 0.011295 | 0.011195 | 0.011296 | 0.011396 | 0.011398 | 0.011295 |
| 0.011195 | 0.011128 | 0.011262 | 0.011195 | 0.011127 | 0.011230 | 0.011396 |
| 0.011295 | 0.011228 | 0.011262 | 0.011295 | 0.011262 | 0.011195 | 0.011396 |
| 0.011262 | 0.011295 | 0.011295 | 0.011228 | 0.011295 | 0.011530 | 0.011194 |
| 0.011228 | 0.011631 | 0.011228 | 0.011262 | 0.011228 | 0.011597 | 0.011146 |
| 0.011622 | 0.011188 | 0.011211 | 0.011422 | 0.011508 | 0.011419 | 0.011144 |
| 0.011165 | 0.011396 | 0.011496 | 0.011603 | 0.011464 | 0.011601 | 0.011733 |
| 0.011632 | 0.011669 | 0.011631 | 0.011880 | 0.011597 | 0.012471 | 0.011633 |
| 0.012372 | 0.012139 | 0.012206 | 0.012545 | 0.011597 | 0.011295 | 0.011598 |
| 0.012036 | 0.011971 | 0.011564 | 0.011463 | 0.011531 | 0.011531 | 0.011500 |
| 0.011396 | 0.011399 | 0.011463 | 0.011430 | 0.011800 | 0.011866 | 0.011867 |
| 0.011766 | 0.011867 | 0.011970 | 0.011737 | 0.012036 | 0.012042 | 0.012103 |
| 0.012104 | 0.012138 | 0.012084 | 0.012104 | 0.012105 | 0.011329 | 0.011631 |
| 0.011699 | 0.012202 | 0.011704 | 0.011933 | 0.012406 | 0.011468 | 0.011363 |
| 0.011329 | 0.011329 | 0.011799 | 0.011842 | 0.011940 | 0.011664 | 0.011330 |
| S358     | 0.011597 | 0.011597 | 0.011933 | 0.011698 | 0.011698 | 0.011765 |
| 0.011603 | 0.011535 | 0.011765 | 0.011195 | 0.011262 | 0.011228 | 0.011194 |
| 0.011228 | 0.011396 | 0.011194 | 0.011228 | 0.011295 | 0.011262 | 0.011228 |
| 0.011194 | 0.011228 | 0.011329 | 0.011195 | 0.011228 | 0.011228 | 0.011569 |

|          |          |          |          |          |          |          |
|----------|----------|----------|----------|----------|----------|----------|
| 0.011463 | 0.011228 | 0.011127 | 0.011362 | 0.011295 | 0.011262 | 0.011295 |
| 0.011262 | 0.011362 | 0.011194 | 0.011262 | 0.011228 | 0.011262 | 0.011429 |
| 0.011194 | 0.011262 | 0.011228 | 0.011161 | 0.011329 | 0.011362 | 0.011295 |
| 0.011262 | 0.011362 | 0.011329 | 0.011597 | 0.011194 | 0.011530 | 0.011194 |
| 0.011228 | 0.011329 | 0.011329 | 0.011530 | 0.011564 | 0.011329 | 0.011429 |
| 0.011295 | 0.011362 | 0.011262 | 0.011496 | 0.011732 | 0.011262 | 0.011329 |
| 0.011228 | 0.011329 | 0.011295 | 0.011362 | 0.011295 | 0.011228 | 0.011228 |
| 0.011194 | 0.011228 | 0.011194 | 0.011295 | 0.011262 | 0.011296 | 0.011362 |
| 0.011295 | 0.011262 | 0.011329 | 0.011228 | 0.011362 | 0.011194 | 0.011262 |
| 0.011429 | 0.011362 | 0.011597 | 0.011429 | 0.011262 | 0.011496 | 0.011194 |
| 0.011431 | 0.011658 | 0.011475 | 0.011177 | 0.011172 | 0.011281 | 0.011375 |
| 0.012011 | 0.011467 | 0.011184 | 0.011496 | 0.011496 | 0.011295 | 0.011396 |
| 0.011329 | 0.011295 | 0.011362 | 0.011262 | 0.011362 | 0.011295 | 0.011295 |
| 0.011262 | 0.011362 | 0.011564 | 0.011429 | 0.011329 | 0.011295 | 0.011228 |
| 0.011195 | 0.011195 | 0.011262 | 0.011228 | 0.011429 | 0.011396 | 0.011329 |
| 0.011429 | 0.011497 | 0.011228 | 0.011228 | 0.011262 | 0.011262 | 0.011263 |
| 0.011331 | 0.011262 | 0.011262 | 0.011132 | 0.011205 | 0.011165 | 0.011262 |
| 0.011263 | 0.011198 | 0.011245 | 0.011233 | 0.011162 | 0.011197 | 0.011229 |
| 0.011492 | 0.011267 | 0.011301 | 0.011195 | 0.011199 | 0.011329 | 0.011296 |
| 0.011363 | 0.011296 | 0.011296 | 0.011396 | 0.011329 | 0.011698 | 0.011497 |
| 0.011530 | 0.011396 | 0.011262 | 0.011362 | 0.011161 | 0.011396 | 0.011195 |
| 0.011262 | 0.011262 | 0.011228 | 0.011195 | 0.011228 | 0.011195 | 0.011295 |
| 0.011262 | 0.011362 | 0.011295 | 0.011195 | 0.011296 | 0.011396 | 0.011398 |
| 0.011396 | 0.011295 | 0.011195 | 0.011128 | 0.011262 | 0.011195 | 0.011127 |
| 0.011230 | 0.011396 | 0.011195 | 0.011396 | 0.011161 | 0.011262 | 0.011228 |
| 0.011329 | 0.011228 | 0.011262 | 0.011228 | 0.011262 | 0.011127 | 0.011262 |
| 0.011295 | 0.011228 | 0.011295 | 0.011228 | 0.011262 | 0.011295 | 0.011530 |
| 0.011631 | 0.011564 | 0.011631 | 0.011330 | 0.011631 | 0.011262 | 0.011228 |
| 0.011263 | 0.011505 | 0.011380 | 0.011163 | 0.011637 | 0.011129 | 0.011257 |
| 0.011637 | 0.011536 | 0.011429 | 0.011631 | 0.011333 | 0.011496 | 0.011463 |
| 0.011396 | 0.011564 | 0.011415 | 0.011266 | 0.011312 | 0.011295 | 0.011365 |
| 0.011463 | 0.011364 | 0.011500 | 0.011568 | 0.011497 | 0.011564 | 0.011670 |
| 0.011399 | 0.011569 | 0.011500 | 0.011432 | 0.011699 | 0.011161 | 0.011363 |
| 0.011329 | 0.011262 | 0.011161 | 0.011161 | 0.011228 | 0.011228 | 0.011228 |
| 0.011228 | 0.011295 | 0.011194 | 0.011295 | 0.011228 | 0.011228 | 0.011295 |
| 0.011228 | 0.011664 | 0.011564 | 0.011597 | 0.011127 | 0.011228 | 0.011262 |
| 0.011262 | 0.011228 | 0.011295 | 0.011329 | 0.011194 | 0.011194 | 0.011194 |
| 0.011731 | 0.011362 | 0.011362 | 0.011161 | 0.011262 | 0.011429 | 0.011194 |
| 0.011194 | 0.011262 | 0.011228 | 0.011396 | 0.011194 | 0.011329 | 0.011463 |
| 0.011396 | 0.011228 | 0.011228 | 0.011161 | 0.011161 | 0.011329 | 0.011262 |
| 0.011161 | 0.011262 | 0.011127 | 0.011161 | 0.011295 | 0.011430 | 0.011195 |
| 0.011161 | 0.011295 | 0.011228 | 0.011127 | 0.011463 | 0.011127 | 0.011295 |
| 0.011368 | 0.011195 | 0.011496 | 0.011329 | 0.011362 | 0.011228 | 0.011262 |
| 0.011194 | 0.011530 | 0.011127 | 0.011396 | 0.011194 | 0.011194 | 0.011127 |
| 0.011362 | 0.011564 | 0.011262 | 0.011329 | 0.011161 | 0.011564 | 0.011194 |
| 0.011194 | 0.011194 | 0.011228 | 0.011329 | 0.011228 | 0.011329 | 0.011396 |
| 0.011396 | 0.011362 | 0.011194 | 0.011362 | 0.011329 | 0.000000 | 0.011161 |
| 0.011194 | 0.000000 | 0.011262 | 0.011194 | 0.011161 | 0.011329 | 0.011194 |
| 0.011228 | 0.011228 | 0.011362 | 0.011396 | 0.011295 | 0.011228 | 0.011228 |
| 0.011295 | 0.011228 | 0.011329 | 0.011194 | 0.011329 | 0.011429 | 0.011664 |
| 0.011228 | 0.011631 | 0.011233 | 0.017747 | 0.011257 | 0.011427 | 0.011583 |
| 0.011545 | 0.011588 | 0.011322 | 0.011234 | 0.011719 | 0.011612 | 0.011364 |
| 0.011487 | 0.011549 | 0.011138 | 0.011228 | 0.011216 | 0.011307 | 0.011232 |
| 0.011482 | 0.011395 | 0.011394 | 0.011193 | 0.011362 | 0.011396 | 0.011398 |
| 0.011266 | 0.011362 | 0.011362 | 0.011329 | 0.011295 | 0.011295 | 0.011262 |
| 0.011295 | 0.011228 | 0.011262 | 0.011295 | 0.011262 | 0.011195 | 0.011228 |
| 0.011228 | 0.011295 | 0.011195 | 0.011295 | 0.011329 | 0.011362 | 0.011262 |
| 0.011295 | 0.011195 | 0.011597 | 0.011597 | 0.011329 | 0.011363 | 0.011396 |
| 0.011161 | 0.011161 | 0.011195 | 0.011295 | 0.011161 | 0.011396 | 0.011396 |
| 0.011429 | 0.011429 | 0.011362 | 0.011463 | 0.011631 | 0.011464 | 0.011295 |

|          |          |          |          |          |          |          |
|----------|----------|----------|----------|----------|----------|----------|
| 0.011295 | 0.011362 | 0.011396 | 0.011228 | 0.011295 | 0.011262 | 0.011295 |
| 0.011363 | 0.011362 | 0.011396 | 0.011363 | 0.011262 | 0.011463 | 0.011429 |
| 0.011297 | 0.011195 | 0.011295 | 0.011329 | 0.011295 | 0.011430 | 0.011463 |
| 0.011631 | 0.011333 | 0.011496 | 0.011463 | 0.011396 | 0.011564 | 0.011195 |
| 0.011363 | 0.011262 | 0.011228 | 0.011228 | 0.011295 | 0.011195 | 0.011295 |
| 0.011329 | 0.011362 | 0.011262 | 0.011295 | 0.011195 | 0.011597 | 0.011597 |
| 0.011329 | 0.011363 | 0.011429 | 0.011362 | 0.012002 | 0.011417 | 0.011341 |
| 0.011412 | 0.011372 | 0.011482 | 0.011372 | 0.011480 | 0.011405 | 0.011370 |
| 0.011953 | 0.011268 | 0.011403 | 0.011337 | 0.011611 | 0.011468 | 0.011570 |
| 0.011978 | 0.011437 | 0.011533 | 0.011597 | 0.011463 | 0.011463 | 0.011499 |
| 0.011161 | 0.011329 | 0.011463 | 0.011429 | 0.011432 | 0.011429 | 0.011397 |
| 0.011262 | 0.011194 | 0.011228 | 0.011262 | 0.011161 | 0.011228 | 0.011127 |
| 0.011262 | 0.011295 | 0.011194 | 0.011161 | 0.011262 | 0.011194 | 0.011228 |
| 0.011228 | 0.011161 | 0.011228 | 0.011262 | 0.011161 | 0.011362 | 0.011396 |
| 0.011295 | 0.011362 | 0.011295 | 0.011295 | 0.011228 | 0.011564 | 0.011262 |
| 0.011304 | 0.011228 | 0.011463 | 0.011467 | 0.011329 | 0.011262 | 0.011329 |
| 0.011262 | 0.011262 | 0.011228 | 0.011262 | 0.011362 | 0.011362 | 0.011295 |
| 0.011295 | 0.011429 | 0.011597 | 0.011329 | 0.011530 | 0.011530 | 0.011396 |
| 0.011228 | 0.011295 | 0.011262 | 0.011732 | 0.011295 | 0.011329 | 0.011295 |
| 0.011329 | 0.011262 | 0.011262 | 0.011564 | 0.011497 | 0.011530 | 0.011262 |
| 0.011362 | 0.011429 | 0.011295 | 0.011362 | 0.011329 | 0.011194 | 0.011530 |
| 0.011295 | 0.011262 | 0.011262 | 0.011429 | 0.011262 | 0.011362 | 0.011597 |
| 0.011295 | 0.011671 | 0.011664 | 0.011467 | 0.011229 | 0.011366 | 0.011215 |
| 0.011225 | 0.011683 | 0.011201 | 0.011417 | 0.011255 | 0.011264 | 0.011379 |
| 0.011468 | 0.011126 | 0.011339 | 0.011192 | 0.011222 | 0.011395 | 0.011344 |
| 0.011362 | 0.011257 | 0.011342 | 0.011272 | 0.011296 | 0.011429 | 0.011497 |
| 0.011497 | 0.011363 | 0.011466 | 0.011467 | 0.011603 | 0.011625 | 0.011295 |
| 0.011530 | 0.011396 | 0.011262 | 0.011362 | 0.011161 | 0.011396 | 0.011195 |
| 0.011262 | 0.011262 | 0.011228 | 0.011195 | 0.011228 | 0.011195 | 0.011295 |
| 0.011270 | 0.011270 | 0.011266 | 0.011300 | 0.011436 | 0.011402 | 0.011333 |
| 0.011401 | 0.011329 | 0.011134 | 0.011096 | 0.011263 | 0.011433 | 0.011433 |
| 0.011228 | 0.011297 | 0.011531 | 0.011500 | 0.011430 | 0.011464 | 0.011396 |
| 0.011329 | 0.011396 | 0.011396 | 0.011295 | 0.011866 | 0.011463 | 0.011530 |
| 0.011564 | 0.011630 | 0.011265 | 0.011337 | 0.011228 | 0.011429 | 0.011396 |
| 0.011430 | 0.011463 | 0.011463 | 0.011463 | 0.011571 | 0.011597 | 0.011234 |
| 0.011128 | 0.011130 | 0.011230 | 0.011196 | 0.011299 | 0.011135 | 0.011468 |
| 0.011266 | 0.011411 | 0.011156 | 0.011285 | 0.011262 | 0.011334 | 0.011228 |
| 0.011195 | 0.011195 | 0.011262 | 0.011228 | 0.011429 | 0.011396 | 0.011329 |
| 0.011429 | 0.011497 | 0.011228 | 0.011228 | 0.011262 | 0.011262 | 0.011263 |
| 0.011331 | 0.011262 | 0.011262 | 0.011296 | 0.011429 | 0.011497 | 0.011497 |
| 0.011363 | 0.011466 | 0.011467 | 0.011603 | 0.011625 | 0.011295 | 0.011463 |
| 0.011396 | 0.011396 | 0.011162 | 0.011408 | 0.011338 | 0.011367 | 0.011235 |
| 0.011404 | 0.011561 | 0.011399 | 0.011298 | 0.011195 | 0.011396 | 0.011262 |
| 0.011362 | 0.011295 | 0.011195 | 0.011296 | 0.011396 | 0.011398 | 0.011295 |
| 0.011195 | 0.011128 | 0.011262 | 0.011195 | 0.011127 | 0.011230 | 0.011396 |
| 0.011295 | 0.011228 | 0.011262 | 0.011295 | 0.011262 | 0.011195 | 0.011396 |
| 0.011262 | 0.011295 | 0.011295 | 0.011228 | 0.011295 | 0.011530 | 0.011194 |
| 0.011228 | 0.011564 | 0.011228 | 0.011262 | 0.011228 | 0.011597 | 0.011189 |
| 0.011678 | 0.011188 | 0.011261 | 0.011422 | 0.011508 | 0.011419 | 0.011144 |
| 0.011218 | 0.011396 | 0.011496 | 0.011603 | 0.011464 | 0.011601 | 0.011733 |
| 0.011632 | 0.011669 | 0.011631 | 0.011880 | 0.011597 | 0.012472 | 0.011633 |
| 0.012372 | 0.012139 | 0.012273 | 0.012545 | 0.011597 | 0.011295 | 0.011598 |
| 0.012036 | 0.011971 | 0.011564 | 0.011463 | 0.011531 | 0.011531 | 0.011500 |
| 0.011396 | 0.011399 | 0.011463 | 0.011430 | 0.011800 | 0.011866 | 0.011867 |
| 0.011766 | 0.011867 | 0.011970 | 0.011737 | 0.012036 | 0.012042 | 0.012103 |
| 0.012104 | 0.012138 | 0.012084 | 0.012104 | 0.012105 | 0.011329 | 0.011631 |
| 0.011699 | 0.012202 | 0.011704 | 0.011933 | 0.012406 | 0.011468 | 0.011363 |
| 0.011329 | 0.011329 | 0.011799 | 0.011842 | 0.011940 | 0.011664 | 0.011330 |
| S359     | 0.011664 | 0.011664 | 0.011933 | 0.011765 | 0.011765 | 0.011832 |
| 0.011671 | 0.011603 | 0.011832 | 0.011262 | 0.011329 | 0.011296 | 0.011262 |



|          |          |          |          |          |          |          |
|----------|----------|----------|----------|----------|----------|----------|
| 0.011295 | 0.011463 | 0.011262 | 0.011295 | 0.011362 | 0.011329 | 0.011295 |
| 0.011262 | 0.011295 | 0.011396 | 0.011262 | 0.011295 | 0.011295 | 0.011637 |
| 0.011530 | 0.011295 | 0.011195 | 0.011429 | 0.011362 | 0.011329 | 0.011362 |
| 0.011329 | 0.011429 | 0.011329 | 0.011329 | 0.011362 | 0.011329 | 0.011497 |
| 0.011262 | 0.011329 | 0.011362 | 0.011295 | 0.011396 | 0.011429 | 0.011362 |
| 0.011329 | 0.011497 | 0.011396 | 0.011664 | 0.011329 | 0.011597 | 0.011329 |
| 0.011295 | 0.011396 | 0.011463 | 0.011597 | 0.011698 | 0.011396 | 0.011497 |
| 0.011362 | 0.011430 | 0.000000 | 0.011564 | 0.011799 | 0.011329 | 0.011396 |
| 0.011295 | 0.011396 | 0.011295 | 0.011429 | 0.011362 | 0.011362 | 0.011362 |
| 0.011262 | 0.011295 | 0.011262 | 0.011362 | 0.011329 | 0.011363 | 0.011429 |
| 0.011362 | 0.011329 | 0.011396 | 0.011295 | 0.011429 | 0.011262 | 0.011329 |
| 0.011496 | 0.011429 | 0.011664 | 0.011497 | 0.011329 | 0.011564 | 0.011329 |
| 0.011468 | 0.011695 | 0.011513 | 0.011216 | 0.011210 | 0.011318 | 0.011415 |
| 0.012048 | 0.011518 | 0.011225 | 0.011564 | 0.011564 | 0.011362 | 0.011463 |
| 0.011396 | 0.011362 | 0.011429 | 0.011329 | 0.011430 | 0.011362 | 0.011362 |
| 0.011329 | 0.011429 | 0.011631 | 0.011496 | 0.011396 | 0.011362 | 0.011295 |
| 0.011262 | 0.011262 | 0.011329 | 0.011295 | 0.011497 | 0.011463 | 0.011396 |
| 0.011497 | 0.011564 | 0.011295 | 0.011295 | 0.011329 | 0.011329 | 0.011330 |
| 0.011398 | 0.011329 | 0.011329 | 0.011204 | 0.011277 | 0.011236 | 0.011329 |
| 0.011331 | 0.011266 | 0.011282 | 0.011302 | 0.011230 | 0.011266 | 0.011297 |
| 0.011564 | 0.011336 | 0.011370 | 0.011262 | 0.011268 | 0.011397 | 0.011363 |
| 0.011430 | 0.011364 | 0.011363 | 0.011463 | 0.011396 | 0.011765 | 0.011564 |
| 0.011597 | 0.011463 | 0.011329 | 0.011430 | 0.011228 | 0.011463 | 0.011262 |
| 0.011329 | 0.011329 | 0.011295 | 0.011262 | 0.011295 | 0.011262 | 0.011362 |
| 0.011329 | 0.011430 | 0.011363 | 0.011262 | 0.011363 | 0.011463 | 0.011466 |
| 0.011463 | 0.011363 | 0.011262 | 0.011195 | 0.011329 | 0.011262 | 0.011195 |
| 0.011264 | 0.011463 | 0.011262 | 0.011463 | 0.011228 | 0.011329 | 0.011295 |
| 0.011396 | 0.011295 | 0.011329 | 0.011295 | 0.011329 | 0.011195 | 0.011329 |
| 0.011363 | 0.011295 | 0.011362 | 0.011295 | 0.011329 | 0.011362 | 0.011597 |
| 0.011698 | 0.011631 | 0.011698 | 0.011431 | 0.011699 | 0.011329 | 0.011295 |
| 0.011330 | 0.011586 | 0.011472 | 0.011198 | 0.011705 | 0.011197 | 0.011296 |
| 0.011705 | 0.011570 | 0.011496 | 0.011698 | 0.011402 | 0.011564 | 0.011530 |
| 0.011463 | 0.011631 | 0.011486 | 0.011349 | 0.011396 | 0.011362 | 0.011432 |
| 0.011530 | 0.011364 | 0.011567 | 0.011635 | 0.011564 | 0.011631 | 0.011738 |
| 0.011466 | 0.011637 | 0.011568 | 0.011500 | 0.011767 | 0.011228 | 0.011431 |
| 0.011396 | 0.011329 | 0.011228 | 0.011228 | 0.011295 | 0.011295 | 0.011362 |
| 0.011295 | 0.011362 | 0.011262 | 0.011362 | 0.011295 | 0.011295 | 0.011362 |
| 0.011295 | 0.011732 | 0.011631 | 0.011664 | 0.011195 | 0.011295 | 0.011262 |
| 0.011329 | 0.011295 | 0.011362 | 0.011396 | 0.011262 | 0.011262 | 0.011262 |
| 0.011799 | 0.011429 | 0.011429 | 0.011228 | 0.011329 | 0.011497 | 0.011262 |
| 0.011262 | 0.011329 | 0.011295 | 0.011463 | 0.011262 | 0.011396 | 0.011530 |
| 0.011463 | 0.011295 | 0.011295 | 0.011228 | 0.011228 | 0.011396 | 0.011329 |
| 0.011228 | 0.011329 | 0.011195 | 0.011228 | 0.011362 | 0.011497 | 0.011262 |
| 0.011228 | 0.011362 | 0.011295 | 0.011195 | 0.011530 | 0.011195 | 0.011362 |
| 0.011437 | 0.011262 | 0.011564 | 0.011396 | 0.011429 | 0.011295 | 0.011396 |
| 0.011262 | 0.011597 | 0.011195 | 0.011463 | 0.011262 | 0.011262 | 0.011195 |
| 0.011429 | 0.011598 | 0.000000 | 0.011396 | 0.011228 | 0.011631 | 0.011262 |
| 0.011262 | 0.011262 | 0.011295 | 0.011396 | 0.011295 | 0.011396 | 0.011463 |
| 0.011463 | 0.011429 | 0.011329 | 0.011430 | 0.011396 | 0.011262 | 0.011228 |
| 0.011262 | 0.011262 | 0.000000 | 0.011262 | 0.011228 | 0.011396 | 0.011262 |
| 0.011295 | 0.011295 | 0.011429 | 0.011463 | 0.011362 | 0.011295 | 0.011295 |
| 0.011295 | 0.011295 | 0.011396 | 0.011262 | 0.011396 | 0.011497 | 0.011799 |
| 0.011295 | 0.011698 | 0.011267 | 0.017785 | 0.011257 | 0.011427 | 0.011618 |
| 0.011579 | 0.011623 | 0.011322 | 0.011234 | 0.011719 | 0.011647 | 0.011364 |
| 0.011487 | 0.011549 | 0.011177 | 0.011270 | 0.011255 | 0.011307 | 0.011275 |
| 0.011529 | 0.011433 | 0.011431 | 0.011259 | 0.011429 | 0.011463 | 0.011466 |
| 0.011335 | 0.011430 | 0.011429 | 0.011396 | 0.011362 | 0.011363 | 0.011329 |
| 0.011362 | 0.011295 | 0.011329 | 0.011362 | 0.011329 | 0.011262 | 0.011295 |
| 0.011295 | 0.011362 | 0.011262 | 0.011161 | 0.011396 | 0.011430 | 0.011329 |
| 0.011362 | 0.011329 | 0.011665 | 0.011665 | 0.011396 | 0.011430 | 0.011463 |

|          |          |          |          |          |          |          |
|----------|----------|----------|----------|----------|----------|----------|
| 0.011228 | 0.011228 | 0.011262 | 0.011363 | 0.011228 | 0.011463 | 0.011463 |
| 0.011497 | 0.011496 | 0.011429 | 0.011530 | 0.011698 | 0.011532 | 0.011362 |
| 0.011362 | 0.011430 | 0.011463 | 0.011295 | 0.011362 | 0.011329 | 0.011362 |
| 0.011430 | 0.011430 | 0.011463 | 0.011430 | 0.011330 | 0.011530 | 0.011497 |
| 0.011365 | 0.011262 | 0.011362 | 0.011463 | 0.011363 | 0.011497 | 0.011530 |
| 0.011698 | 0.011402 | 0.011564 | 0.011530 | 0.011463 | 0.011631 | 0.011262 |
| 0.011431 | 0.011329 | 0.011295 | 0.011295 | 0.011362 | 0.011262 | 0.011161 |
| 0.011396 | 0.011430 | 0.011329 | 0.011362 | 0.011329 | 0.011665 | 0.011665 |
| 0.011396 | 0.011430 | 0.011496 | 0.011429 | 0.012069 | 0.011489 | 0.011412 |
| 0.011482 | 0.011442 | 0.011552 | 0.011441 | 0.011550 | 0.011474 | 0.011440 |
| 0.012022 | 0.011337 | 0.011471 | 0.011406 | 0.011680 | 0.011536 | 0.011639 |
| 0.012046 | 0.011513 | 0.011601 | 0.011664 | 0.011530 | 0.011530 | 0.011567 |
| 0.011228 | 0.011396 | 0.011530 | 0.011496 | 0.011499 | 0.011496 | 0.011464 |
| 0.011329 | 0.011262 | 0.011295 | 0.011329 | 0.011228 | 0.011295 | 0.011195 |
| 0.011329 | 0.011362 | 0.011262 | 0.011228 | 0.011329 | 0.011262 | 0.011295 |
| 0.011295 | 0.011228 | 0.011295 | 0.011329 | 0.011228 | 0.011429 | 0.011463 |
| 0.011362 | 0.011429 | 0.011362 | 0.011362 | 0.011295 | 0.011698 | 0.011329 |
| 0.011373 | 0.011295 | 0.011531 | 0.011535 | 0.011396 | 0.011396 | 0.011396 |
| 0.011396 | 0.011329 | 0.011295 | 0.011329 | 0.011429 | 0.011429 | 0.011362 |
| 0.011362 | 0.011429 | 0.011664 | 0.011396 | 0.011597 | 0.011597 | 0.011463 |
| 0.011295 | 0.011362 | 0.011396 | 0.011799 | 0.011362 | 0.011396 | 0.011362 |
| 0.011396 | 0.011329 | 0.011329 | 0.011631 | 0.011564 | 0.011597 | 0.011329 |
| 0.011430 | 0.011497 | 0.011362 | 0.011430 | 0.011396 | 0.011262 | 0.011597 |
| 0.011362 | 0.011329 | 0.011329 | 0.011497 | 0.011329 | 0.011429 | 0.011665 |
| 0.011362 | 0.011739 | 0.011732 | 0.011507 | 0.011229 | 0.011434 | 0.011215 |
| 0.011225 | 0.011722 | 0.011236 | 0.011462 | 0.011304 | 0.011366 | 0.011379 |
| 0.011519 | 0.011192 | 0.011339 | 0.011192 | 0.011222 | 0.011194 | 0.011385 |
| 0.011399 | 0.011296 | 0.011377 | 0.011307 | 0.011364 | 0.011497 | 0.011564 |
| 0.011564 | 0.011430 | 0.011534 | 0.011535 | 0.011670 | 0.011661 | 0.011362 |
| 0.011597 | 0.011463 | 0.011329 | 0.011430 | 0.011228 | 0.011463 | 0.011262 |
| 0.011329 | 0.011329 | 0.011295 | 0.011262 | 0.011295 | 0.011262 | 0.011362 |
| 0.011340 | 0.011340 | 0.011334 | 0.011368 | 0.011505 | 0.011470 | 0.011470 |
| 0.011469 | 0.011329 | 0.011208 | 0.011204 | 0.011331 | 0.011501 | 0.011501 |
| 0.011296 | 0.011365 | 0.011599 | 0.011567 | 0.011497 | 0.011531 | 0.011463 |
| 0.011396 | 0.011463 | 0.011463 | 0.011362 | 0.011934 | 0.011530 | 0.011598 |
| 0.011631 | 0.011701 | 0.011333 | 0.011407 | 0.011295 | 0.011497 | 0.011463 |
| 0.011498 | 0.011530 | 0.011530 | 0.011530 | 0.011650 | 0.011664 | 0.011303 |
| 0.011196 | 0.011199 | 0.011299 | 0.011264 | 0.011368 | 0.011210 | 0.011536 |
| 0.011335 | 0.011499 | 0.011251 | 0.011360 | 0.011329 | 0.011402 | 0.011295 |
| 0.011262 | 0.011262 | 0.011329 | 0.011295 | 0.011497 | 0.011463 | 0.011396 |
| 0.011497 | 0.011564 | 0.011295 | 0.011295 | 0.011329 | 0.011329 | 0.011330 |
| 0.011398 | 0.011329 | 0.011329 | 0.011364 | 0.011497 | 0.011564 | 0.011564 |
| 0.011430 | 0.011534 | 0.011535 | 0.011670 | 0.011661 | 0.011362 | 0.011530 |
| 0.011463 | 0.011463 | 0.011297 | 0.011478 | 0.011408 | 0.011435 | 0.011270 |
| 0.011439 | 0.011653 | 0.011484 | 0.011366 | 0.011262 | 0.011463 | 0.011329 |
| 0.011430 | 0.011363 | 0.011262 | 0.011363 | 0.011463 | 0.011466 | 0.011363 |
| 0.011262 | 0.011195 | 0.011329 | 0.011262 | 0.011195 | 0.011264 | 0.011463 |
| 0.011362 | 0.011295 | 0.011329 | 0.011362 | 0.011329 | 0.011262 | 0.011463 |
| 0.011329 | 0.011362 | 0.011362 | 0.011295 | 0.011362 | 0.011597 | 0.011262 |
| 0.011295 | 0.011698 | 0.011295 | 0.011329 | 0.011295 | 0.011664 | 0.011232 |
| 0.011679 | 0.011188 | 0.011261 | 0.011463 | 0.011549 | 0.011455 | 0.011186 |
| 0.011218 | 0.011463 | 0.011564 | 0.011671 | 0.011532 | 0.011635 | 0.011800 |
| 0.011700 | 0.011737 | 0.011698 | 0.011915 | 0.011664 | 0.012539 | 0.011700 |
| 0.012439 | 0.012207 | 0.012341 | 0.012613 | 0.011664 | 0.011363 | 0.011665 |
| 0.012104 | 0.012005 | 0.011631 | 0.011530 | 0.011598 | 0.011598 | 0.011567 |
| 0.011463 | 0.011433 | 0.011530 | 0.011497 | 0.011867 | 0.011933 | 0.011935 |
| 0.011834 | 0.011935 | 0.012038 | 0.011771 | 0.012104 | 0.012110 | 0.012171 |
| 0.012172 | 0.012206 | 0.012118 | 0.012172 | 0.012173 | 0.011396 | 0.011699 |
| 0.011767 | 0.012270 | 0.011772 | 0.012001 | 0.012474 | 0.011536 | 0.011430 |
| 0.011396 | 0.011396 | 0.011867 | 0.011924 | 0.012010 | 0.011664 | 0.011397 |

|          |          |          |           |          |          |          |
|----------|----------|----------|-----------|----------|----------|----------|
| S360     | 0.011597 | 0.011597 | 0.011866  | 0.011631 | 0.011631 | 0.011698 |
| 0.011535 | 0.011468 | 0.011698 | 0.011195  | 0.011262 | 0.011228 | 0.011194 |
| 0.011161 | 0.011396 | 0.011127 | 0.011228  | 0.011295 | 0.011262 | 0.011228 |
| 0.011194 | 0.011228 | 0.011262 | 0.011195  | 0.011228 | 0.011228 | 0.011501 |
| 0.011396 | 0.011228 | 0.011127 | 0.011295  | 0.011295 | 0.011262 | 0.011295 |
| 0.011262 | 0.011362 | 0.011262 | 0.011262  | 0.011295 | 0.011262 | 0.011429 |
| 0.000000 | 0.011262 | 0.011295 | 0.011228  | 0.011262 | 0.011362 | 0.011295 |
| 0.011262 | 0.011429 | 0.011329 | 0.011530  | 0.011262 | 0.011530 | 0.011262 |
| 0.011228 | 0.011262 | 0.011396 | 0.011530  | 0.011564 | 0.011262 | 0.011362 |
| 0.011295 | 0.011362 | 0.011262 | 0.011496  | 0.011664 | 0.011262 | 0.011329 |
| 0.011228 | 0.011329 | 0.011295 | 0.011362  | 0.011295 | 0.011295 | 0.011295 |
| 0.011194 | 0.011228 | 0.011194 | 0.011228  | 0.011262 | 0.011296 | 0.011362 |
| 0.011295 | 0.011262 | 0.011329 | 0.011228  | 0.011295 | 0.011194 | 0.011262 |
| 0.011429 | 0.011362 | 0.011597 | 0.011429  | 0.011262 | 0.011496 | 0.011262 |
| 0.011431 | 0.011583 | 0.011437 | 0.011138  | 0.011135 | 0.011281 | 0.011257 |
| 0.011938 | 0.011314 | 0.011143 | 0.011496  | 0.011496 | 0.011228 | 0.011329 |
| 0.011329 | 0.011295 | 0.011362 | 0.011262  | 0.011362 | 0.011295 | 0.011295 |
| 0.011262 | 0.011295 | 0.011564 | 0.011429  | 0.011329 | 0.011295 | 0.011228 |
| 0.011195 | 0.011127 | 0.011262 | 0.011228  | 0.011362 | 0.011329 | 0.011262 |
| 0.011362 | 0.011429 | 0.011228 | 0.011228  | 0.011262 | 0.011262 | 0.011263 |
| 0.011331 | 0.011262 | 0.011262 | 0.011132  | 0.011169 | 0.011165 | 0.011262 |
| 0.011263 | 0.011198 | 0.011208 | 0.011233  | 0.011162 | 0.011197 | 0.011229 |
| 0.011420 | 0.011267 | 0.011301 | 0.011195  | 0.011199 | 0.011329 | 0.011228 |
| 0.011296 | 0.011296 | 0.011296 | 0.011396  | 0.011329 | 0.011698 | 0.011430 |
| 0.011463 | 0.011329 | 0.011262 | 0.011295  | 0.011161 | 0.011329 | 0.011195 |
| 0.011262 | 0.011262 | 0.011228 | 0.011194  | 0.011228 | 0.011195 | 0.011295 |
| 0.011262 | 0.011362 | 0.011295 | 0.011195  | 0.011296 | 0.011396 | 0.011398 |
| 0.011396 | 0.011295 | 0.011195 | 0.011128  | 0.011262 | 0.011195 | 0.011127 |
| 0.011230 | 0.011396 | 0.011195 | 0.011396  | 0.011161 | 0.011262 | 0.011228 |
| 0.011329 | 0.011228 | 0.011262 | 0.011228  | 0.011262 | 0.011127 | 0.011262 |
| 0.011295 | 0.011228 | 0.011295 | 0.011228  | 0.011262 | 0.011295 | 0.011530 |
| 0.011564 | 0.011496 | 0.011564 | 0.011397  | 0.011564 | 0.011262 | 0.011228 |
| 0.011195 | 0.011464 | 0.011335 | 0.011163  | 0.011569 | 0.011129 | 0.011257 |
| 0.011569 | 0.011468 | 0.011429 | 0.011631  | 0.011333 | 0.011496 | 0.011463 |
| 0.011396 | 0.011564 | 0.011415 | 0.011266  | 0.011312 | 0.011295 | 0.011365 |
| 0.011463 | 0.011364 | 0.011500 | 0.011568  | 0.011497 | 0.011564 | 0.011670 |
| 0.011399 | 0.011569 | 0.011500 | 0.011432  | 0.011699 | 0.011161 | 0.011363 |
| 0.011329 | 0.011262 | 0.011161 | 0.011161  | 0.011228 | 0.011228 | 0.011295 |
| 0.011228 | 0.011295 | 0.011194 | 0.011228  | 0.011228 | 0.011228 | 0.011295 |
| 0.011228 | 0.011597 | 0.011497 | 0.011530  | 0.011127 | 0.011228 | 0.011262 |
| 0.011262 | 0.011228 | 0.011295 | 0.011262  | 0.011194 | 0.011194 | 0.011194 |
| 0.011664 | 0.011295 | 0.011362 | 0.011161  | 0.011262 | 0.011429 | 0.011194 |
| 0.011194 | 0.011262 | 0.011228 | 0.011396  | 0.011194 | 0.011329 | 0.011463 |
| 0.011396 | 0.011228 | 0.011228 | 0.011161  | 0.011161 | 0.011329 | 0.011262 |
| 0.011161 | 0.011262 | 0.011127 | 0.011161  | 0.011295 | 0.011362 | 0.011195 |
| 0.011161 | 0.011295 | 0.011228 | 0.011127  | 0.011396 | 0.011127 | 0.011295 |
| 0.011368 | 0.011195 | 0.011429 | 0.011329  | 0.011295 | 0.011228 | 0.011329 |
| 0.011194 | 0.011530 | 0.011127 | 0.011329  | 0.011127 | 0.011127 | 0.011127 |
| 0.011362 | 0.011497 | 0.011262 | 0.011329  | 0.011161 | 0.011497 | 0.011127 |
| 0.011194 | 0.011194 | 0.011228 | 0.011329  | 0.011228 | 0.011329 | 0.011396 |
| 0.011396 | 0.011362 | 0.011262 | 0.011362  | 0.011329 | 0.011194 | 0.011161 |
| 0.011194 | 0.011194 | 0.011262 | 0.000000  | 0.011161 | 0.011329 | 0.011194 |
| 0.011161 | 0.011228 | 0.011362 | 0.011329  | 0.011295 | 0.011228 | 0.011228 |
| 0.011295 | 0.011228 | 0.011329 | 0.011194  | 0.011329 | 0.011429 | 0.011664 |
| 0.011228 | 0.011564 | 0.011233 | 0.0117747 | 0.011191 | 0.011366 | 0.011514 |
| 0.011475 | 0.011517 | 0.011270 | 0.011234  | 0.011609 | 0.011543 | 0.011303 |
| 0.011345 | 0.011426 | 0.011099 | 0.011228  | 0.011099 | 0.011208 | 0.011232 |
| 0.011342 | 0.011284 | 0.011320 | 0.000000  | 0.011362 | 0.011396 | 0.011398 |
| 0.011266 | 0.011362 | 0.011362 | 0.011262  | 0.011295 | 0.011295 | 0.011262 |
| 0.011295 | 0.011228 | 0.011262 | 0.011295  | 0.011262 | 0.011195 | 0.011228 |

|          |          |          |          |          |          |          |
|----------|----------|----------|----------|----------|----------|----------|
| 0.011228 | 0.011295 | 0.011195 | 0.011295 | 0.011329 | 0.011362 | 0.011262 |
| 0.011228 | 0.011195 | 0.011530 | 0.011530 | 0.011329 | 0.011363 | 0.011396 |
| 0.011161 | 0.011161 | 0.011195 | 0.011295 | 0.011161 | 0.011396 | 0.011396 |
| 0.011429 | 0.011429 | 0.011362 | 0.011463 | 0.011564 | 0.011464 | 0.011295 |
| 0.011295 | 0.011362 | 0.011396 | 0.011228 | 0.011295 | 0.011262 | 0.011295 |
| 0.011363 | 0.011362 | 0.011396 | 0.011363 | 0.011262 | 0.011463 | 0.011429 |
| 0.011297 | 0.011195 | 0.011295 | 0.011396 | 0.011295 | 0.011362 | 0.011463 |
| 0.011631 | 0.011333 | 0.011496 | 0.011463 | 0.011396 | 0.011564 | 0.011195 |
| 0.011363 | 0.011262 | 0.011228 | 0.011228 | 0.011295 | 0.011195 | 0.011295 |
| 0.011329 | 0.011362 | 0.011262 | 0.011228 | 0.011195 | 0.011530 | 0.011530 |
| 0.011329 | 0.011363 | 0.011429 | 0.011362 | 0.011935 | 0.011417 | 0.011341 |
| 0.011412 | 0.011372 | 0.011482 | 0.011372 | 0.011480 | 0.011405 | 0.011370 |
| 0.011884 | 0.011268 | 0.011403 | 0.011337 | 0.011611 | 0.011468 | 0.011570 |
| 0.011910 | 0.011362 | 0.011533 | 0.011597 | 0.011463 | 0.011396 | 0.011499 |
| 0.011161 | 0.011329 | 0.011463 | 0.011429 | 0.011432 | 0.011362 | 0.011330 |
| 0.011262 | 0.011194 | 0.011228 | 0.011262 | 0.011161 | 0.011228 | 0.011127 |
| 0.011194 | 0.011228 | 0.011194 | 0.011161 | 0.011262 | 0.011194 | 0.011228 |
| 0.011228 | 0.011161 | 0.011228 | 0.011262 | 0.011161 | 0.011362 | 0.011396 |
| 0.011295 | 0.011295 | 0.011295 | 0.011295 | 0.011228 | 0.011564 | 0.011262 |
| 0.011234 | 0.011228 | 0.011396 | 0.011399 | 0.011329 | 0.011329 | 0.011329 |
| 0.011329 | 0.011262 | 0.011228 | 0.011262 | 0.011362 | 0.011362 | 0.011295 |
| 0.011295 | 0.011429 | 0.011530 | 0.011329 | 0.011530 | 0.011530 | 0.011396 |
| 0.011228 | 0.011295 | 0.011329 | 0.011664 | 0.011295 | 0.011329 | 0.011295 |
| 0.011329 | 0.011194 | 0.011194 | 0.011497 | 0.011497 | 0.011463 | 0.011262 |
| 0.011362 | 0.011429 | 0.011295 | 0.011362 | 0.011329 | 0.011194 | 0.011463 |
| 0.011295 | 0.011262 | 0.011194 | 0.011429 | 0.011262 | 0.011362 | 0.011597 |
| 0.011295 | 0.011603 | 0.011597 | 0.011345 | 0.000000 | 0.011298 | 0.011112 |
| 0.011170 | 0.011566 | 0.011201 | 0.011283 | 0.011109 | 0.011264 | 0.011220 |
| 0.011315 | 0.011126 | 0.011283 | 0.011126 | 0.011168 | 0.011328 | 0.011303 |
| 0.011362 | 0.011218 | 0.011272 | 0.011272 | 0.011296 | 0.011362 | 0.011430 |
| 0.011429 | 0.011296 | 0.011398 | 0.011399 | 0.011535 | 0.011555 | 0.011295 |
| 0.011463 | 0.011329 | 0.011262 | 0.011295 | 0.011161 | 0.011329 | 0.011195 |
| 0.011262 | 0.011262 | 0.011228 | 0.011194 | 0.011228 | 0.011195 | 0.011295 |
| 0.011270 | 0.011270 | 0.011266 | 0.011300 | 0.011437 | 0.011402 | 0.011402 |
| 0.011401 | 0.011329 | 0.011134 | 0.011132 | 0.011263 | 0.011433 | 0.011433 |
| 0.011228 | 0.011297 | 0.011531 | 0.011500 | 0.011430 | 0.011464 | 0.011396 |
| 0.011329 | 0.011396 | 0.011396 | 0.011295 | 0.011799 | 0.011463 | 0.011530 |
| 0.011564 | 0.011559 | 0.011265 | 0.011337 | 0.011228 | 0.011429 | 0.011396 |
| 0.011430 | 0.011463 | 0.011463 | 0.011463 | 0.011610 | 0.011597 | 0.011234 |
| 0.011128 | 0.011130 | 0.011230 | 0.011196 | 0.011231 | 0.011135 | 0.011400 |
| 0.011266 | 0.011323 | 0.011156 | 0.011285 | 0.011262 | 0.011334 | 0.011228 |
| 0.011195 | 0.011127 | 0.011262 | 0.011228 | 0.011362 | 0.011329 | 0.011262 |
| 0.011362 | 0.011429 | 0.011228 | 0.011228 | 0.011262 | 0.011262 | 0.011263 |
| 0.011331 | 0.011262 | 0.011262 | 0.011296 | 0.011362 | 0.011430 | 0.011429 |
| 0.011296 | 0.011398 | 0.011399 | 0.011535 | 0.011555 | 0.011295 | 0.011463 |
| 0.011396 | 0.011396 | 0.011229 | 0.011408 | 0.011338 | 0.011367 | 0.011235 |
| 0.011405 | 0.011561 | 0.011357 | 0.011298 | 0.011195 | 0.011396 | 0.011262 |
| 0.011362 | 0.011295 | 0.011195 | 0.011296 | 0.011396 | 0.011398 | 0.011295 |
| 0.011195 | 0.011128 | 0.011262 | 0.011195 | 0.011127 | 0.011230 | 0.011396 |
| 0.011295 | 0.011228 | 0.011262 | 0.011295 | 0.011262 | 0.011195 | 0.011329 |
| 0.011262 | 0.011295 | 0.011295 | 0.011228 | 0.011295 | 0.011530 | 0.000000 |
| 0.011228 | 0.011564 | 0.011228 | 0.011262 | 0.011228 | 0.011530 | 0.011146 |
| 0.011510 | 0.011145 | 0.011110 | 0.011302 | 0.011386 | 0.011347 | 0.011102 |
| 0.000000 | 0.011329 | 0.011429 | 0.011535 | 0.011397 | 0.011534 | 0.011665 |
| 0.011565 | 0.011601 | 0.011564 | 0.011812 | 0.011530 | 0.012404 | 0.011565 |
| 0.012304 | 0.012072 | 0.012206 | 0.012477 | 0.011530 | 0.011228 | 0.011530 |
| 0.011969 | 0.011903 | 0.011497 | 0.011396 | 0.011464 | 0.011464 | 0.011432 |
| 0.011329 | 0.011331 | 0.011396 | 0.011363 | 0.011733 | 0.011799 | 0.011800 |
| 0.011699 | 0.011800 | 0.011903 | 0.011669 | 0.011969 | 0.011974 | 0.012036 |
| 0.012037 | 0.012070 | 0.012016 | 0.012037 | 0.012038 | 0.011329 | 0.011564 |

|          |          |          |          |          |          |          |
|----------|----------|----------|----------|----------|----------|----------|
| 0.011632 | 0.012135 | 0.011636 | 0.011866 | 0.012339 | 0.011400 | 0.011295 |
| 0.011262 | 0.011262 | 0.011732 | 0.011759 | 0.011869 | 0.011597 | 0.011262 |
| S361     | 0.011564 | 0.011564 | 0.011900 | 0.011664 | 0.011664 | 0.011732 |
| 0.011569 | 0.011502 | 0.011731 | 0.011161 | 0.011228 | 0.011195 | 0.011161 |
| 0.011194 | 0.011362 | 0.011161 | 0.011194 | 0.011262 | 0.011228 | 0.011194 |
| 0.011161 | 0.011194 | 0.011295 | 0.011161 | 0.011127 | 0.011194 | 0.011535 |
| 0.011429 | 0.011195 | 0.011094 | 0.011329 | 0.011194 | 0.011228 | 0.011194 |
| 0.011228 | 0.011262 | 0.011228 | 0.011228 | 0.011262 | 0.011228 | 0.011396 |
| 0.011161 | 0.011228 | 0.011262 | 0.011194 | 0.011295 | 0.011329 | 0.011262 |
| 0.011228 | 0.011396 | 0.011295 | 0.011564 | 0.011228 | 0.011429 | 0.011228 |
| 0.011194 | 0.011295 | 0.011362 | 0.011429 | 0.011597 | 0.011295 | 0.011396 |
| 0.011194 | 0.011262 | 0.011228 | 0.011396 | 0.011698 | 0.011228 | 0.011295 |
| 0.011194 | 0.011295 | 0.011262 | 0.011329 | 0.011262 | 0.011262 | 0.011262 |
| 0.011161 | 0.011194 | 0.011161 | 0.011262 | 0.011228 | 0.011262 | 0.011329 |
| 0.011262 | 0.011228 | 0.011228 | 0.011194 | 0.011329 | 0.011094 | 0.011228 |
| 0.011396 | 0.011329 | 0.011564 | 0.011396 | 0.011228 | 0.011396 | 0.011228 |
| 0.011394 | 0.011620 | 0.011437 | 0.011138 | 0.011135 | 0.011244 | 0.011336 |
| 0.011975 | 0.011365 | 0.011143 | 0.011463 | 0.011463 | 0.011262 | 0.011362 |
| 0.011295 | 0.011262 | 0.011329 | 0.011228 | 0.011329 | 0.011194 | 0.011262 |
| 0.011228 | 0.011329 | 0.011530 | 0.011396 | 0.011295 | 0.011262 | 0.011127 |
| 0.011161 | 0.011161 | 0.011161 | 0.011195 | 0.011396 | 0.011362 | 0.011295 |
| 0.011396 | 0.011463 | 0.011195 | 0.011195 | 0.011228 | 0.011228 | 0.011229 |
| 0.011297 | 0.011228 | 0.011228 | 0.000000 | 0.011169 | 0.011130 | 0.011228 |
| 0.011230 | 0.011163 | 0.011208 | 0.011198 | 0.011128 | 0.011163 | 0.011195 |
| 0.011456 | 0.011233 | 0.011198 | 0.011161 | 0.011164 | 0.011296 | 0.011262 |
| 0.011329 | 0.011262 | 0.011262 | 0.011362 | 0.011295 | 0.011597 | 0.011463 |
| 0.011496 | 0.011362 | 0.011228 | 0.011329 | 0.011127 | 0.011362 | 0.011161 |
| 0.011228 | 0.011228 | 0.011195 | 0.011161 | 0.011194 | 0.011161 | 0.011262 |
| 0.011161 | 0.011262 | 0.011262 | 0.011161 | 0.011262 | 0.011362 | 0.011364 |
| 0.011295 | 0.011262 | 0.011161 | 0.011094 | 0.011228 | 0.011161 | 0.011094 |
| 0.011196 | 0.011295 | 0.011094 | 0.011295 | 0.011127 | 0.011228 | 0.011195 |
| 0.011228 | 0.011195 | 0.011161 | 0.011195 | 0.011228 | 0.011094 | 0.011161 |
| 0.011195 | 0.011195 | 0.011262 | 0.011195 | 0.011228 | 0.011262 | 0.011497 |
| 0.011597 | 0.011530 | 0.011597 | 0.011364 | 0.011598 | 0.011228 | 0.011195 |
| 0.011229 | 0.011464 | 0.011289 | 0.011129 | 0.011603 | 0.011094 | 0.011218 |
| 0.011603 | 0.011502 | 0.011396 | 0.011597 | 0.011299 | 0.011463 | 0.011362 |
| 0.011362 | 0.011530 | 0.011380 | 0.011225 | 0.011270 | 0.011262 | 0.011331 |
| 0.011429 | 0.011330 | 0.011466 | 0.011466 | 0.011463 | 0.011530 | 0.011636 |
| 0.011365 | 0.011467 | 0.011466 | 0.011398 | 0.011666 | 0.011127 | 0.011330 |
| 0.011228 | 0.011228 | 0.011127 | 0.011127 | 0.011127 | 0.011194 | 0.011262 |
| 0.011127 | 0.011194 | 0.011094 | 0.011262 | 0.011127 | 0.011194 | 0.011262 |
| 0.011194 | 0.011631 | 0.011530 | 0.011564 | 0.011094 | 0.011194 | 0.011228 |
| 0.011228 | 0.011194 | 0.011262 | 0.011295 | 0.011161 | 0.011161 | 0.011161 |
| 0.011698 | 0.011329 | 0.011329 | 0.011127 | 0.011228 | 0.011329 | 0.011161 |
| 0.011161 | 0.011228 | 0.011194 | 0.011295 | 0.011161 | 0.011295 | 0.011362 |
| 0.011362 | 0.011194 | 0.011194 | 0.011127 | 0.011127 | 0.011295 | 0.011228 |
| 0.011127 | 0.011228 | 0.011094 | 0.011127 | 0.011262 | 0.011396 | 0.011161 |
| 0.011128 | 0.011262 | 0.011195 | 0.011094 | 0.011429 | 0.011094 | 0.011262 |
| 0.011266 | 0.011161 | 0.011463 | 0.011295 | 0.011329 | 0.011194 | 0.011295 |
| 0.011161 | 0.011429 | 0.011094 | 0.011362 | 0.011161 | 0.011161 | 0.011094 |
| 0.011262 | 0.011530 | 0.011228 | 0.011295 | 0.011127 | 0.011530 | 0.011161 |
| 0.011161 | 0.011161 | 0.011194 | 0.011228 | 0.011194 | 0.011295 | 0.011362 |
| 0.011362 | 0.011329 | 0.011228 | 0.011329 | 0.011228 | 0.011161 | 0.011127 |
| 0.011161 | 0.011161 | 0.011228 | 0.011161 | 0.000000 | 0.011295 | 0.011161 |
| 0.011194 | 0.011194 | 0.011329 | 0.011362 | 0.011262 | 0.011127 | 0.011195 |
| 0.011262 | 0.011194 | 0.011295 | 0.011161 | 0.011295 | 0.011396 | 0.011698 |
| 0.011194 | 0.011597 | 0.011198 | 0.017710 | 0.011126 | 0.011366 | 0.011548 |
| 0.011510 | 0.011553 | 0.011217 | 0.011176 | 0.011609 | 0.011578 | 0.011242 |
| 0.011392 | 0.011487 | 0.011099 | 0.011144 | 0.011138 | 0.011258 | 0.011189 |
| 0.011389 | 0.011358 | 0.011320 | 0.011126 | 0.011329 | 0.011362 | 0.011365 |

|          |          |          |          |          |          |          |
|----------|----------|----------|----------|----------|----------|----------|
| 0.011163 | 0.011329 | 0.011329 | 0.011295 | 0.011262 | 0.011262 | 0.011228 |
| 0.011262 | 0.011195 | 0.011228 | 0.011262 | 0.011228 | 0.011161 | 0.011195 |
| 0.011195 | 0.011262 | 0.011161 | 0.011262 | 0.011295 | 0.011329 | 0.011228 |
| 0.011262 | 0.011228 | 0.011564 | 0.011564 | 0.011295 | 0.011329 | 0.011362 |
| 0.011127 | 0.011127 | 0.011161 | 0.011195 | 0.011127 | 0.011362 | 0.011362 |
| 0.011396 | 0.011396 | 0.011329 | 0.011429 | 0.011597 | 0.011431 | 0.011195 |
| 0.011262 | 0.011329 | 0.011295 | 0.011195 | 0.011262 | 0.011228 | 0.011262 |
| 0.011329 | 0.011329 | 0.011362 | 0.011262 | 0.011161 | 0.011429 | 0.011329 |
| 0.011263 | 0.011161 | 0.011262 | 0.011362 | 0.011262 | 0.011396 | 0.011429 |
| 0.011597 | 0.011299 | 0.011463 | 0.011362 | 0.011362 | 0.011530 | 0.011161 |
| 0.011330 | 0.011228 | 0.011195 | 0.011195 | 0.011262 | 0.011161 | 0.011262 |
| 0.011295 | 0.011329 | 0.011228 | 0.011262 | 0.011228 | 0.011564 | 0.011564 |
| 0.011295 | 0.011329 | 0.011396 | 0.011329 | 0.011968 | 0.011382 | 0.011306 |
| 0.011377 | 0.011338 | 0.011447 | 0.011337 | 0.011445 | 0.011370 | 0.011336 |
| 0.011918 | 0.011233 | 0.011368 | 0.011302 | 0.011577 | 0.011434 | 0.011468 |
| 0.011944 | 0.011399 | 0.011500 | 0.011564 | 0.011429 | 0.011429 | 0.011466 |
| 0.011127 | 0.011228 | 0.011429 | 0.011396 | 0.011398 | 0.011396 | 0.011363 |
| 0.011228 | 0.011094 | 0.011127 | 0.011228 | 0.000000 | 0.011194 | 0.011094 |
| 0.011228 | 0.011262 | 0.011161 | 0.011127 | 0.011228 | 0.011161 | 0.011194 |
| 0.011194 | 0.011127 | 0.011194 | 0.011228 | 0.011127 | 0.011262 | 0.011362 |
| 0.011262 | 0.011329 | 0.011262 | 0.011262 | 0.011194 | 0.011597 | 0.011228 |
| 0.011269 | 0.011195 | 0.011430 | 0.011433 | 0.011228 | 0.011295 | 0.011295 |
| 0.011295 | 0.011161 | 0.011194 | 0.011161 | 0.011329 | 0.011329 | 0.011262 |
| 0.011262 | 0.011396 | 0.011564 | 0.011295 | 0.011497 | 0.011497 | 0.011362 |
| 0.011194 | 0.011262 | 0.011295 | 0.011698 | 0.011262 | 0.011228 | 0.011262 |
| 0.011295 | 0.011228 | 0.011228 | 0.011530 | 0.011396 | 0.011497 | 0.011228 |
| 0.011329 | 0.011396 | 0.011262 | 0.011329 | 0.011295 | 0.011161 | 0.011496 |
| 0.011262 | 0.011228 | 0.011228 | 0.011396 | 0.011228 | 0.011329 | 0.011564 |
| 0.011262 | 0.011637 | 0.011631 | 0.011426 | 0.011117 | 0.011332 | 0.011163 |
| 0.011170 | 0.011644 | 0.011166 | 0.011373 | 0.011158 | 0.011315 | 0.011273 |
| 0.011366 | 0.000000 | 0.011227 | 0.000000 | 0.011114 | 0.011261 | 0.011263 |
| 0.011286 | 0.011139 | 0.011307 | 0.011236 | 0.011262 | 0.011396 | 0.011463 |
| 0.011463 | 0.011329 | 0.011432 | 0.011433 | 0.011569 | 0.011590 | 0.011262 |
| 0.011496 | 0.011362 | 0.011228 | 0.011329 | 0.011127 | 0.011362 | 0.011161 |
| 0.011228 | 0.011228 | 0.011195 | 0.011161 | 0.011194 | 0.011161 | 0.011262 |
| 0.011235 | 0.011235 | 0.011231 | 0.011266 | 0.011402 | 0.011299 | 0.011367 |
| 0.011367 | 0.011296 | 0.011097 | 0.011096 | 0.011230 | 0.011399 | 0.011399 |
| 0.011195 | 0.011263 | 0.011498 | 0.011466 | 0.011396 | 0.011430 | 0.011362 |
| 0.011295 | 0.011362 | 0.011362 | 0.011262 | 0.011832 | 0.011429 | 0.011497 |
| 0.011530 | 0.011594 | 0.011231 | 0.011303 | 0.011195 | 0.011396 | 0.011362 |
| 0.011397 | 0.011429 | 0.011429 | 0.011429 | 0.011571 | 0.011564 | 0.011199 |
| 0.011094 | 0.011095 | 0.011196 | 0.011162 | 0.011265 | 0.011098 | 0.011434 |
| 0.011232 | 0.011323 | 0.000000 | 0.011248 | 0.011228 | 0.011300 | 0.011127 |
| 0.011161 | 0.011161 | 0.011161 | 0.011195 | 0.011396 | 0.011362 | 0.011295 |
| 0.011396 | 0.011463 | 0.011195 | 0.011195 | 0.011228 | 0.011228 | 0.011229 |
| 0.011297 | 0.011228 | 0.011228 | 0.011262 | 0.011396 | 0.011463 | 0.011463 |
| 0.011329 | 0.011432 | 0.011433 | 0.011569 | 0.011590 | 0.011262 | 0.011429 |
| 0.011362 | 0.011362 | 0.011196 | 0.011373 | 0.011303 | 0.011333 | 0.011200 |
| 0.011301 | 0.011516 | 0.011314 | 0.011264 | 0.011094 | 0.011295 | 0.011161 |
| 0.011262 | 0.011262 | 0.011161 | 0.011262 | 0.011362 | 0.011364 | 0.011262 |
| 0.011161 | 0.011094 | 0.011228 | 0.011161 | 0.011094 | 0.011196 | 0.011295 |
| 0.011262 | 0.011195 | 0.011228 | 0.011262 | 0.011228 | 0.011161 | 0.011362 |
| 0.011228 | 0.011262 | 0.011262 | 0.011194 | 0.011262 | 0.011497 | 0.011161 |
| 0.011194 | 0.011597 | 0.011194 | 0.011161 | 0.011194 | 0.011564 | 0.011146 |
| 0.011566 | 0.011145 | 0.011161 | 0.011382 | 0.011467 | 0.011383 | 0.011102 |
| 0.011113 | 0.011362 | 0.011463 | 0.011569 | 0.011430 | 0.011568 | 0.011699 |
| 0.011598 | 0.011635 | 0.011597 | 0.011846 | 0.011564 | 0.012438 | 0.011599 |
| 0.012338 | 0.012105 | 0.012240 | 0.012511 | 0.011564 | 0.011262 | 0.011564 |
| 0.012002 | 0.011937 | 0.011530 | 0.011430 | 0.011497 | 0.011497 | 0.011466 |
| 0.011362 | 0.011365 | 0.011429 | 0.011396 | 0.011766 | 0.011832 | 0.011834 |

|          |          |          |          |          |          |          |
|----------|----------|----------|----------|----------|----------|----------|
| 0.011733 | 0.011833 | 0.011937 | 0.011703 | 0.012003 | 0.012008 | 0.012070 |
| 0.012070 | 0.012104 | 0.012050 | 0.012071 | 0.012072 | 0.011295 | 0.011598 |
| 0.011666 | 0.012169 | 0.011670 | 0.011900 | 0.012373 | 0.011434 | 0.011329 |
| 0.011295 | 0.011295 | 0.011766 | 0.011800 | 0.011904 | 0.011631 | 0.011296 |
| S362     | 0.011732 | 0.011732 | 0.012068 | 0.011832 | 0.011832 | 0.011900 |
| 0.011739 | 0.011671 | 0.011900 | 0.011329 | 0.011329 | 0.011363 | 0.011329 |
| 0.011362 | 0.011530 | 0.011329 | 0.011362 | 0.011429 | 0.011396 | 0.011362 |
| 0.011329 | 0.011362 | 0.011463 | 0.011329 | 0.011363 | 0.011362 | 0.011705 |
| 0.011597 | 0.011362 | 0.011262 | 0.011496 | 0.011429 | 0.011396 | 0.011429 |
| 0.011396 | 0.011497 | 0.011396 | 0.011396 | 0.011429 | 0.011396 | 0.011564 |
| 0.011329 | 0.011396 | 0.011429 | 0.011362 | 0.011463 | 0.011496 | 0.011429 |
| 0.011396 | 0.011564 | 0.011463 | 0.011732 | 0.011396 | 0.011664 | 0.011396 |
| 0.011362 | 0.011463 | 0.011530 | 0.011664 | 0.011765 | 0.011463 | 0.011564 |
| 0.011429 | 0.011497 | 0.011396 | 0.011631 | 0.011866 | 0.011329 | 0.011463 |
| 0.011362 | 0.011463 | 0.011429 | 0.011497 | 0.011429 | 0.011429 | 0.011429 |
| 0.011329 | 0.011362 | 0.011329 | 0.011429 | 0.011396 | 0.011430 | 0.011496 |
| 0.011429 | 0.011396 | 0.011463 | 0.011362 | 0.011496 | 0.011329 | 0.011396 |
| 0.011564 | 0.011496 | 0.011732 | 0.011564 | 0.011396 | 0.011631 | 0.011396 |
| 0.011542 | 0.011770 | 0.011588 | 0.011295 | 0.011284 | 0.011391 | 0.011493 |
| 0.012121 | 0.011569 | 0.011307 | 0.011631 | 0.011631 | 0.011429 | 0.011530 |
| 0.011463 | 0.011429 | 0.011496 | 0.011396 | 0.011497 | 0.011429 | 0.011429 |
| 0.011396 | 0.011496 | 0.011698 | 0.011564 | 0.011463 | 0.011430 | 0.011362 |
| 0.011329 | 0.011329 | 0.011396 | 0.011295 | 0.011564 | 0.011530 | 0.011463 |
| 0.011564 | 0.011631 | 0.011362 | 0.011362 | 0.011396 | 0.011396 | 0.011398 |
| 0.011466 | 0.011396 | 0.011396 | 0.011276 | 0.011349 | 0.011306 | 0.011396 |
| 0.011399 | 0.011335 | 0.011355 | 0.011371 | 0.011298 | 0.011334 | 0.011364 |
| 0.011636 | 0.011405 | 0.011439 | 0.011329 | 0.011337 | 0.011464 | 0.011430 |
| 0.011497 | 0.011431 | 0.011430 | 0.011530 | 0.011463 | 0.011832 | 0.011631 |
| 0.011664 | 0.011530 | 0.011396 | 0.011497 | 0.011295 | 0.011530 | 0.011329 |
| 0.011396 | 0.011396 | 0.011362 | 0.011329 | 0.011362 | 0.011329 | 0.011430 |
| 0.011396 | 0.011497 | 0.011430 | 0.011329 | 0.011431 | 0.011530 | 0.011533 |
| 0.011530 | 0.011430 | 0.011329 | 0.011263 | 0.011396 | 0.011329 | 0.011262 |
| 0.011366 | 0.011530 | 0.011329 | 0.011530 | 0.011295 | 0.011396 | 0.011362 |
| 0.011463 | 0.011362 | 0.011396 | 0.011362 | 0.011396 | 0.011262 | 0.011396 |
| 0.011430 | 0.011362 | 0.011430 | 0.011362 | 0.011396 | 0.011430 | 0.011665 |
| 0.011765 | 0.011698 | 0.011766 | 0.011498 | 0.011766 | 0.011396 | 0.011362 |
| 0.011398 | 0.011667 | 0.011518 | 0.011266 | 0.011773 | 0.011265 | 0.011296 |
| 0.011773 | 0.011672 | 0.011564 | 0.011765 | 0.011436 | 0.011631 | 0.011597 |
| 0.011530 | 0.011698 | 0.011522 | 0.011390 | 0.011312 | 0.011430 | 0.011500 |
| 0.011597 | 0.011465 | 0.011635 | 0.011669 | 0.011631 | 0.011698 | 0.011772 |
| 0.011534 | 0.011671 | 0.011636 | 0.011567 | 0.011834 | 0.011295 | 0.011498 |
| 0.011463 | 0.011396 | 0.011295 | 0.011295 | 0.011362 | 0.011362 | 0.011429 |
| 0.011362 | 0.011429 | 0.011329 | 0.011429 | 0.011362 | 0.011362 | 0.011429 |
| 0.011362 | 0.011799 | 0.011698 | 0.011732 | 0.011262 | 0.011362 | 0.011396 |
| 0.011396 | 0.011362 | 0.011429 | 0.011463 | 0.011329 | 0.011329 | 0.011329 |
| 0.011866 | 0.011496 | 0.011497 | 0.011295 | 0.011396 | 0.011564 | 0.011329 |
| 0.011329 | 0.011396 | 0.011362 | 0.011530 | 0.011329 | 0.011463 | 0.011597 |
| 0.011530 | 0.011362 | 0.011362 | 0.011295 | 0.011295 | 0.011463 | 0.011396 |
| 0.011295 | 0.011396 | 0.011262 | 0.011295 | 0.011429 | 0.011564 | 0.011329 |
| 0.011295 | 0.011429 | 0.011363 | 0.011262 | 0.011597 | 0.011262 | 0.011429 |
| 0.011471 | 0.011329 | 0.011631 | 0.011463 | 0.011497 | 0.011362 | 0.011463 |
| 0.011329 | 0.011664 | 0.011262 | 0.011530 | 0.011329 | 0.011329 | 0.011262 |
| 0.011496 | 0.011665 | 0.011396 | 0.011463 | 0.011295 | 0.011698 | 0.011329 |
| 0.011329 | 0.011329 | 0.011362 | 0.011463 | 0.011362 | 0.011463 | 0.011530 |
| 0.011530 | 0.011497 | 0.011396 | 0.011497 | 0.011463 | 0.011329 | 0.011295 |
| 0.011329 | 0.011329 | 0.011396 | 0.011329 | 0.011295 | 0.000000 | 0.011329 |
| 0.011362 | 0.011362 | 0.011429 | 0.011530 | 0.011429 | 0.011362 | 0.011362 |
| 0.011429 | 0.011362 | 0.011396 | 0.011329 | 0.011463 | 0.011564 | 0.011866 |
| 0.011362 | 0.011765 | 0.011336 | 0.017861 | 0.011388 | 0.011488 | 0.011688 |
| 0.011648 | 0.011693 | 0.011479 | 0.011350 | 0.011884 | 0.011716 | 0.011546 |

|          |          |          |          |          |          |          |
|----------|----------|----------|----------|----------|----------|----------|
| 0.011582 | 0.011732 | 0.011255 | 0.011270 | 0.011255 | 0.011455 | 0.011361 |
| 0.011623 | 0.011507 | 0.011505 | 0.011325 | 0.011497 | 0.011530 | 0.011534 |
| 0.011369 | 0.011497 | 0.011497 | 0.011463 | 0.011429 | 0.011430 | 0.011396 |
| 0.011362 | 0.011362 | 0.011396 | 0.011430 | 0.011396 | 0.011329 | 0.011362 |
| 0.011362 | 0.011430 | 0.011329 | 0.011430 | 0.011463 | 0.011497 | 0.011396 |
| 0.011429 | 0.011396 | 0.011732 | 0.011732 | 0.011463 | 0.011497 | 0.011463 |
| 0.011295 | 0.011295 | 0.011329 | 0.011430 | 0.011295 | 0.011530 | 0.011530 |
| 0.011564 | 0.011564 | 0.011497 | 0.011597 | 0.011766 | 0.011599 | 0.011430 |
| 0.011430 | 0.011497 | 0.011530 | 0.011362 | 0.011430 | 0.011329 | 0.011430 |
| 0.011497 | 0.011497 | 0.011530 | 0.011497 | 0.011397 | 0.011597 | 0.011564 |
| 0.011433 | 0.011329 | 0.011430 | 0.011530 | 0.011430 | 0.011564 | 0.011597 |
| 0.011765 | 0.011436 | 0.011631 | 0.011597 | 0.011530 | 0.011698 | 0.011329 |
| 0.011498 | 0.011396 | 0.011362 | 0.011362 | 0.011430 | 0.011329 | 0.011430 |
| 0.011463 | 0.011497 | 0.011396 | 0.011429 | 0.011396 | 0.011732 | 0.011732 |
| 0.011463 | 0.011497 | 0.011564 | 0.011496 | 0.012137 | 0.011524 | 0.011447 |
| 0.011517 | 0.011476 | 0.011587 | 0.011476 | 0.011585 | 0.011508 | 0.011508 |
| 0.012056 | 0.011372 | 0.011505 | 0.011441 | 0.011714 | 0.011604 | 0.011673 |
| 0.012080 | 0.011550 | 0.011669 | 0.011732 | 0.011597 | 0.011597 | 0.011635 |
| 0.011295 | 0.011463 | 0.011597 | 0.011564 | 0.011567 | 0.011564 | 0.011532 |
| 0.011329 | 0.011329 | 0.011362 | 0.011396 | 0.011295 | 0.011362 | 0.011262 |
| 0.011396 | 0.011429 | 0.011329 | 0.011295 | 0.011396 | 0.011329 | 0.011362 |
| 0.011362 | 0.011295 | 0.011362 | 0.011329 | 0.011295 | 0.011497 | 0.011530 |
| 0.011429 | 0.011497 | 0.011429 | 0.011429 | 0.011362 | 0.011765 | 0.011396 |
| 0.011408 | 0.011362 | 0.011598 | 0.011569 | 0.011463 | 0.011463 | 0.011463 |
| 0.011463 | 0.011396 | 0.011362 | 0.011396 | 0.011429 | 0.011497 | 0.011429 |
| 0.011429 | 0.011564 | 0.011732 | 0.011463 | 0.011665 | 0.011665 | 0.011530 |
| 0.011362 | 0.011429 | 0.011463 | 0.011866 | 0.011430 | 0.011463 | 0.011429 |
| 0.011463 | 0.011396 | 0.011396 | 0.011698 | 0.011631 | 0.011665 | 0.011396 |
| 0.011497 | 0.011564 | 0.011429 | 0.011497 | 0.011463 | 0.011329 | 0.011664 |
| 0.011429 | 0.011396 | 0.011396 | 0.011564 | 0.011396 | 0.011496 | 0.011732 |
| 0.011429 | 0.011807 | 0.011799 | 0.011589 | 0.011399 | 0.011502 | 0.011318 |
| 0.011390 | 0.011800 | 0.011306 | 0.011551 | 0.011353 | 0.011518 | 0.011538 |
| 0.011621 | 0.011324 | 0.011506 | 0.011390 | 0.011330 | 0.011529 | 0.011466 |
| 0.011475 | 0.011375 | 0.011448 | 0.011377 | 0.011431 | 0.011564 | 0.011631 |
| 0.011631 | 0.011497 | 0.011601 | 0.011603 | 0.011738 | 0.011767 | 0.011429 |
| 0.011664 | 0.011530 | 0.011396 | 0.011497 | 0.011295 | 0.011530 | 0.011329 |
| 0.011396 | 0.011396 | 0.011362 | 0.011329 | 0.011362 | 0.011329 | 0.011430 |
| 0.011410 | 0.011410 | 0.011403 | 0.011437 | 0.011573 | 0.011538 | 0.011470 |
| 0.011537 | 0.011464 | 0.011245 | 0.011240 | 0.011399 | 0.011568 | 0.011569 |
| 0.011363 | 0.011433 | 0.011666 | 0.011635 | 0.011565 | 0.011599 | 0.011530 |
| 0.011463 | 0.011530 | 0.011530 | 0.011429 | 0.012001 | 0.011597 | 0.011665 |
| 0.011698 | 0.011772 | 0.011367 | 0.011476 | 0.011362 | 0.011564 | 0.011530 |
| 0.011565 | 0.011597 | 0.011597 | 0.011597 | 0.011728 | 0.011732 | 0.011338 |
| 0.011229 | 0.011233 | 0.011333 | 0.011298 | 0.011402 | 0.011209 | 0.011570 |
| 0.011369 | 0.011455 | 0.011156 | 0.011397 | 0.011396 | 0.011471 | 0.011362 |
| 0.011329 | 0.011329 | 0.011396 | 0.011295 | 0.011564 | 0.011530 | 0.011463 |
| 0.011564 | 0.011631 | 0.011362 | 0.011362 | 0.011396 | 0.011396 | 0.011398 |
| 0.011466 | 0.011396 | 0.011396 | 0.011431 | 0.011564 | 0.011631 | 0.011631 |
| 0.011497 | 0.011601 | 0.011603 | 0.011738 | 0.011767 | 0.011429 | 0.011597 |
| 0.011530 | 0.011530 | 0.011365 | 0.011547 | 0.011477 | 0.011503 | 0.011340 |
| 0.011542 | 0.011744 | 0.011484 | 0.011434 | 0.011329 | 0.011530 | 0.011396 |
| 0.011497 | 0.011430 | 0.011329 | 0.011431 | 0.011530 | 0.011533 | 0.011430 |
| 0.011329 | 0.011263 | 0.011396 | 0.011329 | 0.011262 | 0.011366 | 0.011530 |
| 0.011362 | 0.011362 | 0.011396 | 0.011430 | 0.011396 | 0.011329 | 0.011530 |
| 0.011396 | 0.011429 | 0.011429 | 0.011362 | 0.011429 | 0.011664 | 0.011329 |
| 0.011362 | 0.011765 | 0.011362 | 0.011396 | 0.011362 | 0.011732 | 0.011317 |
| 0.011791 | 0.011315 | 0.011361 | 0.011543 | 0.011630 | 0.011527 | 0.011269 |
| 0.011323 | 0.011530 | 0.011631 | 0.011739 | 0.011599 | 0.011703 | 0.011867 |
| 0.011767 | 0.011770 | 0.011698 | 0.011983 | 0.011732 | 0.012606 | 0.011768 |
| 0.012507 | 0.012274 | 0.012409 | 0.012680 | 0.011731 | 0.011430 | 0.011732 |



|          |          |          |          |          |          |          |
|----------|----------|----------|----------|----------|----------|----------|
| 0.012171 | 0.012072 | 0.011698 | 0.011597 | 0.011665 | 0.011665 | 0.011601 |
| 0.011530 | 0.011501 | 0.011597 | 0.011565 | 0.011935 | 0.012001 | 0.011935 |
| 0.011901 | 0.012002 | 0.012106 | 0.011838 | 0.012171 | 0.012178 | 0.012238 |
| 0.012239 | 0.012273 | 0.012186 | 0.012239 | 0.012241 | 0.011463 | 0.011766 |
| 0.011834 | 0.012337 | 0.011840 | 0.012068 | 0.012541 | 0.011570 | 0.011497 |
| 0.011463 | 0.011463 | 0.011934 | 0.011965 | 0.012081 | 0.011799 | 0.011465 |
| S363     | 0.011597 | 0.011597 | 0.011933 | 0.011698 | 0.011698 | 0.011765 |
| 0.011603 | 0.011535 | 0.011765 | 0.011195 | 0.011262 | 0.011228 | 0.011194 |
| 0.011228 | 0.011396 | 0.011194 | 0.011228 | 0.011295 | 0.011262 | 0.011228 |
| 0.011194 | 0.011228 | 0.011329 | 0.011195 | 0.011228 | 0.011228 | 0.011569 |
| 0.011463 | 0.011228 | 0.011127 | 0.011362 | 0.011295 | 0.011262 | 0.011295 |
| 0.011262 | 0.011362 | 0.011262 | 0.011262 | 0.011295 | 0.011262 | 0.011429 |
| 0.011194 | 0.011262 | 0.011295 | 0.011228 | 0.011329 | 0.011362 | 0.011295 |
| 0.011262 | 0.011429 | 0.011329 | 0.011597 | 0.011262 | 0.011530 | 0.011262 |
| 0.011228 | 0.011329 | 0.011396 | 0.011530 | 0.011631 | 0.011329 | 0.011429 |
| 0.011295 | 0.011362 | 0.011262 | 0.011496 | 0.011732 | 0.011262 | 0.011329 |
| 0.011228 | 0.011329 | 0.011295 | 0.011362 | 0.011295 | 0.011295 | 0.011295 |
| 0.011194 | 0.011228 | 0.011194 | 0.011295 | 0.011262 | 0.011296 | 0.011362 |
| 0.011295 | 0.011262 | 0.011329 | 0.011228 | 0.011362 | 0.011194 | 0.011262 |
| 0.011429 | 0.011362 | 0.011597 | 0.011429 | 0.011262 | 0.011496 | 0.011262 |
| 0.011431 | 0.011658 | 0.011475 | 0.011177 | 0.011172 | 0.011281 | 0.011375 |
| 0.012011 | 0.011416 | 0.011143 | 0.011496 | 0.011496 | 0.011295 | 0.011396 |
| 0.011329 | 0.011295 | 0.011362 | 0.011262 | 0.011362 | 0.011295 | 0.011295 |
| 0.011262 | 0.011362 | 0.011564 | 0.011429 | 0.011329 | 0.011295 | 0.011228 |
| 0.011195 | 0.011195 | 0.011262 | 0.011228 | 0.011429 | 0.011396 | 0.011329 |
| 0.011429 | 0.011497 | 0.011228 | 0.011228 | 0.011262 | 0.011262 | 0.011263 |
| 0.011331 | 0.011262 | 0.011262 | 0.011132 | 0.011205 | 0.011165 | 0.011262 |
| 0.011263 | 0.011198 | 0.011245 | 0.011233 | 0.011162 | 0.011197 | 0.011229 |
| 0.011492 | 0.011267 | 0.011301 | 0.011195 | 0.011199 | 0.011329 | 0.011296 |
| 0.011363 | 0.011296 | 0.011296 | 0.011396 | 0.011329 | 0.011698 | 0.011497 |
| 0.011530 | 0.011396 | 0.011262 | 0.011362 | 0.011161 | 0.011396 | 0.011195 |
| 0.011262 | 0.011262 | 0.011228 | 0.011194 | 0.011228 | 0.011195 | 0.011295 |
| 0.011262 | 0.011362 | 0.011295 | 0.011195 | 0.011296 | 0.011396 | 0.011398 |
| 0.011396 | 0.011295 | 0.011195 | 0.011128 | 0.011262 | 0.011195 | 0.011127 |
| 0.011230 | 0.011396 | 0.011195 | 0.011396 | 0.011161 | 0.011262 | 0.011228 |
| 0.011329 | 0.011228 | 0.011262 | 0.011228 | 0.011262 | 0.011127 | 0.011262 |
| 0.011295 | 0.011228 | 0.011295 | 0.011228 | 0.011262 | 0.011295 | 0.011530 |
| 0.011631 | 0.011564 | 0.011631 | 0.011397 | 0.011631 | 0.011262 | 0.011228 |
| 0.011263 | 0.011545 | 0.011380 | 0.011163 | 0.011637 | 0.011129 | 0.011257 |
| 0.011637 | 0.011536 | 0.011429 | 0.011631 | 0.011333 | 0.011496 | 0.011463 |
| 0.011396 | 0.011564 | 0.011415 | 0.011266 | 0.011228 | 0.011295 | 0.011365 |
| 0.011463 | 0.011364 | 0.011500 | 0.011568 | 0.011497 | 0.011564 | 0.011670 |
| 0.011399 | 0.011569 | 0.011500 | 0.011432 | 0.011699 | 0.011161 | 0.011363 |
| 0.011329 | 0.011262 | 0.011161 | 0.011161 | 0.011228 | 0.011228 | 0.011295 |
| 0.011228 | 0.011295 | 0.011194 | 0.011295 | 0.011228 | 0.011228 | 0.011295 |
| 0.011228 | 0.011664 | 0.011564 | 0.011597 | 0.011127 | 0.011228 | 0.011262 |
| 0.011262 | 0.011228 | 0.011295 | 0.011329 | 0.011194 | 0.011194 | 0.011194 |
| 0.011731 | 0.011362 | 0.011362 | 0.011161 | 0.011262 | 0.011429 | 0.011194 |
| 0.011194 | 0.011262 | 0.011228 | 0.011396 | 0.011194 | 0.011329 | 0.011463 |
| 0.011396 | 0.011228 | 0.011228 | 0.011161 | 0.011161 | 0.011329 | 0.011262 |
| 0.011161 | 0.011262 | 0.011127 | 0.011161 | 0.011295 | 0.011430 | 0.011195 |
| 0.011161 | 0.011295 | 0.011228 | 0.011127 | 0.011463 | 0.011127 | 0.011295 |
| 0.011368 | 0.011195 | 0.011496 | 0.011329 | 0.011362 | 0.011228 | 0.011329 |
| 0.011194 | 0.011530 | 0.011127 | 0.011396 | 0.011194 | 0.011194 | 0.011127 |
| 0.011362 | 0.011564 | 0.011262 | 0.011329 | 0.011161 | 0.011564 | 0.011194 |
| 0.011194 | 0.011194 | 0.011228 | 0.011329 | 0.011228 | 0.011329 | 0.011396 |
| 0.011396 | 0.011362 | 0.011262 | 0.011362 | 0.011329 | 0.011194 | 0.011161 |
| 0.011194 | 0.011194 | 0.011262 | 0.011194 | 0.011161 | 0.011329 | 0.000000 |
| 0.011228 | 0.011228 | 0.011362 | 0.011396 | 0.011295 | 0.011228 | 0.011228 |
| 0.011295 | 0.011228 | 0.011329 | 0.011194 | 0.011329 | 0.011429 | 0.011732 |

|          |          |          |          |          |          |          |
|----------|----------|----------|----------|----------|----------|----------|
| 0.011228 | 0.011631 | 0.011233 | 0.017710 | 0.011191 | 0.011366 | 0.011583 |
| 0.011545 | 0.011588 | 0.011217 | 0.011176 | 0.011664 | 0.011612 | 0.011303 |
| 0.011440 | 0.011487 | 0.011138 | 0.011186 | 0.011177 | 0.011258 | 0.011232 |
| 0.011436 | 0.011395 | 0.011357 | 0.011193 | 0.011362 | 0.011396 | 0.011398 |
| 0.011266 | 0.011362 | 0.011362 | 0.011329 | 0.011295 | 0.011295 | 0.011262 |
| 0.011295 | 0.011228 | 0.011262 | 0.011295 | 0.011262 | 0.011195 | 0.011228 |
| 0.011228 | 0.011295 | 0.011195 | 0.011295 | 0.011329 | 0.011362 | 0.011262 |
| 0.011295 | 0.011262 | 0.011597 | 0.011597 | 0.011329 | 0.011363 | 0.011396 |
| 0.011161 | 0.011161 | 0.011195 | 0.011295 | 0.011161 | 0.011396 | 0.011396 |
| 0.011429 | 0.011429 | 0.011362 | 0.011463 | 0.011631 | 0.011464 | 0.011295 |
| 0.011295 | 0.011362 | 0.011396 | 0.011228 | 0.011295 | 0.011262 | 0.011295 |
| 0.011363 | 0.011362 | 0.011396 | 0.011363 | 0.011262 | 0.011463 | 0.011429 |
| 0.011297 | 0.011195 | 0.011295 | 0.011396 | 0.011295 | 0.011430 | 0.011463 |
| 0.011631 | 0.011333 | 0.011496 | 0.011463 | 0.011396 | 0.011564 | 0.011195 |
| 0.011363 | 0.011262 | 0.011228 | 0.011228 | 0.011295 | 0.011195 | 0.011295 |
| 0.011329 | 0.011362 | 0.011262 | 0.011295 | 0.011262 | 0.011597 | 0.011597 |
| 0.011329 | 0.011363 | 0.011429 | 0.011362 | 0.012002 | 0.011417 | 0.011341 |
| 0.011412 | 0.011372 | 0.011482 | 0.011372 | 0.011480 | 0.011405 | 0.011370 |
| 0.011953 | 0.011268 | 0.011403 | 0.011337 | 0.011611 | 0.011468 | 0.011570 |
| 0.011978 | 0.011437 | 0.011533 | 0.011597 | 0.011463 | 0.011463 | 0.011499 |
| 0.011161 | 0.011329 | 0.011463 | 0.011429 | 0.011432 | 0.011429 | 0.011397 |
| 0.011262 | 0.011194 | 0.011228 | 0.011262 | 0.011161 | 0.011228 | 0.011127 |
| 0.011262 | 0.011295 | 0.011194 | 0.011161 | 0.011262 | 0.011194 | 0.011228 |
| 0.011228 | 0.011161 | 0.011228 | 0.011262 | 0.011161 | 0.011362 | 0.011396 |
| 0.011295 | 0.011362 | 0.011295 | 0.011295 | 0.011228 | 0.011631 | 0.011262 |
| 0.011304 | 0.011228 | 0.011463 | 0.011467 | 0.011329 | 0.011329 | 0.011329 |
| 0.011329 | 0.011262 | 0.011228 | 0.011262 | 0.011362 | 0.011362 | 0.011295 |
| 0.011295 | 0.011429 | 0.011597 | 0.011329 | 0.011530 | 0.011530 | 0.011396 |
| 0.011161 | 0.011228 | 0.011329 | 0.011732 | 0.011295 | 0.011329 | 0.011295 |
| 0.011329 | 0.011262 | 0.011262 | 0.011564 | 0.011497 | 0.011530 | 0.011262 |
| 0.011362 | 0.011429 | 0.011295 | 0.011362 | 0.011329 | 0.011194 | 0.011530 |
| 0.011295 | 0.011262 | 0.011262 | 0.011429 | 0.011262 | 0.011362 | 0.011597 |
| 0.011295 | 0.011671 | 0.011664 | 0.011467 | 0.011173 | 0.011366 | 0.011215 |
| 0.011170 | 0.011683 | 0.011201 | 0.011373 | 0.011255 | 0.011366 | 0.011326 |
| 0.011417 | 0.000000 | 0.011283 | 0.000000 | 0.011168 | 0.011328 | 0.011344 |
| 0.011362 | 0.011257 | 0.011342 | 0.011272 | 0.011296 | 0.011429 | 0.011497 |
| 0.011497 | 0.011363 | 0.011466 | 0.011467 | 0.011602 | 0.011626 | 0.011295 |
| 0.011530 | 0.011396 | 0.011262 | 0.011362 | 0.011161 | 0.011396 | 0.011195 |
| 0.011262 | 0.011262 | 0.011228 | 0.011194 | 0.011228 | 0.011195 | 0.011295 |
| 0.011270 | 0.011270 | 0.011266 | 0.011300 | 0.011437 | 0.011402 | 0.011402 |
| 0.011401 | 0.011329 | 0.011134 | 0.011132 | 0.011263 | 0.011433 | 0.011433 |
| 0.011228 | 0.011297 | 0.011531 | 0.011500 | 0.011430 | 0.011464 | 0.011396 |
| 0.011329 | 0.011396 | 0.011396 | 0.011295 | 0.011866 | 0.011463 | 0.011530 |
| 0.011564 | 0.011630 | 0.011265 | 0.011337 | 0.011228 | 0.011429 | 0.011396 |
| 0.011430 | 0.011463 | 0.011463 | 0.011463 | 0.011571 | 0.011597 | 0.011234 |
| 0.011128 | 0.011130 | 0.011230 | 0.011196 | 0.011299 | 0.011098 | 0.011468 |
| 0.011266 | 0.011367 | 0.011108 | 0.011285 | 0.011262 | 0.011334 | 0.011228 |
| 0.011195 | 0.011195 | 0.011262 | 0.011228 | 0.011429 | 0.011396 | 0.011329 |
| 0.011429 | 0.011497 | 0.011228 | 0.011228 | 0.011262 | 0.011262 | 0.011263 |
| 0.011331 | 0.011262 | 0.011262 | 0.011296 | 0.011429 | 0.011497 | 0.011497 |
| 0.011363 | 0.011466 | 0.011467 | 0.011602 | 0.011626 | 0.011295 | 0.011463 |
| 0.011396 | 0.011396 | 0.011229 | 0.011408 | 0.011338 | 0.011367 | 0.011235 |
| 0.011370 | 0.011561 | 0.011399 | 0.011298 | 0.011195 | 0.011396 | 0.011262 |
| 0.011362 | 0.011295 | 0.011195 | 0.011296 | 0.011396 | 0.011398 | 0.011295 |
| 0.011195 | 0.011128 | 0.011262 | 0.011195 | 0.011127 | 0.011230 | 0.011396 |
| 0.011295 | 0.011228 | 0.011262 | 0.011295 | 0.011262 | 0.011195 | 0.011396 |
| 0.011262 | 0.011295 | 0.011295 | 0.011228 | 0.011295 | 0.011530 | 0.011194 |
| 0.011228 | 0.011631 | 0.011228 | 0.011262 | 0.011228 | 0.011597 | 0.011146 |
| 0.011622 | 0.011188 | 0.011211 | 0.011422 | 0.011508 | 0.011419 | 0.011144 |
| 0.011165 | 0.011396 | 0.011496 | 0.011603 | 0.011464 | 0.011601 | 0.011733 |

|          |          |          |          |          |          |          |
|----------|----------|----------|----------|----------|----------|----------|
| 0.011632 | 0.011669 | 0.011631 | 0.011880 | 0.011597 | 0.012472 | 0.011633 |
| 0.012372 | 0.012139 | 0.012273 | 0.012545 | 0.011597 | 0.011295 | 0.011598 |
| 0.012036 | 0.011971 | 0.011564 | 0.011463 | 0.011531 | 0.011531 | 0.011500 |
| 0.011396 | 0.011399 | 0.011463 | 0.011430 | 0.011800 | 0.011866 | 0.011867 |
| 0.011766 | 0.011867 | 0.011970 | 0.011737 | 0.012036 | 0.012042 | 0.012104 |
| 0.012104 | 0.012138 | 0.012084 | 0.012104 | 0.012105 | 0.011329 | 0.011631 |
| 0.011699 | 0.012202 | 0.011704 | 0.011933 | 0.012406 | 0.011468 | 0.011363 |
| 0.011329 | 0.011329 | 0.011799 | 0.011842 | 0.011940 | 0.011664 | 0.011330 |
| S364     | 0.011631 | 0.011631 | 0.011900 | 0.011664 | 0.011664 | 0.011732 |
| 0.011569 | 0.011502 | 0.011731 | 0.011228 | 0.011295 | 0.011262 | 0.011228 |
| 0.011194 | 0.011429 | 0.011094 | 0.011262 | 0.011329 | 0.011295 | 0.011262 |
| 0.011228 | 0.011262 | 0.011295 | 0.011228 | 0.011262 | 0.011262 | 0.011535 |
| 0.011429 | 0.011262 | 0.011161 | 0.011329 | 0.011329 | 0.011295 | 0.011329 |
| 0.011295 | 0.011396 | 0.011295 | 0.011295 | 0.011329 | 0.011295 | 0.011463 |
| 0.011161 | 0.011295 | 0.011329 | 0.011262 | 0.011295 | 0.011396 | 0.011329 |
| 0.011295 | 0.011463 | 0.011362 | 0.011564 | 0.011295 | 0.011564 | 0.011295 |
| 0.011262 | 0.011295 | 0.011429 | 0.011564 | 0.011597 | 0.011295 | 0.011396 |
| 0.011329 | 0.011396 | 0.011295 | 0.011530 | 0.011698 | 0.011295 | 0.011362 |
| 0.011262 | 0.011362 | 0.011329 | 0.011396 | 0.011329 | 0.011329 | 0.011329 |
| 0.011228 | 0.011262 | 0.011228 | 0.011262 | 0.011295 | 0.011329 | 0.011396 |
| 0.011329 | 0.011295 | 0.011362 | 0.011262 | 0.011329 | 0.011228 | 0.011295 |
| 0.011463 | 0.011396 | 0.011631 | 0.011463 | 0.011295 | 0.011530 | 0.011295 |
| 0.011468 | 0.011620 | 0.011513 | 0.011216 | 0.011210 | 0.011318 | 0.011336 |
| 0.011975 | 0.011365 | 0.011184 | 0.011530 | 0.011530 | 0.011194 | 0.011362 |
| 0.011362 | 0.011329 | 0.011396 | 0.011295 | 0.011396 | 0.011329 | 0.011329 |
| 0.011295 | 0.011329 | 0.011597 | 0.011396 | 0.011362 | 0.011329 | 0.011262 |
| 0.011228 | 0.011161 | 0.011295 | 0.011262 | 0.011396 | 0.011362 | 0.011295 |
| 0.011396 | 0.011463 | 0.011262 | 0.011262 | 0.011295 | 0.011295 | 0.011297 |
| 0.011364 | 0.011295 | 0.011295 | 0.011168 | 0.011241 | 0.011200 | 0.011296 |
| 0.011297 | 0.011232 | 0.011245 | 0.011267 | 0.011196 | 0.011231 | 0.011263 |
| 0.011456 | 0.011301 | 0.011336 | 0.011228 | 0.011233 | 0.011363 | 0.011262 |
| 0.011329 | 0.011330 | 0.011329 | 0.011429 | 0.011362 | 0.011732 | 0.011463 |
| 0.011496 | 0.011362 | 0.011295 | 0.011329 | 0.011195 | 0.011362 | 0.011228 |
| 0.011295 | 0.011295 | 0.011262 | 0.011228 | 0.011262 | 0.011228 | 0.011329 |
| 0.011295 | 0.011396 | 0.011329 | 0.011228 | 0.011330 | 0.011430 | 0.011432 |
| 0.011430 | 0.011329 | 0.011228 | 0.011161 | 0.011295 | 0.011228 | 0.011161 |
| 0.011264 | 0.011430 | 0.011228 | 0.011430 | 0.011195 | 0.011295 | 0.011262 |
| 0.011362 | 0.011262 | 0.011295 | 0.011262 | 0.011295 | 0.011161 | 0.011295 |
| 0.011329 | 0.011262 | 0.011329 | 0.011262 | 0.011295 | 0.011329 | 0.011564 |
| 0.011597 | 0.011530 | 0.011597 | 0.011431 | 0.011598 | 0.011295 | 0.011262 |
| 0.011162 | 0.011464 | 0.011380 | 0.011197 | 0.011603 | 0.011163 | 0.011296 |
| 0.011603 | 0.011502 | 0.011463 | 0.011664 | 0.011367 | 0.011530 | 0.011497 |
| 0.011429 | 0.011597 | 0.011451 | 0.011307 | 0.011354 | 0.011329 | 0.011398 |
| 0.011497 | 0.011397 | 0.011533 | 0.011601 | 0.011530 | 0.011597 | 0.011704 |
| 0.011432 | 0.011603 | 0.011534 | 0.011466 | 0.011733 | 0.011194 | 0.011397 |
| 0.011362 | 0.011295 | 0.011194 | 0.011194 | 0.011262 | 0.011262 | 0.011329 |
| 0.011262 | 0.011329 | 0.011228 | 0.011262 | 0.011262 | 0.011262 | 0.011329 |
| 0.011262 | 0.011631 | 0.011530 | 0.011564 | 0.011161 | 0.011262 | 0.011295 |
| 0.011295 | 0.011262 | 0.011329 | 0.011295 | 0.011228 | 0.011228 | 0.011228 |
| 0.011698 | 0.011329 | 0.011396 | 0.011194 | 0.011295 | 0.011463 | 0.011228 |
| 0.011228 | 0.011295 | 0.011262 | 0.011429 | 0.011228 | 0.011362 | 0.011496 |
| 0.011429 | 0.011262 | 0.011262 | 0.011194 | 0.011194 | 0.011362 | 0.011295 |
| 0.011194 | 0.011295 | 0.011161 | 0.011194 | 0.011329 | 0.011396 | 0.011228 |
| 0.011195 | 0.011329 | 0.011262 | 0.011161 | 0.011429 | 0.011161 | 0.011329 |
| 0.011402 | 0.011228 | 0.011463 | 0.011362 | 0.011329 | 0.011262 | 0.011362 |
| 0.011228 | 0.011564 | 0.011161 | 0.011362 | 0.011094 | 0.011094 | 0.011161 |
| 0.011396 | 0.011530 | 0.011295 | 0.011362 | 0.011194 | 0.011530 | 0.011094 |
| 0.011228 | 0.011228 | 0.011262 | 0.011362 | 0.011262 | 0.011362 | 0.011429 |
| 0.011429 | 0.011396 | 0.011295 | 0.011396 | 0.011362 | 0.011228 | 0.011194 |
| 0.011228 | 0.011228 | 0.011295 | 0.011161 | 0.011194 | 0.011362 | 0.011228 |

|          |          |          |          |          |          |          |
|----------|----------|----------|----------|----------|----------|----------|
| 0.000000 | 0.011262 | 0.011396 | 0.011362 | 0.011329 | 0.011262 | 0.011262 |
| 0.011329 | 0.011262 | 0.011362 | 0.011228 | 0.011362 | 0.011463 | 0.011698 |
| 0.011262 | 0.011597 | 0.011267 | 0.017785 | 0.011191 | 0.011427 | 0.011548 |
| 0.011510 | 0.011553 | 0.011374 | 0.011350 | 0.011609 | 0.011578 | 0.011303 |
| 0.011440 | 0.011487 | 0.011138 | 0.011270 | 0.011177 | 0.011307 | 0.011275 |
| 0.011436 | 0.011321 | 0.011357 | 0.000000 | 0.011396 | 0.011429 | 0.011432 |
| 0.011301 | 0.011396 | 0.011396 | 0.011295 | 0.011329 | 0.011329 | 0.011295 |
| 0.011329 | 0.011262 | 0.011295 | 0.011329 | 0.011295 | 0.011228 | 0.011262 |
| 0.011262 | 0.011329 | 0.011228 | 0.011329 | 0.011362 | 0.011396 | 0.011295 |
| 0.011262 | 0.011228 | 0.011497 | 0.011497 | 0.011362 | 0.011396 | 0.011430 |
| 0.011195 | 0.011195 | 0.011228 | 0.011329 | 0.011195 | 0.011429 | 0.011429 |
| 0.011463 | 0.011463 | 0.011396 | 0.011496 | 0.011597 | 0.011498 | 0.011329 |
| 0.011329 | 0.011396 | 0.011429 | 0.011262 | 0.011329 | 0.011295 | 0.011329 |
| 0.011396 | 0.011396 | 0.011429 | 0.011396 | 0.011296 | 0.011497 | 0.011463 |
| 0.011331 | 0.011228 | 0.011329 | 0.011430 | 0.011329 | 0.011396 | 0.011496 |
| 0.011664 | 0.011367 | 0.011530 | 0.011497 | 0.011429 | 0.011597 | 0.011228 |
| 0.011397 | 0.011295 | 0.011262 | 0.011262 | 0.011329 | 0.011228 | 0.011329 |
| 0.011362 | 0.011396 | 0.011295 | 0.011262 | 0.011228 | 0.011497 | 0.011497 |
| 0.011362 | 0.011396 | 0.011463 | 0.011396 | 0.011968 | 0.011453 | 0.011377 |
| 0.011447 | 0.011407 | 0.011517 | 0.011406 | 0.011515 | 0.011439 | 0.011405 |
| 0.011918 | 0.011302 | 0.011437 | 0.011371 | 0.011645 | 0.011502 | 0.011604 |
| 0.011944 | 0.011399 | 0.011567 | 0.011631 | 0.011496 | 0.011429 | 0.011533 |
| 0.011194 | 0.011362 | 0.011496 | 0.011463 | 0.011466 | 0.011396 | 0.011363 |
| 0.011295 | 0.011228 | 0.011262 | 0.011295 | 0.011194 | 0.011262 | 0.011161 |
| 0.011228 | 0.011262 | 0.011228 | 0.011194 | 0.011295 | 0.011228 | 0.011262 |
| 0.011262 | 0.011194 | 0.011262 | 0.011295 | 0.011194 | 0.011396 | 0.011429 |
| 0.011329 | 0.011329 | 0.011329 | 0.011329 | 0.011262 | 0.011597 | 0.011295 |
| 0.011269 | 0.011262 | 0.011430 | 0.011433 | 0.011362 | 0.011362 | 0.011362 |
| 0.011362 | 0.011295 | 0.011262 | 0.011295 | 0.011396 | 0.011396 | 0.011329 |
| 0.011329 | 0.011463 | 0.011564 | 0.011362 | 0.011564 | 0.011564 | 0.011429 |
| 0.011262 | 0.011329 | 0.011362 | 0.011698 | 0.011329 | 0.011362 | 0.011329 |
| 0.011362 | 0.011228 | 0.011228 | 0.011530 | 0.011530 | 0.011497 | 0.011295 |
| 0.011396 | 0.011463 | 0.011329 | 0.011396 | 0.011362 | 0.011228 | 0.011496 |
| 0.011329 | 0.011295 | 0.011228 | 0.011463 | 0.011295 | 0.011396 | 0.011631 |
| 0.011329 | 0.011637 | 0.011631 | 0.011385 | 0.000000 | 0.011332 | 0.011163 |
| 0.011225 | 0.011605 | 0.011236 | 0.011283 | 0.011109 | 0.011264 | 0.011220 |
| 0.011315 | 0.011126 | 0.011283 | 0.011126 | 0.011168 | 0.011328 | 0.011385 |
| 0.011399 | 0.011296 | 0.011236 | 0.011307 | 0.011330 | 0.011396 | 0.011463 |
| 0.011463 | 0.011329 | 0.011432 | 0.011399 | 0.011501 | 0.011590 | 0.011329 |
| 0.011496 | 0.011362 | 0.011295 | 0.011329 | 0.011195 | 0.011362 | 0.011228 |
| 0.011295 | 0.011295 | 0.011262 | 0.011228 | 0.011262 | 0.011228 | 0.011329 |
| 0.011305 | 0.011305 | 0.011300 | 0.011334 | 0.011471 | 0.011436 | 0.011436 |
| 0.011435 | 0.011363 | 0.011171 | 0.011168 | 0.011297 | 0.011467 | 0.011467 |
| 0.011262 | 0.011331 | 0.011565 | 0.011533 | 0.011464 | 0.011498 | 0.011429 |
| 0.011362 | 0.011429 | 0.011429 | 0.011329 | 0.011832 | 0.011496 | 0.011564 |
| 0.011597 | 0.011594 | 0.011299 | 0.011372 | 0.011262 | 0.011463 | 0.011429 |
| 0.011464 | 0.011496 | 0.011496 | 0.011496 | 0.011610 | 0.011631 | 0.011268 |
| 0.011162 | 0.011164 | 0.011264 | 0.011230 | 0.011265 | 0.011172 | 0.011434 |
| 0.011300 | 0.011367 | 0.011203 | 0.011322 | 0.011296 | 0.011368 | 0.011262 |
| 0.011228 | 0.011161 | 0.011295 | 0.011262 | 0.011396 | 0.011362 | 0.011295 |
| 0.011396 | 0.011463 | 0.011262 | 0.011262 | 0.011295 | 0.011295 | 0.011297 |
| 0.011364 | 0.011295 | 0.011295 | 0.011330 | 0.011396 | 0.011463 | 0.011463 |
| 0.011329 | 0.011432 | 0.011399 | 0.011501 | 0.011590 | 0.011329 | 0.011496 |
| 0.011429 | 0.011429 | 0.011263 | 0.011443 | 0.011373 | 0.011401 | 0.011270 |
| 0.011439 | 0.011607 | 0.011399 | 0.011332 | 0.011228 | 0.011430 | 0.011295 |
| 0.011396 | 0.011329 | 0.011228 | 0.011330 | 0.011430 | 0.011432 | 0.011329 |
| 0.011228 | 0.011161 | 0.011295 | 0.011228 | 0.011161 | 0.011264 | 0.011430 |
| 0.011329 | 0.011262 | 0.011295 | 0.011329 | 0.011295 | 0.011228 | 0.011362 |
| 0.011295 | 0.011329 | 0.011329 | 0.011262 | 0.011329 | 0.011564 | 0.011161 |
| 0.011262 | 0.011597 | 0.011262 | 0.011295 | 0.011262 | 0.011564 | 0.011189 |

|          |          |          |          |          |          |          |
|----------|----------|----------|----------|----------|----------|----------|
| 0.011510 | 0.011188 | 0.011161 | 0.011342 | 0.011426 | 0.011383 | 0.011144 |
| 0.011113 | 0.011362 | 0.011463 | 0.011569 | 0.011430 | 0.011568 | 0.011699 |
| 0.011598 | 0.011635 | 0.011597 | 0.011846 | 0.011564 | 0.012438 | 0.011599 |
| 0.012338 | 0.012106 | 0.012240 | 0.012511 | 0.011564 | 0.011262 | 0.011564 |
| 0.012002 | 0.011937 | 0.011530 | 0.011430 | 0.011497 | 0.011497 | 0.011466 |
| 0.011362 | 0.011365 | 0.011429 | 0.011396 | 0.011766 | 0.011832 | 0.011834 |
| 0.011733 | 0.011833 | 0.011937 | 0.011703 | 0.012003 | 0.012008 | 0.012070 |
| 0.012070 | 0.012104 | 0.012050 | 0.012071 | 0.012072 | 0.011362 | 0.011598 |
| 0.011666 | 0.012169 | 0.011670 | 0.011900 | 0.012373 | 0.011434 | 0.011329 |
| 0.011295 | 0.011295 | 0.011766 | 0.011801 | 0.011904 | 0.011631 | 0.011296 |
| S365     | 0.011631 | 0.011631 | 0.011967 | 0.011732 | 0.011732 | 0.011799 |
| 0.011637 | 0.011569 | 0.011799 | 0.011228 | 0.011295 | 0.011262 | 0.011228 |
| 0.011262 | 0.011429 | 0.011228 | 0.011262 | 0.011329 | 0.011295 | 0.011262 |
| 0.011228 | 0.011262 | 0.011362 | 0.011228 | 0.011262 | 0.011262 | 0.011603 |
| 0.011496 | 0.011262 | 0.011161 | 0.011396 | 0.011329 | 0.011295 | 0.011329 |
| 0.011295 | 0.011396 | 0.011295 | 0.011295 | 0.011329 | 0.011295 | 0.011463 |
| 0.011228 | 0.011295 | 0.011329 | 0.011262 | 0.011362 | 0.011396 | 0.011329 |
| 0.011295 | 0.011463 | 0.011362 | 0.011631 | 0.011295 | 0.011564 | 0.011295 |
| 0.011262 | 0.011362 | 0.011429 | 0.011564 | 0.011664 | 0.011362 | 0.011463 |
| 0.011329 | 0.011396 | 0.011295 | 0.011530 | 0.011765 | 0.011295 | 0.011362 |
| 0.011262 | 0.011362 | 0.011329 | 0.011396 | 0.011329 | 0.011329 | 0.011329 |
| 0.011228 | 0.011262 | 0.011228 | 0.011329 | 0.011295 | 0.011329 | 0.011396 |
| 0.011329 | 0.011295 | 0.011362 | 0.011262 | 0.011396 | 0.011228 | 0.011295 |
| 0.011463 | 0.011396 | 0.011631 | 0.011463 | 0.011295 | 0.011530 | 0.011295 |
| 0.011431 | 0.011658 | 0.011475 | 0.011177 | 0.011172 | 0.011281 | 0.011375 |
| 0.012011 | 0.011467 | 0.011143 | 0.011530 | 0.011530 | 0.011329 | 0.011429 |
| 0.011362 | 0.011329 | 0.011396 | 0.011295 | 0.011396 | 0.011329 | 0.011329 |
| 0.011295 | 0.011396 | 0.011597 | 0.011463 | 0.011362 | 0.011329 | 0.011262 |
| 0.011228 | 0.011228 | 0.011295 | 0.011262 | 0.011463 | 0.011430 | 0.011362 |
| 0.011463 | 0.011530 | 0.011262 | 0.011262 | 0.011295 | 0.011295 | 0.011297 |
| 0.011364 | 0.011295 | 0.011295 | 0.011168 | 0.011241 | 0.011200 | 0.011296 |
| 0.011297 | 0.011232 | 0.011245 | 0.011267 | 0.011196 | 0.011232 | 0.011263 |
| 0.011528 | 0.011302 | 0.011336 | 0.011228 | 0.011233 | 0.011363 | 0.011329 |
| 0.011397 | 0.011330 | 0.011329 | 0.011429 | 0.011362 | 0.011732 | 0.011530 |
| 0.011564 | 0.011430 | 0.011295 | 0.011396 | 0.011195 | 0.011429 | 0.011228 |
| 0.011295 | 0.011295 | 0.011262 | 0.011228 | 0.011262 | 0.011228 | 0.011329 |
| 0.011295 | 0.011396 | 0.011329 | 0.011228 | 0.011330 | 0.011430 | 0.011432 |
| 0.011430 | 0.011329 | 0.011228 | 0.011161 | 0.011295 | 0.011228 | 0.011161 |
| 0.011264 | 0.011430 | 0.011228 | 0.011430 | 0.011195 | 0.011295 | 0.011262 |
| 0.011362 | 0.011262 | 0.011295 | 0.011262 | 0.011295 | 0.011161 | 0.011295 |
| 0.011329 | 0.011262 | 0.011329 | 0.011262 | 0.011295 | 0.011329 | 0.011564 |
| 0.011664 | 0.011597 | 0.011665 | 0.011431 | 0.011665 | 0.011295 | 0.011262 |
| 0.011297 | 0.011586 | 0.011426 | 0.011197 | 0.011671 | 0.011163 | 0.011296 |
| 0.011671 | 0.011570 | 0.011463 | 0.011664 | 0.011368 | 0.011530 | 0.011497 |
| 0.011429 | 0.011597 | 0.011451 | 0.011307 | 0.011354 | 0.011329 | 0.011398 |
| 0.011497 | 0.011397 | 0.011533 | 0.011601 | 0.011530 | 0.011597 | 0.011704 |
| 0.011432 | 0.011603 | 0.011534 | 0.011466 | 0.011733 | 0.011194 | 0.011397 |
| 0.011362 | 0.011295 | 0.011194 | 0.011194 | 0.011262 | 0.011262 | 0.011329 |
| 0.011262 | 0.011329 | 0.011228 | 0.011329 | 0.011262 | 0.011262 | 0.011329 |
| 0.011262 | 0.011698 | 0.011597 | 0.011631 | 0.011161 | 0.011262 | 0.011295 |
| 0.011295 | 0.011262 | 0.011329 | 0.011362 | 0.011228 | 0.011228 | 0.011228 |
| 0.011765 | 0.011396 | 0.011396 | 0.011194 | 0.011295 | 0.011463 | 0.011228 |
| 0.011228 | 0.011295 | 0.011262 | 0.011429 | 0.011228 | 0.011362 | 0.011496 |
| 0.011429 | 0.011262 | 0.011262 | 0.011194 | 0.011194 | 0.011362 | 0.011295 |
| 0.011194 | 0.011295 | 0.011161 | 0.011195 | 0.011329 | 0.011463 | 0.011228 |
| 0.011195 | 0.011329 | 0.011262 | 0.011161 | 0.011496 | 0.011161 | 0.011329 |
| 0.011403 | 0.011228 | 0.011530 | 0.011362 | 0.011396 | 0.011262 | 0.011362 |
| 0.011228 | 0.011564 | 0.011161 | 0.011429 | 0.011228 | 0.011228 | 0.011161 |
| 0.011396 | 0.011598 | 0.011295 | 0.011362 | 0.011194 | 0.011597 | 0.011228 |
| 0.011228 | 0.011228 | 0.011262 | 0.011362 | 0.011262 | 0.011362 | 0.011429 |

|          |          |          |          |          |          |          |
|----------|----------|----------|----------|----------|----------|----------|
| 0.011429 | 0.011396 | 0.011295 | 0.011396 | 0.011362 | 0.011228 | 0.011194 |
| 0.011228 | 0.011228 | 0.011295 | 0.011228 | 0.011194 | 0.011362 | 0.011228 |
| 0.011262 | 0.000000 | 0.011396 | 0.011429 | 0.011329 | 0.011262 | 0.011262 |
| 0.011329 | 0.011262 | 0.011362 | 0.011228 | 0.011362 | 0.011463 | 0.011765 |
| 0.011262 | 0.011664 | 0.011233 | 0.017747 | 0.011257 | 0.011305 | 0.011583 |
| 0.011545 | 0.011588 | 0.011270 | 0.011292 | 0.011719 | 0.011612 | 0.011364 |
| 0.011487 | 0.011487 | 0.011138 | 0.011228 | 0.011216 | 0.011307 | 0.011232 |
| 0.011482 | 0.011395 | 0.011394 | 0.011259 | 0.011396 | 0.011429 | 0.011432 |
| 0.011301 | 0.011396 | 0.011396 | 0.011362 | 0.011329 | 0.011329 | 0.011295 |
| 0.011329 | 0.011262 | 0.011295 | 0.011329 | 0.011295 | 0.011228 | 0.011262 |
| 0.011262 | 0.011329 | 0.011228 | 0.011329 | 0.011362 | 0.011396 | 0.011295 |
| 0.011329 | 0.011295 | 0.011631 | 0.011631 | 0.011362 | 0.011396 | 0.011430 |
| 0.011195 | 0.011195 | 0.011228 | 0.011329 | 0.011195 | 0.011430 | 0.011430 |
| 0.011463 | 0.011463 | 0.011396 | 0.011497 | 0.011665 | 0.011498 | 0.011329 |
| 0.011329 | 0.011396 | 0.011430 | 0.011262 | 0.011329 | 0.011295 | 0.011329 |
| 0.011396 | 0.011396 | 0.011429 | 0.011396 | 0.011296 | 0.011497 | 0.011463 |
| 0.011331 | 0.011228 | 0.011329 | 0.011430 | 0.011329 | 0.011463 | 0.011496 |
| 0.011664 | 0.011368 | 0.011530 | 0.011497 | 0.011429 | 0.011597 | 0.011228 |
| 0.011397 | 0.011296 | 0.011262 | 0.011262 | 0.011329 | 0.011228 | 0.011329 |
| 0.011362 | 0.011396 | 0.011295 | 0.011329 | 0.011295 | 0.011631 | 0.011631 |
| 0.011362 | 0.011396 | 0.011463 | 0.011396 | 0.012035 | 0.011453 | 0.011377 |
| 0.011447 | 0.011407 | 0.011517 | 0.011406 | 0.011515 | 0.011439 | 0.011405 |
| 0.011987 | 0.011302 | 0.011437 | 0.011371 | 0.011645 | 0.011502 | 0.011605 |
| 0.012012 | 0.011475 | 0.011567 | 0.011631 | 0.011496 | 0.011497 | 0.011533 |
| 0.011194 | 0.011362 | 0.011496 | 0.011463 | 0.011466 | 0.011463 | 0.011431 |
| 0.011295 | 0.011228 | 0.011262 | 0.011295 | 0.011194 | 0.011262 | 0.011161 |
| 0.011295 | 0.011329 | 0.011228 | 0.011194 | 0.011295 | 0.011228 | 0.011262 |
| 0.011194 | 0.011194 | 0.011262 | 0.011295 | 0.011194 | 0.011396 | 0.011429 |
| 0.011329 | 0.011396 | 0.011329 | 0.011329 | 0.011262 | 0.011664 | 0.011295 |
| 0.011338 | 0.011262 | 0.011497 | 0.011501 | 0.011362 | 0.011362 | 0.011362 |
| 0.011362 | 0.011295 | 0.011262 | 0.011295 | 0.011396 | 0.011396 | 0.011329 |
| 0.011329 | 0.011463 | 0.011631 | 0.011362 | 0.011564 | 0.011564 | 0.011429 |
| 0.011262 | 0.011329 | 0.011362 | 0.011765 | 0.011329 | 0.011362 | 0.011329 |
| 0.011362 | 0.011295 | 0.011295 | 0.011597 | 0.011530 | 0.011564 | 0.011295 |
| 0.011396 | 0.011463 | 0.011329 | 0.011396 | 0.011362 | 0.011228 | 0.011564 |
| 0.011329 | 0.011295 | 0.011295 | 0.011463 | 0.011295 | 0.011396 | 0.011631 |
| 0.011329 | 0.011705 | 0.011698 | 0.011467 | 0.011173 | 0.011400 | 0.011267 |
| 0.011170 | 0.011683 | 0.011201 | 0.011417 | 0.011255 | 0.011366 | 0.011379 |
| 0.011417 | 0.011192 | 0.011339 | 0.011192 | 0.011222 | 0.011328 | 0.011344 |
| 0.011362 | 0.011257 | 0.011342 | 0.011272 | 0.011330 | 0.011463 | 0.011530 |
| 0.011530 | 0.011396 | 0.011500 | 0.011501 | 0.011636 | 0.011661 | 0.011329 |
| 0.011564 | 0.011430 | 0.011295 | 0.011396 | 0.011195 | 0.011429 | 0.011228 |
| 0.011295 | 0.011295 | 0.011262 | 0.011228 | 0.011262 | 0.011228 | 0.011329 |
| 0.011305 | 0.011305 | 0.011300 | 0.011334 | 0.011471 | 0.011436 | 0.011436 |
| 0.011435 | 0.011363 | 0.011134 | 0.011168 | 0.011297 | 0.011467 | 0.011467 |
| 0.011262 | 0.011331 | 0.011565 | 0.011533 | 0.011464 | 0.011498 | 0.011429 |
| 0.011362 | 0.011429 | 0.011429 | 0.011329 | 0.011900 | 0.011497 | 0.011564 |
| 0.011597 | 0.011665 | 0.011299 | 0.011372 | 0.011262 | 0.011463 | 0.011429 |
| 0.011464 | 0.011496 | 0.011496 | 0.011496 | 0.011610 | 0.011631 | 0.011268 |
| 0.011162 | 0.011164 | 0.011264 | 0.011230 | 0.011333 | 0.011172 | 0.011502 |
| 0.011300 | 0.011455 | 0.011203 | 0.011322 | 0.011296 | 0.011368 | 0.011262 |
| 0.011228 | 0.011228 | 0.011295 | 0.011262 | 0.011463 | 0.011430 | 0.011362 |
| 0.011463 | 0.011530 | 0.011262 | 0.011262 | 0.011295 | 0.011295 | 0.011297 |
| 0.011364 | 0.011295 | 0.011295 | 0.011330 | 0.011463 | 0.011530 | 0.011530 |
| 0.011396 | 0.011500 | 0.011501 | 0.011636 | 0.011661 | 0.011329 | 0.011496 |
| 0.011429 | 0.011429 | 0.011263 | 0.011443 | 0.011373 | 0.011401 | 0.011270 |
| 0.011439 | 0.011653 | 0.011399 | 0.011332 | 0.011228 | 0.011430 | 0.011295 |
| 0.011396 | 0.011329 | 0.011228 | 0.011330 | 0.011430 | 0.011432 | 0.011329 |
| 0.011228 | 0.011161 | 0.011295 | 0.011228 | 0.011161 | 0.011264 | 0.011430 |
| 0.011329 | 0.011262 | 0.011295 | 0.011329 | 0.011295 | 0.011228 | 0.011430 |

|          |          |          |          |          |          |          |
|----------|----------|----------|----------|----------|----------|----------|
| 0.011295 | 0.011329 | 0.011329 | 0.011262 | 0.011329 | 0.011564 | 0.011228 |
| 0.011262 | 0.011664 | 0.011262 | 0.011295 | 0.011262 | 0.011631 | 0.011189 |
| 0.011622 | 0.011145 | 0.011261 | 0.011382 | 0.011508 | 0.011419 | 0.011144 |
| 0.011218 | 0.011429 | 0.011530 | 0.011637 | 0.011498 | 0.011601 | 0.011766 |
| 0.011666 | 0.011703 | 0.011664 | 0.011880 | 0.011631 | 0.012505 | 0.011667 |
| 0.012406 | 0.012173 | 0.012307 | 0.012579 | 0.011631 | 0.011329 | 0.011631 |
| 0.012070 | 0.012005 | 0.011597 | 0.011497 | 0.011565 | 0.011565 | 0.011534 |
| 0.011429 | 0.011399 | 0.011496 | 0.011464 | 0.011834 | 0.011900 | 0.011901 |
| 0.011800 | 0.011901 | 0.012004 | 0.011770 | 0.012070 | 0.012076 | 0.012137 |
| 0.012138 | 0.012172 | 0.012118 | 0.012138 | 0.012139 | 0.011362 | 0.011665 |
| 0.011733 | 0.012236 | 0.011738 | 0.011967 | 0.012440 | 0.011502 | 0.011396 |
| 0.011362 | 0.011362 | 0.011833 | 0.011842 | 0.011975 | 0.011698 | 0.011363 |
| S366     | 0.011765 | 0.011765 | 0.012101 | 0.011866 | 0.011866 | 0.011933 |
| 0.011773 | 0.011705 | 0.011933 | 0.011362 | 0.011429 | 0.011397 | 0.011362 |
| 0.011396 | 0.011564 | 0.011362 | 0.011396 | 0.011463 | 0.011429 | 0.011396 |
| 0.011362 | 0.011396 | 0.011496 | 0.011363 | 0.011396 | 0.011396 | 0.011739 |
| 0.011631 | 0.011396 | 0.011295 | 0.011530 | 0.011463 | 0.011429 | 0.011463 |
| 0.011429 | 0.011530 | 0.011429 | 0.011429 | 0.011463 | 0.011429 | 0.011597 |
| 0.011362 | 0.011429 | 0.011463 | 0.011396 | 0.011496 | 0.011530 | 0.011463 |
| 0.011429 | 0.011597 | 0.011497 | 0.011765 | 0.011429 | 0.011698 | 0.011429 |
| 0.011396 | 0.011497 | 0.011564 | 0.011698 | 0.011799 | 0.011497 | 0.011597 |
| 0.011463 | 0.011530 | 0.011429 | 0.011664 | 0.011900 | 0.011362 | 0.011496 |
| 0.011396 | 0.011496 | 0.011463 | 0.011530 | 0.011463 | 0.011463 | 0.011463 |
| 0.011362 | 0.011396 | 0.011362 | 0.011463 | 0.011429 | 0.011464 | 0.011530 |
| 0.011463 | 0.011429 | 0.011496 | 0.011396 | 0.011530 | 0.011362 | 0.011429 |
| 0.011597 | 0.011530 | 0.011765 | 0.011597 | 0.011429 | 0.011664 | 0.011429 |
| 0.011542 | 0.011770 | 0.011588 | 0.011295 | 0.011284 | 0.011391 | 0.011493 |
| 0.012121 | 0.011518 | 0.011266 | 0.011664 | 0.011664 | 0.011463 | 0.011564 |
| 0.011497 | 0.011463 | 0.011530 | 0.011429 | 0.011530 | 0.011463 | 0.011463 |
| 0.011429 | 0.011530 | 0.011732 | 0.011597 | 0.011497 | 0.011463 | 0.011396 |
| 0.011362 | 0.011362 | 0.011430 | 0.011396 | 0.011597 | 0.011564 | 0.011497 |
| 0.011597 | 0.011665 | 0.011396 | 0.011396 | 0.011430 | 0.011429 | 0.011432 |
| 0.011500 | 0.011430 | 0.011430 | 0.011240 | 0.011349 | 0.011341 | 0.011430 |
| 0.011433 | 0.011335 | 0.011392 | 0.011371 | 0.011332 | 0.011368 | 0.011398 |
| 0.011636 | 0.011439 | 0.011473 | 0.011363 | 0.011337 | 0.011498 | 0.011464 |
| 0.011531 | 0.011465 | 0.011464 | 0.011564 | 0.011496 | 0.011866 | 0.011665 |
| 0.011698 | 0.011564 | 0.011429 | 0.011530 | 0.011329 | 0.011564 | 0.011362 |
| 0.011429 | 0.011429 | 0.011396 | 0.011362 | 0.011396 | 0.011362 | 0.011463 |
| 0.011430 | 0.011530 | 0.011463 | 0.011362 | 0.011465 | 0.011564 | 0.011567 |
| 0.011564 | 0.011463 | 0.011362 | 0.011296 | 0.011429 | 0.011362 | 0.011295 |
| 0.011400 | 0.011564 | 0.011362 | 0.011564 | 0.011329 | 0.011430 | 0.011396 |
| 0.011497 | 0.011396 | 0.011430 | 0.011396 | 0.011430 | 0.011295 | 0.011430 |
| 0.011463 | 0.011396 | 0.011463 | 0.011396 | 0.011429 | 0.011463 | 0.011698 |
| 0.011799 | 0.011732 | 0.011799 | 0.011566 | 0.011799 | 0.011429 | 0.011396 |
| 0.011432 | 0.011748 | 0.011380 | 0.011335 | 0.011773 | 0.011299 | 0.011414 |
| 0.011807 | 0.011706 | 0.011597 | 0.011799 | 0.011436 | 0.011664 | 0.011631 |
| 0.011564 | 0.011732 | 0.011558 | 0.011390 | 0.011437 | 0.011463 | 0.011534 |
| 0.011631 | 0.011499 | 0.011669 | 0.011703 | 0.011664 | 0.011732 | 0.011805 |
| 0.011568 | 0.011705 | 0.011669 | 0.011601 | 0.011868 | 0.011329 | 0.011532 |
| 0.011496 | 0.011429 | 0.011329 | 0.011329 | 0.011396 | 0.011396 | 0.011463 |
| 0.011396 | 0.011463 | 0.011362 | 0.011463 | 0.011396 | 0.011396 | 0.011463 |
| 0.011396 | 0.011832 | 0.011732 | 0.011765 | 0.011295 | 0.011396 | 0.011429 |
| 0.011429 | 0.011396 | 0.011463 | 0.011497 | 0.011362 | 0.011362 | 0.011362 |
| 0.011899 | 0.011530 | 0.011530 | 0.011329 | 0.011429 | 0.011597 | 0.011362 |
| 0.011362 | 0.011429 | 0.011396 | 0.011564 | 0.011362 | 0.011496 | 0.011631 |
| 0.011564 | 0.011396 | 0.011396 | 0.011329 | 0.011329 | 0.011497 | 0.011429 |
| 0.011329 | 0.011429 | 0.011295 | 0.011329 | 0.011463 | 0.011598 | 0.011362 |
| 0.011329 | 0.011463 | 0.011396 | 0.011295 | 0.011631 | 0.011295 | 0.011463 |
| 0.011505 | 0.011362 | 0.011664 | 0.011497 | 0.011530 | 0.011396 | 0.011496 |
| 0.011362 | 0.011698 | 0.011295 | 0.011564 | 0.011362 | 0.011362 | 0.011295 |

|          |          |          |          |          |          |          |
|----------|----------|----------|----------|----------|----------|----------|
| 0.011530 | 0.011732 | 0.011429 | 0.011496 | 0.011329 | 0.011732 | 0.011362 |
| 0.011362 | 0.011362 | 0.011396 | 0.011497 | 0.011396 | 0.011496 | 0.011564 |
| 0.011564 | 0.011530 | 0.011429 | 0.011530 | 0.011496 | 0.011362 | 0.011329 |
| 0.011362 | 0.011362 | 0.011429 | 0.011362 | 0.011329 | 0.011429 | 0.011362 |
| 0.011396 | 0.011396 | 0.000000 | 0.011564 | 0.011463 | 0.011396 | 0.011396 |
| 0.011463 | 0.011396 | 0.011429 | 0.011362 | 0.011496 | 0.011597 | 0.011900 |
| 0.011396 | 0.011799 | 0.011371 | 0.017823 | 0.011387 | 0.011488 | 0.011723 |
| 0.011718 | 0.011693 | 0.011374 | 0.011350 | 0.011829 | 0.011785 | 0.011485 |
| 0.011582 | 0.011671 | 0.011255 | 0.011311 | 0.011294 | 0.011455 | 0.011361 |
| 0.011576 | 0.011507 | 0.011468 | 0.011325 | 0.011530 | 0.011564 | 0.011500 |
| 0.011404 | 0.011530 | 0.011530 | 0.011497 | 0.011463 | 0.011463 | 0.011430 |
| 0.011463 | 0.011396 | 0.011429 | 0.011463 | 0.011430 | 0.011362 | 0.011396 |
| 0.011396 | 0.011463 | 0.011362 | 0.011463 | 0.011497 | 0.011530 | 0.011429 |
| 0.011463 | 0.011430 | 0.011765 | 0.011765 | 0.011497 | 0.011531 | 0.011564 |
| 0.011329 | 0.011329 | 0.011362 | 0.011463 | 0.011329 | 0.011564 | 0.011564 |
| 0.011597 | 0.011597 | 0.011530 | 0.011631 | 0.011799 | 0.011633 | 0.011463 |
| 0.011463 | 0.011530 | 0.011564 | 0.011396 | 0.011463 | 0.011429 | 0.011463 |
| 0.011531 | 0.011530 | 0.011564 | 0.011531 | 0.011431 | 0.011631 | 0.011597 |
| 0.011467 | 0.011362 | 0.011463 | 0.011564 | 0.011463 | 0.011598 | 0.011631 |
| 0.011799 | 0.011436 | 0.011664 | 0.011631 | 0.011564 | 0.011732 | 0.011363 |
| 0.011532 | 0.011430 | 0.011396 | 0.011396 | 0.011463 | 0.011362 | 0.011463 |
| 0.011497 | 0.011530 | 0.011429 | 0.011463 | 0.011430 | 0.011765 | 0.011765 |
| 0.011497 | 0.011531 | 0.011597 | 0.011530 | 0.012170 | 0.011560 | 0.011482 |
| 0.011552 | 0.011511 | 0.011622 | 0.011510 | 0.011620 | 0.011543 | 0.011543 |
| 0.012090 | 0.011406 | 0.011540 | 0.011475 | 0.011749 | 0.011638 | 0.011707 |
| 0.012114 | 0.011588 | 0.011703 | 0.011765 | 0.011631 | 0.011631 | 0.011668 |
| 0.011329 | 0.011497 | 0.011631 | 0.011597 | 0.011601 | 0.011597 | 0.011565 |
| 0.011429 | 0.011362 | 0.011396 | 0.011429 | 0.011329 | 0.011396 | 0.011295 |
| 0.011429 | 0.011463 | 0.011362 | 0.011329 | 0.011429 | 0.011362 | 0.011396 |
| 0.011396 | 0.011329 | 0.011396 | 0.011429 | 0.011329 | 0.011530 | 0.011564 |
| 0.011463 | 0.011530 | 0.011463 | 0.011463 | 0.011396 | 0.011799 | 0.011429 |
| 0.011443 | 0.011396 | 0.011631 | 0.011603 | 0.011497 | 0.011496 | 0.011496 |
| 0.011497 | 0.011429 | 0.011396 | 0.011429 | 0.011463 | 0.011463 | 0.011463 |
| 0.011463 | 0.011597 | 0.011765 | 0.011496 | 0.011698 | 0.011698 | 0.011564 |
| 0.011396 | 0.011463 | 0.011497 | 0.011900 | 0.011463 | 0.011497 | 0.011463 |
| 0.011496 | 0.011429 | 0.011429 | 0.011732 | 0.011665 | 0.011698 | 0.011429 |
| 0.011530 | 0.011597 | 0.011463 | 0.011530 | 0.011496 | 0.011362 | 0.011698 |
| 0.011463 | 0.011429 | 0.011429 | 0.011597 | 0.011429 | 0.011530 | 0.011765 |
| 0.011463 | 0.011841 | 0.011832 | 0.011588 | 0.011342 | 0.011536 | 0.011318 |
| 0.011280 | 0.011800 | 0.011306 | 0.011507 | 0.011402 | 0.011518 | 0.011485 |
| 0.011570 | 0.011324 | 0.011450 | 0.011324 | 0.011330 | 0.011529 | 0.011466 |
| 0.011475 | 0.011375 | 0.011483 | 0.011412 | 0.011465 | 0.011597 | 0.011665 |
| 0.011665 | 0.011531 | 0.011635 | 0.011636 | 0.011772 | 0.011802 | 0.011463 |
| 0.011698 | 0.011564 | 0.011429 | 0.011530 | 0.011329 | 0.011564 | 0.011362 |
| 0.011429 | 0.011429 | 0.011396 | 0.011362 | 0.011396 | 0.011362 | 0.011463 |
| 0.011409 | 0.011445 | 0.011437 | 0.011471 | 0.011608 | 0.011573 | 0.011572 |
| 0.011571 | 0.011497 | 0.011245 | 0.011276 | 0.011433 | 0.011602 | 0.011603 |
| 0.011396 | 0.011467 | 0.011700 | 0.011669 | 0.011598 | 0.011632 | 0.011564 |
| 0.011496 | 0.011564 | 0.011564 | 0.011463 | 0.012034 | 0.011631 | 0.011698 |
| 0.011732 | 0.011772 | 0.011435 | 0.011511 | 0.011396 | 0.011597 | 0.011564 |
| 0.011598 | 0.011631 | 0.011631 | 0.011631 | 0.011768 | 0.011698 | 0.011372 |
| 0.011263 | 0.011268 | 0.011367 | 0.011332 | 0.011436 | 0.011247 | 0.011604 |
| 0.011403 | 0.011499 | 0.011203 | 0.011435 | 0.011363 | 0.011505 | 0.011396 |
| 0.011362 | 0.011362 | 0.011430 | 0.011396 | 0.011597 | 0.011564 | 0.011497 |
| 0.011597 | 0.011665 | 0.011396 | 0.011396 | 0.011430 | 0.011429 | 0.011432 |
| 0.011500 | 0.011430 | 0.011430 | 0.011465 | 0.011597 | 0.011665 | 0.011665 |
| 0.011531 | 0.011635 | 0.011636 | 0.011772 | 0.011802 | 0.011463 | 0.011631 |
| 0.011564 | 0.011564 | 0.011398 | 0.011547 | 0.011477 | 0.011503 | 0.011411 |
| 0.011577 | 0.011744 | 0.011526 | 0.011468 | 0.011362 | 0.011564 | 0.011430 |
| 0.011530 | 0.011463 | 0.011362 | 0.011465 | 0.011564 | 0.011567 | 0.011463 |



|          |          |          |          |          |          |          |
|----------|----------|----------|----------|----------|----------|----------|
| 0.011362 | 0.011296 | 0.011429 | 0.011362 | 0.011295 | 0.011400 | 0.011564 |
| 0.011463 | 0.011396 | 0.011429 | 0.011463 | 0.011430 | 0.011362 | 0.011564 |
| 0.011429 | 0.011463 | 0.011463 | 0.011396 | 0.011463 | 0.011698 | 0.011362 |
| 0.011396 | 0.011799 | 0.011396 | 0.011429 | 0.011396 | 0.011765 | 0.011274 |
| 0.011791 | 0.011315 | 0.011361 | 0.011543 | 0.011630 | 0.011527 | 0.011269 |
| 0.011323 | 0.011564 | 0.011664 | 0.011773 | 0.011632 | 0.011771 | 0.011901 |
| 0.011800 | 0.011804 | 0.011799 | 0.012051 | 0.011765 | 0.012640 | 0.011801 |
| 0.012540 | 0.012308 | 0.012442 | 0.012714 | 0.011765 | 0.011463 | 0.011766 |
| 0.012205 | 0.012140 | 0.011732 | 0.011631 | 0.011699 | 0.011699 | 0.011635 |
| 0.011564 | 0.011569 | 0.011631 | 0.011598 | 0.011968 | 0.012034 | 0.012036 |
| 0.011935 | 0.012035 | 0.012139 | 0.011906 | 0.012205 | 0.012212 | 0.012272 |
| 0.012273 | 0.012307 | 0.012255 | 0.012273 | 0.012274 | 0.011496 | 0.011800 |
| 0.011868 | 0.012371 | 0.011874 | 0.012102 | 0.012575 | 0.011637 | 0.011531 |
| 0.011496 | 0.011496 | 0.011968 | 0.011965 | 0.012081 | 0.011832 | 0.011498 |
| S367     | 0.011799 | 0.011799 | 0.012068 | 0.011832 | 0.011832 | 0.011900 |
| 0.011739 | 0.011671 | 0.011900 | 0.011396 | 0.011463 | 0.011430 | 0.011396 |
| 0.011362 | 0.011597 | 0.011329 | 0.011429 | 0.011496 | 0.011463 | 0.011429 |
| 0.011396 | 0.011429 | 0.011463 | 0.011396 | 0.011430 | 0.011429 | 0.011705 |
| 0.011597 | 0.011429 | 0.011329 | 0.011496 | 0.011496 | 0.011463 | 0.011497 |
| 0.011463 | 0.011564 | 0.011463 | 0.011463 | 0.011496 | 0.011463 | 0.011631 |
| 0.011329 | 0.011463 | 0.011496 | 0.011429 | 0.011463 | 0.011564 | 0.011496 |
| 0.011463 | 0.011631 | 0.011530 | 0.011732 | 0.011463 | 0.011732 | 0.011463 |
| 0.011429 | 0.011463 | 0.011597 | 0.011732 | 0.011765 | 0.011463 | 0.011564 |
| 0.011496 | 0.011564 | 0.011463 | 0.011698 | 0.011866 | 0.011463 | 0.011530 |
| 0.011429 | 0.011530 | 0.011497 | 0.011564 | 0.011496 | 0.011496 | 0.011496 |
| 0.011396 | 0.011429 | 0.011396 | 0.011429 | 0.011463 | 0.011498 | 0.011564 |
| 0.011497 | 0.011463 | 0.011530 | 0.011429 | 0.011496 | 0.011396 | 0.011463 |
| 0.011631 | 0.011564 | 0.011799 | 0.011631 | 0.011463 | 0.011698 | 0.011463 |
| 0.011653 | 0.011807 | 0.011702 | 0.011373 | 0.011396 | 0.011502 | 0.011533 |
| 0.012121 | 0.011518 | 0.011390 | 0.011698 | 0.011698 | 0.011429 | 0.011530 |
| 0.011530 | 0.011496 | 0.011564 | 0.011463 | 0.011564 | 0.011496 | 0.011496 |
| 0.011463 | 0.011496 | 0.011765 | 0.011631 | 0.011530 | 0.011497 | 0.011430 |
| 0.011396 | 0.011329 | 0.011463 | 0.011429 | 0.011564 | 0.011530 | 0.011463 |
| 0.011564 | 0.011631 | 0.011429 | 0.011429 | 0.011463 | 0.011463 | 0.011465 |
| 0.011533 | 0.011463 | 0.011463 | 0.011348 | 0.011422 | 0.011376 | 0.011464 |
| 0.011467 | 0.011404 | 0.011466 | 0.011440 | 0.011366 | 0.011403 | 0.011432 |
| 0.011636 | 0.011474 | 0.011508 | 0.011396 | 0.011406 | 0.011531 | 0.011430 |
| 0.011497 | 0.011498 | 0.011497 | 0.011597 | 0.011530 | 0.011900 | 0.011564 |
| 0.011664 | 0.011530 | 0.011463 | 0.011497 | 0.011362 | 0.011530 | 0.011396 |
| 0.011463 | 0.011463 | 0.011429 | 0.011396 | 0.011429 | 0.011396 | 0.011497 |
| 0.011463 | 0.011564 | 0.011497 | 0.011396 | 0.011498 | 0.011598 | 0.011601 |
| 0.011598 | 0.011497 | 0.011396 | 0.011330 | 0.011463 | 0.011396 | 0.011329 |
| 0.011434 | 0.011598 | 0.011396 | 0.011598 | 0.011362 | 0.011463 | 0.011430 |
| 0.011530 | 0.011429 | 0.011463 | 0.011430 | 0.011463 | 0.011329 | 0.011463 |
| 0.011497 | 0.011429 | 0.011497 | 0.011429 | 0.011463 | 0.011497 | 0.011732 |
| 0.011765 | 0.011698 | 0.011766 | 0.011599 | 0.011766 | 0.011463 | 0.011429 |
| 0.011398 | 0.011586 | 0.011518 | 0.011369 | 0.011773 | 0.011333 | 0.011493 |
| 0.011773 | 0.011672 | 0.011631 | 0.011832 | 0.011538 | 0.011698 | 0.011665 |
| 0.011597 | 0.011765 | 0.011629 | 0.011472 | 0.011437 | 0.011497 | 0.011568 |
| 0.011665 | 0.011566 | 0.011703 | 0.011771 | 0.011698 | 0.011765 | 0.011873 |
| 0.011602 | 0.011773 | 0.011703 | 0.011635 | 0.011834 | 0.011362 | 0.011566 |
| 0.011530 | 0.011463 | 0.011362 | 0.011362 | 0.011429 | 0.011429 | 0.011496 |
| 0.011429 | 0.011497 | 0.011396 | 0.011429 | 0.011429 | 0.011429 | 0.011496 |
| 0.011429 | 0.011799 | 0.011698 | 0.011732 | 0.011329 | 0.011429 | 0.011463 |
| 0.011396 | 0.011429 | 0.011497 | 0.011463 | 0.011396 | 0.011396 | 0.011396 |
| 0.011866 | 0.011496 | 0.011564 | 0.011362 | 0.011463 | 0.011631 | 0.011396 |
| 0.011396 | 0.011463 | 0.011429 | 0.011597 | 0.011396 | 0.011530 | 0.011664 |
| 0.011597 | 0.011429 | 0.011429 | 0.011362 | 0.011362 | 0.011530 | 0.011463 |
| 0.011362 | 0.011463 | 0.011329 | 0.011362 | 0.011497 | 0.011564 | 0.011396 |
| 0.011363 | 0.011496 | 0.011430 | 0.011329 | 0.011597 | 0.011329 | 0.011497 |

|          |          |          |          |          |          |          |
|----------|----------|----------|----------|----------|----------|----------|
| 0.011574 | 0.011396 | 0.011631 | 0.011530 | 0.011497 | 0.011429 | 0.011530 |
| 0.011396 | 0.011732 | 0.011329 | 0.011530 | 0.011329 | 0.011329 | 0.011329 |
| 0.011564 | 0.011698 | 0.011463 | 0.011530 | 0.011362 | 0.011698 | 0.011329 |
| 0.011396 | 0.011396 | 0.011429 | 0.011530 | 0.011429 | 0.011530 | 0.011597 |
| 0.011597 | 0.011564 | 0.011463 | 0.011564 | 0.011530 | 0.011396 | 0.011362 |
| 0.011396 | 0.011396 | 0.011463 | 0.011329 | 0.011362 | 0.011530 | 0.011396 |
| 0.011362 | 0.011429 | 0.011564 | 0.000000 | 0.011496 | 0.011429 | 0.011429 |
| 0.011496 | 0.011429 | 0.011530 | 0.011396 | 0.011530 | 0.011631 | 0.011866 |
| 0.011429 | 0.011765 | 0.011440 | 0.017898 | 0.011387 | 0.011549 | 0.011723 |
| 0.011683 | 0.011729 | 0.011532 | 0.011466 | 0.011884 | 0.011751 | 0.011546 |
| 0.011582 | 0.011732 | 0.011372 | 0.011479 | 0.011333 | 0.011455 | 0.011447 |
| 0.011529 | 0.011544 | 0.011542 | 0.011325 | 0.011564 | 0.011597 | 0.011601 |
| 0.011472 | 0.011564 | 0.011564 | 0.011463 | 0.011497 | 0.011497 | 0.011396 |
| 0.011497 | 0.011429 | 0.011463 | 0.011497 | 0.011463 | 0.011396 | 0.011429 |
| 0.011429 | 0.011497 | 0.011396 | 0.011497 | 0.011530 | 0.011564 | 0.011463 |
| 0.011429 | 0.011396 | 0.011732 | 0.011732 | 0.011530 | 0.011565 | 0.011598 |
| 0.011362 | 0.011362 | 0.011396 | 0.011497 | 0.011362 | 0.011597 | 0.011597 |
| 0.011631 | 0.011631 | 0.011564 | 0.011664 | 0.011766 | 0.011666 | 0.011497 |
| 0.011497 | 0.011564 | 0.011597 | 0.011430 | 0.011497 | 0.011463 | 0.011497 |
| 0.011564 | 0.011564 | 0.011597 | 0.011564 | 0.011464 | 0.011665 | 0.011631 |
| 0.011500 | 0.011396 | 0.011497 | 0.011598 | 0.011497 | 0.011497 | 0.011664 |
| 0.011832 | 0.011538 | 0.011698 | 0.011665 | 0.011597 | 0.011765 | 0.011396 |
| 0.011566 | 0.011464 | 0.011429 | 0.011429 | 0.011497 | 0.011396 | 0.011497 |
| 0.011530 | 0.011564 | 0.011463 | 0.011429 | 0.011396 | 0.011732 | 0.011732 |
| 0.011530 | 0.011565 | 0.011631 | 0.011564 | 0.012137 | 0.011596 | 0.011552 |
| 0.011623 | 0.011580 | 0.011693 | 0.011580 | 0.011655 | 0.011612 | 0.011577 |
| 0.012090 | 0.011475 | 0.011608 | 0.011544 | 0.011818 | 0.011672 | 0.011775 |
| 0.012114 | 0.011550 | 0.011736 | 0.011799 | 0.011664 | 0.011597 | 0.011702 |
| 0.011362 | 0.011530 | 0.011664 | 0.011631 | 0.011634 | 0.011564 | 0.011532 |
| 0.011463 | 0.011396 | 0.011429 | 0.011463 | 0.011362 | 0.011429 | 0.011329 |
| 0.011396 | 0.011429 | 0.011396 | 0.011362 | 0.011463 | 0.011396 | 0.011429 |
| 0.011429 | 0.011362 | 0.011429 | 0.011463 | 0.011362 | 0.011564 | 0.011597 |
| 0.011497 | 0.011497 | 0.011496 | 0.011497 | 0.011429 | 0.011765 | 0.011463 |
| 0.011443 | 0.011429 | 0.011598 | 0.011603 | 0.011530 | 0.011530 | 0.011530 |
| 0.011530 | 0.011463 | 0.011429 | 0.011463 | 0.011564 | 0.011564 | 0.011496 |
| 0.011496 | 0.011631 | 0.011732 | 0.011530 | 0.011732 | 0.011732 | 0.011597 |
| 0.011429 | 0.011496 | 0.011530 | 0.011866 | 0.011497 | 0.011530 | 0.011497 |
| 0.011530 | 0.011396 | 0.011396 | 0.011698 | 0.011698 | 0.011665 | 0.011463 |
| 0.011564 | 0.011631 | 0.011496 | 0.011564 | 0.011530 | 0.011396 | 0.011664 |
| 0.011496 | 0.011463 | 0.011396 | 0.011631 | 0.011463 | 0.011564 | 0.011799 |
| 0.011496 | 0.011807 | 0.011799 | 0.011629 | 0.011229 | 0.011502 | 0.011370 |
| 0.011390 | 0.011800 | 0.011411 | 0.011507 | 0.011402 | 0.011467 | 0.011485 |
| 0.011519 | 0.011323 | 0.011561 | 0.011324 | 0.011437 | 0.011529 | 0.011587 |
| 0.011588 | 0.011493 | 0.011483 | 0.011483 | 0.011498 | 0.011564 | 0.011631 |
| 0.011631 | 0.011497 | 0.011601 | 0.011603 | 0.011738 | 0.011732 | 0.011497 |
| 0.011664 | 0.011530 | 0.011463 | 0.011497 | 0.011362 | 0.011530 | 0.011396 |
| 0.011463 | 0.011463 | 0.011429 | 0.011396 | 0.011429 | 0.011396 | 0.011497 |
| 0.011479 | 0.011480 | 0.011471 | 0.011505 | 0.011642 | 0.011607 | 0.011606 |
| 0.011605 | 0.011531 | 0.011356 | 0.011348 | 0.011467 | 0.011636 | 0.011637 |
| 0.011430 | 0.011501 | 0.011734 | 0.011669 | 0.011632 | 0.011666 | 0.011597 |
| 0.011530 | 0.011597 | 0.011597 | 0.011497 | 0.012001 | 0.011664 | 0.011732 |
| 0.011766 | 0.011737 | 0.011469 | 0.011545 | 0.011429 | 0.011631 | 0.011597 |
| 0.011632 | 0.011664 | 0.011664 | 0.011664 | 0.011768 | 0.011799 | 0.011442 |
| 0.011331 | 0.011337 | 0.011435 | 0.011400 | 0.011402 | 0.011321 | 0.011604 |
| 0.011472 | 0.011455 | 0.011298 | 0.011510 | 0.011464 | 0.011539 | 0.011430 |
| 0.011396 | 0.011329 | 0.011463 | 0.011429 | 0.011564 | 0.011530 | 0.011463 |
| 0.011564 | 0.011631 | 0.011429 | 0.011429 | 0.011463 | 0.011463 | 0.011465 |
| 0.011533 | 0.011463 | 0.011463 | 0.011498 | 0.011564 | 0.011631 | 0.011631 |
| 0.011497 | 0.011601 | 0.011603 | 0.011738 | 0.011732 | 0.011497 | 0.011664 |
| 0.011597 | 0.011597 | 0.011432 | 0.011582 | 0.011547 | 0.011571 | 0.011446 |

|          |          |          |          |          |          |          |
|----------|----------|----------|----------|----------|----------|----------|
| 0.011611 | 0.011698 | 0.011441 | 0.011502 | 0.011396 | 0.011598 | 0.011463 |
| 0.011564 | 0.011497 | 0.011396 | 0.011498 | 0.011598 | 0.011601 | 0.011497 |
| 0.011396 | 0.011330 | 0.011463 | 0.011396 | 0.011329 | 0.011434 | 0.011598 |
| 0.011497 | 0.011429 | 0.011463 | 0.011497 | 0.011463 | 0.011396 | 0.011530 |
| 0.011463 | 0.011497 | 0.011496 | 0.011429 | 0.011496 | 0.011732 | 0.011329 |
| 0.011429 | 0.011765 | 0.011429 | 0.011463 | 0.011429 | 0.011732 | 0.011403 |
| 0.011735 | 0.011400 | 0.011311 | 0.011543 | 0.011630 | 0.011563 | 0.011353 |
| 0.011270 | 0.011530 | 0.011631 | 0.011739 | 0.011599 | 0.011737 | 0.011867 |
| 0.011767 | 0.011804 | 0.011765 | 0.011983 | 0.011732 | 0.012606 | 0.011768 |
| 0.012507 | 0.012274 | 0.012409 | 0.012680 | 0.011731 | 0.011430 | 0.011732 |
| 0.012171 | 0.012106 | 0.011698 | 0.011597 | 0.011665 | 0.011665 | 0.011635 |
| 0.011530 | 0.011535 | 0.011597 | 0.011565 | 0.011935 | 0.012001 | 0.012002 |
| 0.011901 | 0.012002 | 0.012106 | 0.011872 | 0.012171 | 0.012178 | 0.012238 |
| 0.012239 | 0.012239 | 0.012221 | 0.012206 | 0.012207 | 0.011530 | 0.011766 |
| 0.011834 | 0.012337 | 0.011840 | 0.012068 | 0.012541 | 0.011604 | 0.011497 |
| 0.011463 | 0.011463 | 0.011934 | 0.011965 | 0.012081 | 0.011799 | 0.011465 |
| S368     | 0.011698 | 0.011698 | 0.012034 | 0.011799 | 0.011799 | 0.011799 |
| 0.011705 | 0.011637 | 0.011866 | 0.011295 | 0.011362 | 0.011329 | 0.011295 |
| 0.011329 | 0.011496 | 0.011295 | 0.011329 | 0.011396 | 0.011362 | 0.011329 |
| 0.011295 | 0.011329 | 0.011429 | 0.011295 | 0.011329 | 0.011329 | 0.011671 |
| 0.011564 | 0.011329 | 0.011228 | 0.011463 | 0.011396 | 0.011362 | 0.011396 |
| 0.011362 | 0.011463 | 0.011362 | 0.011362 | 0.011396 | 0.011362 | 0.011530 |
| 0.011295 | 0.011362 | 0.011396 | 0.011329 | 0.011429 | 0.011463 | 0.011396 |
| 0.011362 | 0.011530 | 0.011430 | 0.011698 | 0.011362 | 0.011631 | 0.011362 |
| 0.011329 | 0.011429 | 0.011496 | 0.011631 | 0.011732 | 0.011429 | 0.011530 |
| 0.011396 | 0.011463 | 0.011362 | 0.011597 | 0.011832 | 0.011362 | 0.011429 |
| 0.011329 | 0.011429 | 0.011396 | 0.011463 | 0.011396 | 0.011396 | 0.011396 |
| 0.011295 | 0.011329 | 0.011295 | 0.011396 | 0.011362 | 0.011397 | 0.011463 |
| 0.011396 | 0.011362 | 0.011429 | 0.011329 | 0.011463 | 0.011295 | 0.011362 |
| 0.011530 | 0.011463 | 0.011698 | 0.011530 | 0.011362 | 0.011597 | 0.011362 |
| 0.011505 | 0.011733 | 0.011551 | 0.011216 | 0.011247 | 0.011355 | 0.011454 |
| 0.012085 | 0.011467 | 0.011266 | 0.011564 | 0.011597 | 0.011396 | 0.011496 |
| 0.011429 | 0.011396 | 0.011463 | 0.011362 | 0.011463 | 0.011396 | 0.011396 |
| 0.011362 | 0.011463 | 0.011664 | 0.011530 | 0.011429 | 0.011396 | 0.011329 |
| 0.011295 | 0.011295 | 0.011362 | 0.011329 | 0.011530 | 0.011497 | 0.011429 |
| 0.011530 | 0.011597 | 0.011329 | 0.011329 | 0.011362 | 0.011362 | 0.011364 |
| 0.011432 | 0.011362 | 0.011362 | 0.011240 | 0.011313 | 0.011271 | 0.011363 |
| 0.011365 | 0.011301 | 0.011318 | 0.011336 | 0.011264 | 0.011300 | 0.011330 |
| 0.011600 | 0.011370 | 0.011405 | 0.011296 | 0.011302 | 0.011430 | 0.011396 |
| 0.011464 | 0.011397 | 0.011396 | 0.011496 | 0.011429 | 0.011799 | 0.011598 |
| 0.011631 | 0.011497 | 0.011362 | 0.011463 | 0.011262 | 0.011496 | 0.011295 |
| 0.011362 | 0.011362 | 0.011329 | 0.011295 | 0.011329 | 0.011295 | 0.011396 |
| 0.011362 | 0.011463 | 0.011396 | 0.011295 | 0.011397 | 0.011497 | 0.011499 |
| 0.011497 | 0.011396 | 0.011295 | 0.011229 | 0.011362 | 0.011295 | 0.011228 |
| 0.011332 | 0.011497 | 0.011295 | 0.011497 | 0.011262 | 0.011362 | 0.011329 |
| 0.011430 | 0.011329 | 0.011362 | 0.011329 | 0.011362 | 0.011228 | 0.011362 |
| 0.011396 | 0.011329 | 0.011396 | 0.011329 | 0.011362 | 0.011396 | 0.011631 |
| 0.011732 | 0.011664 | 0.011732 | 0.011498 | 0.011732 | 0.011362 | 0.011329 |
| 0.011364 | 0.011667 | 0.011472 | 0.011266 | 0.011739 | 0.011231 | 0.011375 |
| 0.011739 | 0.011638 | 0.011530 | 0.011732 | 0.011436 | 0.011597 | 0.011564 |
| 0.011496 | 0.011664 | 0.011522 | 0.011307 | 0.011395 | 0.011396 | 0.011466 |
| 0.011564 | 0.011465 | 0.011601 | 0.011669 | 0.011597 | 0.011665 | 0.011772 |
| 0.011500 | 0.011671 | 0.011602 | 0.011534 | 0.011800 | 0.011262 | 0.011464 |
| 0.011429 | 0.011362 | 0.011262 | 0.011262 | 0.011329 | 0.011329 | 0.011396 |
| 0.011329 | 0.011396 | 0.011295 | 0.011396 | 0.011329 | 0.011329 | 0.011396 |
| 0.011329 | 0.011765 | 0.011664 | 0.011698 | 0.011228 | 0.011329 | 0.011362 |
| 0.011362 | 0.011329 | 0.011396 | 0.011429 | 0.011295 | 0.011295 | 0.011295 |
| 0.011832 | 0.011463 | 0.011463 | 0.011262 | 0.011362 | 0.011530 | 0.011295 |
| 0.011295 | 0.011362 | 0.011329 | 0.011497 | 0.011295 | 0.011429 | 0.011564 |
| 0.011496 | 0.011329 | 0.011329 | 0.011262 | 0.011262 | 0.011429 | 0.011362 |

|          |          |          |          |          |          |          |
|----------|----------|----------|----------|----------|----------|----------|
| 0.011262 | 0.011362 | 0.011228 | 0.011262 | 0.011396 | 0.011530 | 0.011295 |
| 0.011262 | 0.011396 | 0.011329 | 0.011228 | 0.011564 | 0.011228 | 0.011396 |
| 0.011471 | 0.011295 | 0.011597 | 0.011429 | 0.011463 | 0.011329 | 0.011429 |
| 0.011295 | 0.011631 | 0.011228 | 0.011496 | 0.011295 | 0.011295 | 0.011228 |
| 0.011463 | 0.011665 | 0.011362 | 0.011429 | 0.011262 | 0.011664 | 0.011295 |
| 0.011295 | 0.011295 | 0.011329 | 0.011429 | 0.011329 | 0.011429 | 0.011496 |
| 0.011496 | 0.011463 | 0.011362 | 0.011463 | 0.011429 | 0.011295 | 0.011262 |
| 0.011295 | 0.011295 | 0.011362 | 0.011295 | 0.011262 | 0.011429 | 0.011295 |
| 0.011329 | 0.011329 | 0.011463 | 0.011496 | 0.000000 | 0.011329 | 0.011329 |
| 0.011396 | 0.011329 | 0.011429 | 0.011295 | 0.011429 | 0.011530 | 0.011832 |
| 0.011329 | 0.011732 | 0.011302 | 0.017823 | 0.011126 | 0.011427 | 0.011653 |
| 0.011614 | 0.011658 | 0.011374 | 0.011350 | 0.011664 | 0.011682 | 0.011303 |
| 0.011487 | 0.011487 | 0.011177 | 0.011270 | 0.011294 | 0.011258 | 0.011232 |
| 0.011529 | 0.011470 | 0.011468 | 0.011259 | 0.011463 | 0.011497 | 0.011500 |
| 0.011369 | 0.011463 | 0.011463 | 0.011429 | 0.011396 | 0.011396 | 0.011362 |
| 0.011396 | 0.011329 | 0.011362 | 0.011396 | 0.011362 | 0.011295 | 0.011329 |
| 0.011329 | 0.011396 | 0.011295 | 0.011396 | 0.011430 | 0.011463 | 0.011362 |
| 0.011396 | 0.011362 | 0.011698 | 0.011698 | 0.011430 | 0.011464 | 0.011497 |
| 0.011262 | 0.011262 | 0.011295 | 0.011396 | 0.011262 | 0.011497 | 0.011497 |
| 0.011530 | 0.011530 | 0.011463 | 0.011564 | 0.011732 | 0.011565 | 0.011396 |
| 0.011396 | 0.011463 | 0.011497 | 0.011329 | 0.011396 | 0.011362 | 0.011396 |
| 0.011463 | 0.011463 | 0.011497 | 0.011463 | 0.011363 | 0.011564 | 0.011530 |
| 0.011399 | 0.011295 | 0.011396 | 0.011497 | 0.011396 | 0.011530 | 0.011564 |
| 0.011732 | 0.011436 | 0.011597 | 0.011564 | 0.011496 | 0.011664 | 0.011295 |
| 0.011464 | 0.011363 | 0.011329 | 0.011329 | 0.011396 | 0.011295 | 0.011396 |
| 0.011430 | 0.011463 | 0.011362 | 0.011396 | 0.011362 | 0.011698 | 0.011698 |
| 0.011430 | 0.011464 | 0.011530 | 0.011463 | 0.012103 | 0.011489 | 0.011412 |
| 0.011482 | 0.011476 | 0.011552 | 0.011441 | 0.011585 | 0.011508 | 0.011474 |
| 0.012056 | 0.011372 | 0.011505 | 0.011441 | 0.011714 | 0.011570 | 0.011673 |
| 0.012080 | 0.011512 | 0.011635 | 0.011698 | 0.011564 | 0.011564 | 0.011601 |
| 0.011262 | 0.011429 | 0.011564 | 0.011530 | 0.011533 | 0.011530 | 0.011498 |
| 0.011362 | 0.011295 | 0.011329 | 0.011362 | 0.011262 | 0.011329 | 0.011228 |
| 0.011362 | 0.011396 | 0.011295 | 0.011262 | 0.011362 | 0.011295 | 0.011329 |
| 0.011329 | 0.011262 | 0.011329 | 0.011362 | 0.011262 | 0.011463 | 0.011496 |
| 0.011396 | 0.011463 | 0.011396 | 0.011396 | 0.011329 | 0.011732 | 0.011362 |
| 0.011373 | 0.011329 | 0.011564 | 0.011569 | 0.011429 | 0.011429 | 0.011429 |
| 0.011429 | 0.011362 | 0.011329 | 0.011362 | 0.011463 | 0.011463 | 0.011396 |
| 0.011396 | 0.011530 | 0.011698 | 0.011429 | 0.011631 | 0.011631 | 0.011496 |
| 0.011329 | 0.011396 | 0.011429 | 0.011832 | 0.011396 | 0.011429 | 0.011396 |
| 0.011429 | 0.011362 | 0.011362 | 0.011665 | 0.011597 | 0.011631 | 0.011362 |
| 0.011463 | 0.011530 | 0.011194 | 0.011463 | 0.011429 | 0.011295 | 0.011631 |
| 0.011396 | 0.011362 | 0.011362 | 0.011530 | 0.011362 | 0.011463 | 0.011698 |
| 0.011396 | 0.011773 | 0.011765 | 0.011548 | 0.011173 | 0.011468 | 0.011215 |
| 0.011225 | 0.011761 | 0.011271 | 0.011462 | 0.011207 | 0.011315 | 0.011326 |
| 0.011519 | 0.000000 | 0.011283 | 0.000000 | 0.011114 | 0.011261 | 0.011385 |
| 0.011437 | 0.011296 | 0.011412 | 0.011342 | 0.011397 | 0.011530 | 0.011597 |
| 0.011597 | 0.011464 | 0.011567 | 0.011569 | 0.011704 | 0.011732 | 0.011396 |
| 0.011631 | 0.011497 | 0.011362 | 0.011463 | 0.011262 | 0.011496 | 0.011295 |
| 0.011362 | 0.011362 | 0.011329 | 0.011295 | 0.011329 | 0.011295 | 0.011396 |
| 0.011375 | 0.011375 | 0.011368 | 0.011403 | 0.011539 | 0.011504 | 0.011504 |
| 0.011503 | 0.011430 | 0.011245 | 0.011240 | 0.011365 | 0.011535 | 0.011535 |
| 0.011329 | 0.011399 | 0.011632 | 0.011601 | 0.011531 | 0.011565 | 0.011496 |
| 0.011429 | 0.011496 | 0.011496 | 0.011396 | 0.011967 | 0.011564 | 0.011631 |
| 0.011665 | 0.011737 | 0.011367 | 0.011441 | 0.011329 | 0.011530 | 0.011496 |
| 0.011531 | 0.011564 | 0.011564 | 0.011564 | 0.011728 | 0.011698 | 0.011338 |
| 0.011229 | 0.011233 | 0.011332 | 0.011298 | 0.011402 | 0.011209 | 0.011570 |
| 0.011369 | 0.011499 | 0.011251 | 0.011360 | 0.011363 | 0.011437 | 0.011329 |
| 0.011295 | 0.011295 | 0.011362 | 0.011329 | 0.011530 | 0.011497 | 0.011429 |
| 0.011530 | 0.011597 | 0.011329 | 0.011329 | 0.011362 | 0.011362 | 0.011364 |
| 0.011432 | 0.011362 | 0.011362 | 0.011397 | 0.011530 | 0.011597 | 0.011597 |

|          |          |          |          |          |          |          |
|----------|----------|----------|----------|----------|----------|----------|
| 0.011464 | 0.011567 | 0.011569 | 0.011704 | 0.011732 | 0.011396 | 0.011564 |
| 0.011496 | 0.011496 | 0.011331 | 0.011513 | 0.011408 | 0.011469 | 0.011340 |
| 0.011508 | 0.011744 | 0.011483 | 0.011400 | 0.011295 | 0.011497 | 0.011362 |
| 0.011463 | 0.011396 | 0.011295 | 0.011397 | 0.011497 | 0.011499 | 0.011396 |
| 0.011295 | 0.011229 | 0.011362 | 0.011295 | 0.011228 | 0.011332 | 0.011497 |
| 0.011396 | 0.011329 | 0.011362 | 0.011396 | 0.011362 | 0.011295 | 0.011497 |
| 0.011362 | 0.011396 | 0.011396 | 0.011329 | 0.011396 | 0.011631 | 0.011295 |
| 0.011329 | 0.011732 | 0.011329 | 0.011362 | 0.011329 | 0.011698 | 0.011274 |
| 0.011678 | 0.011230 | 0.011211 | 0.011503 | 0.011589 | 0.011491 | 0.011186 |
| 0.011218 | 0.011496 | 0.011597 | 0.011671 | 0.011565 | 0.011669 | 0.011834 |
| 0.011733 | 0.011770 | 0.011731 | 0.011949 | 0.011698 | 0.012573 | 0.011734 |
| 0.012473 | 0.012241 | 0.012375 | 0.012646 | 0.011631 | 0.011396 | 0.011698 |
| 0.012137 | 0.012072 | 0.011664 | 0.011564 | 0.011632 | 0.011632 | 0.011601 |
| 0.011496 | 0.011467 | 0.011564 | 0.011531 | 0.011901 | 0.011967 | 0.011968 |
| 0.011867 | 0.011968 | 0.012072 | 0.011804 | 0.012138 | 0.012144 | 0.012205 |
| 0.012205 | 0.012239 | 0.012152 | 0.012205 | 0.012207 | 0.011429 | 0.011732 |
| 0.011800 | 0.012303 | 0.011806 | 0.012034 | 0.012508 | 0.011570 | 0.011464 |
| 0.011429 | 0.011429 | 0.011900 | 0.011924 | 0.012045 | 0.011765 | 0.011431 |
| S369     | 0.011631 | 0.011631 | 0.011967 | 0.011731 | 0.011731 | 0.011799 |
| 0.011637 | 0.011569 | 0.011799 | 0.011228 | 0.011295 | 0.011262 | 0.011228 |
| 0.011262 | 0.011429 | 0.011228 | 0.011262 | 0.011329 | 0.011295 | 0.011262 |
| 0.011228 | 0.011262 | 0.011362 | 0.011228 | 0.011195 | 0.011262 | 0.011603 |
| 0.011496 | 0.011262 | 0.011161 | 0.011396 | 0.011262 | 0.011295 | 0.011262 |
| 0.011295 | 0.011329 | 0.011295 | 0.011295 | 0.011329 | 0.011295 | 0.011463 |
| 0.011228 | 0.011295 | 0.011329 | 0.011262 | 0.011362 | 0.011396 | 0.011329 |
| 0.011295 | 0.011463 | 0.011362 | 0.011631 | 0.011295 | 0.011496 | 0.011295 |
| 0.011262 | 0.011362 | 0.011429 | 0.011496 | 0.011664 | 0.011362 | 0.011463 |
| 0.011262 | 0.011329 | 0.011295 | 0.011463 | 0.011765 | 0.011295 | 0.011362 |
| 0.011262 | 0.011362 | 0.011329 | 0.011396 | 0.011329 | 0.011329 | 0.011329 |
| 0.011228 | 0.011262 | 0.011228 | 0.011329 | 0.011295 | 0.011329 | 0.011396 |
| 0.011329 | 0.011295 | 0.011295 | 0.011262 | 0.011396 | 0.011161 | 0.011295 |
| 0.011463 | 0.011396 | 0.011631 | 0.011463 | 0.011295 | 0.011463 | 0.011295 |
| 0.011468 | 0.011695 | 0.011513 | 0.011216 | 0.011210 | 0.011318 | 0.011414 |
| 0.012048 | 0.011416 | 0.011225 | 0.011530 | 0.011530 | 0.011329 | 0.011429 |
| 0.011362 | 0.011329 | 0.011396 | 0.011295 | 0.011396 | 0.011262 | 0.011329 |
| 0.011295 | 0.011396 | 0.011597 | 0.011463 | 0.011362 | 0.011329 | 0.011195 |
| 0.011228 | 0.011228 | 0.011228 | 0.011262 | 0.011463 | 0.011429 | 0.011362 |
| 0.011463 | 0.011530 | 0.011262 | 0.011262 | 0.011295 | 0.011295 | 0.011297 |
| 0.011364 | 0.011295 | 0.011295 | 0.011132 | 0.011241 | 0.011200 | 0.011296 |
| 0.011297 | 0.011232 | 0.011282 | 0.011267 | 0.011196 | 0.011231 | 0.011263 |
| 0.011528 | 0.011301 | 0.011267 | 0.011228 | 0.011233 | 0.011363 | 0.011329 |
| 0.011396 | 0.011330 | 0.011329 | 0.011429 | 0.011362 | 0.011664 | 0.011530 |
| 0.011564 | 0.011429 | 0.011295 | 0.011396 | 0.011195 | 0.011429 | 0.011228 |
| 0.011295 | 0.011295 | 0.011262 | 0.011228 | 0.011262 | 0.011228 | 0.011329 |
| 0.011228 | 0.011329 | 0.011329 | 0.011228 | 0.011330 | 0.011430 | 0.011432 |
| 0.011362 | 0.011329 | 0.011228 | 0.011161 | 0.011295 | 0.011228 | 0.011161 |
| 0.011264 | 0.011362 | 0.011161 | 0.011362 | 0.011195 | 0.011295 | 0.011262 |
| 0.011295 | 0.011262 | 0.011228 | 0.011262 | 0.011295 | 0.011161 | 0.011228 |
| 0.011262 | 0.011262 | 0.011329 | 0.011262 | 0.011295 | 0.011329 | 0.011564 |
| 0.011664 | 0.011597 | 0.011665 | 0.011431 | 0.011665 | 0.011295 | 0.011262 |
| 0.011297 | 0.011545 | 0.011289 | 0.011197 | 0.011671 | 0.011163 | 0.011257 |
| 0.011671 | 0.011570 | 0.011463 | 0.011664 | 0.011367 | 0.011530 | 0.011429 |
| 0.011429 | 0.011597 | 0.011451 | 0.011307 | 0.011354 | 0.011329 | 0.011398 |
| 0.011497 | 0.011397 | 0.011533 | 0.011534 | 0.011530 | 0.011597 | 0.011704 |
| 0.011432 | 0.011535 | 0.011534 | 0.011466 | 0.011733 | 0.011194 | 0.011397 |
| 0.011295 | 0.011295 | 0.011194 | 0.011194 | 0.011194 | 0.011262 | 0.011329 |
| 0.011194 | 0.011262 | 0.011161 | 0.011329 | 0.011194 | 0.011262 | 0.011329 |
| 0.011262 | 0.011698 | 0.011597 | 0.011631 | 0.011161 | 0.011262 | 0.011295 |
| 0.011295 | 0.011262 | 0.011329 | 0.011362 | 0.011228 | 0.011228 | 0.011228 |
| 0.011765 | 0.011396 | 0.011396 | 0.011194 | 0.011295 | 0.011396 | 0.011228 |

|          |          |          |          |          |          |          |
|----------|----------|----------|----------|----------|----------|----------|
| 0.011228 | 0.011295 | 0.011262 | 0.011362 | 0.011228 | 0.011362 | 0.011429 |
| 0.011429 | 0.011262 | 0.011262 | 0.011194 | 0.011194 | 0.011362 | 0.011295 |
| 0.011194 | 0.011295 | 0.011161 | 0.011194 | 0.011329 | 0.011463 | 0.011228 |
| 0.011195 | 0.011329 | 0.011262 | 0.011161 | 0.011496 | 0.011161 | 0.011329 |
| 0.011334 | 0.011228 | 0.011530 | 0.011362 | 0.011396 | 0.011262 | 0.011362 |
| 0.011228 | 0.011496 | 0.011161 | 0.011429 | 0.011228 | 0.011228 | 0.011161 |
| 0.011329 | 0.011597 | 0.011295 | 0.011362 | 0.011194 | 0.011597 | 0.011228 |
| 0.011228 | 0.011228 | 0.011262 | 0.011295 | 0.011262 | 0.011362 | 0.011429 |
| 0.011429 | 0.011396 | 0.011295 | 0.011396 | 0.011295 | 0.011228 | 0.011194 |
| 0.011228 | 0.011228 | 0.011295 | 0.011228 | 0.011127 | 0.011362 | 0.011228 |
| 0.011262 | 0.011262 | 0.011396 | 0.011429 | 0.011329 | 0.000000 | 0.011262 |
| 0.011329 | 0.011262 | 0.011362 | 0.011228 | 0.011362 | 0.011463 | 0.011765 |
| 0.011262 | 0.011664 | 0.011267 | 0.017785 | 0.011191 | 0.011427 | 0.011618 |
| 0.011579 | 0.011623 | 0.011270 | 0.011234 | 0.011609 | 0.011647 | 0.011303 |
| 0.011440 | 0.011549 | 0.011177 | 0.011186 | 0.011177 | 0.011307 | 0.011275 |
| 0.011436 | 0.011433 | 0.011357 | 0.011193 | 0.011396 | 0.011429 | 0.011432 |
| 0.011232 | 0.011396 | 0.011396 | 0.011362 | 0.011329 | 0.011329 | 0.011295 |
| 0.011329 | 0.011262 | 0.011295 | 0.011329 | 0.011295 | 0.011228 | 0.011262 |
| 0.011262 | 0.011329 | 0.011228 | 0.011329 | 0.011362 | 0.011396 | 0.011295 |
| 0.011329 | 0.011295 | 0.011631 | 0.011631 | 0.011362 | 0.011396 | 0.011430 |
| 0.011195 | 0.011195 | 0.011228 | 0.011262 | 0.011195 | 0.011429 | 0.011429 |
| 0.011463 | 0.011463 | 0.011396 | 0.011496 | 0.011665 | 0.011498 | 0.011262 |
| 0.011329 | 0.011396 | 0.011362 | 0.011262 | 0.011329 | 0.011295 | 0.011329 |
| 0.011396 | 0.011396 | 0.011429 | 0.011329 | 0.011229 | 0.011497 | 0.011396 |
| 0.011331 | 0.011228 | 0.011329 | 0.011430 | 0.011329 | 0.011463 | 0.011496 |
| 0.011664 | 0.011367 | 0.011530 | 0.011429 | 0.011429 | 0.011597 | 0.011228 |
| 0.011397 | 0.011295 | 0.011262 | 0.011262 | 0.011329 | 0.011228 | 0.011329 |
| 0.011362 | 0.011396 | 0.011295 | 0.011329 | 0.011295 | 0.011631 | 0.011631 |
| 0.011362 | 0.011396 | 0.011463 | 0.011396 | 0.012035 | 0.011453 | 0.011377 |
| 0.011447 | 0.011407 | 0.011517 | 0.011406 | 0.011515 | 0.011439 | 0.011405 |
| 0.011987 | 0.011302 | 0.011437 | 0.011371 | 0.011645 | 0.011502 | 0.011536 |
| 0.012012 | 0.011475 | 0.011567 | 0.011631 | 0.011496 | 0.011497 | 0.011533 |
| 0.011194 | 0.011295 | 0.011496 | 0.011463 | 0.011466 | 0.011463 | 0.011431 |
| 0.011295 | 0.011161 | 0.011194 | 0.011295 | 0.011127 | 0.011262 | 0.011161 |
| 0.011295 | 0.011329 | 0.011228 | 0.011194 | 0.011295 | 0.011228 | 0.011262 |
| 0.011262 | 0.011194 | 0.011262 | 0.011295 | 0.011194 | 0.011329 | 0.011429 |
| 0.011329 | 0.011396 | 0.011329 | 0.011329 | 0.011262 | 0.011664 | 0.011295 |
| 0.011338 | 0.011262 | 0.011497 | 0.011501 | 0.011295 | 0.011362 | 0.011362 |
| 0.011362 | 0.011228 | 0.011262 | 0.011228 | 0.011396 | 0.011396 | 0.011329 |
| 0.011329 | 0.011463 | 0.011631 | 0.011362 | 0.011564 | 0.011564 | 0.011429 |
| 0.011262 | 0.011329 | 0.011362 | 0.011765 | 0.011329 | 0.011295 | 0.011329 |
| 0.011362 | 0.011295 | 0.011295 | 0.011597 | 0.011463 | 0.011564 | 0.011295 |
| 0.011396 | 0.011463 | 0.011329 | 0.011396 | 0.011362 | 0.011228 | 0.011564 |
| 0.011329 | 0.011295 | 0.011295 | 0.011463 | 0.011295 | 0.011396 | 0.011631 |
| 0.011329 | 0.011705 | 0.011698 | 0.011507 | 0.011173 | 0.011400 | 0.011215 |
| 0.011225 | 0.011722 | 0.011236 | 0.011462 | 0.011207 | 0.011366 | 0.011326 |
| 0.011417 | 0.011126 | 0.011283 | 0.011126 | 0.011168 | 0.011328 | 0.011303 |
| 0.011324 | 0.011218 | 0.011377 | 0.011307 | 0.011330 | 0.011463 | 0.011530 |
| 0.011530 | 0.011396 | 0.011500 | 0.011501 | 0.011636 | 0.011661 | 0.011329 |
| 0.011564 | 0.011429 | 0.011295 | 0.011396 | 0.011195 | 0.011429 | 0.011228 |
| 0.011295 | 0.011295 | 0.011262 | 0.011228 | 0.011262 | 0.011228 | 0.011329 |
| 0.011305 | 0.011305 | 0.011300 | 0.011334 | 0.011471 | 0.011368 | 0.011436 |
| 0.011435 | 0.011363 | 0.011171 | 0.011168 | 0.011297 | 0.011467 | 0.011467 |
| 0.011262 | 0.011331 | 0.011565 | 0.011533 | 0.011464 | 0.011498 | 0.011429 |
| 0.011362 | 0.011429 | 0.011429 | 0.011329 | 0.011900 | 0.011496 | 0.011564 |
| 0.011597 | 0.011665 | 0.011299 | 0.011372 | 0.011262 | 0.011463 | 0.011429 |
| 0.011464 | 0.011496 | 0.011496 | 0.011496 | 0.011650 | 0.011631 | 0.011268 |
| 0.011162 | 0.011164 | 0.011264 | 0.011230 | 0.011333 | 0.011172 | 0.011502 |
| 0.011300 | 0.011411 | 0.011108 | 0.011322 | 0.011296 | 0.011368 | 0.011195 |
| 0.011228 | 0.011228 | 0.011228 | 0.011262 | 0.011463 | 0.011429 | 0.011362 |

|          |          |          |          |          |          |          |
|----------|----------|----------|----------|----------|----------|----------|
| 0.011463 | 0.011530 | 0.011262 | 0.011262 | 0.011295 | 0.011295 | 0.011297 |
| 0.011364 | 0.011295 | 0.011295 | 0.011330 | 0.011463 | 0.011530 | 0.011530 |
| 0.011396 | 0.011500 | 0.011501 | 0.011636 | 0.011661 | 0.011329 | 0.011496 |
| 0.011429 | 0.011429 | 0.011263 | 0.011373 | 0.011373 | 0.011401 | 0.011235 |
| 0.011370 | 0.011516 | 0.011399 | 0.011332 | 0.011161 | 0.011362 | 0.011228 |
| 0.011329 | 0.011329 | 0.011228 | 0.011330 | 0.011430 | 0.011432 | 0.011329 |
| 0.011228 | 0.011161 | 0.011295 | 0.011228 | 0.011161 | 0.011264 | 0.011362 |
| 0.011329 | 0.011262 | 0.011295 | 0.011329 | 0.011295 | 0.011228 | 0.011430 |
| 0.011295 | 0.011329 | 0.011329 | 0.011262 | 0.011329 | 0.011564 | 0.011228 |
| 0.011262 | 0.011664 | 0.011262 | 0.011228 | 0.011262 | 0.011631 | 0.011232 |
| 0.011622 | 0.011230 | 0.011211 | 0.011463 | 0.011549 | 0.011455 | 0.011186 |
| 0.011165 | 0.011429 | 0.011530 | 0.011637 | 0.011498 | 0.011635 | 0.011766 |
| 0.011666 | 0.011703 | 0.011664 | 0.011914 | 0.011631 | 0.012505 | 0.011666 |
| 0.012405 | 0.012173 | 0.012307 | 0.012578 | 0.011631 | 0.011329 | 0.011631 |
| 0.012070 | 0.012004 | 0.011597 | 0.011497 | 0.011565 | 0.011565 | 0.011534 |
| 0.011429 | 0.011433 | 0.011496 | 0.011464 | 0.011833 | 0.011900 | 0.011901 |
| 0.011800 | 0.011901 | 0.012004 | 0.011770 | 0.012070 | 0.012076 | 0.012137 |
| 0.012138 | 0.012171 | 0.012118 | 0.012138 | 0.012139 | 0.011362 | 0.011665 |
| 0.011733 | 0.012236 | 0.011738 | 0.011967 | 0.012440 | 0.011502 | 0.011396 |
| 0.011362 | 0.011362 | 0.011833 | 0.011883 | 0.011975 | 0.011698 | 0.011363 |
| S370     | 0.011631 | 0.011631 | 0.011967 | 0.011732 | 0.011732 | 0.011799 |
| 0.011638 | 0.011570 | 0.011799 | 0.011228 | 0.011295 | 0.011262 | 0.011228 |
| 0.011262 | 0.011429 | 0.011228 | 0.011262 | 0.011329 | 0.011295 | 0.011262 |
| 0.011228 | 0.011262 | 0.011362 | 0.011228 | 0.011262 | 0.011262 | 0.011604 |
| 0.011497 | 0.011262 | 0.011161 | 0.011396 | 0.011329 | 0.011295 | 0.011329 |
| 0.011295 | 0.011396 | 0.011295 | 0.011295 | 0.011329 | 0.011295 | 0.011463 |
| 0.011228 | 0.011295 | 0.011329 | 0.011262 | 0.011362 | 0.011396 | 0.011329 |
| 0.011295 | 0.011463 | 0.011363 | 0.011631 | 0.011295 | 0.011564 | 0.011295 |
| 0.011262 | 0.011362 | 0.011430 | 0.011564 | 0.011665 | 0.011362 | 0.011463 |
| 0.011329 | 0.011396 | 0.011295 | 0.011530 | 0.011766 | 0.011295 | 0.011362 |
| 0.011262 | 0.011362 | 0.011329 | 0.011396 | 0.011329 | 0.011329 | 0.011329 |
| 0.011228 | 0.011262 | 0.011228 | 0.011329 | 0.011295 | 0.011330 | 0.011396 |
| 0.011329 | 0.011295 | 0.011362 | 0.011262 | 0.011396 | 0.011228 | 0.011295 |
| 0.011463 | 0.011396 | 0.011631 | 0.011463 | 0.011295 | 0.011530 | 0.011295 |
| 0.011468 | 0.011695 | 0.011513 | 0.011217 | 0.011210 | 0.011318 | 0.011415 |
| 0.012048 | 0.011518 | 0.011225 | 0.011530 | 0.011530 | 0.011329 | 0.011430 |
| 0.011362 | 0.011329 | 0.011396 | 0.011295 | 0.011396 | 0.011329 | 0.011329 |
| 0.011295 | 0.011396 | 0.011597 | 0.011463 | 0.011362 | 0.011329 | 0.011262 |
| 0.011228 | 0.011228 | 0.011295 | 0.011262 | 0.011463 | 0.011430 | 0.011362 |
| 0.011463 | 0.011530 | 0.011262 | 0.011262 | 0.011295 | 0.011295 | 0.011297 |
| 0.011365 | 0.011295 | 0.011295 | 0.011168 | 0.011205 | 0.011165 | 0.011296 |
| 0.011297 | 0.011232 | 0.011282 | 0.011267 | 0.011196 | 0.011232 | 0.011263 |
| 0.011492 | 0.011302 | 0.011336 | 0.011228 | 0.011233 | 0.011363 | 0.011329 |
| 0.011397 | 0.011330 | 0.011329 | 0.011429 | 0.011362 | 0.011732 | 0.011531 |
| 0.011564 | 0.011430 | 0.011295 | 0.011396 | 0.011195 | 0.011430 | 0.011228 |
| 0.011295 | 0.011295 | 0.011262 | 0.011228 | 0.011262 | 0.011228 | 0.011329 |
| 0.011295 | 0.011396 | 0.011329 | 0.011228 | 0.011330 | 0.011430 | 0.011432 |
| 0.011430 | 0.011329 | 0.011228 | 0.011161 | 0.011295 | 0.011228 | 0.011161 |
| 0.011264 | 0.011430 | 0.011228 | 0.011430 | 0.011195 | 0.011295 | 0.011262 |
| 0.011363 | 0.011262 | 0.011295 | 0.011262 | 0.011295 | 0.011161 | 0.011295 |
| 0.011329 | 0.011262 | 0.011329 | 0.011262 | 0.011295 | 0.011329 | 0.011564 |
| 0.011665 | 0.011597 | 0.011665 | 0.011431 | 0.011665 | 0.011295 | 0.011262 |
| 0.011297 | 0.011586 | 0.011289 | 0.011198 | 0.011671 | 0.011163 | 0.011257 |
| 0.011672 | 0.011570 | 0.011463 | 0.011665 | 0.011368 | 0.011530 | 0.011497 |
| 0.011429 | 0.011597 | 0.011380 | 0.011225 | 0.011270 | 0.011329 | 0.011365 |
| 0.011497 | 0.011398 | 0.011534 | 0.011602 | 0.011530 | 0.011598 | 0.011704 |
| 0.011433 | 0.011603 | 0.011534 | 0.011466 | 0.011733 | 0.011195 | 0.011397 |
| 0.011362 | 0.011295 | 0.011195 | 0.011195 | 0.011262 | 0.011262 | 0.011329 |
| 0.011262 | 0.011329 | 0.011228 | 0.011329 | 0.011262 | 0.011262 | 0.011329 |
| 0.011262 | 0.011698 | 0.011597 | 0.011631 | 0.011161 | 0.011262 | 0.011295 |

|          |          |          |          |          |          |          |
|----------|----------|----------|----------|----------|----------|----------|
| 0.011295 | 0.011262 | 0.011329 | 0.011362 | 0.011228 | 0.011228 | 0.011228 |
| 0.011765 | 0.011396 | 0.011396 | 0.011195 | 0.011295 | 0.011463 | 0.011228 |
| 0.011228 | 0.011295 | 0.011262 | 0.011430 | 0.011228 | 0.011362 | 0.011497 |
| 0.011429 | 0.011262 | 0.011262 | 0.011195 | 0.011195 | 0.011362 | 0.011295 |
| 0.011195 | 0.011295 | 0.011161 | 0.011195 | 0.011329 | 0.011463 | 0.011228 |
| 0.011195 | 0.011329 | 0.011262 | 0.011161 | 0.011497 | 0.011161 | 0.011329 |
| 0.011368 | 0.011228 | 0.011530 | 0.011362 | 0.011396 | 0.011262 | 0.011362 |
| 0.011228 | 0.011564 | 0.011161 | 0.011430 | 0.011228 | 0.011228 | 0.011161 |
| 0.011396 | 0.011598 | 0.011295 | 0.011362 | 0.011195 | 0.011597 | 0.011228 |
| 0.011228 | 0.011228 | 0.011262 | 0.011362 | 0.011262 | 0.011362 | 0.011429 |
| 0.011430 | 0.011396 | 0.011295 | 0.011396 | 0.011362 | 0.011228 | 0.011195 |
| 0.011228 | 0.011228 | 0.011295 | 0.011228 | 0.011195 | 0.011362 | 0.011228 |
| 0.011262 | 0.011262 | 0.011396 | 0.011429 | 0.011329 | 0.011262 | 0.000000 |
| 0.011329 | 0.011262 | 0.011362 | 0.011228 | 0.011362 | 0.011463 | 0.011765 |
| 0.011262 | 0.011665 | 0.011267 | 0.017524 | 0.011126 | 0.011366 | 0.011618 |
| 0.011579 | 0.011623 | 0.011270 | 0.011234 | 0.011719 | 0.011647 | 0.011303 |
| 0.011487 | 0.011487 | 0.011177 | 0.011228 | 0.011255 | 0.011307 | 0.011275 |
| 0.011483 | 0.011433 | 0.011431 | 0.011259 | 0.011396 | 0.011430 | 0.011432 |
| 0.011301 | 0.011396 | 0.011396 | 0.011362 | 0.011329 | 0.011329 | 0.011295 |
| 0.011329 | 0.011262 | 0.011295 | 0.011329 | 0.011295 | 0.011228 | 0.011262 |
| 0.011262 | 0.011329 | 0.011228 | 0.011329 | 0.011362 | 0.011396 | 0.011295 |
| 0.011329 | 0.011295 | 0.011631 | 0.011631 | 0.011363 | 0.011397 | 0.011430 |
| 0.011195 | 0.011195 | 0.011228 | 0.011329 | 0.011195 | 0.011430 | 0.011430 |
| 0.011463 | 0.011463 | 0.011396 | 0.011497 | 0.011631 | 0.011498 | 0.011329 |
| 0.011329 | 0.011396 | 0.011430 | 0.011262 | 0.011329 | 0.011295 | 0.011329 |
| 0.011396 | 0.011396 | 0.011430 | 0.011396 | 0.011296 | 0.011497 | 0.011463 |
| 0.011331 | 0.011228 | 0.011329 | 0.011430 | 0.011329 | 0.011463 | 0.011497 |
| 0.011665 | 0.011368 | 0.011530 | 0.011497 | 0.011429 | 0.011597 | 0.011228 |
| 0.011397 | 0.011296 | 0.011262 | 0.011262 | 0.011329 | 0.011228 | 0.011329 |
| 0.011362 | 0.011396 | 0.011295 | 0.011329 | 0.011295 | 0.011631 | 0.011631 |
| 0.011363 | 0.011397 | 0.011463 | 0.011396 | 0.012036 | 0.011453 | 0.011342 |
| 0.011447 | 0.011407 | 0.011517 | 0.011372 | 0.011515 | 0.011440 | 0.011405 |
| 0.011953 | 0.011303 | 0.011437 | 0.011372 | 0.011646 | 0.011502 | 0.011605 |
| 0.012012 | 0.011399 | 0.011567 | 0.011631 | 0.011497 | 0.011497 | 0.011533 |
| 0.011195 | 0.011362 | 0.011497 | 0.011463 | 0.011466 | 0.011463 | 0.011431 |
| 0.011295 | 0.011228 | 0.011262 | 0.011295 | 0.011195 | 0.011262 | 0.011161 |
| 0.011295 | 0.011329 | 0.011228 | 0.011195 | 0.011295 | 0.011228 | 0.011262 |
| 0.011262 | 0.011195 | 0.011262 | 0.011295 | 0.011195 | 0.011396 | 0.011429 |
| 0.011329 | 0.011396 | 0.011329 | 0.011329 | 0.011262 | 0.011665 | 0.011295 |
| 0.011269 | 0.011262 | 0.011497 | 0.011501 | 0.011362 | 0.011362 | 0.011362 |
| 0.011362 | 0.011295 | 0.011262 | 0.011295 | 0.011396 | 0.011396 | 0.011329 |
| 0.011329 | 0.011463 | 0.011631 | 0.011362 | 0.011564 | 0.011564 | 0.011429 |
| 0.011262 | 0.011329 | 0.011362 | 0.011766 | 0.011329 | 0.011362 | 0.011329 |
| 0.011362 | 0.011295 | 0.011295 | 0.011598 | 0.011530 | 0.011564 | 0.011295 |
| 0.011396 | 0.011463 | 0.011329 | 0.011396 | 0.011362 | 0.011228 | 0.011564 |
| 0.011329 | 0.011295 | 0.011295 | 0.011463 | 0.011295 | 0.011396 | 0.011631 |
| 0.011329 | 0.011705 | 0.011698 | 0.011507 | 0.011229 | 0.011400 | 0.011267 |
| 0.011225 | 0.011722 | 0.011236 | 0.011418 | 0.011304 | 0.011366 | 0.011379 |
| 0.011468 | 0.011192 | 0.011283 | 0.011126 | 0.011222 | 0.011328 | 0.011385 |
| 0.011399 | 0.011296 | 0.011377 | 0.011307 | 0.011330 | 0.011463 | 0.011530 |
| 0.011530 | 0.011397 | 0.011500 | 0.011501 | 0.011637 | 0.011661 | 0.011329 |
| 0.011564 | 0.011430 | 0.011295 | 0.011396 | 0.011195 | 0.011430 | 0.011228 |
| 0.011295 | 0.011295 | 0.011262 | 0.011228 | 0.011262 | 0.011228 | 0.011329 |
| 0.011305 | 0.011305 | 0.011300 | 0.011334 | 0.011471 | 0.011436 | 0.011436 |
| 0.011435 | 0.011363 | 0.011171 | 0.011168 | 0.011297 | 0.011467 | 0.011467 |
| 0.011262 | 0.011331 | 0.011565 | 0.011534 | 0.011464 | 0.011498 | 0.011429 |
| 0.011362 | 0.011429 | 0.011429 | 0.011329 | 0.011900 | 0.011497 | 0.011564 |
| 0.011598 | 0.011666 | 0.011299 | 0.011372 | 0.011262 | 0.011463 | 0.011430 |
| 0.011464 | 0.011497 | 0.011497 | 0.011497 | 0.011611 | 0.011631 | 0.011234 |
| 0.011162 | 0.011130 | 0.011265 | 0.011230 | 0.011334 | 0.011135 | 0.011502 |



|          |          |          |          |          |          |          |
|----------|----------|----------|----------|----------|----------|----------|
| 0.011300 | 0.011367 | 0.011108 | 0.011248 | 0.011296 | 0.011368 | 0.011262 |
| 0.011228 | 0.011228 | 0.011295 | 0.011262 | 0.011463 | 0.011430 | 0.011362 |
| 0.011463 | 0.011530 | 0.011262 | 0.011262 | 0.011295 | 0.011295 | 0.011297 |
| 0.011365 | 0.011295 | 0.011295 | 0.011330 | 0.011463 | 0.011530 | 0.011530 |
| 0.011397 | 0.011500 | 0.011501 | 0.011637 | 0.011661 | 0.011329 | 0.011497 |
| 0.011430 | 0.011430 | 0.011263 | 0.011408 | 0.011373 | 0.011401 | 0.011271 |
| 0.011439 | 0.011653 | 0.011441 | 0.011332 | 0.011228 | 0.011430 | 0.011295 |
| 0.011396 | 0.011329 | 0.011228 | 0.011330 | 0.011430 | 0.011432 | 0.011329 |
| 0.011228 | 0.011161 | 0.011295 | 0.011228 | 0.011161 | 0.011264 | 0.011430 |
| 0.011329 | 0.011262 | 0.011295 | 0.011329 | 0.011295 | 0.011228 | 0.011430 |
| 0.011295 | 0.011329 | 0.011329 | 0.011262 | 0.011329 | 0.011564 | 0.011228 |
| 0.011262 | 0.011665 | 0.011262 | 0.011295 | 0.011262 | 0.011631 | 0.011189 |
| 0.011678 | 0.011230 | 0.011261 | 0.011463 | 0.011549 | 0.011455 | 0.011186 |
| 0.011218 | 0.011429 | 0.011530 | 0.011638 | 0.011498 | 0.011636 | 0.011767 |
| 0.011666 | 0.011703 | 0.011665 | 0.011915 | 0.011631 | 0.012506 | 0.011667 |
| 0.012406 | 0.012174 | 0.012308 | 0.012579 | 0.011631 | 0.011329 | 0.011631 |
| 0.012070 | 0.012005 | 0.011597 | 0.011497 | 0.011565 | 0.011565 | 0.011500 |
| 0.011429 | 0.011433 | 0.011497 | 0.011464 | 0.011834 | 0.011900 | 0.011901 |
| 0.011800 | 0.011901 | 0.012005 | 0.011771 | 0.012071 | 0.012076 | 0.012138 |
| 0.012138 | 0.012172 | 0.012118 | 0.012138 | 0.012140 | 0.011362 | 0.011665 |
| 0.011733 | 0.012236 | 0.011738 | 0.011967 | 0.012441 | 0.011502 | 0.011396 |
| 0.011362 | 0.011362 | 0.011833 | 0.011801 | 0.011975 | 0.011698 | 0.011364 |
| S371     | 0.011698 | 0.011698 | 0.011967 | 0.011799 | 0.011799 | 0.011866 |
| 0.011671 | 0.011603 | 0.011866 | 0.011295 | 0.011362 | 0.011329 | 0.011295 |
| 0.011329 | 0.011496 | 0.011295 | 0.011329 | 0.011396 | 0.011362 | 0.011329 |
| 0.011295 | 0.011329 | 0.011429 | 0.011295 | 0.011329 | 0.011329 | 0.011637 |
| 0.011564 | 0.011329 | 0.011228 | 0.011463 | 0.011396 | 0.011362 | 0.011396 |
| 0.011362 | 0.011463 | 0.011362 | 0.011362 | 0.011396 | 0.011362 | 0.011530 |
| 0.011295 | 0.011362 | 0.011396 | 0.011329 | 0.011429 | 0.011463 | 0.011396 |
| 0.011362 | 0.011530 | 0.011430 | 0.011698 | 0.011362 | 0.011631 | 0.011362 |
| 0.011329 | 0.011429 | 0.011497 | 0.011631 | 0.011732 | 0.011429 | 0.011530 |
| 0.011396 | 0.011463 | 0.011295 | 0.011597 | 0.011832 | 0.011362 | 0.011429 |
| 0.011329 | 0.011429 | 0.011329 | 0.011463 | 0.011262 | 0.011396 | 0.011396 |
| 0.011295 | 0.011329 | 0.011295 | 0.011396 | 0.011362 | 0.011397 | 0.011463 |
| 0.011396 | 0.011362 | 0.011429 | 0.011262 | 0.011463 | 0.011295 | 0.011362 |
| 0.011530 | 0.011463 | 0.011698 | 0.011530 | 0.011362 | 0.011597 | 0.011362 |
| 0.011505 | 0.011733 | 0.011551 | 0.011256 | 0.011247 | 0.011391 | 0.011454 |
| 0.012121 | 0.011467 | 0.011266 | 0.011597 | 0.011597 | 0.011396 | 0.011497 |
| 0.011429 | 0.011396 | 0.011463 | 0.011362 | 0.011463 | 0.011396 | 0.011396 |
| 0.011362 | 0.011329 | 0.011664 | 0.011530 | 0.011429 | 0.011396 | 0.011329 |
| 0.011295 | 0.011295 | 0.011362 | 0.011329 | 0.011530 | 0.011497 | 0.011429 |
| 0.011530 | 0.011597 | 0.011329 | 0.011329 | 0.011362 | 0.011362 | 0.011364 |
| 0.011432 | 0.011362 | 0.011362 | 0.011240 | 0.011277 | 0.011236 | 0.011363 |
| 0.011365 | 0.011301 | 0.011355 | 0.011336 | 0.011264 | 0.011300 | 0.011330 |
| 0.011600 | 0.011370 | 0.011405 | 0.011296 | 0.011302 | 0.011430 | 0.011396 |
| 0.011464 | 0.011397 | 0.011396 | 0.011496 | 0.011429 | 0.011799 | 0.011598 |
| 0.011631 | 0.011497 | 0.011362 | 0.011463 | 0.011262 | 0.011496 | 0.011295 |
| 0.011362 | 0.011362 | 0.011329 | 0.011295 | 0.011329 | 0.011295 | 0.011396 |
| 0.011362 | 0.011463 | 0.011396 | 0.011295 | 0.011397 | 0.011497 | 0.011466 |
| 0.011497 | 0.011396 | 0.011295 | 0.011195 | 0.011362 | 0.011295 | 0.011228 |
| 0.011298 | 0.011497 | 0.011295 | 0.011497 | 0.011262 | 0.011362 | 0.011329 |
| 0.011430 | 0.011329 | 0.011362 | 0.011329 | 0.011362 | 0.011228 | 0.011362 |
| 0.011396 | 0.011329 | 0.011396 | 0.011329 | 0.011362 | 0.011396 | 0.011631 |
| 0.011732 | 0.011664 | 0.011732 | 0.011498 | 0.011732 | 0.011362 | 0.011329 |
| 0.011364 | 0.011667 | 0.011426 | 0.011266 | 0.011739 | 0.011231 | 0.011375 |
| 0.011705 | 0.011638 | 0.011530 | 0.011732 | 0.011436 | 0.011597 | 0.011564 |
| 0.011496 | 0.011664 | 0.011486 | 0.011349 | 0.011395 | 0.011396 | 0.011432 |
| 0.011564 | 0.011465 | 0.011601 | 0.011669 | 0.011597 | 0.011665 | 0.011772 |
| 0.011500 | 0.011671 | 0.011602 | 0.011534 | 0.011800 | 0.011262 | 0.011465 |
| 0.011429 | 0.011362 | 0.011262 | 0.011262 | 0.011329 | 0.011329 | 0.011396 |

|          |          |          |          |          |          |          |
|----------|----------|----------|----------|----------|----------|----------|
| 0.011329 | 0.011396 | 0.011295 | 0.011396 | 0.011329 | 0.011329 | 0.011396 |
| 0.011329 | 0.011765 | 0.011664 | 0.011698 | 0.011228 | 0.011329 | 0.011362 |
| 0.011362 | 0.011329 | 0.011396 | 0.011429 | 0.011295 | 0.011295 | 0.011295 |
| 0.011832 | 0.011463 | 0.011463 | 0.011262 | 0.011362 | 0.011530 | 0.011295 |
| 0.011295 | 0.011362 | 0.011329 | 0.011497 | 0.011295 | 0.011429 | 0.011564 |
| 0.011496 | 0.011329 | 0.011329 | 0.011262 | 0.011262 | 0.011429 | 0.011362 |
| 0.011262 | 0.011362 | 0.011228 | 0.011262 | 0.011396 | 0.011530 | 0.011295 |
| 0.011262 | 0.011396 | 0.011329 | 0.011228 | 0.011564 | 0.011228 | 0.011396 |
| 0.011471 | 0.011295 | 0.011597 | 0.011430 | 0.011463 | 0.011329 | 0.011429 |
| 0.011295 | 0.011631 | 0.011228 | 0.011497 | 0.011295 | 0.011295 | 0.011228 |
| 0.011463 | 0.011665 | 0.011295 | 0.011429 | 0.011262 | 0.011664 | 0.011295 |
| 0.011295 | 0.011295 | 0.011329 | 0.011429 | 0.011329 | 0.011429 | 0.011496 |
| 0.011497 | 0.011463 | 0.011362 | 0.011463 | 0.011429 | 0.011295 | 0.011262 |
| 0.011295 | 0.011295 | 0.011295 | 0.011295 | 0.011262 | 0.011429 | 0.011295 |
| 0.011329 | 0.011329 | 0.011463 | 0.011496 | 0.011396 | 0.011329 | 0.011329 |
| 0.000000 | 0.011329 | 0.011429 | 0.011295 | 0.011429 | 0.011530 | 0.011832 |
| 0.011329 | 0.011732 | 0.011336 | 0.017861 | 0.011257 | 0.011427 | 0.011688 |
| 0.011648 | 0.011693 | 0.011322 | 0.011292 | 0.011774 | 0.011716 | 0.011425 |
| 0.011487 | 0.011610 | 0.011216 | 0.011311 | 0.011333 | 0.011357 | 0.011275 |
| 0.011482 | 0.011507 | 0.011505 | 0.011325 | 0.011463 | 0.011497 | 0.011500 |
| 0.011335 | 0.011463 | 0.011463 | 0.011429 | 0.011396 | 0.011396 | 0.011363 |
| 0.011396 | 0.011329 | 0.011362 | 0.011396 | 0.011362 | 0.011295 | 0.011329 |
| 0.011329 | 0.011396 | 0.011295 | 0.011396 | 0.011430 | 0.011463 | 0.011362 |
| 0.011396 | 0.011362 | 0.011698 | 0.011698 | 0.011430 | 0.011464 | 0.011497 |
| 0.011262 | 0.011262 | 0.011295 | 0.011396 | 0.011262 | 0.011497 | 0.011497 |
| 0.011530 | 0.011530 | 0.011463 | 0.011564 | 0.011732 | 0.011565 | 0.011396 |
| 0.011396 | 0.011463 | 0.011429 | 0.011329 | 0.011396 | 0.011362 | 0.011396 |
| 0.011463 | 0.011463 | 0.011497 | 0.011463 | 0.011363 | 0.011564 | 0.011530 |
| 0.011399 | 0.011295 | 0.011396 | 0.011497 | 0.011396 | 0.011530 | 0.011564 |
| 0.011732 | 0.011436 | 0.011597 | 0.011564 | 0.011496 | 0.011664 | 0.011295 |
| 0.011464 | 0.011363 | 0.011329 | 0.011329 | 0.011396 | 0.011295 | 0.011396 |
| 0.011430 | 0.011463 | 0.011362 | 0.011396 | 0.011362 | 0.011698 | 0.011698 |
| 0.011430 | 0.011464 | 0.011530 | 0.011463 | 0.012103 | 0.011524 | 0.011412 |
| 0.011517 | 0.011476 | 0.011552 | 0.011476 | 0.011585 | 0.011508 | 0.011474 |
| 0.012056 | 0.011372 | 0.011505 | 0.011441 | 0.011714 | 0.011570 | 0.011673 |
| 0.012080 | 0.011512 | 0.011635 | 0.011698 | 0.011564 | 0.011564 | 0.011601 |
| 0.011262 | 0.011429 | 0.011564 | 0.011530 | 0.011533 | 0.011530 | 0.011498 |
| 0.011362 | 0.011295 | 0.011329 | 0.011362 | 0.011262 | 0.011329 | 0.011228 |
| 0.011362 | 0.011396 | 0.011295 | 0.011262 | 0.011362 | 0.011295 | 0.011329 |
| 0.011329 | 0.011262 | 0.011329 | 0.011362 | 0.011262 | 0.011463 | 0.011496 |
| 0.011396 | 0.011463 | 0.011396 | 0.011396 | 0.011329 | 0.011732 | 0.011362 |
| 0.011373 | 0.011329 | 0.011564 | 0.011569 | 0.011429 | 0.011429 | 0.011429 |
| 0.011429 | 0.011362 | 0.011329 | 0.011362 | 0.011463 | 0.011463 | 0.011396 |
| 0.011396 | 0.011463 | 0.011698 | 0.011429 | 0.011631 | 0.011631 | 0.011496 |
| 0.011329 | 0.011396 | 0.011429 | 0.011832 | 0.011396 | 0.011430 | 0.011396 |
| 0.011429 | 0.011362 | 0.011362 | 0.011665 | 0.011597 | 0.011631 | 0.011362 |
| 0.011463 | 0.011530 | 0.011396 | 0.011463 | 0.011429 | 0.011295 | 0.011631 |
| 0.011396 | 0.011362 | 0.011362 | 0.011530 | 0.011362 | 0.011463 | 0.011698 |
| 0.011396 | 0.011739 | 0.011765 | 0.011507 | 0.011229 | 0.011468 | 0.011215 |
| 0.011225 | 0.011761 | 0.011306 | 0.011507 | 0.011304 | 0.011417 | 0.011432 |
| 0.011468 | 0.011258 | 0.011283 | 0.011126 | 0.011276 | 0.011261 | 0.011425 |
| 0.011437 | 0.011336 | 0.011448 | 0.011377 | 0.011397 | 0.011530 | 0.011597 |
| 0.011597 | 0.011464 | 0.011567 | 0.011569 | 0.011704 | 0.011732 | 0.011396 |
| 0.011631 | 0.011497 | 0.011362 | 0.011463 | 0.011262 | 0.011496 | 0.011295 |
| 0.011362 | 0.011362 | 0.011329 | 0.011295 | 0.011329 | 0.011295 | 0.011396 |
| 0.011375 | 0.011375 | 0.011368 | 0.011266 | 0.011539 | 0.011504 | 0.011504 |
| 0.011503 | 0.011296 | 0.011208 | 0.011204 | 0.011365 | 0.011535 | 0.011535 |
| 0.011329 | 0.011399 | 0.011632 | 0.011601 | 0.011531 | 0.011565 | 0.011496 |
| 0.011429 | 0.011496 | 0.011496 | 0.011396 | 0.011967 | 0.011564 | 0.011631 |
| 0.011665 | 0.011737 | 0.011367 | 0.011441 | 0.011329 | 0.011530 | 0.011497 |

|          |          |          |          |          |          |          |
|----------|----------|----------|----------|----------|----------|----------|
| 0.011397 | 0.011564 | 0.011564 | 0.011564 | 0.011728 | 0.011698 | 0.011303 |
| 0.011195 | 0.011199 | 0.011333 | 0.011298 | 0.011402 | 0.011209 | 0.011570 |
| 0.011369 | 0.011499 | 0.011251 | 0.011322 | 0.011363 | 0.011437 | 0.011329 |
| 0.011295 | 0.011295 | 0.011362 | 0.011329 | 0.011530 | 0.011497 | 0.011429 |
| 0.011530 | 0.011597 | 0.011329 | 0.011329 | 0.011362 | 0.011362 | 0.011364 |
| 0.011432 | 0.011362 | 0.011362 | 0.011397 | 0.011530 | 0.011597 | 0.011597 |
| 0.011464 | 0.011567 | 0.011569 | 0.011704 | 0.011732 | 0.011396 | 0.011564 |
| 0.011497 | 0.011497 | 0.011331 | 0.011513 | 0.011442 | 0.011333 | 0.011340 |
| 0.011508 | 0.011698 | 0.011483 | 0.011400 | 0.011295 | 0.011497 | 0.011362 |
| 0.011463 | 0.011396 | 0.011295 | 0.011397 | 0.011497 | 0.011466 | 0.011396 |
| 0.011295 | 0.011195 | 0.011362 | 0.011295 | 0.011228 | 0.011298 | 0.011497 |
| 0.011396 | 0.011329 | 0.011362 | 0.011396 | 0.011362 | 0.011295 | 0.011497 |
| 0.011362 | 0.011396 | 0.011396 | 0.011329 | 0.011396 | 0.011631 | 0.011295 |
| 0.011329 | 0.011732 | 0.011329 | 0.011362 | 0.011329 | 0.011698 | 0.011189 |
| 0.011679 | 0.011230 | 0.011261 | 0.011543 | 0.011549 | 0.011527 | 0.011186 |
| 0.011218 | 0.011496 | 0.011597 | 0.011705 | 0.011565 | 0.011703 | 0.011834 |
| 0.011733 | 0.011770 | 0.011732 | 0.011983 | 0.011698 | 0.012573 | 0.011666 |
| 0.012473 | 0.012241 | 0.012375 | 0.012646 | 0.011698 | 0.011396 | 0.011699 |
| 0.012137 | 0.012072 | 0.011664 | 0.011564 | 0.011632 | 0.011632 | 0.011601 |
| 0.011496 | 0.011501 | 0.011564 | 0.011531 | 0.011901 | 0.011967 | 0.011968 |
| 0.011868 | 0.011968 | 0.012072 | 0.011838 | 0.012138 | 0.012144 | 0.012205 |
| 0.012205 | 0.012239 | 0.012186 | 0.012206 | 0.012207 | 0.011429 | 0.011732 |
| 0.011800 | 0.012303 | 0.011806 | 0.012034 | 0.012508 | 0.011570 | 0.011464 |
| 0.011429 | 0.011429 | 0.011900 | 0.011924 | 0.012045 | 0.011765 | 0.011431 |
| S372     | 0.011631 | 0.011631 | 0.011967 | 0.011732 | 0.011732 | 0.011799 |
| 0.011637 | 0.011569 | 0.011799 | 0.011228 | 0.011295 | 0.011262 | 0.011228 |
| 0.011262 | 0.011429 | 0.011228 | 0.011262 | 0.011329 | 0.011295 | 0.011262 |
| 0.011228 | 0.011262 | 0.011362 | 0.011228 | 0.011262 | 0.011262 | 0.011603 |
| 0.011496 | 0.011262 | 0.011161 | 0.011396 | 0.011329 | 0.011295 | 0.011329 |
| 0.011295 | 0.011396 | 0.011295 | 0.011295 | 0.011329 | 0.011295 | 0.011463 |
| 0.011228 | 0.011295 | 0.011329 | 0.011262 | 0.011362 | 0.011396 | 0.011329 |
| 0.011295 | 0.011463 | 0.011362 | 0.011631 | 0.011295 | 0.011564 | 0.011295 |
| 0.011262 | 0.011362 | 0.011429 | 0.011564 | 0.011664 | 0.011362 | 0.011463 |
| 0.011329 | 0.011396 | 0.011295 | 0.011530 | 0.011765 | 0.011295 | 0.011362 |
| 0.011262 | 0.011362 | 0.011329 | 0.011396 | 0.011329 | 0.011329 | 0.011329 |
| 0.011228 | 0.011262 | 0.011228 | 0.011329 | 0.011295 | 0.011329 | 0.011396 |
| 0.011329 | 0.011295 | 0.011362 | 0.011262 | 0.011396 | 0.011228 | 0.011295 |
| 0.011463 | 0.011396 | 0.011631 | 0.011463 | 0.011295 | 0.011530 | 0.011295 |
| 0.011468 | 0.011695 | 0.011475 | 0.011177 | 0.011172 | 0.011318 | 0.011375 |
| 0.012011 | 0.011467 | 0.011184 | 0.011530 | 0.011530 | 0.011329 | 0.011429 |
| 0.011362 | 0.011329 | 0.011396 | 0.011295 | 0.011396 | 0.011329 | 0.011329 |
| 0.011295 | 0.011396 | 0.011597 | 0.011463 | 0.011362 | 0.011329 | 0.011262 |
| 0.011228 | 0.011228 | 0.011295 | 0.011262 | 0.011463 | 0.011430 | 0.011362 |
| 0.011463 | 0.011530 | 0.011262 | 0.011262 | 0.011295 | 0.011295 | 0.011297 |
| 0.011364 | 0.011295 | 0.011295 | 0.011096 | 0.011169 | 0.011130 | 0.011296 |
| 0.011263 | 0.011198 | 0.011245 | 0.011233 | 0.011162 | 0.011163 | 0.011229 |
| 0.011456 | 0.011233 | 0.011267 | 0.011228 | 0.011199 | 0.011363 | 0.011329 |
| 0.011396 | 0.011330 | 0.011329 | 0.011429 | 0.011362 | 0.011731 | 0.011530 |
| 0.011564 | 0.011429 | 0.011295 | 0.011396 | 0.011195 | 0.011429 | 0.011228 |
| 0.011295 | 0.011295 | 0.011262 | 0.011228 | 0.011262 | 0.011228 | 0.011329 |
| 0.011295 | 0.011396 | 0.011329 | 0.011228 | 0.011330 | 0.011430 | 0.011432 |
| 0.011430 | 0.011329 | 0.011228 | 0.011161 | 0.011295 | 0.011228 | 0.011161 |
| 0.011264 | 0.011430 | 0.011228 | 0.011430 | 0.011195 | 0.011295 | 0.011262 |
| 0.011362 | 0.011262 | 0.011295 | 0.011262 | 0.011295 | 0.011161 | 0.011295 |
| 0.011329 | 0.011262 | 0.011329 | 0.011262 | 0.011295 | 0.011329 | 0.011564 |
| 0.011664 | 0.011597 | 0.011665 | 0.011431 | 0.011665 | 0.011295 | 0.011262 |
| 0.011297 | 0.011586 | 0.011426 | 0.011197 | 0.011671 | 0.011163 | 0.011257 |
| 0.011671 | 0.011570 | 0.011463 | 0.011664 | 0.011368 | 0.011530 | 0.011497 |
| 0.011429 | 0.011597 | 0.011451 | 0.011266 | 0.011312 | 0.011329 | 0.011398 |
| 0.011497 | 0.011397 | 0.011533 | 0.011601 | 0.011530 | 0.011597 | 0.011704 |

|          |          |          |          |          |          |          |
|----------|----------|----------|----------|----------|----------|----------|
| 0.011432 | 0.011603 | 0.011534 | 0.011466 | 0.011733 | 0.011194 | 0.011397 |
| 0.011362 | 0.011295 | 0.011194 | 0.011194 | 0.011262 | 0.011262 | 0.011329 |
| 0.011262 | 0.011329 | 0.011228 | 0.011329 | 0.011262 | 0.011262 | 0.011329 |
| 0.011262 | 0.011698 | 0.011597 | 0.011631 | 0.011161 | 0.011262 | 0.011295 |
| 0.011295 | 0.011262 | 0.011329 | 0.011362 | 0.011228 | 0.011228 | 0.011228 |
| 0.011765 | 0.011396 | 0.011396 | 0.011194 | 0.011295 | 0.011463 | 0.011228 |
| 0.011228 | 0.011295 | 0.011262 | 0.011429 | 0.011228 | 0.011362 | 0.011496 |
| 0.011429 | 0.011262 | 0.011262 | 0.011195 | 0.011194 | 0.011362 | 0.011295 |
| 0.011195 | 0.011295 | 0.011161 | 0.011195 | 0.011329 | 0.011463 | 0.011228 |
| 0.011195 | 0.011329 | 0.011262 | 0.011161 | 0.011496 | 0.011161 | 0.011329 |
| 0.011402 | 0.011228 | 0.011530 | 0.011362 | 0.011396 | 0.011262 | 0.011362 |
| 0.011228 | 0.011564 | 0.011161 | 0.011429 | 0.011228 | 0.011228 | 0.011161 |
| 0.011396 | 0.011598 | 0.011295 | 0.011362 | 0.011194 | 0.011597 | 0.011228 |
| 0.011228 | 0.011228 | 0.011262 | 0.011362 | 0.011262 | 0.011362 | 0.011429 |
| 0.011429 | 0.011396 | 0.011295 | 0.011396 | 0.011362 | 0.011228 | 0.011194 |
| 0.011228 | 0.011228 | 0.011295 | 0.011228 | 0.011194 | 0.011362 | 0.011228 |
| 0.011262 | 0.011262 | 0.011396 | 0.011429 | 0.011329 | 0.011262 | 0.011262 |
| 0.011329 | 0.000000 | 0.011362 | 0.011228 | 0.011362 | 0.011463 | 0.011765 |
| 0.011262 | 0.011664 | 0.011267 | 0.017785 | 0.011257 | 0.011305 | 0.011618 |
| 0.011579 | 0.011623 | 0.011322 | 0.011292 | 0.011719 | 0.011647 | 0.011303 |
| 0.011487 | 0.011426 | 0.011138 | 0.011228 | 0.011216 | 0.011307 | 0.011189 |
| 0.011482 | 0.011395 | 0.011394 | 0.011259 | 0.011396 | 0.011429 | 0.011432 |
| 0.011301 | 0.011396 | 0.011396 | 0.011362 | 0.011329 | 0.011329 | 0.011295 |
| 0.011329 | 0.011262 | 0.011295 | 0.011329 | 0.011295 | 0.011228 | 0.011262 |
| 0.011262 | 0.011329 | 0.011228 | 0.011329 | 0.011362 | 0.011396 | 0.011295 |
| 0.011329 | 0.011295 | 0.011631 | 0.011631 | 0.011362 | 0.011396 | 0.011430 |
| 0.011195 | 0.011195 | 0.011228 | 0.011329 | 0.011195 | 0.011429 | 0.011429 |
| 0.011463 | 0.011463 | 0.011396 | 0.011496 | 0.011665 | 0.011498 | 0.011329 |
| 0.011329 | 0.011396 | 0.011429 | 0.011262 | 0.011329 | 0.011295 | 0.011329 |
| 0.011396 | 0.011396 | 0.011429 | 0.011396 | 0.011296 | 0.011497 | 0.011463 |
| 0.011331 | 0.011228 | 0.011329 | 0.011430 | 0.011329 | 0.011463 | 0.011496 |
| 0.011664 | 0.011368 | 0.011530 | 0.011497 | 0.011429 | 0.011597 | 0.011228 |
| 0.011397 | 0.011296 | 0.011262 | 0.011262 | 0.011329 | 0.011228 | 0.011329 |
| 0.011362 | 0.011396 | 0.011295 | 0.011329 | 0.011295 | 0.011631 | 0.011631 |
| 0.011362 | 0.011396 | 0.011463 | 0.011396 | 0.012035 | 0.011453 | 0.011377 |
| 0.011447 | 0.011407 | 0.011517 | 0.011406 | 0.011515 | 0.011439 | 0.011370 |
| 0.011987 | 0.011302 | 0.011437 | 0.011371 | 0.011645 | 0.011502 | 0.011604 |
| 0.012012 | 0.011475 | 0.011567 | 0.011631 | 0.011496 | 0.011497 | 0.011533 |
| 0.011194 | 0.011362 | 0.011496 | 0.011463 | 0.011466 | 0.011463 | 0.011431 |
| 0.011295 | 0.011228 | 0.011262 | 0.011295 | 0.011194 | 0.011262 | 0.011161 |
| 0.011295 | 0.011329 | 0.011228 | 0.011194 | 0.011295 | 0.011228 | 0.011262 |
| 0.011262 | 0.011194 | 0.011262 | 0.011295 | 0.011194 | 0.011396 | 0.011429 |
| 0.011329 | 0.011396 | 0.011329 | 0.011329 | 0.011262 | 0.011664 | 0.011295 |
| 0.011338 | 0.011262 | 0.011497 | 0.011501 | 0.011362 | 0.011362 | 0.011362 |
| 0.011362 | 0.011295 | 0.011262 | 0.011295 | 0.011396 | 0.011396 | 0.011329 |
| 0.011329 | 0.011463 | 0.011631 | 0.011362 | 0.011564 | 0.011564 | 0.011429 |
| 0.011262 | 0.011329 | 0.011362 | 0.011765 | 0.011329 | 0.011362 | 0.011329 |
| 0.011362 | 0.011295 | 0.011295 | 0.011597 | 0.011530 | 0.011564 | 0.011295 |
| 0.011396 | 0.011463 | 0.011329 | 0.011396 | 0.011362 | 0.011228 | 0.011564 |
| 0.011329 | 0.011295 | 0.011295 | 0.011463 | 0.011295 | 0.011396 | 0.011631 |
| 0.011329 | 0.011705 | 0.011698 | 0.011467 | 0.011173 | 0.011400 | 0.011267 |
| 0.011115 | 0.011683 | 0.011236 | 0.011417 | 0.011255 | 0.011366 | 0.011379 |
| 0.011468 | 0.011192 | 0.011339 | 0.011192 | 0.011222 | 0.011395 | 0.011385 |
| 0.011399 | 0.011296 | 0.011377 | 0.011307 | 0.011330 | 0.011463 | 0.011530 |
| 0.011530 | 0.011396 | 0.011500 | 0.011501 | 0.011636 | 0.011661 | 0.011329 |
| 0.011564 | 0.011429 | 0.011295 | 0.011396 | 0.011195 | 0.011429 | 0.011228 |
| 0.011295 | 0.011295 | 0.011262 | 0.011228 | 0.011262 | 0.011228 | 0.011329 |
| 0.011235 | 0.011235 | 0.011266 | 0.011266 | 0.011402 | 0.011368 | 0.011367 |
| 0.011367 | 0.011363 | 0.011097 | 0.011096 | 0.011263 | 0.011433 | 0.011433 |
| 0.011262 | 0.011297 | 0.011565 | 0.011533 | 0.011464 | 0.011498 | 0.011429 |

|          |          |          |          |          |          |          |
|----------|----------|----------|----------|----------|----------|----------|
| 0.011362 | 0.011429 | 0.011429 | 0.011329 | 0.011900 | 0.011496 | 0.011564 |
| 0.011597 | 0.011665 | 0.011299 | 0.011372 | 0.011262 | 0.011463 | 0.011429 |
| 0.011464 | 0.011496 | 0.011496 | 0.011496 | 0.011610 | 0.011631 | 0.011268 |
| 0.011162 | 0.011164 | 0.011264 | 0.011230 | 0.011333 | 0.011172 | 0.011502 |
| 0.011300 | 0.011411 | 0.011156 | 0.011285 | 0.011296 | 0.011300 | 0.011262 |
| 0.011228 | 0.011228 | 0.011295 | 0.011262 | 0.011463 | 0.011430 | 0.011362 |
| 0.011463 | 0.011530 | 0.011262 | 0.011262 | 0.011295 | 0.011295 | 0.011297 |
| 0.011364 | 0.011295 | 0.011295 | 0.011330 | 0.011463 | 0.011530 | 0.011530 |
| 0.011396 | 0.011500 | 0.011501 | 0.011636 | 0.011661 | 0.011329 | 0.011496 |
| 0.011429 | 0.011429 | 0.011263 | 0.011443 | 0.011338 | 0.011401 | 0.011270 |
| 0.011439 | 0.011653 | 0.011399 | 0.011332 | 0.011228 | 0.011430 | 0.011295 |
| 0.011396 | 0.011329 | 0.011228 | 0.011330 | 0.011430 | 0.011432 | 0.011329 |
| 0.011228 | 0.011161 | 0.011295 | 0.011228 | 0.011161 | 0.011264 | 0.011430 |
| 0.011329 | 0.011262 | 0.011295 | 0.011329 | 0.011295 | 0.011228 | 0.011430 |
| 0.011295 | 0.011329 | 0.011329 | 0.011262 | 0.011329 | 0.011564 | 0.011228 |
| 0.011262 | 0.011664 | 0.011262 | 0.011295 | 0.011262 | 0.011631 | 0.011189 |
| 0.011622 | 0.011145 | 0.011261 | 0.011382 | 0.011508 | 0.011455 | 0.011144 |
| 0.011218 | 0.011429 | 0.011530 | 0.011637 | 0.011498 | 0.011635 | 0.011766 |
| 0.011666 | 0.011703 | 0.011664 | 0.011914 | 0.011631 | 0.012505 | 0.011666 |
| 0.012405 | 0.012173 | 0.012307 | 0.012578 | 0.011631 | 0.011329 | 0.011631 |
| 0.012070 | 0.012004 | 0.011597 | 0.011497 | 0.011565 | 0.011565 | 0.011534 |
| 0.011429 | 0.011433 | 0.011496 | 0.011464 | 0.011833 | 0.011900 | 0.011901 |
| 0.011800 | 0.011901 | 0.012004 | 0.011770 | 0.012070 | 0.012076 | 0.012137 |
| 0.012138 | 0.012171 | 0.012118 | 0.012138 | 0.012139 | 0.011362 | 0.011665 |
| 0.011733 | 0.012236 | 0.011738 | 0.011967 | 0.012440 | 0.011502 | 0.011396 |
| 0.011362 | 0.011362 | 0.011833 | 0.011801 | 0.011940 | 0.011698 | 0.011363 |
| S373     | 0.011732 | 0.011732 | 0.012068 | 0.011832 | 0.011832 | 0.011900 |
| 0.011705 | 0.011637 | 0.011899 | 0.011329 | 0.011396 | 0.011363 | 0.011329 |
| 0.011362 | 0.011530 | 0.011329 | 0.011362 | 0.011429 | 0.011396 | 0.011362 |
| 0.011329 | 0.011362 | 0.011463 | 0.011329 | 0.011363 | 0.011362 | 0.011671 |
| 0.011597 | 0.011362 | 0.011262 | 0.011496 | 0.011429 | 0.011396 | 0.011429 |
| 0.011396 | 0.011496 | 0.011396 | 0.011396 | 0.011429 | 0.011396 | 0.011564 |
| 0.011329 | 0.011396 | 0.011429 | 0.011362 | 0.011463 | 0.011496 | 0.011429 |
| 0.011396 | 0.011564 | 0.011463 | 0.011731 | 0.011396 | 0.011664 | 0.011396 |
| 0.011362 | 0.011463 | 0.011530 | 0.011664 | 0.011765 | 0.011463 | 0.011564 |
| 0.011429 | 0.011496 | 0.011396 | 0.011631 | 0.011866 | 0.011329 | 0.011463 |
| 0.011362 | 0.011463 | 0.011429 | 0.011496 | 0.011429 | 0.011429 | 0.011429 |
| 0.011329 | 0.011362 | 0.011329 | 0.011429 | 0.011396 | 0.011430 | 0.011496 |
| 0.011429 | 0.011396 | 0.011463 | 0.011362 | 0.011496 | 0.011329 | 0.011396 |
| 0.011564 | 0.011496 | 0.011731 | 0.011564 | 0.011396 | 0.011631 | 0.011396 |
| 0.011505 | 0.011733 | 0.011551 | 0.011255 | 0.011284 | 0.011428 | 0.011454 |
| 0.012121 | 0.011518 | 0.011266 | 0.011631 | 0.011631 | 0.011429 | 0.011530 |
| 0.011463 | 0.011429 | 0.011496 | 0.011396 | 0.011496 | 0.011429 | 0.011429 |
| 0.011396 | 0.011496 | 0.011698 | 0.011564 | 0.011463 | 0.011429 | 0.011362 |
| 0.011329 | 0.011329 | 0.011396 | 0.011362 | 0.011564 | 0.011530 | 0.011463 |
| 0.011564 | 0.011631 | 0.011362 | 0.011362 | 0.011396 | 0.011396 | 0.011398 |
| 0.011466 | 0.011396 | 0.011396 | 0.011276 | 0.011349 | 0.011306 | 0.011396 |
| 0.011399 | 0.011335 | 0.011392 | 0.011371 | 0.011298 | 0.011334 | 0.011364 |
| 0.011636 | 0.011405 | 0.011439 | 0.011329 | 0.011337 | 0.011464 | 0.011430 |
| 0.011497 | 0.011431 | 0.011430 | 0.011530 | 0.011463 | 0.011832 | 0.011631 |
| 0.011664 | 0.011530 | 0.011396 | 0.011497 | 0.011295 | 0.011530 | 0.011329 |
| 0.011396 | 0.011396 | 0.011362 | 0.011329 | 0.011362 | 0.011329 | 0.011429 |
| 0.011396 | 0.011497 | 0.011430 | 0.011329 | 0.011431 | 0.011530 | 0.011533 |
| 0.011530 | 0.011430 | 0.011329 | 0.011263 | 0.011396 | 0.011329 | 0.011262 |
| 0.011332 | 0.011530 | 0.011329 | 0.011530 | 0.011295 | 0.011396 | 0.011362 |
| 0.011463 | 0.011362 | 0.011396 | 0.011362 | 0.011396 | 0.011262 | 0.011396 |
| 0.011430 | 0.011362 | 0.011429 | 0.011362 | 0.011396 | 0.011429 | 0.011665 |
| 0.011765 | 0.011698 | 0.011765 | 0.011532 | 0.011766 | 0.011396 | 0.011362 |
| 0.011398 | 0.011667 | 0.011517 | 0.011266 | 0.011773 | 0.011265 | 0.011375 |
| 0.011739 | 0.011672 | 0.011564 | 0.011765 | 0.011470 | 0.011631 | 0.011597 |

|          |          |          |          |          |          |          |
|----------|----------|----------|----------|----------|----------|----------|
| 0.011530 | 0.011698 | 0.011522 | 0.011390 | 0.011437 | 0.011429 | 0.011500 |
| 0.011597 | 0.011465 | 0.011635 | 0.011669 | 0.011631 | 0.011698 | 0.011771 |
| 0.011534 | 0.011671 | 0.011636 | 0.011567 | 0.011834 | 0.011295 | 0.011498 |
| 0.011463 | 0.011396 | 0.011295 | 0.011295 | 0.011362 | 0.011362 | 0.011429 |
| 0.011362 | 0.011429 | 0.011329 | 0.011429 | 0.011362 | 0.011362 | 0.011429 |
| 0.011362 | 0.011799 | 0.011698 | 0.011731 | 0.011262 | 0.011362 | 0.011396 |
| 0.011396 | 0.011362 | 0.011429 | 0.011463 | 0.011329 | 0.011329 | 0.011329 |
| 0.011866 | 0.011496 | 0.011496 | 0.011295 | 0.011396 | 0.011564 | 0.011329 |
| 0.011329 | 0.011396 | 0.011362 | 0.011530 | 0.011329 | 0.011463 | 0.011597 |
| 0.011530 | 0.011362 | 0.011362 | 0.011295 | 0.011295 | 0.011463 | 0.011396 |
| 0.011295 | 0.011396 | 0.011262 | 0.011295 | 0.011429 | 0.011564 | 0.011329 |
| 0.011295 | 0.011429 | 0.011363 | 0.011262 | 0.011597 | 0.011262 | 0.011429 |
| 0.011471 | 0.011329 | 0.011631 | 0.011463 | 0.011496 | 0.011362 | 0.011463 |
| 0.011329 | 0.011664 | 0.011262 | 0.011530 | 0.011329 | 0.011329 | 0.011262 |
| 0.011496 | 0.011698 | 0.011396 | 0.011463 | 0.011295 | 0.011698 | 0.011329 |
| 0.011329 | 0.011329 | 0.011362 | 0.011463 | 0.011362 | 0.011463 | 0.011530 |
| 0.011530 | 0.011496 | 0.011396 | 0.011497 | 0.011463 | 0.011329 | 0.011295 |
| 0.011329 | 0.011329 | 0.011396 | 0.011329 | 0.011295 | 0.011396 | 0.011329 |
| 0.011362 | 0.011362 | 0.011429 | 0.011530 | 0.011429 | 0.011362 | 0.011362 |
| 0.011429 | 0.011362 | 0.000000 | 0.011329 | 0.011463 | 0.011564 | 0.011866 |
| 0.011362 | 0.011765 | 0.011371 | 0.017861 | 0.011257 | 0.011549 | 0.011723 |
| 0.011683 | 0.011728 | 0.011374 | 0.011292 | 0.011719 | 0.011751 | 0.011364 |
| 0.011535 | 0.011610 | 0.011216 | 0.011311 | 0.011333 | 0.011356 | 0.011275 |
| 0.011529 | 0.011507 | 0.011505 | 0.011259 | 0.011496 | 0.011530 | 0.011534 |
| 0.011369 | 0.011497 | 0.011497 | 0.011463 | 0.011429 | 0.011430 | 0.011396 |
| 0.011429 | 0.011362 | 0.011396 | 0.011429 | 0.011396 | 0.011329 | 0.011362 |
| 0.011362 | 0.011429 | 0.011329 | 0.011430 | 0.011463 | 0.011497 | 0.011396 |
| 0.011429 | 0.011396 | 0.011732 | 0.011732 | 0.011463 | 0.011497 | 0.011530 |
| 0.011295 | 0.011295 | 0.011329 | 0.011430 | 0.011295 | 0.011530 | 0.011530 |
| 0.011564 | 0.011564 | 0.011496 | 0.011597 | 0.011765 | 0.011599 | 0.011429 |
| 0.011429 | 0.011497 | 0.011530 | 0.011362 | 0.011429 | 0.011396 | 0.011429 |
| 0.011497 | 0.011497 | 0.011530 | 0.011497 | 0.011397 | 0.011597 | 0.011564 |
| 0.011433 | 0.011329 | 0.011429 | 0.011530 | 0.011430 | 0.011564 | 0.011597 |
| 0.011765 | 0.011470 | 0.011631 | 0.011597 | 0.011530 | 0.011698 | 0.011329 |
| 0.011498 | 0.011396 | 0.011362 | 0.011362 | 0.011429 | 0.011329 | 0.011430 |
| 0.011463 | 0.011497 | 0.011396 | 0.011429 | 0.011396 | 0.011732 | 0.011732 |
| 0.011463 | 0.011497 | 0.011564 | 0.011496 | 0.012136 | 0.011524 | 0.011447 |
| 0.011517 | 0.011476 | 0.011587 | 0.011337 | 0.011585 | 0.011508 | 0.011508 |
| 0.012056 | 0.011372 | 0.011505 | 0.011440 | 0.011714 | 0.011604 | 0.011672 |
| 0.012080 | 0.011550 | 0.011669 | 0.011731 | 0.011597 | 0.011597 | 0.011635 |
| 0.011295 | 0.011463 | 0.011597 | 0.011563 | 0.011567 | 0.011564 | 0.011532 |
| 0.011396 | 0.011329 | 0.011362 | 0.011396 | 0.011295 | 0.011362 | 0.011262 |
| 0.011396 | 0.011429 | 0.011329 | 0.011295 | 0.011396 | 0.011329 | 0.011362 |
| 0.011362 | 0.011295 | 0.011362 | 0.011396 | 0.011295 | 0.011496 | 0.011530 |
| 0.011429 | 0.011496 | 0.011429 | 0.011429 | 0.011362 | 0.011765 | 0.011396 |
| 0.011408 | 0.011362 | 0.011598 | 0.011569 | 0.011463 | 0.011463 | 0.011463 |
| 0.011463 | 0.011396 | 0.011362 | 0.011396 | 0.011429 | 0.011496 | 0.011429 |
| 0.011429 | 0.011564 | 0.011731 | 0.011463 | 0.011664 | 0.011664 | 0.011530 |
| 0.011362 | 0.011429 | 0.011463 | 0.011866 | 0.011430 | 0.011463 | 0.011429 |
| 0.011463 | 0.011396 | 0.011396 | 0.011698 | 0.011631 | 0.011664 | 0.011396 |
| 0.011496 | 0.011564 | 0.011429 | 0.011496 | 0.011463 | 0.011329 | 0.011664 |
| 0.011295 | 0.011396 | 0.011396 | 0.011564 | 0.011396 | 0.011496 | 0.011732 |
| 0.011429 | 0.011773 | 0.011799 | 0.011548 | 0.011286 | 0.011502 | 0.011267 |
| 0.011335 | 0.011761 | 0.011341 | 0.011462 | 0.011304 | 0.011416 | 0.011379 |
| 0.011468 | 0.011192 | 0.011339 | 0.011192 | 0.011276 | 0.011395 | 0.011425 |
| 0.011437 | 0.011336 | 0.011483 | 0.011412 | 0.011431 | 0.011564 | 0.011631 |
| 0.011631 | 0.011497 | 0.011601 | 0.011603 | 0.011738 | 0.011767 | 0.011429 |
| 0.011664 | 0.011530 | 0.011396 | 0.011497 | 0.011295 | 0.011530 | 0.011329 |
| 0.011396 | 0.011396 | 0.011362 | 0.011329 | 0.011362 | 0.011329 | 0.011429 |
| 0.011409 | 0.011410 | 0.011403 | 0.011437 | 0.011573 | 0.011538 | 0.011538 |

|          |          |          |          |          |          |          |
|----------|----------|----------|----------|----------|----------|----------|
| 0.011537 | 0.011464 | 0.011245 | 0.011276 | 0.011399 | 0.011568 | 0.011569 |
| 0.011363 | 0.011365 | 0.011666 | 0.011635 | 0.011565 | 0.011599 | 0.011530 |
| 0.011463 | 0.011530 | 0.011530 | 0.011429 | 0.012000 | 0.011597 | 0.011664 |
| 0.011698 | 0.011772 | 0.011401 | 0.011476 | 0.011362 | 0.011564 | 0.011530 |
| 0.011565 | 0.011597 | 0.011597 | 0.011597 | 0.011768 | 0.011732 | 0.011338 |
| 0.011229 | 0.011233 | 0.011332 | 0.011298 | 0.011402 | 0.011247 | 0.011570 |
| 0.011369 | 0.011543 | 0.011251 | 0.011360 | 0.011396 | 0.011471 | 0.011362 |
| 0.011329 | 0.011329 | 0.011396 | 0.011362 | 0.011564 | 0.011530 | 0.011463 |
| 0.011564 | 0.011631 | 0.011362 | 0.011362 | 0.011396 | 0.011396 | 0.011398 |
| 0.011466 | 0.011396 | 0.011396 | 0.011431 | 0.011564 | 0.011631 | 0.011631 |
| 0.011497 | 0.011601 | 0.011603 | 0.011738 | 0.011767 | 0.011429 | 0.011597 |
| 0.011530 | 0.011530 | 0.011365 | 0.011547 | 0.011477 | 0.011503 | 0.011375 |
| 0.011542 | 0.011698 | 0.011484 | 0.011434 | 0.011329 | 0.011530 | 0.011396 |
| 0.011497 | 0.011430 | 0.011329 | 0.011431 | 0.011530 | 0.011533 | 0.011430 |
| 0.011329 | 0.011263 | 0.011396 | 0.011329 | 0.011262 | 0.011332 | 0.011530 |
| 0.011429 | 0.011362 | 0.011396 | 0.011429 | 0.011396 | 0.011329 | 0.011530 |
| 0.011396 | 0.011429 | 0.011429 | 0.011362 | 0.011429 | 0.011664 | 0.011329 |
| 0.011362 | 0.011765 | 0.011362 | 0.011396 | 0.011362 | 0.011731 | 0.011232 |
| 0.011678 | 0.011273 | 0.011311 | 0.011543 | 0.011589 | 0.011527 | 0.011186 |
| 0.011270 | 0.011530 | 0.011631 | 0.011739 | 0.011599 | 0.011737 | 0.011867 |
| 0.011767 | 0.011770 | 0.011765 | 0.012017 | 0.011731 | 0.012606 | 0.011768 |
| 0.012507 | 0.012274 | 0.012408 | 0.012680 | 0.011731 | 0.011430 | 0.011732 |
| 0.012171 | 0.012106 | 0.011698 | 0.011597 | 0.011665 | 0.011665 | 0.011601 |
| 0.011530 | 0.011535 | 0.011597 | 0.011565 | 0.011934 | 0.012000 | 0.012002 |
| 0.011901 | 0.012002 | 0.012105 | 0.011872 | 0.012171 | 0.012178 | 0.012238 |
| 0.012239 | 0.012273 | 0.012220 | 0.012239 | 0.012240 | 0.011463 | 0.011766 |
| 0.011834 | 0.012337 | 0.011840 | 0.012068 | 0.012541 | 0.011603 | 0.011497 |
| 0.011463 | 0.011463 | 0.011934 | 0.011965 | 0.012080 | 0.011799 | 0.011465 |
| S374     | 0.011597 | 0.011597 | 0.011933 | 0.011698 | 0.011698 | 0.011765 |
| 0.011603 | 0.011535 | 0.011765 | 0.011195 | 0.011262 | 0.011228 | 0.011194 |
| 0.011228 | 0.011396 | 0.011194 | 0.011228 | 0.011295 | 0.011262 | 0.011228 |
| 0.011194 | 0.011228 | 0.011329 | 0.011195 | 0.011228 | 0.011228 | 0.011569 |
| 0.011463 | 0.011228 | 0.011127 | 0.011362 | 0.011295 | 0.011262 | 0.011295 |
| 0.011262 | 0.011362 | 0.011262 | 0.011262 | 0.011295 | 0.011262 | 0.011429 |
| 0.011194 | 0.011262 | 0.011295 | 0.011228 | 0.011329 | 0.011362 | 0.011295 |
| 0.011262 | 0.011429 | 0.011329 | 0.011597 | 0.011262 | 0.011530 | 0.011262 |
| 0.011228 | 0.011329 | 0.011396 | 0.011530 | 0.011631 | 0.011329 | 0.011429 |
| 0.011295 | 0.011362 | 0.011262 | 0.011496 | 0.011732 | 0.011262 | 0.011329 |
| 0.011228 | 0.011329 | 0.011295 | 0.011362 | 0.011295 | 0.011295 | 0.011295 |
| 0.011194 | 0.011228 | 0.011194 | 0.011295 | 0.011262 | 0.011296 | 0.011362 |
| 0.011295 | 0.011262 | 0.011329 | 0.011228 | 0.011362 | 0.011194 | 0.011262 |
| 0.011429 | 0.011362 | 0.011597 | 0.011429 | 0.011262 | 0.011496 | 0.011262 |
| 0.011394 | 0.011620 | 0.011475 | 0.011138 | 0.011172 | 0.011281 | 0.011336 |
| 0.012011 | 0.011467 | 0.011143 | 0.011496 | 0.011496 | 0.011295 | 0.011396 |
| 0.011329 | 0.011295 | 0.011362 | 0.011262 | 0.011362 | 0.011295 | 0.011295 |
| 0.011262 | 0.011362 | 0.011564 | 0.011429 | 0.011329 | 0.011295 | 0.011228 |
| 0.011195 | 0.011195 | 0.011262 | 0.011228 | 0.011429 | 0.011396 | 0.011329 |
| 0.011429 | 0.011497 | 0.011228 | 0.011228 | 0.011262 | 0.011262 | 0.011263 |
| 0.011331 | 0.011262 | 0.011262 | 0.011132 | 0.011205 | 0.011165 | 0.011262 |
| 0.011263 | 0.011198 | 0.011245 | 0.011233 | 0.011162 | 0.011197 | 0.011229 |
| 0.011492 | 0.011267 | 0.011301 | 0.011195 | 0.011199 | 0.011329 | 0.011296 |
| 0.011363 | 0.011296 | 0.011296 | 0.011396 | 0.011329 | 0.011698 | 0.011497 |
| 0.011530 | 0.011396 | 0.011262 | 0.011362 | 0.011161 | 0.011396 | 0.011195 |
| 0.011262 | 0.011262 | 0.011228 | 0.011194 | 0.011228 | 0.011195 | 0.011295 |
| 0.011262 | 0.011362 | 0.011295 | 0.011195 | 0.011296 | 0.011396 | 0.011398 |
| 0.011396 | 0.011295 | 0.011195 | 0.011128 | 0.011262 | 0.011195 | 0.011127 |
| 0.011230 | 0.011396 | 0.011195 | 0.011396 | 0.011161 | 0.011262 | 0.011228 |
| 0.011329 | 0.011228 | 0.011262 | 0.011228 | 0.011262 | 0.011127 | 0.011262 |
| 0.011295 | 0.011228 | 0.011295 | 0.011228 | 0.011262 | 0.011295 | 0.011530 |
| 0.011631 | 0.011564 | 0.011631 | 0.011397 | 0.011631 | 0.011262 | 0.011228 |

|          |          |          |          |          |          |          |
|----------|----------|----------|----------|----------|----------|----------|
| 0.011263 | 0.011545 | 0.011380 | 0.011163 | 0.011637 | 0.011129 | 0.011257 |
| 0.011637 | 0.011536 | 0.011429 | 0.011631 | 0.011333 | 0.011496 | 0.011463 |
| 0.011396 | 0.011564 | 0.011415 | 0.011225 | 0.011270 | 0.011295 | 0.011365 |
| 0.011463 | 0.011364 | 0.011500 | 0.011568 | 0.011497 | 0.011564 | 0.011670 |
| 0.011399 | 0.011569 | 0.011500 | 0.011432 | 0.011699 | 0.011161 | 0.011363 |
| 0.011329 | 0.011262 | 0.011161 | 0.011161 | 0.011228 | 0.011228 | 0.011295 |
| 0.011228 | 0.011295 | 0.011194 | 0.011295 | 0.011228 | 0.011228 | 0.011295 |
| 0.011228 | 0.011664 | 0.011564 | 0.011597 | 0.011127 | 0.011228 | 0.011262 |
| 0.011262 | 0.011228 | 0.011295 | 0.011329 | 0.011194 | 0.011194 | 0.011194 |
| 0.011731 | 0.011362 | 0.011362 | 0.011161 | 0.011262 | 0.011429 | 0.011194 |
| 0.011194 | 0.011262 | 0.011228 | 0.011396 | 0.011194 | 0.011329 | 0.011463 |
| 0.011396 | 0.011228 | 0.011228 | 0.011161 | 0.011161 | 0.011329 | 0.011262 |
| 0.011161 | 0.011262 | 0.011127 | 0.011161 | 0.011295 | 0.011430 | 0.011195 |
| 0.011161 | 0.011295 | 0.011228 | 0.011127 | 0.011463 | 0.011127 | 0.011295 |
| 0.011368 | 0.011195 | 0.011496 | 0.011329 | 0.011362 | 0.011228 | 0.011329 |
| 0.011194 | 0.011530 | 0.011127 | 0.011396 | 0.011194 | 0.011194 | 0.011127 |
| 0.011362 | 0.011564 | 0.011262 | 0.011329 | 0.011161 | 0.011564 | 0.011194 |
| 0.011194 | 0.011194 | 0.011228 | 0.011329 | 0.011228 | 0.011329 | 0.011396 |
| 0.011396 | 0.011362 | 0.011262 | 0.011362 | 0.011329 | 0.011194 | 0.011161 |
| 0.011194 | 0.011194 | 0.011262 | 0.011194 | 0.011161 | 0.011329 | 0.011194 |
| 0.011228 | 0.011228 | 0.011362 | 0.011396 | 0.011295 | 0.011228 | 0.011228 |
| 0.011295 | 0.011228 | 0.011329 | 0.000000 | 0.011329 | 0.011429 | 0.011732 |
| 0.011228 | 0.011631 | 0.011233 | 0.017747 | 0.011191 | 0.011366 | 0.011583 |
| 0.011545 | 0.011588 | 0.011270 | 0.011292 | 0.011664 | 0.011612 | 0.011303 |
| 0.011392 | 0.011487 | 0.011099 | 0.011228 | 0.011216 | 0.011258 | 0.011189 |
| 0.011482 | 0.011395 | 0.011394 | 0.011126 | 0.011362 | 0.011396 | 0.011398 |
| 0.011266 | 0.011362 | 0.011362 | 0.011329 | 0.011295 | 0.011295 | 0.011262 |
| 0.011295 | 0.011228 | 0.011262 | 0.011295 | 0.011262 | 0.011195 | 0.011228 |
| 0.011228 | 0.011295 | 0.011195 | 0.011295 | 0.011329 | 0.011362 | 0.011262 |
| 0.011295 | 0.011262 | 0.011597 | 0.011597 | 0.011329 | 0.011363 | 0.011396 |
| 0.011161 | 0.011161 | 0.011195 | 0.011295 | 0.011161 | 0.011396 | 0.011396 |
| 0.011429 | 0.011429 | 0.011362 | 0.011463 | 0.011631 | 0.011464 | 0.011295 |
| 0.011295 | 0.011362 | 0.011396 | 0.011228 | 0.011295 | 0.011262 | 0.011295 |
| 0.011363 | 0.011362 | 0.011396 | 0.011363 | 0.011262 | 0.011463 | 0.011429 |
| 0.011297 | 0.011195 | 0.011295 | 0.011396 | 0.011295 | 0.011430 | 0.011463 |
| 0.011631 | 0.011333 | 0.011496 | 0.011463 | 0.011396 | 0.011564 | 0.011195 |
| 0.011363 | 0.011262 | 0.011228 | 0.011228 | 0.011295 | 0.011195 | 0.011295 |
| 0.011329 | 0.011362 | 0.011262 | 0.011295 | 0.011262 | 0.011597 | 0.011597 |
| 0.011329 | 0.011363 | 0.011429 | 0.011362 | 0.012002 | 0.011382 | 0.011341 |
| 0.011412 | 0.011338 | 0.011482 | 0.011372 | 0.011445 | 0.011405 | 0.011336 |
| 0.011953 | 0.011268 | 0.011403 | 0.011337 | 0.011611 | 0.011468 | 0.011570 |
| 0.011978 | 0.011437 | 0.011533 | 0.011597 | 0.011463 | 0.011463 | 0.011499 |
| 0.011161 | 0.011329 | 0.011463 | 0.011429 | 0.011432 | 0.011429 | 0.011397 |
| 0.011262 | 0.011194 | 0.011228 | 0.011262 | 0.011161 | 0.011228 | 0.011127 |
| 0.011262 | 0.011295 | 0.011194 | 0.011161 | 0.011262 | 0.011194 | 0.011228 |
| 0.011228 | 0.011161 | 0.011228 | 0.011262 | 0.011161 | 0.011362 | 0.011396 |
| 0.011295 | 0.011362 | 0.011295 | 0.011295 | 0.011228 | 0.011631 | 0.011262 |
| 0.011304 | 0.011228 | 0.011463 | 0.011467 | 0.011329 | 0.011329 | 0.011329 |
| 0.011329 | 0.011262 | 0.011228 | 0.011262 | 0.011362 | 0.011362 | 0.011295 |
| 0.011295 | 0.011429 | 0.011597 | 0.011329 | 0.011530 | 0.011530 | 0.011396 |
| 0.011228 | 0.011295 | 0.011329 | 0.011732 | 0.011295 | 0.011329 | 0.011295 |
| 0.011329 | 0.011262 | 0.011262 | 0.011564 | 0.011497 | 0.011530 | 0.011262 |
| 0.011362 | 0.011429 | 0.011295 | 0.011362 | 0.011329 | 0.011194 | 0.011530 |
| 0.011295 | 0.011262 | 0.011262 | 0.011429 | 0.011262 | 0.011362 | 0.011597 |
| 0.011295 | 0.011671 | 0.011664 | 0.011426 | 0.011173 | 0.011366 | 0.011267 |
| 0.011170 | 0.011644 | 0.011201 | 0.011373 | 0.011207 | 0.011315 | 0.011326 |
| 0.011417 | 0.011126 | 0.011283 | 0.011126 | 0.011168 | 0.011328 | 0.011303 |
| 0.011324 | 0.011218 | 0.011307 | 0.011272 | 0.011296 | 0.011429 | 0.011497 |
| 0.011497 | 0.011363 | 0.011466 | 0.011467 | 0.011602 | 0.011626 | 0.011295 |
| 0.011530 | 0.011396 | 0.011262 | 0.011362 | 0.011161 | 0.011396 | 0.011195 |



|          |          |          |          |          |          |          |
|----------|----------|----------|----------|----------|----------|----------|
| 0.011262 | 0.011262 | 0.011228 | 0.011194 | 0.011228 | 0.011195 | 0.011295 |
| 0.011235 | 0.011270 | 0.011266 | 0.011300 | 0.011437 | 0.011402 | 0.011402 |
| 0.011401 | 0.011329 | 0.011134 | 0.011132 | 0.011263 | 0.011433 | 0.011433 |
| 0.011228 | 0.011297 | 0.011531 | 0.011500 | 0.011430 | 0.011464 | 0.011396 |
| 0.011329 | 0.011396 | 0.011396 | 0.011295 | 0.011866 | 0.011463 | 0.011530 |
| 0.011564 | 0.011630 | 0.011265 | 0.011337 | 0.011228 | 0.011429 | 0.011396 |
| 0.011430 | 0.011463 | 0.011463 | 0.011463 | 0.011610 | 0.011597 | 0.011234 |
| 0.011128 | 0.011130 | 0.011230 | 0.011196 | 0.011299 | 0.011135 | 0.011468 |
| 0.011266 | 0.011367 | 0.011108 | 0.011285 | 0.011262 | 0.011334 | 0.011228 |
| 0.011195 | 0.011195 | 0.011262 | 0.011228 | 0.011429 | 0.011396 | 0.011329 |
| 0.011429 | 0.011497 | 0.011228 | 0.011228 | 0.011262 | 0.011262 | 0.011263 |
| 0.011331 | 0.011262 | 0.011262 | 0.011296 | 0.011429 | 0.011497 | 0.011497 |
| 0.011363 | 0.011466 | 0.011467 | 0.011602 | 0.011626 | 0.011295 | 0.011463 |
| 0.011396 | 0.011396 | 0.011229 | 0.011408 | 0.011338 | 0.011367 | 0.011235 |
| 0.011405 | 0.011607 | 0.011399 | 0.011298 | 0.011195 | 0.011396 | 0.011262 |
| 0.011362 | 0.011295 | 0.011195 | 0.011296 | 0.011396 | 0.011398 | 0.011295 |
| 0.011195 | 0.011128 | 0.011262 | 0.011195 | 0.011127 | 0.011230 | 0.011396 |
| 0.011295 | 0.011228 | 0.011262 | 0.011295 | 0.011262 | 0.011195 | 0.011396 |
| 0.011262 | 0.011295 | 0.011295 | 0.011228 | 0.011295 | 0.011530 | 0.011194 |
| 0.011228 | 0.011631 | 0.011228 | 0.011262 | 0.011228 | 0.011597 | 0.011146 |
| 0.011510 | 0.011145 | 0.011261 | 0.011382 | 0.011467 | 0.011383 | 0.011102 |
| 0.011218 | 0.011396 | 0.011496 | 0.011603 | 0.011464 | 0.011601 | 0.011733 |
| 0.011632 | 0.011669 | 0.011631 | 0.011880 | 0.011597 | 0.012472 | 0.011633 |
| 0.012372 | 0.012139 | 0.012273 | 0.012545 | 0.011597 | 0.011295 | 0.011530 |
| 0.012036 | 0.011903 | 0.011564 | 0.011463 | 0.011531 | 0.011531 | 0.011500 |
| 0.011396 | 0.011399 | 0.011463 | 0.011430 | 0.011800 | 0.011866 | 0.011867 |
| 0.011766 | 0.011867 | 0.011970 | 0.011737 | 0.012036 | 0.012042 | 0.012104 |
| 0.012104 | 0.012138 | 0.012084 | 0.012104 | 0.012105 | 0.011329 | 0.011631 |
| 0.011699 | 0.012202 | 0.011704 | 0.011933 | 0.012406 | 0.011468 | 0.011363 |
| 0.011329 | 0.011329 | 0.011799 | 0.011800 | 0.011940 | 0.011664 | 0.011330 |
| S375     | 0.011732 | 0.011732 | 0.012068 | 0.011832 | 0.011832 | 0.011900 |
| 0.011739 | 0.011671 | 0.011899 | 0.011329 | 0.011396 | 0.011363 | 0.011329 |
| 0.011362 | 0.011530 | 0.011329 | 0.011362 | 0.011429 | 0.011396 | 0.011362 |
| 0.011329 | 0.011362 | 0.011463 | 0.011329 | 0.011363 | 0.011362 | 0.011705 |
| 0.011597 | 0.011362 | 0.011262 | 0.011496 | 0.011429 | 0.011396 | 0.011429 |
| 0.011396 | 0.011496 | 0.011396 | 0.011396 | 0.011429 | 0.011396 | 0.011564 |
| 0.011329 | 0.011396 | 0.011429 | 0.011362 | 0.011463 | 0.011496 | 0.011429 |
| 0.011396 | 0.011564 | 0.011463 | 0.011732 | 0.011396 | 0.011664 | 0.011396 |
| 0.011362 | 0.011463 | 0.011530 | 0.011664 | 0.011765 | 0.011463 | 0.011564 |
| 0.011429 | 0.011497 | 0.011396 | 0.011631 | 0.011866 | 0.011396 | 0.011463 |
| 0.011362 | 0.011463 | 0.011429 | 0.011496 | 0.011429 | 0.011429 | 0.011429 |
| 0.011329 | 0.011362 | 0.011329 | 0.011429 | 0.011396 | 0.011430 | 0.011496 |
| 0.011429 | 0.011396 | 0.011463 | 0.011362 | 0.011496 | 0.011329 | 0.011396 |
| 0.011564 | 0.011496 | 0.011731 | 0.011564 | 0.011396 | 0.011631 | 0.011396 |
| 0.011579 | 0.011807 | 0.011626 | 0.011295 | 0.011321 | 0.011428 | 0.011533 |
| 0.012158 | 0.011569 | 0.011307 | 0.011631 | 0.011631 | 0.011429 | 0.011530 |
| 0.011463 | 0.011429 | 0.011496 | 0.011396 | 0.011497 | 0.011429 | 0.011429 |
| 0.011396 | 0.011496 | 0.011698 | 0.011564 | 0.011463 | 0.011430 | 0.011362 |
| 0.011329 | 0.011329 | 0.011396 | 0.011362 | 0.011564 | 0.011530 | 0.011463 |
| 0.011564 | 0.011631 | 0.011362 | 0.011362 | 0.011396 | 0.011396 | 0.011364 |
| 0.011432 | 0.011396 | 0.011396 | 0.011276 | 0.011349 | 0.011306 | 0.011396 |
| 0.011399 | 0.011335 | 0.011392 | 0.011371 | 0.011298 | 0.011334 | 0.011364 |
| 0.011636 | 0.011405 | 0.011439 | 0.011329 | 0.011337 | 0.011464 | 0.011430 |
| 0.011497 | 0.011431 | 0.011430 | 0.011530 | 0.011463 | 0.011832 | 0.011631 |
| 0.011664 | 0.011530 | 0.011396 | 0.011497 | 0.011295 | 0.011530 | 0.011329 |
| 0.011396 | 0.011396 | 0.011362 | 0.011329 | 0.011362 | 0.011329 | 0.011429 |
| 0.011396 | 0.011497 | 0.011430 | 0.011329 | 0.011431 | 0.011530 | 0.011533 |
| 0.011530 | 0.011430 | 0.011329 | 0.011263 | 0.011396 | 0.011329 | 0.011262 |
| 0.011366 | 0.011530 | 0.011329 | 0.011530 | 0.011295 | 0.011396 | 0.011362 |
| 0.011463 | 0.011362 | 0.011396 | 0.011362 | 0.011396 | 0.011262 | 0.011396 |

|          |          |          |          |          |          |          |
|----------|----------|----------|----------|----------|----------|----------|
| 0.011430 | 0.011362 | 0.011430 | 0.011362 | 0.011396 | 0.011430 | 0.011665 |
| 0.011765 | 0.011698 | 0.011765 | 0.011532 | 0.011766 | 0.011396 | 0.011362 |
| 0.011398 | 0.011667 | 0.011518 | 0.011300 | 0.011773 | 0.011265 | 0.011414 |
| 0.011773 | 0.011672 | 0.011564 | 0.011765 | 0.011470 | 0.011631 | 0.011597 |
| 0.011530 | 0.011698 | 0.011558 | 0.011390 | 0.011479 | 0.011430 | 0.011500 |
| 0.011597 | 0.011499 | 0.011635 | 0.011703 | 0.011631 | 0.011698 | 0.011805 |
| 0.011534 | 0.011705 | 0.011636 | 0.011567 | 0.011834 | 0.011295 | 0.011498 |
| 0.011463 | 0.011396 | 0.011295 | 0.011295 | 0.011362 | 0.011362 | 0.011429 |
| 0.011362 | 0.011429 | 0.011329 | 0.011429 | 0.011362 | 0.011362 | 0.011429 |
| 0.011362 | 0.011799 | 0.011698 | 0.011732 | 0.011262 | 0.011362 | 0.011396 |
| 0.011396 | 0.011362 | 0.011429 | 0.011463 | 0.011329 | 0.011329 | 0.011329 |
| 0.011866 | 0.011496 | 0.011496 | 0.011295 | 0.011396 | 0.011564 | 0.011329 |
| 0.011329 | 0.011396 | 0.011362 | 0.011530 | 0.011329 | 0.011463 | 0.011597 |
| 0.011530 | 0.011362 | 0.011362 | 0.011295 | 0.011295 | 0.011463 | 0.011396 |
| 0.011295 | 0.011396 | 0.011262 | 0.011295 | 0.011429 | 0.011564 | 0.011329 |
| 0.011295 | 0.011429 | 0.011363 | 0.011262 | 0.011597 | 0.011262 | 0.011429 |
| 0.011505 | 0.011329 | 0.011631 | 0.011463 | 0.011496 | 0.011362 | 0.011463 |
| 0.011329 | 0.011664 | 0.011262 | 0.011530 | 0.011329 | 0.011329 | 0.011262 |
| 0.011496 | 0.011698 | 0.011396 | 0.011463 | 0.011295 | 0.011698 | 0.011329 |
| 0.011329 | 0.011329 | 0.011362 | 0.011463 | 0.011362 | 0.011463 | 0.011530 |
| 0.011530 | 0.011496 | 0.011396 | 0.011497 | 0.011463 | 0.011329 | 0.011295 |
| 0.011329 | 0.011329 | 0.011396 | 0.011329 | 0.011295 | 0.011463 | 0.011329 |
| 0.011362 | 0.011362 | 0.011496 | 0.011530 | 0.011429 | 0.011362 | 0.011362 |
| 0.011429 | 0.011362 | 0.011463 | 0.011329 | 0.000000 | 0.011564 | 0.011866 |
| 0.011362 | 0.011765 | 0.011371 | 0.011789 | 0.011388 | 0.011488 | 0.011723 |
| 0.011683 | 0.011729 | 0.011532 | 0.011466 | 0.011774 | 0.011751 | 0.011425 |
| 0.011582 | 0.011610 | 0.011294 | 0.011395 | 0.011372 | 0.011356 | 0.011361 |
| 0.011576 | 0.011544 | 0.011542 | 0.011391 | 0.011497 | 0.011530 | 0.011534 |
| 0.011404 | 0.011497 | 0.011497 | 0.011463 | 0.011429 | 0.011430 | 0.011396 |
| 0.011429 | 0.011362 | 0.011396 | 0.011430 | 0.011396 | 0.011329 | 0.011362 |
| 0.011362 | 0.011430 | 0.011329 | 0.011430 | 0.011463 | 0.011497 | 0.011396 |
| 0.011429 | 0.011396 | 0.011732 | 0.011732 | 0.011463 | 0.011497 | 0.011530 |
| 0.011295 | 0.011295 | 0.011329 | 0.011430 | 0.011295 | 0.011530 | 0.011530 |
| 0.011564 | 0.011564 | 0.011497 | 0.011597 | 0.011765 | 0.011599 | 0.011429 |
| 0.011430 | 0.011497 | 0.011530 | 0.011362 | 0.011430 | 0.011396 | 0.011429 |
| 0.011497 | 0.011497 | 0.011530 | 0.011497 | 0.011397 | 0.011597 | 0.011564 |
| 0.011433 | 0.011329 | 0.011429 | 0.011530 | 0.011430 | 0.011564 | 0.011597 |
| 0.011765 | 0.011470 | 0.011631 | 0.011597 | 0.011530 | 0.011698 | 0.011329 |
| 0.011498 | 0.011396 | 0.011362 | 0.011362 | 0.011430 | 0.011329 | 0.011430 |
| 0.011463 | 0.011497 | 0.011396 | 0.011429 | 0.011396 | 0.011732 | 0.011732 |
| 0.011463 | 0.011497 | 0.011564 | 0.011496 | 0.012137 | 0.011560 | 0.011482 |
| 0.011552 | 0.011511 | 0.011622 | 0.011510 | 0.011620 | 0.011543 | 0.011508 |
| 0.012090 | 0.011406 | 0.011540 | 0.011475 | 0.011749 | 0.011604 | 0.011707 |
| 0.012114 | 0.011588 | 0.011635 | 0.011732 | 0.011597 | 0.011597 | 0.011601 |
| 0.011295 | 0.011463 | 0.011597 | 0.011564 | 0.011533 | 0.011564 | 0.011532 |
| 0.011396 | 0.011329 | 0.011362 | 0.011396 | 0.011295 | 0.011362 | 0.011262 |
| 0.011396 | 0.011429 | 0.011329 | 0.011295 | 0.011396 | 0.011329 | 0.011362 |
| 0.011362 | 0.011295 | 0.011362 | 0.011396 | 0.011295 | 0.011496 | 0.011530 |
| 0.011429 | 0.011496 | 0.011429 | 0.011429 | 0.011362 | 0.011765 | 0.011396 |
| 0.011443 | 0.011362 | 0.011598 | 0.011603 | 0.011463 | 0.011463 | 0.011463 |
| 0.011463 | 0.011396 | 0.011362 | 0.011396 | 0.011496 | 0.011497 | 0.011429 |
| 0.011429 | 0.011564 | 0.011731 | 0.011463 | 0.011664 | 0.011664 | 0.011530 |
| 0.011362 | 0.011429 | 0.011463 | 0.011866 | 0.011430 | 0.011463 | 0.011429 |
| 0.011463 | 0.011396 | 0.011396 | 0.011698 | 0.011631 | 0.011664 | 0.011396 |
| 0.011497 | 0.011564 | 0.011429 | 0.011497 | 0.011463 | 0.011329 | 0.011664 |
| 0.011429 | 0.011396 | 0.011396 | 0.011564 | 0.011396 | 0.011496 | 0.011732 |
| 0.011429 | 0.011807 | 0.011799 | 0.011629 | 0.011342 | 0.011502 | 0.011370 |
| 0.011280 | 0.011839 | 0.011341 | 0.011596 | 0.011353 | 0.011467 | 0.011485 |
| 0.011621 | 0.011324 | 0.011450 | 0.011324 | 0.011330 | 0.011529 | 0.011466 |
| 0.011512 | 0.011414 | 0.011483 | 0.011412 | 0.011431 | 0.011564 | 0.011631 |

|          |          |          |          |          |          |          |
|----------|----------|----------|----------|----------|----------|----------|
| 0.011631 | 0.011497 | 0.011601 | 0.011603 | 0.011738 | 0.011767 | 0.011429 |
| 0.011664 | 0.011530 | 0.011396 | 0.011497 | 0.011295 | 0.011530 | 0.011329 |
| 0.011396 | 0.011396 | 0.011362 | 0.011329 | 0.011362 | 0.011329 | 0.011429 |
| 0.011409 | 0.011410 | 0.011403 | 0.011437 | 0.011573 | 0.011538 | 0.011538 |
| 0.011537 | 0.011464 | 0.011282 | 0.011240 | 0.011399 | 0.011568 | 0.011569 |
| 0.011363 | 0.011433 | 0.011666 | 0.011635 | 0.011565 | 0.011599 | 0.011530 |
| 0.011463 | 0.011530 | 0.011530 | 0.011429 | 0.012001 | 0.011597 | 0.011665 |
| 0.011698 | 0.011772 | 0.011401 | 0.011476 | 0.011362 | 0.011564 | 0.011530 |
| 0.011565 | 0.011597 | 0.011597 | 0.011597 | 0.011768 | 0.011732 | 0.011372 |
| 0.011263 | 0.011268 | 0.011367 | 0.011332 | 0.011436 | 0.011247 | 0.011604 |
| 0.011403 | 0.011543 | 0.011298 | 0.011435 | 0.011396 | 0.011471 | 0.011362 |
| 0.011329 | 0.011329 | 0.011396 | 0.011362 | 0.011564 | 0.011530 | 0.011463 |
| 0.011564 | 0.011631 | 0.011362 | 0.011362 | 0.011396 | 0.011396 | 0.011364 |
| 0.011432 | 0.011396 | 0.011396 | 0.011431 | 0.011564 | 0.011631 | 0.011631 |
| 0.011497 | 0.011601 | 0.011603 | 0.011738 | 0.011767 | 0.011429 | 0.011597 |
| 0.011530 | 0.011530 | 0.011364 | 0.011547 | 0.011477 | 0.011503 | 0.011340 |
| 0.011542 | 0.011698 | 0.011568 | 0.011434 | 0.011329 | 0.011530 | 0.011396 |
| 0.011497 | 0.011430 | 0.011329 | 0.011431 | 0.011530 | 0.011533 | 0.011430 |
| 0.011329 | 0.011263 | 0.011396 | 0.011329 | 0.011262 | 0.011366 | 0.011530 |
| 0.011429 | 0.011362 | 0.011396 | 0.011430 | 0.011396 | 0.011329 | 0.011530 |
| 0.011396 | 0.011429 | 0.011429 | 0.011362 | 0.011429 | 0.011664 | 0.011329 |
| 0.011362 | 0.011765 | 0.011362 | 0.011396 | 0.011362 | 0.011732 | 0.011317 |
| 0.011847 | 0.011315 | 0.011361 | 0.011543 | 0.011630 | 0.011563 | 0.011269 |
| 0.011323 | 0.011530 | 0.011631 | 0.011739 | 0.011599 | 0.011737 | 0.011867 |
| 0.011767 | 0.011804 | 0.011765 | 0.012017 | 0.011731 | 0.012606 | 0.011768 |
| 0.012507 | 0.012274 | 0.012408 | 0.012680 | 0.011731 | 0.011430 | 0.011732 |
| 0.012171 | 0.012106 | 0.011698 | 0.011597 | 0.011665 | 0.011665 | 0.011635 |
| 0.011530 | 0.011535 | 0.011597 | 0.011565 | 0.011935 | 0.012001 | 0.012002 |
| 0.011901 | 0.012002 | 0.012106 | 0.011872 | 0.012171 | 0.012178 | 0.012238 |
| 0.012239 | 0.012273 | 0.012221 | 0.012239 | 0.012241 | 0.011463 | 0.011766 |
| 0.011834 | 0.012337 | 0.011840 | 0.012068 | 0.012541 | 0.011604 | 0.011497 |
| 0.011463 | 0.011463 | 0.011934 | 0.012006 | 0.012081 | 0.011799 | 0.011465 |
| S376     | 0.011832 | 0.011832 | 0.012169 | 0.011933 | 0.011933 | 0.012000 |
| 0.011841 | 0.011773 | 0.011933 | 0.011429 | 0.011496 | 0.011464 | 0.011429 |
| 0.011463 | 0.011564 | 0.011429 | 0.011463 | 0.011530 | 0.011496 | 0.011463 |
| 0.011429 | 0.011463 | 0.011564 | 0.011430 | 0.011463 | 0.011463 | 0.011807 |
| 0.011698 | 0.011463 | 0.011362 | 0.011597 | 0.011530 | 0.011497 | 0.011530 |
| 0.011496 | 0.011597 | 0.011496 | 0.011496 | 0.011530 | 0.011496 | 0.011664 |
| 0.011429 | 0.011496 | 0.011530 | 0.011463 | 0.011564 | 0.011530 | 0.011530 |
| 0.011496 | 0.011664 | 0.011564 | 0.011832 | 0.011496 | 0.011765 | 0.011496 |
| 0.011463 | 0.011564 | 0.011631 | 0.011765 | 0.011866 | 0.011564 | 0.011664 |
| 0.011530 | 0.011597 | 0.011497 | 0.011731 | 0.011967 | 0.011362 | 0.011564 |
| 0.011463 | 0.011564 | 0.011530 | 0.011597 | 0.011530 | 0.011530 | 0.011530 |
| 0.011429 | 0.011463 | 0.011429 | 0.011530 | 0.011496 | 0.011531 | 0.011597 |
| 0.011530 | 0.011429 | 0.011564 | 0.011463 | 0.011597 | 0.011429 | 0.011496 |
| 0.011664 | 0.011597 | 0.011832 | 0.011664 | 0.011496 | 0.011732 | 0.011429 |
| 0.011691 | 0.011919 | 0.011702 | 0.011451 | 0.011396 | 0.011539 | 0.011611 |
| 0.012231 | 0.011670 | 0.011390 | 0.011530 | 0.011530 | 0.011530 | 0.011631 |
| 0.011564 | 0.011530 | 0.011597 | 0.011496 | 0.011597 | 0.011530 | 0.011530 |
| 0.011496 | 0.011597 | 0.011799 | 0.011597 | 0.011564 | 0.011530 | 0.011463 |
| 0.011429 | 0.011429 | 0.011497 | 0.011463 | 0.011665 | 0.011631 | 0.011564 |
| 0.011665 | 0.011732 | 0.011463 | 0.011463 | 0.011497 | 0.011497 | 0.011499 |
| 0.011567 | 0.011497 | 0.011497 | 0.011384 | 0.011422 | 0.011411 | 0.011497 |
| 0.011500 | 0.011438 | 0.011466 | 0.011474 | 0.011400 | 0.011437 | 0.011465 |
| 0.011708 | 0.011508 | 0.011508 | 0.011430 | 0.011406 | 0.011565 | 0.011531 |
| 0.011598 | 0.011532 | 0.011531 | 0.011631 | 0.011564 | 0.011933 | 0.011732 |
| 0.011765 | 0.011631 | 0.011497 | 0.011597 | 0.011396 | 0.011631 | 0.011430 |
| 0.011496 | 0.011496 | 0.011463 | 0.011429 | 0.011463 | 0.011429 | 0.011530 |
| 0.011497 | 0.011597 | 0.011530 | 0.011429 | 0.011465 | 0.011631 | 0.011635 |
| 0.011631 | 0.011530 | 0.011429 | 0.011364 | 0.011497 | 0.011430 | 0.011363 |

|          |          |          |          |          |          |          |
|----------|----------|----------|----------|----------|----------|----------|
| 0.011468 | 0.011631 | 0.011430 | 0.011631 | 0.011396 | 0.011497 | 0.011463 |
| 0.011564 | 0.011463 | 0.011497 | 0.011463 | 0.011497 | 0.011362 | 0.011497 |
| 0.011530 | 0.011463 | 0.011530 | 0.011463 | 0.011497 | 0.011530 | 0.011765 |
| 0.011866 | 0.011799 | 0.011866 | 0.011566 | 0.011866 | 0.011497 | 0.011463 |
| 0.011499 | 0.011788 | 0.011472 | 0.011369 | 0.011807 | 0.011367 | 0.011414 |
| 0.011875 | 0.011774 | 0.011463 | 0.011866 | 0.011572 | 0.011530 | 0.011698 |
| 0.011631 | 0.011597 | 0.011629 | 0.011349 | 0.011521 | 0.011530 | 0.011601 |
| 0.011698 | 0.011600 | 0.011601 | 0.011771 | 0.011732 | 0.011799 | 0.011873 |
| 0.011635 | 0.011773 | 0.011737 | 0.011669 | 0.011935 | 0.011396 | 0.011599 |
| 0.011564 | 0.011496 | 0.011396 | 0.011396 | 0.011463 | 0.011396 | 0.011530 |
| 0.011463 | 0.011530 | 0.011429 | 0.011530 | 0.011463 | 0.011463 | 0.011530 |
| 0.011463 | 0.011899 | 0.011799 | 0.011832 | 0.011362 | 0.011463 | 0.011497 |
| 0.011496 | 0.011463 | 0.011530 | 0.011564 | 0.011429 | 0.011429 | 0.011429 |
| 0.011967 | 0.011597 | 0.011597 | 0.011396 | 0.011496 | 0.011665 | 0.011429 |
| 0.011429 | 0.011496 | 0.011463 | 0.011631 | 0.011429 | 0.011564 | 0.011698 |
| 0.011631 | 0.011463 | 0.011463 | 0.011396 | 0.011396 | 0.011564 | 0.011496 |
| 0.011396 | 0.011496 | 0.011362 | 0.011396 | 0.011530 | 0.011665 | 0.011396 |
| 0.011396 | 0.011530 | 0.011463 | 0.011362 | 0.011698 | 0.011362 | 0.011463 |
| 0.011574 | 0.011429 | 0.011732 | 0.011564 | 0.011597 | 0.011463 | 0.011564 |
| 0.011429 | 0.011765 | 0.011362 | 0.011631 | 0.011429 | 0.011429 | 0.011362 |
| 0.011597 | 0.011799 | 0.011497 | 0.011564 | 0.011396 | 0.011799 | 0.011429 |
| 0.011429 | 0.011429 | 0.011463 | 0.011564 | 0.011463 | 0.011564 | 0.011631 |
| 0.011631 | 0.011597 | 0.011496 | 0.011597 | 0.011564 | 0.011429 | 0.011396 |
| 0.011429 | 0.011429 | 0.011497 | 0.011429 | 0.011396 | 0.011564 | 0.011429 |
| 0.011463 | 0.011463 | 0.011597 | 0.011631 | 0.011530 | 0.011463 | 0.011463 |
| 0.011530 | 0.011463 | 0.011564 | 0.011429 | 0.011564 | 0.000000 | 0.011967 |
| 0.011463 | 0.011866 | 0.011474 | 0.011789 | 0.011518 | 0.011611 | 0.011828 |
| 0.011787 | 0.011834 | 0.011532 | 0.011466 | 0.011939 | 0.011854 | 0.011607 |
| 0.011677 | 0.011732 | 0.011411 | 0.011437 | 0.011450 | 0.011554 | 0.011533 |
| 0.011670 | 0.011619 | 0.011616 | 0.011457 | 0.011597 | 0.011631 | 0.011635 |
| 0.011472 | 0.011597 | 0.011530 | 0.011564 | 0.011530 | 0.011530 | 0.011497 |
| 0.011463 | 0.011463 | 0.011295 | 0.011530 | 0.011497 | 0.011430 | 0.011463 |
| 0.011463 | 0.011530 | 0.011429 | 0.011530 | 0.011564 | 0.011597 | 0.011496 |
| 0.011530 | 0.011497 | 0.011833 | 0.011833 | 0.011564 | 0.011531 | 0.011598 |
| 0.011396 | 0.011396 | 0.011429 | 0.011530 | 0.011396 | 0.011631 | 0.011631 |
| 0.011463 | 0.011463 | 0.011597 | 0.011497 | 0.011866 | 0.011498 | 0.011530 |
| 0.011329 | 0.011597 | 0.011631 | 0.011463 | 0.011530 | 0.011497 | 0.011463 |
| 0.011396 | 0.011396 | 0.011429 | 0.011598 | 0.011498 | 0.011698 | 0.011665 |
| 0.011534 | 0.011430 | 0.011530 | 0.011631 | 0.011530 | 0.011665 | 0.011698 |
| 0.011866 | 0.011572 | 0.011530 | 0.011698 | 0.011631 | 0.011597 | 0.011430 |
| 0.011532 | 0.011430 | 0.011463 | 0.011463 | 0.011530 | 0.011429 | 0.011530 |
| 0.011564 | 0.011597 | 0.011496 | 0.011530 | 0.011497 | 0.011833 | 0.011833 |
| 0.011564 | 0.011531 | 0.011664 | 0.011597 | 0.012238 | 0.011453 | 0.011552 |
| 0.011623 | 0.011442 | 0.011693 | 0.011580 | 0.011550 | 0.011612 | 0.011474 |
| 0.012159 | 0.011475 | 0.011608 | 0.011544 | 0.011818 | 0.011706 | 0.011809 |
| 0.012182 | 0.011663 | 0.011770 | 0.011832 | 0.011698 | 0.011698 | 0.011736 |
| 0.011396 | 0.011564 | 0.011698 | 0.011664 | 0.011668 | 0.011664 | 0.011633 |
| 0.011496 | 0.011429 | 0.011463 | 0.011496 | 0.011396 | 0.011463 | 0.011362 |
| 0.011496 | 0.011530 | 0.011429 | 0.011396 | 0.011496 | 0.011429 | 0.011463 |
| 0.011463 | 0.011396 | 0.011463 | 0.011497 | 0.011396 | 0.011597 | 0.011631 |
| 0.011530 | 0.011597 | 0.011530 | 0.011530 | 0.011463 | 0.011866 | 0.011496 |
| 0.011512 | 0.011463 | 0.011698 | 0.011671 | 0.011564 | 0.011564 | 0.011564 |
| 0.011564 | 0.011497 | 0.011463 | 0.011497 | 0.011463 | 0.011597 | 0.011530 |
| 0.011530 | 0.011664 | 0.011832 | 0.011564 | 0.011765 | 0.011765 | 0.011631 |
| 0.011463 | 0.011530 | 0.011564 | 0.011967 | 0.011530 | 0.011564 | 0.011530 |
| 0.011362 | 0.011496 | 0.011496 | 0.011799 | 0.011732 | 0.011765 | 0.011496 |
| 0.011597 | 0.011664 | 0.011530 | 0.011597 | 0.011564 | 0.011429 | 0.011765 |
| 0.011530 | 0.011496 | 0.011496 | 0.011664 | 0.011496 | 0.011597 | 0.011832 |
| 0.011530 | 0.011909 | 0.011899 | 0.011711 | 0.011455 | 0.011604 | 0.011370 |
| 0.011390 | 0.011917 | 0.011411 | 0.011641 | 0.011548 | 0.011671 | 0.011644 |

|          |          |          |          |          |          |          |
|----------|----------|----------|----------|----------|----------|----------|
| 0.011723 | 0.011455 | 0.011617 | 0.011456 | 0.011491 | 0.011596 | 0.011587 |
| 0.011625 | 0.011493 | 0.011589 | 0.011518 | 0.011532 | 0.011665 | 0.011732 |
| 0.011732 | 0.011598 | 0.011703 | 0.011704 | 0.011840 | 0.011838 | 0.011530 |
| 0.011765 | 0.011631 | 0.011497 | 0.011597 | 0.011396 | 0.011631 | 0.011430 |
| 0.011496 | 0.011496 | 0.011463 | 0.011429 | 0.011463 | 0.011429 | 0.011530 |
| 0.011340 | 0.011480 | 0.011505 | 0.011540 | 0.011676 | 0.011641 | 0.011572 |
| 0.011639 | 0.011565 | 0.011282 | 0.011312 | 0.011433 | 0.011670 | 0.011671 |
| 0.011464 | 0.011534 | 0.011767 | 0.011736 | 0.011464 | 0.011632 | 0.011631 |
| 0.011564 | 0.011631 | 0.011631 | 0.011530 | 0.012101 | 0.011497 | 0.011564 |
| 0.011799 | 0.011843 | 0.011503 | 0.011580 | 0.011463 | 0.011664 | 0.011631 |
| 0.011666 | 0.011698 | 0.011496 | 0.011496 | 0.011846 | 0.011832 | 0.011442 |
| 0.011331 | 0.011337 | 0.011435 | 0.011400 | 0.011504 | 0.011359 | 0.011672 |
| 0.011472 | 0.011630 | 0.011346 | 0.011510 | 0.011497 | 0.011573 | 0.011463 |
| 0.011429 | 0.011429 | 0.011497 | 0.011463 | 0.011665 | 0.011631 | 0.011564 |
| 0.011665 | 0.011732 | 0.011463 | 0.011463 | 0.011497 | 0.011497 | 0.011499 |
| 0.011567 | 0.011497 | 0.011497 | 0.011532 | 0.011665 | 0.011732 | 0.011732 |
| 0.011598 | 0.011703 | 0.011704 | 0.011840 | 0.011838 | 0.011530 | 0.011698 |
| 0.011631 | 0.011631 | 0.011466 | 0.011617 | 0.011512 | 0.011605 | 0.011481 |
| 0.011646 | 0.011926 | 0.011611 | 0.011536 | 0.011430 | 0.011631 | 0.011497 |
| 0.011597 | 0.011530 | 0.011429 | 0.011465 | 0.011631 | 0.011635 | 0.011530 |
| 0.011429 | 0.011364 | 0.011497 | 0.011430 | 0.011363 | 0.011468 | 0.011631 |
| 0.011463 | 0.011463 | 0.011295 | 0.011530 | 0.011497 | 0.011430 | 0.011631 |
| 0.011496 | 0.011530 | 0.011530 | 0.011463 | 0.011530 | 0.011765 | 0.011429 |
| 0.011463 | 0.011866 | 0.011463 | 0.011496 | 0.011463 | 0.011832 | 0.011403 |
| 0.011903 | 0.011443 | 0.011461 | 0.011664 | 0.011752 | 0.011634 | 0.011395 |
| 0.011427 | 0.011631 | 0.011732 | 0.011841 | 0.011700 | 0.011838 | 0.011968 |
| 0.011868 | 0.011906 | 0.011866 | 0.012120 | 0.011832 | 0.012707 | 0.011869 |
| 0.012540 | 0.012376 | 0.012510 | 0.012782 | 0.011832 | 0.011530 | 0.011833 |
| 0.012272 | 0.012207 | 0.011799 | 0.011698 | 0.011766 | 0.011766 | 0.011669 |
| 0.011631 | 0.011637 | 0.011698 | 0.011665 | 0.012036 | 0.012101 | 0.012103 |
| 0.012002 | 0.012103 | 0.012207 | 0.011974 | 0.012273 | 0.012279 | 0.012340 |
| 0.012340 | 0.012374 | 0.012323 | 0.012340 | 0.012342 | 0.011564 | 0.011867 |
| 0.011935 | 0.012438 | 0.011942 | 0.012169 | 0.012643 | 0.011705 | 0.011598 |
| 0.011530 | 0.011564 | 0.012035 | 0.012089 | 0.012186 | 0.011899 | 0.011566 |
| S377     | 0.012135 | 0.012135 | 0.012135 | 0.011967 | 0.011967 | 0.012034 |
| 0.011468 | 0.011468 | 0.012034 | 0.011665 | 0.011799 | 0.011700 | 0.011732 |
| 0.011698 | 0.011933 | 0.011664 | 0.011765 | 0.011832 | 0.011799 | 0.011765 |
| 0.011732 | 0.011765 | 0.011530 | 0.011732 | 0.011766 | 0.011765 | 0.011501 |
| 0.011732 | 0.011765 | 0.011664 | 0.011564 | 0.011832 | 0.011732 | 0.011832 |
| 0.011799 | 0.011900 | 0.011799 | 0.011799 | 0.011832 | 0.011799 | 0.011967 |
| 0.011664 | 0.011799 | 0.011832 | 0.011765 | 0.011799 | 0.011900 | 0.011832 |
| 0.011799 | 0.011967 | 0.011867 | 0.011530 | 0.011799 | 0.012068 | 0.011799 |
| 0.011765 | 0.011799 | 0.011933 | 0.012068 | 0.011362 | 0.011799 | 0.011900 |
| 0.011832 | 0.011900 | 0.011799 | 0.012034 | 0.011664 | 0.011799 | 0.011866 |
| 0.011765 | 0.011866 | 0.011832 | 0.011900 | 0.011832 | 0.011832 | 0.011832 |
| 0.011731 | 0.011765 | 0.011731 | 0.011765 | 0.011799 | 0.011834 | 0.011899 |
| 0.011832 | 0.011799 | 0.011866 | 0.011765 | 0.011698 | 0.011732 | 0.011799 |
| 0.011967 | 0.011899 | 0.011664 | 0.011967 | 0.011799 | 0.012034 | 0.011799 |
| 0.011950 | 0.011508 | 0.011966 | 0.011685 | 0.011657 | 0.011760 | 0.011572 |
| 0.012158 | 0.011416 | 0.011678 | 0.012034 | 0.012034 | 0.011765 | 0.011664 |
| 0.011866 | 0.011832 | 0.011899 | 0.011799 | 0.011900 | 0.011832 | 0.011832 |
| 0.011799 | 0.011832 | 0.012101 | 0.011967 | 0.011866 | 0.011833 | 0.011766 |
| 0.011732 | 0.011665 | 0.011799 | 0.011765 | 0.011698 | 0.011665 | 0.011598 |
| 0.011698 | 0.011766 | 0.011765 | 0.011765 | 0.011799 | 0.011799 | 0.011803 |
| 0.011872 | 0.011799 | 0.011799 | 0.011600 | 0.011675 | 0.011621 | 0.011733 |
| 0.011704 | 0.011644 | 0.011724 | 0.011681 | 0.011638 | 0.011643 | 0.011702 |
| 0.011600 | 0.011715 | 0.011749 | 0.011665 | 0.011648 | 0.011800 | 0.011699 |
| 0.011767 | 0.011768 | 0.011766 | 0.011933 | 0.011866 | 0.012236 | 0.011967 |
| 0.011799 | 0.011866 | 0.011799 | 0.011833 | 0.011698 | 0.011665 | 0.011732 |
| 0.011799 | 0.011799 | 0.011765 | 0.011732 | 0.011765 | 0.011732 | 0.011833 |

|          |          |          |          |          |          |          |
|----------|----------|----------|----------|----------|----------|----------|
| 0.011799 | 0.011900 | 0.011833 | 0.011732 | 0.011802 | 0.011934 | 0.011939 |
| 0.011934 | 0.011766 | 0.011732 | 0.011667 | 0.011799 | 0.011732 | 0.011665 |
| 0.011672 | 0.011934 | 0.011732 | 0.011934 | 0.011698 | 0.011799 | 0.011765 |
| 0.011866 | 0.011765 | 0.011799 | 0.011766 | 0.011799 | 0.011665 | 0.011799 |
| 0.011833 | 0.011765 | 0.011833 | 0.011765 | 0.011799 | 0.011833 | 0.012068 |
| 0.011564 | 0.011496 | 0.011564 | 0.011937 | 0.011497 | 0.011799 | 0.011765 |
| 0.011668 | 0.011909 | 0.011746 | 0.011712 | 0.011569 | 0.011606 | 0.011769 |
| 0.011569 | 0.011672 | 0.011967 | 0.012169 | 0.011812 | 0.012034 | 0.012001 |
| 0.011933 | 0.012101 | 0.011913 | 0.011843 | 0.011815 | 0.011765 | 0.011839 |
| 0.011933 | 0.011836 | 0.012041 | 0.012042 | 0.011967 | 0.012034 | 0.012145 |
| 0.011873 | 0.012045 | 0.011907 | 0.011906 | 0.012171 | 0.011698 | 0.011835 |
| 0.011866 | 0.011799 | 0.011698 | 0.011698 | 0.011765 | 0.011765 | 0.011832 |
| 0.011765 | 0.011832 | 0.011731 | 0.011765 | 0.011765 | 0.011765 | 0.011832 |
| 0.011765 | 0.011597 | 0.011496 | 0.011530 | 0.011664 | 0.011765 | 0.011799 |
| 0.011799 | 0.011698 | 0.011832 | 0.011799 | 0.011731 | 0.011731 | 0.011731 |
| 0.011664 | 0.011832 | 0.011900 | 0.011698 | 0.011799 | 0.011967 | 0.011732 |
| 0.011731 | 0.011799 | 0.011765 | 0.011933 | 0.011732 | 0.011665 | 0.011799 |
| 0.011732 | 0.011765 | 0.011765 | 0.011698 | 0.011698 | 0.011866 | 0.011799 |
| 0.011698 | 0.011799 | 0.011597 | 0.011631 | 0.011765 | 0.011564 | 0.011665 |
| 0.011631 | 0.011765 | 0.011699 | 0.011597 | 0.011362 | 0.011597 | 0.011765 |
| 0.011848 | 0.011732 | 0.011362 | 0.011799 | 0.011832 | 0.011765 | 0.011866 |
| 0.011731 | 0.012068 | 0.011664 | 0.011732 | 0.011664 | 0.011664 | 0.011664 |
| 0.011900 | 0.011766 | 0.011799 | 0.011866 | 0.011698 | 0.011496 | 0.011664 |
| 0.011732 | 0.011731 | 0.011765 | 0.011866 | 0.011765 | 0.011866 | 0.011933 |
| 0.011933 | 0.011900 | 0.011799 | 0.011900 | 0.011866 | 0.011664 | 0.011698 |
| 0.011731 | 0.011664 | 0.011799 | 0.011664 | 0.011698 | 0.011866 | 0.011732 |
| 0.011698 | 0.011765 | 0.011900 | 0.011866 | 0.011832 | 0.011765 | 0.011765 |
| 0.011832 | 0.011765 | 0.011866 | 0.011732 | 0.011866 | 0.011967 | 0.000000 |
| 0.011765 | 0.011429 | 0.011716 | 0.018239 | 0.011518 | 0.011917 | 0.011444 |
| 0.011406 | 0.011447 | 0.011899 | 0.011640 | 0.011610 | 0.011474 | 0.011789 |
| 0.011677 | 0.011732 | 0.011645 | 0.011730 | 0.011529 | 0.011751 | 0.011749 |
| 0.011342 | 0.011582 | 0.011394 | 0.011457 | 0.011900 | 0.011933 | 0.011940 |
| 0.011747 | 0.011900 | 0.011900 | 0.011799 | 0.011833 | 0.011833 | 0.011799 |
| 0.011833 | 0.011765 | 0.011799 | 0.011833 | 0.011799 | 0.011732 | 0.011765 |
| 0.011765 | 0.011833 | 0.011732 | 0.011833 | 0.011866 | 0.011900 | 0.011799 |
| 0.011765 | 0.011665 | 0.011463 | 0.011463 | 0.011866 | 0.011901 | 0.011934 |
| 0.011698 | 0.011698 | 0.011732 | 0.011833 | 0.011698 | 0.011934 | 0.011934 |
| 0.011967 | 0.011967 | 0.011900 | 0.012001 | 0.011497 | 0.012003 | 0.011833 |
| 0.011833 | 0.011900 | 0.011934 | 0.011765 | 0.011833 | 0.011799 | 0.011833 |
| 0.011901 | 0.011900 | 0.011934 | 0.011900 | 0.011801 | 0.012001 | 0.011967 |
| 0.011839 | 0.011732 | 0.011833 | 0.011934 | 0.011833 | 0.011900 | 0.012000 |
| 0.012169 | 0.011812 | 0.012034 | 0.012001 | 0.011933 | 0.012101 | 0.011665 |
| 0.011903 | 0.011733 | 0.011765 | 0.011765 | 0.011833 | 0.011732 | 0.011833 |
| 0.011866 | 0.011900 | 0.011799 | 0.011765 | 0.011665 | 0.011463 | 0.011463 |
| 0.011866 | 0.011901 | 0.011967 | 0.011899 | 0.012406 | 0.011918 | 0.011834 |
| 0.011904 | 0.011927 | 0.011974 | 0.011926 | 0.011970 | 0.011888 | 0.011819 |
| 0.012366 | 0.011752 | 0.011951 | 0.011821 | 0.012094 | 0.011945 | 0.012047 |
| 0.012387 | 0.011890 | 0.012075 | 0.012135 | 0.012000 | 0.011732 | 0.012041 |
| 0.011698 | 0.011866 | 0.012000 | 0.011967 | 0.011973 | 0.011698 | 0.011667 |
| 0.011799 | 0.011732 | 0.011765 | 0.011799 | 0.011698 | 0.011765 | 0.011664 |
| 0.011732 | 0.011765 | 0.011731 | 0.011698 | 0.011799 | 0.011731 | 0.011765 |
| 0.011765 | 0.011698 | 0.011765 | 0.011799 | 0.011698 | 0.011900 | 0.011933 |
| 0.011832 | 0.011832 | 0.011832 | 0.011832 | 0.011765 | 0.011362 | 0.011799 |
| 0.011513 | 0.011698 | 0.011665 | 0.011671 | 0.011799 | 0.011799 | 0.011866 |
| 0.011799 | 0.011799 | 0.011765 | 0.011799 | 0.011900 | 0.011900 | 0.011832 |
| 0.011832 | 0.011967 | 0.011530 | 0.011866 | 0.012068 | 0.012068 | 0.011933 |
| 0.011765 | 0.011832 | 0.011799 | 0.011597 | 0.011799 | 0.011799 | 0.011832 |
| 0.011866 | 0.011731 | 0.011731 | 0.012034 | 0.012034 | 0.012001 | 0.011799 |
| 0.011900 | 0.011967 | 0.011832 | 0.011900 | 0.011866 | 0.011732 | 0.011463 |
| 0.011832 | 0.011799 | 0.011731 | 0.011967 | 0.011799 | 0.011900 | 0.011732 |

|          |          |          |          |          |          |          |
|----------|----------|----------|----------|----------|----------|----------|
| 0.011765 | 0.011603 | 0.011597 | 0.011670 | 0.011512 | 0.011774 | 0.011473 |
| 0.011719 | 0.011839 | 0.011692 | 0.011820 | 0.011695 | 0.011620 | 0.011591 |
| 0.011519 | 0.011521 | 0.011673 | 0.011523 | 0.011545 | 0.011730 | 0.011871 |
| 0.011852 | 0.011808 | 0.011765 | 0.011765 | 0.011836 | 0.011698 | 0.011766 |
| 0.011698 | 0.011834 | 0.011940 | 0.011738 | 0.012078 | 0.012121 | 0.011832 |
| 0.011799 | 0.011866 | 0.011799 | 0.011833 | 0.011698 | 0.011665 | 0.011732 |
| 0.011799 | 0.011799 | 0.011765 | 0.011732 | 0.011765 | 0.011732 | 0.011833 |
| 0.011724 | 0.011725 | 0.011711 | 0.011745 | 0.011882 | 0.011846 | 0.011777 |
| 0.011844 | 0.011800 | 0.011577 | 0.011528 | 0.011704 | 0.011874 | 0.011875 |
| 0.011699 | 0.011738 | 0.012003 | 0.011973 | 0.011901 | 0.011935 | 0.011933 |
| 0.011866 | 0.011933 | 0.011933 | 0.011832 | 0.011732 | 0.012001 | 0.012068 |
| 0.012102 | 0.011523 | 0.011674 | 0.011823 | 0.011698 | 0.011967 | 0.011933 |
| 0.011969 | 0.012000 | 0.012000 | 0.012000 | 0.012043 | 0.012135 | 0.011719 |
| 0.011601 | 0.011614 | 0.011707 | 0.011672 | 0.011709 | 0.011657 | 0.011332 |
| 0.011746 | 0.011543 | 0.011727 | 0.011772 | 0.011733 | 0.011779 | 0.011766 |
| 0.011732 | 0.011665 | 0.011799 | 0.011765 | 0.011698 | 0.011665 | 0.011598 |
| 0.011698 | 0.011766 | 0.011765 | 0.011765 | 0.011799 | 0.011799 | 0.011803 |
| 0.011872 | 0.011799 | 0.011799 | 0.011836 | 0.011698 | 0.011766 | 0.011698 |
| 0.011834 | 0.011940 | 0.011738 | 0.012078 | 0.012121 | 0.011832 | 0.012000 |
| 0.011933 | 0.011933 | 0.011770 | 0.011896 | 0.011894 | 0.011912 | 0.011691 |
| 0.011783 | 0.011926 | 0.011780 | 0.011774 | 0.011732 | 0.011934 | 0.011799 |
| 0.011900 | 0.011833 | 0.011732 | 0.011802 | 0.011934 | 0.011939 | 0.011766 |
| 0.011732 | 0.011667 | 0.011799 | 0.011732 | 0.011665 | 0.011672 | 0.011934 |
| 0.011833 | 0.011765 | 0.011799 | 0.011833 | 0.011799 | 0.011732 | 0.011598 |
| 0.011799 | 0.011832 | 0.011832 | 0.011765 | 0.011832 | 0.012068 | 0.011664 |
| 0.011765 | 0.011362 | 0.011765 | 0.011799 | 0.011765 | 0.011530 | 0.011703 |
| 0.011847 | 0.011528 | 0.011411 | 0.011584 | 0.011671 | 0.011635 | 0.011478 |
| 0.011375 | 0.011665 | 0.011765 | 0.011807 | 0.011666 | 0.011805 | 0.012002 |
| 0.011834 | 0.011872 | 0.011900 | 0.012052 | 0.011866 | 0.012742 | 0.011835 |
| 0.012574 | 0.012342 | 0.012476 | 0.012748 | 0.011799 | 0.011698 | 0.011867 |
| 0.012441 | 0.012241 | 0.011765 | 0.011732 | 0.011733 | 0.011733 | 0.011771 |
| 0.011665 | 0.011671 | 0.011732 | 0.011632 | 0.012002 | 0.012068 | 0.012070 |
| 0.011969 | 0.012070 | 0.012173 | 0.011940 | 0.012441 | 0.012449 | 0.012508 |
| 0.012509 | 0.012543 | 0.012494 | 0.012509 | 0.012511 | 0.011866 | 0.012035 |
| 0.012103 | 0.012674 | 0.012078 | 0.012136 | 0.012609 | 0.011604 | 0.011497 |
| 0.011463 | 0.011530 | 0.012002 | 0.012048 | 0.012116 | 0.011866 | 0.011532 |
| S378     | 0.011631 | 0.011631 | 0.011967 | 0.011732 | 0.011732 | 0.011799 |
| 0.011637 | 0.011569 | 0.011799 | 0.011228 | 0.011295 | 0.011262 | 0.011228 |
| 0.011262 | 0.011429 | 0.011228 | 0.011262 | 0.011329 | 0.011295 | 0.011262 |
| 0.011228 | 0.011262 | 0.011362 | 0.011228 | 0.011262 | 0.011262 | 0.011603 |
| 0.011496 | 0.011262 | 0.011161 | 0.011396 | 0.011329 | 0.011295 | 0.011329 |
| 0.011295 | 0.011396 | 0.011295 | 0.011295 | 0.011329 | 0.011295 | 0.011463 |
| 0.011228 | 0.011295 | 0.011329 | 0.011262 | 0.011362 | 0.011396 | 0.011329 |
| 0.011295 | 0.011463 | 0.011362 | 0.011631 | 0.011295 | 0.011564 | 0.011295 |
| 0.011262 | 0.011362 | 0.011429 | 0.011564 | 0.011664 | 0.011362 | 0.011463 |
| 0.011329 | 0.011396 | 0.011295 | 0.011530 | 0.011765 | 0.011295 | 0.011362 |
| 0.011262 | 0.011362 | 0.011329 | 0.011396 | 0.011329 | 0.011329 | 0.011329 |
| 0.011228 | 0.011262 | 0.011228 | 0.011329 | 0.011295 | 0.011329 | 0.011396 |
| 0.011329 | 0.011295 | 0.011362 | 0.011262 | 0.011396 | 0.011228 | 0.011295 |
| 0.011463 | 0.011396 | 0.011631 | 0.011463 | 0.011295 | 0.011530 | 0.011295 |
| 0.011431 | 0.011658 | 0.011513 | 0.011177 | 0.011210 | 0.011318 | 0.011375 |
| 0.012048 | 0.011518 | 0.011225 | 0.011530 | 0.011530 | 0.011329 | 0.011429 |
| 0.011362 | 0.011329 | 0.011396 | 0.011295 | 0.011396 | 0.011329 | 0.011329 |
| 0.011295 | 0.011396 | 0.011597 | 0.011463 | 0.011362 | 0.011329 | 0.011262 |
| 0.011228 | 0.011228 | 0.011295 | 0.011262 | 0.011463 | 0.011429 | 0.011362 |
| 0.011463 | 0.011530 | 0.011262 | 0.011262 | 0.011295 | 0.011295 | 0.011297 |
| 0.011364 | 0.011295 | 0.011295 | 0.011168 | 0.011241 | 0.011200 | 0.011296 |
| 0.011297 | 0.011232 | 0.011282 | 0.011267 | 0.011196 | 0.011232 | 0.011263 |
| 0.011528 | 0.011302 | 0.011336 | 0.011228 | 0.011233 | 0.011363 | 0.011329 |
| 0.011397 | 0.011330 | 0.011329 | 0.011429 | 0.011362 | 0.011732 | 0.011530 |

|          |          |          |          |          |          |          |
|----------|----------|----------|----------|----------|----------|----------|
| 0.011564 | 0.011430 | 0.011295 | 0.011396 | 0.011195 | 0.011429 | 0.011228 |
| 0.011295 | 0.011295 | 0.011262 | 0.011228 | 0.011262 | 0.011228 | 0.011329 |
| 0.011295 | 0.011396 | 0.011329 | 0.011228 | 0.011330 | 0.011430 | 0.011432 |
| 0.011430 | 0.011329 | 0.011228 | 0.011161 | 0.011295 | 0.011228 | 0.011161 |
| 0.011264 | 0.011430 | 0.011228 | 0.011430 | 0.011195 | 0.011295 | 0.011262 |
| 0.011362 | 0.011262 | 0.011295 | 0.011262 | 0.011295 | 0.011161 | 0.011295 |
| 0.011329 | 0.011262 | 0.011329 | 0.011262 | 0.011295 | 0.011329 | 0.011564 |
| 0.011664 | 0.011597 | 0.011665 | 0.011431 | 0.011665 | 0.011295 | 0.011262 |
| 0.011297 | 0.011586 | 0.011380 | 0.011197 | 0.011671 | 0.011163 | 0.011296 |
| 0.011671 | 0.011570 | 0.011463 | 0.011664 | 0.011367 | 0.011530 | 0.011497 |
| 0.011429 | 0.011597 | 0.011451 | 0.011266 | 0.011354 | 0.011329 | 0.011398 |
| 0.011497 | 0.011397 | 0.011533 | 0.011602 | 0.011530 | 0.011597 | 0.011704 |
| 0.011432 | 0.011603 | 0.011534 | 0.011466 | 0.011733 | 0.011194 | 0.011397 |
| 0.011362 | 0.011295 | 0.011194 | 0.011194 | 0.011262 | 0.011262 | 0.011329 |
| 0.011262 | 0.011329 | 0.011228 | 0.011329 | 0.011262 | 0.011262 | 0.011329 |
| 0.011262 | 0.011698 | 0.011597 | 0.011631 | 0.011161 | 0.011262 | 0.011295 |
| 0.011295 | 0.011262 | 0.011329 | 0.011362 | 0.011228 | 0.011228 | 0.011228 |
| 0.011765 | 0.011396 | 0.011396 | 0.011194 | 0.011295 | 0.011463 | 0.011228 |
| 0.011228 | 0.011295 | 0.011262 | 0.011429 | 0.011228 | 0.011362 | 0.011496 |
| 0.011429 | 0.011262 | 0.011262 | 0.011194 | 0.011194 | 0.011362 | 0.011295 |
| 0.011194 | 0.011295 | 0.011161 | 0.011194 | 0.011329 | 0.011463 | 0.011228 |
| 0.011195 | 0.011329 | 0.011262 | 0.011161 | 0.011496 | 0.011161 | 0.011329 |
| 0.011403 | 0.011228 | 0.011530 | 0.011362 | 0.011396 | 0.011262 | 0.011362 |
| 0.011228 | 0.011564 | 0.011161 | 0.011429 | 0.011228 | 0.011228 | 0.011161 |
| 0.011396 | 0.011597 | 0.011295 | 0.011362 | 0.011194 | 0.011597 | 0.011228 |
| 0.011228 | 0.011228 | 0.011262 | 0.011362 | 0.011262 | 0.011362 | 0.011429 |
| 0.011429 | 0.011396 | 0.011295 | 0.011396 | 0.011362 | 0.011228 | 0.011194 |
| 0.011228 | 0.011228 | 0.011295 | 0.011228 | 0.011194 | 0.011362 | 0.011228 |
| 0.011262 | 0.011262 | 0.011396 | 0.011429 | 0.011329 | 0.011262 | 0.011262 |
| 0.011329 | 0.011262 | 0.011362 | 0.011228 | 0.011362 | 0.011463 | 0.011765 |
| 0.000000 | 0.011664 | 0.011267 | 0.017785 | 0.011191 | 0.011366 | 0.011618 |
| 0.011579 | 0.011623 | 0.011322 | 0.011350 | 0.011664 | 0.011647 | 0.011303 |
| 0.011535 | 0.011548 | 0.011138 | 0.011228 | 0.011255 | 0.011307 | 0.011232 |
| 0.011529 | 0.011433 | 0.011431 | 0.011259 | 0.011396 | 0.011429 | 0.011432 |
| 0.011301 | 0.011396 | 0.011396 | 0.011362 | 0.011329 | 0.011329 | 0.011295 |
| 0.011329 | 0.011262 | 0.011295 | 0.011329 | 0.011295 | 0.011228 | 0.011262 |
| 0.011262 | 0.011329 | 0.011228 | 0.011329 | 0.011362 | 0.011396 | 0.011295 |
| 0.011329 | 0.011295 | 0.011631 | 0.011631 | 0.011362 | 0.011396 | 0.011430 |
| 0.011195 | 0.011195 | 0.011228 | 0.011329 | 0.011195 | 0.011430 | 0.011430 |
| 0.011463 | 0.011463 | 0.011329 | 0.011497 | 0.011665 | 0.011498 | 0.011329 |
| 0.011329 | 0.011396 | 0.011430 | 0.011262 | 0.011329 | 0.011295 | 0.011329 |
| 0.011396 | 0.011396 | 0.011429 | 0.011396 | 0.011296 | 0.011497 | 0.011463 |
| 0.011331 | 0.011228 | 0.011329 | 0.011430 | 0.011329 | 0.011463 | 0.011496 |
| 0.011664 | 0.011367 | 0.011530 | 0.011497 | 0.011429 | 0.011597 | 0.011228 |
| 0.011397 | 0.011295 | 0.011262 | 0.011262 | 0.011329 | 0.011228 | 0.011329 |
| 0.011362 | 0.011396 | 0.011295 | 0.011329 | 0.011295 | 0.011631 | 0.011631 |
| 0.011362 | 0.011396 | 0.011463 | 0.011396 | 0.012036 | 0.011453 | 0.011377 |
| 0.011447 | 0.011407 | 0.011517 | 0.011406 | 0.011515 | 0.011439 | 0.011370 |
| 0.011987 | 0.011302 | 0.011437 | 0.011371 | 0.011645 | 0.011502 | 0.011605 |
| 0.012012 | 0.011475 | 0.011567 | 0.011631 | 0.011496 | 0.011497 | 0.011533 |
| 0.011194 | 0.011362 | 0.011496 | 0.011463 | 0.011466 | 0.011463 | 0.011431 |
| 0.011295 | 0.011228 | 0.011262 | 0.011295 | 0.011194 | 0.011262 | 0.011161 |
| 0.011295 | 0.011329 | 0.011228 | 0.011194 | 0.011295 | 0.011228 | 0.011262 |
| 0.011262 | 0.011194 | 0.011262 | 0.011295 | 0.011194 | 0.011396 | 0.011429 |
| 0.011329 | 0.011396 | 0.011329 | 0.011329 | 0.011262 | 0.011664 | 0.011295 |
| 0.011338 | 0.011262 | 0.011497 | 0.011501 | 0.011362 | 0.011362 | 0.011362 |
| 0.011362 | 0.011295 | 0.011262 | 0.011295 | 0.011396 | 0.011396 | 0.011329 |
| 0.011329 | 0.011463 | 0.011631 | 0.011362 | 0.011564 | 0.011564 | 0.011429 |
| 0.011262 | 0.011329 | 0.011362 | 0.011765 | 0.011329 | 0.011362 | 0.011329 |
| 0.011362 | 0.011295 | 0.011295 | 0.011597 | 0.011530 | 0.011564 | 0.011295 |



|          |          |          |          |          |          |          |
|----------|----------|----------|----------|----------|----------|----------|
| 0.011396 | 0.011463 | 0.011329 | 0.011396 | 0.011362 | 0.011228 | 0.011564 |
| 0.011329 | 0.011295 | 0.011295 | 0.011463 | 0.011295 | 0.011396 | 0.011631 |
| 0.011194 | 0.011705 | 0.011698 | 0.011467 | 0.011286 | 0.011400 | 0.011267 |
| 0.011225 | 0.011722 | 0.011236 | 0.011373 | 0.011207 | 0.011315 | 0.011326 |
| 0.011519 | 0.011126 | 0.011283 | 0.011126 | 0.011168 | 0.011328 | 0.011303 |
| 0.011362 | 0.011257 | 0.011377 | 0.011307 | 0.011330 | 0.011463 | 0.011530 |
| 0.011530 | 0.011396 | 0.011500 | 0.011501 | 0.011636 | 0.011661 | 0.011329 |
| 0.011564 | 0.011430 | 0.011295 | 0.011396 | 0.011195 | 0.011429 | 0.011228 |
| 0.011295 | 0.011295 | 0.011262 | 0.011228 | 0.011262 | 0.011228 | 0.011329 |
| 0.011305 | 0.011305 | 0.011300 | 0.011334 | 0.011471 | 0.011436 | 0.011436 |
| 0.011435 | 0.011363 | 0.011171 | 0.011168 | 0.011297 | 0.011467 | 0.011467 |
| 0.011262 | 0.011331 | 0.011565 | 0.011533 | 0.011464 | 0.011498 | 0.011429 |
| 0.011362 | 0.011429 | 0.011429 | 0.011329 | 0.011900 | 0.011497 | 0.011564 |
| 0.011597 | 0.011665 | 0.011299 | 0.011372 | 0.011262 | 0.011463 | 0.011429 |
| 0.011464 | 0.011496 | 0.011496 | 0.011496 | 0.011611 | 0.011631 | 0.011268 |
| 0.011162 | 0.011164 | 0.011264 | 0.011230 | 0.011333 | 0.011172 | 0.011502 |
| 0.011300 | 0.011455 | 0.011203 | 0.011322 | 0.011296 | 0.011368 | 0.011262 |
| 0.011228 | 0.011228 | 0.011295 | 0.011262 | 0.011463 | 0.011429 | 0.011362 |
| 0.011463 | 0.011530 | 0.011262 | 0.011262 | 0.011295 | 0.011295 | 0.011297 |
| 0.011364 | 0.011295 | 0.011295 | 0.011330 | 0.011463 | 0.011530 | 0.011530 |
| 0.011396 | 0.011500 | 0.011501 | 0.011636 | 0.011661 | 0.011329 | 0.011496 |
| 0.011429 | 0.011429 | 0.011263 | 0.011443 | 0.011373 | 0.011401 | 0.011270 |
| 0.011439 | 0.011653 | 0.011441 | 0.011332 | 0.011228 | 0.011430 | 0.011295 |
| 0.011396 | 0.011329 | 0.011228 | 0.011330 | 0.011430 | 0.011432 | 0.011329 |
| 0.011228 | 0.011161 | 0.011295 | 0.011228 | 0.011161 | 0.011264 | 0.011430 |
| 0.011329 | 0.011262 | 0.011295 | 0.011329 | 0.011295 | 0.011228 | 0.011430 |
| 0.011295 | 0.011329 | 0.011329 | 0.011262 | 0.011329 | 0.011564 | 0.011228 |
| 0.011262 | 0.011664 | 0.011262 | 0.011295 | 0.011262 | 0.011631 | 0.011232 |
| 0.011678 | 0.011230 | 0.011311 | 0.011463 | 0.011549 | 0.011455 | 0.011186 |
| 0.011270 | 0.011429 | 0.011530 | 0.011637 | 0.011498 | 0.011635 | 0.011766 |
| 0.011666 | 0.011703 | 0.011664 | 0.011914 | 0.011631 | 0.012505 | 0.011667 |
| 0.012406 | 0.012173 | 0.012307 | 0.012579 | 0.011631 | 0.011329 | 0.011631 |
| 0.012070 | 0.012005 | 0.011597 | 0.011497 | 0.011565 | 0.011565 | 0.011534 |
| 0.011429 | 0.011433 | 0.011496 | 0.011464 | 0.011834 | 0.011900 | 0.011901 |
| 0.011800 | 0.011901 | 0.012004 | 0.011770 | 0.012070 | 0.012076 | 0.012137 |
| 0.012138 | 0.012172 | 0.012118 | 0.012138 | 0.012139 | 0.011362 | 0.011665 |
| 0.011733 | 0.012236 | 0.011738 | 0.011967 | 0.012440 | 0.011502 | 0.011396 |
| 0.011362 | 0.011362 | 0.011833 | 0.011883 | 0.011975 | 0.011698 | 0.011363 |
| S379     | 0.012034 | 0.012034 | 0.012102 | 0.011866 | 0.011866 | 0.011933 |
| 0.011434 | 0.011366 | 0.011933 | 0.011631 | 0.011698 | 0.011666 | 0.011631 |
| 0.011597 | 0.011832 | 0.011564 | 0.011664 | 0.011732 | 0.011698 | 0.011664 |
| 0.011631 | 0.011664 | 0.011497 | 0.011631 | 0.011665 | 0.011664 | 0.011400 |
| 0.011631 | 0.011664 | 0.011564 | 0.011530 | 0.011732 | 0.011698 | 0.011732 |
| 0.011698 | 0.011799 | 0.011698 | 0.011698 | 0.011732 | 0.011698 | 0.011866 |
| 0.011564 | 0.011698 | 0.011732 | 0.011664 | 0.011698 | 0.011799 | 0.011732 |
| 0.011698 | 0.011866 | 0.011766 | 0.011429 | 0.011698 | 0.011967 | 0.011698 |
| 0.011664 | 0.011698 | 0.011832 | 0.011967 | 0.011329 | 0.011698 | 0.011799 |
| 0.011732 | 0.011799 | 0.011698 | 0.011866 | 0.011564 | 0.011698 | 0.011765 |
| 0.011664 | 0.011765 | 0.011732 | 0.011799 | 0.011732 | 0.011732 | 0.011732 |
| 0.011631 | 0.011664 | 0.011631 | 0.011665 | 0.011698 | 0.011733 | 0.011799 |
| 0.011732 | 0.011698 | 0.011765 | 0.011664 | 0.011597 | 0.011631 | 0.011698 |
| 0.011866 | 0.011799 | 0.011564 | 0.011866 | 0.011698 | 0.011933 | 0.011698 |
| 0.011876 | 0.011434 | 0.011891 | 0.011607 | 0.011583 | 0.011723 | 0.011494 |
| 0.012085 | 0.011416 | 0.011596 | 0.011933 | 0.011933 | 0.011664 | 0.011564 |
| 0.011765 | 0.011732 | 0.011799 | 0.011698 | 0.011799 | 0.011732 | 0.011731 |
| 0.011698 | 0.011731 | 0.012001 | 0.011866 | 0.011765 | 0.011732 | 0.011665 |
| 0.011631 | 0.011564 | 0.011698 | 0.011665 | 0.011598 | 0.011564 | 0.011497 |
| 0.011598 | 0.011665 | 0.011665 | 0.011665 | 0.011698 | 0.011698 | 0.011702 |
| 0.011770 | 0.011698 | 0.011698 | 0.011564 | 0.011566 | 0.011586 | 0.011699 |
| 0.011670 | 0.011610 | 0.011651 | 0.011647 | 0.011604 | 0.011608 | 0.011668 |

|          |          |          |          |          |          |          |
|----------|----------|----------|----------|----------|----------|----------|
| 0.011564 | 0.011681 | 0.011715 | 0.011632 | 0.011613 | 0.011767 | 0.011666 |
| 0.011733 | 0.011734 | 0.011733 | 0.011832 | 0.011765 | 0.012135 | 0.011867 |
| 0.011698 | 0.011766 | 0.011698 | 0.011732 | 0.011597 | 0.011564 | 0.011631 |
| 0.011698 | 0.011698 | 0.011665 | 0.011631 | 0.011664 | 0.011631 | 0.011732 |
| 0.011698 | 0.011799 | 0.011732 | 0.011631 | 0.011734 | 0.011833 | 0.011838 |
| 0.011833 | 0.011732 | 0.011631 | 0.011566 | 0.011698 | 0.011631 | 0.011564 |
| 0.011570 | 0.011833 | 0.011631 | 0.011833 | 0.011597 | 0.011698 | 0.011665 |
| 0.011766 | 0.011665 | 0.011698 | 0.011665 | 0.011698 | 0.011564 | 0.011698 |
| 0.011732 | 0.011665 | 0.011732 | 0.011665 | 0.011698 | 0.011732 | 0.011967 |
| 0.011463 | 0.011396 | 0.011463 | 0.011802 | 0.011396 | 0.011698 | 0.011665 |
| 0.011635 | 0.011910 | 0.011746 | 0.011575 | 0.011467 | 0.011572 | 0.011729 |
| 0.011468 | 0.011639 | 0.011866 | 0.012068 | 0.011778 | 0.011866 | 0.011900 |
| 0.011832 | 0.012000 | 0.011878 | 0.011720 | 0.011689 | 0.011732 | 0.011805 |
| 0.011900 | 0.011802 | 0.011940 | 0.012008 | 0.011933 | 0.012001 | 0.012111 |
| 0.011839 | 0.012011 | 0.011873 | 0.011872 | 0.012137 | 0.011597 | 0.011802 |
| 0.011765 | 0.011698 | 0.011597 | 0.011597 | 0.011664 | 0.011664 | 0.011732 |
| 0.011664 | 0.011732 | 0.011631 | 0.011664 | 0.011664 | 0.011664 | 0.011731 |
| 0.011664 | 0.011496 | 0.011396 | 0.011429 | 0.011564 | 0.011664 | 0.011698 |
| 0.011698 | 0.011597 | 0.011732 | 0.011698 | 0.011631 | 0.011631 | 0.011631 |
| 0.011564 | 0.011732 | 0.011799 | 0.011597 | 0.011698 | 0.011866 | 0.011631 |
| 0.011631 | 0.011698 | 0.011664 | 0.011833 | 0.011631 | 0.011564 | 0.011698 |
| 0.011631 | 0.011664 | 0.011664 | 0.011597 | 0.011597 | 0.011765 | 0.011698 |
| 0.011597 | 0.011698 | 0.011564 | 0.011597 | 0.011732 | 0.011531 | 0.011631 |
| 0.011598 | 0.011732 | 0.011665 | 0.011564 | 0.011262 | 0.011564 | 0.011732 |
| 0.011814 | 0.011631 | 0.011329 | 0.011766 | 0.011732 | 0.011664 | 0.011765 |
| 0.011631 | 0.011967 | 0.011564 | 0.011631 | 0.011564 | 0.011564 | 0.011564 |
| 0.011799 | 0.011665 | 0.011698 | 0.011765 | 0.011597 | 0.011396 | 0.011564 |
| 0.011631 | 0.011631 | 0.011664 | 0.011765 | 0.011664 | 0.011765 | 0.011832 |
| 0.011832 | 0.011799 | 0.011698 | 0.011799 | 0.011765 | 0.011631 | 0.011597 |
| 0.011631 | 0.011631 | 0.011698 | 0.011564 | 0.011597 | 0.011765 | 0.011631 |
| 0.011597 | 0.011664 | 0.011799 | 0.011765 | 0.011732 | 0.011664 | 0.011665 |
| 0.011732 | 0.011664 | 0.011765 | 0.011631 | 0.011765 | 0.011866 | 0.011429 |
| 0.011664 | 0.000000 | 0.011647 | 0.018163 | 0.011388 | 0.011733 | 0.011374 |
| 0.011337 | 0.011377 | 0.011846 | 0.011583 | 0.011555 | 0.011405 | 0.011729 |
| 0.011630 | 0.011610 | 0.011567 | 0.011647 | 0.011490 | 0.011702 | 0.011663 |
| 0.011342 | 0.011507 | 0.011320 | 0.011391 | 0.011799 | 0.011833 | 0.011838 |
| 0.011713 | 0.011799 | 0.011799 | 0.011698 | 0.011732 | 0.011732 | 0.011699 |
| 0.011732 | 0.011664 | 0.011698 | 0.011732 | 0.011698 | 0.011631 | 0.011665 |
| 0.011665 | 0.011732 | 0.011631 | 0.011732 | 0.011766 | 0.011799 | 0.011698 |
| 0.011664 | 0.011631 | 0.011362 | 0.011362 | 0.011766 | 0.011800 | 0.011833 |
| 0.011597 | 0.011598 | 0.011631 | 0.011732 | 0.011598 | 0.011833 | 0.011833 |
| 0.011866 | 0.011866 | 0.011799 | 0.011900 | 0.011396 | 0.011902 | 0.011732 |
| 0.011732 | 0.011799 | 0.011833 | 0.011665 | 0.011732 | 0.011698 | 0.011732 |
| 0.011800 | 0.011799 | 0.011833 | 0.011800 | 0.011700 | 0.011900 | 0.011866 |
| 0.011738 | 0.011631 | 0.011732 | 0.011833 | 0.011732 | 0.011799 | 0.011899 |
| 0.012068 | 0.011778 | 0.011866 | 0.011900 | 0.011832 | 0.012000 | 0.011632 |
| 0.011802 | 0.011699 | 0.011665 | 0.011665 | 0.011732 | 0.011631 | 0.011732 |
| 0.011766 | 0.011799 | 0.011698 | 0.011664 | 0.011631 | 0.011362 | 0.011362 |
| 0.011766 | 0.011800 | 0.011866 | 0.011799 | 0.012373 | 0.011882 | 0.011799 |
| 0.011869 | 0.011823 | 0.011939 | 0.011822 | 0.011936 | 0.011854 | 0.011784 |
| 0.012331 | 0.011718 | 0.011848 | 0.011787 | 0.012059 | 0.011911 | 0.012013 |
| 0.012353 | 0.011852 | 0.011973 | 0.012034 | 0.011900 | 0.011631 | 0.011939 |
| 0.011597 | 0.011765 | 0.011899 | 0.011866 | 0.011871 | 0.011597 | 0.011532 |
| 0.011698 | 0.011631 | 0.011664 | 0.011698 | 0.011597 | 0.011664 | 0.011564 |
| 0.011631 | 0.011664 | 0.011631 | 0.011597 | 0.011698 | 0.011631 | 0.011664 |
| 0.011664 | 0.011597 | 0.011664 | 0.011698 | 0.011597 | 0.011799 | 0.011832 |
| 0.011732 | 0.011732 | 0.011732 | 0.011732 | 0.011664 | 0.011329 | 0.011698 |
| 0.011478 | 0.011665 | 0.011632 | 0.011637 | 0.011698 | 0.011698 | 0.011765 |
| 0.011765 | 0.011698 | 0.011664 | 0.011698 | 0.011799 | 0.011799 | 0.011732 |
| 0.011732 | 0.011866 | 0.011429 | 0.011765 | 0.011967 | 0.011967 | 0.011832 |

|          |          |          |          |          |          |          |
|----------|----------|----------|----------|----------|----------|----------|
| 0.011664 | 0.011732 | 0.011765 | 0.011497 | 0.011732 | 0.011698 | 0.011732 |
| 0.011765 | 0.011631 | 0.011631 | 0.011934 | 0.011934 | 0.011900 | 0.011698 |
| 0.011799 | 0.011866 | 0.011732 | 0.011799 | 0.011765 | 0.011631 | 0.011362 |
| 0.011731 | 0.011698 | 0.011631 | 0.011866 | 0.011698 | 0.011799 | 0.011631 |
| 0.011732 | 0.011501 | 0.011496 | 0.011589 | 0.011399 | 0.011740 | 0.011422 |
| 0.011665 | 0.011761 | 0.011622 | 0.011730 | 0.011548 | 0.011518 | 0.011485 |
| 0.011520 | 0.011324 | 0.011561 | 0.011457 | 0.011384 | 0.011529 | 0.011790 |
| 0.011776 | 0.011729 | 0.011694 | 0.011694 | 0.011735 | 0.011598 | 0.011665 |
| 0.011665 | 0.011733 | 0.011838 | 0.011637 | 0.011976 | 0.012015 | 0.011732 |
| 0.011698 | 0.011766 | 0.011698 | 0.011732 | 0.011597 | 0.011564 | 0.011631 |
| 0.011698 | 0.011698 | 0.011665 | 0.011631 | 0.011664 | 0.011631 | 0.011732 |
| 0.011689 | 0.011690 | 0.011677 | 0.011711 | 0.011847 | 0.011812 | 0.011812 |
| 0.011810 | 0.011766 | 0.011577 | 0.011564 | 0.011670 | 0.011840 | 0.011841 |
| 0.011666 | 0.011704 | 0.011970 | 0.011939 | 0.011868 | 0.011902 | 0.011832 |
| 0.011765 | 0.011832 | 0.011832 | 0.011732 | 0.011631 | 0.011900 | 0.011967 |
| 0.012001 | 0.011416 | 0.011640 | 0.011788 | 0.011665 | 0.011866 | 0.011832 |
| 0.011868 | 0.011900 | 0.011900 | 0.011900 | 0.012004 | 0.012034 | 0.011685 |
| 0.011567 | 0.011580 | 0.011673 | 0.011638 | 0.011675 | 0.011583 | 0.011298 |
| 0.011712 | 0.011455 | 0.011584 | 0.011735 | 0.011699 | 0.011745 | 0.011665 |
| 0.011631 | 0.011564 | 0.011698 | 0.011665 | 0.011598 | 0.011564 | 0.011497 |
| 0.011598 | 0.011665 | 0.011665 | 0.011665 | 0.011698 | 0.011698 | 0.011702 |
| 0.011770 | 0.011698 | 0.011698 | 0.011735 | 0.011598 | 0.011665 | 0.011665 |
| 0.011733 | 0.011838 | 0.011637 | 0.011976 | 0.012015 | 0.011732 | 0.011900 |
| 0.011832 | 0.011832 | 0.011669 | 0.011861 | 0.011790 | 0.011810 | 0.011656 |
| 0.011853 | 0.011972 | 0.011865 | 0.011740 | 0.011631 | 0.011833 | 0.011698 |
| 0.011799 | 0.011732 | 0.011631 | 0.011734 | 0.011833 | 0.011838 | 0.011732 |
| 0.011631 | 0.011566 | 0.011698 | 0.011631 | 0.011564 | 0.011570 | 0.011833 |
| 0.011732 | 0.011664 | 0.011698 | 0.011732 | 0.011698 | 0.011631 | 0.011564 |
| 0.011698 | 0.011732 | 0.011732 | 0.011664 | 0.011732 | 0.011967 | 0.011564 |
| 0.011664 | 0.011329 | 0.011664 | 0.011698 | 0.011664 | 0.011429 | 0.011617 |
| 0.011791 | 0.011443 | 0.011411 | 0.011503 | 0.011590 | 0.011563 | 0.011395 |
| 0.011375 | 0.011564 | 0.011665 | 0.011774 | 0.011633 | 0.011737 | 0.011901 |
| 0.011801 | 0.011838 | 0.011799 | 0.011983 | 0.011765 | 0.012641 | 0.011802 |
| 0.012541 | 0.012275 | 0.012443 | 0.012715 | 0.011698 | 0.011665 | 0.011766 |
| 0.012407 | 0.012106 | 0.011732 | 0.011631 | 0.011699 | 0.011699 | 0.011669 |
| 0.011564 | 0.011535 | 0.011631 | 0.011598 | 0.011969 | 0.012035 | 0.012036 |
| 0.011935 | 0.012036 | 0.012106 | 0.011873 | 0.012408 | 0.012415 | 0.012475 |
| 0.012476 | 0.012509 | 0.012426 | 0.012476 | 0.012477 | 0.011765 | 0.012002 |
| 0.012070 | 0.012573 | 0.012078 | 0.012035 | 0.012508 | 0.011570 | 0.011464 |
| 0.011362 | 0.011430 | 0.011901 | 0.012007 | 0.012081 | 0.011765 | 0.011498 |
| S380     | 0.011647 | 0.011647 | 0.011751 | 0.011716 | 0.011716 | 0.011751 |
| 0.011654 | 0.011549 | 0.011716 | 0.011233 | 0.011267 | 0.011267 | 0.011233 |
| 0.011267 | 0.011440 | 0.011233 | 0.011267 | 0.011336 | 0.011302 | 0.011267 |
| 0.011233 | 0.011267 | 0.011371 | 0.011233 | 0.011267 | 0.011233 | 0.011619 |
| 0.011509 | 0.011267 | 0.011164 | 0.011405 | 0.011302 | 0.011302 | 0.011336 |
| 0.011302 | 0.011405 | 0.011302 | 0.011302 | 0.011336 | 0.011302 | 0.011474 |
| 0.011233 | 0.011302 | 0.011336 | 0.011267 | 0.011371 | 0.011405 | 0.011336 |
| 0.011302 | 0.011474 | 0.011337 | 0.011647 | 0.011302 | 0.011578 | 0.011302 |
| 0.011267 | 0.011371 | 0.011405 | 0.011578 | 0.011681 | 0.011371 | 0.011474 |
| 0.011336 | 0.011405 | 0.011267 | 0.011509 | 0.011785 | 0.011302 | 0.011371 |
| 0.011267 | 0.011336 | 0.011336 | 0.011371 | 0.011302 | 0.011336 | 0.011336 |
| 0.011233 | 0.011233 | 0.011198 | 0.011302 | 0.011302 | 0.011302 | 0.011405 |
| 0.011336 | 0.011302 | 0.011371 | 0.011233 | 0.011405 | 0.011233 | 0.011267 |
| 0.011440 | 0.011405 | 0.011647 | 0.011440 | 0.011302 | 0.011474 | 0.011302 |
| 0.011431 | 0.011695 | 0.011513 | 0.011138 | 0.011210 | 0.011318 | 0.011415 |
| 0.012048 | 0.011416 | 0.011225 | 0.011543 | 0.011509 | 0.011302 | 0.011405 |
| 0.011371 | 0.011336 | 0.011405 | 0.011302 | 0.011371 | 0.011302 | 0.011336 |
| 0.011302 | 0.011371 | 0.011578 | 0.011474 | 0.011371 | 0.011336 | 0.011267 |
| 0.011233 | 0.011233 | 0.011302 | 0.011233 | 0.011474 | 0.011440 | 0.011371 |
| 0.011474 | 0.011543 | 0.011267 | 0.011267 | 0.011302 | 0.011302 | 0.011302 |

|          |          |          |          |          |          |          |
|----------|----------|----------|----------|----------|----------|----------|
| 0.011371 | 0.011302 | 0.011302 | 0.011169 | 0.011207 | 0.011204 | 0.011302 |
| 0.011304 | 0.011234 | 0.011283 | 0.011271 | 0.011200 | 0.011236 | 0.011268 |
| 0.011536 | 0.011272 | 0.011342 | 0.011233 | 0.011236 | 0.011371 | 0.011336 |
| 0.011405 | 0.011337 | 0.011336 | 0.011405 | 0.011371 | 0.011681 | 0.011509 |
| 0.011578 | 0.011440 | 0.011302 | 0.011405 | 0.011198 | 0.011440 | 0.011198 |
| 0.011302 | 0.011302 | 0.011233 | 0.011233 | 0.011233 | 0.011233 | 0.011336 |
| 0.011267 | 0.011405 | 0.011336 | 0.011233 | 0.011337 | 0.011440 | 0.011408 |
| 0.011440 | 0.011336 | 0.011233 | 0.011164 | 0.011302 | 0.011233 | 0.011164 |
| 0.011270 | 0.011440 | 0.011233 | 0.011440 | 0.011198 | 0.011267 | 0.011267 |
| 0.011371 | 0.011267 | 0.011302 | 0.011267 | 0.011302 | 0.011164 | 0.011267 |
| 0.011302 | 0.011267 | 0.011336 | 0.011267 | 0.011302 | 0.011336 | 0.011509 |
| 0.011681 | 0.011612 | 0.011681 | 0.011440 | 0.011682 | 0.011302 | 0.011267 |
| 0.011303 | 0.011599 | 0.011390 | 0.011201 | 0.011688 | 0.011165 | 0.011302 |
| 0.011689 | 0.011584 | 0.011474 | 0.011647 | 0.011376 | 0.011543 | 0.011440 |
| 0.011371 | 0.011578 | 0.011389 | 0.011231 | 0.011319 | 0.011336 | 0.011338 |
| 0.011509 | 0.011407 | 0.011547 | 0.011617 | 0.011405 | 0.011612 | 0.011722 |
| 0.011408 | 0.011618 | 0.011512 | 0.011477 | 0.011751 | 0.011198 | 0.011406 |
| 0.011336 | 0.011267 | 0.011164 | 0.011164 | 0.011267 | 0.011267 | 0.011336 |
| 0.011267 | 0.011336 | 0.011233 | 0.011336 | 0.011267 | 0.011267 | 0.011336 |
| 0.011267 | 0.011716 | 0.011612 | 0.011647 | 0.011164 | 0.011267 | 0.011302 |
| 0.011302 | 0.011267 | 0.011336 | 0.011371 | 0.011233 | 0.011233 | 0.011233 |
| 0.011785 | 0.011371 | 0.011405 | 0.011198 | 0.011302 | 0.011474 | 0.011198 |
| 0.011198 | 0.011267 | 0.011267 | 0.011440 | 0.011233 | 0.011371 | 0.011509 |
| 0.011440 | 0.011267 | 0.011267 | 0.011198 | 0.011198 | 0.011302 | 0.011302 |
| 0.011198 | 0.011302 | 0.011164 | 0.011198 | 0.011336 | 0.011475 | 0.011233 |
| 0.011198 | 0.011336 | 0.011268 | 0.011164 | 0.011509 | 0.011164 | 0.011336 |
| 0.011412 | 0.011233 | 0.011543 | 0.011371 | 0.011405 | 0.011267 | 0.011371 |
| 0.011233 | 0.011578 | 0.011164 | 0.011440 | 0.011233 | 0.011233 | 0.011164 |
| 0.011336 | 0.011612 | 0.011267 | 0.011371 | 0.011198 | 0.011612 | 0.011233 |
| 0.011233 | 0.011233 | 0.011267 | 0.011371 | 0.011267 | 0.011371 | 0.011440 |
| 0.011440 | 0.011405 | 0.011302 | 0.011405 | 0.011371 | 0.011233 | 0.011198 |
| 0.011233 | 0.011233 | 0.011267 | 0.011233 | 0.011198 | 0.011336 | 0.011233 |
| 0.011267 | 0.011233 | 0.011371 | 0.011440 | 0.011302 | 0.011267 | 0.011267 |
| 0.011336 | 0.011267 | 0.011371 | 0.011233 | 0.011371 | 0.011474 | 0.011716 |
| 0.011267 | 0.011647 | 0.000000 | 0.017786 | 0.011191 | 0.011366 | 0.011583 |
| 0.011583 | 0.011588 | 0.011374 | 0.011350 | 0.011664 | 0.011653 | 0.011303 |
| 0.011440 | 0.011426 | 0.011177 | 0.011186 | 0.011255 | 0.011208 | 0.011189 |
| 0.011436 | 0.011433 | 0.011431 | 0.011259 | 0.011405 | 0.011440 | 0.011442 |
| 0.011307 | 0.011405 | 0.011371 | 0.011371 | 0.011302 | 0.011302 | 0.011302 |
| 0.011336 | 0.011267 | 0.011302 | 0.011336 | 0.011267 | 0.011233 | 0.011267 |
| 0.011267 | 0.011302 | 0.011198 | 0.011302 | 0.011371 | 0.011405 | 0.011302 |
| 0.011336 | 0.011302 | 0.011612 | 0.011612 | 0.011302 | 0.011406 | 0.011440 |
| 0.011198 | 0.011198 | 0.011233 | 0.011336 | 0.011198 | 0.011440 | 0.011440 |
| 0.011474 | 0.011474 | 0.011371 | 0.011509 | 0.011681 | 0.011510 | 0.011336 |
| 0.011336 | 0.011405 | 0.011440 | 0.011267 | 0.011267 | 0.011233 | 0.011336 |
| 0.011405 | 0.011405 | 0.011440 | 0.011405 | 0.011302 | 0.011474 | 0.011474 |
| 0.011339 | 0.011198 | 0.011336 | 0.011440 | 0.011336 | 0.011474 | 0.011474 |
| 0.011647 | 0.011376 | 0.011543 | 0.011440 | 0.011371 | 0.011578 | 0.011233 |
| 0.011406 | 0.011302 | 0.011267 | 0.011267 | 0.011302 | 0.011198 | 0.011302 |
| 0.011371 | 0.011405 | 0.011302 | 0.011336 | 0.011302 | 0.011612 | 0.011612 |
| 0.011302 | 0.011406 | 0.011440 | 0.011405 | 0.012062 | 0.011464 | 0.011350 |
| 0.011456 | 0.011417 | 0.011530 | 0.011345 | 0.011528 | 0.011450 | 0.011415 |
| 0.012014 | 0.011309 | 0.011448 | 0.011380 | 0.011662 | 0.011515 | 0.011620 |
| 0.012038 | 0.011487 | 0.011337 | 0.011336 | 0.011336 | 0.011371 | 0.011302 |
| 0.011198 | 0.011233 | 0.011371 | 0.011336 | 0.011337 | 0.011474 | 0.011440 |
| 0.011267 | 0.011233 | 0.011267 | 0.011267 | 0.011198 | 0.011233 | 0.011164 |
| 0.011302 | 0.011336 | 0.011233 | 0.011198 | 0.011302 | 0.011233 | 0.011267 |
| 0.011267 | 0.011198 | 0.011267 | 0.011302 | 0.011198 | 0.011405 | 0.011440 |
| 0.011302 | 0.011405 | 0.011336 | 0.011302 | 0.011267 | 0.011681 | 0.011302 |
| 0.011347 | 0.011233 | 0.011509 | 0.011513 | 0.011371 | 0.011336 | 0.011371 |

|          |          |          |          |          |          |          |
|----------|----------|----------|----------|----------|----------|----------|
| 0.011371 | 0.011302 | 0.011267 | 0.011302 | 0.011405 | 0.011405 | 0.011336 |
| 0.011336 | 0.011440 | 0.011647 | 0.011371 | 0.011474 | 0.011474 | 0.011440 |
| 0.011233 | 0.011336 | 0.011371 | 0.011785 | 0.011336 | 0.011371 | 0.011336 |
| 0.011371 | 0.011267 | 0.011267 | 0.011613 | 0.011509 | 0.011578 | 0.011302 |
| 0.011405 | 0.011474 | 0.011302 | 0.011405 | 0.011336 | 0.011233 | 0.011578 |
| 0.011336 | 0.011267 | 0.011267 | 0.011440 | 0.011302 | 0.011405 | 0.011647 |
| 0.011267 | 0.011724 | 0.011716 | 0.011507 | 0.011173 | 0.011405 | 0.011215 |
| 0.011170 | 0.011722 | 0.011236 | 0.011462 | 0.011207 | 0.011315 | 0.011326 |
| 0.011519 | 0.011126 | 0.011283 | 0.011126 | 0.011168 | 0.011328 | 0.011385 |
| 0.011399 | 0.011296 | 0.011342 | 0.011307 | 0.011337 | 0.011474 | 0.011543 |
| 0.011509 | 0.011406 | 0.011512 | 0.011513 | 0.011652 | 0.011642 | 0.011267 |
| 0.011578 | 0.011440 | 0.011302 | 0.011405 | 0.011198 | 0.011440 | 0.011198 |
| 0.011302 | 0.011302 | 0.011233 | 0.011233 | 0.011233 | 0.011233 | 0.011336 |
| 0.011310 | 0.011311 | 0.011304 | 0.011306 | 0.011481 | 0.011444 | 0.011445 |
| 0.011445 | 0.011302 | 0.011173 | 0.011170 | 0.011304 | 0.011478 | 0.011408 |
| 0.011267 | 0.011338 | 0.011578 | 0.011510 | 0.011474 | 0.011509 | 0.011440 |
| 0.011371 | 0.011440 | 0.011440 | 0.011302 | 0.011923 | 0.011509 | 0.011578 |
| 0.011612 | 0.011646 | 0.011306 | 0.011380 | 0.011267 | 0.011474 | 0.011440 |
| 0.011441 | 0.011440 | 0.011474 | 0.011474 | 0.011627 | 0.011647 | 0.011274 |
| 0.011165 | 0.011167 | 0.011270 | 0.011235 | 0.011341 | 0.011176 | 0.011514 |
| 0.011307 | 0.011464 | 0.011207 | 0.011330 | 0.011302 | 0.011306 | 0.011267 |
| 0.011233 | 0.011233 | 0.011302 | 0.011233 | 0.011474 | 0.011440 | 0.011371 |
| 0.011474 | 0.011543 | 0.011267 | 0.011267 | 0.011302 | 0.011302 | 0.011302 |
| 0.011371 | 0.011302 | 0.011302 | 0.011337 | 0.011474 | 0.011543 | 0.011509 |
| 0.011406 | 0.011512 | 0.011513 | 0.011652 | 0.011642 | 0.011267 | 0.011474 |
| 0.011440 | 0.011440 | 0.011269 | 0.011454 | 0.011381 | 0.011375 | 0.011275 |
| 0.011449 | 0.011669 | 0.011453 | 0.011340 | 0.011233 | 0.011440 | 0.011267 |
| 0.011405 | 0.011336 | 0.011233 | 0.011337 | 0.011440 | 0.011408 | 0.011336 |
| 0.011233 | 0.011164 | 0.011302 | 0.011233 | 0.011164 | 0.011270 | 0.011440 |
| 0.011336 | 0.011267 | 0.011302 | 0.011336 | 0.011267 | 0.011233 | 0.011405 |
| 0.011302 | 0.011336 | 0.011336 | 0.011267 | 0.011336 | 0.011543 | 0.011233 |
| 0.011267 | 0.011681 | 0.011267 | 0.011302 | 0.011267 | 0.011647 | 0.011232 |
| 0.011735 | 0.011230 | 0.011211 | 0.011463 | 0.011508 | 0.011455 | 0.011102 |
| 0.011165 | 0.011440 | 0.011543 | 0.011653 | 0.011509 | 0.011647 | 0.011785 |
| 0.011682 | 0.011720 | 0.011681 | 0.011932 | 0.011612 | 0.012477 | 0.011682 |
| 0.012373 | 0.012165 | 0.012307 | 0.012617 | 0.011612 | 0.011302 | 0.011647 |
| 0.012062 | 0.011820 | 0.011612 | 0.011509 | 0.011578 | 0.011578 | 0.011547 |
| 0.011440 | 0.011441 | 0.011509 | 0.011474 | 0.011854 | 0.011923 | 0.011889 |
| 0.011785 | 0.011889 | 0.011992 | 0.011786 | 0.012097 | 0.012103 | 0.012166 |
| 0.012166 | 0.012166 | 0.012132 | 0.012132 | 0.012132 | 0.011371 | 0.011647 |
| 0.011751 | 0.012235 | 0.011755 | 0.011923 | 0.011751 | 0.011513 | 0.011405 |
| 0.011371 | 0.011371 | 0.011751 | 0.011910 | 0.011945 | 0.011681 | 0.011371 |
| S381     | 0.018202 | 0.018202 | 0.018314 | 0.018239 | 0.018239 | 0.018314 |
| 0.018217 | 0.018141 | 0.018276 | 0.017747 | 0.017785 | 0.017748 | 0.017747 |
| 0.017785 | 0.017899 | 0.017747 | 0.017785 | 0.017785 | 0.017823 | 0.017747 |
| 0.017747 | 0.017785 | 0.017899 | 0.017718 | 0.017755 | 0.017747 | 0.018216 |
| 0.018012 | 0.017786 | 0.017672 | 0.017936 | 0.017823 | 0.017785 | 0.017748 |
| 0.017823 | 0.017936 | 0.017823 | 0.017823 | 0.017861 | 0.017823 | 0.018012 |
| 0.017747 | 0.017785 | 0.017861 | 0.017785 | 0.017823 | 0.017899 | 0.017823 |
| 0.017823 | 0.018012 | 0.017830 | 0.018163 | 0.017823 | 0.018087 | 0.017823 |
| 0.017785 | 0.017826 | 0.017937 | 0.018087 | 0.018201 | 0.017861 | 0.018012 |
| 0.017861 | 0.017899 | 0.017785 | 0.018011 | 0.018201 | 0.017823 | 0.017899 |
| 0.017785 | 0.017823 | 0.017861 | 0.017899 | 0.017823 | 0.017823 | 0.017823 |
| 0.017747 | 0.017747 | 0.017710 | 0.017823 | 0.017823 | 0.017823 | 0.017898 |
| 0.017861 | 0.017823 | 0.017861 | 0.017747 | 0.017898 | 0.017748 | 0.017785 |
| 0.017898 | 0.017936 | 0.018125 | 0.017974 | 0.017823 | 0.018050 | 0.017823 |
| 0.018175 | 0.018507 | 0.018388 | 0.018410 | 0.017989 | 0.018162 | 0.018505 |
| 0.018730 | 0.019854 | 0.018031 | 0.017936 | 0.017936 | 0.017823 | 0.017937 |
| 0.017861 | 0.017823 | 0.017936 | 0.017823 | 0.017899 | 0.017823 | 0.017860 |
| 0.017823 | 0.017898 | 0.018088 | 0.017974 | 0.017899 | 0.017864 | 0.017785 |

|          |          |          |          |          |          |          |
|----------|----------|----------|----------|----------|----------|----------|
| 0.017747 | 0.017747 | 0.017823 | 0.017747 | 0.018012 | 0.017974 | 0.017898 |
| 0.018012 | 0.018087 | 0.017747 | 0.017747 | 0.017749 | 0.017747 | 0.017755 |
| 0.017798 | 0.017823 | 0.017823 | 0.017794 | 0.018067 | 0.018027 | 0.017823 |
| 0.017879 | 0.017802 | 0.018171 | 0.017841 | 0.017789 | 0.017889 | 0.017820 |
| 0.017306 | 0.017969 | 0.017901 | 0.017710 | 0.017806 | 0.017864 | 0.017748 |
| 0.017823 | 0.017841 | 0.017823 | 0.017898 | 0.017898 | 0.018276 | 0.017975 |
| 0.018125 | 0.017974 | 0.017747 | 0.017937 | 0.017710 | 0.017936 | 0.017674 |
| 0.017785 | 0.017785 | 0.017747 | 0.017747 | 0.017747 | 0.017747 | 0.017861 |
| 0.017785 | 0.017936 | 0.017861 | 0.017747 | 0.017849 | 0.017937 | 0.017940 |
| 0.017974 | 0.017861 | 0.017747 | 0.017704 | 0.017823 | 0.017748 | 0.017638 |
| 0.017851 | 0.017937 | 0.017748 | 0.017975 | 0.017711 | 0.017785 | 0.017785 |
| 0.017899 | 0.017785 | 0.017785 | 0.017786 | 0.017823 | 0.017673 | 0.017785 |
| 0.017823 | 0.017785 | 0.017823 | 0.017747 | 0.017823 | 0.017861 | 0.018012 |
| 0.018201 | 0.018049 | 0.018201 | 0.017898 | 0.018201 | 0.017785 | 0.017785 |
| 0.017851 | 0.018526 | 0.017206 | 0.017626 | 0.018260 | 0.017781 | 0.018899 |
| 0.018290 | 0.018161 | 0.017898 | 0.018125 | 0.017990 | 0.017974 | 0.018050 |
| 0.017974 | 0.017974 | 0.018427 | 0.014140 | 0.012929 | 0.017863 | 0.017997 |
| 0.017975 | 0.017928 | 0.018068 | 0.018109 | 0.017898 | 0.018164 | 0.018348 |
| 0.017935 | 0.018128 | 0.018108 | 0.018068 | 0.018322 | 0.017710 | 0.017885 |
| 0.017785 | 0.017785 | 0.017672 | 0.017672 | 0.017748 | 0.017785 | 0.017861 |
| 0.017785 | 0.017861 | 0.017747 | 0.017823 | 0.017785 | 0.017785 | 0.017823 |
| 0.017785 | 0.018201 | 0.018125 | 0.018163 | 0.017672 | 0.017747 | 0.017823 |
| 0.017747 | 0.017747 | 0.017861 | 0.017899 | 0.017747 | 0.017747 | 0.017747 |
| 0.018276 | 0.017861 | 0.017936 | 0.017710 | 0.017823 | 0.017974 | 0.017710 |
| 0.017710 | 0.017785 | 0.017785 | 0.017937 | 0.017747 | 0.017899 | 0.018012 |
| 0.017936 | 0.017785 | 0.017785 | 0.017710 | 0.017710 | 0.017823 | 0.017823 |
| 0.017710 | 0.017823 | 0.017672 | 0.017710 | 0.017861 | 0.017941 | 0.017749 |
| 0.017717 | 0.017861 | 0.017756 | 0.017672 | 0.018012 | 0.017672 | 0.017861 |
| 0.018043 | 0.017748 | 0.018050 | 0.017826 | 0.017936 | 0.017785 | 0.017861 |
| 0.017747 | 0.018087 | 0.017672 | 0.017899 | 0.017710 | 0.017710 | 0.017672 |
| 0.017785 | 0.018125 | 0.017785 | 0.017899 | 0.017672 | 0.018088 | 0.017710 |
| 0.017748 | 0.017747 | 0.017747 | 0.017861 | 0.017785 | 0.017861 | 0.017974 |
| 0.017974 | 0.017861 | 0.017823 | 0.017937 | 0.017898 | 0.017747 | 0.017710 |
| 0.017710 | 0.017747 | 0.017785 | 0.017747 | 0.017710 | 0.017861 | 0.017710 |
| 0.017785 | 0.017747 | 0.017823 | 0.017898 | 0.017823 | 0.017785 | 0.017524 |
| 0.017861 | 0.017785 | 0.017861 | 0.017747 | 0.017899 | 0.017899 | 0.018239 |
| 0.017785 | 0.018163 | 0.017786 | 0.000000 | 0.011257 | 0.013937 | 0.018088 |
| 0.018088 | 0.018051 | 0.011330 | 0.021125 | 0.013943 | 0.018126 | 0.013807 |
| 0.019397 | 0.013959 | 0.018359 | 0.018490 | 0.017914 | 0.013254 | 0.019242 |
| 0.019344 | 0.018152 | 0.017670 | 0.022513 | 0.017899 | 0.017975 | 0.017899 |
| 0.017953 | 0.017898 | 0.017861 | 0.017861 | 0.017825 | 0.017829 | 0.017829 |
| 0.017785 | 0.017785 | 0.017710 | 0.017861 | 0.017785 | 0.017748 | 0.017785 |
| 0.017785 | 0.017823 | 0.017710 | 0.017823 | 0.017861 | 0.017898 | 0.017823 |
| 0.017861 | 0.017823 | 0.018125 | 0.018125 | 0.017902 | 0.017910 | 0.017974 |
| 0.017672 | 0.017710 | 0.017710 | 0.017823 | 0.017710 | 0.017899 | 0.017899 |
| 0.017861 | 0.017898 | 0.017861 | 0.017899 | 0.018125 | 0.017922 | 0.017861 |
| 0.017748 | 0.017899 | 0.017974 | 0.017748 | 0.017785 | 0.017747 | 0.017823 |
| 0.017789 | 0.017785 | 0.017823 | 0.017861 | 0.017842 | 0.017974 | 0.018012 |
| 0.017928 | 0.017710 | 0.017785 | 0.017974 | 0.017823 | 0.017899 | 0.017936 |
| 0.018125 | 0.017990 | 0.017974 | 0.018050 | 0.017974 | 0.017974 | 0.017751 |
| 0.017922 | 0.017826 | 0.017785 | 0.017785 | 0.017823 | 0.017710 | 0.017823 |
| 0.017861 | 0.017898 | 0.017823 | 0.017861 | 0.017823 | 0.018125 | 0.018125 |
| 0.017902 | 0.017910 | 0.017974 | 0.017936 | 0.018584 | 0.018342 | 0.018224 |
| 0.018283 | 0.018112 | 0.018368 | 0.018104 | 0.018296 | 0.018145 | 0.018035 |
| 0.018687 | 0.018052 | 0.018132 | 0.018123 | 0.018397 | 0.018036 | 0.018184 |
| 0.018673 | 0.018745 | 0.017800 | 0.017823 | 0.017785 | 0.017898 | 0.017758 |
| 0.017710 | 0.017748 | 0.017861 | 0.017823 | 0.017795 | 0.017936 | 0.017974 |
| 0.017785 | 0.017747 | 0.017785 | 0.017747 | 0.017710 | 0.017710 | 0.017672 |
| 0.017823 | 0.017861 | 0.017747 | 0.017710 | 0.017673 | 0.017747 | 0.017785 |
| 0.017785 | 0.017710 | 0.017785 | 0.017823 | 0.017710 | 0.017936 | 0.017899 |

|          |          |          |          |          |          |          |
|----------|----------|----------|----------|----------|----------|----------|
| 0.017823 | 0.017936 | 0.017823 | 0.017823 | 0.017710 | 0.018201 | 0.017785 |
| 0.018139 | 0.017749 | 0.018012 | 0.018088 | 0.017899 | 0.017861 | 0.017899 |
| 0.017786 | 0.017823 | 0.017747 | 0.017823 | 0.017936 | 0.017899 | 0.017861 |
| 0.017823 | 0.017899 | 0.018163 | 0.017898 | 0.018012 | 0.018012 | 0.017936 |
| 0.017747 | 0.017823 | 0.017786 | 0.018239 | 0.017830 | 0.017899 | 0.017861 |
| 0.017785 | 0.017785 | 0.017785 | 0.018088 | 0.018012 | 0.018088 | 0.017785 |
| 0.017937 | 0.017974 | 0.017823 | 0.017937 | 0.017823 | 0.017748 | 0.018087 |
| 0.017861 | 0.017785 | 0.017785 | 0.017898 | 0.017785 | 0.017936 | 0.018163 |
| 0.017785 | 0.018292 | 0.018239 | 0.018771 | 0.011231 | 0.017899 | 0.019829 |
| 0.013441 | 0.018687 | 0.017710 | 0.018819 | 0.020012 | 0.020525 | 0.020196 |
| 0.019986 | 0.011192 | 0.020415 | 0.011126 | 0.020169 | 0.011395 | 0.018640 |
| 0.018333 | 0.018314 | 0.017897 | 0.017894 | 0.017890 | 0.017936 | 0.018050 |
| 0.018049 | 0.017943 | 0.018098 | 0.018120 | 0.018187 | 0.018498 | 0.017785 |
| 0.018125 | 0.017974 | 0.017747 | 0.017937 | 0.017710 | 0.017936 | 0.017674 |
| 0.017785 | 0.017785 | 0.017747 | 0.017747 | 0.017747 | 0.017747 | 0.017861 |
| 0.017889 | 0.018075 | 0.017887 | 0.017961 | 0.018141 | 0.017971 | 0.018006 |
| 0.018077 | 0.017785 | 0.018064 | 0.018021 | 0.017879 | 0.018072 | 0.018006 |
| 0.017750 | 0.017917 | 0.018097 | 0.017995 | 0.017900 | 0.018017 | 0.017936 |
| 0.017823 | 0.017975 | 0.017974 | 0.017823 | 0.018466 | 0.017937 | 0.017975 |
| 0.018125 | 0.017922 | 0.017824 | 0.017950 | 0.017785 | 0.018013 | 0.017975 |
| 0.017982 | 0.017936 | 0.017899 | 0.017899 | 0.019049 | 0.018088 | 0.017991 |
| 0.017724 | 0.017905 | 0.017885 | 0.017831 | 0.017995 | 0.018427 | 0.018100 |
| 0.017981 | 0.013308 | 0.011860 | 0.018591 | 0.017823 | 0.018033 | 0.017785 |
| 0.017747 | 0.017747 | 0.017823 | 0.017747 | 0.018012 | 0.017974 | 0.017898 |
| 0.018012 | 0.018087 | 0.017747 | 0.017747 | 0.017749 | 0.017747 | 0.017755 |
| 0.017798 | 0.017823 | 0.017823 | 0.017890 | 0.017936 | 0.018050 | 0.018049 |
| 0.017943 | 0.018098 | 0.018120 | 0.018187 | 0.018498 | 0.017785 | 0.017936 |
| 0.017975 | 0.017975 | 0.017760 | 0.018155 | 0.018110 | 0.017959 | 0.017916 |
| 0.017438 | 0.020484 | 0.018123 | 0.017933 | 0.017748 | 0.017975 | 0.017785 |
| 0.017936 | 0.017861 | 0.017747 | 0.017849 | 0.017937 | 0.017940 | 0.017861 |
| 0.017747 | 0.017704 | 0.017823 | 0.017748 | 0.017638 | 0.017851 | 0.017937 |
| 0.017785 | 0.017785 | 0.017710 | 0.017861 | 0.017785 | 0.017748 | 0.017936 |
| 0.017823 | 0.017823 | 0.017823 | 0.017785 | 0.017823 | 0.018012 | 0.017747 |
| 0.017785 | 0.018201 | 0.017785 | 0.017823 | 0.017785 | 0.018163 | 0.018319 |
| 0.011682 | 0.018825 | 0.019624 | 0.018653 | 0.018783 | 0.018019 | 0.018650 |
| 0.019979 | 0.017974 | 0.018013 | 0.018201 | 0.017974 | 0.018125 | 0.018239 |
| 0.018169 | 0.018251 | 0.018163 | 0.018539 | 0.018125 | 0.019071 | 0.018239 |
| 0.018884 | 0.018730 | 0.018941 | 0.019076 | 0.018125 | 0.017823 | 0.018201 |
| 0.018622 | 0.018394 | 0.018125 | 0.018053 | 0.018087 | 0.018087 | 0.018104 |
| 0.017974 | 0.017977 | 0.018049 | 0.017975 | 0.018315 | 0.018390 | 0.018314 |
| 0.018277 | 0.018390 | 0.018427 | 0.018245 | 0.018586 | 0.018710 | 0.018626 |
| 0.018698 | 0.018698 | 0.018661 | 0.018698 | 0.018698 | 0.017898 | 0.018165 |
| 0.018239 | 0.018808 | 0.018351 | 0.018391 | 0.018131 | 0.018014 | 0.017898 |
| 0.017823 | 0.017861 | 0.018315 | 0.019896 | 0.018567 | 0.018125 | 0.017906 |
| S382     | 0.011387 | 0.011387 | 0.011649 | 0.011518 | 0.011518 | 0.011650 |
| 0.011325 | 0.011259 | 0.011518 | 0.011126 | 0.011257 | 0.011191 | 0.011126 |
| 0.011257 | 0.011191 | 0.011191 | 0.011191 | 0.011126 | 0.011191 | 0.011257 |
| 0.011191 | 0.011191 | 0.011322 | 0.011191 | 0.011191 | 0.011126 | 0.011391 |
| 0.011453 | 0.011257 | 0.011126 | 0.011322 | 0.011191 | 0.011257 | 0.011126 |
| 0.011322 | 0.011387 | 0.011387 | 0.011322 | 0.011387 | 0.011191 | 0.011584 |
| 0.011191 | 0.011257 | 0.011387 | 0.011191 | 0.011387 | 0.011322 | 0.011388 |
| 0.011388 | 0.011519 | 0.011322 | 0.011387 | 0.011322 | 0.011518 | 0.011322 |
| 0.011191 | 0.011388 | 0.011387 | 0.011518 | 0.011518 | 0.011191 | 0.011387 |
| 0.011322 | 0.011257 | 0.011257 | 0.011387 | 0.011388 | 0.011388 | 0.011388 |
| 0.011257 | 0.011322 | 0.011322 | 0.011519 | 0.011257 | 0.011257 | 0.011257 |
| 0.011257 | 0.011257 | 0.011191 | 0.011257 | 0.011257 | 0.011191 | 0.011387 |
| 0.011322 | 0.011257 | 0.011257 | 0.011126 | 0.011387 | 0.011126 | 0.011191 |
| 0.011387 | 0.011322 | 0.011387 | 0.011257 | 0.011322 | 0.011453 | 0.011322 |
| 0.011257 | 0.011388 | 0.011519 | 0.011191 | 0.011191 | 0.011128 | 0.011257 |
| 0.011257 | 0.011281 | 0.011193 | 0.011257 | 0.011257 | 0.011322 | 0.011388 |

|          |          |          |          |          |          |          |
|----------|----------|----------|----------|----------|----------|----------|
| 0.011387 | 0.011191 | 0.011387 | 0.011322 | 0.011322 | 0.011257 | 0.011191 |
| 0.011191 | 0.011387 | 0.011388 | 0.011387 | 0.011388 | 0.011322 | 0.011257 |
| 0.011126 | 0.011257 | 0.011257 | 0.011126 | 0.011322 | 0.011322 | 0.011257 |
| 0.011387 | 0.011518 | 0.011191 | 0.011191 | 0.011191 | 0.011191 | 0.011191 |
| 0.011192 | 0.011322 | 0.011322 | 0.011127 | 0.011194 | 0.011194 | 0.011191 |
| 0.011126 | 0.011257 | 0.011261 | 0.011257 | 0.011127 | 0.011261 | 0.011192 |
| 0.011262 | 0.011261 | 0.011192 | 0.011191 | 0.011126 | 0.011388 | 0.011191 |
| 0.011322 | 0.011322 | 0.011322 | 0.011322 | 0.011257 | 0.011649 | 0.011584 |
| 0.011649 | 0.011388 | 0.011126 | 0.011453 | 0.011191 | 0.011387 | 0.011126 |
| 0.011126 | 0.011191 | 0.011191 | 0.011257 | 0.011257 | 0.011257 | 0.011388 |
| 0.011191 | 0.011322 | 0.011322 | 0.011126 | 0.011258 | 0.011453 | 0.011454 |
| 0.011322 | 0.011322 | 0.011126 | 0.011126 | 0.011387 | 0.011126 | 0.011126 |
| 0.011258 | 0.011322 | 0.011191 | 0.011322 | 0.011126 | 0.011322 | 0.011191 |
| 0.011322 | 0.011191 | 0.011191 | 0.011191 | 0.011191 | 0.011126 | 0.011257 |
| 0.011322 | 0.011257 | 0.011322 | 0.011126 | 0.011191 | 0.011322 | 0.011453 |
| 0.011322 | 0.011322 | 0.011387 | 0.011322 | 0.011387 | 0.011191 | 0.011257 |
| 0.011323 | 0.011298 | 0.011468 | 0.011127 | 0.011524 | 0.011127 | 0.011286 |
| 0.011391 | 0.011325 | 0.011322 | 0.011453 | 0.011326 | 0.011387 | 0.011388 |
| 0.011453 | 0.011453 | 0.011465 | 0.011209 | 0.011136 | 0.011322 | 0.011388 |
| 0.011388 | 0.011323 | 0.011388 | 0.011390 | 0.011257 | 0.011322 | 0.011989 |
| 0.011192 | 0.011394 | 0.011326 | 0.011392 | 0.011585 | 0.011191 | 0.011258 |
| 0.011191 | 0.011257 | 0.011126 | 0.011126 | 0.011191 | 0.011322 | 0.011257 |
| 0.011257 | 0.011322 | 0.011191 | 0.011322 | 0.011257 | 0.011322 | 0.011191 |
| 0.011191 | 0.011584 | 0.011322 | 0.011257 | 0.011126 | 0.011257 | 0.011388 |
| 0.011322 | 0.011191 | 0.011257 | 0.011388 | 0.011126 | 0.011126 | 0.011126 |
| 0.011584 | 0.011257 | 0.011322 | 0.011191 | 0.011322 | 0.011257 | 0.011126 |
| 0.011191 | 0.011191 | 0.011322 | 0.011387 | 0.011257 | 0.011257 | 0.011453 |
| 0.011388 | 0.011322 | 0.011322 | 0.011191 | 0.011126 | 0.011257 | 0.011257 |
| 0.011191 | 0.011387 | 0.011126 | 0.011126 | 0.011191 | 0.011257 | 0.011191 |
| 0.011191 | 0.011191 | 0.011126 | 0.011126 | 0.011322 | 0.011126 | 0.011322 |
| 0.011260 | 0.011191 | 0.011257 | 0.011388 | 0.011387 | 0.011257 | 0.011387 |
| 0.011191 | 0.011518 | 0.011126 | 0.011191 | 0.011191 | 0.011191 | 0.011126 |
| 0.011257 | 0.011387 | 0.011257 | 0.011257 | 0.011126 | 0.011257 | 0.011191 |
| 0.011191 | 0.011191 | 0.011257 | 0.011191 | 0.011257 | 0.011322 | 0.011518 |
| 0.011257 | 0.011257 | 0.011191 | 0.011388 | 0.011387 | 0.011257 | 0.011191 |
| 0.011191 | 0.011257 | 0.011257 | 0.011191 | 0.011126 | 0.011388 | 0.011191 |
| 0.011191 | 0.011257 | 0.011387 | 0.011387 | 0.011126 | 0.011191 | 0.011126 |
| 0.011257 | 0.011257 | 0.011257 | 0.011191 | 0.011388 | 0.011518 | 0.011518 |
| 0.011191 | 0.011388 | 0.011191 | 0.011257 | 0.000000 | 0.011415 | 0.011322 |
| 0.011322 | 0.011322 | 0.011145 | 0.011152 | 0.011450 | 0.011322 | 0.011310 |
| 0.011538 | 0.011251 | 0.011126 | 0.000000 | 0.011264 | 0.011134 | 0.011131 |
| 0.011338 | 0.011322 | 0.011322 | 0.011271 | 0.011322 | 0.011387 | 0.011259 |
| 0.011194 | 0.011257 | 0.011257 | 0.011387 | 0.011257 | 0.011257 | 0.011257 |
| 0.011257 | 0.011191 | 0.011126 | 0.011322 | 0.011322 | 0.011126 | 0.011191 |
| 0.011191 | 0.011388 | 0.011126 | 0.011322 | 0.011322 | 0.011191 | 0.011191 |
| 0.011387 | 0.011322 | 0.011322 | 0.011322 | 0.011388 | 0.011454 | 0.011322 |
| 0.011126 | 0.011126 | 0.011191 | 0.011257 | 0.011126 | 0.011322 | 0.011322 |
| 0.011257 | 0.011322 | 0.011453 | 0.011322 | 0.011322 | 0.011324 | 0.011191 |
| 0.011191 | 0.011387 | 0.011453 | 0.011191 | 0.011322 | 0.011126 | 0.011388 |
| 0.011126 | 0.011126 | 0.011191 | 0.011257 | 0.011191 | 0.011518 | 0.011191 |
| 0.011259 | 0.011126 | 0.011191 | 0.011453 | 0.011257 | 0.011453 | 0.011387 |
| 0.011453 | 0.011326 | 0.011387 | 0.011388 | 0.011453 | 0.011453 | 0.011191 |
| 0.011323 | 0.011257 | 0.011191 | 0.011191 | 0.011388 | 0.011126 | 0.011322 |
| 0.011322 | 0.011191 | 0.011191 | 0.011387 | 0.011322 | 0.011322 | 0.011322 |
| 0.011388 | 0.011454 | 0.011257 | 0.011322 | 0.012109 | 0.011338 | 0.011261 |
| 0.011401 | 0.011330 | 0.011332 | 0.011261 | 0.011334 | 0.011331 | 0.011259 |
| 0.012197 | 0.011197 | 0.011261 | 0.011197 | 0.011398 | 0.011391 | 0.011458 |
| 0.012127 | 0.011414 | 0.011192 | 0.011257 | 0.011257 | 0.011257 | 0.011192 |
| 0.011191 | 0.011191 | 0.011257 | 0.011257 | 0.011192 | 0.011387 | 0.011322 |
| 0.011322 | 0.011191 | 0.011191 | 0.011191 | 0.011126 | 0.011191 | 0.011126 |



|          |          |          |          |          |          |          |
|----------|----------|----------|----------|----------|----------|----------|
| 0.011322 | 0.011322 | 0.011126 | 0.011191 | 0.011191 | 0.011257 | 0.011257 |
| 0.011322 | 0.011191 | 0.011191 | 0.011257 | 0.011191 | 0.011387 | 0.011257 |
| 0.011126 | 0.011387 | 0.011126 | 0.011257 | 0.011126 | 0.011518 | 0.011257 |
| 0.011262 | 0.011191 | 0.011453 | 0.011460 | 0.011322 | 0.011191 | 0.011387 |
| 0.011453 | 0.011257 | 0.011191 | 0.011257 | 0.011584 | 0.011453 | 0.011322 |
| 0.011257 | 0.011453 | 0.011518 | 0.011257 | 0.011519 | 0.011519 | 0.011387 |
| 0.011257 | 0.011387 | 0.011453 | 0.011453 | 0.011257 | 0.011322 | 0.011322 |
| 0.011191 | 0.011257 | 0.011257 | 0.011453 | 0.011453 | 0.011453 | 0.011257 |
| 0.011453 | 0.011453 | 0.011191 | 0.011453 | 0.011191 | 0.011257 | 0.011257 |
| 0.011257 | 0.011257 | 0.011257 | 0.011257 | 0.011257 | 0.011191 | 0.011191 |
| 0.011257 | 0.011325 | 0.011322 | 0.011388 | 0.011205 | 0.011322 | 0.011209 |
| 0.011160 | 0.011519 | 0.011126 | 0.011388 | 0.011191 | 0.011334 | 0.011388 |
| 0.011333 | 0.011132 | 0.011260 | 0.011133 | 0.011194 | 0.011274 | 0.011322 |
| 0.011322 | 0.011257 | 0.011257 | 0.011322 | 0.011323 | 0.011387 | 0.011453 |
| 0.011518 | 0.011388 | 0.011520 | 0.011323 | 0.011455 | 0.011474 | 0.011257 |
| 0.011649 | 0.011388 | 0.011126 | 0.011453 | 0.011191 | 0.011387 | 0.011126 |
| 0.011126 | 0.011191 | 0.011191 | 0.011257 | 0.011257 | 0.011257 | 0.011388 |
| 0.011258 | 0.011128 | 0.011388 | 0.011194 | 0.011460 | 0.011191 | 0.011456 |
| 0.011391 | 0.011126 | 0.011131 | 0.011128 | 0.011388 | 0.011453 | 0.011388 |
| 0.011257 | 0.011257 | 0.011453 | 0.011453 | 0.011322 | 0.011387 | 0.011191 |
| 0.011387 | 0.011322 | 0.011191 | 0.011191 | 0.011978 | 0.011257 | 0.011453 |
| 0.011781 | 0.011267 | 0.011127 | 0.011264 | 0.011257 | 0.011191 | 0.011387 |
| 0.011191 | 0.011387 | 0.011322 | 0.011322 | 0.011286 | 0.011584 | 0.011260 |
| 0.011127 | 0.011127 | 0.011260 | 0.011194 | 0.011329 | 0.011131 | 0.011260 |
| 0.011392 | 0.011295 | 0.011145 | 0.011272 | 0.011257 | 0.011260 | 0.011257 |
| 0.011126 | 0.011257 | 0.011257 | 0.011126 | 0.011322 | 0.011322 | 0.011257 |
| 0.011387 | 0.011518 | 0.011191 | 0.011191 | 0.011191 | 0.011191 | 0.011191 |
| 0.011192 | 0.011322 | 0.011322 | 0.011323 | 0.011387 | 0.011453 | 0.011518 |
| 0.011388 | 0.011520 | 0.011323 | 0.011455 | 0.011474 | 0.011257 | 0.011387 |
| 0.011387 | 0.011387 | 0.011192 | 0.011261 | 0.011261 | 0.011326 | 0.011331 |
| 0.011193 | 0.011679 | 0.011542 | 0.011259 | 0.011191 | 0.011322 | 0.011191 |
| 0.011322 | 0.011322 | 0.011126 | 0.011258 | 0.011453 | 0.011454 | 0.011322 |
| 0.011126 | 0.011126 | 0.011387 | 0.011126 | 0.011126 | 0.011258 | 0.011322 |
| 0.011257 | 0.011191 | 0.011126 | 0.011322 | 0.011322 | 0.011126 | 0.011387 |
| 0.011257 | 0.011388 | 0.011322 | 0.011191 | 0.011126 | 0.011387 | 0.011191 |
| 0.011257 | 0.011518 | 0.011191 | 0.011191 | 0.011191 | 0.011387 | 0.011126 |
| 0.011648 | 0.011196 | 0.011273 | 0.011399 | 0.011453 | 0.011388 | 0.011126 |
| 0.011202 | 0.011322 | 0.011387 | 0.011518 | 0.011387 | 0.011649 | 0.011649 |
| 0.011585 | 0.011657 | 0.011518 | 0.011781 | 0.011387 | 0.012568 | 0.011453 |
| 0.012109 | 0.012043 | 0.012436 | 0.011978 | 0.011387 | 0.011257 | 0.011715 |
| 0.012241 | 0.011913 | 0.011387 | 0.011453 | 0.011322 | 0.011322 | 0.011390 |
| 0.011322 | 0.011322 | 0.011322 | 0.011322 | 0.011584 | 0.011650 | 0.011584 |
| 0.011453 | 0.011584 | 0.011649 | 0.011387 | 0.012175 | 0.012119 | 0.012242 |
| 0.012307 | 0.012241 | 0.012175 | 0.012175 | 0.012241 | 0.011191 | 0.011584 |
| 0.011715 | 0.012043 | 0.011787 | 0.011846 | 0.011584 | 0.011258 | 0.011322 |
| 0.011257 | 0.011191 | 0.011781 | 0.011670 | 0.011912 | 0.011584 | 0.011257 |
| S383     | 0.011611 | 0.011611 | 0.011855 | 0.011917 | 0.011917 | 0.011917 |
| 0.011554 | 0.011554 | 0.011855 | 0.011366 | 0.011366 | 0.011366 | 0.011305 |
| 0.011366 | 0.011549 | 0.011366 | 0.011366 | 0.011488 | 0.011488 | 0.011488 |
| 0.011305 | 0.011488 | 0.011611 | 0.011305 | 0.011489 | 0.011427 | 0.011616 |
| 0.011733 | 0.011427 | 0.011305 | 0.011611 | 0.011366 | 0.011427 | 0.011488 |
| 0.011366 | 0.011427 | 0.011427 | 0.011427 | 0.011611 | 0.011488 | 0.011611 |
| 0.011366 | 0.011366 | 0.011611 | 0.011488 | 0.011427 | 0.011488 | 0.011427 |
| 0.011366 | 0.011733 | 0.011428 | 0.011611 | 0.011549 | 0.011733 | 0.011549 |
| 0.011305 | 0.011427 | 0.011672 | 0.011733 | 0.011855 | 0.011488 | 0.011549 |
| 0.011427 | 0.011488 | 0.011427 | 0.011549 | 0.011855 | 0.011427 | 0.011488 |
| 0.011366 | 0.011549 | 0.011549 | 0.011549 | 0.011427 | 0.011488 | 0.011488 |
| 0.011366 | 0.011366 | 0.011366 | 0.011366 | 0.011366 | 0.011488 | 0.011549 |
| 0.011549 | 0.011305 | 0.011488 | 0.011305 | 0.011488 | 0.011366 | 0.011305 |
| 0.011488 | 0.011427 | 0.011794 | 0.011549 | 0.011427 | 0.011733 | 0.011366 |

|          |          |          |          |          |          |          |
|----------|----------|----------|----------|----------|----------|----------|
| 0.011567 | 0.011693 | 0.011651 | 0.011378 | 0.011389 | 0.011514 | 0.011675 |
| 0.012842 | 0.011575 | 0.011430 | 0.011611 | 0.011672 | 0.011366 | 0.011427 |
| 0.011488 | 0.011427 | 0.011549 | 0.011427 | 0.011427 | 0.011488 | 0.011305 |
| 0.011305 | 0.011366 | 0.011549 | 0.011549 | 0.011427 | 0.011611 | 0.011488 |
| 0.011366 | 0.011305 | 0.011427 | 0.011366 | 0.011672 | 0.011549 | 0.011549 |
| 0.011672 | 0.011794 | 0.011427 | 0.011427 | 0.011488 | 0.011488 | 0.011488 |
| 0.011549 | 0.011488 | 0.011549 | 0.011250 | 0.011323 | 0.011380 | 0.011488 |
| 0.011427 | 0.011427 | 0.011452 | 0.011427 | 0.011305 | 0.011367 | 0.011367 |
| 0.011513 | 0.011370 | 0.011558 | 0.011366 | 0.011306 | 0.011488 | 0.011366 |
| 0.011488 | 0.011488 | 0.011488 | 0.011427 | 0.011488 | 0.011672 | 0.011488 |
| 0.011672 | 0.011549 | 0.011427 | 0.011549 | 0.011366 | 0.011672 | 0.011366 |
| 0.011427 | 0.011427 | 0.011305 | 0.011427 | 0.011427 | 0.011427 | 0.011549 |
| 0.011366 | 0.011672 | 0.011427 | 0.011427 | 0.011491 | 0.011672 | 0.011673 |
| 0.011733 | 0.011549 | 0.011305 | 0.011306 | 0.011488 | 0.011305 | 0.011305 |
| 0.011434 | 0.011733 | 0.011366 | 0.011733 | 0.011366 | 0.011427 | 0.011427 |
| 0.011672 | 0.011305 | 0.011488 | 0.011427 | 0.011488 | 0.011305 | 0.011427 |
| 0.011427 | 0.011427 | 0.011488 | 0.011305 | 0.011366 | 0.011366 | 0.011794 |
| 0.011672 | 0.011611 | 0.011733 | 0.011611 | 0.011733 | 0.011366 | 0.011427 |
| 0.011367 | 0.011518 | 0.011660 | 0.011370 | 0.011616 | 0.011308 | 0.011205 |
| 0.011801 | 0.011676 | 0.011549 | 0.011672 | 0.011435 | 0.011672 | 0.011611 |
| 0.011549 | 0.011794 | 0.011588 | 0.011390 | 0.011409 | 0.011611 | 0.011556 |
| 0.011794 | 0.011491 | 0.011680 | 0.011991 | 0.011549 | 0.011856 | 0.011806 |
| 0.011305 | 0.011932 | 0.011488 | 0.011550 | 0.011795 | 0.011305 | 0.011429 |
| 0.011549 | 0.011488 | 0.011305 | 0.011305 | 0.011366 | 0.011366 | 0.011427 |
| 0.011488 | 0.011549 | 0.011366 | 0.011366 | 0.011427 | 0.011427 | 0.011549 |
| 0.011488 | 0.011794 | 0.011611 | 0.011672 | 0.011305 | 0.011488 | 0.011427 |
| 0.011366 | 0.011366 | 0.011488 | 0.011549 | 0.011366 | 0.011366 | 0.011366 |
| 0.011794 | 0.011427 | 0.011549 | 0.011366 | 0.011549 | 0.011672 | 0.011366 |
| 0.011366 | 0.011366 | 0.011366 | 0.011611 | 0.011366 | 0.011611 | 0.011733 |
| 0.011672 | 0.011366 | 0.011488 | 0.011305 | 0.011305 | 0.011366 | 0.011488 |
| 0.011305 | 0.011427 | 0.011305 | 0.011366 | 0.011488 | 0.011611 | 0.011366 |
| 0.011366 | 0.011427 | 0.011305 | 0.011305 | 0.011611 | 0.011305 | 0.011366 |
| 0.011621 | 0.011366 | 0.011611 | 0.011550 | 0.011427 | 0.011427 | 0.011672 |
| 0.011305 | 0.011733 | 0.011305 | 0.011427 | 0.011366 | 0.011366 | 0.011305 |
| 0.011427 | 0.011672 | 0.011427 | 0.011488 | 0.011366 | 0.011611 | 0.011366 |
| 0.011366 | 0.011366 | 0.011427 | 0.011488 | 0.011366 | 0.011488 | 0.011611 |
| 0.011549 | 0.011672 | 0.011488 | 0.011427 | 0.011488 | 0.011427 | 0.011366 |
| 0.011366 | 0.011427 | 0.011427 | 0.011366 | 0.011366 | 0.011488 | 0.011366 |
| 0.011427 | 0.011305 | 0.011488 | 0.011549 | 0.011427 | 0.011427 | 0.011366 |
| 0.011427 | 0.011305 | 0.011549 | 0.011366 | 0.011488 | 0.011611 | 0.011917 |
| 0.011366 | 0.011733 | 0.011366 | 0.013937 | 0.011415 | 0.000000 | 0.011611 |
| 0.011672 | 0.011611 | 0.011516 | 0.011525 | 0.011886 | 0.011611 | 0.011615 |
| 0.011743 | 0.011700 | 0.011329 | 0.011314 | 0.011415 | 0.011397 | 0.011437 |
| 0.011620 | 0.011673 | 0.011524 | 0.000000 | 0.011488 | 0.011611 | 0.011491 |
| 0.011566 | 0.011610 | 0.011366 | 0.011366 | 0.011488 | 0.011489 | 0.011428 |
| 0.011488 | 0.011305 | 0.011488 | 0.011488 | 0.011427 | 0.011305 | 0.011305 |
| 0.011305 | 0.011427 | 0.011305 | 0.011427 | 0.011488 | 0.011610 | 0.011366 |
| 0.011427 | 0.011427 | 0.011733 | 0.011733 | 0.011550 | 0.011428 | 0.011550 |
| 0.011366 | 0.011305 | 0.011366 | 0.011488 | 0.011305 | 0.011549 | 0.011549 |
| 0.011733 | 0.011549 | 0.011488 | 0.011733 | 0.011794 | 0.011733 | 0.011488 |
| 0.011488 | 0.011611 | 0.011672 | 0.011366 | 0.011366 | 0.011427 | 0.011488 |
| 0.011488 | 0.011488 | 0.011488 | 0.011611 | 0.011549 | 0.011611 | 0.011488 |
| 0.011431 | 0.011305 | 0.011488 | 0.011611 | 0.011427 | 0.011672 | 0.011672 |
| 0.011672 | 0.011435 | 0.011672 | 0.011611 | 0.011549 | 0.011794 | 0.011366 |
| 0.011489 | 0.011305 | 0.011305 | 0.011305 | 0.011427 | 0.011305 | 0.011427 |
| 0.011488 | 0.011610 | 0.011366 | 0.011427 | 0.011427 | 0.011733 | 0.011733 |
| 0.011550 | 0.011428 | 0.011549 | 0.011488 | 0.012286 | 0.011504 | 0.011318 |
| 0.011566 | 0.011501 | 0.011638 | 0.011437 | 0.011568 | 0.011438 | 0.011673 |
| 0.012071 | 0.011375 | 0.011312 | 0.011439 | 0.011943 | 0.011742 | 0.011998 |
| 0.012055 | 0.011530 | 0.011488 | 0.011488 | 0.011549 | 0.011549 | 0.011488 |

|          |          |          |          |          |          |          |
|----------|----------|----------|----------|----------|----------|----------|
| 0.011305 | 0.011366 | 0.011549 | 0.011488 | 0.011488 | 0.011733 | 0.011611 |
| 0.011366 | 0.011427 | 0.011366 | 0.011305 | 0.011366 | 0.011305 | 0.011305 |
| 0.011366 | 0.011366 | 0.011305 | 0.011305 | 0.011427 | 0.011427 | 0.011488 |
| 0.011427 | 0.011366 | 0.011305 | 0.011366 | 0.011305 | 0.011427 | 0.011611 |
| 0.011488 | 0.011427 | 0.011488 | 0.011427 | 0.011427 | 0.011855 | 0.011366 |
| 0.011502 | 0.011366 | 0.011733 | 0.011744 | 0.011550 | 0.011488 | 0.011488 |
| 0.011611 | 0.011427 | 0.011427 | 0.011427 | 0.011549 | 0.011611 | 0.011427 |
| 0.011549 | 0.011549 | 0.011611 | 0.011427 | 0.011549 | 0.011549 | 0.011427 |
| 0.011366 | 0.011488 | 0.011611 | 0.011794 | 0.011427 | 0.011550 | 0.011549 |
| 0.011366 | 0.011366 | 0.011366 | 0.011733 | 0.011672 | 0.011733 | 0.011549 |
| 0.011549 | 0.011611 | 0.011488 | 0.011549 | 0.011366 | 0.011305 | 0.011549 |
| 0.011427 | 0.011488 | 0.011366 | 0.011611 | 0.011549 | 0.011549 | 0.011733 |
| 0.011366 | 0.011616 | 0.011733 | 0.011755 | 0.011369 | 0.011488 | 0.011266 |
| 0.011366 | 0.011895 | 0.011371 | 0.011540 | 0.011497 | 0.011761 | 0.011624 |
| 0.011709 | 0.011397 | 0.011571 | 0.011409 | 0.011529 | 0.011661 | 0.011657 |
| 0.011518 | 0.011491 | 0.011427 | 0.011314 | 0.011552 | 0.011733 | 0.011672 |
| 0.011733 | 0.011488 | 0.011550 | 0.011678 | 0.011740 | 0.011704 | 0.011366 |
| 0.011672 | 0.011549 | 0.011427 | 0.011549 | 0.011366 | 0.011672 | 0.011366 |
| 0.011427 | 0.011427 | 0.011305 | 0.011427 | 0.011427 | 0.011427 | 0.011549 |
| 0.011490 | 0.011501 | 0.011427 | 0.011306 | 0.011672 | 0.011673 | 0.011676 |
| 0.011491 | 0.011427 | 0.011193 | 0.011252 | 0.011366 | 0.011611 | 0.011551 |
| 0.011488 | 0.011427 | 0.011733 | 0.011427 | 0.011488 | 0.011488 | 0.011427 |
| 0.011672 | 0.011549 | 0.011549 | 0.011427 | 0.011794 | 0.011550 | 0.011794 |
| 0.011794 | 0.011655 | 0.011433 | 0.011499 | 0.011427 | 0.011549 | 0.011611 |
| 0.011367 | 0.011549 | 0.011672 | 0.011672 | 0.011637 | 0.011488 | 0.011511 |
| 0.011308 | 0.011317 | 0.011436 | 0.011372 | 0.011434 | 0.011267 | 0.011559 |
| 0.011503 | 0.011520 | 0.011141 | 0.011394 | 0.011427 | 0.011366 | 0.011488 |
| 0.011366 | 0.011305 | 0.011427 | 0.011366 | 0.011672 | 0.011549 | 0.011549 |
| 0.011672 | 0.011794 | 0.011427 | 0.011427 | 0.011488 | 0.011488 | 0.011488 |
| 0.011549 | 0.011488 | 0.011549 | 0.011552 | 0.011733 | 0.011672 | 0.011733 |
| 0.011488 | 0.011550 | 0.011678 | 0.011740 | 0.011704 | 0.011366 | 0.011672 |
| 0.011611 | 0.011611 | 0.011429 | 0.011633 | 0.011372 | 0.011371 | 0.011375 |
| 0.011684 | 0.011806 | 0.011439 | 0.011491 | 0.011366 | 0.011733 | 0.011366 |
| 0.011672 | 0.011427 | 0.011427 | 0.011491 | 0.011672 | 0.011673 | 0.011549 |
| 0.011305 | 0.011306 | 0.011488 | 0.011305 | 0.011305 | 0.011434 | 0.011733 |
| 0.011488 | 0.011305 | 0.011488 | 0.011488 | 0.011427 | 0.011305 | 0.011672 |
| 0.011427 | 0.011366 | 0.011549 | 0.011305 | 0.011488 | 0.011611 | 0.011366 |
| 0.011366 | 0.011855 | 0.011305 | 0.011427 | 0.011427 | 0.011611 | 0.011432 |
| 0.011901 | 0.011436 | 0.011403 | 0.011702 | 0.011712 | 0.011631 | 0.011339 |
| 0.011346 | 0.011611 | 0.011733 | 0.011855 | 0.011672 | 0.011795 | 0.011978 |
| 0.011918 | 0.011865 | 0.011794 | 0.012119 | 0.011794 | 0.013082 | 0.011917 |
| 0.012346 | 0.012591 | 0.012660 | 0.012838 | 0.011917 | 0.011366 | 0.011917 |
| 0.012224 | 0.012040 | 0.011733 | 0.011672 | 0.011733 | 0.011733 | 0.011801 |
| 0.011611 | 0.011614 | 0.011733 | 0.011672 | 0.012040 | 0.012223 | 0.011917 |
| 0.011855 | 0.012100 | 0.012039 | 0.011918 | 0.012224 | 0.012236 | 0.012408 |
| 0.012224 | 0.012470 | 0.012285 | 0.012347 | 0.012286 | 0.011488 | 0.011855 |
| 0.011856 | 0.012592 | 0.011921 | 0.011978 | 0.011794 | 0.011619 | 0.011488 |
| 0.011488 | 0.011488 | 0.011855 | 0.011931 | 0.012006 | 0.011978 | 0.011489 |
| S384     | 0.012002 | 0.012002 | 0.011828 | 0.011793 | 0.011793 | 0.011828 |
| 0.011272 | 0.011201 | 0.011793 | 0.011583 | 0.011618 | 0.011618 | 0.011583 |
| 0.011548 | 0.011793 | 0.011514 | 0.011618 | 0.011688 | 0.011653 | 0.011618 |
| 0.011583 | 0.011618 | 0.011444 | 0.011549 | 0.011619 | 0.011583 | 0.011272 |
| 0.011583 | 0.011618 | 0.011514 | 0.011479 | 0.011653 | 0.011653 | 0.011688 |
| 0.011653 | 0.011758 | 0.011653 | 0.011653 | 0.011688 | 0.011653 | 0.011828 |
| 0.011514 | 0.011653 | 0.011688 | 0.011618 | 0.011653 | 0.011758 | 0.011688 |
| 0.011653 | 0.011828 | 0.011689 | 0.011304 | 0.011653 | 0.011932 | 0.011653 |
| 0.011618 | 0.011653 | 0.011758 | 0.011932 | 0.011409 | 0.011653 | 0.011758 |
| 0.011688 | 0.011758 | 0.011618 | 0.011862 | 0.011444 | 0.011653 | 0.011723 |
| 0.011618 | 0.011688 | 0.011688 | 0.011723 | 0.011653 | 0.011653 | 0.011653 |
| 0.011583 | 0.011583 | 0.011548 | 0.011583 | 0.011653 | 0.011653 | 0.011758 |

|          |          |          |          |          |          |          |
|----------|----------|----------|----------|----------|----------|----------|
| 0.011688 | 0.011653 | 0.011723 | 0.011583 | 0.011479 | 0.011583 | 0.011618 |
| 0.011793 | 0.011758 | 0.011514 | 0.011793 | 0.011653 | 0.011898 | 0.011653 |
| 0.011765 | 0.011284 | 0.011815 | 0.011529 | 0.011513 | 0.011649 | 0.011415 |
| 0.012059 | 0.011365 | 0.011555 | 0.011897 | 0.011863 | 0.011583 | 0.011479 |
| 0.011723 | 0.011688 | 0.011758 | 0.011653 | 0.011723 | 0.011653 | 0.011688 |
| 0.011653 | 0.011653 | 0.011933 | 0.011828 | 0.011723 | 0.011688 | 0.011618 |
| 0.011583 | 0.011514 | 0.011653 | 0.011583 | 0.011549 | 0.011514 | 0.011444 |
| 0.011549 | 0.011618 | 0.011618 | 0.011618 | 0.011653 | 0.011653 | 0.011654 |
| 0.011724 | 0.011653 | 0.011653 | 0.011499 | 0.011541 | 0.011534 | 0.011653 |
| 0.011622 | 0.011552 | 0.011624 | 0.011592 | 0.011554 | 0.011558 | 0.011621 |
| 0.011504 | 0.011597 | 0.011665 | 0.011583 | 0.011557 | 0.011723 | 0.011618 |
| 0.011688 | 0.011690 | 0.011688 | 0.011758 | 0.011723 | 0.012107 | 0.011793 |
| 0.011653 | 0.011723 | 0.011653 | 0.011688 | 0.011548 | 0.011514 | 0.011549 |
| 0.011653 | 0.011653 | 0.011583 | 0.011583 | 0.011583 | 0.011583 | 0.011688 |
| 0.011618 | 0.011758 | 0.011688 | 0.011583 | 0.011690 | 0.011793 | 0.011762 |
| 0.011793 | 0.011688 | 0.011583 | 0.011516 | 0.011653 | 0.011583 | 0.011514 |
| 0.011519 | 0.011793 | 0.011583 | 0.011793 | 0.011548 | 0.011618 | 0.011618 |
| 0.011723 | 0.011618 | 0.011653 | 0.011618 | 0.011653 | 0.011514 | 0.011618 |
| 0.011653 | 0.011618 | 0.011688 | 0.011618 | 0.011653 | 0.011688 | 0.011862 |
| 0.011339 | 0.011269 | 0.011339 | 0.011793 | 0.011409 | 0.011653 | 0.011618 |
| 0.011585 | 0.011940 | 0.011682 | 0.011556 | 0.011342 | 0.011521 | 0.011630 |
| 0.011342 | 0.011590 | 0.011828 | 0.012003 | 0.011735 | 0.011898 | 0.011863 |
| 0.011793 | 0.011932 | 0.011837 | 0.011707 | 0.011672 | 0.011688 | 0.011763 |
| 0.011863 | 0.011761 | 0.011904 | 0.011975 | 0.011758 | 0.011968 | 0.012082 |
| 0.011764 | 0.011977 | 0.011798 | 0.011833 | 0.012108 | 0.011548 | 0.011725 |
| 0.011688 | 0.011618 | 0.011514 | 0.011514 | 0.011583 | 0.011618 | 0.011688 |
| 0.011618 | 0.011688 | 0.011583 | 0.011618 | 0.011618 | 0.011618 | 0.011688 |
| 0.011618 | 0.011374 | 0.011270 | 0.011304 | 0.011514 | 0.011618 | 0.011653 |
| 0.011653 | 0.011548 | 0.011688 | 0.011653 | 0.011583 | 0.011583 | 0.011583 |
| 0.011444 | 0.011653 | 0.011758 | 0.011548 | 0.011653 | 0.011828 | 0.011548 |
| 0.011548 | 0.011618 | 0.011618 | 0.011793 | 0.011583 | 0.011514 | 0.011653 |
| 0.011584 | 0.011618 | 0.011618 | 0.011548 | 0.011548 | 0.011653 | 0.011653 |
| 0.011548 | 0.011653 | 0.011514 | 0.011548 | 0.011688 | 0.011479 | 0.011583 |
| 0.011549 | 0.011688 | 0.011619 | 0.011514 | 0.011235 | 0.011514 | 0.011688 |
| 0.011772 | 0.011583 | 0.011200 | 0.011723 | 0.011688 | 0.011618 | 0.011723 |
| 0.011583 | 0.011932 | 0.011514 | 0.011514 | 0.011514 | 0.011514 | 0.011514 |
| 0.011688 | 0.011618 | 0.011618 | 0.011723 | 0.011548 | 0.011270 | 0.011514 |
| 0.011583 | 0.011583 | 0.011618 | 0.011723 | 0.011618 | 0.011723 | 0.011793 |
| 0.011793 | 0.011758 | 0.011653 | 0.011758 | 0.011723 | 0.011583 | 0.011548 |
| 0.011583 | 0.011583 | 0.011618 | 0.011514 | 0.011548 | 0.011688 | 0.011583 |
| 0.011548 | 0.011583 | 0.011723 | 0.011723 | 0.011653 | 0.011618 | 0.011618 |
| 0.011688 | 0.011618 | 0.011723 | 0.011583 | 0.011723 | 0.011828 | 0.011444 |
| 0.011618 | 0.011374 | 0.011583 | 0.018088 | 0.011322 | 0.011611 | 0.000000 |
| 0.011200 | 0.011201 | 0.011689 | 0.011466 | 0.011390 | 0.011270 | 0.011668 |
| 0.011630 | 0.011366 | 0.011489 | 0.011563 | 0.011451 | 0.011455 | 0.011577 |
| 0.011295 | 0.011475 | 0.011248 | 0.011398 | 0.011758 | 0.011793 | 0.011763 |
| 0.011667 | 0.011758 | 0.011723 | 0.011653 | 0.011653 | 0.011654 | 0.011654 |
| 0.011688 | 0.011618 | 0.011653 | 0.011688 | 0.011618 | 0.011583 | 0.011618 |
| 0.011618 | 0.011653 | 0.011548 | 0.011653 | 0.011723 | 0.011758 | 0.011653 |
| 0.011618 | 0.011583 | 0.011339 | 0.011339 | 0.011723 | 0.011759 | 0.011793 |
| 0.011548 | 0.011548 | 0.011583 | 0.011688 | 0.011548 | 0.011793 | 0.011793 |
| 0.011828 | 0.011828 | 0.011723 | 0.011863 | 0.011409 | 0.011830 | 0.011688 |
| 0.011688 | 0.011758 | 0.011793 | 0.011618 | 0.011618 | 0.011583 | 0.011688 |
| 0.011758 | 0.011758 | 0.011793 | 0.011758 | 0.011655 | 0.011828 | 0.011828 |
| 0.011694 | 0.011548 | 0.011688 | 0.011793 | 0.011688 | 0.011758 | 0.011827 |
| 0.012003 | 0.011735 | 0.011898 | 0.011863 | 0.011793 | 0.011932 | 0.011584 |
| 0.011760 | 0.011653 | 0.011618 | 0.011618 | 0.011653 | 0.011548 | 0.011653 |
| 0.011723 | 0.011758 | 0.011653 | 0.011618 | 0.011583 | 0.011339 | 0.011339 |
| 0.011723 | 0.011759 | 0.011793 | 0.011758 | 0.012353 | 0.011841 | 0.011719 |
| 0.011824 | 0.011782 | 0.011901 | 0.011709 | 0.011897 | 0.011813 | 0.011741 |

|          |          |          |          |          |          |          |
|----------|----------|----------|----------|----------|----------|----------|
| 0.012274 | 0.011672 | 0.011808 | 0.011743 | 0.012027 | 0.011873 | 0.011979 |
| 0.012332 | 0.011806 | 0.011689 | 0.011688 | 0.011688 | 0.011444 | 0.011654 |
| 0.011548 | 0.011583 | 0.011723 | 0.011688 | 0.011689 | 0.011548 | 0.011514 |
| 0.011618 | 0.011583 | 0.011618 | 0.011618 | 0.011548 | 0.011583 | 0.011514 |
| 0.011583 | 0.011618 | 0.011583 | 0.011548 | 0.011653 | 0.011583 | 0.011618 |
| 0.011618 | 0.011548 | 0.011618 | 0.011653 | 0.011548 | 0.011758 | 0.011793 |
| 0.011653 | 0.011688 | 0.011688 | 0.011653 | 0.011618 | 0.011409 | 0.011653 |
| 0.011422 | 0.011583 | 0.011583 | 0.011589 | 0.011653 | 0.011618 | 0.011723 |
| 0.011723 | 0.011653 | 0.011618 | 0.011653 | 0.011758 | 0.011758 | 0.011688 |
| 0.011688 | 0.011793 | 0.011304 | 0.011723 | 0.011828 | 0.011828 | 0.011793 |
| 0.011583 | 0.011688 | 0.011723 | 0.011514 | 0.011688 | 0.011653 | 0.011688 |
| 0.011723 | 0.011548 | 0.011548 | 0.011898 | 0.011863 | 0.011863 | 0.011653 |
| 0.011758 | 0.011828 | 0.011653 | 0.011758 | 0.011688 | 0.011583 | 0.011235 |
| 0.011688 | 0.011618 | 0.011548 | 0.011758 | 0.011653 | 0.011758 | 0.011514 |
| 0.011618 | 0.011378 | 0.011374 | 0.011548 | 0.011342 | 0.011653 | 0.011370 |
| 0.011445 | 0.011770 | 0.011557 | 0.011686 | 0.011548 | 0.011468 | 0.011379 |
| 0.011468 | 0.011258 | 0.011506 | 0.011325 | 0.011330 | 0.011597 | 0.011709 |
| 0.011701 | 0.011650 | 0.011589 | 0.011630 | 0.011691 | 0.011548 | 0.011619 |
| 0.011583 | 0.011689 | 0.011798 | 0.011588 | 0.011941 | 0.011942 | 0.011618 |
| 0.011653 | 0.011723 | 0.011653 | 0.011688 | 0.011548 | 0.011514 | 0.011549 |
| 0.011653 | 0.011653 | 0.011583 | 0.011583 | 0.011583 | 0.011583 | 0.011688 |
| 0.011637 | 0.011640 | 0.011623 | 0.011629 | 0.011806 | 0.011766 | 0.011768 |
| 0.011767 | 0.011653 | 0.011516 | 0.011504 | 0.011622 | 0.011799 | 0.011729 |
| 0.011618 | 0.011658 | 0.011933 | 0.011830 | 0.011828 | 0.011828 | 0.011758 |
| 0.011723 | 0.011793 | 0.011793 | 0.011653 | 0.011653 | 0.011863 | 0.011933 |
| 0.011967 | 0.011282 | 0.011592 | 0.011743 | 0.011618 | 0.011828 | 0.011793 |
| 0.011794 | 0.011793 | 0.011828 | 0.011828 | 0.011873 | 0.011967 | 0.011637 |
| 0.011517 | 0.011528 | 0.011626 | 0.011589 | 0.011629 | 0.011566 | 0.011166 |
| 0.011666 | 0.011334 | 0.011555 | 0.011685 | 0.011653 | 0.011699 | 0.011618 |
| 0.011583 | 0.011514 | 0.011653 | 0.011583 | 0.011549 | 0.011514 | 0.011444 |
| 0.011549 | 0.011618 | 0.011618 | 0.011618 | 0.011653 | 0.011653 | 0.011654 |
| 0.011724 | 0.011653 | 0.011653 | 0.011691 | 0.011548 | 0.011619 | 0.011583 |
| 0.011689 | 0.011798 | 0.011588 | 0.011941 | 0.011942 | 0.011618 | 0.011827 |
| 0.011793 | 0.011793 | 0.011587 | 0.011747 | 0.011746 | 0.011733 | 0.011640 |
| 0.011810 | 0.012007 | 0.011854 | 0.011696 | 0.011583 | 0.011793 | 0.011618 |
| 0.011758 | 0.011688 | 0.011583 | 0.011690 | 0.011793 | 0.011762 | 0.011688 |
| 0.011583 | 0.011516 | 0.011653 | 0.011583 | 0.011514 | 0.011519 | 0.011793 |
| 0.011688 | 0.011618 | 0.011653 | 0.011688 | 0.011618 | 0.011583 | 0.011479 |
| 0.011653 | 0.011688 | 0.011688 | 0.011618 | 0.011688 | 0.011898 | 0.011514 |
| 0.011618 | 0.011409 | 0.011618 | 0.011653 | 0.011618 | 0.011304 | 0.011575 |
| 0.011791 | 0.011400 | 0.011361 | 0.011463 | 0.011508 | 0.011496 | 0.011353 |
| 0.011375 | 0.011514 | 0.011618 | 0.011730 | 0.011583 | 0.011724 | 0.011863 |
| 0.011759 | 0.011798 | 0.011758 | 0.012013 | 0.011653 | 0.012562 | 0.011758 |
| 0.012458 | 0.012247 | 0.012391 | 0.012704 | 0.011618 | 0.011583 | 0.011723 |
| 0.012353 | 0.011898 | 0.011688 | 0.011584 | 0.011653 | 0.011653 | 0.011588 |
| 0.011514 | 0.011516 | 0.011583 | 0.011549 | 0.011933 | 0.012003 | 0.011968 |
| 0.011863 | 0.011968 | 0.012073 | 0.011863 | 0.012388 | 0.012396 | 0.012458 |
| 0.012458 | 0.012458 | 0.012423 | 0.012423 | 0.012423 | 0.011723 | 0.011933 |
| 0.012037 | 0.012527 | 0.012044 | 0.011933 | 0.011759 | 0.011518 | 0.011409 |
| 0.011304 | 0.011374 | 0.011828 | 0.011952 | 0.011955 | 0.011688 | 0.011444 |
| S385     | 0.011960 | 0.011960 | 0.011787 | 0.011753 | 0.011753 | 0.011787 |
| 0.011235 | 0.011165 | 0.011753 | 0.011545 | 0.011579 | 0.011579 | 0.011545 |
| 0.011510 | 0.011752 | 0.011475 | 0.011579 | 0.011648 | 0.011614 | 0.011579 |
| 0.011545 | 0.011579 | 0.011406 | 0.011510 | 0.011580 | 0.011545 | 0.011235 |
| 0.011545 | 0.011579 | 0.011475 | 0.011441 | 0.011614 | 0.011614 | 0.011648 |
| 0.011614 | 0.011718 | 0.011614 | 0.011614 | 0.011648 | 0.011614 | 0.011787 |
| 0.011475 | 0.011614 | 0.011648 | 0.011579 | 0.011614 | 0.011718 | 0.011648 |
| 0.011614 | 0.011787 | 0.011649 | 0.011268 | 0.011614 | 0.011891 | 0.011614 |
| 0.011579 | 0.011614 | 0.011718 | 0.011891 | 0.011372 | 0.011614 | 0.011718 |
| 0.011648 | 0.011718 | 0.011579 | 0.011822 | 0.011406 | 0.011614 | 0.011683 |

|          |          |          |          |          |          |          |
|----------|----------|----------|----------|----------|----------|----------|
| 0.011579 | 0.011648 | 0.011648 | 0.011683 | 0.011614 | 0.011614 | 0.011614 |
| 0.011545 | 0.011545 | 0.011510 | 0.011545 | 0.011614 | 0.011648 | 0.011718 |
| 0.011648 | 0.011614 | 0.011683 | 0.011545 | 0.011441 | 0.011545 | 0.011579 |
| 0.011787 | 0.011718 | 0.011475 | 0.011752 | 0.011614 | 0.011856 | 0.011614 |
| 0.011765 | 0.011284 | 0.011815 | 0.011490 | 0.011513 | 0.011649 | 0.011415 |
| 0.012059 | 0.011416 | 0.011554 | 0.011856 | 0.011822 | 0.011545 | 0.011441 |
| 0.011683 | 0.011648 | 0.011718 | 0.011614 | 0.011683 | 0.011614 | 0.011648 |
| 0.011614 | 0.011614 | 0.011891 | 0.011787 | 0.011683 | 0.011649 | 0.011579 |
| 0.011545 | 0.011475 | 0.011614 | 0.011545 | 0.011510 | 0.011475 | 0.011406 |
| 0.011510 | 0.011579 | 0.011579 | 0.011579 | 0.011614 | 0.011614 | 0.011616 |
| 0.011686 | 0.011614 | 0.011614 | 0.011463 | 0.011504 | 0.011494 | 0.011614 |
| 0.011583 | 0.011517 | 0.011584 | 0.011552 | 0.011515 | 0.011519 | 0.011582 |
| 0.011464 | 0.011557 | 0.011625 | 0.011545 | 0.011518 | 0.011683 | 0.011579 |
| 0.011649 | 0.011650 | 0.011648 | 0.011718 | 0.011683 | 0.012064 | 0.011753 |
| 0.011614 | 0.011683 | 0.011614 | 0.011649 | 0.011510 | 0.011475 | 0.011510 |
| 0.011614 | 0.011614 | 0.011545 | 0.011545 | 0.011579 | 0.011545 | 0.011648 |
| 0.011579 | 0.011718 | 0.011648 | 0.011545 | 0.011651 | 0.011752 | 0.011756 |
| 0.011752 | 0.011648 | 0.011545 | 0.011477 | 0.011614 | 0.011545 | 0.011476 |
| 0.011480 | 0.011753 | 0.011545 | 0.011752 | 0.011510 | 0.011579 | 0.011579 |
| 0.011683 | 0.011579 | 0.011614 | 0.011579 | 0.011614 | 0.011475 | 0.011579 |
| 0.011614 | 0.011579 | 0.011648 | 0.011579 | 0.011614 | 0.011648 | 0.011822 |
| 0.011302 | 0.011233 | 0.011302 | 0.011752 | 0.011372 | 0.011614 | 0.011579 |
| 0.011546 | 0.011890 | 0.011628 | 0.011517 | 0.011305 | 0.011482 | 0.011665 |
| 0.011305 | 0.011550 | 0.011787 | 0.011960 | 0.011694 | 0.011856 | 0.011822 |
| 0.011752 | 0.011891 | 0.011757 | 0.011658 | 0.011623 | 0.011649 | 0.011723 |
| 0.011822 | 0.011720 | 0.011862 | 0.011932 | 0.011787 | 0.011926 | 0.012039 |
| 0.011723 | 0.011935 | 0.011793 | 0.011792 | 0.012065 | 0.011510 | 0.011685 |
| 0.011683 | 0.011579 | 0.011475 | 0.011475 | 0.011545 | 0.011579 | 0.011648 |
| 0.011579 | 0.011648 | 0.011545 | 0.011579 | 0.011579 | 0.011579 | 0.011648 |
| 0.011579 | 0.011337 | 0.011233 | 0.011268 | 0.011475 | 0.011579 | 0.011614 |
| 0.011614 | 0.011510 | 0.011648 | 0.011614 | 0.011545 | 0.011545 | 0.011545 |
| 0.011406 | 0.011614 | 0.011718 | 0.011510 | 0.011614 | 0.011787 | 0.011545 |
| 0.011510 | 0.011579 | 0.011579 | 0.011752 | 0.011545 | 0.011475 | 0.011614 |
| 0.011545 | 0.011579 | 0.011579 | 0.011510 | 0.011510 | 0.011614 | 0.011614 |
| 0.011510 | 0.011614 | 0.011475 | 0.011510 | 0.011648 | 0.011441 | 0.011545 |
| 0.011510 | 0.011648 | 0.011580 | 0.011475 | 0.011199 | 0.011475 | 0.011648 |
| 0.011695 | 0.011545 | 0.011164 | 0.011683 | 0.011648 | 0.011579 | 0.011683 |
| 0.011545 | 0.011891 | 0.011475 | 0.011475 | 0.011475 | 0.011475 | 0.011475 |
| 0.011648 | 0.011579 | 0.011579 | 0.011683 | 0.011510 | 0.011233 | 0.011475 |
| 0.011545 | 0.011545 | 0.011579 | 0.011683 | 0.011579 | 0.011683 | 0.011752 |
| 0.011752 | 0.011718 | 0.011614 | 0.011718 | 0.011683 | 0.011545 | 0.011510 |
| 0.011545 | 0.011545 | 0.011579 | 0.011475 | 0.011510 | 0.011648 | 0.011545 |
| 0.011510 | 0.011545 | 0.011718 | 0.011683 | 0.011614 | 0.011579 | 0.011579 |
| 0.011648 | 0.011579 | 0.011683 | 0.011545 | 0.011683 | 0.011787 | 0.011406 |
| 0.011579 | 0.011337 | 0.011583 | 0.018088 | 0.011322 | 0.011672 | 0.011200 |
| 0.000000 | 0.011201 | 0.011794 | 0.011582 | 0.011445 | 0.011233 | 0.011729 |
| 0.011582 | 0.011427 | 0.011489 | 0.011563 | 0.011490 | 0.011504 | 0.011620 |
| 0.011342 | 0.011437 | 0.011285 | 0.011398 | 0.011718 | 0.011752 | 0.011722 |
| 0.011627 | 0.011718 | 0.011683 | 0.011614 | 0.011614 | 0.011614 | 0.011614 |
| 0.011648 | 0.011579 | 0.011614 | 0.011648 | 0.011579 | 0.011545 | 0.011579 |
| 0.011579 | 0.011614 | 0.011510 | 0.011614 | 0.011683 | 0.011718 | 0.011614 |
| 0.011579 | 0.011545 | 0.011337 | 0.011337 | 0.011683 | 0.011719 | 0.011752 |
| 0.011510 | 0.011510 | 0.011545 | 0.011648 | 0.011510 | 0.011752 | 0.011752 |
| 0.011787 | 0.011787 | 0.011683 | 0.011822 | 0.011372 | 0.011824 | 0.011648 |
| 0.011648 | 0.011718 | 0.011752 | 0.011579 | 0.011614 | 0.011545 | 0.011648 |
| 0.011718 | 0.011718 | 0.011752 | 0.011718 | 0.011615 | 0.011787 | 0.011787 |
| 0.011654 | 0.011545 | 0.011648 | 0.011752 | 0.011649 | 0.011718 | 0.011787 |
| 0.011960 | 0.011694 | 0.011856 | 0.011822 | 0.011752 | 0.011891 | 0.011545 |
| 0.011720 | 0.011614 | 0.011579 | 0.011579 | 0.011614 | 0.011510 | 0.011614 |
| 0.011683 | 0.011718 | 0.011614 | 0.011579 | 0.011545 | 0.011337 | 0.011337 |

|          |          |          |          |          |          |          |
|----------|----------|----------|----------|----------|----------|----------|
| 0.011683 | 0.011719 | 0.011787 | 0.011718 | 0.012308 | 0.011797 | 0.011641 |
| 0.011784 | 0.011740 | 0.011821 | 0.011632 | 0.011854 | 0.011772 | 0.011700 |
| 0.012229 | 0.011631 | 0.011732 | 0.011702 | 0.011983 | 0.011832 | 0.011937 |
| 0.012251 | 0.011722 | 0.011651 | 0.011648 | 0.011648 | 0.011406 | 0.011616 |
| 0.011510 | 0.011545 | 0.011683 | 0.011648 | 0.011651 | 0.011510 | 0.011475 |
| 0.011579 | 0.011545 | 0.011579 | 0.011579 | 0.011510 | 0.011545 | 0.011475 |
| 0.011545 | 0.011579 | 0.011545 | 0.011510 | 0.011614 | 0.011545 | 0.011579 |
| 0.011579 | 0.011510 | 0.011579 | 0.011614 | 0.011510 | 0.011718 | 0.011752 |
| 0.011648 | 0.011648 | 0.011648 | 0.011648 | 0.011579 | 0.011372 | 0.011614 |
| 0.011383 | 0.011545 | 0.011545 | 0.011550 | 0.011614 | 0.011579 | 0.011683 |
| 0.011683 | 0.011614 | 0.011579 | 0.011614 | 0.011718 | 0.011718 | 0.011648 |
| 0.011648 | 0.011752 | 0.011268 | 0.011683 | 0.011822 | 0.011822 | 0.011752 |
| 0.011545 | 0.011648 | 0.011683 | 0.011475 | 0.011649 | 0.011614 | 0.011648 |
| 0.011683 | 0.011510 | 0.011510 | 0.011857 | 0.011856 | 0.011822 | 0.011614 |
| 0.011718 | 0.011787 | 0.011614 | 0.011718 | 0.011648 | 0.011545 | 0.011199 |
| 0.011648 | 0.011614 | 0.011510 | 0.011718 | 0.011614 | 0.011718 | 0.011476 |
| 0.011579 | 0.011340 | 0.011337 | 0.011507 | 0.011399 | 0.011649 | 0.011370 |
| 0.011500 | 0.011690 | 0.011557 | 0.011596 | 0.011548 | 0.011366 | 0.011379 |
| 0.011519 | 0.011258 | 0.011450 | 0.011324 | 0.011330 | 0.011529 | 0.011750 |
| 0.011738 | 0.011650 | 0.011589 | 0.011630 | 0.011651 | 0.011510 | 0.011579 |
| 0.011545 | 0.011649 | 0.011757 | 0.011549 | 0.011864 | 0.011862 | 0.011614 |
| 0.011614 | 0.011683 | 0.011614 | 0.011649 | 0.011510 | 0.011475 | 0.011510 |
| 0.011614 | 0.011614 | 0.011545 | 0.011545 | 0.011579 | 0.011545 | 0.011648 |
| 0.011597 | 0.011599 | 0.011584 | 0.011589 | 0.011764 | 0.011725 | 0.011727 |
| 0.011727 | 0.011614 | 0.011475 | 0.011464 | 0.011583 | 0.011758 | 0.011689 |
| 0.011579 | 0.011618 | 0.011892 | 0.011824 | 0.011787 | 0.011788 | 0.011718 |
| 0.011683 | 0.011752 | 0.011752 | 0.011614 | 0.011614 | 0.011822 | 0.011891 |
| 0.011926 | 0.011207 | 0.011552 | 0.011702 | 0.011579 | 0.011787 | 0.011752 |
| 0.011754 | 0.011752 | 0.011822 | 0.011822 | 0.011825 | 0.011926 | 0.011597 |
| 0.011478 | 0.011489 | 0.011586 | 0.011550 | 0.011589 | 0.011523 | 0.011130 |
| 0.011626 | 0.011333 | 0.011554 | 0.011602 | 0.011614 | 0.011659 | 0.011579 |
| 0.011545 | 0.011475 | 0.011614 | 0.011545 | 0.011510 | 0.011475 | 0.011406 |
| 0.011510 | 0.011579 | 0.011579 | 0.011579 | 0.011614 | 0.011614 | 0.011616 |
| 0.011686 | 0.011614 | 0.011614 | 0.011651 | 0.011510 | 0.011579 | 0.011545 |
| 0.011649 | 0.011757 | 0.011549 | 0.011864 | 0.011862 | 0.011614 | 0.011787 |
| 0.011752 | 0.011752 | 0.011548 | 0.011778 | 0.011704 | 0.011692 | 0.011600 |
| 0.011769 | 0.011999 | 0.011802 | 0.011656 | 0.011545 | 0.011752 | 0.011579 |
| 0.011718 | 0.011648 | 0.011545 | 0.011651 | 0.011752 | 0.011756 | 0.011648 |
| 0.011545 | 0.011477 | 0.011614 | 0.011545 | 0.011476 | 0.011480 | 0.011753 |
| 0.011648 | 0.011579 | 0.011614 | 0.011648 | 0.011579 | 0.011545 | 0.011441 |
| 0.011614 | 0.011648 | 0.011648 | 0.011579 | 0.011648 | 0.011856 | 0.011475 |
| 0.011579 | 0.011372 | 0.011579 | 0.011614 | 0.011579 | 0.011268 | 0.011574 |
| 0.011847 | 0.011400 | 0.011411 | 0.011463 | 0.011508 | 0.011459 | 0.011353 |
| 0.011375 | 0.011475 | 0.011579 | 0.011689 | 0.011545 | 0.011684 | 0.011822 |
| 0.011718 | 0.011757 | 0.011718 | 0.011970 | 0.011614 | 0.012516 | 0.011718 |
| 0.012412 | 0.012203 | 0.012345 | 0.012656 | 0.011579 | 0.011545 | 0.011683 |
| 0.012343 | 0.011857 | 0.011649 | 0.011545 | 0.011614 | 0.011614 | 0.011548 |
| 0.011475 | 0.011477 | 0.011545 | 0.011510 | 0.011892 | 0.011961 | 0.011926 |
| 0.011857 | 0.011926 | 0.012030 | 0.011822 | 0.012343 | 0.012350 | 0.012413 |
| 0.012412 | 0.012412 | 0.012378 | 0.012378 | 0.012378 | 0.011683 | 0.011891 |
| 0.011995 | 0.012481 | 0.012001 | 0.011891 | 0.011719 | 0.011479 | 0.011372 |
| 0.011268 | 0.011337 | 0.011857 | 0.011860 | 0.011812 | 0.011649 | 0.011407 |
| S386     | 0.012010 | 0.012010 | 0.011835 | 0.011799 | 0.011799 | 0.011835 |
| 0.011274 | 0.011203 | 0.011799 | 0.011588 | 0.011623 | 0.011623 | 0.011588 |
| 0.011553 | 0.011799 | 0.011517 | 0.011623 | 0.011693 | 0.011658 | 0.011623 |
| 0.011588 | 0.011623 | 0.011447 | 0.011553 | 0.011624 | 0.011588 | 0.011274 |
| 0.011588 | 0.011623 | 0.011517 | 0.011482 | 0.011658 | 0.011658 | 0.011623 |
| 0.011658 | 0.011764 | 0.011658 | 0.011658 | 0.011693 | 0.011658 | 0.011834 |
| 0.011517 | 0.011658 | 0.011693 | 0.011623 | 0.011658 | 0.011764 | 0.011693 |
| 0.011658 | 0.011834 | 0.011694 | 0.011306 | 0.011658 | 0.011940 | 0.011658 |

|          |          |          |          |          |          |          |
|----------|----------|----------|----------|----------|----------|----------|
| 0.011623 | 0.011658 | 0.011764 | 0.011940 | 0.011412 | 0.011658 | 0.011764 |
| 0.011693 | 0.011729 | 0.011623 | 0.011869 | 0.011412 | 0.011658 | 0.011729 |
| 0.011623 | 0.011693 | 0.011693 | 0.011729 | 0.011658 | 0.011658 | 0.011658 |
| 0.011588 | 0.011588 | 0.011553 | 0.011588 | 0.011658 | 0.011658 | 0.011764 |
| 0.011693 | 0.011658 | 0.011729 | 0.011588 | 0.011482 | 0.011588 | 0.011623 |
| 0.011799 | 0.011764 | 0.011482 | 0.011799 | 0.011658 | 0.011905 | 0.011658 |
| 0.011765 | 0.011284 | 0.011815 | 0.011529 | 0.011513 | 0.011649 | 0.011415 |
| 0.012059 | 0.011416 | 0.011555 | 0.011904 | 0.011869 | 0.011588 | 0.011482 |
| 0.011729 | 0.011693 | 0.011764 | 0.011658 | 0.011729 | 0.011658 | 0.011693 |
| 0.011658 | 0.011658 | 0.011940 | 0.011834 | 0.011729 | 0.011694 | 0.011623 |
| 0.011588 | 0.011517 | 0.011658 | 0.011588 | 0.011553 | 0.011518 | 0.011447 |
| 0.011553 | 0.011623 | 0.011623 | 0.011623 | 0.011658 | 0.011658 | 0.011659 |
| 0.011730 | 0.011658 | 0.011658 | 0.011499 | 0.011545 | 0.011538 | 0.011658 |
| 0.011627 | 0.011556 | 0.011624 | 0.011592 | 0.011558 | 0.011562 | 0.011626 |
| 0.011504 | 0.011601 | 0.011670 | 0.011588 | 0.011558 | 0.011729 | 0.011623 |
| 0.011694 | 0.011695 | 0.011693 | 0.011764 | 0.011728 | 0.012116 | 0.011799 |
| 0.011658 | 0.011729 | 0.011658 | 0.011694 | 0.011553 | 0.011518 | 0.011553 |
| 0.011658 | 0.011658 | 0.011588 | 0.011588 | 0.011588 | 0.011588 | 0.011693 |
| 0.011623 | 0.011764 | 0.011693 | 0.011588 | 0.011696 | 0.011799 | 0.011768 |
| 0.011799 | 0.011693 | 0.011588 | 0.011519 | 0.011658 | 0.011588 | 0.011518 |
| 0.011523 | 0.011799 | 0.011588 | 0.011799 | 0.011553 | 0.011623 | 0.011623 |
| 0.011729 | 0.011623 | 0.011658 | 0.011623 | 0.011658 | 0.011517 | 0.011623 |
| 0.011658 | 0.011623 | 0.011693 | 0.011623 | 0.011658 | 0.011693 | 0.011869 |
| 0.011342 | 0.011201 | 0.011342 | 0.011799 | 0.011412 | 0.011658 | 0.011623 |
| 0.011590 | 0.011907 | 0.011737 | 0.011561 | 0.011345 | 0.011525 | 0.011677 |
| 0.011345 | 0.011593 | 0.011834 | 0.012011 | 0.011740 | 0.011905 | 0.011870 |
| 0.011799 | 0.011940 | 0.011844 | 0.011758 | 0.011723 | 0.011694 | 0.011770 |
| 0.011869 | 0.011767 | 0.011911 | 0.011983 | 0.011764 | 0.011975 | 0.012090 |
| 0.011767 | 0.011985 | 0.011805 | 0.011840 | 0.012117 | 0.011553 | 0.011731 |
| 0.011693 | 0.011623 | 0.011517 | 0.011517 | 0.011588 | 0.011623 | 0.011693 |
| 0.011623 | 0.011693 | 0.011588 | 0.011623 | 0.011623 | 0.011623 | 0.011693 |
| 0.011623 | 0.011377 | 0.011271 | 0.011306 | 0.011517 | 0.011623 | 0.011658 |
| 0.011658 | 0.011553 | 0.011693 | 0.011658 | 0.011588 | 0.011588 | 0.011588 |
| 0.011447 | 0.011658 | 0.011764 | 0.011553 | 0.011658 | 0.011834 | 0.011553 |
| 0.011553 | 0.011623 | 0.011623 | 0.011799 | 0.011588 | 0.011518 | 0.011658 |
| 0.011588 | 0.011623 | 0.011623 | 0.011553 | 0.011553 | 0.011658 | 0.011658 |
| 0.011553 | 0.011658 | 0.011517 | 0.011553 | 0.011693 | 0.011483 | 0.011588 |
| 0.011553 | 0.011693 | 0.011624 | 0.011517 | 0.011236 | 0.011517 | 0.011693 |
| 0.011778 | 0.011588 | 0.011201 | 0.011694 | 0.011693 | 0.011623 | 0.011729 |
| 0.011588 | 0.011940 | 0.011517 | 0.011518 | 0.011517 | 0.011517 | 0.011517 |
| 0.011693 | 0.011623 | 0.011623 | 0.011729 | 0.011553 | 0.011271 | 0.011517 |
| 0.011588 | 0.011588 | 0.011623 | 0.011693 | 0.011623 | 0.011729 | 0.011799 |
| 0.011799 | 0.011764 | 0.011658 | 0.011764 | 0.011728 | 0.011588 | 0.011553 |
| 0.011588 | 0.011588 | 0.011623 | 0.011517 | 0.011553 | 0.011693 | 0.011588 |
| 0.011553 | 0.011588 | 0.011693 | 0.011729 | 0.011658 | 0.011623 | 0.011623 |
| 0.011693 | 0.011623 | 0.011728 | 0.011588 | 0.011729 | 0.011834 | 0.011447 |
| 0.011623 | 0.011377 | 0.011588 | 0.018051 | 0.011322 | 0.011611 | 0.011201 |
| 0.011201 | 0.000000 | 0.011794 | 0.011583 | 0.011445 | 0.011271 | 0.011729 |
| 0.011677 | 0.011427 | 0.011489 | 0.011605 | 0.011490 | 0.011505 | 0.011620 |
| 0.011342 | 0.011475 | 0.011285 | 0.011465 | 0.011764 | 0.011799 | 0.011769 |
| 0.011672 | 0.011764 | 0.011729 | 0.011658 | 0.011658 | 0.011659 | 0.011659 |
| 0.011693 | 0.011623 | 0.011658 | 0.011693 | 0.011623 | 0.011588 | 0.011623 |
| 0.011623 | 0.011658 | 0.011553 | 0.011658 | 0.011729 | 0.011764 | 0.011658 |
| 0.011623 | 0.011588 | 0.011342 | 0.011342 | 0.011729 | 0.011765 | 0.011799 |
| 0.011553 | 0.011553 | 0.011588 | 0.011693 | 0.011553 | 0.011799 | 0.011799 |
| 0.011834 | 0.011834 | 0.011729 | 0.011869 | 0.011412 | 0.011837 | 0.011693 |
| 0.011693 | 0.011764 | 0.011799 | 0.011623 | 0.011623 | 0.011588 | 0.011693 |
| 0.011764 | 0.011764 | 0.011799 | 0.011764 | 0.011660 | 0.011834 | 0.011834 |
| 0.011699 | 0.011553 | 0.011623 | 0.011799 | 0.011694 | 0.011764 | 0.011834 |
| 0.012011 | 0.011740 | 0.011905 | 0.011870 | 0.011799 | 0.011940 | 0.011588 |



|          |          |          |          |          |          |          |
|----------|----------|----------|----------|----------|----------|----------|
| 0.011766 | 0.011658 | 0.011623 | 0.011623 | 0.011658 | 0.011553 | 0.011658 |
| 0.011729 | 0.011764 | 0.011658 | 0.011623 | 0.011588 | 0.011342 | 0.011342 |
| 0.011729 | 0.011765 | 0.011799 | 0.011764 | 0.012364 | 0.011848 | 0.011725 |
| 0.011830 | 0.011788 | 0.011908 | 0.011715 | 0.011905 | 0.011820 | 0.011745 |
| 0.012285 | 0.011677 | 0.011815 | 0.011749 | 0.012035 | 0.011845 | 0.011987 |
| 0.012343 | 0.011814 | 0.011695 | 0.011693 | 0.011693 | 0.011447 | 0.011659 |
| 0.011553 | 0.011588 | 0.011729 | 0.011693 | 0.011694 | 0.011553 | 0.011518 |
| 0.011623 | 0.011588 | 0.011623 | 0.011623 | 0.011553 | 0.011588 | 0.011517 |
| 0.011588 | 0.011623 | 0.011588 | 0.011553 | 0.011658 | 0.011588 | 0.011623 |
| 0.011623 | 0.011553 | 0.011623 | 0.011658 | 0.011553 | 0.011764 | 0.011799 |
| 0.011658 | 0.011693 | 0.011623 | 0.011658 | 0.011623 | 0.011412 | 0.011658 |
| 0.011426 | 0.011588 | 0.011588 | 0.011593 | 0.011658 | 0.011623 | 0.011729 |
| 0.011729 | 0.011658 | 0.011623 | 0.011658 | 0.011764 | 0.011764 | 0.011693 |
| 0.011693 | 0.011799 | 0.011306 | 0.011728 | 0.011834 | 0.011834 | 0.011799 |
| 0.011588 | 0.011693 | 0.011729 | 0.011482 | 0.011694 | 0.011658 | 0.011693 |
| 0.011729 | 0.011553 | 0.011553 | 0.011905 | 0.011870 | 0.011870 | 0.011658 |
| 0.011764 | 0.011834 | 0.011658 | 0.011764 | 0.011693 | 0.011588 | 0.011236 |
| 0.011693 | 0.011623 | 0.011553 | 0.011764 | 0.011658 | 0.011764 | 0.011518 |
| 0.011623 | 0.011381 | 0.011377 | 0.011548 | 0.011399 | 0.011658 | 0.011422 |
| 0.011500 | 0.011770 | 0.011557 | 0.011641 | 0.011597 | 0.011468 | 0.011379 |
| 0.011520 | 0.011324 | 0.011506 | 0.011391 | 0.011330 | 0.011597 | 0.011750 |
| 0.011739 | 0.011651 | 0.011593 | 0.011635 | 0.011696 | 0.011553 | 0.011623 |
| 0.011588 | 0.011694 | 0.011804 | 0.011593 | 0.011948 | 0.011950 | 0.011623 |
| 0.011658 | 0.011729 | 0.011658 | 0.011694 | 0.011553 | 0.011518 | 0.011553 |
| 0.011658 | 0.011658 | 0.011588 | 0.011588 | 0.011588 | 0.011588 | 0.011693 |
| 0.011637 | 0.011644 | 0.011628 | 0.011634 | 0.011812 | 0.011771 | 0.011774 |
| 0.011774 | 0.011658 | 0.011516 | 0.011504 | 0.011627 | 0.011805 | 0.011735 |
| 0.011623 | 0.011663 | 0.011941 | 0.011837 | 0.011834 | 0.011835 | 0.011764 |
| 0.011728 | 0.011799 | 0.011799 | 0.011658 | 0.011658 | 0.011870 | 0.011940 |
| 0.011975 | 0.011284 | 0.011596 | 0.011748 | 0.011623 | 0.011834 | 0.011799 |
| 0.011801 | 0.011799 | 0.011834 | 0.011834 | 0.011839 | 0.011975 | 0.011642 |
| 0.011521 | 0.011532 | 0.011631 | 0.011594 | 0.011633 | 0.011571 | 0.011167 |
| 0.011671 | 0.011383 | 0.011661 | 0.011691 | 0.011658 | 0.011705 | 0.011623 |
| 0.011588 | 0.011517 | 0.011658 | 0.011588 | 0.011553 | 0.011518 | 0.011447 |
| 0.011553 | 0.011623 | 0.011623 | 0.011623 | 0.011658 | 0.011658 | 0.011659 |
| 0.011730 | 0.011658 | 0.011658 | 0.011696 | 0.011553 | 0.011623 | 0.011588 |
| 0.011694 | 0.011804 | 0.011593 | 0.011948 | 0.011950 | 0.011623 | 0.011834 |
| 0.011799 | 0.011799 | 0.011591 | 0.011790 | 0.011752 | 0.011738 | 0.011646 |
| 0.011745 | 0.012066 | 0.011818 | 0.011701 | 0.011588 | 0.011799 | 0.011623 |
| 0.011764 | 0.011693 | 0.011588 | 0.011696 | 0.011799 | 0.011768 | 0.011693 |
| 0.011588 | 0.011519 | 0.011658 | 0.011588 | 0.011518 | 0.011523 | 0.011799 |
| 0.011693 | 0.011623 | 0.011658 | 0.011693 | 0.011623 | 0.011588 | 0.011482 |
| 0.011658 | 0.011693 | 0.011693 | 0.011623 | 0.011623 | 0.011905 | 0.011517 |
| 0.011623 | 0.011412 | 0.011623 | 0.011658 | 0.011623 | 0.011306 | 0.011575 |
| 0.011904 | 0.011400 | 0.011411 | 0.011463 | 0.011508 | 0.011496 | 0.011353 |
| 0.011428 | 0.011518 | 0.011623 | 0.011736 | 0.011588 | 0.011729 | 0.011870 |
| 0.011765 | 0.011804 | 0.011764 | 0.012021 | 0.011658 | 0.012540 | 0.011764 |
| 0.012469 | 0.012257 | 0.012402 | 0.012718 | 0.011623 | 0.011588 | 0.011729 |
| 0.012364 | 0.011906 | 0.011694 | 0.011588 | 0.011658 | 0.011658 | 0.011592 |
| 0.011518 | 0.011519 | 0.011588 | 0.011553 | 0.011906 | 0.011976 | 0.011940 |
| 0.011835 | 0.011940 | 0.012046 | 0.011835 | 0.012364 | 0.012408 | 0.012470 |
| 0.012470 | 0.012470 | 0.012435 | 0.012435 | 0.012435 | 0.011728 | 0.011940 |
| 0.012010 | 0.012540 | 0.012053 | 0.011905 | 0.011730 | 0.011522 | 0.011412 |
| 0.011306 | 0.011377 | 0.011835 | 0.011962 | 0.011963 | 0.011693 | 0.011448 |
| s387     | 0.011532 | 0.011532 | 0.011899 | 0.011794 | 0.011794 | 0.011899 |
| 0.011800 | 0.011694 | 0.011899 | 0.011322 | 0.011322 | 0.011322 | 0.011270 |
| 0.011322 | 0.011479 | 0.011322 | 0.011270 | 0.011322 | 0.011374 | 0.011322 |
| 0.011270 | 0.011374 | 0.011427 | 0.011217 | 0.011322 | 0.011217 | 0.011799 |
| 0.011689 | 0.011322 | 0.011217 | 0.011427 | 0.011374 | 0.011374 | 0.011270 |
| 0.011374 | 0.011479 | 0.011427 | 0.011427 | 0.011427 | 0.011270 | 0.011584 |

|          |          |          |          |          |          |          |
|----------|----------|----------|----------|----------|----------|----------|
| 0.011270 | 0.011374 | 0.011427 | 0.011374 | 0.011427 | 0.011479 | 0.011427 |
| 0.011322 | 0.011584 | 0.011374 | 0.011899 | 0.011374 | 0.011532 | 0.011374 |
| 0.011270 | 0.011427 | 0.011479 | 0.011532 | 0.011899 | 0.011374 | 0.011584 |
| 0.011374 | 0.011322 | 0.011322 | 0.011584 | 0.011951 | 0.011427 | 0.011427 |
| 0.011322 | 0.011374 | 0.011427 | 0.011479 | 0.011322 | 0.011427 | 0.011427 |
| 0.011322 | 0.011322 | 0.011270 | 0.011374 | 0.011322 | 0.011374 | 0.011427 |
| 0.011427 | 0.011322 | 0.011322 | 0.011217 | 0.011479 | 0.011217 | 0.011322 |
| 0.011479 | 0.011532 | 0.011846 | 0.011427 | 0.011374 | 0.011636 | 0.011374 |
| 0.011217 | 0.011899 | 0.011591 | 0.011277 | 0.011273 | 0.011115 | 0.011492 |
| 0.011492 | 0.011565 | 0.011286 | 0.011532 | 0.011479 | 0.011427 | 0.011479 |
| 0.011427 | 0.011427 | 0.011532 | 0.011374 | 0.011374 | 0.011374 | 0.011322 |
| 0.011322 | 0.011427 | 0.011479 | 0.011532 | 0.011374 | 0.011480 | 0.011322 |
| 0.011217 | 0.011270 | 0.011374 | 0.011270 | 0.011584 | 0.011479 | 0.011427 |
| 0.011584 | 0.011584 | 0.011270 | 0.011270 | 0.011270 | 0.011270 | 0.011270 |
| 0.011323 | 0.011427 | 0.011322 | 0.011169 | 0.011280 | 0.011278 | 0.011322 |
| 0.011217 | 0.011322 | 0.011330 | 0.011322 | 0.011220 | 0.011327 | 0.011376 |
| 0.011557 | 0.011328 | 0.011327 | 0.011322 | 0.011270 | 0.011427 | 0.011374 |
| 0.011479 | 0.011374 | 0.011374 | 0.011427 | 0.011374 | 0.011689 | 0.011532 |
| 0.011741 | 0.011584 | 0.011270 | 0.011584 | 0.011270 | 0.011636 | 0.011217 |
| 0.011270 | 0.011270 | 0.011217 | 0.011322 | 0.011322 | 0.011322 | 0.011374 |
| 0.011270 | 0.011374 | 0.011427 | 0.011217 | 0.011374 | 0.011374 | 0.011480 |
| 0.011479 | 0.011322 | 0.011217 | 0.011217 | 0.011427 | 0.011217 | 0.011217 |
| 0.011378 | 0.011479 | 0.011270 | 0.011479 | 0.011217 | 0.011322 | 0.011322 |
| 0.011427 | 0.011270 | 0.011322 | 0.011270 | 0.011322 | 0.011217 | 0.011270 |
| 0.011374 | 0.011322 | 0.011374 | 0.011270 | 0.011322 | 0.011322 | 0.011637 |
| 0.011899 | 0.011741 | 0.011951 | 0.011479 | 0.011846 | 0.011270 | 0.011374 |
| 0.011376 | 0.011500 | 0.011489 | 0.011272 | 0.011796 | 0.011220 | 0.011430 |
| 0.011905 | 0.011638 | 0.011479 | 0.011532 | 0.011327 | 0.011584 | 0.011584 |
| 0.011532 | 0.011636 | 0.011555 | 0.011301 | 0.011361 | 0.011479 | 0.011427 |
| 0.011532 | 0.011323 | 0.011689 | 0.011587 | 0.011427 | 0.011584 | 0.011907 |
| 0.011377 | 0.011592 | 0.011484 | 0.011484 | 0.011847 | 0.011270 | 0.011323 |
| 0.011374 | 0.011322 | 0.011217 | 0.011217 | 0.011270 | 0.011322 | 0.011374 |
| 0.011322 | 0.011374 | 0.011270 | 0.011427 | 0.011322 | 0.011322 | 0.011374 |
| 0.011374 | 0.011951 | 0.011794 | 0.011899 | 0.011217 | 0.011322 | 0.011270 |
| 0.011322 | 0.011270 | 0.011427 | 0.011532 | 0.011270 | 0.011270 | 0.011270 |
| 0.012003 | 0.011532 | 0.011427 | 0.011270 | 0.011374 | 0.011427 | 0.011270 |
| 0.011270 | 0.011270 | 0.011322 | 0.011479 | 0.011217 | 0.011479 | 0.011636 |
| 0.011584 | 0.011374 | 0.011374 | 0.011270 | 0.011217 | 0.011270 | 0.011374 |
| 0.011270 | 0.011374 | 0.011217 | 0.011270 | 0.011270 | 0.011585 | 0.011270 |
| 0.011270 | 0.011270 | 0.011270 | 0.011217 | 0.011636 | 0.011217 | 0.011427 |
| 0.011485 | 0.011322 | 0.011741 | 0.011479 | 0.011479 | 0.011322 | 0.011479 |
| 0.011270 | 0.011532 | 0.011217 | 0.011479 | 0.011322 | 0.011322 | 0.011217 |
| 0.011322 | 0.011636 | 0.011322 | 0.011427 | 0.011217 | 0.011794 | 0.011322 |
| 0.011217 | 0.011322 | 0.011374 | 0.011322 | 0.011322 | 0.011427 | 0.011532 |
| 0.011427 | 0.011374 | 0.011427 | 0.011374 | 0.011427 | 0.011322 | 0.011270 |
| 0.011270 | 0.011322 | 0.011322 | 0.011270 | 0.011217 | 0.011479 | 0.011217 |
| 0.011374 | 0.011270 | 0.011374 | 0.011532 | 0.011374 | 0.011270 | 0.011270 |
| 0.011322 | 0.011322 | 0.011374 | 0.011270 | 0.011532 | 0.011532 | 0.011899 |
| 0.011322 | 0.011846 | 0.011374 | 0.011330 | 0.011145 | 0.011516 | 0.011689 |
| 0.011794 | 0.011794 | 0.000000 | 0.011313 | 0.011756 | 0.011794 | 0.011430 |
| 0.011668 | 0.011501 | 0.011223 | 0.011326 | 0.011335 | 0.011186 | 0.011340 |
| 0.011649 | 0.011606 | 0.011584 | 0.011287 | 0.011479 | 0.011532 | 0.011324 |
| 0.011327 | 0.011374 | 0.011374 | 0.011479 | 0.011375 | 0.011375 | 0.011375 |
| 0.011374 | 0.011270 | 0.011270 | 0.011479 | 0.011322 | 0.011322 | 0.011270 |
| 0.011270 | 0.011374 | 0.011217 | 0.011374 | 0.011427 | 0.011374 | 0.011322 |
| 0.011479 | 0.011427 | 0.011794 | 0.011794 | 0.011532 | 0.011427 | 0.011532 |
| 0.011270 | 0.011270 | 0.011270 | 0.011270 | 0.011270 | 0.011479 | 0.011479 |
| 0.011427 | 0.011479 | 0.011479 | 0.011427 | 0.011899 | 0.011429 | 0.011374 |
| 0.011374 | 0.011479 | 0.011479 | 0.011374 | 0.011374 | 0.011270 | 0.011374 |
| 0.011322 | 0.011322 | 0.011374 | 0.011322 | 0.011323 | 0.011479 | 0.011479 |

|          |          |          |          |          |          |          |
|----------|----------|----------|----------|----------|----------|----------|
| 0.011378 | 0.011217 | 0.011374 | 0.011637 | 0.011322 | 0.011584 | 0.011532 |
| 0.011532 | 0.011327 | 0.011584 | 0.011584 | 0.011532 | 0.011636 | 0.011322 |
| 0.011480 | 0.011322 | 0.011270 | 0.011270 | 0.011374 | 0.011217 | 0.011374 |
| 0.011427 | 0.011374 | 0.011322 | 0.011479 | 0.011427 | 0.011794 | 0.011794 |
| 0.011532 | 0.011427 | 0.011479 | 0.011374 | 0.012214 | 0.011545 | 0.011328 |
| 0.011490 | 0.011540 | 0.011549 | 0.011433 | 0.011705 | 0.011594 | 0.011537 |
| 0.012127 | 0.011275 | 0.011434 | 0.011436 | 0.011651 | 0.011483 | 0.011642 |
| 0.012176 | 0.011455 | 0.011270 | 0.011374 | 0.011322 | 0.011427 | 0.011270 |
| 0.011270 | 0.011217 | 0.011374 | 0.011322 | 0.011270 | 0.011636 | 0.011636 |
| 0.011374 | 0.011270 | 0.011322 | 0.011322 | 0.011217 | 0.011322 | 0.011217 |
| 0.011374 | 0.011374 | 0.011270 | 0.011270 | 0.011374 | 0.011270 | 0.011374 |
| 0.011374 | 0.011217 | 0.011270 | 0.011322 | 0.011217 | 0.011479 | 0.011479 |
| 0.011322 | 0.011479 | 0.011270 | 0.011322 | 0.011374 | 0.011899 | 0.011374 |
| 0.011435 | 0.011270 | 0.011689 | 0.011697 | 0.011427 | 0.011374 | 0.011532 |
| 0.011532 | 0.011322 | 0.011270 | 0.011322 | 0.011584 | 0.011479 | 0.011322 |
| 0.011374 | 0.011584 | 0.011846 | 0.011322 | 0.011479 | 0.011479 | 0.011427 |
| 0.011270 | 0.011322 | 0.011532 | 0.011899 | 0.011375 | 0.011427 | 0.011427 |
| 0.011374 | 0.011270 | 0.011270 | 0.011636 | 0.011584 | 0.011636 | 0.011374 |
| 0.011479 | 0.011479 | 0.011427 | 0.011479 | 0.011322 | 0.011270 | 0.011689 |
| 0.011374 | 0.011374 | 0.011270 | 0.011479 | 0.011374 | 0.011479 | 0.011741 |
| 0.011374 | 0.011694 | 0.011899 | 0.011661 | 0.011265 | 0.011427 | 0.011337 |
| 0.011264 | 0.011838 | 0.011220 | 0.011433 | 0.011327 | 0.011473 | 0.011481 |
| 0.011563 | 0.011226 | 0.011352 | 0.011140 | 0.011204 | 0.011392 | 0.011408 |
| 0.011538 | 0.011341 | 0.011427 | 0.011220 | 0.011376 | 0.011636 | 0.011741 |
| 0.011584 | 0.011584 | 0.011638 | 0.011484 | 0.011746 | 0.011721 | 0.011270 |
| 0.011741 | 0.011584 | 0.011270 | 0.011584 | 0.011270 | 0.011636 | 0.011217 |
| 0.011270 | 0.011270 | 0.011217 | 0.011322 | 0.011322 | 0.011322 | 0.011374 |
| 0.011324 | 0.011441 | 0.011427 | 0.011326 | 0.011591 | 0.011480 | 0.011483 |
| 0.011483 | 0.011217 | 0.011174 | 0.011170 | 0.011427 | 0.011584 | 0.011533 |
| 0.011322 | 0.011427 | 0.011689 | 0.011479 | 0.011532 | 0.011532 | 0.011322 |
| 0.011427 | 0.011532 | 0.011479 | 0.011427 | 0.012161 | 0.011427 | 0.011532 |
| 0.011741 | 0.011840 | 0.011327 | 0.011493 | 0.011322 | 0.011322 | 0.011532 |
| 0.011323 | 0.011479 | 0.011479 | 0.011479 | 0.011363 | 0.011636 | 0.011328 |
| 0.011219 | 0.011221 | 0.011326 | 0.011326 | 0.011381 | 0.011229 | 0.011697 |
| 0.011382 | 0.011639 | 0.011195 | 0.011398 | 0.011427 | 0.011432 | 0.011322 |
| 0.011217 | 0.011270 | 0.011374 | 0.011270 | 0.011584 | 0.011479 | 0.011427 |
| 0.011584 | 0.011584 | 0.011270 | 0.011270 | 0.011270 | 0.011270 | 0.011270 |
| 0.011323 | 0.011427 | 0.011322 | 0.011376 | 0.011636 | 0.011741 | 0.011584 |
| 0.011584 | 0.011638 | 0.011484 | 0.011746 | 0.011721 | 0.011270 | 0.011479 |
| 0.011532 | 0.011532 | 0.011324 | 0.011492 | 0.011327 | 0.011380 | 0.011331 |
| 0.011484 | 0.011756 | 0.011588 | 0.011429 | 0.011270 | 0.011479 | 0.011270 |
| 0.011374 | 0.011427 | 0.011217 | 0.011374 | 0.011374 | 0.011480 | 0.011322 |
| 0.011217 | 0.011217 | 0.011427 | 0.011217 | 0.011217 | 0.011378 | 0.011479 |
| 0.011374 | 0.011270 | 0.011270 | 0.011479 | 0.011322 | 0.011322 | 0.011584 |
| 0.011217 | 0.011374 | 0.011427 | 0.011270 | 0.011270 | 0.011532 | 0.011270 |
| 0.011322 | 0.011899 | 0.011270 | 0.011322 | 0.011322 | 0.011899 | 0.011287 |
| 0.011794 | 0.011297 | 0.011370 | 0.011635 | 0.011682 | 0.011645 | 0.011230 |
| 0.011257 | 0.011636 | 0.011741 | 0.011899 | 0.011689 | 0.011846 | 0.012056 |
| 0.011900 | 0.011960 | 0.011846 | 0.012118 | 0.011741 | 0.012739 | 0.011794 |
| 0.012476 | 0.012318 | 0.012481 | 0.012635 | 0.011794 | 0.011427 | 0.011846 |
| 0.012372 | 0.011952 | 0.011741 | 0.011741 | 0.011846 | 0.011846 | 0.011747 |
| 0.011636 | 0.011637 | 0.011741 | 0.011637 | 0.011899 | 0.011846 | 0.012003 |
| 0.011794 | 0.011846 | 0.012056 | 0.011846 | 0.012215 | 0.012170 | 0.012424 |
| 0.012372 | 0.012372 | 0.012214 | 0.012320 | 0.012320 | 0.011374 | 0.011846 |
| 0.011741 | 0.012319 | 0.011957 | 0.012004 | 0.011794 | 0.011747 | 0.011584 |
| 0.011532 | 0.011479 | 0.011846 | 0.012023 | 0.012136 | 0.011741 | 0.011532 |
| S388     | 0.011466 | 0.011466 | 0.011641 | 0.011524 | 0.011524 | 0.011699 |
| 0.011587 | 0.011470 | 0.011640 | 0.011292 | 0.011234 | 0.011292 | 0.011234 |
| 0.011292 | 0.011466 | 0.011292 | 0.011234 | 0.011292 | 0.011350 | 0.011292 |
| 0.011234 | 0.011350 | 0.011234 | 0.011176 | 0.011293 | 0.011176 | 0.011528 |

|          |          |          |          |          |          |          |
|----------|----------|----------|----------|----------|----------|----------|
| 0.011466 | 0.011292 | 0.011176 | 0.011234 | 0.011350 | 0.011292 | 0.011176 |
| 0.011350 | 0.011408 | 0.011292 | 0.011408 | 0.011350 | 0.011292 | 0.011466 |
| 0.011234 | 0.011350 | 0.011350 | 0.011234 | 0.011408 | 0.011466 | 0.011408 |
| 0.011292 | 0.011525 | 0.011234 | 0.011698 | 0.011292 | 0.011466 | 0.011292 |
| 0.011234 | 0.011408 | 0.011408 | 0.011466 | 0.011640 | 0.011292 | 0.011466 |
| 0.011408 | 0.011234 | 0.011234 | 0.011582 | 0.011641 | 0.011350 | 0.011350 |
| 0.011292 | 0.011408 | 0.011408 | 0.011466 | 0.011292 | 0.011292 | 0.011292 |
| 0.011292 | 0.011234 | 0.011234 | 0.011408 | 0.011234 | 0.011292 | 0.011350 |
| 0.011350 | 0.011292 | 0.011292 | 0.011176 | 0.011466 | 0.011176 | 0.011292 |
| 0.011466 | 0.011524 | 0.011582 | 0.011466 | 0.011408 | 0.011582 | 0.011292 |
| 0.011420 | 0.011659 | 0.011467 | 0.011244 | 0.011176 | 0.011242 | 0.011304 |
| 0.011292 | 0.011388 | 0.011246 | 0.011524 | 0.011408 | 0.011408 | 0.011466 |
| 0.011408 | 0.011350 | 0.011466 | 0.011292 | 0.011408 | 0.011292 | 0.011292 |
| 0.011292 | 0.011408 | 0.011466 | 0.011582 | 0.011292 | 0.011467 | 0.011292 |
| 0.011234 | 0.011234 | 0.011292 | 0.011234 | 0.011292 | 0.011234 | 0.011234 |
| 0.011350 | 0.011350 | 0.011234 | 0.011234 | 0.011234 | 0.011234 | 0.011235 |
| 0.011293 | 0.011350 | 0.011292 | 0.011181 | 0.011240 | 0.011241 | 0.011234 |
| 0.011350 | 0.011292 | 0.011296 | 0.011292 | 0.011178 | 0.011297 | 0.011352 |
| 0.011425 | 0.011356 | 0.011293 | 0.011292 | 0.011234 | 0.011408 | 0.011408 |
| 0.011525 | 0.011350 | 0.011350 | 0.011408 | 0.011350 | 0.011814 | 0.011582 |
| 0.011582 | 0.011466 | 0.011234 | 0.011525 | 0.011234 | 0.011408 | 0.011176 |
| 0.011292 | 0.011234 | 0.011234 | 0.011292 | 0.011292 | 0.011292 | 0.011350 |
| 0.011234 | 0.011350 | 0.011408 | 0.011234 | 0.011292 | 0.011408 | 0.011234 |
| 0.011408 | 0.011350 | 0.011176 | 0.011176 | 0.011408 | 0.011176 | 0.011176 |
| 0.011351 | 0.011408 | 0.011234 | 0.011408 | 0.011176 | 0.011234 | 0.011292 |
| 0.011408 | 0.011176 | 0.011292 | 0.011234 | 0.011234 | 0.011176 | 0.011234 |
| 0.011350 | 0.011292 | 0.011350 | 0.011234 | 0.011292 | 0.011292 | 0.011641 |
| 0.011699 | 0.011466 | 0.011698 | 0.011408 | 0.011524 | 0.011292 | 0.011350 |
| 0.011410 | 0.011541 | 0.011453 | 0.011236 | 0.011642 | 0.011178 | 0.011331 |
| 0.011587 | 0.011468 | 0.011524 | 0.011524 | 0.011297 | 0.011582 | 0.011582 |
| 0.011582 | 0.011640 | 0.011485 | 0.011201 | 0.011340 | 0.011408 | 0.011408 |
| 0.011525 | 0.011293 | 0.011466 | 0.011469 | 0.011292 | 0.011466 | 0.011940 |
| 0.011353 | 0.011473 | 0.011413 | 0.011589 | 0.011874 | 0.011234 | 0.011235 |
| 0.011292 | 0.011292 | 0.011176 | 0.011176 | 0.011234 | 0.011292 | 0.011292 |
| 0.011292 | 0.011292 | 0.011234 | 0.011350 | 0.011292 | 0.011292 | 0.011234 |
| 0.011350 | 0.011756 | 0.011524 | 0.011640 | 0.011176 | 0.011234 | 0.011234 |
| 0.011292 | 0.011234 | 0.011466 | 0.011466 | 0.011234 | 0.011234 | 0.011234 |
| 0.011815 | 0.011466 | 0.011350 | 0.011234 | 0.011350 | 0.011350 | 0.011234 |
| 0.011234 | 0.011234 | 0.011350 | 0.011350 | 0.011176 | 0.011292 | 0.011408 |
| 0.011408 | 0.011350 | 0.011292 | 0.011234 | 0.011176 | 0.011234 | 0.011408 |
| 0.011234 | 0.011350 | 0.011176 | 0.011234 | 0.011408 | 0.011351 | 0.011292 |
| 0.011235 | 0.011350 | 0.011293 | 0.011176 | 0.011408 | 0.011176 | 0.011408 |
| 0.011414 | 0.011292 | 0.011524 | 0.011408 | 0.011466 | 0.011292 | 0.011408 |
| 0.011234 | 0.011466 | 0.011176 | 0.011408 | 0.011292 | 0.011292 | 0.011176 |
| 0.011350 | 0.011466 | 0.011234 | 0.011350 | 0.011176 | 0.011582 | 0.011292 |
| 0.011176 | 0.011292 | 0.011292 | 0.011234 | 0.011234 | 0.011466 | 0.011350 |
| 0.011466 | 0.011292 | 0.011292 | 0.011350 | 0.011466 | 0.011234 | 0.011234 |
| 0.011234 | 0.011234 | 0.011234 | 0.011234 | 0.011176 | 0.011350 | 0.011176 |
| 0.011350 | 0.011292 | 0.011350 | 0.011466 | 0.011350 | 0.011234 | 0.011234 |
| 0.011292 | 0.011292 | 0.011292 | 0.011292 | 0.011466 | 0.011466 | 0.011640 |
| 0.011350 | 0.011583 | 0.011350 | 0.021125 | 0.011152 | 0.011525 | 0.011466 |
| 0.011582 | 0.011583 | 0.011313 | 0.000000 | 0.011475 | 0.011641 | 0.011328 |
| 0.011620 | 0.011241 | 0.011185 | 0.011300 | 0.011293 | 0.011136 | 0.011251 |
| 0.011427 | 0.011419 | 0.011408 | 0.011286 | 0.011350 | 0.011466 | 0.011352 |
| 0.011238 | 0.011408 | 0.011408 | 0.011408 | 0.011350 | 0.011351 | 0.011409 |
| 0.011350 | 0.011176 | 0.011234 | 0.011466 | 0.011234 | 0.011292 | 0.011292 |
| 0.011292 | 0.011350 | 0.011176 | 0.011292 | 0.011350 | 0.011408 | 0.011292 |
| 0.011466 | 0.011350 | 0.011524 | 0.011524 | 0.011467 | 0.011466 | 0.011524 |
| 0.011176 | 0.011176 | 0.011234 | 0.011234 | 0.011234 | 0.011466 | 0.011466 |
| 0.011350 | 0.011524 | 0.011408 | 0.011350 | 0.011640 | 0.011350 | 0.011350 |

|          |          |          |          |          |          |          |
|----------|----------|----------|----------|----------|----------|----------|
| 0.011350 | 0.011350 | 0.011408 | 0.011350 | 0.011350 | 0.011234 | 0.011292 |
| 0.011350 | 0.011350 | 0.011408 | 0.011234 | 0.011293 | 0.011408 | 0.011524 |
| 0.011352 | 0.011176 | 0.011408 | 0.011466 | 0.011292 | 0.011582 | 0.011524 |
| 0.011524 | 0.011297 | 0.011582 | 0.011582 | 0.011582 | 0.011640 | 0.011292 |
| 0.011467 | 0.011292 | 0.011292 | 0.011292 | 0.011350 | 0.011176 | 0.011292 |
| 0.011350 | 0.011408 | 0.011292 | 0.011466 | 0.011350 | 0.011524 | 0.011524 |
| 0.011467 | 0.011466 | 0.011466 | 0.011350 | 0.012048 | 0.011494 | 0.011241 |
| 0.011548 | 0.011481 | 0.011486 | 0.011240 | 0.011483 | 0.011595 | 0.011478 |
| 0.012126 | 0.011239 | 0.011475 | 0.011360 | 0.011538 | 0.011471 | 0.011529 |
| 0.012121 | 0.011452 | 0.011293 | 0.011350 | 0.011292 | 0.011234 | 0.011235 |
| 0.011234 | 0.011176 | 0.011292 | 0.011292 | 0.011293 | 0.011408 | 0.011408 |
| 0.011292 | 0.011234 | 0.011234 | 0.011292 | 0.011176 | 0.011292 | 0.011176 |
| 0.011350 | 0.011350 | 0.011234 | 0.011234 | 0.011292 | 0.011234 | 0.011350 |
| 0.011350 | 0.011176 | 0.011234 | 0.011292 | 0.011176 | 0.011408 | 0.011466 |
| 0.011292 | 0.011466 | 0.011350 | 0.011292 | 0.011234 | 0.011640 | 0.011350 |
| 0.011241 | 0.011234 | 0.011466 | 0.011473 | 0.011350 | 0.011350 | 0.011408 |
| 0.011524 | 0.011292 | 0.011176 | 0.011292 | 0.011524 | 0.011466 | 0.011234 |
| 0.011292 | 0.011525 | 0.011640 | 0.011350 | 0.011350 | 0.011350 | 0.011408 |
| 0.011234 | 0.011234 | 0.011524 | 0.011641 | 0.011351 | 0.011350 | 0.011350 |
| 0.011292 | 0.011234 | 0.011234 | 0.011524 | 0.011525 | 0.011466 | 0.011292 |
| 0.011408 | 0.011466 | 0.011350 | 0.011408 | 0.011292 | 0.011234 | 0.011466 |
| 0.011176 | 0.011350 | 0.011234 | 0.011582 | 0.011292 | 0.011408 | 0.011466 |
| 0.011350 | 0.011470 | 0.011698 | 0.011493 | 0.011284 | 0.011408 | 0.011332 |
| 0.011309 | 0.011608 | 0.011176 | 0.011472 | 0.011288 | 0.011287 | 0.011436 |
| 0.011392 | 0.011151 | 0.011367 | 0.011146 | 0.011137 | 0.011427 | 0.011443 |
| 0.011486 | 0.011311 | 0.011414 | 0.011292 | 0.011352 | 0.011408 | 0.011524 |
| 0.011408 | 0.011525 | 0.011645 | 0.011236 | 0.011704 | 0.011670 | 0.011234 |
| 0.011582 | 0.011466 | 0.011234 | 0.011525 | 0.011234 | 0.011408 | 0.011176 |
| 0.011292 | 0.011234 | 0.011234 | 0.011292 | 0.011292 | 0.011292 | 0.011350 |
| 0.011238 | 0.011360 | 0.011351 | 0.011296 | 0.011473 | 0.011409 | 0.011469 |
| 0.011528 | 0.011176 | 0.011185 | 0.011180 | 0.011408 | 0.011524 | 0.011525 |
| 0.011292 | 0.011466 | 0.011698 | 0.011467 | 0.011524 | 0.011640 | 0.011292 |
| 0.011350 | 0.011524 | 0.011350 | 0.011408 | 0.011989 | 0.011408 | 0.011466 |
| 0.011698 | 0.011608 | 0.011297 | 0.011420 | 0.011292 | 0.011350 | 0.011466 |
| 0.011235 | 0.011524 | 0.011466 | 0.011466 | 0.011459 | 0.011699 | 0.011240 |
| 0.011178 | 0.011179 | 0.011296 | 0.011296 | 0.011358 | 0.011190 | 0.011472 |
| 0.011358 | 0.011426 | 0.011214 | 0.011382 | 0.011408 | 0.011355 | 0.011292 |
| 0.011234 | 0.011234 | 0.011292 | 0.011234 | 0.011292 | 0.011234 | 0.011234 |
| 0.011350 | 0.011350 | 0.011234 | 0.011234 | 0.011234 | 0.011234 | 0.011235 |
| 0.011293 | 0.011350 | 0.011292 | 0.011352 | 0.011408 | 0.011524 | 0.011408 |
| 0.011525 | 0.011645 | 0.011236 | 0.011704 | 0.011670 | 0.011234 | 0.011466 |
| 0.011466 | 0.011466 | 0.011177 | 0.011476 | 0.011295 | 0.011237 | 0.011300 |
| 0.011236 | 0.011730 | 0.011637 | 0.011468 | 0.011234 | 0.011408 | 0.011234 |
| 0.011350 | 0.011408 | 0.011234 | 0.011292 | 0.011408 | 0.011234 | 0.011350 |
| 0.011176 | 0.011176 | 0.011408 | 0.011176 | 0.011176 | 0.011351 | 0.011408 |
| 0.011350 | 0.011176 | 0.011234 | 0.011466 | 0.011234 | 0.011292 | 0.011408 |
| 0.011176 | 0.011350 | 0.011408 | 0.011234 | 0.011350 | 0.011524 | 0.011234 |
| 0.011292 | 0.011640 | 0.011234 | 0.011292 | 0.011292 | 0.011698 | 0.011243 |
| 0.011730 | 0.011252 | 0.011318 | 0.011438 | 0.011487 | 0.011474 | 0.011184 |
| 0.011254 | 0.011408 | 0.011582 | 0.011709 | 0.011524 | 0.011698 | 0.011815 |
| 0.011641 | 0.011764 | 0.011582 | 0.011931 | 0.011466 | 0.012571 | 0.011641 |
| 0.012396 | 0.012105 | 0.012285 | 0.012514 | 0.011408 | 0.011350 | 0.011640 |
| 0.012339 | 0.011757 | 0.011524 | 0.011525 | 0.011582 | 0.011582 | 0.011411 |
| 0.011408 | 0.011408 | 0.011524 | 0.011408 | 0.011699 | 0.011582 | 0.011756 |
| 0.011524 | 0.011582 | 0.011815 | 0.011524 | 0.012164 | 0.012115 | 0.012398 |
| 0.012339 | 0.012280 | 0.012164 | 0.012164 | 0.012222 | 0.011292 | 0.011815 |
| 0.011757 | 0.012164 | 0.011937 | 0.011873 | 0.011699 | 0.011529 | 0.011350 |
| 0.011350 | 0.011292 | 0.011757 | 0.011750 | 0.011717 | 0.011408 | 0.011350 |
| S389     | 0.011939 | 0.011939 | 0.011885 | 0.011885 | 0.011885 | 0.011885 |
| 0.011337 | 0.011337 | 0.011775 | 0.011664 | 0.011719 | 0.011609 | 0.011609 |

|          |          |          |          |          |          |          |
|----------|----------|----------|----------|----------|----------|----------|
| 0.011664 | 0.011829 | 0.011609 | 0.011664 | 0.011719 | 0.011774 | 0.011719 |
| 0.011609 | 0.011774 | 0.011555 | 0.011610 | 0.011665 | 0.011664 | 0.011448 |
| 0.011720 | 0.011774 | 0.011609 | 0.011555 | 0.011664 | 0.011829 | 0.011609 |
| 0.011774 | 0.011774 | 0.011774 | 0.011719 | 0.011829 | 0.011774 | 0.012050 |
| 0.011609 | 0.011774 | 0.011829 | 0.011774 | 0.011719 | 0.011774 | 0.011829 |
| 0.011774 | 0.011995 | 0.011719 | 0.011445 | 0.011774 | 0.011939 | 0.011774 |
| 0.011664 | 0.011720 | 0.011884 | 0.011939 | 0.011610 | 0.011774 | 0.011884 |
| 0.011719 | 0.011719 | 0.011719 | 0.011884 | 0.011500 | 0.011719 | 0.011775 |
| 0.011719 | 0.011829 | 0.011885 | 0.011939 | 0.011719 | 0.011829 | 0.011829 |
| 0.011719 | 0.011719 | 0.011664 | 0.011664 | 0.011664 | 0.011774 | 0.011884 |
| 0.011774 | 0.011719 | 0.011774 | 0.011609 | 0.011774 | 0.011664 | 0.011664 |
| 0.011829 | 0.011774 | 0.011554 | 0.011885 | 0.011774 | 0.012050 | 0.011719 |
| 0.011885 | 0.011445 | 0.012050 | 0.011665 | 0.011675 | 0.011754 | 0.011507 |
| 0.011515 | 0.011461 | 0.011724 | 0.011884 | 0.011774 | 0.011664 | 0.011664 |
| 0.011829 | 0.011664 | 0.011939 | 0.011774 | 0.011885 | 0.011774 | 0.011664 |
| 0.011609 | 0.011719 | 0.011885 | 0.011774 | 0.011719 | 0.011775 | 0.011719 |
| 0.011609 | 0.011609 | 0.011719 | 0.011664 | 0.011665 | 0.011555 | 0.011500 |
| 0.011610 | 0.011719 | 0.011719 | 0.011719 | 0.011774 | 0.011774 | 0.011774 |
| 0.011829 | 0.011774 | 0.011774 | 0.011634 | 0.011636 | 0.011700 | 0.011719 |
| 0.011719 | 0.011719 | 0.011777 | 0.011774 | 0.011619 | 0.011676 | 0.011668 |
| 0.011525 | 0.011738 | 0.011667 | 0.011664 | 0.011609 | 0.011829 | 0.011664 |
| 0.011774 | 0.011829 | 0.011829 | 0.011829 | 0.011774 | 0.011994 | 0.011940 |
| 0.011720 | 0.011884 | 0.011664 | 0.011885 | 0.011664 | 0.011610 | 0.011665 |
| 0.011719 | 0.011774 | 0.011609 | 0.011719 | 0.011719 | 0.011719 | 0.011829 |
| 0.011664 | 0.011774 | 0.011719 | 0.011664 | 0.011778 | 0.011994 | 0.011886 |
| 0.011829 | 0.011829 | 0.011609 | 0.011612 | 0.011829 | 0.011609 | 0.011610 |
| 0.011616 | 0.011830 | 0.011664 | 0.011830 | 0.011610 | 0.011719 | 0.011664 |
| 0.011774 | 0.011609 | 0.011719 | 0.011719 | 0.011774 | 0.011609 | 0.011719 |
| 0.011719 | 0.011774 | 0.011829 | 0.011609 | 0.011719 | 0.011719 | 0.011939 |
| 0.011500 | 0.011390 | 0.011390 | 0.011829 | 0.011500 | 0.011774 | 0.011719 |
| 0.011668 | 0.011930 | 0.011994 | 0.011620 | 0.011449 | 0.011618 | 0.011832 |
| 0.011559 | 0.011611 | 0.011829 | 0.011995 | 0.011792 | 0.011994 | 0.011829 |
| 0.011829 | 0.011994 | 0.012012 | 0.011694 | 0.011731 | 0.011885 | 0.011895 |
| 0.012105 | 0.011777 | 0.011885 | 0.012110 | 0.011829 | 0.011994 | 0.012282 |
| 0.011724 | 0.012121 | 0.011894 | 0.011894 | 0.011996 | 0.011664 | 0.011833 |
| 0.011774 | 0.011774 | 0.011609 | 0.011609 | 0.011664 | 0.011664 | 0.011774 |
| 0.011719 | 0.011774 | 0.011664 | 0.011609 | 0.011719 | 0.011774 | 0.011719 |
| 0.011774 | 0.011609 | 0.011390 | 0.011335 | 0.011609 | 0.011774 | 0.011719 |
| 0.011719 | 0.011664 | 0.011774 | 0.011829 | 0.011664 | 0.011664 | 0.011664 |
| 0.011664 | 0.011719 | 0.011774 | 0.011664 | 0.011774 | 0.011829 | 0.011664 |
| 0.011664 | 0.011664 | 0.011774 | 0.011829 | 0.011664 | 0.011555 | 0.011665 |
| 0.011610 | 0.011719 | 0.011774 | 0.011664 | 0.011609 | 0.011719 | 0.011719 |
| 0.011664 | 0.011829 | 0.011609 | 0.011609 | 0.011829 | 0.011555 | 0.011665 |
| 0.011665 | 0.011829 | 0.011610 | 0.011609 | 0.011390 | 0.011609 | 0.011664 |
| 0.011910 | 0.011664 | 0.011390 | 0.011885 | 0.011719 | 0.011719 | 0.011884 |
| 0.011609 | 0.011939 | 0.011609 | 0.011664 | 0.011609 | 0.011609 | 0.011609 |
| 0.011719 | 0.011609 | 0.011719 | 0.011774 | 0.011664 | 0.011335 | 0.011609 |
| 0.011664 | 0.011664 | 0.011719 | 0.011719 | 0.011719 | 0.011884 | 0.011939 |
| 0.011885 | 0.011829 | 0.011774 | 0.011830 | 0.011774 | 0.011719 | 0.011664 |
| 0.011719 | 0.011719 | 0.011719 | 0.011609 | 0.011609 | 0.011884 | 0.011664 |
| 0.011609 | 0.011719 | 0.011829 | 0.011884 | 0.011664 | 0.011609 | 0.011719 |
| 0.011774 | 0.011719 | 0.011719 | 0.011664 | 0.011774 | 0.011939 | 0.011610 |
| 0.011664 | 0.011555 | 0.011664 | 0.013943 | 0.011450 | 0.011886 | 0.011390 |
| 0.011445 | 0.011445 | 0.011756 | 0.011475 | 0.000000 | 0.011390 | 0.011896 |
| 0.011660 | 0.011640 | 0.011610 | 0.011609 | 0.011666 | 0.011731 | 0.011765 |
| 0.011377 | 0.011626 | 0.011401 | 0.011575 | 0.011719 | 0.011939 | 0.011837 |
| 0.011679 | 0.011884 | 0.011774 | 0.011664 | 0.011775 | 0.011775 | 0.011720 |
| 0.011774 | 0.011609 | 0.011664 | 0.011774 | 0.011719 | 0.011609 | 0.011719 |
| 0.011719 | 0.011829 | 0.011609 | 0.011774 | 0.011774 | 0.011939 | 0.011774 |
| 0.011829 | 0.011719 | 0.011445 | 0.011445 | 0.011885 | 0.011831 | 0.011884 |

|          |          |          |          |          |          |          |
|----------|----------|----------|----------|----------|----------|----------|
| 0.011609 | 0.011609 | 0.011664 | 0.011774 | 0.011609 | 0.011884 | 0.011884 |
| 0.011939 | 0.011829 | 0.011829 | 0.011994 | 0.011554 | 0.011944 | 0.011774 |
| 0.011719 | 0.011994 | 0.011939 | 0.011664 | 0.011719 | 0.011664 | 0.011829 |
| 0.011719 | 0.011719 | 0.011774 | 0.011719 | 0.011774 | 0.011939 | 0.011719 |
| 0.011784 | 0.011609 | 0.011774 | 0.011995 | 0.011719 | 0.011940 | 0.011884 |
| 0.011995 | 0.011792 | 0.011994 | 0.011829 | 0.011829 | 0.011994 | 0.011665 |
| 0.011777 | 0.011720 | 0.011719 | 0.011719 | 0.011829 | 0.011609 | 0.011774 |
| 0.011774 | 0.011939 | 0.011774 | 0.011829 | 0.011719 | 0.011445 | 0.011445 |
| 0.011885 | 0.011831 | 0.011829 | 0.011774 | 0.012601 | 0.011869 | 0.011697 |
| 0.011913 | 0.011793 | 0.011988 | 0.011741 | 0.011859 | 0.011682 | 0.011895 |
| 0.012525 | 0.011742 | 0.011789 | 0.011685 | 0.012077 | 0.012059 | 0.012115 |
| 0.012516 | 0.011995 | 0.011774 | 0.011829 | 0.011829 | 0.011500 | 0.011774 |
| 0.011664 | 0.011609 | 0.011829 | 0.011774 | 0.011774 | 0.011665 | 0.011555 |
| 0.011774 | 0.011664 | 0.011664 | 0.011664 | 0.011609 | 0.011609 | 0.011609 |
| 0.011664 | 0.011664 | 0.011609 | 0.011664 | 0.011719 | 0.011719 | 0.011719 |
| 0.011774 | 0.011664 | 0.011609 | 0.011664 | 0.011609 | 0.011774 | 0.011884 |
| 0.011774 | 0.011719 | 0.011774 | 0.011774 | 0.011609 | 0.011610 | 0.011774 |
| 0.011520 | 0.011665 | 0.011720 | 0.011730 | 0.011774 | 0.011664 | 0.011829 |
| 0.011885 | 0.011719 | 0.011719 | 0.011719 | 0.011885 | 0.011939 | 0.011719 |
| 0.011884 | 0.011994 | 0.011500 | 0.011664 | 0.011774 | 0.011774 | 0.011884 |
| 0.011664 | 0.011829 | 0.011885 | 0.011610 | 0.011774 | 0.011775 | 0.011774 |
| 0.011774 | 0.011664 | 0.011664 | 0.011940 | 0.011939 | 0.011939 | 0.011829 |
| 0.011884 | 0.011829 | 0.011774 | 0.011884 | 0.011664 | 0.011664 | 0.011335 |
| 0.011719 | 0.011774 | 0.011664 | 0.011829 | 0.011829 | 0.011719 | 0.011555 |
| 0.011719 | 0.011392 | 0.011555 | 0.011683 | 0.011368 | 0.011719 | 0.011495 |
| 0.011732 | 0.011750 | 0.011664 | 0.011847 | 0.011684 | 0.011704 | 0.011585 |
| 0.011678 | 0.011441 | 0.011616 | 0.011443 | 0.011517 | 0.011620 | 0.011863 |
| 0.011775 | 0.011682 | 0.011664 | 0.011798 | 0.011779 | 0.011665 | 0.011610 |
| 0.011719 | 0.011830 | 0.011943 | 0.011502 | 0.012002 | 0.012037 | 0.011719 |
| 0.011720 | 0.011884 | 0.011664 | 0.011885 | 0.011664 | 0.011610 | 0.011665 |
| 0.011719 | 0.011774 | 0.011609 | 0.011719 | 0.011719 | 0.011719 | 0.011829 |
| 0.011780 | 0.011686 | 0.011776 | 0.011675 | 0.012008 | 0.011776 | 0.011949 |
| 0.011948 | 0.011719 | 0.011656 | 0.011635 | 0.011774 | 0.011885 | 0.011887 |
| 0.011774 | 0.011664 | 0.011994 | 0.011885 | 0.011830 | 0.011719 | 0.011719 |
| 0.011884 | 0.011829 | 0.011719 | 0.011719 | 0.011940 | 0.011775 | 0.011995 |
| 0.012159 | 0.011355 | 0.011674 | 0.011741 | 0.011664 | 0.011664 | 0.011939 |
| 0.011666 | 0.011884 | 0.011774 | 0.011774 | 0.012102 | 0.012049 | 0.011746 |
| 0.011616 | 0.011630 | 0.011785 | 0.011675 | 0.011736 | 0.011683 | 0.011339 |
| 0.011848 | 0.011569 | 0.011690 | 0.011856 | 0.011719 | 0.011730 | 0.011719 |
| 0.011609 | 0.011609 | 0.011719 | 0.011664 | 0.011665 | 0.011555 | 0.011500 |
| 0.011610 | 0.011719 | 0.011719 | 0.011719 | 0.011774 | 0.011774 | 0.011774 |
| 0.011829 | 0.011774 | 0.011774 | 0.011779 | 0.011665 | 0.011610 | 0.011719 |
| 0.011830 | 0.011943 | 0.011502 | 0.012002 | 0.012037 | 0.011719 | 0.011884 |
| 0.011939 | 0.011939 | 0.011669 | 0.011797 | 0.011788 | 0.011841 | 0.011738 |
| 0.011783 | 0.012085 | 0.012019 | 0.011784 | 0.011664 | 0.011830 | 0.011664 |
| 0.011774 | 0.011719 | 0.011664 | 0.011778 | 0.011994 | 0.011886 | 0.011829 |
| 0.011609 | 0.011612 | 0.011829 | 0.011609 | 0.011610 | 0.011616 | 0.011830 |
| 0.011774 | 0.011609 | 0.011664 | 0.011774 | 0.011719 | 0.011609 | 0.011609 |
| 0.011719 | 0.011829 | 0.011829 | 0.011664 | 0.011774 | 0.011884 | 0.011609 |
| 0.011719 | 0.011610 | 0.011664 | 0.011664 | 0.011719 | 0.011445 | 0.011667 |
| 0.011764 | 0.011496 | 0.011460 | 0.011665 | 0.011646 | 0.011610 | 0.011406 |
| 0.011422 | 0.011555 | 0.011665 | 0.011775 | 0.011609 | 0.011776 | 0.011940 |
| 0.011831 | 0.011837 | 0.011774 | 0.012117 | 0.011720 | 0.012876 | 0.011775 |
| 0.012490 | 0.012490 | 0.012718 | 0.012713 | 0.011610 | 0.011664 | 0.011830 |
| 0.012657 | 0.011995 | 0.011720 | 0.011610 | 0.011555 | 0.011555 | 0.011779 |
| 0.011555 | 0.011557 | 0.011609 | 0.011610 | 0.012051 | 0.012050 | 0.011995 |
| 0.011775 | 0.011885 | 0.011995 | 0.011830 | 0.012657 | 0.012502 | 0.012823 |
| 0.012712 | 0.012767 | 0.012712 | 0.012712 | 0.012712 | 0.011774 | 0.012104 |
| 0.012215 | 0.012711 | 0.012223 | 0.011995 | 0.011775 | 0.011504 | 0.011500 |
| 0.011390 | 0.011445 | 0.011830 | 0.012084 | 0.012304 | 0.011774 | 0.011445 |

|          |          |          |          |          |          |          |
|----------|----------|----------|----------|----------|----------|----------|
| S390     | 0.012027 | 0.012027 | 0.011855 | 0.011820 | 0.011820 | 0.011855 |
| 0.011305 | 0.011235 | 0.011820 | 0.011612 | 0.011647 | 0.011647 | 0.011612 |
| 0.011578 | 0.011820 | 0.011543 | 0.011647 | 0.011716 | 0.011682 | 0.011647 |
| 0.011612 | 0.011647 | 0.011475 | 0.011579 | 0.011648 | 0.011612 | 0.011305 |
| 0.011613 | 0.011647 | 0.011543 | 0.011509 | 0.011682 | 0.011682 | 0.011716 |
| 0.011682 | 0.011785 | 0.011682 | 0.011682 | 0.011716 | 0.011682 | 0.011854 |
| 0.011543 | 0.011682 | 0.011716 | 0.011647 | 0.011682 | 0.011785 | 0.011716 |
| 0.011682 | 0.011855 | 0.011717 | 0.011336 | 0.011682 | 0.011958 | 0.011682 |
| 0.011647 | 0.011682 | 0.011785 | 0.011958 | 0.011440 | 0.011682 | 0.011785 |
| 0.011716 | 0.011785 | 0.011647 | 0.011889 | 0.011475 | 0.011682 | 0.011751 |
| 0.011647 | 0.011716 | 0.011716 | 0.011751 | 0.011682 | 0.011682 | 0.011682 |
| 0.011612 | 0.011612 | 0.011578 | 0.011613 | 0.011682 | 0.011716 | 0.011785 |
| 0.011716 | 0.011682 | 0.011751 | 0.011612 | 0.011509 | 0.011613 | 0.011647 |
| 0.011854 | 0.011785 | 0.011543 | 0.011820 | 0.011682 | 0.011924 | 0.011681 |
| 0.011802 | 0.011322 | 0.011853 | 0.011568 | 0.011589 | 0.011686 | 0.011454 |
| 0.012133 | 0.011518 | 0.011596 | 0.011923 | 0.011889 | 0.011612 | 0.011543 |
| 0.011751 | 0.011716 | 0.011785 | 0.011682 | 0.011751 | 0.011682 | 0.011716 |
| 0.011681 | 0.011681 | 0.011958 | 0.011854 | 0.011751 | 0.011716 | 0.011647 |
| 0.011612 | 0.011543 | 0.011682 | 0.011612 | 0.011578 | 0.011544 | 0.011475 |
| 0.011578 | 0.011647 | 0.011647 | 0.011647 | 0.011682 | 0.011681 | 0.011685 |
| 0.011755 | 0.011682 | 0.011682 | 0.011536 | 0.011578 | 0.011565 | 0.011682 |
| 0.011651 | 0.011587 | 0.011657 | 0.011621 | 0.011584 | 0.011588 | 0.011650 |
| 0.011536 | 0.011627 | 0.011694 | 0.011612 | 0.011587 | 0.011751 | 0.011647 |
| 0.011716 | 0.011718 | 0.011716 | 0.011785 | 0.011751 | 0.012131 | 0.011820 |
| 0.011682 | 0.011751 | 0.011682 | 0.011716 | 0.011578 | 0.011544 | 0.011578 |
| 0.011682 | 0.011682 | 0.011612 | 0.011612 | 0.011647 | 0.011612 | 0.011716 |
| 0.011647 | 0.011785 | 0.011716 | 0.011612 | 0.011719 | 0.011820 | 0.011824 |
| 0.011820 | 0.011716 | 0.011612 | 0.011546 | 0.011681 | 0.011613 | 0.011544 |
| 0.011549 | 0.011820 | 0.011613 | 0.011820 | 0.011578 | 0.011647 | 0.011647 |
| 0.011751 | 0.011647 | 0.011682 | 0.011647 | 0.011682 | 0.011543 | 0.011647 |
| 0.011682 | 0.011647 | 0.011716 | 0.011647 | 0.011682 | 0.011716 | 0.011889 |
| 0.011371 | 0.011302 | 0.011371 | 0.011820 | 0.011440 | 0.011681 | 0.011647 |
| 0.011615 | 0.011930 | 0.011720 | 0.011586 | 0.011374 | 0.011551 | 0.011744 |
| 0.011374 | 0.011619 | 0.011854 | 0.012027 | 0.011763 | 0.011924 | 0.011889 |
| 0.011820 | 0.011958 | 0.011865 | 0.011699 | 0.011664 | 0.011716 | 0.011791 |
| 0.011889 | 0.011788 | 0.011930 | 0.012000 | 0.011854 | 0.011993 | 0.012106 |
| 0.011791 | 0.012002 | 0.011860 | 0.011860 | 0.012132 | 0.011578 | 0.011753 |
| 0.011751 | 0.011647 | 0.011543 | 0.011543 | 0.011613 | 0.011647 | 0.011716 |
| 0.011647 | 0.011716 | 0.011612 | 0.011647 | 0.011647 | 0.011647 | 0.011716 |
| 0.011647 | 0.011405 | 0.011302 | 0.011336 | 0.011543 | 0.011647 | 0.011682 |
| 0.011682 | 0.011578 | 0.011716 | 0.011682 | 0.011612 | 0.011612 | 0.011612 |
| 0.011474 | 0.011682 | 0.011785 | 0.011578 | 0.011682 | 0.011855 | 0.011613 |
| 0.011578 | 0.011647 | 0.011647 | 0.011820 | 0.011612 | 0.011544 | 0.011682 |
| 0.011613 | 0.011647 | 0.011647 | 0.011578 | 0.011578 | 0.011751 | 0.011682 |
| 0.011578 | 0.011682 | 0.011543 | 0.011578 | 0.011716 | 0.011509 | 0.011613 |
| 0.011579 | 0.011716 | 0.011648 | 0.011543 | 0.011267 | 0.011543 | 0.011716 |
| 0.011799 | 0.011613 | 0.011233 | 0.011751 | 0.011716 | 0.011647 | 0.011751 |
| 0.011612 | 0.011958 | 0.011543 | 0.011544 | 0.011543 | 0.011543 | 0.011543 |
| 0.011751 | 0.011647 | 0.011647 | 0.011751 | 0.011578 | 0.011302 | 0.011543 |
| 0.011613 | 0.011612 | 0.011647 | 0.011751 | 0.011647 | 0.011751 | 0.011751 |
| 0.011820 | 0.011785 | 0.011681 | 0.011785 | 0.011751 | 0.011612 | 0.011578 |
| 0.011612 | 0.011612 | 0.011647 | 0.011543 | 0.011578 | 0.011716 | 0.011612 |
| 0.011578 | 0.011612 | 0.011785 | 0.011751 | 0.011682 | 0.011647 | 0.011647 |
| 0.011716 | 0.011647 | 0.011751 | 0.011612 | 0.011751 | 0.011854 | 0.011474 |
| 0.011647 | 0.011405 | 0.011653 | 0.018126 | 0.011322 | 0.011611 | 0.011270 |
| 0.011233 | 0.011271 | 0.011794 | 0.011641 | 0.011390 | 0.000000 | 0.011668 |
| 0.011725 | 0.011365 | 0.011528 | 0.011647 | 0.011529 | 0.011455 | 0.011663 |
| 0.011436 | 0.011512 | 0.011360 | 0.011465 | 0.011785 | 0.011820 | 0.011790 |
| 0.011696 | 0.011785 | 0.011751 | 0.011682 | 0.011682 | 0.011682 | 0.011682 |
| 0.011716 | 0.011647 | 0.011682 | 0.011716 | 0.011647 | 0.011613 | 0.011647 |



|          |          |          |          |          |          |          |
|----------|----------|----------|----------|----------|----------|----------|
| 0.011647 | 0.011682 | 0.011578 | 0.011682 | 0.011751 | 0.011785 | 0.011681 |
| 0.011647 | 0.011613 | 0.011405 | 0.011405 | 0.011751 | 0.011787 | 0.011820 |
| 0.011578 | 0.011578 | 0.011612 | 0.011716 | 0.011578 | 0.011820 | 0.011820 |
| 0.011854 | 0.011854 | 0.011751 | 0.011889 | 0.011440 | 0.011891 | 0.011716 |
| 0.011716 | 0.011785 | 0.011820 | 0.011647 | 0.011682 | 0.011612 | 0.011716 |
| 0.011785 | 0.011785 | 0.011820 | 0.011785 | 0.011683 | 0.011854 | 0.011854 |
| 0.011722 | 0.011613 | 0.011716 | 0.011820 | 0.011716 | 0.011785 | 0.011854 |
| 0.012027 | 0.011763 | 0.011924 | 0.011889 | 0.011820 | 0.011958 | 0.011613 |
| 0.011787 | 0.011682 | 0.011647 | 0.011647 | 0.011682 | 0.011578 | 0.011682 |
| 0.011751 | 0.011785 | 0.011681 | 0.011647 | 0.011613 | 0.011405 | 0.011405 |
| 0.011751 | 0.011787 | 0.011854 | 0.011785 | 0.012374 | 0.011832 | 0.011785 |
| 0.011856 | 0.011774 | 0.011928 | 0.011773 | 0.011888 | 0.011841 | 0.011734 |
| 0.012297 | 0.011701 | 0.011800 | 0.011771 | 0.012052 | 0.011900 | 0.012005 |
| 0.012354 | 0.011798 | 0.011721 | 0.011716 | 0.011716 | 0.011475 | 0.011686 |
| 0.011578 | 0.011613 | 0.011751 | 0.011716 | 0.011721 | 0.011578 | 0.011544 |
| 0.011647 | 0.011612 | 0.011647 | 0.011647 | 0.011578 | 0.011613 | 0.011543 |
| 0.011612 | 0.011647 | 0.011612 | 0.011578 | 0.011682 | 0.011612 | 0.011647 |
| 0.011647 | 0.011578 | 0.011647 | 0.011682 | 0.011578 | 0.011785 | 0.011820 |
| 0.011716 | 0.011716 | 0.011716 | 0.011716 | 0.011647 | 0.011440 | 0.011682 |
| 0.011454 | 0.011613 | 0.011613 | 0.011618 | 0.011682 | 0.011647 | 0.011751 |
| 0.011751 | 0.011682 | 0.011647 | 0.011682 | 0.011785 | 0.011785 | 0.011716 |
| 0.011716 | 0.011820 | 0.011336 | 0.011751 | 0.011889 | 0.011889 | 0.011820 |
| 0.011612 | 0.011647 | 0.011751 | 0.011544 | 0.011717 | 0.011682 | 0.011716 |
| 0.011751 | 0.011578 | 0.011578 | 0.011924 | 0.011924 | 0.011889 | 0.011682 |
| 0.011785 | 0.011854 | 0.011682 | 0.011785 | 0.011716 | 0.011613 | 0.011267 |
| 0.011716 | 0.011682 | 0.011578 | 0.011820 | 0.011682 | 0.011785 | 0.011544 |
| 0.011647 | 0.011409 | 0.011405 | 0.011548 | 0.011399 | 0.011717 | 0.011525 |
| 0.011445 | 0.011769 | 0.011628 | 0.011641 | 0.011597 | 0.011417 | 0.011379 |
| 0.011571 | 0.011258 | 0.011450 | 0.011258 | 0.011222 | 0.011462 | 0.011790 |
| 0.011776 | 0.011690 | 0.011624 | 0.011665 | 0.011719 | 0.011578 | 0.011647 |
| 0.011613 | 0.011717 | 0.011825 | 0.011618 | 0.011932 | 0.011969 | 0.011682 |
| 0.011682 | 0.011751 | 0.011682 | 0.011716 | 0.011578 | 0.011544 | 0.011578 |
| 0.011682 | 0.011682 | 0.011612 | 0.011612 | 0.011647 | 0.011612 | 0.011716 |
| 0.011631 | 0.011669 | 0.011652 | 0.011658 | 0.011833 | 0.011793 | 0.011796 |
| 0.011795 | 0.011682 | 0.011549 | 0.011536 | 0.011651 | 0.011826 | 0.011757 |
| 0.011647 | 0.011686 | 0.011959 | 0.011892 | 0.011855 | 0.011855 | 0.011785 |
| 0.011751 | 0.011820 | 0.011820 | 0.011716 | 0.011682 | 0.011889 | 0.011958 |
| 0.011993 | 0.011316 | 0.011621 | 0.011772 | 0.011647 | 0.011854 | 0.011820 |
| 0.011821 | 0.011820 | 0.011889 | 0.011889 | 0.011903 | 0.011993 | 0.011667 |
| 0.011547 | 0.011559 | 0.011655 | 0.011619 | 0.011658 | 0.011599 | 0.011200 |
| 0.011695 | 0.011378 | 0.011603 | 0.011677 | 0.011682 | 0.011728 | 0.011647 |
| 0.011612 | 0.011543 | 0.011682 | 0.011612 | 0.011578 | 0.011544 | 0.011475 |
| 0.011578 | 0.011647 | 0.011647 | 0.011647 | 0.011682 | 0.011681 | 0.011685 |
| 0.011755 | 0.011682 | 0.011682 | 0.011719 | 0.011578 | 0.011647 | 0.011613 |
| 0.011717 | 0.011825 | 0.011618 | 0.011932 | 0.011969 | 0.011682 | 0.011854 |
| 0.011820 | 0.011820 | 0.011616 | 0.011812 | 0.011774 | 0.011761 | 0.011634 |
| 0.011838 | 0.012043 | 0.011843 | 0.011724 | 0.011613 | 0.011820 | 0.011647 |
| 0.011785 | 0.011716 | 0.011612 | 0.011719 | 0.011820 | 0.011824 | 0.011716 |
| 0.011612 | 0.011546 | 0.011681 | 0.011613 | 0.011544 | 0.011549 | 0.011820 |
| 0.011716 | 0.011647 | 0.011682 | 0.011716 | 0.011647 | 0.011613 | 0.011509 |
| 0.011682 | 0.011647 | 0.011716 | 0.011647 | 0.011716 | 0.011924 | 0.011543 |
| 0.011647 | 0.011440 | 0.011647 | 0.011682 | 0.011647 | 0.011336 | 0.011617 |
| 0.011848 | 0.011443 | 0.011512 | 0.011503 | 0.011549 | 0.011532 | 0.011395 |
| 0.011480 | 0.011544 | 0.011647 | 0.011758 | 0.011613 | 0.011752 | 0.011889 |
| 0.011786 | 0.011825 | 0.011785 | 0.012038 | 0.011682 | 0.012582 | 0.011786 |
| 0.012478 | 0.012270 | 0.012412 | 0.012722 | 0.011647 | 0.011613 | 0.011751 |
| 0.012409 | 0.011924 | 0.011716 | 0.011613 | 0.011682 | 0.011682 | 0.011617 |
| 0.011544 | 0.011546 | 0.011613 | 0.011578 | 0.011959 | 0.012028 | 0.011993 |
| 0.011924 | 0.012028 | 0.012097 | 0.011890 | 0.012409 | 0.012417 | 0.012479 |
| 0.012479 | 0.012479 | 0.012444 | 0.012444 | 0.012444 | 0.011751 | 0.011958 |

|          |          |          |          |          |          |          |
|----------|----------|----------|----------|----------|----------|----------|
| 0.012062 | 0.012547 | 0.012069 | 0.011959 | 0.011786 | 0.011548 | 0.011440 |
| 0.011336 | 0.011405 | 0.011924 | 0.011941 | 0.011991 | 0.011716 | 0.011475 |
| S391     | 0.011546 | 0.011546 | 0.011972 | 0.011850 | 0.011850 | 0.011972 |
| 0.011612 | 0.011612 | 0.011850 | 0.011242 | 0.011364 | 0.011303 | 0.011242 |
| 0.011364 | 0.011425 | 0.011303 | 0.011303 | 0.011364 | 0.011425 | 0.011364 |
| 0.011242 | 0.011425 | 0.011607 | 0.011243 | 0.011304 | 0.011303 | 0.011735 |
| 0.011728 | 0.011425 | 0.011242 | 0.011607 | 0.011303 | 0.011364 | 0.011303 |
| 0.011303 | 0.011364 | 0.011425 | 0.011364 | 0.011485 | 0.011425 | 0.011729 |
| 0.011303 | 0.011425 | 0.011485 | 0.011364 | 0.011425 | 0.011425 | 0.011364 |
| 0.011364 | 0.011668 | 0.011425 | 0.011728 | 0.011425 | 0.011485 | 0.011425 |
| 0.011242 | 0.011425 | 0.011546 | 0.011485 | 0.011850 | 0.011425 | 0.011607 |
| 0.011364 | 0.011303 | 0.011364 | 0.011546 | 0.011850 | 0.011364 | 0.011485 |
| 0.011303 | 0.011425 | 0.011486 | 0.011607 | 0.011364 | 0.011364 | 0.011364 |
| 0.011364 | 0.011364 | 0.011303 | 0.011364 | 0.011303 | 0.011364 | 0.011485 |
| 0.011425 | 0.011303 | 0.011425 | 0.011242 | 0.011485 | 0.011242 | 0.011303 |
| 0.011425 | 0.011364 | 0.011728 | 0.011485 | 0.011364 | 0.011729 | 0.011303 |
| 0.011485 | 0.011728 | 0.011678 | 0.011303 | 0.011307 | 0.011382 | 0.011555 |
| 0.011554 | 0.011574 | 0.011325 | 0.011485 | 0.011485 | 0.011425 | 0.011485 |
| 0.011485 | 0.011303 | 0.011546 | 0.011425 | 0.011425 | 0.011425 | 0.011303 |
| 0.011303 | 0.011425 | 0.011546 | 0.011485 | 0.011303 | 0.011425 | 0.011364 |
| 0.011242 | 0.011303 | 0.011364 | 0.011303 | 0.011668 | 0.011607 | 0.011546 |
| 0.011668 | 0.011789 | 0.011303 | 0.011303 | 0.011364 | 0.011364 | 0.011364 |
| 0.011425 | 0.011425 | 0.011425 | 0.011249 | 0.011316 | 0.011315 | 0.011364 |
| 0.011364 | 0.011364 | 0.011432 | 0.011425 | 0.011246 | 0.011370 | 0.011305 |
| 0.011574 | 0.011373 | 0.011308 | 0.011303 | 0.011243 | 0.011485 | 0.011303 |
| 0.011425 | 0.011364 | 0.011364 | 0.011425 | 0.011364 | 0.011546 | 0.011668 |
| 0.011789 | 0.011607 | 0.011303 | 0.011546 | 0.011303 | 0.011668 | 0.011243 |
| 0.011364 | 0.011303 | 0.011242 | 0.011364 | 0.011364 | 0.011364 | 0.011485 |
| 0.011303 | 0.011425 | 0.011364 | 0.011303 | 0.011427 | 0.011607 | 0.011547 |
| 0.011546 | 0.011485 | 0.011242 | 0.011243 | 0.011425 | 0.011242 | 0.011242 |
| 0.011429 | 0.011546 | 0.011303 | 0.011546 | 0.011242 | 0.011364 | 0.011303 |
| 0.011425 | 0.011242 | 0.011364 | 0.011364 | 0.011425 | 0.011242 | 0.011364 |
| 0.011303 | 0.011425 | 0.011485 | 0.011242 | 0.011303 | 0.011303 | 0.011546 |
| 0.011668 | 0.011668 | 0.011728 | 0.011485 | 0.011789 | 0.011303 | 0.011364 |
| 0.011426 | 0.011508 | 0.011603 | 0.011246 | 0.011736 | 0.011246 | 0.011274 |
| 0.011796 | 0.011608 | 0.011546 | 0.011668 | 0.011372 | 0.011607 | 0.011546 |
| 0.011485 | 0.011668 | 0.011635 | 0.011405 | 0.011355 | 0.011546 | 0.011491 |
| 0.011789 | 0.011365 | 0.011546 | 0.011671 | 0.011425 | 0.011729 | 0.011859 |
| 0.011305 | 0.011679 | 0.011430 | 0.011552 | 0.011547 | 0.011303 | 0.011366 |
| 0.011303 | 0.011425 | 0.011242 | 0.011242 | 0.011242 | 0.011303 | 0.011364 |
| 0.011364 | 0.011425 | 0.011303 | 0.011303 | 0.011364 | 0.011425 | 0.011425 |
| 0.011425 | 0.011789 | 0.011668 | 0.011607 | 0.011242 | 0.011425 | 0.011364 |
| 0.011303 | 0.011303 | 0.011364 | 0.011546 | 0.011303 | 0.011303 | 0.011303 |
| 0.011850 | 0.011425 | 0.011425 | 0.011303 | 0.011425 | 0.011425 | 0.011303 |
| 0.011303 | 0.011303 | 0.011425 | 0.011546 | 0.011303 | 0.011546 | 0.011668 |
| 0.011668 | 0.011364 | 0.011425 | 0.011303 | 0.011242 | 0.011364 | 0.011364 |
| 0.011303 | 0.011485 | 0.011242 | 0.011242 | 0.011485 | 0.011607 | 0.011303 |
| 0.011304 | 0.011364 | 0.011243 | 0.011242 | 0.011668 | 0.011242 | 0.011303 |
| 0.011555 | 0.011303 | 0.011668 | 0.011546 | 0.011546 | 0.011364 | 0.011546 |
| 0.011242 | 0.011485 | 0.011242 | 0.011303 | 0.011303 | 0.011303 | 0.011242 |
| 0.011364 | 0.011668 | 0.011364 | 0.011364 | 0.011303 | 0.011607 | 0.011303 |
| 0.011303 | 0.011303 | 0.011364 | 0.011303 | 0.011364 | 0.011485 | 0.011607 |
| 0.011485 | 0.011546 | 0.011364 | 0.011364 | 0.011425 | 0.011364 | 0.011303 |
| 0.011364 | 0.011364 | 0.011364 | 0.011303 | 0.011242 | 0.011546 | 0.011303 |
| 0.011303 | 0.011364 | 0.011485 | 0.011546 | 0.011303 | 0.011303 | 0.011303 |
| 0.011425 | 0.011303 | 0.011364 | 0.011303 | 0.011425 | 0.011607 | 0.011789 |
| 0.011303 | 0.011729 | 0.011303 | 0.013807 | 0.011310 | 0.011615 | 0.011668 |
| 0.011729 | 0.011729 | 0.011430 | 0.011328 | 0.011896 | 0.011668 | 0.000000 |
| 0.011720 | 0.011611 | 0.011243 | 0.011258 | 0.011393 | 0.011374 | 0.011317 |
| 0.011614 | 0.011623 | 0.011555 | 0.011212 | 0.011364 | 0.011546 | 0.011429 |

|          |          |          |          |          |          |          |
|----------|----------|----------|----------|----------|----------|----------|
| 0.011310 | 0.011546 | 0.011303 | 0.011425 | 0.011425 | 0.011425 | 0.011364 |
| 0.011425 | 0.011242 | 0.011364 | 0.011485 | 0.011364 | 0.011242 | 0.011303 |
| 0.011303 | 0.011485 | 0.011242 | 0.011364 | 0.011425 | 0.011607 | 0.011303 |
| 0.011546 | 0.011425 | 0.011668 | 0.011668 | 0.011486 | 0.011548 | 0.011425 |
| 0.011303 | 0.011242 | 0.011303 | 0.011364 | 0.011242 | 0.011485 | 0.011485 |
| 0.011607 | 0.011546 | 0.011485 | 0.011668 | 0.011789 | 0.011610 | 0.011425 |
| 0.011425 | 0.011546 | 0.011546 | 0.011303 | 0.011303 | 0.011303 | 0.011546 |
| 0.011364 | 0.011364 | 0.011425 | 0.011364 | 0.011425 | 0.011546 | 0.011303 |
| 0.011430 | 0.011242 | 0.011364 | 0.011607 | 0.011364 | 0.011607 | 0.011485 |
| 0.011668 | 0.011372 | 0.011607 | 0.011546 | 0.011485 | 0.011668 | 0.011303 |
| 0.011426 | 0.011243 | 0.011303 | 0.011303 | 0.011485 | 0.011242 | 0.011364 |
| 0.011425 | 0.011607 | 0.011303 | 0.011546 | 0.011425 | 0.011668 | 0.011668 |
| 0.011486 | 0.011548 | 0.011425 | 0.011364 | 0.012338 | 0.011574 | 0.011313 |
| 0.011565 | 0.011498 | 0.011635 | 0.011370 | 0.011504 | 0.011311 | 0.011615 |
| 0.012240 | 0.011312 | 0.011371 | 0.011249 | 0.011812 | 0.011736 | 0.011674 |
| 0.012234 | 0.011668 | 0.011364 | 0.011364 | 0.011425 | 0.011546 | 0.011364 |
| 0.011303 | 0.011242 | 0.011425 | 0.011364 | 0.011364 | 0.011668 | 0.011607 |
| 0.011425 | 0.011303 | 0.011303 | 0.011242 | 0.011242 | 0.011242 | 0.011242 |
| 0.011425 | 0.011425 | 0.011242 | 0.011303 | 0.011364 | 0.011364 | 0.011364 |
| 0.011425 | 0.011303 | 0.011303 | 0.011303 | 0.011242 | 0.011364 | 0.011546 |
| 0.011425 | 0.011546 | 0.011425 | 0.011364 | 0.011364 | 0.011850 | 0.011425 |
| 0.011567 | 0.011303 | 0.011728 | 0.011739 | 0.011425 | 0.011303 | 0.011425 |
| 0.011546 | 0.011364 | 0.011303 | 0.011364 | 0.011546 | 0.011546 | 0.011364 |
| 0.011546 | 0.011607 | 0.011789 | 0.011303 | 0.011485 | 0.011485 | 0.011425 |
| 0.011303 | 0.011485 | 0.011546 | 0.011911 | 0.011425 | 0.011425 | 0.011425 |
| 0.011485 | 0.011364 | 0.011364 | 0.011607 | 0.011546 | 0.011607 | 0.011425 |
| 0.011546 | 0.011425 | 0.011425 | 0.011546 | 0.011303 | 0.011303 | 0.011607 |
| 0.011364 | 0.011425 | 0.011364 | 0.011485 | 0.011425 | 0.011364 | 0.011607 |
| 0.011364 | 0.011673 | 0.011850 | 0.011688 | 0.011398 | 0.011303 | 0.011302 |
| 0.011347 | 0.011813 | 0.011245 | 0.011458 | 0.011403 | 0.011566 | 0.011556 |
| 0.011666 | 0.011316 | 0.011362 | 0.011228 | 0.011348 | 0.011575 | 0.011385 |
| 0.011485 | 0.011374 | 0.011364 | 0.011431 | 0.011427 | 0.011668 | 0.011728 |
| 0.011789 | 0.011486 | 0.011609 | 0.011548 | 0.011489 | 0.011698 | 0.011303 |
| 0.011789 | 0.011607 | 0.011303 | 0.011546 | 0.011303 | 0.011668 | 0.011243 |
| 0.011364 | 0.011303 | 0.011242 | 0.011364 | 0.011364 | 0.011364 | 0.011485 |
| 0.011489 | 0.011314 | 0.011425 | 0.011308 | 0.011678 | 0.011487 | 0.011552 |
| 0.011551 | 0.011364 | 0.011261 | 0.011253 | 0.011364 | 0.011547 | 0.011548 |
| 0.011364 | 0.011303 | 0.011668 | 0.011547 | 0.011546 | 0.011364 | 0.011303 |
| 0.011607 | 0.011485 | 0.011303 | 0.011364 | 0.012094 | 0.011486 | 0.011729 |
| 0.011789 | 0.011649 | 0.011369 | 0.011375 | 0.011303 | 0.011303 | 0.011546 |
| 0.011304 | 0.011485 | 0.011485 | 0.011485 | 0.011644 | 0.011546 | 0.011376 |
| 0.011245 | 0.011250 | 0.011431 | 0.011308 | 0.011435 | 0.011267 | 0.011615 |
| 0.011497 | 0.011691 | 0.011315 | 0.011397 | 0.011364 | 0.011308 | 0.011364 |
| 0.011242 | 0.011303 | 0.011364 | 0.011303 | 0.011668 | 0.011607 | 0.011546 |
| 0.011668 | 0.011789 | 0.011303 | 0.011303 | 0.011364 | 0.011364 | 0.011364 |
| 0.011425 | 0.011425 | 0.011425 | 0.011427 | 0.011668 | 0.011728 | 0.011789 |
| 0.011486 | 0.011609 | 0.011548 | 0.011489 | 0.011698 | 0.011303 | 0.011485 |
| 0.011546 | 0.011546 | 0.011366 | 0.011313 | 0.011308 | 0.011368 | 0.011372 |
| 0.011550 | 0.011625 | 0.011436 | 0.011368 | 0.011303 | 0.011546 | 0.011303 |
| 0.011425 | 0.011364 | 0.011303 | 0.011427 | 0.011607 | 0.011547 | 0.011485 |
| 0.011242 | 0.011243 | 0.011425 | 0.011242 | 0.011242 | 0.011429 | 0.011546 |
| 0.011425 | 0.011242 | 0.011364 | 0.011485 | 0.011364 | 0.011242 | 0.011668 |
| 0.011364 | 0.011485 | 0.011485 | 0.011242 | 0.011425 | 0.011485 | 0.011303 |
| 0.011303 | 0.011850 | 0.011242 | 0.011303 | 0.011364 | 0.011728 | 0.011259 |
| 0.011919 | 0.011329 | 0.011427 | 0.011657 | 0.011636 | 0.011679 | 0.011248 |
| 0.011381 | 0.011607 | 0.011728 | 0.011850 | 0.011668 | 0.011850 | 0.011911 |
| 0.011851 | 0.011921 | 0.011789 | 0.012094 | 0.011789 | 0.013069 | 0.011972 |
| 0.012459 | 0.012581 | 0.012894 | 0.012643 | 0.011850 | 0.011364 | 0.011972 |
| 0.012399 | 0.012155 | 0.011668 | 0.011668 | 0.011607 | 0.011607 | 0.011794 |
| 0.011607 | 0.011608 | 0.011668 | 0.011668 | 0.011911 | 0.012033 | 0.011972 |

|          |          |          |          |          |          |          |
|----------|----------|----------|----------|----------|----------|----------|
| 0.011728 | 0.011911 | 0.011972 | 0.011789 | 0.012277 | 0.012221 | 0.012522 |
| 0.012461 | 0.012521 | 0.012399 | 0.012400 | 0.012461 | 0.011364 | 0.011850 |
| 0.011911 | 0.012459 | 0.011918 | 0.012215 | 0.011850 | 0.011674 | 0.011607 |
| 0.011546 | 0.011485 | 0.011911 | 0.012176 | 0.012376 | 0.011850 | 0.011546 |
| S392     | 0.011629 | 0.011629 | 0.011440 | 0.011392 | 0.011392 | 0.011487 |
| 0.011634 | 0.011538 | 0.011392 | 0.011487 | 0.011487 | 0.011487 | 0.011440 |
| 0.011392 | 0.011630 | 0.011392 | 0.011392 | 0.011487 | 0.011534 | 0.011487 |
| 0.011487 | 0.011534 | 0.011392 | 0.011393 | 0.011440 | 0.011392 | 0.011634 |
| 0.011582 | 0.011487 | 0.011392 | 0.011440 | 0.011487 | 0.011487 | 0.011392 |
| 0.011534 | 0.011582 | 0.011582 | 0.011582 | 0.011534 | 0.011534 | 0.011724 |
| 0.011345 | 0.011534 | 0.011534 | 0.011487 | 0.011534 | 0.011629 | 0.011629 |
| 0.011582 | 0.011677 | 0.011535 | 0.011677 | 0.011487 | 0.011677 | 0.011487 |
| 0.011487 | 0.011535 | 0.011629 | 0.011677 | 0.011677 | 0.011345 | 0.011677 |
| 0.011582 | 0.011535 | 0.011487 | 0.011724 | 0.011725 | 0.011582 | 0.011629 |
| 0.011534 | 0.011535 | 0.011582 | 0.011677 | 0.011487 | 0.011534 | 0.011534 |
| 0.011487 | 0.011487 | 0.011440 | 0.011487 | 0.011487 | 0.011487 | 0.011629 |
| 0.011630 | 0.011534 | 0.011629 | 0.011392 | 0.011582 | 0.011440 | 0.011440 |
| 0.011724 | 0.011629 | 0.011772 | 0.011630 | 0.011582 | 0.011724 | 0.011534 |
| 0.011696 | 0.011652 | 0.011725 | 0.011455 | 0.011440 | 0.011458 | 0.011456 |
| 0.011440 | 0.011492 | 0.011456 | 0.011629 | 0.011629 | 0.011487 | 0.011535 |
| 0.011582 | 0.011487 | 0.011677 | 0.011534 | 0.011677 | 0.011534 | 0.011487 |
| 0.011440 | 0.011487 | 0.011677 | 0.011772 | 0.011630 | 0.011582 | 0.011487 |
| 0.011440 | 0.011392 | 0.011535 | 0.011440 | 0.011440 | 0.011392 | 0.011392 |
| 0.011487 | 0.011487 | 0.011440 | 0.011440 | 0.011440 | 0.011440 | 0.011440 |
| 0.011440 | 0.011535 | 0.011582 | 0.011405 | 0.011451 | 0.011453 | 0.011440 |
| 0.011535 | 0.011487 | 0.011500 | 0.011487 | 0.011397 | 0.011494 | 0.011537 |
| 0.011457 | 0.011544 | 0.011536 | 0.011487 | 0.011392 | 0.011582 | 0.011440 |
| 0.011535 | 0.011487 | 0.011487 | 0.011582 | 0.011534 | 0.011914 | 0.011677 |
| 0.011724 | 0.011677 | 0.011440 | 0.011630 | 0.011440 | 0.011487 | 0.011392 |
| 0.011440 | 0.011487 | 0.011487 | 0.011487 | 0.011487 | 0.011487 | 0.011629 |
| 0.011487 | 0.011582 | 0.011582 | 0.011440 | 0.011487 | 0.011582 | 0.011583 |
| 0.011629 | 0.011535 | 0.011392 | 0.011392 | 0.011582 | 0.011392 | 0.011392 |
| 0.011537 | 0.011630 | 0.011440 | 0.011629 | 0.011392 | 0.011535 | 0.011440 |
| 0.011582 | 0.011440 | 0.011487 | 0.011487 | 0.011534 | 0.011392 | 0.011440 |
| 0.011535 | 0.011487 | 0.011534 | 0.011440 | 0.011487 | 0.011582 | 0.011819 |
| 0.011630 | 0.011582 | 0.011677 | 0.011629 | 0.011630 | 0.011487 | 0.011487 |
| 0.011489 | 0.011623 | 0.011618 | 0.011443 | 0.011730 | 0.011398 | 0.011549 |
| 0.011682 | 0.011539 | 0.011629 | 0.011725 | 0.011588 | 0.011772 | 0.011725 |
| 0.011677 | 0.011772 | 0.011658 | 0.011405 | 0.011469 | 0.011630 | 0.011630 |
| 0.011772 | 0.011583 | 0.011725 | 0.011680 | 0.011582 | 0.011582 | 0.011970 |
| 0.011585 | 0.011686 | 0.011684 | 0.011779 | 0.011868 | 0.011440 | 0.011536 |
| 0.011487 | 0.011487 | 0.011392 | 0.011392 | 0.011440 | 0.011534 | 0.011582 |
| 0.011487 | 0.011535 | 0.011440 | 0.011440 | 0.011487 | 0.011534 | 0.011392 |
| 0.011534 | 0.011772 | 0.011630 | 0.011630 | 0.011392 | 0.011487 | 0.011582 |
| 0.011582 | 0.011440 | 0.011582 | 0.011582 | 0.011440 | 0.011440 | 0.011440 |
| 0.011724 | 0.011535 | 0.011629 | 0.011440 | 0.011534 | 0.011535 | 0.011440 |
| 0.011440 | 0.011440 | 0.011534 | 0.011629 | 0.011440 | 0.011440 | 0.011534 |
| 0.011535 | 0.011534 | 0.011534 | 0.011440 | 0.011392 | 0.011487 | 0.011582 |
| 0.011440 | 0.011582 | 0.011392 | 0.011440 | 0.011582 | 0.011487 | 0.011487 |
| 0.011440 | 0.011582 | 0.011488 | 0.011392 | 0.011487 | 0.011392 | 0.011629 |
| 0.011498 | 0.011487 | 0.011582 | 0.011582 | 0.011535 | 0.011487 | 0.011534 |
| 0.011487 | 0.011677 | 0.011392 | 0.011535 | 0.011392 | 0.011392 | 0.011392 |
| 0.011534 | 0.011534 | 0.011487 | 0.011629 | 0.011392 | 0.011630 | 0.011392 |
| 0.011392 | 0.011487 | 0.011487 | 0.011487 | 0.011534 | 0.011629 | 0.011724 |
| 0.011630 | 0.011582 | 0.011534 | 0.011630 | 0.011629 | 0.011487 | 0.011440 |
| 0.011440 | 0.011487 | 0.011487 | 0.011345 | 0.011392 | 0.011582 | 0.011440 |
| 0.011440 | 0.011487 | 0.011582 | 0.011582 | 0.011487 | 0.011440 | 0.011487 |
| 0.011487 | 0.011487 | 0.011535 | 0.011392 | 0.011582 | 0.011677 | 0.011677 |
| 0.011535 | 0.011630 | 0.011440 | 0.019397 | 0.011538 | 0.011743 | 0.011630 |
| 0.011582 | 0.011677 | 0.011668 | 0.011620 | 0.011660 | 0.011725 | 0.011720 |

|          |          |          |          |          |          |          |
|----------|----------|----------|----------|----------|----------|----------|
| 0.000000 | 0.011603 | 0.011415 | 0.011482 | 0.011401 | 0.011424 | 0.011491 |
| 0.011507 | 0.011493 | 0.011487 | 0.011226 | 0.011629 | 0.011629 | 0.011586 |
| 0.011446 | 0.011582 | 0.011629 | 0.011487 | 0.011535 | 0.011535 | 0.011535 |
| 0.011487 | 0.011440 | 0.011440 | 0.011629 | 0.011535 | 0.011487 | 0.011487 |
| 0.011487 | 0.011582 | 0.011440 | 0.011535 | 0.011629 | 0.011582 | 0.011487 |
| 0.011535 | 0.011440 | 0.011582 | 0.011582 | 0.011630 | 0.011582 | 0.011629 |
| 0.011392 | 0.011392 | 0.011440 | 0.011487 | 0.011392 | 0.011677 | 0.011677 |
| 0.011582 | 0.011629 | 0.011677 | 0.011629 | 0.011630 | 0.011632 | 0.011535 |
| 0.011535 | 0.011629 | 0.011677 | 0.011440 | 0.011534 | 0.011440 | 0.011487 |
| 0.011535 | 0.011534 | 0.011582 | 0.011487 | 0.011488 | 0.011677 | 0.011724 |
| 0.011539 | 0.011392 | 0.011582 | 0.011677 | 0.011535 | 0.011630 | 0.011724 |
| 0.011725 | 0.011588 | 0.011772 | 0.011725 | 0.011677 | 0.011772 | 0.011440 |
| 0.011631 | 0.011582 | 0.011487 | 0.011487 | 0.011582 | 0.011440 | 0.011535 |
| 0.011629 | 0.011582 | 0.011487 | 0.011535 | 0.011440 | 0.011582 | 0.011582 |
| 0.011630 | 0.011582 | 0.011582 | 0.011582 | 0.012058 | 0.011568 | 0.011458 |
| 0.011702 | 0.011551 | 0.011508 | 0.011554 | 0.011655 | 0.011645 | 0.011642 |
| 0.012078 | 0.011451 | 0.011639 | 0.011451 | 0.011594 | 0.011730 | 0.011730 |
| 0.012072 | 0.011435 | 0.011488 | 0.011535 | 0.011487 | 0.011392 | 0.011440 |
| 0.011440 | 0.011440 | 0.011535 | 0.011535 | 0.011488 | 0.011487 | 0.011203 |
| 0.011534 | 0.011440 | 0.011487 | 0.011487 | 0.011392 | 0.011487 | 0.011392 |
| 0.011440 | 0.011440 | 0.011392 | 0.011440 | 0.011487 | 0.011487 | 0.011535 |
| 0.011440 | 0.011440 | 0.011440 | 0.011487 | 0.011440 | 0.011582 | 0.011677 |
| 0.011487 | 0.011535 | 0.011535 | 0.011487 | 0.011392 | 0.011677 | 0.011534 |
| 0.011356 | 0.011440 | 0.011582 | 0.011541 | 0.011582 | 0.011582 | 0.011629 |
| 0.011630 | 0.011487 | 0.011487 | 0.011487 | 0.011724 | 0.011582 | 0.011582 |
| 0.011487 | 0.011677 | 0.011677 | 0.011582 | 0.011677 | 0.011677 | 0.011677 |
| 0.011487 | 0.011582 | 0.011630 | 0.011725 | 0.011535 | 0.011582 | 0.011630 |
| 0.011534 | 0.011440 | 0.011440 | 0.011677 | 0.011772 | 0.011630 | 0.011535 |
| 0.011630 | 0.011630 | 0.011487 | 0.011630 | 0.011534 | 0.011487 | 0.011535 |
| 0.011582 | 0.011487 | 0.011440 | 0.011724 | 0.011535 | 0.011629 | 0.011677 |
| 0.011534 | 0.011586 | 0.011724 | 0.011511 | 0.011430 | 0.011440 | 0.011381 |
| 0.011502 | 0.011357 | 0.011392 | 0.011436 | 0.011341 | 0.011630 | 0.011507 |
| 0.011494 | 0.011480 | 0.011579 | 0.011473 | 0.011471 | 0.011689 | 0.011618 |
| 0.011693 | 0.011505 | 0.011589 | 0.011541 | 0.011535 | 0.011487 | 0.011535 |
| 0.011534 | 0.011535 | 0.011777 | 0.011444 | 0.011680 | 0.011708 | 0.011487 |
| 0.011724 | 0.011677 | 0.011440 | 0.011630 | 0.011440 | 0.011487 | 0.011392 |
| 0.011440 | 0.011487 | 0.011487 | 0.011487 | 0.011487 | 0.011487 | 0.011629 |
| 0.011495 | 0.011549 | 0.011535 | 0.011445 | 0.011685 | 0.011583 | 0.011537 |
| 0.011729 | 0.011392 | 0.011365 | 0.011405 | 0.011582 | 0.011772 | 0.011678 |
| 0.011487 | 0.011629 | 0.011819 | 0.011677 | 0.011629 | 0.011772 | 0.011487 |
| 0.011534 | 0.011630 | 0.011534 | 0.011534 | 0.012010 | 0.011534 | 0.011772 |
| 0.011914 | 0.011607 | 0.011494 | 0.011650 | 0.011534 | 0.011487 | 0.011629 |
| 0.011487 | 0.011677 | 0.011629 | 0.011629 | 0.011607 | 0.011867 | 0.011449 |
| 0.011347 | 0.011351 | 0.011444 | 0.011444 | 0.011448 | 0.011373 | 0.011492 |
| 0.011544 | 0.011430 | 0.011396 | 0.011481 | 0.011487 | 0.011493 | 0.011487 |
| 0.011440 | 0.011392 | 0.011535 | 0.011440 | 0.011440 | 0.011392 | 0.011392 |
| 0.011487 | 0.011487 | 0.011440 | 0.011440 | 0.011440 | 0.011440 | 0.011440 |
| 0.011440 | 0.011535 | 0.011582 | 0.011535 | 0.011487 | 0.011535 | 0.011534 |
| 0.011535 | 0.011777 | 0.011444 | 0.011680 | 0.011708 | 0.011487 | 0.011677 |
| 0.011629 | 0.011629 | 0.011442 | 0.011501 | 0.011598 | 0.011540 | 0.011403 |
| 0.011541 | 0.011619 | 0.011653 | 0.011588 | 0.011440 | 0.011629 | 0.011487 |
| 0.011582 | 0.011582 | 0.011440 | 0.011487 | 0.011582 | 0.011583 | 0.011535 |
| 0.011392 | 0.011392 | 0.011582 | 0.011392 | 0.011392 | 0.011537 | 0.011630 |
| 0.011487 | 0.011440 | 0.011440 | 0.011629 | 0.011535 | 0.011487 | 0.011487 |
| 0.011487 | 0.011630 | 0.011629 | 0.011487 | 0.011535 | 0.011677 | 0.011345 |
| 0.011534 | 0.011677 | 0.011487 | 0.011487 | 0.011534 | 0.011677 | 0.011451 |
| 0.011183 | 0.011416 | 0.011422 | 0.011512 | 0.011598 | 0.011494 | 0.011402 |
| 0.011380 | 0.011203 | 0.011297 | 0.011397 | 0.011250 | 0.011440 | 0.011487 |
| 0.011393 | 0.011491 | 0.011345 | 0.011677 | 0.011250 | 0.012247 | 0.011440 |
| 0.012057 | 0.011819 | 0.012104 | 0.012296 | 0.011582 | 0.011345 | 0.011202 |

|          |          |          |          |          |          |          |
|----------|----------|----------|----------|----------|----------|----------|
| 0.012057 | 0.011297 | 0.011345 | 0.011297 | 0.011345 | 0.011345 | 0.011299 |
| 0.011203 | 0.011203 | 0.011297 | 0.011203 | 0.011868 | 0.011867 | 0.011914 |
| 0.011772 | 0.011772 | 0.012010 | 0.011724 | 0.012105 | 0.012113 | 0.012201 |
| 0.012248 | 0.012201 | 0.012153 | 0.012153 | 0.012248 | 0.011534 | 0.011677 |
| 0.011772 | 0.012200 | 0.011822 | 0.011867 | 0.011772 | 0.011535 | 0.011487 |
| 0.011440 | 0.011392 | 0.011867 | 0.011885 | 0.012010 | 0.011630 | 0.011440 |
| S393     | 0.011732 | 0.011732 | 0.011610 | 0.011549 | 0.011549 | 0.011610 |
| 0.011368 | 0.011368 | 0.011610 | 0.011487 | 0.011549 | 0.011426 | 0.011426 |
| 0.011487 | 0.011671 | 0.011487 | 0.011487 | 0.011548 | 0.011610 | 0.011548 |
| 0.011426 | 0.011610 | 0.011243 | 0.011427 | 0.011610 | 0.011487 | 0.011491 |
| 0.011427 | 0.011610 | 0.011426 | 0.011243 | 0.011487 | 0.011671 | 0.011487 |
| 0.011487 | 0.011610 | 0.011610 | 0.011549 | 0.011671 | 0.011610 | 0.011915 |
| 0.011426 | 0.011610 | 0.011671 | 0.011610 | 0.011548 | 0.011610 | 0.011549 |
| 0.011549 | 0.011854 | 0.011549 | 0.011426 | 0.011610 | 0.011793 | 0.011610 |
| 0.011426 | 0.011549 | 0.011732 | 0.011793 | 0.011671 | 0.011610 | 0.011671 |
| 0.011548 | 0.011610 | 0.011549 | 0.011732 | 0.011549 | 0.011549 | 0.011671 |
| 0.011487 | 0.011610 | 0.011732 | 0.011732 | 0.011549 | 0.011610 | 0.011610 |
| 0.011548 | 0.011549 | 0.011487 | 0.011487 | 0.011487 | 0.011610 | 0.011732 |
| 0.011610 | 0.011426 | 0.011610 | 0.011426 | 0.011549 | 0.011487 | 0.011487 |
| 0.011671 | 0.011549 | 0.011549 | 0.011671 | 0.011549 | 0.011976 | 0.011487 |
| 0.011610 | 0.011427 | 0.011793 | 0.011427 | 0.011434 | 0.011513 | 0.011123 |
| 0.011124 | 0.011213 | 0.011461 | 0.011671 | 0.011610 | 0.011549 | 0.011610 |
| 0.011610 | 0.011487 | 0.011732 | 0.011610 | 0.011610 | 0.011671 | 0.011426 |
| 0.011426 | 0.011487 | 0.011732 | 0.011671 | 0.011549 | 0.011671 | 0.011610 |
| 0.011487 | 0.011426 | 0.011610 | 0.011487 | 0.011304 | 0.011243 | 0.011182 |
| 0.011304 | 0.011426 | 0.011549 | 0.011549 | 0.011610 | 0.011610 | 0.011610 |
| 0.011671 | 0.011610 | 0.011610 | 0.011439 | 0.011440 | 0.011507 | 0.011610 |
| 0.011549 | 0.011548 | 0.011612 | 0.011610 | 0.011427 | 0.011489 | 0.011488 |
| 0.011316 | 0.011555 | 0.011610 | 0.011487 | 0.011426 | 0.011610 | 0.011487 |
| 0.011610 | 0.011610 | 0.011610 | 0.011549 | 0.011549 | 0.011793 | 0.011732 |
| 0.011488 | 0.011610 | 0.011487 | 0.011610 | 0.011487 | 0.011365 | 0.011488 |
| 0.011548 | 0.011548 | 0.011426 | 0.011549 | 0.011548 | 0.011549 | 0.011671 |
| 0.011549 | 0.011671 | 0.011548 | 0.011487 | 0.011613 | 0.011793 | 0.011733 |
| 0.011732 | 0.011671 | 0.011426 | 0.011428 | 0.011609 | 0.011426 | 0.011427 |
| 0.011431 | 0.011732 | 0.011549 | 0.011732 | 0.011426 | 0.011549 | 0.011487 |
| 0.011732 | 0.011426 | 0.011610 | 0.011487 | 0.011549 | 0.011426 | 0.011610 |
| 0.011549 | 0.011610 | 0.011610 | 0.011426 | 0.011487 | 0.011548 | 0.011793 |
| 0.011488 | 0.011426 | 0.011427 | 0.011671 | 0.011488 | 0.011487 | 0.011548 |
| 0.011550 | 0.011746 | 0.011891 | 0.011434 | 0.011492 | 0.011432 | 0.011492 |
| 0.011615 | 0.011366 | 0.011610 | 0.011854 | 0.011498 | 0.011732 | 0.011732 |
| 0.011671 | 0.011793 | 0.011840 | 0.011527 | 0.011560 | 0.011732 | 0.011679 |
| 0.011976 | 0.011550 | 0.011732 | 0.012043 | 0.011610 | 0.011915 | 0.011987 |
| 0.011487 | 0.012055 | 0.011549 | 0.011732 | 0.011855 | 0.011487 | 0.011490 |
| 0.011671 | 0.011610 | 0.011426 | 0.011426 | 0.011487 | 0.011426 | 0.011610 |
| 0.011610 | 0.011732 | 0.011549 | 0.011426 | 0.011610 | 0.011548 | 0.011549 |
| 0.011610 | 0.011671 | 0.011365 | 0.011427 | 0.011426 | 0.011610 | 0.011487 |
| 0.011487 | 0.011487 | 0.011549 | 0.011610 | 0.011487 | 0.011487 | 0.011487 |
| 0.011671 | 0.011548 | 0.011732 | 0.011487 | 0.011610 | 0.011793 | 0.011487 |
| 0.011487 | 0.011487 | 0.011548 | 0.011671 | 0.011487 | 0.011365 | 0.011426 |
| 0.011427 | 0.011487 | 0.011610 | 0.011426 | 0.011426 | 0.011549 | 0.011610 |
| 0.011426 | 0.011549 | 0.011426 | 0.011426 | 0.011671 | 0.011365 | 0.011488 |
| 0.011488 | 0.011548 | 0.011426 | 0.011426 | 0.011426 | 0.011426 | 0.011487 |
| 0.011806 | 0.011487 | 0.011426 | 0.011732 | 0.011548 | 0.011548 | 0.011732 |
| 0.011426 | 0.011793 | 0.011426 | 0.011487 | 0.011487 | 0.011487 | 0.011426 |
| 0.011610 | 0.011365 | 0.011549 | 0.011610 | 0.011487 | 0.011365 | 0.011487 |
| 0.011487 | 0.011487 | 0.011487 | 0.011610 | 0.011487 | 0.011671 | 0.011793 |
| 0.011671 | 0.011671 | 0.011610 | 0.011549 | 0.011610 | 0.011549 | 0.011487 |
| 0.011549 | 0.011549 | 0.011549 | 0.011426 | 0.011487 | 0.011732 | 0.011487 |
| 0.011487 | 0.011487 | 0.011671 | 0.011732 | 0.011487 | 0.011549 | 0.011487 |
| 0.011610 | 0.011426 | 0.011610 | 0.011487 | 0.011610 | 0.011732 | 0.011732 |

|          |          |          |          |          |          |          |
|----------|----------|----------|----------|----------|----------|----------|
| 0.011548 | 0.011610 | 0.011426 | 0.013959 | 0.011251 | 0.011700 | 0.011366 |
| 0.011427 | 0.011427 | 0.011501 | 0.011241 | 0.011640 | 0.011365 | 0.011611 |
| 0.011603 | 0.000000 | 0.011366 | 0.011392 | 0.011407 | 0.011488 | 0.011503 |
| 0.011279 | 0.011376 | 0.011253 | 0.000000 | 0.011549 | 0.011732 | 0.011616 |
| 0.011621 | 0.011671 | 0.011487 | 0.011487 | 0.011610 | 0.011610 | 0.011549 |
| 0.011610 | 0.011426 | 0.011487 | 0.011610 | 0.011549 | 0.011426 | 0.011426 |
| 0.011426 | 0.011610 | 0.011426 | 0.011549 | 0.011610 | 0.011793 | 0.011487 |
| 0.011671 | 0.011549 | 0.011488 | 0.011488 | 0.011732 | 0.011672 | 0.011610 |
| 0.011426 | 0.011426 | 0.011487 | 0.011610 | 0.011426 | 0.011732 | 0.011732 |
| 0.011793 | 0.011610 | 0.011671 | 0.011793 | 0.011610 | 0.011735 | 0.011671 |
| 0.011549 | 0.011732 | 0.011854 | 0.011487 | 0.011487 | 0.011548 | 0.011671 |
| 0.011548 | 0.011548 | 0.011610 | 0.011610 | 0.011671 | 0.011793 | 0.011549 |
| 0.011618 | 0.011426 | 0.011548 | 0.011732 | 0.011549 | 0.011793 | 0.011793 |
| 0.011854 | 0.011498 | 0.011732 | 0.011732 | 0.011671 | 0.011793 | 0.011488 |
| 0.011612 | 0.011427 | 0.011426 | 0.011426 | 0.011610 | 0.011426 | 0.011549 |
| 0.011610 | 0.011793 | 0.011487 | 0.011671 | 0.011549 | 0.011488 | 0.011488 |
| 0.011732 | 0.011672 | 0.011610 | 0.011549 | 0.012345 | 0.011693 | 0.011506 |
| 0.011744 | 0.011622 | 0.011819 | 0.011558 | 0.011691 | 0.011560 | 0.011733 |
| 0.012244 | 0.011499 | 0.011556 | 0.011621 | 0.011992 | 0.011915 | 0.012047 |
| 0.012240 | 0.011796 | 0.011610 | 0.011610 | 0.011671 | 0.011182 | 0.011610 |
| 0.011487 | 0.011487 | 0.011671 | 0.011610 | 0.011610 | 0.011426 | 0.011365 |
| 0.011610 | 0.011548 | 0.011549 | 0.011426 | 0.011487 | 0.011426 | 0.011426 |
| 0.011487 | 0.011487 | 0.011426 | 0.011487 | 0.011548 | 0.011548 | 0.011610 |
| 0.011610 | 0.011487 | 0.011426 | 0.011487 | 0.011426 | 0.011610 | 0.011732 |
| 0.011610 | 0.011548 | 0.011610 | 0.011610 | 0.011426 | 0.011671 | 0.011610 |
| 0.011186 | 0.011487 | 0.011427 | 0.011432 | 0.011671 | 0.011487 | 0.011610 |
| 0.011732 | 0.011610 | 0.011548 | 0.011610 | 0.011732 | 0.011732 | 0.011549 |
| 0.011671 | 0.011793 | 0.011549 | 0.011487 | 0.011671 | 0.011671 | 0.011671 |
| 0.011487 | 0.011671 | 0.011732 | 0.011549 | 0.011610 | 0.011671 | 0.011610 |
| 0.011610 | 0.011487 | 0.011487 | 0.011732 | 0.011732 | 0.011732 | 0.011671 |
| 0.011732 | 0.011671 | 0.011610 | 0.011732 | 0.011487 | 0.011487 | 0.011365 |
| 0.011487 | 0.011610 | 0.011487 | 0.011671 | 0.011671 | 0.011610 | 0.011488 |
| 0.011610 | 0.011430 | 0.011549 | 0.011439 | 0.011150 | 0.011488 | 0.011234 |
| 0.011457 | 0.011574 | 0.011426 | 0.011623 | 0.011507 | 0.011589 | 0.011376 |
| 0.011300 | 0.011338 | 0.011484 | 0.011246 | 0.011297 | 0.011542 | 0.011656 |
| 0.011557 | 0.011509 | 0.011488 | 0.011503 | 0.011612 | 0.011426 | 0.011365 |
| 0.011426 | 0.011549 | 0.011674 | 0.011184 | 0.011798 | 0.011766 | 0.011487 |
| 0.011488 | 0.011610 | 0.011487 | 0.011610 | 0.011487 | 0.011365 | 0.011488 |
| 0.011548 | 0.011548 | 0.011426 | 0.011549 | 0.011548 | 0.011549 | 0.011671 |
| 0.011612 | 0.011559 | 0.011610 | 0.011489 | 0.011854 | 0.011733 | 0.011736 |
| 0.011674 | 0.011549 | 0.011453 | 0.011438 | 0.011610 | 0.011732 | 0.011734 |
| 0.011609 | 0.011549 | 0.011915 | 0.011671 | 0.011671 | 0.011610 | 0.011487 |
| 0.011732 | 0.011671 | 0.011671 | 0.011549 | 0.011793 | 0.011610 | 0.011854 |
| 0.012037 | 0.011389 | 0.011495 | 0.011562 | 0.011549 | 0.011671 | 0.011732 |
| 0.011489 | 0.011671 | 0.011610 | 0.011610 | 0.011862 | 0.011732 | 0.011634 |
| 0.011431 | 0.011439 | 0.011619 | 0.011496 | 0.011556 | 0.011467 | 0.011370 |
| 0.011624 | 0.011218 | 0.011484 | 0.011589 | 0.011548 | 0.011549 | 0.011610 |
| 0.011487 | 0.011426 | 0.011610 | 0.011487 | 0.011304 | 0.011243 | 0.011182 |
| 0.011304 | 0.011426 | 0.011549 | 0.011549 | 0.011610 | 0.011610 | 0.011610 |
| 0.011671 | 0.011610 | 0.011610 | 0.011612 | 0.011426 | 0.011365 | 0.011426 |
| 0.011549 | 0.011674 | 0.011184 | 0.011798 | 0.011766 | 0.011487 | 0.011793 |
| 0.011732 | 0.011732 | 0.011491 | 0.011567 | 0.011497 | 0.011619 | 0.011563 |
| 0.011679 | 0.012047 | 0.011747 | 0.011556 | 0.011549 | 0.011732 | 0.011549 |
| 0.011671 | 0.011548 | 0.011487 | 0.011613 | 0.011793 | 0.011733 | 0.011671 |
| 0.011426 | 0.011428 | 0.011609 | 0.011426 | 0.011427 | 0.011431 | 0.011732 |
| 0.011610 | 0.011426 | 0.011487 | 0.011610 | 0.011549 | 0.011426 | 0.011426 |
| 0.011548 | 0.011549 | 0.011671 | 0.011426 | 0.011610 | 0.011732 | 0.011426 |
| 0.011487 | 0.011671 | 0.011426 | 0.011549 | 0.011548 | 0.011426 | 0.011470 |
| 0.011698 | 0.011264 | 0.011289 | 0.011323 | 0.011322 | 0.011365 | 0.011189 |
| 0.011311 | 0.011365 | 0.011488 | 0.011610 | 0.011426 | 0.011611 | 0.011732 |

|          |          |          |          |          |          |          |
|----------|----------|----------|----------|----------|----------|----------|
| 0.011672 | 0.011678 | 0.011610 | 0.011864 | 0.011549 | 0.012895 | 0.011671 |
| 0.012099 | 0.012343 | 0.012595 | 0.012469 | 0.011549 | 0.011487 | 0.011671 |
| 0.012406 | 0.011916 | 0.011488 | 0.011426 | 0.011426 | 0.011426 | 0.011614 |
| 0.011365 | 0.011367 | 0.011426 | 0.011427 | 0.011732 | 0.011854 | 0.011732 |
| 0.011549 | 0.011671 | 0.011732 | 0.011610 | 0.012406 | 0.012295 | 0.012528 |
| 0.012468 | 0.012590 | 0.012406 | 0.012467 | 0.012468 | 0.011549 | 0.011976 |
| 0.012038 | 0.012528 | 0.012046 | 0.011793 | 0.011549 | 0.011307 | 0.011304 |
| 0.011304 | 0.011243 | 0.011610 | 0.011795 | 0.011879 | 0.011671 | 0.011243 |
| S394     | 0.011333 | 0.011333 | 0.011685 | 0.011646 | 0.011646 | 0.011685 |
| 0.011492 | 0.011413 | 0.011606 | 0.011138 | 0.011177 | 0.011138 | 0.011099 |
| 0.011138 | 0.011372 | 0.011138 | 0.011177 | 0.011177 | 0.011177 | 0.011138 |
| 0.011138 | 0.011177 | 0.011294 | 0.011099 | 0.011177 | 0.011099 | 0.011492 |
| 0.011450 | 0.011177 | 0.000000 | 0.011294 | 0.011216 | 0.011216 | 0.011138 |
| 0.011177 | 0.011333 | 0.011216 | 0.011216 | 0.011216 | 0.011216 | 0.011411 |
| 0.011099 | 0.011216 | 0.011216 | 0.011177 | 0.011294 | 0.011294 | 0.011255 |
| 0.011216 | 0.011372 | 0.011216 | 0.011567 | 0.011177 | 0.011450 | 0.011177 |
| 0.011177 | 0.011294 | 0.011255 | 0.011450 | 0.011606 | 0.011294 | 0.011372 |
| 0.011255 | 0.011294 | 0.011177 | 0.011450 | 0.011607 | 0.011216 | 0.011255 |
| 0.011177 | 0.011216 | 0.011255 | 0.011294 | 0.011177 | 0.011216 | 0.011216 |
| 0.011138 | 0.011138 | 0.011099 | 0.011138 | 0.011216 | 0.011216 | 0.011333 |
| 0.011216 | 0.011138 | 0.011294 | 0.000000 | 0.011333 | 0.011138 | 0.011138 |
| 0.011372 | 0.011294 | 0.011528 | 0.011333 | 0.011177 | 0.011450 | 0.011216 |
| 0.011333 | 0.011568 | 0.011419 | 0.011101 | 0.011101 | 0.011183 | 0.011261 |
| 0.011262 | 0.011379 | 0.011103 | 0.011450 | 0.011372 | 0.011216 | 0.011255 |
| 0.011255 | 0.011255 | 0.011333 | 0.011216 | 0.011255 | 0.011216 | 0.011177 |
| 0.011138 | 0.011255 | 0.011528 | 0.011372 | 0.011255 | 0.011255 | 0.011177 |
| 0.011099 | 0.011138 | 0.011216 | 0.011099 | 0.011411 | 0.011372 | 0.011294 |
| 0.011411 | 0.011489 | 0.011177 | 0.011177 | 0.011216 | 0.011216 | 0.011216 |
| 0.011295 | 0.011177 | 0.011216 | 0.000000 | 0.011101 | 0.011101 | 0.011177 |
| 0.011177 | 0.011138 | 0.011182 | 0.011177 | 0.011100 | 0.011139 | 0.011178 |
| 0.011428 | 0.011180 | 0.011179 | 0.011138 | 0.011099 | 0.011255 | 0.011255 |
| 0.011333 | 0.011255 | 0.011255 | 0.011294 | 0.011255 | 0.011606 | 0.011450 |
| 0.011489 | 0.011372 | 0.011177 | 0.011333 | 0.011099 | 0.011372 | 0.000000 |
| 0.011177 | 0.011216 | 0.011138 | 0.011138 | 0.011138 | 0.011138 | 0.011255 |
| 0.011177 | 0.011294 | 0.011216 | 0.011138 | 0.011256 | 0.011372 | 0.011335 |
| 0.011294 | 0.011255 | 0.011138 | 0.000000 | 0.011216 | 0.011138 | 0.000000 |
| 0.011179 | 0.011294 | 0.011138 | 0.011294 | 0.000000 | 0.011177 | 0.011138 |
| 0.011255 | 0.011138 | 0.011216 | 0.011138 | 0.011177 | 0.000000 | 0.011177 |
| 0.011216 | 0.011177 | 0.011216 | 0.011138 | 0.011177 | 0.011216 | 0.011333 |
| 0.011606 | 0.011450 | 0.011567 | 0.011333 | 0.011567 | 0.011216 | 0.011177 |
| 0.011217 | 0.011441 | 0.011278 | 0.000000 | 0.011613 | 0.000000 | 0.011198 |
| 0.011610 | 0.011493 | 0.011333 | 0.011607 | 0.011259 | 0.011411 | 0.011372 |
| 0.011333 | 0.011489 | 0.011391 | 0.011204 | 0.011109 | 0.011255 | 0.011336 |
| 0.011450 | 0.011295 | 0.011372 | 0.011491 | 0.011255 | 0.011489 | 0.011650 |
| 0.011296 | 0.011494 | 0.011375 | 0.011414 | 0.011646 | 0.011099 | 0.011256 |
| 0.011255 | 0.011177 | 0.000000 | 0.000000 | 0.011138 | 0.011177 | 0.011216 |
| 0.011177 | 0.011255 | 0.011138 | 0.011216 | 0.011177 | 0.011177 | 0.011216 |
| 0.011177 | 0.011645 | 0.011489 | 0.011528 | 0.000000 | 0.011177 | 0.011216 |
| 0.011216 | 0.011138 | 0.011255 | 0.011294 | 0.011099 | 0.011099 | 0.011099 |
| 0.011645 | 0.011255 | 0.011333 | 0.011099 | 0.011177 | 0.011372 | 0.011099 |
| 0.011099 | 0.011099 | 0.011177 | 0.011333 | 0.011138 | 0.011294 | 0.011450 |
| 0.011372 | 0.011177 | 0.011177 | 0.011099 | 0.011099 | 0.011216 | 0.011177 |
| 0.011099 | 0.011216 | 0.000000 | 0.000000 | 0.011255 | 0.011373 | 0.011099 |
| 0.011099 | 0.011255 | 0.011099 | 0.000000 | 0.011411 | 0.000000 | 0.011255 |
| 0.011339 | 0.011138 | 0.011450 | 0.011255 | 0.011333 | 0.011138 | 0.011255 |
| 0.011138 | 0.011450 | 0.000000 | 0.011255 | 0.011138 | 0.011138 | 0.000000 |
| 0.011255 | 0.011528 | 0.011177 | 0.011294 | 0.011099 | 0.011489 | 0.011138 |
| 0.011138 | 0.011138 | 0.011177 | 0.011255 | 0.011177 | 0.011294 | 0.011372 |
| 0.011333 | 0.011294 | 0.011216 | 0.011333 | 0.011294 | 0.011138 | 0.011099 |
| 0.011138 | 0.011138 | 0.011177 | 0.011099 | 0.011099 | 0.011255 | 0.011138 |



|          |          |          |          |          |          |          |
|----------|----------|----------|----------|----------|----------|----------|
| 0.011138 | 0.011138 | 0.011255 | 0.011372 | 0.011177 | 0.011177 | 0.011177 |
| 0.011216 | 0.011138 | 0.011216 | 0.011099 | 0.011294 | 0.011411 | 0.011645 |
| 0.011138 | 0.011567 | 0.011177 | 0.018359 | 0.011126 | 0.011329 | 0.011489 |
| 0.011489 | 0.011489 | 0.011223 | 0.011185 | 0.011610 | 0.011528 | 0.011243 |
| 0.011415 | 0.011366 | 0.000000 | 0.011152 | 0.011145 | 0.011160 | 0.011151 |
| 0.011407 | 0.011342 | 0.011346 | 0.011132 | 0.011294 | 0.011333 | 0.011296 |
| 0.011179 | 0.011255 | 0.011294 | 0.011255 | 0.011216 | 0.011216 | 0.011216 |
| 0.011216 | 0.011138 | 0.011177 | 0.011255 | 0.011177 | 0.011138 | 0.011177 |
| 0.011177 | 0.011216 | 0.000000 | 0.011216 | 0.011294 | 0.011333 | 0.011216 |
| 0.011255 | 0.011216 | 0.011450 | 0.011450 | 0.011294 | 0.011334 | 0.011333 |
| 0.011099 | 0.011099 | 0.011099 | 0.011255 | 0.011099 | 0.011372 | 0.011372 |
| 0.011372 | 0.011333 | 0.011294 | 0.011411 | 0.011606 | 0.011413 | 0.011255 |
| 0.011255 | 0.011333 | 0.011372 | 0.011177 | 0.011177 | 0.011138 | 0.011255 |
| 0.011294 | 0.011294 | 0.011333 | 0.011294 | 0.011217 | 0.011372 | 0.011333 |
| 0.011257 | 0.011099 | 0.011177 | 0.011372 | 0.011177 | 0.011411 | 0.011411 |
| 0.011607 | 0.011259 | 0.011411 | 0.011372 | 0.011333 | 0.011489 | 0.011138 |
| 0.011295 | 0.011216 | 0.011177 | 0.011177 | 0.011216 | 0.000000 | 0.011216 |
| 0.011294 | 0.011333 | 0.011216 | 0.011255 | 0.011216 | 0.011450 | 0.011450 |
| 0.011294 | 0.011334 | 0.011294 | 0.011294 | 0.011959 | 0.011348 | 0.011265 |
| 0.011384 | 0.011299 | 0.011427 | 0.011262 | 0.011341 | 0.011379 | 0.011297 |
| 0.011894 | 0.011220 | 0.011337 | 0.011300 | 0.011537 | 0.011414 | 0.011492 |
| 0.011970 | 0.011412 | 0.011256 | 0.011255 | 0.011255 | 0.011294 | 0.011217 |
| 0.011099 | 0.011138 | 0.011294 | 0.011255 | 0.011256 | 0.011411 | 0.011372 |
| 0.011177 | 0.011138 | 0.011177 | 0.011177 | 0.011099 | 0.011138 | 0.000000 |
| 0.011216 | 0.011255 | 0.011138 | 0.011099 | 0.011216 | 0.011138 | 0.011177 |
| 0.011177 | 0.011099 | 0.011177 | 0.011216 | 0.011099 | 0.011333 | 0.011372 |
| 0.011216 | 0.011333 | 0.011255 | 0.011216 | 0.011177 | 0.011606 | 0.011216 |
| 0.011264 | 0.011138 | 0.011450 | 0.011455 | 0.011255 | 0.011138 | 0.011255 |
| 0.011294 | 0.011216 | 0.011177 | 0.011216 | 0.011333 | 0.011333 | 0.011216 |
| 0.011255 | 0.011372 | 0.011567 | 0.011177 | 0.011372 | 0.011372 | 0.011294 |
| 0.011138 | 0.011255 | 0.011294 | 0.011685 | 0.011255 | 0.011255 | 0.011216 |
| 0.011294 | 0.011138 | 0.011138 | 0.011490 | 0.011411 | 0.011450 | 0.011216 |
| 0.011294 | 0.011372 | 0.011216 | 0.011294 | 0.011177 | 0.011138 | 0.011450 |
| 0.011255 | 0.011177 | 0.011138 | 0.011255 | 0.011216 | 0.011255 | 0.011568 |
| 0.011177 | 0.011570 | 0.011645 | 0.011390 | 0.011118 | 0.011333 | 0.011168 |
| 0.011120 | 0.011631 | 0.011100 | 0.011329 | 0.011158 | 0.011264 | 0.011273 |
| 0.011375 | 0.000000 | 0.011227 | 0.000000 | 0.011114 | 0.011261 | 0.011270 |
| 0.011259 | 0.011183 | 0.011255 | 0.011180 | 0.011256 | 0.011411 | 0.011450 |
| 0.011450 | 0.011334 | 0.011413 | 0.011375 | 0.011492 | 0.011555 | 0.011177 |
| 0.011489 | 0.011372 | 0.011177 | 0.011333 | 0.011099 | 0.011372 | 0.000000 |
| 0.011177 | 0.011216 | 0.011138 | 0.011138 | 0.011138 | 0.011138 | 0.011255 |
| 0.011217 | 0.011181 | 0.011217 | 0.011179 | 0.011376 | 0.011334 | 0.011296 |
| 0.011296 | 0.011177 | 0.000000 | 0.000000 | 0.011216 | 0.011372 | 0.011334 |
| 0.011177 | 0.011255 | 0.011528 | 0.011412 | 0.011411 | 0.011372 | 0.011294 |
| 0.011294 | 0.011372 | 0.011372 | 0.011216 | 0.011880 | 0.011372 | 0.011490 |
| 0.011567 | 0.011516 | 0.011179 | 0.011261 | 0.011177 | 0.011372 | 0.011333 |
| 0.011295 | 0.011333 | 0.011372 | 0.011372 | 0.011471 | 0.011528 | 0.011181 |
| 0.000000 | 0.000000 | 0.011179 | 0.011139 | 0.011219 | 0.000000 | 0.011415 |
| 0.011219 | 0.011365 | 0.000000 | 0.011233 | 0.011216 | 0.011297 | 0.011177 |
| 0.011099 | 0.011138 | 0.011216 | 0.011099 | 0.011411 | 0.011372 | 0.011294 |
| 0.011411 | 0.011489 | 0.011177 | 0.011177 | 0.011216 | 0.011216 | 0.011216 |
| 0.011295 | 0.011177 | 0.011216 | 0.011256 | 0.011411 | 0.011450 | 0.011450 |
| 0.011334 | 0.011413 | 0.011375 | 0.011492 | 0.011555 | 0.011177 | 0.011411 |
| 0.011333 | 0.011333 | 0.011139 | 0.011343 | 0.011302 | 0.011258 | 0.011182 |
| 0.011300 | 0.011547 | 0.011359 | 0.011258 | 0.011138 | 0.011294 | 0.011177 |
| 0.011294 | 0.011216 | 0.011138 | 0.011256 | 0.011372 | 0.011335 | 0.011255 |
| 0.011138 | 0.000000 | 0.011216 | 0.011138 | 0.000000 | 0.011179 | 0.011294 |
| 0.011216 | 0.011138 | 0.011177 | 0.011255 | 0.011177 | 0.011138 | 0.011333 |
| 0.011177 | 0.011255 | 0.011255 | 0.011177 | 0.011255 | 0.011450 | 0.011099 |
| 0.011177 | 0.011606 | 0.011177 | 0.011177 | 0.011138 | 0.011567 | 0.011105 |

|          |          |          |          |          |          |          |
|----------|----------|----------|----------|----------|----------|----------|
| 0.011584 | 0.011104 | 0.011165 | 0.011359 | 0.011398 | 0.011336 | 0.000000 |
| 0.011115 | 0.011372 | 0.011489 | 0.011613 | 0.011450 | 0.011607 | 0.011763 |
| 0.011646 | 0.011650 | 0.011646 | 0.011808 | 0.011489 | 0.012506 | 0.011646 |
| 0.012350 | 0.012114 | 0.012353 | 0.012429 | 0.011489 | 0.011216 | 0.011607 |
| 0.011998 | 0.011763 | 0.011567 | 0.011450 | 0.011489 | 0.011489 | 0.011493 |
| 0.011372 | 0.011374 | 0.011411 | 0.011411 | 0.011763 | 0.011763 | 0.011841 |
| 0.011606 | 0.011724 | 0.011841 | 0.011606 | 0.011998 | 0.012004 | 0.012116 |
| 0.012116 | 0.012076 | 0.011998 | 0.012037 | 0.012037 | 0.011255 | 0.011568 |
| 0.011607 | 0.012076 | 0.011650 | 0.011802 | 0.011607 | 0.011453 | 0.011333 |
| 0.011294 | 0.011294 | 0.011724 | 0.011813 | 0.011896 | 0.011646 | 0.011294 |
| S395     | 0.011437 | 0.011437 | 0.011772 | 0.011730 | 0.011730 | 0.011772 |
| 0.011608 | 0.011524 | 0.011730 | 0.011228 | 0.011186 | 0.011270 | 0.011186 |
| 0.011228 | 0.011437 | 0.011228 | 0.011186 | 0.011270 | 0.011270 | 0.011270 |
| 0.011186 | 0.011270 | 0.011395 | 0.011186 | 0.011228 | 0.011228 | 0.011608 |
| 0.011521 | 0.011270 | 0.011144 | 0.011437 | 0.011270 | 0.011311 | 0.011228 |
| 0.011270 | 0.011395 | 0.011311 | 0.011312 | 0.011353 | 0.011311 | 0.011479 |
| 0.011228 | 0.011270 | 0.011353 | 0.011270 | 0.011353 | 0.011395 | 0.011353 |
| 0.011270 | 0.011521 | 0.011312 | 0.011688 | 0.011311 | 0.011479 | 0.011311 |
| 0.011186 | 0.011353 | 0.011395 | 0.011479 | 0.011688 | 0.011311 | 0.011521 |
| 0.011270 | 0.011353 | 0.011270 | 0.011521 | 0.011773 | 0.011311 | 0.011353 |
| 0.011228 | 0.011353 | 0.011353 | 0.011395 | 0.011270 | 0.011311 | 0.011311 |
| 0.011228 | 0.011186 | 0.011186 | 0.011312 | 0.011228 | 0.011270 | 0.011437 |
| 0.011353 | 0.011270 | 0.011353 | 0.011144 | 0.011437 | 0.011144 | 0.011228 |
| 0.011479 | 0.011437 | 0.011688 | 0.011437 | 0.011312 | 0.011395 | 0.011270 |
| 0.011452 | 0.011719 | 0.011500 | 0.011151 | 0.011194 | 0.011325 | 0.011430 |
| 0.012206 | 0.011448 | 0.011204 | 0.011479 | 0.011521 | 0.011311 | 0.011353 |
| 0.011312 | 0.011311 | 0.011395 | 0.011270 | 0.011312 | 0.011270 | 0.011228 |
| 0.011228 | 0.011353 | 0.011479 | 0.011479 | 0.011312 | 0.011354 | 0.011228 |
| 0.011144 | 0.011228 | 0.011270 | 0.011186 | 0.011479 | 0.011395 | 0.011353 |
| 0.011479 | 0.011563 | 0.011228 | 0.011228 | 0.011228 | 0.011228 | 0.011228 |
| 0.011270 | 0.011311 | 0.011311 | 0.011147 | 0.011194 | 0.011191 | 0.011228 |
| 0.011270 | 0.011228 | 0.011282 | 0.011270 | 0.011145 | 0.011230 | 0.011271 |
| 0.011501 | 0.011274 | 0.011315 | 0.011228 | 0.011186 | 0.011312 | 0.011353 |
| 0.011437 | 0.011311 | 0.011311 | 0.011353 | 0.011311 | 0.011521 | 0.011521 |
| 0.011646 | 0.011479 | 0.011270 | 0.011437 | 0.011186 | 0.011479 | 0.011186 |
| 0.011228 | 0.011228 | 0.011144 | 0.011228 | 0.011228 | 0.011228 | 0.011353 |
| 0.011186 | 0.011353 | 0.011312 | 0.011228 | 0.011355 | 0.011437 | 0.011440 |
| 0.011437 | 0.011353 | 0.011186 | 0.011144 | 0.011311 | 0.011186 | 0.011144 |
| 0.011273 | 0.011437 | 0.011186 | 0.011437 | 0.011186 | 0.011270 | 0.011270 |
| 0.011312 | 0.011228 | 0.011270 | 0.011270 | 0.011311 | 0.011144 | 0.011186 |
| 0.011270 | 0.011228 | 0.011270 | 0.011186 | 0.011228 | 0.011270 | 0.011563 |
| 0.011688 | 0.011563 | 0.011730 | 0.011395 | 0.011647 | 0.011270 | 0.011270 |
| 0.011313 | 0.011562 | 0.011459 | 0.011188 | 0.011650 | 0.011145 | 0.011303 |
| 0.011735 | 0.011567 | 0.011437 | 0.011521 | 0.011316 | 0.011521 | 0.011395 |
| 0.011395 | 0.011563 | 0.011460 | 0.011161 | 0.011211 | 0.011353 | 0.011356 |
| 0.011479 | 0.011270 | 0.011567 | 0.011525 | 0.011353 | 0.011563 | 0.011738 |
| 0.011271 | 0.011527 | 0.011441 | 0.011483 | 0.011689 | 0.011186 | 0.011312 |
| 0.011311 | 0.011228 | 0.011144 | 0.011144 | 0.011186 | 0.011228 | 0.011311 |
| 0.011228 | 0.011228 | 0.011186 | 0.011353 | 0.011228 | 0.011228 | 0.011311 |
| 0.011270 | 0.011772 | 0.011647 | 0.011688 | 0.011144 | 0.011228 | 0.011270 |
| 0.011312 | 0.011228 | 0.011353 | 0.011395 | 0.011186 | 0.011186 | 0.011186 |
| 0.011814 | 0.011395 | 0.011311 | 0.011186 | 0.011311 | 0.011437 | 0.011186 |
| 0.011186 | 0.011186 | 0.011270 | 0.011437 | 0.011186 | 0.011395 | 0.011521 |
| 0.011479 | 0.011270 | 0.011270 | 0.011186 | 0.011144 | 0.011186 | 0.011270 |
| 0.011186 | 0.011270 | 0.011144 | 0.011186 | 0.011353 | 0.011479 | 0.011186 |
| 0.011186 | 0.011311 | 0.011228 | 0.011144 | 0.011521 | 0.011144 | 0.011353 |
| 0.011357 | 0.011228 | 0.011563 | 0.011353 | 0.011395 | 0.011228 | 0.011395 |
| 0.011228 | 0.011479 | 0.011144 | 0.011437 | 0.011228 | 0.011228 | 0.011144 |
| 0.011270 | 0.011563 | 0.011270 | 0.011311 | 0.011144 | 0.011647 | 0.011228 |
| 0.011186 | 0.011228 | 0.011270 | 0.011353 | 0.011228 | 0.011353 | 0.011479 |

|          |          |          |          |          |          |          |
|----------|----------|----------|----------|----------|----------|----------|
| 0.011437 | 0.011353 | 0.011311 | 0.011395 | 0.011311 | 0.011228 | 0.011186 |
| 0.011186 | 0.011228 | 0.011270 | 0.011228 | 0.011144 | 0.011270 | 0.011186 |
| 0.011270 | 0.011228 | 0.011311 | 0.011479 | 0.011270 | 0.011186 | 0.011228 |
| 0.011311 | 0.011228 | 0.011311 | 0.011228 | 0.011395 | 0.011437 | 0.011730 |
| 0.011228 | 0.011647 | 0.011186 | 0.018490 | 0.000000 | 0.011314 | 0.011563 |
| 0.011563 | 0.011605 | 0.011326 | 0.011300 | 0.011609 | 0.011647 | 0.011258 |
| 0.011482 | 0.011392 | 0.011152 | 0.000000 | 0.011241 | 0.011115 | 0.011154 |
| 0.011477 | 0.011465 | 0.011449 | 0.011333 | 0.011395 | 0.011437 | 0.011313 |
| 0.011275 | 0.011395 | 0.011311 | 0.011395 | 0.011228 | 0.011228 | 0.011270 |
| 0.011270 | 0.011228 | 0.011270 | 0.011353 | 0.011270 | 0.011228 | 0.011228 |
| 0.011228 | 0.011312 | 0.011186 | 0.011312 | 0.011353 | 0.011395 | 0.011270 |
| 0.011353 | 0.011312 | 0.011605 | 0.011605 | 0.011270 | 0.011396 | 0.011479 |
| 0.011186 | 0.011186 | 0.011228 | 0.011186 | 0.011186 | 0.011437 | 0.011437 |
| 0.011437 | 0.011437 | 0.011395 | 0.011479 | 0.011730 | 0.011481 | 0.011270 |
| 0.011311 | 0.011395 | 0.011353 | 0.011270 | 0.011270 | 0.011186 | 0.011270 |
| 0.011312 | 0.011311 | 0.011353 | 0.011353 | 0.011270 | 0.011479 | 0.011353 |
| 0.011314 | 0.011144 | 0.011311 | 0.011479 | 0.011312 | 0.011521 | 0.011437 |
| 0.011521 | 0.011316 | 0.011521 | 0.011395 | 0.011395 | 0.011563 | 0.011228 |
| 0.011396 | 0.011228 | 0.011228 | 0.011228 | 0.011312 | 0.011186 | 0.011312 |
| 0.011353 | 0.011395 | 0.011270 | 0.011353 | 0.011312 | 0.011605 | 0.011605 |
| 0.011270 | 0.011396 | 0.011395 | 0.011311 | 0.012150 | 0.011412 | 0.011321 |
| 0.011494 | 0.011407 | 0.011498 | 0.011316 | 0.011541 | 0.011447 | 0.011402 |
| 0.012046 | 0.011233 | 0.011404 | 0.011364 | 0.011621 | 0.011443 | 0.011571 |
| 0.012077 | 0.011383 | 0.011228 | 0.011311 | 0.011270 | 0.011353 | 0.011228 |
| 0.011186 | 0.011186 | 0.011311 | 0.011270 | 0.011228 | 0.011521 | 0.011479 |
| 0.011228 | 0.011186 | 0.011186 | 0.011228 | 0.011144 | 0.011228 | 0.011144 |
| 0.011311 | 0.011311 | 0.011186 | 0.011186 | 0.011270 | 0.011228 | 0.011270 |
| 0.011270 | 0.011186 | 0.011186 | 0.011228 | 0.011186 | 0.011395 | 0.011437 |
| 0.011270 | 0.011395 | 0.011311 | 0.011270 | 0.011270 | 0.011688 | 0.011270 |
| 0.011362 | 0.011228 | 0.011521 | 0.011526 | 0.011312 | 0.011311 | 0.011395 |
| 0.011395 | 0.011228 | 0.011270 | 0.011228 | 0.011437 | 0.011395 | 0.011270 |
| 0.011270 | 0.011479 | 0.011688 | 0.011270 | 0.011437 | 0.011437 | 0.011353 |
| 0.011228 | 0.011311 | 0.011395 | 0.011772 | 0.011312 | 0.011312 | 0.011353 |
| 0.011353 | 0.011270 | 0.011270 | 0.011605 | 0.011437 | 0.011605 | 0.011312 |
| 0.011353 | 0.011437 | 0.011311 | 0.011353 | 0.011270 | 0.011186 | 0.011521 |
| 0.011270 | 0.011270 | 0.011270 | 0.011395 | 0.011312 | 0.011395 | 0.011563 |
| 0.011270 | 0.011566 | 0.011730 | 0.011534 | 0.011188 | 0.011353 | 0.011238 |
| 0.011119 | 0.011763 | 0.011187 | 0.011425 | 0.011173 | 0.011355 | 0.011299 |
| 0.011516 | 0.000000 | 0.011249 | 0.000000 | 0.011182 | 0.011210 | 0.011395 |
| 0.011411 | 0.011249 | 0.011357 | 0.011275 | 0.011355 | 0.011521 | 0.011605 |
| 0.011521 | 0.011438 | 0.011563 | 0.011525 | 0.011652 | 0.011590 | 0.011228 |
| 0.011646 | 0.011479 | 0.011270 | 0.011437 | 0.011186 | 0.011479 | 0.011186 |
| 0.011228 | 0.011228 | 0.011144 | 0.011228 | 0.011228 | 0.011228 | 0.011353 |
| 0.011231 | 0.011320 | 0.011312 | 0.011272 | 0.011441 | 0.011354 | 0.011398 |
| 0.011398 | 0.011228 | 0.011150 | 0.011148 | 0.011311 | 0.011437 | 0.011396 |
| 0.011270 | 0.011353 | 0.011563 | 0.011354 | 0.011437 | 0.011521 | 0.011270 |
| 0.011353 | 0.011395 | 0.011395 | 0.011311 | 0.011982 | 0.011437 | 0.011479 |
| 0.011647 | 0.011683 | 0.011273 | 0.011405 | 0.011270 | 0.011228 | 0.011437 |
| 0.011270 | 0.011353 | 0.011437 | 0.011437 | 0.011495 | 0.011479 | 0.011234 |
| 0.011145 | 0.011147 | 0.011273 | 0.011230 | 0.011317 | 0.011152 | 0.011527 |
| 0.011274 | 0.011429 | 0.011117 | 0.011288 | 0.011312 | 0.011230 | 0.011228 |
| 0.011144 | 0.011228 | 0.011270 | 0.011186 | 0.011479 | 0.011395 | 0.011353 |
| 0.011479 | 0.011563 | 0.011228 | 0.011228 | 0.011228 | 0.011228 | 0.011228 |
| 0.011270 | 0.011311 | 0.011311 | 0.011355 | 0.011521 | 0.011605 | 0.011521 |
| 0.011438 | 0.011563 | 0.011525 | 0.011652 | 0.011590 | 0.011228 | 0.011395 |
| 0.011437 | 0.011437 | 0.011228 | 0.011405 | 0.011274 | 0.011230 | 0.011276 |
| 0.011359 | 0.011733 | 0.011481 | 0.011355 | 0.011186 | 0.011437 | 0.011186 |
| 0.011353 | 0.011312 | 0.011228 | 0.011355 | 0.011437 | 0.011440 | 0.011353 |
| 0.011186 | 0.011144 | 0.011311 | 0.011186 | 0.011144 | 0.011273 | 0.011437 |
| 0.011270 | 0.011228 | 0.011270 | 0.011353 | 0.011270 | 0.011228 | 0.011437 |

|          |          |          |          |          |          |          |
|----------|----------|----------|----------|----------|----------|----------|
| 0.011270 | 0.011270 | 0.011353 | 0.011186 | 0.011311 | 0.011479 | 0.011228 |
| 0.011228 | 0.011688 | 0.011186 | 0.011228 | 0.011270 | 0.011688 | 0.011205 |
| 0.011696 | 0.011212 | 0.011224 | 0.011494 | 0.011541 | 0.011495 | 0.011108 |
| 0.011177 | 0.011479 | 0.011605 | 0.011730 | 0.011563 | 0.011689 | 0.011856 |
| 0.011731 | 0.011778 | 0.011647 | 0.011993 | 0.011605 | 0.012570 | 0.011689 |
| 0.012318 | 0.012276 | 0.012406 | 0.012698 | 0.011605 | 0.011312 | 0.011730 |
| 0.012151 | 0.011815 | 0.011605 | 0.011563 | 0.011647 | 0.011647 | 0.011567 |
| 0.011479 | 0.011481 | 0.011563 | 0.011479 | 0.011856 | 0.011856 | 0.011856 |
| 0.011772 | 0.011814 | 0.011940 | 0.011773 | 0.012109 | 0.012115 | 0.012277 |
| 0.012235 | 0.012193 | 0.012108 | 0.012151 | 0.012151 | 0.011311 | 0.011689 |
| 0.011605 | 0.012234 | 0.011776 | 0.011814 | 0.011647 | 0.011568 | 0.011395 |
| 0.011395 | 0.011353 | 0.011773 | 0.012009 | 0.011916 | 0.011688 | 0.011396 |
| S396     | 0.011685 | 0.011685 | 0.011685 | 0.011646 | 0.011646 | 0.011685 |
| 0.011535 | 0.011456 | 0.011646 | 0.011216 | 0.011216 | 0.011216 | 0.011216 |
| 0.011177 | 0.011411 | 0.011138 | 0.011255 | 0.011255 | 0.011294 | 0.011216 |
| 0.011216 | 0.011255 | 0.011255 | 0.011178 | 0.011217 | 0.011138 | 0.011535 |
| 0.011450 | 0.011255 | 0.011138 | 0.011294 | 0.011255 | 0.011255 | 0.011177 |
| 0.011294 | 0.011372 | 0.011294 | 0.011294 | 0.011333 | 0.011255 | 0.011490 |
| 0.011099 | 0.011255 | 0.011333 | 0.011255 | 0.011294 | 0.011333 | 0.011333 |
| 0.011294 | 0.011490 | 0.011333 | 0.011529 | 0.011294 | 0.011450 | 0.011294 |
| 0.011255 | 0.011295 | 0.011412 | 0.011450 | 0.011529 | 0.011177 | 0.011294 |
| 0.011294 | 0.011372 | 0.011255 | 0.011450 | 0.011646 | 0.011294 | 0.011372 |
| 0.011255 | 0.011333 | 0.011333 | 0.011372 | 0.011294 | 0.011294 | 0.011294 |
| 0.011216 | 0.011177 | 0.011177 | 0.011216 | 0.011294 | 0.011255 | 0.011411 |
| 0.011333 | 0.011294 | 0.011333 | 0.011216 | 0.011294 | 0.011177 | 0.011216 |
| 0.011450 | 0.011372 | 0.011646 | 0.011373 | 0.011294 | 0.011529 | 0.011294 |
| 0.011387 | 0.011596 | 0.011387 | 0.011187 | 0.011183 | 0.011221 | 0.011317 |
| 0.011300 | 0.011379 | 0.011192 | 0.011529 | 0.011411 | 0.011216 | 0.011294 |
| 0.011372 | 0.011294 | 0.011411 | 0.011294 | 0.011373 | 0.011255 | 0.011333 |
| 0.011294 | 0.011294 | 0.011490 | 0.011490 | 0.011372 | 0.011334 | 0.011216 |
| 0.011177 | 0.011138 | 0.011255 | 0.011216 | 0.011411 | 0.011372 | 0.011294 |
| 0.011411 | 0.011411 | 0.011255 | 0.011255 | 0.011255 | 0.011255 | 0.011256 |
| 0.011256 | 0.011294 | 0.011294 | 0.011141 | 0.011183 | 0.011182 | 0.011255 |
| 0.011255 | 0.011216 | 0.011265 | 0.011255 | 0.011179 | 0.011218 | 0.011256 |
| 0.011387 | 0.011259 | 0.011258 | 0.011216 | 0.011217 | 0.011373 | 0.011177 |
| 0.011255 | 0.011333 | 0.011333 | 0.011411 | 0.011372 | 0.011724 | 0.011451 |
| 0.011529 | 0.011294 | 0.011216 | 0.011255 | 0.011177 | 0.011372 | 0.011177 |
| 0.011216 | 0.011294 | 0.011216 | 0.011216 | 0.011216 | 0.011216 | 0.011333 |
| 0.011177 | 0.011333 | 0.011333 | 0.011216 | 0.011333 | 0.011333 | 0.011335 |
| 0.011333 | 0.011255 | 0.011216 | 0.011139 | 0.011294 | 0.011216 | 0.011138 |
| 0.011257 | 0.011333 | 0.011177 | 0.011333 | 0.011138 | 0.011255 | 0.011216 |
| 0.011294 | 0.011255 | 0.011216 | 0.011216 | 0.011255 | 0.011138 | 0.011216 |
| 0.011255 | 0.011255 | 0.011333 | 0.011255 | 0.011294 | 0.011294 | 0.011451 |
| 0.011607 | 0.011450 | 0.011607 | 0.011372 | 0.011568 | 0.011294 | 0.011255 |
| 0.011217 | 0.011526 | 0.011324 | 0.011179 | 0.011611 | 0.011139 | 0.011287 |
| 0.011574 | 0.011494 | 0.011411 | 0.011529 | 0.011378 | 0.011529 | 0.011490 |
| 0.011451 | 0.011529 | 0.011474 | 0.011257 | 0.011303 | 0.011334 | 0.011415 |
| 0.011451 | 0.011374 | 0.011533 | 0.011572 | 0.011372 | 0.011451 | 0.011770 |
| 0.011374 | 0.011574 | 0.011493 | 0.011454 | 0.011686 | 0.011177 | 0.011334 |
| 0.011255 | 0.011216 | 0.011138 | 0.011138 | 0.011177 | 0.011255 | 0.011333 |
| 0.011216 | 0.011216 | 0.011177 | 0.011216 | 0.011216 | 0.011255 | 0.011294 |
| 0.011255 | 0.011646 | 0.011529 | 0.011568 | 0.011138 | 0.011216 | 0.011294 |
| 0.011294 | 0.011216 | 0.011333 | 0.011216 | 0.011216 | 0.011216 | 0.011216 |
| 0.011724 | 0.011294 | 0.011372 | 0.011177 | 0.011255 | 0.011412 | 0.011177 |
| 0.011177 | 0.011216 | 0.011255 | 0.011412 | 0.011177 | 0.011372 | 0.011490 |
| 0.011451 | 0.011255 | 0.011255 | 0.011177 | 0.011177 | 0.011294 | 0.011294 |
| 0.011177 | 0.011294 | 0.011138 | 0.011177 | 0.011294 | 0.011334 | 0.011216 |
| 0.011178 | 0.011294 | 0.011256 | 0.011138 | 0.011372 | 0.011138 | 0.011333 |
| 0.011379 | 0.011216 | 0.011450 | 0.011334 | 0.011294 | 0.011255 | 0.011372 |
| 0.011216 | 0.011450 | 0.011138 | 0.011333 | 0.011138 | 0.011138 | 0.011138 |

|          |          |          |          |          |          |          |
|----------|----------|----------|----------|----------|----------|----------|
| 0.011294 | 0.011529 | 0.011255 | 0.011372 | 0.011138 | 0.011529 | 0.011138 |
| 0.011177 | 0.011216 | 0.011255 | 0.011333 | 0.011177 | 0.011372 | 0.011451 |
| 0.011373 | 0.011333 | 0.011294 | 0.011333 | 0.011333 | 0.011216 | 0.011177 |
| 0.011177 | 0.011216 | 0.011255 | 0.011099 | 0.011138 | 0.011255 | 0.011177 |
| 0.011177 | 0.011216 | 0.011294 | 0.011333 | 0.011294 | 0.011177 | 0.011255 |
| 0.011333 | 0.011216 | 0.011333 | 0.011216 | 0.011372 | 0.011450 | 0.011529 |
| 0.011255 | 0.011490 | 0.011255 | 0.017914 | 0.011264 | 0.011415 | 0.011451 |
| 0.011490 | 0.011490 | 0.011335 | 0.011293 | 0.011666 | 0.011529 | 0.011393 |
| 0.011401 | 0.011407 | 0.011145 | 0.011241 | 0.000000 | 0.011224 | 0.011250 |
| 0.011402 | 0.011345 | 0.011340 | 0.011129 | 0.011412 | 0.011451 | 0.011336 |
| 0.011220 | 0.011333 | 0.011372 | 0.011216 | 0.011255 | 0.011256 | 0.011295 |
| 0.011294 | 0.011255 | 0.011216 | 0.011333 | 0.011255 | 0.011216 | 0.011255 |
| 0.011255 | 0.011294 | 0.011177 | 0.011294 | 0.011372 | 0.011333 | 0.011255 |
| 0.011255 | 0.011216 | 0.011451 | 0.011451 | 0.011334 | 0.011412 | 0.011412 |
| 0.011177 | 0.011177 | 0.011177 | 0.011255 | 0.011177 | 0.011411 | 0.011411 |
| 0.011411 | 0.011411 | 0.011372 | 0.011450 | 0.011568 | 0.011452 | 0.011294 |
| 0.011294 | 0.011411 | 0.011411 | 0.011255 | 0.011255 | 0.011177 | 0.011294 |
| 0.011373 | 0.011372 | 0.011411 | 0.011333 | 0.011217 | 0.011490 | 0.011450 |
| 0.011336 | 0.011177 | 0.011294 | 0.011412 | 0.011255 | 0.011412 | 0.011372 |
| 0.011529 | 0.011378 | 0.011529 | 0.011490 | 0.011451 | 0.011529 | 0.011177 |
| 0.011334 | 0.011294 | 0.011255 | 0.011255 | 0.011294 | 0.011177 | 0.011294 |
| 0.011372 | 0.011333 | 0.011255 | 0.011255 | 0.011216 | 0.011451 | 0.011451 |
| 0.011334 | 0.011412 | 0.011450 | 0.011411 | 0.011998 | 0.011437 | 0.011349 |
| 0.011428 | 0.011425 | 0.011513 | 0.011344 | 0.011510 | 0.011423 | 0.011418 |
| 0.011942 | 0.011303 | 0.011460 | 0.011302 | 0.011502 | 0.011417 | 0.011615 |
| 0.012010 | 0.011373 | 0.011295 | 0.011333 | 0.011294 | 0.011294 | 0.011256 |
| 0.011177 | 0.011177 | 0.011372 | 0.011333 | 0.011295 | 0.011411 | 0.011372 |
| 0.011216 | 0.011177 | 0.011177 | 0.011255 | 0.011138 | 0.011216 | 0.011138 |
| 0.011177 | 0.011216 | 0.011216 | 0.011177 | 0.011294 | 0.011216 | 0.011255 |
| 0.011255 | 0.011177 | 0.011255 | 0.011294 | 0.011177 | 0.011372 | 0.011372 |
| 0.011255 | 0.011294 | 0.011294 | 0.011255 | 0.011216 | 0.011529 | 0.011255 |
| 0.011264 | 0.011216 | 0.011450 | 0.011455 | 0.011334 | 0.011294 | 0.011372 |
| 0.011373 | 0.011255 | 0.011216 | 0.011255 | 0.011411 | 0.011333 | 0.011333 |
| 0.011294 | 0.011451 | 0.011529 | 0.011333 | 0.011451 | 0.011451 | 0.011450 |
| 0.011216 | 0.011294 | 0.011373 | 0.011646 | 0.011256 | 0.011334 | 0.011333 |
| 0.011333 | 0.011177 | 0.011177 | 0.011451 | 0.011490 | 0.011451 | 0.011294 |
| 0.011412 | 0.011490 | 0.011294 | 0.011412 | 0.011255 | 0.011216 | 0.011490 |
| 0.011333 | 0.011255 | 0.011177 | 0.011411 | 0.011294 | 0.011411 | 0.011607 |
| 0.011255 | 0.011614 | 0.011646 | 0.011414 | 0.011119 | 0.011333 | 0.011167 |
| 0.011188 | 0.011610 | 0.011218 | 0.011347 | 0.011113 | 0.011279 | 0.011283 |
| 0.011372 | 0.011197 | 0.011352 | 0.011197 | 0.011230 | 0.011408 | 0.011365 |
| 0.011390 | 0.011233 | 0.011258 | 0.011260 | 0.011335 | 0.011411 | 0.011490 |
| 0.011411 | 0.011256 | 0.011374 | 0.011375 | 0.011532 | 0.011472 | 0.011216 |
| 0.011529 | 0.011294 | 0.011216 | 0.011255 | 0.011177 | 0.011372 | 0.011177 |
| 0.011216 | 0.011294 | 0.011216 | 0.011216 | 0.011216 | 0.011216 | 0.011333 |
| 0.011259 | 0.011261 | 0.011295 | 0.011258 | 0.011494 | 0.011373 | 0.011375 |
| 0.011453 | 0.011255 | 0.011144 | 0.011142 | 0.011294 | 0.011490 | 0.011412 |
| 0.011255 | 0.011333 | 0.011607 | 0.011451 | 0.011450 | 0.011451 | 0.011411 |
| 0.011294 | 0.011411 | 0.011372 | 0.011294 | 0.011802 | 0.011411 | 0.011529 |
| 0.011646 | 0.011550 | 0.011259 | 0.011382 | 0.011255 | 0.011333 | 0.011451 |
| 0.011451 | 0.011411 | 0.011451 | 0.011451 | 0.011513 | 0.011568 | 0.011222 |
| 0.011139 | 0.011141 | 0.011258 | 0.011218 | 0.011220 | 0.011148 | 0.011416 |
| 0.011300 | 0.011360 | 0.011169 | 0.011323 | 0.011294 | 0.011337 | 0.011216 |
| 0.011177 | 0.011138 | 0.011255 | 0.011216 | 0.011411 | 0.011372 | 0.011294 |
| 0.011411 | 0.011411 | 0.011255 | 0.011255 | 0.011255 | 0.011255 | 0.011256 |
| 0.011256 | 0.011294 | 0.011294 | 0.011335 | 0.011411 | 0.011490 | 0.011411 |
| 0.011256 | 0.011374 | 0.011375 | 0.011532 | 0.011472 | 0.011216 | 0.011372 |
| 0.011451 | 0.011451 | 0.011217 | 0.011424 | 0.011343 | 0.011258 | 0.011263 |
| 0.011339 | 0.011589 | 0.011400 | 0.011337 | 0.011177 | 0.011333 | 0.011177 |
| 0.011333 | 0.011333 | 0.011216 | 0.011333 | 0.011333 | 0.011335 | 0.011255 |

|          |          |          |          |          |          |          |
|----------|----------|----------|----------|----------|----------|----------|
| 0.011216 | 0.011139 | 0.011294 | 0.011216 | 0.011138 | 0.011257 | 0.011333 |
| 0.011294 | 0.011255 | 0.011216 | 0.011333 | 0.011255 | 0.011216 | 0.011333 |
| 0.011216 | 0.011294 | 0.011294 | 0.011255 | 0.011294 | 0.011490 | 0.011099 |
| 0.011255 | 0.011529 | 0.011255 | 0.011216 | 0.011255 | 0.011529 | 0.011197 |
| 0.011576 | 0.011198 | 0.011165 | 0.011363 | 0.011411 | 0.011340 | 0.011150 |
| 0.011114 | 0.011372 | 0.011490 | 0.011613 | 0.011450 | 0.011607 | 0.011763 |
| 0.011646 | 0.011689 | 0.011607 | 0.011921 | 0.011490 | 0.012467 | 0.011646 |
| 0.012272 | 0.012115 | 0.012314 | 0.012587 | 0.011568 | 0.011216 | 0.011568 |
| 0.012038 | 0.011763 | 0.011529 | 0.011451 | 0.011529 | 0.011529 | 0.011414 |
| 0.011372 | 0.011374 | 0.011450 | 0.011373 | 0.011763 | 0.011763 | 0.011802 |
| 0.011685 | 0.011802 | 0.011880 | 0.011685 | 0.012038 | 0.012043 | 0.012155 |
| 0.012155 | 0.012116 | 0.012077 | 0.012077 | 0.012116 | 0.011333 | 0.011607 |
| 0.011568 | 0.011959 | 0.011690 | 0.011841 | 0.011646 | 0.011453 | 0.011294 |
| 0.011294 | 0.011294 | 0.011685 | 0.011785 | 0.011896 | 0.011646 | 0.011294 |
| S397     | 0.011505 | 0.011505 | 0.011752 | 0.011751 | 0.011751 | 0.011752 |
| 0.011458 | 0.011458 | 0.011653 | 0.011258 | 0.011307 | 0.011208 | 0.011208 |
| 0.011258 | 0.011406 | 0.011258 | 0.011258 | 0.011307 | 0.011356 | 0.011307 |
| 0.011208 | 0.011356 | 0.011455 | 0.011209 | 0.011357 | 0.011258 | 0.011558 |
| 0.011653 | 0.011356 | 0.011208 | 0.011455 | 0.011307 | 0.011406 | 0.011307 |
| 0.011356 | 0.011406 | 0.011356 | 0.011307 | 0.011406 | 0.011356 | 0.011603 |
| 0.011208 | 0.011356 | 0.011406 | 0.011356 | 0.011307 | 0.011356 | 0.011406 |
| 0.011356 | 0.011554 | 0.011406 | 0.011554 | 0.011356 | 0.011554 | 0.011356 |
| 0.011258 | 0.011307 | 0.011455 | 0.011554 | 0.011751 | 0.011357 | 0.011505 |
| 0.011406 | 0.011356 | 0.011307 | 0.011554 | 0.011702 | 0.011307 | 0.011455 |
| 0.011307 | 0.011406 | 0.011455 | 0.011455 | 0.011307 | 0.011406 | 0.011406 |
| 0.011307 | 0.011307 | 0.011258 | 0.011307 | 0.011258 | 0.011356 | 0.011455 |
| 0.011455 | 0.011307 | 0.011356 | 0.011208 | 0.011307 | 0.011307 | 0.011258 |
| 0.011406 | 0.011406 | 0.011702 | 0.011455 | 0.011357 | 0.011653 | 0.011307 |
| 0.011406 | 0.011505 | 0.011561 | 0.011208 | 0.011213 | 0.011267 | 0.011365 |
| 0.011369 | 0.011316 | 0.011227 | 0.011504 | 0.011406 | 0.011307 | 0.011357 |
| 0.011406 | 0.011356 | 0.011504 | 0.011356 | 0.011455 | 0.011406 | 0.011307 |
| 0.011258 | 0.011307 | 0.011455 | 0.011455 | 0.011406 | 0.011406 | 0.011357 |
| 0.011258 | 0.011208 | 0.011356 | 0.011258 | 0.011554 | 0.011455 | 0.011406 |
| 0.011504 | 0.011603 | 0.011307 | 0.011307 | 0.011356 | 0.011356 | 0.011356 |
| 0.011406 | 0.011356 | 0.011307 | 0.011215 | 0.011165 | 0.011216 | 0.011356 |
| 0.011307 | 0.011307 | 0.011370 | 0.011356 | 0.011211 | 0.011311 | 0.011259 |
| 0.011427 | 0.011313 | 0.011362 | 0.011258 | 0.011209 | 0.011406 | 0.011258 |
| 0.011357 | 0.011406 | 0.011406 | 0.011455 | 0.011356 | 0.011653 | 0.011554 |
| 0.011702 | 0.011455 | 0.011258 | 0.011505 | 0.011258 | 0.011554 | 0.011258 |
| 0.011307 | 0.011356 | 0.011208 | 0.011307 | 0.011307 | 0.011307 | 0.011356 |
| 0.011307 | 0.011406 | 0.011356 | 0.011258 | 0.011358 | 0.011554 | 0.011456 |
| 0.011505 | 0.011406 | 0.011208 | 0.011209 | 0.011406 | 0.011208 | 0.011208 |
| 0.011359 | 0.011505 | 0.011307 | 0.011505 | 0.011208 | 0.011357 | 0.011258 |
| 0.011455 | 0.011258 | 0.011356 | 0.011258 | 0.011307 | 0.011208 | 0.011356 |
| 0.011356 | 0.011356 | 0.011406 | 0.011208 | 0.011307 | 0.011356 | 0.011603 |
| 0.011603 | 0.011504 | 0.011554 | 0.011406 | 0.011653 | 0.011356 | 0.011307 |
| 0.011308 | 0.011425 | 0.011452 | 0.011211 | 0.011558 | 0.011211 | 0.011291 |
| 0.011657 | 0.011456 | 0.011455 | 0.011554 | 0.011413 | 0.011603 | 0.011455 |
| 0.011406 | 0.011603 | 0.011484 | 0.011340 | 0.011294 | 0.011455 | 0.011410 |
| 0.011653 | 0.011357 | 0.011554 | 0.011755 | 0.011406 | 0.011702 | 0.011758 |
| 0.011309 | 0.011762 | 0.011410 | 0.011459 | 0.011653 | 0.011258 | 0.011358 |
| 0.011406 | 0.011356 | 0.011208 | 0.011208 | 0.011307 | 0.011307 | 0.011356 |
| 0.011356 | 0.011455 | 0.011307 | 0.011208 | 0.011356 | 0.011356 | 0.011356 |
| 0.011356 | 0.011702 | 0.011505 | 0.011554 | 0.011208 | 0.011356 | 0.011258 |
| 0.011356 | 0.011258 | 0.011357 | 0.011455 | 0.011258 | 0.011258 | 0.011258 |
| 0.011751 | 0.011356 | 0.011455 | 0.011258 | 0.011356 | 0.011505 | 0.011258 |
| 0.011258 | 0.011258 | 0.011356 | 0.011455 | 0.011258 | 0.011455 | 0.011702 |
| 0.011505 | 0.011307 | 0.011356 | 0.011258 | 0.011208 | 0.011307 | 0.011356 |
| 0.011258 | 0.011406 | 0.011208 | 0.011258 | 0.011406 | 0.011455 | 0.011258 |
| 0.011258 | 0.011406 | 0.011209 | 0.011208 | 0.011504 | 0.011208 | 0.011258 |

|          |          |          |          |          |          |          |
|----------|----------|----------|----------|----------|----------|----------|
| 0.011466 | 0.011258 | 0.011504 | 0.011455 | 0.011356 | 0.011307 | 0.011455 |
| 0.011208 | 0.011554 | 0.011208 | 0.011307 | 0.011258 | 0.011258 | 0.011208 |
| 0.011356 | 0.011455 | 0.011307 | 0.011406 | 0.011258 | 0.011505 | 0.011258 |
| 0.011258 | 0.011258 | 0.011356 | 0.011356 | 0.011356 | 0.011455 | 0.011554 |
| 0.011455 | 0.011455 | 0.011356 | 0.011455 | 0.011455 | 0.011307 | 0.011258 |
| 0.011307 | 0.011307 | 0.011307 | 0.011208 | 0.011258 | 0.011455 | 0.011258 |
| 0.011307 | 0.011307 | 0.011455 | 0.011455 | 0.011258 | 0.011307 | 0.011307 |
| 0.011357 | 0.011307 | 0.011356 | 0.011258 | 0.011356 | 0.011554 | 0.011751 |
| 0.011307 | 0.011702 | 0.011208 | 0.013254 | 0.011134 | 0.011397 | 0.011455 |
| 0.011504 | 0.011505 | 0.011186 | 0.011136 | 0.011731 | 0.011455 | 0.011374 |
| 0.011424 | 0.011488 | 0.011160 | 0.011115 | 0.011224 | 0.000000 | 0.011268 |
| 0.011296 | 0.011529 | 0.011369 | 0.011178 | 0.011406 | 0.011505 | 0.011459 |
| 0.011312 | 0.011455 | 0.011356 | 0.011258 | 0.011357 | 0.011357 | 0.011307 |
| 0.011357 | 0.011258 | 0.011307 | 0.011356 | 0.011357 | 0.011208 | 0.011307 |
| 0.011307 | 0.011356 | 0.011208 | 0.011357 | 0.011356 | 0.011504 | 0.011356 |
| 0.011406 | 0.011307 | 0.011603 | 0.011603 | 0.011455 | 0.011456 | 0.011455 |
| 0.011258 | 0.011208 | 0.011258 | 0.011406 | 0.011208 | 0.011504 | 0.011504 |
| 0.011554 | 0.011455 | 0.011455 | 0.011554 | 0.011653 | 0.011506 | 0.011406 |
| 0.011356 | 0.011554 | 0.011603 | 0.011258 | 0.011307 | 0.011307 | 0.011455 |
| 0.011356 | 0.011356 | 0.011406 | 0.011406 | 0.011406 | 0.011504 | 0.011406 |
| 0.011360 | 0.011208 | 0.011406 | 0.011554 | 0.011307 | 0.011505 | 0.011504 |
| 0.011554 | 0.011413 | 0.011603 | 0.011455 | 0.011406 | 0.011603 | 0.011258 |
| 0.011357 | 0.011307 | 0.011307 | 0.011307 | 0.011356 | 0.011208 | 0.011357 |
| 0.011356 | 0.011504 | 0.011356 | 0.011406 | 0.011307 | 0.011603 | 0.011603 |
| 0.011455 | 0.011456 | 0.011455 | 0.011356 | 0.012098 | 0.011473 | 0.011267 |
| 0.011467 | 0.011414 | 0.011475 | 0.011314 | 0.011520 | 0.011313 | 0.011460 |
| 0.012019 | 0.011314 | 0.011362 | 0.011366 | 0.011769 | 0.011608 | 0.011758 |
| 0.012014 | 0.011502 | 0.011356 | 0.011406 | 0.011406 | 0.011406 | 0.011356 |
| 0.011258 | 0.011307 | 0.011406 | 0.011356 | 0.011356 | 0.011603 | 0.011455 |
| 0.011356 | 0.011307 | 0.011307 | 0.011258 | 0.011258 | 0.011208 | 0.011208 |
| 0.011307 | 0.011307 | 0.011208 | 0.011258 | 0.011307 | 0.011307 | 0.011356 |
| 0.011356 | 0.011258 | 0.011258 | 0.011258 | 0.011258 | 0.011406 | 0.011455 |
| 0.011356 | 0.011356 | 0.011356 | 0.011356 | 0.011307 | 0.011751 | 0.011356 |
| 0.011369 | 0.011258 | 0.011653 | 0.011661 | 0.011406 | 0.011258 | 0.011455 |
| 0.011455 | 0.011357 | 0.011356 | 0.011357 | 0.011455 | 0.011505 | 0.011357 |
| 0.011455 | 0.011554 | 0.011603 | 0.011258 | 0.011455 | 0.011455 | 0.011455 |
| 0.011258 | 0.011455 | 0.011455 | 0.011752 | 0.011356 | 0.011406 | 0.011455 |
| 0.011406 | 0.011258 | 0.011258 | 0.011554 | 0.011604 | 0.011554 | 0.011406 |
| 0.011455 | 0.011406 | 0.011356 | 0.011455 | 0.011258 | 0.011258 | 0.011455 |
| 0.011307 | 0.011356 | 0.011258 | 0.011455 | 0.011406 | 0.011356 | 0.011603 |
| 0.011356 | 0.011558 | 0.011603 | 0.011582 | 0.011133 | 0.011258 | 0.011128 |
| 0.011180 | 0.011643 | 0.011210 | 0.011403 | 0.011240 | 0.011485 | 0.011311 |
| 0.011446 | 0.011274 | 0.011325 | 0.011206 | 0.011252 | 0.011440 | 0.011381 |
| 0.011360 | 0.011321 | 0.011258 | 0.011314 | 0.011308 | 0.011603 | 0.011554 |
| 0.011603 | 0.011456 | 0.011556 | 0.011409 | 0.011607 | 0.011579 | 0.011307 |
| 0.011702 | 0.011455 | 0.011258 | 0.011505 | 0.011258 | 0.011554 | 0.011258 |
| 0.011307 | 0.011356 | 0.011208 | 0.011307 | 0.011307 | 0.011307 | 0.011356 |
| 0.011408 | 0.011316 | 0.011357 | 0.011261 | 0.011561 | 0.011506 | 0.011509 |
| 0.011508 | 0.011307 | 0.011220 | 0.011215 | 0.011357 | 0.011455 | 0.011506 |
| 0.011356 | 0.011307 | 0.011603 | 0.011505 | 0.011455 | 0.011356 | 0.011307 |
| 0.011504 | 0.011455 | 0.011406 | 0.011307 | 0.011999 | 0.011406 | 0.011703 |
| 0.011751 | 0.011536 | 0.011310 | 0.011416 | 0.011356 | 0.011504 | 0.011505 |
| 0.011258 | 0.011455 | 0.011406 | 0.011406 | 0.011582 | 0.011653 | 0.011316 |
| 0.011210 | 0.011162 | 0.011360 | 0.011211 | 0.011313 | 0.011170 | 0.011460 |
| 0.011413 | 0.011310 | 0.011196 | 0.011332 | 0.011307 | 0.011311 | 0.011357 |
| 0.011258 | 0.011208 | 0.011356 | 0.011258 | 0.011554 | 0.011455 | 0.011406 |
| 0.011504 | 0.011603 | 0.011307 | 0.011307 | 0.011356 | 0.011356 | 0.011356 |
| 0.011406 | 0.011356 | 0.011307 | 0.011308 | 0.011603 | 0.011554 | 0.011603 |
| 0.011456 | 0.011556 | 0.011409 | 0.011607 | 0.011579 | 0.011307 | 0.011504 |
| 0.011505 | 0.011505 | 0.011309 | 0.011369 | 0.011312 | 0.011410 | 0.011313 |

|          |          |          |          |          |          |          |
|----------|----------|----------|----------|----------|----------|----------|
| 0.011511 | 0.011597 | 0.011491 | 0.011360 | 0.011307 | 0.011505 | 0.011307 |
| 0.011406 | 0.011356 | 0.011258 | 0.011358 | 0.011554 | 0.011456 | 0.011406 |
| 0.011208 | 0.011209 | 0.011406 | 0.011208 | 0.011208 | 0.011359 | 0.011505 |
| 0.011357 | 0.011258 | 0.011307 | 0.011356 | 0.011357 | 0.011208 | 0.011504 |
| 0.011307 | 0.011406 | 0.011406 | 0.011258 | 0.011356 | 0.011455 | 0.011208 |
| 0.011307 | 0.011751 | 0.011258 | 0.011307 | 0.011307 | 0.011554 | 0.011172 |
| 0.011642 | 0.011231 | 0.011123 | 0.011504 | 0.011491 | 0.011511 | 0.011166 |
| 0.011128 | 0.011455 | 0.011554 | 0.011653 | 0.011504 | 0.011653 | 0.011801 |
| 0.011703 | 0.011708 | 0.011653 | 0.011958 | 0.011603 | 0.012642 | 0.011752 |
| 0.012345 | 0.012246 | 0.012499 | 0.012496 | 0.011702 | 0.011258 | 0.011751 |
| 0.012098 | 0.011950 | 0.011603 | 0.011504 | 0.011554 | 0.011554 | 0.011657 |
| 0.011455 | 0.011457 | 0.011554 | 0.011505 | 0.011950 | 0.011949 | 0.011900 |
| 0.011702 | 0.011801 | 0.011949 | 0.011702 | 0.012099 | 0.012057 | 0.012297 |
| 0.012198 | 0.012247 | 0.012148 | 0.012148 | 0.012148 | 0.011356 | 0.011653 |
| 0.011752 | 0.012296 | 0.011756 | 0.011850 | 0.011653 | 0.011458 | 0.011406 |
| 0.011406 | 0.011356 | 0.011702 | 0.011912 | 0.012174 | 0.011801 | 0.011356 |
| S398     | 0.011447 | 0.011447 | 0.011749 | 0.011749 | 0.011749 | 0.011749 |
| 0.011623 | 0.011537 | 0.011706 | 0.011232 | 0.011232 | 0.011232 | 0.011146 |
| 0.011232 | 0.011447 | 0.011232 | 0.011189 | 0.011275 | 0.011275 | 0.011232 |
| 0.011232 | 0.011275 | 0.011404 | 0.011189 | 0.011276 | 0.011232 | 0.011580 |
| 0.011576 | 0.011275 | 0.011146 | 0.011404 | 0.011189 | 0.011318 | 0.011275 |
| 0.011232 | 0.011361 | 0.011275 | 0.011318 | 0.011361 | 0.011318 | 0.011447 |
| 0.011232 | 0.011318 | 0.011361 | 0.011275 | 0.011361 | 0.011404 | 0.011318 |
| 0.011275 | 0.011491 | 0.011276 | 0.011663 | 0.011318 | 0.011576 | 0.011318 |
| 0.011232 | 0.011361 | 0.011404 | 0.011576 | 0.011663 | 0.011318 | 0.011404 |
| 0.011318 | 0.011318 | 0.011275 | 0.011533 | 0.011749 | 0.011318 | 0.011361 |
| 0.011275 | 0.011361 | 0.011361 | 0.011361 | 0.011232 | 0.011318 | 0.011318 |
| 0.011232 | 0.011232 | 0.011189 | 0.011275 | 0.011232 | 0.011275 | 0.011404 |
| 0.011361 | 0.011189 | 0.011361 | 0.011146 | 0.011404 | 0.011232 | 0.011189 |
| 0.011447 | 0.011361 | 0.011706 | 0.011404 | 0.011275 | 0.011491 | 0.011275 |
| 0.011452 | 0.011669 | 0.011506 | 0.011191 | 0.011194 | 0.011333 | 0.011427 |
| 0.012224 | 0.011512 | 0.011207 | 0.011490 | 0.011533 | 0.011318 | 0.011361 |
| 0.011361 | 0.011318 | 0.011361 | 0.011318 | 0.011318 | 0.011318 | 0.011232 |
| 0.011189 | 0.011318 | 0.011447 | 0.011447 | 0.011361 | 0.011362 | 0.011275 |
| 0.011146 | 0.011232 | 0.011318 | 0.011189 | 0.011490 | 0.011404 | 0.011361 |
| 0.011447 | 0.011533 | 0.011232 | 0.011232 | 0.011275 | 0.011275 | 0.011276 |
| 0.011319 | 0.011318 | 0.011318 | 0.011105 | 0.011151 | 0.011150 | 0.011232 |
| 0.011275 | 0.011232 | 0.011242 | 0.011275 | 0.011147 | 0.011234 | 0.011276 |
| 0.011421 | 0.011235 | 0.011278 | 0.011232 | 0.011147 | 0.011361 | 0.011318 |
| 0.011404 | 0.011361 | 0.011361 | 0.011318 | 0.011318 | 0.011619 | 0.011534 |
| 0.011619 | 0.011447 | 0.011275 | 0.011447 | 0.011189 | 0.011490 | 0.011189 |
| 0.011275 | 0.011232 | 0.011189 | 0.011232 | 0.011232 | 0.011232 | 0.011361 |
| 0.011275 | 0.011447 | 0.011318 | 0.011232 | 0.011363 | 0.011490 | 0.011405 |
| 0.011491 | 0.011361 | 0.011146 | 0.011147 | 0.011318 | 0.011146 | 0.011146 |
| 0.011277 | 0.011491 | 0.011232 | 0.011491 | 0.011189 | 0.011275 | 0.011232 |
| 0.011404 | 0.011189 | 0.011318 | 0.011232 | 0.011275 | 0.011146 | 0.011275 |
| 0.011318 | 0.011275 | 0.011318 | 0.011189 | 0.011232 | 0.011232 | 0.011577 |
| 0.011663 | 0.011576 | 0.011706 | 0.011490 | 0.011706 | 0.011275 | 0.011232 |
| 0.011319 | 0.011525 | 0.011468 | 0.011191 | 0.011757 | 0.011148 | 0.011313 |
| 0.011710 | 0.011496 | 0.011447 | 0.011534 | 0.011323 | 0.011533 | 0.011447 |
| 0.011361 | 0.011619 | 0.011429 | 0.011310 | 0.011267 | 0.011361 | 0.011364 |
| 0.011534 | 0.011363 | 0.011538 | 0.011669 | 0.011318 | 0.011620 | 0.011713 |
| 0.011320 | 0.011670 | 0.011363 | 0.011493 | 0.011750 | 0.011189 | 0.011319 |
| 0.011361 | 0.011275 | 0.011146 | 0.011146 | 0.011232 | 0.011232 | 0.011275 |
| 0.011275 | 0.011361 | 0.011232 | 0.011275 | 0.011275 | 0.011275 | 0.011318 |
| 0.011275 | 0.011792 | 0.011576 | 0.011620 | 0.011146 | 0.011275 | 0.011275 |
| 0.011318 | 0.011275 | 0.011361 | 0.011404 | 0.011189 | 0.011189 | 0.011189 |
| 0.011835 | 0.011404 | 0.011404 | 0.011189 | 0.011318 | 0.011361 | 0.011189 |
| 0.011189 | 0.011189 | 0.011275 | 0.011448 | 0.011232 | 0.011404 | 0.011533 |
| 0.011490 | 0.011275 | 0.011275 | 0.011146 | 0.011146 | 0.011189 | 0.011275 |



|          |          |          |          |          |          |          |
|----------|----------|----------|----------|----------|----------|----------|
| 0.011146 | 0.011318 | 0.011146 | 0.011189 | 0.011361 | 0.011490 | 0.011189 |
| 0.011189 | 0.011361 | 0.011189 | 0.011146 | 0.011533 | 0.011146 | 0.011318 |
| 0.011413 | 0.011232 | 0.011576 | 0.011361 | 0.011404 | 0.011232 | 0.011404 |
| 0.011232 | 0.011576 | 0.011146 | 0.011361 | 0.011232 | 0.011232 | 0.011146 |
| 0.011318 | 0.011490 | 0.011275 | 0.011404 | 0.011146 | 0.011620 | 0.011232 |
| 0.011189 | 0.011232 | 0.011275 | 0.011275 | 0.011232 | 0.011404 | 0.011404 |
| 0.011404 | 0.011404 | 0.011318 | 0.011448 | 0.011361 | 0.011232 | 0.011189 |
| 0.011189 | 0.011232 | 0.011275 | 0.011232 | 0.011189 | 0.011361 | 0.011232 |
| 0.011275 | 0.011232 | 0.011361 | 0.011447 | 0.011232 | 0.011275 | 0.011275 |
| 0.011275 | 0.011189 | 0.011275 | 0.011189 | 0.011361 | 0.011533 | 0.011749 |
| 0.011232 | 0.011663 | 0.011189 | 0.019242 | 0.011131 | 0.011437 | 0.011577 |
| 0.011620 | 0.011620 | 0.011340 | 0.011251 | 0.011765 | 0.011663 | 0.011317 |
| 0.011491 | 0.011503 | 0.011151 | 0.011154 | 0.011250 | 0.011268 | 0.000000 |
| 0.011533 | 0.011471 | 0.011462 | 0.011155 | 0.011404 | 0.011447 | 0.011320 |
| 0.011281 | 0.011404 | 0.011361 | 0.011275 | 0.011275 | 0.011276 | 0.011276 |
| 0.011318 | 0.011189 | 0.011318 | 0.011361 | 0.011275 | 0.011189 | 0.011232 |
| 0.011232 | 0.011275 | 0.011146 | 0.011318 | 0.011404 | 0.011447 | 0.011275 |
| 0.011361 | 0.011275 | 0.011620 | 0.011620 | 0.011362 | 0.011448 | 0.011491 |
| 0.011189 | 0.011146 | 0.011189 | 0.011275 | 0.011146 | 0.011404 | 0.011404 |
| 0.011533 | 0.011447 | 0.011404 | 0.011533 | 0.011706 | 0.011576 | 0.011318 |
| 0.011361 | 0.011447 | 0.011490 | 0.011275 | 0.011275 | 0.011189 | 0.011361 |
| 0.011361 | 0.011361 | 0.011404 | 0.011404 | 0.011319 | 0.011490 | 0.011447 |
| 0.011320 | 0.011146 | 0.011318 | 0.011404 | 0.011275 | 0.011490 | 0.011490 |
| 0.011534 | 0.011323 | 0.011533 | 0.011447 | 0.011361 | 0.011619 | 0.011189 |
| 0.011405 | 0.011318 | 0.011232 | 0.011232 | 0.011275 | 0.011146 | 0.011318 |
| 0.011404 | 0.011447 | 0.011275 | 0.011361 | 0.011275 | 0.011620 | 0.011620 |
| 0.011362 | 0.011448 | 0.011404 | 0.011361 | 0.011922 | 0.011464 | 0.011286 |
| 0.011507 | 0.011412 | 0.011467 | 0.011326 | 0.011504 | 0.011457 | 0.011407 |
| 0.011856 | 0.011237 | 0.011324 | 0.011327 | 0.011679 | 0.011496 | 0.011672 |
| 0.011890 | 0.011495 | 0.011276 | 0.011318 | 0.011318 | 0.011361 | 0.011276 |
| 0.011189 | 0.011232 | 0.011361 | 0.011318 | 0.011276 | 0.011533 | 0.011447 |
| 0.011275 | 0.011232 | 0.011275 | 0.011189 | 0.011189 | 0.011232 | 0.011146 |
| 0.011318 | 0.011318 | 0.011146 | 0.011189 | 0.011275 | 0.011232 | 0.011275 |
| 0.011275 | 0.011189 | 0.011189 | 0.011275 | 0.011189 | 0.011361 | 0.011447 |
| 0.011275 | 0.011404 | 0.011318 | 0.011275 | 0.011232 | 0.011663 | 0.011318 |
| 0.011372 | 0.011189 | 0.011576 | 0.011583 | 0.011361 | 0.011318 | 0.011318 |
| 0.011361 | 0.011318 | 0.011275 | 0.011318 | 0.011447 | 0.011404 | 0.011318 |
| 0.011361 | 0.011447 | 0.011706 | 0.011318 | 0.011361 | 0.011361 | 0.011361 |
| 0.011232 | 0.011318 | 0.011361 | 0.011835 | 0.011319 | 0.011361 | 0.011361 |
| 0.011361 | 0.011232 | 0.011232 | 0.011534 | 0.011577 | 0.011533 | 0.011318 |
| 0.011404 | 0.011490 | 0.011275 | 0.011404 | 0.011275 | 0.011232 | 0.011533 |
| 0.011318 | 0.011275 | 0.011232 | 0.011404 | 0.011318 | 0.011404 | 0.011620 |
| 0.011275 | 0.011623 | 0.011663 | 0.011524 | 0.011123 | 0.011361 | 0.011245 |
| 0.011229 | 0.011709 | 0.011191 | 0.011369 | 0.011281 | 0.011346 | 0.011294 |
| 0.011514 | 0.011129 | 0.011245 | 0.000000 | 0.011120 | 0.011278 | 0.011399 |
| 0.011415 | 0.011297 | 0.011318 | 0.011281 | 0.011363 | 0.011533 | 0.011576 |
| 0.011533 | 0.011448 | 0.011535 | 0.011494 | 0.011581 | 0.011603 | 0.011275 |
| 0.011619 | 0.011447 | 0.011275 | 0.011447 | 0.011189 | 0.011490 | 0.011189 |
| 0.011275 | 0.011232 | 0.011189 | 0.011232 | 0.011232 | 0.011232 | 0.011361 |
| 0.011276 | 0.011281 | 0.011276 | 0.011190 | 0.011493 | 0.011448 | 0.011406 |
| 0.011406 | 0.011232 | 0.011106 | 0.011150 | 0.011318 | 0.011491 | 0.011405 |
| 0.011275 | 0.011361 | 0.011576 | 0.011491 | 0.011490 | 0.011447 | 0.011275 |
| 0.011404 | 0.011447 | 0.011361 | 0.011275 | 0.012007 | 0.011447 | 0.011620 |
| 0.011663 | 0.011658 | 0.011236 | 0.011415 | 0.011275 | 0.011404 | 0.011447 |
| 0.011276 | 0.011361 | 0.011533 | 0.011533 | 0.011410 | 0.011533 | 0.011239 |
| 0.011147 | 0.011150 | 0.011279 | 0.011235 | 0.011323 | 0.011155 | 0.011540 |
| 0.011325 | 0.011492 | 0.011118 | 0.011297 | 0.011232 | 0.011234 | 0.011275 |
| 0.011146 | 0.011232 | 0.011318 | 0.011189 | 0.011490 | 0.011404 | 0.011361 |
| 0.011447 | 0.011533 | 0.011232 | 0.011232 | 0.011275 | 0.011275 | 0.011276 |
| 0.011319 | 0.011318 | 0.011318 | 0.011363 | 0.011533 | 0.011576 | 0.011533 |

|          |          |          |          |          |          |          |
|----------|----------|----------|----------|----------|----------|----------|
| 0.011448 | 0.011535 | 0.011494 | 0.011581 | 0.011603 | 0.011275 | 0.011490 |
| 0.011447 | 0.011447 | 0.011233 | 0.011416 | 0.011368 | 0.011322 | 0.011283 |
| 0.011411 | 0.011748 | 0.011485 | 0.011363 | 0.011232 | 0.011491 | 0.011275 |
| 0.011447 | 0.011318 | 0.011232 | 0.011363 | 0.011490 | 0.011405 | 0.011361 |
| 0.011146 | 0.011147 | 0.011318 | 0.011146 | 0.011146 | 0.011277 | 0.011491 |
| 0.011318 | 0.011189 | 0.011318 | 0.011361 | 0.011275 | 0.011189 | 0.011447 |
| 0.011275 | 0.011361 | 0.011361 | 0.011232 | 0.011318 | 0.011490 | 0.011232 |
| 0.011275 | 0.011663 | 0.011232 | 0.011232 | 0.011232 | 0.011663 | 0.011207 |
| 0.011562 | 0.011110 | 0.011227 | 0.011498 | 0.011543 | 0.011496 | 0.011154 |
| 0.011179 | 0.011447 | 0.011576 | 0.011663 | 0.011533 | 0.011706 | 0.011835 |
| 0.011706 | 0.011711 | 0.011663 | 0.011932 | 0.011576 | 0.012525 | 0.011706 |
| 0.012353 | 0.012136 | 0.012356 | 0.012527 | 0.011619 | 0.011275 | 0.011706 |
| 0.012008 | 0.011878 | 0.011619 | 0.011534 | 0.011576 | 0.011576 | 0.011580 |
| 0.011447 | 0.011449 | 0.011533 | 0.011490 | 0.011921 | 0.011964 | 0.011964 |
| 0.011792 | 0.011835 | 0.012007 | 0.011706 | 0.011922 | 0.011971 | 0.012095 |
| 0.012051 | 0.012008 | 0.011965 | 0.012008 | 0.011965 | 0.011318 | 0.011577 |
| 0.011706 | 0.012266 | 0.011711 | 0.011878 | 0.011706 | 0.011538 | 0.011447 |
| 0.011404 | 0.011361 | 0.011792 | 0.011830 | 0.011896 | 0.011706 | 0.011405 |
| S399     | 0.011623 | 0.011623 | 0.011624 | 0.011577 | 0.011577 | 0.011670 |
| 0.011344 | 0.011249 | 0.011576 | 0.011482 | 0.011482 | 0.011482 | 0.011436 |
| 0.011389 | 0.011717 | 0.011389 | 0.011436 | 0.011482 | 0.011482 | 0.011482 |
| 0.011482 | 0.011482 | 0.011248 | 0.011436 | 0.011483 | 0.011436 | 0.011344 |
| 0.011436 | 0.011483 | 0.011389 | 0.011248 | 0.011482 | 0.011482 | 0.011389 |
| 0.011529 | 0.011576 | 0.011576 | 0.011576 | 0.011576 | 0.011529 | 0.011717 |
| 0.011342 | 0.011529 | 0.011576 | 0.011436 | 0.011529 | 0.011717 | 0.011623 |
| 0.011576 | 0.011670 | 0.011482 | 0.011389 | 0.011529 | 0.011670 | 0.011529 |
| 0.011482 | 0.011530 | 0.011623 | 0.011670 | 0.011389 | 0.011342 | 0.011623 |
| 0.011576 | 0.011482 | 0.011529 | 0.011764 | 0.011342 | 0.011576 | 0.011576 |
| 0.011529 | 0.011529 | 0.011576 | 0.011670 | 0.011482 | 0.011482 | 0.011482 |
| 0.011482 | 0.011482 | 0.011436 | 0.011483 | 0.011482 | 0.011482 | 0.011623 |
| 0.011623 | 0.011482 | 0.011623 | 0.011389 | 0.011482 | 0.011436 | 0.011436 |
| 0.011717 | 0.011623 | 0.011436 | 0.011623 | 0.011576 | 0.011764 | 0.011529 |
| 0.011686 | 0.011397 | 0.011765 | 0.011446 | 0.011436 | 0.011552 | 0.011302 |
| 0.011295 | 0.011215 | 0.011456 | 0.011670 | 0.011529 | 0.011482 | 0.011436 |
| 0.011623 | 0.011482 | 0.011623 | 0.011529 | 0.011670 | 0.011529 | 0.011482 |
| 0.011436 | 0.011482 | 0.011717 | 0.011717 | 0.011623 | 0.011577 | 0.011482 |
| 0.011436 | 0.011389 | 0.011529 | 0.011389 | 0.011389 | 0.011248 | 0.011248 |
| 0.011342 | 0.011342 | 0.011436 | 0.011436 | 0.011436 | 0.011436 | 0.011436 |
| 0.011436 | 0.011529 | 0.011529 | 0.011401 | 0.011446 | 0.011449 | 0.011482 |
| 0.011529 | 0.011482 | 0.011488 | 0.011483 | 0.011393 | 0.011489 | 0.011532 |
| 0.011207 | 0.011539 | 0.011531 | 0.011482 | 0.011389 | 0.011623 | 0.011436 |
| 0.011530 | 0.011482 | 0.011482 | 0.011576 | 0.011529 | 0.011952 | 0.011623 |
| 0.011530 | 0.011623 | 0.011482 | 0.011576 | 0.011436 | 0.011342 | 0.011389 |
| 0.011482 | 0.011482 | 0.011482 | 0.011482 | 0.011482 | 0.011482 | 0.011576 |
| 0.011482 | 0.011576 | 0.011576 | 0.011436 | 0.011529 | 0.011623 | 0.011577 |
| 0.011670 | 0.011576 | 0.011389 | 0.011389 | 0.011576 | 0.011389 | 0.011389 |
| 0.011392 | 0.011670 | 0.011436 | 0.011670 | 0.011389 | 0.011529 | 0.011436 |
| 0.011576 | 0.011436 | 0.011529 | 0.011483 | 0.011529 | 0.011389 | 0.011436 |
| 0.011529 | 0.011482 | 0.011576 | 0.011436 | 0.011482 | 0.011529 | 0.011811 |
| 0.011389 | 0.011295 | 0.011342 | 0.011623 | 0.011342 | 0.011482 | 0.011482 |
| 0.011484 | 0.011724 | 0.011534 | 0.011439 | 0.011439 | 0.011394 | 0.011548 |
| 0.011391 | 0.011298 | 0.011623 | 0.011764 | 0.011587 | 0.011717 | 0.011670 |
| 0.011717 | 0.011717 | 0.011701 | 0.011456 | 0.011579 | 0.011577 | 0.011623 |
| 0.011670 | 0.011578 | 0.011717 | 0.011815 | 0.011529 | 0.011764 | 0.012055 |
| 0.011580 | 0.011822 | 0.011724 | 0.011771 | 0.011859 | 0.011436 | 0.011626 |
| 0.011482 | 0.011482 | 0.011389 | 0.011389 | 0.011436 | 0.011529 | 0.011529 |
| 0.011482 | 0.011529 | 0.011436 | 0.011436 | 0.011482 | 0.011529 | 0.011436 |
| 0.011482 | 0.011483 | 0.011295 | 0.011295 | 0.011389 | 0.011482 | 0.011576 |
| 0.011576 | 0.011342 | 0.011576 | 0.011529 | 0.011482 | 0.011482 | 0.011482 |
| 0.011529 | 0.011576 | 0.011623 | 0.011436 | 0.011529 | 0.011529 | 0.011436 |

|          |          |          |          |          |          |          |
|----------|----------|----------|----------|----------|----------|----------|
| 0.011436 | 0.011436 | 0.011529 | 0.011623 | 0.011436 | 0.011389 | 0.011436 |
| 0.011483 | 0.011529 | 0.011529 | 0.011436 | 0.011389 | 0.011482 | 0.011576 |
| 0.011436 | 0.011576 | 0.011389 | 0.011436 | 0.011576 | 0.011201 | 0.011483 |
| 0.011436 | 0.011576 | 0.011483 | 0.011389 | 0.011201 | 0.011389 | 0.011623 |
| 0.011542 | 0.011483 | 0.011295 | 0.011577 | 0.011529 | 0.011482 | 0.011623 |
| 0.011482 | 0.011670 | 0.011389 | 0.011342 | 0.011389 | 0.011389 | 0.011389 |
| 0.011529 | 0.011295 | 0.011529 | 0.011623 | 0.011389 | 0.011295 | 0.011389 |
| 0.011389 | 0.011482 | 0.011482 | 0.011436 | 0.011529 | 0.011670 | 0.011670 |
| 0.011623 | 0.011576 | 0.011482 | 0.011623 | 0.011623 | 0.011482 | 0.011436 |
| 0.011436 | 0.011482 | 0.011529 | 0.011342 | 0.011389 | 0.011623 | 0.011436 |
| 0.011436 | 0.011482 | 0.011576 | 0.011529 | 0.011529 | 0.011436 | 0.011483 |
| 0.011482 | 0.011482 | 0.011529 | 0.011482 | 0.011576 | 0.011670 | 0.011342 |
| 0.011529 | 0.011342 | 0.011436 | 0.019344 | 0.011338 | 0.011620 | 0.011295 |
| 0.011342 | 0.011342 | 0.011649 | 0.011427 | 0.011377 | 0.011436 | 0.011614 |
| 0.011507 | 0.011279 | 0.011407 | 0.011477 | 0.011402 | 0.011296 | 0.011533 |
| 0.000000 | 0.011348 | 0.000000 | 0.011321 | 0.011623 | 0.011623 | 0.011581 |
| 0.011490 | 0.011623 | 0.011623 | 0.011482 | 0.011577 | 0.011577 | 0.011530 |
| 0.011529 | 0.011436 | 0.011436 | 0.011576 | 0.011529 | 0.011482 | 0.011482 |
| 0.011482 | 0.011576 | 0.011389 | 0.011576 | 0.011670 | 0.011623 | 0.011482 |
| 0.011529 | 0.011436 | 0.011295 | 0.011295 | 0.011577 | 0.011623 | 0.011717 |
| 0.011389 | 0.011389 | 0.011436 | 0.011482 | 0.011389 | 0.011670 | 0.011670 |
| 0.011529 | 0.011623 | 0.011670 | 0.011576 | 0.011389 | 0.011579 | 0.011529 |
| 0.011529 | 0.011623 | 0.011670 | 0.011529 | 0.011529 | 0.011389 | 0.011529 |
| 0.011530 | 0.011529 | 0.011576 | 0.011482 | 0.011531 | 0.011670 | 0.011670 |
| 0.011534 | 0.011389 | 0.011576 | 0.011717 | 0.011529 | 0.011623 | 0.011717 |
| 0.011764 | 0.011587 | 0.011717 | 0.011670 | 0.011717 | 0.011717 | 0.011436 |
| 0.011720 | 0.011577 | 0.011482 | 0.011482 | 0.011576 | 0.011389 | 0.011576 |
| 0.011670 | 0.011623 | 0.011482 | 0.011529 | 0.011436 | 0.011295 | 0.011295 |
| 0.011577 | 0.011623 | 0.011623 | 0.011576 | 0.012188 | 0.011562 | 0.011453 |
| 0.011744 | 0.011546 | 0.011699 | 0.011597 | 0.011698 | 0.011590 | 0.011588 |
| 0.012163 | 0.011496 | 0.011681 | 0.011495 | 0.011829 | 0.011675 | 0.011865 |
| 0.012205 | 0.011642 | 0.011437 | 0.011482 | 0.011482 | 0.011248 | 0.011436 |
| 0.011436 | 0.011389 | 0.011529 | 0.011482 | 0.011483 | 0.011342 | 0.011342 |
| 0.011529 | 0.011436 | 0.011482 | 0.011482 | 0.011389 | 0.011482 | 0.011389 |
| 0.011482 | 0.011482 | 0.011389 | 0.011436 | 0.011529 | 0.011482 | 0.011529 |
| 0.011529 | 0.011436 | 0.011436 | 0.011529 | 0.011436 | 0.011576 | 0.011670 |
| 0.011482 | 0.011529 | 0.011529 | 0.011529 | 0.011389 | 0.011389 | 0.011529 |
| 0.011255 | 0.011436 | 0.011436 | 0.011441 | 0.011576 | 0.011576 | 0.011576 |
| 0.011623 | 0.011482 | 0.011482 | 0.011482 | 0.011717 | 0.011576 | 0.011529 |
| 0.011576 | 0.011670 | 0.011389 | 0.011576 | 0.011623 | 0.011623 | 0.011670 |
| 0.011482 | 0.011529 | 0.011623 | 0.011389 | 0.011577 | 0.011576 | 0.011623 |
| 0.011529 | 0.011389 | 0.011389 | 0.011623 | 0.011811 | 0.011623 | 0.011529 |
| 0.011670 | 0.011670 | 0.011482 | 0.011670 | 0.011529 | 0.011482 | 0.011248 |
| 0.011576 | 0.011529 | 0.011389 | 0.011670 | 0.011529 | 0.011623 | 0.011483 |
| 0.011529 | 0.011296 | 0.011342 | 0.011406 | 0.011242 | 0.011436 | 0.011285 |
| 0.011408 | 0.011499 | 0.011389 | 0.011543 | 0.011397 | 0.011413 | 0.011348 |
| 0.011327 | 0.011278 | 0.011417 | 0.011266 | 0.011294 | 0.011487 | 0.011618 |
| 0.011686 | 0.011505 | 0.011536 | 0.011536 | 0.011579 | 0.011342 | 0.011436 |
| 0.011389 | 0.011577 | 0.011723 | 0.011298 | 0.011817 | 0.011753 | 0.011482 |
| 0.011530 | 0.011623 | 0.011482 | 0.011576 | 0.011436 | 0.011342 | 0.011389 |
| 0.011482 | 0.011482 | 0.011482 | 0.011482 | 0.011482 | 0.011482 | 0.011576 |
| 0.011490 | 0.011543 | 0.011577 | 0.011441 | 0.011726 | 0.011530 | 0.011627 |
| 0.011722 | 0.011389 | 0.011411 | 0.011401 | 0.011576 | 0.011765 | 0.011624 |
| 0.011482 | 0.011623 | 0.011858 | 0.011671 | 0.011576 | 0.011764 | 0.011482 |
| 0.011529 | 0.011670 | 0.011529 | 0.011482 | 0.011671 | 0.011482 | 0.011670 |
| 0.011999 | 0.011258 | 0.011347 | 0.011642 | 0.011482 | 0.011529 | 0.011623 |
| 0.011484 | 0.011670 | 0.011576 | 0.011576 | 0.011663 | 0.011858 | 0.011493 |
| 0.011392 | 0.011395 | 0.011488 | 0.011488 | 0.011491 | 0.011421 | 0.011250 |
| 0.011587 | 0.011240 | 0.011514 | 0.011529 | 0.011482 | 0.011488 | 0.011482 |
| 0.011436 | 0.011389 | 0.011529 | 0.011389 | 0.011389 | 0.011248 | 0.011248 |

|          |          |          |          |          |          |          |
|----------|----------|----------|----------|----------|----------|----------|
| 0.011342 | 0.011342 | 0.011436 | 0.011436 | 0.011436 | 0.011436 | 0.011436 |
| 0.011436 | 0.011529 | 0.011529 | 0.011579 | 0.011342 | 0.011436 | 0.011389 |
| 0.011577 | 0.011723 | 0.011298 | 0.011817 | 0.011753 | 0.011482 | 0.011670 |
| 0.011623 | 0.011623 | 0.011438 | 0.011591 | 0.011639 | 0.011535 | 0.011544 |
| 0.011488 | 0.011847 | 0.011751 | 0.011583 | 0.011436 | 0.011670 | 0.011482 |
| 0.011576 | 0.011576 | 0.011436 | 0.011529 | 0.011623 | 0.011577 | 0.011576 |
| 0.011389 | 0.011389 | 0.011576 | 0.011389 | 0.011389 | 0.011392 | 0.011670 |
| 0.011529 | 0.011436 | 0.011436 | 0.011576 | 0.011529 | 0.011482 | 0.011342 |
| 0.011482 | 0.011623 | 0.011623 | 0.011482 | 0.011529 | 0.011717 | 0.011342 |
| 0.011529 | 0.011389 | 0.011482 | 0.011482 | 0.011529 | 0.011389 | 0.011450 |
| 0.011609 | 0.011317 | 0.011261 | 0.011361 | 0.011402 | 0.011394 | 0.011207 |
| 0.011218 | 0.011342 | 0.011483 | 0.011584 | 0.011436 | 0.011623 | 0.011717 |
| 0.011577 | 0.011628 | 0.011529 | 0.011859 | 0.011436 | 0.012470 | 0.011577 |
| 0.012235 | 0.012046 | 0.012333 | 0.012377 | 0.011483 | 0.011436 | 0.011577 |
| 0.012330 | 0.011671 | 0.011483 | 0.011436 | 0.011483 | 0.011483 | 0.011391 |
| 0.011342 | 0.011342 | 0.011436 | 0.011342 | 0.011765 | 0.011718 | 0.011811 |
| 0.011624 | 0.011671 | 0.011905 | 0.011577 | 0.012188 | 0.012197 | 0.012424 |
| 0.012377 | 0.012283 | 0.012235 | 0.012188 | 0.012283 | 0.011529 | 0.011764 |
| 0.011764 | 0.012329 | 0.011863 | 0.011718 | 0.011577 | 0.011297 | 0.011248 |
| 0.011107 | 0.011154 | 0.011765 | 0.011758 | 0.011926 | 0.011530 | 0.011295 |
| S400     | 0.011843 | 0.011843 | 0.011619 | 0.011544 | 0.011544 | 0.011619 |
| 0.011513 | 0.011400 | 0.011582 | 0.011395 | 0.011433 | 0.011395 | 0.011395 |
| 0.011358 | 0.011582 | 0.011321 | 0.011433 | 0.011470 | 0.011470 | 0.011395 |
| 0.011395 | 0.011433 | 0.011246 | 0.011396 | 0.011433 | 0.011358 | 0.011475 |
| 0.011246 | 0.011433 | 0.011321 | 0.011284 | 0.011470 | 0.011433 | 0.011358 |
| 0.011470 | 0.011582 | 0.011470 | 0.011470 | 0.011507 | 0.011470 | 0.011656 |
| 0.011284 | 0.011470 | 0.011507 | 0.011433 | 0.011470 | 0.011582 | 0.011507 |
| 0.011470 | 0.011656 | 0.011470 | 0.011507 | 0.011470 | 0.011731 | 0.011470 |
| 0.011433 | 0.011470 | 0.011582 | 0.011731 | 0.011544 | 0.011470 | 0.011582 |
| 0.011507 | 0.011544 | 0.011433 | 0.011693 | 0.011545 | 0.011470 | 0.011544 |
| 0.011433 | 0.011470 | 0.011507 | 0.011544 | 0.011470 | 0.011507 | 0.011507 |
| 0.011395 | 0.011395 | 0.011358 | 0.011358 | 0.011470 | 0.011470 | 0.011544 |
| 0.011470 | 0.011470 | 0.011544 | 0.011395 | 0.011507 | 0.011395 | 0.011395 |
| 0.011581 | 0.011544 | 0.011544 | 0.011582 | 0.011470 | 0.011656 | 0.011470 |
| 0.011612 | 0.011537 | 0.011683 | 0.011386 | 0.011364 | 0.011456 | 0.011261 |
| 0.011248 | 0.011264 | 0.011390 | 0.011656 | 0.011582 | 0.011395 | 0.011470 |
| 0.011507 | 0.011470 | 0.011581 | 0.011470 | 0.011544 | 0.011470 | 0.011507 |
| 0.011470 | 0.011470 | 0.011768 | 0.011656 | 0.011544 | 0.011507 | 0.011433 |
| 0.011395 | 0.011321 | 0.011470 | 0.011395 | 0.011358 | 0.011321 | 0.011246 |
| 0.011358 | 0.011433 | 0.011395 | 0.011395 | 0.011433 | 0.011433 | 0.011433 |
| 0.011508 | 0.011470 | 0.011470 | 0.011329 | 0.011368 | 0.011370 | 0.011470 |
| 0.011470 | 0.011395 | 0.011442 | 0.011433 | 0.011362 | 0.011400 | 0.011434 |
| 0.011371 | 0.011439 | 0.011471 | 0.011395 | 0.011395 | 0.011507 | 0.011433 |
| 0.011507 | 0.011470 | 0.011470 | 0.011544 | 0.011544 | 0.011842 | 0.011619 |
| 0.011321 | 0.011544 | 0.011433 | 0.011507 | 0.011358 | 0.011135 | 0.011321 |
| 0.011433 | 0.011433 | 0.011395 | 0.011395 | 0.011395 | 0.011395 | 0.011507 |
| 0.011433 | 0.011544 | 0.011470 | 0.011395 | 0.011471 | 0.011619 | 0.011585 |
| 0.011582 | 0.011507 | 0.011395 | 0.011322 | 0.011470 | 0.011395 | 0.011321 |
| 0.011323 | 0.011582 | 0.011395 | 0.011582 | 0.011321 | 0.011433 | 0.011395 |
| 0.011544 | 0.011433 | 0.011470 | 0.011395 | 0.011433 | 0.011321 | 0.011433 |
| 0.011470 | 0.011433 | 0.011470 | 0.011433 | 0.011470 | 0.011507 | 0.011582 |
| 0.011544 | 0.011395 | 0.011507 | 0.011619 | 0.011545 | 0.011433 | 0.011433 |
| 0.011397 | 0.011689 | 0.011475 | 0.011363 | 0.011550 | 0.011325 | 0.011405 |
| 0.011550 | 0.011436 | 0.011582 | 0.011843 | 0.011550 | 0.011693 | 0.011694 |
| 0.011619 | 0.011693 | 0.011655 | 0.011481 | 0.011483 | 0.011507 | 0.011586 |
| 0.011693 | 0.011584 | 0.011623 | 0.011699 | 0.011544 | 0.011768 | 0.011926 |
| 0.011584 | 0.011700 | 0.011699 | 0.011661 | 0.011918 | 0.011358 | 0.011546 |
| 0.011470 | 0.011433 | 0.011321 | 0.011321 | 0.011433 | 0.011433 | 0.011507 |
| 0.011433 | 0.011507 | 0.011395 | 0.011395 | 0.011358 | 0.011433 | 0.011433 |
| 0.011433 | 0.011544 | 0.011433 | 0.011470 | 0.011321 | 0.011433 | 0.011470 |

|          |          |          |          |          |          |          |
|----------|----------|----------|----------|----------|----------|----------|
| 0.011470 | 0.011395 | 0.011507 | 0.011470 | 0.011395 | 0.011395 | 0.011395 |
| 0.011619 | 0.011433 | 0.011582 | 0.011358 | 0.011433 | 0.011619 | 0.011358 |
| 0.011358 | 0.011395 | 0.011433 | 0.011582 | 0.011395 | 0.011321 | 0.011433 |
| 0.011395 | 0.011433 | 0.011433 | 0.011358 | 0.011358 | 0.011470 | 0.011470 |
| 0.011358 | 0.011470 | 0.011321 | 0.011321 | 0.011507 | 0.011358 | 0.011395 |
| 0.011358 | 0.011507 | 0.011433 | 0.011321 | 0.011358 | 0.011321 | 0.011507 |
| 0.011555 | 0.011395 | 0.011395 | 0.011507 | 0.011507 | 0.011433 | 0.011507 |
| 0.011395 | 0.011731 | 0.011321 | 0.011433 | 0.011321 | 0.011321 | 0.011321 |
| 0.011507 | 0.011470 | 0.011433 | 0.011544 | 0.011358 | 0.011433 | 0.011321 |
| 0.011395 | 0.011395 | 0.011395 | 0.011507 | 0.011433 | 0.011544 | 0.011619 |
| 0.011582 | 0.011507 | 0.011470 | 0.011582 | 0.011544 | 0.011395 | 0.011358 |
| 0.011395 | 0.011395 | 0.011433 | 0.011284 | 0.011358 | 0.011507 | 0.011395 |
| 0.011321 | 0.011395 | 0.011507 | 0.011544 | 0.011470 | 0.011433 | 0.011433 |
| 0.011507 | 0.011395 | 0.011507 | 0.011395 | 0.011544 | 0.011619 | 0.011582 |
| 0.011433 | 0.011507 | 0.011433 | 0.018152 | 0.011322 | 0.011673 | 0.011475 |
| 0.011437 | 0.011475 | 0.011606 | 0.011419 | 0.011626 | 0.011512 | 0.011623 |
| 0.011493 | 0.011376 | 0.011342 | 0.011465 | 0.011345 | 0.011529 | 0.011471 |
| 0.011348 | 0.000000 | 0.011291 | 0.011127 | 0.011544 | 0.011619 | 0.011622 |
| 0.011442 | 0.011581 | 0.011544 | 0.011433 | 0.011470 | 0.011470 | 0.011470 |
| 0.011507 | 0.011433 | 0.011395 | 0.011507 | 0.011433 | 0.011395 | 0.011433 |
| 0.011433 | 0.011470 | 0.011358 | 0.011470 | 0.011544 | 0.011581 | 0.011470 |
| 0.011433 | 0.011395 | 0.011395 | 0.011395 | 0.011545 | 0.011582 | 0.011619 |
| 0.011321 | 0.011358 | 0.011358 | 0.011507 | 0.011358 | 0.011582 | 0.011582 |
| 0.011544 | 0.011582 | 0.011544 | 0.011582 | 0.011507 | 0.011583 | 0.011507 |
| 0.011470 | 0.011544 | 0.011619 | 0.011433 | 0.011433 | 0.011395 | 0.011507 |
| 0.011507 | 0.011507 | 0.011544 | 0.011470 | 0.011471 | 0.011619 | 0.011619 |
| 0.011511 | 0.011358 | 0.011470 | 0.011619 | 0.011433 | 0.011544 | 0.011656 |
| 0.011843 | 0.011550 | 0.011693 | 0.011694 | 0.011619 | 0.011693 | 0.011395 |
| 0.011583 | 0.011470 | 0.011433 | 0.011433 | 0.011470 | 0.011358 | 0.011470 |
| 0.011544 | 0.011581 | 0.011470 | 0.011433 | 0.011395 | 0.011395 | 0.011395 |
| 0.011545 | 0.011582 | 0.011582 | 0.011582 | 0.012142 | 0.011618 | 0.011531 |
| 0.011644 | 0.011562 | 0.011726 | 0.011523 | 0.011606 | 0.011636 | 0.011553 |
| 0.012129 | 0.011484 | 0.011631 | 0.011560 | 0.011826 | 0.011665 | 0.011702 |
| 0.012154 | 0.011568 | 0.011471 | 0.011470 | 0.011470 | 0.011246 | 0.011433 |
| 0.011358 | 0.011395 | 0.011507 | 0.011470 | 0.011470 | 0.011135 | 0.011321 |
| 0.011433 | 0.011395 | 0.011433 | 0.011433 | 0.011358 | 0.011395 | 0.011321 |
| 0.011395 | 0.011433 | 0.011395 | 0.011358 | 0.011470 | 0.011395 | 0.011433 |
| 0.011433 | 0.011358 | 0.011433 | 0.011470 | 0.011358 | 0.011582 | 0.011619 |
| 0.011470 | 0.011507 | 0.011507 | 0.011470 | 0.011358 | 0.011544 | 0.011470 |
| 0.011215 | 0.011395 | 0.011246 | 0.011248 | 0.011544 | 0.011470 | 0.011507 |
| 0.011544 | 0.011470 | 0.011395 | 0.011470 | 0.011582 | 0.011582 | 0.011507 |
| 0.011507 | 0.011582 | 0.011507 | 0.011507 | 0.011656 | 0.011656 | 0.011582 |
| 0.011395 | 0.011507 | 0.011544 | 0.011582 | 0.011507 | 0.011544 | 0.011470 |
| 0.011507 | 0.011358 | 0.011358 | 0.011656 | 0.011619 | 0.011619 | 0.011433 |
| 0.011582 | 0.011619 | 0.011470 | 0.011582 | 0.011470 | 0.011395 | 0.011433 |
| 0.011507 | 0.011433 | 0.011358 | 0.011582 | 0.011433 | 0.011582 | 0.011619 |
| 0.011433 | 0.011588 | 0.011582 | 0.011182 | 0.011173 | 0.011470 | 0.011112 |
| 0.011423 | 0.011566 | 0.011358 | 0.011507 | 0.011353 | 0.011366 | 0.011326 |
| 0.011111 | 0.011258 | 0.011338 | 0.011192 | 0.011276 | 0.011462 | 0.011521 |
| 0.011581 | 0.011461 | 0.011479 | 0.011436 | 0.011509 | 0.011135 | 0.011247 |
| 0.011395 | 0.011508 | 0.011623 | 0.011324 | 0.011660 | 0.011765 | 0.011433 |
| 0.011321 | 0.011544 | 0.011433 | 0.011507 | 0.011358 | 0.011135 | 0.011321 |
| 0.011433 | 0.011433 | 0.011395 | 0.011395 | 0.011395 | 0.011395 | 0.011507 |
| 0.011439 | 0.011481 | 0.011470 | 0.011475 | 0.011662 | 0.011583 | 0.011585 |
| 0.011622 | 0.011470 | 0.011339 | 0.011331 | 0.011470 | 0.011656 | 0.011583 |
| 0.011395 | 0.011507 | 0.011768 | 0.011694 | 0.011619 | 0.011693 | 0.011619 |
| 0.011507 | 0.011619 | 0.011619 | 0.011470 | 0.011806 | 0.011582 | 0.011731 |
| 0.011805 | 0.011457 | 0.011439 | 0.011521 | 0.011433 | 0.011656 | 0.011619 |
| 0.011619 | 0.011619 | 0.011619 | 0.011619 | 0.011714 | 0.011842 | 0.011446 |
| 0.011323 | 0.011330 | 0.011438 | 0.011399 | 0.011402 | 0.011353 | 0.011362 |

|          |          |          |          |          |          |          |
|----------|----------|----------|----------|----------|----------|----------|
| 0.011478 | 0.011305 | 0.011437 | 0.011518 | 0.011470 | 0.011550 | 0.011433 |
| 0.011395 | 0.011321 | 0.011470 | 0.011395 | 0.011358 | 0.011321 | 0.011246 |
| 0.011358 | 0.011433 | 0.011395 | 0.011395 | 0.011433 | 0.011433 | 0.011433 |
| 0.011508 | 0.011470 | 0.011470 | 0.011509 | 0.011135 | 0.011247 | 0.011395 |
| 0.011508 | 0.011623 | 0.011324 | 0.011660 | 0.011765 | 0.011433 | 0.011656 |
| 0.011619 | 0.011619 | 0.011397 | 0.011599 | 0.011560 | 0.011514 | 0.011448 |
| 0.011480 | 0.011769 | 0.011581 | 0.011512 | 0.011395 | 0.011582 | 0.011433 |
| 0.011544 | 0.011470 | 0.011395 | 0.011471 | 0.011619 | 0.011585 | 0.011507 |
| 0.011395 | 0.011322 | 0.011470 | 0.011395 | 0.011321 | 0.011323 | 0.011582 |
| 0.011507 | 0.011433 | 0.011395 | 0.011507 | 0.011433 | 0.011395 | 0.011284 |
| 0.011470 | 0.011507 | 0.011507 | 0.011433 | 0.011507 | 0.011656 | 0.011284 |
| 0.011433 | 0.011544 | 0.011433 | 0.011433 | 0.011433 | 0.011507 | 0.011403 |
| 0.011679 | 0.011273 | 0.011261 | 0.011141 | 0.011223 | 0.011136 | 0.011227 |
| 0.011165 | 0.011321 | 0.011433 | 0.011550 | 0.011395 | 0.011544 | 0.011693 |
| 0.011582 | 0.011623 | 0.011582 | 0.011848 | 0.011470 | 0.012403 | 0.011582 |
| 0.012179 | 0.012066 | 0.012257 | 0.012404 | 0.011433 | 0.011395 | 0.011545 |
| 0.012179 | 0.011731 | 0.011470 | 0.011396 | 0.011433 | 0.011433 | 0.011436 |
| 0.011321 | 0.011321 | 0.011358 | 0.011358 | 0.011619 | 0.011731 | 0.011693 |
| 0.011582 | 0.011694 | 0.011731 | 0.011582 | 0.012142 | 0.012224 | 0.012180 |
| 0.012254 | 0.012254 | 0.012217 | 0.012254 | 0.012254 | 0.011544 | 0.011731 |
| 0.011768 | 0.012291 | 0.011884 | 0.011805 | 0.011619 | 0.011359 | 0.011284 |
| 0.011246 | 0.011246 | 0.011656 | 0.011661 | 0.011813 | 0.011470 | 0.011246 |
| S401     | 0.011839 | 0.011839 | 0.011617 | 0.011542 | 0.011542 | 0.011617 |
| 0.011361 | 0.011248 | 0.011579 | 0.011394 | 0.011431 | 0.011394 | 0.011394 |
| 0.011357 | 0.011579 | 0.011320 | 0.011394 | 0.011431 | 0.011468 | 0.011394 |
| 0.011394 | 0.011431 | 0.011246 | 0.011394 | 0.011394 | 0.011394 | 0.011323 |
| 0.011394 | 0.011431 | 0.011320 | 0.011283 | 0.011431 | 0.011431 | 0.011357 |
| 0.011468 | 0.011542 | 0.011468 | 0.011468 | 0.011505 | 0.011468 | 0.011653 |
| 0.011320 | 0.011431 | 0.011505 | 0.011431 | 0.011468 | 0.011579 | 0.011505 |
| 0.011468 | 0.011654 | 0.011505 | 0.011357 | 0.011468 | 0.011690 | 0.011468 |
| 0.011431 | 0.011468 | 0.011579 | 0.011690 | 0.011357 | 0.011431 | 0.011579 |
| 0.011468 | 0.011505 | 0.011431 | 0.011653 | 0.011431 | 0.011468 | 0.011542 |
| 0.011431 | 0.011468 | 0.011505 | 0.011542 | 0.011468 | 0.011505 | 0.011505 |
| 0.011394 | 0.011394 | 0.011357 | 0.011394 | 0.011468 | 0.011431 | 0.011542 |
| 0.011505 | 0.011468 | 0.011505 | 0.011394 | 0.011431 | 0.011357 | 0.011394 |
| 0.011579 | 0.011579 | 0.011431 | 0.011579 | 0.011468 | 0.011691 | 0.011468 |
| 0.011570 | 0.011376 | 0.011684 | 0.011383 | 0.011365 | 0.011493 | 0.011264 |
| 0.011249 | 0.011213 | 0.011393 | 0.011653 | 0.011579 | 0.011394 | 0.011394 |
| 0.011542 | 0.011468 | 0.011579 | 0.011468 | 0.011542 | 0.011431 | 0.011505 |
| 0.011468 | 0.011468 | 0.011653 | 0.011653 | 0.011542 | 0.011505 | 0.011394 |
| 0.011357 | 0.011320 | 0.011431 | 0.011394 | 0.011357 | 0.011320 | 0.011246 |
| 0.011357 | 0.011431 | 0.011357 | 0.011357 | 0.011357 | 0.011357 | 0.011357 |
| 0.011394 | 0.011468 | 0.011468 | 0.011328 | 0.011372 | 0.011368 | 0.011431 |
| 0.011468 | 0.011394 | 0.011446 | 0.011431 | 0.011360 | 0.011398 | 0.011433 |
| 0.011254 | 0.011438 | 0.011436 | 0.011394 | 0.011394 | 0.011542 | 0.011431 |
| 0.011505 | 0.011468 | 0.011468 | 0.011542 | 0.011542 | 0.011876 | 0.011616 |
| 0.011468 | 0.011542 | 0.011431 | 0.011505 | 0.011357 | 0.011320 | 0.011320 |
| 0.011394 | 0.011394 | 0.011394 | 0.011394 | 0.011394 | 0.011394 | 0.011505 |
| 0.011394 | 0.011505 | 0.011468 | 0.011394 | 0.011470 | 0.011616 | 0.011583 |
| 0.011579 | 0.011505 | 0.011357 | 0.011321 | 0.011468 | 0.011357 | 0.011320 |
| 0.011322 | 0.011579 | 0.011357 | 0.011579 | 0.011357 | 0.011431 | 0.011431 |
| 0.011468 | 0.011431 | 0.011431 | 0.011431 | 0.011468 | 0.011320 | 0.011394 |
| 0.011431 | 0.011431 | 0.011505 | 0.011431 | 0.011468 | 0.011468 | 0.011691 |
| 0.011394 | 0.011246 | 0.011394 | 0.011542 | 0.011394 | 0.011431 | 0.011431 |
| 0.011395 | 0.011728 | 0.011464 | 0.011362 | 0.011397 | 0.011324 | 0.011448 |
| 0.011398 | 0.011322 | 0.011616 | 0.011691 | 0.011551 | 0.011691 | 0.011654 |
| 0.011616 | 0.011728 | 0.011613 | 0.011478 | 0.011519 | 0.011505 | 0.011546 |
| 0.011654 | 0.011544 | 0.011696 | 0.011658 | 0.011542 | 0.011765 | 0.011922 |
| 0.011582 | 0.011660 | 0.011696 | 0.011658 | 0.011877 | 0.011357 | 0.011544 |
| 0.011431 | 0.011394 | 0.011320 | 0.011320 | 0.011394 | 0.011431 | 0.011505 |

|          |          |          |          |          |          |          |
|----------|----------|----------|----------|----------|----------|----------|
| 0.011394 | 0.011431 | 0.011357 | 0.011394 | 0.011394 | 0.011431 | 0.011505 |
| 0.011431 | 0.011394 | 0.011320 | 0.011357 | 0.011320 | 0.011394 | 0.011468 |
| 0.011468 | 0.011357 | 0.011505 | 0.011468 | 0.011394 | 0.011394 | 0.011394 |
| 0.011468 | 0.011468 | 0.011542 | 0.011357 | 0.011468 | 0.011542 | 0.011357 |
| 0.011357 | 0.011394 | 0.011431 | 0.011579 | 0.011394 | 0.011320 | 0.011431 |
| 0.011394 | 0.011431 | 0.011431 | 0.011357 | 0.011357 | 0.011431 | 0.011468 |
| 0.011357 | 0.011468 | 0.011320 | 0.011357 | 0.011505 | 0.011246 | 0.011394 |
| 0.011357 | 0.011505 | 0.011431 | 0.011320 | 0.011209 | 0.011320 | 0.011505 |
| 0.011552 | 0.011394 | 0.011246 | 0.011505 | 0.011505 | 0.011431 | 0.011542 |
| 0.011394 | 0.011690 | 0.011320 | 0.011394 | 0.011320 | 0.011320 | 0.011320 |
| 0.011468 | 0.011357 | 0.011431 | 0.011542 | 0.011320 | 0.011320 | 0.011320 |
| 0.011394 | 0.011394 | 0.011431 | 0.011468 | 0.011431 | 0.011542 | 0.011616 |
| 0.011579 | 0.011542 | 0.011468 | 0.011579 | 0.011505 | 0.011394 | 0.011357 |
| 0.011357 | 0.011394 | 0.011431 | 0.011320 | 0.011320 | 0.011505 | 0.011357 |
| 0.011357 | 0.011394 | 0.011468 | 0.011542 | 0.011468 | 0.011357 | 0.011431 |
| 0.011505 | 0.011394 | 0.011505 | 0.011394 | 0.011542 | 0.011616 | 0.011394 |
| 0.011431 | 0.011320 | 0.011431 | 0.017670 | 0.011322 | 0.011524 | 0.011248 |
| 0.011285 | 0.011285 | 0.011584 | 0.011408 | 0.011401 | 0.011360 | 0.011555 |
| 0.011487 | 0.011253 | 0.011346 | 0.011449 | 0.011340 | 0.011369 | 0.011462 |
| 0.000000 | 0.011291 | 0.000000 | 0.011263 | 0.011542 | 0.011616 | 0.011546 |
| 0.011402 | 0.011542 | 0.011542 | 0.011431 | 0.011468 | 0.011468 | 0.011468 |
| 0.011468 | 0.011431 | 0.011431 | 0.011505 | 0.011431 | 0.011394 | 0.011431 |
| 0.011431 | 0.011468 | 0.011357 | 0.011468 | 0.011542 | 0.011542 | 0.011468 |
| 0.011431 | 0.011394 | 0.011283 | 0.011283 | 0.011542 | 0.011580 | 0.011616 |
| 0.011357 | 0.011357 | 0.011357 | 0.011431 | 0.011357 | 0.011579 | 0.011579 |
| 0.011579 | 0.011616 | 0.011542 | 0.011616 | 0.011394 | 0.011618 | 0.011468 |
| 0.011468 | 0.011542 | 0.011579 | 0.011431 | 0.011431 | 0.011357 | 0.011468 |
| 0.011505 | 0.011505 | 0.011542 | 0.011468 | 0.011432 | 0.011579 | 0.011616 |
| 0.011509 | 0.011357 | 0.011468 | 0.011616 | 0.011431 | 0.011542 | 0.011579 |
| 0.011691 | 0.011551 | 0.011691 | 0.011654 | 0.011616 | 0.011728 | 0.011394 |
| 0.011581 | 0.011468 | 0.011431 | 0.011431 | 0.011468 | 0.011357 | 0.011468 |
| 0.011542 | 0.011542 | 0.011468 | 0.011431 | 0.011394 | 0.011283 | 0.011283 |
| 0.011542 | 0.011580 | 0.011616 | 0.011579 | 0.012174 | 0.011616 | 0.011529 |
| 0.011641 | 0.011598 | 0.011684 | 0.011521 | 0.011681 | 0.011518 | 0.011589 |
| 0.012163 | 0.011482 | 0.011629 | 0.011519 | 0.011822 | 0.011624 | 0.011699 |
| 0.012149 | 0.011565 | 0.011357 | 0.011431 | 0.011394 | 0.011246 | 0.011357 |
| 0.011357 | 0.011357 | 0.011468 | 0.011431 | 0.011394 | 0.011320 | 0.011320 |
| 0.011431 | 0.011357 | 0.011394 | 0.011431 | 0.011320 | 0.011394 | 0.011320 |
| 0.011394 | 0.011431 | 0.011394 | 0.011357 | 0.011468 | 0.011394 | 0.011431 |
| 0.011431 | 0.011357 | 0.011431 | 0.011468 | 0.011357 | 0.011542 | 0.011616 |
| 0.011468 | 0.011505 | 0.011505 | 0.011468 | 0.011431 | 0.011357 | 0.011431 |
| 0.011215 | 0.011394 | 0.011394 | 0.011397 | 0.011505 | 0.011468 | 0.011542 |
| 0.011542 | 0.011431 | 0.011394 | 0.011431 | 0.011579 | 0.011542 | 0.011505 |
| 0.011468 | 0.011579 | 0.011357 | 0.011542 | 0.011653 | 0.011653 | 0.011579 |
| 0.011394 | 0.011468 | 0.011542 | 0.011468 | 0.011468 | 0.011505 | 0.011505 |
| 0.011505 | 0.011357 | 0.011357 | 0.011691 | 0.011654 | 0.011691 | 0.011431 |
| 0.011579 | 0.011616 | 0.011468 | 0.011579 | 0.011468 | 0.011394 | 0.011283 |
| 0.011505 | 0.011431 | 0.011357 | 0.011616 | 0.011431 | 0.011579 | 0.011505 |
| 0.011431 | 0.011398 | 0.011431 | 0.011355 | 0.011230 | 0.011431 | 0.011267 |
| 0.011355 | 0.011583 | 0.011360 | 0.011512 | 0.011357 | 0.011374 | 0.011326 |
| 0.011315 | 0.011258 | 0.011394 | 0.011258 | 0.011276 | 0.011462 | 0.011527 |
| 0.011573 | 0.011429 | 0.011439 | 0.011435 | 0.011507 | 0.011320 | 0.011431 |
| 0.011357 | 0.011506 | 0.011620 | 0.011397 | 0.011695 | 0.011723 | 0.011431 |
| 0.011468 | 0.011542 | 0.011431 | 0.011505 | 0.011357 | 0.011320 | 0.011320 |
| 0.011394 | 0.011394 | 0.011394 | 0.011394 | 0.011394 | 0.011394 | 0.011505 |
| 0.011437 | 0.011480 | 0.011468 | 0.011473 | 0.011660 | 0.011543 | 0.011546 |
| 0.011620 | 0.011431 | 0.011338 | 0.011331 | 0.011468 | 0.011654 | 0.011580 |
| 0.011394 | 0.011505 | 0.011765 | 0.011654 | 0.011616 | 0.011691 | 0.011616 |
| 0.011505 | 0.011579 | 0.011579 | 0.011468 | 0.011654 | 0.011616 | 0.011691 |
| 0.011802 | 0.011296 | 0.011324 | 0.011557 | 0.011431 | 0.011505 | 0.011616 |

|          |          |          |          |          |          |          |
|----------|----------|----------|----------|----------|----------|----------|
| 0.011618 | 0.011579 | 0.011616 | 0.011616 | 0.011621 | 0.011765 | 0.011405 |
| 0.011322 | 0.011328 | 0.011436 | 0.011398 | 0.011400 | 0.011346 | 0.011210 |
| 0.011476 | 0.011203 | 0.011423 | 0.011515 | 0.011468 | 0.011548 | 0.011394 |
| 0.011357 | 0.011320 | 0.011431 | 0.011394 | 0.011357 | 0.011320 | 0.011246 |
| 0.011357 | 0.011431 | 0.011357 | 0.011357 | 0.011357 | 0.011357 | 0.011357 |
| 0.011394 | 0.011468 | 0.011468 | 0.011507 | 0.011320 | 0.011431 | 0.011357 |
| 0.011506 | 0.011620 | 0.011397 | 0.011695 | 0.011723 | 0.011431 | 0.011579 |
| 0.011616 | 0.011616 | 0.011433 | 0.011558 | 0.011558 | 0.011511 | 0.011446 |
| 0.011515 | 0.011762 | 0.011626 | 0.011511 | 0.011357 | 0.011579 | 0.011394 |
| 0.011505 | 0.011468 | 0.011394 | 0.011470 | 0.011616 | 0.011583 | 0.011505 |
| 0.011357 | 0.011321 | 0.011468 | 0.011357 | 0.011320 | 0.011322 | 0.011579 |
| 0.011468 | 0.011431 | 0.011431 | 0.011505 | 0.011431 | 0.011394 | 0.011283 |
| 0.011468 | 0.011505 | 0.011505 | 0.011431 | 0.011505 | 0.011653 | 0.011320 |
| 0.011431 | 0.011357 | 0.011431 | 0.011394 | 0.011431 | 0.011357 | 0.011407 |
| 0.011679 | 0.011281 | 0.011261 | 0.011310 | 0.011355 | 0.011325 | 0.011189 |
| 0.011218 | 0.011320 | 0.011431 | 0.011547 | 0.011394 | 0.011542 | 0.011691 |
| 0.011580 | 0.011620 | 0.011542 | 0.011847 | 0.011468 | 0.012397 | 0.011580 |
| 0.012248 | 0.012062 | 0.012251 | 0.012436 | 0.011505 | 0.011394 | 0.011542 |
| 0.012211 | 0.011728 | 0.011468 | 0.011394 | 0.011468 | 0.011468 | 0.011396 |
| 0.011320 | 0.011320 | 0.011394 | 0.011320 | 0.011617 | 0.011691 | 0.011691 |
| 0.011617 | 0.011728 | 0.011765 | 0.011580 | 0.012174 | 0.012181 | 0.012323 |
| 0.012286 | 0.012286 | 0.012249 | 0.012286 | 0.012286 | 0.011542 | 0.011765 |
| 0.011765 | 0.012322 | 0.011882 | 0.011654 | 0.011505 | 0.011322 | 0.011209 |
| 0.011097 | 0.011172 | 0.011654 | 0.011703 | 0.011854 | 0.011505 | 0.011246 |
| S402     | 0.011722 | 0.011722 | 0.011523 | 0.011391 | 0.011391 | 0.011457 |
| 0.011598 | 0.011396 | 0.011457 | 0.011193 | 0.011259 | 0.011259 | 0.011259 |
| 0.011126 | 0.011457 | 0.000000 | 0.011259 | 0.011259 | 0.011193 | 0.011126 |
| 0.011259 | 0.011126 | 0.000000 | 0.011259 | 0.011193 | 0.011126 | 0.011463 |
| 0.011193 | 0.011193 | 0.011126 | 0.011126 | 0.011325 | 0.011259 | 0.011126 |
| 0.011391 | 0.011523 | 0.011259 | 0.011391 | 0.011126 | 0.011193 | 0.011391 |
| 0.000000 | 0.011193 | 0.011193 | 0.011259 | 0.011259 | 0.011391 | 0.011391 |
| 0.011391 | 0.011325 | 0.011325 | 0.011589 | 0.011126 | 0.011523 | 0.011126 |
| 0.011325 | 0.011259 | 0.011193 | 0.011523 | 0.011391 | 0.011193 | 0.011391 |
| 0.011325 | 0.011457 | 0.011259 | 0.011523 | 0.011523 | 0.011325 | 0.011391 |
| 0.011325 | 0.011259 | 0.011325 | 0.011325 | 0.011325 | 0.011391 | 0.011391 |
| 0.011193 | 0.011193 | 0.011126 | 0.011126 | 0.011325 | 0.011193 | 0.011325 |
| 0.011193 | 0.011391 | 0.011325 | 0.011259 | 0.011325 | 0.011193 | 0.011259 |
| 0.011457 | 0.011457 | 0.011457 | 0.011325 | 0.011193 | 0.011523 | 0.011325 |
| 0.011342 | 0.011489 | 0.011552 | 0.011137 | 0.011129 | 0.011199 | 0.000000 |
| 0.000000 | 0.011248 | 0.011132 | 0.011523 | 0.011457 | 0.011193 | 0.011325 |
| 0.011391 | 0.011325 | 0.011325 | 0.011259 | 0.011325 | 0.011259 | 0.011457 |
| 0.011391 | 0.011325 | 0.011656 | 0.011523 | 0.011391 | 0.011259 | 0.011126 |
| 0.011193 | 0.011126 | 0.011259 | 0.011259 | 0.011193 | 0.011259 | 0.011126 |
| 0.011193 | 0.011193 | 0.011193 | 0.011193 | 0.011193 | 0.011193 | 0.011193 |
| 0.011259 | 0.011259 | 0.011325 | 0.011128 | 0.011195 | 0.011128 | 0.011259 |
| 0.011259 | 0.011193 | 0.011198 | 0.011193 | 0.011195 | 0.011195 | 0.011326 |
| 0.011399 | 0.011195 | 0.011193 | 0.011193 | 0.011259 | 0.011391 | 0.011259 |
| 0.011325 | 0.011259 | 0.011259 | 0.011457 | 0.011325 | 0.011920 | 0.011457 |
| 0.011391 | 0.011325 | 0.011259 | 0.011259 | 0.011126 | 0.011126 | 0.011126 |
| 0.011193 | 0.011259 | 0.011259 | 0.011193 | 0.011193 | 0.011126 | 0.011391 |
| 0.011259 | 0.011325 | 0.011325 | 0.011126 | 0.011259 | 0.011325 | 0.011328 |
| 0.011193 | 0.011193 | 0.011259 | 0.011127 | 0.011193 | 0.011259 | 0.011126 |
| 0.011260 | 0.011193 | 0.011193 | 0.011193 | 0.011126 | 0.011193 | 0.011193 |
| 0.011126 | 0.011325 | 0.011193 | 0.011193 | 0.011193 | 0.011126 | 0.011193 |
| 0.011259 | 0.011193 | 0.011325 | 0.011325 | 0.011325 | 0.011391 | 0.011391 |
| 0.011523 | 0.011325 | 0.011457 | 0.011325 | 0.011457 | 0.011325 | 0.011193 |
| 0.011193 | 0.011448 | 0.011328 | 0.011128 | 0.011596 | 0.011128 | 0.011364 |
| 0.011396 | 0.011462 | 0.011457 | 0.011722 | 0.011395 | 0.011523 | 0.011589 |
| 0.011325 | 0.011523 | 0.011402 | 0.011242 | 0.011318 | 0.011193 | 0.011391 |
| 0.011325 | 0.011524 | 0.011457 | 0.011325 | 0.011391 | 0.011457 | 0.011656 |



|          |          |          |          |          |          |          |
|----------|----------|----------|----------|----------|----------|----------|
| 0.011594 | 0.011325 | 0.011597 | 0.011463 | 0.011722 | 0.011193 | 0.011457 |
| 0.011193 | 0.011126 | 0.011126 | 0.011126 | 0.011259 | 0.011325 | 0.011391 |
| 0.011259 | 0.011193 | 0.011193 | 0.011259 | 0.011193 | 0.011259 | 0.011259 |
| 0.011126 | 0.011523 | 0.011457 | 0.011457 | 0.011126 | 0.011193 | 0.011325 |
| 0.011325 | 0.011259 | 0.011259 | 0.011259 | 0.011193 | 0.011193 | 0.011193 |
| 0.011589 | 0.011259 | 0.011325 | 0.011126 | 0.011193 | 0.011325 | 0.011193 |
| 0.011126 | 0.011193 | 0.011259 | 0.011325 | 0.011193 | 0.011193 | 0.011391 |
| 0.011325 | 0.011259 | 0.011193 | 0.011193 | 0.011193 | 0.011325 | 0.011193 |
| 0.011193 | 0.011259 | 0.011126 | 0.011126 | 0.011259 | 0.011259 | 0.011193 |
| 0.011193 | 0.011325 | 0.011259 | 0.011126 | 0.011259 | 0.011126 | 0.011457 |
| 0.011330 | 0.011259 | 0.011391 | 0.011259 | 0.011325 | 0.011193 | 0.011126 |
| 0.011259 | 0.011523 | 0.011126 | 0.011325 | 0.000000 | 0.000000 | 0.011126 |
| 0.011391 | 0.011457 | 0.011259 | 0.011325 | 0.011126 | 0.011457 | 0.000000 |
| 0.011193 | 0.011193 | 0.011193 | 0.011391 | 0.011325 | 0.011391 | 0.011325 |
| 0.011325 | 0.011193 | 0.011325 | 0.011523 | 0.011325 | 0.011193 | 0.011126 |
| 0.011193 | 0.011193 | 0.011259 | 0.000000 | 0.011126 | 0.011325 | 0.011193 |
| 0.000000 | 0.011259 | 0.011325 | 0.011325 | 0.011259 | 0.011193 | 0.011259 |
| 0.011325 | 0.011259 | 0.011259 | 0.011126 | 0.011391 | 0.011457 | 0.011457 |
| 0.011259 | 0.011391 | 0.011259 | 0.022513 | 0.011271 | 0.000000 | 0.011398 |
| 0.011398 | 0.011465 | 0.011287 | 0.011286 | 0.011575 | 0.011465 | 0.011212 |
| 0.011226 | 0.000000 | 0.011132 | 0.011333 | 0.011129 | 0.011178 | 0.011155 |
| 0.011321 | 0.011127 | 0.011263 | 0.000000 | 0.011391 | 0.011325 | 0.011460 |
| 0.011193 | 0.011259 | 0.011457 | 0.011325 | 0.011193 | 0.011193 | 0.011259 |
| 0.011325 | 0.011325 | 0.011193 | 0.011325 | 0.011193 | 0.011259 | 0.011325 |
| 0.011325 | 0.011259 | 0.011193 | 0.011325 | 0.011391 | 0.011259 | 0.011325 |
| 0.011193 | 0.011193 | 0.011259 | 0.011259 | 0.011325 | 0.011457 | 0.011523 |
| 0.011126 | 0.011193 | 0.011193 | 0.011325 | 0.011193 | 0.011457 | 0.011457 |
| 0.011259 | 0.011457 | 0.011325 | 0.011325 | 0.011457 | 0.011326 | 0.011259 |
| 0.011259 | 0.011259 | 0.011325 | 0.011325 | 0.011325 | 0.011193 | 0.011325 |
| 0.011391 | 0.011391 | 0.011457 | 0.011325 | 0.011260 | 0.011523 | 0.011523 |
| 0.011328 | 0.011193 | 0.011259 | 0.011325 | 0.011325 | 0.011193 | 0.011391 |
| 0.011722 | 0.011395 | 0.011523 | 0.011589 | 0.011325 | 0.011523 | 0.011193 |
| 0.011392 | 0.011391 | 0.011325 | 0.011325 | 0.011259 | 0.011193 | 0.011325 |
| 0.011391 | 0.011259 | 0.011325 | 0.011193 | 0.011193 | 0.011259 | 0.011259 |
| 0.011325 | 0.011457 | 0.011391 | 0.011457 | 0.011855 | 0.011414 | 0.011403 |
| 0.011405 | 0.011396 | 0.011404 | 0.011403 | 0.011401 | 0.011533 | 0.011329 |
| 0.011861 | 0.011332 | 0.011594 | 0.011398 | 0.011463 | 0.011328 | 0.011325 |
| 0.011927 | 0.011284 | 0.011259 | 0.011259 | 0.011193 | 0.011126 | 0.011193 |
| 0.011193 | 0.011193 | 0.011259 | 0.011259 | 0.011259 | 0.011126 | 0.011193 |
| 0.011259 | 0.011126 | 0.011259 | 0.011325 | 0.011126 | 0.011259 | 0.011126 |
| 0.011193 | 0.011259 | 0.011259 | 0.011193 | 0.011325 | 0.011193 | 0.011126 |
| 0.011259 | 0.011126 | 0.011325 | 0.011391 | 0.011193 | 0.011523 | 0.011325 |
| 0.011193 | 0.011325 | 0.011325 | 0.011325 | 0.011193 | 0.011391 | 0.011193 |
| 0.000000 | 0.011259 | 0.011193 | 0.011193 | 0.011391 | 0.011259 | 0.011325 |
| 0.011391 | 0.011259 | 0.011193 | 0.011259 | 0.011391 | 0.011457 | 0.011325 |
| 0.011193 | 0.011523 | 0.011523 | 0.011391 | 0.011589 | 0.011589 | 0.011523 |
| 0.011259 | 0.011259 | 0.011391 | 0.011523 | 0.011325 | 0.011391 | 0.011193 |
| 0.011325 | 0.011126 | 0.011126 | 0.011524 | 0.011523 | 0.011457 | 0.011259 |
| 0.011457 | 0.011391 | 0.011193 | 0.011457 | 0.011325 | 0.011259 | 0.011457 |
| 0.011391 | 0.011193 | 0.011126 | 0.011457 | 0.011259 | 0.011325 | 0.011656 |
| 0.011259 | 0.011665 | 0.011523 | 0.011135 | 0.000000 | 0.011325 | 0.011142 |
| 0.000000 | 0.011473 | 0.011193 | 0.011442 | 0.000000 | 0.011150 | 0.011240 |
| 0.011145 | 0.011174 | 0.011420 | 0.011170 | 0.011153 | 0.011387 | 0.011270 |
| 0.011340 | 0.011198 | 0.011195 | 0.011259 | 0.011392 | 0.011126 | 0.011325 |
| 0.011193 | 0.011325 | 0.011394 | 0.011260 | 0.011393 | 0.011549 | 0.011259 |
| 0.011391 | 0.011325 | 0.011259 | 0.011259 | 0.011126 | 0.011126 | 0.011126 |
| 0.011193 | 0.011259 | 0.011259 | 0.011193 | 0.011193 | 0.011126 | 0.011391 |
| 0.011194 | 0.011196 | 0.011259 | 0.011397 | 0.011397 | 0.011259 | 0.011393 |
| 0.011459 | 0.011259 | 0.011131 | 0.011130 | 0.011259 | 0.011523 | 0.011325 |
| 0.011126 | 0.011391 | 0.011523 | 0.011722 | 0.011523 | 0.011523 | 0.011523 |

|          |          |          |          |          |          |          |
|----------|----------|----------|----------|----------|----------|----------|
| 0.011126 | 0.011391 | 0.011457 | 0.011325 | 0.011987 | 0.011457 | 0.011391 |
| 0.011590 | 0.011471 | 0.011195 | 0.011334 | 0.011193 | 0.011457 | 0.011325 |
| 0.011590 | 0.011391 | 0.011325 | 0.011325 | 0.011446 | 0.011854 | 0.011194 |
| 0.011126 | 0.011127 | 0.011193 | 0.011259 | 0.011194 | 0.011132 | 0.011325 |
| 0.011193 | 0.011228 | 0.011154 | 0.011282 | 0.011391 | 0.011464 | 0.011126 |
| 0.011193 | 0.011126 | 0.011259 | 0.011259 | 0.011193 | 0.011259 | 0.011126 |
| 0.011193 | 0.011193 | 0.011193 | 0.011193 | 0.011193 | 0.011193 | 0.011193 |
| 0.011259 | 0.011259 | 0.011325 | 0.011392 | 0.011126 | 0.011325 | 0.011193 |
| 0.011325 | 0.011394 | 0.011260 | 0.011393 | 0.011549 | 0.011259 | 0.011391 |
| 0.011325 | 0.011325 | 0.011194 | 0.011334 | 0.011474 | 0.011462 | 0.011268 |
| 0.011197 | 0.011610 | 0.011410 | 0.011262 | 0.011193 | 0.011193 | 0.011259 |
| 0.011325 | 0.011325 | 0.011126 | 0.011259 | 0.011325 | 0.011328 | 0.011193 |
| 0.011259 | 0.011127 | 0.011193 | 0.011259 | 0.011126 | 0.011260 | 0.011193 |
| 0.011325 | 0.011325 | 0.011193 | 0.011325 | 0.011193 | 0.011259 | 0.000000 |
| 0.011259 | 0.011457 | 0.011193 | 0.011325 | 0.011325 | 0.011589 | 0.000000 |
| 0.011325 | 0.011391 | 0.011325 | 0.011259 | 0.011193 | 0.011589 | 0.011137 |
| 0.011419 | 0.011209 | 0.011152 | 0.011132 | 0.011203 | 0.011126 | 0.011139 |
| 0.000000 | 0.011193 | 0.011259 | 0.011330 | 0.011259 | 0.011391 | 0.011589 |
| 0.011457 | 0.011590 | 0.011523 | 0.011656 | 0.011325 | 0.011987 | 0.011391 |
| 0.012186 | 0.011656 | 0.011855 | 0.012254 | 0.011193 | 0.011193 | 0.011325 |
| 0.011921 | 0.011457 | 0.011391 | 0.011259 | 0.011325 | 0.011325 | 0.011127 |
| 0.011193 | 0.011193 | 0.011259 | 0.011193 | 0.011457 | 0.011523 | 0.011655 |
| 0.011523 | 0.011656 | 0.011656 | 0.011457 | 0.011921 | 0.011929 | 0.011988 |
| 0.012120 | 0.011788 | 0.011987 | 0.011855 | 0.011987 | 0.011325 | 0.011391 |
| 0.011457 | 0.011722 | 0.011594 | 0.011788 | 0.011590 | 0.011326 | 0.011259 |
| 0.011193 | 0.011193 | 0.011523 | 0.011535 | 0.011987 | 0.011325 | 0.011193 |
| S403     | 0.011765 | 0.011765 | 0.012102 | 0.011866 | 0.011866 | 0.011933 |
| 0.011773 | 0.011705 | 0.011933 | 0.011362 | 0.011429 | 0.011397 | 0.011362 |
| 0.011396 | 0.011564 | 0.011362 | 0.011396 | 0.011463 | 0.011429 | 0.011396 |
| 0.011362 | 0.011396 | 0.011496 | 0.011363 | 0.011396 | 0.011396 | 0.011739 |
| 0.011631 | 0.011396 | 0.011295 | 0.011530 | 0.011463 | 0.011429 | 0.011463 |
| 0.011429 | 0.011530 | 0.011429 | 0.011429 | 0.011463 | 0.011429 | 0.011597 |
| 0.011362 | 0.011429 | 0.011463 | 0.011396 | 0.011496 | 0.011530 | 0.011463 |
| 0.011429 | 0.011597 | 0.011497 | 0.011765 | 0.011429 | 0.011698 | 0.011429 |
| 0.011396 | 0.011497 | 0.011564 | 0.011698 | 0.011799 | 0.011497 | 0.011597 |
| 0.011463 | 0.011530 | 0.011429 | 0.011664 | 0.011900 | 0.011429 | 0.011497 |
| 0.011396 | 0.011496 | 0.011463 | 0.011530 | 0.011463 | 0.011463 | 0.011463 |
| 0.011362 | 0.011396 | 0.011362 | 0.011463 | 0.011429 | 0.011464 | 0.011530 |
| 0.011329 | 0.011429 | 0.011497 | 0.011396 | 0.011530 | 0.011362 | 0.011429 |
| 0.011597 | 0.011530 | 0.011765 | 0.011597 | 0.011429 | 0.011664 | 0.011429 |
| 0.011616 | 0.011845 | 0.011588 | 0.011334 | 0.011284 | 0.011465 | 0.011533 |
| 0.012158 | 0.011569 | 0.011307 | 0.011664 | 0.011664 | 0.011463 | 0.011564 |
| 0.011497 | 0.011463 | 0.011530 | 0.011429 | 0.011530 | 0.011463 | 0.011463 |
| 0.011429 | 0.011530 | 0.011732 | 0.011597 | 0.011362 | 0.011463 | 0.011396 |
| 0.011362 | 0.011362 | 0.011430 | 0.011396 | 0.011597 | 0.011564 | 0.011497 |
| 0.011597 | 0.011665 | 0.011396 | 0.011396 | 0.011430 | 0.011429 | 0.011432 |
| 0.011500 | 0.011430 | 0.011430 | 0.011276 | 0.011313 | 0.011306 | 0.011430 |
| 0.011433 | 0.011370 | 0.011355 | 0.011405 | 0.011332 | 0.011369 | 0.011398 |
| 0.011636 | 0.011439 | 0.011439 | 0.011363 | 0.011371 | 0.011498 | 0.011464 |
| 0.011531 | 0.011465 | 0.011464 | 0.011564 | 0.011496 | 0.011866 | 0.011665 |
| 0.011698 | 0.011564 | 0.011429 | 0.011530 | 0.011329 | 0.011564 | 0.011362 |
| 0.011429 | 0.011429 | 0.011396 | 0.011362 | 0.011396 | 0.011362 | 0.011463 |
| 0.011430 | 0.011530 | 0.011463 | 0.011362 | 0.011465 | 0.011564 | 0.011567 |
| 0.011564 | 0.011463 | 0.011362 | 0.011296 | 0.011429 | 0.011362 | 0.011295 |
| 0.011366 | 0.011564 | 0.011362 | 0.011564 | 0.011329 | 0.011295 | 0.011396 |
| 0.011497 | 0.011396 | 0.011430 | 0.011396 | 0.011430 | 0.011295 | 0.011430 |
| 0.011463 | 0.011396 | 0.011463 | 0.011396 | 0.011430 | 0.011463 | 0.011698 |
| 0.011799 | 0.011732 | 0.011799 | 0.011566 | 0.011799 | 0.011429 | 0.011396 |
| 0.011432 | 0.011707 | 0.011518 | 0.011335 | 0.011807 | 0.011265 | 0.011375 |
| 0.011807 | 0.011706 | 0.011597 | 0.011799 | 0.011504 | 0.011664 | 0.011631 |

|          |          |          |          |          |          |          |
|----------|----------|----------|----------|----------|----------|----------|
| 0.011564 | 0.011732 | 0.011558 | 0.011431 | 0.011479 | 0.011463 | 0.011534 |
| 0.011631 | 0.011532 | 0.011669 | 0.011737 | 0.011665 | 0.011732 | 0.011839 |
| 0.011568 | 0.011739 | 0.011670 | 0.011601 | 0.011868 | 0.011329 | 0.011532 |
| 0.011496 | 0.011429 | 0.011329 | 0.011329 | 0.011396 | 0.011396 | 0.011463 |
| 0.011396 | 0.011463 | 0.011362 | 0.011463 | 0.011396 | 0.011396 | 0.011463 |
| 0.011396 | 0.011832 | 0.011732 | 0.011765 | 0.011295 | 0.011396 | 0.011429 |
| 0.011295 | 0.011396 | 0.011463 | 0.011497 | 0.011362 | 0.011362 | 0.011362 |
| 0.011900 | 0.011530 | 0.011530 | 0.011329 | 0.011429 | 0.011597 | 0.011362 |
| 0.011362 | 0.011429 | 0.011396 | 0.011564 | 0.011362 | 0.011497 | 0.011631 |
| 0.011564 | 0.011396 | 0.011396 | 0.011329 | 0.011329 | 0.011497 | 0.011429 |
| 0.011329 | 0.011429 | 0.011295 | 0.011329 | 0.011463 | 0.011598 | 0.011362 |
| 0.011329 | 0.011463 | 0.011396 | 0.011295 | 0.011631 | 0.011295 | 0.011463 |
| 0.011540 | 0.011362 | 0.011664 | 0.011497 | 0.011530 | 0.011396 | 0.011497 |
| 0.011362 | 0.011698 | 0.011295 | 0.011564 | 0.011362 | 0.011362 | 0.011295 |
| 0.011530 | 0.011732 | 0.011429 | 0.011497 | 0.011329 | 0.011732 | 0.011362 |
| 0.011362 | 0.011362 | 0.011396 | 0.011497 | 0.011396 | 0.011497 | 0.011564 |
| 0.011564 | 0.011530 | 0.011429 | 0.011530 | 0.011496 | 0.011362 | 0.011329 |
| 0.011362 | 0.011362 | 0.011429 | 0.011362 | 0.011329 | 0.011497 | 0.011362 |
| 0.011396 | 0.011396 | 0.011530 | 0.011564 | 0.011463 | 0.011396 | 0.011396 |
| 0.011463 | 0.011396 | 0.011496 | 0.011362 | 0.011497 | 0.011597 | 0.011900 |
| 0.011396 | 0.011799 | 0.011405 | 0.017899 | 0.011322 | 0.011488 | 0.011758 |
| 0.011718 | 0.011764 | 0.011479 | 0.011350 | 0.011719 | 0.011785 | 0.011364 |
| 0.011629 | 0.011549 | 0.011294 | 0.011395 | 0.011412 | 0.011406 | 0.011404 |
| 0.011623 | 0.011544 | 0.011542 | 0.011391 | 0.000000 | 0.011564 | 0.011568 |
| 0.011438 | 0.011530 | 0.011530 | 0.011497 | 0.011463 | 0.011463 | 0.011430 |
| 0.011463 | 0.011396 | 0.011429 | 0.011463 | 0.011295 | 0.011362 | 0.011396 |
| 0.011396 | 0.011463 | 0.011362 | 0.011463 | 0.011497 | 0.011530 | 0.011429 |
| 0.011463 | 0.011430 | 0.011766 | 0.011766 | 0.011497 | 0.011531 | 0.011564 |
| 0.011329 | 0.011329 | 0.011362 | 0.011463 | 0.011329 | 0.011564 | 0.011564 |
| 0.011597 | 0.011597 | 0.011396 | 0.011631 | 0.011799 | 0.011633 | 0.011463 |
| 0.011463 | 0.011530 | 0.011564 | 0.011396 | 0.011463 | 0.011430 | 0.011463 |
| 0.011531 | 0.011530 | 0.011564 | 0.011531 | 0.011431 | 0.011631 | 0.011598 |
| 0.011467 | 0.011362 | 0.011463 | 0.011564 | 0.011463 | 0.011598 | 0.011631 |
| 0.011799 | 0.011504 | 0.011664 | 0.011631 | 0.011564 | 0.011732 | 0.011363 |
| 0.011532 | 0.011430 | 0.011396 | 0.011396 | 0.011463 | 0.011362 | 0.011463 |
| 0.011497 | 0.011530 | 0.011429 | 0.011463 | 0.011430 | 0.011766 | 0.011766 |
| 0.011497 | 0.011531 | 0.011597 | 0.011530 | 0.012170 | 0.011596 | 0.011517 |
| 0.011587 | 0.011546 | 0.011658 | 0.011545 | 0.011655 | 0.011577 | 0.011543 |
| 0.012125 | 0.011441 | 0.011574 | 0.011510 | 0.011783 | 0.011638 | 0.011741 |
| 0.012148 | 0.011588 | 0.011703 | 0.011765 | 0.011631 | 0.011631 | 0.011668 |
| 0.011329 | 0.011497 | 0.011631 | 0.011597 | 0.011601 | 0.011597 | 0.011565 |
| 0.011429 | 0.011362 | 0.011396 | 0.011429 | 0.011329 | 0.011396 | 0.011295 |
| 0.011429 | 0.011463 | 0.011362 | 0.011329 | 0.011429 | 0.011362 | 0.011396 |
| 0.011396 | 0.011329 | 0.011396 | 0.011429 | 0.011329 | 0.011530 | 0.011564 |
| 0.011463 | 0.011530 | 0.011463 | 0.011463 | 0.011396 | 0.011799 | 0.011429 |
| 0.011478 | 0.011396 | 0.011631 | 0.011637 | 0.011497 | 0.011496 | 0.011497 |
| 0.011497 | 0.011429 | 0.011396 | 0.011429 | 0.011530 | 0.011530 | 0.011329 |
| 0.011463 | 0.011597 | 0.011765 | 0.011496 | 0.011698 | 0.011698 | 0.011564 |
| 0.011396 | 0.011463 | 0.011497 | 0.011900 | 0.011463 | 0.011497 | 0.011329 |
| 0.011497 | 0.011429 | 0.011429 | 0.011732 | 0.011665 | 0.011698 | 0.011429 |
| 0.011530 | 0.011597 | 0.011463 | 0.011530 | 0.011496 | 0.011362 | 0.011698 |
| 0.011463 | 0.011429 | 0.011429 | 0.011597 | 0.011429 | 0.011530 | 0.011765 |
| 0.011463 | 0.011841 | 0.011832 | 0.011629 | 0.011342 | 0.011536 | 0.011370 |
| 0.011280 | 0.011839 | 0.011341 | 0.011507 | 0.011402 | 0.011467 | 0.011432 |
| 0.011621 | 0.011324 | 0.011394 | 0.011258 | 0.011330 | 0.011462 | 0.011506 |
| 0.011550 | 0.011414 | 0.011518 | 0.011448 | 0.011465 | 0.011597 | 0.011665 |
| 0.011665 | 0.011531 | 0.011635 | 0.011636 | 0.011772 | 0.011802 | 0.011463 |
| 0.011698 | 0.011564 | 0.011429 | 0.011530 | 0.011329 | 0.011564 | 0.011362 |
| 0.011429 | 0.011429 | 0.011396 | 0.011362 | 0.011396 | 0.011362 | 0.011463 |
| 0.011444 | 0.011445 | 0.011437 | 0.011471 | 0.011608 | 0.011573 | 0.011572 |

|          |          |          |          |          |          |          |
|----------|----------|----------|----------|----------|----------|----------|
| 0.011571 | 0.011497 | 0.011319 | 0.011312 | 0.011433 | 0.011602 | 0.011603 |
| 0.011396 | 0.011467 | 0.011700 | 0.011669 | 0.011598 | 0.011632 | 0.011564 |
| 0.011496 | 0.011564 | 0.011564 | 0.011463 | 0.012034 | 0.011631 | 0.011698 |
| 0.011732 | 0.011808 | 0.011435 | 0.011095 | 0.011396 | 0.011597 | 0.011564 |
| 0.011598 | 0.011631 | 0.011631 | 0.011631 | 0.011768 | 0.011765 | 0.011407 |
| 0.011297 | 0.011303 | 0.011401 | 0.011366 | 0.011470 | 0.011284 | 0.011638 |
| 0.011437 | 0.011543 | 0.011298 | 0.011472 | 0.011430 | 0.011505 | 0.011396 |
| 0.011362 | 0.011362 | 0.011430 | 0.011396 | 0.011597 | 0.011564 | 0.011497 |
| 0.011597 | 0.011665 | 0.011396 | 0.011396 | 0.011430 | 0.011429 | 0.011432 |
| 0.011500 | 0.011430 | 0.011430 | 0.011465 | 0.011597 | 0.011665 | 0.011665 |
| 0.011531 | 0.011635 | 0.011636 | 0.011772 | 0.011802 | 0.011463 | 0.011631 |
| 0.011564 | 0.011564 | 0.011398 | 0.011582 | 0.011477 | 0.011537 | 0.011411 |
| 0.011542 | 0.011789 | 0.011568 | 0.011468 | 0.011362 | 0.011564 | 0.011430 |
| 0.011530 | 0.011463 | 0.011362 | 0.011465 | 0.011564 | 0.011567 | 0.011463 |
| 0.011362 | 0.011296 | 0.011429 | 0.011362 | 0.011295 | 0.011366 | 0.011564 |
| 0.011463 | 0.011396 | 0.011429 | 0.011463 | 0.011295 | 0.011362 | 0.011564 |
| 0.011429 | 0.011463 | 0.011463 | 0.011396 | 0.011463 | 0.011698 | 0.011362 |
| 0.011396 | 0.011799 | 0.011396 | 0.011429 | 0.011396 | 0.011765 | 0.011317 |
| 0.011791 | 0.011315 | 0.011411 | 0.011584 | 0.011671 | 0.011563 | 0.011269 |
| 0.011375 | 0.011564 | 0.011664 | 0.011773 | 0.011633 | 0.011771 | 0.011901 |
| 0.011801 | 0.011838 | 0.011799 | 0.012051 | 0.011765 | 0.012640 | 0.011802 |
| 0.012541 | 0.012308 | 0.012442 | 0.012680 | 0.011765 | 0.011463 | 0.011766 |
| 0.012205 | 0.012140 | 0.011732 | 0.011631 | 0.011699 | 0.011699 | 0.011669 |
| 0.011564 | 0.011569 | 0.011631 | 0.011598 | 0.011968 | 0.012034 | 0.012036 |
| 0.011935 | 0.012036 | 0.012139 | 0.011906 | 0.012205 | 0.012212 | 0.012272 |
| 0.012273 | 0.012307 | 0.012255 | 0.012273 | 0.012275 | 0.011496 | 0.011800 |
| 0.011868 | 0.012371 | 0.011874 | 0.012102 | 0.012575 | 0.011570 | 0.011531 |
| 0.011496 | 0.011496 | 0.011968 | 0.011965 | 0.012116 | 0.011832 | 0.011498 |
| S404     | 0.011262 | 0.011262 | 0.012135 | 0.011900 | 0.011900 | 0.011967 |
| 0.011808 | 0.011740 | 0.011933 | 0.011396 | 0.011463 | 0.011430 | 0.011396 |
| 0.011429 | 0.011597 | 0.011396 | 0.011429 | 0.011497 | 0.011463 | 0.011429 |
| 0.011396 | 0.011429 | 0.011530 | 0.011396 | 0.011430 | 0.011429 | 0.011773 |
| 0.011665 | 0.011429 | 0.011329 | 0.011564 | 0.011497 | 0.011463 | 0.011497 |
| 0.011463 | 0.011564 | 0.011463 | 0.011463 | 0.011497 | 0.011463 | 0.011631 |
| 0.011396 | 0.011463 | 0.011497 | 0.011429 | 0.011530 | 0.011564 | 0.011497 |
| 0.011463 | 0.011631 | 0.011531 | 0.011799 | 0.011463 | 0.011732 | 0.011463 |
| 0.011429 | 0.011530 | 0.011597 | 0.011732 | 0.011833 | 0.011530 | 0.011631 |
| 0.011497 | 0.011564 | 0.011463 | 0.011698 | 0.011934 | 0.011463 | 0.011530 |
| 0.011429 | 0.011530 | 0.011497 | 0.011564 | 0.011497 | 0.011497 | 0.011497 |
| 0.011396 | 0.011429 | 0.011396 | 0.011497 | 0.011463 | 0.011498 | 0.011564 |
| 0.011497 | 0.011463 | 0.011530 | 0.011429 | 0.011564 | 0.011396 | 0.011463 |
| 0.011631 | 0.011564 | 0.011799 | 0.011631 | 0.011463 | 0.011698 | 0.011463 |
| 0.011616 | 0.011845 | 0.011664 | 0.011373 | 0.011396 | 0.011465 | 0.011572 |
| 0.012231 | 0.011620 | 0.011348 | 0.011698 | 0.011698 | 0.011497 | 0.011597 |
| 0.011530 | 0.011429 | 0.011362 | 0.011463 | 0.011564 | 0.011497 | 0.011362 |
| 0.011396 | 0.011564 | 0.011698 | 0.011631 | 0.011530 | 0.011497 | 0.011430 |
| 0.011396 | 0.011396 | 0.011463 | 0.011430 | 0.011631 | 0.011598 | 0.011530 |
| 0.011631 | 0.011698 | 0.011430 | 0.011430 | 0.011463 | 0.011463 | 0.011466 |
| 0.011534 | 0.011463 | 0.011463 | 0.011348 | 0.011422 | 0.011376 | 0.011464 |
| 0.011467 | 0.011404 | 0.011466 | 0.011440 | 0.011366 | 0.011403 | 0.011432 |
| 0.011708 | 0.011474 | 0.011508 | 0.011396 | 0.011406 | 0.011531 | 0.011497 |
| 0.011565 | 0.011498 | 0.011497 | 0.011463 | 0.011262 | 0.011900 | 0.011698 |
| 0.011732 | 0.011597 | 0.011463 | 0.011564 | 0.011362 | 0.011597 | 0.011396 |
| 0.011463 | 0.011463 | 0.011430 | 0.011396 | 0.011429 | 0.011396 | 0.011497 |
| 0.011463 | 0.011564 | 0.011497 | 0.011396 | 0.011498 | 0.011598 | 0.011601 |
| 0.011598 | 0.011497 | 0.011396 | 0.011330 | 0.011463 | 0.011396 | 0.011329 |
| 0.011434 | 0.011598 | 0.011396 | 0.011598 | 0.011362 | 0.011463 | 0.011430 |
| 0.011530 | 0.011430 | 0.011463 | 0.011430 | 0.011463 | 0.011329 | 0.011463 |
| 0.011497 | 0.011430 | 0.011497 | 0.011430 | 0.011329 | 0.011497 | 0.011732 |
| 0.011833 | 0.011765 | 0.011833 | 0.011600 | 0.011833 | 0.011329 | 0.011430 |

|          |          |          |          |          |          |          |
|----------|----------|----------|----------|----------|----------|----------|
| 0.011466 | 0.011788 | 0.011518 | 0.011369 | 0.011841 | 0.011333 | 0.011414 |
| 0.011841 | 0.011740 | 0.011597 | 0.011766 | 0.011333 | 0.011698 | 0.011665 |
| 0.011597 | 0.011765 | 0.011451 | 0.011349 | 0.011438 | 0.011497 | 0.011500 |
| 0.011665 | 0.011431 | 0.011669 | 0.011771 | 0.011564 | 0.011698 | 0.011738 |
| 0.011466 | 0.011739 | 0.011467 | 0.011635 | 0.011834 | 0.011362 | 0.011566 |
| 0.011530 | 0.011463 | 0.011362 | 0.011362 | 0.011429 | 0.011429 | 0.011497 |
| 0.011429 | 0.011497 | 0.011396 | 0.011497 | 0.011429 | 0.011429 | 0.011497 |
| 0.011429 | 0.011866 | 0.011765 | 0.011799 | 0.011329 | 0.011429 | 0.011463 |
| 0.011463 | 0.011429 | 0.011497 | 0.011530 | 0.011396 | 0.011396 | 0.011396 |
| 0.011933 | 0.011564 | 0.011564 | 0.011362 | 0.011463 | 0.011631 | 0.011396 |
| 0.011396 | 0.011463 | 0.011429 | 0.011597 | 0.011396 | 0.011530 | 0.011665 |
| 0.011597 | 0.011429 | 0.011429 | 0.011362 | 0.011362 | 0.011530 | 0.011463 |
| 0.011362 | 0.011463 | 0.011329 | 0.011362 | 0.011497 | 0.011631 | 0.011396 |
| 0.011363 | 0.011497 | 0.011430 | 0.011329 | 0.011665 | 0.011329 | 0.011497 |
| 0.011437 | 0.011396 | 0.011698 | 0.011530 | 0.011564 | 0.011429 | 0.011530 |
| 0.011396 | 0.011732 | 0.011329 | 0.011597 | 0.011396 | 0.011396 | 0.011329 |
| 0.011564 | 0.011766 | 0.011463 | 0.011530 | 0.011362 | 0.011765 | 0.011396 |
| 0.011396 | 0.011396 | 0.011429 | 0.011530 | 0.011429 | 0.011530 | 0.011597 |
| 0.011597 | 0.011564 | 0.011463 | 0.011564 | 0.011530 | 0.011396 | 0.011362 |
| 0.011396 | 0.011396 | 0.011463 | 0.011396 | 0.011362 | 0.011530 | 0.011396 |
| 0.011429 | 0.011429 | 0.011564 | 0.011597 | 0.011497 | 0.011429 | 0.011430 |
| 0.011497 | 0.011429 | 0.011530 | 0.011396 | 0.011530 | 0.011631 | 0.011933 |
| 0.011429 | 0.011833 | 0.011440 | 0.017975 | 0.011387 | 0.011611 | 0.011793 |
| 0.011752 | 0.011799 | 0.011532 | 0.011466 | 0.011939 | 0.011820 | 0.011546 |
| 0.011629 | 0.011732 | 0.011333 | 0.011437 | 0.011451 | 0.011505 | 0.011447 |
| 0.011623 | 0.011619 | 0.011616 | 0.011325 | 0.011564 | 0.000000 | 0.011534 |
| 0.011438 | 0.011564 | 0.011564 | 0.011530 | 0.011497 | 0.011497 | 0.011463 |
| 0.011497 | 0.011429 | 0.011463 | 0.011497 | 0.011463 | 0.011396 | 0.011295 |
| 0.011295 | 0.011497 | 0.011396 | 0.011497 | 0.011530 | 0.011564 | 0.011329 |
| 0.011497 | 0.011463 | 0.011799 | 0.011799 | 0.011530 | 0.011565 | 0.011598 |
| 0.011362 | 0.011362 | 0.011396 | 0.011497 | 0.011362 | 0.011598 | 0.011598 |
| 0.011631 | 0.011597 | 0.011564 | 0.011665 | 0.011833 | 0.011666 | 0.011497 |
| 0.011497 | 0.011564 | 0.011597 | 0.011430 | 0.011497 | 0.011463 | 0.011497 |
| 0.011564 | 0.011564 | 0.011597 | 0.011564 | 0.011464 | 0.011665 | 0.011631 |
| 0.011501 | 0.011396 | 0.011497 | 0.011598 | 0.011497 | 0.011631 | 0.011664 |
| 0.011766 | 0.011333 | 0.011698 | 0.011665 | 0.011597 | 0.011765 | 0.011396 |
| 0.011566 | 0.011464 | 0.011295 | 0.011295 | 0.011497 | 0.011396 | 0.011497 |
| 0.011530 | 0.011564 | 0.011329 | 0.011497 | 0.011463 | 0.011799 | 0.011799 |
| 0.011530 | 0.011565 | 0.011362 | 0.011295 | 0.012171 | 0.011560 | 0.011377 |
| 0.011588 | 0.011546 | 0.011622 | 0.011511 | 0.011620 | 0.011509 | 0.011577 |
| 0.012056 | 0.011303 | 0.011437 | 0.011406 | 0.011715 | 0.011639 | 0.011741 |
| 0.012080 | 0.011550 | 0.011703 | 0.011732 | 0.011664 | 0.011665 | 0.011669 |
| 0.011362 | 0.011530 | 0.011664 | 0.011631 | 0.011635 | 0.011631 | 0.011599 |
| 0.011463 | 0.011396 | 0.011429 | 0.011463 | 0.011362 | 0.011429 | 0.011329 |
| 0.011463 | 0.011497 | 0.011396 | 0.011362 | 0.011463 | 0.011396 | 0.011429 |
| 0.011429 | 0.011362 | 0.011429 | 0.011463 | 0.011362 | 0.011564 | 0.011597 |
| 0.011497 | 0.011564 | 0.011497 | 0.011497 | 0.011429 | 0.011833 | 0.011463 |
| 0.011478 | 0.011430 | 0.011665 | 0.011671 | 0.011530 | 0.011530 | 0.011530 |
| 0.011530 | 0.011463 | 0.011429 | 0.011463 | 0.011564 | 0.011564 | 0.011497 |
| 0.011497 | 0.011631 | 0.011799 | 0.011530 | 0.011732 | 0.011732 | 0.011597 |
| 0.011429 | 0.011497 | 0.011530 | 0.011934 | 0.011497 | 0.011530 | 0.011497 |
| 0.011530 | 0.011463 | 0.011463 | 0.011766 | 0.011698 | 0.011732 | 0.011463 |
| 0.011564 | 0.011631 | 0.011497 | 0.011564 | 0.011530 | 0.011396 | 0.011732 |
| 0.011497 | 0.011463 | 0.011463 | 0.011631 | 0.011463 | 0.011564 | 0.011799 |
| 0.011497 | 0.011875 | 0.011866 | 0.011670 | 0.011399 | 0.011570 | 0.011370 |
| 0.011500 | 0.011917 | 0.011411 | 0.011641 | 0.011402 | 0.011518 | 0.011538 |
| 0.011672 | 0.011389 | 0.011506 | 0.011390 | 0.011384 | 0.011596 | 0.011506 |
| 0.011550 | 0.011454 | 0.011553 | 0.011483 | 0.011498 | 0.011631 | 0.011698 |
| 0.011698 | 0.011565 | 0.011669 | 0.011670 | 0.011806 | 0.011838 | 0.011497 |
| 0.011732 | 0.011597 | 0.011463 | 0.011564 | 0.011362 | 0.011597 | 0.011396 |

|          |          |          |          |          |          |          |
|----------|----------|----------|----------|----------|----------|----------|
| 0.011463 | 0.011463 | 0.011430 | 0.011396 | 0.011429 | 0.011396 | 0.011497 |
| 0.011479 | 0.011480 | 0.011471 | 0.011505 | 0.011642 | 0.011607 | 0.011606 |
| 0.011605 | 0.011531 | 0.011319 | 0.011348 | 0.011467 | 0.011636 | 0.011637 |
| 0.011430 | 0.011501 | 0.011734 | 0.011702 | 0.011632 | 0.011666 | 0.011329 |
| 0.011530 | 0.011530 | 0.011530 | 0.011497 | 0.012035 | 0.011665 | 0.011732 |
| 0.011766 | 0.011844 | 0.011470 | 0.011545 | 0.011430 | 0.011497 | 0.000000 |
| 0.011632 | 0.011530 | 0.011665 | 0.011665 | 0.011768 | 0.011665 | 0.011442 |
| 0.011331 | 0.011303 | 0.011401 | 0.011400 | 0.011504 | 0.011321 | 0.011672 |
| 0.011472 | 0.011543 | 0.011298 | 0.011397 | 0.011464 | 0.011539 | 0.011430 |
| 0.011396 | 0.011396 | 0.011463 | 0.011430 | 0.011631 | 0.011598 | 0.011530 |
| 0.011631 | 0.011698 | 0.011430 | 0.011430 | 0.011463 | 0.011463 | 0.011466 |
| 0.011534 | 0.011463 | 0.011463 | 0.011498 | 0.011631 | 0.011698 | 0.011698 |
| 0.011565 | 0.011669 | 0.011670 | 0.011806 | 0.011838 | 0.011497 | 0.011664 |
| 0.000000 | 0.000000 | 0.011432 | 0.011617 | 0.011547 | 0.011571 | 0.011446 |
| 0.011611 | 0.011790 | 0.011653 | 0.011502 | 0.011396 | 0.011598 | 0.011463 |
| 0.011564 | 0.011497 | 0.011396 | 0.011498 | 0.011598 | 0.011601 | 0.011497 |
| 0.011396 | 0.011330 | 0.011463 | 0.011396 | 0.011329 | 0.011434 | 0.011598 |
| 0.011497 | 0.011429 | 0.011463 | 0.011497 | 0.011463 | 0.011396 | 0.011598 |
| 0.011463 | 0.011497 | 0.011497 | 0.011429 | 0.011497 | 0.011732 | 0.011396 |
| 0.011429 | 0.011833 | 0.011429 | 0.011463 | 0.011429 | 0.011799 | 0.011403 |
| 0.011903 | 0.011358 | 0.011411 | 0.011624 | 0.011671 | 0.011635 | 0.011353 |
| 0.011375 | 0.011597 | 0.011698 | 0.011807 | 0.011666 | 0.011805 | 0.011935 |
| 0.011834 | 0.011872 | 0.011833 | 0.012086 | 0.011799 | 0.012539 | 0.011835 |
| 0.012574 | 0.012207 | 0.012341 | 0.012748 | 0.011799 | 0.011497 | 0.011799 |
| 0.012205 | 0.012174 | 0.011765 | 0.011665 | 0.011733 | 0.011733 | 0.011703 |
| 0.011597 | 0.011603 | 0.011665 | 0.011632 | 0.012002 | 0.012068 | 0.012070 |
| 0.011969 | 0.012069 | 0.012173 | 0.011940 | 0.012205 | 0.012212 | 0.012272 |
| 0.012273 | 0.012307 | 0.012255 | 0.012273 | 0.012274 | 0.011262 | 0.011800 |
| 0.011901 | 0.012405 | 0.011874 | 0.012136 | 0.012609 | 0.011672 | 0.011564 |
| 0.011530 | 0.011530 | 0.012001 | 0.011965 | 0.012151 | 0.011866 | 0.011532 |
| S405     | 0.011737 | 0.011737 | 0.012143 | 0.011906 | 0.011906 | 0.011974 |
| 0.011813 | 0.011745 | 0.011906 | 0.011398 | 0.011466 | 0.011433 | 0.011398 |
| 0.011432 | 0.011601 | 0.011398 | 0.011432 | 0.011500 | 0.011466 | 0.011432 |
| 0.011398 | 0.011432 | 0.011534 | 0.011399 | 0.011433 | 0.011432 | 0.011779 |
| 0.011669 | 0.011432 | 0.011331 | 0.011567 | 0.011466 | 0.011466 | 0.011500 |
| 0.011466 | 0.011568 | 0.011466 | 0.011466 | 0.011500 | 0.011466 | 0.011635 |
| 0.011398 | 0.011466 | 0.011500 | 0.011432 | 0.011534 | 0.011567 | 0.011500 |
| 0.011466 | 0.011635 | 0.011534 | 0.011804 | 0.011466 | 0.011737 | 0.011466 |
| 0.011432 | 0.011534 | 0.011601 | 0.011737 | 0.011838 | 0.011534 | 0.011635 |
| 0.011500 | 0.011568 | 0.011466 | 0.011703 | 0.011940 | 0.011466 | 0.011534 |
| 0.011432 | 0.011534 | 0.011500 | 0.011567 | 0.011500 | 0.011500 | 0.011500 |
| 0.011398 | 0.011432 | 0.011398 | 0.011500 | 0.011466 | 0.011501 | 0.011567 |
| 0.011500 | 0.011466 | 0.011534 | 0.011432 | 0.011567 | 0.011398 | 0.011466 |
| 0.011635 | 0.011567 | 0.011804 | 0.011635 | 0.011466 | 0.011703 | 0.011466 |
| 0.011546 | 0.011813 | 0.011668 | 0.011296 | 0.011399 | 0.011468 | 0.011536 |
| 0.012240 | 0.011521 | 0.011267 | 0.011703 | 0.011703 | 0.011500 | 0.011601 |
| 0.011500 | 0.011500 | 0.011500 | 0.011466 | 0.011568 | 0.011500 | 0.011432 |
| 0.011466 | 0.011567 | 0.011737 | 0.011635 | 0.011534 | 0.011500 | 0.011432 |
| 0.011398 | 0.011398 | 0.011466 | 0.011432 | 0.011635 | 0.011601 | 0.011534 |
| 0.011635 | 0.011703 | 0.011432 | 0.011432 | 0.011466 | 0.011466 | 0.011468 |
| 0.011537 | 0.011466 | 0.011466 | 0.011350 | 0.011424 | 0.011378 | 0.011466 |
| 0.011470 | 0.011406 | 0.011469 | 0.011442 | 0.011368 | 0.011405 | 0.011434 |
| 0.011713 | 0.011477 | 0.011511 | 0.011399 | 0.011408 | 0.011501 | 0.011500 |
| 0.011568 | 0.011501 | 0.011500 | 0.011534 | 0.011466 | 0.011906 | 0.011703 |
| 0.011737 | 0.011601 | 0.011466 | 0.011568 | 0.011365 | 0.011601 | 0.011398 |
| 0.011466 | 0.011466 | 0.011432 | 0.011398 | 0.011432 | 0.011398 | 0.011500 |
| 0.011466 | 0.011567 | 0.011500 | 0.011398 | 0.011501 | 0.011601 | 0.011605 |
| 0.011601 | 0.011500 | 0.011398 | 0.011332 | 0.011466 | 0.011398 | 0.011331 |
| 0.011436 | 0.011601 | 0.011398 | 0.011601 | 0.011365 | 0.011466 | 0.011432 |
| 0.011534 | 0.011432 | 0.011466 | 0.011432 | 0.011466 | 0.011331 | 0.011466 |

|          |          |          |          |          |          |          |
|----------|----------|----------|----------|----------|----------|----------|
| 0.011500 | 0.011432 | 0.011466 | 0.011432 | 0.011398 | 0.011500 | 0.011737 |
| 0.011805 | 0.011770 | 0.011838 | 0.011603 | 0.011838 | 0.011398 | 0.011432 |
| 0.011468 | 0.011791 | 0.011566 | 0.011337 | 0.011812 | 0.011335 | 0.011416 |
| 0.011847 | 0.011745 | 0.011635 | 0.011805 | 0.011403 | 0.011703 | 0.011669 |
| 0.011601 | 0.011770 | 0.011597 | 0.011351 | 0.011440 | 0.011500 | 0.011572 |
| 0.011669 | 0.011502 | 0.011708 | 0.011776 | 0.011635 | 0.011771 | 0.011811 |
| 0.011538 | 0.011779 | 0.011640 | 0.011639 | 0.011908 | 0.011365 | 0.011570 |
| 0.011534 | 0.011432 | 0.011365 | 0.011365 | 0.011432 | 0.011432 | 0.011500 |
| 0.011432 | 0.011500 | 0.011398 | 0.011500 | 0.011432 | 0.011432 | 0.011500 |
| 0.011432 | 0.011872 | 0.011771 | 0.011804 | 0.011331 | 0.011432 | 0.011466 |
| 0.011466 | 0.011432 | 0.011500 | 0.011534 | 0.011398 | 0.011398 | 0.011398 |
| 0.011940 | 0.011567 | 0.011567 | 0.011365 | 0.011466 | 0.011635 | 0.011398 |
| 0.011398 | 0.011466 | 0.011432 | 0.011601 | 0.011398 | 0.011534 | 0.011669 |
| 0.011601 | 0.011432 | 0.011432 | 0.011365 | 0.011365 | 0.011534 | 0.011466 |
| 0.011365 | 0.011466 | 0.011331 | 0.011365 | 0.011500 | 0.011636 | 0.011398 |
| 0.011365 | 0.011500 | 0.011433 | 0.011331 | 0.011669 | 0.011331 | 0.011500 |
| 0.011509 | 0.011398 | 0.011703 | 0.011534 | 0.011568 | 0.011432 | 0.011500 |
| 0.011398 | 0.011737 | 0.011331 | 0.011601 | 0.011398 | 0.011398 | 0.011331 |
| 0.011567 | 0.011771 | 0.011466 | 0.011534 | 0.011365 | 0.011771 | 0.011398 |
| 0.011398 | 0.011398 | 0.011432 | 0.011534 | 0.011432 | 0.011534 | 0.011601 |
| 0.011601 | 0.011567 | 0.011466 | 0.011568 | 0.011534 | 0.011398 | 0.011365 |
| 0.011398 | 0.011398 | 0.011466 | 0.011398 | 0.011365 | 0.011534 | 0.011398 |
| 0.011432 | 0.011432 | 0.011500 | 0.011601 | 0.011500 | 0.011432 | 0.011432 |
| 0.011500 | 0.011432 | 0.011534 | 0.011398 | 0.011534 | 0.011635 | 0.011940 |
| 0.011432 | 0.011838 | 0.011442 | 0.017899 | 0.011259 | 0.011491 | 0.011763 |
| 0.011722 | 0.011769 | 0.011324 | 0.011352 | 0.011837 | 0.011790 | 0.011429 |
| 0.011586 | 0.011616 | 0.011296 | 0.011313 | 0.011336 | 0.011459 | 0.011320 |
| 0.011581 | 0.011622 | 0.011546 | 0.011460 | 0.011568 | 0.011534 | 0.000000 |
| 0.011476 | 0.011567 | 0.011567 | 0.011534 | 0.011500 | 0.011500 | 0.011466 |
| 0.011500 | 0.011432 | 0.011466 | 0.011500 | 0.011466 | 0.011398 | 0.011365 |
| 0.011365 | 0.011500 | 0.011398 | 0.011500 | 0.011534 | 0.011567 | 0.011398 |
| 0.011500 | 0.011466 | 0.011804 | 0.011804 | 0.011534 | 0.011568 | 0.011601 |
| 0.011365 | 0.011365 | 0.011398 | 0.011500 | 0.011365 | 0.011601 | 0.011601 |
| 0.011635 | 0.011635 | 0.011568 | 0.011669 | 0.011804 | 0.011671 | 0.011500 |
| 0.011500 | 0.011567 | 0.011601 | 0.011432 | 0.011500 | 0.011466 | 0.011500 |
| 0.011568 | 0.011568 | 0.011601 | 0.011568 | 0.011467 | 0.011669 | 0.011635 |
| 0.011504 | 0.011398 | 0.011500 | 0.011601 | 0.011500 | 0.011635 | 0.011669 |
| 0.011805 | 0.011403 | 0.011703 | 0.011669 | 0.011601 | 0.011770 | 0.011399 |
| 0.011569 | 0.011466 | 0.011365 | 0.011365 | 0.011500 | 0.011398 | 0.011500 |
| 0.011534 | 0.011567 | 0.011398 | 0.011500 | 0.011466 | 0.011804 | 0.011804 |
| 0.011534 | 0.011568 | 0.011567 | 0.011500 | 0.012179 | 0.011527 | 0.011521 |
| 0.011627 | 0.011479 | 0.011698 | 0.011549 | 0.011659 | 0.011616 | 0.011547 |
| 0.012133 | 0.011409 | 0.011543 | 0.011548 | 0.011824 | 0.011677 | 0.011780 |
| 0.012122 | 0.011591 | 0.011503 | 0.011500 | 0.011500 | 0.011534 | 0.011469 |
| 0.011365 | 0.011398 | 0.011534 | 0.011500 | 0.011503 | 0.011635 | 0.011603 |
| 0.011466 | 0.011398 | 0.011432 | 0.011466 | 0.011365 | 0.011432 | 0.011331 |
| 0.011466 | 0.011500 | 0.011398 | 0.011365 | 0.011466 | 0.011398 | 0.011432 |
| 0.011432 | 0.011365 | 0.011432 | 0.011466 | 0.011365 | 0.011568 | 0.011601 |
| 0.011500 | 0.011568 | 0.011500 | 0.011500 | 0.011432 | 0.011838 | 0.011466 |
| 0.011516 | 0.011432 | 0.011670 | 0.011676 | 0.011534 | 0.011534 | 0.011534 |
| 0.011500 | 0.011466 | 0.011432 | 0.011466 | 0.011567 | 0.011568 | 0.011500 |
| 0.011500 | 0.011635 | 0.011804 | 0.011534 | 0.011737 | 0.011737 | 0.011601 |
| 0.011432 | 0.011500 | 0.011500 | 0.011906 | 0.011500 | 0.011534 | 0.011500 |
| 0.011534 | 0.011466 | 0.011466 | 0.011771 | 0.011703 | 0.011737 | 0.011466 |
| 0.011568 | 0.011635 | 0.011500 | 0.011568 | 0.011534 | 0.011398 | 0.011737 |
| 0.011500 | 0.011466 | 0.011466 | 0.011635 | 0.011466 | 0.011567 | 0.011805 |
| 0.011500 | 0.011881 | 0.011838 | 0.011633 | 0.011287 | 0.011574 | 0.011372 |
| 0.011337 | 0.011882 | 0.011414 | 0.011510 | 0.011404 | 0.011520 | 0.011435 |
| 0.011574 | 0.011259 | 0.011397 | 0.011260 | 0.011278 | 0.011465 | 0.011509 |
| 0.011516 | 0.011416 | 0.011486 | 0.011450 | 0.011502 | 0.011635 | 0.011703 |

|          |          |          |          |          |          |          |
|----------|----------|----------|----------|----------|----------|----------|
| 0.011703 | 0.011568 | 0.011673 | 0.011675 | 0.011811 | 0.011843 | 0.011500 |
| 0.011737 | 0.011601 | 0.011466 | 0.011568 | 0.011365 | 0.011601 | 0.011398 |
| 0.011466 | 0.011466 | 0.011432 | 0.011398 | 0.011432 | 0.011398 | 0.011500 |
| 0.011447 | 0.011483 | 0.011474 | 0.011509 | 0.011646 | 0.011611 | 0.011610 |
| 0.011609 | 0.011534 | 0.011321 | 0.011350 | 0.011470 | 0.011640 | 0.011641 |
| 0.011433 | 0.011504 | 0.011738 | 0.011707 | 0.011568 | 0.011670 | 0.011534 |
| 0.011534 | 0.011568 | 0.011601 | 0.011500 | 0.012076 | 0.011601 | 0.011737 |
| 0.011771 | 0.011814 | 0.011473 | 0.011549 | 0.011432 | 0.011567 | 0.011534 |
| 0.011636 | 0.011601 | 0.011669 | 0.011669 | 0.011807 | 0.011331 | 0.011445 |
| 0.011333 | 0.011339 | 0.011438 | 0.011403 | 0.011508 | 0.011323 | 0.011677 |
| 0.011475 | 0.011501 | 0.011204 | 0.011438 | 0.011467 | 0.011543 | 0.011432 |
| 0.011398 | 0.011398 | 0.011466 | 0.011432 | 0.011635 | 0.011601 | 0.011534 |
| 0.011635 | 0.011703 | 0.011432 | 0.011432 | 0.011466 | 0.011466 | 0.011468 |
| 0.011537 | 0.011466 | 0.011466 | 0.011502 | 0.011635 | 0.011703 | 0.011703 |
| 0.011568 | 0.011673 | 0.011675 | 0.011811 | 0.011843 | 0.011500 | 0.011669 |
| 0.011534 | 0.011534 | 0.011435 | 0.011621 | 0.011550 | 0.011575 | 0.011448 |
| 0.011615 | 0.011791 | 0.011570 | 0.011505 | 0.011398 | 0.011601 | 0.011466 |
| 0.011567 | 0.011500 | 0.011398 | 0.011501 | 0.011601 | 0.011605 | 0.011500 |
| 0.011398 | 0.011332 | 0.011466 | 0.011398 | 0.011331 | 0.011436 | 0.011601 |
| 0.011500 | 0.011432 | 0.011466 | 0.011500 | 0.011466 | 0.011398 | 0.011601 |
| 0.011466 | 0.011500 | 0.011500 | 0.011432 | 0.011500 | 0.011737 | 0.011398 |
| 0.011432 | 0.011838 | 0.011432 | 0.011466 | 0.011432 | 0.011804 | 0.011276 |
| 0.011796 | 0.011359 | 0.011363 | 0.011586 | 0.011674 | 0.011566 | 0.011271 |
| 0.011325 | 0.011601 | 0.011703 | 0.011813 | 0.011670 | 0.011810 | 0.011941 |
| 0.011840 | 0.011878 | 0.011838 | 0.012093 | 0.011804 | 0.012686 | 0.011841 |
| 0.012585 | 0.012351 | 0.012486 | 0.012760 | 0.011804 | 0.011500 | 0.011805 |
| 0.012213 | 0.012181 | 0.011771 | 0.011669 | 0.011737 | 0.011737 | 0.011708 |
| 0.011601 | 0.011607 | 0.011669 | 0.011636 | 0.012009 | 0.012042 | 0.012077 |
| 0.011976 | 0.012076 | 0.012181 | 0.011912 | 0.012213 | 0.012220 | 0.012281 |
| 0.012281 | 0.012315 | 0.012263 | 0.012282 | 0.012283 | 0.011466 | 0.011805 |
| 0.011907 | 0.012415 | 0.011912 | 0.012144 | 0.012620 | 0.011675 | 0.011568 |
| 0.011534 | 0.011534 | 0.011974 | 0.011929 | 0.012157 | 0.011872 | 0.011535 |
| S406     | 0.011644 | 0.011644 | 0.011747 | 0.011713 | 0.011713 | 0.011747 |
| 0.011686 | 0.011616 | 0.011782 | 0.011266 | 0.011335 | 0.011301 | 0.011266 |
| 0.011301 | 0.011472 | 0.011266 | 0.011301 | 0.011369 | 0.011335 | 0.011301 |
| 0.011266 | 0.011301 | 0.011404 | 0.011267 | 0.011232 | 0.011301 | 0.011651 |
| 0.011541 | 0.011266 | 0.011198 | 0.011438 | 0.011301 | 0.011335 | 0.011301 |
| 0.011301 | 0.011369 | 0.011335 | 0.011335 | 0.011335 | 0.011335 | 0.011438 |
| 0.011266 | 0.011335 | 0.011369 | 0.011301 | 0.011404 | 0.011438 | 0.011335 |
| 0.011335 | 0.011507 | 0.011404 | 0.011678 | 0.011335 | 0.011541 | 0.011335 |
| 0.011301 | 0.011404 | 0.011438 | 0.011541 | 0.011713 | 0.011404 | 0.011507 |
| 0.011301 | 0.011369 | 0.011335 | 0.011507 | 0.011816 | 0.011301 | 0.011404 |
| 0.011301 | 0.011404 | 0.011369 | 0.011438 | 0.011335 | 0.011369 | 0.011369 |
| 0.011266 | 0.011301 | 0.011266 | 0.011369 | 0.011335 | 0.011370 | 0.011438 |
| 0.011369 | 0.011335 | 0.011266 | 0.011301 | 0.011438 | 0.011198 | 0.011335 |
| 0.011507 | 0.011438 | 0.011678 | 0.011507 | 0.011335 | 0.011507 | 0.011335 |
| 0.011475 | 0.011706 | 0.011521 | 0.011221 | 0.011213 | 0.011362 | 0.011421 |
| 0.012072 | 0.011476 | 0.011228 | 0.011575 | 0.011575 | 0.011369 | 0.011472 |
| 0.011404 | 0.011369 | 0.011438 | 0.011335 | 0.011438 | 0.011301 | 0.011369 |
| 0.011335 | 0.011438 | 0.011644 | 0.011507 | 0.011404 | 0.011369 | 0.011232 |
| 0.011266 | 0.011266 | 0.011266 | 0.011301 | 0.011507 | 0.011473 | 0.011404 |
| 0.011507 | 0.011576 | 0.011301 | 0.011301 | 0.011335 | 0.011335 | 0.011337 |
| 0.011406 | 0.011335 | 0.011335 | 0.011170 | 0.011281 | 0.011238 | 0.011335 |
| 0.011337 | 0.011271 | 0.011249 | 0.011272 | 0.011233 | 0.011269 | 0.011302 |
| 0.011573 | 0.011341 | 0.000000 | 0.011266 | 0.011272 | 0.011404 | 0.011370 |
| 0.011438 | 0.011370 | 0.011370 | 0.011438 | 0.011369 | 0.011713 | 0.011541 |
| 0.011610 | 0.011473 | 0.011335 | 0.011438 | 0.011232 | 0.011472 | 0.011266 |
| 0.011335 | 0.011335 | 0.011301 | 0.011266 | 0.011301 | 0.011266 | 0.011369 |
| 0.011266 | 0.011369 | 0.011370 | 0.011266 | 0.011371 | 0.011473 | 0.011475 |
| 0.011404 | 0.011370 | 0.011266 | 0.011198 | 0.011335 | 0.011266 | 0.011198 |



|          |          |          |          |          |          |          |
|----------|----------|----------|----------|----------|----------|----------|
| 0.011304 | 0.011404 | 0.011198 | 0.011404 | 0.011232 | 0.011335 | 0.011301 |
| 0.011335 | 0.011301 | 0.011266 | 0.011301 | 0.011335 | 0.011198 | 0.011266 |
| 0.011301 | 0.011301 | 0.011369 | 0.011301 | 0.011335 | 0.011369 | 0.011610 |
| 0.011713 | 0.011644 | 0.011713 | 0.011474 | 0.011713 | 0.011335 | 0.011301 |
| 0.011337 | 0.011598 | 0.011431 | 0.011236 | 0.011720 | 0.011200 | 0.011341 |
| 0.011721 | 0.011616 | 0.011507 | 0.011713 | 0.011375 | 0.011575 | 0.011472 |
| 0.011472 | 0.011644 | 0.011488 | 0.011349 | 0.011395 | 0.011369 | 0.011440 |
| 0.011541 | 0.011438 | 0.011576 | 0.011575 | 0.011575 | 0.011644 | 0.011541 |
| 0.011475 | 0.011576 | 0.011543 | 0.011509 | 0.011782 | 0.011232 | 0.011438 |
| 0.011335 | 0.011301 | 0.011232 | 0.011232 | 0.011232 | 0.011301 | 0.011369 |
| 0.011232 | 0.011301 | 0.011198 | 0.011301 | 0.011232 | 0.011301 | 0.011369 |
| 0.011301 | 0.011747 | 0.011644 | 0.011679 | 0.011198 | 0.011301 | 0.011335 |
| 0.011335 | 0.011301 | 0.011335 | 0.011404 | 0.011266 | 0.011266 | 0.011266 |
| 0.011816 | 0.011404 | 0.011438 | 0.011232 | 0.011301 | 0.011438 | 0.011266 |
| 0.011266 | 0.011335 | 0.011301 | 0.011404 | 0.011266 | 0.011369 | 0.011438 |
| 0.011438 | 0.011266 | 0.011301 | 0.011198 | 0.011232 | 0.011404 | 0.011335 |
| 0.011198 | 0.011301 | 0.011198 | 0.011232 | 0.011369 | 0.011507 | 0.011266 |
| 0.011232 | 0.011369 | 0.011301 | 0.011198 | 0.011541 | 0.011198 | 0.011369 |
| 0.011373 | 0.011266 | 0.011575 | 0.011404 | 0.011438 | 0.011301 | 0.011369 |
| 0.011266 | 0.011541 | 0.011198 | 0.011472 | 0.011266 | 0.011266 | 0.011198 |
| 0.011369 | 0.011610 | 0.011335 | 0.011404 | 0.011232 | 0.011644 | 0.011266 |
| 0.011266 | 0.011266 | 0.011301 | 0.011335 | 0.011301 | 0.011404 | 0.011472 |
| 0.011472 | 0.011438 | 0.011335 | 0.011438 | 0.011335 | 0.011266 | 0.011232 |
| 0.011266 | 0.011266 | 0.011335 | 0.011266 | 0.011163 | 0.011369 | 0.011266 |
| 0.011301 | 0.011301 | 0.011404 | 0.011472 | 0.011369 | 0.011232 | 0.011301 |
| 0.011335 | 0.011301 | 0.011369 | 0.011266 | 0.011404 | 0.011472 | 0.011747 |
| 0.011301 | 0.011713 | 0.011307 | 0.017953 | 0.011194 | 0.011566 | 0.011667 |
| 0.011627 | 0.011672 | 0.011327 | 0.011238 | 0.011679 | 0.011696 | 0.011310 |
| 0.011446 | 0.011621 | 0.011179 | 0.011275 | 0.011220 | 0.011312 | 0.011281 |
| 0.011490 | 0.011442 | 0.011402 | 0.011193 | 0.011438 | 0.011438 | 0.011476 |
| 0.000000 | 0.011404 | 0.011438 | 0.011404 | 0.011369 | 0.011370 | 0.011335 |
| 0.011369 | 0.011301 | 0.011335 | 0.011369 | 0.011335 | 0.011266 | 0.011301 |
| 0.011301 | 0.011369 | 0.011266 | 0.011370 | 0.011404 | 0.011438 | 0.011335 |
| 0.011369 | 0.011335 | 0.011679 | 0.011679 | 0.011404 | 0.011439 | 0.011438 |
| 0.011232 | 0.011232 | 0.011266 | 0.011301 | 0.011232 | 0.011473 | 0.011473 |
| 0.011507 | 0.011507 | 0.011438 | 0.011541 | 0.011713 | 0.011543 | 0.011301 |
| 0.011369 | 0.011369 | 0.011404 | 0.011301 | 0.011369 | 0.011335 | 0.011369 |
| 0.011438 | 0.011438 | 0.011472 | 0.011370 | 0.011267 | 0.011507 | 0.011438 |
| 0.011372 | 0.011266 | 0.011369 | 0.011438 | 0.011370 | 0.011507 | 0.011541 |
| 0.011713 | 0.011375 | 0.011575 | 0.011472 | 0.011472 | 0.011644 | 0.011266 |
| 0.011439 | 0.011335 | 0.011301 | 0.011301 | 0.011369 | 0.011266 | 0.011370 |
| 0.011404 | 0.011438 | 0.011335 | 0.011369 | 0.011335 | 0.011679 | 0.011679 |
| 0.011404 | 0.011439 | 0.011472 | 0.011404 | 0.012058 | 0.011490 | 0.011414 |
| 0.011483 | 0.011444 | 0.011553 | 0.011445 | 0.011552 | 0.011477 | 0.011412 |
| 0.011994 | 0.011338 | 0.011474 | 0.011407 | 0.011682 | 0.011543 | 0.011576 |
| 0.012027 | 0.011512 | 0.011614 | 0.011679 | 0.011541 | 0.011541 | 0.011579 |
| 0.011232 | 0.011335 | 0.011541 | 0.011507 | 0.011510 | 0.011507 | 0.011439 |
| 0.011335 | 0.011198 | 0.011232 | 0.011335 | 0.011163 | 0.011301 | 0.011198 |
| 0.011335 | 0.011369 | 0.011266 | 0.011232 | 0.011335 | 0.011266 | 0.011301 |
| 0.011301 | 0.011232 | 0.011301 | 0.011335 | 0.011232 | 0.011369 | 0.011472 |
| 0.011369 | 0.011438 | 0.011369 | 0.011369 | 0.011301 | 0.011713 | 0.011335 |
| 0.011377 | 0.011301 | 0.011541 | 0.011542 | 0.011335 | 0.011404 | 0.011404 |
| 0.011404 | 0.011266 | 0.011301 | 0.011266 | 0.011404 | 0.011438 | 0.011369 |
| 0.011369 | 0.011507 | 0.011678 | 0.011404 | 0.011576 | 0.011576 | 0.011472 |
| 0.011301 | 0.011369 | 0.011404 | 0.011816 | 0.011370 | 0.011335 | 0.011369 |
| 0.011404 | 0.011335 | 0.011335 | 0.011644 | 0.011507 | 0.011610 | 0.011335 |
| 0.011438 | 0.011507 | 0.011335 | 0.011438 | 0.011404 | 0.011266 | 0.011610 |
| 0.011369 | 0.011335 | 0.011335 | 0.011507 | 0.011335 | 0.011438 | 0.011679 |
| 0.011301 | 0.011755 | 0.011747 | 0.011515 | 0.011232 | 0.011443 | 0.011268 |
| 0.011343 | 0.011699 | 0.011276 | 0.011470 | 0.011210 | 0.011425 | 0.011387 |

|          |          |          |          |          |          |          |
|----------|----------|----------|----------|----------|----------|----------|
| 0.011475 | 0.011128 | 0.011344 | 0.011128 | 0.011171 | 0.011334 | 0.011349 |
| 0.011367 | 0.011220 | 0.011421 | 0.011349 | 0.011371 | 0.011507 | 0.011576 |
| 0.011541 | 0.011439 | 0.011545 | 0.011546 | 0.011685 | 0.011712 | 0.011369 |
| 0.011610 | 0.011473 | 0.011335 | 0.011438 | 0.011232 | 0.011472 | 0.011266 |
| 0.011335 | 0.011335 | 0.011301 | 0.011266 | 0.011301 | 0.011266 | 0.011369 |
| 0.011346 | 0.011345 | 0.011340 | 0.011374 | 0.011514 | 0.011410 | 0.011479 |
| 0.011477 | 0.011370 | 0.011210 | 0.011207 | 0.011337 | 0.011511 | 0.011477 |
| 0.011301 | 0.011372 | 0.011576 | 0.011579 | 0.011507 | 0.011542 | 0.011438 |
| 0.011404 | 0.011472 | 0.011472 | 0.011369 | 0.011954 | 0.011541 | 0.011610 |
| 0.011610 | 0.011715 | 0.011339 | 0.011414 | 0.011266 | 0.011507 | 0.011438 |
| 0.011508 | 0.011507 | 0.011541 | 0.011541 | 0.011665 | 0.011679 | 0.011305 |
| 0.011198 | 0.011199 | 0.011266 | 0.011267 | 0.011371 | 0.011210 | 0.011541 |
| 0.011337 | 0.011455 | 0.011203 | 0.011360 | 0.011335 | 0.011409 | 0.011232 |
| 0.011266 | 0.011266 | 0.011266 | 0.011301 | 0.011507 | 0.011473 | 0.011404 |
| 0.011507 | 0.011576 | 0.011301 | 0.011301 | 0.011335 | 0.011335 | 0.011337 |
| 0.011406 | 0.011335 | 0.011335 | 0.011371 | 0.011507 | 0.011576 | 0.011541 |
| 0.011439 | 0.011545 | 0.011546 | 0.011685 | 0.011712 | 0.011369 | 0.011541 |
| 0.011438 | 0.011438 | 0.011302 | 0.011452 | 0.011415 | 0.011444 | 0.011275 |
| 0.011413 | 0.011527 | 0.011405 | 0.011338 | 0.011198 | 0.011404 | 0.011266 |
| 0.011369 | 0.011370 | 0.011266 | 0.011371 | 0.011473 | 0.011475 | 0.011370 |
| 0.011266 | 0.011198 | 0.011335 | 0.011266 | 0.011198 | 0.011304 | 0.011404 |
| 0.011369 | 0.011301 | 0.011335 | 0.011369 | 0.011335 | 0.011266 | 0.011369 |
| 0.011335 | 0.011369 | 0.011369 | 0.011301 | 0.011369 | 0.011610 | 0.011266 |
| 0.011301 | 0.011713 | 0.011301 | 0.011266 | 0.011301 | 0.011678 | 0.011236 |
| 0.011574 | 0.011233 | 0.011264 | 0.011472 | 0.011558 | 0.011464 | 0.011189 |
| 0.011221 | 0.011438 | 0.011541 | 0.011650 | 0.011508 | 0.011649 | 0.011783 |
| 0.011679 | 0.011747 | 0.011678 | 0.011829 | 0.011610 | 0.012505 | 0.011611 |
| 0.012299 | 0.012163 | 0.012267 | 0.012510 | 0.011678 | 0.011369 | 0.011645 |
| 0.012058 | 0.012026 | 0.011610 | 0.011507 | 0.011576 | 0.011576 | 0.011544 |
| 0.011438 | 0.011442 | 0.011507 | 0.011473 | 0.011886 | 0.011919 | 0.011954 |
| 0.011817 | 0.011920 | 0.012060 | 0.011821 | 0.012093 | 0.012065 | 0.012162 |
| 0.012162 | 0.012197 | 0.012108 | 0.012162 | 0.012164 | 0.011369 | 0.011713 |
| 0.011782 | 0.012264 | 0.011789 | 0.012023 | 0.012507 | 0.011546 | 0.011438 |
| 0.011404 | 0.011404 | 0.011885 | 0.011924 | 0.012032 | 0.011747 | 0.011405 |
| S407     | 0.011765 | 0.011765 | 0.012102 | 0.011866 | 0.011866 | 0.011933 |
| 0.011774 | 0.011706 | 0.011866 | 0.011362 | 0.011429 | 0.011397 | 0.011362 |
| 0.011396 | 0.011564 | 0.011362 | 0.011396 | 0.011463 | 0.011429 | 0.011396 |
| 0.011362 | 0.011396 | 0.011497 | 0.011363 | 0.011396 | 0.011396 | 0.011740 |
| 0.011631 | 0.011362 | 0.011295 | 0.011530 | 0.011463 | 0.011430 | 0.011463 |
| 0.011429 | 0.011530 | 0.011429 | 0.011430 | 0.011463 | 0.011429 | 0.011597 |
| 0.011362 | 0.011429 | 0.011463 | 0.011396 | 0.011497 | 0.011530 | 0.011463 |
| 0.011429 | 0.011598 | 0.011497 | 0.011765 | 0.011429 | 0.011698 | 0.011429 |
| 0.011396 | 0.011497 | 0.011564 | 0.011698 | 0.011799 | 0.011497 | 0.011597 |
| 0.011463 | 0.011530 | 0.011430 | 0.011665 | 0.011900 | 0.011429 | 0.011497 |
| 0.011396 | 0.011497 | 0.011463 | 0.011530 | 0.011463 | 0.011463 | 0.011463 |
| 0.011362 | 0.011396 | 0.011362 | 0.011463 | 0.011429 | 0.011464 | 0.011530 |
| 0.011463 | 0.011429 | 0.011497 | 0.011396 | 0.011530 | 0.011362 | 0.011429 |
| 0.011597 | 0.011530 | 0.011765 | 0.011597 | 0.011430 | 0.011665 | 0.011429 |
| 0.011579 | 0.011807 | 0.011664 | 0.011334 | 0.011359 | 0.011465 | 0.011533 |
| 0.012195 | 0.011670 | 0.011307 | 0.011665 | 0.011665 | 0.011463 | 0.011564 |
| 0.011497 | 0.011463 | 0.011530 | 0.011429 | 0.011463 | 0.011463 | 0.011463 |
| 0.011429 | 0.011530 | 0.011732 | 0.011597 | 0.011497 | 0.011463 | 0.011396 |
| 0.011362 | 0.011362 | 0.011430 | 0.011396 | 0.011597 | 0.011564 | 0.011497 |
| 0.011597 | 0.011665 | 0.011396 | 0.011396 | 0.011430 | 0.011429 | 0.011432 |
| 0.011500 | 0.011429 | 0.011430 | 0.011240 | 0.011313 | 0.011271 | 0.011430 |
| 0.011433 | 0.011369 | 0.011392 | 0.011405 | 0.011298 | 0.011334 | 0.011398 |
| 0.011600 | 0.011370 | 0.011473 | 0.011363 | 0.011371 | 0.011497 | 0.011464 |
| 0.011531 | 0.011465 | 0.011464 | 0.011564 | 0.011497 | 0.011866 | 0.011665 |
| 0.011698 | 0.011564 | 0.011429 | 0.011530 | 0.011329 | 0.011564 | 0.011362 |
| 0.011430 | 0.011429 | 0.011396 | 0.011362 | 0.011396 | 0.011362 | 0.011463 |

|          |          |          |          |          |          |          |
|----------|----------|----------|----------|----------|----------|----------|
| 0.011430 | 0.011530 | 0.011463 | 0.011362 | 0.011464 | 0.011564 | 0.011567 |
| 0.011497 | 0.011463 | 0.011362 | 0.011296 | 0.011429 | 0.011362 | 0.011295 |
| 0.011400 | 0.011497 | 0.011362 | 0.011497 | 0.011329 | 0.011430 | 0.011396 |
| 0.011497 | 0.011396 | 0.011430 | 0.011396 | 0.011429 | 0.011295 | 0.011429 |
| 0.011463 | 0.011396 | 0.011463 | 0.011396 | 0.011429 | 0.011463 | 0.011698 |
| 0.011799 | 0.011732 | 0.011799 | 0.011566 | 0.011799 | 0.011429 | 0.011396 |
| 0.011432 | 0.011707 | 0.011563 | 0.011335 | 0.011807 | 0.011299 | 0.011454 |
| 0.011807 | 0.011706 | 0.011597 | 0.011799 | 0.011504 | 0.011665 | 0.011631 |
| 0.011564 | 0.011732 | 0.011593 | 0.011349 | 0.011354 | 0.011463 | 0.011534 |
| 0.011631 | 0.011532 | 0.011669 | 0.011737 | 0.011665 | 0.011732 | 0.011840 |
| 0.011534 | 0.011739 | 0.011636 | 0.011601 | 0.011868 | 0.011329 | 0.011532 |
| 0.011497 | 0.011429 | 0.011329 | 0.011329 | 0.011396 | 0.011396 | 0.011463 |
| 0.011396 | 0.011463 | 0.011362 | 0.011463 | 0.011396 | 0.011396 | 0.011463 |
| 0.011396 | 0.011833 | 0.011732 | 0.011765 | 0.011295 | 0.011396 | 0.011430 |
| 0.011430 | 0.011396 | 0.011463 | 0.011497 | 0.011362 | 0.011362 | 0.011362 |
| 0.011900 | 0.011530 | 0.011530 | 0.011329 | 0.011429 | 0.011598 | 0.011362 |
| 0.011362 | 0.011429 | 0.011396 | 0.011564 | 0.011362 | 0.011497 | 0.011631 |
| 0.011564 | 0.011396 | 0.011396 | 0.011329 | 0.011329 | 0.011497 | 0.011429 |
| 0.011329 | 0.011429 | 0.011295 | 0.011329 | 0.011463 | 0.011598 | 0.011362 |
| 0.011329 | 0.011463 | 0.011396 | 0.011295 | 0.011631 | 0.011295 | 0.011463 |
| 0.011540 | 0.011362 | 0.011665 | 0.011497 | 0.011530 | 0.011396 | 0.011497 |
| 0.011362 | 0.011698 | 0.011295 | 0.011564 | 0.011362 | 0.011362 | 0.011295 |
| 0.011530 | 0.011732 | 0.011430 | 0.011497 | 0.011329 | 0.011732 | 0.011362 |
| 0.011362 | 0.011362 | 0.011396 | 0.011497 | 0.011396 | 0.011497 | 0.011564 |
| 0.011564 | 0.011530 | 0.011429 | 0.011530 | 0.011497 | 0.011362 | 0.011329 |
| 0.011362 | 0.011362 | 0.011430 | 0.011362 | 0.011329 | 0.011497 | 0.011362 |
| 0.011396 | 0.011396 | 0.011530 | 0.011564 | 0.011463 | 0.011396 | 0.011396 |
| 0.011463 | 0.011396 | 0.011497 | 0.011362 | 0.011497 | 0.011597 | 0.011900 |
| 0.011396 | 0.011799 | 0.011405 | 0.017898 | 0.011257 | 0.011610 | 0.011758 |
| 0.011718 | 0.011764 | 0.011374 | 0.011408 | 0.011884 | 0.011785 | 0.011546 |
| 0.011582 | 0.011671 | 0.011255 | 0.011395 | 0.011333 | 0.011455 | 0.011404 |
| 0.011623 | 0.011581 | 0.011542 | 0.011259 | 0.011530 | 0.011564 | 0.011567 |
| 0.011404 | 0.000000 | 0.011530 | 0.011497 | 0.011463 | 0.011463 | 0.011430 |
| 0.011463 | 0.011396 | 0.011429 | 0.011463 | 0.011430 | 0.011362 | 0.011396 |
| 0.011396 | 0.011463 | 0.011362 | 0.011463 | 0.011497 | 0.011530 | 0.011429 |
| 0.011463 | 0.011430 | 0.011765 | 0.011765 | 0.011497 | 0.011531 | 0.011564 |
| 0.011329 | 0.011329 | 0.011362 | 0.011463 | 0.011329 | 0.011564 | 0.011564 |
| 0.011597 | 0.011597 | 0.011530 | 0.011631 | 0.011799 | 0.011633 | 0.011463 |
| 0.011463 | 0.011530 | 0.011564 | 0.011396 | 0.011463 | 0.011429 | 0.011463 |
| 0.011531 | 0.011530 | 0.011564 | 0.011530 | 0.011431 | 0.011631 | 0.011597 |
| 0.011467 | 0.011362 | 0.011463 | 0.011564 | 0.011463 | 0.011597 | 0.011631 |
| 0.011799 | 0.011504 | 0.011665 | 0.011631 | 0.011564 | 0.011732 | 0.011363 |
| 0.011532 | 0.011430 | 0.011396 | 0.011396 | 0.011463 | 0.011362 | 0.011463 |
| 0.011497 | 0.011530 | 0.011429 | 0.011463 | 0.011430 | 0.011765 | 0.011765 |
| 0.011497 | 0.011531 | 0.011597 | 0.011530 | 0.012171 | 0.011525 | 0.011517 |
| 0.011552 | 0.011511 | 0.011623 | 0.011545 | 0.011620 | 0.011543 | 0.011474 |
| 0.012125 | 0.011441 | 0.011574 | 0.011510 | 0.011749 | 0.011604 | 0.011741 |
| 0.012149 | 0.011550 | 0.011466 | 0.011463 | 0.011463 | 0.011497 | 0.011432 |
| 0.011329 | 0.011362 | 0.011497 | 0.011463 | 0.011466 | 0.011597 | 0.011565 |
| 0.011429 | 0.011362 | 0.011396 | 0.011429 | 0.011329 | 0.011396 | 0.011295 |
| 0.011429 | 0.011463 | 0.011362 | 0.011329 | 0.011430 | 0.011362 | 0.011396 |
| 0.011396 | 0.011329 | 0.011396 | 0.011430 | 0.011329 | 0.011530 | 0.011564 |
| 0.011463 | 0.011530 | 0.011463 | 0.011463 | 0.011396 | 0.011799 | 0.011429 |
| 0.011443 | 0.011396 | 0.011632 | 0.011637 | 0.011497 | 0.011497 | 0.011497 |
| 0.011497 | 0.011430 | 0.011396 | 0.011430 | 0.011530 | 0.011530 | 0.011463 |
| 0.011463 | 0.011597 | 0.011765 | 0.011497 | 0.011698 | 0.011698 | 0.011564 |
| 0.011396 | 0.011463 | 0.011497 | 0.011900 | 0.011463 | 0.011497 | 0.011463 |
| 0.011497 | 0.011429 | 0.011429 | 0.011732 | 0.011665 | 0.011698 | 0.011430 |
| 0.011530 | 0.011597 | 0.011463 | 0.011530 | 0.011497 | 0.011362 | 0.011698 |
| 0.011463 | 0.011429 | 0.011429 | 0.011597 | 0.011430 | 0.011530 | 0.011765 |

|          |          |          |          |          |          |          |
|----------|----------|----------|----------|----------|----------|----------|
| 0.011463 | 0.011841 | 0.011833 | 0.011629 | 0.011229 | 0.011536 | 0.011318 |
| 0.011390 | 0.011839 | 0.011376 | 0.011507 | 0.011402 | 0.011467 | 0.011432 |
| 0.011519 | 0.011258 | 0.011339 | 0.011126 | 0.011330 | 0.011395 | 0.011466 |
| 0.011437 | 0.011375 | 0.011483 | 0.011448 | 0.011465 | 0.011597 | 0.011665 |
| 0.011665 | 0.011531 | 0.011635 | 0.011636 | 0.011772 | 0.011802 | 0.011463 |
| 0.011698 | 0.011564 | 0.011429 | 0.011530 | 0.011329 | 0.011564 | 0.011362 |
| 0.011430 | 0.011429 | 0.011396 | 0.011362 | 0.011396 | 0.011362 | 0.011463 |
| 0.011409 | 0.011375 | 0.011437 | 0.011437 | 0.011573 | 0.011573 | 0.011538 |
| 0.011571 | 0.011497 | 0.011245 | 0.011240 | 0.011433 | 0.011602 | 0.011603 |
| 0.011396 | 0.011467 | 0.011700 | 0.011668 | 0.011598 | 0.011632 | 0.011564 |
| 0.011497 | 0.011564 | 0.011564 | 0.011463 | 0.012035 | 0.011631 | 0.011698 |
| 0.011732 | 0.011808 | 0.011435 | 0.011511 | 0.011396 | 0.011597 | 0.011564 |
| 0.011599 | 0.011631 | 0.011631 | 0.011631 | 0.011728 | 0.011765 | 0.011372 |
| 0.011297 | 0.011268 | 0.011401 | 0.011366 | 0.011470 | 0.011210 | 0.011638 |
| 0.011438 | 0.011455 | 0.011203 | 0.011435 | 0.011430 | 0.011471 | 0.011396 |
| 0.011362 | 0.011362 | 0.011430 | 0.011396 | 0.011597 | 0.011564 | 0.011497 |
| 0.011597 | 0.011665 | 0.011396 | 0.011396 | 0.011430 | 0.011429 | 0.011432 |
| 0.011500 | 0.011429 | 0.011430 | 0.011465 | 0.011597 | 0.011665 | 0.011665 |
| 0.011531 | 0.011635 | 0.011636 | 0.011772 | 0.011802 | 0.011463 | 0.011631 |
| 0.011564 | 0.011564 | 0.011398 | 0.011582 | 0.011512 | 0.011537 | 0.011411 |
| 0.011542 | 0.011744 | 0.011568 | 0.011468 | 0.011362 | 0.011497 | 0.011430 |
| 0.011530 | 0.011463 | 0.011362 | 0.011464 | 0.011564 | 0.011567 | 0.011463 |
| 0.011362 | 0.011296 | 0.011429 | 0.011362 | 0.011295 | 0.011400 | 0.011497 |
| 0.011463 | 0.011396 | 0.011429 | 0.011463 | 0.011430 | 0.011362 | 0.011564 |
| 0.011429 | 0.011463 | 0.011463 | 0.011396 | 0.011463 | 0.011698 | 0.011362 |
| 0.011396 | 0.011799 | 0.011396 | 0.011429 | 0.011396 | 0.011765 | 0.011274 |
| 0.011678 | 0.011315 | 0.011411 | 0.011543 | 0.011671 | 0.011563 | 0.011311 |
| 0.011323 | 0.011564 | 0.011665 | 0.011773 | 0.011632 | 0.011771 | 0.011901 |
| 0.011800 | 0.011838 | 0.011799 | 0.012051 | 0.011765 | 0.012640 | 0.011801 |
| 0.012540 | 0.012308 | 0.012442 | 0.012714 | 0.011765 | 0.011463 | 0.011766 |
| 0.012204 | 0.012140 | 0.011732 | 0.011631 | 0.011699 | 0.011699 | 0.011669 |
| 0.011564 | 0.011569 | 0.011631 | 0.011598 | 0.011968 | 0.012035 | 0.012036 |
| 0.011935 | 0.012035 | 0.012139 | 0.011906 | 0.012205 | 0.012212 | 0.012272 |
| 0.012273 | 0.012306 | 0.012255 | 0.012273 | 0.012274 | 0.011497 | 0.011799 |
| 0.011867 | 0.012371 | 0.011874 | 0.012102 | 0.012575 | 0.011637 | 0.011531 |
| 0.011497 | 0.011497 | 0.011968 | 0.011924 | 0.012116 | 0.011833 | 0.011498 |
| S408     | 0.011765 | 0.011765 | 0.012102 | 0.011866 | 0.011866 | 0.011933 |
| 0.011773 | 0.011705 | 0.011866 | 0.011362 | 0.011429 | 0.011397 | 0.011362 |
| 0.011396 | 0.011564 | 0.011362 | 0.011396 | 0.011463 | 0.011429 | 0.011396 |
| 0.011362 | 0.011396 | 0.011497 | 0.011363 | 0.011396 | 0.011396 | 0.011739 |
| 0.011631 | 0.011396 | 0.011295 | 0.011530 | 0.011463 | 0.011430 | 0.011463 |
| 0.011429 | 0.011530 | 0.011429 | 0.011429 | 0.011463 | 0.011429 | 0.011597 |
| 0.011362 | 0.011429 | 0.011463 | 0.011396 | 0.011497 | 0.011463 | 0.011463 |
| 0.011429 | 0.011597 | 0.011497 | 0.011765 | 0.011429 | 0.011698 | 0.011429 |
| 0.011396 | 0.011497 | 0.011564 | 0.011698 | 0.011799 | 0.011497 | 0.011597 |
| 0.011463 | 0.011530 | 0.011429 | 0.011664 | 0.011900 | 0.011429 | 0.011497 |
| 0.011396 | 0.011497 | 0.011463 | 0.011530 | 0.011463 | 0.011463 | 0.011463 |
| 0.011362 | 0.011396 | 0.011362 | 0.011463 | 0.011429 | 0.011464 | 0.011530 |
| 0.011463 | 0.011429 | 0.011497 | 0.011396 | 0.011530 | 0.011362 | 0.011429 |
| 0.011597 | 0.011530 | 0.011765 | 0.011597 | 0.011429 | 0.011665 | 0.011429 |
| 0.011579 | 0.011807 | 0.011626 | 0.011334 | 0.011321 | 0.011391 | 0.011533 |
| 0.012158 | 0.011620 | 0.011348 | 0.011597 | 0.011597 | 0.011463 | 0.011564 |
| 0.011497 | 0.011463 | 0.011530 | 0.011429 | 0.011530 | 0.011463 | 0.011463 |
| 0.011429 | 0.011530 | 0.011732 | 0.011597 | 0.011497 | 0.011463 | 0.011396 |
| 0.011362 | 0.011362 | 0.011430 | 0.011396 | 0.011597 | 0.011564 | 0.011497 |
| 0.011597 | 0.011665 | 0.011396 | 0.011396 | 0.011430 | 0.011429 | 0.011432 |
| 0.011500 | 0.011429 | 0.011430 | 0.011312 | 0.011386 | 0.011341 | 0.011430 |
| 0.011433 | 0.011369 | 0.011392 | 0.011405 | 0.011332 | 0.011368 | 0.011398 |
| 0.011672 | 0.011439 | 0.011473 | 0.011363 | 0.011371 | 0.011498 | 0.011464 |
| 0.011531 | 0.011465 | 0.011464 | 0.011564 | 0.011497 | 0.011866 | 0.011665 |

|          |          |          |          |          |          |          |
|----------|----------|----------|----------|----------|----------|----------|
| 0.011698 | 0.011564 | 0.011429 | 0.011530 | 0.011329 | 0.011564 | 0.011362 |
| 0.011429 | 0.011429 | 0.011396 | 0.011362 | 0.011396 | 0.011362 | 0.011463 |
| 0.011430 | 0.011530 | 0.011463 | 0.011362 | 0.011465 | 0.011564 | 0.011567 |
| 0.011564 | 0.011463 | 0.011362 | 0.011296 | 0.011429 | 0.011362 | 0.011295 |
| 0.011400 | 0.011564 | 0.011362 | 0.011564 | 0.011329 | 0.011430 | 0.011396 |
| 0.011497 | 0.011396 | 0.011430 | 0.011396 | 0.011430 | 0.011295 | 0.011430 |
| 0.011463 | 0.011396 | 0.011463 | 0.011396 | 0.011429 | 0.011463 | 0.011698 |
| 0.011799 | 0.011732 | 0.011799 | 0.011532 | 0.011799 | 0.011429 | 0.011396 |
| 0.011432 | 0.011707 | 0.011517 | 0.011300 | 0.011807 | 0.011299 | 0.011375 |
| 0.011807 | 0.011706 | 0.011530 | 0.011799 | 0.011504 | 0.011597 | 0.011631 |
| 0.011564 | 0.011664 | 0.011558 | 0.011390 | 0.011437 | 0.011463 | 0.011534 |
| 0.011631 | 0.011532 | 0.011635 | 0.011737 | 0.011665 | 0.011732 | 0.011840 |
| 0.011568 | 0.011739 | 0.011670 | 0.011601 | 0.011868 | 0.011329 | 0.011532 |
| 0.011497 | 0.011429 | 0.011329 | 0.011329 | 0.011396 | 0.011396 | 0.011463 |
| 0.011396 | 0.011463 | 0.011362 | 0.011463 | 0.011396 | 0.011396 | 0.011463 |
| 0.011396 | 0.011832 | 0.011732 | 0.011765 | 0.011295 | 0.011396 | 0.011429 |
| 0.011429 | 0.011396 | 0.011463 | 0.011497 | 0.011362 | 0.011362 | 0.011362 |
| 0.011900 | 0.011530 | 0.011530 | 0.011329 | 0.011429 | 0.011597 | 0.011362 |
| 0.011362 | 0.011429 | 0.011396 | 0.011564 | 0.011362 | 0.011497 | 0.011631 |
| 0.011564 | 0.011396 | 0.011396 | 0.011329 | 0.011329 | 0.011497 | 0.011429 |
| 0.011329 | 0.011429 | 0.011295 | 0.011329 | 0.011463 | 0.011598 | 0.011362 |
| 0.011329 | 0.011463 | 0.011396 | 0.011295 | 0.011631 | 0.011295 | 0.011463 |
| 0.011505 | 0.011362 | 0.011665 | 0.011497 | 0.011530 | 0.011396 | 0.011497 |
| 0.011362 | 0.011698 | 0.011295 | 0.011564 | 0.011362 | 0.011362 | 0.011295 |
| 0.011530 | 0.011732 | 0.011429 | 0.011497 | 0.011329 | 0.011732 | 0.011362 |
| 0.011362 | 0.011362 | 0.011396 | 0.011497 | 0.011396 | 0.011497 | 0.011564 |
| 0.011564 | 0.011530 | 0.011429 | 0.011530 | 0.011497 | 0.011362 | 0.011329 |
| 0.011362 | 0.011362 | 0.011429 | 0.011362 | 0.011329 | 0.011497 | 0.011362 |
| 0.011396 | 0.011396 | 0.011530 | 0.011564 | 0.011463 | 0.011396 | 0.011396 |
| 0.011463 | 0.011396 | 0.011497 | 0.011362 | 0.011497 | 0.011530 | 0.011900 |
| 0.011396 | 0.011799 | 0.011371 | 0.017861 | 0.011257 | 0.011366 | 0.011723 |
| 0.011683 | 0.011729 | 0.011374 | 0.011408 | 0.011774 | 0.011751 | 0.011303 |
| 0.011629 | 0.011487 | 0.011294 | 0.011311 | 0.011372 | 0.011356 | 0.011361 |
| 0.011623 | 0.011544 | 0.011542 | 0.011457 | 0.011530 | 0.011564 | 0.011567 |
| 0.011438 | 0.011530 | 0.000000 | 0.011497 | 0.011463 | 0.011463 | 0.011430 |
| 0.011463 | 0.011396 | 0.011362 | 0.011463 | 0.011430 | 0.011362 | 0.011396 |
| 0.011396 | 0.011463 | 0.011362 | 0.011463 | 0.011497 | 0.011530 | 0.011429 |
| 0.011463 | 0.011430 | 0.011765 | 0.011765 | 0.011497 | 0.011531 | 0.011564 |
| 0.011329 | 0.011329 | 0.011362 | 0.011463 | 0.011329 | 0.011564 | 0.011564 |
| 0.011530 | 0.011530 | 0.011530 | 0.011564 | 0.011799 | 0.011565 | 0.011463 |
| 0.011396 | 0.011530 | 0.011564 | 0.011396 | 0.011463 | 0.011429 | 0.011463 |
| 0.011463 | 0.011463 | 0.011497 | 0.011531 | 0.011431 | 0.011631 | 0.011597 |
| 0.011467 | 0.011362 | 0.011463 | 0.011564 | 0.011463 | 0.011598 | 0.011631 |
| 0.011799 | 0.011504 | 0.011597 | 0.011631 | 0.011564 | 0.011664 | 0.011363 |
| 0.011464 | 0.011430 | 0.011396 | 0.011396 | 0.011463 | 0.011362 | 0.011463 |
| 0.011497 | 0.011530 | 0.011429 | 0.011463 | 0.011430 | 0.011765 | 0.011765 |
| 0.011497 | 0.011531 | 0.011597 | 0.011530 | 0.012170 | 0.011560 | 0.011482 |
| 0.011588 | 0.011511 | 0.011658 | 0.011510 | 0.011620 | 0.011578 | 0.011508 |
| 0.012090 | 0.011441 | 0.011574 | 0.011510 | 0.011783 | 0.011638 | 0.011741 |
| 0.012148 | 0.011588 | 0.011635 | 0.011664 | 0.011631 | 0.011631 | 0.011601 |
| 0.011329 | 0.011497 | 0.011631 | 0.011597 | 0.011601 | 0.011597 | 0.011532 |
| 0.011429 | 0.011362 | 0.011396 | 0.011429 | 0.011329 | 0.011396 | 0.011295 |
| 0.011429 | 0.011463 | 0.011362 | 0.011329 | 0.011429 | 0.011362 | 0.011396 |
| 0.011396 | 0.011329 | 0.011396 | 0.011429 | 0.011329 | 0.011530 | 0.011564 |
| 0.011463 | 0.011530 | 0.011463 | 0.011463 | 0.011396 | 0.011799 | 0.011429 |
| 0.011443 | 0.011396 | 0.011631 | 0.011637 | 0.011497 | 0.011497 | 0.011497 |
| 0.011497 | 0.011429 | 0.011396 | 0.011429 | 0.011530 | 0.011530 | 0.011463 |
| 0.011463 | 0.011597 | 0.011765 | 0.011497 | 0.011698 | 0.011698 | 0.011564 |
| 0.011396 | 0.011463 | 0.011497 | 0.011900 | 0.011463 | 0.011497 | 0.011463 |
| 0.011429 | 0.011429 | 0.011429 | 0.011732 | 0.011665 | 0.011698 | 0.011429 |

|          |          |          |          |          |          |          |
|----------|----------|----------|----------|----------|----------|----------|
| 0.011530 | 0.011597 | 0.011463 | 0.011530 | 0.011497 | 0.011362 | 0.011698 |
| 0.011463 | 0.011429 | 0.011429 | 0.011597 | 0.011429 | 0.011530 | 0.011765 |
| 0.011463 | 0.011841 | 0.011832 | 0.011588 | 0.011342 | 0.011536 | 0.011473 |
| 0.011225 | 0.011839 | 0.011341 | 0.011596 | 0.011451 | 0.011467 | 0.011538 |
| 0.011621 | 0.011258 | 0.011505 | 0.011324 | 0.011384 | 0.011529 | 0.011506 |
| 0.011512 | 0.011414 | 0.011483 | 0.011412 | 0.011465 | 0.011597 | 0.011665 |
| 0.011665 | 0.011531 | 0.011601 | 0.011636 | 0.011772 | 0.011802 | 0.011463 |
| 0.011698 | 0.011564 | 0.011429 | 0.011530 | 0.011329 | 0.011564 | 0.011362 |
| 0.011429 | 0.011429 | 0.011396 | 0.011362 | 0.011396 | 0.011362 | 0.011463 |
| 0.011409 | 0.011445 | 0.011437 | 0.011471 | 0.011608 | 0.011573 | 0.011572 |
| 0.011571 | 0.011497 | 0.011319 | 0.011312 | 0.011433 | 0.011602 | 0.011603 |
| 0.011396 | 0.011467 | 0.011700 | 0.011669 | 0.011464 | 0.011632 | 0.011564 |
| 0.011497 | 0.011564 | 0.011564 | 0.011463 | 0.012034 | 0.011564 | 0.011631 |
| 0.011732 | 0.011808 | 0.011435 | 0.011511 | 0.011396 | 0.011597 | 0.011564 |
| 0.011598 | 0.011631 | 0.011564 | 0.011564 | 0.011807 | 0.011765 | 0.011407 |
| 0.011297 | 0.011303 | 0.011401 | 0.011366 | 0.011470 | 0.011321 | 0.011638 |
| 0.011437 | 0.011543 | 0.011298 | 0.011435 | 0.011430 | 0.011505 | 0.011396 |
| 0.011362 | 0.011362 | 0.011430 | 0.011396 | 0.011597 | 0.011564 | 0.011497 |
| 0.011597 | 0.011665 | 0.011396 | 0.011396 | 0.011430 | 0.011429 | 0.011432 |
| 0.011500 | 0.011429 | 0.011430 | 0.011465 | 0.011597 | 0.011665 | 0.011665 |
| 0.011531 | 0.011601 | 0.011636 | 0.011772 | 0.011802 | 0.011463 | 0.011631 |
| 0.011564 | 0.011564 | 0.011398 | 0.011547 | 0.011512 | 0.011537 | 0.011375 |
| 0.011542 | 0.011698 | 0.011611 | 0.011468 | 0.011362 | 0.011564 | 0.011430 |
| 0.011530 | 0.011463 | 0.011362 | 0.011465 | 0.011564 | 0.011567 | 0.011463 |
| 0.011362 | 0.011296 | 0.011429 | 0.011362 | 0.011295 | 0.011400 | 0.011564 |
| 0.011463 | 0.011396 | 0.011362 | 0.011463 | 0.011430 | 0.011362 | 0.011564 |
| 0.011429 | 0.011463 | 0.011463 | 0.011396 | 0.011463 | 0.011698 | 0.011362 |
| 0.011396 | 0.011799 | 0.011396 | 0.011429 | 0.011396 | 0.011765 | 0.011317 |
| 0.011791 | 0.011315 | 0.011411 | 0.011584 | 0.011671 | 0.011563 | 0.011269 |
| 0.011375 | 0.011564 | 0.011664 | 0.011773 | 0.011632 | 0.011737 | 0.011901 |
| 0.011800 | 0.011838 | 0.011799 | 0.012017 | 0.011765 | 0.012640 | 0.011801 |
| 0.012540 | 0.012274 | 0.012442 | 0.012714 | 0.011765 | 0.011463 | 0.011766 |
| 0.012204 | 0.012106 | 0.011732 | 0.011631 | 0.011699 | 0.011699 | 0.011669 |
| 0.011564 | 0.011535 | 0.011631 | 0.011598 | 0.011968 | 0.012034 | 0.012036 |
| 0.011935 | 0.012035 | 0.012105 | 0.011872 | 0.012205 | 0.012212 | 0.012272 |
| 0.012273 | 0.012307 | 0.012220 | 0.012273 | 0.012274 | 0.011497 | 0.011800 |
| 0.011868 | 0.012371 | 0.011874 | 0.012102 | 0.012575 | 0.011637 | 0.011531 |
| 0.011463 | 0.011496 | 0.011900 | 0.012006 | 0.012116 | 0.011832 | 0.011498 |
| S409     | 0.011732 | 0.011732 | 0.012001 | 0.011765 | 0.011765 | 0.011833 |
| 0.011672 | 0.011604 | 0.011765 | 0.011329 | 0.011396 | 0.011363 | 0.011329 |
| 0.011295 | 0.011530 | 0.011262 | 0.011362 | 0.011429 | 0.011396 | 0.011362 |
| 0.011329 | 0.011362 | 0.011396 | 0.011329 | 0.011363 | 0.011362 | 0.011638 |
| 0.011530 | 0.011362 | 0.011262 | 0.011429 | 0.011429 | 0.011396 | 0.011430 |
| 0.011396 | 0.011497 | 0.011396 | 0.011396 | 0.011429 | 0.011396 | 0.011564 |
| 0.011262 | 0.011396 | 0.011429 | 0.011362 | 0.011396 | 0.011497 | 0.011429 |
| 0.011396 | 0.011564 | 0.011463 | 0.011665 | 0.011396 | 0.011665 | 0.011396 |
| 0.011362 | 0.011396 | 0.011530 | 0.011665 | 0.011698 | 0.011396 | 0.011430 |
| 0.011429 | 0.011497 | 0.011396 | 0.011631 | 0.011799 | 0.011396 | 0.011463 |
| 0.011362 | 0.011463 | 0.011430 | 0.011497 | 0.011429 | 0.011429 | 0.011429 |
| 0.011329 | 0.011362 | 0.011329 | 0.011362 | 0.011396 | 0.011430 | 0.011497 |
| 0.011430 | 0.011396 | 0.011463 | 0.011362 | 0.011429 | 0.011329 | 0.011396 |
| 0.011564 | 0.011497 | 0.011732 | 0.011564 | 0.011396 | 0.011631 | 0.011396 |
| 0.011542 | 0.011695 | 0.011588 | 0.011255 | 0.011284 | 0.011428 | 0.011415 |
| 0.012048 | 0.011467 | 0.011307 | 0.011631 | 0.011631 | 0.011362 | 0.011463 |
| 0.011463 | 0.011429 | 0.011497 | 0.011396 | 0.011497 | 0.011429 | 0.011429 |
| 0.011396 | 0.011429 | 0.011698 | 0.011564 | 0.011463 | 0.011430 | 0.011362 |
| 0.011329 | 0.011262 | 0.011396 | 0.011362 | 0.011497 | 0.011463 | 0.011396 |
| 0.011497 | 0.011564 | 0.011362 | 0.011362 | 0.011396 | 0.011396 | 0.011398 |
| 0.011466 | 0.011396 | 0.011396 | 0.011276 | 0.011349 | 0.011306 | 0.011396 |
| 0.011399 | 0.011335 | 0.011355 | 0.011371 | 0.011298 | 0.011334 | 0.011364 |

|          |          |          |          |          |          |          |
|----------|----------|----------|----------|----------|----------|----------|
| 0.011564 | 0.011405 | 0.011439 | 0.011329 | 0.011337 | 0.011464 | 0.011296 |
| 0.011363 | 0.011431 | 0.011430 | 0.011530 | 0.011463 | 0.011833 | 0.011564 |
| 0.011597 | 0.011463 | 0.011396 | 0.011430 | 0.011295 | 0.011463 | 0.011329 |
| 0.011396 | 0.011396 | 0.011362 | 0.011329 | 0.011362 | 0.011329 | 0.011429 |
| 0.011396 | 0.011497 | 0.011430 | 0.011329 | 0.011431 | 0.011530 | 0.011533 |
| 0.011530 | 0.011430 | 0.011329 | 0.011263 | 0.011396 | 0.011329 | 0.011262 |
| 0.011366 | 0.011530 | 0.011329 | 0.011530 | 0.011295 | 0.011396 | 0.011362 |
| 0.011463 | 0.011362 | 0.011396 | 0.011362 | 0.011396 | 0.011262 | 0.011396 |
| 0.011430 | 0.011362 | 0.011429 | 0.011362 | 0.011396 | 0.011429 | 0.011665 |
| 0.011698 | 0.011631 | 0.011698 | 0.011532 | 0.011698 | 0.011396 | 0.011362 |
| 0.011330 | 0.011586 | 0.011426 | 0.011300 | 0.011705 | 0.011265 | 0.011414 |
| 0.011705 | 0.011604 | 0.011564 | 0.011766 | 0.011470 | 0.011631 | 0.011598 |
| 0.011530 | 0.011698 | 0.011558 | 0.011390 | 0.011480 | 0.011430 | 0.011500 |
| 0.011598 | 0.011499 | 0.011635 | 0.011703 | 0.011631 | 0.011698 | 0.011806 |
| 0.011534 | 0.011705 | 0.011636 | 0.011568 | 0.011834 | 0.011295 | 0.011498 |
| 0.011463 | 0.011396 | 0.011295 | 0.011295 | 0.011362 | 0.011362 | 0.011429 |
| 0.011362 | 0.011430 | 0.011329 | 0.011362 | 0.011362 | 0.011362 | 0.011429 |
| 0.011362 | 0.011732 | 0.011631 | 0.011665 | 0.011262 | 0.011362 | 0.011396 |
| 0.011396 | 0.011362 | 0.011430 | 0.011396 | 0.011329 | 0.011329 | 0.011329 |
| 0.011799 | 0.011429 | 0.011497 | 0.011295 | 0.011396 | 0.011564 | 0.011329 |
| 0.011329 | 0.011396 | 0.011362 | 0.011530 | 0.011329 | 0.011463 | 0.011597 |
| 0.011530 | 0.011362 | 0.011362 | 0.011295 | 0.011295 | 0.011463 | 0.011396 |
| 0.011295 | 0.011396 | 0.011262 | 0.011295 | 0.011430 | 0.011497 | 0.011329 |
| 0.011295 | 0.011430 | 0.011363 | 0.011262 | 0.011530 | 0.011262 | 0.011430 |
| 0.011505 | 0.011329 | 0.011564 | 0.011463 | 0.011430 | 0.011362 | 0.011463 |
| 0.011329 | 0.011665 | 0.011262 | 0.011463 | 0.011262 | 0.011262 | 0.011262 |
| 0.011497 | 0.011631 | 0.011396 | 0.011463 | 0.011295 | 0.011631 | 0.011262 |
| 0.011329 | 0.011329 | 0.011362 | 0.011463 | 0.011362 | 0.011463 | 0.011530 |
| 0.011530 | 0.011497 | 0.011396 | 0.011497 | 0.011463 | 0.011329 | 0.011295 |
| 0.011329 | 0.011329 | 0.011396 | 0.011262 | 0.011295 | 0.011463 | 0.011329 |
| 0.011295 | 0.011362 | 0.011497 | 0.011463 | 0.011429 | 0.011362 | 0.011362 |
| 0.011429 | 0.011362 | 0.011463 | 0.011329 | 0.011463 | 0.011564 | 0.011799 |
| 0.011362 | 0.011698 | 0.011371 | 0.017861 | 0.011387 | 0.011366 | 0.011653 |
| 0.011614 | 0.011658 | 0.011479 | 0.011408 | 0.011664 | 0.011682 | 0.011425 |
| 0.011487 | 0.011487 | 0.011255 | 0.011395 | 0.011216 | 0.011258 | 0.011275 |
| 0.011482 | 0.011433 | 0.011431 | 0.011325 | 0.011497 | 0.011530 | 0.011534 |
| 0.011404 | 0.011497 | 0.011497 | 0.000000 | 0.011430 | 0.011430 | 0.011396 |
| 0.011430 | 0.011362 | 0.011396 | 0.011429 | 0.011396 | 0.011329 | 0.011362 |
| 0.011362 | 0.011429 | 0.011329 | 0.011430 | 0.011463 | 0.011497 | 0.011396 |
| 0.011362 | 0.011329 | 0.011665 | 0.011665 | 0.011463 | 0.011497 | 0.011530 |
| 0.011295 | 0.011295 | 0.011329 | 0.011430 | 0.011295 | 0.011530 | 0.011530 |
| 0.011564 | 0.011564 | 0.011497 | 0.011597 | 0.011698 | 0.011565 | 0.011430 |
| 0.011429 | 0.011497 | 0.011530 | 0.011362 | 0.011429 | 0.011396 | 0.011430 |
| 0.011497 | 0.011497 | 0.011530 | 0.011497 | 0.011397 | 0.011597 | 0.011564 |
| 0.011399 | 0.011329 | 0.011429 | 0.011530 | 0.011430 | 0.011497 | 0.011597 |
| 0.011766 | 0.011470 | 0.011631 | 0.011598 | 0.011530 | 0.011698 | 0.011329 |
| 0.011498 | 0.011396 | 0.011362 | 0.011362 | 0.011429 | 0.011329 | 0.011430 |
| 0.011463 | 0.011497 | 0.011396 | 0.011362 | 0.011329 | 0.011665 | 0.011665 |
| 0.011463 | 0.011497 | 0.011564 | 0.011497 | 0.012070 | 0.011560 | 0.011482 |
| 0.011552 | 0.011511 | 0.011623 | 0.011511 | 0.011620 | 0.011543 | 0.011509 |
| 0.012022 | 0.011406 | 0.011540 | 0.011475 | 0.011749 | 0.011605 | 0.011707 |
| 0.012046 | 0.011512 | 0.011432 | 0.011429 | 0.011429 | 0.011396 | 0.011398 |
| 0.011295 | 0.011329 | 0.011463 | 0.011429 | 0.011432 | 0.011497 | 0.011464 |
| 0.011396 | 0.011329 | 0.011362 | 0.011396 | 0.011295 | 0.011362 | 0.011262 |
| 0.011329 | 0.011362 | 0.011329 | 0.011295 | 0.011396 | 0.011329 | 0.011362 |
| 0.011362 | 0.011295 | 0.011362 | 0.011396 | 0.011295 | 0.011497 | 0.011530 |
| 0.011430 | 0.011430 | 0.011429 | 0.011430 | 0.011362 | 0.011698 | 0.011396 |
| 0.011373 | 0.011362 | 0.011531 | 0.011535 | 0.011463 | 0.011463 | 0.011463 |
| 0.011463 | 0.011396 | 0.011362 | 0.011396 | 0.011497 | 0.011497 | 0.011429 |
| 0.011429 | 0.011564 | 0.011665 | 0.011463 | 0.011665 | 0.011665 | 0.011530 |

|          |          |          |          |          |          |          |
|----------|----------|----------|----------|----------|----------|----------|
| 0.011362 | 0.011429 | 0.011463 | 0.011799 | 0.011430 | 0.011463 | 0.011430 |
| 0.011463 | 0.011329 | 0.011329 | 0.011564 | 0.011631 | 0.011530 | 0.011396 |
| 0.011497 | 0.011564 | 0.011429 | 0.011497 | 0.011463 | 0.011329 | 0.011597 |
| 0.011429 | 0.011396 | 0.011329 | 0.011564 | 0.011396 | 0.011497 | 0.011732 |
| 0.011429 | 0.011740 | 0.011732 | 0.011507 | 0.011229 | 0.011434 | 0.011267 |
| 0.011170 | 0.011722 | 0.011341 | 0.011462 | 0.011255 | 0.011366 | 0.011379 |
| 0.011519 | 0.011324 | 0.011450 | 0.011324 | 0.011330 | 0.011529 | 0.011466 |
| 0.011475 | 0.011375 | 0.011412 | 0.011412 | 0.011431 | 0.011497 | 0.011564 |
| 0.011564 | 0.011430 | 0.011533 | 0.011535 | 0.011670 | 0.011696 | 0.011430 |
| 0.011597 | 0.011463 | 0.011396 | 0.011430 | 0.011295 | 0.011463 | 0.011329 |
| 0.011396 | 0.011396 | 0.011362 | 0.011329 | 0.011362 | 0.011329 | 0.011429 |
| 0.011409 | 0.011410 | 0.011403 | 0.011437 | 0.011573 | 0.011538 | 0.011538 |
| 0.011537 | 0.011464 | 0.011282 | 0.011276 | 0.011399 | 0.011568 | 0.011569 |
| 0.011363 | 0.011433 | 0.011666 | 0.011635 | 0.011565 | 0.011599 | 0.011530 |
| 0.011463 | 0.011530 | 0.011530 | 0.011429 | 0.011934 | 0.011597 | 0.011665 |
| 0.011698 | 0.011701 | 0.011401 | 0.011476 | 0.011362 | 0.011564 | 0.011530 |
| 0.011565 | 0.011597 | 0.011597 | 0.011597 | 0.011689 | 0.011732 | 0.011373 |
| 0.011263 | 0.011268 | 0.011367 | 0.011332 | 0.011368 | 0.011284 | 0.011536 |
| 0.011403 | 0.011455 | 0.011298 | 0.011435 | 0.011396 | 0.011471 | 0.011362 |
| 0.011329 | 0.011262 | 0.011396 | 0.011362 | 0.011497 | 0.011463 | 0.011396 |
| 0.011497 | 0.011564 | 0.011362 | 0.011362 | 0.011396 | 0.011396 | 0.011398 |
| 0.011466 | 0.011396 | 0.011396 | 0.011431 | 0.011497 | 0.011564 | 0.011564 |
| 0.011430 | 0.011533 | 0.011535 | 0.011670 | 0.011696 | 0.011430 | 0.011597 |
| 0.011530 | 0.011530 | 0.011364 | 0.011547 | 0.011477 | 0.011503 | 0.011375 |
| 0.011542 | 0.011607 | 0.011526 | 0.011434 | 0.011329 | 0.011530 | 0.011396 |
| 0.011497 | 0.011430 | 0.011329 | 0.011431 | 0.011530 | 0.011533 | 0.011430 |
| 0.011329 | 0.011263 | 0.011396 | 0.011329 | 0.011262 | 0.011366 | 0.011530 |
| 0.011430 | 0.011362 | 0.011396 | 0.011429 | 0.011396 | 0.011329 | 0.011463 |
| 0.011396 | 0.011430 | 0.011429 | 0.011362 | 0.011429 | 0.011665 | 0.011262 |
| 0.011362 | 0.011698 | 0.011362 | 0.011396 | 0.011362 | 0.011665 | 0.011317 |
| 0.011735 | 0.011315 | 0.011261 | 0.011463 | 0.011549 | 0.011455 | 0.011227 |
| 0.011218 | 0.011463 | 0.011564 | 0.011671 | 0.011531 | 0.011669 | 0.011800 |
| 0.011699 | 0.011737 | 0.011698 | 0.011949 | 0.011665 | 0.012472 | 0.011700 |
| 0.012439 | 0.012139 | 0.012273 | 0.012612 | 0.011665 | 0.011362 | 0.011665 |
| 0.012103 | 0.012038 | 0.011631 | 0.011530 | 0.011598 | 0.011598 | 0.011568 |
| 0.011463 | 0.011467 | 0.011530 | 0.011497 | 0.011867 | 0.011934 | 0.011935 |
| 0.011834 | 0.011934 | 0.012038 | 0.011804 | 0.012104 | 0.012110 | 0.012171 |
| 0.012172 | 0.012205 | 0.012084 | 0.012172 | 0.012173 | 0.011463 | 0.011699 |
| 0.011767 | 0.012270 | 0.011772 | 0.012001 | 0.012474 | 0.011536 | 0.011430 |
| 0.011396 | 0.011396 | 0.011867 | 0.011883 | 0.012010 | 0.011732 | 0.011397 |
| S410     | 0.011698 | 0.011698 | 0.012034 | 0.011799 | 0.011799 | 0.011866 |
| 0.011671 | 0.011604 | 0.011866 | 0.011295 | 0.011362 | 0.011296 | 0.011295 |
| 0.011329 | 0.011429 | 0.011295 | 0.011329 | 0.011396 | 0.011362 | 0.011329 |
| 0.011295 | 0.011329 | 0.011429 | 0.011295 | 0.011329 | 0.011329 | 0.011637 |
| 0.011564 | 0.011329 | 0.011228 | 0.011463 | 0.011396 | 0.011362 | 0.011396 |
| 0.011362 | 0.011463 | 0.011362 | 0.011362 | 0.011396 | 0.011362 | 0.011530 |
| 0.011295 | 0.011362 | 0.011396 | 0.011329 | 0.011429 | 0.011463 | 0.011396 |
| 0.011362 | 0.011530 | 0.011430 | 0.011698 | 0.011362 | 0.011631 | 0.011362 |
| 0.011329 | 0.011430 | 0.011497 | 0.011631 | 0.011732 | 0.011429 | 0.011530 |
| 0.011396 | 0.011463 | 0.011362 | 0.011597 | 0.011833 | 0.011362 | 0.011429 |
| 0.011329 | 0.011429 | 0.011396 | 0.011463 | 0.011396 | 0.011396 | 0.011396 |
| 0.011295 | 0.011329 | 0.011295 | 0.011396 | 0.011362 | 0.011363 | 0.011463 |
| 0.011396 | 0.011362 | 0.011429 | 0.011329 | 0.011463 | 0.011295 | 0.011362 |
| 0.011530 | 0.011463 | 0.011698 | 0.011530 | 0.011362 | 0.011597 | 0.011362 |
| 0.011505 | 0.011733 | 0.011551 | 0.011256 | 0.011247 | 0.011355 | 0.011454 |
| 0.012085 | 0.011518 | 0.011266 | 0.011597 | 0.011597 | 0.011396 | 0.011497 |
| 0.011429 | 0.011396 | 0.011463 | 0.011362 | 0.011463 | 0.011396 | 0.011396 |
| 0.011362 | 0.011463 | 0.011665 | 0.011530 | 0.011429 | 0.011396 | 0.011329 |
| 0.011295 | 0.011295 | 0.011362 | 0.011329 | 0.011530 | 0.011497 | 0.011430 |
| 0.011530 | 0.011597 | 0.011329 | 0.011329 | 0.011362 | 0.011362 | 0.011364 |



|          |          |          |          |          |          |          |
|----------|----------|----------|----------|----------|----------|----------|
| 0.011432 | 0.011362 | 0.011362 | 0.011240 | 0.011313 | 0.011271 | 0.011363 |
| 0.011365 | 0.011301 | 0.011319 | 0.011336 | 0.011264 | 0.011300 | 0.011330 |
| 0.011600 | 0.011371 | 0.011405 | 0.011296 | 0.011302 | 0.011430 | 0.011397 |
| 0.011464 | 0.011397 | 0.011396 | 0.011496 | 0.011429 | 0.011799 | 0.011598 |
| 0.011631 | 0.011497 | 0.011362 | 0.011463 | 0.011262 | 0.011497 | 0.011295 |
| 0.011362 | 0.011362 | 0.011329 | 0.011295 | 0.011329 | 0.011295 | 0.011396 |
| 0.011362 | 0.011463 | 0.011396 | 0.011295 | 0.011397 | 0.011497 | 0.011500 |
| 0.011497 | 0.011195 | 0.011295 | 0.011229 | 0.011362 | 0.011295 | 0.011228 |
| 0.011332 | 0.011497 | 0.011295 | 0.011497 | 0.011262 | 0.011363 | 0.011329 |
| 0.011430 | 0.011329 | 0.011362 | 0.011329 | 0.011362 | 0.011228 | 0.011362 |
| 0.011396 | 0.011329 | 0.011396 | 0.011329 | 0.011362 | 0.011396 | 0.011631 |
| 0.011732 | 0.011665 | 0.011732 | 0.011465 | 0.011732 | 0.011362 | 0.011329 |
| 0.011330 | 0.011626 | 0.011518 | 0.011232 | 0.011739 | 0.011231 | 0.011336 |
| 0.011705 | 0.011638 | 0.011530 | 0.011732 | 0.011436 | 0.011597 | 0.011564 |
| 0.011497 | 0.011664 | 0.011522 | 0.011349 | 0.011396 | 0.011396 | 0.011466 |
| 0.011564 | 0.011465 | 0.011601 | 0.011669 | 0.011597 | 0.011665 | 0.011772 |
| 0.011500 | 0.011671 | 0.011602 | 0.011534 | 0.011800 | 0.011262 | 0.011465 |
| 0.011429 | 0.011362 | 0.011262 | 0.011262 | 0.011329 | 0.011329 | 0.011396 |
| 0.011329 | 0.011396 | 0.011295 | 0.011396 | 0.011329 | 0.011329 | 0.011396 |
| 0.011329 | 0.011765 | 0.011665 | 0.011698 | 0.011228 | 0.011329 | 0.011362 |
| 0.011362 | 0.011329 | 0.011396 | 0.011429 | 0.011295 | 0.011295 | 0.011295 |
| 0.011832 | 0.011463 | 0.011463 | 0.011262 | 0.011362 | 0.011530 | 0.011295 |
| 0.011295 | 0.011362 | 0.011329 | 0.011497 | 0.011295 | 0.011429 | 0.011564 |
| 0.011497 | 0.011329 | 0.011329 | 0.011262 | 0.011262 | 0.011430 | 0.011362 |
| 0.011262 | 0.011362 | 0.011228 | 0.011262 | 0.011396 | 0.011530 | 0.011295 |
| 0.011262 | 0.011396 | 0.011329 | 0.011228 | 0.011564 | 0.011228 | 0.011396 |
| 0.011471 | 0.011295 | 0.011597 | 0.011430 | 0.011463 | 0.011329 | 0.011429 |
| 0.011295 | 0.011631 | 0.011228 | 0.011497 | 0.011295 | 0.011295 | 0.011228 |
| 0.011463 | 0.011665 | 0.011362 | 0.011429 | 0.011262 | 0.011665 | 0.011295 |
| 0.011295 | 0.011295 | 0.011329 | 0.011429 | 0.011329 | 0.011429 | 0.011497 |
| 0.011497 | 0.011463 | 0.011362 | 0.011463 | 0.011429 | 0.011295 | 0.011262 |
| 0.011295 | 0.011295 | 0.011362 | 0.011295 | 0.011262 | 0.011429 | 0.011295 |
| 0.011329 | 0.011329 | 0.011463 | 0.011497 | 0.011396 | 0.011329 | 0.011329 |
| 0.011396 | 0.011329 | 0.011429 | 0.011295 | 0.011429 | 0.011530 | 0.011833 |
| 0.011329 | 0.011732 | 0.011302 | 0.017825 | 0.011257 | 0.011488 | 0.011653 |
| 0.011614 | 0.011658 | 0.011375 | 0.011350 | 0.011775 | 0.011682 | 0.011425 |
| 0.011535 | 0.011610 | 0.011216 | 0.011228 | 0.011255 | 0.011357 | 0.011275 |
| 0.011577 | 0.011470 | 0.011468 | 0.011193 | 0.011463 | 0.011497 | 0.011500 |
| 0.011369 | 0.011463 | 0.011463 | 0.011430 | 0.000000 | 0.000000 | 0.011363 |
| 0.011396 | 0.011329 | 0.011362 | 0.011396 | 0.011363 | 0.011295 | 0.011329 |
| 0.011329 | 0.011396 | 0.011295 | 0.011396 | 0.011430 | 0.011463 | 0.011362 |
| 0.011396 | 0.011362 | 0.011698 | 0.011698 | 0.011430 | 0.011464 | 0.011497 |
| 0.011262 | 0.011262 | 0.011295 | 0.011396 | 0.011262 | 0.011497 | 0.011497 |
| 0.011530 | 0.011530 | 0.011463 | 0.011564 | 0.011732 | 0.011565 | 0.011396 |
| 0.011396 | 0.011463 | 0.011497 | 0.011329 | 0.011396 | 0.011362 | 0.011396 |
| 0.011463 | 0.011463 | 0.011497 | 0.011463 | 0.011363 | 0.011564 | 0.011530 |
| 0.011399 | 0.011295 | 0.011396 | 0.011497 | 0.011396 | 0.011530 | 0.011564 |
| 0.011732 | 0.011436 | 0.011597 | 0.011564 | 0.011497 | 0.011664 | 0.011295 |
| 0.011465 | 0.011363 | 0.011329 | 0.011329 | 0.011396 | 0.011295 | 0.011396 |
| 0.011430 | 0.011463 | 0.011362 | 0.011396 | 0.011362 | 0.011698 | 0.011698 |
| 0.011430 | 0.011464 | 0.011530 | 0.011463 | 0.012103 | 0.011525 | 0.011447 |
| 0.011517 | 0.011476 | 0.011587 | 0.011476 | 0.011585 | 0.011509 | 0.011474 |
| 0.012056 | 0.011372 | 0.011505 | 0.011441 | 0.011715 | 0.011570 | 0.011673 |
| 0.012080 | 0.011550 | 0.011635 | 0.011698 | 0.011564 | 0.011564 | 0.011601 |
| 0.011262 | 0.011429 | 0.011564 | 0.011530 | 0.011533 | 0.011530 | 0.011464 |
| 0.011362 | 0.011295 | 0.011329 | 0.011362 | 0.011262 | 0.011329 | 0.011228 |
| 0.011362 | 0.011396 | 0.011295 | 0.011262 | 0.011362 | 0.011295 | 0.011329 |
| 0.011329 | 0.011262 | 0.011329 | 0.011362 | 0.011262 | 0.011463 | 0.011497 |
| 0.011396 | 0.011463 | 0.011396 | 0.011396 | 0.011329 | 0.011732 | 0.011362 |
| 0.011408 | 0.011329 | 0.011564 | 0.011569 | 0.011430 | 0.011429 | 0.011429 |

|          |          |          |          |          |          |          |
|----------|----------|----------|----------|----------|----------|----------|
| 0.011430 | 0.011362 | 0.011329 | 0.011362 | 0.011463 | 0.011463 | 0.011396 |
| 0.011396 | 0.011530 | 0.011698 | 0.011429 | 0.011631 | 0.011631 | 0.011497 |
| 0.011329 | 0.011396 | 0.011430 | 0.011833 | 0.011396 | 0.011430 | 0.011396 |
| 0.011429 | 0.011362 | 0.011362 | 0.011665 | 0.011598 | 0.011631 | 0.011362 |
| 0.011463 | 0.011530 | 0.011396 | 0.011463 | 0.011429 | 0.011295 | 0.011631 |
| 0.011396 | 0.011362 | 0.011362 | 0.011530 | 0.011362 | 0.011463 | 0.011698 |
| 0.011396 | 0.011739 | 0.011765 | 0.011548 | 0.011286 | 0.011468 | 0.011267 |
| 0.011280 | 0.011761 | 0.011271 | 0.011507 | 0.011353 | 0.011417 | 0.011432 |
| 0.011519 | 0.011192 | 0.011339 | 0.011126 | 0.011330 | 0.011395 | 0.011425 |
| 0.011437 | 0.011336 | 0.011413 | 0.011342 | 0.011397 | 0.011530 | 0.011598 |
| 0.011598 | 0.011464 | 0.011567 | 0.011569 | 0.011704 | 0.011732 | 0.011396 |
| 0.011631 | 0.011497 | 0.011362 | 0.011463 | 0.011262 | 0.011497 | 0.011295 |
| 0.011362 | 0.011362 | 0.011329 | 0.011295 | 0.011329 | 0.011295 | 0.011396 |
| 0.011375 | 0.011375 | 0.011369 | 0.011403 | 0.011539 | 0.011504 | 0.011504 |
| 0.011503 | 0.011430 | 0.011245 | 0.011240 | 0.011365 | 0.011535 | 0.011535 |
| 0.011329 | 0.011399 | 0.011633 | 0.011601 | 0.011531 | 0.011565 | 0.011497 |
| 0.011429 | 0.011497 | 0.011496 | 0.011396 | 0.011967 | 0.011564 | 0.011631 |
| 0.011665 | 0.011737 | 0.011367 | 0.011441 | 0.011329 | 0.011530 | 0.011497 |
| 0.011531 | 0.011564 | 0.011564 | 0.011564 | 0.011729 | 0.011631 | 0.011338 |
| 0.011229 | 0.011233 | 0.011333 | 0.011298 | 0.011402 | 0.011247 | 0.011570 |
| 0.011369 | 0.011499 | 0.011251 | 0.011360 | 0.011363 | 0.011437 | 0.011329 |
| 0.011295 | 0.011295 | 0.011362 | 0.011329 | 0.011530 | 0.011497 | 0.011430 |
| 0.011530 | 0.011597 | 0.011329 | 0.011329 | 0.011362 | 0.011362 | 0.011364 |
| 0.011432 | 0.011362 | 0.011362 | 0.011397 | 0.011530 | 0.011598 | 0.011598 |
| 0.011464 | 0.011567 | 0.011569 | 0.011704 | 0.011732 | 0.011396 | 0.011564 |
| 0.011497 | 0.011497 | 0.011331 | 0.011513 | 0.011408 | 0.011469 | 0.011306 |
| 0.011474 | 0.011698 | 0.011526 | 0.011400 | 0.011295 | 0.011497 | 0.011362 |
| 0.011463 | 0.011396 | 0.011295 | 0.011397 | 0.011497 | 0.011500 | 0.011195 |
| 0.011295 | 0.011229 | 0.011362 | 0.011295 | 0.011228 | 0.011332 | 0.011497 |
| 0.011396 | 0.011329 | 0.011362 | 0.011396 | 0.011363 | 0.011295 | 0.011497 |
| 0.011362 | 0.011396 | 0.011396 | 0.011329 | 0.011396 | 0.011631 | 0.011295 |
| 0.011329 | 0.011732 | 0.011329 | 0.011362 | 0.011329 | 0.011698 | 0.011275 |
| 0.011735 | 0.011273 | 0.011361 | 0.011503 | 0.011590 | 0.011491 | 0.011228 |
| 0.011270 | 0.011497 | 0.011597 | 0.011705 | 0.011532 | 0.011669 | 0.011800 |
| 0.011733 | 0.011771 | 0.011732 | 0.011949 | 0.011698 | 0.012573 | 0.011700 |
| 0.012473 | 0.012207 | 0.012375 | 0.012613 | 0.011698 | 0.011396 | 0.011699 |
| 0.012137 | 0.012039 | 0.011665 | 0.011564 | 0.011632 | 0.011632 | 0.011601 |
| 0.011497 | 0.011467 | 0.011564 | 0.011531 | 0.011901 | 0.011967 | 0.011969 |
| 0.011868 | 0.011968 | 0.012038 | 0.011805 | 0.012138 | 0.012144 | 0.012205 |
| 0.012206 | 0.012239 | 0.012152 | 0.012206 | 0.012173 | 0.011429 | 0.011732 |
| 0.011800 | 0.012304 | 0.011772 | 0.012035 | 0.012474 | 0.011536 | 0.011464 |
| 0.011429 | 0.011429 | 0.011901 | 0.011965 | 0.012046 | 0.011765 | 0.011397 |
| S411     | 0.011698 | 0.011698 | 0.012035 | 0.011799 | 0.011799 | 0.011867 |
| 0.011672 | 0.011604 | 0.011866 | 0.011295 | 0.011362 | 0.011296 | 0.011295 |
| 0.011329 | 0.011430 | 0.011295 | 0.011329 | 0.011396 | 0.011362 | 0.011329 |
| 0.011295 | 0.011329 | 0.011430 | 0.011296 | 0.011329 | 0.011329 | 0.011638 |
| 0.011564 | 0.011329 | 0.011228 | 0.011463 | 0.011396 | 0.011363 | 0.011396 |
| 0.011362 | 0.011463 | 0.011362 | 0.011362 | 0.011396 | 0.011362 | 0.011530 |
| 0.011295 | 0.011362 | 0.011396 | 0.011329 | 0.011430 | 0.011463 | 0.011396 |
| 0.011362 | 0.011531 | 0.011430 | 0.011698 | 0.011362 | 0.011631 | 0.011362 |
| 0.011329 | 0.011430 | 0.011497 | 0.011631 | 0.011732 | 0.011430 | 0.011530 |
| 0.011396 | 0.011463 | 0.011363 | 0.011598 | 0.011833 | 0.011362 | 0.011430 |
| 0.011329 | 0.011430 | 0.011396 | 0.011463 | 0.011396 | 0.011396 | 0.011396 |
| 0.011295 | 0.011329 | 0.011295 | 0.011396 | 0.011362 | 0.011363 | 0.011463 |
| 0.011396 | 0.011362 | 0.011430 | 0.011329 | 0.011463 | 0.011295 | 0.011362 |
| 0.011530 | 0.011463 | 0.011698 | 0.011530 | 0.011362 | 0.011598 | 0.011362 |
| 0.011506 | 0.011733 | 0.011551 | 0.011256 | 0.011247 | 0.011355 | 0.011454 |
| 0.012086 | 0.011518 | 0.011266 | 0.011598 | 0.011598 | 0.011396 | 0.011497 |
| 0.011430 | 0.011396 | 0.011463 | 0.011362 | 0.011463 | 0.011396 | 0.011396 |
| 0.011362 | 0.011463 | 0.011665 | 0.011530 | 0.011430 | 0.011396 | 0.011329 |

|          |          |          |          |          |          |          |
|----------|----------|----------|----------|----------|----------|----------|
| 0.011295 | 0.011295 | 0.011363 | 0.011329 | 0.011531 | 0.011497 | 0.011430 |
| 0.011531 | 0.011598 | 0.011329 | 0.011329 | 0.011363 | 0.011363 | 0.011364 |
| 0.011432 | 0.011363 | 0.011363 | 0.011240 | 0.011314 | 0.011271 | 0.011363 |
| 0.011365 | 0.011301 | 0.011319 | 0.011336 | 0.011264 | 0.011300 | 0.011331 |
| 0.011601 | 0.011371 | 0.011405 | 0.011296 | 0.011302 | 0.011431 | 0.011397 |
| 0.011464 | 0.011397 | 0.011397 | 0.011497 | 0.011430 | 0.011799 | 0.011598 |
| 0.011631 | 0.011497 | 0.011363 | 0.011463 | 0.011262 | 0.011497 | 0.011295 |
| 0.011362 | 0.011362 | 0.011329 | 0.011295 | 0.011329 | 0.011295 | 0.011396 |
| 0.011363 | 0.011463 | 0.011396 | 0.011295 | 0.011397 | 0.011497 | 0.011500 |
| 0.011497 | 0.011195 | 0.011295 | 0.011229 | 0.011363 | 0.011295 | 0.011228 |
| 0.011332 | 0.011497 | 0.011295 | 0.011497 | 0.011262 | 0.011363 | 0.011329 |
| 0.011430 | 0.011329 | 0.011363 | 0.011329 | 0.011363 | 0.011228 | 0.011363 |
| 0.011396 | 0.011329 | 0.011396 | 0.011329 | 0.011363 | 0.011396 | 0.011631 |
| 0.011732 | 0.011665 | 0.011732 | 0.011465 | 0.011733 | 0.011363 | 0.011329 |
| 0.011331 | 0.011627 | 0.011518 | 0.011232 | 0.011739 | 0.011231 | 0.011336 |
| 0.011706 | 0.011639 | 0.011530 | 0.011732 | 0.011436 | 0.011598 | 0.011564 |
| 0.011497 | 0.011665 | 0.011522 | 0.011349 | 0.011396 | 0.011396 | 0.011466 |
| 0.011564 | 0.011465 | 0.011601 | 0.011670 | 0.011598 | 0.011665 | 0.011772 |
| 0.011500 | 0.011672 | 0.011602 | 0.011534 | 0.011801 | 0.011262 | 0.011465 |
| 0.011430 | 0.011362 | 0.011262 | 0.011262 | 0.011329 | 0.011329 | 0.011396 |
| 0.011329 | 0.011396 | 0.011295 | 0.011396 | 0.011329 | 0.011329 | 0.011396 |
| 0.011329 | 0.011766 | 0.011665 | 0.011698 | 0.011228 | 0.011329 | 0.011363 |
| 0.011362 | 0.011329 | 0.011396 | 0.011430 | 0.011295 | 0.011295 | 0.011295 |
| 0.011833 | 0.011463 | 0.011463 | 0.011262 | 0.011362 | 0.011531 | 0.011295 |
| 0.011295 | 0.011362 | 0.011329 | 0.011497 | 0.011295 | 0.011430 | 0.011564 |
| 0.011497 | 0.011329 | 0.011329 | 0.011262 | 0.011262 | 0.011430 | 0.011362 |
| 0.011262 | 0.011362 | 0.011228 | 0.011262 | 0.011396 | 0.011531 | 0.011295 |
| 0.011262 | 0.011396 | 0.011329 | 0.011228 | 0.011564 | 0.011228 | 0.011396 |
| 0.011471 | 0.011295 | 0.011598 | 0.011430 | 0.011463 | 0.011329 | 0.011430 |
| 0.011295 | 0.011631 | 0.011228 | 0.011497 | 0.011295 | 0.011295 | 0.011228 |
| 0.011463 | 0.011665 | 0.011363 | 0.011430 | 0.011262 | 0.011665 | 0.011295 |
| 0.011295 | 0.011295 | 0.011329 | 0.011430 | 0.011329 | 0.011430 | 0.011497 |
| 0.011497 | 0.011463 | 0.011362 | 0.011463 | 0.011430 | 0.011295 | 0.011262 |
| 0.011295 | 0.011295 | 0.011363 | 0.011295 | 0.011262 | 0.011430 | 0.011295 |
| 0.011329 | 0.011329 | 0.011463 | 0.011497 | 0.011396 | 0.011329 | 0.011329 |
| 0.011396 | 0.011329 | 0.011430 | 0.011295 | 0.011430 | 0.011530 | 0.011833 |
| 0.011329 | 0.011732 | 0.011302 | 0.017829 | 0.011257 | 0.011489 | 0.011654 |
| 0.011614 | 0.011659 | 0.011375 | 0.011351 | 0.011775 | 0.011682 | 0.011425 |
| 0.011535 | 0.011610 | 0.011216 | 0.011228 | 0.011256 | 0.011357 | 0.011276 |
| 0.011577 | 0.011470 | 0.011468 | 0.011193 | 0.011463 | 0.011497 | 0.011500 |
| 0.011370 | 0.011463 | 0.011463 | 0.011430 | 0.000000 | 0.000000 | 0.011363 |
| 0.011396 | 0.011329 | 0.011363 | 0.011396 | 0.011363 | 0.011295 | 0.011329 |
| 0.011329 | 0.011396 | 0.011295 | 0.011396 | 0.011430 | 0.011463 | 0.011362 |
| 0.011396 | 0.011363 | 0.011699 | 0.011699 | 0.011430 | 0.011464 | 0.011497 |
| 0.011262 | 0.011262 | 0.011295 | 0.011396 | 0.011262 | 0.011497 | 0.011497 |
| 0.011531 | 0.011530 | 0.011463 | 0.011564 | 0.011732 | 0.011566 | 0.011396 |
| 0.011396 | 0.011463 | 0.011497 | 0.011329 | 0.011396 | 0.011363 | 0.011396 |
| 0.011464 | 0.011464 | 0.011497 | 0.011464 | 0.011363 | 0.011564 | 0.011531 |
| 0.011399 | 0.011295 | 0.011396 | 0.011497 | 0.011396 | 0.011531 | 0.011564 |
| 0.011732 | 0.011436 | 0.011598 | 0.011564 | 0.011497 | 0.011665 | 0.011296 |
| 0.011465 | 0.011363 | 0.011329 | 0.011329 | 0.011396 | 0.011295 | 0.011396 |
| 0.011430 | 0.011463 | 0.011362 | 0.011396 | 0.011363 | 0.011699 | 0.011699 |
| 0.011430 | 0.011464 | 0.011530 | 0.011463 | 0.012104 | 0.011525 | 0.011447 |
| 0.011518 | 0.011477 | 0.011588 | 0.011476 | 0.011586 | 0.011509 | 0.011474 |
| 0.012057 | 0.011372 | 0.011506 | 0.011441 | 0.011715 | 0.011571 | 0.011673 |
| 0.012081 | 0.011551 | 0.011635 | 0.011698 | 0.011564 | 0.011564 | 0.011601 |
| 0.011262 | 0.011430 | 0.011564 | 0.011530 | 0.011533 | 0.011530 | 0.011465 |
| 0.011362 | 0.011295 | 0.011329 | 0.011362 | 0.011262 | 0.011329 | 0.011228 |
| 0.011362 | 0.011396 | 0.011295 | 0.011262 | 0.011362 | 0.011295 | 0.011329 |
| 0.011329 | 0.011262 | 0.011329 | 0.011363 | 0.011262 | 0.011463 | 0.011497 |

|          |          |          |          |          |          |          |
|----------|----------|----------|----------|----------|----------|----------|
| 0.011396 | 0.011463 | 0.011396 | 0.011396 | 0.011329 | 0.011732 | 0.011362 |
| 0.011408 | 0.011329 | 0.011564 | 0.011569 | 0.011430 | 0.011430 | 0.011430 |
| 0.011430 | 0.011363 | 0.011329 | 0.011363 | 0.011463 | 0.011463 | 0.011396 |
| 0.011396 | 0.011530 | 0.011698 | 0.011430 | 0.011631 | 0.011631 | 0.011497 |
| 0.011329 | 0.011396 | 0.011430 | 0.011833 | 0.011396 | 0.011430 | 0.011396 |
| 0.011430 | 0.011362 | 0.011362 | 0.011665 | 0.011598 | 0.011631 | 0.011362 |
| 0.011463 | 0.011530 | 0.011396 | 0.011463 | 0.011430 | 0.011295 | 0.011631 |
| 0.011396 | 0.011362 | 0.011362 | 0.011530 | 0.011362 | 0.011463 | 0.011699 |
| 0.011396 | 0.011740 | 0.011766 | 0.011548 | 0.011286 | 0.011468 | 0.011267 |
| 0.011280 | 0.011762 | 0.011271 | 0.011507 | 0.011353 | 0.011417 | 0.011433 |
| 0.011520 | 0.011192 | 0.011339 | 0.011126 | 0.011330 | 0.011396 | 0.011425 |
| 0.011437 | 0.011336 | 0.011413 | 0.011342 | 0.011398 | 0.011531 | 0.011598 |
| 0.011598 | 0.011464 | 0.011568 | 0.011569 | 0.011705 | 0.011732 | 0.011396 |
| 0.011631 | 0.011497 | 0.011363 | 0.011463 | 0.011262 | 0.011497 | 0.011295 |
| 0.011362 | 0.011362 | 0.011329 | 0.011295 | 0.011329 | 0.011295 | 0.011396 |
| 0.011375 | 0.011375 | 0.011369 | 0.011403 | 0.011540 | 0.011505 | 0.011504 |
| 0.011503 | 0.011430 | 0.011245 | 0.011240 | 0.011365 | 0.011535 | 0.011536 |
| 0.011329 | 0.011399 | 0.011633 | 0.011601 | 0.011531 | 0.011565 | 0.011497 |
| 0.011430 | 0.011497 | 0.011497 | 0.011396 | 0.011968 | 0.011564 | 0.011631 |
| 0.011665 | 0.011737 | 0.011367 | 0.011442 | 0.011329 | 0.011530 | 0.011497 |
| 0.011531 | 0.011564 | 0.011564 | 0.011564 | 0.011729 | 0.011631 | 0.011338 |
| 0.011229 | 0.011233 | 0.011333 | 0.011298 | 0.011402 | 0.011247 | 0.011570 |
| 0.011369 | 0.011499 | 0.011251 | 0.011360 | 0.011363 | 0.011437 | 0.011329 |
| 0.011295 | 0.011295 | 0.011363 | 0.011329 | 0.011531 | 0.011497 | 0.011430 |
| 0.011531 | 0.011598 | 0.011329 | 0.011329 | 0.011363 | 0.011363 | 0.011364 |
| 0.011432 | 0.011363 | 0.011363 | 0.011398 | 0.011531 | 0.011598 | 0.011598 |
| 0.011464 | 0.011568 | 0.011569 | 0.011705 | 0.011732 | 0.011396 | 0.011564 |
| 0.011497 | 0.011497 | 0.011331 | 0.011513 | 0.011408 | 0.011469 | 0.011306 |
| 0.011474 | 0.011699 | 0.011526 | 0.011400 | 0.011295 | 0.011497 | 0.011363 |
| 0.011463 | 0.011396 | 0.011295 | 0.011397 | 0.011497 | 0.011500 | 0.011195 |
| 0.011295 | 0.011229 | 0.011363 | 0.011295 | 0.011228 | 0.011332 | 0.011497 |
| 0.011396 | 0.011329 | 0.011363 | 0.011396 | 0.011363 | 0.011295 | 0.011497 |
| 0.011362 | 0.011396 | 0.011396 | 0.011329 | 0.011396 | 0.011631 | 0.011295 |
| 0.011329 | 0.011732 | 0.011329 | 0.011362 | 0.011329 | 0.011698 | 0.011275 |
| 0.011736 | 0.011273 | 0.011361 | 0.011503 | 0.011590 | 0.011491 | 0.011228 |
| 0.011270 | 0.011497 | 0.011598 | 0.011706 | 0.011532 | 0.011670 | 0.011801 |
| 0.011734 | 0.011771 | 0.011732 | 0.011949 | 0.011698 | 0.012574 | 0.011701 |
| 0.012474 | 0.012208 | 0.012376 | 0.012614 | 0.011698 | 0.011396 | 0.011699 |
| 0.012138 | 0.012039 | 0.011665 | 0.011564 | 0.011632 | 0.011632 | 0.011602 |
| 0.011497 | 0.011467 | 0.011564 | 0.011531 | 0.011902 | 0.011968 | 0.011969 |
| 0.011868 | 0.011969 | 0.012039 | 0.011805 | 0.012139 | 0.012145 | 0.012206 |
| 0.012206 | 0.012240 | 0.012153 | 0.012206 | 0.012174 | 0.011430 | 0.011733 |
| 0.011801 | 0.012304 | 0.011773 | 0.012035 | 0.012475 | 0.011536 | 0.011464 |
| 0.011430 | 0.011430 | 0.011901 | 0.011966 | 0.012046 | 0.011766 | 0.011397 |
| S412     | 0.011665 | 0.011665 | 0.012002 | 0.011766 | 0.011766 | 0.011833 |
| 0.011672 | 0.011604 | 0.011766 | 0.011262 | 0.011329 | 0.011296 | 0.011262 |
| 0.011295 | 0.011463 | 0.011262 | 0.011295 | 0.011362 | 0.011329 | 0.011295 |
| 0.011262 | 0.011295 | 0.011396 | 0.011262 | 0.011296 | 0.011295 | 0.011638 |
| 0.011530 | 0.011295 | 0.011195 | 0.011430 | 0.011362 | 0.011329 | 0.011363 |
| 0.011329 | 0.011430 | 0.011329 | 0.011329 | 0.011362 | 0.011329 | 0.011497 |
| 0.011262 | 0.011329 | 0.011363 | 0.011295 | 0.011396 | 0.011430 | 0.011363 |
| 0.011329 | 0.011497 | 0.011396 | 0.011665 | 0.011329 | 0.011598 | 0.011329 |
| 0.011295 | 0.011396 | 0.011463 | 0.011598 | 0.011699 | 0.011396 | 0.011497 |
| 0.011362 | 0.011430 | 0.011329 | 0.011564 | 0.011800 | 0.011329 | 0.011396 |
| 0.011295 | 0.011396 | 0.011363 | 0.011430 | 0.011329 | 0.011363 | 0.011363 |
| 0.011262 | 0.011295 | 0.011262 | 0.011363 | 0.011329 | 0.011363 | 0.011430 |
| 0.011363 | 0.011329 | 0.011396 | 0.011295 | 0.011430 | 0.011262 | 0.011329 |
| 0.011497 | 0.011430 | 0.011665 | 0.011497 | 0.011329 | 0.011564 | 0.011329 |
| 0.011505 | 0.011733 | 0.011551 | 0.011256 | 0.011247 | 0.011355 | 0.011415 |
| 0.012086 | 0.011467 | 0.011266 | 0.011564 | 0.011564 | 0.011362 | 0.011463 |

|          |          |          |          |          |          |          |
|----------|----------|----------|----------|----------|----------|----------|
| 0.011396 | 0.011362 | 0.011430 | 0.011329 | 0.011430 | 0.011363 | 0.011363 |
| 0.011329 | 0.011430 | 0.011631 | 0.011497 | 0.011396 | 0.011363 | 0.011295 |
| 0.011262 | 0.011262 | 0.011329 | 0.011295 | 0.011497 | 0.011463 | 0.011396 |
| 0.011497 | 0.011564 | 0.011295 | 0.011295 | 0.011329 | 0.011329 | 0.011331 |
| 0.011398 | 0.011329 | 0.011329 | 0.011204 | 0.011277 | 0.011236 | 0.011329 |
| 0.011331 | 0.011267 | 0.011319 | 0.011302 | 0.011230 | 0.011266 | 0.011297 |
| 0.011564 | 0.011336 | 0.011370 | 0.011262 | 0.011268 | 0.011397 | 0.011363 |
| 0.011430 | 0.011364 | 0.011363 | 0.011463 | 0.011396 | 0.011766 | 0.011564 |
| 0.011598 | 0.011463 | 0.011329 | 0.011430 | 0.011228 | 0.011463 | 0.011262 |
| 0.011329 | 0.011329 | 0.011295 | 0.011262 | 0.011295 | 0.011262 | 0.011363 |
| 0.011329 | 0.011430 | 0.011363 | 0.011262 | 0.011364 | 0.011463 | 0.011466 |
| 0.011463 | 0.011363 | 0.011262 | 0.011195 | 0.011329 | 0.011262 | 0.011195 |
| 0.011298 | 0.011463 | 0.011262 | 0.011463 | 0.011228 | 0.011329 | 0.011295 |
| 0.011396 | 0.011295 | 0.011329 | 0.011295 | 0.011329 | 0.011195 | 0.011329 |
| 0.011363 | 0.011295 | 0.011363 | 0.011295 | 0.011329 | 0.011363 | 0.011598 |
| 0.011699 | 0.011631 | 0.011699 | 0.011465 | 0.011699 | 0.011329 | 0.011295 |
| 0.011331 | 0.011627 | 0.011335 | 0.011232 | 0.011705 | 0.011197 | 0.011336 |
| 0.011706 | 0.011605 | 0.011497 | 0.011699 | 0.011402 | 0.011564 | 0.011531 |
| 0.011463 | 0.011631 | 0.011487 | 0.011349 | 0.011396 | 0.011363 | 0.011433 |
| 0.011531 | 0.011431 | 0.011568 | 0.011636 | 0.011564 | 0.011632 | 0.011738 |
| 0.011467 | 0.011637 | 0.011568 | 0.011500 | 0.011700 | 0.011228 | 0.011431 |
| 0.011396 | 0.011329 | 0.011228 | 0.011228 | 0.011295 | 0.011295 | 0.011363 |
| 0.011295 | 0.011363 | 0.011262 | 0.011362 | 0.011295 | 0.011295 | 0.011362 |
| 0.011295 | 0.011732 | 0.011631 | 0.011665 | 0.011195 | 0.011295 | 0.011329 |
| 0.011329 | 0.011295 | 0.011295 | 0.011396 | 0.011262 | 0.011262 | 0.011262 |
| 0.011799 | 0.011430 | 0.011430 | 0.011228 | 0.011329 | 0.011497 | 0.011262 |
| 0.011262 | 0.011329 | 0.011295 | 0.011463 | 0.011262 | 0.011396 | 0.011530 |
| 0.011463 | 0.011295 | 0.011295 | 0.011228 | 0.011228 | 0.011396 | 0.011329 |
| 0.011228 | 0.011329 | 0.011195 | 0.011228 | 0.011363 | 0.011497 | 0.011262 |
| 0.011228 | 0.011363 | 0.011296 | 0.011195 | 0.011530 | 0.011195 | 0.011363 |
| 0.011437 | 0.011262 | 0.011564 | 0.011396 | 0.011430 | 0.011295 | 0.011396 |
| 0.011262 | 0.011598 | 0.011195 | 0.011463 | 0.011262 | 0.011262 | 0.011195 |
| 0.011430 | 0.011632 | 0.011329 | 0.011396 | 0.011228 | 0.011631 | 0.011262 |
| 0.011262 | 0.011262 | 0.011295 | 0.011396 | 0.011295 | 0.011396 | 0.011463 |
| 0.011463 | 0.011430 | 0.011329 | 0.011430 | 0.011396 | 0.011262 | 0.011228 |
| 0.011262 | 0.011262 | 0.011329 | 0.011262 | 0.011228 | 0.011396 | 0.011262 |
| 0.011295 | 0.011295 | 0.011430 | 0.011396 | 0.011362 | 0.011295 | 0.011295 |
| 0.011363 | 0.011295 | 0.011396 | 0.011262 | 0.011396 | 0.011497 | 0.011799 |
| 0.011295 | 0.011699 | 0.011302 | 0.017829 | 0.011257 | 0.011428 | 0.011654 |
| 0.011614 | 0.011659 | 0.011375 | 0.011409 | 0.011720 | 0.011682 | 0.011364 |
| 0.011535 | 0.011549 | 0.011216 | 0.011270 | 0.011295 | 0.011307 | 0.011276 |
| 0.011530 | 0.011470 | 0.011468 | 0.011259 | 0.011430 | 0.011463 | 0.011466 |
| 0.011335 | 0.011430 | 0.011430 | 0.011396 | 0.011363 | 0.011363 | 0.000000 |
| 0.011363 | 0.011295 | 0.011329 | 0.011363 | 0.011329 | 0.011262 | 0.011295 |
| 0.011295 | 0.011363 | 0.011262 | 0.011363 | 0.011396 | 0.011430 | 0.011329 |
| 0.011362 | 0.011329 | 0.011665 | 0.011665 | 0.011396 | 0.011430 | 0.011463 |
| 0.011228 | 0.011228 | 0.011262 | 0.011363 | 0.011228 | 0.011463 | 0.011463 |
| 0.011497 | 0.011497 | 0.011430 | 0.011530 | 0.011699 | 0.011532 | 0.011363 |
| 0.011363 | 0.011430 | 0.011463 | 0.011295 | 0.011363 | 0.011329 | 0.011363 |
| 0.011430 | 0.011430 | 0.011463 | 0.011430 | 0.011330 | 0.011531 | 0.011497 |
| 0.011365 | 0.011262 | 0.011363 | 0.011463 | 0.011363 | 0.011497 | 0.011530 |
| 0.011699 | 0.011402 | 0.011564 | 0.011531 | 0.011463 | 0.011631 | 0.011262 |
| 0.011431 | 0.011329 | 0.011295 | 0.011295 | 0.011363 | 0.011262 | 0.011363 |
| 0.011396 | 0.011430 | 0.011329 | 0.011362 | 0.011329 | 0.011665 | 0.011665 |
| 0.011396 | 0.011430 | 0.011497 | 0.011430 | 0.012070 | 0.011489 | 0.011412 |
| 0.011482 | 0.011442 | 0.011552 | 0.011441 | 0.011550 | 0.011474 | 0.011440 |
| 0.012022 | 0.011337 | 0.011471 | 0.011406 | 0.011680 | 0.011537 | 0.011639 |
| 0.012046 | 0.011475 | 0.011534 | 0.011564 | 0.011530 | 0.011530 | 0.011500 |
| 0.011228 | 0.011396 | 0.011530 | 0.011497 | 0.011500 | 0.011497 | 0.011465 |
| 0.011329 | 0.011262 | 0.011295 | 0.011329 | 0.011228 | 0.011295 | 0.011195 |

|          |          |          |          |          |          |          |
|----------|----------|----------|----------|----------|----------|----------|
| 0.011329 | 0.011362 | 0.011262 | 0.011228 | 0.011329 | 0.011262 | 0.011295 |
| 0.011295 | 0.011228 | 0.011295 | 0.011329 | 0.011228 | 0.011430 | 0.011463 |
| 0.011363 | 0.011430 | 0.011362 | 0.011363 | 0.011295 | 0.011699 | 0.011329 |
| 0.011373 | 0.011295 | 0.011531 | 0.011535 | 0.011396 | 0.011396 | 0.011396 |
| 0.011396 | 0.011329 | 0.011295 | 0.011329 | 0.011430 | 0.011430 | 0.011362 |
| 0.011362 | 0.011497 | 0.011665 | 0.011396 | 0.011598 | 0.011598 | 0.011463 |
| 0.011295 | 0.011363 | 0.011396 | 0.011800 | 0.011363 | 0.011396 | 0.011363 |
| 0.011396 | 0.011329 | 0.011329 | 0.011631 | 0.011564 | 0.011598 | 0.011329 |
| 0.011430 | 0.011497 | 0.011362 | 0.011430 | 0.011396 | 0.011262 | 0.011598 |
| 0.011362 | 0.011329 | 0.011329 | 0.011497 | 0.011329 | 0.011430 | 0.011665 |
| 0.011362 | 0.011740 | 0.011732 | 0.011548 | 0.011230 | 0.011434 | 0.011318 |
| 0.011280 | 0.011761 | 0.011271 | 0.011507 | 0.011256 | 0.011417 | 0.011432 |
| 0.011469 | 0.011126 | 0.011395 | 0.011193 | 0.011222 | 0.011396 | 0.011385 |
| 0.011400 | 0.011296 | 0.011413 | 0.011342 | 0.011364 | 0.011497 | 0.011564 |
| 0.011564 | 0.011430 | 0.011534 | 0.011535 | 0.011671 | 0.011697 | 0.011363 |
| 0.011598 | 0.011463 | 0.011329 | 0.011430 | 0.011228 | 0.011463 | 0.011262 |
| 0.011329 | 0.011329 | 0.011295 | 0.011262 | 0.011295 | 0.011262 | 0.011363 |
| 0.011340 | 0.011340 | 0.011334 | 0.011369 | 0.011505 | 0.011470 | 0.011470 |
| 0.011469 | 0.011397 | 0.011208 | 0.011204 | 0.011331 | 0.011501 | 0.011502 |
| 0.011296 | 0.011365 | 0.011599 | 0.011534 | 0.011498 | 0.011532 | 0.011463 |
| 0.011396 | 0.011463 | 0.011463 | 0.011363 | 0.011934 | 0.011531 | 0.011598 |
| 0.011632 | 0.011702 | 0.011333 | 0.011407 | 0.011295 | 0.011497 | 0.011463 |
| 0.011498 | 0.011530 | 0.011530 | 0.011530 | 0.011650 | 0.011665 | 0.011303 |
| 0.011195 | 0.011199 | 0.011298 | 0.011264 | 0.011368 | 0.011172 | 0.011536 |
| 0.011335 | 0.011455 | 0.011203 | 0.011322 | 0.011329 | 0.011403 | 0.011295 |
| 0.011262 | 0.011262 | 0.011329 | 0.011295 | 0.011497 | 0.011463 | 0.011396 |
| 0.011497 | 0.011564 | 0.011295 | 0.011295 | 0.011329 | 0.011329 | 0.011331 |
| 0.011398 | 0.011329 | 0.011329 | 0.011364 | 0.011497 | 0.011564 | 0.011564 |
| 0.011430 | 0.011534 | 0.011535 | 0.011671 | 0.011697 | 0.011363 | 0.011530 |
| 0.011463 | 0.011463 | 0.011297 | 0.011408 | 0.011408 | 0.011435 | 0.011306 |
| 0.011474 | 0.011608 | 0.011442 | 0.011298 | 0.011262 | 0.011463 | 0.011329 |
| 0.011430 | 0.011363 | 0.011262 | 0.011364 | 0.011463 | 0.011466 | 0.011363 |
| 0.011262 | 0.011195 | 0.011329 | 0.011262 | 0.011195 | 0.011298 | 0.011463 |
| 0.011363 | 0.011295 | 0.011329 | 0.011363 | 0.011329 | 0.011262 | 0.011464 |
| 0.011329 | 0.011363 | 0.011363 | 0.011295 | 0.011362 | 0.011598 | 0.011262 |
| 0.011295 | 0.011699 | 0.011295 | 0.011329 | 0.011295 | 0.011665 | 0.011275 |
| 0.011735 | 0.011273 | 0.011261 | 0.011503 | 0.011590 | 0.011491 | 0.011228 |
| 0.011270 | 0.011463 | 0.011564 | 0.011638 | 0.011532 | 0.011670 | 0.011801 |
| 0.011700 | 0.011737 | 0.011699 | 0.011949 | 0.011665 | 0.012540 | 0.011701 |
| 0.012440 | 0.012208 | 0.012342 | 0.012613 | 0.011665 | 0.011363 | 0.011665 |
| 0.012104 | 0.012039 | 0.011631 | 0.011531 | 0.011599 | 0.011599 | 0.011568 |
| 0.011463 | 0.011467 | 0.011530 | 0.011498 | 0.011868 | 0.011934 | 0.011935 |
| 0.011835 | 0.011935 | 0.012039 | 0.011805 | 0.012105 | 0.012111 | 0.012172 |
| 0.012172 | 0.012206 | 0.012153 | 0.012172 | 0.012174 | 0.011396 | 0.011699 |
| 0.011767 | 0.012271 | 0.011773 | 0.012002 | 0.012475 | 0.011536 | 0.011430 |
| 0.011396 | 0.011396 | 0.011867 | 0.011883 | 0.012011 | 0.011732 | 0.011397 |
| S413     | 0.011698 | 0.011698 | 0.012034 | 0.011799 | 0.011799 | 0.011866 |
| 0.011672 | 0.011604 | 0.011799 | 0.011295 | 0.011362 | 0.011329 | 0.011295 |
| 0.011329 | 0.011497 | 0.011295 | 0.011329 | 0.011396 | 0.011362 | 0.011329 |
| 0.011295 | 0.011329 | 0.011429 | 0.011295 | 0.011329 | 0.011329 | 0.011637 |
| 0.011564 | 0.011329 | 0.011228 | 0.011463 | 0.011396 | 0.011362 | 0.011396 |
| 0.011362 | 0.011463 | 0.011362 | 0.011362 | 0.011396 | 0.011362 | 0.011530 |
| 0.011295 | 0.011362 | 0.011396 | 0.011329 | 0.011429 | 0.011463 | 0.011396 |
| 0.011362 | 0.011530 | 0.011430 | 0.011698 | 0.011362 | 0.011631 | 0.011362 |
| 0.011329 | 0.011430 | 0.011497 | 0.011631 | 0.011732 | 0.011430 | 0.011530 |
| 0.011396 | 0.011463 | 0.011362 | 0.011597 | 0.011833 | 0.011362 | 0.011430 |
| 0.011329 | 0.011429 | 0.011396 | 0.011463 | 0.011396 | 0.011396 | 0.011396 |
| 0.011295 | 0.011329 | 0.011295 | 0.011396 | 0.011362 | 0.011397 | 0.011463 |
| 0.011396 | 0.011362 | 0.011429 | 0.011329 | 0.011463 | 0.011295 | 0.011362 |
| 0.011530 | 0.011463 | 0.011698 | 0.011530 | 0.011362 | 0.011597 | 0.011362 |

|          |          |          |          |          |          |          |
|----------|----------|----------|----------|----------|----------|----------|
| 0.011505 | 0.011733 | 0.011551 | 0.011256 | 0.011284 | 0.011391 | 0.011454 |
| 0.012121 | 0.011467 | 0.011225 | 0.011530 | 0.011530 | 0.011396 | 0.011497 |
| 0.011430 | 0.011396 | 0.011463 | 0.011362 | 0.011463 | 0.011396 | 0.011396 |
| 0.011362 | 0.011463 | 0.011665 | 0.011530 | 0.011430 | 0.011396 | 0.011329 |
| 0.011295 | 0.011295 | 0.011362 | 0.011329 | 0.011530 | 0.011497 | 0.011430 |
| 0.011530 | 0.011597 | 0.011329 | 0.011329 | 0.011362 | 0.011362 | 0.011364 |
| 0.011432 | 0.011362 | 0.011362 | 0.011240 | 0.011313 | 0.011271 | 0.011363 |
| 0.011365 | 0.011301 | 0.011355 | 0.011336 | 0.011264 | 0.011300 | 0.011330 |
| 0.011600 | 0.011370 | 0.011405 | 0.011296 | 0.011302 | 0.011430 | 0.011397 |
| 0.011464 | 0.011397 | 0.011396 | 0.011497 | 0.011429 | 0.011799 | 0.011598 |
| 0.011631 | 0.011497 | 0.011362 | 0.011463 | 0.011262 | 0.011497 | 0.011295 |
| 0.011362 | 0.011362 | 0.011329 | 0.011295 | 0.011329 | 0.011295 | 0.011396 |
| 0.011362 | 0.011463 | 0.011396 | 0.011295 | 0.011397 | 0.011497 | 0.011499 |
| 0.011497 | 0.011396 | 0.011295 | 0.011229 | 0.011362 | 0.011295 | 0.011228 |
| 0.011332 | 0.011497 | 0.011295 | 0.011497 | 0.011262 | 0.011362 | 0.011329 |
| 0.011430 | 0.011329 | 0.011362 | 0.011329 | 0.011362 | 0.011228 | 0.011362 |
| 0.011396 | 0.011329 | 0.011396 | 0.011329 | 0.011362 | 0.011396 | 0.011631 |
| 0.011732 | 0.011664 | 0.011732 | 0.011431 | 0.011732 | 0.011362 | 0.011329 |
| 0.011364 | 0.011667 | 0.011426 | 0.011232 | 0.011739 | 0.011231 | 0.011336 |
| 0.011705 | 0.011638 | 0.011463 | 0.011732 | 0.011402 | 0.011530 | 0.011564 |
| 0.011497 | 0.011597 | 0.011522 | 0.011307 | 0.011438 | 0.011396 | 0.011466 |
| 0.011564 | 0.011465 | 0.011567 | 0.011669 | 0.011597 | 0.011665 | 0.011772 |
| 0.011500 | 0.011671 | 0.011602 | 0.011534 | 0.011801 | 0.011262 | 0.011465 |
| 0.011429 | 0.011362 | 0.011262 | 0.011262 | 0.011329 | 0.011329 | 0.011396 |
| 0.011329 | 0.011396 | 0.011295 | 0.011396 | 0.011329 | 0.011329 | 0.011396 |
| 0.011329 | 0.011765 | 0.011665 | 0.011698 | 0.011228 | 0.011329 | 0.011362 |
| 0.011362 | 0.011329 | 0.011396 | 0.011430 | 0.011295 | 0.011295 | 0.011295 |
| 0.011833 | 0.011463 | 0.011463 | 0.011262 | 0.011362 | 0.011530 | 0.011295 |
| 0.011295 | 0.011362 | 0.011329 | 0.011497 | 0.011295 | 0.011429 | 0.011564 |
| 0.011497 | 0.011329 | 0.011329 | 0.011262 | 0.011262 | 0.011430 | 0.011362 |
| 0.011262 | 0.011362 | 0.011228 | 0.011262 | 0.011396 | 0.011530 | 0.011295 |
| 0.011262 | 0.011396 | 0.011329 | 0.011228 | 0.011564 | 0.011228 | 0.011396 |
| 0.011471 | 0.011295 | 0.011597 | 0.011430 | 0.011463 | 0.011329 | 0.011429 |
| 0.011295 | 0.011631 | 0.011228 | 0.011497 | 0.011295 | 0.011295 | 0.011228 |
| 0.011463 | 0.011665 | 0.011362 | 0.011430 | 0.011262 | 0.011665 | 0.011295 |
| 0.011295 | 0.011295 | 0.011329 | 0.011430 | 0.011329 | 0.011429 | 0.011497 |
| 0.011497 | 0.011463 | 0.011362 | 0.011463 | 0.011429 | 0.011295 | 0.011262 |
| 0.011295 | 0.011295 | 0.011362 | 0.011295 | 0.011262 | 0.011362 | 0.011295 |
| 0.011329 | 0.011329 | 0.011463 | 0.011497 | 0.011396 | 0.011329 | 0.011329 |
| 0.011396 | 0.011329 | 0.011429 | 0.011295 | 0.011429 | 0.011463 | 0.011833 |
| 0.011329 | 0.011732 | 0.011336 | 0.011785 | 0.011257 | 0.011488 | 0.011688 |
| 0.011648 | 0.011693 | 0.011374 | 0.011350 | 0.011774 | 0.011716 | 0.011425 |
| 0.011487 | 0.011610 | 0.011216 | 0.011270 | 0.011294 | 0.011357 | 0.011318 |
| 0.011529 | 0.011507 | 0.011468 | 0.011325 | 0.011463 | 0.011497 | 0.011500 |
| 0.011369 | 0.011463 | 0.011463 | 0.011430 | 0.011396 | 0.011396 | 0.011363 |
| 0.000000 | 0.011329 | 0.011295 | 0.011396 | 0.011362 | 0.011295 | 0.011329 |
| 0.011329 | 0.011396 | 0.011295 | 0.011396 | 0.011430 | 0.011463 | 0.011362 |
| 0.011396 | 0.011362 | 0.011698 | 0.011698 | 0.011430 | 0.011464 | 0.011430 |
| 0.011262 | 0.011262 | 0.011295 | 0.011396 | 0.011262 | 0.011497 | 0.011497 |
| 0.011463 | 0.011463 | 0.011463 | 0.011497 | 0.011732 | 0.011498 | 0.011396 |
| 0.011329 | 0.011463 | 0.011497 | 0.011329 | 0.011396 | 0.011362 | 0.011329 |
| 0.011396 | 0.011396 | 0.011429 | 0.011463 | 0.011363 | 0.011564 | 0.011530 |
| 0.011399 | 0.011295 | 0.011396 | 0.011497 | 0.011396 | 0.011530 | 0.011564 |
| 0.011732 | 0.011402 | 0.011530 | 0.011564 | 0.011497 | 0.011597 | 0.011295 |
| 0.011464 | 0.011363 | 0.011329 | 0.011329 | 0.011396 | 0.011295 | 0.011396 |
| 0.011430 | 0.011463 | 0.011362 | 0.011396 | 0.011362 | 0.011698 | 0.011698 |
| 0.011430 | 0.011464 | 0.011530 | 0.011463 | 0.012103 | 0.011453 | 0.011447 |
| 0.011517 | 0.011442 | 0.011587 | 0.011476 | 0.011550 | 0.011509 | 0.011439 |
| 0.012056 | 0.011372 | 0.011505 | 0.011441 | 0.011715 | 0.011570 | 0.011673 |
| 0.012080 | 0.011550 | 0.011567 | 0.011597 | 0.011564 | 0.011564 | 0.011533 |

|          |          |          |          |          |          |          |
|----------|----------|----------|----------|----------|----------|----------|
| 0.011262 | 0.011429 | 0.011564 | 0.011530 | 0.011533 | 0.011530 | 0.011498 |
| 0.011362 | 0.011295 | 0.011329 | 0.011362 | 0.011262 | 0.011329 | 0.011228 |
| 0.011362 | 0.011396 | 0.011295 | 0.011262 | 0.011362 | 0.011295 | 0.011329 |
| 0.011329 | 0.011262 | 0.011329 | 0.011295 | 0.011262 | 0.011463 | 0.011497 |
| 0.011396 | 0.011463 | 0.011396 | 0.011396 | 0.011329 | 0.011732 | 0.011362 |
| 0.011408 | 0.011329 | 0.011564 | 0.011569 | 0.011430 | 0.011429 | 0.011429 |
| 0.011430 | 0.011362 | 0.011329 | 0.011362 | 0.011463 | 0.011463 | 0.011396 |
| 0.011396 | 0.011530 | 0.011698 | 0.011429 | 0.011631 | 0.011631 | 0.011497 |
| 0.011329 | 0.011396 | 0.011430 | 0.011833 | 0.011396 | 0.011430 | 0.011396 |
| 0.011362 | 0.011362 | 0.011362 | 0.011665 | 0.011598 | 0.011631 | 0.011362 |
| 0.011463 | 0.011530 | 0.011396 | 0.011463 | 0.011429 | 0.011295 | 0.011631 |
| 0.011396 | 0.011362 | 0.011362 | 0.011530 | 0.011362 | 0.011463 | 0.011698 |
| 0.011396 | 0.011739 | 0.011765 | 0.011548 | 0.011286 | 0.011468 | 0.011267 |
| 0.011280 | 0.011761 | 0.011306 | 0.011417 | 0.011353 | 0.011417 | 0.011379 |
| 0.011519 | 0.011192 | 0.011339 | 0.011192 | 0.011222 | 0.011395 | 0.011425 |
| 0.011437 | 0.011336 | 0.011448 | 0.011377 | 0.011397 | 0.011530 | 0.011598 |
| 0.011597 | 0.011464 | 0.011567 | 0.011569 | 0.011704 | 0.011732 | 0.011396 |
| 0.011631 | 0.011497 | 0.011362 | 0.011463 | 0.011262 | 0.011497 | 0.011295 |
| 0.011362 | 0.011362 | 0.011329 | 0.011295 | 0.011329 | 0.011295 | 0.011396 |
| 0.011305 | 0.011375 | 0.011368 | 0.011403 | 0.011539 | 0.011504 | 0.011231 |
| 0.011503 | 0.011430 | 0.011208 | 0.011096 | 0.011365 | 0.011535 | 0.011535 |
| 0.011329 | 0.011399 | 0.011633 | 0.011601 | 0.011464 | 0.011565 | 0.011497 |
| 0.011429 | 0.011497 | 0.011497 | 0.011396 | 0.011967 | 0.011497 | 0.011564 |
| 0.011665 | 0.011701 | 0.011333 | 0.011441 | 0.011329 | 0.011530 | 0.011497 |
| 0.011531 | 0.011564 | 0.011497 | 0.011497 | 0.011689 | 0.011698 | 0.011338 |
| 0.011229 | 0.011233 | 0.011333 | 0.011298 | 0.011402 | 0.011172 | 0.011570 |
| 0.011369 | 0.011455 | 0.011203 | 0.011360 | 0.011363 | 0.011437 | 0.011329 |
| 0.011295 | 0.011295 | 0.011362 | 0.011329 | 0.011530 | 0.011497 | 0.011430 |
| 0.011530 | 0.011597 | 0.011329 | 0.011329 | 0.011362 | 0.011362 | 0.011364 |
| 0.011432 | 0.011362 | 0.011362 | 0.011397 | 0.011530 | 0.011598 | 0.011597 |
| 0.011464 | 0.011567 | 0.011569 | 0.011704 | 0.011732 | 0.011396 | 0.011564 |
| 0.011497 | 0.011497 | 0.011331 | 0.011513 | 0.011442 | 0.011469 | 0.011341 |
| 0.011508 | 0.011698 | 0.011441 | 0.011400 | 0.011295 | 0.011497 | 0.011362 |
| 0.011463 | 0.011396 | 0.011295 | 0.011397 | 0.011497 | 0.011499 | 0.011396 |
| 0.011295 | 0.011229 | 0.011362 | 0.011295 | 0.011228 | 0.011332 | 0.011497 |
| 0.000000 | 0.011329 | 0.011295 | 0.011396 | 0.011362 | 0.011295 | 0.011497 |
| 0.011362 | 0.011396 | 0.011396 | 0.011329 | 0.011396 | 0.011631 | 0.011295 |
| 0.011329 | 0.011732 | 0.011329 | 0.011362 | 0.011329 | 0.011698 | 0.011232 |
| 0.011735 | 0.011273 | 0.011261 | 0.011543 | 0.011589 | 0.011527 | 0.011227 |
| 0.011218 | 0.011497 | 0.011597 | 0.011705 | 0.011565 | 0.011703 | 0.011834 |
| 0.011733 | 0.011770 | 0.011732 | 0.011983 | 0.011698 | 0.012573 | 0.011734 |
| 0.012406 | 0.012241 | 0.012375 | 0.012646 | 0.011698 | 0.011396 | 0.011699 |
| 0.012137 | 0.012072 | 0.011665 | 0.011564 | 0.011632 | 0.011632 | 0.011534 |
| 0.011497 | 0.011501 | 0.011564 | 0.011531 | 0.011901 | 0.011967 | 0.011968 |
| 0.011868 | 0.011968 | 0.012072 | 0.011838 | 0.012138 | 0.012144 | 0.012205 |
| 0.012205 | 0.012239 | 0.012186 | 0.012206 | 0.012207 | 0.011429 | 0.011732 |
| 0.011800 | 0.012304 | 0.011806 | 0.012035 | 0.012508 | 0.011536 | 0.011464 |
| 0.011429 | 0.011429 | 0.011833 | 0.011924 | 0.012045 | 0.011765 | 0.011431 |
| S414     | 0.011631 | 0.011631 | 0.011967 | 0.011732 | 0.011732 | 0.011799 |
| 0.011603 | 0.011536 | 0.011732 | 0.011228 | 0.011295 | 0.011262 | 0.011228 |
| 0.011262 | 0.011429 | 0.011228 | 0.011262 | 0.011329 | 0.011295 | 0.011262 |
| 0.011228 | 0.011262 | 0.011362 | 0.011228 | 0.011262 | 0.011262 | 0.011569 |
| 0.011496 | 0.011262 | 0.011161 | 0.011396 | 0.011329 | 0.011295 | 0.011329 |
| 0.011295 | 0.011396 | 0.011295 | 0.011295 | 0.011329 | 0.011295 | 0.011463 |
| 0.011228 | 0.011295 | 0.011329 | 0.011262 | 0.011362 | 0.011396 | 0.011329 |
| 0.011295 | 0.011463 | 0.011363 | 0.011631 | 0.011295 | 0.011564 | 0.011295 |
| 0.011262 | 0.011362 | 0.011429 | 0.011564 | 0.011664 | 0.011362 | 0.011463 |
| 0.011329 | 0.011396 | 0.011295 | 0.011530 | 0.011765 | 0.011295 | 0.011362 |
| 0.011262 | 0.011362 | 0.011329 | 0.011396 | 0.011329 | 0.011329 | 0.011329 |
| 0.011228 | 0.011262 | 0.011228 | 0.011329 | 0.011295 | 0.011329 | 0.011396 |



|          |          |          |          |          |          |          |
|----------|----------|----------|----------|----------|----------|----------|
| 0.011329 | 0.011295 | 0.011362 | 0.011262 | 0.011396 | 0.011228 | 0.011295 |
| 0.011463 | 0.011396 | 0.011631 | 0.011463 | 0.011295 | 0.011530 | 0.011295 |
| 0.011431 | 0.011658 | 0.011475 | 0.011138 | 0.011209 | 0.011318 | 0.011375 |
| 0.012048 | 0.011365 | 0.011184 | 0.011530 | 0.011530 | 0.011329 | 0.011429 |
| 0.011362 | 0.011329 | 0.011396 | 0.011295 | 0.011396 | 0.011329 | 0.011262 |
| 0.011228 | 0.011396 | 0.011597 | 0.011463 | 0.011362 | 0.011329 | 0.011262 |
| 0.011228 | 0.011228 | 0.011295 | 0.011262 | 0.011463 | 0.011429 | 0.011362 |
| 0.011463 | 0.011530 | 0.011262 | 0.011262 | 0.011295 | 0.011295 | 0.011297 |
| 0.011364 | 0.011295 | 0.011295 | 0.011168 | 0.011241 | 0.011200 | 0.011296 |
| 0.011297 | 0.011232 | 0.011282 | 0.011267 | 0.011196 | 0.011231 | 0.011263 |
| 0.011528 | 0.011301 | 0.011336 | 0.011228 | 0.011233 | 0.011363 | 0.011329 |
| 0.011396 | 0.011330 | 0.011329 | 0.011362 | 0.011362 | 0.011732 | 0.011530 |
| 0.011564 | 0.011429 | 0.011295 | 0.011396 | 0.011195 | 0.011429 | 0.011228 |
| 0.011295 | 0.011295 | 0.011262 | 0.011228 | 0.011262 | 0.011228 | 0.011329 |
| 0.011295 | 0.011396 | 0.011329 | 0.011228 | 0.011330 | 0.011430 | 0.011432 |
| 0.011430 | 0.011329 | 0.011228 | 0.011161 | 0.011295 | 0.011228 | 0.011161 |
| 0.011264 | 0.011430 | 0.011228 | 0.011430 | 0.011195 | 0.011295 | 0.011262 |
| 0.011362 | 0.000000 | 0.011295 | 0.011262 | 0.011295 | 0.011161 | 0.011295 |
| 0.011329 | 0.011262 | 0.011329 | 0.011262 | 0.011228 | 0.011329 | 0.011564 |
| 0.011664 | 0.011597 | 0.011665 | 0.011431 | 0.011665 | 0.011295 | 0.011262 |
| 0.011297 | 0.011586 | 0.011426 | 0.011197 | 0.011671 | 0.011163 | 0.011296 |
| 0.011637 | 0.011570 | 0.011463 | 0.011664 | 0.011367 | 0.011530 | 0.011497 |
| 0.011429 | 0.011597 | 0.011451 | 0.011225 | 0.011354 | 0.011329 | 0.011399 |
| 0.011497 | 0.011330 | 0.011533 | 0.011602 | 0.011463 | 0.011597 | 0.011704 |
| 0.011365 | 0.011603 | 0.011534 | 0.011466 | 0.011733 | 0.011195 | 0.011397 |
| 0.011362 | 0.011295 | 0.011195 | 0.011195 | 0.011262 | 0.011262 | 0.011329 |
| 0.011262 | 0.011329 | 0.011228 | 0.011329 | 0.011262 | 0.011262 | 0.011329 |
| 0.011262 | 0.011698 | 0.011597 | 0.011631 | 0.011161 | 0.011262 | 0.011295 |
| 0.011295 | 0.011262 | 0.011329 | 0.011362 | 0.011228 | 0.011228 | 0.011228 |
| 0.011765 | 0.011396 | 0.011396 | 0.011195 | 0.011295 | 0.011463 | 0.011228 |
| 0.011228 | 0.011295 | 0.011262 | 0.011429 | 0.011228 | 0.011362 | 0.011496 |
| 0.011429 | 0.011262 | 0.011262 | 0.011195 | 0.011195 | 0.011362 | 0.011295 |
| 0.011195 | 0.011295 | 0.011161 | 0.011195 | 0.011329 | 0.011463 | 0.011228 |
| 0.011195 | 0.011329 | 0.011262 | 0.011161 | 0.011496 | 0.011161 | 0.011329 |
| 0.011403 | 0.011228 | 0.011530 | 0.011362 | 0.011396 | 0.011262 | 0.011362 |
| 0.011228 | 0.011564 | 0.011161 | 0.011429 | 0.011228 | 0.011228 | 0.011161 |
| 0.011396 | 0.011598 | 0.011295 | 0.011362 | 0.011195 | 0.011597 | 0.011228 |
| 0.011228 | 0.011228 | 0.011262 | 0.011362 | 0.011262 | 0.011362 | 0.011429 |
| 0.011429 | 0.011396 | 0.011295 | 0.011396 | 0.011362 | 0.011228 | 0.011195 |
| 0.011228 | 0.011228 | 0.011295 | 0.011228 | 0.011195 | 0.011362 | 0.011228 |
| 0.011262 | 0.011262 | 0.011396 | 0.011429 | 0.011329 | 0.011262 | 0.011262 |
| 0.011329 | 0.011262 | 0.011362 | 0.011228 | 0.011362 | 0.011463 | 0.011765 |
| 0.011262 | 0.011664 | 0.011267 | 0.017785 | 0.011191 | 0.011305 | 0.011618 |
| 0.011579 | 0.011623 | 0.011270 | 0.011176 | 0.011609 | 0.011647 | 0.011242 |
| 0.011440 | 0.011426 | 0.011138 | 0.011228 | 0.011255 | 0.011258 | 0.011189 |
| 0.011436 | 0.011433 | 0.011431 | 0.011325 | 0.011396 | 0.011429 | 0.011432 |
| 0.011301 | 0.011396 | 0.011396 | 0.011362 | 0.011329 | 0.011329 | 0.011295 |
| 0.011329 | 0.000000 | 0.011295 | 0.011329 | 0.011295 | 0.011228 | 0.011262 |
| 0.011262 | 0.011329 | 0.011228 | 0.011329 | 0.011362 | 0.011396 | 0.011295 |
| 0.011329 | 0.011295 | 0.011631 | 0.011631 | 0.011362 | 0.011396 | 0.011430 |
| 0.011195 | 0.011195 | 0.011228 | 0.011329 | 0.011195 | 0.011429 | 0.011429 |
| 0.011463 | 0.011463 | 0.011396 | 0.011496 | 0.011665 | 0.011498 | 0.011329 |
| 0.011329 | 0.011396 | 0.011429 | 0.011262 | 0.011329 | 0.011295 | 0.011329 |
| 0.011396 | 0.011396 | 0.011429 | 0.011396 | 0.011296 | 0.011497 | 0.011396 |
| 0.011331 | 0.011228 | 0.011329 | 0.011430 | 0.011329 | 0.011463 | 0.011496 |
| 0.011664 | 0.011367 | 0.011530 | 0.011497 | 0.011429 | 0.011597 | 0.011228 |
| 0.011397 | 0.011295 | 0.011262 | 0.011262 | 0.011329 | 0.011228 | 0.011329 |
| 0.011362 | 0.011396 | 0.011295 | 0.011329 | 0.011295 | 0.011631 | 0.011631 |
| 0.011362 | 0.011396 | 0.011463 | 0.011396 | 0.012036 | 0.011453 | 0.011377 |
| 0.011447 | 0.011407 | 0.011517 | 0.011407 | 0.011515 | 0.011440 | 0.011405 |

|          |          |          |          |          |          |          |
|----------|----------|----------|----------|----------|----------|----------|
| 0.011987 | 0.011303 | 0.011437 | 0.011371 | 0.011645 | 0.011502 | 0.011605 |
| 0.012012 | 0.011475 | 0.011500 | 0.011530 | 0.011496 | 0.011496 | 0.011466 |
| 0.011195 | 0.011362 | 0.011496 | 0.011463 | 0.011466 | 0.011463 | 0.011431 |
| 0.011295 | 0.011228 | 0.011262 | 0.011295 | 0.011195 | 0.011262 | 0.011161 |
| 0.011295 | 0.011329 | 0.011228 | 0.011195 | 0.011295 | 0.011228 | 0.011262 |
| 0.011262 | 0.011195 | 0.011262 | 0.011295 | 0.011195 | 0.011396 | 0.011429 |
| 0.011329 | 0.011396 | 0.011329 | 0.011329 | 0.011262 | 0.011664 | 0.011295 |
| 0.011339 | 0.011262 | 0.011497 | 0.011501 | 0.011362 | 0.011362 | 0.011362 |
| 0.011362 | 0.011295 | 0.011262 | 0.011295 | 0.011396 | 0.011396 | 0.011329 |
| 0.011329 | 0.011463 | 0.011631 | 0.011362 | 0.011564 | 0.011564 | 0.011429 |
| 0.011262 | 0.011329 | 0.011362 | 0.011765 | 0.011329 | 0.011362 | 0.011329 |
| 0.011362 | 0.011295 | 0.011295 | 0.011597 | 0.011530 | 0.011564 | 0.011295 |
| 0.011396 | 0.011463 | 0.011329 | 0.011396 | 0.011362 | 0.011228 | 0.011564 |
| 0.011329 | 0.011295 | 0.011295 | 0.011463 | 0.011295 | 0.011396 | 0.011631 |
| 0.011329 | 0.011671 | 0.011698 | 0.011467 | 0.011229 | 0.011400 | 0.011215 |
| 0.011115 | 0.011683 | 0.011236 | 0.011373 | 0.011255 | 0.011366 | 0.011326 |
| 0.011417 | 0.011126 | 0.011283 | 0.011126 | 0.011168 | 0.011328 | 0.011344 |
| 0.011362 | 0.011257 | 0.011377 | 0.011307 | 0.011330 | 0.011463 | 0.011530 |
| 0.011530 | 0.011396 | 0.011500 | 0.011501 | 0.011636 | 0.011625 | 0.011329 |
| 0.011564 | 0.011429 | 0.011295 | 0.011396 | 0.011195 | 0.011429 | 0.011228 |
| 0.011295 | 0.011295 | 0.011262 | 0.011228 | 0.011262 | 0.011228 | 0.011329 |
| 0.011305 | 0.011305 | 0.011300 | 0.011334 | 0.011471 | 0.011436 | 0.011436 |
| 0.011435 | 0.011363 | 0.011134 | 0.011132 | 0.011297 | 0.011467 | 0.011467 |
| 0.011262 | 0.011331 | 0.011565 | 0.011533 | 0.011464 | 0.011498 | 0.011429 |
| 0.011362 | 0.011429 | 0.011429 | 0.011329 | 0.011900 | 0.011497 | 0.011564 |
| 0.011597 | 0.011665 | 0.011299 | 0.011372 | 0.011262 | 0.011396 | 0.011429 |
| 0.011464 | 0.011496 | 0.011497 | 0.011497 | 0.011650 | 0.011631 | 0.011268 |
| 0.011162 | 0.011164 | 0.011264 | 0.011230 | 0.011333 | 0.011172 | 0.011502 |
| 0.011300 | 0.011455 | 0.011156 | 0.011285 | 0.011296 | 0.011368 | 0.011262 |
| 0.011228 | 0.011228 | 0.011295 | 0.011262 | 0.011463 | 0.011429 | 0.011362 |
| 0.011463 | 0.011530 | 0.011262 | 0.011262 | 0.011295 | 0.011295 | 0.011297 |
| 0.011364 | 0.011295 | 0.011295 | 0.011330 | 0.011463 | 0.011530 | 0.011530 |
| 0.011396 | 0.011500 | 0.011501 | 0.011636 | 0.011625 | 0.011329 | 0.011496 |
| 0.011429 | 0.011429 | 0.011263 | 0.011443 | 0.011373 | 0.011401 | 0.011270 |
| 0.011439 | 0.011607 | 0.011399 | 0.011332 | 0.011228 | 0.011430 | 0.011295 |
| 0.011396 | 0.011329 | 0.011228 | 0.011330 | 0.011430 | 0.011432 | 0.011329 |
| 0.011228 | 0.011161 | 0.011295 | 0.011228 | 0.011161 | 0.011264 | 0.011430 |
| 0.011329 | 0.000000 | 0.011295 | 0.011329 | 0.011295 | 0.011228 | 0.011430 |
| 0.011295 | 0.011329 | 0.011329 | 0.011262 | 0.011329 | 0.011564 | 0.011228 |
| 0.011262 | 0.011664 | 0.011262 | 0.011295 | 0.011262 | 0.011631 | 0.011189 |
| 0.011678 | 0.011188 | 0.011211 | 0.011463 | 0.011508 | 0.011455 | 0.011144 |
| 0.011165 | 0.011429 | 0.011530 | 0.011637 | 0.011498 | 0.011635 | 0.011766 |
| 0.011666 | 0.011703 | 0.011664 | 0.011914 | 0.011631 | 0.012505 | 0.011666 |
| 0.012405 | 0.012173 | 0.012307 | 0.012578 | 0.011631 | 0.011329 | 0.011631 |
| 0.012070 | 0.012004 | 0.011597 | 0.011497 | 0.011564 | 0.011564 | 0.011534 |
| 0.011429 | 0.011433 | 0.011496 | 0.011464 | 0.011833 | 0.011900 | 0.011901 |
| 0.011800 | 0.011901 | 0.012004 | 0.011770 | 0.012070 | 0.012076 | 0.012137 |
| 0.012138 | 0.012171 | 0.012050 | 0.012138 | 0.012139 | 0.011362 | 0.011665 |
| 0.011733 | 0.012236 | 0.011738 | 0.011967 | 0.012440 | 0.011502 | 0.011396 |
| 0.011362 | 0.011362 | 0.011833 | 0.011842 | 0.011975 | 0.011698 | 0.011363 |
| S415     | 0.011665 | 0.011665 | 0.012001 | 0.011765 | 0.011765 | 0.011832 |
| 0.011671 | 0.011604 | 0.011765 | 0.011262 | 0.011329 | 0.011296 | 0.011262 |
| 0.011295 | 0.011463 | 0.011262 | 0.011295 | 0.011362 | 0.011329 | 0.011295 |
| 0.011262 | 0.011295 | 0.011396 | 0.011262 | 0.011295 | 0.011295 | 0.011637 |
| 0.011530 | 0.011295 | 0.011195 | 0.011429 | 0.011362 | 0.011329 | 0.011362 |
| 0.011329 | 0.011429 | 0.011329 | 0.011329 | 0.011362 | 0.011329 | 0.011497 |
| 0.011262 | 0.011329 | 0.011362 | 0.011295 | 0.011396 | 0.011362 | 0.011362 |
| 0.011329 | 0.011497 | 0.011396 | 0.011664 | 0.011329 | 0.011530 | 0.011329 |
| 0.011295 | 0.011396 | 0.011463 | 0.011530 | 0.011698 | 0.011396 | 0.011497 |
| 0.011362 | 0.011429 | 0.011329 | 0.011564 | 0.011799 | 0.011329 | 0.011396 |

|          |          |          |          |          |          |          |
|----------|----------|----------|----------|----------|----------|----------|
| 0.011295 | 0.011396 | 0.011362 | 0.011429 | 0.011362 | 0.011362 | 0.011362 |
| 0.011262 | 0.011295 | 0.011262 | 0.011362 | 0.011329 | 0.011363 | 0.011429 |
| 0.011362 | 0.011329 | 0.011396 | 0.011295 | 0.011429 | 0.011262 | 0.011329 |
| 0.011497 | 0.011429 | 0.011664 | 0.011497 | 0.011329 | 0.011564 | 0.011329 |
| 0.011505 | 0.011733 | 0.011475 | 0.011216 | 0.011172 | 0.011355 | 0.011375 |
| 0.012048 | 0.011416 | 0.011143 | 0.011362 | 0.011362 | 0.011362 | 0.011463 |
| 0.011396 | 0.011362 | 0.011429 | 0.011329 | 0.011429 | 0.011362 | 0.011362 |
| 0.011329 | 0.011429 | 0.011631 | 0.011496 | 0.011396 | 0.011362 | 0.011295 |
| 0.011262 | 0.011262 | 0.011329 | 0.011295 | 0.011497 | 0.011463 | 0.011396 |
| 0.011497 | 0.011564 | 0.011295 | 0.011295 | 0.011329 | 0.011329 | 0.011330 |
| 0.011398 | 0.011329 | 0.011329 | 0.011204 | 0.011205 | 0.011236 | 0.011329 |
| 0.011331 | 0.011266 | 0.011245 | 0.011302 | 0.011230 | 0.011266 | 0.011297 |
| 0.011528 | 0.011336 | 0.011336 | 0.011262 | 0.011233 | 0.011397 | 0.011363 |
| 0.011430 | 0.011363 | 0.011363 | 0.011463 | 0.011396 | 0.011765 | 0.011564 |
| 0.011597 | 0.011463 | 0.011329 | 0.011430 | 0.011228 | 0.011463 | 0.011262 |
| 0.011329 | 0.011329 | 0.011295 | 0.011262 | 0.011295 | 0.011262 | 0.011362 |
| 0.011329 | 0.011429 | 0.011362 | 0.011262 | 0.011363 | 0.011463 | 0.011466 |
| 0.011463 | 0.011362 | 0.011262 | 0.011195 | 0.011329 | 0.011262 | 0.011195 |
| 0.011298 | 0.011463 | 0.011262 | 0.011463 | 0.011161 | 0.011329 | 0.011228 |
| 0.011396 | 0.011295 | 0.011329 | 0.011228 | 0.011262 | 0.011195 | 0.011329 |
| 0.011362 | 0.011295 | 0.011362 | 0.011295 | 0.011329 | 0.011362 | 0.011597 |
| 0.011698 | 0.011631 | 0.011698 | 0.011397 | 0.011698 | 0.011329 | 0.011295 |
| 0.011330 | 0.011626 | 0.011380 | 0.011197 | 0.011705 | 0.011197 | 0.011336 |
| 0.011705 | 0.011604 | 0.011295 | 0.011698 | 0.011402 | 0.011362 | 0.011530 |
| 0.011463 | 0.011429 | 0.011487 | 0.011184 | 0.011354 | 0.011362 | 0.011432 |
| 0.011530 | 0.011431 | 0.011432 | 0.011635 | 0.011564 | 0.011631 | 0.011738 |
| 0.011466 | 0.011637 | 0.011568 | 0.011500 | 0.011767 | 0.011228 | 0.011431 |
| 0.011396 | 0.011329 | 0.011228 | 0.011228 | 0.011295 | 0.011295 | 0.011362 |
| 0.011295 | 0.011362 | 0.011262 | 0.011362 | 0.011295 | 0.011295 | 0.011362 |
| 0.011295 | 0.011732 | 0.011631 | 0.011664 | 0.011195 | 0.011295 | 0.011329 |
| 0.011329 | 0.011228 | 0.011362 | 0.011396 | 0.011262 | 0.011262 | 0.011262 |
| 0.011799 | 0.011429 | 0.011429 | 0.011228 | 0.011329 | 0.011497 | 0.011262 |
| 0.011262 | 0.011329 | 0.011295 | 0.011463 | 0.011262 | 0.011396 | 0.011530 |
| 0.011463 | 0.011295 | 0.011295 | 0.011228 | 0.011228 | 0.011396 | 0.011329 |
| 0.011228 | 0.011329 | 0.011195 | 0.011228 | 0.011362 | 0.011497 | 0.011262 |
| 0.011228 | 0.011362 | 0.011295 | 0.011195 | 0.011530 | 0.011195 | 0.011362 |
| 0.011437 | 0.011262 | 0.011564 | 0.011396 | 0.011429 | 0.011295 | 0.011396 |
| 0.011262 | 0.011530 | 0.011195 | 0.011463 | 0.011262 | 0.011262 | 0.011195 |
| 0.011429 | 0.011631 | 0.011329 | 0.011396 | 0.011228 | 0.011631 | 0.011262 |
| 0.011262 | 0.011262 | 0.011295 | 0.011396 | 0.011295 | 0.011396 | 0.011463 |
| 0.011463 | 0.011362 | 0.011329 | 0.011430 | 0.011396 | 0.011262 | 0.011228 |
| 0.011262 | 0.011262 | 0.011329 | 0.011262 | 0.011228 | 0.011396 | 0.011262 |
| 0.011295 | 0.011295 | 0.011429 | 0.011463 | 0.011362 | 0.011295 | 0.011295 |
| 0.011362 | 0.011295 | 0.011396 | 0.011262 | 0.011396 | 0.011295 | 0.011799 |
| 0.011295 | 0.011698 | 0.011302 | 0.017710 | 0.011126 | 0.011488 | 0.011653 |
| 0.011614 | 0.011658 | 0.011270 | 0.011234 | 0.011664 | 0.011682 | 0.011364 |
| 0.011440 | 0.011487 | 0.011177 | 0.011270 | 0.011216 | 0.011307 | 0.011318 |
| 0.011436 | 0.011395 | 0.011431 | 0.011193 | 0.011429 | 0.011463 | 0.011466 |
| 0.011335 | 0.011429 | 0.011362 | 0.011396 | 0.011362 | 0.011363 | 0.011329 |
| 0.011295 | 0.011295 | 0.000000 | 0.011362 | 0.011329 | 0.011262 | 0.011295 |
| 0.011295 | 0.011362 | 0.011262 | 0.011362 | 0.011396 | 0.011429 | 0.011329 |
| 0.011362 | 0.011329 | 0.011665 | 0.011665 | 0.011396 | 0.011430 | 0.011463 |
| 0.011228 | 0.011228 | 0.011262 | 0.011362 | 0.011228 | 0.011463 | 0.011463 |
| 0.011295 | 0.011295 | 0.011429 | 0.011329 | 0.011698 | 0.011330 | 0.011362 |
| 0.011161 | 0.011429 | 0.011463 | 0.011295 | 0.011362 | 0.011329 | 0.011295 |
| 0.011228 | 0.011228 | 0.011262 | 0.011430 | 0.011330 | 0.011530 | 0.011497 |
| 0.011365 | 0.011262 | 0.011362 | 0.011463 | 0.011362 | 0.011497 | 0.011530 |
| 0.011698 | 0.011402 | 0.011362 | 0.011530 | 0.011463 | 0.011429 | 0.011262 |
| 0.011363 | 0.011329 | 0.011295 | 0.011295 | 0.011362 | 0.011262 | 0.011362 |
| 0.011396 | 0.011429 | 0.011329 | 0.011362 | 0.011329 | 0.011665 | 0.011665 |

|          |          |          |          |          |          |          |
|----------|----------|----------|----------|----------|----------|----------|
| 0.011396 | 0.011430 | 0.011496 | 0.011429 | 0.012069 | 0.011310 | 0.011412 |
| 0.011482 | 0.011303 | 0.011552 | 0.011441 | 0.011410 | 0.011474 | 0.011302 |
| 0.012022 | 0.011337 | 0.011471 | 0.011406 | 0.011680 | 0.011536 | 0.011639 |
| 0.012046 | 0.011512 | 0.011534 | 0.011564 | 0.011530 | 0.011530 | 0.011499 |
| 0.011228 | 0.011396 | 0.011530 | 0.011496 | 0.011499 | 0.011496 | 0.011464 |
| 0.011329 | 0.011262 | 0.011295 | 0.011329 | 0.011228 | 0.011295 | 0.011195 |
| 0.011329 | 0.011362 | 0.011262 | 0.011228 | 0.011329 | 0.011262 | 0.011295 |
| 0.011295 | 0.011228 | 0.011295 | 0.011329 | 0.011228 | 0.011429 | 0.011463 |
| 0.011362 | 0.011429 | 0.011362 | 0.011362 | 0.011295 | 0.011698 | 0.011329 |
| 0.011373 | 0.011295 | 0.011531 | 0.011535 | 0.011396 | 0.011396 | 0.011396 |
| 0.011396 | 0.011329 | 0.011295 | 0.011329 | 0.011429 | 0.011429 | 0.011362 |
| 0.011362 | 0.011497 | 0.011664 | 0.011329 | 0.011597 | 0.011597 | 0.011463 |
| 0.011295 | 0.011362 | 0.011396 | 0.011799 | 0.011363 | 0.011396 | 0.011362 |
| 0.011195 | 0.011329 | 0.011329 | 0.011564 | 0.011564 | 0.011530 | 0.011329 |
| 0.011429 | 0.011497 | 0.011362 | 0.011429 | 0.011396 | 0.011262 | 0.011597 |
| 0.011362 | 0.011329 | 0.011329 | 0.011497 | 0.011329 | 0.011429 | 0.011665 |
| 0.011362 | 0.011739 | 0.011732 | 0.011467 | 0.011117 | 0.011434 | 0.011215 |
| 0.011280 | 0.011683 | 0.011236 | 0.011373 | 0.011255 | 0.011366 | 0.011326 |
| 0.011417 | 0.000000 | 0.011283 | 0.000000 | 0.011168 | 0.011261 | 0.011344 |
| 0.011437 | 0.011257 | 0.011412 | 0.011342 | 0.011364 | 0.011497 | 0.011564 |
| 0.011564 | 0.011430 | 0.011533 | 0.011535 | 0.011670 | 0.011696 | 0.011362 |
| 0.011597 | 0.011463 | 0.011329 | 0.011430 | 0.011228 | 0.011463 | 0.011262 |
| 0.011329 | 0.011329 | 0.011295 | 0.011262 | 0.011295 | 0.011262 | 0.011362 |
| 0.011165 | 0.011305 | 0.011334 | 0.011368 | 0.011505 | 0.011470 | 0.011402 |
| 0.011469 | 0.011396 | 0.011171 | 0.011132 | 0.011331 | 0.011501 | 0.011501 |
| 0.011296 | 0.011365 | 0.011599 | 0.011567 | 0.011296 | 0.011531 | 0.011463 |
| 0.011396 | 0.011463 | 0.011463 | 0.011362 | 0.011934 | 0.011262 | 0.011396 |
| 0.011631 | 0.011665 | 0.011333 | 0.011407 | 0.011295 | 0.011497 | 0.011463 |
| 0.011497 | 0.011530 | 0.011329 | 0.011329 | 0.011689 | 0.011664 | 0.011303 |
| 0.011195 | 0.011199 | 0.011299 | 0.011264 | 0.011368 | 0.011210 | 0.011536 |
| 0.011335 | 0.011455 | 0.011203 | 0.011360 | 0.011329 | 0.011402 | 0.011295 |
| 0.011262 | 0.011262 | 0.011329 | 0.011295 | 0.011497 | 0.011463 | 0.011396 |
| 0.011497 | 0.011564 | 0.011295 | 0.011295 | 0.011329 | 0.011329 | 0.011330 |
| 0.011398 | 0.011329 | 0.011329 | 0.011364 | 0.011497 | 0.011564 | 0.011564 |
| 0.011430 | 0.011533 | 0.011535 | 0.011670 | 0.011696 | 0.011362 | 0.011530 |
| 0.011463 | 0.011463 | 0.011297 | 0.011443 | 0.011408 | 0.011435 | 0.011305 |
| 0.011473 | 0.011698 | 0.011441 | 0.011366 | 0.011262 | 0.011463 | 0.011329 |
| 0.011429 | 0.011362 | 0.011262 | 0.011363 | 0.011463 | 0.011466 | 0.011362 |
| 0.011262 | 0.011195 | 0.011329 | 0.011262 | 0.011195 | 0.011298 | 0.011463 |
| 0.011295 | 0.011295 | 0.000000 | 0.011362 | 0.011329 | 0.011262 | 0.011463 |
| 0.011329 | 0.011362 | 0.011362 | 0.011295 | 0.011362 | 0.011597 | 0.011262 |
| 0.011295 | 0.011698 | 0.011295 | 0.011329 | 0.011295 | 0.011664 | 0.011146 |
| 0.011566 | 0.011188 | 0.011211 | 0.011422 | 0.011508 | 0.011455 | 0.011144 |
| 0.011165 | 0.011463 | 0.011564 | 0.011671 | 0.011531 | 0.011669 | 0.011800 |
| 0.011699 | 0.011737 | 0.011698 | 0.011949 | 0.011664 | 0.012539 | 0.011700 |
| 0.012372 | 0.012207 | 0.012341 | 0.012612 | 0.011664 | 0.011362 | 0.011665 |
| 0.012103 | 0.012038 | 0.011631 | 0.011530 | 0.011598 | 0.011598 | 0.011500 |
| 0.011463 | 0.011467 | 0.011530 | 0.011497 | 0.011867 | 0.011933 | 0.011935 |
| 0.011834 | 0.011934 | 0.012038 | 0.011804 | 0.012104 | 0.012110 | 0.012171 |
| 0.012172 | 0.012205 | 0.012152 | 0.012172 | 0.012173 | 0.011396 | 0.011699 |
| 0.011766 | 0.012270 | 0.011772 | 0.012001 | 0.012474 | 0.011536 | 0.011430 |
| 0.011362 | 0.011396 | 0.011867 | 0.011924 | 0.012010 | 0.011732 | 0.011397 |
| s416     | 0.011698 | 0.011698 | 0.012035 | 0.011799 | 0.011799 | 0.011866 |
| 0.011706 | 0.011638 | 0.011799 | 0.011295 | 0.011362 | 0.011329 | 0.011295 |
| 0.011329 | 0.011497 | 0.011295 | 0.011329 | 0.011396 | 0.011362 | 0.011329 |
| 0.011295 | 0.011329 | 0.011429 | 0.011296 | 0.011329 | 0.011329 | 0.011672 |
| 0.011564 | 0.011329 | 0.011228 | 0.011463 | 0.011396 | 0.011362 | 0.011396 |
| 0.011362 | 0.011463 | 0.011362 | 0.011362 | 0.011396 | 0.011362 | 0.011530 |
| 0.011295 | 0.011362 | 0.011396 | 0.011329 | 0.011430 | 0.011463 | 0.011396 |
| 0.011362 | 0.011530 | 0.011430 | 0.011698 | 0.011362 | 0.011631 | 0.011362 |

|          |          |          |          |          |          |          |
|----------|----------|----------|----------|----------|----------|----------|
| 0.011329 | 0.011430 | 0.011497 | 0.011631 | 0.011732 | 0.011430 | 0.011530 |
| 0.011396 | 0.011463 | 0.011362 | 0.011597 | 0.011833 | 0.011362 | 0.011430 |
| 0.011329 | 0.011429 | 0.011396 | 0.011463 | 0.011396 | 0.011396 | 0.011396 |
| 0.011295 | 0.011329 | 0.011295 | 0.011396 | 0.011362 | 0.011397 | 0.011463 |
| 0.011396 | 0.011362 | 0.011430 | 0.011329 | 0.011463 | 0.011295 | 0.011362 |
| 0.011530 | 0.011463 | 0.011698 | 0.011530 | 0.011362 | 0.011598 | 0.011362 |
| 0.011542 | 0.011770 | 0.011588 | 0.011295 | 0.011284 | 0.011391 | 0.011493 |
| 0.012121 | 0.011569 | 0.011307 | 0.011597 | 0.011597 | 0.011396 | 0.011497 |
| 0.011430 | 0.011396 | 0.011463 | 0.011362 | 0.011463 | 0.011396 | 0.011396 |
| 0.011362 | 0.011463 | 0.011665 | 0.011530 | 0.011430 | 0.011396 | 0.011329 |
| 0.011295 | 0.011295 | 0.011362 | 0.011329 | 0.011530 | 0.011497 | 0.011429 |
| 0.011530 | 0.011597 | 0.011329 | 0.011329 | 0.011362 | 0.011362 | 0.011364 |
| 0.011398 | 0.011362 | 0.011295 | 0.011240 | 0.011313 | 0.011271 | 0.011363 |
| 0.011365 | 0.011301 | 0.011355 | 0.011336 | 0.011264 | 0.011300 | 0.011330 |
| 0.011600 | 0.011370 | 0.011405 | 0.011296 | 0.011302 | 0.011430 | 0.011396 |
| 0.011464 | 0.011397 | 0.011396 | 0.011497 | 0.011429 | 0.011799 | 0.011598 |
| 0.011631 | 0.011497 | 0.011362 | 0.011463 | 0.011262 | 0.011497 | 0.011295 |
| 0.011362 | 0.011362 | 0.011329 | 0.011295 | 0.011329 | 0.011295 | 0.011329 |
| 0.011362 | 0.011463 | 0.011396 | 0.011295 | 0.011397 | 0.011497 | 0.011499 |
| 0.011497 | 0.011396 | 0.011295 | 0.011229 | 0.011362 | 0.011295 | 0.011228 |
| 0.011332 | 0.011497 | 0.011295 | 0.011497 | 0.011262 | 0.011362 | 0.011329 |
| 0.011430 | 0.011329 | 0.011362 | 0.011329 | 0.011362 | 0.011228 | 0.011362 |
| 0.011329 | 0.011329 | 0.011396 | 0.011329 | 0.011362 | 0.011396 | 0.011631 |
| 0.011732 | 0.011665 | 0.011732 | 0.011498 | 0.011732 | 0.011362 | 0.011329 |
| 0.011364 | 0.011667 | 0.011472 | 0.011266 | 0.011739 | 0.011231 | 0.011336 |
| 0.011739 | 0.011638 | 0.011530 | 0.011732 | 0.011436 | 0.011598 | 0.011564 |
| 0.011497 | 0.011665 | 0.011522 | 0.011349 | 0.011438 | 0.011396 | 0.011466 |
| 0.011564 | 0.011465 | 0.011601 | 0.011670 | 0.011598 | 0.011665 | 0.011772 |
| 0.011500 | 0.011671 | 0.011602 | 0.011534 | 0.011733 | 0.011262 | 0.011465 |
| 0.011429 | 0.011362 | 0.011262 | 0.011262 | 0.011329 | 0.011329 | 0.011396 |
| 0.011329 | 0.011396 | 0.011295 | 0.011396 | 0.011329 | 0.011329 | 0.011396 |
| 0.011329 | 0.011765 | 0.011665 | 0.011698 | 0.011228 | 0.011329 | 0.011362 |
| 0.011362 | 0.011329 | 0.011396 | 0.011430 | 0.011295 | 0.011295 | 0.011295 |
| 0.011833 | 0.011463 | 0.011463 | 0.011262 | 0.011362 | 0.011530 | 0.011295 |
| 0.011295 | 0.011362 | 0.011329 | 0.011497 | 0.011295 | 0.011430 | 0.011564 |
| 0.011429 | 0.011329 | 0.011329 | 0.011262 | 0.011262 | 0.011430 | 0.011362 |
| 0.011262 | 0.011362 | 0.011228 | 0.011262 | 0.011396 | 0.011531 | 0.011295 |
| 0.011195 | 0.011396 | 0.011329 | 0.011228 | 0.011564 | 0.011228 | 0.011396 |
| 0.011471 | 0.011295 | 0.011598 | 0.011430 | 0.011463 | 0.011329 | 0.011430 |
| 0.011295 | 0.011631 | 0.011228 | 0.011497 | 0.011295 | 0.011295 | 0.011228 |
| 0.011463 | 0.011665 | 0.011362 | 0.011430 | 0.011262 | 0.011665 | 0.011295 |
| 0.011295 | 0.011295 | 0.011329 | 0.011430 | 0.011329 | 0.011430 | 0.011497 |
| 0.011497 | 0.011463 | 0.011362 | 0.011463 | 0.011429 | 0.011295 | 0.011262 |
| 0.011295 | 0.011295 | 0.011362 | 0.011295 | 0.011262 | 0.011430 | 0.011295 |
| 0.011329 | 0.011329 | 0.011463 | 0.011497 | 0.011396 | 0.011329 | 0.011329 |
| 0.011396 | 0.011329 | 0.011429 | 0.011295 | 0.011430 | 0.011530 | 0.011833 |
| 0.011329 | 0.011732 | 0.011336 | 0.017861 | 0.011322 | 0.011488 | 0.011688 |
| 0.011648 | 0.011693 | 0.011479 | 0.011466 | 0.011774 | 0.011716 | 0.011485 |
| 0.011629 | 0.011610 | 0.011255 | 0.011353 | 0.011333 | 0.011356 | 0.011361 |
| 0.011576 | 0.011507 | 0.011505 | 0.011325 | 0.011463 | 0.011497 | 0.011500 |
| 0.011369 | 0.011463 | 0.011463 | 0.011429 | 0.011396 | 0.011396 | 0.011363 |
| 0.011396 | 0.011329 | 0.011362 | 0.000000 | 0.011362 | 0.011295 | 0.011329 |
| 0.011329 | 0.011396 | 0.011295 | 0.011396 | 0.011430 | 0.011463 | 0.011362 |
| 0.011396 | 0.011362 | 0.011698 | 0.011698 | 0.011430 | 0.011464 | 0.011497 |
| 0.011262 | 0.011262 | 0.011295 | 0.011396 | 0.011262 | 0.011497 | 0.011497 |
| 0.011530 | 0.011530 | 0.011463 | 0.011564 | 0.011732 | 0.011565 | 0.011396 |
| 0.011396 | 0.011463 | 0.011497 | 0.011329 | 0.011396 | 0.011362 | 0.011396 |
| 0.011463 | 0.011463 | 0.011497 | 0.011463 | 0.011363 | 0.011564 | 0.011530 |
| 0.011399 | 0.011295 | 0.011396 | 0.011497 | 0.011396 | 0.011530 | 0.011564 |
| 0.011732 | 0.011436 | 0.011598 | 0.011564 | 0.011497 | 0.011665 | 0.011295 |

|          |          |          |          |          |          |          |
|----------|----------|----------|----------|----------|----------|----------|
| 0.011464 | 0.011363 | 0.011329 | 0.011329 | 0.011396 | 0.011295 | 0.011396 |
| 0.011430 | 0.011463 | 0.011362 | 0.011396 | 0.011362 | 0.011698 | 0.011698 |
| 0.011430 | 0.011464 | 0.011530 | 0.011463 | 0.012103 | 0.011525 | 0.011447 |
| 0.011517 | 0.011476 | 0.011587 | 0.011476 | 0.011585 | 0.011509 | 0.011474 |
| 0.012056 | 0.011372 | 0.011506 | 0.011441 | 0.011715 | 0.011571 | 0.011673 |
| 0.012081 | 0.011512 | 0.011365 | 0.011396 | 0.011396 | 0.011429 | 0.011331 |
| 0.011262 | 0.011295 | 0.011430 | 0.011396 | 0.011364 | 0.011530 | 0.011498 |
| 0.011362 | 0.011295 | 0.011329 | 0.011362 | 0.011262 | 0.011329 | 0.011228 |
| 0.011362 | 0.011396 | 0.011295 | 0.011262 | 0.011362 | 0.011295 | 0.011329 |
| 0.011329 | 0.011262 | 0.011329 | 0.011362 | 0.011262 | 0.011463 | 0.011497 |
| 0.011396 | 0.011463 | 0.011396 | 0.011396 | 0.011329 | 0.011732 | 0.011362 |
| 0.011408 | 0.011329 | 0.011564 | 0.011569 | 0.011430 | 0.011429 | 0.011430 |
| 0.011430 | 0.011362 | 0.011329 | 0.011362 | 0.011463 | 0.011463 | 0.011396 |
| 0.011396 | 0.011530 | 0.011698 | 0.011429 | 0.011631 | 0.011631 | 0.011497 |
| 0.011329 | 0.011396 | 0.011430 | 0.011833 | 0.011396 | 0.011430 | 0.011396 |
| 0.011430 | 0.011362 | 0.011362 | 0.011665 | 0.011598 | 0.011631 | 0.011362 |
| 0.011463 | 0.011530 | 0.011396 | 0.011463 | 0.011430 | 0.011295 | 0.011631 |
| 0.011396 | 0.011362 | 0.011362 | 0.011530 | 0.011362 | 0.011463 | 0.011698 |
| 0.011396 | 0.011774 | 0.011765 | 0.011589 | 0.011286 | 0.011468 | 0.011421 |
| 0.011280 | 0.011800 | 0.011306 | 0.011551 | 0.011353 | 0.011467 | 0.011432 |
| 0.011570 | 0.011324 | 0.011506 | 0.011324 | 0.011384 | 0.011462 | 0.011466 |
| 0.011475 | 0.011375 | 0.011448 | 0.011377 | 0.011330 | 0.011530 | 0.011597 |
| 0.011597 | 0.011464 | 0.011567 | 0.011569 | 0.011704 | 0.011732 | 0.011396 |
| 0.011631 | 0.011497 | 0.011362 | 0.011463 | 0.011262 | 0.011497 | 0.011295 |
| 0.011362 | 0.011362 | 0.011329 | 0.011295 | 0.011329 | 0.011295 | 0.011329 |
| 0.011375 | 0.011375 | 0.011368 | 0.011403 | 0.011539 | 0.011504 | 0.011504 |
| 0.011503 | 0.011430 | 0.011171 | 0.011240 | 0.011365 | 0.011535 | 0.011535 |
| 0.011329 | 0.011399 | 0.011632 | 0.011601 | 0.011531 | 0.011565 | 0.011497 |
| 0.011429 | 0.011497 | 0.011497 | 0.011396 | 0.011967 | 0.011564 | 0.011631 |
| 0.011665 | 0.011737 | 0.011367 | 0.011407 | 0.011329 | 0.011530 | 0.011497 |
| 0.011531 | 0.011564 | 0.011564 | 0.011564 | 0.011729 | 0.011698 | 0.011338 |
| 0.011229 | 0.011233 | 0.011333 | 0.011298 | 0.011402 | 0.011210 | 0.011570 |
| 0.011335 | 0.011411 | 0.011156 | 0.011360 | 0.011363 | 0.011437 | 0.011329 |
| 0.011295 | 0.011295 | 0.011362 | 0.011329 | 0.011530 | 0.011497 | 0.011429 |
| 0.011530 | 0.011597 | 0.011329 | 0.011329 | 0.011362 | 0.011362 | 0.011364 |
| 0.011398 | 0.011362 | 0.011295 | 0.011330 | 0.011530 | 0.011597 | 0.011597 |
| 0.011464 | 0.011567 | 0.011569 | 0.011704 | 0.011732 | 0.011396 | 0.011564 |
| 0.011497 | 0.011497 | 0.011331 | 0.011513 | 0.011442 | 0.011469 | 0.011340 |
| 0.011508 | 0.011698 | 0.011441 | 0.011400 | 0.011295 | 0.011497 | 0.011362 |
| 0.011463 | 0.011396 | 0.011295 | 0.011397 | 0.011497 | 0.011499 | 0.011396 |
| 0.011295 | 0.011229 | 0.011362 | 0.011295 | 0.011228 | 0.011332 | 0.011497 |
| 0.011396 | 0.011329 | 0.011362 | 0.000000 | 0.011362 | 0.011295 | 0.011497 |
| 0.011362 | 0.011396 | 0.011396 | 0.011329 | 0.011396 | 0.011631 | 0.011295 |
| 0.011329 | 0.011732 | 0.011329 | 0.011362 | 0.011329 | 0.011698 | 0.011317 |
| 0.011735 | 0.011315 | 0.011361 | 0.011543 | 0.011630 | 0.011527 | 0.011269 |
| 0.011323 | 0.011497 | 0.011597 | 0.011705 | 0.011565 | 0.011703 | 0.011834 |
| 0.011733 | 0.011771 | 0.011732 | 0.011983 | 0.011698 | 0.012573 | 0.011734 |
| 0.012473 | 0.012241 | 0.012375 | 0.012646 | 0.011698 | 0.011396 | 0.011699 |
| 0.012137 | 0.012072 | 0.011665 | 0.011564 | 0.011632 | 0.011632 | 0.011602 |
| 0.011497 | 0.011501 | 0.011564 | 0.011531 | 0.011901 | 0.011967 | 0.011968 |
| 0.011868 | 0.011968 | 0.012072 | 0.011838 | 0.012138 | 0.012144 | 0.012205 |
| 0.012205 | 0.012239 | 0.012186 | 0.012206 | 0.012207 | 0.011429 | 0.011732 |
| 0.011800 | 0.012304 | 0.011806 | 0.012035 | 0.012508 | 0.011570 | 0.011464 |
| 0.011429 | 0.011429 | 0.011900 | 0.011924 | 0.012045 | 0.011765 | 0.011431 |
| s417     | 0.011665 | 0.011665 | 0.012001 | 0.011766 | 0.011766 | 0.011833 |
| 0.011672 | 0.011604 | 0.011766 | 0.011262 | 0.011329 | 0.011296 | 0.011262 |
| 0.011295 | 0.011463 | 0.011262 | 0.011295 | 0.011362 | 0.011329 | 0.011295 |
| 0.011262 | 0.011295 | 0.011396 | 0.011262 | 0.011296 | 0.011295 | 0.011638 |
| 0.011530 | 0.011295 | 0.011195 | 0.011430 | 0.011362 | 0.011329 | 0.011363 |
| 0.011329 | 0.011430 | 0.011329 | 0.011329 | 0.011362 | 0.011329 | 0.011497 |

|          |          |          |          |          |          |          |
|----------|----------|----------|----------|----------|----------|----------|
| 0.011262 | 0.011329 | 0.011362 | 0.011295 | 0.011396 | 0.011430 | 0.011362 |
| 0.011329 | 0.011497 | 0.011396 | 0.011665 | 0.011329 | 0.011598 | 0.011329 |
| 0.011295 | 0.011396 | 0.011463 | 0.011598 | 0.011698 | 0.011396 | 0.011497 |
| 0.011362 | 0.011430 | 0.011329 | 0.011564 | 0.011799 | 0.011329 | 0.011396 |
| 0.011295 | 0.011396 | 0.011362 | 0.011430 | 0.011362 | 0.011362 | 0.011362 |
| 0.011262 | 0.011295 | 0.011262 | 0.011363 | 0.011329 | 0.011363 | 0.011430 |
| 0.011228 | 0.011329 | 0.011396 | 0.011295 | 0.011430 | 0.011262 | 0.011329 |
| 0.011497 | 0.011430 | 0.011665 | 0.011497 | 0.011329 | 0.011564 | 0.011329 |
| 0.011468 | 0.011695 | 0.011513 | 0.011216 | 0.011210 | 0.011318 | 0.011415 |
| 0.012048 | 0.011467 | 0.011225 | 0.011564 | 0.011564 | 0.011362 | 0.011463 |
| 0.011396 | 0.011362 | 0.011430 | 0.011329 | 0.011430 | 0.011362 | 0.011362 |
| 0.011329 | 0.011429 | 0.011631 | 0.011497 | 0.011262 | 0.011363 | 0.011295 |
| 0.011262 | 0.011262 | 0.011329 | 0.011295 | 0.011497 | 0.011463 | 0.011396 |
| 0.011497 | 0.011564 | 0.011295 | 0.011295 | 0.011329 | 0.011329 | 0.011330 |
| 0.011398 | 0.011329 | 0.011329 | 0.011168 | 0.011277 | 0.011236 | 0.011329 |
| 0.011331 | 0.011266 | 0.011282 | 0.011267 | 0.011230 | 0.011266 | 0.011297 |
| 0.011528 | 0.011336 | 0.011370 | 0.011262 | 0.011233 | 0.011397 | 0.011363 |
| 0.011430 | 0.011364 | 0.011363 | 0.011463 | 0.011396 | 0.011766 | 0.011564 |
| 0.011597 | 0.011463 | 0.011329 | 0.011430 | 0.011228 | 0.011463 | 0.011262 |
| 0.011329 | 0.011329 | 0.011295 | 0.011262 | 0.011295 | 0.011262 | 0.011362 |
| 0.011329 | 0.011430 | 0.011363 | 0.011262 | 0.011363 | 0.011463 | 0.011466 |
| 0.011463 | 0.011363 | 0.011262 | 0.011195 | 0.011329 | 0.011262 | 0.011195 |
| 0.011264 | 0.011463 | 0.011262 | 0.011463 | 0.011228 | 0.000000 | 0.011295 |
| 0.011396 | 0.011295 | 0.011329 | 0.011295 | 0.011329 | 0.011195 | 0.011329 |
| 0.011363 | 0.011295 | 0.011362 | 0.011295 | 0.011329 | 0.011362 | 0.011597 |
| 0.011698 | 0.011631 | 0.011698 | 0.011465 | 0.011699 | 0.011329 | 0.011295 |
| 0.011330 | 0.011626 | 0.011426 | 0.011232 | 0.011705 | 0.011197 | 0.011336 |
| 0.011706 | 0.011604 | 0.011497 | 0.011699 | 0.011402 | 0.011564 | 0.011531 |
| 0.011463 | 0.011631 | 0.011487 | 0.011307 | 0.011354 | 0.011363 | 0.011433 |
| 0.011530 | 0.011431 | 0.011568 | 0.011636 | 0.011564 | 0.011631 | 0.011738 |
| 0.011466 | 0.011638 | 0.011568 | 0.011500 | 0.011767 | 0.011228 | 0.011431 |
| 0.011396 | 0.011329 | 0.011228 | 0.011228 | 0.011295 | 0.011295 | 0.011362 |
| 0.011295 | 0.011363 | 0.011262 | 0.011362 | 0.011295 | 0.011295 | 0.011362 |
| 0.011295 | 0.011732 | 0.011631 | 0.011665 | 0.011195 | 0.011295 | 0.011329 |
| 0.011195 | 0.011295 | 0.011363 | 0.011396 | 0.011262 | 0.011262 | 0.011262 |
| 0.011799 | 0.011430 | 0.011430 | 0.011228 | 0.011329 | 0.011497 | 0.011262 |
| 0.011262 | 0.011329 | 0.011295 | 0.011463 | 0.011262 | 0.011396 | 0.011530 |
| 0.011463 | 0.011295 | 0.011295 | 0.011228 | 0.011228 | 0.011396 | 0.011329 |
| 0.011228 | 0.011329 | 0.011195 | 0.011228 | 0.011363 | 0.011497 | 0.011262 |
| 0.011228 | 0.011362 | 0.011296 | 0.011195 | 0.011530 | 0.011195 | 0.011362 |
| 0.011437 | 0.011262 | 0.011564 | 0.011396 | 0.011430 | 0.011295 | 0.011396 |
| 0.011262 | 0.011598 | 0.011195 | 0.011463 | 0.011262 | 0.011262 | 0.011195 |
| 0.011430 | 0.011631 | 0.011329 | 0.011396 | 0.011228 | 0.011631 | 0.011262 |
| 0.011262 | 0.011262 | 0.011295 | 0.011396 | 0.011295 | 0.011396 | 0.011463 |
| 0.011463 | 0.011430 | 0.011329 | 0.011430 | 0.011396 | 0.011262 | 0.011228 |
| 0.011262 | 0.011262 | 0.011329 | 0.011262 | 0.011228 | 0.011396 | 0.011262 |
| 0.011295 | 0.011295 | 0.011430 | 0.011463 | 0.011362 | 0.011295 | 0.011295 |
| 0.011362 | 0.011295 | 0.011396 | 0.011262 | 0.011396 | 0.011497 | 0.011799 |
| 0.011295 | 0.011698 | 0.011267 | 0.017785 | 0.011322 | 0.011427 | 0.011618 |
| 0.011579 | 0.011623 | 0.011322 | 0.011234 | 0.011719 | 0.011647 | 0.011364 |
| 0.011535 | 0.011549 | 0.011177 | 0.011270 | 0.011255 | 0.011357 | 0.011275 |
| 0.011529 | 0.011433 | 0.011431 | 0.011193 | 0.011295 | 0.011463 | 0.011466 |
| 0.011335 | 0.011430 | 0.011430 | 0.011396 | 0.011363 | 0.011363 | 0.011329 |
| 0.011362 | 0.011295 | 0.011329 | 0.011362 | 0.000000 | 0.011262 | 0.011295 |
| 0.011295 | 0.011362 | 0.011262 | 0.011363 | 0.011396 | 0.011430 | 0.011329 |
| 0.011362 | 0.011329 | 0.011665 | 0.011665 | 0.011396 | 0.011430 | 0.011463 |
| 0.011228 | 0.011228 | 0.011262 | 0.011363 | 0.011228 | 0.011463 | 0.011463 |
| 0.011497 | 0.011497 | 0.011295 | 0.011530 | 0.011698 | 0.011532 | 0.011363 |
| 0.011362 | 0.011430 | 0.011463 | 0.011295 | 0.011362 | 0.011329 | 0.011363 |
| 0.011430 | 0.011430 | 0.011463 | 0.011430 | 0.011330 | 0.011530 | 0.011497 |

|          |          |          |          |          |          |          |
|----------|----------|----------|----------|----------|----------|----------|
| 0.011365 | 0.011262 | 0.011362 | 0.011463 | 0.011363 | 0.011497 | 0.011530 |
| 0.011699 | 0.011402 | 0.011564 | 0.011531 | 0.011463 | 0.011631 | 0.011262 |
| 0.011431 | 0.011329 | 0.011295 | 0.011295 | 0.011362 | 0.011262 | 0.011363 |
| 0.011396 | 0.011430 | 0.011329 | 0.011362 | 0.011329 | 0.011665 | 0.011665 |
| 0.011396 | 0.011430 | 0.011497 | 0.011430 | 0.012070 | 0.011489 | 0.011412 |
| 0.011482 | 0.011442 | 0.011552 | 0.011441 | 0.011550 | 0.011474 | 0.011440 |
| 0.012022 | 0.011337 | 0.011471 | 0.011406 | 0.011680 | 0.011537 | 0.011639 |
| 0.012047 | 0.011513 | 0.011365 | 0.011362 | 0.011362 | 0.011396 | 0.011331 |
| 0.011228 | 0.011262 | 0.011396 | 0.011362 | 0.011364 | 0.011497 | 0.011464 |
| 0.011329 | 0.011262 | 0.011295 | 0.011329 | 0.011228 | 0.011295 | 0.011195 |
| 0.011329 | 0.011362 | 0.011262 | 0.011228 | 0.011329 | 0.011262 | 0.011295 |
| 0.011295 | 0.011228 | 0.011295 | 0.011329 | 0.011228 | 0.011430 | 0.011463 |
| 0.011363 | 0.011430 | 0.011362 | 0.011363 | 0.011295 | 0.011698 | 0.011329 |
| 0.011373 | 0.011295 | 0.011531 | 0.011535 | 0.011396 | 0.011396 | 0.011396 |
| 0.011396 | 0.011329 | 0.011295 | 0.011329 | 0.011430 | 0.011430 | 0.011228 |
| 0.011362 | 0.011497 | 0.011665 | 0.011396 | 0.011598 | 0.011598 | 0.011463 |
| 0.011295 | 0.011362 | 0.011396 | 0.011799 | 0.011363 | 0.011396 | 0.011228 |
| 0.011396 | 0.011329 | 0.011329 | 0.011631 | 0.011564 | 0.011598 | 0.011329 |
| 0.011430 | 0.011497 | 0.011362 | 0.011430 | 0.011396 | 0.011262 | 0.011598 |
| 0.011362 | 0.011329 | 0.011329 | 0.011497 | 0.011329 | 0.011430 | 0.011665 |
| 0.011362 | 0.011740 | 0.011732 | 0.011507 | 0.011286 | 0.011400 | 0.011267 |
| 0.011225 | 0.011722 | 0.011236 | 0.011462 | 0.011304 | 0.011417 | 0.011432 |
| 0.011519 | 0.011258 | 0.011394 | 0.011258 | 0.011276 | 0.011462 | 0.011385 |
| 0.011399 | 0.011296 | 0.011377 | 0.011307 | 0.011364 | 0.011497 | 0.011564 |
| 0.011564 | 0.011430 | 0.011534 | 0.011535 | 0.011670 | 0.011696 | 0.011363 |
| 0.011597 | 0.011463 | 0.011329 | 0.011430 | 0.011228 | 0.011463 | 0.011262 |
| 0.011329 | 0.011329 | 0.011295 | 0.011262 | 0.011295 | 0.011262 | 0.011362 |
| 0.011340 | 0.011340 | 0.011300 | 0.011368 | 0.011505 | 0.011470 | 0.011470 |
| 0.011469 | 0.011396 | 0.011171 | 0.011168 | 0.011331 | 0.011501 | 0.011501 |
| 0.011296 | 0.011365 | 0.011599 | 0.011567 | 0.011497 | 0.011531 | 0.011463 |
| 0.011396 | 0.011463 | 0.011463 | 0.011362 | 0.011934 | 0.011530 | 0.011598 |
| 0.011631 | 0.011701 | 0.011333 | 0.011303 | 0.011295 | 0.011497 | 0.011463 |
| 0.011498 | 0.011530 | 0.011530 | 0.011530 | 0.011689 | 0.011665 | 0.011303 |
| 0.011196 | 0.011199 | 0.011299 | 0.011264 | 0.011368 | 0.011210 | 0.011536 |
| 0.011335 | 0.011499 | 0.011251 | 0.011360 | 0.011329 | 0.011402 | 0.011295 |
| 0.011262 | 0.011262 | 0.011329 | 0.011295 | 0.011497 | 0.011463 | 0.011396 |
| 0.011497 | 0.011564 | 0.011295 | 0.011295 | 0.011329 | 0.011329 | 0.011330 |
| 0.011398 | 0.011329 | 0.011329 | 0.011364 | 0.011497 | 0.011564 | 0.011564 |
| 0.011430 | 0.011534 | 0.011535 | 0.011670 | 0.011696 | 0.011363 | 0.011530 |
| 0.011463 | 0.011463 | 0.011297 | 0.011478 | 0.011408 | 0.011435 | 0.011305 |
| 0.011473 | 0.011698 | 0.011484 | 0.011366 | 0.011262 | 0.011463 | 0.011329 |
| 0.011430 | 0.011363 | 0.011262 | 0.011363 | 0.011463 | 0.011466 | 0.011363 |
| 0.011262 | 0.011195 | 0.011329 | 0.011262 | 0.011195 | 0.011264 | 0.011463 |
| 0.011362 | 0.011295 | 0.011329 | 0.011362 | 0.000000 | 0.011262 | 0.011463 |
| 0.011329 | 0.011363 | 0.011362 | 0.011295 | 0.011362 | 0.011598 | 0.011262 |
| 0.011295 | 0.011698 | 0.011295 | 0.011329 | 0.011295 | 0.011665 | 0.011232 |
| 0.011735 | 0.011230 | 0.011311 | 0.011463 | 0.011549 | 0.011455 | 0.011186 |
| 0.011270 | 0.011463 | 0.011564 | 0.011671 | 0.011532 | 0.011669 | 0.011800 |
| 0.011700 | 0.011737 | 0.011698 | 0.011949 | 0.011665 | 0.012540 | 0.011700 |
| 0.012439 | 0.012207 | 0.012341 | 0.012613 | 0.011665 | 0.011363 | 0.011665 |
| 0.012104 | 0.012038 | 0.011631 | 0.011531 | 0.011598 | 0.011598 | 0.011568 |
| 0.011463 | 0.011467 | 0.011530 | 0.011497 | 0.011867 | 0.011934 | 0.011935 |
| 0.011834 | 0.011935 | 0.012038 | 0.011804 | 0.012104 | 0.012110 | 0.012171 |
| 0.012172 | 0.012206 | 0.012118 | 0.012172 | 0.012173 | 0.011396 | 0.011699 |
| 0.011767 | 0.012270 | 0.011772 | 0.012001 | 0.012474 | 0.011536 | 0.011430 |
| 0.011396 | 0.011396 | 0.011867 | 0.011883 | 0.011975 | 0.011732 | 0.011397 |
| S418     | 0.011598 | 0.011598 | 0.011934 | 0.011698 | 0.011698 | 0.011765 |
| 0.011604 | 0.011536 | 0.011698 | 0.011195 | 0.011262 | 0.011229 | 0.011195 |
| 0.011228 | 0.011396 | 0.011195 | 0.011228 | 0.011295 | 0.011262 | 0.011228 |
| 0.011195 | 0.011228 | 0.011329 | 0.011195 | 0.011228 | 0.011228 | 0.011570 |



|          |          |          |          |          |          |          |
|----------|----------|----------|----------|----------|----------|----------|
| 0.011463 | 0.011228 | 0.011127 | 0.011362 | 0.011295 | 0.011262 | 0.011295 |
| 0.011262 | 0.011362 | 0.011262 | 0.011262 | 0.011295 | 0.011262 | 0.011430 |
| 0.011195 | 0.011262 | 0.011295 | 0.011228 | 0.011329 | 0.011362 | 0.011295 |
| 0.011262 | 0.011430 | 0.011329 | 0.011597 | 0.011262 | 0.011530 | 0.011262 |
| 0.011228 | 0.011329 | 0.011396 | 0.011530 | 0.011631 | 0.011329 | 0.011430 |
| 0.011295 | 0.011362 | 0.011262 | 0.011497 | 0.011732 | 0.011262 | 0.011329 |
| 0.011228 | 0.011329 | 0.011295 | 0.011362 | 0.011295 | 0.011295 | 0.011295 |
| 0.011195 | 0.011228 | 0.011195 | 0.011295 | 0.011262 | 0.011296 | 0.011362 |
| 0.011295 | 0.011262 | 0.011329 | 0.011228 | 0.011362 | 0.011195 | 0.011262 |
| 0.011429 | 0.011362 | 0.011597 | 0.011430 | 0.011262 | 0.011497 | 0.011262 |
| 0.011431 | 0.011658 | 0.011475 | 0.011177 | 0.011172 | 0.011244 | 0.011375 |
| 0.012011 | 0.011467 | 0.011184 | 0.011497 | 0.011497 | 0.011295 | 0.011396 |
| 0.011329 | 0.011295 | 0.011362 | 0.011262 | 0.011362 | 0.011295 | 0.011295 |
| 0.011262 | 0.011362 | 0.011564 | 0.011429 | 0.011329 | 0.011295 | 0.011228 |
| 0.011195 | 0.011195 | 0.011262 | 0.011228 | 0.011429 | 0.011396 | 0.011329 |
| 0.011429 | 0.011497 | 0.011228 | 0.011228 | 0.011262 | 0.011262 | 0.011263 |
| 0.011331 | 0.011262 | 0.011262 | 0.011132 | 0.011205 | 0.011165 | 0.011262 |
| 0.011263 | 0.011198 | 0.011245 | 0.011233 | 0.011162 | 0.011197 | 0.011229 |
| 0.011492 | 0.011267 | 0.011301 | 0.011195 | 0.011199 | 0.011329 | 0.011296 |
| 0.011363 | 0.011296 | 0.011296 | 0.011396 | 0.011329 | 0.011698 | 0.011497 |
| 0.011530 | 0.011396 | 0.011262 | 0.011362 | 0.011161 | 0.011396 | 0.011195 |
| 0.011262 | 0.011262 | 0.011228 | 0.011195 | 0.011228 | 0.011195 | 0.011295 |
| 0.011262 | 0.011362 | 0.011295 | 0.011195 | 0.011296 | 0.011396 | 0.011398 |
| 0.011396 | 0.011295 | 0.011195 | 0.011128 | 0.011262 | 0.011195 | 0.011128 |
| 0.011230 | 0.011396 | 0.011195 | 0.011396 | 0.011161 | 0.011262 | 0.011228 |
| 0.011329 | 0.011228 | 0.011262 | 0.011228 | 0.011262 | 0.011127 | 0.011262 |
| 0.011295 | 0.011228 | 0.011295 | 0.011228 | 0.011262 | 0.011295 | 0.011530 |
| 0.011631 | 0.011564 | 0.011631 | 0.011397 | 0.011631 | 0.011262 | 0.011228 |
| 0.011263 | 0.011545 | 0.011335 | 0.011163 | 0.011637 | 0.011129 | 0.011218 |
| 0.011637 | 0.011536 | 0.011429 | 0.011631 | 0.011333 | 0.011497 | 0.011463 |
| 0.011396 | 0.011564 | 0.011416 | 0.011266 | 0.011312 | 0.011295 | 0.011365 |
| 0.011463 | 0.011364 | 0.011500 | 0.011568 | 0.011497 | 0.011564 | 0.011670 |
| 0.011399 | 0.011570 | 0.011500 | 0.011432 | 0.011700 | 0.011161 | 0.011364 |
| 0.011329 | 0.011262 | 0.011161 | 0.011161 | 0.011228 | 0.011228 | 0.011295 |
| 0.011228 | 0.011295 | 0.011195 | 0.011295 | 0.011228 | 0.011228 | 0.011295 |
| 0.011228 | 0.011665 | 0.011564 | 0.011597 | 0.011127 | 0.011228 | 0.011262 |
| 0.011262 | 0.011228 | 0.011295 | 0.011329 | 0.011195 | 0.011195 | 0.011195 |
| 0.011732 | 0.011362 | 0.011362 | 0.011161 | 0.011262 | 0.011430 | 0.011195 |
| 0.011195 | 0.011262 | 0.011228 | 0.011396 | 0.011195 | 0.011329 | 0.011463 |
| 0.011396 | 0.011228 | 0.011228 | 0.011161 | 0.011161 | 0.011329 | 0.011262 |
| 0.011161 | 0.011262 | 0.011127 | 0.011161 | 0.011295 | 0.011430 | 0.011195 |
| 0.011161 | 0.011295 | 0.011228 | 0.011127 | 0.011463 | 0.011127 | 0.011295 |
| 0.011368 | 0.011195 | 0.011497 | 0.011329 | 0.011362 | 0.011228 | 0.011329 |
| 0.011195 | 0.011530 | 0.011127 | 0.011396 | 0.011195 | 0.011195 | 0.011127 |
| 0.011362 | 0.011564 | 0.011262 | 0.011329 | 0.011161 | 0.011564 | 0.011195 |
| 0.011195 | 0.011195 | 0.011228 | 0.011329 | 0.011228 | 0.011329 | 0.011396 |
| 0.011396 | 0.011362 | 0.011262 | 0.011363 | 0.011329 | 0.011195 | 0.011161 |
| 0.011195 | 0.011195 | 0.011262 | 0.011195 | 0.011161 | 0.011329 | 0.011195 |
| 0.011228 | 0.011228 | 0.011362 | 0.011396 | 0.011295 | 0.011228 | 0.011228 |
| 0.011295 | 0.011228 | 0.011329 | 0.011195 | 0.011329 | 0.011430 | 0.011732 |
| 0.011228 | 0.011631 | 0.011233 | 0.017748 | 0.011126 | 0.011305 | 0.011583 |
| 0.011545 | 0.011588 | 0.011322 | 0.011292 | 0.011609 | 0.011613 | 0.011242 |
| 0.011487 | 0.011426 | 0.011138 | 0.011228 | 0.011216 | 0.011208 | 0.011189 |
| 0.011482 | 0.011395 | 0.011394 | 0.011259 | 0.011362 | 0.011396 | 0.011398 |
| 0.011266 | 0.011362 | 0.011362 | 0.011329 | 0.011295 | 0.011295 | 0.011262 |
| 0.011295 | 0.011228 | 0.011262 | 0.011295 | 0.011262 | 0.000000 | 0.011228 |
| 0.011228 | 0.011295 | 0.011195 | 0.011295 | 0.011329 | 0.011362 | 0.011262 |
| 0.011295 | 0.011262 | 0.011597 | 0.011597 | 0.011329 | 0.011363 | 0.011396 |
| 0.011161 | 0.011161 | 0.011195 | 0.011295 | 0.011161 | 0.011396 | 0.011396 |
| 0.011429 | 0.011429 | 0.011362 | 0.011463 | 0.011631 | 0.011464 | 0.011295 |

|          |          |          |          |          |          |          |
|----------|----------|----------|----------|----------|----------|----------|
| 0.011295 | 0.011362 | 0.011396 | 0.011228 | 0.011295 | 0.011262 | 0.011295 |
| 0.011363 | 0.011362 | 0.011396 | 0.011363 | 0.011262 | 0.011463 | 0.011430 |
| 0.011297 | 0.011195 | 0.011295 | 0.011396 | 0.011295 | 0.011430 | 0.011463 |
| 0.011631 | 0.011333 | 0.011497 | 0.011463 | 0.011396 | 0.011564 | 0.011195 |
| 0.011363 | 0.011262 | 0.011228 | 0.011228 | 0.011295 | 0.011195 | 0.011295 |
| 0.011329 | 0.011362 | 0.011262 | 0.011295 | 0.011262 | 0.011597 | 0.011597 |
| 0.011329 | 0.011363 | 0.011429 | 0.011362 | 0.012002 | 0.011418 | 0.011342 |
| 0.011412 | 0.011372 | 0.011482 | 0.011372 | 0.011480 | 0.011405 | 0.011371 |
| 0.011953 | 0.011268 | 0.011403 | 0.011337 | 0.011611 | 0.011468 | 0.011571 |
| 0.011978 | 0.011437 | 0.011297 | 0.011295 | 0.011295 | 0.011329 | 0.011263 |
| 0.011161 | 0.011195 | 0.011329 | 0.011295 | 0.011297 | 0.011429 | 0.011397 |
| 0.011262 | 0.011195 | 0.011228 | 0.011262 | 0.011161 | 0.011228 | 0.011127 |
| 0.011262 | 0.011295 | 0.011195 | 0.011161 | 0.011262 | 0.011195 | 0.011228 |
| 0.011228 | 0.011161 | 0.011228 | 0.011262 | 0.011161 | 0.011362 | 0.011396 |
| 0.011295 | 0.011362 | 0.011295 | 0.011295 | 0.011228 | 0.011631 | 0.011262 |
| 0.011304 | 0.011228 | 0.011463 | 0.011467 | 0.011329 | 0.011329 | 0.011329 |
| 0.011329 | 0.011262 | 0.011228 | 0.011262 | 0.011362 | 0.011362 | 0.011295 |
| 0.011295 | 0.011430 | 0.011597 | 0.011329 | 0.011530 | 0.011530 | 0.011396 |
| 0.011228 | 0.011295 | 0.011329 | 0.011732 | 0.011295 | 0.011329 | 0.011295 |
| 0.011329 | 0.011262 | 0.011262 | 0.011564 | 0.011497 | 0.011530 | 0.011262 |
| 0.011362 | 0.011430 | 0.011295 | 0.011362 | 0.011329 | 0.011195 | 0.011530 |
| 0.011295 | 0.011262 | 0.011262 | 0.011430 | 0.011262 | 0.011362 | 0.011598 |
| 0.011295 | 0.011672 | 0.011665 | 0.011467 | 0.011229 | 0.011366 | 0.011267 |
| 0.011115 | 0.011683 | 0.011201 | 0.011417 | 0.011207 | 0.011366 | 0.011326 |
| 0.011468 | 0.000000 | 0.011283 | 0.000000 | 0.011168 | 0.011261 | 0.011344 |
| 0.011362 | 0.011257 | 0.011342 | 0.011272 | 0.011296 | 0.011429 | 0.011497 |
| 0.011497 | 0.011363 | 0.011466 | 0.011467 | 0.011603 | 0.011626 | 0.011295 |
| 0.011530 | 0.011396 | 0.011262 | 0.011362 | 0.011161 | 0.011396 | 0.011195 |
| 0.011262 | 0.011262 | 0.011228 | 0.011195 | 0.011228 | 0.011195 | 0.011295 |
| 0.011270 | 0.011270 | 0.011266 | 0.011300 | 0.011437 | 0.011402 | 0.011402 |
| 0.011401 | 0.011329 | 0.011134 | 0.011132 | 0.011263 | 0.011433 | 0.011433 |
| 0.011228 | 0.011297 | 0.011531 | 0.011500 | 0.011430 | 0.011464 | 0.011396 |
| 0.011329 | 0.011396 | 0.011396 | 0.011295 | 0.011867 | 0.011463 | 0.011531 |
| 0.011564 | 0.011630 | 0.011265 | 0.011337 | 0.011228 | 0.011429 | 0.011396 |
| 0.011430 | 0.011463 | 0.011463 | 0.011463 | 0.011571 | 0.011597 | 0.011234 |
| 0.011128 | 0.011130 | 0.011231 | 0.011196 | 0.011299 | 0.011135 | 0.011468 |
| 0.011266 | 0.011411 | 0.000000 | 0.011285 | 0.011262 | 0.011334 | 0.011228 |
| 0.011195 | 0.011195 | 0.011262 | 0.011228 | 0.011429 | 0.011396 | 0.011329 |
| 0.011429 | 0.011497 | 0.011228 | 0.011228 | 0.011262 | 0.011262 | 0.011263 |
| 0.011331 | 0.011262 | 0.011262 | 0.011296 | 0.011429 | 0.011497 | 0.011497 |
| 0.011363 | 0.011466 | 0.011467 | 0.011603 | 0.011626 | 0.011295 | 0.011463 |
| 0.011396 | 0.011396 | 0.011229 | 0.011408 | 0.011338 | 0.011367 | 0.011235 |
| 0.011405 | 0.011607 | 0.011357 | 0.011298 | 0.011195 | 0.011396 | 0.011262 |
| 0.011362 | 0.011295 | 0.011195 | 0.011296 | 0.011396 | 0.011398 | 0.011295 |
| 0.011195 | 0.011128 | 0.011262 | 0.011195 | 0.011128 | 0.011230 | 0.011396 |
| 0.011295 | 0.011228 | 0.011262 | 0.011295 | 0.011262 | 0.000000 | 0.011396 |
| 0.011262 | 0.011295 | 0.011295 | 0.011228 | 0.011295 | 0.011530 | 0.011195 |
| 0.011228 | 0.011631 | 0.011228 | 0.011262 | 0.011228 | 0.011597 | 0.011189 |
| 0.011679 | 0.011188 | 0.011261 | 0.011422 | 0.011508 | 0.011419 | 0.011144 |
| 0.011218 | 0.011396 | 0.011497 | 0.011603 | 0.011464 | 0.011601 | 0.011733 |
| 0.011632 | 0.011669 | 0.011631 | 0.011880 | 0.011597 | 0.012472 | 0.011633 |
| 0.012372 | 0.012139 | 0.012273 | 0.012545 | 0.011597 | 0.011295 | 0.011598 |
| 0.012036 | 0.011971 | 0.011564 | 0.011463 | 0.011531 | 0.011531 | 0.011500 |
| 0.011396 | 0.011399 | 0.011463 | 0.011430 | 0.011800 | 0.011866 | 0.011867 |
| 0.011767 | 0.011867 | 0.011970 | 0.011737 | 0.012037 | 0.012042 | 0.012104 |
| 0.012104 | 0.012138 | 0.012084 | 0.012104 | 0.012106 | 0.011329 | 0.011631 |
| 0.011699 | 0.012203 | 0.011704 | 0.011934 | 0.012406 | 0.011468 | 0.011363 |
| 0.011329 | 0.011329 | 0.011799 | 0.011842 | 0.011940 | 0.011665 | 0.011330 |
| S419     | 0.011497 | 0.011497 | 0.011967 | 0.011732 | 0.011732 | 0.011799 |
| 0.011638 | 0.011570 | 0.011732 | 0.011228 | 0.011295 | 0.011262 | 0.011228 |

|          |          |          |          |          |          |          |
|----------|----------|----------|----------|----------|----------|----------|
| 0.011262 | 0.011429 | 0.011228 | 0.011262 | 0.011329 | 0.011295 | 0.011262 |
| 0.011228 | 0.011262 | 0.011362 | 0.011228 | 0.011262 | 0.011262 | 0.011604 |
| 0.011497 | 0.011262 | 0.011161 | 0.011396 | 0.011329 | 0.011295 | 0.011329 |
| 0.011295 | 0.011396 | 0.011295 | 0.011295 | 0.011329 | 0.011295 | 0.011463 |
| 0.011228 | 0.011295 | 0.011329 | 0.011262 | 0.011362 | 0.011396 | 0.011329 |
| 0.011295 | 0.011463 | 0.011363 | 0.011631 | 0.011295 | 0.011564 | 0.011295 |
| 0.011262 | 0.011362 | 0.011429 | 0.011564 | 0.011665 | 0.011362 | 0.011463 |
| 0.011329 | 0.011396 | 0.011295 | 0.011530 | 0.011765 | 0.011295 | 0.011362 |
| 0.011262 | 0.011362 | 0.011329 | 0.011396 | 0.011329 | 0.011329 | 0.011329 |
| 0.011228 | 0.011262 | 0.011228 | 0.011329 | 0.011295 | 0.011329 | 0.011396 |
| 0.011329 | 0.011295 | 0.011362 | 0.011262 | 0.011396 | 0.011228 | 0.011295 |
| 0.011463 | 0.011396 | 0.011631 | 0.011463 | 0.011295 | 0.011530 | 0.011295 |
| 0.011468 | 0.011695 | 0.011513 | 0.011177 | 0.011210 | 0.011318 | 0.011415 |
| 0.012048 | 0.011467 | 0.011184 | 0.011530 | 0.011530 | 0.011329 | 0.011429 |
| 0.011362 | 0.011262 | 0.011262 | 0.011295 | 0.011396 | 0.011329 | 0.011195 |
| 0.011228 | 0.011396 | 0.011530 | 0.011463 | 0.011362 | 0.011329 | 0.011262 |
| 0.011228 | 0.011228 | 0.011295 | 0.011262 | 0.011463 | 0.011429 | 0.011362 |
| 0.011463 | 0.011530 | 0.011262 | 0.011262 | 0.011295 | 0.011295 | 0.011297 |
| 0.011364 | 0.011295 | 0.011295 | 0.011168 | 0.011241 | 0.011200 | 0.011296 |
| 0.011297 | 0.011232 | 0.011282 | 0.011267 | 0.011196 | 0.011231 | 0.011263 |
| 0.011528 | 0.011301 | 0.011336 | 0.011228 | 0.011233 | 0.011363 | 0.011329 |
| 0.011396 | 0.011330 | 0.011329 | 0.011295 | 0.011228 | 0.011732 | 0.011530 |
| 0.011564 | 0.011429 | 0.011295 | 0.011396 | 0.011195 | 0.011429 | 0.011228 |
| 0.011295 | 0.011295 | 0.011262 | 0.011228 | 0.011262 | 0.011228 | 0.011329 |
| 0.011295 | 0.011396 | 0.011329 | 0.011228 | 0.011330 | 0.011429 | 0.011432 |
| 0.011430 | 0.011329 | 0.011228 | 0.011161 | 0.011295 | 0.011228 | 0.011161 |
| 0.011264 | 0.011430 | 0.011228 | 0.011430 | 0.011195 | 0.011295 | 0.011262 |
| 0.011362 | 0.011262 | 0.011295 | 0.011262 | 0.011295 | 0.011161 | 0.011295 |
| 0.011329 | 0.011262 | 0.011329 | 0.011262 | 0.011161 | 0.011329 | 0.011564 |
| 0.011665 | 0.011597 | 0.011665 | 0.011431 | 0.011665 | 0.011094 | 0.011262 |
| 0.011297 | 0.011586 | 0.011335 | 0.011197 | 0.011671 | 0.011163 | 0.011257 |
| 0.011671 | 0.011570 | 0.011429 | 0.011598 | 0.011299 | 0.011530 | 0.011497 |
| 0.011429 | 0.011597 | 0.011344 | 0.011184 | 0.011270 | 0.011329 | 0.011331 |
| 0.011497 | 0.011263 | 0.011534 | 0.011602 | 0.011396 | 0.011530 | 0.011568 |
| 0.011297 | 0.011603 | 0.011399 | 0.011466 | 0.011666 | 0.011195 | 0.011397 |
| 0.011362 | 0.011295 | 0.011195 | 0.011195 | 0.011262 | 0.011262 | 0.011329 |
| 0.011262 | 0.011329 | 0.011228 | 0.011329 | 0.011262 | 0.011262 | 0.011329 |
| 0.011262 | 0.011698 | 0.011597 | 0.011631 | 0.011161 | 0.011262 | 0.011295 |
| 0.011295 | 0.011262 | 0.011329 | 0.011362 | 0.011228 | 0.011228 | 0.011228 |
| 0.011765 | 0.011396 | 0.011396 | 0.011195 | 0.011295 | 0.011463 | 0.011228 |
| 0.011228 | 0.011295 | 0.011262 | 0.011430 | 0.011228 | 0.011362 | 0.011497 |
| 0.011429 | 0.011262 | 0.011262 | 0.011195 | 0.011195 | 0.011362 | 0.011295 |
| 0.011195 | 0.011295 | 0.011161 | 0.011195 | 0.011329 | 0.011463 | 0.011228 |
| 0.011195 | 0.011329 | 0.011262 | 0.011161 | 0.011497 | 0.011161 | 0.011329 |
| 0.011368 | 0.011228 | 0.011530 | 0.011363 | 0.011396 | 0.011262 | 0.011362 |
| 0.011228 | 0.011564 | 0.011161 | 0.011429 | 0.011228 | 0.011228 | 0.011161 |
| 0.011396 | 0.011598 | 0.011295 | 0.011362 | 0.011195 | 0.011597 | 0.011228 |
| 0.011228 | 0.011228 | 0.011262 | 0.011362 | 0.011262 | 0.011362 | 0.011429 |
| 0.011429 | 0.011396 | 0.011295 | 0.011396 | 0.011362 | 0.011228 | 0.011195 |
| 0.011228 | 0.011228 | 0.011295 | 0.011228 | 0.011195 | 0.011362 | 0.011228 |
| 0.011262 | 0.011262 | 0.011396 | 0.011429 | 0.011329 | 0.011262 | 0.011262 |
| 0.011329 | 0.011262 | 0.011362 | 0.011228 | 0.011362 | 0.011463 | 0.011765 |
| 0.011262 | 0.011665 | 0.011267 | 0.017785 | 0.011191 | 0.011305 | 0.011618 |
| 0.011579 | 0.011623 | 0.011270 | 0.011292 | 0.011719 | 0.011647 | 0.011303 |
| 0.011487 | 0.011426 | 0.011177 | 0.011228 | 0.011255 | 0.011307 | 0.011232 |
| 0.011482 | 0.011433 | 0.011431 | 0.011325 | 0.011396 | 0.011295 | 0.011365 |
| 0.011301 | 0.011396 | 0.011396 | 0.011362 | 0.011329 | 0.011329 | 0.011295 |
| 0.011329 | 0.011262 | 0.011295 | 0.011329 | 0.011295 | 0.011228 | 0.000000 |
| 0.000000 | 0.011329 | 0.011228 | 0.011329 | 0.011362 | 0.011396 | 0.011094 |
| 0.011329 | 0.011295 | 0.011631 | 0.011631 | 0.011362 | 0.011396 | 0.011430 |

|          |          |          |          |          |          |          |
|----------|----------|----------|----------|----------|----------|----------|
| 0.011195 | 0.011195 | 0.011228 | 0.011329 | 0.011195 | 0.011429 | 0.011429 |
| 0.011463 | 0.011429 | 0.011396 | 0.011497 | 0.011665 | 0.011498 | 0.011329 |
| 0.011329 | 0.011396 | 0.011429 | 0.011262 | 0.011329 | 0.011295 | 0.011329 |
| 0.011396 | 0.011396 | 0.011429 | 0.011396 | 0.011296 | 0.011497 | 0.011463 |
| 0.011331 | 0.011228 | 0.011329 | 0.011430 | 0.011329 | 0.011463 | 0.011497 |
| 0.011598 | 0.011299 | 0.011530 | 0.011497 | 0.011429 | 0.011597 | 0.011228 |
| 0.011397 | 0.011295 | 0.000000 | 0.000000 | 0.011329 | 0.011228 | 0.011329 |
| 0.011362 | 0.011396 | 0.011094 | 0.011329 | 0.011295 | 0.011631 | 0.011631 |
| 0.011362 | 0.011396 | 0.011329 | 0.011262 | 0.012002 | 0.011453 | 0.011271 |
| 0.011447 | 0.011407 | 0.011517 | 0.011372 | 0.011515 | 0.011371 | 0.011405 |
| 0.011953 | 0.011164 | 0.011300 | 0.011302 | 0.011577 | 0.011502 | 0.011605 |
| 0.011944 | 0.011399 | 0.011331 | 0.011329 | 0.011329 | 0.011362 | 0.011297 |
| 0.011195 | 0.011228 | 0.011362 | 0.011329 | 0.011331 | 0.011463 | 0.011431 |
| 0.011295 | 0.011228 | 0.011262 | 0.011295 | 0.011195 | 0.011262 | 0.011161 |
| 0.011295 | 0.011329 | 0.011228 | 0.011195 | 0.011295 | 0.011228 | 0.011262 |
| 0.011262 | 0.011195 | 0.011262 | 0.011295 | 0.011195 | 0.011396 | 0.011429 |
| 0.011329 | 0.011396 | 0.011329 | 0.011329 | 0.011262 | 0.011665 | 0.011295 |
| 0.011339 | 0.011262 | 0.011497 | 0.011501 | 0.011362 | 0.011362 | 0.011362 |
| 0.011362 | 0.011295 | 0.011262 | 0.011295 | 0.011396 | 0.011396 | 0.011329 |
| 0.011329 | 0.011463 | 0.011631 | 0.011362 | 0.011564 | 0.011564 | 0.011429 |
| 0.011262 | 0.011329 | 0.011362 | 0.011765 | 0.011329 | 0.011362 | 0.011329 |
| 0.011362 | 0.011295 | 0.011295 | 0.011598 | 0.011530 | 0.011564 | 0.011295 |
| 0.011396 | 0.011463 | 0.011329 | 0.011396 | 0.011362 | 0.011228 | 0.011564 |
| 0.011329 | 0.011295 | 0.011295 | 0.011463 | 0.011295 | 0.011396 | 0.011631 |
| 0.011329 | 0.011706 | 0.011698 | 0.011507 | 0.011173 | 0.011400 | 0.011267 |
| 0.011170 | 0.011722 | 0.011236 | 0.011462 | 0.011255 | 0.011366 | 0.011379 |
| 0.011468 | 0.011192 | 0.011339 | 0.011192 | 0.011222 | 0.011328 | 0.011385 |
| 0.011399 | 0.011296 | 0.011377 | 0.011307 | 0.011330 | 0.011463 | 0.011530 |
| 0.011530 | 0.011396 | 0.011500 | 0.011501 | 0.011636 | 0.011661 | 0.011329 |
| 0.011564 | 0.011429 | 0.011295 | 0.011396 | 0.011195 | 0.011429 | 0.011228 |
| 0.011295 | 0.011295 | 0.011262 | 0.011228 | 0.011262 | 0.011228 | 0.011329 |
| 0.011305 | 0.011305 | 0.011300 | 0.011334 | 0.011471 | 0.011436 | 0.011436 |
| 0.011435 | 0.011363 | 0.011171 | 0.011168 | 0.011297 | 0.011467 | 0.011467 |
| 0.011262 | 0.011331 | 0.011565 | 0.011533 | 0.011464 | 0.011498 | 0.011295 |
| 0.011362 | 0.011362 | 0.011362 | 0.011329 | 0.011866 | 0.011497 | 0.011564 |
| 0.011597 | 0.011666 | 0.011299 | 0.011372 | 0.011262 | 0.011329 | 0.011295 |
| 0.011464 | 0.011362 | 0.011497 | 0.011497 | 0.011532 | 0.011497 | 0.011268 |
| 0.011162 | 0.011164 | 0.011265 | 0.011230 | 0.011334 | 0.011135 | 0.011502 |
| 0.011300 | 0.011367 | 0.011108 | 0.011248 | 0.011296 | 0.011368 | 0.011262 |
| 0.011228 | 0.011228 | 0.011295 | 0.011262 | 0.011463 | 0.011429 | 0.011362 |
| 0.011463 | 0.011530 | 0.011262 | 0.011262 | 0.011295 | 0.011295 | 0.011297 |
| 0.011364 | 0.011295 | 0.011295 | 0.011330 | 0.011463 | 0.011530 | 0.011530 |
| 0.011396 | 0.011500 | 0.011501 | 0.011636 | 0.011661 | 0.011329 | 0.011497 |
| 0.011295 | 0.011295 | 0.011263 | 0.011443 | 0.011373 | 0.011401 | 0.011270 |
| 0.011439 | 0.011607 | 0.011399 | 0.011332 | 0.011228 | 0.011430 | 0.011295 |
| 0.011396 | 0.011329 | 0.011228 | 0.011330 | 0.011429 | 0.011432 | 0.011329 |
| 0.011228 | 0.011161 | 0.011295 | 0.011228 | 0.011161 | 0.011264 | 0.011430 |
| 0.011329 | 0.011262 | 0.011295 | 0.011329 | 0.011295 | 0.011228 | 0.011430 |
| 0.011295 | 0.011329 | 0.011329 | 0.011262 | 0.011329 | 0.011564 | 0.011228 |
| 0.011262 | 0.011665 | 0.011262 | 0.011295 | 0.011262 | 0.011631 | 0.011232 |
| 0.011678 | 0.011188 | 0.011261 | 0.011422 | 0.011549 | 0.011455 | 0.011144 |
| 0.011218 | 0.011429 | 0.011530 | 0.011637 | 0.011498 | 0.011635 | 0.011766 |
| 0.011666 | 0.011703 | 0.011665 | 0.011914 | 0.011631 | 0.012438 | 0.011666 |
| 0.012405 | 0.012105 | 0.012240 | 0.012578 | 0.011631 | 0.011329 | 0.011631 |
| 0.012036 | 0.012004 | 0.011597 | 0.011497 | 0.011565 | 0.011565 | 0.011534 |
| 0.011429 | 0.011433 | 0.011497 | 0.011464 | 0.011833 | 0.011900 | 0.011901 |
| 0.011800 | 0.011901 | 0.012004 | 0.011770 | 0.012036 | 0.012042 | 0.012103 |
| 0.012104 | 0.012138 | 0.012084 | 0.012104 | 0.012105 | 0.011228 | 0.011631 |
| 0.011733 | 0.012236 | 0.011704 | 0.011967 | 0.012440 | 0.011502 | 0.011396 |
| 0.011362 | 0.011362 | 0.011833 | 0.011800 | 0.011975 | 0.011698 | 0.011363 |

|          |          |          |          |          |          |          |
|----------|----------|----------|----------|----------|----------|----------|
| S420     | 0.011497 | 0.011497 | 0.011967 | 0.011732 | 0.011732 | 0.011799 |
| 0.011638 | 0.011570 | 0.011732 | 0.011228 | 0.011295 | 0.011262 | 0.011228 |
| 0.011262 | 0.011429 | 0.011228 | 0.011262 | 0.011329 | 0.011295 | 0.011262 |
| 0.011228 | 0.011262 | 0.011362 | 0.011228 | 0.011262 | 0.011262 | 0.011604 |
| 0.011497 | 0.011262 | 0.011161 | 0.011396 | 0.011329 | 0.011295 | 0.011329 |
| 0.011295 | 0.011396 | 0.011295 | 0.011295 | 0.011329 | 0.011295 | 0.011463 |
| 0.011228 | 0.011295 | 0.011329 | 0.011262 | 0.011362 | 0.011396 | 0.011329 |
| 0.011295 | 0.011463 | 0.011363 | 0.011631 | 0.011295 | 0.011564 | 0.011295 |
| 0.011262 | 0.011362 | 0.011429 | 0.011564 | 0.011665 | 0.011362 | 0.011463 |
| 0.011329 | 0.011396 | 0.011295 | 0.011530 | 0.011765 | 0.011295 | 0.011362 |
| 0.011262 | 0.011362 | 0.011329 | 0.011396 | 0.011329 | 0.011329 | 0.011329 |
| 0.011228 | 0.011262 | 0.011228 | 0.011329 | 0.011295 | 0.011329 | 0.011396 |
| 0.011329 | 0.011295 | 0.011362 | 0.011262 | 0.011396 | 0.011228 | 0.011295 |
| 0.011463 | 0.011396 | 0.011631 | 0.011463 | 0.011295 | 0.011530 | 0.011295 |
| 0.011468 | 0.011695 | 0.011513 | 0.011177 | 0.011210 | 0.011318 | 0.011415 |
| 0.012048 | 0.011467 | 0.011184 | 0.011530 | 0.011530 | 0.011329 | 0.011429 |
| 0.011362 | 0.011262 | 0.011262 | 0.011295 | 0.011396 | 0.011329 | 0.011195 |
| 0.011228 | 0.011396 | 0.011530 | 0.011463 | 0.011362 | 0.011329 | 0.011262 |
| 0.011228 | 0.011228 | 0.011295 | 0.011262 | 0.011463 | 0.011429 | 0.011362 |
| 0.011463 | 0.011530 | 0.011262 | 0.011262 | 0.011295 | 0.011295 | 0.011297 |
| 0.011364 | 0.011295 | 0.011295 | 0.011168 | 0.011241 | 0.011200 | 0.011296 |
| 0.011297 | 0.011232 | 0.011282 | 0.011267 | 0.011196 | 0.011231 | 0.011263 |
| 0.011528 | 0.011301 | 0.011336 | 0.011228 | 0.011233 | 0.011363 | 0.011329 |
| 0.011396 | 0.011330 | 0.011329 | 0.011295 | 0.011228 | 0.011732 | 0.011530 |
| 0.011564 | 0.011429 | 0.011295 | 0.011396 | 0.011195 | 0.011429 | 0.011228 |
| 0.011295 | 0.011295 | 0.011262 | 0.011228 | 0.011262 | 0.011228 | 0.011329 |
| 0.011295 | 0.011396 | 0.011329 | 0.011228 | 0.011330 | 0.011429 | 0.011432 |
| 0.011430 | 0.011329 | 0.011228 | 0.011161 | 0.011295 | 0.011228 | 0.011161 |
| 0.011264 | 0.011430 | 0.011228 | 0.011430 | 0.011195 | 0.011295 | 0.011262 |
| 0.011362 | 0.011262 | 0.011295 | 0.011262 | 0.011295 | 0.011161 | 0.011295 |
| 0.011329 | 0.011262 | 0.011329 | 0.011262 | 0.011161 | 0.011329 | 0.011564 |
| 0.011665 | 0.011597 | 0.011665 | 0.011431 | 0.011665 | 0.011094 | 0.011262 |
| 0.011297 | 0.011586 | 0.011335 | 0.011197 | 0.011671 | 0.011163 | 0.011257 |
| 0.011671 | 0.011570 | 0.011429 | 0.011598 | 0.011299 | 0.011530 | 0.011497 |
| 0.011429 | 0.011597 | 0.011344 | 0.011184 | 0.011270 | 0.011329 | 0.011331 |
| 0.011497 | 0.011263 | 0.011534 | 0.011602 | 0.011396 | 0.011530 | 0.011568 |
| 0.011297 | 0.011603 | 0.011399 | 0.011466 | 0.011666 | 0.011195 | 0.011397 |
| 0.011362 | 0.011295 | 0.011195 | 0.011195 | 0.011262 | 0.011262 | 0.011329 |
| 0.011262 | 0.011329 | 0.011228 | 0.011329 | 0.011262 | 0.011262 | 0.011329 |
| 0.011262 | 0.011698 | 0.011597 | 0.011631 | 0.011161 | 0.011262 | 0.011295 |
| 0.011295 | 0.011262 | 0.011329 | 0.011362 | 0.011228 | 0.011228 | 0.011228 |
| 0.011765 | 0.011396 | 0.011396 | 0.011195 | 0.011295 | 0.011463 | 0.011228 |
| 0.011228 | 0.011295 | 0.011262 | 0.011430 | 0.011228 | 0.011362 | 0.011497 |
| 0.011429 | 0.011262 | 0.011262 | 0.011195 | 0.011195 | 0.011362 | 0.011295 |
| 0.011195 | 0.011295 | 0.011161 | 0.011195 | 0.011329 | 0.011463 | 0.011228 |
| 0.011195 | 0.011329 | 0.011262 | 0.011161 | 0.011497 | 0.011161 | 0.011329 |
| 0.011368 | 0.011228 | 0.011530 | 0.011363 | 0.011396 | 0.011262 | 0.011362 |
| 0.011228 | 0.011564 | 0.011161 | 0.011429 | 0.011228 | 0.011228 | 0.011161 |
| 0.011396 | 0.011598 | 0.011295 | 0.011362 | 0.011195 | 0.011597 | 0.011228 |
| 0.011228 | 0.011228 | 0.011262 | 0.011362 | 0.011262 | 0.011362 | 0.011429 |
| 0.011429 | 0.011396 | 0.011295 | 0.011396 | 0.011362 | 0.011228 | 0.011195 |
| 0.011228 | 0.011228 | 0.011295 | 0.011228 | 0.011195 | 0.011362 | 0.011228 |
| 0.011262 | 0.011262 | 0.011396 | 0.011429 | 0.011329 | 0.011262 | 0.011262 |
| 0.011329 | 0.011262 | 0.011362 | 0.011228 | 0.011362 | 0.011463 | 0.011765 |
| 0.011262 | 0.011665 | 0.011267 | 0.017785 | 0.011191 | 0.011305 | 0.011618 |
| 0.011579 | 0.011623 | 0.011270 | 0.011292 | 0.011719 | 0.011647 | 0.011303 |
| 0.011487 | 0.011426 | 0.011177 | 0.011228 | 0.011255 | 0.011307 | 0.011232 |
| 0.011482 | 0.011433 | 0.011431 | 0.011325 | 0.011396 | 0.011295 | 0.011365 |
| 0.011301 | 0.011396 | 0.011396 | 0.011362 | 0.011329 | 0.011329 | 0.011295 |
| 0.011329 | 0.011262 | 0.011295 | 0.011329 | 0.011295 | 0.011228 | 0.000000 |

|          |          |          |          |          |          |          |
|----------|----------|----------|----------|----------|----------|----------|
| 0.000000 | 0.011329 | 0.011228 | 0.011329 | 0.011362 | 0.011396 | 0.011094 |
| 0.011329 | 0.011295 | 0.011631 | 0.011631 | 0.011362 | 0.011396 | 0.011430 |
| 0.011195 | 0.011195 | 0.011228 | 0.011329 | 0.011195 | 0.011429 | 0.011429 |
| 0.011463 | 0.011429 | 0.011396 | 0.011497 | 0.011665 | 0.011498 | 0.011329 |
| 0.011329 | 0.011396 | 0.011429 | 0.011262 | 0.011329 | 0.011295 | 0.011329 |
| 0.011396 | 0.011396 | 0.011429 | 0.011396 | 0.011296 | 0.011497 | 0.011463 |
| 0.011331 | 0.011228 | 0.011329 | 0.011430 | 0.011329 | 0.011463 | 0.011497 |
| 0.011598 | 0.011299 | 0.011530 | 0.011497 | 0.011429 | 0.011597 | 0.011228 |
| 0.011397 | 0.011295 | 0.000000 | 0.000000 | 0.011329 | 0.011228 | 0.011329 |
| 0.011362 | 0.011396 | 0.011094 | 0.011329 | 0.011295 | 0.011631 | 0.011631 |
| 0.011362 | 0.011396 | 0.011329 | 0.011262 | 0.012002 | 0.011453 | 0.011271 |
| 0.011447 | 0.011407 | 0.011517 | 0.011372 | 0.011515 | 0.011371 | 0.011405 |
| 0.011953 | 0.011164 | 0.011300 | 0.011302 | 0.011577 | 0.011502 | 0.011605 |
| 0.011944 | 0.011399 | 0.011331 | 0.011329 | 0.011329 | 0.011362 | 0.011297 |
| 0.011195 | 0.011228 | 0.011362 | 0.011329 | 0.011331 | 0.011463 | 0.011431 |
| 0.011295 | 0.011228 | 0.011262 | 0.011295 | 0.011195 | 0.011262 | 0.011161 |
| 0.011295 | 0.011329 | 0.011228 | 0.011195 | 0.011295 | 0.011228 | 0.011262 |
| 0.011262 | 0.011195 | 0.011262 | 0.011295 | 0.011195 | 0.011396 | 0.011429 |
| 0.011329 | 0.011396 | 0.011329 | 0.011329 | 0.011262 | 0.011665 | 0.011295 |
| 0.011339 | 0.011262 | 0.011497 | 0.011501 | 0.011362 | 0.011362 | 0.011362 |
| 0.011362 | 0.011295 | 0.011262 | 0.011295 | 0.011396 | 0.011396 | 0.011329 |
| 0.011329 | 0.011463 | 0.011631 | 0.011362 | 0.011564 | 0.011564 | 0.011429 |
| 0.011262 | 0.011329 | 0.011362 | 0.011765 | 0.011329 | 0.011362 | 0.011329 |
| 0.011362 | 0.011295 | 0.011295 | 0.011598 | 0.011530 | 0.011564 | 0.011295 |
| 0.011396 | 0.011463 | 0.011329 | 0.011396 | 0.011362 | 0.011228 | 0.011564 |
| 0.011329 | 0.011295 | 0.011295 | 0.011463 | 0.011295 | 0.011396 | 0.011631 |
| 0.011329 | 0.011706 | 0.011698 | 0.011507 | 0.011173 | 0.011400 | 0.011267 |
| 0.011170 | 0.011722 | 0.011236 | 0.011462 | 0.011255 | 0.011366 | 0.011379 |
| 0.011468 | 0.011192 | 0.011339 | 0.011192 | 0.011222 | 0.011328 | 0.011385 |
| 0.011399 | 0.011296 | 0.011377 | 0.011307 | 0.011330 | 0.011463 | 0.011530 |
| 0.011530 | 0.011396 | 0.011500 | 0.011501 | 0.011636 | 0.011661 | 0.011329 |
| 0.011564 | 0.011429 | 0.011295 | 0.011396 | 0.011195 | 0.011429 | 0.011228 |
| 0.011295 | 0.011295 | 0.011262 | 0.011228 | 0.011262 | 0.011228 | 0.011329 |
| 0.011305 | 0.011305 | 0.011300 | 0.011334 | 0.011471 | 0.011436 | 0.011436 |
| 0.011435 | 0.011363 | 0.011171 | 0.011168 | 0.011297 | 0.011467 | 0.011467 |
| 0.011262 | 0.011331 | 0.011565 | 0.011533 | 0.011464 | 0.011498 | 0.011295 |
| 0.011362 | 0.011362 | 0.011362 | 0.011329 | 0.011866 | 0.011497 | 0.011564 |
| 0.011597 | 0.011666 | 0.011299 | 0.011372 | 0.011262 | 0.011329 | 0.011295 |
| 0.011464 | 0.011362 | 0.011497 | 0.011497 | 0.011532 | 0.011497 | 0.011268 |
| 0.011162 | 0.011164 | 0.011265 | 0.011230 | 0.011334 | 0.011135 | 0.011502 |
| 0.011300 | 0.011367 | 0.011108 | 0.011248 | 0.011296 | 0.011368 | 0.011262 |
| 0.011228 | 0.011228 | 0.011295 | 0.011262 | 0.011463 | 0.011429 | 0.011362 |
| 0.011463 | 0.011530 | 0.011262 | 0.011262 | 0.011295 | 0.011295 | 0.011297 |
| 0.011364 | 0.011295 | 0.011295 | 0.011330 | 0.011463 | 0.011530 | 0.011530 |
| 0.011396 | 0.011500 | 0.011501 | 0.011636 | 0.011661 | 0.011329 | 0.011497 |
| 0.011295 | 0.011295 | 0.011263 | 0.011443 | 0.011373 | 0.011401 | 0.011270 |
| 0.011439 | 0.011607 | 0.011399 | 0.011332 | 0.011228 | 0.011430 | 0.011295 |
| 0.011396 | 0.011329 | 0.011228 | 0.011330 | 0.011429 | 0.011432 | 0.011329 |
| 0.011228 | 0.011161 | 0.011295 | 0.011228 | 0.011161 | 0.011264 | 0.011430 |
| 0.011329 | 0.011262 | 0.011295 | 0.011329 | 0.011295 | 0.011228 | 0.011430 |
| 0.011295 | 0.011329 | 0.011329 | 0.011262 | 0.011329 | 0.011564 | 0.011228 |
| 0.011262 | 0.011665 | 0.011262 | 0.011295 | 0.011262 | 0.011631 | 0.011232 |
| 0.011678 | 0.011188 | 0.011261 | 0.011422 | 0.011549 | 0.011455 | 0.011144 |
| 0.011218 | 0.011429 | 0.011530 | 0.011637 | 0.011498 | 0.011635 | 0.011766 |
| 0.011666 | 0.011703 | 0.011665 | 0.011914 | 0.011631 | 0.012438 | 0.011666 |
| 0.012405 | 0.012105 | 0.012240 | 0.012578 | 0.011631 | 0.011329 | 0.011631 |
| 0.012036 | 0.012004 | 0.011597 | 0.011497 | 0.011565 | 0.011565 | 0.011534 |
| 0.011429 | 0.011433 | 0.011497 | 0.011464 | 0.011833 | 0.011900 | 0.011901 |
| 0.011800 | 0.011901 | 0.012004 | 0.011770 | 0.012036 | 0.012042 | 0.012103 |
| 0.012104 | 0.012138 | 0.012084 | 0.012104 | 0.012105 | 0.011228 | 0.011631 |

|          |          |          |          |          |          |          |
|----------|----------|----------|----------|----------|----------|----------|
| 0.011733 | 0.012236 | 0.011704 | 0.011967 | 0.012440 | 0.011502 | 0.011396 |
| 0.011362 | 0.011362 | 0.011833 | 0.011800 | 0.011975 | 0.011698 | 0.011363 |
| S421     | 0.011698 | 0.011698 | 0.012035 | 0.011799 | 0.011799 | 0.011866 |
| 0.011706 | 0.011638 | 0.011799 | 0.011295 | 0.011362 | 0.011329 | 0.011295 |
| 0.011329 | 0.011497 | 0.011295 | 0.011329 | 0.011396 | 0.011362 | 0.011329 |
| 0.011295 | 0.011329 | 0.011429 | 0.011296 | 0.011329 | 0.011329 | 0.011672 |
| 0.011564 | 0.011329 | 0.011228 | 0.011463 | 0.011396 | 0.011362 | 0.011396 |
| 0.011362 | 0.011463 | 0.011362 | 0.011362 | 0.011396 | 0.011362 | 0.011530 |
| 0.011295 | 0.011362 | 0.011396 | 0.011329 | 0.011430 | 0.011463 | 0.011396 |
| 0.011362 | 0.011530 | 0.011430 | 0.011698 | 0.011362 | 0.011631 | 0.011362 |
| 0.011329 | 0.011430 | 0.011497 | 0.011631 | 0.011732 | 0.011430 | 0.011530 |
| 0.011396 | 0.011463 | 0.011362 | 0.011597 | 0.011833 | 0.011362 | 0.011430 |
| 0.011329 | 0.011429 | 0.011396 | 0.011127 | 0.011396 | 0.011396 | 0.011396 |
| 0.011295 | 0.011329 | 0.011295 | 0.011396 | 0.011362 | 0.011397 | 0.011463 |
| 0.011396 | 0.011362 | 0.011430 | 0.011329 | 0.011463 | 0.011295 | 0.011362 |
| 0.011530 | 0.011463 | 0.011698 | 0.011530 | 0.011362 | 0.011598 | 0.011362 |
| 0.011505 | 0.011733 | 0.011551 | 0.011255 | 0.011247 | 0.011355 | 0.011454 |
| 0.012085 | 0.011569 | 0.011266 | 0.011597 | 0.011597 | 0.011396 | 0.011497 |
| 0.011430 | 0.011396 | 0.011463 | 0.011362 | 0.011463 | 0.011396 | 0.011396 |
| 0.011362 | 0.011463 | 0.011597 | 0.011530 | 0.011430 | 0.011396 | 0.011329 |
| 0.011295 | 0.011295 | 0.011362 | 0.011329 | 0.011530 | 0.011497 | 0.011429 |
| 0.011530 | 0.011597 | 0.011329 | 0.011329 | 0.011362 | 0.011362 | 0.011364 |
| 0.011432 | 0.011362 | 0.011362 | 0.011240 | 0.011313 | 0.011271 | 0.011363 |
| 0.011365 | 0.011301 | 0.011318 | 0.011336 | 0.011264 | 0.011300 | 0.011330 |
| 0.011600 | 0.011370 | 0.011405 | 0.011296 | 0.011302 | 0.011430 | 0.011396 |
| 0.011464 | 0.011397 | 0.011396 | 0.011497 | 0.011429 | 0.011799 | 0.011598 |
| 0.011631 | 0.011497 | 0.011362 | 0.011463 | 0.011262 | 0.011497 | 0.011295 |
| 0.011362 | 0.011362 | 0.011329 | 0.011295 | 0.011329 | 0.011295 | 0.011396 |
| 0.011362 | 0.011463 | 0.011396 | 0.011295 | 0.011397 | 0.011497 | 0.011499 |
| 0.011497 | 0.011396 | 0.011295 | 0.011229 | 0.011362 | 0.011295 | 0.011228 |
| 0.011332 | 0.011497 | 0.011295 | 0.011497 | 0.011262 | 0.011362 | 0.011329 |
| 0.011430 | 0.011329 | 0.011362 | 0.011329 | 0.011362 | 0.011228 | 0.011362 |
| 0.011396 | 0.011329 | 0.011396 | 0.011329 | 0.011362 | 0.011396 | 0.011631 |
| 0.011732 | 0.011665 | 0.011732 | 0.011465 | 0.011732 | 0.011362 | 0.011329 |
| 0.011364 | 0.011545 | 0.011518 | 0.011232 | 0.011739 | 0.011231 | 0.011336 |
| 0.011739 | 0.011638 | 0.011530 | 0.011665 | 0.011436 | 0.011598 | 0.011564 |
| 0.011497 | 0.011597 | 0.011522 | 0.011349 | 0.011396 | 0.011396 | 0.011466 |
| 0.011564 | 0.011465 | 0.011601 | 0.011670 | 0.011598 | 0.011665 | 0.011772 |
| 0.011500 | 0.011671 | 0.011602 | 0.011534 | 0.011801 | 0.011262 | 0.011465 |
| 0.011429 | 0.011362 | 0.011262 | 0.011262 | 0.011329 | 0.011329 | 0.011396 |
| 0.011329 | 0.011396 | 0.011295 | 0.011396 | 0.011329 | 0.011329 | 0.011396 |
| 0.011329 | 0.011765 | 0.011665 | 0.011698 | 0.011228 | 0.011329 | 0.011362 |
| 0.011362 | 0.011329 | 0.011396 | 0.011430 | 0.011295 | 0.011295 | 0.011295 |
| 0.011833 | 0.011463 | 0.011463 | 0.011262 | 0.011362 | 0.011530 | 0.011295 |
| 0.011295 | 0.011362 | 0.011329 | 0.011497 | 0.011295 | 0.011430 | 0.011564 |
| 0.011497 | 0.011329 | 0.011329 | 0.011262 | 0.011262 | 0.011430 | 0.011362 |
| 0.011262 | 0.011362 | 0.011228 | 0.011262 | 0.011396 | 0.011531 | 0.011295 |
| 0.011262 | 0.011396 | 0.011329 | 0.011228 | 0.011564 | 0.011228 | 0.011396 |
| 0.011471 | 0.011295 | 0.011598 | 0.011430 | 0.011463 | 0.011329 | 0.011430 |
| 0.011295 | 0.011631 | 0.011228 | 0.011497 | 0.011295 | 0.011295 | 0.011228 |
| 0.011463 | 0.011631 | 0.011362 | 0.011430 | 0.011262 | 0.011665 | 0.011295 |
| 0.011295 | 0.011295 | 0.011329 | 0.011430 | 0.011329 | 0.011430 | 0.011497 |
| 0.011497 | 0.011463 | 0.011362 | 0.011463 | 0.011429 | 0.011295 | 0.011262 |
| 0.011295 | 0.011295 | 0.011362 | 0.011295 | 0.011262 | 0.011430 | 0.011295 |
| 0.011329 | 0.011329 | 0.011463 | 0.011497 | 0.011396 | 0.011329 | 0.011329 |
| 0.011396 | 0.011329 | 0.011429 | 0.011295 | 0.011430 | 0.011530 | 0.011833 |
| 0.011329 | 0.011732 | 0.011302 | 0.017823 | 0.011388 | 0.011427 | 0.011653 |
| 0.011614 | 0.011658 | 0.011374 | 0.011350 | 0.011829 | 0.011682 | 0.011485 |
| 0.011582 | 0.011610 | 0.011216 | 0.011312 | 0.011294 | 0.011356 | 0.011275 |
| 0.011576 | 0.011470 | 0.011468 | 0.011259 | 0.011463 | 0.011497 | 0.011500 |

|          |          |          |          |          |          |          |
|----------|----------|----------|----------|----------|----------|----------|
| 0.011369 | 0.011463 | 0.011463 | 0.011429 | 0.011396 | 0.011396 | 0.011363 |
| 0.011396 | 0.011329 | 0.011362 | 0.011396 | 0.011362 | 0.011295 | 0.011329 |
| 0.011329 | 0.000000 | 0.011295 | 0.011396 | 0.011430 | 0.011463 | 0.011362 |
| 0.011396 | 0.011362 | 0.011698 | 0.011698 | 0.011430 | 0.011464 | 0.011497 |
| 0.011262 | 0.011262 | 0.011295 | 0.011396 | 0.011262 | 0.011497 | 0.011497 |
| 0.011530 | 0.011530 | 0.011463 | 0.011564 | 0.011732 | 0.011565 | 0.011396 |
| 0.011396 | 0.011463 | 0.011497 | 0.011329 | 0.011396 | 0.011362 | 0.011396 |
| 0.011463 | 0.011463 | 0.011497 | 0.011463 | 0.011363 | 0.011564 | 0.011530 |
| 0.011399 | 0.011295 | 0.011396 | 0.011497 | 0.011396 | 0.011530 | 0.011564 |
| 0.011665 | 0.011436 | 0.011598 | 0.011564 | 0.011497 | 0.011597 | 0.011295 |
| 0.011464 | 0.011363 | 0.011329 | 0.011329 | 0.000000 | 0.011295 | 0.011396 |
| 0.011430 | 0.011463 | 0.011362 | 0.011396 | 0.011362 | 0.011698 | 0.011698 |
| 0.011430 | 0.011464 | 0.011530 | 0.011463 | 0.012103 | 0.011525 | 0.011447 |
| 0.011517 | 0.011476 | 0.011587 | 0.011476 | 0.011585 | 0.011509 | 0.011474 |
| 0.012056 | 0.011372 | 0.011506 | 0.011441 | 0.011715 | 0.011571 | 0.011673 |
| 0.012081 | 0.011550 | 0.011398 | 0.011396 | 0.011396 | 0.011429 | 0.011364 |
| 0.011262 | 0.011295 | 0.011430 | 0.011396 | 0.011398 | 0.011530 | 0.011498 |
| 0.011362 | 0.011295 | 0.011329 | 0.011362 | 0.011262 | 0.011329 | 0.011228 |
| 0.011362 | 0.011396 | 0.011295 | 0.011262 | 0.011362 | 0.011295 | 0.011329 |
| 0.011329 | 0.011262 | 0.011329 | 0.011362 | 0.011262 | 0.011463 | 0.011497 |
| 0.011396 | 0.011463 | 0.011396 | 0.011396 | 0.011329 | 0.011732 | 0.011362 |
| 0.011408 | 0.011329 | 0.011564 | 0.011569 | 0.011430 | 0.011429 | 0.011430 |
| 0.011430 | 0.011362 | 0.011329 | 0.011362 | 0.011463 | 0.011463 | 0.011396 |
| 0.011396 | 0.011530 | 0.011698 | 0.011429 | 0.011631 | 0.011631 | 0.011497 |
| 0.011329 | 0.011396 | 0.011430 | 0.011833 | 0.011396 | 0.011430 | 0.011396 |
| 0.011430 | 0.011362 | 0.011362 | 0.011665 | 0.011598 | 0.011631 | 0.011362 |
| 0.011463 | 0.011530 | 0.011396 | 0.011463 | 0.011430 | 0.011295 | 0.011631 |
| 0.011396 | 0.011362 | 0.011362 | 0.011530 | 0.011362 | 0.011463 | 0.011698 |
| 0.011396 | 0.011774 | 0.011765 | 0.011548 | 0.011342 | 0.011468 | 0.011370 |
| 0.011280 | 0.011761 | 0.011271 | 0.011507 | 0.011353 | 0.011467 | 0.011485 |
| 0.011570 | 0.011258 | 0.011450 | 0.011258 | 0.011330 | 0.011529 | 0.011425 |
| 0.011437 | 0.011336 | 0.011412 | 0.011342 | 0.011397 | 0.011530 | 0.011597 |
| 0.011597 | 0.011464 | 0.011567 | 0.011569 | 0.011704 | 0.011696 | 0.011396 |
| 0.011631 | 0.011497 | 0.011362 | 0.011463 | 0.011262 | 0.011497 | 0.011295 |
| 0.011362 | 0.011362 | 0.011329 | 0.011295 | 0.011329 | 0.011295 | 0.011396 |
| 0.011375 | 0.011375 | 0.011368 | 0.011403 | 0.011539 | 0.011504 | 0.011504 |
| 0.011503 | 0.011430 | 0.011245 | 0.011240 | 0.011365 | 0.011535 | 0.011535 |
| 0.011329 | 0.011399 | 0.011632 | 0.011601 | 0.011531 | 0.011565 | 0.011497 |
| 0.011429 | 0.011497 | 0.011497 | 0.011396 | 0.011967 | 0.011564 | 0.011631 |
| 0.011665 | 0.011737 | 0.011367 | 0.011441 | 0.011329 | 0.011530 | 0.011497 |
| 0.011531 | 0.011564 | 0.011564 | 0.011564 | 0.011689 | 0.011698 | 0.011338 |
| 0.011229 | 0.011233 | 0.011333 | 0.011298 | 0.011402 | 0.011210 | 0.011570 |
| 0.011369 | 0.011499 | 0.011251 | 0.011397 | 0.011363 | 0.011437 | 0.011329 |
| 0.011295 | 0.011295 | 0.011362 | 0.011329 | 0.011530 | 0.011497 | 0.011429 |
| 0.011530 | 0.011597 | 0.011329 | 0.011329 | 0.011362 | 0.011362 | 0.011364 |
| 0.011432 | 0.011362 | 0.011362 | 0.011397 | 0.011530 | 0.011597 | 0.011597 |
| 0.011464 | 0.011567 | 0.011569 | 0.011704 | 0.011696 | 0.011396 | 0.011564 |
| 0.011497 | 0.011497 | 0.011331 | 0.011513 | 0.011442 | 0.011469 | 0.011305 |
| 0.011508 | 0.011653 | 0.011483 | 0.011400 | 0.011295 | 0.011497 | 0.011362 |
| 0.011463 | 0.011396 | 0.011295 | 0.011397 | 0.011497 | 0.011499 | 0.011396 |
| 0.011295 | 0.011229 | 0.011362 | 0.011295 | 0.011228 | 0.011332 | 0.011497 |
| 0.011396 | 0.011329 | 0.011362 | 0.011396 | 0.011362 | 0.011295 | 0.011497 |
| 0.011362 | 0.011396 | 0.011396 | 0.011329 | 0.011396 | 0.011631 | 0.011295 |
| 0.011329 | 0.011732 | 0.011329 | 0.011362 | 0.011329 | 0.011698 | 0.011275 |
| 0.011735 | 0.011273 | 0.011361 | 0.011503 | 0.011589 | 0.011491 | 0.011227 |
| 0.011323 | 0.011497 | 0.011597 | 0.011705 | 0.011565 | 0.011669 | 0.011834 |
| 0.011733 | 0.011771 | 0.011732 | 0.011949 | 0.011698 | 0.012573 | 0.011734 |
| 0.012473 | 0.012241 | 0.012375 | 0.012646 | 0.011698 | 0.011396 | 0.011699 |
| 0.012137 | 0.012038 | 0.011665 | 0.011564 | 0.011632 | 0.011632 | 0.011602 |
| 0.011497 | 0.011467 | 0.011564 | 0.011531 | 0.011901 | 0.011967 | 0.011968 |



|          |          |          |           |          |          |          |
|----------|----------|----------|-----------|----------|----------|----------|
| 0.011868 | 0.011968 | 0.012072 | 0.011804  | 0.012138 | 0.012144 | 0.012205 |
| 0.012205 | 0.012239 | 0.012152 | 0.012206  | 0.012207 | 0.011429 | 0.011732 |
| 0.011800 | 0.012304 | 0.011806 | 0.012035  | 0.012508 | 0.011570 | 0.011464 |
| 0.011429 | 0.011429 | 0.011900 | 0.011965  | 0.012045 | 0.011765 | 0.011431 |
| S422     | 0.011597 | 0.011597 | 0.011934  | 0.011698 | 0.011698 | 0.011765 |
| 0.011604 | 0.011536 | 0.011698 | 0.011195  | 0.011262 | 0.011228 | 0.011195 |
| 0.011228 | 0.011396 | 0.011195 | 0.011228  | 0.011295 | 0.011262 | 0.011228 |
| 0.011195 | 0.011228 | 0.011329 | 0.011195  | 0.011228 | 0.011228 | 0.011570 |
| 0.011463 | 0.011228 | 0.011127 | 0.011362  | 0.011295 | 0.011262 | 0.011295 |
| 0.011262 | 0.011362 | 0.011262 | 0.011262  | 0.011295 | 0.011262 | 0.011430 |
| 0.011195 | 0.011262 | 0.011295 | 0.011228  | 0.011329 | 0.011362 | 0.011295 |
| 0.011262 | 0.011430 | 0.011329 | 0.011597  | 0.011262 | 0.011530 | 0.011262 |
| 0.011228 | 0.011329 | 0.011396 | 0.011530  | 0.011631 | 0.011329 | 0.011430 |
| 0.011295 | 0.011362 | 0.011262 | 0.011497  | 0.011732 | 0.011262 | 0.011329 |
| 0.011228 | 0.011329 | 0.011295 | 0.011362  | 0.011295 | 0.011295 | 0.011295 |
| 0.011195 | 0.011228 | 0.011195 | 0.011295  | 0.011262 | 0.011296 | 0.011362 |
| 0.011295 | 0.011262 | 0.011329 | 0.011228  | 0.011362 | 0.011195 | 0.011262 |
| 0.011429 | 0.011362 | 0.011597 | 0.011430  | 0.011262 | 0.011497 | 0.011262 |
| 0.011357 | 0.011583 | 0.011437 | 0.011099  | 0.011135 | 0.011244 | 0.011296 |
| 0.011975 | 0.011365 | 0.011143 | 0.011497  | 0.011497 | 0.011295 | 0.011396 |
| 0.011329 | 0.011295 | 0.011362 | 0.011262  | 0.011362 | 0.011295 | 0.011295 |
| 0.011262 | 0.011362 | 0.011564 | 0.011429  | 0.011329 | 0.011295 | 0.011228 |
| 0.011195 | 0.011195 | 0.011262 | 0.011228  | 0.011429 | 0.011396 | 0.011329 |
| 0.011429 | 0.011497 | 0.011228 | 0.011228  | 0.011262 | 0.011262 | 0.011263 |
| 0.011331 | 0.011262 | 0.011262 | 0.011132  | 0.011205 | 0.011165 | 0.011262 |
| 0.011263 | 0.011198 | 0.011208 | 0.011233  | 0.011162 | 0.011197 | 0.011229 |
| 0.011492 | 0.011267 | 0.011301 | 0.011195  | 0.011199 | 0.011329 | 0.011296 |
| 0.011363 | 0.011296 | 0.011296 | 0.011396  | 0.011329 | 0.011698 | 0.011497 |
| 0.011530 | 0.011396 | 0.011262 | 0.011362  | 0.011161 | 0.011396 | 0.011195 |
| 0.011262 | 0.011262 | 0.011228 | 0.011195  | 0.011228 | 0.011195 | 0.011295 |
| 0.011262 | 0.011362 | 0.011295 | 0.011195  | 0.011296 | 0.011396 | 0.011398 |
| 0.011396 | 0.011295 | 0.011195 | 0.011128  | 0.011262 | 0.011195 | 0.011127 |
| 0.011230 | 0.011396 | 0.011195 | 0.011396  | 0.011161 | 0.011262 | 0.011228 |
| 0.011329 | 0.011228 | 0.011262 | 0.011228  | 0.011262 | 0.011127 | 0.011262 |
| 0.011295 | 0.011228 | 0.011295 | 0.011228  | 0.011262 | 0.011295 | 0.011530 |
| 0.011631 | 0.011564 | 0.011631 | 0.011397  | 0.011631 | 0.011262 | 0.011228 |
| 0.011263 | 0.011545 | 0.011335 | 0.011163  | 0.011637 | 0.011129 | 0.011257 |
| 0.011637 | 0.011536 | 0.011429 | 0.011631  | 0.011333 | 0.011497 | 0.011463 |
| 0.011396 | 0.011564 | 0.011416 | 0.011225  | 0.011312 | 0.011295 | 0.011365 |
| 0.011463 | 0.011364 | 0.011500 | 0.011568  | 0.011497 | 0.011564 | 0.011670 |
| 0.011399 | 0.011569 | 0.011500 | 0.011432  | 0.011700 | 0.011161 | 0.011364 |
| 0.011329 | 0.011262 | 0.011161 | 0.011161  | 0.011228 | 0.011228 | 0.011295 |
| 0.011228 | 0.011295 | 0.011195 | 0.011295  | 0.011228 | 0.011228 | 0.011295 |
| 0.011228 | 0.011665 | 0.011564 | 0.011597  | 0.011127 | 0.011228 | 0.011262 |
| 0.011262 | 0.011228 | 0.011295 | 0.011329  | 0.011195 | 0.011195 | 0.011195 |
| 0.011732 | 0.011362 | 0.011362 | 0.011161  | 0.011262 | 0.011430 | 0.011195 |
| 0.011195 | 0.011262 | 0.011228 | 0.011396  | 0.011195 | 0.011329 | 0.011463 |
| 0.011396 | 0.011228 | 0.011228 | 0.011161  | 0.011161 | 0.011329 | 0.011262 |
| 0.011161 | 0.011262 | 0.011127 | 0.011161  | 0.011295 | 0.011430 | 0.011195 |
| 0.011161 | 0.011295 | 0.011228 | 0.011127  | 0.011463 | 0.011127 | 0.011295 |
| 0.011368 | 0.011195 | 0.011497 | 0.011329  | 0.011362 | 0.011228 | 0.011329 |
| 0.011195 | 0.011530 | 0.011127 | 0.011396  | 0.011195 | 0.011195 | 0.011127 |
| 0.011362 | 0.011564 | 0.011262 | 0.011329  | 0.011161 | 0.011564 | 0.011195 |
| 0.011195 | 0.011195 | 0.011228 | 0.011329  | 0.011228 | 0.011329 | 0.011396 |
| 0.011396 | 0.011362 | 0.011262 | 0.011362  | 0.011329 | 0.011195 | 0.011161 |
| 0.011195 | 0.011195 | 0.011262 | 0.011195  | 0.011161 | 0.011329 | 0.011195 |
| 0.011228 | 0.011228 | 0.011362 | 0.011396  | 0.011295 | 0.011228 | 0.011228 |
| 0.011295 | 0.011228 | 0.011329 | 0.011195  | 0.011329 | 0.011429 | 0.011732 |
| 0.011228 | 0.011631 | 0.011198 | 0.0117710 | 0.011126 | 0.011305 | 0.011548 |
| 0.011510 | 0.011553 | 0.011217 | 0.011176  | 0.011609 | 0.011578 | 0.011242 |

|          |          |          |          |          |          |          |
|----------|----------|----------|----------|----------|----------|----------|
| 0.011440 | 0.011426 | 0.000000 | 0.011186 | 0.011177 | 0.011208 | 0.011146 |
| 0.011389 | 0.011358 | 0.011357 | 0.011193 | 0.011362 | 0.011396 | 0.011398 |
| 0.011266 | 0.011362 | 0.011362 | 0.011329 | 0.011295 | 0.011295 | 0.011262 |
| 0.011295 | 0.011228 | 0.011262 | 0.011295 | 0.011262 | 0.011195 | 0.011228 |
| 0.011228 | 0.011295 | 0.000000 | 0.011295 | 0.011329 | 0.011362 | 0.011262 |
| 0.011295 | 0.011262 | 0.011597 | 0.011597 | 0.011329 | 0.011363 | 0.011396 |
| 0.011161 | 0.011161 | 0.011195 | 0.011295 | 0.011161 | 0.011396 | 0.011396 |
| 0.011429 | 0.011429 | 0.011362 | 0.011463 | 0.011631 | 0.011464 | 0.011295 |
| 0.011295 | 0.011362 | 0.011396 | 0.011228 | 0.011295 | 0.011262 | 0.011295 |
| 0.011363 | 0.011362 | 0.011396 | 0.011363 | 0.011262 | 0.011463 | 0.011429 |
| 0.011297 | 0.011195 | 0.011295 | 0.011396 | 0.011295 | 0.011430 | 0.011463 |
| 0.011631 | 0.011333 | 0.011497 | 0.011463 | 0.011396 | 0.011564 | 0.011195 |
| 0.011363 | 0.011262 | 0.011228 | 0.011228 | 0.011295 | 0.000000 | 0.011295 |
| 0.011329 | 0.011362 | 0.011262 | 0.011295 | 0.011262 | 0.011597 | 0.011597 |
| 0.011329 | 0.011363 | 0.011429 | 0.011362 | 0.012002 | 0.011417 | 0.011342 |
| 0.011412 | 0.011372 | 0.011482 | 0.011372 | 0.011480 | 0.011405 | 0.011371 |
| 0.011953 | 0.011268 | 0.011403 | 0.011337 | 0.011611 | 0.011468 | 0.011571 |
| 0.011978 | 0.011437 | 0.011297 | 0.011295 | 0.011295 | 0.011329 | 0.011263 |
| 0.011161 | 0.011195 | 0.011329 | 0.011295 | 0.011297 | 0.011429 | 0.011397 |
| 0.011262 | 0.011195 | 0.011228 | 0.011262 | 0.011161 | 0.011228 | 0.011127 |
| 0.011262 | 0.011295 | 0.011195 | 0.011161 | 0.011262 | 0.011195 | 0.011228 |
| 0.011228 | 0.011161 | 0.011228 | 0.011262 | 0.011161 | 0.011362 | 0.011396 |
| 0.011295 | 0.011362 | 0.011295 | 0.011295 | 0.011228 | 0.011631 | 0.011262 |
| 0.011304 | 0.011228 | 0.011463 | 0.011467 | 0.011329 | 0.011329 | 0.011329 |
| 0.011329 | 0.011262 | 0.011228 | 0.011262 | 0.011362 | 0.011362 | 0.011295 |
| 0.011295 | 0.011430 | 0.011597 | 0.011329 | 0.011530 | 0.011530 | 0.011396 |
| 0.011228 | 0.011295 | 0.011329 | 0.011732 | 0.011295 | 0.011329 | 0.011295 |
| 0.011329 | 0.011195 | 0.011195 | 0.011564 | 0.011497 | 0.011530 | 0.011262 |
| 0.011362 | 0.011430 | 0.011295 | 0.011362 | 0.011329 | 0.011195 | 0.011530 |
| 0.011295 | 0.011262 | 0.011195 | 0.011430 | 0.011262 | 0.011362 | 0.011598 |
| 0.011295 | 0.011672 | 0.011665 | 0.011385 | 0.011117 | 0.011366 | 0.011215 |
| 0.011115 | 0.011605 | 0.011166 | 0.011328 | 0.011158 | 0.011264 | 0.011273 |
| 0.011366 | 0.000000 | 0.011227 | 0.000000 | 0.011114 | 0.011261 | 0.011303 |
| 0.011324 | 0.011218 | 0.011307 | 0.011236 | 0.011296 | 0.011429 | 0.011497 |
| 0.011497 | 0.011363 | 0.011466 | 0.011467 | 0.011602 | 0.011626 | 0.011295 |
| 0.011530 | 0.011396 | 0.011262 | 0.011362 | 0.011161 | 0.011396 | 0.011195 |
| 0.011262 | 0.011262 | 0.011228 | 0.011195 | 0.011228 | 0.011195 | 0.011295 |
| 0.011270 | 0.011270 | 0.011266 | 0.011300 | 0.011437 | 0.011402 | 0.011402 |
| 0.011401 | 0.011329 | 0.011134 | 0.011132 | 0.011263 | 0.011433 | 0.011433 |
| 0.011228 | 0.011297 | 0.011531 | 0.011500 | 0.011430 | 0.011464 | 0.011396 |
| 0.011329 | 0.011396 | 0.011396 | 0.011295 | 0.011866 | 0.011463 | 0.011530 |
| 0.011564 | 0.011630 | 0.011265 | 0.011337 | 0.011228 | 0.011430 | 0.011396 |
| 0.011430 | 0.011463 | 0.011463 | 0.011463 | 0.011610 | 0.011597 | 0.011234 |
| 0.011128 | 0.011130 | 0.011231 | 0.011196 | 0.011299 | 0.011135 | 0.011468 |
| 0.011266 | 0.011411 | 0.011156 | 0.011285 | 0.011262 | 0.011334 | 0.011228 |
| 0.011195 | 0.011195 | 0.011262 | 0.011228 | 0.011429 | 0.011396 | 0.011329 |
| 0.011429 | 0.011497 | 0.011228 | 0.011228 | 0.011262 | 0.011262 | 0.011263 |
| 0.011331 | 0.011262 | 0.011262 | 0.011296 | 0.011429 | 0.011497 | 0.011497 |
| 0.011363 | 0.011466 | 0.011467 | 0.011602 | 0.011626 | 0.011295 | 0.011463 |
| 0.011396 | 0.011396 | 0.011229 | 0.011408 | 0.011338 | 0.011367 | 0.011235 |
| 0.011405 | 0.011607 | 0.011399 | 0.011298 | 0.011195 | 0.011396 | 0.011262 |
| 0.011362 | 0.011295 | 0.011195 | 0.011296 | 0.011396 | 0.011398 | 0.011295 |
| 0.011195 | 0.011128 | 0.011262 | 0.011195 | 0.011127 | 0.011230 | 0.011396 |
| 0.011295 | 0.011228 | 0.011262 | 0.011295 | 0.011262 | 0.011195 | 0.011396 |
| 0.011262 | 0.011295 | 0.011295 | 0.011228 | 0.011295 | 0.011530 | 0.011195 |
| 0.011228 | 0.011631 | 0.011228 | 0.011262 | 0.011228 | 0.011597 | 0.011146 |
| 0.011566 | 0.011145 | 0.011161 | 0.011382 | 0.011467 | 0.011383 | 0.011102 |
| 0.011113 | 0.011396 | 0.011497 | 0.011603 | 0.011464 | 0.011568 | 0.011733 |
| 0.011632 | 0.011669 | 0.011631 | 0.011846 | 0.011597 | 0.012472 | 0.011633 |
| 0.012372 | 0.012139 | 0.012273 | 0.012545 | 0.011597 | 0.011295 | 0.011598 |

|          |          |          |          |          |          |          |
|----------|----------|----------|----------|----------|----------|----------|
| 0.012036 | 0.011903 | 0.011564 | 0.011463 | 0.011531 | 0.011531 | 0.011500 |
| 0.011396 | 0.011365 | 0.011463 | 0.011430 | 0.011800 | 0.011866 | 0.011867 |
| 0.011767 | 0.011867 | 0.011970 | 0.011737 | 0.012036 | 0.012042 | 0.012104 |
| 0.012104 | 0.012138 | 0.012084 | 0.012104 | 0.012105 | 0.011329 | 0.011631 |
| 0.011699 | 0.012203 | 0.011704 | 0.011934 | 0.012406 | 0.011468 | 0.011363 |
| 0.011329 | 0.011329 | 0.011799 | 0.011842 | 0.011940 | 0.011665 | 0.011330 |
| S423     | 0.011698 | 0.011698 | 0.012035 | 0.011799 | 0.011799 | 0.011866 |
| 0.011706 | 0.011638 | 0.011799 | 0.011295 | 0.011362 | 0.011330 | 0.011295 |
| 0.011329 | 0.011497 | 0.011295 | 0.011329 | 0.011396 | 0.011362 | 0.011329 |
| 0.011295 | 0.011329 | 0.011430 | 0.011296 | 0.011329 | 0.011329 | 0.011672 |
| 0.011564 | 0.011329 | 0.011228 | 0.011463 | 0.011396 | 0.011363 | 0.011396 |
| 0.011362 | 0.011463 | 0.011362 | 0.011363 | 0.011396 | 0.011362 | 0.011530 |
| 0.011295 | 0.011362 | 0.011396 | 0.011329 | 0.011430 | 0.011463 | 0.011396 |
| 0.011362 | 0.011531 | 0.011430 | 0.011698 | 0.011362 | 0.011631 | 0.011362 |
| 0.011329 | 0.011430 | 0.011497 | 0.011631 | 0.011732 | 0.011430 | 0.011530 |
| 0.011396 | 0.011463 | 0.011161 | 0.011597 | 0.011833 | 0.011362 | 0.011430 |
| 0.011329 | 0.011430 | 0.011396 | 0.011463 | 0.011396 | 0.011396 | 0.011396 |
| 0.011295 | 0.011329 | 0.011295 | 0.011396 | 0.011362 | 0.011397 | 0.011463 |
| 0.011396 | 0.011362 | 0.011430 | 0.011329 | 0.011463 | 0.011295 | 0.011362 |
| 0.011530 | 0.011463 | 0.011698 | 0.011531 | 0.011363 | 0.011598 | 0.011362 |
| 0.011505 | 0.011733 | 0.011551 | 0.011256 | 0.011247 | 0.011355 | 0.011454 |
| 0.012085 | 0.011569 | 0.011266 | 0.011597 | 0.011598 | 0.011396 | 0.011497 |
| 0.011430 | 0.011396 | 0.011463 | 0.011362 | 0.011463 | 0.011396 | 0.011396 |
| 0.011362 | 0.011463 | 0.011665 | 0.011530 | 0.011430 | 0.011396 | 0.011329 |
| 0.011295 | 0.011295 | 0.011363 | 0.011329 | 0.011530 | 0.011497 | 0.011430 |
| 0.011530 | 0.011597 | 0.011329 | 0.011329 | 0.011362 | 0.011362 | 0.011364 |
| 0.011432 | 0.011362 | 0.011362 | 0.011240 | 0.011313 | 0.011271 | 0.011363 |
| 0.011365 | 0.011301 | 0.011319 | 0.011336 | 0.011264 | 0.011300 | 0.011331 |
| 0.011600 | 0.011371 | 0.011405 | 0.011296 | 0.011302 | 0.011430 | 0.011397 |
| 0.011464 | 0.011397 | 0.011397 | 0.011497 | 0.011430 | 0.011799 | 0.011598 |
| 0.011631 | 0.011497 | 0.011362 | 0.011463 | 0.011262 | 0.011497 | 0.011295 |
| 0.011363 | 0.011362 | 0.011329 | 0.011295 | 0.011329 | 0.011295 | 0.011396 |
| 0.011363 | 0.011463 | 0.011396 | 0.011295 | 0.011397 | 0.011497 | 0.011500 |
| 0.011497 | 0.011396 | 0.011295 | 0.011229 | 0.011362 | 0.011295 | 0.011228 |
| 0.011298 | 0.011497 | 0.011295 | 0.011497 | 0.011262 | 0.011363 | 0.011329 |
| 0.011430 | 0.011329 | 0.011363 | 0.011329 | 0.011362 | 0.011228 | 0.011362 |
| 0.011396 | 0.011329 | 0.011396 | 0.011329 | 0.011362 | 0.011396 | 0.011631 |
| 0.011732 | 0.011665 | 0.011732 | 0.011465 | 0.011732 | 0.011362 | 0.011329 |
| 0.011364 | 0.011626 | 0.011518 | 0.011232 | 0.011739 | 0.011231 | 0.011296 |
| 0.011740 | 0.011604 | 0.011530 | 0.011732 | 0.011436 | 0.011598 | 0.011564 |
| 0.011497 | 0.011665 | 0.011522 | 0.011390 | 0.011438 | 0.011396 | 0.011466 |
| 0.011564 | 0.011398 | 0.011601 | 0.011670 | 0.011598 | 0.011665 | 0.011772 |
| 0.011500 | 0.011672 | 0.011602 | 0.011534 | 0.011801 | 0.011262 | 0.011465 |
| 0.011430 | 0.011362 | 0.011262 | 0.011262 | 0.011262 | 0.011329 | 0.011396 |
| 0.011329 | 0.011396 | 0.011295 | 0.011396 | 0.011329 | 0.011329 | 0.011396 |
| 0.011329 | 0.011765 | 0.011665 | 0.011698 | 0.011228 | 0.011329 | 0.011295 |
| 0.011363 | 0.011329 | 0.011396 | 0.011430 | 0.011295 | 0.011295 | 0.011295 |
| 0.011833 | 0.011463 | 0.011463 | 0.011262 | 0.011362 | 0.011531 | 0.011295 |
| 0.011295 | 0.011362 | 0.011329 | 0.011497 | 0.011295 | 0.011430 | 0.011564 |
| 0.011497 | 0.011329 | 0.011329 | 0.011262 | 0.011262 | 0.011430 | 0.011362 |
| 0.011262 | 0.011362 | 0.011228 | 0.011262 | 0.011396 | 0.011531 | 0.011295 |
| 0.011262 | 0.011396 | 0.011329 | 0.011228 | 0.011564 | 0.011228 | 0.011396 |
| 0.011471 | 0.011295 | 0.011598 | 0.011430 | 0.011463 | 0.011329 | 0.011430 |
| 0.011295 | 0.011631 | 0.011228 | 0.011497 | 0.011295 | 0.011295 | 0.011228 |
| 0.011463 | 0.011631 | 0.011161 | 0.011430 | 0.011262 | 0.011665 | 0.011295 |
| 0.011295 | 0.011295 | 0.011329 | 0.011430 | 0.011329 | 0.011430 | 0.011497 |
| 0.011497 | 0.011463 | 0.011362 | 0.011463 | 0.011430 | 0.011295 | 0.011262 |
| 0.011295 | 0.011295 | 0.011161 | 0.011295 | 0.011262 | 0.011430 | 0.011295 |
| 0.011329 | 0.011329 | 0.011463 | 0.011497 | 0.011396 | 0.011329 | 0.011329 |
| 0.011396 | 0.011329 | 0.011430 | 0.011295 | 0.011430 | 0.011530 | 0.011833 |

|          |          |          |          |          |          |          |
|----------|----------|----------|----------|----------|----------|----------|
| 0.011329 | 0.011732 | 0.011302 | 0.017823 | 0.011322 | 0.011427 | 0.011653 |
| 0.011614 | 0.011658 | 0.011374 | 0.011292 | 0.011774 | 0.011682 | 0.011364 |
| 0.011535 | 0.011549 | 0.011216 | 0.011312 | 0.011294 | 0.011357 | 0.011318 |
| 0.011576 | 0.011470 | 0.011468 | 0.011325 | 0.011463 | 0.011497 | 0.011500 |
| 0.011370 | 0.011463 | 0.011463 | 0.011430 | 0.011396 | 0.011396 | 0.011363 |
| 0.011396 | 0.011329 | 0.011362 | 0.011396 | 0.011363 | 0.011295 | 0.011329 |
| 0.011329 | 0.011396 | 0.011295 | 0.000000 | 0.011430 | 0.011463 | 0.011362 |
| 0.011396 | 0.011363 | 0.011698 | 0.011698 | 0.011430 | 0.011464 | 0.011497 |
| 0.011262 | 0.011262 | 0.011295 | 0.011396 | 0.011262 | 0.011497 | 0.011497 |
| 0.011530 | 0.011530 | 0.011463 | 0.011564 | 0.011732 | 0.011565 | 0.011396 |
| 0.011396 | 0.011463 | 0.011497 | 0.011329 | 0.011396 | 0.011362 | 0.011396 |
| 0.011463 | 0.011463 | 0.011497 | 0.011463 | 0.011363 | 0.011564 | 0.011530 |
| 0.011399 | 0.011295 | 0.011396 | 0.011497 | 0.011396 | 0.011531 | 0.011564 |
| 0.011732 | 0.011436 | 0.011598 | 0.011564 | 0.011497 | 0.011665 | 0.011296 |
| 0.011465 | 0.011363 | 0.011329 | 0.011329 | 0.011396 | 0.011295 | 0.000000 |
| 0.011430 | 0.011463 | 0.011362 | 0.011396 | 0.011363 | 0.011698 | 0.011698 |
| 0.011430 | 0.011464 | 0.011530 | 0.011463 | 0.012104 | 0.011525 | 0.011447 |
| 0.011517 | 0.011477 | 0.011588 | 0.011476 | 0.011585 | 0.011509 | 0.011474 |
| 0.012057 | 0.011372 | 0.011506 | 0.011441 | 0.011715 | 0.011571 | 0.011673 |
| 0.012081 | 0.011550 | 0.011398 | 0.011396 | 0.011396 | 0.011430 | 0.011364 |
| 0.011262 | 0.011295 | 0.011430 | 0.011396 | 0.011398 | 0.011530 | 0.011498 |
| 0.011362 | 0.011295 | 0.011329 | 0.011362 | 0.011262 | 0.011329 | 0.011228 |
| 0.011362 | 0.011396 | 0.011295 | 0.011262 | 0.011362 | 0.011295 | 0.011329 |
| 0.011329 | 0.011262 | 0.011329 | 0.011363 | 0.011262 | 0.011463 | 0.011497 |
| 0.011396 | 0.011463 | 0.011396 | 0.011396 | 0.011329 | 0.011732 | 0.011362 |
| 0.011408 | 0.011329 | 0.011564 | 0.011569 | 0.011430 | 0.011430 | 0.011430 |
| 0.011430 | 0.011363 | 0.011329 | 0.011363 | 0.011463 | 0.011463 | 0.011396 |
| 0.011396 | 0.011530 | 0.011698 | 0.011430 | 0.011631 | 0.011631 | 0.011497 |
| 0.011329 | 0.011396 | 0.011430 | 0.011833 | 0.011396 | 0.011430 | 0.011396 |
| 0.011430 | 0.011362 | 0.011362 | 0.011665 | 0.011598 | 0.011631 | 0.011363 |
| 0.011463 | 0.011530 | 0.011396 | 0.011463 | 0.011430 | 0.011295 | 0.011631 |
| 0.011396 | 0.011362 | 0.011362 | 0.011530 | 0.011363 | 0.011463 | 0.011699 |
| 0.011396 | 0.011774 | 0.011766 | 0.011548 | 0.011286 | 0.011468 | 0.011267 |
| 0.011280 | 0.011761 | 0.011271 | 0.011507 | 0.011353 | 0.011417 | 0.011432 |
| 0.011570 | 0.011258 | 0.011394 | 0.011258 | 0.011276 | 0.011395 | 0.011425 |
| 0.011437 | 0.011336 | 0.011413 | 0.011342 | 0.011397 | 0.011530 | 0.011598 |
| 0.011597 | 0.011464 | 0.011567 | 0.011569 | 0.011704 | 0.011696 | 0.011396 |
| 0.011631 | 0.011497 | 0.011362 | 0.011463 | 0.011262 | 0.011497 | 0.011295 |
| 0.011363 | 0.011362 | 0.011329 | 0.011295 | 0.011329 | 0.011295 | 0.011396 |
| 0.011375 | 0.011375 | 0.011369 | 0.011403 | 0.011539 | 0.011504 | 0.011504 |
| 0.011503 | 0.011363 | 0.011245 | 0.011240 | 0.011365 | 0.011535 | 0.011535 |
| 0.011329 | 0.011399 | 0.011633 | 0.011601 | 0.011531 | 0.011565 | 0.011497 |
| 0.011430 | 0.011497 | 0.011497 | 0.011396 | 0.011968 | 0.011564 | 0.011631 |
| 0.011665 | 0.011737 | 0.011367 | 0.011441 | 0.011329 | 0.011530 | 0.011497 |
| 0.011531 | 0.011564 | 0.011564 | 0.011564 | 0.011650 | 0.011698 | 0.011338 |
| 0.011229 | 0.011233 | 0.011333 | 0.011298 | 0.011402 | 0.011247 | 0.011570 |
| 0.011369 | 0.011543 | 0.011299 | 0.011397 | 0.011363 | 0.011437 | 0.011329 |
| 0.011295 | 0.011295 | 0.011363 | 0.011329 | 0.011530 | 0.011497 | 0.011430 |
| 0.011530 | 0.011597 | 0.011329 | 0.011329 | 0.011362 | 0.011362 | 0.011364 |
| 0.011432 | 0.011362 | 0.011362 | 0.011397 | 0.011530 | 0.011598 | 0.011597 |
| 0.011464 | 0.011567 | 0.011569 | 0.011704 | 0.011696 | 0.011396 | 0.011564 |
| 0.011497 | 0.011497 | 0.011331 | 0.011513 | 0.011442 | 0.011469 | 0.011305 |
| 0.011473 | 0.011653 | 0.011526 | 0.011400 | 0.011295 | 0.011497 | 0.011363 |
| 0.011463 | 0.011396 | 0.011295 | 0.011397 | 0.011497 | 0.011500 | 0.011396 |
| 0.011295 | 0.011229 | 0.011362 | 0.011295 | 0.011228 | 0.011298 | 0.011497 |
| 0.011396 | 0.011329 | 0.011362 | 0.011396 | 0.011363 | 0.011295 | 0.011497 |
| 0.011362 | 0.011396 | 0.011396 | 0.011329 | 0.011396 | 0.011631 | 0.011295 |
| 0.011329 | 0.011732 | 0.011329 | 0.011362 | 0.011329 | 0.011698 | 0.011275 |
| 0.011735 | 0.011230 | 0.011311 | 0.011503 | 0.011589 | 0.011491 | 0.011228 |
| 0.011270 | 0.011497 | 0.011598 | 0.011705 | 0.011565 | 0.011669 | 0.011834 |

|          |          |          |          |          |          |          |
|----------|----------|----------|----------|----------|----------|----------|
| 0.011733 | 0.011771 | 0.011732 | 0.011949 | 0.011698 | 0.012573 | 0.011734 |
| 0.012473 | 0.012241 | 0.012375 | 0.012647 | 0.011698 | 0.011396 | 0.011699 |
| 0.012137 | 0.012038 | 0.011665 | 0.011564 | 0.011632 | 0.011632 | 0.011602 |
| 0.011497 | 0.011467 | 0.011564 | 0.011531 | 0.011901 | 0.011968 | 0.011968 |
| 0.011868 | 0.011968 | 0.012072 | 0.011804 | 0.012138 | 0.012144 | 0.012205 |
| 0.012206 | 0.012239 | 0.012152 | 0.012206 | 0.012207 | 0.011430 | 0.011732 |
| 0.011800 | 0.012304 | 0.011806 | 0.012035 | 0.012508 | 0.011570 | 0.011464 |
| 0.011430 | 0.011430 | 0.011901 | 0.011965 | 0.012046 | 0.011698 | 0.011431 |
| S424     | 0.011732 | 0.011732 | 0.012068 | 0.011833 | 0.011833 | 0.011900 |
| 0.011740 | 0.011672 | 0.011833 | 0.011329 | 0.011396 | 0.011363 | 0.011329 |
| 0.011362 | 0.011530 | 0.011329 | 0.011362 | 0.011430 | 0.011396 | 0.011362 |
| 0.011329 | 0.011362 | 0.011463 | 0.011329 | 0.011363 | 0.011362 | 0.011706 |
| 0.011597 | 0.011362 | 0.011262 | 0.011497 | 0.011430 | 0.011396 | 0.011430 |
| 0.011396 | 0.011497 | 0.011396 | 0.011396 | 0.011429 | 0.011396 | 0.011564 |
| 0.011329 | 0.011396 | 0.011430 | 0.011362 | 0.011463 | 0.011497 | 0.011430 |
| 0.011396 | 0.011564 | 0.011463 | 0.011732 | 0.011396 | 0.011665 | 0.011396 |
| 0.011362 | 0.011463 | 0.011530 | 0.011665 | 0.011765 | 0.011463 | 0.011564 |
| 0.011429 | 0.011497 | 0.011396 | 0.011631 | 0.011866 | 0.011396 | 0.011463 |
| 0.011362 | 0.011463 | 0.011430 | 0.011497 | 0.011429 | 0.011430 | 0.011430 |
| 0.011329 | 0.011362 | 0.011329 | 0.011430 | 0.011396 | 0.011430 | 0.011497 |
| 0.011430 | 0.011396 | 0.011463 | 0.011362 | 0.011497 | 0.011329 | 0.011396 |
| 0.011564 | 0.011497 | 0.011732 | 0.011564 | 0.011396 | 0.011631 | 0.011396 |
| 0.011579 | 0.011807 | 0.011626 | 0.011334 | 0.011321 | 0.011428 | 0.011533 |
| 0.012158 | 0.011620 | 0.011348 | 0.011631 | 0.011631 | 0.011429 | 0.011530 |
| 0.011463 | 0.011429 | 0.011497 | 0.011396 | 0.011497 | 0.011430 | 0.011429 |
| 0.011396 | 0.011497 | 0.011698 | 0.011564 | 0.011463 | 0.011362 | 0.011362 |
| 0.011329 | 0.011329 | 0.011396 | 0.011362 | 0.011564 | 0.011530 | 0.011463 |
| 0.011564 | 0.011631 | 0.011362 | 0.011362 | 0.011396 | 0.011396 | 0.011398 |
| 0.011466 | 0.011396 | 0.011396 | 0.011240 | 0.011349 | 0.011306 | 0.011396 |
| 0.011399 | 0.011335 | 0.011392 | 0.011371 | 0.011298 | 0.011334 | 0.011364 |
| 0.011600 | 0.011370 | 0.011439 | 0.011329 | 0.011337 | 0.011464 | 0.011430 |
| 0.011497 | 0.011431 | 0.011430 | 0.011530 | 0.011463 | 0.011833 | 0.011631 |
| 0.011665 | 0.011530 | 0.011396 | 0.011497 | 0.011295 | 0.011530 | 0.011329 |
| 0.011396 | 0.011396 | 0.011362 | 0.011329 | 0.011362 | 0.011329 | 0.011430 |
| 0.011396 | 0.011497 | 0.011430 | 0.011329 | 0.011431 | 0.011530 | 0.011533 |
| 0.011530 | 0.011430 | 0.011329 | 0.011263 | 0.011396 | 0.011329 | 0.011262 |
| 0.011332 | 0.011530 | 0.011329 | 0.011530 | 0.011295 | 0.011396 | 0.011362 |
| 0.011463 | 0.011362 | 0.011396 | 0.011362 | 0.011396 | 0.011262 | 0.011396 |
| 0.011430 | 0.011362 | 0.011430 | 0.011362 | 0.011396 | 0.011430 | 0.011665 |
| 0.011765 | 0.011698 | 0.011765 | 0.011532 | 0.011766 | 0.011396 | 0.011362 |
| 0.011398 | 0.011667 | 0.011472 | 0.011300 | 0.011773 | 0.011265 | 0.011414 |
| 0.011773 | 0.011672 | 0.011564 | 0.011766 | 0.011470 | 0.011631 | 0.011598 |
| 0.011530 | 0.011698 | 0.011558 | 0.011390 | 0.011438 | 0.011430 | 0.011500 |
| 0.011598 | 0.011499 | 0.011635 | 0.011703 | 0.011631 | 0.011698 | 0.011806 |
| 0.011534 | 0.011705 | 0.011636 | 0.011568 | 0.011834 | 0.011295 | 0.011498 |
| 0.011463 | 0.011396 | 0.011295 | 0.011295 | 0.011362 | 0.011362 | 0.011429 |
| 0.011362 | 0.011430 | 0.011329 | 0.011430 | 0.011362 | 0.011362 | 0.011429 |
| 0.011362 | 0.011799 | 0.011698 | 0.011732 | 0.011262 | 0.011362 | 0.011396 |
| 0.011396 | 0.011362 | 0.011430 | 0.011463 | 0.011329 | 0.011329 | 0.011329 |
| 0.011866 | 0.011497 | 0.011497 | 0.011295 | 0.011396 | 0.011564 | 0.011329 |
| 0.011329 | 0.011396 | 0.011362 | 0.011530 | 0.011329 | 0.011463 | 0.011597 |
| 0.011530 | 0.011362 | 0.011362 | 0.011295 | 0.011295 | 0.011463 | 0.011396 |
| 0.011295 | 0.011396 | 0.011262 | 0.011295 | 0.011430 | 0.011564 | 0.011329 |
| 0.011296 | 0.011430 | 0.011363 | 0.011262 | 0.011597 | 0.011262 | 0.011430 |
| 0.011505 | 0.011329 | 0.011631 | 0.011463 | 0.011497 | 0.011362 | 0.011463 |
| 0.011329 | 0.011665 | 0.011262 | 0.011530 | 0.011329 | 0.011329 | 0.011262 |
| 0.011497 | 0.011699 | 0.011396 | 0.011463 | 0.011295 | 0.011698 | 0.011329 |
| 0.011329 | 0.011329 | 0.011362 | 0.011463 | 0.011362 | 0.011463 | 0.011530 |
| 0.011530 | 0.011497 | 0.011396 | 0.011497 | 0.011463 | 0.011329 | 0.011295 |
| 0.011329 | 0.011329 | 0.011396 | 0.011329 | 0.011295 | 0.011463 | 0.011329 |

|          |          |          |          |          |          |          |
|----------|----------|----------|----------|----------|----------|----------|
| 0.011362 | 0.011362 | 0.011497 | 0.011530 | 0.011430 | 0.011362 | 0.011362 |
| 0.011430 | 0.011362 | 0.011463 | 0.011329 | 0.011463 | 0.011564 | 0.011866 |
| 0.011362 | 0.011766 | 0.011371 | 0.017861 | 0.011322 | 0.011488 | 0.011723 |
| 0.011683 | 0.011729 | 0.011427 | 0.011350 | 0.011774 | 0.011751 | 0.011425 |
| 0.011629 | 0.011610 | 0.011294 | 0.011353 | 0.011372 | 0.011356 | 0.011404 |
| 0.011670 | 0.011544 | 0.011542 | 0.011391 | 0.011497 | 0.011530 | 0.011534 |
| 0.011404 | 0.011497 | 0.011497 | 0.011463 | 0.011430 | 0.011430 | 0.011396 |
| 0.011430 | 0.011362 | 0.011396 | 0.011430 | 0.011396 | 0.011329 | 0.011362 |
| 0.011362 | 0.011430 | 0.011329 | 0.011430 | 0.000000 | 0.011497 | 0.011396 |
| 0.011430 | 0.011396 | 0.011732 | 0.011732 | 0.011463 | 0.011497 | 0.011530 |
| 0.011295 | 0.011295 | 0.011329 | 0.011430 | 0.011295 | 0.011530 | 0.011530 |
| 0.011564 | 0.011564 | 0.011497 | 0.011597 | 0.011765 | 0.011599 | 0.011430 |
| 0.011430 | 0.011497 | 0.011530 | 0.011362 | 0.011430 | 0.011396 | 0.011430 |
| 0.011497 | 0.011497 | 0.011530 | 0.011497 | 0.011397 | 0.011597 | 0.011564 |
| 0.011433 | 0.011329 | 0.011429 | 0.011530 | 0.011430 | 0.011564 | 0.011597 |
| 0.011766 | 0.011470 | 0.011631 | 0.011598 | 0.011530 | 0.011698 | 0.011329 |
| 0.011498 | 0.011396 | 0.011362 | 0.011362 | 0.011430 | 0.011329 | 0.011430 |
| 0.000000 | 0.011497 | 0.011396 | 0.011430 | 0.011396 | 0.011732 | 0.011732 |
| 0.011463 | 0.011497 | 0.011564 | 0.011497 | 0.012137 | 0.011560 | 0.011482 |
| 0.011552 | 0.011511 | 0.011623 | 0.011511 | 0.011620 | 0.011543 | 0.011509 |
| 0.012091 | 0.011406 | 0.011540 | 0.011475 | 0.011749 | 0.011605 | 0.011707 |
| 0.012115 | 0.011588 | 0.011432 | 0.011429 | 0.011429 | 0.011463 | 0.011398 |
| 0.011295 | 0.011329 | 0.011463 | 0.011429 | 0.011432 | 0.011564 | 0.011532 |
| 0.011396 | 0.011329 | 0.011362 | 0.011396 | 0.011295 | 0.011362 | 0.011262 |
| 0.011396 | 0.011430 | 0.011329 | 0.011295 | 0.011396 | 0.011329 | 0.011362 |
| 0.011362 | 0.011295 | 0.011362 | 0.011396 | 0.011295 | 0.011497 | 0.011530 |
| 0.011430 | 0.011497 | 0.011430 | 0.011430 | 0.011362 | 0.011765 | 0.011396 |
| 0.011443 | 0.011362 | 0.011598 | 0.011603 | 0.011463 | 0.011463 | 0.011463 |
| 0.011463 | 0.011396 | 0.011362 | 0.011396 | 0.011497 | 0.011497 | 0.011430 |
| 0.011362 | 0.011564 | 0.011732 | 0.011463 | 0.011665 | 0.011665 | 0.011530 |
| 0.011362 | 0.011430 | 0.011463 | 0.011866 | 0.011430 | 0.011463 | 0.011430 |
| 0.011463 | 0.011396 | 0.011396 | 0.011699 | 0.011631 | 0.011665 | 0.011396 |
| 0.011497 | 0.011564 | 0.011430 | 0.011497 | 0.011463 | 0.011329 | 0.011665 |
| 0.011429 | 0.011396 | 0.011396 | 0.011564 | 0.011396 | 0.011497 | 0.011732 |
| 0.011429 | 0.011808 | 0.011799 | 0.011629 | 0.011286 | 0.011502 | 0.011318 |
| 0.011280 | 0.011839 | 0.011341 | 0.011596 | 0.011451 | 0.011518 | 0.011538 |
| 0.011621 | 0.011324 | 0.011450 | 0.011258 | 0.011384 | 0.011395 | 0.011506 |
| 0.011512 | 0.011414 | 0.011483 | 0.011377 | 0.011431 | 0.011564 | 0.011631 |
| 0.011631 | 0.011497 | 0.011601 | 0.011603 | 0.011738 | 0.011767 | 0.011430 |
| 0.011665 | 0.011530 | 0.011396 | 0.011497 | 0.011295 | 0.011530 | 0.011329 |
| 0.011396 | 0.011396 | 0.011362 | 0.011329 | 0.011362 | 0.011329 | 0.011430 |
| 0.011409 | 0.011410 | 0.011403 | 0.011437 | 0.011573 | 0.011538 | 0.011538 |
| 0.011537 | 0.011464 | 0.011208 | 0.011240 | 0.011399 | 0.011568 | 0.011569 |
| 0.011363 | 0.011433 | 0.011666 | 0.011635 | 0.011565 | 0.011599 | 0.011530 |
| 0.011463 | 0.011530 | 0.011530 | 0.011429 | 0.012001 | 0.011598 | 0.011665 |
| 0.011698 | 0.011773 | 0.011401 | 0.011476 | 0.011362 | 0.011564 | 0.011530 |
| 0.011498 | 0.011597 | 0.011597 | 0.011597 | 0.011729 | 0.011732 | 0.011373 |
| 0.011263 | 0.011268 | 0.011367 | 0.011332 | 0.011436 | 0.011284 | 0.011604 |
| 0.011403 | 0.011543 | 0.011203 | 0.011435 | 0.011396 | 0.011471 | 0.011362 |
| 0.011329 | 0.011329 | 0.011396 | 0.011362 | 0.011564 | 0.011530 | 0.011463 |
| 0.011564 | 0.011631 | 0.011362 | 0.011362 | 0.011396 | 0.011396 | 0.011398 |
| 0.011466 | 0.011396 | 0.011396 | 0.011431 | 0.011564 | 0.011631 | 0.011631 |
| 0.011497 | 0.011601 | 0.011603 | 0.011738 | 0.011767 | 0.011430 | 0.011597 |
| 0.011530 | 0.011530 | 0.011364 | 0.011547 | 0.011477 | 0.011503 | 0.011375 |
| 0.011542 | 0.011789 | 0.011568 | 0.011434 | 0.011329 | 0.011530 | 0.011396 |
| 0.011497 | 0.011430 | 0.011329 | 0.011431 | 0.011530 | 0.011533 | 0.011430 |
| 0.011329 | 0.011263 | 0.011396 | 0.011329 | 0.011262 | 0.011332 | 0.011530 |
| 0.011430 | 0.011362 | 0.011396 | 0.011430 | 0.011396 | 0.011329 | 0.011530 |
| 0.011396 | 0.011430 | 0.011429 | 0.011362 | 0.011430 | 0.011665 | 0.011329 |
| 0.011362 | 0.011765 | 0.011362 | 0.011396 | 0.011362 | 0.011732 | 0.011360 |

|          |          |          |          |          |          |          |
|----------|----------|----------|----------|----------|----------|----------|
| 0.011791 | 0.011315 | 0.011411 | 0.011584 | 0.011671 | 0.011563 | 0.011311 |
| 0.011323 | 0.011530 | 0.011631 | 0.011739 | 0.011599 | 0.011737 | 0.011867 |
| 0.011767 | 0.011804 | 0.011765 | 0.012017 | 0.011732 | 0.012607 | 0.011768 |
| 0.012507 | 0.012274 | 0.012408 | 0.012646 | 0.011732 | 0.011430 | 0.011732 |
| 0.012171 | 0.012106 | 0.011698 | 0.011598 | 0.011665 | 0.011665 | 0.011635 |
| 0.011530 | 0.011535 | 0.011597 | 0.011565 | 0.011935 | 0.011934 | 0.012002 |
| 0.011902 | 0.012002 | 0.012106 | 0.011872 | 0.012171 | 0.012178 | 0.012238 |
| 0.012239 | 0.012273 | 0.012221 | 0.012239 | 0.012241 | 0.011463 | 0.011766 |
| 0.011834 | 0.012270 | 0.011840 | 0.012068 | 0.012541 | 0.011604 | 0.011497 |
| 0.011463 | 0.011463 | 0.011934 | 0.011965 | 0.012081 | 0.011799 | 0.011465 |
| S425     | 0.011765 | 0.011765 | 0.012102 | 0.011866 | 0.011866 | 0.011933 |
| 0.011774 | 0.011706 | 0.011866 | 0.011362 | 0.011429 | 0.011397 | 0.011362 |
| 0.011396 | 0.011564 | 0.011362 | 0.011396 | 0.011396 | 0.011429 | 0.011396 |
| 0.011362 | 0.011396 | 0.011497 | 0.011363 | 0.011396 | 0.011396 | 0.011740 |
| 0.011631 | 0.011396 | 0.011295 | 0.011530 | 0.011463 | 0.011430 | 0.011463 |
| 0.011429 | 0.011530 | 0.011429 | 0.011430 | 0.011463 | 0.011228 | 0.011597 |
| 0.011362 | 0.011429 | 0.011463 | 0.011396 | 0.011497 | 0.011530 | 0.011463 |
| 0.011429 | 0.011598 | 0.011497 | 0.011765 | 0.011429 | 0.011698 | 0.011429 |
| 0.011396 | 0.011497 | 0.011564 | 0.011698 | 0.011799 | 0.011497 | 0.011597 |
| 0.011463 | 0.011530 | 0.011430 | 0.011597 | 0.011900 | 0.011429 | 0.011497 |
| 0.011396 | 0.011497 | 0.011463 | 0.011530 | 0.011463 | 0.011463 | 0.011463 |
| 0.011362 | 0.011396 | 0.011362 | 0.011463 | 0.011429 | 0.011464 | 0.011530 |
| 0.011463 | 0.011429 | 0.011497 | 0.011396 | 0.011530 | 0.011362 | 0.011429 |
| 0.011597 | 0.011530 | 0.011765 | 0.011396 | 0.011430 | 0.011665 | 0.011429 |
| 0.011468 | 0.011845 | 0.011664 | 0.011373 | 0.011359 | 0.011318 | 0.011572 |
| 0.012195 | 0.011569 | 0.011348 | 0.011665 | 0.011665 | 0.011463 | 0.011564 |
| 0.011497 | 0.011463 | 0.011530 | 0.011429 | 0.011530 | 0.011463 | 0.011463 |
| 0.011429 | 0.011530 | 0.011732 | 0.011597 | 0.011497 | 0.011463 | 0.011396 |
| 0.011362 | 0.011362 | 0.011430 | 0.011396 | 0.011597 | 0.011564 | 0.011497 |
| 0.011597 | 0.011665 | 0.011396 | 0.011396 | 0.011430 | 0.011429 | 0.011432 |
| 0.011500 | 0.011429 | 0.011430 | 0.011312 | 0.011386 | 0.011341 | 0.011430 |
| 0.011230 | 0.011369 | 0.011429 | 0.011405 | 0.011332 | 0.011368 | 0.011398 |
| 0.011672 | 0.011439 | 0.011473 | 0.011363 | 0.011371 | 0.011497 | 0.011464 |
| 0.011531 | 0.011465 | 0.011464 | 0.011564 | 0.011497 | 0.011866 | 0.011665 |
| 0.011698 | 0.011564 | 0.011429 | 0.011530 | 0.011329 | 0.011564 | 0.011362 |
| 0.011430 | 0.011429 | 0.011396 | 0.011362 | 0.011396 | 0.011362 | 0.011463 |
| 0.011430 | 0.011530 | 0.011463 | 0.011362 | 0.011464 | 0.011564 | 0.011567 |
| 0.011564 | 0.011463 | 0.011362 | 0.011296 | 0.011429 | 0.011362 | 0.011295 |
| 0.011400 | 0.011564 | 0.011362 | 0.011564 | 0.011329 | 0.011430 | 0.011396 |
| 0.011497 | 0.011396 | 0.011430 | 0.011396 | 0.011429 | 0.011295 | 0.011429 |
| 0.011463 | 0.011396 | 0.011463 | 0.011396 | 0.011429 | 0.011463 | 0.011698 |
| 0.011799 | 0.011732 | 0.011799 | 0.011566 | 0.011799 | 0.011429 | 0.011396 |
| 0.011432 | 0.011707 | 0.011517 | 0.011335 | 0.011773 | 0.011299 | 0.011414 |
| 0.011807 | 0.011706 | 0.011597 | 0.011799 | 0.011504 | 0.011665 | 0.011631 |
| 0.011564 | 0.011732 | 0.011593 | 0.011472 | 0.011521 | 0.011463 | 0.011534 |
| 0.011631 | 0.011532 | 0.011669 | 0.011737 | 0.011665 | 0.011732 | 0.011840 |
| 0.011568 | 0.011739 | 0.011670 | 0.011398 | 0.011868 | 0.011329 | 0.011532 |
| 0.011497 | 0.011429 | 0.011329 | 0.011329 | 0.011396 | 0.011396 | 0.011463 |
| 0.011396 | 0.011463 | 0.011362 | 0.011463 | 0.011396 | 0.011396 | 0.011463 |
| 0.011396 | 0.011833 | 0.011732 | 0.011765 | 0.011295 | 0.011396 | 0.011430 |
| 0.011430 | 0.011396 | 0.011463 | 0.011497 | 0.011362 | 0.011362 | 0.011362 |
| 0.011900 | 0.011530 | 0.011530 | 0.011329 | 0.011429 | 0.011598 | 0.011362 |
| 0.011362 | 0.011429 | 0.011396 | 0.011564 | 0.011362 | 0.011497 | 0.011631 |
| 0.011564 | 0.011396 | 0.011396 | 0.011329 | 0.011329 | 0.011497 | 0.011429 |
| 0.011329 | 0.011429 | 0.011295 | 0.011329 | 0.011262 | 0.011598 | 0.011362 |
| 0.011329 | 0.011262 | 0.011396 | 0.011295 | 0.011631 | 0.011295 | 0.011463 |
| 0.011540 | 0.011362 | 0.011665 | 0.011497 | 0.011396 | 0.011396 | 0.011497 |
| 0.011362 | 0.011698 | 0.011295 | 0.011564 | 0.011362 | 0.011362 | 0.011295 |
| 0.011530 | 0.011732 | 0.011430 | 0.011497 | 0.011329 | 0.011732 | 0.011362 |
| 0.011362 | 0.011362 | 0.011396 | 0.011497 | 0.011396 | 0.011497 | 0.011564 |

|          |          |          |          |          |          |          |
|----------|----------|----------|----------|----------|----------|----------|
| 0.011362 | 0.011530 | 0.011429 | 0.011530 | 0.011497 | 0.011362 | 0.011329 |
| 0.011362 | 0.011362 | 0.011430 | 0.011362 | 0.011329 | 0.011497 | 0.011362 |
| 0.011396 | 0.011396 | 0.011530 | 0.011564 | 0.011463 | 0.011396 | 0.011396 |
| 0.011463 | 0.011396 | 0.011497 | 0.011362 | 0.011497 | 0.011597 | 0.011900 |
| 0.011396 | 0.011799 | 0.011405 | 0.017898 | 0.011191 | 0.011610 | 0.011758 |
| 0.011718 | 0.011764 | 0.011374 | 0.011408 | 0.011939 | 0.011785 | 0.011607 |
| 0.011582 | 0.011793 | 0.011333 | 0.011395 | 0.011333 | 0.011504 | 0.011447 |
| 0.011623 | 0.011581 | 0.011542 | 0.011259 | 0.011530 | 0.011564 | 0.011567 |
| 0.011438 | 0.011530 | 0.011530 | 0.011497 | 0.011463 | 0.011463 | 0.011430 |
| 0.011463 | 0.011396 | 0.011429 | 0.011463 | 0.011430 | 0.011362 | 0.011396 |
| 0.011396 | 0.011463 | 0.011362 | 0.011463 | 0.011497 | 0.000000 | 0.011429 |
| 0.011463 | 0.011430 | 0.011765 | 0.011765 | 0.011497 | 0.011531 | 0.011564 |
| 0.011329 | 0.011329 | 0.011362 | 0.011463 | 0.011329 | 0.011564 | 0.011564 |
| 0.011597 | 0.011597 | 0.011530 | 0.011631 | 0.011799 | 0.011633 | 0.011463 |
| 0.011463 | 0.011530 | 0.011564 | 0.011396 | 0.011463 | 0.011429 | 0.011463 |
| 0.011531 | 0.011530 | 0.011564 | 0.011530 | 0.011431 | 0.011631 | 0.011597 |
| 0.011467 | 0.011362 | 0.011396 | 0.011564 | 0.011463 | 0.011597 | 0.011564 |
| 0.011799 | 0.011504 | 0.011665 | 0.011631 | 0.011564 | 0.011732 | 0.011363 |
| 0.011532 | 0.011430 | 0.011396 | 0.011396 | 0.011463 | 0.011362 | 0.011463 |
| 0.011497 | 0.000000 | 0.011429 | 0.011463 | 0.011430 | 0.011765 | 0.011765 |
| 0.011497 | 0.011531 | 0.011597 | 0.011530 | 0.012171 | 0.011596 | 0.011517 |
| 0.011377 | 0.011546 | 0.011587 | 0.011545 | 0.011655 | 0.011578 | 0.011543 |
| 0.012125 | 0.011441 | 0.011574 | 0.011510 | 0.011784 | 0.011639 | 0.011741 |
| 0.012149 | 0.011550 | 0.011466 | 0.011463 | 0.011463 | 0.011497 | 0.011432 |
| 0.011329 | 0.011362 | 0.011497 | 0.011463 | 0.011466 | 0.011597 | 0.011565 |
| 0.011429 | 0.011362 | 0.011396 | 0.011429 | 0.011329 | 0.011396 | 0.011295 |
| 0.011362 | 0.011396 | 0.011362 | 0.011329 | 0.011430 | 0.011362 | 0.011396 |
| 0.011396 | 0.011329 | 0.011396 | 0.011430 | 0.011329 | 0.011530 | 0.011429 |
| 0.011329 | 0.011396 | 0.011262 | 0.011396 | 0.011396 | 0.011799 | 0.011429 |
| 0.011478 | 0.011396 | 0.011632 | 0.011637 | 0.011497 | 0.011497 | 0.011497 |
| 0.011497 | 0.011430 | 0.011396 | 0.011430 | 0.011530 | 0.011530 | 0.011463 |
| 0.011396 | 0.011597 | 0.011765 | 0.011497 | 0.011698 | 0.011698 | 0.011564 |
| 0.011396 | 0.011463 | 0.011497 | 0.011900 | 0.011463 | 0.011497 | 0.011463 |
| 0.011497 | 0.011429 | 0.011429 | 0.011732 | 0.011665 | 0.011698 | 0.011430 |
| 0.011530 | 0.011597 | 0.011463 | 0.011530 | 0.011497 | 0.011362 | 0.011698 |
| 0.011463 | 0.011429 | 0.011429 | 0.011597 | 0.011430 | 0.011530 | 0.011765 |
| 0.011463 | 0.011841 | 0.011833 | 0.011670 | 0.011286 | 0.011536 | 0.011318 |
| 0.011445 | 0.011878 | 0.011376 | 0.011507 | 0.011451 | 0.011467 | 0.011432 |
| 0.011519 | 0.011258 | 0.011339 | 0.011126 | 0.011330 | 0.011328 | 0.011547 |
| 0.011550 | 0.011454 | 0.011518 | 0.011412 | 0.011465 | 0.011597 | 0.011665 |
| 0.011665 | 0.011531 | 0.011635 | 0.011636 | 0.011772 | 0.011802 | 0.011463 |
| 0.011698 | 0.011564 | 0.011429 | 0.011530 | 0.011329 | 0.011564 | 0.011362 |
| 0.011430 | 0.011429 | 0.011396 | 0.011362 | 0.011396 | 0.011362 | 0.011463 |
| 0.011444 | 0.011445 | 0.011437 | 0.011471 | 0.011608 | 0.011573 | 0.011572 |
| 0.011571 | 0.011497 | 0.011319 | 0.011312 | 0.011433 | 0.011602 | 0.011603 |
| 0.011396 | 0.011467 | 0.011700 | 0.011668 | 0.011598 | 0.011632 | 0.011564 |
| 0.011497 | 0.011564 | 0.011564 | 0.011463 | 0.012035 | 0.011631 | 0.011698 |
| 0.011732 | 0.011737 | 0.011435 | 0.011511 | 0.011396 | 0.011597 | 0.011564 |
| 0.011599 | 0.011631 | 0.011631 | 0.011631 | 0.011650 | 0.011765 | 0.011407 |
| 0.011297 | 0.011303 | 0.011401 | 0.011366 | 0.011470 | 0.011284 | 0.011638 |
| 0.011438 | 0.011543 | 0.011251 | 0.011472 | 0.011430 | 0.011505 | 0.011396 |
| 0.011362 | 0.011362 | 0.011430 | 0.011396 | 0.011597 | 0.011564 | 0.011497 |
| 0.011597 | 0.011665 | 0.011396 | 0.011396 | 0.011430 | 0.011429 | 0.011432 |
| 0.011500 | 0.011429 | 0.011430 | 0.011465 | 0.011597 | 0.011665 | 0.011665 |
| 0.011531 | 0.011635 | 0.011636 | 0.011772 | 0.011802 | 0.011463 | 0.011564 |
| 0.011564 | 0.011564 | 0.011398 | 0.011513 | 0.011512 | 0.011537 | 0.011411 |
| 0.011577 | 0.011789 | 0.011526 | 0.011468 | 0.011362 | 0.011564 | 0.011430 |
| 0.011530 | 0.011463 | 0.011362 | 0.011464 | 0.011564 | 0.011567 | 0.011463 |
| 0.011362 | 0.011296 | 0.011429 | 0.011362 | 0.011295 | 0.011400 | 0.011564 |
| 0.011463 | 0.011396 | 0.011429 | 0.011463 | 0.011430 | 0.011362 | 0.011564 |



|          |          |          |          |          |          |          |
|----------|----------|----------|----------|----------|----------|----------|
| 0.011429 | 0.011463 | 0.011463 | 0.011396 | 0.011262 | 0.011631 | 0.011362 |
| 0.011396 | 0.011799 | 0.011396 | 0.011429 | 0.011396 | 0.011765 | 0.011360 |
| 0.011791 | 0.011400 | 0.011411 | 0.011624 | 0.011711 | 0.011598 | 0.011353 |
| 0.011270 | 0.011564 | 0.011665 | 0.011773 | 0.011632 | 0.011771 | 0.011901 |
| 0.011800 | 0.011838 | 0.011799 | 0.012051 | 0.011765 | 0.012640 | 0.011801 |
| 0.012540 | 0.012308 | 0.012442 | 0.012714 | 0.011765 | 0.011463 | 0.011766 |
| 0.012204 | 0.012140 | 0.011732 | 0.011631 | 0.011699 | 0.011699 | 0.011669 |
| 0.011564 | 0.011569 | 0.011631 | 0.011598 | 0.011968 | 0.011967 | 0.012036 |
| 0.011935 | 0.012035 | 0.012139 | 0.011906 | 0.012205 | 0.012212 | 0.012272 |
| 0.012205 | 0.012306 | 0.012255 | 0.012273 | 0.012274 | 0.011497 | 0.011799 |
| 0.011867 | 0.012371 | 0.011874 | 0.012102 | 0.012575 | 0.011637 | 0.011531 |
| 0.011497 | 0.011497 | 0.011968 | 0.012006 | 0.012080 | 0.011833 | 0.011498 |
| S426     | 0.011530 | 0.011530 | 0.012001 | 0.011765 | 0.011765 | 0.011832 |
| 0.011671 | 0.011603 | 0.011799 | 0.011262 | 0.011329 | 0.011296 | 0.011262 |
| 0.011295 | 0.011463 | 0.011262 | 0.011295 | 0.011362 | 0.011329 | 0.011295 |
| 0.011262 | 0.011295 | 0.011396 | 0.011262 | 0.011295 | 0.011295 | 0.011637 |
| 0.011530 | 0.011295 | 0.011195 | 0.011429 | 0.011362 | 0.011329 | 0.011362 |
| 0.011329 | 0.011429 | 0.011329 | 0.011329 | 0.011362 | 0.011329 | 0.011496 |
| 0.011262 | 0.011329 | 0.011362 | 0.011295 | 0.011396 | 0.011429 | 0.011362 |
| 0.011329 | 0.011497 | 0.011396 | 0.011664 | 0.011329 | 0.011597 | 0.011329 |
| 0.011295 | 0.011396 | 0.011463 | 0.011597 | 0.011698 | 0.011396 | 0.011496 |
| 0.011362 | 0.011429 | 0.011329 | 0.011564 | 0.011799 | 0.011329 | 0.011396 |
| 0.011295 | 0.011396 | 0.011362 | 0.011429 | 0.011362 | 0.011362 | 0.011362 |
| 0.011262 | 0.011295 | 0.011262 | 0.011362 | 0.011329 | 0.011363 | 0.011429 |
| 0.011362 | 0.011329 | 0.011396 | 0.011295 | 0.011429 | 0.011262 | 0.011329 |
| 0.011496 | 0.011429 | 0.011664 | 0.011497 | 0.011329 | 0.011564 | 0.011329 |
| 0.011505 | 0.011732 | 0.011551 | 0.011217 | 0.011247 | 0.011355 | 0.011454 |
| 0.012048 | 0.011467 | 0.011184 | 0.011564 | 0.011564 | 0.011362 | 0.011463 |
| 0.011396 | 0.011295 | 0.011295 | 0.011329 | 0.011429 | 0.011362 | 0.011228 |
| 0.011262 | 0.011429 | 0.011564 | 0.011497 | 0.011396 | 0.011362 | 0.011295 |
| 0.011262 | 0.011262 | 0.011329 | 0.011295 | 0.011497 | 0.011463 | 0.011396 |
| 0.011497 | 0.011564 | 0.011295 | 0.011295 | 0.011329 | 0.011329 | 0.011330 |
| 0.011398 | 0.011329 | 0.011329 | 0.011204 | 0.011277 | 0.011236 | 0.011329 |
| 0.011331 | 0.011266 | 0.011318 | 0.011302 | 0.011230 | 0.011266 | 0.011297 |
| 0.011564 | 0.011336 | 0.011370 | 0.011262 | 0.011268 | 0.011397 | 0.011363 |
| 0.011430 | 0.011363 | 0.011363 | 0.011329 | 0.011262 | 0.011765 | 0.011564 |
| 0.011597 | 0.011463 | 0.011329 | 0.011429 | 0.011228 | 0.011463 | 0.011262 |
| 0.011329 | 0.011329 | 0.011295 | 0.011262 | 0.011295 | 0.011262 | 0.011362 |
| 0.011329 | 0.011429 | 0.011362 | 0.011262 | 0.011363 | 0.011463 | 0.011466 |
| 0.011463 | 0.011362 | 0.011262 | 0.011195 | 0.011329 | 0.011262 | 0.011195 |
| 0.011298 | 0.011463 | 0.011262 | 0.011463 | 0.011228 | 0.011329 | 0.011295 |
| 0.011396 | 0.011295 | 0.011329 | 0.011295 | 0.011329 | 0.011195 | 0.011329 |
| 0.011362 | 0.011295 | 0.011362 | 0.011295 | 0.011195 | 0.011362 | 0.011597 |
| 0.011698 | 0.011631 | 0.011698 | 0.011465 | 0.011698 | 0.011127 | 0.011295 |
| 0.011330 | 0.011626 | 0.011335 | 0.011232 | 0.011705 | 0.011197 | 0.011296 |
| 0.011705 | 0.011604 | 0.011463 | 0.011631 | 0.011333 | 0.011564 | 0.011530 |
| 0.011463 | 0.011631 | 0.011344 | 0.011184 | 0.011270 | 0.011362 | 0.011365 |
| 0.011530 | 0.011296 | 0.011567 | 0.011635 | 0.011429 | 0.011564 | 0.011602 |
| 0.011331 | 0.011637 | 0.011433 | 0.011500 | 0.011699 | 0.011228 | 0.011431 |
| 0.011396 | 0.011329 | 0.011228 | 0.011228 | 0.011295 | 0.011295 | 0.011362 |
| 0.011295 | 0.011362 | 0.011262 | 0.011362 | 0.011295 | 0.011295 | 0.011362 |
| 0.011295 | 0.011731 | 0.011631 | 0.011664 | 0.011195 | 0.011295 | 0.011329 |
| 0.011329 | 0.011295 | 0.011362 | 0.011396 | 0.011262 | 0.011262 | 0.011262 |
| 0.011799 | 0.011429 | 0.011429 | 0.011228 | 0.011329 | 0.011497 | 0.011262 |
| 0.011262 | 0.011329 | 0.011295 | 0.011463 | 0.011262 | 0.011396 | 0.011530 |
| 0.011463 | 0.011295 | 0.011295 | 0.011228 | 0.011228 | 0.011396 | 0.011329 |
| 0.011228 | 0.011329 | 0.011195 | 0.011228 | 0.011362 | 0.011497 | 0.011262 |
| 0.011228 | 0.011362 | 0.011295 | 0.011195 | 0.011530 | 0.011195 | 0.011362 |
| 0.011402 | 0.011262 | 0.011564 | 0.011396 | 0.011429 | 0.011295 | 0.011396 |
| 0.011262 | 0.011597 | 0.011195 | 0.011463 | 0.011262 | 0.011262 | 0.011195 |

|          |          |          |          |          |          |          |
|----------|----------|----------|----------|----------|----------|----------|
| 0.011429 | 0.011631 | 0.011329 | 0.011396 | 0.011228 | 0.011631 | 0.011262 |
| 0.011262 | 0.011262 | 0.011295 | 0.011396 | 0.011295 | 0.011396 | 0.011463 |
| 0.011463 | 0.011429 | 0.011329 | 0.011429 | 0.011396 | 0.011262 | 0.011228 |
| 0.011262 | 0.011262 | 0.011329 | 0.011262 | 0.011228 | 0.011396 | 0.011262 |
| 0.011295 | 0.011295 | 0.011429 | 0.011463 | 0.011362 | 0.011295 | 0.011295 |
| 0.011362 | 0.011295 | 0.011396 | 0.011262 | 0.011396 | 0.011496 | 0.011799 |
| 0.011295 | 0.011698 | 0.011302 | 0.017823 | 0.011191 | 0.011366 | 0.011653 |
| 0.011614 | 0.011658 | 0.011322 | 0.011292 | 0.011774 | 0.011681 | 0.011303 |
| 0.011487 | 0.011487 | 0.011216 | 0.011270 | 0.011255 | 0.011356 | 0.011275 |
| 0.011482 | 0.011470 | 0.011468 | 0.011325 | 0.011429 | 0.011329 | 0.011398 |
| 0.011335 | 0.011429 | 0.011429 | 0.011396 | 0.011362 | 0.011362 | 0.011329 |
| 0.011362 | 0.011295 | 0.011329 | 0.011362 | 0.011329 | 0.011262 | 0.011094 |
| 0.011094 | 0.011362 | 0.011262 | 0.011362 | 0.011396 | 0.011429 | 0.000000 |
| 0.011362 | 0.011329 | 0.011665 | 0.011665 | 0.011396 | 0.011430 | 0.011463 |
| 0.011228 | 0.011228 | 0.011262 | 0.011362 | 0.011228 | 0.011463 | 0.011463 |
| 0.011497 | 0.011463 | 0.011429 | 0.011530 | 0.011698 | 0.011531 | 0.011362 |
| 0.011362 | 0.011429 | 0.011463 | 0.011295 | 0.011362 | 0.011329 | 0.011362 |
| 0.011430 | 0.011430 | 0.011463 | 0.011430 | 0.011330 | 0.011530 | 0.011497 |
| 0.011365 | 0.011262 | 0.011362 | 0.011463 | 0.011362 | 0.011497 | 0.011530 |
| 0.011631 | 0.011333 | 0.011564 | 0.011530 | 0.011463 | 0.011631 | 0.011262 |
| 0.011431 | 0.011329 | 0.011094 | 0.011094 | 0.011362 | 0.011262 | 0.011362 |
| 0.011396 | 0.011429 | 0.000000 | 0.011362 | 0.011329 | 0.011665 | 0.011665 |
| 0.011396 | 0.011430 | 0.011362 | 0.011295 | 0.012036 | 0.011489 | 0.011306 |
| 0.011482 | 0.011442 | 0.011552 | 0.011407 | 0.011550 | 0.011405 | 0.011439 |
| 0.011987 | 0.011199 | 0.011334 | 0.011337 | 0.011611 | 0.011536 | 0.011639 |
| 0.011978 | 0.011437 | 0.011567 | 0.011597 | 0.011530 | 0.011530 | 0.011533 |
| 0.011228 | 0.011396 | 0.011530 | 0.011496 | 0.011500 | 0.011497 | 0.011464 |
| 0.011329 | 0.011262 | 0.011295 | 0.011329 | 0.011228 | 0.011295 | 0.011195 |
| 0.011329 | 0.011362 | 0.011262 | 0.011228 | 0.011329 | 0.011262 | 0.011295 |
| 0.011295 | 0.011228 | 0.011295 | 0.011329 | 0.011228 | 0.011429 | 0.011463 |
| 0.011362 | 0.011429 | 0.011362 | 0.011362 | 0.011295 | 0.011698 | 0.011329 |
| 0.011373 | 0.011295 | 0.011531 | 0.011535 | 0.011396 | 0.011396 | 0.011396 |
| 0.011396 | 0.011329 | 0.011295 | 0.011329 | 0.011429 | 0.011429 | 0.011362 |
| 0.011362 | 0.011496 | 0.011664 | 0.011396 | 0.011597 | 0.011597 | 0.011463 |
| 0.011295 | 0.011362 | 0.011396 | 0.011799 | 0.011363 | 0.011396 | 0.011362 |
| 0.011396 | 0.011329 | 0.011329 | 0.011631 | 0.011564 | 0.011597 | 0.011329 |
| 0.011429 | 0.011497 | 0.011362 | 0.011429 | 0.011396 | 0.011262 | 0.011597 |
| 0.011362 | 0.011329 | 0.011329 | 0.011496 | 0.011329 | 0.011429 | 0.011664 |
| 0.011362 | 0.011739 | 0.011732 | 0.011548 | 0.011173 | 0.011434 | 0.011267 |
| 0.011225 | 0.011722 | 0.011271 | 0.011462 | 0.011255 | 0.011366 | 0.011379 |
| 0.011468 | 0.011192 | 0.011339 | 0.011192 | 0.011222 | 0.011328 | 0.011425 |
| 0.011437 | 0.011336 | 0.011412 | 0.011342 | 0.011363 | 0.011497 | 0.011564 |
| 0.011564 | 0.011430 | 0.011533 | 0.011535 | 0.011670 | 0.011696 | 0.011362 |
| 0.011597 | 0.011463 | 0.011329 | 0.011429 | 0.011228 | 0.011463 | 0.011262 |
| 0.011329 | 0.011329 | 0.011295 | 0.011262 | 0.011295 | 0.011262 | 0.011362 |
| 0.011340 | 0.011340 | 0.011334 | 0.011368 | 0.011505 | 0.011470 | 0.011470 |
| 0.011469 | 0.011396 | 0.011208 | 0.011204 | 0.011331 | 0.011501 | 0.011501 |
| 0.011296 | 0.011365 | 0.011599 | 0.011567 | 0.011497 | 0.011531 | 0.011329 |
| 0.011396 | 0.011396 | 0.011396 | 0.011362 | 0.011900 | 0.011530 | 0.011597 |
| 0.011631 | 0.011665 | 0.011333 | 0.011407 | 0.011295 | 0.011362 | 0.011329 |
| 0.011497 | 0.011396 | 0.011530 | 0.011530 | 0.011571 | 0.011530 | 0.011303 |
| 0.011196 | 0.011199 | 0.011298 | 0.011264 | 0.011368 | 0.011172 | 0.011536 |
| 0.011335 | 0.011367 | 0.011108 | 0.011285 | 0.011329 | 0.011402 | 0.011295 |
| 0.011262 | 0.011262 | 0.011329 | 0.011295 | 0.011497 | 0.011463 | 0.011396 |
| 0.011497 | 0.011564 | 0.011295 | 0.011295 | 0.011329 | 0.011329 | 0.011330 |
| 0.011398 | 0.011329 | 0.011329 | 0.011363 | 0.011497 | 0.011564 | 0.011564 |
| 0.011430 | 0.011533 | 0.011535 | 0.011670 | 0.011696 | 0.011362 | 0.011530 |
| 0.011329 | 0.011329 | 0.011297 | 0.011478 | 0.011408 | 0.011435 | 0.011305 |
| 0.011473 | 0.011653 | 0.011399 | 0.011366 | 0.011262 | 0.011463 | 0.011329 |
| 0.011429 | 0.011362 | 0.011262 | 0.011363 | 0.011463 | 0.011466 | 0.011362 |

|          |          |          |          |          |          |          |
|----------|----------|----------|----------|----------|----------|----------|
| 0.011262 | 0.011195 | 0.011329 | 0.011262 | 0.011195 | 0.011298 | 0.011463 |
| 0.011362 | 0.011295 | 0.011329 | 0.011362 | 0.011329 | 0.011262 | 0.011463 |
| 0.011329 | 0.011362 | 0.011362 | 0.011295 | 0.011362 | 0.011597 | 0.011262 |
| 0.011295 | 0.011698 | 0.011295 | 0.011329 | 0.011295 | 0.011664 | 0.011232 |
| 0.011678 | 0.011188 | 0.011261 | 0.011422 | 0.011549 | 0.011491 | 0.011144 |
| 0.011218 | 0.011463 | 0.011564 | 0.011671 | 0.011531 | 0.011669 | 0.011800 |
| 0.011699 | 0.011737 | 0.011698 | 0.011914 | 0.011664 | 0.012472 | 0.011700 |
| 0.012439 | 0.012139 | 0.012273 | 0.012612 | 0.011664 | 0.011362 | 0.011665 |
| 0.012069 | 0.012038 | 0.011631 | 0.011530 | 0.011598 | 0.011598 | 0.011567 |
| 0.011463 | 0.011467 | 0.011530 | 0.011497 | 0.011867 | 0.011933 | 0.011935 |
| 0.011834 | 0.011934 | 0.012038 | 0.011804 | 0.012070 | 0.012076 | 0.012137 |
| 0.012138 | 0.012171 | 0.012118 | 0.012138 | 0.012139 | 0.011262 | 0.011665 |
| 0.011766 | 0.012270 | 0.011738 | 0.012001 | 0.012474 | 0.011536 | 0.011430 |
| 0.011396 | 0.011396 | 0.011867 | 0.011842 | 0.012010 | 0.011732 | 0.011397 |
| S427     | 0.011698 | 0.011698 | 0.011967 | 0.011732 | 0.011732 | 0.011799 |
| 0.011603 | 0.011536 | 0.011799 | 0.011295 | 0.011362 | 0.011329 | 0.011295 |
| 0.011262 | 0.011496 | 0.011228 | 0.011329 | 0.011396 | 0.011362 | 0.011329 |
| 0.011295 | 0.011329 | 0.011362 | 0.011295 | 0.011329 | 0.011329 | 0.011569 |
| 0.011496 | 0.011329 | 0.011228 | 0.011396 | 0.011396 | 0.011362 | 0.011396 |
| 0.011362 | 0.011463 | 0.011362 | 0.011362 | 0.011396 | 0.011362 | 0.011530 |
| 0.011228 | 0.011362 | 0.011396 | 0.011329 | 0.011362 | 0.011463 | 0.011396 |
| 0.011362 | 0.011530 | 0.011430 | 0.011631 | 0.011362 | 0.011631 | 0.011362 |
| 0.011329 | 0.011362 | 0.011497 | 0.011631 | 0.011664 | 0.011362 | 0.011463 |
| 0.011396 | 0.011463 | 0.011362 | 0.011597 | 0.011765 | 0.011362 | 0.011429 |
| 0.011329 | 0.011429 | 0.011396 | 0.011463 | 0.011396 | 0.011396 | 0.011396 |
| 0.011295 | 0.011329 | 0.011295 | 0.011262 | 0.011362 | 0.011329 | 0.011463 |
| 0.011396 | 0.011362 | 0.011429 | 0.011329 | 0.011396 | 0.011295 | 0.011362 |
| 0.011530 | 0.011463 | 0.011698 | 0.011530 | 0.011362 | 0.011597 | 0.011362 |
| 0.011542 | 0.011695 | 0.011588 | 0.011295 | 0.011284 | 0.011391 | 0.011415 |
| 0.012048 | 0.011518 | 0.011307 | 0.011597 | 0.011597 | 0.011329 | 0.011429 |
| 0.011429 | 0.011396 | 0.011463 | 0.011362 | 0.011463 | 0.011396 | 0.011396 |
| 0.011362 | 0.011396 | 0.011664 | 0.011530 | 0.011429 | 0.011396 | 0.011329 |
| 0.011295 | 0.011228 | 0.011362 | 0.011329 | 0.011463 | 0.011429 | 0.011362 |
| 0.011463 | 0.011530 | 0.011329 | 0.011329 | 0.011362 | 0.011362 | 0.011364 |
| 0.011432 | 0.011362 | 0.011362 | 0.011240 | 0.011313 | 0.011271 | 0.011363 |
| 0.011365 | 0.011301 | 0.011355 | 0.011336 | 0.011264 | 0.011300 | 0.011330 |
| 0.011528 | 0.011370 | 0.011405 | 0.011296 | 0.011302 | 0.011430 | 0.011329 |
| 0.011397 | 0.011397 | 0.011396 | 0.011496 | 0.011429 | 0.011732 | 0.011530 |
| 0.011564 | 0.011430 | 0.011362 | 0.011396 | 0.011262 | 0.011429 | 0.011295 |
| 0.011362 | 0.011362 | 0.011329 | 0.011295 | 0.011329 | 0.011295 | 0.011396 |
| 0.011362 | 0.011463 | 0.011396 | 0.011295 | 0.011397 | 0.011497 | 0.011499 |
| 0.011497 | 0.011396 | 0.011295 | 0.011229 | 0.011362 | 0.011295 | 0.011228 |
| 0.011332 | 0.011497 | 0.011295 | 0.011497 | 0.011262 | 0.011362 | 0.011329 |
| 0.011430 | 0.011329 | 0.011362 | 0.011329 | 0.011362 | 0.011228 | 0.011362 |
| 0.011396 | 0.011329 | 0.011396 | 0.011329 | 0.011362 | 0.011396 | 0.011631 |
| 0.011664 | 0.011597 | 0.011665 | 0.011498 | 0.011665 | 0.011362 | 0.011329 |
| 0.011297 | 0.011545 | 0.011472 | 0.011266 | 0.011671 | 0.011231 | 0.011375 |
| 0.011637 | 0.011570 | 0.011530 | 0.011732 | 0.011436 | 0.011597 | 0.011564 |
| 0.011496 | 0.011664 | 0.011522 | 0.011349 | 0.011354 | 0.011396 | 0.011466 |
| 0.011564 | 0.011465 | 0.011601 | 0.011669 | 0.011597 | 0.011665 | 0.011772 |
| 0.011500 | 0.011671 | 0.011602 | 0.011534 | 0.011800 | 0.011262 | 0.011465 |
| 0.011429 | 0.011362 | 0.011262 | 0.011262 | 0.011329 | 0.011329 | 0.011396 |
| 0.011329 | 0.011396 | 0.011295 | 0.011329 | 0.011329 | 0.011329 | 0.011396 |
| 0.011329 | 0.011698 | 0.011597 | 0.011631 | 0.011228 | 0.011329 | 0.011362 |
| 0.011362 | 0.011329 | 0.011396 | 0.011362 | 0.011295 | 0.011295 | 0.011295 |
| 0.011765 | 0.011329 | 0.011463 | 0.011262 | 0.011362 | 0.011530 | 0.011295 |
| 0.011295 | 0.011362 | 0.011329 | 0.011497 | 0.011295 | 0.011429 | 0.011564 |
| 0.011496 | 0.011329 | 0.011329 | 0.011262 | 0.011262 | 0.011429 | 0.011362 |
| 0.011262 | 0.011362 | 0.011228 | 0.011262 | 0.011396 | 0.011463 | 0.011295 |
| 0.011262 | 0.011396 | 0.011329 | 0.011228 | 0.011496 | 0.011228 | 0.011396 |

|          |          |          |          |          |          |          |
|----------|----------|----------|----------|----------|----------|----------|
| 0.011471 | 0.011295 | 0.011530 | 0.011430 | 0.011396 | 0.011329 | 0.011429 |
| 0.011295 | 0.011631 | 0.011228 | 0.011429 | 0.011228 | 0.011228 | 0.011228 |
| 0.011463 | 0.011598 | 0.011362 | 0.011429 | 0.011262 | 0.011597 | 0.011228 |
| 0.011295 | 0.011295 | 0.011329 | 0.011429 | 0.011329 | 0.011429 | 0.011496 |
| 0.011497 | 0.011463 | 0.011362 | 0.011463 | 0.011429 | 0.011295 | 0.011262 |
| 0.011295 | 0.011295 | 0.011362 | 0.011228 | 0.011262 | 0.011429 | 0.011295 |
| 0.011262 | 0.011329 | 0.011463 | 0.011429 | 0.011396 | 0.011329 | 0.011329 |
| 0.011396 | 0.011329 | 0.011429 | 0.011295 | 0.011429 | 0.011530 | 0.011765 |
| 0.011329 | 0.011664 | 0.011336 | 0.017861 | 0.011387 | 0.011427 | 0.011618 |
| 0.011579 | 0.011623 | 0.011479 | 0.011466 | 0.011829 | 0.011647 | 0.011546 |
| 0.011535 | 0.011671 | 0.011255 | 0.011353 | 0.011255 | 0.011406 | 0.011361 |
| 0.011529 | 0.011433 | 0.011431 | 0.011193 | 0.011463 | 0.011497 | 0.011500 |
| 0.011369 | 0.011463 | 0.011463 | 0.011362 | 0.011396 | 0.011396 | 0.011362 |
| 0.011396 | 0.011329 | 0.011362 | 0.011396 | 0.011362 | 0.011295 | 0.011329 |
| 0.011329 | 0.011396 | 0.011295 | 0.011396 | 0.011430 | 0.011463 | 0.011362 |
| 0.000000 | 0.011295 | 0.011631 | 0.011631 | 0.011430 | 0.011464 | 0.011497 |
| 0.011262 | 0.011262 | 0.011295 | 0.011396 | 0.011262 | 0.011497 | 0.011497 |
| 0.011530 | 0.011530 | 0.011463 | 0.011564 | 0.011665 | 0.011565 | 0.011396 |
| 0.011396 | 0.011463 | 0.011497 | 0.011329 | 0.011396 | 0.011362 | 0.011396 |
| 0.011463 | 0.011463 | 0.011497 | 0.011463 | 0.011363 | 0.011564 | 0.011530 |
| 0.011399 | 0.011295 | 0.011396 | 0.011497 | 0.011396 | 0.011463 | 0.011564 |
| 0.011732 | 0.011436 | 0.011597 | 0.011564 | 0.011496 | 0.011664 | 0.011295 |
| 0.011464 | 0.011363 | 0.011329 | 0.011329 | 0.011396 | 0.011295 | 0.011396 |
| 0.011430 | 0.011463 | 0.011362 | 0.000000 | 0.011295 | 0.011631 | 0.011631 |
| 0.011430 | 0.011464 | 0.011530 | 0.011463 | 0.012036 | 0.011524 | 0.011447 |
| 0.011517 | 0.011476 | 0.011587 | 0.011476 | 0.011585 | 0.011508 | 0.011474 |
| 0.011987 | 0.011372 | 0.011505 | 0.011441 | 0.011714 | 0.011570 | 0.011673 |
| 0.012012 | 0.011475 | 0.011635 | 0.011698 | 0.011564 | 0.011497 | 0.011601 |
| 0.011262 | 0.011429 | 0.011564 | 0.011530 | 0.011533 | 0.011463 | 0.011431 |
| 0.011362 | 0.011295 | 0.011329 | 0.011362 | 0.011262 | 0.011329 | 0.011228 |
| 0.011295 | 0.011329 | 0.011295 | 0.011262 | 0.011362 | 0.011295 | 0.011329 |
| 0.011329 | 0.011262 | 0.011329 | 0.011362 | 0.011262 | 0.011463 | 0.011496 |
| 0.011396 | 0.011396 | 0.011396 | 0.011396 | 0.011329 | 0.011664 | 0.011362 |
| 0.011338 | 0.011329 | 0.011497 | 0.011501 | 0.011429 | 0.011429 | 0.011429 |
| 0.011429 | 0.011362 | 0.011329 | 0.011362 | 0.011463 | 0.011463 | 0.011396 |
| 0.011396 | 0.011530 | 0.011631 | 0.011429 | 0.011631 | 0.011631 | 0.011496 |
| 0.011329 | 0.011396 | 0.011429 | 0.011765 | 0.011396 | 0.011429 | 0.011396 |
| 0.011429 | 0.011295 | 0.011295 | 0.011597 | 0.011597 | 0.011564 | 0.011362 |
| 0.011463 | 0.011530 | 0.011396 | 0.011463 | 0.011429 | 0.011295 | 0.011564 |
| 0.011396 | 0.011362 | 0.011295 | 0.011530 | 0.011362 | 0.011463 | 0.011698 |
| 0.011396 | 0.011671 | 0.011698 | 0.011507 | 0.011229 | 0.011400 | 0.011318 |
| 0.011335 | 0.011722 | 0.011306 | 0.011462 | 0.011255 | 0.011467 | 0.011432 |
| 0.011519 | 0.011323 | 0.011505 | 0.011390 | 0.011384 | 0.011529 | 0.011466 |
| 0.011475 | 0.011375 | 0.011377 | 0.011377 | 0.011397 | 0.011463 | 0.011530 |
| 0.011530 | 0.011396 | 0.011500 | 0.011501 | 0.011636 | 0.011626 | 0.011396 |
| 0.011564 | 0.011430 | 0.011362 | 0.011396 | 0.011262 | 0.011429 | 0.011295 |
| 0.011362 | 0.011362 | 0.011329 | 0.011295 | 0.011329 | 0.011295 | 0.011396 |
| 0.011375 | 0.011375 | 0.011368 | 0.011403 | 0.011539 | 0.011504 | 0.011504 |
| 0.011503 | 0.011430 | 0.011208 | 0.011240 | 0.011365 | 0.011535 | 0.011535 |
| 0.011329 | 0.011399 | 0.011632 | 0.011601 | 0.011531 | 0.011565 | 0.011496 |
| 0.011429 | 0.011496 | 0.011496 | 0.011396 | 0.011900 | 0.011564 | 0.011631 |
| 0.011665 | 0.011665 | 0.011367 | 0.011441 | 0.011329 | 0.011530 | 0.011496 |
| 0.011531 | 0.011564 | 0.011564 | 0.011564 | 0.011728 | 0.011698 | 0.011338 |
| 0.011229 | 0.011233 | 0.011333 | 0.011298 | 0.011333 | 0.011247 | 0.011502 |
| 0.011369 | 0.011367 | 0.011203 | 0.011360 | 0.011363 | 0.011437 | 0.011329 |
| 0.011295 | 0.011228 | 0.011362 | 0.011329 | 0.011463 | 0.011429 | 0.011362 |
| 0.011463 | 0.011530 | 0.011329 | 0.011329 | 0.011362 | 0.011362 | 0.011364 |
| 0.011432 | 0.011362 | 0.011362 | 0.011397 | 0.011463 | 0.011530 | 0.011530 |
| 0.011396 | 0.011500 | 0.011501 | 0.011636 | 0.011626 | 0.011396 | 0.011564 |
| 0.011496 | 0.011496 | 0.011331 | 0.011513 | 0.011442 | 0.011469 | 0.011340 |

|          |          |          |          |          |          |          |
|----------|----------|----------|----------|----------|----------|----------|
| 0.011508 | 0.011698 | 0.011483 | 0.011400 | 0.011295 | 0.011497 | 0.011362 |
| 0.011463 | 0.011396 | 0.011295 | 0.011397 | 0.011497 | 0.011499 | 0.011396 |
| 0.011295 | 0.011229 | 0.011362 | 0.011295 | 0.011228 | 0.011332 | 0.011497 |
| 0.011396 | 0.011329 | 0.011362 | 0.011396 | 0.011362 | 0.011295 | 0.011430 |
| 0.011362 | 0.011396 | 0.011396 | 0.011329 | 0.011396 | 0.011631 | 0.011228 |
| 0.011329 | 0.011664 | 0.011329 | 0.011362 | 0.011329 | 0.011631 | 0.011317 |
| 0.011678 | 0.011315 | 0.011211 | 0.011463 | 0.011549 | 0.011455 | 0.011269 |
| 0.011270 | 0.011429 | 0.011530 | 0.011637 | 0.011498 | 0.011635 | 0.011766 |
| 0.011666 | 0.011703 | 0.011664 | 0.011914 | 0.011631 | 0.012505 | 0.011667 |
| 0.012406 | 0.012173 | 0.012307 | 0.012579 | 0.011631 | 0.011329 | 0.011631 |
| 0.012070 | 0.011937 | 0.011597 | 0.011497 | 0.011565 | 0.011565 | 0.011534 |
| 0.011429 | 0.011433 | 0.011496 | 0.011464 | 0.011834 | 0.011900 | 0.011901 |
| 0.011800 | 0.011901 | 0.012004 | 0.011770 | 0.012070 | 0.012076 | 0.012137 |
| 0.012138 | 0.012172 | 0.012118 | 0.012138 | 0.012139 | 0.011429 | 0.011665 |
| 0.011733 | 0.012236 | 0.011738 | 0.011967 | 0.012440 | 0.011502 | 0.011396 |
| 0.011362 | 0.011362 | 0.011833 | 0.011842 | 0.011975 | 0.011698 | 0.011363 |
| S428     | 0.011665 | 0.011665 | 0.011934 | 0.011698 | 0.011698 | 0.011766 |
| 0.011604 | 0.011536 | 0.011698 | 0.011262 | 0.011329 | 0.011296 | 0.011262 |
| 0.011228 | 0.011463 | 0.011195 | 0.011295 | 0.011362 | 0.011329 | 0.011295 |
| 0.011262 | 0.011295 | 0.011329 | 0.011262 | 0.011296 | 0.011295 | 0.011570 |
| 0.011463 | 0.011295 | 0.011195 | 0.011362 | 0.011362 | 0.011329 | 0.011362 |
| 0.011329 | 0.011430 | 0.011329 | 0.011329 | 0.011362 | 0.011329 | 0.011497 |
| 0.011195 | 0.011329 | 0.011362 | 0.011295 | 0.011329 | 0.011430 | 0.011362 |
| 0.011329 | 0.011497 | 0.011396 | 0.011598 | 0.011329 | 0.011597 | 0.011329 |
| 0.011295 | 0.011329 | 0.011463 | 0.011597 | 0.011564 | 0.011329 | 0.011430 |
| 0.011362 | 0.011430 | 0.011329 | 0.011564 | 0.011732 | 0.011329 | 0.011396 |
| 0.011295 | 0.011396 | 0.011362 | 0.011430 | 0.011362 | 0.011362 | 0.011362 |
| 0.011262 | 0.011295 | 0.011262 | 0.011295 | 0.011329 | 0.011363 | 0.011429 |
| 0.011362 | 0.011329 | 0.011396 | 0.011295 | 0.011362 | 0.011262 | 0.011329 |
| 0.011497 | 0.011429 | 0.011665 | 0.011497 | 0.011329 | 0.011564 | 0.011329 |
| 0.011505 | 0.011658 | 0.011551 | 0.011216 | 0.011247 | 0.011355 | 0.011375 |
| 0.012011 | 0.011416 | 0.011266 | 0.011564 | 0.011564 | 0.011295 | 0.011396 |
| 0.011396 | 0.011362 | 0.011429 | 0.011329 | 0.011430 | 0.011362 | 0.011362 |
| 0.011329 | 0.011362 | 0.011631 | 0.011497 | 0.011396 | 0.011363 | 0.011295 |
| 0.011262 | 0.011195 | 0.011329 | 0.011295 | 0.011430 | 0.011396 | 0.011329 |
| 0.011430 | 0.011497 | 0.011295 | 0.011295 | 0.011329 | 0.011329 | 0.011330 |
| 0.011398 | 0.011329 | 0.011329 | 0.011204 | 0.011277 | 0.011236 | 0.011329 |
| 0.011331 | 0.011266 | 0.011318 | 0.011302 | 0.011230 | 0.011266 | 0.011297 |
| 0.011492 | 0.011336 | 0.011370 | 0.011262 | 0.011268 | 0.011397 | 0.011296 |
| 0.011363 | 0.011364 | 0.011363 | 0.011463 | 0.011396 | 0.011766 | 0.011497 |
| 0.011530 | 0.011396 | 0.011329 | 0.011363 | 0.011228 | 0.011396 | 0.011262 |
| 0.011329 | 0.011329 | 0.011295 | 0.011262 | 0.011295 | 0.011262 | 0.011362 |
| 0.011329 | 0.011430 | 0.011362 | 0.011262 | 0.011363 | 0.011463 | 0.011466 |
| 0.011463 | 0.011362 | 0.011262 | 0.011195 | 0.011329 | 0.011262 | 0.011195 |
| 0.011298 | 0.011463 | 0.011262 | 0.011463 | 0.011228 | 0.011329 | 0.011295 |
| 0.011396 | 0.011295 | 0.011329 | 0.011295 | 0.011329 | 0.011195 | 0.011329 |
| 0.011362 | 0.011295 | 0.011362 | 0.011295 | 0.011329 | 0.011362 | 0.011597 |
| 0.011631 | 0.011564 | 0.011631 | 0.011465 | 0.011631 | 0.011329 | 0.011295 |
| 0.011263 | 0.011505 | 0.011380 | 0.011232 | 0.011637 | 0.011197 | 0.011296 |
| 0.011570 | 0.011536 | 0.011497 | 0.011698 | 0.011402 | 0.011564 | 0.011531 |
| 0.011463 | 0.011631 | 0.011487 | 0.011307 | 0.011396 | 0.011363 | 0.011433 |
| 0.011530 | 0.011431 | 0.011568 | 0.011602 | 0.011564 | 0.011631 | 0.011738 |
| 0.011466 | 0.011603 | 0.011568 | 0.011500 | 0.011767 | 0.011228 | 0.011431 |
| 0.011396 | 0.011329 | 0.011228 | 0.011228 | 0.011295 | 0.011295 | 0.011362 |
| 0.011295 | 0.011362 | 0.011262 | 0.011295 | 0.011295 | 0.011295 | 0.011362 |
| 0.011295 | 0.011665 | 0.011564 | 0.011598 | 0.011195 | 0.011295 | 0.011329 |
| 0.011329 | 0.011295 | 0.011362 | 0.011329 | 0.011262 | 0.011262 | 0.011262 |
| 0.011732 | 0.011362 | 0.011430 | 0.011228 | 0.011329 | 0.011497 | 0.011262 |
| 0.011262 | 0.011329 | 0.011295 | 0.011463 | 0.011262 | 0.011396 | 0.011530 |
| 0.011463 | 0.011295 | 0.011295 | 0.011228 | 0.011228 | 0.011396 | 0.011329 |

|          |          |          |          |          |          |          |
|----------|----------|----------|----------|----------|----------|----------|
| 0.011228 | 0.011329 | 0.011195 | 0.011228 | 0.011362 | 0.011430 | 0.011262 |
| 0.011228 | 0.011362 | 0.011296 | 0.011195 | 0.011463 | 0.011195 | 0.011362 |
| 0.011437 | 0.011262 | 0.011497 | 0.011396 | 0.011362 | 0.011295 | 0.011396 |
| 0.011262 | 0.011597 | 0.011195 | 0.011396 | 0.011195 | 0.011195 | 0.011195 |
| 0.011430 | 0.011564 | 0.011329 | 0.011396 | 0.011228 | 0.011564 | 0.011195 |
| 0.011262 | 0.011262 | 0.011295 | 0.011396 | 0.011295 | 0.011396 | 0.011463 |
| 0.011463 | 0.011430 | 0.011329 | 0.011430 | 0.011396 | 0.011195 | 0.011228 |
| 0.011262 | 0.011195 | 0.011329 | 0.011195 | 0.011228 | 0.011396 | 0.011262 |
| 0.011228 | 0.011295 | 0.011430 | 0.011396 | 0.011362 | 0.011295 | 0.011295 |
| 0.011362 | 0.011295 | 0.011396 | 0.011262 | 0.011396 | 0.011497 | 0.011665 |
| 0.011295 | 0.011631 | 0.011302 | 0.017823 | 0.011322 | 0.011427 | 0.011583 |
| 0.011545 | 0.011588 | 0.011427 | 0.011350 | 0.011719 | 0.011613 | 0.011425 |
| 0.011440 | 0.011549 | 0.011216 | 0.011312 | 0.011216 | 0.011307 | 0.011275 |
| 0.011436 | 0.011395 | 0.011394 | 0.011193 | 0.011430 | 0.011463 | 0.011466 |
| 0.011335 | 0.011430 | 0.011430 | 0.011329 | 0.011362 | 0.011363 | 0.011329 |
| 0.011362 | 0.011295 | 0.011329 | 0.011362 | 0.011329 | 0.011262 | 0.011295 |
| 0.011295 | 0.011362 | 0.011262 | 0.011363 | 0.011396 | 0.011430 | 0.011329 |
| 0.011295 | 0.000000 | 0.011598 | 0.011597 | 0.011396 | 0.011430 | 0.011463 |
| 0.011228 | 0.011228 | 0.011262 | 0.011362 | 0.011228 | 0.011463 | 0.011463 |
| 0.011497 | 0.011497 | 0.011430 | 0.011530 | 0.011631 | 0.011532 | 0.011362 |
| 0.011362 | 0.011430 | 0.011463 | 0.011295 | 0.011362 | 0.011329 | 0.011362 |
| 0.011430 | 0.011430 | 0.011463 | 0.011430 | 0.011330 | 0.011530 | 0.011497 |
| 0.011365 | 0.011262 | 0.011362 | 0.011463 | 0.011363 | 0.011430 | 0.011530 |
| 0.011698 | 0.011402 | 0.011564 | 0.011531 | 0.011463 | 0.011631 | 0.011262 |
| 0.011431 | 0.011329 | 0.011295 | 0.011295 | 0.011362 | 0.011262 | 0.011363 |
| 0.011396 | 0.011430 | 0.011329 | 0.011295 | 0.000000 | 0.011598 | 0.011597 |
| 0.011396 | 0.011430 | 0.011497 | 0.011429 | 0.012002 | 0.011489 | 0.011412 |
| 0.011482 | 0.011442 | 0.011552 | 0.011441 | 0.011550 | 0.011474 | 0.011440 |
| 0.011953 | 0.011337 | 0.011471 | 0.011406 | 0.011680 | 0.011537 | 0.011639 |
| 0.011978 | 0.011437 | 0.011365 | 0.011362 | 0.011362 | 0.011329 | 0.011331 |
| 0.011228 | 0.011262 | 0.011396 | 0.011362 | 0.011364 | 0.011429 | 0.011397 |
| 0.011329 | 0.011262 | 0.011295 | 0.011329 | 0.011228 | 0.011295 | 0.011195 |
| 0.011262 | 0.011295 | 0.011262 | 0.011228 | 0.011329 | 0.011262 | 0.011295 |
| 0.011295 | 0.011228 | 0.011295 | 0.011329 | 0.011228 | 0.011430 | 0.011463 |
| 0.011362 | 0.011362 | 0.011362 | 0.011362 | 0.011295 | 0.011564 | 0.011329 |
| 0.011304 | 0.011295 | 0.011463 | 0.011467 | 0.011396 | 0.011396 | 0.011396 |
| 0.011329 | 0.011329 | 0.011295 | 0.011329 | 0.011430 | 0.011430 | 0.011362 |
| 0.011362 | 0.011497 | 0.011597 | 0.011396 | 0.011598 | 0.011598 | 0.011463 |
| 0.011295 | 0.011362 | 0.011329 | 0.011732 | 0.011363 | 0.011396 | 0.011362 |
| 0.011396 | 0.011262 | 0.011262 | 0.011564 | 0.011564 | 0.011530 | 0.011329 |
| 0.011430 | 0.011497 | 0.011362 | 0.011430 | 0.011396 | 0.011262 | 0.011530 |
| 0.011362 | 0.011329 | 0.011262 | 0.011497 | 0.011329 | 0.011430 | 0.011665 |
| 0.011362 | 0.011672 | 0.011665 | 0.011467 | 0.011230 | 0.011366 | 0.011215 |
| 0.011225 | 0.011683 | 0.011271 | 0.011373 | 0.011255 | 0.011417 | 0.011326 |
| 0.011417 | 0.011258 | 0.011394 | 0.011258 | 0.011276 | 0.011462 | 0.011425 |
| 0.011437 | 0.011336 | 0.011342 | 0.011342 | 0.011364 | 0.011429 | 0.011497 |
| 0.011497 | 0.011363 | 0.011466 | 0.011467 | 0.011603 | 0.011626 | 0.011362 |
| 0.011530 | 0.011396 | 0.011329 | 0.011363 | 0.011228 | 0.011396 | 0.011262 |
| 0.011329 | 0.011329 | 0.011295 | 0.011262 | 0.011295 | 0.011262 | 0.011362 |
| 0.011340 | 0.011340 | 0.011334 | 0.011368 | 0.011505 | 0.011470 | 0.011402 |
| 0.011469 | 0.011396 | 0.011208 | 0.011168 | 0.011331 | 0.011501 | 0.011501 |
| 0.011296 | 0.011365 | 0.011599 | 0.011567 | 0.011497 | 0.011531 | 0.011463 |
| 0.011396 | 0.011463 | 0.011463 | 0.011362 | 0.011867 | 0.011530 | 0.011598 |
| 0.011631 | 0.011630 | 0.011333 | 0.011407 | 0.011295 | 0.011497 | 0.011463 |
| 0.011498 | 0.011530 | 0.011530 | 0.011530 | 0.011689 | 0.011665 | 0.011303 |
| 0.011196 | 0.011199 | 0.011299 | 0.011264 | 0.011299 | 0.011172 | 0.011468 |
| 0.011335 | 0.011367 | 0.011203 | 0.011360 | 0.011329 | 0.011402 | 0.011295 |
| 0.011262 | 0.011195 | 0.011329 | 0.011295 | 0.011430 | 0.011396 | 0.011329 |
| 0.011430 | 0.011497 | 0.011295 | 0.011295 | 0.011329 | 0.011329 | 0.011330 |
| 0.011398 | 0.011329 | 0.011329 | 0.011364 | 0.011429 | 0.011497 | 0.011497 |

|          |          |          |          |          |          |          |
|----------|----------|----------|----------|----------|----------|----------|
| 0.011363 | 0.011466 | 0.011467 | 0.011603 | 0.011626 | 0.011362 | 0.011530 |
| 0.011463 | 0.011463 | 0.011297 | 0.011478 | 0.011408 | 0.011435 | 0.011305 |
| 0.011473 | 0.011516 | 0.011399 | 0.011366 | 0.011262 | 0.011463 | 0.011329 |
| 0.011430 | 0.011362 | 0.011262 | 0.011363 | 0.011463 | 0.011466 | 0.011362 |
| 0.011262 | 0.011195 | 0.011329 | 0.011262 | 0.011195 | 0.011298 | 0.011463 |
| 0.011362 | 0.011295 | 0.011329 | 0.011362 | 0.011329 | 0.011262 | 0.011396 |
| 0.011329 | 0.011362 | 0.011362 | 0.011295 | 0.011362 | 0.011598 | 0.011195 |
| 0.011295 | 0.011564 | 0.011295 | 0.011329 | 0.011295 | 0.011598 | 0.011275 |
| 0.011679 | 0.011273 | 0.011211 | 0.011423 | 0.011508 | 0.011419 | 0.011227 |
| 0.011165 | 0.011396 | 0.011497 | 0.011603 | 0.011464 | 0.011601 | 0.011733 |
| 0.011632 | 0.011669 | 0.011631 | 0.011880 | 0.011598 | 0.012472 | 0.011633 |
| 0.012372 | 0.012139 | 0.012274 | 0.012545 | 0.011597 | 0.011295 | 0.011598 |
| 0.012036 | 0.011971 | 0.011564 | 0.011463 | 0.011531 | 0.011531 | 0.011500 |
| 0.011396 | 0.011399 | 0.011463 | 0.011430 | 0.011800 | 0.011867 | 0.011867 |
| 0.011767 | 0.011867 | 0.011971 | 0.011737 | 0.012037 | 0.012042 | 0.012104 |
| 0.012104 | 0.012138 | 0.012084 | 0.012104 | 0.012106 | 0.011396 | 0.011632 |
| 0.011699 | 0.012203 | 0.011704 | 0.011934 | 0.012406 | 0.011468 | 0.011363 |
| 0.011329 | 0.011329 | 0.011800 | 0.011801 | 0.011940 | 0.011665 | 0.011330 |
| S429     | 0.012001 | 0.012001 | 0.012068 | 0.011833 | 0.011833 | 0.011900 |
| 0.011400 | 0.011332 | 0.011833 | 0.011598 | 0.011665 | 0.011632 | 0.011597 |
| 0.011564 | 0.011799 | 0.011530 | 0.011631 | 0.011698 | 0.011665 | 0.011631 |
| 0.011597 | 0.011631 | 0.011463 | 0.011598 | 0.011598 | 0.011631 | 0.011366 |
| 0.011598 | 0.011631 | 0.011530 | 0.011497 | 0.011698 | 0.011665 | 0.011698 |
| 0.011665 | 0.011765 | 0.011665 | 0.011665 | 0.011698 | 0.011665 | 0.011833 |
| 0.011530 | 0.011665 | 0.011698 | 0.011631 | 0.011665 | 0.011765 | 0.011698 |
| 0.011665 | 0.011833 | 0.011732 | 0.011396 | 0.011665 | 0.011934 | 0.011665 |
| 0.011631 | 0.011665 | 0.011799 | 0.011934 | 0.011362 | 0.011665 | 0.011765 |
| 0.011698 | 0.011766 | 0.011665 | 0.011900 | 0.011530 | 0.011665 | 0.011732 |
| 0.011631 | 0.011732 | 0.011698 | 0.011765 | 0.011698 | 0.011698 | 0.011698 |
| 0.011597 | 0.011631 | 0.011597 | 0.011631 | 0.011665 | 0.011700 | 0.011765 |
| 0.011698 | 0.011665 | 0.011732 | 0.011631 | 0.011564 | 0.011597 | 0.011665 |
| 0.011833 | 0.011765 | 0.011530 | 0.011833 | 0.011665 | 0.011900 | 0.011665 |
| 0.011839 | 0.011396 | 0.011815 | 0.011529 | 0.011508 | 0.011686 | 0.011415 |
| 0.012011 | 0.011315 | 0.011472 | 0.011900 | 0.011900 | 0.011631 | 0.011530 |
| 0.011732 | 0.011698 | 0.011765 | 0.011665 | 0.011766 | 0.011698 | 0.011698 |
| 0.011665 | 0.011698 | 0.011967 | 0.011833 | 0.011732 | 0.011699 | 0.011631 |
| 0.011597 | 0.011530 | 0.011665 | 0.011631 | 0.011564 | 0.011530 | 0.011463 |
| 0.011564 | 0.011631 | 0.011631 | 0.011631 | 0.011665 | 0.011665 | 0.011668 |
| 0.011736 | 0.011665 | 0.011665 | 0.011456 | 0.011530 | 0.011516 | 0.011665 |
| 0.011602 | 0.011507 | 0.011577 | 0.011578 | 0.011570 | 0.011540 | 0.011634 |
| 0.011492 | 0.011612 | 0.011646 | 0.011598 | 0.011544 | 0.011733 | 0.011632 |
| 0.011699 | 0.011701 | 0.011699 | 0.011799 | 0.011732 | 0.012102 | 0.011833 |
| 0.011665 | 0.011732 | 0.011665 | 0.011698 | 0.011564 | 0.011530 | 0.011598 |
| 0.011665 | 0.011665 | 0.011631 | 0.011597 | 0.011631 | 0.011597 | 0.011698 |
| 0.011665 | 0.011765 | 0.011698 | 0.011597 | 0.011700 | 0.011799 | 0.011804 |
| 0.011799 | 0.011698 | 0.011597 | 0.011532 | 0.011665 | 0.011597 | 0.011530 |
| 0.011536 | 0.011799 | 0.011598 | 0.011799 | 0.011564 | 0.011665 | 0.011631 |
| 0.011732 | 0.011631 | 0.011665 | 0.011631 | 0.011665 | 0.011530 | 0.011665 |
| 0.011698 | 0.011631 | 0.011698 | 0.011631 | 0.011665 | 0.011698 | 0.011934 |
| 0.011429 | 0.011362 | 0.011429 | 0.011802 | 0.011362 | 0.011665 | 0.011631 |
| 0.011601 | 0.011909 | 0.011746 | 0.011575 | 0.011433 | 0.011538 | 0.011729 |
| 0.011434 | 0.011604 | 0.011833 | 0.012035 | 0.011743 | 0.011900 | 0.011867 |
| 0.011799 | 0.011967 | 0.011842 | 0.011720 | 0.011689 | 0.011699 | 0.011771 |
| 0.011867 | 0.011769 | 0.011906 | 0.011974 | 0.011900 | 0.011968 | 0.012077 |
| 0.011805 | 0.011977 | 0.011839 | 0.011838 | 0.012104 | 0.011564 | 0.011768 |
| 0.011732 | 0.011665 | 0.011564 | 0.011564 | 0.011631 | 0.011631 | 0.011698 |
| 0.011631 | 0.011698 | 0.011597 | 0.011631 | 0.011631 | 0.011631 | 0.011698 |
| 0.011631 | 0.011463 | 0.011362 | 0.011396 | 0.011530 | 0.011631 | 0.011665 |
| 0.011665 | 0.011564 | 0.011698 | 0.011665 | 0.011597 | 0.011597 | 0.011597 |
| 0.011530 | 0.011698 | 0.011765 | 0.011564 | 0.011665 | 0.011833 | 0.011597 |

|          |          |          |          |          |          |          |
|----------|----------|----------|----------|----------|----------|----------|
| 0.011597 | 0.011665 | 0.011631 | 0.011799 | 0.011597 | 0.011530 | 0.011665 |
| 0.011598 | 0.011631 | 0.011631 | 0.011564 | 0.011564 | 0.011732 | 0.011665 |
| 0.011564 | 0.011665 | 0.011530 | 0.011564 | 0.011698 | 0.011497 | 0.011598 |
| 0.011564 | 0.011698 | 0.011632 | 0.011530 | 0.011228 | 0.011530 | 0.011698 |
| 0.011780 | 0.011598 | 0.011295 | 0.011732 | 0.011698 | 0.011631 | 0.011732 |
| 0.011597 | 0.011934 | 0.011530 | 0.011598 | 0.011530 | 0.011530 | 0.011530 |
| 0.011765 | 0.011632 | 0.011665 | 0.011732 | 0.011564 | 0.011362 | 0.011530 |
| 0.011597 | 0.011597 | 0.011631 | 0.011732 | 0.011631 | 0.011732 | 0.011799 |
| 0.011799 | 0.011765 | 0.011665 | 0.011766 | 0.011732 | 0.011597 | 0.011564 |
| 0.011597 | 0.011597 | 0.011665 | 0.011530 | 0.011564 | 0.011732 | 0.011597 |
| 0.011497 | 0.011631 | 0.011765 | 0.011732 | 0.011698 | 0.011631 | 0.011631 |
| 0.011698 | 0.011631 | 0.011732 | 0.011597 | 0.011732 | 0.011833 | 0.011463 |
| 0.011631 | 0.011362 | 0.011612 | 0.018125 | 0.011322 | 0.011733 | 0.011339 |
| 0.011337 | 0.011342 | 0.011794 | 0.011524 | 0.011445 | 0.011405 | 0.011668 |
| 0.011582 | 0.011488 | 0.011450 | 0.011605 | 0.011451 | 0.011603 | 0.011620 |
| 0.011295 | 0.011395 | 0.011283 | 0.011259 | 0.011766 | 0.011799 | 0.011804 |
| 0.011679 | 0.011765 | 0.011765 | 0.011665 | 0.011698 | 0.011699 | 0.011665 |
| 0.011698 | 0.011631 | 0.011665 | 0.011698 | 0.011665 | 0.011597 | 0.011631 |
| 0.011631 | 0.011698 | 0.011597 | 0.011698 | 0.011732 | 0.011765 | 0.011665 |
| 0.011631 | 0.011598 | 0.000000 | 0.000000 | 0.011732 | 0.011767 | 0.011799 |
| 0.011564 | 0.011564 | 0.011597 | 0.011698 | 0.011564 | 0.011799 | 0.011799 |
| 0.011833 | 0.011833 | 0.011765 | 0.011866 | 0.011362 | 0.011869 | 0.011698 |
| 0.011698 | 0.011765 | 0.011799 | 0.011631 | 0.011698 | 0.011665 | 0.011698 |
| 0.011766 | 0.011766 | 0.011799 | 0.011766 | 0.011666 | 0.011866 | 0.011833 |
| 0.011704 | 0.011597 | 0.011698 | 0.011799 | 0.011698 | 0.011766 | 0.011866 |
| 0.012035 | 0.011743 | 0.011900 | 0.011867 | 0.011799 | 0.011967 | 0.011598 |
| 0.011768 | 0.011665 | 0.011631 | 0.011631 | 0.011698 | 0.011597 | 0.011698 |
| 0.011732 | 0.011765 | 0.011665 | 0.011631 | 0.011598 | 0.000000 | 0.000000 |
| 0.011732 | 0.011767 | 0.011833 | 0.011765 | 0.012339 | 0.011847 | 0.011764 |
| 0.011834 | 0.011789 | 0.011904 | 0.011788 | 0.011901 | 0.011819 | 0.011716 |
| 0.012297 | 0.011684 | 0.011814 | 0.011752 | 0.012025 | 0.011877 | 0.011980 |
| 0.012319 | 0.011814 | 0.011703 | 0.011698 | 0.011698 | 0.011463 | 0.011669 |
| 0.011564 | 0.011597 | 0.011732 | 0.011698 | 0.011702 | 0.011564 | 0.011532 |
| 0.011665 | 0.011597 | 0.011631 | 0.011665 | 0.011564 | 0.011631 | 0.011530 |
| 0.011597 | 0.011631 | 0.011597 | 0.011564 | 0.011665 | 0.011597 | 0.011631 |
| 0.011631 | 0.011564 | 0.011631 | 0.011665 | 0.011564 | 0.011765 | 0.011799 |
| 0.011698 | 0.011698 | 0.011698 | 0.011698 | 0.011631 | 0.011362 | 0.011665 |
| 0.011443 | 0.011631 | 0.011598 | 0.011603 | 0.011665 | 0.011665 | 0.011732 |
| 0.011732 | 0.011665 | 0.011631 | 0.011665 | 0.011765 | 0.011766 | 0.011698 |
| 0.011698 | 0.011833 | 0.011396 | 0.011732 | 0.011934 | 0.011934 | 0.011799 |
| 0.011631 | 0.011698 | 0.011732 | 0.011463 | 0.011699 | 0.011665 | 0.011698 |
| 0.011732 | 0.011597 | 0.011597 | 0.011900 | 0.011900 | 0.011866 | 0.011665 |
| 0.011766 | 0.011833 | 0.011698 | 0.011766 | 0.011732 | 0.011597 | 0.011329 |
| 0.011698 | 0.011665 | 0.011597 | 0.011833 | 0.011665 | 0.011765 | 0.011598 |
| 0.011698 | 0.011468 | 0.011463 | 0.011467 | 0.011286 | 0.011706 | 0.011318 |
| 0.011555 | 0.011644 | 0.011587 | 0.011596 | 0.011499 | 0.011366 | 0.011379 |
| 0.011417 | 0.011258 | 0.011450 | 0.011324 | 0.011330 | 0.011529 | 0.011790 |
| 0.011776 | 0.011690 | 0.011659 | 0.011659 | 0.011701 | 0.011564 | 0.011631 |
| 0.011631 | 0.011699 | 0.011804 | 0.011569 | 0.011942 | 0.011979 | 0.011698 |
| 0.011665 | 0.011732 | 0.011665 | 0.011698 | 0.011564 | 0.011530 | 0.011598 |
| 0.011665 | 0.011665 | 0.011631 | 0.011597 | 0.011631 | 0.011597 | 0.011698 |
| 0.011619 | 0.011620 | 0.011608 | 0.011642 | 0.011779 | 0.011744 | 0.011743 |
| 0.011742 | 0.011733 | 0.011503 | 0.011492 | 0.011602 | 0.011772 | 0.011773 |
| 0.011632 | 0.011636 | 0.011936 | 0.011905 | 0.011834 | 0.011868 | 0.011799 |
| 0.011732 | 0.011799 | 0.011799 | 0.011698 | 0.011597 | 0.011866 | 0.011934 |
| 0.011967 | 0.011345 | 0.011606 | 0.011753 | 0.011631 | 0.011833 | 0.011799 |
| 0.011834 | 0.011866 | 0.011866 | 0.011866 | 0.011965 | 0.012001 | 0.011650 |
| 0.011534 | 0.011545 | 0.011639 | 0.011604 | 0.011641 | 0.011546 | 0.011264 |
| 0.011678 | 0.011323 | 0.011489 | 0.011660 | 0.011665 | 0.011676 | 0.011631 |
| 0.011597 | 0.011530 | 0.011665 | 0.011631 | 0.011564 | 0.011530 | 0.011463 |



|          |          |          |          |          |          |          |
|----------|----------|----------|----------|----------|----------|----------|
| 0.011564 | 0.011631 | 0.011631 | 0.011631 | 0.011665 | 0.011665 | 0.011668 |
| 0.011736 | 0.011665 | 0.011665 | 0.011701 | 0.011564 | 0.011631 | 0.011631 |
| 0.011699 | 0.011804 | 0.011569 | 0.011942 | 0.011979 | 0.011698 | 0.011866 |
| 0.011799 | 0.011799 | 0.011635 | 0.011826 | 0.011721 | 0.011775 | 0.011656 |
| 0.011818 | 0.011972 | 0.011780 | 0.011706 | 0.011598 | 0.011799 | 0.011665 |
| 0.011765 | 0.011698 | 0.011597 | 0.011700 | 0.011799 | 0.011804 | 0.011698 |
| 0.011597 | 0.011532 | 0.011665 | 0.011597 | 0.011530 | 0.011536 | 0.011799 |
| 0.011698 | 0.011631 | 0.011665 | 0.011698 | 0.011665 | 0.011597 | 0.011530 |
| 0.011665 | 0.011698 | 0.011698 | 0.011631 | 0.011698 | 0.011934 | 0.011530 |
| 0.011631 | 0.011362 | 0.011631 | 0.011665 | 0.011631 | 0.011396 | 0.011489 |
| 0.011735 | 0.011315 | 0.011311 | 0.011382 | 0.011467 | 0.011527 | 0.011269 |
| 0.011270 | 0.011530 | 0.011631 | 0.011739 | 0.011599 | 0.011737 | 0.011868 |
| 0.011767 | 0.011805 | 0.011766 | 0.011983 | 0.011732 | 0.012607 | 0.011768 |
| 0.012507 | 0.012275 | 0.012409 | 0.012681 | 0.011665 | 0.011631 | 0.011732 |
| 0.012373 | 0.012106 | 0.011699 | 0.011598 | 0.011666 | 0.011666 | 0.011636 |
| 0.011530 | 0.011535 | 0.011598 | 0.011565 | 0.011935 | 0.012001 | 0.012002 |
| 0.011902 | 0.012002 | 0.012106 | 0.011872 | 0.012374 | 0.012381 | 0.012441 |
| 0.012442 | 0.012475 | 0.012426 | 0.012442 | 0.012443 | 0.011732 | 0.011968 |
| 0.012036 | 0.012540 | 0.012044 | 0.012002 | 0.012474 | 0.011536 | 0.011430 |
| 0.011329 | 0.011396 | 0.011934 | 0.011883 | 0.011975 | 0.011732 | 0.011465 |
| S430     | 0.012001 | 0.012001 | 0.012068 | 0.011833 | 0.011833 | 0.011900 |
| 0.011400 | 0.011332 | 0.011833 | 0.011598 | 0.011665 | 0.011632 | 0.011597 |
| 0.011564 | 0.011799 | 0.011530 | 0.011631 | 0.011698 | 0.011665 | 0.011631 |
| 0.011597 | 0.011631 | 0.011463 | 0.011598 | 0.011598 | 0.011631 | 0.011366 |
| 0.011598 | 0.011631 | 0.011530 | 0.011497 | 0.011698 | 0.011665 | 0.011698 |
| 0.011665 | 0.011765 | 0.011665 | 0.011665 | 0.011698 | 0.011665 | 0.011833 |
| 0.011530 | 0.011665 | 0.011698 | 0.011631 | 0.011665 | 0.011765 | 0.011698 |
| 0.011665 | 0.011833 | 0.011732 | 0.011396 | 0.011665 | 0.011934 | 0.011665 |
| 0.011631 | 0.011665 | 0.011799 | 0.011934 | 0.011362 | 0.011665 | 0.011765 |
| 0.011698 | 0.011766 | 0.011665 | 0.011900 | 0.011530 | 0.011665 | 0.011732 |
| 0.011631 | 0.011732 | 0.011698 | 0.011765 | 0.011698 | 0.011698 | 0.011698 |
| 0.011597 | 0.011631 | 0.011597 | 0.011631 | 0.011665 | 0.011700 | 0.011765 |
| 0.011698 | 0.011665 | 0.011732 | 0.011631 | 0.011564 | 0.011597 | 0.011665 |
| 0.011833 | 0.011765 | 0.011530 | 0.011833 | 0.011665 | 0.011900 | 0.011665 |
| 0.011839 | 0.011396 | 0.011815 | 0.011529 | 0.011508 | 0.011686 | 0.011415 |
| 0.012011 | 0.011315 | 0.011472 | 0.011900 | 0.011900 | 0.011631 | 0.011530 |
| 0.011732 | 0.011698 | 0.011765 | 0.011665 | 0.011766 | 0.011698 | 0.011698 |
| 0.011665 | 0.011698 | 0.011967 | 0.011833 | 0.011732 | 0.011699 | 0.011631 |
| 0.011597 | 0.011530 | 0.011665 | 0.011631 | 0.011564 | 0.011530 | 0.011463 |
| 0.011564 | 0.011631 | 0.011631 | 0.011631 | 0.011665 | 0.011665 | 0.011668 |
| 0.011736 | 0.011665 | 0.011665 | 0.011456 | 0.011530 | 0.011516 | 0.011665 |
| 0.011602 | 0.011507 | 0.011577 | 0.011578 | 0.011570 | 0.011540 | 0.011634 |
| 0.011492 | 0.011612 | 0.011646 | 0.011598 | 0.011544 | 0.011733 | 0.011632 |
| 0.011699 | 0.011701 | 0.011699 | 0.011799 | 0.011732 | 0.012102 | 0.011833 |
| 0.011665 | 0.011732 | 0.011665 | 0.011698 | 0.011564 | 0.011530 | 0.011598 |
| 0.011665 | 0.011665 | 0.011631 | 0.011597 | 0.011631 | 0.011597 | 0.011698 |
| 0.011665 | 0.011765 | 0.011698 | 0.011597 | 0.011700 | 0.011799 | 0.011804 |
| 0.011799 | 0.011698 | 0.011597 | 0.011532 | 0.011665 | 0.011597 | 0.011530 |
| 0.011536 | 0.011799 | 0.011597 | 0.011799 | 0.011564 | 0.011665 | 0.011631 |
| 0.011732 | 0.011631 | 0.011665 | 0.011631 | 0.011665 | 0.011530 | 0.011665 |
| 0.011698 | 0.011631 | 0.011698 | 0.011631 | 0.011665 | 0.011698 | 0.011934 |
| 0.011429 | 0.011362 | 0.011429 | 0.011802 | 0.011362 | 0.011665 | 0.011631 |
| 0.011601 | 0.011909 | 0.011746 | 0.011575 | 0.011433 | 0.011538 | 0.011729 |
| 0.011434 | 0.011604 | 0.011833 | 0.012035 | 0.011743 | 0.011900 | 0.011867 |
| 0.011799 | 0.011967 | 0.011842 | 0.011720 | 0.011689 | 0.011699 | 0.011771 |
| 0.011867 | 0.011769 | 0.011906 | 0.011974 | 0.011900 | 0.011968 | 0.012077 |
| 0.011805 | 0.011977 | 0.011839 | 0.011838 | 0.012104 | 0.011564 | 0.011768 |
| 0.011732 | 0.011665 | 0.011564 | 0.011564 | 0.011631 | 0.011631 | 0.011698 |
| 0.011631 | 0.011698 | 0.011597 | 0.011631 | 0.011631 | 0.011631 | 0.011698 |
| 0.011631 | 0.011463 | 0.011362 | 0.011396 | 0.011530 | 0.011631 | 0.011665 |

|          |          |          |          |          |          |          |
|----------|----------|----------|----------|----------|----------|----------|
| 0.011665 | 0.011564 | 0.011698 | 0.011665 | 0.011597 | 0.011597 | 0.011597 |
| 0.011530 | 0.011698 | 0.011765 | 0.011564 | 0.011665 | 0.011833 | 0.011597 |
| 0.011597 | 0.011665 | 0.011631 | 0.011799 | 0.011597 | 0.011530 | 0.011665 |
| 0.011598 | 0.011631 | 0.011631 | 0.011564 | 0.011564 | 0.011732 | 0.011665 |
| 0.011564 | 0.011665 | 0.011530 | 0.011564 | 0.011698 | 0.011497 | 0.011598 |
| 0.011564 | 0.011698 | 0.011632 | 0.011530 | 0.011228 | 0.011530 | 0.011698 |
| 0.011780 | 0.011597 | 0.011295 | 0.011732 | 0.011698 | 0.011631 | 0.011732 |
| 0.011597 | 0.011934 | 0.011530 | 0.011597 | 0.011530 | 0.011530 | 0.011530 |
| 0.011765 | 0.011632 | 0.011665 | 0.011732 | 0.011564 | 0.011362 | 0.011530 |
| 0.011597 | 0.011597 | 0.011631 | 0.011732 | 0.011631 | 0.011732 | 0.011799 |
| 0.011799 | 0.011765 | 0.011665 | 0.011766 | 0.011732 | 0.011597 | 0.011564 |
| 0.011597 | 0.011597 | 0.011665 | 0.011530 | 0.011564 | 0.011732 | 0.011597 |
| 0.011497 | 0.011631 | 0.011765 | 0.011732 | 0.011698 | 0.011631 | 0.011631 |
| 0.011698 | 0.011631 | 0.011732 | 0.011597 | 0.011732 | 0.011833 | 0.011463 |
| 0.011631 | 0.011362 | 0.011612 | 0.018125 | 0.011322 | 0.011733 | 0.011339 |
| 0.011337 | 0.011342 | 0.011794 | 0.011524 | 0.011445 | 0.011405 | 0.011668 |
| 0.011582 | 0.011488 | 0.011450 | 0.011605 | 0.011451 | 0.011603 | 0.011620 |
| 0.011295 | 0.011395 | 0.011283 | 0.011259 | 0.011766 | 0.011799 | 0.011804 |
| 0.011679 | 0.011765 | 0.011765 | 0.011665 | 0.011698 | 0.011699 | 0.011665 |
| 0.011698 | 0.011631 | 0.011665 | 0.011698 | 0.011665 | 0.011597 | 0.011631 |
| 0.011631 | 0.011698 | 0.011597 | 0.011698 | 0.011732 | 0.011765 | 0.011665 |
| 0.011631 | 0.011597 | 0.000000 | 0.000000 | 0.011732 | 0.011767 | 0.011799 |
| 0.011564 | 0.011564 | 0.011597 | 0.011698 | 0.011564 | 0.011799 | 0.011799 |
| 0.011833 | 0.011833 | 0.011765 | 0.011866 | 0.011362 | 0.011869 | 0.011698 |
| 0.011698 | 0.011765 | 0.011799 | 0.011631 | 0.011698 | 0.011665 | 0.011698 |
| 0.011766 | 0.011766 | 0.011799 | 0.011766 | 0.011666 | 0.011866 | 0.011833 |
| 0.011704 | 0.011597 | 0.011698 | 0.011799 | 0.011698 | 0.011766 | 0.011866 |
| 0.012035 | 0.011743 | 0.011900 | 0.011867 | 0.011799 | 0.011967 | 0.011598 |
| 0.011768 | 0.011665 | 0.011631 | 0.011631 | 0.011698 | 0.011597 | 0.011698 |
| 0.011732 | 0.011765 | 0.011665 | 0.011631 | 0.011597 | 0.000000 | 0.000000 |
| 0.011732 | 0.011767 | 0.011833 | 0.011765 | 0.012339 | 0.011847 | 0.011764 |
| 0.011834 | 0.011789 | 0.011904 | 0.011788 | 0.011901 | 0.011819 | 0.011716 |
| 0.012297 | 0.011684 | 0.011814 | 0.011752 | 0.012025 | 0.011877 | 0.011980 |
| 0.012319 | 0.011814 | 0.011703 | 0.011698 | 0.011698 | 0.011463 | 0.011669 |
| 0.011564 | 0.011597 | 0.011732 | 0.011698 | 0.011702 | 0.011564 | 0.011532 |
| 0.011665 | 0.011597 | 0.011631 | 0.011665 | 0.011564 | 0.011631 | 0.011530 |
| 0.011597 | 0.011631 | 0.011597 | 0.011564 | 0.011665 | 0.011597 | 0.011631 |
| 0.011631 | 0.011564 | 0.011631 | 0.011665 | 0.011564 | 0.011765 | 0.011799 |
| 0.011698 | 0.011698 | 0.011698 | 0.011698 | 0.011631 | 0.011362 | 0.011665 |
| 0.011443 | 0.011631 | 0.011598 | 0.011603 | 0.011665 | 0.011665 | 0.011732 |
| 0.011732 | 0.011665 | 0.011631 | 0.011665 | 0.011765 | 0.011765 | 0.011698 |
| 0.011698 | 0.011833 | 0.011396 | 0.011732 | 0.011934 | 0.011934 | 0.011799 |
| 0.011631 | 0.011698 | 0.011732 | 0.011463 | 0.011699 | 0.011665 | 0.011698 |
| 0.011732 | 0.011597 | 0.011597 | 0.011900 | 0.011900 | 0.011866 | 0.011665 |
| 0.011766 | 0.011833 | 0.011698 | 0.011766 | 0.011732 | 0.011597 | 0.011329 |
| 0.011698 | 0.011665 | 0.011597 | 0.011833 | 0.011665 | 0.011765 | 0.011598 |
| 0.011698 | 0.011468 | 0.011463 | 0.011467 | 0.011286 | 0.011706 | 0.011318 |
| 0.011555 | 0.011644 | 0.011587 | 0.011596 | 0.011499 | 0.011366 | 0.011379 |
| 0.011417 | 0.011258 | 0.011450 | 0.011324 | 0.011330 | 0.011529 | 0.011790 |
| 0.011776 | 0.011690 | 0.011659 | 0.011659 | 0.011701 | 0.011564 | 0.011631 |
| 0.011631 | 0.011699 | 0.011804 | 0.011569 | 0.011942 | 0.011979 | 0.011698 |
| 0.011665 | 0.011732 | 0.011665 | 0.011698 | 0.011564 | 0.011530 | 0.011598 |
| 0.011665 | 0.011665 | 0.011631 | 0.011597 | 0.011631 | 0.011597 | 0.011698 |
| 0.011619 | 0.011620 | 0.011608 | 0.011642 | 0.011779 | 0.011744 | 0.011743 |
| 0.011742 | 0.011733 | 0.011503 | 0.011492 | 0.011602 | 0.011772 | 0.011773 |
| 0.011632 | 0.011636 | 0.011936 | 0.011905 | 0.011834 | 0.011868 | 0.011799 |
| 0.011732 | 0.011799 | 0.011799 | 0.011698 | 0.011597 | 0.011866 | 0.011934 |
| 0.011967 | 0.011345 | 0.011606 | 0.011753 | 0.011631 | 0.011833 | 0.011799 |
| 0.011834 | 0.011866 | 0.011866 | 0.011866 | 0.011965 | 0.012001 | 0.011650 |
| 0.011534 | 0.011545 | 0.011639 | 0.011604 | 0.011641 | 0.011546 | 0.011264 |

|          |          |          |          |          |          |          |
|----------|----------|----------|----------|----------|----------|----------|
| 0.011678 | 0.011323 | 0.011489 | 0.011660 | 0.011665 | 0.011676 | 0.011631 |
| 0.011597 | 0.011530 | 0.011665 | 0.011631 | 0.011564 | 0.011530 | 0.011463 |
| 0.011564 | 0.011631 | 0.011631 | 0.011631 | 0.011665 | 0.011665 | 0.011668 |
| 0.011736 | 0.011665 | 0.011665 | 0.011701 | 0.011564 | 0.011631 | 0.011631 |
| 0.011699 | 0.011804 | 0.011569 | 0.011942 | 0.011979 | 0.011698 | 0.011866 |
| 0.011799 | 0.011799 | 0.011635 | 0.011826 | 0.011721 | 0.011775 | 0.011656 |
| 0.011818 | 0.011972 | 0.011780 | 0.011706 | 0.011597 | 0.011799 | 0.011665 |
| 0.011765 | 0.011698 | 0.011597 | 0.011700 | 0.011799 | 0.011804 | 0.011698 |
| 0.011597 | 0.011532 | 0.011665 | 0.011597 | 0.011530 | 0.011536 | 0.011799 |
| 0.011698 | 0.011631 | 0.011665 | 0.011698 | 0.011665 | 0.011597 | 0.011530 |
| 0.011665 | 0.011698 | 0.011698 | 0.011631 | 0.011698 | 0.011934 | 0.011530 |
| 0.011631 | 0.011362 | 0.011631 | 0.011665 | 0.011631 | 0.011396 | 0.011489 |
| 0.011735 | 0.011315 | 0.011311 | 0.011382 | 0.011467 | 0.011527 | 0.011269 |
| 0.011270 | 0.011530 | 0.011631 | 0.011739 | 0.011599 | 0.011737 | 0.011868 |
| 0.011767 | 0.011805 | 0.011766 | 0.011983 | 0.011732 | 0.012607 | 0.011768 |
| 0.012507 | 0.012275 | 0.012409 | 0.012681 | 0.011665 | 0.011631 | 0.011732 |
| 0.012373 | 0.012106 | 0.011698 | 0.011598 | 0.011666 | 0.011666 | 0.011636 |
| 0.011530 | 0.011535 | 0.011597 | 0.011565 | 0.011935 | 0.012001 | 0.012002 |
| 0.011902 | 0.012002 | 0.012106 | 0.011872 | 0.012374 | 0.012381 | 0.012441 |
| 0.012442 | 0.012475 | 0.012426 | 0.012442 | 0.012443 | 0.011732 | 0.011968 |
| 0.012036 | 0.012540 | 0.012044 | 0.012002 | 0.012474 | 0.011536 | 0.011430 |
| 0.011329 | 0.011396 | 0.011934 | 0.011883 | 0.011975 | 0.011732 | 0.011465 |
| S431     | 0.011732 | 0.011732 | 0.012068 | 0.011833 | 0.011833 | 0.011900 |
| 0.011740 | 0.011672 | 0.011900 | 0.011329 | 0.011396 | 0.011363 | 0.011329 |
| 0.011362 | 0.011530 | 0.011329 | 0.011362 | 0.011430 | 0.011396 | 0.011362 |
| 0.011329 | 0.011362 | 0.011463 | 0.011329 | 0.011363 | 0.011362 | 0.011706 |
| 0.011597 | 0.011362 | 0.011262 | 0.011497 | 0.011430 | 0.011396 | 0.011430 |
| 0.011396 | 0.011497 | 0.011396 | 0.011396 | 0.011430 | 0.011396 | 0.011564 |
| 0.011329 | 0.011396 | 0.011430 | 0.011362 | 0.011463 | 0.011497 | 0.011430 |
| 0.011396 | 0.011564 | 0.011463 | 0.011732 | 0.011396 | 0.011665 | 0.011396 |
| 0.011362 | 0.011463 | 0.011530 | 0.011665 | 0.011766 | 0.011463 | 0.011564 |
| 0.011430 | 0.011497 | 0.011396 | 0.011631 | 0.011866 | 0.011396 | 0.011463 |
| 0.011362 | 0.011463 | 0.011430 | 0.011497 | 0.011430 | 0.011430 | 0.011430 |
| 0.011329 | 0.011362 | 0.011329 | 0.011430 | 0.011396 | 0.011431 | 0.011497 |
| 0.011362 | 0.011396 | 0.011463 | 0.011362 | 0.011497 | 0.011329 | 0.011396 |
| 0.011564 | 0.011497 | 0.011732 | 0.011564 | 0.011396 | 0.011564 | 0.011396 |
| 0.011580 | 0.011808 | 0.011626 | 0.011295 | 0.011322 | 0.011391 | 0.011533 |
| 0.012159 | 0.011569 | 0.011349 | 0.011631 | 0.011631 | 0.011429 | 0.011530 |
| 0.011463 | 0.011430 | 0.011497 | 0.011396 | 0.011497 | 0.011430 | 0.011429 |
| 0.011396 | 0.011497 | 0.011698 | 0.011564 | 0.011463 | 0.011430 | 0.011363 |
| 0.011329 | 0.011329 | 0.011396 | 0.011362 | 0.011564 | 0.011530 | 0.011463 |
| 0.011564 | 0.011631 | 0.011362 | 0.011362 | 0.011396 | 0.011396 | 0.011398 |
| 0.011466 | 0.011396 | 0.011396 | 0.011276 | 0.011350 | 0.011306 | 0.011397 |
| 0.011399 | 0.011335 | 0.011392 | 0.011371 | 0.011298 | 0.011334 | 0.011364 |
| 0.011636 | 0.011405 | 0.011439 | 0.011329 | 0.011337 | 0.011464 | 0.011430 |
| 0.011498 | 0.011431 | 0.011430 | 0.011530 | 0.011463 | 0.011766 | 0.011631 |
| 0.011665 | 0.011531 | 0.011396 | 0.011497 | 0.011295 | 0.011530 | 0.011329 |
| 0.011396 | 0.011396 | 0.011362 | 0.011329 | 0.011362 | 0.011329 | 0.011430 |
| 0.011396 | 0.011497 | 0.011430 | 0.011329 | 0.011431 | 0.011531 | 0.011534 |
| 0.011531 | 0.011430 | 0.011329 | 0.011263 | 0.011396 | 0.011329 | 0.011262 |
| 0.011366 | 0.011531 | 0.011329 | 0.011531 | 0.011295 | 0.011396 | 0.011363 |
| 0.011463 | 0.011362 | 0.011396 | 0.011363 | 0.011396 | 0.011262 | 0.011396 |
| 0.011430 | 0.011362 | 0.011430 | 0.011362 | 0.011396 | 0.011430 | 0.011665 |
| 0.011766 | 0.011698 | 0.011766 | 0.011532 | 0.011766 | 0.011396 | 0.011362 |
| 0.011398 | 0.011667 | 0.011518 | 0.011300 | 0.011773 | 0.011265 | 0.011414 |
| 0.011774 | 0.011673 | 0.011564 | 0.011766 | 0.011470 | 0.011631 | 0.011530 |
| 0.011463 | 0.011698 | 0.011558 | 0.011390 | 0.011438 | 0.011430 | 0.011500 |
| 0.011598 | 0.011499 | 0.011635 | 0.011703 | 0.011631 | 0.011699 | 0.011806 |
| 0.011534 | 0.011705 | 0.011636 | 0.011568 | 0.011834 | 0.011295 | 0.011498 |
| 0.011463 | 0.011396 | 0.011295 | 0.011295 | 0.011362 | 0.011362 | 0.011430 |

|          |          |          |          |          |          |          |
|----------|----------|----------|----------|----------|----------|----------|
| 0.011362 | 0.011362 | 0.011329 | 0.011430 | 0.011362 | 0.011362 | 0.011429 |
| 0.011362 | 0.011799 | 0.011698 | 0.011732 | 0.011262 | 0.011362 | 0.011396 |
| 0.011396 | 0.011362 | 0.011430 | 0.011463 | 0.011329 | 0.011329 | 0.011329 |
| 0.011866 | 0.011497 | 0.011497 | 0.011295 | 0.011396 | 0.011564 | 0.011329 |
| 0.011329 | 0.011396 | 0.011362 | 0.011530 | 0.011329 | 0.011463 | 0.011597 |
| 0.011530 | 0.011362 | 0.011362 | 0.011295 | 0.011295 | 0.011463 | 0.011396 |
| 0.011295 | 0.011396 | 0.011262 | 0.011295 | 0.011430 | 0.011564 | 0.011329 |
| 0.011296 | 0.011430 | 0.011363 | 0.011262 | 0.011597 | 0.011262 | 0.011430 |
| 0.011505 | 0.011329 | 0.011631 | 0.011463 | 0.011497 | 0.011295 | 0.011463 |
| 0.011329 | 0.011665 | 0.011262 | 0.011530 | 0.011329 | 0.011329 | 0.011262 |
| 0.011497 | 0.011699 | 0.011396 | 0.011463 | 0.011295 | 0.011698 | 0.011329 |
| 0.011329 | 0.011329 | 0.011362 | 0.011463 | 0.011362 | 0.011463 | 0.011530 |
| 0.011530 | 0.011497 | 0.011396 | 0.011497 | 0.011463 | 0.011329 | 0.011295 |
| 0.011329 | 0.011329 | 0.011396 | 0.011329 | 0.011295 | 0.011463 | 0.011329 |
| 0.011362 | 0.011362 | 0.011497 | 0.011530 | 0.011430 | 0.011362 | 0.011363 |
| 0.011430 | 0.011362 | 0.011463 | 0.011329 | 0.011463 | 0.011564 | 0.011866 |
| 0.011362 | 0.011766 | 0.011302 | 0.017902 | 0.011388 | 0.011550 | 0.011723 |
| 0.011683 | 0.011729 | 0.011532 | 0.011467 | 0.011885 | 0.011751 | 0.011486 |
| 0.011630 | 0.011732 | 0.011294 | 0.011270 | 0.011334 | 0.011455 | 0.011362 |
| 0.011577 | 0.011545 | 0.011542 | 0.011325 | 0.011497 | 0.011530 | 0.011534 |
| 0.011404 | 0.011497 | 0.011497 | 0.011463 | 0.011430 | 0.011430 | 0.011396 |
| 0.011430 | 0.011362 | 0.011396 | 0.011430 | 0.011396 | 0.011329 | 0.011362 |
| 0.011362 | 0.011430 | 0.011329 | 0.011430 | 0.011463 | 0.011497 | 0.011396 |
| 0.011430 | 0.011396 | 0.011732 | 0.011732 | 0.000000 | 0.011497 | 0.011531 |
| 0.011295 | 0.011295 | 0.011329 | 0.011430 | 0.011295 | 0.011530 | 0.011530 |
| 0.011564 | 0.011564 | 0.011497 | 0.011598 | 0.011766 | 0.011599 | 0.011430 |
| 0.011430 | 0.011497 | 0.011530 | 0.011363 | 0.011430 | 0.011396 | 0.011430 |
| 0.011497 | 0.011497 | 0.011530 | 0.011497 | 0.011397 | 0.011598 | 0.011564 |
| 0.011433 | 0.011329 | 0.011430 | 0.011531 | 0.011430 | 0.011564 | 0.011597 |
| 0.011766 | 0.011470 | 0.011631 | 0.011530 | 0.011463 | 0.011698 | 0.011329 |
| 0.011498 | 0.011396 | 0.011362 | 0.011362 | 0.011430 | 0.011329 | 0.011430 |
| 0.011463 | 0.011497 | 0.011396 | 0.011430 | 0.011396 | 0.011732 | 0.011732 |
| 0.000000 | 0.011497 | 0.011564 | 0.011497 | 0.012137 | 0.011561 | 0.011482 |
| 0.011553 | 0.011511 | 0.011623 | 0.011511 | 0.011620 | 0.011543 | 0.011509 |
| 0.012091 | 0.011406 | 0.011540 | 0.011475 | 0.011749 | 0.011605 | 0.011707 |
| 0.012115 | 0.011588 | 0.011669 | 0.011732 | 0.011597 | 0.011598 | 0.011635 |
| 0.011295 | 0.011463 | 0.011597 | 0.011564 | 0.011567 | 0.011564 | 0.011532 |
| 0.011396 | 0.011329 | 0.011362 | 0.011396 | 0.011295 | 0.011362 | 0.011262 |
| 0.011396 | 0.011430 | 0.011329 | 0.011295 | 0.011396 | 0.011329 | 0.011362 |
| 0.011362 | 0.011295 | 0.011362 | 0.011396 | 0.011295 | 0.011497 | 0.011530 |
| 0.011430 | 0.011497 | 0.011430 | 0.011430 | 0.011362 | 0.011766 | 0.011396 |
| 0.011443 | 0.011362 | 0.011598 | 0.011603 | 0.011463 | 0.011463 | 0.011463 |
| 0.011463 | 0.011396 | 0.011362 | 0.011396 | 0.011497 | 0.011497 | 0.011430 |
| 0.011430 | 0.011564 | 0.011732 | 0.011463 | 0.011665 | 0.011665 | 0.011530 |
| 0.011362 | 0.011430 | 0.011463 | 0.011866 | 0.011430 | 0.011463 | 0.011362 |
| 0.011463 | 0.011396 | 0.011396 | 0.011699 | 0.011631 | 0.011665 | 0.011396 |
| 0.011497 | 0.011564 | 0.011430 | 0.011497 | 0.011463 | 0.011329 | 0.011665 |
| 0.011429 | 0.011396 | 0.011396 | 0.011564 | 0.011396 | 0.011497 | 0.011732 |
| 0.011430 | 0.011808 | 0.011799 | 0.011630 | 0.011342 | 0.011502 | 0.011422 |
| 0.011390 | 0.011839 | 0.011341 | 0.011596 | 0.011402 | 0.011519 | 0.011539 |
| 0.011622 | 0.011324 | 0.011506 | 0.011325 | 0.011384 | 0.011530 | 0.011506 |
| 0.011512 | 0.011414 | 0.011483 | 0.011413 | 0.011431 | 0.011564 | 0.011631 |
| 0.011631 | 0.011497 | 0.011601 | 0.011603 | 0.011739 | 0.011767 | 0.011430 |
| 0.011665 | 0.011531 | 0.011396 | 0.011497 | 0.011295 | 0.011530 | 0.011329 |
| 0.011396 | 0.011396 | 0.011362 | 0.011329 | 0.011362 | 0.011329 | 0.011430 |
| 0.011410 | 0.011410 | 0.011403 | 0.011437 | 0.011574 | 0.011539 | 0.011538 |
| 0.011537 | 0.011464 | 0.011282 | 0.011276 | 0.011399 | 0.011569 | 0.011569 |
| 0.011363 | 0.011433 | 0.011666 | 0.011635 | 0.011565 | 0.011599 | 0.011530 |
| 0.011396 | 0.011530 | 0.011530 | 0.011430 | 0.012001 | 0.011598 | 0.011665 |
| 0.011699 | 0.011737 | 0.011401 | 0.011441 | 0.011362 | 0.011564 | 0.011530 |

|          |          |          |          |          |          |          |
|----------|----------|----------|----------|----------|----------|----------|
| 0.011565 | 0.011597 | 0.011598 | 0.011598 | 0.011728 | 0.011732 | 0.011373 |
| 0.011263 | 0.011268 | 0.011367 | 0.011332 | 0.011436 | 0.011284 | 0.011604 |
| 0.011403 | 0.011499 | 0.011251 | 0.011435 | 0.011397 | 0.011402 | 0.011363 |
| 0.011329 | 0.011329 | 0.011396 | 0.011362 | 0.011564 | 0.011530 | 0.011463 |
| 0.011564 | 0.011631 | 0.011362 | 0.011362 | 0.011396 | 0.011396 | 0.011398 |
| 0.011466 | 0.011396 | 0.011396 | 0.011431 | 0.011564 | 0.011631 | 0.011631 |
| 0.011497 | 0.011601 | 0.011603 | 0.011739 | 0.011767 | 0.011430 | 0.011597 |
| 0.011530 | 0.011530 | 0.011365 | 0.011548 | 0.011477 | 0.011503 | 0.011376 |
| 0.011543 | 0.011790 | 0.011568 | 0.011434 | 0.011329 | 0.011531 | 0.011396 |
| 0.011497 | 0.011430 | 0.011329 | 0.011431 | 0.011531 | 0.011534 | 0.011430 |
| 0.011329 | 0.011263 | 0.011396 | 0.011329 | 0.011262 | 0.011366 | 0.011531 |
| 0.011430 | 0.011362 | 0.011396 | 0.011430 | 0.011396 | 0.011329 | 0.011531 |
| 0.011396 | 0.011430 | 0.011430 | 0.011362 | 0.011430 | 0.011665 | 0.011329 |
| 0.011362 | 0.011766 | 0.011362 | 0.011396 | 0.011362 | 0.011732 | 0.011360 |
| 0.011848 | 0.011358 | 0.011361 | 0.011584 | 0.011671 | 0.011563 | 0.011269 |
| 0.011323 | 0.011530 | 0.011631 | 0.011740 | 0.011599 | 0.011737 | 0.011868 |
| 0.011767 | 0.011805 | 0.011765 | 0.012018 | 0.011732 | 0.012607 | 0.011768 |
| 0.012507 | 0.012275 | 0.012409 | 0.012681 | 0.011732 | 0.011430 | 0.011732 |
| 0.012171 | 0.012106 | 0.011698 | 0.011598 | 0.011666 | 0.011666 | 0.011635 |
| 0.011530 | 0.011535 | 0.011597 | 0.011565 | 0.011935 | 0.012001 | 0.012002 |
| 0.011902 | 0.012002 | 0.012106 | 0.011839 | 0.012172 | 0.012144 | 0.012239 |
| 0.012240 | 0.012240 | 0.012221 | 0.012240 | 0.012241 | 0.011463 | 0.011766 |
| 0.011834 | 0.012338 | 0.011840 | 0.012069 | 0.012542 | 0.011604 | 0.011497 |
| 0.011463 | 0.011463 | 0.011934 | 0.012007 | 0.012081 | 0.011799 | 0.011465 |
| S432     | 0.011766 | 0.011766 | 0.012103 | 0.011867 | 0.011867 | 0.011935 |
| 0.011775 | 0.011707 | 0.011800 | 0.011363 | 0.011430 | 0.011397 | 0.011363 |
| 0.011396 | 0.011497 | 0.011363 | 0.011329 | 0.011464 | 0.011430 | 0.011396 |
| 0.011363 | 0.011396 | 0.011497 | 0.011363 | 0.011397 | 0.011396 | 0.011741 |
| 0.011632 | 0.011396 | 0.011296 | 0.011531 | 0.011464 | 0.011430 | 0.011464 |
| 0.011430 | 0.011531 | 0.011430 | 0.011430 | 0.011396 | 0.011430 | 0.011598 |
| 0.011363 | 0.011430 | 0.011396 | 0.011396 | 0.011497 | 0.011464 | 0.011464 |
| 0.011430 | 0.011531 | 0.011498 | 0.011766 | 0.011363 | 0.011699 | 0.011363 |
| 0.011396 | 0.011497 | 0.011565 | 0.011699 | 0.011800 | 0.011497 | 0.011598 |
| 0.011464 | 0.011531 | 0.011430 | 0.011665 | 0.011901 | 0.011363 | 0.011497 |
| 0.011396 | 0.011497 | 0.011396 | 0.011531 | 0.011464 | 0.011464 | 0.011464 |
| 0.011363 | 0.011396 | 0.011363 | 0.011464 | 0.011430 | 0.011465 | 0.011531 |
| 0.011464 | 0.011430 | 0.011497 | 0.011396 | 0.011531 | 0.011363 | 0.011430 |
| 0.011598 | 0.011531 | 0.011766 | 0.011598 | 0.011430 | 0.011666 | 0.011363 |
| 0.011617 | 0.011846 | 0.011665 | 0.011373 | 0.011359 | 0.011428 | 0.011573 |
| 0.012196 | 0.011671 | 0.011390 | 0.011598 | 0.011665 | 0.011464 | 0.011565 |
| 0.011497 | 0.011464 | 0.011531 | 0.011430 | 0.011531 | 0.011464 | 0.011464 |
| 0.011430 | 0.011531 | 0.011733 | 0.011531 | 0.011497 | 0.011464 | 0.011397 |
| 0.011363 | 0.011363 | 0.011430 | 0.011396 | 0.011598 | 0.011565 | 0.011497 |
| 0.011598 | 0.011598 | 0.011396 | 0.011396 | 0.011430 | 0.011430 | 0.011432 |
| 0.011500 | 0.011430 | 0.011430 | 0.011312 | 0.011350 | 0.011306 | 0.011431 |
| 0.011433 | 0.011370 | 0.011430 | 0.011406 | 0.011332 | 0.011369 | 0.011399 |
| 0.011637 | 0.011440 | 0.011474 | 0.011363 | 0.011372 | 0.011498 | 0.011464 |
| 0.011532 | 0.011465 | 0.011464 | 0.011564 | 0.011497 | 0.011800 | 0.011666 |
| 0.011699 | 0.011565 | 0.011430 | 0.011531 | 0.011329 | 0.011564 | 0.011363 |
| 0.011430 | 0.011430 | 0.011396 | 0.011363 | 0.011396 | 0.011363 | 0.011464 |
| 0.011430 | 0.011531 | 0.011464 | 0.011363 | 0.011330 | 0.011531 | 0.011568 |
| 0.011565 | 0.011464 | 0.011363 | 0.011296 | 0.011430 | 0.011363 | 0.011296 |
| 0.011400 | 0.011565 | 0.011363 | 0.011565 | 0.011329 | 0.011430 | 0.011397 |
| 0.011497 | 0.011396 | 0.011430 | 0.011397 | 0.011430 | 0.011296 | 0.011430 |
| 0.011464 | 0.011396 | 0.011464 | 0.011396 | 0.011430 | 0.011464 | 0.011699 |
| 0.011800 | 0.011733 | 0.011800 | 0.011567 | 0.011801 | 0.011430 | 0.011396 |
| 0.011432 | 0.011707 | 0.011563 | 0.011335 | 0.011740 | 0.011299 | 0.011297 |
| 0.011808 | 0.011707 | 0.011598 | 0.011800 | 0.011505 | 0.011666 | 0.011632 |
| 0.011497 | 0.011733 | 0.011558 | 0.011349 | 0.011396 | 0.011464 | 0.011501 |
| 0.011632 | 0.011533 | 0.011670 | 0.011738 | 0.011666 | 0.011733 | 0.011841 |

|          |          |          |          |          |          |          |
|----------|----------|----------|----------|----------|----------|----------|
| 0.011569 | 0.011740 | 0.011603 | 0.011602 | 0.011835 | 0.011329 | 0.011533 |
| 0.011497 | 0.011430 | 0.011329 | 0.011329 | 0.011396 | 0.011329 | 0.011464 |
| 0.011396 | 0.011464 | 0.011363 | 0.011464 | 0.011396 | 0.011396 | 0.011396 |
| 0.011396 | 0.011834 | 0.011733 | 0.011766 | 0.011296 | 0.011396 | 0.011430 |
| 0.011430 | 0.011396 | 0.011464 | 0.011497 | 0.011363 | 0.011363 | 0.011363 |
| 0.011901 | 0.011531 | 0.011531 | 0.011329 | 0.011430 | 0.011531 | 0.011363 |
| 0.011363 | 0.011430 | 0.011396 | 0.011565 | 0.011329 | 0.011497 | 0.011632 |
| 0.011565 | 0.011396 | 0.011396 | 0.011329 | 0.011329 | 0.011497 | 0.011430 |
| 0.011329 | 0.011430 | 0.011296 | 0.011329 | 0.011464 | 0.011599 | 0.011329 |
| 0.011330 | 0.011464 | 0.011397 | 0.011296 | 0.011632 | 0.011296 | 0.011397 |
| 0.011540 | 0.011363 | 0.011666 | 0.011497 | 0.011531 | 0.011396 | 0.011430 |
| 0.011363 | 0.011699 | 0.011296 | 0.011565 | 0.011363 | 0.011363 | 0.011296 |
| 0.011531 | 0.011733 | 0.011430 | 0.011497 | 0.011329 | 0.011733 | 0.011363 |
| 0.011363 | 0.011363 | 0.011396 | 0.011497 | 0.011396 | 0.011497 | 0.011565 |
| 0.011565 | 0.011531 | 0.011430 | 0.011531 | 0.011497 | 0.011363 | 0.011329 |
| 0.011363 | 0.011363 | 0.011430 | 0.011363 | 0.011329 | 0.011497 | 0.011363 |
| 0.011396 | 0.011396 | 0.011531 | 0.011565 | 0.011464 | 0.011396 | 0.011397 |
| 0.011464 | 0.011396 | 0.011497 | 0.011363 | 0.011497 | 0.011531 | 0.011901 |
| 0.011396 | 0.011800 | 0.011406 | 0.017910 | 0.011454 | 0.011428 | 0.011759 |
| 0.011719 | 0.011765 | 0.011427 | 0.011466 | 0.011831 | 0.011787 | 0.011548 |
| 0.011582 | 0.011672 | 0.011334 | 0.011396 | 0.011412 | 0.011456 | 0.011448 |
| 0.011623 | 0.011582 | 0.011580 | 0.011457 | 0.011531 | 0.011565 | 0.011568 |
| 0.011439 | 0.011531 | 0.011531 | 0.011497 | 0.011464 | 0.011464 | 0.011430 |
| 0.011464 | 0.011396 | 0.011430 | 0.011464 | 0.011430 | 0.011363 | 0.011396 |
| 0.011396 | 0.011464 | 0.011363 | 0.011464 | 0.011497 | 0.011531 | 0.011430 |
| 0.011464 | 0.011430 | 0.011767 | 0.011767 | 0.011497 | 0.000000 | 0.011565 |
| 0.011329 | 0.011329 | 0.011363 | 0.011464 | 0.011329 | 0.011565 | 0.011565 |
| 0.011598 | 0.011598 | 0.011531 | 0.011632 | 0.011800 | 0.011634 | 0.011464 |
| 0.011464 | 0.011531 | 0.011497 | 0.011397 | 0.011464 | 0.011430 | 0.011397 |
| 0.011531 | 0.011531 | 0.011565 | 0.011531 | 0.011431 | 0.011632 | 0.011598 |
| 0.011433 | 0.011363 | 0.011464 | 0.011565 | 0.011464 | 0.011598 | 0.011632 |
| 0.011800 | 0.011505 | 0.011666 | 0.011632 | 0.011497 | 0.011733 | 0.011363 |
| 0.011465 | 0.011363 | 0.011396 | 0.011396 | 0.011464 | 0.011363 | 0.011464 |
| 0.011497 | 0.011531 | 0.011430 | 0.011464 | 0.011430 | 0.011767 | 0.011767 |
| 0.011497 | 0.000000 | 0.011598 | 0.011531 | 0.012172 | 0.011597 | 0.011483 |
| 0.011588 | 0.011547 | 0.011659 | 0.011546 | 0.011656 | 0.011578 | 0.011544 |
| 0.012127 | 0.011442 | 0.011575 | 0.011511 | 0.011785 | 0.011639 | 0.011742 |
| 0.012150 | 0.011589 | 0.011636 | 0.011665 | 0.011632 | 0.011632 | 0.011602 |
| 0.011329 | 0.011497 | 0.011632 | 0.011598 | 0.011602 | 0.011598 | 0.011566 |
| 0.011430 | 0.011363 | 0.011396 | 0.011430 | 0.011329 | 0.011396 | 0.011296 |
| 0.011430 | 0.011464 | 0.011363 | 0.011329 | 0.011430 | 0.011363 | 0.011396 |
| 0.011329 | 0.011329 | 0.011396 | 0.011430 | 0.011329 | 0.011531 | 0.011565 |
| 0.011464 | 0.011531 | 0.011464 | 0.011464 | 0.011396 | 0.011800 | 0.011430 |
| 0.011444 | 0.011396 | 0.011632 | 0.011638 | 0.011498 | 0.011497 | 0.011497 |
| 0.011497 | 0.011430 | 0.011396 | 0.011430 | 0.011464 | 0.011531 | 0.011464 |
| 0.011464 | 0.011598 | 0.011766 | 0.011497 | 0.011699 | 0.011699 | 0.011565 |
| 0.011396 | 0.011464 | 0.011497 | 0.011901 | 0.011464 | 0.011498 | 0.011464 |
| 0.011497 | 0.011430 | 0.011430 | 0.011733 | 0.011666 | 0.011699 | 0.011430 |
| 0.011531 | 0.011598 | 0.011464 | 0.011531 | 0.011497 | 0.011363 | 0.011699 |
| 0.011464 | 0.011430 | 0.011430 | 0.011598 | 0.011430 | 0.011531 | 0.011767 |
| 0.011464 | 0.011843 | 0.011834 | 0.011671 | 0.011399 | 0.011537 | 0.011421 |
| 0.011336 | 0.011840 | 0.011377 | 0.011642 | 0.011500 | 0.011571 | 0.011646 |
| 0.011672 | 0.011456 | 0.011563 | 0.011391 | 0.011493 | 0.011598 | 0.011548 |
| 0.011551 | 0.011454 | 0.011519 | 0.011448 | 0.011465 | 0.011598 | 0.011666 |
| 0.011666 | 0.011532 | 0.011636 | 0.011637 | 0.011773 | 0.011804 | 0.011464 |
| 0.011699 | 0.011565 | 0.011430 | 0.011531 | 0.011329 | 0.011564 | 0.011363 |
| 0.011430 | 0.011430 | 0.011396 | 0.011363 | 0.011396 | 0.011363 | 0.011464 |
| 0.011445 | 0.011446 | 0.011369 | 0.011472 | 0.011609 | 0.011574 | 0.011505 |
| 0.011572 | 0.011498 | 0.011319 | 0.011277 | 0.011366 | 0.011603 | 0.011604 |
| 0.011397 | 0.011467 | 0.011701 | 0.011670 | 0.011599 | 0.011566 | 0.011565 |

|          |          |          |          |          |          |          |
|----------|----------|----------|----------|----------|----------|----------|
| 0.011497 | 0.011565 | 0.011564 | 0.011464 | 0.012036 | 0.011632 | 0.011699 |
| 0.011733 | 0.011773 | 0.011436 | 0.011511 | 0.011396 | 0.011598 | 0.011565 |
| 0.011599 | 0.011632 | 0.011632 | 0.011632 | 0.011769 | 0.011766 | 0.011373 |
| 0.011297 | 0.011268 | 0.011401 | 0.011367 | 0.011471 | 0.011285 | 0.011639 |
| 0.011438 | 0.011500 | 0.011251 | 0.011436 | 0.011431 | 0.011506 | 0.011397 |
| 0.011363 | 0.011363 | 0.011430 | 0.011396 | 0.011598 | 0.011565 | 0.011497 |
| 0.011598 | 0.011598 | 0.011396 | 0.011396 | 0.011430 | 0.011430 | 0.011432 |
| 0.011500 | 0.011430 | 0.011430 | 0.011465 | 0.011598 | 0.011666 | 0.011666 |
| 0.011532 | 0.011636 | 0.011637 | 0.011773 | 0.011804 | 0.011464 | 0.011632 |
| 0.011565 | 0.011565 | 0.011399 | 0.011583 | 0.011443 | 0.011538 | 0.011376 |
| 0.011578 | 0.011789 | 0.011526 | 0.011469 | 0.011363 | 0.011565 | 0.011430 |
| 0.011531 | 0.011464 | 0.011363 | 0.011330 | 0.011531 | 0.011568 | 0.011464 |
| 0.011363 | 0.011296 | 0.011430 | 0.011363 | 0.011296 | 0.011400 | 0.011565 |
| 0.011464 | 0.011396 | 0.011430 | 0.011464 | 0.011430 | 0.011363 | 0.011565 |
| 0.011430 | 0.011464 | 0.011464 | 0.011396 | 0.011464 | 0.011699 | 0.011363 |
| 0.011396 | 0.011800 | 0.011396 | 0.011430 | 0.011396 | 0.011766 | 0.011361 |
| 0.011791 | 0.011401 | 0.011411 | 0.011625 | 0.011713 | 0.011599 | 0.011353 |
| 0.011375 | 0.011565 | 0.011598 | 0.011706 | 0.011566 | 0.011704 | 0.011835 |
| 0.011734 | 0.011772 | 0.011733 | 0.012053 | 0.011766 | 0.012643 | 0.011803 |
| 0.012543 | 0.012310 | 0.012445 | 0.012717 | 0.011766 | 0.011464 | 0.011666 |
| 0.012206 | 0.012040 | 0.011733 | 0.011632 | 0.011700 | 0.011700 | 0.011670 |
| 0.011565 | 0.011570 | 0.011632 | 0.011599 | 0.011970 | 0.012036 | 0.012037 |
| 0.011937 | 0.012037 | 0.012141 | 0.011907 | 0.012207 | 0.012214 | 0.012274 |
| 0.012275 | 0.012309 | 0.012257 | 0.012275 | 0.012276 | 0.011497 | 0.011801 |
| 0.011869 | 0.012373 | 0.011841 | 0.012104 | 0.012578 | 0.011638 | 0.011532 |
| 0.011497 | 0.011497 | 0.011969 | 0.012008 | 0.012118 | 0.011834 | 0.011499 |
| S433     | 0.011799 | 0.011799 | 0.012136 | 0.011900 | 0.011900 | 0.011967 |
| 0.011808 | 0.011740 | 0.011900 | 0.011396 | 0.011463 | 0.011430 | 0.011396 |
| 0.011430 | 0.011598 | 0.011396 | 0.011430 | 0.011497 | 0.011463 | 0.011430 |
| 0.011396 | 0.011430 | 0.011530 | 0.011396 | 0.011430 | 0.011430 | 0.011774 |
| 0.011665 | 0.011430 | 0.011329 | 0.011564 | 0.011497 | 0.011463 | 0.011497 |
| 0.011463 | 0.011564 | 0.011463 | 0.011463 | 0.011497 | 0.011463 | 0.011631 |
| 0.011396 | 0.011463 | 0.011497 | 0.011430 | 0.011530 | 0.011564 | 0.011497 |
| 0.011463 | 0.011631 | 0.011531 | 0.011799 | 0.011463 | 0.011732 | 0.011463 |
| 0.011430 | 0.011531 | 0.011598 | 0.011732 | 0.011833 | 0.011530 | 0.011631 |
| 0.011497 | 0.011564 | 0.011463 | 0.011698 | 0.011934 | 0.011463 | 0.011530 |
| 0.011430 | 0.011530 | 0.011497 | 0.011564 | 0.011497 | 0.011497 | 0.011497 |
| 0.011396 | 0.011430 | 0.011396 | 0.011497 | 0.011463 | 0.011498 | 0.011564 |
| 0.011497 | 0.011430 | 0.011530 | 0.011430 | 0.011564 | 0.011396 | 0.011463 |
| 0.011631 | 0.011564 | 0.011799 | 0.011631 | 0.011463 | 0.011698 | 0.011463 |
| 0.011616 | 0.011845 | 0.011664 | 0.011412 | 0.011396 | 0.011465 | 0.011572 |
| 0.012231 | 0.011670 | 0.011390 | 0.011698 | 0.011698 | 0.011497 | 0.011598 |
| 0.011530 | 0.011430 | 0.011564 | 0.011463 | 0.011564 | 0.011497 | 0.011497 |
| 0.011463 | 0.011564 | 0.011698 | 0.011631 | 0.011530 | 0.011497 | 0.011430 |
| 0.011396 | 0.011396 | 0.011463 | 0.011430 | 0.011631 | 0.011598 | 0.011530 |
| 0.011631 | 0.011698 | 0.011430 | 0.011430 | 0.011463 | 0.011463 | 0.011465 |
| 0.011534 | 0.011463 | 0.011463 | 0.011348 | 0.011422 | 0.011376 | 0.011464 |
| 0.011467 | 0.011404 | 0.011466 | 0.011440 | 0.011366 | 0.011403 | 0.011432 |
| 0.011708 | 0.011474 | 0.011508 | 0.011396 | 0.011406 | 0.011531 | 0.011497 |
| 0.011565 | 0.011498 | 0.011497 | 0.011597 | 0.011530 | 0.011900 | 0.011699 |
| 0.011732 | 0.011598 | 0.011463 | 0.011564 | 0.011362 | 0.011597 | 0.011396 |
| 0.011463 | 0.011463 | 0.011430 | 0.011396 | 0.011430 | 0.011396 | 0.011497 |
| 0.011463 | 0.011564 | 0.011497 | 0.011396 | 0.011498 | 0.011598 | 0.011601 |
| 0.011598 | 0.011497 | 0.011396 | 0.011330 | 0.011463 | 0.011396 | 0.011329 |
| 0.011434 | 0.011598 | 0.011396 | 0.011598 | 0.011362 | 0.011463 | 0.011430 |
| 0.011530 | 0.011430 | 0.011463 | 0.011430 | 0.011463 | 0.011329 | 0.011463 |
| 0.011497 | 0.011430 | 0.011497 | 0.011430 | 0.011463 | 0.011497 | 0.011732 |
| 0.011833 | 0.011765 | 0.011833 | 0.011600 | 0.011833 | 0.011463 | 0.011430 |
| 0.011466 | 0.011788 | 0.011563 | 0.011369 | 0.011841 | 0.011333 | 0.011454 |
| 0.011842 | 0.011740 | 0.011631 | 0.011766 | 0.011504 | 0.011698 | 0.011665 |

|          |          |          |          |          |          |          |
|----------|----------|----------|----------|----------|----------|----------|
| 0.011598 | 0.011765 | 0.011593 | 0.011431 | 0.011480 | 0.011497 | 0.011568 |
| 0.011665 | 0.011566 | 0.011669 | 0.011771 | 0.011699 | 0.011699 | 0.011874 |
| 0.011602 | 0.011774 | 0.011704 | 0.011635 | 0.011834 | 0.011362 | 0.011566 |
| 0.011530 | 0.011463 | 0.011362 | 0.011362 | 0.011430 | 0.011430 | 0.011497 |
| 0.011430 | 0.011497 | 0.011396 | 0.011497 | 0.011430 | 0.011430 | 0.011497 |
| 0.011430 | 0.011866 | 0.011766 | 0.011799 | 0.011329 | 0.011430 | 0.011463 |
| 0.011463 | 0.011430 | 0.011497 | 0.011530 | 0.011396 | 0.011396 | 0.011396 |
| 0.011934 | 0.011564 | 0.011564 | 0.011362 | 0.011463 | 0.011631 | 0.011396 |
| 0.011396 | 0.011463 | 0.011430 | 0.011598 | 0.011396 | 0.011530 | 0.011665 |
| 0.011598 | 0.011430 | 0.011430 | 0.011362 | 0.011362 | 0.011531 | 0.011463 |
| 0.011362 | 0.011463 | 0.011329 | 0.011362 | 0.011497 | 0.011632 | 0.011396 |
| 0.011363 | 0.011497 | 0.011430 | 0.011329 | 0.011665 | 0.011329 | 0.011497 |
| 0.011574 | 0.011396 | 0.011698 | 0.011531 | 0.011564 | 0.011430 | 0.011530 |
| 0.011396 | 0.011732 | 0.011329 | 0.011598 | 0.011396 | 0.011396 | 0.011329 |
| 0.011564 | 0.011766 | 0.011463 | 0.011530 | 0.011362 | 0.011766 | 0.011396 |
| 0.011396 | 0.011396 | 0.011430 | 0.011530 | 0.011430 | 0.011530 | 0.011598 |
| 0.011598 | 0.011564 | 0.011463 | 0.011564 | 0.011530 | 0.011396 | 0.011362 |
| 0.011396 | 0.011396 | 0.011463 | 0.011396 | 0.011362 | 0.011463 | 0.011396 |
| 0.011430 | 0.011430 | 0.011564 | 0.011598 | 0.011497 | 0.011430 | 0.011430 |
| 0.011497 | 0.011430 | 0.011530 | 0.011396 | 0.011530 | 0.011598 | 0.011934 |
| 0.011430 | 0.011833 | 0.011440 | 0.017974 | 0.011322 | 0.011550 | 0.011793 |
| 0.011752 | 0.011799 | 0.011532 | 0.011524 | 0.011884 | 0.011820 | 0.011425 |
| 0.011629 | 0.011610 | 0.011333 | 0.011479 | 0.011412 | 0.011455 | 0.011491 |
| 0.011717 | 0.011619 | 0.011616 | 0.011523 | 0.011564 | 0.011598 | 0.011601 |
| 0.011438 | 0.011564 | 0.011564 | 0.011530 | 0.011497 | 0.011497 | 0.011463 |
| 0.011430 | 0.011430 | 0.011463 | 0.011497 | 0.011463 | 0.011396 | 0.011430 |
| 0.011430 | 0.011497 | 0.011396 | 0.011497 | 0.011530 | 0.011564 | 0.011463 |
| 0.011497 | 0.011463 | 0.011799 | 0.011799 | 0.011531 | 0.011565 | 0.000000 |
| 0.011362 | 0.011362 | 0.011396 | 0.011497 | 0.011362 | 0.011598 | 0.011598 |
| 0.011631 | 0.011631 | 0.011564 | 0.011665 | 0.011833 | 0.011667 | 0.011497 |
| 0.011497 | 0.011564 | 0.011598 | 0.011430 | 0.011497 | 0.011463 | 0.011497 |
| 0.011564 | 0.011564 | 0.011598 | 0.011564 | 0.011464 | 0.011665 | 0.011631 |
| 0.011501 | 0.011396 | 0.011497 | 0.011598 | 0.011430 | 0.011631 | 0.011665 |
| 0.011766 | 0.011504 | 0.011698 | 0.011665 | 0.011598 | 0.011765 | 0.011396 |
| 0.011566 | 0.011464 | 0.011430 | 0.011430 | 0.011497 | 0.011396 | 0.011497 |
| 0.011530 | 0.011564 | 0.011463 | 0.011497 | 0.011463 | 0.011799 | 0.011799 |
| 0.011531 | 0.011565 | 0.011631 | 0.011564 | 0.012205 | 0.011596 | 0.011518 |
| 0.011588 | 0.011546 | 0.011658 | 0.011580 | 0.011656 | 0.011509 | 0.011578 |
| 0.012125 | 0.011441 | 0.011574 | 0.011441 | 0.011715 | 0.011639 | 0.011741 |
| 0.012183 | 0.011626 | 0.011500 | 0.011497 | 0.011497 | 0.011530 | 0.011466 |
| 0.011362 | 0.011396 | 0.011530 | 0.011497 | 0.011500 | 0.011631 | 0.011599 |
| 0.011463 | 0.011396 | 0.011430 | 0.011463 | 0.011362 | 0.011430 | 0.011329 |
| 0.011463 | 0.011497 | 0.011396 | 0.011362 | 0.011463 | 0.011396 | 0.011430 |
| 0.011430 | 0.011362 | 0.011430 | 0.011396 | 0.011362 | 0.011564 | 0.011598 |
| 0.011497 | 0.011564 | 0.011497 | 0.011497 | 0.011430 | 0.011833 | 0.011463 |
| 0.011513 | 0.011430 | 0.011665 | 0.011671 | 0.011531 | 0.011530 | 0.011530 |
| 0.011530 | 0.011463 | 0.011430 | 0.011463 | 0.011564 | 0.011564 | 0.011497 |
| 0.011497 | 0.011631 | 0.011799 | 0.011530 | 0.011732 | 0.011732 | 0.011598 |
| 0.011430 | 0.011497 | 0.011530 | 0.011934 | 0.011497 | 0.011531 | 0.011497 |
| 0.011530 | 0.011463 | 0.011463 | 0.011766 | 0.011699 | 0.011732 | 0.011463 |
| 0.011564 | 0.011631 | 0.011497 | 0.011564 | 0.011530 | 0.011396 | 0.011732 |
| 0.011497 | 0.011463 | 0.011463 | 0.011631 | 0.011463 | 0.011564 | 0.011799 |
| 0.011497 | 0.011876 | 0.011866 | 0.011670 | 0.011455 | 0.011570 | 0.011421 |
| 0.011390 | 0.011917 | 0.011411 | 0.011596 | 0.011499 | 0.011467 | 0.011538 |
| 0.011672 | 0.011258 | 0.011506 | 0.011390 | 0.011438 | 0.011462 | 0.011547 |
| 0.011475 | 0.011454 | 0.011553 | 0.011483 | 0.011498 | 0.011631 | 0.011698 |
| 0.011698 | 0.011565 | 0.011669 | 0.011670 | 0.011806 | 0.011838 | 0.011497 |
| 0.011732 | 0.011598 | 0.011463 | 0.011564 | 0.011362 | 0.011597 | 0.011396 |
| 0.011463 | 0.011463 | 0.011430 | 0.011396 | 0.011430 | 0.011396 | 0.011497 |
| 0.011479 | 0.011480 | 0.011471 | 0.011505 | 0.011642 | 0.011607 | 0.011538 |



|          |          |          |          |          |          |          |
|----------|----------|----------|----------|----------|----------|----------|
| 0.011605 | 0.011531 | 0.011356 | 0.011312 | 0.011467 | 0.011636 | 0.011637 |
| 0.011430 | 0.011501 | 0.011734 | 0.011703 | 0.011632 | 0.011666 | 0.011597 |
| 0.011530 | 0.011530 | 0.011530 | 0.011497 | 0.012069 | 0.011665 | 0.011732 |
| 0.011766 | 0.011844 | 0.011436 | 0.011545 | 0.011430 | 0.011631 | 0.011598 |
| 0.011632 | 0.011665 | 0.011665 | 0.011665 | 0.011728 | 0.011799 | 0.011442 |
| 0.011331 | 0.011303 | 0.011401 | 0.011400 | 0.011505 | 0.011284 | 0.011672 |
| 0.011472 | 0.011630 | 0.011346 | 0.011472 | 0.011464 | 0.011539 | 0.011430 |
| 0.011396 | 0.011396 | 0.011463 | 0.011430 | 0.011631 | 0.011598 | 0.011530 |
| 0.011631 | 0.011698 | 0.011430 | 0.011430 | 0.011463 | 0.011463 | 0.011465 |
| 0.011534 | 0.011463 | 0.011463 | 0.011498 | 0.011631 | 0.011698 | 0.011698 |
| 0.011565 | 0.011669 | 0.011670 | 0.011806 | 0.011838 | 0.011497 | 0.011665 |
| 0.011598 | 0.011598 | 0.011432 | 0.011617 | 0.011547 | 0.011571 | 0.011411 |
| 0.011611 | 0.011835 | 0.011611 | 0.011502 | 0.011396 | 0.011598 | 0.011463 |
| 0.011564 | 0.011497 | 0.011396 | 0.011498 | 0.011598 | 0.011601 | 0.011497 |
| 0.011396 | 0.011330 | 0.011463 | 0.011396 | 0.011329 | 0.011434 | 0.011598 |
| 0.011430 | 0.011430 | 0.011463 | 0.011497 | 0.011463 | 0.011396 | 0.011598 |
| 0.011463 | 0.011497 | 0.011497 | 0.011430 | 0.011497 | 0.011732 | 0.011396 |
| 0.011430 | 0.011833 | 0.011430 | 0.011463 | 0.011430 | 0.011799 | 0.011446 |
| 0.011904 | 0.011400 | 0.011461 | 0.011664 | 0.011712 | 0.011635 | 0.011395 |
| 0.011375 | 0.011597 | 0.011698 | 0.011807 | 0.011666 | 0.011805 | 0.011935 |
| 0.011834 | 0.011872 | 0.011833 | 0.012086 | 0.011799 | 0.012675 | 0.011835 |
| 0.012574 | 0.012342 | 0.012476 | 0.012680 | 0.011799 | 0.011497 | 0.011800 |
| 0.012238 | 0.012174 | 0.011766 | 0.011665 | 0.011733 | 0.011733 | 0.011703 |
| 0.011597 | 0.011603 | 0.011665 | 0.011632 | 0.012002 | 0.012068 | 0.012070 |
| 0.011969 | 0.012069 | 0.012173 | 0.011940 | 0.012239 | 0.012246 | 0.012306 |
| 0.012307 | 0.012341 | 0.012289 | 0.012307 | 0.012308 | 0.011530 | 0.011833 |
| 0.011901 | 0.012405 | 0.011908 | 0.012136 | 0.012609 | 0.011638 | 0.011564 |
| 0.011530 | 0.011530 | 0.012002 | 0.012048 | 0.012151 | 0.011866 | 0.011532 |
| S434     | 0.011564 | 0.011564 | 0.011900 | 0.011665 | 0.011665 | 0.011732 |
| 0.011570 | 0.011502 | 0.011665 | 0.011161 | 0.011228 | 0.011195 | 0.011161 |
| 0.011195 | 0.011362 | 0.011161 | 0.011195 | 0.011262 | 0.011228 | 0.011195 |
| 0.011161 | 0.011195 | 0.011295 | 0.011161 | 0.011195 | 0.011195 | 0.011536 |
| 0.011429 | 0.011195 | 0.011094 | 0.011329 | 0.011262 | 0.011228 | 0.011262 |
| 0.011228 | 0.011329 | 0.011228 | 0.011228 | 0.011262 | 0.011228 | 0.011396 |
| 0.011161 | 0.011228 | 0.011262 | 0.011195 | 0.011295 | 0.011329 | 0.011262 |
| 0.011228 | 0.011396 | 0.011295 | 0.011564 | 0.011228 | 0.011497 | 0.011228 |
| 0.011195 | 0.011295 | 0.011362 | 0.011497 | 0.011597 | 0.011295 | 0.011396 |
| 0.011262 | 0.011329 | 0.011228 | 0.011463 | 0.011698 | 0.011228 | 0.011295 |
| 0.011195 | 0.011295 | 0.011262 | 0.011329 | 0.011262 | 0.011262 | 0.011262 |
| 0.011161 | 0.011195 | 0.011161 | 0.011262 | 0.011228 | 0.011262 | 0.011329 |
| 0.011262 | 0.011228 | 0.011295 | 0.011195 | 0.011329 | 0.011161 | 0.011228 |
| 0.011396 | 0.011329 | 0.011564 | 0.011396 | 0.011228 | 0.011463 | 0.011228 |
| 0.011394 | 0.011620 | 0.011400 | 0.011138 | 0.011098 | 0.011244 | 0.011296 |
| 0.011938 | 0.011365 | 0.011102 | 0.011463 | 0.011463 | 0.011262 | 0.011362 |
| 0.011295 | 0.011262 | 0.011329 | 0.011228 | 0.011329 | 0.011262 | 0.011262 |
| 0.011228 | 0.011329 | 0.011530 | 0.011396 | 0.011295 | 0.011262 | 0.011195 |
| 0.011161 | 0.011161 | 0.011228 | 0.011195 | 0.011396 | 0.011362 | 0.011295 |
| 0.011396 | 0.011463 | 0.011195 | 0.011195 | 0.011228 | 0.011228 | 0.011229 |
| 0.011297 | 0.011228 | 0.011228 | 0.011096 | 0.011133 | 0.011130 | 0.011228 |
| 0.011230 | 0.011163 | 0.011171 | 0.011198 | 0.011128 | 0.011163 | 0.011195 |
| 0.011420 | 0.011233 | 0.011232 | 0.011161 | 0.011164 | 0.011296 | 0.011262 |
| 0.011329 | 0.011262 | 0.011262 | 0.011362 | 0.011295 | 0.011665 | 0.011463 |
| 0.011497 | 0.011362 | 0.011228 | 0.011329 | 0.011127 | 0.011362 | 0.011161 |
| 0.011228 | 0.011228 | 0.011195 | 0.011161 | 0.011195 | 0.011161 | 0.011262 |
| 0.011228 | 0.011329 | 0.011262 | 0.011161 | 0.011262 | 0.011362 | 0.011364 |
| 0.011362 | 0.011262 | 0.011161 | 0.011094 | 0.011228 | 0.011161 | 0.011094 |
| 0.011196 | 0.011362 | 0.011161 | 0.011362 | 0.011127 | 0.011228 | 0.011195 |
| 0.011295 | 0.011195 | 0.011228 | 0.011195 | 0.011228 | 0.011094 | 0.011228 |
| 0.011262 | 0.011195 | 0.011262 | 0.011195 | 0.011228 | 0.011262 | 0.011497 |
| 0.011597 | 0.011530 | 0.011597 | 0.011363 | 0.011598 | 0.011228 | 0.011195 |

|          |          |          |          |          |          |          |
|----------|----------|----------|----------|----------|----------|----------|
| 0.011229 | 0.011505 | 0.011289 | 0.011129 | 0.011603 | 0.011094 | 0.011218 |
| 0.011603 | 0.011502 | 0.011396 | 0.011597 | 0.011299 | 0.011463 | 0.011430 |
| 0.011362 | 0.011530 | 0.011380 | 0.011225 | 0.011270 | 0.011262 | 0.011331 |
| 0.011430 | 0.011330 | 0.011466 | 0.011534 | 0.011463 | 0.011530 | 0.011636 |
| 0.011365 | 0.011535 | 0.011466 | 0.011398 | 0.011666 | 0.011127 | 0.011330 |
| 0.011295 | 0.011228 | 0.011127 | 0.011127 | 0.011195 | 0.011195 | 0.011262 |
| 0.011195 | 0.011262 | 0.011161 | 0.011262 | 0.011195 | 0.011195 | 0.011262 |
| 0.011195 | 0.011631 | 0.011530 | 0.011564 | 0.011094 | 0.011195 | 0.011228 |
| 0.011228 | 0.011195 | 0.011262 | 0.011295 | 0.011161 | 0.011161 | 0.011161 |
| 0.011698 | 0.011329 | 0.011329 | 0.011127 | 0.011228 | 0.011396 | 0.011161 |
| 0.011161 | 0.011228 | 0.011195 | 0.011362 | 0.011161 | 0.011295 | 0.011362 |
| 0.011362 | 0.011195 | 0.011195 | 0.011127 | 0.011127 | 0.011295 | 0.011228 |
| 0.011127 | 0.011228 | 0.011094 | 0.011127 | 0.011262 | 0.011396 | 0.011161 |
| 0.011128 | 0.011262 | 0.011195 | 0.011094 | 0.011429 | 0.011094 | 0.011262 |
| 0.011334 | 0.011161 | 0.011463 | 0.011295 | 0.011329 | 0.011195 | 0.011295 |
| 0.011161 | 0.011497 | 0.011094 | 0.011362 | 0.011161 | 0.011161 | 0.011094 |
| 0.011329 | 0.011531 | 0.011228 | 0.011295 | 0.011127 | 0.011530 | 0.011161 |
| 0.011161 | 0.011161 | 0.011127 | 0.011295 | 0.011195 | 0.011295 | 0.011362 |
| 0.011362 | 0.011329 | 0.011228 | 0.011329 | 0.011295 | 0.011161 | 0.011127 |
| 0.011161 | 0.011161 | 0.011228 | 0.011161 | 0.011127 | 0.011295 | 0.011161 |
| 0.011195 | 0.011195 | 0.011329 | 0.011362 | 0.011262 | 0.011195 | 0.011195 |
| 0.011262 | 0.011195 | 0.011295 | 0.011161 | 0.011295 | 0.011396 | 0.011698 |
| 0.011195 | 0.011597 | 0.011198 | 0.017672 | 0.011126 | 0.011366 | 0.011548 |
| 0.011510 | 0.011553 | 0.011270 | 0.011176 | 0.011609 | 0.011578 | 0.011303 |
| 0.011392 | 0.011426 | 0.011099 | 0.011186 | 0.011177 | 0.011258 | 0.011189 |
| 0.011389 | 0.011321 | 0.011357 | 0.011126 | 0.011329 | 0.011362 | 0.011365 |
| 0.011232 | 0.011329 | 0.011329 | 0.011295 | 0.011262 | 0.011262 | 0.011228 |
| 0.011262 | 0.011195 | 0.011228 | 0.011262 | 0.011228 | 0.011161 | 0.011195 |
| 0.011195 | 0.011262 | 0.011161 | 0.011262 | 0.011295 | 0.011329 | 0.011228 |
| 0.011262 | 0.011228 | 0.011564 | 0.011564 | 0.011295 | 0.011329 | 0.011362 |
| 0.000000 | 0.011127 | 0.011161 | 0.011262 | 0.011127 | 0.011362 | 0.011362 |
| 0.011396 | 0.011396 | 0.011329 | 0.011429 | 0.011597 | 0.011431 | 0.011262 |
| 0.011262 | 0.011329 | 0.011362 | 0.011195 | 0.011262 | 0.011228 | 0.011262 |
| 0.011329 | 0.011329 | 0.011362 | 0.011329 | 0.011229 | 0.011429 | 0.011396 |
| 0.011263 | 0.011161 | 0.011262 | 0.011362 | 0.011262 | 0.011396 | 0.011429 |
| 0.011597 | 0.011299 | 0.011463 | 0.011430 | 0.011362 | 0.011530 | 0.011161 |
| 0.011330 | 0.011228 | 0.011195 | 0.011195 | 0.011262 | 0.011161 | 0.011262 |
| 0.011295 | 0.011329 | 0.011228 | 0.011262 | 0.011228 | 0.011564 | 0.011564 |
| 0.011295 | 0.011329 | 0.011396 | 0.011329 | 0.011969 | 0.011382 | 0.011306 |
| 0.011377 | 0.011338 | 0.011447 | 0.011337 | 0.011445 | 0.011371 | 0.011336 |
| 0.011919 | 0.011233 | 0.011369 | 0.011302 | 0.011577 | 0.011434 | 0.011537 |
| 0.011944 | 0.011399 | 0.011263 | 0.011262 | 0.011262 | 0.011295 | 0.011229 |
| 0.011127 | 0.011161 | 0.011295 | 0.011262 | 0.011263 | 0.011396 | 0.011363 |
| 0.011228 | 0.011161 | 0.011195 | 0.011228 | 0.011127 | 0.011195 | 0.011094 |
| 0.011228 | 0.011262 | 0.011161 | 0.011127 | 0.011228 | 0.011161 | 0.011195 |
| 0.011195 | 0.011127 | 0.011195 | 0.011228 | 0.011127 | 0.011329 | 0.011362 |
| 0.011262 | 0.011329 | 0.011262 | 0.011262 | 0.011195 | 0.011597 | 0.011228 |
| 0.011269 | 0.011195 | 0.011430 | 0.011433 | 0.011295 | 0.011295 | 0.011295 |
| 0.011295 | 0.011228 | 0.011195 | 0.011228 | 0.011329 | 0.011329 | 0.011262 |
| 0.011262 | 0.011396 | 0.011564 | 0.011295 | 0.011497 | 0.011497 | 0.011362 |
| 0.011195 | 0.011262 | 0.011295 | 0.011631 | 0.011262 | 0.011295 | 0.011262 |
| 0.011295 | 0.011228 | 0.011228 | 0.011530 | 0.011463 | 0.011497 | 0.011228 |
| 0.011329 | 0.011396 | 0.011262 | 0.011329 | 0.011295 | 0.011161 | 0.011497 |
| 0.011262 | 0.011228 | 0.011228 | 0.011396 | 0.011228 | 0.011329 | 0.011564 |
| 0.011262 | 0.011638 | 0.011631 | 0.011385 | 0.011117 | 0.011332 | 0.011163 |
| 0.011170 | 0.011605 | 0.011131 | 0.011328 | 0.011158 | 0.011264 | 0.011273 |
| 0.011366 | 0.000000 | 0.011227 | 0.000000 | 0.011114 | 0.011261 | 0.011263 |
| 0.011324 | 0.011178 | 0.011307 | 0.011236 | 0.011262 | 0.011396 | 0.011463 |
| 0.011463 | 0.011329 | 0.011432 | 0.011433 | 0.011569 | 0.011555 | 0.011262 |
| 0.011497 | 0.011362 | 0.011228 | 0.011329 | 0.011127 | 0.011362 | 0.011161 |

|          |          |          |          |          |          |          |
|----------|----------|----------|----------|----------|----------|----------|
| 0.011228 | 0.011228 | 0.011195 | 0.011161 | 0.011195 | 0.011161 | 0.011262 |
| 0.011235 | 0.011235 | 0.011231 | 0.011266 | 0.011402 | 0.011368 | 0.011367 |
| 0.011367 | 0.011296 | 0.011097 | 0.000000 | 0.011230 | 0.011399 | 0.011399 |
| 0.011195 | 0.011263 | 0.011498 | 0.011466 | 0.011396 | 0.011430 | 0.011362 |
| 0.011295 | 0.011362 | 0.011362 | 0.011262 | 0.011833 | 0.011430 | 0.011497 |
| 0.011530 | 0.011594 | 0.011231 | 0.011303 | 0.011195 | 0.011396 | 0.011362 |
| 0.011397 | 0.011429 | 0.011430 | 0.011430 | 0.011532 | 0.011564 | 0.011199 |
| 0.011094 | 0.011095 | 0.011196 | 0.011162 | 0.011265 | 0.011098 | 0.011434 |
| 0.011232 | 0.011367 | 0.011108 | 0.011248 | 0.011228 | 0.011300 | 0.011195 |
| 0.011161 | 0.011161 | 0.011228 | 0.011195 | 0.011396 | 0.011362 | 0.011295 |
| 0.011396 | 0.011463 | 0.011195 | 0.011195 | 0.011228 | 0.011228 | 0.011229 |
| 0.011297 | 0.011228 | 0.011228 | 0.011262 | 0.011396 | 0.011463 | 0.011463 |
| 0.011329 | 0.011432 | 0.011433 | 0.011569 | 0.011555 | 0.011262 | 0.011429 |
| 0.011362 | 0.011362 | 0.011196 | 0.011339 | 0.011303 | 0.011333 | 0.011200 |
| 0.011370 | 0.011561 | 0.011357 | 0.011264 | 0.011161 | 0.011362 | 0.011228 |
| 0.011329 | 0.011262 | 0.011161 | 0.011262 | 0.011362 | 0.011364 | 0.011262 |
| 0.011161 | 0.011094 | 0.011228 | 0.011161 | 0.011094 | 0.011196 | 0.011362 |
| 0.011262 | 0.011195 | 0.011228 | 0.011262 | 0.011228 | 0.011161 | 0.011362 |
| 0.011228 | 0.011262 | 0.011262 | 0.011195 | 0.011262 | 0.011497 | 0.011161 |
| 0.011195 | 0.011597 | 0.011195 | 0.011228 | 0.011195 | 0.011564 | 0.011103 |
| 0.011566 | 0.011103 | 0.011161 | 0.011342 | 0.011426 | 0.011347 | 0.000000 |
| 0.011113 | 0.011362 | 0.011463 | 0.011569 | 0.011430 | 0.011568 | 0.011699 |
| 0.011598 | 0.011635 | 0.011597 | 0.011846 | 0.011564 | 0.012438 | 0.011599 |
| 0.012338 | 0.012105 | 0.012240 | 0.012511 | 0.011564 | 0.011262 | 0.011564 |
| 0.012002 | 0.011937 | 0.011530 | 0.011430 | 0.011497 | 0.011497 | 0.011466 |
| 0.011362 | 0.011365 | 0.011429 | 0.011396 | 0.011766 | 0.011833 | 0.011834 |
| 0.011733 | 0.011833 | 0.011937 | 0.011703 | 0.012003 | 0.012008 | 0.012070 |
| 0.012070 | 0.012104 | 0.012050 | 0.012070 | 0.012072 | 0.011295 | 0.011598 |
| 0.011665 | 0.012169 | 0.011670 | 0.011900 | 0.012373 | 0.011434 | 0.011329 |
| 0.011295 | 0.011295 | 0.011766 | 0.011800 | 0.011904 | 0.011631 | 0.011296 |
| S435     | 0.011564 | 0.011564 | 0.011900 | 0.011665 | 0.011665 | 0.011732 |
| 0.011570 | 0.011502 | 0.011665 | 0.011161 | 0.011228 | 0.011195 | 0.011161 |
| 0.011195 | 0.011362 | 0.011161 | 0.011195 | 0.011262 | 0.011228 | 0.011195 |
| 0.011161 | 0.011195 | 0.011295 | 0.011161 | 0.011195 | 0.011195 | 0.011536 |
| 0.011429 | 0.011195 | 0.011094 | 0.011329 | 0.011262 | 0.011228 | 0.011262 |
| 0.011228 | 0.011329 | 0.011228 | 0.011228 | 0.011262 | 0.011228 | 0.011396 |
| 0.011161 | 0.011228 | 0.011262 | 0.011195 | 0.011295 | 0.011329 | 0.011262 |
| 0.011228 | 0.011396 | 0.011295 | 0.011564 | 0.011228 | 0.011497 | 0.011228 |
| 0.011195 | 0.011295 | 0.011362 | 0.011497 | 0.011597 | 0.011295 | 0.011396 |
| 0.011262 | 0.011329 | 0.011228 | 0.011463 | 0.011698 | 0.011228 | 0.011295 |
| 0.011195 | 0.011295 | 0.011262 | 0.011329 | 0.011262 | 0.011262 | 0.011262 |
| 0.011161 | 0.011195 | 0.011161 | 0.011262 | 0.011228 | 0.011262 | 0.011329 |
| 0.011262 | 0.011228 | 0.011295 | 0.011195 | 0.011329 | 0.011161 | 0.011228 |
| 0.011396 | 0.011329 | 0.011564 | 0.011396 | 0.011228 | 0.011463 | 0.011228 |
| 0.011394 | 0.011620 | 0.011437 | 0.011099 | 0.011135 | 0.011244 | 0.011336 |
| 0.011975 | 0.011365 | 0.011143 | 0.011463 | 0.011463 | 0.011262 | 0.011362 |
| 0.011295 | 0.011262 | 0.011329 | 0.011228 | 0.011329 | 0.011262 | 0.011262 |
| 0.011228 | 0.011329 | 0.011530 | 0.011396 | 0.011295 | 0.011262 | 0.011195 |
| 0.011161 | 0.011161 | 0.011228 | 0.011195 | 0.011396 | 0.011362 | 0.011295 |
| 0.011396 | 0.011463 | 0.011195 | 0.011195 | 0.011228 | 0.011228 | 0.011229 |
| 0.011297 | 0.011228 | 0.011228 | 0.011096 | 0.011169 | 0.011130 | 0.011228 |
| 0.011230 | 0.011163 | 0.011208 | 0.011198 | 0.011128 | 0.011163 | 0.011195 |
| 0.011456 | 0.011233 | 0.011267 | 0.011161 | 0.011164 | 0.011296 | 0.011262 |
| 0.011329 | 0.011262 | 0.011262 | 0.011362 | 0.011295 | 0.011665 | 0.011463 |
| 0.011497 | 0.011362 | 0.011228 | 0.011329 | 0.011127 | 0.011362 | 0.011161 |
| 0.011228 | 0.011228 | 0.011195 | 0.011161 | 0.011195 | 0.011161 | 0.011262 |
| 0.011228 | 0.011329 | 0.011262 | 0.011161 | 0.011262 | 0.011362 | 0.011364 |
| 0.011362 | 0.011262 | 0.011161 | 0.011094 | 0.011228 | 0.011161 | 0.011094 |
| 0.011196 | 0.011362 | 0.011161 | 0.011362 | 0.011127 | 0.011228 | 0.011195 |
| 0.011295 | 0.011195 | 0.011228 | 0.011195 | 0.011228 | 0.011094 | 0.011228 |

|          |          |          |          |          |          |          |
|----------|----------|----------|----------|----------|----------|----------|
| 0.011262 | 0.011195 | 0.011262 | 0.011195 | 0.011228 | 0.011262 | 0.011497 |
| 0.011597 | 0.011530 | 0.011597 | 0.011364 | 0.011598 | 0.011228 | 0.011195 |
| 0.011229 | 0.011505 | 0.011335 | 0.011129 | 0.011603 | 0.011094 | 0.011218 |
| 0.011603 | 0.011502 | 0.011396 | 0.011598 | 0.011299 | 0.011463 | 0.011430 |
| 0.011362 | 0.011530 | 0.011380 | 0.011184 | 0.011270 | 0.011262 | 0.011331 |
| 0.011430 | 0.011330 | 0.011466 | 0.011534 | 0.011463 | 0.011530 | 0.011636 |
| 0.011365 | 0.011536 | 0.011467 | 0.011398 | 0.011666 | 0.011127 | 0.011330 |
| 0.011295 | 0.011228 | 0.011127 | 0.011127 | 0.011195 | 0.011195 | 0.011262 |
| 0.011195 | 0.011262 | 0.011161 | 0.011262 | 0.011195 | 0.011195 | 0.011262 |
| 0.011195 | 0.011631 | 0.011530 | 0.011564 | 0.011094 | 0.011195 | 0.011228 |
| 0.011228 | 0.011195 | 0.011262 | 0.011295 | 0.011161 | 0.011161 | 0.011161 |
| 0.011698 | 0.011329 | 0.011329 | 0.011127 | 0.011228 | 0.011396 | 0.011161 |
| 0.011161 | 0.011228 | 0.011195 | 0.011362 | 0.011161 | 0.011295 | 0.011429 |
| 0.011362 | 0.011195 | 0.011195 | 0.011127 | 0.011127 | 0.011295 | 0.011228 |
| 0.011127 | 0.011228 | 0.011094 | 0.011127 | 0.011262 | 0.011396 | 0.011161 |
| 0.011128 | 0.011262 | 0.011195 | 0.011094 | 0.011429 | 0.011094 | 0.011262 |
| 0.011334 | 0.011161 | 0.011463 | 0.011295 | 0.011329 | 0.011195 | 0.011295 |
| 0.011161 | 0.011497 | 0.011094 | 0.011362 | 0.011161 | 0.011161 | 0.011094 |
| 0.011329 | 0.011531 | 0.011228 | 0.011295 | 0.011127 | 0.011530 | 0.011161 |
| 0.011161 | 0.011161 | 0.011195 | 0.011295 | 0.011195 | 0.011295 | 0.011362 |
| 0.011362 | 0.011329 | 0.011228 | 0.011329 | 0.011295 | 0.011161 | 0.011127 |
| 0.011161 | 0.011161 | 0.011228 | 0.011161 | 0.011127 | 0.011295 | 0.011161 |
| 0.011195 | 0.011195 | 0.011329 | 0.011362 | 0.011262 | 0.011195 | 0.011195 |
| 0.011262 | 0.011195 | 0.011295 | 0.011161 | 0.011295 | 0.011396 | 0.011698 |
| 0.011195 | 0.011598 | 0.011198 | 0.017710 | 0.011126 | 0.011305 | 0.011548 |
| 0.011510 | 0.011553 | 0.011270 | 0.011176 | 0.011609 | 0.011578 | 0.011242 |
| 0.011392 | 0.011426 | 0.011099 | 0.011186 | 0.011177 | 0.011208 | 0.011146 |
| 0.011389 | 0.011358 | 0.011357 | 0.011193 | 0.011329 | 0.011362 | 0.011365 |
| 0.011232 | 0.011329 | 0.011329 | 0.011295 | 0.011262 | 0.011262 | 0.011228 |
| 0.011262 | 0.011195 | 0.011228 | 0.011262 | 0.011228 | 0.011161 | 0.011195 |
| 0.011195 | 0.011262 | 0.011161 | 0.011262 | 0.011295 | 0.011329 | 0.011228 |
| 0.011262 | 0.011228 | 0.011564 | 0.011564 | 0.011295 | 0.011329 | 0.011362 |
| 0.011127 | 0.000000 | 0.011161 | 0.011262 | 0.011127 | 0.011362 | 0.011362 |
| 0.011396 | 0.011396 | 0.011329 | 0.011429 | 0.011597 | 0.011431 | 0.011262 |
| 0.011262 | 0.011329 | 0.011362 | 0.011195 | 0.011262 | 0.011228 | 0.011262 |
| 0.011329 | 0.011329 | 0.011362 | 0.011329 | 0.011229 | 0.011429 | 0.011396 |
| 0.011263 | 0.011161 | 0.011262 | 0.011362 | 0.011262 | 0.011396 | 0.011429 |
| 0.011598 | 0.011299 | 0.011463 | 0.011430 | 0.011362 | 0.011530 | 0.011161 |
| 0.011330 | 0.011228 | 0.011195 | 0.011195 | 0.011262 | 0.011161 | 0.011262 |
| 0.011295 | 0.011329 | 0.011228 | 0.011262 | 0.011228 | 0.011564 | 0.011564 |
| 0.011295 | 0.011329 | 0.011396 | 0.011329 | 0.011969 | 0.011382 | 0.011306 |
| 0.011377 | 0.011338 | 0.011447 | 0.011337 | 0.011445 | 0.011371 | 0.011336 |
| 0.011919 | 0.011233 | 0.011369 | 0.011302 | 0.011577 | 0.011434 | 0.011537 |
| 0.011944 | 0.011399 | 0.011263 | 0.011262 | 0.011262 | 0.011295 | 0.011229 |
| 0.011127 | 0.011161 | 0.011295 | 0.011262 | 0.011263 | 0.011396 | 0.011363 |
| 0.011228 | 0.011161 | 0.011195 | 0.011228 | 0.011127 | 0.011195 | 0.011094 |
| 0.011228 | 0.011262 | 0.011161 | 0.011127 | 0.011228 | 0.011161 | 0.011195 |
| 0.011195 | 0.011127 | 0.011195 | 0.011228 | 0.011127 | 0.011329 | 0.011362 |
| 0.011262 | 0.011329 | 0.011262 | 0.011262 | 0.011195 | 0.011597 | 0.011228 |
| 0.011269 | 0.011195 | 0.011430 | 0.011433 | 0.011295 | 0.011295 | 0.011295 |
| 0.011295 | 0.011228 | 0.011195 | 0.011228 | 0.011329 | 0.011329 | 0.011262 |
| 0.011262 | 0.011396 | 0.011564 | 0.011295 | 0.011497 | 0.011497 | 0.011362 |
| 0.011195 | 0.011262 | 0.011295 | 0.011698 | 0.011262 | 0.011295 | 0.011262 |
| 0.011295 | 0.011228 | 0.011228 | 0.011530 | 0.011463 | 0.011497 | 0.011228 |
| 0.011329 | 0.011396 | 0.011262 | 0.011329 | 0.011295 | 0.011161 | 0.011497 |
| 0.011262 | 0.011228 | 0.011228 | 0.011396 | 0.011228 | 0.011329 | 0.011564 |
| 0.011262 | 0.011638 | 0.011631 | 0.011426 | 0.011173 | 0.011332 | 0.011163 |
| 0.011115 | 0.011644 | 0.011166 | 0.011328 | 0.011207 | 0.011315 | 0.011273 |
| 0.011366 | 0.000000 | 0.011227 | 0.000000 | 0.011114 | 0.011261 | 0.011303 |
| 0.011324 | 0.011218 | 0.011307 | 0.011236 | 0.011262 | 0.011396 | 0.011463 |

|          |          |          |          |          |          |          |
|----------|----------|----------|----------|----------|----------|----------|
| 0.011463 | 0.011329 | 0.011432 | 0.011433 | 0.011569 | 0.011590 | 0.011262 |
| 0.011497 | 0.011362 | 0.011228 | 0.011329 | 0.011127 | 0.011362 | 0.011161 |
| 0.011228 | 0.011228 | 0.011195 | 0.011161 | 0.011195 | 0.011161 | 0.011262 |
| 0.011235 | 0.011235 | 0.011231 | 0.011266 | 0.011402 | 0.011368 | 0.011367 |
| 0.011367 | 0.011296 | 0.011097 | 0.011096 | 0.011230 | 0.011399 | 0.011399 |
| 0.011195 | 0.011263 | 0.011498 | 0.011466 | 0.011396 | 0.011430 | 0.011362 |
| 0.011295 | 0.011362 | 0.011362 | 0.011262 | 0.011833 | 0.011430 | 0.011497 |
| 0.011530 | 0.011594 | 0.011231 | 0.011303 | 0.011195 | 0.011396 | 0.011362 |
| 0.011397 | 0.011429 | 0.011430 | 0.011430 | 0.011571 | 0.011564 | 0.011199 |
| 0.011094 | 0.011095 | 0.011196 | 0.011162 | 0.011265 | 0.011098 | 0.011434 |
| 0.011232 | 0.011367 | 0.011108 | 0.011248 | 0.011228 | 0.011300 | 0.011195 |
| 0.011161 | 0.011161 | 0.011228 | 0.011195 | 0.011396 | 0.011362 | 0.011295 |
| 0.011396 | 0.011463 | 0.011195 | 0.011195 | 0.011228 | 0.011228 | 0.011229 |
| 0.011297 | 0.011228 | 0.011228 | 0.011262 | 0.011396 | 0.011463 | 0.011463 |
| 0.011329 | 0.011432 | 0.011433 | 0.011569 | 0.011590 | 0.011262 | 0.011429 |
| 0.011362 | 0.011362 | 0.011196 | 0.011373 | 0.011303 | 0.011333 | 0.011200 |
| 0.011370 | 0.011516 | 0.011357 | 0.011264 | 0.011161 | 0.011362 | 0.011228 |
| 0.011329 | 0.011262 | 0.011161 | 0.011262 | 0.011362 | 0.011364 | 0.011262 |
| 0.011161 | 0.011094 | 0.011228 | 0.011161 | 0.011094 | 0.011196 | 0.011362 |
| 0.011262 | 0.011195 | 0.011228 | 0.011262 | 0.011228 | 0.011161 | 0.011362 |
| 0.011228 | 0.011262 | 0.011262 | 0.011195 | 0.011262 | 0.011497 | 0.011161 |
| 0.011195 | 0.011597 | 0.011195 | 0.011228 | 0.011195 | 0.011564 | 0.011146 |
| 0.011622 | 0.011145 | 0.011161 | 0.011382 | 0.011467 | 0.011383 | 0.011102 |
| 0.011113 | 0.011362 | 0.011463 | 0.011569 | 0.011430 | 0.011568 | 0.011699 |
| 0.011598 | 0.011567 | 0.011597 | 0.011846 | 0.011564 | 0.012438 | 0.011599 |
| 0.012338 | 0.012105 | 0.012240 | 0.012511 | 0.011564 | 0.011262 | 0.011564 |
| 0.012002 | 0.011937 | 0.011530 | 0.011430 | 0.011497 | 0.011497 | 0.011466 |
| 0.011362 | 0.011365 | 0.011429 | 0.011396 | 0.011766 | 0.011833 | 0.011834 |
| 0.011733 | 0.011833 | 0.011937 | 0.011703 | 0.012003 | 0.012008 | 0.012070 |
| 0.012070 | 0.012104 | 0.012050 | 0.012071 | 0.012072 | 0.011295 | 0.011598 |
| 0.011666 | 0.012169 | 0.011670 | 0.011900 | 0.012373 | 0.011434 | 0.011329 |
| 0.011295 | 0.011295 | 0.011766 | 0.011800 | 0.011904 | 0.011631 | 0.011296 |
| S436     | 0.011597 | 0.011597 | 0.011934 | 0.011698 | 0.011698 | 0.011765 |
| 0.011604 | 0.011536 | 0.011698 | 0.011195 | 0.011262 | 0.011228 | 0.011195 |
| 0.011228 | 0.011396 | 0.011195 | 0.011228 | 0.011295 | 0.011262 | 0.011228 |
| 0.011195 | 0.011228 | 0.011329 | 0.011195 | 0.011228 | 0.011228 | 0.011570 |
| 0.011463 | 0.011228 | 0.011127 | 0.011362 | 0.011295 | 0.011262 | 0.011295 |
| 0.011262 | 0.011362 | 0.011262 | 0.011262 | 0.011295 | 0.011262 | 0.011430 |
| 0.011195 | 0.011262 | 0.011295 | 0.011228 | 0.011329 | 0.011362 | 0.011295 |
| 0.011262 | 0.011430 | 0.011329 | 0.011597 | 0.011262 | 0.011530 | 0.011262 |
| 0.011228 | 0.011329 | 0.011396 | 0.011530 | 0.011631 | 0.011329 | 0.011430 |
| 0.011295 | 0.011362 | 0.011262 | 0.011497 | 0.011732 | 0.011262 | 0.011329 |
| 0.011228 | 0.011329 | 0.011295 | 0.011362 | 0.011295 | 0.011295 | 0.011295 |
| 0.011195 | 0.011228 | 0.011195 | 0.011295 | 0.011262 | 0.011296 | 0.011362 |
| 0.011295 | 0.011262 | 0.011329 | 0.011228 | 0.011362 | 0.011195 | 0.011262 |
| 0.011429 | 0.011362 | 0.011597 | 0.011430 | 0.011262 | 0.011497 | 0.011262 |
| 0.011394 | 0.011620 | 0.011437 | 0.011138 | 0.011135 | 0.011281 | 0.011336 |
| 0.011975 | 0.011416 | 0.011143 | 0.011497 | 0.011497 | 0.011295 | 0.011396 |
| 0.011329 | 0.011295 | 0.011362 | 0.011262 | 0.011362 | 0.011295 | 0.011295 |
| 0.011262 | 0.011362 | 0.011564 | 0.011429 | 0.011329 | 0.011295 | 0.011228 |
| 0.011195 | 0.011195 | 0.011262 | 0.011228 | 0.011429 | 0.011396 | 0.011329 |
| 0.011429 | 0.011497 | 0.011228 | 0.011228 | 0.011262 | 0.011262 | 0.011263 |
| 0.011331 | 0.011262 | 0.011262 | 0.011132 | 0.011205 | 0.011165 | 0.011262 |
| 0.011263 | 0.011198 | 0.011245 | 0.011233 | 0.011162 | 0.011197 | 0.011229 |
| 0.011492 | 0.011267 | 0.011301 | 0.011195 | 0.011199 | 0.011329 | 0.011296 |
| 0.011363 | 0.011296 | 0.011296 | 0.011396 | 0.011329 | 0.011698 | 0.011497 |
| 0.011530 | 0.011396 | 0.011262 | 0.011362 | 0.011161 | 0.011396 | 0.011195 |
| 0.011262 | 0.011262 | 0.011228 | 0.011195 | 0.011228 | 0.011195 | 0.011295 |
| 0.011262 | 0.011362 | 0.011295 | 0.011195 | 0.011296 | 0.011396 | 0.011398 |
| 0.011396 | 0.011295 | 0.011195 | 0.011128 | 0.011262 | 0.011195 | 0.011127 |

|          |          |          |          |          |          |          |
|----------|----------|----------|----------|----------|----------|----------|
| 0.011230 | 0.011396 | 0.011195 | 0.011396 | 0.011161 | 0.011262 | 0.011228 |
| 0.011329 | 0.011228 | 0.011262 | 0.011228 | 0.011262 | 0.011127 | 0.011262 |
| 0.011295 | 0.011228 | 0.011295 | 0.011228 | 0.011262 | 0.011295 | 0.011530 |
| 0.011631 | 0.011564 | 0.011631 | 0.011397 | 0.011631 | 0.011262 | 0.011228 |
| 0.011263 | 0.011545 | 0.011380 | 0.011163 | 0.011637 | 0.011129 | 0.011257 |
| 0.011637 | 0.011536 | 0.011429 | 0.011631 | 0.011333 | 0.011497 | 0.011463 |
| 0.011396 | 0.011564 | 0.011416 | 0.011225 | 0.011270 | 0.011295 | 0.011365 |
| 0.011463 | 0.011364 | 0.011500 | 0.011568 | 0.011497 | 0.011564 | 0.011670 |
| 0.011399 | 0.011569 | 0.011500 | 0.011432 | 0.011700 | 0.011161 | 0.011364 |
| 0.011329 | 0.011262 | 0.011161 | 0.011161 | 0.011228 | 0.011228 | 0.011295 |
| 0.011228 | 0.011295 | 0.011195 | 0.011295 | 0.011228 | 0.011228 | 0.011295 |
| 0.011228 | 0.011665 | 0.011564 | 0.011597 | 0.011127 | 0.011228 | 0.011262 |
| 0.011262 | 0.011228 | 0.011295 | 0.011329 | 0.011195 | 0.011195 | 0.011195 |
| 0.011732 | 0.011362 | 0.011362 | 0.011161 | 0.011262 | 0.011430 | 0.011195 |
| 0.011195 | 0.011262 | 0.011228 | 0.011396 | 0.011195 | 0.011329 | 0.011463 |
| 0.011396 | 0.011228 | 0.011228 | 0.011161 | 0.011161 | 0.011329 | 0.011262 |
| 0.011161 | 0.011262 | 0.011127 | 0.011161 | 0.011295 | 0.011430 | 0.011195 |
| 0.011161 | 0.011295 | 0.011228 | 0.011127 | 0.011463 | 0.011127 | 0.011295 |
| 0.011368 | 0.011195 | 0.011497 | 0.011329 | 0.011362 | 0.011228 | 0.011329 |
| 0.011195 | 0.011530 | 0.011127 | 0.011396 | 0.011195 | 0.011195 | 0.011127 |
| 0.011362 | 0.011564 | 0.011262 | 0.011329 | 0.011161 | 0.011564 | 0.011195 |
| 0.011195 | 0.011195 | 0.011228 | 0.011329 | 0.011228 | 0.011329 | 0.011396 |
| 0.011396 | 0.011362 | 0.011262 | 0.011362 | 0.011329 | 0.011195 | 0.011161 |
| 0.011195 | 0.011195 | 0.011262 | 0.011195 | 0.011161 | 0.011329 | 0.011195 |
| 0.011228 | 0.011228 | 0.011362 | 0.011396 | 0.011295 | 0.011228 | 0.011228 |
| 0.011295 | 0.011228 | 0.011329 | 0.011195 | 0.011329 | 0.011429 | 0.011732 |
| 0.011228 | 0.011631 | 0.011233 | 0.017710 | 0.011191 | 0.011366 | 0.011583 |
| 0.011545 | 0.011588 | 0.011270 | 0.011234 | 0.011664 | 0.011612 | 0.011303 |
| 0.011440 | 0.011487 | 0.011099 | 0.011228 | 0.011177 | 0.011258 | 0.011189 |
| 0.011436 | 0.011358 | 0.011357 | 0.011193 | 0.011362 | 0.011396 | 0.011398 |
| 0.011266 | 0.011362 | 0.011362 | 0.011329 | 0.011295 | 0.011295 | 0.011262 |
| 0.011295 | 0.011228 | 0.011262 | 0.011295 | 0.011262 | 0.011195 | 0.011228 |
| 0.011228 | 0.011295 | 0.011195 | 0.011295 | 0.011329 | 0.011362 | 0.011262 |
| 0.011295 | 0.011262 | 0.011597 | 0.011597 | 0.011329 | 0.011363 | 0.011396 |
| 0.011161 | 0.011161 | 0.000000 | 0.011295 | 0.011161 | 0.011396 | 0.011396 |
| 0.011429 | 0.011429 | 0.011362 | 0.011463 | 0.011631 | 0.011464 | 0.011295 |
| 0.011295 | 0.011362 | 0.011396 | 0.011228 | 0.011295 | 0.011262 | 0.011295 |
| 0.011363 | 0.011362 | 0.011396 | 0.011363 | 0.011262 | 0.011463 | 0.011429 |
| 0.011297 | 0.011195 | 0.011295 | 0.011396 | 0.011295 | 0.011430 | 0.011463 |
| 0.011631 | 0.011333 | 0.011497 | 0.011463 | 0.011396 | 0.011564 | 0.011195 |
| 0.011363 | 0.011262 | 0.011228 | 0.011228 | 0.011295 | 0.011195 | 0.011295 |
| 0.011329 | 0.011362 | 0.011262 | 0.011295 | 0.011262 | 0.011597 | 0.011597 |
| 0.011329 | 0.011363 | 0.011429 | 0.011362 | 0.012002 | 0.011417 | 0.011342 |
| 0.011412 | 0.011372 | 0.011482 | 0.011372 | 0.011480 | 0.011405 | 0.011371 |
| 0.011953 | 0.011268 | 0.011403 | 0.011337 | 0.011611 | 0.011468 | 0.011571 |
| 0.011978 | 0.011437 | 0.011297 | 0.011295 | 0.011295 | 0.011329 | 0.011263 |
| 0.011161 | 0.011195 | 0.011329 | 0.011295 | 0.011297 | 0.011429 | 0.011397 |
| 0.011262 | 0.011195 | 0.011228 | 0.011262 | 0.011161 | 0.011228 | 0.011127 |
| 0.011262 | 0.011295 | 0.011195 | 0.011161 | 0.011262 | 0.011195 | 0.011228 |
| 0.011228 | 0.011161 | 0.011228 | 0.011262 | 0.011161 | 0.011362 | 0.011396 |
| 0.011295 | 0.011362 | 0.011295 | 0.011295 | 0.011228 | 0.011631 | 0.011262 |
| 0.011304 | 0.011228 | 0.011463 | 0.011467 | 0.011329 | 0.011329 | 0.011329 |
| 0.011329 | 0.011262 | 0.011228 | 0.011262 | 0.011362 | 0.011362 | 0.011295 |
| 0.011295 | 0.011430 | 0.011597 | 0.011329 | 0.011530 | 0.011530 | 0.011396 |
| 0.011228 | 0.011295 | 0.011329 | 0.011732 | 0.011295 | 0.011329 | 0.011295 |
| 0.011329 | 0.011262 | 0.011262 | 0.011564 | 0.011497 | 0.011530 | 0.011262 |
| 0.011362 | 0.011430 | 0.011295 | 0.011362 | 0.011329 | 0.011195 | 0.011530 |
| 0.011295 | 0.011262 | 0.011262 | 0.011430 | 0.011262 | 0.011362 | 0.011598 |
| 0.011295 | 0.011672 | 0.011665 | 0.011426 | 0.011173 | 0.011366 | 0.011215 |
| 0.011225 | 0.011644 | 0.011201 | 0.011373 | 0.011207 | 0.011315 | 0.011326 |

|          |          |          |          |          |          |          |
|----------|----------|----------|----------|----------|----------|----------|
| 0.011417 | 0.011126 | 0.011283 | 0.011126 | 0.011168 | 0.011328 | 0.011303 |
| 0.011324 | 0.011218 | 0.011342 | 0.011272 | 0.011296 | 0.011429 | 0.011497 |
| 0.011497 | 0.011363 | 0.011466 | 0.011467 | 0.011602 | 0.011626 | 0.011295 |
| 0.011530 | 0.011396 | 0.011262 | 0.011362 | 0.011161 | 0.011396 | 0.011195 |
| 0.011262 | 0.011262 | 0.011228 | 0.011195 | 0.011228 | 0.011195 | 0.011295 |
| 0.011270 | 0.011270 | 0.011266 | 0.011300 | 0.011437 | 0.011402 | 0.011402 |
| 0.011401 | 0.011329 | 0.011134 | 0.011132 | 0.011263 | 0.011433 | 0.011433 |
| 0.011228 | 0.011297 | 0.011531 | 0.011500 | 0.011430 | 0.011464 | 0.011396 |
| 0.011329 | 0.011396 | 0.011396 | 0.011295 | 0.011866 | 0.011463 | 0.011530 |
| 0.011564 | 0.011630 | 0.011265 | 0.011337 | 0.011228 | 0.011430 | 0.011396 |
| 0.011430 | 0.011463 | 0.011463 | 0.011463 | 0.011610 | 0.011597 | 0.011234 |
| 0.011128 | 0.011130 | 0.011231 | 0.011196 | 0.011299 | 0.011135 | 0.011468 |
| 0.011266 | 0.011367 | 0.011108 | 0.011285 | 0.011262 | 0.011334 | 0.011228 |
| 0.011195 | 0.011195 | 0.011262 | 0.011228 | 0.011429 | 0.011396 | 0.011329 |
| 0.011429 | 0.011497 | 0.011228 | 0.011228 | 0.011262 | 0.011262 | 0.011263 |
| 0.011331 | 0.011262 | 0.011262 | 0.011296 | 0.011429 | 0.011497 | 0.011497 |
| 0.011363 | 0.011466 | 0.011467 | 0.011602 | 0.011626 | 0.011295 | 0.011463 |
| 0.011396 | 0.011396 | 0.011229 | 0.011408 | 0.011338 | 0.011367 | 0.011235 |
| 0.011405 | 0.011607 | 0.011399 | 0.011298 | 0.011195 | 0.011396 | 0.011262 |
| 0.011362 | 0.011295 | 0.011195 | 0.011296 | 0.011396 | 0.011398 | 0.011295 |
| 0.011195 | 0.011128 | 0.011262 | 0.011195 | 0.011127 | 0.011230 | 0.011396 |
| 0.011295 | 0.011228 | 0.011262 | 0.011295 | 0.011262 | 0.011195 | 0.011396 |
| 0.011262 | 0.011295 | 0.011295 | 0.011228 | 0.011295 | 0.011530 | 0.011195 |
| 0.011228 | 0.011631 | 0.011228 | 0.011262 | 0.011228 | 0.011597 | 0.011146 |
| 0.011622 | 0.011145 | 0.011211 | 0.011382 | 0.011467 | 0.011383 | 0.011102 |
| 0.011165 | 0.011396 | 0.011497 | 0.011603 | 0.011464 | 0.011601 | 0.011733 |
| 0.011632 | 0.011669 | 0.011631 | 0.011880 | 0.011597 | 0.012472 | 0.011633 |
| 0.012372 | 0.012139 | 0.012273 | 0.012545 | 0.011597 | 0.011295 | 0.011598 |
| 0.012036 | 0.011971 | 0.011564 | 0.011463 | 0.011531 | 0.011531 | 0.011500 |
| 0.011396 | 0.011399 | 0.011463 | 0.011430 | 0.011800 | 0.011866 | 0.011867 |
| 0.011767 | 0.011867 | 0.011970 | 0.011737 | 0.012036 | 0.012042 | 0.012104 |
| 0.012104 | 0.012138 | 0.012084 | 0.012104 | 0.012105 | 0.011329 | 0.011631 |
| 0.011699 | 0.012203 | 0.011704 | 0.011934 | 0.012406 | 0.011468 | 0.011363 |
| 0.011329 | 0.011329 | 0.011799 | 0.011842 | 0.011940 | 0.011665 | 0.011330 |
| S437     | 0.011698 | 0.011698 | 0.012035 | 0.011799 | 0.011799 | 0.011866 |
| 0.011706 | 0.011638 | 0.011799 | 0.011295 | 0.011362 | 0.011329 | 0.011295 |
| 0.011329 | 0.011497 | 0.011295 | 0.011329 | 0.011396 | 0.011362 | 0.011329 |
| 0.011295 | 0.011329 | 0.011429 | 0.011296 | 0.011262 | 0.011329 | 0.011672 |
| 0.011564 | 0.011329 | 0.011228 | 0.011463 | 0.011329 | 0.011363 | 0.011329 |
| 0.011362 | 0.011396 | 0.011362 | 0.011362 | 0.011396 | 0.011362 | 0.011530 |
| 0.011295 | 0.011362 | 0.011396 | 0.011329 | 0.011430 | 0.011463 | 0.011396 |
| 0.011362 | 0.011531 | 0.011430 | 0.011698 | 0.011362 | 0.011564 | 0.011362 |
| 0.011329 | 0.011430 | 0.011497 | 0.011564 | 0.011732 | 0.011430 | 0.011530 |
| 0.011329 | 0.011396 | 0.011363 | 0.011530 | 0.011833 | 0.011362 | 0.011430 |
| 0.011329 | 0.011430 | 0.011396 | 0.011463 | 0.011396 | 0.011396 | 0.011396 |
| 0.011295 | 0.011329 | 0.011295 | 0.011396 | 0.011362 | 0.011397 | 0.011463 |
| 0.011396 | 0.011362 | 0.011362 | 0.011329 | 0.011463 | 0.011228 | 0.011362 |
| 0.011530 | 0.011463 | 0.011698 | 0.011530 | 0.011362 | 0.011530 | 0.011362 |
| 0.011542 | 0.011770 | 0.011588 | 0.011295 | 0.011284 | 0.011391 | 0.011493 |
| 0.012121 | 0.011467 | 0.011266 | 0.011597 | 0.011598 | 0.011396 | 0.011497 |
| 0.011430 | 0.011396 | 0.011463 | 0.011362 | 0.011463 | 0.011329 | 0.011396 |
| 0.011362 | 0.011463 | 0.011665 | 0.011463 | 0.011430 | 0.011396 | 0.011262 |
| 0.011295 | 0.011295 | 0.011295 | 0.011329 | 0.011530 | 0.011497 | 0.011430 |
| 0.011530 | 0.011597 | 0.011329 | 0.011329 | 0.011362 | 0.011362 | 0.011364 |
| 0.011432 | 0.011362 | 0.011362 | 0.011204 | 0.011313 | 0.011271 | 0.011363 |
| 0.011365 | 0.011301 | 0.011355 | 0.011336 | 0.011264 | 0.011300 | 0.011330 |
| 0.011600 | 0.011370 | 0.011336 | 0.011296 | 0.011302 | 0.011430 | 0.011397 |
| 0.011464 | 0.011397 | 0.011396 | 0.011497 | 0.011429 | 0.011732 | 0.011598 |
| 0.011631 | 0.011497 | 0.011362 | 0.011463 | 0.011262 | 0.011497 | 0.011295 |
| 0.011362 | 0.011362 | 0.011329 | 0.011295 | 0.011329 | 0.011295 | 0.011396 |

|          |          |          |          |          |          |          |
|----------|----------|----------|----------|----------|----------|----------|
| 0.011295 | 0.011396 | 0.011396 | 0.011295 | 0.011397 | 0.011497 | 0.011500 |
| 0.011430 | 0.011396 | 0.011295 | 0.011229 | 0.011362 | 0.011295 | 0.011228 |
| 0.011332 | 0.011430 | 0.011195 | 0.011430 | 0.011262 | 0.011363 | 0.011329 |
| 0.011362 | 0.011329 | 0.011295 | 0.011329 | 0.011362 | 0.011228 | 0.011295 |
| 0.011329 | 0.011329 | 0.011396 | 0.011329 | 0.011362 | 0.011396 | 0.011631 |
| 0.011732 | 0.011665 | 0.011732 | 0.011498 | 0.011732 | 0.011362 | 0.011329 |
| 0.011364 | 0.011586 | 0.011426 | 0.011232 | 0.011705 | 0.011231 | 0.011296 |
| 0.011739 | 0.011638 | 0.011530 | 0.011732 | 0.011436 | 0.011598 | 0.011497 |
| 0.011497 | 0.011665 | 0.011522 | 0.011349 | 0.011396 | 0.011396 | 0.011466 |
| 0.011564 | 0.011465 | 0.011601 | 0.011602 | 0.011598 | 0.011665 | 0.011772 |
| 0.011500 | 0.011603 | 0.011602 | 0.011534 | 0.011801 | 0.011262 | 0.011465 |
| 0.011362 | 0.011362 | 0.011262 | 0.011262 | 0.011262 | 0.011329 | 0.011396 |
| 0.011262 | 0.011329 | 0.011228 | 0.011396 | 0.011262 | 0.011329 | 0.011396 |
| 0.011329 | 0.011765 | 0.011665 | 0.011698 | 0.011228 | 0.011329 | 0.011363 |
| 0.011362 | 0.011329 | 0.011396 | 0.011430 | 0.011295 | 0.011295 | 0.011295 |
| 0.011833 | 0.011463 | 0.011463 | 0.011262 | 0.011362 | 0.011463 | 0.011295 |
| 0.011295 | 0.011362 | 0.011329 | 0.011430 | 0.011295 | 0.011430 | 0.011497 |
| 0.011497 | 0.011329 | 0.011329 | 0.011262 | 0.011262 | 0.011430 | 0.011362 |
| 0.011262 | 0.011362 | 0.011228 | 0.011262 | 0.011396 | 0.011531 | 0.011295 |
| 0.011262 | 0.011396 | 0.011329 | 0.011228 | 0.011564 | 0.011228 | 0.011396 |
| 0.011403 | 0.011295 | 0.011598 | 0.011430 | 0.011463 | 0.011329 | 0.011430 |
| 0.011295 | 0.011564 | 0.011228 | 0.011497 | 0.011295 | 0.011295 | 0.011228 |
| 0.011396 | 0.011665 | 0.011363 | 0.011430 | 0.011262 | 0.011665 | 0.011295 |
| 0.011295 | 0.011295 | 0.011329 | 0.011362 | 0.011329 | 0.011430 | 0.011497 |
| 0.011497 | 0.011463 | 0.011362 | 0.011463 | 0.011362 | 0.011295 | 0.011262 |
| 0.011295 | 0.011295 | 0.011363 | 0.011295 | 0.011195 | 0.011430 | 0.011295 |
| 0.011329 | 0.011329 | 0.011463 | 0.011497 | 0.011396 | 0.011262 | 0.011329 |
| 0.011396 | 0.011329 | 0.011430 | 0.011295 | 0.011430 | 0.011530 | 0.011833 |
| 0.011329 | 0.011732 | 0.011336 | 0.017823 | 0.011257 | 0.011488 | 0.011688 |
| 0.011648 | 0.011693 | 0.011270 | 0.011234 | 0.011774 | 0.011716 | 0.011364 |
| 0.011487 | 0.011610 | 0.011255 | 0.011186 | 0.011255 | 0.011406 | 0.011275 |
| 0.011482 | 0.011507 | 0.011431 | 0.011325 | 0.011463 | 0.011497 | 0.011500 |
| 0.011301 | 0.011463 | 0.011463 | 0.011430 | 0.011396 | 0.011396 | 0.011363 |
| 0.011396 | 0.011329 | 0.011362 | 0.011396 | 0.011363 | 0.011295 | 0.011329 |
| 0.011329 | 0.011396 | 0.011295 | 0.011396 | 0.011430 | 0.011463 | 0.011362 |
| 0.011396 | 0.011362 | 0.011698 | 0.011698 | 0.011430 | 0.011464 | 0.011497 |
| 0.011262 | 0.011262 | 0.011295 | 0.000000 | 0.011262 | 0.011497 | 0.011497 |
| 0.011530 | 0.011530 | 0.011463 | 0.011564 | 0.011732 | 0.011565 | 0.011329 |
| 0.011396 | 0.011463 | 0.011430 | 0.011329 | 0.011396 | 0.011362 | 0.011396 |
| 0.011463 | 0.011463 | 0.011497 | 0.011396 | 0.011296 | 0.011564 | 0.011463 |
| 0.011399 | 0.011295 | 0.011396 | 0.011497 | 0.011396 | 0.011530 | 0.011564 |
| 0.011732 | 0.011436 | 0.011598 | 0.011497 | 0.011497 | 0.011665 | 0.011295 |
| 0.011464 | 0.011363 | 0.011329 | 0.011329 | 0.011396 | 0.011295 | 0.011396 |
| 0.011430 | 0.011463 | 0.011362 | 0.011396 | 0.011362 | 0.011698 | 0.011698 |
| 0.011430 | 0.011464 | 0.011530 | 0.011463 | 0.012104 | 0.011525 | 0.011447 |
| 0.011517 | 0.011477 | 0.011588 | 0.011476 | 0.011585 | 0.011509 | 0.011474 |
| 0.012057 | 0.011372 | 0.011506 | 0.011441 | 0.011715 | 0.011571 | 0.011605 |
| 0.012081 | 0.011550 | 0.011398 | 0.011396 | 0.011396 | 0.011430 | 0.011364 |
| 0.011262 | 0.011228 | 0.011430 | 0.011396 | 0.011398 | 0.011530 | 0.011498 |
| 0.011362 | 0.011228 | 0.011262 | 0.011362 | 0.011195 | 0.011329 | 0.011228 |
| 0.011362 | 0.011396 | 0.011295 | 0.011262 | 0.011362 | 0.011295 | 0.011329 |
| 0.011329 | 0.011262 | 0.011329 | 0.011363 | 0.011262 | 0.011396 | 0.011497 |
| 0.011396 | 0.011463 | 0.011396 | 0.011396 | 0.011329 | 0.011732 | 0.011362 |
| 0.011408 | 0.011329 | 0.011564 | 0.011569 | 0.011363 | 0.011430 | 0.011430 |
| 0.011430 | 0.011295 | 0.011329 | 0.011295 | 0.011463 | 0.011463 | 0.011396 |
| 0.011396 | 0.011530 | 0.011698 | 0.011429 | 0.011631 | 0.011631 | 0.011497 |
| 0.011329 | 0.011396 | 0.011430 | 0.011833 | 0.011396 | 0.011363 | 0.011396 |
| 0.011430 | 0.011362 | 0.011362 | 0.011665 | 0.011530 | 0.011631 | 0.011362 |
| 0.011463 | 0.011530 | 0.011396 | 0.011463 | 0.011430 | 0.011295 | 0.011631 |
| 0.011396 | 0.011362 | 0.011362 | 0.011530 | 0.011362 | 0.011463 | 0.011698 |



|          |          |          |          |          |          |          |
|----------|----------|----------|----------|----------|----------|----------|
| 0.011396 | 0.011774 | 0.011766 | 0.011589 | 0.011286 | 0.011468 | 0.011318 |
| 0.011280 | 0.011800 | 0.011306 | 0.011507 | 0.011353 | 0.011518 | 0.011379 |
| 0.011468 | 0.011192 | 0.011339 | 0.011192 | 0.011276 | 0.011395 | 0.011425 |
| 0.011437 | 0.011296 | 0.011448 | 0.011377 | 0.011397 | 0.011530 | 0.011598 |
| 0.011597 | 0.011464 | 0.011567 | 0.011569 | 0.011704 | 0.011696 | 0.011396 |
| 0.011631 | 0.011497 | 0.011362 | 0.011463 | 0.011262 | 0.011497 | 0.011295 |
| 0.011362 | 0.011362 | 0.011329 | 0.011295 | 0.011329 | 0.011295 | 0.011396 |
| 0.011375 | 0.011375 | 0.011368 | 0.011403 | 0.011539 | 0.011436 | 0.011504 |
| 0.011503 | 0.011430 | 0.011245 | 0.011240 | 0.011365 | 0.011535 | 0.011535 |
| 0.011329 | 0.011399 | 0.011633 | 0.011601 | 0.011531 | 0.011565 | 0.011497 |
| 0.011430 | 0.011497 | 0.011497 | 0.011396 | 0.011968 | 0.011564 | 0.011631 |
| 0.011665 | 0.011701 | 0.011367 | 0.011441 | 0.011329 | 0.011530 | 0.011497 |
| 0.011531 | 0.011564 | 0.011564 | 0.011564 | 0.011650 | 0.011698 | 0.011338 |
| 0.011229 | 0.011233 | 0.011333 | 0.011298 | 0.011402 | 0.011210 | 0.011570 |
| 0.011369 | 0.011455 | 0.011156 | 0.011397 | 0.011363 | 0.011437 | 0.011262 |
| 0.011295 | 0.011295 | 0.011295 | 0.011329 | 0.011530 | 0.011497 | 0.011430 |
| 0.011530 | 0.011597 | 0.011329 | 0.011329 | 0.011362 | 0.011362 | 0.011364 |
| 0.011432 | 0.011362 | 0.011362 | 0.011397 | 0.011530 | 0.011598 | 0.011597 |
| 0.011464 | 0.011567 | 0.011569 | 0.011704 | 0.011696 | 0.011396 | 0.011564 |
| 0.011497 | 0.011497 | 0.011331 | 0.011478 | 0.011408 | 0.011469 | 0.011341 |
| 0.011439 | 0.011607 | 0.011399 | 0.011400 | 0.011195 | 0.011430 | 0.011295 |
| 0.011396 | 0.011396 | 0.011295 | 0.011397 | 0.011497 | 0.011500 | 0.011396 |
| 0.011295 | 0.011229 | 0.011362 | 0.011295 | 0.011228 | 0.011332 | 0.011430 |
| 0.011396 | 0.011329 | 0.011362 | 0.011396 | 0.011363 | 0.011295 | 0.011497 |
| 0.011362 | 0.011396 | 0.011396 | 0.011329 | 0.011396 | 0.011631 | 0.011295 |
| 0.011329 | 0.011732 | 0.011329 | 0.011295 | 0.011329 | 0.011698 | 0.011232 |
| 0.011678 | 0.011315 | 0.011261 | 0.011543 | 0.011630 | 0.011527 | 0.011227 |
| 0.011218 | 0.011497 | 0.011597 | 0.011705 | 0.011565 | 0.011703 | 0.011834 |
| 0.011733 | 0.011771 | 0.011732 | 0.011983 | 0.011698 | 0.012573 | 0.011734 |
| 0.012473 | 0.012241 | 0.012375 | 0.012646 | 0.011698 | 0.011396 | 0.011699 |
| 0.012137 | 0.012072 | 0.011665 | 0.011564 | 0.011632 | 0.011632 | 0.011602 |
| 0.011497 | 0.011467 | 0.011564 | 0.011531 | 0.011901 | 0.011967 | 0.011968 |
| 0.011868 | 0.011968 | 0.012072 | 0.011838 | 0.012138 | 0.012144 | 0.012205 |
| 0.012206 | 0.012239 | 0.012186 | 0.012206 | 0.012207 | 0.011429 | 0.011732 |
| 0.011800 | 0.012304 | 0.011806 | 0.012035 | 0.012508 | 0.011570 | 0.011464 |
| 0.011430 | 0.011429 | 0.011900 | 0.011965 | 0.012045 | 0.011765 | 0.011431 |
| S438     | 0.011564 | 0.011564 | 0.011900 | 0.011665 | 0.011665 | 0.011732 |
| 0.011570 | 0.011502 | 0.011665 | 0.011161 | 0.011228 | 0.011195 | 0.011161 |
| 0.011195 | 0.011362 | 0.011161 | 0.011195 | 0.011262 | 0.011228 | 0.011195 |
| 0.011161 | 0.011195 | 0.011295 | 0.011161 | 0.011195 | 0.011195 | 0.011536 |
| 0.011429 | 0.011195 | 0.011094 | 0.011329 | 0.011262 | 0.011228 | 0.011262 |
| 0.011228 | 0.011329 | 0.011228 | 0.011228 | 0.011262 | 0.011228 | 0.011396 |
| 0.011161 | 0.011228 | 0.011262 | 0.011195 | 0.011295 | 0.011329 | 0.011262 |
| 0.011228 | 0.011396 | 0.011295 | 0.011564 | 0.011228 | 0.011497 | 0.011228 |
| 0.011195 | 0.011295 | 0.011362 | 0.011497 | 0.011597 | 0.011295 | 0.011396 |
| 0.011262 | 0.011329 | 0.011228 | 0.011463 | 0.011698 | 0.011228 | 0.011295 |
| 0.011195 | 0.011295 | 0.011262 | 0.011329 | 0.011262 | 0.011262 | 0.011262 |
| 0.011161 | 0.011195 | 0.011161 | 0.011262 | 0.011228 | 0.011262 | 0.011329 |
| 0.011262 | 0.011228 | 0.011295 | 0.011195 | 0.011329 | 0.011161 | 0.011228 |
| 0.011396 | 0.011329 | 0.011564 | 0.011396 | 0.011228 | 0.011463 | 0.011228 |
| 0.011394 | 0.011620 | 0.011437 | 0.011099 | 0.011135 | 0.011244 | 0.011336 |
| 0.011975 | 0.011365 | 0.011143 | 0.011463 | 0.011463 | 0.011262 | 0.011362 |
| 0.011295 | 0.011262 | 0.011329 | 0.011228 | 0.011329 | 0.011262 | 0.011262 |
| 0.011228 | 0.011329 | 0.011530 | 0.011396 | 0.011295 | 0.011262 | 0.011195 |
| 0.011161 | 0.011161 | 0.011228 | 0.011195 | 0.011396 | 0.011362 | 0.011295 |
| 0.011396 | 0.011463 | 0.011195 | 0.011195 | 0.011228 | 0.011228 | 0.011229 |
| 0.011297 | 0.011228 | 0.011228 | 0.011096 | 0.011169 | 0.011130 | 0.011228 |
| 0.011230 | 0.011163 | 0.011208 | 0.011198 | 0.011128 | 0.011163 | 0.011195 |
| 0.011456 | 0.011233 | 0.011267 | 0.011161 | 0.011164 | 0.011296 | 0.011262 |
| 0.011329 | 0.011262 | 0.011262 | 0.011362 | 0.011295 | 0.011665 | 0.011463 |

|          |          |          |          |          |          |          |
|----------|----------|----------|----------|----------|----------|----------|
| 0.011497 | 0.011362 | 0.011228 | 0.011329 | 0.011127 | 0.011362 | 0.011161 |
| 0.011228 | 0.011228 | 0.011195 | 0.011161 | 0.011195 | 0.011161 | 0.011262 |
| 0.011228 | 0.011329 | 0.011262 | 0.011161 | 0.011262 | 0.011362 | 0.011364 |
| 0.011362 | 0.011262 | 0.011161 | 0.011094 | 0.011228 | 0.011161 | 0.011094 |
| 0.011196 | 0.011362 | 0.011161 | 0.011362 | 0.011127 | 0.011228 | 0.011195 |
| 0.011295 | 0.011195 | 0.011228 | 0.011195 | 0.011228 | 0.011094 | 0.011228 |
| 0.011262 | 0.011195 | 0.011262 | 0.011195 | 0.011228 | 0.011262 | 0.011497 |
| 0.011597 | 0.011530 | 0.011597 | 0.011364 | 0.011598 | 0.011228 | 0.011195 |
| 0.011229 | 0.011464 | 0.011289 | 0.011129 | 0.011603 | 0.011094 | 0.011218 |
| 0.011603 | 0.011502 | 0.011396 | 0.011598 | 0.011299 | 0.011463 | 0.011430 |
| 0.011362 | 0.011530 | 0.011380 | 0.011225 | 0.011270 | 0.011262 | 0.011331 |
| 0.011430 | 0.011330 | 0.011466 | 0.011534 | 0.011463 | 0.011530 | 0.011636 |
| 0.011365 | 0.011536 | 0.011467 | 0.011398 | 0.011666 | 0.011127 | 0.011330 |
| 0.011295 | 0.011228 | 0.011127 | 0.011127 | 0.011195 | 0.011195 | 0.011262 |
| 0.011195 | 0.011262 | 0.011161 | 0.011262 | 0.011195 | 0.011195 | 0.011262 |
| 0.011195 | 0.011631 | 0.011530 | 0.011564 | 0.011094 | 0.011195 | 0.011228 |
| 0.011228 | 0.011195 | 0.011262 | 0.011295 | 0.011161 | 0.011161 | 0.011161 |
| 0.011698 | 0.011329 | 0.011329 | 0.011127 | 0.011228 | 0.011396 | 0.011161 |
| 0.011161 | 0.011228 | 0.011195 | 0.011362 | 0.011161 | 0.011295 | 0.011429 |
| 0.011362 | 0.011195 | 0.011195 | 0.011127 | 0.011127 | 0.011295 | 0.011228 |
| 0.011127 | 0.011228 | 0.011094 | 0.011127 | 0.011262 | 0.011396 | 0.011161 |
| 0.011128 | 0.011262 | 0.011195 | 0.011094 | 0.011429 | 0.011094 | 0.011262 |
| 0.011334 | 0.011161 | 0.011463 | 0.011295 | 0.011329 | 0.011195 | 0.011295 |
| 0.011161 | 0.011497 | 0.011094 | 0.011362 | 0.011161 | 0.011161 | 0.011094 |
| 0.011329 | 0.011531 | 0.011228 | 0.011295 | 0.011127 | 0.011530 | 0.011161 |
| 0.011161 | 0.011161 | 0.011195 | 0.011295 | 0.011195 | 0.011295 | 0.011362 |
| 0.011362 | 0.011329 | 0.011228 | 0.011329 | 0.011295 | 0.011161 | 0.011127 |
| 0.011161 | 0.011161 | 0.011228 | 0.011161 | 0.011127 | 0.011295 | 0.011161 |
| 0.011195 | 0.011195 | 0.011329 | 0.011362 | 0.011262 | 0.011195 | 0.011195 |
| 0.011262 | 0.011195 | 0.011295 | 0.011161 | 0.011295 | 0.011396 | 0.011698 |
| 0.011195 | 0.011598 | 0.011198 | 0.017710 | 0.011126 | 0.011305 | 0.011548 |
| 0.011510 | 0.011553 | 0.011270 | 0.011234 | 0.011609 | 0.011578 | 0.011242 |
| 0.011392 | 0.011426 | 0.011099 | 0.011186 | 0.011177 | 0.011208 | 0.011146 |
| 0.011389 | 0.011358 | 0.011357 | 0.011193 | 0.011329 | 0.011362 | 0.011365 |
| 0.011232 | 0.011329 | 0.011329 | 0.011295 | 0.011262 | 0.011262 | 0.011228 |
| 0.011262 | 0.011195 | 0.011228 | 0.011262 | 0.011228 | 0.011161 | 0.011195 |
| 0.011195 | 0.011262 | 0.011161 | 0.011262 | 0.011295 | 0.011329 | 0.011228 |
| 0.011262 | 0.011228 | 0.011564 | 0.011564 | 0.011295 | 0.011329 | 0.011362 |
| 0.011127 | 0.011127 | 0.011161 | 0.011262 | 0.000000 | 0.011362 | 0.011362 |
| 0.011396 | 0.011396 | 0.011329 | 0.011429 | 0.011597 | 0.011431 | 0.011262 |
| 0.011262 | 0.011329 | 0.011362 | 0.011195 | 0.011262 | 0.011228 | 0.011262 |
| 0.011329 | 0.011329 | 0.011362 | 0.011329 | 0.011229 | 0.011429 | 0.011396 |
| 0.011263 | 0.011161 | 0.011262 | 0.011362 | 0.011262 | 0.011396 | 0.011429 |
| 0.011598 | 0.011299 | 0.011463 | 0.011430 | 0.011362 | 0.011530 | 0.011161 |
| 0.011330 | 0.011228 | 0.011195 | 0.011195 | 0.011262 | 0.011161 | 0.011262 |
| 0.011295 | 0.011329 | 0.011228 | 0.011262 | 0.011228 | 0.011564 | 0.011564 |
| 0.011295 | 0.011329 | 0.011396 | 0.011329 | 0.011969 | 0.011382 | 0.011306 |
| 0.011377 | 0.011338 | 0.011447 | 0.011337 | 0.011445 | 0.011371 | 0.011336 |
| 0.011919 | 0.011233 | 0.011369 | 0.011302 | 0.011577 | 0.011434 | 0.011537 |
| 0.011944 | 0.011399 | 0.011263 | 0.011262 | 0.011262 | 0.011295 | 0.011229 |
| 0.011127 | 0.011161 | 0.011295 | 0.011262 | 0.011263 | 0.011396 | 0.011363 |
| 0.011228 | 0.011161 | 0.011195 | 0.011228 | 0.011127 | 0.011195 | 0.011094 |
| 0.011228 | 0.011262 | 0.011161 | 0.011127 | 0.011228 | 0.011161 | 0.011195 |
| 0.011195 | 0.011127 | 0.011195 | 0.011228 | 0.011127 | 0.011329 | 0.011362 |
| 0.011262 | 0.011329 | 0.011262 | 0.011262 | 0.011195 | 0.011597 | 0.011228 |
| 0.011269 | 0.011195 | 0.011430 | 0.011433 | 0.011295 | 0.011295 | 0.011295 |
| 0.011295 | 0.011228 | 0.011195 | 0.011228 | 0.011329 | 0.011329 | 0.011262 |
| 0.011262 | 0.011396 | 0.011564 | 0.011295 | 0.011497 | 0.011497 | 0.011362 |
| 0.011195 | 0.011262 | 0.011295 | 0.011698 | 0.011262 | 0.011295 | 0.011262 |
| 0.011295 | 0.011228 | 0.011228 | 0.011530 | 0.011463 | 0.011497 | 0.011228 |

|          |          |          |          |          |          |          |
|----------|----------|----------|----------|----------|----------|----------|
| 0.011329 | 0.011396 | 0.011262 | 0.011329 | 0.011295 | 0.011161 | 0.011497 |
| 0.011262 | 0.011228 | 0.011228 | 0.011396 | 0.011228 | 0.011329 | 0.011564 |
| 0.011262 | 0.011638 | 0.011631 | 0.011426 | 0.011117 | 0.011332 | 0.011163 |
| 0.011115 | 0.011644 | 0.011166 | 0.011373 | 0.011158 | 0.011264 | 0.011273 |
| 0.011417 | 0.000000 | 0.011227 | 0.000000 | 0.011114 | 0.011261 | 0.011303 |
| 0.011324 | 0.011218 | 0.011307 | 0.011236 | 0.011262 | 0.011396 | 0.011463 |
| 0.011463 | 0.011329 | 0.011432 | 0.011433 | 0.011569 | 0.011590 | 0.011262 |
| 0.011497 | 0.011362 | 0.011228 | 0.011329 | 0.011127 | 0.011362 | 0.011161 |
| 0.011228 | 0.011228 | 0.011195 | 0.011161 | 0.011195 | 0.011161 | 0.011262 |
| 0.011235 | 0.011235 | 0.011231 | 0.011266 | 0.011402 | 0.011368 | 0.011367 |
| 0.011367 | 0.011296 | 0.000000 | 0.011096 | 0.011230 | 0.011399 | 0.011399 |
| 0.011195 | 0.011263 | 0.011498 | 0.011466 | 0.011396 | 0.011430 | 0.011362 |
| 0.011295 | 0.011362 | 0.011362 | 0.011262 | 0.011833 | 0.011430 | 0.011497 |
| 0.011530 | 0.011594 | 0.011231 | 0.011303 | 0.011195 | 0.011396 | 0.011362 |
| 0.011397 | 0.011429 | 0.011430 | 0.011430 | 0.011571 | 0.011564 | 0.011199 |
| 0.011094 | 0.011095 | 0.011196 | 0.011162 | 0.011265 | 0.011098 | 0.011434 |
| 0.011232 | 0.011367 | 0.011108 | 0.011248 | 0.011228 | 0.011300 | 0.011195 |
| 0.011161 | 0.011161 | 0.011228 | 0.011195 | 0.011396 | 0.011362 | 0.011295 |
| 0.011396 | 0.011463 | 0.011195 | 0.011195 | 0.011228 | 0.011228 | 0.011229 |
| 0.011297 | 0.011228 | 0.011228 | 0.011262 | 0.011396 | 0.011463 | 0.011463 |
| 0.011329 | 0.011432 | 0.011433 | 0.011569 | 0.011590 | 0.011262 | 0.011429 |
| 0.011362 | 0.011362 | 0.011196 | 0.011373 | 0.011303 | 0.011333 | 0.011200 |
| 0.011370 | 0.011516 | 0.011314 | 0.011264 | 0.011161 | 0.011362 | 0.011228 |
| 0.011329 | 0.011262 | 0.011161 | 0.011262 | 0.011362 | 0.011364 | 0.011262 |
| 0.011161 | 0.011094 | 0.011228 | 0.011161 | 0.011094 | 0.011196 | 0.011362 |
| 0.011262 | 0.011195 | 0.011228 | 0.011262 | 0.011228 | 0.011161 | 0.011362 |
| 0.011228 | 0.011262 | 0.011262 | 0.011195 | 0.011262 | 0.011497 | 0.011161 |
| 0.011195 | 0.011597 | 0.011195 | 0.011228 | 0.011195 | 0.011564 | 0.011146 |
| 0.011622 | 0.011145 | 0.011161 | 0.011382 | 0.011467 | 0.011383 | 0.000000 |
| 0.011113 | 0.011362 | 0.011463 | 0.011569 | 0.011430 | 0.011568 | 0.011699 |
| 0.011598 | 0.011635 | 0.011597 | 0.011846 | 0.011564 | 0.012438 | 0.011599 |
| 0.012338 | 0.012105 | 0.012240 | 0.012511 | 0.011564 | 0.011262 | 0.011564 |
| 0.012002 | 0.011937 | 0.011530 | 0.011430 | 0.011497 | 0.011497 | 0.011466 |
| 0.011362 | 0.011365 | 0.011429 | 0.011396 | 0.011766 | 0.011833 | 0.011834 |
| 0.011733 | 0.011833 | 0.011937 | 0.011703 | 0.012003 | 0.012008 | 0.012070 |
| 0.012070 | 0.012104 | 0.012050 | 0.012071 | 0.012072 | 0.011295 | 0.011598 |
| 0.011666 | 0.012169 | 0.011670 | 0.011900 | 0.012373 | 0.011434 | 0.011329 |
| 0.011295 | 0.011295 | 0.011766 | 0.011800 | 0.011904 | 0.011631 | 0.011296 |
| S439     | 0.011799 | 0.011799 | 0.012136 | 0.011900 | 0.011900 | 0.011967 |
| 0.011808 | 0.011740 | 0.011900 | 0.011396 | 0.011463 | 0.011430 | 0.011396 |
| 0.011429 | 0.011597 | 0.011396 | 0.011429 | 0.011497 | 0.011463 | 0.011429 |
| 0.011396 | 0.011430 | 0.011530 | 0.011396 | 0.011430 | 0.011429 | 0.011774 |
| 0.011665 | 0.011430 | 0.011329 | 0.011564 | 0.011497 | 0.011463 | 0.011497 |
| 0.011463 | 0.011564 | 0.011463 | 0.011396 | 0.011497 | 0.011463 | 0.011631 |
| 0.011396 | 0.011463 | 0.011497 | 0.011429 | 0.011530 | 0.011564 | 0.011497 |
| 0.011463 | 0.011631 | 0.011531 | 0.011799 | 0.011463 | 0.011732 | 0.011463 |
| 0.011429 | 0.011530 | 0.011597 | 0.011732 | 0.011833 | 0.011530 | 0.011631 |
| 0.011497 | 0.011564 | 0.011463 | 0.011698 | 0.011934 | 0.011463 | 0.011530 |
| 0.011430 | 0.011530 | 0.011497 | 0.011564 | 0.011497 | 0.011497 | 0.011497 |
| 0.011396 | 0.011429 | 0.011396 | 0.011497 | 0.011463 | 0.011498 | 0.011564 |
| 0.011497 | 0.011463 | 0.011530 | 0.011429 | 0.011564 | 0.011396 | 0.011463 |
| 0.011631 | 0.011564 | 0.011799 | 0.011631 | 0.011463 | 0.011698 | 0.011463 |
| 0.011653 | 0.011882 | 0.011702 | 0.011373 | 0.011359 | 0.011502 | 0.011572 |
| 0.012195 | 0.011620 | 0.011390 | 0.011698 | 0.011698 | 0.011497 | 0.011598 |
| 0.011530 | 0.011497 | 0.011564 | 0.011463 | 0.011564 | 0.011497 | 0.011497 |
| 0.011463 | 0.011564 | 0.011766 | 0.011631 | 0.011530 | 0.011497 | 0.011430 |
| 0.011396 | 0.011396 | 0.011463 | 0.011429 | 0.011631 | 0.011597 | 0.011530 |
| 0.011631 | 0.011698 | 0.011429 | 0.011429 | 0.011463 | 0.011463 | 0.011465 |
| 0.011533 | 0.011463 | 0.011463 | 0.011348 | 0.011422 | 0.011376 | 0.011464 |
| 0.011467 | 0.011404 | 0.011466 | 0.011440 | 0.011366 | 0.011403 | 0.011432 |

|          |          |          |          |          |          |          |
|----------|----------|----------|----------|----------|----------|----------|
| 0.011672 | 0.011474 | 0.011508 | 0.011396 | 0.011406 | 0.011531 | 0.011497 |
| 0.011565 | 0.011498 | 0.011497 | 0.011597 | 0.011530 | 0.011900 | 0.011698 |
| 0.011732 | 0.011598 | 0.011463 | 0.011564 | 0.011362 | 0.011597 | 0.011396 |
| 0.011463 | 0.011463 | 0.011429 | 0.011396 | 0.011429 | 0.011396 | 0.011497 |
| 0.011463 | 0.011564 | 0.011497 | 0.011396 | 0.011498 | 0.011597 | 0.011601 |
| 0.011598 | 0.011497 | 0.011396 | 0.011330 | 0.011463 | 0.011396 | 0.011329 |
| 0.011434 | 0.011598 | 0.011396 | 0.011598 | 0.011362 | 0.011463 | 0.011430 |
| 0.011530 | 0.011429 | 0.011463 | 0.011430 | 0.011463 | 0.011329 | 0.011463 |
| 0.011497 | 0.011429 | 0.011497 | 0.011429 | 0.011463 | 0.011497 | 0.011732 |
| 0.011833 | 0.011765 | 0.011833 | 0.011599 | 0.011833 | 0.011463 | 0.011429 |
| 0.011466 | 0.011788 | 0.011472 | 0.011369 | 0.011841 | 0.011333 | 0.011454 |
| 0.011841 | 0.011740 | 0.011631 | 0.011833 | 0.011538 | 0.011698 | 0.011598 |
| 0.011597 | 0.011765 | 0.011629 | 0.011513 | 0.011522 | 0.011497 | 0.011568 |
| 0.011665 | 0.011566 | 0.011703 | 0.011771 | 0.011698 | 0.011766 | 0.011874 |
| 0.011602 | 0.011773 | 0.011704 | 0.011635 | 0.011902 | 0.011362 | 0.011566 |
| 0.011530 | 0.011463 | 0.011362 | 0.011362 | 0.011430 | 0.011430 | 0.011497 |
| 0.011429 | 0.011497 | 0.011396 | 0.011497 | 0.011430 | 0.011362 | 0.011497 |
| 0.011430 | 0.011866 | 0.011766 | 0.011799 | 0.011329 | 0.011430 | 0.011463 |
| 0.011463 | 0.011429 | 0.011497 | 0.011530 | 0.011396 | 0.011396 | 0.011396 |
| 0.011934 | 0.011564 | 0.011564 | 0.011362 | 0.011463 | 0.011631 | 0.011396 |
| 0.011396 | 0.011463 | 0.011429 | 0.011598 | 0.011396 | 0.011530 | 0.011665 |
| 0.011597 | 0.011430 | 0.011429 | 0.011362 | 0.011362 | 0.011530 | 0.011463 |
| 0.011362 | 0.011463 | 0.011329 | 0.011362 | 0.011497 | 0.011631 | 0.011396 |
| 0.011363 | 0.011497 | 0.011430 | 0.011329 | 0.011665 | 0.011329 | 0.011497 |
| 0.011574 | 0.011396 | 0.011698 | 0.011531 | 0.011564 | 0.011430 | 0.011530 |
| 0.011396 | 0.011732 | 0.011329 | 0.011598 | 0.011396 | 0.011396 | 0.011329 |
| 0.011564 | 0.011766 | 0.011463 | 0.011530 | 0.011362 | 0.011766 | 0.011396 |
| 0.011396 | 0.011396 | 0.011429 | 0.011530 | 0.011429 | 0.011530 | 0.011597 |
| 0.011597 | 0.011564 | 0.011463 | 0.011564 | 0.011530 | 0.011396 | 0.011362 |
| 0.011396 | 0.011396 | 0.011463 | 0.011396 | 0.011362 | 0.011530 | 0.011396 |
| 0.011429 | 0.011430 | 0.011564 | 0.011597 | 0.011497 | 0.011429 | 0.011430 |
| 0.011497 | 0.011429 | 0.011530 | 0.011396 | 0.011530 | 0.011631 | 0.011934 |
| 0.011430 | 0.011833 | 0.011440 | 0.017899 | 0.011322 | 0.011549 | 0.011793 |
| 0.011752 | 0.011799 | 0.011479 | 0.011466 | 0.011884 | 0.011820 | 0.011485 |
| 0.011677 | 0.011732 | 0.011372 | 0.011437 | 0.011411 | 0.011504 | 0.011404 |
| 0.011670 | 0.011582 | 0.011579 | 0.011457 | 0.011564 | 0.011598 | 0.011601 |
| 0.011473 | 0.011564 | 0.011564 | 0.011530 | 0.011497 | 0.011497 | 0.011463 |
| 0.011497 | 0.011429 | 0.011463 | 0.011497 | 0.011463 | 0.011396 | 0.011429 |
| 0.011429 | 0.011497 | 0.011396 | 0.011497 | 0.011530 | 0.011564 | 0.011463 |
| 0.011497 | 0.011463 | 0.011799 | 0.011799 | 0.011530 | 0.011565 | 0.011598 |
| 0.011362 | 0.011362 | 0.011396 | 0.011497 | 0.011362 | 0.000000 | 0.000000 |
| 0.011631 | 0.011631 | 0.011564 | 0.011665 | 0.011833 | 0.011666 | 0.011497 |
| 0.011497 | 0.011564 | 0.011597 | 0.011430 | 0.011497 | 0.011463 | 0.011497 |
| 0.011564 | 0.011564 | 0.011597 | 0.011564 | 0.011464 | 0.011665 | 0.011631 |
| 0.011501 | 0.011396 | 0.011497 | 0.011598 | 0.011497 | 0.011564 | 0.011665 |
| 0.011833 | 0.011538 | 0.011698 | 0.011598 | 0.011597 | 0.011765 | 0.011396 |
| 0.011566 | 0.011464 | 0.011429 | 0.011429 | 0.011497 | 0.011396 | 0.011497 |
| 0.011530 | 0.011564 | 0.011463 | 0.011497 | 0.011463 | 0.011799 | 0.011799 |
| 0.011530 | 0.011565 | 0.011631 | 0.011564 | 0.012204 | 0.011632 | 0.011553 |
| 0.011623 | 0.011581 | 0.011693 | 0.011580 | 0.011691 | 0.011612 | 0.011578 |
| 0.012160 | 0.011476 | 0.011608 | 0.011545 | 0.011818 | 0.011673 | 0.011775 |
| 0.012183 | 0.011663 | 0.011500 | 0.011497 | 0.011497 | 0.011530 | 0.011466 |
| 0.011362 | 0.011396 | 0.011530 | 0.011497 | 0.011500 | 0.011631 | 0.011599 |
| 0.011463 | 0.011396 | 0.011430 | 0.011463 | 0.011362 | 0.011430 | 0.011329 |
| 0.011463 | 0.011497 | 0.011396 | 0.011362 | 0.011463 | 0.011396 | 0.011430 |
| 0.011429 | 0.011362 | 0.011430 | 0.011463 | 0.011362 | 0.011564 | 0.011597 |
| 0.011497 | 0.011564 | 0.011497 | 0.011497 | 0.011429 | 0.011833 | 0.011463 |
| 0.011513 | 0.011430 | 0.011665 | 0.011671 | 0.011530 | 0.011530 | 0.011530 |
| 0.011530 | 0.011463 | 0.011429 | 0.011463 | 0.011564 | 0.011564 | 0.011497 |
| 0.011497 | 0.011631 | 0.011799 | 0.011530 | 0.011732 | 0.011732 | 0.011597 |

|          |          |          |          |          |          |          |
|----------|----------|----------|----------|----------|----------|----------|
| 0.011429 | 0.011497 | 0.011530 | 0.011934 | 0.011497 | 0.011530 | 0.011497 |
| 0.011530 | 0.011463 | 0.011463 | 0.011766 | 0.011698 | 0.011732 | 0.011463 |
| 0.011564 | 0.011631 | 0.011497 | 0.011564 | 0.011530 | 0.011396 | 0.011732 |
| 0.011497 | 0.011463 | 0.011463 | 0.011631 | 0.011463 | 0.011564 | 0.011799 |
| 0.011497 | 0.011876 | 0.011866 | 0.011670 | 0.011399 | 0.011570 | 0.011421 |
| 0.011335 | 0.011878 | 0.011411 | 0.011596 | 0.011402 | 0.011518 | 0.011538 |
| 0.011723 | 0.011258 | 0.011505 | 0.011324 | 0.011384 | 0.011529 | 0.011547 |
| 0.011588 | 0.011414 | 0.011553 | 0.011448 | 0.011498 | 0.011631 | 0.011698 |
| 0.011698 | 0.011565 | 0.011669 | 0.011636 | 0.011806 | 0.011802 | 0.011497 |
| 0.011732 | 0.011598 | 0.011463 | 0.011564 | 0.011362 | 0.011597 | 0.011396 |
| 0.011463 | 0.011463 | 0.011429 | 0.011396 | 0.011429 | 0.011396 | 0.011497 |
| 0.011479 | 0.011480 | 0.011471 | 0.011505 | 0.011642 | 0.011607 | 0.011606 |
| 0.011605 | 0.011531 | 0.011356 | 0.011312 | 0.011467 | 0.011636 | 0.011637 |
| 0.011430 | 0.011500 | 0.011734 | 0.011702 | 0.011632 | 0.011666 | 0.011597 |
| 0.011530 | 0.011597 | 0.011597 | 0.011497 | 0.012068 | 0.011665 | 0.011732 |
| 0.011766 | 0.011808 | 0.011470 | 0.011545 | 0.011430 | 0.011631 | 0.011598 |
| 0.011632 | 0.011665 | 0.011665 | 0.011665 | 0.011847 | 0.011799 | 0.011442 |
| 0.011331 | 0.011337 | 0.011435 | 0.011400 | 0.011504 | 0.011359 | 0.011672 |
| 0.011403 | 0.011630 | 0.011346 | 0.011510 | 0.011464 | 0.011539 | 0.011430 |
| 0.011396 | 0.011396 | 0.011463 | 0.011429 | 0.011631 | 0.011597 | 0.011530 |
| 0.011631 | 0.011698 | 0.011429 | 0.011429 | 0.011463 | 0.011463 | 0.011465 |
| 0.011533 | 0.011463 | 0.011463 | 0.011498 | 0.011631 | 0.011698 | 0.011698 |
| 0.011565 | 0.011669 | 0.011636 | 0.011806 | 0.011802 | 0.011497 | 0.011665 |
| 0.011598 | 0.011598 | 0.011432 | 0.011582 | 0.011512 | 0.011571 | 0.011446 |
| 0.011577 | 0.011789 | 0.011653 | 0.011502 | 0.011396 | 0.011598 | 0.011463 |
| 0.011564 | 0.011497 | 0.011396 | 0.011498 | 0.011597 | 0.011601 | 0.011497 |
| 0.011396 | 0.011330 | 0.011463 | 0.011396 | 0.011329 | 0.011434 | 0.011598 |
| 0.011497 | 0.011429 | 0.011463 | 0.011497 | 0.011463 | 0.011396 | 0.011598 |
| 0.011463 | 0.011497 | 0.011497 | 0.011429 | 0.011497 | 0.011732 | 0.011396 |
| 0.011430 | 0.011833 | 0.011429 | 0.011463 | 0.011429 | 0.011799 | 0.011403 |
| 0.011847 | 0.011400 | 0.011411 | 0.011624 | 0.011712 | 0.011634 | 0.011311 |
| 0.011375 | 0.011597 | 0.011698 | 0.011807 | 0.011666 | 0.011805 | 0.011935 |
| 0.011834 | 0.011872 | 0.011833 | 0.012086 | 0.011799 | 0.012674 | 0.011835 |
| 0.012574 | 0.012342 | 0.012476 | 0.012748 | 0.011799 | 0.011497 | 0.011799 |
| 0.012238 | 0.012173 | 0.011766 | 0.011665 | 0.011733 | 0.011733 | 0.011703 |
| 0.011597 | 0.011569 | 0.011665 | 0.011632 | 0.012002 | 0.012068 | 0.012069 |
| 0.011969 | 0.012069 | 0.012173 | 0.011940 | 0.012239 | 0.012246 | 0.012306 |
| 0.012307 | 0.012340 | 0.012289 | 0.012307 | 0.012308 | 0.011530 | 0.011833 |
| 0.011901 | 0.012405 | 0.011908 | 0.012136 | 0.012609 | 0.011671 | 0.011564 |
| 0.011530 | 0.011530 | 0.011934 | 0.012006 | 0.012151 | 0.011866 | 0.011532 |
| S440     | 0.011799 | 0.011799 | 0.012136 | 0.011900 | 0.011900 | 0.011967 |
| 0.011808 | 0.011740 | 0.011900 | 0.011396 | 0.011463 | 0.011430 | 0.011396 |
| 0.011429 | 0.011597 | 0.011396 | 0.011429 | 0.011497 | 0.011463 | 0.011429 |
| 0.011396 | 0.011430 | 0.011530 | 0.011396 | 0.011430 | 0.011429 | 0.011774 |
| 0.011665 | 0.011430 | 0.011329 | 0.011564 | 0.011497 | 0.011463 | 0.011497 |
| 0.011463 | 0.011564 | 0.011463 | 0.011396 | 0.011497 | 0.011463 | 0.011631 |
| 0.011396 | 0.011463 | 0.011497 | 0.011429 | 0.011530 | 0.011564 | 0.011497 |
| 0.011463 | 0.011631 | 0.011531 | 0.011799 | 0.011463 | 0.011732 | 0.011463 |
| 0.011429 | 0.011530 | 0.011597 | 0.011732 | 0.011833 | 0.011530 | 0.011631 |
| 0.011497 | 0.011564 | 0.011463 | 0.011698 | 0.011934 | 0.011463 | 0.011530 |
| 0.011430 | 0.011530 | 0.011497 | 0.011564 | 0.011497 | 0.011497 | 0.011497 |
| 0.011396 | 0.011429 | 0.011396 | 0.011497 | 0.011463 | 0.011498 | 0.011564 |
| 0.011497 | 0.011463 | 0.011530 | 0.011429 | 0.011564 | 0.011396 | 0.011463 |
| 0.011631 | 0.011564 | 0.011799 | 0.011631 | 0.011463 | 0.011698 | 0.011463 |
| 0.011653 | 0.011882 | 0.011702 | 0.011373 | 0.011359 | 0.011502 | 0.011572 |
| 0.012195 | 0.011620 | 0.011390 | 0.011698 | 0.011698 | 0.011497 | 0.011598 |
| 0.011530 | 0.011497 | 0.011564 | 0.011463 | 0.011564 | 0.011497 | 0.011497 |
| 0.011463 | 0.011564 | 0.011766 | 0.011631 | 0.011530 | 0.011497 | 0.011430 |
| 0.011396 | 0.011396 | 0.011463 | 0.011429 | 0.011631 | 0.011597 | 0.011530 |
| 0.011631 | 0.011698 | 0.011429 | 0.011429 | 0.011463 | 0.011463 | 0.011465 |

|          |          |          |          |          |          |          |
|----------|----------|----------|----------|----------|----------|----------|
| 0.011533 | 0.011463 | 0.011463 | 0.011348 | 0.011422 | 0.011376 | 0.011464 |
| 0.011467 | 0.011404 | 0.011466 | 0.011440 | 0.011366 | 0.011403 | 0.011432 |
| 0.011672 | 0.011474 | 0.011508 | 0.011396 | 0.011406 | 0.011531 | 0.011497 |
| 0.011565 | 0.011498 | 0.011497 | 0.011597 | 0.011530 | 0.011900 | 0.011698 |
| 0.011732 | 0.011598 | 0.011463 | 0.011564 | 0.011362 | 0.011597 | 0.011396 |
| 0.011463 | 0.011463 | 0.011429 | 0.011396 | 0.011429 | 0.011396 | 0.011497 |
| 0.011463 | 0.011564 | 0.011497 | 0.011396 | 0.011498 | 0.011597 | 0.011601 |
| 0.011598 | 0.011497 | 0.011396 | 0.011330 | 0.011463 | 0.011396 | 0.011329 |
| 0.011434 | 0.011598 | 0.011396 | 0.011598 | 0.011362 | 0.011463 | 0.011430 |
| 0.011530 | 0.011429 | 0.011463 | 0.011430 | 0.011463 | 0.011329 | 0.011463 |
| 0.011497 | 0.011429 | 0.011497 | 0.011429 | 0.011463 | 0.011497 | 0.011732 |
| 0.011833 | 0.011765 | 0.011833 | 0.011599 | 0.011833 | 0.011463 | 0.011429 |
| 0.011466 | 0.011788 | 0.011472 | 0.011369 | 0.011841 | 0.011333 | 0.011454 |
| 0.011841 | 0.011740 | 0.011631 | 0.011833 | 0.011538 | 0.011698 | 0.011598 |
| 0.011597 | 0.011765 | 0.011629 | 0.011513 | 0.011522 | 0.011497 | 0.011568 |
| 0.011665 | 0.011566 | 0.011703 | 0.011771 | 0.011698 | 0.011766 | 0.011874 |
| 0.011602 | 0.011773 | 0.011704 | 0.011635 | 0.011902 | 0.011362 | 0.011566 |
| 0.011530 | 0.011463 | 0.011362 | 0.011362 | 0.011430 | 0.011430 | 0.011497 |
| 0.011429 | 0.011497 | 0.011396 | 0.011497 | 0.011430 | 0.011362 | 0.011497 |
| 0.011430 | 0.011866 | 0.011766 | 0.011799 | 0.011329 | 0.011430 | 0.011463 |
| 0.011463 | 0.011429 | 0.011497 | 0.011530 | 0.011396 | 0.011396 | 0.011396 |
| 0.011934 | 0.011564 | 0.011564 | 0.011362 | 0.011463 | 0.011631 | 0.011396 |
| 0.011396 | 0.011463 | 0.011429 | 0.011598 | 0.011396 | 0.011530 | 0.011665 |
| 0.011597 | 0.011430 | 0.011429 | 0.011362 | 0.011362 | 0.011530 | 0.011463 |
| 0.011362 | 0.011463 | 0.011329 | 0.011362 | 0.011497 | 0.011631 | 0.011396 |
| 0.011363 | 0.011497 | 0.011430 | 0.011329 | 0.011665 | 0.011329 | 0.011497 |
| 0.011574 | 0.011396 | 0.011698 | 0.011531 | 0.011564 | 0.011430 | 0.011530 |
| 0.011396 | 0.011732 | 0.011329 | 0.011598 | 0.011396 | 0.011396 | 0.011329 |
| 0.011564 | 0.011766 | 0.011463 | 0.011530 | 0.011362 | 0.011766 | 0.011396 |
| 0.011396 | 0.011396 | 0.011429 | 0.011530 | 0.011429 | 0.011530 | 0.011597 |
| 0.011597 | 0.011564 | 0.011463 | 0.011564 | 0.011530 | 0.011396 | 0.011362 |
| 0.011396 | 0.011396 | 0.011463 | 0.011396 | 0.011362 | 0.011530 | 0.011396 |
| 0.011429 | 0.011430 | 0.011564 | 0.011597 | 0.011497 | 0.011429 | 0.011430 |
| 0.011497 | 0.011429 | 0.011530 | 0.011396 | 0.011530 | 0.011631 | 0.011934 |
| 0.011430 | 0.011833 | 0.011440 | 0.017899 | 0.011322 | 0.011549 | 0.011793 |
| 0.011752 | 0.011799 | 0.011479 | 0.011466 | 0.011884 | 0.011820 | 0.011485 |
| 0.011677 | 0.011732 | 0.011372 | 0.011437 | 0.011411 | 0.011504 | 0.011404 |
| 0.011670 | 0.011582 | 0.011579 | 0.011457 | 0.011564 | 0.011598 | 0.011601 |
| 0.011473 | 0.011564 | 0.011564 | 0.011530 | 0.011497 | 0.011497 | 0.011463 |
| 0.011497 | 0.011429 | 0.011463 | 0.011497 | 0.011463 | 0.011396 | 0.011429 |
| 0.011429 | 0.011497 | 0.011396 | 0.011497 | 0.011530 | 0.011564 | 0.011463 |
| 0.011497 | 0.011463 | 0.011799 | 0.011799 | 0.011530 | 0.011565 | 0.011598 |
| 0.011362 | 0.011362 | 0.011396 | 0.011497 | 0.011362 | 0.000000 | 0.000000 |
| 0.011631 | 0.011631 | 0.011564 | 0.011665 | 0.011833 | 0.011666 | 0.011497 |
| 0.011497 | 0.011564 | 0.011597 | 0.011430 | 0.011497 | 0.011463 | 0.011497 |
| 0.011564 | 0.011564 | 0.011597 | 0.011564 | 0.011464 | 0.011665 | 0.011631 |
| 0.011501 | 0.011396 | 0.011497 | 0.011598 | 0.011497 | 0.011564 | 0.011665 |
| 0.011833 | 0.011538 | 0.011698 | 0.011598 | 0.011597 | 0.011765 | 0.011396 |
| 0.011566 | 0.011464 | 0.011429 | 0.011429 | 0.011497 | 0.011396 | 0.011497 |
| 0.011530 | 0.011564 | 0.011463 | 0.011497 | 0.011463 | 0.011799 | 0.011799 |
| 0.011530 | 0.011565 | 0.011631 | 0.011564 | 0.012204 | 0.011632 | 0.011553 |
| 0.011623 | 0.011581 | 0.011693 | 0.011580 | 0.011691 | 0.011612 | 0.011578 |
| 0.012160 | 0.011476 | 0.011608 | 0.011545 | 0.011818 | 0.011673 | 0.011775 |
| 0.012183 | 0.011663 | 0.011500 | 0.011497 | 0.011497 | 0.011530 | 0.011466 |
| 0.011362 | 0.011396 | 0.011530 | 0.011497 | 0.011500 | 0.011631 | 0.011599 |
| 0.011463 | 0.011396 | 0.011430 | 0.011463 | 0.011362 | 0.011430 | 0.011329 |
| 0.011463 | 0.011497 | 0.011396 | 0.011362 | 0.011463 | 0.011396 | 0.011430 |
| 0.011429 | 0.011362 | 0.011430 | 0.011463 | 0.011362 | 0.011564 | 0.011597 |
| 0.011497 | 0.011564 | 0.011497 | 0.011497 | 0.011429 | 0.011833 | 0.011463 |
| 0.011513 | 0.011430 | 0.011665 | 0.011671 | 0.011530 | 0.011530 | 0.011530 |

|          |          |          |          |          |          |          |
|----------|----------|----------|----------|----------|----------|----------|
| 0.011530 | 0.011463 | 0.011429 | 0.011463 | 0.011564 | 0.011564 | 0.011497 |
| 0.011497 | 0.011631 | 0.011799 | 0.011530 | 0.011732 | 0.011732 | 0.011597 |
| 0.011429 | 0.011497 | 0.011530 | 0.011934 | 0.011497 | 0.011530 | 0.011497 |
| 0.011530 | 0.011463 | 0.011463 | 0.011766 | 0.011698 | 0.011732 | 0.011463 |
| 0.011564 | 0.011631 | 0.011497 | 0.011564 | 0.011530 | 0.011396 | 0.011732 |
| 0.011497 | 0.011463 | 0.011463 | 0.011631 | 0.011463 | 0.011564 | 0.011799 |
| 0.011497 | 0.011876 | 0.011866 | 0.011670 | 0.011399 | 0.011570 | 0.011421 |
| 0.011335 | 0.011878 | 0.011411 | 0.011596 | 0.011402 | 0.011518 | 0.011538 |
| 0.011723 | 0.011258 | 0.011505 | 0.011324 | 0.011384 | 0.011529 | 0.011547 |
| 0.011588 | 0.011414 | 0.011553 | 0.011448 | 0.011498 | 0.011631 | 0.011698 |
| 0.011698 | 0.011565 | 0.011669 | 0.011636 | 0.011806 | 0.011802 | 0.011497 |
| 0.011732 | 0.011598 | 0.011463 | 0.011564 | 0.011362 | 0.011597 | 0.011396 |
| 0.011463 | 0.011463 | 0.011429 | 0.011396 | 0.011429 | 0.011396 | 0.011497 |
| 0.011479 | 0.011480 | 0.011471 | 0.011505 | 0.011642 | 0.011607 | 0.011606 |
| 0.011605 | 0.011531 | 0.011356 | 0.011312 | 0.011467 | 0.011636 | 0.011637 |
| 0.011430 | 0.011500 | 0.011734 | 0.011702 | 0.011632 | 0.011666 | 0.011597 |
| 0.011530 | 0.011597 | 0.011597 | 0.011497 | 0.012068 | 0.011665 | 0.011732 |
| 0.011766 | 0.011808 | 0.011470 | 0.011545 | 0.011430 | 0.011631 | 0.011598 |
| 0.011632 | 0.011665 | 0.011665 | 0.011665 | 0.011847 | 0.011799 | 0.011442 |
| 0.011331 | 0.011337 | 0.011435 | 0.011400 | 0.011504 | 0.011359 | 0.011672 |
| 0.011403 | 0.011630 | 0.011346 | 0.011510 | 0.011464 | 0.011539 | 0.011430 |
| 0.011396 | 0.011396 | 0.011463 | 0.011429 | 0.011631 | 0.011597 | 0.011530 |
| 0.011631 | 0.011698 | 0.011429 | 0.011429 | 0.011463 | 0.011463 | 0.011465 |
| 0.011533 | 0.011463 | 0.011463 | 0.011498 | 0.011631 | 0.011698 | 0.011698 |
| 0.011565 | 0.011669 | 0.011636 | 0.011806 | 0.011802 | 0.011497 | 0.011665 |
| 0.011598 | 0.011598 | 0.011432 | 0.011582 | 0.011512 | 0.011571 | 0.011446 |
| 0.011577 | 0.011789 | 0.011653 | 0.011502 | 0.011396 | 0.011598 | 0.011463 |
| 0.011564 | 0.011497 | 0.011396 | 0.011498 | 0.011597 | 0.011601 | 0.011497 |
| 0.011396 | 0.011330 | 0.011463 | 0.011396 | 0.011329 | 0.011434 | 0.011598 |
| 0.011497 | 0.011429 | 0.011463 | 0.011497 | 0.011463 | 0.011396 | 0.011598 |
| 0.011463 | 0.011497 | 0.011497 | 0.011429 | 0.011497 | 0.011732 | 0.011396 |
| 0.011430 | 0.011833 | 0.011429 | 0.011463 | 0.011429 | 0.011799 | 0.011403 |
| 0.011847 | 0.011400 | 0.011411 | 0.011624 | 0.011712 | 0.011634 | 0.011311 |
| 0.011375 | 0.011597 | 0.011698 | 0.011807 | 0.011666 | 0.011805 | 0.011935 |
| 0.011834 | 0.011872 | 0.011833 | 0.012086 | 0.011799 | 0.012674 | 0.011835 |
| 0.012574 | 0.012342 | 0.012476 | 0.012748 | 0.011799 | 0.011497 | 0.011799 |
| 0.012238 | 0.012173 | 0.011766 | 0.011665 | 0.011733 | 0.011733 | 0.011703 |
| 0.011597 | 0.011569 | 0.011665 | 0.011632 | 0.012002 | 0.012068 | 0.012069 |
| 0.011969 | 0.012069 | 0.012173 | 0.011940 | 0.012239 | 0.012246 | 0.012306 |
| 0.012307 | 0.012340 | 0.012289 | 0.012307 | 0.012308 | 0.011530 | 0.011833 |
| 0.011901 | 0.012405 | 0.011908 | 0.012136 | 0.012609 | 0.011671 | 0.011564 |
| 0.011530 | 0.011530 | 0.011934 | 0.012006 | 0.012151 | 0.011866 | 0.011532 |
| S441     | 0.011833 | 0.011833 | 0.012169 | 0.011933 | 0.011933 | 0.012001 |
| 0.011842 | 0.011774 | 0.011933 | 0.011430 | 0.011497 | 0.011464 | 0.011429 |
| 0.011463 | 0.011631 | 0.011429 | 0.011463 | 0.011530 | 0.011497 | 0.011463 |
| 0.011429 | 0.011463 | 0.011564 | 0.011430 | 0.011463 | 0.011463 | 0.011807 |
| 0.011698 | 0.011463 | 0.011362 | 0.011597 | 0.011530 | 0.011497 | 0.011530 |
| 0.011497 | 0.011597 | 0.011497 | 0.011497 | 0.011530 | 0.011497 | 0.011665 |
| 0.011429 | 0.011497 | 0.011530 | 0.011463 | 0.011564 | 0.011530 | 0.011530 |
| 0.011497 | 0.011665 | 0.011564 | 0.011833 | 0.011497 | 0.011765 | 0.011497 |
| 0.011463 | 0.011564 | 0.011631 | 0.011765 | 0.011866 | 0.011564 | 0.011665 |
| 0.011530 | 0.011597 | 0.011497 | 0.011732 | 0.011967 | 0.011497 | 0.011564 |
| 0.011463 | 0.011564 | 0.011530 | 0.011597 | 0.011530 | 0.011530 | 0.011530 |
| 0.011429 | 0.011463 | 0.011429 | 0.011530 | 0.011497 | 0.011531 | 0.011597 |
| 0.011530 | 0.011497 | 0.011564 | 0.011463 | 0.011597 | 0.011429 | 0.011497 |
| 0.011665 | 0.011597 | 0.011833 | 0.011665 | 0.011429 | 0.011732 | 0.011497 |
| 0.011691 | 0.011919 | 0.011664 | 0.011412 | 0.011321 | 0.011539 | 0.011533 |
| 0.012195 | 0.011467 | 0.011307 | 0.011530 | 0.011463 | 0.011530 | 0.011631 |
| 0.011564 | 0.011530 | 0.011597 | 0.011497 | 0.011597 | 0.011530 | 0.011530 |
| 0.011497 | 0.011597 | 0.011799 | 0.011665 | 0.011564 | 0.011530 | 0.011463 |

|          |          |          |          |          |          |          |
|----------|----------|----------|----------|----------|----------|----------|
| 0.011429 | 0.011429 | 0.011497 | 0.011463 | 0.011665 | 0.011631 | 0.011564 |
| 0.011665 | 0.011732 | 0.011463 | 0.011463 | 0.011497 | 0.011497 | 0.011499 |
| 0.011567 | 0.011497 | 0.011497 | 0.011348 | 0.011386 | 0.011411 | 0.011497 |
| 0.011500 | 0.011438 | 0.011429 | 0.011474 | 0.011400 | 0.011437 | 0.011465 |
| 0.011672 | 0.011474 | 0.011508 | 0.011430 | 0.011406 | 0.011565 | 0.011531 |
| 0.011598 | 0.011532 | 0.011531 | 0.011631 | 0.011564 | 0.011934 | 0.011732 |
| 0.011765 | 0.011631 | 0.011497 | 0.011597 | 0.011396 | 0.011631 | 0.011430 |
| 0.011497 | 0.011497 | 0.011463 | 0.011429 | 0.011463 | 0.011429 | 0.011530 |
| 0.011497 | 0.011597 | 0.011530 | 0.011429 | 0.011532 | 0.011631 | 0.011635 |
| 0.011631 | 0.011530 | 0.011429 | 0.011364 | 0.011497 | 0.011429 | 0.011362 |
| 0.011468 | 0.011631 | 0.011430 | 0.011631 | 0.011396 | 0.011497 | 0.011463 |
| 0.011564 | 0.011463 | 0.011497 | 0.011463 | 0.011497 | 0.011362 | 0.011497 |
| 0.011530 | 0.011463 | 0.011530 | 0.011463 | 0.011497 | 0.011530 | 0.011765 |
| 0.011866 | 0.011799 | 0.011866 | 0.011566 | 0.011866 | 0.011497 | 0.011463 |
| 0.011499 | 0.011748 | 0.011517 | 0.011369 | 0.011875 | 0.011367 | 0.011493 |
| 0.011875 | 0.011774 | 0.011463 | 0.011866 | 0.011572 | 0.011463 | 0.011698 |
| 0.011631 | 0.011530 | 0.011664 | 0.011390 | 0.011521 | 0.011530 | 0.011602 |
| 0.011698 | 0.011600 | 0.011601 | 0.011805 | 0.011732 | 0.011799 | 0.011908 |
| 0.011636 | 0.011807 | 0.011738 | 0.011669 | 0.011935 | 0.011396 | 0.011600 |
| 0.011564 | 0.011497 | 0.011396 | 0.011396 | 0.011463 | 0.011463 | 0.011530 |
| 0.011463 | 0.011530 | 0.011429 | 0.011530 | 0.011463 | 0.011463 | 0.011530 |
| 0.011463 | 0.011900 | 0.011799 | 0.011833 | 0.011362 | 0.011463 | 0.011497 |
| 0.011497 | 0.011463 | 0.011530 | 0.011564 | 0.011429 | 0.011429 | 0.011429 |
| 0.011967 | 0.011597 | 0.011597 | 0.011396 | 0.011497 | 0.011665 | 0.011429 |
| 0.011429 | 0.011497 | 0.011463 | 0.011631 | 0.011429 | 0.011564 | 0.011698 |
| 0.011631 | 0.011463 | 0.011463 | 0.011396 | 0.011396 | 0.011564 | 0.011497 |
| 0.011396 | 0.011497 | 0.011362 | 0.011396 | 0.011530 | 0.011665 | 0.011430 |
| 0.011396 | 0.011530 | 0.011464 | 0.011362 | 0.011698 | 0.011362 | 0.011530 |
| 0.011608 | 0.011430 | 0.011732 | 0.011564 | 0.011597 | 0.011463 | 0.011564 |
| 0.011429 | 0.011765 | 0.011362 | 0.011631 | 0.011429 | 0.011429 | 0.011362 |
| 0.011597 | 0.011799 | 0.011497 | 0.011564 | 0.011396 | 0.011799 | 0.011429 |
| 0.011429 | 0.011429 | 0.011463 | 0.011564 | 0.011463 | 0.011564 | 0.011631 |
| 0.011631 | 0.011597 | 0.011497 | 0.011598 | 0.011564 | 0.011429 | 0.011396 |
| 0.011429 | 0.011429 | 0.011497 | 0.011429 | 0.011396 | 0.011564 | 0.011429 |
| 0.011463 | 0.011463 | 0.011597 | 0.011631 | 0.011530 | 0.011463 | 0.011463 |
| 0.011530 | 0.011463 | 0.011564 | 0.011429 | 0.011564 | 0.011463 | 0.011967 |
| 0.011463 | 0.011866 | 0.011474 | 0.017861 | 0.011257 | 0.011733 | 0.011828 |
| 0.011787 | 0.011834 | 0.011427 | 0.011350 | 0.011939 | 0.011854 | 0.011607 |
| 0.011582 | 0.011793 | 0.011372 | 0.011437 | 0.011411 | 0.011554 | 0.011533 |
| 0.011529 | 0.011544 | 0.011579 | 0.011259 | 0.011597 | 0.011631 | 0.011635 |
| 0.011507 | 0.011597 | 0.011530 | 0.011564 | 0.011530 | 0.011531 | 0.011497 |
| 0.011463 | 0.011463 | 0.011295 | 0.011530 | 0.011497 | 0.011429 | 0.011463 |
| 0.011463 | 0.011530 | 0.011429 | 0.011530 | 0.011564 | 0.011597 | 0.011497 |
| 0.011530 | 0.011497 | 0.011833 | 0.011833 | 0.011564 | 0.011598 | 0.011631 |
| 0.011396 | 0.011396 | 0.011429 | 0.011530 | 0.011396 | 0.011631 | 0.011631 |
| 0.000000 | 0.011463 | 0.011597 | 0.011094 | 0.011866 | 0.011094 | 0.011530 |
| 0.011329 | 0.011597 | 0.011631 | 0.011463 | 0.011530 | 0.011497 | 0.011463 |
| 0.011396 | 0.011396 | 0.011429 | 0.011598 | 0.011498 | 0.011698 | 0.011665 |
| 0.011534 | 0.011429 | 0.011530 | 0.011631 | 0.011530 | 0.011665 | 0.011698 |
| 0.011866 | 0.011572 | 0.011463 | 0.011698 | 0.011631 | 0.011530 | 0.011430 |
| 0.011532 | 0.011497 | 0.011463 | 0.011463 | 0.011530 | 0.011429 | 0.011530 |
| 0.011564 | 0.011597 | 0.011497 | 0.011530 | 0.011497 | 0.011833 | 0.011833 |
| 0.011564 | 0.011598 | 0.011665 | 0.011597 | 0.012238 | 0.011417 | 0.011588 |
| 0.011658 | 0.011407 | 0.011728 | 0.011615 | 0.011585 | 0.011647 | 0.011405 |
| 0.012194 | 0.011510 | 0.011643 | 0.011579 | 0.011852 | 0.011707 | 0.011809 |
| 0.012217 | 0.011663 | 0.011534 | 0.011530 | 0.011530 | 0.011564 | 0.011500 |
| 0.011396 | 0.011429 | 0.011564 | 0.011530 | 0.011533 | 0.011665 | 0.011633 |
| 0.011497 | 0.011429 | 0.011463 | 0.011497 | 0.011396 | 0.011463 | 0.011362 |
| 0.011497 | 0.011530 | 0.011429 | 0.011396 | 0.011497 | 0.011429 | 0.011463 |
| 0.011463 | 0.011396 | 0.011463 | 0.011497 | 0.011396 | 0.011597 | 0.011631 |



|          |          |          |          |          |          |          |
|----------|----------|----------|----------|----------|----------|----------|
| 0.011530 | 0.011597 | 0.011530 | 0.011530 | 0.011463 | 0.011866 | 0.011497 |
| 0.011547 | 0.011463 | 0.011699 | 0.011705 | 0.011564 | 0.011564 | 0.011564 |
| 0.011564 | 0.011497 | 0.011463 | 0.011497 | 0.011597 | 0.011597 | 0.011530 |
| 0.011530 | 0.011665 | 0.011833 | 0.011564 | 0.011766 | 0.011766 | 0.011631 |
| 0.011463 | 0.011530 | 0.011564 | 0.011967 | 0.011531 | 0.011564 | 0.011530 |
| 0.011362 | 0.011497 | 0.011497 | 0.011799 | 0.011732 | 0.011766 | 0.011497 |
| 0.011597 | 0.011665 | 0.011530 | 0.011597 | 0.011564 | 0.011429 | 0.011765 |
| 0.011530 | 0.011497 | 0.011497 | 0.011665 | 0.011497 | 0.011597 | 0.011833 |
| 0.011530 | 0.011910 | 0.011900 | 0.011629 | 0.011229 | 0.011604 | 0.011318 |
| 0.011500 | 0.011839 | 0.011411 | 0.011551 | 0.011451 | 0.011569 | 0.011538 |
| 0.011519 | 0.011324 | 0.011450 | 0.011192 | 0.011384 | 0.011395 | 0.011547 |
| 0.011625 | 0.011414 | 0.011589 | 0.011448 | 0.011532 | 0.011665 | 0.011732 |
| 0.011732 | 0.011598 | 0.011703 | 0.011704 | 0.011840 | 0.011873 | 0.011530 |
| 0.011765 | 0.011631 | 0.011497 | 0.011597 | 0.011396 | 0.011631 | 0.011430 |
| 0.011497 | 0.011497 | 0.011463 | 0.011429 | 0.011463 | 0.011429 | 0.011530 |
| 0.011340 | 0.011480 | 0.011505 | 0.011540 | 0.011676 | 0.011641 | 0.011572 |
| 0.011639 | 0.011564 | 0.011319 | 0.011276 | 0.011500 | 0.011670 | 0.011671 |
| 0.011464 | 0.011534 | 0.011767 | 0.011736 | 0.011396 | 0.011699 | 0.011631 |
| 0.011564 | 0.011631 | 0.011631 | 0.011530 | 0.012102 | 0.011429 | 0.011497 |
| 0.011799 | 0.011844 | 0.011504 | 0.011580 | 0.011463 | 0.011665 | 0.011631 |
| 0.011666 | 0.011698 | 0.011429 | 0.011429 | 0.011846 | 0.011833 | 0.011477 |
| 0.011365 | 0.011372 | 0.011469 | 0.011434 | 0.011539 | 0.011359 | 0.011706 |
| 0.011506 | 0.011586 | 0.011298 | 0.011510 | 0.011497 | 0.011573 | 0.011463 |
| 0.011429 | 0.011429 | 0.011497 | 0.011463 | 0.011665 | 0.011631 | 0.011564 |
| 0.011665 | 0.011732 | 0.011463 | 0.011463 | 0.011497 | 0.011497 | 0.011499 |
| 0.011567 | 0.011497 | 0.011497 | 0.011532 | 0.011665 | 0.011732 | 0.011732 |
| 0.011598 | 0.011703 | 0.011704 | 0.011840 | 0.011873 | 0.011530 | 0.011698 |
| 0.011631 | 0.011631 | 0.011466 | 0.011617 | 0.011581 | 0.011605 | 0.011481 |
| 0.011646 | 0.011926 | 0.011610 | 0.011536 | 0.011430 | 0.011631 | 0.011497 |
| 0.011597 | 0.011530 | 0.011429 | 0.011532 | 0.011631 | 0.011635 | 0.011530 |
| 0.011429 | 0.011364 | 0.011497 | 0.011429 | 0.011362 | 0.011468 | 0.011631 |
| 0.011463 | 0.011463 | 0.011295 | 0.011530 | 0.011497 | 0.011429 | 0.011631 |
| 0.011497 | 0.011530 | 0.011530 | 0.011463 | 0.011530 | 0.011765 | 0.011429 |
| 0.011463 | 0.011866 | 0.011463 | 0.011497 | 0.011463 | 0.011833 | 0.011317 |
| 0.011735 | 0.011358 | 0.011311 | 0.011584 | 0.011671 | 0.011634 | 0.011311 |
| 0.011218 | 0.011631 | 0.011732 | 0.011841 | 0.011700 | 0.011838 | 0.011968 |
| 0.011868 | 0.011906 | 0.011866 | 0.012120 | 0.011833 | 0.012708 | 0.011869 |
| 0.012540 | 0.012376 | 0.012510 | 0.012781 | 0.011833 | 0.011530 | 0.011833 |
| 0.012272 | 0.012207 | 0.011799 | 0.011698 | 0.011766 | 0.011766 | 0.011669 |
| 0.011631 | 0.011637 | 0.011698 | 0.011665 | 0.012035 | 0.012102 | 0.012103 |
| 0.012003 | 0.012103 | 0.012207 | 0.011974 | 0.012205 | 0.012279 | 0.012339 |
| 0.012340 | 0.012374 | 0.012323 | 0.012340 | 0.012342 | 0.011564 | 0.011867 |
| 0.011935 | 0.012439 | 0.011942 | 0.012169 | 0.012643 | 0.011705 | 0.011598 |
| 0.011530 | 0.011564 | 0.012035 | 0.012047 | 0.012186 | 0.011900 | 0.011566 |
| S442     | 0.011799 | 0.011799 | 0.012169 | 0.011933 | 0.011933 | 0.012000 |
| 0.011841 | 0.011773 | 0.012000 | 0.011429 | 0.011496 | 0.011464 | 0.011429 |
| 0.011463 | 0.011631 | 0.011429 | 0.011463 | 0.011530 | 0.011496 | 0.011463 |
| 0.011429 | 0.011463 | 0.011564 | 0.011430 | 0.011463 | 0.011396 | 0.011807 |
| 0.011698 | 0.011463 | 0.011362 | 0.011597 | 0.011530 | 0.011497 | 0.011530 |
| 0.011496 | 0.011597 | 0.011496 | 0.011496 | 0.011530 | 0.011496 | 0.011664 |
| 0.011429 | 0.011496 | 0.011530 | 0.011463 | 0.011564 | 0.011530 | 0.011530 |
| 0.011496 | 0.011664 | 0.011564 | 0.011832 | 0.011496 | 0.011765 | 0.011496 |
| 0.011463 | 0.011564 | 0.011631 | 0.011765 | 0.011866 | 0.011564 | 0.011664 |
| 0.011530 | 0.011597 | 0.011496 | 0.011731 | 0.011967 | 0.011496 | 0.011564 |
| 0.011463 | 0.011564 | 0.011530 | 0.011597 | 0.011530 | 0.011530 | 0.011530 |
| 0.011429 | 0.011463 | 0.011429 | 0.011530 | 0.011496 | 0.011531 | 0.011597 |
| 0.011530 | 0.011496 | 0.011564 | 0.011463 | 0.011597 | 0.011429 | 0.011496 |
| 0.011664 | 0.011597 | 0.011832 | 0.011664 | 0.011496 | 0.011731 | 0.011496 |
| 0.011653 | 0.011882 | 0.011664 | 0.011334 | 0.011359 | 0.011539 | 0.011533 |
| 0.012231 | 0.011620 | 0.011348 | 0.011530 | 0.011530 | 0.011530 | 0.011631 |

|          |          |          |          |          |          |          |
|----------|----------|----------|----------|----------|----------|----------|
| 0.011564 | 0.011496 | 0.011564 | 0.011496 | 0.011597 | 0.011530 | 0.011496 |
| 0.011463 | 0.011597 | 0.011765 | 0.011664 | 0.011564 | 0.011530 | 0.011463 |
| 0.011429 | 0.011429 | 0.011497 | 0.011463 | 0.011665 | 0.011631 | 0.011564 |
| 0.011665 | 0.011732 | 0.011463 | 0.011463 | 0.011497 | 0.011497 | 0.011499 |
| 0.011567 | 0.011497 | 0.011497 | 0.011348 | 0.011349 | 0.011376 | 0.011497 |
| 0.011500 | 0.011438 | 0.011429 | 0.011474 | 0.011366 | 0.011403 | 0.011465 |
| 0.011672 | 0.011474 | 0.011508 | 0.011430 | 0.011406 | 0.011565 | 0.011531 |
| 0.011598 | 0.011532 | 0.011531 | 0.011597 | 0.011530 | 0.011933 | 0.011732 |
| 0.011765 | 0.011631 | 0.011496 | 0.011597 | 0.011396 | 0.011631 | 0.011430 |
| 0.011496 | 0.011496 | 0.011463 | 0.011429 | 0.011463 | 0.011429 | 0.011530 |
| 0.011497 | 0.011597 | 0.011530 | 0.011429 | 0.011532 | 0.011631 | 0.011635 |
| 0.011631 | 0.011530 | 0.011429 | 0.011364 | 0.011497 | 0.011429 | 0.011362 |
| 0.011468 | 0.011631 | 0.011430 | 0.011631 | 0.011396 | 0.011497 | 0.011463 |
| 0.011564 | 0.011463 | 0.011497 | 0.011463 | 0.011497 | 0.011362 | 0.011497 |
| 0.011530 | 0.011463 | 0.011530 | 0.011463 | 0.011463 | 0.011530 | 0.011765 |
| 0.011866 | 0.011799 | 0.011866 | 0.011566 | 0.011866 | 0.011463 | 0.011463 |
| 0.011499 | 0.011828 | 0.011563 | 0.011369 | 0.011875 | 0.011367 | 0.011493 |
| 0.011875 | 0.011774 | 0.000000 | 0.011832 | 0.011572 | 0.011530 | 0.011698 |
| 0.011631 | 0.011597 | 0.011593 | 0.011266 | 0.011479 | 0.011530 | 0.011568 |
| 0.011698 | 0.011566 | 0.011601 | 0.011805 | 0.011698 | 0.011765 | 0.011873 |
| 0.011568 | 0.011807 | 0.011669 | 0.011635 | 0.011901 | 0.011396 | 0.011599 |
| 0.011564 | 0.011496 | 0.011396 | 0.011396 | 0.011463 | 0.011463 | 0.011530 |
| 0.011463 | 0.011530 | 0.011429 | 0.011530 | 0.011463 | 0.011463 | 0.011530 |
| 0.011463 | 0.011899 | 0.011799 | 0.011832 | 0.011362 | 0.011463 | 0.011496 |
| 0.011496 | 0.011463 | 0.011530 | 0.011564 | 0.011429 | 0.011429 | 0.011429 |
| 0.011967 | 0.011597 | 0.011597 | 0.011396 | 0.011496 | 0.011664 | 0.011429 |
| 0.011429 | 0.011496 | 0.011463 | 0.011631 | 0.011429 | 0.011564 | 0.011698 |
| 0.011631 | 0.011463 | 0.011463 | 0.011396 | 0.011396 | 0.011564 | 0.011496 |
| 0.011396 | 0.011496 | 0.011362 | 0.011396 | 0.011530 | 0.011665 | 0.011429 |
| 0.011396 | 0.011530 | 0.011463 | 0.011362 | 0.011698 | 0.011362 | 0.011530 |
| 0.011608 | 0.011429 | 0.011732 | 0.011564 | 0.011597 | 0.011463 | 0.011564 |
| 0.011429 | 0.011765 | 0.011362 | 0.011631 | 0.011429 | 0.011429 | 0.011362 |
| 0.011597 | 0.011799 | 0.011496 | 0.011564 | 0.011396 | 0.011799 | 0.011429 |
| 0.011429 | 0.011429 | 0.011463 | 0.011564 | 0.011463 | 0.011564 | 0.011631 |
| 0.011631 | 0.011597 | 0.011496 | 0.011597 | 0.011564 | 0.011429 | 0.011396 |
| 0.011429 | 0.011429 | 0.011496 | 0.011429 | 0.011396 | 0.011564 | 0.011429 |
| 0.011463 | 0.011463 | 0.011597 | 0.011631 | 0.011530 | 0.011463 | 0.011463 |
| 0.011530 | 0.011463 | 0.011564 | 0.011429 | 0.011564 | 0.011463 | 0.011967 |
| 0.011463 | 0.011866 | 0.011474 | 0.017898 | 0.011322 | 0.011549 | 0.011828 |
| 0.011787 | 0.011834 | 0.011479 | 0.011524 | 0.011829 | 0.011854 | 0.011546 |
| 0.011629 | 0.011610 | 0.011333 | 0.011437 | 0.011411 | 0.011455 | 0.011447 |
| 0.011623 | 0.011582 | 0.011616 | 0.011457 | 0.011597 | 0.011597 | 0.011635 |
| 0.011507 | 0.011597 | 0.011530 | 0.011564 | 0.011530 | 0.011530 | 0.011497 |
| 0.011463 | 0.011463 | 0.011295 | 0.011530 | 0.011497 | 0.011429 | 0.011429 |
| 0.011429 | 0.011530 | 0.011429 | 0.011530 | 0.011564 | 0.011597 | 0.011463 |
| 0.011530 | 0.011497 | 0.011833 | 0.011833 | 0.011564 | 0.011598 | 0.011631 |
| 0.011396 | 0.011396 | 0.011429 | 0.011530 | 0.011396 | 0.011631 | 0.011631 |
| 0.011463 | 0.000000 | 0.011597 | 0.011496 | 0.011866 | 0.011498 | 0.011530 |
| 0.011329 | 0.011597 | 0.011631 | 0.011463 | 0.011530 | 0.011497 | 0.011463 |
| 0.011396 | 0.011396 | 0.011429 | 0.011598 | 0.011498 | 0.011698 | 0.011665 |
| 0.011534 | 0.011429 | 0.011530 | 0.011631 | 0.011530 | 0.011665 | 0.011698 |
| 0.011832 | 0.011572 | 0.011530 | 0.011698 | 0.011631 | 0.011597 | 0.011430 |
| 0.011532 | 0.011497 | 0.011429 | 0.011429 | 0.011530 | 0.011429 | 0.011530 |
| 0.011564 | 0.011597 | 0.011463 | 0.011530 | 0.011497 | 0.011833 | 0.011833 |
| 0.011564 | 0.011598 | 0.011631 | 0.011564 | 0.012170 | 0.011453 | 0.011552 |
| 0.011623 | 0.011442 | 0.011693 | 0.011614 | 0.011550 | 0.011577 | 0.011439 |
| 0.012125 | 0.011441 | 0.011608 | 0.011510 | 0.011783 | 0.011672 | 0.011809 |
| 0.012148 | 0.011663 | 0.011770 | 0.011832 | 0.011698 | 0.011698 | 0.011736 |
| 0.011396 | 0.011564 | 0.011698 | 0.011664 | 0.011668 | 0.011664 | 0.011633 |
| 0.011496 | 0.011429 | 0.011463 | 0.011496 | 0.011396 | 0.011463 | 0.011362 |

|          |          |          |          |          |          |          |
|----------|----------|----------|----------|----------|----------|----------|
| 0.011496 | 0.011530 | 0.011429 | 0.011396 | 0.011496 | 0.011429 | 0.011463 |
| 0.011463 | 0.011396 | 0.011463 | 0.011496 | 0.011396 | 0.011597 | 0.011631 |
| 0.011530 | 0.011597 | 0.011530 | 0.011530 | 0.011463 | 0.011866 | 0.011496 |
| 0.011512 | 0.011463 | 0.011698 | 0.011705 | 0.011564 | 0.011564 | 0.011564 |
| 0.011564 | 0.011496 | 0.011463 | 0.011496 | 0.011597 | 0.011597 | 0.011530 |
| 0.011530 | 0.011664 | 0.011832 | 0.011563 | 0.011765 | 0.011765 | 0.011631 |
| 0.011463 | 0.011530 | 0.011564 | 0.011967 | 0.011530 | 0.011564 | 0.011530 |
| 0.011362 | 0.011496 | 0.011496 | 0.011799 | 0.011732 | 0.011765 | 0.011496 |
| 0.011597 | 0.011664 | 0.011530 | 0.011597 | 0.011564 | 0.011429 | 0.011765 |
| 0.011530 | 0.011496 | 0.011496 | 0.011664 | 0.011496 | 0.011597 | 0.011832 |
| 0.011530 | 0.011909 | 0.011899 | 0.011629 | 0.011286 | 0.011604 | 0.011421 |
| 0.011390 | 0.011878 | 0.011411 | 0.011551 | 0.011402 | 0.011518 | 0.011485 |
| 0.011672 | 0.011258 | 0.011450 | 0.011258 | 0.011330 | 0.011462 | 0.011506 |
| 0.011588 | 0.011454 | 0.011589 | 0.011518 | 0.011532 | 0.011665 | 0.011732 |
| 0.011732 | 0.011598 | 0.011669 | 0.011704 | 0.011840 | 0.011873 | 0.011530 |
| 0.011765 | 0.011631 | 0.011496 | 0.011597 | 0.011396 | 0.011631 | 0.011430 |
| 0.011496 | 0.011496 | 0.011463 | 0.011429 | 0.011463 | 0.011429 | 0.011530 |
| 0.011340 | 0.011445 | 0.011505 | 0.011505 | 0.011642 | 0.011641 | 0.011572 |
| 0.011639 | 0.011564 | 0.011319 | 0.011276 | 0.011500 | 0.011670 | 0.011671 |
| 0.011464 | 0.011534 | 0.011767 | 0.011736 | 0.011464 | 0.011699 | 0.011597 |
| 0.011564 | 0.011597 | 0.011597 | 0.011530 | 0.012034 | 0.011496 | 0.011564 |
| 0.011799 | 0.011843 | 0.011503 | 0.011545 | 0.011463 | 0.011631 | 0.011597 |
| 0.011666 | 0.011664 | 0.011496 | 0.011496 | 0.011846 | 0.011799 | 0.011476 |
| 0.011364 | 0.011337 | 0.011469 | 0.011434 | 0.011504 | 0.011359 | 0.011706 |
| 0.011506 | 0.011586 | 0.011346 | 0.011510 | 0.011497 | 0.011539 | 0.011463 |
| 0.011429 | 0.011429 | 0.011497 | 0.011463 | 0.011665 | 0.011631 | 0.011564 |
| 0.011665 | 0.011732 | 0.011463 | 0.011463 | 0.011497 | 0.011497 | 0.011499 |
| 0.011567 | 0.011497 | 0.011497 | 0.011532 | 0.011665 | 0.011732 | 0.011732 |
| 0.011598 | 0.011669 | 0.011704 | 0.011840 | 0.011873 | 0.011530 | 0.011698 |
| 0.011597 | 0.011597 | 0.011466 | 0.011582 | 0.011581 | 0.011605 | 0.011481 |
| 0.011646 | 0.011881 | 0.011610 | 0.011536 | 0.011430 | 0.011631 | 0.011497 |
| 0.011597 | 0.011530 | 0.011429 | 0.011532 | 0.011631 | 0.011635 | 0.011530 |
| 0.011429 | 0.011364 | 0.011497 | 0.011429 | 0.011362 | 0.011468 | 0.011631 |
| 0.011463 | 0.011463 | 0.011295 | 0.011530 | 0.011497 | 0.011429 | 0.011631 |
| 0.011496 | 0.011530 | 0.011530 | 0.011463 | 0.011530 | 0.011765 | 0.011429 |
| 0.011463 | 0.011866 | 0.011463 | 0.011496 | 0.011463 | 0.011832 | 0.011360 |
| 0.011791 | 0.011358 | 0.011411 | 0.011584 | 0.011712 | 0.011634 | 0.011311 |
| 0.011375 | 0.011631 | 0.011731 | 0.011841 | 0.011700 | 0.011838 | 0.011968 |
| 0.011868 | 0.011906 | 0.011866 | 0.012120 | 0.011832 | 0.012674 | 0.011869 |
| 0.012540 | 0.012342 | 0.012476 | 0.012781 | 0.011832 | 0.011530 | 0.011833 |
| 0.012204 | 0.012207 | 0.011799 | 0.011698 | 0.011766 | 0.011766 | 0.011669 |
| 0.011631 | 0.011637 | 0.011698 | 0.011665 | 0.012035 | 0.012101 | 0.012103 |
| 0.012002 | 0.012103 | 0.012207 | 0.011974 | 0.012205 | 0.012212 | 0.012272 |
| 0.012273 | 0.012307 | 0.012255 | 0.012273 | 0.012274 | 0.011530 | 0.011800 |
| 0.011935 | 0.012371 | 0.011874 | 0.012169 | 0.012643 | 0.011705 | 0.011598 |
| 0.011530 | 0.011563 | 0.012035 | 0.012047 | 0.012186 | 0.011899 | 0.011566 |
| S443     | 0.011765 | 0.011765 | 0.012102 | 0.011866 | 0.011866 | 0.011933 |
| 0.011773 | 0.011705 | 0.011933 | 0.011362 | 0.011429 | 0.011397 | 0.011362 |
| 0.011396 | 0.011564 | 0.011362 | 0.011396 | 0.011463 | 0.011429 | 0.011396 |
| 0.011362 | 0.011396 | 0.011496 | 0.011363 | 0.011396 | 0.011329 | 0.011739 |
| 0.011631 | 0.011396 | 0.011295 | 0.011530 | 0.011463 | 0.011429 | 0.011463 |
| 0.011429 | 0.011530 | 0.011429 | 0.011429 | 0.011463 | 0.011429 | 0.011597 |
| 0.011362 | 0.011429 | 0.011463 | 0.011396 | 0.011496 | 0.011530 | 0.011463 |
| 0.011429 | 0.011597 | 0.011497 | 0.011765 | 0.011429 | 0.011698 | 0.011429 |
| 0.011396 | 0.011497 | 0.011564 | 0.011698 | 0.011799 | 0.011497 | 0.011597 |
| 0.011463 | 0.011530 | 0.011429 | 0.011664 | 0.011900 | 0.011429 | 0.011497 |
| 0.011396 | 0.011496 | 0.011463 | 0.011530 | 0.011463 | 0.011463 | 0.011463 |
| 0.011362 | 0.011396 | 0.011362 | 0.011463 | 0.011429 | 0.011464 | 0.011530 |
| 0.011329 | 0.011429 | 0.011497 | 0.011396 | 0.011530 | 0.011362 | 0.011429 |
| 0.011597 | 0.011530 | 0.011765 | 0.011597 | 0.011429 | 0.011664 | 0.011429 |

|          |          |          |          |          |          |          |
|----------|----------|----------|----------|----------|----------|----------|
| 0.011579 | 0.011807 | 0.011626 | 0.011334 | 0.011321 | 0.011428 | 0.011533 |
| 0.012158 | 0.011619 | 0.011348 | 0.011664 | 0.011597 | 0.011463 | 0.011564 |
| 0.011497 | 0.011463 | 0.011530 | 0.011429 | 0.011530 | 0.011463 | 0.011463 |
| 0.011429 | 0.011530 | 0.011732 | 0.011597 | 0.011362 | 0.011463 | 0.011396 |
| 0.011362 | 0.011362 | 0.011430 | 0.011396 | 0.011597 | 0.011564 | 0.011497 |
| 0.011597 | 0.011665 | 0.011396 | 0.011396 | 0.011430 | 0.011429 | 0.011432 |
| 0.011500 | 0.011430 | 0.011430 | 0.011312 | 0.011386 | 0.011341 | 0.011430 |
| 0.011433 | 0.011370 | 0.011392 | 0.011405 | 0.011332 | 0.011369 | 0.011398 |
| 0.011672 | 0.011439 | 0.011473 | 0.011363 | 0.011371 | 0.011498 | 0.011464 |
| 0.011531 | 0.011465 | 0.011464 | 0.011564 | 0.011496 | 0.011866 | 0.011665 |
| 0.011698 | 0.011564 | 0.011429 | 0.011530 | 0.011329 | 0.011564 | 0.011362 |
| 0.011429 | 0.011429 | 0.011396 | 0.011362 | 0.011396 | 0.011362 | 0.011463 |
| 0.011430 | 0.011530 | 0.011463 | 0.011362 | 0.011465 | 0.011564 | 0.011567 |
| 0.011564 | 0.011463 | 0.011362 | 0.011296 | 0.011429 | 0.011362 | 0.011295 |
| 0.011366 | 0.011564 | 0.011362 | 0.011564 | 0.011295 | 0.011295 | 0.011396 |
| 0.011497 | 0.011396 | 0.011430 | 0.011396 | 0.011430 | 0.011295 | 0.011430 |
| 0.011463 | 0.011396 | 0.011463 | 0.011396 | 0.011429 | 0.011463 | 0.011698 |
| 0.011799 | 0.011732 | 0.011799 | 0.011532 | 0.011799 | 0.011429 | 0.011396 |
| 0.011432 | 0.011626 | 0.011563 | 0.011300 | 0.011807 | 0.011299 | 0.011414 |
| 0.011807 | 0.011706 | 0.011597 | 0.011799 | 0.011504 | 0.011665 | 0.011631 |
| 0.011564 | 0.011732 | 0.011593 | 0.011431 | 0.011521 | 0.011463 | 0.011534 |
| 0.011631 | 0.011532 | 0.011669 | 0.011737 | 0.011665 | 0.011732 | 0.011839 |
| 0.011568 | 0.011739 | 0.011670 | 0.011601 | 0.011868 | 0.011329 | 0.011532 |
| 0.011496 | 0.011429 | 0.011329 | 0.011329 | 0.011396 | 0.011396 | 0.011463 |
| 0.011396 | 0.011463 | 0.011362 | 0.011463 | 0.011396 | 0.011396 | 0.011463 |
| 0.011396 | 0.011832 | 0.011732 | 0.011765 | 0.011295 | 0.011396 | 0.011429 |
| 0.011295 | 0.011396 | 0.011463 | 0.011497 | 0.011362 | 0.011362 | 0.011362 |
| 0.011900 | 0.011530 | 0.011530 | 0.011329 | 0.011429 | 0.011597 | 0.011362 |
| 0.011362 | 0.011429 | 0.011396 | 0.011564 | 0.011362 | 0.011497 | 0.011631 |
| 0.011564 | 0.011396 | 0.011396 | 0.011329 | 0.011329 | 0.011497 | 0.011429 |
| 0.011329 | 0.011429 | 0.011295 | 0.011329 | 0.011463 | 0.011598 | 0.011362 |
| 0.011329 | 0.011463 | 0.011396 | 0.011295 | 0.011631 | 0.011295 | 0.011463 |
| 0.011540 | 0.011362 | 0.011664 | 0.011497 | 0.011530 | 0.011396 | 0.011497 |
| 0.011362 | 0.011698 | 0.011295 | 0.011564 | 0.011362 | 0.011362 | 0.011295 |
| 0.011530 | 0.011698 | 0.011429 | 0.011497 | 0.011329 | 0.011732 | 0.011362 |
| 0.011362 | 0.011362 | 0.011396 | 0.011497 | 0.011396 | 0.011497 | 0.011564 |
| 0.011564 | 0.011530 | 0.011429 | 0.011530 | 0.011496 | 0.011362 | 0.011329 |
| 0.011362 | 0.011362 | 0.011429 | 0.011362 | 0.011329 | 0.011497 | 0.011362 |
| 0.011396 | 0.011396 | 0.011530 | 0.011564 | 0.011463 | 0.011396 | 0.011396 |
| 0.011463 | 0.011396 | 0.011496 | 0.011362 | 0.011497 | 0.011597 | 0.011900 |
| 0.011329 | 0.011799 | 0.011371 | 0.017861 | 0.011453 | 0.011488 | 0.011723 |
| 0.011683 | 0.011729 | 0.011479 | 0.011408 | 0.011829 | 0.011751 | 0.011485 |
| 0.011677 | 0.011671 | 0.011294 | 0.011395 | 0.011372 | 0.011455 | 0.011404 |
| 0.011670 | 0.011544 | 0.011542 | 0.011325 | 0.011396 | 0.011564 | 0.011568 |
| 0.011438 | 0.011530 | 0.011530 | 0.011497 | 0.011463 | 0.011463 | 0.011430 |
| 0.011463 | 0.011396 | 0.011429 | 0.011463 | 0.011295 | 0.011362 | 0.011396 |
| 0.011396 | 0.011463 | 0.011362 | 0.011463 | 0.011497 | 0.011530 | 0.011429 |
| 0.011463 | 0.011430 | 0.011765 | 0.011765 | 0.011497 | 0.011531 | 0.011564 |
| 0.011329 | 0.011329 | 0.011362 | 0.011463 | 0.011329 | 0.011564 | 0.011564 |
| 0.011597 | 0.011597 | 0.000000 | 0.011631 | 0.011799 | 0.011633 | 0.011463 |
| 0.011463 | 0.011530 | 0.011564 | 0.011396 | 0.011463 | 0.011430 | 0.011463 |
| 0.011531 | 0.011530 | 0.011564 | 0.011531 | 0.011431 | 0.011631 | 0.011597 |
| 0.011467 | 0.011362 | 0.011463 | 0.011564 | 0.011463 | 0.011598 | 0.011631 |
| 0.011799 | 0.011504 | 0.011665 | 0.011631 | 0.011564 | 0.011732 | 0.011363 |
| 0.011532 | 0.011430 | 0.011396 | 0.011396 | 0.011463 | 0.011362 | 0.011463 |
| 0.011497 | 0.011530 | 0.011429 | 0.011463 | 0.011430 | 0.011765 | 0.011765 |
| 0.011497 | 0.011531 | 0.011597 | 0.011530 | 0.012170 | 0.011596 | 0.011517 |
| 0.011587 | 0.011546 | 0.011658 | 0.011545 | 0.011655 | 0.011578 | 0.011543 |
| 0.012125 | 0.011441 | 0.011574 | 0.011510 | 0.011783 | 0.011638 | 0.011741 |
| 0.012148 | 0.011626 | 0.011703 | 0.011765 | 0.011631 | 0.011631 | 0.011668 |

|          |          |          |          |          |          |          |
|----------|----------|----------|----------|----------|----------|----------|
| 0.011329 | 0.011497 | 0.011631 | 0.011597 | 0.011601 | 0.011597 | 0.011565 |
| 0.011429 | 0.011362 | 0.011396 | 0.011429 | 0.011329 | 0.011396 | 0.011295 |
| 0.011429 | 0.011463 | 0.011362 | 0.011329 | 0.011429 | 0.011362 | 0.011396 |
| 0.011396 | 0.011329 | 0.011396 | 0.011429 | 0.011329 | 0.011530 | 0.011564 |
| 0.011463 | 0.011530 | 0.011463 | 0.011463 | 0.011396 | 0.011799 | 0.011429 |
| 0.011478 | 0.011396 | 0.011631 | 0.011637 | 0.011497 | 0.011496 | 0.011497 |
| 0.011497 | 0.011429 | 0.011396 | 0.011429 | 0.011530 | 0.011530 | 0.011329 |
| 0.011463 | 0.011597 | 0.011765 | 0.011496 | 0.011698 | 0.011698 | 0.011564 |
| 0.011396 | 0.011463 | 0.011497 | 0.011900 | 0.011463 | 0.011497 | 0.011329 |
| 0.011497 | 0.011429 | 0.011429 | 0.011732 | 0.011665 | 0.011698 | 0.011429 |
| 0.011530 | 0.011597 | 0.011463 | 0.011530 | 0.011496 | 0.011362 | 0.011698 |
| 0.011463 | 0.011429 | 0.011429 | 0.011597 | 0.011429 | 0.011530 | 0.011765 |
| 0.011396 | 0.011841 | 0.011832 | 0.011629 | 0.011455 | 0.011536 | 0.011421 |
| 0.011335 | 0.011839 | 0.011341 | 0.011551 | 0.011451 | 0.011518 | 0.011538 |
| 0.011672 | 0.011389 | 0.011506 | 0.011390 | 0.011384 | 0.011596 | 0.011506 |
| 0.011512 | 0.011414 | 0.011483 | 0.011412 | 0.011465 | 0.011597 | 0.011665 |
| 0.011665 | 0.011531 | 0.011635 | 0.011636 | 0.011772 | 0.011802 | 0.011463 |
| 0.011698 | 0.011564 | 0.011429 | 0.011530 | 0.011329 | 0.011564 | 0.011362 |
| 0.011429 | 0.011429 | 0.011396 | 0.011362 | 0.011396 | 0.011362 | 0.011463 |
| 0.011444 | 0.011445 | 0.011437 | 0.011471 | 0.011608 | 0.011573 | 0.011572 |
| 0.011571 | 0.011497 | 0.011319 | 0.011312 | 0.011433 | 0.011602 | 0.011603 |
| 0.011396 | 0.011467 | 0.011633 | 0.011669 | 0.011598 | 0.011632 | 0.011564 |
| 0.011496 | 0.011564 | 0.011564 | 0.011463 | 0.012034 | 0.011631 | 0.011698 |
| 0.011665 | 0.011808 | 0.011435 | 0.011407 | 0.011396 | 0.011597 | 0.011564 |
| 0.011598 | 0.011631 | 0.011631 | 0.011631 | 0.011729 | 0.011765 | 0.011407 |
| 0.011297 | 0.011303 | 0.011401 | 0.011366 | 0.011470 | 0.011321 | 0.011638 |
| 0.011437 | 0.011630 | 0.011394 | 0.011472 | 0.011430 | 0.011505 | 0.011396 |
| 0.011362 | 0.011362 | 0.011430 | 0.011396 | 0.011597 | 0.011564 | 0.011497 |
| 0.011597 | 0.011665 | 0.011396 | 0.011396 | 0.011430 | 0.011429 | 0.011432 |
| 0.011500 | 0.011430 | 0.011430 | 0.011465 | 0.011597 | 0.011665 | 0.011665 |
| 0.011531 | 0.011635 | 0.011636 | 0.011772 | 0.011802 | 0.011463 | 0.011631 |
| 0.011564 | 0.011564 | 0.011398 | 0.011582 | 0.011512 | 0.011537 | 0.011375 |
| 0.011577 | 0.011744 | 0.011568 | 0.011468 | 0.011362 | 0.011564 | 0.011430 |
| 0.011530 | 0.011463 | 0.011362 | 0.011465 | 0.011564 | 0.011567 | 0.011463 |
| 0.011362 | 0.011296 | 0.011429 | 0.011362 | 0.011295 | 0.011366 | 0.011564 |
| 0.011463 | 0.011396 | 0.011429 | 0.011463 | 0.011295 | 0.011362 | 0.011564 |
| 0.011429 | 0.011463 | 0.011463 | 0.011396 | 0.011463 | 0.011698 | 0.011362 |
| 0.011396 | 0.011799 | 0.011396 | 0.011429 | 0.011396 | 0.011765 | 0.011360 |
| 0.011904 | 0.011358 | 0.011461 | 0.011584 | 0.011671 | 0.011563 | 0.011311 |
| 0.011427 | 0.011564 | 0.011664 | 0.011773 | 0.011632 | 0.011737 | 0.011901 |
| 0.011800 | 0.011838 | 0.011799 | 0.012017 | 0.011765 | 0.012640 | 0.011801 |
| 0.012540 | 0.012308 | 0.012442 | 0.012714 | 0.011765 | 0.011463 | 0.011766 |
| 0.012205 | 0.012106 | 0.011732 | 0.011631 | 0.011699 | 0.011699 | 0.011669 |
| 0.011564 | 0.011535 | 0.011631 | 0.011598 | 0.011968 | 0.012034 | 0.012036 |
| 0.011935 | 0.012035 | 0.012139 | 0.011872 | 0.012205 | 0.012212 | 0.012272 |
| 0.012273 | 0.012307 | 0.012221 | 0.012273 | 0.012274 | 0.011496 | 0.011800 |
| 0.011868 | 0.012371 | 0.011874 | 0.012102 | 0.012575 | 0.011638 | 0.011531 |
| 0.011496 | 0.011496 | 0.011968 | 0.012006 | 0.012116 | 0.011832 | 0.011498 |
| S444     | 0.011866 | 0.011866 | 0.012203 | 0.011967 | 0.011967 | 0.012034 |
| 0.011875 | 0.011807 | 0.011967 | 0.011463 | 0.011530 | 0.011498 | 0.011463 |
| 0.011497 | 0.011664 | 0.011463 | 0.011497 | 0.011564 | 0.011530 | 0.011497 |
| 0.011463 | 0.011497 | 0.011597 | 0.011463 | 0.011497 | 0.011497 | 0.011841 |
| 0.011732 | 0.011497 | 0.011396 | 0.011631 | 0.011564 | 0.011530 | 0.011564 |
| 0.011530 | 0.011631 | 0.011530 | 0.011530 | 0.011564 | 0.011530 | 0.011698 |
| 0.011463 | 0.011530 | 0.011564 | 0.011496 | 0.011597 | 0.011564 | 0.011564 |
| 0.011530 | 0.011698 | 0.011598 | 0.011866 | 0.011530 | 0.011799 | 0.011530 |
| 0.011496 | 0.011597 | 0.011665 | 0.011799 | 0.011900 | 0.011597 | 0.011698 |
| 0.011564 | 0.011631 | 0.011530 | 0.011765 | 0.012001 | 0.011530 | 0.011597 |
| 0.011497 | 0.011597 | 0.011564 | 0.011631 | 0.011564 | 0.011564 | 0.011564 |
| 0.011463 | 0.011496 | 0.011463 | 0.011564 | 0.011530 | 0.011565 | 0.011631 |

|          |          |          |          |          |          |          |
|----------|----------|----------|----------|----------|----------|----------|
| 0.011564 | 0.011530 | 0.011597 | 0.011496 | 0.011631 | 0.011463 | 0.011530 |
| 0.011698 | 0.011631 | 0.011866 | 0.011698 | 0.011463 | 0.011765 | 0.011530 |
| 0.011728 | 0.011957 | 0.011702 | 0.011451 | 0.011359 | 0.011576 | 0.011572 |
| 0.012231 | 0.011518 | 0.011348 | 0.011564 | 0.011496 | 0.011564 | 0.011665 |
| 0.011597 | 0.011564 | 0.011631 | 0.011530 | 0.011631 | 0.011564 | 0.011564 |
| 0.011530 | 0.011631 | 0.011833 | 0.011698 | 0.011597 | 0.011564 | 0.011497 |
| 0.011463 | 0.011463 | 0.011530 | 0.011497 | 0.011698 | 0.011665 | 0.011597 |
| 0.011698 | 0.011765 | 0.011497 | 0.011497 | 0.011530 | 0.011530 | 0.011533 |
| 0.011601 | 0.011530 | 0.011530 | 0.011384 | 0.011422 | 0.011446 | 0.011531 |
| 0.011534 | 0.011473 | 0.011466 | 0.011509 | 0.011434 | 0.011471 | 0.011499 |
| 0.011708 | 0.011508 | 0.011542 | 0.011464 | 0.011440 | 0.011598 | 0.011565 |
| 0.011632 | 0.011566 | 0.011565 | 0.011664 | 0.011597 | 0.011967 | 0.011766 |
| 0.011799 | 0.011665 | 0.011530 | 0.011631 | 0.011429 | 0.011664 | 0.011463 |
| 0.011530 | 0.011530 | 0.011497 | 0.011463 | 0.011497 | 0.011463 | 0.011564 |
| 0.011530 | 0.011631 | 0.011564 | 0.011463 | 0.011566 | 0.011665 | 0.011669 |
| 0.011665 | 0.011564 | 0.011463 | 0.011397 | 0.011530 | 0.011463 | 0.011396 |
| 0.011502 | 0.011665 | 0.011463 | 0.011665 | 0.011429 | 0.011530 | 0.011497 |
| 0.011597 | 0.011497 | 0.011530 | 0.011497 | 0.011530 | 0.011396 | 0.011530 |
| 0.011564 | 0.011497 | 0.011564 | 0.011497 | 0.011530 | 0.011564 | 0.011799 |
| 0.011900 | 0.011832 | 0.011900 | 0.011599 | 0.011900 | 0.011530 | 0.011497 |
| 0.011533 | 0.011788 | 0.011563 | 0.011403 | 0.011908 | 0.011401 | 0.011532 |
| 0.011909 | 0.011808 | 0.011496 | 0.011900 | 0.011607 | 0.011497 | 0.011732 |
| 0.011664 | 0.011564 | 0.011700 | 0.011390 | 0.011521 | 0.011564 | 0.011635 |
| 0.011732 | 0.011634 | 0.011635 | 0.011839 | 0.011765 | 0.011833 | 0.011941 |
| 0.011669 | 0.011841 | 0.011771 | 0.011703 | 0.011969 | 0.011429 | 0.011633 |
| 0.011597 | 0.011530 | 0.011429 | 0.011429 | 0.011497 | 0.011497 | 0.011564 |
| 0.011496 | 0.011564 | 0.011463 | 0.011564 | 0.011497 | 0.011497 | 0.011564 |
| 0.011497 | 0.011933 | 0.011833 | 0.011866 | 0.011396 | 0.011497 | 0.011530 |
| 0.011530 | 0.011497 | 0.011564 | 0.011597 | 0.011463 | 0.011463 | 0.011463 |
| 0.012000 | 0.011631 | 0.011631 | 0.011429 | 0.011530 | 0.011698 | 0.011463 |
| 0.011463 | 0.011530 | 0.011496 | 0.011665 | 0.011463 | 0.011597 | 0.011732 |
| 0.011664 | 0.011497 | 0.011497 | 0.011429 | 0.011429 | 0.011597 | 0.011530 |
| 0.011429 | 0.011530 | 0.011396 | 0.011429 | 0.011564 | 0.011699 | 0.011463 |
| 0.011430 | 0.011564 | 0.011497 | 0.011396 | 0.011732 | 0.011396 | 0.011564 |
| 0.011642 | 0.011463 | 0.011765 | 0.011598 | 0.011631 | 0.011497 | 0.011597 |
| 0.011463 | 0.011799 | 0.011396 | 0.011665 | 0.011463 | 0.011463 | 0.011396 |
| 0.011631 | 0.011833 | 0.011530 | 0.011597 | 0.011429 | 0.011833 | 0.011463 |
| 0.011463 | 0.011463 | 0.011497 | 0.011597 | 0.011496 | 0.011597 | 0.011664 |
| 0.011665 | 0.011631 | 0.011530 | 0.011631 | 0.011597 | 0.011463 | 0.011429 |
| 0.011463 | 0.011463 | 0.011530 | 0.011463 | 0.011429 | 0.011597 | 0.011463 |
| 0.011496 | 0.011497 | 0.011631 | 0.011664 | 0.011564 | 0.011496 | 0.011497 |
| 0.011564 | 0.011496 | 0.011597 | 0.011463 | 0.011597 | 0.011497 | 0.012001 |
| 0.011497 | 0.011900 | 0.011509 | 0.017899 | 0.011322 | 0.011733 | 0.011863 |
| 0.011822 | 0.011869 | 0.011427 | 0.011350 | 0.011994 | 0.011889 | 0.011668 |
| 0.011629 | 0.011793 | 0.011411 | 0.011479 | 0.011450 | 0.011554 | 0.011533 |
| 0.011576 | 0.011582 | 0.011616 | 0.011325 | 0.011631 | 0.011665 | 0.011669 |
| 0.011541 | 0.011631 | 0.011564 | 0.011597 | 0.011564 | 0.011564 | 0.011530 |
| 0.011497 | 0.011496 | 0.011329 | 0.011564 | 0.011530 | 0.011463 | 0.011497 |
| 0.011497 | 0.011564 | 0.011463 | 0.011564 | 0.011597 | 0.011631 | 0.011530 |
| 0.011564 | 0.011530 | 0.011866 | 0.011866 | 0.011598 | 0.011632 | 0.011665 |
| 0.011429 | 0.011429 | 0.011463 | 0.011564 | 0.011429 | 0.011665 | 0.011665 |
| 0.011094 | 0.011496 | 0.011631 | 0.000000 | 0.011900 | 0.011128 | 0.011564 |
| 0.011362 | 0.011631 | 0.011665 | 0.011497 | 0.011564 | 0.011530 | 0.011497 |
| 0.011430 | 0.011430 | 0.011463 | 0.011631 | 0.011532 | 0.011732 | 0.011698 |
| 0.011568 | 0.011463 | 0.011564 | 0.011665 | 0.011564 | 0.011698 | 0.011732 |
| 0.011900 | 0.011607 | 0.011497 | 0.011732 | 0.011664 | 0.011564 | 0.011463 |
| 0.011566 | 0.011531 | 0.011497 | 0.011497 | 0.011564 | 0.011463 | 0.011564 |
| 0.011597 | 0.011631 | 0.011530 | 0.011564 | 0.011530 | 0.011866 | 0.011866 |
| 0.011598 | 0.011632 | 0.011698 | 0.011631 | 0.012272 | 0.011453 | 0.011623 |
| 0.011693 | 0.011442 | 0.011763 | 0.011649 | 0.011620 | 0.011681 | 0.011439 |

|          |          |          |          |          |          |          |
|----------|----------|----------|----------|----------|----------|----------|
| 0.012228 | 0.011545 | 0.011677 | 0.011614 | 0.011887 | 0.011741 | 0.011843 |
| 0.012250 | 0.011701 | 0.011737 | 0.011765 | 0.011732 | 0.011732 | 0.011702 |
| 0.011429 | 0.011597 | 0.011732 | 0.011698 | 0.011702 | 0.011698 | 0.011666 |
| 0.011530 | 0.011463 | 0.011497 | 0.011530 | 0.011429 | 0.011497 | 0.011396 |
| 0.011530 | 0.011564 | 0.011463 | 0.011429 | 0.011530 | 0.011463 | 0.011497 |
| 0.011496 | 0.011429 | 0.011497 | 0.011530 | 0.011429 | 0.011631 | 0.011664 |
| 0.011564 | 0.011631 | 0.011564 | 0.011564 | 0.011497 | 0.011900 | 0.011530 |
| 0.011582 | 0.011497 | 0.011732 | 0.011739 | 0.011597 | 0.011597 | 0.011597 |
| 0.011597 | 0.011530 | 0.011496 | 0.011530 | 0.011631 | 0.011631 | 0.011564 |
| 0.011564 | 0.011698 | 0.011866 | 0.011597 | 0.011799 | 0.011799 | 0.011664 |
| 0.011496 | 0.011564 | 0.011597 | 0.012001 | 0.011564 | 0.011597 | 0.011564 |
| 0.011396 | 0.011530 | 0.011530 | 0.011833 | 0.011765 | 0.011799 | 0.011530 |
| 0.011631 | 0.011698 | 0.011564 | 0.011631 | 0.011597 | 0.011463 | 0.011799 |
| 0.011564 | 0.011530 | 0.011530 | 0.011698 | 0.011530 | 0.011631 | 0.011866 |
| 0.011564 | 0.011943 | 0.011933 | 0.011670 | 0.011286 | 0.011638 | 0.011370 |
| 0.011500 | 0.011878 | 0.011446 | 0.011596 | 0.011499 | 0.011620 | 0.011591 |
| 0.011570 | 0.011324 | 0.011506 | 0.011192 | 0.011437 | 0.011462 | 0.011587 |
| 0.011663 | 0.011454 | 0.011624 | 0.011483 | 0.011566 | 0.011698 | 0.011765 |
| 0.011765 | 0.011632 | 0.011736 | 0.011738 | 0.011874 | 0.011908 | 0.011564 |
| 0.011799 | 0.011665 | 0.011530 | 0.011631 | 0.011429 | 0.011664 | 0.011463 |
| 0.011530 | 0.011530 | 0.011497 | 0.011463 | 0.011497 | 0.011463 | 0.011564 |
| 0.011375 | 0.011515 | 0.011540 | 0.011574 | 0.011710 | 0.011675 | 0.011606 |
| 0.011673 | 0.011598 | 0.011356 | 0.011312 | 0.011534 | 0.011704 | 0.011705 |
| 0.011497 | 0.011568 | 0.011801 | 0.011770 | 0.011430 | 0.011733 | 0.011664 |
| 0.011597 | 0.011664 | 0.011664 | 0.011564 | 0.012135 | 0.011463 | 0.011530 |
| 0.011833 | 0.011879 | 0.011538 | 0.011615 | 0.011497 | 0.011698 | 0.011665 |
| 0.011699 | 0.011732 | 0.011463 | 0.011463 | 0.011886 | 0.011866 | 0.011511 |
| 0.011398 | 0.011406 | 0.011503 | 0.011468 | 0.011573 | 0.011359 | 0.011740 |
| 0.011540 | 0.011586 | 0.011298 | 0.011547 | 0.011531 | 0.011608 | 0.011497 |
| 0.011463 | 0.011463 | 0.011530 | 0.011497 | 0.011698 | 0.011665 | 0.011597 |
| 0.011698 | 0.011765 | 0.011497 | 0.011497 | 0.011530 | 0.011530 | 0.011533 |
| 0.011601 | 0.011530 | 0.011530 | 0.011566 | 0.011698 | 0.011765 | 0.011765 |
| 0.011632 | 0.011736 | 0.011738 | 0.011874 | 0.011908 | 0.011564 | 0.011732 |
| 0.011665 | 0.011665 | 0.011500 | 0.011652 | 0.011616 | 0.011639 | 0.011516 |
| 0.011680 | 0.011972 | 0.011653 | 0.011570 | 0.011463 | 0.011665 | 0.011530 |
| 0.011631 | 0.011564 | 0.011463 | 0.011566 | 0.011665 | 0.011669 | 0.011564 |
| 0.011463 | 0.011397 | 0.011530 | 0.011463 | 0.011396 | 0.011502 | 0.011665 |
| 0.011497 | 0.011496 | 0.011329 | 0.011564 | 0.011530 | 0.011463 | 0.011665 |
| 0.011530 | 0.011564 | 0.011564 | 0.011496 | 0.011564 | 0.011799 | 0.011463 |
| 0.011497 | 0.011900 | 0.011496 | 0.011530 | 0.011496 | 0.011866 | 0.011360 |
| 0.011735 | 0.011400 | 0.011361 | 0.011624 | 0.011712 | 0.011670 | 0.011353 |
| 0.011270 | 0.011664 | 0.011765 | 0.011875 | 0.011734 | 0.011872 | 0.012002 |
| 0.011901 | 0.011940 | 0.011900 | 0.012154 | 0.011866 | 0.012741 | 0.011903 |
| 0.012574 | 0.012410 | 0.012544 | 0.012815 | 0.011866 | 0.011564 | 0.011867 |
| 0.012306 | 0.012241 | 0.011833 | 0.011732 | 0.011800 | 0.011800 | 0.011703 |
| 0.011664 | 0.011671 | 0.011732 | 0.011699 | 0.012069 | 0.012135 | 0.012137 |
| 0.012036 | 0.012136 | 0.012241 | 0.012008 | 0.012239 | 0.012313 | 0.012373 |
| 0.012374 | 0.012408 | 0.012357 | 0.012374 | 0.012376 | 0.011597 | 0.011900 |
| 0.011969 | 0.012472 | 0.011976 | 0.012203 | 0.012676 | 0.011739 | 0.011632 |
| 0.011564 | 0.011597 | 0.012069 | 0.012089 | 0.012221 | 0.011933 | 0.011599 |
| S445     | 0.012035 | 0.012035 | 0.012102 | 0.011867 | 0.011867 | 0.011934 |
| 0.011434 | 0.011366 | 0.011867 | 0.011631 | 0.011698 | 0.011666 | 0.011631 |
| 0.011597 | 0.011833 | 0.011564 | 0.011665 | 0.011732 | 0.011698 | 0.011665 |
| 0.011631 | 0.011665 | 0.011497 | 0.011632 | 0.011665 | 0.011665 | 0.011400 |
| 0.011631 | 0.011665 | 0.011564 | 0.011530 | 0.011732 | 0.011698 | 0.011732 |
| 0.011698 | 0.011799 | 0.011698 | 0.011698 | 0.011732 | 0.011698 | 0.011866 |
| 0.011564 | 0.011698 | 0.011732 | 0.011665 | 0.011698 | 0.011799 | 0.011732 |
| 0.011698 | 0.011867 | 0.011766 | 0.011429 | 0.011698 | 0.011967 | 0.011698 |
| 0.011665 | 0.011699 | 0.011833 | 0.011967 | 0.011396 | 0.011698 | 0.011799 |
| 0.011732 | 0.011799 | 0.011698 | 0.011933 | 0.011564 | 0.011698 | 0.011766 |

|          |          |          |          |          |          |          |
|----------|----------|----------|----------|----------|----------|----------|
| 0.011665 | 0.011765 | 0.011732 | 0.011799 | 0.011732 | 0.011732 | 0.011732 |
| 0.011631 | 0.011665 | 0.011631 | 0.011665 | 0.011698 | 0.011733 | 0.011799 |
| 0.011732 | 0.011698 | 0.011765 | 0.011665 | 0.011597 | 0.011631 | 0.011698 |
| 0.011866 | 0.011799 | 0.011564 | 0.011866 | 0.011698 | 0.011934 | 0.011698 |
| 0.011913 | 0.011471 | 0.011928 | 0.011646 | 0.011620 | 0.011760 | 0.011533 |
| 0.012121 | 0.011416 | 0.011554 | 0.011933 | 0.011934 | 0.011665 | 0.011564 |
| 0.011766 | 0.011732 | 0.011799 | 0.011698 | 0.011799 | 0.011732 | 0.011732 |
| 0.011698 | 0.011732 | 0.012001 | 0.011866 | 0.011766 | 0.011732 | 0.011665 |
| 0.011631 | 0.011564 | 0.011698 | 0.011665 | 0.011598 | 0.011564 | 0.011497 |
| 0.011598 | 0.011665 | 0.011665 | 0.011665 | 0.011698 | 0.011698 | 0.011702 |
| 0.011770 | 0.011698 | 0.011698 | 0.011564 | 0.011639 | 0.011586 | 0.011699 |
| 0.011670 | 0.011610 | 0.011687 | 0.011647 | 0.011604 | 0.011608 | 0.011668 |
| 0.011564 | 0.011681 | 0.011715 | 0.011632 | 0.011613 | 0.011767 | 0.011666 |
| 0.011733 | 0.011734 | 0.011733 | 0.011833 | 0.011765 | 0.012136 | 0.011867 |
| 0.011698 | 0.011766 | 0.011698 | 0.011732 | 0.011597 | 0.011564 | 0.011631 |
| 0.011698 | 0.011698 | 0.011665 | 0.011631 | 0.011665 | 0.011631 | 0.011732 |
| 0.011698 | 0.011799 | 0.011732 | 0.011631 | 0.011734 | 0.011833 | 0.011838 |
| 0.011833 | 0.011732 | 0.011631 | 0.011566 | 0.011698 | 0.011631 | 0.011564 |
| 0.011570 | 0.011833 | 0.011631 | 0.011833 | 0.011598 | 0.011698 | 0.011665 |
| 0.011766 | 0.011665 | 0.011698 | 0.011665 | 0.011698 | 0.011564 | 0.011698 |
| 0.011732 | 0.011665 | 0.011732 | 0.011665 | 0.011698 | 0.011732 | 0.011967 |
| 0.011463 | 0.011396 | 0.011463 | 0.011836 | 0.011396 | 0.011698 | 0.011665 |
| 0.011635 | 0.011950 | 0.011792 | 0.011609 | 0.011467 | 0.011572 | 0.011729 |
| 0.011468 | 0.011638 | 0.011866 | 0.012068 | 0.011743 | 0.011934 | 0.011900 |
| 0.011833 | 0.012001 | 0.011878 | 0.011720 | 0.011689 | 0.011732 | 0.011805 |
| 0.011900 | 0.011803 | 0.011940 | 0.012008 | 0.011934 | 0.012001 | 0.012111 |
| 0.011839 | 0.012011 | 0.011873 | 0.011872 | 0.012138 | 0.011597 | 0.011802 |
| 0.011765 | 0.011698 | 0.011597 | 0.011597 | 0.011665 | 0.011665 | 0.011732 |
| 0.011665 | 0.011732 | 0.011631 | 0.011665 | 0.011665 | 0.011665 | 0.011732 |
| 0.011665 | 0.011497 | 0.011396 | 0.011430 | 0.011564 | 0.011665 | 0.011698 |
| 0.011698 | 0.011597 | 0.011732 | 0.011698 | 0.011631 | 0.011631 | 0.011631 |
| 0.011564 | 0.011732 | 0.011799 | 0.011597 | 0.011698 | 0.011867 | 0.011631 |
| 0.011631 | 0.011698 | 0.011665 | 0.011833 | 0.011631 | 0.011564 | 0.011698 |
| 0.011631 | 0.011665 | 0.011665 | 0.011597 | 0.011597 | 0.011766 | 0.011698 |
| 0.011597 | 0.011698 | 0.011564 | 0.011597 | 0.011732 | 0.011531 | 0.011631 |
| 0.011598 | 0.011732 | 0.011665 | 0.011564 | 0.011262 | 0.011564 | 0.011732 |
| 0.011814 | 0.011631 | 0.011329 | 0.011766 | 0.011732 | 0.011665 | 0.011765 |
| 0.011631 | 0.011967 | 0.011564 | 0.011631 | 0.011564 | 0.011564 | 0.011564 |
| 0.011799 | 0.011665 | 0.011698 | 0.011766 | 0.011597 | 0.011396 | 0.011564 |
| 0.011631 | 0.011631 | 0.011665 | 0.011766 | 0.011665 | 0.011765 | 0.011833 |
| 0.011833 | 0.011799 | 0.011698 | 0.011799 | 0.011765 | 0.011631 | 0.011597 |
| 0.011631 | 0.011631 | 0.011698 | 0.011564 | 0.011597 | 0.011766 | 0.011631 |
| 0.011597 | 0.011665 | 0.011799 | 0.011766 | 0.011732 | 0.011665 | 0.011631 |
| 0.011732 | 0.011665 | 0.011765 | 0.011631 | 0.011765 | 0.011866 | 0.011497 |
| 0.011665 | 0.011396 | 0.011681 | 0.018125 | 0.011322 | 0.011794 | 0.011409 |
| 0.011372 | 0.011412 | 0.011899 | 0.011640 | 0.011554 | 0.011440 | 0.011789 |
| 0.011630 | 0.011610 | 0.011606 | 0.011730 | 0.011568 | 0.011653 | 0.011706 |
| 0.011389 | 0.011507 | 0.011394 | 0.011457 | 0.011799 | 0.011833 | 0.011804 |
| 0.011713 | 0.011799 | 0.011799 | 0.011698 | 0.011732 | 0.011732 | 0.011699 |
| 0.011732 | 0.011665 | 0.011698 | 0.011732 | 0.011698 | 0.011631 | 0.011665 |
| 0.011665 | 0.011732 | 0.011631 | 0.011732 | 0.011765 | 0.011799 | 0.011698 |
| 0.011665 | 0.011631 | 0.011362 | 0.011362 | 0.011766 | 0.011800 | 0.011833 |
| 0.011597 | 0.011597 | 0.011631 | 0.011732 | 0.011597 | 0.011833 | 0.011833 |
| 0.011866 | 0.011866 | 0.011799 | 0.011900 | 0.000000 | 0.011902 | 0.011732 |
| 0.011732 | 0.011799 | 0.011833 | 0.011665 | 0.011732 | 0.011698 | 0.011732 |
| 0.011800 | 0.011799 | 0.011833 | 0.011799 | 0.011700 | 0.011900 | 0.011866 |
| 0.011738 | 0.011631 | 0.011732 | 0.011833 | 0.011732 | 0.011799 | 0.011900 |
| 0.012068 | 0.011743 | 0.011934 | 0.011900 | 0.011833 | 0.012001 | 0.011632 |
| 0.011802 | 0.011699 | 0.011665 | 0.011665 | 0.011732 | 0.011631 | 0.011732 |
| 0.011765 | 0.011799 | 0.011698 | 0.011665 | 0.011631 | 0.011362 | 0.011362 |



|          |          |          |          |          |          |          |
|----------|----------|----------|----------|----------|----------|----------|
| 0.011766 | 0.011800 | 0.011866 | 0.011799 | 0.012373 | 0.011882 | 0.011799 |
| 0.011869 | 0.011824 | 0.011939 | 0.011823 | 0.011936 | 0.011854 | 0.011785 |
| 0.012332 | 0.011718 | 0.011848 | 0.011787 | 0.012060 | 0.011911 | 0.012014 |
| 0.012353 | 0.011852 | 0.011737 | 0.011732 | 0.011732 | 0.011497 | 0.011702 |
| 0.011597 | 0.011631 | 0.011765 | 0.011732 | 0.011736 | 0.011598 | 0.011566 |
| 0.011698 | 0.011631 | 0.011665 | 0.011698 | 0.011597 | 0.011665 | 0.011564 |
| 0.011631 | 0.011665 | 0.011631 | 0.011597 | 0.011698 | 0.011631 | 0.011665 |
| 0.011665 | 0.011597 | 0.011665 | 0.011698 | 0.011597 | 0.011799 | 0.011833 |
| 0.011732 | 0.011732 | 0.011732 | 0.011732 | 0.011665 | 0.011396 | 0.011698 |
| 0.011478 | 0.011665 | 0.011632 | 0.011637 | 0.011698 | 0.011698 | 0.011765 |
| 0.011766 | 0.011698 | 0.011665 | 0.011698 | 0.011799 | 0.011799 | 0.011732 |
| 0.011732 | 0.011866 | 0.011429 | 0.011765 | 0.011967 | 0.011967 | 0.011833 |
| 0.011665 | 0.011732 | 0.011766 | 0.011497 | 0.011732 | 0.011698 | 0.011732 |
| 0.011765 | 0.011631 | 0.011631 | 0.011934 | 0.011934 | 0.011900 | 0.011698 |
| 0.011799 | 0.011866 | 0.011732 | 0.011799 | 0.011765 | 0.011631 | 0.011362 |
| 0.011732 | 0.011698 | 0.011631 | 0.011866 | 0.011698 | 0.011799 | 0.011631 |
| 0.011732 | 0.011502 | 0.011497 | 0.011589 | 0.011286 | 0.011740 | 0.011422 |
| 0.011609 | 0.011761 | 0.011657 | 0.011730 | 0.011597 | 0.011467 | 0.011485 |
| 0.011519 | 0.011258 | 0.011561 | 0.011324 | 0.011438 | 0.011529 | 0.011790 |
| 0.011852 | 0.011729 | 0.011730 | 0.011730 | 0.011734 | 0.011598 | 0.011665 |
| 0.011665 | 0.011733 | 0.011838 | 0.011637 | 0.011976 | 0.012015 | 0.011732 |
| 0.011698 | 0.011766 | 0.011698 | 0.011732 | 0.011597 | 0.011564 | 0.011631 |
| 0.011698 | 0.011698 | 0.011665 | 0.011631 | 0.011665 | 0.011631 | 0.011732 |
| 0.011689 | 0.011690 | 0.011677 | 0.011711 | 0.011847 | 0.011812 | 0.011811 |
| 0.011810 | 0.011766 | 0.011577 | 0.011564 | 0.011670 | 0.011840 | 0.011841 |
| 0.011666 | 0.011704 | 0.011969 | 0.011939 | 0.011868 | 0.011902 | 0.011833 |
| 0.011765 | 0.011833 | 0.011833 | 0.011732 | 0.011631 | 0.011900 | 0.011968 |
| 0.012001 | 0.011416 | 0.011640 | 0.011788 | 0.011665 | 0.011866 | 0.011833 |
| 0.011868 | 0.011900 | 0.011900 | 0.011900 | 0.012004 | 0.012035 | 0.011685 |
| 0.011568 | 0.011580 | 0.011673 | 0.011638 | 0.011675 | 0.011620 | 0.011298 |
| 0.011712 | 0.011411 | 0.011584 | 0.011735 | 0.011699 | 0.011745 | 0.011665 |
| 0.011631 | 0.011564 | 0.011698 | 0.011665 | 0.011598 | 0.011564 | 0.011497 |
| 0.011598 | 0.011665 | 0.011665 | 0.011665 | 0.011698 | 0.011698 | 0.011702 |
| 0.011770 | 0.011698 | 0.011698 | 0.011734 | 0.011598 | 0.011665 | 0.011665 |
| 0.011733 | 0.011838 | 0.011637 | 0.011976 | 0.012015 | 0.011732 | 0.011900 |
| 0.011833 | 0.011833 | 0.011669 | 0.011861 | 0.011790 | 0.011809 | 0.011691 |
| 0.011852 | 0.012017 | 0.011780 | 0.011740 | 0.011631 | 0.011833 | 0.011698 |
| 0.011799 | 0.011732 | 0.011631 | 0.011734 | 0.011833 | 0.011838 | 0.011732 |
| 0.011631 | 0.011566 | 0.011698 | 0.011631 | 0.011564 | 0.011570 | 0.011833 |
| 0.011732 | 0.011665 | 0.011698 | 0.011732 | 0.011698 | 0.011631 | 0.011564 |
| 0.011698 | 0.011732 | 0.011732 | 0.011665 | 0.011732 | 0.011967 | 0.011564 |
| 0.011665 | 0.011396 | 0.011665 | 0.011698 | 0.011665 | 0.011429 | 0.011574 |
| 0.011791 | 0.011400 | 0.011411 | 0.011463 | 0.011549 | 0.011599 | 0.011395 |
| 0.011375 | 0.011564 | 0.011665 | 0.011773 | 0.011633 | 0.011771 | 0.011901 |
| 0.011801 | 0.011839 | 0.011799 | 0.012017 | 0.011766 | 0.012641 | 0.011802 |
| 0.012541 | 0.012309 | 0.012443 | 0.012715 | 0.011698 | 0.011665 | 0.011766 |
| 0.012407 | 0.012140 | 0.011732 | 0.011632 | 0.011699 | 0.011699 | 0.011669 |
| 0.011564 | 0.011569 | 0.011631 | 0.011598 | 0.011969 | 0.012035 | 0.012036 |
| 0.011936 | 0.012036 | 0.012140 | 0.011906 | 0.012408 | 0.012415 | 0.012475 |
| 0.012475 | 0.012509 | 0.012460 | 0.012476 | 0.012477 | 0.011765 | 0.012002 |
| 0.012070 | 0.012574 | 0.012044 | 0.012035 | 0.012508 | 0.011536 | 0.011464 |
| 0.011362 | 0.011430 | 0.011968 | 0.012006 | 0.012046 | 0.011766 | 0.011498 |
| s446     | 0.011869 | 0.011869 | 0.012206 | 0.011970 | 0.011970 | 0.012037 |
| 0.011878 | 0.011810 | 0.011970 | 0.011464 | 0.011531 | 0.011499 | 0.011464 |
| 0.011498 | 0.011666 | 0.011464 | 0.011498 | 0.011565 | 0.011532 | 0.011498 |
| 0.011464 | 0.011498 | 0.011599 | 0.011397 | 0.011498 | 0.011498 | 0.011844 |
| 0.011734 | 0.011498 | 0.011397 | 0.011633 | 0.011565 | 0.011532 | 0.011565 |
| 0.011532 | 0.011633 | 0.011498 | 0.011532 | 0.011565 | 0.011532 | 0.011700 |
| 0.011464 | 0.011532 | 0.011565 | 0.011498 | 0.011599 | 0.011565 | 0.011565 |
| 0.011532 | 0.011700 | 0.011566 | 0.011869 | 0.011532 | 0.011801 | 0.011532 |

|          |          |          |          |          |          |          |
|----------|----------|----------|----------|----------|----------|----------|
| 0.011498 | 0.011599 | 0.011666 | 0.011801 | 0.011902 | 0.011599 | 0.011666 |
| 0.011565 | 0.011633 | 0.011532 | 0.011767 | 0.012004 | 0.011532 | 0.011599 |
| 0.011498 | 0.011599 | 0.011565 | 0.011633 | 0.011565 | 0.011565 | 0.011565 |
| 0.011464 | 0.011498 | 0.011464 | 0.011565 | 0.011532 | 0.011566 | 0.011599 |
| 0.011565 | 0.011532 | 0.011599 | 0.011498 | 0.011633 | 0.011464 | 0.011532 |
| 0.011666 | 0.011633 | 0.011869 | 0.011700 | 0.011464 | 0.011767 | 0.011532 |
| 0.011693 | 0.011960 | 0.011704 | 0.011452 | 0.011360 | 0.011577 | 0.011574 |
| 0.012235 | 0.011520 | 0.011350 | 0.011565 | 0.011498 | 0.011565 | 0.011666 |
| 0.011599 | 0.011565 | 0.011633 | 0.011532 | 0.011633 | 0.011565 | 0.011565 |
| 0.011531 | 0.011633 | 0.011835 | 0.011700 | 0.011599 | 0.011565 | 0.011498 |
| 0.011464 | 0.011464 | 0.011532 | 0.011498 | 0.011700 | 0.011666 | 0.011599 |
| 0.011700 | 0.011768 | 0.011498 | 0.011498 | 0.011532 | 0.011532 | 0.011534 |
| 0.011603 | 0.011532 | 0.011532 | 0.011385 | 0.011423 | 0.011447 | 0.011532 |
| 0.011536 | 0.011474 | 0.011467 | 0.011510 | 0.011435 | 0.011473 | 0.011501 |
| 0.011710 | 0.011510 | 0.011544 | 0.011465 | 0.011442 | 0.011600 | 0.011566 |
| 0.011634 | 0.011567 | 0.011566 | 0.011666 | 0.011599 | 0.011970 | 0.011768 |
| 0.011801 | 0.011666 | 0.011532 | 0.011633 | 0.011431 | 0.011666 | 0.011464 |
| 0.011532 | 0.011532 | 0.011498 | 0.011464 | 0.011498 | 0.011464 | 0.011565 |
| 0.011532 | 0.011633 | 0.011565 | 0.011464 | 0.011567 | 0.011667 | 0.011670 |
| 0.011667 | 0.011566 | 0.011464 | 0.011398 | 0.011532 | 0.011464 | 0.011397 |
| 0.011503 | 0.011667 | 0.011464 | 0.011667 | 0.011431 | 0.011532 | 0.011498 |
| 0.011599 | 0.011498 | 0.011532 | 0.011498 | 0.011532 | 0.011397 | 0.011532 |
| 0.011565 | 0.011498 | 0.011565 | 0.011498 | 0.011532 | 0.011565 | 0.011801 |
| 0.011902 | 0.011835 | 0.011902 | 0.011601 | 0.011903 | 0.011532 | 0.011498 |
| 0.011534 | 0.011791 | 0.011565 | 0.011404 | 0.011911 | 0.011402 | 0.011534 |
| 0.011912 | 0.011777 | 0.011498 | 0.011902 | 0.011608 | 0.011498 | 0.011734 |
| 0.011599 | 0.011565 | 0.011702 | 0.011432 | 0.011565 | 0.011565 | 0.011637 |
| 0.011734 | 0.011635 | 0.011637 | 0.011841 | 0.011768 | 0.011835 | 0.011944 |
| 0.011671 | 0.011843 | 0.011773 | 0.011705 | 0.011972 | 0.011430 | 0.011635 |
| 0.011599 | 0.011532 | 0.011430 | 0.011430 | 0.011498 | 0.011498 | 0.011565 |
| 0.011498 | 0.011565 | 0.011464 | 0.011565 | 0.011498 | 0.011498 | 0.011565 |
| 0.011498 | 0.011936 | 0.011835 | 0.011869 | 0.011397 | 0.011498 | 0.011532 |
| 0.011532 | 0.011498 | 0.011565 | 0.011599 | 0.011464 | 0.011464 | 0.011464 |
| 0.012003 | 0.011633 | 0.011633 | 0.011431 | 0.011532 | 0.011700 | 0.011464 |
| 0.011464 | 0.011531 | 0.011498 | 0.011666 | 0.011464 | 0.011599 | 0.011734 |
| 0.011666 | 0.011498 | 0.011498 | 0.011431 | 0.011430 | 0.011599 | 0.011532 |
| 0.011431 | 0.011532 | 0.011397 | 0.011431 | 0.011565 | 0.011700 | 0.011464 |
| 0.011431 | 0.011565 | 0.011498 | 0.011397 | 0.011734 | 0.011397 | 0.011565 |
| 0.011644 | 0.011464 | 0.011767 | 0.011599 | 0.011633 | 0.011498 | 0.011599 |
| 0.011464 | 0.011801 | 0.011397 | 0.011666 | 0.011464 | 0.011464 | 0.011397 |
| 0.011633 | 0.011835 | 0.011532 | 0.011599 | 0.011430 | 0.011835 | 0.011464 |
| 0.011464 | 0.011464 | 0.011498 | 0.011599 | 0.011464 | 0.011599 | 0.011666 |
| 0.011666 | 0.011633 | 0.011532 | 0.011633 | 0.011599 | 0.011464 | 0.011431 |
| 0.011464 | 0.011464 | 0.011532 | 0.011464 | 0.011431 | 0.011599 | 0.011464 |
| 0.011498 | 0.011498 | 0.011633 | 0.011666 | 0.011565 | 0.011498 | 0.011498 |
| 0.011565 | 0.011498 | 0.011599 | 0.011464 | 0.011599 | 0.011498 | 0.012003 |
| 0.011498 | 0.011902 | 0.011510 | 0.017922 | 0.011324 | 0.011733 | 0.011830 |
| 0.011824 | 0.011837 | 0.011429 | 0.011350 | 0.011944 | 0.011891 | 0.011610 |
| 0.011632 | 0.011735 | 0.011413 | 0.011481 | 0.011452 | 0.011506 | 0.011576 |
| 0.011579 | 0.011583 | 0.011618 | 0.011326 | 0.011633 | 0.011666 | 0.011671 |
| 0.011543 | 0.011633 | 0.011565 | 0.011565 | 0.011565 | 0.011566 | 0.011532 |
| 0.011498 | 0.011498 | 0.011330 | 0.011565 | 0.011532 | 0.011464 | 0.011498 |
| 0.011498 | 0.011565 | 0.011464 | 0.011565 | 0.011599 | 0.011633 | 0.011531 |
| 0.011565 | 0.011532 | 0.011869 | 0.011869 | 0.011599 | 0.011634 | 0.011667 |
| 0.011431 | 0.011431 | 0.011464 | 0.011565 | 0.011431 | 0.011666 | 0.011666 |
| 0.011094 | 0.011498 | 0.011633 | 0.011128 | 0.011902 | 0.000000 | 0.011565 |
| 0.011363 | 0.011633 | 0.011666 | 0.011498 | 0.011565 | 0.011532 | 0.011498 |
| 0.011431 | 0.011431 | 0.011464 | 0.011633 | 0.011533 | 0.011734 | 0.011700 |
| 0.011568 | 0.011464 | 0.011565 | 0.011667 | 0.011565 | 0.011700 | 0.011734 |
| 0.011902 | 0.011608 | 0.011498 | 0.011734 | 0.011599 | 0.011565 | 0.011465 |

|          |          |          |          |          |          |          |
|----------|----------|----------|----------|----------|----------|----------|
| 0.011567 | 0.011532 | 0.011498 | 0.011498 | 0.011565 | 0.011464 | 0.011565 |
| 0.011599 | 0.011633 | 0.011531 | 0.011565 | 0.011532 | 0.011869 | 0.011869 |
| 0.011599 | 0.011634 | 0.011700 | 0.011633 | 0.012275 | 0.011454 | 0.011625 |
| 0.011695 | 0.011443 | 0.011765 | 0.011651 | 0.011622 | 0.011683 | 0.011441 |
| 0.012232 | 0.011546 | 0.011644 | 0.011615 | 0.011889 | 0.011743 | 0.011845 |
| 0.012254 | 0.011703 | 0.011739 | 0.011767 | 0.011734 | 0.011734 | 0.011704 |
| 0.011430 | 0.011599 | 0.011734 | 0.011700 | 0.011704 | 0.011700 | 0.011668 |
| 0.011531 | 0.011464 | 0.011498 | 0.011532 | 0.011431 | 0.011498 | 0.011397 |
| 0.011532 | 0.011565 | 0.011464 | 0.011431 | 0.011532 | 0.011464 | 0.011498 |
| 0.011498 | 0.011430 | 0.011498 | 0.011532 | 0.011430 | 0.011633 | 0.011666 |
| 0.011565 | 0.011633 | 0.011565 | 0.011565 | 0.011498 | 0.011902 | 0.011532 |
| 0.011584 | 0.011498 | 0.011734 | 0.011741 | 0.011599 | 0.011599 | 0.011599 |
| 0.011599 | 0.011532 | 0.011498 | 0.011532 | 0.011633 | 0.011633 | 0.011565 |
| 0.011565 | 0.011700 | 0.011869 | 0.011599 | 0.011801 | 0.011801 | 0.011666 |
| 0.011498 | 0.011565 | 0.011599 | 0.012004 | 0.011566 | 0.011599 | 0.011565 |
| 0.011397 | 0.011532 | 0.011532 | 0.011835 | 0.011768 | 0.011801 | 0.011532 |
| 0.011633 | 0.011700 | 0.011565 | 0.011633 | 0.011599 | 0.011464 | 0.011801 |
| 0.011565 | 0.011532 | 0.011532 | 0.011700 | 0.011532 | 0.011633 | 0.011869 |
| 0.011565 | 0.011946 | 0.011936 | 0.011672 | 0.011287 | 0.011640 | 0.011371 |
| 0.011500 | 0.011881 | 0.011448 | 0.011598 | 0.011501 | 0.011623 | 0.011594 |
| 0.011573 | 0.011325 | 0.011508 | 0.011193 | 0.011439 | 0.011465 | 0.011589 |
| 0.011665 | 0.011455 | 0.011590 | 0.011484 | 0.011567 | 0.011700 | 0.011768 |
| 0.011768 | 0.011634 | 0.011738 | 0.011740 | 0.011876 | 0.011911 | 0.011565 |
| 0.011801 | 0.011666 | 0.011532 | 0.011633 | 0.011431 | 0.011666 | 0.011464 |
| 0.011532 | 0.011532 | 0.011498 | 0.011464 | 0.011498 | 0.011464 | 0.011565 |
| 0.011376 | 0.011516 | 0.011541 | 0.011575 | 0.011712 | 0.011677 | 0.011608 |
| 0.011675 | 0.011600 | 0.011357 | 0.011313 | 0.011536 | 0.011706 | 0.011707 |
| 0.011499 | 0.011570 | 0.011803 | 0.011772 | 0.011431 | 0.011668 | 0.011666 |
| 0.011599 | 0.011666 | 0.011666 | 0.011565 | 0.012139 | 0.011464 | 0.011532 |
| 0.011835 | 0.011882 | 0.011505 | 0.011616 | 0.011498 | 0.011700 | 0.011666 |
| 0.011701 | 0.011734 | 0.011464 | 0.011464 | 0.011886 | 0.011869 | 0.011513 |
| 0.011399 | 0.011408 | 0.011504 | 0.011469 | 0.011574 | 0.011397 | 0.011742 |
| 0.011542 | 0.011631 | 0.011346 | 0.011549 | 0.011532 | 0.011609 | 0.011498 |
| 0.011464 | 0.011464 | 0.011532 | 0.011498 | 0.011700 | 0.011666 | 0.011599 |
| 0.011700 | 0.011768 | 0.011498 | 0.011498 | 0.011532 | 0.011532 | 0.011534 |
| 0.011603 | 0.011532 | 0.011532 | 0.011567 | 0.011700 | 0.011768 | 0.011768 |
| 0.011634 | 0.011738 | 0.011740 | 0.011876 | 0.011911 | 0.011565 | 0.011734 |
| 0.011666 | 0.011666 | 0.011501 | 0.011654 | 0.011618 | 0.011641 | 0.011517 |
| 0.011682 | 0.011973 | 0.011654 | 0.011571 | 0.011464 | 0.011667 | 0.011532 |
| 0.011633 | 0.011565 | 0.011464 | 0.011567 | 0.011667 | 0.011670 | 0.011566 |
| 0.011464 | 0.011398 | 0.011532 | 0.011464 | 0.011397 | 0.011503 | 0.011667 |
| 0.011498 | 0.011498 | 0.011330 | 0.011565 | 0.011532 | 0.011464 | 0.011667 |
| 0.011532 | 0.011565 | 0.011565 | 0.011498 | 0.011565 | 0.011801 | 0.011464 |
| 0.011498 | 0.011902 | 0.011498 | 0.011532 | 0.011498 | 0.011869 | 0.011361 |
| 0.011795 | 0.011402 | 0.011362 | 0.011626 | 0.011673 | 0.011672 | 0.011354 |
| 0.011271 | 0.011666 | 0.011767 | 0.011878 | 0.011736 | 0.011875 | 0.012005 |
| 0.011904 | 0.011942 | 0.011902 | 0.012123 | 0.011869 | 0.012713 | 0.011905 |
| 0.012579 | 0.012380 | 0.012514 | 0.012821 | 0.011868 | 0.011566 | 0.011869 |
| 0.012309 | 0.012245 | 0.011835 | 0.011734 | 0.011802 | 0.011802 | 0.011705 |
| 0.011666 | 0.011673 | 0.011734 | 0.011701 | 0.012072 | 0.012139 | 0.012140 |
| 0.012039 | 0.012140 | 0.012244 | 0.012010 | 0.012242 | 0.012317 | 0.012377 |
| 0.012378 | 0.012412 | 0.012361 | 0.012378 | 0.012380 | 0.011599 | 0.011903 |
| 0.011971 | 0.012476 | 0.011979 | 0.012206 | 0.012681 | 0.011742 | 0.011633 |
| 0.011565 | 0.011599 | 0.012072 | 0.012089 | 0.012225 | 0.011936 | 0.011601 |
| s447     | 0.011698 | 0.011698 | 0.012034 | 0.011799 | 0.011799 | 0.011866 |
| 0.011706 | 0.011638 | 0.011799 | 0.011295 | 0.011362 | 0.011329 | 0.011295 |
| 0.011329 | 0.011497 | 0.011295 | 0.011329 | 0.011396 | 0.011362 | 0.011329 |
| 0.011295 | 0.011329 | 0.011429 | 0.011295 | 0.011262 | 0.011329 | 0.011671 |
| 0.011564 | 0.011329 | 0.011228 | 0.011463 | 0.011329 | 0.011362 | 0.011329 |
| 0.011362 | 0.011396 | 0.011362 | 0.011362 | 0.011396 | 0.011362 | 0.011530 |

|          |          |          |          |          |          |          |
|----------|----------|----------|----------|----------|----------|----------|
| 0.011295 | 0.011362 | 0.011396 | 0.011329 | 0.011429 | 0.011463 | 0.011396 |
| 0.011362 | 0.011530 | 0.011430 | 0.011698 | 0.011362 | 0.011564 | 0.011362 |
| 0.011329 | 0.011430 | 0.011497 | 0.011564 | 0.011732 | 0.011430 | 0.011530 |
| 0.011329 | 0.011396 | 0.011362 | 0.011530 | 0.011833 | 0.011362 | 0.011430 |
| 0.011329 | 0.011429 | 0.011396 | 0.011463 | 0.011396 | 0.011396 | 0.011396 |
| 0.011295 | 0.011329 | 0.011295 | 0.011396 | 0.011362 | 0.011397 | 0.011463 |
| 0.011396 | 0.011362 | 0.011362 | 0.011329 | 0.011463 | 0.011228 | 0.011362 |
| 0.011530 | 0.011463 | 0.011698 | 0.011530 | 0.011362 | 0.011530 | 0.011362 |
| 0.011542 | 0.011770 | 0.011588 | 0.011295 | 0.011284 | 0.011391 | 0.011493 |
| 0.012121 | 0.011467 | 0.011266 | 0.011597 | 0.011597 | 0.011396 | 0.011497 |
| 0.011430 | 0.011396 | 0.011463 | 0.011362 | 0.011463 | 0.011329 | 0.011396 |
| 0.011362 | 0.011463 | 0.011665 | 0.011530 | 0.011430 | 0.011396 | 0.011262 |
| 0.011295 | 0.011295 | 0.011295 | 0.011329 | 0.011530 | 0.011497 | 0.011430 |
| 0.011530 | 0.011597 | 0.011329 | 0.011329 | 0.011362 | 0.011362 | 0.011364 |
| 0.011432 | 0.011362 | 0.011362 | 0.011204 | 0.011313 | 0.011271 | 0.011363 |
| 0.011365 | 0.011301 | 0.011355 | 0.011336 | 0.011264 | 0.011300 | 0.011330 |
| 0.011600 | 0.011370 | 0.011336 | 0.011296 | 0.011302 | 0.011430 | 0.011397 |
| 0.011464 | 0.011397 | 0.011396 | 0.011496 | 0.011429 | 0.011732 | 0.011598 |
| 0.011631 | 0.011497 | 0.011362 | 0.011463 | 0.011262 | 0.011497 | 0.011295 |
| 0.011362 | 0.011362 | 0.011329 | 0.011295 | 0.011329 | 0.011295 | 0.011396 |
| 0.011295 | 0.011396 | 0.011396 | 0.011295 | 0.011397 | 0.011497 | 0.011500 |
| 0.011430 | 0.011396 | 0.011295 | 0.011229 | 0.011362 | 0.011295 | 0.011228 |
| 0.011332 | 0.011430 | 0.011228 | 0.011430 | 0.011262 | 0.011363 | 0.011329 |
| 0.011362 | 0.011329 | 0.011295 | 0.011329 | 0.011362 | 0.011228 | 0.011295 |
| 0.011329 | 0.011329 | 0.011396 | 0.011329 | 0.011362 | 0.011396 | 0.011631 |
| 0.011732 | 0.011664 | 0.011732 | 0.011498 | 0.011732 | 0.011362 | 0.011329 |
| 0.011364 | 0.011586 | 0.011426 | 0.011266 | 0.011739 | 0.011231 | 0.011336 |
| 0.011739 | 0.011638 | 0.011530 | 0.011732 | 0.011436 | 0.011597 | 0.011497 |
| 0.011497 | 0.011664 | 0.011522 | 0.011349 | 0.011396 | 0.011396 | 0.011466 |
| 0.011564 | 0.011465 | 0.011601 | 0.011602 | 0.011597 | 0.011665 | 0.011772 |
| 0.011500 | 0.011603 | 0.011602 | 0.011534 | 0.011801 | 0.011262 | 0.011465 |
| 0.011362 | 0.011362 | 0.011262 | 0.011262 | 0.011262 | 0.011329 | 0.011396 |
| 0.011262 | 0.011329 | 0.011228 | 0.011396 | 0.011262 | 0.011329 | 0.011396 |
| 0.011329 | 0.011765 | 0.011665 | 0.011698 | 0.011228 | 0.011329 | 0.011362 |
| 0.011362 | 0.011329 | 0.011396 | 0.011430 | 0.011295 | 0.011295 | 0.011295 |
| 0.011833 | 0.011463 | 0.011463 | 0.011262 | 0.011362 | 0.011463 | 0.011295 |
| 0.011295 | 0.011362 | 0.011329 | 0.011430 | 0.011295 | 0.011429 | 0.011497 |
| 0.011497 | 0.011329 | 0.011329 | 0.011262 | 0.011262 | 0.011430 | 0.011362 |
| 0.011262 | 0.011362 | 0.011228 | 0.011262 | 0.011396 | 0.011531 | 0.011295 |
| 0.011262 | 0.011396 | 0.011329 | 0.011228 | 0.011564 | 0.011228 | 0.011396 |
| 0.011403 | 0.011295 | 0.011597 | 0.011430 | 0.011463 | 0.011329 | 0.011429 |
| 0.011295 | 0.011564 | 0.011228 | 0.011497 | 0.011295 | 0.011295 | 0.011228 |
| 0.011396 | 0.011665 | 0.011362 | 0.011430 | 0.011262 | 0.011665 | 0.011295 |
| 0.011295 | 0.011295 | 0.011329 | 0.011362 | 0.011329 | 0.011429 | 0.011497 |
| 0.011497 | 0.011463 | 0.011362 | 0.011463 | 0.011362 | 0.011295 | 0.011262 |
| 0.011295 | 0.011295 | 0.011362 | 0.011295 | 0.011195 | 0.011430 | 0.011295 |
| 0.011329 | 0.011329 | 0.011463 | 0.011497 | 0.011396 | 0.011262 | 0.011329 |
| 0.011396 | 0.011329 | 0.011429 | 0.011295 | 0.011429 | 0.011530 | 0.011833 |
| 0.011329 | 0.011732 | 0.011336 | 0.017861 | 0.011191 | 0.011488 | 0.011688 |
| 0.011648 | 0.011693 | 0.011374 | 0.011350 | 0.011774 | 0.011716 | 0.011425 |
| 0.011535 | 0.011671 | 0.011255 | 0.011270 | 0.011294 | 0.011406 | 0.011318 |
| 0.011529 | 0.011507 | 0.011468 | 0.011259 | 0.011463 | 0.011497 | 0.011500 |
| 0.011301 | 0.011463 | 0.011463 | 0.011430 | 0.011396 | 0.011396 | 0.011363 |
| 0.011396 | 0.011329 | 0.011362 | 0.011396 | 0.011363 | 0.011295 | 0.011329 |
| 0.011329 | 0.011396 | 0.011295 | 0.011396 | 0.011430 | 0.011463 | 0.011362 |
| 0.011396 | 0.011362 | 0.011698 | 0.011698 | 0.011430 | 0.011464 | 0.011497 |
| 0.011262 | 0.011262 | 0.011295 | 0.011329 | 0.011262 | 0.011497 | 0.011497 |
| 0.011530 | 0.011530 | 0.011463 | 0.011564 | 0.011732 | 0.011565 | 0.000000 |
| 0.011396 | 0.011463 | 0.011430 | 0.011329 | 0.011396 | 0.011362 | 0.011396 |
| 0.011463 | 0.011463 | 0.011497 | 0.011396 | 0.011296 | 0.011564 | 0.011463 |

|          |          |          |          |          |          |          |
|----------|----------|----------|----------|----------|----------|----------|
| 0.011399 | 0.011295 | 0.011396 | 0.011497 | 0.011396 | 0.011530 | 0.011564 |
| 0.011732 | 0.011436 | 0.011597 | 0.011497 | 0.011497 | 0.011664 | 0.011295 |
| 0.011464 | 0.011363 | 0.011329 | 0.011329 | 0.011396 | 0.011295 | 0.011396 |
| 0.011430 | 0.011463 | 0.011362 | 0.011396 | 0.011362 | 0.011698 | 0.011698 |
| 0.011430 | 0.011464 | 0.011530 | 0.011463 | 0.012103 | 0.011489 | 0.011412 |
| 0.011482 | 0.011476 | 0.011587 | 0.011441 | 0.011585 | 0.011509 | 0.011474 |
| 0.012056 | 0.011372 | 0.011505 | 0.011441 | 0.011715 | 0.011570 | 0.011605 |
| 0.012080 | 0.011512 | 0.011567 | 0.011597 | 0.011564 | 0.011564 | 0.011533 |
| 0.011262 | 0.011362 | 0.011564 | 0.011530 | 0.011533 | 0.011530 | 0.011498 |
| 0.011362 | 0.011228 | 0.011262 | 0.011362 | 0.011195 | 0.011329 | 0.011228 |
| 0.011362 | 0.011396 | 0.011295 | 0.011262 | 0.011362 | 0.011295 | 0.011329 |
| 0.011329 | 0.011262 | 0.011329 | 0.011362 | 0.011262 | 0.011396 | 0.011497 |
| 0.011396 | 0.011463 | 0.011396 | 0.011396 | 0.011329 | 0.011732 | 0.011362 |
| 0.011373 | 0.011329 | 0.011564 | 0.011569 | 0.011362 | 0.011429 | 0.011429 |
| 0.011430 | 0.011295 | 0.011329 | 0.011295 | 0.011463 | 0.011463 | 0.011396 |
| 0.011396 | 0.011530 | 0.011698 | 0.011429 | 0.011631 | 0.011631 | 0.011497 |
| 0.011329 | 0.011396 | 0.011430 | 0.011833 | 0.011396 | 0.011362 | 0.011396 |
| 0.011429 | 0.011362 | 0.011362 | 0.011665 | 0.011530 | 0.011631 | 0.011362 |
| 0.011463 | 0.011530 | 0.011396 | 0.011463 | 0.011429 | 0.011295 | 0.011631 |
| 0.011396 | 0.011362 | 0.011362 | 0.011530 | 0.011362 | 0.011463 | 0.011698 |
| 0.011396 | 0.011773 | 0.011765 | 0.011589 | 0.011173 | 0.011468 | 0.011318 |
| 0.011335 | 0.011800 | 0.011306 | 0.011507 | 0.011207 | 0.011417 | 0.011379 |
| 0.011468 | 0.011126 | 0.011339 | 0.011126 | 0.011168 | 0.011328 | 0.011385 |
| 0.011437 | 0.011296 | 0.011448 | 0.011377 | 0.011397 | 0.011530 | 0.011598 |
| 0.011597 | 0.011464 | 0.011567 | 0.011569 | 0.011704 | 0.011732 | 0.011396 |
| 0.011631 | 0.011497 | 0.011362 | 0.011463 | 0.011262 | 0.011497 | 0.011295 |
| 0.011362 | 0.011362 | 0.011329 | 0.011295 | 0.011329 | 0.011295 | 0.011396 |
| 0.011375 | 0.011375 | 0.011368 | 0.011403 | 0.011539 | 0.011436 | 0.011504 |
| 0.011435 | 0.011430 | 0.011245 | 0.011240 | 0.011365 | 0.011535 | 0.011535 |
| 0.011329 | 0.011399 | 0.011633 | 0.011601 | 0.011531 | 0.011565 | 0.011497 |
| 0.011429 | 0.011497 | 0.011497 | 0.011396 | 0.011967 | 0.011564 | 0.011631 |
| 0.011597 | 0.011737 | 0.011367 | 0.011441 | 0.011329 | 0.011530 | 0.011497 |
| 0.011531 | 0.011564 | 0.011564 | 0.011564 | 0.011729 | 0.011698 | 0.011338 |
| 0.011229 | 0.011233 | 0.011333 | 0.011298 | 0.011402 | 0.011210 | 0.011570 |
| 0.011369 | 0.011455 | 0.011203 | 0.011360 | 0.011363 | 0.011437 | 0.011262 |
| 0.011295 | 0.011295 | 0.011295 | 0.011329 | 0.011530 | 0.011497 | 0.011430 |
| 0.011530 | 0.011597 | 0.011329 | 0.011329 | 0.011362 | 0.011362 | 0.011364 |
| 0.011432 | 0.011362 | 0.011362 | 0.011397 | 0.011530 | 0.011598 | 0.011597 |
| 0.011464 | 0.011567 | 0.011569 | 0.011704 | 0.011732 | 0.011396 | 0.011564 |
| 0.011497 | 0.011497 | 0.011331 | 0.011478 | 0.011408 | 0.011469 | 0.011341 |
| 0.011439 | 0.011653 | 0.011441 | 0.011400 | 0.011228 | 0.011430 | 0.011295 |
| 0.011396 | 0.011396 | 0.011295 | 0.011397 | 0.011497 | 0.011500 | 0.011396 |
| 0.011295 | 0.011229 | 0.011362 | 0.011295 | 0.011228 | 0.011332 | 0.011430 |
| 0.011396 | 0.011329 | 0.011362 | 0.011396 | 0.011363 | 0.011295 | 0.011497 |
| 0.011362 | 0.011396 | 0.011396 | 0.011329 | 0.011396 | 0.011631 | 0.011295 |
| 0.011329 | 0.011732 | 0.011329 | 0.011295 | 0.011329 | 0.011698 | 0.011275 |
| 0.011678 | 0.011273 | 0.011261 | 0.011503 | 0.011589 | 0.011527 | 0.011269 |
| 0.011218 | 0.011497 | 0.011597 | 0.011671 | 0.011565 | 0.011703 | 0.011834 |
| 0.011733 | 0.011770 | 0.011732 | 0.011983 | 0.011698 | 0.012573 | 0.011734 |
| 0.012473 | 0.012241 | 0.012375 | 0.012646 | 0.011698 | 0.011396 | 0.011699 |
| 0.012137 | 0.012072 | 0.011665 | 0.011564 | 0.011632 | 0.011632 | 0.011601 |
| 0.011497 | 0.011501 | 0.011564 | 0.011531 | 0.011901 | 0.011967 | 0.011968 |
| 0.011868 | 0.011968 | 0.012072 | 0.011838 | 0.012138 | 0.012144 | 0.012205 |
| 0.012206 | 0.012239 | 0.012186 | 0.012206 | 0.012207 | 0.011429 | 0.011732 |
| 0.011800 | 0.012304 | 0.011806 | 0.012035 | 0.012508 | 0.011570 | 0.011464 |
| 0.011429 | 0.011429 | 0.011900 | 0.011924 | 0.012045 | 0.011765 | 0.011431 |
| S448     | 0.011698 | 0.011698 | 0.012035 | 0.011799 | 0.011799 | 0.011866 |
| 0.011706 | 0.011638 | 0.011799 | 0.011295 | 0.011362 | 0.011329 | 0.011295 |
| 0.011329 | 0.011497 | 0.011295 | 0.011329 | 0.011396 | 0.011362 | 0.011329 |
| 0.011295 | 0.011329 | 0.011429 | 0.011296 | 0.011329 | 0.011329 | 0.011672 |

|          |          |          |           |          |          |          |
|----------|----------|----------|-----------|----------|----------|----------|
| 0.011564 | 0.011329 | 0.011228 | 0.011463  | 0.011396 | 0.011362 | 0.011396 |
| 0.011362 | 0.011463 | 0.011362 | 0.011362  | 0.011396 | 0.011362 | 0.011530 |
| 0.011295 | 0.011362 | 0.011396 | 0.011329  | 0.011430 | 0.011396 | 0.011396 |
| 0.011362 | 0.011530 | 0.011430 | 0.011698  | 0.011362 | 0.011631 | 0.011362 |
| 0.011329 | 0.011430 | 0.011497 | 0.011631  | 0.011732 | 0.011430 | 0.011530 |
| 0.011396 | 0.011463 | 0.011362 | 0.011597  | 0.011833 | 0.011362 | 0.011430 |
| 0.011329 | 0.011429 | 0.011396 | 0.011463  | 0.011396 | 0.011396 | 0.011396 |
| 0.011295 | 0.011329 | 0.011295 | 0.011396  | 0.011362 | 0.011397 | 0.011463 |
| 0.011396 | 0.011362 | 0.011430 | 0.011329  | 0.011463 | 0.011295 | 0.011362 |
| 0.011530 | 0.011463 | 0.011698 | 0.011530  | 0.011362 | 0.011598 | 0.011362 |
| 0.011542 | 0.011770 | 0.011551 | 0.011295  | 0.011247 | 0.011391 | 0.011454 |
| 0.012085 | 0.011518 | 0.011225 | 0.011396  | 0.011396 | 0.011396 | 0.011497 |
| 0.011430 | 0.011396 | 0.011463 | 0.011362  | 0.011463 | 0.011396 | 0.011396 |
| 0.011362 | 0.011463 | 0.011665 | 0.011530  | 0.011430 | 0.011396 | 0.011329 |
| 0.011295 | 0.011295 | 0.011362 | 0.011329  | 0.011530 | 0.011497 | 0.011429 |
| 0.011530 | 0.011597 | 0.011329 | 0.011329  | 0.011362 | 0.011362 | 0.011364 |
| 0.011432 | 0.011362 | 0.011362 | 0.011240  | 0.011277 | 0.011236 | 0.011363 |
| 0.011365 | 0.011301 | 0.011318 | 0.011336  | 0.011264 | 0.011300 | 0.011330 |
| 0.011564 | 0.011370 | 0.011370 | 0.011296  | 0.011268 | 0.011430 | 0.011396 |
| 0.011464 | 0.011397 | 0.011396 | 0.011497  | 0.011429 | 0.011799 | 0.011598 |
| 0.011631 | 0.011497 | 0.011362 | 0.011463  | 0.011262 | 0.011497 | 0.011295 |
| 0.011362 | 0.011362 | 0.011329 | 0.011295  | 0.011329 | 0.011295 | 0.011396 |
| 0.011362 | 0.011463 | 0.011396 | 0.011295  | 0.011397 | 0.011497 | 0.011499 |
| 0.011497 | 0.011396 | 0.011295 | 0.011229  | 0.011362 | 0.011295 | 0.011228 |
| 0.011298 | 0.011497 | 0.011295 | 0.011497  | 0.011262 | 0.011362 | 0.011329 |
| 0.011430 | 0.011329 | 0.011362 | 0.011329  | 0.011362 | 0.011228 | 0.011362 |
| 0.011396 | 0.011329 | 0.011396 | 0.011329  | 0.011362 | 0.011396 | 0.011631 |
| 0.011732 | 0.011665 | 0.011732 | 0.011431  | 0.011732 | 0.011362 | 0.011329 |
| 0.011364 | 0.011626 | 0.011335 | 0.011232  | 0.011739 | 0.011231 | 0.011375 |
| 0.011739 | 0.011638 | 0.011329 | 0.011732  | 0.011436 | 0.011396 | 0.011564 |
| 0.011497 | 0.011463 | 0.011522 | 0.011225  | 0.011396 | 0.011396 | 0.011466 |
| 0.011564 | 0.011465 | 0.011466 | 0.011670  | 0.011598 | 0.011665 | 0.011772 |
| 0.011500 | 0.011671 | 0.011602 | 0.011534  | 0.011801 | 0.011262 | 0.011465 |
| 0.011429 | 0.011362 | 0.011262 | 0.011262  | 0.011329 | 0.011329 | 0.011396 |
| 0.011329 | 0.011396 | 0.011295 | 0.011396  | 0.011329 | 0.011329 | 0.011396 |
| 0.011329 | 0.011765 | 0.011665 | 0.011698  | 0.011228 | 0.011329 | 0.011362 |
| 0.011362 | 0.011329 | 0.011396 | 0.011430  | 0.011295 | 0.011295 | 0.011295 |
| 0.011833 | 0.011463 | 0.011463 | 0.011262  | 0.011362 | 0.011530 | 0.011295 |
| 0.011295 | 0.011362 | 0.011329 | 0.011497  | 0.011295 | 0.011430 | 0.011564 |
| 0.011497 | 0.011329 | 0.011329 | 0.011262  | 0.011262 | 0.011430 | 0.011362 |
| 0.011262 | 0.011362 | 0.011228 | 0.011262  | 0.011396 | 0.011531 | 0.011295 |
| 0.011262 | 0.011396 | 0.011329 | 0.011228  | 0.011564 | 0.011228 | 0.011396 |
| 0.011471 | 0.011295 | 0.011598 | 0.011430  | 0.011463 | 0.011329 | 0.011430 |
| 0.011295 | 0.011631 | 0.011228 | 0.011497  | 0.011295 | 0.011295 | 0.011228 |
| 0.011463 | 0.011665 | 0.011362 | 0.011430  | 0.011262 | 0.011665 | 0.011295 |
| 0.011295 | 0.011295 | 0.011329 | 0.011430  | 0.011329 | 0.011430 | 0.011497 |
| 0.011497 | 0.011463 | 0.011362 | 0.011463  | 0.011429 | 0.011295 | 0.011262 |
| 0.011295 | 0.011295 | 0.011362 | 0.011295  | 0.011262 | 0.011430 | 0.011295 |
| 0.011329 | 0.011329 | 0.011463 | 0.011497  | 0.011396 | 0.011329 | 0.011329 |
| 0.011396 | 0.011329 | 0.011429 | 0.011295  | 0.011430 | 0.011329 | 0.011833 |
| 0.011329 | 0.011732 | 0.011336 | 0.0117748 | 0.011191 | 0.011488 | 0.011688 |
| 0.011648 | 0.011693 | 0.011374 | 0.011350  | 0.011719 | 0.011716 | 0.011425 |
| 0.011535 | 0.011549 | 0.011255 | 0.011311  | 0.011294 | 0.011356 | 0.011361 |
| 0.011529 | 0.011470 | 0.011468 | 0.011259  | 0.011463 | 0.011497 | 0.011500 |
| 0.011369 | 0.011463 | 0.011396 | 0.011429  | 0.011396 | 0.011396 | 0.011363 |
| 0.011329 | 0.011329 | 0.011161 | 0.011396  | 0.011362 | 0.011295 | 0.011329 |
| 0.011329 | 0.011396 | 0.011295 | 0.011396  | 0.011430 | 0.011463 | 0.011362 |
| 0.011396 | 0.011362 | 0.011698 | 0.011698  | 0.011430 | 0.011464 | 0.011497 |
| 0.011262 | 0.011262 | 0.011295 | 0.011396  | 0.011262 | 0.011497 | 0.011497 |
| 0.011329 | 0.011329 | 0.011463 | 0.011362  | 0.011732 | 0.011363 | 0.011396 |

|          |          |          |          |          |          |          |
|----------|----------|----------|----------|----------|----------|----------|
| 0.000000 | 0.011463 | 0.011497 | 0.011329 | 0.011396 | 0.011362 | 0.011329 |
| 0.011262 | 0.011262 | 0.011295 | 0.011463 | 0.011363 | 0.011564 | 0.011530 |
| 0.011399 | 0.011295 | 0.011396 | 0.011497 | 0.011396 | 0.011530 | 0.011564 |
| 0.011732 | 0.011436 | 0.011396 | 0.011564 | 0.011497 | 0.011463 | 0.011295 |
| 0.011397 | 0.011363 | 0.011329 | 0.011329 | 0.011396 | 0.011295 | 0.011396 |
| 0.011430 | 0.011463 | 0.011362 | 0.011396 | 0.011362 | 0.011698 | 0.011698 |
| 0.011430 | 0.011464 | 0.011530 | 0.011463 | 0.012103 | 0.011346 | 0.011447 |
| 0.011517 | 0.011338 | 0.011587 | 0.011476 | 0.011445 | 0.011509 | 0.011336 |
| 0.012056 | 0.011372 | 0.011506 | 0.011441 | 0.011715 | 0.011571 | 0.011673 |
| 0.012081 | 0.011550 | 0.011398 | 0.011396 | 0.011396 | 0.011429 | 0.011364 |
| 0.011262 | 0.011295 | 0.011430 | 0.011396 | 0.011398 | 0.011530 | 0.011498 |
| 0.011362 | 0.011295 | 0.011329 | 0.011362 | 0.011262 | 0.011329 | 0.011228 |
| 0.011362 | 0.011396 | 0.011295 | 0.011262 | 0.011362 | 0.011295 | 0.011329 |
| 0.011329 | 0.011262 | 0.011329 | 0.011362 | 0.011262 | 0.011463 | 0.011497 |
| 0.011396 | 0.011463 | 0.011396 | 0.011396 | 0.011329 | 0.011732 | 0.011362 |
| 0.011408 | 0.011329 | 0.011564 | 0.011569 | 0.011430 | 0.011429 | 0.011430 |
| 0.011430 | 0.011362 | 0.011329 | 0.011362 | 0.011463 | 0.011463 | 0.011396 |
| 0.011396 | 0.011530 | 0.011698 | 0.011429 | 0.011631 | 0.011631 | 0.011497 |
| 0.011329 | 0.011396 | 0.011430 | 0.011833 | 0.011396 | 0.011430 | 0.011396 |
| 0.011228 | 0.011362 | 0.011362 | 0.011665 | 0.011598 | 0.011631 | 0.011362 |
| 0.011463 | 0.011530 | 0.011396 | 0.011463 | 0.011430 | 0.011295 | 0.011631 |
| 0.011396 | 0.011362 | 0.011362 | 0.011530 | 0.011362 | 0.011463 | 0.011698 |
| 0.011396 | 0.011774 | 0.011765 | 0.011548 | 0.011229 | 0.011468 | 0.011318 |
| 0.011280 | 0.011761 | 0.011271 | 0.011462 | 0.011353 | 0.011467 | 0.011432 |
| 0.011519 | 0.011126 | 0.011394 | 0.011192 | 0.011276 | 0.011395 | 0.011425 |
| 0.011475 | 0.011336 | 0.011448 | 0.011377 | 0.011397 | 0.011530 | 0.011597 |
| 0.011597 | 0.011464 | 0.011567 | 0.011569 | 0.011704 | 0.011732 | 0.011396 |
| 0.011631 | 0.011497 | 0.011362 | 0.011463 | 0.011262 | 0.011497 | 0.011295 |
| 0.011362 | 0.011362 | 0.011329 | 0.011295 | 0.011329 | 0.011295 | 0.011396 |
| 0.011200 | 0.011340 | 0.011368 | 0.011403 | 0.011539 | 0.011504 | 0.011436 |
| 0.011503 | 0.011430 | 0.011208 | 0.011168 | 0.011365 | 0.011535 | 0.011535 |
| 0.011329 | 0.011399 | 0.011632 | 0.011601 | 0.011329 | 0.011565 | 0.011497 |
| 0.011429 | 0.011497 | 0.011497 | 0.011396 | 0.011967 | 0.011362 | 0.011430 |
| 0.011665 | 0.011701 | 0.011367 | 0.011441 | 0.011329 | 0.011530 | 0.011497 |
| 0.011531 | 0.011564 | 0.011362 | 0.011362 | 0.011729 | 0.011698 | 0.011338 |
| 0.011229 | 0.011233 | 0.011333 | 0.011298 | 0.011402 | 0.011247 | 0.011570 |
| 0.011369 | 0.011499 | 0.011251 | 0.011397 | 0.011363 | 0.011437 | 0.011329 |
| 0.011295 | 0.011295 | 0.011362 | 0.011329 | 0.011530 | 0.011497 | 0.011429 |
| 0.011530 | 0.011597 | 0.011329 | 0.011329 | 0.011362 | 0.011362 | 0.011364 |
| 0.011432 | 0.011362 | 0.011362 | 0.011397 | 0.011530 | 0.011597 | 0.011597 |
| 0.011464 | 0.011567 | 0.011569 | 0.011704 | 0.011732 | 0.011396 | 0.011564 |
| 0.011497 | 0.011497 | 0.011331 | 0.011443 | 0.011442 | 0.011469 | 0.011340 |
| 0.011508 | 0.011744 | 0.011441 | 0.011400 | 0.011295 | 0.011497 | 0.011362 |
| 0.011463 | 0.011396 | 0.011295 | 0.011397 | 0.011497 | 0.011499 | 0.011396 |
| 0.011295 | 0.011229 | 0.011362 | 0.011295 | 0.011228 | 0.011298 | 0.011497 |
| 0.011329 | 0.011329 | 0.011161 | 0.011396 | 0.011362 | 0.011295 | 0.011497 |
| 0.011362 | 0.011396 | 0.011396 | 0.011329 | 0.011396 | 0.011631 | 0.011295 |
| 0.011329 | 0.011732 | 0.011329 | 0.011362 | 0.011329 | 0.011698 | 0.011232 |
| 0.011679 | 0.011273 | 0.011311 | 0.011503 | 0.011589 | 0.011491 | 0.011227 |
| 0.011270 | 0.011497 | 0.011597 | 0.011637 | 0.011565 | 0.011703 | 0.011834 |
| 0.011733 | 0.011771 | 0.011732 | 0.011983 | 0.011698 | 0.012573 | 0.011734 |
| 0.012405 | 0.012241 | 0.012375 | 0.012646 | 0.011698 | 0.011396 | 0.011699 |
| 0.012137 | 0.012072 | 0.011665 | 0.011564 | 0.011632 | 0.011632 | 0.011534 |
| 0.011497 | 0.011501 | 0.011564 | 0.011531 | 0.011901 | 0.011967 | 0.011968 |
| 0.011868 | 0.011968 | 0.012072 | 0.011838 | 0.012138 | 0.012144 | 0.012205 |
| 0.012205 | 0.012239 | 0.012186 | 0.012206 | 0.012207 | 0.011429 | 0.011732 |
| 0.011800 | 0.012304 | 0.011806 | 0.012035 | 0.012508 | 0.011570 | 0.011464 |
| 0.011396 | 0.011429 | 0.011900 | 0.011924 | 0.012045 | 0.011765 | 0.011431 |
| S449     | 0.011766 | 0.011766 | 0.012102 | 0.011866 | 0.011866 | 0.011934 |
| 0.011774 | 0.011706 | 0.011866 | 0.011362 | 0.011429 | 0.011397 | 0.011362 |

|          |          |          |          |          |          |          |
|----------|----------|----------|----------|----------|----------|----------|
| 0.011396 | 0.011564 | 0.011362 | 0.011396 | 0.011463 | 0.011430 | 0.011396 |
| 0.011362 | 0.011396 | 0.011497 | 0.011363 | 0.011396 | 0.011396 | 0.011740 |
| 0.011631 | 0.011396 | 0.011295 | 0.011530 | 0.011463 | 0.011430 | 0.011463 |
| 0.011430 | 0.011530 | 0.011429 | 0.011430 | 0.011396 | 0.011429 | 0.011597 |
| 0.011362 | 0.011429 | 0.011463 | 0.011396 | 0.011497 | 0.011530 | 0.011463 |
| 0.011430 | 0.011598 | 0.011497 | 0.011765 | 0.011429 | 0.011698 | 0.011429 |
| 0.011396 | 0.011497 | 0.011564 | 0.011698 | 0.011799 | 0.011497 | 0.011597 |
| 0.011463 | 0.011530 | 0.011430 | 0.011665 | 0.011900 | 0.011430 | 0.011497 |
| 0.011396 | 0.011497 | 0.011463 | 0.011530 | 0.011463 | 0.011463 | 0.011463 |
| 0.011362 | 0.011396 | 0.011362 | 0.011463 | 0.011429 | 0.011464 | 0.011530 |
| 0.011463 | 0.011429 | 0.011497 | 0.011396 | 0.011530 | 0.011362 | 0.011429 |
| 0.011597 | 0.011530 | 0.011765 | 0.011598 | 0.011430 | 0.011665 | 0.011429 |
| 0.011616 | 0.011845 | 0.011664 | 0.011373 | 0.011321 | 0.011465 | 0.011533 |
| 0.012158 | 0.011518 | 0.011307 | 0.011665 | 0.011665 | 0.011463 | 0.011564 |
| 0.011497 | 0.011463 | 0.011530 | 0.011429 | 0.011530 | 0.011463 | 0.011463 |
| 0.011429 | 0.011530 | 0.011732 | 0.011597 | 0.011497 | 0.011463 | 0.011396 |
| 0.011362 | 0.011362 | 0.011430 | 0.011396 | 0.011597 | 0.011564 | 0.011497 |
| 0.011597 | 0.011665 | 0.011396 | 0.011396 | 0.011430 | 0.011429 | 0.011432 |
| 0.011500 | 0.011429 | 0.011430 | 0.011276 | 0.011349 | 0.011306 | 0.011430 |
| 0.011433 | 0.011369 | 0.011429 | 0.011405 | 0.011298 | 0.011334 | 0.011364 |
| 0.011636 | 0.011405 | 0.011473 | 0.011363 | 0.011371 | 0.011497 | 0.011464 |
| 0.011531 | 0.011465 | 0.011464 | 0.011564 | 0.011497 | 0.011866 | 0.011665 |
| 0.011698 | 0.011564 | 0.011429 | 0.011530 | 0.011329 | 0.011564 | 0.011362 |
| 0.011430 | 0.011429 | 0.011396 | 0.011362 | 0.011396 | 0.011362 | 0.011463 |
| 0.011430 | 0.011530 | 0.011463 | 0.011362 | 0.011464 | 0.011564 | 0.011567 |
| 0.011564 | 0.011463 | 0.011362 | 0.011296 | 0.011429 | 0.011362 | 0.011295 |
| 0.011400 | 0.011564 | 0.011362 | 0.011564 | 0.011329 | 0.011430 | 0.011396 |
| 0.011497 | 0.011396 | 0.011430 | 0.011396 | 0.011430 | 0.011295 | 0.011430 |
| 0.011463 | 0.011396 | 0.011463 | 0.011396 | 0.011429 | 0.011463 | 0.011698 |
| 0.011799 | 0.011732 | 0.011799 | 0.011566 | 0.011799 | 0.011429 | 0.011396 |
| 0.011432 | 0.011667 | 0.011518 | 0.011335 | 0.011807 | 0.011299 | 0.011414 |
| 0.011807 | 0.011672 | 0.011597 | 0.011799 | 0.011504 | 0.011665 | 0.011631 |
| 0.011564 | 0.011732 | 0.011558 | 0.011431 | 0.011438 | 0.011463 | 0.011534 |
| 0.011631 | 0.011499 | 0.011669 | 0.011703 | 0.011665 | 0.011732 | 0.011806 |
| 0.011568 | 0.011671 | 0.011670 | 0.011601 | 0.011868 | 0.011329 | 0.011498 |
| 0.011497 | 0.011430 | 0.011329 | 0.011329 | 0.011396 | 0.011396 | 0.011463 |
| 0.011396 | 0.011463 | 0.011362 | 0.011463 | 0.011396 | 0.011396 | 0.011463 |
| 0.011396 | 0.011833 | 0.011732 | 0.011765 | 0.011295 | 0.011396 | 0.011430 |
| 0.011430 | 0.011396 | 0.011463 | 0.011497 | 0.011362 | 0.011362 | 0.011362 |
| 0.011900 | 0.011530 | 0.011530 | 0.011329 | 0.011429 | 0.011598 | 0.011362 |
| 0.011362 | 0.011429 | 0.011396 | 0.011564 | 0.011362 | 0.011497 | 0.011631 |
| 0.011564 | 0.011396 | 0.011396 | 0.011329 | 0.011329 | 0.011497 | 0.011429 |
| 0.011329 | 0.011429 | 0.011295 | 0.011329 | 0.011463 | 0.011598 | 0.011362 |
| 0.011329 | 0.011463 | 0.011396 | 0.011295 | 0.011631 | 0.011295 | 0.011463 |
| 0.011505 | 0.011362 | 0.011665 | 0.011497 | 0.011530 | 0.011396 | 0.011430 |
| 0.011362 | 0.011698 | 0.011295 | 0.011564 | 0.011362 | 0.011362 | 0.011295 |
| 0.011530 | 0.011732 | 0.011430 | 0.011497 | 0.011329 | 0.011732 | 0.011362 |
| 0.011362 | 0.011362 | 0.011396 | 0.011497 | 0.011396 | 0.011497 | 0.011564 |
| 0.011564 | 0.011530 | 0.011429 | 0.011530 | 0.011497 | 0.011362 | 0.011329 |
| 0.011362 | 0.011362 | 0.011430 | 0.011362 | 0.011329 | 0.011497 | 0.011362 |
| 0.011396 | 0.011396 | 0.011530 | 0.011564 | 0.011463 | 0.011396 | 0.011396 |
| 0.011463 | 0.011396 | 0.011497 | 0.011362 | 0.011497 | 0.011597 | 0.011900 |
| 0.011396 | 0.011799 | 0.011405 | 0.017899 | 0.011387 | 0.011611 | 0.011758 |
| 0.011718 | 0.011764 | 0.011479 | 0.011350 | 0.011994 | 0.011785 | 0.011546 |
| 0.011629 | 0.011732 | 0.011333 | 0.011395 | 0.011411 | 0.011554 | 0.011447 |
| 0.011623 | 0.011544 | 0.011542 | 0.011259 | 0.011530 | 0.011564 | 0.011567 |
| 0.011369 | 0.011530 | 0.011530 | 0.011497 | 0.011463 | 0.011463 | 0.011430 |
| 0.011463 | 0.011396 | 0.011429 | 0.011463 | 0.011430 | 0.011362 | 0.011396 |
| 0.011396 | 0.011463 | 0.011362 | 0.011463 | 0.011497 | 0.011530 | 0.011429 |
| 0.011463 | 0.011430 | 0.011765 | 0.011765 | 0.011497 | 0.011531 | 0.011564 |



|          |          |          |          |          |          |          |
|----------|----------|----------|----------|----------|----------|----------|
| 0.011329 | 0.011329 | 0.011362 | 0.011463 | 0.011329 | 0.011564 | 0.011564 |
| 0.011597 | 0.011597 | 0.011530 | 0.011631 | 0.011799 | 0.011633 | 0.011463 |
| 0.011463 | 0.000000 | 0.011564 | 0.011396 | 0.011463 | 0.011429 | 0.011463 |
| 0.011531 | 0.011530 | 0.011564 | 0.011530 | 0.011431 | 0.011631 | 0.011597 |
| 0.011467 | 0.011362 | 0.011463 | 0.011564 | 0.011463 | 0.011598 | 0.011631 |
| 0.011799 | 0.011504 | 0.011665 | 0.011631 | 0.011564 | 0.011732 | 0.011363 |
| 0.011532 | 0.011430 | 0.011396 | 0.011396 | 0.011463 | 0.011362 | 0.011463 |
| 0.011497 | 0.011530 | 0.011429 | 0.011463 | 0.011430 | 0.011765 | 0.011765 |
| 0.011497 | 0.011531 | 0.011597 | 0.011530 | 0.012171 | 0.011525 | 0.011482 |
| 0.011517 | 0.011511 | 0.011587 | 0.011511 | 0.011585 | 0.011543 | 0.011543 |
| 0.012091 | 0.011372 | 0.011540 | 0.011441 | 0.011715 | 0.011639 | 0.011707 |
| 0.012115 | 0.011550 | 0.011466 | 0.011463 | 0.011463 | 0.011497 | 0.011432 |
| 0.011329 | 0.011362 | 0.011497 | 0.011463 | 0.011466 | 0.011597 | 0.011565 |
| 0.011429 | 0.011362 | 0.011396 | 0.011429 | 0.011329 | 0.011396 | 0.011295 |
| 0.011429 | 0.011463 | 0.011362 | 0.011329 | 0.011430 | 0.011362 | 0.011396 |
| 0.011396 | 0.011329 | 0.011396 | 0.011430 | 0.011329 | 0.011530 | 0.011564 |
| 0.011463 | 0.011530 | 0.011463 | 0.011463 | 0.011396 | 0.011799 | 0.011429 |
| 0.011443 | 0.011396 | 0.011632 | 0.011603 | 0.011497 | 0.011497 | 0.011497 |
| 0.011497 | 0.011430 | 0.011396 | 0.011430 | 0.011530 | 0.011530 | 0.011463 |
| 0.011463 | 0.011597 | 0.011765 | 0.011497 | 0.011698 | 0.011698 | 0.011564 |
| 0.011396 | 0.011463 | 0.011497 | 0.011900 | 0.011463 | 0.011497 | 0.011463 |
| 0.011497 | 0.011429 | 0.011429 | 0.011732 | 0.011665 | 0.011698 | 0.011430 |
| 0.011530 | 0.011597 | 0.011463 | 0.011530 | 0.011497 | 0.011362 | 0.011698 |
| 0.011463 | 0.011429 | 0.011429 | 0.011597 | 0.011430 | 0.011530 | 0.011766 |
| 0.011463 | 0.011842 | 0.011833 | 0.011629 | 0.011342 | 0.011536 | 0.011267 |
| 0.011390 | 0.011839 | 0.011376 | 0.011596 | 0.011402 | 0.011518 | 0.011538 |
| 0.011570 | 0.011389 | 0.011450 | 0.011324 | 0.011384 | 0.011529 | 0.011506 |
| 0.011550 | 0.011414 | 0.011518 | 0.011377 | 0.011465 | 0.011597 | 0.011665 |
| 0.011665 | 0.011531 | 0.011635 | 0.011636 | 0.011772 | 0.011802 | 0.011463 |
| 0.011698 | 0.011564 | 0.011429 | 0.011530 | 0.011329 | 0.011564 | 0.011362 |
| 0.011430 | 0.011429 | 0.011396 | 0.011362 | 0.011396 | 0.011362 | 0.011463 |
| 0.011444 | 0.011410 | 0.011437 | 0.011437 | 0.011608 | 0.011573 | 0.011572 |
| 0.011537 | 0.011497 | 0.011245 | 0.011276 | 0.011433 | 0.011602 | 0.011603 |
| 0.011396 | 0.011467 | 0.011700 | 0.011669 | 0.011598 | 0.011632 | 0.011564 |
| 0.011497 | 0.011564 | 0.011564 | 0.011463 | 0.012035 | 0.011631 | 0.011698 |
| 0.011732 | 0.011808 | 0.011435 | 0.011441 | 0.011396 | 0.011597 | 0.011564 |
| 0.011599 | 0.011631 | 0.011631 | 0.011631 | 0.011807 | 0.011765 | 0.011338 |
| 0.011263 | 0.011268 | 0.011333 | 0.011298 | 0.011436 | 0.011247 | 0.011570 |
| 0.011403 | 0.011543 | 0.011251 | 0.011397 | 0.011430 | 0.011471 | 0.011396 |
| 0.011362 | 0.011362 | 0.011430 | 0.011396 | 0.011597 | 0.011564 | 0.011497 |
| 0.011597 | 0.011665 | 0.011396 | 0.011396 | 0.011430 | 0.011429 | 0.011432 |
| 0.011500 | 0.011429 | 0.011430 | 0.011465 | 0.011597 | 0.011665 | 0.011665 |
| 0.011531 | 0.011635 | 0.011636 | 0.011772 | 0.011802 | 0.011463 | 0.011631 |
| 0.011564 | 0.011564 | 0.011398 | 0.011513 | 0.011512 | 0.011537 | 0.011375 |
| 0.011577 | 0.011698 | 0.011484 | 0.011468 | 0.011362 | 0.011564 | 0.011430 |
| 0.011530 | 0.011463 | 0.011362 | 0.011464 | 0.011564 | 0.011567 | 0.011463 |
| 0.011362 | 0.011296 | 0.011429 | 0.011362 | 0.011295 | 0.011400 | 0.011564 |
| 0.011463 | 0.011396 | 0.011429 | 0.011463 | 0.011430 | 0.011362 | 0.011530 |
| 0.011429 | 0.011463 | 0.011463 | 0.011396 | 0.011463 | 0.011698 | 0.011362 |
| 0.011396 | 0.011799 | 0.011396 | 0.011430 | 0.011396 | 0.011765 | 0.011317 |
| 0.011847 | 0.011315 | 0.011361 | 0.011543 | 0.011630 | 0.011599 | 0.011311 |
| 0.011270 | 0.011564 | 0.011665 | 0.011773 | 0.011632 | 0.011771 | 0.011901 |
| 0.011767 | 0.011771 | 0.011799 | 0.012051 | 0.011765 | 0.012641 | 0.011801 |
| 0.012540 | 0.012308 | 0.012442 | 0.012714 | 0.011765 | 0.011463 | 0.011766 |
| 0.012204 | 0.012140 | 0.011732 | 0.011631 | 0.011699 | 0.011699 | 0.011669 |
| 0.011564 | 0.011535 | 0.011631 | 0.011598 | 0.011968 | 0.012035 | 0.012036 |
| 0.011935 | 0.012035 | 0.012139 | 0.011906 | 0.012205 | 0.012212 | 0.012272 |
| 0.012273 | 0.012307 | 0.012255 | 0.012273 | 0.012274 | 0.011497 | 0.011800 |
| 0.011867 | 0.012371 | 0.011874 | 0.012102 | 0.012575 | 0.011637 | 0.011531 |
| 0.011497 | 0.011497 | 0.011968 | 0.011924 | 0.012116 | 0.011833 | 0.011498 |

|          |          |          |          |          |          |          |
|----------|----------|----------|----------|----------|----------|----------|
| S450     | 0.011799 | 0.011799 | 0.012136 | 0.011900 | 0.011900 | 0.011967 |
| 0.011808 | 0.011740 | 0.011900 | 0.011396 | 0.011463 | 0.011430 | 0.011396 |
| 0.011429 | 0.011597 | 0.011396 | 0.011429 | 0.011497 | 0.011463 | 0.011429 |
| 0.011396 | 0.011430 | 0.011530 | 0.011396 | 0.011363 | 0.011429 | 0.011774 |
| 0.011665 | 0.011430 | 0.011329 | 0.011564 | 0.011429 | 0.011463 | 0.011430 |
| 0.011463 | 0.011497 | 0.011463 | 0.011463 | 0.011497 | 0.011463 | 0.011631 |
| 0.011396 | 0.011463 | 0.011497 | 0.011429 | 0.011530 | 0.011564 | 0.011497 |
| 0.011463 | 0.011631 | 0.011531 | 0.011799 | 0.011463 | 0.011665 | 0.011463 |
| 0.011429 | 0.011530 | 0.011598 | 0.011665 | 0.011833 | 0.011530 | 0.011631 |
| 0.011429 | 0.011497 | 0.011463 | 0.011631 | 0.011934 | 0.011463 | 0.011530 |
| 0.011430 | 0.011530 | 0.011497 | 0.011564 | 0.011497 | 0.011497 | 0.011497 |
| 0.011396 | 0.011429 | 0.011396 | 0.011497 | 0.011463 | 0.011498 | 0.011564 |
| 0.011497 | 0.011463 | 0.011463 | 0.011429 | 0.011564 | 0.011329 | 0.011463 |
| 0.011631 | 0.011564 | 0.011799 | 0.011631 | 0.011463 | 0.011631 | 0.011463 |
| 0.011653 | 0.011882 | 0.011702 | 0.011412 | 0.011396 | 0.011465 | 0.011611 |
| 0.012231 | 0.011619 | 0.011431 | 0.011698 | 0.011698 | 0.011497 | 0.011598 |
| 0.011530 | 0.011497 | 0.011564 | 0.011463 | 0.011564 | 0.011429 | 0.011497 |
| 0.011463 | 0.011564 | 0.011766 | 0.011631 | 0.011530 | 0.011497 | 0.011362 |
| 0.011396 | 0.011396 | 0.011396 | 0.011429 | 0.011631 | 0.011597 | 0.011530 |
| 0.011631 | 0.011698 | 0.011429 | 0.011429 | 0.011463 | 0.011463 | 0.011465 |
| 0.011533 | 0.011463 | 0.011463 | 0.011312 | 0.011422 | 0.011376 | 0.011464 |
| 0.011467 | 0.011404 | 0.011466 | 0.011440 | 0.011366 | 0.011403 | 0.011432 |
| 0.011708 | 0.011474 | 0.011439 | 0.011396 | 0.011406 | 0.011531 | 0.011497 |
| 0.011565 | 0.011498 | 0.011497 | 0.011597 | 0.011530 | 0.011833 | 0.011698 |
| 0.011732 | 0.011598 | 0.011463 | 0.011564 | 0.011362 | 0.011597 | 0.011396 |
| 0.011463 | 0.011463 | 0.011429 | 0.011396 | 0.011429 | 0.011396 | 0.011497 |
| 0.011396 | 0.011497 | 0.011497 | 0.011396 | 0.011498 | 0.011598 | 0.011601 |
| 0.011530 | 0.011497 | 0.011396 | 0.011330 | 0.011463 | 0.011396 | 0.011329 |
| 0.011434 | 0.011530 | 0.011329 | 0.011530 | 0.011362 | 0.011463 | 0.011430 |
| 0.011463 | 0.011429 | 0.011396 | 0.011430 | 0.011463 | 0.011329 | 0.011396 |
| 0.011430 | 0.011429 | 0.011497 | 0.011429 | 0.011463 | 0.011497 | 0.011732 |
| 0.011833 | 0.011765 | 0.011833 | 0.011599 | 0.011833 | 0.011463 | 0.011429 |
| 0.011465 | 0.011747 | 0.011472 | 0.011369 | 0.011841 | 0.011333 | 0.011414 |
| 0.011841 | 0.011740 | 0.011631 | 0.011833 | 0.011504 | 0.011698 | 0.011598 |
| 0.011597 | 0.011765 | 0.011558 | 0.011431 | 0.011480 | 0.011497 | 0.011568 |
| 0.011665 | 0.011566 | 0.011703 | 0.011703 | 0.011698 | 0.011766 | 0.011874 |
| 0.011602 | 0.011705 | 0.011704 | 0.011635 | 0.011868 | 0.011362 | 0.011566 |
| 0.011463 | 0.011463 | 0.011362 | 0.011362 | 0.011362 | 0.011430 | 0.011497 |
| 0.011362 | 0.011430 | 0.011329 | 0.011497 | 0.011362 | 0.011429 | 0.011497 |
| 0.011430 | 0.011866 | 0.011766 | 0.011799 | 0.011329 | 0.011430 | 0.011463 |
| 0.011463 | 0.011429 | 0.011497 | 0.011530 | 0.011396 | 0.011396 | 0.011396 |
| 0.011934 | 0.011564 | 0.011564 | 0.011362 | 0.011463 | 0.011564 | 0.011396 |
| 0.011396 | 0.011463 | 0.011429 | 0.011530 | 0.011396 | 0.011530 | 0.011597 |
| 0.011597 | 0.011430 | 0.011429 | 0.011362 | 0.011362 | 0.011530 | 0.011463 |
| 0.011362 | 0.011463 | 0.011329 | 0.011362 | 0.011497 | 0.011631 | 0.011396 |
| 0.011363 | 0.011497 | 0.011430 | 0.011329 | 0.011665 | 0.011329 | 0.011497 |
| 0.011471 | 0.011396 | 0.011698 | 0.011530 | 0.011564 | 0.011430 | 0.011530 |
| 0.011396 | 0.011665 | 0.011329 | 0.011598 | 0.011396 | 0.011396 | 0.011329 |
| 0.011497 | 0.011766 | 0.011463 | 0.011530 | 0.011362 | 0.011766 | 0.011396 |
| 0.011396 | 0.011396 | 0.011429 | 0.011463 | 0.011429 | 0.011530 | 0.011597 |
| 0.011598 | 0.011564 | 0.011463 | 0.011564 | 0.011463 | 0.011396 | 0.011362 |
| 0.011396 | 0.011396 | 0.011463 | 0.011396 | 0.011295 | 0.011530 | 0.011396 |
| 0.011429 | 0.011430 | 0.011564 | 0.011597 | 0.011497 | 0.011362 | 0.011430 |
| 0.011429 | 0.011429 | 0.011530 | 0.011396 | 0.011530 | 0.011631 | 0.011934 |
| 0.011430 | 0.011833 | 0.011440 | 0.017974 | 0.011453 | 0.011672 | 0.011793 |
| 0.011752 | 0.011799 | 0.011479 | 0.011408 | 0.011939 | 0.011820 | 0.011546 |
| 0.011677 | 0.011854 | 0.011372 | 0.011353 | 0.011411 | 0.011603 | 0.011490 |
| 0.011670 | 0.011619 | 0.011579 | 0.011325 | 0.011564 | 0.011597 | 0.011601 |
| 0.011404 | 0.011564 | 0.011564 | 0.011530 | 0.011497 | 0.011497 | 0.011463 |
| 0.011497 | 0.011429 | 0.011463 | 0.011497 | 0.011463 | 0.011396 | 0.011429 |

|          |          |          |          |          |          |          |
|----------|----------|----------|----------|----------|----------|----------|
| 0.011429 | 0.011497 | 0.011396 | 0.011497 | 0.011530 | 0.011564 | 0.011463 |
| 0.011497 | 0.011463 | 0.011799 | 0.011799 | 0.011530 | 0.011497 | 0.011598 |
| 0.011362 | 0.011362 | 0.011396 | 0.011430 | 0.011362 | 0.011597 | 0.011597 |
| 0.011631 | 0.011631 | 0.011564 | 0.011665 | 0.011833 | 0.011666 | 0.011430 |
| 0.011497 | 0.011564 | 0.000000 | 0.011430 | 0.011497 | 0.011463 | 0.011497 |
| 0.011564 | 0.011564 | 0.011597 | 0.011497 | 0.011397 | 0.011665 | 0.011564 |
| 0.011501 | 0.011396 | 0.011497 | 0.011598 | 0.011497 | 0.011631 | 0.011665 |
| 0.011833 | 0.011504 | 0.011698 | 0.011598 | 0.011597 | 0.011765 | 0.011363 |
| 0.011566 | 0.011464 | 0.011429 | 0.011429 | 0.011497 | 0.011396 | 0.011497 |
| 0.011530 | 0.011564 | 0.011463 | 0.011497 | 0.011463 | 0.011799 | 0.011799 |
| 0.011530 | 0.011497 | 0.011631 | 0.011564 | 0.012205 | 0.011632 | 0.011482 |
| 0.011623 | 0.011581 | 0.011658 | 0.011545 | 0.011690 | 0.011612 | 0.011578 |
| 0.012160 | 0.011476 | 0.011608 | 0.011545 | 0.011818 | 0.011673 | 0.011707 |
| 0.012149 | 0.011588 | 0.011500 | 0.011497 | 0.011497 | 0.011530 | 0.011466 |
| 0.011362 | 0.011329 | 0.011530 | 0.011497 | 0.011500 | 0.011631 | 0.011599 |
| 0.011463 | 0.011329 | 0.011362 | 0.011463 | 0.011295 | 0.011430 | 0.011329 |
| 0.011463 | 0.011497 | 0.011396 | 0.011362 | 0.011463 | 0.011396 | 0.011430 |
| 0.011429 | 0.011362 | 0.011430 | 0.011463 | 0.011362 | 0.011497 | 0.011597 |
| 0.011497 | 0.011564 | 0.011497 | 0.011497 | 0.011429 | 0.011833 | 0.011463 |
| 0.011513 | 0.011430 | 0.011665 | 0.011671 | 0.011463 | 0.011530 | 0.011530 |
| 0.011530 | 0.011396 | 0.011429 | 0.011396 | 0.011564 | 0.011564 | 0.011497 |
| 0.011497 | 0.011631 | 0.011799 | 0.011530 | 0.011732 | 0.011732 | 0.011597 |
| 0.011429 | 0.011497 | 0.011530 | 0.011934 | 0.011497 | 0.011463 | 0.011497 |
| 0.011530 | 0.011463 | 0.011463 | 0.011766 | 0.011631 | 0.011732 | 0.011463 |
| 0.011564 | 0.011631 | 0.011497 | 0.011564 | 0.011530 | 0.011396 | 0.011732 |
| 0.011497 | 0.011463 | 0.011463 | 0.011631 | 0.011463 | 0.011564 | 0.011799 |
| 0.011497 | 0.011876 | 0.011866 | 0.011711 | 0.011455 | 0.011570 | 0.011421 |
| 0.011500 | 0.011917 | 0.011411 | 0.011686 | 0.011451 | 0.011671 | 0.011644 |
| 0.011723 | 0.011455 | 0.011561 | 0.011456 | 0.011491 | 0.011663 | 0.011547 |
| 0.011550 | 0.011414 | 0.011553 | 0.011483 | 0.011498 | 0.011631 | 0.011698 |
| 0.011698 | 0.011565 | 0.011669 | 0.011670 | 0.011806 | 0.011838 | 0.011497 |
| 0.011732 | 0.011598 | 0.011463 | 0.011564 | 0.011362 | 0.011597 | 0.011396 |
| 0.011463 | 0.011463 | 0.011429 | 0.011396 | 0.011429 | 0.011396 | 0.011497 |
| 0.011479 | 0.011480 | 0.011471 | 0.011505 | 0.011642 | 0.011538 | 0.011606 |
| 0.011605 | 0.011531 | 0.011356 | 0.011348 | 0.011467 | 0.011636 | 0.011637 |
| 0.011430 | 0.011501 | 0.011734 | 0.011702 | 0.011632 | 0.011666 | 0.011597 |
| 0.011530 | 0.011597 | 0.011597 | 0.011497 | 0.012068 | 0.011665 | 0.011732 |
| 0.011766 | 0.011844 | 0.011470 | 0.011545 | 0.011430 | 0.011631 | 0.011597 |
| 0.011632 | 0.011665 | 0.011665 | 0.011665 | 0.011807 | 0.011799 | 0.011442 |
| 0.011331 | 0.011303 | 0.011435 | 0.011400 | 0.011504 | 0.011322 | 0.011672 |
| 0.011438 | 0.011543 | 0.011298 | 0.011435 | 0.011464 | 0.011539 | 0.011362 |
| 0.011396 | 0.011396 | 0.011396 | 0.011429 | 0.011631 | 0.011597 | 0.011530 |
| 0.011631 | 0.011698 | 0.011429 | 0.011429 | 0.011463 | 0.011463 | 0.011465 |
| 0.011533 | 0.011463 | 0.011463 | 0.011498 | 0.011631 | 0.011698 | 0.011698 |
| 0.011565 | 0.011669 | 0.011670 | 0.011806 | 0.011838 | 0.011497 | 0.011665 |
| 0.011597 | 0.011597 | 0.011432 | 0.011617 | 0.011547 | 0.011571 | 0.011446 |
| 0.011542 | 0.011744 | 0.011611 | 0.011502 | 0.011329 | 0.011530 | 0.011396 |
| 0.011497 | 0.011497 | 0.011396 | 0.011498 | 0.011598 | 0.011601 | 0.011497 |
| 0.011396 | 0.011330 | 0.011463 | 0.011396 | 0.011329 | 0.011434 | 0.011530 |
| 0.011497 | 0.011429 | 0.011463 | 0.011497 | 0.011463 | 0.011396 | 0.011597 |
| 0.011463 | 0.011497 | 0.011497 | 0.011429 | 0.011497 | 0.011732 | 0.011396 |
| 0.011430 | 0.011833 | 0.011429 | 0.011396 | 0.011429 | 0.011799 | 0.011446 |
| 0.011903 | 0.011443 | 0.011461 | 0.011664 | 0.011752 | 0.011634 | 0.011395 |
| 0.011427 | 0.011597 | 0.011698 | 0.011807 | 0.011666 | 0.011805 | 0.011935 |
| 0.011834 | 0.011872 | 0.011833 | 0.012086 | 0.011799 | 0.012674 | 0.011835 |
| 0.012574 | 0.012342 | 0.012476 | 0.012748 | 0.011799 | 0.011497 | 0.011799 |
| 0.012238 | 0.012173 | 0.011766 | 0.011665 | 0.011733 | 0.011733 | 0.011669 |
| 0.011597 | 0.011603 | 0.011665 | 0.011632 | 0.012002 | 0.012068 | 0.012069 |
| 0.011969 | 0.012069 | 0.012173 | 0.011940 | 0.012239 | 0.012246 | 0.012306 |
| 0.012307 | 0.012340 | 0.012289 | 0.012307 | 0.012308 | 0.011530 | 0.011833 |

|          |          |          |           |          |          |          |
|----------|----------|----------|-----------|----------|----------|----------|
| 0.011901 | 0.012405 | 0.011874 | 0.012136  | 0.012609 | 0.011671 | 0.011564 |
| 0.011530 | 0.011530 | 0.012001 | 0.012006  | 0.012151 | 0.011866 | 0.011532 |
| S451     | 0.011631 | 0.011631 | 0.011900  | 0.011665 | 0.011665 | 0.011732 |
| 0.011638 | 0.011570 | 0.011665 | 0.011228  | 0.011295 | 0.011262 | 0.011228 |
| 0.011262 | 0.011430 | 0.011228 | 0.011262  | 0.011329 | 0.011295 | 0.011262 |
| 0.011228 | 0.011262 | 0.011362 | 0.011228  | 0.011262 | 0.011262 | 0.011604 |
| 0.011497 | 0.011262 | 0.011161 | 0.011396  | 0.011329 | 0.011295 | 0.011329 |
| 0.011295 | 0.011396 | 0.011295 | 0.011295  | 0.011329 | 0.011295 | 0.011463 |
| 0.011228 | 0.011295 | 0.011329 | 0.011262  | 0.011362 | 0.011396 | 0.011329 |
| 0.011295 | 0.011463 | 0.011363 | 0.011631  | 0.011295 | 0.011564 | 0.011295 |
| 0.011262 | 0.011362 | 0.011430 | 0.011564  | 0.011665 | 0.011362 | 0.011463 |
| 0.011329 | 0.011396 | 0.011295 | 0.011530  | 0.011766 | 0.011295 | 0.011362 |
| 0.011262 | 0.011362 | 0.011329 | 0.011396  | 0.011329 | 0.011329 | 0.011329 |
| 0.011228 | 0.011262 | 0.011228 | 0.011329  | 0.011295 | 0.011329 | 0.011396 |
| 0.011329 | 0.011295 | 0.011362 | 0.011262  | 0.011396 | 0.011228 | 0.011295 |
| 0.011463 | 0.011396 | 0.011631 | 0.011463  | 0.011295 | 0.011530 | 0.011295 |
| 0.011468 | 0.011658 | 0.011513 | 0.011216  | 0.011210 | 0.011281 | 0.011415 |
| 0.012048 | 0.011518 | 0.011225 | 0.011530  | 0.011530 | 0.011329 | 0.011430 |
| 0.011362 | 0.011329 | 0.011396 | 0.011295  | 0.011396 | 0.011329 | 0.011329 |
| 0.011295 | 0.011396 | 0.011597 | 0.011463  | 0.011362 | 0.011329 | 0.011262 |
| 0.011228 | 0.011228 | 0.011295 | 0.011262  | 0.011463 | 0.011429 | 0.011362 |
| 0.011463 | 0.011530 | 0.011262 | 0.011262  | 0.011295 | 0.011295 | 0.011297 |
| 0.011364 | 0.011295 | 0.011295 | 0.011168  | 0.011241 | 0.011200 | 0.011296 |
| 0.011297 | 0.011232 | 0.011282 | 0.011267  | 0.011196 | 0.011232 | 0.011263 |
| 0.011528 | 0.011302 | 0.011336 | 0.011228  | 0.011233 | 0.011363 | 0.011329 |
| 0.011397 | 0.011330 | 0.011329 | 0.011429  | 0.011362 | 0.011732 | 0.011530 |
| 0.011564 | 0.011430 | 0.011228 | 0.011396  | 0.011195 | 0.011429 | 0.011228 |
| 0.011295 | 0.011295 | 0.011262 | 0.011228  | 0.011262 | 0.011228 | 0.011329 |
| 0.011295 | 0.011396 | 0.011329 | 0.011228  | 0.011330 | 0.011430 | 0.011432 |
| 0.011430 | 0.011329 | 0.011228 | 0.011161  | 0.011295 | 0.011228 | 0.011161 |
| 0.011264 | 0.011430 | 0.011228 | 0.011430  | 0.011195 | 0.011295 | 0.011262 |
| 0.011362 | 0.011262 | 0.011295 | 0.011262  | 0.011295 | 0.011161 | 0.011295 |
| 0.011329 | 0.011262 | 0.011329 | 0.011262  | 0.011295 | 0.011329 | 0.011564 |
| 0.011665 | 0.011597 | 0.011665 | 0.011431  | 0.011665 | 0.011295 | 0.011262 |
| 0.011297 | 0.011545 | 0.011426 | 0.011197  | 0.011671 | 0.011163 | 0.011257 |
| 0.011671 | 0.011570 | 0.011463 | 0.011665  | 0.011368 | 0.011530 | 0.011497 |
| 0.011430 | 0.011597 | 0.011451 | 0.011266  | 0.011312 | 0.011329 | 0.011399 |
| 0.011497 | 0.011398 | 0.011534 | 0.011602  | 0.011530 | 0.011598 | 0.011704 |
| 0.011433 | 0.011603 | 0.011534 | 0.011466  | 0.011733 | 0.011195 | 0.011330 |
| 0.011362 | 0.011295 | 0.011195 | 0.011195  | 0.011262 | 0.011262 | 0.011329 |
| 0.011262 | 0.011329 | 0.011228 | 0.011329  | 0.011262 | 0.011262 | 0.011329 |
| 0.011262 | 0.011698 | 0.011598 | 0.011631  | 0.011161 | 0.011262 | 0.011295 |
| 0.011295 | 0.011262 | 0.011329 | 0.011362  | 0.011228 | 0.011228 | 0.011228 |
| 0.011765 | 0.011396 | 0.011396 | 0.011195  | 0.011295 | 0.011463 | 0.011228 |
| 0.011228 | 0.011295 | 0.011262 | 0.011430  | 0.011228 | 0.011362 | 0.011497 |
| 0.011362 | 0.011262 | 0.011262 | 0.011195  | 0.011195 | 0.011362 | 0.011295 |
| 0.011195 | 0.011295 | 0.011161 | 0.011195  | 0.011329 | 0.011463 | 0.011228 |
| 0.011195 | 0.011329 | 0.011262 | 0.011161  | 0.011497 | 0.011161 | 0.011329 |
| 0.011403 | 0.011228 | 0.011530 | 0.011363  | 0.011396 | 0.011262 | 0.011362 |
| 0.011228 | 0.011564 | 0.011161 | 0.011430  | 0.011228 | 0.011228 | 0.011161 |
| 0.011396 | 0.011598 | 0.011295 | 0.011362  | 0.011195 | 0.011598 | 0.011228 |
| 0.011228 | 0.011228 | 0.011262 | 0.011362  | 0.011262 | 0.011362 | 0.011430 |
| 0.011430 | 0.011396 | 0.011295 | 0.011396  | 0.011362 | 0.011228 | 0.011195 |
| 0.011228 | 0.011228 | 0.011295 | 0.011228  | 0.011195 | 0.011362 | 0.011228 |
| 0.011262 | 0.011262 | 0.011396 | 0.011430  | 0.011329 | 0.011262 | 0.011262 |
| 0.011329 | 0.011262 | 0.011362 | 0.011228  | 0.011362 | 0.011463 | 0.011765 |
| 0.011262 | 0.011665 | 0.011267 | 0.0117748 | 0.011191 | 0.011366 | 0.011618 |
| 0.011579 | 0.011623 | 0.011374 | 0.011350  | 0.011664 | 0.011647 | 0.011303 |
| 0.011440 | 0.011487 | 0.011177 | 0.011270  | 0.011255 | 0.011258 | 0.011275 |
| 0.011529 | 0.011433 | 0.011431 | 0.011325  | 0.011396 | 0.011430 | 0.011432 |

|          |          |          |          |          |          |          |
|----------|----------|----------|----------|----------|----------|----------|
| 0.011301 | 0.011396 | 0.011396 | 0.011362 | 0.011329 | 0.011329 | 0.011295 |
| 0.011329 | 0.011262 | 0.011295 | 0.011329 | 0.011295 | 0.011228 | 0.011262 |
| 0.011262 | 0.011329 | 0.011228 | 0.011329 | 0.011362 | 0.011396 | 0.011295 |
| 0.011329 | 0.011295 | 0.011631 | 0.011631 | 0.011363 | 0.011397 | 0.011430 |
| 0.011195 | 0.011195 | 0.011228 | 0.011329 | 0.011195 | 0.011430 | 0.011430 |
| 0.011463 | 0.011463 | 0.011396 | 0.011497 | 0.011665 | 0.011498 | 0.011329 |
| 0.011329 | 0.011396 | 0.011430 | 0.000000 | 0.011329 | 0.011295 | 0.011329 |
| 0.011396 | 0.011396 | 0.011429 | 0.011396 | 0.011296 | 0.011497 | 0.011463 |
| 0.011331 | 0.011228 | 0.011329 | 0.011430 | 0.011329 | 0.011463 | 0.011497 |
| 0.011665 | 0.011368 | 0.011530 | 0.011497 | 0.011430 | 0.011597 | 0.011228 |
| 0.011397 | 0.011295 | 0.011262 | 0.011262 | 0.011329 | 0.011228 | 0.011329 |
| 0.011362 | 0.011396 | 0.011295 | 0.011329 | 0.011295 | 0.011631 | 0.011631 |
| 0.011363 | 0.011397 | 0.011463 | 0.011396 | 0.012036 | 0.011453 | 0.011377 |
| 0.011447 | 0.011407 | 0.011517 | 0.011407 | 0.011515 | 0.011371 | 0.011405 |
| 0.011988 | 0.011303 | 0.011437 | 0.011372 | 0.011646 | 0.011502 | 0.011605 |
| 0.012012 | 0.011437 | 0.011331 | 0.011329 | 0.011329 | 0.011362 | 0.011297 |
| 0.011195 | 0.011228 | 0.011362 | 0.011329 | 0.011331 | 0.011463 | 0.011363 |
| 0.011295 | 0.011228 | 0.011262 | 0.011295 | 0.011195 | 0.011262 | 0.011161 |
| 0.011295 | 0.011329 | 0.011228 | 0.011195 | 0.011295 | 0.011228 | 0.011262 |
| 0.011262 | 0.011195 | 0.011262 | 0.011295 | 0.011195 | 0.011396 | 0.011430 |
| 0.011329 | 0.011396 | 0.011329 | 0.011329 | 0.011262 | 0.011665 | 0.011295 |
| 0.011339 | 0.011262 | 0.011497 | 0.011501 | 0.011363 | 0.011362 | 0.011362 |
| 0.011362 | 0.011295 | 0.011262 | 0.011295 | 0.011396 | 0.011396 | 0.011329 |
| 0.011329 | 0.011463 | 0.011631 | 0.011362 | 0.011564 | 0.011564 | 0.011429 |
| 0.011262 | 0.011329 | 0.011362 | 0.011766 | 0.011329 | 0.011363 | 0.011329 |
| 0.011362 | 0.011295 | 0.011295 | 0.011598 | 0.011530 | 0.011564 | 0.011295 |
| 0.011396 | 0.011463 | 0.011329 | 0.011396 | 0.011362 | 0.011228 | 0.011564 |
| 0.011329 | 0.011295 | 0.011295 | 0.011463 | 0.011295 | 0.011396 | 0.011631 |
| 0.011329 | 0.011706 | 0.011698 | 0.011507 | 0.011286 | 0.011400 | 0.011318 |
| 0.011170 | 0.011644 | 0.011236 | 0.011328 | 0.011255 | 0.011366 | 0.011326 |
| 0.011519 | 0.011126 | 0.011283 | 0.011126 | 0.011168 | 0.011328 | 0.011385 |
| 0.011399 | 0.011296 | 0.011377 | 0.011307 | 0.011262 | 0.011463 | 0.011463 |
| 0.011530 | 0.011329 | 0.011500 | 0.011501 | 0.011569 | 0.011590 | 0.011329 |
| 0.011564 | 0.011430 | 0.011228 | 0.011396 | 0.011195 | 0.011429 | 0.011228 |
| 0.011295 | 0.011295 | 0.011262 | 0.011228 | 0.011262 | 0.011228 | 0.011329 |
| 0.011305 | 0.011305 | 0.011300 | 0.011334 | 0.011471 | 0.011436 | 0.011436 |
| 0.011435 | 0.011363 | 0.011134 | 0.011168 | 0.011297 | 0.011467 | 0.011467 |
| 0.011262 | 0.011331 | 0.011565 | 0.011533 | 0.011464 | 0.011498 | 0.011429 |
| 0.011362 | 0.011430 | 0.011429 | 0.011329 | 0.011900 | 0.011497 | 0.011564 |
| 0.011597 | 0.011666 | 0.011299 | 0.011372 | 0.011262 | 0.011430 | 0.011430 |
| 0.011464 | 0.011497 | 0.011497 | 0.011497 | 0.011650 | 0.011631 | 0.011268 |
| 0.011162 | 0.011164 | 0.011265 | 0.011230 | 0.011334 | 0.011172 | 0.011502 |
| 0.011300 | 0.011367 | 0.011108 | 0.011285 | 0.011296 | 0.011368 | 0.011262 |
| 0.011228 | 0.011228 | 0.011295 | 0.011262 | 0.011463 | 0.011429 | 0.011362 |
| 0.011463 | 0.011530 | 0.011262 | 0.011262 | 0.011295 | 0.011295 | 0.011297 |
| 0.011364 | 0.011295 | 0.011295 | 0.011262 | 0.011463 | 0.011463 | 0.011530 |
| 0.011329 | 0.011500 | 0.011501 | 0.011569 | 0.011590 | 0.011329 | 0.011497 |
| 0.011430 | 0.011430 | 0.011263 | 0.011443 | 0.011373 | 0.011401 | 0.011235 |
| 0.011439 | 0.011561 | 0.011357 | 0.011332 | 0.011228 | 0.011430 | 0.011295 |
| 0.011396 | 0.011329 | 0.011228 | 0.011330 | 0.011430 | 0.011432 | 0.011329 |
| 0.011228 | 0.011161 | 0.011295 | 0.011228 | 0.011161 | 0.011264 | 0.011430 |
| 0.011329 | 0.011262 | 0.011295 | 0.011329 | 0.011295 | 0.011228 | 0.011430 |
| 0.011295 | 0.011329 | 0.011329 | 0.011262 | 0.011329 | 0.011564 | 0.011228 |
| 0.011262 | 0.011665 | 0.011262 | 0.011295 | 0.011262 | 0.011631 | 0.011232 |
| 0.011622 | 0.011230 | 0.011311 | 0.011463 | 0.011549 | 0.011455 | 0.011186 |
| 0.011270 | 0.011362 | 0.011463 | 0.011569 | 0.011430 | 0.011568 | 0.011699 |
| 0.011598 | 0.011635 | 0.011597 | 0.011846 | 0.011564 | 0.012438 | 0.011599 |
| 0.012338 | 0.012105 | 0.012240 | 0.012511 | 0.011631 | 0.011262 | 0.011564 |
| 0.012002 | 0.011937 | 0.011530 | 0.011430 | 0.011497 | 0.011497 | 0.011534 |
| 0.011362 | 0.011365 | 0.011429 | 0.011396 | 0.011834 | 0.011900 | 0.011901 |

|          |          |          |          |          |          |          |
|----------|----------|----------|----------|----------|----------|----------|
| 0.011801 | 0.011901 | 0.012004 | 0.011770 | 0.012070 | 0.012076 | 0.012137 |
| 0.012138 | 0.012172 | 0.012118 | 0.012138 | 0.012139 | 0.011362 | 0.011665 |
| 0.011733 | 0.012237 | 0.011738 | 0.011968 | 0.012440 | 0.011502 | 0.011396 |
| 0.011362 | 0.011362 | 0.011833 | 0.011883 | 0.011975 | 0.011698 | 0.011363 |
| S452     | 0.011698 | 0.011698 | 0.012035 | 0.011799 | 0.011799 | 0.011866 |
| 0.011706 | 0.011638 | 0.011799 | 0.011295 | 0.011362 | 0.011329 | 0.011295 |
| 0.011329 | 0.011497 | 0.011295 | 0.011329 | 0.011396 | 0.011362 | 0.011329 |
| 0.011295 | 0.011329 | 0.011429 | 0.011295 | 0.011329 | 0.011329 | 0.011672 |
| 0.011564 | 0.011329 | 0.011228 | 0.011463 | 0.011396 | 0.011362 | 0.011396 |
| 0.011362 | 0.011463 | 0.011362 | 0.011362 | 0.011396 | 0.011362 | 0.011530 |
| 0.011295 | 0.011362 | 0.011396 | 0.011329 | 0.011429 | 0.011463 | 0.011396 |
| 0.011362 | 0.011530 | 0.011430 | 0.011698 | 0.011362 | 0.011631 | 0.011362 |
| 0.011329 | 0.011430 | 0.011497 | 0.011631 | 0.011732 | 0.011430 | 0.011530 |
| 0.011396 | 0.011463 | 0.011362 | 0.011597 | 0.011833 | 0.011362 | 0.011430 |
| 0.011329 | 0.011429 | 0.011396 | 0.011463 | 0.011396 | 0.011396 | 0.011396 |
| 0.011295 | 0.011329 | 0.011295 | 0.011396 | 0.011362 | 0.011397 | 0.011463 |
| 0.011396 | 0.011362 | 0.011430 | 0.011329 | 0.011463 | 0.011295 | 0.011362 |
| 0.011530 | 0.011463 | 0.011698 | 0.011530 | 0.011362 | 0.011597 | 0.011362 |
| 0.011468 | 0.011695 | 0.011513 | 0.011216 | 0.011210 | 0.011318 | 0.011415 |
| 0.012048 | 0.011518 | 0.011225 | 0.011597 | 0.011597 | 0.011396 | 0.011497 |
| 0.011430 | 0.011396 | 0.011463 | 0.011362 | 0.011463 | 0.011396 | 0.011396 |
| 0.011362 | 0.011463 | 0.011665 | 0.011530 | 0.011430 | 0.011396 | 0.011329 |
| 0.011295 | 0.011295 | 0.011362 | 0.011329 | 0.011530 | 0.011497 | 0.011429 |
| 0.011530 | 0.011597 | 0.011329 | 0.011329 | 0.011362 | 0.011362 | 0.011364 |
| 0.011432 | 0.011362 | 0.011362 | 0.011204 | 0.011277 | 0.011271 | 0.011363 |
| 0.011365 | 0.011266 | 0.011282 | 0.011336 | 0.011264 | 0.011300 | 0.011330 |
| 0.011600 | 0.011370 | 0.011405 | 0.011296 | 0.011302 | 0.011430 | 0.011396 |
| 0.011464 | 0.011397 | 0.011396 | 0.011497 | 0.011429 | 0.011799 | 0.011598 |
| 0.011631 | 0.011497 | 0.011362 | 0.011463 | 0.011262 | 0.011497 | 0.011295 |
| 0.011362 | 0.011362 | 0.011329 | 0.011295 | 0.011329 | 0.011295 | 0.011396 |
| 0.011362 | 0.011463 | 0.011396 | 0.011295 | 0.011397 | 0.011497 | 0.011499 |
| 0.011497 | 0.011396 | 0.011295 | 0.011229 | 0.011362 | 0.011295 | 0.011228 |
| 0.011332 | 0.011497 | 0.011295 | 0.011497 | 0.011262 | 0.011362 | 0.011329 |
| 0.011430 | 0.011329 | 0.011362 | 0.011329 | 0.011362 | 0.011228 | 0.011362 |
| 0.011396 | 0.011329 | 0.011396 | 0.011329 | 0.011362 | 0.011396 | 0.011631 |
| 0.011732 | 0.011665 | 0.011732 | 0.011498 | 0.011732 | 0.011362 | 0.011329 |
| 0.011364 | 0.011626 | 0.011472 | 0.011232 | 0.011739 | 0.011231 | 0.011375 |
| 0.011739 | 0.011638 | 0.011530 | 0.011732 | 0.011436 | 0.011598 | 0.011564 |
| 0.011497 | 0.011665 | 0.011522 | 0.011390 | 0.011438 | 0.011396 | 0.011466 |
| 0.011564 | 0.011465 | 0.011601 | 0.011670 | 0.011598 | 0.011665 | 0.011772 |
| 0.011500 | 0.011671 | 0.011602 | 0.011534 | 0.011801 | 0.011262 | 0.011465 |
| 0.011429 | 0.011362 | 0.011262 | 0.011262 | 0.011329 | 0.011329 | 0.011396 |
| 0.011329 | 0.011396 | 0.011295 | 0.011396 | 0.011329 | 0.011329 | 0.011396 |
| 0.011329 | 0.011765 | 0.011665 | 0.011698 | 0.011228 | 0.011329 | 0.011362 |
| 0.011362 | 0.011329 | 0.011396 | 0.011430 | 0.011295 | 0.011295 | 0.011295 |
| 0.011833 | 0.011463 | 0.011463 | 0.011262 | 0.011362 | 0.011530 | 0.011295 |
| 0.011295 | 0.011362 | 0.011329 | 0.011497 | 0.011295 | 0.011430 | 0.011564 |
| 0.011497 | 0.011329 | 0.011329 | 0.011262 | 0.011262 | 0.011430 | 0.011362 |
| 0.011262 | 0.011362 | 0.011228 | 0.011262 | 0.011396 | 0.011531 | 0.011295 |
| 0.011262 | 0.011396 | 0.011329 | 0.011228 | 0.011564 | 0.011228 | 0.011396 |
| 0.011471 | 0.011295 | 0.011598 | 0.011430 | 0.011463 | 0.011329 | 0.011430 |
| 0.011295 | 0.011631 | 0.011228 | 0.011497 | 0.011295 | 0.011295 | 0.011228 |
| 0.011463 | 0.011665 | 0.011362 | 0.011430 | 0.011262 | 0.011665 | 0.011295 |
| 0.011295 | 0.011295 | 0.011329 | 0.011430 | 0.011329 | 0.011430 | 0.011497 |
| 0.011497 | 0.011463 | 0.011362 | 0.011463 | 0.011429 | 0.011295 | 0.011262 |
| 0.011295 | 0.011295 | 0.011362 | 0.011295 | 0.011262 | 0.011430 | 0.011295 |
| 0.011329 | 0.011329 | 0.011463 | 0.011497 | 0.011396 | 0.011329 | 0.011329 |
| 0.011396 | 0.011329 | 0.011429 | 0.011295 | 0.011430 | 0.011530 | 0.011833 |
| 0.011329 | 0.011732 | 0.011267 | 0.011785 | 0.011322 | 0.011366 | 0.011618 |
| 0.011614 | 0.011623 | 0.011374 | 0.011350 | 0.011719 | 0.011682 | 0.011303 |

|          |          |          |          |          |          |          |
|----------|----------|----------|----------|----------|----------|----------|
| 0.011534 | 0.011487 | 0.011177 | 0.011270 | 0.011255 | 0.011307 | 0.011275 |
| 0.011529 | 0.011433 | 0.011431 | 0.011325 | 0.011463 | 0.011497 | 0.011500 |
| 0.011369 | 0.011463 | 0.011463 | 0.011429 | 0.011396 | 0.011396 | 0.011363 |
| 0.011396 | 0.011329 | 0.011362 | 0.011396 | 0.011362 | 0.011295 | 0.011329 |
| 0.011329 | 0.011396 | 0.011295 | 0.011396 | 0.011430 | 0.011463 | 0.011362 |
| 0.011396 | 0.011362 | 0.011698 | 0.011698 | 0.011430 | 0.011464 | 0.011497 |
| 0.011262 | 0.011262 | 0.011295 | 0.011396 | 0.011262 | 0.011497 | 0.011497 |
| 0.011530 | 0.011530 | 0.011463 | 0.011564 | 0.011732 | 0.011565 | 0.011396 |
| 0.011396 | 0.011463 | 0.011497 | 0.011329 | 0.000000 | 0.011362 | 0.011396 |
| 0.011463 | 0.011463 | 0.011497 | 0.011463 | 0.011363 | 0.011564 | 0.011530 |
| 0.011399 | 0.011295 | 0.011396 | 0.011497 | 0.011396 | 0.011530 | 0.011564 |
| 0.011732 | 0.011436 | 0.011598 | 0.011564 | 0.011497 | 0.011665 | 0.011295 |
| 0.011464 | 0.011363 | 0.011329 | 0.011329 | 0.011396 | 0.011295 | 0.011396 |
| 0.011430 | 0.011463 | 0.011362 | 0.011396 | 0.011362 | 0.011698 | 0.011698 |
| 0.011430 | 0.011464 | 0.011530 | 0.011463 | 0.012103 | 0.011525 | 0.011447 |
| 0.011517 | 0.011476 | 0.011587 | 0.011476 | 0.011585 | 0.011509 | 0.011474 |
| 0.012056 | 0.011372 | 0.011506 | 0.011441 | 0.011715 | 0.011571 | 0.011673 |
| 0.012081 | 0.011550 | 0.011398 | 0.011396 | 0.011396 | 0.011429 | 0.011364 |
| 0.011262 | 0.011295 | 0.011430 | 0.011396 | 0.011398 | 0.011530 | 0.011498 |
| 0.011362 | 0.011295 | 0.011329 | 0.011362 | 0.011262 | 0.011329 | 0.011228 |
| 0.011362 | 0.011396 | 0.011295 | 0.011262 | 0.011362 | 0.011295 | 0.011329 |
| 0.011329 | 0.011262 | 0.011329 | 0.011362 | 0.011262 | 0.011463 | 0.011497 |
| 0.011396 | 0.011463 | 0.011396 | 0.011396 | 0.011329 | 0.011732 | 0.011362 |
| 0.011408 | 0.011329 | 0.011564 | 0.011569 | 0.011430 | 0.011429 | 0.011430 |
| 0.011430 | 0.011362 | 0.011329 | 0.011362 | 0.011463 | 0.011463 | 0.011396 |
| 0.011396 | 0.011530 | 0.011698 | 0.011429 | 0.011631 | 0.011631 | 0.011497 |
| 0.011329 | 0.011396 | 0.011430 | 0.011766 | 0.011396 | 0.011430 | 0.011396 |
| 0.011430 | 0.011362 | 0.011362 | 0.011665 | 0.011598 | 0.011631 | 0.011362 |
| 0.011463 | 0.011530 | 0.011396 | 0.011463 | 0.011362 | 0.011295 | 0.011631 |
| 0.011396 | 0.011362 | 0.011362 | 0.011530 | 0.011362 | 0.011463 | 0.011698 |
| 0.011396 | 0.011774 | 0.011765 | 0.011507 | 0.011286 | 0.011468 | 0.011318 |
| 0.011225 | 0.011722 | 0.011236 | 0.011462 | 0.011304 | 0.011417 | 0.011432 |
| 0.011519 | 0.011258 | 0.011394 | 0.011258 | 0.011276 | 0.011395 | 0.011385 |
| 0.011399 | 0.011296 | 0.011377 | 0.011307 | 0.011397 | 0.011530 | 0.011597 |
| 0.011597 | 0.011464 | 0.011567 | 0.011569 | 0.011704 | 0.011732 | 0.011396 |
| 0.011631 | 0.011497 | 0.011362 | 0.011463 | 0.011262 | 0.011497 | 0.011295 |
| 0.011362 | 0.011362 | 0.011329 | 0.011295 | 0.011329 | 0.011295 | 0.011396 |
| 0.011375 | 0.011375 | 0.011368 | 0.011403 | 0.011539 | 0.011504 | 0.011504 |
| 0.011503 | 0.011430 | 0.011245 | 0.011240 | 0.011365 | 0.011535 | 0.011535 |
| 0.011329 | 0.011399 | 0.011632 | 0.011601 | 0.011531 | 0.011565 | 0.011497 |
| 0.011429 | 0.011497 | 0.011497 | 0.011396 | 0.011967 | 0.011564 | 0.011631 |
| 0.011665 | 0.011737 | 0.011367 | 0.011441 | 0.011329 | 0.011530 | 0.011497 |
| 0.011531 | 0.011564 | 0.011564 | 0.011564 | 0.011728 | 0.011698 | 0.011338 |
| 0.011229 | 0.011233 | 0.011333 | 0.011298 | 0.011402 | 0.011247 | 0.011570 |
| 0.011369 | 0.011499 | 0.011251 | 0.011397 | 0.011363 | 0.011437 | 0.011329 |
| 0.011295 | 0.011295 | 0.011362 | 0.011329 | 0.011530 | 0.011497 | 0.011429 |
| 0.011530 | 0.011597 | 0.011329 | 0.011329 | 0.011362 | 0.011362 | 0.011364 |
| 0.011432 | 0.011362 | 0.011362 | 0.011397 | 0.011530 | 0.011597 | 0.011597 |
| 0.011464 | 0.011567 | 0.011569 | 0.011704 | 0.011732 | 0.011396 | 0.011564 |
| 0.011497 | 0.011497 | 0.011331 | 0.011513 | 0.011442 | 0.011469 | 0.011340 |
| 0.011508 | 0.011698 | 0.011484 | 0.011400 | 0.011295 | 0.011497 | 0.011362 |
| 0.011463 | 0.011396 | 0.011295 | 0.011397 | 0.011497 | 0.011499 | 0.011396 |
| 0.011295 | 0.011229 | 0.011362 | 0.011295 | 0.011228 | 0.011332 | 0.011497 |
| 0.011396 | 0.011329 | 0.011362 | 0.011396 | 0.011362 | 0.011295 | 0.011497 |
| 0.011362 | 0.011396 | 0.011396 | 0.011329 | 0.011396 | 0.011631 | 0.011295 |
| 0.011329 | 0.011732 | 0.011329 | 0.011362 | 0.011329 | 0.011698 | 0.011232 |
| 0.011735 | 0.011230 | 0.011311 | 0.011463 | 0.011549 | 0.011455 | 0.011186 |
| 0.011270 | 0.011497 | 0.011597 | 0.011705 | 0.011565 | 0.011669 | 0.011834 |
| 0.011733 | 0.011771 | 0.011732 | 0.011949 | 0.011698 | 0.012573 | 0.011734 |
| 0.012473 | 0.012241 | 0.012375 | 0.012646 | 0.011698 | 0.011396 | 0.011699 |

|          |          |          |          |          |          |          |
|----------|----------|----------|----------|----------|----------|----------|
| 0.012137 | 0.012072 | 0.011665 | 0.011564 | 0.011632 | 0.011632 | 0.011602 |
| 0.011497 | 0.011467 | 0.011564 | 0.011531 | 0.011901 | 0.011967 | 0.011968 |
| 0.011868 | 0.011968 | 0.012072 | 0.011804 | 0.012138 | 0.012144 | 0.012205 |
| 0.012205 | 0.012239 | 0.012152 | 0.012206 | 0.012207 | 0.011429 | 0.011732 |
| 0.011800 | 0.012304 | 0.011806 | 0.012035 | 0.012508 | 0.011570 | 0.011464 |
| 0.011429 | 0.011429 | 0.011900 | 0.011965 | 0.012010 | 0.011765 | 0.011431 |
| S453     | 0.011665 | 0.011665 | 0.012001 | 0.011765 | 0.011765 | 0.011833 |
| 0.011672 | 0.011604 | 0.011765 | 0.011262 | 0.011329 | 0.011296 | 0.011262 |
| 0.011295 | 0.011463 | 0.011262 | 0.011295 | 0.011362 | 0.011329 | 0.011295 |
| 0.011262 | 0.011295 | 0.011396 | 0.011262 | 0.011295 | 0.011295 | 0.011638 |
| 0.011530 | 0.011295 | 0.011195 | 0.011429 | 0.011362 | 0.011329 | 0.011362 |
| 0.011329 | 0.011430 | 0.011329 | 0.011329 | 0.011362 | 0.011329 | 0.011497 |
| 0.011262 | 0.011329 | 0.011362 | 0.011295 | 0.011396 | 0.011429 | 0.011362 |
| 0.011329 | 0.011497 | 0.011396 | 0.011665 | 0.011329 | 0.011597 | 0.011329 |
| 0.011295 | 0.011396 | 0.011463 | 0.011597 | 0.011698 | 0.011396 | 0.011497 |
| 0.011362 | 0.011430 | 0.011329 | 0.011564 | 0.011799 | 0.011329 | 0.011396 |
| 0.011295 | 0.011396 | 0.011362 | 0.011430 | 0.011362 | 0.011362 | 0.011362 |
| 0.011262 | 0.011295 | 0.011262 | 0.011362 | 0.011329 | 0.011363 | 0.011429 |
| 0.011362 | 0.011329 | 0.011396 | 0.011295 | 0.011429 | 0.011262 | 0.011329 |
| 0.011497 | 0.011429 | 0.011665 | 0.011497 | 0.011329 | 0.011564 | 0.011329 |
| 0.011431 | 0.011658 | 0.011475 | 0.011177 | 0.011172 | 0.011244 | 0.011375 |
| 0.012011 | 0.011365 | 0.011184 | 0.011564 | 0.011564 | 0.011362 | 0.011463 |
| 0.011396 | 0.011362 | 0.011429 | 0.011329 | 0.011430 | 0.011362 | 0.011362 |
| 0.011329 | 0.011429 | 0.011631 | 0.011497 | 0.011396 | 0.011362 | 0.011295 |
| 0.011262 | 0.011262 | 0.011329 | 0.011161 | 0.011497 | 0.011463 | 0.011396 |
| 0.011497 | 0.011564 | 0.011295 | 0.011295 | 0.011329 | 0.011329 | 0.011330 |
| 0.011398 | 0.011329 | 0.011329 | 0.011168 | 0.011241 | 0.011236 | 0.011329 |
| 0.011331 | 0.011232 | 0.011245 | 0.011267 | 0.011230 | 0.011266 | 0.011297 |
| 0.011528 | 0.011336 | 0.011336 | 0.011262 | 0.011233 | 0.011397 | 0.011363 |
| 0.011430 | 0.011363 | 0.011363 | 0.011463 | 0.011396 | 0.011765 | 0.011564 |
| 0.011597 | 0.011463 | 0.011329 | 0.011430 | 0.011228 | 0.011463 | 0.011262 |
| 0.011329 | 0.011329 | 0.011295 | 0.011262 | 0.011295 | 0.011262 | 0.011362 |
| 0.011329 | 0.011429 | 0.011362 | 0.011262 | 0.011363 | 0.011463 | 0.011466 |
| 0.011463 | 0.011362 | 0.011262 | 0.011195 | 0.011329 | 0.011262 | 0.011195 |
| 0.011298 | 0.011463 | 0.011262 | 0.011463 | 0.011228 | 0.011329 | 0.011295 |
| 0.011396 | 0.011295 | 0.011329 | 0.011295 | 0.011329 | 0.011195 | 0.011329 |
| 0.011362 | 0.011295 | 0.011362 | 0.011295 | 0.011329 | 0.011362 | 0.011597 |
| 0.011698 | 0.011631 | 0.011698 | 0.011431 | 0.011698 | 0.011329 | 0.011295 |
| 0.011297 | 0.011545 | 0.011380 | 0.011197 | 0.011705 | 0.011197 | 0.011257 |
| 0.011705 | 0.011604 | 0.011497 | 0.011698 | 0.011402 | 0.011564 | 0.011530 |
| 0.011463 | 0.011631 | 0.011487 | 0.011349 | 0.011396 | 0.011362 | 0.011432 |
| 0.011530 | 0.011431 | 0.011567 | 0.011636 | 0.011564 | 0.011631 | 0.011738 |
| 0.011466 | 0.011637 | 0.011568 | 0.011500 | 0.011767 | 0.011228 | 0.011431 |
| 0.011396 | 0.011329 | 0.011228 | 0.011228 | 0.011295 | 0.011295 | 0.011362 |
| 0.011295 | 0.011362 | 0.011262 | 0.011362 | 0.011295 | 0.011295 | 0.011362 |
| 0.011295 | 0.011732 | 0.011631 | 0.011665 | 0.011195 | 0.011295 | 0.011329 |
| 0.011329 | 0.011295 | 0.011362 | 0.011396 | 0.011262 | 0.011262 | 0.011262 |
| 0.011799 | 0.011429 | 0.011430 | 0.011228 | 0.011329 | 0.011430 | 0.011262 |
| 0.011262 | 0.011329 | 0.011295 | 0.011463 | 0.011262 | 0.011396 | 0.011530 |
| 0.011463 | 0.011295 | 0.011295 | 0.011228 | 0.011228 | 0.011396 | 0.011329 |
| 0.011228 | 0.011329 | 0.011195 | 0.011228 | 0.011362 | 0.011497 | 0.011262 |
| 0.011228 | 0.011362 | 0.011296 | 0.011195 | 0.011530 | 0.011195 | 0.011362 |
| 0.011437 | 0.011262 | 0.011564 | 0.011396 | 0.011430 | 0.011295 | 0.011396 |
| 0.011262 | 0.011597 | 0.011195 | 0.011463 | 0.011262 | 0.011262 | 0.011195 |
| 0.011429 | 0.011598 | 0.011329 | 0.011396 | 0.011228 | 0.011631 | 0.011262 |
| 0.011262 | 0.011262 | 0.011295 | 0.011396 | 0.011295 | 0.011396 | 0.011463 |
| 0.011463 | 0.011430 | 0.011329 | 0.011430 | 0.011396 | 0.011262 | 0.011228 |
| 0.011262 | 0.011262 | 0.011329 | 0.011262 | 0.011228 | 0.011329 | 0.011262 |
| 0.011295 | 0.011295 | 0.011429 | 0.011463 | 0.011362 | 0.011295 | 0.011295 |
| 0.011362 | 0.011295 | 0.011396 | 0.011262 | 0.011396 | 0.011497 | 0.011799 |



|          |          |          |          |          |          |          |
|----------|----------|----------|----------|----------|----------|----------|
| 0.011295 | 0.011698 | 0.011233 | 0.017747 | 0.011126 | 0.011427 | 0.011583 |
| 0.011545 | 0.011588 | 0.011270 | 0.011234 | 0.011664 | 0.011612 | 0.011303 |
| 0.011440 | 0.011548 | 0.011138 | 0.011186 | 0.011177 | 0.011307 | 0.011189 |
| 0.011389 | 0.011395 | 0.011357 | 0.011193 | 0.011430 | 0.011463 | 0.011466 |
| 0.011335 | 0.011429 | 0.011429 | 0.011396 | 0.011362 | 0.011363 | 0.011329 |
| 0.011362 | 0.011295 | 0.011329 | 0.011362 | 0.011329 | 0.011262 | 0.011295 |
| 0.011295 | 0.011362 | 0.011262 | 0.011362 | 0.011396 | 0.011429 | 0.011329 |
| 0.011362 | 0.011329 | 0.011665 | 0.011665 | 0.011396 | 0.011430 | 0.011463 |
| 0.011228 | 0.011228 | 0.011262 | 0.011362 | 0.011228 | 0.011463 | 0.011463 |
| 0.011497 | 0.011497 | 0.011430 | 0.011530 | 0.011698 | 0.011532 | 0.011362 |
| 0.011362 | 0.011429 | 0.011463 | 0.011295 | 0.011362 | 0.000000 | 0.011362 |
| 0.011430 | 0.011430 | 0.011463 | 0.011430 | 0.011330 | 0.011530 | 0.011497 |
| 0.011365 | 0.011262 | 0.011362 | 0.011463 | 0.011362 | 0.011497 | 0.011530 |
| 0.011698 | 0.011402 | 0.011564 | 0.011530 | 0.011463 | 0.011631 | 0.011262 |
| 0.011431 | 0.011329 | 0.011295 | 0.011295 | 0.011362 | 0.011262 | 0.011362 |
| 0.011396 | 0.011429 | 0.011329 | 0.011362 | 0.011329 | 0.011665 | 0.011665 |
| 0.011396 | 0.011430 | 0.011497 | 0.011430 | 0.012070 | 0.011489 | 0.011412 |
| 0.011482 | 0.011442 | 0.011552 | 0.011441 | 0.011550 | 0.011474 | 0.011440 |
| 0.012022 | 0.011337 | 0.011471 | 0.011406 | 0.011680 | 0.011536 | 0.011639 |
| 0.012046 | 0.011512 | 0.011365 | 0.011362 | 0.011362 | 0.011396 | 0.011331 |
| 0.011228 | 0.011262 | 0.011396 | 0.011362 | 0.011364 | 0.011497 | 0.011464 |
| 0.011329 | 0.011262 | 0.011295 | 0.011329 | 0.011228 | 0.011295 | 0.011195 |
| 0.011329 | 0.011362 | 0.011262 | 0.011228 | 0.011329 | 0.011262 | 0.011295 |
| 0.011295 | 0.011228 | 0.011295 | 0.011329 | 0.011228 | 0.011430 | 0.011463 |
| 0.011362 | 0.011430 | 0.011362 | 0.011362 | 0.011295 | 0.011698 | 0.011329 |
| 0.011373 | 0.011295 | 0.011531 | 0.011535 | 0.011396 | 0.011396 | 0.011396 |
| 0.011396 | 0.011329 | 0.011295 | 0.011329 | 0.011430 | 0.011430 | 0.011362 |
| 0.011362 | 0.011497 | 0.011665 | 0.011396 | 0.011598 | 0.011598 | 0.011463 |
| 0.011295 | 0.011362 | 0.011396 | 0.011799 | 0.011363 | 0.011396 | 0.011362 |
| 0.011396 | 0.011329 | 0.011329 | 0.011631 | 0.011564 | 0.011598 | 0.011329 |
| 0.011430 | 0.011497 | 0.011362 | 0.011430 | 0.011396 | 0.011262 | 0.011597 |
| 0.011362 | 0.011329 | 0.011329 | 0.011497 | 0.011329 | 0.011429 | 0.011665 |
| 0.011362 | 0.011740 | 0.011732 | 0.011467 | 0.011173 | 0.011400 | 0.011215 |
| 0.011225 | 0.011683 | 0.011201 | 0.011417 | 0.011207 | 0.011366 | 0.011326 |
| 0.011366 | 0.011126 | 0.011283 | 0.000000 | 0.011168 | 0.011261 | 0.011303 |
| 0.011324 | 0.011257 | 0.011342 | 0.011272 | 0.011364 | 0.011497 | 0.011564 |
| 0.011564 | 0.011430 | 0.011533 | 0.011535 | 0.011670 | 0.011696 | 0.011362 |
| 0.011597 | 0.011463 | 0.011329 | 0.011430 | 0.011228 | 0.011463 | 0.011262 |
| 0.011329 | 0.011329 | 0.011295 | 0.011262 | 0.011295 | 0.011262 | 0.011362 |
| 0.011270 | 0.011270 | 0.011300 | 0.011368 | 0.011505 | 0.011436 | 0.011436 |
| 0.011469 | 0.011396 | 0.011134 | 0.011132 | 0.011331 | 0.011501 | 0.011501 |
| 0.011296 | 0.011365 | 0.011599 | 0.011533 | 0.011497 | 0.011531 | 0.011463 |
| 0.011396 | 0.011463 | 0.011463 | 0.011362 | 0.011934 | 0.011530 | 0.011598 |
| 0.011631 | 0.011701 | 0.011333 | 0.011407 | 0.011295 | 0.011497 | 0.011463 |
| 0.011498 | 0.011530 | 0.011530 | 0.011530 | 0.011650 | 0.011665 | 0.011303 |
| 0.011196 | 0.011199 | 0.011299 | 0.011264 | 0.011368 | 0.011210 | 0.011536 |
| 0.011335 | 0.011499 | 0.011251 | 0.011360 | 0.011329 | 0.011402 | 0.011295 |
| 0.011262 | 0.011262 | 0.011329 | 0.011161 | 0.011497 | 0.011463 | 0.011396 |
| 0.011497 | 0.011564 | 0.011295 | 0.011295 | 0.011329 | 0.011329 | 0.011330 |
| 0.011398 | 0.011329 | 0.011329 | 0.011364 | 0.011497 | 0.011564 | 0.011564 |
| 0.011430 | 0.011533 | 0.011535 | 0.011670 | 0.011696 | 0.011362 | 0.011530 |
| 0.011463 | 0.011463 | 0.011297 | 0.011478 | 0.011408 | 0.011435 | 0.011270 |
| 0.011473 | 0.011561 | 0.011399 | 0.011366 | 0.011262 | 0.011463 | 0.011329 |
| 0.011429 | 0.011362 | 0.011262 | 0.011363 | 0.011463 | 0.011466 | 0.011362 |
| 0.011262 | 0.011195 | 0.011329 | 0.011262 | 0.011195 | 0.011298 | 0.011463 |
| 0.011362 | 0.011295 | 0.011329 | 0.011362 | 0.011329 | 0.011262 | 0.011463 |
| 0.011329 | 0.011362 | 0.011362 | 0.011295 | 0.011362 | 0.011597 | 0.011262 |
| 0.011295 | 0.011698 | 0.011295 | 0.011329 | 0.011295 | 0.011665 | 0.011189 |
| 0.011566 | 0.011188 | 0.011161 | 0.011422 | 0.011508 | 0.011419 | 0.011144 |
| 0.011113 | 0.011463 | 0.011564 | 0.011671 | 0.011531 | 0.011635 | 0.011800 |

|          |          |          |          |          |          |          |
|----------|----------|----------|----------|----------|----------|----------|
| 0.011699 | 0.011737 | 0.011698 | 0.011914 | 0.011665 | 0.012539 | 0.011700 |
| 0.012439 | 0.012207 | 0.012341 | 0.012612 | 0.011665 | 0.011362 | 0.011665 |
| 0.012103 | 0.012004 | 0.011631 | 0.011530 | 0.011598 | 0.011598 | 0.011568 |
| 0.011463 | 0.011433 | 0.011530 | 0.011497 | 0.011867 | 0.011934 | 0.011935 |
| 0.011801 | 0.011934 | 0.012038 | 0.011770 | 0.012104 | 0.012110 | 0.012171 |
| 0.012172 | 0.012205 | 0.012084 | 0.012172 | 0.012173 | 0.011396 | 0.011699 |
| 0.011766 | 0.012203 | 0.011772 | 0.012001 | 0.012474 | 0.011536 | 0.011430 |
| 0.011396 | 0.011396 | 0.011867 | 0.011924 | 0.011975 | 0.011732 | 0.011397 |
| S454     | 0.011698 | 0.011698 | 0.012034 | 0.011799 | 0.011799 | 0.011866 |
| 0.011706 | 0.011638 | 0.011799 | 0.011295 | 0.011362 | 0.011329 | 0.011295 |
| 0.011329 | 0.011497 | 0.011295 | 0.011262 | 0.011396 | 0.011362 | 0.011329 |
| 0.011295 | 0.011329 | 0.011429 | 0.011295 | 0.011329 | 0.011329 | 0.011671 |
| 0.011564 | 0.011329 | 0.011228 | 0.011463 | 0.011396 | 0.011362 | 0.011396 |
| 0.011362 | 0.011463 | 0.011362 | 0.011362 | 0.011329 | 0.011362 | 0.011530 |
| 0.011295 | 0.011362 | 0.011329 | 0.011329 | 0.011429 | 0.011396 | 0.011396 |
| 0.011362 | 0.011463 | 0.011430 | 0.011698 | 0.011295 | 0.011631 | 0.011295 |
| 0.011329 | 0.011430 | 0.011497 | 0.011631 | 0.011732 | 0.011430 | 0.011530 |
| 0.011396 | 0.011463 | 0.011362 | 0.011597 | 0.011833 | 0.011362 | 0.011430 |
| 0.011329 | 0.011429 | 0.011396 | 0.011463 | 0.011396 | 0.011396 | 0.011396 |
| 0.011295 | 0.011329 | 0.011295 | 0.011396 | 0.011362 | 0.011397 | 0.011463 |
| 0.011396 | 0.011362 | 0.011429 | 0.011329 | 0.011463 | 0.011295 | 0.011362 |
| 0.011530 | 0.011463 | 0.011698 | 0.011530 | 0.011362 | 0.011597 | 0.011362 |
| 0.011542 | 0.011770 | 0.011588 | 0.011295 | 0.011284 | 0.011355 | 0.011493 |
| 0.012121 | 0.011518 | 0.011266 | 0.011463 | 0.011530 | 0.011396 | 0.011497 |
| 0.011430 | 0.011396 | 0.011463 | 0.011362 | 0.011463 | 0.011396 | 0.011396 |
| 0.011362 | 0.011463 | 0.011665 | 0.011530 | 0.011430 | 0.011396 | 0.011329 |
| 0.011295 | 0.011295 | 0.011362 | 0.011329 | 0.011530 | 0.011497 | 0.011430 |
| 0.011530 | 0.011597 | 0.011329 | 0.011329 | 0.011362 | 0.011362 | 0.011364 |
| 0.011432 | 0.011362 | 0.011362 | 0.011240 | 0.011313 | 0.011271 | 0.011363 |
| 0.011365 | 0.011301 | 0.011355 | 0.011336 | 0.011264 | 0.011300 | 0.011330 |
| 0.011600 | 0.011370 | 0.011405 | 0.011296 | 0.011302 | 0.011430 | 0.011397 |
| 0.011464 | 0.011397 | 0.011396 | 0.011496 | 0.011429 | 0.011732 | 0.011598 |
| 0.011631 | 0.011497 | 0.011362 | 0.011463 | 0.011262 | 0.011497 | 0.011295 |
| 0.011362 | 0.011362 | 0.011329 | 0.011295 | 0.011329 | 0.011295 | 0.011396 |
| 0.011362 | 0.011463 | 0.011396 | 0.011295 | 0.011397 | 0.011497 | 0.011500 |
| 0.011497 | 0.011396 | 0.011295 | 0.011229 | 0.011362 | 0.011295 | 0.011228 |
| 0.011332 | 0.011497 | 0.011295 | 0.011497 | 0.011262 | 0.011363 | 0.011329 |
| 0.011430 | 0.011329 | 0.011362 | 0.011329 | 0.011362 | 0.011228 | 0.011362 |
| 0.011396 | 0.011329 | 0.011396 | 0.011329 | 0.011362 | 0.011396 | 0.011631 |
| 0.011732 | 0.011664 | 0.011732 | 0.011431 | 0.011732 | 0.011362 | 0.011329 |
| 0.011364 | 0.011626 | 0.011472 | 0.011232 | 0.011739 | 0.011231 | 0.011296 |
| 0.011739 | 0.011638 | 0.011463 | 0.011732 | 0.011436 | 0.011530 | 0.011564 |
| 0.011430 | 0.011597 | 0.011522 | 0.011266 | 0.011396 | 0.011396 | 0.011466 |
| 0.011564 | 0.011465 | 0.011567 | 0.011669 | 0.011597 | 0.011665 | 0.011772 |
| 0.011500 | 0.011671 | 0.011534 | 0.011534 | 0.011767 | 0.011262 | 0.011465 |
| 0.011429 | 0.011362 | 0.011262 | 0.011262 | 0.011329 | 0.011329 | 0.011396 |
| 0.011329 | 0.011396 | 0.011295 | 0.011396 | 0.011329 | 0.011329 | 0.011329 |
| 0.011329 | 0.011765 | 0.011665 | 0.011698 | 0.011228 | 0.011329 | 0.011362 |
| 0.011362 | 0.011329 | 0.011396 | 0.011430 | 0.011295 | 0.011295 | 0.011295 |
| 0.011833 | 0.011463 | 0.011463 | 0.011262 | 0.011362 | 0.011463 | 0.011295 |
| 0.011295 | 0.011362 | 0.011329 | 0.011497 | 0.011295 | 0.011429 | 0.011564 |
| 0.011497 | 0.011329 | 0.011329 | 0.011262 | 0.011262 | 0.011430 | 0.011362 |
| 0.011262 | 0.011362 | 0.011228 | 0.011262 | 0.011396 | 0.011531 | 0.011295 |
| 0.011262 | 0.011396 | 0.011329 | 0.011228 | 0.011564 | 0.011228 | 0.011396 |
| 0.011471 | 0.011295 | 0.011597 | 0.011430 | 0.011463 | 0.011329 | 0.011362 |
| 0.011295 | 0.011631 | 0.011228 | 0.011497 | 0.011295 | 0.011295 | 0.011228 |
| 0.011463 | 0.011665 | 0.011362 | 0.011430 | 0.011262 | 0.011665 | 0.011295 |
| 0.011295 | 0.011295 | 0.011329 | 0.011430 | 0.011329 | 0.011429 | 0.011497 |
| 0.011497 | 0.011463 | 0.011362 | 0.011463 | 0.011429 | 0.011295 | 0.011262 |
| 0.011295 | 0.011295 | 0.011362 | 0.011295 | 0.011262 | 0.011430 | 0.011295 |

|          |          |          |          |          |          |          |
|----------|----------|----------|----------|----------|----------|----------|
| 0.011329 | 0.011329 | 0.011463 | 0.011497 | 0.011396 | 0.011329 | 0.011329 |
| 0.011396 | 0.011329 | 0.011429 | 0.011295 | 0.011429 | 0.011463 | 0.011833 |
| 0.011329 | 0.011732 | 0.011336 | 0.017823 | 0.011388 | 0.011488 | 0.011688 |
| 0.011648 | 0.011693 | 0.011374 | 0.011292 | 0.011829 | 0.011716 | 0.011546 |
| 0.011487 | 0.011671 | 0.011255 | 0.011270 | 0.011294 | 0.011455 | 0.011361 |
| 0.011529 | 0.011507 | 0.011468 | 0.011325 | 0.011463 | 0.011497 | 0.011500 |
| 0.011369 | 0.011463 | 0.011463 | 0.011430 | 0.011396 | 0.011396 | 0.011363 |
| 0.011329 | 0.011329 | 0.011295 | 0.011396 | 0.011363 | 0.011295 | 0.011329 |
| 0.011329 | 0.011396 | 0.011295 | 0.011396 | 0.011430 | 0.011463 | 0.011362 |
| 0.011396 | 0.011362 | 0.011698 | 0.011698 | 0.011430 | 0.011397 | 0.011497 |
| 0.011262 | 0.011262 | 0.011295 | 0.011396 | 0.011262 | 0.011497 | 0.011497 |
| 0.011463 | 0.011463 | 0.011463 | 0.011497 | 0.011732 | 0.011498 | 0.011396 |
| 0.011329 | 0.011463 | 0.011497 | 0.011329 | 0.011396 | 0.011362 | 0.000000 |
| 0.011396 | 0.011396 | 0.011429 | 0.011463 | 0.011363 | 0.011564 | 0.011530 |
| 0.011399 | 0.011295 | 0.011396 | 0.011497 | 0.011396 | 0.011530 | 0.011564 |
| 0.011732 | 0.011436 | 0.011530 | 0.011564 | 0.011430 | 0.011597 | 0.011295 |
| 0.011397 | 0.011363 | 0.011329 | 0.011329 | 0.011396 | 0.011295 | 0.011396 |
| 0.011430 | 0.011463 | 0.011362 | 0.011396 | 0.011362 | 0.011698 | 0.011698 |
| 0.011430 | 0.011397 | 0.011530 | 0.011463 | 0.012103 | 0.011453 | 0.011447 |
| 0.011517 | 0.011442 | 0.011587 | 0.011476 | 0.011550 | 0.011509 | 0.011439 |
| 0.012056 | 0.011372 | 0.011505 | 0.011441 | 0.011715 | 0.011570 | 0.011673 |
| 0.012080 | 0.011550 | 0.011567 | 0.011597 | 0.011564 | 0.011564 | 0.011533 |
| 0.011262 | 0.011429 | 0.011564 | 0.011530 | 0.011533 | 0.011530 | 0.011498 |
| 0.011362 | 0.011295 | 0.011329 | 0.011362 | 0.011262 | 0.011329 | 0.011228 |
| 0.011362 | 0.011396 | 0.011295 | 0.011262 | 0.011362 | 0.011295 | 0.011329 |
| 0.011262 | 0.011262 | 0.011329 | 0.011362 | 0.011262 | 0.011463 | 0.011497 |
| 0.011396 | 0.011463 | 0.011396 | 0.011396 | 0.011329 | 0.011732 | 0.011362 |
| 0.011408 | 0.011329 | 0.011564 | 0.011569 | 0.011430 | 0.011429 | 0.011429 |
| 0.011430 | 0.011362 | 0.011329 | 0.011362 | 0.011463 | 0.011463 | 0.011396 |
| 0.011396 | 0.011530 | 0.011698 | 0.011429 | 0.011631 | 0.011631 | 0.011497 |
| 0.011329 | 0.011396 | 0.011430 | 0.011833 | 0.011396 | 0.011430 | 0.011396 |
| 0.011362 | 0.011362 | 0.011362 | 0.011665 | 0.011598 | 0.011631 | 0.011362 |
| 0.011463 | 0.011530 | 0.011396 | 0.011463 | 0.011429 | 0.011295 | 0.011631 |
| 0.011396 | 0.011362 | 0.011362 | 0.011530 | 0.011362 | 0.011463 | 0.011698 |
| 0.011396 | 0.011773 | 0.011765 | 0.011589 | 0.011342 | 0.011468 | 0.011318 |
| 0.011335 | 0.011761 | 0.011306 | 0.011507 | 0.011402 | 0.011468 | 0.011485 |
| 0.011570 | 0.011258 | 0.011450 | 0.011258 | 0.011330 | 0.011529 | 0.011466 |
| 0.011475 | 0.011375 | 0.011448 | 0.011377 | 0.011397 | 0.011530 | 0.011598 |
| 0.011597 | 0.011464 | 0.011567 | 0.011569 | 0.011704 | 0.011732 | 0.011396 |
| 0.011631 | 0.011497 | 0.011362 | 0.011463 | 0.011262 | 0.011497 | 0.011295 |
| 0.011362 | 0.011362 | 0.011329 | 0.011295 | 0.011329 | 0.011295 | 0.011396 |
| 0.011305 | 0.011375 | 0.011300 | 0.011403 | 0.011539 | 0.011504 | 0.011368 |
| 0.011503 | 0.011430 | 0.011245 | 0.011168 | 0.011365 | 0.011535 | 0.011535 |
| 0.011329 | 0.011399 | 0.011633 | 0.011601 | 0.011464 | 0.011565 | 0.011497 |
| 0.011429 | 0.011497 | 0.011497 | 0.011396 | 0.011967 | 0.011497 | 0.011564 |
| 0.011665 | 0.011701 | 0.011367 | 0.011441 | 0.011329 | 0.011530 | 0.011497 |
| 0.011531 | 0.011564 | 0.011497 | 0.011497 | 0.011650 | 0.011698 | 0.011338 |
| 0.011229 | 0.011233 | 0.011333 | 0.011298 | 0.011402 | 0.011247 | 0.011570 |
| 0.011369 | 0.011455 | 0.011203 | 0.011397 | 0.011363 | 0.011437 | 0.011329 |
| 0.011295 | 0.011295 | 0.011362 | 0.011329 | 0.011530 | 0.011497 | 0.011430 |
| 0.011530 | 0.011597 | 0.011329 | 0.011329 | 0.011362 | 0.011362 | 0.011364 |
| 0.011432 | 0.011362 | 0.011362 | 0.011397 | 0.011530 | 0.011598 | 0.011597 |
| 0.011464 | 0.011567 | 0.011569 | 0.011704 | 0.011732 | 0.011396 | 0.011564 |
| 0.011497 | 0.011497 | 0.011331 | 0.011513 | 0.011408 | 0.011469 | 0.011341 |
| 0.011508 | 0.011698 | 0.011483 | 0.011400 | 0.011295 | 0.011497 | 0.011362 |
| 0.011463 | 0.011396 | 0.011295 | 0.011397 | 0.011497 | 0.011500 | 0.011396 |
| 0.011295 | 0.011229 | 0.011362 | 0.011295 | 0.011228 | 0.011332 | 0.011497 |
| 0.011329 | 0.011329 | 0.011295 | 0.011396 | 0.011363 | 0.011295 | 0.011497 |
| 0.011362 | 0.011396 | 0.011396 | 0.011329 | 0.011396 | 0.011631 | 0.011295 |
| 0.011329 | 0.011732 | 0.011329 | 0.011362 | 0.011329 | 0.011698 | 0.011275 |

|          |          |          |          |          |          |          |
|----------|----------|----------|----------|----------|----------|----------|
| 0.011735 | 0.011315 | 0.011311 | 0.011543 | 0.011630 | 0.011527 | 0.011269 |
| 0.011270 | 0.011497 | 0.011530 | 0.011637 | 0.011498 | 0.011635 | 0.011766 |
| 0.011666 | 0.011703 | 0.011665 | 0.011983 | 0.011698 | 0.012573 | 0.011734 |
| 0.012406 | 0.012241 | 0.012375 | 0.012646 | 0.011698 | 0.011396 | 0.011631 |
| 0.012137 | 0.012005 | 0.011665 | 0.011564 | 0.011632 | 0.011632 | 0.011534 |
| 0.011497 | 0.011501 | 0.011564 | 0.011531 | 0.011901 | 0.011967 | 0.011968 |
| 0.011868 | 0.011968 | 0.012072 | 0.011838 | 0.012138 | 0.012144 | 0.012205 |
| 0.012206 | 0.012239 | 0.012118 | 0.012206 | 0.012207 | 0.011429 | 0.011732 |
| 0.011800 | 0.012304 | 0.011772 | 0.012035 | 0.012508 | 0.011570 | 0.011464 |
| 0.011429 | 0.011429 | 0.011900 | 0.011965 | 0.012045 | 0.011765 | 0.011431 |
| S455     | 0.011766 | 0.011766 | 0.012103 | 0.011867 | 0.011867 | 0.011934 |
| 0.011774 | 0.011672 | 0.011867 | 0.011363 | 0.011430 | 0.011397 | 0.011363 |
| 0.011396 | 0.011564 | 0.011363 | 0.011396 | 0.011463 | 0.011430 | 0.011396 |
| 0.011295 | 0.011396 | 0.011497 | 0.011363 | 0.011397 | 0.011396 | 0.011740 |
| 0.011631 | 0.011396 | 0.011295 | 0.011531 | 0.011463 | 0.011430 | 0.011463 |
| 0.011430 | 0.011531 | 0.011430 | 0.011430 | 0.011463 | 0.011430 | 0.011598 |
| 0.011363 | 0.011430 | 0.011463 | 0.011396 | 0.011497 | 0.011463 | 0.011463 |
| 0.011430 | 0.011598 | 0.011497 | 0.011766 | 0.011430 | 0.011699 | 0.011430 |
| 0.011396 | 0.011497 | 0.011564 | 0.011699 | 0.011800 | 0.011497 | 0.011598 |
| 0.011463 | 0.011531 | 0.011430 | 0.011665 | 0.011901 | 0.011430 | 0.011497 |
| 0.011396 | 0.011497 | 0.011463 | 0.011531 | 0.011463 | 0.011463 | 0.011463 |
| 0.011363 | 0.011396 | 0.011363 | 0.011463 | 0.011430 | 0.011464 | 0.011531 |
| 0.011463 | 0.011430 | 0.011497 | 0.011396 | 0.011531 | 0.011363 | 0.011430 |
| 0.011598 | 0.011531 | 0.011766 | 0.011598 | 0.011430 | 0.011665 | 0.011430 |
| 0.011579 | 0.011807 | 0.011626 | 0.011334 | 0.011284 | 0.011465 | 0.011454 |
| 0.012122 | 0.011518 | 0.011266 | 0.011195 | 0.011463 | 0.011463 | 0.011564 |
| 0.011497 | 0.011463 | 0.011531 | 0.011430 | 0.011531 | 0.011463 | 0.011463 |
| 0.011430 | 0.011531 | 0.011732 | 0.011598 | 0.011497 | 0.011464 | 0.011396 |
| 0.011363 | 0.011363 | 0.011430 | 0.011396 | 0.011598 | 0.011564 | 0.011497 |
| 0.011598 | 0.011665 | 0.011396 | 0.011396 | 0.011430 | 0.011430 | 0.011432 |
| 0.011500 | 0.011430 | 0.011430 | 0.011312 | 0.011350 | 0.011341 | 0.011430 |
| 0.011433 | 0.011370 | 0.011392 | 0.011405 | 0.011332 | 0.011369 | 0.011398 |
| 0.011636 | 0.011440 | 0.011439 | 0.011363 | 0.011337 | 0.011498 | 0.011464 |
| 0.011531 | 0.011465 | 0.011464 | 0.011564 | 0.011497 | 0.011867 | 0.011665 |
| 0.011699 | 0.011564 | 0.011430 | 0.011531 | 0.011329 | 0.011564 | 0.011363 |
| 0.011430 | 0.011430 | 0.011396 | 0.011363 | 0.011396 | 0.011363 | 0.011463 |
| 0.011430 | 0.011531 | 0.011463 | 0.011363 | 0.011465 | 0.011564 | 0.011567 |
| 0.011564 | 0.011463 | 0.011363 | 0.011296 | 0.011430 | 0.011363 | 0.011296 |
| 0.011400 | 0.011564 | 0.011363 | 0.011564 | 0.011329 | 0.011430 | 0.011396 |
| 0.011497 | 0.011396 | 0.011430 | 0.011396 | 0.011430 | 0.011295 | 0.011430 |
| 0.011463 | 0.011396 | 0.011463 | 0.011396 | 0.011430 | 0.011463 | 0.011699 |
| 0.011800 | 0.011732 | 0.011800 | 0.011498 | 0.011800 | 0.011430 | 0.011396 |
| 0.011432 | 0.011748 | 0.011472 | 0.011300 | 0.011807 | 0.011299 | 0.011414 |
| 0.011808 | 0.011707 | 0.011396 | 0.011800 | 0.011504 | 0.011463 | 0.011632 |
| 0.011564 | 0.011531 | 0.011594 | 0.011225 | 0.011480 | 0.011464 | 0.011534 |
| 0.011632 | 0.011533 | 0.011534 | 0.011738 | 0.011665 | 0.011733 | 0.011840 |
| 0.011568 | 0.011740 | 0.011670 | 0.011602 | 0.011869 | 0.011329 | 0.011532 |
| 0.011497 | 0.011430 | 0.011329 | 0.011329 | 0.011396 | 0.011396 | 0.011463 |
| 0.011396 | 0.011463 | 0.011363 | 0.011463 | 0.011396 | 0.011396 | 0.011463 |
| 0.011396 | 0.011833 | 0.011732 | 0.011766 | 0.011295 | 0.011396 | 0.011430 |
| 0.011430 | 0.011396 | 0.011463 | 0.011497 | 0.011363 | 0.011363 | 0.011363 |
| 0.011900 | 0.011531 | 0.011531 | 0.011329 | 0.011430 | 0.011598 | 0.011363 |
| 0.011363 | 0.011430 | 0.011396 | 0.011564 | 0.011363 | 0.011497 | 0.011631 |
| 0.011564 | 0.011396 | 0.011396 | 0.011329 | 0.011329 | 0.011497 | 0.011430 |
| 0.011329 | 0.011430 | 0.011295 | 0.011329 | 0.011463 | 0.011598 | 0.011363 |
| 0.011329 | 0.011463 | 0.011397 | 0.011295 | 0.011631 | 0.011295 | 0.011463 |
| 0.011540 | 0.011363 | 0.011665 | 0.011497 | 0.011531 | 0.011396 | 0.011497 |
| 0.011363 | 0.011699 | 0.011295 | 0.011564 | 0.011363 | 0.011363 | 0.011295 |
| 0.011531 | 0.011733 | 0.011430 | 0.011497 | 0.011329 | 0.011732 | 0.011363 |
| 0.011363 | 0.011363 | 0.011396 | 0.011497 | 0.011396 | 0.011497 | 0.011564 |

|          |          |          |          |          |          |          |
|----------|----------|----------|----------|----------|----------|----------|
| 0.011564 | 0.011531 | 0.011430 | 0.011531 | 0.011497 | 0.011363 | 0.011329 |
| 0.011363 | 0.011363 | 0.011430 | 0.011363 | 0.011329 | 0.011497 | 0.011363 |
| 0.011396 | 0.011396 | 0.011531 | 0.011564 | 0.011463 | 0.011396 | 0.011396 |
| 0.011463 | 0.011396 | 0.011497 | 0.011363 | 0.011497 | 0.011396 | 0.011901 |
| 0.011396 | 0.011800 | 0.011405 | 0.017789 | 0.011126 | 0.011488 | 0.011758 |
| 0.011718 | 0.011764 | 0.011322 | 0.011350 | 0.011719 | 0.011785 | 0.011364 |
| 0.011535 | 0.011548 | 0.011294 | 0.011312 | 0.011373 | 0.011356 | 0.011361 |
| 0.011530 | 0.011507 | 0.011505 | 0.011391 | 0.011531 | 0.011564 | 0.011568 |
| 0.011438 | 0.011531 | 0.011463 | 0.011497 | 0.011463 | 0.011464 | 0.011430 |
| 0.011396 | 0.011396 | 0.011228 | 0.011463 | 0.011430 | 0.011363 | 0.011396 |
| 0.011396 | 0.011463 | 0.011363 | 0.011463 | 0.011497 | 0.011531 | 0.011430 |
| 0.011463 | 0.011430 | 0.011766 | 0.011766 | 0.011497 | 0.011531 | 0.011564 |
| 0.011329 | 0.011329 | 0.011363 | 0.011463 | 0.011329 | 0.011564 | 0.011564 |
| 0.011396 | 0.011396 | 0.011531 | 0.011430 | 0.011800 | 0.011431 | 0.011463 |
| 0.011262 | 0.011531 | 0.011564 | 0.011396 | 0.011463 | 0.011430 | 0.011396 |
| 0.000000 | 0.000000 | 0.011094 | 0.011531 | 0.011431 | 0.011631 | 0.011598 |
| 0.011467 | 0.011363 | 0.011463 | 0.011564 | 0.011463 | 0.011598 | 0.011631 |
| 0.011800 | 0.011504 | 0.011463 | 0.011632 | 0.011564 | 0.011531 | 0.011363 |
| 0.011465 | 0.011430 | 0.011396 | 0.011396 | 0.011463 | 0.011363 | 0.011463 |
| 0.011497 | 0.011531 | 0.011430 | 0.011463 | 0.011430 | 0.011766 | 0.011766 |
| 0.011497 | 0.011531 | 0.011598 | 0.011531 | 0.012172 | 0.011418 | 0.011518 |
| 0.011588 | 0.011407 | 0.011658 | 0.011546 | 0.011515 | 0.011578 | 0.011405 |
| 0.012126 | 0.011441 | 0.011575 | 0.011510 | 0.011784 | 0.011639 | 0.011741 |
| 0.012149 | 0.011626 | 0.011466 | 0.011463 | 0.011463 | 0.011497 | 0.011432 |
| 0.011329 | 0.011363 | 0.011497 | 0.011463 | 0.011466 | 0.011598 | 0.011566 |
| 0.011430 | 0.011363 | 0.011396 | 0.011430 | 0.011329 | 0.011396 | 0.011295 |
| 0.011430 | 0.011463 | 0.011363 | 0.011329 | 0.011430 | 0.011363 | 0.011396 |
| 0.011396 | 0.011329 | 0.011396 | 0.011430 | 0.011329 | 0.011531 | 0.011564 |
| 0.011463 | 0.011531 | 0.011463 | 0.011463 | 0.011396 | 0.011800 | 0.011430 |
| 0.011478 | 0.011396 | 0.011632 | 0.011638 | 0.011497 | 0.011497 | 0.011497 |
| 0.011497 | 0.011430 | 0.011396 | 0.011430 | 0.011531 | 0.011531 | 0.011463 |
| 0.011463 | 0.011598 | 0.011766 | 0.011497 | 0.011699 | 0.011699 | 0.011564 |
| 0.011396 | 0.011463 | 0.011497 | 0.011901 | 0.011464 | 0.011497 | 0.011463 |
| 0.011295 | 0.011430 | 0.011430 | 0.011733 | 0.011665 | 0.011699 | 0.011430 |
| 0.011531 | 0.011598 | 0.011463 | 0.011531 | 0.011497 | 0.011363 | 0.011699 |
| 0.011463 | 0.011430 | 0.011430 | 0.011598 | 0.011430 | 0.011531 | 0.011766 |
| 0.011463 | 0.011842 | 0.011833 | 0.011548 | 0.011286 | 0.011536 | 0.011370 |
| 0.011280 | 0.011800 | 0.011341 | 0.011462 | 0.011353 | 0.011417 | 0.011379 |
| 0.011519 | 0.000000 | 0.011338 | 0.011126 | 0.011276 | 0.011328 | 0.011466 |
| 0.011475 | 0.011375 | 0.011518 | 0.011413 | 0.011465 | 0.011598 | 0.011665 |
| 0.011665 | 0.011531 | 0.011568 | 0.011637 | 0.011773 | 0.011732 | 0.011430 |
| 0.011699 | 0.011564 | 0.011430 | 0.011531 | 0.011329 | 0.011564 | 0.011363 |
| 0.011430 | 0.011430 | 0.011396 | 0.011363 | 0.011396 | 0.011363 | 0.011463 |
| 0.011270 | 0.011410 | 0.011437 | 0.011471 | 0.011608 | 0.011573 | 0.011504 |
| 0.011571 | 0.011497 | 0.011282 | 0.011240 | 0.011433 | 0.011603 | 0.011603 |
| 0.011397 | 0.011467 | 0.011700 | 0.011669 | 0.011397 | 0.011632 | 0.011564 |
| 0.011497 | 0.011564 | 0.011564 | 0.011463 | 0.012035 | 0.011430 | 0.011497 |
| 0.011732 | 0.011773 | 0.011436 | 0.011511 | 0.011396 | 0.011598 | 0.011564 |
| 0.011599 | 0.011631 | 0.011430 | 0.011430 | 0.011807 | 0.011766 | 0.011407 |
| 0.011297 | 0.011303 | 0.011401 | 0.011366 | 0.011471 | 0.011322 | 0.011638 |
| 0.011438 | 0.011586 | 0.011298 | 0.011472 | 0.011430 | 0.011505 | 0.011396 |
| 0.011363 | 0.011363 | 0.011430 | 0.011396 | 0.011598 | 0.011564 | 0.011497 |
| 0.011598 | 0.011665 | 0.011396 | 0.011396 | 0.011430 | 0.011430 | 0.011432 |
| 0.011500 | 0.011430 | 0.011430 | 0.011465 | 0.011598 | 0.011665 | 0.011665 |
| 0.011531 | 0.011568 | 0.011637 | 0.011773 | 0.011732 | 0.011430 | 0.011631 |
| 0.011564 | 0.011564 | 0.011365 | 0.011548 | 0.011477 | 0.011537 | 0.011376 |
| 0.011577 | 0.011744 | 0.011526 | 0.011468 | 0.011363 | 0.011564 | 0.011430 |
| 0.011531 | 0.011463 | 0.011363 | 0.011465 | 0.011564 | 0.011567 | 0.011463 |
| 0.011363 | 0.011296 | 0.011430 | 0.011363 | 0.011296 | 0.011400 | 0.011564 |
| 0.011396 | 0.011396 | 0.011228 | 0.011463 | 0.011430 | 0.011363 | 0.011564 |

|          |          |          |          |          |          |          |
|----------|----------|----------|----------|----------|----------|----------|
| 0.011430 | 0.011463 | 0.011463 | 0.011396 | 0.011463 | 0.011699 | 0.011363 |
| 0.011396 | 0.011800 | 0.011396 | 0.011430 | 0.011396 | 0.011766 | 0.011232 |
| 0.011678 | 0.011315 | 0.011311 | 0.011543 | 0.011630 | 0.011563 | 0.011227 |
| 0.011270 | 0.011564 | 0.011665 | 0.011773 | 0.011633 | 0.011771 | 0.011901 |
| 0.011801 | 0.011839 | 0.011800 | 0.012052 | 0.011766 | 0.012642 | 0.011802 |
| 0.012474 | 0.012309 | 0.012443 | 0.012714 | 0.011766 | 0.011463 | 0.011766 |
| 0.012205 | 0.012140 | 0.011732 | 0.011632 | 0.011699 | 0.011699 | 0.011602 |
| 0.011564 | 0.011535 | 0.011631 | 0.011598 | 0.011968 | 0.012035 | 0.012036 |
| 0.011936 | 0.012036 | 0.012140 | 0.011906 | 0.012206 | 0.012212 | 0.012273 |
| 0.012273 | 0.012307 | 0.012255 | 0.012273 | 0.012275 | 0.011497 | 0.011800 |
| 0.011868 | 0.012372 | 0.011874 | 0.012103 | 0.012576 | 0.011638 | 0.011531 |
| 0.011463 | 0.011497 | 0.011968 | 0.012047 | 0.012116 | 0.011833 | 0.011498 |
| S456     | 0.011766 | 0.011766 | 0.012102 | 0.011866 | 0.011866 | 0.011934 |
| 0.011774 | 0.011672 | 0.011866 | 0.011363 | 0.011430 | 0.011397 | 0.011362 |
| 0.011396 | 0.011564 | 0.011362 | 0.011396 | 0.011463 | 0.011430 | 0.011396 |
| 0.011295 | 0.011396 | 0.011497 | 0.011363 | 0.011396 | 0.011396 | 0.011740 |
| 0.011631 | 0.011396 | 0.011295 | 0.011530 | 0.011463 | 0.011430 | 0.011463 |
| 0.011430 | 0.011530 | 0.011430 | 0.011430 | 0.011463 | 0.011430 | 0.011598 |
| 0.011362 | 0.011430 | 0.011463 | 0.011396 | 0.011497 | 0.011463 | 0.011463 |
| 0.011430 | 0.011598 | 0.011497 | 0.011766 | 0.011430 | 0.011698 | 0.011430 |
| 0.011396 | 0.011497 | 0.011564 | 0.011698 | 0.011799 | 0.011497 | 0.011598 |
| 0.011463 | 0.011530 | 0.011430 | 0.011665 | 0.011900 | 0.011430 | 0.011497 |
| 0.011396 | 0.011497 | 0.011463 | 0.011530 | 0.011463 | 0.011463 | 0.011463 |
| 0.011362 | 0.011396 | 0.011362 | 0.011463 | 0.011430 | 0.011464 | 0.011530 |
| 0.011463 | 0.011430 | 0.011497 | 0.011396 | 0.011530 | 0.011362 | 0.011430 |
| 0.011598 | 0.011530 | 0.011766 | 0.011598 | 0.011430 | 0.011665 | 0.011430 |
| 0.011579 | 0.011807 | 0.011626 | 0.011334 | 0.011284 | 0.011465 | 0.011454 |
| 0.012121 | 0.011518 | 0.011266 | 0.011195 | 0.011463 | 0.011463 | 0.011564 |
| 0.011497 | 0.011463 | 0.011530 | 0.011430 | 0.011530 | 0.011463 | 0.011463 |
| 0.011430 | 0.011530 | 0.011732 | 0.011598 | 0.011497 | 0.011463 | 0.011396 |
| 0.011362 | 0.011362 | 0.011430 | 0.011396 | 0.011598 | 0.011564 | 0.011497 |
| 0.011598 | 0.011665 | 0.011396 | 0.011396 | 0.011430 | 0.011430 | 0.011432 |
| 0.011500 | 0.011430 | 0.011430 | 0.011312 | 0.011349 | 0.011341 | 0.011430 |
| 0.011433 | 0.011369 | 0.011392 | 0.011405 | 0.011332 | 0.011368 | 0.011398 |
| 0.011636 | 0.011439 | 0.011439 | 0.011363 | 0.011337 | 0.011497 | 0.011464 |
| 0.011531 | 0.011465 | 0.011464 | 0.011564 | 0.011497 | 0.011867 | 0.011665 |
| 0.011698 | 0.011564 | 0.011430 | 0.011530 | 0.011329 | 0.011564 | 0.011363 |
| 0.011430 | 0.011430 | 0.011396 | 0.011362 | 0.011396 | 0.011362 | 0.011463 |
| 0.011430 | 0.011530 | 0.011463 | 0.011362 | 0.011465 | 0.011564 | 0.011567 |
| 0.011564 | 0.011463 | 0.011362 | 0.011296 | 0.011430 | 0.011362 | 0.011295 |
| 0.011400 | 0.011564 | 0.011362 | 0.011564 | 0.011329 | 0.011430 | 0.011396 |
| 0.011497 | 0.011396 | 0.011430 | 0.011396 | 0.011430 | 0.011295 | 0.011430 |
| 0.011463 | 0.011396 | 0.011463 | 0.011396 | 0.011430 | 0.011463 | 0.011698 |
| 0.011799 | 0.011732 | 0.011799 | 0.011498 | 0.011799 | 0.011430 | 0.011396 |
| 0.011432 | 0.011747 | 0.011472 | 0.011300 | 0.011807 | 0.011299 | 0.011414 |
| 0.011808 | 0.011706 | 0.011396 | 0.011799 | 0.011504 | 0.011463 | 0.011631 |
| 0.011564 | 0.011530 | 0.011593 | 0.011225 | 0.011480 | 0.011463 | 0.011534 |
| 0.011631 | 0.011533 | 0.011534 | 0.011737 | 0.011665 | 0.011732 | 0.011840 |
| 0.011568 | 0.011739 | 0.011670 | 0.011602 | 0.011868 | 0.011329 | 0.011532 |
| 0.011497 | 0.011430 | 0.011329 | 0.011329 | 0.011396 | 0.011396 | 0.011463 |
| 0.011396 | 0.011463 | 0.011362 | 0.011463 | 0.011396 | 0.011396 | 0.011463 |
| 0.011396 | 0.011833 | 0.011732 | 0.011766 | 0.011295 | 0.011396 | 0.011430 |
| 0.011430 | 0.011396 | 0.011463 | 0.011497 | 0.011362 | 0.011362 | 0.011362 |
| 0.011900 | 0.011530 | 0.011530 | 0.011329 | 0.011430 | 0.011598 | 0.011362 |
| 0.011362 | 0.011430 | 0.011396 | 0.011564 | 0.011362 | 0.011497 | 0.011631 |
| 0.011564 | 0.011396 | 0.011396 | 0.011329 | 0.011329 | 0.011497 | 0.011430 |
| 0.011329 | 0.011430 | 0.011295 | 0.011329 | 0.011463 | 0.011598 | 0.011363 |
| 0.011329 | 0.011463 | 0.011396 | 0.011295 | 0.011631 | 0.011295 | 0.011463 |
| 0.011540 | 0.011362 | 0.011665 | 0.011497 | 0.011530 | 0.011396 | 0.011497 |
| 0.011362 | 0.011698 | 0.011295 | 0.011564 | 0.011362 | 0.011362 | 0.011295 |

|          |          |          |          |          |          |          |
|----------|----------|----------|----------|----------|----------|----------|
| 0.011530 | 0.011732 | 0.011430 | 0.011497 | 0.011329 | 0.011732 | 0.011362 |
| 0.011362 | 0.011362 | 0.011396 | 0.011497 | 0.011396 | 0.011497 | 0.011564 |
| 0.011564 | 0.011530 | 0.011430 | 0.011530 | 0.011497 | 0.011362 | 0.011329 |
| 0.011362 | 0.011362 | 0.011430 | 0.011362 | 0.011329 | 0.011497 | 0.011362 |
| 0.011396 | 0.011396 | 0.011530 | 0.011564 | 0.011463 | 0.011396 | 0.011396 |
| 0.011463 | 0.011396 | 0.011497 | 0.011362 | 0.011497 | 0.011396 | 0.011900 |
| 0.011396 | 0.011799 | 0.011405 | 0.017785 | 0.011126 | 0.011488 | 0.011758 |
| 0.011718 | 0.011764 | 0.011322 | 0.011350 | 0.011719 | 0.011785 | 0.011364 |
| 0.011534 | 0.011548 | 0.011294 | 0.011311 | 0.011372 | 0.011356 | 0.011361 |
| 0.011529 | 0.011507 | 0.011505 | 0.011391 | 0.011530 | 0.011564 | 0.011568 |
| 0.011438 | 0.011530 | 0.011463 | 0.011497 | 0.011463 | 0.011464 | 0.011430 |
| 0.011396 | 0.011396 | 0.011228 | 0.011463 | 0.011430 | 0.011362 | 0.011396 |
| 0.011396 | 0.011463 | 0.011362 | 0.011463 | 0.011497 | 0.011530 | 0.011430 |
| 0.011463 | 0.011430 | 0.011766 | 0.011766 | 0.011497 | 0.011531 | 0.011564 |
| 0.011329 | 0.011329 | 0.011362 | 0.011463 | 0.011329 | 0.011564 | 0.011564 |
| 0.011396 | 0.011396 | 0.011530 | 0.011430 | 0.011799 | 0.011431 | 0.011463 |
| 0.011262 | 0.011530 | 0.011564 | 0.011396 | 0.011463 | 0.011430 | 0.011396 |
| 0.000000 | 0.000000 | 0.011094 | 0.011530 | 0.011431 | 0.011631 | 0.011598 |
| 0.011467 | 0.011362 | 0.011463 | 0.011564 | 0.011463 | 0.011598 | 0.011631 |
| 0.011799 | 0.011504 | 0.011463 | 0.011631 | 0.011564 | 0.011530 | 0.011363 |
| 0.011464 | 0.011430 | 0.011396 | 0.011396 | 0.011463 | 0.011362 | 0.011463 |
| 0.011497 | 0.011530 | 0.011430 | 0.011463 | 0.011430 | 0.011766 | 0.011766 |
| 0.011497 | 0.011531 | 0.011598 | 0.011530 | 0.012171 | 0.011418 | 0.011518 |
| 0.011588 | 0.011407 | 0.011658 | 0.011545 | 0.011515 | 0.011578 | 0.011405 |
| 0.012125 | 0.011441 | 0.011574 | 0.011510 | 0.011784 | 0.011639 | 0.011741 |
| 0.012149 | 0.011625 | 0.011466 | 0.011463 | 0.011463 | 0.011497 | 0.011432 |
| 0.011329 | 0.011362 | 0.011497 | 0.011463 | 0.011466 | 0.011598 | 0.011565 |
| 0.011430 | 0.011362 | 0.011396 | 0.011430 | 0.011329 | 0.011396 | 0.011295 |
| 0.011430 | 0.011463 | 0.011362 | 0.011329 | 0.011430 | 0.011362 | 0.011396 |
| 0.011396 | 0.011329 | 0.011396 | 0.011430 | 0.011329 | 0.011530 | 0.011564 |
| 0.011463 | 0.011530 | 0.011463 | 0.011463 | 0.011396 | 0.011799 | 0.011430 |
| 0.011478 | 0.011396 | 0.011632 | 0.011637 | 0.011497 | 0.011497 | 0.011497 |
| 0.011497 | 0.011430 | 0.011396 | 0.011430 | 0.011530 | 0.011530 | 0.011463 |
| 0.011463 | 0.011598 | 0.011766 | 0.011497 | 0.011699 | 0.011699 | 0.011564 |
| 0.011396 | 0.011463 | 0.011497 | 0.011900 | 0.011464 | 0.011497 | 0.011463 |
| 0.011295 | 0.011430 | 0.011430 | 0.011732 | 0.011665 | 0.011698 | 0.011430 |
| 0.011530 | 0.011598 | 0.011463 | 0.011530 | 0.011497 | 0.011362 | 0.011698 |
| 0.011463 | 0.011430 | 0.011430 | 0.011598 | 0.011430 | 0.011530 | 0.011766 |
| 0.011463 | 0.011842 | 0.011833 | 0.011548 | 0.011286 | 0.011536 | 0.011370 |
| 0.011280 | 0.011800 | 0.011341 | 0.011462 | 0.011353 | 0.011417 | 0.011379 |
| 0.011519 | 0.000000 | 0.011338 | 0.011126 | 0.011276 | 0.011328 | 0.011466 |
| 0.011475 | 0.011375 | 0.011518 | 0.011412 | 0.011465 | 0.011598 | 0.011665 |
| 0.011665 | 0.011531 | 0.011601 | 0.011637 | 0.011772 | 0.011732 | 0.011430 |
| 0.011698 | 0.011564 | 0.011430 | 0.011530 | 0.011329 | 0.011564 | 0.011363 |
| 0.011430 | 0.011430 | 0.011396 | 0.011362 | 0.011396 | 0.011362 | 0.011463 |
| 0.011270 | 0.011410 | 0.011437 | 0.011471 | 0.011608 | 0.011573 | 0.011504 |
| 0.011571 | 0.011497 | 0.011282 | 0.011240 | 0.011433 | 0.011602 | 0.011603 |
| 0.011396 | 0.011467 | 0.011700 | 0.011668 | 0.011396 | 0.011632 | 0.011564 |
| 0.011497 | 0.011564 | 0.011564 | 0.011463 | 0.012035 | 0.011430 | 0.011497 |
| 0.011732 | 0.011773 | 0.011436 | 0.011511 | 0.011396 | 0.011598 | 0.011564 |
| 0.011599 | 0.011631 | 0.011430 | 0.011430 | 0.011807 | 0.011766 | 0.011407 |
| 0.011297 | 0.011303 | 0.011401 | 0.011366 | 0.011470 | 0.011322 | 0.011638 |
| 0.011438 | 0.011586 | 0.011298 | 0.011472 | 0.011430 | 0.011505 | 0.011396 |
| 0.011362 | 0.011362 | 0.011430 | 0.011396 | 0.011598 | 0.011564 | 0.011497 |
| 0.011598 | 0.011665 | 0.011396 | 0.011396 | 0.011430 | 0.011430 | 0.011432 |
| 0.011500 | 0.011430 | 0.011430 | 0.011465 | 0.011598 | 0.011665 | 0.011665 |
| 0.011531 | 0.011601 | 0.011637 | 0.011772 | 0.011732 | 0.011430 | 0.011631 |
| 0.011564 | 0.011564 | 0.011365 | 0.011548 | 0.011477 | 0.011537 | 0.011375 |
| 0.011577 | 0.011744 | 0.011526 | 0.011468 | 0.011362 | 0.011564 | 0.011430 |
| 0.011530 | 0.011463 | 0.011362 | 0.011465 | 0.011564 | 0.011567 | 0.011463 |

|          |          |          |          |          |          |          |
|----------|----------|----------|----------|----------|----------|----------|
| 0.011362 | 0.011296 | 0.011430 | 0.011362 | 0.011295 | 0.011400 | 0.011564 |
| 0.011396 | 0.011396 | 0.011228 | 0.011463 | 0.011430 | 0.011362 | 0.011564 |
| 0.011430 | 0.011463 | 0.011463 | 0.011396 | 0.011463 | 0.011698 | 0.011362 |
| 0.011396 | 0.011799 | 0.011396 | 0.011430 | 0.011396 | 0.011766 | 0.011232 |
| 0.011678 | 0.011315 | 0.011311 | 0.011543 | 0.011630 | 0.011563 | 0.011227 |
| 0.011270 | 0.011564 | 0.011665 | 0.011773 | 0.011632 | 0.011771 | 0.011901 |
| 0.011801 | 0.011838 | 0.011799 | 0.012051 | 0.011766 | 0.012641 | 0.011801 |
| 0.012473 | 0.012308 | 0.012442 | 0.012714 | 0.011766 | 0.011463 | 0.011766 |
| 0.012205 | 0.012140 | 0.011732 | 0.011631 | 0.011699 | 0.011699 | 0.011602 |
| 0.011564 | 0.011535 | 0.011631 | 0.011598 | 0.011968 | 0.012035 | 0.012036 |
| 0.011935 | 0.012035 | 0.012139 | 0.011906 | 0.012205 | 0.012211 | 0.012272 |
| 0.012273 | 0.012306 | 0.012255 | 0.012273 | 0.012274 | 0.011497 | 0.011800 |
| 0.011867 | 0.012372 | 0.011874 | 0.012102 | 0.012575 | 0.011637 | 0.011531 |
| 0.011463 | 0.011497 | 0.011968 | 0.012047 | 0.012116 | 0.011833 | 0.011498 |
| S457     | 0.011799 | 0.011799 | 0.012136 | 0.011900 | 0.011900 | 0.011967 |
| 0.011808 | 0.011740 | 0.011900 | 0.011396 | 0.011463 | 0.011430 | 0.011396 |
| 0.011429 | 0.011597 | 0.011396 | 0.011429 | 0.011497 | 0.011463 | 0.011429 |
| 0.011329 | 0.011429 | 0.011530 | 0.011396 | 0.011430 | 0.011429 | 0.011774 |
| 0.011665 | 0.011429 | 0.011329 | 0.011564 | 0.011497 | 0.011463 | 0.011497 |
| 0.011463 | 0.011564 | 0.011463 | 0.011463 | 0.011497 | 0.011463 | 0.011631 |
| 0.011396 | 0.011463 | 0.011497 | 0.011429 | 0.011530 | 0.011497 | 0.011497 |
| 0.011463 | 0.011631 | 0.011531 | 0.011799 | 0.011463 | 0.011732 | 0.011463 |
| 0.011429 | 0.011530 | 0.011597 | 0.011732 | 0.011833 | 0.011530 | 0.011631 |
| 0.011497 | 0.011564 | 0.011463 | 0.011698 | 0.011934 | 0.011463 | 0.011530 |
| 0.011429 | 0.011530 | 0.011497 | 0.011564 | 0.011497 | 0.011497 | 0.011497 |
| 0.011396 | 0.011429 | 0.011396 | 0.011497 | 0.011463 | 0.011498 | 0.011564 |
| 0.011497 | 0.011463 | 0.011530 | 0.011429 | 0.011564 | 0.011396 | 0.011463 |
| 0.011631 | 0.011564 | 0.011799 | 0.011631 | 0.011463 | 0.011698 | 0.011463 |
| 0.011616 | 0.011845 | 0.011664 | 0.011373 | 0.011321 | 0.011502 | 0.011493 |
| 0.012158 | 0.011569 | 0.011307 | 0.011228 | 0.011497 | 0.011497 | 0.011597 |
| 0.011530 | 0.011497 | 0.011564 | 0.011463 | 0.011564 | 0.011497 | 0.011497 |
| 0.011463 | 0.011564 | 0.011765 | 0.011631 | 0.011530 | 0.011497 | 0.011430 |
| 0.011396 | 0.011396 | 0.011463 | 0.011429 | 0.011631 | 0.011597 | 0.011530 |
| 0.011631 | 0.011698 | 0.011429 | 0.011429 | 0.011463 | 0.011463 | 0.011465 |
| 0.011533 | 0.011463 | 0.011463 | 0.011348 | 0.011386 | 0.011376 | 0.011464 |
| 0.011467 | 0.011404 | 0.011429 | 0.011440 | 0.011366 | 0.011403 | 0.011432 |
| 0.011672 | 0.011474 | 0.011473 | 0.011396 | 0.011371 | 0.011531 | 0.011497 |
| 0.011565 | 0.011498 | 0.011497 | 0.011597 | 0.011530 | 0.011900 | 0.011698 |
| 0.011732 | 0.011597 | 0.011463 | 0.011564 | 0.011362 | 0.011597 | 0.011396 |
| 0.011463 | 0.011463 | 0.011429 | 0.011396 | 0.011429 | 0.011396 | 0.011497 |
| 0.011463 | 0.011564 | 0.011497 | 0.011396 | 0.011498 | 0.011597 | 0.011601 |
| 0.011598 | 0.011497 | 0.011396 | 0.011330 | 0.011463 | 0.011396 | 0.011329 |
| 0.011434 | 0.011598 | 0.011396 | 0.011598 | 0.011362 | 0.011463 | 0.011429 |
| 0.011530 | 0.011429 | 0.011463 | 0.011430 | 0.011463 | 0.011329 | 0.011463 |
| 0.011497 | 0.011429 | 0.011497 | 0.011429 | 0.011463 | 0.011497 | 0.011732 |
| 0.011833 | 0.011765 | 0.011833 | 0.011532 | 0.011833 | 0.011463 | 0.011429 |
| 0.011465 | 0.011788 | 0.011517 | 0.011335 | 0.011841 | 0.011333 | 0.011454 |
| 0.011841 | 0.011740 | 0.011429 | 0.011833 | 0.011538 | 0.011497 | 0.011665 |
| 0.011597 | 0.011564 | 0.011629 | 0.011266 | 0.011480 | 0.011497 | 0.011568 |
| 0.011665 | 0.011566 | 0.011567 | 0.011771 | 0.011698 | 0.011766 | 0.011874 |
| 0.011602 | 0.011773 | 0.011704 | 0.011635 | 0.011902 | 0.011362 | 0.011566 |
| 0.011530 | 0.011463 | 0.011362 | 0.011362 | 0.011429 | 0.011429 | 0.011497 |
| 0.011429 | 0.011497 | 0.011396 | 0.011497 | 0.011429 | 0.011429 | 0.011497 |
| 0.011429 | 0.011866 | 0.011765 | 0.011799 | 0.011329 | 0.011429 | 0.011463 |
| 0.011463 | 0.011429 | 0.011497 | 0.011530 | 0.011396 | 0.011396 | 0.011396 |
| 0.011933 | 0.011564 | 0.011564 | 0.011362 | 0.011463 | 0.011631 | 0.011396 |
| 0.011396 | 0.011463 | 0.011429 | 0.011598 | 0.011396 | 0.011530 | 0.011665 |
| 0.011597 | 0.011429 | 0.011429 | 0.011362 | 0.011362 | 0.011530 | 0.011463 |
| 0.011362 | 0.011463 | 0.011329 | 0.011362 | 0.011497 | 0.011631 | 0.011396 |
| 0.011363 | 0.011497 | 0.011430 | 0.011329 | 0.011665 | 0.011329 | 0.011497 |



|          |          |          |          |          |          |          |
|----------|----------|----------|----------|----------|----------|----------|
| 0.011574 | 0.011396 | 0.011698 | 0.011530 | 0.011564 | 0.011429 | 0.011530 |
| 0.011396 | 0.011732 | 0.011329 | 0.011597 | 0.011396 | 0.011396 | 0.011329 |
| 0.011564 | 0.011766 | 0.011463 | 0.011530 | 0.011362 | 0.011765 | 0.011396 |
| 0.011396 | 0.011396 | 0.011429 | 0.011530 | 0.011429 | 0.011530 | 0.011597 |
| 0.011597 | 0.011564 | 0.011463 | 0.011564 | 0.011530 | 0.011396 | 0.011362 |
| 0.011396 | 0.011396 | 0.011463 | 0.011396 | 0.011362 | 0.011530 | 0.011396 |
| 0.011429 | 0.011429 | 0.011564 | 0.011597 | 0.011497 | 0.011429 | 0.011430 |
| 0.011497 | 0.011429 | 0.011530 | 0.011396 | 0.011530 | 0.011429 | 0.011934 |
| 0.011429 | 0.011833 | 0.011440 | 0.017823 | 0.011191 | 0.011488 | 0.011793 |
| 0.011752 | 0.011799 | 0.011374 | 0.011408 | 0.011774 | 0.011820 | 0.011425 |
| 0.011582 | 0.011610 | 0.011333 | 0.011353 | 0.011411 | 0.011406 | 0.011404 |
| 0.011576 | 0.011544 | 0.011542 | 0.011457 | 0.011564 | 0.011597 | 0.011601 |
| 0.011472 | 0.011564 | 0.011497 | 0.011530 | 0.011497 | 0.011497 | 0.011463 |
| 0.011429 | 0.011429 | 0.011262 | 0.011497 | 0.011463 | 0.011396 | 0.011429 |
| 0.011429 | 0.011497 | 0.011396 | 0.011497 | 0.011530 | 0.011564 | 0.011463 |
| 0.011497 | 0.011463 | 0.011799 | 0.011799 | 0.011530 | 0.011565 | 0.011598 |
| 0.011362 | 0.011362 | 0.011396 | 0.011497 | 0.011362 | 0.011597 | 0.011597 |
| 0.011429 | 0.011429 | 0.011564 | 0.011463 | 0.011833 | 0.011464 | 0.011497 |
| 0.011295 | 0.011564 | 0.011597 | 0.011429 | 0.011497 | 0.011463 | 0.011429 |
| 0.011094 | 0.011094 | 0.000000 | 0.011564 | 0.011464 | 0.011665 | 0.011631 |
| 0.011501 | 0.011396 | 0.011497 | 0.011598 | 0.011497 | 0.011631 | 0.011665 |
| 0.011833 | 0.011538 | 0.011497 | 0.011665 | 0.011597 | 0.011564 | 0.011396 |
| 0.011498 | 0.011464 | 0.011429 | 0.011429 | 0.011497 | 0.011396 | 0.011497 |
| 0.011530 | 0.011564 | 0.011463 | 0.011497 | 0.011463 | 0.011799 | 0.011799 |
| 0.011530 | 0.011565 | 0.011631 | 0.011564 | 0.012204 | 0.011453 | 0.011553 |
| 0.011623 | 0.011442 | 0.011693 | 0.011580 | 0.011550 | 0.011612 | 0.011440 |
| 0.012160 | 0.011476 | 0.011608 | 0.011545 | 0.011818 | 0.011673 | 0.011775 |
| 0.012183 | 0.011663 | 0.011500 | 0.011497 | 0.011497 | 0.011530 | 0.011466 |
| 0.011362 | 0.011396 | 0.011530 | 0.011497 | 0.011500 | 0.011631 | 0.011599 |
| 0.011463 | 0.011396 | 0.011429 | 0.011463 | 0.011362 | 0.011429 | 0.011329 |
| 0.011463 | 0.011497 | 0.011396 | 0.011362 | 0.011463 | 0.011396 | 0.011429 |
| 0.011429 | 0.011362 | 0.011429 | 0.011463 | 0.011362 | 0.011564 | 0.011597 |
| 0.011497 | 0.011564 | 0.011497 | 0.011497 | 0.011429 | 0.011833 | 0.011463 |
| 0.011513 | 0.011430 | 0.011665 | 0.011671 | 0.011530 | 0.011530 | 0.011530 |
| 0.011530 | 0.011463 | 0.011429 | 0.011463 | 0.011564 | 0.011564 | 0.011497 |
| 0.011497 | 0.011631 | 0.011799 | 0.011530 | 0.011732 | 0.011732 | 0.011597 |
| 0.011429 | 0.011497 | 0.011530 | 0.011934 | 0.011497 | 0.011530 | 0.011497 |
| 0.011329 | 0.011463 | 0.011463 | 0.011766 | 0.011698 | 0.011732 | 0.011463 |
| 0.011564 | 0.011631 | 0.011497 | 0.011564 | 0.011530 | 0.011396 | 0.011732 |
| 0.011497 | 0.011463 | 0.011463 | 0.011631 | 0.011463 | 0.011564 | 0.011799 |
| 0.011497 | 0.011876 | 0.011866 | 0.011589 | 0.011342 | 0.011570 | 0.011421 |
| 0.011335 | 0.011839 | 0.011376 | 0.011507 | 0.011402 | 0.011467 | 0.011432 |
| 0.011570 | 0.011126 | 0.011394 | 0.011192 | 0.011330 | 0.011395 | 0.011506 |
| 0.011512 | 0.011414 | 0.011553 | 0.011448 | 0.011498 | 0.011631 | 0.011698 |
| 0.011698 | 0.011564 | 0.011635 | 0.011670 | 0.011806 | 0.011732 | 0.011497 |
| 0.011732 | 0.011597 | 0.011463 | 0.011564 | 0.011362 | 0.011597 | 0.011396 |
| 0.011463 | 0.011463 | 0.011429 | 0.011396 | 0.011429 | 0.011396 | 0.011497 |
| 0.011305 | 0.011445 | 0.011471 | 0.011505 | 0.011642 | 0.011607 | 0.011538 |
| 0.011605 | 0.011531 | 0.011319 | 0.011276 | 0.011467 | 0.011636 | 0.011637 |
| 0.011430 | 0.011500 | 0.011733 | 0.011702 | 0.011430 | 0.011666 | 0.011597 |
| 0.011530 | 0.011597 | 0.011597 | 0.011497 | 0.012068 | 0.011463 | 0.011530 |
| 0.011765 | 0.011808 | 0.011470 | 0.011545 | 0.011430 | 0.011631 | 0.011597 |
| 0.011632 | 0.011665 | 0.011463 | 0.011463 | 0.011846 | 0.011799 | 0.011442 |
| 0.011331 | 0.011337 | 0.011435 | 0.011400 | 0.011504 | 0.011359 | 0.011672 |
| 0.011472 | 0.011586 | 0.011298 | 0.011510 | 0.011464 | 0.011539 | 0.011430 |
| 0.011396 | 0.011396 | 0.011463 | 0.011429 | 0.011631 | 0.011597 | 0.011530 |
| 0.011631 | 0.011698 | 0.011429 | 0.011429 | 0.011463 | 0.011463 | 0.011465 |
| 0.011533 | 0.011463 | 0.011463 | 0.011498 | 0.011631 | 0.011698 | 0.011698 |
| 0.011564 | 0.011635 | 0.011670 | 0.011806 | 0.011732 | 0.011497 | 0.011665 |
| 0.011597 | 0.011597 | 0.011398 | 0.011582 | 0.011512 | 0.011571 | 0.011411 |

|          |          |          |          |          |          |          |
|----------|----------|----------|----------|----------|----------|----------|
| 0.011611 | 0.011789 | 0.011568 | 0.011502 | 0.011396 | 0.011598 | 0.011463 |
| 0.011564 | 0.011497 | 0.011396 | 0.011498 | 0.011597 | 0.011601 | 0.011497 |
| 0.011396 | 0.011330 | 0.011463 | 0.011396 | 0.011329 | 0.011434 | 0.011598 |
| 0.011429 | 0.011429 | 0.011262 | 0.011497 | 0.011463 | 0.011396 | 0.011597 |
| 0.011463 | 0.011497 | 0.011497 | 0.011429 | 0.011497 | 0.011732 | 0.011396 |
| 0.011429 | 0.011833 | 0.011429 | 0.011463 | 0.011429 | 0.011799 | 0.011274 |
| 0.011735 | 0.011358 | 0.011361 | 0.011584 | 0.011671 | 0.011599 | 0.011269 |
| 0.011323 | 0.011597 | 0.011698 | 0.011807 | 0.011666 | 0.011805 | 0.011935 |
| 0.011834 | 0.011872 | 0.011833 | 0.012085 | 0.011799 | 0.012674 | 0.011835 |
| 0.012506 | 0.012342 | 0.012476 | 0.012748 | 0.011799 | 0.011497 | 0.011799 |
| 0.012238 | 0.012173 | 0.011765 | 0.011665 | 0.011733 | 0.011733 | 0.011635 |
| 0.011597 | 0.011569 | 0.011665 | 0.011632 | 0.012002 | 0.012068 | 0.012069 |
| 0.011969 | 0.012069 | 0.012173 | 0.011940 | 0.012239 | 0.012245 | 0.012306 |
| 0.012306 | 0.012340 | 0.012289 | 0.012307 | 0.012308 | 0.011530 | 0.011833 |
| 0.011901 | 0.012405 | 0.011908 | 0.012136 | 0.012609 | 0.011671 | 0.011564 |
| 0.011497 | 0.011530 | 0.012001 | 0.012089 | 0.012151 | 0.011866 | 0.011532 |
| S458     | 0.011766 | 0.011766 | 0.012102 | 0.011867 | 0.011867 | 0.011934 |
| 0.011774 | 0.011672 | 0.011867 | 0.011363 | 0.011430 | 0.011397 | 0.011363 |
| 0.011396 | 0.011564 | 0.011362 | 0.011396 | 0.011463 | 0.011430 | 0.011396 |
| 0.011363 | 0.011396 | 0.011497 | 0.011363 | 0.011329 | 0.011396 | 0.011740 |
| 0.011631 | 0.011396 | 0.011295 | 0.011530 | 0.011396 | 0.011430 | 0.011396 |
| 0.011430 | 0.011463 | 0.011430 | 0.011430 | 0.011463 | 0.011430 | 0.011598 |
| 0.011363 | 0.011430 | 0.011463 | 0.011396 | 0.011430 | 0.011530 | 0.011463 |
| 0.011430 | 0.011598 | 0.011497 | 0.011766 | 0.011430 | 0.011631 | 0.011430 |
| 0.011396 | 0.011430 | 0.011564 | 0.011631 | 0.011799 | 0.011497 | 0.011598 |
| 0.011396 | 0.011463 | 0.011430 | 0.011598 | 0.011901 | 0.011430 | 0.011497 |
| 0.011396 | 0.011497 | 0.011463 | 0.011531 | 0.011463 | 0.011463 | 0.011463 |
| 0.011362 | 0.011396 | 0.011363 | 0.011463 | 0.011430 | 0.011464 | 0.011530 |
| 0.011463 | 0.011430 | 0.011430 | 0.011396 | 0.011530 | 0.011295 | 0.011430 |
| 0.011598 | 0.011530 | 0.011766 | 0.011598 | 0.011430 | 0.011598 | 0.011430 |
| 0.011616 | 0.011845 | 0.011588 | 0.011334 | 0.011247 | 0.011465 | 0.011454 |
| 0.012121 | 0.011467 | 0.011266 | 0.011665 | 0.011665 | 0.011463 | 0.011564 |
| 0.011497 | 0.011463 | 0.011530 | 0.011430 | 0.011531 | 0.011396 | 0.011463 |
| 0.011430 | 0.011530 | 0.011732 | 0.011598 | 0.011497 | 0.011463 | 0.011329 |
| 0.011363 | 0.011362 | 0.011363 | 0.011396 | 0.011598 | 0.011564 | 0.011497 |
| 0.011598 | 0.011665 | 0.011396 | 0.011396 | 0.011430 | 0.011430 | 0.011432 |
| 0.011500 | 0.011430 | 0.011430 | 0.011276 | 0.011313 | 0.011341 | 0.011430 |
| 0.011433 | 0.011370 | 0.011355 | 0.011405 | 0.011332 | 0.011369 | 0.011398 |
| 0.011672 | 0.011439 | 0.011370 | 0.011363 | 0.011371 | 0.011498 | 0.011464 |
| 0.011531 | 0.011465 | 0.011464 | 0.011564 | 0.011497 | 0.011799 | 0.011665 |
| 0.011698 | 0.011564 | 0.011430 | 0.011531 | 0.011329 | 0.011564 | 0.011363 |
| 0.011430 | 0.011430 | 0.011396 | 0.011363 | 0.011396 | 0.011363 | 0.011463 |
| 0.011363 | 0.011396 | 0.011463 | 0.011362 | 0.011465 | 0.011564 | 0.011567 |
| 0.011497 | 0.011463 | 0.011363 | 0.011296 | 0.011430 | 0.011363 | 0.011295 |
| 0.011400 | 0.011497 | 0.011295 | 0.011497 | 0.011329 | 0.011430 | 0.011396 |
| 0.011430 | 0.011396 | 0.011363 | 0.011396 | 0.011430 | 0.011295 | 0.011363 |
| 0.011396 | 0.011396 | 0.011463 | 0.011396 | 0.011430 | 0.011463 | 0.011699 |
| 0.011799 | 0.011732 | 0.011799 | 0.011566 | 0.011800 | 0.011430 | 0.011396 |
| 0.011432 | 0.011707 | 0.011518 | 0.011335 | 0.011807 | 0.011299 | 0.011414 |
| 0.011808 | 0.011706 | 0.011598 | 0.011800 | 0.011504 | 0.011665 | 0.011564 |
| 0.011564 | 0.011732 | 0.011594 | 0.011431 | 0.011480 | 0.011464 | 0.011534 |
| 0.011632 | 0.011533 | 0.011669 | 0.011670 | 0.011665 | 0.011732 | 0.011840 |
| 0.011568 | 0.011672 | 0.011670 | 0.011602 | 0.011868 | 0.011329 | 0.011532 |
| 0.011430 | 0.011430 | 0.011329 | 0.011329 | 0.011329 | 0.011396 | 0.011463 |
| 0.011262 | 0.011396 | 0.011295 | 0.011463 | 0.011329 | 0.011396 | 0.011463 |
| 0.011396 | 0.011833 | 0.011732 | 0.011766 | 0.011295 | 0.011396 | 0.011430 |
| 0.011430 | 0.011396 | 0.011463 | 0.011497 | 0.011362 | 0.011362 | 0.011362 |
| 0.011900 | 0.011531 | 0.011531 | 0.011329 | 0.011430 | 0.011531 | 0.011363 |
| 0.011362 | 0.011430 | 0.011396 | 0.011430 | 0.011363 | 0.011497 | 0.011497 |
| 0.011564 | 0.011396 | 0.011396 | 0.011329 | 0.011329 | 0.011497 | 0.011430 |

|          |          |          |          |          |          |          |
|----------|----------|----------|----------|----------|----------|----------|
| 0.011329 | 0.011430 | 0.011295 | 0.011329 | 0.011463 | 0.011598 | 0.011363 |
| 0.011329 | 0.011463 | 0.011397 | 0.011295 | 0.011631 | 0.011295 | 0.011463 |
| 0.011471 | 0.011363 | 0.011665 | 0.011497 | 0.011531 | 0.011396 | 0.011497 |
| 0.011362 | 0.011631 | 0.011295 | 0.011564 | 0.011363 | 0.011363 | 0.011295 |
| 0.011463 | 0.011733 | 0.011430 | 0.011497 | 0.011329 | 0.011732 | 0.011363 |
| 0.011363 | 0.011362 | 0.011396 | 0.011430 | 0.011396 | 0.011497 | 0.011564 |
| 0.011564 | 0.011531 | 0.011430 | 0.011531 | 0.011430 | 0.011363 | 0.011329 |
| 0.011362 | 0.011363 | 0.011430 | 0.011363 | 0.011262 | 0.011497 | 0.011363 |
| 0.011396 | 0.011396 | 0.011531 | 0.011564 | 0.011463 | 0.011329 | 0.011396 |
| 0.011463 | 0.011396 | 0.011497 | 0.011363 | 0.011497 | 0.011598 | 0.011900 |
| 0.011396 | 0.011800 | 0.011405 | 0.017861 | 0.011257 | 0.011611 | 0.011758 |
| 0.011718 | 0.011764 | 0.011322 | 0.011234 | 0.011719 | 0.011785 | 0.011364 |
| 0.011487 | 0.011610 | 0.011294 | 0.011353 | 0.011333 | 0.011406 | 0.011404 |
| 0.011482 | 0.011470 | 0.011468 | 0.011325 | 0.011531 | 0.011564 | 0.011568 |
| 0.011370 | 0.011530 | 0.011531 | 0.011497 | 0.011463 | 0.011464 | 0.011430 |
| 0.011463 | 0.011396 | 0.011430 | 0.011463 | 0.011430 | 0.011363 | 0.011396 |
| 0.011396 | 0.011463 | 0.011363 | 0.011463 | 0.011497 | 0.011530 | 0.011430 |
| 0.011463 | 0.011430 | 0.011766 | 0.011766 | 0.011497 | 0.011531 | 0.011564 |
| 0.011329 | 0.011329 | 0.011363 | 0.011396 | 0.011329 | 0.011564 | 0.011564 |
| 0.011598 | 0.011598 | 0.011531 | 0.011631 | 0.011799 | 0.011633 | 0.011396 |
| 0.011463 | 0.011530 | 0.011497 | 0.011396 | 0.011463 | 0.011430 | 0.011463 |
| 0.011531 | 0.011530 | 0.011564 | 0.000000 | 0.011363 | 0.011631 | 0.011530 |
| 0.011467 | 0.011363 | 0.011463 | 0.011564 | 0.011463 | 0.011598 | 0.011631 |
| 0.011800 | 0.011504 | 0.011665 | 0.011564 | 0.011564 | 0.011732 | 0.011329 |
| 0.011532 | 0.011430 | 0.011396 | 0.011396 | 0.011463 | 0.011363 | 0.011463 |
| 0.011497 | 0.011530 | 0.011430 | 0.011463 | 0.011430 | 0.011766 | 0.011766 |
| 0.011497 | 0.011531 | 0.011598 | 0.011530 | 0.012171 | 0.011597 | 0.011518 |
| 0.011588 | 0.011546 | 0.011658 | 0.011546 | 0.011656 | 0.011578 | 0.011543 |
| 0.012126 | 0.011441 | 0.011574 | 0.011510 | 0.011784 | 0.011639 | 0.011673 |
| 0.012149 | 0.011626 | 0.011466 | 0.011463 | 0.011463 | 0.011497 | 0.011432 |
| 0.011329 | 0.011295 | 0.011497 | 0.011463 | 0.011466 | 0.011598 | 0.011565 |
| 0.011430 | 0.011295 | 0.011329 | 0.011430 | 0.011262 | 0.011396 | 0.011295 |
| 0.011430 | 0.011463 | 0.011363 | 0.011329 | 0.011430 | 0.011362 | 0.011396 |
| 0.011396 | 0.011329 | 0.011396 | 0.011430 | 0.011329 | 0.011463 | 0.011564 |
| 0.011463 | 0.011531 | 0.011463 | 0.011463 | 0.011396 | 0.011799 | 0.011430 |
| 0.011478 | 0.011396 | 0.011632 | 0.011637 | 0.011430 | 0.011497 | 0.011497 |
| 0.011497 | 0.011363 | 0.011396 | 0.011363 | 0.011531 | 0.011531 | 0.011463 |
| 0.011463 | 0.011598 | 0.011766 | 0.011497 | 0.011699 | 0.011699 | 0.011564 |
| 0.011396 | 0.011463 | 0.011497 | 0.011901 | 0.011464 | 0.011430 | 0.011463 |
| 0.011497 | 0.011430 | 0.011430 | 0.011733 | 0.011598 | 0.011699 | 0.011430 |
| 0.011531 | 0.011598 | 0.011463 | 0.011531 | 0.011497 | 0.011363 | 0.011699 |
| 0.011463 | 0.011430 | 0.011430 | 0.011598 | 0.011430 | 0.011530 | 0.011766 |
| 0.011463 | 0.011842 | 0.011833 | 0.011548 | 0.011286 | 0.011536 | 0.011318 |
| 0.011390 | 0.011761 | 0.011341 | 0.011507 | 0.011304 | 0.011467 | 0.011379 |
| 0.011468 | 0.000000 | 0.011227 | 0.011126 | 0.011276 | 0.011395 | 0.011425 |
| 0.011512 | 0.011257 | 0.011518 | 0.011412 | 0.011465 | 0.011598 | 0.011665 |
| 0.011665 | 0.011531 | 0.011635 | 0.011637 | 0.011772 | 0.011803 | 0.011430 |
| 0.011698 | 0.011564 | 0.011430 | 0.011531 | 0.011329 | 0.011564 | 0.011363 |
| 0.011430 | 0.011430 | 0.011396 | 0.011363 | 0.011396 | 0.011363 | 0.011463 |
| 0.011444 | 0.011445 | 0.011437 | 0.011471 | 0.011608 | 0.011504 | 0.011572 |
| 0.011571 | 0.011497 | 0.011319 | 0.011312 | 0.011433 | 0.011602 | 0.011603 |
| 0.011397 | 0.011467 | 0.011700 | 0.011669 | 0.011598 | 0.011632 | 0.011564 |
| 0.011497 | 0.011564 | 0.011564 | 0.011463 | 0.012035 | 0.011631 | 0.011699 |
| 0.011732 | 0.011809 | 0.011436 | 0.011511 | 0.011396 | 0.011598 | 0.011564 |
| 0.011599 | 0.011631 | 0.011631 | 0.011631 | 0.011807 | 0.011766 | 0.011407 |
| 0.011297 | 0.011303 | 0.011401 | 0.011366 | 0.011471 | 0.011322 | 0.011638 |
| 0.011438 | 0.011586 | 0.011298 | 0.011472 | 0.011430 | 0.011505 | 0.011329 |
| 0.011363 | 0.011362 | 0.011363 | 0.011396 | 0.011598 | 0.011564 | 0.011497 |
| 0.011598 | 0.011665 | 0.011396 | 0.011396 | 0.011430 | 0.011430 | 0.011432 |
| 0.011500 | 0.011430 | 0.011430 | 0.011465 | 0.011598 | 0.011665 | 0.011665 |

|          |          |          |          |          |          |          |
|----------|----------|----------|----------|----------|----------|----------|
| 0.011531 | 0.011635 | 0.011637 | 0.011772 | 0.011803 | 0.011430 | 0.011631 |
| 0.011564 | 0.011564 | 0.011398 | 0.011583 | 0.011512 | 0.011537 | 0.011376 |
| 0.011508 | 0.011698 | 0.011526 | 0.011468 | 0.011295 | 0.011497 | 0.011363 |
| 0.011396 | 0.011463 | 0.011362 | 0.011465 | 0.011564 | 0.011567 | 0.011463 |
| 0.011363 | 0.011296 | 0.011430 | 0.011363 | 0.011295 | 0.011400 | 0.011497 |
| 0.011463 | 0.011396 | 0.011430 | 0.011463 | 0.011430 | 0.011363 | 0.011564 |
| 0.011430 | 0.011463 | 0.011463 | 0.011396 | 0.011463 | 0.011699 | 0.011363 |
| 0.011396 | 0.011799 | 0.011396 | 0.011295 | 0.011396 | 0.011766 | 0.011232 |
| 0.011678 | 0.011273 | 0.011261 | 0.011503 | 0.011589 | 0.011563 | 0.011186 |
| 0.011218 | 0.011564 | 0.011665 | 0.011773 | 0.011633 | 0.011771 | 0.011901 |
| 0.011801 | 0.011839 | 0.011799 | 0.012051 | 0.011766 | 0.012641 | 0.011802 |
| 0.012541 | 0.012308 | 0.012443 | 0.012714 | 0.011766 | 0.011463 | 0.011766 |
| 0.012205 | 0.012140 | 0.011732 | 0.011632 | 0.011699 | 0.011699 | 0.011670 |
| 0.011564 | 0.011569 | 0.011631 | 0.011598 | 0.011968 | 0.012035 | 0.012036 |
| 0.011936 | 0.012036 | 0.012139 | 0.011906 | 0.012138 | 0.012212 | 0.012273 |
| 0.012273 | 0.012307 | 0.012255 | 0.012273 | 0.012275 | 0.011497 | 0.011800 |
| 0.011868 | 0.012372 | 0.011874 | 0.012103 | 0.012575 | 0.011638 | 0.011531 |
| 0.011497 | 0.011497 | 0.011968 | 0.012048 | 0.012116 | 0.011833 | 0.011498 |
| S459     | 0.011666 | 0.011666 | 0.012004 | 0.011767 | 0.011767 | 0.011835 |
| 0.011673 | 0.011571 | 0.011767 | 0.011262 | 0.011330 | 0.011296 | 0.011262 |
| 0.011296 | 0.011464 | 0.011262 | 0.011296 | 0.011363 | 0.011330 | 0.011296 |
| 0.011262 | 0.011296 | 0.011397 | 0.011262 | 0.011229 | 0.011296 | 0.011639 |
| 0.011532 | 0.011296 | 0.011195 | 0.011431 | 0.011296 | 0.011330 | 0.011296 |
| 0.011330 | 0.011363 | 0.011330 | 0.011330 | 0.011363 | 0.011330 | 0.011498 |
| 0.011262 | 0.011330 | 0.011363 | 0.011296 | 0.011397 | 0.011363 | 0.011363 |
| 0.011330 | 0.011498 | 0.011397 | 0.011633 | 0.011330 | 0.011464 | 0.011330 |
| 0.011296 | 0.011397 | 0.011464 | 0.011464 | 0.011700 | 0.011397 | 0.011498 |
| 0.011296 | 0.011363 | 0.011330 | 0.011498 | 0.011801 | 0.011330 | 0.011397 |
| 0.011296 | 0.011397 | 0.011363 | 0.011431 | 0.011363 | 0.011363 | 0.011363 |
| 0.011262 | 0.011296 | 0.011262 | 0.011363 | 0.011330 | 0.011364 | 0.011431 |
| 0.011363 | 0.011330 | 0.011330 | 0.011296 | 0.011431 | 0.011195 | 0.011330 |
| 0.011498 | 0.011431 | 0.011666 | 0.011498 | 0.011330 | 0.011498 | 0.011330 |
| 0.011506 | 0.011734 | 0.011552 | 0.011256 | 0.011247 | 0.011355 | 0.011455 |
| 0.012088 | 0.011519 | 0.011267 | 0.011565 | 0.011565 | 0.011363 | 0.011464 |
| 0.011397 | 0.011363 | 0.011431 | 0.011330 | 0.011431 | 0.011296 | 0.011363 |
| 0.011330 | 0.011431 | 0.011633 | 0.011498 | 0.011397 | 0.011363 | 0.011229 |
| 0.011262 | 0.011262 | 0.011262 | 0.011296 | 0.011498 | 0.011464 | 0.011397 |
| 0.011498 | 0.011565 | 0.011296 | 0.011296 | 0.011330 | 0.011330 | 0.011331 |
| 0.011399 | 0.011330 | 0.011330 | 0.011168 | 0.011278 | 0.011236 | 0.011330 |
| 0.011332 | 0.011267 | 0.011319 | 0.011302 | 0.011231 | 0.011266 | 0.011297 |
| 0.011565 | 0.011337 | 0.011302 | 0.011262 | 0.011268 | 0.011397 | 0.011364 |
| 0.011431 | 0.011364 | 0.011364 | 0.011464 | 0.011397 | 0.011700 | 0.011565 |
| 0.011599 | 0.011464 | 0.011330 | 0.011431 | 0.011229 | 0.011464 | 0.011262 |
| 0.011330 | 0.011330 | 0.011296 | 0.011262 | 0.011296 | 0.011262 | 0.011363 |
| 0.011262 | 0.011363 | 0.011363 | 0.011262 | 0.011364 | 0.011431 | 0.011433 |
| 0.011397 | 0.011363 | 0.011262 | 0.011196 | 0.011330 | 0.011262 | 0.011195 |
| 0.011265 | 0.011397 | 0.011195 | 0.011397 | 0.011229 | 0.011330 | 0.011296 |
| 0.011330 | 0.011296 | 0.011262 | 0.011296 | 0.011330 | 0.011195 | 0.011262 |
| 0.011296 | 0.011296 | 0.011363 | 0.011296 | 0.011330 | 0.011363 | 0.011599 |
| 0.011700 | 0.011633 | 0.011700 | 0.011466 | 0.011700 | 0.011330 | 0.011296 |
| 0.011331 | 0.011587 | 0.011427 | 0.011232 | 0.011707 | 0.011197 | 0.011336 |
| 0.011707 | 0.011606 | 0.011498 | 0.011700 | 0.011403 | 0.011565 | 0.011464 |
| 0.011464 | 0.011633 | 0.011488 | 0.011349 | 0.011396 | 0.011363 | 0.011434 |
| 0.011532 | 0.011432 | 0.011569 | 0.011501 | 0.011565 | 0.011633 | 0.011740 |
| 0.011468 | 0.011503 | 0.011570 | 0.011501 | 0.011769 | 0.011229 | 0.011432 |
| 0.011330 | 0.011330 | 0.011229 | 0.011229 | 0.011229 | 0.011296 | 0.011363 |
| 0.011229 | 0.011296 | 0.011195 | 0.011363 | 0.011229 | 0.011296 | 0.011363 |
| 0.011296 | 0.011734 | 0.011633 | 0.011666 | 0.011195 | 0.011296 | 0.011330 |
| 0.011330 | 0.011296 | 0.011363 | 0.011397 | 0.011262 | 0.011262 | 0.011262 |
| 0.011801 | 0.011431 | 0.011431 | 0.011229 | 0.011330 | 0.011431 | 0.011262 |

|          |          |          |          |          |          |          |
|----------|----------|----------|----------|----------|----------|----------|
| 0.011262 | 0.011330 | 0.011296 | 0.011397 | 0.011262 | 0.011397 | 0.011464 |
| 0.011464 | 0.011296 | 0.011296 | 0.011229 | 0.011229 | 0.011397 | 0.011330 |
| 0.011229 | 0.011330 | 0.011195 | 0.011229 | 0.011363 | 0.011498 | 0.011262 |
| 0.011229 | 0.011363 | 0.011296 | 0.011195 | 0.011532 | 0.011195 | 0.011363 |
| 0.011369 | 0.011262 | 0.011565 | 0.011397 | 0.011431 | 0.011296 | 0.011397 |
| 0.011262 | 0.011464 | 0.011195 | 0.011464 | 0.011262 | 0.011262 | 0.011195 |
| 0.011363 | 0.011633 | 0.011330 | 0.011397 | 0.011229 | 0.011633 | 0.011262 |
| 0.011262 | 0.011262 | 0.011296 | 0.011330 | 0.011296 | 0.011397 | 0.011464 |
| 0.011464 | 0.011431 | 0.011330 | 0.011431 | 0.011330 | 0.011262 | 0.011229 |
| 0.011262 | 0.011262 | 0.011330 | 0.011262 | 0.011161 | 0.011397 | 0.011262 |
| 0.011296 | 0.011296 | 0.011431 | 0.011464 | 0.011363 | 0.011229 | 0.011296 |
| 0.011363 | 0.011296 | 0.011397 | 0.011262 | 0.011397 | 0.011498 | 0.011801 |
| 0.011296 | 0.011700 | 0.011302 | 0.017842 | 0.011191 | 0.011549 | 0.011655 |
| 0.011615 | 0.011660 | 0.011323 | 0.011293 | 0.011774 | 0.011683 | 0.011425 |
| 0.011488 | 0.011671 | 0.011217 | 0.011270 | 0.011217 | 0.011406 | 0.011319 |
| 0.011531 | 0.011471 | 0.011432 | 0.011260 | 0.011431 | 0.011464 | 0.011467 |
| 0.011267 | 0.011431 | 0.011431 | 0.011397 | 0.011363 | 0.011363 | 0.011330 |
| 0.011363 | 0.011296 | 0.011330 | 0.011363 | 0.011330 | 0.011262 | 0.011296 |
| 0.011296 | 0.011363 | 0.011262 | 0.011363 | 0.011397 | 0.011431 | 0.011330 |
| 0.011363 | 0.011330 | 0.011666 | 0.011666 | 0.011397 | 0.011431 | 0.011464 |
| 0.011229 | 0.011229 | 0.011262 | 0.011296 | 0.011229 | 0.011464 | 0.011464 |
| 0.011498 | 0.011498 | 0.011431 | 0.011532 | 0.011700 | 0.011533 | 0.011296 |
| 0.011363 | 0.011431 | 0.011397 | 0.011296 | 0.011363 | 0.011330 | 0.011363 |
| 0.011431 | 0.011431 | 0.011464 | 0.011363 | 0.000000 | 0.011532 | 0.011431 |
| 0.011366 | 0.011262 | 0.011363 | 0.011464 | 0.011363 | 0.011498 | 0.011532 |
| 0.011700 | 0.011403 | 0.011565 | 0.011464 | 0.011464 | 0.011633 | 0.011262 |
| 0.011364 | 0.011330 | 0.011296 | 0.011296 | 0.011363 | 0.011262 | 0.011363 |
| 0.011397 | 0.011431 | 0.011330 | 0.011363 | 0.011330 | 0.011666 | 0.011666 |
| 0.011397 | 0.011431 | 0.011498 | 0.011431 | 0.012073 | 0.011490 | 0.011413 |
| 0.011483 | 0.011443 | 0.011554 | 0.011442 | 0.011552 | 0.011475 | 0.011441 |
| 0.012025 | 0.011338 | 0.011473 | 0.011407 | 0.011682 | 0.011538 | 0.011504 |
| 0.012049 | 0.011512 | 0.011365 | 0.011363 | 0.011363 | 0.011397 | 0.011331 |
| 0.011229 | 0.011195 | 0.011397 | 0.011363 | 0.011365 | 0.011498 | 0.011465 |
| 0.011330 | 0.011195 | 0.011195 | 0.011330 | 0.011161 | 0.011296 | 0.011195 |
| 0.011330 | 0.011363 | 0.011262 | 0.011229 | 0.011330 | 0.011262 | 0.011296 |
| 0.011296 | 0.011229 | 0.011296 | 0.011330 | 0.011229 | 0.011363 | 0.011464 |
| 0.011363 | 0.011431 | 0.011363 | 0.011363 | 0.011296 | 0.011700 | 0.011330 |
| 0.011374 | 0.011296 | 0.011532 | 0.011537 | 0.011330 | 0.011397 | 0.011397 |
| 0.011397 | 0.011262 | 0.011296 | 0.011262 | 0.011431 | 0.011431 | 0.011363 |
| 0.011363 | 0.011498 | 0.011666 | 0.011397 | 0.011599 | 0.011599 | 0.011464 |
| 0.011296 | 0.011363 | 0.011397 | 0.011801 | 0.011363 | 0.011330 | 0.011363 |
| 0.011397 | 0.011330 | 0.011330 | 0.011633 | 0.011498 | 0.011599 | 0.011330 |
| 0.011431 | 0.011498 | 0.011363 | 0.011431 | 0.011397 | 0.011262 | 0.011599 |
| 0.011363 | 0.011330 | 0.011330 | 0.011498 | 0.011330 | 0.011431 | 0.011666 |
| 0.011363 | 0.011742 | 0.011734 | 0.011549 | 0.011230 | 0.011435 | 0.011267 |
| 0.011335 | 0.011763 | 0.011271 | 0.011508 | 0.011304 | 0.011367 | 0.011326 |
| 0.011470 | 0.011126 | 0.011283 | 0.000000 | 0.011222 | 0.011261 | 0.011386 |
| 0.011400 | 0.011258 | 0.011413 | 0.011343 | 0.011364 | 0.011498 | 0.011565 |
| 0.011565 | 0.011431 | 0.011535 | 0.011536 | 0.011672 | 0.011698 | 0.011330 |
| 0.011599 | 0.011464 | 0.011330 | 0.011431 | 0.011229 | 0.011464 | 0.011262 |
| 0.011330 | 0.011330 | 0.011296 | 0.011262 | 0.011296 | 0.011262 | 0.011363 |
| 0.011340 | 0.011341 | 0.011335 | 0.011369 | 0.011506 | 0.011403 | 0.011471 |
| 0.011470 | 0.011397 | 0.011208 | 0.011205 | 0.011332 | 0.011502 | 0.011502 |
| 0.011296 | 0.011366 | 0.011600 | 0.011568 | 0.011498 | 0.011532 | 0.011464 |
| 0.011397 | 0.011464 | 0.011464 | 0.011363 | 0.011936 | 0.011532 | 0.011599 |
| 0.011633 | 0.011667 | 0.011334 | 0.011408 | 0.011296 | 0.011498 | 0.011464 |
| 0.011499 | 0.011532 | 0.011532 | 0.011532 | 0.011691 | 0.011666 | 0.011304 |
| 0.011196 | 0.011199 | 0.011299 | 0.011265 | 0.011369 | 0.011210 | 0.011537 |
| 0.011335 | 0.011455 | 0.011203 | 0.011360 | 0.011330 | 0.011403 | 0.011229 |
| 0.011262 | 0.011262 | 0.011262 | 0.011296 | 0.011498 | 0.011464 | 0.011397 |

|          |          |          |          |          |          |          |
|----------|----------|----------|----------|----------|----------|----------|
| 0.011498 | 0.011565 | 0.011296 | 0.011296 | 0.011330 | 0.011330 | 0.011331 |
| 0.011399 | 0.011330 | 0.011330 | 0.011364 | 0.011498 | 0.011565 | 0.011565 |
| 0.011431 | 0.011535 | 0.011536 | 0.011672 | 0.011698 | 0.011330 | 0.011532 |
| 0.011464 | 0.011464 | 0.011298 | 0.011479 | 0.011409 | 0.011436 | 0.011306 |
| 0.011405 | 0.011654 | 0.011442 | 0.011367 | 0.011195 | 0.011397 | 0.011262 |
| 0.011363 | 0.011363 | 0.011262 | 0.011364 | 0.011431 | 0.011433 | 0.011363 |
| 0.011262 | 0.011196 | 0.011330 | 0.011262 | 0.011195 | 0.011265 | 0.011397 |
| 0.011363 | 0.011296 | 0.011330 | 0.011363 | 0.011330 | 0.011262 | 0.011464 |
| 0.011262 | 0.011363 | 0.011363 | 0.011296 | 0.011363 | 0.011599 | 0.011262 |
| 0.011296 | 0.011700 | 0.011296 | 0.011262 | 0.011296 | 0.011633 | 0.011275 |
| 0.011681 | 0.011273 | 0.011312 | 0.011504 | 0.011591 | 0.011492 | 0.011228 |
| 0.011218 | 0.011464 | 0.011565 | 0.011673 | 0.011533 | 0.011671 | 0.011802 |
| 0.011701 | 0.011739 | 0.011700 | 0.011951 | 0.011666 | 0.012544 | 0.011702 |
| 0.012443 | 0.012210 | 0.012345 | 0.012616 | 0.011666 | 0.011363 | 0.011666 |
| 0.012106 | 0.012041 | 0.011633 | 0.011532 | 0.011600 | 0.011600 | 0.011569 |
| 0.011464 | 0.011468 | 0.011532 | 0.011498 | 0.011869 | 0.011936 | 0.011937 |
| 0.011836 | 0.011937 | 0.012040 | 0.011806 | 0.012107 | 0.012113 | 0.012174 |
| 0.012174 | 0.012208 | 0.012155 | 0.012175 | 0.012176 | 0.011397 | 0.011700 |
| 0.011768 | 0.012274 | 0.011774 | 0.012004 | 0.012478 | 0.011537 | 0.011431 |
| 0.011397 | 0.011397 | 0.011869 | 0.011927 | 0.012013 | 0.011734 | 0.011398 |
| S460     | 0.011866 | 0.011866 | 0.012203 | 0.011967 | 0.011967 | 0.012034 |
| 0.011876 | 0.011808 | 0.011967 | 0.011463 | 0.011530 | 0.011498 | 0.011463 |
| 0.011497 | 0.011665 | 0.011463 | 0.011497 | 0.011564 | 0.011530 | 0.011497 |
| 0.011463 | 0.011497 | 0.011597 | 0.011464 | 0.011497 | 0.011497 | 0.011841 |
| 0.011732 | 0.011497 | 0.011396 | 0.011631 | 0.011564 | 0.011530 | 0.011564 |
| 0.011530 | 0.011631 | 0.011530 | 0.011530 | 0.011564 | 0.011530 | 0.011698 |
| 0.011463 | 0.011530 | 0.011564 | 0.011497 | 0.011597 | 0.011631 | 0.011564 |
| 0.011530 | 0.011698 | 0.011598 | 0.011866 | 0.011530 | 0.011799 | 0.011530 |
| 0.011497 | 0.011598 | 0.011665 | 0.011799 | 0.011900 | 0.011597 | 0.011698 |
| 0.011564 | 0.011631 | 0.011530 | 0.011765 | 0.012001 | 0.011530 | 0.011597 |
| 0.011497 | 0.011597 | 0.011564 | 0.011631 | 0.011564 | 0.011564 | 0.011564 |
| 0.011463 | 0.011497 | 0.011463 | 0.011564 | 0.011530 | 0.011565 | 0.011631 |
| 0.011564 | 0.011530 | 0.011597 | 0.011497 | 0.011631 | 0.011463 | 0.011530 |
| 0.011698 | 0.011631 | 0.011866 | 0.011698 | 0.011530 | 0.011765 | 0.011530 |
| 0.011653 | 0.011882 | 0.011664 | 0.011412 | 0.011359 | 0.011539 | 0.011572 |
| 0.012231 | 0.011670 | 0.011348 | 0.011765 | 0.011765 | 0.011564 | 0.011665 |
| 0.011597 | 0.011564 | 0.011631 | 0.011530 | 0.011631 | 0.011564 | 0.011564 |
| 0.011530 | 0.011631 | 0.011833 | 0.011698 | 0.011597 | 0.011564 | 0.011497 |
| 0.011463 | 0.011463 | 0.011530 | 0.011497 | 0.011698 | 0.011665 | 0.011597 |
| 0.011698 | 0.011765 | 0.011497 | 0.011497 | 0.011530 | 0.011530 | 0.011533 |
| 0.011601 | 0.011463 | 0.011530 | 0.011420 | 0.011494 | 0.011446 | 0.011531 |
| 0.011534 | 0.011473 | 0.011466 | 0.011509 | 0.011434 | 0.011471 | 0.011499 |
| 0.011780 | 0.011543 | 0.011577 | 0.011464 | 0.011475 | 0.011598 | 0.011565 |
| 0.011632 | 0.011566 | 0.011564 | 0.011665 | 0.011597 | 0.011967 | 0.011765 |
| 0.011799 | 0.011665 | 0.011530 | 0.011631 | 0.011430 | 0.011665 | 0.011463 |
| 0.011530 | 0.011530 | 0.011497 | 0.011463 | 0.011497 | 0.011463 | 0.011564 |
| 0.011530 | 0.011631 | 0.011564 | 0.011463 | 0.011566 | 0.011665 | 0.011668 |
| 0.011665 | 0.011564 | 0.011463 | 0.011397 | 0.011530 | 0.011463 | 0.011396 |
| 0.011502 | 0.011665 | 0.011463 | 0.011665 | 0.011430 | 0.011530 | 0.011497 |
| 0.011597 | 0.011497 | 0.011530 | 0.011497 | 0.011530 | 0.011396 | 0.011530 |
| 0.011564 | 0.011497 | 0.011564 | 0.011497 | 0.011530 | 0.011564 | 0.011799 |
| 0.011900 | 0.011833 | 0.011900 | 0.011633 | 0.011900 | 0.011530 | 0.011497 |
| 0.011533 | 0.011667 | 0.011609 | 0.011369 | 0.011841 | 0.011367 | 0.011493 |
| 0.011909 | 0.011808 | 0.011698 | 0.011900 | 0.011607 | 0.011765 | 0.011732 |
| 0.011665 | 0.011833 | 0.011664 | 0.011555 | 0.011563 | 0.011564 | 0.011636 |
| 0.011732 | 0.011634 | 0.011737 | 0.011839 | 0.011765 | 0.011833 | 0.011908 |
| 0.011670 | 0.011841 | 0.011771 | 0.011703 | 0.011969 | 0.011429 | 0.011633 |
| 0.011597 | 0.011530 | 0.011429 | 0.011429 | 0.011497 | 0.011497 | 0.011564 |
| 0.011497 | 0.011564 | 0.011463 | 0.011564 | 0.011497 | 0.011497 | 0.011564 |
| 0.011497 | 0.011933 | 0.011833 | 0.011866 | 0.011396 | 0.011497 | 0.011530 |

|          |          |          |          |          |          |          |
|----------|----------|----------|----------|----------|----------|----------|
| 0.011530 | 0.011497 | 0.011564 | 0.011597 | 0.011463 | 0.011463 | 0.011463 |
| 0.012001 | 0.011631 | 0.011631 | 0.011429 | 0.011530 | 0.011698 | 0.011463 |
| 0.011463 | 0.011530 | 0.011497 | 0.011665 | 0.011463 | 0.011564 | 0.011732 |
| 0.011665 | 0.011497 | 0.011497 | 0.011430 | 0.011430 | 0.011597 | 0.011530 |
| 0.011430 | 0.011530 | 0.011396 | 0.011430 | 0.011564 | 0.011699 | 0.011463 |
| 0.011430 | 0.011564 | 0.011497 | 0.011396 | 0.011732 | 0.011396 | 0.011564 |
| 0.011642 | 0.011463 | 0.011765 | 0.011598 | 0.011631 | 0.011497 | 0.011597 |
| 0.011463 | 0.011799 | 0.011396 | 0.011665 | 0.011463 | 0.011463 | 0.011396 |
| 0.011631 | 0.011833 | 0.011530 | 0.011597 | 0.011430 | 0.011833 | 0.011463 |
| 0.011463 | 0.011463 | 0.011497 | 0.011597 | 0.011497 | 0.011597 | 0.011665 |
| 0.011665 | 0.011631 | 0.011530 | 0.011631 | 0.011597 | 0.011463 | 0.011429 |
| 0.011463 | 0.011463 | 0.011530 | 0.011463 | 0.011429 | 0.011597 | 0.011463 |
| 0.011497 | 0.011497 | 0.011631 | 0.011665 | 0.011564 | 0.011497 | 0.011497 |
| 0.011564 | 0.011497 | 0.011597 | 0.011463 | 0.011597 | 0.011698 | 0.012001 |
| 0.011497 | 0.011900 | 0.011474 | 0.017974 | 0.011518 | 0.011611 | 0.011828 |
| 0.011787 | 0.011834 | 0.011479 | 0.011408 | 0.011939 | 0.011854 | 0.011546 |
| 0.011677 | 0.011793 | 0.011372 | 0.011479 | 0.011490 | 0.011504 | 0.011490 |
| 0.011670 | 0.011619 | 0.011579 | 0.011523 | 0.011631 | 0.011665 | 0.011669 |
| 0.011507 | 0.011631 | 0.011631 | 0.011597 | 0.011564 | 0.011564 | 0.011531 |
| 0.011564 | 0.011497 | 0.011530 | 0.011564 | 0.011530 | 0.011463 | 0.011497 |
| 0.011497 | 0.011564 | 0.011463 | 0.011564 | 0.011597 | 0.011631 | 0.011530 |
| 0.011564 | 0.011530 | 0.011866 | 0.011866 | 0.011598 | 0.011632 | 0.011665 |
| 0.011429 | 0.011429 | 0.011463 | 0.011564 | 0.011429 | 0.011665 | 0.011665 |
| 0.011698 | 0.011698 | 0.011631 | 0.011732 | 0.011900 | 0.011734 | 0.011564 |
| 0.011564 | 0.011631 | 0.011665 | 0.011497 | 0.011564 | 0.011530 | 0.011564 |
| 0.011631 | 0.011631 | 0.011665 | 0.011631 | 0.011532 | 0.000000 | 0.011698 |
| 0.011568 | 0.011463 | 0.011564 | 0.011665 | 0.011564 | 0.011698 | 0.011732 |
| 0.011900 | 0.011607 | 0.011765 | 0.011732 | 0.011665 | 0.011833 | 0.011463 |
| 0.011633 | 0.011531 | 0.011497 | 0.011497 | 0.011564 | 0.011463 | 0.011564 |
| 0.011597 | 0.011631 | 0.011530 | 0.011564 | 0.011530 | 0.011866 | 0.011866 |
| 0.011598 | 0.011632 | 0.011698 | 0.011631 | 0.012272 | 0.011668 | 0.011588 |
| 0.011658 | 0.011615 | 0.011728 | 0.011649 | 0.011726 | 0.011647 | 0.011646 |
| 0.012194 | 0.011510 | 0.011643 | 0.011579 | 0.011852 | 0.011707 | 0.011809 |
| 0.012251 | 0.011701 | 0.011568 | 0.011564 | 0.011564 | 0.011597 | 0.011533 |
| 0.011429 | 0.011463 | 0.011597 | 0.011564 | 0.011567 | 0.011698 | 0.011633 |
| 0.011530 | 0.011463 | 0.011497 | 0.011530 | 0.011429 | 0.011497 | 0.011396 |
| 0.011530 | 0.011564 | 0.011463 | 0.011429 | 0.011530 | 0.011463 | 0.011497 |
| 0.011497 | 0.011429 | 0.011497 | 0.011530 | 0.011430 | 0.011631 | 0.011665 |
| 0.011564 | 0.011631 | 0.011564 | 0.011564 | 0.011497 | 0.011900 | 0.011530 |
| 0.011582 | 0.011497 | 0.011732 | 0.011739 | 0.011597 | 0.011597 | 0.011597 |
| 0.011597 | 0.011530 | 0.011497 | 0.011530 | 0.011631 | 0.011631 | 0.011564 |
| 0.011564 | 0.011698 | 0.011866 | 0.011597 | 0.011799 | 0.011799 | 0.011665 |
| 0.011497 | 0.011564 | 0.011597 | 0.012001 | 0.011564 | 0.011597 | 0.011564 |
| 0.011597 | 0.011530 | 0.011530 | 0.011833 | 0.011765 | 0.011799 | 0.011530 |
| 0.011631 | 0.011698 | 0.011564 | 0.011631 | 0.011597 | 0.011463 | 0.011799 |
| 0.011564 | 0.011530 | 0.011530 | 0.011698 | 0.011530 | 0.011631 | 0.011866 |
| 0.011564 | 0.011944 | 0.011933 | 0.011670 | 0.011399 | 0.011638 | 0.011421 |
| 0.011500 | 0.011917 | 0.011446 | 0.011596 | 0.011451 | 0.011518 | 0.011591 |
| 0.011672 | 0.011324 | 0.011561 | 0.011390 | 0.011437 | 0.011663 | 0.011587 |
| 0.011588 | 0.011454 | 0.011589 | 0.011483 | 0.011566 | 0.011698 | 0.011765 |
| 0.011765 | 0.011632 | 0.011736 | 0.011738 | 0.011874 | 0.011873 | 0.011564 |
| 0.011799 | 0.011665 | 0.011530 | 0.011631 | 0.011430 | 0.011665 | 0.011463 |
| 0.011530 | 0.011530 | 0.011497 | 0.011463 | 0.011497 | 0.011463 | 0.011564 |
| 0.011549 | 0.011550 | 0.011540 | 0.011574 | 0.011710 | 0.011675 | 0.011675 |
| 0.011673 | 0.011598 | 0.011429 | 0.011420 | 0.011534 | 0.011704 | 0.011705 |
| 0.011497 | 0.011568 | 0.011801 | 0.011770 | 0.011699 | 0.011733 | 0.011665 |
| 0.011597 | 0.011665 | 0.011665 | 0.011564 | 0.012135 | 0.011732 | 0.011799 |
| 0.011833 | 0.011915 | 0.011538 | 0.011615 | 0.011497 | 0.011698 | 0.011665 |
| 0.011700 | 0.011732 | 0.011732 | 0.011732 | 0.011925 | 0.011866 | 0.011511 |
| 0.011398 | 0.011372 | 0.011469 | 0.011468 | 0.011539 | 0.011396 | 0.011740 |

|          |          |          |          |          |          |          |
|----------|----------|----------|----------|----------|----------|----------|
| 0.011506 | 0.011674 | 0.011394 | 0.011547 | 0.011531 | 0.011608 | 0.011497 |
| 0.011463 | 0.011463 | 0.011530 | 0.011497 | 0.011698 | 0.011665 | 0.011597 |
| 0.011698 | 0.011765 | 0.011497 | 0.011497 | 0.011530 | 0.011530 | 0.011533 |
| 0.011601 | 0.011463 | 0.011530 | 0.011566 | 0.011698 | 0.011765 | 0.011765 |
| 0.011632 | 0.011736 | 0.011738 | 0.011874 | 0.011873 | 0.011564 | 0.011732 |
| 0.011665 | 0.011665 | 0.011466 | 0.011652 | 0.011616 | 0.011639 | 0.011481 |
| 0.011646 | 0.011789 | 0.011695 | 0.011570 | 0.011463 | 0.011665 | 0.011530 |
| 0.011631 | 0.011564 | 0.011463 | 0.011566 | 0.011665 | 0.011668 | 0.011564 |
| 0.011463 | 0.011397 | 0.011530 | 0.011463 | 0.011396 | 0.011502 | 0.011665 |
| 0.011564 | 0.011497 | 0.011530 | 0.011564 | 0.011530 | 0.011463 | 0.011665 |
| 0.011530 | 0.011564 | 0.011564 | 0.011497 | 0.011564 | 0.011799 | 0.011463 |
| 0.011497 | 0.011900 | 0.011497 | 0.011530 | 0.011497 | 0.011866 | 0.011403 |
| 0.011903 | 0.011400 | 0.011461 | 0.011664 | 0.011712 | 0.011670 | 0.011353 |
| 0.011427 | 0.011665 | 0.011765 | 0.011875 | 0.011734 | 0.011838 | 0.012002 |
| 0.011901 | 0.011940 | 0.011900 | 0.012120 | 0.011866 | 0.012741 | 0.011902 |
| 0.012641 | 0.012376 | 0.012543 | 0.012815 | 0.011866 | 0.011564 | 0.011867 |
| 0.012305 | 0.012207 | 0.011833 | 0.011732 | 0.011800 | 0.011800 | 0.011771 |
| 0.011665 | 0.011637 | 0.011732 | 0.011699 | 0.012069 | 0.012135 | 0.012137 |
| 0.012036 | 0.012136 | 0.012207 | 0.011974 | 0.012306 | 0.012313 | 0.012373 |
| 0.012374 | 0.012407 | 0.012323 | 0.012374 | 0.012375 | 0.011597 | 0.011900 |
| 0.011968 | 0.012472 | 0.011976 | 0.012203 | 0.012676 | 0.011739 | 0.011632 |
| 0.011597 | 0.011597 | 0.012068 | 0.012130 | 0.012221 | 0.011934 | 0.011599 |
| S461     | 0.011833 | 0.011833 | 0.012169 | 0.011934 | 0.011934 | 0.012001 |
| 0.011808 | 0.011740 | 0.011934 | 0.011430 | 0.011497 | 0.011464 | 0.011429 |
| 0.011463 | 0.011631 | 0.011429 | 0.011463 | 0.011530 | 0.011497 | 0.011463 |
| 0.011429 | 0.011463 | 0.011564 | 0.011430 | 0.011396 | 0.011463 | 0.011774 |
| 0.011698 | 0.011463 | 0.011362 | 0.011597 | 0.011463 | 0.011497 | 0.011463 |
| 0.011497 | 0.011530 | 0.011497 | 0.011497 | 0.011530 | 0.011497 | 0.011665 |
| 0.011429 | 0.011497 | 0.011530 | 0.011463 | 0.011564 | 0.011597 | 0.011530 |
| 0.011497 | 0.011665 | 0.011564 | 0.011833 | 0.011497 | 0.011698 | 0.011497 |
| 0.011463 | 0.011564 | 0.011631 | 0.011698 | 0.011866 | 0.011564 | 0.011665 |
| 0.011463 | 0.011530 | 0.011497 | 0.011665 | 0.011967 | 0.011497 | 0.011564 |
| 0.011463 | 0.011564 | 0.011530 | 0.011597 | 0.011530 | 0.011530 | 0.011530 |
| 0.011429 | 0.011463 | 0.011429 | 0.011530 | 0.011497 | 0.011531 | 0.011597 |
| 0.011530 | 0.011497 | 0.011497 | 0.011463 | 0.011597 | 0.011362 | 0.011497 |
| 0.011665 | 0.011597 | 0.011833 | 0.011665 | 0.011497 | 0.011665 | 0.011497 |
| 0.011653 | 0.011882 | 0.011702 | 0.011412 | 0.011433 | 0.011539 | 0.011611 |
| 0.012268 | 0.011569 | 0.011390 | 0.011732 | 0.011732 | 0.011530 | 0.011631 |
| 0.011564 | 0.011530 | 0.011597 | 0.011497 | 0.011597 | 0.011463 | 0.011463 |
| 0.011429 | 0.011597 | 0.011799 | 0.011665 | 0.011564 | 0.011530 | 0.011396 |
| 0.011429 | 0.011429 | 0.011429 | 0.011463 | 0.011665 | 0.011631 | 0.011564 |
| 0.011665 | 0.011732 | 0.011463 | 0.011463 | 0.011497 | 0.011497 | 0.011499 |
| 0.011567 | 0.011497 | 0.011497 | 0.011348 | 0.011458 | 0.011411 | 0.011497 |
| 0.011500 | 0.011438 | 0.011466 | 0.011474 | 0.011400 | 0.011437 | 0.011465 |
| 0.011744 | 0.011508 | 0.011473 | 0.011430 | 0.011440 | 0.011565 | 0.011531 |
| 0.011598 | 0.011532 | 0.011531 | 0.011564 | 0.011564 | 0.011866 | 0.011732 |
| 0.011765 | 0.011631 | 0.011497 | 0.011597 | 0.011396 | 0.011631 | 0.011430 |
| 0.011497 | 0.011497 | 0.011463 | 0.011429 | 0.011463 | 0.011429 | 0.011530 |
| 0.011429 | 0.011530 | 0.011530 | 0.011429 | 0.011532 | 0.011631 | 0.011635 |
| 0.011564 | 0.011530 | 0.011429 | 0.011364 | 0.011497 | 0.011430 | 0.011363 |
| 0.011468 | 0.011564 | 0.011362 | 0.011564 | 0.011396 | 0.011497 | 0.011463 |
| 0.011497 | 0.011396 | 0.011429 | 0.011463 | 0.011497 | 0.011362 | 0.011429 |
| 0.011463 | 0.011463 | 0.011530 | 0.011463 | 0.011429 | 0.011530 | 0.011765 |
| 0.011866 | 0.011799 | 0.011866 | 0.011633 | 0.011866 | 0.011497 | 0.011463 |
| 0.011499 | 0.011707 | 0.011380 | 0.011403 | 0.011875 | 0.011367 | 0.011493 |
| 0.011841 | 0.011774 | 0.011665 | 0.011866 | 0.011572 | 0.011732 | 0.011631 |
| 0.011631 | 0.011799 | 0.011593 | 0.011472 | 0.011522 | 0.011530 | 0.011602 |
| 0.011698 | 0.011533 | 0.011737 | 0.011737 | 0.011665 | 0.011799 | 0.011908 |
| 0.011568 | 0.011739 | 0.011738 | 0.011669 | 0.011935 | 0.011396 | 0.011600 |
| 0.011497 | 0.011497 | 0.011396 | 0.011396 | 0.011396 | 0.011463 | 0.011530 |



|          |          |          |          |          |          |          |
|----------|----------|----------|----------|----------|----------|----------|
| 0.011396 | 0.011463 | 0.011362 | 0.011530 | 0.011396 | 0.011463 | 0.011530 |
| 0.011463 | 0.011900 | 0.011799 | 0.011833 | 0.011362 | 0.011463 | 0.011497 |
| 0.011497 | 0.011463 | 0.011530 | 0.011564 | 0.011429 | 0.011429 | 0.011429 |
| 0.011967 | 0.011530 | 0.011597 | 0.011396 | 0.011497 | 0.011597 | 0.011430 |
| 0.011429 | 0.011497 | 0.011463 | 0.011564 | 0.011429 | 0.011564 | 0.011631 |
| 0.011631 | 0.011463 | 0.011463 | 0.011396 | 0.011396 | 0.011564 | 0.011497 |
| 0.011396 | 0.011497 | 0.011362 | 0.011396 | 0.011530 | 0.011665 | 0.011430 |
| 0.011396 | 0.011530 | 0.011464 | 0.011362 | 0.011698 | 0.011362 | 0.011530 |
| 0.011505 | 0.011430 | 0.011732 | 0.011564 | 0.011597 | 0.011463 | 0.011564 |
| 0.011429 | 0.011698 | 0.011362 | 0.011631 | 0.011430 | 0.011430 | 0.011362 |
| 0.011530 | 0.011800 | 0.011497 | 0.011564 | 0.011396 | 0.011799 | 0.011430 |
| 0.011430 | 0.011429 | 0.011463 | 0.011497 | 0.011463 | 0.011564 | 0.011631 |
| 0.011631 | 0.011597 | 0.011497 | 0.011598 | 0.011497 | 0.011429 | 0.011396 |
| 0.011429 | 0.011429 | 0.011497 | 0.011429 | 0.011329 | 0.011564 | 0.011429 |
| 0.011463 | 0.011463 | 0.011597 | 0.011631 | 0.011530 | 0.011396 | 0.011463 |
| 0.011530 | 0.011463 | 0.011564 | 0.011429 | 0.011564 | 0.011665 | 0.011967 |
| 0.011463 | 0.011866 | 0.011474 | 0.018012 | 0.011191 | 0.011488 | 0.011828 |
| 0.011787 | 0.011834 | 0.011479 | 0.011524 | 0.011719 | 0.011854 | 0.011303 |
| 0.011724 | 0.011549 | 0.011333 | 0.011353 | 0.011450 | 0.011406 | 0.011447 |
| 0.011670 | 0.011619 | 0.011616 | 0.011523 | 0.011598 | 0.011631 | 0.011635 |
| 0.011438 | 0.011597 | 0.011597 | 0.011564 | 0.011530 | 0.011531 | 0.011497 |
| 0.011530 | 0.011396 | 0.011497 | 0.011530 | 0.011497 | 0.011430 | 0.011463 |
| 0.011463 | 0.011530 | 0.011429 | 0.011530 | 0.011564 | 0.011597 | 0.011497 |
| 0.011530 | 0.011497 | 0.011833 | 0.011833 | 0.011564 | 0.011598 | 0.011631 |
| 0.011396 | 0.011396 | 0.011429 | 0.011463 | 0.011396 | 0.011631 | 0.011631 |
| 0.011665 | 0.011665 | 0.011597 | 0.011698 | 0.011866 | 0.011700 | 0.011463 |
| 0.011530 | 0.011597 | 0.011564 | 0.011463 | 0.011530 | 0.011497 | 0.011530 |
| 0.011598 | 0.011598 | 0.011631 | 0.011530 | 0.011431 | 0.011698 | 0.000000 |
| 0.011534 | 0.011430 | 0.011530 | 0.011631 | 0.011530 | 0.011665 | 0.011698 |
| 0.011866 | 0.011572 | 0.011732 | 0.011631 | 0.011631 | 0.011799 | 0.011430 |
| 0.011599 | 0.011497 | 0.011463 | 0.011463 | 0.011530 | 0.011429 | 0.011530 |
| 0.011564 | 0.011597 | 0.011497 | 0.011530 | 0.011497 | 0.011833 | 0.011833 |
| 0.011564 | 0.011598 | 0.011665 | 0.011597 | 0.012238 | 0.011632 | 0.011518 |
| 0.011623 | 0.011581 | 0.011693 | 0.011545 | 0.011726 | 0.011647 | 0.011612 |
| 0.012160 | 0.011510 | 0.011643 | 0.011579 | 0.011853 | 0.011707 | 0.011741 |
| 0.012217 | 0.011626 | 0.011534 | 0.011530 | 0.011530 | 0.011564 | 0.011500 |
| 0.011396 | 0.011362 | 0.011564 | 0.011530 | 0.011533 | 0.011665 | 0.011633 |
| 0.011497 | 0.011362 | 0.011396 | 0.011497 | 0.011329 | 0.011463 | 0.011362 |
| 0.011497 | 0.011530 | 0.011429 | 0.011396 | 0.011497 | 0.011429 | 0.011463 |
| 0.011463 | 0.011396 | 0.011463 | 0.011497 | 0.011396 | 0.011530 | 0.011631 |
| 0.011530 | 0.011597 | 0.011530 | 0.011530 | 0.011463 | 0.011866 | 0.011497 |
| 0.011478 | 0.011463 | 0.011699 | 0.011705 | 0.011497 | 0.011564 | 0.011564 |
| 0.011564 | 0.011430 | 0.011463 | 0.011430 | 0.011597 | 0.011597 | 0.011530 |
| 0.011530 | 0.011665 | 0.011833 | 0.011564 | 0.011766 | 0.011766 | 0.011631 |
| 0.011463 | 0.011530 | 0.011564 | 0.011967 | 0.011531 | 0.011497 | 0.011530 |
| 0.011564 | 0.011497 | 0.011497 | 0.011799 | 0.011631 | 0.011766 | 0.011497 |
| 0.011597 | 0.011665 | 0.011530 | 0.011597 | 0.011564 | 0.011430 | 0.011765 |
| 0.011530 | 0.011497 | 0.011497 | 0.011665 | 0.011497 | 0.011597 | 0.011833 |
| 0.011530 | 0.011876 | 0.011900 | 0.011670 | 0.011342 | 0.011604 | 0.011473 |
| 0.011335 | 0.011878 | 0.011446 | 0.011551 | 0.011402 | 0.011518 | 0.011485 |
| 0.011570 | 0.011258 | 0.011450 | 0.011192 | 0.011276 | 0.011395 | 0.011547 |
| 0.011550 | 0.011414 | 0.011589 | 0.011518 | 0.011532 | 0.011665 | 0.011732 |
| 0.011732 | 0.011598 | 0.011703 | 0.011704 | 0.011840 | 0.011873 | 0.011530 |
| 0.011765 | 0.011631 | 0.011497 | 0.011597 | 0.011396 | 0.011631 | 0.011430 |
| 0.011497 | 0.011497 | 0.011463 | 0.011429 | 0.011463 | 0.011429 | 0.011530 |
| 0.011514 | 0.011515 | 0.011505 | 0.011540 | 0.011676 | 0.011573 | 0.011641 |
| 0.011639 | 0.011565 | 0.011356 | 0.011348 | 0.011501 | 0.011636 | 0.011671 |
| 0.011464 | 0.011534 | 0.011767 | 0.011736 | 0.011666 | 0.011700 | 0.011631 |
| 0.011564 | 0.011631 | 0.011631 | 0.011530 | 0.012102 | 0.011698 | 0.011766 |
| 0.011799 | 0.011808 | 0.011504 | 0.011511 | 0.011463 | 0.011597 | 0.011631 |

|          |          |          |          |          |          |          |
|----------|----------|----------|----------|----------|----------|----------|
| 0.011666 | 0.011698 | 0.011698 | 0.011698 | 0.011768 | 0.011833 | 0.011477 |
| 0.011365 | 0.011372 | 0.011469 | 0.011434 | 0.011539 | 0.011359 | 0.011706 |
| 0.011506 | 0.011543 | 0.011298 | 0.011435 | 0.011497 | 0.011573 | 0.011396 |
| 0.011429 | 0.011429 | 0.011429 | 0.011463 | 0.011665 | 0.011631 | 0.011564 |
| 0.011665 | 0.011732 | 0.011463 | 0.011463 | 0.011497 | 0.011497 | 0.011499 |
| 0.011567 | 0.011497 | 0.011497 | 0.011532 | 0.011665 | 0.011732 | 0.011732 |
| 0.011598 | 0.011703 | 0.011704 | 0.011840 | 0.011873 | 0.011530 | 0.011698 |
| 0.011631 | 0.011631 | 0.011466 | 0.011617 | 0.011547 | 0.011605 | 0.011446 |
| 0.011577 | 0.011881 | 0.011611 | 0.011536 | 0.011362 | 0.011564 | 0.011429 |
| 0.011530 | 0.011530 | 0.011429 | 0.011532 | 0.011631 | 0.011635 | 0.011530 |
| 0.011429 | 0.011364 | 0.011497 | 0.011430 | 0.011363 | 0.011468 | 0.011564 |
| 0.011530 | 0.011396 | 0.011497 | 0.011530 | 0.011497 | 0.011430 | 0.011631 |
| 0.011497 | 0.011530 | 0.011530 | 0.011463 | 0.011530 | 0.011766 | 0.011429 |
| 0.011463 | 0.011866 | 0.011463 | 0.011429 | 0.011463 | 0.011833 | 0.011403 |
| 0.011791 | 0.011400 | 0.011361 | 0.011664 | 0.011712 | 0.011670 | 0.011353 |
| 0.011375 | 0.011631 | 0.011732 | 0.011807 | 0.011700 | 0.011838 | 0.011968 |
| 0.011868 | 0.011906 | 0.011866 | 0.012120 | 0.011833 | 0.012708 | 0.011869 |
| 0.012608 | 0.012376 | 0.012510 | 0.012781 | 0.011833 | 0.011530 | 0.011833 |
| 0.012272 | 0.012207 | 0.011799 | 0.011699 | 0.011766 | 0.011766 | 0.011737 |
| 0.011631 | 0.011637 | 0.011698 | 0.011665 | 0.012035 | 0.012102 | 0.012103 |
| 0.012003 | 0.012103 | 0.012207 | 0.011974 | 0.012272 | 0.012279 | 0.012340 |
| 0.012340 | 0.012374 | 0.012255 | 0.012340 | 0.012342 | 0.011564 | 0.011867 |
| 0.011935 | 0.012439 | 0.011942 | 0.012169 | 0.012643 | 0.011705 | 0.011598 |
| 0.011564 | 0.011564 | 0.012035 | 0.012048 | 0.012186 | 0.011900 | 0.011566 |
| S462     | 0.011704 | 0.011704 | 0.012043 | 0.011805 | 0.011805 | 0.011873 |
| 0.011711 | 0.011643 | 0.011873 | 0.011297 | 0.011365 | 0.011332 | 0.011297 |
| 0.011331 | 0.011500 | 0.011297 | 0.011331 | 0.011331 | 0.011365 | 0.011331 |
| 0.011297 | 0.011331 | 0.011433 | 0.011298 | 0.011331 | 0.011331 | 0.011677 |
| 0.011568 | 0.011331 | 0.011230 | 0.011466 | 0.011399 | 0.011365 | 0.011399 |
| 0.011365 | 0.011467 | 0.011331 | 0.011365 | 0.011399 | 0.011365 | 0.011263 |
| 0.011297 | 0.011365 | 0.011365 | 0.011331 | 0.011433 | 0.011467 | 0.011399 |
| 0.011365 | 0.011534 | 0.011399 | 0.011704 | 0.011365 | 0.011636 | 0.011365 |
| 0.011331 | 0.011433 | 0.011500 | 0.011636 | 0.011738 | 0.011433 | 0.011500 |
| 0.011399 | 0.011467 | 0.011365 | 0.011602 | 0.011839 | 0.011365 | 0.011433 |
| 0.011331 | 0.011433 | 0.011365 | 0.011433 | 0.011399 | 0.011399 | 0.011399 |
| 0.011297 | 0.011331 | 0.011297 | 0.011399 | 0.011365 | 0.011400 | 0.011399 |
| 0.011399 | 0.011365 | 0.011433 | 0.011331 | 0.011467 | 0.011297 | 0.011365 |
| 0.011500 | 0.011466 | 0.011704 | 0.011534 | 0.011365 | 0.011602 | 0.011365 |
| 0.011547 | 0.011777 | 0.011594 | 0.011297 | 0.011286 | 0.011395 | 0.011498 |
| 0.012132 | 0.011575 | 0.011310 | 0.011602 | 0.011602 | 0.011399 | 0.011500 |
| 0.011433 | 0.011399 | 0.011467 | 0.011365 | 0.011467 | 0.011399 | 0.011399 |
| 0.011365 | 0.011466 | 0.011670 | 0.011534 | 0.011433 | 0.011365 | 0.011331 |
| 0.011297 | 0.011297 | 0.011365 | 0.011331 | 0.011534 | 0.011501 | 0.011433 |
| 0.011534 | 0.011602 | 0.011331 | 0.011331 | 0.011365 | 0.011365 | 0.011367 |
| 0.011435 | 0.011365 | 0.011365 | 0.011242 | 0.011279 | 0.011237 | 0.011365 |
| 0.011368 | 0.011303 | 0.011358 | 0.011339 | 0.011266 | 0.011302 | 0.011333 |
| 0.011604 | 0.011373 | 0.011408 | 0.011298 | 0.011304 | 0.011434 | 0.011400 |
| 0.011467 | 0.011400 | 0.011399 | 0.011500 | 0.011433 | 0.011805 | 0.011535 |
| 0.011636 | 0.011501 | 0.011365 | 0.011467 | 0.011263 | 0.011500 | 0.011297 |
| 0.011365 | 0.011365 | 0.011331 | 0.011297 | 0.011331 | 0.011297 | 0.011399 |
| 0.011365 | 0.011467 | 0.011399 | 0.011297 | 0.011366 | 0.011501 | 0.011503 |
| 0.011501 | 0.011399 | 0.011297 | 0.011230 | 0.011365 | 0.011297 | 0.011230 |
| 0.011334 | 0.011501 | 0.011297 | 0.011501 | 0.011263 | 0.011365 | 0.011331 |
| 0.011433 | 0.011331 | 0.011365 | 0.011331 | 0.011365 | 0.011230 | 0.011365 |
| 0.011399 | 0.011331 | 0.011399 | 0.011331 | 0.011365 | 0.011399 | 0.011636 |
| 0.011738 | 0.011670 | 0.011738 | 0.011502 | 0.011738 | 0.011365 | 0.011331 |
| 0.011367 | 0.011672 | 0.011476 | 0.011268 | 0.011745 | 0.011232 | 0.011378 |
| 0.011745 | 0.011644 | 0.011534 | 0.011738 | 0.011439 | 0.011602 | 0.011568 |
| 0.011500 | 0.011670 | 0.011490 | 0.011309 | 0.011356 | 0.011399 | 0.011435 |
| 0.011568 | 0.011469 | 0.011606 | 0.011675 | 0.011602 | 0.011670 | 0.011778 |

|          |          |          |          |          |          |          |
|----------|----------|----------|----------|----------|----------|----------|
| 0.011504 | 0.011677 | 0.011607 | 0.011538 | 0.011807 | 0.011263 | 0.011468 |
| 0.011433 | 0.011365 | 0.011263 | 0.011263 | 0.011331 | 0.011331 | 0.011399 |
| 0.011331 | 0.011399 | 0.011297 | 0.011399 | 0.011331 | 0.011331 | 0.011399 |
| 0.011331 | 0.011771 | 0.011670 | 0.011704 | 0.011230 | 0.011331 | 0.011365 |
| 0.011365 | 0.011331 | 0.011399 | 0.011433 | 0.011297 | 0.011297 | 0.011297 |
| 0.011839 | 0.011467 | 0.011467 | 0.011263 | 0.011331 | 0.011534 | 0.011297 |
| 0.011297 | 0.011365 | 0.011331 | 0.011501 | 0.011297 | 0.011433 | 0.011568 |
| 0.011500 | 0.011331 | 0.011331 | 0.011263 | 0.011263 | 0.011433 | 0.011365 |
| 0.011263 | 0.011365 | 0.011230 | 0.011263 | 0.011399 | 0.011535 | 0.011297 |
| 0.011264 | 0.011399 | 0.011331 | 0.011230 | 0.011568 | 0.011230 | 0.011331 |
| 0.011475 | 0.011297 | 0.011602 | 0.011433 | 0.011467 | 0.011331 | 0.011433 |
| 0.011297 | 0.011636 | 0.011230 | 0.011500 | 0.011297 | 0.011297 | 0.011230 |
| 0.011467 | 0.011670 | 0.011365 | 0.011433 | 0.011263 | 0.011670 | 0.011297 |
| 0.011297 | 0.011297 | 0.011331 | 0.011433 | 0.011297 | 0.011433 | 0.011500 |
| 0.011500 | 0.011467 | 0.011365 | 0.011467 | 0.011433 | 0.011297 | 0.011263 |
| 0.011297 | 0.011297 | 0.011365 | 0.011297 | 0.011263 | 0.011433 | 0.011297 |
| 0.011331 | 0.011331 | 0.011467 | 0.011500 | 0.011399 | 0.011331 | 0.011331 |
| 0.011399 | 0.011331 | 0.011433 | 0.011297 | 0.011433 | 0.011534 | 0.011839 |
| 0.011331 | 0.011738 | 0.011339 | 0.017928 | 0.011259 | 0.011431 | 0.011694 |
| 0.011654 | 0.011699 | 0.011378 | 0.011352 | 0.011784 | 0.011722 | 0.011430 |
| 0.011539 | 0.011618 | 0.011257 | 0.011314 | 0.011336 | 0.011360 | 0.011320 |
| 0.011534 | 0.011511 | 0.011509 | 0.011328 | 0.011467 | 0.011501 | 0.011504 |
| 0.011372 | 0.011467 | 0.011467 | 0.011399 | 0.011399 | 0.011399 | 0.011365 |
| 0.011399 | 0.011331 | 0.011365 | 0.011399 | 0.011365 | 0.011297 | 0.011331 |
| 0.011331 | 0.011399 | 0.011297 | 0.011399 | 0.011433 | 0.011467 | 0.011365 |
| 0.011399 | 0.011365 | 0.011704 | 0.011704 | 0.011433 | 0.011433 | 0.011501 |
| 0.011263 | 0.011263 | 0.011297 | 0.011399 | 0.011263 | 0.011501 | 0.011501 |
| 0.011534 | 0.011534 | 0.011467 | 0.011568 | 0.011738 | 0.011568 | 0.011399 |
| 0.011399 | 0.011467 | 0.011501 | 0.011331 | 0.011399 | 0.011365 | 0.011399 |
| 0.011467 | 0.011467 | 0.011501 | 0.011467 | 0.011366 | 0.011568 | 0.011534 |
| 0.000000 | 0.011297 | 0.011399 | 0.011501 | 0.011399 | 0.011535 | 0.011568 |
| 0.011738 | 0.011439 | 0.011602 | 0.011568 | 0.011500 | 0.011670 | 0.011298 |
| 0.011468 | 0.011365 | 0.011331 | 0.011331 | 0.011399 | 0.011297 | 0.011399 |
| 0.011433 | 0.011467 | 0.011365 | 0.011399 | 0.011365 | 0.011704 | 0.011704 |
| 0.011433 | 0.011433 | 0.011534 | 0.011467 | 0.012112 | 0.011529 | 0.011414 |
| 0.011521 | 0.011480 | 0.011557 | 0.011480 | 0.011590 | 0.011513 | 0.011478 |
| 0.012065 | 0.011375 | 0.011475 | 0.011444 | 0.011720 | 0.011575 | 0.011678 |
| 0.012089 | 0.011516 | 0.011640 | 0.011704 | 0.011568 | 0.011568 | 0.011606 |
| 0.011263 | 0.011433 | 0.011568 | 0.011534 | 0.011537 | 0.011534 | 0.011502 |
| 0.011365 | 0.011297 | 0.011331 | 0.011365 | 0.011263 | 0.011331 | 0.011230 |
| 0.011365 | 0.011399 | 0.011297 | 0.011263 | 0.011365 | 0.011297 | 0.011331 |
| 0.011331 | 0.011263 | 0.011331 | 0.011365 | 0.011263 | 0.011467 | 0.011500 |
| 0.011399 | 0.011467 | 0.011399 | 0.011399 | 0.011331 | 0.011738 | 0.011365 |
| 0.011376 | 0.011331 | 0.011569 | 0.011574 | 0.011433 | 0.011433 | 0.011433 |
| 0.011433 | 0.011365 | 0.011331 | 0.011365 | 0.011467 | 0.011467 | 0.011399 |
| 0.011399 | 0.011534 | 0.011704 | 0.011433 | 0.011636 | 0.011636 | 0.011500 |
| 0.011331 | 0.011399 | 0.011433 | 0.011839 | 0.011399 | 0.011433 | 0.011399 |
| 0.011433 | 0.011365 | 0.011365 | 0.011670 | 0.011602 | 0.011636 | 0.011365 |
| 0.011467 | 0.011534 | 0.011399 | 0.011467 | 0.011433 | 0.011297 | 0.011636 |
| 0.011399 | 0.011365 | 0.011365 | 0.011534 | 0.011365 | 0.011467 | 0.011704 |
| 0.011399 | 0.011780 | 0.011771 | 0.011594 | 0.011345 | 0.011472 | 0.011321 |
| 0.011226 | 0.011807 | 0.011308 | 0.011557 | 0.011406 | 0.011473 | 0.011544 |
| 0.011575 | 0.011261 | 0.011454 | 0.011261 | 0.011388 | 0.011467 | 0.011470 |
| 0.011479 | 0.011378 | 0.011451 | 0.011380 | 0.011400 | 0.011534 | 0.011602 |
| 0.011602 | 0.011467 | 0.011572 | 0.011573 | 0.011710 | 0.011737 | 0.011399 |
| 0.011636 | 0.011501 | 0.011365 | 0.011467 | 0.011263 | 0.011500 | 0.011297 |
| 0.011365 | 0.011365 | 0.011331 | 0.011297 | 0.011331 | 0.011297 | 0.011399 |
| 0.011377 | 0.011378 | 0.011371 | 0.011406 | 0.011544 | 0.011508 | 0.011508 |
| 0.011473 | 0.011433 | 0.011247 | 0.011242 | 0.011368 | 0.011539 | 0.011539 |
| 0.011332 | 0.011334 | 0.011604 | 0.011606 | 0.011535 | 0.011569 | 0.011500 |

|          |          |          |          |          |          |          |
|----------|----------|----------|----------|----------|----------|----------|
| 0.011433 | 0.011500 | 0.011500 | 0.011399 | 0.011975 | 0.011568 | 0.011602 |
| 0.011670 | 0.011743 | 0.011370 | 0.011445 | 0.011331 | 0.011534 | 0.011500 |
| 0.011535 | 0.011568 | 0.011568 | 0.011568 | 0.011692 | 0.011704 | 0.011305 |
| 0.011231 | 0.011200 | 0.011335 | 0.011300 | 0.011405 | 0.011211 | 0.011574 |
| 0.011372 | 0.011457 | 0.011204 | 0.011362 | 0.011366 | 0.011440 | 0.011331 |
| 0.011297 | 0.011297 | 0.011365 | 0.011331 | 0.011534 | 0.011501 | 0.011433 |
| 0.011534 | 0.011602 | 0.011331 | 0.011331 | 0.011365 | 0.011365 | 0.011367 |
| 0.011435 | 0.011365 | 0.011365 | 0.011400 | 0.011534 | 0.011602 | 0.011602 |
| 0.011467 | 0.011572 | 0.011573 | 0.011710 | 0.011737 | 0.011399 | 0.011568 |
| 0.011500 | 0.011500 | 0.011333 | 0.011517 | 0.011446 | 0.011472 | 0.011343 |
| 0.011512 | 0.011703 | 0.011530 | 0.011403 | 0.011297 | 0.011501 | 0.011365 |
| 0.011467 | 0.011399 | 0.011297 | 0.011366 | 0.011501 | 0.011503 | 0.011399 |
| 0.011297 | 0.011230 | 0.011365 | 0.011297 | 0.011230 | 0.011334 | 0.011501 |
| 0.011399 | 0.011331 | 0.011365 | 0.011399 | 0.011365 | 0.011297 | 0.011501 |
| 0.011365 | 0.011399 | 0.011399 | 0.011331 | 0.011399 | 0.011636 | 0.011297 |
| 0.011331 | 0.011738 | 0.011331 | 0.011365 | 0.011331 | 0.011704 | 0.011276 |
| 0.011798 | 0.011318 | 0.011313 | 0.011548 | 0.011636 | 0.011531 | 0.011272 |
| 0.011272 | 0.011500 | 0.011602 | 0.011711 | 0.011570 | 0.011709 | 0.011841 |
| 0.011739 | 0.011777 | 0.011738 | 0.011957 | 0.011704 | 0.012383 | 0.011740 |
| 0.012486 | 0.012217 | 0.012353 | 0.012626 | 0.011704 | 0.011399 | 0.011670 |
| 0.012147 | 0.012047 | 0.011670 | 0.011568 | 0.011637 | 0.011637 | 0.011606 |
| 0.011500 | 0.011505 | 0.011568 | 0.011535 | 0.011908 | 0.011975 | 0.011977 |
| 0.011875 | 0.011976 | 0.012047 | 0.011845 | 0.012147 | 0.012151 | 0.012215 |
| 0.012216 | 0.012250 | 0.012196 | 0.012216 | 0.012217 | 0.011433 | 0.011738 |
| 0.011807 | 0.012315 | 0.011813 | 0.011941 | 0.012521 | 0.011574 | 0.011467 |
| 0.011433 | 0.011433 | 0.011908 | 0.011928 | 0.012055 | 0.011771 | 0.011434 |
| S463     | 0.011598 | 0.011598 | 0.011934 | 0.011698 | 0.011698 | 0.011765 |
| 0.011604 | 0.011536 | 0.011698 | 0.011195 | 0.011262 | 0.011229 | 0.011195 |
| 0.011228 | 0.011396 | 0.011195 | 0.011228 | 0.011295 | 0.011262 | 0.011228 |
| 0.011195 | 0.011228 | 0.011329 | 0.011195 | 0.011228 | 0.011228 | 0.011570 |
| 0.011463 | 0.011228 | 0.011127 | 0.011362 | 0.011295 | 0.011262 | 0.011295 |
| 0.011262 | 0.011362 | 0.011262 | 0.011262 | 0.011295 | 0.011262 | 0.011430 |
| 0.011195 | 0.011262 | 0.011295 | 0.011228 | 0.011329 | 0.011362 | 0.011295 |
| 0.011262 | 0.011430 | 0.011329 | 0.011597 | 0.011262 | 0.011530 | 0.011262 |
| 0.011228 | 0.011329 | 0.011396 | 0.011530 | 0.011631 | 0.011329 | 0.011430 |
| 0.011295 | 0.011362 | 0.011262 | 0.011497 | 0.011732 | 0.011262 | 0.011329 |
| 0.011228 | 0.011329 | 0.011295 | 0.011362 | 0.011295 | 0.011295 | 0.011295 |
| 0.011195 | 0.011228 | 0.011195 | 0.011295 | 0.011262 | 0.011296 | 0.011362 |
| 0.011295 | 0.011262 | 0.011329 | 0.011228 | 0.011362 | 0.011195 | 0.011262 |
| 0.011429 | 0.011362 | 0.011597 | 0.011430 | 0.011262 | 0.011497 | 0.011262 |
| 0.011394 | 0.011620 | 0.011437 | 0.011138 | 0.011135 | 0.011244 | 0.011336 |
| 0.011975 | 0.011365 | 0.011143 | 0.011497 | 0.011497 | 0.011295 | 0.011396 |
| 0.011329 | 0.011295 | 0.011362 | 0.011262 | 0.011362 | 0.011295 | 0.011295 |
| 0.011262 | 0.011362 | 0.011564 | 0.011429 | 0.011329 | 0.011295 | 0.011228 |
| 0.011195 | 0.011195 | 0.011262 | 0.011228 | 0.011429 | 0.011396 | 0.011329 |
| 0.011429 | 0.011497 | 0.011228 | 0.011228 | 0.011262 | 0.011262 | 0.011263 |
| 0.011331 | 0.011262 | 0.011262 | 0.011096 | 0.011169 | 0.011165 | 0.011262 |
| 0.011263 | 0.011163 | 0.011208 | 0.011233 | 0.011162 | 0.011197 | 0.011229 |
| 0.011456 | 0.011233 | 0.011301 | 0.011195 | 0.011199 | 0.011329 | 0.011296 |
| 0.011363 | 0.011296 | 0.011296 | 0.011396 | 0.011329 | 0.011698 | 0.011497 |
| 0.011530 | 0.011396 | 0.011262 | 0.011362 | 0.011161 | 0.011396 | 0.011195 |
| 0.011262 | 0.011262 | 0.011228 | 0.011195 | 0.011228 | 0.011195 | 0.011295 |
| 0.011262 | 0.011362 | 0.011295 | 0.011195 | 0.011296 | 0.011396 | 0.011398 |
| 0.011396 | 0.011295 | 0.011195 | 0.011128 | 0.011262 | 0.011195 | 0.011128 |
| 0.011230 | 0.011396 | 0.011195 | 0.011396 | 0.011161 | 0.011262 | 0.011228 |
| 0.011329 | 0.011228 | 0.011262 | 0.011228 | 0.011262 | 0.011127 | 0.011262 |
| 0.011295 | 0.011228 | 0.011295 | 0.011228 | 0.011262 | 0.011295 | 0.011530 |
| 0.011631 | 0.011564 | 0.011631 | 0.011397 | 0.011631 | 0.011262 | 0.011228 |
| 0.011263 | 0.011545 | 0.011335 | 0.011163 | 0.011637 | 0.011129 | 0.011257 |
| 0.011637 | 0.011536 | 0.011429 | 0.011631 | 0.011333 | 0.011497 | 0.011463 |

|          |          |          |          |          |          |          |
|----------|----------|----------|----------|----------|----------|----------|
| 0.011396 | 0.011564 | 0.011416 | 0.011225 | 0.011312 | 0.011295 | 0.011365 |
| 0.011463 | 0.011364 | 0.011500 | 0.011568 | 0.011497 | 0.011564 | 0.011670 |
| 0.011399 | 0.011570 | 0.011500 | 0.011432 | 0.011700 | 0.011161 | 0.011364 |
| 0.011329 | 0.011262 | 0.011161 | 0.011161 | 0.011228 | 0.011228 | 0.011295 |
| 0.011228 | 0.011295 | 0.011195 | 0.011295 | 0.011228 | 0.011228 | 0.011295 |
| 0.011228 | 0.011665 | 0.011564 | 0.011597 | 0.011127 | 0.011228 | 0.011262 |
| 0.011262 | 0.011228 | 0.011295 | 0.011329 | 0.011195 | 0.011195 | 0.011195 |
| 0.011732 | 0.011362 | 0.011362 | 0.011161 | 0.011262 | 0.011430 | 0.011195 |
| 0.011195 | 0.011262 | 0.011228 | 0.011396 | 0.011195 | 0.011329 | 0.011463 |
| 0.011396 | 0.011228 | 0.011228 | 0.011161 | 0.011161 | 0.011329 | 0.011262 |
| 0.011161 | 0.011262 | 0.011127 | 0.011161 | 0.011295 | 0.011430 | 0.011195 |
| 0.011161 | 0.011295 | 0.011228 | 0.011127 | 0.011463 | 0.011127 | 0.011295 |
| 0.011368 | 0.011195 | 0.011497 | 0.011329 | 0.011362 | 0.011228 | 0.011329 |
| 0.011195 | 0.011530 | 0.011127 | 0.011396 | 0.011195 | 0.011195 | 0.011127 |
| 0.011362 | 0.011564 | 0.011262 | 0.011329 | 0.011161 | 0.011564 | 0.011195 |
| 0.011127 | 0.011195 | 0.011228 | 0.011329 | 0.011228 | 0.011329 | 0.011396 |
| 0.011396 | 0.011362 | 0.011262 | 0.011363 | 0.011329 | 0.011195 | 0.011161 |
| 0.011195 | 0.011195 | 0.011262 | 0.011195 | 0.011161 | 0.011329 | 0.011195 |
| 0.011228 | 0.011228 | 0.011362 | 0.011396 | 0.011295 | 0.011228 | 0.011228 |
| 0.011295 | 0.011228 | 0.011329 | 0.011195 | 0.011329 | 0.011430 | 0.011732 |
| 0.011228 | 0.011631 | 0.011198 | 0.017710 | 0.011126 | 0.011305 | 0.011548 |
| 0.011545 | 0.011553 | 0.011217 | 0.011176 | 0.011609 | 0.011613 | 0.011242 |
| 0.011392 | 0.011426 | 0.011099 | 0.011144 | 0.011177 | 0.011208 | 0.011146 |
| 0.011389 | 0.011358 | 0.011357 | 0.011193 | 0.011362 | 0.011396 | 0.011398 |
| 0.011266 | 0.011362 | 0.011362 | 0.011329 | 0.011295 | 0.011295 | 0.011262 |
| 0.011295 | 0.011228 | 0.011262 | 0.011295 | 0.011262 | 0.011195 | 0.011228 |
| 0.011228 | 0.011295 | 0.011195 | 0.011295 | 0.011329 | 0.011362 | 0.011262 |
| 0.011295 | 0.011262 | 0.011597 | 0.011597 | 0.011329 | 0.011363 | 0.011396 |
| 0.011161 | 0.011161 | 0.011195 | 0.011295 | 0.011161 | 0.011396 | 0.011396 |
| 0.011429 | 0.011429 | 0.011362 | 0.011463 | 0.011631 | 0.011464 | 0.011295 |
| 0.011295 | 0.011362 | 0.011396 | 0.011228 | 0.011295 | 0.011262 | 0.011295 |
| 0.011363 | 0.011362 | 0.011396 | 0.011363 | 0.011262 | 0.011463 | 0.011430 |
| 0.011297 | 0.000000 | 0.011295 | 0.011396 | 0.011295 | 0.011430 | 0.011463 |
| 0.011631 | 0.011333 | 0.011497 | 0.011463 | 0.011396 | 0.011564 | 0.011195 |
| 0.011363 | 0.011262 | 0.011228 | 0.011228 | 0.011295 | 0.011195 | 0.011295 |
| 0.011329 | 0.011362 | 0.011262 | 0.011295 | 0.011262 | 0.011597 | 0.011597 |
| 0.011329 | 0.011363 | 0.011429 | 0.011362 | 0.012002 | 0.011418 | 0.011342 |
| 0.011412 | 0.011372 | 0.011482 | 0.011372 | 0.011480 | 0.011405 | 0.011371 |
| 0.011953 | 0.011268 | 0.011403 | 0.011337 | 0.011611 | 0.011468 | 0.011571 |
| 0.011978 | 0.011437 | 0.011297 | 0.011295 | 0.011295 | 0.011329 | 0.011263 |
| 0.011161 | 0.011195 | 0.011329 | 0.011295 | 0.011297 | 0.011429 | 0.011397 |
| 0.011262 | 0.011195 | 0.011228 | 0.011262 | 0.011161 | 0.011228 | 0.011127 |
| 0.011262 | 0.011295 | 0.011195 | 0.011161 | 0.011262 | 0.011195 | 0.011228 |
| 0.011228 | 0.011161 | 0.011228 | 0.011262 | 0.011161 | 0.011362 | 0.011396 |
| 0.011295 | 0.011362 | 0.011295 | 0.011295 | 0.011228 | 0.011631 | 0.011262 |
| 0.011304 | 0.011228 | 0.011463 | 0.011467 | 0.011329 | 0.011329 | 0.011329 |
| 0.011329 | 0.011262 | 0.011228 | 0.011262 | 0.011362 | 0.011362 | 0.011295 |
| 0.011295 | 0.011430 | 0.011597 | 0.011329 | 0.011530 | 0.011530 | 0.011396 |
| 0.011228 | 0.011295 | 0.011329 | 0.011732 | 0.011295 | 0.011329 | 0.011295 |
| 0.011329 | 0.011262 | 0.011262 | 0.011564 | 0.011497 | 0.011530 | 0.011262 |
| 0.011362 | 0.011430 | 0.011295 | 0.011362 | 0.011329 | 0.011195 | 0.011530 |
| 0.011295 | 0.011262 | 0.011262 | 0.011430 | 0.011262 | 0.011362 | 0.011598 |
| 0.011295 | 0.011672 | 0.011665 | 0.011426 | 0.011173 | 0.011332 | 0.011215 |
| 0.011115 | 0.011644 | 0.011166 | 0.011373 | 0.011207 | 0.011315 | 0.011273 |
| 0.011366 | 0.000000 | 0.011227 | 0.000000 | 0.011168 | 0.011261 | 0.011303 |
| 0.011324 | 0.011218 | 0.011307 | 0.011236 | 0.011296 | 0.011429 | 0.011497 |
| 0.011497 | 0.011363 | 0.011466 | 0.011467 | 0.011603 | 0.011626 | 0.011295 |
| 0.011530 | 0.011396 | 0.011262 | 0.011362 | 0.011161 | 0.011396 | 0.011195 |
| 0.011262 | 0.011262 | 0.011228 | 0.011195 | 0.011228 | 0.011195 | 0.011295 |
| 0.011270 | 0.011270 | 0.011266 | 0.011266 | 0.011437 | 0.011402 | 0.011402 |

|          |          |          |          |          |          |          |
|----------|----------|----------|----------|----------|----------|----------|
| 0.011401 | 0.011329 | 0.011097 | 0.011096 | 0.011263 | 0.011433 | 0.011433 |
| 0.011228 | 0.011297 | 0.011531 | 0.011500 | 0.011430 | 0.011464 | 0.011396 |
| 0.011329 | 0.011396 | 0.011396 | 0.011295 | 0.011867 | 0.011463 | 0.011531 |
| 0.011564 | 0.011630 | 0.011265 | 0.011337 | 0.011228 | 0.011429 | 0.011396 |
| 0.011430 | 0.011463 | 0.011463 | 0.011463 | 0.011611 | 0.011597 | 0.011234 |
| 0.011128 | 0.011130 | 0.011231 | 0.011196 | 0.011299 | 0.011135 | 0.011468 |
| 0.011266 | 0.011411 | 0.011108 | 0.011285 | 0.011262 | 0.011334 | 0.011228 |
| 0.011195 | 0.011195 | 0.011262 | 0.011228 | 0.011429 | 0.011396 | 0.011329 |
| 0.011429 | 0.011497 | 0.011228 | 0.011228 | 0.011262 | 0.011262 | 0.011263 |
| 0.011331 | 0.011262 | 0.011262 | 0.011296 | 0.011429 | 0.011497 | 0.011497 |
| 0.011363 | 0.011466 | 0.011467 | 0.011603 | 0.011626 | 0.011295 | 0.011463 |
| 0.011396 | 0.011396 | 0.011229 | 0.011408 | 0.011303 | 0.011333 | 0.011200 |
| 0.011405 | 0.011561 | 0.011399 | 0.011298 | 0.011195 | 0.011396 | 0.011262 |
| 0.011362 | 0.011295 | 0.011195 | 0.011296 | 0.011396 | 0.011398 | 0.011295 |
| 0.011195 | 0.011128 | 0.011262 | 0.011195 | 0.011128 | 0.011230 | 0.011396 |
| 0.011295 | 0.011228 | 0.011262 | 0.011295 | 0.011262 | 0.011195 | 0.011396 |
| 0.011262 | 0.011295 | 0.011295 | 0.011228 | 0.011295 | 0.011530 | 0.011195 |
| 0.011228 | 0.011631 | 0.011228 | 0.011262 | 0.011228 | 0.011597 | 0.011103 |
| 0.011566 | 0.011145 | 0.011161 | 0.011382 | 0.011467 | 0.011383 | 0.000000 |
| 0.011113 | 0.011396 | 0.011497 | 0.011603 | 0.011464 | 0.011601 | 0.011733 |
| 0.011632 | 0.011669 | 0.011631 | 0.011880 | 0.011597 | 0.012472 | 0.011633 |
| 0.012372 | 0.012139 | 0.012273 | 0.012545 | 0.011597 | 0.011295 | 0.011598 |
| 0.012036 | 0.011971 | 0.011564 | 0.011463 | 0.011531 | 0.011531 | 0.011500 |
| 0.011396 | 0.011399 | 0.011463 | 0.011430 | 0.011800 | 0.011866 | 0.011867 |
| 0.011767 | 0.011867 | 0.011970 | 0.011737 | 0.012037 | 0.012042 | 0.012104 |
| 0.012104 | 0.012138 | 0.012084 | 0.012104 | 0.012106 | 0.011329 | 0.011631 |
| 0.011699 | 0.012203 | 0.011704 | 0.011934 | 0.012406 | 0.011468 | 0.011363 |
| 0.011329 | 0.011329 | 0.011799 | 0.011842 | 0.011904 | 0.011665 | 0.011330 |
| S464     | 0.011698 | 0.011698 | 0.012035 | 0.011799 | 0.011799 | 0.011866 |
| 0.011706 | 0.011638 | 0.011799 | 0.011295 | 0.011362 | 0.011329 | 0.011295 |
| 0.011329 | 0.011497 | 0.011295 | 0.011329 | 0.011329 | 0.011362 | 0.011329 |
| 0.011295 | 0.011329 | 0.011429 | 0.011295 | 0.011329 | 0.011329 | 0.011672 |
| 0.011564 | 0.011329 | 0.011228 | 0.011463 | 0.011396 | 0.011362 | 0.011396 |
| 0.011362 | 0.011463 | 0.011362 | 0.011362 | 0.011396 | 0.011362 | 0.011530 |
| 0.011295 | 0.011362 | 0.011396 | 0.011329 | 0.011429 | 0.011463 | 0.011396 |
| 0.011362 | 0.011530 | 0.011430 | 0.011698 | 0.011362 | 0.011631 | 0.011362 |
| 0.011329 | 0.011430 | 0.011497 | 0.011631 | 0.011732 | 0.011430 | 0.011530 |
| 0.011396 | 0.011463 | 0.011362 | 0.011597 | 0.011833 | 0.011362 | 0.011430 |
| 0.011329 | 0.011429 | 0.011396 | 0.011463 | 0.011396 | 0.011396 | 0.011396 |
| 0.011295 | 0.011329 | 0.011295 | 0.011396 | 0.011362 | 0.011397 | 0.011463 |
| 0.011396 | 0.011362 | 0.011429 | 0.011329 | 0.011463 | 0.011295 | 0.011362 |
| 0.011530 | 0.011463 | 0.011698 | 0.011530 | 0.011362 | 0.011597 | 0.011362 |
| 0.011505 | 0.011733 | 0.011588 | 0.011255 | 0.011284 | 0.011391 | 0.011454 |
| 0.012121 | 0.011518 | 0.011184 | 0.011597 | 0.011597 | 0.011396 | 0.011497 |
| 0.011430 | 0.011396 | 0.011463 | 0.011362 | 0.011463 | 0.011396 | 0.011396 |
| 0.011362 | 0.011463 | 0.011665 | 0.011463 | 0.011430 | 0.011396 | 0.011329 |
| 0.011295 | 0.011295 | 0.011362 | 0.011329 | 0.011530 | 0.011497 | 0.011429 |
| 0.011530 | 0.011597 | 0.011329 | 0.011329 | 0.011362 | 0.011362 | 0.011364 |
| 0.011432 | 0.011362 | 0.011362 | 0.011240 | 0.011313 | 0.011271 | 0.011363 |
| 0.011365 | 0.011301 | 0.011318 | 0.011336 | 0.011264 | 0.011300 | 0.011330 |
| 0.011600 | 0.011370 | 0.011405 | 0.011296 | 0.011302 | 0.011430 | 0.011396 |
| 0.011464 | 0.011397 | 0.011396 | 0.011497 | 0.011429 | 0.011799 | 0.011598 |
| 0.011631 | 0.011497 | 0.011362 | 0.011463 | 0.011262 | 0.011497 | 0.011295 |
| 0.011362 | 0.011362 | 0.011329 | 0.011295 | 0.011329 | 0.011295 | 0.011396 |
| 0.011362 | 0.011463 | 0.011396 | 0.011295 | 0.011397 | 0.011497 | 0.011499 |
| 0.011497 | 0.011396 | 0.011295 | 0.011229 | 0.011362 | 0.011295 | 0.011228 |
| 0.011332 | 0.011497 | 0.011295 | 0.011497 | 0.011262 | 0.011362 | 0.011329 |
| 0.011430 | 0.011329 | 0.011362 | 0.011329 | 0.011362 | 0.011228 | 0.011362 |
| 0.011396 | 0.011329 | 0.011396 | 0.011329 | 0.011362 | 0.011396 | 0.011631 |
| 0.011732 | 0.011665 | 0.011732 | 0.011498 | 0.011732 | 0.011362 | 0.011329 |

|          |          |          |          |          |          |          |
|----------|----------|----------|----------|----------|----------|----------|
| 0.011364 | 0.011626 | 0.011517 | 0.011266 | 0.011705 | 0.011231 | 0.011375 |
| 0.011739 | 0.011638 | 0.011530 | 0.011732 | 0.011436 | 0.011597 | 0.011564 |
| 0.011497 | 0.011665 | 0.011522 | 0.011349 | 0.011396 | 0.011396 | 0.011466 |
| 0.011564 | 0.011465 | 0.011601 | 0.011669 | 0.011598 | 0.011665 | 0.011772 |
| 0.011500 | 0.011671 | 0.011602 | 0.011534 | 0.011801 | 0.011262 | 0.011465 |
| 0.011429 | 0.011362 | 0.011262 | 0.011262 | 0.011329 | 0.011329 | 0.011396 |
| 0.011329 | 0.011396 | 0.011295 | 0.011396 | 0.011329 | 0.011329 | 0.011396 |
| 0.011329 | 0.011765 | 0.011665 | 0.011698 | 0.011228 | 0.011329 | 0.011362 |
| 0.011362 | 0.011329 | 0.011396 | 0.011430 | 0.011295 | 0.011295 | 0.011295 |
| 0.011833 | 0.011463 | 0.011463 | 0.011262 | 0.011362 | 0.011530 | 0.011295 |
| 0.011295 | 0.011362 | 0.011329 | 0.011497 | 0.011295 | 0.011429 | 0.011564 |
| 0.011497 | 0.011329 | 0.011329 | 0.011262 | 0.011262 | 0.011430 | 0.011362 |
| 0.011262 | 0.011362 | 0.011228 | 0.011262 | 0.011396 | 0.011531 | 0.011295 |
| 0.011262 | 0.011396 | 0.011329 | 0.011228 | 0.011564 | 0.011228 | 0.011396 |
| 0.011471 | 0.011295 | 0.011597 | 0.011430 | 0.011463 | 0.011329 | 0.011429 |
| 0.011295 | 0.011631 | 0.011228 | 0.011497 | 0.011295 | 0.011295 | 0.011228 |
| 0.011463 | 0.011665 | 0.011362 | 0.011430 | 0.011262 | 0.011665 | 0.011295 |
| 0.011295 | 0.011295 | 0.011329 | 0.011430 | 0.011329 | 0.011429 | 0.011497 |
| 0.011497 | 0.011463 | 0.011362 | 0.011463 | 0.011429 | 0.011295 | 0.011262 |
| 0.011295 | 0.011295 | 0.011362 | 0.011295 | 0.011262 | 0.011430 | 0.011295 |
| 0.011329 | 0.011329 | 0.011463 | 0.011497 | 0.011396 | 0.011329 | 0.011329 |
| 0.011396 | 0.011329 | 0.011429 | 0.011295 | 0.011429 | 0.011530 | 0.011833 |
| 0.011329 | 0.011732 | 0.011336 | 0.011785 | 0.011191 | 0.011488 | 0.011688 |
| 0.011648 | 0.011623 | 0.011374 | 0.011408 | 0.011774 | 0.011716 | 0.011364 |
| 0.011582 | 0.011548 | 0.011177 | 0.011311 | 0.011294 | 0.011406 | 0.011318 |
| 0.011576 | 0.011470 | 0.011468 | 0.011259 | 0.011463 | 0.011497 | 0.011500 |
| 0.011369 | 0.011463 | 0.011463 | 0.011429 | 0.011396 | 0.011396 | 0.011363 |
| 0.011396 | 0.011329 | 0.011362 | 0.011396 | 0.011362 | 0.011295 | 0.011329 |
| 0.011329 | 0.011396 | 0.011295 | 0.011396 | 0.011429 | 0.011396 | 0.011362 |
| 0.011396 | 0.011362 | 0.011698 | 0.011698 | 0.011430 | 0.011464 | 0.011497 |
| 0.011262 | 0.011262 | 0.011295 | 0.011396 | 0.011262 | 0.011497 | 0.011497 |
| 0.011530 | 0.011530 | 0.011463 | 0.011564 | 0.011732 | 0.011565 | 0.011396 |
| 0.011396 | 0.011463 | 0.011497 | 0.011329 | 0.011396 | 0.011362 | 0.011396 |
| 0.011463 | 0.011463 | 0.011497 | 0.011463 | 0.011363 | 0.011564 | 0.011530 |
| 0.011399 | 0.011295 | 0.000000 | 0.011497 | 0.011396 | 0.011530 | 0.011497 |
| 0.011732 | 0.011436 | 0.011597 | 0.011564 | 0.011497 | 0.011665 | 0.011295 |
| 0.011464 | 0.011363 | 0.011329 | 0.011329 | 0.011396 | 0.011295 | 0.011396 |
| 0.011429 | 0.011396 | 0.011362 | 0.011396 | 0.011362 | 0.011698 | 0.011698 |
| 0.011430 | 0.011464 | 0.011530 | 0.011463 | 0.012103 | 0.011489 | 0.011447 |
| 0.011517 | 0.011442 | 0.011517 | 0.011476 | 0.011550 | 0.011509 | 0.011440 |
| 0.012056 | 0.011372 | 0.011506 | 0.011441 | 0.011715 | 0.011571 | 0.011673 |
| 0.012080 | 0.011437 | 0.011398 | 0.011396 | 0.011396 | 0.011429 | 0.011364 |
| 0.011262 | 0.011295 | 0.011429 | 0.011396 | 0.011398 | 0.011530 | 0.011498 |
| 0.011362 | 0.011295 | 0.011329 | 0.011362 | 0.011262 | 0.011329 | 0.011228 |
| 0.011362 | 0.011396 | 0.011295 | 0.011262 | 0.011362 | 0.011295 | 0.011329 |
| 0.011329 | 0.011262 | 0.011329 | 0.011362 | 0.011262 | 0.011463 | 0.011497 |
| 0.011396 | 0.011463 | 0.011329 | 0.011396 | 0.011329 | 0.011732 | 0.011362 |
| 0.011408 | 0.011329 | 0.011564 | 0.011569 | 0.011430 | 0.011429 | 0.011429 |
| 0.011430 | 0.011362 | 0.011329 | 0.011362 | 0.011463 | 0.011463 | 0.011396 |
| 0.011329 | 0.011530 | 0.011698 | 0.011429 | 0.011631 | 0.011631 | 0.011497 |
| 0.011329 | 0.011396 | 0.011430 | 0.011833 | 0.011396 | 0.011430 | 0.011396 |
| 0.011429 | 0.011362 | 0.011362 | 0.011665 | 0.011598 | 0.011631 | 0.011362 |
| 0.011463 | 0.011530 | 0.011396 | 0.011463 | 0.011429 | 0.011295 | 0.011631 |
| 0.011396 | 0.011362 | 0.011362 | 0.011530 | 0.011362 | 0.011463 | 0.011698 |
| 0.011396 | 0.011774 | 0.011765 | 0.011507 | 0.011229 | 0.011468 | 0.011318 |
| 0.011280 | 0.011722 | 0.011306 | 0.011373 | 0.011304 | 0.011417 | 0.011326 |
| 0.011468 | 0.011126 | 0.011283 | 0.011126 | 0.011168 | 0.011328 | 0.011425 |
| 0.011437 | 0.011336 | 0.011412 | 0.011377 | 0.011397 | 0.011530 | 0.011597 |
| 0.011597 | 0.011464 | 0.011567 | 0.011569 | 0.011704 | 0.011732 | 0.011396 |
| 0.011631 | 0.011497 | 0.011362 | 0.011463 | 0.011262 | 0.011497 | 0.011295 |

|          |          |          |          |          |          |          |
|----------|----------|----------|----------|----------|----------|----------|
| 0.011362 | 0.011362 | 0.011329 | 0.011295 | 0.011329 | 0.011295 | 0.011396 |
| 0.011340 | 0.011375 | 0.011368 | 0.011403 | 0.011539 | 0.011504 | 0.011504 |
| 0.011503 | 0.011430 | 0.011245 | 0.011240 | 0.011365 | 0.011535 | 0.011535 |
| 0.011329 | 0.011399 | 0.011632 | 0.011601 | 0.011531 | 0.011565 | 0.011497 |
| 0.011429 | 0.011497 | 0.011497 | 0.011396 | 0.011967 | 0.011564 | 0.011631 |
| 0.011665 | 0.011701 | 0.011367 | 0.011441 | 0.011329 | 0.011530 | 0.011497 |
| 0.011531 | 0.011564 | 0.011564 | 0.011564 | 0.011689 | 0.011698 | 0.011338 |
| 0.011229 | 0.011233 | 0.011333 | 0.011298 | 0.011402 | 0.011210 | 0.011570 |
| 0.011369 | 0.011455 | 0.011203 | 0.011397 | 0.011363 | 0.011437 | 0.011329 |
| 0.011295 | 0.011295 | 0.011362 | 0.011329 | 0.011530 | 0.011497 | 0.011429 |
| 0.011530 | 0.011597 | 0.011329 | 0.011329 | 0.011362 | 0.011362 | 0.011364 |
| 0.011432 | 0.011362 | 0.011362 | 0.011397 | 0.011530 | 0.011597 | 0.011597 |
| 0.011464 | 0.011567 | 0.011569 | 0.011704 | 0.011732 | 0.011396 | 0.011497 |
| 0.011497 | 0.011497 | 0.011331 | 0.011478 | 0.011442 | 0.011469 | 0.011340 |
| 0.011508 | 0.011744 | 0.011441 | 0.011400 | 0.011295 | 0.011497 | 0.011362 |
| 0.011463 | 0.011396 | 0.011295 | 0.011397 | 0.011497 | 0.011499 | 0.011396 |
| 0.011295 | 0.011229 | 0.011362 | 0.011295 | 0.011228 | 0.011332 | 0.011497 |
| 0.011396 | 0.011329 | 0.011362 | 0.011396 | 0.011362 | 0.011295 | 0.011497 |
| 0.011362 | 0.011396 | 0.011396 | 0.011329 | 0.011329 | 0.011631 | 0.011295 |
| 0.011329 | 0.011732 | 0.011329 | 0.011362 | 0.011329 | 0.011698 | 0.011189 |
| 0.011679 | 0.011230 | 0.011311 | 0.011463 | 0.011549 | 0.011491 | 0.011186 |
| 0.011270 | 0.011497 | 0.011597 | 0.011705 | 0.011565 | 0.011703 | 0.011834 |
| 0.011733 | 0.011771 | 0.011732 | 0.011983 | 0.011698 | 0.012573 | 0.011734 |
| 0.012473 | 0.012241 | 0.012375 | 0.012646 | 0.011698 | 0.011396 | 0.011698 |
| 0.012137 | 0.012072 | 0.011665 | 0.011564 | 0.011632 | 0.011632 | 0.011601 |
| 0.011497 | 0.011501 | 0.011564 | 0.011531 | 0.011901 | 0.011900 | 0.011968 |
| 0.011868 | 0.011968 | 0.012072 | 0.011838 | 0.012138 | 0.012144 | 0.012205 |
| 0.012205 | 0.012239 | 0.012186 | 0.012205 | 0.012207 | 0.011429 | 0.011732 |
| 0.011800 | 0.012304 | 0.011806 | 0.012035 | 0.012508 | 0.011570 | 0.011464 |
| 0.011429 | 0.011429 | 0.011900 | 0.011924 | 0.012045 | 0.011765 | 0.011431 |
| S465     | 0.011799 | 0.011799 | 0.012136 | 0.011900 | 0.011900 | 0.011967 |
| 0.011808 | 0.011740 | 0.011900 | 0.011396 | 0.011463 | 0.011430 | 0.011396 |
| 0.011430 | 0.011598 | 0.011396 | 0.011430 | 0.011497 | 0.011463 | 0.011430 |
| 0.011396 | 0.011430 | 0.011530 | 0.011396 | 0.011430 | 0.011430 | 0.011774 |
| 0.011665 | 0.011430 | 0.011329 | 0.011564 | 0.011497 | 0.011463 | 0.011497 |
| 0.011463 | 0.011564 | 0.011396 | 0.011463 | 0.011430 | 0.011463 | 0.011631 |
| 0.011396 | 0.011463 | 0.011430 | 0.011362 | 0.011530 | 0.011564 | 0.011497 |
| 0.011463 | 0.011564 | 0.011531 | 0.011799 | 0.011396 | 0.011732 | 0.011396 |
| 0.011430 | 0.011531 | 0.011531 | 0.011732 | 0.011799 | 0.011530 | 0.011631 |
| 0.011497 | 0.011564 | 0.011463 | 0.011698 | 0.011934 | 0.011463 | 0.011530 |
| 0.011430 | 0.011530 | 0.011497 | 0.011564 | 0.011497 | 0.011430 | 0.011430 |
| 0.011396 | 0.011430 | 0.011396 | 0.011497 | 0.011463 | 0.011498 | 0.011564 |
| 0.011497 | 0.011463 | 0.011530 | 0.011430 | 0.011564 | 0.011396 | 0.011463 |
| 0.011631 | 0.011564 | 0.011799 | 0.011631 | 0.011463 | 0.011698 | 0.011396 |
| 0.011654 | 0.011882 | 0.011702 | 0.011373 | 0.011396 | 0.011502 | 0.011612 |
| 0.012231 | 0.011670 | 0.011431 | 0.011698 | 0.011698 | 0.011497 | 0.011598 |
| 0.011530 | 0.011497 | 0.011564 | 0.011463 | 0.011564 | 0.011497 | 0.011497 |
| 0.011463 | 0.011564 | 0.011766 | 0.011631 | 0.011530 | 0.011497 | 0.011430 |
| 0.011396 | 0.011396 | 0.011463 | 0.011430 | 0.011631 | 0.011598 | 0.011530 |
| 0.011631 | 0.011698 | 0.011430 | 0.011430 | 0.011463 | 0.011463 | 0.011465 |
| 0.011534 | 0.011463 | 0.011463 | 0.011312 | 0.011386 | 0.011341 | 0.011464 |
| 0.011467 | 0.011404 | 0.011466 | 0.011440 | 0.011332 | 0.011369 | 0.011398 |
| 0.011672 | 0.011439 | 0.011474 | 0.011396 | 0.011406 | 0.011531 | 0.011497 |
| 0.011565 | 0.011498 | 0.011497 | 0.011597 | 0.011530 | 0.011900 | 0.011699 |
| 0.011732 | 0.011598 | 0.011463 | 0.011564 | 0.011362 | 0.011597 | 0.011396 |
| 0.011463 | 0.011463 | 0.011430 | 0.011396 | 0.011430 | 0.011396 | 0.011497 |
| 0.011463 | 0.011564 | 0.011497 | 0.011396 | 0.011498 | 0.011598 | 0.011601 |
| 0.011598 | 0.011497 | 0.011396 | 0.011330 | 0.011463 | 0.011396 | 0.011329 |
| 0.011400 | 0.011598 | 0.011396 | 0.011598 | 0.011362 | 0.011463 | 0.011430 |
| 0.011530 | 0.011430 | 0.011463 | 0.011430 | 0.011463 | 0.011329 | 0.011463 |



|          |          |          |          |          |          |          |
|----------|----------|----------|----------|----------|----------|----------|
| 0.011497 | 0.011430 | 0.011497 | 0.011430 | 0.011463 | 0.011497 | 0.011732 |
| 0.011833 | 0.011765 | 0.011833 | 0.011532 | 0.011833 | 0.011463 | 0.011430 |
| 0.011466 | 0.011707 | 0.011609 | 0.011369 | 0.011841 | 0.011333 | 0.011375 |
| 0.011842 | 0.011740 | 0.011631 | 0.011833 | 0.011504 | 0.011698 | 0.011665 |
| 0.011598 | 0.011765 | 0.011558 | 0.011390 | 0.011480 | 0.011497 | 0.011568 |
| 0.011665 | 0.011533 | 0.011703 | 0.011737 | 0.011699 | 0.011766 | 0.011840 |
| 0.011602 | 0.011739 | 0.011670 | 0.011602 | 0.011902 | 0.011362 | 0.011566 |
| 0.011530 | 0.011463 | 0.011362 | 0.011362 | 0.011430 | 0.011430 | 0.011430 |
| 0.011430 | 0.011497 | 0.011396 | 0.011497 | 0.011430 | 0.011430 | 0.011497 |
| 0.011430 | 0.011866 | 0.011766 | 0.011799 | 0.011329 | 0.011430 | 0.011463 |
| 0.011463 | 0.011430 | 0.011497 | 0.011530 | 0.011396 | 0.011396 | 0.011396 |
| 0.011934 | 0.011564 | 0.011564 | 0.011362 | 0.011463 | 0.011631 | 0.011396 |
| 0.011396 | 0.011463 | 0.011430 | 0.011598 | 0.011396 | 0.011530 | 0.011665 |
| 0.011598 | 0.011430 | 0.011430 | 0.011362 | 0.011362 | 0.011531 | 0.011463 |
| 0.011362 | 0.011463 | 0.011329 | 0.011362 | 0.011497 | 0.011632 | 0.011396 |
| 0.011363 | 0.011497 | 0.011430 | 0.011329 | 0.011665 | 0.011329 | 0.011497 |
| 0.011540 | 0.011396 | 0.011698 | 0.011531 | 0.011564 | 0.011430 | 0.011463 |
| 0.011396 | 0.011732 | 0.011329 | 0.011598 | 0.011396 | 0.011396 | 0.011329 |
| 0.011564 | 0.011766 | 0.011463 | 0.011530 | 0.011362 | 0.011766 | 0.011396 |
| 0.011396 | 0.011396 | 0.011430 | 0.011530 | 0.011430 | 0.011530 | 0.011598 |
| 0.011598 | 0.011564 | 0.011396 | 0.011564 | 0.011530 | 0.011329 | 0.011362 |
| 0.011396 | 0.011329 | 0.011463 | 0.011396 | 0.011362 | 0.011530 | 0.011396 |
| 0.011430 | 0.011430 | 0.011564 | 0.011598 | 0.011497 | 0.011430 | 0.011430 |
| 0.011497 | 0.011430 | 0.011530 | 0.011396 | 0.011530 | 0.011631 | 0.011934 |
| 0.011430 | 0.011833 | 0.011440 | 0.017974 | 0.011453 | 0.011611 | 0.011793 |
| 0.011752 | 0.011799 | 0.011637 | 0.011466 | 0.011995 | 0.011820 | 0.011607 |
| 0.011677 | 0.011732 | 0.011372 | 0.011479 | 0.011412 | 0.011554 | 0.011404 |
| 0.011717 | 0.011619 | 0.011616 | 0.011325 | 0.011564 | 0.011598 | 0.011601 |
| 0.011438 | 0.011564 | 0.011564 | 0.011530 | 0.011497 | 0.011497 | 0.011463 |
| 0.011497 | 0.011430 | 0.011463 | 0.011497 | 0.011463 | 0.011396 | 0.011430 |
| 0.011430 | 0.011497 | 0.011396 | 0.011497 | 0.011530 | 0.011564 | 0.011463 |
| 0.011497 | 0.011463 | 0.011799 | 0.011799 | 0.011531 | 0.011565 | 0.011598 |
| 0.011362 | 0.011362 | 0.011396 | 0.011497 | 0.011362 | 0.011598 | 0.011598 |
| 0.011631 | 0.011631 | 0.011564 | 0.011665 | 0.011833 | 0.011667 | 0.011497 |
| 0.011497 | 0.011564 | 0.011598 | 0.011430 | 0.011497 | 0.011463 | 0.011497 |
| 0.011564 | 0.011564 | 0.011598 | 0.011564 | 0.011464 | 0.011665 | 0.011631 |
| 0.011501 | 0.011396 | 0.011497 | 0.000000 | 0.011497 | 0.011631 | 0.011665 |
| 0.011833 | 0.011504 | 0.011698 | 0.011665 | 0.011598 | 0.011765 | 0.011396 |
| 0.011566 | 0.011464 | 0.011430 | 0.011430 | 0.011497 | 0.011396 | 0.011497 |
| 0.011530 | 0.011564 | 0.011463 | 0.011497 | 0.011463 | 0.011799 | 0.011799 |
| 0.011531 | 0.011565 | 0.011631 | 0.011564 | 0.012205 | 0.011561 | 0.011518 |
| 0.011553 | 0.011511 | 0.011623 | 0.011545 | 0.011620 | 0.011543 | 0.011543 |
| 0.012091 | 0.011406 | 0.011540 | 0.011475 | 0.011749 | 0.011639 | 0.011741 |
| 0.012149 | 0.011588 | 0.011500 | 0.011497 | 0.011497 | 0.011530 | 0.011466 |
| 0.011362 | 0.011396 | 0.011530 | 0.011497 | 0.011500 | 0.011631 | 0.011599 |
| 0.011463 | 0.011396 | 0.011430 | 0.011463 | 0.011362 | 0.011430 | 0.011329 |
| 0.011463 | 0.011497 | 0.011396 | 0.011362 | 0.011463 | 0.011396 | 0.011430 |
| 0.011430 | 0.011362 | 0.011430 | 0.011463 | 0.011362 | 0.011564 | 0.011598 |
| 0.011497 | 0.011564 | 0.011497 | 0.011497 | 0.011430 | 0.011799 | 0.011463 |
| 0.011478 | 0.011430 | 0.011665 | 0.011637 | 0.011531 | 0.011463 | 0.011530 |
| 0.011530 | 0.011463 | 0.011430 | 0.011463 | 0.011564 | 0.011564 | 0.011497 |
| 0.011497 | 0.011631 | 0.011799 | 0.011530 | 0.011732 | 0.011732 | 0.011598 |
| 0.011430 | 0.011497 | 0.011530 | 0.011934 | 0.011497 | 0.011531 | 0.011497 |
| 0.011530 | 0.011463 | 0.011463 | 0.011766 | 0.011699 | 0.011732 | 0.011463 |
| 0.011564 | 0.011631 | 0.011497 | 0.011564 | 0.011530 | 0.011396 | 0.011732 |
| 0.011497 | 0.011463 | 0.011463 | 0.011631 | 0.011463 | 0.011564 | 0.011799 |
| 0.011497 | 0.011876 | 0.011866 | 0.011711 | 0.011342 | 0.011570 | 0.011318 |
| 0.011390 | 0.011917 | 0.011411 | 0.011686 | 0.011499 | 0.011468 | 0.011591 |
| 0.011723 | 0.011389 | 0.011506 | 0.011390 | 0.011438 | 0.011596 | 0.011587 |
| 0.011588 | 0.011493 | 0.011553 | 0.011448 | 0.011498 | 0.011631 | 0.011698 |

|          |          |          |          |          |          |          |
|----------|----------|----------|----------|----------|----------|----------|
| 0.011698 | 0.011565 | 0.011669 | 0.011670 | 0.011806 | 0.011802 | 0.011497 |
| 0.011732 | 0.011598 | 0.011463 | 0.011564 | 0.011362 | 0.011597 | 0.011396 |
| 0.011463 | 0.011463 | 0.011430 | 0.011396 | 0.011430 | 0.011396 | 0.011497 |
| 0.011444 | 0.011445 | 0.011471 | 0.011471 | 0.011608 | 0.011607 | 0.011572 |
| 0.011571 | 0.011531 | 0.011282 | 0.011312 | 0.011467 | 0.011636 | 0.011637 |
| 0.011430 | 0.011501 | 0.011734 | 0.011703 | 0.011632 | 0.011666 | 0.011597 |
| 0.011530 | 0.011598 | 0.011597 | 0.011497 | 0.012069 | 0.011665 | 0.011732 |
| 0.011766 | 0.011844 | 0.011470 | 0.011545 | 0.011430 | 0.011631 | 0.011598 |
| 0.011632 | 0.011665 | 0.011665 | 0.011665 | 0.011689 | 0.011799 | 0.011407 |
| 0.011297 | 0.011303 | 0.011401 | 0.011366 | 0.011436 | 0.011247 | 0.011638 |
| 0.011438 | 0.011543 | 0.011298 | 0.011435 | 0.011464 | 0.011505 | 0.011430 |
| 0.011396 | 0.011396 | 0.011463 | 0.011430 | 0.011631 | 0.011598 | 0.011530 |
| 0.011631 | 0.011698 | 0.011430 | 0.011430 | 0.011463 | 0.011463 | 0.011465 |
| 0.011534 | 0.011463 | 0.011463 | 0.011498 | 0.011631 | 0.011698 | 0.011698 |
| 0.011565 | 0.011669 | 0.011670 | 0.011806 | 0.011802 | 0.011497 | 0.011665 |
| 0.011598 | 0.011598 | 0.011365 | 0.011617 | 0.011547 | 0.011571 | 0.011411 |
| 0.011611 | 0.011789 | 0.011568 | 0.011502 | 0.011396 | 0.011598 | 0.011463 |
| 0.011564 | 0.011497 | 0.011396 | 0.011498 | 0.011598 | 0.011601 | 0.011497 |
| 0.011396 | 0.011330 | 0.011463 | 0.011396 | 0.011329 | 0.011400 | 0.011598 |
| 0.011497 | 0.011430 | 0.011463 | 0.011497 | 0.011463 | 0.011396 | 0.011598 |
| 0.011463 | 0.011497 | 0.011497 | 0.011430 | 0.011497 | 0.011732 | 0.011396 |
| 0.011430 | 0.011799 | 0.011430 | 0.011463 | 0.011430 | 0.011799 | 0.011446 |
| 0.011904 | 0.011358 | 0.011461 | 0.011624 | 0.011752 | 0.011635 | 0.011353 |
| 0.011375 | 0.011597 | 0.011698 | 0.011807 | 0.011666 | 0.011805 | 0.011935 |
| 0.011834 | 0.011838 | 0.011833 | 0.012086 | 0.011799 | 0.012675 | 0.011835 |
| 0.012574 | 0.012342 | 0.012476 | 0.012748 | 0.011799 | 0.011497 | 0.011800 |
| 0.012238 | 0.012174 | 0.011766 | 0.011665 | 0.011733 | 0.011733 | 0.011669 |
| 0.011597 | 0.011603 | 0.011665 | 0.011598 | 0.012002 | 0.012068 | 0.012070 |
| 0.011969 | 0.012069 | 0.012173 | 0.011940 | 0.012239 | 0.012246 | 0.012306 |
| 0.012307 | 0.012341 | 0.012289 | 0.012307 | 0.012308 | 0.011530 | 0.011833 |
| 0.011901 | 0.012405 | 0.011908 | 0.012136 | 0.012609 | 0.011672 | 0.011564 |
| 0.011530 | 0.011530 | 0.012002 | 0.011924 | 0.012151 | 0.011866 | 0.011532 |
| S466     | 0.011698 | 0.011698 | 0.012035 | 0.011799 | 0.011799 | 0.011866 |
| 0.011706 | 0.011638 | 0.011799 | 0.011295 | 0.011362 | 0.011330 | 0.011295 |
| 0.011329 | 0.011497 | 0.011295 | 0.011329 | 0.011396 | 0.011362 | 0.011329 |
| 0.011295 | 0.011329 | 0.011430 | 0.011296 | 0.011329 | 0.011329 | 0.011672 |
| 0.011564 | 0.011329 | 0.011228 | 0.011463 | 0.011396 | 0.011363 | 0.011396 |
| 0.011362 | 0.011463 | 0.011362 | 0.011363 | 0.011396 | 0.011362 | 0.011530 |
| 0.011295 | 0.011362 | 0.011396 | 0.011329 | 0.011430 | 0.011463 | 0.011396 |
| 0.011362 | 0.011531 | 0.011430 | 0.011698 | 0.011362 | 0.011631 | 0.011362 |
| 0.011329 | 0.011430 | 0.011497 | 0.011631 | 0.011732 | 0.011430 | 0.011530 |
| 0.011396 | 0.011463 | 0.011363 | 0.011597 | 0.011833 | 0.011362 | 0.011430 |
| 0.011329 | 0.011430 | 0.011396 | 0.011463 | 0.011396 | 0.011396 | 0.011396 |
| 0.011295 | 0.011329 | 0.011295 | 0.011396 | 0.011362 | 0.011397 | 0.011463 |
| 0.011396 | 0.011362 | 0.011430 | 0.011329 | 0.011463 | 0.011295 | 0.011362 |
| 0.011530 | 0.011463 | 0.011698 | 0.011531 | 0.011363 | 0.011598 | 0.011362 |
| 0.011505 | 0.011733 | 0.011513 | 0.011216 | 0.011210 | 0.011392 | 0.011415 |
| 0.012048 | 0.011518 | 0.011225 | 0.011597 | 0.011598 | 0.011396 | 0.011497 |
| 0.011430 | 0.011329 | 0.011463 | 0.011362 | 0.011463 | 0.011396 | 0.011396 |
| 0.011362 | 0.011463 | 0.011598 | 0.011530 | 0.011430 | 0.011396 | 0.011329 |
| 0.011295 | 0.011295 | 0.011363 | 0.011329 | 0.011530 | 0.011497 | 0.011430 |
| 0.011530 | 0.011597 | 0.011329 | 0.011329 | 0.011362 | 0.011362 | 0.011364 |
| 0.011432 | 0.011362 | 0.011362 | 0.011204 | 0.011277 | 0.011236 | 0.011363 |
| 0.011331 | 0.011266 | 0.011319 | 0.011302 | 0.011264 | 0.011266 | 0.011331 |
| 0.011564 | 0.011336 | 0.011370 | 0.011296 | 0.011268 | 0.011430 | 0.011397 |
| 0.011464 | 0.011397 | 0.011397 | 0.011497 | 0.011430 | 0.011799 | 0.011598 |
| 0.011631 | 0.011497 | 0.011362 | 0.011463 | 0.011262 | 0.011497 | 0.011295 |
| 0.011295 | 0.011362 | 0.011329 | 0.011295 | 0.011329 | 0.011295 | 0.011396 |
| 0.011363 | 0.011463 | 0.011396 | 0.011295 | 0.011397 | 0.011497 | 0.011500 |
| 0.011497 | 0.011396 | 0.011295 | 0.011229 | 0.011362 | 0.011295 | 0.011228 |

|          |          |          |          |          |          |          |
|----------|----------|----------|----------|----------|----------|----------|
| 0.011332 | 0.011497 | 0.011295 | 0.011497 | 0.011262 | 0.011363 | 0.011329 |
| 0.011430 | 0.011329 | 0.011363 | 0.011329 | 0.011362 | 0.011228 | 0.011362 |
| 0.011396 | 0.011329 | 0.011396 | 0.011329 | 0.011362 | 0.011396 | 0.011631 |
| 0.011732 | 0.011665 | 0.011732 | 0.011498 | 0.011732 | 0.011362 | 0.011329 |
| 0.011364 | 0.011667 | 0.011518 | 0.011266 | 0.011739 | 0.011231 | 0.011336 |
| 0.011740 | 0.011638 | 0.011530 | 0.011665 | 0.011436 | 0.011598 | 0.011564 |
| 0.011497 | 0.011665 | 0.011522 | 0.011390 | 0.011312 | 0.011396 | 0.011466 |
| 0.011564 | 0.011465 | 0.011601 | 0.011670 | 0.011598 | 0.011598 | 0.011772 |
| 0.011500 | 0.011672 | 0.011602 | 0.011534 | 0.011733 | 0.011262 | 0.011465 |
| 0.011430 | 0.011362 | 0.011262 | 0.011262 | 0.011329 | 0.011329 | 0.011396 |
| 0.011329 | 0.011396 | 0.011295 | 0.011396 | 0.011329 | 0.011329 | 0.011396 |
| 0.011329 | 0.011765 | 0.011665 | 0.011698 | 0.011228 | 0.011329 | 0.011363 |
| 0.011363 | 0.011329 | 0.011396 | 0.011430 | 0.011295 | 0.011295 | 0.011295 |
| 0.011833 | 0.011463 | 0.011463 | 0.011262 | 0.011362 | 0.011531 | 0.011295 |
| 0.011295 | 0.011362 | 0.011329 | 0.011497 | 0.011295 | 0.011430 | 0.011564 |
| 0.011497 | 0.011329 | 0.011329 | 0.011262 | 0.011262 | 0.011430 | 0.011362 |
| 0.011262 | 0.011362 | 0.011228 | 0.011262 | 0.011396 | 0.011531 | 0.011295 |
| 0.011262 | 0.011396 | 0.011329 | 0.011228 | 0.011564 | 0.011228 | 0.011396 |
| 0.011471 | 0.011295 | 0.011598 | 0.011430 | 0.011463 | 0.011329 | 0.011430 |
| 0.011295 | 0.011631 | 0.011228 | 0.011497 | 0.011295 | 0.011295 | 0.011228 |
| 0.011463 | 0.011665 | 0.011363 | 0.011430 | 0.011262 | 0.011665 | 0.011295 |
| 0.011295 | 0.011295 | 0.011329 | 0.011430 | 0.011329 | 0.011430 | 0.011497 |
| 0.011497 | 0.011463 | 0.011362 | 0.011463 | 0.011430 | 0.011295 | 0.011262 |
| 0.011295 | 0.011295 | 0.011363 | 0.011295 | 0.011262 | 0.011430 | 0.011295 |
| 0.011329 | 0.011329 | 0.011463 | 0.011497 | 0.011396 | 0.011329 | 0.011329 |
| 0.011396 | 0.011329 | 0.011430 | 0.011295 | 0.011430 | 0.011530 | 0.011833 |
| 0.011329 | 0.011732 | 0.011336 | 0.017823 | 0.011257 | 0.011427 | 0.011688 |
| 0.011649 | 0.011694 | 0.011322 | 0.011292 | 0.011719 | 0.011716 | 0.011364 |
| 0.011535 | 0.011549 | 0.011177 | 0.011312 | 0.011255 | 0.011307 | 0.011275 |
| 0.011529 | 0.011433 | 0.011431 | 0.011325 | 0.011463 | 0.011497 | 0.011500 |
| 0.011370 | 0.011463 | 0.011463 | 0.011430 | 0.011396 | 0.011396 | 0.011363 |
| 0.011396 | 0.011329 | 0.011362 | 0.011396 | 0.011363 | 0.011295 | 0.011329 |
| 0.011329 | 0.011396 | 0.011295 | 0.011396 | 0.011430 | 0.011463 | 0.011362 |
| 0.011396 | 0.011363 | 0.011698 | 0.011698 | 0.011430 | 0.011464 | 0.011430 |
| 0.011262 | 0.011262 | 0.011295 | 0.011396 | 0.011262 | 0.011497 | 0.011497 |
| 0.011530 | 0.011530 | 0.011463 | 0.011564 | 0.011732 | 0.011565 | 0.011396 |
| 0.011396 | 0.011463 | 0.011497 | 0.011329 | 0.011396 | 0.011362 | 0.011396 |
| 0.011463 | 0.011463 | 0.011497 | 0.011463 | 0.011363 | 0.011564 | 0.011530 |
| 0.011399 | 0.011295 | 0.011396 | 0.011497 | 0.000000 | 0.011531 | 0.011564 |
| 0.011665 | 0.011436 | 0.011598 | 0.011564 | 0.011497 | 0.011665 | 0.011296 |
| 0.011465 | 0.011363 | 0.011329 | 0.011329 | 0.011396 | 0.011295 | 0.011396 |
| 0.011430 | 0.011463 | 0.011362 | 0.011396 | 0.011363 | 0.011698 | 0.011698 |
| 0.011430 | 0.011464 | 0.011530 | 0.011463 | 0.012104 | 0.011525 | 0.011447 |
| 0.011517 | 0.011477 | 0.011588 | 0.011476 | 0.011585 | 0.011440 | 0.011440 |
| 0.012057 | 0.011372 | 0.011506 | 0.011372 | 0.011646 | 0.011571 | 0.011673 |
| 0.012081 | 0.011550 | 0.011398 | 0.011396 | 0.011396 | 0.011430 | 0.011364 |
| 0.011262 | 0.011295 | 0.011430 | 0.011396 | 0.011398 | 0.011530 | 0.011498 |
| 0.011362 | 0.011295 | 0.011329 | 0.011362 | 0.011262 | 0.011329 | 0.011228 |
| 0.011362 | 0.011396 | 0.011295 | 0.011262 | 0.011362 | 0.011295 | 0.011329 |
| 0.011329 | 0.011262 | 0.011329 | 0.011363 | 0.011262 | 0.011463 | 0.011497 |
| 0.011396 | 0.011463 | 0.011396 | 0.011396 | 0.011329 | 0.011732 | 0.011362 |
| 0.011408 | 0.011329 | 0.011564 | 0.011569 | 0.011430 | 0.011430 | 0.011430 |
| 0.011430 | 0.011363 | 0.011329 | 0.011363 | 0.011463 | 0.011463 | 0.011396 |
| 0.011396 | 0.011530 | 0.011698 | 0.011430 | 0.011631 | 0.011631 | 0.011497 |
| 0.011329 | 0.011396 | 0.011430 | 0.011833 | 0.011396 | 0.011430 | 0.011396 |
| 0.011430 | 0.011362 | 0.011362 | 0.011665 | 0.011598 | 0.011631 | 0.011363 |
| 0.011463 | 0.011530 | 0.011396 | 0.011463 | 0.011430 | 0.011295 | 0.011631 |
| 0.011396 | 0.011362 | 0.011362 | 0.011530 | 0.011363 | 0.011463 | 0.011699 |
| 0.011396 | 0.011774 | 0.011766 | 0.011507 | 0.011286 | 0.011468 | 0.011318 |
| 0.011280 | 0.011722 | 0.011306 | 0.011462 | 0.011304 | 0.011366 | 0.011432 |

|          |          |          |          |          |          |          |
|----------|----------|----------|----------|----------|----------|----------|
| 0.011519 | 0.011192 | 0.011394 | 0.011258 | 0.011276 | 0.011462 | 0.011425 |
| 0.011362 | 0.011336 | 0.011448 | 0.011377 | 0.011397 | 0.011530 | 0.011598 |
| 0.011597 | 0.011464 | 0.011567 | 0.011569 | 0.011704 | 0.011732 | 0.011396 |
| 0.011631 | 0.011497 | 0.011362 | 0.011463 | 0.011262 | 0.011497 | 0.011295 |
| 0.011295 | 0.011362 | 0.011329 | 0.011295 | 0.011329 | 0.011295 | 0.011396 |
| 0.011340 | 0.011340 | 0.011334 | 0.011368 | 0.011505 | 0.011470 | 0.011470 |
| 0.011469 | 0.011430 | 0.011208 | 0.011204 | 0.011331 | 0.011501 | 0.011501 |
| 0.011329 | 0.011365 | 0.011633 | 0.011601 | 0.011531 | 0.011565 | 0.011497 |
| 0.011430 | 0.011430 | 0.011429 | 0.011396 | 0.011968 | 0.011564 | 0.011631 |
| 0.011665 | 0.011737 | 0.011367 | 0.011441 | 0.011329 | 0.011530 | 0.011497 |
| 0.011531 | 0.011564 | 0.011564 | 0.011564 | 0.011689 | 0.011698 | 0.011338 |
| 0.011229 | 0.011233 | 0.011333 | 0.011298 | 0.011402 | 0.011247 | 0.011570 |
| 0.011335 | 0.011455 | 0.011203 | 0.011360 | 0.011363 | 0.011402 | 0.011329 |
| 0.011295 | 0.011295 | 0.011363 | 0.011329 | 0.011530 | 0.011497 | 0.011430 |
| 0.011530 | 0.011597 | 0.011329 | 0.011329 | 0.011362 | 0.011362 | 0.011364 |
| 0.011432 | 0.011362 | 0.011362 | 0.011397 | 0.011530 | 0.011598 | 0.011597 |
| 0.011464 | 0.011567 | 0.011569 | 0.011704 | 0.011732 | 0.011396 | 0.011564 |
| 0.011497 | 0.011497 | 0.011331 | 0.011513 | 0.011442 | 0.011469 | 0.011341 |
| 0.011508 | 0.011698 | 0.011526 | 0.011400 | 0.011295 | 0.011497 | 0.011363 |
| 0.011463 | 0.011396 | 0.011295 | 0.011397 | 0.011497 | 0.011500 | 0.011396 |
| 0.011295 | 0.011229 | 0.011362 | 0.011295 | 0.011228 | 0.011332 | 0.011497 |
| 0.011396 | 0.011329 | 0.011362 | 0.011396 | 0.011363 | 0.011295 | 0.011497 |
| 0.011362 | 0.011396 | 0.011396 | 0.011329 | 0.011396 | 0.011631 | 0.011295 |
| 0.011329 | 0.011732 | 0.011329 | 0.011362 | 0.011329 | 0.011698 | 0.011232 |
| 0.011735 | 0.011230 | 0.011311 | 0.011463 | 0.011549 | 0.011491 | 0.011186 |
| 0.011270 | 0.011497 | 0.011598 | 0.011705 | 0.011565 | 0.011703 | 0.011834 |
| 0.011733 | 0.011771 | 0.011732 | 0.011983 | 0.011698 | 0.012573 | 0.011734 |
| 0.012473 | 0.012241 | 0.012375 | 0.012579 | 0.011698 | 0.011396 | 0.011699 |
| 0.012137 | 0.012072 | 0.011665 | 0.011564 | 0.011632 | 0.011632 | 0.011602 |
| 0.011497 | 0.011501 | 0.011564 | 0.011531 | 0.011901 | 0.011968 | 0.011968 |
| 0.011868 | 0.011968 | 0.012072 | 0.011838 | 0.012138 | 0.012144 | 0.012205 |
| 0.012206 | 0.012239 | 0.012187 | 0.012206 | 0.012207 | 0.011430 | 0.011732 |
| 0.011800 | 0.012304 | 0.011806 | 0.012035 | 0.012508 | 0.011570 | 0.011464 |
| 0.011430 | 0.011430 | 0.011901 | 0.011924 | 0.012010 | 0.011766 | 0.011431 |
| S467     | 0.011833 | 0.011833 | 0.012102 | 0.011866 | 0.011866 | 0.011934 |
| 0.011774 | 0.011706 | 0.011866 | 0.011430 | 0.011497 | 0.011464 | 0.011430 |
| 0.011396 | 0.011631 | 0.011362 | 0.011463 | 0.011530 | 0.011497 | 0.011463 |
| 0.011430 | 0.011463 | 0.011497 | 0.011430 | 0.011464 | 0.011463 | 0.011740 |
| 0.011631 | 0.011463 | 0.011362 | 0.011530 | 0.011530 | 0.011497 | 0.011530 |
| 0.011497 | 0.011598 | 0.011497 | 0.011497 | 0.011530 | 0.011497 | 0.011665 |
| 0.011362 | 0.011497 | 0.011530 | 0.011463 | 0.011497 | 0.011598 | 0.011530 |
| 0.011497 | 0.011665 | 0.011564 | 0.011766 | 0.011497 | 0.011766 | 0.011497 |
| 0.011463 | 0.011497 | 0.011631 | 0.011766 | 0.011799 | 0.011497 | 0.011598 |
| 0.011530 | 0.011598 | 0.011497 | 0.011732 | 0.011900 | 0.011497 | 0.011564 |
| 0.011463 | 0.011564 | 0.011530 | 0.011598 | 0.011530 | 0.011530 | 0.011530 |
| 0.011430 | 0.011463 | 0.011430 | 0.011463 | 0.011497 | 0.011531 | 0.011597 |
| 0.011530 | 0.011497 | 0.011564 | 0.011463 | 0.011530 | 0.011430 | 0.011497 |
| 0.011665 | 0.011597 | 0.011833 | 0.011665 | 0.011497 | 0.011732 | 0.011497 |
| 0.011691 | 0.011845 | 0.011740 | 0.011412 | 0.011396 | 0.011502 | 0.011533 |
| 0.012158 | 0.011620 | 0.011431 | 0.011732 | 0.011732 | 0.011463 | 0.011564 |
| 0.011564 | 0.011530 | 0.011597 | 0.011497 | 0.011598 | 0.011530 | 0.011530 |
| 0.011497 | 0.011530 | 0.011799 | 0.011665 | 0.011564 | 0.011531 | 0.011463 |
| 0.011430 | 0.011362 | 0.011497 | 0.011463 | 0.011597 | 0.011564 | 0.011497 |
| 0.011597 | 0.011665 | 0.011463 | 0.011463 | 0.011497 | 0.011497 | 0.011499 |
| 0.011567 | 0.011497 | 0.011497 | 0.011384 | 0.011458 | 0.011411 | 0.011497 |
| 0.011501 | 0.011438 | 0.011503 | 0.011474 | 0.011400 | 0.011437 | 0.011466 |
| 0.011672 | 0.011508 | 0.011542 | 0.011430 | 0.011441 | 0.011565 | 0.011464 |
| 0.011531 | 0.011532 | 0.011531 | 0.011631 | 0.011564 | 0.011934 | 0.011463 |
| 0.011698 | 0.011564 | 0.011497 | 0.011531 | 0.011396 | 0.011564 | 0.011430 |
| 0.011497 | 0.011497 | 0.011463 | 0.011430 | 0.011463 | 0.011430 | 0.011530 |

|          |          |          |          |          |          |          |
|----------|----------|----------|----------|----------|----------|----------|
| 0.011497 | 0.011598 | 0.011530 | 0.011430 | 0.011532 | 0.011631 | 0.011635 |
| 0.011631 | 0.011531 | 0.011430 | 0.011364 | 0.011497 | 0.011430 | 0.011363 |
| 0.011468 | 0.011631 | 0.011430 | 0.011631 | 0.011396 | 0.011497 | 0.011463 |
| 0.011564 | 0.011463 | 0.011497 | 0.011463 | 0.011497 | 0.011362 | 0.011497 |
| 0.011530 | 0.011463 | 0.011530 | 0.011463 | 0.011497 | 0.011530 | 0.011765 |
| 0.011799 | 0.011732 | 0.011799 | 0.011633 | 0.011799 | 0.011497 | 0.011463 |
| 0.011432 | 0.011464 | 0.011609 | 0.011403 | 0.011807 | 0.011367 | 0.011493 |
| 0.011808 | 0.011706 | 0.011665 | 0.011867 | 0.011573 | 0.011732 | 0.011699 |
| 0.011631 | 0.011799 | 0.011665 | 0.011514 | 0.011564 | 0.011531 | 0.011602 |
| 0.011699 | 0.011600 | 0.011737 | 0.011805 | 0.011732 | 0.011799 | 0.011908 |
| 0.011636 | 0.011807 | 0.011738 | 0.011669 | 0.011936 | 0.011396 | 0.011600 |
| 0.011564 | 0.011497 | 0.011396 | 0.011396 | 0.011463 | 0.011463 | 0.011530 |
| 0.011463 | 0.011530 | 0.011430 | 0.011463 | 0.011463 | 0.011463 | 0.011530 |
| 0.011463 | 0.011833 | 0.011732 | 0.011766 | 0.011362 | 0.011463 | 0.011497 |
| 0.011497 | 0.011463 | 0.011530 | 0.011497 | 0.011430 | 0.011430 | 0.011430 |
| 0.011833 | 0.011530 | 0.011598 | 0.011396 | 0.011497 | 0.011665 | 0.011430 |
| 0.011430 | 0.011497 | 0.011463 | 0.011631 | 0.011430 | 0.011564 | 0.011698 |
| 0.011631 | 0.011463 | 0.011463 | 0.011396 | 0.011396 | 0.011564 | 0.011497 |
| 0.011396 | 0.011497 | 0.011362 | 0.011396 | 0.011530 | 0.011598 | 0.011430 |
| 0.011396 | 0.011530 | 0.011464 | 0.011362 | 0.011631 | 0.011362 | 0.011530 |
| 0.011608 | 0.011430 | 0.011665 | 0.011564 | 0.011530 | 0.011463 | 0.011564 |
| 0.011430 | 0.011766 | 0.011362 | 0.011564 | 0.011362 | 0.011362 | 0.011362 |
| 0.011598 | 0.011732 | 0.011497 | 0.011564 | 0.011396 | 0.011732 | 0.011362 |
| 0.011430 | 0.011430 | 0.011463 | 0.011564 | 0.011463 | 0.011564 | 0.011631 |
| 0.011631 | 0.011598 | 0.011497 | 0.011598 | 0.011564 | 0.011430 | 0.011396 |
| 0.011430 | 0.011430 | 0.011497 | 0.011362 | 0.011396 | 0.011564 | 0.011430 |
| 0.011396 | 0.011463 | 0.011598 | 0.011497 | 0.011530 | 0.011463 | 0.011463 |
| 0.011530 | 0.011463 | 0.011564 | 0.011430 | 0.011564 | 0.011665 | 0.011900 |
| 0.011463 | 0.011799 | 0.011474 | 0.011789 | 0.011453 | 0.011672 | 0.011758 |
| 0.011718 | 0.011764 | 0.011584 | 0.011582 | 0.011940 | 0.011785 | 0.011607 |
| 0.011630 | 0.011793 | 0.011411 | 0.011521 | 0.011412 | 0.011505 | 0.011490 |
| 0.011623 | 0.011544 | 0.011542 | 0.011193 | 0.011598 | 0.011631 | 0.011635 |
| 0.011507 | 0.011597 | 0.011598 | 0.011497 | 0.011530 | 0.011531 | 0.011497 |
| 0.011530 | 0.011463 | 0.011497 | 0.011530 | 0.011497 | 0.011430 | 0.011463 |
| 0.011463 | 0.011530 | 0.011430 | 0.011531 | 0.011564 | 0.011597 | 0.011497 |
| 0.011463 | 0.011430 | 0.011766 | 0.011766 | 0.011564 | 0.011598 | 0.011631 |
| 0.011396 | 0.011396 | 0.011430 | 0.011530 | 0.011396 | 0.011564 | 0.011564 |
| 0.011665 | 0.011665 | 0.011598 | 0.011698 | 0.011799 | 0.011700 | 0.011530 |
| 0.011530 | 0.011598 | 0.011631 | 0.011463 | 0.011530 | 0.011497 | 0.011530 |
| 0.011598 | 0.011598 | 0.011631 | 0.011598 | 0.011498 | 0.011698 | 0.011665 |
| 0.011535 | 0.011430 | 0.011530 | 0.011631 | 0.011531 | 0.000000 | 0.011698 |
| 0.011867 | 0.011573 | 0.011732 | 0.011699 | 0.011631 | 0.011799 | 0.011430 |
| 0.011599 | 0.011497 | 0.011463 | 0.011463 | 0.011530 | 0.011430 | 0.011531 |
| 0.011564 | 0.011597 | 0.011497 | 0.011463 | 0.011430 | 0.011766 | 0.011766 |
| 0.011564 | 0.011598 | 0.011665 | 0.011597 | 0.012171 | 0.011668 | 0.011588 |
| 0.011658 | 0.011615 | 0.011728 | 0.011615 | 0.011726 | 0.011647 | 0.011612 |
| 0.012125 | 0.011510 | 0.011643 | 0.011579 | 0.011853 | 0.011707 | 0.011809 |
| 0.012149 | 0.011437 | 0.011534 | 0.011530 | 0.011530 | 0.011497 | 0.011500 |
| 0.011396 | 0.011430 | 0.011564 | 0.011530 | 0.011533 | 0.011597 | 0.011566 |
| 0.011497 | 0.011430 | 0.011463 | 0.011497 | 0.011396 | 0.011463 | 0.011362 |
| 0.011430 | 0.011463 | 0.011430 | 0.011396 | 0.011497 | 0.011430 | 0.011463 |
| 0.011463 | 0.011396 | 0.011463 | 0.011497 | 0.011396 | 0.011598 | 0.011631 |
| 0.011530 | 0.011530 | 0.011530 | 0.011530 | 0.011463 | 0.011799 | 0.011497 |
| 0.011478 | 0.011463 | 0.011632 | 0.011637 | 0.011564 | 0.011564 | 0.011564 |
| 0.011564 | 0.011497 | 0.011463 | 0.011497 | 0.011598 | 0.011598 | 0.011530 |
| 0.011530 | 0.011665 | 0.011766 | 0.011564 | 0.011766 | 0.011766 | 0.011631 |
| 0.011463 | 0.011530 | 0.011564 | 0.011900 | 0.011531 | 0.011564 | 0.011530 |
| 0.011564 | 0.011430 | 0.011430 | 0.011732 | 0.011732 | 0.011699 | 0.011497 |
| 0.011598 | 0.011665 | 0.011530 | 0.011598 | 0.011564 | 0.011430 | 0.011698 |
| 0.011530 | 0.011497 | 0.011430 | 0.011665 | 0.011497 | 0.011598 | 0.011833 |

|          |          |          |          |          |          |          |
|----------|----------|----------|----------|----------|----------|----------|
| 0.011530 | 0.011842 | 0.011833 | 0.011629 | 0.011399 | 0.011536 | 0.011421 |
| 0.011445 | 0.011839 | 0.011447 | 0.011552 | 0.011451 | 0.011569 | 0.011538 |
| 0.011621 | 0.011389 | 0.011617 | 0.011457 | 0.011491 | 0.011663 | 0.011628 |
| 0.011625 | 0.011493 | 0.011518 | 0.011483 | 0.011532 | 0.011597 | 0.011665 |
| 0.011665 | 0.011531 | 0.011635 | 0.011637 | 0.011772 | 0.011803 | 0.011530 |
| 0.011698 | 0.011564 | 0.011497 | 0.011531 | 0.011396 | 0.011564 | 0.011430 |
| 0.011497 | 0.011497 | 0.011463 | 0.011430 | 0.011463 | 0.011430 | 0.011530 |
| 0.011514 | 0.011515 | 0.011506 | 0.011540 | 0.011676 | 0.011641 | 0.011641 |
| 0.011639 | 0.011565 | 0.011393 | 0.011384 | 0.011501 | 0.011670 | 0.011671 |
| 0.011464 | 0.011534 | 0.011767 | 0.011736 | 0.011666 | 0.011700 | 0.011631 |
| 0.011564 | 0.011631 | 0.011631 | 0.011530 | 0.012035 | 0.011698 | 0.011766 |
| 0.011799 | 0.011773 | 0.011504 | 0.011580 | 0.011463 | 0.011665 | 0.011631 |
| 0.011666 | 0.011698 | 0.011698 | 0.011698 | 0.011768 | 0.011833 | 0.011477 |
| 0.011365 | 0.011372 | 0.011469 | 0.011434 | 0.011436 | 0.011396 | 0.011638 |
| 0.011438 | 0.011587 | 0.011441 | 0.011547 | 0.011497 | 0.011574 | 0.011463 |
| 0.011430 | 0.011362 | 0.011497 | 0.011463 | 0.011597 | 0.011564 | 0.011497 |
| 0.011597 | 0.011665 | 0.011463 | 0.011463 | 0.011497 | 0.011497 | 0.011499 |
| 0.011567 | 0.011497 | 0.011497 | 0.011532 | 0.011597 | 0.011665 | 0.011665 |
| 0.011531 | 0.011635 | 0.011637 | 0.011772 | 0.011803 | 0.011530 | 0.011698 |
| 0.011631 | 0.011631 | 0.011466 | 0.011582 | 0.011582 | 0.011605 | 0.011481 |
| 0.011646 | 0.011835 | 0.011568 | 0.011536 | 0.011430 | 0.011631 | 0.011497 |
| 0.011598 | 0.011530 | 0.011430 | 0.011532 | 0.011631 | 0.011635 | 0.011531 |
| 0.011430 | 0.011364 | 0.011497 | 0.011430 | 0.011363 | 0.011468 | 0.011631 |
| 0.011530 | 0.011463 | 0.011497 | 0.011530 | 0.011497 | 0.011430 | 0.011564 |
| 0.011497 | 0.011530 | 0.011530 | 0.011463 | 0.011530 | 0.011698 | 0.011362 |
| 0.011463 | 0.011799 | 0.011463 | 0.011497 | 0.011463 | 0.011766 | 0.011446 |
| 0.011848 | 0.011443 | 0.011411 | 0.011584 | 0.011671 | 0.011599 | 0.011395 |
| 0.011375 | 0.011564 | 0.011665 | 0.011773 | 0.011633 | 0.011771 | 0.011901 |
| 0.011801 | 0.011838 | 0.011799 | 0.012052 | 0.011766 | 0.012641 | 0.011802 |
| 0.012541 | 0.012308 | 0.012442 | 0.012714 | 0.011765 | 0.011463 | 0.011766 |
| 0.012205 | 0.012140 | 0.011732 | 0.011631 | 0.011699 | 0.011699 | 0.011669 |
| 0.011564 | 0.011535 | 0.011631 | 0.011598 | 0.011968 | 0.012035 | 0.012036 |
| 0.011936 | 0.012036 | 0.012139 | 0.011906 | 0.012205 | 0.012212 | 0.012272 |
| 0.012273 | 0.012307 | 0.012255 | 0.012273 | 0.012275 | 0.011564 | 0.011800 |
| 0.011868 | 0.012371 | 0.011874 | 0.012102 | 0.012575 | 0.011638 | 0.011531 |
| 0.011497 | 0.011497 | 0.011968 | 0.012006 | 0.012116 | 0.011833 | 0.011498 |
| S468     | 0.011866 | 0.011866 | 0.012202 | 0.011967 | 0.011967 | 0.012034 |
| 0.011875 | 0.011807 | 0.012034 | 0.011463 | 0.011530 | 0.011498 | 0.011463 |
| 0.011496 | 0.011664 | 0.011463 | 0.011496 | 0.011496 | 0.011530 | 0.011496 |
| 0.011463 | 0.011496 | 0.011597 | 0.011463 | 0.011497 | 0.011496 | 0.011841 |
| 0.011731 | 0.011496 | 0.011396 | 0.011631 | 0.011564 | 0.011530 | 0.011564 |
| 0.011530 | 0.011631 | 0.011530 | 0.011530 | 0.011564 | 0.011530 | 0.011698 |
| 0.011463 | 0.011530 | 0.011564 | 0.011496 | 0.011597 | 0.011631 | 0.011564 |
| 0.011530 | 0.011698 | 0.011598 | 0.011866 | 0.011530 | 0.011799 | 0.011530 |
| 0.011496 | 0.011597 | 0.011664 | 0.011799 | 0.011899 | 0.011597 | 0.011698 |
| 0.011564 | 0.011631 | 0.011530 | 0.011765 | 0.012000 | 0.011530 | 0.011597 |
| 0.011496 | 0.011597 | 0.011564 | 0.011631 | 0.011564 | 0.011564 | 0.011564 |
| 0.011463 | 0.011496 | 0.011463 | 0.011564 | 0.011530 | 0.011565 | 0.011631 |
| 0.011564 | 0.011530 | 0.011597 | 0.011496 | 0.011631 | 0.011463 | 0.011530 |
| 0.011698 | 0.011631 | 0.011866 | 0.011698 | 0.011530 | 0.011765 | 0.011530 |
| 0.011691 | 0.011919 | 0.011739 | 0.011451 | 0.011433 | 0.011502 | 0.011651 |
| 0.012268 | 0.011721 | 0.011431 | 0.011765 | 0.011765 | 0.011564 | 0.011664 |
| 0.011597 | 0.011564 | 0.011631 | 0.011530 | 0.011631 | 0.011564 | 0.011564 |
| 0.011530 | 0.011631 | 0.011832 | 0.011698 | 0.011597 | 0.011564 | 0.011497 |
| 0.011396 | 0.011463 | 0.011530 | 0.011497 | 0.011698 | 0.011665 | 0.011597 |
| 0.011698 | 0.011765 | 0.011497 | 0.011497 | 0.011530 | 0.011530 | 0.011533 |
| 0.011601 | 0.011530 | 0.011530 | 0.011420 | 0.011494 | 0.011446 | 0.011531 |
| 0.011534 | 0.011473 | 0.011503 | 0.011509 | 0.011434 | 0.011471 | 0.011499 |
| 0.011780 | 0.011543 | 0.011577 | 0.011464 | 0.011475 | 0.011598 | 0.011565 |
| 0.011632 | 0.011566 | 0.011564 | 0.011664 | 0.011597 | 0.011967 | 0.011765 |

|          |          |          |          |          |          |          |
|----------|----------|----------|----------|----------|----------|----------|
| 0.011799 | 0.011665 | 0.011530 | 0.011631 | 0.011429 | 0.011664 | 0.011463 |
| 0.011530 | 0.011530 | 0.011497 | 0.011463 | 0.011496 | 0.011463 | 0.011564 |
| 0.011530 | 0.011631 | 0.011564 | 0.011463 | 0.011566 | 0.011665 | 0.011668 |
| 0.011665 | 0.011564 | 0.011463 | 0.011397 | 0.011530 | 0.011463 | 0.011396 |
| 0.011502 | 0.011665 | 0.011463 | 0.011665 | 0.011429 | 0.011530 | 0.011497 |
| 0.011597 | 0.011497 | 0.011530 | 0.011497 | 0.011530 | 0.011396 | 0.011530 |
| 0.011564 | 0.011497 | 0.011564 | 0.011497 | 0.011530 | 0.011497 | 0.011396 |
| 0.011900 | 0.011832 | 0.011900 | 0.011633 | 0.011900 | 0.011530 | 0.011497 |
| 0.011533 | 0.011788 | 0.011655 | 0.011403 | 0.011875 | 0.011401 | 0.011532 |
| 0.011909 | 0.011808 | 0.011698 | 0.011900 | 0.011607 | 0.011765 | 0.011732 |
| 0.011664 | 0.011832 | 0.011700 | 0.011555 | 0.011605 | 0.011564 | 0.011635 |
| 0.011463 | 0.011633 | 0.011770 | 0.011838 | 0.011765 | 0.011832 | 0.011941 |
| 0.011669 | 0.011841 | 0.011703 | 0.011703 | 0.011968 | 0.011429 | 0.011633 |
| 0.011597 | 0.011530 | 0.011429 | 0.011429 | 0.011496 | 0.011496 | 0.011564 |
| 0.011496 | 0.011564 | 0.011463 | 0.011564 | 0.011496 | 0.011496 | 0.011564 |
| 0.011496 | 0.011933 | 0.011832 | 0.011866 | 0.011396 | 0.011496 | 0.011530 |
| 0.011530 | 0.011496 | 0.011564 | 0.011597 | 0.011463 | 0.011463 | 0.011463 |
| 0.012000 | 0.011631 | 0.011631 | 0.011429 | 0.011530 | 0.011698 | 0.011463 |
| 0.011463 | 0.011530 | 0.011496 | 0.011664 | 0.011463 | 0.011597 | 0.011731 |
| 0.011664 | 0.011496 | 0.011496 | 0.011429 | 0.011429 | 0.011597 | 0.011530 |
| 0.011429 | 0.011530 | 0.011396 | 0.011429 | 0.011564 | 0.011698 | 0.011463 |
| 0.011430 | 0.011564 | 0.011497 | 0.011396 | 0.011731 | 0.011396 | 0.011564 |
| 0.011642 | 0.011463 | 0.011765 | 0.011597 | 0.011631 | 0.011496 | 0.011597 |
| 0.011463 | 0.011799 | 0.011396 | 0.011664 | 0.011463 | 0.011463 | 0.011396 |
| 0.011631 | 0.011799 | 0.011530 | 0.011597 | 0.011429 | 0.011832 | 0.011463 |
| 0.011463 | 0.011463 | 0.011496 | 0.011597 | 0.011496 | 0.011597 | 0.011664 |
| 0.011664 | 0.011631 | 0.011530 | 0.011631 | 0.011597 | 0.011463 | 0.011429 |
| 0.011463 | 0.011463 | 0.011530 | 0.011463 | 0.011429 | 0.011597 | 0.011463 |
| 0.011496 | 0.011496 | 0.011631 | 0.011664 | 0.011564 | 0.011496 | 0.011497 |
| 0.011564 | 0.011496 | 0.011597 | 0.011463 | 0.011597 | 0.011698 | 0.012000 |
| 0.011496 | 0.011899 | 0.011474 | 0.017936 | 0.011387 | 0.011672 | 0.011827 |
| 0.011787 | 0.011834 | 0.011532 | 0.011524 | 0.011884 | 0.011854 | 0.011485 |
| 0.011724 | 0.011793 | 0.011411 | 0.011437 | 0.011372 | 0.011504 | 0.011490 |
| 0.011717 | 0.011656 | 0.011579 | 0.011391 | 0.011631 | 0.011664 | 0.011669 |
| 0.011541 | 0.011631 | 0.011631 | 0.011597 | 0.011564 | 0.011564 | 0.011530 |
| 0.011564 | 0.011496 | 0.011530 | 0.011564 | 0.011530 | 0.011463 | 0.011497 |
| 0.011497 | 0.011564 | 0.011463 | 0.011564 | 0.011597 | 0.011564 | 0.011530 |
| 0.011564 | 0.011530 | 0.011866 | 0.011866 | 0.011597 | 0.011632 | 0.011665 |
| 0.011429 | 0.011429 | 0.011463 | 0.011564 | 0.011429 | 0.011665 | 0.011665 |
| 0.011698 | 0.011698 | 0.011631 | 0.011732 | 0.011900 | 0.011734 | 0.011564 |
| 0.011564 | 0.011631 | 0.011665 | 0.011497 | 0.011564 | 0.011530 | 0.011564 |
| 0.011631 | 0.011631 | 0.011665 | 0.011631 | 0.011532 | 0.011732 | 0.011698 |
| 0.011568 | 0.011463 | 0.011497 | 0.011665 | 0.011564 | 0.011698 | 0.000000 |
| 0.011900 | 0.011607 | 0.011765 | 0.011732 | 0.011664 | 0.011832 | 0.011463 |
| 0.011633 | 0.011531 | 0.011497 | 0.011497 | 0.011564 | 0.011463 | 0.011564 |
| 0.011597 | 0.011564 | 0.011530 | 0.011564 | 0.011530 | 0.011866 | 0.011866 |
| 0.011597 | 0.011632 | 0.011698 | 0.011631 | 0.012271 | 0.011703 | 0.011623 |
| 0.011693 | 0.011650 | 0.011693 | 0.011649 | 0.011760 | 0.011681 | 0.011646 |
| 0.012228 | 0.011545 | 0.011677 | 0.011613 | 0.011887 | 0.011468 | 0.011843 |
| 0.012250 | 0.011663 | 0.011804 | 0.011866 | 0.011732 | 0.011732 | 0.011770 |
| 0.011429 | 0.011597 | 0.011731 | 0.011698 | 0.011702 | 0.011698 | 0.011666 |
| 0.011530 | 0.011463 | 0.011496 | 0.011530 | 0.011429 | 0.011496 | 0.011396 |
| 0.011530 | 0.011564 | 0.011463 | 0.011429 | 0.011530 | 0.011463 | 0.011496 |
| 0.011496 | 0.011429 | 0.011496 | 0.011530 | 0.011429 | 0.011631 | 0.011396 |
| 0.011564 | 0.011631 | 0.011564 | 0.011564 | 0.011496 | 0.011899 | 0.011530 |
| 0.011582 | 0.011497 | 0.011732 | 0.011739 | 0.011597 | 0.011597 | 0.011597 |
| 0.011597 | 0.011530 | 0.011496 | 0.011530 | 0.011631 | 0.011631 | 0.011564 |
| 0.011496 | 0.011698 | 0.011866 | 0.011597 | 0.011799 | 0.011799 | 0.011664 |
| 0.011496 | 0.011564 | 0.011597 | 0.012000 | 0.011564 | 0.011597 | 0.011564 |
| 0.011597 | 0.011530 | 0.011530 | 0.011832 | 0.011765 | 0.011799 | 0.011530 |

|          |          |          |          |          |          |          |
|----------|----------|----------|----------|----------|----------|----------|
| 0.011631 | 0.011698 | 0.011564 | 0.011631 | 0.011597 | 0.011463 | 0.011799 |
| 0.011563 | 0.011530 | 0.011530 | 0.011698 | 0.011530 | 0.011631 | 0.011866 |
| 0.011563 | 0.011943 | 0.011933 | 0.011751 | 0.011399 | 0.011638 | 0.011525 |
| 0.011445 | 0.011956 | 0.011446 | 0.011685 | 0.011548 | 0.011671 | 0.011644 |
| 0.011672 | 0.011258 | 0.011617 | 0.011390 | 0.011437 | 0.011596 | 0.011222 |
| 0.011588 | 0.011532 | 0.011588 | 0.011518 | 0.011566 | 0.011698 | 0.011765 |
| 0.011765 | 0.011632 | 0.011736 | 0.011738 | 0.011874 | 0.011908 | 0.011564 |
| 0.011799 | 0.011665 | 0.011530 | 0.011631 | 0.011429 | 0.011664 | 0.011463 |
| 0.011530 | 0.011530 | 0.011497 | 0.011463 | 0.011496 | 0.011463 | 0.011564 |
| 0.011549 | 0.011550 | 0.011540 | 0.011574 | 0.011710 | 0.011675 | 0.011675 |
| 0.011673 | 0.011598 | 0.011429 | 0.011420 | 0.011534 | 0.011704 | 0.011705 |
| 0.011497 | 0.011568 | 0.011801 | 0.011770 | 0.011699 | 0.011733 | 0.011664 |
| 0.011597 | 0.011664 | 0.011664 | 0.011564 | 0.012135 | 0.011732 | 0.011799 |
| 0.011833 | 0.011879 | 0.011538 | 0.011614 | 0.011497 | 0.011698 | 0.011664 |
| 0.011699 | 0.011731 | 0.011731 | 0.011731 | 0.011886 | 0.011866 | 0.011511 |
| 0.011398 | 0.011406 | 0.011503 | 0.011468 | 0.011572 | 0.011396 | 0.011740 |
| 0.011540 | 0.011674 | 0.011441 | 0.011585 | 0.011531 | 0.011608 | 0.011497 |
| 0.011396 | 0.011463 | 0.011530 | 0.011497 | 0.011698 | 0.011665 | 0.011597 |
| 0.011698 | 0.011765 | 0.011497 | 0.011497 | 0.011530 | 0.011530 | 0.011533 |
| 0.011601 | 0.011530 | 0.011530 | 0.011566 | 0.011698 | 0.011765 | 0.011765 |
| 0.011632 | 0.011736 | 0.011738 | 0.011874 | 0.011908 | 0.011564 | 0.011127 |
| 0.011664 | 0.011664 | 0.011500 | 0.011652 | 0.011616 | 0.011639 | 0.011481 |
| 0.011680 | 0.011425 | 0.011314 | 0.011570 | 0.011463 | 0.011665 | 0.011530 |
| 0.011631 | 0.011564 | 0.011463 | 0.011566 | 0.011665 | 0.011668 | 0.011564 |
| 0.011463 | 0.011397 | 0.011530 | 0.011463 | 0.011396 | 0.011502 | 0.011665 |
| 0.011564 | 0.011496 | 0.011530 | 0.011564 | 0.011530 | 0.011463 | 0.011665 |
| 0.011530 | 0.011564 | 0.011295 | 0.011496 | 0.011564 | 0.011799 | 0.011463 |
| 0.011496 | 0.011899 | 0.011496 | 0.011530 | 0.011496 | 0.011866 | 0.011446 |
| 0.011847 | 0.011485 | 0.011511 | 0.011704 | 0.011793 | 0.011670 | 0.011436 |
| 0.011427 | 0.011664 | 0.011765 | 0.011875 | 0.011734 | 0.011838 | 0.012002 |
| 0.011901 | 0.011940 | 0.011899 | 0.012120 | 0.011866 | 0.012741 | 0.011902 |
| 0.012641 | 0.012409 | 0.012543 | 0.012815 | 0.011866 | 0.011564 | 0.011867 |
| 0.012305 | 0.012207 | 0.011832 | 0.011732 | 0.011800 | 0.011800 | 0.011770 |
| 0.011664 | 0.011637 | 0.011731 | 0.011699 | 0.012035 | 0.012034 | 0.012103 |
| 0.012002 | 0.012069 | 0.012207 | 0.011940 | 0.012306 | 0.012279 | 0.012373 |
| 0.012374 | 0.012408 | 0.012323 | 0.012374 | 0.012375 | 0.011597 | 0.011900 |
| 0.011968 | 0.012472 | 0.011942 | 0.012202 | 0.012676 | 0.011739 | 0.011632 |
| 0.011597 | 0.011597 | 0.012068 | 0.012171 | 0.012221 | 0.011933 | 0.011599 |
| S469     | 0.011967 | 0.011967 | 0.012371 | 0.012135 | 0.012135 | 0.012202 |
| 0.012045 | 0.011977 | 0.012202 | 0.011631 | 0.011698 | 0.011666 | 0.011631 |
| 0.011664 | 0.011832 | 0.011631 | 0.011664 | 0.011732 | 0.011698 | 0.011664 |
| 0.011631 | 0.011664 | 0.011765 | 0.011631 | 0.011665 | 0.011664 | 0.012011 |
| 0.011900 | 0.011664 | 0.011564 | 0.011799 | 0.011732 | 0.011698 | 0.011732 |
| 0.011698 | 0.011799 | 0.011698 | 0.011698 | 0.011732 | 0.011698 | 0.011866 |
| 0.011631 | 0.011698 | 0.011732 | 0.011664 | 0.011765 | 0.011799 | 0.011732 |
| 0.011698 | 0.011866 | 0.011766 | 0.012034 | 0.011698 | 0.011967 | 0.011698 |
| 0.011664 | 0.011765 | 0.011833 | 0.011967 | 0.012068 | 0.011765 | 0.011866 |
| 0.011732 | 0.011799 | 0.011698 | 0.011933 | 0.012169 | 0.011698 | 0.011765 |
| 0.011664 | 0.011765 | 0.011732 | 0.011732 | 0.011732 | 0.011732 | 0.011732 |
| 0.011631 | 0.011664 | 0.011631 | 0.011732 | 0.011698 | 0.011733 | 0.011799 |
| 0.011732 | 0.011698 | 0.011765 | 0.011664 | 0.011799 | 0.011631 | 0.011698 |
| 0.011866 | 0.011799 | 0.012034 | 0.011866 | 0.011698 | 0.011933 | 0.011698 |
| 0.011876 | 0.012107 | 0.011891 | 0.011568 | 0.011545 | 0.011723 | 0.011848 |
| 0.012451 | 0.011772 | 0.011555 | 0.011933 | 0.011933 | 0.011732 | 0.011833 |
| 0.011765 | 0.011530 | 0.011732 | 0.011698 | 0.011799 | 0.011732 | 0.011664 |
| 0.011631 | 0.011799 | 0.011127 | 0.011866 | 0.011765 | 0.011732 | 0.011665 |
| 0.011631 | 0.011631 | 0.011698 | 0.011665 | 0.011866 | 0.011833 | 0.011766 |
| 0.011866 | 0.011934 | 0.011665 | 0.011665 | 0.011698 | 0.011698 | 0.011702 |
| 0.011770 | 0.011698 | 0.011698 | 0.011600 | 0.011675 | 0.011621 | 0.011699 |
| 0.011704 | 0.011645 | 0.011651 | 0.011681 | 0.011604 | 0.011643 | 0.011668 |



|          |          |          |          |          |          |          |
|----------|----------|----------|----------|----------|----------|----------|
| 0.011961 | 0.011715 | 0.011749 | 0.011632 | 0.011648 | 0.011767 | 0.011733 |
| 0.011800 | 0.011735 | 0.011733 | 0.011765 | 0.011698 | 0.012135 | 0.011934 |
| 0.011967 | 0.011833 | 0.011698 | 0.011799 | 0.011597 | 0.011833 | 0.011631 |
| 0.011698 | 0.011698 | 0.011665 | 0.011631 | 0.011664 | 0.011631 | 0.011732 |
| 0.011698 | 0.011799 | 0.011732 | 0.011631 | 0.011734 | 0.011833 | 0.011804 |
| 0.011833 | 0.011732 | 0.011631 | 0.011566 | 0.011698 | 0.011631 | 0.011564 |
| 0.011672 | 0.011833 | 0.011631 | 0.011833 | 0.011597 | 0.011699 | 0.011665 |
| 0.011766 | 0.011665 | 0.011698 | 0.011665 | 0.011698 | 0.011564 | 0.011698 |
| 0.011732 | 0.011665 | 0.011732 | 0.011665 | 0.011631 | 0.011732 | 0.011967 |
| 0.012068 | 0.012001 | 0.012068 | 0.011836 | 0.012069 | 0.011631 | 0.011665 |
| 0.011702 | 0.011950 | 0.011655 | 0.011609 | 0.012011 | 0.011572 | 0.011690 |
| 0.012079 | 0.011979 | 0.011832 | 0.000000 | 0.011743 | 0.011933 | 0.011900 |
| 0.011832 | 0.012001 | 0.011807 | 0.011720 | 0.011605 | 0.011732 | 0.011737 |
| 0.011900 | 0.011735 | 0.011940 | 0.012008 | 0.011866 | 0.011799 | 0.012043 |
| 0.011771 | 0.012011 | 0.011873 | 0.011872 | 0.011935 | 0.011597 | 0.011802 |
| 0.011765 | 0.011698 | 0.011597 | 0.011597 | 0.011664 | 0.011664 | 0.011732 |
| 0.011664 | 0.011732 | 0.011631 | 0.011732 | 0.011664 | 0.011664 | 0.011732 |
| 0.011664 | 0.012101 | 0.012001 | 0.012034 | 0.011564 | 0.011664 | 0.011698 |
| 0.011698 | 0.011664 | 0.011732 | 0.011765 | 0.011631 | 0.011631 | 0.011631 |
| 0.012169 | 0.011799 | 0.011799 | 0.011597 | 0.011698 | 0.011866 | 0.011631 |
| 0.011631 | 0.011698 | 0.011664 | 0.011833 | 0.011631 | 0.011765 | 0.011900 |
| 0.011832 | 0.011664 | 0.011664 | 0.011597 | 0.011597 | 0.011765 | 0.011698 |
| 0.011597 | 0.011698 | 0.011564 | 0.011597 | 0.011732 | 0.011867 | 0.011631 |
| 0.011598 | 0.011732 | 0.011665 | 0.011564 | 0.011900 | 0.011564 | 0.011732 |
| 0.011814 | 0.011631 | 0.011933 | 0.011766 | 0.011799 | 0.011664 | 0.011765 |
| 0.011631 | 0.011967 | 0.011564 | 0.011833 | 0.011631 | 0.011631 | 0.011564 |
| 0.011732 | 0.012001 | 0.011698 | 0.011765 | 0.011597 | 0.012001 | 0.011631 |
| 0.011631 | 0.011631 | 0.011664 | 0.011765 | 0.011664 | 0.011765 | 0.011832 |
| 0.011833 | 0.011799 | 0.011698 | 0.011799 | 0.011765 | 0.011631 | 0.011597 |
| 0.011631 | 0.011631 | 0.011698 | 0.011631 | 0.011597 | 0.011765 | 0.011631 |
| 0.011664 | 0.011664 | 0.011799 | 0.011832 | 0.011732 | 0.011664 | 0.011665 |
| 0.011732 | 0.011664 | 0.011765 | 0.011631 | 0.011765 | 0.011866 | 0.012169 |
| 0.011664 | 0.012068 | 0.011647 | 0.018125 | 0.011453 | 0.011672 | 0.012003 |
| 0.011960 | 0.012011 | 0.011532 | 0.011524 | 0.011995 | 0.012027 | 0.011668 |
| 0.011725 | 0.011854 | 0.011607 | 0.011521 | 0.011529 | 0.011554 | 0.011534 |
| 0.011764 | 0.011843 | 0.011691 | 0.011722 | 0.011799 | 0.011766 | 0.011805 |
| 0.011713 | 0.011799 | 0.011799 | 0.011766 | 0.011732 | 0.011732 | 0.011699 |
| 0.011732 | 0.011664 | 0.011698 | 0.011732 | 0.011699 | 0.011631 | 0.011598 |
| 0.011598 | 0.011665 | 0.011631 | 0.011732 | 0.011766 | 0.011799 | 0.011631 |
| 0.011732 | 0.011698 | 0.012035 | 0.012035 | 0.011766 | 0.011800 | 0.011766 |
| 0.011597 | 0.011598 | 0.011631 | 0.011732 | 0.011598 | 0.011833 | 0.011833 |
| 0.011866 | 0.011832 | 0.011799 | 0.011900 | 0.012068 | 0.011902 | 0.011732 |
| 0.011732 | 0.011799 | 0.011833 | 0.011665 | 0.011732 | 0.011698 | 0.011732 |
| 0.011800 | 0.011799 | 0.011833 | 0.011800 | 0.011700 | 0.011900 | 0.011866 |
| 0.011738 | 0.011631 | 0.011732 | 0.011833 | 0.011665 | 0.011867 | 0.011900 |
| 0.000000 | 0.011743 | 0.011933 | 0.011900 | 0.011832 | 0.012001 | 0.011632 |
| 0.011802 | 0.011699 | 0.011598 | 0.011598 | 0.011665 | 0.011631 | 0.011732 |
| 0.011766 | 0.011799 | 0.011631 | 0.011732 | 0.011698 | 0.012035 | 0.012035 |
| 0.011766 | 0.011800 | 0.011799 | 0.011732 | 0.012406 | 0.011846 | 0.011729 |
| 0.011869 | 0.011823 | 0.011939 | 0.011822 | 0.011936 | 0.011509 | 0.011819 |
| 0.012366 | 0.011649 | 0.011780 | 0.011579 | 0.011852 | 0.011911 | 0.012013 |
| 0.012387 | 0.011890 | 0.011973 | 0.012034 | 0.011900 | 0.011900 | 0.011939 |
| 0.011597 | 0.011765 | 0.011900 | 0.011866 | 0.011871 | 0.011866 | 0.011835 |
| 0.011698 | 0.011631 | 0.011664 | 0.011698 | 0.011597 | 0.011664 | 0.011564 |
| 0.011698 | 0.011732 | 0.011631 | 0.011597 | 0.011698 | 0.011631 | 0.011664 |
| 0.011664 | 0.011597 | 0.011664 | 0.011698 | 0.011597 | 0.011799 | 0.011832 |
| 0.011732 | 0.011799 | 0.011732 | 0.011732 | 0.011664 | 0.012068 | 0.011698 |
| 0.011756 | 0.011665 | 0.011900 | 0.011909 | 0.011766 | 0.011765 | 0.011765 |
| 0.011765 | 0.011698 | 0.011664 | 0.011698 | 0.011799 | 0.011799 | 0.011732 |
| 0.011732 | 0.011866 | 0.012034 | 0.011765 | 0.011967 | 0.011967 | 0.011832 |

|          |          |          |          |          |          |          |
|----------|----------|----------|----------|----------|----------|----------|
| 0.011664 | 0.011732 | 0.011765 | 0.012169 | 0.011732 | 0.011766 | 0.011732 |
| 0.011765 | 0.011698 | 0.011698 | 0.012001 | 0.011934 | 0.011967 | 0.011698 |
| 0.011799 | 0.011866 | 0.011732 | 0.011799 | 0.011765 | 0.011631 | 0.011967 |
| 0.011732 | 0.011698 | 0.011698 | 0.011866 | 0.011698 | 0.011799 | 0.012034 |
| 0.011732 | 0.012113 | 0.012101 | 0.011914 | 0.011455 | 0.011808 | 0.011525 |
| 0.011445 | 0.012151 | 0.011622 | 0.011820 | 0.011646 | 0.011620 | 0.011645 |
| 0.011775 | 0.011258 | 0.011617 | 0.011457 | 0.011546 | 0.011731 | 0.011790 |
| 0.011701 | 0.011729 | 0.011765 | 0.011694 | 0.011735 | 0.011866 | 0.011934 |
| 0.011934 | 0.011800 | 0.011906 | 0.011908 | 0.012044 | 0.012015 | 0.011732 |
| 0.011967 | 0.011833 | 0.011698 | 0.011799 | 0.011597 | 0.011833 | 0.011631 |
| 0.011698 | 0.011698 | 0.011665 | 0.011631 | 0.011664 | 0.011631 | 0.011732 |
| 0.011724 | 0.011725 | 0.011711 | 0.011745 | 0.011882 | 0.011846 | 0.011846 |
| 0.011844 | 0.011767 | 0.011614 | 0.011600 | 0.011704 | 0.011874 | 0.011875 |
| 0.011666 | 0.011738 | 0.011970 | 0.011939 | 0.011868 | 0.011902 | 0.011765 |
| 0.011765 | 0.011631 | 0.011631 | 0.011732 | 0.012270 | 0.011900 | 0.011967 |
| 0.012001 | 0.012022 | 0.011708 | 0.011788 | 0.011665 | 0.011799 | 0.011765 |
| 0.011868 | 0.011832 | 0.011900 | 0.011900 | 0.011807 | 0.011967 | 0.011685 |
| 0.011567 | 0.011580 | 0.011673 | 0.011638 | 0.011744 | 0.011471 | 0.011910 |
| 0.011712 | 0.011762 | 0.011537 | 0.011697 | 0.011699 | 0.011779 | 0.011665 |
| 0.011631 | 0.011631 | 0.011698 | 0.011665 | 0.011866 | 0.011833 | 0.011766 |
| 0.011866 | 0.011934 | 0.011665 | 0.011665 | 0.011698 | 0.011698 | 0.011702 |
| 0.011770 | 0.011698 | 0.011698 | 0.011735 | 0.011866 | 0.011934 | 0.011934 |
| 0.011800 | 0.011906 | 0.011908 | 0.012044 | 0.012015 | 0.011732 | 0.011900 |
| 0.011765 | 0.011765 | 0.011669 | 0.011791 | 0.011790 | 0.011775 | 0.011691 |
| 0.011853 | 0.012018 | 0.011823 | 0.011740 | 0.011631 | 0.011833 | 0.011698 |
| 0.011799 | 0.011732 | 0.011631 | 0.011734 | 0.011833 | 0.011804 | 0.011732 |
| 0.011631 | 0.011566 | 0.011698 | 0.011631 | 0.011564 | 0.011672 | 0.011833 |
| 0.011732 | 0.011664 | 0.011698 | 0.011732 | 0.011699 | 0.011631 | 0.011833 |
| 0.011698 | 0.011732 | 0.011732 | 0.011664 | 0.011732 | 0.011967 | 0.011631 |
| 0.011664 | 0.012068 | 0.011664 | 0.011698 | 0.011664 | 0.012034 | 0.011532 |
| 0.011960 | 0.011656 | 0.011562 | 0.011906 | 0.011956 | 0.011850 | 0.011520 |
| 0.011480 | 0.011832 | 0.011933 | 0.012045 | 0.011902 | 0.012008 | 0.012171 |
| 0.012070 | 0.012109 | 0.012068 | 0.012291 | 0.012034 | 0.012843 | 0.012072 |
| 0.012810 | 0.012511 | 0.012645 | 0.012917 | 0.012034 | 0.011732 | 0.012035 |
| 0.012441 | 0.012410 | 0.012001 | 0.011900 | 0.011969 | 0.011969 | 0.011940 |
| 0.011832 | 0.011807 | 0.011900 | 0.011868 | 0.012238 | 0.012304 | 0.012305 |
| 0.012205 | 0.012305 | 0.012410 | 0.012143 | 0.012442 | 0.012449 | 0.012509 |
| 0.012509 | 0.012543 | 0.012460 | 0.012510 | 0.012511 | 0.011698 | 0.012035 |
| 0.012137 | 0.012640 | 0.012112 | 0.012371 | 0.012845 | 0.011910 | 0.011800 |
| 0.011765 | 0.011765 | 0.012237 | 0.012336 | 0.012398 | 0.012101 | 0.011768 |
| S470     | 0.011538 | 0.011538 | 0.012017 | 0.011846 | 0.011846 | 0.011914 |
| 0.011751 | 0.011682 | 0.011846 | 0.011333 | 0.011402 | 0.011368 | 0.011333 |
| 0.011367 | 0.011538 | 0.011333 | 0.011367 | 0.011436 | 0.011402 | 0.011367 |
| 0.011333 | 0.011368 | 0.011470 | 0.011334 | 0.011368 | 0.011368 | 0.011717 |
| 0.011607 | 0.011368 | 0.011265 | 0.011504 | 0.011436 | 0.011402 | 0.011436 |
| 0.011402 | 0.011504 | 0.011402 | 0.011402 | 0.011436 | 0.011402 | 0.011572 |
| 0.011333 | 0.011402 | 0.011436 | 0.011368 | 0.011470 | 0.011504 | 0.011436 |
| 0.011402 | 0.011573 | 0.011470 | 0.011743 | 0.011402 | 0.011675 | 0.011402 |
| 0.011367 | 0.011470 | 0.011538 | 0.011675 | 0.011777 | 0.011470 | 0.011572 |
| 0.011436 | 0.011504 | 0.011402 | 0.011641 | 0.011880 | 0.011402 | 0.011470 |
| 0.011368 | 0.011470 | 0.011436 | 0.011504 | 0.011436 | 0.011436 | 0.011436 |
| 0.011333 | 0.011368 | 0.011333 | 0.011436 | 0.011402 | 0.011437 | 0.011504 |
| 0.011436 | 0.011402 | 0.011470 | 0.011367 | 0.011504 | 0.011333 | 0.011402 |
| 0.011572 | 0.011504 | 0.011743 | 0.011572 | 0.011402 | 0.011607 | 0.011402 |
| 0.011513 | 0.011783 | 0.011598 | 0.011339 | 0.011326 | 0.011434 | 0.011501 |
| 0.012178 | 0.011523 | 0.011310 | 0.011641 | 0.011641 | 0.011436 | 0.011538 |
| 0.011436 | 0.011436 | 0.011367 | 0.011402 | 0.011504 | 0.011436 | 0.011367 |
| 0.011402 | 0.011504 | 0.011675 | 0.011572 | 0.011470 | 0.011436 | 0.011368 |
| 0.011333 | 0.011333 | 0.011402 | 0.011368 | 0.011572 | 0.011538 | 0.011470 |
| 0.011572 | 0.011641 | 0.011368 | 0.011368 | 0.011402 | 0.011402 | 0.011404 |

|          |          |          |          |          |          |          |
|----------|----------|----------|----------|----------|----------|----------|
| 0.011473 | 0.011368 | 0.011402 | 0.011243 | 0.011318 | 0.011274 | 0.011402 |
| 0.011405 | 0.011340 | 0.011398 | 0.011376 | 0.011268 | 0.011304 | 0.011335 |
| 0.011610 | 0.011376 | 0.011410 | 0.011334 | 0.011341 | 0.011436 | 0.011436 |
| 0.011505 | 0.011437 | 0.011436 | 0.011470 | 0.011197 | 0.011846 | 0.011641 |
| 0.011675 | 0.011538 | 0.011402 | 0.011504 | 0.011299 | 0.011538 | 0.011333 |
| 0.011402 | 0.011402 | 0.011368 | 0.011333 | 0.011367 | 0.011333 | 0.011436 |
| 0.011402 | 0.011504 | 0.011436 | 0.011333 | 0.011437 | 0.011538 | 0.011541 |
| 0.011538 | 0.011436 | 0.011333 | 0.011266 | 0.011402 | 0.011333 | 0.011265 |
| 0.011371 | 0.011538 | 0.011333 | 0.011538 | 0.011299 | 0.011402 | 0.011368 |
| 0.011470 | 0.011368 | 0.011402 | 0.011368 | 0.011368 | 0.011265 | 0.011402 |
| 0.011436 | 0.011368 | 0.011402 | 0.011368 | 0.011333 | 0.011436 | 0.011675 |
| 0.011777 | 0.011709 | 0.011778 | 0.011540 | 0.011778 | 0.011333 | 0.011368 |
| 0.011404 | 0.011675 | 0.011477 | 0.011305 | 0.011785 | 0.011268 | 0.011338 |
| 0.011751 | 0.011683 | 0.011572 | 0.011743 | 0.000000 | 0.011641 | 0.011607 |
| 0.011538 | 0.011709 | 0.011422 | 0.011186 | 0.011273 | 0.011436 | 0.011508 |
| 0.011607 | 0.011438 | 0.011576 | 0.011714 | 0.011572 | 0.011709 | 0.011750 |
| 0.011473 | 0.011682 | 0.011439 | 0.011542 | 0.011847 | 0.011299 | 0.011506 |
| 0.011470 | 0.011402 | 0.011299 | 0.011299 | 0.011367 | 0.011368 | 0.011436 |
| 0.011368 | 0.011436 | 0.011333 | 0.011436 | 0.011368 | 0.011367 | 0.011436 |
| 0.011368 | 0.011812 | 0.011709 | 0.011743 | 0.011265 | 0.011367 | 0.011402 |
| 0.011402 | 0.011367 | 0.011436 | 0.011470 | 0.011333 | 0.011333 | 0.011333 |
| 0.011880 | 0.011504 | 0.011504 | 0.011299 | 0.011402 | 0.011573 | 0.011333 |
| 0.011333 | 0.011402 | 0.011367 | 0.011538 | 0.011333 | 0.011470 | 0.011538 |
| 0.011538 | 0.011368 | 0.011367 | 0.011299 | 0.011299 | 0.011470 | 0.011402 |
| 0.011299 | 0.011402 | 0.011265 | 0.011299 | 0.011436 | 0.011539 | 0.011333 |
| 0.011299 | 0.011436 | 0.011368 | 0.011265 | 0.011607 | 0.011265 | 0.011436 |
| 0.011409 | 0.011333 | 0.011641 | 0.011470 | 0.011504 | 0.011367 | 0.011436 |
| 0.011333 | 0.011675 | 0.011265 | 0.011538 | 0.011333 | 0.011333 | 0.011265 |
| 0.011504 | 0.011710 | 0.011402 | 0.011470 | 0.011299 | 0.011709 | 0.011333 |
| 0.011333 | 0.011333 | 0.011367 | 0.011470 | 0.011367 | 0.011470 | 0.011538 |
| 0.011538 | 0.011504 | 0.011402 | 0.011504 | 0.011470 | 0.011333 | 0.011299 |
| 0.011333 | 0.011333 | 0.011402 | 0.011333 | 0.011299 | 0.011436 | 0.011333 |
| 0.011367 | 0.011368 | 0.011436 | 0.011538 | 0.011436 | 0.011367 | 0.011368 |
| 0.011436 | 0.011368 | 0.011470 | 0.011333 | 0.011470 | 0.011572 | 0.011812 |
| 0.011367 | 0.011778 | 0.011376 | 0.017990 | 0.011326 | 0.011435 | 0.011735 |
| 0.011694 | 0.011740 | 0.011327 | 0.011297 | 0.011792 | 0.011763 | 0.011372 |
| 0.011588 | 0.011498 | 0.011259 | 0.011316 | 0.011378 | 0.011413 | 0.011323 |
| 0.011587 | 0.011550 | 0.011551 | 0.011395 | 0.011504 | 0.011333 | 0.011403 |
| 0.011375 | 0.011504 | 0.011504 | 0.011470 | 0.011436 | 0.011436 | 0.011402 |
| 0.011402 | 0.011367 | 0.011402 | 0.011436 | 0.011402 | 0.011333 | 0.011299 |
| 0.011299 | 0.011436 | 0.011333 | 0.011436 | 0.011470 | 0.011504 | 0.011333 |
| 0.011436 | 0.011402 | 0.011743 | 0.011743 | 0.011470 | 0.011505 | 0.011504 |
| 0.011299 | 0.011299 | 0.011333 | 0.011436 | 0.011299 | 0.011538 | 0.011538 |
| 0.011572 | 0.011572 | 0.011504 | 0.011607 | 0.011743 | 0.011608 | 0.011436 |
| 0.011436 | 0.011504 | 0.011504 | 0.011368 | 0.011436 | 0.011402 | 0.011436 |
| 0.011504 | 0.011504 | 0.011538 | 0.011504 | 0.011403 | 0.011607 | 0.011572 |
| 0.011439 | 0.011333 | 0.011436 | 0.011504 | 0.011436 | 0.011573 | 0.011607 |
| 0.011743 | 0.000000 | 0.011641 | 0.011607 | 0.011538 | 0.011709 | 0.011334 |
| 0.011506 | 0.011402 | 0.011299 | 0.011299 | 0.011436 | 0.011333 | 0.011436 |
| 0.011470 | 0.011504 | 0.011333 | 0.011436 | 0.011402 | 0.011743 | 0.011743 |
| 0.011470 | 0.011505 | 0.011299 | 0.011231 | 0.012087 | 0.011459 | 0.011311 |
| 0.011489 | 0.011448 | 0.011525 | 0.011448 | 0.011487 | 0.011481 | 0.011481 |
| 0.011934 | 0.011201 | 0.011339 | 0.011376 | 0.011691 | 0.011545 | 0.011683 |
| 0.011994 | 0.011405 | 0.011542 | 0.011504 | 0.011538 | 0.011538 | 0.011507 |
| 0.011299 | 0.011402 | 0.011538 | 0.011504 | 0.011507 | 0.011572 | 0.011540 |
| 0.011402 | 0.011333 | 0.011367 | 0.011402 | 0.011299 | 0.011368 | 0.011265 |
| 0.011402 | 0.011436 | 0.011333 | 0.011299 | 0.011402 | 0.011333 | 0.011367 |
| 0.011333 | 0.011299 | 0.011368 | 0.011368 | 0.011299 | 0.011504 | 0.011538 |
| 0.011436 | 0.011504 | 0.011436 | 0.011436 | 0.011367 | 0.011777 | 0.011402 |
| 0.011414 | 0.011368 | 0.011607 | 0.011612 | 0.011470 | 0.011470 | 0.011470 |

|          |          |          |          |          |          |          |
|----------|----------|----------|----------|----------|----------|----------|
| 0.011470 | 0.011402 | 0.011333 | 0.011402 | 0.011504 | 0.011504 | 0.011436 |
| 0.011436 | 0.011572 | 0.011743 | 0.011470 | 0.011675 | 0.011675 | 0.011538 |
| 0.011367 | 0.011436 | 0.011470 | 0.011846 | 0.011436 | 0.011470 | 0.011436 |
| 0.011470 | 0.011402 | 0.011402 | 0.011709 | 0.011607 | 0.011675 | 0.011402 |
| 0.011504 | 0.011572 | 0.011436 | 0.011504 | 0.011470 | 0.011333 | 0.011675 |
| 0.011436 | 0.011402 | 0.011402 | 0.011572 | 0.011402 | 0.011504 | 0.011743 |
| 0.011367 | 0.011820 | 0.011812 | 0.011555 | 0.011287 | 0.011510 | 0.011373 |
| 0.011284 | 0.011849 | 0.011346 | 0.011559 | 0.011407 | 0.011472 | 0.011492 |
| 0.011575 | 0.011326 | 0.011456 | 0.011328 | 0.011333 | 0.011535 | 0.011470 |
| 0.011443 | 0.011379 | 0.011490 | 0.011383 | 0.011437 | 0.011572 | 0.011641 |
| 0.011641 | 0.011505 | 0.011610 | 0.011612 | 0.011750 | 0.011780 | 0.011436 |
| 0.011675 | 0.011538 | 0.011402 | 0.011504 | 0.011299 | 0.011538 | 0.011333 |
| 0.011402 | 0.011402 | 0.011368 | 0.011333 | 0.011367 | 0.011333 | 0.011436 |
| 0.011380 | 0.011380 | 0.011408 | 0.011408 | 0.011547 | 0.011547 | 0.011511 |
| 0.011511 | 0.011471 | 0.011211 | 0.011243 | 0.011405 | 0.011577 | 0.011578 |
| 0.011368 | 0.011439 | 0.011676 | 0.011645 | 0.011573 | 0.011608 | 0.011265 |
| 0.011470 | 0.011538 | 0.011538 | 0.011436 | 0.012017 | 0.011607 | 0.011675 |
| 0.011709 | 0.011785 | 0.011407 | 0.011483 | 0.011368 | 0.011504 | 0.011333 |
| 0.011573 | 0.011538 | 0.011572 | 0.011572 | 0.011769 | 0.011607 | 0.011378 |
| 0.011267 | 0.011201 | 0.011337 | 0.011337 | 0.011408 | 0.011212 | 0.011613 |
| 0.011409 | 0.011418 | 0.000000 | 0.011289 | 0.011402 | 0.011443 | 0.011368 |
| 0.011333 | 0.011333 | 0.011402 | 0.011368 | 0.011572 | 0.011538 | 0.011470 |
| 0.011572 | 0.011641 | 0.011368 | 0.011368 | 0.011402 | 0.011402 | 0.011404 |
| 0.011473 | 0.011368 | 0.011402 | 0.011437 | 0.011572 | 0.011641 | 0.011641 |
| 0.011505 | 0.011610 | 0.011612 | 0.011750 | 0.011780 | 0.011436 | 0.011607 |
| 0.011333 | 0.011333 | 0.011370 | 0.011555 | 0.011485 | 0.011510 | 0.011381 |
| 0.011551 | 0.011753 | 0.011573 | 0.011440 | 0.011333 | 0.011538 | 0.011402 |
| 0.011504 | 0.011436 | 0.011333 | 0.011437 | 0.011538 | 0.011541 | 0.011436 |
| 0.011333 | 0.011266 | 0.011402 | 0.011333 | 0.011265 | 0.011371 | 0.011538 |
| 0.011402 | 0.011367 | 0.011402 | 0.011436 | 0.011402 | 0.011333 | 0.011538 |
| 0.011402 | 0.011436 | 0.011436 | 0.011367 | 0.011436 | 0.011675 | 0.011333 |
| 0.011368 | 0.011777 | 0.011367 | 0.011402 | 0.011367 | 0.011743 | 0.011321 |
| 0.011744 | 0.011232 | 0.011364 | 0.011549 | 0.011638 | 0.011535 | 0.011272 |
| 0.011325 | 0.011538 | 0.011641 | 0.011751 | 0.011608 | 0.011748 | 0.011847 |
| 0.011779 | 0.011817 | 0.011777 | 0.012034 | 0.011743 | 0.012633 | 0.011780 |
| 0.012531 | 0.012295 | 0.012432 | 0.012708 | 0.011743 | 0.011436 | 0.011744 |
| 0.012121 | 0.012124 | 0.011709 | 0.011607 | 0.011676 | 0.011676 | 0.011645 |
| 0.011538 | 0.011543 | 0.011607 | 0.011573 | 0.011949 | 0.012017 | 0.012018 |
| 0.011916 | 0.012018 | 0.012123 | 0.011886 | 0.012122 | 0.012128 | 0.012190 |
| 0.012156 | 0.012225 | 0.012171 | 0.012191 | 0.012192 | 0.011197 | 0.011744 |
| 0.011847 | 0.012325 | 0.011852 | 0.012051 | 0.012567 | 0.011610 | 0.011505 |
| 0.011470 | 0.011470 | 0.011949 | 0.011811 | 0.012057 | 0.011812 | 0.011471 |
| S471     | 0.011900 | 0.011900 | 0.012236 | 0.012000 | 0.012000 | 0.012068 |
| 0.011909 | 0.011841 | 0.012068 | 0.011497 | 0.011564 | 0.011531 | 0.011496 |
| 0.011530 | 0.011698 | 0.011496 | 0.011530 | 0.011597 | 0.011564 | 0.011530 |
| 0.011496 | 0.011530 | 0.011631 | 0.011497 | 0.011531 | 0.011530 | 0.011875 |
| 0.011765 | 0.011530 | 0.011429 | 0.011664 | 0.011597 | 0.011564 | 0.011597 |
| 0.011564 | 0.011664 | 0.011564 | 0.011564 | 0.011597 | 0.011564 | 0.011732 |
| 0.011496 | 0.011564 | 0.011597 | 0.011530 | 0.011631 | 0.011597 | 0.011597 |
| 0.011564 | 0.011732 | 0.011631 | 0.011900 | 0.011564 | 0.011832 | 0.011564 |
| 0.011530 | 0.011631 | 0.011698 | 0.011832 | 0.011933 | 0.011631 | 0.011732 |
| 0.011597 | 0.011665 | 0.011564 | 0.011731 | 0.012034 | 0.011564 | 0.011631 |
| 0.011530 | 0.011631 | 0.011597 | 0.011664 | 0.011597 | 0.011597 | 0.011597 |
| 0.011496 | 0.011530 | 0.011496 | 0.011597 | 0.011564 | 0.011599 | 0.011664 |
| 0.011597 | 0.011564 | 0.011631 | 0.011530 | 0.011664 | 0.011497 | 0.011564 |
| 0.011732 | 0.011664 | 0.011900 | 0.011732 | 0.011564 | 0.011799 | 0.011564 |
| 0.011765 | 0.011957 | 0.011777 | 0.011490 | 0.011471 | 0.011612 | 0.011651 |
| 0.012305 | 0.011721 | 0.011472 | 0.011597 | 0.011530 | 0.011597 | 0.011698 |
| 0.011631 | 0.011597 | 0.011664 | 0.011564 | 0.011665 | 0.011597 | 0.011597 |
| 0.011564 | 0.011664 | 0.011866 | 0.011731 | 0.011631 | 0.011597 | 0.011530 |

|          |          |          |          |          |          |          |
|----------|----------|----------|----------|----------|----------|----------|
| 0.011497 | 0.011497 | 0.011564 | 0.011530 | 0.011732 | 0.011698 | 0.011631 |
| 0.011732 | 0.011799 | 0.011530 | 0.011530 | 0.011564 | 0.011564 | 0.011567 |
| 0.011635 | 0.011564 | 0.011564 | 0.011456 | 0.011494 | 0.011481 | 0.011565 |
| 0.011568 | 0.011507 | 0.011540 | 0.011543 | 0.011468 | 0.011506 | 0.011533 |
| 0.011780 | 0.011577 | 0.011577 | 0.011497 | 0.011475 | 0.011632 | 0.011598 |
| 0.011666 | 0.011600 | 0.011598 | 0.011698 | 0.011631 | 0.012001 | 0.011799 |
| 0.011832 | 0.011698 | 0.011564 | 0.011665 | 0.011463 | 0.011698 | 0.011497 |
| 0.011564 | 0.011564 | 0.011530 | 0.011497 | 0.011530 | 0.011497 | 0.011597 |
| 0.011564 | 0.011665 | 0.011598 | 0.011497 | 0.011599 | 0.011698 | 0.011635 |
| 0.011699 | 0.011598 | 0.011497 | 0.011431 | 0.011564 | 0.011497 | 0.011430 |
| 0.011536 | 0.011699 | 0.011497 | 0.011699 | 0.011463 | 0.011564 | 0.011530 |
| 0.011631 | 0.011530 | 0.011564 | 0.011530 | 0.011564 | 0.011430 | 0.011564 |
| 0.011598 | 0.011530 | 0.011598 | 0.011530 | 0.011564 | 0.011597 | 0.011833 |
| 0.011933 | 0.011866 | 0.011934 | 0.011633 | 0.011934 | 0.011564 | 0.011530 |
| 0.011567 | 0.011869 | 0.011563 | 0.011438 | 0.011943 | 0.011435 | 0.011611 |
| 0.011943 | 0.011842 | 0.011530 | 0.011933 | 0.011641 | 0.000000 | 0.011765 |
| 0.011698 | 0.011597 | 0.011735 | 0.011390 | 0.011605 | 0.011598 | 0.011669 |
| 0.011765 | 0.011667 | 0.011669 | 0.011873 | 0.011799 | 0.011866 | 0.011975 |
| 0.011703 | 0.011875 | 0.011805 | 0.011737 | 0.012002 | 0.011463 | 0.011667 |
| 0.011631 | 0.011564 | 0.011463 | 0.011463 | 0.011530 | 0.011530 | 0.011597 |
| 0.011530 | 0.011597 | 0.011496 | 0.011597 | 0.011530 | 0.011530 | 0.011597 |
| 0.011530 | 0.011967 | 0.011866 | 0.011900 | 0.011429 | 0.011530 | 0.011564 |
| 0.011564 | 0.011530 | 0.011597 | 0.011631 | 0.011496 | 0.011496 | 0.011496 |
| 0.012034 | 0.011664 | 0.011664 | 0.011463 | 0.011564 | 0.011732 | 0.011497 |
| 0.011496 | 0.011564 | 0.011530 | 0.011698 | 0.011496 | 0.011631 | 0.011765 |
| 0.011698 | 0.011530 | 0.011530 | 0.011463 | 0.011463 | 0.011631 | 0.011564 |
| 0.011463 | 0.011564 | 0.011429 | 0.011463 | 0.011597 | 0.011732 | 0.011497 |
| 0.011463 | 0.011597 | 0.011531 | 0.011429 | 0.011765 | 0.011429 | 0.011597 |
| 0.011677 | 0.011497 | 0.011799 | 0.011631 | 0.011664 | 0.011530 | 0.011631 |
| 0.011496 | 0.011832 | 0.011429 | 0.011698 | 0.011496 | 0.011496 | 0.011429 |
| 0.011664 | 0.011866 | 0.011564 | 0.011631 | 0.011463 | 0.011866 | 0.011496 |
| 0.011497 | 0.011496 | 0.011530 | 0.011631 | 0.011530 | 0.011631 | 0.011698 |
| 0.011698 | 0.011664 | 0.011564 | 0.011665 | 0.011631 | 0.011496 | 0.011463 |
| 0.011496 | 0.011496 | 0.011564 | 0.011496 | 0.011463 | 0.011631 | 0.011496 |
| 0.011530 | 0.011530 | 0.011664 | 0.011698 | 0.011597 | 0.011530 | 0.011530 |
| 0.011597 | 0.011530 | 0.011631 | 0.011496 | 0.011631 | 0.011530 | 0.012034 |
| 0.011530 | 0.011866 | 0.011543 | 0.017974 | 0.011387 | 0.011672 | 0.011898 |
| 0.011856 | 0.011905 | 0.011584 | 0.011582 | 0.011994 | 0.011924 | 0.011607 |
| 0.011772 | 0.011732 | 0.011411 | 0.011521 | 0.011529 | 0.011603 | 0.011533 |
| 0.011717 | 0.011693 | 0.011691 | 0.011523 | 0.011664 | 0.011698 | 0.011703 |
| 0.011575 | 0.011665 | 0.011597 | 0.011631 | 0.011597 | 0.011598 | 0.011564 |
| 0.011530 | 0.011530 | 0.011362 | 0.011598 | 0.011564 | 0.011497 | 0.011530 |
| 0.011530 | 0.011598 | 0.011497 | 0.011598 | 0.011631 | 0.011665 | 0.011564 |
| 0.011597 | 0.011564 | 0.011900 | 0.011900 | 0.011631 | 0.011666 | 0.011698 |
| 0.011463 | 0.011463 | 0.011497 | 0.011598 | 0.011463 | 0.011698 | 0.011698 |
| 0.011463 | 0.011530 | 0.011665 | 0.011497 | 0.011934 | 0.011498 | 0.011597 |
| 0.011396 | 0.011665 | 0.011698 | 0.011530 | 0.011598 | 0.011564 | 0.011530 |
| 0.011463 | 0.011463 | 0.011497 | 0.011665 | 0.011565 | 0.011765 | 0.011732 |
| 0.011602 | 0.011497 | 0.011597 | 0.011698 | 0.011598 | 0.011732 | 0.011765 |
| 0.011933 | 0.011641 | 0.000000 | 0.011765 | 0.011698 | 0.011597 | 0.011497 |
| 0.011599 | 0.011564 | 0.011530 | 0.011530 | 0.011598 | 0.011497 | 0.011598 |
| 0.011631 | 0.011665 | 0.011564 | 0.011597 | 0.011564 | 0.011900 | 0.011900 |
| 0.011631 | 0.011666 | 0.011731 | 0.011664 | 0.012305 | 0.011489 | 0.011658 |
| 0.011728 | 0.011476 | 0.011798 | 0.011684 | 0.011655 | 0.011716 | 0.011474 |
| 0.012262 | 0.011579 | 0.011711 | 0.011648 | 0.011921 | 0.011774 | 0.011877 |
| 0.012284 | 0.011777 | 0.011838 | 0.011900 | 0.011765 | 0.011765 | 0.011804 |
| 0.011463 | 0.011631 | 0.011765 | 0.011731 | 0.011736 | 0.011731 | 0.011700 |
| 0.011564 | 0.011496 | 0.011530 | 0.011564 | 0.011463 | 0.011530 | 0.011429 |
| 0.011564 | 0.011597 | 0.011496 | 0.011463 | 0.011564 | 0.011496 | 0.011530 |
| 0.011530 | 0.011463 | 0.011530 | 0.011564 | 0.011463 | 0.011664 | 0.011698 |

|          |          |          |          |          |          |          |
|----------|----------|----------|----------|----------|----------|----------|
| 0.011597 | 0.011664 | 0.011597 | 0.011597 | 0.011530 | 0.011933 | 0.011564 |
| 0.011617 | 0.011530 | 0.011766 | 0.011773 | 0.011631 | 0.011631 | 0.011631 |
| 0.011631 | 0.011564 | 0.011530 | 0.011564 | 0.011664 | 0.011664 | 0.011597 |
| 0.011597 | 0.011732 | 0.011900 | 0.011631 | 0.011833 | 0.011833 | 0.011698 |
| 0.011530 | 0.011597 | 0.011631 | 0.012034 | 0.011598 | 0.011631 | 0.011597 |
| 0.011429 | 0.011564 | 0.011564 | 0.011866 | 0.011799 | 0.011833 | 0.011564 |
| 0.011665 | 0.011732 | 0.011597 | 0.011665 | 0.011631 | 0.011497 | 0.011832 |
| 0.011597 | 0.011564 | 0.011564 | 0.011732 | 0.011564 | 0.011664 | 0.011900 |
| 0.011597 | 0.011977 | 0.011967 | 0.011751 | 0.011455 | 0.011672 | 0.011525 |
| 0.011500 | 0.011956 | 0.011482 | 0.011596 | 0.011499 | 0.011620 | 0.011591 |
| 0.011723 | 0.011389 | 0.011561 | 0.011324 | 0.011437 | 0.011529 | 0.011628 |
| 0.011701 | 0.011532 | 0.011659 | 0.011589 | 0.011600 | 0.011732 | 0.011799 |
| 0.011799 | 0.011666 | 0.011770 | 0.011772 | 0.011874 | 0.011944 | 0.011597 |
| 0.011832 | 0.011698 | 0.011564 | 0.011665 | 0.011463 | 0.011698 | 0.011497 |
| 0.011564 | 0.011564 | 0.011530 | 0.011497 | 0.011530 | 0.011497 | 0.011597 |
| 0.011410 | 0.011550 | 0.011574 | 0.011608 | 0.011745 | 0.011709 | 0.011641 |
| 0.011708 | 0.011632 | 0.011430 | 0.011384 | 0.011568 | 0.011738 | 0.011739 |
| 0.011531 | 0.011602 | 0.011835 | 0.011804 | 0.011464 | 0.011767 | 0.011698 |
| 0.011631 | 0.011698 | 0.011698 | 0.011597 | 0.012169 | 0.011497 | 0.011564 |
| 0.011866 | 0.011915 | 0.011572 | 0.011649 | 0.011530 | 0.011732 | 0.011698 |
| 0.011733 | 0.011765 | 0.011496 | 0.011496 | 0.011886 | 0.011900 | 0.011546 |
| 0.011432 | 0.011441 | 0.011537 | 0.011502 | 0.011607 | 0.011471 | 0.011774 |
| 0.011575 | 0.011674 | 0.011441 | 0.011622 | 0.011565 | 0.011642 | 0.011530 |
| 0.011497 | 0.011497 | 0.011564 | 0.011530 | 0.011732 | 0.011698 | 0.011631 |
| 0.011732 | 0.011799 | 0.011530 | 0.011530 | 0.011564 | 0.011564 | 0.011567 |
| 0.011635 | 0.011564 | 0.011564 | 0.011600 | 0.011732 | 0.011799 | 0.011799 |
| 0.011666 | 0.011770 | 0.011772 | 0.011874 | 0.011944 | 0.011597 | 0.011765 |
| 0.011698 | 0.011698 | 0.011534 | 0.011687 | 0.011651 | 0.011673 | 0.011551 |
| 0.011715 | 0.011972 | 0.011653 | 0.011604 | 0.011497 | 0.011699 | 0.011564 |
| 0.011665 | 0.011598 | 0.011497 | 0.011599 | 0.011698 | 0.011635 | 0.011598 |
| 0.011497 | 0.011431 | 0.011564 | 0.011497 | 0.011430 | 0.011536 | 0.011699 |
| 0.011530 | 0.011530 | 0.011362 | 0.011598 | 0.011564 | 0.011497 | 0.011698 |
| 0.011564 | 0.011597 | 0.011597 | 0.011530 | 0.011597 | 0.011833 | 0.011496 |
| 0.011530 | 0.011933 | 0.011530 | 0.011564 | 0.011530 | 0.011900 | 0.011489 |
| 0.011904 | 0.011528 | 0.011511 | 0.011745 | 0.011834 | 0.011706 | 0.011478 |
| 0.011480 | 0.011698 | 0.011799 | 0.011909 | 0.011767 | 0.011906 | 0.012036 |
| 0.011935 | 0.011974 | 0.011933 | 0.012188 | 0.011900 | 0.012775 | 0.011936 |
| 0.012608 | 0.012444 | 0.012578 | 0.012849 | 0.011899 | 0.011598 | 0.011900 |
| 0.012340 | 0.012275 | 0.011866 | 0.011766 | 0.011834 | 0.011834 | 0.011737 |
| 0.011698 | 0.011705 | 0.011765 | 0.011733 | 0.012103 | 0.012169 | 0.012171 |
| 0.012070 | 0.012170 | 0.012275 | 0.012042 | 0.012340 | 0.012347 | 0.012407 |
| 0.012408 | 0.012442 | 0.012392 | 0.012408 | 0.012410 | 0.011631 | 0.011934 |
| 0.012002 | 0.012505 | 0.012010 | 0.012236 | 0.012710 | 0.011773 | 0.011665 |
| 0.011597 | 0.011631 | 0.012102 | 0.012171 | 0.012222 | 0.011967 | 0.011633 |
| S472     | 0.011866 | 0.011866 | 0.012203 | 0.011967 | 0.011967 | 0.012034 |
| 0.011876 | 0.011807 | 0.012034 | 0.011463 | 0.011530 | 0.011498 | 0.011463 |
| 0.011497 | 0.011665 | 0.011463 | 0.011497 | 0.011564 | 0.011530 | 0.011497 |
| 0.011463 | 0.011497 | 0.011597 | 0.011463 | 0.011430 | 0.011497 | 0.011841 |
| 0.011732 | 0.011497 | 0.011396 | 0.011631 | 0.011497 | 0.011530 | 0.011497 |
| 0.011530 | 0.011564 | 0.011530 | 0.011463 | 0.011564 | 0.011530 | 0.011698 |
| 0.011463 | 0.011530 | 0.011564 | 0.011497 | 0.011597 | 0.011631 | 0.011564 |
| 0.011530 | 0.011698 | 0.011598 | 0.011866 | 0.011530 | 0.011732 | 0.011530 |
| 0.011497 | 0.011598 | 0.011665 | 0.011732 | 0.011900 | 0.011597 | 0.011698 |
| 0.011497 | 0.011564 | 0.011530 | 0.011698 | 0.012001 | 0.011530 | 0.011597 |
| 0.011497 | 0.011597 | 0.011564 | 0.011631 | 0.011564 | 0.011564 | 0.011564 |
| 0.011463 | 0.011497 | 0.011463 | 0.011564 | 0.011530 | 0.011565 | 0.011631 |
| 0.011564 | 0.011530 | 0.011530 | 0.011497 | 0.011631 | 0.011396 | 0.011530 |
| 0.011698 | 0.011631 | 0.011866 | 0.011698 | 0.011530 | 0.011497 | 0.011530 |
| 0.011654 | 0.011882 | 0.011740 | 0.011373 | 0.011471 | 0.011539 | 0.011612 |
| 0.012305 | 0.011671 | 0.011472 | 0.011765 | 0.011765 | 0.011564 | 0.011665 |

|          |          |          |          |          |          |          |
|----------|----------|----------|----------|----------|----------|----------|
| 0.011597 | 0.011564 | 0.011631 | 0.011530 | 0.011631 | 0.011497 | 0.011564 |
| 0.011530 | 0.011631 | 0.011833 | 0.011698 | 0.011597 | 0.011564 | 0.011430 |
| 0.011463 | 0.011463 | 0.011463 | 0.011497 | 0.011698 | 0.011665 | 0.011598 |
| 0.011698 | 0.011766 | 0.011497 | 0.011497 | 0.011530 | 0.011530 | 0.011533 |
| 0.011601 | 0.011530 | 0.011530 | 0.011384 | 0.011494 | 0.011446 | 0.011531 |
| 0.011535 | 0.011473 | 0.011540 | 0.011509 | 0.011434 | 0.011471 | 0.011499 |
| 0.011780 | 0.011543 | 0.011508 | 0.011464 | 0.011475 | 0.011599 | 0.011565 |
| 0.011632 | 0.011566 | 0.011565 | 0.011664 | 0.011597 | 0.011833 | 0.011766 |
| 0.011799 | 0.011665 | 0.011530 | 0.011631 | 0.011430 | 0.011665 | 0.011463 |
| 0.011530 | 0.011530 | 0.011497 | 0.011463 | 0.011497 | 0.011463 | 0.011564 |
| 0.011463 | 0.011564 | 0.011564 | 0.011463 | 0.011566 | 0.011665 | 0.011669 |
| 0.011598 | 0.011564 | 0.011463 | 0.011398 | 0.011530 | 0.011463 | 0.011396 |
| 0.011502 | 0.011598 | 0.011396 | 0.011598 | 0.011430 | 0.011531 | 0.011497 |
| 0.011530 | 0.011497 | 0.011463 | 0.011497 | 0.011530 | 0.011396 | 0.011463 |
| 0.011497 | 0.011497 | 0.011564 | 0.011497 | 0.011530 | 0.011564 | 0.011799 |
| 0.011900 | 0.011833 | 0.011900 | 0.011667 | 0.011900 | 0.011530 | 0.011497 |
| 0.011533 | 0.011788 | 0.011563 | 0.011438 | 0.011909 | 0.011367 | 0.011532 |
| 0.011909 | 0.011809 | 0.011698 | 0.011900 | 0.011607 | 0.011765 | 0.000000 |
| 0.011597 | 0.011833 | 0.011700 | 0.011514 | 0.011647 | 0.011564 | 0.011636 |
| 0.011732 | 0.011634 | 0.011770 | 0.011771 | 0.011765 | 0.011833 | 0.011941 |
| 0.011670 | 0.011773 | 0.011771 | 0.011703 | 0.011969 | 0.011429 | 0.011633 |
| 0.011530 | 0.011530 | 0.011429 | 0.011429 | 0.011429 | 0.011497 | 0.011564 |
| 0.011429 | 0.011497 | 0.011396 | 0.011564 | 0.011429 | 0.011497 | 0.011564 |
| 0.011497 | 0.011933 | 0.011833 | 0.011866 | 0.011396 | 0.011497 | 0.011530 |
| 0.011530 | 0.011497 | 0.011564 | 0.011597 | 0.011463 | 0.011463 | 0.011463 |
| 0.012001 | 0.011631 | 0.011631 | 0.011429 | 0.011530 | 0.011631 | 0.011463 |
| 0.011463 | 0.011530 | 0.011497 | 0.011597 | 0.011463 | 0.011597 | 0.011664 |
| 0.011665 | 0.011497 | 0.011497 | 0.011429 | 0.011429 | 0.011598 | 0.011530 |
| 0.011429 | 0.011530 | 0.011396 | 0.011429 | 0.011564 | 0.011699 | 0.011463 |
| 0.011430 | 0.011564 | 0.011497 | 0.011396 | 0.011732 | 0.011396 | 0.011564 |
| 0.011574 | 0.011463 | 0.011765 | 0.011598 | 0.011631 | 0.011497 | 0.011597 |
| 0.011463 | 0.011732 | 0.011396 | 0.011665 | 0.011463 | 0.011463 | 0.011396 |
| 0.011564 | 0.011833 | 0.011530 | 0.011597 | 0.011429 | 0.011833 | 0.011463 |
| 0.011463 | 0.011463 | 0.011497 | 0.011530 | 0.011497 | 0.011597 | 0.011665 |
| 0.011665 | 0.011631 | 0.011530 | 0.011631 | 0.011530 | 0.011463 | 0.011429 |
| 0.011463 | 0.011463 | 0.011530 | 0.011463 | 0.011362 | 0.011597 | 0.011463 |
| 0.011497 | 0.011497 | 0.011631 | 0.011665 | 0.011564 | 0.011429 | 0.011497 |
| 0.011564 | 0.011497 | 0.011597 | 0.011463 | 0.011597 | 0.011698 | 0.012001 |
| 0.011497 | 0.011900 | 0.011440 | 0.018050 | 0.011388 | 0.011611 | 0.011863 |
| 0.011822 | 0.011870 | 0.011584 | 0.011582 | 0.011829 | 0.011889 | 0.011546 |
| 0.011725 | 0.011732 | 0.011372 | 0.011395 | 0.011490 | 0.011455 | 0.011447 |
| 0.011670 | 0.011694 | 0.011654 | 0.011589 | 0.011631 | 0.011665 | 0.011669 |
| 0.011472 | 0.011631 | 0.011631 | 0.011598 | 0.011564 | 0.011564 | 0.011531 |
| 0.011564 | 0.011497 | 0.011530 | 0.011564 | 0.011531 | 0.011463 | 0.011497 |
| 0.011497 | 0.011564 | 0.011463 | 0.011564 | 0.011598 | 0.011631 | 0.011530 |
| 0.011564 | 0.011531 | 0.011867 | 0.011867 | 0.011530 | 0.011632 | 0.011665 |
| 0.011430 | 0.011430 | 0.011463 | 0.011497 | 0.011430 | 0.011598 | 0.011598 |
| 0.011698 | 0.011698 | 0.011631 | 0.011732 | 0.011900 | 0.011734 | 0.011497 |
| 0.011564 | 0.011631 | 0.011598 | 0.011497 | 0.011564 | 0.011530 | 0.011564 |
| 0.011632 | 0.011631 | 0.011665 | 0.011564 | 0.011464 | 0.011732 | 0.011631 |
| 0.011568 | 0.011463 | 0.011564 | 0.011665 | 0.011564 | 0.011699 | 0.011732 |
| 0.011900 | 0.011607 | 0.011765 | 0.000000 | 0.011597 | 0.011833 | 0.011464 |
| 0.011633 | 0.011531 | 0.011497 | 0.011497 | 0.011564 | 0.011463 | 0.011564 |
| 0.011598 | 0.011631 | 0.011530 | 0.011564 | 0.011531 | 0.011867 | 0.011867 |
| 0.011530 | 0.011632 | 0.011698 | 0.011631 | 0.012272 | 0.011703 | 0.011623 |
| 0.011693 | 0.011650 | 0.011763 | 0.011649 | 0.011760 | 0.011681 | 0.011647 |
| 0.012228 | 0.011545 | 0.011677 | 0.011614 | 0.011887 | 0.011741 | 0.011775 |
| 0.012251 | 0.011739 | 0.011804 | 0.011866 | 0.011732 | 0.011732 | 0.011770 |
| 0.011429 | 0.011530 | 0.011732 | 0.011698 | 0.011702 | 0.011698 | 0.011667 |
| 0.011530 | 0.011396 | 0.011429 | 0.011530 | 0.011362 | 0.011497 | 0.011396 |

|          |          |          |          |          |          |          |
|----------|----------|----------|----------|----------|----------|----------|
| 0.011530 | 0.011564 | 0.011463 | 0.011429 | 0.011530 | 0.011463 | 0.011497 |
| 0.011497 | 0.011429 | 0.011497 | 0.011530 | 0.011429 | 0.011564 | 0.011665 |
| 0.011564 | 0.011631 | 0.011564 | 0.011564 | 0.011497 | 0.011900 | 0.011530 |
| 0.011582 | 0.011497 | 0.011732 | 0.011739 | 0.011530 | 0.011597 | 0.011597 |
| 0.011598 | 0.011463 | 0.011497 | 0.011463 | 0.011631 | 0.011631 | 0.011564 |
| 0.011564 | 0.011698 | 0.011866 | 0.011597 | 0.011799 | 0.011799 | 0.011664 |
| 0.011497 | 0.011564 | 0.011598 | 0.012001 | 0.011564 | 0.011530 | 0.011564 |
| 0.011597 | 0.011530 | 0.011530 | 0.011833 | 0.011698 | 0.011799 | 0.011530 |
| 0.011631 | 0.011698 | 0.011564 | 0.011631 | 0.011597 | 0.011463 | 0.011799 |
| 0.011564 | 0.011530 | 0.011530 | 0.011698 | 0.011530 | 0.011631 | 0.011866 |
| 0.011564 | 0.011943 | 0.011933 | 0.011711 | 0.011455 | 0.011638 | 0.011525 |
| 0.011390 | 0.011917 | 0.011482 | 0.011686 | 0.011451 | 0.011569 | 0.011592 |
| 0.011723 | 0.011324 | 0.011561 | 0.011457 | 0.011438 | 0.011596 | 0.011587 |
| 0.011588 | 0.011454 | 0.011624 | 0.011553 | 0.011566 | 0.011698 | 0.011766 |
| 0.011766 | 0.011632 | 0.011737 | 0.011738 | 0.011874 | 0.011873 | 0.011564 |
| 0.011799 | 0.011665 | 0.011530 | 0.011631 | 0.011430 | 0.011665 | 0.011463 |
| 0.011530 | 0.011530 | 0.011497 | 0.011463 | 0.011497 | 0.011463 | 0.011564 |
| 0.011549 | 0.011550 | 0.011540 | 0.011574 | 0.011711 | 0.011607 | 0.011675 |
| 0.011674 | 0.011598 | 0.011430 | 0.011384 | 0.011535 | 0.011704 | 0.011705 |
| 0.011497 | 0.011568 | 0.011801 | 0.011770 | 0.011699 | 0.011733 | 0.011664 |
| 0.011597 | 0.011665 | 0.011664 | 0.011564 | 0.012136 | 0.011732 | 0.011799 |
| 0.011833 | 0.011915 | 0.011538 | 0.011615 | 0.011497 | 0.011698 | 0.011665 |
| 0.011700 | 0.011732 | 0.011732 | 0.011732 | 0.011886 | 0.011866 | 0.011511 |
| 0.011398 | 0.011407 | 0.011503 | 0.011468 | 0.011573 | 0.011433 | 0.011740 |
| 0.011541 | 0.011674 | 0.011489 | 0.011585 | 0.011531 | 0.011539 | 0.011430 |
| 0.011463 | 0.011463 | 0.011463 | 0.011497 | 0.011698 | 0.011665 | 0.011598 |
| 0.011698 | 0.011766 | 0.011497 | 0.011497 | 0.011530 | 0.011530 | 0.011533 |
| 0.011601 | 0.011530 | 0.011530 | 0.011566 | 0.011698 | 0.011766 | 0.011766 |
| 0.011632 | 0.011737 | 0.011738 | 0.011874 | 0.011873 | 0.011564 | 0.011732 |
| 0.011665 | 0.011665 | 0.011500 | 0.011687 | 0.011616 | 0.011639 | 0.011516 |
| 0.011611 | 0.011926 | 0.011568 | 0.011570 | 0.011396 | 0.011598 | 0.011463 |
| 0.011564 | 0.011564 | 0.011463 | 0.011566 | 0.011665 | 0.011669 | 0.011564 |
| 0.011463 | 0.011398 | 0.011530 | 0.011463 | 0.011396 | 0.011502 | 0.011598 |
| 0.011564 | 0.011497 | 0.011530 | 0.011564 | 0.011531 | 0.011463 | 0.011665 |
| 0.011530 | 0.011564 | 0.011564 | 0.011497 | 0.011564 | 0.011799 | 0.011463 |
| 0.011497 | 0.011900 | 0.011497 | 0.011463 | 0.011497 | 0.011866 | 0.011489 |
| 0.011960 | 0.011485 | 0.011461 | 0.011745 | 0.011793 | 0.011706 | 0.011395 |
| 0.011428 | 0.011664 | 0.011765 | 0.011875 | 0.011734 | 0.011873 | 0.012002 |
| 0.011902 | 0.011940 | 0.011900 | 0.012154 | 0.011866 | 0.012742 | 0.011903 |
| 0.012642 | 0.012410 | 0.012544 | 0.012816 | 0.011866 | 0.011564 | 0.011867 |
| 0.012306 | 0.012241 | 0.011833 | 0.011732 | 0.011800 | 0.011800 | 0.011771 |
| 0.011664 | 0.011671 | 0.011732 | 0.011699 | 0.012070 | 0.012135 | 0.012137 |
| 0.012036 | 0.012137 | 0.012241 | 0.012008 | 0.012307 | 0.012314 | 0.012374 |
| 0.012375 | 0.012408 | 0.012358 | 0.012375 | 0.012376 | 0.011597 | 0.011901 |
| 0.011969 | 0.012472 | 0.011976 | 0.012203 | 0.012677 | 0.011740 | 0.011632 |
| 0.011597 | 0.011597 | 0.012002 | 0.012130 | 0.012222 | 0.011933 | 0.011600 |
| s473     | 0.011799 | 0.011799 | 0.012135 | 0.011899 | 0.011899 | 0.011967 |
| 0.011807 | 0.011739 | 0.011967 | 0.011396 | 0.011463 | 0.011430 | 0.011396 |
| 0.011429 | 0.011597 | 0.011396 | 0.011362 | 0.011496 | 0.011463 | 0.011429 |
| 0.011396 | 0.011429 | 0.011530 | 0.011329 | 0.011430 | 0.011429 | 0.011773 |
| 0.011664 | 0.011429 | 0.011329 | 0.011564 | 0.011496 | 0.011463 | 0.011497 |
| 0.011463 | 0.011564 | 0.011463 | 0.011463 | 0.011429 | 0.011463 | 0.011631 |
| 0.011396 | 0.011463 | 0.011429 | 0.011429 | 0.011530 | 0.011496 | 0.011496 |
| 0.011463 | 0.011564 | 0.011530 | 0.011799 | 0.011396 | 0.011732 | 0.011396 |
| 0.011429 | 0.011530 | 0.011597 | 0.011732 | 0.011832 | 0.011530 | 0.011631 |
| 0.011496 | 0.011564 | 0.011463 | 0.011698 | 0.011933 | 0.011463 | 0.011530 |
| 0.011429 | 0.011530 | 0.011497 | 0.011564 | 0.011496 | 0.011496 | 0.011496 |
| 0.011396 | 0.011429 | 0.011396 | 0.011497 | 0.011463 | 0.011498 | 0.011564 |
| 0.011497 | 0.011463 | 0.011530 | 0.011429 | 0.011564 | 0.011396 | 0.011463 |
| 0.011631 | 0.011564 | 0.011799 | 0.011631 | 0.011463 | 0.011631 | 0.011463 |



|          |          |          |          |          |          |          |
|----------|----------|----------|----------|----------|----------|----------|
| 0.011616 | 0.011845 | 0.011702 | 0.011334 | 0.011396 | 0.011465 | 0.011572 |
| 0.012231 | 0.011721 | 0.011390 | 0.011631 | 0.011698 | 0.011496 | 0.011597 |
| 0.011530 | 0.011496 | 0.011564 | 0.011463 | 0.011564 | 0.011496 | 0.011496 |
| 0.011463 | 0.011564 | 0.011765 | 0.011631 | 0.011530 | 0.011497 | 0.011430 |
| 0.011396 | 0.011396 | 0.011463 | 0.011430 | 0.011631 | 0.011597 | 0.011530 |
| 0.011631 | 0.011698 | 0.011429 | 0.011429 | 0.011463 | 0.011463 | 0.011465 |
| 0.011533 | 0.011463 | 0.011463 | 0.011348 | 0.011422 | 0.011376 | 0.011464 |
| 0.011467 | 0.011404 | 0.011466 | 0.011440 | 0.011366 | 0.011403 | 0.011432 |
| 0.011708 | 0.011474 | 0.011508 | 0.011396 | 0.011406 | 0.011531 | 0.011497 |
| 0.011565 | 0.011498 | 0.011497 | 0.011597 | 0.011530 | 0.011765 | 0.011698 |
| 0.011731 | 0.011598 | 0.011463 | 0.011564 | 0.011362 | 0.011597 | 0.011396 |
| 0.011463 | 0.011463 | 0.011429 | 0.011396 | 0.011429 | 0.011396 | 0.011497 |
| 0.011463 | 0.011564 | 0.011497 | 0.011396 | 0.011498 | 0.011598 | 0.011601 |
| 0.011598 | 0.011497 | 0.011396 | 0.011330 | 0.011463 | 0.011396 | 0.011329 |
| 0.011434 | 0.011598 | 0.011396 | 0.011598 | 0.011362 | 0.011463 | 0.011430 |
| 0.011530 | 0.011429 | 0.011463 | 0.011430 | 0.011463 | 0.011329 | 0.011463 |
| 0.011497 | 0.011430 | 0.011497 | 0.011429 | 0.011463 | 0.011497 | 0.011732 |
| 0.011833 | 0.011765 | 0.011833 | 0.011600 | 0.011833 | 0.011463 | 0.011362 |
| 0.011465 | 0.011748 | 0.011655 | 0.011369 | 0.011841 | 0.011333 | 0.011414 |
| 0.011841 | 0.011706 | 0.011631 | 0.011832 | 0.011538 | 0.011698 | 0.011597 |
| 0.000000 | 0.011765 | 0.011629 | 0.011390 | 0.011479 | 0.011497 | 0.011568 |
| 0.011665 | 0.011566 | 0.011703 | 0.011771 | 0.011698 | 0.011765 | 0.011873 |
| 0.011602 | 0.011773 | 0.011636 | 0.011635 | 0.011868 | 0.011362 | 0.011566 |
| 0.011530 | 0.011463 | 0.011362 | 0.011362 | 0.011429 | 0.011429 | 0.011496 |
| 0.011429 | 0.011497 | 0.011396 | 0.011496 | 0.011429 | 0.011429 | 0.011429 |
| 0.011429 | 0.011866 | 0.011765 | 0.011799 | 0.011329 | 0.011429 | 0.011463 |
| 0.011463 | 0.011429 | 0.011497 | 0.011530 | 0.011396 | 0.011396 | 0.011396 |
| 0.011933 | 0.011564 | 0.011564 | 0.011362 | 0.011463 | 0.011564 | 0.011396 |
| 0.011396 | 0.011463 | 0.011429 | 0.011597 | 0.011396 | 0.011530 | 0.011664 |
| 0.011597 | 0.011429 | 0.011429 | 0.011362 | 0.011362 | 0.011530 | 0.011463 |
| 0.011362 | 0.011463 | 0.011329 | 0.011362 | 0.011497 | 0.011631 | 0.011396 |
| 0.011363 | 0.011496 | 0.011430 | 0.011329 | 0.011664 | 0.011329 | 0.011497 |
| 0.011574 | 0.011396 | 0.011698 | 0.011530 | 0.011564 | 0.011429 | 0.011463 |
| 0.011396 | 0.011732 | 0.011329 | 0.011597 | 0.011396 | 0.011396 | 0.011329 |
| 0.011564 | 0.011766 | 0.011463 | 0.011530 | 0.011362 | 0.011765 | 0.011396 |
| 0.011396 | 0.011396 | 0.011429 | 0.011530 | 0.011429 | 0.011530 | 0.011597 |
| 0.011597 | 0.011564 | 0.011463 | 0.011564 | 0.011530 | 0.011396 | 0.011362 |
| 0.011396 | 0.011396 | 0.011463 | 0.011396 | 0.011362 | 0.011530 | 0.011396 |
| 0.011429 | 0.011429 | 0.011564 | 0.011597 | 0.011496 | 0.011429 | 0.011429 |
| 0.011496 | 0.011429 | 0.011530 | 0.011396 | 0.011530 | 0.011631 | 0.011933 |
| 0.011429 | 0.011832 | 0.011371 | 0.017974 | 0.011453 | 0.011549 | 0.011793 |
| 0.011752 | 0.011799 | 0.011532 | 0.011582 | 0.011829 | 0.011820 | 0.011485 |
| 0.011677 | 0.011671 | 0.011333 | 0.011395 | 0.011451 | 0.011406 | 0.011361 |
| 0.011717 | 0.011619 | 0.011616 | 0.011325 | 0.011564 | 0.011597 | 0.011601 |
| 0.011472 | 0.011564 | 0.011564 | 0.011530 | 0.011497 | 0.011497 | 0.011463 |
| 0.011497 | 0.011429 | 0.011463 | 0.011497 | 0.011463 | 0.011396 | 0.011429 |
| 0.011429 | 0.011497 | 0.011396 | 0.011497 | 0.011530 | 0.011564 | 0.011463 |
| 0.011496 | 0.011463 | 0.011799 | 0.011799 | 0.011463 | 0.011497 | 0.011598 |
| 0.011362 | 0.011362 | 0.011396 | 0.011497 | 0.011362 | 0.011597 | 0.011597 |
| 0.011631 | 0.011631 | 0.011564 | 0.011664 | 0.011833 | 0.011599 | 0.011497 |
| 0.011497 | 0.011564 | 0.011597 | 0.011430 | 0.011497 | 0.011463 | 0.011430 |
| 0.011564 | 0.011564 | 0.011597 | 0.011564 | 0.011464 | 0.011665 | 0.011631 |
| 0.011500 | 0.011396 | 0.011497 | 0.011598 | 0.011497 | 0.011631 | 0.011664 |
| 0.011832 | 0.011538 | 0.011698 | 0.011597 | 0.000000 | 0.011765 | 0.011396 |
| 0.011498 | 0.011464 | 0.011429 | 0.011429 | 0.011497 | 0.011396 | 0.011497 |
| 0.011530 | 0.011564 | 0.011463 | 0.011496 | 0.011463 | 0.011799 | 0.011799 |
| 0.011463 | 0.011497 | 0.011631 | 0.011564 | 0.012204 | 0.011596 | 0.011552 |
| 0.011623 | 0.011546 | 0.011693 | 0.011580 | 0.011655 | 0.011612 | 0.011543 |
| 0.012159 | 0.011475 | 0.011608 | 0.011544 | 0.011818 | 0.011672 | 0.011775 |
| 0.012182 | 0.011663 | 0.011736 | 0.011799 | 0.011664 | 0.011664 | 0.011702 |

|          |          |          |          |          |          |          |
|----------|----------|----------|----------|----------|----------|----------|
| 0.011362 | 0.011530 | 0.011664 | 0.011631 | 0.011634 | 0.011631 | 0.011599 |
| 0.011463 | 0.011396 | 0.011429 | 0.011463 | 0.011362 | 0.011429 | 0.011329 |
| 0.011463 | 0.011496 | 0.011396 | 0.011362 | 0.011463 | 0.011396 | 0.011429 |
| 0.011362 | 0.011362 | 0.011429 | 0.011463 | 0.011362 | 0.011564 | 0.011597 |
| 0.011497 | 0.011564 | 0.011496 | 0.011497 | 0.011429 | 0.011832 | 0.011463 |
| 0.011512 | 0.011429 | 0.011665 | 0.011671 | 0.011530 | 0.011530 | 0.011530 |
| 0.011530 | 0.011463 | 0.011429 | 0.011463 | 0.011564 | 0.011564 | 0.011496 |
| 0.011496 | 0.011631 | 0.011799 | 0.011530 | 0.011732 | 0.011732 | 0.011597 |
| 0.011429 | 0.011496 | 0.011530 | 0.011933 | 0.011497 | 0.011530 | 0.011497 |
| 0.011530 | 0.011463 | 0.011463 | 0.011765 | 0.011698 | 0.011732 | 0.011463 |
| 0.011564 | 0.011631 | 0.011496 | 0.011564 | 0.011530 | 0.011396 | 0.011732 |
| 0.011496 | 0.011463 | 0.011463 | 0.011564 | 0.011463 | 0.011564 | 0.011799 |
| 0.011496 | 0.011875 | 0.011866 | 0.011670 | 0.011455 | 0.011570 | 0.011525 |
| 0.011335 | 0.011839 | 0.011411 | 0.011641 | 0.011451 | 0.011518 | 0.011591 |
| 0.011723 | 0.011324 | 0.011561 | 0.011324 | 0.011438 | 0.011596 | 0.011547 |
| 0.011550 | 0.011454 | 0.011518 | 0.011483 | 0.011498 | 0.011631 | 0.011698 |
| 0.011698 | 0.011565 | 0.011669 | 0.011670 | 0.011806 | 0.011838 | 0.011497 |
| 0.011731 | 0.011598 | 0.011463 | 0.011564 | 0.011362 | 0.011597 | 0.011396 |
| 0.011463 | 0.011463 | 0.011429 | 0.011396 | 0.011429 | 0.011396 | 0.011497 |
| 0.011444 | 0.011480 | 0.011403 | 0.011505 | 0.011642 | 0.011607 | 0.011538 |
| 0.011605 | 0.011531 | 0.011356 | 0.011312 | 0.011467 | 0.011636 | 0.011637 |
| 0.011430 | 0.011501 | 0.011734 | 0.011702 | 0.011632 | 0.011599 | 0.011597 |
| 0.011530 | 0.011597 | 0.011597 | 0.011496 | 0.012068 | 0.011664 | 0.011732 |
| 0.011766 | 0.011844 | 0.011435 | 0.011511 | 0.011429 | 0.011631 | 0.011597 |
| 0.011632 | 0.011664 | 0.011664 | 0.011664 | 0.011768 | 0.011799 | 0.011442 |
| 0.011331 | 0.011337 | 0.011435 | 0.011400 | 0.011504 | 0.011359 | 0.011672 |
| 0.011472 | 0.011543 | 0.011298 | 0.011510 | 0.011464 | 0.011471 | 0.011430 |
| 0.011396 | 0.011396 | 0.011463 | 0.011430 | 0.011631 | 0.011597 | 0.011530 |
| 0.011631 | 0.011698 | 0.011429 | 0.011429 | 0.011463 | 0.011463 | 0.011465 |
| 0.011533 | 0.011463 | 0.011463 | 0.011498 | 0.011631 | 0.011698 | 0.011698 |
| 0.011565 | 0.011669 | 0.011670 | 0.011806 | 0.011838 | 0.011497 | 0.011664 |
| 0.011597 | 0.011597 | 0.011432 | 0.011617 | 0.011547 | 0.011571 | 0.011411 |
| 0.011611 | 0.011789 | 0.011653 | 0.011502 | 0.011396 | 0.011598 | 0.011463 |
| 0.011564 | 0.011497 | 0.011396 | 0.011498 | 0.011598 | 0.011601 | 0.011497 |
| 0.011396 | 0.011330 | 0.011463 | 0.011396 | 0.011329 | 0.011434 | 0.011598 |
| 0.011497 | 0.011429 | 0.011463 | 0.011497 | 0.011463 | 0.011396 | 0.011597 |
| 0.011463 | 0.011497 | 0.011496 | 0.011429 | 0.011496 | 0.011732 | 0.011396 |
| 0.011429 | 0.011832 | 0.011429 | 0.011463 | 0.011429 | 0.011799 | 0.011403 |
| 0.011847 | 0.011400 | 0.011511 | 0.011624 | 0.011712 | 0.011599 | 0.011311 |
| 0.011480 | 0.011597 | 0.011631 | 0.011739 | 0.011599 | 0.011737 | 0.011867 |
| 0.011767 | 0.011804 | 0.011765 | 0.012086 | 0.011799 | 0.012674 | 0.011835 |
| 0.012507 | 0.012342 | 0.012476 | 0.012748 | 0.011799 | 0.011497 | 0.011732 |
| 0.012238 | 0.012106 | 0.011765 | 0.011665 | 0.011733 | 0.011733 | 0.011703 |
| 0.011597 | 0.011603 | 0.011664 | 0.011632 | 0.012002 | 0.012068 | 0.012069 |
| 0.011969 | 0.012069 | 0.012173 | 0.011940 | 0.012239 | 0.012246 | 0.012306 |
| 0.012307 | 0.012340 | 0.012289 | 0.012307 | 0.012308 | 0.011530 | 0.011833 |
| 0.011901 | 0.012404 | 0.011908 | 0.012135 | 0.012609 | 0.011671 | 0.011564 |
| 0.011530 | 0.011530 | 0.012001 | 0.011965 | 0.012151 | 0.011866 | 0.011532 |
| s474     | 0.011967 | 0.011967 | 0.012303 | 0.012068 | 0.012068 | 0.012135 |
| 0.011977 | 0.011909 | 0.012068 | 0.011564 | 0.011631 | 0.011599 | 0.011564 |
| 0.011597 | 0.011765 | 0.011564 | 0.011597 | 0.011664 | 0.011631 | 0.011597 |
| 0.011564 | 0.011597 | 0.011698 | 0.011564 | 0.011598 | 0.011597 | 0.011943 |
| 0.011832 | 0.011597 | 0.011496 | 0.011732 | 0.011664 | 0.011631 | 0.011664 |
| 0.011631 | 0.011732 | 0.011631 | 0.011631 | 0.011664 | 0.011631 | 0.011799 |
| 0.011564 | 0.011631 | 0.011664 | 0.011597 | 0.011698 | 0.011664 | 0.011664 |
| 0.011631 | 0.011799 | 0.011699 | 0.011967 | 0.011631 | 0.011900 | 0.011631 |
| 0.011597 | 0.011698 | 0.011765 | 0.011900 | 0.012000 | 0.011698 | 0.011799 |
| 0.011664 | 0.011732 | 0.011631 | 0.011866 | 0.012101 | 0.011631 | 0.011698 |
| 0.011597 | 0.011698 | 0.011664 | 0.011664 | 0.011664 | 0.011664 | 0.011664 |
| 0.011564 | 0.011597 | 0.011564 | 0.011664 | 0.011631 | 0.011666 | 0.011732 |

|          |          |          |          |          |          |          |
|----------|----------|----------|----------|----------|----------|----------|
| 0.011664 | 0.011631 | 0.011698 | 0.011597 | 0.011732 | 0.011564 | 0.011631 |
| 0.011799 | 0.011732 | 0.011967 | 0.011799 | 0.011631 | 0.011866 | 0.011631 |
| 0.011802 | 0.012032 | 0.011777 | 0.011529 | 0.011471 | 0.011649 | 0.011690 |
| 0.012341 | 0.011721 | 0.011472 | 0.011664 | 0.011597 | 0.011664 | 0.011765 |
| 0.011698 | 0.011664 | 0.011732 | 0.011631 | 0.011732 | 0.011664 | 0.011664 |
| 0.011631 | 0.011664 | 0.011933 | 0.011799 | 0.011698 | 0.011665 | 0.011597 |
| 0.011564 | 0.011564 | 0.011631 | 0.011597 | 0.011799 | 0.011765 | 0.011698 |
| 0.011799 | 0.011866 | 0.011597 | 0.011597 | 0.011631 | 0.011631 | 0.011634 |
| 0.011703 | 0.011631 | 0.011631 | 0.011528 | 0.011530 | 0.011551 | 0.011632 |
| 0.011636 | 0.011576 | 0.011540 | 0.011612 | 0.011536 | 0.011574 | 0.011601 |
| 0.011852 | 0.011646 | 0.011646 | 0.011564 | 0.011544 | 0.011699 | 0.011665 |
| 0.011733 | 0.011667 | 0.011665 | 0.011765 | 0.011698 | 0.012068 | 0.011866 |
| 0.011900 | 0.011765 | 0.011631 | 0.011732 | 0.011530 | 0.011765 | 0.011564 |
| 0.011631 | 0.011631 | 0.011597 | 0.011564 | 0.011597 | 0.011564 | 0.011664 |
| 0.011631 | 0.011732 | 0.011665 | 0.011564 | 0.011667 | 0.011765 | 0.011770 |
| 0.011765 | 0.011665 | 0.011564 | 0.011498 | 0.011631 | 0.011564 | 0.011497 |
| 0.011604 | 0.011765 | 0.011564 | 0.011765 | 0.011530 | 0.011631 | 0.011597 |
| 0.011698 | 0.011597 | 0.011631 | 0.011597 | 0.011631 | 0.011497 | 0.011631 |
| 0.011665 | 0.011597 | 0.011665 | 0.011564 | 0.011631 | 0.011665 | 0.011900 |
| 0.012000 | 0.011933 | 0.012001 | 0.011667 | 0.012001 | 0.011631 | 0.011597 |
| 0.011634 | 0.011950 | 0.011609 | 0.011472 | 0.012010 | 0.011503 | 0.011611 |
| 0.012011 | 0.011910 | 0.011597 | 0.012001 | 0.011709 | 0.011597 | 0.011833 |
| 0.011765 | 0.000000 | 0.011806 | 0.011513 | 0.011689 | 0.011665 | 0.011737 |
| 0.011833 | 0.011735 | 0.011736 | 0.011940 | 0.011866 | 0.011933 | 0.012043 |
| 0.011771 | 0.011943 | 0.011873 | 0.011804 | 0.012070 | 0.011530 | 0.011734 |
| 0.011698 | 0.011631 | 0.011530 | 0.011530 | 0.011597 | 0.011597 | 0.011664 |
| 0.011597 | 0.011664 | 0.011564 | 0.011664 | 0.011597 | 0.011597 | 0.011664 |
| 0.011597 | 0.012034 | 0.011933 | 0.011967 | 0.011496 | 0.011597 | 0.011631 |
| 0.011631 | 0.011597 | 0.011664 | 0.011698 | 0.011564 | 0.011564 | 0.011564 |
| 0.012101 | 0.011732 | 0.011732 | 0.011530 | 0.011631 | 0.011799 | 0.011564 |
| 0.011564 | 0.011631 | 0.011597 | 0.011765 | 0.011564 | 0.011698 | 0.011832 |
| 0.011765 | 0.011597 | 0.011597 | 0.011530 | 0.011530 | 0.011698 | 0.011631 |
| 0.011530 | 0.011631 | 0.011497 | 0.011530 | 0.011664 | 0.011799 | 0.011564 |
| 0.011531 | 0.011664 | 0.011564 | 0.011497 | 0.011832 | 0.011497 | 0.011664 |
| 0.011745 | 0.011564 | 0.011866 | 0.011698 | 0.011732 | 0.011597 | 0.011698 |
| 0.011564 | 0.011900 | 0.011496 | 0.011765 | 0.011564 | 0.011564 | 0.011496 |
| 0.011732 | 0.011900 | 0.011631 | 0.011698 | 0.011530 | 0.011933 | 0.011564 |
| 0.011564 | 0.011564 | 0.011597 | 0.011698 | 0.011597 | 0.011698 | 0.011765 |
| 0.011765 | 0.011732 | 0.011631 | 0.011732 | 0.011664 | 0.011564 | 0.011530 |
| 0.011564 | 0.011564 | 0.011631 | 0.011564 | 0.011530 | 0.011698 | 0.011564 |
| 0.011597 | 0.011597 | 0.011732 | 0.011765 | 0.011664 | 0.011597 | 0.011597 |
| 0.011664 | 0.011597 | 0.011698 | 0.011564 | 0.011698 | 0.011597 | 0.012101 |
| 0.011597 | 0.012000 | 0.011578 | 0.017974 | 0.011453 | 0.011794 | 0.011932 |
| 0.011891 | 0.011940 | 0.011636 | 0.011640 | 0.011994 | 0.011958 | 0.011668 |
| 0.011772 | 0.011793 | 0.011489 | 0.011563 | 0.011529 | 0.011603 | 0.011619 |
| 0.011717 | 0.011693 | 0.011728 | 0.011523 | 0.011732 | 0.011765 | 0.011770 |
| 0.011644 | 0.011732 | 0.011664 | 0.011698 | 0.011664 | 0.011665 | 0.011631 |
| 0.011597 | 0.011597 | 0.011429 | 0.011665 | 0.011631 | 0.011564 | 0.011597 |
| 0.011597 | 0.011597 | 0.011564 | 0.011665 | 0.011698 | 0.011732 | 0.011631 |
| 0.011664 | 0.011631 | 0.011967 | 0.011967 | 0.011698 | 0.011733 | 0.011765 |
| 0.011530 | 0.011530 | 0.011564 | 0.011665 | 0.011530 | 0.011765 | 0.011765 |
| 0.011530 | 0.011597 | 0.011732 | 0.011564 | 0.012001 | 0.011565 | 0.011664 |
| 0.011463 | 0.011732 | 0.011765 | 0.011597 | 0.011665 | 0.011631 | 0.011597 |
| 0.011531 | 0.011530 | 0.011564 | 0.011732 | 0.011633 | 0.011833 | 0.011799 |
| 0.011670 | 0.011564 | 0.011665 | 0.011765 | 0.011665 | 0.011799 | 0.011832 |
| 0.012001 | 0.011709 | 0.011597 | 0.011833 | 0.011765 | 0.000000 | 0.011564 |
| 0.011667 | 0.011632 | 0.011597 | 0.011597 | 0.011597 | 0.011564 | 0.011665 |
| 0.011698 | 0.011732 | 0.011631 | 0.011664 | 0.011631 | 0.011967 | 0.011967 |
| 0.011698 | 0.011733 | 0.011799 | 0.011732 | 0.012372 | 0.011560 | 0.011728 |
| 0.011798 | 0.011546 | 0.011869 | 0.011753 | 0.011725 | 0.011785 | 0.011543 |

|          |          |          |          |          |          |          |
|----------|----------|----------|----------|----------|----------|----------|
| 0.012331 | 0.011649 | 0.011780 | 0.011717 | 0.011990 | 0.011843 | 0.011945 |
| 0.012352 | 0.011852 | 0.011838 | 0.011866 | 0.011832 | 0.011832 | 0.011804 |
| 0.011530 | 0.011698 | 0.011832 | 0.011799 | 0.011804 | 0.011799 | 0.011768 |
| 0.011631 | 0.011564 | 0.011597 | 0.011631 | 0.011530 | 0.011597 | 0.011496 |
| 0.011631 | 0.011664 | 0.011564 | 0.011530 | 0.011631 | 0.011564 | 0.011597 |
| 0.011597 | 0.011530 | 0.011597 | 0.011631 | 0.011530 | 0.011732 | 0.011765 |
| 0.011664 | 0.011732 | 0.011664 | 0.011664 | 0.011597 | 0.012000 | 0.011631 |
| 0.011687 | 0.011597 | 0.011833 | 0.011841 | 0.011698 | 0.011698 | 0.011698 |
| 0.011698 | 0.011631 | 0.011597 | 0.011631 | 0.011732 | 0.011732 | 0.011664 |
| 0.011664 | 0.011799 | 0.011967 | 0.011698 | 0.011900 | 0.011900 | 0.011765 |
| 0.011597 | 0.011664 | 0.011698 | 0.012101 | 0.011665 | 0.011698 | 0.011664 |
| 0.011496 | 0.011631 | 0.011631 | 0.011933 | 0.011866 | 0.011900 | 0.011631 |
| 0.011732 | 0.011799 | 0.011664 | 0.011732 | 0.011698 | 0.011564 | 0.011900 |
| 0.011664 | 0.011631 | 0.011631 | 0.011799 | 0.011631 | 0.011732 | 0.011967 |
| 0.011664 | 0.012045 | 0.012034 | 0.011751 | 0.011455 | 0.011740 | 0.011628 |
| 0.011554 | 0.011995 | 0.011517 | 0.011685 | 0.011646 | 0.011671 | 0.011644 |
| 0.011723 | 0.011389 | 0.011617 | 0.011390 | 0.011491 | 0.011529 | 0.011668 |
| 0.011738 | 0.011572 | 0.011694 | 0.011624 | 0.011667 | 0.011799 | 0.011866 |
| 0.011866 | 0.011733 | 0.011838 | 0.011840 | 0.011942 | 0.011979 | 0.011664 |
| 0.011900 | 0.011765 | 0.011631 | 0.011732 | 0.011530 | 0.011765 | 0.011564 |
| 0.011631 | 0.011631 | 0.011597 | 0.011564 | 0.011597 | 0.011564 | 0.011664 |
| 0.011479 | 0.011620 | 0.011642 | 0.011677 | 0.011813 | 0.011778 | 0.011709 |
| 0.011776 | 0.011699 | 0.011466 | 0.011456 | 0.011636 | 0.011806 | 0.011807 |
| 0.011598 | 0.011670 | 0.011902 | 0.011871 | 0.011531 | 0.011834 | 0.011765 |
| 0.011698 | 0.011765 | 0.011765 | 0.011664 | 0.012236 | 0.011564 | 0.011631 |
| 0.011934 | 0.011986 | 0.011640 | 0.011718 | 0.011597 | 0.011799 | 0.011765 |
| 0.011800 | 0.011832 | 0.011564 | 0.011564 | 0.012043 | 0.011967 | 0.011615 |
| 0.011500 | 0.011510 | 0.011605 | 0.011570 | 0.011675 | 0.011545 | 0.011842 |
| 0.011643 | 0.011718 | 0.011536 | 0.011697 | 0.011632 | 0.011710 | 0.011597 |
| 0.011564 | 0.011564 | 0.011631 | 0.011597 | 0.011799 | 0.011765 | 0.011698 |
| 0.011799 | 0.011866 | 0.011597 | 0.011597 | 0.011631 | 0.011631 | 0.011634 |
| 0.011703 | 0.011631 | 0.011631 | 0.011667 | 0.011799 | 0.011866 | 0.011866 |
| 0.011733 | 0.011838 | 0.011840 | 0.011942 | 0.011979 | 0.011664 | 0.011832 |
| 0.011765 | 0.011765 | 0.011601 | 0.011756 | 0.011720 | 0.011741 | 0.011586 |
| 0.011714 | 0.012017 | 0.011653 | 0.011672 | 0.011564 | 0.011765 | 0.011631 |
| 0.011732 | 0.011665 | 0.011564 | 0.011667 | 0.011765 | 0.011770 | 0.011665 |
| 0.011564 | 0.011498 | 0.011631 | 0.011564 | 0.011497 | 0.011604 | 0.011765 |
| 0.011597 | 0.011597 | 0.011429 | 0.011665 | 0.011631 | 0.011564 | 0.011766 |
| 0.011631 | 0.011664 | 0.011664 | 0.011597 | 0.011664 | 0.011900 | 0.011564 |
| 0.011597 | 0.012000 | 0.011597 | 0.011631 | 0.011597 | 0.011967 | 0.011446 |
| 0.011903 | 0.011485 | 0.011511 | 0.011745 | 0.011834 | 0.011742 | 0.011436 |
| 0.011427 | 0.011765 | 0.011866 | 0.011977 | 0.011835 | 0.011940 | 0.012103 |
| 0.012002 | 0.012041 | 0.012000 | 0.012222 | 0.011967 | 0.012842 | 0.012004 |
| 0.012675 | 0.012511 | 0.012645 | 0.012849 | 0.011967 | 0.011665 | 0.011967 |
| 0.012407 | 0.012308 | 0.011933 | 0.011833 | 0.011901 | 0.011901 | 0.011804 |
| 0.011765 | 0.011738 | 0.011832 | 0.011800 | 0.012170 | 0.012236 | 0.012238 |
| 0.012137 | 0.012237 | 0.012342 | 0.012075 | 0.012407 | 0.012415 | 0.012474 |
| 0.012475 | 0.012509 | 0.012425 | 0.012475 | 0.012477 | 0.011698 | 0.012001 |
| 0.012069 | 0.012573 | 0.012078 | 0.012304 | 0.012777 | 0.011841 | 0.011733 |
| 0.011664 | 0.011698 | 0.012169 | 0.012295 | 0.012327 | 0.012034 | 0.011700 |
| s475     | 0.011598 | 0.011598 | 0.011766 | 0.011699 | 0.011699 | 0.011766 |
| 0.011604 | 0.011536 | 0.011699 | 0.011195 | 0.011262 | 0.011229 | 0.011195 |
| 0.011228 | 0.011396 | 0.011195 | 0.011228 | 0.011295 | 0.011262 | 0.011228 |
| 0.011195 | 0.011228 | 0.011329 | 0.011195 | 0.011228 | 0.011228 | 0.011570 |
| 0.011463 | 0.011228 | 0.011128 | 0.011363 | 0.011295 | 0.011262 | 0.011295 |
| 0.011262 | 0.011363 | 0.011262 | 0.011262 | 0.011295 | 0.011262 | 0.011430 |
| 0.011195 | 0.011262 | 0.011295 | 0.011228 | 0.011295 | 0.011363 | 0.011295 |
| 0.011262 | 0.011430 | 0.011329 | 0.011598 | 0.011262 | 0.011531 | 0.011262 |
| 0.011228 | 0.011295 | 0.011396 | 0.011531 | 0.011631 | 0.011329 | 0.011430 |
| 0.011295 | 0.011363 | 0.011262 | 0.011497 | 0.011732 | 0.011262 | 0.011329 |

|          |          |          |          |          |          |          |
|----------|----------|----------|----------|----------|----------|----------|
| 0.011228 | 0.011329 | 0.011295 | 0.011363 | 0.011295 | 0.011295 | 0.011295 |
| 0.011195 | 0.011228 | 0.011195 | 0.011295 | 0.011262 | 0.011296 | 0.011363 |
| 0.011295 | 0.011262 | 0.011329 | 0.011228 | 0.011363 | 0.011195 | 0.011262 |
| 0.011430 | 0.011363 | 0.011598 | 0.011430 | 0.011262 | 0.011497 | 0.011262 |
| 0.011431 | 0.011658 | 0.011475 | 0.011138 | 0.011172 | 0.011281 | 0.011375 |
| 0.012012 | 0.011416 | 0.011184 | 0.011497 | 0.011497 | 0.011295 | 0.011396 |
| 0.011329 | 0.011295 | 0.011363 | 0.011262 | 0.011363 | 0.011295 | 0.011295 |
| 0.011262 | 0.011363 | 0.011564 | 0.011430 | 0.011329 | 0.011296 | 0.011228 |
| 0.011195 | 0.011195 | 0.011262 | 0.011228 | 0.011430 | 0.011396 | 0.011329 |
| 0.011430 | 0.011497 | 0.011228 | 0.011228 | 0.011262 | 0.011262 | 0.011263 |
| 0.011331 | 0.011262 | 0.011262 | 0.011132 | 0.011205 | 0.011165 | 0.011262 |
| 0.011264 | 0.011198 | 0.011245 | 0.011233 | 0.011162 | 0.011197 | 0.011229 |
| 0.011492 | 0.011267 | 0.011301 | 0.011195 | 0.011199 | 0.011329 | 0.011296 |
| 0.011363 | 0.011296 | 0.011296 | 0.011396 | 0.011329 | 0.011699 | 0.011497 |
| 0.011531 | 0.011396 | 0.011262 | 0.011363 | 0.011161 | 0.011396 | 0.011195 |
| 0.011262 | 0.011262 | 0.011228 | 0.011195 | 0.011228 | 0.011195 | 0.011295 |
| 0.011262 | 0.011363 | 0.011295 | 0.011195 | 0.011296 | 0.011396 | 0.011398 |
| 0.011396 | 0.011296 | 0.011195 | 0.011128 | 0.011262 | 0.011195 | 0.011128 |
| 0.011230 | 0.011396 | 0.011195 | 0.011396 | 0.011161 | 0.011262 | 0.011228 |
| 0.011329 | 0.011228 | 0.011262 | 0.011228 | 0.011262 | 0.011128 | 0.011262 |
| 0.011295 | 0.011228 | 0.011295 | 0.011228 | 0.011262 | 0.011295 | 0.011531 |
| 0.011631 | 0.011564 | 0.011632 | 0.011398 | 0.011632 | 0.011262 | 0.011228 |
| 0.011263 | 0.011545 | 0.011380 | 0.011163 | 0.011637 | 0.011129 | 0.011257 |
| 0.011638 | 0.011536 | 0.011430 | 0.011632 | 0.011334 | 0.011497 | 0.011464 |
| 0.011396 | 0.011564 | 0.011416 | 0.011266 | 0.011312 | 0.011295 | 0.011365 |
| 0.011463 | 0.011364 | 0.011500 | 0.011568 | 0.011497 | 0.011564 | 0.011671 |
| 0.011399 | 0.011570 | 0.011501 | 0.011432 | 0.011700 | 0.011161 | 0.011364 |
| 0.011329 | 0.011262 | 0.011161 | 0.011161 | 0.011228 | 0.011228 | 0.011295 |
| 0.011228 | 0.011295 | 0.011195 | 0.011295 | 0.011228 | 0.011228 | 0.011295 |
| 0.011228 | 0.011665 | 0.011564 | 0.011598 | 0.011128 | 0.011228 | 0.011262 |
| 0.011262 | 0.011228 | 0.011295 | 0.011329 | 0.011195 | 0.011195 | 0.011195 |
| 0.011732 | 0.011363 | 0.011363 | 0.011161 | 0.011262 | 0.011430 | 0.011195 |
| 0.011195 | 0.011262 | 0.011228 | 0.011396 | 0.011195 | 0.011329 | 0.011463 |
| 0.011396 | 0.011228 | 0.011228 | 0.011161 | 0.011161 | 0.011329 | 0.011262 |
| 0.011161 | 0.011262 | 0.011128 | 0.011161 | 0.011295 | 0.011430 | 0.011195 |
| 0.011161 | 0.011295 | 0.011228 | 0.011128 | 0.011463 | 0.011128 | 0.011295 |
| 0.011369 | 0.011195 | 0.011497 | 0.011329 | 0.011329 | 0.011228 | 0.011329 |
| 0.011195 | 0.011531 | 0.011128 | 0.011396 | 0.011195 | 0.011195 | 0.011128 |
| 0.011363 | 0.011565 | 0.011262 | 0.011329 | 0.011161 | 0.011564 | 0.011195 |
| 0.011195 | 0.011195 | 0.011228 | 0.011329 | 0.011228 | 0.011329 | 0.011396 |
| 0.011396 | 0.011363 | 0.011262 | 0.011363 | 0.011329 | 0.011195 | 0.011161 |
| 0.011195 | 0.011195 | 0.011262 | 0.011195 | 0.011161 | 0.011329 | 0.011195 |
| 0.011228 | 0.011228 | 0.011363 | 0.011396 | 0.011295 | 0.011228 | 0.011228 |
| 0.011295 | 0.011228 | 0.011329 | 0.011195 | 0.011329 | 0.011430 | 0.011665 |
| 0.011228 | 0.011632 | 0.011233 | 0.017751 | 0.011191 | 0.011366 | 0.011584 |
| 0.011545 | 0.011588 | 0.011322 | 0.011292 | 0.011665 | 0.011613 | 0.011303 |
| 0.011440 | 0.011488 | 0.011138 | 0.011228 | 0.011177 | 0.011258 | 0.011189 |
| 0.011436 | 0.011395 | 0.011394 | 0.011193 | 0.011363 | 0.011396 | 0.011399 |
| 0.011266 | 0.011363 | 0.011363 | 0.011329 | 0.011295 | 0.011296 | 0.011262 |
| 0.011295 | 0.011228 | 0.011262 | 0.011295 | 0.011262 | 0.011195 | 0.011228 |
| 0.011228 | 0.011295 | 0.011195 | 0.011296 | 0.011329 | 0.011363 | 0.011262 |
| 0.011295 | 0.011262 | 0.011598 | 0.011598 | 0.011329 | 0.011363 | 0.011396 |
| 0.011161 | 0.011161 | 0.011195 | 0.011295 | 0.011161 | 0.011396 | 0.011396 |
| 0.011430 | 0.011430 | 0.011363 | 0.011463 | 0.011632 | 0.011465 | 0.011295 |
| 0.011295 | 0.011363 | 0.011363 | 0.011228 | 0.011295 | 0.011262 | 0.011295 |
| 0.011363 | 0.011363 | 0.011396 | 0.011329 | 0.011262 | 0.011463 | 0.011430 |
| 0.011298 | 0.011195 | 0.011295 | 0.011396 | 0.011296 | 0.011430 | 0.011463 |
| 0.011632 | 0.011334 | 0.011497 | 0.011464 | 0.011396 | 0.011564 | 0.000000 |
| 0.011364 | 0.011262 | 0.011228 | 0.011228 | 0.011295 | 0.011195 | 0.011296 |
| 0.011329 | 0.011363 | 0.011262 | 0.011295 | 0.011262 | 0.011598 | 0.011598 |

|          |          |          |          |          |          |          |
|----------|----------|----------|----------|----------|----------|----------|
| 0.011329 | 0.011363 | 0.011430 | 0.011363 | 0.012003 | 0.011418 | 0.011342 |
| 0.011412 | 0.011373 | 0.011482 | 0.011372 | 0.011480 | 0.011405 | 0.011371 |
| 0.011954 | 0.011268 | 0.011403 | 0.011337 | 0.011611 | 0.011469 | 0.011571 |
| 0.011979 | 0.011437 | 0.011399 | 0.011363 | 0.011396 | 0.011396 | 0.011365 |
| 0.011161 | 0.011262 | 0.011396 | 0.011363 | 0.011365 | 0.011430 | 0.011397 |
| 0.011262 | 0.011195 | 0.011228 | 0.011262 | 0.011161 | 0.011228 | 0.011128 |
| 0.011228 | 0.011262 | 0.011195 | 0.011161 | 0.011262 | 0.011195 | 0.011228 |
| 0.011228 | 0.011161 | 0.011228 | 0.011262 | 0.011161 | 0.011363 | 0.011396 |
| 0.011295 | 0.011329 | 0.011295 | 0.011295 | 0.011228 | 0.011631 | 0.011262 |
| 0.011304 | 0.011228 | 0.011464 | 0.011468 | 0.011329 | 0.011329 | 0.011329 |
| 0.011329 | 0.011262 | 0.011228 | 0.011262 | 0.011363 | 0.011363 | 0.011295 |
| 0.011295 | 0.011430 | 0.011598 | 0.011329 | 0.011531 | 0.011531 | 0.011396 |
| 0.011228 | 0.011295 | 0.011329 | 0.011732 | 0.011296 | 0.011329 | 0.011295 |
| 0.011329 | 0.011262 | 0.011262 | 0.011564 | 0.011497 | 0.011531 | 0.011262 |
| 0.011363 | 0.011430 | 0.011295 | 0.011363 | 0.011329 | 0.011195 | 0.011531 |
| 0.011295 | 0.011262 | 0.011262 | 0.011430 | 0.011262 | 0.011363 | 0.011598 |
| 0.011228 | 0.011672 | 0.011665 | 0.011467 | 0.011173 | 0.011366 | 0.011215 |
| 0.011170 | 0.011683 | 0.011201 | 0.011418 | 0.011207 | 0.011315 | 0.011326 |
| 0.011468 | 0.011126 | 0.011283 | 0.011126 | 0.011168 | 0.011328 | 0.011344 |
| 0.011362 | 0.011257 | 0.011342 | 0.011272 | 0.011296 | 0.011430 | 0.011497 |
| 0.011497 | 0.011363 | 0.011466 | 0.011467 | 0.011603 | 0.011626 | 0.011295 |
| 0.011531 | 0.011396 | 0.011262 | 0.011363 | 0.011161 | 0.011396 | 0.011195 |
| 0.011262 | 0.011262 | 0.011228 | 0.011195 | 0.011228 | 0.011195 | 0.011295 |
| 0.011270 | 0.011270 | 0.011266 | 0.011300 | 0.011437 | 0.011402 | 0.011402 |
| 0.011401 | 0.011329 | 0.011134 | 0.011132 | 0.011264 | 0.011433 | 0.011434 |
| 0.011228 | 0.011297 | 0.011532 | 0.011500 | 0.011430 | 0.011464 | 0.011396 |
| 0.011329 | 0.011396 | 0.011396 | 0.011295 | 0.011867 | 0.011463 | 0.011531 |
| 0.011564 | 0.011630 | 0.011265 | 0.011337 | 0.011228 | 0.011430 | 0.011396 |
| 0.011431 | 0.011463 | 0.011463 | 0.011463 | 0.011611 | 0.011598 | 0.011234 |
| 0.011128 | 0.011130 | 0.011231 | 0.011196 | 0.011300 | 0.011135 | 0.011468 |
| 0.011266 | 0.011411 | 0.011156 | 0.011285 | 0.011262 | 0.011334 | 0.011228 |
| 0.011195 | 0.011195 | 0.011262 | 0.011228 | 0.011430 | 0.011396 | 0.011329 |
| 0.011430 | 0.011497 | 0.011228 | 0.011228 | 0.011262 | 0.011262 | 0.011263 |
| 0.011331 | 0.011262 | 0.011262 | 0.011296 | 0.011430 | 0.011497 | 0.011497 |
| 0.011363 | 0.011466 | 0.011467 | 0.011603 | 0.011626 | 0.011295 | 0.011463 |
| 0.011396 | 0.011396 | 0.011229 | 0.011408 | 0.011338 | 0.011367 | 0.011235 |
| 0.011405 | 0.011562 | 0.011399 | 0.011298 | 0.011195 | 0.011396 | 0.011262 |
| 0.011363 | 0.011295 | 0.011195 | 0.011296 | 0.011396 | 0.011398 | 0.011296 |
| 0.011195 | 0.011128 | 0.011262 | 0.011195 | 0.011128 | 0.011230 | 0.011396 |
| 0.011295 | 0.011228 | 0.011262 | 0.011295 | 0.011262 | 0.011195 | 0.011396 |
| 0.011262 | 0.011295 | 0.011295 | 0.011228 | 0.011295 | 0.011531 | 0.011195 |
| 0.011228 | 0.011631 | 0.011228 | 0.011262 | 0.011228 | 0.011598 | 0.011189 |
| 0.011622 | 0.011188 | 0.011211 | 0.011423 | 0.011508 | 0.011419 | 0.011102 |
| 0.011165 | 0.011396 | 0.011497 | 0.011604 | 0.011464 | 0.011602 | 0.011733 |
| 0.011632 | 0.011669 | 0.011631 | 0.011881 | 0.011598 | 0.012473 | 0.011633 |
| 0.012373 | 0.012140 | 0.012274 | 0.012545 | 0.011598 | 0.011295 | 0.011598 |
| 0.012036 | 0.011972 | 0.011564 | 0.011464 | 0.011531 | 0.011531 | 0.011500 |
| 0.011396 | 0.011400 | 0.011463 | 0.011430 | 0.011800 | 0.011867 | 0.011868 |
| 0.011767 | 0.011868 | 0.011971 | 0.011737 | 0.012003 | 0.012043 | 0.012104 |
| 0.012105 | 0.012138 | 0.012084 | 0.012105 | 0.012106 | 0.011329 | 0.011632 |
| 0.011699 | 0.012204 | 0.011705 | 0.011935 | 0.012408 | 0.011468 | 0.011363 |
| 0.011329 | 0.011329 | 0.011800 | 0.011842 | 0.011940 | 0.011665 | 0.011330 |
| s476     | 0.011768 | 0.011768 | 0.012105 | 0.011869 | 0.011869 | 0.011936 |
| 0.011776 | 0.011674 | 0.011869 | 0.011363 | 0.011431 | 0.011398 | 0.011363 |
| 0.011397 | 0.011566 | 0.011363 | 0.011296 | 0.011464 | 0.011431 | 0.011397 |
| 0.011363 | 0.011397 | 0.011498 | 0.011364 | 0.011397 | 0.011397 | 0.011742 |
| 0.011633 | 0.011397 | 0.011296 | 0.011532 | 0.011464 | 0.011431 | 0.011464 |
| 0.011431 | 0.011532 | 0.011431 | 0.011431 | 0.011397 | 0.011431 | 0.011599 |
| 0.011363 | 0.011431 | 0.011397 | 0.011397 | 0.011498 | 0.000000 | 0.011464 |
| 0.011431 | 0.011532 | 0.011498 | 0.011768 | 0.011363 | 0.011700 | 0.011363 |

|          |          |          |          |          |          |          |
|----------|----------|----------|----------|----------|----------|----------|
| 0.011397 | 0.011498 | 0.011566 | 0.011700 | 0.011802 | 0.011498 | 0.011599 |
| 0.011464 | 0.011532 | 0.011431 | 0.011667 | 0.011903 | 0.011431 | 0.011498 |
| 0.011397 | 0.011498 | 0.011464 | 0.011532 | 0.011464 | 0.011464 | 0.011464 |
| 0.011363 | 0.011397 | 0.011363 | 0.011464 | 0.011431 | 0.011465 | 0.011532 |
| 0.011464 | 0.011431 | 0.011498 | 0.011397 | 0.011532 | 0.011363 | 0.011431 |
| 0.011599 | 0.011498 | 0.011768 | 0.011599 | 0.011431 | 0.011667 | 0.011431 |
| 0.011618 | 0.011847 | 0.011666 | 0.011374 | 0.011360 | 0.011429 | 0.011574 |
| 0.012198 | 0.011724 | 0.011391 | 0.011532 | 0.011599 | 0.011464 | 0.011566 |
| 0.011498 | 0.011464 | 0.011532 | 0.011431 | 0.011532 | 0.011464 | 0.011464 |
| 0.011431 | 0.011532 | 0.011734 | 0.011599 | 0.011498 | 0.011465 | 0.011397 |
| 0.011363 | 0.011363 | 0.011431 | 0.011397 | 0.011599 | 0.011565 | 0.011498 |
| 0.011599 | 0.011667 | 0.011397 | 0.011397 | 0.011431 | 0.011431 | 0.011433 |
| 0.011501 | 0.011431 | 0.011431 | 0.011313 | 0.011387 | 0.011342 | 0.011431 |
| 0.011434 | 0.011370 | 0.011430 | 0.011406 | 0.011333 | 0.011369 | 0.011399 |
| 0.011674 | 0.011441 | 0.011475 | 0.011364 | 0.011372 | 0.011499 | 0.011465 |
| 0.011532 | 0.011466 | 0.011465 | 0.011565 | 0.011498 | 0.011802 | 0.011667 |
| 0.011700 | 0.011566 | 0.011431 | 0.011532 | 0.011330 | 0.011565 | 0.011363 |
| 0.011431 | 0.011431 | 0.011397 | 0.011363 | 0.011397 | 0.011363 | 0.011464 |
| 0.011431 | 0.011498 | 0.011464 | 0.011363 | 0.011466 | 0.011566 | 0.011569 |
| 0.011566 | 0.011464 | 0.011363 | 0.011297 | 0.011431 | 0.011363 | 0.011296 |
| 0.011401 | 0.011566 | 0.011363 | 0.011566 | 0.011330 | 0.011431 | 0.011397 |
| 0.011498 | 0.011397 | 0.011431 | 0.011397 | 0.011431 | 0.011296 | 0.011431 |
| 0.011464 | 0.011397 | 0.011464 | 0.011363 | 0.011431 | 0.011464 | 0.011700 |
| 0.011802 | 0.011734 | 0.011802 | 0.011567 | 0.011802 | 0.011431 | 0.011397 |
| 0.011433 | 0.011749 | 0.011565 | 0.011335 | 0.011809 | 0.011300 | 0.011415 |
| 0.011810 | 0.011708 | 0.011532 | 0.011802 | 0.011506 | 0.011599 | 0.011633 |
| 0.011498 | 0.011667 | 0.011595 | 0.011432 | 0.011439 | 0.011465 | 0.011536 |
| 0.011633 | 0.011534 | 0.011637 | 0.011739 | 0.011667 | 0.011734 | 0.011842 |
| 0.011570 | 0.011742 | 0.011604 | 0.011603 | 0.011837 | 0.011330 | 0.011534 |
| 0.011498 | 0.011431 | 0.011330 | 0.011330 | 0.011397 | 0.011397 | 0.011464 |
| 0.011397 | 0.011464 | 0.011363 | 0.011464 | 0.011397 | 0.011397 | 0.011397 |
| 0.011397 | 0.011835 | 0.011734 | 0.011768 | 0.011296 | 0.011397 | 0.011431 |
| 0.011431 | 0.011397 | 0.011464 | 0.011498 | 0.011363 | 0.011363 | 0.011363 |
| 0.011903 | 0.011532 | 0.011532 | 0.011330 | 0.011431 | 0.011532 | 0.011363 |
| 0.011363 | 0.011431 | 0.011397 | 0.011566 | 0.011363 | 0.011498 | 0.011633 |
| 0.011566 | 0.011397 | 0.011397 | 0.011330 | 0.011330 | 0.011498 | 0.011431 |
| 0.011330 | 0.011431 | 0.011296 | 0.011330 | 0.011464 | 0.011600 | 0.011363 |
| 0.011330 | 0.011464 | 0.011397 | 0.011296 | 0.011633 | 0.011296 | 0.011464 |
| 0.011541 | 0.011363 | 0.011667 | 0.011498 | 0.011532 | 0.011397 | 0.011431 |
| 0.011363 | 0.011700 | 0.011296 | 0.011566 | 0.011363 | 0.011363 | 0.011296 |
| 0.011532 | 0.011734 | 0.011431 | 0.011498 | 0.011330 | 0.011734 | 0.011363 |
| 0.011363 | 0.011363 | 0.011397 | 0.011498 | 0.011397 | 0.011498 | 0.011566 |
| 0.011566 | 0.011532 | 0.011431 | 0.011532 | 0.011498 | 0.011363 | 0.011330 |
| 0.011363 | 0.011363 | 0.011431 | 0.011363 | 0.011330 | 0.011498 | 0.011363 |
| 0.011397 | 0.011397 | 0.011532 | 0.011566 | 0.011464 | 0.011397 | 0.011397 |
| 0.011464 | 0.011397 | 0.011498 | 0.011363 | 0.011498 | 0.011532 | 0.011903 |
| 0.011397 | 0.011802 | 0.011406 | 0.017922 | 0.011323 | 0.011489 | 0.011760 |
| 0.011720 | 0.011766 | 0.011480 | 0.011467 | 0.011777 | 0.011787 | 0.011426 |
| 0.011631 | 0.011612 | 0.011295 | 0.011396 | 0.011334 | 0.011357 | 0.011405 |
| 0.011720 | 0.011583 | 0.011581 | 0.011392 | 0.011532 | 0.011566 | 0.011569 |
| 0.011439 | 0.011532 | 0.011464 | 0.011498 | 0.011465 | 0.011465 | 0.011431 |
| 0.011464 | 0.011397 | 0.011363 | 0.011464 | 0.011431 | 0.011363 | 0.011397 |
| 0.011397 | 0.011464 | 0.011363 | 0.011465 | 0.011498 | 0.011532 | 0.011431 |
| 0.011464 | 0.011431 | 0.011768 | 0.011768 | 0.011498 | 0.011465 | 0.011566 |
| 0.011330 | 0.011330 | 0.011363 | 0.011464 | 0.011330 | 0.011566 | 0.011566 |
| 0.011532 | 0.011532 | 0.011532 | 0.011566 | 0.011802 | 0.011567 | 0.011464 |
| 0.011397 | 0.011532 | 0.011566 | 0.011397 | 0.011464 | 0.011431 | 0.011397 |
| 0.011465 | 0.011464 | 0.011498 | 0.011532 | 0.011364 | 0.011633 | 0.011599 |
| 0.011468 | 0.011363 | 0.011464 | 0.011566 | 0.011465 | 0.011599 | 0.011633 |
| 0.011802 | 0.011506 | 0.011599 | 0.011633 | 0.011498 | 0.011667 | 0.011364 |

|          |          |          |          |          |          |          |
|----------|----------|----------|----------|----------|----------|----------|
| 0.000000 | 0.011431 | 0.011397 | 0.011397 | 0.011464 | 0.011363 | 0.011465 |
| 0.011498 | 0.011532 | 0.011431 | 0.011464 | 0.011431 | 0.011768 | 0.011768 |
| 0.011498 | 0.011465 | 0.011599 | 0.011498 | 0.012174 | 0.011562 | 0.011519 |
| 0.011589 | 0.011512 | 0.011660 | 0.011547 | 0.011622 | 0.011579 | 0.011510 |
| 0.012129 | 0.011442 | 0.011576 | 0.011511 | 0.011786 | 0.011641 | 0.011743 |
| 0.012152 | 0.011627 | 0.011467 | 0.011464 | 0.011464 | 0.011498 | 0.011433 |
| 0.011330 | 0.011363 | 0.011498 | 0.011464 | 0.011467 | 0.011599 | 0.011567 |
| 0.011431 | 0.011363 | 0.011397 | 0.011431 | 0.011330 | 0.011397 | 0.011296 |
| 0.011431 | 0.011464 | 0.011363 | 0.011330 | 0.011431 | 0.011363 | 0.011397 |
| 0.011330 | 0.011330 | 0.011397 | 0.011431 | 0.011330 | 0.011532 | 0.011566 |
| 0.011464 | 0.011532 | 0.011464 | 0.011464 | 0.011397 | 0.011802 | 0.011431 |
| 0.011479 | 0.011397 | 0.011633 | 0.011639 | 0.011498 | 0.011498 | 0.011498 |
| 0.011498 | 0.011431 | 0.011397 | 0.011431 | 0.011532 | 0.011532 | 0.011464 |
| 0.011464 | 0.011599 | 0.011768 | 0.011498 | 0.011700 | 0.011700 | 0.011565 |
| 0.011397 | 0.011464 | 0.011498 | 0.011903 | 0.011431 | 0.011498 | 0.011464 |
| 0.011431 | 0.011431 | 0.011431 | 0.011734 | 0.011667 | 0.011700 | 0.011431 |
| 0.011532 | 0.011599 | 0.011464 | 0.011532 | 0.011498 | 0.011363 | 0.011700 |
| 0.011464 | 0.011431 | 0.011431 | 0.011599 | 0.011431 | 0.011532 | 0.011768 |
| 0.011464 | 0.011844 | 0.011835 | 0.011672 | 0.011400 | 0.011538 | 0.011423 |
| 0.011335 | 0.011842 | 0.011377 | 0.011598 | 0.011452 | 0.011468 | 0.011540 |
| 0.011674 | 0.011258 | 0.011507 | 0.011259 | 0.011439 | 0.011464 | 0.011508 |
| 0.011552 | 0.011415 | 0.011520 | 0.011449 | 0.011466 | 0.011599 | 0.011667 |
| 0.011667 | 0.011532 | 0.011637 | 0.011638 | 0.011775 | 0.011769 | 0.011464 |
| 0.011700 | 0.011566 | 0.011431 | 0.011532 | 0.011330 | 0.011565 | 0.011363 |
| 0.011431 | 0.011431 | 0.011397 | 0.011363 | 0.011397 | 0.011363 | 0.011464 |
| 0.011411 | 0.011446 | 0.011369 | 0.011472 | 0.011609 | 0.011574 | 0.011505 |
| 0.011573 | 0.011499 | 0.011320 | 0.011277 | 0.011434 | 0.011604 | 0.011605 |
| 0.011397 | 0.011468 | 0.011702 | 0.011670 | 0.011532 | 0.011634 | 0.011565 |
| 0.011498 | 0.011566 | 0.011565 | 0.011464 | 0.012038 | 0.011566 | 0.011633 |
| 0.011734 | 0.011775 | 0.011437 | 0.011512 | 0.011397 | 0.011599 | 0.011566 |
| 0.011600 | 0.011633 | 0.011566 | 0.011566 | 0.011731 | 0.011768 | 0.011374 |
| 0.011298 | 0.011303 | 0.011402 | 0.011367 | 0.011472 | 0.011322 | 0.011640 |
| 0.011439 | 0.011544 | 0.011299 | 0.011473 | 0.011431 | 0.011506 | 0.011397 |
| 0.011363 | 0.011363 | 0.011431 | 0.011397 | 0.011599 | 0.011565 | 0.011498 |
| 0.011599 | 0.011667 | 0.011397 | 0.011397 | 0.011431 | 0.011431 | 0.011433 |
| 0.011501 | 0.011431 | 0.011431 | 0.011466 | 0.011599 | 0.011667 | 0.011667 |
| 0.011532 | 0.011637 | 0.011638 | 0.011775 | 0.011769 | 0.011464 | 0.011633 |
| 0.011566 | 0.011566 | 0.011399 | 0.011583 | 0.011513 | 0.011538 | 0.011412 |
| 0.011578 | 0.011790 | 0.011611 | 0.011469 | 0.011363 | 0.011566 | 0.011431 |
| 0.011498 | 0.011464 | 0.011363 | 0.011466 | 0.011566 | 0.011569 | 0.011464 |
| 0.011363 | 0.011297 | 0.011431 | 0.011363 | 0.011296 | 0.011401 | 0.011566 |
| 0.011464 | 0.011397 | 0.011363 | 0.011464 | 0.011431 | 0.011363 | 0.011566 |
| 0.011363 | 0.011464 | 0.011464 | 0.011397 | 0.011464 | 0.011700 | 0.011363 |
| 0.011397 | 0.011802 | 0.011397 | 0.011431 | 0.011397 | 0.011768 | 0.011404 |
| 0.011794 | 0.011402 | 0.011513 | 0.011626 | 0.011714 | 0.011600 | 0.011354 |
| 0.011429 | 0.011565 | 0.011599 | 0.011707 | 0.011567 | 0.011705 | 0.011836 |
| 0.011735 | 0.011773 | 0.011734 | 0.012054 | 0.011768 | 0.012646 | 0.011804 |
| 0.012545 | 0.012312 | 0.012447 | 0.012719 | 0.011768 | 0.011465 | 0.011700 |
| 0.012208 | 0.012075 | 0.011734 | 0.011633 | 0.011701 | 0.011701 | 0.011671 |
| 0.011565 | 0.011570 | 0.011633 | 0.011600 | 0.011971 | 0.012038 | 0.012039 |
| 0.011938 | 0.012038 | 0.012143 | 0.011909 | 0.012209 | 0.012215 | 0.012276 |
| 0.012276 | 0.012310 | 0.012258 | 0.012277 | 0.012278 | 0.011498 | 0.011802 |
| 0.011870 | 0.012376 | 0.011876 | 0.012106 | 0.012580 | 0.011639 | 0.011532 |
| 0.011464 | 0.011498 | 0.011971 | 0.012050 | 0.012119 | 0.011835 | 0.011500 |
| s477     | 0.011665 | 0.011665 | 0.011935 | 0.011766 | 0.011766 | 0.011834 |
| 0.011672 | 0.011570 | 0.011699 | 0.011262 | 0.011329 | 0.011296 | 0.011262 |
| 0.011295 | 0.011396 | 0.011262 | 0.011295 | 0.011363 | 0.011329 | 0.011295 |
| 0.011262 | 0.011296 | 0.011396 | 0.011262 | 0.011296 | 0.011295 | 0.011638 |
| 0.011531 | 0.011296 | 0.011195 | 0.011430 | 0.011363 | 0.011329 | 0.011363 |
| 0.011329 | 0.011430 | 0.011329 | 0.011329 | 0.011363 | 0.011329 | 0.011497 |



|          |          |          |          |          |          |          |
|----------|----------|----------|----------|----------|----------|----------|
| 0.011262 | 0.011329 | 0.011363 | 0.011296 | 0.011396 | 0.011430 | 0.011363 |
| 0.011329 | 0.011497 | 0.011397 | 0.011665 | 0.011329 | 0.011598 | 0.011329 |
| 0.011295 | 0.011396 | 0.011464 | 0.011598 | 0.011699 | 0.011396 | 0.011497 |
| 0.011363 | 0.011430 | 0.011329 | 0.011564 | 0.011800 | 0.011195 | 0.011396 |
| 0.011296 | 0.011396 | 0.011363 | 0.011430 | 0.011363 | 0.011363 | 0.011363 |
| 0.011262 | 0.011296 | 0.011262 | 0.011363 | 0.011329 | 0.011363 | 0.011430 |
| 0.011363 | 0.011329 | 0.011396 | 0.011295 | 0.011430 | 0.011262 | 0.011295 |
| 0.011497 | 0.011430 | 0.011665 | 0.011497 | 0.011329 | 0.011564 | 0.011262 |
| 0.011505 | 0.011733 | 0.011551 | 0.011256 | 0.011247 | 0.011355 | 0.011454 |
| 0.012085 | 0.011569 | 0.011266 | 0.011564 | 0.011564 | 0.011363 | 0.011464 |
| 0.011396 | 0.011363 | 0.011430 | 0.011329 | 0.011430 | 0.011363 | 0.011363 |
| 0.011329 | 0.011430 | 0.011632 | 0.011430 | 0.011396 | 0.011363 | 0.011296 |
| 0.011262 | 0.011262 | 0.011329 | 0.011295 | 0.011497 | 0.011464 | 0.011396 |
| 0.011497 | 0.011564 | 0.011295 | 0.011295 | 0.011329 | 0.011329 | 0.011331 |
| 0.011399 | 0.011329 | 0.011329 | 0.011204 | 0.011277 | 0.011236 | 0.011329 |
| 0.011331 | 0.011267 | 0.011319 | 0.011302 | 0.011230 | 0.011266 | 0.011297 |
| 0.011564 | 0.011336 | 0.011370 | 0.011262 | 0.011268 | 0.011397 | 0.011363 |
| 0.011430 | 0.011364 | 0.011363 | 0.011464 | 0.011396 | 0.011766 | 0.011565 |
| 0.011598 | 0.011464 | 0.011329 | 0.011430 | 0.011228 | 0.011463 | 0.011262 |
| 0.011329 | 0.011329 | 0.011295 | 0.011262 | 0.011295 | 0.011262 | 0.011363 |
| 0.011329 | 0.011430 | 0.011363 | 0.011262 | 0.011296 | 0.011464 | 0.011466 |
| 0.011464 | 0.011363 | 0.011262 | 0.011195 | 0.011329 | 0.011262 | 0.011195 |
| 0.011298 | 0.011464 | 0.011262 | 0.011464 | 0.011228 | 0.011329 | 0.011295 |
| 0.011396 | 0.011295 | 0.011329 | 0.011296 | 0.011329 | 0.011195 | 0.011329 |
| 0.011363 | 0.011295 | 0.011363 | 0.011295 | 0.011329 | 0.011363 | 0.011598 |
| 0.011699 | 0.011632 | 0.011699 | 0.011465 | 0.011699 | 0.011329 | 0.011295 |
| 0.011331 | 0.011626 | 0.011335 | 0.011232 | 0.011638 | 0.011197 | 0.011257 |
| 0.011706 | 0.011605 | 0.011497 | 0.011699 | 0.011402 | 0.011564 | 0.011531 |
| 0.011464 | 0.011632 | 0.011416 | 0.011266 | 0.011312 | 0.011363 | 0.011433 |
| 0.011531 | 0.011432 | 0.011568 | 0.011636 | 0.011564 | 0.011632 | 0.011739 |
| 0.011467 | 0.011638 | 0.011569 | 0.011500 | 0.011768 | 0.011228 | 0.011431 |
| 0.011396 | 0.011329 | 0.011228 | 0.011228 | 0.011295 | 0.011228 | 0.011363 |
| 0.011296 | 0.011363 | 0.011262 | 0.011363 | 0.011296 | 0.011295 | 0.011363 |
| 0.011296 | 0.011733 | 0.011632 | 0.011665 | 0.011195 | 0.011295 | 0.011329 |
| 0.011329 | 0.011295 | 0.011363 | 0.011396 | 0.011262 | 0.011262 | 0.011262 |
| 0.011800 | 0.011430 | 0.011430 | 0.011228 | 0.011329 | 0.011497 | 0.011262 |
| 0.011262 | 0.011329 | 0.011295 | 0.011464 | 0.011262 | 0.011396 | 0.011531 |
| 0.011464 | 0.011296 | 0.011295 | 0.011228 | 0.011228 | 0.011396 | 0.011329 |
| 0.011228 | 0.011329 | 0.011195 | 0.011228 | 0.011363 | 0.011497 | 0.011228 |
| 0.011228 | 0.011363 | 0.011296 | 0.011195 | 0.011531 | 0.011195 | 0.011296 |
| 0.011369 | 0.011262 | 0.011564 | 0.011396 | 0.011430 | 0.011295 | 0.011396 |
| 0.011262 | 0.011598 | 0.011195 | 0.011464 | 0.011262 | 0.011262 | 0.011195 |
| 0.011430 | 0.011632 | 0.011329 | 0.011396 | 0.011228 | 0.011632 | 0.011262 |
| 0.011262 | 0.011262 | 0.011295 | 0.011396 | 0.011295 | 0.011396 | 0.011464 |
| 0.011464 | 0.011430 | 0.011329 | 0.011363 | 0.011396 | 0.011262 | 0.011228 |
| 0.011262 | 0.011262 | 0.011329 | 0.011262 | 0.011228 | 0.011396 | 0.011262 |
| 0.011295 | 0.011296 | 0.011430 | 0.011464 | 0.011363 | 0.011295 | 0.011296 |
| 0.011363 | 0.011296 | 0.011396 | 0.011262 | 0.011396 | 0.011430 | 0.011733 |
| 0.011295 | 0.011699 | 0.011302 | 0.017826 | 0.011257 | 0.011305 | 0.011653 |
| 0.011614 | 0.011658 | 0.011322 | 0.011292 | 0.011720 | 0.011682 | 0.011243 |
| 0.011582 | 0.011427 | 0.011216 | 0.011228 | 0.011294 | 0.011307 | 0.011318 |
| 0.011577 | 0.011470 | 0.011468 | 0.011391 | 0.011430 | 0.011464 | 0.011466 |
| 0.011335 | 0.011430 | 0.011430 | 0.011396 | 0.011363 | 0.011363 | 0.011329 |
| 0.011363 | 0.011295 | 0.011329 | 0.011363 | 0.011329 | 0.011262 | 0.011295 |
| 0.011295 | 0.011363 | 0.011262 | 0.011363 | 0.011396 | 0.011430 | 0.011329 |
| 0.011363 | 0.011329 | 0.011665 | 0.011665 | 0.011396 | 0.011363 | 0.011464 |
| 0.011228 | 0.011228 | 0.011262 | 0.011363 | 0.011228 | 0.011464 | 0.011464 |
| 0.011497 | 0.011497 | 0.011430 | 0.011531 | 0.011699 | 0.011532 | 0.011363 |
| 0.011363 | 0.011430 | 0.011464 | 0.011295 | 0.011363 | 0.011329 | 0.011363 |
| 0.011430 | 0.011430 | 0.011464 | 0.011430 | 0.011330 | 0.011531 | 0.011497 |

|          |          |          |          |          |          |          |
|----------|----------|----------|----------|----------|----------|----------|
| 0.011365 | 0.011262 | 0.011363 | 0.011464 | 0.011363 | 0.011497 | 0.011531 |
| 0.011699 | 0.011402 | 0.011564 | 0.011531 | 0.011464 | 0.011632 | 0.011262 |
| 0.011431 | 0.000000 | 0.011295 | 0.011295 | 0.011363 | 0.011262 | 0.011363 |
| 0.011396 | 0.011430 | 0.011329 | 0.011363 | 0.011329 | 0.011665 | 0.011665 |
| 0.011396 | 0.011363 | 0.011497 | 0.011430 | 0.012071 | 0.011489 | 0.011342 |
| 0.011483 | 0.011442 | 0.011518 | 0.011372 | 0.011551 | 0.011475 | 0.011440 |
| 0.012023 | 0.011338 | 0.011472 | 0.011406 | 0.011681 | 0.011537 | 0.011639 |
| 0.012047 | 0.011437 | 0.011365 | 0.011363 | 0.011363 | 0.011396 | 0.011331 |
| 0.011228 | 0.011262 | 0.011396 | 0.011363 | 0.011365 | 0.011497 | 0.011465 |
| 0.011329 | 0.011262 | 0.011295 | 0.011295 | 0.011228 | 0.011296 | 0.011195 |
| 0.011329 | 0.011363 | 0.011262 | 0.011228 | 0.011329 | 0.011262 | 0.011295 |
| 0.011295 | 0.011228 | 0.011296 | 0.011329 | 0.011228 | 0.011430 | 0.011464 |
| 0.011363 | 0.011430 | 0.011363 | 0.011363 | 0.011295 | 0.011699 | 0.011329 |
| 0.011304 | 0.011296 | 0.011531 | 0.011536 | 0.011396 | 0.011396 | 0.011396 |
| 0.011396 | 0.011329 | 0.011295 | 0.011329 | 0.011363 | 0.011430 | 0.011363 |
| 0.011363 | 0.011497 | 0.011665 | 0.011396 | 0.011598 | 0.011598 | 0.011464 |
| 0.011295 | 0.011363 | 0.011396 | 0.011800 | 0.011363 | 0.011396 | 0.011363 |
| 0.011396 | 0.011329 | 0.011329 | 0.011632 | 0.011565 | 0.011598 | 0.011329 |
| 0.011430 | 0.011497 | 0.011363 | 0.011430 | 0.011396 | 0.011262 | 0.011598 |
| 0.011363 | 0.011329 | 0.011329 | 0.011497 | 0.011329 | 0.011430 | 0.011665 |
| 0.011295 | 0.011740 | 0.011733 | 0.011548 | 0.011342 | 0.011434 | 0.011370 |
| 0.011225 | 0.011761 | 0.011271 | 0.011507 | 0.011353 | 0.011468 | 0.011485 |
| 0.011570 | 0.011324 | 0.011450 | 0.011325 | 0.011330 | 0.011529 | 0.011425 |
| 0.011437 | 0.011336 | 0.011413 | 0.011342 | 0.011364 | 0.011497 | 0.011564 |
| 0.011564 | 0.011430 | 0.011534 | 0.011535 | 0.011671 | 0.011697 | 0.011363 |
| 0.011598 | 0.011464 | 0.011329 | 0.011430 | 0.011228 | 0.011463 | 0.011262 |
| 0.011329 | 0.011329 | 0.011295 | 0.011262 | 0.011295 | 0.011262 | 0.011363 |
| 0.011340 | 0.011340 | 0.011334 | 0.011369 | 0.011505 | 0.011470 | 0.011470 |
| 0.011469 | 0.011397 | 0.011208 | 0.011204 | 0.011264 | 0.011501 | 0.011468 |
| 0.011296 | 0.011365 | 0.011599 | 0.011568 | 0.011498 | 0.011464 | 0.011464 |
| 0.011396 | 0.011464 | 0.011463 | 0.011363 | 0.011935 | 0.011531 | 0.011598 |
| 0.011632 | 0.011702 | 0.011333 | 0.011407 | 0.011296 | 0.011497 | 0.011464 |
| 0.011498 | 0.011531 | 0.011531 | 0.011531 | 0.011690 | 0.011665 | 0.011303 |
| 0.011196 | 0.011199 | 0.011299 | 0.011264 | 0.011368 | 0.011210 | 0.011537 |
| 0.011335 | 0.011411 | 0.011156 | 0.011285 | 0.011329 | 0.011403 | 0.011296 |
| 0.011262 | 0.011262 | 0.011329 | 0.011295 | 0.011497 | 0.011464 | 0.011396 |
| 0.011497 | 0.011564 | 0.011295 | 0.011295 | 0.011329 | 0.011329 | 0.011331 |
| 0.011399 | 0.011329 | 0.011329 | 0.011364 | 0.011497 | 0.011564 | 0.011564 |
| 0.011430 | 0.011534 | 0.011535 | 0.011671 | 0.011697 | 0.011363 | 0.011531 |
| 0.011464 | 0.011464 | 0.011297 | 0.011478 | 0.011095 | 0.011435 | 0.011306 |
| 0.011474 | 0.011653 | 0.011484 | 0.011366 | 0.011262 | 0.011464 | 0.011329 |
| 0.011430 | 0.011363 | 0.011262 | 0.011296 | 0.011464 | 0.011466 | 0.011363 |
| 0.011262 | 0.011195 | 0.011329 | 0.011262 | 0.011195 | 0.011298 | 0.011464 |
| 0.011363 | 0.011295 | 0.011329 | 0.011363 | 0.011329 | 0.011262 | 0.011464 |
| 0.011329 | 0.011363 | 0.011363 | 0.011295 | 0.011363 | 0.011564 | 0.011262 |
| 0.011296 | 0.011699 | 0.011295 | 0.011329 | 0.011295 | 0.011665 | 0.011275 |
| 0.011791 | 0.011273 | 0.011361 | 0.011503 | 0.011590 | 0.011491 | 0.011228 |
| 0.011323 | 0.011464 | 0.011564 | 0.011672 | 0.011532 | 0.011669 | 0.011801 |
| 0.011700 | 0.011737 | 0.011699 | 0.011949 | 0.011665 | 0.012541 | 0.011701 |
| 0.012441 | 0.012208 | 0.012342 | 0.012614 | 0.011665 | 0.011363 | 0.011665 |
| 0.012104 | 0.012039 | 0.011632 | 0.011531 | 0.011599 | 0.011599 | 0.011568 |
| 0.011464 | 0.011467 | 0.011531 | 0.011498 | 0.011868 | 0.011935 | 0.011935 |
| 0.011835 | 0.011935 | 0.012005 | 0.011805 | 0.012105 | 0.012111 | 0.012172 |
| 0.012172 | 0.012206 | 0.012153 | 0.012173 | 0.012174 | 0.011396 | 0.011699 |
| 0.011767 | 0.012272 | 0.011773 | 0.011969 | 0.012475 | 0.011536 | 0.011430 |
| 0.011396 | 0.011396 | 0.011867 | 0.011842 | 0.011976 | 0.011733 | 0.011397 |
| S478     | 0.011497 | 0.011497 | 0.011967 | 0.011732 | 0.011732 | 0.011799 |
| 0.011638 | 0.011570 | 0.011732 | 0.011228 | 0.011295 | 0.011262 | 0.011228 |
| 0.011262 | 0.011429 | 0.011228 | 0.011262 | 0.011329 | 0.011295 | 0.011262 |
| 0.011228 | 0.011262 | 0.011362 | 0.011228 | 0.011262 | 0.011262 | 0.011604 |

|          |          |          |          |          |          |          |
|----------|----------|----------|----------|----------|----------|----------|
| 0.011497 | 0.011262 | 0.011161 | 0.011396 | 0.011329 | 0.011295 | 0.011329 |
| 0.011295 | 0.011396 | 0.011295 | 0.011295 | 0.011329 | 0.011295 | 0.011463 |
| 0.011228 | 0.011295 | 0.011329 | 0.011262 | 0.011362 | 0.011396 | 0.011329 |
| 0.011295 | 0.011463 | 0.011363 | 0.011631 | 0.011295 | 0.011564 | 0.011295 |
| 0.011262 | 0.011362 | 0.011429 | 0.011564 | 0.011665 | 0.011362 | 0.011463 |
| 0.011329 | 0.011396 | 0.011295 | 0.011530 | 0.011765 | 0.011295 | 0.011362 |
| 0.011262 | 0.011362 | 0.011329 | 0.011396 | 0.011329 | 0.011329 | 0.011329 |
| 0.011228 | 0.011262 | 0.011228 | 0.011329 | 0.011295 | 0.011329 | 0.011396 |
| 0.011329 | 0.011295 | 0.011362 | 0.011262 | 0.011396 | 0.011228 | 0.011295 |
| 0.011463 | 0.011396 | 0.011631 | 0.011463 | 0.011295 | 0.011530 | 0.011295 |
| 0.011468 | 0.011695 | 0.011513 | 0.011177 | 0.011210 | 0.011318 | 0.011415 |
| 0.012048 | 0.011467 | 0.011184 | 0.011530 | 0.011530 | 0.011329 | 0.011429 |
| 0.011362 | 0.011262 | 0.011262 | 0.011295 | 0.011396 | 0.011329 | 0.011195 |
| 0.011228 | 0.011396 | 0.011530 | 0.011463 | 0.011362 | 0.011329 | 0.011262 |
| 0.011228 | 0.011228 | 0.011295 | 0.011262 | 0.011463 | 0.011429 | 0.011362 |
| 0.011463 | 0.011530 | 0.011262 | 0.011262 | 0.011295 | 0.011295 | 0.011297 |
| 0.011364 | 0.011295 | 0.011295 | 0.011168 | 0.011241 | 0.011200 | 0.011296 |
| 0.011297 | 0.011232 | 0.011282 | 0.011267 | 0.011196 | 0.011231 | 0.011263 |
| 0.011528 | 0.011301 | 0.011336 | 0.011228 | 0.011233 | 0.011363 | 0.011329 |
| 0.011396 | 0.011330 | 0.011329 | 0.011295 | 0.011228 | 0.011732 | 0.011530 |
| 0.011564 | 0.011429 | 0.011295 | 0.011396 | 0.011195 | 0.011429 | 0.011228 |
| 0.011295 | 0.011295 | 0.011262 | 0.011228 | 0.011262 | 0.011228 | 0.011329 |
| 0.011295 | 0.011396 | 0.011329 | 0.011228 | 0.011330 | 0.011429 | 0.011432 |
| 0.011430 | 0.011329 | 0.011228 | 0.011161 | 0.011295 | 0.011228 | 0.011161 |
| 0.011264 | 0.011430 | 0.011228 | 0.011430 | 0.011195 | 0.011295 | 0.011262 |
| 0.011362 | 0.011262 | 0.011295 | 0.011262 | 0.011295 | 0.011161 | 0.011295 |
| 0.011329 | 0.011262 | 0.011329 | 0.011262 | 0.011161 | 0.011329 | 0.011564 |
| 0.011665 | 0.011597 | 0.011665 | 0.011431 | 0.011665 | 0.011094 | 0.011262 |
| 0.011297 | 0.011586 | 0.011335 | 0.011197 | 0.011671 | 0.011163 | 0.011257 |
| 0.011671 | 0.011570 | 0.011429 | 0.011598 | 0.011299 | 0.011530 | 0.011497 |
| 0.011429 | 0.011597 | 0.011344 | 0.011184 | 0.011270 | 0.011329 | 0.011331 |
| 0.011497 | 0.011263 | 0.011534 | 0.011602 | 0.011396 | 0.011530 | 0.011568 |
| 0.011297 | 0.011603 | 0.011399 | 0.011466 | 0.011666 | 0.011195 | 0.011397 |
| 0.011362 | 0.011295 | 0.011195 | 0.011195 | 0.011262 | 0.011262 | 0.011329 |
| 0.011262 | 0.011329 | 0.011228 | 0.011329 | 0.011262 | 0.011262 | 0.011329 |
| 0.011262 | 0.011698 | 0.011597 | 0.011631 | 0.011161 | 0.011262 | 0.011295 |
| 0.011295 | 0.011262 | 0.011329 | 0.011362 | 0.011228 | 0.011228 | 0.011228 |
| 0.011765 | 0.011396 | 0.011396 | 0.011195 | 0.011295 | 0.011463 | 0.011228 |
| 0.011228 | 0.011295 | 0.011262 | 0.011430 | 0.011228 | 0.011362 | 0.011497 |
| 0.011429 | 0.011262 | 0.011262 | 0.011195 | 0.011195 | 0.011362 | 0.011295 |
| 0.011195 | 0.011295 | 0.011161 | 0.011195 | 0.011329 | 0.011463 | 0.011228 |
| 0.011195 | 0.011329 | 0.011262 | 0.011161 | 0.011497 | 0.011161 | 0.011329 |
| 0.011368 | 0.011228 | 0.011530 | 0.011363 | 0.011396 | 0.011262 | 0.011362 |
| 0.011228 | 0.011564 | 0.011161 | 0.011429 | 0.011228 | 0.011228 | 0.011161 |
| 0.011396 | 0.011598 | 0.011295 | 0.011362 | 0.011195 | 0.011597 | 0.011228 |
| 0.011228 | 0.011228 | 0.011262 | 0.011362 | 0.011262 | 0.011362 | 0.011429 |
| 0.011429 | 0.011396 | 0.011295 | 0.011396 | 0.011362 | 0.011228 | 0.011195 |
| 0.011228 | 0.011228 | 0.011295 | 0.011228 | 0.011195 | 0.011362 | 0.011228 |
| 0.011262 | 0.011262 | 0.011396 | 0.011429 | 0.011329 | 0.011262 | 0.011262 |
| 0.011329 | 0.011262 | 0.011362 | 0.011228 | 0.011362 | 0.011463 | 0.011765 |
| 0.011262 | 0.011665 | 0.011267 | 0.017785 | 0.011191 | 0.011305 | 0.011618 |
| 0.011579 | 0.011623 | 0.011270 | 0.011292 | 0.011719 | 0.011647 | 0.011303 |
| 0.011487 | 0.011426 | 0.011177 | 0.011228 | 0.011255 | 0.011307 | 0.011232 |
| 0.011482 | 0.011433 | 0.011431 | 0.011325 | 0.011396 | 0.011295 | 0.011365 |
| 0.011301 | 0.011396 | 0.011396 | 0.011362 | 0.011329 | 0.011329 | 0.011295 |
| 0.011329 | 0.011262 | 0.011295 | 0.011329 | 0.011295 | 0.011228 | 0.000000 |
| 0.000000 | 0.011329 | 0.011228 | 0.011329 | 0.011362 | 0.011396 | 0.011094 |
| 0.011329 | 0.011295 | 0.011631 | 0.011631 | 0.011362 | 0.011396 | 0.011430 |
| 0.011195 | 0.011195 | 0.011228 | 0.011329 | 0.011195 | 0.011429 | 0.011429 |
| 0.011463 | 0.011429 | 0.011396 | 0.011497 | 0.011665 | 0.011498 | 0.011329 |

|          |          |          |          |          |          |          |
|----------|----------|----------|----------|----------|----------|----------|
| 0.011329 | 0.011396 | 0.011429 | 0.011262 | 0.011329 | 0.011295 | 0.011329 |
| 0.011396 | 0.011396 | 0.011429 | 0.011396 | 0.011296 | 0.011497 | 0.011463 |
| 0.011331 | 0.011228 | 0.011329 | 0.011430 | 0.011329 | 0.011463 | 0.011497 |
| 0.011598 | 0.011299 | 0.011530 | 0.011497 | 0.011429 | 0.011597 | 0.011228 |
| 0.011397 | 0.011295 | 0.000000 | 0.000000 | 0.011329 | 0.011228 | 0.011329 |
| 0.011362 | 0.011396 | 0.011094 | 0.011329 | 0.011295 | 0.011631 | 0.011631 |
| 0.011362 | 0.011396 | 0.011329 | 0.011262 | 0.012002 | 0.011453 | 0.011271 |
| 0.011447 | 0.011407 | 0.011517 | 0.011372 | 0.011515 | 0.011371 | 0.011405 |
| 0.011953 | 0.011164 | 0.011300 | 0.011302 | 0.011577 | 0.011502 | 0.011605 |
| 0.011944 | 0.011399 | 0.011331 | 0.011329 | 0.011329 | 0.011362 | 0.011297 |
| 0.011195 | 0.011228 | 0.011362 | 0.011329 | 0.011331 | 0.011463 | 0.011431 |
| 0.011295 | 0.011228 | 0.011262 | 0.011295 | 0.011195 | 0.011262 | 0.011161 |
| 0.011295 | 0.011329 | 0.011228 | 0.011195 | 0.011295 | 0.011228 | 0.011262 |
| 0.011262 | 0.011195 | 0.011262 | 0.011295 | 0.011195 | 0.011396 | 0.011429 |
| 0.011329 | 0.011396 | 0.011329 | 0.011329 | 0.011262 | 0.011665 | 0.011295 |
| 0.011339 | 0.011262 | 0.011497 | 0.011501 | 0.011362 | 0.011362 | 0.011362 |
| 0.011362 | 0.011295 | 0.011262 | 0.011295 | 0.011396 | 0.011396 | 0.011329 |
| 0.011329 | 0.011463 | 0.011631 | 0.011362 | 0.011564 | 0.011564 | 0.011429 |
| 0.011262 | 0.011329 | 0.011362 | 0.011765 | 0.011329 | 0.011362 | 0.011329 |
| 0.011362 | 0.011295 | 0.011295 | 0.011598 | 0.011530 | 0.011564 | 0.011295 |
| 0.011396 | 0.011463 | 0.011329 | 0.011396 | 0.011362 | 0.011228 | 0.011564 |
| 0.011329 | 0.011295 | 0.011295 | 0.011463 | 0.011295 | 0.011396 | 0.011631 |
| 0.011329 | 0.011706 | 0.011698 | 0.011507 | 0.011173 | 0.011400 | 0.011267 |
| 0.011170 | 0.011722 | 0.011236 | 0.011462 | 0.011255 | 0.011366 | 0.011379 |
| 0.011468 | 0.011192 | 0.011339 | 0.011192 | 0.011222 | 0.011328 | 0.011385 |
| 0.011399 | 0.011296 | 0.011377 | 0.011307 | 0.011330 | 0.011463 | 0.011530 |
| 0.011530 | 0.011396 | 0.011500 | 0.011501 | 0.011636 | 0.011661 | 0.011329 |
| 0.011564 | 0.011429 | 0.011295 | 0.011396 | 0.011195 | 0.011429 | 0.011228 |
| 0.011295 | 0.011295 | 0.011262 | 0.011228 | 0.011262 | 0.011228 | 0.011329 |
| 0.011305 | 0.011305 | 0.011300 | 0.011334 | 0.011471 | 0.011436 | 0.011436 |
| 0.011435 | 0.011363 | 0.011171 | 0.011168 | 0.011297 | 0.011467 | 0.011467 |
| 0.011262 | 0.011331 | 0.011565 | 0.011533 | 0.011464 | 0.011498 | 0.011295 |
| 0.011362 | 0.011362 | 0.011362 | 0.011329 | 0.011866 | 0.011497 | 0.011564 |
| 0.011597 | 0.011666 | 0.011299 | 0.011372 | 0.011262 | 0.011329 | 0.011295 |
| 0.011464 | 0.011362 | 0.011497 | 0.011497 | 0.011532 | 0.011497 | 0.011268 |
| 0.011162 | 0.011164 | 0.011265 | 0.011230 | 0.011334 | 0.011135 | 0.011502 |
| 0.011300 | 0.011367 | 0.011108 | 0.011248 | 0.011296 | 0.011368 | 0.011262 |
| 0.011228 | 0.011228 | 0.011295 | 0.011262 | 0.011463 | 0.011429 | 0.011362 |
| 0.011463 | 0.011530 | 0.011262 | 0.011262 | 0.011295 | 0.011295 | 0.011297 |
| 0.011364 | 0.011295 | 0.011295 | 0.011330 | 0.011463 | 0.011530 | 0.011530 |
| 0.011396 | 0.011500 | 0.011501 | 0.011636 | 0.011661 | 0.011329 | 0.011497 |
| 0.011295 | 0.011295 | 0.011263 | 0.011443 | 0.011373 | 0.011401 | 0.011270 |
| 0.011439 | 0.011607 | 0.011399 | 0.011332 | 0.011228 | 0.011430 | 0.011295 |
| 0.011396 | 0.011329 | 0.011228 | 0.011330 | 0.011429 | 0.011432 | 0.011329 |
| 0.011228 | 0.011161 | 0.011295 | 0.011228 | 0.011161 | 0.011264 | 0.011430 |
| 0.011329 | 0.011262 | 0.011295 | 0.011329 | 0.011295 | 0.011228 | 0.011430 |
| 0.011295 | 0.011329 | 0.011329 | 0.011262 | 0.011329 | 0.011564 | 0.011228 |
| 0.011262 | 0.011665 | 0.011262 | 0.011295 | 0.011262 | 0.011631 | 0.011232 |
| 0.011678 | 0.011188 | 0.011261 | 0.011422 | 0.011549 | 0.011455 | 0.011144 |
| 0.011218 | 0.011429 | 0.011530 | 0.011637 | 0.011498 | 0.011635 | 0.011766 |
| 0.011666 | 0.011703 | 0.011665 | 0.011914 | 0.011631 | 0.012438 | 0.011666 |
| 0.012405 | 0.012105 | 0.012240 | 0.012578 | 0.011631 | 0.011329 | 0.011631 |
| 0.012036 | 0.012004 | 0.011597 | 0.011497 | 0.011565 | 0.011565 | 0.011534 |
| 0.011429 | 0.011433 | 0.011497 | 0.011464 | 0.011833 | 0.011900 | 0.011901 |
| 0.011800 | 0.011901 | 0.012004 | 0.011770 | 0.012036 | 0.012042 | 0.012103 |
| 0.012104 | 0.012138 | 0.012084 | 0.012104 | 0.012105 | 0.011228 | 0.011631 |
| 0.011733 | 0.012236 | 0.011704 | 0.011967 | 0.012440 | 0.011502 | 0.011396 |
| 0.011362 | 0.011362 | 0.011833 | 0.011800 | 0.011975 | 0.011698 | 0.011363 |
| S479     | 0.011497 | 0.011497 | 0.011967 | 0.011732 | 0.011732 | 0.011799 |
| 0.011638 | 0.011570 | 0.011732 | 0.011228 | 0.011295 | 0.011262 | 0.011228 |

|          |          |          |          |          |          |          |
|----------|----------|----------|----------|----------|----------|----------|
| 0.011262 | 0.011429 | 0.011228 | 0.011262 | 0.011329 | 0.011295 | 0.011262 |
| 0.011228 | 0.011262 | 0.011362 | 0.011228 | 0.011262 | 0.011262 | 0.011604 |
| 0.011497 | 0.011262 | 0.011161 | 0.011396 | 0.011329 | 0.011295 | 0.011329 |
| 0.011295 | 0.011396 | 0.011295 | 0.011295 | 0.011329 | 0.011295 | 0.011463 |
| 0.011228 | 0.011295 | 0.011329 | 0.011262 | 0.011362 | 0.011396 | 0.011329 |
| 0.011295 | 0.011463 | 0.011363 | 0.011631 | 0.011295 | 0.011564 | 0.011295 |
| 0.011262 | 0.011362 | 0.011429 | 0.011564 | 0.011665 | 0.011362 | 0.011463 |
| 0.011329 | 0.011396 | 0.011295 | 0.011530 | 0.011765 | 0.011295 | 0.011362 |
| 0.011262 | 0.011362 | 0.011329 | 0.011396 | 0.011329 | 0.011329 | 0.011329 |
| 0.011228 | 0.011262 | 0.011228 | 0.011329 | 0.011295 | 0.011329 | 0.011396 |
| 0.011329 | 0.011295 | 0.011362 | 0.011262 | 0.011396 | 0.011228 | 0.011295 |
| 0.011463 | 0.011396 | 0.011631 | 0.011463 | 0.011295 | 0.011530 | 0.011295 |
| 0.011468 | 0.011695 | 0.011513 | 0.011177 | 0.011210 | 0.011318 | 0.011415 |
| 0.012048 | 0.011467 | 0.011184 | 0.011530 | 0.011530 | 0.011329 | 0.011429 |
| 0.011362 | 0.011262 | 0.011262 | 0.011295 | 0.011396 | 0.011329 | 0.011195 |
| 0.011228 | 0.011396 | 0.011530 | 0.011463 | 0.011362 | 0.011329 | 0.011262 |
| 0.011228 | 0.011228 | 0.011295 | 0.011262 | 0.011463 | 0.011429 | 0.011362 |
| 0.011463 | 0.011530 | 0.011262 | 0.011262 | 0.011295 | 0.011295 | 0.011297 |
| 0.011364 | 0.011295 | 0.011295 | 0.011168 | 0.011241 | 0.011200 | 0.011296 |
| 0.011297 | 0.011232 | 0.011282 | 0.011267 | 0.011196 | 0.011231 | 0.011263 |
| 0.011528 | 0.011301 | 0.011336 | 0.011228 | 0.011233 | 0.011363 | 0.011329 |
| 0.011396 | 0.011330 | 0.011329 | 0.011295 | 0.011228 | 0.011732 | 0.011530 |
| 0.011564 | 0.011429 | 0.011295 | 0.011396 | 0.011195 | 0.011429 | 0.011228 |
| 0.011295 | 0.011295 | 0.011262 | 0.011228 | 0.011262 | 0.011228 | 0.011329 |
| 0.011295 | 0.011396 | 0.011329 | 0.011228 | 0.011330 | 0.011429 | 0.011432 |
| 0.011430 | 0.011329 | 0.011228 | 0.011161 | 0.011295 | 0.011228 | 0.011161 |
| 0.011264 | 0.011430 | 0.011228 | 0.011430 | 0.011195 | 0.011295 | 0.011262 |
| 0.011362 | 0.011262 | 0.011295 | 0.011262 | 0.011295 | 0.011161 | 0.011295 |
| 0.011329 | 0.011262 | 0.011329 | 0.011262 | 0.011161 | 0.011329 | 0.011564 |
| 0.011665 | 0.011597 | 0.011665 | 0.011431 | 0.011665 | 0.011094 | 0.011262 |
| 0.011297 | 0.011586 | 0.011335 | 0.011197 | 0.011671 | 0.011163 | 0.011257 |
| 0.011671 | 0.011570 | 0.011429 | 0.011598 | 0.011299 | 0.011530 | 0.011497 |
| 0.011429 | 0.011597 | 0.011344 | 0.011184 | 0.011270 | 0.011329 | 0.011331 |
| 0.011497 | 0.011263 | 0.011534 | 0.011602 | 0.011396 | 0.011530 | 0.011568 |
| 0.011297 | 0.011603 | 0.011399 | 0.011466 | 0.011666 | 0.011195 | 0.011397 |
| 0.011362 | 0.011295 | 0.011195 | 0.011195 | 0.011262 | 0.011262 | 0.011329 |
| 0.011262 | 0.011329 | 0.011228 | 0.011329 | 0.011262 | 0.011262 | 0.011329 |
| 0.011262 | 0.011698 | 0.011597 | 0.011631 | 0.011161 | 0.011262 | 0.011295 |
| 0.011295 | 0.011262 | 0.011329 | 0.011362 | 0.011228 | 0.011228 | 0.011228 |
| 0.011765 | 0.011396 | 0.011396 | 0.011195 | 0.011295 | 0.011463 | 0.011228 |
| 0.011228 | 0.011295 | 0.011262 | 0.011430 | 0.011228 | 0.011362 | 0.011497 |
| 0.011429 | 0.011262 | 0.011262 | 0.011195 | 0.011195 | 0.011362 | 0.011295 |
| 0.011195 | 0.011295 | 0.011161 | 0.011195 | 0.011329 | 0.011463 | 0.011228 |
| 0.011195 | 0.011329 | 0.011262 | 0.011161 | 0.011497 | 0.011161 | 0.011329 |
| 0.011368 | 0.011228 | 0.011530 | 0.011363 | 0.011396 | 0.011262 | 0.011362 |
| 0.011228 | 0.011564 | 0.011161 | 0.011429 | 0.011228 | 0.011228 | 0.011161 |
| 0.011396 | 0.011598 | 0.011295 | 0.011362 | 0.011195 | 0.011597 | 0.011228 |
| 0.011228 | 0.011228 | 0.011262 | 0.011362 | 0.011262 | 0.011362 | 0.011429 |
| 0.011429 | 0.011396 | 0.011295 | 0.011396 | 0.011362 | 0.011228 | 0.011195 |
| 0.011228 | 0.011228 | 0.011295 | 0.011228 | 0.011195 | 0.011362 | 0.011228 |
| 0.011262 | 0.011262 | 0.011396 | 0.011429 | 0.011329 | 0.011262 | 0.011262 |
| 0.011329 | 0.011262 | 0.011362 | 0.011228 | 0.011362 | 0.011463 | 0.011765 |
| 0.011262 | 0.011665 | 0.011267 | 0.017785 | 0.011191 | 0.011305 | 0.011618 |
| 0.011579 | 0.011623 | 0.011270 | 0.011292 | 0.011719 | 0.011647 | 0.011303 |
| 0.011487 | 0.011426 | 0.011177 | 0.011228 | 0.011255 | 0.011307 | 0.011232 |
| 0.011482 | 0.011433 | 0.011431 | 0.011325 | 0.011396 | 0.011295 | 0.011365 |
| 0.011301 | 0.011396 | 0.011396 | 0.011362 | 0.011329 | 0.011329 | 0.011295 |
| 0.011329 | 0.011262 | 0.011295 | 0.011329 | 0.011295 | 0.011228 | 0.000000 |
| 0.000000 | 0.011329 | 0.011228 | 0.011329 | 0.011362 | 0.011396 | 0.011094 |
| 0.011329 | 0.011295 | 0.011631 | 0.011631 | 0.011362 | 0.011396 | 0.011430 |

|          |          |          |          |          |          |          |
|----------|----------|----------|----------|----------|----------|----------|
| 0.011195 | 0.011195 | 0.011228 | 0.011329 | 0.011195 | 0.011429 | 0.011429 |
| 0.011463 | 0.011429 | 0.011396 | 0.011497 | 0.011665 | 0.011498 | 0.011329 |
| 0.011329 | 0.011396 | 0.011429 | 0.011262 | 0.011329 | 0.011295 | 0.011329 |
| 0.011396 | 0.011396 | 0.011429 | 0.011396 | 0.011296 | 0.011497 | 0.011463 |
| 0.011331 | 0.011228 | 0.011329 | 0.011430 | 0.011329 | 0.011463 | 0.011497 |
| 0.011598 | 0.011299 | 0.011530 | 0.011497 | 0.011429 | 0.011597 | 0.011228 |
| 0.011397 | 0.011295 | 0.000000 | 0.000000 | 0.011329 | 0.011228 | 0.011329 |
| 0.011362 | 0.011396 | 0.011094 | 0.011329 | 0.011295 | 0.011631 | 0.011631 |
| 0.011362 | 0.011396 | 0.011329 | 0.011262 | 0.012002 | 0.011453 | 0.011271 |
| 0.011447 | 0.011407 | 0.011517 | 0.011372 | 0.011515 | 0.011371 | 0.011405 |
| 0.011953 | 0.011164 | 0.011300 | 0.011302 | 0.011577 | 0.011502 | 0.011605 |
| 0.011944 | 0.011399 | 0.011331 | 0.011329 | 0.011329 | 0.011362 | 0.011297 |
| 0.011195 | 0.011228 | 0.011362 | 0.011329 | 0.011331 | 0.011463 | 0.011431 |
| 0.011295 | 0.011228 | 0.011262 | 0.011295 | 0.011195 | 0.011262 | 0.011161 |
| 0.011295 | 0.011329 | 0.011228 | 0.011195 | 0.011295 | 0.011228 | 0.011262 |
| 0.011262 | 0.011195 | 0.011262 | 0.011295 | 0.011195 | 0.011396 | 0.011429 |
| 0.011329 | 0.011396 | 0.011329 | 0.011329 | 0.011262 | 0.011665 | 0.011295 |
| 0.011339 | 0.011262 | 0.011497 | 0.011501 | 0.011362 | 0.011362 | 0.011362 |
| 0.011362 | 0.011295 | 0.011262 | 0.011295 | 0.011396 | 0.011396 | 0.011329 |
| 0.011329 | 0.011463 | 0.011631 | 0.011362 | 0.011564 | 0.011564 | 0.011429 |
| 0.011262 | 0.011329 | 0.011362 | 0.011765 | 0.011329 | 0.011362 | 0.011329 |
| 0.011362 | 0.011295 | 0.011295 | 0.011598 | 0.011530 | 0.011564 | 0.011295 |
| 0.011396 | 0.011463 | 0.011329 | 0.011396 | 0.011362 | 0.011228 | 0.011564 |
| 0.011329 | 0.011295 | 0.011295 | 0.011463 | 0.011295 | 0.011396 | 0.011631 |
| 0.011329 | 0.011706 | 0.011698 | 0.011507 | 0.011173 | 0.011400 | 0.011267 |
| 0.011170 | 0.011722 | 0.011236 | 0.011462 | 0.011255 | 0.011366 | 0.011379 |
| 0.011468 | 0.011192 | 0.011339 | 0.011192 | 0.011222 | 0.011328 | 0.011385 |
| 0.011399 | 0.011296 | 0.011377 | 0.011307 | 0.011330 | 0.011463 | 0.011530 |
| 0.011530 | 0.011396 | 0.011500 | 0.011501 | 0.011636 | 0.011661 | 0.011329 |
| 0.011564 | 0.011429 | 0.011295 | 0.011396 | 0.011195 | 0.011429 | 0.011228 |
| 0.011295 | 0.011295 | 0.011262 | 0.011228 | 0.011262 | 0.011228 | 0.011329 |
| 0.011305 | 0.011305 | 0.011300 | 0.011334 | 0.011471 | 0.011436 | 0.011436 |
| 0.011435 | 0.011363 | 0.011171 | 0.011168 | 0.011297 | 0.011467 | 0.011467 |
| 0.011262 | 0.011331 | 0.011565 | 0.011533 | 0.011464 | 0.011498 | 0.011295 |
| 0.011362 | 0.011362 | 0.011362 | 0.011329 | 0.011866 | 0.011497 | 0.011564 |
| 0.011597 | 0.011666 | 0.011299 | 0.011372 | 0.011262 | 0.011329 | 0.011295 |
| 0.011464 | 0.011362 | 0.011497 | 0.011497 | 0.011532 | 0.011497 | 0.011268 |
| 0.011162 | 0.011164 | 0.011265 | 0.011230 | 0.011334 | 0.011135 | 0.011502 |
| 0.011300 | 0.011367 | 0.011108 | 0.011248 | 0.011296 | 0.011368 | 0.011262 |
| 0.011228 | 0.011228 | 0.011295 | 0.011262 | 0.011463 | 0.011429 | 0.011362 |
| 0.011463 | 0.011530 | 0.011262 | 0.011262 | 0.011295 | 0.011295 | 0.011297 |
| 0.011364 | 0.011295 | 0.011295 | 0.011330 | 0.011463 | 0.011530 | 0.011530 |
| 0.011396 | 0.011500 | 0.011501 | 0.011636 | 0.011661 | 0.011329 | 0.011497 |
| 0.011295 | 0.011295 | 0.011263 | 0.011443 | 0.011373 | 0.011401 | 0.011270 |
| 0.011439 | 0.011607 | 0.011399 | 0.011332 | 0.011228 | 0.011430 | 0.011295 |
| 0.011396 | 0.011329 | 0.011228 | 0.011330 | 0.011429 | 0.011432 | 0.011329 |
| 0.011228 | 0.011161 | 0.011295 | 0.011228 | 0.011161 | 0.011264 | 0.011430 |
| 0.011329 | 0.011262 | 0.011295 | 0.011329 | 0.011295 | 0.011228 | 0.011430 |
| 0.011295 | 0.011329 | 0.011329 | 0.011262 | 0.011329 | 0.011564 | 0.011228 |
| 0.011262 | 0.011665 | 0.011262 | 0.011295 | 0.011262 | 0.011631 | 0.011232 |
| 0.011678 | 0.011188 | 0.011261 | 0.011422 | 0.011549 | 0.011455 | 0.011144 |
| 0.011218 | 0.011429 | 0.011530 | 0.011637 | 0.011498 | 0.011635 | 0.011766 |
| 0.011666 | 0.011703 | 0.011665 | 0.011914 | 0.011631 | 0.012438 | 0.011666 |
| 0.012405 | 0.012105 | 0.012240 | 0.012578 | 0.011631 | 0.011329 | 0.011631 |
| 0.012036 | 0.012004 | 0.011597 | 0.011497 | 0.011565 | 0.011565 | 0.011534 |
| 0.011429 | 0.011433 | 0.011497 | 0.011464 | 0.011833 | 0.011900 | 0.011901 |
| 0.011800 | 0.011901 | 0.012004 | 0.011770 | 0.012036 | 0.012042 | 0.012103 |
| 0.012104 | 0.012138 | 0.012084 | 0.012104 | 0.012105 | 0.011228 | 0.011631 |
| 0.011733 | 0.012236 | 0.011704 | 0.011967 | 0.012440 | 0.011502 | 0.011396 |
| 0.011362 | 0.011362 | 0.011833 | 0.011800 | 0.011975 | 0.011698 | 0.011363 |

|          |          |          |          |          |          |          |
|----------|----------|----------|----------|----------|----------|----------|
| S480     | 0.011698 | 0.011698 | 0.012035 | 0.011799 | 0.011799 | 0.011866 |
| 0.011706 | 0.011638 | 0.011799 | 0.011295 | 0.011362 | 0.011329 | 0.011295 |
| 0.011329 | 0.011497 | 0.011295 | 0.011329 | 0.011396 | 0.011362 | 0.011329 |
| 0.011295 | 0.011329 | 0.011429 | 0.011296 | 0.011329 | 0.011329 | 0.011672 |
| 0.011564 | 0.011329 | 0.011228 | 0.011463 | 0.011396 | 0.011362 | 0.011396 |
| 0.011362 | 0.011463 | 0.011362 | 0.011362 | 0.011396 | 0.011362 | 0.011530 |
| 0.011295 | 0.011362 | 0.011396 | 0.011329 | 0.011430 | 0.011463 | 0.011396 |
| 0.011362 | 0.011530 | 0.011430 | 0.011698 | 0.011362 | 0.011631 | 0.011362 |
| 0.011329 | 0.011430 | 0.011497 | 0.011631 | 0.011732 | 0.011430 | 0.011530 |
| 0.011396 | 0.011463 | 0.011362 | 0.011597 | 0.011833 | 0.011362 | 0.011430 |
| 0.011329 | 0.011429 | 0.011396 | 0.011127 | 0.011396 | 0.011396 | 0.011396 |
| 0.011295 | 0.011329 | 0.011295 | 0.011396 | 0.011362 | 0.011397 | 0.011463 |
| 0.011396 | 0.011362 | 0.011430 | 0.011329 | 0.011463 | 0.011295 | 0.011362 |
| 0.011530 | 0.011463 | 0.011698 | 0.011530 | 0.011362 | 0.011598 | 0.011362 |
| 0.011505 | 0.011733 | 0.011551 | 0.011255 | 0.011247 | 0.011355 | 0.011454 |
| 0.012085 | 0.011569 | 0.011266 | 0.011597 | 0.011597 | 0.011396 | 0.011497 |
| 0.011430 | 0.011396 | 0.011463 | 0.011362 | 0.011463 | 0.011396 | 0.011396 |
| 0.011362 | 0.011463 | 0.011597 | 0.011530 | 0.011430 | 0.011396 | 0.011329 |
| 0.011295 | 0.011295 | 0.011362 | 0.011329 | 0.011530 | 0.011497 | 0.011429 |
| 0.011530 | 0.011597 | 0.011329 | 0.011329 | 0.011362 | 0.011362 | 0.011364 |
| 0.011432 | 0.011362 | 0.011362 | 0.011240 | 0.011313 | 0.011271 | 0.011363 |
| 0.011365 | 0.011301 | 0.011318 | 0.011336 | 0.011264 | 0.011300 | 0.011330 |
| 0.011600 | 0.011370 | 0.011405 | 0.011296 | 0.011302 | 0.011430 | 0.011396 |
| 0.011464 | 0.011397 | 0.011396 | 0.011497 | 0.011429 | 0.011799 | 0.011598 |
| 0.011631 | 0.011497 | 0.011362 | 0.011463 | 0.011262 | 0.011497 | 0.011295 |
| 0.011362 | 0.011362 | 0.011329 | 0.011295 | 0.011329 | 0.011295 | 0.011396 |
| 0.011362 | 0.011463 | 0.011396 | 0.011295 | 0.011397 | 0.011497 | 0.011499 |
| 0.011497 | 0.011396 | 0.011295 | 0.011229 | 0.011362 | 0.011295 | 0.011228 |
| 0.011332 | 0.011497 | 0.011295 | 0.011497 | 0.011262 | 0.011362 | 0.011329 |
| 0.011430 | 0.011329 | 0.011362 | 0.011329 | 0.011362 | 0.011228 | 0.011362 |
| 0.011396 | 0.011329 | 0.011396 | 0.011329 | 0.011362 | 0.011396 | 0.011631 |
| 0.011732 | 0.011665 | 0.011732 | 0.011465 | 0.011732 | 0.011362 | 0.011329 |
| 0.011364 | 0.011545 | 0.011518 | 0.011232 | 0.011739 | 0.011231 | 0.011336 |
| 0.011739 | 0.011638 | 0.011530 | 0.011665 | 0.011436 | 0.011598 | 0.011564 |
| 0.011497 | 0.011597 | 0.011522 | 0.011349 | 0.011396 | 0.011396 | 0.011466 |
| 0.011564 | 0.011465 | 0.011601 | 0.011670 | 0.011598 | 0.011665 | 0.011772 |
| 0.011500 | 0.011671 | 0.011602 | 0.011534 | 0.011801 | 0.011262 | 0.011465 |
| 0.011429 | 0.011362 | 0.011262 | 0.011262 | 0.011329 | 0.011329 | 0.011396 |
| 0.011329 | 0.011396 | 0.011295 | 0.011396 | 0.011329 | 0.011329 | 0.011396 |
| 0.011329 | 0.011765 | 0.011665 | 0.011698 | 0.011228 | 0.011329 | 0.011362 |
| 0.011362 | 0.011329 | 0.011396 | 0.011430 | 0.011295 | 0.011295 | 0.011295 |
| 0.011833 | 0.011463 | 0.011463 | 0.011262 | 0.011362 | 0.011530 | 0.011295 |
| 0.011295 | 0.011362 | 0.011329 | 0.011497 | 0.011295 | 0.011430 | 0.011564 |
| 0.011497 | 0.011329 | 0.011329 | 0.011262 | 0.011262 | 0.011430 | 0.011362 |
| 0.011262 | 0.011362 | 0.011228 | 0.011262 | 0.011396 | 0.011531 | 0.011295 |
| 0.011262 | 0.011396 | 0.011329 | 0.011228 | 0.011564 | 0.011228 | 0.011396 |
| 0.011471 | 0.011295 | 0.011598 | 0.011430 | 0.011463 | 0.011329 | 0.011430 |
| 0.011295 | 0.011631 | 0.011228 | 0.011497 | 0.011295 | 0.011295 | 0.011228 |
| 0.011463 | 0.011631 | 0.011362 | 0.011430 | 0.011262 | 0.011665 | 0.011295 |
| 0.011295 | 0.011295 | 0.011329 | 0.011430 | 0.011329 | 0.011430 | 0.011497 |
| 0.011497 | 0.011463 | 0.011362 | 0.011463 | 0.011429 | 0.011295 | 0.011262 |
| 0.011295 | 0.011295 | 0.011362 | 0.011295 | 0.011262 | 0.011430 | 0.011295 |
| 0.011329 | 0.011329 | 0.011463 | 0.011497 | 0.011396 | 0.011329 | 0.011329 |
| 0.011396 | 0.011329 | 0.011429 | 0.011295 | 0.011430 | 0.011530 | 0.011833 |
| 0.011329 | 0.011732 | 0.011302 | 0.017823 | 0.011388 | 0.011427 | 0.011653 |
| 0.011614 | 0.011658 | 0.011374 | 0.011350 | 0.011829 | 0.011682 | 0.011485 |
| 0.011582 | 0.011610 | 0.011216 | 0.011312 | 0.011294 | 0.011356 | 0.011275 |
| 0.011576 | 0.011470 | 0.011468 | 0.011259 | 0.011463 | 0.011497 | 0.011500 |
| 0.011369 | 0.011463 | 0.011463 | 0.011429 | 0.011396 | 0.011396 | 0.011363 |
| 0.011396 | 0.011329 | 0.011362 | 0.011396 | 0.011362 | 0.011295 | 0.011329 |

|          |          |          |          |          |          |          |
|----------|----------|----------|----------|----------|----------|----------|
| 0.011329 | 0.000000 | 0.011295 | 0.011396 | 0.011430 | 0.011463 | 0.011362 |
| 0.011396 | 0.011362 | 0.011698 | 0.011698 | 0.011430 | 0.011464 | 0.011497 |
| 0.011262 | 0.011262 | 0.011295 | 0.011396 | 0.011262 | 0.011497 | 0.011497 |
| 0.011530 | 0.011530 | 0.011463 | 0.011564 | 0.011732 | 0.011565 | 0.011396 |
| 0.011396 | 0.011463 | 0.011497 | 0.011329 | 0.011396 | 0.011362 | 0.011396 |
| 0.011463 | 0.011463 | 0.011497 | 0.011463 | 0.011363 | 0.011564 | 0.011530 |
| 0.011399 | 0.011295 | 0.011396 | 0.011497 | 0.011396 | 0.011530 | 0.011564 |
| 0.011665 | 0.011436 | 0.011598 | 0.011564 | 0.011497 | 0.011597 | 0.011295 |
| 0.011464 | 0.011363 | 0.011329 | 0.011329 | 0.000000 | 0.011295 | 0.011396 |
| 0.011430 | 0.011463 | 0.011362 | 0.011396 | 0.011362 | 0.011698 | 0.011698 |
| 0.011430 | 0.011464 | 0.011530 | 0.011463 | 0.012103 | 0.011525 | 0.011447 |
| 0.011517 | 0.011476 | 0.011587 | 0.011476 | 0.011585 | 0.011509 | 0.011474 |
| 0.012056 | 0.011372 | 0.011506 | 0.011441 | 0.011715 | 0.011571 | 0.011673 |
| 0.012081 | 0.011550 | 0.011398 | 0.011396 | 0.011396 | 0.011429 | 0.011364 |
| 0.011262 | 0.011295 | 0.011430 | 0.011396 | 0.011398 | 0.011530 | 0.011498 |
| 0.011362 | 0.011295 | 0.011329 | 0.011362 | 0.011262 | 0.011329 | 0.011228 |
| 0.011362 | 0.011396 | 0.011295 | 0.011262 | 0.011362 | 0.011295 | 0.011329 |
| 0.011329 | 0.011262 | 0.011329 | 0.011362 | 0.011262 | 0.011463 | 0.011497 |
| 0.011396 | 0.011463 | 0.011396 | 0.011396 | 0.011329 | 0.011732 | 0.011362 |
| 0.011408 | 0.011329 | 0.011564 | 0.011569 | 0.011430 | 0.011429 | 0.011430 |
| 0.011430 | 0.011362 | 0.011329 | 0.011362 | 0.011463 | 0.011463 | 0.011396 |
| 0.011396 | 0.011530 | 0.011698 | 0.011429 | 0.011631 | 0.011631 | 0.011497 |
| 0.011329 | 0.011396 | 0.011430 | 0.011833 | 0.011396 | 0.011430 | 0.011396 |
| 0.011430 | 0.011362 | 0.011362 | 0.011665 | 0.011598 | 0.011631 | 0.011362 |
| 0.011463 | 0.011530 | 0.011396 | 0.011463 | 0.011430 | 0.011295 | 0.011631 |
| 0.011396 | 0.011362 | 0.011362 | 0.011530 | 0.011362 | 0.011463 | 0.011698 |
| 0.011396 | 0.011774 | 0.011765 | 0.011548 | 0.011342 | 0.011468 | 0.011370 |
| 0.011280 | 0.011761 | 0.011271 | 0.011507 | 0.011353 | 0.011467 | 0.011485 |
| 0.011570 | 0.011258 | 0.011450 | 0.011258 | 0.011330 | 0.011529 | 0.011425 |
| 0.011437 | 0.011336 | 0.011412 | 0.011342 | 0.011397 | 0.011530 | 0.011597 |
| 0.011597 | 0.011464 | 0.011567 | 0.011569 | 0.011704 | 0.011696 | 0.011396 |
| 0.011631 | 0.011497 | 0.011362 | 0.011463 | 0.011262 | 0.011497 | 0.011295 |
| 0.011362 | 0.011362 | 0.011329 | 0.011295 | 0.011329 | 0.011295 | 0.011396 |
| 0.011375 | 0.011375 | 0.011368 | 0.011403 | 0.011539 | 0.011504 | 0.011504 |
| 0.011503 | 0.011430 | 0.011245 | 0.011240 | 0.011365 | 0.011535 | 0.011535 |
| 0.011329 | 0.011399 | 0.011632 | 0.011601 | 0.011531 | 0.011565 | 0.011497 |
| 0.011429 | 0.011497 | 0.011497 | 0.011396 | 0.011967 | 0.011564 | 0.011631 |
| 0.011665 | 0.011737 | 0.011367 | 0.011441 | 0.011329 | 0.011530 | 0.011497 |
| 0.011531 | 0.011564 | 0.011564 | 0.011564 | 0.011689 | 0.011698 | 0.011338 |
| 0.011229 | 0.011233 | 0.011333 | 0.011298 | 0.011402 | 0.011210 | 0.011570 |
| 0.011369 | 0.011499 | 0.011251 | 0.011397 | 0.011363 | 0.011437 | 0.011329 |
| 0.011295 | 0.011295 | 0.011362 | 0.011329 | 0.011530 | 0.011497 | 0.011429 |
| 0.011530 | 0.011597 | 0.011329 | 0.011329 | 0.011362 | 0.011362 | 0.011364 |
| 0.011432 | 0.011362 | 0.011362 | 0.011397 | 0.011530 | 0.011597 | 0.011597 |
| 0.011464 | 0.011567 | 0.011569 | 0.011704 | 0.011696 | 0.011396 | 0.011564 |
| 0.011497 | 0.011497 | 0.011331 | 0.011513 | 0.011442 | 0.011469 | 0.011305 |
| 0.011508 | 0.011653 | 0.011483 | 0.011400 | 0.011295 | 0.011497 | 0.011362 |
| 0.011463 | 0.011396 | 0.011295 | 0.011397 | 0.011497 | 0.011499 | 0.011396 |
| 0.011295 | 0.011229 | 0.011362 | 0.011295 | 0.011228 | 0.011332 | 0.011497 |
| 0.011396 | 0.011329 | 0.011362 | 0.011396 | 0.011362 | 0.011295 | 0.011497 |
| 0.011362 | 0.011396 | 0.011396 | 0.011329 | 0.011396 | 0.011631 | 0.011295 |
| 0.011329 | 0.011732 | 0.011329 | 0.011362 | 0.011329 | 0.011698 | 0.011275 |
| 0.011735 | 0.011273 | 0.011361 | 0.011503 | 0.011589 | 0.011491 | 0.011227 |
| 0.011323 | 0.011497 | 0.011597 | 0.011705 | 0.011565 | 0.011669 | 0.011834 |
| 0.011733 | 0.011771 | 0.011732 | 0.011949 | 0.011698 | 0.012573 | 0.011734 |
| 0.012473 | 0.012241 | 0.012375 | 0.012646 | 0.011698 | 0.011396 | 0.011699 |
| 0.012137 | 0.012038 | 0.011665 | 0.011564 | 0.011632 | 0.011632 | 0.011602 |
| 0.011497 | 0.011467 | 0.011564 | 0.011531 | 0.011901 | 0.011967 | 0.011968 |
| 0.011868 | 0.011968 | 0.012072 | 0.011804 | 0.012138 | 0.012144 | 0.012205 |
| 0.012205 | 0.012239 | 0.012152 | 0.012206 | 0.012207 | 0.011429 | 0.011732 |



|          |          |          |          |          |          |          |
|----------|----------|----------|----------|----------|----------|----------|
| 0.011800 | 0.012304 | 0.011806 | 0.012035 | 0.012508 | 0.011570 | 0.011464 |
| 0.011429 | 0.011429 | 0.011900 | 0.011965 | 0.012045 | 0.011765 | 0.011431 |
| S481     | 0.011597 | 0.011597 | 0.011934 | 0.011698 | 0.011698 | 0.011765 |
| 0.011604 | 0.011536 | 0.011698 | 0.011195 | 0.011262 | 0.011228 | 0.011195 |
| 0.011228 | 0.011396 | 0.011195 | 0.011228 | 0.011295 | 0.011262 | 0.011228 |
| 0.011195 | 0.011228 | 0.011329 | 0.011195 | 0.011228 | 0.011228 | 0.011570 |
| 0.011463 | 0.011228 | 0.011127 | 0.011362 | 0.011295 | 0.011262 | 0.011295 |
| 0.011262 | 0.011362 | 0.011262 | 0.011262 | 0.011295 | 0.011262 | 0.011430 |
| 0.011195 | 0.011262 | 0.011295 | 0.011228 | 0.011329 | 0.011362 | 0.011295 |
| 0.011262 | 0.011430 | 0.011329 | 0.011597 | 0.011262 | 0.011530 | 0.011262 |
| 0.011228 | 0.011329 | 0.011396 | 0.011530 | 0.011631 | 0.011329 | 0.011430 |
| 0.011295 | 0.011362 | 0.011262 | 0.011497 | 0.011732 | 0.011262 | 0.011329 |
| 0.011228 | 0.011329 | 0.011295 | 0.011362 | 0.011295 | 0.011295 | 0.011295 |
| 0.011195 | 0.011228 | 0.011195 | 0.011295 | 0.011262 | 0.011296 | 0.011362 |
| 0.011295 | 0.011262 | 0.011329 | 0.011228 | 0.011362 | 0.011195 | 0.011262 |
| 0.011429 | 0.011362 | 0.011597 | 0.011430 | 0.011262 | 0.011497 | 0.011262 |
| 0.011357 | 0.011583 | 0.011437 | 0.011099 | 0.011135 | 0.011244 | 0.011296 |
| 0.011975 | 0.011365 | 0.011143 | 0.011497 | 0.011497 | 0.011295 | 0.011396 |
| 0.011329 | 0.011295 | 0.011362 | 0.011262 | 0.011362 | 0.011295 | 0.011295 |
| 0.011262 | 0.011362 | 0.011564 | 0.011429 | 0.011329 | 0.011295 | 0.011228 |
| 0.011195 | 0.011195 | 0.011262 | 0.011228 | 0.011429 | 0.011396 | 0.011329 |
| 0.011429 | 0.011497 | 0.011228 | 0.011228 | 0.011262 | 0.011262 | 0.011263 |
| 0.011331 | 0.011262 | 0.011262 | 0.011132 | 0.011205 | 0.011165 | 0.011262 |
| 0.011263 | 0.011198 | 0.011208 | 0.011233 | 0.011162 | 0.011197 | 0.011229 |
| 0.011492 | 0.011267 | 0.011301 | 0.011195 | 0.011199 | 0.011329 | 0.011296 |
| 0.011363 | 0.011296 | 0.011296 | 0.011396 | 0.011329 | 0.011698 | 0.011497 |
| 0.011530 | 0.011396 | 0.011262 | 0.011362 | 0.011161 | 0.011396 | 0.011195 |
| 0.011262 | 0.011262 | 0.011228 | 0.011195 | 0.011228 | 0.011195 | 0.011295 |
| 0.011262 | 0.011362 | 0.011295 | 0.011195 | 0.011296 | 0.011396 | 0.011398 |
| 0.011396 | 0.011295 | 0.011195 | 0.011128 | 0.011262 | 0.011195 | 0.011127 |
| 0.011230 | 0.011396 | 0.011195 | 0.011396 | 0.011161 | 0.011262 | 0.011228 |
| 0.011329 | 0.011228 | 0.011262 | 0.011228 | 0.011262 | 0.011127 | 0.011262 |
| 0.011295 | 0.011228 | 0.011295 | 0.011228 | 0.011262 | 0.011295 | 0.011530 |
| 0.011631 | 0.011564 | 0.011631 | 0.011397 | 0.011631 | 0.011262 | 0.011228 |
| 0.011263 | 0.011545 | 0.011335 | 0.011163 | 0.011637 | 0.011129 | 0.011257 |
| 0.011637 | 0.011536 | 0.011429 | 0.011631 | 0.011333 | 0.011497 | 0.011463 |
| 0.011396 | 0.011564 | 0.011416 | 0.011225 | 0.011312 | 0.011295 | 0.011365 |
| 0.011463 | 0.011364 | 0.011500 | 0.011568 | 0.011497 | 0.011564 | 0.011670 |
| 0.011399 | 0.011569 | 0.011500 | 0.011432 | 0.011700 | 0.011161 | 0.011364 |
| 0.011329 | 0.011262 | 0.011161 | 0.011161 | 0.011228 | 0.011228 | 0.011295 |
| 0.011228 | 0.011295 | 0.011195 | 0.011295 | 0.011228 | 0.011228 | 0.011295 |
| 0.011228 | 0.011665 | 0.011564 | 0.011597 | 0.011127 | 0.011228 | 0.011262 |
| 0.011262 | 0.011228 | 0.011295 | 0.011329 | 0.011195 | 0.011195 | 0.011195 |
| 0.011732 | 0.011362 | 0.011362 | 0.011161 | 0.011262 | 0.011430 | 0.011195 |
| 0.011195 | 0.011262 | 0.011228 | 0.011396 | 0.011195 | 0.011329 | 0.011463 |
| 0.011396 | 0.011228 | 0.011228 | 0.011161 | 0.011161 | 0.011329 | 0.011262 |
| 0.011161 | 0.011262 | 0.011127 | 0.011161 | 0.011295 | 0.011430 | 0.011195 |
| 0.011161 | 0.011295 | 0.011228 | 0.011127 | 0.011463 | 0.011127 | 0.011295 |
| 0.011368 | 0.011195 | 0.011497 | 0.011329 | 0.011362 | 0.011228 | 0.011329 |
| 0.011195 | 0.011530 | 0.011127 | 0.011396 | 0.011195 | 0.011195 | 0.011127 |
| 0.011362 | 0.011564 | 0.011262 | 0.011329 | 0.011161 | 0.011564 | 0.011195 |
| 0.011195 | 0.011195 | 0.011228 | 0.011329 | 0.011228 | 0.011329 | 0.011396 |
| 0.011396 | 0.011362 | 0.011262 | 0.011362 | 0.011329 | 0.011195 | 0.011161 |
| 0.011195 | 0.011195 | 0.011262 | 0.011195 | 0.011161 | 0.011329 | 0.011195 |
| 0.011228 | 0.011228 | 0.011362 | 0.011396 | 0.011295 | 0.011228 | 0.011228 |
| 0.011295 | 0.011228 | 0.011329 | 0.011195 | 0.011329 | 0.011429 | 0.011732 |
| 0.011228 | 0.011631 | 0.011198 | 0.017710 | 0.011126 | 0.011305 | 0.011548 |
| 0.011510 | 0.011553 | 0.011217 | 0.011176 | 0.011609 | 0.011578 | 0.011242 |
| 0.011440 | 0.011426 | 0.000000 | 0.011186 | 0.011177 | 0.011208 | 0.011146 |
| 0.011389 | 0.011358 | 0.011357 | 0.011193 | 0.011362 | 0.011396 | 0.011398 |

|          |          |          |          |          |          |          |
|----------|----------|----------|----------|----------|----------|----------|
| 0.011266 | 0.011362 | 0.011362 | 0.011329 | 0.011295 | 0.011295 | 0.011262 |
| 0.011295 | 0.011228 | 0.011262 | 0.011295 | 0.011262 | 0.011195 | 0.011228 |
| 0.011228 | 0.011295 | 0.000000 | 0.011295 | 0.011329 | 0.011362 | 0.011262 |
| 0.011295 | 0.011262 | 0.011597 | 0.011597 | 0.011329 | 0.011363 | 0.011396 |
| 0.011161 | 0.011161 | 0.011195 | 0.011295 | 0.011161 | 0.011396 | 0.011396 |
| 0.011429 | 0.011429 | 0.011362 | 0.011463 | 0.011631 | 0.011464 | 0.011295 |
| 0.011295 | 0.011362 | 0.011396 | 0.011228 | 0.011295 | 0.011262 | 0.011295 |
| 0.011363 | 0.011362 | 0.011396 | 0.011363 | 0.011262 | 0.011463 | 0.011429 |
| 0.011297 | 0.011195 | 0.011295 | 0.011396 | 0.011295 | 0.011430 | 0.011463 |
| 0.011631 | 0.011333 | 0.011497 | 0.011463 | 0.011396 | 0.011564 | 0.011195 |
| 0.011363 | 0.011262 | 0.011228 | 0.011228 | 0.011295 | 0.000000 | 0.011295 |
| 0.011329 | 0.011362 | 0.011262 | 0.011295 | 0.011262 | 0.011597 | 0.011597 |
| 0.011329 | 0.011363 | 0.011429 | 0.011362 | 0.012002 | 0.011417 | 0.011342 |
| 0.011412 | 0.011372 | 0.011482 | 0.011372 | 0.011480 | 0.011405 | 0.011371 |
| 0.011953 | 0.011268 | 0.011403 | 0.011337 | 0.011611 | 0.011468 | 0.011571 |
| 0.011978 | 0.011437 | 0.011297 | 0.011295 | 0.011295 | 0.011329 | 0.011263 |
| 0.011161 | 0.011195 | 0.011329 | 0.011295 | 0.011297 | 0.011429 | 0.011397 |
| 0.011262 | 0.011195 | 0.011228 | 0.011262 | 0.011161 | 0.011228 | 0.011127 |
| 0.011262 | 0.011295 | 0.011195 | 0.011161 | 0.011262 | 0.011195 | 0.011228 |
| 0.011228 | 0.011161 | 0.011228 | 0.011262 | 0.011161 | 0.011362 | 0.011396 |
| 0.011295 | 0.011362 | 0.011295 | 0.011295 | 0.011228 | 0.011631 | 0.011262 |
| 0.011304 | 0.011228 | 0.011463 | 0.011467 | 0.011329 | 0.011329 | 0.011329 |
| 0.011329 | 0.011262 | 0.011228 | 0.011262 | 0.011362 | 0.011362 | 0.011295 |
| 0.011295 | 0.011430 | 0.011597 | 0.011329 | 0.011530 | 0.011530 | 0.011396 |
| 0.011228 | 0.011295 | 0.011329 | 0.011732 | 0.011295 | 0.011329 | 0.011295 |
| 0.011329 | 0.011195 | 0.011195 | 0.011564 | 0.011497 | 0.011530 | 0.011262 |
| 0.011362 | 0.011430 | 0.011295 | 0.011362 | 0.011329 | 0.011195 | 0.011530 |
| 0.011295 | 0.011262 | 0.011195 | 0.011430 | 0.011262 | 0.011362 | 0.011598 |
| 0.011295 | 0.011672 | 0.011665 | 0.011385 | 0.011117 | 0.011366 | 0.011215 |
| 0.011115 | 0.011605 | 0.011166 | 0.011328 | 0.011158 | 0.011264 | 0.011273 |
| 0.011366 | 0.000000 | 0.011227 | 0.000000 | 0.011114 | 0.011261 | 0.011303 |
| 0.011324 | 0.011218 | 0.011307 | 0.011236 | 0.011296 | 0.011429 | 0.011497 |
| 0.011497 | 0.011363 | 0.011466 | 0.011467 | 0.011602 | 0.011626 | 0.011295 |
| 0.011530 | 0.011396 | 0.011262 | 0.011362 | 0.011161 | 0.011396 | 0.011195 |
| 0.011262 | 0.011262 | 0.011228 | 0.011195 | 0.011228 | 0.011195 | 0.011295 |
| 0.011270 | 0.011270 | 0.011266 | 0.011300 | 0.011437 | 0.011402 | 0.011402 |
| 0.011401 | 0.011329 | 0.011134 | 0.011132 | 0.011263 | 0.011433 | 0.011433 |
| 0.011228 | 0.011297 | 0.011531 | 0.011500 | 0.011430 | 0.011464 | 0.011396 |
| 0.011329 | 0.011396 | 0.011396 | 0.011295 | 0.011866 | 0.011463 | 0.011530 |
| 0.011564 | 0.011630 | 0.011265 | 0.011337 | 0.011228 | 0.011430 | 0.011396 |
| 0.011430 | 0.011463 | 0.011463 | 0.011463 | 0.011610 | 0.011597 | 0.011234 |
| 0.011128 | 0.011130 | 0.011231 | 0.011196 | 0.011299 | 0.011135 | 0.011468 |
| 0.011266 | 0.011411 | 0.011156 | 0.011285 | 0.011262 | 0.011334 | 0.011228 |
| 0.011195 | 0.011195 | 0.011262 | 0.011228 | 0.011429 | 0.011396 | 0.011329 |
| 0.011429 | 0.011497 | 0.011228 | 0.011228 | 0.011262 | 0.011262 | 0.011263 |
| 0.011331 | 0.011262 | 0.011262 | 0.011296 | 0.011429 | 0.011497 | 0.011497 |
| 0.011363 | 0.011466 | 0.011467 | 0.011602 | 0.011626 | 0.011295 | 0.011463 |
| 0.011396 | 0.011396 | 0.011229 | 0.011408 | 0.011338 | 0.011367 | 0.011235 |
| 0.011405 | 0.011607 | 0.011399 | 0.011298 | 0.011195 | 0.011396 | 0.011262 |
| 0.011362 | 0.011295 | 0.011195 | 0.011296 | 0.011396 | 0.011398 | 0.011295 |
| 0.011195 | 0.011128 | 0.011262 | 0.011195 | 0.011127 | 0.011230 | 0.011396 |
| 0.011295 | 0.011228 | 0.011262 | 0.011295 | 0.011262 | 0.011195 | 0.011396 |
| 0.011262 | 0.011295 | 0.011295 | 0.011228 | 0.011295 | 0.011530 | 0.011195 |
| 0.011228 | 0.011631 | 0.011228 | 0.011262 | 0.011228 | 0.011597 | 0.011146 |
| 0.011566 | 0.011145 | 0.011161 | 0.011382 | 0.011467 | 0.011383 | 0.011102 |
| 0.011113 | 0.011396 | 0.011497 | 0.011603 | 0.011464 | 0.011568 | 0.011733 |
| 0.011632 | 0.011669 | 0.011631 | 0.011846 | 0.011597 | 0.012472 | 0.011633 |
| 0.012372 | 0.012139 | 0.012273 | 0.012545 | 0.011597 | 0.011295 | 0.011598 |
| 0.012036 | 0.011903 | 0.011564 | 0.011463 | 0.011531 | 0.011531 | 0.011500 |
| 0.011396 | 0.011365 | 0.011463 | 0.011430 | 0.011800 | 0.011866 | 0.011867 |

|          |          |          |           |          |          |          |
|----------|----------|----------|-----------|----------|----------|----------|
| 0.011767 | 0.011867 | 0.011970 | 0.011737  | 0.012036 | 0.012042 | 0.012104 |
| 0.012104 | 0.012138 | 0.012084 | 0.012104  | 0.012105 | 0.011329 | 0.011631 |
| 0.011699 | 0.012203 | 0.011704 | 0.011934  | 0.012406 | 0.011468 | 0.011363 |
| 0.011329 | 0.011329 | 0.011799 | 0.011842  | 0.011940 | 0.011665 | 0.011330 |
| S482     | 0.011698 | 0.011698 | 0.012035  | 0.011799 | 0.011799 | 0.011866 |
| 0.011706 | 0.011638 | 0.011799 | 0.011295  | 0.011362 | 0.011330 | 0.011295 |
| 0.011329 | 0.011497 | 0.011295 | 0.011329  | 0.011396 | 0.011362 | 0.011329 |
| 0.011295 | 0.011329 | 0.011430 | 0.011296  | 0.011329 | 0.011329 | 0.011672 |
| 0.011564 | 0.011329 | 0.011228 | 0.011463  | 0.011396 | 0.011363 | 0.011396 |
| 0.011362 | 0.011463 | 0.011362 | 0.011363  | 0.011396 | 0.011362 | 0.011530 |
| 0.011295 | 0.011362 | 0.011396 | 0.011329  | 0.011430 | 0.011463 | 0.011396 |
| 0.011362 | 0.011531 | 0.011430 | 0.011698  | 0.011362 | 0.011631 | 0.011362 |
| 0.011329 | 0.011430 | 0.011497 | 0.011631  | 0.011732 | 0.011430 | 0.011530 |
| 0.011396 | 0.011463 | 0.011161 | 0.011597  | 0.011833 | 0.011362 | 0.011430 |
| 0.011329 | 0.011430 | 0.011396 | 0.011463  | 0.011396 | 0.011396 | 0.011396 |
| 0.011295 | 0.011329 | 0.011295 | 0.011396  | 0.011362 | 0.011397 | 0.011463 |
| 0.011396 | 0.011362 | 0.011430 | 0.011329  | 0.011463 | 0.011295 | 0.011362 |
| 0.011530 | 0.011463 | 0.011698 | 0.011531  | 0.011363 | 0.011598 | 0.011362 |
| 0.011505 | 0.011733 | 0.011551 | 0.011256  | 0.011247 | 0.011355 | 0.011454 |
| 0.012085 | 0.011569 | 0.011266 | 0.011597  | 0.011598 | 0.011396 | 0.011497 |
| 0.011430 | 0.011396 | 0.011463 | 0.011362  | 0.011463 | 0.011396 | 0.011396 |
| 0.011362 | 0.011463 | 0.011665 | 0.011530  | 0.011430 | 0.011396 | 0.011329 |
| 0.011295 | 0.011295 | 0.011363 | 0.011329  | 0.011530 | 0.011497 | 0.011430 |
| 0.011530 | 0.011597 | 0.011329 | 0.011329  | 0.011362 | 0.011362 | 0.011364 |
| 0.011432 | 0.011362 | 0.011362 | 0.011240  | 0.011313 | 0.011271 | 0.011363 |
| 0.011365 | 0.011301 | 0.011319 | 0.011336  | 0.011264 | 0.011300 | 0.011331 |
| 0.011600 | 0.011371 | 0.011405 | 0.011296  | 0.011302 | 0.011430 | 0.011397 |
| 0.011464 | 0.011397 | 0.011397 | 0.011497  | 0.011430 | 0.011799 | 0.011598 |
| 0.011631 | 0.011497 | 0.011362 | 0.011463  | 0.011262 | 0.011497 | 0.011295 |
| 0.011363 | 0.011362 | 0.011329 | 0.011295  | 0.011329 | 0.011295 | 0.011396 |
| 0.011363 | 0.011463 | 0.011396 | 0.011295  | 0.011397 | 0.011497 | 0.011500 |
| 0.011497 | 0.011396 | 0.011295 | 0.011229  | 0.011362 | 0.011295 | 0.011228 |
| 0.011298 | 0.011497 | 0.011295 | 0.011497  | 0.011262 | 0.011363 | 0.011329 |
| 0.011430 | 0.011329 | 0.011363 | 0.011329  | 0.011362 | 0.011228 | 0.011362 |
| 0.011396 | 0.011329 | 0.011396 | 0.011329  | 0.011362 | 0.011396 | 0.011631 |
| 0.011732 | 0.011665 | 0.011732 | 0.011465  | 0.011732 | 0.011362 | 0.011329 |
| 0.011364 | 0.011626 | 0.011518 | 0.011232  | 0.011739 | 0.011231 | 0.011296 |
| 0.011740 | 0.011604 | 0.011530 | 0.011732  | 0.011436 | 0.011598 | 0.011564 |
| 0.011497 | 0.011665 | 0.011522 | 0.011390  | 0.011438 | 0.011396 | 0.011466 |
| 0.011564 | 0.011398 | 0.011601 | 0.011670  | 0.011598 | 0.011665 | 0.011772 |
| 0.011500 | 0.011672 | 0.011602 | 0.011534  | 0.011801 | 0.011262 | 0.011465 |
| 0.011430 | 0.011362 | 0.011262 | 0.011262  | 0.011262 | 0.011329 | 0.011396 |
| 0.011329 | 0.011396 | 0.011295 | 0.011396  | 0.011329 | 0.011329 | 0.011396 |
| 0.011329 | 0.011765 | 0.011665 | 0.011698  | 0.011228 | 0.011329 | 0.011295 |
| 0.011363 | 0.011329 | 0.011396 | 0.011430  | 0.011295 | 0.011295 | 0.011295 |
| 0.011833 | 0.011463 | 0.011463 | 0.011262  | 0.011362 | 0.011531 | 0.011295 |
| 0.011295 | 0.011362 | 0.011329 | 0.011497  | 0.011295 | 0.011430 | 0.011564 |
| 0.011497 | 0.011329 | 0.011329 | 0.011262  | 0.011262 | 0.011430 | 0.011362 |
| 0.011262 | 0.011362 | 0.011228 | 0.011262  | 0.011396 | 0.011531 | 0.011295 |
| 0.011262 | 0.011396 | 0.011329 | 0.011228  | 0.011564 | 0.011228 | 0.011396 |
| 0.011471 | 0.011295 | 0.011598 | 0.011430  | 0.011463 | 0.011329 | 0.011430 |
| 0.011295 | 0.011631 | 0.011228 | 0.011497  | 0.011295 | 0.011295 | 0.011228 |
| 0.011463 | 0.011631 | 0.011161 | 0.011430  | 0.011262 | 0.011665 | 0.011295 |
| 0.011295 | 0.011295 | 0.011329 | 0.011430  | 0.011329 | 0.011430 | 0.011497 |
| 0.011497 | 0.011463 | 0.011362 | 0.011463  | 0.011430 | 0.011295 | 0.011262 |
| 0.011295 | 0.011295 | 0.011161 | 0.011295  | 0.011262 | 0.011430 | 0.011295 |
| 0.011329 | 0.011329 | 0.011463 | 0.011497  | 0.011396 | 0.011329 | 0.011329 |
| 0.011396 | 0.011329 | 0.011430 | 0.011295  | 0.011430 | 0.011530 | 0.011833 |
| 0.011329 | 0.011732 | 0.011302 | 0.0117823 | 0.011322 | 0.011427 | 0.011653 |
| 0.011614 | 0.011658 | 0.011374 | 0.011292  | 0.011774 | 0.011682 | 0.011364 |

|          |          |          |          |          |          |          |
|----------|----------|----------|----------|----------|----------|----------|
| 0.011535 | 0.011549 | 0.011216 | 0.011312 | 0.011294 | 0.011357 | 0.011318 |
| 0.011576 | 0.011470 | 0.011468 | 0.011325 | 0.011463 | 0.011497 | 0.011500 |
| 0.011370 | 0.011463 | 0.011463 | 0.011430 | 0.011396 | 0.011396 | 0.011363 |
| 0.011396 | 0.011329 | 0.011362 | 0.011396 | 0.011363 | 0.011295 | 0.011329 |
| 0.011329 | 0.011396 | 0.011295 | 0.000000 | 0.011430 | 0.011463 | 0.011362 |
| 0.011396 | 0.011363 | 0.011698 | 0.011698 | 0.011430 | 0.011464 | 0.011497 |
| 0.011262 | 0.011262 | 0.011295 | 0.011396 | 0.011262 | 0.011497 | 0.011497 |
| 0.011530 | 0.011530 | 0.011463 | 0.011564 | 0.011732 | 0.011565 | 0.011396 |
| 0.011396 | 0.011463 | 0.011497 | 0.011329 | 0.011396 | 0.011362 | 0.011396 |
| 0.011463 | 0.011463 | 0.011497 | 0.011463 | 0.011363 | 0.011564 | 0.011530 |
| 0.011399 | 0.011295 | 0.011396 | 0.011497 | 0.011396 | 0.011531 | 0.011564 |
| 0.011732 | 0.011436 | 0.011598 | 0.011564 | 0.011497 | 0.011665 | 0.011296 |
| 0.011465 | 0.011363 | 0.011329 | 0.011329 | 0.011396 | 0.011295 | 0.000000 |
| 0.011430 | 0.011463 | 0.011362 | 0.011396 | 0.011363 | 0.011698 | 0.011698 |
| 0.011430 | 0.011464 | 0.011530 | 0.011463 | 0.012104 | 0.011525 | 0.011447 |
| 0.011517 | 0.011477 | 0.011588 | 0.011476 | 0.011585 | 0.011509 | 0.011474 |
| 0.012057 | 0.011372 | 0.011506 | 0.011441 | 0.011715 | 0.011571 | 0.011673 |
| 0.012081 | 0.011550 | 0.011398 | 0.011396 | 0.011396 | 0.011430 | 0.011364 |
| 0.011262 | 0.011295 | 0.011430 | 0.011396 | 0.011398 | 0.011530 | 0.011498 |
| 0.011362 | 0.011295 | 0.011329 | 0.011362 | 0.011262 | 0.011329 | 0.011228 |
| 0.011362 | 0.011396 | 0.011295 | 0.011262 | 0.011362 | 0.011295 | 0.011329 |
| 0.011329 | 0.011262 | 0.011329 | 0.011363 | 0.011262 | 0.011463 | 0.011497 |
| 0.011396 | 0.011463 | 0.011396 | 0.011396 | 0.011329 | 0.011732 | 0.011362 |
| 0.011408 | 0.011329 | 0.011564 | 0.011569 | 0.011430 | 0.011430 | 0.011430 |
| 0.011430 | 0.011363 | 0.011329 | 0.011363 | 0.011463 | 0.011463 | 0.011396 |
| 0.011396 | 0.011530 | 0.011698 | 0.011430 | 0.011631 | 0.011631 | 0.011497 |
| 0.011329 | 0.011396 | 0.011430 | 0.011833 | 0.011396 | 0.011430 | 0.011396 |
| 0.011430 | 0.011362 | 0.011362 | 0.011665 | 0.011598 | 0.011631 | 0.011363 |
| 0.011463 | 0.011530 | 0.011396 | 0.011463 | 0.011430 | 0.011295 | 0.011631 |
| 0.011396 | 0.011362 | 0.011362 | 0.011530 | 0.011363 | 0.011463 | 0.011699 |
| 0.011396 | 0.011774 | 0.011766 | 0.011548 | 0.011286 | 0.011468 | 0.011267 |
| 0.011280 | 0.011761 | 0.011271 | 0.011507 | 0.011353 | 0.011417 | 0.011432 |
| 0.011570 | 0.011258 | 0.011394 | 0.011258 | 0.011276 | 0.011395 | 0.011425 |
| 0.011437 | 0.011336 | 0.011413 | 0.011342 | 0.011397 | 0.011530 | 0.011598 |
| 0.011597 | 0.011464 | 0.011567 | 0.011569 | 0.011704 | 0.011696 | 0.011396 |
| 0.011631 | 0.011497 | 0.011362 | 0.011463 | 0.011262 | 0.011497 | 0.011295 |
| 0.011363 | 0.011362 | 0.011329 | 0.011295 | 0.011329 | 0.011295 | 0.011396 |
| 0.011375 | 0.011375 | 0.011369 | 0.011403 | 0.011539 | 0.011504 | 0.011504 |
| 0.011503 | 0.011363 | 0.011245 | 0.011240 | 0.011365 | 0.011535 | 0.011535 |
| 0.011329 | 0.011399 | 0.011633 | 0.011601 | 0.011531 | 0.011565 | 0.011497 |
| 0.011430 | 0.011497 | 0.011497 | 0.011396 | 0.011968 | 0.011564 | 0.011631 |
| 0.011665 | 0.011737 | 0.011367 | 0.011441 | 0.011329 | 0.011530 | 0.011497 |
| 0.011531 | 0.011564 | 0.011564 | 0.011564 | 0.011650 | 0.011698 | 0.011338 |
| 0.011229 | 0.011233 | 0.011333 | 0.011298 | 0.011402 | 0.011247 | 0.011570 |
| 0.011369 | 0.011543 | 0.011299 | 0.011397 | 0.011363 | 0.011437 | 0.011329 |
| 0.011295 | 0.011295 | 0.011363 | 0.011329 | 0.011530 | 0.011497 | 0.011430 |
| 0.011530 | 0.011597 | 0.011329 | 0.011329 | 0.011362 | 0.011362 | 0.011364 |
| 0.011432 | 0.011362 | 0.011362 | 0.011397 | 0.011530 | 0.011598 | 0.011597 |
| 0.011464 | 0.011567 | 0.011569 | 0.011704 | 0.011696 | 0.011396 | 0.011564 |
| 0.011497 | 0.011497 | 0.011331 | 0.011513 | 0.011442 | 0.011469 | 0.011305 |
| 0.011473 | 0.011653 | 0.011526 | 0.011400 | 0.011295 | 0.011497 | 0.011363 |
| 0.011463 | 0.011396 | 0.011295 | 0.011397 | 0.011497 | 0.011500 | 0.011396 |
| 0.011295 | 0.011229 | 0.011362 | 0.011295 | 0.011228 | 0.011298 | 0.011497 |
| 0.011396 | 0.011329 | 0.011362 | 0.011396 | 0.011363 | 0.011295 | 0.011497 |
| 0.011362 | 0.011396 | 0.011396 | 0.011329 | 0.011396 | 0.011631 | 0.011295 |
| 0.011329 | 0.011732 | 0.011329 | 0.011362 | 0.011329 | 0.011698 | 0.011275 |
| 0.011735 | 0.011230 | 0.011311 | 0.011503 | 0.011589 | 0.011491 | 0.011228 |
| 0.011270 | 0.011497 | 0.011598 | 0.011705 | 0.011565 | 0.011669 | 0.011834 |
| 0.011733 | 0.011771 | 0.011732 | 0.011949 | 0.011698 | 0.012573 | 0.011734 |
| 0.012473 | 0.012241 | 0.012375 | 0.012647 | 0.011698 | 0.011396 | 0.011699 |

|          |          |          |          |          |          |          |
|----------|----------|----------|----------|----------|----------|----------|
| 0.012137 | 0.012038 | 0.011665 | 0.011564 | 0.011632 | 0.011632 | 0.011602 |
| 0.011497 | 0.011467 | 0.011564 | 0.011531 | 0.011901 | 0.011968 | 0.011968 |
| 0.011868 | 0.011968 | 0.012072 | 0.011804 | 0.012138 | 0.012144 | 0.012205 |
| 0.012206 | 0.012239 | 0.012152 | 0.012206 | 0.012207 | 0.011430 | 0.011732 |
| 0.011800 | 0.012304 | 0.011806 | 0.012035 | 0.012508 | 0.011570 | 0.011464 |
| 0.011430 | 0.011430 | 0.011901 | 0.011965 | 0.012046 | 0.011698 | 0.011431 |
| S483     | 0.011732 | 0.011732 | 0.012068 | 0.011833 | 0.011833 | 0.011900 |
| 0.011740 | 0.011672 | 0.011833 | 0.011329 | 0.011396 | 0.011363 | 0.011329 |
| 0.011362 | 0.011530 | 0.011329 | 0.011362 | 0.011430 | 0.011396 | 0.011362 |
| 0.011329 | 0.011362 | 0.011463 | 0.011329 | 0.011363 | 0.011362 | 0.011706 |
| 0.011597 | 0.011362 | 0.011262 | 0.011497 | 0.011430 | 0.011396 | 0.011430 |
| 0.011396 | 0.011497 | 0.011396 | 0.011396 | 0.011429 | 0.011396 | 0.011564 |
| 0.011329 | 0.011396 | 0.011430 | 0.011362 | 0.011463 | 0.011497 | 0.011430 |
| 0.011396 | 0.011564 | 0.011463 | 0.011732 | 0.011396 | 0.011665 | 0.011396 |
| 0.011362 | 0.011463 | 0.011530 | 0.011665 | 0.011765 | 0.011463 | 0.011564 |
| 0.011429 | 0.011497 | 0.011396 | 0.011631 | 0.011866 | 0.011396 | 0.011463 |
| 0.011362 | 0.011463 | 0.011430 | 0.011497 | 0.011429 | 0.011430 | 0.011430 |
| 0.011329 | 0.011362 | 0.011329 | 0.011430 | 0.011396 | 0.011430 | 0.011497 |
| 0.011430 | 0.011396 | 0.011463 | 0.011362 | 0.011497 | 0.011329 | 0.011396 |
| 0.011564 | 0.011497 | 0.011732 | 0.011564 | 0.011396 | 0.011631 | 0.011396 |
| 0.011579 | 0.011807 | 0.011626 | 0.011334 | 0.011321 | 0.011428 | 0.011533 |
| 0.012158 | 0.011620 | 0.011348 | 0.011631 | 0.011631 | 0.011429 | 0.011530 |
| 0.011463 | 0.011429 | 0.011497 | 0.011396 | 0.011497 | 0.011430 | 0.011429 |
| 0.011396 | 0.011497 | 0.011698 | 0.011564 | 0.011463 | 0.011362 | 0.011362 |
| 0.011329 | 0.011329 | 0.011396 | 0.011362 | 0.011564 | 0.011530 | 0.011463 |
| 0.011564 | 0.011631 | 0.011362 | 0.011362 | 0.011396 | 0.011396 | 0.011398 |
| 0.011466 | 0.011396 | 0.011396 | 0.011240 | 0.011349 | 0.011306 | 0.011396 |
| 0.011399 | 0.011335 | 0.011392 | 0.011371 | 0.011298 | 0.011334 | 0.011364 |
| 0.011600 | 0.011370 | 0.011439 | 0.011329 | 0.011337 | 0.011464 | 0.011430 |
| 0.011497 | 0.011431 | 0.011430 | 0.011530 | 0.011463 | 0.011833 | 0.011631 |
| 0.011665 | 0.011530 | 0.011396 | 0.011497 | 0.011295 | 0.011530 | 0.011329 |
| 0.011396 | 0.011396 | 0.011362 | 0.011329 | 0.011362 | 0.011329 | 0.011430 |
| 0.011396 | 0.011497 | 0.011430 | 0.011329 | 0.011431 | 0.011530 | 0.011533 |
| 0.011530 | 0.011430 | 0.011329 | 0.011263 | 0.011396 | 0.011329 | 0.011262 |
| 0.011332 | 0.011530 | 0.011329 | 0.011530 | 0.011295 | 0.011396 | 0.011362 |
| 0.011463 | 0.011362 | 0.011396 | 0.011362 | 0.011396 | 0.011262 | 0.011396 |
| 0.011430 | 0.011362 | 0.011430 | 0.011362 | 0.011396 | 0.011430 | 0.011665 |
| 0.011765 | 0.011698 | 0.011765 | 0.011532 | 0.011766 | 0.011396 | 0.011362 |
| 0.011398 | 0.011667 | 0.011472 | 0.011300 | 0.011773 | 0.011265 | 0.011414 |
| 0.011773 | 0.011672 | 0.011564 | 0.011766 | 0.011470 | 0.011631 | 0.011598 |
| 0.011530 | 0.011698 | 0.011558 | 0.011390 | 0.011438 | 0.011430 | 0.011500 |
| 0.011598 | 0.011499 | 0.011635 | 0.011703 | 0.011631 | 0.011698 | 0.011806 |
| 0.011534 | 0.011705 | 0.011636 | 0.011568 | 0.011834 | 0.011295 | 0.011498 |
| 0.011463 | 0.011396 | 0.011295 | 0.011295 | 0.011362 | 0.011362 | 0.011429 |
| 0.011362 | 0.011430 | 0.011329 | 0.011430 | 0.011362 | 0.011362 | 0.011429 |
| 0.011362 | 0.011799 | 0.011698 | 0.011732 | 0.011262 | 0.011362 | 0.011396 |
| 0.011396 | 0.011362 | 0.011430 | 0.011463 | 0.011329 | 0.011329 | 0.011329 |
| 0.011866 | 0.011497 | 0.011497 | 0.011295 | 0.011396 | 0.011564 | 0.011329 |
| 0.011329 | 0.011396 | 0.011362 | 0.011530 | 0.011329 | 0.011463 | 0.011597 |
| 0.011530 | 0.011362 | 0.011362 | 0.011295 | 0.011295 | 0.011463 | 0.011396 |
| 0.011295 | 0.011396 | 0.011262 | 0.011295 | 0.011430 | 0.011564 | 0.011329 |
| 0.011296 | 0.011430 | 0.011363 | 0.011262 | 0.011597 | 0.011262 | 0.011430 |
| 0.011505 | 0.011329 | 0.011631 | 0.011463 | 0.011497 | 0.011362 | 0.011463 |
| 0.011329 | 0.011665 | 0.011262 | 0.011530 | 0.011329 | 0.011329 | 0.011262 |
| 0.011497 | 0.011699 | 0.011396 | 0.011463 | 0.011295 | 0.011698 | 0.011329 |
| 0.011329 | 0.011329 | 0.011362 | 0.011463 | 0.011362 | 0.011463 | 0.011530 |
| 0.011530 | 0.011497 | 0.011396 | 0.011497 | 0.011463 | 0.011329 | 0.011295 |
| 0.011329 | 0.011329 | 0.011396 | 0.011329 | 0.011295 | 0.011463 | 0.011329 |
| 0.011362 | 0.011362 | 0.011497 | 0.011530 | 0.011430 | 0.011362 | 0.011362 |
| 0.011430 | 0.011362 | 0.011463 | 0.011329 | 0.011463 | 0.011564 | 0.011866 |

|          |          |          |          |          |          |          |
|----------|----------|----------|----------|----------|----------|----------|
| 0.011362 | 0.011766 | 0.011371 | 0.017861 | 0.011322 | 0.011488 | 0.011723 |
| 0.011683 | 0.011729 | 0.011427 | 0.011350 | 0.011774 | 0.011751 | 0.011425 |
| 0.011629 | 0.011610 | 0.011294 | 0.011353 | 0.011372 | 0.011356 | 0.011404 |
| 0.011670 | 0.011544 | 0.011542 | 0.011391 | 0.011497 | 0.011530 | 0.011534 |
| 0.011404 | 0.011497 | 0.011497 | 0.011463 | 0.011430 | 0.011430 | 0.011396 |
| 0.011430 | 0.011362 | 0.011396 | 0.011430 | 0.011396 | 0.011329 | 0.011362 |
| 0.011362 | 0.011430 | 0.011329 | 0.011430 | 0.000000 | 0.011497 | 0.011396 |
| 0.011430 | 0.011396 | 0.011732 | 0.011732 | 0.011463 | 0.011497 | 0.011530 |
| 0.011295 | 0.011295 | 0.011329 | 0.011430 | 0.011295 | 0.011530 | 0.011530 |
| 0.011564 | 0.011564 | 0.011497 | 0.011597 | 0.011765 | 0.011599 | 0.011430 |
| 0.011430 | 0.011497 | 0.011530 | 0.011362 | 0.011430 | 0.011396 | 0.011430 |
| 0.011497 | 0.011497 | 0.011530 | 0.011497 | 0.011397 | 0.011597 | 0.011564 |
| 0.011433 | 0.011329 | 0.011429 | 0.011530 | 0.011430 | 0.011564 | 0.011597 |
| 0.011766 | 0.011470 | 0.011631 | 0.011598 | 0.011530 | 0.011698 | 0.011329 |
| 0.011498 | 0.011396 | 0.011362 | 0.011362 | 0.011430 | 0.011329 | 0.011430 |
| 0.000000 | 0.011497 | 0.011396 | 0.011430 | 0.011396 | 0.011732 | 0.011732 |
| 0.011463 | 0.011497 | 0.011564 | 0.011497 | 0.012137 | 0.011560 | 0.011482 |
| 0.011552 | 0.011511 | 0.011623 | 0.011511 | 0.011620 | 0.011543 | 0.011509 |
| 0.012091 | 0.011406 | 0.011540 | 0.011475 | 0.011749 | 0.011605 | 0.011707 |
| 0.012115 | 0.011588 | 0.011432 | 0.011429 | 0.011429 | 0.011463 | 0.011398 |
| 0.011295 | 0.011329 | 0.011463 | 0.011429 | 0.011432 | 0.011564 | 0.011532 |
| 0.011396 | 0.011329 | 0.011362 | 0.011396 | 0.011295 | 0.011362 | 0.011262 |
| 0.011396 | 0.011430 | 0.011329 | 0.011295 | 0.011396 | 0.011329 | 0.011362 |
| 0.011362 | 0.011295 | 0.011362 | 0.011396 | 0.011295 | 0.011497 | 0.011530 |
| 0.011430 | 0.011497 | 0.011430 | 0.011430 | 0.011362 | 0.011765 | 0.011396 |
| 0.011443 | 0.011362 | 0.011598 | 0.011603 | 0.011463 | 0.011463 | 0.011463 |
| 0.011463 | 0.011396 | 0.011362 | 0.011396 | 0.011497 | 0.011497 | 0.011430 |
| 0.011362 | 0.011564 | 0.011732 | 0.011463 | 0.011665 | 0.011665 | 0.011530 |
| 0.011362 | 0.011430 | 0.011463 | 0.011866 | 0.011430 | 0.011463 | 0.011430 |
| 0.011463 | 0.011396 | 0.011396 | 0.011699 | 0.011631 | 0.011665 | 0.011396 |
| 0.011497 | 0.011564 | 0.011430 | 0.011497 | 0.011463 | 0.011329 | 0.011665 |
| 0.011429 | 0.011396 | 0.011396 | 0.011564 | 0.011396 | 0.011497 | 0.011732 |
| 0.011429 | 0.011808 | 0.011799 | 0.011629 | 0.011286 | 0.011502 | 0.011318 |
| 0.011280 | 0.011839 | 0.011341 | 0.011596 | 0.011451 | 0.011518 | 0.011538 |
| 0.011621 | 0.011324 | 0.011450 | 0.011258 | 0.011384 | 0.011395 | 0.011506 |
| 0.011512 | 0.011414 | 0.011483 | 0.011377 | 0.011431 | 0.011564 | 0.011631 |
| 0.011631 | 0.011497 | 0.011601 | 0.011603 | 0.011738 | 0.011767 | 0.011430 |
| 0.011665 | 0.011530 | 0.011396 | 0.011497 | 0.011295 | 0.011530 | 0.011329 |
| 0.011396 | 0.011396 | 0.011362 | 0.011329 | 0.011362 | 0.011329 | 0.011430 |
| 0.011409 | 0.011410 | 0.011403 | 0.011437 | 0.011573 | 0.011538 | 0.011538 |
| 0.011537 | 0.011464 | 0.011208 | 0.011240 | 0.011399 | 0.011568 | 0.011569 |
| 0.011363 | 0.011433 | 0.011666 | 0.011635 | 0.011565 | 0.011599 | 0.011530 |
| 0.011463 | 0.011530 | 0.011530 | 0.011429 | 0.012001 | 0.011598 | 0.011665 |
| 0.011698 | 0.011773 | 0.011401 | 0.011476 | 0.011362 | 0.011564 | 0.011530 |
| 0.011498 | 0.011597 | 0.011597 | 0.011597 | 0.011729 | 0.011732 | 0.011373 |
| 0.011263 | 0.011268 | 0.011367 | 0.011332 | 0.011436 | 0.011284 | 0.011604 |
| 0.011403 | 0.011543 | 0.011203 | 0.011435 | 0.011396 | 0.011471 | 0.011362 |
| 0.011329 | 0.011329 | 0.011396 | 0.011362 | 0.011564 | 0.011530 | 0.011463 |
| 0.011564 | 0.011631 | 0.011362 | 0.011362 | 0.011396 | 0.011396 | 0.011398 |
| 0.011466 | 0.011396 | 0.011396 | 0.011431 | 0.011564 | 0.011631 | 0.011631 |
| 0.011497 | 0.011601 | 0.011603 | 0.011738 | 0.011767 | 0.011430 | 0.011597 |
| 0.011530 | 0.011530 | 0.011364 | 0.011547 | 0.011477 | 0.011503 | 0.011375 |
| 0.011542 | 0.011789 | 0.011568 | 0.011434 | 0.011329 | 0.011530 | 0.011396 |
| 0.011497 | 0.011430 | 0.011329 | 0.011431 | 0.011530 | 0.011533 | 0.011430 |
| 0.011329 | 0.011263 | 0.011396 | 0.011329 | 0.011262 | 0.011332 | 0.011530 |
| 0.011430 | 0.011362 | 0.011396 | 0.011430 | 0.011396 | 0.011329 | 0.011530 |
| 0.011396 | 0.011430 | 0.011429 | 0.011362 | 0.011430 | 0.011665 | 0.011329 |
| 0.011362 | 0.011765 | 0.011362 | 0.011396 | 0.011362 | 0.011732 | 0.011360 |
| 0.011791 | 0.011315 | 0.011411 | 0.011584 | 0.011671 | 0.011563 | 0.011311 |
| 0.011323 | 0.011530 | 0.011631 | 0.011739 | 0.011599 | 0.011737 | 0.011867 |

|          |          |          |          |          |          |          |
|----------|----------|----------|----------|----------|----------|----------|
| 0.011767 | 0.011804 | 0.011765 | 0.012017 | 0.011732 | 0.012607 | 0.011768 |
| 0.012507 | 0.012274 | 0.012408 | 0.012646 | 0.011732 | 0.011430 | 0.011732 |
| 0.012171 | 0.012106 | 0.011698 | 0.011598 | 0.011665 | 0.011665 | 0.011635 |
| 0.011530 | 0.011535 | 0.011597 | 0.011565 | 0.011935 | 0.011934 | 0.012002 |
| 0.011902 | 0.012002 | 0.012106 | 0.011872 | 0.012171 | 0.012178 | 0.012238 |
| 0.012239 | 0.012273 | 0.012221 | 0.012239 | 0.012241 | 0.011463 | 0.011766 |
| 0.011834 | 0.012270 | 0.011840 | 0.012068 | 0.012541 | 0.011604 | 0.011497 |
| 0.011463 | 0.011463 | 0.011934 | 0.011965 | 0.012081 | 0.011799 | 0.011465 |
| S484     | 0.011765 | 0.011765 | 0.012102 | 0.011866 | 0.011866 | 0.011933 |
| 0.011774 | 0.011706 | 0.011866 | 0.011362 | 0.011429 | 0.011397 | 0.011362 |
| 0.011396 | 0.011564 | 0.011362 | 0.011396 | 0.011396 | 0.011429 | 0.011396 |
| 0.011362 | 0.011396 | 0.011497 | 0.011363 | 0.011396 | 0.011396 | 0.011740 |
| 0.011631 | 0.011396 | 0.011295 | 0.011530 | 0.011463 | 0.011430 | 0.011463 |
| 0.011429 | 0.011530 | 0.011429 | 0.011430 | 0.011463 | 0.011228 | 0.011597 |
| 0.011362 | 0.011429 | 0.011463 | 0.011396 | 0.011497 | 0.011530 | 0.011463 |
| 0.011429 | 0.011598 | 0.011497 | 0.011765 | 0.011429 | 0.011698 | 0.011429 |
| 0.011396 | 0.011497 | 0.011564 | 0.011698 | 0.011799 | 0.011497 | 0.011597 |
| 0.011463 | 0.011530 | 0.011430 | 0.011597 | 0.011900 | 0.011429 | 0.011497 |
| 0.011396 | 0.011497 | 0.011463 | 0.011530 | 0.011463 | 0.011463 | 0.011463 |
| 0.011362 | 0.011396 | 0.011362 | 0.011463 | 0.011429 | 0.011464 | 0.011530 |
| 0.011463 | 0.011429 | 0.011497 | 0.011396 | 0.011530 | 0.011362 | 0.011429 |
| 0.011597 | 0.011530 | 0.011765 | 0.011396 | 0.011430 | 0.011665 | 0.011429 |
| 0.011468 | 0.011845 | 0.011664 | 0.011373 | 0.011359 | 0.011318 | 0.011572 |
| 0.012195 | 0.011569 | 0.011348 | 0.011665 | 0.011665 | 0.011463 | 0.011564 |
| 0.011497 | 0.011463 | 0.011530 | 0.011429 | 0.011530 | 0.011463 | 0.011463 |
| 0.011429 | 0.011530 | 0.011732 | 0.011597 | 0.011497 | 0.011463 | 0.011396 |
| 0.011362 | 0.011362 | 0.011430 | 0.011396 | 0.011597 | 0.011564 | 0.011497 |
| 0.011597 | 0.011665 | 0.011396 | 0.011396 | 0.011430 | 0.011429 | 0.011432 |
| 0.011500 | 0.011429 | 0.011430 | 0.011312 | 0.011386 | 0.011341 | 0.011430 |
| 0.011230 | 0.011369 | 0.011429 | 0.011405 | 0.011332 | 0.011368 | 0.011398 |
| 0.011672 | 0.011439 | 0.011473 | 0.011363 | 0.011371 | 0.011497 | 0.011464 |
| 0.011531 | 0.011465 | 0.011464 | 0.011564 | 0.011497 | 0.011866 | 0.011665 |
| 0.011698 | 0.011564 | 0.011429 | 0.011530 | 0.011329 | 0.011564 | 0.011362 |
| 0.011430 | 0.011429 | 0.011396 | 0.011362 | 0.011396 | 0.011362 | 0.011463 |
| 0.011430 | 0.011530 | 0.011463 | 0.011362 | 0.011464 | 0.011564 | 0.011567 |
| 0.011564 | 0.011463 | 0.011362 | 0.011296 | 0.011429 | 0.011362 | 0.011295 |
| 0.011400 | 0.011564 | 0.011362 | 0.011564 | 0.011329 | 0.011430 | 0.011396 |
| 0.011497 | 0.011396 | 0.011430 | 0.011396 | 0.011429 | 0.011295 | 0.011429 |
| 0.011463 | 0.011396 | 0.011463 | 0.011396 | 0.011429 | 0.011463 | 0.011698 |
| 0.011799 | 0.011732 | 0.011799 | 0.011566 | 0.011799 | 0.011429 | 0.011396 |
| 0.011432 | 0.011707 | 0.011517 | 0.011335 | 0.011773 | 0.011299 | 0.011414 |
| 0.011807 | 0.011706 | 0.011597 | 0.011799 | 0.011504 | 0.011665 | 0.011631 |
| 0.011564 | 0.011732 | 0.011593 | 0.011472 | 0.011521 | 0.011463 | 0.011534 |
| 0.011631 | 0.011532 | 0.011669 | 0.011737 | 0.011665 | 0.011732 | 0.011840 |
| 0.011568 | 0.011739 | 0.011670 | 0.011398 | 0.011868 | 0.011329 | 0.011532 |
| 0.011497 | 0.011429 | 0.011329 | 0.011329 | 0.011396 | 0.011396 | 0.011463 |
| 0.011396 | 0.011463 | 0.011362 | 0.011463 | 0.011396 | 0.011396 | 0.011463 |
| 0.011396 | 0.011833 | 0.011732 | 0.011765 | 0.011295 | 0.011396 | 0.011430 |
| 0.011430 | 0.011396 | 0.011463 | 0.011497 | 0.011362 | 0.011362 | 0.011362 |
| 0.011900 | 0.011530 | 0.011530 | 0.011329 | 0.011429 | 0.011598 | 0.011362 |
| 0.011362 | 0.011429 | 0.011396 | 0.011564 | 0.011362 | 0.011497 | 0.011631 |
| 0.011564 | 0.011396 | 0.011396 | 0.011329 | 0.011329 | 0.011497 | 0.011429 |
| 0.011329 | 0.011429 | 0.011295 | 0.011329 | 0.011262 | 0.011598 | 0.011362 |
| 0.011329 | 0.011262 | 0.011396 | 0.011295 | 0.011631 | 0.011295 | 0.011463 |
| 0.011540 | 0.011362 | 0.011665 | 0.011497 | 0.011396 | 0.011396 | 0.011497 |
| 0.011362 | 0.011698 | 0.011295 | 0.011564 | 0.011362 | 0.011362 | 0.011295 |
| 0.011530 | 0.011732 | 0.011430 | 0.011497 | 0.011329 | 0.011732 | 0.011362 |
| 0.011362 | 0.011362 | 0.011396 | 0.011497 | 0.011396 | 0.011497 | 0.011564 |
| 0.011362 | 0.011530 | 0.011429 | 0.011530 | 0.011497 | 0.011362 | 0.011329 |
| 0.011362 | 0.011362 | 0.011430 | 0.011362 | 0.011329 | 0.011497 | 0.011362 |

|          |          |          |          |          |          |          |
|----------|----------|----------|----------|----------|----------|----------|
| 0.011396 | 0.011396 | 0.011530 | 0.011564 | 0.011463 | 0.011396 | 0.011396 |
| 0.011463 | 0.011396 | 0.011497 | 0.011362 | 0.011497 | 0.011597 | 0.011900 |
| 0.011396 | 0.011799 | 0.011405 | 0.017898 | 0.011191 | 0.011610 | 0.011758 |
| 0.011718 | 0.011764 | 0.011374 | 0.011408 | 0.011939 | 0.011785 | 0.011607 |
| 0.011582 | 0.011793 | 0.011333 | 0.011395 | 0.011333 | 0.011504 | 0.011447 |
| 0.011623 | 0.011581 | 0.011542 | 0.011259 | 0.011530 | 0.011564 | 0.011567 |
| 0.011438 | 0.011530 | 0.011530 | 0.011497 | 0.011463 | 0.011463 | 0.011430 |
| 0.011463 | 0.011396 | 0.011429 | 0.011463 | 0.011430 | 0.011362 | 0.011396 |
| 0.011396 | 0.011463 | 0.011362 | 0.011463 | 0.011497 | 0.000000 | 0.011429 |
| 0.011463 | 0.011430 | 0.011765 | 0.011765 | 0.011497 | 0.011531 | 0.011564 |
| 0.011329 | 0.011329 | 0.011362 | 0.011463 | 0.011329 | 0.011564 | 0.011564 |
| 0.011597 | 0.011597 | 0.011530 | 0.011631 | 0.011799 | 0.011633 | 0.011463 |
| 0.011463 | 0.011530 | 0.011564 | 0.011396 | 0.011463 | 0.011429 | 0.011463 |
| 0.011531 | 0.011530 | 0.011564 | 0.011530 | 0.011431 | 0.011631 | 0.011597 |
| 0.011467 | 0.011362 | 0.011396 | 0.011564 | 0.011463 | 0.011597 | 0.011564 |
| 0.011799 | 0.011504 | 0.011665 | 0.011631 | 0.011564 | 0.011732 | 0.011363 |
| 0.011532 | 0.011430 | 0.011396 | 0.011396 | 0.011463 | 0.011362 | 0.011463 |
| 0.011497 | 0.000000 | 0.011429 | 0.011463 | 0.011430 | 0.011765 | 0.011765 |
| 0.011497 | 0.011531 | 0.011597 | 0.011530 | 0.012171 | 0.011596 | 0.011517 |
| 0.011377 | 0.011546 | 0.011587 | 0.011545 | 0.011655 | 0.011578 | 0.011543 |
| 0.012125 | 0.011441 | 0.011574 | 0.011510 | 0.011784 | 0.011639 | 0.011741 |
| 0.012149 | 0.011550 | 0.011466 | 0.011463 | 0.011463 | 0.011497 | 0.011432 |
| 0.011329 | 0.011362 | 0.011497 | 0.011463 | 0.011466 | 0.011597 | 0.011565 |
| 0.011429 | 0.011362 | 0.011396 | 0.011429 | 0.011329 | 0.011396 | 0.011295 |
| 0.011362 | 0.011396 | 0.011362 | 0.011329 | 0.011430 | 0.011362 | 0.011396 |
| 0.011396 | 0.011329 | 0.011396 | 0.011430 | 0.011329 | 0.011530 | 0.011429 |
| 0.011329 | 0.011396 | 0.011262 | 0.011396 | 0.011396 | 0.011799 | 0.011429 |
| 0.011478 | 0.011396 | 0.011632 | 0.011637 | 0.011497 | 0.011497 | 0.011497 |
| 0.011497 | 0.011430 | 0.011396 | 0.011430 | 0.011530 | 0.011530 | 0.011463 |
| 0.011396 | 0.011597 | 0.011765 | 0.011497 | 0.011698 | 0.011698 | 0.011564 |
| 0.011396 | 0.011463 | 0.011497 | 0.011900 | 0.011463 | 0.011497 | 0.011463 |
| 0.011497 | 0.011429 | 0.011429 | 0.011732 | 0.011665 | 0.011698 | 0.011430 |
| 0.011530 | 0.011597 | 0.011463 | 0.011530 | 0.011497 | 0.011362 | 0.011698 |
| 0.011463 | 0.011429 | 0.011429 | 0.011597 | 0.011430 | 0.011530 | 0.011765 |
| 0.011463 | 0.011841 | 0.011833 | 0.011670 | 0.011286 | 0.011536 | 0.011318 |
| 0.011445 | 0.011878 | 0.011376 | 0.011507 | 0.011451 | 0.011467 | 0.011432 |
| 0.011519 | 0.011258 | 0.011339 | 0.011126 | 0.011330 | 0.011328 | 0.011547 |
| 0.011550 | 0.011454 | 0.011518 | 0.011412 | 0.011465 | 0.011597 | 0.011665 |
| 0.011665 | 0.011531 | 0.011635 | 0.011636 | 0.011772 | 0.011802 | 0.011463 |
| 0.011698 | 0.011564 | 0.011429 | 0.011530 | 0.011329 | 0.011564 | 0.011362 |
| 0.011430 | 0.011429 | 0.011396 | 0.011362 | 0.011396 | 0.011362 | 0.011463 |
| 0.011444 | 0.011445 | 0.011437 | 0.011471 | 0.011608 | 0.011573 | 0.011572 |
| 0.011571 | 0.011497 | 0.011319 | 0.011312 | 0.011433 | 0.011602 | 0.011603 |
| 0.011396 | 0.011467 | 0.011700 | 0.011668 | 0.011598 | 0.011632 | 0.011564 |
| 0.011497 | 0.011564 | 0.011564 | 0.011463 | 0.012035 | 0.011631 | 0.011698 |
| 0.011732 | 0.011737 | 0.011435 | 0.011511 | 0.011396 | 0.011597 | 0.011564 |
| 0.011599 | 0.011631 | 0.011631 | 0.011631 | 0.011650 | 0.011765 | 0.011407 |
| 0.011297 | 0.011303 | 0.011401 | 0.011366 | 0.011470 | 0.011284 | 0.011638 |
| 0.011438 | 0.011543 | 0.011251 | 0.011472 | 0.011430 | 0.011505 | 0.011396 |
| 0.011362 | 0.011362 | 0.011430 | 0.011396 | 0.011597 | 0.011564 | 0.011497 |
| 0.011597 | 0.011665 | 0.011396 | 0.011396 | 0.011430 | 0.011429 | 0.011432 |
| 0.011500 | 0.011429 | 0.011430 | 0.011465 | 0.011597 | 0.011665 | 0.011665 |
| 0.011531 | 0.011635 | 0.011636 | 0.011772 | 0.011802 | 0.011463 | 0.011564 |
| 0.011564 | 0.011564 | 0.011398 | 0.011513 | 0.011512 | 0.011537 | 0.011411 |
| 0.011577 | 0.011789 | 0.011526 | 0.011468 | 0.011362 | 0.011564 | 0.011430 |
| 0.011530 | 0.011463 | 0.011362 | 0.011464 | 0.011564 | 0.011567 | 0.011463 |
| 0.011362 | 0.011296 | 0.011429 | 0.011362 | 0.011295 | 0.011400 | 0.011564 |
| 0.011463 | 0.011396 | 0.011429 | 0.011463 | 0.011430 | 0.011362 | 0.011564 |
| 0.011429 | 0.011463 | 0.011463 | 0.011396 | 0.011262 | 0.011631 | 0.011362 |
| 0.011396 | 0.011799 | 0.011396 | 0.011429 | 0.011396 | 0.011765 | 0.011360 |



|          |          |          |          |          |          |          |
|----------|----------|----------|----------|----------|----------|----------|
| 0.011791 | 0.011400 | 0.011411 | 0.011624 | 0.011711 | 0.011598 | 0.011353 |
| 0.011270 | 0.011564 | 0.011665 | 0.011773 | 0.011632 | 0.011771 | 0.011901 |
| 0.011800 | 0.011838 | 0.011799 | 0.012051 | 0.011765 | 0.012640 | 0.011801 |
| 0.012540 | 0.012308 | 0.012442 | 0.012714 | 0.011765 | 0.011463 | 0.011766 |
| 0.012204 | 0.012140 | 0.011732 | 0.011631 | 0.011699 | 0.011699 | 0.011669 |
| 0.011564 | 0.011569 | 0.011631 | 0.011598 | 0.011968 | 0.011967 | 0.012036 |
| 0.011935 | 0.012035 | 0.012139 | 0.011906 | 0.012205 | 0.012212 | 0.012272 |
| 0.012205 | 0.012306 | 0.012255 | 0.012273 | 0.012274 | 0.011497 | 0.011799 |
| 0.011867 | 0.012371 | 0.011874 | 0.012102 | 0.012575 | 0.011637 | 0.011531 |
| 0.011497 | 0.011497 | 0.011968 | 0.012006 | 0.012080 | 0.011833 | 0.011498 |
| S485     | 0.011530 | 0.011530 | 0.012001 | 0.011765 | 0.011765 | 0.011832 |
| 0.011671 | 0.011603 | 0.011799 | 0.011262 | 0.011329 | 0.011296 | 0.011262 |
| 0.011295 | 0.011463 | 0.011262 | 0.011295 | 0.011362 | 0.011329 | 0.011295 |
| 0.011262 | 0.011295 | 0.011396 | 0.011262 | 0.011295 | 0.011295 | 0.011637 |
| 0.011530 | 0.011295 | 0.011195 | 0.011429 | 0.011362 | 0.011329 | 0.011362 |
| 0.011329 | 0.011429 | 0.011329 | 0.011329 | 0.011362 | 0.011329 | 0.011496 |
| 0.011262 | 0.011329 | 0.011362 | 0.011295 | 0.011396 | 0.011429 | 0.011362 |
| 0.011329 | 0.011497 | 0.011396 | 0.011664 | 0.011329 | 0.011597 | 0.011329 |
| 0.011295 | 0.011396 | 0.011463 | 0.011597 | 0.011698 | 0.011396 | 0.011496 |
| 0.011362 | 0.011429 | 0.011329 | 0.011564 | 0.011799 | 0.011329 | 0.011396 |
| 0.011295 | 0.011396 | 0.011362 | 0.011429 | 0.011362 | 0.011362 | 0.011362 |
| 0.011262 | 0.011295 | 0.011262 | 0.011362 | 0.011329 | 0.011363 | 0.011429 |
| 0.011362 | 0.011329 | 0.011396 | 0.011295 | 0.011429 | 0.011262 | 0.011329 |
| 0.011496 | 0.011429 | 0.011664 | 0.011497 | 0.011329 | 0.011564 | 0.011329 |
| 0.011505 | 0.011732 | 0.011551 | 0.011217 | 0.011247 | 0.011355 | 0.011454 |
| 0.012048 | 0.011467 | 0.011184 | 0.011564 | 0.011564 | 0.011362 | 0.011463 |
| 0.011396 | 0.011295 | 0.011295 | 0.011329 | 0.011429 | 0.011362 | 0.011228 |
| 0.011262 | 0.011429 | 0.011564 | 0.011497 | 0.011396 | 0.011362 | 0.011295 |
| 0.011262 | 0.011262 | 0.011329 | 0.011295 | 0.011497 | 0.011463 | 0.011396 |
| 0.011497 | 0.011564 | 0.011295 | 0.011295 | 0.011329 | 0.011329 | 0.011330 |
| 0.011398 | 0.011329 | 0.011329 | 0.011204 | 0.011277 | 0.011236 | 0.011329 |
| 0.011331 | 0.011266 | 0.011318 | 0.011302 | 0.011230 | 0.011266 | 0.011297 |
| 0.011564 | 0.011336 | 0.011370 | 0.011262 | 0.011268 | 0.011397 | 0.011363 |
| 0.011430 | 0.011363 | 0.011363 | 0.011329 | 0.011262 | 0.011765 | 0.011564 |
| 0.011597 | 0.011463 | 0.011329 | 0.011429 | 0.011228 | 0.011463 | 0.011262 |
| 0.011329 | 0.011329 | 0.011295 | 0.011262 | 0.011295 | 0.011262 | 0.011362 |
| 0.011329 | 0.011429 | 0.011362 | 0.011262 | 0.011363 | 0.011463 | 0.011466 |
| 0.011463 | 0.011362 | 0.011262 | 0.011195 | 0.011329 | 0.011262 | 0.011195 |
| 0.011298 | 0.011463 | 0.011262 | 0.011463 | 0.011228 | 0.011329 | 0.011295 |
| 0.011396 | 0.011295 | 0.011329 | 0.011295 | 0.011329 | 0.011195 | 0.011329 |
| 0.011362 | 0.011295 | 0.011362 | 0.011295 | 0.011195 | 0.011362 | 0.011597 |
| 0.011698 | 0.011631 | 0.011698 | 0.011465 | 0.011698 | 0.011127 | 0.011295 |
| 0.011330 | 0.011626 | 0.011335 | 0.011232 | 0.011705 | 0.011197 | 0.011296 |
| 0.011705 | 0.011604 | 0.011463 | 0.011631 | 0.011333 | 0.011564 | 0.011530 |
| 0.011463 | 0.011631 | 0.011344 | 0.011184 | 0.011270 | 0.011362 | 0.011365 |
| 0.011530 | 0.011296 | 0.011567 | 0.011635 | 0.011429 | 0.011564 | 0.011602 |
| 0.011331 | 0.011637 | 0.011433 | 0.011500 | 0.011699 | 0.011228 | 0.011431 |
| 0.011396 | 0.011329 | 0.011228 | 0.011228 | 0.011295 | 0.011295 | 0.011362 |
| 0.011295 | 0.011362 | 0.011262 | 0.011362 | 0.011295 | 0.011295 | 0.011362 |
| 0.011295 | 0.011731 | 0.011631 | 0.011664 | 0.011195 | 0.011295 | 0.011329 |
| 0.011329 | 0.011295 | 0.011362 | 0.011396 | 0.011262 | 0.011262 | 0.011262 |
| 0.011799 | 0.011429 | 0.011429 | 0.011228 | 0.011329 | 0.011497 | 0.011262 |
| 0.011262 | 0.011329 | 0.011295 | 0.011463 | 0.011262 | 0.011396 | 0.011530 |
| 0.011463 | 0.011295 | 0.011295 | 0.011228 | 0.011228 | 0.011396 | 0.011329 |
| 0.011228 | 0.011329 | 0.011195 | 0.011228 | 0.011362 | 0.011497 | 0.011262 |
| 0.011228 | 0.011362 | 0.011295 | 0.011195 | 0.011530 | 0.011195 | 0.011362 |
| 0.011402 | 0.011262 | 0.011564 | 0.011396 | 0.011429 | 0.011295 | 0.011396 |
| 0.011262 | 0.011597 | 0.011195 | 0.011463 | 0.011262 | 0.011262 | 0.011195 |
| 0.011429 | 0.011631 | 0.011329 | 0.011396 | 0.011228 | 0.011631 | 0.011262 |
| 0.011262 | 0.011262 | 0.011295 | 0.011396 | 0.011295 | 0.011396 | 0.011463 |

|          |          |          |          |          |          |          |
|----------|----------|----------|----------|----------|----------|----------|
| 0.011463 | 0.011429 | 0.011329 | 0.011429 | 0.011396 | 0.011262 | 0.011228 |
| 0.011262 | 0.011262 | 0.011329 | 0.011262 | 0.011228 | 0.011396 | 0.011262 |
| 0.011295 | 0.011295 | 0.011429 | 0.011463 | 0.011362 | 0.011295 | 0.011295 |
| 0.011362 | 0.011295 | 0.011396 | 0.011262 | 0.011396 | 0.011496 | 0.011799 |
| 0.011295 | 0.011698 | 0.011302 | 0.017823 | 0.011191 | 0.011366 | 0.011653 |
| 0.011614 | 0.011658 | 0.011322 | 0.011292 | 0.011774 | 0.011681 | 0.011303 |
| 0.011487 | 0.011487 | 0.011216 | 0.011270 | 0.011255 | 0.011356 | 0.011275 |
| 0.011482 | 0.011470 | 0.011468 | 0.011325 | 0.011429 | 0.011329 | 0.011398 |
| 0.011335 | 0.011429 | 0.011429 | 0.011396 | 0.011362 | 0.011362 | 0.011329 |
| 0.011362 | 0.011295 | 0.011329 | 0.011362 | 0.011329 | 0.011262 | 0.011094 |
| 0.011094 | 0.011362 | 0.011262 | 0.011362 | 0.011396 | 0.011429 | 0.000000 |
| 0.011362 | 0.011329 | 0.011665 | 0.011665 | 0.011396 | 0.011430 | 0.011463 |
| 0.011228 | 0.011228 | 0.011262 | 0.011362 | 0.011228 | 0.011463 | 0.011463 |
| 0.011497 | 0.011463 | 0.011429 | 0.011530 | 0.011698 | 0.011531 | 0.011362 |
| 0.011362 | 0.011429 | 0.011463 | 0.011295 | 0.011362 | 0.011329 | 0.011362 |
| 0.011430 | 0.011430 | 0.011463 | 0.011430 | 0.011330 | 0.011530 | 0.011497 |
| 0.011365 | 0.011262 | 0.011362 | 0.011463 | 0.011362 | 0.011497 | 0.011530 |
| 0.011631 | 0.011333 | 0.011564 | 0.011530 | 0.011463 | 0.011631 | 0.011262 |
| 0.011431 | 0.011329 | 0.011094 | 0.011094 | 0.011362 | 0.011262 | 0.011362 |
| 0.011396 | 0.011429 | 0.000000 | 0.011362 | 0.011329 | 0.011665 | 0.011665 |
| 0.011396 | 0.011430 | 0.011362 | 0.011295 | 0.012036 | 0.011489 | 0.011306 |
| 0.011482 | 0.011442 | 0.011552 | 0.011407 | 0.011550 | 0.011405 | 0.011439 |
| 0.011987 | 0.011199 | 0.011334 | 0.011337 | 0.011611 | 0.011536 | 0.011639 |
| 0.011978 | 0.011437 | 0.011567 | 0.011597 | 0.011530 | 0.011530 | 0.011533 |
| 0.011228 | 0.011396 | 0.011530 | 0.011496 | 0.011500 | 0.011497 | 0.011464 |
| 0.011329 | 0.011262 | 0.011295 | 0.011329 | 0.011228 | 0.011295 | 0.011195 |
| 0.011329 | 0.011362 | 0.011262 | 0.011228 | 0.011329 | 0.011262 | 0.011295 |
| 0.011295 | 0.011228 | 0.011295 | 0.011329 | 0.011228 | 0.011429 | 0.011463 |
| 0.011362 | 0.011429 | 0.011362 | 0.011362 | 0.011295 | 0.011698 | 0.011329 |
| 0.011373 | 0.011295 | 0.011531 | 0.011535 | 0.011396 | 0.011396 | 0.011396 |
| 0.011396 | 0.011329 | 0.011295 | 0.011329 | 0.011429 | 0.011429 | 0.011362 |
| 0.011362 | 0.011496 | 0.011664 | 0.011396 | 0.011597 | 0.011597 | 0.011463 |
| 0.011295 | 0.011362 | 0.011396 | 0.011799 | 0.011363 | 0.011396 | 0.011362 |
| 0.011396 | 0.011329 | 0.011329 | 0.011631 | 0.011564 | 0.011597 | 0.011329 |
| 0.011429 | 0.011497 | 0.011362 | 0.011429 | 0.011396 | 0.011262 | 0.011597 |
| 0.011362 | 0.011329 | 0.011329 | 0.011496 | 0.011329 | 0.011429 | 0.011664 |
| 0.011362 | 0.011739 | 0.011732 | 0.011548 | 0.011173 | 0.011434 | 0.011267 |
| 0.011225 | 0.011722 | 0.011271 | 0.011462 | 0.011255 | 0.011366 | 0.011379 |
| 0.011468 | 0.011192 | 0.011339 | 0.011192 | 0.011222 | 0.011328 | 0.011425 |
| 0.011437 | 0.011336 | 0.011412 | 0.011342 | 0.011363 | 0.011497 | 0.011564 |
| 0.011564 | 0.011430 | 0.011533 | 0.011535 | 0.011670 | 0.011696 | 0.011362 |
| 0.011597 | 0.011463 | 0.011329 | 0.011429 | 0.011228 | 0.011463 | 0.011262 |
| 0.011329 | 0.011329 | 0.011295 | 0.011262 | 0.011295 | 0.011262 | 0.011362 |
| 0.011340 | 0.011340 | 0.011334 | 0.011368 | 0.011505 | 0.011470 | 0.011470 |
| 0.011469 | 0.011396 | 0.011208 | 0.011204 | 0.011331 | 0.011501 | 0.011501 |
| 0.011296 | 0.011365 | 0.011599 | 0.011567 | 0.011497 | 0.011531 | 0.011329 |
| 0.011396 | 0.011396 | 0.011396 | 0.011362 | 0.011900 | 0.011530 | 0.011597 |
| 0.011631 | 0.011665 | 0.011333 | 0.011407 | 0.011295 | 0.011362 | 0.011329 |
| 0.011497 | 0.011396 | 0.011530 | 0.011530 | 0.011571 | 0.011530 | 0.011303 |
| 0.011196 | 0.011199 | 0.011298 | 0.011264 | 0.011368 | 0.011172 | 0.011536 |
| 0.011335 | 0.011367 | 0.011108 | 0.011285 | 0.011329 | 0.011402 | 0.011295 |
| 0.011262 | 0.011262 | 0.011329 | 0.011295 | 0.011497 | 0.011463 | 0.011396 |
| 0.011497 | 0.011564 | 0.011295 | 0.011295 | 0.011329 | 0.011329 | 0.011330 |
| 0.011398 | 0.011329 | 0.011329 | 0.011363 | 0.011497 | 0.011564 | 0.011564 |
| 0.011430 | 0.011533 | 0.011535 | 0.011670 | 0.011696 | 0.011362 | 0.011530 |
| 0.011329 | 0.011329 | 0.011297 | 0.011478 | 0.011408 | 0.011435 | 0.011305 |
| 0.011473 | 0.011653 | 0.011399 | 0.011366 | 0.011262 | 0.011463 | 0.011329 |
| 0.011429 | 0.011362 | 0.011262 | 0.011363 | 0.011463 | 0.011466 | 0.011362 |
| 0.011262 | 0.011195 | 0.011329 | 0.011262 | 0.011195 | 0.011298 | 0.011463 |
| 0.011362 | 0.011295 | 0.011329 | 0.011362 | 0.011329 | 0.011262 | 0.011463 |

|          |          |          |          |          |          |          |
|----------|----------|----------|----------|----------|----------|----------|
| 0.011329 | 0.011362 | 0.011362 | 0.011295 | 0.011362 | 0.011597 | 0.011262 |
| 0.011295 | 0.011698 | 0.011295 | 0.011329 | 0.011295 | 0.011664 | 0.011232 |
| 0.011678 | 0.011188 | 0.011261 | 0.011422 | 0.011549 | 0.011491 | 0.011144 |
| 0.011218 | 0.011463 | 0.011564 | 0.011671 | 0.011531 | 0.011669 | 0.011800 |
| 0.011699 | 0.011737 | 0.011698 | 0.011914 | 0.011664 | 0.012472 | 0.011700 |
| 0.012439 | 0.012139 | 0.012273 | 0.012612 | 0.011664 | 0.011362 | 0.011665 |
| 0.012069 | 0.012038 | 0.011631 | 0.011530 | 0.011598 | 0.011598 | 0.011567 |
| 0.011463 | 0.011467 | 0.011530 | 0.011497 | 0.011867 | 0.011933 | 0.011935 |
| 0.011834 | 0.011934 | 0.012038 | 0.011804 | 0.012070 | 0.012076 | 0.012137 |
| 0.012138 | 0.012171 | 0.012118 | 0.012138 | 0.012139 | 0.011262 | 0.011665 |
| 0.011766 | 0.012270 | 0.011738 | 0.012001 | 0.012474 | 0.011536 | 0.011430 |
| 0.011396 | 0.011396 | 0.011867 | 0.011842 | 0.012010 | 0.011732 | 0.011397 |
| S486     | 0.011698 | 0.011698 | 0.011967 | 0.011732 | 0.011732 | 0.011799 |
| 0.011603 | 0.011536 | 0.011799 | 0.011295 | 0.011362 | 0.011329 | 0.011295 |
| 0.011262 | 0.011496 | 0.011228 | 0.011329 | 0.011396 | 0.011362 | 0.011329 |
| 0.011295 | 0.011329 | 0.011362 | 0.011295 | 0.011329 | 0.011329 | 0.011569 |
| 0.011496 | 0.011329 | 0.011228 | 0.011396 | 0.011396 | 0.011362 | 0.011396 |
| 0.011362 | 0.011463 | 0.011362 | 0.011362 | 0.011396 | 0.011362 | 0.011530 |
| 0.011228 | 0.011362 | 0.011396 | 0.011329 | 0.011362 | 0.011463 | 0.011396 |
| 0.011362 | 0.011530 | 0.011430 | 0.011631 | 0.011362 | 0.011631 | 0.011362 |
| 0.011329 | 0.011362 | 0.011497 | 0.011631 | 0.011664 | 0.011362 | 0.011463 |
| 0.011396 | 0.011463 | 0.011362 | 0.011597 | 0.011765 | 0.011362 | 0.011429 |
| 0.011329 | 0.011429 | 0.011396 | 0.011463 | 0.011396 | 0.011396 | 0.011396 |
| 0.011295 | 0.011329 | 0.011295 | 0.011262 | 0.011362 | 0.011329 | 0.011463 |
| 0.011396 | 0.011362 | 0.011429 | 0.011329 | 0.011396 | 0.011295 | 0.011362 |
| 0.011530 | 0.011463 | 0.011698 | 0.011530 | 0.011362 | 0.011597 | 0.011362 |
| 0.011542 | 0.011695 | 0.011588 | 0.011295 | 0.011284 | 0.011391 | 0.011415 |
| 0.012048 | 0.011518 | 0.011307 | 0.011597 | 0.011597 | 0.011329 | 0.011429 |
| 0.011429 | 0.011396 | 0.011463 | 0.011362 | 0.011463 | 0.011396 | 0.011396 |
| 0.011362 | 0.011396 | 0.011664 | 0.011530 | 0.011429 | 0.011396 | 0.011329 |
| 0.011295 | 0.011228 | 0.011362 | 0.011329 | 0.011463 | 0.011429 | 0.011362 |
| 0.011463 | 0.011530 | 0.011329 | 0.011329 | 0.011362 | 0.011362 | 0.011364 |
| 0.011432 | 0.011362 | 0.011362 | 0.011240 | 0.011313 | 0.011271 | 0.011363 |
| 0.011365 | 0.011301 | 0.011355 | 0.011336 | 0.011264 | 0.011300 | 0.011330 |
| 0.011528 | 0.011370 | 0.011405 | 0.011296 | 0.011302 | 0.011430 | 0.011329 |
| 0.011397 | 0.011397 | 0.011396 | 0.011496 | 0.011429 | 0.011732 | 0.011530 |
| 0.011564 | 0.011430 | 0.011362 | 0.011396 | 0.011262 | 0.011429 | 0.011295 |
| 0.011362 | 0.011362 | 0.011329 | 0.011295 | 0.011329 | 0.011295 | 0.011396 |
| 0.011362 | 0.011463 | 0.011396 | 0.011295 | 0.011397 | 0.011497 | 0.011499 |
| 0.011497 | 0.011396 | 0.011295 | 0.011229 | 0.011362 | 0.011295 | 0.011228 |
| 0.011332 | 0.011497 | 0.011295 | 0.011497 | 0.011262 | 0.011362 | 0.011329 |
| 0.011430 | 0.011329 | 0.011362 | 0.011329 | 0.011362 | 0.011228 | 0.011362 |
| 0.011396 | 0.011329 | 0.011396 | 0.011329 | 0.011362 | 0.011396 | 0.011631 |
| 0.011664 | 0.011597 | 0.011665 | 0.011498 | 0.011665 | 0.011362 | 0.011329 |
| 0.011297 | 0.011545 | 0.011472 | 0.011266 | 0.011671 | 0.011231 | 0.011375 |
| 0.011637 | 0.011570 | 0.011530 | 0.011732 | 0.011436 | 0.011597 | 0.011564 |
| 0.011496 | 0.011664 | 0.011522 | 0.011349 | 0.011354 | 0.011396 | 0.011466 |
| 0.011564 | 0.011465 | 0.011601 | 0.011669 | 0.011597 | 0.011665 | 0.011772 |
| 0.011500 | 0.011671 | 0.011602 | 0.011534 | 0.011800 | 0.011262 | 0.011465 |
| 0.011429 | 0.011362 | 0.011262 | 0.011262 | 0.011329 | 0.011329 | 0.011396 |
| 0.011329 | 0.011396 | 0.011295 | 0.011329 | 0.011329 | 0.011329 | 0.011396 |
| 0.011329 | 0.011698 | 0.011597 | 0.011631 | 0.011228 | 0.011329 | 0.011362 |
| 0.011362 | 0.011329 | 0.011396 | 0.011362 | 0.011295 | 0.011295 | 0.011295 |
| 0.011765 | 0.011329 | 0.011463 | 0.011262 | 0.011362 | 0.011530 | 0.011295 |
| 0.011295 | 0.011362 | 0.011329 | 0.011497 | 0.011295 | 0.011429 | 0.011564 |
| 0.011496 | 0.011329 | 0.011329 | 0.011262 | 0.011262 | 0.011429 | 0.011362 |
| 0.011262 | 0.011362 | 0.011228 | 0.011262 | 0.011396 | 0.011463 | 0.011295 |
| 0.011262 | 0.011396 | 0.011329 | 0.011228 | 0.011496 | 0.011228 | 0.011396 |
| 0.011471 | 0.011295 | 0.011530 | 0.011430 | 0.011396 | 0.011329 | 0.011429 |
| 0.011295 | 0.011631 | 0.011228 | 0.011429 | 0.011228 | 0.011228 | 0.011228 |

|          |          |          |          |          |          |          |
|----------|----------|----------|----------|----------|----------|----------|
| 0.011463 | 0.011598 | 0.011362 | 0.011429 | 0.011262 | 0.011597 | 0.011228 |
| 0.011295 | 0.011295 | 0.011329 | 0.011429 | 0.011329 | 0.011429 | 0.011496 |
| 0.011497 | 0.011463 | 0.011362 | 0.011463 | 0.011429 | 0.011295 | 0.011262 |
| 0.011295 | 0.011295 | 0.011362 | 0.011228 | 0.011262 | 0.011429 | 0.011295 |
| 0.011262 | 0.011329 | 0.011463 | 0.011429 | 0.011396 | 0.011329 | 0.011329 |
| 0.011396 | 0.011329 | 0.011429 | 0.011295 | 0.011429 | 0.011530 | 0.011765 |
| 0.011329 | 0.011664 | 0.011336 | 0.017861 | 0.011387 | 0.011427 | 0.011618 |
| 0.011579 | 0.011623 | 0.011479 | 0.011466 | 0.011829 | 0.011647 | 0.011546 |
| 0.011535 | 0.011671 | 0.011255 | 0.011353 | 0.011255 | 0.011406 | 0.011361 |
| 0.011529 | 0.011433 | 0.011431 | 0.011193 | 0.011463 | 0.011497 | 0.011500 |
| 0.011369 | 0.011463 | 0.011463 | 0.011362 | 0.011396 | 0.011396 | 0.011362 |
| 0.011396 | 0.011329 | 0.011362 | 0.011396 | 0.011362 | 0.011295 | 0.011329 |
| 0.011329 | 0.011396 | 0.011295 | 0.011396 | 0.011430 | 0.011463 | 0.011362 |
| 0.000000 | 0.011295 | 0.011631 | 0.011631 | 0.011430 | 0.011464 | 0.011497 |
| 0.011262 | 0.011262 | 0.011295 | 0.011396 | 0.011262 | 0.011497 | 0.011497 |
| 0.011530 | 0.011530 | 0.011463 | 0.011564 | 0.011665 | 0.011565 | 0.011396 |
| 0.011396 | 0.011463 | 0.011497 | 0.011329 | 0.011396 | 0.011362 | 0.011396 |
| 0.011463 | 0.011463 | 0.011497 | 0.011463 | 0.011363 | 0.011564 | 0.011530 |
| 0.011399 | 0.011295 | 0.011396 | 0.011497 | 0.011396 | 0.011463 | 0.011564 |
| 0.011732 | 0.011436 | 0.011597 | 0.011564 | 0.011496 | 0.011664 | 0.011295 |
| 0.011464 | 0.011363 | 0.011329 | 0.011329 | 0.011396 | 0.011295 | 0.011396 |
| 0.011430 | 0.011463 | 0.011362 | 0.000000 | 0.011295 | 0.011631 | 0.011631 |
| 0.011430 | 0.011464 | 0.011530 | 0.011463 | 0.012036 | 0.011524 | 0.011447 |
| 0.011517 | 0.011476 | 0.011587 | 0.011476 | 0.011585 | 0.011508 | 0.011474 |
| 0.011987 | 0.011372 | 0.011505 | 0.011441 | 0.011714 | 0.011570 | 0.011673 |
| 0.012012 | 0.011475 | 0.011635 | 0.011698 | 0.011564 | 0.011497 | 0.011601 |
| 0.011262 | 0.011429 | 0.011564 | 0.011530 | 0.011533 | 0.011463 | 0.011431 |
| 0.011362 | 0.011295 | 0.011329 | 0.011362 | 0.011262 | 0.011329 | 0.011228 |
| 0.011295 | 0.011329 | 0.011295 | 0.011262 | 0.011362 | 0.011295 | 0.011329 |
| 0.011329 | 0.011262 | 0.011329 | 0.011362 | 0.011262 | 0.011463 | 0.011496 |
| 0.011396 | 0.011396 | 0.011396 | 0.011396 | 0.011329 | 0.011664 | 0.011362 |
| 0.011338 | 0.011329 | 0.011497 | 0.011501 | 0.011429 | 0.011429 | 0.011429 |
| 0.011429 | 0.011362 | 0.011329 | 0.011362 | 0.011463 | 0.011463 | 0.011396 |
| 0.011396 | 0.011530 | 0.011631 | 0.011429 | 0.011631 | 0.011631 | 0.011496 |
| 0.011329 | 0.011396 | 0.011429 | 0.011765 | 0.011396 | 0.011429 | 0.011396 |
| 0.011429 | 0.011295 | 0.011295 | 0.011597 | 0.011597 | 0.011564 | 0.011362 |
| 0.011463 | 0.011530 | 0.011396 | 0.011463 | 0.011429 | 0.011295 | 0.011564 |
| 0.011396 | 0.011362 | 0.011295 | 0.011530 | 0.011362 | 0.011463 | 0.011698 |
| 0.011396 | 0.011671 | 0.011698 | 0.011507 | 0.011229 | 0.011400 | 0.011318 |
| 0.011335 | 0.011722 | 0.011306 | 0.011462 | 0.011255 | 0.011467 | 0.011432 |
| 0.011519 | 0.011323 | 0.011505 | 0.011390 | 0.011384 | 0.011529 | 0.011466 |
| 0.011475 | 0.011375 | 0.011377 | 0.011377 | 0.011397 | 0.011463 | 0.011530 |
| 0.011530 | 0.011396 | 0.011500 | 0.011501 | 0.011636 | 0.011626 | 0.011396 |
| 0.011564 | 0.011430 | 0.011362 | 0.011396 | 0.011262 | 0.011429 | 0.011295 |
| 0.011362 | 0.011362 | 0.011329 | 0.011295 | 0.011329 | 0.011295 | 0.011396 |
| 0.011375 | 0.011375 | 0.011368 | 0.011403 | 0.011539 | 0.011504 | 0.011504 |
| 0.011503 | 0.011430 | 0.011208 | 0.011240 | 0.011365 | 0.011535 | 0.011535 |
| 0.011329 | 0.011399 | 0.011632 | 0.011601 | 0.011531 | 0.011565 | 0.011496 |
| 0.011429 | 0.011496 | 0.011496 | 0.011396 | 0.011900 | 0.011564 | 0.011631 |
| 0.011665 | 0.011665 | 0.011367 | 0.011441 | 0.011329 | 0.011530 | 0.011496 |
| 0.011531 | 0.011564 | 0.011564 | 0.011564 | 0.011728 | 0.011698 | 0.011338 |
| 0.011229 | 0.011233 | 0.011333 | 0.011298 | 0.011333 | 0.011247 | 0.011502 |
| 0.011369 | 0.011367 | 0.011203 | 0.011360 | 0.011363 | 0.011437 | 0.011329 |
| 0.011295 | 0.011228 | 0.011362 | 0.011329 | 0.011463 | 0.011429 | 0.011362 |
| 0.011463 | 0.011530 | 0.011329 | 0.011329 | 0.011362 | 0.011362 | 0.011364 |
| 0.011432 | 0.011362 | 0.011362 | 0.011397 | 0.011463 | 0.011530 | 0.011530 |
| 0.011396 | 0.011500 | 0.011501 | 0.011636 | 0.011626 | 0.011396 | 0.011564 |
| 0.011496 | 0.011496 | 0.011331 | 0.011513 | 0.011442 | 0.011469 | 0.011340 |
| 0.011508 | 0.011698 | 0.011483 | 0.011400 | 0.011295 | 0.011497 | 0.011362 |
| 0.011463 | 0.011396 | 0.011295 | 0.011397 | 0.011497 | 0.011499 | 0.011396 |

|          |          |          |          |          |          |          |
|----------|----------|----------|----------|----------|----------|----------|
| 0.011295 | 0.011229 | 0.011362 | 0.011295 | 0.011228 | 0.011332 | 0.011497 |
| 0.011396 | 0.011329 | 0.011362 | 0.011396 | 0.011362 | 0.011295 | 0.011430 |
| 0.011362 | 0.011396 | 0.011396 | 0.011329 | 0.011396 | 0.011631 | 0.011228 |
| 0.011329 | 0.011664 | 0.011329 | 0.011362 | 0.011329 | 0.011631 | 0.011317 |
| 0.011678 | 0.011315 | 0.011211 | 0.011463 | 0.011549 | 0.011455 | 0.011269 |
| 0.011270 | 0.011429 | 0.011530 | 0.011637 | 0.011498 | 0.011635 | 0.011766 |
| 0.011666 | 0.011703 | 0.011664 | 0.011914 | 0.011631 | 0.012505 | 0.011667 |
| 0.012406 | 0.012173 | 0.012307 | 0.012579 | 0.011631 | 0.011329 | 0.011631 |
| 0.012070 | 0.011937 | 0.011597 | 0.011497 | 0.011565 | 0.011565 | 0.011534 |
| 0.011429 | 0.011433 | 0.011496 | 0.011464 | 0.011834 | 0.011900 | 0.011901 |
| 0.011800 | 0.011901 | 0.012004 | 0.011770 | 0.012070 | 0.012076 | 0.012137 |
| 0.012138 | 0.012172 | 0.012118 | 0.012138 | 0.012139 | 0.011429 | 0.011665 |
| 0.011733 | 0.012236 | 0.011738 | 0.011967 | 0.012440 | 0.011502 | 0.011396 |
| 0.011362 | 0.011362 | 0.011833 | 0.011842 | 0.011975 | 0.011698 | 0.011363 |
| S487     | 0.011665 | 0.011665 | 0.011934 | 0.011698 | 0.011698 | 0.011766 |
| 0.011604 | 0.011536 | 0.011698 | 0.011262 | 0.011329 | 0.011296 | 0.011262 |
| 0.011228 | 0.011463 | 0.011195 | 0.011295 | 0.011362 | 0.011329 | 0.011295 |
| 0.011262 | 0.011295 | 0.011329 | 0.011262 | 0.011296 | 0.011295 | 0.011570 |
| 0.011463 | 0.011295 | 0.011195 | 0.011362 | 0.011362 | 0.011329 | 0.011362 |
| 0.011329 | 0.011430 | 0.011329 | 0.011329 | 0.011362 | 0.011329 | 0.011497 |
| 0.011195 | 0.011329 | 0.011362 | 0.011295 | 0.011329 | 0.011430 | 0.011362 |
| 0.011329 | 0.011497 | 0.011396 | 0.011598 | 0.011329 | 0.011597 | 0.011329 |
| 0.011295 | 0.011329 | 0.011463 | 0.011597 | 0.011564 | 0.011329 | 0.011430 |
| 0.011362 | 0.011430 | 0.011329 | 0.011564 | 0.011732 | 0.011329 | 0.011396 |
| 0.011295 | 0.011396 | 0.011362 | 0.011430 | 0.011362 | 0.011362 | 0.011362 |
| 0.011262 | 0.011295 | 0.011262 | 0.011295 | 0.011329 | 0.011363 | 0.011429 |
| 0.011362 | 0.011329 | 0.011396 | 0.011295 | 0.011362 | 0.011262 | 0.011329 |
| 0.011497 | 0.011429 | 0.011665 | 0.011497 | 0.011329 | 0.011564 | 0.011329 |
| 0.011505 | 0.011658 | 0.011551 | 0.011216 | 0.011247 | 0.011355 | 0.011375 |
| 0.012011 | 0.011416 | 0.011266 | 0.011564 | 0.011564 | 0.011295 | 0.011396 |
| 0.011396 | 0.011362 | 0.011429 | 0.011329 | 0.011430 | 0.011362 | 0.011362 |
| 0.011329 | 0.011362 | 0.011631 | 0.011497 | 0.011396 | 0.011363 | 0.011295 |
| 0.011262 | 0.011195 | 0.011329 | 0.011295 | 0.011430 | 0.011396 | 0.011329 |
| 0.011430 | 0.011497 | 0.011295 | 0.011295 | 0.011329 | 0.011329 | 0.011330 |
| 0.011398 | 0.011329 | 0.011329 | 0.011204 | 0.011277 | 0.011236 | 0.011329 |
| 0.011331 | 0.011266 | 0.011318 | 0.011302 | 0.011230 | 0.011266 | 0.011297 |
| 0.011492 | 0.011336 | 0.011370 | 0.011262 | 0.011268 | 0.011397 | 0.011296 |
| 0.011363 | 0.011364 | 0.011363 | 0.011463 | 0.011396 | 0.011766 | 0.011497 |
| 0.011530 | 0.011396 | 0.011329 | 0.011363 | 0.011228 | 0.011396 | 0.011262 |
| 0.011329 | 0.011329 | 0.011295 | 0.011262 | 0.011295 | 0.011262 | 0.011362 |
| 0.011329 | 0.011430 | 0.011362 | 0.011262 | 0.011363 | 0.011463 | 0.011466 |
| 0.011463 | 0.011362 | 0.011262 | 0.011195 | 0.011329 | 0.011262 | 0.011195 |
| 0.011298 | 0.011463 | 0.011262 | 0.011463 | 0.011228 | 0.011329 | 0.011295 |
| 0.011396 | 0.011295 | 0.011329 | 0.011295 | 0.011329 | 0.011195 | 0.011329 |
| 0.011362 | 0.011295 | 0.011362 | 0.011295 | 0.011329 | 0.011362 | 0.011597 |
| 0.011631 | 0.011564 | 0.011631 | 0.011465 | 0.011631 | 0.011329 | 0.011295 |
| 0.011263 | 0.011505 | 0.011380 | 0.011232 | 0.011637 | 0.011197 | 0.011296 |
| 0.011570 | 0.011536 | 0.011497 | 0.011698 | 0.011402 | 0.011564 | 0.011531 |
| 0.011463 | 0.011631 | 0.011487 | 0.011307 | 0.011396 | 0.011363 | 0.011433 |
| 0.011530 | 0.011431 | 0.011568 | 0.011602 | 0.011564 | 0.011631 | 0.011738 |
| 0.011466 | 0.011603 | 0.011568 | 0.011500 | 0.011767 | 0.011228 | 0.011431 |
| 0.011396 | 0.011329 | 0.011228 | 0.011228 | 0.011295 | 0.011295 | 0.011362 |
| 0.011295 | 0.011362 | 0.011262 | 0.011295 | 0.011295 | 0.011295 | 0.011362 |
| 0.011295 | 0.011665 | 0.011564 | 0.011598 | 0.011195 | 0.011295 | 0.011329 |
| 0.011329 | 0.011295 | 0.011362 | 0.011329 | 0.011262 | 0.011262 | 0.011262 |
| 0.011732 | 0.011362 | 0.011430 | 0.011228 | 0.011329 | 0.011497 | 0.011262 |
| 0.011262 | 0.011329 | 0.011295 | 0.011463 | 0.011262 | 0.011396 | 0.011530 |
| 0.011463 | 0.011295 | 0.011295 | 0.011228 | 0.011228 | 0.011396 | 0.011329 |
| 0.011228 | 0.011329 | 0.011195 | 0.011228 | 0.011362 | 0.011430 | 0.011262 |
| 0.011228 | 0.011362 | 0.011296 | 0.011195 | 0.011463 | 0.011195 | 0.011362 |

|          |          |          |          |          |          |          |
|----------|----------|----------|----------|----------|----------|----------|
| 0.011437 | 0.011262 | 0.011497 | 0.011396 | 0.011362 | 0.011295 | 0.011396 |
| 0.011262 | 0.011597 | 0.011195 | 0.011396 | 0.011195 | 0.011195 | 0.011195 |
| 0.011430 | 0.011564 | 0.011329 | 0.011396 | 0.011228 | 0.011564 | 0.011195 |
| 0.011262 | 0.011262 | 0.011295 | 0.011396 | 0.011295 | 0.011396 | 0.011463 |
| 0.011463 | 0.011430 | 0.011329 | 0.011430 | 0.011396 | 0.011195 | 0.011228 |
| 0.011262 | 0.011195 | 0.011329 | 0.011195 | 0.011228 | 0.011396 | 0.011262 |
| 0.011228 | 0.011295 | 0.011430 | 0.011396 | 0.011362 | 0.011295 | 0.011295 |
| 0.011362 | 0.011295 | 0.011396 | 0.011262 | 0.011396 | 0.011497 | 0.011665 |
| 0.011295 | 0.011631 | 0.011302 | 0.017823 | 0.011322 | 0.011427 | 0.011583 |
| 0.011545 | 0.011588 | 0.011427 | 0.011350 | 0.011719 | 0.011613 | 0.011425 |
| 0.011440 | 0.011549 | 0.011216 | 0.011312 | 0.011216 | 0.011307 | 0.011275 |
| 0.011436 | 0.011395 | 0.011394 | 0.011193 | 0.011430 | 0.011463 | 0.011466 |
| 0.011335 | 0.011430 | 0.011430 | 0.011329 | 0.011362 | 0.011363 | 0.011329 |
| 0.011362 | 0.011295 | 0.011329 | 0.011362 | 0.011329 | 0.011262 | 0.011295 |
| 0.011295 | 0.011362 | 0.011262 | 0.011363 | 0.011396 | 0.011430 | 0.011329 |
| 0.011295 | 0.000000 | 0.011598 | 0.011597 | 0.011396 | 0.011430 | 0.011463 |
| 0.011228 | 0.011228 | 0.011262 | 0.011362 | 0.011228 | 0.011463 | 0.011463 |
| 0.011497 | 0.011497 | 0.011430 | 0.011530 | 0.011631 | 0.011532 | 0.011362 |
| 0.011362 | 0.011430 | 0.011463 | 0.011295 | 0.011362 | 0.011329 | 0.011362 |
| 0.011430 | 0.011430 | 0.011463 | 0.011430 | 0.011330 | 0.011530 | 0.011497 |
| 0.011365 | 0.011262 | 0.011362 | 0.011463 | 0.011363 | 0.011430 | 0.011530 |
| 0.011698 | 0.011402 | 0.011564 | 0.011531 | 0.011463 | 0.011631 | 0.011262 |
| 0.011431 | 0.011329 | 0.011295 | 0.011295 | 0.011362 | 0.011262 | 0.011363 |
| 0.011396 | 0.011430 | 0.011329 | 0.011295 | 0.000000 | 0.011598 | 0.011597 |
| 0.011396 | 0.011430 | 0.011497 | 0.011429 | 0.012002 | 0.011489 | 0.011412 |
| 0.011482 | 0.011442 | 0.011552 | 0.011441 | 0.011550 | 0.011474 | 0.011440 |
| 0.011953 | 0.011337 | 0.011471 | 0.011406 | 0.011680 | 0.011537 | 0.011639 |
| 0.011978 | 0.011437 | 0.011365 | 0.011362 | 0.011362 | 0.011329 | 0.011331 |
| 0.011228 | 0.011262 | 0.011396 | 0.011362 | 0.011364 | 0.011429 | 0.011397 |
| 0.011329 | 0.011262 | 0.011295 | 0.011329 | 0.011228 | 0.011295 | 0.011195 |
| 0.011262 | 0.011295 | 0.011262 | 0.011228 | 0.011329 | 0.011262 | 0.011295 |
| 0.011295 | 0.011228 | 0.011295 | 0.011329 | 0.011228 | 0.011430 | 0.011463 |
| 0.011362 | 0.011362 | 0.011362 | 0.011362 | 0.011295 | 0.011564 | 0.011329 |
| 0.011304 | 0.011295 | 0.011463 | 0.011467 | 0.011396 | 0.011396 | 0.011396 |
| 0.011329 | 0.011329 | 0.011295 | 0.011329 | 0.011430 | 0.011430 | 0.011362 |
| 0.011362 | 0.011497 | 0.011597 | 0.011396 | 0.011598 | 0.011598 | 0.011463 |
| 0.011295 | 0.011362 | 0.011329 | 0.011732 | 0.011363 | 0.011396 | 0.011362 |
| 0.011396 | 0.011262 | 0.011262 | 0.011564 | 0.011564 | 0.011530 | 0.011329 |
| 0.011430 | 0.011497 | 0.011362 | 0.011430 | 0.011396 | 0.011262 | 0.011530 |
| 0.011362 | 0.011329 | 0.011262 | 0.011497 | 0.011329 | 0.011430 | 0.011665 |
| 0.011362 | 0.011672 | 0.011665 | 0.011467 | 0.011230 | 0.011366 | 0.011215 |
| 0.011225 | 0.011683 | 0.011271 | 0.011373 | 0.011255 | 0.011417 | 0.011326 |
| 0.011417 | 0.011258 | 0.011394 | 0.011258 | 0.011276 | 0.011462 | 0.011425 |
| 0.011437 | 0.011336 | 0.011342 | 0.011342 | 0.011364 | 0.011429 | 0.011497 |
| 0.011497 | 0.011363 | 0.011466 | 0.011467 | 0.011603 | 0.011626 | 0.011362 |
| 0.011530 | 0.011396 | 0.011329 | 0.011363 | 0.011228 | 0.011396 | 0.011262 |
| 0.011329 | 0.011329 | 0.011295 | 0.011262 | 0.011295 | 0.011262 | 0.011362 |
| 0.011340 | 0.011340 | 0.011334 | 0.011368 | 0.011505 | 0.011470 | 0.011402 |
| 0.011469 | 0.011396 | 0.011208 | 0.011168 | 0.011331 | 0.011501 | 0.011501 |
| 0.011296 | 0.011365 | 0.011599 | 0.011567 | 0.011497 | 0.011531 | 0.011463 |
| 0.011396 | 0.011463 | 0.011463 | 0.011362 | 0.011867 | 0.011530 | 0.011598 |
| 0.011631 | 0.011630 | 0.011333 | 0.011407 | 0.011295 | 0.011497 | 0.011463 |
| 0.011498 | 0.011530 | 0.011530 | 0.011530 | 0.011689 | 0.011665 | 0.011303 |
| 0.011196 | 0.011199 | 0.011299 | 0.011264 | 0.011299 | 0.011172 | 0.011468 |
| 0.011335 | 0.011367 | 0.011203 | 0.011360 | 0.011329 | 0.011402 | 0.011295 |
| 0.011262 | 0.011195 | 0.011329 | 0.011295 | 0.011430 | 0.011396 | 0.011329 |
| 0.011430 | 0.011497 | 0.011295 | 0.011295 | 0.011329 | 0.011329 | 0.011330 |
| 0.011398 | 0.011329 | 0.011329 | 0.011364 | 0.011429 | 0.011497 | 0.011497 |
| 0.011363 | 0.011466 | 0.011467 | 0.011603 | 0.011626 | 0.011362 | 0.011530 |
| 0.011463 | 0.011463 | 0.011297 | 0.011478 | 0.011408 | 0.011435 | 0.011305 |

|          |          |          |          |          |          |          |
|----------|----------|----------|----------|----------|----------|----------|
| 0.011473 | 0.011516 | 0.011399 | 0.011366 | 0.011262 | 0.011463 | 0.011329 |
| 0.011430 | 0.011362 | 0.011262 | 0.011363 | 0.011463 | 0.011466 | 0.011362 |
| 0.011262 | 0.011195 | 0.011329 | 0.011262 | 0.011195 | 0.011298 | 0.011463 |
| 0.011362 | 0.011295 | 0.011329 | 0.011362 | 0.011329 | 0.011262 | 0.011396 |
| 0.011329 | 0.011362 | 0.011362 | 0.011295 | 0.011362 | 0.011598 | 0.011195 |
| 0.011295 | 0.011564 | 0.011295 | 0.011329 | 0.011295 | 0.011598 | 0.011275 |
| 0.011679 | 0.011273 | 0.011211 | 0.011423 | 0.011508 | 0.011419 | 0.011227 |
| 0.011165 | 0.011396 | 0.011497 | 0.011603 | 0.011464 | 0.011601 | 0.011733 |
| 0.011632 | 0.011669 | 0.011631 | 0.011880 | 0.011598 | 0.012472 | 0.011633 |
| 0.012372 | 0.012139 | 0.012274 | 0.012545 | 0.011597 | 0.011295 | 0.011598 |
| 0.012036 | 0.011971 | 0.011564 | 0.011463 | 0.011531 | 0.011531 | 0.011500 |
| 0.011396 | 0.011399 | 0.011463 | 0.011430 | 0.011800 | 0.011867 | 0.011867 |
| 0.011767 | 0.011867 | 0.011971 | 0.011737 | 0.012037 | 0.012042 | 0.012104 |
| 0.012104 | 0.012138 | 0.012084 | 0.012104 | 0.012106 | 0.011396 | 0.011632 |
| 0.011699 | 0.012203 | 0.011704 | 0.011934 | 0.012406 | 0.011468 | 0.011363 |
| 0.011329 | 0.011329 | 0.011800 | 0.011801 | 0.011940 | 0.011665 | 0.011330 |
| S488     | 0.012001 | 0.012001 | 0.012068 | 0.011833 | 0.011833 | 0.011900 |
| 0.011400 | 0.011332 | 0.011833 | 0.011598 | 0.011665 | 0.011632 | 0.011597 |
| 0.011564 | 0.011799 | 0.011530 | 0.011631 | 0.011698 | 0.011665 | 0.011631 |
| 0.011597 | 0.011631 | 0.011463 | 0.011598 | 0.011598 | 0.011631 | 0.011366 |
| 0.011598 | 0.011631 | 0.011530 | 0.011497 | 0.011698 | 0.011665 | 0.011698 |
| 0.011665 | 0.011765 | 0.011665 | 0.011665 | 0.011698 | 0.011665 | 0.011833 |
| 0.011530 | 0.011665 | 0.011698 | 0.011631 | 0.011665 | 0.011765 | 0.011698 |
| 0.011665 | 0.011833 | 0.011732 | 0.011396 | 0.011665 | 0.011934 | 0.011665 |
| 0.011631 | 0.011665 | 0.011799 | 0.011934 | 0.011362 | 0.011665 | 0.011765 |
| 0.011698 | 0.011766 | 0.011665 | 0.011900 | 0.011530 | 0.011665 | 0.011732 |
| 0.011631 | 0.011732 | 0.011698 | 0.011765 | 0.011698 | 0.011698 | 0.011698 |
| 0.011597 | 0.011631 | 0.011597 | 0.011631 | 0.011665 | 0.011700 | 0.011765 |
| 0.011698 | 0.011665 | 0.011732 | 0.011631 | 0.011564 | 0.011597 | 0.011665 |
| 0.011833 | 0.011765 | 0.011530 | 0.011833 | 0.011665 | 0.011900 | 0.011665 |
| 0.011839 | 0.011396 | 0.011815 | 0.011529 | 0.011508 | 0.011686 | 0.011415 |
| 0.012011 | 0.011315 | 0.011472 | 0.011900 | 0.011900 | 0.011631 | 0.011530 |
| 0.011732 | 0.011698 | 0.011765 | 0.011665 | 0.011766 | 0.011698 | 0.011698 |
| 0.011665 | 0.011698 | 0.011967 | 0.011833 | 0.011732 | 0.011699 | 0.011631 |
| 0.011597 | 0.011530 | 0.011665 | 0.011631 | 0.011564 | 0.011530 | 0.011463 |
| 0.011564 | 0.011631 | 0.011631 | 0.011631 | 0.011665 | 0.011665 | 0.011668 |
| 0.011736 | 0.011665 | 0.011665 | 0.011456 | 0.011530 | 0.011516 | 0.011665 |
| 0.011602 | 0.011507 | 0.011577 | 0.011578 | 0.011570 | 0.011540 | 0.011634 |
| 0.011492 | 0.011612 | 0.011646 | 0.011598 | 0.011544 | 0.011733 | 0.011632 |
| 0.011699 | 0.011701 | 0.011699 | 0.011799 | 0.011732 | 0.012102 | 0.011833 |
| 0.011665 | 0.011732 | 0.011665 | 0.011698 | 0.011564 | 0.011530 | 0.011598 |
| 0.011665 | 0.011665 | 0.011631 | 0.011597 | 0.011631 | 0.011597 | 0.011698 |
| 0.011665 | 0.011765 | 0.011698 | 0.011597 | 0.011700 | 0.011799 | 0.011804 |
| 0.011799 | 0.011698 | 0.011597 | 0.011532 | 0.011665 | 0.011597 | 0.011530 |
| 0.011536 | 0.011799 | 0.011598 | 0.011799 | 0.011564 | 0.011665 | 0.011631 |
| 0.011732 | 0.011631 | 0.011665 | 0.011631 | 0.011665 | 0.011530 | 0.011665 |
| 0.011698 | 0.011631 | 0.011698 | 0.011631 | 0.011665 | 0.011698 | 0.011934 |
| 0.011429 | 0.011362 | 0.011429 | 0.011802 | 0.011362 | 0.011665 | 0.011631 |
| 0.011601 | 0.011909 | 0.011746 | 0.011575 | 0.011433 | 0.011538 | 0.011729 |
| 0.011434 | 0.011604 | 0.011833 | 0.012035 | 0.011743 | 0.011900 | 0.011867 |
| 0.011799 | 0.011967 | 0.011842 | 0.011720 | 0.011689 | 0.011699 | 0.011771 |
| 0.011867 | 0.011769 | 0.011906 | 0.011974 | 0.011900 | 0.011968 | 0.012077 |
| 0.011805 | 0.011977 | 0.011839 | 0.011838 | 0.012104 | 0.011564 | 0.011768 |
| 0.011732 | 0.011665 | 0.011564 | 0.011564 | 0.011631 | 0.011631 | 0.011698 |
| 0.011631 | 0.011698 | 0.011597 | 0.011631 | 0.011631 | 0.011631 | 0.011698 |
| 0.011631 | 0.011463 | 0.011362 | 0.011396 | 0.011530 | 0.011631 | 0.011665 |
| 0.011665 | 0.011564 | 0.011698 | 0.011665 | 0.011597 | 0.011597 | 0.011597 |
| 0.011530 | 0.011698 | 0.011765 | 0.011564 | 0.011665 | 0.011833 | 0.011597 |
| 0.011597 | 0.011665 | 0.011631 | 0.011799 | 0.011597 | 0.011530 | 0.011665 |
| 0.011598 | 0.011631 | 0.011631 | 0.011564 | 0.011564 | 0.011732 | 0.011665 |

|          |          |          |          |          |          |          |
|----------|----------|----------|----------|----------|----------|----------|
| 0.011564 | 0.011665 | 0.011530 | 0.011564 | 0.011698 | 0.011497 | 0.011598 |
| 0.011564 | 0.011698 | 0.011632 | 0.011530 | 0.011228 | 0.011530 | 0.011698 |
| 0.011780 | 0.011598 | 0.011295 | 0.011732 | 0.011698 | 0.011631 | 0.011732 |
| 0.011597 | 0.011934 | 0.011530 | 0.011598 | 0.011530 | 0.011530 | 0.011530 |
| 0.011765 | 0.011632 | 0.011665 | 0.011732 | 0.011564 | 0.011362 | 0.011530 |
| 0.011597 | 0.011597 | 0.011631 | 0.011732 | 0.011631 | 0.011732 | 0.011799 |
| 0.011799 | 0.011765 | 0.011665 | 0.011766 | 0.011732 | 0.011597 | 0.011564 |
| 0.011597 | 0.011597 | 0.011665 | 0.011530 | 0.011564 | 0.011732 | 0.011597 |
| 0.011497 | 0.011631 | 0.011765 | 0.011732 | 0.011698 | 0.011631 | 0.011631 |
| 0.011698 | 0.011631 | 0.011732 | 0.011597 | 0.011732 | 0.011833 | 0.011463 |
| 0.011631 | 0.011362 | 0.011612 | 0.018125 | 0.011322 | 0.011733 | 0.011339 |
| 0.011337 | 0.011342 | 0.011794 | 0.011524 | 0.011445 | 0.011405 | 0.011668 |
| 0.011582 | 0.011488 | 0.011450 | 0.011605 | 0.011451 | 0.011603 | 0.011620 |
| 0.011295 | 0.011395 | 0.011283 | 0.011259 | 0.011766 | 0.011799 | 0.011804 |
| 0.011679 | 0.011765 | 0.011765 | 0.011665 | 0.011698 | 0.011699 | 0.011665 |
| 0.011698 | 0.011631 | 0.011665 | 0.011698 | 0.011665 | 0.011597 | 0.011631 |
| 0.011631 | 0.011698 | 0.011597 | 0.011698 | 0.011732 | 0.011765 | 0.011665 |
| 0.011631 | 0.011598 | 0.000000 | 0.000000 | 0.011732 | 0.011767 | 0.011799 |
| 0.011564 | 0.011564 | 0.011597 | 0.011698 | 0.011564 | 0.011799 | 0.011799 |
| 0.011833 | 0.011833 | 0.011765 | 0.011866 | 0.011362 | 0.011869 | 0.011698 |
| 0.011698 | 0.011765 | 0.011799 | 0.011631 | 0.011698 | 0.011665 | 0.011698 |
| 0.011766 | 0.011766 | 0.011799 | 0.011766 | 0.011666 | 0.011866 | 0.011833 |
| 0.011704 | 0.011597 | 0.011698 | 0.011799 | 0.011698 | 0.011766 | 0.011866 |
| 0.012035 | 0.011743 | 0.011900 | 0.011867 | 0.011799 | 0.011967 | 0.011598 |
| 0.011768 | 0.011665 | 0.011631 | 0.011631 | 0.011698 | 0.011597 | 0.011698 |
| 0.011732 | 0.011765 | 0.011665 | 0.011631 | 0.011598 | 0.000000 | 0.000000 |
| 0.011732 | 0.011767 | 0.011833 | 0.011765 | 0.012339 | 0.011847 | 0.011764 |
| 0.011834 | 0.011789 | 0.011904 | 0.011788 | 0.011901 | 0.011819 | 0.011716 |
| 0.012297 | 0.011684 | 0.011814 | 0.011752 | 0.012025 | 0.011877 | 0.011980 |
| 0.012319 | 0.011814 | 0.011703 | 0.011698 | 0.011698 | 0.011463 | 0.011669 |
| 0.011564 | 0.011597 | 0.011732 | 0.011698 | 0.011702 | 0.011564 | 0.011532 |
| 0.011665 | 0.011597 | 0.011631 | 0.011665 | 0.011564 | 0.011631 | 0.011530 |
| 0.011597 | 0.011631 | 0.011597 | 0.011564 | 0.011665 | 0.011597 | 0.011631 |
| 0.011631 | 0.011564 | 0.011631 | 0.011665 | 0.011564 | 0.011765 | 0.011799 |
| 0.011698 | 0.011698 | 0.011698 | 0.011698 | 0.011631 | 0.011362 | 0.011665 |
| 0.011443 | 0.011631 | 0.011598 | 0.011603 | 0.011665 | 0.011665 | 0.011732 |
| 0.011732 | 0.011665 | 0.011631 | 0.011665 | 0.011765 | 0.011766 | 0.011698 |
| 0.011698 | 0.011833 | 0.011396 | 0.011732 | 0.011934 | 0.011934 | 0.011799 |
| 0.011631 | 0.011698 | 0.011732 | 0.011463 | 0.011699 | 0.011665 | 0.011698 |
| 0.011732 | 0.011597 | 0.011597 | 0.011900 | 0.011900 | 0.011866 | 0.011665 |
| 0.011766 | 0.011833 | 0.011698 | 0.011766 | 0.011732 | 0.011597 | 0.011329 |
| 0.011698 | 0.011665 | 0.011597 | 0.011833 | 0.011665 | 0.011765 | 0.011598 |
| 0.011698 | 0.011468 | 0.011463 | 0.011467 | 0.011286 | 0.011706 | 0.011318 |
| 0.011555 | 0.011644 | 0.011587 | 0.011596 | 0.011499 | 0.011366 | 0.011379 |
| 0.011417 | 0.011258 | 0.011450 | 0.011324 | 0.011330 | 0.011529 | 0.011790 |
| 0.011776 | 0.011690 | 0.011659 | 0.011659 | 0.011701 | 0.011564 | 0.011631 |
| 0.011631 | 0.011699 | 0.011804 | 0.011569 | 0.011942 | 0.011979 | 0.011698 |
| 0.011665 | 0.011732 | 0.011665 | 0.011698 | 0.011564 | 0.011530 | 0.011598 |
| 0.011665 | 0.011665 | 0.011631 | 0.011597 | 0.011631 | 0.011597 | 0.011698 |
| 0.011619 | 0.011620 | 0.011608 | 0.011642 | 0.011779 | 0.011744 | 0.011743 |
| 0.011742 | 0.011733 | 0.011503 | 0.011492 | 0.011602 | 0.011772 | 0.011773 |
| 0.011632 | 0.011636 | 0.011936 | 0.011905 | 0.011834 | 0.011868 | 0.011799 |
| 0.011732 | 0.011799 | 0.011799 | 0.011698 | 0.011597 | 0.011866 | 0.011934 |
| 0.011967 | 0.011345 | 0.011606 | 0.011753 | 0.011631 | 0.011833 | 0.011799 |
| 0.011834 | 0.011866 | 0.011866 | 0.011866 | 0.011965 | 0.012001 | 0.011650 |
| 0.011534 | 0.011545 | 0.011639 | 0.011604 | 0.011641 | 0.011546 | 0.011264 |
| 0.011678 | 0.011323 | 0.011489 | 0.011660 | 0.011665 | 0.011676 | 0.011631 |
| 0.011597 | 0.011530 | 0.011665 | 0.011631 | 0.011564 | 0.011530 | 0.011463 |
| 0.011564 | 0.011631 | 0.011631 | 0.011631 | 0.011665 | 0.011665 | 0.011668 |
| 0.011736 | 0.011665 | 0.011665 | 0.011701 | 0.011564 | 0.011631 | 0.011631 |



|          |          |          |          |          |          |          |
|----------|----------|----------|----------|----------|----------|----------|
| 0.011699 | 0.011804 | 0.011569 | 0.011942 | 0.011979 | 0.011698 | 0.011866 |
| 0.011799 | 0.011799 | 0.011635 | 0.011826 | 0.011721 | 0.011775 | 0.011656 |
| 0.011818 | 0.011972 | 0.011780 | 0.011706 | 0.011598 | 0.011799 | 0.011665 |
| 0.011765 | 0.011698 | 0.011597 | 0.011700 | 0.011799 | 0.011804 | 0.011698 |
| 0.011597 | 0.011532 | 0.011665 | 0.011597 | 0.011530 | 0.011536 | 0.011799 |
| 0.011698 | 0.011631 | 0.011665 | 0.011698 | 0.011665 | 0.011597 | 0.011530 |
| 0.011665 | 0.011698 | 0.011698 | 0.011631 | 0.011698 | 0.011934 | 0.011530 |
| 0.011631 | 0.011362 | 0.011631 | 0.011665 | 0.011631 | 0.011396 | 0.011489 |
| 0.011735 | 0.011315 | 0.011311 | 0.011382 | 0.011467 | 0.011527 | 0.011269 |
| 0.011270 | 0.011530 | 0.011631 | 0.011739 | 0.011599 | 0.011737 | 0.011868 |
| 0.011767 | 0.011805 | 0.011766 | 0.011983 | 0.011732 | 0.012607 | 0.011768 |
| 0.012507 | 0.012275 | 0.012409 | 0.012681 | 0.011665 | 0.011631 | 0.011732 |
| 0.012373 | 0.012106 | 0.011699 | 0.011598 | 0.011666 | 0.011666 | 0.011636 |
| 0.011530 | 0.011535 | 0.011598 | 0.011565 | 0.011935 | 0.012001 | 0.012002 |
| 0.011902 | 0.012002 | 0.012106 | 0.011872 | 0.012374 | 0.012381 | 0.012441 |
| 0.012442 | 0.012475 | 0.012426 | 0.012442 | 0.012443 | 0.011732 | 0.011968 |
| 0.012036 | 0.012540 | 0.012044 | 0.012002 | 0.012474 | 0.011536 | 0.011430 |
| 0.011329 | 0.011396 | 0.011934 | 0.011883 | 0.011975 | 0.011732 | 0.011465 |
| S489     | 0.012001 | 0.012001 | 0.012068 | 0.011833 | 0.011833 | 0.011900 |
| 0.011400 | 0.011332 | 0.011833 | 0.011598 | 0.011665 | 0.011632 | 0.011597 |
| 0.011564 | 0.011799 | 0.011530 | 0.011631 | 0.011698 | 0.011665 | 0.011631 |
| 0.011597 | 0.011631 | 0.011463 | 0.011598 | 0.011598 | 0.011631 | 0.011366 |
| 0.011598 | 0.011631 | 0.011530 | 0.011497 | 0.011698 | 0.011665 | 0.011698 |
| 0.011665 | 0.011765 | 0.011665 | 0.011665 | 0.011698 | 0.011665 | 0.011833 |
| 0.011530 | 0.011665 | 0.011698 | 0.011631 | 0.011665 | 0.011765 | 0.011698 |
| 0.011665 | 0.011833 | 0.011732 | 0.011396 | 0.011665 | 0.011934 | 0.011665 |
| 0.011631 | 0.011665 | 0.011799 | 0.011934 | 0.011362 | 0.011665 | 0.011765 |
| 0.011698 | 0.011766 | 0.011665 | 0.011900 | 0.011530 | 0.011665 | 0.011732 |
| 0.011631 | 0.011732 | 0.011698 | 0.011765 | 0.011698 | 0.011698 | 0.011698 |
| 0.011597 | 0.011631 | 0.011597 | 0.011631 | 0.011665 | 0.011700 | 0.011765 |
| 0.011698 | 0.011665 | 0.011732 | 0.011631 | 0.011564 | 0.011597 | 0.011665 |
| 0.011833 | 0.011765 | 0.011530 | 0.011833 | 0.011665 | 0.011900 | 0.011665 |
| 0.011839 | 0.011396 | 0.011815 | 0.011529 | 0.011508 | 0.011686 | 0.011415 |
| 0.012011 | 0.011315 | 0.011472 | 0.011900 | 0.011900 | 0.011631 | 0.011530 |
| 0.011732 | 0.011698 | 0.011765 | 0.011665 | 0.011766 | 0.011698 | 0.011698 |
| 0.011665 | 0.011698 | 0.011967 | 0.011833 | 0.011732 | 0.011699 | 0.011631 |
| 0.011597 | 0.011530 | 0.011665 | 0.011631 | 0.011564 | 0.011530 | 0.011463 |
| 0.011564 | 0.011631 | 0.011631 | 0.011631 | 0.011665 | 0.011665 | 0.011668 |
| 0.011736 | 0.011665 | 0.011665 | 0.011456 | 0.011530 | 0.011516 | 0.011665 |
| 0.011602 | 0.011507 | 0.011577 | 0.011578 | 0.011570 | 0.011540 | 0.011634 |
| 0.011492 | 0.011612 | 0.011646 | 0.011598 | 0.011544 | 0.011733 | 0.011632 |
| 0.011699 | 0.011701 | 0.011699 | 0.011799 | 0.011732 | 0.012102 | 0.011833 |
| 0.011665 | 0.011732 | 0.011665 | 0.011698 | 0.011564 | 0.011530 | 0.011598 |
| 0.011665 | 0.011665 | 0.011631 | 0.011597 | 0.011631 | 0.011597 | 0.011698 |
| 0.011665 | 0.011765 | 0.011698 | 0.011597 | 0.011700 | 0.011799 | 0.011804 |
| 0.011799 | 0.011698 | 0.011597 | 0.011532 | 0.011665 | 0.011597 | 0.011530 |
| 0.011536 | 0.011799 | 0.011597 | 0.011799 | 0.011564 | 0.011665 | 0.011631 |
| 0.011732 | 0.011631 | 0.011665 | 0.011631 | 0.011665 | 0.011530 | 0.011665 |
| 0.011698 | 0.011631 | 0.011698 | 0.011631 | 0.011665 | 0.011698 | 0.011934 |
| 0.011429 | 0.011362 | 0.011429 | 0.011802 | 0.011362 | 0.011665 | 0.011631 |
| 0.011601 | 0.011909 | 0.011746 | 0.011575 | 0.011433 | 0.011538 | 0.011729 |
| 0.011434 | 0.011604 | 0.011833 | 0.012035 | 0.011743 | 0.011900 | 0.011867 |
| 0.011799 | 0.011967 | 0.011842 | 0.011720 | 0.011689 | 0.011699 | 0.011771 |
| 0.011867 | 0.011769 | 0.011906 | 0.011974 | 0.011900 | 0.011968 | 0.012077 |
| 0.011805 | 0.011977 | 0.011839 | 0.011838 | 0.012104 | 0.011564 | 0.011768 |
| 0.011732 | 0.011665 | 0.011564 | 0.011564 | 0.011631 | 0.011631 | 0.011698 |
| 0.011631 | 0.011698 | 0.011597 | 0.011631 | 0.011631 | 0.011631 | 0.011698 |
| 0.011631 | 0.011463 | 0.011362 | 0.011396 | 0.011530 | 0.011631 | 0.011665 |
| 0.011665 | 0.011564 | 0.011698 | 0.011665 | 0.011597 | 0.011597 | 0.011597 |
| 0.011530 | 0.011698 | 0.011765 | 0.011564 | 0.011665 | 0.011833 | 0.011597 |

|          |          |          |          |          |          |          |
|----------|----------|----------|----------|----------|----------|----------|
| 0.011597 | 0.011665 | 0.011631 | 0.011799 | 0.011597 | 0.011530 | 0.011665 |
| 0.011598 | 0.011631 | 0.011631 | 0.011564 | 0.011564 | 0.011732 | 0.011665 |
| 0.011564 | 0.011665 | 0.011530 | 0.011564 | 0.011698 | 0.011497 | 0.011598 |
| 0.011564 | 0.011698 | 0.011632 | 0.011530 | 0.011228 | 0.011530 | 0.011698 |
| 0.011780 | 0.011597 | 0.011295 | 0.011732 | 0.011698 | 0.011631 | 0.011732 |
| 0.011597 | 0.011934 | 0.011530 | 0.011597 | 0.011530 | 0.011530 | 0.011530 |
| 0.011765 | 0.011632 | 0.011665 | 0.011732 | 0.011564 | 0.011362 | 0.011530 |
| 0.011597 | 0.011597 | 0.011631 | 0.011732 | 0.011631 | 0.011732 | 0.011799 |
| 0.011799 | 0.011765 | 0.011665 | 0.011766 | 0.011732 | 0.011597 | 0.011564 |
| 0.011597 | 0.011597 | 0.011665 | 0.011530 | 0.011564 | 0.011732 | 0.011597 |
| 0.011497 | 0.011631 | 0.011765 | 0.011732 | 0.011698 | 0.011631 | 0.011631 |
| 0.011698 | 0.011631 | 0.011732 | 0.011597 | 0.011732 | 0.011833 | 0.011463 |
| 0.011631 | 0.011362 | 0.011612 | 0.018125 | 0.011322 | 0.011733 | 0.011339 |
| 0.011337 | 0.011342 | 0.011794 | 0.011524 | 0.011445 | 0.011405 | 0.011668 |
| 0.011582 | 0.011488 | 0.011450 | 0.011605 | 0.011451 | 0.011603 | 0.011620 |
| 0.011295 | 0.011395 | 0.011283 | 0.011259 | 0.011766 | 0.011799 | 0.011804 |
| 0.011679 | 0.011765 | 0.011765 | 0.011665 | 0.011698 | 0.011699 | 0.011665 |
| 0.011698 | 0.011631 | 0.011665 | 0.011698 | 0.011665 | 0.011597 | 0.011631 |
| 0.011631 | 0.011698 | 0.011597 | 0.011698 | 0.011732 | 0.011765 | 0.011665 |
| 0.011631 | 0.011597 | 0.000000 | 0.000000 | 0.011732 | 0.011767 | 0.011799 |
| 0.011564 | 0.011564 | 0.011597 | 0.011698 | 0.011564 | 0.011799 | 0.011799 |
| 0.011833 | 0.011833 | 0.011765 | 0.011866 | 0.011362 | 0.011869 | 0.011698 |
| 0.011698 | 0.011765 | 0.011799 | 0.011631 | 0.011698 | 0.011665 | 0.011698 |
| 0.011766 | 0.011766 | 0.011799 | 0.011766 | 0.011666 | 0.011866 | 0.011833 |
| 0.011704 | 0.011597 | 0.011698 | 0.011799 | 0.011698 | 0.011766 | 0.011866 |
| 0.012035 | 0.011743 | 0.011900 | 0.011867 | 0.011799 | 0.011967 | 0.011598 |
| 0.011768 | 0.011665 | 0.011631 | 0.011631 | 0.011698 | 0.011597 | 0.011698 |
| 0.011732 | 0.011765 | 0.011665 | 0.011631 | 0.011597 | 0.000000 | 0.000000 |
| 0.011732 | 0.011767 | 0.011833 | 0.011765 | 0.012339 | 0.011847 | 0.011764 |
| 0.011834 | 0.011789 | 0.011904 | 0.011788 | 0.011901 | 0.011819 | 0.011716 |
| 0.012297 | 0.011684 | 0.011814 | 0.011752 | 0.012025 | 0.011877 | 0.011980 |
| 0.012319 | 0.011814 | 0.011703 | 0.011698 | 0.011698 | 0.011463 | 0.011669 |
| 0.011564 | 0.011597 | 0.011732 | 0.011698 | 0.011702 | 0.011564 | 0.011532 |
| 0.011665 | 0.011597 | 0.011631 | 0.011665 | 0.011564 | 0.011631 | 0.011530 |
| 0.011597 | 0.011631 | 0.011597 | 0.011564 | 0.011665 | 0.011597 | 0.011631 |
| 0.011631 | 0.011564 | 0.011631 | 0.011665 | 0.011564 | 0.011765 | 0.011799 |
| 0.011698 | 0.011698 | 0.011698 | 0.011698 | 0.011631 | 0.011362 | 0.011665 |
| 0.011443 | 0.011631 | 0.011598 | 0.011603 | 0.011665 | 0.011665 | 0.011732 |
| 0.011732 | 0.011665 | 0.011631 | 0.011665 | 0.011765 | 0.011765 | 0.011698 |
| 0.011698 | 0.011833 | 0.011396 | 0.011732 | 0.011934 | 0.011934 | 0.011799 |
| 0.011631 | 0.011698 | 0.011732 | 0.011463 | 0.011699 | 0.011665 | 0.011698 |
| 0.011732 | 0.011597 | 0.011597 | 0.011900 | 0.011900 | 0.011866 | 0.011665 |
| 0.011766 | 0.011833 | 0.011698 | 0.011766 | 0.011732 | 0.011597 | 0.011329 |
| 0.011698 | 0.011665 | 0.011597 | 0.011833 | 0.011665 | 0.011765 | 0.011598 |
| 0.011698 | 0.011468 | 0.011463 | 0.011467 | 0.011286 | 0.011706 | 0.011318 |
| 0.011555 | 0.011644 | 0.011587 | 0.011596 | 0.011499 | 0.011366 | 0.011379 |
| 0.011417 | 0.011258 | 0.011450 | 0.011324 | 0.011330 | 0.011529 | 0.011790 |
| 0.011776 | 0.011690 | 0.011659 | 0.011659 | 0.011701 | 0.011564 | 0.011631 |
| 0.011631 | 0.011699 | 0.011804 | 0.011569 | 0.011942 | 0.011979 | 0.011698 |
| 0.011665 | 0.011732 | 0.011665 | 0.011698 | 0.011564 | 0.011530 | 0.011598 |
| 0.011665 | 0.011665 | 0.011631 | 0.011597 | 0.011631 | 0.011597 | 0.011698 |
| 0.011619 | 0.011620 | 0.011608 | 0.011642 | 0.011779 | 0.011744 | 0.011743 |
| 0.011742 | 0.011733 | 0.011503 | 0.011492 | 0.011602 | 0.011772 | 0.011773 |
| 0.011632 | 0.011636 | 0.011936 | 0.011905 | 0.011834 | 0.011868 | 0.011799 |
| 0.011732 | 0.011799 | 0.011799 | 0.011698 | 0.011597 | 0.011866 | 0.011934 |
| 0.011967 | 0.011345 | 0.011606 | 0.011753 | 0.011631 | 0.011833 | 0.011799 |
| 0.011834 | 0.011866 | 0.011866 | 0.011866 | 0.011965 | 0.012001 | 0.011650 |
| 0.011534 | 0.011545 | 0.011639 | 0.011604 | 0.011641 | 0.011546 | 0.011264 |
| 0.011678 | 0.011323 | 0.011489 | 0.011660 | 0.011665 | 0.011676 | 0.011631 |
| 0.011597 | 0.011530 | 0.011665 | 0.011631 | 0.011564 | 0.011530 | 0.011463 |

|          |          |          |          |          |          |          |
|----------|----------|----------|----------|----------|----------|----------|
| 0.011564 | 0.011631 | 0.011631 | 0.011631 | 0.011665 | 0.011665 | 0.011668 |
| 0.011736 | 0.011665 | 0.011665 | 0.011701 | 0.011564 | 0.011631 | 0.011631 |
| 0.011699 | 0.011804 | 0.011569 | 0.011942 | 0.011979 | 0.011698 | 0.011866 |
| 0.011799 | 0.011799 | 0.011635 | 0.011826 | 0.011721 | 0.011775 | 0.011656 |
| 0.011818 | 0.011972 | 0.011780 | 0.011706 | 0.011597 | 0.011799 | 0.011665 |
| 0.011765 | 0.011698 | 0.011597 | 0.011700 | 0.011799 | 0.011804 | 0.011698 |
| 0.011597 | 0.011532 | 0.011665 | 0.011597 | 0.011530 | 0.011536 | 0.011799 |
| 0.011698 | 0.011631 | 0.011665 | 0.011698 | 0.011665 | 0.011597 | 0.011530 |
| 0.011665 | 0.011698 | 0.011698 | 0.011631 | 0.011698 | 0.011934 | 0.011530 |
| 0.011631 | 0.011362 | 0.011631 | 0.011665 | 0.011631 | 0.011396 | 0.011489 |
| 0.011735 | 0.011315 | 0.011311 | 0.011382 | 0.011467 | 0.011527 | 0.011269 |
| 0.011270 | 0.011530 | 0.011631 | 0.011739 | 0.011599 | 0.011737 | 0.011868 |
| 0.011767 | 0.011805 | 0.011766 | 0.011983 | 0.011732 | 0.012607 | 0.011768 |
| 0.012507 | 0.012275 | 0.012409 | 0.012681 | 0.011665 | 0.011631 | 0.011732 |
| 0.012373 | 0.012106 | 0.011698 | 0.011598 | 0.011666 | 0.011666 | 0.011636 |
| 0.011530 | 0.011535 | 0.011597 | 0.011565 | 0.011935 | 0.012001 | 0.012002 |
| 0.011902 | 0.012002 | 0.012106 | 0.011872 | 0.012374 | 0.012381 | 0.012441 |
| 0.012442 | 0.012475 | 0.012426 | 0.012442 | 0.012443 | 0.011732 | 0.011968 |
| 0.012036 | 0.012540 | 0.012044 | 0.012002 | 0.012474 | 0.011536 | 0.011430 |
| 0.011329 | 0.011396 | 0.011934 | 0.011883 | 0.011975 | 0.011732 | 0.011465 |
| S490     | 0.011732 | 0.011732 | 0.012068 | 0.011833 | 0.011833 | 0.011900 |
| 0.011740 | 0.011672 | 0.011900 | 0.011329 | 0.011396 | 0.011363 | 0.011329 |
| 0.011362 | 0.011530 | 0.011329 | 0.011362 | 0.011430 | 0.011396 | 0.011362 |
| 0.011329 | 0.011362 | 0.011463 | 0.011329 | 0.011363 | 0.011362 | 0.011706 |
| 0.011597 | 0.011362 | 0.011262 | 0.011497 | 0.011430 | 0.011396 | 0.011430 |
| 0.011396 | 0.011497 | 0.011396 | 0.011396 | 0.011430 | 0.011396 | 0.011564 |
| 0.011329 | 0.011396 | 0.011430 | 0.011362 | 0.011463 | 0.011497 | 0.011430 |
| 0.011396 | 0.011564 | 0.011463 | 0.011732 | 0.011396 | 0.011665 | 0.011396 |
| 0.011362 | 0.011463 | 0.011530 | 0.011665 | 0.011766 | 0.011463 | 0.011564 |
| 0.011430 | 0.011497 | 0.011396 | 0.011631 | 0.011866 | 0.011396 | 0.011463 |
| 0.011362 | 0.011463 | 0.011430 | 0.011497 | 0.011430 | 0.011430 | 0.011430 |
| 0.011329 | 0.011362 | 0.011329 | 0.011430 | 0.011396 | 0.011431 | 0.011497 |
| 0.011362 | 0.011396 | 0.011463 | 0.011362 | 0.011497 | 0.011329 | 0.011396 |
| 0.011564 | 0.011497 | 0.011732 | 0.011564 | 0.011396 | 0.011564 | 0.011396 |
| 0.011580 | 0.011808 | 0.011626 | 0.011295 | 0.011322 | 0.011391 | 0.011533 |
| 0.012159 | 0.011569 | 0.011349 | 0.011631 | 0.011631 | 0.011429 | 0.011530 |
| 0.011463 | 0.011430 | 0.011497 | 0.011396 | 0.011497 | 0.011430 | 0.011429 |
| 0.011396 | 0.011497 | 0.011698 | 0.011564 | 0.011463 | 0.011430 | 0.011363 |
| 0.011329 | 0.011329 | 0.011396 | 0.011362 | 0.011564 | 0.011530 | 0.011463 |
| 0.011564 | 0.011631 | 0.011362 | 0.011362 | 0.011396 | 0.011396 | 0.011398 |
| 0.011466 | 0.011396 | 0.011396 | 0.011276 | 0.011350 | 0.011306 | 0.011397 |
| 0.011399 | 0.011335 | 0.011392 | 0.011371 | 0.011298 | 0.011334 | 0.011364 |
| 0.011636 | 0.011405 | 0.011439 | 0.011329 | 0.011337 | 0.011464 | 0.011430 |
| 0.011498 | 0.011431 | 0.011430 | 0.011530 | 0.011463 | 0.011766 | 0.011631 |
| 0.011665 | 0.011531 | 0.011396 | 0.011497 | 0.011295 | 0.011530 | 0.011329 |
| 0.011396 | 0.011396 | 0.011362 | 0.011329 | 0.011362 | 0.011329 | 0.011430 |
| 0.011396 | 0.011497 | 0.011430 | 0.011329 | 0.011431 | 0.011531 | 0.011534 |
| 0.011531 | 0.011430 | 0.011329 | 0.011263 | 0.011396 | 0.011329 | 0.011262 |
| 0.011366 | 0.011531 | 0.011329 | 0.011531 | 0.011295 | 0.011396 | 0.011363 |
| 0.011463 | 0.011362 | 0.011396 | 0.011363 | 0.011396 | 0.011262 | 0.011396 |
| 0.011430 | 0.011362 | 0.011430 | 0.011362 | 0.011396 | 0.011430 | 0.011665 |
| 0.011766 | 0.011698 | 0.011766 | 0.011532 | 0.011766 | 0.011396 | 0.011362 |
| 0.011398 | 0.011667 | 0.011518 | 0.011300 | 0.011773 | 0.011265 | 0.011414 |
| 0.011774 | 0.011673 | 0.011564 | 0.011766 | 0.011470 | 0.011631 | 0.011530 |
| 0.011463 | 0.011698 | 0.011558 | 0.011390 | 0.011438 | 0.011430 | 0.011500 |
| 0.011598 | 0.011499 | 0.011635 | 0.011703 | 0.011631 | 0.011699 | 0.011806 |
| 0.011534 | 0.011705 | 0.011636 | 0.011568 | 0.011834 | 0.011295 | 0.011498 |
| 0.011463 | 0.011396 | 0.011295 | 0.011295 | 0.011362 | 0.011362 | 0.011430 |
| 0.011362 | 0.011362 | 0.011329 | 0.011430 | 0.011362 | 0.011362 | 0.011429 |
| 0.011362 | 0.011799 | 0.011698 | 0.011732 | 0.011262 | 0.011362 | 0.011396 |

|          |          |          |          |          |          |          |
|----------|----------|----------|----------|----------|----------|----------|
| 0.011396 | 0.011362 | 0.011430 | 0.011463 | 0.011329 | 0.011329 | 0.011329 |
| 0.011866 | 0.011497 | 0.011497 | 0.011295 | 0.011396 | 0.011564 | 0.011329 |
| 0.011329 | 0.011396 | 0.011362 | 0.011530 | 0.011329 | 0.011463 | 0.011597 |
| 0.011530 | 0.011362 | 0.011362 | 0.011295 | 0.011295 | 0.011463 | 0.011396 |
| 0.011295 | 0.011396 | 0.011262 | 0.011295 | 0.011430 | 0.011564 | 0.011329 |
| 0.011296 | 0.011430 | 0.011363 | 0.011262 | 0.011597 | 0.011262 | 0.011430 |
| 0.011505 | 0.011329 | 0.011631 | 0.011463 | 0.011497 | 0.011295 | 0.011463 |
| 0.011329 | 0.011665 | 0.011262 | 0.011530 | 0.011329 | 0.011329 | 0.011262 |
| 0.011497 | 0.011699 | 0.011396 | 0.011463 | 0.011295 | 0.011698 | 0.011329 |
| 0.011329 | 0.011329 | 0.011362 | 0.011463 | 0.011362 | 0.011463 | 0.011530 |
| 0.011530 | 0.011497 | 0.011396 | 0.011497 | 0.011463 | 0.011329 | 0.011295 |
| 0.011329 | 0.011329 | 0.011396 | 0.011329 | 0.011295 | 0.011463 | 0.011329 |
| 0.011362 | 0.011362 | 0.011497 | 0.011530 | 0.011430 | 0.011362 | 0.011363 |
| 0.011430 | 0.011362 | 0.011463 | 0.011329 | 0.011463 | 0.011564 | 0.011866 |
| 0.011362 | 0.011766 | 0.011302 | 0.017902 | 0.011388 | 0.011550 | 0.011723 |
| 0.011683 | 0.011729 | 0.011532 | 0.011467 | 0.011885 | 0.011751 | 0.011486 |
| 0.011630 | 0.011732 | 0.011294 | 0.011270 | 0.011334 | 0.011455 | 0.011362 |
| 0.011577 | 0.011545 | 0.011542 | 0.011325 | 0.011497 | 0.011530 | 0.011534 |
| 0.011404 | 0.011497 | 0.011497 | 0.011463 | 0.011430 | 0.011430 | 0.011396 |
| 0.011430 | 0.011362 | 0.011396 | 0.011430 | 0.011396 | 0.011329 | 0.011362 |
| 0.011362 | 0.011430 | 0.011329 | 0.011430 | 0.011463 | 0.011497 | 0.011396 |
| 0.011430 | 0.011396 | 0.011732 | 0.011732 | 0.000000 | 0.011497 | 0.011531 |
| 0.011295 | 0.011295 | 0.011329 | 0.011430 | 0.011295 | 0.011530 | 0.011530 |
| 0.011564 | 0.011564 | 0.011497 | 0.011598 | 0.011766 | 0.011599 | 0.011430 |
| 0.011430 | 0.011497 | 0.011530 | 0.011363 | 0.011430 | 0.011396 | 0.011430 |
| 0.011497 | 0.011497 | 0.011530 | 0.011497 | 0.011397 | 0.011598 | 0.011564 |
| 0.011433 | 0.011329 | 0.011430 | 0.011531 | 0.011430 | 0.011564 | 0.011597 |
| 0.011766 | 0.011470 | 0.011631 | 0.011530 | 0.011463 | 0.011698 | 0.011329 |
| 0.011498 | 0.011396 | 0.011362 | 0.011362 | 0.011430 | 0.011329 | 0.011430 |
| 0.011463 | 0.011497 | 0.011396 | 0.011430 | 0.011396 | 0.011732 | 0.011732 |
| 0.000000 | 0.011497 | 0.011564 | 0.011497 | 0.012137 | 0.011561 | 0.011482 |
| 0.011553 | 0.011511 | 0.011623 | 0.011511 | 0.011620 | 0.011543 | 0.011509 |
| 0.012091 | 0.011406 | 0.011540 | 0.011475 | 0.011749 | 0.011605 | 0.011707 |
| 0.012115 | 0.011588 | 0.011669 | 0.011732 | 0.011597 | 0.011598 | 0.011635 |
| 0.011295 | 0.011463 | 0.011597 | 0.011564 | 0.011567 | 0.011564 | 0.011532 |
| 0.011396 | 0.011329 | 0.011362 | 0.011396 | 0.011295 | 0.011362 | 0.011262 |
| 0.011396 | 0.011430 | 0.011329 | 0.011295 | 0.011396 | 0.011329 | 0.011362 |
| 0.011362 | 0.011295 | 0.011362 | 0.011396 | 0.011295 | 0.011497 | 0.011530 |
| 0.011430 | 0.011497 | 0.011430 | 0.011430 | 0.011362 | 0.011766 | 0.011396 |
| 0.011443 | 0.011362 | 0.011598 | 0.011603 | 0.011463 | 0.011463 | 0.011463 |
| 0.011463 | 0.011396 | 0.011362 | 0.011396 | 0.011497 | 0.011497 | 0.011430 |
| 0.011430 | 0.011564 | 0.011732 | 0.011463 | 0.011665 | 0.011665 | 0.011530 |
| 0.011362 | 0.011430 | 0.011463 | 0.011866 | 0.011430 | 0.011463 | 0.011362 |
| 0.011463 | 0.011396 | 0.011396 | 0.011699 | 0.011631 | 0.011665 | 0.011396 |
| 0.011497 | 0.011564 | 0.011430 | 0.011497 | 0.011463 | 0.011329 | 0.011665 |
| 0.011429 | 0.011396 | 0.011396 | 0.011564 | 0.011396 | 0.011497 | 0.011732 |
| 0.011430 | 0.011808 | 0.011799 | 0.011630 | 0.011342 | 0.011502 | 0.011422 |
| 0.011390 | 0.011839 | 0.011341 | 0.011596 | 0.011402 | 0.011519 | 0.011539 |
| 0.011622 | 0.011324 | 0.011506 | 0.011325 | 0.011384 | 0.011530 | 0.011506 |
| 0.011512 | 0.011414 | 0.011483 | 0.011413 | 0.011431 | 0.011564 | 0.011631 |
| 0.011631 | 0.011497 | 0.011601 | 0.011603 | 0.011739 | 0.011767 | 0.011430 |
| 0.011665 | 0.011531 | 0.011396 | 0.011497 | 0.011295 | 0.011530 | 0.011329 |
| 0.011396 | 0.011396 | 0.011362 | 0.011329 | 0.011362 | 0.011329 | 0.011430 |
| 0.011410 | 0.011410 | 0.011403 | 0.011437 | 0.011574 | 0.011539 | 0.011538 |
| 0.011537 | 0.011464 | 0.011282 | 0.011276 | 0.011399 | 0.011569 | 0.011569 |
| 0.011363 | 0.011433 | 0.011666 | 0.011635 | 0.011565 | 0.011599 | 0.011530 |
| 0.011396 | 0.011530 | 0.011530 | 0.011430 | 0.012001 | 0.011598 | 0.011665 |
| 0.011699 | 0.011737 | 0.011401 | 0.011441 | 0.011362 | 0.011564 | 0.011530 |
| 0.011565 | 0.011597 | 0.011598 | 0.011598 | 0.011728 | 0.011732 | 0.011373 |
| 0.011263 | 0.011268 | 0.011367 | 0.011332 | 0.011436 | 0.011284 | 0.011604 |

|          |          |          |          |          |          |          |
|----------|----------|----------|----------|----------|----------|----------|
| 0.011403 | 0.011499 | 0.011251 | 0.011435 | 0.011397 | 0.011402 | 0.011363 |
| 0.011329 | 0.011329 | 0.011396 | 0.011362 | 0.011564 | 0.011530 | 0.011463 |
| 0.011564 | 0.011631 | 0.011362 | 0.011362 | 0.011396 | 0.011396 | 0.011398 |
| 0.011466 | 0.011396 | 0.011396 | 0.011431 | 0.011564 | 0.011631 | 0.011631 |
| 0.011497 | 0.011601 | 0.011603 | 0.011739 | 0.011767 | 0.011430 | 0.011597 |
| 0.011530 | 0.011530 | 0.011365 | 0.011548 | 0.011477 | 0.011503 | 0.011376 |
| 0.011543 | 0.011790 | 0.011568 | 0.011434 | 0.011329 | 0.011531 | 0.011396 |
| 0.011497 | 0.011430 | 0.011329 | 0.011431 | 0.011531 | 0.011534 | 0.011430 |
| 0.011329 | 0.011263 | 0.011396 | 0.011329 | 0.011262 | 0.011366 | 0.011531 |
| 0.011430 | 0.011362 | 0.011396 | 0.011430 | 0.011396 | 0.011329 | 0.011531 |
| 0.011396 | 0.011430 | 0.011430 | 0.011362 | 0.011430 | 0.011665 | 0.011329 |
| 0.011362 | 0.011766 | 0.011362 | 0.011396 | 0.011362 | 0.011732 | 0.011360 |
| 0.011848 | 0.011358 | 0.011361 | 0.011584 | 0.011671 | 0.011563 | 0.011269 |
| 0.011323 | 0.011530 | 0.011631 | 0.011740 | 0.011599 | 0.011737 | 0.011868 |
| 0.011767 | 0.011805 | 0.011765 | 0.012018 | 0.011732 | 0.012607 | 0.011768 |
| 0.012507 | 0.012275 | 0.012409 | 0.012681 | 0.011732 | 0.011430 | 0.011732 |
| 0.012171 | 0.012106 | 0.011698 | 0.011598 | 0.011666 | 0.011666 | 0.011635 |
| 0.011530 | 0.011535 | 0.011597 | 0.011565 | 0.011935 | 0.012001 | 0.012002 |
| 0.011902 | 0.012002 | 0.012106 | 0.011839 | 0.012172 | 0.012144 | 0.012239 |
| 0.012240 | 0.012240 | 0.012221 | 0.012240 | 0.012241 | 0.011463 | 0.011766 |
| 0.011834 | 0.012338 | 0.011840 | 0.012069 | 0.012542 | 0.011604 | 0.011497 |
| 0.011463 | 0.011463 | 0.011934 | 0.012007 | 0.012081 | 0.011799 | 0.011465 |
| S491     | 0.011766 | 0.011766 | 0.012103 | 0.011867 | 0.011867 | 0.011935 |
| 0.011775 | 0.011707 | 0.011800 | 0.011363 | 0.011430 | 0.011397 | 0.011363 |
| 0.011396 | 0.011497 | 0.011363 | 0.011329 | 0.011464 | 0.011430 | 0.011396 |
| 0.011363 | 0.011396 | 0.011497 | 0.011363 | 0.011397 | 0.011396 | 0.011741 |
| 0.011632 | 0.011396 | 0.011296 | 0.011531 | 0.011464 | 0.011430 | 0.011464 |
| 0.011430 | 0.011531 | 0.011430 | 0.011430 | 0.011396 | 0.011430 | 0.011598 |
| 0.011363 | 0.011430 | 0.011396 | 0.011396 | 0.011497 | 0.011464 | 0.011464 |
| 0.011430 | 0.011531 | 0.011498 | 0.011766 | 0.011363 | 0.011699 | 0.011363 |
| 0.011396 | 0.011497 | 0.011565 | 0.011699 | 0.011800 | 0.011497 | 0.011598 |
| 0.011464 | 0.011531 | 0.011430 | 0.011665 | 0.011901 | 0.011363 | 0.011497 |
| 0.011396 | 0.011497 | 0.011396 | 0.011531 | 0.011464 | 0.011464 | 0.011464 |
| 0.011363 | 0.011396 | 0.011363 | 0.011464 | 0.011430 | 0.011465 | 0.011531 |
| 0.011464 | 0.011430 | 0.011497 | 0.011396 | 0.011531 | 0.011363 | 0.011430 |
| 0.011598 | 0.011531 | 0.011766 | 0.011598 | 0.011430 | 0.011666 | 0.011363 |
| 0.011617 | 0.011846 | 0.011665 | 0.011373 | 0.011359 | 0.011428 | 0.011573 |
| 0.012196 | 0.011671 | 0.011390 | 0.011598 | 0.011665 | 0.011464 | 0.011565 |
| 0.011497 | 0.011464 | 0.011531 | 0.011430 | 0.011531 | 0.011464 | 0.011464 |
| 0.011430 | 0.011531 | 0.011733 | 0.011531 | 0.011497 | 0.011464 | 0.011397 |
| 0.011363 | 0.011363 | 0.011430 | 0.011396 | 0.011598 | 0.011565 | 0.011497 |
| 0.011598 | 0.011598 | 0.011396 | 0.011396 | 0.011430 | 0.011430 | 0.011432 |
| 0.011500 | 0.011430 | 0.011430 | 0.011312 | 0.011350 | 0.011306 | 0.011431 |
| 0.011433 | 0.011370 | 0.011430 | 0.011406 | 0.011332 | 0.011369 | 0.011399 |
| 0.011637 | 0.011440 | 0.011474 | 0.011363 | 0.011372 | 0.011498 | 0.011464 |
| 0.011532 | 0.011465 | 0.011464 | 0.011564 | 0.011497 | 0.011800 | 0.011666 |
| 0.011699 | 0.011565 | 0.011430 | 0.011531 | 0.011329 | 0.011564 | 0.011363 |
| 0.011430 | 0.011430 | 0.011396 | 0.011363 | 0.011396 | 0.011363 | 0.011464 |
| 0.011430 | 0.011531 | 0.011464 | 0.011363 | 0.011330 | 0.011531 | 0.011568 |
| 0.011565 | 0.011464 | 0.011363 | 0.011296 | 0.011430 | 0.011363 | 0.011296 |
| 0.011400 | 0.011565 | 0.011363 | 0.011565 | 0.011329 | 0.011430 | 0.011397 |
| 0.011497 | 0.011396 | 0.011430 | 0.011397 | 0.011430 | 0.011296 | 0.011430 |
| 0.011464 | 0.011396 | 0.011464 | 0.011396 | 0.011430 | 0.011464 | 0.011699 |
| 0.011800 | 0.011733 | 0.011800 | 0.011567 | 0.011801 | 0.011430 | 0.011396 |
| 0.011432 | 0.011707 | 0.011563 | 0.011335 | 0.011740 | 0.011299 | 0.011297 |
| 0.011808 | 0.011707 | 0.011598 | 0.011800 | 0.011505 | 0.011666 | 0.011632 |
| 0.011497 | 0.011733 | 0.011558 | 0.011349 | 0.011396 | 0.011464 | 0.011501 |
| 0.011632 | 0.011533 | 0.011670 | 0.011738 | 0.011666 | 0.011733 | 0.011841 |
| 0.011569 | 0.011740 | 0.011603 | 0.011602 | 0.011835 | 0.011329 | 0.011533 |
| 0.011497 | 0.011430 | 0.011329 | 0.011329 | 0.011396 | 0.011329 | 0.011464 |

|          |          |          |          |          |          |          |
|----------|----------|----------|----------|----------|----------|----------|
| 0.011396 | 0.011464 | 0.011363 | 0.011464 | 0.011396 | 0.011396 | 0.011396 |
| 0.011396 | 0.011834 | 0.011733 | 0.011766 | 0.011296 | 0.011396 | 0.011430 |
| 0.011430 | 0.011396 | 0.011464 | 0.011497 | 0.011363 | 0.011363 | 0.011363 |
| 0.011901 | 0.011531 | 0.011531 | 0.011329 | 0.011430 | 0.011531 | 0.011363 |
| 0.011363 | 0.011430 | 0.011396 | 0.011565 | 0.011329 | 0.011497 | 0.011632 |
| 0.011565 | 0.011396 | 0.011396 | 0.011329 | 0.011329 | 0.011497 | 0.011430 |
| 0.011329 | 0.011430 | 0.011296 | 0.011329 | 0.011464 | 0.011599 | 0.011329 |
| 0.011330 | 0.011464 | 0.011397 | 0.011296 | 0.011632 | 0.011296 | 0.011397 |
| 0.011540 | 0.011363 | 0.011666 | 0.011497 | 0.011531 | 0.011396 | 0.011430 |
| 0.011363 | 0.011699 | 0.011296 | 0.011565 | 0.011363 | 0.011363 | 0.011296 |
| 0.011531 | 0.011733 | 0.011430 | 0.011497 | 0.011329 | 0.011733 | 0.011363 |
| 0.011363 | 0.011363 | 0.011396 | 0.011497 | 0.011396 | 0.011497 | 0.011565 |
| 0.011565 | 0.011531 | 0.011430 | 0.011531 | 0.011497 | 0.011363 | 0.011329 |
| 0.011363 | 0.011363 | 0.011430 | 0.011363 | 0.011329 | 0.011497 | 0.011363 |
| 0.011396 | 0.011396 | 0.011531 | 0.011565 | 0.011464 | 0.011396 | 0.011397 |
| 0.011464 | 0.011396 | 0.011497 | 0.011363 | 0.011497 | 0.011531 | 0.011901 |
| 0.011396 | 0.011800 | 0.011406 | 0.017910 | 0.011454 | 0.011428 | 0.011759 |
| 0.011719 | 0.011765 | 0.011427 | 0.011466 | 0.011831 | 0.011787 | 0.011548 |
| 0.011582 | 0.011672 | 0.011334 | 0.011396 | 0.011412 | 0.011456 | 0.011448 |
| 0.011623 | 0.011582 | 0.011580 | 0.011457 | 0.011531 | 0.011565 | 0.011568 |
| 0.011439 | 0.011531 | 0.011531 | 0.011497 | 0.011464 | 0.011464 | 0.011430 |
| 0.011464 | 0.011396 | 0.011430 | 0.011464 | 0.011430 | 0.011363 | 0.011396 |
| 0.011396 | 0.011464 | 0.011363 | 0.011464 | 0.011497 | 0.011531 | 0.011430 |
| 0.011464 | 0.011430 | 0.011767 | 0.011767 | 0.011497 | 0.000000 | 0.011565 |
| 0.011329 | 0.011329 | 0.011363 | 0.011464 | 0.011329 | 0.011565 | 0.011565 |
| 0.011598 | 0.011598 | 0.011531 | 0.011632 | 0.011800 | 0.011634 | 0.011464 |
| 0.011464 | 0.011531 | 0.011497 | 0.011397 | 0.011464 | 0.011430 | 0.011397 |
| 0.011531 | 0.011531 | 0.011565 | 0.011531 | 0.011431 | 0.011632 | 0.011598 |
| 0.011433 | 0.011363 | 0.011464 | 0.011565 | 0.011464 | 0.011598 | 0.011632 |
| 0.011800 | 0.011505 | 0.011666 | 0.011632 | 0.011497 | 0.011733 | 0.011363 |
| 0.011465 | 0.011363 | 0.011396 | 0.011396 | 0.011464 | 0.011363 | 0.011464 |
| 0.011497 | 0.011531 | 0.011430 | 0.011464 | 0.011430 | 0.011767 | 0.011767 |
| 0.011497 | 0.000000 | 0.011598 | 0.011531 | 0.012172 | 0.011597 | 0.011483 |
| 0.011588 | 0.011547 | 0.011659 | 0.011546 | 0.011656 | 0.011578 | 0.011544 |
| 0.012127 | 0.011442 | 0.011575 | 0.011511 | 0.011785 | 0.011639 | 0.011742 |
| 0.012150 | 0.011589 | 0.011636 | 0.011665 | 0.011632 | 0.011632 | 0.011602 |
| 0.011329 | 0.011497 | 0.011632 | 0.011598 | 0.011602 | 0.011598 | 0.011566 |
| 0.011430 | 0.011363 | 0.011396 | 0.011430 | 0.011329 | 0.011396 | 0.011296 |
| 0.011430 | 0.011464 | 0.011363 | 0.011329 | 0.011430 | 0.011363 | 0.011396 |
| 0.011329 | 0.011329 | 0.011396 | 0.011430 | 0.011329 | 0.011531 | 0.011565 |
| 0.011464 | 0.011531 | 0.011464 | 0.011464 | 0.011396 | 0.011800 | 0.011430 |
| 0.011444 | 0.011396 | 0.011632 | 0.011638 | 0.011498 | 0.011497 | 0.011497 |
| 0.011497 | 0.011430 | 0.011396 | 0.011430 | 0.011464 | 0.011531 | 0.011464 |
| 0.011464 | 0.011598 | 0.011766 | 0.011497 | 0.011699 | 0.011699 | 0.011565 |
| 0.011396 | 0.011464 | 0.011497 | 0.011901 | 0.011464 | 0.011498 | 0.011464 |
| 0.011497 | 0.011430 | 0.011430 | 0.011733 | 0.011666 | 0.011699 | 0.011430 |
| 0.011531 | 0.011598 | 0.011464 | 0.011531 | 0.011497 | 0.011363 | 0.011699 |
| 0.011464 | 0.011430 | 0.011430 | 0.011598 | 0.011430 | 0.011531 | 0.011767 |
| 0.011464 | 0.011843 | 0.011834 | 0.011671 | 0.011399 | 0.011537 | 0.011421 |
| 0.011336 | 0.011840 | 0.011377 | 0.011642 | 0.011500 | 0.011571 | 0.011646 |
| 0.011672 | 0.011456 | 0.011563 | 0.011391 | 0.011493 | 0.011598 | 0.011548 |
| 0.011551 | 0.011454 | 0.011519 | 0.011448 | 0.011465 | 0.011598 | 0.011666 |
| 0.011666 | 0.011532 | 0.011636 | 0.011637 | 0.011773 | 0.011804 | 0.011464 |
| 0.011699 | 0.011565 | 0.011430 | 0.011531 | 0.011329 | 0.011564 | 0.011363 |
| 0.011430 | 0.011430 | 0.011396 | 0.011363 | 0.011396 | 0.011363 | 0.011464 |
| 0.011445 | 0.011446 | 0.011369 | 0.011472 | 0.011609 | 0.011574 | 0.011505 |
| 0.011572 | 0.011498 | 0.011319 | 0.011277 | 0.011366 | 0.011603 | 0.011604 |
| 0.011397 | 0.011467 | 0.011701 | 0.011670 | 0.011599 | 0.011566 | 0.011565 |
| 0.011497 | 0.011565 | 0.011564 | 0.011464 | 0.012036 | 0.011632 | 0.011699 |
| 0.011733 | 0.011773 | 0.011436 | 0.011511 | 0.011396 | 0.011598 | 0.011565 |

|          |          |          |          |          |          |          |
|----------|----------|----------|----------|----------|----------|----------|
| 0.011599 | 0.011632 | 0.011632 | 0.011632 | 0.011769 | 0.011766 | 0.011373 |
| 0.011297 | 0.011268 | 0.011401 | 0.011367 | 0.011471 | 0.011285 | 0.011639 |
| 0.011438 | 0.011500 | 0.011251 | 0.011436 | 0.011431 | 0.011506 | 0.011397 |
| 0.011363 | 0.011363 | 0.011430 | 0.011396 | 0.011598 | 0.011565 | 0.011497 |
| 0.011598 | 0.011598 | 0.011396 | 0.011396 | 0.011430 | 0.011430 | 0.011432 |
| 0.011500 | 0.011430 | 0.011430 | 0.011465 | 0.011598 | 0.011666 | 0.011666 |
| 0.011532 | 0.011636 | 0.011637 | 0.011773 | 0.011804 | 0.011464 | 0.011632 |
| 0.011565 | 0.011565 | 0.011399 | 0.011583 | 0.011443 | 0.011538 | 0.011376 |
| 0.011578 | 0.011789 | 0.011526 | 0.011469 | 0.011363 | 0.011565 | 0.011430 |
| 0.011531 | 0.011464 | 0.011363 | 0.011330 | 0.011531 | 0.011568 | 0.011464 |
| 0.011363 | 0.011296 | 0.011430 | 0.011363 | 0.011296 | 0.011400 | 0.011565 |
| 0.011464 | 0.011396 | 0.011430 | 0.011464 | 0.011430 | 0.011363 | 0.011565 |
| 0.011430 | 0.011464 | 0.011464 | 0.011396 | 0.011464 | 0.011699 | 0.011363 |
| 0.011396 | 0.011800 | 0.011396 | 0.011430 | 0.011396 | 0.011766 | 0.011361 |
| 0.011791 | 0.011401 | 0.011411 | 0.011625 | 0.011713 | 0.011599 | 0.011353 |
| 0.011375 | 0.011565 | 0.011598 | 0.011706 | 0.011566 | 0.011704 | 0.011835 |
| 0.011734 | 0.011772 | 0.011733 | 0.012053 | 0.011766 | 0.012643 | 0.011803 |
| 0.012543 | 0.012310 | 0.012445 | 0.012717 | 0.011766 | 0.011464 | 0.011666 |
| 0.012206 | 0.012040 | 0.011733 | 0.011632 | 0.011700 | 0.011700 | 0.011670 |
| 0.011565 | 0.011570 | 0.011632 | 0.011599 | 0.011970 | 0.012036 | 0.012037 |
| 0.011937 | 0.012037 | 0.012141 | 0.011907 | 0.012207 | 0.012214 | 0.012274 |
| 0.012275 | 0.012309 | 0.012257 | 0.012275 | 0.012276 | 0.011497 | 0.011801 |
| 0.011869 | 0.012373 | 0.011841 | 0.012104 | 0.012578 | 0.011638 | 0.011532 |
| 0.011497 | 0.011497 | 0.011969 | 0.012008 | 0.012118 | 0.011834 | 0.011499 |
| S492     | 0.011564 | 0.011564 | 0.012169 | 0.011933 | 0.011933 | 0.012000 |
| 0.011841 | 0.011773 | 0.012000 | 0.011429 | 0.011496 | 0.011464 | 0.011429 |
| 0.011463 | 0.011631 | 0.011429 | 0.011463 | 0.011530 | 0.011496 | 0.011463 |
| 0.011429 | 0.011463 | 0.011564 | 0.011430 | 0.011463 | 0.011463 | 0.011807 |
| 0.011698 | 0.011463 | 0.011362 | 0.011597 | 0.011530 | 0.011497 | 0.011530 |
| 0.011496 | 0.011597 | 0.011496 | 0.011496 | 0.011530 | 0.011496 | 0.011597 |
| 0.011429 | 0.011496 | 0.011530 | 0.011463 | 0.011563 | 0.011597 | 0.011530 |
| 0.011496 | 0.011664 | 0.011564 | 0.011832 | 0.011496 | 0.011765 | 0.011496 |
| 0.011463 | 0.011564 | 0.011631 | 0.011765 | 0.011866 | 0.011564 | 0.011664 |
| 0.011530 | 0.011597 | 0.011496 | 0.011731 | 0.011967 | 0.011496 | 0.011564 |
| 0.011463 | 0.011564 | 0.011530 | 0.011597 | 0.011530 | 0.011530 | 0.011530 |
| 0.011429 | 0.011463 | 0.011429 | 0.011530 | 0.011496 | 0.011531 | 0.011597 |
| 0.011530 | 0.011496 | 0.011564 | 0.011463 | 0.011597 | 0.011429 | 0.011496 |
| 0.011664 | 0.011597 | 0.011832 | 0.011664 | 0.011496 | 0.011731 | 0.011496 |
| 0.011616 | 0.011845 | 0.011664 | 0.011373 | 0.011396 | 0.011502 | 0.011572 |
| 0.012231 | 0.011569 | 0.011348 | 0.011731 | 0.011731 | 0.011530 | 0.011631 |
| 0.011564 | 0.011463 | 0.011396 | 0.011496 | 0.011597 | 0.011530 | 0.011396 |
| 0.011429 | 0.011597 | 0.011732 | 0.011664 | 0.011564 | 0.011530 | 0.011463 |
| 0.011429 | 0.011429 | 0.011497 | 0.011463 | 0.011665 | 0.011631 | 0.011564 |
| 0.011665 | 0.011732 | 0.011463 | 0.011463 | 0.011497 | 0.011497 | 0.011499 |
| 0.011567 | 0.011497 | 0.011497 | 0.011348 | 0.011422 | 0.011411 | 0.011497 |
| 0.011500 | 0.011404 | 0.011466 | 0.011474 | 0.011400 | 0.011437 | 0.011465 |
| 0.011744 | 0.011508 | 0.011542 | 0.011430 | 0.011440 | 0.011565 | 0.011531 |
| 0.011598 | 0.011532 | 0.011531 | 0.011496 | 0.011228 | 0.011933 | 0.011732 |
| 0.011765 | 0.011631 | 0.011496 | 0.011597 | 0.011396 | 0.011631 | 0.011430 |
| 0.011429 | 0.011496 | 0.011463 | 0.011429 | 0.011463 | 0.011429 | 0.011530 |
| 0.011497 | 0.011597 | 0.011530 | 0.011429 | 0.011532 | 0.011631 | 0.011635 |
| 0.011631 | 0.011530 | 0.011429 | 0.011364 | 0.011497 | 0.011429 | 0.011362 |
| 0.011468 | 0.011631 | 0.011430 | 0.011631 | 0.011362 | 0.011497 | 0.011463 |
| 0.011564 | 0.011463 | 0.011497 | 0.011463 | 0.011497 | 0.011362 | 0.011497 |
| 0.011530 | 0.011463 | 0.011530 | 0.011463 | 0.011362 | 0.011530 | 0.011765 |
| 0.011866 | 0.011799 | 0.011866 | 0.011633 | 0.011866 | 0.011362 | 0.011463 |
| 0.011499 | 0.011828 | 0.011563 | 0.011403 | 0.011874 | 0.011367 | 0.011454 |
| 0.011875 | 0.011774 | 0.011631 | 0.011799 | 0.011299 | 0.011731 | 0.011698 |
| 0.011631 | 0.011799 | 0.011486 | 0.011349 | 0.011395 | 0.011530 | 0.011534 |
| 0.011698 | 0.011465 | 0.011702 | 0.011804 | 0.011597 | 0.011732 | 0.011772 |

|          |          |          |          |          |          |          |
|----------|----------|----------|----------|----------|----------|----------|
| 0.011500 | 0.011773 | 0.011500 | 0.011669 | 0.011867 | 0.011396 | 0.011599 |
| 0.011564 | 0.011496 | 0.011396 | 0.011396 | 0.011463 | 0.011463 | 0.011530 |
| 0.011463 | 0.011530 | 0.011429 | 0.011530 | 0.011463 | 0.011463 | 0.011530 |
| 0.011463 | 0.011899 | 0.011799 | 0.011832 | 0.011362 | 0.011463 | 0.011496 |
| 0.011496 | 0.011463 | 0.011530 | 0.011564 | 0.011429 | 0.011429 | 0.011429 |
| 0.011967 | 0.011597 | 0.011597 | 0.011396 | 0.011496 | 0.011664 | 0.011429 |
| 0.011429 | 0.011496 | 0.011463 | 0.011631 | 0.011429 | 0.011564 | 0.011698 |
| 0.011631 | 0.011463 | 0.011463 | 0.011396 | 0.011396 | 0.011564 | 0.011496 |
| 0.011396 | 0.011496 | 0.011362 | 0.011396 | 0.011530 | 0.011665 | 0.011429 |
| 0.011396 | 0.011530 | 0.011463 | 0.011362 | 0.011698 | 0.011362 | 0.011530 |
| 0.011539 | 0.011429 | 0.011732 | 0.011564 | 0.011597 | 0.011463 | 0.011564 |
| 0.011429 | 0.011765 | 0.011362 | 0.011631 | 0.011429 | 0.011429 | 0.011362 |
| 0.011597 | 0.011799 | 0.011496 | 0.011564 | 0.011396 | 0.011799 | 0.011429 |
| 0.011429 | 0.011429 | 0.011463 | 0.011564 | 0.011463 | 0.011564 | 0.011631 |
| 0.011631 | 0.011597 | 0.011496 | 0.011597 | 0.011564 | 0.011429 | 0.011396 |
| 0.011429 | 0.011429 | 0.011496 | 0.011429 | 0.011396 | 0.011564 | 0.011429 |
| 0.011463 | 0.011463 | 0.011597 | 0.011631 | 0.011530 | 0.011463 | 0.011463 |
| 0.011530 | 0.011463 | 0.011564 | 0.011429 | 0.011564 | 0.011664 | 0.011967 |
| 0.011463 | 0.011866 | 0.011440 | 0.017974 | 0.011257 | 0.011549 | 0.011793 |
| 0.011787 | 0.011799 | 0.011479 | 0.011466 | 0.011829 | 0.011854 | 0.011425 |
| 0.011582 | 0.011610 | 0.011294 | 0.011395 | 0.011450 | 0.011455 | 0.011404 |
| 0.011623 | 0.011582 | 0.011616 | 0.011391 | 0.011597 | 0.011362 | 0.011567 |
| 0.011472 | 0.011597 | 0.011597 | 0.011564 | 0.011530 | 0.011530 | 0.011497 |
| 0.011530 | 0.011463 | 0.011496 | 0.011530 | 0.011497 | 0.011429 | 0.011329 |
| 0.011329 | 0.011530 | 0.011429 | 0.011530 | 0.011564 | 0.011597 | 0.011362 |
| 0.011530 | 0.011497 | 0.011833 | 0.011833 | 0.011564 | 0.011598 | 0.011631 |
| 0.011396 | 0.011396 | 0.011429 | 0.011530 | 0.011396 | 0.011631 | 0.011631 |
| 0.011665 | 0.011631 | 0.011597 | 0.011698 | 0.011866 | 0.011700 | 0.011530 |
| 0.011530 | 0.011597 | 0.011631 | 0.011463 | 0.011530 | 0.011497 | 0.011530 |
| 0.011598 | 0.011598 | 0.011631 | 0.011598 | 0.011498 | 0.011698 | 0.011665 |
| 0.011534 | 0.011429 | 0.011530 | 0.011631 | 0.011530 | 0.011665 | 0.011698 |
| 0.011799 | 0.011299 | 0.011731 | 0.011698 | 0.011631 | 0.011799 | 0.011430 |
| 0.011599 | 0.011497 | 0.011329 | 0.011329 | 0.011530 | 0.011429 | 0.011530 |
| 0.011564 | 0.011597 | 0.011362 | 0.011530 | 0.011497 | 0.011833 | 0.011833 |
| 0.011564 | 0.011598 | 0.000000 | 0.011262 | 0.012204 | 0.011596 | 0.011341 |
| 0.011623 | 0.011580 | 0.011657 | 0.011545 | 0.011655 | 0.011543 | 0.011612 |
| 0.012090 | 0.011268 | 0.011403 | 0.011440 | 0.011749 | 0.011672 | 0.011775 |
| 0.012114 | 0.011588 | 0.011770 | 0.011832 | 0.011698 | 0.011698 | 0.011736 |
| 0.011396 | 0.011564 | 0.011698 | 0.011664 | 0.011668 | 0.011664 | 0.011633 |
| 0.011496 | 0.011429 | 0.011463 | 0.011496 | 0.011396 | 0.011463 | 0.011362 |
| 0.011496 | 0.011530 | 0.011429 | 0.011396 | 0.011496 | 0.011429 | 0.011463 |
| 0.011463 | 0.011396 | 0.011463 | 0.011496 | 0.011396 | 0.011597 | 0.011631 |
| 0.011530 | 0.011597 | 0.011530 | 0.011530 | 0.011463 | 0.011866 | 0.011496 |
| 0.011512 | 0.011463 | 0.011698 | 0.011705 | 0.011564 | 0.011564 | 0.011564 |
| 0.011564 | 0.011496 | 0.011463 | 0.011496 | 0.011597 | 0.011597 | 0.011530 |
| 0.011530 | 0.011664 | 0.011832 | 0.011564 | 0.011765 | 0.011765 | 0.011631 |
| 0.011463 | 0.011530 | 0.011564 | 0.011967 | 0.011530 | 0.011564 | 0.011530 |
| 0.011564 | 0.011496 | 0.011496 | 0.011799 | 0.011732 | 0.011765 | 0.011496 |
| 0.011597 | 0.011664 | 0.011530 | 0.011597 | 0.011563 | 0.011429 | 0.011765 |
| 0.011530 | 0.011429 | 0.011496 | 0.011664 | 0.011496 | 0.011597 | 0.011832 |
| 0.011530 | 0.011909 | 0.011899 | 0.011588 | 0.011342 | 0.011604 | 0.011318 |
| 0.011445 | 0.011878 | 0.011411 | 0.011551 | 0.011353 | 0.011417 | 0.011432 |
| 0.011621 | 0.011258 | 0.011394 | 0.011258 | 0.011276 | 0.011462 | 0.011547 |
| 0.011550 | 0.011454 | 0.011553 | 0.011483 | 0.011532 | 0.011665 | 0.011732 |
| 0.011732 | 0.011598 | 0.011702 | 0.011704 | 0.011840 | 0.011873 | 0.011530 |
| 0.011765 | 0.011631 | 0.011496 | 0.011597 | 0.011396 | 0.011631 | 0.011430 |
| 0.011429 | 0.011496 | 0.011463 | 0.011429 | 0.011463 | 0.011429 | 0.011530 |
| 0.011514 | 0.011515 | 0.011505 | 0.011540 | 0.011676 | 0.011641 | 0.011640 |
| 0.011639 | 0.011564 | 0.011356 | 0.011384 | 0.011500 | 0.011670 | 0.011671 |
| 0.011464 | 0.011534 | 0.011700 | 0.011736 | 0.011665 | 0.011699 | 0.011295 |



|          |          |          |          |          |          |          |
|----------|----------|----------|----------|----------|----------|----------|
| 0.011564 | 0.011564 | 0.011564 | 0.011530 | 0.012068 | 0.011698 | 0.011765 |
| 0.011732 | 0.011843 | 0.011503 | 0.011580 | 0.011463 | 0.011530 | 0.011362 |
| 0.011666 | 0.011564 | 0.011698 | 0.011698 | 0.011728 | 0.011698 | 0.011476 |
| 0.011364 | 0.011337 | 0.011435 | 0.011434 | 0.011538 | 0.011359 | 0.011706 |
| 0.011506 | 0.011543 | 0.011251 | 0.011435 | 0.011497 | 0.011573 | 0.011463 |
| 0.011429 | 0.011429 | 0.011497 | 0.011463 | 0.011665 | 0.011631 | 0.011564 |
| 0.011665 | 0.011732 | 0.011463 | 0.011463 | 0.011497 | 0.011497 | 0.011499 |
| 0.011567 | 0.011497 | 0.011497 | 0.011532 | 0.011665 | 0.011732 | 0.011732 |
| 0.011598 | 0.011702 | 0.011704 | 0.011840 | 0.011873 | 0.011530 | 0.011698 |
| 0.011362 | 0.011362 | 0.011466 | 0.011652 | 0.011581 | 0.011605 | 0.011481 |
| 0.011646 | 0.011835 | 0.011695 | 0.011536 | 0.011430 | 0.011631 | 0.011497 |
| 0.011597 | 0.011530 | 0.011429 | 0.011532 | 0.011631 | 0.011635 | 0.011530 |
| 0.011429 | 0.011364 | 0.011497 | 0.011429 | 0.011362 | 0.011468 | 0.011631 |
| 0.011530 | 0.011463 | 0.011496 | 0.011530 | 0.011497 | 0.011429 | 0.011631 |
| 0.011496 | 0.011530 | 0.011530 | 0.011463 | 0.011530 | 0.011765 | 0.011429 |
| 0.011463 | 0.011866 | 0.011463 | 0.011496 | 0.011463 | 0.011832 | 0.011360 |
| 0.011847 | 0.011315 | 0.011361 | 0.011624 | 0.011671 | 0.011634 | 0.011269 |
| 0.011323 | 0.011631 | 0.011731 | 0.011841 | 0.011700 | 0.011838 | 0.011968 |
| 0.011868 | 0.011906 | 0.011866 | 0.012120 | 0.011832 | 0.012640 | 0.011869 |
| 0.012608 | 0.012308 | 0.012442 | 0.012781 | 0.011832 | 0.011530 | 0.011833 |
| 0.012238 | 0.012207 | 0.011799 | 0.011698 | 0.011766 | 0.011766 | 0.011737 |
| 0.011631 | 0.011637 | 0.011698 | 0.011665 | 0.012035 | 0.012101 | 0.012103 |
| 0.012002 | 0.012103 | 0.012207 | 0.011974 | 0.012239 | 0.012245 | 0.012306 |
| 0.012306 | 0.012340 | 0.012289 | 0.012306 | 0.012308 | 0.011228 | 0.011833 |
| 0.011935 | 0.012438 | 0.011908 | 0.012169 | 0.012643 | 0.011705 | 0.011598 |
| 0.011564 | 0.011564 | 0.012035 | 0.012006 | 0.012116 | 0.011899 | 0.011566 |
| S493     | 0.011497 | 0.011497 | 0.012102 | 0.011866 | 0.011866 | 0.011933 |
| 0.011773 | 0.011705 | 0.011933 | 0.011362 | 0.011429 | 0.011397 | 0.011362 |
| 0.011396 | 0.011564 | 0.011362 | 0.011396 | 0.011463 | 0.011429 | 0.011396 |
| 0.011362 | 0.011396 | 0.011496 | 0.011363 | 0.011396 | 0.011396 | 0.011739 |
| 0.011631 | 0.011396 | 0.011295 | 0.011530 | 0.011463 | 0.011429 | 0.011463 |
| 0.011429 | 0.011530 | 0.011429 | 0.011429 | 0.011463 | 0.011429 | 0.011597 |
| 0.011362 | 0.011429 | 0.011463 | 0.011396 | 0.011496 | 0.011530 | 0.011463 |
| 0.011429 | 0.011597 | 0.011497 | 0.011765 | 0.011429 | 0.011698 | 0.011429 |
| 0.011396 | 0.011497 | 0.011564 | 0.011698 | 0.011799 | 0.011496 | 0.011597 |
| 0.011463 | 0.011530 | 0.011429 | 0.011664 | 0.011900 | 0.011429 | 0.011496 |
| 0.011396 | 0.011496 | 0.011463 | 0.011530 | 0.011463 | 0.011463 | 0.011463 |
| 0.011362 | 0.011396 | 0.011362 | 0.011463 | 0.011429 | 0.011464 | 0.011530 |
| 0.011463 | 0.011429 | 0.011496 | 0.011396 | 0.011530 | 0.011362 | 0.011429 |
| 0.011597 | 0.011530 | 0.011765 | 0.011597 | 0.011429 | 0.011664 | 0.011429 |
| 0.011579 | 0.011807 | 0.011626 | 0.011334 | 0.011359 | 0.011465 | 0.011533 |
| 0.012195 | 0.011569 | 0.011349 | 0.011664 | 0.011664 | 0.011463 | 0.011564 |
| 0.011496 | 0.011396 | 0.011329 | 0.011429 | 0.011530 | 0.011463 | 0.011329 |
| 0.011362 | 0.011530 | 0.011664 | 0.011597 | 0.011496 | 0.011463 | 0.011396 |
| 0.011362 | 0.011362 | 0.011429 | 0.011396 | 0.011597 | 0.011564 | 0.011497 |
| 0.011597 | 0.011665 | 0.011396 | 0.011396 | 0.011430 | 0.011430 | 0.011432 |
| 0.011500 | 0.011429 | 0.011430 | 0.011312 | 0.011386 | 0.011341 | 0.011430 |
| 0.011433 | 0.011369 | 0.011429 | 0.011405 | 0.011332 | 0.011368 | 0.011398 |
| 0.011672 | 0.011439 | 0.011473 | 0.011363 | 0.011371 | 0.011497 | 0.011464 |
| 0.011531 | 0.011465 | 0.011464 | 0.011429 | 0.011161 | 0.011866 | 0.011665 |
| 0.011698 | 0.011564 | 0.011429 | 0.011530 | 0.011329 | 0.011564 | 0.011362 |
| 0.011429 | 0.011429 | 0.011396 | 0.011362 | 0.011396 | 0.011362 | 0.011463 |
| 0.011429 | 0.011530 | 0.011463 | 0.011362 | 0.011465 | 0.011564 | 0.011567 |
| 0.011564 | 0.011463 | 0.011362 | 0.011296 | 0.011429 | 0.011362 | 0.011295 |
| 0.011400 | 0.011564 | 0.011362 | 0.011564 | 0.011329 | 0.011430 | 0.011396 |
| 0.011497 | 0.011396 | 0.011429 | 0.011396 | 0.011430 | 0.011295 | 0.011430 |
| 0.011463 | 0.011396 | 0.011463 | 0.011396 | 0.011295 | 0.011463 | 0.011698 |
| 0.011799 | 0.011732 | 0.011799 | 0.011566 | 0.011799 | 0.011295 | 0.011396 |
| 0.011432 | 0.011667 | 0.011472 | 0.011335 | 0.011773 | 0.011299 | 0.011375 |
| 0.011807 | 0.011706 | 0.011564 | 0.011732 | 0.011231 | 0.011664 | 0.011631 |

|          |          |          |          |          |          |          |
|----------|----------|----------|----------|----------|----------|----------|
| 0.011564 | 0.011732 | 0.011415 | 0.011266 | 0.011354 | 0.011463 | 0.011466 |
| 0.011631 | 0.011397 | 0.011635 | 0.011737 | 0.011530 | 0.011665 | 0.011704 |
| 0.011432 | 0.011705 | 0.011432 | 0.011601 | 0.011800 | 0.011329 | 0.011532 |
| 0.011496 | 0.011429 | 0.011329 | 0.011329 | 0.011396 | 0.011396 | 0.011463 |
| 0.011396 | 0.011463 | 0.011362 | 0.011463 | 0.011396 | 0.011396 | 0.011463 |
| 0.011396 | 0.011832 | 0.011731 | 0.011765 | 0.011295 | 0.011396 | 0.011429 |
| 0.011429 | 0.011396 | 0.011463 | 0.011496 | 0.011362 | 0.011362 | 0.011362 |
| 0.011899 | 0.011530 | 0.011530 | 0.011329 | 0.011429 | 0.011597 | 0.011362 |
| 0.011362 | 0.011429 | 0.011396 | 0.011564 | 0.011362 | 0.011497 | 0.011631 |
| 0.011564 | 0.011396 | 0.011396 | 0.011329 | 0.011329 | 0.011496 | 0.011429 |
| 0.011329 | 0.011429 | 0.011295 | 0.011329 | 0.011463 | 0.011598 | 0.011362 |
| 0.011329 | 0.011463 | 0.011396 | 0.011295 | 0.011631 | 0.011295 | 0.011463 |
| 0.011471 | 0.011362 | 0.011664 | 0.011497 | 0.011530 | 0.011396 | 0.011496 |
| 0.011362 | 0.011698 | 0.011295 | 0.011564 | 0.011362 | 0.011362 | 0.011295 |
| 0.011530 | 0.011732 | 0.011429 | 0.011496 | 0.011329 | 0.011731 | 0.011362 |
| 0.011362 | 0.011362 | 0.011396 | 0.011496 | 0.011396 | 0.011496 | 0.011564 |
| 0.011564 | 0.011530 | 0.011429 | 0.011530 | 0.011496 | 0.011362 | 0.011329 |
| 0.011362 | 0.011362 | 0.011429 | 0.011362 | 0.011329 | 0.011496 | 0.011362 |
| 0.011396 | 0.011396 | 0.011530 | 0.011564 | 0.011463 | 0.011396 | 0.011396 |
| 0.011463 | 0.011396 | 0.011496 | 0.011362 | 0.011496 | 0.011597 | 0.011899 |
| 0.011396 | 0.011799 | 0.011405 | 0.017936 | 0.011322 | 0.011488 | 0.011758 |
| 0.011718 | 0.011764 | 0.011374 | 0.011350 | 0.011774 | 0.011785 | 0.011364 |
| 0.011582 | 0.011549 | 0.011294 | 0.011311 | 0.011411 | 0.011356 | 0.011361 |
| 0.011576 | 0.011582 | 0.011579 | 0.011457 | 0.011530 | 0.011295 | 0.011500 |
| 0.011404 | 0.011530 | 0.011530 | 0.011497 | 0.011463 | 0.011463 | 0.011430 |
| 0.011463 | 0.011396 | 0.011429 | 0.011463 | 0.011430 | 0.011362 | 0.011262 |
| 0.011262 | 0.011463 | 0.011362 | 0.011463 | 0.011497 | 0.011530 | 0.011295 |
| 0.011463 | 0.011429 | 0.011765 | 0.011765 | 0.011497 | 0.011531 | 0.011564 |
| 0.011329 | 0.011329 | 0.011362 | 0.011463 | 0.011329 | 0.011564 | 0.011564 |
| 0.011597 | 0.011564 | 0.011530 | 0.011631 | 0.011799 | 0.011633 | 0.011463 |
| 0.011463 | 0.011530 | 0.011564 | 0.011396 | 0.011463 | 0.011430 | 0.011463 |
| 0.011531 | 0.011530 | 0.011564 | 0.011530 | 0.011431 | 0.011631 | 0.011597 |
| 0.011467 | 0.011362 | 0.011463 | 0.011564 | 0.011463 | 0.011597 | 0.011631 |
| 0.011732 | 0.011231 | 0.011664 | 0.011631 | 0.011564 | 0.011732 | 0.011363 |
| 0.011498 | 0.011430 | 0.011262 | 0.011262 | 0.011463 | 0.011362 | 0.011463 |
| 0.011497 | 0.011530 | 0.011295 | 0.011463 | 0.011429 | 0.011765 | 0.011765 |
| 0.011497 | 0.011531 | 0.011262 | 0.000000 | 0.012136 | 0.011524 | 0.011271 |
| 0.011552 | 0.011511 | 0.011587 | 0.011476 | 0.011585 | 0.011474 | 0.011543 |
| 0.012021 | 0.011199 | 0.011334 | 0.011371 | 0.011680 | 0.011604 | 0.011706 |
| 0.012046 | 0.011512 | 0.011703 | 0.011765 | 0.011631 | 0.011631 | 0.011668 |
| 0.011329 | 0.011497 | 0.011631 | 0.011597 | 0.011601 | 0.011597 | 0.011565 |
| 0.011429 | 0.011362 | 0.011396 | 0.011429 | 0.011329 | 0.011396 | 0.011295 |
| 0.011429 | 0.011463 | 0.011362 | 0.011329 | 0.011429 | 0.011362 | 0.011396 |
| 0.011396 | 0.011329 | 0.011396 | 0.011429 | 0.011329 | 0.011530 | 0.011564 |
| 0.011463 | 0.011530 | 0.011463 | 0.011463 | 0.011396 | 0.011799 | 0.011429 |
| 0.011443 | 0.011396 | 0.011631 | 0.011637 | 0.011496 | 0.011496 | 0.011496 |
| 0.011496 | 0.011429 | 0.011396 | 0.011429 | 0.011530 | 0.011530 | 0.011463 |
| 0.011463 | 0.011597 | 0.011765 | 0.011497 | 0.011698 | 0.011698 | 0.011564 |
| 0.011396 | 0.011463 | 0.011496 | 0.011900 | 0.011463 | 0.011497 | 0.011463 |
| 0.011496 | 0.011429 | 0.011429 | 0.011732 | 0.011664 | 0.011698 | 0.011429 |
| 0.011530 | 0.011597 | 0.011463 | 0.011530 | 0.011496 | 0.011362 | 0.011698 |
| 0.011463 | 0.011429 | 0.011429 | 0.011597 | 0.011429 | 0.011530 | 0.011765 |
| 0.011463 | 0.011841 | 0.011832 | 0.011588 | 0.011342 | 0.011536 | 0.011318 |
| 0.011335 | 0.011878 | 0.011376 | 0.011596 | 0.011402 | 0.011467 | 0.011485 |
| 0.011621 | 0.011324 | 0.011450 | 0.011324 | 0.011330 | 0.011462 | 0.011506 |
| 0.011512 | 0.011414 | 0.011518 | 0.011448 | 0.011465 | 0.011597 | 0.011665 |
| 0.011665 | 0.011531 | 0.011635 | 0.011637 | 0.011772 | 0.011802 | 0.011463 |
| 0.011698 | 0.011564 | 0.011429 | 0.011530 | 0.011329 | 0.011564 | 0.011362 |
| 0.011429 | 0.011429 | 0.011396 | 0.011362 | 0.011396 | 0.011362 | 0.011463 |
| 0.011444 | 0.011445 | 0.011437 | 0.011471 | 0.011608 | 0.011573 | 0.011572 |

|          |          |          |          |          |          |          |
|----------|----------|----------|----------|----------|----------|----------|
| 0.011571 | 0.011497 | 0.011282 | 0.011312 | 0.011433 | 0.011602 | 0.011603 |
| 0.011396 | 0.011467 | 0.011700 | 0.011668 | 0.011598 | 0.011632 | 0.011228 |
| 0.011497 | 0.011496 | 0.011496 | 0.011463 | 0.012000 | 0.011631 | 0.011698 |
| 0.011732 | 0.011808 | 0.011435 | 0.011476 | 0.011396 | 0.011463 | 0.011295 |
| 0.011598 | 0.011496 | 0.011631 | 0.011631 | 0.011728 | 0.011631 | 0.011407 |
| 0.011297 | 0.011268 | 0.011367 | 0.011366 | 0.011470 | 0.011284 | 0.011638 |
| 0.011437 | 0.011499 | 0.011203 | 0.011360 | 0.011430 | 0.011505 | 0.011396 |
| 0.011362 | 0.011362 | 0.011429 | 0.011396 | 0.011597 | 0.011564 | 0.011497 |
| 0.011597 | 0.011665 | 0.011396 | 0.011396 | 0.011430 | 0.011430 | 0.011432 |
| 0.011500 | 0.011429 | 0.011430 | 0.011465 | 0.011597 | 0.011665 | 0.011665 |
| 0.011531 | 0.011635 | 0.011637 | 0.011772 | 0.011802 | 0.011463 | 0.011631 |
| 0.011295 | 0.011295 | 0.011398 | 0.011582 | 0.011512 | 0.011537 | 0.011411 |
| 0.011577 | 0.011744 | 0.011568 | 0.011434 | 0.011362 | 0.011564 | 0.011429 |
| 0.011530 | 0.011463 | 0.011362 | 0.011465 | 0.011564 | 0.011567 | 0.011463 |
| 0.011362 | 0.011296 | 0.011429 | 0.011362 | 0.011295 | 0.011400 | 0.011564 |
| 0.011463 | 0.011396 | 0.011429 | 0.011463 | 0.011430 | 0.011362 | 0.011564 |
| 0.011429 | 0.011463 | 0.011463 | 0.011396 | 0.011463 | 0.011698 | 0.011362 |
| 0.011396 | 0.011799 | 0.011396 | 0.011429 | 0.011396 | 0.011765 | 0.011360 |
| 0.011847 | 0.011315 | 0.011361 | 0.011624 | 0.011671 | 0.011599 | 0.011269 |
| 0.011323 | 0.011564 | 0.011664 | 0.011773 | 0.011633 | 0.011771 | 0.011901 |
| 0.011800 | 0.011838 | 0.011799 | 0.012051 | 0.011765 | 0.012573 | 0.011801 |
| 0.012540 | 0.012241 | 0.012375 | 0.012713 | 0.011765 | 0.011463 | 0.011766 |
| 0.012171 | 0.012140 | 0.011732 | 0.011631 | 0.011699 | 0.011699 | 0.011669 |
| 0.011564 | 0.011569 | 0.011631 | 0.011598 | 0.011968 | 0.012034 | 0.012036 |
| 0.011935 | 0.012035 | 0.012139 | 0.011906 | 0.012171 | 0.012178 | 0.012238 |
| 0.012239 | 0.012272 | 0.012220 | 0.012239 | 0.012240 | 0.011161 | 0.011766 |
| 0.011867 | 0.012371 | 0.011840 | 0.012102 | 0.012575 | 0.011638 | 0.011531 |
| 0.011496 | 0.011496 | 0.011967 | 0.011924 | 0.012116 | 0.011832 | 0.011498 |
| S494     | 0.012373 | 0.012373 | 0.012474 | 0.012440 | 0.012440 | 0.012507 |
| 0.012251 | 0.012183 | 0.012507 | 0.012002 | 0.012069 | 0.012037 | 0.012002 |
| 0.011968 | 0.012204 | 0.011934 | 0.012035 | 0.012103 | 0.012069 | 0.012035 |
| 0.012002 | 0.012035 | 0.012069 | 0.012003 | 0.012037 | 0.012035 | 0.012217 |
| 0.012204 | 0.012036 | 0.011934 | 0.012103 | 0.012103 | 0.012069 | 0.012103 |
| 0.012069 | 0.012170 | 0.012069 | 0.012069 | 0.012103 | 0.012069 | 0.012204 |
| 0.011935 | 0.012069 | 0.012103 | 0.012035 | 0.012069 | 0.012170 | 0.012103 |
| 0.012069 | 0.012238 | 0.012138 | 0.012339 | 0.012069 | 0.012339 | 0.012069 |
| 0.012035 | 0.012070 | 0.012204 | 0.012339 | 0.012373 | 0.012069 | 0.012170 |
| 0.012103 | 0.012170 | 0.012069 | 0.012305 | 0.012474 | 0.012069 | 0.012137 |
| 0.012035 | 0.012136 | 0.012103 | 0.012170 | 0.012103 | 0.012103 | 0.012103 |
| 0.012002 | 0.012035 | 0.012002 | 0.012036 | 0.012069 | 0.012106 | 0.012170 |
| 0.012103 | 0.012069 | 0.012137 | 0.012035 | 0.012103 | 0.012002 | 0.012069 |
| 0.012238 | 0.012170 | 0.012406 | 0.012238 | 0.012069 | 0.012305 | 0.012069 |
| 0.012211 | 0.012370 | 0.012269 | 0.011920 | 0.011994 | 0.012129 | 0.012125 |
| 0.012783 | 0.012130 | 0.012009 | 0.012305 | 0.012305 | 0.012035 | 0.012137 |
| 0.012137 | 0.012069 | 0.012136 | 0.012069 | 0.012170 | 0.012103 | 0.012069 |
| 0.012035 | 0.012103 | 0.012339 | 0.012237 | 0.012069 | 0.012103 | 0.012036 |
| 0.012002 | 0.011935 | 0.012070 | 0.012036 | 0.012171 | 0.012137 | 0.012070 |
| 0.012171 | 0.012238 | 0.012036 | 0.012036 | 0.012070 | 0.012070 | 0.012076 |
| 0.012144 | 0.012070 | 0.012070 | 0.011960 | 0.012038 | 0.011973 | 0.012070 |
| 0.012078 | 0.012024 | 0.012095 | 0.012062 | 0.011945 | 0.011986 | 0.012041 |
| 0.012250 | 0.012061 | 0.012129 | 0.012003 | 0.012029 | 0.012138 | 0.012037 |
| 0.012104 | 0.012106 | 0.012104 | 0.012170 | 0.012103 | 0.012507 | 0.012205 |
| 0.012271 | 0.012137 | 0.012069 | 0.012104 | 0.011968 | 0.012137 | 0.012002 |
| 0.012069 | 0.012069 | 0.012036 | 0.012002 | 0.012035 | 0.012002 | 0.012103 |
| 0.012070 | 0.012171 | 0.012104 | 0.012002 | 0.012107 | 0.012205 | 0.012178 |
| 0.012205 | 0.012104 | 0.012002 | 0.011905 | 0.012070 | 0.012002 | 0.011935 |
| 0.012013 | 0.012205 | 0.011969 | 0.012205 | 0.011968 | 0.012070 | 0.012036 |
| 0.012137 | 0.012036 | 0.012070 | 0.012036 | 0.012070 | 0.011935 | 0.012070 |
| 0.012104 | 0.012036 | 0.012103 | 0.012036 | 0.012036 | 0.012103 | 0.012339 |
| 0.012373 | 0.012305 | 0.012373 | 0.012209 | 0.012373 | 0.012036 | 0.012036 |

|          |          |          |          |          |          |          |
|----------|----------|----------|----------|----------|----------|----------|
| 0.011974 | 0.012275 | 0.012205 | 0.011988 | 0.012387 | 0.011914 | 0.012085 |
| 0.012285 | 0.012286 | 0.012170 | 0.012406 | 0.012087 | 0.012305 | 0.012272 |
| 0.012204 | 0.012372 | 0.012199 | 0.012134 | 0.012236 | 0.012103 | 0.012145 |
| 0.012271 | 0.012141 | 0.012314 | 0.012349 | 0.012271 | 0.012339 | 0.012452 |
| 0.012179 | 0.012352 | 0.012247 | 0.012212 | 0.012475 | 0.011968 | 0.012174 |
| 0.012136 | 0.012069 | 0.011968 | 0.011968 | 0.012036 | 0.012035 | 0.012103 |
| 0.012035 | 0.012103 | 0.012002 | 0.012036 | 0.012035 | 0.012035 | 0.012103 |
| 0.012035 | 0.012406 | 0.012305 | 0.012339 | 0.011934 | 0.012036 | 0.012069 |
| 0.012069 | 0.012035 | 0.012103 | 0.012069 | 0.012002 | 0.012002 | 0.012002 |
| 0.012474 | 0.012069 | 0.012170 | 0.011968 | 0.012069 | 0.012238 | 0.012002 |
| 0.012002 | 0.012069 | 0.012035 | 0.012204 | 0.012002 | 0.012137 | 0.012271 |
| 0.012204 | 0.012035 | 0.012035 | 0.011968 | 0.011968 | 0.012137 | 0.012069 |
| 0.011968 | 0.012069 | 0.011934 | 0.011968 | 0.012103 | 0.012171 | 0.012002 |
| 0.011969 | 0.012103 | 0.012037 | 0.011934 | 0.012204 | 0.011934 | 0.012103 |
| 0.012192 | 0.012002 | 0.012238 | 0.012137 | 0.012103 | 0.012036 | 0.012137 |
| 0.012002 | 0.012339 | 0.011934 | 0.012137 | 0.011935 | 0.011935 | 0.011934 |
| 0.012170 | 0.012306 | 0.012069 | 0.012137 | 0.011968 | 0.012305 | 0.011935 |
| 0.012002 | 0.012002 | 0.012035 | 0.012137 | 0.012035 | 0.012137 | 0.012204 |
| 0.012204 | 0.012170 | 0.012069 | 0.012171 | 0.012136 | 0.012002 | 0.011968 |
| 0.012002 | 0.012002 | 0.012069 | 0.011935 | 0.011968 | 0.012137 | 0.012002 |
| 0.011968 | 0.012035 | 0.012170 | 0.012137 | 0.012103 | 0.012035 | 0.012036 |
| 0.012103 | 0.012035 | 0.012136 | 0.012002 | 0.012137 | 0.012238 | 0.012406 |
| 0.012036 | 0.012373 | 0.012062 | 0.018584 | 0.012109 | 0.012286 | 0.012353 |
| 0.012308 | 0.012364 | 0.012214 | 0.012048 | 0.012601 | 0.012374 | 0.012338 |
| 0.012058 | 0.012345 | 0.011959 | 0.012150 | 0.011998 | 0.012098 | 0.011922 |
| 0.012188 | 0.012142 | 0.012174 | 0.011855 | 0.012170 | 0.012171 | 0.012179 |
| 0.012058 | 0.012171 | 0.012170 | 0.012070 | 0.012103 | 0.012104 | 0.012070 |
| 0.012103 | 0.012036 | 0.012069 | 0.012103 | 0.012070 | 0.012002 | 0.012002 |
| 0.012002 | 0.012103 | 0.012002 | 0.012104 | 0.012137 | 0.012171 | 0.012036 |
| 0.012036 | 0.012002 | 0.012339 | 0.012339 | 0.012137 | 0.012172 | 0.012205 |
| 0.011969 | 0.011969 | 0.012002 | 0.012104 | 0.011969 | 0.012204 | 0.012204 |
| 0.012238 | 0.012170 | 0.012170 | 0.012272 | 0.012373 | 0.012275 | 0.012103 |
| 0.012103 | 0.012171 | 0.012205 | 0.012036 | 0.012103 | 0.012070 | 0.012103 |
| 0.012172 | 0.012171 | 0.012204 | 0.012171 | 0.012073 | 0.012272 | 0.012238 |
| 0.012112 | 0.012002 | 0.012103 | 0.012205 | 0.012104 | 0.012171 | 0.012271 |
| 0.012406 | 0.012087 | 0.012305 | 0.012272 | 0.012204 | 0.012372 | 0.012003 |
| 0.012174 | 0.012071 | 0.012002 | 0.012002 | 0.012103 | 0.012002 | 0.012104 |
| 0.012137 | 0.012171 | 0.012036 | 0.012036 | 0.012002 | 0.012339 | 0.012339 |
| 0.012137 | 0.012172 | 0.012204 | 0.012136 | 0.000000 | 0.012241 | 0.012153 |
| 0.012222 | 0.012207 | 0.012327 | 0.012206 | 0.012287 | 0.012201 | 0.012165 |
| 0.011232 | 0.012030 | 0.012193 | 0.012099 | 0.012371 | 0.012253 | 0.012355 |
| 0.011230 | 0.012230 | 0.012348 | 0.012406 | 0.012271 | 0.012204 | 0.012313 |
| 0.011968 | 0.012137 | 0.012271 | 0.012237 | 0.012245 | 0.012170 | 0.012140 |
| 0.012069 | 0.012002 | 0.012036 | 0.012069 | 0.011968 | 0.012035 | 0.011934 |
| 0.012002 | 0.012036 | 0.012002 | 0.011968 | 0.012069 | 0.012002 | 0.012036 |
| 0.012035 | 0.011968 | 0.012035 | 0.012069 | 0.011968 | 0.012170 | 0.012204 |
| 0.012103 | 0.012103 | 0.012103 | 0.012103 | 0.012035 | 0.012373 | 0.012069 |
| 0.012071 | 0.012036 | 0.012204 | 0.012215 | 0.012137 | 0.012136 | 0.012137 |
| 0.012137 | 0.012069 | 0.012035 | 0.012069 | 0.012170 | 0.012170 | 0.012103 |
| 0.012103 | 0.012238 | 0.012339 | 0.012136 | 0.012339 | 0.012339 | 0.012204 |
| 0.012035 | 0.012103 | 0.012137 | 0.012474 | 0.012104 | 0.012137 | 0.012103 |
| 0.012137 | 0.011934 | 0.011934 | 0.012306 | 0.012305 | 0.012272 | 0.012069 |
| 0.012170 | 0.012238 | 0.012103 | 0.012170 | 0.012136 | 0.012002 | 0.012271 |
| 0.012103 | 0.012069 | 0.011934 | 0.012238 | 0.012069 | 0.012170 | 0.012406 |
| 0.012035 | 0.012319 | 0.012406 | 0.012159 | 0.011738 | 0.012115 | 0.011887 |
| 0.011995 | 0.012386 | 0.012045 | 0.012223 | 0.011940 | 0.012029 | 0.012017 |
| 0.012235 | 0.011917 | 0.012120 | 0.011920 | 0.011924 | 0.012200 | 0.012116 |
| 0.012154 | 0.012045 | 0.012118 | 0.012118 | 0.012107 | 0.012171 | 0.012238 |
| 0.012204 | 0.012105 | 0.012212 | 0.012215 | 0.012352 | 0.012300 | 0.012103 |
| 0.012271 | 0.012137 | 0.012069 | 0.012104 | 0.011968 | 0.012137 | 0.012002 |

|          |          |          |          |          |          |          |
|----------|----------|----------|----------|----------|----------|----------|
| 0.012069 | 0.012069 | 0.012036 | 0.012002 | 0.012035 | 0.012002 | 0.012103 |
| 0.012110 | 0.012076 | 0.012089 | 0.012089 | 0.012225 | 0.012223 | 0.012223 |
| 0.012220 | 0.012138 | 0.011984 | 0.011925 | 0.012078 | 0.012248 | 0.012249 |
| 0.012037 | 0.012112 | 0.012341 | 0.012313 | 0.012239 | 0.012273 | 0.012170 |
| 0.012136 | 0.012170 | 0.012170 | 0.012103 | 0.012542 | 0.012271 | 0.012272 |
| 0.012373 | 0.012417 | 0.012085 | 0.012170 | 0.012035 | 0.012204 | 0.012170 |
| 0.012240 | 0.012204 | 0.012271 | 0.012271 | 0.012399 | 0.012373 | 0.012067 |
| 0.011941 | 0.011927 | 0.012049 | 0.012012 | 0.012019 | 0.011957 | 0.012217 |
| 0.012090 | 0.012246 | 0.012110 | 0.012036 | 0.012070 | 0.012122 | 0.012036 |
| 0.012002 | 0.011935 | 0.012070 | 0.012036 | 0.012171 | 0.012137 | 0.012070 |
| 0.012171 | 0.012238 | 0.012036 | 0.012036 | 0.012070 | 0.012070 | 0.012076 |
| 0.012144 | 0.012070 | 0.012070 | 0.012107 | 0.012171 | 0.012238 | 0.012204 |
| 0.012105 | 0.012212 | 0.012215 | 0.012352 | 0.012300 | 0.012103 | 0.012271 |
| 0.012170 | 0.012170 | 0.012043 | 0.012245 | 0.012175 | 0.012186 | 0.012078 |
| 0.012233 | 0.012431 | 0.012162 | 0.012116 | 0.011969 | 0.012205 | 0.012070 |
| 0.012171 | 0.012104 | 0.012002 | 0.012107 | 0.012205 | 0.012178 | 0.012104 |
| 0.012002 | 0.011905 | 0.012070 | 0.012002 | 0.011935 | 0.012013 | 0.012205 |
| 0.012103 | 0.012036 | 0.012069 | 0.012103 | 0.012070 | 0.012002 | 0.012137 |
| 0.012069 | 0.012103 | 0.012103 | 0.012035 | 0.012103 | 0.012339 | 0.011935 |
| 0.012035 | 0.012373 | 0.012035 | 0.012069 | 0.012035 | 0.012339 | 0.011961 |
| 0.012242 | 0.011869 | 0.011863 | 0.012149 | 0.012161 | 0.012174 | 0.011855 |
| 0.011796 | 0.012136 | 0.012238 | 0.012352 | 0.012207 | 0.012348 | 0.012476 |
| 0.012374 | 0.012415 | 0.012372 | 0.012635 | 0.012339 | 0.013183 | 0.012376 |
| 0.013082 | 0.012851 | 0.012986 | 0.013292 | 0.012339 | 0.012036 | 0.012340 |
| 0.011497 | 0.012717 | 0.012305 | 0.012205 | 0.012272 | 0.012272 | 0.012246 |
| 0.012136 | 0.012148 | 0.012204 | 0.012171 | 0.012543 | 0.012609 | 0.012610 |
| 0.012510 | 0.012611 | 0.012715 | 0.012483 | 0.011363 | 0.011297 | 0.011363 |
| 0.011363 | 0.011464 | 0.011401 | 0.011430 | 0.011431 | 0.012103 | 0.011565 |
| 0.012441 | 0.012878 | 0.011569 | 0.012677 | 0.013152 | 0.012182 | 0.012104 |
| 0.012069 | 0.012069 | 0.012542 | 0.012667 | 0.012681 | 0.012406 | 0.012073 |
| S495     | 0.011775 | 0.011775 | 0.011953 | 0.011918 | 0.011918 | 0.011918 |
| 0.011856 | 0.011783 | 0.011989 | 0.011417 | 0.011489 | 0.011454 | 0.011417 |
| 0.011453 | 0.011596 | 0.011417 | 0.011453 | 0.011524 | 0.011489 | 0.011453 |
| 0.011417 | 0.011453 | 0.011560 | 0.011418 | 0.011454 | 0.011453 | 0.011820 |
| 0.011703 | 0.011453 | 0.011346 | 0.011596 | 0.011453 | 0.011489 | 0.011525 |
| 0.011453 | 0.011596 | 0.011489 | 0.011489 | 0.011453 | 0.011489 | 0.011667 |
| 0.011417 | 0.011489 | 0.011489 | 0.011453 | 0.011560 | 0.011560 | 0.011489 |
| 0.011489 | 0.011632 | 0.011561 | 0.011846 | 0.011453 | 0.011775 | 0.011453 |
| 0.011453 | 0.011560 | 0.011560 | 0.011775 | 0.011846 | 0.011560 | 0.011667 |
| 0.011489 | 0.011596 | 0.011489 | 0.011739 | 0.011989 | 0.011453 | 0.011560 |
| 0.011453 | 0.011524 | 0.011525 | 0.011596 | 0.011489 | 0.011524 | 0.011524 |
| 0.011417 | 0.011453 | 0.011417 | 0.011489 | 0.011489 | 0.011526 | 0.011596 |
| 0.011525 | 0.011453 | 0.011560 | 0.011453 | 0.011596 | 0.011417 | 0.011489 |
| 0.011667 | 0.011596 | 0.011846 | 0.011668 | 0.011453 | 0.011703 | 0.011489 |
| 0.011644 | 0.011923 | 0.011661 | 0.011392 | 0.011380 | 0.011533 | 0.011599 |
| 0.012273 | 0.011546 | 0.011363 | 0.011560 | 0.011489 | 0.011524 | 0.011632 |
| 0.011560 | 0.011524 | 0.011560 | 0.011453 | 0.011525 | 0.011524 | 0.011524 |
| 0.011489 | 0.011596 | 0.011775 | 0.011632 | 0.011560 | 0.011525 | 0.011453 |
| 0.011417 | 0.011417 | 0.011489 | 0.011453 | 0.011668 | 0.011632 | 0.011560 |
| 0.011668 | 0.011739 | 0.011453 | 0.011453 | 0.011489 | 0.011489 | 0.011492 |
| 0.011564 | 0.011489 | 0.011489 | 0.011364 | 0.011404 | 0.011393 | 0.011489 |
| 0.011493 | 0.011426 | 0.011455 | 0.011464 | 0.011383 | 0.011421 | 0.011454 |
| 0.011706 | 0.011496 | 0.011463 | 0.011418 | 0.011392 | 0.011561 | 0.011525 |
| 0.011597 | 0.011526 | 0.011525 | 0.011560 | 0.011489 | 0.011954 | 0.011668 |
| 0.011775 | 0.011632 | 0.011489 | 0.011596 | 0.011382 | 0.011632 | 0.011418 |
| 0.011489 | 0.011489 | 0.011417 | 0.011417 | 0.011453 | 0.011417 | 0.011453 |
| 0.011489 | 0.011596 | 0.011525 | 0.011417 | 0.011526 | 0.011632 | 0.011636 |
| 0.011632 | 0.011525 | 0.011417 | 0.011347 | 0.011489 | 0.011418 | 0.011346 |
| 0.011458 | 0.011632 | 0.011418 | 0.011632 | 0.011382 | 0.011489 | 0.011453 |
| 0.011561 | 0.011453 | 0.011489 | 0.011453 | 0.011489 | 0.011346 | 0.011489 |

|          |          |          |          |          |          |          |
|----------|----------|----------|----------|----------|----------|----------|
| 0.011525 | 0.011453 | 0.011525 | 0.011453 | 0.011489 | 0.011525 | 0.011775 |
| 0.011846 | 0.011810 | 0.011882 | 0.011527 | 0.011883 | 0.011489 | 0.011453 |
| 0.011492 | 0.011792 | 0.011498 | 0.011353 | 0.011890 | 0.011350 | 0.011478 |
| 0.011892 | 0.011784 | 0.011453 | 0.011846 | 0.011459 | 0.011489 | 0.011703 |
| 0.011596 | 0.011560 | 0.011653 | 0.011311 | 0.011522 | 0.011525 | 0.011600 |
| 0.011667 | 0.011596 | 0.011596 | 0.011811 | 0.011739 | 0.011811 | 0.011703 |
| 0.011634 | 0.011811 | 0.011703 | 0.011632 | 0.011918 | 0.011382 | 0.011596 |
| 0.011560 | 0.011453 | 0.011382 | 0.011382 | 0.011453 | 0.011453 | 0.011524 |
| 0.011453 | 0.011525 | 0.011417 | 0.011525 | 0.011453 | 0.011453 | 0.011524 |
| 0.011453 | 0.011918 | 0.011810 | 0.011846 | 0.011346 | 0.011453 | 0.011489 |
| 0.011489 | 0.011453 | 0.011489 | 0.011560 | 0.011417 | 0.011417 | 0.011417 |
| 0.011989 | 0.011560 | 0.011560 | 0.011382 | 0.011453 | 0.011668 | 0.011417 |
| 0.011417 | 0.011489 | 0.011417 | 0.011632 | 0.011417 | 0.011524 | 0.011632 |
| 0.011596 | 0.011417 | 0.011453 | 0.011346 | 0.011382 | 0.011525 | 0.011489 |
| 0.011346 | 0.011453 | 0.011346 | 0.011382 | 0.011525 | 0.011667 | 0.011417 |
| 0.011382 | 0.011524 | 0.011417 | 0.011346 | 0.011703 | 0.011346 | 0.011524 |
| 0.011602 | 0.011417 | 0.011739 | 0.011560 | 0.011596 | 0.011453 | 0.011489 |
| 0.011417 | 0.011775 | 0.011346 | 0.011632 | 0.011417 | 0.011417 | 0.011346 |
| 0.011596 | 0.011775 | 0.011489 | 0.011560 | 0.011382 | 0.011810 | 0.011417 |
| 0.011417 | 0.011417 | 0.011453 | 0.011560 | 0.011453 | 0.011560 | 0.011632 |
| 0.011632 | 0.011596 | 0.011489 | 0.011596 | 0.011524 | 0.011417 | 0.011382 |
| 0.011417 | 0.011417 | 0.011489 | 0.011417 | 0.011382 | 0.011524 | 0.011417 |
| 0.011453 | 0.011453 | 0.011560 | 0.011596 | 0.011489 | 0.011453 | 0.011453 |
| 0.011524 | 0.011453 | 0.011524 | 0.011382 | 0.011560 | 0.011453 | 0.011918 |
| 0.011453 | 0.011882 | 0.011464 | 0.018342 | 0.011338 | 0.011504 | 0.011841 |
| 0.011797 | 0.011848 | 0.011545 | 0.011494 | 0.011869 | 0.011832 | 0.011574 |
| 0.011568 | 0.011693 | 0.011348 | 0.011412 | 0.011437 | 0.011473 | 0.011464 |
| 0.011562 | 0.011618 | 0.011616 | 0.011414 | 0.011596 | 0.011560 | 0.011527 |
| 0.011490 | 0.011525 | 0.011560 | 0.011560 | 0.011525 | 0.011525 | 0.011489 |
| 0.011453 | 0.011453 | 0.011310 | 0.011525 | 0.011489 | 0.011418 | 0.011453 |
| 0.011453 | 0.011525 | 0.011417 | 0.011525 | 0.011560 | 0.011596 | 0.011489 |
| 0.011524 | 0.011489 | 0.011847 | 0.011847 | 0.011561 | 0.011597 | 0.011596 |
| 0.011382 | 0.011382 | 0.011417 | 0.011525 | 0.011382 | 0.011632 | 0.011632 |
| 0.011417 | 0.011453 | 0.011596 | 0.011453 | 0.011882 | 0.011454 | 0.011489 |
| 0.011346 | 0.011525 | 0.011632 | 0.011453 | 0.011525 | 0.011489 | 0.011453 |
| 0.011418 | 0.011418 | 0.011453 | 0.011597 | 0.011490 | 0.011668 | 0.011632 |
| 0.011529 | 0.011418 | 0.011489 | 0.011561 | 0.011525 | 0.011668 | 0.011703 |
| 0.011846 | 0.011459 | 0.011489 | 0.011703 | 0.011596 | 0.011560 | 0.011418 |
| 0.011562 | 0.011489 | 0.011453 | 0.011453 | 0.011525 | 0.011417 | 0.011525 |
| 0.011560 | 0.011596 | 0.011489 | 0.011524 | 0.011489 | 0.011847 | 0.011847 |
| 0.011561 | 0.011597 | 0.011596 | 0.011524 | 0.012241 | 0.000000 | 0.011572 |
| 0.011636 | 0.000000 | 0.011714 | 0.011602 | 0.011597 | 0.011632 | 0.011385 |
| 0.012174 | 0.011489 | 0.011596 | 0.011561 | 0.011846 | 0.011667 | 0.011811 |
| 0.012209 | 0.011670 | 0.011744 | 0.011846 | 0.011703 | 0.011703 | 0.011744 |
| 0.011382 | 0.011560 | 0.011703 | 0.011667 | 0.011636 | 0.011667 | 0.011598 |
| 0.011489 | 0.011417 | 0.011453 | 0.011489 | 0.011382 | 0.011453 | 0.011346 |
| 0.011489 | 0.011524 | 0.011417 | 0.011382 | 0.011489 | 0.011417 | 0.011453 |
| 0.011453 | 0.011382 | 0.011453 | 0.011489 | 0.011382 | 0.011596 | 0.011632 |
| 0.011525 | 0.011596 | 0.011525 | 0.011525 | 0.011453 | 0.011846 | 0.011489 |
| 0.011531 | 0.011453 | 0.011703 | 0.011704 | 0.011560 | 0.011560 | 0.011560 |
| 0.011525 | 0.011453 | 0.011453 | 0.011453 | 0.011560 | 0.011596 | 0.011525 |
| 0.011524 | 0.011632 | 0.011846 | 0.011560 | 0.011739 | 0.011739 | 0.011632 |
| 0.011453 | 0.011524 | 0.011525 | 0.011954 | 0.011525 | 0.011560 | 0.011525 |
| 0.011382 | 0.011489 | 0.011489 | 0.011811 | 0.011703 | 0.011775 | 0.011489 |
| 0.011596 | 0.011667 | 0.011489 | 0.011596 | 0.011560 | 0.011417 | 0.011775 |
| 0.011524 | 0.011489 | 0.011489 | 0.011667 | 0.011489 | 0.011596 | 0.011846 |
| 0.011453 | 0.011928 | 0.011882 | 0.011703 | 0.011347 | 0.011603 | 0.011334 |
| 0.011401 | 0.011887 | 0.011397 | 0.011534 | 0.011417 | 0.011539 | 0.011512 |
| 0.011645 | 0.011334 | 0.011476 | 0.011271 | 0.011343 | 0.011485 | 0.011531 |
| 0.011614 | 0.011433 | 0.011581 | 0.011473 | 0.011527 | 0.011668 | 0.011739 |

|          |          |          |          |          |          |          |
|----------|----------|----------|----------|----------|----------|----------|
| 0.011703 | 0.011597 | 0.011672 | 0.011709 | 0.011818 | 0.011853 | 0.011525 |
| 0.011775 | 0.011632 | 0.011489 | 0.011596 | 0.011382 | 0.011632 | 0.011418 |
| 0.011489 | 0.011489 | 0.011417 | 0.011417 | 0.011453 | 0.011417 | 0.011453 |
| 0.011318 | 0.011466 | 0.011498 | 0.011530 | 0.011675 | 0.011642 | 0.011568 |
| 0.011602 | 0.011561 | 0.011331 | 0.011289 | 0.011493 | 0.011673 | 0.011638 |
| 0.011453 | 0.011529 | 0.011705 | 0.011743 | 0.011203 | 0.011668 | 0.011560 |
| 0.011560 | 0.011632 | 0.011632 | 0.011524 | 0.012097 | 0.011239 | 0.011525 |
| 0.011739 | 0.011818 | 0.011423 | 0.011574 | 0.011417 | 0.011632 | 0.011560 |
| 0.011633 | 0.011667 | 0.011453 | 0.011453 | 0.011810 | 0.011810 | 0.011460 |
| 0.011346 | 0.011350 | 0.011453 | 0.011418 | 0.011525 | 0.011366 | 0.011703 |
| 0.011493 | 0.011595 | 0.011350 | 0.011520 | 0.011489 | 0.011530 | 0.011453 |
| 0.011417 | 0.011417 | 0.011489 | 0.011453 | 0.011668 | 0.011632 | 0.011560 |
| 0.011668 | 0.011739 | 0.011453 | 0.011453 | 0.011489 | 0.011489 | 0.011492 |
| 0.011564 | 0.011489 | 0.011489 | 0.011527 | 0.011668 | 0.011739 | 0.011703 |
| 0.011597 | 0.011672 | 0.011709 | 0.011818 | 0.011853 | 0.011525 | 0.011667 |
| 0.011560 | 0.011560 | 0.011456 | 0.011577 | 0.011577 | 0.011604 | 0.011433 |
| 0.011648 | 0.011883 | 0.011592 | 0.011492 | 0.011418 | 0.011632 | 0.011489 |
| 0.011596 | 0.011525 | 0.011417 | 0.011526 | 0.011632 | 0.011636 | 0.011525 |
| 0.011417 | 0.011347 | 0.011489 | 0.011418 | 0.011346 | 0.011458 | 0.011632 |
| 0.011453 | 0.011453 | 0.011310 | 0.011525 | 0.011489 | 0.011418 | 0.011525 |
| 0.011489 | 0.011525 | 0.011524 | 0.011453 | 0.011525 | 0.011775 | 0.011417 |
| 0.011453 | 0.011846 | 0.011453 | 0.011489 | 0.011417 | 0.011846 | 0.011379 |
| 0.011815 | 0.011415 | 0.011326 | 0.011649 | 0.011743 | 0.011629 | 0.011326 |
| 0.011287 | 0.011596 | 0.011703 | 0.011812 | 0.011669 | 0.011816 | 0.011955 |
| 0.011847 | 0.011918 | 0.011846 | 0.012042 | 0.011810 | 0.012742 | 0.011812 |
| 0.012420 | 0.012387 | 0.012495 | 0.012712 | 0.011846 | 0.011525 | 0.011811 |
| 0.012242 | 0.012209 | 0.011775 | 0.011668 | 0.011739 | 0.011739 | 0.011635 |
| 0.011596 | 0.011602 | 0.011667 | 0.011632 | 0.012062 | 0.012061 | 0.012133 |
| 0.011991 | 0.012098 | 0.012244 | 0.011959 | 0.012278 | 0.012250 | 0.012349 |
| 0.012350 | 0.012386 | 0.012296 | 0.012314 | 0.012352 | 0.011489 | 0.011883 |
| 0.011919 | 0.012419 | 0.011926 | 0.012168 | 0.012708 | 0.011711 | 0.011596 |
| 0.011560 | 0.011560 | 0.012062 | 0.012089 | 0.012186 | 0.011918 | 0.011562 |
| S496     | 0.011588 | 0.011588 | 0.011975 | 0.011764 | 0.011764 | 0.011799 |
| 0.011772 | 0.011701 | 0.011869 | 0.011342 | 0.011412 | 0.011378 | 0.011341 |
| 0.011377 | 0.011517 | 0.011341 | 0.011377 | 0.011412 | 0.011412 | 0.011377 |
| 0.011341 | 0.011377 | 0.011482 | 0.011342 | 0.011377 | 0.011377 | 0.011736 |
| 0.011588 | 0.011342 | 0.011271 | 0.011517 | 0.011447 | 0.011412 | 0.011447 |
| 0.011412 | 0.011517 | 0.011412 | 0.011412 | 0.011377 | 0.011412 | 0.011552 |
| 0.011341 | 0.011412 | 0.011412 | 0.011377 | 0.011482 | 0.011517 | 0.011447 |
| 0.011412 | 0.011553 | 0.011483 | 0.011764 | 0.011377 | 0.011693 | 0.011377 |
| 0.011377 | 0.011482 | 0.011482 | 0.011693 | 0.011799 | 0.011482 | 0.011588 |
| 0.011412 | 0.011517 | 0.011412 | 0.011658 | 0.011905 | 0.011377 | 0.011482 |
| 0.011341 | 0.011482 | 0.011412 | 0.011517 | 0.011412 | 0.011447 | 0.011447 |
| 0.011341 | 0.011377 | 0.011341 | 0.011447 | 0.011412 | 0.011448 | 0.011482 |
| 0.011447 | 0.011412 | 0.011482 | 0.011377 | 0.011517 | 0.011306 | 0.011412 |
| 0.011588 | 0.011517 | 0.011764 | 0.011588 | 0.011412 | 0.011658 | 0.011412 |
| 0.011564 | 0.011802 | 0.011613 | 0.011266 | 0.011296 | 0.011409 | 0.011514 |
| 0.012177 | 0.011434 | 0.011276 | 0.011658 | 0.011658 | 0.011447 | 0.011553 |
| 0.011482 | 0.011377 | 0.011377 | 0.011412 | 0.011482 | 0.011447 | 0.011341 |
| 0.011341 | 0.011517 | 0.011658 | 0.011588 | 0.011482 | 0.011447 | 0.011377 |
| 0.011342 | 0.011342 | 0.011412 | 0.011377 | 0.011588 | 0.011553 | 0.011482 |
| 0.011588 | 0.011658 | 0.011377 | 0.011377 | 0.011412 | 0.011412 | 0.011379 |
| 0.011450 | 0.011412 | 0.011412 | 0.011249 | 0.011324 | 0.011315 | 0.011412 |
| 0.011415 | 0.011312 | 0.011332 | 0.011350 | 0.011309 | 0.011347 | 0.011379 |
| 0.011662 | 0.011421 | 0.011458 | 0.011342 | 0.011350 | 0.011483 | 0.011448 |
| 0.011518 | 0.011449 | 0.011448 | 0.011412 | 0.011236 | 0.011834 | 0.011658 |
| 0.011693 | 0.011553 | 0.011412 | 0.011518 | 0.011306 | 0.011553 | 0.011342 |
| 0.011412 | 0.011412 | 0.011342 | 0.011342 | 0.011377 | 0.011342 | 0.011447 |
| 0.011412 | 0.011482 | 0.011447 | 0.011342 | 0.011413 | 0.011518 | 0.011556 |
| 0.011553 | 0.011447 | 0.011342 | 0.011272 | 0.011412 | 0.011342 | 0.011271 |

|          |          |          |          |          |          |          |
|----------|----------|----------|----------|----------|----------|----------|
| 0.011381 | 0.011553 | 0.011342 | 0.011553 | 0.011306 | 0.011412 | 0.011377 |
| 0.011482 | 0.011377 | 0.011412 | 0.011377 | 0.011412 | 0.011271 | 0.011412 |
| 0.011447 | 0.011377 | 0.011447 | 0.011377 | 0.011306 | 0.011447 | 0.011694 |
| 0.011799 | 0.011728 | 0.011799 | 0.011519 | 0.011799 | 0.011306 | 0.011377 |
| 0.011414 | 0.011699 | 0.011531 | 0.011312 | 0.011807 | 0.011275 | 0.011430 |
| 0.011808 | 0.011666 | 0.011552 | 0.011729 | 0.011311 | 0.011658 | 0.011623 |
| 0.011552 | 0.011728 | 0.011491 | 0.011349 | 0.011437 | 0.011447 | 0.011412 |
| 0.011588 | 0.011413 | 0.011659 | 0.011729 | 0.011553 | 0.011623 | 0.011518 |
| 0.011450 | 0.011730 | 0.011521 | 0.011556 | 0.011800 | 0.011306 | 0.011448 |
| 0.011482 | 0.011377 | 0.011306 | 0.011306 | 0.011377 | 0.011377 | 0.011447 |
| 0.011377 | 0.011447 | 0.011341 | 0.011447 | 0.011377 | 0.011377 | 0.011447 |
| 0.011377 | 0.011834 | 0.011728 | 0.011764 | 0.011271 | 0.011377 | 0.011412 |
| 0.011412 | 0.011377 | 0.011412 | 0.011482 | 0.011341 | 0.011341 | 0.011341 |
| 0.011904 | 0.011517 | 0.011517 | 0.011306 | 0.011377 | 0.011588 | 0.011341 |
| 0.011341 | 0.011412 | 0.011377 | 0.011553 | 0.011341 | 0.011447 | 0.011588 |
| 0.011517 | 0.011377 | 0.011377 | 0.011306 | 0.011306 | 0.011482 | 0.011412 |
| 0.011306 | 0.011412 | 0.011271 | 0.011306 | 0.011447 | 0.011588 | 0.011342 |
| 0.011306 | 0.011412 | 0.011377 | 0.011271 | 0.011623 | 0.011271 | 0.011447 |
| 0.011518 | 0.011342 | 0.011658 | 0.011482 | 0.011517 | 0.011377 | 0.011412 |
| 0.011341 | 0.011693 | 0.011271 | 0.011553 | 0.011341 | 0.011341 | 0.011271 |
| 0.011482 | 0.011694 | 0.011412 | 0.011447 | 0.011306 | 0.011728 | 0.011341 |
| 0.011341 | 0.011341 | 0.011377 | 0.011482 | 0.011341 | 0.011447 | 0.011552 |
| 0.011553 | 0.011482 | 0.011412 | 0.011482 | 0.011447 | 0.011341 | 0.011306 |
| 0.011341 | 0.011341 | 0.011412 | 0.011341 | 0.011306 | 0.011447 | 0.011341 |
| 0.011377 | 0.011377 | 0.011482 | 0.011552 | 0.011412 | 0.011377 | 0.011342 |
| 0.011412 | 0.011377 | 0.011447 | 0.011341 | 0.011482 | 0.011552 | 0.011834 |
| 0.011377 | 0.011799 | 0.011350 | 0.018224 | 0.011261 | 0.011318 | 0.011719 |
| 0.011641 | 0.011725 | 0.011328 | 0.011241 | 0.011697 | 0.011785 | 0.011313 |
| 0.011458 | 0.011506 | 0.011265 | 0.011321 | 0.011349 | 0.011267 | 0.011286 |
| 0.011453 | 0.011531 | 0.011529 | 0.011403 | 0.011517 | 0.011377 | 0.011521 |
| 0.011414 | 0.011517 | 0.011482 | 0.011482 | 0.011447 | 0.011447 | 0.011412 |
| 0.011447 | 0.011377 | 0.011412 | 0.011447 | 0.011412 | 0.011342 | 0.011271 |
| 0.011271 | 0.011447 | 0.011342 | 0.011447 | 0.011482 | 0.011517 | 0.011306 |
| 0.011447 | 0.011412 | 0.011764 | 0.011764 | 0.011482 | 0.011483 | 0.011518 |
| 0.011306 | 0.011306 | 0.011342 | 0.011447 | 0.011306 | 0.011553 | 0.011553 |
| 0.011588 | 0.011552 | 0.011517 | 0.011623 | 0.011799 | 0.011625 | 0.011412 |
| 0.011447 | 0.011482 | 0.011482 | 0.011377 | 0.011447 | 0.011412 | 0.011447 |
| 0.011518 | 0.011518 | 0.011553 | 0.011518 | 0.011413 | 0.011588 | 0.011518 |
| 0.011414 | 0.011342 | 0.011447 | 0.011518 | 0.011447 | 0.011588 | 0.011623 |
| 0.011729 | 0.011311 | 0.011658 | 0.011623 | 0.011552 | 0.011728 | 0.011342 |
| 0.011519 | 0.011342 | 0.011271 | 0.011271 | 0.011447 | 0.011342 | 0.011447 |
| 0.011482 | 0.011517 | 0.011306 | 0.011447 | 0.011412 | 0.011764 | 0.011764 |
| 0.011482 | 0.011483 | 0.011341 | 0.011271 | 0.012153 | 0.011572 | 0.000000 |
| 0.011528 | 0.011525 | 0.011630 | 0.011518 | 0.011637 | 0.011487 | 0.011494 |
| 0.012084 | 0.011239 | 0.011378 | 0.011417 | 0.011665 | 0.011592 | 0.011730 |
| 0.012117 | 0.011588 | 0.011627 | 0.011764 | 0.011623 | 0.011623 | 0.011627 |
| 0.011306 | 0.011482 | 0.011623 | 0.011588 | 0.011520 | 0.011588 | 0.011519 |
| 0.011412 | 0.011341 | 0.011377 | 0.011412 | 0.011306 | 0.011377 | 0.011271 |
| 0.011412 | 0.011447 | 0.011341 | 0.011306 | 0.011412 | 0.011341 | 0.011377 |
| 0.011377 | 0.011306 | 0.011377 | 0.011412 | 0.011306 | 0.011517 | 0.011552 |
| 0.011447 | 0.011517 | 0.011447 | 0.011447 | 0.011377 | 0.011799 | 0.011412 |
| 0.011450 | 0.011377 | 0.011588 | 0.011588 | 0.011482 | 0.011482 | 0.011482 |
| 0.011482 | 0.011412 | 0.011377 | 0.011412 | 0.011482 | 0.011517 | 0.011447 |
| 0.011447 | 0.011588 | 0.011764 | 0.011482 | 0.011658 | 0.011658 | 0.011552 |
| 0.011377 | 0.011447 | 0.011482 | 0.011905 | 0.011447 | 0.011482 | 0.011447 |
| 0.011482 | 0.011412 | 0.011412 | 0.011693 | 0.011623 | 0.011658 | 0.011412 |
| 0.011517 | 0.011588 | 0.011412 | 0.011517 | 0.011482 | 0.011341 | 0.011693 |
| 0.011447 | 0.011412 | 0.011412 | 0.011588 | 0.011412 | 0.011517 | 0.011728 |
| 0.011377 | 0.011843 | 0.011834 | 0.011572 | 0.011177 | 0.011523 | 0.011328 |
| 0.011177 | 0.011800 | 0.011318 | 0.011531 | 0.011314 | 0.011385 | 0.011400 |



|          |          |          |          |          |          |          |
|----------|----------|----------|----------|----------|----------|----------|
| 0.011537 | 0.011130 | 0.011354 | 0.000000 | 0.011174 | 0.011409 | 0.011443 |
| 0.011494 | 0.011390 | 0.011467 | 0.011393 | 0.011449 | 0.011588 | 0.011658 |
| 0.011658 | 0.011518 | 0.011627 | 0.011628 | 0.011771 | 0.011803 | 0.011447 |
| 0.011693 | 0.011553 | 0.011412 | 0.011518 | 0.011306 | 0.011553 | 0.011342 |
| 0.011412 | 0.011412 | 0.011342 | 0.011342 | 0.011377 | 0.011342 | 0.011447 |
| 0.011427 | 0.011427 | 0.011419 | 0.011455 | 0.011598 | 0.011562 | 0.011561 |
| 0.011559 | 0.011448 | 0.011291 | 0.011287 | 0.011415 | 0.011593 | 0.011594 |
| 0.011377 | 0.011451 | 0.011625 | 0.011662 | 0.011589 | 0.011624 | 0.011306 |
| 0.011482 | 0.011482 | 0.011482 | 0.011447 | 0.012010 | 0.011623 | 0.011693 |
| 0.011694 | 0.011805 | 0.011382 | 0.011496 | 0.011342 | 0.011447 | 0.011377 |
| 0.011589 | 0.011517 | 0.011623 | 0.011623 | 0.011682 | 0.011658 | 0.011380 |
| 0.011271 | 0.011273 | 0.011342 | 0.011342 | 0.011450 | 0.011287 | 0.011624 |
| 0.011414 | 0.011544 | 0.011251 | 0.011435 | 0.011412 | 0.011491 | 0.011377 |
| 0.011342 | 0.011342 | 0.011412 | 0.011377 | 0.011588 | 0.011553 | 0.011482 |
| 0.011588 | 0.011658 | 0.011377 | 0.011377 | 0.011412 | 0.011412 | 0.011379 |
| 0.011450 | 0.011412 | 0.011412 | 0.011449 | 0.011588 | 0.011658 | 0.011658 |
| 0.011518 | 0.011627 | 0.011628 | 0.011771 | 0.011803 | 0.011447 | 0.011623 |
| 0.011377 | 0.011377 | 0.011379 | 0.011535 | 0.011423 | 0.011524 | 0.011354 |
| 0.011566 | 0.011730 | 0.011590 | 0.011416 | 0.011342 | 0.011553 | 0.011412 |
| 0.011482 | 0.011447 | 0.011342 | 0.011413 | 0.011518 | 0.011556 | 0.011447 |
| 0.011342 | 0.011272 | 0.011412 | 0.011342 | 0.011271 | 0.011381 | 0.011553 |
| 0.011447 | 0.011377 | 0.011412 | 0.011447 | 0.011412 | 0.011342 | 0.011447 |
| 0.011412 | 0.011447 | 0.011447 | 0.011377 | 0.011447 | 0.011693 | 0.011341 |
| 0.011341 | 0.011799 | 0.011377 | 0.011412 | 0.011377 | 0.011764 | 0.011240 |
| 0.011699 | 0.011239 | 0.011216 | 0.011528 | 0.011616 | 0.011551 | 0.011193 |
| 0.011171 | 0.011517 | 0.011623 | 0.011731 | 0.011589 | 0.011734 | 0.011871 |
| 0.011765 | 0.011835 | 0.011764 | 0.011920 | 0.011693 | 0.012539 | 0.011625 |
| 0.012399 | 0.012191 | 0.012331 | 0.012580 | 0.011764 | 0.011447 | 0.011729 |
| 0.012118 | 0.012120 | 0.011623 | 0.011588 | 0.011659 | 0.011659 | 0.011626 |
| 0.011517 | 0.011522 | 0.011588 | 0.011553 | 0.011941 | 0.011975 | 0.012012 |
| 0.011871 | 0.011976 | 0.012120 | 0.011876 | 0.012189 | 0.012196 | 0.012259 |
| 0.012260 | 0.012295 | 0.012169 | 0.012260 | 0.012262 | 0.011236 | 0.011764 |
| 0.011835 | 0.012398 | 0.011842 | 0.012081 | 0.012612 | 0.011630 | 0.011518 |
| 0.011482 | 0.011482 | 0.011976 | 0.012007 | 0.011984 | 0.011834 | 0.011484 |
| S497     | 0.011799 | 0.011799 | 0.011939 | 0.011904 | 0.011904 | 0.011904 |
| 0.011843 | 0.011772 | 0.011974 | 0.011412 | 0.011482 | 0.011448 | 0.011412 |
| 0.011447 | 0.011587 | 0.011412 | 0.011447 | 0.011517 | 0.011482 | 0.011447 |
| 0.011412 | 0.011447 | 0.011552 | 0.011412 | 0.011447 | 0.011447 | 0.011807 |
| 0.011693 | 0.011447 | 0.011341 | 0.011587 | 0.011482 | 0.011482 | 0.011517 |
| 0.011447 | 0.011587 | 0.011482 | 0.011482 | 0.011447 | 0.011271 | 0.011658 |
| 0.011412 | 0.011482 | 0.011482 | 0.011447 | 0.011552 | 0.011587 | 0.011482 |
| 0.011482 | 0.011623 | 0.011553 | 0.011834 | 0.011447 | 0.011763 | 0.011447 |
| 0.011447 | 0.011552 | 0.011552 | 0.011763 | 0.011834 | 0.011552 | 0.011658 |
| 0.011482 | 0.011588 | 0.011482 | 0.011658 | 0.011975 | 0.011447 | 0.011552 |
| 0.011447 | 0.011517 | 0.011517 | 0.011587 | 0.011482 | 0.011517 | 0.011517 |
| 0.011412 | 0.011447 | 0.011412 | 0.011517 | 0.011482 | 0.011483 | 0.011587 |
| 0.011517 | 0.011447 | 0.011552 | 0.011447 | 0.011587 | 0.011412 | 0.011482 |
| 0.011623 | 0.011587 | 0.011834 | 0.011447 | 0.011482 | 0.011728 | 0.011482 |
| 0.011482 | 0.011911 | 0.011685 | 0.011428 | 0.011411 | 0.011368 | 0.011632 |
| 0.012283 | 0.011689 | 0.011443 | 0.011693 | 0.011728 | 0.011517 | 0.011623 |
| 0.011552 | 0.011517 | 0.011587 | 0.011482 | 0.011588 | 0.011517 | 0.011517 |
| 0.011482 | 0.011587 | 0.011799 | 0.011658 | 0.011552 | 0.011517 | 0.011447 |
| 0.011412 | 0.011412 | 0.011482 | 0.011447 | 0.011658 | 0.011623 | 0.011552 |
| 0.011658 | 0.011728 | 0.011447 | 0.011447 | 0.011482 | 0.011482 | 0.011483 |
| 0.011519 | 0.011482 | 0.011482 | 0.011357 | 0.011434 | 0.011387 | 0.011482 |
| 0.011273 | 0.011418 | 0.011486 | 0.011458 | 0.011377 | 0.011415 | 0.011448 |
| 0.011733 | 0.011489 | 0.011528 | 0.011412 | 0.011422 | 0.011553 | 0.011518 |
| 0.011588 | 0.011519 | 0.011517 | 0.011552 | 0.011517 | 0.011939 | 0.011658 |
| 0.011763 | 0.011623 | 0.011482 | 0.011588 | 0.011377 | 0.011623 | 0.011412 |
| 0.011482 | 0.011482 | 0.011412 | 0.011412 | 0.011447 | 0.011412 | 0.011517 |

|          |          |          |          |          |          |          |
|----------|----------|----------|----------|----------|----------|----------|
| 0.011482 | 0.011588 | 0.011517 | 0.011412 | 0.011519 | 0.011623 | 0.011627 |
| 0.011623 | 0.011517 | 0.011412 | 0.011343 | 0.011482 | 0.011412 | 0.011342 |
| 0.011452 | 0.011623 | 0.011412 | 0.011623 | 0.011377 | 0.011482 | 0.011447 |
| 0.011553 | 0.011447 | 0.011482 | 0.011447 | 0.011482 | 0.011342 | 0.011482 |
| 0.011517 | 0.011447 | 0.011517 | 0.011447 | 0.011482 | 0.011517 | 0.011764 |
| 0.011869 | 0.011799 | 0.011869 | 0.011590 | 0.011869 | 0.011482 | 0.011447 |
| 0.011485 | 0.011782 | 0.011586 | 0.011384 | 0.011877 | 0.011346 | 0.011389 |
| 0.011879 | 0.011772 | 0.011623 | 0.011869 | 0.011489 | 0.011728 | 0.011693 |
| 0.011623 | 0.011798 | 0.011643 | 0.011476 | 0.011567 | 0.011517 | 0.011592 |
| 0.011693 | 0.011588 | 0.011728 | 0.011799 | 0.011728 | 0.011799 | 0.011693 |
| 0.011625 | 0.011799 | 0.011693 | 0.000000 | 0.011940 | 0.011376 | 0.011587 |
| 0.011552 | 0.011447 | 0.011376 | 0.011376 | 0.011447 | 0.011447 | 0.011517 |
| 0.011447 | 0.011517 | 0.011412 | 0.011517 | 0.011447 | 0.011447 | 0.011517 |
| 0.011447 | 0.011904 | 0.011799 | 0.011834 | 0.011341 | 0.011447 | 0.011482 |
| 0.011482 | 0.011447 | 0.011482 | 0.011552 | 0.011412 | 0.011412 | 0.011412 |
| 0.011974 | 0.011552 | 0.011587 | 0.011377 | 0.011447 | 0.011658 | 0.011412 |
| 0.011412 | 0.011482 | 0.011412 | 0.011623 | 0.011412 | 0.011517 | 0.011623 |
| 0.011587 | 0.011412 | 0.011447 | 0.011341 | 0.011376 | 0.011552 | 0.011482 |
| 0.011341 | 0.011447 | 0.011341 | 0.011376 | 0.011236 | 0.011658 | 0.011412 |
| 0.011377 | 0.011306 | 0.011447 | 0.011341 | 0.011693 | 0.011341 | 0.011517 |
| 0.011594 | 0.011412 | 0.011728 | 0.011552 | 0.011447 | 0.011447 | 0.011482 |
| 0.011412 | 0.011763 | 0.011341 | 0.011623 | 0.011412 | 0.011412 | 0.011341 |
| 0.011552 | 0.011764 | 0.011482 | 0.011552 | 0.011376 | 0.011799 | 0.011412 |
| 0.011412 | 0.011412 | 0.011447 | 0.011552 | 0.011447 | 0.011552 | 0.011623 |
| 0.011412 | 0.011587 | 0.011482 | 0.011588 | 0.011517 | 0.011412 | 0.011377 |
| 0.011412 | 0.011412 | 0.011482 | 0.011412 | 0.011377 | 0.011517 | 0.011412 |
| 0.011447 | 0.011447 | 0.011552 | 0.011623 | 0.011482 | 0.011447 | 0.011447 |
| 0.011517 | 0.011447 | 0.011517 | 0.011412 | 0.011552 | 0.011623 | 0.011904 |
| 0.011447 | 0.011869 | 0.011456 | 0.018283 | 0.011401 | 0.011566 | 0.011824 |
| 0.011784 | 0.011830 | 0.011490 | 0.011548 | 0.011913 | 0.011856 | 0.011565 |
| 0.011702 | 0.011744 | 0.011384 | 0.011494 | 0.011428 | 0.011467 | 0.011507 |
| 0.011744 | 0.011644 | 0.011641 | 0.011405 | 0.011587 | 0.011588 | 0.011627 |
| 0.011483 | 0.011552 | 0.011588 | 0.011552 | 0.011517 | 0.011518 | 0.011482 |
| 0.011517 | 0.011447 | 0.011482 | 0.011517 | 0.011482 | 0.011412 | 0.011447 |
| 0.011447 | 0.011517 | 0.011412 | 0.011517 | 0.011552 | 0.011377 | 0.011482 |
| 0.011517 | 0.011482 | 0.011834 | 0.011834 | 0.011553 | 0.011588 | 0.011588 |
| 0.011377 | 0.011377 | 0.011412 | 0.011517 | 0.011377 | 0.011623 | 0.011623 |
| 0.011658 | 0.011623 | 0.011587 | 0.011693 | 0.011869 | 0.011695 | 0.011482 |
| 0.011517 | 0.011517 | 0.011623 | 0.011447 | 0.011517 | 0.011482 | 0.011517 |
| 0.011588 | 0.011588 | 0.011623 | 0.011588 | 0.011483 | 0.011658 | 0.011623 |
| 0.011521 | 0.011412 | 0.011517 | 0.011553 | 0.011517 | 0.011658 | 0.011693 |
| 0.011869 | 0.011489 | 0.011728 | 0.011693 | 0.011623 | 0.011798 | 0.011412 |
| 0.011589 | 0.011483 | 0.011447 | 0.011447 | 0.011517 | 0.011412 | 0.011517 |
| 0.011552 | 0.011377 | 0.011482 | 0.011517 | 0.011482 | 0.011834 | 0.011834 |
| 0.011553 | 0.011588 | 0.011623 | 0.011552 | 0.012222 | 0.011636 | 0.011528 |
| 0.000000 | 0.011594 | 0.011704 | 0.011558 | 0.011704 | 0.011626 | 0.011561 |
| 0.012157 | 0.011484 | 0.011623 | 0.011554 | 0.011834 | 0.011693 | 0.011799 |
| 0.012192 | 0.011667 | 0.011695 | 0.011834 | 0.011693 | 0.011693 | 0.011694 |
| 0.011376 | 0.011552 | 0.011693 | 0.011658 | 0.011589 | 0.011658 | 0.011589 |
| 0.011482 | 0.011412 | 0.011447 | 0.011482 | 0.011377 | 0.011447 | 0.011341 |
| 0.011412 | 0.011447 | 0.011412 | 0.011377 | 0.011482 | 0.011412 | 0.011447 |
| 0.011447 | 0.011376 | 0.011447 | 0.011482 | 0.011376 | 0.011587 | 0.011482 |
| 0.011377 | 0.011447 | 0.011306 | 0.011447 | 0.011447 | 0.011834 | 0.011482 |
| 0.011524 | 0.011447 | 0.011693 | 0.011693 | 0.011552 | 0.011552 | 0.011552 |
| 0.011482 | 0.011482 | 0.011447 | 0.011482 | 0.011482 | 0.011552 | 0.011517 |
| 0.011517 | 0.011623 | 0.011763 | 0.011552 | 0.011693 | 0.011693 | 0.011623 |
| 0.011447 | 0.011517 | 0.011482 | 0.011939 | 0.011517 | 0.011552 | 0.011517 |
| 0.011552 | 0.011482 | 0.011482 | 0.011799 | 0.011658 | 0.011763 | 0.011482 |
| 0.011588 | 0.011587 | 0.011482 | 0.011588 | 0.011552 | 0.011412 | 0.011763 |
| 0.011517 | 0.011482 | 0.011482 | 0.011623 | 0.011482 | 0.011587 | 0.011834 |

|          |          |          |          |          |          |          |
|----------|----------|----------|----------|----------|----------|----------|
| 0.011447 | 0.011914 | 0.011904 | 0.011735 | 0.011404 | 0.011594 | 0.011485 |
| 0.011343 | 0.011916 | 0.011426 | 0.011665 | 0.011563 | 0.011592 | 0.011616 |
| 0.011636 | 0.011403 | 0.011527 | 0.011335 | 0.011506 | 0.011545 | 0.011608 |
| 0.011606 | 0.011509 | 0.011574 | 0.011427 | 0.011519 | 0.011658 | 0.011728 |
| 0.011693 | 0.011588 | 0.011698 | 0.011699 | 0.011841 | 0.011839 | 0.011482 |
| 0.011763 | 0.011623 | 0.011482 | 0.011588 | 0.011377 | 0.011623 | 0.011412 |
| 0.011482 | 0.011482 | 0.011412 | 0.011412 | 0.011447 | 0.011412 | 0.011517 |
| 0.011499 | 0.011496 | 0.011491 | 0.011522 | 0.011665 | 0.011632 | 0.011631 |
| 0.011629 | 0.011553 | 0.011365 | 0.011359 | 0.011486 | 0.011663 | 0.011628 |
| 0.011447 | 0.011521 | 0.011730 | 0.011697 | 0.011588 | 0.011623 | 0.011587 |
| 0.011552 | 0.011623 | 0.011623 | 0.011517 | 0.012080 | 0.011693 | 0.011728 |
| 0.011764 | 0.011841 | 0.011489 | 0.011566 | 0.011412 | 0.011623 | 0.011587 |
| 0.011659 | 0.011658 | 0.011693 | 0.011693 | 0.011761 | 0.011834 | 0.011453 |
| 0.011342 | 0.011345 | 0.011447 | 0.011412 | 0.011518 | 0.011362 | 0.011693 |
| 0.011486 | 0.011634 | 0.011395 | 0.011514 | 0.011482 | 0.011486 | 0.011447 |
| 0.011412 | 0.011412 | 0.011482 | 0.011447 | 0.011658 | 0.011623 | 0.011552 |
| 0.011658 | 0.011728 | 0.011447 | 0.011447 | 0.011482 | 0.011482 | 0.011483 |
| 0.011519 | 0.011482 | 0.011482 | 0.011519 | 0.011658 | 0.011728 | 0.011693 |
| 0.011588 | 0.011698 | 0.011699 | 0.011841 | 0.011839 | 0.011482 | 0.011693 |
| 0.011587 | 0.011587 | 0.011450 | 0.011607 | 0.011569 | 0.011595 | 0.011426 |
| 0.011638 | 0.011779 | 0.011588 | 0.011487 | 0.011412 | 0.011623 | 0.011482 |
| 0.011588 | 0.011517 | 0.011412 | 0.011519 | 0.011623 | 0.011627 | 0.011517 |
| 0.011412 | 0.011343 | 0.011482 | 0.011412 | 0.011342 | 0.011452 | 0.011623 |
| 0.011517 | 0.011447 | 0.011482 | 0.011517 | 0.011482 | 0.011412 | 0.011517 |
| 0.011482 | 0.011517 | 0.011517 | 0.011447 | 0.011306 | 0.011693 | 0.011412 |
| 0.011447 | 0.011834 | 0.011447 | 0.011482 | 0.011447 | 0.011834 | 0.011465 |
| 0.011859 | 0.011453 | 0.011525 | 0.011684 | 0.011777 | 0.011659 | 0.011411 |
| 0.011389 | 0.011587 | 0.011693 | 0.011800 | 0.011659 | 0.011804 | 0.011941 |
| 0.011834 | 0.011904 | 0.011834 | 0.012026 | 0.011798 | 0.012715 | 0.011800 |
| 0.012504 | 0.012366 | 0.012472 | 0.012685 | 0.011834 | 0.011517 | 0.011799 |
| 0.012187 | 0.012190 | 0.011763 | 0.011658 | 0.011729 | 0.011729 | 0.011697 |
| 0.011587 | 0.011593 | 0.011658 | 0.011623 | 0.012046 | 0.012045 | 0.012116 |
| 0.011976 | 0.012046 | 0.012225 | 0.011980 | 0.012259 | 0.012230 | 0.012329 |
| 0.012329 | 0.012364 | 0.012276 | 0.012329 | 0.012332 | 0.011517 | 0.011870 |
| 0.011905 | 0.012398 | 0.011912 | 0.012186 | 0.012682 | 0.011700 | 0.011588 |
| 0.011552 | 0.011552 | 0.012046 | 0.012055 | 0.012197 | 0.011904 | 0.011554 |
| S498     | 0.011754 | 0.011754 | 0.012101 | 0.011858 | 0.011858 | 0.011892 |
| 0.011797 | 0.011727 | 0.011927 | 0.011372 | 0.011441 | 0.011408 | 0.011372 |
| 0.011407 | 0.011580 | 0.011372 | 0.011407 | 0.011476 | 0.011442 | 0.011407 |
| 0.011372 | 0.011407 | 0.011511 | 0.011373 | 0.011407 | 0.011407 | 0.011762 |
| 0.011650 | 0.011407 | 0.011303 | 0.011545 | 0.011407 | 0.011442 | 0.011476 |
| 0.011407 | 0.011546 | 0.011442 | 0.011442 | 0.011407 | 0.011441 | 0.011615 |
| 0.011372 | 0.011441 | 0.011442 | 0.011407 | 0.011511 | 0.011511 | 0.011442 |
| 0.011442 | 0.011580 | 0.011511 | 0.011788 | 0.011407 | 0.011719 | 0.011407 |
| 0.011407 | 0.011511 | 0.011511 | 0.011719 | 0.011788 | 0.011511 | 0.011615 |
| 0.011476 | 0.011546 | 0.011442 | 0.011684 | 0.011927 | 0.011407 | 0.011511 |
| 0.011407 | 0.011511 | 0.011476 | 0.011546 | 0.011441 | 0.011476 | 0.011476 |
| 0.011372 | 0.011407 | 0.011372 | 0.011442 | 0.011441 | 0.011477 | 0.011545 |
| 0.011476 | 0.011407 | 0.011511 | 0.011407 | 0.011546 | 0.011372 | 0.011442 |
| 0.011615 | 0.011545 | 0.011788 | 0.011615 | 0.011407 | 0.011684 | 0.011441 |
| 0.011627 | 0.011859 | 0.011603 | 0.011341 | 0.011331 | 0.011480 | 0.011542 |
| 0.012198 | 0.011535 | 0.011354 | 0.011546 | 0.011476 | 0.011476 | 0.011580 |
| 0.011511 | 0.011476 | 0.011546 | 0.011442 | 0.011511 | 0.011476 | 0.011476 |
| 0.011441 | 0.011545 | 0.011754 | 0.011580 | 0.011511 | 0.011476 | 0.011407 |
| 0.011372 | 0.011372 | 0.011442 | 0.011407 | 0.011615 | 0.011580 | 0.011511 |
| 0.011615 | 0.011685 | 0.011407 | 0.011407 | 0.011442 | 0.011442 | 0.011444 |
| 0.011514 | 0.011442 | 0.011442 | 0.011320 | 0.011359 | 0.011349 | 0.011442 |
| 0.011445 | 0.011380 | 0.011404 | 0.011417 | 0.011340 | 0.011377 | 0.011409 |
| 0.011653 | 0.011450 | 0.011452 | 0.011373 | 0.011346 | 0.011512 | 0.011477 |
| 0.011547 | 0.011478 | 0.011477 | 0.011511 | 0.011476 | 0.011893 | 0.011685 |

|          |          |          |          |          |          |          |
|----------|----------|----------|----------|----------|----------|----------|
| 0.011719 | 0.011581 | 0.011442 | 0.011546 | 0.011338 | 0.011580 | 0.011372 |
| 0.011442 | 0.011442 | 0.011407 | 0.011372 | 0.011407 | 0.011372 | 0.011407 |
| 0.011442 | 0.011546 | 0.011477 | 0.011372 | 0.011478 | 0.011581 | 0.011584 |
| 0.011581 | 0.011477 | 0.011372 | 0.011304 | 0.011442 | 0.011372 | 0.011303 |
| 0.011411 | 0.011581 | 0.011372 | 0.011581 | 0.011338 | 0.011442 | 0.011407 |
| 0.011511 | 0.011407 | 0.011442 | 0.011407 | 0.011442 | 0.011303 | 0.011442 |
| 0.011477 | 0.011407 | 0.011476 | 0.011407 | 0.011442 | 0.011476 | 0.011719 |
| 0.011789 | 0.011754 | 0.011824 | 0.011513 | 0.011824 | 0.011442 | 0.011407 |
| 0.011444 | 0.011729 | 0.011484 | 0.011344 | 0.011832 | 0.011307 | 0.011425 |
| 0.011832 | 0.011728 | 0.011442 | 0.011823 | 0.011448 | 0.011476 | 0.011650 |
| 0.011546 | 0.011546 | 0.011601 | 0.011309 | 0.011479 | 0.011476 | 0.011550 |
| 0.011650 | 0.011546 | 0.011615 | 0.011754 | 0.011684 | 0.011754 | 0.011650 |
| 0.011584 | 0.011756 | 0.011653 | 0.011617 | 0.011894 | 0.011338 | 0.011546 |
| 0.011511 | 0.011407 | 0.011338 | 0.011338 | 0.011407 | 0.011407 | 0.011476 |
| 0.011407 | 0.011476 | 0.011372 | 0.011476 | 0.011407 | 0.011407 | 0.011476 |
| 0.011407 | 0.011858 | 0.011754 | 0.011788 | 0.011303 | 0.011407 | 0.011442 |
| 0.011442 | 0.011407 | 0.011442 | 0.011511 | 0.011372 | 0.011372 | 0.011372 |
| 0.011927 | 0.011546 | 0.011511 | 0.011338 | 0.011407 | 0.011615 | 0.011372 |
| 0.011372 | 0.011441 | 0.011407 | 0.011580 | 0.011372 | 0.011476 | 0.011580 |
| 0.011546 | 0.011407 | 0.011407 | 0.011303 | 0.011338 | 0.011511 | 0.011441 |
| 0.011303 | 0.011441 | 0.011303 | 0.011338 | 0.011476 | 0.011615 | 0.011372 |
| 0.011338 | 0.011476 | 0.011373 | 0.011303 | 0.011650 | 0.011303 | 0.011476 |
| 0.011552 | 0.011372 | 0.011684 | 0.011511 | 0.011546 | 0.011407 | 0.011442 |
| 0.011372 | 0.011719 | 0.011303 | 0.011580 | 0.011372 | 0.011372 | 0.011303 |
| 0.011546 | 0.011719 | 0.011442 | 0.011511 | 0.011338 | 0.011754 | 0.011372 |
| 0.011372 | 0.011372 | 0.011407 | 0.011511 | 0.011407 | 0.011511 | 0.011580 |
| 0.011580 | 0.011546 | 0.011441 | 0.011546 | 0.011511 | 0.011372 | 0.011338 |
| 0.011372 | 0.011372 | 0.011442 | 0.011372 | 0.011338 | 0.011476 | 0.011372 |
| 0.011407 | 0.011407 | 0.011511 | 0.011580 | 0.011476 | 0.011407 | 0.011407 |
| 0.011476 | 0.011407 | 0.011476 | 0.011338 | 0.011511 | 0.011442 | 0.011927 |
| 0.011407 | 0.011823 | 0.011417 | 0.018112 | 0.011330 | 0.011501 | 0.011782 |
| 0.011740 | 0.011788 | 0.011540 | 0.011481 | 0.011793 | 0.011774 | 0.011498 |
| 0.011551 | 0.011622 | 0.011299 | 0.011407 | 0.011425 | 0.011414 | 0.011412 |
| 0.011546 | 0.011562 | 0.011598 | 0.011396 | 0.011546 | 0.011546 | 0.011479 |
| 0.011444 | 0.011511 | 0.011511 | 0.011511 | 0.011476 | 0.011477 | 0.011442 |
| 0.011442 | 0.011407 | 0.011303 | 0.011476 | 0.011442 | 0.011372 | 0.011407 |
| 0.011407 | 0.011476 | 0.011372 | 0.011477 | 0.011511 | 0.011546 | 0.011442 |
| 0.011476 | 0.011442 | 0.011789 | 0.011789 | 0.011511 | 0.011547 | 0.011546 |
| 0.011338 | 0.011338 | 0.011372 | 0.011477 | 0.011338 | 0.011581 | 0.011581 |
| 0.011407 | 0.011442 | 0.011546 | 0.011442 | 0.011824 | 0.011443 | 0.011476 |
| 0.011338 | 0.011511 | 0.011581 | 0.011407 | 0.011476 | 0.011442 | 0.011442 |
| 0.011407 | 0.011407 | 0.011442 | 0.011546 | 0.011443 | 0.011615 | 0.011581 |
| 0.011480 | 0.011372 | 0.011442 | 0.011511 | 0.011477 | 0.011615 | 0.011650 |
| 0.011823 | 0.011448 | 0.011476 | 0.011650 | 0.011546 | 0.011546 | 0.011373 |
| 0.011512 | 0.011442 | 0.011407 | 0.011407 | 0.011476 | 0.011372 | 0.011477 |
| 0.011511 | 0.011546 | 0.011442 | 0.011476 | 0.011442 | 0.011789 | 0.011789 |
| 0.011511 | 0.011547 | 0.011580 | 0.011511 | 0.012207 | 0.000000 | 0.011525 |
| 0.011594 | 0.000000 | 0.011666 | 0.011555 | 0.011586 | 0.011583 | 0.011377 |
| 0.012143 | 0.011444 | 0.011546 | 0.011515 | 0.011793 | 0.011652 | 0.011755 |
| 0.012177 | 0.011630 | 0.011724 | 0.011788 | 0.011650 | 0.011650 | 0.011689 |
| 0.011338 | 0.011511 | 0.011650 | 0.011615 | 0.011619 | 0.011615 | 0.011547 |
| 0.011441 | 0.011372 | 0.011407 | 0.011442 | 0.011338 | 0.011407 | 0.011303 |
| 0.011441 | 0.011476 | 0.011372 | 0.011338 | 0.011442 | 0.011372 | 0.011407 |
| 0.011407 | 0.011338 | 0.011407 | 0.011442 | 0.011338 | 0.011546 | 0.011580 |
| 0.011476 | 0.011546 | 0.011476 | 0.011476 | 0.011407 | 0.011788 | 0.011441 |
| 0.011487 | 0.011407 | 0.011650 | 0.011651 | 0.011511 | 0.011511 | 0.011511 |
| 0.011476 | 0.011442 | 0.011407 | 0.011442 | 0.011511 | 0.011546 | 0.011476 |
| 0.011476 | 0.011615 | 0.011788 | 0.011511 | 0.011684 | 0.011684 | 0.011580 |
| 0.011407 | 0.011476 | 0.011476 | 0.011927 | 0.011477 | 0.011511 | 0.011476 |
| 0.011372 | 0.011441 | 0.011441 | 0.011754 | 0.011650 | 0.011719 | 0.011442 |

|          |          |          |          |          |          |          |
|----------|----------|----------|----------|----------|----------|----------|
| 0.011546 | 0.011615 | 0.011442 | 0.011546 | 0.011511 | 0.011372 | 0.011719 |
| 0.011476 | 0.011442 | 0.011441 | 0.011615 | 0.011442 | 0.011546 | 0.011789 |
| 0.011476 | 0.011867 | 0.011823 | 0.011641 | 0.011346 | 0.011552 | 0.011325 |
| 0.011342 | 0.011821 | 0.011351 | 0.011562 | 0.011360 | 0.011475 | 0.011496 |
| 0.011635 | 0.011330 | 0.011461 | 0.011265 | 0.011337 | 0.011475 | 0.011474 |
| 0.011559 | 0.011381 | 0.011530 | 0.011461 | 0.011478 | 0.011615 | 0.011685 |
| 0.011685 | 0.011547 | 0.011619 | 0.011655 | 0.011760 | 0.011792 | 0.011476 |
| 0.011719 | 0.011581 | 0.011442 | 0.011546 | 0.011338 | 0.011580 | 0.011372 |
| 0.011442 | 0.011442 | 0.011407 | 0.011372 | 0.011407 | 0.011372 | 0.011407 |
| 0.011347 | 0.011420 | 0.011450 | 0.011483 | 0.011624 | 0.011590 | 0.011554 |
| 0.011552 | 0.011512 | 0.011287 | 0.011283 | 0.011445 | 0.011620 | 0.011621 |
| 0.011408 | 0.011480 | 0.011686 | 0.011689 | 0.011199 | 0.011616 | 0.011546 |
| 0.011511 | 0.011580 | 0.011580 | 0.011476 | 0.012066 | 0.011234 | 0.011511 |
| 0.011719 | 0.011794 | 0.011377 | 0.011524 | 0.011372 | 0.011615 | 0.011546 |
| 0.011616 | 0.011650 | 0.011442 | 0.011442 | 0.011752 | 0.011754 | 0.011414 |
| 0.011303 | 0.011307 | 0.011408 | 0.011373 | 0.011478 | 0.011324 | 0.011651 |
| 0.011446 | 0.011587 | 0.011346 | 0.011477 | 0.011442 | 0.011518 | 0.011407 |
| 0.011372 | 0.011372 | 0.011442 | 0.011407 | 0.011615 | 0.011580 | 0.011511 |
| 0.011615 | 0.011685 | 0.011407 | 0.011407 | 0.011442 | 0.011442 | 0.011444 |
| 0.011514 | 0.011442 | 0.011442 | 0.011478 | 0.011615 | 0.011685 | 0.011685 |
| 0.011547 | 0.011619 | 0.011655 | 0.011760 | 0.011792 | 0.011476 | 0.011650 |
| 0.011546 | 0.011546 | 0.011410 | 0.011528 | 0.011527 | 0.011553 | 0.011386 |
| 0.011594 | 0.011812 | 0.011582 | 0.011445 | 0.011372 | 0.011581 | 0.011442 |
| 0.011546 | 0.011477 | 0.011372 | 0.011478 | 0.011581 | 0.011584 | 0.011477 |
| 0.011372 | 0.011304 | 0.011442 | 0.011372 | 0.011303 | 0.011411 | 0.011581 |
| 0.011442 | 0.011407 | 0.011303 | 0.011476 | 0.011442 | 0.011372 | 0.011476 |
| 0.011442 | 0.011476 | 0.011476 | 0.011407 | 0.011476 | 0.011719 | 0.011372 |
| 0.011407 | 0.011788 | 0.011407 | 0.011442 | 0.011372 | 0.011788 | 0.011370 |
| 0.011806 | 0.011363 | 0.011320 | 0.011597 | 0.011683 | 0.011576 | 0.011276 |
| 0.011278 | 0.011545 | 0.011650 | 0.011761 | 0.011617 | 0.011759 | 0.011894 |
| 0.011790 | 0.011859 | 0.011788 | 0.011979 | 0.011754 | 0.012657 | 0.011791 |
| 0.012520 | 0.012315 | 0.012453 | 0.012664 | 0.011788 | 0.011477 | 0.011754 |
| 0.012208 | 0.012140 | 0.011719 | 0.011615 | 0.011685 | 0.011685 | 0.011619 |
| 0.011545 | 0.011551 | 0.011615 | 0.011581 | 0.011998 | 0.012032 | 0.012068 |
| 0.011929 | 0.012033 | 0.012175 | 0.011899 | 0.012243 | 0.012215 | 0.012312 |
| 0.012313 | 0.012348 | 0.012260 | 0.012313 | 0.012315 | 0.011476 | 0.011824 |
| 0.011894 | 0.012379 | 0.011866 | 0.012136 | 0.012625 | 0.011657 | 0.011546 |
| 0.011511 | 0.011511 | 0.011998 | 0.012048 | 0.012152 | 0.011858 | 0.011513 |
| S499     | 0.011763 | 0.011763 | 0.011974 | 0.011904 | 0.011904 | 0.011939 |
| 0.011914 | 0.011843 | 0.012009 | 0.011482 | 0.011552 | 0.011518 | 0.011482 |
| 0.011517 | 0.011693 | 0.011482 | 0.011517 | 0.011482 | 0.011552 | 0.011517 |
| 0.011482 | 0.011517 | 0.011622 | 0.011482 | 0.011517 | 0.011517 | 0.011878 |
| 0.011763 | 0.011482 | 0.011411 | 0.011657 | 0.011552 | 0.011552 | 0.011587 |
| 0.011517 | 0.011658 | 0.011552 | 0.011552 | 0.011552 | 0.011552 | 0.011693 |
| 0.011482 | 0.011552 | 0.011587 | 0.011517 | 0.011622 | 0.011657 | 0.011552 |
| 0.011552 | 0.011728 | 0.011623 | 0.011904 | 0.011552 | 0.011833 | 0.011552 |
| 0.011517 | 0.011623 | 0.011658 | 0.011833 | 0.011904 | 0.011622 | 0.011728 |
| 0.011587 | 0.011658 | 0.011552 | 0.011798 | 0.012045 | 0.011517 | 0.011622 |
| 0.011482 | 0.011622 | 0.011587 | 0.011657 | 0.011552 | 0.011587 | 0.011587 |
| 0.011482 | 0.011517 | 0.011482 | 0.011587 | 0.011552 | 0.011589 | 0.011657 |
| 0.011587 | 0.011517 | 0.011622 | 0.011517 | 0.011657 | 0.011447 | 0.011552 |
| 0.011728 | 0.011657 | 0.011904 | 0.011728 | 0.011552 | 0.011798 | 0.011552 |
| 0.011717 | 0.011956 | 0.011729 | 0.011431 | 0.011452 | 0.011601 | 0.011677 |
| 0.012367 | 0.011702 | 0.011448 | 0.011798 | 0.011798 | 0.011587 | 0.011693 |
| 0.011622 | 0.011587 | 0.011622 | 0.011552 | 0.011622 | 0.011587 | 0.011587 |
| 0.011552 | 0.011657 | 0.011869 | 0.011728 | 0.011622 | 0.011587 | 0.011517 |
| 0.011482 | 0.011482 | 0.011552 | 0.011517 | 0.011728 | 0.011693 | 0.011623 |
| 0.011728 | 0.011798 | 0.011517 | 0.011517 | 0.011552 | 0.011552 | 0.011555 |
| 0.011627 | 0.011552 | 0.011552 | 0.011434 | 0.011509 | 0.011458 | 0.011552 |
| 0.011556 | 0.011492 | 0.011525 | 0.011494 | 0.011448 | 0.011486 | 0.011518 |

|          |          |          |          |          |          |          |
|----------|----------|----------|----------|----------|----------|----------|
| 0.011807 | 0.011561 | 0.011600 | 0.011482 | 0.011422 | 0.011623 | 0.011588 |
| 0.011658 | 0.011589 | 0.011588 | 0.011622 | 0.011552 | 0.011974 | 0.011763 |
| 0.011833 | 0.011693 | 0.011552 | 0.011658 | 0.011447 | 0.011693 | 0.011482 |
| 0.011552 | 0.011552 | 0.011482 | 0.011482 | 0.011517 | 0.011482 | 0.011587 |
| 0.011552 | 0.011623 | 0.011588 | 0.011482 | 0.011589 | 0.011658 | 0.011662 |
| 0.011693 | 0.011588 | 0.011482 | 0.011378 | 0.011552 | 0.011482 | 0.011412 |
| 0.011451 | 0.011693 | 0.011482 | 0.011693 | 0.011447 | 0.011552 | 0.011517 |
| 0.011623 | 0.011517 | 0.011552 | 0.011517 | 0.011552 | 0.011412 | 0.011552 |
| 0.011588 | 0.011517 | 0.011587 | 0.011517 | 0.011552 | 0.011587 | 0.011834 |
| 0.011939 | 0.011869 | 0.011939 | 0.011695 | 0.011939 | 0.011552 | 0.011517 |
| 0.011555 | 0.011824 | 0.011720 | 0.011456 | 0.011913 | 0.011417 | 0.011595 |
| 0.011949 | 0.011807 | 0.011693 | 0.011939 | 0.011525 | 0.011798 | 0.011763 |
| 0.011693 | 0.011869 | 0.011706 | 0.011514 | 0.011647 | 0.011587 | 0.011624 |
| 0.011763 | 0.011658 | 0.011798 | 0.011869 | 0.011798 | 0.011833 | 0.011763 |
| 0.011695 | 0.011869 | 0.011763 | 0.011728 | 0.012010 | 0.011447 | 0.011587 |
| 0.011622 | 0.011517 | 0.011447 | 0.011447 | 0.011517 | 0.011517 | 0.011587 |
| 0.011517 | 0.011587 | 0.011482 | 0.011587 | 0.011517 | 0.011517 | 0.011587 |
| 0.011517 | 0.011974 | 0.011869 | 0.011904 | 0.011411 | 0.011517 | 0.011552 |
| 0.011552 | 0.011517 | 0.011552 | 0.011622 | 0.011482 | 0.011482 | 0.011482 |
| 0.012044 | 0.011622 | 0.011657 | 0.011447 | 0.011517 | 0.011728 | 0.011482 |
| 0.011482 | 0.011552 | 0.011517 | 0.011693 | 0.011482 | 0.011587 | 0.011693 |
| 0.011657 | 0.011482 | 0.011517 | 0.011411 | 0.011447 | 0.011622 | 0.011552 |
| 0.011411 | 0.011517 | 0.011411 | 0.011447 | 0.011587 | 0.011728 | 0.011482 |
| 0.011447 | 0.011552 | 0.011517 | 0.011411 | 0.011763 | 0.011411 | 0.011587 |
| 0.011660 | 0.011482 | 0.011798 | 0.011623 | 0.011658 | 0.011517 | 0.011587 |
| 0.011482 | 0.011833 | 0.011411 | 0.011693 | 0.011482 | 0.011482 | 0.011411 |
| 0.011657 | 0.011834 | 0.011552 | 0.011587 | 0.011447 | 0.011869 | 0.011482 |
| 0.011482 | 0.011482 | 0.011517 | 0.011622 | 0.011482 | 0.011587 | 0.011622 |
| 0.011693 | 0.011622 | 0.011552 | 0.011658 | 0.011622 | 0.011482 | 0.011447 |
| 0.011482 | 0.011482 | 0.011552 | 0.011482 | 0.011447 | 0.011587 | 0.011482 |
| 0.011517 | 0.011517 | 0.011622 | 0.011693 | 0.011552 | 0.011517 | 0.011517 |
| 0.011552 | 0.011517 | 0.011587 | 0.011482 | 0.011622 | 0.011693 | 0.011974 |
| 0.011517 | 0.011939 | 0.011530 | 0.018368 | 0.011332 | 0.011638 | 0.011901 |
| 0.011821 | 0.011908 | 0.011549 | 0.011486 | 0.011988 | 0.011928 | 0.011635 |
| 0.011508 | 0.011819 | 0.011427 | 0.011498 | 0.011513 | 0.011475 | 0.011467 |
| 0.011699 | 0.011726 | 0.011684 | 0.011404 | 0.011658 | 0.011622 | 0.011698 |
| 0.011553 | 0.011623 | 0.011658 | 0.011623 | 0.011587 | 0.011588 | 0.011552 |
| 0.011587 | 0.011517 | 0.011552 | 0.011587 | 0.011552 | 0.011482 | 0.011517 |
| 0.011517 | 0.011587 | 0.011482 | 0.011588 | 0.011623 | 0.011587 | 0.011552 |
| 0.011587 | 0.011552 | 0.011904 | 0.011904 | 0.011623 | 0.011659 | 0.011658 |
| 0.011447 | 0.011447 | 0.011482 | 0.011588 | 0.011447 | 0.011693 | 0.011693 |
| 0.011728 | 0.011693 | 0.011658 | 0.011763 | 0.011939 | 0.011765 | 0.011587 |
| 0.011587 | 0.011587 | 0.011658 | 0.011517 | 0.011587 | 0.011552 | 0.011587 |
| 0.011658 | 0.011658 | 0.011693 | 0.011658 | 0.011554 | 0.011728 | 0.011693 |
| 0.011557 | 0.011482 | 0.011517 | 0.011623 | 0.011588 | 0.011728 | 0.011693 |
| 0.011939 | 0.011525 | 0.011798 | 0.011763 | 0.011693 | 0.011869 | 0.011482 |
| 0.011660 | 0.011518 | 0.011517 | 0.011517 | 0.011587 | 0.011482 | 0.011588 |
| 0.011623 | 0.011587 | 0.011552 | 0.011587 | 0.011552 | 0.011904 | 0.011904 |
| 0.011623 | 0.011659 | 0.011657 | 0.011587 | 0.012327 | 0.011714 | 0.011630 |
| 0.011704 | 0.011666 | 0.000000 | 0.011662 | 0.011776 | 0.011697 | 0.011633 |
| 0.012259 | 0.011556 | 0.011693 | 0.011626 | 0.011870 | 0.011763 | 0.011869 |
| 0.012293 | 0.011663 | 0.011804 | 0.011904 | 0.011763 | 0.011763 | 0.011803 |
| 0.011447 | 0.011622 | 0.011763 | 0.011728 | 0.011697 | 0.011728 | 0.011660 |
| 0.011552 | 0.011482 | 0.011517 | 0.011552 | 0.011447 | 0.011517 | 0.011411 |
| 0.011552 | 0.011587 | 0.011411 | 0.011447 | 0.011552 | 0.011482 | 0.011517 |
| 0.011517 | 0.011447 | 0.011517 | 0.011552 | 0.011447 | 0.011658 | 0.011693 |
| 0.011587 | 0.011658 | 0.011587 | 0.011587 | 0.011517 | 0.011904 | 0.011552 |
| 0.011593 | 0.011517 | 0.011763 | 0.011763 | 0.011622 | 0.011622 | 0.011622 |
| 0.011622 | 0.011552 | 0.011517 | 0.011552 | 0.011622 | 0.011658 | 0.011587 |
| 0.011447 | 0.011693 | 0.011904 | 0.011622 | 0.011798 | 0.011798 | 0.011693 |

|          |          |          |          |          |          |          |
|----------|----------|----------|----------|----------|----------|----------|
| 0.011517 | 0.011587 | 0.011622 | 0.012045 | 0.011588 | 0.011622 | 0.011587 |
| 0.011622 | 0.011552 | 0.011552 | 0.011834 | 0.011763 | 0.011798 | 0.011552 |
| 0.011658 | 0.011728 | 0.011552 | 0.011658 | 0.011622 | 0.011482 | 0.011833 |
| 0.011587 | 0.011552 | 0.011552 | 0.011728 | 0.011552 | 0.011657 | 0.011904 |
| 0.011517 | 0.011985 | 0.011974 | 0.011741 | 0.011409 | 0.011665 | 0.011328 |
| 0.011465 | 0.011962 | 0.011502 | 0.011624 | 0.011416 | 0.011491 | 0.011455 |
| 0.011753 | 0.011130 | 0.011413 | 0.011200 | 0.011288 | 0.011482 | 0.011654 |
| 0.011650 | 0.011554 | 0.011651 | 0.011577 | 0.011519 | 0.011728 | 0.011799 |
| 0.011763 | 0.011659 | 0.011768 | 0.011770 | 0.011877 | 0.011839 | 0.011587 |
| 0.011833 | 0.011693 | 0.011552 | 0.011658 | 0.011447 | 0.011693 | 0.011482 |
| 0.011552 | 0.011552 | 0.011482 | 0.011482 | 0.011517 | 0.011482 | 0.011587 |
| 0.011572 | 0.011568 | 0.011562 | 0.011593 | 0.011736 | 0.011704 | 0.011703 |
| 0.011700 | 0.011588 | 0.011440 | 0.011434 | 0.011556 | 0.011734 | 0.011699 |
| 0.011517 | 0.011592 | 0.011800 | 0.011803 | 0.011729 | 0.011764 | 0.011622 |
| 0.011622 | 0.011693 | 0.011693 | 0.011482 | 0.012186 | 0.011763 | 0.011834 |
| 0.011834 | 0.011879 | 0.011524 | 0.011638 | 0.011482 | 0.011728 | 0.011622 |
| 0.011729 | 0.011728 | 0.011763 | 0.011763 | 0.011846 | 0.011904 | 0.011522 |
| 0.011411 | 0.011414 | 0.011482 | 0.011482 | 0.011588 | 0.011399 | 0.011763 |
| 0.011555 | 0.011719 | 0.011489 | 0.011548 | 0.011552 | 0.011558 | 0.011517 |
| 0.011482 | 0.011482 | 0.011552 | 0.011517 | 0.011728 | 0.011693 | 0.011623 |
| 0.011728 | 0.011798 | 0.011517 | 0.011517 | 0.011552 | 0.011552 | 0.011555 |
| 0.011627 | 0.011552 | 0.011552 | 0.011519 | 0.011728 | 0.011799 | 0.011763 |
| 0.011659 | 0.011768 | 0.011770 | 0.011877 | 0.011839 | 0.011587 | 0.011693 |
| 0.011622 | 0.011622 | 0.011521 | 0.011643 | 0.011605 | 0.011667 | 0.011500 |
| 0.011710 | 0.011874 | 0.011679 | 0.011558 | 0.011482 | 0.011693 | 0.011552 |
| 0.011623 | 0.011588 | 0.011482 | 0.011589 | 0.011658 | 0.011662 | 0.011588 |
| 0.011482 | 0.011378 | 0.011552 | 0.011482 | 0.011412 | 0.011451 | 0.011693 |
| 0.011587 | 0.011517 | 0.011552 | 0.011587 | 0.011552 | 0.011482 | 0.011587 |
| 0.011552 | 0.011552 | 0.011587 | 0.011517 | 0.011587 | 0.011833 | 0.011482 |
| 0.011482 | 0.011904 | 0.011517 | 0.011552 | 0.011517 | 0.011904 | 0.011421 |
| 0.011870 | 0.011413 | 0.011427 | 0.011776 | 0.011785 | 0.011738 | 0.011370 |
| 0.011392 | 0.011657 | 0.011763 | 0.011874 | 0.011730 | 0.011875 | 0.012011 |
| 0.011904 | 0.011974 | 0.011904 | 0.011990 | 0.011833 | 0.012749 | 0.011765 |
| 0.012609 | 0.012401 | 0.012507 | 0.012720 | 0.011904 | 0.011587 | 0.011869 |
| 0.012293 | 0.012261 | 0.011798 | 0.011728 | 0.011799 | 0.011799 | 0.011767 |
| 0.011657 | 0.011664 | 0.011728 | 0.011693 | 0.012116 | 0.012080 | 0.012186 |
| 0.012046 | 0.012151 | 0.012295 | 0.012050 | 0.012364 | 0.012336 | 0.012434 |
| 0.012434 | 0.012470 | 0.012347 | 0.012435 | 0.012437 | 0.011552 | 0.011940 |
| 0.011975 | 0.012503 | 0.012019 | 0.012221 | 0.012752 | 0.011771 | 0.011658 |
| 0.011622 | 0.011622 | 0.012116 | 0.012172 | 0.012167 | 0.011974 | 0.011624 |
| S500     | 0.011718 | 0.011718 | 0.012100 | 0.011822 | 0.011822 | 0.011857 |
| 0.011796 | 0.011726 | 0.011926 | 0.011372 | 0.011441 | 0.011407 | 0.011372 |
| 0.011406 | 0.011545 | 0.011372 | 0.011406 | 0.011476 | 0.011441 | 0.011406 |
| 0.011372 | 0.011406 | 0.011510 | 0.011372 | 0.011407 | 0.011406 | 0.011761 |
| 0.011614 | 0.011406 | 0.011303 | 0.011545 | 0.011476 | 0.011441 | 0.011476 |
| 0.011441 | 0.011545 | 0.011441 | 0.011441 | 0.011441 | 0.011441 | 0.011614 |
| 0.011372 | 0.011441 | 0.011476 | 0.011406 | 0.011510 | 0.011545 | 0.011476 |
| 0.011441 | 0.011580 | 0.011476 | 0.011788 | 0.011441 | 0.011718 | 0.011441 |
| 0.011406 | 0.011511 | 0.011545 | 0.011718 | 0.011822 | 0.011510 | 0.011614 |
| 0.011441 | 0.011545 | 0.011441 | 0.011684 | 0.011926 | 0.011406 | 0.011510 |
| 0.011372 | 0.011510 | 0.011476 | 0.011545 | 0.011441 | 0.011476 | 0.011476 |
| 0.011372 | 0.011406 | 0.011372 | 0.011476 | 0.011441 | 0.011477 | 0.011545 |
| 0.011476 | 0.011441 | 0.011510 | 0.011406 | 0.011545 | 0.011337 | 0.011441 |
| 0.011614 | 0.011545 | 0.011788 | 0.011614 | 0.011441 | 0.011684 | 0.011441 |
| 0.011557 | 0.011792 | 0.011605 | 0.011303 | 0.011292 | 0.011365 | 0.011508 |
| 0.012158 | 0.011584 | 0.011316 | 0.011684 | 0.011684 | 0.011476 | 0.011580 |
| 0.011510 | 0.011476 | 0.011476 | 0.011441 | 0.011545 | 0.011476 | 0.011441 |
| 0.011441 | 0.011545 | 0.011753 | 0.011614 | 0.011510 | 0.011476 | 0.011407 |
| 0.011372 | 0.011372 | 0.011441 | 0.011407 | 0.011615 | 0.011580 | 0.011511 |
| 0.011615 | 0.011684 | 0.011407 | 0.011407 | 0.011441 | 0.011441 | 0.011409 |

|          |          |          |          |          |          |          |
|----------|----------|----------|----------|----------|----------|----------|
| 0.011479 | 0.011441 | 0.011441 | 0.011283 | 0.011359 | 0.011349 | 0.011442 |
| 0.011445 | 0.011344 | 0.011404 | 0.011416 | 0.011340 | 0.011378 | 0.011409 |
| 0.011692 | 0.011451 | 0.011487 | 0.011372 | 0.011382 | 0.011511 | 0.011477 |
| 0.011546 | 0.011478 | 0.011477 | 0.011476 | 0.011441 | 0.011857 | 0.011684 |
| 0.011718 | 0.011580 | 0.011441 | 0.011545 | 0.011337 | 0.011580 | 0.011372 |
| 0.011441 | 0.011441 | 0.011372 | 0.011372 | 0.011406 | 0.011372 | 0.011476 |
| 0.011441 | 0.011545 | 0.011476 | 0.011372 | 0.011477 | 0.011545 | 0.011514 |
| 0.011580 | 0.011476 | 0.011372 | 0.011304 | 0.011441 | 0.011372 | 0.011303 |
| 0.011376 | 0.011580 | 0.011372 | 0.011580 | 0.011337 | 0.011441 | 0.011407 |
| 0.011511 | 0.011407 | 0.011441 | 0.011407 | 0.011441 | 0.011303 | 0.011441 |
| 0.011476 | 0.011407 | 0.011476 | 0.011407 | 0.011407 | 0.011476 | 0.011719 |
| 0.011822 | 0.011753 | 0.011823 | 0.011582 | 0.011823 | 0.011407 | 0.011407 |
| 0.011444 | 0.011688 | 0.011571 | 0.011273 | 0.011831 | 0.011307 | 0.011343 |
| 0.011831 | 0.011727 | 0.011614 | 0.011822 | 0.011448 | 0.011684 | 0.011649 |
| 0.011580 | 0.011753 | 0.011597 | 0.011431 | 0.011479 | 0.011476 | 0.011514 |
| 0.011649 | 0.011512 | 0.011686 | 0.011754 | 0.011649 | 0.011753 | 0.011615 |
| 0.011549 | 0.011754 | 0.011654 | 0.011583 | 0.011893 | 0.011337 | 0.011476 |
| 0.011510 | 0.011406 | 0.011337 | 0.011337 | 0.011406 | 0.011406 | 0.011476 |
| 0.011406 | 0.011476 | 0.011372 | 0.011476 | 0.011406 | 0.011406 | 0.011476 |
| 0.011406 | 0.011857 | 0.011753 | 0.011788 | 0.011303 | 0.011406 | 0.011441 |
| 0.011441 | 0.011406 | 0.011441 | 0.011510 | 0.011372 | 0.011372 | 0.011372 |
| 0.011926 | 0.011545 | 0.011545 | 0.011337 | 0.011406 | 0.011614 | 0.011372 |
| 0.011372 | 0.011441 | 0.011406 | 0.011580 | 0.011372 | 0.011476 | 0.011614 |
| 0.011545 | 0.011372 | 0.011406 | 0.011337 | 0.011337 | 0.011510 | 0.011441 |
| 0.011337 | 0.011406 | 0.011303 | 0.011337 | 0.011476 | 0.011615 | 0.011372 |
| 0.011337 | 0.011441 | 0.011407 | 0.011303 | 0.011649 | 0.011303 | 0.011476 |
| 0.011546 | 0.011372 | 0.011684 | 0.011511 | 0.011545 | 0.011406 | 0.011476 |
| 0.011372 | 0.011718 | 0.011303 | 0.011580 | 0.011372 | 0.011372 | 0.011303 |
| 0.011545 | 0.011719 | 0.011441 | 0.011476 | 0.011337 | 0.011753 | 0.011372 |
| 0.011372 | 0.011372 | 0.011406 | 0.011510 | 0.011372 | 0.011476 | 0.011580 |
| 0.011580 | 0.011545 | 0.011441 | 0.011510 | 0.011476 | 0.011372 | 0.011337 |
| 0.011372 | 0.011372 | 0.011441 | 0.011372 | 0.011337 | 0.011476 | 0.011372 |
| 0.011406 | 0.011406 | 0.011510 | 0.011580 | 0.011441 | 0.011406 | 0.011372 |
| 0.011476 | 0.011406 | 0.011337 | 0.011372 | 0.011510 | 0.011580 | 0.011926 |
| 0.011406 | 0.011822 | 0.011345 | 0.018104 | 0.011261 | 0.011437 | 0.011709 |
| 0.011632 | 0.011715 | 0.011433 | 0.011240 | 0.011741 | 0.011773 | 0.011370 |
| 0.011554 | 0.011558 | 0.011262 | 0.011316 | 0.011344 | 0.011314 | 0.011326 |
| 0.011597 | 0.011523 | 0.011521 | 0.011403 | 0.011545 | 0.011511 | 0.011549 |
| 0.011445 | 0.011545 | 0.011510 | 0.011511 | 0.011476 | 0.011476 | 0.011441 |
| 0.011476 | 0.011407 | 0.011441 | 0.011476 | 0.011441 | 0.011372 | 0.011372 |
| 0.011372 | 0.011476 | 0.011372 | 0.011476 | 0.011511 | 0.011545 | 0.011407 |
| 0.011476 | 0.011441 | 0.011788 | 0.011788 | 0.011511 | 0.011546 | 0.011580 |
| 0.011337 | 0.011337 | 0.011372 | 0.011476 | 0.011337 | 0.011580 | 0.011580 |
| 0.011615 | 0.011614 | 0.011545 | 0.011649 | 0.011823 | 0.011651 | 0.011441 |
| 0.011476 | 0.011511 | 0.011545 | 0.011407 | 0.011476 | 0.011441 | 0.011476 |
| 0.011546 | 0.011545 | 0.011580 | 0.011546 | 0.011442 | 0.011649 | 0.011545 |
| 0.011480 | 0.011372 | 0.011476 | 0.011545 | 0.011476 | 0.011615 | 0.011649 |
| 0.011822 | 0.011448 | 0.011684 | 0.011649 | 0.011580 | 0.011753 | 0.011372 |
| 0.011547 | 0.011372 | 0.011372 | 0.011372 | 0.011476 | 0.011372 | 0.011476 |
| 0.011511 | 0.011545 | 0.011407 | 0.011476 | 0.011441 | 0.011788 | 0.011788 |
| 0.011511 | 0.011546 | 0.011545 | 0.011476 | 0.012206 | 0.011602 | 0.011518 |
| 0.011558 | 0.011555 | 0.011662 | 0.000000 | 0.011666 | 0.011587 | 0.011523 |
| 0.012141 | 0.011413 | 0.011549 | 0.011518 | 0.011797 | 0.011655 | 0.011756 |
| 0.012171 | 0.011626 | 0.011653 | 0.011788 | 0.011649 | 0.011649 | 0.011653 |
| 0.011337 | 0.011510 | 0.011649 | 0.011614 | 0.011548 | 0.011614 | 0.011547 |
| 0.011441 | 0.011372 | 0.011406 | 0.011441 | 0.011337 | 0.011406 | 0.011303 |
| 0.011441 | 0.011476 | 0.011372 | 0.011337 | 0.011441 | 0.011372 | 0.011406 |
| 0.011406 | 0.011337 | 0.011406 | 0.011441 | 0.011337 | 0.011545 | 0.011580 |
| 0.011476 | 0.011545 | 0.011476 | 0.011476 | 0.011406 | 0.011822 | 0.011441 |
| 0.011482 | 0.011407 | 0.011615 | 0.011615 | 0.011510 | 0.011510 | 0.011510 |



|          |          |          |          |          |          |          |
|----------|----------|----------|----------|----------|----------|----------|
| 0.011510 | 0.011441 | 0.011406 | 0.011441 | 0.011510 | 0.011545 | 0.011476 |
| 0.011476 | 0.011614 | 0.011788 | 0.011510 | 0.011684 | 0.011684 | 0.011580 |
| 0.011406 | 0.011476 | 0.011510 | 0.011926 | 0.011476 | 0.011510 | 0.011476 |
| 0.011510 | 0.011441 | 0.011441 | 0.011718 | 0.011649 | 0.011684 | 0.011441 |
| 0.011545 | 0.011614 | 0.011441 | 0.011545 | 0.011510 | 0.011372 | 0.011718 |
| 0.011268 | 0.011441 | 0.011441 | 0.011614 | 0.011441 | 0.011545 | 0.011753 |
| 0.011476 | 0.011866 | 0.011857 | 0.011607 | 0.011410 | 0.011551 | 0.011379 |
| 0.011288 | 0.011787 | 0.011314 | 0.011570 | 0.011362 | 0.011485 | 0.011393 |
| 0.011586 | 0.011197 | 0.011352 | 0.011198 | 0.011283 | 0.011409 | 0.011480 |
| 0.011488 | 0.011385 | 0.011461 | 0.011388 | 0.011478 | 0.011615 | 0.011684 |
| 0.011684 | 0.011546 | 0.011653 | 0.011655 | 0.011795 | 0.011791 | 0.011476 |
| 0.011718 | 0.011580 | 0.011441 | 0.011545 | 0.011337 | 0.011580 | 0.011372 |
| 0.011441 | 0.011441 | 0.011372 | 0.011372 | 0.011406 | 0.011372 | 0.011476 |
| 0.011457 | 0.011457 | 0.011449 | 0.011484 | 0.011625 | 0.011589 | 0.011589 |
| 0.011587 | 0.011511 | 0.011325 | 0.011320 | 0.011445 | 0.011620 | 0.011586 |
| 0.011407 | 0.011480 | 0.011686 | 0.011688 | 0.011615 | 0.011651 | 0.011510 |
| 0.011510 | 0.011580 | 0.011580 | 0.011476 | 0.012065 | 0.011649 | 0.011718 |
| 0.011719 | 0.011830 | 0.011447 | 0.011525 | 0.011372 | 0.011545 | 0.011510 |
| 0.011616 | 0.011614 | 0.011649 | 0.011649 | 0.011793 | 0.011753 | 0.011413 |
| 0.011303 | 0.011307 | 0.011408 | 0.011373 | 0.011479 | 0.011325 | 0.011650 |
| 0.011446 | 0.011544 | 0.011251 | 0.011435 | 0.011442 | 0.011519 | 0.011407 |
| 0.011372 | 0.011372 | 0.011441 | 0.011407 | 0.011615 | 0.011580 | 0.011511 |
| 0.011615 | 0.011684 | 0.011407 | 0.011407 | 0.011441 | 0.011441 | 0.011409 |
| 0.011479 | 0.011441 | 0.011441 | 0.011478 | 0.011615 | 0.011684 | 0.011684 |
| 0.011546 | 0.011653 | 0.011655 | 0.011795 | 0.011791 | 0.011476 | 0.011649 |
| 0.011510 | 0.011510 | 0.011409 | 0.011563 | 0.011454 | 0.011552 | 0.011349 |
| 0.011558 | 0.011624 | 0.011494 | 0.011446 | 0.011372 | 0.011580 | 0.011441 |
| 0.011545 | 0.011476 | 0.011372 | 0.011477 | 0.011545 | 0.011514 | 0.011476 |
| 0.011372 | 0.011304 | 0.011441 | 0.011372 | 0.011303 | 0.011376 | 0.011580 |
| 0.011476 | 0.011407 | 0.011441 | 0.011476 | 0.011441 | 0.011372 | 0.011476 |
| 0.011441 | 0.011476 | 0.011476 | 0.011406 | 0.011476 | 0.011718 | 0.011372 |
| 0.011372 | 0.011822 | 0.011406 | 0.011441 | 0.011406 | 0.011788 | 0.011283 |
| 0.011757 | 0.011324 | 0.011370 | 0.011562 | 0.011650 | 0.011543 | 0.011234 |
| 0.011334 | 0.011545 | 0.011649 | 0.011755 | 0.011616 | 0.011724 | 0.011893 |
| 0.011789 | 0.011859 | 0.011788 | 0.011977 | 0.011753 | 0.012656 | 0.011755 |
| 0.012449 | 0.012313 | 0.012452 | 0.012697 | 0.011788 | 0.011476 | 0.011754 |
| 0.012206 | 0.012104 | 0.011684 | 0.011615 | 0.011685 | 0.011685 | 0.011653 |
| 0.011545 | 0.011515 | 0.011614 | 0.011581 | 0.011962 | 0.011996 | 0.012032 |
| 0.011893 | 0.011997 | 0.012139 | 0.011863 | 0.012242 | 0.012214 | 0.012311 |
| 0.012312 | 0.012346 | 0.012188 | 0.012312 | 0.012313 | 0.011441 | 0.011823 |
| 0.011859 | 0.012413 | 0.011900 | 0.012100 | 0.012624 | 0.011656 | 0.011546 |
| 0.011510 | 0.011510 | 0.011997 | 0.012048 | 0.011933 | 0.011857 | 0.011512 |
| S501     | 0.011830 | 0.011830 | 0.012006 | 0.011970 | 0.011970 | 0.012006 |
| 0.011911 | 0.011840 | 0.012041 | 0.011480 | 0.011550 | 0.011516 | 0.011480 |
| 0.011515 | 0.011690 | 0.011480 | 0.011515 | 0.011585 | 0.011550 | 0.011515 |
| 0.011480 | 0.011515 | 0.011620 | 0.011481 | 0.011516 | 0.011515 | 0.011875 |
| 0.011760 | 0.011515 | 0.011410 | 0.011655 | 0.011550 | 0.011550 | 0.011585 |
| 0.011515 | 0.011655 | 0.011550 | 0.011550 | 0.011515 | 0.011550 | 0.011725 |
| 0.011480 | 0.011550 | 0.011550 | 0.011515 | 0.011620 | 0.011620 | 0.011550 |
| 0.011550 | 0.011690 | 0.011621 | 0.011900 | 0.011515 | 0.011830 | 0.011515 |
| 0.011515 | 0.011620 | 0.011620 | 0.011830 | 0.011900 | 0.011620 | 0.011725 |
| 0.011585 | 0.011655 | 0.011550 | 0.011795 | 0.012041 | 0.011515 | 0.011620 |
| 0.011515 | 0.011620 | 0.011585 | 0.011655 | 0.011550 | 0.011585 | 0.011585 |
| 0.011480 | 0.011515 | 0.011480 | 0.011550 | 0.011550 | 0.011587 | 0.011655 |
| 0.011585 | 0.011515 | 0.011620 | 0.011515 | 0.011655 | 0.011480 | 0.011550 |
| 0.011725 | 0.011655 | 0.011900 | 0.011725 | 0.011515 | 0.011795 | 0.011550 |
| 0.011746 | 0.011982 | 0.011686 | 0.011466 | 0.011412 | 0.011599 | 0.011587 |
| 0.012285 | 0.011647 | 0.011400 | 0.011655 | 0.011655 | 0.011585 | 0.011690 |
| 0.011620 | 0.011585 | 0.011620 | 0.011550 | 0.011620 | 0.011585 | 0.011585 |
| 0.011550 | 0.011655 | 0.011865 | 0.011690 | 0.011620 | 0.011550 | 0.011515 |

|          |          |          |          |          |          |          |
|----------|----------|----------|----------|----------|----------|----------|
| 0.011480 | 0.011480 | 0.011550 | 0.011515 | 0.011725 | 0.011691 | 0.011620 |
| 0.011726 | 0.011796 | 0.011515 | 0.011515 | 0.011550 | 0.011550 | 0.011553 |
| 0.011624 | 0.011550 | 0.011550 | 0.011396 | 0.011435 | 0.011423 | 0.011551 |
| 0.011519 | 0.011454 | 0.011446 | 0.011492 | 0.011447 | 0.011450 | 0.011517 |
| 0.011694 | 0.011524 | 0.011526 | 0.011480 | 0.011421 | 0.011621 | 0.011586 |
| 0.011656 | 0.011587 | 0.011586 | 0.011620 | 0.011550 | 0.012006 | 0.011761 |
| 0.011830 | 0.011691 | 0.011550 | 0.011655 | 0.011445 | 0.011690 | 0.011480 |
| 0.011550 | 0.011550 | 0.011515 | 0.011480 | 0.011515 | 0.011480 | 0.011585 |
| 0.011550 | 0.011655 | 0.011585 | 0.011480 | 0.011587 | 0.011691 | 0.011695 |
| 0.011691 | 0.011586 | 0.011480 | 0.011412 | 0.011550 | 0.011480 | 0.011410 |
| 0.011521 | 0.011691 | 0.011480 | 0.011691 | 0.011445 | 0.011550 | 0.011515 |
| 0.011550 | 0.011515 | 0.011550 | 0.011515 | 0.011550 | 0.011410 | 0.011550 |
| 0.011585 | 0.011515 | 0.011585 | 0.011515 | 0.011550 | 0.011585 | 0.011831 |
| 0.011936 | 0.011865 | 0.011936 | 0.011623 | 0.011936 | 0.011550 | 0.011515 |
| 0.011553 | 0.011861 | 0.011583 | 0.011454 | 0.011945 | 0.011416 | 0.011551 |
| 0.011946 | 0.011840 | 0.011550 | 0.011936 | 0.011487 | 0.011655 | 0.011760 |
| 0.011655 | 0.011725 | 0.011713 | 0.011435 | 0.011521 | 0.011585 | 0.011660 |
| 0.011725 | 0.011655 | 0.000000 | 0.011865 | 0.011795 | 0.011865 | 0.011760 |
| 0.011694 | 0.011866 | 0.011762 | 0.011727 | 0.012006 | 0.011445 | 0.011655 |
| 0.011620 | 0.011515 | 0.011445 | 0.011445 | 0.011515 | 0.011515 | 0.011585 |
| 0.011515 | 0.011585 | 0.011480 | 0.011585 | 0.011515 | 0.011515 | 0.011585 |
| 0.011515 | 0.011970 | 0.011865 | 0.011900 | 0.011410 | 0.011515 | 0.011550 |
| 0.011550 | 0.011515 | 0.011550 | 0.011620 | 0.011480 | 0.011480 | 0.011480 |
| 0.012041 | 0.011620 | 0.011620 | 0.011445 | 0.011515 | 0.011725 | 0.011480 |
| 0.011480 | 0.011550 | 0.011515 | 0.011690 | 0.011480 | 0.011585 | 0.011690 |
| 0.011655 | 0.011480 | 0.011515 | 0.011410 | 0.011445 | 0.011620 | 0.011550 |
| 0.011410 | 0.011515 | 0.011410 | 0.011445 | 0.011585 | 0.011725 | 0.011480 |
| 0.011445 | 0.011585 | 0.011480 | 0.011410 | 0.011760 | 0.011410 | 0.011585 |
| 0.011661 | 0.011480 | 0.011795 | 0.011620 | 0.011655 | 0.011515 | 0.011550 |
| 0.011480 | 0.011830 | 0.011410 | 0.011690 | 0.011480 | 0.011480 | 0.011410 |
| 0.011655 | 0.011831 | 0.011550 | 0.011620 | 0.011445 | 0.011865 | 0.011480 |
| 0.011480 | 0.011480 | 0.011515 | 0.011620 | 0.011515 | 0.011620 | 0.011690 |
| 0.011690 | 0.011655 | 0.011550 | 0.011655 | 0.011620 | 0.011480 | 0.011445 |
| 0.011480 | 0.011480 | 0.011550 | 0.011480 | 0.011445 | 0.011585 | 0.011480 |
| 0.011515 | 0.011515 | 0.011620 | 0.011655 | 0.011585 | 0.011515 | 0.011515 |
| 0.011585 | 0.011515 | 0.011585 | 0.011445 | 0.011620 | 0.011550 | 0.011970 |
| 0.011515 | 0.011936 | 0.011528 | 0.018296 | 0.011334 | 0.011568 | 0.011897 |
| 0.011854 | 0.011905 | 0.011705 | 0.011483 | 0.011859 | 0.011888 | 0.011504 |
| 0.011655 | 0.011691 | 0.011341 | 0.011541 | 0.011510 | 0.011520 | 0.011504 |
| 0.011698 | 0.011606 | 0.011681 | 0.011401 | 0.011655 | 0.011620 | 0.011659 |
| 0.011552 | 0.011620 | 0.011620 | 0.011620 | 0.011585 | 0.011586 | 0.011550 |
| 0.011550 | 0.011515 | 0.011410 | 0.011585 | 0.011550 | 0.011480 | 0.011515 |
| 0.011515 | 0.011585 | 0.011480 | 0.011585 | 0.011620 | 0.011655 | 0.011550 |
| 0.011585 | 0.011550 | 0.011901 | 0.011901 | 0.011620 | 0.011656 | 0.011656 |
| 0.011445 | 0.011445 | 0.011480 | 0.011585 | 0.011445 | 0.011691 | 0.011691 |
| 0.011585 | 0.011550 | 0.011655 | 0.011620 | 0.011936 | 0.011622 | 0.011585 |
| 0.011445 | 0.011585 | 0.011690 | 0.011515 | 0.011585 | 0.011550 | 0.011550 |
| 0.011515 | 0.011515 | 0.011550 | 0.011656 | 0.011552 | 0.011726 | 0.011726 |
| 0.011590 | 0.011480 | 0.011550 | 0.011620 | 0.011585 | 0.011726 | 0.011760 |
| 0.011936 | 0.011487 | 0.011655 | 0.011760 | 0.011655 | 0.011725 | 0.011480 |
| 0.011622 | 0.011551 | 0.011515 | 0.011515 | 0.011585 | 0.011480 | 0.011585 |
| 0.011620 | 0.011655 | 0.011550 | 0.011585 | 0.011550 | 0.011901 | 0.011901 |
| 0.011620 | 0.011656 | 0.011655 | 0.011585 | 0.012287 | 0.011597 | 0.011637 |
| 0.011704 | 0.011586 | 0.011776 | 0.011666 | 0.000000 | 0.011692 | 0.011521 |
| 0.012222 | 0.011552 | 0.011656 | 0.011623 | 0.011903 | 0.011726 | 0.011866 |
| 0.012255 | 0.011745 | 0.011836 | 0.011900 | 0.011760 | 0.011760 | 0.011800 |
| 0.011445 | 0.011620 | 0.011760 | 0.011725 | 0.011730 | 0.011725 | 0.011657 |
| 0.011550 | 0.011480 | 0.011515 | 0.011550 | 0.011445 | 0.011515 | 0.011410 |
| 0.011550 | 0.011585 | 0.011480 | 0.011445 | 0.011550 | 0.011480 | 0.011515 |
| 0.011515 | 0.011445 | 0.011515 | 0.011550 | 0.011445 | 0.011655 | 0.011690 |

|          |          |          |          |          |          |          |
|----------|----------|----------|----------|----------|----------|----------|
| 0.011585 | 0.011655 | 0.011585 | 0.011585 | 0.011515 | 0.011900 | 0.011550 |
| 0.011598 | 0.011515 | 0.011760 | 0.011761 | 0.011620 | 0.011620 | 0.011620 |
| 0.011620 | 0.011550 | 0.011515 | 0.011550 | 0.011620 | 0.011655 | 0.011585 |
| 0.011585 | 0.011690 | 0.011900 | 0.011620 | 0.011795 | 0.011795 | 0.011690 |
| 0.011515 | 0.011585 | 0.011620 | 0.012041 | 0.011586 | 0.011620 | 0.011585 |
| 0.011375 | 0.011550 | 0.011550 | 0.011866 | 0.011795 | 0.011830 | 0.011550 |
| 0.011655 | 0.011725 | 0.011550 | 0.011655 | 0.011620 | 0.011480 | 0.011830 |
| 0.011585 | 0.011550 | 0.011550 | 0.011725 | 0.011550 | 0.011655 | 0.011900 |
| 0.011515 | 0.011981 | 0.011970 | 0.011688 | 0.011405 | 0.011662 | 0.011380 |
| 0.011515 | 0.011869 | 0.011463 | 0.011522 | 0.011414 | 0.011477 | 0.011446 |
| 0.011642 | 0.011264 | 0.011407 | 0.011268 | 0.011340 | 0.011481 | 0.011562 |
| 0.011641 | 0.011465 | 0.011644 | 0.011575 | 0.011587 | 0.011725 | 0.011796 |
| 0.011761 | 0.011656 | 0.011730 | 0.011767 | 0.011873 | 0.011910 | 0.011585 |
| 0.011830 | 0.011691 | 0.011550 | 0.011655 | 0.011445 | 0.011690 | 0.011480 |
| 0.011550 | 0.011550 | 0.011515 | 0.011480 | 0.011515 | 0.011480 | 0.011585 |
| 0.011385 | 0.011495 | 0.011524 | 0.011557 | 0.011699 | 0.011666 | 0.011629 |
| 0.011626 | 0.011621 | 0.011364 | 0.011359 | 0.011519 | 0.011696 | 0.011661 |
| 0.011516 | 0.011554 | 0.011762 | 0.011800 | 0.011586 | 0.011726 | 0.011620 |
| 0.011620 | 0.011690 | 0.011690 | 0.011585 | 0.012181 | 0.011620 | 0.011690 |
| 0.011796 | 0.011951 | 0.011523 | 0.011637 | 0.011480 | 0.011725 | 0.011620 |
| 0.011727 | 0.011725 | 0.011620 | 0.011620 | 0.011757 | 0.011865 | 0.011524 |
| 0.011410 | 0.011415 | 0.011515 | 0.011481 | 0.011587 | 0.011440 | 0.011760 |
| 0.011555 | 0.011633 | 0.011395 | 0.011554 | 0.011551 | 0.011557 | 0.011515 |
| 0.011480 | 0.011480 | 0.011550 | 0.011515 | 0.011725 | 0.011691 | 0.011620 |
| 0.011726 | 0.011796 | 0.011515 | 0.011515 | 0.011550 | 0.011550 | 0.011553 |
| 0.011624 | 0.011550 | 0.011550 | 0.011587 | 0.011725 | 0.011796 | 0.011761 |
| 0.011656 | 0.011730 | 0.011767 | 0.011873 | 0.011910 | 0.011585 | 0.011760 |
| 0.011620 | 0.011620 | 0.011519 | 0.011640 | 0.011641 | 0.011629 | 0.011425 |
| 0.011671 | 0.011912 | 0.011673 | 0.011554 | 0.011480 | 0.011691 | 0.011550 |
| 0.011655 | 0.011585 | 0.011480 | 0.011587 | 0.011691 | 0.011695 | 0.011586 |
| 0.011480 | 0.011412 | 0.011550 | 0.011480 | 0.011410 | 0.011521 | 0.011691 |
| 0.011550 | 0.011515 | 0.011410 | 0.011585 | 0.011550 | 0.011480 | 0.011585 |
| 0.011550 | 0.011585 | 0.011585 | 0.011515 | 0.011585 | 0.011830 | 0.011480 |
| 0.011515 | 0.011900 | 0.011515 | 0.011550 | 0.011480 | 0.011900 | 0.011372 |
| 0.011872 | 0.011409 | 0.011428 | 0.011642 | 0.011730 | 0.011692 | 0.011321 |
| 0.011391 | 0.011655 | 0.011760 | 0.011874 | 0.011727 | 0.011872 | 0.012007 |
| 0.011901 | 0.011971 | 0.011900 | 0.012093 | 0.011865 | 0.012778 | 0.011903 |
| 0.012568 | 0.012431 | 0.012536 | 0.012749 | 0.011900 | 0.011585 | 0.011866 |
| 0.012288 | 0.012256 | 0.011830 | 0.011726 | 0.011796 | 0.011796 | 0.011729 |
| 0.011655 | 0.011662 | 0.011725 | 0.011691 | 0.012112 | 0.012146 | 0.012182 |
| 0.012042 | 0.012147 | 0.012290 | 0.012047 | 0.012324 | 0.012296 | 0.012394 |
| 0.012394 | 0.012429 | 0.012342 | 0.012394 | 0.012396 | 0.011550 | 0.011936 |
| 0.012007 | 0.012462 | 0.012015 | 0.012216 | 0.012746 | 0.011768 | 0.011656 |
| 0.011620 | 0.011620 | 0.012112 | 0.012089 | 0.012236 | 0.011971 | 0.011622 |
| S502     | 0.011716 | 0.011716 | 0.012061 | 0.011888 | 0.011888 | 0.011923 |
| 0.011828 | 0.011758 | 0.011957 | 0.011405 | 0.011474 | 0.011440 | 0.011405 |
| 0.011439 | 0.011612 | 0.011405 | 0.011439 | 0.011508 | 0.011474 | 0.011439 |
| 0.011405 | 0.011439 | 0.011543 | 0.011405 | 0.011440 | 0.011439 | 0.011793 |
| 0.011681 | 0.011439 | 0.011336 | 0.011577 | 0.011508 | 0.011474 | 0.011508 |
| 0.011439 | 0.011577 | 0.011474 | 0.011474 | 0.011439 | 0.011474 | 0.011646 |
| 0.011405 | 0.011474 | 0.011474 | 0.011439 | 0.011543 | 0.011577 | 0.011474 |
| 0.011474 | 0.011612 | 0.011543 | 0.011819 | 0.011439 | 0.011750 | 0.011439 |
| 0.011439 | 0.011543 | 0.011543 | 0.011750 | 0.011819 | 0.011543 | 0.011646 |
| 0.011508 | 0.011577 | 0.011474 | 0.011715 | 0.011957 | 0.011439 | 0.011543 |
| 0.011439 | 0.011543 | 0.011508 | 0.011577 | 0.011474 | 0.011508 | 0.011508 |
| 0.011405 | 0.011439 | 0.011405 | 0.011508 | 0.011474 | 0.011510 | 0.011577 |
| 0.011508 | 0.011474 | 0.011543 | 0.011439 | 0.011577 | 0.011405 | 0.011474 |
| 0.011646 | 0.011577 | 0.011819 | 0.011647 | 0.011474 | 0.011715 | 0.011474 |
| 0.011666 | 0.011900 | 0.011715 | 0.011383 | 0.011406 | 0.011515 | 0.011624 |
| 0.012266 | 0.011687 | 0.011440 | 0.011715 | 0.011715 | 0.011508 | 0.011612 |

|          |          |          |          |          |          |          |
|----------|----------|----------|----------|----------|----------|----------|
| 0.011543 | 0.011302 | 0.011508 | 0.011474 | 0.011577 | 0.011508 | 0.011439 |
| 0.011405 | 0.011577 | 0.011439 | 0.011646 | 0.011543 | 0.011509 | 0.011440 |
| 0.011405 | 0.011405 | 0.011474 | 0.011440 | 0.011647 | 0.011612 | 0.011543 |
| 0.011647 | 0.011716 | 0.011440 | 0.011440 | 0.011474 | 0.011474 | 0.011477 |
| 0.011547 | 0.011474 | 0.011474 | 0.011354 | 0.011430 | 0.011383 | 0.011475 |
| 0.011478 | 0.011413 | 0.011478 | 0.011450 | 0.011373 | 0.011410 | 0.011442 |
| 0.011723 | 0.011483 | 0.011520 | 0.011406 | 0.011416 | 0.011544 | 0.011509 |
| 0.011578 | 0.011510 | 0.011509 | 0.011508 | 0.011439 | 0.011923 | 0.011716 |
| 0.011750 | 0.011612 | 0.011405 | 0.011578 | 0.011371 | 0.011612 | 0.011405 |
| 0.011474 | 0.011474 | 0.011440 | 0.011405 | 0.011439 | 0.011405 | 0.011509 |
| 0.011474 | 0.011578 | 0.011509 | 0.011405 | 0.011510 | 0.011612 | 0.011616 |
| 0.011612 | 0.011509 | 0.011405 | 0.011337 | 0.011474 | 0.011405 | 0.011336 |
| 0.011444 | 0.011612 | 0.011405 | 0.011612 | 0.011371 | 0.011474 | 0.011440 |
| 0.011543 | 0.011440 | 0.011474 | 0.011440 | 0.011474 | 0.011336 | 0.011474 |
| 0.011509 | 0.011440 | 0.011509 | 0.011440 | 0.011405 | 0.011509 | 0.011750 |
| 0.011854 | 0.011785 | 0.011854 | 0.011580 | 0.011854 | 0.011405 | 0.011440 |
| 0.011477 | 0.011725 | 0.011575 | 0.011378 | 0.011862 | 0.011340 | 0.011422 |
| 0.011863 | 0.011759 | 0.011577 | 0.011509 | 0.011481 | 0.011716 | 0.011681 |
| 0.011612 | 0.011785 | 0.011563 | 0.011475 | 0.011479 | 0.011509 | 0.011512 |
| 0.011681 | 0.011509 | 0.011715 | 0.011785 | 0.011646 | 0.011578 | 0.011612 |
| 0.011545 | 0.011786 | 0.011614 | 0.011614 | 0.011716 | 0.011370 | 0.011578 |
| 0.011543 | 0.011439 | 0.011370 | 0.011370 | 0.011439 | 0.011439 | 0.011508 |
| 0.011439 | 0.011508 | 0.011405 | 0.011508 | 0.011439 | 0.011439 | 0.011508 |
| 0.011439 | 0.011888 | 0.011785 | 0.011819 | 0.011336 | 0.011439 | 0.011474 |
| 0.011474 | 0.011439 | 0.011474 | 0.011543 | 0.011405 | 0.011405 | 0.011405 |
| 0.011957 | 0.011577 | 0.011543 | 0.011370 | 0.011439 | 0.011647 | 0.011405 |
| 0.011405 | 0.011474 | 0.011439 | 0.011612 | 0.011405 | 0.011508 | 0.011612 |
| 0.011508 | 0.011439 | 0.011439 | 0.011336 | 0.011370 | 0.011543 | 0.011474 |
| 0.011336 | 0.011474 | 0.011336 | 0.011370 | 0.011508 | 0.011647 | 0.011405 |
| 0.011371 | 0.011508 | 0.011440 | 0.011336 | 0.011681 | 0.011336 | 0.011508 |
| 0.011584 | 0.011405 | 0.011715 | 0.011543 | 0.011577 | 0.011439 | 0.011474 |
| 0.011405 | 0.011750 | 0.011336 | 0.011612 | 0.011405 | 0.011405 | 0.011336 |
| 0.011577 | 0.011750 | 0.011474 | 0.011543 | 0.011370 | 0.011785 | 0.011405 |
| 0.011405 | 0.011405 | 0.011439 | 0.011543 | 0.011439 | 0.011543 | 0.011612 |
| 0.011612 | 0.011577 | 0.011474 | 0.011578 | 0.011543 | 0.011405 | 0.011370 |
| 0.011405 | 0.011405 | 0.011474 | 0.011405 | 0.011370 | 0.011508 | 0.011405 |
| 0.011439 | 0.011439 | 0.011543 | 0.011612 | 0.011508 | 0.011439 | 0.011440 |
| 0.011508 | 0.011439 | 0.011508 | 0.011405 | 0.011543 | 0.011612 | 0.011888 |
| 0.011439 | 0.011854 | 0.011450 | 0.018145 | 0.011331 | 0.011438 | 0.011813 |
| 0.011772 | 0.011820 | 0.011594 | 0.011595 | 0.011682 | 0.011841 | 0.011311 |
| 0.011645 | 0.011560 | 0.011379 | 0.011447 | 0.011423 | 0.011313 | 0.011457 |
| 0.011590 | 0.011636 | 0.011518 | 0.011533 | 0.011577 | 0.011509 | 0.011616 |
| 0.011477 | 0.011543 | 0.011578 | 0.011543 | 0.011509 | 0.011509 | 0.011474 |
| 0.011509 | 0.011440 | 0.011474 | 0.011509 | 0.011474 | 0.011405 | 0.011371 |
| 0.011371 | 0.011509 | 0.011405 | 0.011509 | 0.011543 | 0.011578 | 0.011405 |
| 0.011508 | 0.011474 | 0.011819 | 0.011819 | 0.011543 | 0.011578 | 0.011509 |
| 0.011371 | 0.011371 | 0.011405 | 0.011509 | 0.011371 | 0.011612 | 0.011612 |
| 0.011647 | 0.011577 | 0.011578 | 0.011681 | 0.011854 | 0.011683 | 0.011509 |
| 0.011509 | 0.011543 | 0.011612 | 0.011371 | 0.011509 | 0.011474 | 0.011509 |
| 0.011578 | 0.011578 | 0.011612 | 0.011578 | 0.011475 | 0.011647 | 0.011647 |
| 0.011513 | 0.011405 | 0.011509 | 0.011543 | 0.011440 | 0.011647 | 0.011681 |
| 0.011509 | 0.011481 | 0.011716 | 0.011681 | 0.011612 | 0.011785 | 0.011405 |
| 0.011579 | 0.011475 | 0.011371 | 0.011371 | 0.011509 | 0.011405 | 0.011509 |
| 0.011543 | 0.011578 | 0.011405 | 0.011508 | 0.011474 | 0.011819 | 0.011819 |
| 0.011543 | 0.011578 | 0.011543 | 0.011474 | 0.012201 | 0.011632 | 0.011487 |
| 0.011626 | 0.011583 | 0.011697 | 0.011587 | 0.011692 | 0.000000 | 0.011554 |
| 0.012137 | 0.011407 | 0.011544 | 0.011339 | 0.011615 | 0.011683 | 0.011786 |
| 0.012171 | 0.011663 | 0.011720 | 0.011819 | 0.011681 | 0.011681 | 0.011720 |
| 0.011370 | 0.011543 | 0.011681 | 0.011646 | 0.011650 | 0.011646 | 0.011579 |
| 0.011474 | 0.011405 | 0.011439 | 0.011474 | 0.011370 | 0.011439 | 0.011336 |

|          |          |          |          |          |          |          |
|----------|----------|----------|----------|----------|----------|----------|
| 0.011474 | 0.011508 | 0.011405 | 0.011370 | 0.011474 | 0.011405 | 0.011439 |
| 0.011439 | 0.011370 | 0.011439 | 0.011474 | 0.011370 | 0.011577 | 0.011612 |
| 0.011508 | 0.011577 | 0.011508 | 0.011508 | 0.011439 | 0.011819 | 0.011474 |
| 0.011519 | 0.011439 | 0.011681 | 0.011682 | 0.011543 | 0.011543 | 0.011543 |
| 0.011543 | 0.011474 | 0.011439 | 0.011474 | 0.011543 | 0.011577 | 0.011508 |
| 0.011508 | 0.011612 | 0.011819 | 0.011543 | 0.011716 | 0.011716 | 0.011612 |
| 0.011439 | 0.011508 | 0.011543 | 0.011957 | 0.011509 | 0.011543 | 0.011508 |
| 0.011543 | 0.011474 | 0.011474 | 0.011785 | 0.011681 | 0.011750 | 0.011474 |
| 0.011577 | 0.011646 | 0.011474 | 0.011577 | 0.011543 | 0.011405 | 0.011750 |
| 0.011508 | 0.011474 | 0.011474 | 0.011646 | 0.011474 | 0.011577 | 0.011819 |
| 0.011439 | 0.011898 | 0.011888 | 0.011726 | 0.011461 | 0.011584 | 0.011480 |
| 0.011229 | 0.011904 | 0.011421 | 0.011656 | 0.011461 | 0.011476 | 0.011553 |
| 0.011741 | 0.011263 | 0.011520 | 0.011402 | 0.011393 | 0.011615 | 0.011558 |
| 0.011483 | 0.011503 | 0.011567 | 0.011495 | 0.011510 | 0.011647 | 0.011716 |
| 0.011716 | 0.011578 | 0.011685 | 0.011687 | 0.011827 | 0.011860 | 0.011508 |
| 0.011750 | 0.011612 | 0.011405 | 0.011578 | 0.011371 | 0.011612 | 0.011405 |
| 0.011474 | 0.011474 | 0.011440 | 0.011405 | 0.011439 | 0.011405 | 0.011509 |
| 0.011455 | 0.011489 | 0.011483 | 0.011516 | 0.011655 | 0.011622 | 0.011621 |
| 0.011619 | 0.011544 | 0.011360 | 0.011355 | 0.011478 | 0.011652 | 0.011653 |
| 0.011440 | 0.011513 | 0.011683 | 0.011720 | 0.011648 | 0.011682 | 0.011508 |
| 0.011543 | 0.011405 | 0.011405 | 0.011509 | 0.012061 | 0.011681 | 0.011750 |
| 0.011716 | 0.011827 | 0.011446 | 0.011558 | 0.011405 | 0.011543 | 0.011509 |
| 0.011648 | 0.011612 | 0.011681 | 0.011681 | 0.011625 | 0.011750 | 0.011447 |
| 0.011336 | 0.011340 | 0.011440 | 0.011406 | 0.011511 | 0.011360 | 0.011682 |
| 0.011478 | 0.011631 | 0.011394 | 0.011511 | 0.011475 | 0.011515 | 0.011440 |
| 0.011405 | 0.011405 | 0.011474 | 0.011440 | 0.011647 | 0.011612 | 0.011543 |
| 0.011647 | 0.011716 | 0.011440 | 0.011440 | 0.011474 | 0.011474 | 0.011477 |
| 0.011547 | 0.011474 | 0.011474 | 0.011510 | 0.011647 | 0.011716 | 0.011716 |
| 0.011578 | 0.011685 | 0.011687 | 0.011827 | 0.011860 | 0.011508 | 0.011681 |
| 0.011509 | 0.011509 | 0.011442 | 0.011597 | 0.011560 | 0.011550 | 0.011420 |
| 0.011627 | 0.011805 | 0.011578 | 0.011477 | 0.011405 | 0.011612 | 0.011474 |
| 0.011578 | 0.011509 | 0.011405 | 0.011510 | 0.011612 | 0.011616 | 0.011509 |
| 0.011405 | 0.011337 | 0.011474 | 0.011405 | 0.011336 | 0.011444 | 0.011612 |
| 0.011509 | 0.011440 | 0.011474 | 0.011509 | 0.011474 | 0.011405 | 0.011509 |
| 0.011474 | 0.011508 | 0.011508 | 0.011439 | 0.011508 | 0.011750 | 0.011405 |
| 0.011439 | 0.011819 | 0.011439 | 0.011474 | 0.011439 | 0.011819 | 0.011459 |
| 0.011922 | 0.011450 | 0.011472 | 0.011681 | 0.011768 | 0.011651 | 0.011363 |
| 0.011439 | 0.011577 | 0.011681 | 0.011792 | 0.011648 | 0.011790 | 0.011924 |
| 0.011821 | 0.011890 | 0.011819 | 0.012008 | 0.011784 | 0.012614 | 0.011787 |
| 0.012581 | 0.012273 | 0.012411 | 0.012585 | 0.011750 | 0.011509 | 0.011785 |
| 0.012201 | 0.012169 | 0.011750 | 0.011647 | 0.011717 | 0.011717 | 0.011685 |
| 0.011577 | 0.011583 | 0.011646 | 0.011613 | 0.012028 | 0.012061 | 0.012097 |
| 0.011959 | 0.012062 | 0.012204 | 0.011963 | 0.012237 | 0.012209 | 0.012305 |
| 0.012306 | 0.012341 | 0.012253 | 0.012306 | 0.012308 | 0.011439 | 0.011820 |
| 0.011924 | 0.012407 | 0.011896 | 0.012165 | 0.012652 | 0.011688 | 0.011578 |
| 0.011543 | 0.011543 | 0.012027 | 0.012089 | 0.012182 | 0.011888 | 0.011545 |
| S503     | 0.011784 | 0.011784 | 0.011888 | 0.011853 | 0.011853 | 0.011922 |
| 0.011723 | 0.011653 | 0.011922 | 0.011370 | 0.011439 | 0.011406 | 0.011370 |
| 0.011405 | 0.011577 | 0.011370 | 0.011405 | 0.011474 | 0.011439 | 0.011405 |
| 0.011370 | 0.011405 | 0.011508 | 0.011371 | 0.011405 | 0.011405 | 0.011688 |
| 0.011646 | 0.011405 | 0.011302 | 0.011543 | 0.011439 | 0.011439 | 0.011474 |
| 0.011405 | 0.011543 | 0.011439 | 0.011439 | 0.011474 | 0.011439 | 0.011612 |
| 0.011370 | 0.011439 | 0.011474 | 0.011405 | 0.011508 | 0.011508 | 0.011439 |
| 0.011439 | 0.011612 | 0.011509 | 0.011750 | 0.011439 | 0.011715 | 0.011439 |
| 0.011405 | 0.011509 | 0.011577 | 0.011715 | 0.011750 | 0.011508 | 0.011612 |
| 0.011474 | 0.011543 | 0.011440 | 0.011681 | 0.011888 | 0.011439 | 0.011508 |
| 0.011405 | 0.011508 | 0.011474 | 0.011543 | 0.011474 | 0.011474 | 0.011474 |
| 0.011370 | 0.011405 | 0.011370 | 0.011439 | 0.011439 | 0.011475 | 0.011543 |
| 0.011474 | 0.011405 | 0.011508 | 0.011405 | 0.011543 | 0.011370 | 0.011405 |
| 0.011612 | 0.011543 | 0.011784 | 0.011612 | 0.011405 | 0.011681 | 0.011439 |

|          |          |          |          |          |          |          |
|----------|----------|----------|----------|----------|----------|----------|
| 0.011587 | 0.011781 | 0.011560 | 0.011336 | 0.011326 | 0.011438 | 0.011497 |
| 0.012178 | 0.011581 | 0.011310 | 0.011543 | 0.011474 | 0.011474 | 0.011543 |
| 0.011508 | 0.011474 | 0.011543 | 0.011439 | 0.011508 | 0.011474 | 0.011474 |
| 0.011439 | 0.011543 | 0.011750 | 0.011577 | 0.011508 | 0.011474 | 0.011405 |
| 0.011371 | 0.011371 | 0.011440 | 0.011405 | 0.011612 | 0.011578 | 0.011508 |
| 0.011612 | 0.011681 | 0.011405 | 0.011405 | 0.011440 | 0.011439 | 0.011442 |
| 0.011512 | 0.011440 | 0.011440 | 0.011314 | 0.011353 | 0.011344 | 0.011440 |
| 0.011440 | 0.011376 | 0.011398 | 0.011411 | 0.011337 | 0.011372 | 0.011406 |
| 0.011642 | 0.011444 | 0.011446 | 0.011371 | 0.011342 | 0.011509 | 0.011474 |
| 0.011543 | 0.011475 | 0.011474 | 0.011543 | 0.011508 | 0.011888 | 0.011647 |
| 0.011715 | 0.011578 | 0.011439 | 0.011543 | 0.011336 | 0.011577 | 0.011371 |
| 0.011405 | 0.011439 | 0.011405 | 0.011370 | 0.011405 | 0.011371 | 0.011474 |
| 0.011440 | 0.011543 | 0.011474 | 0.011371 | 0.011476 | 0.011578 | 0.011581 |
| 0.011578 | 0.011474 | 0.011371 | 0.011303 | 0.011440 | 0.011371 | 0.011302 |
| 0.011409 | 0.011578 | 0.011371 | 0.011578 | 0.011336 | 0.011440 | 0.011405 |
| 0.011509 | 0.011405 | 0.011440 | 0.011405 | 0.011440 | 0.011302 | 0.011440 |
| 0.011474 | 0.011405 | 0.011474 | 0.011405 | 0.011439 | 0.011474 | 0.011716 |
| 0.011784 | 0.011715 | 0.011785 | 0.011545 | 0.011785 | 0.011439 | 0.011405 |
| 0.011442 | 0.011726 | 0.011439 | 0.011342 | 0.011792 | 0.011305 | 0.011424 |
| 0.011758 | 0.011723 | 0.011439 | 0.011819 | 0.011481 | 0.011474 | 0.011647 |
| 0.011543 | 0.011543 | 0.011568 | 0.011310 | 0.011355 | 0.011474 | 0.011546 |
| 0.011646 | 0.011510 | 0.011581 | 0.011720 | 0.011681 | 0.011750 | 0.011826 |
| 0.011578 | 0.011722 | 0.011681 | 0.011612 | 0.011889 | 0.011336 | 0.011544 |
| 0.011508 | 0.011439 | 0.011336 | 0.011336 | 0.011405 | 0.011405 | 0.011474 |
| 0.011405 | 0.011474 | 0.011370 | 0.011474 | 0.011405 | 0.011405 | 0.011474 |
| 0.011405 | 0.011819 | 0.011715 | 0.011750 | 0.011302 | 0.011405 | 0.011440 |
| 0.011439 | 0.011405 | 0.011474 | 0.011508 | 0.011370 | 0.011370 | 0.011370 |
| 0.011888 | 0.011508 | 0.011543 | 0.011336 | 0.011439 | 0.011612 | 0.011370 |
| 0.011370 | 0.011439 | 0.011405 | 0.011577 | 0.011370 | 0.011508 | 0.011612 |
| 0.011577 | 0.011370 | 0.011405 | 0.011302 | 0.011336 | 0.011508 | 0.011439 |
| 0.011302 | 0.011405 | 0.011302 | 0.011336 | 0.011474 | 0.011612 | 0.011371 |
| 0.011336 | 0.011474 | 0.011370 | 0.011302 | 0.011612 | 0.011302 | 0.011474 |
| 0.011517 | 0.011371 | 0.011646 | 0.011474 | 0.011543 | 0.011405 | 0.011508 |
| 0.011370 | 0.011715 | 0.011302 | 0.011543 | 0.011370 | 0.011370 | 0.011302 |
| 0.011543 | 0.011750 | 0.011440 | 0.011508 | 0.011336 | 0.011715 | 0.011370 |
| 0.011370 | 0.011370 | 0.011405 | 0.011508 | 0.011405 | 0.011508 | 0.011577 |
| 0.011577 | 0.011543 | 0.011439 | 0.011543 | 0.011508 | 0.011370 | 0.011336 |
| 0.011370 | 0.011370 | 0.011440 | 0.011370 | 0.011336 | 0.011508 | 0.011370 |
| 0.011405 | 0.011405 | 0.011543 | 0.011577 | 0.011474 | 0.011405 | 0.011405 |
| 0.011474 | 0.011370 | 0.011508 | 0.011336 | 0.011508 | 0.011474 | 0.011819 |
| 0.011370 | 0.011784 | 0.011415 | 0.018035 | 0.011259 | 0.011673 | 0.011741 |
| 0.011700 | 0.011745 | 0.011537 | 0.011478 | 0.011895 | 0.011734 | 0.011615 |
| 0.011642 | 0.011733 | 0.011297 | 0.011402 | 0.011418 | 0.011460 | 0.011407 |
| 0.011588 | 0.011553 | 0.011589 | 0.011329 | 0.011543 | 0.011577 | 0.011547 |
| 0.011412 | 0.011474 | 0.011508 | 0.011509 | 0.011474 | 0.011474 | 0.011440 |
| 0.011439 | 0.011405 | 0.011302 | 0.011474 | 0.011440 | 0.011371 | 0.011405 |
| 0.011405 | 0.011474 | 0.011371 | 0.011474 | 0.011509 | 0.011543 | 0.011439 |
| 0.011474 | 0.011440 | 0.011716 | 0.011716 | 0.011509 | 0.011544 | 0.011578 |
| 0.011336 | 0.011336 | 0.011371 | 0.011474 | 0.011336 | 0.011578 | 0.011578 |
| 0.011405 | 0.011439 | 0.011543 | 0.011439 | 0.011785 | 0.011441 | 0.011474 |
| 0.011336 | 0.011543 | 0.011578 | 0.011405 | 0.011474 | 0.011440 | 0.011439 |
| 0.011405 | 0.011405 | 0.011440 | 0.011543 | 0.011441 | 0.011646 | 0.011612 |
| 0.011478 | 0.011371 | 0.011440 | 0.011543 | 0.011440 | 0.011612 | 0.011646 |
| 0.011819 | 0.011481 | 0.011474 | 0.011647 | 0.011543 | 0.011543 | 0.011371 |
| 0.011510 | 0.011440 | 0.011405 | 0.011405 | 0.011474 | 0.011371 | 0.011474 |
| 0.011509 | 0.011543 | 0.011439 | 0.011474 | 0.011440 | 0.011716 | 0.011716 |
| 0.011509 | 0.011544 | 0.011612 | 0.011543 | 0.012165 | 0.011385 | 0.011494 |
| 0.011561 | 0.011377 | 0.011633 | 0.011523 | 0.011521 | 0.011554 | 0.000000 |
| 0.012082 | 0.011413 | 0.011515 | 0.011484 | 0.011762 | 0.011650 | 0.011723 |
| 0.012107 | 0.011597 | 0.011685 | 0.011784 | 0.011646 | 0.011646 | 0.011650 |

|          |          |          |          |          |          |          |
|----------|----------|----------|----------|----------|----------|----------|
| 0.011336 | 0.011508 | 0.011646 | 0.011612 | 0.011616 | 0.011612 | 0.011579 |
| 0.011439 | 0.011370 | 0.011405 | 0.011439 | 0.011336 | 0.011405 | 0.011302 |
| 0.011439 | 0.011474 | 0.011370 | 0.011336 | 0.011439 | 0.011370 | 0.011405 |
| 0.011405 | 0.011336 | 0.011405 | 0.011440 | 0.011336 | 0.011543 | 0.011577 |
| 0.011474 | 0.011543 | 0.011474 | 0.011474 | 0.011405 | 0.011750 | 0.011439 |
| 0.011451 | 0.011405 | 0.011646 | 0.011617 | 0.011509 | 0.011508 | 0.011508 |
| 0.011508 | 0.011440 | 0.011405 | 0.011440 | 0.011543 | 0.011543 | 0.011474 |
| 0.011474 | 0.011577 | 0.011750 | 0.011508 | 0.011716 | 0.011716 | 0.011577 |
| 0.011405 | 0.011474 | 0.011508 | 0.011888 | 0.011474 | 0.011509 | 0.011474 |
| 0.011370 | 0.011439 | 0.011439 | 0.011750 | 0.011647 | 0.011715 | 0.011439 |
| 0.011543 | 0.011612 | 0.011474 | 0.011543 | 0.011474 | 0.011370 | 0.011681 |
| 0.011474 | 0.011439 | 0.011439 | 0.011612 | 0.011439 | 0.011543 | 0.011784 |
| 0.011370 | 0.011793 | 0.011819 | 0.011594 | 0.011342 | 0.011549 | 0.011377 |
| 0.011446 | 0.011807 | 0.011348 | 0.011557 | 0.011406 | 0.011473 | 0.011491 |
| 0.011576 | 0.011261 | 0.011455 | 0.011261 | 0.011333 | 0.011400 | 0.011473 |
| 0.011519 | 0.011380 | 0.011527 | 0.011458 | 0.011476 | 0.011612 | 0.011681 |
| 0.011646 | 0.011544 | 0.011616 | 0.011652 | 0.011756 | 0.011787 | 0.011474 |
| 0.011715 | 0.011578 | 0.011439 | 0.011543 | 0.011336 | 0.011577 | 0.011371 |
| 0.011405 | 0.011439 | 0.011405 | 0.011370 | 0.011405 | 0.011371 | 0.011474 |
| 0.011342 | 0.011415 | 0.011445 | 0.011476 | 0.011615 | 0.011583 | 0.011547 |
| 0.011546 | 0.011509 | 0.011247 | 0.011278 | 0.011440 | 0.011613 | 0.011579 |
| 0.011405 | 0.011475 | 0.011716 | 0.011684 | 0.011405 | 0.011613 | 0.011577 |
| 0.011508 | 0.011577 | 0.011577 | 0.011474 | 0.012026 | 0.011405 | 0.011509 |
| 0.011750 | 0.011792 | 0.011411 | 0.011522 | 0.011405 | 0.011612 | 0.011577 |
| 0.011613 | 0.011612 | 0.011439 | 0.011439 | 0.011746 | 0.011750 | 0.011380 |
| 0.011269 | 0.011273 | 0.011375 | 0.011339 | 0.011409 | 0.011288 | 0.011583 |
| 0.011411 | 0.011545 | 0.011252 | 0.011402 | 0.011440 | 0.011511 | 0.011405 |
| 0.011371 | 0.011371 | 0.011440 | 0.011405 | 0.011612 | 0.011578 | 0.011508 |
| 0.011612 | 0.011681 | 0.011405 | 0.011405 | 0.011440 | 0.011439 | 0.011442 |
| 0.011512 | 0.011440 | 0.011440 | 0.011476 | 0.011612 | 0.011681 | 0.011646 |
| 0.011544 | 0.011616 | 0.011652 | 0.011756 | 0.011787 | 0.011474 | 0.011646 |
| 0.011577 | 0.011577 | 0.011407 | 0.011561 | 0.011523 | 0.011550 | 0.011420 |
| 0.011591 | 0.011863 | 0.011496 | 0.011479 | 0.011371 | 0.011578 | 0.011440 |
| 0.011543 | 0.011474 | 0.011371 | 0.011476 | 0.011578 | 0.011581 | 0.011474 |
| 0.011371 | 0.011303 | 0.011440 | 0.011371 | 0.011302 | 0.011409 | 0.011578 |
| 0.011439 | 0.011405 | 0.011302 | 0.011474 | 0.011440 | 0.011371 | 0.011543 |
| 0.011439 | 0.011474 | 0.011474 | 0.011405 | 0.011474 | 0.011681 | 0.011370 |
| 0.011405 | 0.011750 | 0.011405 | 0.011439 | 0.011370 | 0.011750 | 0.011320 |
| 0.011791 | 0.011316 | 0.011368 | 0.011584 | 0.011636 | 0.011571 | 0.011272 |
| 0.011329 | 0.011577 | 0.011681 | 0.011792 | 0.011648 | 0.011790 | 0.011924 |
| 0.011820 | 0.011824 | 0.011819 | 0.012078 | 0.011750 | 0.012683 | 0.011821 |
| 0.012442 | 0.012341 | 0.012445 | 0.012724 | 0.011784 | 0.011474 | 0.011785 |
| 0.012200 | 0.012169 | 0.011750 | 0.011647 | 0.011716 | 0.011716 | 0.011616 |
| 0.011577 | 0.011583 | 0.011646 | 0.011612 | 0.011958 | 0.011957 | 0.012027 |
| 0.011855 | 0.011958 | 0.012098 | 0.011893 | 0.012201 | 0.012208 | 0.012270 |
| 0.012270 | 0.012305 | 0.012252 | 0.012270 | 0.012272 | 0.011508 | 0.011820 |
| 0.011854 | 0.012337 | 0.011896 | 0.012130 | 0.012616 | 0.011653 | 0.011543 |
| 0.011508 | 0.011508 | 0.011992 | 0.012010 | 0.012138 | 0.011853 | 0.011510 |
| S504     | 0.012262 | 0.012262 | 0.012469 | 0.012365 | 0.012365 | 0.012400 |
| 0.012207 | 0.012137 | 0.012434 | 0.011953 | 0.012021 | 0.011990 | 0.011953 |
| 0.011918 | 0.012159 | 0.011884 | 0.011987 | 0.012021 | 0.012022 | 0.011987 |
| 0.011953 | 0.011987 | 0.012021 | 0.011953 | 0.011988 | 0.011987 | 0.012172 |
| 0.012159 | 0.011987 | 0.011884 | 0.012056 | 0.012022 | 0.012022 | 0.012056 |
| 0.012022 | 0.012125 | 0.012021 | 0.012022 | 0.012021 | 0.012021 | 0.012159 |
| 0.011884 | 0.012021 | 0.012056 | 0.011987 | 0.012021 | 0.012125 | 0.012056 |
| 0.012022 | 0.012194 | 0.012091 | 0.012297 | 0.012021 | 0.012297 | 0.012021 |
| 0.011987 | 0.012022 | 0.012125 | 0.012297 | 0.012297 | 0.012022 | 0.012125 |
| 0.012056 | 0.012125 | 0.012022 | 0.012262 | 0.012435 | 0.011987 | 0.012090 |
| 0.011953 | 0.012090 | 0.012056 | 0.012125 | 0.012021 | 0.012056 | 0.012056 |
| 0.011953 | 0.011987 | 0.011953 | 0.011987 | 0.012021 | 0.012059 | 0.012124 |

|          |          |          |          |          |          |          |
|----------|----------|----------|----------|----------|----------|----------|
| 0.012056 | 0.011987 | 0.012090 | 0.011987 | 0.012056 | 0.011918 | 0.012021 |
| 0.012193 | 0.012124 | 0.012365 | 0.012194 | 0.012022 | 0.012262 | 0.012021 |
| 0.012154 | 0.012315 | 0.012174 | 0.011862 | 0.011978 | 0.012041 | 0.012063 |
| 0.012786 | 0.012101 | 0.011942 | 0.012262 | 0.012262 | 0.011987 | 0.012090 |
| 0.012090 | 0.012021 | 0.012056 | 0.012021 | 0.012125 | 0.012056 | 0.012021 |
| 0.011987 | 0.012056 | 0.012297 | 0.012193 | 0.012022 | 0.012056 | 0.011988 |
| 0.011953 | 0.011884 | 0.012022 | 0.011988 | 0.012125 | 0.012091 | 0.012022 |
| 0.012125 | 0.012194 | 0.011987 | 0.011987 | 0.012022 | 0.012022 | 0.012028 |
| 0.012098 | 0.012022 | 0.012022 | 0.011905 | 0.011985 | 0.011919 | 0.012023 |
| 0.012030 | 0.011975 | 0.012081 | 0.012013 | 0.011893 | 0.011935 | 0.011992 |
| 0.012200 | 0.012011 | 0.012081 | 0.011954 | 0.011980 | 0.012093 | 0.011989 |
| 0.012058 | 0.012060 | 0.012058 | 0.012056 | 0.011987 | 0.012469 | 0.012194 |
| 0.012228 | 0.012091 | 0.012022 | 0.012057 | 0.011919 | 0.012090 | 0.011953 |
| 0.012022 | 0.012021 | 0.011988 | 0.011953 | 0.011987 | 0.011953 | 0.012056 |
| 0.012022 | 0.012125 | 0.012057 | 0.011953 | 0.012060 | 0.012160 | 0.012132 |
| 0.012160 | 0.012057 | 0.011953 | 0.011853 | 0.012022 | 0.011953 | 0.011885 |
| 0.011964 | 0.012160 | 0.011919 | 0.012160 | 0.011919 | 0.012022 | 0.011988 |
| 0.012091 | 0.011987 | 0.012022 | 0.011988 | 0.012022 | 0.011884 | 0.012022 |
| 0.012057 | 0.011988 | 0.012056 | 0.011987 | 0.011987 | 0.012056 | 0.012297 |
| 0.012331 | 0.012262 | 0.012332 | 0.012164 | 0.012332 | 0.011987 | 0.011988 |
| 0.011924 | 0.012262 | 0.012129 | 0.011938 | 0.012345 | 0.011863 | 0.012022 |
| 0.012242 | 0.012243 | 0.012125 | 0.012366 | 0.011934 | 0.012262 | 0.012228 |
| 0.012159 | 0.012331 | 0.012128 | 0.012051 | 0.012110 | 0.012056 | 0.012064 |
| 0.012228 | 0.012092 | 0.012263 | 0.012297 | 0.012228 | 0.012297 | 0.012193 |
| 0.012133 | 0.012299 | 0.012167 | 0.012166 | 0.012436 | 0.011918 | 0.012126 |
| 0.012090 | 0.011987 | 0.011918 | 0.011918 | 0.011987 | 0.011987 | 0.012056 |
| 0.011987 | 0.012056 | 0.011953 | 0.011987 | 0.011987 | 0.011987 | 0.012056 |
| 0.011987 | 0.012365 | 0.012262 | 0.012297 | 0.011884 | 0.011987 | 0.012022 |
| 0.012022 | 0.011987 | 0.012022 | 0.012022 | 0.011953 | 0.011953 | 0.011953 |
| 0.012434 | 0.012056 | 0.012125 | 0.011918 | 0.011987 | 0.012194 | 0.011953 |
| 0.011953 | 0.012021 | 0.011987 | 0.012159 | 0.011953 | 0.012056 | 0.012159 |
| 0.012125 | 0.011987 | 0.011987 | 0.011918 | 0.011918 | 0.012090 | 0.012021 |
| 0.011918 | 0.012021 | 0.011884 | 0.011918 | 0.012056 | 0.012125 | 0.011953 |
| 0.011919 | 0.012056 | 0.011988 | 0.011884 | 0.012159 | 0.011884 | 0.012056 |
| 0.012134 | 0.011953 | 0.012193 | 0.012091 | 0.012056 | 0.011987 | 0.012056 |
| 0.011953 | 0.012297 | 0.011884 | 0.012090 | 0.011884 | 0.011884 | 0.011884 |
| 0.012125 | 0.012229 | 0.012022 | 0.012090 | 0.011918 | 0.012262 | 0.011884 |
| 0.011953 | 0.011953 | 0.011987 | 0.012090 | 0.011987 | 0.012090 | 0.012159 |
| 0.012159 | 0.012125 | 0.012021 | 0.012125 | 0.012090 | 0.011953 | 0.011918 |
| 0.011953 | 0.011953 | 0.012022 | 0.011884 | 0.011918 | 0.012056 | 0.011953 |
| 0.011918 | 0.011987 | 0.012090 | 0.012090 | 0.012056 | 0.011987 | 0.011953 |
| 0.012056 | 0.011987 | 0.012056 | 0.011953 | 0.012090 | 0.012159 | 0.012366 |
| 0.011987 | 0.012331 | 0.012014 | 0.018687 | 0.012197 | 0.012071 | 0.012274 |
| 0.012229 | 0.012285 | 0.012127 | 0.012126 | 0.012525 | 0.012297 | 0.012240 |
| 0.012078 | 0.012244 | 0.011894 | 0.012046 | 0.011942 | 0.012019 | 0.011856 |
| 0.012163 | 0.012129 | 0.012163 | 0.011861 | 0.012125 | 0.012056 | 0.012133 |
| 0.011994 | 0.012125 | 0.012090 | 0.012022 | 0.012056 | 0.012057 | 0.012022 |
| 0.012056 | 0.011987 | 0.012022 | 0.012056 | 0.012022 | 0.011953 | 0.011953 |
| 0.011953 | 0.012056 | 0.011953 | 0.012057 | 0.012091 | 0.012125 | 0.011987 |
| 0.011987 | 0.011953 | 0.012297 | 0.012297 | 0.012091 | 0.012127 | 0.012125 |
| 0.011919 | 0.011919 | 0.011953 | 0.012057 | 0.011919 | 0.012160 | 0.012160 |
| 0.012194 | 0.012125 | 0.012125 | 0.012228 | 0.012332 | 0.012232 | 0.012056 |
| 0.012056 | 0.012091 | 0.012160 | 0.011988 | 0.012056 | 0.012022 | 0.012056 |
| 0.012126 | 0.012125 | 0.012160 | 0.012126 | 0.012025 | 0.012194 | 0.012160 |
| 0.012065 | 0.011953 | 0.012056 | 0.012091 | 0.012057 | 0.012125 | 0.012228 |
| 0.012366 | 0.011934 | 0.012262 | 0.012228 | 0.012159 | 0.012331 | 0.011954 |
| 0.012129 | 0.012023 | 0.011953 | 0.011953 | 0.012056 | 0.011953 | 0.012057 |
| 0.012091 | 0.012125 | 0.011987 | 0.011987 | 0.011953 | 0.012297 | 0.012297 |
| 0.012091 | 0.012127 | 0.012090 | 0.012021 | 0.011232 | 0.012174 | 0.012084 |
| 0.012157 | 0.012143 | 0.012259 | 0.012141 | 0.012222 | 0.012137 | 0.012082 |



|          |          |          |          |          |          |          |
|----------|----------|----------|----------|----------|----------|----------|
| 0.000000 | 0.011966 | 0.012129 | 0.012034 | 0.012308 | 0.012200 | 0.012299 |
| 0.011198 | 0.012155 | 0.012306 | 0.012366 | 0.012228 | 0.012159 | 0.012270 |
| 0.011918 | 0.012090 | 0.012228 | 0.012193 | 0.012201 | 0.012124 | 0.012060 |
| 0.012021 | 0.011953 | 0.011987 | 0.012021 | 0.011918 | 0.011987 | 0.011884 |
| 0.011953 | 0.011987 | 0.011953 | 0.011918 | 0.012022 | 0.011953 | 0.011987 |
| 0.011987 | 0.011918 | 0.011987 | 0.012022 | 0.011918 | 0.012125 | 0.012159 |
| 0.012056 | 0.012056 | 0.012056 | 0.012056 | 0.011987 | 0.012297 | 0.012021 |
| 0.012011 | 0.011987 | 0.012160 | 0.012161 | 0.012091 | 0.012090 | 0.012090 |
| 0.012090 | 0.012022 | 0.011987 | 0.012022 | 0.012090 | 0.012125 | 0.012056 |
| 0.012056 | 0.012194 | 0.012297 | 0.012090 | 0.012262 | 0.012262 | 0.012159 |
| 0.011987 | 0.012056 | 0.012090 | 0.012435 | 0.012057 | 0.012091 | 0.012056 |
| 0.012090 | 0.011884 | 0.011884 | 0.012263 | 0.012228 | 0.012228 | 0.012022 |
| 0.012125 | 0.012193 | 0.012021 | 0.012125 | 0.012090 | 0.011953 | 0.012228 |
| 0.012056 | 0.012021 | 0.011884 | 0.012194 | 0.012022 | 0.012125 | 0.012331 |
| 0.011987 | 0.012276 | 0.012365 | 0.012095 | 0.011810 | 0.012069 | 0.011945 |
| 0.011856 | 0.012339 | 0.011995 | 0.012155 | 0.011907 | 0.012102 | 0.012094 |
| 0.012209 | 0.011940 | 0.012202 | 0.012013 | 0.011999 | 0.012300 | 0.012052 |
| 0.012095 | 0.011982 | 0.012034 | 0.012070 | 0.012060 | 0.012125 | 0.012194 |
| 0.012194 | 0.012058 | 0.012167 | 0.012170 | 0.012309 | 0.012255 | 0.012056 |
| 0.012228 | 0.012091 | 0.012022 | 0.012057 | 0.011919 | 0.012090 | 0.011953 |
| 0.012022 | 0.012021 | 0.011988 | 0.011953 | 0.011987 | 0.011953 | 0.012056 |
| 0.012061 | 0.012025 | 0.012042 | 0.012040 | 0.012180 | 0.012179 | 0.012178 |
| 0.012173 | 0.012092 | 0.011921 | 0.011870 | 0.012030 | 0.012204 | 0.012206 |
| 0.011989 | 0.012065 | 0.012266 | 0.012271 | 0.012196 | 0.012231 | 0.012056 |
| 0.012090 | 0.012125 | 0.012124 | 0.012056 | 0.012504 | 0.012228 | 0.012228 |
| 0.012297 | 0.012333 | 0.012037 | 0.012124 | 0.011953 | 0.012159 | 0.012056 |
| 0.012196 | 0.012193 | 0.012228 | 0.012228 | 0.012311 | 0.012331 | 0.012005 |
| 0.011884 | 0.011863 | 0.011989 | 0.011956 | 0.011960 | 0.011886 | 0.012161 |
| 0.012030 | 0.012161 | 0.012014 | 0.011961 | 0.012023 | 0.012075 | 0.011988 |
| 0.011953 | 0.011884 | 0.012022 | 0.011988 | 0.012125 | 0.012091 | 0.012022 |
| 0.012125 | 0.012194 | 0.011987 | 0.011987 | 0.012022 | 0.012022 | 0.012028 |
| 0.012098 | 0.012022 | 0.012022 | 0.012060 | 0.012125 | 0.012194 | 0.012194 |
| 0.012058 | 0.012167 | 0.012170 | 0.012309 | 0.012255 | 0.012056 | 0.012228 |
| 0.012056 | 0.012056 | 0.011994 | 0.012164 | 0.012127 | 0.012140 | 0.011991 |
| 0.012188 | 0.012318 | 0.012054 | 0.012033 | 0.011919 | 0.012160 | 0.012022 |
| 0.012125 | 0.012057 | 0.011953 | 0.012060 | 0.012160 | 0.012132 | 0.012057 |
| 0.011953 | 0.011853 | 0.012022 | 0.011953 | 0.011885 | 0.011964 | 0.012160 |
| 0.012056 | 0.011987 | 0.012022 | 0.012056 | 0.012022 | 0.011953 | 0.011987 |
| 0.012021 | 0.012056 | 0.012056 | 0.011987 | 0.012056 | 0.012297 | 0.011884 |
| 0.011953 | 0.012297 | 0.011987 | 0.012022 | 0.011987 | 0.012297 | 0.011942 |
| 0.012267 | 0.011883 | 0.011932 | 0.012134 | 0.012139 | 0.012163 | 0.011791 |
| 0.011866 | 0.012056 | 0.012159 | 0.012276 | 0.012128 | 0.012272 | 0.012402 |
| 0.012299 | 0.012368 | 0.012297 | 0.012529 | 0.012262 | 0.013124 | 0.012266 |
| 0.012987 | 0.012786 | 0.012922 | 0.013201 | 0.012297 | 0.011988 | 0.012263 |
| 0.011438 | 0.012647 | 0.012193 | 0.012125 | 0.012195 | 0.012195 | 0.012166 |
| 0.012056 | 0.012067 | 0.012124 | 0.012092 | 0.012505 | 0.012538 | 0.012574 |
| 0.012437 | 0.012540 | 0.012682 | 0.012444 | 0.011335 | 0.011233 | 0.011335 |
| 0.011335 | 0.011438 | 0.011339 | 0.011404 | 0.011404 | 0.011987 | 0.011541 |
| 0.012402 | 0.012847 | 0.011545 | 0.012607 | 0.013127 | 0.012137 | 0.012057 |
| 0.012021 | 0.012021 | 0.012504 | 0.012544 | 0.012610 | 0.012365 | 0.012025 |
| S505     | 0.011510 | 0.011510 | 0.011787 | 0.011753 | 0.011753 | 0.011787 |
| 0.011691 | 0.011621 | 0.011822 | 0.011268 | 0.011337 | 0.011303 | 0.011268 |
| 0.011302 | 0.011475 | 0.011268 | 0.011302 | 0.011372 | 0.011337 | 0.011302 |
| 0.011268 | 0.011302 | 0.011406 | 0.011268 | 0.011303 | 0.011302 | 0.011656 |
| 0.011545 | 0.011302 | 0.011199 | 0.011441 | 0.011337 | 0.011337 | 0.011372 |
| 0.011302 | 0.011441 | 0.011337 | 0.011337 | 0.011302 | 0.011337 | 0.011510 |
| 0.011268 | 0.011337 | 0.011337 | 0.011302 | 0.011406 | 0.011441 | 0.011337 |
| 0.011337 | 0.011476 | 0.011407 | 0.011683 | 0.011302 | 0.011614 | 0.011302 |
| 0.011302 | 0.011406 | 0.011406 | 0.011614 | 0.011683 | 0.011406 | 0.011510 |
| 0.011372 | 0.011441 | 0.011337 | 0.011579 | 0.011822 | 0.011302 | 0.011406 |

|          |          |          |          |          |          |          |
|----------|----------|----------|----------|----------|----------|----------|
| 0.011302 | 0.011406 | 0.011372 | 0.011441 | 0.011337 | 0.011372 | 0.011372 |
| 0.011268 | 0.011302 | 0.011268 | 0.011372 | 0.011337 | 0.011373 | 0.011441 |
| 0.011372 | 0.011302 | 0.011406 | 0.011302 | 0.011441 | 0.011268 | 0.011337 |
| 0.011510 | 0.011441 | 0.011683 | 0.011510 | 0.011337 | 0.011579 | 0.011337 |
| 0.011516 | 0.011749 | 0.011524 | 0.011222 | 0.011253 | 0.011364 | 0.011464 |
| 0.012119 | 0.011480 | 0.011272 | 0.011579 | 0.011579 | 0.011372 | 0.011475 |
| 0.011406 | 0.011302 | 0.011302 | 0.011337 | 0.011441 | 0.011372 | 0.011233 |
| 0.011268 | 0.011441 | 0.011579 | 0.011510 | 0.011406 | 0.011372 | 0.011303 |
| 0.011268 | 0.011268 | 0.011337 | 0.011303 | 0.011510 | 0.011476 | 0.011406 |
| 0.011510 | 0.011580 | 0.011303 | 0.011303 | 0.011337 | 0.011337 | 0.011339 |
| 0.011409 | 0.011337 | 0.011337 | 0.011208 | 0.011283 | 0.011239 | 0.011337 |
| 0.011339 | 0.011273 | 0.011327 | 0.011309 | 0.011234 | 0.011270 | 0.011303 |
| 0.011576 | 0.011342 | 0.011379 | 0.011268 | 0.011274 | 0.011407 | 0.011372 |
| 0.011441 | 0.011373 | 0.011372 | 0.011268 | 0.011164 | 0.011787 | 0.011545 |
| 0.011614 | 0.011476 | 0.011337 | 0.011441 | 0.011233 | 0.011476 | 0.011268 |
| 0.011337 | 0.011337 | 0.011303 | 0.011268 | 0.011302 | 0.011268 | 0.011372 |
| 0.011337 | 0.011441 | 0.011372 | 0.011268 | 0.011373 | 0.011476 | 0.011478 |
| 0.011476 | 0.011372 | 0.011268 | 0.011199 | 0.011337 | 0.011268 | 0.011199 |
| 0.011305 | 0.011476 | 0.011268 | 0.011476 | 0.011233 | 0.011337 | 0.011303 |
| 0.011406 | 0.011303 | 0.011337 | 0.011303 | 0.011337 | 0.011199 | 0.011337 |
| 0.011372 | 0.011303 | 0.011372 | 0.011303 | 0.011199 | 0.011372 | 0.011614 |
| 0.011718 | 0.011649 | 0.011718 | 0.011443 | 0.011718 | 0.011199 | 0.011303 |
| 0.011339 | 0.011643 | 0.011388 | 0.011237 | 0.011725 | 0.011201 | 0.011303 |
| 0.011726 | 0.011621 | 0.011441 | 0.011649 | 0.011201 | 0.011579 | 0.011545 |
| 0.011475 | 0.011649 | 0.011383 | 0.011226 | 0.011312 | 0.011372 | 0.011374 |
| 0.011545 | 0.011303 | 0.011579 | 0.011649 | 0.011441 | 0.011579 | 0.011406 |
| 0.011338 | 0.011649 | 0.011407 | 0.011476 | 0.011718 | 0.011233 | 0.011441 |
| 0.011406 | 0.011302 | 0.011233 | 0.011233 | 0.011302 | 0.011302 | 0.011372 |
| 0.011302 | 0.011372 | 0.011268 | 0.011372 | 0.011302 | 0.011302 | 0.011372 |
| 0.011302 | 0.011752 | 0.011649 | 0.011683 | 0.011199 | 0.011302 | 0.011337 |
| 0.011337 | 0.011302 | 0.011337 | 0.011406 | 0.011268 | 0.011268 | 0.011268 |
| 0.011822 | 0.011406 | 0.011406 | 0.011233 | 0.011302 | 0.011510 | 0.011268 |
| 0.011268 | 0.011337 | 0.011302 | 0.011476 | 0.011268 | 0.011372 | 0.011476 |
| 0.011441 | 0.011268 | 0.011302 | 0.011199 | 0.011233 | 0.011406 | 0.011337 |
| 0.011199 | 0.011302 | 0.011199 | 0.011233 | 0.011372 | 0.011510 | 0.011268 |
| 0.011233 | 0.011372 | 0.011303 | 0.011199 | 0.011545 | 0.011199 | 0.011372 |
| 0.011410 | 0.011268 | 0.011579 | 0.011406 | 0.011441 | 0.011302 | 0.011337 |
| 0.011268 | 0.011614 | 0.011199 | 0.011475 | 0.011268 | 0.011268 | 0.011199 |
| 0.011441 | 0.011614 | 0.011337 | 0.011406 | 0.011233 | 0.011649 | 0.011268 |
| 0.011268 | 0.011268 | 0.011302 | 0.011406 | 0.011302 | 0.011406 | 0.011475 |
| 0.011475 | 0.011441 | 0.011337 | 0.011441 | 0.011406 | 0.011268 | 0.011233 |
| 0.011268 | 0.011268 | 0.011337 | 0.011268 | 0.011233 | 0.011372 | 0.011268 |
| 0.011302 | 0.011302 | 0.011406 | 0.011475 | 0.011372 | 0.011302 | 0.011303 |
| 0.011372 | 0.011302 | 0.011372 | 0.011268 | 0.011406 | 0.011475 | 0.011752 |
| 0.011302 | 0.011718 | 0.011309 | 0.018052 | 0.011197 | 0.011375 | 0.011672 |
| 0.011631 | 0.011677 | 0.011275 | 0.011239 | 0.011742 | 0.011701 | 0.011312 |
| 0.011451 | 0.011499 | 0.011220 | 0.011233 | 0.011303 | 0.011314 | 0.011237 |
| 0.011496 | 0.011484 | 0.011482 | 0.011332 | 0.011441 | 0.011303 | 0.011409 |
| 0.011338 | 0.011441 | 0.011441 | 0.011406 | 0.011372 | 0.011372 | 0.011337 |
| 0.011372 | 0.011303 | 0.011337 | 0.011372 | 0.011337 | 0.011268 | 0.011164 |
| 0.011164 | 0.011372 | 0.011268 | 0.011372 | 0.011406 | 0.011441 | 0.011199 |
| 0.011372 | 0.011337 | 0.011684 | 0.011684 | 0.011406 | 0.011442 | 0.011441 |
| 0.011233 | 0.011233 | 0.011268 | 0.011372 | 0.011233 | 0.011476 | 0.011476 |
| 0.011510 | 0.011441 | 0.011441 | 0.011545 | 0.011718 | 0.011546 | 0.011372 |
| 0.011372 | 0.011372 | 0.011476 | 0.011303 | 0.011372 | 0.011337 | 0.011372 |
| 0.011441 | 0.011441 | 0.011476 | 0.011441 | 0.011338 | 0.011510 | 0.011510 |
| 0.011375 | 0.011268 | 0.011372 | 0.011406 | 0.011372 | 0.011510 | 0.011545 |
| 0.011649 | 0.011201 | 0.011579 | 0.011545 | 0.011475 | 0.011649 | 0.011268 |
| 0.011442 | 0.011338 | 0.011164 | 0.011164 | 0.011372 | 0.011268 | 0.011372 |
| 0.011406 | 0.011441 | 0.011199 | 0.011372 | 0.011337 | 0.011684 | 0.011684 |

|          |          |          |          |          |          |          |
|----------|----------|----------|----------|----------|----------|----------|
| 0.011406 | 0.011442 | 0.011268 | 0.011199 | 0.012030 | 0.011489 | 0.011239 |
| 0.011484 | 0.011444 | 0.011556 | 0.011413 | 0.011552 | 0.011407 | 0.011413 |
| 0.011966 | 0.000000 | 0.011268 | 0.011339 | 0.011615 | 0.011545 | 0.011649 |
| 0.011965 | 0.011475 | 0.011618 | 0.011683 | 0.011545 | 0.011545 | 0.011583 |
| 0.011233 | 0.011406 | 0.011545 | 0.011510 | 0.011513 | 0.011510 | 0.011442 |
| 0.011337 | 0.011268 | 0.011302 | 0.011337 | 0.011233 | 0.011302 | 0.011199 |
| 0.011337 | 0.011372 | 0.011268 | 0.011233 | 0.011337 | 0.011268 | 0.011302 |
| 0.011302 | 0.011233 | 0.011302 | 0.011337 | 0.011233 | 0.011441 | 0.011475 |
| 0.011372 | 0.011441 | 0.011372 | 0.011372 | 0.011302 | 0.011683 | 0.011337 |
| 0.011379 | 0.011303 | 0.011545 | 0.011545 | 0.011406 | 0.011406 | 0.011406 |
| 0.011406 | 0.011337 | 0.011302 | 0.011337 | 0.011406 | 0.011441 | 0.011372 |
| 0.011372 | 0.011510 | 0.011683 | 0.011406 | 0.011579 | 0.011579 | 0.011475 |
| 0.011302 | 0.011372 | 0.011406 | 0.011822 | 0.011372 | 0.011406 | 0.011372 |
| 0.011406 | 0.011337 | 0.011337 | 0.011649 | 0.011545 | 0.011614 | 0.011337 |
| 0.011441 | 0.011510 | 0.011337 | 0.011441 | 0.011406 | 0.011268 | 0.011614 |
| 0.011372 | 0.011337 | 0.011337 | 0.011510 | 0.011337 | 0.011441 | 0.011683 |
| 0.011302 | 0.011761 | 0.011753 | 0.011519 | 0.011175 | 0.011446 | 0.011323 |
| 0.011230 | 0.011745 | 0.011278 | 0.011520 | 0.011312 | 0.011373 | 0.011390 |
| 0.011534 | 0.011196 | 0.011349 | 0.011129 | 0.011227 | 0.011339 | 0.011435 |
| 0.011446 | 0.011343 | 0.011424 | 0.011351 | 0.011373 | 0.011510 | 0.011580 |
| 0.011545 | 0.011442 | 0.011548 | 0.011550 | 0.011690 | 0.011717 | 0.011372 |
| 0.011614 | 0.011476 | 0.011337 | 0.011441 | 0.011233 | 0.011476 | 0.011268 |
| 0.011337 | 0.011337 | 0.011303 | 0.011268 | 0.011302 | 0.011268 | 0.011372 |
| 0.011312 | 0.011346 | 0.011343 | 0.011376 | 0.011516 | 0.011483 | 0.011482 |
| 0.011480 | 0.011407 | 0.011210 | 0.011208 | 0.011339 | 0.011514 | 0.011480 |
| 0.011303 | 0.011374 | 0.011546 | 0.011582 | 0.011511 | 0.011546 | 0.011233 |
| 0.011406 | 0.011406 | 0.011406 | 0.011372 | 0.011926 | 0.011545 | 0.011614 |
| 0.011580 | 0.011720 | 0.011342 | 0.011416 | 0.011268 | 0.011337 | 0.011302 |
| 0.011511 | 0.011372 | 0.011545 | 0.011545 | 0.011586 | 0.011545 | 0.011307 |
| 0.011199 | 0.011201 | 0.011302 | 0.011268 | 0.011372 | 0.011210 | 0.011545 |
| 0.011340 | 0.011455 | 0.011108 | 0.011323 | 0.011337 | 0.011375 | 0.011303 |
| 0.011268 | 0.011268 | 0.011337 | 0.011303 | 0.011510 | 0.011476 | 0.011406 |
| 0.011510 | 0.011580 | 0.011303 | 0.011303 | 0.011337 | 0.011337 | 0.011339 |
| 0.011409 | 0.011337 | 0.011337 | 0.011373 | 0.011510 | 0.011580 | 0.011545 |
| 0.011442 | 0.011548 | 0.011550 | 0.011690 | 0.011717 | 0.011372 | 0.011545 |
| 0.011302 | 0.011302 | 0.011304 | 0.011454 | 0.011383 | 0.011447 | 0.011277 |
| 0.011487 | 0.011621 | 0.011492 | 0.011339 | 0.011268 | 0.011476 | 0.011337 |
| 0.011441 | 0.011372 | 0.011268 | 0.011373 | 0.011476 | 0.011478 | 0.011372 |
| 0.011268 | 0.011199 | 0.011337 | 0.011268 | 0.011199 | 0.011305 | 0.011476 |
| 0.011372 | 0.011303 | 0.011337 | 0.011372 | 0.011337 | 0.011268 | 0.011372 |
| 0.011337 | 0.011372 | 0.011372 | 0.011302 | 0.011372 | 0.011614 | 0.011268 |
| 0.011302 | 0.011683 | 0.011302 | 0.011337 | 0.011302 | 0.011683 | 0.011238 |
| 0.011636 | 0.011234 | 0.011267 | 0.011516 | 0.011604 | 0.011505 | 0.011147 |
| 0.011223 | 0.011441 | 0.011545 | 0.011654 | 0.011511 | 0.011653 | 0.011789 |
| 0.011684 | 0.011753 | 0.011683 | 0.011870 | 0.011649 | 0.012481 | 0.011650 |
| 0.012378 | 0.012137 | 0.012242 | 0.012556 | 0.011683 | 0.011372 | 0.011649 |
| 0.012031 | 0.012034 | 0.011614 | 0.011510 | 0.011580 | 0.011580 | 0.011548 |
| 0.011441 | 0.011445 | 0.011510 | 0.011476 | 0.011892 | 0.011926 | 0.011961 |
| 0.011823 | 0.011927 | 0.012068 | 0.011826 | 0.012067 | 0.012038 | 0.012136 |
| 0.012136 | 0.012170 | 0.012081 | 0.012136 | 0.012138 | 0.011164 | 0.011684 |
| 0.011788 | 0.012238 | 0.011759 | 0.012030 | 0.012518 | 0.011550 | 0.011441 |
| 0.011406 | 0.011406 | 0.011892 | 0.011883 | 0.012040 | 0.011753 | 0.011408 |
| s506     | 0.011643 | 0.011643 | 0.012123 | 0.011882 | 0.011882 | 0.011917 |
| 0.011823 | 0.011753 | 0.011951 | 0.011403 | 0.011471 | 0.011438 | 0.011403 |
| 0.011437 | 0.011608 | 0.011403 | 0.011437 | 0.011505 | 0.011471 | 0.011437 |
| 0.011403 | 0.011437 | 0.011540 | 0.011403 | 0.011437 | 0.011437 | 0.011788 |
| 0.011677 | 0.011437 | 0.011334 | 0.011574 | 0.011471 | 0.011471 | 0.011505 |
| 0.011437 | 0.011574 | 0.011471 | 0.011471 | 0.011437 | 0.011471 | 0.011642 |
| 0.011403 | 0.011471 | 0.011471 | 0.011437 | 0.011540 | 0.011574 | 0.011471 |
| 0.011471 | 0.011608 | 0.011540 | 0.011814 | 0.011437 | 0.011745 | 0.011437 |

|          |          |          |          |          |          |          |
|----------|----------|----------|----------|----------|----------|----------|
| 0.011437 | 0.011540 | 0.011540 | 0.011745 | 0.011814 | 0.011540 | 0.011642 |
| 0.011505 | 0.011574 | 0.011471 | 0.011711 | 0.011951 | 0.011437 | 0.011540 |
| 0.011437 | 0.011540 | 0.011505 | 0.011574 | 0.011471 | 0.011505 | 0.011505 |
| 0.011403 | 0.011437 | 0.011403 | 0.011505 | 0.011471 | 0.011507 | 0.011574 |
| 0.011505 | 0.011437 | 0.011540 | 0.011437 | 0.011574 | 0.011403 | 0.011471 |
| 0.011642 | 0.011574 | 0.011814 | 0.011642 | 0.011471 | 0.011711 | 0.011471 |
| 0.011624 | 0.011856 | 0.011634 | 0.011340 | 0.011404 | 0.011512 | 0.011580 |
| 0.012257 | 0.011682 | 0.011395 | 0.011711 | 0.011711 | 0.011505 | 0.011608 |
| 0.011540 | 0.011437 | 0.011437 | 0.011471 | 0.011574 | 0.011505 | 0.011368 |
| 0.011403 | 0.011574 | 0.011711 | 0.011642 | 0.011540 | 0.011506 | 0.011437 |
| 0.011403 | 0.011403 | 0.011471 | 0.011437 | 0.011643 | 0.011608 | 0.011540 |
| 0.011643 | 0.011711 | 0.011437 | 0.011437 | 0.011471 | 0.011471 | 0.011474 |
| 0.011543 | 0.011471 | 0.011471 | 0.011352 | 0.011428 | 0.011380 | 0.011472 |
| 0.011475 | 0.011411 | 0.011475 | 0.011448 | 0.011371 | 0.011408 | 0.011439 |
| 0.011718 | 0.011480 | 0.011517 | 0.011403 | 0.011413 | 0.011541 | 0.011506 |
| 0.011575 | 0.011507 | 0.011506 | 0.011403 | 0.011300 | 0.011917 | 0.011677 |
| 0.011745 | 0.011608 | 0.011471 | 0.011574 | 0.011369 | 0.011608 | 0.011403 |
| 0.011471 | 0.011471 | 0.011437 | 0.011403 | 0.011437 | 0.011403 | 0.011506 |
| 0.011471 | 0.011574 | 0.011506 | 0.011403 | 0.011507 | 0.011608 | 0.011612 |
| 0.011608 | 0.011506 | 0.011403 | 0.011335 | 0.011471 | 0.011403 | 0.011334 |
| 0.011441 | 0.011609 | 0.011403 | 0.011609 | 0.011368 | 0.011471 | 0.011437 |
| 0.011540 | 0.011437 | 0.011471 | 0.011437 | 0.011471 | 0.011334 | 0.011471 |
| 0.011506 | 0.011437 | 0.011506 | 0.011437 | 0.011334 | 0.011506 | 0.011746 |
| 0.011848 | 0.011780 | 0.011848 | 0.011576 | 0.011849 | 0.011334 | 0.011437 |
| 0.011474 | 0.011803 | 0.011525 | 0.011375 | 0.011857 | 0.011339 | 0.011460 |
| 0.011857 | 0.011754 | 0.011608 | 0.011780 | 0.011339 | 0.011711 | 0.011677 |
| 0.011608 | 0.011780 | 0.011523 | 0.011307 | 0.011354 | 0.011506 | 0.011509 |
| 0.011677 | 0.011438 | 0.011711 | 0.011780 | 0.011574 | 0.011711 | 0.011540 |
| 0.011474 | 0.011781 | 0.011542 | 0.011644 | 0.011849 | 0.011368 | 0.011575 |
| 0.011540 | 0.011437 | 0.011368 | 0.011368 | 0.011437 | 0.011437 | 0.011505 |
| 0.011437 | 0.011505 | 0.011403 | 0.011505 | 0.011437 | 0.011437 | 0.011505 |
| 0.011437 | 0.011882 | 0.011780 | 0.011814 | 0.011334 | 0.011437 | 0.011471 |
| 0.011471 | 0.011437 | 0.011471 | 0.011540 | 0.011403 | 0.011403 | 0.011403 |
| 0.011951 | 0.011574 | 0.011574 | 0.011368 | 0.011437 | 0.011643 | 0.011403 |
| 0.011403 | 0.011471 | 0.011437 | 0.011608 | 0.011403 | 0.011505 | 0.011608 |
| 0.011574 | 0.011403 | 0.011437 | 0.011334 | 0.011368 | 0.011540 | 0.011471 |
| 0.011334 | 0.011437 | 0.011334 | 0.011368 | 0.011505 | 0.011642 | 0.011403 |
| 0.011368 | 0.011505 | 0.011437 | 0.011334 | 0.011677 | 0.011334 | 0.011505 |
| 0.011546 | 0.011403 | 0.011711 | 0.011540 | 0.011574 | 0.011437 | 0.011471 |
| 0.011403 | 0.011745 | 0.011334 | 0.011608 | 0.011403 | 0.011403 | 0.011334 |
| 0.011574 | 0.011746 | 0.011471 | 0.011540 | 0.011368 | 0.011780 | 0.011403 |
| 0.011403 | 0.011403 | 0.011437 | 0.011540 | 0.011437 | 0.011540 | 0.011608 |
| 0.011608 | 0.011574 | 0.011471 | 0.011574 | 0.011540 | 0.011403 | 0.011368 |
| 0.011403 | 0.011403 | 0.011471 | 0.011403 | 0.011368 | 0.011505 | 0.011403 |
| 0.011437 | 0.011437 | 0.011540 | 0.011608 | 0.011505 | 0.011437 | 0.011437 |
| 0.011505 | 0.011437 | 0.011505 | 0.011403 | 0.011540 | 0.011608 | 0.011951 |
| 0.011437 | 0.011848 | 0.011448 | 0.018132 | 0.011261 | 0.011312 | 0.011808 |
| 0.011732 | 0.011815 | 0.011434 | 0.011475 | 0.011789 | 0.011800 | 0.011371 |
| 0.011639 | 0.011556 | 0.011337 | 0.011404 | 0.011460 | 0.011362 | 0.011324 |
| 0.011681 | 0.011631 | 0.011629 | 0.011594 | 0.011574 | 0.011437 | 0.011543 |
| 0.011474 | 0.011574 | 0.011574 | 0.011540 | 0.011505 | 0.011506 | 0.011471 |
| 0.011505 | 0.011437 | 0.011471 | 0.011506 | 0.011471 | 0.011403 | 0.011300 |
| 0.011300 | 0.011506 | 0.011403 | 0.011506 | 0.011540 | 0.011574 | 0.011334 |
| 0.011505 | 0.011471 | 0.011814 | 0.011814 | 0.011540 | 0.011575 | 0.011574 |
| 0.011369 | 0.011369 | 0.011403 | 0.011506 | 0.011369 | 0.011608 | 0.011608 |
| 0.011643 | 0.011608 | 0.011574 | 0.011677 | 0.011848 | 0.011644 | 0.011505 |
| 0.011506 | 0.011540 | 0.011608 | 0.011437 | 0.011506 | 0.011471 | 0.011505 |
| 0.011575 | 0.011574 | 0.011608 | 0.011574 | 0.011473 | 0.011643 | 0.011643 |
| 0.011475 | 0.011403 | 0.011506 | 0.011540 | 0.011506 | 0.011643 | 0.011677 |
| 0.011780 | 0.011339 | 0.011711 | 0.011677 | 0.011608 | 0.011780 | 0.011403 |

|          |          |          |          |          |          |          |
|----------|----------|----------|----------|----------|----------|----------|
| 0.011576 | 0.011472 | 0.011300 | 0.011300 | 0.011506 | 0.011403 | 0.011506 |
| 0.011540 | 0.011574 | 0.011334 | 0.011505 | 0.011471 | 0.011814 | 0.011814 |
| 0.011540 | 0.011575 | 0.011403 | 0.011334 | 0.012193 | 0.011596 | 0.011378 |
| 0.011623 | 0.011546 | 0.011693 | 0.011549 | 0.011656 | 0.011544 | 0.011515 |
| 0.012129 | 0.011268 | 0.000000 | 0.011475 | 0.011749 | 0.011679 | 0.011781 |
| 0.012129 | 0.011625 | 0.011750 | 0.011814 | 0.011677 | 0.011677 | 0.011715 |
| 0.011368 | 0.011540 | 0.011677 | 0.011642 | 0.011646 | 0.011642 | 0.011576 |
| 0.011471 | 0.011403 | 0.011437 | 0.011471 | 0.011368 | 0.011437 | 0.011334 |
| 0.011471 | 0.011505 | 0.011403 | 0.011368 | 0.011471 | 0.011403 | 0.011437 |
| 0.011437 | 0.011368 | 0.011437 | 0.011471 | 0.011368 | 0.011574 | 0.011608 |
| 0.011505 | 0.011574 | 0.011505 | 0.011505 | 0.011437 | 0.011814 | 0.011471 |
| 0.011517 | 0.011437 | 0.011677 | 0.011678 | 0.011540 | 0.011540 | 0.011540 |
| 0.011540 | 0.011471 | 0.011437 | 0.011471 | 0.011540 | 0.011574 | 0.011505 |
| 0.011505 | 0.011642 | 0.011814 | 0.011540 | 0.011711 | 0.011711 | 0.011608 |
| 0.011437 | 0.011505 | 0.011540 | 0.011951 | 0.011506 | 0.011540 | 0.011505 |
| 0.011540 | 0.011471 | 0.011471 | 0.011780 | 0.011677 | 0.011745 | 0.011471 |
| 0.011574 | 0.011642 | 0.011471 | 0.011574 | 0.011540 | 0.011403 | 0.011745 |
| 0.011505 | 0.011471 | 0.011471 | 0.011642 | 0.011471 | 0.011574 | 0.011814 |
| 0.011505 | 0.011892 | 0.011882 | 0.011638 | 0.011346 | 0.011581 | 0.011528 |
| 0.011229 | 0.011857 | 0.011419 | 0.011605 | 0.011458 | 0.011475 | 0.011493 |
| 0.011684 | 0.011263 | 0.011458 | 0.011263 | 0.011335 | 0.011472 | 0.011554 |
| 0.011557 | 0.011459 | 0.011528 | 0.011492 | 0.011507 | 0.011643 | 0.011711 |
| 0.011677 | 0.011575 | 0.011681 | 0.011683 | 0.011787 | 0.011854 | 0.011505 |
| 0.011745 | 0.011608 | 0.011471 | 0.011574 | 0.011369 | 0.011608 | 0.011403 |
| 0.011471 | 0.011471 | 0.011437 | 0.011403 | 0.011437 | 0.011403 | 0.011506 |
| 0.011452 | 0.011486 | 0.011480 | 0.011513 | 0.011651 | 0.011618 | 0.011618 |
| 0.011615 | 0.011541 | 0.011358 | 0.011353 | 0.011475 | 0.011648 | 0.011649 |
| 0.011438 | 0.011510 | 0.011713 | 0.011715 | 0.011644 | 0.011678 | 0.011368 |
| 0.011540 | 0.011540 | 0.011540 | 0.011506 | 0.012054 | 0.011677 | 0.011745 |
| 0.011746 | 0.011858 | 0.011478 | 0.011554 | 0.011403 | 0.011506 | 0.011437 |
| 0.011644 | 0.011540 | 0.011677 | 0.011677 | 0.011664 | 0.011677 | 0.011445 |
| 0.011334 | 0.011338 | 0.011438 | 0.011404 | 0.011507 | 0.011359 | 0.011678 |
| 0.011475 | 0.011455 | 0.011156 | 0.011472 | 0.011472 | 0.011547 | 0.011437 |
| 0.011403 | 0.011403 | 0.011471 | 0.011437 | 0.011643 | 0.011608 | 0.011540 |
| 0.011643 | 0.011711 | 0.011437 | 0.011437 | 0.011471 | 0.011471 | 0.011474 |
| 0.011543 | 0.011471 | 0.011471 | 0.011507 | 0.011643 | 0.011711 | 0.011677 |
| 0.011575 | 0.011681 | 0.011683 | 0.011787 | 0.011854 | 0.011505 | 0.011677 |
| 0.011437 | 0.011437 | 0.011440 | 0.011593 | 0.011557 | 0.011582 | 0.011382 |
| 0.011623 | 0.011711 | 0.011664 | 0.011476 | 0.011403 | 0.011609 | 0.011471 |
| 0.011574 | 0.011506 | 0.011403 | 0.011507 | 0.011608 | 0.011612 | 0.011506 |
| 0.011403 | 0.011335 | 0.011471 | 0.011403 | 0.011334 | 0.011441 | 0.011609 |
| 0.011505 | 0.011437 | 0.011471 | 0.011506 | 0.011471 | 0.011403 | 0.011506 |
| 0.011471 | 0.011505 | 0.011505 | 0.011437 | 0.011505 | 0.011745 | 0.011403 |
| 0.011437 | 0.011814 | 0.011437 | 0.011471 | 0.011437 | 0.011814 | 0.011368 |
| 0.011801 | 0.011361 | 0.011469 | 0.011635 | 0.011721 | 0.011610 | 0.011275 |
| 0.011435 | 0.011574 | 0.011677 | 0.011788 | 0.011644 | 0.011785 | 0.011918 |
| 0.011816 | 0.011884 | 0.011814 | 0.012002 | 0.011780 | 0.012604 | 0.011817 |
| 0.012536 | 0.012265 | 0.012402 | 0.012679 | 0.011814 | 0.011506 | 0.011780 |
| 0.012193 | 0.012161 | 0.011745 | 0.011643 | 0.011712 | 0.011712 | 0.011681 |
| 0.011574 | 0.011579 | 0.011642 | 0.011609 | 0.012021 | 0.012054 | 0.012090 |
| 0.011953 | 0.012055 | 0.012196 | 0.011957 | 0.012229 | 0.012201 | 0.012297 |
| 0.012298 | 0.012332 | 0.012245 | 0.012298 | 0.012299 | 0.011300 | 0.011815 |
| 0.011918 | 0.012432 | 0.011891 | 0.012157 | 0.012641 | 0.011684 | 0.011575 |
| 0.011540 | 0.011540 | 0.012021 | 0.011965 | 0.012174 | 0.011882 | 0.011542 |
| s507     | 0.011614 | 0.011614 | 0.011856 | 0.011821 | 0.011821 | 0.011856 |
| 0.011760 | 0.011690 | 0.011890 | 0.011337 | 0.011406 | 0.011372 | 0.011337 |
| 0.011371 | 0.011544 | 0.011337 | 0.011371 | 0.011441 | 0.011406 | 0.011371 |
| 0.011337 | 0.011371 | 0.011475 | 0.011337 | 0.011372 | 0.011371 | 0.011725 |
| 0.011613 | 0.011371 | 0.011268 | 0.011510 | 0.011406 | 0.011406 | 0.011441 |
| 0.011371 | 0.011510 | 0.011406 | 0.011406 | 0.011371 | 0.011406 | 0.011579 |

|          |          |          |          |          |          |          |
|----------|----------|----------|----------|----------|----------|----------|
| 0.011337 | 0.011406 | 0.011406 | 0.011371 | 0.011475 | 0.011510 | 0.011406 |
| 0.011406 | 0.011544 | 0.011475 | 0.011752 | 0.011371 | 0.011683 | 0.011371 |
| 0.011371 | 0.011475 | 0.011475 | 0.011683 | 0.011752 | 0.011475 | 0.011579 |
| 0.011441 | 0.011510 | 0.011406 | 0.011648 | 0.011891 | 0.011371 | 0.011475 |
| 0.011371 | 0.011441 | 0.011441 | 0.011510 | 0.011406 | 0.011441 | 0.011441 |
| 0.011337 | 0.011371 | 0.011337 | 0.011441 | 0.011406 | 0.011442 | 0.011510 |
| 0.011441 | 0.011371 | 0.011475 | 0.011371 | 0.011510 | 0.011337 | 0.011406 |
| 0.011579 | 0.011510 | 0.011752 | 0.011579 | 0.011406 | 0.011648 | 0.011406 |
| 0.011553 | 0.011825 | 0.011601 | 0.011303 | 0.011291 | 0.011440 | 0.011544 |
| 0.012155 | 0.011480 | 0.011313 | 0.011648 | 0.011648 | 0.011440 | 0.011544 |
| 0.011475 | 0.011233 | 0.011406 | 0.011406 | 0.011510 | 0.011441 | 0.011371 |
| 0.011337 | 0.011510 | 0.011510 | 0.011579 | 0.011475 | 0.011441 | 0.011372 |
| 0.011337 | 0.011337 | 0.011406 | 0.011372 | 0.011579 | 0.011545 | 0.011475 |
| 0.011579 | 0.011648 | 0.011372 | 0.011372 | 0.011406 | 0.011406 | 0.011408 |
| 0.011478 | 0.011406 | 0.011406 | 0.011281 | 0.011356 | 0.011311 | 0.011406 |
| 0.011409 | 0.011343 | 0.011403 | 0.011380 | 0.011303 | 0.011340 | 0.011372 |
| 0.011649 | 0.011413 | 0.011450 | 0.011337 | 0.011345 | 0.011476 | 0.011441 |
| 0.011510 | 0.011442 | 0.011441 | 0.011406 | 0.011337 | 0.011856 | 0.011579 |
| 0.011683 | 0.011545 | 0.011406 | 0.011510 | 0.011302 | 0.011544 | 0.011337 |
| 0.011406 | 0.011406 | 0.011372 | 0.011337 | 0.011371 | 0.011337 | 0.011441 |
| 0.011406 | 0.011510 | 0.011441 | 0.011337 | 0.011442 | 0.011545 | 0.011513 |
| 0.011545 | 0.011441 | 0.011337 | 0.011269 | 0.011406 | 0.011337 | 0.011268 |
| 0.011375 | 0.011545 | 0.011337 | 0.011545 | 0.011302 | 0.011406 | 0.011372 |
| 0.011475 | 0.011372 | 0.011406 | 0.011372 | 0.011406 | 0.011268 | 0.011406 |
| 0.011441 | 0.011372 | 0.011441 | 0.011372 | 0.011337 | 0.011441 | 0.011683 |
| 0.011787 | 0.011717 | 0.011787 | 0.011512 | 0.011787 | 0.011337 | 0.011372 |
| 0.011408 | 0.011685 | 0.011341 | 0.011308 | 0.011795 | 0.011271 | 0.011424 |
| 0.011795 | 0.011690 | 0.011510 | 0.011579 | 0.011376 | 0.011648 | 0.011614 |
| 0.011544 | 0.011717 | 0.011455 | 0.011391 | 0.011396 | 0.011441 | 0.011444 |
| 0.011614 | 0.011441 | 0.011648 | 0.011717 | 0.011579 | 0.011510 | 0.011544 |
| 0.011477 | 0.011717 | 0.011545 | 0.011580 | 0.011648 | 0.011302 | 0.011510 |
| 0.011475 | 0.011371 | 0.011302 | 0.011302 | 0.011371 | 0.011371 | 0.011441 |
| 0.011371 | 0.011441 | 0.011337 | 0.011441 | 0.011371 | 0.011371 | 0.011440 |
| 0.011371 | 0.011821 | 0.011717 | 0.011752 | 0.011268 | 0.011371 | 0.011406 |
| 0.011406 | 0.011371 | 0.011406 | 0.011475 | 0.011337 | 0.011337 | 0.011337 |
| 0.011890 | 0.011475 | 0.011510 | 0.011302 | 0.011371 | 0.011579 | 0.011337 |
| 0.011337 | 0.011406 | 0.011337 | 0.011544 | 0.011337 | 0.011441 | 0.011544 |
| 0.011510 | 0.011337 | 0.011371 | 0.011268 | 0.011302 | 0.011475 | 0.011406 |
| 0.011268 | 0.011371 | 0.011268 | 0.011302 | 0.011441 | 0.011579 | 0.011337 |
| 0.011302 | 0.011441 | 0.011372 | 0.011268 | 0.011613 | 0.011268 | 0.011441 |
| 0.011515 | 0.011337 | 0.011648 | 0.011475 | 0.011510 | 0.011371 | 0.011406 |
| 0.011337 | 0.011683 | 0.011268 | 0.011544 | 0.011337 | 0.011337 | 0.011268 |
| 0.011510 | 0.011683 | 0.011406 | 0.011475 | 0.011302 | 0.011717 | 0.011337 |
| 0.011337 | 0.011337 | 0.011371 | 0.011475 | 0.011371 | 0.011475 | 0.011544 |
| 0.011544 | 0.011510 | 0.011406 | 0.011510 | 0.011475 | 0.011337 | 0.011302 |
| 0.011337 | 0.011337 | 0.011406 | 0.011337 | 0.011302 | 0.011441 | 0.011337 |
| 0.011371 | 0.011371 | 0.011475 | 0.011544 | 0.011441 | 0.011371 | 0.011372 |
| 0.011441 | 0.011371 | 0.011440 | 0.011337 | 0.011475 | 0.011544 | 0.011821 |
| 0.011371 | 0.011787 | 0.011380 | 0.018123 | 0.011197 | 0.011439 | 0.011743 |
| 0.011702 | 0.011749 | 0.011436 | 0.011360 | 0.011685 | 0.011771 | 0.011249 |
| 0.011451 | 0.011621 | 0.011300 | 0.011364 | 0.011302 | 0.011366 | 0.011327 |
| 0.011495 | 0.011560 | 0.011519 | 0.011398 | 0.011510 | 0.011406 | 0.011548 |
| 0.011407 | 0.011510 | 0.011510 | 0.011475 | 0.011441 | 0.011441 | 0.011406 |
| 0.011441 | 0.011371 | 0.011406 | 0.011441 | 0.011406 | 0.011337 | 0.011302 |
| 0.011302 | 0.011441 | 0.011337 | 0.011441 | 0.011475 | 0.011510 | 0.011337 |
| 0.011441 | 0.011406 | 0.011752 | 0.011752 | 0.011475 | 0.011511 | 0.011441 |
| 0.011302 | 0.011302 | 0.011337 | 0.011441 | 0.011302 | 0.011545 | 0.011545 |
| 0.011579 | 0.011510 | 0.011510 | 0.011614 | 0.011787 | 0.011615 | 0.011441 |
| 0.011441 | 0.011441 | 0.011545 | 0.011372 | 0.011441 | 0.011406 | 0.011441 |
| 0.011510 | 0.011510 | 0.011545 | 0.011510 | 0.011407 | 0.011579 | 0.011579 |

|          |          |          |          |          |          |          |
|----------|----------|----------|----------|----------|----------|----------|
| 0.011444 | 0.011337 | 0.011441 | 0.011475 | 0.011372 | 0.011579 | 0.011613 |
| 0.011579 | 0.011376 | 0.011648 | 0.011614 | 0.011544 | 0.011717 | 0.011337 |
| 0.011511 | 0.011406 | 0.011302 | 0.011302 | 0.011441 | 0.011337 | 0.011441 |
| 0.011475 | 0.011510 | 0.011337 | 0.011441 | 0.011406 | 0.011752 | 0.011752 |
| 0.011475 | 0.011511 | 0.011440 | 0.011371 | 0.012099 | 0.011561 | 0.011417 |
| 0.011554 | 0.011515 | 0.011626 | 0.011518 | 0.011623 | 0.011339 | 0.011484 |
| 0.012034 | 0.011339 | 0.011475 | 0.000000 | 0.011545 | 0.011614 | 0.011718 |
| 0.012068 | 0.011588 | 0.011687 | 0.011752 | 0.011614 | 0.011614 | 0.011652 |
| 0.011302 | 0.011475 | 0.011613 | 0.011579 | 0.011582 | 0.011579 | 0.011511 |
| 0.011406 | 0.011337 | 0.011371 | 0.011406 | 0.011302 | 0.011371 | 0.011268 |
| 0.011406 | 0.011441 | 0.011337 | 0.011302 | 0.011406 | 0.011337 | 0.011371 |
| 0.011371 | 0.011302 | 0.011371 | 0.011406 | 0.011302 | 0.011510 | 0.011544 |
| 0.011441 | 0.011510 | 0.011441 | 0.011441 | 0.011371 | 0.011752 | 0.011406 |
| 0.011450 | 0.011371 | 0.011613 | 0.011614 | 0.011475 | 0.011475 | 0.011475 |
| 0.011475 | 0.011406 | 0.011371 | 0.011406 | 0.011475 | 0.011510 | 0.011441 |
| 0.011440 | 0.011579 | 0.011752 | 0.011475 | 0.011648 | 0.011648 | 0.011544 |
| 0.011371 | 0.011441 | 0.011475 | 0.011856 | 0.011441 | 0.011475 | 0.011441 |
| 0.011406 | 0.011406 | 0.011406 | 0.011718 | 0.011648 | 0.011683 | 0.011406 |
| 0.011510 | 0.011579 | 0.011406 | 0.011510 | 0.011475 | 0.011337 | 0.011683 |
| 0.011440 | 0.011406 | 0.011406 | 0.011579 | 0.011406 | 0.011510 | 0.011752 |
| 0.011371 | 0.011830 | 0.011821 | 0.011602 | 0.011232 | 0.011515 | 0.011270 |
| 0.011286 | 0.011785 | 0.011350 | 0.011565 | 0.011261 | 0.011375 | 0.011390 |
| 0.011531 | 0.011129 | 0.011348 | 0.011198 | 0.011227 | 0.011407 | 0.011476 |
| 0.011407 | 0.011423 | 0.011496 | 0.011387 | 0.011442 | 0.011579 | 0.011648 |
| 0.011614 | 0.011510 | 0.011617 | 0.011619 | 0.011759 | 0.011790 | 0.011441 |
| 0.011683 | 0.011545 | 0.011406 | 0.011510 | 0.011302 | 0.011544 | 0.011337 |
| 0.011406 | 0.011406 | 0.011372 | 0.011337 | 0.011371 | 0.011337 | 0.011441 |
| 0.011420 | 0.011418 | 0.011413 | 0.011446 | 0.011586 | 0.011553 | 0.011552 |
| 0.011550 | 0.011475 | 0.011285 | 0.011281 | 0.011409 | 0.011583 | 0.011549 |
| 0.011372 | 0.011444 | 0.011649 | 0.011652 | 0.011579 | 0.011614 | 0.011406 |
| 0.011475 | 0.011337 | 0.011129 | 0.011441 | 0.011925 | 0.011614 | 0.011683 |
| 0.011683 | 0.011756 | 0.011412 | 0.011487 | 0.011337 | 0.011510 | 0.011406 |
| 0.011580 | 0.011510 | 0.011613 | 0.011613 | 0.011545 | 0.011683 | 0.011377 |
| 0.011268 | 0.011271 | 0.011371 | 0.011337 | 0.011442 | 0.011285 | 0.011614 |
| 0.011409 | 0.011500 | 0.011251 | 0.011436 | 0.011406 | 0.011480 | 0.011372 |
| 0.011337 | 0.011337 | 0.011406 | 0.011372 | 0.011579 | 0.011545 | 0.011475 |
| 0.011579 | 0.011648 | 0.011372 | 0.011372 | 0.011406 | 0.011406 | 0.011408 |
| 0.011478 | 0.011406 | 0.011406 | 0.011442 | 0.011579 | 0.011648 | 0.011614 |
| 0.011510 | 0.011617 | 0.011619 | 0.011759 | 0.011790 | 0.011441 | 0.011614 |
| 0.011406 | 0.011406 | 0.011374 | 0.011526 | 0.011490 | 0.011516 | 0.011348 |
| 0.011557 | 0.011623 | 0.011407 | 0.011410 | 0.011337 | 0.011545 | 0.011406 |
| 0.011510 | 0.011441 | 0.011337 | 0.011442 | 0.011545 | 0.011513 | 0.011441 |
| 0.011337 | 0.011269 | 0.011406 | 0.011337 | 0.011268 | 0.011375 | 0.011545 |
| 0.011441 | 0.011371 | 0.011406 | 0.011441 | 0.011406 | 0.011337 | 0.011441 |
| 0.011406 | 0.011441 | 0.011441 | 0.011371 | 0.011441 | 0.011683 | 0.011337 |
| 0.011371 | 0.011752 | 0.011371 | 0.011406 | 0.011371 | 0.011752 | 0.011283 |
| 0.011690 | 0.011276 | 0.011267 | 0.011555 | 0.011603 | 0.011578 | 0.011190 |
| 0.011223 | 0.011510 | 0.011613 | 0.011724 | 0.011580 | 0.011722 | 0.011857 |
| 0.011752 | 0.011821 | 0.011752 | 0.011905 | 0.011717 | 0.012549 | 0.011754 |
| 0.012446 | 0.012206 | 0.012310 | 0.012554 | 0.011752 | 0.011441 | 0.011718 |
| 0.012100 | 0.012102 | 0.011683 | 0.011579 | 0.011649 | 0.011649 | 0.011617 |
| 0.011510 | 0.011515 | 0.011579 | 0.011545 | 0.011961 | 0.011960 | 0.012030 |
| 0.011892 | 0.011996 | 0.012136 | 0.011895 | 0.012135 | 0.012107 | 0.012204 |
| 0.012204 | 0.012239 | 0.012150 | 0.012204 | 0.012207 | 0.011337 | 0.011753 |
| 0.011857 | 0.012306 | 0.011829 | 0.012064 | 0.012587 | 0.011620 | 0.011510 |
| 0.011475 | 0.011475 | 0.011960 | 0.012007 | 0.012112 | 0.011821 | 0.011477 |
| S508     | 0.011921 | 0.011921 | 0.012094 | 0.012059 | 0.012059 | 0.012093 |
| 0.011966 | 0.011896 | 0.012128 | 0.011611 | 0.011680 | 0.011647 | 0.011611 |
| 0.011645 | 0.011818 | 0.011611 | 0.011645 | 0.011714 | 0.011680 | 0.011645 |
| 0.011611 | 0.011645 | 0.011749 | 0.011577 | 0.011646 | 0.011645 | 0.011931 |

|          |          |          |          |          |          |          |
|----------|----------|----------|----------|----------|----------|----------|
| 0.011887 | 0.011645 | 0.011542 | 0.011783 | 0.011680 | 0.011680 | 0.011714 |
| 0.011646 | 0.011783 | 0.011680 | 0.011680 | 0.011645 | 0.011680 | 0.011852 |
| 0.011611 | 0.011680 | 0.011680 | 0.011645 | 0.011749 | 0.011783 | 0.011680 |
| 0.011680 | 0.011818 | 0.011749 | 0.012025 | 0.011645 | 0.011956 | 0.011645 |
| 0.011645 | 0.011749 | 0.011749 | 0.011956 | 0.012025 | 0.011749 | 0.011783 |
| 0.011714 | 0.011783 | 0.011680 | 0.011921 | 0.012163 | 0.011645 | 0.011749 |
| 0.011645 | 0.011749 | 0.011714 | 0.011783 | 0.011680 | 0.011714 | 0.011714 |
| 0.011611 | 0.011645 | 0.011611 | 0.011714 | 0.011680 | 0.011716 | 0.011783 |
| 0.011714 | 0.011645 | 0.011749 | 0.011645 | 0.011783 | 0.011611 | 0.011680 |
| 0.011852 | 0.011783 | 0.012025 | 0.011852 | 0.011680 | 0.011921 | 0.011680 |
| 0.011853 | 0.012088 | 0.011868 | 0.011583 | 0.011635 | 0.011703 | 0.011823 |
| 0.012489 | 0.011843 | 0.011607 | 0.011921 | 0.011921 | 0.011714 | 0.011818 |
| 0.011749 | 0.011508 | 0.011714 | 0.011680 | 0.011783 | 0.011714 | 0.011645 |
| 0.011611 | 0.011783 | 0.011783 | 0.011852 | 0.011749 | 0.011715 | 0.011646 |
| 0.011611 | 0.011611 | 0.011680 | 0.011646 | 0.011852 | 0.011818 | 0.011749 |
| 0.011852 | 0.011921 | 0.011646 | 0.011646 | 0.011680 | 0.011680 | 0.011684 |
| 0.011754 | 0.011680 | 0.011680 | 0.011572 | 0.011612 | 0.011558 | 0.011680 |
| 0.011685 | 0.011624 | 0.011667 | 0.011662 | 0.011578 | 0.011617 | 0.011647 |
| 0.011865 | 0.011690 | 0.011730 | 0.011611 | 0.011627 | 0.011750 | 0.011715 |
| 0.011784 | 0.011717 | 0.011715 | 0.011680 | 0.011645 | 0.012128 | 0.011887 |
| 0.011955 | 0.011749 | 0.011680 | 0.011715 | 0.011577 | 0.011818 | 0.011611 |
| 0.011680 | 0.011680 | 0.011646 | 0.011611 | 0.011645 | 0.011611 | 0.011715 |
| 0.011680 | 0.011784 | 0.011715 | 0.011611 | 0.011717 | 0.011818 | 0.011823 |
| 0.011818 | 0.011715 | 0.011611 | 0.011544 | 0.011680 | 0.011611 | 0.011543 |
| 0.011583 | 0.011818 | 0.011611 | 0.011818 | 0.011577 | 0.011680 | 0.011646 |
| 0.011749 | 0.011646 | 0.011680 | 0.011646 | 0.011680 | 0.011542 | 0.011680 |
| 0.011715 | 0.011646 | 0.011715 | 0.011646 | 0.011611 | 0.011715 | 0.011956 |
| 0.012059 | 0.011990 | 0.012060 | 0.011786 | 0.012060 | 0.011611 | 0.011646 |
| 0.011684 | 0.011931 | 0.011807 | 0.011588 | 0.012070 | 0.011550 | 0.011704 |
| 0.012001 | 0.011966 | 0.011783 | 0.011852 | 0.011691 | 0.011921 | 0.011887 |
| 0.011818 | 0.011990 | 0.011739 | 0.011680 | 0.011731 | 0.011715 | 0.011685 |
| 0.011887 | 0.011715 | 0.011921 | 0.011853 | 0.011852 | 0.000000 | 0.011818 |
| 0.011751 | 0.011853 | 0.011818 | 0.011852 | 0.011922 | 0.011576 | 0.011783 |
| 0.011749 | 0.011646 | 0.011576 | 0.011576 | 0.011645 | 0.011645 | 0.011714 |
| 0.011645 | 0.011714 | 0.011611 | 0.011714 | 0.011645 | 0.011645 | 0.011714 |
| 0.011645 | 0.012093 | 0.011990 | 0.012025 | 0.011542 | 0.011645 | 0.011680 |
| 0.011680 | 0.011645 | 0.011680 | 0.011680 | 0.011611 | 0.011611 | 0.011611 |
| 0.012162 | 0.011749 | 0.011783 | 0.011577 | 0.011645 | 0.011852 | 0.011611 |
| 0.011611 | 0.011680 | 0.011645 | 0.011818 | 0.011611 | 0.011714 | 0.011818 |
| 0.011783 | 0.011611 | 0.011645 | 0.011542 | 0.011576 | 0.011749 | 0.011680 |
| 0.011542 | 0.011645 | 0.011542 | 0.011576 | 0.011714 | 0.011852 | 0.011611 |
| 0.011577 | 0.011714 | 0.011645 | 0.011542 | 0.011887 | 0.011542 | 0.011714 |
| 0.011792 | 0.011611 | 0.011921 | 0.011749 | 0.011783 | 0.011645 | 0.011680 |
| 0.011611 | 0.011956 | 0.011542 | 0.011818 | 0.011611 | 0.011611 | 0.011542 |
| 0.011783 | 0.011956 | 0.011680 | 0.011749 | 0.011576 | 0.011990 | 0.011611 |
| 0.011611 | 0.011611 | 0.011645 | 0.011749 | 0.011576 | 0.011749 | 0.011818 |
| 0.011818 | 0.011783 | 0.011680 | 0.011783 | 0.011749 | 0.011611 | 0.011577 |
| 0.011611 | 0.011611 | 0.011680 | 0.011611 | 0.011577 | 0.011714 | 0.011611 |
| 0.011645 | 0.011645 | 0.011749 | 0.011818 | 0.011714 | 0.011645 | 0.011646 |
| 0.011714 | 0.011645 | 0.011714 | 0.011611 | 0.011749 | 0.011818 | 0.012094 |
| 0.011645 | 0.012059 | 0.011662 | 0.018397 | 0.011398 | 0.011943 | 0.012027 |
| 0.011983 | 0.012035 | 0.011651 | 0.011538 | 0.012077 | 0.012052 | 0.011812 |
| 0.011594 | 0.011992 | 0.011537 | 0.011621 | 0.011502 | 0.011769 | 0.011679 |
| 0.011829 | 0.011826 | 0.011822 | 0.011463 | 0.011783 | 0.011715 | 0.011824 |
| 0.011682 | 0.011749 | 0.011783 | 0.011749 | 0.011715 | 0.011715 | 0.011680 |
| 0.011715 | 0.011645 | 0.011680 | 0.011715 | 0.011680 | 0.011611 | 0.011577 |
| 0.011577 | 0.011715 | 0.011611 | 0.011715 | 0.011749 | 0.011784 | 0.011611 |
| 0.011714 | 0.011680 | 0.012025 | 0.012025 | 0.011749 | 0.011785 | 0.011715 |
| 0.011577 | 0.011577 | 0.011611 | 0.011715 | 0.011577 | 0.011818 | 0.011818 |
| 0.011852 | 0.011783 | 0.011783 | 0.011887 | 0.012060 | 0.011889 | 0.011715 |



|          |          |          |          |          |          |          |
|----------|----------|----------|----------|----------|----------|----------|
| 0.011715 | 0.011715 | 0.011818 | 0.011646 | 0.011715 | 0.011680 | 0.011715 |
| 0.011784 | 0.011784 | 0.011818 | 0.011784 | 0.011682 | 0.011852 | 0.011853 |
| 0.011720 | 0.011611 | 0.011715 | 0.011749 | 0.011646 | 0.011853 | 0.011887 |
| 0.011852 | 0.011691 | 0.011921 | 0.011887 | 0.011818 | 0.011990 | 0.011611 |
| 0.011786 | 0.011681 | 0.011577 | 0.011577 | 0.011715 | 0.011611 | 0.011715 |
| 0.011749 | 0.011784 | 0.011611 | 0.011714 | 0.011680 | 0.012025 | 0.012025 |
| 0.011749 | 0.011785 | 0.011749 | 0.011680 | 0.012371 | 0.011846 | 0.011665 |
| 0.011834 | 0.011793 | 0.011870 | 0.011797 | 0.011903 | 0.011615 | 0.011762 |
| 0.012308 | 0.011615 | 0.011749 | 0.011545 | 0.000000 | 0.011887 | 0.011853 |
| 0.012342 | 0.011852 | 0.011962 | 0.012025 | 0.011887 | 0.011887 | 0.011927 |
| 0.011576 | 0.011749 | 0.011887 | 0.011852 | 0.011857 | 0.011852 | 0.011786 |
| 0.011680 | 0.011611 | 0.011645 | 0.011680 | 0.011577 | 0.011645 | 0.011542 |
| 0.011680 | 0.011714 | 0.011611 | 0.011577 | 0.011680 | 0.011611 | 0.011645 |
| 0.011645 | 0.011576 | 0.011645 | 0.011680 | 0.011576 | 0.011783 | 0.011818 |
| 0.011714 | 0.011783 | 0.011714 | 0.011714 | 0.011645 | 0.012025 | 0.011680 |
| 0.011694 | 0.011646 | 0.011887 | 0.011888 | 0.011749 | 0.011749 | 0.011749 |
| 0.011749 | 0.011680 | 0.011645 | 0.011680 | 0.011749 | 0.011783 | 0.011714 |
| 0.011714 | 0.011818 | 0.012025 | 0.011749 | 0.011921 | 0.011921 | 0.011818 |
| 0.011645 | 0.011714 | 0.011749 | 0.012163 | 0.011715 | 0.011749 | 0.011714 |
| 0.011749 | 0.011680 | 0.011680 | 0.011990 | 0.011887 | 0.011956 | 0.011680 |
| 0.011783 | 0.011852 | 0.011680 | 0.011783 | 0.011749 | 0.011611 | 0.011956 |
| 0.011714 | 0.011680 | 0.011680 | 0.011852 | 0.011680 | 0.011783 | 0.012025 |
| 0.011645 | 0.012036 | 0.012094 | 0.011890 | 0.011404 | 0.011792 | 0.011373 |
| 0.011681 | 0.012062 | 0.011637 | 0.011882 | 0.011660 | 0.011530 | 0.011606 |
| 0.011793 | 0.011400 | 0.011518 | 0.011401 | 0.011559 | 0.011614 | 0.011764 |
| 0.011674 | 0.011702 | 0.011783 | 0.011711 | 0.011717 | 0.011852 | 0.011922 |
| 0.011887 | 0.011715 | 0.011823 | 0.011895 | 0.012034 | 0.012004 | 0.011714 |
| 0.011955 | 0.011749 | 0.011680 | 0.011715 | 0.011577 | 0.011818 | 0.011611 |
| 0.011680 | 0.011680 | 0.011646 | 0.011611 | 0.011645 | 0.011611 | 0.011715 |
| 0.011705 | 0.011664 | 0.011692 | 0.011722 | 0.011861 | 0.011831 | 0.011830 |
| 0.011826 | 0.011749 | 0.011582 | 0.011572 | 0.011685 | 0.011859 | 0.011825 |
| 0.011646 | 0.011720 | 0.011923 | 0.011926 | 0.011853 | 0.011888 | 0.011714 |
| 0.011749 | 0.011611 | 0.011611 | 0.011714 | 0.012266 | 0.011887 | 0.011956 |
| 0.011956 | 0.012045 | 0.011690 | 0.011768 | 0.011611 | 0.011783 | 0.011714 |
| 0.011854 | 0.011783 | 0.011887 | 0.011887 | 0.011829 | 0.011956 | 0.011622 |
| 0.011542 | 0.011514 | 0.011646 | 0.011578 | 0.011716 | 0.011546 | 0.011887 |
| 0.011686 | 0.011850 | 0.011632 | 0.011622 | 0.011680 | 0.011756 | 0.011646 |
| 0.011611 | 0.011611 | 0.011680 | 0.011646 | 0.011852 | 0.011818 | 0.011749 |
| 0.011852 | 0.011921 | 0.011646 | 0.011646 | 0.011680 | 0.011680 | 0.011684 |
| 0.011754 | 0.011680 | 0.011680 | 0.011717 | 0.011852 | 0.011922 | 0.011887 |
| 0.011715 | 0.011823 | 0.011895 | 0.012034 | 0.012004 | 0.011714 | 0.011887 |
| 0.011714 | 0.011714 | 0.011650 | 0.011809 | 0.011774 | 0.011794 | 0.011634 |
| 0.011838 | 0.012089 | 0.011882 | 0.011687 | 0.011611 | 0.011818 | 0.011680 |
| 0.011784 | 0.011715 | 0.011611 | 0.011717 | 0.011818 | 0.011823 | 0.011715 |
| 0.011611 | 0.011544 | 0.011680 | 0.011611 | 0.011543 | 0.011583 | 0.011818 |
| 0.011715 | 0.011645 | 0.011680 | 0.011715 | 0.011680 | 0.011611 | 0.011715 |
| 0.011680 | 0.011714 | 0.011714 | 0.011645 | 0.011714 | 0.011956 | 0.011611 |
| 0.011645 | 0.012025 | 0.011645 | 0.011680 | 0.011645 | 0.012025 | 0.011591 |
| 0.011859 | 0.011533 | 0.011471 | 0.011882 | 0.011933 | 0.011871 | 0.011534 |
| 0.011330 | 0.011783 | 0.011887 | 0.012000 | 0.011854 | 0.011997 | 0.012130 |
| 0.012025 | 0.012094 | 0.012024 | 0.012217 | 0.011956 | 0.012784 | 0.012027 |
| 0.012682 | 0.012443 | 0.012547 | 0.012790 | 0.012024 | 0.011715 | 0.011991 |
| 0.012372 | 0.012375 | 0.011956 | 0.011853 | 0.011922 | 0.011922 | 0.011892 |
| 0.011783 | 0.011791 | 0.011852 | 0.011818 | 0.012233 | 0.012266 | 0.012302 |
| 0.012164 | 0.012268 | 0.012408 | 0.012169 | 0.012407 | 0.012380 | 0.012476 |
| 0.012476 | 0.012511 | 0.012426 | 0.012476 | 0.012479 | 0.011645 | 0.012025 |
| 0.012129 | 0.012439 | 0.012104 | 0.012370 | 0.012856 | 0.011896 | 0.011784 |
| 0.011749 | 0.011749 | 0.012233 | 0.012295 | 0.012396 | 0.012093 | 0.011751 |
| S509     | 0.011843 | 0.011843 | 0.012149 | 0.011979 | 0.011979 | 0.012047 |
| 0.011886 | 0.011817 | 0.012047 | 0.011468 | 0.011536 | 0.011503 | 0.011468 |

|          |          |          |          |          |          |          |
|----------|----------|----------|----------|----------|----------|----------|
| 0.011502 | 0.011672 | 0.011468 | 0.011502 | 0.011570 | 0.011536 | 0.011502 |
| 0.011468 | 0.011502 | 0.011604 | 0.011469 | 0.011503 | 0.011502 | 0.011852 |
| 0.011740 | 0.011502 | 0.011400 | 0.011638 | 0.011536 | 0.011536 | 0.011570 |
| 0.011502 | 0.011638 | 0.011536 | 0.011536 | 0.011570 | 0.011536 | 0.011706 |
| 0.011468 | 0.011536 | 0.011570 | 0.011502 | 0.011604 | 0.011638 | 0.011536 |
| 0.011536 | 0.011707 | 0.011605 | 0.011877 | 0.011536 | 0.011808 | 0.011536 |
| 0.011502 | 0.011604 | 0.011672 | 0.011808 | 0.011877 | 0.011604 | 0.011706 |
| 0.011570 | 0.011638 | 0.011536 | 0.011774 | 0.012013 | 0.011536 | 0.011604 |
| 0.011502 | 0.011604 | 0.011570 | 0.011638 | 0.011570 | 0.011570 | 0.011570 |
| 0.011468 | 0.011502 | 0.011468 | 0.011570 | 0.011536 | 0.011572 | 0.011638 |
| 0.011570 | 0.011502 | 0.011604 | 0.011502 | 0.011638 | 0.011468 | 0.011536 |
| 0.011706 | 0.011638 | 0.011877 | 0.011706 | 0.011536 | 0.011774 | 0.011536 |
| 0.011695 | 0.011925 | 0.011706 | 0.011457 | 0.011439 | 0.011508 | 0.011655 |
| 0.012285 | 0.011727 | 0.011434 | 0.011774 | 0.011774 | 0.011570 | 0.011672 |
| 0.011604 | 0.011570 | 0.011638 | 0.011536 | 0.011638 | 0.011570 | 0.011570 |
| 0.011536 | 0.011638 | 0.011843 | 0.011706 | 0.011604 | 0.011570 | 0.011502 |
| 0.011468 | 0.011468 | 0.011537 | 0.011502 | 0.011707 | 0.011673 | 0.011605 |
| 0.011707 | 0.011775 | 0.011502 | 0.011502 | 0.011537 | 0.011536 | 0.011539 |
| 0.011608 | 0.011536 | 0.011537 | 0.011386 | 0.011461 | 0.011413 | 0.011537 |
| 0.011541 | 0.011478 | 0.011509 | 0.011480 | 0.011437 | 0.011474 | 0.011505 |
| 0.011713 | 0.011546 | 0.011583 | 0.011469 | 0.011446 | 0.011606 | 0.011571 |
| 0.011639 | 0.011572 | 0.011571 | 0.011638 | 0.011570 | 0.011979 | 0.011775 |
| 0.011808 | 0.011673 | 0.011536 | 0.011639 | 0.011434 | 0.011672 | 0.011469 |
| 0.011536 | 0.011536 | 0.011502 | 0.011468 | 0.011502 | 0.011468 | 0.011570 |
| 0.011537 | 0.011639 | 0.011571 | 0.011468 | 0.011572 | 0.011673 | 0.011677 |
| 0.011673 | 0.011571 | 0.011468 | 0.011402 | 0.011536 | 0.011468 | 0.011401 |
| 0.011508 | 0.011673 | 0.011468 | 0.011673 | 0.011434 | 0.011537 | 0.011502 |
| 0.011605 | 0.011502 | 0.011537 | 0.011503 | 0.011537 | 0.011400 | 0.011537 |
| 0.011571 | 0.011502 | 0.011571 | 0.011502 | 0.011536 | 0.011570 | 0.011536 |
| 0.011911 | 0.011809 | 0.011911 | 0.011675 | 0.011911 | 0.011536 | 0.011502 |
| 0.011539 | 0.011799 | 0.011618 | 0.011443 | 0.011886 | 0.011406 | 0.011580 |
| 0.011921 | 0.011818 | 0.011672 | 0.011911 | 0.011545 | 0.011774 | 0.011741 |
| 0.011672 | 0.011843 | 0.011666 | 0.011513 | 0.011479 | 0.011570 | 0.011609 |
| 0.011094 | 0.011640 | 0.011775 | 0.011845 | 0.011774 | 0.011843 | 0.011950 |
| 0.011675 | 0.011851 | 0.011674 | 0.011707 | 0.011980 | 0.011434 | 0.011641 |
| 0.011604 | 0.011536 | 0.011434 | 0.011434 | 0.011502 | 0.011502 | 0.011570 |
| 0.011502 | 0.011570 | 0.011468 | 0.011570 | 0.011502 | 0.011502 | 0.011570 |
| 0.011502 | 0.011945 | 0.011843 | 0.011877 | 0.011400 | 0.011502 | 0.011536 |
| 0.011536 | 0.011502 | 0.011570 | 0.011604 | 0.011468 | 0.011468 | 0.011468 |
| 0.012013 | 0.011638 | 0.011638 | 0.011434 | 0.011536 | 0.011706 | 0.011468 |
| 0.011468 | 0.011536 | 0.011502 | 0.011672 | 0.011468 | 0.011604 | 0.011706 |
| 0.011672 | 0.011468 | 0.011502 | 0.011400 | 0.011434 | 0.011604 | 0.011536 |
| 0.011400 | 0.011502 | 0.011400 | 0.011434 | 0.011570 | 0.011706 | 0.011468 |
| 0.011435 | 0.011570 | 0.011502 | 0.011400 | 0.011740 | 0.011400 | 0.011570 |
| 0.011650 | 0.011468 | 0.011774 | 0.011605 | 0.011638 | 0.011502 | 0.011604 |
| 0.011468 | 0.011808 | 0.011400 | 0.011672 | 0.011468 | 0.011468 | 0.011400 |
| 0.011638 | 0.011843 | 0.011536 | 0.011604 | 0.011434 | 0.011843 | 0.011468 |
| 0.011468 | 0.011468 | 0.011502 | 0.011604 | 0.011502 | 0.011604 | 0.011672 |
| 0.011672 | 0.011638 | 0.011536 | 0.011638 | 0.011604 | 0.011468 | 0.011434 |
| 0.011468 | 0.011468 | 0.011536 | 0.011468 | 0.011434 | 0.011604 | 0.011468 |
| 0.011502 | 0.011502 | 0.011638 | 0.011672 | 0.011570 | 0.011502 | 0.011502 |
| 0.011570 | 0.011502 | 0.011604 | 0.011468 | 0.011604 | 0.011706 | 0.011945 |
| 0.011502 | 0.011911 | 0.011515 | 0.018036 | 0.011391 | 0.011742 | 0.011873 |
| 0.011832 | 0.011845 | 0.011483 | 0.011471 | 0.012059 | 0.011900 | 0.011736 |
| 0.011730 | 0.011915 | 0.011414 | 0.011443 | 0.011417 | 0.011608 | 0.011496 |
| 0.011675 | 0.011665 | 0.011624 | 0.011328 | 0.011638 | 0.011639 | 0.011677 |
| 0.011543 | 0.011604 | 0.011638 | 0.011605 | 0.011570 | 0.011571 | 0.011537 |
| 0.011570 | 0.011502 | 0.011536 | 0.011571 | 0.011537 | 0.011468 | 0.011502 |
| 0.011502 | 0.011571 | 0.011468 | 0.011571 | 0.011605 | 0.011639 | 0.011536 |
| 0.011570 | 0.011537 | 0.011877 | 0.011877 | 0.011605 | 0.011639 | 0.011639 |

|          |          |          |          |          |          |          |
|----------|----------|----------|----------|----------|----------|----------|
| 0.011434 | 0.011434 | 0.011468 | 0.011571 | 0.011434 | 0.011673 | 0.011673 |
| 0.011707 | 0.011672 | 0.011638 | 0.011741 | 0.011911 | 0.011743 | 0.011570 |
| 0.011571 | 0.011639 | 0.011673 | 0.011502 | 0.011571 | 0.011536 | 0.011570 |
| 0.011639 | 0.011639 | 0.011673 | 0.011639 | 0.011538 | 0.011707 | 0.011707 |
| 0.011575 | 0.011468 | 0.011571 | 0.011639 | 0.011571 | 0.011707 | 0.011468 |
| 0.011911 | 0.011545 | 0.011774 | 0.011741 | 0.011672 | 0.011843 | 0.011469 |
| 0.011641 | 0.011537 | 0.011502 | 0.011502 | 0.011571 | 0.011468 | 0.011571 |
| 0.011605 | 0.011639 | 0.011536 | 0.011570 | 0.011537 | 0.011877 | 0.011877 |
| 0.011605 | 0.011639 | 0.011672 | 0.011604 | 0.012253 | 0.011667 | 0.011592 |
| 0.011693 | 0.011652 | 0.011763 | 0.011655 | 0.011726 | 0.011683 | 0.011650 |
| 0.012200 | 0.011545 | 0.011679 | 0.011614 | 0.011887 | 0.000000 | 0.011848 |
| 0.012231 | 0.011701 | 0.011814 | 0.011877 | 0.011740 | 0.011741 | 0.011779 |
| 0.011434 | 0.011604 | 0.011740 | 0.011706 | 0.011711 | 0.011706 | 0.011675 |
| 0.011536 | 0.011468 | 0.011502 | 0.011536 | 0.011434 | 0.011502 | 0.011400 |
| 0.011536 | 0.011570 | 0.011468 | 0.011434 | 0.011536 | 0.011468 | 0.011502 |
| 0.011502 | 0.011434 | 0.011502 | 0.011536 | 0.011434 | 0.011638 | 0.011400 |
| 0.011570 | 0.011638 | 0.011570 | 0.011570 | 0.011502 | 0.011877 | 0.011536 |
| 0.011552 | 0.011502 | 0.011741 | 0.011748 | 0.011604 | 0.011604 | 0.011604 |
| 0.011604 | 0.011536 | 0.011502 | 0.011536 | 0.011638 | 0.011638 | 0.011502 |
| 0.011570 | 0.011672 | 0.011877 | 0.011604 | 0.011809 | 0.011809 | 0.011672 |
| 0.011502 | 0.011570 | 0.011604 | 0.012013 | 0.011503 | 0.011604 | 0.011570 |
| 0.011604 | 0.011536 | 0.011536 | 0.011843 | 0.011775 | 0.011809 | 0.011536 |
| 0.011638 | 0.011706 | 0.011502 | 0.011638 | 0.011604 | 0.011468 | 0.011808 |
| 0.011570 | 0.011536 | 0.011536 | 0.011706 | 0.011536 | 0.011638 | 0.011877 |
| 0.011502 | 0.011955 | 0.011945 | 0.011756 | 0.011286 | 0.011646 | 0.011529 |
| 0.011505 | 0.011969 | 0.011452 | 0.011691 | 0.011602 | 0.011677 | 0.011704 |
| 0.011627 | 0.011327 | 0.011623 | 0.011328 | 0.011496 | 0.011535 | 0.011346 |
| 0.011629 | 0.011536 | 0.011632 | 0.011560 | 0.011573 | 0.011707 | 0.011775 |
| 0.011775 | 0.011639 | 0.011745 | 0.011747 | 0.011885 | 0.011920 | 0.011570 |
| 0.011808 | 0.011673 | 0.011536 | 0.011639 | 0.011434 | 0.011672 | 0.011469 |
| 0.011536 | 0.011536 | 0.011502 | 0.011468 | 0.011502 | 0.011468 | 0.011570 |
| 0.011520 | 0.011554 | 0.011546 | 0.011578 | 0.011715 | 0.011683 | 0.011682 |
| 0.011681 | 0.011605 | 0.011395 | 0.011387 | 0.011541 | 0.011713 | 0.011679 |
| 0.011503 | 0.011575 | 0.011811 | 0.011779 | 0.011708 | 0.011742 | 0.011638 |
| 0.011604 | 0.011672 | 0.011672 | 0.011570 | 0.012149 | 0.011740 | 0.011809 |
| 0.011843 | 0.011924 | 0.011544 | 0.011621 | 0.011502 | 0.011707 | 0.011638 |
| 0.011708 | 0.011740 | 0.011740 | 0.011740 | 0.011858 | 0.011877 | 0.011480 |
| 0.011403 | 0.011373 | 0.011507 | 0.011473 | 0.011576 | 0.011359 | 0.011747 |
| 0.011545 | 0.011587 | 0.011346 | 0.011510 | 0.011537 | 0.011612 | 0.011502 |
| 0.011468 | 0.011468 | 0.011537 | 0.011502 | 0.011707 | 0.011673 | 0.011605 |
| 0.011707 | 0.011775 | 0.011502 | 0.011502 | 0.011537 | 0.011536 | 0.011539 |
| 0.011608 | 0.011536 | 0.011537 | 0.011573 | 0.011707 | 0.011775 | 0.011775 |
| 0.011639 | 0.011745 | 0.011747 | 0.011885 | 0.011920 | 0.011570 | 0.011468 |
| 0.011638 | 0.011638 | 0.011506 | 0.011660 | 0.011624 | 0.011647 | 0.011522 |
| 0.011688 | 0.011662 | 0.011361 | 0.011577 | 0.011468 | 0.011673 | 0.011537 |
| 0.011639 | 0.011571 | 0.011468 | 0.011572 | 0.011673 | 0.011677 | 0.011571 |
| 0.011468 | 0.011402 | 0.011536 | 0.011468 | 0.011401 | 0.011508 | 0.011673 |
| 0.011570 | 0.011502 | 0.011536 | 0.011571 | 0.011537 | 0.011468 | 0.011673 |
| 0.011536 | 0.011570 | 0.011298 | 0.011502 | 0.011570 | 0.011809 | 0.011468 |
| 0.011502 | 0.011877 | 0.011502 | 0.011536 | 0.011502 | 0.011877 | 0.011409 |
| 0.011791 | 0.011485 | 0.011465 | 0.011710 | 0.011799 | 0.011679 | 0.011443 |
| 0.011378 | 0.011672 | 0.011774 | 0.011886 | 0.011742 | 0.011883 | 0.012015 |
| 0.011913 | 0.011951 | 0.011911 | 0.012169 | 0.011877 | 0.012763 | 0.011914 |
| 0.012628 | 0.012427 | 0.012529 | 0.012804 | 0.011877 | 0.011571 | 0.011877 |
| 0.012288 | 0.012257 | 0.011843 | 0.011741 | 0.011810 | 0.011810 | 0.011780 |
| 0.011672 | 0.011679 | 0.011740 | 0.011708 | 0.012082 | 0.012149 | 0.012151 |
| 0.012049 | 0.012151 | 0.012256 | 0.012019 | 0.012288 | 0.012261 | 0.012356 |
| 0.012357 | 0.012391 | 0.012340 | 0.012357 | 0.012359 | 0.011570 | 0.011911 |
| 0.011980 | 0.012422 | 0.011988 | 0.012184 | 0.012664 | 0.011749 | 0.011639 |
| 0.011604 | 0.011604 | 0.012082 | 0.012089 | 0.012237 | 0.011945 | 0.011607 |

|          |          |          |          |          |          |          |
|----------|----------|----------|----------|----------|----------|----------|
| S510     | 0.011945 | 0.011945 | 0.012047 | 0.012013 | 0.012013 | 0.012047 |
| 0.011990 | 0.011921 | 0.012081 | 0.011570 | 0.011638 | 0.011606 | 0.011570 |
| 0.011604 | 0.011775 | 0.011570 | 0.011604 | 0.011673 | 0.011639 | 0.011604 |
| 0.011570 | 0.011605 | 0.011707 | 0.011571 | 0.011537 | 0.011604 | 0.011955 |
| 0.011843 | 0.011605 | 0.011502 | 0.011741 | 0.011604 | 0.011639 | 0.011605 |
| 0.011639 | 0.011673 | 0.011639 | 0.011639 | 0.011639 | 0.011639 | 0.011741 |
| 0.011570 | 0.011639 | 0.011673 | 0.011604 | 0.011707 | 0.011741 | 0.011673 |
| 0.011639 | 0.011809 | 0.011707 | 0.011979 | 0.011639 | 0.011638 | 0.011639 |
| 0.011604 | 0.011707 | 0.011775 | 0.011638 | 0.012013 | 0.011707 | 0.011809 |
| 0.011604 | 0.011673 | 0.011639 | 0.011809 | 0.012116 | 0.011605 | 0.011707 |
| 0.011605 | 0.011707 | 0.011673 | 0.011741 | 0.011638 | 0.011673 | 0.011673 |
| 0.011570 | 0.011604 | 0.011570 | 0.011673 | 0.011638 | 0.011674 | 0.011741 |
| 0.011673 | 0.011639 | 0.011639 | 0.011604 | 0.011741 | 0.011502 | 0.011639 |
| 0.011809 | 0.011741 | 0.011979 | 0.011809 | 0.011639 | 0.011809 | 0.011638 |
| 0.011807 | 0.012039 | 0.011896 | 0.011575 | 0.011514 | 0.011695 | 0.011695 |
| 0.012359 | 0.011779 | 0.011517 | 0.011877 | 0.011877 | 0.011672 | 0.011775 |
| 0.011707 | 0.011673 | 0.011741 | 0.011639 | 0.011741 | 0.011604 | 0.011672 |
| 0.011638 | 0.011741 | 0.011945 | 0.011809 | 0.011707 | 0.011673 | 0.011537 |
| 0.011571 | 0.011571 | 0.011571 | 0.011605 | 0.011809 | 0.011775 | 0.011707 |
| 0.011809 | 0.011877 | 0.011605 | 0.011605 | 0.011639 | 0.011639 | 0.011642 |
| 0.011711 | 0.011639 | 0.011639 | 0.011497 | 0.011610 | 0.011557 | 0.011639 |
| 0.011643 | 0.011582 | 0.011621 | 0.011619 | 0.011541 | 0.011580 | 0.011607 |
| 0.011898 | 0.011653 | 0.011618 | 0.011571 | 0.011586 | 0.011708 | 0.011673 |
| 0.011742 | 0.011675 | 0.011673 | 0.011740 | 0.011672 | 0.012013 | 0.011843 |
| 0.011911 | 0.011775 | 0.011639 | 0.011741 | 0.011537 | 0.011775 | 0.011571 |
| 0.011639 | 0.011639 | 0.011605 | 0.011571 | 0.011604 | 0.011571 | 0.011673 |
| 0.011571 | 0.011673 | 0.011673 | 0.011571 | 0.011675 | 0.011775 | 0.011780 |
| 0.011707 | 0.011673 | 0.011571 | 0.011505 | 0.011639 | 0.011571 | 0.011503 |
| 0.011542 | 0.011707 | 0.011503 | 0.011707 | 0.011537 | 0.011639 | 0.011605 |
| 0.011639 | 0.011605 | 0.011571 | 0.011605 | 0.011639 | 0.011503 | 0.011571 |
| 0.011605 | 0.011605 | 0.011673 | 0.011605 | 0.011639 | 0.011673 | 0.011911 |
| 0.012013 | 0.011945 | 0.012014 | 0.011778 | 0.012014 | 0.011639 | 0.011605 |
| 0.011642 | 0.011921 | 0.011799 | 0.011547 | 0.012024 | 0.011510 | 0.011617 |
| 0.012024 | 0.011921 | 0.011809 | 0.012013 | 0.011683 | 0.011877 | 0.011775 |
| 0.011775 | 0.011945 | 0.011808 | 0.011721 | 0.011773 | 0.011673 | 0.011746 |
| 0.011843 | 0.011741 | 0.011878 | 0.011094 | 0.011877 | 0.011809 | 0.012015 |
| 0.011781 | 0.011094 | 0.011849 | 0.011814 | 0.012082 | 0.011536 | 0.011742 |
| 0.011638 | 0.011639 | 0.011536 | 0.011536 | 0.011536 | 0.011605 | 0.011673 |
| 0.011536 | 0.011605 | 0.011502 | 0.011673 | 0.011536 | 0.011604 | 0.011672 |
| 0.011605 | 0.012047 | 0.011945 | 0.011979 | 0.011502 | 0.011605 | 0.011639 |
| 0.011639 | 0.011604 | 0.011639 | 0.011707 | 0.011570 | 0.011570 | 0.011570 |
| 0.012115 | 0.011707 | 0.011741 | 0.011536 | 0.011604 | 0.011741 | 0.011571 |
| 0.011570 | 0.011638 | 0.011604 | 0.011707 | 0.011570 | 0.011673 | 0.011740 |
| 0.011741 | 0.011605 | 0.011604 | 0.011536 | 0.011536 | 0.011707 | 0.011638 |
| 0.011536 | 0.011638 | 0.011502 | 0.011536 | 0.011673 | 0.011809 | 0.011571 |
| 0.011537 | 0.011673 | 0.011605 | 0.011502 | 0.011843 | 0.011502 | 0.011673 |
| 0.011681 | 0.011571 | 0.011877 | 0.011707 | 0.011741 | 0.011605 | 0.011673 |
| 0.011570 | 0.011638 | 0.011502 | 0.011775 | 0.011570 | 0.011570 | 0.011502 |
| 0.011672 | 0.011945 | 0.011639 | 0.011707 | 0.011536 | 0.011945 | 0.011570 |
| 0.011571 | 0.011570 | 0.011604 | 0.011639 | 0.011604 | 0.011707 | 0.011775 |
| 0.011775 | 0.011741 | 0.011638 | 0.011741 | 0.011638 | 0.011570 | 0.011536 |
| 0.011570 | 0.011570 | 0.011639 | 0.011570 | 0.011468 | 0.011673 | 0.011570 |
| 0.011604 | 0.011605 | 0.011707 | 0.011775 | 0.011673 | 0.011536 | 0.011605 |
| 0.011673 | 0.011604 | 0.011672 | 0.011570 | 0.011707 | 0.011809 | 0.012047 |
| 0.011605 | 0.012013 | 0.011620 | 0.018184 | 0.011458 | 0.011998 | 0.011979 |
| 0.011937 | 0.011987 | 0.011642 | 0.011529 | 0.012115 | 0.012005 | 0.011674 |
| 0.011730 | 0.012047 | 0.011492 | 0.011571 | 0.011615 | 0.011758 | 0.011672 |
| 0.011865 | 0.011702 | 0.011699 | 0.011325 | 0.011741 | 0.011741 | 0.011780 |
| 0.011576 | 0.011741 | 0.011741 | 0.011707 | 0.011673 | 0.011673 | 0.011639 |
| 0.011673 | 0.011605 | 0.011639 | 0.011673 | 0.011639 | 0.011571 | 0.011605 |

|          |          |          |          |          |          |          |
|----------|----------|----------|----------|----------|----------|----------|
| 0.011605 | 0.011673 | 0.011571 | 0.011673 | 0.011707 | 0.011741 | 0.011639 |
| 0.011673 | 0.011639 | 0.011980 | 0.011980 | 0.011707 | 0.011742 | 0.011741 |
| 0.011537 | 0.011537 | 0.011571 | 0.011605 | 0.011537 | 0.011775 | 0.011775 |
| 0.011809 | 0.011809 | 0.011741 | 0.011843 | 0.012014 | 0.011845 | 0.011605 |
| 0.011673 | 0.011707 | 0.011707 | 0.011605 | 0.011673 | 0.011639 | 0.011673 |
| 0.011741 | 0.011741 | 0.011775 | 0.011673 | 0.011504 | 0.011809 | 0.011741 |
| 0.011678 | 0.011571 | 0.011673 | 0.011741 | 0.011673 | 0.011809 | 0.011843 |
| 0.012013 | 0.011683 | 0.011877 | 0.011775 | 0.011775 | 0.011945 | 0.011571 |
| 0.011743 | 0.011639 | 0.011605 | 0.011605 | 0.011673 | 0.011571 | 0.011673 |
| 0.011707 | 0.011741 | 0.011639 | 0.011673 | 0.011639 | 0.011980 | 0.011980 |
| 0.011707 | 0.011742 | 0.011775 | 0.011706 | 0.012355 | 0.011811 | 0.011730 |
| 0.011799 | 0.011755 | 0.011869 | 0.011756 | 0.011866 | 0.011786 | 0.011723 |
| 0.012299 | 0.011649 | 0.011781 | 0.011718 | 0.011853 | 0.011848 | 0.000000 |
| 0.012328 | 0.011852 | 0.011917 | 0.011979 | 0.011843 | 0.011843 | 0.011882 |
| 0.011536 | 0.011639 | 0.011775 | 0.011740 | 0.011814 | 0.011809 | 0.011743 |
| 0.011638 | 0.011502 | 0.011536 | 0.011639 | 0.011468 | 0.011605 | 0.011502 |
| 0.011639 | 0.011673 | 0.011570 | 0.011536 | 0.011639 | 0.011570 | 0.011605 |
| 0.011604 | 0.011536 | 0.011605 | 0.011639 | 0.011536 | 0.011673 | 0.011775 |
| 0.011673 | 0.011741 | 0.011673 | 0.011673 | 0.011604 | 0.012013 | 0.011639 |
| 0.011692 | 0.011605 | 0.011843 | 0.011846 | 0.011639 | 0.011707 | 0.011707 |
| 0.011707 | 0.011571 | 0.011604 | 0.011571 | 0.011707 | 0.011741 | 0.011673 |
| 0.011673 | 0.011809 | 0.011979 | 0.011706 | 0.011877 | 0.011877 | 0.011775 |
| 0.011604 | 0.011673 | 0.011707 | 0.012116 | 0.011673 | 0.011639 | 0.011673 |
| 0.011707 | 0.011638 | 0.011638 | 0.011945 | 0.011809 | 0.011911 | 0.011639 |
| 0.011741 | 0.011809 | 0.011673 | 0.011741 | 0.011707 | 0.011571 | 0.011911 |
| 0.011672 | 0.011639 | 0.011638 | 0.011809 | 0.011639 | 0.011741 | 0.011979 |
| 0.011604 | 0.012059 | 0.012047 | 0.011756 | 0.011459 | 0.011749 | 0.011422 |
| 0.011733 | 0.011969 | 0.011594 | 0.011736 | 0.011552 | 0.011625 | 0.011596 |
| 0.011781 | 0.011460 | 0.011510 | 0.011328 | 0.011441 | 0.011467 | 0.011714 |
| 0.011705 | 0.011536 | 0.011739 | 0.011560 | 0.011675 | 0.011809 | 0.011877 |
| 0.011843 | 0.011742 | 0.011849 | 0.011851 | 0.011988 | 0.012028 | 0.011673 |
| 0.011911 | 0.011775 | 0.011639 | 0.011741 | 0.011537 | 0.011775 | 0.011571 |
| 0.011639 | 0.011639 | 0.011605 | 0.011571 | 0.011604 | 0.011571 | 0.011673 |
| 0.011662 | 0.011662 | 0.011650 | 0.011684 | 0.011823 | 0.011718 | 0.011787 |
| 0.011784 | 0.011707 | 0.011544 | 0.011497 | 0.011643 | 0.011815 | 0.011816 |
| 0.011605 | 0.011678 | 0.011913 | 0.011882 | 0.011810 | 0.011844 | 0.011741 |
| 0.011707 | 0.011775 | 0.011775 | 0.011673 | 0.012252 | 0.011843 | 0.011911 |
| 0.011946 | 0.011997 | 0.011648 | 0.011727 | 0.011604 | 0.011809 | 0.011741 |
| 0.011811 | 0.011809 | 0.011843 | 0.011843 | 0.011978 | 0.011979 | 0.011617 |
| 0.011504 | 0.011511 | 0.011607 | 0.011573 | 0.011679 | 0.011546 | 0.011846 |
| 0.011646 | 0.011806 | 0.011537 | 0.011698 | 0.011639 | 0.011719 | 0.011537 |
| 0.011571 | 0.011571 | 0.011571 | 0.011605 | 0.011809 | 0.011775 | 0.011707 |
| 0.011809 | 0.011877 | 0.011605 | 0.011605 | 0.011639 | 0.011639 | 0.011642 |
| 0.011711 | 0.011639 | 0.011639 | 0.011675 | 0.011809 | 0.011877 | 0.011843 |
| 0.011742 | 0.011849 | 0.011851 | 0.011988 | 0.012028 | 0.011673 | 0.011843 |
| 0.011741 | 0.011741 | 0.011609 | 0.011766 | 0.011695 | 0.011751 | 0.011556 |
| 0.011724 | 0.012031 | 0.011745 | 0.011646 | 0.011503 | 0.011707 | 0.011571 |
| 0.011673 | 0.011673 | 0.011571 | 0.011675 | 0.011775 | 0.011780 | 0.011673 |
| 0.011571 | 0.011505 | 0.011639 | 0.011571 | 0.011503 | 0.011542 | 0.011707 |
| 0.011673 | 0.011605 | 0.011639 | 0.011673 | 0.011639 | 0.011571 | 0.011707 |
| 0.011639 | 0.011673 | 0.011673 | 0.011604 | 0.011673 | 0.011911 | 0.011570 |
| 0.011605 | 0.012013 | 0.011604 | 0.011570 | 0.011604 | 0.011979 | 0.011539 |
| 0.011911 | 0.011446 | 0.011515 | 0.011755 | 0.011840 | 0.011824 | 0.011485 |
| 0.011431 | 0.011741 | 0.011843 | 0.011954 | 0.011811 | 0.011883 | 0.012083 |
| 0.011980 | 0.012050 | 0.011979 | 0.012133 | 0.011911 | 0.012798 | 0.011982 |
| 0.012663 | 0.012461 | 0.012598 | 0.012804 | 0.011979 | 0.011673 | 0.011946 |
| 0.012356 | 0.012325 | 0.011911 | 0.011809 | 0.011878 | 0.011878 | 0.011848 |
| 0.011741 | 0.011748 | 0.011809 | 0.011775 | 0.012185 | 0.012218 | 0.012253 |
| 0.012117 | 0.012219 | 0.012358 | 0.012122 | 0.012391 | 0.012365 | 0.012459 |
| 0.012459 | 0.012494 | 0.012410 | 0.012460 | 0.012462 | 0.011672 | 0.011980 |

|          |          |          |          |          |          |          |
|----------|----------|----------|----------|----------|----------|----------|
| 0.012082 | 0.012457 | 0.012057 | 0.012286 | 0.012767 | 0.011852 | 0.011741 |
| 0.011707 | 0.011706 | 0.012185 | 0.012254 | 0.012344 | 0.012047 | 0.011709 |
| S511     | 0.012284 | 0.012284 | 0.012421 | 0.012386 | 0.012386 | 0.012420 |
| 0.012230 | 0.012161 | 0.012454 | 0.011978 | 0.012046 | 0.012014 | 0.011978 |
| 0.011944 | 0.012182 | 0.011910 | 0.012012 | 0.012080 | 0.012046 | 0.012012 |
| 0.011978 | 0.012012 | 0.012046 | 0.011979 | 0.012013 | 0.012012 | 0.012195 |
| 0.012148 | 0.012012 | 0.011910 | 0.012080 | 0.012080 | 0.012046 | 0.012080 |
| 0.012046 | 0.012148 | 0.012046 | 0.012046 | 0.012046 | 0.012046 | 0.012182 |
| 0.011910 | 0.012046 | 0.012080 | 0.012012 | 0.012046 | 0.012148 | 0.012080 |
| 0.012046 | 0.012216 | 0.012115 | 0.012318 | 0.012046 | 0.012318 | 0.012046 |
| 0.012012 | 0.012046 | 0.012182 | 0.012318 | 0.012353 | 0.012046 | 0.012148 |
| 0.012080 | 0.012148 | 0.012046 | 0.012284 | 0.012455 | 0.012012 | 0.012114 |
| 0.012012 | 0.012114 | 0.012080 | 0.012148 | 0.012046 | 0.012080 | 0.012080 |
| 0.011978 | 0.012012 | 0.011978 | 0.012012 | 0.012046 | 0.012083 | 0.012148 |
| 0.012080 | 0.012046 | 0.012114 | 0.012012 | 0.012080 | 0.011978 | 0.012046 |
| 0.012216 | 0.012148 | 0.012386 | 0.012216 | 0.012046 | 0.012284 | 0.012046 |
| 0.012225 | 0.012385 | 0.012245 | 0.011891 | 0.011967 | 0.012104 | 0.012138 |
| 0.012803 | 0.012147 | 0.011979 | 0.012284 | 0.012284 | 0.012012 | 0.012114 |
| 0.012114 | 0.012046 | 0.012046 | 0.012046 | 0.012148 | 0.012080 | 0.012012 |
| 0.012012 | 0.012080 | 0.012318 | 0.012216 | 0.012046 | 0.012080 | 0.012012 |
| 0.011978 | 0.011910 | 0.012047 | 0.012012 | 0.012149 | 0.012115 | 0.012046 |
| 0.012149 | 0.012217 | 0.012012 | 0.012012 | 0.012047 | 0.012046 | 0.012052 |
| 0.012122 | 0.012046 | 0.012047 | 0.011933 | 0.012012 | 0.011946 | 0.012047 |
| 0.012054 | 0.011999 | 0.012069 | 0.012038 | 0.011919 | 0.011960 | 0.012017 |
| 0.012225 | 0.012036 | 0.012106 | 0.011979 | 0.012005 | 0.012116 | 0.012013 |
| 0.012081 | 0.012083 | 0.012081 | 0.012080 | 0.012012 | 0.012489 | 0.012183 |
| 0.012250 | 0.012115 | 0.012046 | 0.012081 | 0.011944 | 0.012114 | 0.011979 |
| 0.012046 | 0.012046 | 0.012012 | 0.011978 | 0.012012 | 0.011978 | 0.012080 |
| 0.012047 | 0.012149 | 0.012081 | 0.011978 | 0.012084 | 0.012149 | 0.012156 |
| 0.012183 | 0.012081 | 0.011978 | 0.011880 | 0.012046 | 0.011978 | 0.011911 |
| 0.011989 | 0.012183 | 0.011944 | 0.012183 | 0.011944 | 0.012047 | 0.012012 |
| 0.012115 | 0.012012 | 0.012047 | 0.012013 | 0.012046 | 0.011910 | 0.012046 |
| 0.012081 | 0.012012 | 0.012081 | 0.012012 | 0.011978 | 0.012080 | 0.012319 |
| 0.012353 | 0.012284 | 0.012353 | 0.012187 | 0.012353 | 0.011978 | 0.012012 |
| 0.011950 | 0.012288 | 0.012068 | 0.011964 | 0.012367 | 0.011889 | 0.012050 |
| 0.012264 | 0.012265 | 0.012148 | 0.012387 | 0.011994 | 0.012284 | 0.012251 |
| 0.012182 | 0.012352 | 0.012164 | 0.012093 | 0.012152 | 0.012080 | 0.012122 |
| 0.012250 | 0.012083 | 0.012293 | 0.012325 | 0.012216 | 0.012319 | 0.012358 |
| 0.012123 | 0.012323 | 0.012191 | 0.012190 | 0.012455 | 0.011944 | 0.012150 |
| 0.012114 | 0.012046 | 0.011944 | 0.011944 | 0.012012 | 0.012012 | 0.012080 |
| 0.012012 | 0.012080 | 0.011978 | 0.012012 | 0.012012 | 0.012012 | 0.012080 |
| 0.012012 | 0.012386 | 0.012284 | 0.012318 | 0.011910 | 0.012012 | 0.012046 |
| 0.012046 | 0.012012 | 0.012046 | 0.012046 | 0.011978 | 0.011978 | 0.011978 |
| 0.012455 | 0.012046 | 0.012148 | 0.011944 | 0.012012 | 0.012216 | 0.011978 |
| 0.011978 | 0.012046 | 0.012012 | 0.012182 | 0.011978 | 0.012080 | 0.012216 |
| 0.012148 | 0.012012 | 0.012012 | 0.011944 | 0.011944 | 0.012114 | 0.012046 |
| 0.011944 | 0.012046 | 0.011910 | 0.011944 | 0.012080 | 0.012149 | 0.011978 |
| 0.011944 | 0.012080 | 0.012013 | 0.011910 | 0.012182 | 0.011910 | 0.012080 |
| 0.012158 | 0.011978 | 0.012216 | 0.012114 | 0.012080 | 0.012012 | 0.012080 |
| 0.011978 | 0.012318 | 0.011910 | 0.012114 | 0.011910 | 0.011910 | 0.011910 |
| 0.012148 | 0.012285 | 0.012046 | 0.012114 | 0.011944 | 0.012284 | 0.011910 |
| 0.011978 | 0.011978 | 0.012012 | 0.012114 | 0.012012 | 0.012080 | 0.012182 |
| 0.012182 | 0.012148 | 0.012046 | 0.012148 | 0.012114 | 0.011978 | 0.011944 |
| 0.011978 | 0.011978 | 0.012046 | 0.011910 | 0.011944 | 0.012080 | 0.011978 |
| 0.011944 | 0.012012 | 0.012114 | 0.012114 | 0.012080 | 0.012012 | 0.012012 |
| 0.012080 | 0.012012 | 0.012080 | 0.011978 | 0.012114 | 0.012182 | 0.012387 |
| 0.012012 | 0.012353 | 0.012038 | 0.018673 | 0.012127 | 0.012055 | 0.012332 |
| 0.012251 | 0.012343 | 0.012176 | 0.012121 | 0.012516 | 0.012354 | 0.012234 |
| 0.012072 | 0.012240 | 0.011970 | 0.012077 | 0.012010 | 0.012014 | 0.011890 |
| 0.012205 | 0.012154 | 0.012149 | 0.011927 | 0.012148 | 0.012080 | 0.012122 |

|          |          |          |          |          |          |          |
|----------|----------|----------|----------|----------|----------|----------|
| 0.012027 | 0.012149 | 0.012148 | 0.012046 | 0.012080 | 0.012081 | 0.012046 |
| 0.012080 | 0.012012 | 0.012046 | 0.012081 | 0.012047 | 0.011978 | 0.011944 |
| 0.011944 | 0.012081 | 0.011978 | 0.012081 | 0.012115 | 0.012149 | 0.011978 |
| 0.012012 | 0.011978 | 0.012319 | 0.012319 | 0.012115 | 0.012150 | 0.012183 |
| 0.011944 | 0.011944 | 0.011978 | 0.012081 | 0.011944 | 0.012183 | 0.012183 |
| 0.012217 | 0.012148 | 0.012148 | 0.012250 | 0.012353 | 0.012254 | 0.012080 |
| 0.012081 | 0.012115 | 0.012149 | 0.012012 | 0.012081 | 0.012046 | 0.012080 |
| 0.012149 | 0.012149 | 0.012183 | 0.012149 | 0.012049 | 0.012251 | 0.012217 |
| 0.012089 | 0.011978 | 0.012080 | 0.012149 | 0.012081 | 0.012149 | 0.012250 |
| 0.012387 | 0.011994 | 0.012284 | 0.012251 | 0.012182 | 0.012352 | 0.011979 |
| 0.012152 | 0.012047 | 0.011944 | 0.011944 | 0.012081 | 0.011978 | 0.012081 |
| 0.012115 | 0.012149 | 0.011978 | 0.012012 | 0.011978 | 0.012319 | 0.012319 |
| 0.012115 | 0.012150 | 0.012114 | 0.012046 | 0.011230 | 0.012209 | 0.012117 |
| 0.012192 | 0.012177 | 0.012293 | 0.012171 | 0.012255 | 0.012171 | 0.012107 |
| 0.011198 | 0.011965 | 0.012129 | 0.012068 | 0.012342 | 0.012231 | 0.012328 |
| 0.000000 | 0.012193 | 0.012328 | 0.012387 | 0.012250 | 0.012182 | 0.012293 |
| 0.011944 | 0.012114 | 0.012250 | 0.012216 | 0.012224 | 0.012148 | 0.012084 |
| 0.012046 | 0.011978 | 0.012012 | 0.012046 | 0.011944 | 0.012012 | 0.011910 |
| 0.011978 | 0.012012 | 0.011978 | 0.011944 | 0.012046 | 0.011978 | 0.012012 |
| 0.012012 | 0.011944 | 0.012012 | 0.012046 | 0.011944 | 0.012148 | 0.012182 |
| 0.012080 | 0.012080 | 0.012080 | 0.012080 | 0.012012 | 0.012353 | 0.012046 |
| 0.012039 | 0.012012 | 0.012148 | 0.012152 | 0.012114 | 0.012114 | 0.012114 |
| 0.012114 | 0.012046 | 0.012012 | 0.012046 | 0.012114 | 0.012148 | 0.012080 |
| 0.012080 | 0.012216 | 0.012318 | 0.012114 | 0.012284 | 0.012284 | 0.012182 |
| 0.012012 | 0.012080 | 0.012114 | 0.012455 | 0.012081 | 0.012114 | 0.012080 |
| 0.012114 | 0.011910 | 0.011910 | 0.012285 | 0.012285 | 0.012251 | 0.012046 |
| 0.012148 | 0.012216 | 0.012080 | 0.012148 | 0.012114 | 0.011978 | 0.012250 |
| 0.012080 | 0.012046 | 0.011910 | 0.012216 | 0.012046 | 0.012148 | 0.012387 |
| 0.012012 | 0.012299 | 0.012387 | 0.012173 | 0.011808 | 0.012092 | 0.011943 |
| 0.011844 | 0.012363 | 0.012020 | 0.012149 | 0.011953 | 0.012044 | 0.012034 |
| 0.012254 | 0.011935 | 0.012138 | 0.011938 | 0.011938 | 0.012225 | 0.012129 |
| 0.012167 | 0.012057 | 0.012095 | 0.012094 | 0.012085 | 0.012148 | 0.012217 |
| 0.012183 | 0.012082 | 0.012190 | 0.012193 | 0.012331 | 0.012278 | 0.012080 |
| 0.012250 | 0.012115 | 0.012046 | 0.012081 | 0.011944 | 0.012114 | 0.011979 |
| 0.012046 | 0.012046 | 0.012012 | 0.011978 | 0.012012 | 0.011978 | 0.012080 |
| 0.012086 | 0.012050 | 0.012065 | 0.012065 | 0.012203 | 0.012201 | 0.012201 |
| 0.012197 | 0.012115 | 0.011913 | 0.011898 | 0.012054 | 0.012226 | 0.012228 |
| 0.012013 | 0.012089 | 0.012321 | 0.012292 | 0.012217 | 0.012252 | 0.012080 |
| 0.012114 | 0.012148 | 0.012148 | 0.012080 | 0.012523 | 0.012250 | 0.012250 |
| 0.012353 | 0.012395 | 0.012061 | 0.012147 | 0.012012 | 0.012148 | 0.012080 |
| 0.012219 | 0.012148 | 0.012250 | 0.012250 | 0.012296 | 0.012318 | 0.012002 |
| 0.011912 | 0.011897 | 0.012019 | 0.011983 | 0.011989 | 0.011886 | 0.012189 |
| 0.012061 | 0.012158 | 0.012014 | 0.011998 | 0.012047 | 0.012099 | 0.012012 |
| 0.011978 | 0.011910 | 0.012047 | 0.012012 | 0.012149 | 0.012115 | 0.012046 |
| 0.012149 | 0.012217 | 0.012012 | 0.012012 | 0.012047 | 0.012046 | 0.012052 |
| 0.012122 | 0.012046 | 0.012047 | 0.012085 | 0.012148 | 0.012217 | 0.012183 |
| 0.012082 | 0.012190 | 0.012193 | 0.012331 | 0.012278 | 0.012080 | 0.012250 |
| 0.012080 | 0.012080 | 0.012019 | 0.012188 | 0.012152 | 0.012164 | 0.011981 |
| 0.012211 | 0.012351 | 0.012129 | 0.012058 | 0.011944 | 0.012183 | 0.012047 |
| 0.012149 | 0.012081 | 0.011978 | 0.012084 | 0.012149 | 0.012156 | 0.012081 |
| 0.011978 | 0.011880 | 0.012046 | 0.011978 | 0.011911 | 0.011989 | 0.012183 |
| 0.012080 | 0.012012 | 0.012046 | 0.012081 | 0.012047 | 0.011978 | 0.012012 |
| 0.012046 | 0.012080 | 0.012080 | 0.012012 | 0.012080 | 0.012319 | 0.011910 |
| 0.012012 | 0.012353 | 0.012012 | 0.012046 | 0.012012 | 0.012318 | 0.011973 |
| 0.012263 | 0.011923 | 0.011927 | 0.012204 | 0.012216 | 0.012187 | 0.011823 |
| 0.011861 | 0.012080 | 0.012182 | 0.012297 | 0.012151 | 0.012294 | 0.012423 |
| 0.012320 | 0.012391 | 0.012318 | 0.012548 | 0.012284 | 0.013137 | 0.012322 |
| 0.013036 | 0.012801 | 0.012938 | 0.013213 | 0.012318 | 0.012013 | 0.012285 |
| 0.011434 | 0.012666 | 0.012250 | 0.012149 | 0.012217 | 0.012217 | 0.012189 |
| 0.012080 | 0.012091 | 0.012148 | 0.012115 | 0.012490 | 0.012523 | 0.012558 |

|          |          |          |          |          |          |          |
|----------|----------|----------|----------|----------|----------|----------|
| 0.012423 | 0.012525 | 0.012664 | 0.012430 | 0.011332 | 0.011129 | 0.011332 |
| 0.011196 | 0.011434 | 0.011302 | 0.011400 | 0.011401 | 0.012012 | 0.011536 |
| 0.012422 | 0.012864 | 0.011540 | 0.012626 | 0.013141 | 0.012160 | 0.012081 |
| 0.012046 | 0.012046 | 0.012524 | 0.012626 | 0.012628 | 0.012386 | 0.011981 |
| S512     | 0.011776 | 0.011776 | 0.011852 | 0.011776 | 0.011776 | 0.011814 |
| 0.011824 | 0.011709 | 0.011814 | 0.011437 | 0.011512 | 0.011475 | 0.011437 |
| 0.011399 | 0.011626 | 0.011362 | 0.011475 | 0.011437 | 0.011512 | 0.011437 |
| 0.011437 | 0.011475 | 0.011512 | 0.011437 | 0.011475 | 0.011475 | 0.011786 |
| 0.011625 | 0.011437 | 0.011362 | 0.011550 | 0.011512 | 0.011512 | 0.011550 |
| 0.011475 | 0.011626 | 0.011512 | 0.011512 | 0.011475 | 0.011512 | 0.011663 |
| 0.011362 | 0.011512 | 0.011512 | 0.011475 | 0.011512 | 0.011626 | 0.011512 |
| 0.011475 | 0.011663 | 0.011588 | 0.011814 | 0.011475 | 0.011814 | 0.011475 |
| 0.011437 | 0.011512 | 0.011588 | 0.011814 | 0.011777 | 0.011475 | 0.011626 |
| 0.011512 | 0.011626 | 0.011513 | 0.011776 | 0.011965 | 0.011475 | 0.011588 |
| 0.011437 | 0.011550 | 0.011512 | 0.011626 | 0.011512 | 0.011550 | 0.011550 |
| 0.011437 | 0.011475 | 0.011437 | 0.011475 | 0.011512 | 0.011551 | 0.011588 |
| 0.011550 | 0.011475 | 0.011588 | 0.011475 | 0.011512 | 0.011399 | 0.011512 |
| 0.011701 | 0.011625 | 0.011890 | 0.011701 | 0.011437 | 0.011776 | 0.011512 |
| 0.011683 | 0.011856 | 0.011740 | 0.011461 | 0.011442 | 0.011516 | 0.011593 |
| 0.012304 | 0.011582 | 0.011338 | 0.011776 | 0.011776 | 0.011475 | 0.011588 |
| 0.011588 | 0.011550 | 0.011550 | 0.011475 | 0.011550 | 0.011550 | 0.011512 |
| 0.011512 | 0.011550 | 0.011814 | 0.011663 | 0.011588 | 0.011550 | 0.011475 |
| 0.011437 | 0.011362 | 0.011512 | 0.011475 | 0.011625 | 0.011588 | 0.011512 |
| 0.011625 | 0.011701 | 0.011475 | 0.011475 | 0.011512 | 0.011512 | 0.011515 |
| 0.011592 | 0.011512 | 0.011512 | 0.011379 | 0.011457 | 0.011405 | 0.011512 |
| 0.011516 | 0.011446 | 0.011478 | 0.011448 | 0.011400 | 0.011441 | 0.011476 |
| 0.011694 | 0.011481 | 0.011524 | 0.011399 | 0.011449 | 0.011588 | 0.011475 |
| 0.011550 | 0.011551 | 0.011550 | 0.011550 | 0.011437 | 0.011927 | 0.011437 |
| 0.011739 | 0.011588 | 0.011475 | 0.011550 | 0.011399 | 0.011588 | 0.011437 |
| 0.011512 | 0.011512 | 0.011437 | 0.011437 | 0.011475 | 0.011437 | 0.011550 |
| 0.011512 | 0.011588 | 0.011512 | 0.011437 | 0.011514 | 0.011626 | 0.011668 |
| 0.011663 | 0.011550 | 0.011437 | 0.011363 | 0.011512 | 0.011437 | 0.011362 |
| 0.011404 | 0.011663 | 0.011399 | 0.011663 | 0.011399 | 0.011513 | 0.011437 |
| 0.011588 | 0.011475 | 0.011512 | 0.011475 | 0.011512 | 0.011362 | 0.011512 |
| 0.011512 | 0.011437 | 0.011550 | 0.011475 | 0.011475 | 0.011550 | 0.011776 |
| 0.011814 | 0.011776 | 0.011852 | 0.011628 | 0.011852 | 0.011437 | 0.011437 |
| 0.011439 | 0.011473 | 0.011671 | 0.011407 | 0.011823 | 0.011366 | 0.011458 |
| 0.011862 | 0.011747 | 0.011663 | 0.011890 | 0.011405 | 0.011777 | 0.011739 |
| 0.011663 | 0.011852 | 0.011668 | 0.011486 | 0.011532 | 0.011513 | 0.011588 |
| 0.011701 | 0.011588 | 0.011776 | 0.011852 | 0.011739 | 0.011814 | 0.011701 |
| 0.011628 | 0.011852 | 0.011701 | 0.011663 | 0.011965 | 0.011399 | 0.011512 |
| 0.011588 | 0.011475 | 0.011399 | 0.011399 | 0.011475 | 0.011475 | 0.011512 |
| 0.011475 | 0.011550 | 0.011437 | 0.011475 | 0.011475 | 0.011437 | 0.011550 |
| 0.011475 | 0.011852 | 0.011777 | 0.011814 | 0.011362 | 0.011475 | 0.011513 |
| 0.011512 | 0.011475 | 0.011512 | 0.011513 | 0.011437 | 0.011437 | 0.011437 |
| 0.011965 | 0.011475 | 0.011588 | 0.011399 | 0.011475 | 0.011701 | 0.011437 |
| 0.011437 | 0.011512 | 0.011437 | 0.011663 | 0.011437 | 0.011550 | 0.011663 |
| 0.011625 | 0.011437 | 0.011437 | 0.011362 | 0.011399 | 0.011588 | 0.011475 |
| 0.011362 | 0.011437 | 0.011362 | 0.011399 | 0.011550 | 0.011625 | 0.011437 |
| 0.011399 | 0.011512 | 0.011437 | 0.011362 | 0.011663 | 0.011362 | 0.011550 |
| 0.011626 | 0.011437 | 0.011701 | 0.011588 | 0.011550 | 0.011475 | 0.011512 |
| 0.011437 | 0.011814 | 0.011362 | 0.011588 | 0.011362 | 0.011362 | 0.011362 |
| 0.011626 | 0.011739 | 0.011513 | 0.011550 | 0.011399 | 0.011777 | 0.011362 |
| 0.011437 | 0.011399 | 0.011475 | 0.011588 | 0.011437 | 0.011550 | 0.011663 |
| 0.011663 | 0.011588 | 0.011512 | 0.011588 | 0.011550 | 0.011437 | 0.011399 |
| 0.011437 | 0.011437 | 0.011513 | 0.011362 | 0.011399 | 0.011550 | 0.011437 |
| 0.011399 | 0.011475 | 0.011588 | 0.011550 | 0.011512 | 0.011475 | 0.011399 |
| 0.011512 | 0.011475 | 0.011550 | 0.011437 | 0.011588 | 0.011663 | 0.011890 |
| 0.011475 | 0.011852 | 0.011487 | 0.018745 | 0.011414 | 0.011530 | 0.011806 |
| 0.011722 | 0.011814 | 0.011455 | 0.011452 | 0.011995 | 0.011798 | 0.011668 |



|          |          |          |          |          |          |          |
|----------|----------|----------|----------|----------|----------|----------|
| 0.011435 | 0.011796 | 0.011412 | 0.011383 | 0.011373 | 0.011502 | 0.011495 |
| 0.011642 | 0.011568 | 0.011565 | 0.011284 | 0.011588 | 0.011550 | 0.011591 |
| 0.011512 | 0.011550 | 0.011588 | 0.011512 | 0.011550 | 0.011551 | 0.011475 |
| 0.011550 | 0.011475 | 0.011512 | 0.011512 | 0.011513 | 0.011437 | 0.011399 |
| 0.011399 | 0.011550 | 0.011437 | 0.011550 | 0.011588 | 0.011550 | 0.011437 |
| 0.011475 | 0.011437 | 0.011814 | 0.011814 | 0.011588 | 0.011589 | 0.011626 |
| 0.011399 | 0.011399 | 0.011437 | 0.011550 | 0.011399 | 0.011663 | 0.011663 |
| 0.011663 | 0.011663 | 0.011626 | 0.011701 | 0.011852 | 0.011703 | 0.011512 |
| 0.011550 | 0.011550 | 0.011588 | 0.011437 | 0.011550 | 0.011512 | 0.011550 |
| 0.011626 | 0.011625 | 0.011663 | 0.011626 | 0.011512 | 0.011701 | 0.011626 |
| 0.011516 | 0.011437 | 0.011437 | 0.011588 | 0.011550 | 0.011437 | 0.011663 |
| 0.011890 | 0.011405 | 0.011777 | 0.011739 | 0.011663 | 0.011852 | 0.011437 |
| 0.011627 | 0.011437 | 0.011399 | 0.011399 | 0.011550 | 0.011437 | 0.011550 |
| 0.011588 | 0.011550 | 0.011437 | 0.011475 | 0.011437 | 0.011814 | 0.011814 |
| 0.011588 | 0.011589 | 0.011588 | 0.011512 | 0.012230 | 0.011670 | 0.011588 |
| 0.011667 | 0.011630 | 0.011663 | 0.011626 | 0.011745 | 0.011663 | 0.011597 |
| 0.012155 | 0.011475 | 0.011625 | 0.011588 | 0.011852 | 0.011701 | 0.011852 |
| 0.012193 | 0.000000 | 0.011516 | 0.011550 | 0.011550 | 0.011512 | 0.011516 |
| 0.011399 | 0.011437 | 0.011588 | 0.011550 | 0.011516 | 0.011625 | 0.011514 |
| 0.011512 | 0.011399 | 0.011437 | 0.011512 | 0.011399 | 0.011475 | 0.011362 |
| 0.011437 | 0.011475 | 0.011437 | 0.011399 | 0.011512 | 0.011437 | 0.011475 |
| 0.011475 | 0.011399 | 0.011475 | 0.011513 | 0.011399 | 0.011626 | 0.011663 |
| 0.011550 | 0.011550 | 0.011550 | 0.011550 | 0.011475 | 0.011777 | 0.011512 |
| 0.011475 | 0.011475 | 0.011625 | 0.011626 | 0.011588 | 0.011588 | 0.011588 |
| 0.011588 | 0.011475 | 0.011475 | 0.011475 | 0.011588 | 0.011626 | 0.011550 |
| 0.011475 | 0.011663 | 0.011814 | 0.011588 | 0.011777 | 0.011777 | 0.011626 |
| 0.011475 | 0.011550 | 0.011588 | 0.011928 | 0.011551 | 0.011588 | 0.011550 |
| 0.011588 | 0.011437 | 0.011437 | 0.011739 | 0.011701 | 0.011701 | 0.011512 |
| 0.011626 | 0.011701 | 0.011512 | 0.011626 | 0.011588 | 0.011437 | 0.011739 |
| 0.011550 | 0.011512 | 0.011437 | 0.011701 | 0.011512 | 0.011626 | 0.011852 |
| 0.011475 | 0.011900 | 0.011890 | 0.011659 | 0.011240 | 0.011556 | 0.011292 |
| 0.011364 | 0.011814 | 0.011456 | 0.011521 | 0.011437 | 0.011583 | 0.011482 |
| 0.011623 | 0.011357 | 0.011560 | 0.011357 | 0.011426 | 0.011571 | 0.011611 |
| 0.011652 | 0.011504 | 0.011535 | 0.011497 | 0.011514 | 0.011625 | 0.011663 |
| 0.011663 | 0.011513 | 0.011629 | 0.011669 | 0.011745 | 0.011817 | 0.011475 |
| 0.011739 | 0.011588 | 0.011475 | 0.011550 | 0.011399 | 0.011588 | 0.011437 |
| 0.011512 | 0.011512 | 0.011437 | 0.011437 | 0.011475 | 0.011437 | 0.011550 |
| 0.011491 | 0.011527 | 0.011483 | 0.011556 | 0.011708 | 0.011674 | 0.011673 |
| 0.011670 | 0.011550 | 0.011387 | 0.011382 | 0.011516 | 0.011707 | 0.011669 |
| 0.011475 | 0.011554 | 0.011702 | 0.011743 | 0.011701 | 0.011739 | 0.011550 |
| 0.011588 | 0.011663 | 0.011663 | 0.011512 | 0.012041 | 0.011739 | 0.011814 |
| 0.011776 | 0.011822 | 0.011482 | 0.011525 | 0.011437 | 0.011626 | 0.011550 |
| 0.011665 | 0.011626 | 0.011739 | 0.011739 | 0.011720 | 0.011814 | 0.011476 |
| 0.011362 | 0.011362 | 0.011437 | 0.011437 | 0.011475 | 0.011334 | 0.011663 |
| 0.011476 | 0.011511 | 0.011351 | 0.011525 | 0.011512 | 0.011555 | 0.011475 |
| 0.011437 | 0.011362 | 0.011512 | 0.011475 | 0.011625 | 0.011588 | 0.011512 |
| 0.011625 | 0.011701 | 0.011475 | 0.011475 | 0.011512 | 0.011512 | 0.011515 |
| 0.011592 | 0.011512 | 0.011512 | 0.011514 | 0.011625 | 0.011663 | 0.011663 |
| 0.011513 | 0.011629 | 0.011669 | 0.011745 | 0.011817 | 0.011475 | 0.011625 |
| 0.011550 | 0.011550 | 0.011478 | 0.011607 | 0.011526 | 0.011634 | 0.011453 |
| 0.011680 | 0.011679 | 0.011624 | 0.011516 | 0.011399 | 0.011663 | 0.011512 |
| 0.011588 | 0.011512 | 0.011437 | 0.011514 | 0.011626 | 0.011668 | 0.011550 |
| 0.011437 | 0.011363 | 0.011512 | 0.011437 | 0.011362 | 0.011404 | 0.011663 |
| 0.011550 | 0.011475 | 0.011512 | 0.011512 | 0.011513 | 0.011437 | 0.011475 |
| 0.011512 | 0.011512 | 0.011550 | 0.011437 | 0.011550 | 0.011814 | 0.011362 |
| 0.011437 | 0.011777 | 0.011437 | 0.011512 | 0.011475 | 0.011814 | 0.011398 |
| 0.011602 | 0.011389 | 0.011285 | 0.011596 | 0.011698 | 0.011626 | 0.011393 |
| 0.011241 | 0.011512 | 0.011626 | 0.011739 | 0.011589 | 0.011744 | 0.011853 |
| 0.011776 | 0.011852 | 0.011776 | 0.011943 | 0.011701 | 0.012569 | 0.011589 |
| 0.012343 | 0.012194 | 0.012270 | 0.012498 | 0.011814 | 0.011437 | 0.011739 |

|          |          |          |          |          |          |          |
|----------|----------|----------|----------|----------|----------|----------|
| 0.012155 | 0.012158 | 0.011625 | 0.011588 | 0.011663 | 0.011663 | 0.011591 |
| 0.011512 | 0.011517 | 0.011588 | 0.011550 | 0.012003 | 0.011927 | 0.012078 |
| 0.011929 | 0.012041 | 0.012195 | 0.011932 | 0.012269 | 0.012239 | 0.012344 |
| 0.012344 | 0.012382 | 0.012249 | 0.012269 | 0.012309 | 0.011475 | 0.011852 |
| 0.011890 | 0.012419 | 0.011898 | 0.012117 | 0.012723 | 0.011670 | 0.011550 |
| 0.011512 | 0.011512 | 0.011965 | 0.012016 | 0.012012 | 0.011890 | 0.011514 |
| S513     | 0.011940 | 0.011940 | 0.012279 | 0.012041 | 0.012041 | 0.012109 |
| 0.011950 | 0.011881 | 0.012075 | 0.011534 | 0.011601 | 0.011331 | 0.011533 |
| 0.011567 | 0.011736 | 0.011533 | 0.011567 | 0.011635 | 0.011601 | 0.011567 |
| 0.011533 | 0.011567 | 0.011669 | 0.011534 | 0.011568 | 0.011567 | 0.011915 |
| 0.011804 | 0.011567 | 0.011466 | 0.011703 | 0.011635 | 0.011601 | 0.011635 |
| 0.011601 | 0.011703 | 0.011601 | 0.011601 | 0.011635 | 0.011601 | 0.011770 |
| 0.011533 | 0.011601 | 0.011635 | 0.011567 | 0.011669 | 0.011703 | 0.011635 |
| 0.011601 | 0.011770 | 0.011669 | 0.011939 | 0.011601 | 0.011872 | 0.011601 |
| 0.011567 | 0.011669 | 0.011736 | 0.011872 | 0.011973 | 0.011669 | 0.011770 |
| 0.011635 | 0.011703 | 0.011601 | 0.011838 | 0.012075 | 0.011601 | 0.011669 |
| 0.011567 | 0.011669 | 0.011635 | 0.011703 | 0.011635 | 0.011635 | 0.011635 |
| 0.011533 | 0.011567 | 0.011533 | 0.011635 | 0.011601 | 0.011365 | 0.011703 |
| 0.011635 | 0.011601 | 0.011669 | 0.011567 | 0.011703 | 0.011533 | 0.011601 |
| 0.011736 | 0.011703 | 0.011939 | 0.011770 | 0.011601 | 0.011838 | 0.011601 |
| 0.011543 | 0.011771 | 0.011552 | 0.011256 | 0.011210 | 0.011392 | 0.011455 |
| 0.012087 | 0.011417 | 0.011184 | 0.011838 | 0.011804 | 0.011635 | 0.011703 |
| 0.011669 | 0.011635 | 0.011703 | 0.011601 | 0.011703 | 0.011635 | 0.011635 |
| 0.011601 | 0.011703 | 0.011906 | 0.011770 | 0.011669 | 0.011635 | 0.011331 |
| 0.011297 | 0.011297 | 0.011365 | 0.011331 | 0.011534 | 0.011500 | 0.011432 |
| 0.011534 | 0.011601 | 0.011128 | 0.011128 | 0.011094 | 0.011094 | 0.011094 |
| 0.011162 | 0.011365 | 0.011365 | 0.011240 | 0.011314 | 0.011272 | 0.011365 |
| 0.011367 | 0.011301 | 0.011320 | 0.011338 | 0.011266 | 0.011302 | 0.011332 |
| 0.011532 | 0.011373 | 0.011407 | 0.011297 | 0.011304 | 0.011433 | 0.011399 |
| 0.011467 | 0.011400 | 0.011399 | 0.011736 | 0.011669 | 0.012041 | 0.011703 |
| 0.011872 | 0.011534 | 0.011432 | 0.011500 | 0.011297 | 0.011669 | 0.011331 |
| 0.011601 | 0.011601 | 0.011365 | 0.011398 | 0.011567 | 0.011297 | 0.011432 |
| 0.011365 | 0.011466 | 0.011398 | 0.011297 | 0.011400 | 0.011500 | 0.011503 |
| 0.011500 | 0.011399 | 0.011297 | 0.011230 | 0.011365 | 0.011297 | 0.011229 |
| 0.011334 | 0.011500 | 0.011297 | 0.011500 | 0.011500 | 0.011365 | 0.011331 |
| 0.011432 | 0.011331 | 0.011365 | 0.011331 | 0.011365 | 0.011229 | 0.011365 |
| 0.011365 | 0.011331 | 0.011398 | 0.011331 | 0.011365 | 0.011398 | 0.011635 |
| 0.011906 | 0.011838 | 0.011737 | 0.011468 | 0.011737 | 0.011365 | 0.011331 |
| 0.011366 | 0.011590 | 0.011383 | 0.011233 | 0.011915 | 0.011232 | 0.011298 |
| 0.011915 | 0.011574 | 0.011770 | 0.011973 | 0.011542 | 0.011838 | 0.011804 |
| 0.011736 | 0.011838 | 0.011776 | 0.011351 | 0.011610 | 0.011635 | 0.011708 |
| 0.011804 | 0.011706 | 0.011844 | 0.011912 | 0.011838 | 0.011906 | 0.012016 |
| 0.011742 | 0.011915 | 0.011845 | 0.011741 | 0.012009 | 0.011500 | 0.011705 |
| 0.011669 | 0.011601 | 0.011500 | 0.011500 | 0.011567 | 0.011567 | 0.011635 |
| 0.011567 | 0.011635 | 0.011533 | 0.011635 | 0.011567 | 0.011567 | 0.011635 |
| 0.011567 | 0.012007 | 0.011906 | 0.011939 | 0.011466 | 0.011567 | 0.011601 |
| 0.011601 | 0.011567 | 0.011635 | 0.011669 | 0.011533 | 0.011533 | 0.011533 |
| 0.012075 | 0.011703 | 0.011703 | 0.011500 | 0.011601 | 0.011770 | 0.011533 |
| 0.011533 | 0.011601 | 0.011567 | 0.011736 | 0.011533 | 0.011669 | 0.011804 |
| 0.011736 | 0.011567 | 0.011567 | 0.011500 | 0.011500 | 0.011601 | 0.011601 |
| 0.011500 | 0.011601 | 0.011466 | 0.011500 | 0.011635 | 0.011771 | 0.011534 |
| 0.011500 | 0.011635 | 0.011568 | 0.011466 | 0.011804 | 0.011466 | 0.011635 |
| 0.011715 | 0.011533 | 0.011838 | 0.011669 | 0.011703 | 0.011567 | 0.011669 |
| 0.011533 | 0.011872 | 0.011466 | 0.011736 | 0.011533 | 0.011533 | 0.011466 |
| 0.011669 | 0.011839 | 0.011601 | 0.011669 | 0.011500 | 0.011906 | 0.011533 |
| 0.011533 | 0.011533 | 0.011567 | 0.011669 | 0.011567 | 0.011669 | 0.011736 |
| 0.011736 | 0.011703 | 0.011601 | 0.011703 | 0.011669 | 0.011533 | 0.011500 |
| 0.011533 | 0.011533 | 0.011601 | 0.011533 | 0.011500 | 0.011669 | 0.011533 |
| 0.011567 | 0.011567 | 0.011703 | 0.011736 | 0.011635 | 0.011567 | 0.011567 |
| 0.011635 | 0.011567 | 0.011669 | 0.011533 | 0.011635 | 0.011770 | 0.012075 |

|          |          |          |          |          |          |          |
|----------|----------|----------|----------|----------|----------|----------|
| 0.011567 | 0.011973 | 0.011337 | 0.017800 | 0.011192 | 0.011488 | 0.011689 |
| 0.011651 | 0.011695 | 0.011270 | 0.011293 | 0.011774 | 0.011721 | 0.011364 |
| 0.011488 | 0.011610 | 0.011256 | 0.011228 | 0.011295 | 0.011356 | 0.011276 |
| 0.011437 | 0.011471 | 0.011357 | 0.011259 | 0.011703 | 0.011703 | 0.011503 |
| 0.011614 | 0.011466 | 0.011635 | 0.011432 | 0.011635 | 0.011635 | 0.011534 |
| 0.011567 | 0.011500 | 0.011534 | 0.011365 | 0.011365 | 0.011297 | 0.011331 |
| 0.011331 | 0.011398 | 0.011297 | 0.011398 | 0.011432 | 0.011466 | 0.011567 |
| 0.011635 | 0.011365 | 0.011703 | 0.011703 | 0.011669 | 0.011636 | 0.011500 |
| 0.011263 | 0.011263 | 0.011297 | 0.011398 | 0.011263 | 0.011500 | 0.011500 |
| 0.011534 | 0.011770 | 0.011703 | 0.011737 | 0.011737 | 0.011739 | 0.011567 |
| 0.011398 | 0.011466 | 0.011500 | 0.011331 | 0.011398 | 0.011365 | 0.011567 |
| 0.011466 | 0.011466 | 0.011500 | 0.011466 | 0.011365 | 0.011568 | 0.011534 |
| 0.011640 | 0.011297 | 0.011398 | 0.011500 | 0.011398 | 0.011534 | 0.011804 |
| 0.011973 | 0.011542 | 0.011838 | 0.011804 | 0.011736 | 0.011838 | 0.011399 |
| 0.011467 | 0.011365 | 0.011331 | 0.011331 | 0.011398 | 0.011297 | 0.011398 |
| 0.011432 | 0.011466 | 0.011567 | 0.011635 | 0.011365 | 0.011703 | 0.011703 |
| 0.011669 | 0.011636 | 0.011770 | 0.011703 | 0.012348 | 0.011744 | 0.011627 |
| 0.011695 | 0.011724 | 0.011804 | 0.011653 | 0.011836 | 0.011720 | 0.011685 |
| 0.012306 | 0.011618 | 0.011750 | 0.011687 | 0.011962 | 0.011814 | 0.011917 |
| 0.012328 | 0.011516 | 0.000000 | 0.011398 | 0.011128 | 0.011500 | 0.011094 |
| 0.011500 | 0.011331 | 0.011331 | 0.011297 | 0.011162 | 0.011770 | 0.011501 |
| 0.011601 | 0.011533 | 0.011567 | 0.011601 | 0.011500 | 0.011567 | 0.011466 |
| 0.011601 | 0.011635 | 0.011533 | 0.011500 | 0.011601 | 0.011533 | 0.011567 |
| 0.011567 | 0.011500 | 0.011567 | 0.011601 | 0.011500 | 0.011703 | 0.011736 |
| 0.011635 | 0.011703 | 0.011635 | 0.011635 | 0.011567 | 0.011973 | 0.011601 |
| 0.011621 | 0.011567 | 0.011805 | 0.011812 | 0.011669 | 0.011669 | 0.011669 |
| 0.011669 | 0.011601 | 0.011567 | 0.011601 | 0.011703 | 0.011703 | 0.011635 |
| 0.011635 | 0.011770 | 0.011906 | 0.011669 | 0.011872 | 0.011872 | 0.011736 |
| 0.011567 | 0.011635 | 0.011669 | 0.012075 | 0.011635 | 0.011669 | 0.011635 |
| 0.011669 | 0.011601 | 0.011601 | 0.011906 | 0.011804 | 0.011872 | 0.011601 |
| 0.011703 | 0.011736 | 0.011635 | 0.011703 | 0.011669 | 0.011533 | 0.011872 |
| 0.011635 | 0.011601 | 0.011601 | 0.011736 | 0.011601 | 0.011703 | 0.011939 |
| 0.011635 | 0.012018 | 0.012007 | 0.011549 | 0.011173 | 0.011471 | 0.011267 |
| 0.011280 | 0.011762 | 0.011307 | 0.011418 | 0.011256 | 0.011418 | 0.011380 |
| 0.011418 | 0.011126 | 0.011339 | 0.011127 | 0.011168 | 0.011329 | 0.011467 |
| 0.011475 | 0.011336 | 0.011448 | 0.011343 | 0.011400 | 0.011534 | 0.011601 |
| 0.011601 | 0.011467 | 0.011571 | 0.011538 | 0.011709 | 0.011737 | 0.011635 |
| 0.011872 | 0.011534 | 0.011432 | 0.011500 | 0.011297 | 0.011669 | 0.011331 |
| 0.011601 | 0.011601 | 0.011365 | 0.011398 | 0.011567 | 0.011297 | 0.011432 |
| 0.011377 | 0.011377 | 0.011371 | 0.011405 | 0.011543 | 0.011508 | 0.011507 |
| 0.011506 | 0.011433 | 0.011246 | 0.011242 | 0.011367 | 0.011538 | 0.011539 |
| 0.011331 | 0.011401 | 0.011637 | 0.011571 | 0.011534 | 0.011535 | 0.011736 |
| 0.011669 | 0.011736 | 0.011736 | 0.011534 | 0.012211 | 0.011804 | 0.011872 |
| 0.011669 | 0.011957 | 0.011610 | 0.011444 | 0.011567 | 0.011703 | 0.011736 |
| 0.011772 | 0.011804 | 0.011804 | 0.011804 | 0.011694 | 0.011939 | 0.011549 |
| 0.011469 | 0.011479 | 0.011575 | 0.011539 | 0.011645 | 0.011436 | 0.011813 |
| 0.011613 | 0.011368 | 0.011108 | 0.011362 | 0.011365 | 0.011405 | 0.011331 |
| 0.011297 | 0.011297 | 0.011365 | 0.011331 | 0.011534 | 0.011500 | 0.011432 |
| 0.011534 | 0.011601 | 0.011128 | 0.011128 | 0.011094 | 0.011094 | 0.011094 |
| 0.011162 | 0.011365 | 0.011365 | 0.011400 | 0.011534 | 0.011601 | 0.011601 |
| 0.011467 | 0.011571 | 0.011538 | 0.011709 | 0.011737 | 0.011635 | 0.011737 |
| 0.011736 | 0.011736 | 0.011333 | 0.011516 | 0.011445 | 0.011506 | 0.011343 |
| 0.011511 | 0.011750 | 0.011445 | 0.011573 | 0.011297 | 0.011500 | 0.011365 |
| 0.011466 | 0.011398 | 0.011297 | 0.011400 | 0.011500 | 0.011503 | 0.011399 |
| 0.011297 | 0.011230 | 0.011365 | 0.011297 | 0.011229 | 0.011334 | 0.011500 |
| 0.011567 | 0.011500 | 0.011534 | 0.011365 | 0.011365 | 0.011297 | 0.011500 |
| 0.011601 | 0.011635 | 0.011635 | 0.011567 | 0.011635 | 0.011872 | 0.011533 |
| 0.011567 | 0.011973 | 0.011567 | 0.011601 | 0.011567 | 0.011939 | 0.011189 |
| 0.011624 | 0.011273 | 0.011211 | 0.011504 | 0.011591 | 0.011528 | 0.011186 |
| 0.011218 | 0.011736 | 0.011838 | 0.011676 | 0.011569 | 0.011708 | 0.011839 |

|          |          |          |          |          |          |          |
|----------|----------|----------|----------|----------|----------|----------|
| 0.011738 | 0.011912 | 0.011973 | 0.011990 | 0.011939 | 0.012787 | 0.011739 |
| 0.012449 | 0.012249 | 0.012384 | 0.012658 | 0.011939 | 0.011398 | 0.011703 |
| 0.012111 | 0.012079 | 0.011906 | 0.011771 | 0.011636 | 0.011636 | 0.011844 |
| 0.011736 | 0.011504 | 0.011804 | 0.011534 | 0.011907 | 0.012211 | 0.011975 |
| 0.012111 | 0.011941 | 0.012079 | 0.011844 | 0.012145 | 0.012152 | 0.012213 |
| 0.012214 | 0.012248 | 0.012195 | 0.012214 | 0.012215 | 0.011669 | 0.011737 |
| 0.011738 | 0.012550 | 0.011812 | 0.012279 | 0.012484 | 0.011573 | 0.011467 |
| 0.011669 | 0.011669 | 0.011906 | 0.011890 | 0.012047 | 0.012007 | 0.011434 |
| S514     | 0.012001 | 0.012001 | 0.012337 | 0.012101 | 0.012101 | 0.012169 |
| 0.012011 | 0.011943 | 0.012101 | 0.011597 | 0.011664 | 0.011329 | 0.011597 |
| 0.011631 | 0.011799 | 0.011597 | 0.011631 | 0.011698 | 0.011664 | 0.011631 |
| 0.011597 | 0.011631 | 0.011731 | 0.011598 | 0.011631 | 0.011631 | 0.011977 |
| 0.011866 | 0.011631 | 0.011530 | 0.011765 | 0.011698 | 0.011665 | 0.011698 |
| 0.011664 | 0.011765 | 0.011664 | 0.011664 | 0.011698 | 0.011664 | 0.011832 |
| 0.011597 | 0.011664 | 0.011698 | 0.011631 | 0.011732 | 0.011765 | 0.011698 |
| 0.011664 | 0.011833 | 0.011732 | 0.012000 | 0.011664 | 0.011933 | 0.011664 |
| 0.011631 | 0.011732 | 0.011799 | 0.011933 | 0.012034 | 0.011732 | 0.011832 |
| 0.011698 | 0.011765 | 0.011664 | 0.011899 | 0.012135 | 0.011664 | 0.011732 |
| 0.011631 | 0.011731 | 0.011698 | 0.011765 | 0.011698 | 0.011698 | 0.011698 |
| 0.011597 | 0.011631 | 0.011597 | 0.011698 | 0.011664 | 0.011397 | 0.011765 |
| 0.011698 | 0.011664 | 0.011732 | 0.011631 | 0.011765 | 0.011597 | 0.011664 |
| 0.011832 | 0.011765 | 0.012000 | 0.011832 | 0.011664 | 0.011900 | 0.011664 |
| 0.011542 | 0.011770 | 0.011551 | 0.011255 | 0.011210 | 0.011391 | 0.011454 |
| 0.012085 | 0.011467 | 0.011225 | 0.011899 | 0.011900 | 0.011698 | 0.011799 |
| 0.011732 | 0.011698 | 0.011765 | 0.011664 | 0.011765 | 0.011698 | 0.011698 |
| 0.011664 | 0.011765 | 0.011967 | 0.011832 | 0.011732 | 0.011698 | 0.011329 |
| 0.011295 | 0.011295 | 0.011362 | 0.011329 | 0.011530 | 0.011497 | 0.011429 |
| 0.011530 | 0.011597 | 0.011127 | 0.011127 | 0.011161 | 0.011161 | 0.011162 |
| 0.011229 | 0.011362 | 0.011362 | 0.011240 | 0.011313 | 0.011271 | 0.011363 |
| 0.011365 | 0.011301 | 0.011318 | 0.011336 | 0.011264 | 0.011300 | 0.011330 |
| 0.011528 | 0.011370 | 0.011405 | 0.011296 | 0.011302 | 0.011430 | 0.011396 |
| 0.011464 | 0.011397 | 0.011396 | 0.011799 | 0.011731 | 0.012101 | 0.011665 |
| 0.011933 | 0.011497 | 0.011497 | 0.011463 | 0.011262 | 0.011698 | 0.011295 |
| 0.011664 | 0.011664 | 0.011329 | 0.011463 | 0.011631 | 0.011295 | 0.011429 |
| 0.011362 | 0.011463 | 0.011396 | 0.011295 | 0.011397 | 0.011497 | 0.011499 |
| 0.011497 | 0.011396 | 0.011295 | 0.011229 | 0.011362 | 0.011295 | 0.011228 |
| 0.011332 | 0.011497 | 0.011295 | 0.011497 | 0.011564 | 0.011362 | 0.011329 |
| 0.011430 | 0.011329 | 0.011362 | 0.011329 | 0.011362 | 0.011228 | 0.011362 |
| 0.011396 | 0.011329 | 0.011396 | 0.011329 | 0.011362 | 0.011396 | 0.011631 |
| 0.011933 | 0.011866 | 0.011732 | 0.011498 | 0.011732 | 0.011362 | 0.011329 |
| 0.011330 | 0.011626 | 0.011426 | 0.011266 | 0.011908 | 0.011231 | 0.011296 |
| 0.011909 | 0.011570 | 0.011832 | 0.012034 | 0.011504 | 0.011900 | 0.011866 |
| 0.011799 | 0.011866 | 0.011842 | 0.011390 | 0.011731 | 0.011698 | 0.011771 |
| 0.011866 | 0.011769 | 0.011906 | 0.011974 | 0.011900 | 0.011967 | 0.012077 |
| 0.011805 | 0.011977 | 0.011907 | 0.011838 | 0.012103 | 0.011564 | 0.011768 |
| 0.011731 | 0.011664 | 0.011564 | 0.011564 | 0.011631 | 0.011631 | 0.011698 |
| 0.011631 | 0.011698 | 0.011597 | 0.011698 | 0.011631 | 0.011631 | 0.011698 |
| 0.011631 | 0.012068 | 0.011967 | 0.012000 | 0.011530 | 0.011631 | 0.011664 |
| 0.011664 | 0.011631 | 0.011698 | 0.011732 | 0.011597 | 0.011597 | 0.011597 |
| 0.012135 | 0.011765 | 0.011765 | 0.011564 | 0.011664 | 0.011833 | 0.011597 |
| 0.011597 | 0.011664 | 0.011631 | 0.011799 | 0.011597 | 0.011732 | 0.011866 |
| 0.011799 | 0.011631 | 0.011631 | 0.011564 | 0.011564 | 0.011732 | 0.011664 |
| 0.011564 | 0.011664 | 0.011530 | 0.011564 | 0.011698 | 0.011833 | 0.011597 |
| 0.011564 | 0.011698 | 0.011631 | 0.011530 | 0.011866 | 0.011530 | 0.011698 |
| 0.011779 | 0.011597 | 0.011900 | 0.011732 | 0.011765 | 0.011631 | 0.011732 |
| 0.011597 | 0.011933 | 0.011530 | 0.011799 | 0.011597 | 0.011597 | 0.011530 |
| 0.011765 | 0.011900 | 0.011664 | 0.011732 | 0.011564 | 0.011967 | 0.011597 |
| 0.011597 | 0.011597 | 0.011631 | 0.011732 | 0.011631 | 0.011732 | 0.011799 |
| 0.011799 | 0.011765 | 0.011664 | 0.011765 | 0.011731 | 0.011597 | 0.011564 |
| 0.011597 | 0.011597 | 0.011664 | 0.011597 | 0.011564 | 0.011732 | 0.011597 |

|          |          |          |          |          |          |          |
|----------|----------|----------|----------|----------|----------|----------|
| 0.011631 | 0.011631 | 0.011765 | 0.011799 | 0.011698 | 0.011631 | 0.011631 |
| 0.011698 | 0.011631 | 0.011731 | 0.011597 | 0.011732 | 0.011832 | 0.012135 |
| 0.011631 | 0.012034 | 0.011336 | 0.017823 | 0.011257 | 0.011488 | 0.011688 |
| 0.011648 | 0.011693 | 0.011374 | 0.011350 | 0.011829 | 0.011716 | 0.011364 |
| 0.011535 | 0.011610 | 0.011255 | 0.011311 | 0.011333 | 0.011406 | 0.011318 |
| 0.011482 | 0.011470 | 0.011431 | 0.011259 | 0.011765 | 0.011732 | 0.011500 |
| 0.011679 | 0.011463 | 0.011664 | 0.011429 | 0.011698 | 0.011698 | 0.011564 |
| 0.011597 | 0.011530 | 0.011564 | 0.011396 | 0.011362 | 0.011295 | 0.011329 |
| 0.011329 | 0.011396 | 0.011295 | 0.011396 | 0.011429 | 0.011463 | 0.011597 |
| 0.011698 | 0.011362 | 0.011698 | 0.011698 | 0.011732 | 0.011665 | 0.011497 |
| 0.011262 | 0.011262 | 0.011295 | 0.011396 | 0.011262 | 0.011497 | 0.011497 |
| 0.011530 | 0.011832 | 0.011765 | 0.011765 | 0.011732 | 0.011767 | 0.011597 |
| 0.011396 | 0.011463 | 0.011497 | 0.011329 | 0.011396 | 0.011362 | 0.011597 |
| 0.011463 | 0.011463 | 0.011497 | 0.011463 | 0.011363 | 0.011564 | 0.011530 |
| 0.011704 | 0.011295 | 0.011396 | 0.011497 | 0.011396 | 0.011530 | 0.011866 |
| 0.012034 | 0.011504 | 0.011900 | 0.011866 | 0.011799 | 0.011866 | 0.011363 |
| 0.011464 | 0.011363 | 0.011329 | 0.011329 | 0.011396 | 0.011295 | 0.011396 |
| 0.011429 | 0.011463 | 0.011597 | 0.011698 | 0.011362 | 0.011698 | 0.011698 |
| 0.011732 | 0.011665 | 0.011832 | 0.011765 | 0.012406 | 0.011846 | 0.011764 |
| 0.011834 | 0.011788 | 0.011904 | 0.011788 | 0.011900 | 0.011819 | 0.011784 |
| 0.012366 | 0.011683 | 0.011814 | 0.011752 | 0.012025 | 0.011877 | 0.011979 |
| 0.012387 | 0.011550 | 0.011398 | 0.000000 | 0.011295 | 0.011429 | 0.011364 |
| 0.011564 | 0.011329 | 0.011362 | 0.011329 | 0.011398 | 0.011832 | 0.011498 |
| 0.011664 | 0.011597 | 0.011631 | 0.011664 | 0.011564 | 0.011631 | 0.011530 |
| 0.011664 | 0.011698 | 0.011597 | 0.011564 | 0.011664 | 0.011597 | 0.011631 |
| 0.011631 | 0.011564 | 0.011631 | 0.011664 | 0.011564 | 0.011765 | 0.011799 |
| 0.011698 | 0.011765 | 0.011698 | 0.011698 | 0.011631 | 0.012034 | 0.011664 |
| 0.011721 | 0.011631 | 0.011867 | 0.011875 | 0.011732 | 0.011731 | 0.011732 |
| 0.011732 | 0.011664 | 0.011631 | 0.011664 | 0.011765 | 0.011765 | 0.011698 |
| 0.011698 | 0.011832 | 0.012000 | 0.011731 | 0.011933 | 0.011933 | 0.011799 |
| 0.011631 | 0.011698 | 0.011732 | 0.012135 | 0.011698 | 0.011732 | 0.011698 |
| 0.011732 | 0.011664 | 0.011664 | 0.011967 | 0.011900 | 0.011933 | 0.011664 |
| 0.011765 | 0.011832 | 0.011698 | 0.011765 | 0.011732 | 0.011597 | 0.011933 |
| 0.011698 | 0.011664 | 0.011664 | 0.011832 | 0.011664 | 0.011765 | 0.012001 |
| 0.011698 | 0.012079 | 0.012068 | 0.011548 | 0.011229 | 0.011468 | 0.011318 |
| 0.011280 | 0.011761 | 0.011306 | 0.011462 | 0.011304 | 0.011417 | 0.011432 |
| 0.011468 | 0.011258 | 0.011394 | 0.011192 | 0.011276 | 0.011395 | 0.011466 |
| 0.011475 | 0.011336 | 0.011448 | 0.011342 | 0.011397 | 0.011530 | 0.011597 |
| 0.011597 | 0.011464 | 0.011567 | 0.011569 | 0.011704 | 0.011732 | 0.011698 |
| 0.011933 | 0.011497 | 0.011497 | 0.011463 | 0.011262 | 0.011698 | 0.011295 |
| 0.011664 | 0.011664 | 0.011329 | 0.011463 | 0.011631 | 0.011295 | 0.011429 |
| 0.011375 | 0.011375 | 0.011368 | 0.011403 | 0.011539 | 0.011504 | 0.011504 |
| 0.011503 | 0.011430 | 0.011245 | 0.011240 | 0.011365 | 0.011535 | 0.011535 |
| 0.011329 | 0.011399 | 0.011632 | 0.011601 | 0.011531 | 0.011565 | 0.011799 |
| 0.011731 | 0.011799 | 0.011799 | 0.011564 | 0.012270 | 0.011866 | 0.011933 |
| 0.011665 | 0.012057 | 0.011674 | 0.011441 | 0.011631 | 0.011698 | 0.011799 |
| 0.011834 | 0.011866 | 0.011866 | 0.011866 | 0.011689 | 0.012000 | 0.011650 |
| 0.011533 | 0.011545 | 0.011639 | 0.011604 | 0.011709 | 0.011545 | 0.011876 |
| 0.011678 | 0.011411 | 0.011156 | 0.011397 | 0.011363 | 0.011437 | 0.011329 |
| 0.011295 | 0.011295 | 0.011362 | 0.011329 | 0.011530 | 0.011497 | 0.011429 |
| 0.011530 | 0.011597 | 0.011127 | 0.011127 | 0.011161 | 0.011161 | 0.011162 |
| 0.011229 | 0.011362 | 0.011362 | 0.011397 | 0.011530 | 0.011597 | 0.011597 |
| 0.011464 | 0.011567 | 0.011569 | 0.011704 | 0.011732 | 0.011698 | 0.011765 |
| 0.011799 | 0.011799 | 0.011331 | 0.011513 | 0.011442 | 0.011503 | 0.011340 |
| 0.011508 | 0.011698 | 0.011399 | 0.011570 | 0.011295 | 0.011497 | 0.011362 |
| 0.011463 | 0.011396 | 0.011295 | 0.011397 | 0.011497 | 0.011499 | 0.011396 |
| 0.011295 | 0.011229 | 0.011362 | 0.011295 | 0.011228 | 0.011332 | 0.011497 |
| 0.011597 | 0.011530 | 0.011564 | 0.011396 | 0.011362 | 0.011295 | 0.011497 |
| 0.011664 | 0.011698 | 0.011698 | 0.011631 | 0.011698 | 0.011933 | 0.011597 |
| 0.011631 | 0.012034 | 0.011631 | 0.011664 | 0.011631 | 0.012000 | 0.011232 |

|          |          |          |          |          |          |          |
|----------|----------|----------|----------|----------|----------|----------|
| 0.011678 | 0.011273 | 0.011261 | 0.011503 | 0.011589 | 0.011527 | 0.011186 |
| 0.011218 | 0.011799 | 0.011900 | 0.011705 | 0.011565 | 0.011703 | 0.011834 |
| 0.011733 | 0.011872 | 0.012034 | 0.011983 | 0.012000 | 0.012842 | 0.011734 |
| 0.012473 | 0.012241 | 0.012375 | 0.012646 | 0.012000 | 0.011396 | 0.011698 |
| 0.012137 | 0.012072 | 0.011967 | 0.011866 | 0.011632 | 0.011632 | 0.011906 |
| 0.011799 | 0.011501 | 0.011866 | 0.011531 | 0.011901 | 0.012270 | 0.011968 |
| 0.012171 | 0.011968 | 0.012072 | 0.011838 | 0.012138 | 0.012144 | 0.012205 |
| 0.012205 | 0.012239 | 0.012186 | 0.012205 | 0.012207 | 0.011731 | 0.011732 |
| 0.011800 | 0.012606 | 0.011806 | 0.012337 | 0.012474 | 0.011570 | 0.011464 |
| 0.011732 | 0.011731 | 0.011900 | 0.011924 | 0.012045 | 0.012068 | 0.011431 |
| S515     | 0.011866 | 0.011866 | 0.012202 | 0.011967 | 0.011967 | 0.012034 |
| 0.011875 | 0.011807 | 0.011967 | 0.011463 | 0.011530 | 0.011329 | 0.011463 |
| 0.011496 | 0.011664 | 0.011463 | 0.011496 | 0.011564 | 0.011530 | 0.011496 |
| 0.011463 | 0.011496 | 0.011597 | 0.011463 | 0.011497 | 0.011496 | 0.011841 |
| 0.011732 | 0.011496 | 0.011396 | 0.011631 | 0.011564 | 0.011530 | 0.011564 |
| 0.011530 | 0.011631 | 0.011530 | 0.011530 | 0.011564 | 0.011530 | 0.011698 |
| 0.011463 | 0.011530 | 0.011564 | 0.011496 | 0.011597 | 0.011631 | 0.011564 |
| 0.011530 | 0.011698 | 0.011598 | 0.011866 | 0.011530 | 0.011799 | 0.011530 |
| 0.011496 | 0.011597 | 0.011664 | 0.011799 | 0.011900 | 0.011597 | 0.011698 |
| 0.011564 | 0.011631 | 0.011530 | 0.011765 | 0.012001 | 0.011530 | 0.011597 |
| 0.011496 | 0.011597 | 0.011564 | 0.011631 | 0.011564 | 0.011564 | 0.011564 |
| 0.011463 | 0.011496 | 0.011463 | 0.011564 | 0.011530 | 0.011397 | 0.011631 |
| 0.011564 | 0.011530 | 0.011597 | 0.011496 | 0.011631 | 0.011463 | 0.011530 |
| 0.011698 | 0.011631 | 0.011866 | 0.011698 | 0.011530 | 0.011765 | 0.011530 |
| 0.011542 | 0.011770 | 0.011551 | 0.011255 | 0.011209 | 0.011391 | 0.011454 |
| 0.012085 | 0.011467 | 0.011184 | 0.011765 | 0.011765 | 0.011564 | 0.011664 |
| 0.011597 | 0.011564 | 0.011631 | 0.011530 | 0.011631 | 0.011564 | 0.011564 |
| 0.011530 | 0.011631 | 0.011832 | 0.011698 | 0.011597 | 0.011564 | 0.011329 |
| 0.011295 | 0.011295 | 0.011362 | 0.011329 | 0.011530 | 0.011497 | 0.011429 |
| 0.011530 | 0.011597 | 0.011127 | 0.011127 | 0.011094 | 0.011094 | 0.011094 |
| 0.011162 | 0.011362 | 0.011362 | 0.011240 | 0.011313 | 0.011271 | 0.011363 |
| 0.011365 | 0.011301 | 0.011318 | 0.011336 | 0.011264 | 0.011300 | 0.011330 |
| 0.011528 | 0.011370 | 0.011404 | 0.011296 | 0.011302 | 0.011430 | 0.011396 |
| 0.011464 | 0.011397 | 0.011396 | 0.011664 | 0.011597 | 0.011967 | 0.011698 |
| 0.011799 | 0.011530 | 0.011396 | 0.011497 | 0.011295 | 0.011664 | 0.011329 |
| 0.011530 | 0.011530 | 0.011362 | 0.011329 | 0.011496 | 0.011295 | 0.011429 |
| 0.011362 | 0.011463 | 0.011396 | 0.011295 | 0.011397 | 0.011497 | 0.011499 |
| 0.011497 | 0.011396 | 0.011295 | 0.011229 | 0.011362 | 0.011295 | 0.011228 |
| 0.011332 | 0.011497 | 0.011295 | 0.011497 | 0.011429 | 0.011362 | 0.011329 |
| 0.011429 | 0.011329 | 0.011362 | 0.011329 | 0.011362 | 0.011228 | 0.011362 |
| 0.011396 | 0.011329 | 0.011396 | 0.011329 | 0.011362 | 0.011396 | 0.011631 |
| 0.011900 | 0.011832 | 0.011732 | 0.011498 | 0.011732 | 0.011362 | 0.011329 |
| 0.011364 | 0.011586 | 0.011426 | 0.011232 | 0.011908 | 0.011231 | 0.011336 |
| 0.011909 | 0.011570 | 0.011698 | 0.011900 | 0.011538 | 0.011765 | 0.011732 |
| 0.011664 | 0.011832 | 0.011700 | 0.011390 | 0.011563 | 0.011564 | 0.011635 |
| 0.011732 | 0.011634 | 0.011770 | 0.011838 | 0.011765 | 0.011833 | 0.011941 |
| 0.011669 | 0.011841 | 0.011771 | 0.011703 | 0.011969 | 0.011429 | 0.011633 |
| 0.011597 | 0.011530 | 0.011429 | 0.011429 | 0.011496 | 0.011496 | 0.011564 |
| 0.011496 | 0.011564 | 0.011463 | 0.011564 | 0.011496 | 0.011496 | 0.011564 |
| 0.011496 | 0.011933 | 0.011832 | 0.011866 | 0.011396 | 0.011496 | 0.011530 |
| 0.011530 | 0.011496 | 0.011564 | 0.011597 | 0.011463 | 0.011463 | 0.011463 |
| 0.012000 | 0.011631 | 0.011631 | 0.011429 | 0.011530 | 0.011698 | 0.011463 |
| 0.011463 | 0.011530 | 0.011496 | 0.011664 | 0.011463 | 0.011597 | 0.011732 |
| 0.011664 | 0.011496 | 0.011496 | 0.011429 | 0.011429 | 0.011597 | 0.011530 |
| 0.011429 | 0.011530 | 0.011396 | 0.011429 | 0.011564 | 0.011698 | 0.011463 |
| 0.011430 | 0.011564 | 0.011497 | 0.011396 | 0.011732 | 0.011396 | 0.011564 |
| 0.011642 | 0.011463 | 0.011765 | 0.011598 | 0.011631 | 0.011496 | 0.011597 |
| 0.011463 | 0.011799 | 0.011396 | 0.011664 | 0.011463 | 0.011463 | 0.011396 |
| 0.011631 | 0.011766 | 0.011530 | 0.011597 | 0.011429 | 0.011832 | 0.011463 |
| 0.011463 | 0.011463 | 0.011496 | 0.011597 | 0.011496 | 0.011597 | 0.011664 |

|          |          |          |          |          |          |          |
|----------|----------|----------|----------|----------|----------|----------|
| 0.011664 | 0.011631 | 0.011530 | 0.011631 | 0.011597 | 0.011463 | 0.011429 |
| 0.011463 | 0.011463 | 0.011530 | 0.011463 | 0.011429 | 0.011597 | 0.011463 |
| 0.011496 | 0.011496 | 0.011631 | 0.011664 | 0.011564 | 0.011496 | 0.011497 |
| 0.011564 | 0.011496 | 0.011597 | 0.011463 | 0.011597 | 0.011698 | 0.012000 |
| 0.011496 | 0.011900 | 0.011336 | 0.017785 | 0.011257 | 0.011549 | 0.011688 |
| 0.011648 | 0.011693 | 0.011322 | 0.011292 | 0.011829 | 0.011716 | 0.011425 |
| 0.011487 | 0.011671 | 0.011255 | 0.011270 | 0.011294 | 0.011406 | 0.011318 |
| 0.011482 | 0.011470 | 0.011394 | 0.011193 | 0.011631 | 0.011664 | 0.011500 |
| 0.011541 | 0.011463 | 0.011631 | 0.011429 | 0.011564 | 0.011564 | 0.011530 |
| 0.011564 | 0.011496 | 0.011530 | 0.011396 | 0.011362 | 0.011295 | 0.011329 |
| 0.011329 | 0.011396 | 0.011295 | 0.011396 | 0.011429 | 0.011463 | 0.011530 |
| 0.011564 | 0.011362 | 0.011698 | 0.011698 | 0.011597 | 0.011632 | 0.011497 |
| 0.011262 | 0.011262 | 0.011295 | 0.011396 | 0.011262 | 0.011497 | 0.011497 |
| 0.011530 | 0.011698 | 0.011631 | 0.011732 | 0.011732 | 0.011734 | 0.011564 |
| 0.011396 | 0.011463 | 0.011497 | 0.011329 | 0.011396 | 0.011362 | 0.011564 |
| 0.011463 | 0.011463 | 0.011497 | 0.011463 | 0.011363 | 0.011564 | 0.011530 |
| 0.011568 | 0.011295 | 0.011396 | 0.011497 | 0.011396 | 0.011530 | 0.011732 |
| 0.011900 | 0.011538 | 0.011765 | 0.011732 | 0.011664 | 0.011832 | 0.011396 |
| 0.011464 | 0.011363 | 0.011329 | 0.011329 | 0.011396 | 0.011295 | 0.011396 |
| 0.011429 | 0.011463 | 0.011530 | 0.011564 | 0.011362 | 0.011698 | 0.011698 |
| 0.011597 | 0.011632 | 0.011698 | 0.011631 | 0.012271 | 0.011703 | 0.011623 |
| 0.011693 | 0.011650 | 0.011763 | 0.011649 | 0.011760 | 0.011681 | 0.011646 |
| 0.012228 | 0.011545 | 0.011677 | 0.011614 | 0.011887 | 0.011740 | 0.011843 |
| 0.012250 | 0.011550 | 0.011128 | 0.011295 | 0.000000 | 0.011497 | 0.011094 |
| 0.011429 | 0.011329 | 0.011262 | 0.011228 | 0.011162 | 0.011698 | 0.011498 |
| 0.011530 | 0.011463 | 0.011496 | 0.011530 | 0.011429 | 0.011496 | 0.011396 |
| 0.011530 | 0.011564 | 0.011463 | 0.011429 | 0.011530 | 0.011463 | 0.011496 |
| 0.011496 | 0.011429 | 0.011496 | 0.011530 | 0.011429 | 0.011631 | 0.011664 |
| 0.011564 | 0.011631 | 0.011564 | 0.011564 | 0.011496 | 0.011900 | 0.011530 |
| 0.011582 | 0.011497 | 0.011732 | 0.011739 | 0.011597 | 0.011597 | 0.011597 |
| 0.011597 | 0.011530 | 0.011496 | 0.011530 | 0.011631 | 0.011631 | 0.011564 |
| 0.011564 | 0.011698 | 0.011866 | 0.011597 | 0.011799 | 0.011799 | 0.011664 |
| 0.011496 | 0.011564 | 0.011597 | 0.012001 | 0.011564 | 0.011597 | 0.011564 |
| 0.011597 | 0.011530 | 0.011530 | 0.011832 | 0.011765 | 0.011799 | 0.011530 |
| 0.011631 | 0.011698 | 0.011564 | 0.011631 | 0.011597 | 0.011463 | 0.011799 |
| 0.011564 | 0.011530 | 0.011530 | 0.011698 | 0.011530 | 0.011631 | 0.011866 |
| 0.011564 | 0.011943 | 0.011933 | 0.011548 | 0.011229 | 0.011468 | 0.011267 |
| 0.011335 | 0.011761 | 0.011306 | 0.011417 | 0.011304 | 0.011416 | 0.011379 |
| 0.011468 | 0.011192 | 0.011339 | 0.011192 | 0.011222 | 0.011395 | 0.011466 |
| 0.011475 | 0.011336 | 0.011448 | 0.011342 | 0.011397 | 0.011530 | 0.011597 |
| 0.011597 | 0.011464 | 0.011567 | 0.011569 | 0.011704 | 0.011732 | 0.011564 |
| 0.011799 | 0.011530 | 0.011396 | 0.011497 | 0.011295 | 0.011664 | 0.011329 |
| 0.011530 | 0.011530 | 0.011362 | 0.011329 | 0.011496 | 0.011295 | 0.011429 |
| 0.011375 | 0.011375 | 0.011368 | 0.011403 | 0.011539 | 0.011504 | 0.011504 |
| 0.011503 | 0.011430 | 0.011245 | 0.011240 | 0.011365 | 0.011534 | 0.011535 |
| 0.011329 | 0.011399 | 0.011632 | 0.011601 | 0.011531 | 0.011565 | 0.011664 |
| 0.011597 | 0.011664 | 0.011664 | 0.011564 | 0.012135 | 0.011732 | 0.011799 |
| 0.011665 | 0.011879 | 0.011538 | 0.011441 | 0.011497 | 0.011698 | 0.011664 |
| 0.011699 | 0.011732 | 0.011732 | 0.011732 | 0.011728 | 0.011866 | 0.011511 |
| 0.011398 | 0.011406 | 0.011503 | 0.011468 | 0.011573 | 0.011396 | 0.011740 |
| 0.011540 | 0.011411 | 0.011156 | 0.011397 | 0.011363 | 0.011436 | 0.011329 |
| 0.011295 | 0.011295 | 0.011362 | 0.011329 | 0.011530 | 0.011497 | 0.011429 |
| 0.011530 | 0.011597 | 0.011127 | 0.011127 | 0.011094 | 0.011094 | 0.011094 |
| 0.011162 | 0.011362 | 0.011362 | 0.011397 | 0.011530 | 0.011597 | 0.011597 |
| 0.011464 | 0.011567 | 0.011569 | 0.011704 | 0.011732 | 0.011564 | 0.011732 |
| 0.011664 | 0.011664 | 0.011331 | 0.011513 | 0.011442 | 0.011503 | 0.011340 |
| 0.011508 | 0.011744 | 0.011441 | 0.011570 | 0.011295 | 0.011497 | 0.011362 |
| 0.011463 | 0.011396 | 0.011295 | 0.011397 | 0.011497 | 0.011499 | 0.011396 |
| 0.011295 | 0.011229 | 0.011362 | 0.011295 | 0.011228 | 0.011332 | 0.011497 |
| 0.011564 | 0.011496 | 0.011530 | 0.011396 | 0.011362 | 0.011295 | 0.011497 |

|          |          |          |          |          |          |          |
|----------|----------|----------|----------|----------|----------|----------|
| 0.011530 | 0.011564 | 0.011564 | 0.011496 | 0.011564 | 0.011799 | 0.011463 |
| 0.011496 | 0.011900 | 0.011496 | 0.011530 | 0.011496 | 0.011866 | 0.011189 |
| 0.011678 | 0.011273 | 0.011261 | 0.011503 | 0.011589 | 0.011527 | 0.011186 |
| 0.011218 | 0.011664 | 0.011765 | 0.011705 | 0.011565 | 0.011703 | 0.011834 |
| 0.011733 | 0.011906 | 0.011900 | 0.011983 | 0.011866 | 0.012741 | 0.011734 |
| 0.012473 | 0.012240 | 0.012375 | 0.012646 | 0.011866 | 0.011396 | 0.011698 |
| 0.012137 | 0.012072 | 0.011832 | 0.011732 | 0.011632 | 0.011632 | 0.011771 |
| 0.011664 | 0.011501 | 0.011732 | 0.011531 | 0.011901 | 0.012135 | 0.011968 |
| 0.012036 | 0.011968 | 0.012072 | 0.011838 | 0.012138 | 0.012144 | 0.012205 |
| 0.012205 | 0.012239 | 0.012186 | 0.012205 | 0.012207 | 0.011597 | 0.011732 |
| 0.011733 | 0.012472 | 0.011806 | 0.012203 | 0.012474 | 0.011569 | 0.011464 |
| 0.011597 | 0.011597 | 0.011900 | 0.011924 | 0.012045 | 0.011933 | 0.011431 |
| S516     | 0.011866 | 0.011866 | 0.011866 | 0.011631 | 0.011631 | 0.011698 |
| 0.011604 | 0.011536 | 0.011698 | 0.011463 | 0.011530 | 0.011363 | 0.011463 |
| 0.011429 | 0.011664 | 0.011396 | 0.011496 | 0.011564 | 0.011530 | 0.011496 |
| 0.011463 | 0.011497 | 0.011262 | 0.011463 | 0.011497 | 0.011497 | 0.011570 |
| 0.011463 | 0.011497 | 0.011396 | 0.011295 | 0.011564 | 0.011530 | 0.011564 |
| 0.011530 | 0.011631 | 0.011530 | 0.011530 | 0.011564 | 0.011530 | 0.011698 |
| 0.011396 | 0.011530 | 0.011564 | 0.011497 | 0.011530 | 0.011631 | 0.011564 |
| 0.011530 | 0.011698 | 0.011598 | 0.011597 | 0.011530 | 0.011799 | 0.011530 |
| 0.011497 | 0.011530 | 0.011664 | 0.011799 | 0.011631 | 0.011530 | 0.011631 |
| 0.011564 | 0.011631 | 0.011530 | 0.011765 | 0.011732 | 0.011530 | 0.011597 |
| 0.011497 | 0.011597 | 0.011564 | 0.011631 | 0.011564 | 0.011564 | 0.011564 |
| 0.011463 | 0.011497 | 0.011463 | 0.011497 | 0.011530 | 0.011430 | 0.011631 |
| 0.011564 | 0.011530 | 0.011597 | 0.011497 | 0.011564 | 0.011463 | 0.011530 |
| 0.011698 | 0.011631 | 0.011664 | 0.011698 | 0.011530 | 0.011765 | 0.011530 |
| 0.011579 | 0.011508 | 0.011626 | 0.011334 | 0.011321 | 0.011428 | 0.011139 |
| 0.011792 | 0.011213 | 0.011348 | 0.011765 | 0.011765 | 0.011497 | 0.011597 |
| 0.011597 | 0.011564 | 0.011631 | 0.011530 | 0.011631 | 0.011564 | 0.011564 |
| 0.011530 | 0.011564 | 0.011832 | 0.011698 | 0.011597 | 0.011564 | 0.011362 |
| 0.011329 | 0.011262 | 0.011396 | 0.011362 | 0.011161 | 0.011127 | 0.000000 |
| 0.011161 | 0.011228 | 0.011362 | 0.011362 | 0.011396 | 0.011396 | 0.011398 |
| 0.011466 | 0.011396 | 0.011396 | 0.011276 | 0.011349 | 0.011306 | 0.011396 |
| 0.011399 | 0.011335 | 0.011392 | 0.011371 | 0.011298 | 0.011334 | 0.011364 |
| 0.011348 | 0.011405 | 0.011439 | 0.011329 | 0.011337 | 0.011464 | 0.011363 |
| 0.011430 | 0.011431 | 0.011430 | 0.011664 | 0.011597 | 0.011967 | 0.011631 |
| 0.011530 | 0.011463 | 0.011396 | 0.011430 | 0.011295 | 0.011396 | 0.011329 |
| 0.011530 | 0.011530 | 0.011362 | 0.011329 | 0.011496 | 0.011329 | 0.011429 |
| 0.011396 | 0.011497 | 0.011430 | 0.011329 | 0.011431 | 0.011530 | 0.011533 |
| 0.011530 | 0.011430 | 0.011329 | 0.011263 | 0.011396 | 0.011329 | 0.011262 |
| 0.011264 | 0.011530 | 0.011329 | 0.011530 | 0.011429 | 0.011396 | 0.011362 |
| 0.011463 | 0.011362 | 0.011396 | 0.011362 | 0.011396 | 0.011262 | 0.011396 |
| 0.011430 | 0.011362 | 0.011429 | 0.011362 | 0.011396 | 0.011429 | 0.011665 |
| 0.011631 | 0.011564 | 0.011497 | 0.011532 | 0.011497 | 0.011396 | 0.011362 |
| 0.011330 | 0.011626 | 0.011472 | 0.011300 | 0.011637 | 0.011265 | 0.011414 |
| 0.011637 | 0.011400 | 0.011698 | 0.011900 | 0.011538 | 0.011765 | 0.011732 |
| 0.011664 | 0.011832 | 0.011700 | 0.011390 | 0.011605 | 0.011564 | 0.011635 |
| 0.011732 | 0.011634 | 0.011770 | 0.011839 | 0.011765 | 0.011833 | 0.011941 |
| 0.011669 | 0.011841 | 0.011771 | 0.011703 | 0.011969 | 0.011429 | 0.011633 |
| 0.011597 | 0.011530 | 0.011429 | 0.011429 | 0.011497 | 0.011497 | 0.011564 |
| 0.011497 | 0.011564 | 0.011463 | 0.011497 | 0.011497 | 0.011496 | 0.011564 |
| 0.011497 | 0.011664 | 0.011564 | 0.011597 | 0.011396 | 0.011497 | 0.011530 |
| 0.011530 | 0.011496 | 0.011564 | 0.011530 | 0.011463 | 0.011463 | 0.011463 |
| 0.011732 | 0.011564 | 0.011631 | 0.011429 | 0.011530 | 0.011698 | 0.011463 |
| 0.011463 | 0.011530 | 0.011497 | 0.011664 | 0.011463 | 0.011396 | 0.011530 |
| 0.011463 | 0.011497 | 0.011496 | 0.011429 | 0.011429 | 0.011597 | 0.011530 |
| 0.011429 | 0.011530 | 0.011396 | 0.011429 | 0.011564 | 0.011430 | 0.011463 |
| 0.011430 | 0.011564 | 0.011497 | 0.011396 | 0.011463 | 0.011396 | 0.011564 |
| 0.011642 | 0.011463 | 0.011497 | 0.011598 | 0.011564 | 0.011497 | 0.011597 |
| 0.011463 | 0.011799 | 0.011396 | 0.011597 | 0.011396 | 0.011396 | 0.011396 |



|          |          |          |          |          |          |          |
|----------|----------|----------|----------|----------|----------|----------|
| 0.011631 | 0.011564 | 0.011530 | 0.011597 | 0.011429 | 0.011564 | 0.011396 |
| 0.011463 | 0.011463 | 0.011496 | 0.011597 | 0.011497 | 0.011597 | 0.011664 |
| 0.011664 | 0.011631 | 0.011530 | 0.011631 | 0.011597 | 0.011463 | 0.011429 |
| 0.011463 | 0.011463 | 0.011530 | 0.011396 | 0.011429 | 0.011597 | 0.011463 |
| 0.011429 | 0.011497 | 0.011631 | 0.011597 | 0.011564 | 0.011497 | 0.011497 |
| 0.011564 | 0.011497 | 0.011597 | 0.011463 | 0.011597 | 0.011698 | 0.011732 |
| 0.011497 | 0.011631 | 0.011371 | 0.017898 | 0.011257 | 0.011549 | 0.011444 |
| 0.011406 | 0.011447 | 0.011427 | 0.011234 | 0.011500 | 0.011475 | 0.011546 |
| 0.011392 | 0.011182 | 0.011294 | 0.011353 | 0.011294 | 0.011406 | 0.011361 |
| 0.011248 | 0.011246 | 0.011246 | 0.011126 | 0.011631 | 0.011665 | 0.011534 |
| 0.011541 | 0.011497 | 0.011631 | 0.011396 | 0.011564 | 0.011564 | 0.011530 |
| 0.011564 | 0.011496 | 0.011530 | 0.011429 | 0.011396 | 0.011329 | 0.011362 |
| 0.011362 | 0.011429 | 0.011329 | 0.011430 | 0.011463 | 0.011497 | 0.011530 |
| 0.011497 | 0.011329 | 0.011463 | 0.011463 | 0.011598 | 0.011632 | 0.011530 |
| 0.011295 | 0.011295 | 0.011329 | 0.011430 | 0.011295 | 0.011530 | 0.011530 |
| 0.011564 | 0.011698 | 0.011631 | 0.011732 | 0.011497 | 0.011734 | 0.011564 |
| 0.011429 | 0.011497 | 0.011530 | 0.011362 | 0.011429 | 0.011396 | 0.011564 |
| 0.011497 | 0.011497 | 0.011530 | 0.011497 | 0.011397 | 0.011597 | 0.011564 |
| 0.011568 | 0.011329 | 0.011429 | 0.011530 | 0.011430 | 0.011497 | 0.011732 |
| 0.011900 | 0.011538 | 0.011765 | 0.011732 | 0.011664 | 0.011832 | 0.011396 |
| 0.011498 | 0.011396 | 0.011362 | 0.011362 | 0.011429 | 0.011329 | 0.011430 |
| 0.011463 | 0.011497 | 0.011530 | 0.011497 | 0.011329 | 0.011463 | 0.011463 |
| 0.011598 | 0.011632 | 0.011698 | 0.011631 | 0.012204 | 0.011703 | 0.011623 |
| 0.011693 | 0.011650 | 0.011763 | 0.011649 | 0.011760 | 0.011681 | 0.011646 |
| 0.012159 | 0.011545 | 0.011677 | 0.011614 | 0.011887 | 0.011741 | 0.011843 |
| 0.012182 | 0.011512 | 0.011500 | 0.011429 | 0.011497 | 0.000000 | 0.011466 |
| 0.011429 | 0.011362 | 0.011497 | 0.011463 | 0.011466 | 0.011429 | 0.011262 |
| 0.011530 | 0.011463 | 0.011497 | 0.011530 | 0.011429 | 0.011497 | 0.011396 |
| 0.011463 | 0.011497 | 0.011463 | 0.011429 | 0.011530 | 0.011463 | 0.011497 |
| 0.011497 | 0.011429 | 0.011497 | 0.011530 | 0.011429 | 0.011631 | 0.011664 |
| 0.011564 | 0.011564 | 0.011564 | 0.011564 | 0.011496 | 0.011631 | 0.011530 |
| 0.011234 | 0.011497 | 0.011463 | 0.011467 | 0.011597 | 0.011597 | 0.011597 |
| 0.011597 | 0.011530 | 0.011497 | 0.011530 | 0.011631 | 0.011631 | 0.011564 |
| 0.011564 | 0.011698 | 0.011597 | 0.011597 | 0.011799 | 0.011799 | 0.011664 |
| 0.011496 | 0.011564 | 0.011597 | 0.011732 | 0.011564 | 0.011597 | 0.011564 |
| 0.011597 | 0.011463 | 0.011463 | 0.011765 | 0.011765 | 0.011732 | 0.011530 |
| 0.011631 | 0.011698 | 0.011564 | 0.011631 | 0.011597 | 0.011463 | 0.011530 |
| 0.011564 | 0.011530 | 0.011463 | 0.011698 | 0.011530 | 0.011631 | 0.011665 |
| 0.011564 | 0.011671 | 0.011665 | 0.011263 | 0.000000 | 0.011434 | 0.011215 |
| 0.011335 | 0.011527 | 0.011341 | 0.011507 | 0.011353 | 0.011315 | 0.011273 |
| 0.011213 | 0.011192 | 0.011339 | 0.011126 | 0.011222 | 0.011328 | 0.011506 |
| 0.011512 | 0.011414 | 0.011412 | 0.011412 | 0.011431 | 0.011295 | 0.011362 |
| 0.011295 | 0.011430 | 0.011533 | 0.011196 | 0.011670 | 0.011696 | 0.011564 |
| 0.011530 | 0.011463 | 0.011396 | 0.011430 | 0.011295 | 0.011396 | 0.011329 |
| 0.011530 | 0.011530 | 0.011362 | 0.011329 | 0.011496 | 0.011329 | 0.011429 |
| 0.011409 | 0.011410 | 0.011403 | 0.011437 | 0.011573 | 0.011538 | 0.011538 |
| 0.011537 | 0.011464 | 0.011282 | 0.011276 | 0.011399 | 0.011568 | 0.011569 |
| 0.011363 | 0.011433 | 0.011666 | 0.011635 | 0.011565 | 0.011599 | 0.011664 |
| 0.011597 | 0.011664 | 0.011664 | 0.011564 | 0.011866 | 0.011732 | 0.011799 |
| 0.011698 | 0.011630 | 0.011538 | 0.011476 | 0.011497 | 0.011698 | 0.011665 |
| 0.011699 | 0.011732 | 0.011732 | 0.011732 | 0.011728 | 0.011866 | 0.011511 |
| 0.011398 | 0.011406 | 0.011503 | 0.011468 | 0.011504 | 0.011433 | 0.011468 |
| 0.011540 | 0.011192 | 0.011251 | 0.011435 | 0.011396 | 0.011471 | 0.011362 |
| 0.011329 | 0.011262 | 0.011396 | 0.011362 | 0.011161 | 0.011127 | 0.000000 |
| 0.011161 | 0.011228 | 0.011362 | 0.011362 | 0.011396 | 0.011396 | 0.011398 |
| 0.011466 | 0.011396 | 0.011396 | 0.011431 | 0.011295 | 0.011362 | 0.011295 |
| 0.011430 | 0.011533 | 0.011196 | 0.011670 | 0.011696 | 0.011564 | 0.011732 |
| 0.011665 | 0.011665 | 0.011365 | 0.011547 | 0.011477 | 0.011537 | 0.011375 |
| 0.011542 | 0.011698 | 0.011526 | 0.011570 | 0.011329 | 0.011530 | 0.011396 |
| 0.011497 | 0.011430 | 0.011329 | 0.011431 | 0.011530 | 0.011533 | 0.011430 |

|          |          |          |          |          |          |          |
|----------|----------|----------|----------|----------|----------|----------|
| 0.011329 | 0.011263 | 0.011396 | 0.011329 | 0.011262 | 0.011264 | 0.011530 |
| 0.011564 | 0.011496 | 0.011530 | 0.011429 | 0.011396 | 0.011329 | 0.011262 |
| 0.011530 | 0.011564 | 0.011564 | 0.011497 | 0.011564 | 0.011799 | 0.011396 |
| 0.011497 | 0.011631 | 0.011497 | 0.011530 | 0.011496 | 0.011597 | 0.011317 |
| 0.011510 | 0.011188 | 0.011161 | 0.011262 | 0.011345 | 0.011276 | 0.011144 |
| 0.011113 | 0.011396 | 0.011497 | 0.011468 | 0.011330 | 0.011466 | 0.011598 |
| 0.011498 | 0.011635 | 0.011631 | 0.011744 | 0.011597 | 0.012472 | 0.011498 |
| 0.012237 | 0.012004 | 0.012139 | 0.012410 | 0.011597 | 0.011362 | 0.011463 |
| 0.012103 | 0.011836 | 0.011564 | 0.011463 | 0.011396 | 0.011396 | 0.011500 |
| 0.011396 | 0.011264 | 0.011463 | 0.011296 | 0.011666 | 0.011866 | 0.011733 |
| 0.011767 | 0.011733 | 0.011836 | 0.011601 | 0.012104 | 0.012110 | 0.012171 |
| 0.012172 | 0.012205 | 0.012152 | 0.012172 | 0.012173 | 0.011597 | 0.011699 |
| 0.011766 | 0.012405 | 0.011772 | 0.011934 | 0.012272 | 0.011332 | 0.011228 |
| 0.011329 | 0.011329 | 0.011665 | 0.011677 | 0.011799 | 0.011664 | 0.011195 |
| S517     | 0.011905 | 0.011905 | 0.012244 | 0.012007 | 0.012007 | 0.012074 |
| 0.011915 | 0.011847 | 0.012041 | 0.011500 | 0.011567 | 0.011297 | 0.011499 |
| 0.011533 | 0.011702 | 0.011499 | 0.011533 | 0.011601 | 0.011567 | 0.011533 |
| 0.011499 | 0.011533 | 0.011635 | 0.011500 | 0.011534 | 0.011533 | 0.011881 |
| 0.011770 | 0.011533 | 0.011432 | 0.011668 | 0.011601 | 0.011567 | 0.011601 |
| 0.011567 | 0.011668 | 0.011567 | 0.011567 | 0.011601 | 0.011567 | 0.011736 |
| 0.011499 | 0.011567 | 0.011601 | 0.011533 | 0.011635 | 0.011668 | 0.011601 |
| 0.011567 | 0.011736 | 0.011635 | 0.011905 | 0.011567 | 0.011837 | 0.011567 |
| 0.011533 | 0.011635 | 0.011702 | 0.011837 | 0.011939 | 0.011635 | 0.011736 |
| 0.011601 | 0.011668 | 0.011567 | 0.011804 | 0.012041 | 0.011567 | 0.011635 |
| 0.011533 | 0.011635 | 0.011601 | 0.011668 | 0.011601 | 0.011601 | 0.011601 |
| 0.011499 | 0.011533 | 0.011499 | 0.011601 | 0.011567 | 0.011331 | 0.011668 |
| 0.011601 | 0.011567 | 0.011635 | 0.011533 | 0.011668 | 0.011499 | 0.011567 |
| 0.011702 | 0.011668 | 0.011905 | 0.011736 | 0.011567 | 0.011804 | 0.011567 |
| 0.011506 | 0.011733 | 0.011514 | 0.011217 | 0.011172 | 0.011355 | 0.011415 |
| 0.012050 | 0.011417 | 0.011143 | 0.011804 | 0.011770 | 0.011601 | 0.011668 |
| 0.011635 | 0.011601 | 0.011668 | 0.011567 | 0.011668 | 0.011601 | 0.011601 |
| 0.011567 | 0.011668 | 0.011871 | 0.011736 | 0.011635 | 0.011601 | 0.011297 |
| 0.011263 | 0.011263 | 0.011331 | 0.011297 | 0.011500 | 0.011466 | 0.011398 |
| 0.011500 | 0.011567 | 0.011094 | 0.011094 | 0.000000 | 0.000000 | 0.000000 |
| 0.011128 | 0.011331 | 0.011331 | 0.011204 | 0.011277 | 0.011237 | 0.011331 |
| 0.011333 | 0.011267 | 0.011283 | 0.011303 | 0.011231 | 0.011267 | 0.011298 |
| 0.011495 | 0.011338 | 0.011372 | 0.011263 | 0.011269 | 0.011399 | 0.011365 |
| 0.011433 | 0.011366 | 0.011365 | 0.011702 | 0.011635 | 0.012007 | 0.011669 |
| 0.011837 | 0.011500 | 0.011398 | 0.011466 | 0.011263 | 0.011635 | 0.011297 |
| 0.011567 | 0.011567 | 0.011331 | 0.011364 | 0.011533 | 0.011263 | 0.011398 |
| 0.011331 | 0.011432 | 0.011364 | 0.011263 | 0.011365 | 0.011466 | 0.011468 |
| 0.011466 | 0.011364 | 0.011263 | 0.011196 | 0.011331 | 0.011263 | 0.011196 |
| 0.011300 | 0.011466 | 0.011263 | 0.011466 | 0.011466 | 0.011331 | 0.011297 |
| 0.011398 | 0.011297 | 0.011331 | 0.011297 | 0.011331 | 0.011195 | 0.011331 |
| 0.011331 | 0.011297 | 0.011364 | 0.011297 | 0.011331 | 0.011364 | 0.011601 |
| 0.011871 | 0.011804 | 0.011702 | 0.011433 | 0.011703 | 0.011331 | 0.011297 |
| 0.011332 | 0.011590 | 0.011383 | 0.011198 | 0.011880 | 0.011198 | 0.011298 |
| 0.011881 | 0.011539 | 0.011736 | 0.011939 | 0.011507 | 0.011804 | 0.011770 |
| 0.011702 | 0.011804 | 0.011740 | 0.011351 | 0.011610 | 0.011601 | 0.011673 |
| 0.011770 | 0.011671 | 0.011809 | 0.011878 | 0.011804 | 0.011872 | 0.011981 |
| 0.011708 | 0.011880 | 0.011810 | 0.011707 | 0.011975 | 0.011466 | 0.011671 |
| 0.011635 | 0.011567 | 0.011466 | 0.011466 | 0.011533 | 0.011533 | 0.011601 |
| 0.011533 | 0.011601 | 0.011499 | 0.011601 | 0.011533 | 0.011533 | 0.011601 |
| 0.011533 | 0.011973 | 0.011871 | 0.011905 | 0.011432 | 0.011533 | 0.011567 |
| 0.011567 | 0.011533 | 0.011601 | 0.011635 | 0.011499 | 0.011499 | 0.011499 |
| 0.012040 | 0.011668 | 0.011668 | 0.011466 | 0.011567 | 0.011736 | 0.011499 |
| 0.011499 | 0.011567 | 0.011533 | 0.011702 | 0.011499 | 0.011635 | 0.011770 |
| 0.011702 | 0.011533 | 0.011533 | 0.011466 | 0.011466 | 0.011567 | 0.011567 |
| 0.011466 | 0.011567 | 0.011432 | 0.011466 | 0.011601 | 0.011737 | 0.011500 |
| 0.011466 | 0.011601 | 0.011534 | 0.011432 | 0.011770 | 0.011432 | 0.011601 |

|          |          |          |          |          |          |          |
|----------|----------|----------|----------|----------|----------|----------|
| 0.011681 | 0.011499 | 0.011804 | 0.011635 | 0.011668 | 0.011533 | 0.011635 |
| 0.011499 | 0.011837 | 0.011432 | 0.011702 | 0.011499 | 0.011499 | 0.011432 |
| 0.011635 | 0.011804 | 0.011567 | 0.011635 | 0.011466 | 0.011871 | 0.011499 |
| 0.011499 | 0.011499 | 0.011533 | 0.011635 | 0.011533 | 0.011635 | 0.011702 |
| 0.011702 | 0.011668 | 0.011567 | 0.011668 | 0.011635 | 0.011499 | 0.011466 |
| 0.011499 | 0.011499 | 0.011567 | 0.011499 | 0.011466 | 0.011635 | 0.011499 |
| 0.011533 | 0.011533 | 0.011668 | 0.011702 | 0.011601 | 0.011533 | 0.011533 |
| 0.011601 | 0.011533 | 0.011635 | 0.011499 | 0.011601 | 0.011736 | 0.012041 |
| 0.011533 | 0.011939 | 0.011302 | 0.017758 | 0.011192 | 0.011488 | 0.011654 |
| 0.011616 | 0.011659 | 0.011270 | 0.011235 | 0.011774 | 0.011686 | 0.011364 |
| 0.011440 | 0.011610 | 0.011217 | 0.011228 | 0.011256 | 0.011356 | 0.011276 |
| 0.011436 | 0.011433 | 0.011357 | 0.011193 | 0.011668 | 0.011669 | 0.011469 |
| 0.011579 | 0.011432 | 0.011601 | 0.011398 | 0.011601 | 0.011601 | 0.011500 |
| 0.011533 | 0.011466 | 0.011499 | 0.011331 | 0.011331 | 0.011263 | 0.011297 |
| 0.011297 | 0.011364 | 0.011263 | 0.011364 | 0.011398 | 0.011432 | 0.011533 |
| 0.011601 | 0.011331 | 0.011669 | 0.011669 | 0.011635 | 0.011602 | 0.011466 |
| 0.011229 | 0.011229 | 0.011263 | 0.011364 | 0.011229 | 0.011466 | 0.011466 |
| 0.011500 | 0.011736 | 0.011668 | 0.011702 | 0.011702 | 0.011704 | 0.011533 |
| 0.011364 | 0.011432 | 0.011466 | 0.011297 | 0.011364 | 0.011331 | 0.011533 |
| 0.011432 | 0.011432 | 0.011466 | 0.011432 | 0.011331 | 0.011533 | 0.011500 |
| 0.011606 | 0.011263 | 0.011364 | 0.011466 | 0.011364 | 0.011500 | 0.011770 |
| 0.011939 | 0.011507 | 0.011804 | 0.011770 | 0.011702 | 0.011804 | 0.011365 |
| 0.011433 | 0.011331 | 0.011297 | 0.011297 | 0.011364 | 0.011263 | 0.011364 |
| 0.011398 | 0.011432 | 0.011533 | 0.011601 | 0.011331 | 0.011669 | 0.011669 |
| 0.011635 | 0.011602 | 0.011736 | 0.011668 | 0.012313 | 0.011744 | 0.011627 |
| 0.011694 | 0.011689 | 0.011803 | 0.011653 | 0.011800 | 0.011720 | 0.011650 |
| 0.012270 | 0.011583 | 0.011715 | 0.011652 | 0.011927 | 0.011779 | 0.011882 |
| 0.012293 | 0.011516 | 0.011094 | 0.011364 | 0.011094 | 0.011466 | 0.000000 |
| 0.011466 | 0.011297 | 0.011297 | 0.011263 | 0.011195 | 0.011736 | 0.011467 |
| 0.011567 | 0.011499 | 0.011533 | 0.011567 | 0.011466 | 0.011533 | 0.011432 |
| 0.011567 | 0.011601 | 0.011499 | 0.011466 | 0.011567 | 0.011499 | 0.011533 |
| 0.011533 | 0.011466 | 0.011533 | 0.011567 | 0.011466 | 0.011668 | 0.011702 |
| 0.011601 | 0.011668 | 0.011601 | 0.011601 | 0.011533 | 0.011939 | 0.011567 |
| 0.011621 | 0.011533 | 0.011771 | 0.011778 | 0.011635 | 0.011635 | 0.011635 |
| 0.011635 | 0.011567 | 0.011533 | 0.011567 | 0.011668 | 0.011668 | 0.011601 |
| 0.011601 | 0.011736 | 0.011871 | 0.011635 | 0.011838 | 0.011838 | 0.011702 |
| 0.011533 | 0.011601 | 0.011635 | 0.012041 | 0.011601 | 0.011635 | 0.011601 |
| 0.011635 | 0.011567 | 0.011567 | 0.011871 | 0.011770 | 0.011838 | 0.011567 |
| 0.011668 | 0.011702 | 0.011601 | 0.011668 | 0.011635 | 0.011499 | 0.011837 |
| 0.011601 | 0.011567 | 0.011567 | 0.011702 | 0.011567 | 0.011668 | 0.011905 |
| 0.011601 | 0.011983 | 0.011973 | 0.011508 | 0.011173 | 0.011437 | 0.011215 |
| 0.011280 | 0.011723 | 0.011271 | 0.011373 | 0.011256 | 0.011366 | 0.011326 |
| 0.011418 | 0.011126 | 0.011283 | 0.011127 | 0.011168 | 0.011329 | 0.011426 |
| 0.011437 | 0.011297 | 0.011413 | 0.011307 | 0.011366 | 0.011500 | 0.011567 |
| 0.011567 | 0.011432 | 0.011537 | 0.011538 | 0.011674 | 0.011701 | 0.011601 |
| 0.011837 | 0.011500 | 0.011398 | 0.011466 | 0.011263 | 0.011635 | 0.011297 |
| 0.011567 | 0.011567 | 0.011331 | 0.011364 | 0.011533 | 0.011263 | 0.011398 |
| 0.011342 | 0.011342 | 0.011336 | 0.011371 | 0.011508 | 0.011473 | 0.011473 |
| 0.011472 | 0.011399 | 0.011209 | 0.011205 | 0.011333 | 0.011504 | 0.011504 |
| 0.011297 | 0.011367 | 0.011602 | 0.011536 | 0.011500 | 0.011500 | 0.011702 |
| 0.011635 | 0.011702 | 0.011702 | 0.011500 | 0.012176 | 0.011770 | 0.011838 |
| 0.011635 | 0.011921 | 0.011575 | 0.011409 | 0.011533 | 0.011669 | 0.011702 |
| 0.011737 | 0.011770 | 0.011770 | 0.011770 | 0.011654 | 0.011905 | 0.011549 |
| 0.011435 | 0.011444 | 0.011540 | 0.011505 | 0.011610 | 0.011436 | 0.011779 |
| 0.011578 | 0.011368 | 0.011108 | 0.011362 | 0.011331 | 0.011370 | 0.011297 |
| 0.011263 | 0.011263 | 0.011331 | 0.011297 | 0.011500 | 0.011466 | 0.011398 |
| 0.011500 | 0.011567 | 0.011094 | 0.011094 | 0.000000 | 0.000000 | 0.000000 |
| 0.011128 | 0.011331 | 0.011331 | 0.011366 | 0.011500 | 0.011567 | 0.011567 |
| 0.011432 | 0.011537 | 0.011538 | 0.011674 | 0.011701 | 0.011601 | 0.011702 |
| 0.011702 | 0.011702 | 0.011299 | 0.011481 | 0.011410 | 0.011472 | 0.011307 |

|          |          |          |          |          |          |          |
|----------|----------|----------|----------|----------|----------|----------|
| 0.011476 | 0.011703 | 0.011402 | 0.011539 | 0.011263 | 0.011466 | 0.011331 |
| 0.011432 | 0.011364 | 0.011263 | 0.011365 | 0.011466 | 0.011468 | 0.011364 |
| 0.011263 | 0.011196 | 0.011331 | 0.011263 | 0.011196 | 0.011300 | 0.011466 |
| 0.011533 | 0.011466 | 0.011499 | 0.011331 | 0.011331 | 0.011263 | 0.011466 |
| 0.011567 | 0.011601 | 0.011601 | 0.011533 | 0.011601 | 0.011838 | 0.011499 |
| 0.011533 | 0.011939 | 0.011533 | 0.011567 | 0.011533 | 0.011905 | 0.011146 |
| 0.011623 | 0.011231 | 0.011211 | 0.011463 | 0.011549 | 0.011491 | 0.011144 |
| 0.011165 | 0.011702 | 0.011804 | 0.011675 | 0.011535 | 0.011673 | 0.011805 |
| 0.011704 | 0.011877 | 0.011939 | 0.011955 | 0.011905 | 0.012752 | 0.011704 |
| 0.012414 | 0.012215 | 0.012349 | 0.012623 | 0.011905 | 0.011364 | 0.011669 |
| 0.012076 | 0.012045 | 0.011871 | 0.011770 | 0.011602 | 0.011602 | 0.011809 |
| 0.011702 | 0.011470 | 0.011770 | 0.011500 | 0.011872 | 0.012176 | 0.011941 |
| 0.012076 | 0.011906 | 0.012045 | 0.011809 | 0.012111 | 0.012117 | 0.012178 |
| 0.012179 | 0.012213 | 0.012159 | 0.012179 | 0.012180 | 0.011635 | 0.011703 |
| 0.011703 | 0.012515 | 0.011777 | 0.012244 | 0.012450 | 0.011539 | 0.011432 |
| 0.011635 | 0.011635 | 0.011872 | 0.011890 | 0.012011 | 0.011973 | 0.011399 |
| S518     | 0.011564 | 0.011564 | 0.011900 | 0.011664 | 0.011664 | 0.011731 |
| 0.011569 | 0.011501 | 0.011731 | 0.011161 | 0.011228 | 0.011195 | 0.011161 |
| 0.011194 | 0.011362 | 0.011161 | 0.011194 | 0.011262 | 0.011228 | 0.011194 |
| 0.011161 | 0.011194 | 0.011295 | 0.011161 | 0.011195 | 0.011194 | 0.011535 |
| 0.011429 | 0.011194 | 0.011094 | 0.011329 | 0.011262 | 0.011228 | 0.011262 |
| 0.011228 | 0.011329 | 0.011228 | 0.011228 | 0.011262 | 0.011228 | 0.011396 |
| 0.011161 | 0.011228 | 0.011262 | 0.011194 | 0.011295 | 0.011329 | 0.011262 |
| 0.011228 | 0.011396 | 0.011295 | 0.011564 | 0.011228 | 0.011496 | 0.011228 |
| 0.011194 | 0.011295 | 0.011362 | 0.011496 | 0.011597 | 0.011295 | 0.011396 |
| 0.011262 | 0.011329 | 0.011228 | 0.011463 | 0.011698 | 0.011228 | 0.011295 |
| 0.011194 | 0.011295 | 0.011262 | 0.011329 | 0.011262 | 0.011262 | 0.011262 |
| 0.011161 | 0.011194 | 0.011161 | 0.011262 | 0.011228 | 0.011262 | 0.011329 |
| 0.011262 | 0.011228 | 0.011295 | 0.011194 | 0.011329 | 0.011161 | 0.011228 |
| 0.011396 | 0.011329 | 0.011564 | 0.011396 | 0.011228 | 0.011463 | 0.011228 |
| 0.011394 | 0.011620 | 0.011437 | 0.011138 | 0.011135 | 0.011244 | 0.011336 |
| 0.011975 | 0.011416 | 0.011143 | 0.011463 | 0.011463 | 0.011262 | 0.011362 |
| 0.011295 | 0.011262 | 0.011329 | 0.011228 | 0.011329 | 0.011262 | 0.011262 |
| 0.011228 | 0.011329 | 0.011530 | 0.011396 | 0.011295 | 0.011262 | 0.011195 |
| 0.011161 | 0.011161 | 0.011228 | 0.011195 | 0.011396 | 0.011362 | 0.011295 |
| 0.011396 | 0.011463 | 0.011195 | 0.011195 | 0.011228 | 0.011228 | 0.011229 |
| 0.011297 | 0.011228 | 0.011228 | 0.011096 | 0.011169 | 0.011130 | 0.011228 |
| 0.011230 | 0.011163 | 0.011208 | 0.011198 | 0.011128 | 0.011163 | 0.011195 |
| 0.011456 | 0.011233 | 0.011267 | 0.011161 | 0.011164 | 0.011296 | 0.011262 |
| 0.011329 | 0.011262 | 0.011262 | 0.011362 | 0.011295 | 0.011664 | 0.011463 |
| 0.011496 | 0.011362 | 0.011228 | 0.011329 | 0.011127 | 0.011362 | 0.011161 |
| 0.011228 | 0.011228 | 0.011195 | 0.011161 | 0.011194 | 0.011161 | 0.011262 |
| 0.011228 | 0.011329 | 0.011262 | 0.011161 | 0.011262 | 0.011362 | 0.011364 |
| 0.011362 | 0.011262 | 0.011161 | 0.011094 | 0.011228 | 0.011161 | 0.011094 |
| 0.011196 | 0.011362 | 0.011161 | 0.011362 | 0.011127 | 0.011228 | 0.011195 |
| 0.011295 | 0.011195 | 0.011228 | 0.011195 | 0.011228 | 0.011094 | 0.011228 |
| 0.011262 | 0.011195 | 0.011262 | 0.011195 | 0.011228 | 0.011262 | 0.011497 |
| 0.011597 | 0.011530 | 0.011597 | 0.011363 | 0.011598 | 0.011228 | 0.011195 |
| 0.011229 | 0.011505 | 0.011335 | 0.011129 | 0.011603 | 0.011094 | 0.011218 |
| 0.011603 | 0.011502 | 0.011396 | 0.011597 | 0.011299 | 0.011463 | 0.011429 |
| 0.011362 | 0.011530 | 0.011380 | 0.011184 | 0.011270 | 0.011262 | 0.011331 |
| 0.011429 | 0.011330 | 0.011466 | 0.011534 | 0.011463 | 0.011530 | 0.011636 |
| 0.011365 | 0.011535 | 0.011466 | 0.011398 | 0.011666 | 0.000000 | 0.011330 |
| 0.011295 | 0.011228 | 0.011127 | 0.011127 | 0.011194 | 0.011194 | 0.011262 |
| 0.011194 | 0.011262 | 0.011161 | 0.011262 | 0.011194 | 0.011194 | 0.011262 |
| 0.011194 | 0.011631 | 0.011530 | 0.011564 | 0.011094 | 0.011194 | 0.011228 |
| 0.011228 | 0.011194 | 0.011262 | 0.011295 | 0.011161 | 0.011161 | 0.011161 |
| 0.011698 | 0.011329 | 0.011329 | 0.011127 | 0.011228 | 0.011396 | 0.011161 |
| 0.011161 | 0.011228 | 0.011194 | 0.011362 | 0.011161 | 0.011295 | 0.011429 |
| 0.011362 | 0.011194 | 0.011194 | 0.011127 | 0.011127 | 0.011295 | 0.011228 |

|          |          |          |          |          |          |          |
|----------|----------|----------|----------|----------|----------|----------|
| 0.011127 | 0.011228 | 0.011094 | 0.011127 | 0.011262 | 0.011396 | 0.011161 |
| 0.011128 | 0.011262 | 0.011195 | 0.011094 | 0.011429 | 0.011094 | 0.011262 |
| 0.011334 | 0.011161 | 0.011463 | 0.011295 | 0.011329 | 0.011194 | 0.011295 |
| 0.011161 | 0.011496 | 0.011094 | 0.011362 | 0.011161 | 0.011161 | 0.011094 |
| 0.011329 | 0.011530 | 0.011228 | 0.011295 | 0.011127 | 0.011530 | 0.011161 |
| 0.011161 | 0.011161 | 0.011194 | 0.011295 | 0.011194 | 0.011295 | 0.011362 |
| 0.011362 | 0.011329 | 0.011228 | 0.011329 | 0.011295 | 0.011161 | 0.011127 |
| 0.011161 | 0.011161 | 0.011228 | 0.011161 | 0.011127 | 0.011295 | 0.011161 |
| 0.011194 | 0.011194 | 0.011329 | 0.011362 | 0.011262 | 0.011194 | 0.011195 |
| 0.011262 | 0.011194 | 0.011295 | 0.011161 | 0.011295 | 0.011396 | 0.011698 |
| 0.011194 | 0.011597 | 0.011198 | 0.017710 | 0.011191 | 0.011305 | 0.011548 |
| 0.011510 | 0.011553 | 0.011270 | 0.011234 | 0.011664 | 0.011578 | 0.011303 |
| 0.011440 | 0.011487 | 0.011099 | 0.011186 | 0.011177 | 0.011258 | 0.011189 |
| 0.011436 | 0.011358 | 0.011357 | 0.011193 | 0.011329 | 0.011362 | 0.011365 |
| 0.011232 | 0.011329 | 0.011329 | 0.011295 | 0.011262 | 0.011262 | 0.011228 |
| 0.011262 | 0.011195 | 0.011228 | 0.011262 | 0.011228 | 0.011161 | 0.011195 |
| 0.011195 | 0.011262 | 0.011161 | 0.011262 | 0.011295 | 0.011329 | 0.011228 |
| 0.011262 | 0.011228 | 0.011564 | 0.011564 | 0.011295 | 0.011329 | 0.011362 |
| 0.011127 | 0.011127 | 0.011161 | 0.011262 | 0.011127 | 0.011362 | 0.011362 |
| 0.011396 | 0.011396 | 0.011329 | 0.011429 | 0.011597 | 0.011430 | 0.011262 |
| 0.011262 | 0.011329 | 0.011362 | 0.011195 | 0.011262 | 0.011228 | 0.011262 |
| 0.011329 | 0.011329 | 0.011362 | 0.011329 | 0.011229 | 0.011429 | 0.011396 |
| 0.011263 | 0.011161 | 0.011262 | 0.011362 | 0.011262 | 0.011396 | 0.011429 |
| 0.011597 | 0.011299 | 0.011463 | 0.011429 | 0.011362 | 0.011530 | 0.011161 |
| 0.011330 | 0.011228 | 0.011195 | 0.011195 | 0.011262 | 0.011161 | 0.011262 |
| 0.011295 | 0.011329 | 0.011228 | 0.011262 | 0.011228 | 0.011564 | 0.011564 |
| 0.011295 | 0.011329 | 0.011396 | 0.011329 | 0.011968 | 0.011382 | 0.011306 |
| 0.011376 | 0.011338 | 0.011447 | 0.011337 | 0.011445 | 0.011370 | 0.011336 |
| 0.011918 | 0.011233 | 0.011368 | 0.011302 | 0.011576 | 0.011434 | 0.011536 |
| 0.011944 | 0.011399 | 0.011500 | 0.011564 | 0.011429 | 0.011429 | 0.011466 |
| 0.000000 | 0.011295 | 0.011429 | 0.011396 | 0.011398 | 0.011396 | 0.011363 |
| 0.011228 | 0.011161 | 0.011194 | 0.011228 | 0.011127 | 0.011194 | 0.011094 |
| 0.011228 | 0.011262 | 0.011161 | 0.011127 | 0.011228 | 0.011161 | 0.011194 |
| 0.011194 | 0.011127 | 0.011194 | 0.011228 | 0.011127 | 0.011329 | 0.011362 |
| 0.011262 | 0.011329 | 0.011262 | 0.011262 | 0.011194 | 0.011597 | 0.011228 |
| 0.011269 | 0.011195 | 0.011430 | 0.011433 | 0.011295 | 0.011295 | 0.011295 |
| 0.011295 | 0.011228 | 0.011194 | 0.011228 | 0.011329 | 0.011329 | 0.011262 |
| 0.011262 | 0.011396 | 0.011564 | 0.011295 | 0.011497 | 0.011497 | 0.011362 |
| 0.011194 | 0.011262 | 0.011295 | 0.011698 | 0.011262 | 0.011295 | 0.011262 |
| 0.011295 | 0.011228 | 0.011228 | 0.011530 | 0.011463 | 0.011496 | 0.011228 |
| 0.011329 | 0.011396 | 0.011262 | 0.011329 | 0.011295 | 0.011161 | 0.011496 |
| 0.011262 | 0.011228 | 0.011228 | 0.011396 | 0.011228 | 0.011329 | 0.011564 |
| 0.011262 | 0.011637 | 0.011631 | 0.011426 | 0.011173 | 0.011332 | 0.011215 |
| 0.011115 | 0.011644 | 0.011166 | 0.011373 | 0.011207 | 0.011315 | 0.011326 |
| 0.011417 | 0.011126 | 0.011283 | 0.011126 | 0.011168 | 0.011328 | 0.011303 |
| 0.011324 | 0.011218 | 0.011307 | 0.011236 | 0.011262 | 0.011396 | 0.011463 |
| 0.011463 | 0.011329 | 0.011432 | 0.011433 | 0.011569 | 0.011590 | 0.011262 |
| 0.011496 | 0.011362 | 0.011228 | 0.011329 | 0.011127 | 0.011362 | 0.011161 |
| 0.011228 | 0.011228 | 0.011195 | 0.011161 | 0.011194 | 0.011161 | 0.011262 |
| 0.011235 | 0.011235 | 0.011231 | 0.011266 | 0.011402 | 0.011368 | 0.011367 |
| 0.011367 | 0.011296 | 0.011097 | 0.011096 | 0.011230 | 0.011399 | 0.011399 |
| 0.011195 | 0.011263 | 0.011498 | 0.011466 | 0.011396 | 0.011430 | 0.011362 |
| 0.011295 | 0.011362 | 0.011362 | 0.011262 | 0.011832 | 0.011429 | 0.011497 |
| 0.011530 | 0.011594 | 0.011231 | 0.011303 | 0.011195 | 0.011396 | 0.011362 |
| 0.011396 | 0.011429 | 0.011429 | 0.011429 | 0.011571 | 0.011564 | 0.011199 |
| 0.011094 | 0.011095 | 0.011196 | 0.011162 | 0.011265 | 0.011098 | 0.011434 |
| 0.011232 | 0.011367 | 0.000000 | 0.011248 | 0.011228 | 0.011300 | 0.011195 |
| 0.011161 | 0.011161 | 0.011228 | 0.011195 | 0.011396 | 0.011362 | 0.011295 |
| 0.011396 | 0.011463 | 0.011195 | 0.011195 | 0.011228 | 0.011228 | 0.011229 |
| 0.011297 | 0.011228 | 0.011228 | 0.011262 | 0.011396 | 0.011463 | 0.011463 |

|          |          |          |          |          |          |          |
|----------|----------|----------|----------|----------|----------|----------|
| 0.011329 | 0.011432 | 0.011433 | 0.011569 | 0.011590 | 0.011262 | 0.011429 |
| 0.011362 | 0.011362 | 0.011196 | 0.011373 | 0.011303 | 0.011333 | 0.011200 |
| 0.011370 | 0.011561 | 0.011357 | 0.011264 | 0.011161 | 0.011362 | 0.011228 |
| 0.011329 | 0.011262 | 0.011161 | 0.011262 | 0.011362 | 0.011364 | 0.011262 |
| 0.011161 | 0.011094 | 0.011228 | 0.011161 | 0.011094 | 0.011196 | 0.011362 |
| 0.011262 | 0.011195 | 0.011228 | 0.011262 | 0.011228 | 0.011161 | 0.011362 |
| 0.011228 | 0.011262 | 0.011262 | 0.011194 | 0.011262 | 0.011496 | 0.011161 |
| 0.011194 | 0.011597 | 0.011194 | 0.011228 | 0.011194 | 0.011564 | 0.011146 |
| 0.011622 | 0.011145 | 0.011211 | 0.011382 | 0.011467 | 0.011383 | 0.011102 |
| 0.011165 | 0.011362 | 0.011463 | 0.011569 | 0.011430 | 0.011568 | 0.011699 |
| 0.011598 | 0.011635 | 0.011597 | 0.011846 | 0.011564 | 0.012438 | 0.011599 |
| 0.012338 | 0.012105 | 0.012240 | 0.012511 | 0.011564 | 0.011262 | 0.011564 |
| 0.012002 | 0.011937 | 0.011530 | 0.011429 | 0.011497 | 0.011497 | 0.011466 |
| 0.011362 | 0.011365 | 0.011429 | 0.011396 | 0.011766 | 0.011832 | 0.011834 |
| 0.011733 | 0.011833 | 0.011937 | 0.011703 | 0.012003 | 0.012008 | 0.012070 |
| 0.012070 | 0.012104 | 0.012050 | 0.012070 | 0.012072 | 0.011295 | 0.011598 |
| 0.011665 | 0.012169 | 0.011670 | 0.011900 | 0.012373 | 0.011434 | 0.011329 |
| 0.011295 | 0.011295 | 0.011766 | 0.011800 | 0.011904 | 0.011631 | 0.011296 |
| S519     | 0.011732 | 0.011732 | 0.012068 | 0.011832 | 0.011832 | 0.011900 |
| 0.011739 | 0.011671 | 0.011832 | 0.011329 | 0.011396 | 0.011229 | 0.011329 |
| 0.011362 | 0.011530 | 0.011329 | 0.011362 | 0.011429 | 0.011396 | 0.011362 |
| 0.011329 | 0.011362 | 0.011463 | 0.011329 | 0.011295 | 0.011362 | 0.011705 |
| 0.011597 | 0.011362 | 0.011262 | 0.011497 | 0.011362 | 0.011396 | 0.011362 |
| 0.011396 | 0.011429 | 0.011396 | 0.011396 | 0.011429 | 0.011396 | 0.011564 |
| 0.011329 | 0.011396 | 0.011429 | 0.011362 | 0.011463 | 0.011497 | 0.011429 |
| 0.011396 | 0.011564 | 0.011463 | 0.011732 | 0.011396 | 0.011597 | 0.011396 |
| 0.011362 | 0.011463 | 0.011530 | 0.011597 | 0.011765 | 0.011463 | 0.011564 |
| 0.011362 | 0.011429 | 0.011396 | 0.011564 | 0.011866 | 0.011396 | 0.011463 |
| 0.011362 | 0.011463 | 0.011429 | 0.011497 | 0.011429 | 0.011429 | 0.011429 |
| 0.011329 | 0.011362 | 0.011329 | 0.011429 | 0.011396 | 0.011296 | 0.011497 |
| 0.011429 | 0.011396 | 0.011396 | 0.011362 | 0.011497 | 0.011262 | 0.011396 |
| 0.011564 | 0.011497 | 0.011732 | 0.011564 | 0.011396 | 0.011564 | 0.011396 |
| 0.011431 | 0.011658 | 0.011475 | 0.011177 | 0.011172 | 0.011281 | 0.011375 |
| 0.012011 | 0.011365 | 0.011184 | 0.011631 | 0.011631 | 0.011429 | 0.011530 |
| 0.011463 | 0.011429 | 0.011497 | 0.011396 | 0.011497 | 0.011362 | 0.011429 |
| 0.011396 | 0.011496 | 0.011698 | 0.011564 | 0.011463 | 0.011430 | 0.011161 |
| 0.011195 | 0.011195 | 0.011195 | 0.011228 | 0.011429 | 0.011396 | 0.011329 |
| 0.011429 | 0.011497 | 0.011228 | 0.011228 | 0.011262 | 0.011262 | 0.011263 |
| 0.011331 | 0.011262 | 0.011262 | 0.011096 | 0.011205 | 0.011165 | 0.011262 |
| 0.011263 | 0.011198 | 0.011208 | 0.011233 | 0.011162 | 0.011197 | 0.011229 |
| 0.011492 | 0.011267 | 0.011232 | 0.011195 | 0.011199 | 0.011329 | 0.011296 |
| 0.011363 | 0.011296 | 0.011296 | 0.011530 | 0.011463 | 0.011765 | 0.011564 |
| 0.011664 | 0.011396 | 0.011262 | 0.011362 | 0.011161 | 0.011530 | 0.011195 |
| 0.011396 | 0.011396 | 0.011228 | 0.011195 | 0.011362 | 0.011195 | 0.011295 |
| 0.011195 | 0.011295 | 0.011295 | 0.011195 | 0.011296 | 0.011396 | 0.011398 |
| 0.011329 | 0.011295 | 0.011195 | 0.011128 | 0.011262 | 0.011195 | 0.011128 |
| 0.011230 | 0.011329 | 0.011127 | 0.011329 | 0.011295 | 0.011262 | 0.011228 |
| 0.011262 | 0.011228 | 0.011195 | 0.011228 | 0.011262 | 0.011127 | 0.011195 |
| 0.011228 | 0.011228 | 0.011295 | 0.011228 | 0.011262 | 0.011295 | 0.011530 |
| 0.011765 | 0.011698 | 0.011631 | 0.011397 | 0.011631 | 0.011262 | 0.011228 |
| 0.011263 | 0.011464 | 0.011335 | 0.011163 | 0.011773 | 0.011129 | 0.011257 |
| 0.011773 | 0.011536 | 0.011564 | 0.011765 | 0.011402 | 0.011631 | 0.011530 |
| 0.011530 | 0.011698 | 0.011558 | 0.011266 | 0.011479 | 0.011430 | 0.011500 |
| 0.011597 | 0.011499 | 0.011635 | 0.011635 | 0.011631 | 0.011698 | 0.011806 |
| 0.011534 | 0.011637 | 0.011636 | 0.011567 | 0.011834 | 0.011295 | 0.011498 |
| 0.011396 | 0.011396 | 0.011295 | 0.011295 | 0.011295 | 0.011362 | 0.011429 |
| 0.011295 | 0.011362 | 0.011262 | 0.011429 | 0.011295 | 0.011362 | 0.011429 |
| 0.011362 | 0.011799 | 0.011698 | 0.011732 | 0.011262 | 0.011362 | 0.011396 |
| 0.011396 | 0.011362 | 0.011429 | 0.011463 | 0.011329 | 0.011329 | 0.011329 |
| 0.011866 | 0.011497 | 0.011497 | 0.011295 | 0.011396 | 0.011497 | 0.011329 |

|          |          |          |          |          |          |          |
|----------|----------|----------|----------|----------|----------|----------|
| 0.011329 | 0.011396 | 0.011362 | 0.011463 | 0.011329 | 0.011463 | 0.011530 |
| 0.011530 | 0.011362 | 0.011362 | 0.011295 | 0.011295 | 0.011463 | 0.011396 |
| 0.011295 | 0.011396 | 0.011262 | 0.011295 | 0.011429 | 0.011564 | 0.011329 |
| 0.011295 | 0.011429 | 0.011363 | 0.011262 | 0.011597 | 0.011262 | 0.011429 |
| 0.011437 | 0.011329 | 0.011631 | 0.011463 | 0.011497 | 0.011362 | 0.011463 |
| 0.011329 | 0.011597 | 0.011262 | 0.011530 | 0.011329 | 0.011329 | 0.011262 |
| 0.011429 | 0.011698 | 0.011396 | 0.011463 | 0.011295 | 0.011698 | 0.011329 |
| 0.011329 | 0.011329 | 0.011362 | 0.011396 | 0.011362 | 0.011463 | 0.011530 |
| 0.011530 | 0.011497 | 0.011396 | 0.011497 | 0.011396 | 0.011329 | 0.011295 |
| 0.011329 | 0.011329 | 0.011396 | 0.011329 | 0.011228 | 0.011463 | 0.011329 |
| 0.011362 | 0.011362 | 0.011497 | 0.011530 | 0.011429 | 0.011295 | 0.011362 |
| 0.011429 | 0.011362 | 0.011463 | 0.011329 | 0.011463 | 0.011564 | 0.011866 |
| 0.011362 | 0.011765 | 0.011233 | 0.011748 | 0.011191 | 0.011366 | 0.011583 |
| 0.011545 | 0.011588 | 0.011217 | 0.011176 | 0.011609 | 0.011613 | 0.011242 |
| 0.011440 | 0.011487 | 0.011138 | 0.011186 | 0.011177 | 0.011307 | 0.011232 |
| 0.011389 | 0.011395 | 0.011357 | 0.011193 | 0.011497 | 0.011530 | 0.011398 |
| 0.011335 | 0.011362 | 0.011497 | 0.011329 | 0.011429 | 0.011430 | 0.011396 |
| 0.011429 | 0.011362 | 0.011396 | 0.011295 | 0.011262 | 0.011195 | 0.011228 |
| 0.011228 | 0.011295 | 0.011195 | 0.011295 | 0.011329 | 0.011362 | 0.011396 |
| 0.011429 | 0.011262 | 0.011597 | 0.011597 | 0.011463 | 0.011497 | 0.011396 |
| 0.011161 | 0.011161 | 0.011195 | 0.011228 | 0.011161 | 0.011396 | 0.011396 |
| 0.011429 | 0.011564 | 0.011497 | 0.011597 | 0.011631 | 0.011599 | 0.011362 |
| 0.011295 | 0.011362 | 0.011329 | 0.011228 | 0.011295 | 0.011262 | 0.011429 |
| 0.011363 | 0.011362 | 0.011396 | 0.011295 | 0.011195 | 0.011463 | 0.011362 |
| 0.011433 | 0.011195 | 0.011295 | 0.011396 | 0.011295 | 0.011430 | 0.011597 |
| 0.011765 | 0.011402 | 0.011631 | 0.011530 | 0.011530 | 0.011698 | 0.011262 |
| 0.011363 | 0.011262 | 0.011228 | 0.011228 | 0.011295 | 0.011195 | 0.011295 |
| 0.011329 | 0.011362 | 0.011396 | 0.011429 | 0.011262 | 0.011597 | 0.011597 |
| 0.011463 | 0.011497 | 0.011564 | 0.011497 | 0.012137 | 0.011560 | 0.011482 |
| 0.011552 | 0.011511 | 0.011622 | 0.011510 | 0.011620 | 0.011543 | 0.011508 |
| 0.012090 | 0.011406 | 0.011540 | 0.011475 | 0.011749 | 0.011604 | 0.011639 |
| 0.012114 | 0.011437 | 0.011331 | 0.011329 | 0.011329 | 0.011362 | 0.011297 |
| 0.011295 | 0.000000 | 0.011329 | 0.011295 | 0.011297 | 0.011564 | 0.011397 |
| 0.011396 | 0.011262 | 0.011295 | 0.011396 | 0.011228 | 0.011362 | 0.011262 |
| 0.011396 | 0.011429 | 0.011329 | 0.011295 | 0.011396 | 0.011329 | 0.011362 |
| 0.011362 | 0.011295 | 0.011362 | 0.011396 | 0.011295 | 0.011429 | 0.011530 |
| 0.011429 | 0.011497 | 0.011429 | 0.011429 | 0.011362 | 0.011765 | 0.011396 |
| 0.011443 | 0.011362 | 0.011598 | 0.011603 | 0.011396 | 0.011463 | 0.011463 |
| 0.011463 | 0.011329 | 0.011362 | 0.011329 | 0.011497 | 0.011497 | 0.011429 |
| 0.011429 | 0.011564 | 0.011732 | 0.011463 | 0.011665 | 0.011665 | 0.011530 |
| 0.011362 | 0.011429 | 0.011463 | 0.011866 | 0.011430 | 0.011396 | 0.011429 |
| 0.011463 | 0.011396 | 0.011396 | 0.011698 | 0.011564 | 0.011665 | 0.011396 |
| 0.011497 | 0.011564 | 0.011429 | 0.011497 | 0.011463 | 0.011329 | 0.011664 |
| 0.011429 | 0.011396 | 0.011396 | 0.011564 | 0.011396 | 0.011497 | 0.011732 |
| 0.011429 | 0.011807 | 0.011799 | 0.011467 | 0.011117 | 0.011366 | 0.011215 |
| 0.011170 | 0.011683 | 0.011201 | 0.011417 | 0.011207 | 0.011366 | 0.011326 |
| 0.011417 | 0.011126 | 0.011283 | 0.000000 | 0.011114 | 0.011328 | 0.011303 |
| 0.011324 | 0.011178 | 0.011342 | 0.011272 | 0.011296 | 0.011429 | 0.011497 |
| 0.011497 | 0.011363 | 0.011466 | 0.011467 | 0.011603 | 0.011626 | 0.011429 |
| 0.011664 | 0.011396 | 0.011262 | 0.011362 | 0.011161 | 0.011530 | 0.011195 |
| 0.011396 | 0.011396 | 0.011228 | 0.011195 | 0.011362 | 0.011195 | 0.011295 |
| 0.011270 | 0.011270 | 0.011266 | 0.011300 | 0.011437 | 0.011333 | 0.011402 |
| 0.011401 | 0.011329 | 0.011134 | 0.011132 | 0.011263 | 0.011433 | 0.011433 |
| 0.011228 | 0.011297 | 0.011531 | 0.011500 | 0.011430 | 0.011464 | 0.011530 |
| 0.011463 | 0.011530 | 0.011530 | 0.011429 | 0.012001 | 0.011597 | 0.011665 |
| 0.011564 | 0.011772 | 0.011401 | 0.011337 | 0.011362 | 0.011564 | 0.011530 |
| 0.011565 | 0.011597 | 0.011597 | 0.011597 | 0.011611 | 0.011732 | 0.011372 |
| 0.011263 | 0.011268 | 0.011367 | 0.011332 | 0.011436 | 0.011284 | 0.011604 |
| 0.011403 | 0.011367 | 0.000000 | 0.011285 | 0.011262 | 0.011334 | 0.011161 |
| 0.011195 | 0.011195 | 0.011195 | 0.011228 | 0.011429 | 0.011396 | 0.011329 |

|          |          |          |          |          |          |          |
|----------|----------|----------|----------|----------|----------|----------|
| 0.011429 | 0.011497 | 0.011228 | 0.011228 | 0.011262 | 0.011262 | 0.011263 |
| 0.011331 | 0.011262 | 0.011262 | 0.011296 | 0.011429 | 0.011497 | 0.011497 |
| 0.011363 | 0.011466 | 0.011467 | 0.011603 | 0.011626 | 0.011429 | 0.011597 |
| 0.011530 | 0.011530 | 0.011229 | 0.011373 | 0.011338 | 0.011401 | 0.011235 |
| 0.011336 | 0.011561 | 0.011357 | 0.011434 | 0.011127 | 0.011329 | 0.011195 |
| 0.011295 | 0.011295 | 0.011195 | 0.011296 | 0.011396 | 0.011398 | 0.011295 |
| 0.011195 | 0.011128 | 0.011262 | 0.011195 | 0.011128 | 0.011230 | 0.011329 |
| 0.011429 | 0.011362 | 0.011396 | 0.011295 | 0.011262 | 0.011195 | 0.011396 |
| 0.011396 | 0.011429 | 0.011429 | 0.011362 | 0.011429 | 0.011665 | 0.011329 |
| 0.011362 | 0.011765 | 0.011362 | 0.011329 | 0.011362 | 0.011732 | 0.011189 |
| 0.011622 | 0.011188 | 0.011161 | 0.011422 | 0.011508 | 0.011419 | 0.011144 |
| 0.011113 | 0.011530 | 0.011631 | 0.011603 | 0.011464 | 0.011601 | 0.011733 |
| 0.011632 | 0.011770 | 0.011765 | 0.011880 | 0.011732 | 0.012606 | 0.011633 |
| 0.012372 | 0.012139 | 0.012273 | 0.012545 | 0.011732 | 0.011295 | 0.011598 |
| 0.012036 | 0.011971 | 0.011698 | 0.011598 | 0.011531 | 0.011531 | 0.011635 |
| 0.011530 | 0.011399 | 0.011597 | 0.011430 | 0.011800 | 0.012001 | 0.011867 |
| 0.011901 | 0.011867 | 0.011970 | 0.011737 | 0.012037 | 0.012042 | 0.012104 |
| 0.012104 | 0.012138 | 0.012084 | 0.012104 | 0.012106 | 0.011463 | 0.011631 |
| 0.011699 | 0.012337 | 0.011704 | 0.012068 | 0.012406 | 0.011468 | 0.011363 |
| 0.011463 | 0.011463 | 0.011799 | 0.011842 | 0.011940 | 0.011799 | 0.011330 |
| S520     | 0.011866 | 0.011866 | 0.012202 | 0.011967 | 0.011967 | 0.012034 |
| 0.011875 | 0.011807 | 0.012034 | 0.011463 | 0.011530 | 0.011363 | 0.011463 |
| 0.011496 | 0.011664 | 0.011463 | 0.011496 | 0.011564 | 0.011530 | 0.011496 |
| 0.011463 | 0.011496 | 0.011597 | 0.011463 | 0.011497 | 0.011496 | 0.011841 |
| 0.011731 | 0.011496 | 0.011396 | 0.011631 | 0.011564 | 0.011530 | 0.011564 |
| 0.011530 | 0.011631 | 0.011530 | 0.011530 | 0.011564 | 0.011530 | 0.011698 |
| 0.011463 | 0.011530 | 0.011564 | 0.011496 | 0.011597 | 0.011631 | 0.011564 |
| 0.011530 | 0.011698 | 0.011598 | 0.011866 | 0.011530 | 0.011731 | 0.011530 |
| 0.011496 | 0.011597 | 0.011664 | 0.011731 | 0.011899 | 0.011597 | 0.011698 |
| 0.011564 | 0.011631 | 0.011530 | 0.011765 | 0.012000 | 0.011530 | 0.011597 |
| 0.011496 | 0.011597 | 0.011564 | 0.011631 | 0.011564 | 0.011564 | 0.011564 |
| 0.011463 | 0.011496 | 0.011463 | 0.011564 | 0.011530 | 0.011430 | 0.011631 |
| 0.011564 | 0.011530 | 0.011597 | 0.011496 | 0.011631 | 0.011463 | 0.011530 |
| 0.011698 | 0.011631 | 0.011866 | 0.011698 | 0.011530 | 0.011765 | 0.011530 |
| 0.011579 | 0.011807 | 0.011588 | 0.011295 | 0.011247 | 0.011428 | 0.011493 |
| 0.012121 | 0.011518 | 0.011266 | 0.011765 | 0.011765 | 0.011563 | 0.011664 |
| 0.011597 | 0.011564 | 0.011631 | 0.011530 | 0.011631 | 0.011564 | 0.011564 |
| 0.011530 | 0.011631 | 0.011832 | 0.011698 | 0.011597 | 0.011564 | 0.011362 |
| 0.011329 | 0.011329 | 0.011396 | 0.011362 | 0.011564 | 0.011530 | 0.011463 |
| 0.011564 | 0.011631 | 0.011161 | 0.011161 | 0.011195 | 0.011195 | 0.011195 |
| 0.011263 | 0.011396 | 0.011396 | 0.011276 | 0.011349 | 0.011306 | 0.011396 |
| 0.011399 | 0.011335 | 0.011355 | 0.011371 | 0.011298 | 0.011334 | 0.011364 |
| 0.011564 | 0.011405 | 0.011439 | 0.011329 | 0.011337 | 0.011464 | 0.011430 |
| 0.011497 | 0.011431 | 0.011430 | 0.011664 | 0.011597 | 0.011967 | 0.011698 |
| 0.011799 | 0.011530 | 0.011396 | 0.011497 | 0.011295 | 0.011664 | 0.011329 |
| 0.011530 | 0.011530 | 0.011362 | 0.011329 | 0.011496 | 0.011329 | 0.011429 |
| 0.011396 | 0.011497 | 0.011430 | 0.011329 | 0.011431 | 0.011530 | 0.011533 |
| 0.011530 | 0.011430 | 0.011329 | 0.011263 | 0.011396 | 0.011329 | 0.011262 |
| 0.011332 | 0.011530 | 0.011329 | 0.011530 | 0.011429 | 0.011396 | 0.011362 |
| 0.011463 | 0.011362 | 0.011396 | 0.011362 | 0.011396 | 0.011262 | 0.011396 |
| 0.011430 | 0.011362 | 0.011430 | 0.011362 | 0.011396 | 0.011429 | 0.011665 |
| 0.011900 | 0.011832 | 0.011765 | 0.011532 | 0.011766 | 0.011396 | 0.011362 |
| 0.011398 | 0.011667 | 0.011426 | 0.011300 | 0.011908 | 0.011265 | 0.011336 |
| 0.011909 | 0.011604 | 0.011698 | 0.011900 | 0.011538 | 0.011765 | 0.011732 |
| 0.011664 | 0.011832 | 0.011700 | 0.011431 | 0.011563 | 0.011564 | 0.011635 |
| 0.011732 | 0.011633 | 0.011770 | 0.011771 | 0.011765 | 0.011832 | 0.011941 |
| 0.011669 | 0.011773 | 0.011771 | 0.011703 | 0.011968 | 0.011429 | 0.011633 |
| 0.011597 | 0.011530 | 0.011429 | 0.011429 | 0.011496 | 0.011496 | 0.011564 |
| 0.011496 | 0.011564 | 0.011463 | 0.011564 | 0.011496 | 0.011496 | 0.011563 |
| 0.011496 | 0.011933 | 0.011832 | 0.011866 | 0.011396 | 0.011496 | 0.011530 |



|          |          |          |          |          |          |          |
|----------|----------|----------|----------|----------|----------|----------|
| 0.011530 | 0.011496 | 0.011564 | 0.011597 | 0.011463 | 0.011463 | 0.011463 |
| 0.012000 | 0.011631 | 0.011631 | 0.011429 | 0.011530 | 0.011698 | 0.011463 |
| 0.011463 | 0.011530 | 0.011496 | 0.011664 | 0.011463 | 0.011597 | 0.011731 |
| 0.011664 | 0.011496 | 0.011496 | 0.011429 | 0.011429 | 0.011597 | 0.011530 |
| 0.011429 | 0.011530 | 0.011396 | 0.011429 | 0.011564 | 0.011698 | 0.011463 |
| 0.011430 | 0.011564 | 0.011497 | 0.011396 | 0.011731 | 0.011396 | 0.011564 |
| 0.011642 | 0.011463 | 0.011765 | 0.011597 | 0.011631 | 0.011496 | 0.011597 |
| 0.011463 | 0.011731 | 0.011396 | 0.011664 | 0.011463 | 0.011463 | 0.011396 |
| 0.011631 | 0.011766 | 0.011530 | 0.011597 | 0.011429 | 0.011832 | 0.011463 |
| 0.011463 | 0.011463 | 0.011496 | 0.011597 | 0.011496 | 0.011597 | 0.011664 |
| 0.011664 | 0.011631 | 0.011530 | 0.011631 | 0.011597 | 0.011463 | 0.011429 |
| 0.011463 | 0.011463 | 0.011530 | 0.011463 | 0.011429 | 0.011597 | 0.011463 |
| 0.011496 | 0.011496 | 0.011631 | 0.011664 | 0.011564 | 0.011496 | 0.011497 |
| 0.011564 | 0.011496 | 0.011597 | 0.011463 | 0.011597 | 0.011698 | 0.012000 |
| 0.011496 | 0.011899 | 0.011371 | 0.017861 | 0.011257 | 0.011549 | 0.011723 |
| 0.011683 | 0.011729 | 0.011374 | 0.011292 | 0.011829 | 0.011751 | 0.011425 |
| 0.011535 | 0.011671 | 0.011294 | 0.011311 | 0.011372 | 0.011406 | 0.011361 |
| 0.011529 | 0.011507 | 0.011468 | 0.011259 | 0.011631 | 0.011664 | 0.011534 |
| 0.011541 | 0.011497 | 0.011631 | 0.011463 | 0.011564 | 0.011564 | 0.011530 |
| 0.011564 | 0.011496 | 0.011530 | 0.011430 | 0.011396 | 0.011329 | 0.011362 |
| 0.011362 | 0.011430 | 0.011329 | 0.011430 | 0.011463 | 0.011497 | 0.011530 |
| 0.011564 | 0.011396 | 0.011732 | 0.011732 | 0.011597 | 0.011632 | 0.011530 |
| 0.011295 | 0.011295 | 0.011329 | 0.011430 | 0.011295 | 0.011530 | 0.011530 |
| 0.011564 | 0.011698 | 0.011631 | 0.011732 | 0.011765 | 0.011734 | 0.011564 |
| 0.011430 | 0.011497 | 0.011530 | 0.011362 | 0.011430 | 0.011396 | 0.011564 |
| 0.011497 | 0.011497 | 0.011530 | 0.011497 | 0.011397 | 0.011597 | 0.011564 |
| 0.011568 | 0.011329 | 0.011429 | 0.011530 | 0.011430 | 0.011564 | 0.011731 |
| 0.011900 | 0.011538 | 0.011765 | 0.011732 | 0.011664 | 0.011832 | 0.011396 |
| 0.011498 | 0.011396 | 0.011362 | 0.011362 | 0.011430 | 0.011329 | 0.011430 |
| 0.011463 | 0.011497 | 0.011530 | 0.011564 | 0.011396 | 0.011732 | 0.011732 |
| 0.011597 | 0.011632 | 0.011698 | 0.011631 | 0.012271 | 0.011703 | 0.011623 |
| 0.011693 | 0.011650 | 0.011763 | 0.011649 | 0.011760 | 0.011681 | 0.011646 |
| 0.012228 | 0.011545 | 0.011677 | 0.011613 | 0.011887 | 0.011740 | 0.011775 |
| 0.012250 | 0.011588 | 0.011331 | 0.011362 | 0.011262 | 0.011497 | 0.011297 |
| 0.011429 | 0.011329 | 0.000000 | 0.011094 | 0.011229 | 0.011698 | 0.011532 |
| 0.011530 | 0.011463 | 0.011496 | 0.011530 | 0.011429 | 0.011496 | 0.011396 |
| 0.011530 | 0.011564 | 0.011463 | 0.011429 | 0.011530 | 0.011463 | 0.011496 |
| 0.011496 | 0.011429 | 0.011496 | 0.011530 | 0.011429 | 0.011631 | 0.011664 |
| 0.011564 | 0.011631 | 0.011564 | 0.011564 | 0.011496 | 0.011899 | 0.011530 |
| 0.011582 | 0.011497 | 0.011732 | 0.011739 | 0.011597 | 0.011597 | 0.011597 |
| 0.011597 | 0.011530 | 0.011496 | 0.011530 | 0.011631 | 0.011631 | 0.011564 |
| 0.011563 | 0.011698 | 0.011866 | 0.011597 | 0.011799 | 0.011799 | 0.011664 |
| 0.011496 | 0.011564 | 0.011597 | 0.012000 | 0.011564 | 0.011597 | 0.011564 |
| 0.011597 | 0.011530 | 0.011530 | 0.011832 | 0.011765 | 0.011799 | 0.011530 |
| 0.011631 | 0.011698 | 0.011564 | 0.011631 | 0.011597 | 0.011463 | 0.011799 |
| 0.011563 | 0.011530 | 0.011530 | 0.011698 | 0.011530 | 0.011631 | 0.011866 |
| 0.011563 | 0.011943 | 0.011933 | 0.011589 | 0.011229 | 0.011502 | 0.011267 |
| 0.011335 | 0.011800 | 0.011341 | 0.011507 | 0.011353 | 0.011417 | 0.011432 |
| 0.011519 | 0.011258 | 0.011394 | 0.011192 | 0.011276 | 0.011328 | 0.011506 |
| 0.011512 | 0.011375 | 0.011483 | 0.011377 | 0.011431 | 0.011564 | 0.011631 |
| 0.011631 | 0.011497 | 0.011601 | 0.011603 | 0.011738 | 0.011767 | 0.011564 |
| 0.011799 | 0.011530 | 0.011396 | 0.011497 | 0.011295 | 0.011664 | 0.011329 |
| 0.011530 | 0.011530 | 0.011362 | 0.011329 | 0.011496 | 0.011329 | 0.011429 |
| 0.011409 | 0.011410 | 0.011403 | 0.011437 | 0.011573 | 0.011538 | 0.011538 |
| 0.011537 | 0.011464 | 0.011282 | 0.011276 | 0.011399 | 0.011568 | 0.011569 |
| 0.011363 | 0.011433 | 0.011666 | 0.011635 | 0.011565 | 0.011599 | 0.011664 |
| 0.011597 | 0.011664 | 0.011664 | 0.011564 | 0.012135 | 0.011732 | 0.011799 |
| 0.011698 | 0.011915 | 0.011538 | 0.011476 | 0.011496 | 0.011698 | 0.011664 |
| 0.011699 | 0.011731 | 0.011731 | 0.011731 | 0.011768 | 0.011866 | 0.011511 |
| 0.011398 | 0.011406 | 0.011503 | 0.011468 | 0.011572 | 0.011396 | 0.011740 |

|          |          |          |          |          |          |          |
|----------|----------|----------|----------|----------|----------|----------|
| 0.011540 | 0.011455 | 0.011156 | 0.011435 | 0.011396 | 0.011471 | 0.011362 |
| 0.011329 | 0.011329 | 0.011396 | 0.011362 | 0.011564 | 0.011530 | 0.011463 |
| 0.011564 | 0.011631 | 0.011161 | 0.011161 | 0.011195 | 0.011195 | 0.011195 |
| 0.011263 | 0.011396 | 0.011396 | 0.011431 | 0.011564 | 0.011631 | 0.011631 |
| 0.011497 | 0.011601 | 0.011603 | 0.011738 | 0.011767 | 0.011564 | 0.011732 |
| 0.011664 | 0.011664 | 0.011365 | 0.011547 | 0.011442 | 0.011537 | 0.011340 |
| 0.011542 | 0.011789 | 0.011483 | 0.011570 | 0.011329 | 0.011530 | 0.011396 |
| 0.011497 | 0.011430 | 0.011329 | 0.011431 | 0.011530 | 0.011533 | 0.011430 |
| 0.011329 | 0.011263 | 0.011396 | 0.011329 | 0.011262 | 0.011332 | 0.011530 |
| 0.011564 | 0.011496 | 0.011530 | 0.011430 | 0.011396 | 0.011329 | 0.011530 |
| 0.011530 | 0.011564 | 0.011564 | 0.011496 | 0.011564 | 0.011799 | 0.011463 |
| 0.011496 | 0.011899 | 0.011496 | 0.011530 | 0.011496 | 0.011866 | 0.011275 |
| 0.011678 | 0.011273 | 0.011261 | 0.011543 | 0.011630 | 0.011563 | 0.011227 |
| 0.011218 | 0.011664 | 0.011765 | 0.011739 | 0.011599 | 0.011669 | 0.011867 |
| 0.011767 | 0.011906 | 0.011899 | 0.012017 | 0.011866 | 0.012741 | 0.011768 |
| 0.012507 | 0.012274 | 0.012408 | 0.012680 | 0.011866 | 0.011430 | 0.011732 |
| 0.012171 | 0.012106 | 0.011832 | 0.011732 | 0.011665 | 0.011665 | 0.011770 |
| 0.011664 | 0.011535 | 0.011731 | 0.011565 | 0.011935 | 0.012135 | 0.012002 |
| 0.012036 | 0.012002 | 0.012106 | 0.011872 | 0.012171 | 0.012178 | 0.012238 |
| 0.012239 | 0.012273 | 0.012221 | 0.012239 | 0.012241 | 0.011597 | 0.011766 |
| 0.011834 | 0.012472 | 0.011840 | 0.012202 | 0.012508 | 0.011604 | 0.011497 |
| 0.011597 | 0.011597 | 0.011934 | 0.011965 | 0.012081 | 0.011933 | 0.011465 |
| S521     | 0.011832 | 0.011832 | 0.012169 | 0.011933 | 0.011933 | 0.012000 |
| 0.011841 | 0.011773 | 0.012000 | 0.011429 | 0.011496 | 0.011329 | 0.011429 |
| 0.011463 | 0.011631 | 0.011429 | 0.011463 | 0.011530 | 0.011496 | 0.011463 |
| 0.011429 | 0.011463 | 0.011564 | 0.011430 | 0.011463 | 0.011463 | 0.011807 |
| 0.011698 | 0.011463 | 0.011362 | 0.011597 | 0.011530 | 0.011497 | 0.011530 |
| 0.011496 | 0.011597 | 0.011496 | 0.011496 | 0.011530 | 0.011496 | 0.011664 |
| 0.011429 | 0.011496 | 0.011530 | 0.011463 | 0.011563 | 0.011597 | 0.011530 |
| 0.011496 | 0.011664 | 0.011564 | 0.011832 | 0.011496 | 0.011698 | 0.011496 |
| 0.011463 | 0.011564 | 0.011631 | 0.011698 | 0.011866 | 0.011564 | 0.011664 |
| 0.011530 | 0.011597 | 0.011496 | 0.011731 | 0.011967 | 0.011496 | 0.011564 |
| 0.011463 | 0.011563 | 0.011530 | 0.011597 | 0.011530 | 0.011530 | 0.011530 |
| 0.011429 | 0.011463 | 0.011429 | 0.011530 | 0.011496 | 0.011397 | 0.011597 |
| 0.011530 | 0.011496 | 0.011564 | 0.011463 | 0.011597 | 0.011429 | 0.011496 |
| 0.011664 | 0.011597 | 0.011832 | 0.011664 | 0.011496 | 0.011731 | 0.011496 |
| 0.011542 | 0.011770 | 0.011551 | 0.011255 | 0.011210 | 0.011391 | 0.011454 |
| 0.012085 | 0.011467 | 0.011225 | 0.011731 | 0.011731 | 0.011530 | 0.011631 |
| 0.011564 | 0.011530 | 0.011597 | 0.011496 | 0.011597 | 0.011530 | 0.011530 |
| 0.011496 | 0.011597 | 0.011799 | 0.011664 | 0.011564 | 0.011530 | 0.011329 |
| 0.011295 | 0.011295 | 0.011362 | 0.011329 | 0.011530 | 0.011497 | 0.011429 |
| 0.011530 | 0.011597 | 0.011127 | 0.011127 | 0.011161 | 0.011161 | 0.011162 |
| 0.011229 | 0.011362 | 0.011362 | 0.011240 | 0.011313 | 0.011271 | 0.011363 |
| 0.011365 | 0.011301 | 0.011318 | 0.011336 | 0.011264 | 0.011300 | 0.011330 |
| 0.011528 | 0.011370 | 0.011405 | 0.011296 | 0.011302 | 0.011430 | 0.011396 |
| 0.011464 | 0.011397 | 0.011396 | 0.011631 | 0.011564 | 0.011933 | 0.011665 |
| 0.011765 | 0.011497 | 0.011362 | 0.011463 | 0.011262 | 0.011631 | 0.011295 |
| 0.011496 | 0.011496 | 0.011329 | 0.011295 | 0.011463 | 0.011295 | 0.011396 |
| 0.011362 | 0.011463 | 0.011396 | 0.011295 | 0.011397 | 0.011497 | 0.011499 |
| 0.011497 | 0.011396 | 0.011295 | 0.011229 | 0.011362 | 0.011295 | 0.011228 |
| 0.011332 | 0.011497 | 0.011295 | 0.011497 | 0.011396 | 0.011362 | 0.011329 |
| 0.011430 | 0.011329 | 0.011362 | 0.011329 | 0.011362 | 0.011228 | 0.011362 |
| 0.011396 | 0.011329 | 0.011396 | 0.011329 | 0.011362 | 0.011396 | 0.011631 |
| 0.011866 | 0.011799 | 0.011732 | 0.011498 | 0.011732 | 0.011362 | 0.011329 |
| 0.011364 | 0.011626 | 0.011380 | 0.011266 | 0.011874 | 0.011231 | 0.011296 |
| 0.011875 | 0.011570 | 0.011664 | 0.011866 | 0.011504 | 0.011731 | 0.011698 |
| 0.011631 | 0.011799 | 0.011664 | 0.011390 | 0.011521 | 0.011530 | 0.011601 |
| 0.011698 | 0.011600 | 0.011736 | 0.011737 | 0.011732 | 0.011799 | 0.011907 |
| 0.011635 | 0.011739 | 0.011737 | 0.011669 | 0.011935 | 0.011396 | 0.011599 |
| 0.011563 | 0.011496 | 0.011396 | 0.011396 | 0.011463 | 0.011463 | 0.011530 |

|          |          |          |          |          |          |          |
|----------|----------|----------|----------|----------|----------|----------|
| 0.011463 | 0.011530 | 0.011429 | 0.011530 | 0.011463 | 0.011463 | 0.011530 |
| 0.011463 | 0.011899 | 0.011799 | 0.011832 | 0.011362 | 0.011463 | 0.011496 |
| 0.011496 | 0.011463 | 0.011530 | 0.011564 | 0.011429 | 0.011429 | 0.011429 |
| 0.011967 | 0.011597 | 0.011597 | 0.011396 | 0.011496 | 0.011664 | 0.011429 |
| 0.011429 | 0.011496 | 0.011463 | 0.011631 | 0.011429 | 0.011564 | 0.011698 |
| 0.011631 | 0.011463 | 0.011463 | 0.011396 | 0.011396 | 0.011564 | 0.011496 |
| 0.011396 | 0.011496 | 0.011362 | 0.011396 | 0.011530 | 0.011665 | 0.011429 |
| 0.011396 | 0.011530 | 0.011463 | 0.011362 | 0.011698 | 0.011362 | 0.011530 |
| 0.011608 | 0.011429 | 0.011732 | 0.011564 | 0.011597 | 0.011463 | 0.011564 |
| 0.011429 | 0.011698 | 0.011362 | 0.011631 | 0.011429 | 0.011429 | 0.011362 |
| 0.011597 | 0.011732 | 0.011496 | 0.011564 | 0.011396 | 0.011799 | 0.011429 |
| 0.011429 | 0.011429 | 0.011463 | 0.011564 | 0.011463 | 0.011564 | 0.011631 |
| 0.011631 | 0.011597 | 0.011496 | 0.011597 | 0.011563 | 0.011429 | 0.011396 |
| 0.011429 | 0.011429 | 0.011496 | 0.011429 | 0.011396 | 0.011564 | 0.011429 |
| 0.011463 | 0.011463 | 0.011597 | 0.011631 | 0.011530 | 0.011463 | 0.011463 |
| 0.011530 | 0.011463 | 0.011563 | 0.011429 | 0.011564 | 0.011664 | 0.011967 |
| 0.011463 | 0.011866 | 0.011336 | 0.017823 | 0.011257 | 0.011488 | 0.011688 |
| 0.011648 | 0.011693 | 0.011322 | 0.011292 | 0.011774 | 0.011716 | 0.011364 |
| 0.011535 | 0.011610 | 0.011255 | 0.011270 | 0.011333 | 0.011356 | 0.011318 |
| 0.011482 | 0.011470 | 0.011431 | 0.011259 | 0.011597 | 0.011631 | 0.011500 |
| 0.011507 | 0.011463 | 0.011597 | 0.011429 | 0.011530 | 0.011530 | 0.011497 |
| 0.011530 | 0.011463 | 0.011496 | 0.011396 | 0.011362 | 0.011295 | 0.011329 |
| 0.011329 | 0.011396 | 0.011295 | 0.011396 | 0.011429 | 0.011463 | 0.011496 |
| 0.011530 | 0.011362 | 0.011698 | 0.011698 | 0.011564 | 0.011598 | 0.011497 |
| 0.011262 | 0.011262 | 0.011295 | 0.011396 | 0.011262 | 0.011497 | 0.011497 |
| 0.011530 | 0.011664 | 0.011597 | 0.011698 | 0.011732 | 0.011700 | 0.011530 |
| 0.011396 | 0.011463 | 0.011497 | 0.011329 | 0.011396 | 0.011362 | 0.011530 |
| 0.011463 | 0.011463 | 0.011497 | 0.011463 | 0.011363 | 0.011564 | 0.011530 |
| 0.011534 | 0.011295 | 0.011396 | 0.011497 | 0.011396 | 0.011530 | 0.011698 |
| 0.011866 | 0.011504 | 0.011731 | 0.011698 | 0.011631 | 0.011799 | 0.011363 |
| 0.011464 | 0.011363 | 0.011329 | 0.011329 | 0.011396 | 0.011295 | 0.011396 |
| 0.011429 | 0.011463 | 0.011496 | 0.011530 | 0.011362 | 0.011698 | 0.011698 |
| 0.011564 | 0.011598 | 0.011664 | 0.011597 | 0.012237 | 0.011667 | 0.011588 |
| 0.011658 | 0.011615 | 0.011728 | 0.011614 | 0.011725 | 0.011646 | 0.011612 |
| 0.012193 | 0.011510 | 0.011642 | 0.011579 | 0.011852 | 0.011706 | 0.011740 |
| 0.012216 | 0.011550 | 0.011297 | 0.011329 | 0.011228 | 0.011463 | 0.011263 |
| 0.011396 | 0.011295 | 0.011094 | 0.000000 | 0.011195 | 0.011664 | 0.011498 |
| 0.011496 | 0.011429 | 0.011463 | 0.011496 | 0.011396 | 0.011463 | 0.011362 |
| 0.011496 | 0.011530 | 0.011429 | 0.011396 | 0.011496 | 0.011429 | 0.011463 |
| 0.011463 | 0.011396 | 0.011463 | 0.011496 | 0.011396 | 0.011597 | 0.011631 |
| 0.011530 | 0.011597 | 0.011530 | 0.011530 | 0.011463 | 0.011866 | 0.011496 |
| 0.011547 | 0.011463 | 0.011698 | 0.011705 | 0.011564 | 0.011563 | 0.011564 |
| 0.011564 | 0.011496 | 0.011463 | 0.011496 | 0.011597 | 0.011597 | 0.011530 |
| 0.011530 | 0.011664 | 0.011832 | 0.011564 | 0.011765 | 0.011765 | 0.011631 |
| 0.011463 | 0.011530 | 0.011564 | 0.011967 | 0.011530 | 0.011564 | 0.011530 |
| 0.011564 | 0.011496 | 0.011496 | 0.011799 | 0.011732 | 0.011765 | 0.011496 |
| 0.011597 | 0.011664 | 0.011530 | 0.011597 | 0.011563 | 0.011429 | 0.011765 |
| 0.011530 | 0.011496 | 0.011496 | 0.011664 | 0.011496 | 0.011597 | 0.011832 |
| 0.011530 | 0.011909 | 0.011899 | 0.011548 | 0.011229 | 0.011468 | 0.011267 |
| 0.011280 | 0.011761 | 0.011306 | 0.011462 | 0.011304 | 0.011417 | 0.011432 |
| 0.011468 | 0.011258 | 0.011394 | 0.011192 | 0.011276 | 0.011328 | 0.011466 |
| 0.011475 | 0.011336 | 0.011448 | 0.011342 | 0.011397 | 0.011530 | 0.011597 |
| 0.011597 | 0.011464 | 0.011567 | 0.011569 | 0.011704 | 0.011732 | 0.011530 |
| 0.011765 | 0.011497 | 0.011362 | 0.011463 | 0.011262 | 0.011631 | 0.011295 |
| 0.011496 | 0.011496 | 0.011329 | 0.011295 | 0.011463 | 0.011295 | 0.011396 |
| 0.011375 | 0.011375 | 0.011368 | 0.011403 | 0.011539 | 0.011504 | 0.011504 |
| 0.011503 | 0.011430 | 0.011245 | 0.011240 | 0.011365 | 0.011535 | 0.011535 |
| 0.011329 | 0.011399 | 0.011632 | 0.011601 | 0.011531 | 0.011565 | 0.011631 |
| 0.011564 | 0.011631 | 0.011631 | 0.011530 | 0.012101 | 0.011698 | 0.011765 |
| 0.011665 | 0.011879 | 0.011503 | 0.011441 | 0.011463 | 0.011664 | 0.011631 |

|          |          |          |          |          |          |          |
|----------|----------|----------|----------|----------|----------|----------|
| 0.011666 | 0.011698 | 0.011698 | 0.011698 | 0.011728 | 0.011832 | 0.011476 |
| 0.011364 | 0.011372 | 0.011469 | 0.011434 | 0.011538 | 0.011359 | 0.011706 |
| 0.011506 | 0.011411 | 0.011108 | 0.011397 | 0.011363 | 0.011437 | 0.011329 |
| 0.011295 | 0.011295 | 0.011362 | 0.011329 | 0.011530 | 0.011497 | 0.011429 |
| 0.011530 | 0.011597 | 0.011127 | 0.011127 | 0.011161 | 0.011161 | 0.011162 |
| 0.011229 | 0.011362 | 0.011362 | 0.011397 | 0.011530 | 0.011597 | 0.011597 |
| 0.011464 | 0.011567 | 0.011569 | 0.011704 | 0.011732 | 0.011530 | 0.011698 |
| 0.011631 | 0.011631 | 0.011331 | 0.011513 | 0.011408 | 0.011503 | 0.011305 |
| 0.011508 | 0.011744 | 0.011441 | 0.011536 | 0.011295 | 0.011497 | 0.011362 |
| 0.011463 | 0.011396 | 0.011295 | 0.011397 | 0.011497 | 0.011499 | 0.011396 |
| 0.011295 | 0.011229 | 0.011362 | 0.011295 | 0.011228 | 0.011332 | 0.011497 |
| 0.011530 | 0.011463 | 0.011496 | 0.011396 | 0.011362 | 0.011295 | 0.011497 |
| 0.011496 | 0.011530 | 0.011530 | 0.011463 | 0.011530 | 0.011765 | 0.011429 |
| 0.011463 | 0.011866 | 0.011463 | 0.011496 | 0.011463 | 0.011832 | 0.011232 |
| 0.011678 | 0.011273 | 0.011261 | 0.011503 | 0.011589 | 0.011527 | 0.011186 |
| 0.011218 | 0.011631 | 0.011731 | 0.011705 | 0.011565 | 0.011635 | 0.011834 |
| 0.011733 | 0.011872 | 0.011866 | 0.011983 | 0.011832 | 0.012707 | 0.011734 |
| 0.012473 | 0.012241 | 0.012375 | 0.012646 | 0.011832 | 0.011396 | 0.011698 |
| 0.012137 | 0.012072 | 0.011799 | 0.011698 | 0.011632 | 0.011632 | 0.011737 |
| 0.011631 | 0.011501 | 0.011698 | 0.011531 | 0.011901 | 0.012101 | 0.011968 |
| 0.012002 | 0.011968 | 0.012072 | 0.011838 | 0.012138 | 0.012144 | 0.012205 |
| 0.012205 | 0.012239 | 0.012186 | 0.012205 | 0.012207 | 0.011564 | 0.011732 |
| 0.011800 | 0.012438 | 0.011806 | 0.012169 | 0.012474 | 0.011570 | 0.011464 |
| 0.011564 | 0.011563 | 0.011900 | 0.011924 | 0.012045 | 0.011899 | 0.011431 |
| S522     | 0.011838 | 0.011838 | 0.012176 | 0.011939 | 0.011939 | 0.012007 |
| 0.011847 | 0.011778 | 0.012007 | 0.011432 | 0.011499 | 0.011331 | 0.011432 |
| 0.011466 | 0.011634 | 0.011432 | 0.011466 | 0.011533 | 0.011499 | 0.011466 |
| 0.011432 | 0.011466 | 0.011567 | 0.011432 | 0.011466 | 0.011466 | 0.011812 |
| 0.011702 | 0.011466 | 0.011364 | 0.011601 | 0.011533 | 0.011499 | 0.011533 |
| 0.011499 | 0.011601 | 0.011499 | 0.011499 | 0.011533 | 0.011499 | 0.011668 |
| 0.011432 | 0.011499 | 0.011533 | 0.011466 | 0.011567 | 0.011601 | 0.011533 |
| 0.011499 | 0.011668 | 0.011567 | 0.011837 | 0.011499 | 0.011770 | 0.011499 |
| 0.011466 | 0.011567 | 0.011635 | 0.011770 | 0.011871 | 0.011567 | 0.011668 |
| 0.011533 | 0.011601 | 0.011499 | 0.011736 | 0.011973 | 0.011499 | 0.011567 |
| 0.011466 | 0.011567 | 0.011533 | 0.011601 | 0.011533 | 0.011533 | 0.011533 |
| 0.011432 | 0.011466 | 0.011432 | 0.011533 | 0.011499 | 0.011365 | 0.011601 |
| 0.011533 | 0.011499 | 0.011567 | 0.011466 | 0.011601 | 0.011432 | 0.011499 |
| 0.011634 | 0.011601 | 0.011837 | 0.011668 | 0.011499 | 0.011736 | 0.011499 |
| 0.011543 | 0.011771 | 0.011551 | 0.011256 | 0.011210 | 0.011392 | 0.011454 |
| 0.012086 | 0.011417 | 0.011184 | 0.011736 | 0.011702 | 0.011533 | 0.011601 |
| 0.011567 | 0.011533 | 0.011601 | 0.011499 | 0.011601 | 0.011533 | 0.011533 |
| 0.011499 | 0.011601 | 0.011804 | 0.011668 | 0.011567 | 0.011533 | 0.011331 |
| 0.011297 | 0.011297 | 0.011364 | 0.011331 | 0.011533 | 0.011500 | 0.011432 |
| 0.011533 | 0.011601 | 0.011128 | 0.011128 | 0.011094 | 0.011094 | 0.011094 |
| 0.011162 | 0.011364 | 0.011364 | 0.011240 | 0.011314 | 0.011272 | 0.011365 |
| 0.011367 | 0.011301 | 0.011320 | 0.011338 | 0.011265 | 0.011302 | 0.011332 |
| 0.011531 | 0.011373 | 0.011407 | 0.011297 | 0.011304 | 0.011433 | 0.011399 |
| 0.011466 | 0.011399 | 0.011399 | 0.011635 | 0.011567 | 0.011939 | 0.011669 |
| 0.011770 | 0.011500 | 0.011364 | 0.011466 | 0.011263 | 0.011635 | 0.011297 |
| 0.011499 | 0.011499 | 0.011331 | 0.011297 | 0.011466 | 0.011297 | 0.011398 |
| 0.011364 | 0.011466 | 0.011398 | 0.011297 | 0.011399 | 0.011500 | 0.011502 |
| 0.011500 | 0.011398 | 0.011297 | 0.011230 | 0.011364 | 0.011297 | 0.011229 |
| 0.011334 | 0.011500 | 0.011297 | 0.011500 | 0.011398 | 0.011364 | 0.011331 |
| 0.011432 | 0.011331 | 0.011364 | 0.011331 | 0.011364 | 0.011229 | 0.011364 |
| 0.011364 | 0.011331 | 0.011398 | 0.011331 | 0.011364 | 0.011398 | 0.011635 |
| 0.011871 | 0.011804 | 0.011736 | 0.011467 | 0.011736 | 0.011364 | 0.011331 |
| 0.011366 | 0.011590 | 0.011383 | 0.011233 | 0.011880 | 0.011232 | 0.011298 |
| 0.011881 | 0.011574 | 0.011668 | 0.011871 | 0.011507 | 0.011736 | 0.011702 |
| 0.011634 | 0.011804 | 0.011668 | 0.011351 | 0.011483 | 0.011533 | 0.011605 |
| 0.011702 | 0.011603 | 0.011741 | 0.011809 | 0.011736 | 0.011804 | 0.011913 |

|          |          |          |          |          |          |          |
|----------|----------|----------|----------|----------|----------|----------|
| 0.011639 | 0.011812 | 0.011742 | 0.011639 | 0.011907 | 0.011398 | 0.011603 |
| 0.011567 | 0.011499 | 0.011398 | 0.011398 | 0.011466 | 0.011466 | 0.011533 |
| 0.011466 | 0.011533 | 0.011432 | 0.011533 | 0.011466 | 0.011466 | 0.011533 |
| 0.011466 | 0.011905 | 0.011804 | 0.011837 | 0.011364 | 0.011466 | 0.011499 |
| 0.011499 | 0.011466 | 0.011533 | 0.011567 | 0.011432 | 0.011432 | 0.011432 |
| 0.011973 | 0.011601 | 0.011601 | 0.011398 | 0.011499 | 0.011668 | 0.011432 |
| 0.011432 | 0.011499 | 0.011466 | 0.011635 | 0.011432 | 0.011567 | 0.011702 |
| 0.011635 | 0.011466 | 0.011466 | 0.011398 | 0.011398 | 0.011499 | 0.011499 |
| 0.011398 | 0.011499 | 0.011364 | 0.011398 | 0.011533 | 0.011669 | 0.011432 |
| 0.011398 | 0.011533 | 0.011466 | 0.011364 | 0.011702 | 0.011364 | 0.011533 |
| 0.011612 | 0.011432 | 0.011736 | 0.011567 | 0.011601 | 0.011466 | 0.011567 |
| 0.011432 | 0.011770 | 0.011364 | 0.011635 | 0.011432 | 0.011432 | 0.011364 |
| 0.011567 | 0.011736 | 0.011499 | 0.011567 | 0.011398 | 0.011804 | 0.011432 |
| 0.011432 | 0.011432 | 0.011466 | 0.011567 | 0.011466 | 0.011567 | 0.011635 |
| 0.011635 | 0.011601 | 0.011499 | 0.011601 | 0.011567 | 0.011432 | 0.011398 |
| 0.011432 | 0.011432 | 0.011499 | 0.011432 | 0.011398 | 0.011567 | 0.011432 |
| 0.011466 | 0.011466 | 0.011601 | 0.011634 | 0.011533 | 0.011466 | 0.011466 |
| 0.011533 | 0.011466 | 0.011567 | 0.011432 | 0.011533 | 0.011668 | 0.011973 |
| 0.011466 | 0.011871 | 0.011337 | 0.011795 | 0.011192 | 0.011488 | 0.011689 |
| 0.011651 | 0.011694 | 0.011270 | 0.011293 | 0.011774 | 0.011721 | 0.011364 |
| 0.011488 | 0.011610 | 0.011256 | 0.011228 | 0.011295 | 0.011356 | 0.011276 |
| 0.011483 | 0.011470 | 0.011394 | 0.011259 | 0.011601 | 0.011635 | 0.011503 |
| 0.011510 | 0.011466 | 0.011601 | 0.011432 | 0.011533 | 0.011533 | 0.011500 |
| 0.011533 | 0.011466 | 0.011499 | 0.011364 | 0.011364 | 0.011297 | 0.011331 |
| 0.011331 | 0.011398 | 0.011297 | 0.011398 | 0.011432 | 0.011466 | 0.011500 |
| 0.011533 | 0.011364 | 0.011702 | 0.011702 | 0.011567 | 0.011602 | 0.011500 |
| 0.011263 | 0.011263 | 0.011297 | 0.011398 | 0.011263 | 0.011500 | 0.011500 |
| 0.011533 | 0.011668 | 0.011601 | 0.011702 | 0.011736 | 0.011704 | 0.011533 |
| 0.011398 | 0.011466 | 0.011500 | 0.011331 | 0.011398 | 0.011364 | 0.011533 |
| 0.011466 | 0.011466 | 0.011500 | 0.011466 | 0.011365 | 0.011567 | 0.011533 |
| 0.011537 | 0.011297 | 0.011398 | 0.011500 | 0.011398 | 0.011533 | 0.011702 |
| 0.011871 | 0.011507 | 0.011736 | 0.011702 | 0.011634 | 0.011804 | 0.011365 |
| 0.011467 | 0.011365 | 0.011331 | 0.011331 | 0.011398 | 0.011297 | 0.011398 |
| 0.011432 | 0.011466 | 0.011500 | 0.011533 | 0.011364 | 0.011702 | 0.011702 |
| 0.011567 | 0.011602 | 0.011668 | 0.011601 | 0.012245 | 0.011636 | 0.011520 |
| 0.011589 | 0.011619 | 0.011697 | 0.011548 | 0.011730 | 0.011650 | 0.011616 |
| 0.012201 | 0.011513 | 0.011646 | 0.011582 | 0.011857 | 0.011711 | 0.011814 |
| 0.012224 | 0.011516 | 0.011162 | 0.011398 | 0.011162 | 0.011466 | 0.011195 |
| 0.011398 | 0.011297 | 0.011229 | 0.011195 | 0.000000 | 0.011668 | 0.011501 |
| 0.011499 | 0.011432 | 0.011466 | 0.011499 | 0.011398 | 0.011466 | 0.011364 |
| 0.011499 | 0.011533 | 0.011432 | 0.011398 | 0.011499 | 0.011432 | 0.011466 |
| 0.011466 | 0.011398 | 0.011466 | 0.011499 | 0.011398 | 0.011601 | 0.011635 |
| 0.011533 | 0.011601 | 0.011533 | 0.011533 | 0.011466 | 0.011871 | 0.011499 |
| 0.011516 | 0.011466 | 0.011703 | 0.011709 | 0.011567 | 0.011567 | 0.011567 |
| 0.011567 | 0.011499 | 0.011466 | 0.011499 | 0.011601 | 0.011601 | 0.011533 |
| 0.011533 | 0.011668 | 0.011804 | 0.011567 | 0.011770 | 0.011770 | 0.011634 |
| 0.011466 | 0.011533 | 0.011567 | 0.011973 | 0.011534 | 0.011567 | 0.011533 |
| 0.011567 | 0.011499 | 0.011499 | 0.011804 | 0.011702 | 0.011770 | 0.011499 |
| 0.011601 | 0.011635 | 0.011533 | 0.011601 | 0.011567 | 0.011432 | 0.011770 |
| 0.011533 | 0.011499 | 0.011499 | 0.011634 | 0.011499 | 0.011601 | 0.011837 |
| 0.011533 | 0.011915 | 0.011905 | 0.011549 | 0.011173 | 0.011471 | 0.011267 |
| 0.011280 | 0.011762 | 0.011306 | 0.011418 | 0.011256 | 0.011417 | 0.011379 |
| 0.011418 | 0.011126 | 0.011339 | 0.011127 | 0.011168 | 0.011329 | 0.011466 |
| 0.011475 | 0.011336 | 0.011448 | 0.011342 | 0.011399 | 0.011533 | 0.011601 |
| 0.011601 | 0.011466 | 0.011571 | 0.011538 | 0.011709 | 0.011736 | 0.011533 |
| 0.011770 | 0.011500 | 0.011364 | 0.011466 | 0.011263 | 0.011635 | 0.011297 |
| 0.011499 | 0.011499 | 0.011331 | 0.011297 | 0.011466 | 0.011297 | 0.011398 |
| 0.011377 | 0.011377 | 0.011371 | 0.011405 | 0.011542 | 0.011507 | 0.011507 |
| 0.011506 | 0.011432 | 0.011246 | 0.011242 | 0.011367 | 0.011538 | 0.011538 |
| 0.011331 | 0.011401 | 0.011636 | 0.011570 | 0.011534 | 0.011534 | 0.011635 |

|          |          |          |          |          |          |          |
|----------|----------|----------|----------|----------|----------|----------|
| 0.011567 | 0.011635 | 0.011635 | 0.011500 | 0.012108 | 0.011702 | 0.011770 |
| 0.011669 | 0.011849 | 0.011507 | 0.011444 | 0.011466 | 0.011669 | 0.011635 |
| 0.011670 | 0.011702 | 0.011702 | 0.011702 | 0.011694 | 0.011837 | 0.011444 |
| 0.011366 | 0.011374 | 0.011471 | 0.011436 | 0.011542 | 0.011323 | 0.011710 |
| 0.011509 | 0.011368 | 0.011108 | 0.011362 | 0.011365 | 0.011405 | 0.011331 |
| 0.011297 | 0.011297 | 0.011364 | 0.011331 | 0.011533 | 0.011500 | 0.011432 |
| 0.011533 | 0.011601 | 0.011128 | 0.011128 | 0.011094 | 0.011094 | 0.011094 |
| 0.011162 | 0.011364 | 0.011364 | 0.011399 | 0.011533 | 0.011601 | 0.011601 |
| 0.011466 | 0.011571 | 0.011538 | 0.011709 | 0.011736 | 0.011533 | 0.011702 |
| 0.011635 | 0.011635 | 0.011333 | 0.011516 | 0.011445 | 0.011506 | 0.011342 |
| 0.011511 | 0.011749 | 0.011444 | 0.011539 | 0.011297 | 0.011500 | 0.011364 |
| 0.011466 | 0.011398 | 0.011297 | 0.011399 | 0.011500 | 0.011502 | 0.011398 |
| 0.011297 | 0.011230 | 0.011364 | 0.011297 | 0.011229 | 0.011334 | 0.011500 |
| 0.011533 | 0.011466 | 0.011499 | 0.011364 | 0.011364 | 0.011297 | 0.011500 |
| 0.011499 | 0.011533 | 0.011533 | 0.011466 | 0.011533 | 0.011770 | 0.011432 |
| 0.011466 | 0.011871 | 0.011466 | 0.011499 | 0.011466 | 0.011837 | 0.011189 |
| 0.011623 | 0.011273 | 0.011211 | 0.011504 | 0.011590 | 0.011527 | 0.011186 |
| 0.011218 | 0.011635 | 0.011736 | 0.011675 | 0.011569 | 0.011707 | 0.011839 |
| 0.011738 | 0.011877 | 0.011871 | 0.011989 | 0.011837 | 0.012718 | 0.011738 |
| 0.012448 | 0.012248 | 0.012383 | 0.012657 | 0.011837 | 0.011398 | 0.011703 |
| 0.012110 | 0.012079 | 0.011804 | 0.011702 | 0.011636 | 0.011636 | 0.011741 |
| 0.011635 | 0.011504 | 0.011702 | 0.011534 | 0.011906 | 0.012108 | 0.011974 |
| 0.012008 | 0.011940 | 0.012078 | 0.011843 | 0.012145 | 0.012151 | 0.012212 |
| 0.012213 | 0.012247 | 0.012194 | 0.012213 | 0.012214 | 0.011567 | 0.011737 |
| 0.011737 | 0.012447 | 0.011811 | 0.012176 | 0.012484 | 0.011573 | 0.011466 |
| 0.011567 | 0.011567 | 0.011906 | 0.011890 | 0.012047 | 0.011905 | 0.011433 |
| S523     | 0.011832 | 0.011832 | 0.011900 | 0.011664 | 0.011664 | 0.011732 |
| 0.011569 | 0.011502 | 0.011731 | 0.011429 | 0.011496 | 0.011464 | 0.011429 |
| 0.011396 | 0.011597 | 0.011362 | 0.011463 | 0.011530 | 0.011496 | 0.011463 |
| 0.011429 | 0.011463 | 0.011295 | 0.011430 | 0.011463 | 0.011463 | 0.011535 |
| 0.011194 | 0.011463 | 0.011362 | 0.011329 | 0.011530 | 0.011497 | 0.011530 |
| 0.011496 | 0.011597 | 0.011496 | 0.011496 | 0.011530 | 0.011496 | 0.011664 |
| 0.011362 | 0.011496 | 0.011530 | 0.011463 | 0.011496 | 0.011597 | 0.011530 |
| 0.011496 | 0.011664 | 0.011564 | 0.011564 | 0.011496 | 0.011765 | 0.011496 |
| 0.011463 | 0.011497 | 0.011631 | 0.011765 | 0.011597 | 0.011496 | 0.011597 |
| 0.011530 | 0.011597 | 0.011496 | 0.011731 | 0.011698 | 0.011496 | 0.011564 |
| 0.011463 | 0.011564 | 0.011530 | 0.011597 | 0.011530 | 0.011530 | 0.011530 |
| 0.011429 | 0.011463 | 0.011429 | 0.011463 | 0.011496 | 0.011531 | 0.011597 |
| 0.011530 | 0.011496 | 0.011564 | 0.011463 | 0.011530 | 0.011429 | 0.011496 |
| 0.011664 | 0.011597 | 0.011631 | 0.011664 | 0.011496 | 0.011664 | 0.011496 |
| 0.011691 | 0.011620 | 0.011702 | 0.011451 | 0.011359 | 0.011539 | 0.011257 |
| 0.011902 | 0.011264 | 0.011390 | 0.011731 | 0.011731 | 0.011463 | 0.011564 |
| 0.011564 | 0.011530 | 0.011597 | 0.011496 | 0.011597 | 0.011530 | 0.011530 |
| 0.011496 | 0.011530 | 0.011799 | 0.011664 | 0.011564 | 0.011530 | 0.011463 |
| 0.011429 | 0.011362 | 0.011497 | 0.011463 | 0.011396 | 0.011362 | 0.011295 |
| 0.011396 | 0.011463 | 0.011463 | 0.011463 | 0.011497 | 0.011497 | 0.011499 |
| 0.011567 | 0.011497 | 0.011497 | 0.011384 | 0.011422 | 0.011411 | 0.011497 |
| 0.011500 | 0.011438 | 0.011466 | 0.011474 | 0.011400 | 0.011437 | 0.011465 |
| 0.011456 | 0.011508 | 0.011508 | 0.011430 | 0.011440 | 0.011565 | 0.011464 |
| 0.011531 | 0.011532 | 0.011531 | 0.011631 | 0.011564 | 0.011866 | 0.011665 |
| 0.011362 | 0.011564 | 0.011496 | 0.011530 | 0.011396 | 0.011094 | 0.011430 |
| 0.011496 | 0.011496 | 0.011463 | 0.011429 | 0.011463 | 0.011429 | 0.011530 |
| 0.011497 | 0.011597 | 0.011530 | 0.011429 | 0.011532 | 0.011631 | 0.011635 |
| 0.011631 | 0.011530 | 0.011429 | 0.011364 | 0.011497 | 0.011429 | 0.011362 |
| 0.011366 | 0.011631 | 0.011430 | 0.011631 | 0.011396 | 0.011497 | 0.011463 |
| 0.011564 | 0.011463 | 0.011497 | 0.011463 | 0.011497 | 0.011362 | 0.011497 |
| 0.011530 | 0.011463 | 0.011530 | 0.011463 | 0.011497 | 0.011530 | 0.011765 |
| 0.011597 | 0.011530 | 0.011598 | 0.011633 | 0.011598 | 0.011497 | 0.011463 |
| 0.011432 | 0.011707 | 0.011563 | 0.011403 | 0.011603 | 0.011367 | 0.011454 |
| 0.011603 | 0.011502 | 0.011664 | 0.011866 | 0.011572 | 0.011731 | 0.011698 |

|          |          |          |          |          |          |          |
|----------|----------|----------|----------|----------|----------|----------|
| 0.011631 | 0.011799 | 0.011664 | 0.011554 | 0.011605 | 0.011530 | 0.011601 |
| 0.011698 | 0.011600 | 0.011736 | 0.011804 | 0.011732 | 0.011799 | 0.011907 |
| 0.011635 | 0.011807 | 0.011737 | 0.011669 | 0.011935 | 0.011396 | 0.011599 |
| 0.011496 | 0.011496 | 0.011396 | 0.011396 | 0.011463 | 0.011463 | 0.011530 |
| 0.011463 | 0.011530 | 0.011429 | 0.011463 | 0.011396 | 0.011463 | 0.011530 |
| 0.011463 | 0.011631 | 0.011530 | 0.011564 | 0.011362 | 0.011463 | 0.011496 |
| 0.011496 | 0.011463 | 0.011530 | 0.011496 | 0.011429 | 0.011429 | 0.011429 |
| 0.011698 | 0.011530 | 0.011597 | 0.011396 | 0.011496 | 0.011664 | 0.011429 |
| 0.011429 | 0.011496 | 0.011463 | 0.011631 | 0.011429 | 0.011362 | 0.011496 |
| 0.011429 | 0.011463 | 0.011463 | 0.011396 | 0.011396 | 0.011564 | 0.011496 |
| 0.011396 | 0.011496 | 0.011362 | 0.011396 | 0.011530 | 0.011396 | 0.011429 |
| 0.011396 | 0.011530 | 0.011463 | 0.011362 | 0.011429 | 0.011362 | 0.011530 |
| 0.011608 | 0.011429 | 0.011463 | 0.011564 | 0.011530 | 0.011463 | 0.011564 |
| 0.011429 | 0.011765 | 0.011362 | 0.011564 | 0.011362 | 0.011362 | 0.011362 |
| 0.011597 | 0.011530 | 0.011496 | 0.011564 | 0.011396 | 0.011530 | 0.011362 |
| 0.011429 | 0.011429 | 0.011463 | 0.011564 | 0.011463 | 0.011564 | 0.011631 |
| 0.011631 | 0.011597 | 0.011496 | 0.011597 | 0.011564 | 0.011429 | 0.011396 |
| 0.011429 | 0.011429 | 0.011496 | 0.011362 | 0.011396 | 0.011564 | 0.011429 |
| 0.011396 | 0.011463 | 0.011597 | 0.011564 | 0.011530 | 0.011463 | 0.011463 |
| 0.011530 | 0.011463 | 0.011564 | 0.011429 | 0.011564 | 0.011664 | 0.011698 |
| 0.011463 | 0.011597 | 0.011474 | 0.017936 | 0.011387 | 0.011733 | 0.011548 |
| 0.011510 | 0.011553 | 0.011636 | 0.011408 | 0.011665 | 0.011578 | 0.011668 |
| 0.011487 | 0.011426 | 0.011411 | 0.011521 | 0.011411 | 0.011603 | 0.011533 |
| 0.011342 | 0.011135 | 0.011320 | 0.011126 | 0.011597 | 0.011631 | 0.011635 |
| 0.011507 | 0.011597 | 0.011597 | 0.011497 | 0.011530 | 0.011530 | 0.011497 |
| 0.011530 | 0.011463 | 0.011496 | 0.011530 | 0.011497 | 0.011429 | 0.011463 |
| 0.011463 | 0.011530 | 0.011429 | 0.011530 | 0.011564 | 0.011597 | 0.011497 |
| 0.011463 | 0.011429 | 0.011564 | 0.011564 | 0.011564 | 0.011598 | 0.011631 |
| 0.011396 | 0.011396 | 0.011429 | 0.011530 | 0.011396 | 0.011631 | 0.011631 |
| 0.011665 | 0.011664 | 0.011597 | 0.011698 | 0.011598 | 0.011700 | 0.011530 |
| 0.011530 | 0.011597 | 0.011631 | 0.011463 | 0.011530 | 0.011497 | 0.011530 |
| 0.011598 | 0.011598 | 0.011631 | 0.011598 | 0.011498 | 0.011698 | 0.011665 |
| 0.011534 | 0.011429 | 0.011530 | 0.011631 | 0.011530 | 0.011597 | 0.011698 |
| 0.011866 | 0.011572 | 0.011731 | 0.011698 | 0.011631 | 0.011799 | 0.011430 |
| 0.011599 | 0.011497 | 0.011463 | 0.011463 | 0.011530 | 0.011429 | 0.011530 |
| 0.011564 | 0.011597 | 0.011497 | 0.011463 | 0.011429 | 0.011564 | 0.011564 |
| 0.011564 | 0.011598 | 0.011664 | 0.011597 | 0.012170 | 0.011667 | 0.011588 |
| 0.011658 | 0.011615 | 0.011728 | 0.011614 | 0.011725 | 0.011646 | 0.011612 |
| 0.012124 | 0.011510 | 0.011642 | 0.011579 | 0.011852 | 0.011706 | 0.011809 |
| 0.012148 | 0.011625 | 0.011770 | 0.011832 | 0.011698 | 0.011429 | 0.011736 |
| 0.011396 | 0.011564 | 0.011698 | 0.011664 | 0.011668 | 0.000000 | 0.011363 |
| 0.011496 | 0.011429 | 0.011463 | 0.011496 | 0.011396 | 0.011463 | 0.011362 |
| 0.011429 | 0.011463 | 0.011429 | 0.011396 | 0.011496 | 0.011429 | 0.011463 |
| 0.011463 | 0.011396 | 0.011463 | 0.011496 | 0.011396 | 0.011597 | 0.011631 |
| 0.011530 | 0.011530 | 0.011530 | 0.011530 | 0.011463 | 0.011597 | 0.011496 |
| 0.011269 | 0.011463 | 0.011195 | 0.011196 | 0.011564 | 0.011564 | 0.011564 |
| 0.011564 | 0.011496 | 0.011463 | 0.011496 | 0.011597 | 0.011597 | 0.011530 |
| 0.011530 | 0.011664 | 0.011564 | 0.011564 | 0.011765 | 0.011765 | 0.011631 |
| 0.011463 | 0.011530 | 0.011564 | 0.011698 | 0.011530 | 0.011564 | 0.011530 |
| 0.011564 | 0.011429 | 0.011429 | 0.011732 | 0.011732 | 0.011698 | 0.011496 |
| 0.011597 | 0.011664 | 0.011530 | 0.011597 | 0.011563 | 0.011429 | 0.011496 |
| 0.011530 | 0.011496 | 0.011429 | 0.011664 | 0.011496 | 0.011597 | 0.011631 |
| 0.011530 | 0.011637 | 0.011631 | 0.011101 | 0.011229 | 0.011536 | 0.011112 |
| 0.011500 | 0.011566 | 0.011411 | 0.011551 | 0.011402 | 0.011417 | 0.011379 |
| 0.011111 | 0.011324 | 0.011394 | 0.011258 | 0.011330 | 0.011529 | 0.011587 |
| 0.011625 | 0.011454 | 0.011518 | 0.011483 | 0.011532 | 0.000000 | 0.011195 |
| 0.011463 | 0.011531 | 0.011635 | 0.011433 | 0.011772 | 0.011802 | 0.011530 |
| 0.011362 | 0.011564 | 0.011496 | 0.011530 | 0.011396 | 0.011094 | 0.011430 |
| 0.011496 | 0.011496 | 0.011463 | 0.011429 | 0.011463 | 0.011429 | 0.011530 |
| 0.011514 | 0.011515 | 0.011505 | 0.011540 | 0.011676 | 0.011641 | 0.011640 |

|          |          |          |          |          |          |          |
|----------|----------|----------|----------|----------|----------|----------|
| 0.011639 | 0.011564 | 0.011392 | 0.011384 | 0.011500 | 0.011670 | 0.011671 |
| 0.011464 | 0.011534 | 0.011767 | 0.011736 | 0.011665 | 0.011699 | 0.011631 |
| 0.011564 | 0.011631 | 0.011631 | 0.011530 | 0.011833 | 0.011698 | 0.011765 |
| 0.011799 | 0.011594 | 0.011503 | 0.011580 | 0.011463 | 0.011664 | 0.011631 |
| 0.011666 | 0.011698 | 0.011698 | 0.011698 | 0.011846 | 0.011832 | 0.011476 |
| 0.011364 | 0.011372 | 0.011469 | 0.011434 | 0.011470 | 0.011396 | 0.011434 |
| 0.011506 | 0.011367 | 0.011489 | 0.011547 | 0.011497 | 0.011573 | 0.011463 |
| 0.011429 | 0.011362 | 0.011497 | 0.011463 | 0.011396 | 0.011362 | 0.011295 |
| 0.011396 | 0.011463 | 0.011463 | 0.011463 | 0.011497 | 0.011497 | 0.011499 |
| 0.011567 | 0.011497 | 0.011497 | 0.011532 | 0.000000 | 0.011195 | 0.011463 |
| 0.011531 | 0.011635 | 0.011433 | 0.011772 | 0.011802 | 0.011530 | 0.011698 |
| 0.011631 | 0.011631 | 0.011466 | 0.011652 | 0.011581 | 0.011571 | 0.011481 |
| 0.011646 | 0.011835 | 0.011611 | 0.011536 | 0.011430 | 0.011631 | 0.011497 |
| 0.011597 | 0.011530 | 0.011429 | 0.011532 | 0.011631 | 0.011635 | 0.011530 |
| 0.011429 | 0.011364 | 0.011497 | 0.011429 | 0.011362 | 0.011366 | 0.011631 |
| 0.011530 | 0.011463 | 0.011496 | 0.011530 | 0.011497 | 0.011429 | 0.011362 |
| 0.011496 | 0.011530 | 0.011530 | 0.011463 | 0.011530 | 0.011765 | 0.011362 |
| 0.011463 | 0.011597 | 0.011463 | 0.011496 | 0.011463 | 0.011564 | 0.011403 |
| 0.011622 | 0.011273 | 0.011261 | 0.000000 | 0.011142 | 0.011132 | 0.011227 |
| 0.011218 | 0.011362 | 0.011463 | 0.011569 | 0.011430 | 0.011568 | 0.011699 |
| 0.011598 | 0.011635 | 0.011597 | 0.011846 | 0.011564 | 0.012438 | 0.011599 |
| 0.012338 | 0.012106 | 0.012240 | 0.012511 | 0.011564 | 0.011463 | 0.011564 |
| 0.012204 | 0.011937 | 0.011530 | 0.011430 | 0.011497 | 0.011497 | 0.011466 |
| 0.011362 | 0.011332 | 0.011429 | 0.011396 | 0.011766 | 0.011833 | 0.011834 |
| 0.011733 | 0.011834 | 0.011937 | 0.011703 | 0.012205 | 0.012211 | 0.012272 |
| 0.012273 | 0.012306 | 0.012255 | 0.012273 | 0.012274 | 0.011564 | 0.011799 |
| 0.011867 | 0.012371 | 0.011874 | 0.011900 | 0.012373 | 0.011434 | 0.011329 |
| 0.011295 | 0.011295 | 0.011766 | 0.011800 | 0.011904 | 0.011631 | 0.011296 |
| S524     | 0.011801 | 0.011801 | 0.011599 | 0.011363 | 0.011363 | 0.011431 |
| 0.011537 | 0.011435 | 0.011363 | 0.011397 | 0.011464 | 0.011431 | 0.011397 |
| 0.011363 | 0.011599 | 0.011330 | 0.011431 | 0.011498 | 0.011464 | 0.011431 |
| 0.011397 | 0.011431 | 0.011262 | 0.011364 | 0.011397 | 0.011431 | 0.011503 |
| 0.011397 | 0.011431 | 0.011330 | 0.011296 | 0.011464 | 0.011464 | 0.011498 |
| 0.011464 | 0.011565 | 0.011464 | 0.011464 | 0.011498 | 0.011464 | 0.011633 |
| 0.011330 | 0.011464 | 0.011498 | 0.011431 | 0.011464 | 0.011565 | 0.011498 |
| 0.011464 | 0.011633 | 0.011532 | 0.011532 | 0.011464 | 0.011734 | 0.011464 |
| 0.011431 | 0.011464 | 0.011599 | 0.011734 | 0.011566 | 0.011464 | 0.011565 |
| 0.011498 | 0.011565 | 0.011464 | 0.011700 | 0.011667 | 0.011464 | 0.011532 |
| 0.011431 | 0.011532 | 0.011498 | 0.011565 | 0.011464 | 0.011498 | 0.011498 |
| 0.011397 | 0.011431 | 0.011397 | 0.011431 | 0.011464 | 0.011498 | 0.011565 |
| 0.011498 | 0.011464 | 0.011532 | 0.011397 | 0.011498 | 0.011397 | 0.011431 |
| 0.011633 | 0.011565 | 0.011599 | 0.011633 | 0.011464 | 0.011700 | 0.011464 |
| 0.011653 | 0.011546 | 0.011702 | 0.011373 | 0.011396 | 0.011465 | 0.011296 |
| 0.011938 | 0.011314 | 0.011431 | 0.011700 | 0.011700 | 0.011397 | 0.011532 |
| 0.011532 | 0.011498 | 0.011565 | 0.011464 | 0.011565 | 0.011464 | 0.011498 |
| 0.011464 | 0.011464 | 0.011768 | 0.011633 | 0.011532 | 0.011498 | 0.011431 |
| 0.011397 | 0.011330 | 0.011464 | 0.011431 | 0.011363 | 0.011330 | 0.011262 |
| 0.011363 | 0.011431 | 0.011431 | 0.011431 | 0.011464 | 0.011464 | 0.011467 |
| 0.011535 | 0.011464 | 0.011464 | 0.011349 | 0.011387 | 0.011377 | 0.011465 |
| 0.011468 | 0.011405 | 0.011466 | 0.011441 | 0.011367 | 0.011404 | 0.011433 |
| 0.011421 | 0.011440 | 0.011509 | 0.011397 | 0.011407 | 0.011532 | 0.011431 |
| 0.011499 | 0.011499 | 0.011498 | 0.011599 | 0.011532 | 0.011903 | 0.011633 |
| 0.011464 | 0.011532 | 0.011464 | 0.011498 | 0.011363 | 0.011330 | 0.011397 |
| 0.011464 | 0.011464 | 0.011431 | 0.011397 | 0.011431 | 0.011397 | 0.011498 |
| 0.011464 | 0.011565 | 0.011498 | 0.011397 | 0.011500 | 0.011599 | 0.011603 |
| 0.011599 | 0.011498 | 0.011397 | 0.011331 | 0.011464 | 0.011397 | 0.011330 |
| 0.011333 | 0.011599 | 0.011397 | 0.011599 | 0.011363 | 0.011464 | 0.011431 |
| 0.011532 | 0.011431 | 0.011464 | 0.011431 | 0.011464 | 0.011330 | 0.011431 |
| 0.011498 | 0.011431 | 0.011498 | 0.011431 | 0.011464 | 0.011498 | 0.011700 |
| 0.011566 | 0.011498 | 0.011566 | 0.011599 | 0.011566 | 0.011464 | 0.011431 |



|          |          |          |          |          |          |          |
|----------|----------|----------|----------|----------|----------|----------|
| 0.011398 | 0.011667 | 0.011565 | 0.011369 | 0.011571 | 0.011334 | 0.011454 |
| 0.011571 | 0.011469 | 0.011633 | 0.011835 | 0.011540 | 0.011700 | 0.011667 |
| 0.011599 | 0.011768 | 0.011595 | 0.011391 | 0.011481 | 0.011498 | 0.011569 |
| 0.011667 | 0.011568 | 0.011705 | 0.011739 | 0.011700 | 0.011768 | 0.011808 |
| 0.011604 | 0.011741 | 0.011706 | 0.011637 | 0.011904 | 0.011363 | 0.011500 |
| 0.011532 | 0.011464 | 0.011363 | 0.011363 | 0.011431 | 0.011431 | 0.011498 |
| 0.011431 | 0.011498 | 0.011397 | 0.011431 | 0.011431 | 0.011431 | 0.011498 |
| 0.011431 | 0.011599 | 0.011498 | 0.011532 | 0.011330 | 0.011431 | 0.011464 |
| 0.011464 | 0.011431 | 0.011498 | 0.011464 | 0.011397 | 0.011397 | 0.011397 |
| 0.011599 | 0.011498 | 0.011565 | 0.011363 | 0.011464 | 0.011633 | 0.011397 |
| 0.011397 | 0.011464 | 0.011431 | 0.011599 | 0.011397 | 0.011262 | 0.011397 |
| 0.011330 | 0.011431 | 0.011431 | 0.011363 | 0.011363 | 0.011532 | 0.011464 |
| 0.011363 | 0.011464 | 0.011330 | 0.011363 | 0.011498 | 0.011364 | 0.011397 |
| 0.011364 | 0.011498 | 0.011431 | 0.011330 | 0.011397 | 0.011330 | 0.011498 |
| 0.011541 | 0.011397 | 0.011431 | 0.011532 | 0.011498 | 0.011431 | 0.011532 |
| 0.011397 | 0.011734 | 0.011330 | 0.011532 | 0.011330 | 0.011330 | 0.011330 |
| 0.011532 | 0.011498 | 0.011464 | 0.011532 | 0.011363 | 0.011498 | 0.011330 |
| 0.011397 | 0.011397 | 0.011431 | 0.011532 | 0.011431 | 0.011532 | 0.011599 |
| 0.011599 | 0.011565 | 0.011464 | 0.011566 | 0.011532 | 0.011397 | 0.011363 |
| 0.011397 | 0.011397 | 0.011464 | 0.011330 | 0.011363 | 0.011532 | 0.011397 |
| 0.011363 | 0.011431 | 0.011565 | 0.011532 | 0.011498 | 0.011431 | 0.011431 |
| 0.011498 | 0.011431 | 0.011532 | 0.011397 | 0.011532 | 0.011633 | 0.011667 |
| 0.011431 | 0.011532 | 0.011440 | 0.017974 | 0.011322 | 0.011611 | 0.011514 |
| 0.011475 | 0.011518 | 0.011636 | 0.011408 | 0.011555 | 0.011544 | 0.011607 |
| 0.011203 | 0.011365 | 0.011372 | 0.011479 | 0.011372 | 0.011455 | 0.011447 |
| 0.011342 | 0.011321 | 0.011320 | 0.011193 | 0.011565 | 0.011599 | 0.011603 |
| 0.011439 | 0.011565 | 0.011532 | 0.011464 | 0.011464 | 0.011465 | 0.011465 |
| 0.011498 | 0.011431 | 0.011464 | 0.011498 | 0.011464 | 0.011397 | 0.011431 |
| 0.011431 | 0.011498 | 0.011397 | 0.011498 | 0.011532 | 0.011565 | 0.011464 |
| 0.011431 | 0.011397 | 0.011532 | 0.011532 | 0.011532 | 0.011566 | 0.011599 |
| 0.011363 | 0.011363 | 0.011397 | 0.011498 | 0.011363 | 0.011599 | 0.011599 |
| 0.011633 | 0.011633 | 0.011565 | 0.011666 | 0.011566 | 0.011668 | 0.011498 |
| 0.011498 | 0.011565 | 0.011599 | 0.011363 | 0.011498 | 0.011464 | 0.011498 |
| 0.011566 | 0.011565 | 0.011599 | 0.011565 | 0.011465 | 0.011633 | 0.011633 |
| 0.011502 | 0.011397 | 0.011498 | 0.011599 | 0.011498 | 0.011566 | 0.011666 |
| 0.011835 | 0.011540 | 0.011700 | 0.011667 | 0.011599 | 0.011768 | 0.011397 |
| 0.011567 | 0.011465 | 0.011431 | 0.011431 | 0.011498 | 0.011397 | 0.011498 |
| 0.011532 | 0.011565 | 0.011464 | 0.011431 | 0.011397 | 0.011532 | 0.011532 |
| 0.011532 | 0.011566 | 0.011633 | 0.011565 | 0.012140 | 0.011598 | 0.011519 |
| 0.011589 | 0.011547 | 0.011660 | 0.011547 | 0.011657 | 0.011579 | 0.011579 |
| 0.012060 | 0.011442 | 0.011576 | 0.011511 | 0.011786 | 0.011675 | 0.011743 |
| 0.012084 | 0.011514 | 0.011501 | 0.011498 | 0.011498 | 0.011262 | 0.011467 |
| 0.011363 | 0.011397 | 0.011532 | 0.011498 | 0.011501 | 0.011363 | 0.000000 |
| 0.011464 | 0.011397 | 0.011431 | 0.011431 | 0.011363 | 0.011431 | 0.011330 |
| 0.011397 | 0.011431 | 0.011397 | 0.011363 | 0.011464 | 0.011397 | 0.011431 |
| 0.011431 | 0.011363 | 0.011431 | 0.011464 | 0.011363 | 0.011565 | 0.011599 |
| 0.011498 | 0.011498 | 0.011498 | 0.011498 | 0.011431 | 0.011566 | 0.011464 |
| 0.011200 | 0.011431 | 0.011397 | 0.011367 | 0.011532 | 0.011532 | 0.011532 |
| 0.011532 | 0.011464 | 0.011431 | 0.011464 | 0.011565 | 0.011565 | 0.011498 |
| 0.011498 | 0.011633 | 0.011532 | 0.011532 | 0.011734 | 0.011734 | 0.011599 |
| 0.011431 | 0.011498 | 0.011532 | 0.011667 | 0.011498 | 0.011532 | 0.011498 |
| 0.011532 | 0.011397 | 0.011397 | 0.011700 | 0.011700 | 0.011667 | 0.011464 |
| 0.011565 | 0.011633 | 0.011498 | 0.011565 | 0.011532 | 0.011397 | 0.011464 |
| 0.011498 | 0.011464 | 0.011397 | 0.011633 | 0.011464 | 0.011565 | 0.011599 |
| 0.011498 | 0.011605 | 0.011599 | 0.011385 | 0.011286 | 0.011503 | 0.011215 |
| 0.011390 | 0.011294 | 0.011411 | 0.011462 | 0.011402 | 0.011467 | 0.011326 |
| 0.011315 | 0.011258 | 0.011394 | 0.011258 | 0.011276 | 0.011462 | 0.011587 |
| 0.011588 | 0.011493 | 0.011483 | 0.011483 | 0.011432 | 0.011363 | 0.011363 |
| 0.011431 | 0.011431 | 0.011603 | 0.011400 | 0.011672 | 0.011698 | 0.011464 |
| 0.011464 | 0.011532 | 0.011464 | 0.011498 | 0.011363 | 0.011330 | 0.011397 |

|          |          |          |          |          |          |          |
|----------|----------|----------|----------|----------|----------|----------|
| 0.011464 | 0.011464 | 0.011431 | 0.011397 | 0.011431 | 0.011397 | 0.011498 |
| 0.011481 | 0.011481 | 0.011472 | 0.011472 | 0.011643 | 0.011608 | 0.011608 |
| 0.011607 | 0.011498 | 0.011319 | 0.011349 | 0.011468 | 0.011638 | 0.011605 |
| 0.011431 | 0.011502 | 0.011735 | 0.011704 | 0.011633 | 0.011668 | 0.011599 |
| 0.011532 | 0.011599 | 0.011599 | 0.011498 | 0.011802 | 0.011667 | 0.011734 |
| 0.011768 | 0.011525 | 0.011471 | 0.011547 | 0.011431 | 0.011599 | 0.011599 |
| 0.011600 | 0.011666 | 0.011667 | 0.011667 | 0.011849 | 0.011801 | 0.011408 |
| 0.011298 | 0.011303 | 0.011402 | 0.011367 | 0.011403 | 0.011322 | 0.011367 |
| 0.011439 | 0.011236 | 0.011347 | 0.011436 | 0.011465 | 0.011541 | 0.011431 |
| 0.011397 | 0.011330 | 0.011464 | 0.011431 | 0.011363 | 0.011330 | 0.011262 |
| 0.011363 | 0.011431 | 0.011431 | 0.011431 | 0.011464 | 0.011464 | 0.011467 |
| 0.011535 | 0.011464 | 0.011464 | 0.011432 | 0.011363 | 0.011363 | 0.011431 |
| 0.011431 | 0.011603 | 0.011400 | 0.011672 | 0.011698 | 0.011464 | 0.011666 |
| 0.011599 | 0.011599 | 0.011433 | 0.011549 | 0.011547 | 0.011538 | 0.011340 |
| 0.011612 | 0.011607 | 0.011527 | 0.011503 | 0.011397 | 0.011599 | 0.011464 |
| 0.011565 | 0.011498 | 0.011397 | 0.011500 | 0.011599 | 0.011603 | 0.011498 |
| 0.011397 | 0.011331 | 0.011464 | 0.011397 | 0.011330 | 0.011333 | 0.011599 |
| 0.011498 | 0.011431 | 0.011464 | 0.011498 | 0.011464 | 0.011397 | 0.011296 |
| 0.011464 | 0.011498 | 0.011498 | 0.011431 | 0.011498 | 0.011700 | 0.011330 |
| 0.011431 | 0.011566 | 0.011431 | 0.011464 | 0.011431 | 0.011532 | 0.011446 |
| 0.011285 | 0.011315 | 0.011261 | 0.011342 | 0.011427 | 0.011347 | 0.011269 |
| 0.011218 | 0.000000 | 0.011161 | 0.011264 | 0.011128 | 0.011263 | 0.011397 |
| 0.011296 | 0.011366 | 0.011296 | 0.011538 | 0.011262 | 0.012139 | 0.011296 |
| 0.012038 | 0.011802 | 0.011939 | 0.012276 | 0.011532 | 0.011296 | 0.011262 |
| 0.012039 | 0.011465 | 0.011229 | 0.011128 | 0.011195 | 0.011195 | 0.011230 |
| 0.000000 | 0.000000 | 0.011128 | 0.011094 | 0.011735 | 0.011802 | 0.011802 |
| 0.011702 | 0.011802 | 0.011870 | 0.011669 | 0.012174 | 0.012181 | 0.012242 |
| 0.012242 | 0.012276 | 0.012220 | 0.012242 | 0.012242 | 0.011532 | 0.011768 |
| 0.011836 | 0.012308 | 0.011841 | 0.011836 | 0.011633 | 0.011400 | 0.011296 |
| 0.011262 | 0.011262 | 0.011701 | 0.011720 | 0.011872 | 0.011566 | 0.011263 |
| S525     | 0.011664 | 0.011664 | 0.012001 | 0.011765 | 0.011765 | 0.011832 |
| 0.011671 | 0.011603 | 0.011832 | 0.011262 | 0.011127 | 0.011296 | 0.011262 |
| 0.011295 | 0.011463 | 0.011262 | 0.011295 | 0.011362 | 0.011329 | 0.011295 |
| 0.011262 | 0.011295 | 0.011396 | 0.011262 | 0.011295 | 0.011295 | 0.011637 |
| 0.011530 | 0.011295 | 0.011194 | 0.011429 | 0.011362 | 0.011329 | 0.011362 |
| 0.011329 | 0.011429 | 0.011329 | 0.011329 | 0.011362 | 0.011329 | 0.011496 |
| 0.011262 | 0.011329 | 0.011362 | 0.011295 | 0.011396 | 0.011429 | 0.011362 |
| 0.011329 | 0.011496 | 0.011396 | 0.011664 | 0.011329 | 0.011597 | 0.011329 |
| 0.011295 | 0.011396 | 0.011463 | 0.011597 | 0.011698 | 0.011396 | 0.011496 |
| 0.011362 | 0.011429 | 0.011329 | 0.011563 | 0.011799 | 0.011329 | 0.011396 |
| 0.011295 | 0.011362 | 0.011362 | 0.011429 | 0.011362 | 0.011362 | 0.011362 |
| 0.011262 | 0.011295 | 0.011262 | 0.011362 | 0.011329 | 0.011363 | 0.011429 |
| 0.011362 | 0.011329 | 0.011396 | 0.011295 | 0.011429 | 0.011262 | 0.011329 |
| 0.011496 | 0.011429 | 0.011664 | 0.011496 | 0.011329 | 0.011564 | 0.011329 |
| 0.011468 | 0.011695 | 0.011513 | 0.011216 | 0.011210 | 0.011318 | 0.011415 |
| 0.012048 | 0.011518 | 0.011225 | 0.011563 | 0.011564 | 0.011362 | 0.011463 |
| 0.011396 | 0.011362 | 0.011429 | 0.011329 | 0.011429 | 0.011362 | 0.011362 |
| 0.011329 | 0.011429 | 0.011631 | 0.011496 | 0.011396 | 0.011362 | 0.011295 |
| 0.011262 | 0.011262 | 0.011329 | 0.011295 | 0.011497 | 0.011463 | 0.011396 |
| 0.011497 | 0.011564 | 0.011295 | 0.011295 | 0.011329 | 0.011329 | 0.011330 |
| 0.011398 | 0.011329 | 0.011329 | 0.011204 | 0.011277 | 0.011235 | 0.011329 |
| 0.011331 | 0.011266 | 0.011282 | 0.011302 | 0.011230 | 0.011266 | 0.011297 |
| 0.011564 | 0.011336 | 0.011370 | 0.011262 | 0.011268 | 0.011397 | 0.011363 |
| 0.011430 | 0.011363 | 0.011363 | 0.011463 | 0.011396 | 0.011765 | 0.011564 |
| 0.011597 | 0.011463 | 0.011329 | 0.011429 | 0.011228 | 0.011463 | 0.011262 |
| 0.011329 | 0.011329 | 0.011295 | 0.011262 | 0.011295 | 0.011262 | 0.011362 |
| 0.011329 | 0.011429 | 0.011362 | 0.011262 | 0.011363 | 0.011463 | 0.011466 |
| 0.011463 | 0.011362 | 0.011262 | 0.011195 | 0.011329 | 0.011262 | 0.011195 |
| 0.011298 | 0.011463 | 0.011262 | 0.011463 | 0.011228 | 0.011329 | 0.011295 |
| 0.011396 | 0.011295 | 0.011329 | 0.011295 | 0.011329 | 0.011195 | 0.011329 |

|          |          |          |          |          |          |          |
|----------|----------|----------|----------|----------|----------|----------|
| 0.011362 | 0.011295 | 0.011362 | 0.011295 | 0.011329 | 0.011362 | 0.011597 |
| 0.011698 | 0.011631 | 0.011698 | 0.011431 | 0.011698 | 0.011329 | 0.011295 |
| 0.011330 | 0.011586 | 0.011472 | 0.011197 | 0.011705 | 0.011197 | 0.011296 |
| 0.011705 | 0.011604 | 0.011496 | 0.011698 | 0.011402 | 0.011564 | 0.011530 |
| 0.011463 | 0.011631 | 0.011486 | 0.011349 | 0.011312 | 0.011362 | 0.011432 |
| 0.011530 | 0.011431 | 0.011567 | 0.011635 | 0.011564 | 0.011631 | 0.011738 |
| 0.011466 | 0.011637 | 0.011568 | 0.011500 | 0.011766 | 0.011228 | 0.011431 |
| 0.011396 | 0.011329 | 0.011228 | 0.011228 | 0.011295 | 0.011295 | 0.011362 |
| 0.011295 | 0.011362 | 0.011262 | 0.011362 | 0.011295 | 0.011295 | 0.011362 |
| 0.011295 | 0.011731 | 0.011631 | 0.011664 | 0.011194 | 0.011295 | 0.011329 |
| 0.011329 | 0.011295 | 0.011362 | 0.011396 | 0.011262 | 0.011262 | 0.011262 |
| 0.011799 | 0.011429 | 0.011429 | 0.011228 | 0.011329 | 0.011496 | 0.011262 |
| 0.011262 | 0.011329 | 0.011295 | 0.011463 | 0.011262 | 0.011396 | 0.011530 |
| 0.011463 | 0.011295 | 0.011295 | 0.011228 | 0.011228 | 0.011396 | 0.011329 |
| 0.011228 | 0.011329 | 0.011195 | 0.011228 | 0.011362 | 0.011497 | 0.011262 |
| 0.011228 | 0.011362 | 0.011295 | 0.011195 | 0.011530 | 0.011195 | 0.011362 |
| 0.011437 | 0.011262 | 0.011564 | 0.011396 | 0.011429 | 0.011295 | 0.011396 |
| 0.011262 | 0.011597 | 0.011194 | 0.011463 | 0.011262 | 0.011262 | 0.011194 |
| 0.011429 | 0.011631 | 0.011329 | 0.011396 | 0.011228 | 0.011631 | 0.011262 |
| 0.011262 | 0.011262 | 0.011295 | 0.011396 | 0.011295 | 0.011396 | 0.011463 |
| 0.011463 | 0.011429 | 0.011329 | 0.011429 | 0.011396 | 0.011262 | 0.011228 |
| 0.011262 | 0.011262 | 0.011329 | 0.011262 | 0.011228 | 0.011329 | 0.011262 |
| 0.011295 | 0.011295 | 0.011429 | 0.011463 | 0.011362 | 0.011295 | 0.011295 |
| 0.011362 | 0.011295 | 0.011396 | 0.011262 | 0.011396 | 0.011496 | 0.011799 |
| 0.011295 | 0.011698 | 0.011267 | 0.017785 | 0.011322 | 0.011366 | 0.011618 |
| 0.011579 | 0.011623 | 0.011374 | 0.011292 | 0.011774 | 0.011647 | 0.011425 |
| 0.011534 | 0.011610 | 0.011177 | 0.011228 | 0.011216 | 0.011356 | 0.011275 |
| 0.011529 | 0.011433 | 0.011431 | 0.011259 | 0.011429 | 0.011463 | 0.011466 |
| 0.011335 | 0.011429 | 0.011429 | 0.011396 | 0.011362 | 0.011362 | 0.011329 |
| 0.011362 | 0.011295 | 0.011329 | 0.011362 | 0.011329 | 0.011262 | 0.011295 |
| 0.011295 | 0.011362 | 0.011262 | 0.011362 | 0.011396 | 0.011429 | 0.011329 |
| 0.011362 | 0.011329 | 0.011665 | 0.011665 | 0.011396 | 0.011430 | 0.011463 |
| 0.011228 | 0.011228 | 0.011262 | 0.011362 | 0.011228 | 0.011463 | 0.011463 |
| 0.011497 | 0.011496 | 0.011429 | 0.011530 | 0.011698 | 0.011531 | 0.011362 |
| 0.011362 | 0.011429 | 0.011463 | 0.011295 | 0.011362 | 0.011329 | 0.011362 |
| 0.011430 | 0.011430 | 0.011463 | 0.011430 | 0.011330 | 0.011530 | 0.011497 |
| 0.011365 | 0.011262 | 0.011362 | 0.011463 | 0.011362 | 0.011497 | 0.011530 |
| 0.011698 | 0.011402 | 0.011564 | 0.011530 | 0.011463 | 0.011631 | 0.011262 |
| 0.011431 | 0.011329 | 0.011295 | 0.011295 | 0.011362 | 0.011262 | 0.011362 |
| 0.011396 | 0.011429 | 0.011329 | 0.011362 | 0.011329 | 0.011665 | 0.011665 |
| 0.011396 | 0.011430 | 0.011496 | 0.011429 | 0.012069 | 0.011489 | 0.011412 |
| 0.011482 | 0.011441 | 0.011552 | 0.011441 | 0.011550 | 0.011474 | 0.011439 |
| 0.012021 | 0.011337 | 0.011471 | 0.011406 | 0.011680 | 0.011536 | 0.011638 |
| 0.012046 | 0.011512 | 0.011601 | 0.011664 | 0.011530 | 0.011530 | 0.011567 |
| 0.011228 | 0.011396 | 0.011530 | 0.011496 | 0.011499 | 0.011496 | 0.011464 |
| 0.000000 | 0.011262 | 0.011295 | 0.011329 | 0.011228 | 0.011295 | 0.011194 |
| 0.011329 | 0.011362 | 0.011262 | 0.011228 | 0.011329 | 0.011262 | 0.011295 |
| 0.011295 | 0.011228 | 0.011295 | 0.011329 | 0.011228 | 0.011429 | 0.011463 |
| 0.011362 | 0.011429 | 0.011362 | 0.011362 | 0.011295 | 0.011698 | 0.011329 |
| 0.011373 | 0.011295 | 0.011530 | 0.011535 | 0.011396 | 0.011396 | 0.011396 |
| 0.011396 | 0.011329 | 0.011295 | 0.011329 | 0.011429 | 0.011429 | 0.011362 |
| 0.011362 | 0.011429 | 0.011664 | 0.011396 | 0.011597 | 0.011597 | 0.011463 |
| 0.011295 | 0.011362 | 0.011396 | 0.011799 | 0.011362 | 0.011396 | 0.011362 |
| 0.011396 | 0.011329 | 0.011329 | 0.011631 | 0.011564 | 0.011597 | 0.011329 |
| 0.011429 | 0.011496 | 0.011362 | 0.011429 | 0.011396 | 0.011262 | 0.011597 |
| 0.011362 | 0.011329 | 0.011329 | 0.011496 | 0.011329 | 0.011429 | 0.011664 |
| 0.011362 | 0.011739 | 0.011731 | 0.011507 | 0.011286 | 0.011434 | 0.011318 |
| 0.011280 | 0.011722 | 0.011236 | 0.011462 | 0.011304 | 0.011416 | 0.011432 |
| 0.011519 | 0.011192 | 0.011394 | 0.011258 | 0.011276 | 0.011462 | 0.011385 |
| 0.011399 | 0.011296 | 0.011377 | 0.011307 | 0.011363 | 0.011497 | 0.011564 |

|          |          |          |          |          |          |          |
|----------|----------|----------|----------|----------|----------|----------|
| 0.011564 | 0.011430 | 0.011533 | 0.011535 | 0.011670 | 0.011696 | 0.011362 |
| 0.011597 | 0.011463 | 0.011329 | 0.011429 | 0.011228 | 0.011463 | 0.011262 |
| 0.011329 | 0.011329 | 0.011295 | 0.011262 | 0.011295 | 0.011262 | 0.011362 |
| 0.011340 | 0.011340 | 0.011334 | 0.011368 | 0.011505 | 0.011470 | 0.011470 |
| 0.011469 | 0.011396 | 0.011208 | 0.011204 | 0.011331 | 0.011501 | 0.011501 |
| 0.011296 | 0.011365 | 0.011599 | 0.011567 | 0.011497 | 0.011531 | 0.011463 |
| 0.011396 | 0.011463 | 0.011463 | 0.011362 | 0.011866 | 0.011530 | 0.011597 |
| 0.011631 | 0.011701 | 0.011333 | 0.011407 | 0.011295 | 0.011497 | 0.011463 |
| 0.011497 | 0.011530 | 0.011530 | 0.011530 | 0.011689 | 0.011664 | 0.011303 |
| 0.011195 | 0.011199 | 0.011298 | 0.011264 | 0.011368 | 0.011209 | 0.011536 |
| 0.011334 | 0.011411 | 0.011156 | 0.011360 | 0.011329 | 0.011402 | 0.011295 |
| 0.011262 | 0.011262 | 0.011329 | 0.011295 | 0.011497 | 0.011463 | 0.011396 |
| 0.011497 | 0.011564 | 0.011295 | 0.011295 | 0.011329 | 0.011329 | 0.011330 |
| 0.011398 | 0.011329 | 0.011329 | 0.011363 | 0.011497 | 0.011564 | 0.011564 |
| 0.011430 | 0.011533 | 0.011535 | 0.011670 | 0.011696 | 0.011362 | 0.011530 |
| 0.011463 | 0.011463 | 0.011297 | 0.011478 | 0.011408 | 0.011435 | 0.011235 |
| 0.011473 | 0.011653 | 0.011399 | 0.011366 | 0.011262 | 0.011463 | 0.011329 |
| 0.011429 | 0.011362 | 0.011262 | 0.011363 | 0.011463 | 0.011466 | 0.011362 |
| 0.011262 | 0.011195 | 0.011329 | 0.011262 | 0.011195 | 0.011298 | 0.011463 |
| 0.011362 | 0.011295 | 0.011329 | 0.011362 | 0.011329 | 0.011262 | 0.011463 |
| 0.011329 | 0.011362 | 0.011362 | 0.011295 | 0.011362 | 0.011597 | 0.011262 |
| 0.011295 | 0.011698 | 0.011295 | 0.011329 | 0.011295 | 0.011664 | 0.011232 |
| 0.011734 | 0.011230 | 0.011311 | 0.011463 | 0.011549 | 0.011455 | 0.011186 |
| 0.011270 | 0.011463 | 0.011564 | 0.011671 | 0.011531 | 0.011635 | 0.011800 |
| 0.011699 | 0.011737 | 0.011631 | 0.011914 | 0.011664 | 0.012539 | 0.011700 |
| 0.012439 | 0.012207 | 0.012341 | 0.012612 | 0.011664 | 0.011362 | 0.011665 |
| 0.012103 | 0.012004 | 0.011631 | 0.011530 | 0.011598 | 0.011598 | 0.011567 |
| 0.011463 | 0.011433 | 0.011530 | 0.011497 | 0.011867 | 0.011933 | 0.011867 |
| 0.011834 | 0.011934 | 0.012038 | 0.011770 | 0.012104 | 0.012110 | 0.012171 |
| 0.012171 | 0.012205 | 0.012118 | 0.012171 | 0.012173 | 0.011396 | 0.011699 |
| 0.011766 | 0.012270 | 0.011772 | 0.012001 | 0.012474 | 0.011536 | 0.011430 |
| 0.011396 | 0.011396 | 0.011867 | 0.011924 | 0.012010 | 0.011731 | 0.011397 |
| S526     | 0.011597 | 0.011597 | 0.011933 | 0.011698 | 0.011698 | 0.011765 |
| 0.011603 | 0.011535 | 0.011765 | 0.011195 | 0.011262 | 0.011228 | 0.011194 |
| 0.011228 | 0.011396 | 0.011194 | 0.011228 | 0.011295 | 0.011262 | 0.011161 |
| 0.011194 | 0.011228 | 0.011329 | 0.011195 | 0.011161 | 0.011228 | 0.011569 |
| 0.011463 | 0.011228 | 0.011127 | 0.011362 | 0.011228 | 0.011262 | 0.011228 |
| 0.011262 | 0.011295 | 0.011262 | 0.011262 | 0.011295 | 0.011262 | 0.011429 |
| 0.011194 | 0.011262 | 0.011295 | 0.011228 | 0.011329 | 0.011362 | 0.011295 |
| 0.011262 | 0.011429 | 0.011329 | 0.011597 | 0.011262 | 0.011463 | 0.011262 |
| 0.011228 | 0.011329 | 0.011396 | 0.011463 | 0.011631 | 0.011329 | 0.011429 |
| 0.011228 | 0.011295 | 0.011262 | 0.011429 | 0.011732 | 0.011262 | 0.011329 |
| 0.011228 | 0.011329 | 0.011295 | 0.011362 | 0.011295 | 0.011295 | 0.011295 |
| 0.011194 | 0.011228 | 0.011194 | 0.011295 | 0.011262 | 0.011296 | 0.011362 |
| 0.011295 | 0.011262 | 0.011262 | 0.011228 | 0.011362 | 0.011127 | 0.011262 |
| 0.011429 | 0.011362 | 0.011597 | 0.011429 | 0.011262 | 0.011429 | 0.011262 |
| 0.011431 | 0.011658 | 0.011475 | 0.011177 | 0.011172 | 0.011281 | 0.011375 |
| 0.012011 | 0.011416 | 0.011102 | 0.011496 | 0.011496 | 0.011295 | 0.011396 |
| 0.011329 | 0.011295 | 0.011362 | 0.011262 | 0.011362 | 0.011228 | 0.011295 |
| 0.011262 | 0.011362 | 0.011564 | 0.011429 | 0.011329 | 0.011295 | 0.011161 |
| 0.011195 | 0.011195 | 0.011195 | 0.011228 | 0.011429 | 0.011396 | 0.011329 |
| 0.011429 | 0.011497 | 0.011228 | 0.011228 | 0.011262 | 0.011262 | 0.011263 |
| 0.011331 | 0.011262 | 0.011262 | 0.011096 | 0.011205 | 0.011165 | 0.011262 |
| 0.011263 | 0.011198 | 0.011245 | 0.011233 | 0.011162 | 0.011197 | 0.011229 |
| 0.011492 | 0.011267 | 0.011232 | 0.011128 | 0.011199 | 0.011329 | 0.011296 |
| 0.011363 | 0.011296 | 0.011296 | 0.011396 | 0.011329 | 0.011631 | 0.011497 |
| 0.011530 | 0.011396 | 0.011262 | 0.011362 | 0.011161 | 0.011396 | 0.011195 |
| 0.011262 | 0.011262 | 0.011228 | 0.011194 | 0.011228 | 0.011195 | 0.011295 |
| 0.011195 | 0.011295 | 0.011295 | 0.011195 | 0.011296 | 0.011396 | 0.011398 |
| 0.011329 | 0.011295 | 0.011195 | 0.011128 | 0.011262 | 0.011195 | 0.011127 |

|          |          |          |          |          |          |          |
|----------|----------|----------|----------|----------|----------|----------|
| 0.011162 | 0.011329 | 0.011127 | 0.011329 | 0.011161 | 0.011262 | 0.011228 |
| 0.011262 | 0.011228 | 0.011195 | 0.011228 | 0.011262 | 0.011127 | 0.011195 |
| 0.011228 | 0.011161 | 0.011295 | 0.011228 | 0.011262 | 0.011295 | 0.011530 |
| 0.011631 | 0.011564 | 0.011631 | 0.011397 | 0.011631 | 0.011262 | 0.011161 |
| 0.011263 | 0.011505 | 0.011335 | 0.011163 | 0.011637 | 0.011129 | 0.011257 |
| 0.011637 | 0.011536 | 0.011429 | 0.011631 | 0.011333 | 0.011496 | 0.011396 |
| 0.011396 | 0.011564 | 0.011415 | 0.011266 | 0.011270 | 0.011228 | 0.011365 |
| 0.011463 | 0.011364 | 0.011500 | 0.011500 | 0.011497 | 0.011564 | 0.011670 |
| 0.011399 | 0.011501 | 0.011500 | 0.011432 | 0.011699 | 0.011161 | 0.011363 |
| 0.011262 | 0.011262 | 0.011161 | 0.011161 | 0.011161 | 0.011228 | 0.011295 |
| 0.011161 | 0.011228 | 0.011127 | 0.011295 | 0.011161 | 0.011161 | 0.011295 |
| 0.011228 | 0.011664 | 0.011564 | 0.011597 | 0.011127 | 0.011228 | 0.011262 |
| 0.011262 | 0.011228 | 0.011295 | 0.011329 | 0.011194 | 0.011194 | 0.011194 |
| 0.011731 | 0.011362 | 0.011362 | 0.011161 | 0.011262 | 0.011362 | 0.011194 |
| 0.011194 | 0.011262 | 0.011228 | 0.011329 | 0.011194 | 0.011329 | 0.011396 |
| 0.011396 | 0.011228 | 0.011161 | 0.011161 | 0.011161 | 0.011329 | 0.011262 |
| 0.011161 | 0.011262 | 0.011127 | 0.011161 | 0.011295 | 0.011430 | 0.011195 |
| 0.011161 | 0.011295 | 0.011228 | 0.011127 | 0.011463 | 0.011127 | 0.011295 |
| 0.011300 | 0.011195 | 0.011496 | 0.011329 | 0.011362 | 0.011228 | 0.011329 |
| 0.011194 | 0.011463 | 0.011127 | 0.011396 | 0.011194 | 0.011194 | 0.011127 |
| 0.011295 | 0.011564 | 0.011262 | 0.011329 | 0.011161 | 0.011564 | 0.011194 |
| 0.011194 | 0.011127 | 0.011228 | 0.011262 | 0.011228 | 0.011329 | 0.011396 |
| 0.011396 | 0.011362 | 0.011262 | 0.011362 | 0.011262 | 0.011194 | 0.011161 |
| 0.011194 | 0.011194 | 0.011262 | 0.011194 | 0.011094 | 0.011329 | 0.011194 |
| 0.011228 | 0.011228 | 0.011362 | 0.011396 | 0.011295 | 0.011161 | 0.011228 |
| 0.011295 | 0.011228 | 0.011329 | 0.011194 | 0.011329 | 0.011429 | 0.011732 |
| 0.011228 | 0.011631 | 0.011233 | 0.017747 | 0.011191 | 0.011427 | 0.011583 |
| 0.011545 | 0.011588 | 0.011270 | 0.011234 | 0.011664 | 0.011612 | 0.011303 |
| 0.011440 | 0.011548 | 0.011138 | 0.011186 | 0.011177 | 0.011307 | 0.011232 |
| 0.011436 | 0.011395 | 0.011357 | 0.011126 | 0.011362 | 0.011396 | 0.011398 |
| 0.011198 | 0.011362 | 0.011362 | 0.011329 | 0.011295 | 0.011295 | 0.011262 |
| 0.011295 | 0.011228 | 0.011262 | 0.011295 | 0.011262 | 0.011195 | 0.011228 |
| 0.011228 | 0.011295 | 0.011195 | 0.011295 | 0.011329 | 0.011362 | 0.011262 |
| 0.011295 | 0.011262 | 0.011597 | 0.011597 | 0.011329 | 0.011363 | 0.011396 |
| 0.011161 | 0.011161 | 0.011195 | 0.011228 | 0.011161 | 0.011396 | 0.011396 |
| 0.011429 | 0.011429 | 0.011362 | 0.011463 | 0.011631 | 0.011464 | 0.011228 |
| 0.011295 | 0.011362 | 0.011329 | 0.011228 | 0.011295 | 0.011262 | 0.011295 |
| 0.011363 | 0.011362 | 0.011396 | 0.011295 | 0.011195 | 0.011463 | 0.011362 |
| 0.011297 | 0.011195 | 0.011295 | 0.011396 | 0.011295 | 0.011430 | 0.011463 |
| 0.011631 | 0.011333 | 0.011496 | 0.011396 | 0.011396 | 0.011564 | 0.011195 |
| 0.011363 | 0.011262 | 0.011228 | 0.011228 | 0.011295 | 0.011195 | 0.011295 |
| 0.011329 | 0.011362 | 0.011262 | 0.011295 | 0.011262 | 0.011597 | 0.011597 |
| 0.011329 | 0.011363 | 0.011429 | 0.011362 | 0.012002 | 0.011417 | 0.011341 |
| 0.011412 | 0.011372 | 0.011482 | 0.011372 | 0.011480 | 0.011405 | 0.011370 |
| 0.011953 | 0.011268 | 0.011403 | 0.011337 | 0.011611 | 0.011468 | 0.011502 |
| 0.011978 | 0.011399 | 0.011533 | 0.011597 | 0.011463 | 0.011463 | 0.011499 |
| 0.011161 | 0.011262 | 0.011463 | 0.011429 | 0.011432 | 0.011429 | 0.011397 |
| 0.011262 | 0.000000 | 0.011161 | 0.011262 | 0.011094 | 0.011228 | 0.011127 |
| 0.011262 | 0.011295 | 0.011194 | 0.011161 | 0.011262 | 0.011194 | 0.011228 |
| 0.011228 | 0.011161 | 0.011228 | 0.011262 | 0.011161 | 0.011295 | 0.011396 |
| 0.011295 | 0.011362 | 0.011295 | 0.011295 | 0.011228 | 0.011631 | 0.011262 |
| 0.011304 | 0.011228 | 0.011463 | 0.011467 | 0.011262 | 0.011329 | 0.011329 |
| 0.011329 | 0.011194 | 0.011228 | 0.011194 | 0.011362 | 0.011362 | 0.011295 |
| 0.011295 | 0.011429 | 0.011597 | 0.011329 | 0.011530 | 0.011530 | 0.011396 |
| 0.011228 | 0.011295 | 0.011329 | 0.011732 | 0.011295 | 0.011262 | 0.011295 |
| 0.011329 | 0.011262 | 0.011262 | 0.011564 | 0.011429 | 0.011530 | 0.011262 |
| 0.011362 | 0.011429 | 0.011295 | 0.011362 | 0.011329 | 0.011194 | 0.011530 |
| 0.011295 | 0.011262 | 0.011262 | 0.011429 | 0.011262 | 0.011362 | 0.011597 |
| 0.011295 | 0.011671 | 0.011664 | 0.011467 | 0.011173 | 0.011366 | 0.011215 |
| 0.011225 | 0.011683 | 0.011201 | 0.011417 | 0.011207 | 0.011366 | 0.011326 |

|          |          |          |          |          |          |          |
|----------|----------|----------|----------|----------|----------|----------|
| 0.011417 | 0.011126 | 0.011283 | 0.011126 | 0.011168 | 0.011328 | 0.011303 |
| 0.011324 | 0.011178 | 0.011342 | 0.011272 | 0.011296 | 0.011429 | 0.011497 |
| 0.011497 | 0.011363 | 0.011466 | 0.011467 | 0.011602 | 0.011626 | 0.011295 |
| 0.011530 | 0.011396 | 0.011262 | 0.011362 | 0.011161 | 0.011396 | 0.011195 |
| 0.011262 | 0.011262 | 0.011228 | 0.011194 | 0.011228 | 0.011195 | 0.011295 |
| 0.011270 | 0.011270 | 0.011197 | 0.011300 | 0.011437 | 0.011333 | 0.011402 |
| 0.011401 | 0.011329 | 0.011134 | 0.011132 | 0.011263 | 0.011433 | 0.011433 |
| 0.011228 | 0.011297 | 0.011531 | 0.011500 | 0.011430 | 0.011464 | 0.011396 |
| 0.011329 | 0.011396 | 0.011396 | 0.011295 | 0.011866 | 0.011463 | 0.011530 |
| 0.011564 | 0.011630 | 0.011265 | 0.011337 | 0.011228 | 0.011429 | 0.011396 |
| 0.011430 | 0.011463 | 0.011463 | 0.011463 | 0.011571 | 0.011597 | 0.011234 |
| 0.011128 | 0.011130 | 0.011230 | 0.011196 | 0.011299 | 0.011098 | 0.011468 |
| 0.011197 | 0.011323 | 0.000000 | 0.011248 | 0.011262 | 0.011334 | 0.011161 |
| 0.011195 | 0.011195 | 0.011195 | 0.011228 | 0.011429 | 0.011396 | 0.011329 |
| 0.011429 | 0.011497 | 0.011228 | 0.011228 | 0.011262 | 0.011262 | 0.011263 |
| 0.011331 | 0.011262 | 0.011262 | 0.011296 | 0.011429 | 0.011497 | 0.011497 |
| 0.011363 | 0.011466 | 0.011467 | 0.011602 | 0.011626 | 0.011295 | 0.011463 |
| 0.011396 | 0.011396 | 0.011229 | 0.011408 | 0.011338 | 0.011367 | 0.011235 |
| 0.011336 | 0.011561 | 0.011357 | 0.011298 | 0.011127 | 0.011329 | 0.011195 |
| 0.011295 | 0.011295 | 0.011195 | 0.011296 | 0.011396 | 0.011398 | 0.011295 |
| 0.011195 | 0.011128 | 0.011262 | 0.011195 | 0.011127 | 0.011162 | 0.011329 |
| 0.011295 | 0.011228 | 0.011262 | 0.011295 | 0.011262 | 0.011195 | 0.011396 |
| 0.011262 | 0.011295 | 0.011295 | 0.011228 | 0.011295 | 0.011530 | 0.011194 |
| 0.011228 | 0.011631 | 0.011228 | 0.011194 | 0.011228 | 0.011597 | 0.011189 |
| 0.011622 | 0.011188 | 0.011211 | 0.011422 | 0.011508 | 0.011419 | 0.011144 |
| 0.011165 | 0.011396 | 0.011496 | 0.011603 | 0.011464 | 0.011601 | 0.011733 |
| 0.011632 | 0.011669 | 0.011631 | 0.011880 | 0.011597 | 0.012472 | 0.011633 |
| 0.012372 | 0.012139 | 0.012273 | 0.012545 | 0.011597 | 0.011295 | 0.011598 |
| 0.012036 | 0.011971 | 0.011564 | 0.011463 | 0.011531 | 0.011531 | 0.011500 |
| 0.011396 | 0.011399 | 0.011463 | 0.011430 | 0.011800 | 0.011866 | 0.011867 |
| 0.011766 | 0.011867 | 0.011970 | 0.011737 | 0.012036 | 0.012042 | 0.012104 |
| 0.012104 | 0.012138 | 0.012084 | 0.012104 | 0.012105 | 0.011329 | 0.011631 |
| 0.011699 | 0.012202 | 0.011704 | 0.011933 | 0.012406 | 0.011468 | 0.011363 |
| 0.011329 | 0.011329 | 0.011799 | 0.011800 | 0.011940 | 0.011664 | 0.011330 |
| S527     | 0.011631 | 0.011631 | 0.011967 | 0.011732 | 0.011732 | 0.011799 |
| 0.011637 | 0.011569 | 0.011799 | 0.011228 | 0.011295 | 0.011262 | 0.011228 |
| 0.011262 | 0.011429 | 0.011228 | 0.011262 | 0.011329 | 0.011295 | 0.011262 |
| 0.011228 | 0.011262 | 0.011362 | 0.011228 | 0.011195 | 0.011262 | 0.011603 |
| 0.011496 | 0.011262 | 0.011161 | 0.011396 | 0.011262 | 0.011295 | 0.011262 |
| 0.011295 | 0.011329 | 0.011295 | 0.011295 | 0.011329 | 0.011295 | 0.011463 |
| 0.011228 | 0.011295 | 0.011329 | 0.011262 | 0.011362 | 0.011396 | 0.011329 |
| 0.011295 | 0.011463 | 0.011362 | 0.011631 | 0.011295 | 0.011496 | 0.011295 |
| 0.011262 | 0.011362 | 0.011429 | 0.011496 | 0.011664 | 0.011362 | 0.011463 |
| 0.011262 | 0.011329 | 0.011295 | 0.011463 | 0.011765 | 0.011295 | 0.011362 |
| 0.011262 | 0.011362 | 0.011329 | 0.011396 | 0.011329 | 0.011329 | 0.011329 |
| 0.011228 | 0.011262 | 0.011228 | 0.011329 | 0.011295 | 0.011329 | 0.011396 |
| 0.011329 | 0.011295 | 0.011295 | 0.011262 | 0.011396 | 0.011161 | 0.011295 |
| 0.011463 | 0.011396 | 0.011631 | 0.011463 | 0.011295 | 0.011463 | 0.011295 |
| 0.011468 | 0.011695 | 0.011513 | 0.011216 | 0.011210 | 0.011281 | 0.011415 |
| 0.012048 | 0.011467 | 0.011225 | 0.011530 | 0.011530 | 0.011329 | 0.011429 |
| 0.011362 | 0.011329 | 0.011396 | 0.011295 | 0.011396 | 0.011262 | 0.011329 |
| 0.011295 | 0.011396 | 0.011597 | 0.011463 | 0.011362 | 0.011329 | 0.011195 |
| 0.011228 | 0.011228 | 0.011228 | 0.011262 | 0.011463 | 0.011429 | 0.011362 |
| 0.011463 | 0.011530 | 0.011262 | 0.011262 | 0.011295 | 0.011295 | 0.011297 |
| 0.011364 | 0.011295 | 0.011295 | 0.011132 | 0.011241 | 0.011200 | 0.011296 |
| 0.011297 | 0.011232 | 0.011282 | 0.011267 | 0.011196 | 0.011232 | 0.011263 |
| 0.011528 | 0.011302 | 0.011267 | 0.011228 | 0.011233 | 0.011363 | 0.011329 |
| 0.011397 | 0.011330 | 0.011329 | 0.011429 | 0.011362 | 0.011664 | 0.011530 |
| 0.011564 | 0.011430 | 0.011295 | 0.011396 | 0.011195 | 0.011429 | 0.011228 |
| 0.011295 | 0.011295 | 0.011262 | 0.011228 | 0.011262 | 0.011228 | 0.011329 |

|          |          |          |          |          |          |          |
|----------|----------|----------|----------|----------|----------|----------|
| 0.011228 | 0.011329 | 0.011329 | 0.011228 | 0.011330 | 0.011430 | 0.011432 |
| 0.011362 | 0.011329 | 0.011228 | 0.011161 | 0.011295 | 0.011228 | 0.011161 |
| 0.011264 | 0.011362 | 0.011161 | 0.011362 | 0.011195 | 0.011295 | 0.011262 |
| 0.011295 | 0.011262 | 0.011228 | 0.011262 | 0.011295 | 0.011161 | 0.011228 |
| 0.011262 | 0.011262 | 0.011329 | 0.011262 | 0.011295 | 0.011329 | 0.011564 |
| 0.011664 | 0.011597 | 0.011665 | 0.011431 | 0.011665 | 0.011295 | 0.011262 |
| 0.011297 | 0.011545 | 0.011380 | 0.011197 | 0.011671 | 0.011163 | 0.011296 |
| 0.011671 | 0.011570 | 0.011463 | 0.011664 | 0.011367 | 0.011530 | 0.011429 |
| 0.011429 | 0.011597 | 0.011451 | 0.011266 | 0.011270 | 0.011329 | 0.011398 |
| 0.011497 | 0.011397 | 0.011533 | 0.011534 | 0.011530 | 0.011597 | 0.011704 |
| 0.011432 | 0.011535 | 0.011534 | 0.011466 | 0.011733 | 0.011194 | 0.011397 |
| 0.011295 | 0.011295 | 0.011194 | 0.011194 | 0.011194 | 0.011262 | 0.011329 |
| 0.011194 | 0.011262 | 0.011161 | 0.011329 | 0.011194 | 0.011262 | 0.011329 |
| 0.011262 | 0.011698 | 0.011597 | 0.011631 | 0.011161 | 0.011262 | 0.011295 |
| 0.011295 | 0.011262 | 0.011329 | 0.011362 | 0.011228 | 0.011228 | 0.011228 |
| 0.011765 | 0.011396 | 0.011396 | 0.011194 | 0.011295 | 0.011396 | 0.011228 |
| 0.011228 | 0.011295 | 0.011262 | 0.011362 | 0.011228 | 0.011362 | 0.011429 |
| 0.011429 | 0.011262 | 0.011262 | 0.011194 | 0.011194 | 0.011362 | 0.011295 |
| 0.011194 | 0.011295 | 0.011161 | 0.011194 | 0.011329 | 0.011463 | 0.011228 |
| 0.011195 | 0.011329 | 0.011262 | 0.011161 | 0.011496 | 0.011161 | 0.011329 |
| 0.011334 | 0.011228 | 0.011530 | 0.011362 | 0.011396 | 0.011262 | 0.011362 |
| 0.011228 | 0.011496 | 0.011161 | 0.011429 | 0.011228 | 0.011228 | 0.011161 |
| 0.011329 | 0.011597 | 0.011295 | 0.011362 | 0.011194 | 0.011597 | 0.011228 |
| 0.011228 | 0.011228 | 0.011262 | 0.011295 | 0.011262 | 0.011362 | 0.011429 |
| 0.011429 | 0.011396 | 0.011295 | 0.011396 | 0.011295 | 0.011228 | 0.011194 |
| 0.011228 | 0.011228 | 0.011295 | 0.011228 | 0.011127 | 0.011362 | 0.011228 |
| 0.011262 | 0.011262 | 0.011396 | 0.011429 | 0.011329 | 0.011194 | 0.011262 |
| 0.011329 | 0.011262 | 0.011362 | 0.011228 | 0.011362 | 0.011463 | 0.011765 |
| 0.011262 | 0.011664 | 0.011267 | 0.011785 | 0.011191 | 0.011366 | 0.011618 |
| 0.011579 | 0.011623 | 0.011322 | 0.011234 | 0.011664 | 0.011647 | 0.011303 |
| 0.011487 | 0.011549 | 0.011177 | 0.011186 | 0.011177 | 0.011307 | 0.011275 |
| 0.011482 | 0.011433 | 0.011394 | 0.011259 | 0.011396 | 0.011429 | 0.011432 |
| 0.011232 | 0.011396 | 0.011396 | 0.011362 | 0.011329 | 0.011329 | 0.011295 |
| 0.011329 | 0.011262 | 0.011295 | 0.011329 | 0.011295 | 0.011228 | 0.011262 |
| 0.011262 | 0.011329 | 0.011228 | 0.011329 | 0.011362 | 0.011396 | 0.011295 |
| 0.011329 | 0.011295 | 0.011631 | 0.011631 | 0.011362 | 0.011396 | 0.011430 |
| 0.011195 | 0.011195 | 0.011228 | 0.011262 | 0.011195 | 0.011430 | 0.011430 |
| 0.011463 | 0.011463 | 0.011396 | 0.011497 | 0.011665 | 0.011498 | 0.011262 |
| 0.011329 | 0.011396 | 0.011362 | 0.011262 | 0.011329 | 0.011295 | 0.011329 |
| 0.011396 | 0.011396 | 0.011429 | 0.011329 | 0.011195 | 0.011497 | 0.011396 |
| 0.011331 | 0.011228 | 0.011329 | 0.011430 | 0.011329 | 0.011463 | 0.011496 |
| 0.011664 | 0.011367 | 0.011530 | 0.011429 | 0.011429 | 0.011597 | 0.011228 |
| 0.011397 | 0.011295 | 0.011262 | 0.011262 | 0.011329 | 0.011228 | 0.011329 |
| 0.011362 | 0.011396 | 0.011295 | 0.011329 | 0.011295 | 0.011631 | 0.011631 |
| 0.011362 | 0.011396 | 0.011463 | 0.011396 | 0.012036 | 0.011453 | 0.011377 |
| 0.011447 | 0.011407 | 0.011517 | 0.011406 | 0.011515 | 0.011439 | 0.011405 |
| 0.011987 | 0.011302 | 0.011437 | 0.011371 | 0.011645 | 0.011502 | 0.011536 |
| 0.012012 | 0.011437 | 0.011567 | 0.011631 | 0.011496 | 0.011497 | 0.011533 |
| 0.011194 | 0.011295 | 0.011496 | 0.011463 | 0.011466 | 0.011463 | 0.011431 |
| 0.011295 | 0.011161 | 0.000000 | 0.011295 | 0.011127 | 0.011262 | 0.011161 |
| 0.011295 | 0.011329 | 0.011228 | 0.011194 | 0.011295 | 0.011228 | 0.011262 |
| 0.011262 | 0.011194 | 0.011262 | 0.011295 | 0.011194 | 0.011329 | 0.011429 |
| 0.011329 | 0.011396 | 0.011329 | 0.011329 | 0.011262 | 0.011664 | 0.011295 |
| 0.011338 | 0.011262 | 0.011497 | 0.011501 | 0.011295 | 0.011362 | 0.011362 |
| 0.011362 | 0.011228 | 0.011262 | 0.011228 | 0.011396 | 0.011396 | 0.011329 |
| 0.011329 | 0.011463 | 0.011631 | 0.011362 | 0.011564 | 0.011564 | 0.011429 |
| 0.011262 | 0.011329 | 0.011362 | 0.011765 | 0.011329 | 0.011295 | 0.011329 |
| 0.011362 | 0.011295 | 0.011295 | 0.011597 | 0.011463 | 0.011564 | 0.011295 |
| 0.011396 | 0.011463 | 0.011329 | 0.011396 | 0.011362 | 0.011228 | 0.011564 |
| 0.011329 | 0.011295 | 0.011295 | 0.011463 | 0.011295 | 0.011396 | 0.011631 |

|          |          |          |          |          |          |          |
|----------|----------|----------|----------|----------|----------|----------|
| 0.011329 | 0.011705 | 0.011698 | 0.011507 | 0.011229 | 0.011400 | 0.011267 |
| 0.011225 | 0.011722 | 0.011236 | 0.011462 | 0.011207 | 0.011417 | 0.011326 |
| 0.011468 | 0.011126 | 0.011283 | 0.011126 | 0.011168 | 0.011328 | 0.011344 |
| 0.011362 | 0.011218 | 0.011377 | 0.011307 | 0.011330 | 0.011463 | 0.011530 |
| 0.011530 | 0.011396 | 0.011500 | 0.011501 | 0.011636 | 0.011626 | 0.011329 |
| 0.011564 | 0.011430 | 0.011295 | 0.011396 | 0.011195 | 0.011429 | 0.011228 |
| 0.011295 | 0.011295 | 0.011262 | 0.011228 | 0.011262 | 0.011228 | 0.011329 |
| 0.011305 | 0.011305 | 0.011300 | 0.011334 | 0.011471 | 0.011368 | 0.011436 |
| 0.011435 | 0.011363 | 0.011171 | 0.011168 | 0.011297 | 0.011467 | 0.011467 |
| 0.011262 | 0.011331 | 0.011565 | 0.011533 | 0.011464 | 0.011498 | 0.011429 |
| 0.011362 | 0.011429 | 0.011429 | 0.011329 | 0.011832 | 0.011497 | 0.011564 |
| 0.011597 | 0.011665 | 0.011299 | 0.011372 | 0.011262 | 0.011463 | 0.011429 |
| 0.011464 | 0.011496 | 0.011496 | 0.011496 | 0.011650 | 0.011631 | 0.011268 |
| 0.011162 | 0.011164 | 0.011264 | 0.011230 | 0.011333 | 0.011172 | 0.011502 |
| 0.011300 | 0.011323 | 0.000000 | 0.011285 | 0.011296 | 0.011368 | 0.011195 |
| 0.011228 | 0.011228 | 0.011228 | 0.011262 | 0.011463 | 0.011429 | 0.011362 |
| 0.011463 | 0.011530 | 0.011262 | 0.011262 | 0.011295 | 0.011295 | 0.011297 |
| 0.011364 | 0.011295 | 0.011295 | 0.011330 | 0.011463 | 0.011530 | 0.011530 |
| 0.011396 | 0.011500 | 0.011501 | 0.011636 | 0.011626 | 0.011329 | 0.011496 |
| 0.011429 | 0.011429 | 0.011263 | 0.011443 | 0.011373 | 0.011401 | 0.011270 |
| 0.011370 | 0.011607 | 0.011399 | 0.011332 | 0.011161 | 0.011362 | 0.011228 |
| 0.011329 | 0.011329 | 0.011228 | 0.011330 | 0.011430 | 0.011432 | 0.011329 |
| 0.011228 | 0.011161 | 0.011295 | 0.011228 | 0.011161 | 0.011264 | 0.011362 |
| 0.011329 | 0.011262 | 0.011295 | 0.011329 | 0.011295 | 0.011228 | 0.011430 |
| 0.011295 | 0.011329 | 0.011329 | 0.011262 | 0.011329 | 0.011564 | 0.011228 |
| 0.011262 | 0.011664 | 0.011262 | 0.011228 | 0.011262 | 0.011631 | 0.011232 |
| 0.011678 | 0.011230 | 0.011261 | 0.011463 | 0.011549 | 0.011455 | 0.011186 |
| 0.011218 | 0.011429 | 0.011530 | 0.011637 | 0.011498 | 0.011635 | 0.011766 |
| 0.011666 | 0.011703 | 0.011664 | 0.011914 | 0.011631 | 0.012505 | 0.011667 |
| 0.012406 | 0.012173 | 0.012307 | 0.012579 | 0.011631 | 0.011329 | 0.011631 |
| 0.012070 | 0.012005 | 0.011597 | 0.011497 | 0.011565 | 0.011565 | 0.011534 |
| 0.011429 | 0.011433 | 0.011496 | 0.011464 | 0.011834 | 0.011900 | 0.011901 |
| 0.011800 | 0.011901 | 0.012004 | 0.011770 | 0.012070 | 0.012076 | 0.012137 |
| 0.012138 | 0.012172 | 0.012118 | 0.012138 | 0.012139 | 0.011362 | 0.011665 |
| 0.011733 | 0.012236 | 0.011738 | 0.011967 | 0.012440 | 0.011502 | 0.011396 |
| 0.011362 | 0.011362 | 0.011833 | 0.011883 | 0.011975 | 0.011698 | 0.011363 |
| S528     | 0.011664 | 0.011664 | 0.012001 | 0.011765 | 0.011765 | 0.011832 |
| 0.011671 | 0.011603 | 0.011832 | 0.011262 | 0.011329 | 0.011296 | 0.011262 |
| 0.011295 | 0.011463 | 0.011262 | 0.011295 | 0.011362 | 0.011329 | 0.011295 |
| 0.011262 | 0.011295 | 0.011396 | 0.011262 | 0.011295 | 0.011295 | 0.011637 |
| 0.011530 | 0.011295 | 0.011194 | 0.011429 | 0.011362 | 0.011329 | 0.011362 |
| 0.011329 | 0.011429 | 0.011329 | 0.011329 | 0.011362 | 0.011329 | 0.011496 |
| 0.011262 | 0.011329 | 0.011362 | 0.011295 | 0.011396 | 0.011429 | 0.011362 |
| 0.011329 | 0.011497 | 0.011396 | 0.011664 | 0.011329 | 0.011530 | 0.011329 |
| 0.011295 | 0.011396 | 0.011463 | 0.011530 | 0.011698 | 0.011396 | 0.011496 |
| 0.011362 | 0.011429 | 0.011329 | 0.011564 | 0.011799 | 0.011329 | 0.011396 |
| 0.011295 | 0.011396 | 0.011362 | 0.011429 | 0.011362 | 0.011362 | 0.011362 |
| 0.011262 | 0.011295 | 0.011262 | 0.011362 | 0.011329 | 0.011363 | 0.011429 |
| 0.011362 | 0.011329 | 0.011396 | 0.011295 | 0.011429 | 0.011262 | 0.011194 |
| 0.011496 | 0.011429 | 0.011664 | 0.011497 | 0.011329 | 0.011564 | 0.011329 |
| 0.011468 | 0.011695 | 0.011513 | 0.011177 | 0.011210 | 0.011318 | 0.011414 |
| 0.012048 | 0.011467 | 0.011225 | 0.011564 | 0.011564 | 0.011362 | 0.011463 |
| 0.011396 | 0.011362 | 0.011429 | 0.011329 | 0.011429 | 0.011362 | 0.011362 |
| 0.011329 | 0.011429 | 0.011631 | 0.011496 | 0.011396 | 0.011362 | 0.011295 |
| 0.011262 | 0.011262 | 0.011329 | 0.011295 | 0.011497 | 0.011463 | 0.011396 |
| 0.011497 | 0.011564 | 0.011295 | 0.011295 | 0.011329 | 0.011329 | 0.011330 |
| 0.011398 | 0.011329 | 0.011329 | 0.011204 | 0.011277 | 0.011236 | 0.011329 |
| 0.011331 | 0.011266 | 0.011282 | 0.011302 | 0.011230 | 0.011266 | 0.011297 |
| 0.011564 | 0.011336 | 0.011370 | 0.011262 | 0.011268 | 0.011397 | 0.011363 |
| 0.011430 | 0.011363 | 0.011363 | 0.011463 | 0.011396 | 0.011765 | 0.011564 |



|          |          |          |          |          |          |          |
|----------|----------|----------|----------|----------|----------|----------|
| 0.011597 | 0.011463 | 0.011329 | 0.011430 | 0.011228 | 0.011463 | 0.011262 |
| 0.011329 | 0.011329 | 0.011295 | 0.011262 | 0.011295 | 0.011262 | 0.011362 |
| 0.011329 | 0.011429 | 0.011362 | 0.011262 | 0.011363 | 0.011463 | 0.011466 |
| 0.011463 | 0.011362 | 0.011262 | 0.011195 | 0.011329 | 0.011262 | 0.011195 |
| 0.011298 | 0.011463 | 0.011262 | 0.011463 | 0.011228 | 0.011329 | 0.011295 |
| 0.011396 | 0.011295 | 0.011329 | 0.011295 | 0.011329 | 0.011195 | 0.011329 |
| 0.011362 | 0.011295 | 0.011362 | 0.011295 | 0.011329 | 0.011362 | 0.011597 |
| 0.011698 | 0.011631 | 0.011698 | 0.011431 | 0.011698 | 0.011329 | 0.011295 |
| 0.011330 | 0.011545 | 0.011426 | 0.011197 | 0.011705 | 0.011197 | 0.011296 |
| 0.011705 | 0.011604 | 0.011496 | 0.011698 | 0.011402 | 0.011564 | 0.011530 |
| 0.011463 | 0.011631 | 0.011486 | 0.011307 | 0.011395 | 0.011362 | 0.011432 |
| 0.011530 | 0.011431 | 0.011567 | 0.011635 | 0.011564 | 0.011631 | 0.011738 |
| 0.011466 | 0.011637 | 0.011568 | 0.011500 | 0.011767 | 0.011228 | 0.011431 |
| 0.011396 | 0.011329 | 0.011228 | 0.011228 | 0.011295 | 0.011295 | 0.011362 |
| 0.011295 | 0.011362 | 0.011262 | 0.011362 | 0.011295 | 0.011295 | 0.011362 |
| 0.011295 | 0.011731 | 0.011631 | 0.011664 | 0.011194 | 0.011295 | 0.011329 |
| 0.011329 | 0.011295 | 0.011362 | 0.011396 | 0.011262 | 0.011262 | 0.011262 |
| 0.011799 | 0.011429 | 0.011429 | 0.011228 | 0.011329 | 0.011497 | 0.011262 |
| 0.011262 | 0.011329 | 0.011295 | 0.011463 | 0.011262 | 0.011396 | 0.011530 |
| 0.011463 | 0.011295 | 0.011295 | 0.011228 | 0.011228 | 0.011396 | 0.011329 |
| 0.011228 | 0.011329 | 0.011195 | 0.011228 | 0.011362 | 0.011497 | 0.011262 |
| 0.011228 | 0.011362 | 0.011295 | 0.011195 | 0.011530 | 0.011195 | 0.011362 |
| 0.011437 | 0.011262 | 0.011564 | 0.011396 | 0.011429 | 0.011295 | 0.011396 |
| 0.011262 | 0.011530 | 0.011194 | 0.011463 | 0.011262 | 0.011262 | 0.011194 |
| 0.011429 | 0.011597 | 0.011329 | 0.011396 | 0.011228 | 0.011631 | 0.011262 |
| 0.011262 | 0.011262 | 0.011295 | 0.011396 | 0.011295 | 0.011396 | 0.011463 |
| 0.011463 | 0.011429 | 0.011329 | 0.011429 | 0.011396 | 0.011262 | 0.011228 |
| 0.011262 | 0.011262 | 0.011329 | 0.011262 | 0.011228 | 0.011396 | 0.011262 |
| 0.011295 | 0.011295 | 0.011429 | 0.011463 | 0.011362 | 0.011295 | 0.011295 |
| 0.011362 | 0.011295 | 0.011396 | 0.011262 | 0.011396 | 0.011496 | 0.011799 |
| 0.011295 | 0.011698 | 0.011267 | 0.017747 | 0.011191 | 0.011305 | 0.011618 |
| 0.011579 | 0.011623 | 0.011322 | 0.011292 | 0.011664 | 0.011647 | 0.011242 |
| 0.011487 | 0.011426 | 0.011177 | 0.011228 | 0.011255 | 0.011258 | 0.011189 |
| 0.011482 | 0.011433 | 0.011431 | 0.011325 | 0.011429 | 0.011463 | 0.011466 |
| 0.011335 | 0.011429 | 0.011429 | 0.011396 | 0.011362 | 0.011362 | 0.011329 |
| 0.011362 | 0.011295 | 0.011329 | 0.011362 | 0.011329 | 0.011262 | 0.011295 |
| 0.011295 | 0.011362 | 0.011262 | 0.011362 | 0.011396 | 0.011429 | 0.011329 |
| 0.011362 | 0.011329 | 0.011665 | 0.011665 | 0.011396 | 0.011430 | 0.011463 |
| 0.011228 | 0.011228 | 0.011262 | 0.011362 | 0.011228 | 0.011463 | 0.011463 |
| 0.011497 | 0.011496 | 0.011429 | 0.011530 | 0.011698 | 0.011532 | 0.011362 |
| 0.011362 | 0.011429 | 0.011463 | 0.011295 | 0.011362 | 0.011329 | 0.011362 |
| 0.011430 | 0.011430 | 0.011463 | 0.011430 | 0.011330 | 0.011530 | 0.011497 |
| 0.011365 | 0.011262 | 0.011362 | 0.011463 | 0.011362 | 0.011497 | 0.011530 |
| 0.011698 | 0.011402 | 0.011564 | 0.011530 | 0.011463 | 0.011631 | 0.011262 |
| 0.011431 | 0.011295 | 0.011295 | 0.011295 | 0.011362 | 0.011262 | 0.011362 |
| 0.011396 | 0.011429 | 0.011329 | 0.011362 | 0.011329 | 0.011665 | 0.011665 |
| 0.011396 | 0.011430 | 0.011496 | 0.011429 | 0.012069 | 0.011489 | 0.011412 |
| 0.011482 | 0.011442 | 0.011552 | 0.011441 | 0.011550 | 0.011474 | 0.011439 |
| 0.012021 | 0.011337 | 0.011471 | 0.011406 | 0.011680 | 0.011536 | 0.011639 |
| 0.012046 | 0.011512 | 0.011601 | 0.011664 | 0.011530 | 0.011530 | 0.011567 |
| 0.011228 | 0.011396 | 0.011530 | 0.011496 | 0.011499 | 0.011496 | 0.011431 |
| 0.011329 | 0.011262 | 0.011295 | 0.000000 | 0.011228 | 0.011295 | 0.011194 |
| 0.011329 | 0.011362 | 0.011262 | 0.011228 | 0.011329 | 0.011262 | 0.011295 |
| 0.011295 | 0.011228 | 0.011295 | 0.011329 | 0.011228 | 0.011429 | 0.011463 |
| 0.011362 | 0.011429 | 0.011362 | 0.011362 | 0.011295 | 0.011698 | 0.011329 |
| 0.011373 | 0.011295 | 0.011530 | 0.011535 | 0.011396 | 0.011396 | 0.011396 |
| 0.011396 | 0.011329 | 0.011295 | 0.011329 | 0.011429 | 0.011429 | 0.011362 |
| 0.011362 | 0.011496 | 0.011664 | 0.011396 | 0.011597 | 0.011597 | 0.011463 |
| 0.011295 | 0.011362 | 0.011396 | 0.011799 | 0.011362 | 0.011396 | 0.011362 |
| 0.011396 | 0.011329 | 0.011329 | 0.011631 | 0.011564 | 0.011597 | 0.011329 |

|          |          |          |          |          |          |          |
|----------|----------|----------|----------|----------|----------|----------|
| 0.011429 | 0.011496 | 0.011362 | 0.011429 | 0.011396 | 0.011262 | 0.011597 |
| 0.011362 | 0.011329 | 0.011329 | 0.011496 | 0.011329 | 0.011429 | 0.011664 |
| 0.011362 | 0.011739 | 0.011731 | 0.011507 | 0.011229 | 0.011434 | 0.011267 |
| 0.011115 | 0.011722 | 0.011236 | 0.011328 | 0.011255 | 0.011315 | 0.011326 |
| 0.011519 | 0.011126 | 0.011283 | 0.011126 | 0.011168 | 0.011328 | 0.011385 |
| 0.011399 | 0.011296 | 0.011377 | 0.011307 | 0.011364 | 0.011497 | 0.011564 |
| 0.011564 | 0.011430 | 0.011533 | 0.011535 | 0.011670 | 0.011661 | 0.011362 |
| 0.011597 | 0.011463 | 0.011329 | 0.011430 | 0.011228 | 0.011463 | 0.011262 |
| 0.011329 | 0.011329 | 0.011295 | 0.011262 | 0.011295 | 0.011262 | 0.011362 |
| 0.011340 | 0.011340 | 0.011334 | 0.011368 | 0.011505 | 0.011470 | 0.011470 |
| 0.011469 | 0.011396 | 0.011208 | 0.011204 | 0.011331 | 0.011501 | 0.011501 |
| 0.011296 | 0.011365 | 0.011599 | 0.011567 | 0.011497 | 0.011531 | 0.011463 |
| 0.011396 | 0.011463 | 0.011463 | 0.011362 | 0.011933 | 0.011530 | 0.011597 |
| 0.011631 | 0.011701 | 0.011333 | 0.011407 | 0.011295 | 0.011497 | 0.011463 |
| 0.011497 | 0.011530 | 0.011530 | 0.011530 | 0.011689 | 0.011664 | 0.011303 |
| 0.011195 | 0.011199 | 0.011298 | 0.011264 | 0.011368 | 0.011209 | 0.011536 |
| 0.011335 | 0.011499 | 0.011251 | 0.011360 | 0.011329 | 0.011402 | 0.011295 |
| 0.011262 | 0.011262 | 0.011329 | 0.011295 | 0.011497 | 0.011463 | 0.011396 |
| 0.011497 | 0.011564 | 0.011295 | 0.011295 | 0.011329 | 0.011329 | 0.011330 |
| 0.011398 | 0.011329 | 0.011329 | 0.011364 | 0.011497 | 0.011564 | 0.011564 |
| 0.011430 | 0.011533 | 0.011535 | 0.011670 | 0.011661 | 0.011362 | 0.011530 |
| 0.011463 | 0.011463 | 0.011297 | 0.011478 | 0.011408 | 0.011435 | 0.011270 |
| 0.011473 | 0.011653 | 0.011441 | 0.011366 | 0.011262 | 0.011463 | 0.011329 |
| 0.011429 | 0.011362 | 0.011262 | 0.011363 | 0.011463 | 0.011466 | 0.011362 |
| 0.011262 | 0.011195 | 0.011329 | 0.011262 | 0.011195 | 0.011298 | 0.011463 |
| 0.011362 | 0.011295 | 0.011329 | 0.011362 | 0.011329 | 0.011262 | 0.011463 |
| 0.011329 | 0.011362 | 0.011362 | 0.011295 | 0.011362 | 0.011597 | 0.011262 |
| 0.011295 | 0.011698 | 0.011295 | 0.011329 | 0.011295 | 0.011664 | 0.011232 |
| 0.011735 | 0.011230 | 0.011261 | 0.011463 | 0.011549 | 0.011455 | 0.011144 |
| 0.011218 | 0.011463 | 0.011564 | 0.011671 | 0.011531 | 0.011635 | 0.011800 |
| 0.011699 | 0.011737 | 0.011698 | 0.011914 | 0.011664 | 0.012539 | 0.011700 |
| 0.012439 | 0.012207 | 0.012341 | 0.012612 | 0.011664 | 0.011362 | 0.011665 |
| 0.012103 | 0.012004 | 0.011631 | 0.011530 | 0.011598 | 0.011598 | 0.011567 |
| 0.011463 | 0.011433 | 0.011530 | 0.011497 | 0.011867 | 0.011933 | 0.011935 |
| 0.011834 | 0.011934 | 0.012038 | 0.011770 | 0.012104 | 0.012110 | 0.012171 |
| 0.012172 | 0.012205 | 0.012118 | 0.012172 | 0.012173 | 0.011396 | 0.011699 |
| 0.011766 | 0.012270 | 0.011772 | 0.012001 | 0.012474 | 0.011536 | 0.011430 |
| 0.011396 | 0.011396 | 0.011867 | 0.011924 | 0.012010 | 0.011732 | 0.011397 |
| S529     | 0.011564 | 0.011564 | 0.011900 | 0.011664 | 0.011664 | 0.011732 |
| 0.011569 | 0.011502 | 0.011731 | 0.011161 | 0.011228 | 0.011195 | 0.011161 |
| 0.011194 | 0.011362 | 0.011161 | 0.011194 | 0.011262 | 0.011228 | 0.011194 |
| 0.011161 | 0.011194 | 0.011295 | 0.011161 | 0.011127 | 0.011194 | 0.011535 |
| 0.011429 | 0.011195 | 0.011094 | 0.011329 | 0.011194 | 0.011228 | 0.011194 |
| 0.011228 | 0.011262 | 0.011228 | 0.011228 | 0.011262 | 0.011228 | 0.011396 |
| 0.011161 | 0.011228 | 0.011262 | 0.011194 | 0.011295 | 0.011329 | 0.011262 |
| 0.011228 | 0.011396 | 0.011295 | 0.011564 | 0.011228 | 0.011429 | 0.011228 |
| 0.011194 | 0.011295 | 0.011362 | 0.011429 | 0.011597 | 0.011295 | 0.011396 |
| 0.011194 | 0.011262 | 0.011228 | 0.011396 | 0.011698 | 0.011228 | 0.011295 |
| 0.011194 | 0.011295 | 0.011262 | 0.011329 | 0.011262 | 0.011262 | 0.011262 |
| 0.011161 | 0.011194 | 0.011161 | 0.011262 | 0.011228 | 0.011262 | 0.011329 |
| 0.011262 | 0.011228 | 0.011228 | 0.011194 | 0.011329 | 0.011094 | 0.011228 |
| 0.011396 | 0.011329 | 0.011564 | 0.011396 | 0.011228 | 0.011396 | 0.011228 |
| 0.011394 | 0.011620 | 0.011437 | 0.011138 | 0.011135 | 0.011244 | 0.011336 |
| 0.011975 | 0.011365 | 0.011143 | 0.011463 | 0.011463 | 0.011262 | 0.011362 |
| 0.011295 | 0.011262 | 0.011329 | 0.011228 | 0.011329 | 0.011194 | 0.011262 |
| 0.011228 | 0.011329 | 0.011530 | 0.011396 | 0.011295 | 0.011262 | 0.011127 |
| 0.011161 | 0.011161 | 0.011161 | 0.011195 | 0.011396 | 0.011362 | 0.011295 |
| 0.011396 | 0.011463 | 0.011195 | 0.011195 | 0.011228 | 0.011228 | 0.011229 |
| 0.011297 | 0.011228 | 0.011228 | 0.000000 | 0.011169 | 0.011130 | 0.011228 |
| 0.011230 | 0.011163 | 0.011208 | 0.011198 | 0.011128 | 0.011163 | 0.011195 |

|          |          |          |          |          |          |          |
|----------|----------|----------|----------|----------|----------|----------|
| 0.011456 | 0.011233 | 0.011198 | 0.011161 | 0.011164 | 0.011296 | 0.011262 |
| 0.011329 | 0.011262 | 0.011262 | 0.011362 | 0.011295 | 0.011597 | 0.011463 |
| 0.011496 | 0.011362 | 0.011228 | 0.011329 | 0.011127 | 0.011362 | 0.011161 |
| 0.011228 | 0.011228 | 0.011195 | 0.011161 | 0.011194 | 0.011161 | 0.011262 |
| 0.011161 | 0.011262 | 0.011262 | 0.011161 | 0.011262 | 0.011362 | 0.011364 |
| 0.011295 | 0.011262 | 0.011161 | 0.011094 | 0.011228 | 0.011161 | 0.011094 |
| 0.011196 | 0.011295 | 0.011094 | 0.011295 | 0.011127 | 0.011228 | 0.011195 |
| 0.011228 | 0.011195 | 0.011161 | 0.011195 | 0.011228 | 0.011094 | 0.011161 |
| 0.011195 | 0.011195 | 0.011262 | 0.011195 | 0.011228 | 0.011262 | 0.011497 |
| 0.011597 | 0.011530 | 0.011597 | 0.011364 | 0.011598 | 0.011228 | 0.011195 |
| 0.011229 | 0.011464 | 0.011289 | 0.011129 | 0.011603 | 0.011094 | 0.011218 |
| 0.011603 | 0.011502 | 0.011396 | 0.011597 | 0.011299 | 0.011463 | 0.011362 |
| 0.011362 | 0.011530 | 0.011380 | 0.011225 | 0.011270 | 0.011262 | 0.011331 |
| 0.011429 | 0.011330 | 0.011466 | 0.011466 | 0.011463 | 0.011530 | 0.011636 |
| 0.011365 | 0.011467 | 0.011466 | 0.011398 | 0.011666 | 0.011127 | 0.011330 |
| 0.011228 | 0.011228 | 0.011127 | 0.011127 | 0.011127 | 0.011194 | 0.011262 |
| 0.011127 | 0.011194 | 0.011094 | 0.011262 | 0.011127 | 0.011194 | 0.011262 |
| 0.011194 | 0.011631 | 0.011530 | 0.011564 | 0.011094 | 0.011194 | 0.011228 |
| 0.011228 | 0.011194 | 0.011262 | 0.011295 | 0.011161 | 0.011161 | 0.011161 |
| 0.011698 | 0.011329 | 0.011329 | 0.011127 | 0.011228 | 0.011329 | 0.011161 |
| 0.011161 | 0.011228 | 0.011194 | 0.011295 | 0.011161 | 0.011295 | 0.011362 |
| 0.011362 | 0.011194 | 0.011194 | 0.011127 | 0.011127 | 0.011295 | 0.011228 |
| 0.011127 | 0.011228 | 0.011094 | 0.011127 | 0.011262 | 0.011396 | 0.011161 |
| 0.011128 | 0.011262 | 0.011195 | 0.011094 | 0.011429 | 0.011094 | 0.011262 |
| 0.011266 | 0.011161 | 0.011463 | 0.011295 | 0.011329 | 0.011194 | 0.011295 |
| 0.011161 | 0.011429 | 0.011094 | 0.011362 | 0.011161 | 0.011161 | 0.011094 |
| 0.011262 | 0.011530 | 0.011228 | 0.011295 | 0.011127 | 0.011530 | 0.011161 |
| 0.011161 | 0.011161 | 0.011194 | 0.011228 | 0.011194 | 0.011295 | 0.011362 |
| 0.011362 | 0.011329 | 0.011228 | 0.011329 | 0.011228 | 0.011161 | 0.011127 |
| 0.011161 | 0.011161 | 0.011228 | 0.011161 | 0.000000 | 0.011295 | 0.011161 |
| 0.011194 | 0.011194 | 0.011329 | 0.011362 | 0.011262 | 0.011127 | 0.011195 |
| 0.011262 | 0.011194 | 0.011295 | 0.011161 | 0.011295 | 0.011396 | 0.011698 |
| 0.011194 | 0.011597 | 0.011198 | 0.017710 | 0.011126 | 0.011366 | 0.011548 |
| 0.011510 | 0.011553 | 0.011217 | 0.011176 | 0.011609 | 0.011578 | 0.011242 |
| 0.011392 | 0.011487 | 0.011099 | 0.011144 | 0.011138 | 0.011258 | 0.011189 |
| 0.011389 | 0.011358 | 0.011320 | 0.011126 | 0.011329 | 0.011362 | 0.011365 |
| 0.011163 | 0.011329 | 0.011329 | 0.011295 | 0.011262 | 0.011262 | 0.011228 |
| 0.011262 | 0.011195 | 0.011228 | 0.011262 | 0.011228 | 0.011161 | 0.011195 |
| 0.011195 | 0.011262 | 0.011161 | 0.011262 | 0.011295 | 0.011329 | 0.011228 |
| 0.011262 | 0.011228 | 0.011564 | 0.011564 | 0.011295 | 0.011329 | 0.011362 |
| 0.011127 | 0.011127 | 0.011161 | 0.011195 | 0.011127 | 0.011362 | 0.011362 |
| 0.011396 | 0.011396 | 0.011329 | 0.011429 | 0.011597 | 0.011431 | 0.011195 |
| 0.011262 | 0.011329 | 0.011295 | 0.011195 | 0.011262 | 0.011228 | 0.011262 |
| 0.011329 | 0.011329 | 0.011362 | 0.011262 | 0.011161 | 0.011429 | 0.011329 |
| 0.011263 | 0.011161 | 0.011262 | 0.011362 | 0.011262 | 0.011396 | 0.011429 |
| 0.011597 | 0.011299 | 0.011463 | 0.011362 | 0.011362 | 0.011530 | 0.011161 |
| 0.011330 | 0.011228 | 0.011195 | 0.011195 | 0.011262 | 0.011161 | 0.011262 |
| 0.011295 | 0.011329 | 0.011228 | 0.011262 | 0.011228 | 0.011564 | 0.011564 |
| 0.011295 | 0.011329 | 0.011396 | 0.011329 | 0.011968 | 0.011382 | 0.011306 |
| 0.011377 | 0.011338 | 0.011447 | 0.011337 | 0.011445 | 0.011370 | 0.011336 |
| 0.011918 | 0.011233 | 0.011368 | 0.011302 | 0.011577 | 0.011434 | 0.011468 |
| 0.011944 | 0.011399 | 0.011500 | 0.011564 | 0.011429 | 0.011429 | 0.011466 |
| 0.011127 | 0.011228 | 0.011429 | 0.011396 | 0.011398 | 0.011396 | 0.011363 |
| 0.011228 | 0.011094 | 0.011127 | 0.011228 | 0.000000 | 0.011194 | 0.011094 |
| 0.011228 | 0.011262 | 0.011161 | 0.011127 | 0.011228 | 0.011161 | 0.011194 |
| 0.011194 | 0.011127 | 0.011194 | 0.011228 | 0.011127 | 0.011262 | 0.011362 |
| 0.011262 | 0.011329 | 0.011262 | 0.011262 | 0.011194 | 0.011597 | 0.011228 |
| 0.011269 | 0.011195 | 0.011430 | 0.011433 | 0.011228 | 0.011295 | 0.011295 |
| 0.011295 | 0.011161 | 0.011194 | 0.011161 | 0.011329 | 0.011329 | 0.011262 |
| 0.011262 | 0.011396 | 0.011564 | 0.011295 | 0.011497 | 0.011497 | 0.011362 |

|          |          |          |          |          |          |          |
|----------|----------|----------|----------|----------|----------|----------|
| 0.011194 | 0.011262 | 0.011295 | 0.011698 | 0.011262 | 0.011228 | 0.011262 |
| 0.011295 | 0.011228 | 0.011228 | 0.011530 | 0.011396 | 0.011497 | 0.011228 |
| 0.011329 | 0.011396 | 0.011262 | 0.011329 | 0.011295 | 0.011161 | 0.011496 |
| 0.011262 | 0.011228 | 0.011228 | 0.011396 | 0.011228 | 0.011329 | 0.011564 |
| 0.011262 | 0.011637 | 0.011631 | 0.011426 | 0.011117 | 0.011332 | 0.011163 |
| 0.011170 | 0.011644 | 0.011166 | 0.011373 | 0.011158 | 0.011315 | 0.011273 |
| 0.011366 | 0.000000 | 0.011227 | 0.000000 | 0.011114 | 0.011261 | 0.011263 |
| 0.011286 | 0.011139 | 0.011307 | 0.011236 | 0.011262 | 0.011396 | 0.011463 |
| 0.011463 | 0.011329 | 0.011432 | 0.011433 | 0.011569 | 0.011590 | 0.011262 |
| 0.011496 | 0.011362 | 0.011228 | 0.011329 | 0.011127 | 0.011362 | 0.011161 |
| 0.011228 | 0.011228 | 0.011195 | 0.011161 | 0.011194 | 0.011161 | 0.011262 |
| 0.011235 | 0.011235 | 0.011231 | 0.011266 | 0.011402 | 0.011299 | 0.011367 |
| 0.011367 | 0.011296 | 0.011097 | 0.011096 | 0.011230 | 0.011399 | 0.011399 |
| 0.011195 | 0.011263 | 0.011498 | 0.011466 | 0.011396 | 0.011430 | 0.011362 |
| 0.011295 | 0.011362 | 0.011362 | 0.011262 | 0.011832 | 0.011429 | 0.011497 |
| 0.011530 | 0.011594 | 0.011231 | 0.011303 | 0.011195 | 0.011396 | 0.011362 |
| 0.011397 | 0.011429 | 0.011429 | 0.011429 | 0.011571 | 0.011564 | 0.011199 |
| 0.011094 | 0.011095 | 0.011196 | 0.011162 | 0.011265 | 0.011098 | 0.011434 |
| 0.011232 | 0.011323 | 0.000000 | 0.011248 | 0.011228 | 0.011300 | 0.011127 |
| 0.011161 | 0.011161 | 0.011161 | 0.011195 | 0.011396 | 0.011362 | 0.011295 |
| 0.011396 | 0.011463 | 0.011195 | 0.011195 | 0.011228 | 0.011228 | 0.011229 |
| 0.011297 | 0.011228 | 0.011228 | 0.011262 | 0.011396 | 0.011463 | 0.011463 |
| 0.011329 | 0.011432 | 0.011433 | 0.011569 | 0.011590 | 0.011262 | 0.011429 |
| 0.011362 | 0.011362 | 0.011196 | 0.011373 | 0.011303 | 0.011333 | 0.011200 |
| 0.011301 | 0.011516 | 0.011314 | 0.011264 | 0.011094 | 0.011295 | 0.011161 |
| 0.011262 | 0.011262 | 0.011161 | 0.011262 | 0.011362 | 0.011364 | 0.011262 |
| 0.011161 | 0.011094 | 0.011228 | 0.011161 | 0.011094 | 0.011196 | 0.011295 |
| 0.011262 | 0.011195 | 0.011228 | 0.011262 | 0.011228 | 0.011161 | 0.011362 |
| 0.011228 | 0.011262 | 0.011262 | 0.011194 | 0.011262 | 0.011497 | 0.011161 |
| 0.011194 | 0.011597 | 0.011194 | 0.011161 | 0.011194 | 0.011564 | 0.011146 |
| 0.011566 | 0.011145 | 0.011161 | 0.011382 | 0.011467 | 0.011383 | 0.011102 |
| 0.011113 | 0.011362 | 0.011463 | 0.011569 | 0.011430 | 0.011568 | 0.011699 |
| 0.011598 | 0.011635 | 0.011597 | 0.011846 | 0.011564 | 0.012438 | 0.011599 |
| 0.012338 | 0.012105 | 0.012240 | 0.012511 | 0.011564 | 0.011262 | 0.011564 |
| 0.012002 | 0.011937 | 0.011530 | 0.011430 | 0.011497 | 0.011497 | 0.011466 |
| 0.011362 | 0.011365 | 0.011429 | 0.011396 | 0.011766 | 0.011832 | 0.011834 |
| 0.011733 | 0.011833 | 0.011937 | 0.011703 | 0.012003 | 0.012008 | 0.012070 |
| 0.012070 | 0.012104 | 0.012050 | 0.012071 | 0.012072 | 0.011295 | 0.011598 |
| 0.011666 | 0.012169 | 0.011670 | 0.011900 | 0.012373 | 0.011434 | 0.011329 |
| 0.011295 | 0.011295 | 0.011766 | 0.011800 | 0.011904 | 0.011631 | 0.011296 |
| S530     | 0.011631 | 0.011631 | 0.011967 | 0.011732 | 0.011732 | 0.011799 |
| 0.011637 | 0.011569 | 0.011799 | 0.011228 | 0.011295 | 0.011262 | 0.011228 |
| 0.011262 | 0.011429 | 0.011228 | 0.011262 | 0.011329 | 0.011295 | 0.011262 |
| 0.011228 | 0.011262 | 0.011362 | 0.011228 | 0.011262 | 0.011262 | 0.011603 |
| 0.011496 | 0.011262 | 0.011161 | 0.011396 | 0.011329 | 0.011295 | 0.011329 |
| 0.011295 | 0.011396 | 0.011295 | 0.011295 | 0.011329 | 0.011295 | 0.011463 |
| 0.011228 | 0.011295 | 0.011329 | 0.011262 | 0.011362 | 0.011396 | 0.011329 |
| 0.011295 | 0.011463 | 0.011362 | 0.011631 | 0.011295 | 0.011564 | 0.011295 |
| 0.011262 | 0.011362 | 0.011429 | 0.011564 | 0.011664 | 0.011362 | 0.011463 |
| 0.011329 | 0.011396 | 0.011295 | 0.011530 | 0.011765 | 0.011295 | 0.011362 |
| 0.011262 | 0.011362 | 0.011329 | 0.011396 | 0.011329 | 0.011329 | 0.011329 |
| 0.011228 | 0.011262 | 0.011228 | 0.011329 | 0.011295 | 0.011329 | 0.011396 |
| 0.011329 | 0.011295 | 0.011362 | 0.011262 | 0.011396 | 0.011228 | 0.011295 |
| 0.011463 | 0.011396 | 0.011631 | 0.011463 | 0.011295 | 0.011530 | 0.011295 |
| 0.011431 | 0.011658 | 0.011475 | 0.011177 | 0.011172 | 0.011281 | 0.011375 |
| 0.012011 | 0.011467 | 0.011184 | 0.011530 | 0.011530 | 0.011329 | 0.011429 |
| 0.011362 | 0.011329 | 0.011396 | 0.011295 | 0.011396 | 0.011329 | 0.011329 |
| 0.011295 | 0.011396 | 0.011597 | 0.011463 | 0.011362 | 0.011329 | 0.011262 |
| 0.011228 | 0.011228 | 0.011295 | 0.011262 | 0.011463 | 0.011430 | 0.011362 |
| 0.011463 | 0.011530 | 0.011262 | 0.011262 | 0.011295 | 0.011295 | 0.011297 |

|          |          |          |          |          |          |          |
|----------|----------|----------|----------|----------|----------|----------|
| 0.011364 | 0.011295 | 0.011295 | 0.011132 | 0.011241 | 0.011200 | 0.011296 |
| 0.011297 | 0.011232 | 0.011245 | 0.011233 | 0.011196 | 0.011232 | 0.011263 |
| 0.011492 | 0.011302 | 0.011336 | 0.011228 | 0.011199 | 0.011363 | 0.011329 |
| 0.011397 | 0.011330 | 0.011329 | 0.011429 | 0.011362 | 0.011732 | 0.011530 |
| 0.011564 | 0.011430 | 0.011295 | 0.011396 | 0.011195 | 0.011429 | 0.011228 |
| 0.011295 | 0.011295 | 0.011262 | 0.011228 | 0.011262 | 0.011228 | 0.011329 |
| 0.011295 | 0.011396 | 0.011329 | 0.011228 | 0.011330 | 0.011430 | 0.011432 |
| 0.011430 | 0.011329 | 0.011228 | 0.011161 | 0.011295 | 0.011228 | 0.011161 |
| 0.011264 | 0.011430 | 0.011228 | 0.011430 | 0.011195 | 0.011295 | 0.011262 |
| 0.011362 | 0.011262 | 0.011295 | 0.011262 | 0.011295 | 0.011161 | 0.011295 |
| 0.011329 | 0.011262 | 0.011329 | 0.011262 | 0.011295 | 0.011329 | 0.011564 |
| 0.011664 | 0.011597 | 0.011665 | 0.011431 | 0.011665 | 0.011295 | 0.011262 |
| 0.011297 | 0.011545 | 0.011289 | 0.011197 | 0.011671 | 0.011163 | 0.011296 |
| 0.011671 | 0.011570 | 0.011463 | 0.011664 | 0.011368 | 0.011530 | 0.011497 |
| 0.011429 | 0.011597 | 0.011451 | 0.011307 | 0.011312 | 0.011329 | 0.011398 |
| 0.011497 | 0.011397 | 0.011533 | 0.011601 | 0.011530 | 0.011597 | 0.011704 |
| 0.011432 | 0.011603 | 0.011534 | 0.011466 | 0.011733 | 0.011194 | 0.011397 |
| 0.011362 | 0.011295 | 0.011194 | 0.011194 | 0.011262 | 0.011262 | 0.011329 |
| 0.011262 | 0.011329 | 0.011228 | 0.011329 | 0.011262 | 0.011262 | 0.011329 |
| 0.011262 | 0.011698 | 0.011597 | 0.011631 | 0.011161 | 0.011262 | 0.011295 |
| 0.011295 | 0.011262 | 0.011329 | 0.011362 | 0.011228 | 0.011228 | 0.011228 |
| 0.011765 | 0.011396 | 0.011396 | 0.011194 | 0.011295 | 0.011463 | 0.011228 |
| 0.011228 | 0.011295 | 0.011262 | 0.011429 | 0.011228 | 0.011362 | 0.011496 |
| 0.011429 | 0.011262 | 0.011262 | 0.011194 | 0.011194 | 0.011362 | 0.011295 |
| 0.011194 | 0.011295 | 0.011161 | 0.011195 | 0.011329 | 0.011463 | 0.011228 |
| 0.011195 | 0.011329 | 0.011262 | 0.011161 | 0.011496 | 0.011161 | 0.011329 |
| 0.011403 | 0.011228 | 0.011530 | 0.011362 | 0.011396 | 0.011262 | 0.011362 |
| 0.011228 | 0.011564 | 0.011161 | 0.011429 | 0.011228 | 0.011228 | 0.011161 |
| 0.011396 | 0.011598 | 0.011295 | 0.011362 | 0.011194 | 0.011597 | 0.011228 |
| 0.011228 | 0.011228 | 0.011262 | 0.011362 | 0.011262 | 0.011362 | 0.011429 |
| 0.011429 | 0.011396 | 0.011295 | 0.011329 | 0.011362 | 0.011228 | 0.011194 |
| 0.011228 | 0.011228 | 0.011295 | 0.011228 | 0.011194 | 0.011362 | 0.011228 |
| 0.011262 | 0.011262 | 0.011396 | 0.011429 | 0.011329 | 0.011262 | 0.011262 |
| 0.011329 | 0.011262 | 0.011362 | 0.011228 | 0.011362 | 0.011463 | 0.011765 |
| 0.011262 | 0.011664 | 0.011233 | 0.017710 | 0.011191 | 0.011305 | 0.011583 |
| 0.011545 | 0.011588 | 0.011322 | 0.011292 | 0.011609 | 0.011613 | 0.011242 |
| 0.011487 | 0.011426 | 0.011138 | 0.011228 | 0.011216 | 0.011208 | 0.011232 |
| 0.011482 | 0.011395 | 0.011394 | 0.011259 | 0.011396 | 0.011429 | 0.011432 |
| 0.011301 | 0.011396 | 0.011396 | 0.011362 | 0.011329 | 0.011329 | 0.011295 |
| 0.011329 | 0.011262 | 0.011295 | 0.011329 | 0.011295 | 0.011228 | 0.011262 |
| 0.011262 | 0.011329 | 0.011228 | 0.011329 | 0.011362 | 0.011396 | 0.011295 |
| 0.011329 | 0.011295 | 0.011631 | 0.011631 | 0.011362 | 0.011396 | 0.011430 |
| 0.011195 | 0.011195 | 0.011228 | 0.011329 | 0.011195 | 0.011430 | 0.011430 |
| 0.011463 | 0.011463 | 0.011396 | 0.011497 | 0.011665 | 0.011498 | 0.011329 |
| 0.011329 | 0.011396 | 0.011430 | 0.011262 | 0.011329 | 0.011295 | 0.011329 |
| 0.011396 | 0.011396 | 0.011429 | 0.011396 | 0.011296 | 0.011497 | 0.011463 |
| 0.011331 | 0.011228 | 0.011329 | 0.011430 | 0.011329 | 0.011463 | 0.011496 |
| 0.011664 | 0.011368 | 0.011530 | 0.011497 | 0.011429 | 0.011597 | 0.011228 |
| 0.011397 | 0.011296 | 0.011262 | 0.011262 | 0.011329 | 0.011228 | 0.011329 |
| 0.011362 | 0.011396 | 0.011295 | 0.011329 | 0.011295 | 0.011631 | 0.011631 |
| 0.011362 | 0.011396 | 0.011463 | 0.011396 | 0.012035 | 0.011453 | 0.011377 |
| 0.011447 | 0.011407 | 0.011517 | 0.011406 | 0.011515 | 0.011439 | 0.011405 |
| 0.011987 | 0.011302 | 0.011437 | 0.011371 | 0.011645 | 0.011502 | 0.011605 |
| 0.012012 | 0.011475 | 0.011567 | 0.011631 | 0.011496 | 0.011497 | 0.011533 |
| 0.011194 | 0.011362 | 0.011496 | 0.011463 | 0.011466 | 0.011463 | 0.011431 |
| 0.011295 | 0.011228 | 0.011262 | 0.011295 | 0.011194 | 0.000000 | 0.011161 |
| 0.011295 | 0.011329 | 0.011228 | 0.011194 | 0.011228 | 0.011228 | 0.011262 |
| 0.011262 | 0.011194 | 0.011262 | 0.011295 | 0.011194 | 0.011396 | 0.011429 |
| 0.011329 | 0.011396 | 0.011329 | 0.011329 | 0.011262 | 0.011664 | 0.011295 |
| 0.011338 | 0.011262 | 0.011497 | 0.011501 | 0.011362 | 0.011362 | 0.011362 |

|          |          |          |          |          |          |          |
|----------|----------|----------|----------|----------|----------|----------|
| 0.011362 | 0.011295 | 0.011262 | 0.011295 | 0.011396 | 0.011396 | 0.011329 |
| 0.011329 | 0.011463 | 0.011631 | 0.011362 | 0.011564 | 0.011564 | 0.011429 |
| 0.011262 | 0.011329 | 0.011362 | 0.011765 | 0.011329 | 0.011362 | 0.011329 |
| 0.011362 | 0.011295 | 0.011295 | 0.011597 | 0.011530 | 0.011564 | 0.011295 |
| 0.011396 | 0.011463 | 0.011329 | 0.011396 | 0.011362 | 0.011228 | 0.011564 |
| 0.011329 | 0.011295 | 0.011295 | 0.011463 | 0.011295 | 0.011396 | 0.011631 |
| 0.011329 | 0.011705 | 0.011698 | 0.011467 | 0.011229 | 0.011366 | 0.011267 |
| 0.011115 | 0.011683 | 0.011201 | 0.011373 | 0.011255 | 0.011315 | 0.011326 |
| 0.011468 | 0.011126 | 0.011283 | 0.011126 | 0.011168 | 0.011328 | 0.011344 |
| 0.011362 | 0.011257 | 0.011342 | 0.011272 | 0.011330 | 0.011463 | 0.011530 |
| 0.011530 | 0.011396 | 0.011500 | 0.011501 | 0.011636 | 0.011661 | 0.011329 |
| 0.011564 | 0.011430 | 0.011295 | 0.011396 | 0.011195 | 0.011429 | 0.011228 |
| 0.011295 | 0.011295 | 0.011262 | 0.011228 | 0.011262 | 0.011228 | 0.011329 |
| 0.011305 | 0.011305 | 0.011266 | 0.011334 | 0.011471 | 0.011436 | 0.011436 |
| 0.011435 | 0.011363 | 0.011134 | 0.011132 | 0.011297 | 0.011467 | 0.011467 |
| 0.011262 | 0.011331 | 0.011565 | 0.011533 | 0.011464 | 0.011498 | 0.011429 |
| 0.011362 | 0.011429 | 0.011429 | 0.011329 | 0.011900 | 0.011497 | 0.011564 |
| 0.011597 | 0.011665 | 0.011299 | 0.011372 | 0.011262 | 0.011463 | 0.011429 |
| 0.011464 | 0.011496 | 0.011496 | 0.011496 | 0.011610 | 0.011631 | 0.011268 |
| 0.011162 | 0.011164 | 0.011264 | 0.011230 | 0.011333 | 0.011172 | 0.011502 |
| 0.011300 | 0.011455 | 0.011203 | 0.011322 | 0.011296 | 0.011368 | 0.011262 |
| 0.011228 | 0.011228 | 0.011295 | 0.011262 | 0.011463 | 0.011430 | 0.011362 |
| 0.011463 | 0.011530 | 0.011262 | 0.011262 | 0.011295 | 0.011295 | 0.011297 |
| 0.011364 | 0.011295 | 0.011295 | 0.011330 | 0.011463 | 0.011530 | 0.011530 |
| 0.011396 | 0.011500 | 0.011501 | 0.011636 | 0.011661 | 0.011329 | 0.011496 |
| 0.011429 | 0.011429 | 0.011263 | 0.011443 | 0.011373 | 0.011401 | 0.011270 |
| 0.011439 | 0.011607 | 0.011399 | 0.011332 | 0.011228 | 0.011430 | 0.011295 |
| 0.011396 | 0.011329 | 0.011228 | 0.011330 | 0.011430 | 0.011432 | 0.011329 |
| 0.011228 | 0.011161 | 0.011295 | 0.011228 | 0.011161 | 0.011264 | 0.011430 |
| 0.011329 | 0.011262 | 0.011295 | 0.011329 | 0.011295 | 0.011228 | 0.011430 |
| 0.011295 | 0.011329 | 0.011329 | 0.011262 | 0.011329 | 0.011564 | 0.011228 |
| 0.011262 | 0.011664 | 0.011262 | 0.011295 | 0.011262 | 0.011631 | 0.011189 |
| 0.011679 | 0.011188 | 0.011261 | 0.011422 | 0.011508 | 0.011419 | 0.011144 |
| 0.011218 | 0.011429 | 0.011530 | 0.011637 | 0.011498 | 0.011635 | 0.011766 |
| 0.011666 | 0.011703 | 0.011664 | 0.011914 | 0.011631 | 0.012505 | 0.011667 |
| 0.012406 | 0.012173 | 0.012307 | 0.012579 | 0.011631 | 0.011329 | 0.011631 |
| 0.012070 | 0.012005 | 0.011597 | 0.011497 | 0.011565 | 0.011565 | 0.011534 |
| 0.011429 | 0.011433 | 0.011496 | 0.011464 | 0.011834 | 0.011900 | 0.011901 |
| 0.011800 | 0.011901 | 0.012004 | 0.011770 | 0.012070 | 0.012076 | 0.012137 |
| 0.012138 | 0.012172 | 0.012084 | 0.012138 | 0.012139 | 0.011362 | 0.011665 |
| 0.011733 | 0.012236 | 0.011738 | 0.011967 | 0.012440 | 0.011502 | 0.011396 |
| 0.011362 | 0.011362 | 0.011833 | 0.011883 | 0.011940 | 0.011698 | 0.011363 |
| S531     | 0.011530 | 0.011530 | 0.011866 | 0.011631 | 0.011631 | 0.011698 |
| 0.011535 | 0.011468 | 0.011698 | 0.011127 | 0.011194 | 0.011161 | 0.011127 |
| 0.011161 | 0.011329 | 0.011127 | 0.011161 | 0.011228 | 0.011194 | 0.011161 |
| 0.011127 | 0.011161 | 0.011262 | 0.011127 | 0.011161 | 0.011161 | 0.011501 |
| 0.011396 | 0.011161 | 0.000000 | 0.011295 | 0.011228 | 0.011195 | 0.011228 |
| 0.011194 | 0.011295 | 0.011194 | 0.011194 | 0.011228 | 0.011194 | 0.011362 |
| 0.011127 | 0.011194 | 0.011228 | 0.011161 | 0.011262 | 0.011295 | 0.011228 |
| 0.011194 | 0.011362 | 0.011262 | 0.011530 | 0.011194 | 0.011463 | 0.011194 |
| 0.011161 | 0.011262 | 0.011329 | 0.011463 | 0.011564 | 0.011262 | 0.011362 |
| 0.011228 | 0.011295 | 0.011195 | 0.011429 | 0.011664 | 0.011194 | 0.011262 |
| 0.011161 | 0.011262 | 0.011228 | 0.011295 | 0.011228 | 0.011228 | 0.011228 |
| 0.011127 | 0.011161 | 0.011127 | 0.011228 | 0.011194 | 0.011228 | 0.011295 |
| 0.011228 | 0.011194 | 0.011262 | 0.011161 | 0.011295 | 0.011127 | 0.011194 |
| 0.011362 | 0.011295 | 0.011530 | 0.011362 | 0.011194 | 0.011429 | 0.011194 |
| 0.011357 | 0.011583 | 0.011400 | 0.011099 | 0.011098 | 0.011207 | 0.011296 |
| 0.011938 | 0.011365 | 0.011102 | 0.011429 | 0.011429 | 0.011228 | 0.011329 |
| 0.011262 | 0.011228 | 0.011295 | 0.011194 | 0.011295 | 0.011228 | 0.011228 |
| 0.011194 | 0.011295 | 0.011496 | 0.011362 | 0.011262 | 0.011228 | 0.011161 |

|          |          |          |          |          |          |          |
|----------|----------|----------|----------|----------|----------|----------|
| 0.011127 | 0.011127 | 0.011195 | 0.011161 | 0.011362 | 0.011329 | 0.011262 |
| 0.011362 | 0.011429 | 0.011161 | 0.011161 | 0.011195 | 0.011195 | 0.011195 |
| 0.011263 | 0.011195 | 0.011195 | 0.000000 | 0.011133 | 0.011095 | 0.011195 |
| 0.011196 | 0.011129 | 0.011171 | 0.011164 | 0.011094 | 0.011129 | 0.011162 |
| 0.011420 | 0.011198 | 0.011232 | 0.011128 | 0.011129 | 0.011262 | 0.011228 |
| 0.011296 | 0.011229 | 0.011228 | 0.011329 | 0.011262 | 0.011631 | 0.011430 |
| 0.011463 | 0.011329 | 0.011195 | 0.011295 | 0.011094 | 0.011329 | 0.011127 |
| 0.011194 | 0.011194 | 0.011161 | 0.011127 | 0.011161 | 0.011127 | 0.011228 |
| 0.011195 | 0.011295 | 0.011228 | 0.011127 | 0.011229 | 0.011329 | 0.011331 |
| 0.011329 | 0.011228 | 0.011127 | 0.000000 | 0.011195 | 0.011127 | 0.000000 |
| 0.011162 | 0.011329 | 0.011127 | 0.011329 | 0.011094 | 0.011195 | 0.011161 |
| 0.011262 | 0.011161 | 0.011195 | 0.011161 | 0.011195 | 0.000000 | 0.011195 |
| 0.011228 | 0.011161 | 0.011228 | 0.011161 | 0.011195 | 0.011228 | 0.011463 |
| 0.011564 | 0.011496 | 0.011564 | 0.011330 | 0.011564 | 0.011195 | 0.011161 |
| 0.011195 | 0.011464 | 0.011289 | 0.011095 | 0.011569 | 0.000000 | 0.011178 |
| 0.011569 | 0.011468 | 0.011362 | 0.011564 | 0.011265 | 0.011429 | 0.011396 |
| 0.011329 | 0.011496 | 0.011344 | 0.011184 | 0.011228 | 0.011228 | 0.011297 |
| 0.011396 | 0.011296 | 0.011432 | 0.011500 | 0.011429 | 0.011497 | 0.011602 |
| 0.011331 | 0.011501 | 0.011432 | 0.011364 | 0.011632 | 0.011094 | 0.011296 |
| 0.011262 | 0.011194 | 0.011094 | 0.011094 | 0.011161 | 0.011161 | 0.011228 |
| 0.011161 | 0.011228 | 0.011127 | 0.011228 | 0.011161 | 0.011161 | 0.011228 |
| 0.011161 | 0.011597 | 0.011496 | 0.011530 | 0.000000 | 0.011161 | 0.011195 |
| 0.011194 | 0.011161 | 0.011228 | 0.011262 | 0.011127 | 0.011127 | 0.011127 |
| 0.011664 | 0.011295 | 0.011295 | 0.011094 | 0.011194 | 0.011362 | 0.011127 |
| 0.011127 | 0.011194 | 0.011161 | 0.011329 | 0.011127 | 0.011262 | 0.011396 |
| 0.011329 | 0.011161 | 0.011161 | 0.011094 | 0.011094 | 0.011262 | 0.011194 |
| 0.011094 | 0.011194 | 0.000000 | 0.011094 | 0.011228 | 0.011362 | 0.011127 |
| 0.011094 | 0.011228 | 0.011161 | 0.000000 | 0.011396 | 0.000000 | 0.011228 |
| 0.011300 | 0.011127 | 0.011429 | 0.011262 | 0.011295 | 0.011161 | 0.011262 |
| 0.011127 | 0.011463 | 0.000000 | 0.011329 | 0.011127 | 0.011127 | 0.000000 |
| 0.011295 | 0.011497 | 0.011195 | 0.011262 | 0.011094 | 0.011496 | 0.011127 |
| 0.011127 | 0.011127 | 0.011161 | 0.011262 | 0.011161 | 0.011262 | 0.011329 |
| 0.011329 | 0.011295 | 0.011194 | 0.011295 | 0.011262 | 0.011127 | 0.011094 |
| 0.011127 | 0.011127 | 0.011195 | 0.011127 | 0.011094 | 0.011262 | 0.011127 |
| 0.011161 | 0.011161 | 0.011295 | 0.011329 | 0.011228 | 0.011161 | 0.011161 |
| 0.011228 | 0.011161 | 0.011262 | 0.011127 | 0.011262 | 0.011362 | 0.011664 |
| 0.011161 | 0.011564 | 0.011164 | 0.017672 | 0.011126 | 0.011305 | 0.011514 |
| 0.011475 | 0.011517 | 0.011217 | 0.011176 | 0.011609 | 0.011543 | 0.011242 |
| 0.011392 | 0.011426 | 0.000000 | 0.011144 | 0.011138 | 0.011208 | 0.011146 |
| 0.011389 | 0.011321 | 0.011320 | 0.011126 | 0.011295 | 0.011329 | 0.011331 |
| 0.011198 | 0.011295 | 0.011295 | 0.011262 | 0.011228 | 0.011228 | 0.011195 |
| 0.011228 | 0.011161 | 0.011195 | 0.011228 | 0.011195 | 0.011127 | 0.011161 |
| 0.011161 | 0.011228 | 0.011127 | 0.011228 | 0.011262 | 0.011295 | 0.011195 |
| 0.011228 | 0.011195 | 0.011530 | 0.011530 | 0.011262 | 0.011296 | 0.011329 |
| 0.011094 | 0.011094 | 0.011127 | 0.011228 | 0.011094 | 0.011329 | 0.011329 |
| 0.011362 | 0.011362 | 0.011295 | 0.011396 | 0.011564 | 0.011397 | 0.011228 |
| 0.011228 | 0.011295 | 0.011329 | 0.011161 | 0.011228 | 0.011195 | 0.011228 |
| 0.011295 | 0.011295 | 0.011329 | 0.011295 | 0.011195 | 0.011396 | 0.011362 |
| 0.011230 | 0.011127 | 0.011228 | 0.011329 | 0.011228 | 0.011362 | 0.011396 |
| 0.011564 | 0.011265 | 0.011429 | 0.011396 | 0.011329 | 0.011496 | 0.011128 |
| 0.011296 | 0.011195 | 0.011161 | 0.011161 | 0.011228 | 0.011127 | 0.011228 |
| 0.011262 | 0.011295 | 0.011195 | 0.011228 | 0.011195 | 0.011530 | 0.011530 |
| 0.011262 | 0.011296 | 0.011362 | 0.011295 | 0.011934 | 0.011346 | 0.011271 |
| 0.011341 | 0.011303 | 0.011411 | 0.011303 | 0.011410 | 0.011336 | 0.011302 |
| 0.011884 | 0.011199 | 0.011334 | 0.011268 | 0.011542 | 0.011400 | 0.011502 |
| 0.011910 | 0.011362 | 0.011466 | 0.011530 | 0.011396 | 0.011396 | 0.011432 |
| 0.011094 | 0.011262 | 0.011396 | 0.011362 | 0.011364 | 0.011362 | 0.011330 |
| 0.011194 | 0.011127 | 0.011161 | 0.011194 | 0.011094 | 0.011161 | 0.000000 |
| 0.011194 | 0.011228 | 0.011127 | 0.011094 | 0.011194 | 0.011127 | 0.011161 |
| 0.011161 | 0.011094 | 0.011161 | 0.011195 | 0.011094 | 0.011295 | 0.011329 |

|          |          |          |          |          |          |          |
|----------|----------|----------|----------|----------|----------|----------|
| 0.011228 | 0.011295 | 0.011228 | 0.011228 | 0.011161 | 0.011564 | 0.011194 |
| 0.011234 | 0.011161 | 0.011396 | 0.011399 | 0.011262 | 0.011262 | 0.011262 |
| 0.011262 | 0.011195 | 0.011161 | 0.011195 | 0.011295 | 0.011295 | 0.011228 |
| 0.011228 | 0.011362 | 0.011530 | 0.011262 | 0.011463 | 0.011463 | 0.011329 |
| 0.011161 | 0.011228 | 0.011262 | 0.011664 | 0.011228 | 0.011262 | 0.011228 |
| 0.011262 | 0.011194 | 0.011194 | 0.011497 | 0.011429 | 0.011463 | 0.011194 |
| 0.011295 | 0.011362 | 0.011228 | 0.011295 | 0.011262 | 0.011127 | 0.011463 |
| 0.011228 | 0.011194 | 0.011194 | 0.011362 | 0.011194 | 0.011295 | 0.011530 |
| 0.011228 | 0.011603 | 0.011597 | 0.011385 | 0.011117 | 0.011298 | 0.011163 |
| 0.011115 | 0.011605 | 0.011131 | 0.011328 | 0.011158 | 0.011264 | 0.011273 |
| 0.011366 | 0.000000 | 0.011227 | 0.000000 | 0.011114 | 0.011261 | 0.011263 |
| 0.011286 | 0.011178 | 0.011272 | 0.011201 | 0.011229 | 0.011362 | 0.011429 |
| 0.011429 | 0.011296 | 0.011398 | 0.011399 | 0.011535 | 0.011555 | 0.011228 |
| 0.011463 | 0.011329 | 0.011195 | 0.011295 | 0.011094 | 0.011329 | 0.011127 |
| 0.011194 | 0.011194 | 0.011161 | 0.011127 | 0.011161 | 0.011127 | 0.011228 |
| 0.011200 | 0.011200 | 0.011197 | 0.011231 | 0.011368 | 0.011333 | 0.011333 |
| 0.011333 | 0.011262 | 0.000000 | 0.000000 | 0.011196 | 0.011365 | 0.011366 |
| 0.011161 | 0.011230 | 0.011464 | 0.011432 | 0.011363 | 0.011397 | 0.011329 |
| 0.011262 | 0.011329 | 0.011329 | 0.011228 | 0.011799 | 0.011396 | 0.011463 |
| 0.011497 | 0.011558 | 0.011197 | 0.011268 | 0.011161 | 0.011362 | 0.011329 |
| 0.011363 | 0.011396 | 0.011396 | 0.011396 | 0.011532 | 0.011530 | 0.011164 |
| 0.000000 | 0.000000 | 0.011162 | 0.011128 | 0.011231 | 0.000000 | 0.011400 |
| 0.011197 | 0.011323 | 0.000000 | 0.011210 | 0.011195 | 0.011265 | 0.011161 |
| 0.011127 | 0.011127 | 0.011195 | 0.011161 | 0.011362 | 0.011329 | 0.011262 |
| 0.011362 | 0.011429 | 0.011161 | 0.011161 | 0.011195 | 0.011195 | 0.011195 |
| 0.011263 | 0.011195 | 0.011195 | 0.011229 | 0.011362 | 0.011429 | 0.011429 |
| 0.011296 | 0.011398 | 0.011399 | 0.011535 | 0.011555 | 0.011228 | 0.011396 |
| 0.011329 | 0.011329 | 0.011162 | 0.011339 | 0.011269 | 0.011299 | 0.011165 |
| 0.011336 | 0.011516 | 0.011314 | 0.011230 | 0.011127 | 0.011329 | 0.011195 |
| 0.011295 | 0.011228 | 0.011127 | 0.011229 | 0.011329 | 0.011331 | 0.011228 |
| 0.011127 | 0.000000 | 0.011195 | 0.011127 | 0.000000 | 0.011162 | 0.011329 |
| 0.011228 | 0.011161 | 0.011195 | 0.011228 | 0.011195 | 0.011127 | 0.011329 |
| 0.011194 | 0.011228 | 0.011228 | 0.011161 | 0.011228 | 0.011463 | 0.011127 |
| 0.011161 | 0.011564 | 0.011161 | 0.011194 | 0.011161 | 0.011530 | 0.011103 |
| 0.011566 | 0.011103 | 0.011161 | 0.011342 | 0.011426 | 0.011347 | 0.000000 |
| 0.011113 | 0.011329 | 0.011429 | 0.011535 | 0.011397 | 0.011534 | 0.011665 |
| 0.011565 | 0.011601 | 0.011564 | 0.011812 | 0.011530 | 0.012404 | 0.011565 |
| 0.012304 | 0.012072 | 0.012206 | 0.012477 | 0.011530 | 0.011228 | 0.011530 |
| 0.011969 | 0.011903 | 0.011496 | 0.011396 | 0.011464 | 0.011464 | 0.011432 |
| 0.011329 | 0.011331 | 0.011396 | 0.011363 | 0.011733 | 0.011799 | 0.011800 |
| 0.011699 | 0.011800 | 0.011903 | 0.011669 | 0.011969 | 0.011974 | 0.012036 |
| 0.012037 | 0.012070 | 0.012015 | 0.012037 | 0.012038 | 0.011262 | 0.011564 |
| 0.011632 | 0.012135 | 0.011636 | 0.011866 | 0.012339 | 0.011400 | 0.011295 |
| 0.011262 | 0.011262 | 0.011732 | 0.011759 | 0.011869 | 0.011597 | 0.011262 |
| S532     | 0.011664 | 0.011664 | 0.011933 | 0.011698 | 0.011698 | 0.011765 |
| 0.011603 | 0.011535 | 0.011765 | 0.011262 | 0.011329 | 0.011296 | 0.011262 |
| 0.011228 | 0.011463 | 0.011194 | 0.011295 | 0.011362 | 0.011329 | 0.011295 |
| 0.011262 | 0.011295 | 0.011329 | 0.011262 | 0.011295 | 0.011295 | 0.011569 |
| 0.011463 | 0.011295 | 0.011194 | 0.011362 | 0.011362 | 0.011329 | 0.011362 |
| 0.011329 | 0.011429 | 0.011329 | 0.011329 | 0.011362 | 0.011262 | 0.011496 |
| 0.011194 | 0.011329 | 0.011362 | 0.011295 | 0.011329 | 0.011429 | 0.011362 |
| 0.011329 | 0.011497 | 0.011396 | 0.011597 | 0.011329 | 0.011597 | 0.011329 |
| 0.011295 | 0.011329 | 0.011463 | 0.011597 | 0.011631 | 0.011329 | 0.011429 |
| 0.011362 | 0.011429 | 0.011329 | 0.011496 | 0.011732 | 0.011329 | 0.011396 |
| 0.011295 | 0.011396 | 0.011362 | 0.011429 | 0.011362 | 0.011362 | 0.011362 |
| 0.011262 | 0.011295 | 0.011262 | 0.011295 | 0.011329 | 0.011363 | 0.011429 |
| 0.011362 | 0.011329 | 0.011396 | 0.011295 | 0.011362 | 0.011262 | 0.011329 |
| 0.011496 | 0.011429 | 0.011664 | 0.011429 | 0.011329 | 0.011564 | 0.011329 |
| 0.011431 | 0.011658 | 0.011551 | 0.011255 | 0.011247 | 0.011281 | 0.011375 |
| 0.012011 | 0.011467 | 0.011266 | 0.011564 | 0.011564 | 0.011295 | 0.011396 |



|          |          |          |          |          |          |          |
|----------|----------|----------|----------|----------|----------|----------|
| 0.011396 | 0.011362 | 0.011429 | 0.011329 | 0.011429 | 0.011362 | 0.011362 |
| 0.011329 | 0.011362 | 0.011631 | 0.011496 | 0.011396 | 0.011362 | 0.011295 |
| 0.011262 | 0.011195 | 0.011262 | 0.011295 | 0.011429 | 0.011396 | 0.011329 |
| 0.011429 | 0.011497 | 0.011295 | 0.011295 | 0.011329 | 0.011329 | 0.011330 |
| 0.011398 | 0.011329 | 0.011329 | 0.011204 | 0.011277 | 0.011235 | 0.011329 |
| 0.011263 | 0.011266 | 0.011318 | 0.011302 | 0.011230 | 0.011266 | 0.011297 |
| 0.011492 | 0.011336 | 0.011370 | 0.011262 | 0.011268 | 0.011397 | 0.011296 |
| 0.011363 | 0.011363 | 0.011363 | 0.011463 | 0.011396 | 0.011765 | 0.011497 |
| 0.011530 | 0.011396 | 0.011329 | 0.011362 | 0.011228 | 0.011396 | 0.011262 |
| 0.011329 | 0.011329 | 0.011295 | 0.011262 | 0.011295 | 0.011262 | 0.011362 |
| 0.011329 | 0.011429 | 0.011362 | 0.011262 | 0.011363 | 0.011463 | 0.011466 |
| 0.011463 | 0.011362 | 0.011262 | 0.011195 | 0.011329 | 0.011262 | 0.011195 |
| 0.011298 | 0.011463 | 0.011262 | 0.011463 | 0.011228 | 0.011329 | 0.011295 |
| 0.011396 | 0.011295 | 0.011329 | 0.011295 | 0.011329 | 0.011195 | 0.011329 |
| 0.011362 | 0.011295 | 0.011362 | 0.011295 | 0.011329 | 0.011362 | 0.011597 |
| 0.011631 | 0.011564 | 0.011631 | 0.011465 | 0.011631 | 0.011329 | 0.011295 |
| 0.011263 | 0.011505 | 0.011380 | 0.011232 | 0.011637 | 0.011197 | 0.011336 |
| 0.011637 | 0.011536 | 0.011496 | 0.011698 | 0.011402 | 0.011564 | 0.011530 |
| 0.011463 | 0.011631 | 0.011486 | 0.011349 | 0.011395 | 0.011362 | 0.011432 |
| 0.011530 | 0.011431 | 0.011567 | 0.011635 | 0.011564 | 0.011631 | 0.011738 |
| 0.011466 | 0.011637 | 0.011568 | 0.011432 | 0.011766 | 0.011228 | 0.011431 |
| 0.011396 | 0.011329 | 0.011228 | 0.011228 | 0.011295 | 0.011295 | 0.011362 |
| 0.011295 | 0.011362 | 0.011262 | 0.011228 | 0.011295 | 0.011295 | 0.011362 |
| 0.011295 | 0.011664 | 0.011564 | 0.011597 | 0.011194 | 0.011295 | 0.011329 |
| 0.011329 | 0.011295 | 0.011362 | 0.011329 | 0.011262 | 0.011262 | 0.011262 |
| 0.011731 | 0.011362 | 0.011429 | 0.011228 | 0.011329 | 0.011497 | 0.011262 |
| 0.011262 | 0.011329 | 0.011295 | 0.011463 | 0.011262 | 0.011396 | 0.011530 |
| 0.011463 | 0.011295 | 0.011295 | 0.011228 | 0.011228 | 0.011396 | 0.011329 |
| 0.011228 | 0.011329 | 0.011194 | 0.011228 | 0.011295 | 0.011430 | 0.011262 |
| 0.011228 | 0.011295 | 0.011295 | 0.011194 | 0.011463 | 0.011195 | 0.011362 |
| 0.011437 | 0.011262 | 0.011496 | 0.011396 | 0.011161 | 0.011295 | 0.011396 |
| 0.011262 | 0.011597 | 0.011194 | 0.011396 | 0.011194 | 0.011194 | 0.011194 |
| 0.011429 | 0.011564 | 0.011329 | 0.011396 | 0.011228 | 0.011564 | 0.011194 |
| 0.011262 | 0.011262 | 0.011295 | 0.011396 | 0.011295 | 0.011396 | 0.011463 |
| 0.011396 | 0.011429 | 0.011329 | 0.011429 | 0.011396 | 0.011262 | 0.011228 |
| 0.011262 | 0.011262 | 0.011329 | 0.011194 | 0.011228 | 0.011396 | 0.011262 |
| 0.011228 | 0.011295 | 0.011429 | 0.011396 | 0.011362 | 0.011295 | 0.011295 |
| 0.011362 | 0.011295 | 0.011396 | 0.011262 | 0.011396 | 0.011496 | 0.011732 |
| 0.011295 | 0.011631 | 0.011302 | 0.017823 | 0.011322 | 0.011366 | 0.011583 |
| 0.011545 | 0.011588 | 0.011374 | 0.011350 | 0.011664 | 0.011612 | 0.011425 |
| 0.011440 | 0.011487 | 0.011216 | 0.011311 | 0.011177 | 0.011307 | 0.011318 |
| 0.011482 | 0.011395 | 0.011394 | 0.011193 | 0.011429 | 0.011463 | 0.011466 |
| 0.011335 | 0.011429 | 0.011429 | 0.011329 | 0.011362 | 0.011362 | 0.011329 |
| 0.011362 | 0.011295 | 0.011329 | 0.011362 | 0.011329 | 0.011262 | 0.011295 |
| 0.011295 | 0.011362 | 0.011262 | 0.011362 | 0.011396 | 0.011362 | 0.011329 |
| 0.011295 | 0.011262 | 0.011597 | 0.011597 | 0.011396 | 0.011430 | 0.011463 |
| 0.011228 | 0.011228 | 0.011262 | 0.011362 | 0.011228 | 0.011463 | 0.011463 |
| 0.011497 | 0.011496 | 0.011429 | 0.011530 | 0.011631 | 0.011532 | 0.011362 |
| 0.011362 | 0.011429 | 0.011463 | 0.011295 | 0.011362 | 0.011329 | 0.011362 |
| 0.011430 | 0.011430 | 0.011463 | 0.011430 | 0.011330 | 0.011530 | 0.011497 |
| 0.011365 | 0.011262 | 0.011362 | 0.011463 | 0.011362 | 0.011430 | 0.011530 |
| 0.011698 | 0.011402 | 0.011564 | 0.011530 | 0.011463 | 0.011631 | 0.011228 |
| 0.011431 | 0.011329 | 0.011295 | 0.011295 | 0.011362 | 0.011262 | 0.011362 |
| 0.011396 | 0.011362 | 0.011329 | 0.011295 | 0.011262 | 0.011597 | 0.011597 |
| 0.011396 | 0.011430 | 0.011496 | 0.011429 | 0.012002 | 0.011489 | 0.011412 |
| 0.011412 | 0.011441 | 0.011552 | 0.011441 | 0.011550 | 0.011474 | 0.011439 |
| 0.011953 | 0.011337 | 0.011471 | 0.011406 | 0.011680 | 0.011536 | 0.011639 |
| 0.011978 | 0.011437 | 0.011601 | 0.011664 | 0.011530 | 0.011463 | 0.011567 |
| 0.011228 | 0.011396 | 0.011530 | 0.011496 | 0.011499 | 0.011429 | 0.011397 |
| 0.011329 | 0.011262 | 0.011295 | 0.011329 | 0.011228 | 0.011295 | 0.011194 |

|          |          |          |          |          |          |          |
|----------|----------|----------|----------|----------|----------|----------|
| 0.000000 | 0.011094 | 0.011262 | 0.011228 | 0.011329 | 0.011262 | 0.011295 |
| 0.011295 | 0.011228 | 0.011295 | 0.011329 | 0.011228 | 0.011429 | 0.011396 |
| 0.011295 | 0.011161 | 0.011295 | 0.011295 | 0.011295 | 0.011631 | 0.011329 |
| 0.011304 | 0.011295 | 0.011463 | 0.011467 | 0.011396 | 0.011396 | 0.011396 |
| 0.011396 | 0.011329 | 0.011295 | 0.011329 | 0.011429 | 0.011429 | 0.011362 |
| 0.011362 | 0.011496 | 0.011597 | 0.011396 | 0.011597 | 0.011597 | 0.011463 |
| 0.011295 | 0.011362 | 0.011396 | 0.011732 | 0.011362 | 0.011396 | 0.011362 |
| 0.011396 | 0.011262 | 0.011262 | 0.011564 | 0.011564 | 0.011530 | 0.011329 |
| 0.011429 | 0.011496 | 0.011362 | 0.011429 | 0.011396 | 0.011262 | 0.011530 |
| 0.011362 | 0.011329 | 0.011262 | 0.011496 | 0.011329 | 0.011429 | 0.011664 |
| 0.011362 | 0.011671 | 0.011664 | 0.011467 | 0.011173 | 0.011366 | 0.011215 |
| 0.011225 | 0.011683 | 0.011271 | 0.011417 | 0.011255 | 0.011366 | 0.011326 |
| 0.011417 | 0.011258 | 0.011394 | 0.011258 | 0.011330 | 0.011462 | 0.011425 |
| 0.011437 | 0.011336 | 0.011342 | 0.011342 | 0.011364 | 0.011429 | 0.011497 |
| 0.011497 | 0.011363 | 0.011466 | 0.011467 | 0.011602 | 0.011626 | 0.011362 |
| 0.011530 | 0.011396 | 0.011329 | 0.011362 | 0.011228 | 0.011396 | 0.011262 |
| 0.011329 | 0.011329 | 0.011295 | 0.011262 | 0.011295 | 0.011262 | 0.011362 |
| 0.011340 | 0.011340 | 0.011266 | 0.011368 | 0.011505 | 0.011470 | 0.011470 |
| 0.011469 | 0.011396 | 0.011208 | 0.011204 | 0.011331 | 0.011501 | 0.011501 |
| 0.011296 | 0.011365 | 0.011599 | 0.011567 | 0.011497 | 0.011531 | 0.011463 |
| 0.011396 | 0.011463 | 0.011463 | 0.011362 | 0.011866 | 0.011530 | 0.011597 |
| 0.011631 | 0.011594 | 0.011333 | 0.011407 | 0.011295 | 0.011497 | 0.011463 |
| 0.011497 | 0.011530 | 0.011530 | 0.011530 | 0.011689 | 0.011664 | 0.011303 |
| 0.011195 | 0.011199 | 0.011298 | 0.011264 | 0.011299 | 0.011209 | 0.011468 |
| 0.011335 | 0.011411 | 0.011251 | 0.011360 | 0.011329 | 0.011402 | 0.011295 |
| 0.011262 | 0.011195 | 0.011262 | 0.011295 | 0.011429 | 0.011396 | 0.011329 |
| 0.011429 | 0.011497 | 0.011295 | 0.011295 | 0.011329 | 0.011329 | 0.011330 |
| 0.011398 | 0.011329 | 0.011329 | 0.011364 | 0.011429 | 0.011497 | 0.011497 |
| 0.011363 | 0.011466 | 0.011467 | 0.011602 | 0.011626 | 0.011362 | 0.011530 |
| 0.011463 | 0.011463 | 0.011297 | 0.011478 | 0.011408 | 0.011435 | 0.011305 |
| 0.011473 | 0.011561 | 0.011441 | 0.011366 | 0.011262 | 0.011463 | 0.011329 |
| 0.011429 | 0.011362 | 0.011262 | 0.011363 | 0.011463 | 0.011466 | 0.011362 |
| 0.011262 | 0.011195 | 0.011329 | 0.011262 | 0.011195 | 0.011298 | 0.011463 |
| 0.011362 | 0.011295 | 0.011329 | 0.011362 | 0.011329 | 0.011262 | 0.011396 |
| 0.011329 | 0.011362 | 0.011362 | 0.011295 | 0.011295 | 0.011530 | 0.011194 |
| 0.011295 | 0.011631 | 0.011295 | 0.011329 | 0.011295 | 0.011597 | 0.011274 |
| 0.011622 | 0.011273 | 0.011261 | 0.011422 | 0.011508 | 0.011419 | 0.011227 |
| 0.011165 | 0.011396 | 0.011496 | 0.011603 | 0.011464 | 0.011601 | 0.011733 |
| 0.011632 | 0.011669 | 0.011631 | 0.011880 | 0.011597 | 0.012472 | 0.011633 |
| 0.012372 | 0.012139 | 0.012273 | 0.012545 | 0.011597 | 0.011295 | 0.011598 |
| 0.012036 | 0.011971 | 0.011564 | 0.011463 | 0.011531 | 0.011531 | 0.011500 |
| 0.011396 | 0.011399 | 0.011463 | 0.011430 | 0.011800 | 0.011866 | 0.011867 |
| 0.011766 | 0.011867 | 0.011970 | 0.011737 | 0.012036 | 0.012042 | 0.012104 |
| 0.012104 | 0.012138 | 0.012084 | 0.012104 | 0.012105 | 0.011396 | 0.011631 |
| 0.011699 | 0.012202 | 0.011704 | 0.011933 | 0.012406 | 0.011468 | 0.011363 |
| 0.011329 | 0.011329 | 0.011799 | 0.011842 | 0.011940 | 0.011664 | 0.011330 |
| S533     | 0.011698 | 0.011698 | 0.011967 | 0.011732 | 0.011732 | 0.011799 |
| 0.011637 | 0.011569 | 0.011799 | 0.011295 | 0.011362 | 0.011329 | 0.011295 |
| 0.011262 | 0.011496 | 0.011228 | 0.011329 | 0.011396 | 0.011362 | 0.011329 |
| 0.011295 | 0.011329 | 0.011362 | 0.011295 | 0.011329 | 0.011329 | 0.011603 |
| 0.011496 | 0.011329 | 0.011228 | 0.011396 | 0.011396 | 0.011362 | 0.011396 |
| 0.011362 | 0.011463 | 0.011362 | 0.011362 | 0.011396 | 0.011295 | 0.011530 |
| 0.011228 | 0.011362 | 0.011396 | 0.011329 | 0.011362 | 0.011463 | 0.011396 |
| 0.011362 | 0.011530 | 0.011430 | 0.011631 | 0.011362 | 0.011631 | 0.011362 |
| 0.011329 | 0.011362 | 0.011496 | 0.011631 | 0.011664 | 0.011362 | 0.011463 |
| 0.011396 | 0.011463 | 0.011362 | 0.011530 | 0.011765 | 0.011362 | 0.011429 |
| 0.011329 | 0.011429 | 0.011396 | 0.011463 | 0.011396 | 0.011396 | 0.011396 |
| 0.011295 | 0.011329 | 0.011295 | 0.011329 | 0.011362 | 0.011397 | 0.011463 |
| 0.011396 | 0.011362 | 0.011429 | 0.011329 | 0.011396 | 0.011295 | 0.011362 |
| 0.011530 | 0.011463 | 0.011698 | 0.011463 | 0.011362 | 0.011597 | 0.011362 |

|          |          |          |          |          |          |          |
|----------|----------|----------|----------|----------|----------|----------|
| 0.011468 | 0.011695 | 0.011588 | 0.011295 | 0.011284 | 0.011318 | 0.011415 |
| 0.012048 | 0.011467 | 0.011307 | 0.011597 | 0.011597 | 0.011329 | 0.011429 |
| 0.011429 | 0.011396 | 0.011463 | 0.011362 | 0.011463 | 0.011396 | 0.011396 |
| 0.011362 | 0.011396 | 0.011664 | 0.011530 | 0.011429 | 0.011396 | 0.011329 |
| 0.011295 | 0.011228 | 0.011295 | 0.011329 | 0.011463 | 0.011429 | 0.011362 |
| 0.011463 | 0.011530 | 0.011329 | 0.011329 | 0.011362 | 0.011362 | 0.011364 |
| 0.011432 | 0.011362 | 0.011362 | 0.011240 | 0.011313 | 0.011271 | 0.011363 |
| 0.011297 | 0.011301 | 0.011355 | 0.011336 | 0.011264 | 0.011300 | 0.011330 |
| 0.011528 | 0.011370 | 0.011405 | 0.011296 | 0.011302 | 0.011430 | 0.011329 |
| 0.011397 | 0.011397 | 0.011396 | 0.011496 | 0.011429 | 0.011799 | 0.011530 |
| 0.011564 | 0.011430 | 0.011362 | 0.011396 | 0.011262 | 0.011429 | 0.011295 |
| 0.011362 | 0.011362 | 0.011329 | 0.011295 | 0.011329 | 0.011295 | 0.011396 |
| 0.011362 | 0.011463 | 0.011396 | 0.011295 | 0.011397 | 0.011497 | 0.011499 |
| 0.011497 | 0.011396 | 0.011295 | 0.011229 | 0.011362 | 0.011295 | 0.011228 |
| 0.011332 | 0.011497 | 0.011295 | 0.011497 | 0.011262 | 0.011362 | 0.011329 |
| 0.011430 | 0.011329 | 0.011362 | 0.011329 | 0.011362 | 0.011228 | 0.011362 |
| 0.011396 | 0.011329 | 0.011396 | 0.011329 | 0.011362 | 0.011396 | 0.011631 |
| 0.011664 | 0.011597 | 0.011665 | 0.011498 | 0.011665 | 0.011362 | 0.011329 |
| 0.011297 | 0.011545 | 0.011426 | 0.011266 | 0.011671 | 0.011231 | 0.011336 |
| 0.011671 | 0.011570 | 0.011530 | 0.011732 | 0.011436 | 0.011597 | 0.011564 |
| 0.011496 | 0.011664 | 0.011522 | 0.011349 | 0.011437 | 0.011396 | 0.011466 |
| 0.011564 | 0.011465 | 0.011601 | 0.011669 | 0.011597 | 0.011665 | 0.011772 |
| 0.011500 | 0.011671 | 0.011602 | 0.011466 | 0.011800 | 0.011262 | 0.011464 |
| 0.011429 | 0.011362 | 0.011262 | 0.011262 | 0.011329 | 0.011329 | 0.011396 |
| 0.011329 | 0.011396 | 0.011295 | 0.011262 | 0.011329 | 0.011329 | 0.011396 |
| 0.011329 | 0.011698 | 0.011597 | 0.011631 | 0.011228 | 0.011329 | 0.011362 |
| 0.011362 | 0.011329 | 0.011396 | 0.011362 | 0.011295 | 0.011295 | 0.011295 |
| 0.011765 | 0.011396 | 0.011463 | 0.011262 | 0.011362 | 0.011530 | 0.011295 |
| 0.011295 | 0.011362 | 0.011329 | 0.011497 | 0.011295 | 0.011429 | 0.011564 |
| 0.011496 | 0.011329 | 0.011329 | 0.011262 | 0.011262 | 0.011429 | 0.011362 |
| 0.011262 | 0.011362 | 0.011228 | 0.011262 | 0.011329 | 0.011463 | 0.011295 |
| 0.011262 | 0.011329 | 0.011329 | 0.011228 | 0.011496 | 0.011228 | 0.011396 |
| 0.011471 | 0.011295 | 0.011530 | 0.011429 | 0.011127 | 0.011329 | 0.011429 |
| 0.011295 | 0.011631 | 0.011228 | 0.011429 | 0.011228 | 0.011228 | 0.011228 |
| 0.011463 | 0.011597 | 0.011362 | 0.011429 | 0.011262 | 0.011597 | 0.011228 |
| 0.011295 | 0.011295 | 0.011329 | 0.011429 | 0.011329 | 0.011429 | 0.011496 |
| 0.011429 | 0.011463 | 0.011362 | 0.011463 | 0.011429 | 0.011295 | 0.011262 |
| 0.011295 | 0.011295 | 0.011362 | 0.011228 | 0.011262 | 0.011429 | 0.011295 |
| 0.011262 | 0.011329 | 0.011463 | 0.011429 | 0.011396 | 0.011329 | 0.011329 |
| 0.011396 | 0.011329 | 0.011429 | 0.011295 | 0.011429 | 0.011530 | 0.011765 |
| 0.011329 | 0.011664 | 0.011336 | 0.017861 | 0.011322 | 0.011366 | 0.011618 |
| 0.011579 | 0.011623 | 0.011374 | 0.011350 | 0.011664 | 0.011647 | 0.011425 |
| 0.011440 | 0.011487 | 0.011255 | 0.011311 | 0.011216 | 0.011307 | 0.011318 |
| 0.011482 | 0.011433 | 0.011431 | 0.011259 | 0.011463 | 0.011497 | 0.011500 |
| 0.011369 | 0.011463 | 0.011463 | 0.011362 | 0.011396 | 0.011396 | 0.011362 |
| 0.011396 | 0.011329 | 0.011362 | 0.011396 | 0.011362 | 0.011295 | 0.011329 |
| 0.011329 | 0.011396 | 0.011295 | 0.011396 | 0.011430 | 0.011396 | 0.011362 |
| 0.011329 | 0.011295 | 0.011631 | 0.011631 | 0.011430 | 0.011464 | 0.011497 |
| 0.011262 | 0.011262 | 0.011295 | 0.011396 | 0.011262 | 0.011497 | 0.011497 |
| 0.011530 | 0.011530 | 0.011463 | 0.011564 | 0.011665 | 0.011565 | 0.011396 |
| 0.011396 | 0.011463 | 0.011497 | 0.011329 | 0.011396 | 0.011362 | 0.011396 |
| 0.011463 | 0.011463 | 0.011497 | 0.011463 | 0.011363 | 0.011564 | 0.011530 |
| 0.011399 | 0.011295 | 0.011396 | 0.011497 | 0.011396 | 0.011463 | 0.011564 |
| 0.011732 | 0.011436 | 0.011597 | 0.011564 | 0.011496 | 0.011664 | 0.011262 |
| 0.011464 | 0.011363 | 0.011329 | 0.011329 | 0.011396 | 0.011295 | 0.011396 |
| 0.011430 | 0.011396 | 0.011362 | 0.011329 | 0.011295 | 0.011631 | 0.011631 |
| 0.011430 | 0.011464 | 0.011530 | 0.011463 | 0.012036 | 0.011524 | 0.011447 |
| 0.011447 | 0.011476 | 0.011587 | 0.011476 | 0.011585 | 0.011508 | 0.011474 |
| 0.011987 | 0.011372 | 0.011505 | 0.011441 | 0.011714 | 0.011570 | 0.011673 |
| 0.012012 | 0.011475 | 0.011635 | 0.011698 | 0.011564 | 0.011497 | 0.011601 |

|          |          |          |          |          |          |          |
|----------|----------|----------|----------|----------|----------|----------|
| 0.011262 | 0.011429 | 0.011564 | 0.011530 | 0.011533 | 0.011463 | 0.011431 |
| 0.011362 | 0.011295 | 0.011329 | 0.011362 | 0.011262 | 0.011329 | 0.011228 |
| 0.011094 | 0.000000 | 0.011228 | 0.011262 | 0.011295 | 0.011295 | 0.011329 |
| 0.011329 | 0.011262 | 0.011329 | 0.011362 | 0.011262 | 0.011463 | 0.011362 |
| 0.011262 | 0.011127 | 0.011262 | 0.011262 | 0.011329 | 0.011664 | 0.011362 |
| 0.011338 | 0.011329 | 0.011497 | 0.011501 | 0.011429 | 0.011429 | 0.011429 |
| 0.011429 | 0.011362 | 0.011329 | 0.011362 | 0.011463 | 0.011463 | 0.011396 |
| 0.011396 | 0.011530 | 0.011631 | 0.011429 | 0.011631 | 0.011631 | 0.011496 |
| 0.011329 | 0.011396 | 0.011429 | 0.011765 | 0.011396 | 0.011429 | 0.011396 |
| 0.011429 | 0.011295 | 0.011295 | 0.011597 | 0.011597 | 0.011564 | 0.011362 |
| 0.011463 | 0.011530 | 0.011396 | 0.011463 | 0.011429 | 0.011295 | 0.011564 |
| 0.011396 | 0.011362 | 0.011295 | 0.011530 | 0.011362 | 0.011463 | 0.011698 |
| 0.011396 | 0.011705 | 0.011698 | 0.011507 | 0.011229 | 0.011400 | 0.011267 |
| 0.011225 | 0.011722 | 0.011306 | 0.011462 | 0.011304 | 0.011417 | 0.011326 |
| 0.011417 | 0.011258 | 0.011394 | 0.011258 | 0.011384 | 0.011462 | 0.011466 |
| 0.011475 | 0.011375 | 0.011377 | 0.011377 | 0.011397 | 0.011463 | 0.011530 |
| 0.011530 | 0.011396 | 0.011500 | 0.011501 | 0.011636 | 0.011661 | 0.011396 |
| 0.011564 | 0.011430 | 0.011362 | 0.011396 | 0.011262 | 0.011429 | 0.011295 |
| 0.011362 | 0.011362 | 0.011329 | 0.011295 | 0.011329 | 0.011295 | 0.011396 |
| 0.011375 | 0.011375 | 0.011300 | 0.011403 | 0.011539 | 0.011504 | 0.011504 |
| 0.011503 | 0.011430 | 0.011245 | 0.011240 | 0.011365 | 0.011535 | 0.011535 |
| 0.011329 | 0.011399 | 0.011632 | 0.011601 | 0.011531 | 0.011565 | 0.011496 |
| 0.011429 | 0.011496 | 0.011496 | 0.011396 | 0.011900 | 0.011564 | 0.011631 |
| 0.011665 | 0.011630 | 0.011367 | 0.011441 | 0.011329 | 0.011530 | 0.011496 |
| 0.011531 | 0.011564 | 0.011564 | 0.011564 | 0.011728 | 0.011698 | 0.011338 |
| 0.011229 | 0.011233 | 0.011332 | 0.011298 | 0.011333 | 0.011247 | 0.011502 |
| 0.011369 | 0.011455 | 0.011298 | 0.011397 | 0.011363 | 0.011437 | 0.011329 |
| 0.011295 | 0.011228 | 0.011295 | 0.011329 | 0.011463 | 0.011429 | 0.011362 |
| 0.011463 | 0.011530 | 0.011329 | 0.011329 | 0.011362 | 0.011362 | 0.011364 |
| 0.011432 | 0.011362 | 0.011362 | 0.011397 | 0.011463 | 0.011530 | 0.011530 |
| 0.011396 | 0.011500 | 0.011501 | 0.011636 | 0.011661 | 0.011396 | 0.011564 |
| 0.011496 | 0.011496 | 0.011331 | 0.011513 | 0.011408 | 0.011469 | 0.011305 |
| 0.011473 | 0.011561 | 0.011441 | 0.011400 | 0.011295 | 0.011497 | 0.011362 |
| 0.011463 | 0.011396 | 0.011295 | 0.011397 | 0.011497 | 0.011499 | 0.011396 |
| 0.011295 | 0.011229 | 0.011362 | 0.011295 | 0.011228 | 0.011332 | 0.011497 |
| 0.011396 | 0.011329 | 0.011362 | 0.011396 | 0.011362 | 0.011295 | 0.011430 |
| 0.011362 | 0.011396 | 0.011396 | 0.011329 | 0.011262 | 0.011496 | 0.011228 |
| 0.011329 | 0.011664 | 0.011329 | 0.011362 | 0.011329 | 0.011631 | 0.011274 |
| 0.011622 | 0.011315 | 0.011261 | 0.011463 | 0.011549 | 0.011455 | 0.011227 |
| 0.011165 | 0.011429 | 0.011530 | 0.011637 | 0.011498 | 0.011635 | 0.011766 |
| 0.011666 | 0.011703 | 0.011664 | 0.011914 | 0.011631 | 0.012505 | 0.011667 |
| 0.012406 | 0.012173 | 0.012307 | 0.012579 | 0.011631 | 0.011329 | 0.011631 |
| 0.012070 | 0.012005 | 0.011597 | 0.011497 | 0.011565 | 0.011565 | 0.011534 |
| 0.011429 | 0.011433 | 0.011496 | 0.011464 | 0.011834 | 0.011900 | 0.011901 |
| 0.011800 | 0.011901 | 0.012004 | 0.011770 | 0.012070 | 0.012076 | 0.012137 |
| 0.012138 | 0.012172 | 0.012118 | 0.012138 | 0.012139 | 0.011429 | 0.011665 |
| 0.011733 | 0.012236 | 0.011738 | 0.011967 | 0.012440 | 0.011502 | 0.011396 |
| 0.011362 | 0.011362 | 0.011833 | 0.011883 | 0.011975 | 0.011698 | 0.011363 |
| s534     | 0.011597 | 0.011597 | 0.011933 | 0.011698 | 0.011698 | 0.011765 |
| 0.011603 | 0.011535 | 0.011765 | 0.011195 | 0.011262 | 0.011228 | 0.011194 |
| 0.011228 | 0.011396 | 0.011194 | 0.011228 | 0.011295 | 0.011262 | 0.011228 |
| 0.011194 | 0.011228 | 0.011329 | 0.011195 | 0.011228 | 0.011228 | 0.011569 |
| 0.011463 | 0.011228 | 0.011127 | 0.011362 | 0.011295 | 0.011262 | 0.011295 |
| 0.011262 | 0.011362 | 0.011262 | 0.011262 | 0.011295 | 0.011262 | 0.011429 |
| 0.011194 | 0.011262 | 0.011295 | 0.011228 | 0.011329 | 0.011362 | 0.011295 |
| 0.011262 | 0.011429 | 0.011329 | 0.011597 | 0.011262 | 0.011530 | 0.011262 |
| 0.011228 | 0.011329 | 0.011396 | 0.011530 | 0.011631 | 0.011329 | 0.011429 |
| 0.011295 | 0.011362 | 0.011262 | 0.011496 | 0.011732 | 0.011262 | 0.011329 |
| 0.011228 | 0.011329 | 0.011295 | 0.011362 | 0.011295 | 0.011295 | 0.011295 |
| 0.011194 | 0.011228 | 0.011194 | 0.011295 | 0.011262 | 0.011296 | 0.011362 |

|          |          |          |          |          |          |          |
|----------|----------|----------|----------|----------|----------|----------|
| 0.011295 | 0.011262 | 0.011329 | 0.011228 | 0.011362 | 0.011194 | 0.011262 |
| 0.011429 | 0.011362 | 0.011597 | 0.011429 | 0.011262 | 0.011496 | 0.011262 |
| 0.011431 | 0.011658 | 0.011475 | 0.011138 | 0.011172 | 0.011281 | 0.011375 |
| 0.012011 | 0.011365 | 0.011184 | 0.011496 | 0.011496 | 0.011295 | 0.011396 |
| 0.011329 | 0.011295 | 0.011362 | 0.011262 | 0.011362 | 0.011295 | 0.011295 |
| 0.011262 | 0.011362 | 0.011564 | 0.011429 | 0.011329 | 0.011295 | 0.011228 |
| 0.011195 | 0.011195 | 0.011262 | 0.011228 | 0.011429 | 0.011396 | 0.011329 |
| 0.011429 | 0.011497 | 0.011228 | 0.011228 | 0.011262 | 0.011262 | 0.011263 |
| 0.011331 | 0.011262 | 0.011262 | 0.011132 | 0.011205 | 0.011165 | 0.011262 |
| 0.011263 | 0.011198 | 0.011245 | 0.011233 | 0.011162 | 0.011197 | 0.011229 |
| 0.011492 | 0.011267 | 0.011301 | 0.011195 | 0.011129 | 0.011329 | 0.011296 |
| 0.011363 | 0.011296 | 0.011296 | 0.011396 | 0.011329 | 0.011698 | 0.011497 |
| 0.011530 | 0.011396 | 0.011262 | 0.011362 | 0.011161 | 0.011396 | 0.011195 |
| 0.011262 | 0.011262 | 0.011228 | 0.011195 | 0.011228 | 0.011195 | 0.011295 |
| 0.011262 | 0.011362 | 0.011295 | 0.011195 | 0.011296 | 0.011396 | 0.011398 |
| 0.011396 | 0.011295 | 0.011195 | 0.011128 | 0.011262 | 0.011195 | 0.011127 |
| 0.011230 | 0.011396 | 0.011195 | 0.011396 | 0.011161 | 0.011262 | 0.011228 |
| 0.011329 | 0.011228 | 0.011262 | 0.011228 | 0.011262 | 0.011127 | 0.011262 |
| 0.011295 | 0.011228 | 0.011295 | 0.011228 | 0.011262 | 0.011295 | 0.011530 |
| 0.011631 | 0.011564 | 0.011631 | 0.011397 | 0.011631 | 0.011262 | 0.011228 |
| 0.011263 | 0.011545 | 0.011380 | 0.011163 | 0.011637 | 0.011129 | 0.011218 |
| 0.011637 | 0.011536 | 0.011429 | 0.011631 | 0.011333 | 0.011496 | 0.011463 |
| 0.011396 | 0.011564 | 0.011415 | 0.011184 | 0.011312 | 0.011295 | 0.011365 |
| 0.011463 | 0.011364 | 0.011500 | 0.011568 | 0.011497 | 0.011564 | 0.011670 |
| 0.011399 | 0.011569 | 0.011500 | 0.011432 | 0.011699 | 0.011161 | 0.011363 |
| 0.011329 | 0.011262 | 0.011161 | 0.011161 | 0.011228 | 0.011228 | 0.011295 |
| 0.011228 | 0.011295 | 0.011194 | 0.011295 | 0.011228 | 0.011228 | 0.011295 |
| 0.011228 | 0.011664 | 0.011564 | 0.011597 | 0.011127 | 0.011228 | 0.011262 |
| 0.011262 | 0.011228 | 0.011295 | 0.011329 | 0.011194 | 0.011194 | 0.011194 |
| 0.011731 | 0.011362 | 0.011362 | 0.011161 | 0.011262 | 0.011429 | 0.011194 |
| 0.011194 | 0.011262 | 0.011228 | 0.011396 | 0.011194 | 0.011329 | 0.011463 |
| 0.011396 | 0.011228 | 0.011228 | 0.011161 | 0.011161 | 0.011329 | 0.011262 |
| 0.011161 | 0.011262 | 0.011127 | 0.011161 | 0.011295 | 0.011430 | 0.011195 |
| 0.011161 | 0.011295 | 0.011228 | 0.011127 | 0.011463 | 0.011127 | 0.011295 |
| 0.011368 | 0.011195 | 0.011496 | 0.011329 | 0.011295 | 0.011228 | 0.011329 |
| 0.011194 | 0.011530 | 0.011127 | 0.011396 | 0.011194 | 0.011194 | 0.011127 |
| 0.011362 | 0.011564 | 0.011262 | 0.011329 | 0.011161 | 0.011564 | 0.011194 |
| 0.011194 | 0.011194 | 0.011228 | 0.011329 | 0.011228 | 0.011329 | 0.011329 |
| 0.011396 | 0.011362 | 0.011262 | 0.011362 | 0.011329 | 0.011194 | 0.011161 |
| 0.011194 | 0.011194 | 0.011262 | 0.011194 | 0.011161 | 0.011329 | 0.011194 |
| 0.011228 | 0.011228 | 0.011362 | 0.011396 | 0.011295 | 0.011228 | 0.011228 |
| 0.011295 | 0.011228 | 0.011329 | 0.011194 | 0.011329 | 0.011429 | 0.011731 |
| 0.011228 | 0.011631 | 0.011233 | 0.017747 | 0.011126 | 0.011305 | 0.011583 |
| 0.011545 | 0.011588 | 0.011270 | 0.011234 | 0.011609 | 0.011612 | 0.011242 |
| 0.011392 | 0.011426 | 0.011138 | 0.011186 | 0.011216 | 0.011208 | 0.011146 |
| 0.011389 | 0.011395 | 0.011394 | 0.011259 | 0.011362 | 0.011396 | 0.011398 |
| 0.011266 | 0.011362 | 0.011362 | 0.011329 | 0.011295 | 0.011295 | 0.011262 |
| 0.011295 | 0.011228 | 0.011262 | 0.011295 | 0.011262 | 0.011195 | 0.011228 |
| 0.011228 | 0.011295 | 0.011195 | 0.011295 | 0.011329 | 0.011362 | 0.011262 |
| 0.011295 | 0.011262 | 0.011597 | 0.011597 | 0.011329 | 0.011363 | 0.011396 |
| 0.011161 | 0.011161 | 0.011195 | 0.011295 | 0.011161 | 0.011396 | 0.011396 |
| 0.011429 | 0.011429 | 0.011362 | 0.011463 | 0.011631 | 0.011464 | 0.011295 |
| 0.011295 | 0.011362 | 0.011396 | 0.011228 | 0.011295 | 0.011262 | 0.011295 |
| 0.011363 | 0.011362 | 0.011396 | 0.011363 | 0.011262 | 0.011463 | 0.011429 |
| 0.011297 | 0.011195 | 0.011295 | 0.011396 | 0.011295 | 0.011430 | 0.011463 |
| 0.011631 | 0.011333 | 0.011496 | 0.011463 | 0.011396 | 0.011564 | 0.011195 |
| 0.011363 | 0.011262 | 0.011228 | 0.011228 | 0.011295 | 0.011195 | 0.011295 |
| 0.011329 | 0.011362 | 0.011262 | 0.011295 | 0.011262 | 0.011597 | 0.011597 |
| 0.011329 | 0.011363 | 0.011429 | 0.011362 | 0.012002 | 0.011417 | 0.011341 |
| 0.011412 | 0.011372 | 0.011411 | 0.011372 | 0.011480 | 0.011405 | 0.011370 |

|          |          |          |          |          |          |          |
|----------|----------|----------|----------|----------|----------|----------|
| 0.011953 | 0.011268 | 0.011403 | 0.011337 | 0.011611 | 0.011468 | 0.011570 |
| 0.011978 | 0.011437 | 0.011533 | 0.011597 | 0.011463 | 0.011463 | 0.011499 |
| 0.011161 | 0.011329 | 0.011463 | 0.011429 | 0.011432 | 0.011429 | 0.011397 |
| 0.011262 | 0.011194 | 0.011228 | 0.011262 | 0.011161 | 0.011228 | 0.011127 |
| 0.011262 | 0.011228 | 0.000000 | 0.011161 | 0.011194 | 0.011194 | 0.011228 |
| 0.011228 | 0.011161 | 0.011228 | 0.011262 | 0.011161 | 0.011362 | 0.011329 |
| 0.011228 | 0.011295 | 0.011228 | 0.011228 | 0.011228 | 0.011631 | 0.011262 |
| 0.011304 | 0.011228 | 0.011463 | 0.011467 | 0.011329 | 0.011329 | 0.011329 |
| 0.011329 | 0.011262 | 0.011228 | 0.011262 | 0.011362 | 0.011362 | 0.011295 |
| 0.011295 | 0.011429 | 0.011597 | 0.011329 | 0.011530 | 0.011530 | 0.011396 |
| 0.011228 | 0.011295 | 0.011329 | 0.011732 | 0.011295 | 0.011329 | 0.011295 |
| 0.011329 | 0.011262 | 0.011262 | 0.011564 | 0.011497 | 0.011530 | 0.011262 |
| 0.011362 | 0.011429 | 0.011295 | 0.011362 | 0.011329 | 0.011194 | 0.011530 |
| 0.011295 | 0.011262 | 0.011262 | 0.011429 | 0.011262 | 0.011362 | 0.011597 |
| 0.011295 | 0.011671 | 0.011664 | 0.011467 | 0.011173 | 0.011366 | 0.011215 |
| 0.011115 | 0.011683 | 0.011201 | 0.011417 | 0.011207 | 0.011315 | 0.011273 |
| 0.011417 | 0.000000 | 0.011227 | 0.000000 | 0.011168 | 0.011261 | 0.011344 |
| 0.011362 | 0.011257 | 0.011342 | 0.011272 | 0.011296 | 0.011429 | 0.011497 |
| 0.011497 | 0.011363 | 0.011466 | 0.011467 | 0.011603 | 0.011625 | 0.011295 |
| 0.011530 | 0.011396 | 0.011262 | 0.011362 | 0.011161 | 0.011396 | 0.011195 |
| 0.011262 | 0.011262 | 0.011228 | 0.011195 | 0.011228 | 0.011195 | 0.011295 |
| 0.011270 | 0.011270 | 0.011266 | 0.011300 | 0.011436 | 0.011402 | 0.011402 |
| 0.011401 | 0.011329 | 0.011134 | 0.011132 | 0.011263 | 0.011433 | 0.011433 |
| 0.011228 | 0.011297 | 0.011531 | 0.011500 | 0.011430 | 0.011464 | 0.011396 |
| 0.011329 | 0.011396 | 0.011396 | 0.011228 | 0.011866 | 0.011463 | 0.011530 |
| 0.011564 | 0.011630 | 0.011265 | 0.011337 | 0.011228 | 0.011429 | 0.011396 |
| 0.011430 | 0.011463 | 0.011463 | 0.011463 | 0.011610 | 0.011597 | 0.011234 |
| 0.011128 | 0.011130 | 0.011230 | 0.011196 | 0.011299 | 0.011135 | 0.011468 |
| 0.011266 | 0.011411 | 0.011156 | 0.011285 | 0.011262 | 0.011266 | 0.011228 |
| 0.011195 | 0.011195 | 0.011262 | 0.011228 | 0.011429 | 0.011396 | 0.011329 |
| 0.011429 | 0.011497 | 0.011228 | 0.011228 | 0.011262 | 0.011262 | 0.011263 |
| 0.011331 | 0.011262 | 0.011262 | 0.011296 | 0.011429 | 0.011497 | 0.011497 |
| 0.011363 | 0.011466 | 0.011467 | 0.011603 | 0.011625 | 0.011295 | 0.011463 |
| 0.011396 | 0.011396 | 0.011229 | 0.011408 | 0.011303 | 0.011367 | 0.011200 |
| 0.011370 | 0.011561 | 0.011357 | 0.011298 | 0.011195 | 0.011396 | 0.011262 |
| 0.011362 | 0.011295 | 0.011195 | 0.011296 | 0.011396 | 0.011398 | 0.011295 |
| 0.011195 | 0.011128 | 0.011262 | 0.011195 | 0.011127 | 0.011230 | 0.011396 |
| 0.011295 | 0.011228 | 0.011262 | 0.011295 | 0.011262 | 0.011195 | 0.011396 |
| 0.011262 | 0.011295 | 0.011295 | 0.011228 | 0.011228 | 0.011463 | 0.011194 |
| 0.011228 | 0.011631 | 0.011228 | 0.011262 | 0.011228 | 0.011597 | 0.011146 |
| 0.011622 | 0.011188 | 0.011161 | 0.011422 | 0.011508 | 0.011419 | 0.000000 |
| 0.011113 | 0.011396 | 0.011496 | 0.011603 | 0.011464 | 0.011601 | 0.011733 |
| 0.011632 | 0.011669 | 0.011631 | 0.011880 | 0.011597 | 0.012472 | 0.011633 |
| 0.012372 | 0.012139 | 0.012273 | 0.012545 | 0.011597 | 0.011295 | 0.011598 |
| 0.012036 | 0.011971 | 0.011564 | 0.011463 | 0.011531 | 0.011531 | 0.011500 |
| 0.011396 | 0.011399 | 0.011463 | 0.011430 | 0.011800 | 0.011866 | 0.011867 |
| 0.011766 | 0.011867 | 0.011970 | 0.011737 | 0.012036 | 0.012042 | 0.012103 |
| 0.012104 | 0.012138 | 0.012084 | 0.012104 | 0.012105 | 0.011329 | 0.011631 |
| 0.011699 | 0.012202 | 0.011704 | 0.011933 | 0.012406 | 0.011468 | 0.011363 |
| 0.011329 | 0.011329 | 0.011799 | 0.011842 | 0.011940 | 0.011664 | 0.011330 |
| S535     | 0.011564 | 0.011564 | 0.011900 | 0.011664 | 0.011664 | 0.011732 |
| 0.011569 | 0.011502 | 0.011731 | 0.011161 | 0.011228 | 0.011195 | 0.011161 |
| 0.011194 | 0.011362 | 0.011161 | 0.011194 | 0.011262 | 0.011228 | 0.011194 |
| 0.011161 | 0.011194 | 0.011295 | 0.011161 | 0.011195 | 0.011194 | 0.011535 |
| 0.011429 | 0.011195 | 0.011094 | 0.011329 | 0.011262 | 0.011228 | 0.011262 |
| 0.011228 | 0.011329 | 0.011228 | 0.011228 | 0.011262 | 0.011228 | 0.011396 |
| 0.011161 | 0.011228 | 0.011262 | 0.011194 | 0.011295 | 0.011329 | 0.011262 |
| 0.011228 | 0.011396 | 0.011295 | 0.011564 | 0.011228 | 0.011496 | 0.011228 |
| 0.011194 | 0.011295 | 0.011362 | 0.011496 | 0.011597 | 0.011295 | 0.011396 |
| 0.011262 | 0.011329 | 0.011228 | 0.011463 | 0.011698 | 0.011228 | 0.011295 |

|          |          |          |          |          |          |          |
|----------|----------|----------|----------|----------|----------|----------|
| 0.011194 | 0.011295 | 0.011262 | 0.011329 | 0.011262 | 0.011262 | 0.011262 |
| 0.011161 | 0.011194 | 0.011161 | 0.011262 | 0.011228 | 0.011262 | 0.011329 |
| 0.011262 | 0.011228 | 0.011295 | 0.011194 | 0.011329 | 0.011161 | 0.011228 |
| 0.011396 | 0.011329 | 0.011564 | 0.011396 | 0.011228 | 0.011463 | 0.011228 |
| 0.011394 | 0.011620 | 0.011437 | 0.011138 | 0.011135 | 0.011244 | 0.011336 |
| 0.011975 | 0.011416 | 0.011143 | 0.011463 | 0.011463 | 0.011262 | 0.011362 |
| 0.011295 | 0.011262 | 0.011329 | 0.011228 | 0.011329 | 0.011262 | 0.011262 |
| 0.011228 | 0.011329 | 0.011530 | 0.011396 | 0.011295 | 0.011262 | 0.011195 |
| 0.011161 | 0.011161 | 0.011228 | 0.011195 | 0.011396 | 0.011362 | 0.011295 |
| 0.011396 | 0.011463 | 0.011195 | 0.011195 | 0.011228 | 0.011228 | 0.011229 |
| 0.011297 | 0.011228 | 0.011228 | 0.011096 | 0.011169 | 0.011130 | 0.011228 |
| 0.011230 | 0.011163 | 0.011208 | 0.011198 | 0.011128 | 0.011163 | 0.011195 |
| 0.011456 | 0.011233 | 0.011267 | 0.011161 | 0.011164 | 0.011296 | 0.011262 |
| 0.011329 | 0.011262 | 0.011262 | 0.011362 | 0.011295 | 0.011664 | 0.011463 |
| 0.011496 | 0.011362 | 0.011228 | 0.011329 | 0.011127 | 0.011362 | 0.011161 |
| 0.011228 | 0.011228 | 0.011195 | 0.011161 | 0.011194 | 0.011161 | 0.011262 |
| 0.011228 | 0.011329 | 0.011262 | 0.011161 | 0.011262 | 0.011362 | 0.011364 |
| 0.011362 | 0.011262 | 0.011161 | 0.011094 | 0.011228 | 0.011161 | 0.011094 |
| 0.011196 | 0.011362 | 0.011161 | 0.011362 | 0.011127 | 0.011228 | 0.011195 |
| 0.011295 | 0.011195 | 0.011228 | 0.011195 | 0.011228 | 0.011094 | 0.011228 |
| 0.011262 | 0.011195 | 0.011262 | 0.011195 | 0.011228 | 0.011262 | 0.011497 |
| 0.011597 | 0.011530 | 0.011597 | 0.011364 | 0.011598 | 0.011228 | 0.011195 |
| 0.011229 | 0.011505 | 0.011335 | 0.011129 | 0.011603 | 0.011094 | 0.011218 |
| 0.011603 | 0.011502 | 0.011396 | 0.011597 | 0.011299 | 0.011463 | 0.011429 |
| 0.011362 | 0.011530 | 0.011380 | 0.011225 | 0.011270 | 0.011262 | 0.011331 |
| 0.011429 | 0.011330 | 0.011466 | 0.011534 | 0.011463 | 0.011530 | 0.011636 |
| 0.011365 | 0.011535 | 0.011466 | 0.011398 | 0.011666 | 0.011127 | 0.011330 |
| 0.011295 | 0.011228 | 0.011127 | 0.011127 | 0.011194 | 0.011194 | 0.011262 |
| 0.011194 | 0.011262 | 0.011161 | 0.011262 | 0.011194 | 0.011194 | 0.011262 |
| 0.011194 | 0.011631 | 0.011530 | 0.011564 | 0.011094 | 0.011194 | 0.011228 |
| 0.011228 | 0.011194 | 0.011262 | 0.011295 | 0.011161 | 0.011161 | 0.011161 |
| 0.011698 | 0.011329 | 0.011329 | 0.011127 | 0.011228 | 0.011396 | 0.011161 |
| 0.011161 | 0.011228 | 0.011194 | 0.011362 | 0.011161 | 0.011295 | 0.011429 |
| 0.011362 | 0.011194 | 0.011194 | 0.011127 | 0.011127 | 0.011295 | 0.011228 |
| 0.011127 | 0.011228 | 0.011094 | 0.011127 | 0.011262 | 0.011396 | 0.011161 |
| 0.011128 | 0.011262 | 0.011195 | 0.011094 | 0.011429 | 0.011094 | 0.011262 |
| 0.011334 | 0.011161 | 0.011463 | 0.011295 | 0.011329 | 0.011194 | 0.011295 |
| 0.011161 | 0.011496 | 0.011094 | 0.011362 | 0.011161 | 0.011161 | 0.011094 |
| 0.011329 | 0.011530 | 0.011228 | 0.011295 | 0.011127 | 0.011530 | 0.011161 |
| 0.011161 | 0.011161 | 0.011194 | 0.011295 | 0.011194 | 0.011295 | 0.011362 |
| 0.011362 | 0.011329 | 0.011228 | 0.011329 | 0.011295 | 0.011161 | 0.011127 |
| 0.011161 | 0.011161 | 0.011228 | 0.011161 | 0.011127 | 0.011295 | 0.011161 |
| 0.011194 | 0.011194 | 0.011329 | 0.011362 | 0.011262 | 0.011194 | 0.011195 |
| 0.011262 | 0.011194 | 0.011295 | 0.011161 | 0.011295 | 0.011396 | 0.011698 |
| 0.011194 | 0.011597 | 0.011198 | 0.017710 | 0.011191 | 0.011305 | 0.011548 |
| 0.011510 | 0.011553 | 0.011270 | 0.011234 | 0.011664 | 0.011578 | 0.011303 |
| 0.011440 | 0.011487 | 0.011099 | 0.011186 | 0.011177 | 0.011258 | 0.011189 |
| 0.011436 | 0.011358 | 0.011357 | 0.011193 | 0.011329 | 0.011362 | 0.011365 |
| 0.011232 | 0.011329 | 0.011329 | 0.011295 | 0.011262 | 0.011262 | 0.011228 |
| 0.011262 | 0.011195 | 0.011228 | 0.011262 | 0.011228 | 0.011161 | 0.011195 |
| 0.011195 | 0.011262 | 0.011161 | 0.011262 | 0.011295 | 0.011329 | 0.011228 |
| 0.011262 | 0.011228 | 0.011564 | 0.011564 | 0.011295 | 0.011329 | 0.011362 |
| 0.011127 | 0.011127 | 0.011161 | 0.011262 | 0.011127 | 0.011362 | 0.011362 |
| 0.011396 | 0.011396 | 0.011329 | 0.011429 | 0.011597 | 0.011431 | 0.011262 |
| 0.011262 | 0.011329 | 0.011362 | 0.011195 | 0.011262 | 0.011228 | 0.011262 |
| 0.011329 | 0.011329 | 0.011362 | 0.011329 | 0.011229 | 0.011429 | 0.011396 |
| 0.011263 | 0.011161 | 0.011262 | 0.011362 | 0.011262 | 0.011396 | 0.011429 |
| 0.011597 | 0.011299 | 0.011463 | 0.011429 | 0.011362 | 0.011530 | 0.011161 |
| 0.011330 | 0.011228 | 0.011195 | 0.011195 | 0.011262 | 0.011161 | 0.011262 |
| 0.011295 | 0.011329 | 0.011228 | 0.011262 | 0.011228 | 0.011564 | 0.011564 |

|          |          |          |          |          |          |          |
|----------|----------|----------|----------|----------|----------|----------|
| 0.011295 | 0.011329 | 0.011396 | 0.011329 | 0.011968 | 0.011382 | 0.011306 |
| 0.011377 | 0.011338 | 0.011447 | 0.011337 | 0.011445 | 0.011370 | 0.011336 |
| 0.011918 | 0.011233 | 0.011368 | 0.011302 | 0.011577 | 0.011434 | 0.011536 |
| 0.011944 | 0.011399 | 0.011500 | 0.011564 | 0.011429 | 0.011429 | 0.011466 |
| 0.011127 | 0.011295 | 0.011429 | 0.011396 | 0.011398 | 0.011396 | 0.011363 |
| 0.011228 | 0.011161 | 0.011194 | 0.011228 | 0.011127 | 0.011194 | 0.011094 |
| 0.011228 | 0.011262 | 0.011161 | 0.000000 | 0.011228 | 0.011161 | 0.011194 |
| 0.011194 | 0.011127 | 0.011194 | 0.011228 | 0.011127 | 0.011329 | 0.011362 |
| 0.011262 | 0.011329 | 0.011262 | 0.011262 | 0.011194 | 0.011597 | 0.011228 |
| 0.011269 | 0.011195 | 0.011430 | 0.011433 | 0.011295 | 0.011295 | 0.011295 |
| 0.011295 | 0.011228 | 0.011194 | 0.011228 | 0.011329 | 0.011329 | 0.011262 |
| 0.011262 | 0.011396 | 0.011564 | 0.011295 | 0.011497 | 0.011497 | 0.011362 |
| 0.011194 | 0.011262 | 0.011295 | 0.011698 | 0.011262 | 0.011295 | 0.011262 |
| 0.011295 | 0.011228 | 0.011228 | 0.011530 | 0.011463 | 0.011497 | 0.011228 |
| 0.011329 | 0.011396 | 0.011262 | 0.011329 | 0.011295 | 0.011161 | 0.011496 |
| 0.011262 | 0.011228 | 0.011228 | 0.011396 | 0.011228 | 0.011329 | 0.011564 |
| 0.011262 | 0.011637 | 0.011631 | 0.011426 | 0.011173 | 0.011332 | 0.011215 |
| 0.011115 | 0.011644 | 0.011166 | 0.011373 | 0.011207 | 0.011315 | 0.011326 |
| 0.011417 | 0.011126 | 0.011283 | 0.011126 | 0.011168 | 0.011328 | 0.011303 |
| 0.011324 | 0.011218 | 0.011307 | 0.011236 | 0.011262 | 0.011396 | 0.011463 |
| 0.011463 | 0.011329 | 0.011432 | 0.011433 | 0.011569 | 0.011590 | 0.011262 |
| 0.011496 | 0.011362 | 0.011228 | 0.011329 | 0.011127 | 0.011362 | 0.011161 |
| 0.011228 | 0.011228 | 0.011195 | 0.011161 | 0.011194 | 0.011161 | 0.011262 |
| 0.011235 | 0.011235 | 0.011231 | 0.011266 | 0.011402 | 0.011368 | 0.011367 |
| 0.011367 | 0.011296 | 0.011097 | 0.011096 | 0.011230 | 0.011399 | 0.011399 |
| 0.011195 | 0.011263 | 0.011498 | 0.011466 | 0.011396 | 0.011430 | 0.011362 |
| 0.011295 | 0.011362 | 0.011362 | 0.011262 | 0.011832 | 0.011429 | 0.011497 |
| 0.011530 | 0.011594 | 0.011231 | 0.011303 | 0.011195 | 0.011396 | 0.011362 |
| 0.011397 | 0.011429 | 0.011429 | 0.011429 | 0.011571 | 0.011564 | 0.011199 |
| 0.011094 | 0.011095 | 0.011196 | 0.011162 | 0.011265 | 0.011098 | 0.011434 |
| 0.011232 | 0.011367 | 0.011108 | 0.011248 | 0.011228 | 0.011300 | 0.011195 |
| 0.011161 | 0.011161 | 0.011228 | 0.011195 | 0.011396 | 0.011362 | 0.011295 |
| 0.011396 | 0.011463 | 0.011195 | 0.011195 | 0.011228 | 0.011228 | 0.011229 |
| 0.011297 | 0.011228 | 0.011228 | 0.011262 | 0.011396 | 0.011463 | 0.011463 |
| 0.011329 | 0.011432 | 0.011433 | 0.011569 | 0.011590 | 0.011262 | 0.011429 |
| 0.011362 | 0.011362 | 0.011196 | 0.011373 | 0.011303 | 0.011333 | 0.011200 |
| 0.011370 | 0.011561 | 0.011357 | 0.011264 | 0.011161 | 0.011362 | 0.011228 |
| 0.011329 | 0.011262 | 0.011161 | 0.011262 | 0.011362 | 0.011364 | 0.011262 |
| 0.011161 | 0.011094 | 0.011228 | 0.011161 | 0.011094 | 0.011196 | 0.011362 |
| 0.011262 | 0.011195 | 0.011228 | 0.011262 | 0.011228 | 0.011161 | 0.011362 |
| 0.011228 | 0.011262 | 0.011262 | 0.011194 | 0.011262 | 0.011497 | 0.011161 |
| 0.011194 | 0.011597 | 0.011194 | 0.011228 | 0.011194 | 0.011564 | 0.011146 |
| 0.011622 | 0.011145 | 0.011211 | 0.011382 | 0.011467 | 0.011383 | 0.011102 |
| 0.011165 | 0.011362 | 0.011463 | 0.011569 | 0.011430 | 0.011568 | 0.011699 |
| 0.011598 | 0.011635 | 0.011597 | 0.011846 | 0.011564 | 0.012438 | 0.011599 |
| 0.012338 | 0.012105 | 0.012240 | 0.012511 | 0.011564 | 0.011262 | 0.011564 |
| 0.012002 | 0.011937 | 0.011530 | 0.011430 | 0.011497 | 0.011497 | 0.011466 |
| 0.011362 | 0.011365 | 0.011429 | 0.011396 | 0.011766 | 0.011832 | 0.011834 |
| 0.011733 | 0.011833 | 0.011937 | 0.011703 | 0.012003 | 0.012008 | 0.012070 |
| 0.012070 | 0.012104 | 0.012050 | 0.012071 | 0.012072 | 0.011295 | 0.011598 |
| 0.011666 | 0.012169 | 0.011670 | 0.011900 | 0.012373 | 0.011434 | 0.011329 |
| 0.011295 | 0.011295 | 0.011766 | 0.011800 | 0.011904 | 0.011631 | 0.011296 |
| s536     | 0.011664 | 0.011664 | 0.012001 | 0.011765 | 0.011765 | 0.011832 |
| 0.011671 | 0.011603 | 0.011832 | 0.011262 | 0.011329 | 0.011296 | 0.011262 |
| 0.011295 | 0.011463 | 0.011262 | 0.011295 | 0.011362 | 0.011329 | 0.011295 |
| 0.011262 | 0.011295 | 0.011396 | 0.011262 | 0.011295 | 0.011295 | 0.011637 |
| 0.011530 | 0.011295 | 0.011194 | 0.011429 | 0.011362 | 0.011329 | 0.011362 |
| 0.011329 | 0.011429 | 0.011329 | 0.011329 | 0.011362 | 0.011329 | 0.011497 |
| 0.011262 | 0.011329 | 0.011362 | 0.011295 | 0.011396 | 0.011429 | 0.011362 |
| 0.011329 | 0.011497 | 0.011396 | 0.011664 | 0.011329 | 0.011597 | 0.011329 |



|          |          |          |          |          |          |          |
|----------|----------|----------|----------|----------|----------|----------|
| 0.011295 | 0.011396 | 0.011463 | 0.011597 | 0.011698 | 0.011396 | 0.011496 |
| 0.011362 | 0.011429 | 0.011329 | 0.011564 | 0.011799 | 0.011329 | 0.011396 |
| 0.011295 | 0.011396 | 0.011362 | 0.011429 | 0.011362 | 0.011362 | 0.011362 |
| 0.011262 | 0.011295 | 0.011262 | 0.011362 | 0.011329 | 0.011363 | 0.011429 |
| 0.011362 | 0.011329 | 0.011396 | 0.011295 | 0.011429 | 0.011262 | 0.011329 |
| 0.011496 | 0.011429 | 0.011664 | 0.011497 | 0.011329 | 0.011497 | 0.011329 |
| 0.011505 | 0.011733 | 0.011551 | 0.011256 | 0.011247 | 0.011355 | 0.011454 |
| 0.012085 | 0.011518 | 0.011266 | 0.011564 | 0.011564 | 0.011362 | 0.011463 |
| 0.011396 | 0.011362 | 0.011429 | 0.011329 | 0.011429 | 0.011362 | 0.011362 |
| 0.011329 | 0.011429 | 0.011631 | 0.011496 | 0.011396 | 0.011362 | 0.011295 |
| 0.011262 | 0.011262 | 0.011329 | 0.011295 | 0.011497 | 0.011463 | 0.011396 |
| 0.011497 | 0.011564 | 0.011295 | 0.011295 | 0.011329 | 0.011329 | 0.011330 |
| 0.011398 | 0.011329 | 0.011329 | 0.011204 | 0.011277 | 0.011236 | 0.011329 |
| 0.011331 | 0.011266 | 0.011318 | 0.011302 | 0.011230 | 0.011266 | 0.011297 |
| 0.011564 | 0.011336 | 0.011370 | 0.011262 | 0.011268 | 0.011397 | 0.011363 |
| 0.011430 | 0.011364 | 0.011363 | 0.011463 | 0.011396 | 0.011765 | 0.011564 |
| 0.011597 | 0.011463 | 0.011329 | 0.011430 | 0.011228 | 0.011463 | 0.011262 |
| 0.011329 | 0.011329 | 0.011295 | 0.011262 | 0.011295 | 0.011262 | 0.011362 |
| 0.011329 | 0.011430 | 0.011362 | 0.011262 | 0.011363 | 0.011463 | 0.011466 |
| 0.011463 | 0.011363 | 0.011262 | 0.011195 | 0.011329 | 0.011262 | 0.011195 |
| 0.011264 | 0.011463 | 0.011262 | 0.011463 | 0.011228 | 0.011329 | 0.011295 |
| 0.011396 | 0.011295 | 0.011329 | 0.011295 | 0.011329 | 0.011195 | 0.011329 |
| 0.011362 | 0.011295 | 0.011362 | 0.011295 | 0.011329 | 0.011362 | 0.011597 |
| 0.011698 | 0.011631 | 0.011698 | 0.011465 | 0.011698 | 0.011329 | 0.011295 |
| 0.011330 | 0.011586 | 0.011426 | 0.011232 | 0.011705 | 0.011197 | 0.011296 |
| 0.011705 | 0.011604 | 0.011496 | 0.011698 | 0.011402 | 0.011564 | 0.011530 |
| 0.011463 | 0.011631 | 0.011486 | 0.011307 | 0.011395 | 0.011362 | 0.011432 |
| 0.011530 | 0.011431 | 0.011567 | 0.011635 | 0.011564 | 0.011631 | 0.011738 |
| 0.011466 | 0.011637 | 0.011568 | 0.011500 | 0.011767 | 0.011228 | 0.011431 |
| 0.011396 | 0.011329 | 0.011228 | 0.011228 | 0.011295 | 0.011295 | 0.011362 |
| 0.011295 | 0.011362 | 0.011262 | 0.011362 | 0.011295 | 0.011295 | 0.011362 |
| 0.011295 | 0.011731 | 0.011631 | 0.011664 | 0.011194 | 0.011295 | 0.011329 |
| 0.011329 | 0.011295 | 0.011362 | 0.011396 | 0.011194 | 0.011194 | 0.011194 |
| 0.011799 | 0.011429 | 0.011429 | 0.011228 | 0.011329 | 0.011497 | 0.011262 |
| 0.011262 | 0.011329 | 0.011295 | 0.011463 | 0.011262 | 0.011396 | 0.011530 |
| 0.011463 | 0.011295 | 0.011295 | 0.011228 | 0.011228 | 0.011396 | 0.011329 |
| 0.011228 | 0.011329 | 0.011195 | 0.011228 | 0.011362 | 0.011497 | 0.011262 |
| 0.011228 | 0.011362 | 0.011295 | 0.011195 | 0.011530 | 0.011195 | 0.011362 |
| 0.011437 | 0.011262 | 0.011564 | 0.011396 | 0.011362 | 0.011295 | 0.011396 |
| 0.011262 | 0.011597 | 0.011194 | 0.011463 | 0.011262 | 0.011262 | 0.011194 |
| 0.011429 | 0.011631 | 0.011329 | 0.011396 | 0.011228 | 0.011631 | 0.011262 |
| 0.011262 | 0.011262 | 0.011295 | 0.011396 | 0.011295 | 0.011396 | 0.011463 |
| 0.011463 | 0.011429 | 0.011329 | 0.011362 | 0.011396 | 0.011262 | 0.011228 |
| 0.011262 | 0.011262 | 0.011329 | 0.011262 | 0.011228 | 0.011396 | 0.011262 |
| 0.011295 | 0.011295 | 0.011429 | 0.011463 | 0.011362 | 0.011295 | 0.011295 |
| 0.011362 | 0.011295 | 0.011396 | 0.011262 | 0.011396 | 0.011496 | 0.011799 |
| 0.011295 | 0.011698 | 0.011302 | 0.017673 | 0.011191 | 0.011427 | 0.011653 |
| 0.011614 | 0.011658 | 0.011374 | 0.011292 | 0.011719 | 0.011682 | 0.011364 |
| 0.011487 | 0.011548 | 0.011216 | 0.011270 | 0.011294 | 0.011307 | 0.011275 |
| 0.011529 | 0.011470 | 0.011468 | 0.011325 | 0.011429 | 0.011463 | 0.011466 |
| 0.011335 | 0.011430 | 0.011429 | 0.011396 | 0.011362 | 0.011362 | 0.011329 |
| 0.011362 | 0.011295 | 0.011329 | 0.011362 | 0.011329 | 0.011262 | 0.011295 |
| 0.011295 | 0.011362 | 0.011262 | 0.011362 | 0.011396 | 0.011430 | 0.011329 |
| 0.011362 | 0.011329 | 0.011665 | 0.011665 | 0.011396 | 0.011430 | 0.011463 |
| 0.011228 | 0.011228 | 0.011262 | 0.011362 | 0.011228 | 0.011463 | 0.011463 |
| 0.011497 | 0.011496 | 0.011429 | 0.011530 | 0.011698 | 0.011532 | 0.011362 |
| 0.011362 | 0.011430 | 0.011463 | 0.011295 | 0.011362 | 0.011329 | 0.011362 |
| 0.011430 | 0.011430 | 0.011463 | 0.011430 | 0.011330 | 0.011530 | 0.011497 |
| 0.011365 | 0.011262 | 0.011362 | 0.011463 | 0.011362 | 0.011497 | 0.011530 |
| 0.011698 | 0.011402 | 0.011564 | 0.011530 | 0.011463 | 0.011631 | 0.011262 |

|          |          |          |          |          |          |          |
|----------|----------|----------|----------|----------|----------|----------|
| 0.011431 | 0.011329 | 0.011295 | 0.011295 | 0.011362 | 0.011262 | 0.011362 |
| 0.011396 | 0.011430 | 0.011329 | 0.011362 | 0.011329 | 0.011665 | 0.011665 |
| 0.011396 | 0.011430 | 0.011496 | 0.011429 | 0.012069 | 0.011489 | 0.011412 |
| 0.011482 | 0.011442 | 0.011552 | 0.011441 | 0.011550 | 0.011474 | 0.011439 |
| 0.012022 | 0.011337 | 0.011471 | 0.011406 | 0.011680 | 0.011536 | 0.011639 |
| 0.012046 | 0.011512 | 0.011601 | 0.011664 | 0.011530 | 0.011530 | 0.011567 |
| 0.011228 | 0.011396 | 0.011530 | 0.011496 | 0.011499 | 0.011496 | 0.011464 |
| 0.011329 | 0.011262 | 0.011295 | 0.011329 | 0.011228 | 0.011228 | 0.011194 |
| 0.011329 | 0.011295 | 0.011194 | 0.011228 | 0.000000 | 0.011262 | 0.011295 |
| 0.011295 | 0.011228 | 0.011295 | 0.011329 | 0.011228 | 0.011429 | 0.011396 |
| 0.011295 | 0.011362 | 0.011295 | 0.011295 | 0.011295 | 0.011698 | 0.011329 |
| 0.011373 | 0.011295 | 0.011530 | 0.011535 | 0.011396 | 0.011396 | 0.011396 |
| 0.011396 | 0.011329 | 0.011295 | 0.011329 | 0.011429 | 0.011429 | 0.011362 |
| 0.011362 | 0.011429 | 0.011664 | 0.011396 | 0.011597 | 0.011597 | 0.011463 |
| 0.011295 | 0.011362 | 0.011396 | 0.011799 | 0.011362 | 0.011396 | 0.011362 |
| 0.011396 | 0.011329 | 0.011329 | 0.011631 | 0.011564 | 0.011597 | 0.011329 |
| 0.011429 | 0.011497 | 0.011362 | 0.011429 | 0.011396 | 0.011262 | 0.011597 |
| 0.011362 | 0.011329 | 0.011329 | 0.011497 | 0.011329 | 0.011429 | 0.011664 |
| 0.011362 | 0.011739 | 0.011732 | 0.011548 | 0.011286 | 0.011434 | 0.011318 |
| 0.011225 | 0.011761 | 0.011271 | 0.011462 | 0.011353 | 0.011417 | 0.011326 |
| 0.011519 | 0.011126 | 0.011283 | 0.011126 | 0.011222 | 0.011328 | 0.011425 |
| 0.011437 | 0.011336 | 0.011412 | 0.011342 | 0.011364 | 0.011497 | 0.011564 |
| 0.011564 | 0.011430 | 0.011534 | 0.011535 | 0.011670 | 0.011696 | 0.011362 |
| 0.011597 | 0.011463 | 0.011329 | 0.011430 | 0.011228 | 0.011463 | 0.011262 |
| 0.011329 | 0.011329 | 0.011295 | 0.011262 | 0.011295 | 0.011262 | 0.011362 |
| 0.011340 | 0.011340 | 0.011334 | 0.011368 | 0.011505 | 0.011470 | 0.011470 |
| 0.011469 | 0.011396 | 0.011208 | 0.011204 | 0.011331 | 0.011501 | 0.011501 |
| 0.011296 | 0.011365 | 0.011599 | 0.011567 | 0.011497 | 0.011531 | 0.011463 |
| 0.011396 | 0.011463 | 0.011463 | 0.011362 | 0.011933 | 0.011530 | 0.011597 |
| 0.011631 | 0.011701 | 0.011333 | 0.011407 | 0.011295 | 0.011497 | 0.011463 |
| 0.011497 | 0.011530 | 0.011530 | 0.011530 | 0.011689 | 0.011664 | 0.011303 |
| 0.011195 | 0.011199 | 0.011298 | 0.011264 | 0.011368 | 0.011209 | 0.011536 |
| 0.011335 | 0.011499 | 0.011251 | 0.011360 | 0.011329 | 0.011402 | 0.011295 |
| 0.011262 | 0.011262 | 0.011329 | 0.011295 | 0.011497 | 0.011463 | 0.011396 |
| 0.011497 | 0.011564 | 0.011295 | 0.011295 | 0.011329 | 0.011329 | 0.011330 |
| 0.011398 | 0.011329 | 0.011329 | 0.011364 | 0.011497 | 0.011564 | 0.011564 |
| 0.011430 | 0.011534 | 0.011535 | 0.011670 | 0.011696 | 0.011362 | 0.011530 |
| 0.011463 | 0.011463 | 0.011297 | 0.011478 | 0.011373 | 0.011435 | 0.011270 |
| 0.011439 | 0.011607 | 0.011399 | 0.011366 | 0.011262 | 0.011463 | 0.011329 |
| 0.011430 | 0.011362 | 0.011262 | 0.011363 | 0.011463 | 0.011466 | 0.011363 |
| 0.011262 | 0.011195 | 0.011329 | 0.011262 | 0.011195 | 0.011264 | 0.011463 |
| 0.011362 | 0.011295 | 0.011329 | 0.011362 | 0.011329 | 0.011262 | 0.011463 |
| 0.011329 | 0.011362 | 0.011362 | 0.011295 | 0.011295 | 0.011530 | 0.011262 |
| 0.011295 | 0.011698 | 0.011295 | 0.011329 | 0.011295 | 0.011664 | 0.011232 |
| 0.011678 | 0.011230 | 0.011261 | 0.011503 | 0.011589 | 0.011491 | 0.011186 |
| 0.011218 | 0.011463 | 0.011564 | 0.011671 | 0.011531 | 0.011669 | 0.011800 |
| 0.011699 | 0.011737 | 0.011698 | 0.011949 | 0.011664 | 0.012539 | 0.011700 |
| 0.012439 | 0.012207 | 0.012341 | 0.012613 | 0.011664 | 0.011362 | 0.011665 |
| 0.012103 | 0.012038 | 0.011631 | 0.011530 | 0.011598 | 0.011598 | 0.011567 |
| 0.011463 | 0.011467 | 0.011530 | 0.011497 | 0.011867 | 0.011933 | 0.011935 |
| 0.011834 | 0.011935 | 0.012038 | 0.011804 | 0.012104 | 0.012110 | 0.012171 |
| 0.012172 | 0.012205 | 0.012152 | 0.012172 | 0.012173 | 0.011396 | 0.011699 |
| 0.011767 | 0.012270 | 0.011772 | 0.012001 | 0.012474 | 0.011536 | 0.011430 |
| 0.011396 | 0.011396 | 0.011867 | 0.011924 | 0.012010 | 0.011732 | 0.011397 |
| s537     | 0.011597 | 0.011597 | 0.011933 | 0.011698 | 0.011698 | 0.011765 |
| 0.011603 | 0.011535 | 0.011765 | 0.011195 | 0.011262 | 0.011228 | 0.011194 |
| 0.011228 | 0.011396 | 0.011194 | 0.011228 | 0.011295 | 0.011262 | 0.011228 |
| 0.011194 | 0.011228 | 0.011329 | 0.011195 | 0.011228 | 0.011228 | 0.011569 |
| 0.011463 | 0.011228 | 0.011127 | 0.011362 | 0.011295 | 0.011262 | 0.011295 |
| 0.011262 | 0.011362 | 0.011262 | 0.011262 | 0.011295 | 0.011262 | 0.011429 |

|          |          |          |          |          |          |          |
|----------|----------|----------|----------|----------|----------|----------|
| 0.011194 | 0.011262 | 0.011295 | 0.011228 | 0.011329 | 0.011362 | 0.011295 |
| 0.011262 | 0.011429 | 0.011329 | 0.011597 | 0.011262 | 0.011530 | 0.011262 |
| 0.011228 | 0.011329 | 0.011396 | 0.011530 | 0.011631 | 0.011329 | 0.011429 |
| 0.011295 | 0.011362 | 0.011262 | 0.011496 | 0.011732 | 0.011262 | 0.011329 |
| 0.011228 | 0.011329 | 0.011295 | 0.011362 | 0.011295 | 0.011295 | 0.011295 |
| 0.011194 | 0.011228 | 0.011194 | 0.011295 | 0.011262 | 0.011296 | 0.011362 |
| 0.011295 | 0.011262 | 0.011329 | 0.011228 | 0.011362 | 0.011194 | 0.011262 |
| 0.011429 | 0.011362 | 0.011597 | 0.011429 | 0.011262 | 0.011496 | 0.011262 |
| 0.011431 | 0.011658 | 0.011475 | 0.011177 | 0.011172 | 0.011281 | 0.011375 |
| 0.012011 | 0.011467 | 0.011184 | 0.011496 | 0.011496 | 0.011295 | 0.011396 |
| 0.011329 | 0.011295 | 0.011362 | 0.011262 | 0.011362 | 0.011295 | 0.011295 |
| 0.011262 | 0.011362 | 0.011564 | 0.011429 | 0.011329 | 0.011295 | 0.011228 |
| 0.011195 | 0.011195 | 0.011262 | 0.011228 | 0.011429 | 0.011396 | 0.011329 |
| 0.011429 | 0.011497 | 0.011228 | 0.011228 | 0.011262 | 0.011262 | 0.011263 |
| 0.011331 | 0.011262 | 0.011262 | 0.011132 | 0.011205 | 0.011165 | 0.011262 |
| 0.011263 | 0.011198 | 0.011245 | 0.011233 | 0.011162 | 0.011197 | 0.011229 |
| 0.011492 | 0.011267 | 0.011301 | 0.011195 | 0.011199 | 0.011329 | 0.011296 |
| 0.011363 | 0.011296 | 0.011296 | 0.011396 | 0.011329 | 0.011698 | 0.011497 |
| 0.011530 | 0.011396 | 0.011262 | 0.011362 | 0.011161 | 0.011396 | 0.011195 |
| 0.011262 | 0.011262 | 0.011228 | 0.011194 | 0.011228 | 0.011195 | 0.011295 |
| 0.011262 | 0.011362 | 0.011295 | 0.011195 | 0.011296 | 0.011396 | 0.011398 |
| 0.011396 | 0.011295 | 0.011195 | 0.011128 | 0.011262 | 0.011195 | 0.011127 |
| 0.011230 | 0.011396 | 0.011195 | 0.011396 | 0.011161 | 0.011262 | 0.011228 |
| 0.011329 | 0.011228 | 0.011262 | 0.011228 | 0.011262 | 0.011127 | 0.011262 |
| 0.011295 | 0.011228 | 0.011295 | 0.011228 | 0.011262 | 0.011295 | 0.011530 |
| 0.011631 | 0.011564 | 0.011631 | 0.011397 | 0.011631 | 0.011262 | 0.011228 |
| 0.011263 | 0.011545 | 0.011380 | 0.011163 | 0.011637 | 0.011129 | 0.011257 |
| 0.011637 | 0.011536 | 0.011429 | 0.011631 | 0.011333 | 0.011496 | 0.011463 |
| 0.011396 | 0.011564 | 0.011415 | 0.011266 | 0.011312 | 0.011295 | 0.011365 |
| 0.011463 | 0.011364 | 0.011500 | 0.011568 | 0.011496 | 0.011564 | 0.011670 |
| 0.011398 | 0.011569 | 0.011500 | 0.011432 | 0.011699 | 0.011161 | 0.011363 |
| 0.011329 | 0.011262 | 0.011161 | 0.011161 | 0.011228 | 0.011228 | 0.011295 |
| 0.011228 | 0.011295 | 0.011194 | 0.011295 | 0.011228 | 0.011228 | 0.011295 |
| 0.011228 | 0.011664 | 0.011564 | 0.011597 | 0.011127 | 0.011228 | 0.011262 |
| 0.011262 | 0.011228 | 0.011295 | 0.011329 | 0.011194 | 0.011194 | 0.011194 |
| 0.011731 | 0.011362 | 0.011362 | 0.011161 | 0.011262 | 0.011429 | 0.011194 |
| 0.011194 | 0.011262 | 0.011228 | 0.011396 | 0.011194 | 0.011329 | 0.011463 |
| 0.011396 | 0.011228 | 0.011228 | 0.011161 | 0.011161 | 0.011329 | 0.011262 |
| 0.011161 | 0.011262 | 0.011127 | 0.011161 | 0.011295 | 0.011430 | 0.011195 |
| 0.011161 | 0.011295 | 0.011228 | 0.011127 | 0.011463 | 0.011127 | 0.011295 |
| 0.011368 | 0.011194 | 0.011496 | 0.011329 | 0.011362 | 0.011228 | 0.011329 |
| 0.011194 | 0.011530 | 0.011127 | 0.011396 | 0.011194 | 0.011194 | 0.011127 |
| 0.011362 | 0.011564 | 0.011262 | 0.011329 | 0.011161 | 0.011564 | 0.011194 |
| 0.011194 | 0.011194 | 0.011228 | 0.011329 | 0.011228 | 0.011329 | 0.011396 |
| 0.011396 | 0.011362 | 0.011262 | 0.011362 | 0.011329 | 0.011194 | 0.011161 |
| 0.011194 | 0.011194 | 0.011262 | 0.011194 | 0.011161 | 0.011329 | 0.011194 |
| 0.011228 | 0.011228 | 0.011362 | 0.011396 | 0.011295 | 0.011228 | 0.011228 |
| 0.011295 | 0.011228 | 0.011329 | 0.011194 | 0.011329 | 0.011429 | 0.011731 |
| 0.011228 | 0.011631 | 0.011233 | 0.017747 | 0.011257 | 0.011427 | 0.011583 |
| 0.011545 | 0.011588 | 0.011270 | 0.011234 | 0.011719 | 0.011612 | 0.011364 |
| 0.011487 | 0.011548 | 0.011138 | 0.011228 | 0.011216 | 0.011307 | 0.011232 |
| 0.011482 | 0.011395 | 0.011394 | 0.011193 | 0.011362 | 0.011396 | 0.011398 |
| 0.011266 | 0.011362 | 0.011362 | 0.011329 | 0.011295 | 0.011295 | 0.011262 |
| 0.011295 | 0.011228 | 0.011262 | 0.011295 | 0.011262 | 0.011195 | 0.011228 |
| 0.011228 | 0.011295 | 0.011195 | 0.011295 | 0.011329 | 0.011362 | 0.011262 |
| 0.011295 | 0.011262 | 0.011597 | 0.011597 | 0.011329 | 0.011363 | 0.011396 |
| 0.011161 | 0.011161 | 0.011195 | 0.011295 | 0.011161 | 0.011396 | 0.011396 |
| 0.011429 | 0.011429 | 0.011362 | 0.011463 | 0.011631 | 0.011464 | 0.011295 |
| 0.011295 | 0.011362 | 0.011396 | 0.011228 | 0.011295 | 0.011262 | 0.011295 |
| 0.011363 | 0.011362 | 0.011396 | 0.011362 | 0.011262 | 0.011463 | 0.011429 |

|          |          |          |          |          |          |          |
|----------|----------|----------|----------|----------|----------|----------|
| 0.011297 | 0.011195 | 0.011295 | 0.011396 | 0.011295 | 0.011430 | 0.011463 |
| 0.011631 | 0.011333 | 0.011496 | 0.011463 | 0.011396 | 0.011564 | 0.011195 |
| 0.011363 | 0.011262 | 0.011228 | 0.011228 | 0.011295 | 0.011195 | 0.011295 |
| 0.011329 | 0.011362 | 0.011262 | 0.011295 | 0.011262 | 0.011597 | 0.011597 |
| 0.011329 | 0.011363 | 0.011429 | 0.011362 | 0.012002 | 0.011417 | 0.011341 |
| 0.011412 | 0.011372 | 0.011482 | 0.011372 | 0.011480 | 0.011405 | 0.011370 |
| 0.011953 | 0.011268 | 0.011403 | 0.011337 | 0.011611 | 0.011468 | 0.011570 |
| 0.011978 | 0.011437 | 0.011533 | 0.011597 | 0.011463 | 0.011463 | 0.011499 |
| 0.011161 | 0.011329 | 0.011463 | 0.011429 | 0.011432 | 0.011429 | 0.011397 |
| 0.011262 | 0.011194 | 0.011228 | 0.011262 | 0.011161 | 0.011228 | 0.011127 |
| 0.011262 | 0.011295 | 0.011194 | 0.011161 | 0.011262 | 0.000000 | 0.011228 |
| 0.011228 | 0.011094 | 0.011228 | 0.011262 | 0.011161 | 0.011362 | 0.011396 |
| 0.011295 | 0.011362 | 0.011295 | 0.011295 | 0.011228 | 0.011631 | 0.011262 |
| 0.011304 | 0.011228 | 0.011463 | 0.011467 | 0.011329 | 0.011329 | 0.011329 |
| 0.011329 | 0.011262 | 0.011228 | 0.011262 | 0.011362 | 0.011362 | 0.011295 |
| 0.011295 | 0.011429 | 0.011597 | 0.011329 | 0.011530 | 0.011530 | 0.011396 |
| 0.011228 | 0.011295 | 0.011329 | 0.011732 | 0.011295 | 0.011329 | 0.011295 |
| 0.011329 | 0.011262 | 0.011262 | 0.011564 | 0.011497 | 0.011530 | 0.011262 |
| 0.011362 | 0.011429 | 0.011295 | 0.011362 | 0.011329 | 0.011194 | 0.011530 |
| 0.011295 | 0.011262 | 0.011262 | 0.011429 | 0.011262 | 0.011362 | 0.011597 |
| 0.011295 | 0.011671 | 0.011664 | 0.011467 | 0.011173 | 0.011366 | 0.011267 |
| 0.011225 | 0.011683 | 0.011201 | 0.011417 | 0.011255 | 0.011366 | 0.011379 |
| 0.011468 | 0.011192 | 0.011338 | 0.000000 | 0.011222 | 0.011328 | 0.011344 |
| 0.011362 | 0.011257 | 0.011342 | 0.011272 | 0.011296 | 0.011429 | 0.011497 |
| 0.011497 | 0.011363 | 0.011466 | 0.011467 | 0.011602 | 0.011625 | 0.011295 |
| 0.011530 | 0.011396 | 0.011262 | 0.011362 | 0.011161 | 0.011396 | 0.011195 |
| 0.011262 | 0.011262 | 0.011228 | 0.011194 | 0.011228 | 0.011195 | 0.011295 |
| 0.011270 | 0.011270 | 0.011266 | 0.011300 | 0.011436 | 0.011402 | 0.011402 |
| 0.011401 | 0.011329 | 0.011134 | 0.011132 | 0.011263 | 0.011433 | 0.011433 |
| 0.011228 | 0.011297 | 0.011531 | 0.011499 | 0.011430 | 0.011464 | 0.011396 |
| 0.011329 | 0.011396 | 0.011396 | 0.011295 | 0.011866 | 0.011463 | 0.011530 |
| 0.011564 | 0.011630 | 0.011265 | 0.011337 | 0.011228 | 0.011429 | 0.011396 |
| 0.011430 | 0.011463 | 0.011463 | 0.011463 | 0.011610 | 0.011597 | 0.011234 |
| 0.011128 | 0.011130 | 0.011230 | 0.011196 | 0.011299 | 0.011135 | 0.011468 |
| 0.011266 | 0.011411 | 0.011108 | 0.011285 | 0.011262 | 0.011334 | 0.011228 |
| 0.011195 | 0.011195 | 0.011262 | 0.011228 | 0.011429 | 0.011396 | 0.011329 |
| 0.011429 | 0.011497 | 0.011228 | 0.011228 | 0.011262 | 0.011262 | 0.011263 |
| 0.011331 | 0.011262 | 0.011262 | 0.011296 | 0.011429 | 0.011497 | 0.011497 |
| 0.011363 | 0.011466 | 0.011467 | 0.011602 | 0.011625 | 0.011295 | 0.011463 |
| 0.011396 | 0.011396 | 0.011229 | 0.011408 | 0.011338 | 0.011367 | 0.011235 |
| 0.011404 | 0.011561 | 0.011399 | 0.011298 | 0.011195 | 0.011396 | 0.011262 |
| 0.011362 | 0.011295 | 0.011195 | 0.011296 | 0.011396 | 0.011398 | 0.011295 |
| 0.011195 | 0.011128 | 0.011262 | 0.011195 | 0.011127 | 0.011230 | 0.011396 |
| 0.011295 | 0.011228 | 0.011262 | 0.011295 | 0.011262 | 0.011195 | 0.011396 |
| 0.011262 | 0.011295 | 0.011295 | 0.011228 | 0.011295 | 0.011530 | 0.011194 |
| 0.011228 | 0.011631 | 0.011228 | 0.011262 | 0.011228 | 0.011597 | 0.011189 |
| 0.011622 | 0.011188 | 0.011261 | 0.011422 | 0.011508 | 0.011419 | 0.011144 |
| 0.011218 | 0.011396 | 0.011496 | 0.011603 | 0.011464 | 0.011601 | 0.011733 |
| 0.011632 | 0.011669 | 0.011631 | 0.011880 | 0.011597 | 0.012471 | 0.011633 |
| 0.012372 | 0.012139 | 0.012273 | 0.012545 | 0.011597 | 0.011295 | 0.011598 |
| 0.012036 | 0.011971 | 0.011564 | 0.011463 | 0.011531 | 0.011531 | 0.011500 |
| 0.011396 | 0.011399 | 0.011463 | 0.011430 | 0.011800 | 0.011866 | 0.011867 |
| 0.011766 | 0.011867 | 0.011970 | 0.011737 | 0.012036 | 0.012042 | 0.012103 |
| 0.012104 | 0.012138 | 0.012084 | 0.012104 | 0.012105 | 0.011329 | 0.011631 |
| 0.011699 | 0.012202 | 0.011704 | 0.011933 | 0.012406 | 0.011468 | 0.011363 |
| 0.011329 | 0.011329 | 0.011799 | 0.011842 | 0.011939 | 0.011664 | 0.011330 |
| S538     | 0.011631 | 0.011631 | 0.011967 | 0.011732 | 0.011732 | 0.011799 |
| 0.011637 | 0.011569 | 0.011799 | 0.011228 | 0.011295 | 0.011262 | 0.011228 |
| 0.011262 | 0.011429 | 0.011228 | 0.011262 | 0.011329 | 0.011295 | 0.011262 |
| 0.011228 | 0.011262 | 0.011362 | 0.011228 | 0.011262 | 0.011262 | 0.011603 |

|          |          |          |          |          |          |          |
|----------|----------|----------|----------|----------|----------|----------|
| 0.011496 | 0.011262 | 0.011161 | 0.011396 | 0.011329 | 0.011295 | 0.011329 |
| 0.011295 | 0.011396 | 0.011295 | 0.011295 | 0.011329 | 0.011295 | 0.011463 |
| 0.011228 | 0.011295 | 0.011329 | 0.011262 | 0.011362 | 0.011396 | 0.011329 |
| 0.011295 | 0.011463 | 0.011362 | 0.011631 | 0.011295 | 0.011564 | 0.011295 |
| 0.011262 | 0.011362 | 0.011429 | 0.011564 | 0.011664 | 0.011362 | 0.011463 |
| 0.011329 | 0.011396 | 0.011295 | 0.011530 | 0.011765 | 0.011295 | 0.011362 |
| 0.011262 | 0.011362 | 0.011329 | 0.011396 | 0.011329 | 0.011329 | 0.011329 |
| 0.011228 | 0.011262 | 0.011228 | 0.011329 | 0.011295 | 0.011329 | 0.011396 |
| 0.011329 | 0.011295 | 0.011362 | 0.011262 | 0.011396 | 0.011228 | 0.011295 |
| 0.011463 | 0.011396 | 0.011631 | 0.011463 | 0.011295 | 0.011530 | 0.011295 |
| 0.011468 | 0.011695 | 0.011513 | 0.011216 | 0.011210 | 0.011318 | 0.011415 |
| 0.012048 | 0.011518 | 0.011225 | 0.011530 | 0.011530 | 0.011329 | 0.011429 |
| 0.011362 | 0.011329 | 0.011396 | 0.011295 | 0.011396 | 0.011329 | 0.011329 |
| 0.011295 | 0.011396 | 0.011597 | 0.011463 | 0.011362 | 0.011329 | 0.011262 |
| 0.011228 | 0.011228 | 0.011295 | 0.011262 | 0.011463 | 0.011429 | 0.011362 |
| 0.011463 | 0.011530 | 0.011262 | 0.011262 | 0.011295 | 0.011295 | 0.011297 |
| 0.011364 | 0.011295 | 0.011295 | 0.011168 | 0.011241 | 0.011200 | 0.011296 |
| 0.011297 | 0.011232 | 0.011282 | 0.011267 | 0.011196 | 0.011232 | 0.011263 |
| 0.011528 | 0.011302 | 0.011336 | 0.011228 | 0.011233 | 0.011363 | 0.011329 |
| 0.011397 | 0.011330 | 0.011329 | 0.011429 | 0.011362 | 0.011732 | 0.011530 |
| 0.011564 | 0.011430 | 0.011295 | 0.011396 | 0.011195 | 0.011429 | 0.011228 |
| 0.011295 | 0.011295 | 0.011262 | 0.011228 | 0.011262 | 0.011228 | 0.011329 |
| 0.011295 | 0.011396 | 0.011329 | 0.011228 | 0.011330 | 0.011430 | 0.011398 |
| 0.011430 | 0.011329 | 0.011228 | 0.011161 | 0.011295 | 0.011228 | 0.011161 |
| 0.011264 | 0.011430 | 0.011228 | 0.011430 | 0.011195 | 0.011295 | 0.011262 |
| 0.011362 | 0.011262 | 0.011295 | 0.011262 | 0.011295 | 0.011161 | 0.011295 |
| 0.011329 | 0.011262 | 0.011329 | 0.011262 | 0.011295 | 0.011329 | 0.011564 |
| 0.011664 | 0.011597 | 0.011665 | 0.011431 | 0.011665 | 0.011295 | 0.011262 |
| 0.011297 | 0.011586 | 0.011380 | 0.011197 | 0.011671 | 0.011163 | 0.011257 |
| 0.011671 | 0.011570 | 0.011463 | 0.011664 | 0.011367 | 0.011530 | 0.011497 |
| 0.011429 | 0.011597 | 0.011451 | 0.011307 | 0.011354 | 0.011329 | 0.011398 |
| 0.011497 | 0.011397 | 0.011533 | 0.011602 | 0.011530 | 0.011597 | 0.011704 |
| 0.011432 | 0.011603 | 0.011534 | 0.011466 | 0.011733 | 0.011194 | 0.011397 |
| 0.011362 | 0.011295 | 0.011194 | 0.011194 | 0.011262 | 0.011262 | 0.011329 |
| 0.011262 | 0.011329 | 0.011228 | 0.011329 | 0.011262 | 0.011262 | 0.011329 |
| 0.011262 | 0.011698 | 0.011597 | 0.011631 | 0.011161 | 0.011262 | 0.011295 |
| 0.011295 | 0.011262 | 0.011329 | 0.011362 | 0.011228 | 0.011228 | 0.011228 |
| 0.011765 | 0.011396 | 0.011396 | 0.011194 | 0.011295 | 0.011463 | 0.011228 |
| 0.011228 | 0.011295 | 0.011262 | 0.011429 | 0.011228 | 0.011362 | 0.011496 |
| 0.011429 | 0.011262 | 0.011262 | 0.011194 | 0.011194 | 0.011362 | 0.011295 |
| 0.011194 | 0.011295 | 0.011161 | 0.011194 | 0.011329 | 0.011463 | 0.011228 |
| 0.011195 | 0.011329 | 0.011262 | 0.011161 | 0.011496 | 0.011161 | 0.011329 |
| 0.011403 | 0.011228 | 0.011530 | 0.011362 | 0.011396 | 0.011262 | 0.011362 |
| 0.011228 | 0.011564 | 0.011161 | 0.011429 | 0.011228 | 0.011228 | 0.011161 |
| 0.011396 | 0.011597 | 0.011295 | 0.011362 | 0.011194 | 0.011597 | 0.011228 |
| 0.011228 | 0.011228 | 0.011262 | 0.011362 | 0.011262 | 0.011362 | 0.011429 |
| 0.011429 | 0.011396 | 0.011295 | 0.011396 | 0.011362 | 0.011228 | 0.011194 |
| 0.011228 | 0.011228 | 0.011295 | 0.011228 | 0.011194 | 0.011362 | 0.011228 |
| 0.011262 | 0.011262 | 0.011396 | 0.011429 | 0.011329 | 0.011262 | 0.011262 |
| 0.011329 | 0.011262 | 0.011362 | 0.011228 | 0.011362 | 0.011463 | 0.011765 |
| 0.011262 | 0.011664 | 0.011267 | 0.017785 | 0.011257 | 0.011488 | 0.011618 |
| 0.011579 | 0.011623 | 0.011374 | 0.011350 | 0.011719 | 0.011647 | 0.011364 |
| 0.011535 | 0.011610 | 0.011177 | 0.011270 | 0.011255 | 0.011356 | 0.011275 |
| 0.011529 | 0.011433 | 0.011431 | 0.011126 | 0.011396 | 0.011429 | 0.011432 |
| 0.011301 | 0.011396 | 0.011396 | 0.011362 | 0.011329 | 0.011329 | 0.011295 |
| 0.011329 | 0.011262 | 0.011295 | 0.011329 | 0.011295 | 0.011228 | 0.011262 |
| 0.011262 | 0.011329 | 0.011228 | 0.011329 | 0.011362 | 0.011396 | 0.011295 |
| 0.011329 | 0.011295 | 0.011631 | 0.011631 | 0.011362 | 0.011396 | 0.011430 |
| 0.011195 | 0.011195 | 0.011228 | 0.011329 | 0.011195 | 0.011430 | 0.011430 |
| 0.011463 | 0.011463 | 0.011396 | 0.011497 | 0.011665 | 0.011498 | 0.011329 |

|          |          |          |          |          |          |          |
|----------|----------|----------|----------|----------|----------|----------|
| 0.011329 | 0.011396 | 0.011430 | 0.011262 | 0.011329 | 0.011295 | 0.011329 |
| 0.011396 | 0.011396 | 0.011429 | 0.011396 | 0.011296 | 0.011497 | 0.011463 |
| 0.011331 | 0.011228 | 0.011329 | 0.011430 | 0.011329 | 0.011463 | 0.011496 |
| 0.011664 | 0.011367 | 0.011530 | 0.011497 | 0.011429 | 0.011597 | 0.011228 |
| 0.011397 | 0.011295 | 0.011262 | 0.011262 | 0.011329 | 0.011228 | 0.011329 |
| 0.011362 | 0.011396 | 0.011295 | 0.011329 | 0.011295 | 0.011631 | 0.011631 |
| 0.011362 | 0.011396 | 0.011463 | 0.011396 | 0.012036 | 0.011453 | 0.011377 |
| 0.011447 | 0.011407 | 0.011517 | 0.011406 | 0.011515 | 0.011439 | 0.011405 |
| 0.011987 | 0.011302 | 0.011437 | 0.011371 | 0.011645 | 0.011502 | 0.011605 |
| 0.012012 | 0.011475 | 0.011567 | 0.011631 | 0.011496 | 0.011497 | 0.011533 |
| 0.011194 | 0.011362 | 0.011496 | 0.011463 | 0.011466 | 0.011463 | 0.011431 |
| 0.011295 | 0.011228 | 0.011262 | 0.011295 | 0.011194 | 0.011262 | 0.011161 |
| 0.011295 | 0.011329 | 0.011228 | 0.011194 | 0.011295 | 0.011228 | 0.000000 |
| 0.011262 | 0.011194 | 0.011262 | 0.011295 | 0.011194 | 0.011396 | 0.011429 |
| 0.011329 | 0.011396 | 0.011329 | 0.011329 | 0.011262 | 0.011664 | 0.011295 |
| 0.011338 | 0.011262 | 0.011497 | 0.011501 | 0.011362 | 0.011362 | 0.011362 |
| 0.011362 | 0.011295 | 0.011262 | 0.011295 | 0.011396 | 0.011396 | 0.011329 |
| 0.011329 | 0.011463 | 0.011631 | 0.011362 | 0.011564 | 0.011564 | 0.011429 |
| 0.011262 | 0.011329 | 0.011362 | 0.011765 | 0.011329 | 0.011362 | 0.011329 |
| 0.011362 | 0.011295 | 0.011295 | 0.011597 | 0.011530 | 0.011564 | 0.011295 |
| 0.011396 | 0.011463 | 0.011329 | 0.011396 | 0.011362 | 0.011228 | 0.011564 |
| 0.011329 | 0.011295 | 0.011295 | 0.011463 | 0.011295 | 0.011396 | 0.011631 |
| 0.011329 | 0.011705 | 0.011698 | 0.011507 | 0.011286 | 0.011400 | 0.011267 |
| 0.011280 | 0.011722 | 0.011236 | 0.011417 | 0.011255 | 0.011366 | 0.011379 |
| 0.011519 | 0.011192 | 0.011339 | 0.011192 | 0.011222 | 0.011395 | 0.011344 |
| 0.011399 | 0.011257 | 0.011377 | 0.011307 | 0.011330 | 0.011463 | 0.011530 |
| 0.011530 | 0.011396 | 0.011500 | 0.011501 | 0.011636 | 0.011590 | 0.011329 |
| 0.011564 | 0.011430 | 0.011295 | 0.011396 | 0.011195 | 0.011429 | 0.011228 |
| 0.011295 | 0.011295 | 0.011262 | 0.011228 | 0.011262 | 0.011228 | 0.011329 |
| 0.011305 | 0.011305 | 0.011300 | 0.011334 | 0.011471 | 0.011436 | 0.011436 |
| 0.011435 | 0.011363 | 0.011171 | 0.011168 | 0.011297 | 0.011467 | 0.011467 |
| 0.011262 | 0.011331 | 0.011565 | 0.011533 | 0.011464 | 0.011464 | 0.011429 |
| 0.011362 | 0.011429 | 0.011429 | 0.011329 | 0.011900 | 0.011497 | 0.011564 |
| 0.011597 | 0.011665 | 0.011299 | 0.011372 | 0.011262 | 0.011463 | 0.011429 |
| 0.011464 | 0.011496 | 0.011496 | 0.011496 | 0.011650 | 0.011631 | 0.011268 |
| 0.011162 | 0.011164 | 0.011264 | 0.011230 | 0.011333 | 0.011172 | 0.011502 |
| 0.011300 | 0.011455 | 0.011203 | 0.011322 | 0.011296 | 0.011368 | 0.011262 |
| 0.011228 | 0.011228 | 0.011295 | 0.011262 | 0.011463 | 0.011429 | 0.011362 |
| 0.011463 | 0.011530 | 0.011262 | 0.011262 | 0.011295 | 0.011295 | 0.011297 |
| 0.011364 | 0.011295 | 0.011295 | 0.011330 | 0.011463 | 0.011530 | 0.011530 |
| 0.011396 | 0.011500 | 0.011501 | 0.011636 | 0.011590 | 0.011329 | 0.011496 |
| 0.011429 | 0.011429 | 0.011263 | 0.011443 | 0.011373 | 0.011401 | 0.011270 |
| 0.011439 | 0.011607 | 0.011399 | 0.011332 | 0.011228 | 0.011430 | 0.011295 |
| 0.011396 | 0.011329 | 0.011228 | 0.011330 | 0.011430 | 0.011398 | 0.011329 |
| 0.011228 | 0.011161 | 0.011295 | 0.011228 | 0.011161 | 0.011264 | 0.011430 |
| 0.011329 | 0.011262 | 0.011295 | 0.011329 | 0.011295 | 0.011228 | 0.011430 |
| 0.011295 | 0.011329 | 0.011329 | 0.011262 | 0.011329 | 0.011564 | 0.011228 |
| 0.011262 | 0.011664 | 0.011262 | 0.011295 | 0.011262 | 0.011631 | 0.011232 |
| 0.011622 | 0.011230 | 0.011311 | 0.011463 | 0.011549 | 0.011455 | 0.011186 |
| 0.011270 | 0.011429 | 0.011530 | 0.011637 | 0.011498 | 0.011635 | 0.011766 |
| 0.011666 | 0.011703 | 0.011664 | 0.011914 | 0.011631 | 0.012505 | 0.011667 |
| 0.012406 | 0.012173 | 0.012307 | 0.012579 | 0.011631 | 0.011329 | 0.011631 |
| 0.012070 | 0.012005 | 0.011597 | 0.011497 | 0.011565 | 0.011565 | 0.011534 |
| 0.011429 | 0.011433 | 0.011496 | 0.011464 | 0.011834 | 0.011900 | 0.011901 |
| 0.011800 | 0.011901 | 0.012004 | 0.011770 | 0.012070 | 0.012076 | 0.012137 |
| 0.012138 | 0.012172 | 0.012118 | 0.012138 | 0.012139 | 0.011362 | 0.011665 |
| 0.011733 | 0.012236 | 0.011738 | 0.011967 | 0.012440 | 0.011502 | 0.011396 |
| 0.011362 | 0.011362 | 0.011833 | 0.011883 | 0.011975 | 0.011698 | 0.011363 |
| S539     | 0.011631 | 0.011631 | 0.011967 | 0.011731 | 0.011731 | 0.011799 |
| 0.011637 | 0.011569 | 0.011799 | 0.011228 | 0.011295 | 0.011262 | 0.011228 |

|          |          |          |          |          |          |          |
|----------|----------|----------|----------|----------|----------|----------|
| 0.011262 | 0.011429 | 0.011228 | 0.011194 | 0.011329 | 0.011295 | 0.011262 |
| 0.011228 | 0.011262 | 0.011362 | 0.011228 | 0.011262 | 0.011262 | 0.011603 |
| 0.011496 | 0.011262 | 0.011161 | 0.011396 | 0.011329 | 0.011295 | 0.011329 |
| 0.011295 | 0.011396 | 0.011295 | 0.011295 | 0.011262 | 0.011295 | 0.011463 |
| 0.011228 | 0.011295 | 0.011262 | 0.011262 | 0.011362 | 0.011329 | 0.011329 |
| 0.011295 | 0.011396 | 0.011362 | 0.011631 | 0.011228 | 0.011564 | 0.011228 |
| 0.011262 | 0.011362 | 0.011429 | 0.011564 | 0.011664 | 0.011362 | 0.011463 |
| 0.011329 | 0.011396 | 0.011295 | 0.011530 | 0.011765 | 0.011295 | 0.011362 |
| 0.011262 | 0.011362 | 0.011329 | 0.011396 | 0.011329 | 0.011329 | 0.011329 |
| 0.011228 | 0.011262 | 0.011228 | 0.011329 | 0.011295 | 0.011329 | 0.011396 |
| 0.011329 | 0.011295 | 0.011362 | 0.011262 | 0.011396 | 0.011228 | 0.011295 |
| 0.011463 | 0.011396 | 0.011631 | 0.011463 | 0.011295 | 0.011530 | 0.011295 |
| 0.011468 | 0.011695 | 0.011513 | 0.011216 | 0.011210 | 0.011281 | 0.011414 |
| 0.012048 | 0.011467 | 0.011225 | 0.011463 | 0.011530 | 0.011329 | 0.011429 |
| 0.011362 | 0.011329 | 0.011396 | 0.011295 | 0.011396 | 0.011329 | 0.011329 |
| 0.011295 | 0.011396 | 0.011597 | 0.011463 | 0.011362 | 0.011329 | 0.011262 |
| 0.011228 | 0.011228 | 0.011295 | 0.011262 | 0.011463 | 0.011429 | 0.011362 |
| 0.011463 | 0.011530 | 0.011262 | 0.011262 | 0.011295 | 0.011295 | 0.011297 |
| 0.011364 | 0.011295 | 0.011295 | 0.011168 | 0.011241 | 0.011200 | 0.011296 |
| 0.011297 | 0.011232 | 0.011282 | 0.011267 | 0.011196 | 0.011231 | 0.011263 |
| 0.011528 | 0.011301 | 0.011336 | 0.011228 | 0.011233 | 0.011363 | 0.011329 |
| 0.011396 | 0.011330 | 0.011329 | 0.011429 | 0.011362 | 0.011664 | 0.011530 |
| 0.011564 | 0.011429 | 0.011295 | 0.011396 | 0.011195 | 0.011429 | 0.011228 |
| 0.011295 | 0.011295 | 0.011262 | 0.011228 | 0.011262 | 0.011228 | 0.011329 |
| 0.011295 | 0.011396 | 0.011329 | 0.011228 | 0.011330 | 0.011430 | 0.011432 |
| 0.011430 | 0.011329 | 0.011228 | 0.011161 | 0.011295 | 0.011228 | 0.011161 |
| 0.011264 | 0.011430 | 0.011228 | 0.011430 | 0.011195 | 0.011295 | 0.011262 |
| 0.011362 | 0.011262 | 0.011295 | 0.011262 | 0.011295 | 0.011161 | 0.011295 |
| 0.011329 | 0.011262 | 0.011329 | 0.011262 | 0.011295 | 0.011329 | 0.011564 |
| 0.011664 | 0.011597 | 0.011665 | 0.011431 | 0.011665 | 0.011295 | 0.011262 |
| 0.011297 | 0.011586 | 0.011426 | 0.011197 | 0.011671 | 0.011163 | 0.011218 |
| 0.011671 | 0.011570 | 0.011463 | 0.011664 | 0.011333 | 0.011530 | 0.011497 |
| 0.011362 | 0.011597 | 0.011451 | 0.011307 | 0.011354 | 0.011329 | 0.011398 |
| 0.011497 | 0.011397 | 0.011533 | 0.011601 | 0.011530 | 0.011597 | 0.011704 |
| 0.011432 | 0.011603 | 0.011466 | 0.011466 | 0.011699 | 0.011194 | 0.011397 |
| 0.011362 | 0.011295 | 0.011194 | 0.011194 | 0.011262 | 0.011262 | 0.011329 |
| 0.011262 | 0.011329 | 0.011228 | 0.011329 | 0.011262 | 0.011262 | 0.011262 |
| 0.011262 | 0.011698 | 0.011597 | 0.011631 | 0.011161 | 0.011262 | 0.011295 |
| 0.011295 | 0.011262 | 0.011329 | 0.011362 | 0.011228 | 0.011228 | 0.011228 |
| 0.011765 | 0.011396 | 0.011396 | 0.011194 | 0.011295 | 0.011396 | 0.011228 |
| 0.011228 | 0.011295 | 0.011262 | 0.011429 | 0.011228 | 0.011362 | 0.011496 |
| 0.011429 | 0.011262 | 0.011262 | 0.011194 | 0.011194 | 0.011362 | 0.011295 |
| 0.011194 | 0.011295 | 0.011161 | 0.011194 | 0.011329 | 0.011463 | 0.011228 |
| 0.011195 | 0.011329 | 0.011262 | 0.011161 | 0.011496 | 0.011161 | 0.011329 |
| 0.011402 | 0.011228 | 0.011530 | 0.011362 | 0.011396 | 0.011262 | 0.011295 |
| 0.011228 | 0.011564 | 0.011161 | 0.011429 | 0.011228 | 0.011228 | 0.011161 |
| 0.011396 | 0.011597 | 0.011295 | 0.011362 | 0.011194 | 0.011597 | 0.011228 |
| 0.011228 | 0.011228 | 0.011262 | 0.011362 | 0.011262 | 0.011362 | 0.011429 |
| 0.011429 | 0.011396 | 0.011295 | 0.011396 | 0.011362 | 0.011228 | 0.011194 |
| 0.011228 | 0.011228 | 0.011295 | 0.011228 | 0.011194 | 0.011362 | 0.011228 |
| 0.011262 | 0.011194 | 0.011396 | 0.011429 | 0.011329 | 0.011262 | 0.011262 |
| 0.011329 | 0.011262 | 0.011362 | 0.011228 | 0.011362 | 0.011463 | 0.011765 |
| 0.011262 | 0.011664 | 0.011267 | 0.017785 | 0.011322 | 0.011427 | 0.011618 |
| 0.011579 | 0.011623 | 0.011374 | 0.011350 | 0.011774 | 0.011647 | 0.011425 |
| 0.011440 | 0.011610 | 0.011177 | 0.011270 | 0.011255 | 0.011356 | 0.011275 |
| 0.011529 | 0.011433 | 0.011431 | 0.011259 | 0.011396 | 0.011429 | 0.011432 |
| 0.011301 | 0.011396 | 0.011396 | 0.011362 | 0.011329 | 0.011329 | 0.011295 |
| 0.011329 | 0.011262 | 0.011295 | 0.011329 | 0.011295 | 0.011228 | 0.011262 |
| 0.011262 | 0.011329 | 0.011228 | 0.011329 | 0.011362 | 0.011396 | 0.011295 |
| 0.011329 | 0.011295 | 0.011631 | 0.011631 | 0.011362 | 0.011329 | 0.011430 |

|          |          |          |          |          |          |          |
|----------|----------|----------|----------|----------|----------|----------|
| 0.011195 | 0.011195 | 0.011228 | 0.011329 | 0.011195 | 0.011429 | 0.011429 |
| 0.011463 | 0.011463 | 0.011396 | 0.011496 | 0.011665 | 0.011498 | 0.011329 |
| 0.011329 | 0.011396 | 0.011429 | 0.011262 | 0.011329 | 0.011295 | 0.011262 |
| 0.011396 | 0.011396 | 0.011429 | 0.011396 | 0.011296 | 0.011497 | 0.011463 |
| 0.011331 | 0.011228 | 0.011329 | 0.011430 | 0.011329 | 0.011463 | 0.011496 |
| 0.011664 | 0.011333 | 0.011530 | 0.011497 | 0.011362 | 0.011597 | 0.011228 |
| 0.011330 | 0.011295 | 0.011262 | 0.011262 | 0.011329 | 0.011228 | 0.011329 |
| 0.011362 | 0.011396 | 0.011295 | 0.011329 | 0.011295 | 0.011631 | 0.011631 |
| 0.011362 | 0.011329 | 0.011463 | 0.011396 | 0.012035 | 0.011453 | 0.011377 |
| 0.011447 | 0.011407 | 0.011517 | 0.011406 | 0.011515 | 0.011439 | 0.011405 |
| 0.011987 | 0.011302 | 0.011437 | 0.011371 | 0.011645 | 0.011502 | 0.011604 |
| 0.012012 | 0.011475 | 0.011567 | 0.011631 | 0.011496 | 0.011497 | 0.011533 |
| 0.011194 | 0.011362 | 0.011496 | 0.011463 | 0.011466 | 0.011463 | 0.011431 |
| 0.011295 | 0.011228 | 0.011262 | 0.011295 | 0.011194 | 0.011262 | 0.011161 |
| 0.011295 | 0.011329 | 0.011228 | 0.011194 | 0.011295 | 0.011228 | 0.011262 |
| 0.000000 | 0.011194 | 0.011262 | 0.011295 | 0.011194 | 0.011396 | 0.011429 |
| 0.011329 | 0.011396 | 0.011329 | 0.011329 | 0.011262 | 0.011664 | 0.011295 |
| 0.011338 | 0.011262 | 0.011497 | 0.011501 | 0.011362 | 0.011362 | 0.011362 |
| 0.011362 | 0.011295 | 0.011262 | 0.011295 | 0.011396 | 0.011396 | 0.011329 |
| 0.011329 | 0.011463 | 0.011631 | 0.011362 | 0.011564 | 0.011564 | 0.011429 |
| 0.011262 | 0.011329 | 0.011362 | 0.011765 | 0.011329 | 0.011362 | 0.011329 |
| 0.011362 | 0.011295 | 0.011295 | 0.011597 | 0.011530 | 0.011564 | 0.011295 |
| 0.011396 | 0.011463 | 0.011329 | 0.011396 | 0.011362 | 0.011228 | 0.011564 |
| 0.011329 | 0.011295 | 0.011295 | 0.011463 | 0.011295 | 0.011396 | 0.011631 |
| 0.011329 | 0.011705 | 0.011698 | 0.011507 | 0.011286 | 0.011400 | 0.011267 |
| 0.011280 | 0.011683 | 0.011236 | 0.011462 | 0.011304 | 0.011366 | 0.011432 |
| 0.011519 | 0.011258 | 0.011394 | 0.011258 | 0.011276 | 0.011462 | 0.011385 |
| 0.011399 | 0.011296 | 0.011377 | 0.011307 | 0.011330 | 0.011463 | 0.011530 |
| 0.011530 | 0.011396 | 0.011500 | 0.011501 | 0.011636 | 0.011661 | 0.011329 |
| 0.011564 | 0.011429 | 0.011295 | 0.011396 | 0.011195 | 0.011429 | 0.011228 |
| 0.011295 | 0.011295 | 0.011262 | 0.011228 | 0.011262 | 0.011228 | 0.011329 |
| 0.011305 | 0.011305 | 0.011231 | 0.011334 | 0.011471 | 0.011436 | 0.011367 |
| 0.011435 | 0.011363 | 0.011171 | 0.011132 | 0.011297 | 0.011467 | 0.011467 |
| 0.011262 | 0.011331 | 0.011565 | 0.011533 | 0.011464 | 0.011498 | 0.011429 |
| 0.011362 | 0.011429 | 0.011429 | 0.011329 | 0.011900 | 0.011496 | 0.011564 |
| 0.011597 | 0.011665 | 0.011265 | 0.011372 | 0.011262 | 0.011463 | 0.011429 |
| 0.011464 | 0.011496 | 0.011496 | 0.011496 | 0.011571 | 0.011631 | 0.011268 |
| 0.011162 | 0.011164 | 0.011264 | 0.011230 | 0.011333 | 0.011172 | 0.011502 |
| 0.011300 | 0.011455 | 0.011203 | 0.011322 | 0.011296 | 0.011368 | 0.011262 |
| 0.011228 | 0.011228 | 0.011295 | 0.011262 | 0.011463 | 0.011429 | 0.011362 |
| 0.011463 | 0.011530 | 0.011262 | 0.011262 | 0.011295 | 0.011295 | 0.011297 |
| 0.011364 | 0.011295 | 0.011295 | 0.011330 | 0.011463 | 0.011530 | 0.011530 |
| 0.011396 | 0.011500 | 0.011501 | 0.011636 | 0.011661 | 0.011329 | 0.011496 |
| 0.011429 | 0.011429 | 0.011263 | 0.011443 | 0.011373 | 0.011401 | 0.011270 |
| 0.011439 | 0.011653 | 0.011399 | 0.011332 | 0.011228 | 0.011430 | 0.011295 |
| 0.011396 | 0.011329 | 0.011228 | 0.011330 | 0.011430 | 0.011432 | 0.011329 |
| 0.011228 | 0.011161 | 0.011295 | 0.011228 | 0.011161 | 0.011264 | 0.011430 |
| 0.011329 | 0.011262 | 0.011295 | 0.011329 | 0.011295 | 0.011228 | 0.011430 |
| 0.011295 | 0.011329 | 0.011329 | 0.011262 | 0.011329 | 0.011564 | 0.011228 |
| 0.011262 | 0.011664 | 0.011262 | 0.011295 | 0.011262 | 0.011631 | 0.011232 |
| 0.011678 | 0.011230 | 0.011261 | 0.011463 | 0.011549 | 0.011455 | 0.011186 |
| 0.011218 | 0.011429 | 0.011463 | 0.011569 | 0.011430 | 0.011568 | 0.011632 |
| 0.011598 | 0.011635 | 0.011597 | 0.011914 | 0.011631 | 0.012505 | 0.011666 |
| 0.012405 | 0.012173 | 0.012307 | 0.012578 | 0.011631 | 0.011329 | 0.011564 |
| 0.012070 | 0.011937 | 0.011597 | 0.011497 | 0.011565 | 0.011565 | 0.011534 |
| 0.011429 | 0.011433 | 0.011496 | 0.011464 | 0.011833 | 0.011900 | 0.011901 |
| 0.011800 | 0.011901 | 0.012004 | 0.011770 | 0.012070 | 0.012076 | 0.012137 |
| 0.012138 | 0.012171 | 0.012118 | 0.012138 | 0.012139 | 0.011362 | 0.011665 |
| 0.011733 | 0.012236 | 0.011738 | 0.011967 | 0.012440 | 0.011468 | 0.011396 |
| 0.011362 | 0.011362 | 0.011833 | 0.011883 | 0.011975 | 0.011698 | 0.011363 |



|          |          |          |          |          |          |          |
|----------|----------|----------|----------|----------|----------|----------|
| S540     | 0.011564 | 0.011564 | 0.011900 | 0.011664 | 0.011664 | 0.011731 |
| 0.011569 | 0.011501 | 0.011731 | 0.011161 | 0.011228 | 0.011195 | 0.011161 |
| 0.011194 | 0.011362 | 0.011161 | 0.011194 | 0.011262 | 0.011228 | 0.011194 |
| 0.011161 | 0.011194 | 0.011295 | 0.011161 | 0.011195 | 0.011194 | 0.011535 |
| 0.011429 | 0.011194 | 0.011094 | 0.011329 | 0.011262 | 0.011228 | 0.011262 |
| 0.011228 | 0.011329 | 0.011228 | 0.011228 | 0.011262 | 0.011228 | 0.011396 |
| 0.011161 | 0.011228 | 0.011262 | 0.011194 | 0.011295 | 0.011329 | 0.011262 |
| 0.011228 | 0.011396 | 0.011295 | 0.011564 | 0.011228 | 0.011496 | 0.011228 |
| 0.011194 | 0.011295 | 0.011362 | 0.011496 | 0.011597 | 0.011295 | 0.011396 |
| 0.011262 | 0.011329 | 0.011228 | 0.011463 | 0.011698 | 0.011228 | 0.011295 |
| 0.011194 | 0.011295 | 0.011262 | 0.011329 | 0.011262 | 0.011262 | 0.011262 |
| 0.011161 | 0.011194 | 0.011161 | 0.011262 | 0.011228 | 0.011262 | 0.011329 |
| 0.011262 | 0.011228 | 0.011295 | 0.011194 | 0.011329 | 0.011161 | 0.011228 |
| 0.011396 | 0.011329 | 0.011564 | 0.011396 | 0.011228 | 0.011463 | 0.011228 |
| 0.011394 | 0.011620 | 0.011437 | 0.011138 | 0.011135 | 0.011244 | 0.011336 |
| 0.011975 | 0.011416 | 0.011143 | 0.011463 | 0.011463 | 0.011262 | 0.011362 |
| 0.011295 | 0.011262 | 0.011329 | 0.011228 | 0.011329 | 0.011262 | 0.011262 |
| 0.011228 | 0.011329 | 0.011530 | 0.011396 | 0.011295 | 0.011262 | 0.011195 |
| 0.011161 | 0.011161 | 0.011228 | 0.011195 | 0.011396 | 0.011362 | 0.011295 |
| 0.011396 | 0.011463 | 0.011195 | 0.011195 | 0.011228 | 0.011228 | 0.011229 |
| 0.011297 | 0.011228 | 0.011228 | 0.011096 | 0.011169 | 0.011130 | 0.011228 |
| 0.011230 | 0.011163 | 0.011208 | 0.011198 | 0.011128 | 0.011163 | 0.011195 |
| 0.011456 | 0.011233 | 0.011267 | 0.011161 | 0.011164 | 0.011296 | 0.011262 |
| 0.011329 | 0.011262 | 0.011262 | 0.011362 | 0.011295 | 0.011664 | 0.011463 |
| 0.011496 | 0.011362 | 0.011228 | 0.011329 | 0.011127 | 0.011362 | 0.011161 |
| 0.011228 | 0.011228 | 0.011195 | 0.011161 | 0.011194 | 0.011161 | 0.011262 |
| 0.011228 | 0.011329 | 0.011262 | 0.011161 | 0.011262 | 0.011362 | 0.011364 |
| 0.011362 | 0.011262 | 0.011161 | 0.011094 | 0.011228 | 0.011161 | 0.011094 |
| 0.011196 | 0.011362 | 0.011161 | 0.011362 | 0.011127 | 0.011228 | 0.011195 |
| 0.011295 | 0.011195 | 0.011228 | 0.011195 | 0.011228 | 0.011094 | 0.011228 |
| 0.011262 | 0.011195 | 0.011262 | 0.011195 | 0.011228 | 0.011262 | 0.011497 |
| 0.011597 | 0.011530 | 0.011597 | 0.011363 | 0.011598 | 0.011228 | 0.011195 |
| 0.011229 | 0.011505 | 0.011335 | 0.011129 | 0.011603 | 0.011094 | 0.011218 |
| 0.011603 | 0.011502 | 0.011396 | 0.011597 | 0.011299 | 0.011463 | 0.011429 |
| 0.011362 | 0.011530 | 0.011380 | 0.011225 | 0.011270 | 0.011262 | 0.011331 |
| 0.011429 | 0.011330 | 0.011466 | 0.011534 | 0.011463 | 0.011530 | 0.011636 |
| 0.011365 | 0.011535 | 0.011466 | 0.011398 | 0.011666 | 0.011127 | 0.011330 |
| 0.011295 | 0.011228 | 0.011127 | 0.011127 | 0.011194 | 0.011194 | 0.011262 |
| 0.011194 | 0.011262 | 0.011161 | 0.011262 | 0.011194 | 0.011194 | 0.011262 |
| 0.011194 | 0.011631 | 0.011530 | 0.011564 | 0.011094 | 0.011194 | 0.011228 |
| 0.011228 | 0.011194 | 0.011262 | 0.011295 | 0.011161 | 0.011161 | 0.011161 |
| 0.011698 | 0.011329 | 0.011329 | 0.011127 | 0.011228 | 0.011396 | 0.011161 |
| 0.011161 | 0.011228 | 0.011194 | 0.011362 | 0.011161 | 0.011295 | 0.011429 |
| 0.011362 | 0.011194 | 0.011194 | 0.011127 | 0.011127 | 0.011295 | 0.011228 |
| 0.011127 | 0.011228 | 0.011094 | 0.011127 | 0.011262 | 0.011396 | 0.011161 |
| 0.011128 | 0.011262 | 0.011195 | 0.011094 | 0.011429 | 0.011094 | 0.011262 |
| 0.011334 | 0.011161 | 0.011463 | 0.011295 | 0.011329 | 0.011194 | 0.011295 |
| 0.011161 | 0.011496 | 0.011094 | 0.011362 | 0.011161 | 0.011161 | 0.011094 |
| 0.011329 | 0.011530 | 0.011228 | 0.011295 | 0.011127 | 0.011530 | 0.011161 |
| 0.011161 | 0.011161 | 0.011194 | 0.011295 | 0.011194 | 0.011295 | 0.011362 |
| 0.011362 | 0.011329 | 0.011228 | 0.011329 | 0.011295 | 0.011161 | 0.011127 |
| 0.011161 | 0.011161 | 0.011228 | 0.011161 | 0.011127 | 0.011295 | 0.011161 |
| 0.011194 | 0.011194 | 0.011329 | 0.011362 | 0.011262 | 0.011194 | 0.011195 |
| 0.011262 | 0.011194 | 0.011295 | 0.011161 | 0.011295 | 0.011396 | 0.011698 |
| 0.011194 | 0.011597 | 0.011198 | 0.017710 | 0.011191 | 0.011366 | 0.011548 |
| 0.011510 | 0.011553 | 0.011217 | 0.011176 | 0.011664 | 0.011578 | 0.011303 |
| 0.011440 | 0.011487 | 0.011099 | 0.011186 | 0.011177 | 0.011258 | 0.011189 |
| 0.011436 | 0.011358 | 0.011357 | 0.011126 | 0.011329 | 0.011362 | 0.011365 |
| 0.011232 | 0.011329 | 0.011329 | 0.011295 | 0.011262 | 0.011262 | 0.011228 |
| 0.011262 | 0.011195 | 0.011228 | 0.011262 | 0.011228 | 0.011161 | 0.011195 |

|          |          |          |          |          |          |          |
|----------|----------|----------|----------|----------|----------|----------|
| 0.011195 | 0.011262 | 0.011161 | 0.011262 | 0.011295 | 0.011329 | 0.011228 |
| 0.011262 | 0.011228 | 0.011564 | 0.011564 | 0.011295 | 0.011329 | 0.011362 |
| 0.011127 | 0.011127 | 0.011161 | 0.011262 | 0.011127 | 0.011362 | 0.011362 |
| 0.011396 | 0.011396 | 0.011329 | 0.011429 | 0.011597 | 0.011430 | 0.011262 |
| 0.011262 | 0.011329 | 0.011362 | 0.011195 | 0.011262 | 0.011228 | 0.011262 |
| 0.011329 | 0.011329 | 0.011362 | 0.011329 | 0.011229 | 0.011429 | 0.011396 |
| 0.011263 | 0.011161 | 0.011262 | 0.011362 | 0.011262 | 0.011396 | 0.011429 |
| 0.011597 | 0.011299 | 0.011463 | 0.011429 | 0.011362 | 0.011530 | 0.011161 |
| 0.011330 | 0.011228 | 0.011195 | 0.011195 | 0.011262 | 0.011161 | 0.011262 |
| 0.011295 | 0.011329 | 0.011228 | 0.011262 | 0.011228 | 0.011564 | 0.011564 |
| 0.011295 | 0.011329 | 0.011396 | 0.011329 | 0.011968 | 0.011382 | 0.011306 |
| 0.011376 | 0.011338 | 0.011447 | 0.011337 | 0.011445 | 0.011370 | 0.011336 |
| 0.011918 | 0.011233 | 0.011368 | 0.011302 | 0.011576 | 0.011434 | 0.011536 |
| 0.011944 | 0.011399 | 0.011500 | 0.011564 | 0.011429 | 0.011429 | 0.011466 |
| 0.011127 | 0.011295 | 0.011429 | 0.011396 | 0.011398 | 0.011396 | 0.011363 |
| 0.011228 | 0.011161 | 0.011194 | 0.011228 | 0.011127 | 0.011194 | 0.011094 |
| 0.011228 | 0.011262 | 0.011161 | 0.011127 | 0.011228 | 0.011094 | 0.011194 |
| 0.011194 | 0.000000 | 0.011194 | 0.011228 | 0.011127 | 0.011329 | 0.011362 |
| 0.011262 | 0.011329 | 0.011262 | 0.011262 | 0.011194 | 0.011597 | 0.011228 |
| 0.011269 | 0.011195 | 0.011430 | 0.011433 | 0.011295 | 0.011295 | 0.011295 |
| 0.011295 | 0.011228 | 0.011194 | 0.011228 | 0.011329 | 0.011329 | 0.011262 |
| 0.011262 | 0.011396 | 0.011564 | 0.011295 | 0.011497 | 0.011497 | 0.011362 |
| 0.011194 | 0.011262 | 0.011295 | 0.011698 | 0.011262 | 0.011295 | 0.011262 |
| 0.011295 | 0.011228 | 0.011228 | 0.011530 | 0.011463 | 0.011496 | 0.011228 |
| 0.011329 | 0.011396 | 0.011262 | 0.011329 | 0.011295 | 0.011161 | 0.011496 |
| 0.011262 | 0.011228 | 0.011228 | 0.011396 | 0.011228 | 0.011329 | 0.011564 |
| 0.011262 | 0.011637 | 0.011631 | 0.011426 | 0.011117 | 0.011332 | 0.011215 |
| 0.011170 | 0.011644 | 0.011166 | 0.011373 | 0.011207 | 0.011315 | 0.011326 |
| 0.011417 | 0.011126 | 0.011283 | 0.000000 | 0.011168 | 0.011261 | 0.011303 |
| 0.011324 | 0.011218 | 0.011307 | 0.011236 | 0.011262 | 0.011396 | 0.011463 |
| 0.011463 | 0.011329 | 0.011432 | 0.011433 | 0.011569 | 0.011590 | 0.011262 |
| 0.011496 | 0.011362 | 0.011228 | 0.011329 | 0.011127 | 0.011362 | 0.011161 |
| 0.011228 | 0.011228 | 0.011195 | 0.011161 | 0.011194 | 0.011161 | 0.011262 |
| 0.011235 | 0.011235 | 0.011231 | 0.011266 | 0.011402 | 0.011368 | 0.011367 |
| 0.011367 | 0.011296 | 0.011097 | 0.011096 | 0.011230 | 0.011399 | 0.011399 |
| 0.011195 | 0.011263 | 0.011498 | 0.011466 | 0.011396 | 0.011430 | 0.011362 |
| 0.011295 | 0.011362 | 0.011362 | 0.011262 | 0.011832 | 0.011429 | 0.011497 |
| 0.011530 | 0.011594 | 0.011231 | 0.011303 | 0.011195 | 0.011396 | 0.011362 |
| 0.011396 | 0.011429 | 0.011429 | 0.011429 | 0.011571 | 0.011564 | 0.011199 |
| 0.011094 | 0.011095 | 0.011196 | 0.011162 | 0.011265 | 0.011098 | 0.011434 |
| 0.011232 | 0.011367 | 0.000000 | 0.011248 | 0.011228 | 0.011300 | 0.011195 |
| 0.011161 | 0.011161 | 0.011228 | 0.011195 | 0.011396 | 0.011362 | 0.011295 |
| 0.011396 | 0.011463 | 0.011195 | 0.011195 | 0.011228 | 0.011228 | 0.011229 |
| 0.011297 | 0.011228 | 0.011228 | 0.011262 | 0.011396 | 0.011463 | 0.011463 |
| 0.011329 | 0.011432 | 0.011433 | 0.011569 | 0.011590 | 0.011262 | 0.011429 |
| 0.011362 | 0.011362 | 0.011196 | 0.011373 | 0.011303 | 0.011333 | 0.011200 |
| 0.011370 | 0.011516 | 0.011357 | 0.011264 | 0.011161 | 0.011362 | 0.011228 |
| 0.011329 | 0.011262 | 0.011161 | 0.011262 | 0.011362 | 0.011364 | 0.011262 |
| 0.011161 | 0.011094 | 0.011228 | 0.011161 | 0.011094 | 0.011196 | 0.011362 |
| 0.011262 | 0.011195 | 0.011228 | 0.011262 | 0.011228 | 0.011161 | 0.011362 |
| 0.011228 | 0.011262 | 0.011262 | 0.011194 | 0.011262 | 0.011496 | 0.011161 |
| 0.011194 | 0.011597 | 0.011194 | 0.011228 | 0.011194 | 0.011564 | 0.011146 |
| 0.011566 | 0.011145 | 0.011211 | 0.011382 | 0.011467 | 0.011383 | 0.011102 |
| 0.011165 | 0.011362 | 0.011463 | 0.011569 | 0.011430 | 0.011568 | 0.011699 |
| 0.011598 | 0.011635 | 0.011597 | 0.011846 | 0.011564 | 0.012438 | 0.011599 |
| 0.012338 | 0.012105 | 0.012240 | 0.012511 | 0.011564 | 0.011262 | 0.011564 |
| 0.012002 | 0.011937 | 0.011530 | 0.011429 | 0.011497 | 0.011497 | 0.011466 |
| 0.011362 | 0.011365 | 0.011429 | 0.011396 | 0.011766 | 0.011832 | 0.011834 |
| 0.011733 | 0.011833 | 0.011937 | 0.011703 | 0.012003 | 0.012008 | 0.012070 |
| 0.012070 | 0.012104 | 0.012050 | 0.012070 | 0.012072 | 0.011295 | 0.011598 |

|          |          |          |          |          |          |          |
|----------|----------|----------|----------|----------|----------|----------|
| 0.011665 | 0.012169 | 0.011670 | 0.011900 | 0.012373 | 0.011434 | 0.011329 |
| 0.011295 | 0.011295 | 0.011766 | 0.011800 | 0.011904 | 0.011631 | 0.011296 |
| S541     | 0.011631 | 0.011631 | 0.011967 | 0.011732 | 0.011732 | 0.011799 |
| 0.011637 | 0.011569 | 0.011799 | 0.011228 | 0.011295 | 0.011262 | 0.011228 |
| 0.011262 | 0.011429 | 0.011228 | 0.011262 | 0.011329 | 0.011295 | 0.011262 |
| 0.011228 | 0.011262 | 0.011362 | 0.011228 | 0.011262 | 0.011262 | 0.011603 |
| 0.011496 | 0.011262 | 0.011161 | 0.011396 | 0.011329 | 0.011295 | 0.011329 |
| 0.011295 | 0.011396 | 0.011295 | 0.011295 | 0.011329 | 0.011295 | 0.011463 |
| 0.011228 | 0.011295 | 0.011329 | 0.011262 | 0.011362 | 0.011396 | 0.011329 |
| 0.011295 | 0.011463 | 0.011362 | 0.011631 | 0.011295 | 0.011564 | 0.011295 |
| 0.011262 | 0.011362 | 0.011429 | 0.011564 | 0.011664 | 0.011362 | 0.011463 |
| 0.011329 | 0.011396 | 0.011295 | 0.011530 | 0.011765 | 0.011295 | 0.011362 |
| 0.011262 | 0.011362 | 0.011329 | 0.011396 | 0.011329 | 0.011329 | 0.011329 |
| 0.011228 | 0.011262 | 0.011228 | 0.011329 | 0.011295 | 0.011329 | 0.011396 |
| 0.011329 | 0.011295 | 0.011362 | 0.011262 | 0.011396 | 0.011228 | 0.011295 |
| 0.011463 | 0.011396 | 0.011631 | 0.011463 | 0.011295 | 0.011530 | 0.011295 |
| 0.011468 | 0.011695 | 0.011513 | 0.011216 | 0.011210 | 0.011318 | 0.011415 |
| 0.012048 | 0.011416 | 0.011225 | 0.011530 | 0.011530 | 0.011329 | 0.011429 |
| 0.011362 | 0.011329 | 0.011396 | 0.011295 | 0.011396 | 0.011329 | 0.011329 |
| 0.011295 | 0.011396 | 0.011597 | 0.011463 | 0.011362 | 0.011329 | 0.011262 |
| 0.011228 | 0.011228 | 0.011295 | 0.011262 | 0.011463 | 0.011430 | 0.011362 |
| 0.011463 | 0.011530 | 0.011262 | 0.011262 | 0.011295 | 0.011295 | 0.011297 |
| 0.011364 | 0.011295 | 0.011295 | 0.011168 | 0.011241 | 0.011200 | 0.011296 |
| 0.011297 | 0.011232 | 0.011282 | 0.011267 | 0.011196 | 0.011232 | 0.011263 |
| 0.011528 | 0.011302 | 0.011336 | 0.011228 | 0.011233 | 0.011363 | 0.011329 |
| 0.011397 | 0.011330 | 0.011329 | 0.011429 | 0.011362 | 0.011732 | 0.011530 |
| 0.011564 | 0.011430 | 0.011295 | 0.011396 | 0.011195 | 0.011429 | 0.011228 |
| 0.011295 | 0.011295 | 0.011262 | 0.011228 | 0.011262 | 0.011228 | 0.011329 |
| 0.011295 | 0.011396 | 0.011329 | 0.011228 | 0.011330 | 0.011430 | 0.011432 |
| 0.011430 | 0.011329 | 0.011228 | 0.011161 | 0.011295 | 0.011228 | 0.011161 |
| 0.011264 | 0.011430 | 0.011228 | 0.011430 | 0.011195 | 0.011295 | 0.011262 |
| 0.011362 | 0.011262 | 0.011295 | 0.011262 | 0.011295 | 0.011161 | 0.011295 |
| 0.011329 | 0.011262 | 0.011329 | 0.011262 | 0.011295 | 0.011329 | 0.011564 |
| 0.011664 | 0.011597 | 0.011665 | 0.011431 | 0.011665 | 0.011295 | 0.011262 |
| 0.011297 | 0.011545 | 0.011380 | 0.011197 | 0.011671 | 0.011163 | 0.011257 |
| 0.011671 | 0.011570 | 0.011463 | 0.011664 | 0.011368 | 0.011530 | 0.011497 |
| 0.011429 | 0.011597 | 0.011451 | 0.011225 | 0.011354 | 0.011329 | 0.011398 |
| 0.011497 | 0.011397 | 0.011533 | 0.011601 | 0.011530 | 0.011597 | 0.011704 |
| 0.011432 | 0.011603 | 0.011534 | 0.011466 | 0.011733 | 0.011194 | 0.011397 |
| 0.011362 | 0.011295 | 0.011194 | 0.011194 | 0.011262 | 0.011262 | 0.011329 |
| 0.011262 | 0.011329 | 0.011228 | 0.011329 | 0.011262 | 0.011262 | 0.011329 |
| 0.011262 | 0.011698 | 0.011597 | 0.011631 | 0.011161 | 0.011262 | 0.011295 |
| 0.011295 | 0.011262 | 0.011329 | 0.011362 | 0.011228 | 0.011228 | 0.011228 |
| 0.011765 | 0.011396 | 0.011396 | 0.011194 | 0.011295 | 0.011463 | 0.011228 |
| 0.011228 | 0.011295 | 0.011262 | 0.011429 | 0.011228 | 0.011362 | 0.011496 |
| 0.011429 | 0.011262 | 0.011262 | 0.011194 | 0.011194 | 0.011362 | 0.011295 |
| 0.011194 | 0.011295 | 0.011161 | 0.011195 | 0.011329 | 0.011463 | 0.011228 |
| 0.011195 | 0.011329 | 0.011262 | 0.011161 | 0.011496 | 0.011161 | 0.011329 |
| 0.011403 | 0.011228 | 0.011530 | 0.011362 | 0.011396 | 0.011262 | 0.011362 |
| 0.011228 | 0.011564 | 0.011161 | 0.011429 | 0.011228 | 0.011228 | 0.011161 |
| 0.011396 | 0.011598 | 0.011295 | 0.011362 | 0.011194 | 0.011597 | 0.011228 |
| 0.011228 | 0.011228 | 0.011262 | 0.011362 | 0.011262 | 0.011362 | 0.011429 |
| 0.011429 | 0.011396 | 0.011295 | 0.011396 | 0.011362 | 0.011228 | 0.011194 |
| 0.011228 | 0.011228 | 0.011295 | 0.011228 | 0.011194 | 0.011362 | 0.011228 |
| 0.011262 | 0.011262 | 0.011396 | 0.011429 | 0.011329 | 0.011262 | 0.011262 |
| 0.011329 | 0.011262 | 0.011362 | 0.011228 | 0.011362 | 0.011463 | 0.011765 |
| 0.011262 | 0.011664 | 0.011267 | 0.011785 | 0.011191 | 0.011305 | 0.011618 |
| 0.011579 | 0.011623 | 0.011270 | 0.011234 | 0.011609 | 0.011647 | 0.011303 |
| 0.011440 | 0.011426 | 0.011177 | 0.011186 | 0.011255 | 0.011258 | 0.011189 |
| 0.011436 | 0.011433 | 0.011431 | 0.011325 | 0.011396 | 0.011429 | 0.011432 |

|          |          |          |          |          |          |          |
|----------|----------|----------|----------|----------|----------|----------|
| 0.011301 | 0.011396 | 0.011396 | 0.011362 | 0.011329 | 0.011329 | 0.011295 |
| 0.011329 | 0.011262 | 0.011295 | 0.011329 | 0.011295 | 0.011228 | 0.011262 |
| 0.011262 | 0.011329 | 0.011228 | 0.011329 | 0.011362 | 0.011396 | 0.011295 |
| 0.011329 | 0.011295 | 0.011631 | 0.011631 | 0.011362 | 0.011396 | 0.011430 |
| 0.011195 | 0.011195 | 0.011228 | 0.011329 | 0.011195 | 0.011430 | 0.011430 |
| 0.011463 | 0.011463 | 0.011396 | 0.011497 | 0.011665 | 0.011498 | 0.011329 |
| 0.011329 | 0.011396 | 0.011430 | 0.011262 | 0.011329 | 0.011295 | 0.011329 |
| 0.011396 | 0.011396 | 0.011429 | 0.011396 | 0.011296 | 0.011497 | 0.011463 |
| 0.011331 | 0.011228 | 0.011329 | 0.011430 | 0.011329 | 0.011463 | 0.011496 |
| 0.011664 | 0.011368 | 0.011530 | 0.011497 | 0.011429 | 0.011597 | 0.011228 |
| 0.011397 | 0.011296 | 0.011262 | 0.011262 | 0.011329 | 0.011228 | 0.011329 |
| 0.011362 | 0.011396 | 0.011295 | 0.011329 | 0.011295 | 0.011631 | 0.011631 |
| 0.011362 | 0.011396 | 0.011463 | 0.011396 | 0.012035 | 0.011453 | 0.011377 |
| 0.011447 | 0.011407 | 0.011517 | 0.011406 | 0.011515 | 0.011439 | 0.011405 |
| 0.011987 | 0.011302 | 0.011437 | 0.011371 | 0.011645 | 0.011502 | 0.011605 |
| 0.012012 | 0.011475 | 0.011567 | 0.011631 | 0.011496 | 0.011497 | 0.011533 |
| 0.011194 | 0.011362 | 0.011496 | 0.011463 | 0.011466 | 0.011463 | 0.011431 |
| 0.011295 | 0.011228 | 0.011262 | 0.011295 | 0.011194 | 0.011262 | 0.011161 |
| 0.011295 | 0.011329 | 0.011228 | 0.011194 | 0.011295 | 0.011228 | 0.011262 |
| 0.011262 | 0.011194 | 0.000000 | 0.011295 | 0.011194 | 0.011396 | 0.011429 |
| 0.011329 | 0.011396 | 0.011329 | 0.011329 | 0.011262 | 0.011664 | 0.011295 |
| 0.011338 | 0.011262 | 0.011497 | 0.011501 | 0.011362 | 0.011362 | 0.011362 |
| 0.011362 | 0.011295 | 0.011262 | 0.011295 | 0.011396 | 0.011396 | 0.011329 |
| 0.011329 | 0.011463 | 0.011631 | 0.011362 | 0.011564 | 0.011564 | 0.011429 |
| 0.011262 | 0.011329 | 0.011362 | 0.011765 | 0.011329 | 0.011362 | 0.011329 |
| 0.011362 | 0.011295 | 0.011295 | 0.011597 | 0.011530 | 0.011564 | 0.011295 |
| 0.011396 | 0.011463 | 0.011329 | 0.011396 | 0.011362 | 0.011228 | 0.011564 |
| 0.011329 | 0.011295 | 0.011295 | 0.011463 | 0.011295 | 0.011396 | 0.011631 |
| 0.011329 | 0.011705 | 0.011698 | 0.011507 | 0.011286 | 0.011400 | 0.011318 |
| 0.011170 | 0.011722 | 0.011236 | 0.011462 | 0.011304 | 0.011417 | 0.011326 |
| 0.011417 | 0.011126 | 0.011283 | 0.011126 | 0.011276 | 0.011328 | 0.011385 |
| 0.011399 | 0.011218 | 0.011377 | 0.011307 | 0.011330 | 0.011463 | 0.011530 |
| 0.011530 | 0.011396 | 0.011500 | 0.011501 | 0.011636 | 0.011661 | 0.011329 |
| 0.011564 | 0.011430 | 0.011295 | 0.011396 | 0.011195 | 0.011429 | 0.011228 |
| 0.011295 | 0.011295 | 0.011262 | 0.011228 | 0.011262 | 0.011228 | 0.011329 |
| 0.011305 | 0.011305 | 0.011300 | 0.011334 | 0.011471 | 0.011436 | 0.011436 |
| 0.011435 | 0.011363 | 0.011171 | 0.011168 | 0.011297 | 0.011467 | 0.011467 |
| 0.011262 | 0.011331 | 0.011565 | 0.011466 | 0.011464 | 0.011498 | 0.011429 |
| 0.011362 | 0.011429 | 0.011429 | 0.011329 | 0.011900 | 0.011497 | 0.011564 |
| 0.011597 | 0.011630 | 0.011299 | 0.011372 | 0.011262 | 0.011463 | 0.011429 |
| 0.011464 | 0.011496 | 0.011496 | 0.011496 | 0.011650 | 0.011631 | 0.011268 |
| 0.011162 | 0.011164 | 0.011264 | 0.011230 | 0.011333 | 0.011172 | 0.011502 |
| 0.011300 | 0.011455 | 0.011108 | 0.011322 | 0.011296 | 0.011368 | 0.011262 |
| 0.011228 | 0.011228 | 0.011295 | 0.011262 | 0.011463 | 0.011430 | 0.011362 |
| 0.011463 | 0.011530 | 0.011262 | 0.011262 | 0.011295 | 0.011295 | 0.011297 |
| 0.011364 | 0.011295 | 0.011295 | 0.011330 | 0.011463 | 0.011530 | 0.011530 |
| 0.011396 | 0.011500 | 0.011501 | 0.011636 | 0.011661 | 0.011329 | 0.011496 |
| 0.011429 | 0.011429 | 0.011263 | 0.011443 | 0.011303 | 0.011367 | 0.011200 |
| 0.011404 | 0.011516 | 0.011357 | 0.011332 | 0.011228 | 0.011430 | 0.011295 |
| 0.011396 | 0.011329 | 0.011228 | 0.011330 | 0.011430 | 0.011432 | 0.011329 |
| 0.011228 | 0.011161 | 0.011295 | 0.011228 | 0.011161 | 0.011264 | 0.011430 |
| 0.011329 | 0.011262 | 0.011295 | 0.011329 | 0.011295 | 0.011228 | 0.011430 |
| 0.011295 | 0.011329 | 0.011329 | 0.011262 | 0.011329 | 0.011564 | 0.011228 |
| 0.011262 | 0.011664 | 0.011262 | 0.011295 | 0.011262 | 0.011631 | 0.011146 |
| 0.011622 | 0.011230 | 0.011211 | 0.011463 | 0.011549 | 0.011455 | 0.011102 |
| 0.011165 | 0.011429 | 0.011530 | 0.011637 | 0.011498 | 0.011635 | 0.011766 |
| 0.011666 | 0.011703 | 0.011664 | 0.011914 | 0.011631 | 0.012505 | 0.011667 |
| 0.012406 | 0.012173 | 0.012307 | 0.012579 | 0.011631 | 0.011329 | 0.011631 |
| 0.012070 | 0.012005 | 0.011597 | 0.011497 | 0.011565 | 0.011565 | 0.011534 |
| 0.011429 | 0.011433 | 0.011496 | 0.011464 | 0.011834 | 0.011900 | 0.011901 |

|          |          |          |          |          |          |          |
|----------|----------|----------|----------|----------|----------|----------|
| 0.011800 | 0.011901 | 0.012004 | 0.011770 | 0.012070 | 0.012076 | 0.012137 |
| 0.012138 | 0.012172 | 0.012118 | 0.012138 | 0.012139 | 0.011362 | 0.011665 |
| 0.011733 | 0.012236 | 0.011738 | 0.011967 | 0.012440 | 0.011502 | 0.011396 |
| 0.011362 | 0.011362 | 0.011833 | 0.011883 | 0.011975 | 0.011698 | 0.011363 |
| S542     | 0.011664 | 0.011664 | 0.012001 | 0.011765 | 0.011765 | 0.011832 |
| 0.011671 | 0.011603 | 0.011832 | 0.011262 | 0.011329 | 0.011296 | 0.011262 |
| 0.011295 | 0.011463 | 0.011262 | 0.011295 | 0.011362 | 0.011329 | 0.011295 |
| 0.011262 | 0.011295 | 0.011396 | 0.011262 | 0.011295 | 0.011295 | 0.011637 |
| 0.011530 | 0.011295 | 0.011195 | 0.011429 | 0.011362 | 0.011329 | 0.011362 |
| 0.011329 | 0.011429 | 0.011329 | 0.011329 | 0.011362 | 0.011329 | 0.011497 |
| 0.011262 | 0.011329 | 0.011362 | 0.011295 | 0.011396 | 0.011429 | 0.011362 |
| 0.011329 | 0.011497 | 0.011396 | 0.011664 | 0.011329 | 0.011597 | 0.011329 |
| 0.011295 | 0.011396 | 0.011463 | 0.011597 | 0.011698 | 0.011396 | 0.011497 |
| 0.011362 | 0.011430 | 0.011329 | 0.011564 | 0.011799 | 0.011329 | 0.011396 |
| 0.011295 | 0.011396 | 0.011362 | 0.011429 | 0.011362 | 0.011362 | 0.011362 |
| 0.011262 | 0.011295 | 0.011262 | 0.011362 | 0.011329 | 0.011363 | 0.011429 |
| 0.011362 | 0.011329 | 0.011396 | 0.011295 | 0.011429 | 0.011262 | 0.011329 |
| 0.011496 | 0.011429 | 0.011664 | 0.011497 | 0.011329 | 0.011564 | 0.011329 |
| 0.011505 | 0.011733 | 0.011551 | 0.011256 | 0.011247 | 0.011355 | 0.011454 |
| 0.012085 | 0.011467 | 0.011266 | 0.011564 | 0.011564 | 0.011362 | 0.011463 |
| 0.011396 | 0.011362 | 0.011429 | 0.011329 | 0.011430 | 0.011362 | 0.011362 |
| 0.011329 | 0.011429 | 0.011631 | 0.011496 | 0.011396 | 0.011362 | 0.011295 |
| 0.011262 | 0.011262 | 0.011329 | 0.011295 | 0.011497 | 0.011463 | 0.011396 |
| 0.011497 | 0.011564 | 0.011295 | 0.011295 | 0.011329 | 0.011329 | 0.011330 |
| 0.011398 | 0.011329 | 0.011329 | 0.011168 | 0.011277 | 0.011236 | 0.011329 |
| 0.011331 | 0.011266 | 0.011319 | 0.011302 | 0.011230 | 0.011266 | 0.011297 |
| 0.011564 | 0.011336 | 0.011370 | 0.011262 | 0.011268 | 0.011397 | 0.011363 |
| 0.011430 | 0.011364 | 0.011363 | 0.011463 | 0.011396 | 0.011765 | 0.011564 |
| 0.011597 | 0.011463 | 0.011329 | 0.011430 | 0.011228 | 0.011463 | 0.011262 |
| 0.011329 | 0.011329 | 0.011295 | 0.011262 | 0.011295 | 0.011262 | 0.011362 |
| 0.011329 | 0.011430 | 0.011363 | 0.011262 | 0.011363 | 0.011463 | 0.011466 |
| 0.011463 | 0.011363 | 0.011262 | 0.011195 | 0.011329 | 0.011262 | 0.011195 |
| 0.011298 | 0.011463 | 0.011262 | 0.011463 | 0.011228 | 0.011329 | 0.011295 |
| 0.011396 | 0.011295 | 0.011329 | 0.011295 | 0.011329 | 0.011195 | 0.011329 |
| 0.011363 | 0.011295 | 0.011362 | 0.011295 | 0.011329 | 0.011362 | 0.011597 |
| 0.011698 | 0.011631 | 0.011698 | 0.011465 | 0.011699 | 0.011329 | 0.011295 |
| 0.011330 | 0.011586 | 0.011380 | 0.011232 | 0.011705 | 0.011197 | 0.011257 |
| 0.011705 | 0.011570 | 0.011496 | 0.011698 | 0.011368 | 0.011564 | 0.011530 |
| 0.011463 | 0.011631 | 0.011486 | 0.011349 | 0.011396 | 0.011362 | 0.011432 |
| 0.011530 | 0.011431 | 0.011567 | 0.011635 | 0.011564 | 0.011631 | 0.011738 |
| 0.011466 | 0.011637 | 0.011568 | 0.011500 | 0.011767 | 0.011228 | 0.011431 |
| 0.011396 | 0.011329 | 0.011228 | 0.011228 | 0.011295 | 0.011295 | 0.011362 |
| 0.011295 | 0.011362 | 0.011262 | 0.011362 | 0.011295 | 0.011295 | 0.011362 |
| 0.011295 | 0.011732 | 0.011631 | 0.011664 | 0.011195 | 0.011295 | 0.011329 |
| 0.011329 | 0.011295 | 0.011362 | 0.011396 | 0.011262 | 0.011262 | 0.011262 |
| 0.011799 | 0.011429 | 0.011429 | 0.011228 | 0.011329 | 0.011497 | 0.011262 |
| 0.011262 | 0.011329 | 0.011295 | 0.011463 | 0.011262 | 0.011396 | 0.011530 |
| 0.011463 | 0.011295 | 0.011295 | 0.011228 | 0.011228 | 0.011396 | 0.011329 |
| 0.011228 | 0.011329 | 0.011195 | 0.011228 | 0.011362 | 0.011497 | 0.011262 |
| 0.011228 | 0.011362 | 0.011295 | 0.011195 | 0.011530 | 0.011195 | 0.011362 |
| 0.011437 | 0.011262 | 0.011564 | 0.011396 | 0.011429 | 0.011295 | 0.011396 |
| 0.011262 | 0.011597 | 0.011195 | 0.011463 | 0.011262 | 0.011262 | 0.011195 |
| 0.011362 | 0.011631 | 0.011329 | 0.011396 | 0.011228 | 0.011631 | 0.011262 |
| 0.011262 | 0.011262 | 0.011295 | 0.011396 | 0.011295 | 0.011396 | 0.011463 |
| 0.011463 | 0.011429 | 0.011329 | 0.011430 | 0.011396 | 0.011262 | 0.011228 |
| 0.011262 | 0.011262 | 0.011329 | 0.011262 | 0.011228 | 0.011329 | 0.011262 |
| 0.011295 | 0.011295 | 0.011429 | 0.011463 | 0.011362 | 0.011295 | 0.011295 |
| 0.011362 | 0.011295 | 0.011396 | 0.011262 | 0.011396 | 0.011497 | 0.011799 |
| 0.011295 | 0.011698 | 0.011302 | 0.017823 | 0.011257 | 0.011366 | 0.011653 |
| 0.011614 | 0.011658 | 0.011322 | 0.011292 | 0.011664 | 0.011682 | 0.011303 |

|          |          |          |          |          |          |          |
|----------|----------|----------|----------|----------|----------|----------|
| 0.011487 | 0.011487 | 0.011216 | 0.011228 | 0.011294 | 0.011258 | 0.011275 |
| 0.011529 | 0.011470 | 0.011468 | 0.011391 | 0.011429 | 0.011463 | 0.011466 |
| 0.011335 | 0.011430 | 0.011429 | 0.011396 | 0.011362 | 0.011363 | 0.011329 |
| 0.011295 | 0.011295 | 0.011329 | 0.011362 | 0.011329 | 0.011262 | 0.011295 |
| 0.011295 | 0.011362 | 0.011262 | 0.011363 | 0.011396 | 0.011430 | 0.011329 |
| 0.011362 | 0.011329 | 0.011665 | 0.011665 | 0.011396 | 0.011430 | 0.011396 |
| 0.011228 | 0.011228 | 0.011262 | 0.011363 | 0.011228 | 0.011463 | 0.011463 |
| 0.011497 | 0.011496 | 0.011429 | 0.011530 | 0.011698 | 0.011532 | 0.011362 |
| 0.011362 | 0.011430 | 0.011463 | 0.011295 | 0.011362 | 0.011329 | 0.011362 |
| 0.011430 | 0.011430 | 0.011463 | 0.011430 | 0.011330 | 0.011530 | 0.011497 |
| 0.011365 | 0.011262 | 0.011362 | 0.011463 | 0.011363 | 0.011497 | 0.011530 |
| 0.011698 | 0.011368 | 0.011564 | 0.011530 | 0.011463 | 0.011631 | 0.011262 |
| 0.011431 | 0.011329 | 0.011295 | 0.011295 | 0.011362 | 0.011262 | 0.011363 |
| 0.011396 | 0.011430 | 0.011329 | 0.011362 | 0.011329 | 0.011665 | 0.011665 |
| 0.011396 | 0.011430 | 0.011496 | 0.011429 | 0.012069 | 0.011489 | 0.011412 |
| 0.011482 | 0.011442 | 0.011552 | 0.011441 | 0.011550 | 0.011474 | 0.011440 |
| 0.012022 | 0.011337 | 0.011471 | 0.011406 | 0.011680 | 0.011536 | 0.011639 |
| 0.012046 | 0.011513 | 0.011601 | 0.011664 | 0.011530 | 0.011530 | 0.011567 |
| 0.011228 | 0.011396 | 0.011530 | 0.011496 | 0.011499 | 0.011496 | 0.011464 |
| 0.011329 | 0.011262 | 0.011295 | 0.011329 | 0.011228 | 0.011295 | 0.011195 |
| 0.011329 | 0.011362 | 0.011262 | 0.011228 | 0.011329 | 0.011262 | 0.011295 |
| 0.011295 | 0.011228 | 0.011295 | 0.000000 | 0.011228 | 0.011429 | 0.011463 |
| 0.011362 | 0.011429 | 0.011362 | 0.011362 | 0.011295 | 0.011698 | 0.011329 |
| 0.011373 | 0.011295 | 0.011531 | 0.011535 | 0.011396 | 0.011396 | 0.011396 |
| 0.011396 | 0.011329 | 0.011295 | 0.011329 | 0.011429 | 0.011429 | 0.011362 |
| 0.011362 | 0.011497 | 0.011664 | 0.011396 | 0.011597 | 0.011597 | 0.011463 |
| 0.011295 | 0.011362 | 0.011396 | 0.011799 | 0.011362 | 0.011396 | 0.011362 |
| 0.011396 | 0.011329 | 0.011329 | 0.011631 | 0.011564 | 0.011597 | 0.011329 |
| 0.011430 | 0.011497 | 0.011362 | 0.011430 | 0.011396 | 0.011262 | 0.011597 |
| 0.011362 | 0.011329 | 0.011329 | 0.011497 | 0.011329 | 0.011429 | 0.011665 |
| 0.011362 | 0.011739 | 0.011732 | 0.011507 | 0.011286 | 0.011434 | 0.011267 |
| 0.011170 | 0.011761 | 0.011271 | 0.011462 | 0.011353 | 0.011366 | 0.011379 |
| 0.011519 | 0.011192 | 0.011339 | 0.011192 | 0.011222 | 0.011328 | 0.011425 |
| 0.011437 | 0.011336 | 0.011413 | 0.011342 | 0.011364 | 0.011497 | 0.011564 |
| 0.011564 | 0.011430 | 0.011534 | 0.011535 | 0.011670 | 0.011696 | 0.011362 |
| 0.011597 | 0.011463 | 0.011329 | 0.011430 | 0.011228 | 0.011463 | 0.011262 |
| 0.011329 | 0.011329 | 0.011295 | 0.011262 | 0.011295 | 0.011262 | 0.011362 |
| 0.011305 | 0.011340 | 0.011334 | 0.011368 | 0.011505 | 0.011470 | 0.011402 |
| 0.011469 | 0.011396 | 0.011171 | 0.011132 | 0.011331 | 0.011501 | 0.011501 |
| 0.011296 | 0.011365 | 0.011599 | 0.011567 | 0.011497 | 0.011531 | 0.011463 |
| 0.011396 | 0.011463 | 0.011463 | 0.011362 | 0.011934 | 0.011530 | 0.011598 |
| 0.011631 | 0.011701 | 0.011299 | 0.011407 | 0.011295 | 0.011497 | 0.011463 |
| 0.011498 | 0.011530 | 0.011530 | 0.011530 | 0.011611 | 0.011664 | 0.011303 |
| 0.011196 | 0.011199 | 0.011299 | 0.011264 | 0.011368 | 0.011172 | 0.011536 |
| 0.011335 | 0.011455 | 0.011156 | 0.011360 | 0.011329 | 0.011402 | 0.011295 |
| 0.011262 | 0.011262 | 0.011329 | 0.011295 | 0.011497 | 0.011463 | 0.011396 |
| 0.011497 | 0.011564 | 0.011295 | 0.011295 | 0.011329 | 0.011329 | 0.011330 |
| 0.011398 | 0.011329 | 0.011329 | 0.011364 | 0.011497 | 0.011564 | 0.011564 |
| 0.011430 | 0.011534 | 0.011535 | 0.011670 | 0.011696 | 0.011362 | 0.011530 |
| 0.011463 | 0.011463 | 0.011297 | 0.011478 | 0.011373 | 0.011435 | 0.011270 |
| 0.011439 | 0.011653 | 0.011484 | 0.011366 | 0.011262 | 0.011463 | 0.011329 |
| 0.011430 | 0.011363 | 0.011262 | 0.011363 | 0.011463 | 0.011466 | 0.011363 |
| 0.011262 | 0.011195 | 0.011329 | 0.011262 | 0.011195 | 0.011298 | 0.011463 |
| 0.011295 | 0.011295 | 0.011329 | 0.011362 | 0.011329 | 0.011262 | 0.011463 |
| 0.011329 | 0.011362 | 0.011362 | 0.011295 | 0.011362 | 0.011597 | 0.011262 |
| 0.011295 | 0.011698 | 0.011295 | 0.011329 | 0.011295 | 0.011664 | 0.011232 |
| 0.011735 | 0.011230 | 0.011261 | 0.011503 | 0.011589 | 0.011491 | 0.011186 |
| 0.011218 | 0.011463 | 0.011564 | 0.011671 | 0.011532 | 0.011669 | 0.011800 |
| 0.011700 | 0.011737 | 0.011698 | 0.011949 | 0.011664 | 0.012539 | 0.011700 |
| 0.012439 | 0.012207 | 0.012341 | 0.012613 | 0.011664 | 0.011363 | 0.011665 |

|          |          |          |          |          |          |          |
|----------|----------|----------|----------|----------|----------|----------|
| 0.012104 | 0.012038 | 0.011631 | 0.011497 | 0.011598 | 0.011598 | 0.011567 |
| 0.011463 | 0.011467 | 0.011530 | 0.011497 | 0.011867 | 0.011933 | 0.011935 |
| 0.011834 | 0.011935 | 0.012038 | 0.011804 | 0.012104 | 0.012110 | 0.012171 |
| 0.012172 | 0.012206 | 0.012152 | 0.012172 | 0.012173 | 0.011396 | 0.011699 |
| 0.011767 | 0.012270 | 0.011772 | 0.012001 | 0.012474 | 0.011502 | 0.011430 |
| 0.011396 | 0.011396 | 0.011867 | 0.011924 | 0.012010 | 0.011732 | 0.011397 |
| S543     | 0.011564 | 0.011564 | 0.011900 | 0.011664 | 0.011664 | 0.011732 |
| 0.011569 | 0.011501 | 0.011731 | 0.011161 | 0.011228 | 0.011195 | 0.011161 |
| 0.011194 | 0.011362 | 0.011161 | 0.011194 | 0.011262 | 0.011228 | 0.011194 |
| 0.011161 | 0.011194 | 0.011295 | 0.011161 | 0.011195 | 0.011194 | 0.011535 |
| 0.011429 | 0.011194 | 0.011094 | 0.011329 | 0.011262 | 0.011228 | 0.011262 |
| 0.011228 | 0.011329 | 0.011228 | 0.011228 | 0.011262 | 0.011228 | 0.011396 |
| 0.011161 | 0.011228 | 0.011262 | 0.011194 | 0.011295 | 0.011329 | 0.011262 |
| 0.011228 | 0.011396 | 0.011295 | 0.011564 | 0.011228 | 0.011496 | 0.011228 |
| 0.011194 | 0.011295 | 0.011362 | 0.011496 | 0.011597 | 0.011295 | 0.011396 |
| 0.011262 | 0.011329 | 0.011228 | 0.011463 | 0.011698 | 0.011228 | 0.011295 |
| 0.011194 | 0.011295 | 0.011262 | 0.011329 | 0.011262 | 0.011262 | 0.011262 |
| 0.011161 | 0.011194 | 0.011161 | 0.011262 | 0.011228 | 0.011262 | 0.011329 |
| 0.011262 | 0.011228 | 0.011295 | 0.011194 | 0.011329 | 0.011161 | 0.011228 |
| 0.011396 | 0.011329 | 0.011564 | 0.011396 | 0.011228 | 0.011463 | 0.011228 |
| 0.011394 | 0.011620 | 0.011437 | 0.011138 | 0.011135 | 0.011244 | 0.011336 |
| 0.011975 | 0.011365 | 0.011143 | 0.011463 | 0.011463 | 0.011262 | 0.011362 |
| 0.011295 | 0.011262 | 0.011329 | 0.011228 | 0.011329 | 0.011262 | 0.011262 |
| 0.011228 | 0.011329 | 0.011530 | 0.011396 | 0.011295 | 0.011262 | 0.011195 |
| 0.011161 | 0.011161 | 0.011228 | 0.011195 | 0.011396 | 0.011362 | 0.011295 |
| 0.011396 | 0.011463 | 0.011195 | 0.011195 | 0.011228 | 0.011228 | 0.011229 |
| 0.011297 | 0.011228 | 0.011228 | 0.011096 | 0.011169 | 0.011130 | 0.011228 |
| 0.011230 | 0.011163 | 0.011208 | 0.011198 | 0.011128 | 0.011163 | 0.011195 |
| 0.011456 | 0.011233 | 0.011267 | 0.011161 | 0.011164 | 0.011296 | 0.011262 |
| 0.011329 | 0.011262 | 0.011262 | 0.011362 | 0.011295 | 0.011664 | 0.011463 |
| 0.011496 | 0.011362 | 0.011228 | 0.011329 | 0.011127 | 0.011362 | 0.011161 |
| 0.011228 | 0.011228 | 0.011195 | 0.011161 | 0.011194 | 0.011161 | 0.011262 |
| 0.011228 | 0.011329 | 0.011262 | 0.011161 | 0.011262 | 0.011362 | 0.011364 |
| 0.011362 | 0.011262 | 0.011161 | 0.011094 | 0.011228 | 0.011161 | 0.011094 |
| 0.011196 | 0.011362 | 0.011161 | 0.011362 | 0.011127 | 0.011228 | 0.011195 |
| 0.011295 | 0.011195 | 0.011228 | 0.011195 | 0.011228 | 0.011094 | 0.011228 |
| 0.011262 | 0.011195 | 0.011262 | 0.011195 | 0.011228 | 0.011262 | 0.011497 |
| 0.011597 | 0.011530 | 0.011597 | 0.011363 | 0.011597 | 0.011228 | 0.011195 |
| 0.011229 | 0.011505 | 0.011335 | 0.011129 | 0.011603 | 0.011094 | 0.011218 |
| 0.011603 | 0.011502 | 0.011396 | 0.011597 | 0.011299 | 0.011463 | 0.011429 |
| 0.011362 | 0.011530 | 0.011380 | 0.011225 | 0.011270 | 0.011262 | 0.011331 |
| 0.011429 | 0.011330 | 0.011466 | 0.011534 | 0.011463 | 0.011530 | 0.011636 |
| 0.011365 | 0.011535 | 0.011466 | 0.011398 | 0.011666 | 0.011127 | 0.011330 |
| 0.011295 | 0.011228 | 0.011127 | 0.011127 | 0.011194 | 0.011194 | 0.011262 |
| 0.011194 | 0.011262 | 0.011161 | 0.011262 | 0.011194 | 0.011194 | 0.011262 |
| 0.011194 | 0.011631 | 0.011530 | 0.011564 | 0.011094 | 0.011194 | 0.011228 |
| 0.011228 | 0.011194 | 0.011262 | 0.011295 | 0.011161 | 0.011161 | 0.011161 |
| 0.011698 | 0.011329 | 0.011329 | 0.011127 | 0.011228 | 0.011396 | 0.011161 |
| 0.011161 | 0.011228 | 0.011194 | 0.011362 | 0.011161 | 0.011295 | 0.011429 |
| 0.011362 | 0.011194 | 0.011194 | 0.011127 | 0.011127 | 0.011295 | 0.011228 |
| 0.011127 | 0.011228 | 0.011094 | 0.011127 | 0.011262 | 0.011396 | 0.011161 |
| 0.011128 | 0.011262 | 0.011195 | 0.011094 | 0.011429 | 0.011094 | 0.011262 |
| 0.011334 | 0.011161 | 0.011463 | 0.011295 | 0.011329 | 0.011194 | 0.011295 |
| 0.011161 | 0.011496 | 0.011094 | 0.011362 | 0.011161 | 0.011161 | 0.011094 |
| 0.011329 | 0.011530 | 0.011228 | 0.011295 | 0.011127 | 0.011530 | 0.011161 |
| 0.011161 | 0.011161 | 0.011194 | 0.011295 | 0.011194 | 0.011295 | 0.011362 |
| 0.011362 | 0.011329 | 0.011228 | 0.011329 | 0.011295 | 0.011161 | 0.011127 |
| 0.011161 | 0.011161 | 0.011228 | 0.011161 | 0.011127 | 0.011295 | 0.011161 |
| 0.011194 | 0.011194 | 0.011329 | 0.011362 | 0.011262 | 0.011194 | 0.011195 |
| 0.011262 | 0.011194 | 0.011295 | 0.011161 | 0.011295 | 0.011396 | 0.011698 |

|          |          |          |          |          |          |          |
|----------|----------|----------|----------|----------|----------|----------|
| 0.011194 | 0.011597 | 0.011198 | 0.017710 | 0.011191 | 0.011305 | 0.011548 |
| 0.011510 | 0.011553 | 0.011217 | 0.011176 | 0.011609 | 0.011578 | 0.011242 |
| 0.011440 | 0.011426 | 0.011099 | 0.011186 | 0.011177 | 0.011258 | 0.011189 |
| 0.011436 | 0.011358 | 0.011357 | 0.011193 | 0.011329 | 0.011362 | 0.011365 |
| 0.011232 | 0.011329 | 0.011329 | 0.011295 | 0.011262 | 0.011262 | 0.011228 |
| 0.011262 | 0.011195 | 0.011228 | 0.011262 | 0.011228 | 0.011161 | 0.011195 |
| 0.011195 | 0.011262 | 0.011161 | 0.011262 | 0.011295 | 0.011329 | 0.011228 |
| 0.011262 | 0.011228 | 0.011564 | 0.011564 | 0.011295 | 0.011329 | 0.011362 |
| 0.011127 | 0.011127 | 0.011161 | 0.011262 | 0.011127 | 0.011362 | 0.011362 |
| 0.011396 | 0.011396 | 0.011329 | 0.011429 | 0.011597 | 0.011430 | 0.011262 |
| 0.011262 | 0.011329 | 0.011362 | 0.011195 | 0.011262 | 0.011228 | 0.011262 |
| 0.011329 | 0.011329 | 0.011362 | 0.011329 | 0.011229 | 0.011430 | 0.011396 |
| 0.011263 | 0.011161 | 0.011262 | 0.011362 | 0.011262 | 0.011396 | 0.011429 |
| 0.011597 | 0.011299 | 0.011463 | 0.011429 | 0.011362 | 0.011530 | 0.011161 |
| 0.011330 | 0.011228 | 0.011195 | 0.011195 | 0.011262 | 0.011161 | 0.011262 |
| 0.011295 | 0.011329 | 0.011228 | 0.011262 | 0.011228 | 0.011564 | 0.011564 |
| 0.011295 | 0.011329 | 0.011396 | 0.011329 | 0.011968 | 0.011382 | 0.011306 |
| 0.011376 | 0.011338 | 0.011447 | 0.011337 | 0.011445 | 0.011370 | 0.011336 |
| 0.011918 | 0.011233 | 0.011368 | 0.011302 | 0.011576 | 0.011434 | 0.011536 |
| 0.011944 | 0.011399 | 0.011500 | 0.011564 | 0.011429 | 0.011429 | 0.011466 |
| 0.011127 | 0.011295 | 0.011429 | 0.011396 | 0.011398 | 0.011396 | 0.011363 |
| 0.011228 | 0.011161 | 0.011194 | 0.011228 | 0.011127 | 0.011194 | 0.011094 |
| 0.011228 | 0.011262 | 0.011161 | 0.011127 | 0.011228 | 0.011161 | 0.011194 |
| 0.011194 | 0.011127 | 0.011194 | 0.011228 | 0.000000 | 0.011329 | 0.011362 |
| 0.011262 | 0.011329 | 0.011262 | 0.011262 | 0.011194 | 0.011597 | 0.011228 |
| 0.011269 | 0.011195 | 0.011430 | 0.011433 | 0.011295 | 0.011295 | 0.011295 |
| 0.011295 | 0.011228 | 0.011194 | 0.011228 | 0.011329 | 0.011329 | 0.011262 |
| 0.011262 | 0.011396 | 0.011564 | 0.011295 | 0.011497 | 0.011497 | 0.011362 |
| 0.011194 | 0.011262 | 0.011295 | 0.011698 | 0.011262 | 0.011295 | 0.011262 |
| 0.011295 | 0.011228 | 0.011228 | 0.011530 | 0.011463 | 0.011496 | 0.011228 |
| 0.011329 | 0.011396 | 0.011262 | 0.011329 | 0.011295 | 0.011161 | 0.011496 |
| 0.011262 | 0.011228 | 0.011228 | 0.011396 | 0.011228 | 0.011329 | 0.011564 |
| 0.011262 | 0.011637 | 0.011631 | 0.011426 | 0.011173 | 0.011332 | 0.011215 |
| 0.011115 | 0.011644 | 0.011166 | 0.011373 | 0.011207 | 0.011315 | 0.011326 |
| 0.011417 | 0.011126 | 0.011283 | 0.011126 | 0.011168 | 0.011328 | 0.011304 |
| 0.011324 | 0.011218 | 0.011307 | 0.011236 | 0.011262 | 0.011396 | 0.011463 |
| 0.011463 | 0.011329 | 0.011432 | 0.011433 | 0.011569 | 0.011590 | 0.011262 |
| 0.011496 | 0.011362 | 0.011228 | 0.011329 | 0.011127 | 0.011362 | 0.011161 |
| 0.011228 | 0.011228 | 0.011195 | 0.011161 | 0.011194 | 0.011161 | 0.011262 |
| 0.011235 | 0.011235 | 0.011231 | 0.011266 | 0.011402 | 0.011368 | 0.011367 |
| 0.011367 | 0.011296 | 0.011097 | 0.011096 | 0.011230 | 0.011399 | 0.011399 |
| 0.011195 | 0.011263 | 0.011498 | 0.011466 | 0.011396 | 0.011430 | 0.011362 |
| 0.011295 | 0.011362 | 0.011362 | 0.011262 | 0.011832 | 0.011429 | 0.011497 |
| 0.011530 | 0.011594 | 0.011231 | 0.011303 | 0.011195 | 0.011396 | 0.011362 |
| 0.011396 | 0.011429 | 0.011429 | 0.011429 | 0.011571 | 0.011564 | 0.011199 |
| 0.011094 | 0.011095 | 0.011196 | 0.011162 | 0.011265 | 0.011098 | 0.011434 |
| 0.011232 | 0.011367 | 0.000000 | 0.011248 | 0.011228 | 0.011300 | 0.011195 |
| 0.011161 | 0.011161 | 0.011228 | 0.011195 | 0.011396 | 0.011362 | 0.011295 |
| 0.011396 | 0.011463 | 0.011195 | 0.011195 | 0.011228 | 0.011228 | 0.011229 |
| 0.011297 | 0.011228 | 0.011228 | 0.011262 | 0.011396 | 0.011463 | 0.011463 |
| 0.011329 | 0.011432 | 0.011433 | 0.011569 | 0.011590 | 0.011262 | 0.011429 |
| 0.011362 | 0.011362 | 0.011196 | 0.011373 | 0.011303 | 0.011333 | 0.011200 |
| 0.011370 | 0.011561 | 0.011357 | 0.011264 | 0.011161 | 0.011362 | 0.011228 |
| 0.011329 | 0.011262 | 0.011161 | 0.011262 | 0.011362 | 0.011364 | 0.011262 |
| 0.011161 | 0.011094 | 0.011228 | 0.011161 | 0.011094 | 0.011196 | 0.011362 |
| 0.011262 | 0.011195 | 0.011228 | 0.011262 | 0.011228 | 0.011161 | 0.011362 |
| 0.011228 | 0.011262 | 0.011262 | 0.011194 | 0.011262 | 0.011496 | 0.011161 |
| 0.011194 | 0.011597 | 0.011194 | 0.011228 | 0.011194 | 0.011564 | 0.011146 |
| 0.011622 | 0.011145 | 0.011211 | 0.011382 | 0.011467 | 0.011383 | 0.011102 |
| 0.011165 | 0.011362 | 0.011463 | 0.011569 | 0.011430 | 0.011568 | 0.011699 |



|          |          |          |          |          |          |          |
|----------|----------|----------|----------|----------|----------|----------|
| 0.011598 | 0.011635 | 0.011597 | 0.011846 | 0.011564 | 0.012438 | 0.011599 |
| 0.012338 | 0.012105 | 0.012240 | 0.012511 | 0.011564 | 0.011262 | 0.011564 |
| 0.012002 | 0.011937 | 0.011530 | 0.011429 | 0.011497 | 0.011497 | 0.011466 |
| 0.011362 | 0.011365 | 0.011429 | 0.011396 | 0.011766 | 0.011832 | 0.011834 |
| 0.011733 | 0.011833 | 0.011937 | 0.011703 | 0.012003 | 0.012008 | 0.012070 |
| 0.012070 | 0.012104 | 0.012050 | 0.012070 | 0.012072 | 0.011295 | 0.011598 |
| 0.011665 | 0.012169 | 0.011670 | 0.011900 | 0.012373 | 0.011434 | 0.011329 |
| 0.011295 | 0.011295 | 0.011766 | 0.011759 | 0.011904 | 0.011631 | 0.011296 |
| S544     | 0.011765 | 0.011765 | 0.012101 | 0.011866 | 0.011866 | 0.011933 |
| 0.011773 | 0.011705 | 0.011933 | 0.011362 | 0.011429 | 0.011397 | 0.011362 |
| 0.011396 | 0.011564 | 0.011362 | 0.011396 | 0.011463 | 0.011429 | 0.011396 |
| 0.011362 | 0.011396 | 0.011496 | 0.011363 | 0.011329 | 0.011396 | 0.011739 |
| 0.011631 | 0.011396 | 0.011295 | 0.011530 | 0.011396 | 0.011429 | 0.011396 |
| 0.011429 | 0.000000 | 0.011429 | 0.011429 | 0.011463 | 0.011429 | 0.011597 |
| 0.011362 | 0.011429 | 0.011463 | 0.011396 | 0.011496 | 0.011530 | 0.011463 |
| 0.011429 | 0.011597 | 0.011497 | 0.011765 | 0.011429 | 0.011631 | 0.011429 |
| 0.011396 | 0.011497 | 0.011564 | 0.011631 | 0.011799 | 0.011497 | 0.011597 |
| 0.011396 | 0.011329 | 0.011429 | 0.011597 | 0.011900 | 0.011429 | 0.011497 |
| 0.011396 | 0.011496 | 0.011463 | 0.011530 | 0.011463 | 0.011463 | 0.011463 |
| 0.011362 | 0.011396 | 0.011362 | 0.011463 | 0.011429 | 0.011464 | 0.011530 |
| 0.011463 | 0.011429 | 0.011429 | 0.011396 | 0.011530 | 0.011295 | 0.011429 |
| 0.011597 | 0.011530 | 0.011765 | 0.011530 | 0.011429 | 0.011597 | 0.011429 |
| 0.011616 | 0.011845 | 0.011664 | 0.011334 | 0.011321 | 0.011465 | 0.011572 |
| 0.012195 | 0.011569 | 0.011390 | 0.011664 | 0.011664 | 0.011463 | 0.011564 |
| 0.011497 | 0.011463 | 0.011530 | 0.011429 | 0.011530 | 0.011396 | 0.011463 |
| 0.011429 | 0.011530 | 0.011732 | 0.011597 | 0.011497 | 0.011463 | 0.011329 |
| 0.011362 | 0.011362 | 0.011362 | 0.011396 | 0.011597 | 0.011564 | 0.011497 |
| 0.011597 | 0.011665 | 0.011396 | 0.011396 | 0.011430 | 0.011429 | 0.011432 |
| 0.011500 | 0.011430 | 0.011430 | 0.011276 | 0.011386 | 0.011341 | 0.011430 |
| 0.011433 | 0.011370 | 0.011429 | 0.011405 | 0.011332 | 0.011369 | 0.011398 |
| 0.011636 | 0.011439 | 0.011405 | 0.011363 | 0.011371 | 0.011498 | 0.011464 |
| 0.011531 | 0.011465 | 0.011464 | 0.011564 | 0.011496 | 0.011799 | 0.011665 |
| 0.011698 | 0.011564 | 0.011429 | 0.011530 | 0.011329 | 0.011564 | 0.011362 |
| 0.011429 | 0.011429 | 0.011396 | 0.011362 | 0.011396 | 0.011362 | 0.011463 |
| 0.011362 | 0.011463 | 0.011463 | 0.011362 | 0.011465 | 0.011564 | 0.011533 |
| 0.011497 | 0.011463 | 0.011362 | 0.011296 | 0.011429 | 0.011362 | 0.011295 |
| 0.011400 | 0.011497 | 0.011295 | 0.011497 | 0.011329 | 0.011430 | 0.011396 |
| 0.011430 | 0.011396 | 0.011362 | 0.011396 | 0.011430 | 0.011295 | 0.011362 |
| 0.011396 | 0.011396 | 0.011463 | 0.011396 | 0.011429 | 0.011463 | 0.011698 |
| 0.011799 | 0.011732 | 0.011799 | 0.011566 | 0.011799 | 0.011429 | 0.011396 |
| 0.011432 | 0.011667 | 0.011472 | 0.011335 | 0.011807 | 0.011299 | 0.011414 |
| 0.011807 | 0.011706 | 0.011597 | 0.011799 | 0.011504 | 0.011664 | 0.011564 |
| 0.011564 | 0.011732 | 0.011593 | 0.011390 | 0.011479 | 0.011463 | 0.011534 |
| 0.011631 | 0.011532 | 0.011669 | 0.011669 | 0.011664 | 0.011732 | 0.011839 |
| 0.011568 | 0.011671 | 0.011670 | 0.011601 | 0.011868 | 0.011329 | 0.011532 |
| 0.011429 | 0.011429 | 0.011329 | 0.011329 | 0.011329 | 0.011396 | 0.011463 |
| 0.011329 | 0.011396 | 0.011295 | 0.011463 | 0.011329 | 0.011396 | 0.011463 |
| 0.011396 | 0.011832 | 0.011732 | 0.011765 | 0.011295 | 0.011396 | 0.011429 |
| 0.011429 | 0.011396 | 0.011463 | 0.011497 | 0.011362 | 0.011362 | 0.011362 |
| 0.011832 | 0.011530 | 0.011530 | 0.011329 | 0.011429 | 0.011396 | 0.011362 |
| 0.011362 | 0.011429 | 0.011396 | 0.011497 | 0.011362 | 0.011496 | 0.011564 |
| 0.011564 | 0.011329 | 0.011396 | 0.011329 | 0.011329 | 0.011497 | 0.011429 |
| 0.011329 | 0.011429 | 0.011295 | 0.011329 | 0.011463 | 0.011598 | 0.011362 |
| 0.011329 | 0.011463 | 0.011396 | 0.011295 | 0.011631 | 0.011295 | 0.011463 |
| 0.011471 | 0.011362 | 0.011664 | 0.011497 | 0.011530 | 0.011396 | 0.011496 |
| 0.011362 | 0.011631 | 0.011295 | 0.011564 | 0.011362 | 0.011362 | 0.011295 |
| 0.011463 | 0.011732 | 0.011429 | 0.011497 | 0.011329 | 0.011732 | 0.011362 |
| 0.011362 | 0.011362 | 0.011329 | 0.011295 | 0.011396 | 0.011496 | 0.011564 |
| 0.011496 | 0.011530 | 0.011429 | 0.011530 | 0.011429 | 0.011362 | 0.011329 |
| 0.011362 | 0.011362 | 0.011429 | 0.011362 | 0.011262 | 0.011497 | 0.011362 |

|          |          |          |           |          |          |          |
|----------|----------|----------|-----------|----------|----------|----------|
| 0.011396 | 0.011396 | 0.011530 | 0.011564  | 0.011463 | 0.011329 | 0.011396 |
| 0.011463 | 0.011396 | 0.011496 | 0.011362  | 0.011496 | 0.011597 | 0.011900 |
| 0.011396 | 0.011799 | 0.011405 | 0.0117936 | 0.011387 | 0.011427 | 0.011758 |
| 0.011718 | 0.011764 | 0.011479 | 0.011408  | 0.011774 | 0.011785 | 0.011364 |
| 0.011582 | 0.011610 | 0.011333 | 0.011395  | 0.011372 | 0.011406 | 0.011361 |
| 0.011576 | 0.011582 | 0.011542 | 0.011523  | 0.011530 | 0.011564 | 0.011568 |
| 0.011369 | 0.011530 | 0.011530 | 0.011497  | 0.011463 | 0.011463 | 0.011430 |
| 0.011463 | 0.011396 | 0.011429 | 0.011463  | 0.011430 | 0.011362 | 0.011396 |
| 0.011396 | 0.011463 | 0.011362 | 0.011463  | 0.011497 | 0.011530 | 0.011429 |
| 0.011463 | 0.011430 | 0.011765 | 0.011765  | 0.011497 | 0.011531 | 0.011564 |
| 0.011329 | 0.011329 | 0.011362 | 0.011396  | 0.011329 | 0.011564 | 0.011564 |
| 0.011597 | 0.011597 | 0.011530 | 0.011631  | 0.011799 | 0.011633 | 0.011396 |
| 0.011463 | 0.011530 | 0.011497 | 0.011396  | 0.011463 | 0.011430 | 0.011463 |
| 0.011531 | 0.011530 | 0.011564 | 0.011463  | 0.011363 | 0.011631 | 0.011530 |
| 0.011467 | 0.011362 | 0.011463 | 0.011564  | 0.011463 | 0.011598 | 0.011631 |
| 0.011799 | 0.011504 | 0.011664 | 0.011564  | 0.011564 | 0.011732 | 0.011363 |
| 0.011532 | 0.011430 | 0.011396 | 0.011396  | 0.011463 | 0.011362 | 0.011463 |
| 0.011497 | 0.011530 | 0.011429 | 0.011463  | 0.011430 | 0.011765 | 0.011765 |
| 0.011497 | 0.011531 | 0.011597 | 0.011530  | 0.012170 | 0.011596 | 0.011517 |
| 0.011587 | 0.011546 | 0.011658 | 0.011545  | 0.011655 | 0.011577 | 0.011543 |
| 0.012125 | 0.011441 | 0.011574 | 0.011510  | 0.011783 | 0.011638 | 0.011673 |
| 0.012148 | 0.011626 | 0.011703 | 0.011765  | 0.011631 | 0.011631 | 0.011668 |
| 0.011329 | 0.011429 | 0.011631 | 0.011597  | 0.011601 | 0.011597 | 0.011565 |
| 0.011429 | 0.011295 | 0.011329 | 0.011429  | 0.011262 | 0.011396 | 0.011295 |
| 0.011429 | 0.011463 | 0.011362 | 0.011329  | 0.011429 | 0.011362 | 0.011396 |
| 0.011396 | 0.011329 | 0.011396 | 0.011429  | 0.011329 | 0.000000 | 0.011564 |
| 0.011463 | 0.011530 | 0.011463 | 0.011463  | 0.011396 | 0.011799 | 0.011429 |
| 0.011478 | 0.011396 | 0.011631 | 0.011637  | 0.011429 | 0.011496 | 0.011496 |
| 0.011497 | 0.011362 | 0.011396 | 0.011362  | 0.011530 | 0.011530 | 0.011463 |
| 0.011463 | 0.011597 | 0.011765 | 0.011496  | 0.011698 | 0.011698 | 0.011530 |
| 0.011396 | 0.011463 | 0.011497 | 0.011900  | 0.011463 | 0.011429 | 0.011463 |
| 0.011496 | 0.011429 | 0.011429 | 0.011732  | 0.011597 | 0.011698 | 0.011429 |
| 0.011530 | 0.011597 | 0.011463 | 0.011530  | 0.011496 | 0.011362 | 0.011698 |
| 0.011463 | 0.011429 | 0.011429 | 0.011597  | 0.011429 | 0.011530 | 0.011765 |
| 0.011463 | 0.011841 | 0.011832 | 0.011629  | 0.011399 | 0.011536 | 0.011370 |
| 0.011335 | 0.011878 | 0.011376 | 0.011596  | 0.011402 | 0.011569 | 0.011485 |
| 0.011570 | 0.011324 | 0.011450 | 0.011324  | 0.011330 | 0.011462 | 0.011506 |
| 0.011512 | 0.011375 | 0.011518 | 0.011448  | 0.011465 | 0.011597 | 0.011665 |
| 0.011665 | 0.011531 | 0.011635 | 0.011636  | 0.011772 | 0.011767 | 0.011463 |
| 0.011698 | 0.011564 | 0.011429 | 0.011530  | 0.011329 | 0.011564 | 0.011362 |
| 0.011429 | 0.011429 | 0.011396 | 0.011362  | 0.011396 | 0.011362 | 0.011463 |
| 0.011444 | 0.011445 | 0.011437 | 0.011471  | 0.011608 | 0.011504 | 0.011572 |
| 0.011571 | 0.011497 | 0.011282 | 0.011276  | 0.011433 | 0.011602 | 0.011603 |
| 0.011396 | 0.011467 | 0.011700 | 0.011669  | 0.011598 | 0.011632 | 0.011564 |
| 0.011496 | 0.011564 | 0.011564 | 0.011463  | 0.012034 | 0.011597 | 0.011698 |
| 0.011732 | 0.011808 | 0.011435 | 0.011476  | 0.011396 | 0.011597 | 0.011564 |
| 0.011598 | 0.011631 | 0.011631 | 0.011631  | 0.011807 | 0.011765 | 0.011407 |
| 0.011297 | 0.011303 | 0.011401 | 0.011366  | 0.011470 | 0.011321 | 0.011638 |
| 0.011437 | 0.011543 | 0.011298 | 0.011472  | 0.011430 | 0.011505 | 0.011329 |
| 0.011362 | 0.011362 | 0.011362 | 0.011396  | 0.011597 | 0.011564 | 0.011497 |
| 0.011597 | 0.011665 | 0.011396 | 0.011396  | 0.011430 | 0.011429 | 0.011432 |
| 0.011500 | 0.011430 | 0.011430 | 0.011465  | 0.011597 | 0.011665 | 0.011665 |
| 0.011531 | 0.011635 | 0.011636 | 0.011772  | 0.011767 | 0.011463 | 0.011631 |
| 0.011564 | 0.011564 | 0.011398 | 0.011582  | 0.011512 | 0.011537 | 0.011411 |
| 0.011508 | 0.011698 | 0.011526 | 0.011468  | 0.011295 | 0.011497 | 0.011362 |
| 0.011463 | 0.011463 | 0.011362 | 0.011465  | 0.011564 | 0.011533 | 0.011463 |
| 0.011362 | 0.011296 | 0.011429 | 0.011362  | 0.011295 | 0.011400 | 0.011497 |
| 0.011463 | 0.011396 | 0.011429 | 0.011463  | 0.011430 | 0.011362 | 0.011564 |
| 0.011429 | 0.011463 | 0.011463 | 0.011396  | 0.011463 | 0.011698 | 0.011362 |
| 0.011396 | 0.011799 | 0.011396 | 0.011362  | 0.011396 | 0.011765 | 0.011360 |

|          |          |          |          |          |          |          |
|----------|----------|----------|----------|----------|----------|----------|
| 0.011791 | 0.011358 | 0.011361 | 0.011624 | 0.011671 | 0.011599 | 0.011311 |
| 0.011323 | 0.011564 | 0.011664 | 0.011773 | 0.011632 | 0.011771 | 0.011901 |
| 0.011733 | 0.011838 | 0.011799 | 0.012051 | 0.011765 | 0.012640 | 0.011801 |
| 0.012540 | 0.012308 | 0.012442 | 0.012714 | 0.011765 | 0.011463 | 0.011766 |
| 0.012205 | 0.012140 | 0.011732 | 0.011631 | 0.011699 | 0.011699 | 0.011669 |
| 0.011564 | 0.011569 | 0.011631 | 0.011598 | 0.011968 | 0.012034 | 0.012036 |
| 0.011935 | 0.012035 | 0.012139 | 0.011906 | 0.012205 | 0.012212 | 0.012272 |
| 0.012273 | 0.012307 | 0.012255 | 0.012273 | 0.012274 | 0.011496 | 0.011800 |
| 0.011868 | 0.012371 | 0.011874 | 0.012102 | 0.012575 | 0.011638 | 0.011531 |
| 0.011496 | 0.011496 | 0.011968 | 0.012048 | 0.012116 | 0.011832 | 0.011498 |
| S545     | 0.011799 | 0.011799 | 0.012135 | 0.011900 | 0.011900 | 0.011967 |
| 0.011807 | 0.011739 | 0.011967 | 0.011396 | 0.011463 | 0.011430 | 0.011396 |
| 0.011429 | 0.011597 | 0.011396 | 0.011429 | 0.011496 | 0.011463 | 0.011429 |
| 0.011396 | 0.011429 | 0.011530 | 0.011396 | 0.011430 | 0.011429 | 0.011773 |
| 0.011664 | 0.011429 | 0.011329 | 0.011564 | 0.011496 | 0.011463 | 0.011497 |
| 0.011463 | 0.011564 | 0.011463 | 0.011463 | 0.011496 | 0.011329 | 0.011631 |
| 0.011396 | 0.011463 | 0.011496 | 0.011429 | 0.011530 | 0.011564 | 0.011496 |
| 0.011463 | 0.011631 | 0.011530 | 0.011799 | 0.011463 | 0.011731 | 0.011463 |
| 0.011429 | 0.011530 | 0.011597 | 0.011731 | 0.011832 | 0.011530 | 0.011631 |
| 0.011496 | 0.011564 | 0.011463 | 0.011631 | 0.011933 | 0.011463 | 0.011530 |
| 0.011429 | 0.011530 | 0.011497 | 0.011564 | 0.011496 | 0.011496 | 0.011496 |
| 0.011396 | 0.011429 | 0.011396 | 0.011497 | 0.011463 | 0.011498 | 0.011564 |
| 0.011497 | 0.011463 | 0.011530 | 0.011429 | 0.011564 | 0.011396 | 0.011463 |
| 0.011631 | 0.011564 | 0.011799 | 0.011497 | 0.011463 | 0.011698 | 0.011463 |
| 0.011579 | 0.011882 | 0.011702 | 0.011412 | 0.011396 | 0.011391 | 0.011611 |
| 0.012231 | 0.011670 | 0.011431 | 0.011698 | 0.011698 | 0.011496 | 0.011597 |
| 0.011530 | 0.011496 | 0.011564 | 0.011463 | 0.011564 | 0.011496 | 0.011496 |
| 0.011463 | 0.011564 | 0.011765 | 0.011631 | 0.011530 | 0.011497 | 0.011430 |
| 0.011396 | 0.011396 | 0.011463 | 0.011429 | 0.011631 | 0.011597 | 0.011530 |
| 0.011631 | 0.011698 | 0.011429 | 0.011429 | 0.011463 | 0.011463 | 0.011465 |
| 0.011533 | 0.011463 | 0.011463 | 0.011348 | 0.011422 | 0.011376 | 0.011464 |
| 0.011331 | 0.011404 | 0.011466 | 0.011440 | 0.011366 | 0.011403 | 0.011432 |
| 0.011708 | 0.011474 | 0.011508 | 0.011396 | 0.011406 | 0.011531 | 0.011497 |
| 0.011565 | 0.011498 | 0.011497 | 0.011597 | 0.011530 | 0.011900 | 0.011698 |
| 0.011731 | 0.011597 | 0.011463 | 0.011564 | 0.011362 | 0.011597 | 0.011396 |
| 0.011463 | 0.011463 | 0.011429 | 0.011396 | 0.011429 | 0.011396 | 0.011497 |
| 0.011463 | 0.011564 | 0.011497 | 0.011396 | 0.011498 | 0.011597 | 0.011601 |
| 0.011598 | 0.011497 | 0.011396 | 0.011330 | 0.011463 | 0.011396 | 0.011329 |
| 0.011434 | 0.011598 | 0.011396 | 0.011598 | 0.011362 | 0.011463 | 0.011430 |
| 0.011530 | 0.011429 | 0.011463 | 0.011430 | 0.011463 | 0.011329 | 0.011463 |
| 0.011497 | 0.011429 | 0.011497 | 0.011429 | 0.011463 | 0.011497 | 0.011463 |
| 0.011833 | 0.011765 | 0.011833 | 0.011599 | 0.011833 | 0.011463 | 0.011429 |
| 0.011466 | 0.011747 | 0.011517 | 0.011369 | 0.011841 | 0.011333 | 0.011414 |
| 0.011841 | 0.011740 | 0.011631 | 0.011832 | 0.011538 | 0.011698 | 0.011665 |
| 0.011597 | 0.011765 | 0.011629 | 0.011431 | 0.011521 | 0.011497 | 0.011568 |
| 0.011396 | 0.011566 | 0.011703 | 0.011771 | 0.011698 | 0.011765 | 0.011873 |
| 0.011602 | 0.011773 | 0.011636 | 0.011500 | 0.011901 | 0.011362 | 0.011566 |
| 0.011530 | 0.011463 | 0.011362 | 0.011362 | 0.011429 | 0.011429 | 0.011496 |
| 0.011429 | 0.011497 | 0.011396 | 0.011496 | 0.011429 | 0.011429 | 0.011496 |
| 0.011429 | 0.011866 | 0.011765 | 0.011799 | 0.011329 | 0.011429 | 0.011463 |
| 0.011463 | 0.011429 | 0.011497 | 0.011530 | 0.011396 | 0.011396 | 0.011396 |
| 0.011933 | 0.011564 | 0.011564 | 0.011362 | 0.011463 | 0.011631 | 0.011396 |
| 0.011396 | 0.011463 | 0.011429 | 0.011597 | 0.011396 | 0.011530 | 0.011664 |
| 0.011597 | 0.011429 | 0.011429 | 0.011362 | 0.011362 | 0.011530 | 0.011463 |
| 0.011362 | 0.011463 | 0.011329 | 0.011362 | 0.011362 | 0.011631 | 0.011396 |
| 0.011363 | 0.011362 | 0.011430 | 0.011329 | 0.011664 | 0.011329 | 0.011497 |
| 0.011574 | 0.011396 | 0.011698 | 0.011530 | 0.011362 | 0.011429 | 0.011530 |
| 0.011396 | 0.011731 | 0.011329 | 0.011597 | 0.011396 | 0.011396 | 0.011329 |
| 0.011564 | 0.011766 | 0.011463 | 0.011530 | 0.011362 | 0.011765 | 0.011396 |
| 0.011396 | 0.011396 | 0.011429 | 0.011530 | 0.011429 | 0.011530 | 0.011597 |

|          |          |          |          |          |          |          |
|----------|----------|----------|----------|----------|----------|----------|
| 0.011463 | 0.011564 | 0.011463 | 0.011564 | 0.011530 | 0.011396 | 0.011362 |
| 0.011396 | 0.011396 | 0.011463 | 0.011396 | 0.011362 | 0.011530 | 0.011396 |
| 0.011429 | 0.011429 | 0.011564 | 0.011597 | 0.011496 | 0.011429 | 0.011429 |
| 0.011496 | 0.011429 | 0.011530 | 0.011396 | 0.011530 | 0.011631 | 0.011933 |
| 0.011429 | 0.011832 | 0.011440 | 0.017899 | 0.011257 | 0.011611 | 0.011793 |
| 0.011752 | 0.011799 | 0.011479 | 0.011466 | 0.011884 | 0.011820 | 0.011546 |
| 0.011677 | 0.011732 | 0.011372 | 0.011437 | 0.011372 | 0.011455 | 0.011447 |
| 0.011670 | 0.011619 | 0.011616 | 0.011325 | 0.011564 | 0.011597 | 0.011601 |
| 0.011472 | 0.011564 | 0.011564 | 0.011530 | 0.011497 | 0.011497 | 0.011463 |
| 0.011497 | 0.011429 | 0.011463 | 0.011497 | 0.011463 | 0.011396 | 0.011429 |
| 0.011429 | 0.011497 | 0.011396 | 0.011497 | 0.011530 | 0.011429 | 0.011463 |
| 0.011496 | 0.011463 | 0.011799 | 0.011799 | 0.011530 | 0.011565 | 0.011598 |
| 0.011362 | 0.011362 | 0.011396 | 0.011497 | 0.011362 | 0.011597 | 0.011597 |
| 0.011631 | 0.011631 | 0.011564 | 0.011664 | 0.011833 | 0.011666 | 0.011497 |
| 0.011497 | 0.011564 | 0.011597 | 0.011430 | 0.011497 | 0.011463 | 0.011497 |
| 0.011564 | 0.011564 | 0.011597 | 0.011564 | 0.011464 | 0.011665 | 0.011631 |
| 0.011500 | 0.011396 | 0.011497 | 0.011598 | 0.011497 | 0.011631 | 0.011396 |
| 0.011832 | 0.011538 | 0.011698 | 0.011665 | 0.011597 | 0.011765 | 0.011396 |
| 0.011566 | 0.011464 | 0.011429 | 0.011429 | 0.011497 | 0.011396 | 0.011497 |
| 0.011530 | 0.011429 | 0.011463 | 0.011496 | 0.011463 | 0.011799 | 0.011799 |
| 0.011530 | 0.011565 | 0.011631 | 0.011564 | 0.012204 | 0.011632 | 0.011552 |
| 0.011482 | 0.011580 | 0.011693 | 0.011580 | 0.011690 | 0.011612 | 0.011577 |
| 0.012159 | 0.011475 | 0.011608 | 0.011544 | 0.011818 | 0.011400 | 0.011775 |
| 0.012182 | 0.011663 | 0.011736 | 0.011799 | 0.011664 | 0.011664 | 0.011702 |
| 0.011362 | 0.011530 | 0.011664 | 0.011631 | 0.011635 | 0.011631 | 0.011599 |
| 0.011463 | 0.011396 | 0.011429 | 0.011463 | 0.011362 | 0.011429 | 0.011329 |
| 0.011396 | 0.011362 | 0.011329 | 0.011362 | 0.011396 | 0.011396 | 0.011429 |
| 0.011429 | 0.011362 | 0.011429 | 0.011463 | 0.011362 | 0.011564 | 0.000000 |
| 0.011295 | 0.011362 | 0.011295 | 0.011362 | 0.011429 | 0.011832 | 0.011463 |
| 0.011512 | 0.011429 | 0.011665 | 0.011671 | 0.011530 | 0.011530 | 0.011530 |
| 0.011530 | 0.011463 | 0.011429 | 0.011463 | 0.011564 | 0.011564 | 0.011496 |
| 0.011496 | 0.011631 | 0.011799 | 0.011530 | 0.011732 | 0.011732 | 0.011597 |
| 0.011429 | 0.011496 | 0.011530 | 0.011933 | 0.011497 | 0.011530 | 0.011497 |
| 0.011530 | 0.011463 | 0.011463 | 0.011765 | 0.011698 | 0.011732 | 0.011463 |
| 0.011564 | 0.011631 | 0.011496 | 0.011564 | 0.011530 | 0.011396 | 0.011731 |
| 0.011496 | 0.011463 | 0.011463 | 0.011631 | 0.011463 | 0.011564 | 0.011799 |
| 0.011496 | 0.011875 | 0.011866 | 0.011711 | 0.011342 | 0.011570 | 0.011525 |
| 0.011390 | 0.011917 | 0.011411 | 0.011641 | 0.011548 | 0.011569 | 0.011538 |
| 0.011570 | 0.011192 | 0.011506 | 0.011192 | 0.011437 | 0.011395 | 0.011304 |
| 0.011588 | 0.011493 | 0.011553 | 0.011483 | 0.011498 | 0.011631 | 0.011698 |
| 0.011698 | 0.011564 | 0.011669 | 0.011670 | 0.011806 | 0.011838 | 0.011497 |
| 0.011731 | 0.011597 | 0.011463 | 0.011564 | 0.011362 | 0.011597 | 0.011396 |
| 0.011463 | 0.011463 | 0.011429 | 0.011396 | 0.011429 | 0.011396 | 0.011497 |
| 0.011479 | 0.011480 | 0.011471 | 0.011505 | 0.011642 | 0.011607 | 0.011606 |
| 0.011605 | 0.011531 | 0.011356 | 0.011348 | 0.011467 | 0.011636 | 0.011637 |
| 0.011430 | 0.011500 | 0.011734 | 0.011702 | 0.011632 | 0.011666 | 0.011597 |
| 0.011530 | 0.011597 | 0.011597 | 0.011497 | 0.012068 | 0.011664 | 0.011732 |
| 0.011766 | 0.011808 | 0.011469 | 0.011545 | 0.011429 | 0.011631 | 0.011597 |
| 0.011632 | 0.011664 | 0.011664 | 0.011664 | 0.011807 | 0.011799 | 0.011442 |
| 0.011331 | 0.011337 | 0.011435 | 0.011400 | 0.011504 | 0.011359 | 0.011672 |
| 0.011472 | 0.011586 | 0.011346 | 0.011510 | 0.011464 | 0.011539 | 0.011430 |
| 0.011396 | 0.011396 | 0.011463 | 0.011429 | 0.011631 | 0.011597 | 0.011530 |
| 0.011631 | 0.011698 | 0.011429 | 0.011429 | 0.011463 | 0.011463 | 0.011465 |
| 0.011533 | 0.011463 | 0.011463 | 0.011498 | 0.011631 | 0.011698 | 0.011698 |
| 0.011564 | 0.011669 | 0.011670 | 0.011806 | 0.011838 | 0.011497 | 0.011396 |
| 0.011597 | 0.011597 | 0.011432 | 0.011617 | 0.011512 | 0.011571 | 0.011411 |
| 0.011577 | 0.011607 | 0.011230 | 0.011502 | 0.011396 | 0.011598 | 0.011463 |
| 0.011564 | 0.011497 | 0.011396 | 0.011498 | 0.011597 | 0.011601 | 0.011497 |
| 0.011396 | 0.011330 | 0.011463 | 0.011396 | 0.011329 | 0.011434 | 0.011598 |
| 0.011497 | 0.011429 | 0.011463 | 0.011497 | 0.011463 | 0.011396 | 0.011598 |

|          |          |          |          |          |          |          |
|----------|----------|----------|----------|----------|----------|----------|
| 0.011463 | 0.011497 | 0.011228 | 0.011429 | 0.011295 | 0.011597 | 0.011396 |
| 0.011429 | 0.011832 | 0.011429 | 0.011463 | 0.011429 | 0.011799 | 0.011403 |
| 0.011735 | 0.011443 | 0.011461 | 0.011664 | 0.011752 | 0.011634 | 0.011353 |
| 0.011323 | 0.011597 | 0.011698 | 0.011807 | 0.011666 | 0.011805 | 0.011935 |
| 0.011834 | 0.011872 | 0.011832 | 0.012086 | 0.011799 | 0.012674 | 0.011835 |
| 0.012574 | 0.012342 | 0.012476 | 0.012748 | 0.011799 | 0.011497 | 0.011799 |
| 0.012238 | 0.012173 | 0.011765 | 0.011665 | 0.011733 | 0.011733 | 0.011703 |
| 0.011597 | 0.011603 | 0.011664 | 0.011632 | 0.012002 | 0.012068 | 0.012069 |
| 0.011969 | 0.012069 | 0.012173 | 0.011940 | 0.012239 | 0.012246 | 0.012306 |
| 0.012307 | 0.012340 | 0.012289 | 0.012307 | 0.012308 | 0.011530 | 0.011833 |
| 0.011901 | 0.012404 | 0.011908 | 0.012135 | 0.012609 | 0.011672 | 0.011564 |
| 0.011530 | 0.011530 | 0.012001 | 0.012089 | 0.012151 | 0.011866 | 0.011532 |
| S546     | 0.011698 | 0.011698 | 0.012034 | 0.011799 | 0.011799 | 0.011866 |
| 0.011705 | 0.011637 | 0.011866 | 0.011295 | 0.011362 | 0.011329 | 0.011295 |
| 0.011329 | 0.011497 | 0.011295 | 0.011329 | 0.011396 | 0.011362 | 0.011329 |
| 0.011295 | 0.011329 | 0.011429 | 0.011295 | 0.011329 | 0.011329 | 0.011671 |
| 0.011564 | 0.011329 | 0.011228 | 0.011463 | 0.011396 | 0.011362 | 0.011396 |
| 0.011362 | 0.011463 | 0.011362 | 0.011362 | 0.011396 | 0.011228 | 0.011530 |
| 0.011295 | 0.011362 | 0.011396 | 0.011329 | 0.011429 | 0.011463 | 0.011396 |
| 0.011362 | 0.011530 | 0.011430 | 0.011698 | 0.011362 | 0.011631 | 0.011362 |
| 0.011329 | 0.011430 | 0.011497 | 0.011631 | 0.011732 | 0.011429 | 0.011530 |
| 0.011396 | 0.011463 | 0.011362 | 0.011530 | 0.011833 | 0.011362 | 0.011429 |
| 0.011329 | 0.011429 | 0.011396 | 0.011463 | 0.011396 | 0.011396 | 0.011396 |
| 0.011295 | 0.011329 | 0.011295 | 0.011396 | 0.011362 | 0.011329 | 0.011463 |
| 0.011396 | 0.011362 | 0.011429 | 0.011329 | 0.011463 | 0.011295 | 0.011362 |
| 0.011530 | 0.011463 | 0.011698 | 0.011329 | 0.011362 | 0.011597 | 0.011362 |
| 0.011431 | 0.011733 | 0.011551 | 0.011255 | 0.011247 | 0.011281 | 0.011454 |
| 0.012085 | 0.011467 | 0.011266 | 0.011597 | 0.011597 | 0.011396 | 0.011497 |
| 0.011429 | 0.011396 | 0.011463 | 0.011362 | 0.011463 | 0.011396 | 0.011396 |
| 0.011362 | 0.011463 | 0.011664 | 0.011530 | 0.011429 | 0.011396 | 0.011329 |
| 0.011295 | 0.011295 | 0.011362 | 0.011329 | 0.011530 | 0.011497 | 0.011430 |
| 0.011530 | 0.011597 | 0.011329 | 0.011329 | 0.011362 | 0.011362 | 0.011364 |
| 0.011432 | 0.011362 | 0.011362 | 0.011204 | 0.011277 | 0.011271 | 0.011363 |
| 0.011230 | 0.011266 | 0.011355 | 0.011336 | 0.011264 | 0.011300 | 0.011330 |
| 0.011600 | 0.011370 | 0.011405 | 0.011296 | 0.011302 | 0.011430 | 0.011397 |
| 0.011464 | 0.011397 | 0.011396 | 0.011496 | 0.011429 | 0.011799 | 0.011598 |
| 0.011631 | 0.011497 | 0.011362 | 0.011463 | 0.011262 | 0.011497 | 0.011295 |
| 0.011362 | 0.011362 | 0.011329 | 0.011295 | 0.011329 | 0.011295 | 0.011396 |
| 0.011362 | 0.011463 | 0.011396 | 0.011295 | 0.011397 | 0.011497 | 0.011500 |
| 0.011497 | 0.011396 | 0.011295 | 0.011229 | 0.011362 | 0.011295 | 0.011228 |
| 0.011298 | 0.011497 | 0.011295 | 0.011497 | 0.011262 | 0.011363 | 0.011329 |
| 0.011430 | 0.011329 | 0.011362 | 0.011329 | 0.011362 | 0.011228 | 0.011362 |
| 0.011396 | 0.011329 | 0.011396 | 0.011329 | 0.011362 | 0.011396 | 0.011631 |
| 0.011732 | 0.011664 | 0.011732 | 0.011498 | 0.011732 | 0.011362 | 0.011329 |
| 0.011364 | 0.011626 | 0.011426 | 0.011266 | 0.011739 | 0.011231 | 0.011296 |
| 0.011739 | 0.011638 | 0.011530 | 0.011732 | 0.011436 | 0.011597 | 0.011564 |
| 0.011497 | 0.011664 | 0.011522 | 0.011349 | 0.011437 | 0.011396 | 0.011466 |
| 0.011564 | 0.011465 | 0.011601 | 0.011669 | 0.011597 | 0.011665 | 0.011772 |
| 0.011500 | 0.011671 | 0.011602 | 0.011398 | 0.011800 | 0.011262 | 0.011465 |
| 0.011429 | 0.011362 | 0.011262 | 0.011262 | 0.011329 | 0.011329 | 0.011396 |
| 0.011329 | 0.011396 | 0.011295 | 0.011396 | 0.011329 | 0.011329 | 0.011396 |
| 0.011329 | 0.011765 | 0.011664 | 0.011698 | 0.011228 | 0.011329 | 0.011362 |
| 0.011362 | 0.011329 | 0.011396 | 0.011429 | 0.011295 | 0.011295 | 0.011295 |
| 0.011832 | 0.011463 | 0.011463 | 0.011262 | 0.011362 | 0.011530 | 0.011295 |
| 0.011295 | 0.011362 | 0.011329 | 0.011497 | 0.011295 | 0.011429 | 0.011564 |
| 0.011497 | 0.011329 | 0.011329 | 0.011262 | 0.011262 | 0.011430 | 0.011362 |
| 0.011262 | 0.011362 | 0.011228 | 0.011262 | 0.011262 | 0.011530 | 0.011295 |
| 0.011262 | 0.011262 | 0.011329 | 0.011228 | 0.011564 | 0.011228 | 0.011396 |
| 0.011471 | 0.011295 | 0.011597 | 0.011430 | 0.011262 | 0.011329 | 0.011429 |
| 0.011295 | 0.011631 | 0.011228 | 0.011497 | 0.011295 | 0.011295 | 0.011228 |

|          |          |          |          |          |          |          |
|----------|----------|----------|----------|----------|----------|----------|
| 0.011463 | 0.011665 | 0.011362 | 0.011429 | 0.011262 | 0.011664 | 0.011295 |
| 0.011295 | 0.011295 | 0.011329 | 0.011429 | 0.011329 | 0.011429 | 0.011497 |
| 0.011295 | 0.011463 | 0.011362 | 0.011463 | 0.011429 | 0.011295 | 0.011262 |
| 0.011295 | 0.011295 | 0.011362 | 0.011295 | 0.011262 | 0.011429 | 0.011295 |
| 0.011329 | 0.011329 | 0.011463 | 0.011497 | 0.011396 | 0.011329 | 0.011329 |
| 0.011396 | 0.011329 | 0.011429 | 0.011295 | 0.011429 | 0.011530 | 0.011832 |
| 0.011329 | 0.011732 | 0.011302 | 0.017823 | 0.011126 | 0.011488 | 0.011653 |
| 0.011648 | 0.011658 | 0.011322 | 0.011292 | 0.011774 | 0.011716 | 0.011425 |
| 0.011487 | 0.011610 | 0.011216 | 0.011270 | 0.011255 | 0.011356 | 0.011275 |
| 0.011482 | 0.011470 | 0.011468 | 0.011193 | 0.011463 | 0.011497 | 0.011500 |
| 0.011369 | 0.011463 | 0.011463 | 0.011430 | 0.011396 | 0.011396 | 0.011363 |
| 0.011396 | 0.011329 | 0.011362 | 0.011396 | 0.011363 | 0.011295 | 0.011329 |
| 0.011329 | 0.011396 | 0.011295 | 0.011396 | 0.011430 | 0.011329 | 0.011362 |
| 0.011396 | 0.011362 | 0.011698 | 0.011698 | 0.011430 | 0.011464 | 0.011497 |
| 0.011262 | 0.011262 | 0.011295 | 0.011396 | 0.011262 | 0.011497 | 0.011497 |
| 0.011530 | 0.011530 | 0.011463 | 0.011564 | 0.011732 | 0.011565 | 0.011396 |
| 0.011396 | 0.011463 | 0.011497 | 0.011329 | 0.011396 | 0.011362 | 0.011396 |
| 0.011463 | 0.011463 | 0.011497 | 0.011463 | 0.011363 | 0.011564 | 0.011530 |
| 0.011399 | 0.011295 | 0.011396 | 0.011497 | 0.011396 | 0.011530 | 0.011564 |
| 0.011732 | 0.011436 | 0.011597 | 0.011564 | 0.011497 | 0.011664 | 0.011295 |
| 0.011464 | 0.011363 | 0.011329 | 0.011329 | 0.011396 | 0.011295 | 0.011396 |
| 0.011430 | 0.011329 | 0.011362 | 0.011396 | 0.011362 | 0.011698 | 0.011698 |
| 0.011430 | 0.011464 | 0.011530 | 0.011463 | 0.012103 | 0.011525 | 0.011447 |
| 0.011377 | 0.011476 | 0.011587 | 0.011476 | 0.011585 | 0.011508 | 0.011474 |
| 0.012056 | 0.011372 | 0.011505 | 0.011441 | 0.011714 | 0.011570 | 0.011673 |
| 0.012080 | 0.011550 | 0.011635 | 0.011698 | 0.011564 | 0.011564 | 0.011601 |
| 0.011262 | 0.011429 | 0.011564 | 0.011530 | 0.011533 | 0.011530 | 0.011498 |
| 0.011362 | 0.011295 | 0.011329 | 0.011362 | 0.011262 | 0.011329 | 0.011228 |
| 0.011295 | 0.011262 | 0.011228 | 0.011262 | 0.011295 | 0.011295 | 0.011329 |
| 0.011329 | 0.011262 | 0.011329 | 0.011362 | 0.011262 | 0.011463 | 0.011295 |
| 0.000000 | 0.011262 | 0.011194 | 0.011195 | 0.011329 | 0.011732 | 0.011362 |
| 0.011408 | 0.011329 | 0.011564 | 0.011569 | 0.011430 | 0.011429 | 0.011429 |
| 0.011429 | 0.011362 | 0.011329 | 0.011362 | 0.011463 | 0.011463 | 0.011396 |
| 0.011396 | 0.011530 | 0.011698 | 0.011429 | 0.011631 | 0.011631 | 0.011496 |
| 0.011329 | 0.011396 | 0.011429 | 0.011833 | 0.011396 | 0.011430 | 0.011396 |
| 0.011429 | 0.011362 | 0.011362 | 0.011665 | 0.011597 | 0.011631 | 0.011362 |
| 0.011463 | 0.011530 | 0.011396 | 0.011463 | 0.011429 | 0.011295 | 0.011631 |
| 0.011396 | 0.011362 | 0.011362 | 0.011530 | 0.011362 | 0.011463 | 0.011698 |
| 0.011396 | 0.011773 | 0.011765 | 0.011548 | 0.011229 | 0.011468 | 0.011318 |
| 0.011280 | 0.011761 | 0.011271 | 0.011507 | 0.011353 | 0.011417 | 0.011379 |
| 0.011417 | 0.011126 | 0.011339 | 0.011126 | 0.011330 | 0.011328 | 0.011425 |
| 0.011437 | 0.011336 | 0.011412 | 0.011342 | 0.011397 | 0.011530 | 0.011598 |
| 0.011597 | 0.011464 | 0.011567 | 0.011569 | 0.011704 | 0.011732 | 0.011396 |
| 0.011631 | 0.011497 | 0.011362 | 0.011463 | 0.011262 | 0.011497 | 0.011295 |
| 0.011362 | 0.011362 | 0.011329 | 0.011295 | 0.011329 | 0.011295 | 0.011396 |
| 0.011375 | 0.011375 | 0.011368 | 0.011403 | 0.011539 | 0.011504 | 0.011504 |
| 0.011503 | 0.011430 | 0.011245 | 0.011240 | 0.011365 | 0.011535 | 0.011535 |
| 0.011329 | 0.011399 | 0.011633 | 0.011601 | 0.011531 | 0.011565 | 0.011496 |
| 0.011429 | 0.011497 | 0.011496 | 0.011396 | 0.011967 | 0.011564 | 0.011631 |
| 0.011665 | 0.011665 | 0.011367 | 0.011441 | 0.011329 | 0.011530 | 0.011497 |
| 0.011531 | 0.011564 | 0.011564 | 0.011564 | 0.011729 | 0.011698 | 0.011338 |
| 0.011229 | 0.011233 | 0.011333 | 0.011298 | 0.011402 | 0.011247 | 0.011570 |
| 0.011369 | 0.011455 | 0.011203 | 0.011397 | 0.011363 | 0.011437 | 0.011329 |
| 0.011295 | 0.011295 | 0.011362 | 0.011329 | 0.011530 | 0.011497 | 0.011430 |
| 0.011530 | 0.011597 | 0.011329 | 0.011329 | 0.011362 | 0.011362 | 0.011364 |
| 0.011432 | 0.011362 | 0.011362 | 0.011397 | 0.011530 | 0.011598 | 0.011597 |
| 0.011464 | 0.011567 | 0.011569 | 0.011704 | 0.011732 | 0.011396 | 0.011564 |
| 0.011497 | 0.011497 | 0.011331 | 0.011478 | 0.011408 | 0.011469 | 0.011305 |
| 0.011473 | 0.011653 | 0.011441 | 0.011400 | 0.011295 | 0.011497 | 0.011362 |
| 0.011463 | 0.011396 | 0.011295 | 0.011397 | 0.011497 | 0.011500 | 0.011396 |

|          |          |          |          |          |          |          |
|----------|----------|----------|----------|----------|----------|----------|
| 0.011295 | 0.011229 | 0.011362 | 0.011295 | 0.011228 | 0.011298 | 0.011497 |
| 0.011396 | 0.011329 | 0.011362 | 0.011396 | 0.011363 | 0.011295 | 0.011497 |
| 0.011362 | 0.011396 | 0.011396 | 0.011329 | 0.011194 | 0.011497 | 0.011295 |
| 0.011329 | 0.011732 | 0.011329 | 0.011362 | 0.011329 | 0.011698 | 0.011232 |
| 0.011622 | 0.011273 | 0.011261 | 0.011503 | 0.011589 | 0.011491 | 0.011186 |
| 0.011165 | 0.011496 | 0.011597 | 0.011705 | 0.011565 | 0.011703 | 0.011834 |
| 0.011733 | 0.011770 | 0.011732 | 0.011983 | 0.011698 | 0.012573 | 0.011734 |
| 0.012473 | 0.012241 | 0.012375 | 0.012646 | 0.011698 | 0.011396 | 0.011699 |
| 0.012137 | 0.012072 | 0.011664 | 0.011564 | 0.011632 | 0.011632 | 0.011601 |
| 0.011496 | 0.011501 | 0.011564 | 0.011531 | 0.011901 | 0.011967 | 0.011968 |
| 0.011868 | 0.011968 | 0.012072 | 0.011838 | 0.012138 | 0.012144 | 0.012205 |
| 0.012206 | 0.012239 | 0.012186 | 0.012206 | 0.012207 | 0.011429 | 0.011732 |
| 0.011800 | 0.012303 | 0.011806 | 0.012034 | 0.012508 | 0.011570 | 0.011464 |
| 0.011429 | 0.011429 | 0.011900 | 0.011924 | 0.012010 | 0.011765 | 0.011431 |
| S547     | 0.011765 | 0.011765 | 0.012034 | 0.011799 | 0.011799 | 0.011866 |
| 0.011705 | 0.011637 | 0.011866 | 0.011362 | 0.011429 | 0.011397 | 0.011362 |
| 0.011329 | 0.011564 | 0.011295 | 0.011396 | 0.011463 | 0.011429 | 0.011396 |
| 0.011362 | 0.011396 | 0.011429 | 0.011363 | 0.011396 | 0.011396 | 0.011671 |
| 0.011564 | 0.011396 | 0.011295 | 0.011463 | 0.011463 | 0.011429 | 0.011463 |
| 0.011429 | 0.011530 | 0.011429 | 0.011429 | 0.011463 | 0.011295 | 0.011597 |
| 0.011295 | 0.011429 | 0.011463 | 0.011396 | 0.011429 | 0.011530 | 0.011463 |
| 0.011429 | 0.011597 | 0.011497 | 0.011698 | 0.011429 | 0.011698 | 0.011429 |
| 0.011396 | 0.011430 | 0.011564 | 0.011698 | 0.011732 | 0.011429 | 0.011530 |
| 0.011463 | 0.011530 | 0.011429 | 0.011597 | 0.011833 | 0.011429 | 0.011497 |
| 0.011329 | 0.011496 | 0.011463 | 0.011530 | 0.011463 | 0.011463 | 0.011463 |
| 0.011362 | 0.011396 | 0.011362 | 0.011396 | 0.011429 | 0.011464 | 0.011530 |
| 0.011463 | 0.011429 | 0.011496 | 0.011396 | 0.011463 | 0.011362 | 0.011429 |
| 0.011597 | 0.011530 | 0.011765 | 0.011463 | 0.011429 | 0.011664 | 0.011429 |
| 0.011542 | 0.011770 | 0.011664 | 0.011373 | 0.011359 | 0.011391 | 0.011493 |
| 0.012121 | 0.011518 | 0.011390 | 0.011664 | 0.011664 | 0.011396 | 0.011497 |
| 0.011497 | 0.011463 | 0.011530 | 0.011429 | 0.011530 | 0.011463 | 0.011463 |
| 0.011429 | 0.011463 | 0.011732 | 0.011597 | 0.011497 | 0.011463 | 0.011396 |
| 0.011362 | 0.011295 | 0.011362 | 0.011396 | 0.011530 | 0.011497 | 0.011430 |
| 0.011530 | 0.011597 | 0.011396 | 0.011396 | 0.011430 | 0.011429 | 0.011432 |
| 0.011500 | 0.011430 | 0.011430 | 0.011312 | 0.011386 | 0.011341 | 0.011430 |
| 0.011297 | 0.011370 | 0.011429 | 0.011405 | 0.011332 | 0.011369 | 0.011398 |
| 0.011600 | 0.011439 | 0.011473 | 0.011363 | 0.011371 | 0.011498 | 0.011397 |
| 0.011464 | 0.011465 | 0.011464 | 0.011564 | 0.011496 | 0.011866 | 0.011598 |
| 0.011631 | 0.011497 | 0.011429 | 0.011463 | 0.011329 | 0.011497 | 0.011362 |
| 0.011429 | 0.011429 | 0.011396 | 0.011362 | 0.011396 | 0.011362 | 0.011463 |
| 0.011430 | 0.011530 | 0.011463 | 0.011362 | 0.011465 | 0.011564 | 0.011567 |
| 0.011564 | 0.011463 | 0.011362 | 0.011296 | 0.011429 | 0.011362 | 0.011295 |
| 0.011400 | 0.011564 | 0.011362 | 0.011564 | 0.011329 | 0.011430 | 0.011396 |
| 0.011497 | 0.011396 | 0.011430 | 0.011396 | 0.011430 | 0.011295 | 0.011430 |
| 0.011463 | 0.011396 | 0.011463 | 0.011396 | 0.011429 | 0.011463 | 0.011698 |
| 0.011732 | 0.011664 | 0.011732 | 0.011566 | 0.011732 | 0.011429 | 0.011396 |
| 0.011364 | 0.011626 | 0.011472 | 0.011335 | 0.011739 | 0.011299 | 0.011375 |
| 0.011739 | 0.011638 | 0.011597 | 0.011799 | 0.011504 | 0.011664 | 0.011631 |
| 0.011564 | 0.011732 | 0.011593 | 0.011431 | 0.011521 | 0.011463 | 0.011534 |
| 0.011631 | 0.011532 | 0.011669 | 0.011737 | 0.011664 | 0.011732 | 0.011839 |
| 0.011568 | 0.011739 | 0.011670 | 0.011466 | 0.011868 | 0.011329 | 0.011532 |
| 0.011496 | 0.011429 | 0.011329 | 0.011329 | 0.011396 | 0.011396 | 0.011463 |
| 0.011396 | 0.011463 | 0.011362 | 0.011329 | 0.011396 | 0.011396 | 0.011463 |
| 0.011396 | 0.011765 | 0.011664 | 0.011698 | 0.011295 | 0.011396 | 0.011429 |
| 0.011429 | 0.011396 | 0.011463 | 0.011429 | 0.011362 | 0.011362 | 0.011362 |
| 0.011832 | 0.011463 | 0.011530 | 0.011329 | 0.011429 | 0.011597 | 0.011362 |
| 0.011362 | 0.011429 | 0.011396 | 0.011564 | 0.011362 | 0.011496 | 0.011631 |
| 0.011564 | 0.011396 | 0.011396 | 0.011329 | 0.011329 | 0.011497 | 0.011429 |
| 0.011329 | 0.011429 | 0.011295 | 0.011329 | 0.011329 | 0.011530 | 0.011362 |
| 0.011329 | 0.011329 | 0.011396 | 0.011295 | 0.011564 | 0.011295 | 0.011463 |

|          |          |          |          |          |          |          |
|----------|----------|----------|----------|----------|----------|----------|
| 0.011539 | 0.011362 | 0.011597 | 0.011497 | 0.000000 | 0.011396 | 0.011496 |
| 0.011362 | 0.011698 | 0.011295 | 0.011497 | 0.011295 | 0.011295 | 0.011295 |
| 0.011530 | 0.011665 | 0.011429 | 0.011497 | 0.011329 | 0.011664 | 0.011295 |
| 0.011362 | 0.011362 | 0.011396 | 0.011497 | 0.011396 | 0.011496 | 0.011564 |
| 0.011429 | 0.011530 | 0.011429 | 0.011530 | 0.011496 | 0.011362 | 0.011329 |
| 0.011362 | 0.011362 | 0.011429 | 0.011295 | 0.011329 | 0.011497 | 0.011362 |
| 0.011329 | 0.011396 | 0.011530 | 0.011497 | 0.011463 | 0.011396 | 0.011396 |
| 0.011463 | 0.011396 | 0.011496 | 0.011362 | 0.011496 | 0.011597 | 0.011832 |
| 0.011396 | 0.011732 | 0.011405 | 0.017936 | 0.011387 | 0.011427 | 0.011688 |
| 0.011648 | 0.011693 | 0.011479 | 0.011466 | 0.011719 | 0.011716 | 0.011546 |
| 0.011535 | 0.011548 | 0.011333 | 0.011395 | 0.011294 | 0.011356 | 0.011404 |
| 0.011529 | 0.011507 | 0.011505 | 0.011325 | 0.011530 | 0.011564 | 0.011568 |
| 0.011438 | 0.011530 | 0.011530 | 0.011430 | 0.011463 | 0.011463 | 0.011430 |
| 0.011463 | 0.011396 | 0.011429 | 0.011463 | 0.011430 | 0.011362 | 0.011396 |
| 0.011396 | 0.011463 | 0.011362 | 0.011463 | 0.011497 | 0.011396 | 0.011429 |
| 0.011396 | 0.011362 | 0.011698 | 0.011698 | 0.011497 | 0.011531 | 0.011564 |
| 0.011329 | 0.011329 | 0.011362 | 0.011463 | 0.011329 | 0.011564 | 0.011564 |
| 0.011597 | 0.011597 | 0.011530 | 0.011631 | 0.011732 | 0.011633 | 0.011463 |
| 0.011463 | 0.011530 | 0.011564 | 0.011396 | 0.011463 | 0.011430 | 0.011463 |
| 0.011531 | 0.011530 | 0.011564 | 0.011531 | 0.011431 | 0.011631 | 0.011597 |
| 0.011467 | 0.011362 | 0.011463 | 0.011564 | 0.011463 | 0.011530 | 0.011631 |
| 0.011799 | 0.011504 | 0.011664 | 0.011631 | 0.011564 | 0.011732 | 0.011329 |
| 0.011532 | 0.011430 | 0.011396 | 0.011396 | 0.011463 | 0.011362 | 0.011463 |
| 0.011497 | 0.011396 | 0.011429 | 0.011396 | 0.011362 | 0.011698 | 0.011698 |
| 0.011497 | 0.011531 | 0.011597 | 0.011530 | 0.012103 | 0.011596 | 0.011517 |
| 0.011447 | 0.011546 | 0.011658 | 0.011545 | 0.011655 | 0.011577 | 0.011543 |
| 0.012056 | 0.011441 | 0.011574 | 0.011510 | 0.011783 | 0.011638 | 0.011741 |
| 0.012080 | 0.011550 | 0.011703 | 0.011765 | 0.011631 | 0.011564 | 0.011668 |
| 0.011329 | 0.011497 | 0.011631 | 0.011597 | 0.011601 | 0.011530 | 0.011498 |
| 0.011429 | 0.011362 | 0.011396 | 0.011429 | 0.011329 | 0.011396 | 0.011295 |
| 0.011161 | 0.011127 | 0.011295 | 0.011329 | 0.011362 | 0.011362 | 0.011396 |
| 0.011396 | 0.011329 | 0.011396 | 0.011429 | 0.011329 | 0.011530 | 0.011362 |
| 0.011262 | 0.000000 | 0.011262 | 0.011329 | 0.011396 | 0.011732 | 0.011429 |
| 0.011408 | 0.011396 | 0.011564 | 0.011569 | 0.011497 | 0.011496 | 0.011496 |
| 0.011497 | 0.011429 | 0.011396 | 0.011429 | 0.011530 | 0.011530 | 0.011463 |
| 0.011463 | 0.011597 | 0.011698 | 0.011496 | 0.011698 | 0.011698 | 0.011564 |
| 0.011396 | 0.011463 | 0.011497 | 0.011833 | 0.011463 | 0.011497 | 0.011463 |
| 0.011496 | 0.011362 | 0.011362 | 0.011665 | 0.011665 | 0.011631 | 0.011429 |
| 0.011530 | 0.011597 | 0.011463 | 0.011530 | 0.011496 | 0.011362 | 0.011631 |
| 0.011463 | 0.011429 | 0.011362 | 0.011597 | 0.011429 | 0.011530 | 0.011765 |
| 0.011463 | 0.011773 | 0.011765 | 0.011589 | 0.011286 | 0.011468 | 0.011370 |
| 0.011280 | 0.011800 | 0.011376 | 0.011552 | 0.011402 | 0.011467 | 0.011432 |
| 0.011468 | 0.011389 | 0.011506 | 0.011324 | 0.011491 | 0.011529 | 0.011547 |
| 0.011550 | 0.011454 | 0.011448 | 0.011448 | 0.011465 | 0.011530 | 0.011598 |
| 0.011597 | 0.011464 | 0.011567 | 0.011569 | 0.011704 | 0.011732 | 0.011463 |
| 0.011631 | 0.011497 | 0.011429 | 0.011463 | 0.011329 | 0.011497 | 0.011362 |
| 0.011429 | 0.011429 | 0.011396 | 0.011362 | 0.011396 | 0.011362 | 0.011463 |
| 0.011444 | 0.011445 | 0.011368 | 0.011471 | 0.011608 | 0.011573 | 0.011572 |
| 0.011571 | 0.011497 | 0.011319 | 0.011312 | 0.011433 | 0.011602 | 0.011603 |
| 0.011396 | 0.011467 | 0.011700 | 0.011669 | 0.011598 | 0.011632 | 0.011564 |
| 0.011496 | 0.011564 | 0.011564 | 0.011463 | 0.011967 | 0.011631 | 0.011698 |
| 0.011732 | 0.011701 | 0.011435 | 0.011511 | 0.011396 | 0.011597 | 0.011564 |
| 0.011598 | 0.011631 | 0.011631 | 0.011631 | 0.011807 | 0.011765 | 0.011407 |
| 0.011297 | 0.011303 | 0.011401 | 0.011366 | 0.011402 | 0.011321 | 0.011570 |
| 0.011437 | 0.011499 | 0.011346 | 0.011472 | 0.011430 | 0.011505 | 0.011396 |
| 0.011362 | 0.011295 | 0.011362 | 0.011396 | 0.011530 | 0.011497 | 0.011430 |
| 0.011530 | 0.011597 | 0.011396 | 0.011396 | 0.011430 | 0.011429 | 0.011432 |
| 0.011500 | 0.011430 | 0.011430 | 0.011465 | 0.011530 | 0.011598 | 0.011597 |
| 0.011464 | 0.011567 | 0.011569 | 0.011704 | 0.011732 | 0.011463 | 0.011631 |
| 0.011564 | 0.011564 | 0.011398 | 0.011582 | 0.011477 | 0.011537 | 0.011375 |



|          |          |          |          |          |          |          |
|----------|----------|----------|----------|----------|----------|----------|
| 0.011542 | 0.011653 | 0.011441 | 0.011468 | 0.011362 | 0.011564 | 0.011430 |
| 0.011530 | 0.011463 | 0.011362 | 0.011465 | 0.011564 | 0.011567 | 0.011463 |
| 0.011362 | 0.011296 | 0.011429 | 0.011362 | 0.011295 | 0.011400 | 0.011564 |
| 0.011463 | 0.011396 | 0.011429 | 0.011463 | 0.011430 | 0.011362 | 0.011497 |
| 0.011429 | 0.011463 | 0.011463 | 0.011396 | 0.011262 | 0.011564 | 0.011295 |
| 0.011329 | 0.011732 | 0.011396 | 0.011429 | 0.011396 | 0.011698 | 0.011360 |
| 0.011679 | 0.011400 | 0.011311 | 0.011543 | 0.011630 | 0.011527 | 0.011311 |
| 0.011218 | 0.011496 | 0.011597 | 0.011705 | 0.011565 | 0.011703 | 0.011834 |
| 0.011733 | 0.011770 | 0.011732 | 0.011983 | 0.011698 | 0.012573 | 0.011734 |
| 0.012473 | 0.012241 | 0.012375 | 0.012646 | 0.011698 | 0.011396 | 0.011699 |
| 0.012137 | 0.012072 | 0.011664 | 0.011564 | 0.011632 | 0.011632 | 0.011601 |
| 0.011496 | 0.011501 | 0.011564 | 0.011531 | 0.011901 | 0.011967 | 0.011968 |
| 0.011868 | 0.011968 | 0.012072 | 0.011838 | 0.012138 | 0.012144 | 0.012205 |
| 0.012206 | 0.012239 | 0.012186 | 0.012206 | 0.012207 | 0.011496 | 0.011732 |
| 0.011800 | 0.012303 | 0.011806 | 0.012034 | 0.012508 | 0.011570 | 0.011464 |
| 0.011429 | 0.011429 | 0.011900 | 0.011965 | 0.012045 | 0.011765 | 0.011431 |
| S548     | 0.011698 | 0.011698 | 0.012034 | 0.011799 | 0.011799 | 0.011866 |
| 0.011705 | 0.011637 | 0.011866 | 0.011295 | 0.011362 | 0.011329 | 0.011295 |
| 0.011329 | 0.011496 | 0.011295 | 0.011329 | 0.011396 | 0.011362 | 0.011329 |
| 0.011295 | 0.011329 | 0.011429 | 0.011295 | 0.011329 | 0.011329 | 0.011671 |
| 0.011564 | 0.011329 | 0.011228 | 0.011463 | 0.011396 | 0.011362 | 0.011396 |
| 0.011362 | 0.011463 | 0.011362 | 0.011362 | 0.011396 | 0.011161 | 0.011530 |
| 0.011295 | 0.011362 | 0.011396 | 0.011329 | 0.011429 | 0.011463 | 0.011396 |
| 0.011362 | 0.011530 | 0.011430 | 0.011698 | 0.011362 | 0.011631 | 0.011362 |
| 0.011329 | 0.011429 | 0.011497 | 0.011631 | 0.011732 | 0.011429 | 0.011530 |
| 0.011396 | 0.011463 | 0.011362 | 0.011530 | 0.011832 | 0.011362 | 0.011429 |
| 0.011329 | 0.011429 | 0.011396 | 0.011463 | 0.011396 | 0.011396 | 0.011396 |
| 0.011295 | 0.011329 | 0.011295 | 0.011396 | 0.011362 | 0.011397 | 0.011463 |
| 0.011396 | 0.011362 | 0.011429 | 0.011329 | 0.011463 | 0.011295 | 0.011362 |
| 0.011530 | 0.011463 | 0.011698 | 0.011329 | 0.011362 | 0.011597 | 0.011362 |
| 0.011394 | 0.011770 | 0.011588 | 0.011295 | 0.011284 | 0.011244 | 0.011493 |
| 0.012121 | 0.011518 | 0.011307 | 0.011597 | 0.011597 | 0.011396 | 0.011497 |
| 0.011429 | 0.011396 | 0.011463 | 0.011362 | 0.011463 | 0.011396 | 0.011396 |
| 0.011362 | 0.011463 | 0.011664 | 0.011530 | 0.011429 | 0.011396 | 0.011329 |
| 0.011295 | 0.011295 | 0.011362 | 0.011329 | 0.011530 | 0.011497 | 0.011429 |
| 0.011530 | 0.011597 | 0.011329 | 0.011329 | 0.011362 | 0.011362 | 0.011364 |
| 0.011432 | 0.011362 | 0.011362 | 0.011240 | 0.011313 | 0.011271 | 0.011363 |
| 0.011162 | 0.011301 | 0.011355 | 0.011336 | 0.011264 | 0.011300 | 0.011330 |
| 0.011600 | 0.011370 | 0.011405 | 0.011296 | 0.011302 | 0.011430 | 0.011396 |
| 0.011464 | 0.011397 | 0.011396 | 0.011496 | 0.011429 | 0.011799 | 0.011598 |
| 0.011631 | 0.011497 | 0.011362 | 0.011463 | 0.011262 | 0.011496 | 0.011295 |
| 0.011362 | 0.011362 | 0.011329 | 0.011295 | 0.011329 | 0.011295 | 0.011396 |
| 0.011362 | 0.011463 | 0.011396 | 0.011295 | 0.011397 | 0.011497 | 0.011499 |
| 0.011497 | 0.011396 | 0.011295 | 0.011229 | 0.011362 | 0.011295 | 0.011228 |
| 0.011332 | 0.011497 | 0.011295 | 0.011497 | 0.011262 | 0.011362 | 0.011329 |
| 0.011430 | 0.011329 | 0.011362 | 0.011329 | 0.011362 | 0.011228 | 0.011362 |
| 0.011396 | 0.011329 | 0.011396 | 0.011329 | 0.011362 | 0.011396 | 0.011631 |
| 0.011732 | 0.011664 | 0.011732 | 0.011498 | 0.011732 | 0.011362 | 0.011329 |
| 0.011364 | 0.011626 | 0.011426 | 0.011266 | 0.011739 | 0.011231 | 0.011296 |
| 0.011739 | 0.011638 | 0.011530 | 0.011732 | 0.011436 | 0.011597 | 0.011564 |
| 0.011496 | 0.011664 | 0.011522 | 0.011349 | 0.011437 | 0.011396 | 0.011466 |
| 0.011564 | 0.011465 | 0.011601 | 0.011669 | 0.011597 | 0.011665 | 0.011772 |
| 0.011500 | 0.011671 | 0.011602 | 0.011331 | 0.011800 | 0.011262 | 0.011465 |
| 0.011429 | 0.011362 | 0.011262 | 0.011262 | 0.011329 | 0.011329 | 0.011396 |
| 0.011329 | 0.011396 | 0.011295 | 0.011396 | 0.011329 | 0.011329 | 0.011396 |
| 0.011329 | 0.011765 | 0.011664 | 0.011698 | 0.011228 | 0.011329 | 0.011362 |
| 0.011362 | 0.011329 | 0.011396 | 0.011429 | 0.011295 | 0.011295 | 0.011295 |
| 0.011832 | 0.011463 | 0.011463 | 0.011262 | 0.011362 | 0.011530 | 0.011295 |
| 0.011295 | 0.011362 | 0.011329 | 0.011497 | 0.011295 | 0.011429 | 0.011564 |
| 0.011496 | 0.011329 | 0.011329 | 0.011262 | 0.011262 | 0.011429 | 0.011362 |

|          |          |          |          |          |          |          |
|----------|----------|----------|----------|----------|----------|----------|
| 0.011262 | 0.011362 | 0.011228 | 0.011262 | 0.011195 | 0.011530 | 0.011295 |
| 0.011262 | 0.011195 | 0.011329 | 0.011228 | 0.011564 | 0.011228 | 0.011396 |
| 0.011471 | 0.011295 | 0.011597 | 0.011430 | 0.011262 | 0.011329 | 0.011429 |
| 0.011295 | 0.011631 | 0.011228 | 0.011497 | 0.011295 | 0.011295 | 0.011228 |
| 0.011463 | 0.011665 | 0.011362 | 0.011429 | 0.011262 | 0.011664 | 0.011295 |
| 0.011295 | 0.011295 | 0.011329 | 0.011429 | 0.011329 | 0.011429 | 0.011496 |
| 0.011295 | 0.011463 | 0.011362 | 0.011463 | 0.011429 | 0.011295 | 0.011262 |
| 0.011295 | 0.011295 | 0.011362 | 0.011295 | 0.011262 | 0.011429 | 0.011295 |
| 0.011329 | 0.011329 | 0.011463 | 0.011496 | 0.011396 | 0.011329 | 0.011329 |
| 0.011396 | 0.011329 | 0.011429 | 0.011295 | 0.011429 | 0.011530 | 0.011832 |
| 0.011329 | 0.011732 | 0.011336 | 0.017823 | 0.011126 | 0.011488 | 0.011688 |
| 0.011648 | 0.011623 | 0.011270 | 0.011350 | 0.011774 | 0.011716 | 0.011425 |
| 0.011535 | 0.011610 | 0.011255 | 0.011311 | 0.011294 | 0.011356 | 0.011318 |
| 0.011529 | 0.011507 | 0.011505 | 0.011325 | 0.011463 | 0.011497 | 0.011500 |
| 0.011369 | 0.011463 | 0.011463 | 0.011429 | 0.011396 | 0.011396 | 0.011362 |
| 0.011396 | 0.011329 | 0.011362 | 0.011396 | 0.011362 | 0.011295 | 0.011329 |
| 0.011329 | 0.011396 | 0.011295 | 0.011396 | 0.011430 | 0.011262 | 0.011362 |
| 0.011396 | 0.011362 | 0.011698 | 0.011698 | 0.011430 | 0.011464 | 0.011497 |
| 0.011262 | 0.011262 | 0.011295 | 0.011396 | 0.011262 | 0.011497 | 0.011497 |
| 0.011530 | 0.011530 | 0.011463 | 0.011564 | 0.011732 | 0.011565 | 0.011396 |
| 0.011396 | 0.011463 | 0.011497 | 0.011329 | 0.011396 | 0.011362 | 0.011396 |
| 0.011463 | 0.011463 | 0.011497 | 0.011463 | 0.011363 | 0.011564 | 0.011530 |
| 0.011399 | 0.011295 | 0.011329 | 0.011497 | 0.011396 | 0.011530 | 0.011564 |
| 0.011732 | 0.011436 | 0.011597 | 0.011564 | 0.011496 | 0.011664 | 0.011295 |
| 0.011464 | 0.011363 | 0.011329 | 0.011329 | 0.011396 | 0.011295 | 0.011396 |
| 0.011430 | 0.011262 | 0.011362 | 0.011396 | 0.011362 | 0.011698 | 0.011698 |
| 0.011430 | 0.011464 | 0.011530 | 0.011463 | 0.012103 | 0.011525 | 0.011447 |
| 0.011306 | 0.011476 | 0.011587 | 0.011476 | 0.011585 | 0.011508 | 0.011474 |
| 0.012056 | 0.011372 | 0.011505 | 0.011441 | 0.011714 | 0.011570 | 0.011673 |
| 0.012080 | 0.011550 | 0.011635 | 0.011698 | 0.011564 | 0.011564 | 0.011601 |
| 0.011262 | 0.011429 | 0.011564 | 0.011530 | 0.011533 | 0.011530 | 0.011498 |
| 0.011362 | 0.011295 | 0.011329 | 0.011362 | 0.011262 | 0.011329 | 0.011228 |
| 0.011295 | 0.011262 | 0.011228 | 0.011262 | 0.011295 | 0.011295 | 0.011329 |
| 0.011329 | 0.011262 | 0.011329 | 0.011362 | 0.011262 | 0.011463 | 0.011295 |
| 0.011194 | 0.011262 | 0.000000 | 0.011262 | 0.011329 | 0.011732 | 0.011362 |
| 0.011408 | 0.011329 | 0.011564 | 0.011569 | 0.011430 | 0.011429 | 0.011429 |
| 0.011429 | 0.011362 | 0.011329 | 0.011362 | 0.011463 | 0.011463 | 0.011396 |
| 0.011396 | 0.011530 | 0.011698 | 0.011429 | 0.011631 | 0.011631 | 0.011496 |
| 0.011329 | 0.011396 | 0.011429 | 0.011832 | 0.011396 | 0.011430 | 0.011396 |
| 0.011429 | 0.011362 | 0.011362 | 0.011665 | 0.011597 | 0.011631 | 0.011362 |
| 0.011463 | 0.011530 | 0.011396 | 0.011463 | 0.011429 | 0.011295 | 0.011631 |
| 0.011396 | 0.011362 | 0.011362 | 0.011530 | 0.011362 | 0.011463 | 0.011698 |
| 0.011396 | 0.011773 | 0.011765 | 0.011589 | 0.011286 | 0.011468 | 0.011370 |
| 0.011280 | 0.011800 | 0.011306 | 0.011462 | 0.011402 | 0.011417 | 0.011326 |
| 0.011468 | 0.011126 | 0.011283 | 0.000000 | 0.011276 | 0.011261 | 0.011466 |
| 0.011475 | 0.011375 | 0.011448 | 0.011377 | 0.011397 | 0.011530 | 0.011597 |
| 0.011597 | 0.011464 | 0.011567 | 0.011569 | 0.011704 | 0.011732 | 0.011396 |
| 0.011631 | 0.011497 | 0.011362 | 0.011463 | 0.011262 | 0.011496 | 0.011295 |
| 0.011362 | 0.011362 | 0.011329 | 0.011295 | 0.011329 | 0.011295 | 0.011396 |
| 0.011375 | 0.011375 | 0.011368 | 0.011403 | 0.011539 | 0.011504 | 0.011504 |
| 0.011503 | 0.011430 | 0.011245 | 0.011240 | 0.011365 | 0.011535 | 0.011535 |
| 0.011329 | 0.011399 | 0.011632 | 0.011601 | 0.011531 | 0.011565 | 0.011496 |
| 0.011429 | 0.011496 | 0.011496 | 0.011396 | 0.011967 | 0.011564 | 0.011631 |
| 0.011665 | 0.011701 | 0.011367 | 0.011441 | 0.011329 | 0.011530 | 0.011496 |
| 0.011531 | 0.011564 | 0.011564 | 0.011564 | 0.011689 | 0.011698 | 0.011338 |
| 0.011229 | 0.011233 | 0.011333 | 0.011298 | 0.011402 | 0.011247 | 0.011570 |
| 0.011369 | 0.011499 | 0.011251 | 0.011397 | 0.011363 | 0.011437 | 0.011329 |
| 0.011295 | 0.011295 | 0.011362 | 0.011329 | 0.011530 | 0.011497 | 0.011429 |
| 0.011530 | 0.011597 | 0.011329 | 0.011329 | 0.011362 | 0.011362 | 0.011364 |
| 0.011432 | 0.011362 | 0.011362 | 0.011397 | 0.011530 | 0.011597 | 0.011597 |

|          |          |          |          |          |          |          |
|----------|----------|----------|----------|----------|----------|----------|
| 0.011464 | 0.011567 | 0.011569 | 0.011704 | 0.011732 | 0.011396 | 0.011564 |
| 0.011496 | 0.011496 | 0.011331 | 0.011513 | 0.011408 | 0.011469 | 0.011305 |
| 0.011473 | 0.011698 | 0.011399 | 0.011400 | 0.011295 | 0.011497 | 0.011362 |
| 0.011463 | 0.011396 | 0.011295 | 0.011397 | 0.011497 | 0.011499 | 0.011396 |
| 0.011295 | 0.011229 | 0.011362 | 0.011295 | 0.011228 | 0.011332 | 0.011497 |
| 0.011396 | 0.011329 | 0.011362 | 0.011396 | 0.011362 | 0.011295 | 0.011497 |
| 0.011362 | 0.011396 | 0.011396 | 0.011329 | 0.000000 | 0.011497 | 0.011295 |
| 0.011329 | 0.011732 | 0.011329 | 0.011362 | 0.011329 | 0.011698 | 0.011274 |
| 0.011678 | 0.011315 | 0.011311 | 0.011543 | 0.011630 | 0.011527 | 0.011227 |
| 0.011218 | 0.011496 | 0.011597 | 0.011705 | 0.011565 | 0.011703 | 0.011834 |
| 0.011733 | 0.011770 | 0.011731 | 0.011983 | 0.011698 | 0.012573 | 0.011734 |
| 0.012473 | 0.012241 | 0.012375 | 0.012646 | 0.011698 | 0.011396 | 0.011699 |
| 0.012137 | 0.012072 | 0.011664 | 0.011564 | 0.011632 | 0.011632 | 0.011601 |
| 0.011496 | 0.011501 | 0.011564 | 0.011531 | 0.011901 | 0.011967 | 0.011968 |
| 0.011868 | 0.011968 | 0.012072 | 0.011838 | 0.012138 | 0.012144 | 0.012205 |
| 0.012205 | 0.012239 | 0.012186 | 0.012206 | 0.012207 | 0.011429 | 0.011732 |
| 0.011800 | 0.012303 | 0.011806 | 0.012034 | 0.012508 | 0.011570 | 0.011464 |
| 0.011429 | 0.011429 | 0.011900 | 0.011965 | 0.012045 | 0.011765 | 0.011431 |
| S549     | 0.011698 | 0.011698 | 0.012034 | 0.011799 | 0.011799 | 0.011866 |
| 0.011705 | 0.011637 | 0.011866 | 0.011295 | 0.011362 | 0.011329 | 0.011295 |
| 0.011329 | 0.011497 | 0.011295 | 0.011329 | 0.011396 | 0.011362 | 0.011329 |
| 0.011295 | 0.011329 | 0.011429 | 0.011295 | 0.011329 | 0.011329 | 0.011671 |
| 0.011564 | 0.011329 | 0.011228 | 0.011463 | 0.011396 | 0.011362 | 0.011396 |
| 0.011295 | 0.011463 | 0.011362 | 0.011362 | 0.011396 | 0.011295 | 0.011530 |
| 0.011295 | 0.011362 | 0.011396 | 0.011329 | 0.011429 | 0.011463 | 0.011329 |
| 0.011362 | 0.011530 | 0.011430 | 0.011698 | 0.011362 | 0.011631 | 0.011362 |
| 0.011329 | 0.011430 | 0.011497 | 0.011631 | 0.011732 | 0.011429 | 0.011530 |
| 0.011396 | 0.011463 | 0.011362 | 0.011530 | 0.011833 | 0.011362 | 0.011362 |
| 0.011329 | 0.011429 | 0.011396 | 0.011463 | 0.011396 | 0.011396 | 0.011396 |
| 0.011295 | 0.011329 | 0.011295 | 0.011396 | 0.011362 | 0.011397 | 0.011463 |
| 0.011396 | 0.011362 | 0.011429 | 0.011329 | 0.011463 | 0.011295 | 0.011362 |
| 0.011530 | 0.011463 | 0.011698 | 0.011463 | 0.011362 | 0.011597 | 0.011362 |
| 0.011431 | 0.011733 | 0.011551 | 0.011255 | 0.011247 | 0.011281 | 0.011454 |
| 0.012085 | 0.011518 | 0.011266 | 0.011597 | 0.011597 | 0.011396 | 0.011497 |
| 0.011429 | 0.011396 | 0.011463 | 0.011362 | 0.011463 | 0.011396 | 0.011396 |
| 0.011362 | 0.011463 | 0.011664 | 0.011530 | 0.011429 | 0.011396 | 0.011329 |
| 0.011295 | 0.011295 | 0.011362 | 0.011329 | 0.011530 | 0.011497 | 0.011430 |
| 0.011530 | 0.011597 | 0.011329 | 0.011329 | 0.011362 | 0.011362 | 0.011364 |
| 0.011432 | 0.011362 | 0.011362 | 0.011204 | 0.011277 | 0.011271 | 0.011363 |
| 0.011297 | 0.011266 | 0.011355 | 0.011336 | 0.011264 | 0.011300 | 0.011330 |
| 0.011600 | 0.011370 | 0.011405 | 0.011296 | 0.011302 | 0.011430 | 0.011397 |
| 0.011464 | 0.011397 | 0.011396 | 0.011496 | 0.011429 | 0.011799 | 0.011598 |
| 0.011631 | 0.011497 | 0.011362 | 0.011463 | 0.011262 | 0.011497 | 0.011295 |
| 0.011362 | 0.011362 | 0.011329 | 0.011295 | 0.011329 | 0.011295 | 0.011396 |
| 0.011362 | 0.011463 | 0.011396 | 0.011295 | 0.011397 | 0.011497 | 0.011500 |
| 0.011497 | 0.011396 | 0.011295 | 0.011229 | 0.011362 | 0.011295 | 0.011228 |
| 0.011332 | 0.011497 | 0.011295 | 0.011497 | 0.011262 | 0.011363 | 0.011329 |
| 0.011430 | 0.011329 | 0.011362 | 0.011329 | 0.011362 | 0.011228 | 0.011362 |
| 0.011396 | 0.011329 | 0.011396 | 0.011329 | 0.011362 | 0.011396 | 0.011631 |
| 0.011732 | 0.011664 | 0.011732 | 0.011498 | 0.011732 | 0.011362 | 0.011329 |
| 0.011364 | 0.011667 | 0.011472 | 0.011266 | 0.011739 | 0.011231 | 0.011336 |
| 0.011739 | 0.011638 | 0.011530 | 0.011732 | 0.011436 | 0.011597 | 0.011564 |
| 0.011497 | 0.011664 | 0.011522 | 0.011349 | 0.011437 | 0.011396 | 0.011466 |
| 0.011564 | 0.011465 | 0.011601 | 0.011669 | 0.011597 | 0.011665 | 0.011772 |
| 0.011500 | 0.011671 | 0.011602 | 0.011466 | 0.011800 | 0.011262 | 0.011465 |
| 0.011429 | 0.011362 | 0.011262 | 0.011262 | 0.011329 | 0.011329 | 0.011396 |
| 0.011329 | 0.011396 | 0.011295 | 0.011396 | 0.011329 | 0.011329 | 0.011396 |
| 0.011329 | 0.011765 | 0.011664 | 0.011698 | 0.011228 | 0.011329 | 0.011362 |
| 0.011362 | 0.011329 | 0.011396 | 0.011429 | 0.011295 | 0.011295 | 0.011295 |
| 0.011832 | 0.011463 | 0.011463 | 0.011262 | 0.011362 | 0.011530 | 0.011295 |

|          |          |          |          |          |          |          |
|----------|----------|----------|----------|----------|----------|----------|
| 0.011295 | 0.011362 | 0.011329 | 0.011497 | 0.011295 | 0.011429 | 0.011564 |
| 0.011497 | 0.011329 | 0.011329 | 0.011262 | 0.011262 | 0.011430 | 0.011362 |
| 0.011262 | 0.011362 | 0.011228 | 0.011262 | 0.011329 | 0.011530 | 0.011295 |
| 0.011262 | 0.011329 | 0.011329 | 0.011228 | 0.011564 | 0.011228 | 0.011396 |
| 0.011471 | 0.011295 | 0.011597 | 0.011430 | 0.011329 | 0.011329 | 0.011429 |
| 0.011295 | 0.011631 | 0.011228 | 0.011497 | 0.011295 | 0.011295 | 0.011228 |
| 0.011463 | 0.011665 | 0.011362 | 0.011429 | 0.011262 | 0.011664 | 0.011295 |
| 0.011295 | 0.011295 | 0.011329 | 0.011429 | 0.011329 | 0.011429 | 0.011497 |
| 0.011429 | 0.011463 | 0.011362 | 0.011463 | 0.011429 | 0.011295 | 0.011262 |
| 0.011295 | 0.011295 | 0.011362 | 0.011295 | 0.011262 | 0.011429 | 0.011295 |
| 0.011329 | 0.011329 | 0.011463 | 0.011497 | 0.011396 | 0.011329 | 0.011329 |
| 0.011396 | 0.011329 | 0.011429 | 0.011295 | 0.011429 | 0.011530 | 0.011832 |
| 0.011329 | 0.011732 | 0.011302 | 0.017823 | 0.011257 | 0.011427 | 0.011653 |
| 0.011648 | 0.011658 | 0.011322 | 0.011292 | 0.011774 | 0.011716 | 0.011364 |
| 0.011487 | 0.011610 | 0.011216 | 0.011270 | 0.011255 | 0.011356 | 0.011275 |
| 0.011529 | 0.011470 | 0.011468 | 0.011325 | 0.011463 | 0.011497 | 0.011500 |
| 0.011369 | 0.011463 | 0.011463 | 0.011430 | 0.011396 | 0.011396 | 0.011363 |
| 0.011396 | 0.011329 | 0.011362 | 0.011396 | 0.011363 | 0.011295 | 0.011329 |
| 0.011329 | 0.011396 | 0.011295 | 0.011396 | 0.011430 | 0.011396 | 0.011362 |
| 0.011396 | 0.011362 | 0.011698 | 0.011698 | 0.011430 | 0.011464 | 0.011497 |
| 0.011262 | 0.011262 | 0.011295 | 0.011396 | 0.011262 | 0.011497 | 0.011497 |
| 0.011530 | 0.011530 | 0.011463 | 0.011564 | 0.011732 | 0.011565 | 0.011396 |
| 0.011396 | 0.011463 | 0.011497 | 0.011329 | 0.011396 | 0.011362 | 0.011396 |
| 0.011463 | 0.011463 | 0.011497 | 0.011463 | 0.011363 | 0.011564 | 0.011530 |
| 0.011399 | 0.011295 | 0.011396 | 0.011497 | 0.011396 | 0.011530 | 0.011564 |
| 0.011732 | 0.011436 | 0.011597 | 0.011564 | 0.011497 | 0.011664 | 0.011295 |
| 0.011464 | 0.011363 | 0.011329 | 0.011329 | 0.011396 | 0.011295 | 0.011396 |
| 0.011430 | 0.011396 | 0.011362 | 0.011396 | 0.011362 | 0.011698 | 0.011698 |
| 0.011430 | 0.011464 | 0.011530 | 0.011463 | 0.012103 | 0.011525 | 0.011447 |
| 0.011447 | 0.011476 | 0.011587 | 0.011476 | 0.011585 | 0.011508 | 0.011474 |
| 0.012056 | 0.011372 | 0.011505 | 0.011441 | 0.011714 | 0.011570 | 0.011673 |
| 0.012080 | 0.011550 | 0.011635 | 0.011698 | 0.011564 | 0.011564 | 0.011601 |
| 0.011262 | 0.011429 | 0.011564 | 0.011530 | 0.011533 | 0.011530 | 0.011498 |
| 0.011362 | 0.011295 | 0.011329 | 0.011362 | 0.011262 | 0.011329 | 0.011228 |
| 0.011295 | 0.011262 | 0.011228 | 0.011262 | 0.011295 | 0.011295 | 0.011329 |
| 0.011329 | 0.011262 | 0.011329 | 0.011362 | 0.011262 | 0.011463 | 0.011362 |
| 0.011195 | 0.011329 | 0.011262 | 0.000000 | 0.011329 | 0.011732 | 0.011362 |
| 0.011408 | 0.011329 | 0.011564 | 0.011569 | 0.011430 | 0.011429 | 0.011429 |
| 0.011429 | 0.011362 | 0.011329 | 0.011362 | 0.011463 | 0.011463 | 0.011396 |
| 0.011396 | 0.011530 | 0.011698 | 0.011429 | 0.011631 | 0.011631 | 0.011496 |
| 0.011329 | 0.011396 | 0.011429 | 0.011833 | 0.011396 | 0.011430 | 0.011396 |
| 0.011429 | 0.011362 | 0.011362 | 0.011665 | 0.011597 | 0.011631 | 0.011362 |
| 0.011463 | 0.011530 | 0.011396 | 0.011463 | 0.011429 | 0.011295 | 0.011631 |
| 0.011396 | 0.011362 | 0.011362 | 0.011530 | 0.011362 | 0.011463 | 0.011698 |
| 0.011396 | 0.011773 | 0.011765 | 0.011548 | 0.011286 | 0.011468 | 0.011318 |
| 0.011225 | 0.011761 | 0.011271 | 0.011507 | 0.011353 | 0.011417 | 0.011379 |
| 0.011468 | 0.011192 | 0.011339 | 0.011192 | 0.011330 | 0.011395 | 0.011425 |
| 0.011437 | 0.011336 | 0.011412 | 0.011342 | 0.011397 | 0.011530 | 0.011598 |
| 0.011597 | 0.011464 | 0.011567 | 0.011569 | 0.011704 | 0.011732 | 0.011396 |
| 0.011631 | 0.011497 | 0.011362 | 0.011463 | 0.011262 | 0.011497 | 0.011295 |
| 0.011362 | 0.011362 | 0.011329 | 0.011295 | 0.011329 | 0.011295 | 0.011396 |
| 0.011375 | 0.011375 | 0.011368 | 0.011403 | 0.011539 | 0.011504 | 0.011504 |
| 0.011503 | 0.011430 | 0.011245 | 0.011240 | 0.011365 | 0.011535 | 0.011535 |
| 0.011329 | 0.011399 | 0.011633 | 0.011601 | 0.011531 | 0.011565 | 0.011496 |
| 0.011429 | 0.011497 | 0.011496 | 0.011396 | 0.011967 | 0.011564 | 0.011631 |
| 0.011665 | 0.011665 | 0.011367 | 0.011441 | 0.011329 | 0.011530 | 0.011497 |
| 0.011531 | 0.011564 | 0.011564 | 0.011564 | 0.011729 | 0.011698 | 0.011338 |
| 0.011229 | 0.011233 | 0.011333 | 0.011298 | 0.011402 | 0.011247 | 0.011570 |
| 0.011369 | 0.011499 | 0.011251 | 0.011397 | 0.011363 | 0.011437 | 0.011329 |
| 0.011295 | 0.011295 | 0.011362 | 0.011329 | 0.011530 | 0.011497 | 0.011430 |

|          |          |          |          |          |          |          |
|----------|----------|----------|----------|----------|----------|----------|
| 0.011530 | 0.011597 | 0.011329 | 0.011329 | 0.011362 | 0.011362 | 0.011364 |
| 0.011432 | 0.011362 | 0.011362 | 0.011397 | 0.011530 | 0.011598 | 0.011597 |
| 0.011464 | 0.011567 | 0.011569 | 0.011704 | 0.011732 | 0.011396 | 0.011564 |
| 0.011497 | 0.011497 | 0.011331 | 0.011513 | 0.011408 | 0.011469 | 0.011305 |
| 0.011473 | 0.011653 | 0.011441 | 0.011400 | 0.011295 | 0.011497 | 0.011362 |
| 0.011463 | 0.011396 | 0.011295 | 0.011397 | 0.011497 | 0.011500 | 0.011396 |
| 0.011295 | 0.011229 | 0.011362 | 0.011295 | 0.011228 | 0.011332 | 0.011497 |
| 0.011396 | 0.011329 | 0.011362 | 0.011396 | 0.011363 | 0.011295 | 0.011497 |
| 0.011362 | 0.011396 | 0.011396 | 0.011329 | 0.011262 | 0.011497 | 0.011295 |
| 0.011329 | 0.011732 | 0.011329 | 0.011362 | 0.011329 | 0.011698 | 0.011232 |
| 0.011679 | 0.011273 | 0.011311 | 0.011503 | 0.011589 | 0.011491 | 0.011186 |
| 0.011218 | 0.011496 | 0.011597 | 0.011705 | 0.011565 | 0.011703 | 0.011834 |
| 0.011733 | 0.011770 | 0.011732 | 0.011983 | 0.011698 | 0.012573 | 0.011734 |
| 0.012473 | 0.012241 | 0.012375 | 0.012646 | 0.011698 | 0.011396 | 0.011699 |
| 0.012137 | 0.012072 | 0.011664 | 0.011564 | 0.011632 | 0.011632 | 0.011601 |
| 0.011496 | 0.011501 | 0.011564 | 0.011531 | 0.011901 | 0.011967 | 0.011968 |
| 0.011868 | 0.011968 | 0.012072 | 0.011838 | 0.012138 | 0.012110 | 0.012205 |
| 0.012206 | 0.012239 | 0.012186 | 0.012206 | 0.012207 | 0.011429 | 0.011732 |
| 0.011800 | 0.012303 | 0.011806 | 0.012034 | 0.012508 | 0.011570 | 0.011464 |
| 0.011429 | 0.011429 | 0.011900 | 0.011965 | 0.012010 | 0.011765 | 0.011431 |
| S550     | 0.011631 | 0.011631 | 0.011967 | 0.011731 | 0.011731 | 0.011799 |
| 0.011637 | 0.011569 | 0.011799 | 0.011228 | 0.011295 | 0.011262 | 0.011228 |
| 0.011262 | 0.011429 | 0.011228 | 0.011262 | 0.011329 | 0.011295 | 0.011262 |
| 0.011228 | 0.011262 | 0.011362 | 0.011228 | 0.011262 | 0.011262 | 0.011603 |
| 0.011496 | 0.011262 | 0.011161 | 0.011396 | 0.011329 | 0.011295 | 0.011329 |
| 0.011295 | 0.011396 | 0.011295 | 0.011295 | 0.011329 | 0.011295 | 0.011463 |
| 0.011228 | 0.011295 | 0.011329 | 0.011262 | 0.011362 | 0.011396 | 0.011329 |
| 0.011295 | 0.011463 | 0.011362 | 0.011631 | 0.011295 | 0.011564 | 0.011295 |
| 0.011262 | 0.011362 | 0.011429 | 0.011564 | 0.011664 | 0.011362 | 0.011463 |
| 0.011329 | 0.011396 | 0.011295 | 0.011530 | 0.011765 | 0.011295 | 0.011362 |
| 0.011262 | 0.011362 | 0.011329 | 0.011396 | 0.011329 | 0.011329 | 0.011329 |
| 0.011228 | 0.011262 | 0.011228 | 0.011329 | 0.011295 | 0.011329 | 0.011396 |
| 0.011329 | 0.011295 | 0.011362 | 0.011262 | 0.011396 | 0.011228 | 0.011295 |
| 0.011463 | 0.011396 | 0.011631 | 0.011463 | 0.011295 | 0.011530 | 0.011295 |
| 0.011468 | 0.011695 | 0.011437 | 0.011177 | 0.011135 | 0.011318 | 0.011336 |
| 0.011975 | 0.011365 | 0.011143 | 0.011530 | 0.011530 | 0.011329 | 0.011429 |
| 0.011362 | 0.011329 | 0.011396 | 0.011295 | 0.011396 | 0.011329 | 0.011329 |
| 0.011295 | 0.011396 | 0.011597 | 0.011463 | 0.011362 | 0.011329 | 0.011262 |
| 0.011228 | 0.011228 | 0.011295 | 0.011262 | 0.011463 | 0.011429 | 0.011362 |
| 0.011463 | 0.011530 | 0.011262 | 0.011262 | 0.011295 | 0.011295 | 0.011297 |
| 0.011297 | 0.011295 | 0.011295 | 0.011132 | 0.011169 | 0.011200 | 0.011296 |
| 0.011297 | 0.011232 | 0.011208 | 0.011267 | 0.011196 | 0.011231 | 0.011263 |
| 0.011492 | 0.011301 | 0.011267 | 0.011228 | 0.011164 | 0.011363 | 0.011329 |
| 0.011396 | 0.011330 | 0.011329 | 0.011429 | 0.011362 | 0.011732 | 0.011530 |
| 0.011564 | 0.011430 | 0.011295 | 0.011396 | 0.011195 | 0.011429 | 0.011228 |
| 0.011295 | 0.011295 | 0.011262 | 0.011228 | 0.011262 | 0.011228 | 0.011329 |
| 0.011295 | 0.011396 | 0.011329 | 0.011228 | 0.011330 | 0.011430 | 0.011432 |
| 0.011430 | 0.011329 | 0.011228 | 0.011161 | 0.011295 | 0.011228 | 0.011161 |
| 0.011264 | 0.011430 | 0.011228 | 0.011430 | 0.011195 | 0.011295 | 0.011262 |
| 0.011362 | 0.011262 | 0.011295 | 0.011262 | 0.011295 | 0.011161 | 0.011295 |
| 0.011329 | 0.011262 | 0.011329 | 0.011262 | 0.011295 | 0.011329 | 0.011564 |
| 0.011664 | 0.011597 | 0.011665 | 0.011431 | 0.011665 | 0.011295 | 0.011262 |
| 0.011297 | 0.011586 | 0.011380 | 0.011197 | 0.011671 | 0.011163 | 0.011257 |
| 0.011671 | 0.011570 | 0.011463 | 0.011664 | 0.011367 | 0.011530 | 0.011497 |
| 0.011429 | 0.011597 | 0.011451 | 0.011266 | 0.011312 | 0.011329 | 0.011398 |
| 0.011497 | 0.011397 | 0.011533 | 0.011601 | 0.011530 | 0.011597 | 0.011704 |
| 0.011432 | 0.011603 | 0.011534 | 0.011466 | 0.011733 | 0.011194 | 0.011397 |
| 0.011362 | 0.011295 | 0.011194 | 0.011194 | 0.011262 | 0.011262 | 0.011329 |
| 0.011262 | 0.011329 | 0.011228 | 0.011329 | 0.011262 | 0.011262 | 0.011329 |
| 0.011262 | 0.011698 | 0.011597 | 0.011631 | 0.011161 | 0.011262 | 0.011295 |

|          |          |          |          |          |          |          |
|----------|----------|----------|----------|----------|----------|----------|
| 0.011295 | 0.011262 | 0.011329 | 0.011362 | 0.011228 | 0.011228 | 0.011228 |
| 0.011765 | 0.011396 | 0.011396 | 0.011194 | 0.011295 | 0.011463 | 0.011228 |
| 0.011228 | 0.011295 | 0.011262 | 0.011429 | 0.011228 | 0.011362 | 0.011496 |
| 0.011429 | 0.011262 | 0.011262 | 0.011194 | 0.011194 | 0.011362 | 0.011295 |
| 0.011194 | 0.011295 | 0.011161 | 0.011194 | 0.011329 | 0.011463 | 0.011228 |
| 0.011195 | 0.011329 | 0.011262 | 0.011161 | 0.011496 | 0.011161 | 0.011329 |
| 0.011402 | 0.011228 | 0.011530 | 0.011362 | 0.011396 | 0.011262 | 0.011362 |
| 0.011228 | 0.011564 | 0.011161 | 0.011429 | 0.011228 | 0.011228 | 0.011161 |
| 0.011396 | 0.011597 | 0.011295 | 0.011362 | 0.011194 | 0.011597 | 0.011228 |
| 0.011228 | 0.011228 | 0.011262 | 0.011362 | 0.011262 | 0.011362 | 0.011429 |
| 0.011429 | 0.011396 | 0.011295 | 0.011396 | 0.011362 | 0.011228 | 0.011194 |
| 0.011228 | 0.011228 | 0.011295 | 0.011228 | 0.011194 | 0.011362 | 0.011228 |
| 0.011262 | 0.011262 | 0.011396 | 0.011429 | 0.011329 | 0.011262 | 0.011262 |
| 0.011329 | 0.011262 | 0.011362 | 0.011228 | 0.011362 | 0.011463 | 0.011765 |
| 0.011262 | 0.011664 | 0.011267 | 0.017710 | 0.011126 | 0.011427 | 0.011618 |
| 0.011579 | 0.011623 | 0.011374 | 0.011234 | 0.011609 | 0.011647 | 0.011364 |
| 0.011392 | 0.011426 | 0.011177 | 0.011270 | 0.011216 | 0.011307 | 0.011232 |
| 0.011389 | 0.011358 | 0.011431 | 0.011193 | 0.011396 | 0.011429 | 0.011432 |
| 0.011301 | 0.011396 | 0.011396 | 0.011362 | 0.011329 | 0.011329 | 0.011295 |
| 0.011329 | 0.011262 | 0.011295 | 0.011329 | 0.011295 | 0.011228 | 0.011262 |
| 0.011262 | 0.011329 | 0.011228 | 0.011329 | 0.011362 | 0.011396 | 0.011295 |
| 0.011329 | 0.011295 | 0.011631 | 0.011631 | 0.011362 | 0.011396 | 0.011430 |
| 0.011195 | 0.011195 | 0.011228 | 0.011329 | 0.011195 | 0.011429 | 0.011429 |
| 0.011463 | 0.011463 | 0.011396 | 0.011497 | 0.011665 | 0.011498 | 0.011329 |
| 0.011329 | 0.011396 | 0.011429 | 0.011262 | 0.011329 | 0.011295 | 0.011329 |
| 0.011396 | 0.011396 | 0.011429 | 0.011396 | 0.011296 | 0.011497 | 0.011463 |
| 0.011331 | 0.011228 | 0.011329 | 0.011430 | 0.011329 | 0.011463 | 0.011496 |
| 0.011664 | 0.011367 | 0.011530 | 0.011497 | 0.011429 | 0.011597 | 0.011228 |
| 0.011397 | 0.011295 | 0.011262 | 0.011262 | 0.011329 | 0.011228 | 0.011329 |
| 0.011362 | 0.011396 | 0.011295 | 0.011329 | 0.011295 | 0.011631 | 0.011631 |
| 0.011362 | 0.011396 | 0.011463 | 0.011396 | 0.012035 | 0.011453 | 0.011377 |
| 0.011447 | 0.011407 | 0.011517 | 0.011406 | 0.011515 | 0.011439 | 0.011405 |
| 0.011987 | 0.011302 | 0.011437 | 0.011371 | 0.011645 | 0.011502 | 0.011604 |
| 0.012012 | 0.011475 | 0.011567 | 0.011631 | 0.011496 | 0.011496 | 0.011533 |
| 0.011194 | 0.011362 | 0.011496 | 0.011463 | 0.011466 | 0.011463 | 0.011431 |
| 0.011295 | 0.011228 | 0.011262 | 0.011295 | 0.011194 | 0.011262 | 0.011161 |
| 0.011295 | 0.011329 | 0.011228 | 0.011194 | 0.011295 | 0.011228 | 0.011262 |
| 0.011262 | 0.011194 | 0.011262 | 0.011295 | 0.011194 | 0.011396 | 0.011429 |
| 0.011329 | 0.011396 | 0.011329 | 0.011329 | 0.000000 | 0.011664 | 0.011295 |
| 0.011338 | 0.011262 | 0.011497 | 0.011501 | 0.011362 | 0.011362 | 0.011362 |
| 0.011362 | 0.011295 | 0.011262 | 0.011295 | 0.011396 | 0.011396 | 0.011329 |
| 0.011329 | 0.011463 | 0.011631 | 0.011362 | 0.011564 | 0.011564 | 0.011429 |
| 0.011262 | 0.011329 | 0.011362 | 0.011765 | 0.011329 | 0.011362 | 0.011329 |
| 0.011362 | 0.011295 | 0.011295 | 0.011597 | 0.011530 | 0.011564 | 0.011295 |
| 0.011396 | 0.011463 | 0.011329 | 0.011396 | 0.011362 | 0.011228 | 0.011564 |
| 0.011329 | 0.011295 | 0.011295 | 0.011463 | 0.011295 | 0.011396 | 0.011631 |
| 0.011329 | 0.011705 | 0.011698 | 0.011426 | 0.011117 | 0.011400 | 0.011163 |
| 0.011225 | 0.011644 | 0.011166 | 0.011373 | 0.011158 | 0.011264 | 0.011273 |
| 0.011417 | 0.000000 | 0.011227 | 0.000000 | 0.011114 | 0.011261 | 0.011303 |
| 0.011399 | 0.011218 | 0.011377 | 0.011307 | 0.011330 | 0.011463 | 0.011530 |
| 0.011530 | 0.011396 | 0.011500 | 0.011501 | 0.011636 | 0.011590 | 0.011329 |
| 0.011564 | 0.011430 | 0.011295 | 0.011396 | 0.011195 | 0.011429 | 0.011228 |
| 0.011295 | 0.011295 | 0.011262 | 0.011228 | 0.011262 | 0.011228 | 0.011329 |
| 0.011305 | 0.011235 | 0.011300 | 0.011334 | 0.011471 | 0.011436 | 0.011436 |
| 0.011435 | 0.011363 | 0.011134 | 0.011096 | 0.011297 | 0.011467 | 0.011467 |
| 0.011262 | 0.011331 | 0.011565 | 0.011533 | 0.011464 | 0.011498 | 0.011429 |
| 0.011362 | 0.011429 | 0.011429 | 0.011329 | 0.011900 | 0.011496 | 0.011564 |
| 0.011597 | 0.011665 | 0.011299 | 0.011372 | 0.011262 | 0.011463 | 0.011429 |
| 0.011464 | 0.011496 | 0.011496 | 0.011496 | 0.011610 | 0.011631 | 0.011268 |
| 0.011162 | 0.011164 | 0.011264 | 0.011230 | 0.011333 | 0.011172 | 0.011502 |

|          |          |          |          |          |          |          |
|----------|----------|----------|----------|----------|----------|----------|
| 0.011300 | 0.011455 | 0.011203 | 0.011322 | 0.011296 | 0.011368 | 0.011262 |
| 0.011228 | 0.011228 | 0.011295 | 0.011262 | 0.011463 | 0.011429 | 0.011362 |
| 0.011463 | 0.011530 | 0.011262 | 0.011262 | 0.011295 | 0.011295 | 0.011297 |
| 0.011297 | 0.011295 | 0.011295 | 0.011330 | 0.011463 | 0.011530 | 0.011530 |
| 0.011396 | 0.011500 | 0.011501 | 0.011636 | 0.011590 | 0.011329 | 0.011496 |
| 0.011429 | 0.011429 | 0.011263 | 0.011408 | 0.011373 | 0.011401 | 0.011270 |
| 0.011439 | 0.011607 | 0.011441 | 0.011332 | 0.011228 | 0.011430 | 0.011295 |
| 0.011396 | 0.011329 | 0.011228 | 0.011330 | 0.011430 | 0.011432 | 0.011329 |
| 0.011228 | 0.011161 | 0.011295 | 0.011228 | 0.011161 | 0.011264 | 0.011430 |
| 0.011329 | 0.011262 | 0.011295 | 0.011329 | 0.011295 | 0.011228 | 0.011430 |
| 0.011295 | 0.011329 | 0.011329 | 0.011262 | 0.011329 | 0.011564 | 0.011228 |
| 0.011262 | 0.011664 | 0.011262 | 0.011295 | 0.011262 | 0.011631 | 0.011146 |
| 0.011622 | 0.011145 | 0.011161 | 0.011382 | 0.011467 | 0.011383 | 0.000000 |
| 0.011113 | 0.011429 | 0.011530 | 0.011637 | 0.011498 | 0.011635 | 0.011766 |
| 0.011666 | 0.011703 | 0.011664 | 0.011914 | 0.011631 | 0.012505 | 0.011666 |
| 0.012405 | 0.012173 | 0.012307 | 0.012578 | 0.011631 | 0.011329 | 0.011631 |
| 0.012070 | 0.012004 | 0.011597 | 0.011497 | 0.011564 | 0.011564 | 0.011534 |
| 0.011429 | 0.011433 | 0.011496 | 0.011464 | 0.011833 | 0.011900 | 0.011901 |
| 0.011800 | 0.011901 | 0.012004 | 0.011770 | 0.012070 | 0.012076 | 0.012137 |
| 0.012138 | 0.012172 | 0.012118 | 0.012138 | 0.012139 | 0.011362 | 0.011665 |
| 0.011733 | 0.012236 | 0.011738 | 0.011967 | 0.012440 | 0.011502 | 0.011396 |
| 0.011362 | 0.011362 | 0.011833 | 0.011883 | 0.011975 | 0.011698 | 0.011363 |
| S551     | 0.012034 | 0.012034 | 0.012102 | 0.011866 | 0.011866 | 0.011933 |
| 0.011434 | 0.011366 | 0.011933 | 0.011631 | 0.011698 | 0.011666 | 0.011631 |
| 0.011597 | 0.011832 | 0.011564 | 0.011664 | 0.011732 | 0.011698 | 0.011664 |
| 0.011631 | 0.011664 | 0.011497 | 0.011631 | 0.011665 | 0.011664 | 0.011400 |
| 0.011631 | 0.011664 | 0.011564 | 0.011530 | 0.011732 | 0.011698 | 0.011732 |
| 0.011698 | 0.011799 | 0.011698 | 0.011698 | 0.011731 | 0.011698 | 0.011866 |
| 0.011564 | 0.011698 | 0.011732 | 0.011664 | 0.011698 | 0.011799 | 0.011732 |
| 0.011698 | 0.011866 | 0.011766 | 0.011429 | 0.011698 | 0.011967 | 0.011698 |
| 0.011664 | 0.011698 | 0.011832 | 0.011967 | 0.000000 | 0.011698 | 0.011799 |
| 0.011731 | 0.011799 | 0.011698 | 0.011933 | 0.011564 | 0.011698 | 0.011765 |
| 0.011664 | 0.011765 | 0.011732 | 0.011799 | 0.011731 | 0.011732 | 0.011732 |
| 0.011631 | 0.011664 | 0.011631 | 0.011664 | 0.011698 | 0.011733 | 0.011799 |
| 0.011732 | 0.011698 | 0.011765 | 0.011664 | 0.011597 | 0.011631 | 0.011698 |
| 0.011866 | 0.011799 | 0.011564 | 0.011866 | 0.011698 | 0.011933 | 0.011698 |
| 0.011913 | 0.011471 | 0.011928 | 0.011646 | 0.011620 | 0.011760 | 0.011533 |
| 0.012121 | 0.011467 | 0.011637 | 0.011933 | 0.011933 | 0.011664 | 0.011564 |
| 0.011765 | 0.011731 | 0.011799 | 0.011698 | 0.011799 | 0.011732 | 0.011731 |
| 0.011698 | 0.011731 | 0.012000 | 0.011866 | 0.011765 | 0.011732 | 0.011665 |
| 0.011631 | 0.011564 | 0.011698 | 0.011665 | 0.011598 | 0.011564 | 0.011497 |
| 0.011598 | 0.011665 | 0.011665 | 0.011665 | 0.011698 | 0.011698 | 0.011702 |
| 0.011770 | 0.011698 | 0.011698 | 0.011528 | 0.011603 | 0.011551 | 0.011699 |
| 0.011670 | 0.011610 | 0.011687 | 0.011647 | 0.011570 | 0.011574 | 0.011634 |
| 0.011528 | 0.011646 | 0.011680 | 0.011632 | 0.011613 | 0.011767 | 0.011666 |
| 0.011733 | 0.011734 | 0.011733 | 0.011832 | 0.011765 | 0.012135 | 0.011867 |
| 0.011698 | 0.011766 | 0.011698 | 0.011732 | 0.011597 | 0.011564 | 0.011631 |
| 0.011698 | 0.011698 | 0.011665 | 0.011631 | 0.011664 | 0.011631 | 0.011732 |
| 0.011698 | 0.011799 | 0.011732 | 0.011631 | 0.011734 | 0.011833 | 0.011838 |
| 0.011833 | 0.011732 | 0.011631 | 0.011566 | 0.011698 | 0.011631 | 0.011564 |
| 0.011570 | 0.011833 | 0.011631 | 0.011833 | 0.011597 | 0.011698 | 0.011665 |
| 0.011766 | 0.011665 | 0.011698 | 0.011665 | 0.011698 | 0.011564 | 0.011698 |
| 0.011732 | 0.011665 | 0.011732 | 0.011665 | 0.011698 | 0.011732 | 0.011967 |
| 0.011463 | 0.011396 | 0.011463 | 0.011836 | 0.011396 | 0.011698 | 0.011665 |
| 0.011634 | 0.011869 | 0.011701 | 0.011609 | 0.011467 | 0.011572 | 0.011769 |
| 0.011468 | 0.011638 | 0.011866 | 0.012068 | 0.011777 | 0.011933 | 0.011900 |
| 0.011832 | 0.012000 | 0.011842 | 0.011761 | 0.011689 | 0.011732 | 0.011805 |
| 0.011900 | 0.011802 | 0.011939 | 0.012008 | 0.011933 | 0.012001 | 0.012111 |
| 0.011839 | 0.012011 | 0.011839 | 0.011838 | 0.012137 | 0.011597 | 0.011802 |
| 0.011765 | 0.011698 | 0.011597 | 0.011597 | 0.011664 | 0.011664 | 0.011731 |

|          |          |          |          |          |          |          |
|----------|----------|----------|----------|----------|----------|----------|
| 0.011664 | 0.011732 | 0.011631 | 0.011664 | 0.011664 | 0.011664 | 0.011731 |
| 0.011664 | 0.011496 | 0.011396 | 0.011429 | 0.011564 | 0.011664 | 0.011698 |
| 0.011698 | 0.011597 | 0.011732 | 0.011698 | 0.011631 | 0.011631 | 0.011631 |
| 0.011564 | 0.011732 | 0.011799 | 0.011597 | 0.011698 | 0.011866 | 0.011631 |
| 0.011631 | 0.011698 | 0.011664 | 0.011832 | 0.011631 | 0.011564 | 0.011698 |
| 0.011631 | 0.011664 | 0.011664 | 0.011597 | 0.011597 | 0.011765 | 0.011698 |
| 0.011597 | 0.011698 | 0.011564 | 0.011597 | 0.011732 | 0.011531 | 0.011631 |
| 0.011598 | 0.011732 | 0.011665 | 0.011564 | 0.011262 | 0.011564 | 0.011732 |
| 0.011814 | 0.011631 | 0.011329 | 0.011765 | 0.011732 | 0.011664 | 0.011765 |
| 0.011631 | 0.011967 | 0.011564 | 0.011631 | 0.011564 | 0.011564 | 0.011564 |
| 0.011799 | 0.011665 | 0.011698 | 0.011765 | 0.011597 | 0.011396 | 0.011564 |
| 0.011631 | 0.011631 | 0.011664 | 0.011765 | 0.011664 | 0.011765 | 0.011832 |
| 0.011832 | 0.011799 | 0.011698 | 0.011799 | 0.011765 | 0.011564 | 0.011597 |
| 0.011631 | 0.011564 | 0.011698 | 0.011564 | 0.011597 | 0.011765 | 0.011631 |
| 0.011597 | 0.011664 | 0.011799 | 0.011765 | 0.011732 | 0.011664 | 0.011665 |
| 0.011732 | 0.011664 | 0.011765 | 0.011631 | 0.011765 | 0.011866 | 0.011362 |
| 0.011664 | 0.011329 | 0.011681 | 0.018201 | 0.011518 | 0.011855 | 0.011409 |
| 0.011372 | 0.011412 | 0.011899 | 0.011640 | 0.011610 | 0.011440 | 0.011850 |
| 0.011677 | 0.011671 | 0.011606 | 0.011688 | 0.011529 | 0.011751 | 0.011663 |
| 0.011389 | 0.011544 | 0.011357 | 0.011391 | 0.011799 | 0.011833 | 0.011838 |
| 0.011713 | 0.011799 | 0.011799 | 0.011698 | 0.011732 | 0.011732 | 0.011699 |
| 0.011732 | 0.011664 | 0.011698 | 0.011732 | 0.011698 | 0.011631 | 0.011665 |
| 0.011665 | 0.011732 | 0.011631 | 0.011732 | 0.011765 | 0.011799 | 0.011698 |
| 0.011664 | 0.011564 | 0.011362 | 0.011362 | 0.011766 | 0.011800 | 0.011833 |
| 0.011597 | 0.011597 | 0.011631 | 0.011732 | 0.011597 | 0.011833 | 0.011833 |
| 0.011866 | 0.011866 | 0.011799 | 0.011900 | 0.011396 | 0.011902 | 0.011732 |
| 0.011732 | 0.011799 | 0.011833 | 0.011665 | 0.011732 | 0.011698 | 0.011732 |
| 0.011800 | 0.011799 | 0.011833 | 0.011799 | 0.011700 | 0.011900 | 0.011866 |
| 0.011738 | 0.011631 | 0.011732 | 0.011799 | 0.011732 | 0.011799 | 0.011899 |
| 0.012068 | 0.011777 | 0.011933 | 0.011900 | 0.011832 | 0.012000 | 0.011631 |
| 0.011802 | 0.011699 | 0.011665 | 0.011665 | 0.011732 | 0.011631 | 0.011732 |
| 0.011765 | 0.011799 | 0.011698 | 0.011664 | 0.011564 | 0.011362 | 0.011362 |
| 0.011766 | 0.011800 | 0.011866 | 0.011799 | 0.012373 | 0.011846 | 0.011799 |
| 0.011834 | 0.011788 | 0.011904 | 0.011822 | 0.011900 | 0.011819 | 0.011750 |
| 0.012297 | 0.011683 | 0.011814 | 0.011752 | 0.012025 | 0.011877 | 0.012013 |
| 0.012353 | 0.011777 | 0.011973 | 0.012034 | 0.011900 | 0.011631 | 0.011939 |
| 0.011597 | 0.011765 | 0.011899 | 0.011866 | 0.011871 | 0.011597 | 0.011566 |
| 0.011698 | 0.011631 | 0.011664 | 0.011698 | 0.011597 | 0.011664 | 0.011564 |
| 0.011631 | 0.011664 | 0.011631 | 0.011597 | 0.011698 | 0.011631 | 0.011664 |
| 0.011664 | 0.011597 | 0.011664 | 0.011698 | 0.011597 | 0.011799 | 0.011832 |
| 0.011732 | 0.011732 | 0.011732 | 0.011732 | 0.011664 | 0.000000 | 0.011698 |
| 0.011478 | 0.011665 | 0.011631 | 0.011637 | 0.011698 | 0.011698 | 0.011765 |
| 0.011698 | 0.011698 | 0.011664 | 0.011698 | 0.011799 | 0.011799 | 0.011732 |
| 0.011731 | 0.011866 | 0.011429 | 0.011765 | 0.011967 | 0.011967 | 0.011832 |
| 0.011664 | 0.011732 | 0.011698 | 0.011496 | 0.011732 | 0.011698 | 0.011732 |
| 0.011765 | 0.011631 | 0.011631 | 0.011934 | 0.011933 | 0.011900 | 0.011698 |
| 0.011799 | 0.011866 | 0.011732 | 0.011799 | 0.011765 | 0.011631 | 0.011362 |
| 0.011731 | 0.011698 | 0.011631 | 0.011866 | 0.011698 | 0.011799 | 0.011631 |
| 0.011731 | 0.011501 | 0.011496 | 0.011629 | 0.011399 | 0.011740 | 0.011473 |
| 0.011664 | 0.011800 | 0.011657 | 0.011775 | 0.011646 | 0.011569 | 0.011538 |
| 0.011570 | 0.011455 | 0.011617 | 0.011523 | 0.011491 | 0.011730 | 0.011831 |
| 0.011814 | 0.011769 | 0.011730 | 0.011730 | 0.011734 | 0.011598 | 0.011665 |
| 0.011665 | 0.011733 | 0.011838 | 0.011637 | 0.011976 | 0.012015 | 0.011732 |
| 0.011698 | 0.011766 | 0.011698 | 0.011732 | 0.011597 | 0.011564 | 0.011631 |
| 0.011698 | 0.011698 | 0.011665 | 0.011631 | 0.011664 | 0.011631 | 0.011732 |
| 0.011654 | 0.011655 | 0.011677 | 0.011677 | 0.011813 | 0.011812 | 0.011709 |
| 0.011776 | 0.011766 | 0.011540 | 0.011492 | 0.011670 | 0.011840 | 0.011841 |
| 0.011666 | 0.011704 | 0.011969 | 0.011939 | 0.011868 | 0.011902 | 0.011832 |
| 0.011765 | 0.011832 | 0.011832 | 0.011732 | 0.011631 | 0.011900 | 0.011967 |
| 0.012001 | 0.011416 | 0.011640 | 0.011788 | 0.011664 | 0.011866 | 0.011832 |



|          |          |          |          |          |          |          |
|----------|----------|----------|----------|----------|----------|----------|
| 0.011868 | 0.011899 | 0.011900 | 0.011900 | 0.011965 | 0.012034 | 0.011685 |
| 0.011567 | 0.011580 | 0.011673 | 0.011638 | 0.011641 | 0.011545 | 0.011298 |
| 0.011712 | 0.011411 | 0.011584 | 0.011660 | 0.011699 | 0.011710 | 0.011665 |
| 0.011631 | 0.011564 | 0.011698 | 0.011665 | 0.011598 | 0.011564 | 0.011497 |
| 0.011598 | 0.011665 | 0.011665 | 0.011665 | 0.011698 | 0.011698 | 0.011702 |
| 0.011770 | 0.011698 | 0.011698 | 0.011734 | 0.011598 | 0.011665 | 0.011665 |
| 0.011733 | 0.011838 | 0.011637 | 0.011976 | 0.012015 | 0.011732 | 0.011900 |
| 0.011832 | 0.011832 | 0.011669 | 0.011861 | 0.011790 | 0.011809 | 0.011691 |
| 0.011852 | 0.012017 | 0.011865 | 0.011740 | 0.011631 | 0.011833 | 0.011698 |
| 0.011799 | 0.011732 | 0.011631 | 0.011734 | 0.011833 | 0.011838 | 0.011732 |
| 0.011631 | 0.011566 | 0.011698 | 0.011631 | 0.011564 | 0.011570 | 0.011833 |
| 0.011732 | 0.011664 | 0.011698 | 0.011732 | 0.011698 | 0.011631 | 0.011564 |
| 0.011698 | 0.011732 | 0.011731 | 0.011664 | 0.011732 | 0.011967 | 0.011564 |
| 0.011664 | 0.000000 | 0.011664 | 0.011698 | 0.011664 | 0.011429 | 0.011660 |
| 0.011848 | 0.011443 | 0.011461 | 0.011503 | 0.011630 | 0.011599 | 0.011436 |
| 0.011428 | 0.011564 | 0.011665 | 0.011774 | 0.011633 | 0.011771 | 0.011901 |
| 0.011801 | 0.011838 | 0.011799 | 0.012017 | 0.011765 | 0.012641 | 0.011802 |
| 0.012541 | 0.012309 | 0.012443 | 0.012715 | 0.011698 | 0.011665 | 0.011766 |
| 0.012407 | 0.012140 | 0.011732 | 0.011631 | 0.011699 | 0.011699 | 0.011669 |
| 0.011564 | 0.011569 | 0.011631 | 0.011598 | 0.011969 | 0.012035 | 0.012036 |
| 0.011935 | 0.012036 | 0.012140 | 0.011906 | 0.012408 | 0.012415 | 0.012475 |
| 0.012475 | 0.012509 | 0.012460 | 0.012476 | 0.012477 | 0.011765 | 0.012002 |
| 0.012070 | 0.012573 | 0.012078 | 0.012035 | 0.012508 | 0.011570 | 0.011464 |
| 0.011362 | 0.011429 | 0.011968 | 0.011924 | 0.012081 | 0.011765 | 0.011498 |
| S552     | 0.011664 | 0.011664 | 0.012000 | 0.011765 | 0.011765 | 0.011832 |
| 0.011671 | 0.011603 | 0.011832 | 0.011262 | 0.011329 | 0.011296 | 0.011262 |
| 0.011295 | 0.011463 | 0.011262 | 0.011295 | 0.011362 | 0.011329 | 0.011295 |
| 0.011262 | 0.011295 | 0.011396 | 0.011262 | 0.011295 | 0.011295 | 0.011637 |
| 0.011530 | 0.011295 | 0.011194 | 0.011429 | 0.011362 | 0.011329 | 0.011362 |
| 0.011329 | 0.011429 | 0.011329 | 0.011329 | 0.011362 | 0.011329 | 0.011496 |
| 0.011262 | 0.000000 | 0.011362 | 0.011295 | 0.011396 | 0.011429 | 0.011362 |
| 0.011329 | 0.011497 | 0.011396 | 0.011664 | 0.011329 | 0.011597 | 0.011329 |
| 0.011295 | 0.011396 | 0.011463 | 0.011597 | 0.011698 | 0.011396 | 0.011496 |
| 0.011362 | 0.011429 | 0.011329 | 0.011563 | 0.011799 | 0.011329 | 0.011396 |
| 0.011295 | 0.011396 | 0.011362 | 0.011429 | 0.011362 | 0.011362 | 0.011362 |
| 0.011262 | 0.011295 | 0.011262 | 0.011362 | 0.011329 | 0.011363 | 0.011429 |
| 0.011362 | 0.011329 | 0.011396 | 0.011295 | 0.011429 | 0.011262 | 0.011329 |
| 0.011496 | 0.011429 | 0.011664 | 0.011496 | 0.011329 | 0.011564 | 0.011329 |
| 0.011505 | 0.011732 | 0.011551 | 0.011255 | 0.011247 | 0.011318 | 0.011454 |
| 0.012085 | 0.011518 | 0.011225 | 0.011564 | 0.011564 | 0.011362 | 0.011463 |
| 0.011396 | 0.011362 | 0.011429 | 0.011329 | 0.011429 | 0.011362 | 0.011362 |
| 0.011329 | 0.011429 | 0.011631 | 0.011496 | 0.011396 | 0.011362 | 0.011295 |
| 0.011262 | 0.011262 | 0.011329 | 0.011295 | 0.011497 | 0.011463 | 0.011396 |
| 0.011497 | 0.011564 | 0.011295 | 0.011295 | 0.011329 | 0.011329 | 0.011330 |
| 0.011398 | 0.011329 | 0.011329 | 0.011204 | 0.011277 | 0.011235 | 0.011329 |
| 0.011331 | 0.011266 | 0.011318 | 0.011302 | 0.011230 | 0.011266 | 0.011297 |
| 0.011564 | 0.011336 | 0.011370 | 0.011262 | 0.011268 | 0.011397 | 0.011363 |
| 0.011430 | 0.011363 | 0.011363 | 0.011463 | 0.011396 | 0.011698 | 0.011564 |
| 0.011597 | 0.011463 | 0.011329 | 0.011430 | 0.011228 | 0.011463 | 0.011262 |
| 0.011329 | 0.011329 | 0.011295 | 0.011262 | 0.011295 | 0.011262 | 0.011362 |
| 0.011329 | 0.011429 | 0.011362 | 0.011262 | 0.011363 | 0.011463 | 0.011466 |
| 0.011463 | 0.011362 | 0.011262 | 0.011195 | 0.011329 | 0.011262 | 0.011195 |
| 0.011298 | 0.011463 | 0.011262 | 0.011463 | 0.011228 | 0.011329 | 0.011295 |
| 0.011396 | 0.011295 | 0.011329 | 0.011295 | 0.011329 | 0.011195 | 0.011329 |
| 0.011362 | 0.011295 | 0.011362 | 0.011295 | 0.011329 | 0.011362 | 0.011597 |
| 0.011698 | 0.011631 | 0.011698 | 0.011465 | 0.011698 | 0.011329 | 0.011295 |
| 0.011330 | 0.011626 | 0.011426 | 0.011232 | 0.011705 | 0.011197 | 0.011336 |
| 0.011705 | 0.011604 | 0.011496 | 0.011698 | 0.011402 | 0.011564 | 0.011530 |
| 0.011463 | 0.011631 | 0.011486 | 0.011349 | 0.011354 | 0.011362 | 0.011432 |
| 0.011530 | 0.011431 | 0.011567 | 0.011635 | 0.011564 | 0.011631 | 0.011738 |

|          |          |          |          |          |          |          |
|----------|----------|----------|----------|----------|----------|----------|
| 0.011466 | 0.011637 | 0.011568 | 0.011500 | 0.011766 | 0.011228 | 0.011431 |
| 0.011396 | 0.011329 | 0.011228 | 0.011228 | 0.011295 | 0.011295 | 0.011362 |
| 0.011295 | 0.011362 | 0.011262 | 0.011362 | 0.011295 | 0.011295 | 0.011362 |
| 0.011295 | 0.011731 | 0.011631 | 0.011664 | 0.011194 | 0.011295 | 0.011329 |
| 0.011329 | 0.011295 | 0.011362 | 0.011396 | 0.011262 | 0.011262 | 0.011262 |
| 0.011799 | 0.011429 | 0.011429 | 0.011228 | 0.011329 | 0.011497 | 0.011262 |
| 0.011262 | 0.011329 | 0.011295 | 0.011463 | 0.011262 | 0.011396 | 0.011530 |
| 0.011463 | 0.011295 | 0.011295 | 0.011228 | 0.011228 | 0.011396 | 0.011329 |
| 0.011228 | 0.011329 | 0.011194 | 0.011228 | 0.011362 | 0.011497 | 0.011262 |
| 0.011228 | 0.011362 | 0.011295 | 0.011194 | 0.011530 | 0.011195 | 0.011362 |
| 0.011437 | 0.011262 | 0.011564 | 0.011396 | 0.011429 | 0.011295 | 0.011396 |
| 0.011262 | 0.011597 | 0.011194 | 0.011463 | 0.011262 | 0.011262 | 0.011194 |
| 0.011429 | 0.011631 | 0.011329 | 0.011396 | 0.011228 | 0.011631 | 0.011262 |
| 0.011262 | 0.011262 | 0.011295 | 0.011396 | 0.011295 | 0.011396 | 0.011463 |
| 0.011463 | 0.011429 | 0.011329 | 0.011429 | 0.011396 | 0.011262 | 0.011228 |
| 0.011262 | 0.011262 | 0.011329 | 0.011262 | 0.011228 | 0.011396 | 0.011262 |
| 0.011295 | 0.011295 | 0.011429 | 0.011463 | 0.011362 | 0.011295 | 0.011295 |
| 0.011362 | 0.011295 | 0.011396 | 0.011262 | 0.011396 | 0.011496 | 0.011799 |
| 0.011295 | 0.011698 | 0.011302 | 0.011785 | 0.011257 | 0.011366 | 0.011653 |
| 0.011614 | 0.011658 | 0.011374 | 0.011350 | 0.011774 | 0.011682 | 0.011425 |
| 0.011534 | 0.011610 | 0.011216 | 0.011270 | 0.011255 | 0.011356 | 0.011318 |
| 0.011529 | 0.011470 | 0.011431 | 0.011193 | 0.011429 | 0.011463 | 0.011466 |
| 0.011335 | 0.011429 | 0.011429 | 0.011396 | 0.011362 | 0.011362 | 0.011329 |
| 0.011362 | 0.011295 | 0.011329 | 0.011362 | 0.011329 | 0.011262 | 0.011295 |
| 0.011295 | 0.011362 | 0.011262 | 0.011362 | 0.011396 | 0.011429 | 0.011329 |
| 0.011362 | 0.011329 | 0.011665 | 0.011665 | 0.011396 | 0.011430 | 0.011463 |
| 0.011228 | 0.011228 | 0.011262 | 0.011362 | 0.011228 | 0.011463 | 0.011463 |
| 0.011497 | 0.011496 | 0.011429 | 0.011530 | 0.011698 | 0.011532 | 0.011362 |
| 0.011362 | 0.011429 | 0.011463 | 0.011295 | 0.011362 | 0.011329 | 0.011362 |
| 0.011430 | 0.011430 | 0.011463 | 0.011430 | 0.011330 | 0.011530 | 0.011497 |
| 0.011365 | 0.011262 | 0.011362 | 0.011463 | 0.011362 | 0.011497 | 0.011530 |
| 0.011698 | 0.011402 | 0.011564 | 0.011530 | 0.011463 | 0.011631 | 0.011262 |
| 0.011431 | 0.011329 | 0.011295 | 0.011295 | 0.011362 | 0.011262 | 0.011362 |
| 0.011396 | 0.011429 | 0.011329 | 0.011362 | 0.011329 | 0.011665 | 0.011665 |
| 0.011396 | 0.011430 | 0.011496 | 0.011429 | 0.012069 | 0.011489 | 0.011412 |
| 0.011482 | 0.011441 | 0.011552 | 0.011441 | 0.011550 | 0.011474 | 0.011439 |
| 0.012021 | 0.011337 | 0.011471 | 0.011406 | 0.011680 | 0.011536 | 0.011639 |
| 0.012046 | 0.011512 | 0.011601 | 0.011664 | 0.011530 | 0.011530 | 0.011567 |
| 0.011228 | 0.011396 | 0.011530 | 0.011496 | 0.011499 | 0.011496 | 0.011464 |
| 0.011329 | 0.011262 | 0.011295 | 0.011329 | 0.011228 | 0.011295 | 0.011194 |
| 0.011329 | 0.011362 | 0.011262 | 0.011228 | 0.011329 | 0.011262 | 0.011295 |
| 0.011295 | 0.011228 | 0.011295 | 0.011329 | 0.011228 | 0.011429 | 0.011463 |
| 0.011362 | 0.011429 | 0.011362 | 0.011362 | 0.011295 | 0.011698 | 0.000000 |
| 0.011373 | 0.011295 | 0.011530 | 0.011535 | 0.011396 | 0.011396 | 0.011396 |
| 0.011396 | 0.011329 | 0.011295 | 0.011329 | 0.011429 | 0.011429 | 0.011362 |
| 0.011362 | 0.011496 | 0.011664 | 0.011396 | 0.011597 | 0.011597 | 0.011463 |
| 0.011295 | 0.011362 | 0.011396 | 0.011799 | 0.011362 | 0.011396 | 0.011362 |
| 0.011396 | 0.011329 | 0.011329 | 0.011631 | 0.011564 | 0.011597 | 0.011329 |
| 0.011429 | 0.011496 | 0.011362 | 0.011429 | 0.011396 | 0.011262 | 0.011597 |
| 0.011362 | 0.011329 | 0.011329 | 0.011496 | 0.011329 | 0.011429 | 0.011664 |
| 0.011362 | 0.011739 | 0.011731 | 0.011548 | 0.011286 | 0.011434 | 0.011318 |
| 0.011280 | 0.011761 | 0.011271 | 0.011417 | 0.011353 | 0.011416 | 0.011379 |
| 0.011519 | 0.011126 | 0.011338 | 0.011192 | 0.011222 | 0.011395 | 0.011425 |
| 0.011437 | 0.011336 | 0.011412 | 0.011342 | 0.011364 | 0.011497 | 0.011564 |
| 0.011564 | 0.011430 | 0.011533 | 0.011535 | 0.011670 | 0.011696 | 0.011362 |
| 0.011597 | 0.011463 | 0.011329 | 0.011430 | 0.011228 | 0.011463 | 0.011262 |
| 0.011329 | 0.011329 | 0.011295 | 0.011262 | 0.011295 | 0.011262 | 0.011362 |
| 0.011340 | 0.011340 | 0.011334 | 0.011368 | 0.011505 | 0.011470 | 0.011470 |
| 0.011469 | 0.011396 | 0.011208 | 0.011204 | 0.011331 | 0.011501 | 0.011501 |
| 0.011296 | 0.011365 | 0.011599 | 0.011567 | 0.011497 | 0.011531 | 0.011463 |

|          |          |          |          |          |          |          |
|----------|----------|----------|----------|----------|----------|----------|
| 0.011396 | 0.011463 | 0.011463 | 0.011362 | 0.011933 | 0.011530 | 0.011597 |
| 0.011631 | 0.011701 | 0.011333 | 0.011407 | 0.011295 | 0.011497 | 0.011463 |
| 0.011497 | 0.011530 | 0.011530 | 0.011530 | 0.011650 | 0.011664 | 0.011303 |
| 0.011195 | 0.011199 | 0.011298 | 0.011264 | 0.011368 | 0.011172 | 0.011536 |
| 0.011335 | 0.011455 | 0.011203 | 0.011360 | 0.011329 | 0.011402 | 0.011295 |
| 0.011262 | 0.011262 | 0.011329 | 0.011295 | 0.011497 | 0.011463 | 0.011396 |
| 0.011497 | 0.011564 | 0.011295 | 0.011295 | 0.011329 | 0.011329 | 0.011330 |
| 0.011398 | 0.011329 | 0.011329 | 0.011364 | 0.011497 | 0.011564 | 0.011564 |
| 0.011430 | 0.011533 | 0.011535 | 0.011670 | 0.011696 | 0.011362 | 0.011530 |
| 0.011463 | 0.011463 | 0.011297 | 0.011478 | 0.011408 | 0.011435 | 0.011305 |
| 0.011439 | 0.011652 | 0.011483 | 0.011366 | 0.011262 | 0.011463 | 0.011329 |
| 0.011429 | 0.011362 | 0.011262 | 0.011363 | 0.011463 | 0.011466 | 0.011362 |
| 0.011262 | 0.011195 | 0.011329 | 0.011262 | 0.011195 | 0.011298 | 0.011463 |
| 0.011362 | 0.011295 | 0.011329 | 0.011362 | 0.011329 | 0.011262 | 0.011463 |
| 0.011329 | 0.011362 | 0.011362 | 0.011295 | 0.011362 | 0.011597 | 0.011262 |
| 0.011295 | 0.011698 | 0.011295 | 0.011329 | 0.011295 | 0.011664 | 0.011232 |
| 0.011734 | 0.011273 | 0.011311 | 0.011503 | 0.011589 | 0.011491 | 0.011227 |
| 0.011270 | 0.011463 | 0.011564 | 0.011671 | 0.011531 | 0.011669 | 0.011800 |
| 0.011699 | 0.011737 | 0.011698 | 0.011949 | 0.011664 | 0.012539 | 0.011700 |
| 0.012439 | 0.012207 | 0.012341 | 0.012612 | 0.011664 | 0.011362 | 0.011665 |
| 0.012103 | 0.012038 | 0.011631 | 0.011530 | 0.011598 | 0.011598 | 0.011567 |
| 0.011463 | 0.011467 | 0.011530 | 0.011497 | 0.011867 | 0.011933 | 0.011935 |
| 0.011834 | 0.011934 | 0.012038 | 0.011804 | 0.012104 | 0.012110 | 0.012171 |
| 0.012171 | 0.012205 | 0.012152 | 0.012172 | 0.012173 | 0.011396 | 0.011699 |
| 0.011766 | 0.012270 | 0.011772 | 0.012001 | 0.012474 | 0.011536 | 0.011430 |
| 0.011396 | 0.011396 | 0.011867 | 0.011924 | 0.012010 | 0.011731 | 0.011397 |
| S553     | 0.011687 | 0.011687 | 0.011582 | 0.011373 | 0.011373 | 0.011408 |
| 0.011448 | 0.011377 | 0.011547 | 0.011304 | 0.011373 | 0.011339 | 0.011304 |
| 0.011269 | 0.011478 | 0.011234 | 0.011338 | 0.011408 | 0.011373 | 0.011338 |
| 0.011304 | 0.011338 | 0.011095 | 0.011304 | 0.011339 | 0.011338 | 0.011412 |
| 0.011304 | 0.011304 | 0.011234 | 0.011130 | 0.011373 | 0.011373 | 0.011408 |
| 0.011338 | 0.011478 | 0.011373 | 0.011373 | 0.011373 | 0.011373 | 0.011512 |
| 0.011234 | 0.011373 | 0.011408 | 0.011338 | 0.011373 | 0.011478 | 0.011373 |
| 0.011373 | 0.011547 | 0.011443 | 0.011443 | 0.011373 | 0.011652 | 0.011373 |
| 0.011338 | 0.011373 | 0.011478 | 0.011652 | 0.011478 | 0.011373 | 0.011478 |
| 0.011373 | 0.011478 | 0.011373 | 0.011617 | 0.011582 | 0.011338 | 0.011443 |
| 0.011304 | 0.011443 | 0.011373 | 0.011478 | 0.011373 | 0.011408 | 0.011408 |
| 0.011304 | 0.011338 | 0.011304 | 0.011339 | 0.011373 | 0.011409 | 0.011443 |
| 0.011408 | 0.011373 | 0.011443 | 0.011338 | 0.011408 | 0.011269 | 0.011373 |
| 0.011547 | 0.011478 | 0.011512 | 0.011547 | 0.011373 | 0.011617 | 0.011373 |
| 0.011562 | 0.011488 | 0.011610 | 0.011305 | 0.011293 | 0.011405 | 0.011101 |
| 0.011783 | 0.011219 | 0.011318 | 0.011617 | 0.011617 | 0.011338 | 0.011443 |
| 0.011443 | 0.011408 | 0.011443 | 0.011373 | 0.011478 | 0.011408 | 0.011408 |
| 0.011373 | 0.011408 | 0.011686 | 0.011547 | 0.011443 | 0.011408 | 0.011339 |
| 0.011304 | 0.011234 | 0.011373 | 0.011339 | 0.011199 | 0.011165 | 0.011095 |
| 0.011199 | 0.011269 | 0.011339 | 0.011339 | 0.011373 | 0.011373 | 0.011375 |
| 0.011446 | 0.011373 | 0.011373 | 0.011246 | 0.011319 | 0.011275 | 0.011374 |
| 0.011376 | 0.011310 | 0.011329 | 0.011311 | 0.011270 | 0.011307 | 0.011340 |
| 0.011319 | 0.011380 | 0.011417 | 0.011304 | 0.011311 | 0.011444 | 0.011339 |
| 0.011409 | 0.011410 | 0.011409 | 0.011478 | 0.011408 | 0.011826 | 0.011548 |
| 0.011373 | 0.011443 | 0.011373 | 0.011408 | 0.011269 | 0.011234 | 0.011304 |
| 0.011373 | 0.011373 | 0.011304 | 0.011304 | 0.011338 | 0.011304 | 0.011408 |
| 0.011373 | 0.011443 | 0.011408 | 0.011304 | 0.011375 | 0.011513 | 0.011516 |
| 0.011513 | 0.011408 | 0.011304 | 0.011235 | 0.011373 | 0.011304 | 0.011234 |
| 0.011236 | 0.011513 | 0.011304 | 0.011513 | 0.011269 | 0.011373 | 0.011339 |
| 0.011443 | 0.011339 | 0.011373 | 0.011339 | 0.011373 | 0.011234 | 0.011373 |
| 0.011408 | 0.011339 | 0.011408 | 0.011339 | 0.011373 | 0.011408 | 0.011652 |
| 0.011478 | 0.011408 | 0.011478 | 0.011514 | 0.011478 | 0.011373 | 0.011339 |
| 0.011305 | 0.011607 | 0.011480 | 0.011274 | 0.011482 | 0.011237 | 0.011385 |
| 0.011483 | 0.011378 | 0.011512 | 0.011756 | 0.011414 | 0.011617 | 0.011582 |

|          |          |          |          |          |          |          |
|----------|----------|----------|----------|----------|----------|----------|
| 0.011512 | 0.011687 | 0.011526 | 0.011390 | 0.011437 | 0.011408 | 0.011478 |
| 0.011547 | 0.011479 | 0.011621 | 0.011689 | 0.011617 | 0.011652 | 0.011584 |
| 0.011514 | 0.011688 | 0.011618 | 0.011513 | 0.011827 | 0.011269 | 0.011479 |
| 0.011443 | 0.011338 | 0.011269 | 0.011269 | 0.011338 | 0.011338 | 0.011408 |
| 0.011338 | 0.011408 | 0.011304 | 0.011338 | 0.011338 | 0.011338 | 0.011408 |
| 0.011338 | 0.011512 | 0.011408 | 0.011443 | 0.011234 | 0.011338 | 0.011373 |
| 0.011373 | 0.011338 | 0.011373 | 0.011373 | 0.011304 | 0.011304 | 0.011304 |
| 0.011582 | 0.011408 | 0.011478 | 0.011269 | 0.011338 | 0.011547 | 0.011304 |
| 0.011304 | 0.011373 | 0.011338 | 0.011512 | 0.011304 | 0.011199 | 0.011338 |
| 0.011269 | 0.011304 | 0.011338 | 0.011234 | 0.011269 | 0.011443 | 0.011373 |
| 0.011234 | 0.011338 | 0.011234 | 0.011269 | 0.011408 | 0.011269 | 0.011304 |
| 0.011269 | 0.011373 | 0.011339 | 0.011234 | 0.011304 | 0.011234 | 0.011408 |
| 0.011480 | 0.011304 | 0.011339 | 0.011443 | 0.011408 | 0.011338 | 0.011408 |
| 0.011304 | 0.011652 | 0.011234 | 0.011443 | 0.011234 | 0.011234 | 0.011234 |
| 0.011478 | 0.011374 | 0.011373 | 0.011408 | 0.011269 | 0.011408 | 0.011234 |
| 0.011304 | 0.011304 | 0.011338 | 0.011443 | 0.011338 | 0.011443 | 0.011512 |
| 0.011512 | 0.011478 | 0.011373 | 0.011443 | 0.011408 | 0.011304 | 0.011269 |
| 0.011304 | 0.011304 | 0.011373 | 0.011234 | 0.011269 | 0.011408 | 0.011304 |
| 0.011269 | 0.011338 | 0.011443 | 0.011443 | 0.011373 | 0.011338 | 0.011269 |
| 0.011373 | 0.011338 | 0.011408 | 0.011304 | 0.011443 | 0.011512 | 0.011513 |
| 0.011338 | 0.011478 | 0.011347 | 0.018139 | 0.011262 | 0.011502 | 0.011422 |
| 0.011383 | 0.011426 | 0.011435 | 0.011241 | 0.011520 | 0.011454 | 0.011567 |
| 0.011356 | 0.011186 | 0.011264 | 0.011362 | 0.011264 | 0.011369 | 0.011372 |
| 0.011255 | 0.011215 | 0.011215 | 0.000000 | 0.011478 | 0.011478 | 0.011516 |
| 0.011377 | 0.011443 | 0.011443 | 0.011373 | 0.011408 | 0.011408 | 0.011373 |
| 0.011408 | 0.011339 | 0.011373 | 0.011408 | 0.011373 | 0.011304 | 0.011339 |
| 0.011339 | 0.011408 | 0.011304 | 0.011408 | 0.011443 | 0.011478 | 0.011373 |
| 0.011338 | 0.011304 | 0.011443 | 0.011443 | 0.011443 | 0.011444 | 0.011513 |
| 0.011269 | 0.011269 | 0.011304 | 0.011408 | 0.011269 | 0.011513 | 0.011513 |
| 0.011547 | 0.011512 | 0.011478 | 0.011582 | 0.011478 | 0.011584 | 0.011373 |
| 0.011408 | 0.011443 | 0.011513 | 0.011339 | 0.011408 | 0.011373 | 0.011408 |
| 0.011478 | 0.011478 | 0.011513 | 0.011478 | 0.011374 | 0.011582 | 0.011478 |
| 0.011376 | 0.011304 | 0.011408 | 0.011478 | 0.011408 | 0.011478 | 0.011582 |
| 0.011756 | 0.011414 | 0.011617 | 0.011582 | 0.011512 | 0.011687 | 0.011304 |
| 0.011479 | 0.011304 | 0.011339 | 0.011339 | 0.011408 | 0.011304 | 0.011408 |
| 0.011443 | 0.011478 | 0.011373 | 0.011338 | 0.011304 | 0.011443 | 0.011443 |
| 0.011443 | 0.011444 | 0.011512 | 0.011443 | 0.012071 | 0.011531 | 0.011450 |
| 0.011524 | 0.011487 | 0.011593 | 0.011482 | 0.011598 | 0.011519 | 0.011451 |
| 0.012011 | 0.011379 | 0.011517 | 0.011450 | 0.011694 | 0.011552 | 0.011692 |
| 0.012039 | 0.011475 | 0.011621 | 0.011721 | 0.011582 | 0.011234 | 0.011621 |
| 0.011269 | 0.011443 | 0.011582 | 0.011547 | 0.011516 | 0.011269 | 0.011200 |
| 0.011373 | 0.011304 | 0.011338 | 0.011373 | 0.011269 | 0.011338 | 0.011234 |
| 0.011304 | 0.011338 | 0.011304 | 0.011269 | 0.011373 | 0.011304 | 0.011338 |
| 0.011338 | 0.011269 | 0.011338 | 0.011373 | 0.011269 | 0.011478 | 0.011512 |
| 0.011408 | 0.011408 | 0.011408 | 0.011408 | 0.011338 | 0.011478 | 0.011373 |
| 0.000000 | 0.011339 | 0.011304 | 0.011304 | 0.011443 | 0.011443 | 0.011443 |
| 0.011443 | 0.011373 | 0.011338 | 0.011373 | 0.011443 | 0.011478 | 0.011408 |
| 0.011408 | 0.011547 | 0.011443 | 0.011443 | 0.011617 | 0.011617 | 0.011512 |
| 0.011338 | 0.011408 | 0.011443 | 0.011582 | 0.011408 | 0.011443 | 0.011408 |
| 0.011443 | 0.011304 | 0.011304 | 0.011582 | 0.011547 | 0.011547 | 0.011373 |
| 0.011478 | 0.011547 | 0.011373 | 0.011478 | 0.011443 | 0.011304 | 0.011373 |
| 0.011408 | 0.011373 | 0.011304 | 0.011547 | 0.011373 | 0.011478 | 0.011478 |
| 0.011338 | 0.011518 | 0.011513 | 0.011273 | 0.000000 | 0.011413 | 0.011167 |
| 0.011345 | 0.011466 | 0.011315 | 0.011482 | 0.011314 | 0.011329 | 0.011285 |
| 0.011218 | 0.011199 | 0.011352 | 0.011129 | 0.011229 | 0.011339 | 0.011484 |
| 0.011492 | 0.011388 | 0.011389 | 0.011389 | 0.011410 | 0.011269 | 0.011339 |
| 0.011269 | 0.011409 | 0.011516 | 0.011236 | 0.011658 | 0.011684 | 0.011408 |
| 0.011373 | 0.011443 | 0.011373 | 0.011408 | 0.011269 | 0.011234 | 0.011304 |
| 0.011373 | 0.011373 | 0.011304 | 0.011304 | 0.011338 | 0.011304 | 0.011408 |
| 0.011386 | 0.011385 | 0.011380 | 0.011413 | 0.011554 | 0.011521 | 0.011520 |

|          |          |          |          |          |          |          |
|----------|----------|----------|----------|----------|----------|----------|
| 0.011519 | 0.011409 | 0.011249 | 0.011246 | 0.011376 | 0.011552 | 0.011518 |
| 0.011339 | 0.011411 | 0.011584 | 0.011621 | 0.011548 | 0.011583 | 0.011478 |
| 0.011443 | 0.011512 | 0.011512 | 0.011408 | 0.011722 | 0.011582 | 0.011652 |
| 0.011652 | 0.011467 | 0.011379 | 0.011454 | 0.011304 | 0.011513 | 0.011478 |
| 0.011548 | 0.011582 | 0.011582 | 0.011582 | 0.011715 | 0.011721 | 0.011343 |
| 0.011234 | 0.011237 | 0.011305 | 0.011304 | 0.011340 | 0.011248 | 0.011305 |
| 0.011378 | 0.011192 | 0.011251 | 0.011398 | 0.011374 | 0.011448 | 0.011339 |
| 0.011304 | 0.011234 | 0.011373 | 0.011339 | 0.011199 | 0.011165 | 0.011095 |
| 0.011199 | 0.011269 | 0.011339 | 0.011339 | 0.011373 | 0.011373 | 0.011375 |
| 0.011446 | 0.011373 | 0.011373 | 0.011410 | 0.011269 | 0.011339 | 0.011269 |
| 0.011409 | 0.011516 | 0.011236 | 0.011658 | 0.011684 | 0.011408 | 0.011582 |
| 0.011478 | 0.011478 | 0.011341 | 0.011493 | 0.011383 | 0.011484 | 0.011315 |
| 0.011525 | 0.011630 | 0.011497 | 0.011377 | 0.011304 | 0.011513 | 0.011373 |
| 0.011443 | 0.011408 | 0.011304 | 0.011375 | 0.011513 | 0.011516 | 0.011408 |
| 0.011304 | 0.011235 | 0.011373 | 0.011304 | 0.011234 | 0.011236 | 0.011513 |
| 0.011408 | 0.011339 | 0.011373 | 0.011408 | 0.011373 | 0.011304 | 0.011130 |
| 0.011373 | 0.011408 | 0.011408 | 0.011338 | 0.011408 | 0.011652 | 0.011234 |
| 0.011304 | 0.011478 | 0.011338 | 0.011373 | 0.011338 | 0.011443 | 0.011327 |
| 0.011463 | 0.011193 | 0.011164 | 0.011227 | 0.011315 | 0.011247 | 0.011148 |
| 0.011115 | 0.011199 | 0.011304 | 0.011409 | 0.011270 | 0.011411 | 0.011548 |
| 0.011444 | 0.011514 | 0.011443 | 0.011627 | 0.011373 | 0.012279 | 0.011340 |
| 0.012071 | 0.011934 | 0.012038 | 0.012249 | 0.011443 | 0.011339 | 0.011408 |
| 0.012072 | 0.011794 | 0.011373 | 0.011269 | 0.011339 | 0.011339 | 0.011305 |
| 0.011199 | 0.011201 | 0.011269 | 0.011235 | 0.011618 | 0.011652 | 0.011688 |
| 0.011548 | 0.011653 | 0.011794 | 0.011551 | 0.012107 | 0.012113 | 0.012177 |
| 0.012177 | 0.012212 | 0.012122 | 0.012177 | 0.012179 | 0.011408 | 0.011687 |
| 0.011723 | 0.012244 | 0.011763 | 0.011756 | 0.012281 | 0.011307 | 0.011200 |
| 0.011165 | 0.011165 | 0.011652 | 0.011636 | 0.011718 | 0.011513 | 0.011165 |
| S554     | 0.011631 | 0.011631 | 0.011900 | 0.011732 | 0.011732 | 0.011799 |
| 0.011638 | 0.011570 | 0.011799 | 0.011228 | 0.011295 | 0.011262 | 0.011228 |
| 0.011262 | 0.011429 | 0.011228 | 0.011262 | 0.011329 | 0.011295 | 0.011262 |
| 0.011228 | 0.011262 | 0.011362 | 0.011228 | 0.011262 | 0.011262 | 0.011603 |
| 0.011497 | 0.011262 | 0.011161 | 0.011396 | 0.011329 | 0.011295 | 0.011329 |
| 0.011295 | 0.011396 | 0.011295 | 0.011295 | 0.011329 | 0.011295 | 0.011463 |
| 0.011228 | 0.011295 | 0.011329 | 0.011262 | 0.011362 | 0.011396 | 0.011329 |
| 0.011295 | 0.011463 | 0.011363 | 0.011631 | 0.011295 | 0.011564 | 0.011295 |
| 0.011262 | 0.011362 | 0.011429 | 0.011564 | 0.011665 | 0.011362 | 0.011463 |
| 0.011329 | 0.011396 | 0.011295 | 0.011530 | 0.011765 | 0.011295 | 0.011362 |
| 0.011262 | 0.011362 | 0.011329 | 0.011396 | 0.011329 | 0.011329 | 0.011329 |
| 0.011228 | 0.011262 | 0.011228 | 0.011329 | 0.011295 | 0.011329 | 0.011396 |
| 0.011329 | 0.011295 | 0.011362 | 0.011262 | 0.011396 | 0.011228 | 0.011295 |
| 0.011463 | 0.011396 | 0.011631 | 0.011463 | 0.011295 | 0.011530 | 0.011295 |
| 0.011431 | 0.011658 | 0.011475 | 0.011177 | 0.011135 | 0.011281 | 0.011375 |
| 0.012012 | 0.011416 | 0.011184 | 0.011530 | 0.011530 | 0.011329 | 0.011429 |
| 0.011362 | 0.011329 | 0.011396 | 0.011295 | 0.011396 | 0.011329 | 0.011329 |
| 0.011295 | 0.011396 | 0.011597 | 0.011463 | 0.011362 | 0.011329 | 0.011262 |
| 0.011228 | 0.011228 | 0.011295 | 0.011262 | 0.011463 | 0.011430 | 0.011362 |
| 0.011463 | 0.011530 | 0.011262 | 0.011262 | 0.011295 | 0.011295 | 0.011297 |
| 0.011365 | 0.011295 | 0.011295 | 0.011168 | 0.011241 | 0.011200 | 0.011296 |
| 0.011297 | 0.011232 | 0.011245 | 0.011267 | 0.011196 | 0.011232 | 0.011263 |
| 0.011528 | 0.011302 | 0.011336 | 0.011228 | 0.011233 | 0.011363 | 0.011329 |
| 0.011397 | 0.011330 | 0.011329 | 0.011429 | 0.011362 | 0.011732 | 0.011530 |
| 0.011564 | 0.011430 | 0.011295 | 0.011396 | 0.011195 | 0.011429 | 0.011228 |
| 0.011295 | 0.011295 | 0.011262 | 0.011228 | 0.011262 | 0.011228 | 0.011329 |
| 0.011295 | 0.011396 | 0.011329 | 0.011228 | 0.011330 | 0.011430 | 0.011398 |
| 0.011430 | 0.011329 | 0.011228 | 0.011161 | 0.011295 | 0.011228 | 0.011161 |
| 0.011264 | 0.011430 | 0.011228 | 0.011430 | 0.011195 | 0.011295 | 0.011262 |
| 0.011362 | 0.011262 | 0.011295 | 0.011262 | 0.011295 | 0.011161 | 0.011295 |
| 0.011329 | 0.011262 | 0.011329 | 0.011262 | 0.011295 | 0.011329 | 0.011564 |
| 0.011665 | 0.011597 | 0.011665 | 0.011431 | 0.011665 | 0.011295 | 0.011262 |

|          |          |          |          |          |          |          |
|----------|----------|----------|----------|----------|----------|----------|
| 0.011297 | 0.011505 | 0.011380 | 0.011163 | 0.011671 | 0.011163 | 0.011257 |
| 0.011671 | 0.011570 | 0.011463 | 0.011665 | 0.011368 | 0.011530 | 0.011497 |
| 0.011429 | 0.011597 | 0.011451 | 0.011307 | 0.011354 | 0.011329 | 0.011399 |
| 0.011497 | 0.011397 | 0.011534 | 0.011602 | 0.011530 | 0.011597 | 0.011704 |
| 0.011432 | 0.011603 | 0.011534 | 0.011466 | 0.011733 | 0.011195 | 0.011397 |
| 0.011362 | 0.011295 | 0.011195 | 0.011195 | 0.011262 | 0.011262 | 0.011329 |
| 0.011262 | 0.011329 | 0.011228 | 0.011329 | 0.011262 | 0.011262 | 0.011329 |
| 0.011262 | 0.011698 | 0.011597 | 0.011631 | 0.011161 | 0.011262 | 0.011295 |
| 0.011295 | 0.011262 | 0.011329 | 0.011362 | 0.011228 | 0.011228 | 0.011228 |
| 0.011765 | 0.011396 | 0.011396 | 0.011195 | 0.011295 | 0.011463 | 0.011228 |
| 0.011228 | 0.011295 | 0.011262 | 0.011429 | 0.011228 | 0.011362 | 0.011497 |
| 0.011429 | 0.011262 | 0.011262 | 0.011195 | 0.011195 | 0.011362 | 0.011295 |
| 0.011195 | 0.011295 | 0.011161 | 0.011195 | 0.011329 | 0.011463 | 0.011228 |
| 0.011195 | 0.011329 | 0.011262 | 0.011161 | 0.011497 | 0.011161 | 0.011329 |
| 0.011403 | 0.011228 | 0.011530 | 0.011362 | 0.011396 | 0.011262 | 0.011362 |
| 0.011228 | 0.011564 | 0.011161 | 0.011429 | 0.011228 | 0.011228 | 0.011161 |
| 0.011396 | 0.011598 | 0.011295 | 0.011362 | 0.011195 | 0.011597 | 0.011228 |
| 0.011228 | 0.011228 | 0.011262 | 0.011362 | 0.011262 | 0.011362 | 0.011429 |
| 0.011429 | 0.011396 | 0.011295 | 0.011396 | 0.011362 | 0.011228 | 0.011195 |
| 0.011228 | 0.011228 | 0.011295 | 0.011228 | 0.011195 | 0.011362 | 0.011228 |
| 0.011262 | 0.011262 | 0.011396 | 0.011429 | 0.011329 | 0.011262 | 0.011262 |
| 0.011329 | 0.011262 | 0.011362 | 0.011228 | 0.011362 | 0.011463 | 0.011698 |
| 0.011262 | 0.011665 | 0.011233 | 0.017749 | 0.011191 | 0.011366 | 0.011583 |
| 0.011545 | 0.011588 | 0.011270 | 0.011234 | 0.011665 | 0.011613 | 0.011303 |
| 0.011440 | 0.011487 | 0.011138 | 0.011228 | 0.011216 | 0.011258 | 0.011189 |
| 0.011436 | 0.011395 | 0.011394 | 0.011259 | 0.011396 | 0.011430 | 0.011432 |
| 0.011301 | 0.011396 | 0.011396 | 0.011362 | 0.011329 | 0.011329 | 0.011295 |
| 0.011329 | 0.011262 | 0.011295 | 0.011329 | 0.011295 | 0.011228 | 0.011262 |
| 0.011262 | 0.011329 | 0.011228 | 0.011329 | 0.011362 | 0.011396 | 0.011295 |
| 0.011329 | 0.011295 | 0.011631 | 0.011631 | 0.011362 | 0.011396 | 0.011430 |
| 0.011195 | 0.011195 | 0.011228 | 0.011329 | 0.011195 | 0.011430 | 0.011430 |
| 0.011463 | 0.011463 | 0.011396 | 0.011497 | 0.011665 | 0.011498 | 0.011329 |
| 0.011329 | 0.011396 | 0.011430 | 0.011262 | 0.011329 | 0.011295 | 0.011329 |
| 0.011396 | 0.011396 | 0.011430 | 0.011396 | 0.011296 | 0.011497 | 0.011463 |
| 0.011331 | 0.011228 | 0.011329 | 0.011430 | 0.011329 | 0.011463 | 0.011497 |
| 0.011665 | 0.011368 | 0.011530 | 0.011497 | 0.011429 | 0.011597 | 0.011228 |
| 0.011397 | 0.011296 | 0.011262 | 0.011262 | 0.011329 | 0.011228 | 0.011329 |
| 0.011362 | 0.011396 | 0.011295 | 0.011329 | 0.011295 | 0.011631 | 0.011631 |
| 0.011362 | 0.011396 | 0.011463 | 0.011396 | 0.012036 | 0.011453 | 0.011377 |
| 0.011447 | 0.011407 | 0.011517 | 0.011407 | 0.011515 | 0.011439 | 0.011405 |
| 0.011987 | 0.011303 | 0.011437 | 0.011371 | 0.011646 | 0.011502 | 0.011605 |
| 0.012012 | 0.011475 | 0.011567 | 0.011631 | 0.011497 | 0.011497 | 0.011533 |
| 0.011195 | 0.011362 | 0.011497 | 0.011463 | 0.011466 | 0.011463 | 0.011431 |
| 0.011295 | 0.011228 | 0.011262 | 0.011295 | 0.011195 | 0.011262 | 0.011161 |
| 0.011295 | 0.011329 | 0.011228 | 0.011195 | 0.011295 | 0.011228 | 0.011262 |
| 0.011262 | 0.011195 | 0.011262 | 0.011295 | 0.011195 | 0.011396 | 0.011429 |
| 0.011329 | 0.011396 | 0.011329 | 0.011329 | 0.011262 | 0.011665 | 0.011295 |
| 0.011339 | 0.000000 | 0.011497 | 0.011501 | 0.011362 | 0.011362 | 0.011362 |
| 0.011362 | 0.011295 | 0.011262 | 0.011295 | 0.011396 | 0.011396 | 0.011329 |
| 0.011329 | 0.011463 | 0.011631 | 0.011362 | 0.011564 | 0.011564 | 0.011429 |
| 0.011262 | 0.011329 | 0.011362 | 0.011765 | 0.011329 | 0.011362 | 0.011329 |
| 0.011362 | 0.011295 | 0.011295 | 0.011597 | 0.011530 | 0.011564 | 0.011295 |
| 0.011396 | 0.011463 | 0.011329 | 0.011396 | 0.011362 | 0.011228 | 0.011564 |
| 0.011329 | 0.011295 | 0.011295 | 0.011463 | 0.011295 | 0.011396 | 0.011631 |
| 0.011262 | 0.011705 | 0.011698 | 0.011426 | 0.011173 | 0.011400 | 0.011215 |
| 0.011170 | 0.011683 | 0.011201 | 0.011418 | 0.011207 | 0.011315 | 0.011326 |
| 0.011417 | 0.011126 | 0.011283 | 0.011126 | 0.011168 | 0.011328 | 0.011344 |
| 0.011362 | 0.011257 | 0.011342 | 0.011272 | 0.011330 | 0.011463 | 0.011530 |
| 0.011530 | 0.011396 | 0.011500 | 0.011501 | 0.011637 | 0.011661 | 0.011329 |
| 0.011564 | 0.011430 | 0.011295 | 0.011396 | 0.011195 | 0.011429 | 0.011228 |

|          |          |          |          |          |          |          |
|----------|----------|----------|----------|----------|----------|----------|
| 0.011295 | 0.011295 | 0.011262 | 0.011228 | 0.011262 | 0.011228 | 0.011329 |
| 0.011305 | 0.011305 | 0.011300 | 0.011334 | 0.011471 | 0.011436 | 0.011436 |
| 0.011435 | 0.011363 | 0.011171 | 0.011168 | 0.011297 | 0.011467 | 0.011467 |
| 0.011262 | 0.011331 | 0.011565 | 0.011533 | 0.011464 | 0.011498 | 0.011429 |
| 0.011362 | 0.011429 | 0.011429 | 0.011329 | 0.011900 | 0.011497 | 0.011564 |
| 0.011598 | 0.011665 | 0.011299 | 0.011372 | 0.011262 | 0.011463 | 0.011429 |
| 0.011464 | 0.011497 | 0.011497 | 0.011497 | 0.011650 | 0.011631 | 0.011268 |
| 0.011162 | 0.011164 | 0.011264 | 0.011230 | 0.011333 | 0.011172 | 0.011502 |
| 0.011300 | 0.011455 | 0.011203 | 0.011322 | 0.011296 | 0.011368 | 0.011262 |
| 0.011228 | 0.011228 | 0.011295 | 0.011262 | 0.011463 | 0.011430 | 0.011362 |
| 0.011463 | 0.011530 | 0.011262 | 0.011262 | 0.011295 | 0.011295 | 0.011297 |
| 0.011365 | 0.011295 | 0.011295 | 0.011330 | 0.011463 | 0.011530 | 0.011530 |
| 0.011396 | 0.011500 | 0.011501 | 0.011637 | 0.011661 | 0.011329 | 0.011497 |
| 0.011429 | 0.011429 | 0.011263 | 0.011443 | 0.011373 | 0.011401 | 0.011270 |
| 0.011439 | 0.011516 | 0.011357 | 0.011332 | 0.011228 | 0.011430 | 0.011295 |
| 0.011396 | 0.011329 | 0.011228 | 0.011330 | 0.011430 | 0.011398 | 0.011329 |
| 0.011228 | 0.011161 | 0.011295 | 0.011228 | 0.011161 | 0.011264 | 0.011430 |
| 0.011329 | 0.011262 | 0.011295 | 0.011329 | 0.011295 | 0.011228 | 0.011430 |
| 0.011295 | 0.011329 | 0.011329 | 0.011262 | 0.011329 | 0.011564 | 0.011228 |
| 0.011262 | 0.011665 | 0.011262 | 0.011295 | 0.011262 | 0.011631 | 0.011146 |
| 0.011622 | 0.011145 | 0.011211 | 0.011423 | 0.011467 | 0.011419 | 0.011102 |
| 0.011165 | 0.011429 | 0.011530 | 0.011637 | 0.011498 | 0.011602 | 0.011767 |
| 0.011666 | 0.011703 | 0.011664 | 0.011880 | 0.011631 | 0.012506 | 0.011667 |
| 0.012372 | 0.012173 | 0.012307 | 0.012579 | 0.011631 | 0.011329 | 0.011631 |
| 0.012070 | 0.012005 | 0.011597 | 0.011497 | 0.011565 | 0.011565 | 0.011534 |
| 0.011429 | 0.011399 | 0.011497 | 0.011464 | 0.011834 | 0.011900 | 0.011901 |
| 0.011800 | 0.011901 | 0.012004 | 0.011737 | 0.012070 | 0.012076 | 0.012137 |
| 0.012138 | 0.012172 | 0.012084 | 0.012138 | 0.012139 | 0.011362 | 0.011665 |
| 0.011733 | 0.012236 | 0.011738 | 0.011967 | 0.012441 | 0.011502 | 0.011396 |
| 0.011362 | 0.011362 | 0.011833 | 0.011883 | 0.011975 | 0.011698 | 0.011364 |
| S555     | 0.011867 | 0.011867 | 0.011732 | 0.011699 | 0.011699 | 0.011766 |
| 0.011604 | 0.011536 | 0.011766 | 0.011463 | 0.011530 | 0.011498 | 0.011463 |
| 0.011430 | 0.011665 | 0.011396 | 0.011497 | 0.011564 | 0.011530 | 0.011497 |
| 0.011463 | 0.011497 | 0.011329 | 0.011464 | 0.011497 | 0.011497 | 0.011570 |
| 0.000000 | 0.011497 | 0.011396 | 0.011363 | 0.011564 | 0.011530 | 0.011564 |
| 0.011530 | 0.011631 | 0.011530 | 0.011530 | 0.011564 | 0.011530 | 0.011699 |
| 0.011396 | 0.011530 | 0.011564 | 0.011497 | 0.011530 | 0.011631 | 0.011564 |
| 0.011530 | 0.011699 | 0.011598 | 0.011598 | 0.011530 | 0.011799 | 0.011530 |
| 0.011497 | 0.011531 | 0.011598 | 0.011799 | 0.011631 | 0.011531 | 0.011631 |
| 0.011564 | 0.011631 | 0.011531 | 0.011766 | 0.011733 | 0.011530 | 0.011598 |
| 0.011497 | 0.011598 | 0.011564 | 0.011631 | 0.011564 | 0.011564 | 0.011564 |
| 0.011463 | 0.011497 | 0.011463 | 0.011497 | 0.011530 | 0.011565 | 0.011631 |
| 0.011564 | 0.011530 | 0.011598 | 0.011497 | 0.011564 | 0.011463 | 0.011530 |
| 0.011698 | 0.011631 | 0.011665 | 0.011699 | 0.011530 | 0.011732 | 0.011530 |
| 0.011728 | 0.011658 | 0.011739 | 0.011490 | 0.011433 | 0.011576 | 0.011336 |
| 0.011975 | 0.011416 | 0.011472 | 0.011766 | 0.011766 | 0.011497 | 0.011598 |
| 0.011598 | 0.011564 | 0.011631 | 0.011530 | 0.011631 | 0.011564 | 0.011564 |
| 0.011530 | 0.011564 | 0.011833 | 0.011698 | 0.011598 | 0.011564 | 0.011497 |
| 0.011463 | 0.011396 | 0.011531 | 0.011497 | 0.011430 | 0.011396 | 0.011329 |
| 0.011430 | 0.011497 | 0.011497 | 0.011497 | 0.011531 | 0.011531 | 0.011533 |
| 0.011602 | 0.011531 | 0.011531 | 0.011420 | 0.011458 | 0.011446 | 0.011531 |
| 0.011534 | 0.011473 | 0.011503 | 0.011509 | 0.011434 | 0.011471 | 0.011499 |
| 0.011492 | 0.011543 | 0.011542 | 0.011464 | 0.011475 | 0.011598 | 0.011497 |
| 0.011565 | 0.011566 | 0.011564 | 0.011665 | 0.011598 | 0.011900 | 0.011665 |
| 0.011430 | 0.011598 | 0.011531 | 0.011564 | 0.011430 | 0.011161 | 0.011464 |
| 0.011530 | 0.011530 | 0.011497 | 0.011463 | 0.011497 | 0.011463 | 0.011564 |
| 0.011531 | 0.011632 | 0.011564 | 0.011463 | 0.011566 | 0.011665 | 0.011669 |
| 0.011665 | 0.011564 | 0.011463 | 0.011398 | 0.011531 | 0.011463 | 0.011396 |
| 0.011400 | 0.011665 | 0.011464 | 0.011665 | 0.011430 | 0.011531 | 0.011497 |
| 0.011598 | 0.011497 | 0.011531 | 0.011497 | 0.011531 | 0.011396 | 0.011531 |

|          |          |          |          |          |          |          |
|----------|----------|----------|----------|----------|----------|----------|
| 0.011564 | 0.011497 | 0.011564 | 0.011497 | 0.011531 | 0.011564 | 0.011800 |
| 0.011632 | 0.011564 | 0.011632 | 0.011667 | 0.011632 | 0.011531 | 0.011497 |
| 0.011466 | 0.011748 | 0.011609 | 0.011438 | 0.011638 | 0.011401 | 0.011493 |
| 0.011638 | 0.011536 | 0.011698 | 0.011900 | 0.011607 | 0.011766 | 0.011732 |
| 0.011665 | 0.011833 | 0.011665 | 0.011555 | 0.011605 | 0.011564 | 0.011636 |
| 0.011732 | 0.011633 | 0.011771 | 0.011839 | 0.011766 | 0.011833 | 0.011942 |
| 0.011670 | 0.011841 | 0.011771 | 0.011703 | 0.011969 | 0.011430 | 0.011633 |
| 0.011598 | 0.011530 | 0.011430 | 0.011430 | 0.011497 | 0.011497 | 0.011564 |
| 0.011497 | 0.011564 | 0.011463 | 0.011497 | 0.011463 | 0.011497 | 0.011564 |
| 0.011497 | 0.011665 | 0.011564 | 0.011598 | 0.011396 | 0.011497 | 0.011531 |
| 0.011530 | 0.011497 | 0.011564 | 0.011531 | 0.011463 | 0.011463 | 0.011463 |
| 0.011732 | 0.011530 | 0.011631 | 0.011430 | 0.011530 | 0.011699 | 0.011463 |
| 0.011463 | 0.011530 | 0.011497 | 0.011665 | 0.011463 | 0.011396 | 0.011530 |
| 0.011463 | 0.011497 | 0.011497 | 0.011430 | 0.011430 | 0.011598 | 0.011530 |
| 0.011430 | 0.011530 | 0.011396 | 0.011430 | 0.011564 | 0.011430 | 0.011463 |
| 0.011430 | 0.011564 | 0.011497 | 0.011396 | 0.011463 | 0.011396 | 0.011564 |
| 0.011608 | 0.011463 | 0.011497 | 0.011598 | 0.011564 | 0.011497 | 0.011598 |
| 0.011463 | 0.011799 | 0.011396 | 0.011598 | 0.011396 | 0.011396 | 0.011396 |
| 0.011631 | 0.011564 | 0.011531 | 0.011598 | 0.011430 | 0.011564 | 0.011396 |
| 0.011463 | 0.011463 | 0.011497 | 0.011598 | 0.011497 | 0.011598 | 0.011665 |
| 0.011665 | 0.011631 | 0.011530 | 0.011631 | 0.011598 | 0.011463 | 0.011430 |
| 0.011463 | 0.011463 | 0.011531 | 0.011396 | 0.011430 | 0.011598 | 0.011463 |
| 0.011430 | 0.011497 | 0.011631 | 0.011598 | 0.011564 | 0.011497 | 0.011497 |
| 0.011564 | 0.011497 | 0.011598 | 0.011463 | 0.011598 | 0.011698 | 0.011665 |
| 0.011497 | 0.011632 | 0.011509 | 0.018012 | 0.011453 | 0.011733 | 0.011583 |
| 0.011545 | 0.011588 | 0.011689 | 0.011466 | 0.011720 | 0.011613 | 0.011728 |
| 0.011582 | 0.011427 | 0.011450 | 0.011521 | 0.011450 | 0.011653 | 0.011576 |
| 0.011436 | 0.011246 | 0.011394 | 0.011193 | 0.011631 | 0.011665 | 0.011670 |
| 0.011541 | 0.011632 | 0.011631 | 0.011531 | 0.011564 | 0.011564 | 0.011531 |
| 0.011564 | 0.011497 | 0.011531 | 0.011564 | 0.011531 | 0.011463 | 0.011497 |
| 0.011497 | 0.011564 | 0.011463 | 0.011564 | 0.011598 | 0.011632 | 0.011531 |
| 0.011497 | 0.011463 | 0.011598 | 0.011598 | 0.011598 | 0.011632 | 0.011665 |
| 0.011430 | 0.011430 | 0.011463 | 0.011564 | 0.011430 | 0.011665 | 0.011665 |
| 0.011699 | 0.011698 | 0.011631 | 0.011732 | 0.011632 | 0.011734 | 0.011564 |
| 0.011564 | 0.011632 | 0.011665 | 0.011497 | 0.011564 | 0.011531 | 0.011564 |
| 0.011632 | 0.011632 | 0.011665 | 0.011632 | 0.011532 | 0.011732 | 0.011699 |
| 0.011569 | 0.011463 | 0.011564 | 0.011665 | 0.011564 | 0.011632 | 0.011732 |
| 0.011900 | 0.011607 | 0.011766 | 0.011732 | 0.011665 | 0.011833 | 0.011464 |
| 0.011633 | 0.011531 | 0.011497 | 0.011497 | 0.011564 | 0.011463 | 0.011564 |
| 0.011598 | 0.011632 | 0.011531 | 0.011497 | 0.011463 | 0.011598 | 0.011598 |
| 0.011598 | 0.011632 | 0.011698 | 0.011631 | 0.012204 | 0.011703 | 0.011588 |
| 0.011693 | 0.011650 | 0.011763 | 0.011615 | 0.011760 | 0.011681 | 0.011646 |
| 0.012160 | 0.011545 | 0.011677 | 0.011613 | 0.011887 | 0.011741 | 0.011843 |
| 0.012148 | 0.011625 | 0.011805 | 0.011867 | 0.011732 | 0.011463 | 0.011771 |
| 0.011430 | 0.011598 | 0.011732 | 0.011698 | 0.011703 | 0.011195 | 0.011397 |
| 0.011530 | 0.011463 | 0.011497 | 0.011530 | 0.011430 | 0.011497 | 0.011396 |
| 0.011463 | 0.011497 | 0.011463 | 0.011430 | 0.011530 | 0.011463 | 0.011497 |
| 0.011497 | 0.011430 | 0.011497 | 0.011531 | 0.011430 | 0.011631 | 0.011665 |
| 0.011564 | 0.011564 | 0.011564 | 0.011564 | 0.011497 | 0.011631 | 0.011530 |
| 0.011304 | 0.011497 | 0.000000 | 0.000000 | 0.011598 | 0.011598 | 0.011598 |
| 0.011598 | 0.011531 | 0.011497 | 0.011531 | 0.011631 | 0.011631 | 0.011564 |
| 0.011564 | 0.011699 | 0.011598 | 0.011598 | 0.011800 | 0.011800 | 0.011665 |
| 0.011497 | 0.011564 | 0.011598 | 0.011732 | 0.011564 | 0.011598 | 0.011564 |
| 0.011598 | 0.011463 | 0.011463 | 0.011766 | 0.011766 | 0.011732 | 0.011530 |
| 0.011631 | 0.011699 | 0.011564 | 0.011631 | 0.011598 | 0.011463 | 0.011531 |
| 0.011564 | 0.011530 | 0.011463 | 0.011699 | 0.011530 | 0.011631 | 0.011665 |
| 0.011497 | 0.011672 | 0.011665 | 0.011223 | 0.011342 | 0.011570 | 0.011267 |
| 0.011555 | 0.011644 | 0.011446 | 0.011641 | 0.011499 | 0.011518 | 0.011485 |
| 0.011264 | 0.011455 | 0.011561 | 0.011456 | 0.011438 | 0.011663 | 0.011628 |
| 0.011663 | 0.011532 | 0.011553 | 0.011553 | 0.011566 | 0.011195 | 0.011262 |



|          |          |          |          |          |          |          |
|----------|----------|----------|----------|----------|----------|----------|
| 0.011464 | 0.011565 | 0.011669 | 0.011467 | 0.011807 | 0.011839 | 0.011564 |
| 0.011430 | 0.011598 | 0.011531 | 0.011564 | 0.011430 | 0.011161 | 0.011464 |
| 0.011530 | 0.011530 | 0.011497 | 0.011463 | 0.011497 | 0.011463 | 0.011564 |
| 0.011549 | 0.011550 | 0.011540 | 0.011574 | 0.011710 | 0.011675 | 0.011675 |
| 0.011673 | 0.011598 | 0.011429 | 0.011420 | 0.011534 | 0.011704 | 0.011705 |
| 0.011497 | 0.011568 | 0.011801 | 0.011770 | 0.011699 | 0.011733 | 0.011665 |
| 0.011598 | 0.011665 | 0.011665 | 0.011564 | 0.011867 | 0.011732 | 0.011800 |
| 0.011833 | 0.011631 | 0.011538 | 0.011580 | 0.011497 | 0.011699 | 0.011665 |
| 0.011700 | 0.011698 | 0.011732 | 0.011732 | 0.011886 | 0.011867 | 0.011511 |
| 0.011398 | 0.011407 | 0.011503 | 0.011468 | 0.011505 | 0.011433 | 0.011468 |
| 0.011540 | 0.011367 | 0.011441 | 0.011547 | 0.011531 | 0.011608 | 0.011497 |
| 0.011463 | 0.011396 | 0.011531 | 0.011497 | 0.011430 | 0.011396 | 0.011329 |
| 0.011430 | 0.011497 | 0.011497 | 0.011497 | 0.011531 | 0.011531 | 0.011533 |
| 0.011602 | 0.011531 | 0.011531 | 0.011566 | 0.011195 | 0.011262 | 0.011464 |
| 0.011565 | 0.011669 | 0.011467 | 0.011807 | 0.011839 | 0.011564 | 0.011732 |
| 0.011665 | 0.011665 | 0.011500 | 0.011687 | 0.011617 | 0.011640 | 0.011516 |
| 0.011681 | 0.011790 | 0.011695 | 0.011570 | 0.011464 | 0.011665 | 0.011531 |
| 0.011632 | 0.011564 | 0.011463 | 0.011566 | 0.011665 | 0.011669 | 0.011564 |
| 0.011463 | 0.011398 | 0.011531 | 0.011463 | 0.011396 | 0.011400 | 0.011665 |
| 0.011564 | 0.011497 | 0.011531 | 0.011564 | 0.011531 | 0.011463 | 0.011396 |
| 0.011530 | 0.011564 | 0.011564 | 0.011497 | 0.011564 | 0.011799 | 0.011396 |
| 0.011497 | 0.011631 | 0.011497 | 0.011530 | 0.011497 | 0.011598 | 0.011489 |
| 0.011735 | 0.011358 | 0.011361 | 0.011181 | 0.011264 | 0.011204 | 0.011311 |
| 0.011323 | 0.011396 | 0.011497 | 0.011603 | 0.011464 | 0.011602 | 0.011733 |
| 0.011632 | 0.011669 | 0.011631 | 0.011880 | 0.011598 | 0.012473 | 0.011633 |
| 0.012339 | 0.012139 | 0.012275 | 0.012546 | 0.011598 | 0.011497 | 0.011598 |
| 0.012239 | 0.011972 | 0.011564 | 0.011464 | 0.011531 | 0.011531 | 0.011500 |
| 0.011396 | 0.011400 | 0.011463 | 0.011430 | 0.011801 | 0.011867 | 0.011867 |
| 0.011767 | 0.011868 | 0.011971 | 0.011737 | 0.012239 | 0.012246 | 0.012306 |
| 0.012307 | 0.012340 | 0.012290 | 0.012307 | 0.012309 | 0.011598 | 0.011834 |
| 0.011901 | 0.012406 | 0.011908 | 0.011934 | 0.012408 | 0.011468 | 0.011363 |
| 0.011329 | 0.011329 | 0.011800 | 0.011801 | 0.011940 | 0.011665 | 0.011330 |
| S556     | 0.011875 | 0.011875 | 0.011705 | 0.011671 | 0.011671 | 0.011705 |
| 0.011609 | 0.011541 | 0.011739 | 0.011467 | 0.011535 | 0.011502 | 0.011467 |
| 0.011433 | 0.011671 | 0.011399 | 0.011501 | 0.011569 | 0.011535 | 0.011501 |
| 0.011467 | 0.011501 | 0.011332 | 0.011468 | 0.011502 | 0.011501 | 0.011575 |
| 0.000000 | 0.011501 | 0.011399 | 0.011365 | 0.011569 | 0.011535 | 0.011569 |
| 0.011535 | 0.011637 | 0.011535 | 0.011535 | 0.011535 | 0.011535 | 0.011705 |
| 0.011399 | 0.011535 | 0.011569 | 0.011501 | 0.011535 | 0.011637 | 0.011569 |
| 0.011535 | 0.011705 | 0.011603 | 0.011603 | 0.011535 | 0.011807 | 0.011535 |
| 0.011501 | 0.011535 | 0.011569 | 0.011807 | 0.011637 | 0.011535 | 0.011637 |
| 0.011569 | 0.011637 | 0.011535 | 0.011773 | 0.011739 | 0.011501 | 0.011603 |
| 0.011501 | 0.011603 | 0.011569 | 0.011637 | 0.011535 | 0.011569 | 0.011569 |
| 0.011467 | 0.011501 | 0.011467 | 0.011501 | 0.011535 | 0.011570 | 0.011637 |
| 0.011569 | 0.011535 | 0.011603 | 0.011501 | 0.011569 | 0.011467 | 0.011535 |
| 0.011705 | 0.011637 | 0.011671 | 0.011705 | 0.011535 | 0.011739 | 0.011535 |
| 0.011735 | 0.011664 | 0.011747 | 0.011495 | 0.011437 | 0.011581 | 0.011339 |
| 0.011985 | 0.011421 | 0.011477 | 0.011773 | 0.011773 | 0.011501 | 0.011603 |
| 0.011603 | 0.011569 | 0.011637 | 0.011535 | 0.011637 | 0.011569 | 0.011569 |
| 0.011535 | 0.011569 | 0.011841 | 0.011705 | 0.011603 | 0.011569 | 0.011501 |
| 0.011467 | 0.011400 | 0.011535 | 0.011501 | 0.011434 | 0.011400 | 0.011332 |
| 0.011434 | 0.011501 | 0.011501 | 0.011501 | 0.011535 | 0.011535 | 0.011538 |
| 0.011607 | 0.011535 | 0.011535 | 0.011423 | 0.011462 | 0.011449 | 0.011535 |
| 0.011539 | 0.011477 | 0.011508 | 0.011513 | 0.011437 | 0.011475 | 0.011503 |
| 0.011496 | 0.011547 | 0.011547 | 0.011468 | 0.011479 | 0.011604 | 0.011502 |
| 0.011570 | 0.011571 | 0.011569 | 0.011637 | 0.011603 | 0.011909 | 0.011671 |
| 0.011433 | 0.011603 | 0.011535 | 0.011569 | 0.011433 | 0.011162 | 0.011467 |
| 0.011535 | 0.011535 | 0.011501 | 0.011467 | 0.011501 | 0.011467 | 0.011569 |
| 0.011535 | 0.011637 | 0.011569 | 0.011467 | 0.011571 | 0.011671 | 0.011675 |
| 0.011671 | 0.011569 | 0.011467 | 0.011401 | 0.011535 | 0.011467 | 0.011400 |

|          |          |          |          |          |          |          |
|----------|----------|----------|----------|----------|----------|----------|
| 0.011403 | 0.011671 | 0.011467 | 0.011671 | 0.011433 | 0.011535 | 0.011501 |
| 0.011603 | 0.011501 | 0.011535 | 0.011501 | 0.011535 | 0.011400 | 0.011535 |
| 0.011569 | 0.011501 | 0.011569 | 0.011501 | 0.011535 | 0.011569 | 0.011807 |
| 0.011637 | 0.011569 | 0.011637 | 0.011673 | 0.011638 | 0.011535 | 0.011501 |
| 0.011470 | 0.011754 | 0.011609 | 0.011442 | 0.011643 | 0.011405 | 0.011495 |
| 0.011644 | 0.011541 | 0.011705 | 0.011909 | 0.011612 | 0.011773 | 0.011739 |
| 0.011671 | 0.011841 | 0.011665 | 0.011555 | 0.011605 | 0.011569 | 0.011641 |
| 0.011739 | 0.011638 | 0.011778 | 0.011844 | 0.011773 | 0.011841 | 0.011741 |
| 0.011676 | 0.011842 | 0.011778 | 0.011709 | 0.011977 | 0.011433 | 0.011637 |
| 0.011603 | 0.011501 | 0.011433 | 0.011433 | 0.011501 | 0.011501 | 0.011569 |
| 0.011501 | 0.011569 | 0.011467 | 0.011501 | 0.011467 | 0.011501 | 0.011569 |
| 0.011501 | 0.011671 | 0.011569 | 0.011603 | 0.011399 | 0.011501 | 0.011535 |
| 0.011535 | 0.011501 | 0.011535 | 0.011535 | 0.011467 | 0.011467 | 0.011467 |
| 0.011739 | 0.011535 | 0.011637 | 0.011433 | 0.011501 | 0.011705 | 0.011467 |
| 0.011467 | 0.011535 | 0.011501 | 0.011671 | 0.011467 | 0.011365 | 0.011501 |
| 0.011433 | 0.011501 | 0.011501 | 0.011433 | 0.011433 | 0.011603 | 0.011535 |
| 0.011433 | 0.011535 | 0.011399 | 0.011433 | 0.011569 | 0.011434 | 0.011467 |
| 0.011433 | 0.011569 | 0.011502 | 0.011399 | 0.011467 | 0.011399 | 0.011569 |
| 0.011609 | 0.011467 | 0.011501 | 0.011603 | 0.011569 | 0.011501 | 0.011569 |
| 0.011467 | 0.011807 | 0.011399 | 0.011603 | 0.011399 | 0.011399 | 0.011399 |
| 0.011637 | 0.011535 | 0.011535 | 0.011569 | 0.011433 | 0.011569 | 0.011399 |
| 0.011467 | 0.011467 | 0.011501 | 0.011603 | 0.011501 | 0.011603 | 0.011671 |
| 0.011671 | 0.011637 | 0.011535 | 0.011637 | 0.011603 | 0.011467 | 0.011433 |
| 0.011467 | 0.011467 | 0.011535 | 0.011399 | 0.011433 | 0.011569 | 0.011467 |
| 0.011433 | 0.011501 | 0.011603 | 0.011603 | 0.011569 | 0.011501 | 0.011501 |
| 0.011569 | 0.011501 | 0.011569 | 0.011467 | 0.011603 | 0.011671 | 0.011671 |
| 0.011501 | 0.011637 | 0.011513 | 0.018088 | 0.011460 | 0.011744 | 0.011589 |
| 0.011550 | 0.011593 | 0.011697 | 0.011473 | 0.011730 | 0.011618 | 0.011739 |
| 0.011541 | 0.011432 | 0.011455 | 0.011526 | 0.011455 | 0.011661 | 0.011583 |
| 0.011441 | 0.011248 | 0.011397 | 0.011193 | 0.011637 | 0.011671 | 0.011676 |
| 0.011542 | 0.011637 | 0.011637 | 0.011535 | 0.011569 | 0.011569 | 0.011535 |
| 0.011569 | 0.011501 | 0.011535 | 0.011569 | 0.011535 | 0.011467 | 0.011501 |
| 0.011501 | 0.011569 | 0.011467 | 0.011569 | 0.011603 | 0.011637 | 0.011535 |
| 0.011501 | 0.011467 | 0.011603 | 0.011603 | 0.011603 | 0.011638 | 0.011671 |
| 0.011433 | 0.011433 | 0.011467 | 0.011569 | 0.011433 | 0.011671 | 0.011671 |
| 0.011705 | 0.011705 | 0.011637 | 0.011739 | 0.011637 | 0.011741 | 0.011569 |
| 0.011569 | 0.011603 | 0.011671 | 0.011501 | 0.011569 | 0.011535 | 0.011569 |
| 0.011638 | 0.011637 | 0.011671 | 0.011637 | 0.011537 | 0.011739 | 0.011705 |
| 0.011574 | 0.011467 | 0.011569 | 0.011637 | 0.011569 | 0.011637 | 0.011739 |
| 0.011909 | 0.011612 | 0.011773 | 0.011739 | 0.011671 | 0.011841 | 0.011468 |
| 0.011639 | 0.011536 | 0.011501 | 0.011501 | 0.011569 | 0.011467 | 0.011569 |
| 0.011603 | 0.011637 | 0.011535 | 0.011501 | 0.011467 | 0.011603 | 0.011603 |
| 0.011603 | 0.011638 | 0.011705 | 0.011637 | 0.012215 | 0.011704 | 0.011588 |
| 0.011693 | 0.011651 | 0.011763 | 0.011615 | 0.011761 | 0.011682 | 0.011617 |
| 0.012161 | 0.011545 | 0.011678 | 0.011614 | 0.011888 | 0.011748 | 0.011846 |
| 0.012152 | 0.011626 | 0.011812 | 0.011875 | 0.011739 | 0.011467 | 0.011778 |
| 0.011433 | 0.011603 | 0.011739 | 0.011705 | 0.011709 | 0.011196 | 0.011367 |
| 0.011535 | 0.011467 | 0.011501 | 0.011535 | 0.011433 | 0.011501 | 0.011399 |
| 0.011467 | 0.011501 | 0.011467 | 0.011433 | 0.011535 | 0.011467 | 0.011501 |
| 0.011501 | 0.011433 | 0.011501 | 0.011535 | 0.011433 | 0.011637 | 0.011671 |
| 0.011569 | 0.011569 | 0.011569 | 0.011569 | 0.011501 | 0.011637 | 0.011535 |
| 0.011304 | 0.011501 | 0.000000 | 0.000000 | 0.011603 | 0.011603 | 0.011603 |
| 0.011603 | 0.011535 | 0.011501 | 0.011535 | 0.011603 | 0.011637 | 0.011569 |
| 0.011569 | 0.011705 | 0.011603 | 0.011603 | 0.011773 | 0.011773 | 0.011671 |
| 0.011501 | 0.011569 | 0.011603 | 0.011739 | 0.011569 | 0.011603 | 0.011569 |
| 0.011603 | 0.011467 | 0.011467 | 0.011739 | 0.011773 | 0.011705 | 0.011535 |
| 0.011637 | 0.011705 | 0.011535 | 0.011637 | 0.011603 | 0.011467 | 0.011535 |
| 0.011569 | 0.011535 | 0.011467 | 0.011705 | 0.011535 | 0.011637 | 0.011671 |
| 0.011501 | 0.011678 | 0.011671 | 0.011225 | 0.011347 | 0.011575 | 0.011267 |
| 0.011562 | 0.011611 | 0.011450 | 0.011648 | 0.011505 | 0.011525 | 0.011492 |

|          |          |          |          |          |          |          |
|----------|----------|----------|----------|----------|----------|----------|
| 0.011267 | 0.011462 | 0.011569 | 0.011464 | 0.011443 | 0.011674 | 0.011635 |
| 0.011670 | 0.011538 | 0.011558 | 0.011558 | 0.011571 | 0.011196 | 0.011264 |
| 0.011467 | 0.011570 | 0.011675 | 0.011471 | 0.011814 | 0.011846 | 0.011569 |
| 0.011433 | 0.011603 | 0.011535 | 0.011569 | 0.011433 | 0.011162 | 0.011467 |
| 0.011535 | 0.011535 | 0.011501 | 0.011467 | 0.011501 | 0.011467 | 0.011569 |
| 0.011554 | 0.011554 | 0.011544 | 0.011579 | 0.011717 | 0.011681 | 0.011681 |
| 0.011678 | 0.011569 | 0.011430 | 0.011423 | 0.011539 | 0.011710 | 0.011711 |
| 0.011502 | 0.011573 | 0.011774 | 0.011777 | 0.011705 | 0.011740 | 0.011671 |
| 0.011603 | 0.011671 | 0.011671 | 0.011569 | 0.011875 | 0.011739 | 0.011807 |
| 0.011807 | 0.011636 | 0.011543 | 0.011585 | 0.011467 | 0.011705 | 0.011671 |
| 0.011706 | 0.011705 | 0.011739 | 0.011739 | 0.011855 | 0.011875 | 0.011512 |
| 0.011400 | 0.011407 | 0.011503 | 0.011468 | 0.011506 | 0.011434 | 0.011469 |
| 0.011541 | 0.011367 | 0.011441 | 0.011547 | 0.011535 | 0.011613 | 0.011501 |
| 0.011467 | 0.011400 | 0.011535 | 0.011501 | 0.011434 | 0.011400 | 0.011332 |
| 0.011434 | 0.011501 | 0.011501 | 0.011501 | 0.011535 | 0.011535 | 0.011538 |
| 0.011607 | 0.011535 | 0.011535 | 0.011571 | 0.011196 | 0.011264 | 0.011467 |
| 0.011570 | 0.011675 | 0.011471 | 0.011814 | 0.011846 | 0.011569 | 0.011739 |
| 0.011671 | 0.011671 | 0.011505 | 0.011658 | 0.011622 | 0.011645 | 0.011484 |
| 0.011687 | 0.011749 | 0.011698 | 0.011541 | 0.011467 | 0.011671 | 0.011535 |
| 0.011637 | 0.011569 | 0.011467 | 0.011571 | 0.011671 | 0.011675 | 0.011569 |
| 0.011467 | 0.011401 | 0.011535 | 0.011467 | 0.011400 | 0.011403 | 0.011671 |
| 0.011569 | 0.011501 | 0.011535 | 0.011569 | 0.011535 | 0.011467 | 0.011298 |
| 0.011535 | 0.011569 | 0.011569 | 0.011501 | 0.011569 | 0.011807 | 0.011399 |
| 0.011501 | 0.011637 | 0.011501 | 0.011535 | 0.011501 | 0.011603 | 0.011494 |
| 0.011688 | 0.011361 | 0.011365 | 0.011182 | 0.011266 | 0.011205 | 0.011314 |
| 0.011327 | 0.011365 | 0.011467 | 0.011574 | 0.011434 | 0.011573 | 0.011706 |
| 0.011604 | 0.011672 | 0.011603 | 0.011819 | 0.011569 | 0.012453 | 0.011605 |
| 0.012318 | 0.012116 | 0.012252 | 0.012492 | 0.011603 | 0.011501 | 0.011570 |
| 0.012216 | 0.011946 | 0.011535 | 0.011434 | 0.011502 | 0.011502 | 0.011470 |
| 0.011365 | 0.011369 | 0.011433 | 0.011400 | 0.011808 | 0.011841 | 0.011875 |
| 0.011740 | 0.011842 | 0.011980 | 0.011743 | 0.012251 | 0.012258 | 0.012319 |
| 0.012319 | 0.012353 | 0.012267 | 0.012319 | 0.012321 | 0.011603 | 0.011841 |
| 0.011909 | 0.012419 | 0.011917 | 0.011943 | 0.012421 | 0.011472 | 0.011366 |
| 0.011332 | 0.011332 | 0.011807 | 0.011801 | 0.011949 | 0.011671 | 0.011333 |
| S557     | 0.011732 | 0.011732 | 0.012068 | 0.011832 | 0.011832 | 0.011900 |
| 0.011671 | 0.011603 | 0.011900 | 0.011329 | 0.011396 | 0.011363 | 0.011329 |
| 0.011362 | 0.011530 | 0.011329 | 0.011362 | 0.011429 | 0.011396 | 0.011362 |
| 0.011329 | 0.011362 | 0.011463 | 0.011329 | 0.011295 | 0.011362 | 0.011637 |
| 0.011597 | 0.011362 | 0.011262 | 0.011497 | 0.011362 | 0.011396 | 0.011362 |
| 0.011396 | 0.011429 | 0.011396 | 0.011396 | 0.011429 | 0.011396 | 0.011564 |
| 0.011329 | 0.011396 | 0.011429 | 0.011362 | 0.011463 | 0.011497 | 0.011429 |
| 0.011396 | 0.011564 | 0.011463 | 0.011664 | 0.011396 | 0.011597 | 0.011396 |
| 0.011362 | 0.011463 | 0.011530 | 0.011597 | 0.011698 | 0.011463 | 0.011564 |
| 0.011362 | 0.011430 | 0.011396 | 0.011564 | 0.011799 | 0.011396 | 0.011463 |
| 0.011362 | 0.011463 | 0.011430 | 0.011497 | 0.011429 | 0.011429 | 0.011429 |
| 0.011329 | 0.011362 | 0.011329 | 0.011430 | 0.011396 | 0.011430 | 0.011497 |
| 0.011430 | 0.011396 | 0.011396 | 0.011362 | 0.011429 | 0.011262 | 0.011396 |
| 0.011564 | 0.011497 | 0.011664 | 0.011564 | 0.011396 | 0.011564 | 0.011396 |
| 0.011542 | 0.011695 | 0.011589 | 0.011295 | 0.011322 | 0.011428 | 0.011493 |
| 0.012158 | 0.011569 | 0.011307 | 0.011631 | 0.011631 | 0.011429 | 0.011463 |
| 0.011463 | 0.011429 | 0.011497 | 0.011396 | 0.011497 | 0.011362 | 0.011429 |
| 0.011396 | 0.011496 | 0.011698 | 0.011564 | 0.011463 | 0.011430 | 0.011295 |
| 0.011329 | 0.011329 | 0.011329 | 0.011362 | 0.011564 | 0.011530 | 0.011463 |
| 0.011564 | 0.011631 | 0.011362 | 0.011362 | 0.011396 | 0.011396 | 0.011398 |
| 0.011466 | 0.011396 | 0.011396 | 0.011240 | 0.011350 | 0.011306 | 0.011396 |
| 0.011399 | 0.011335 | 0.011392 | 0.011371 | 0.011298 | 0.011334 | 0.011364 |
| 0.011636 | 0.011405 | 0.011370 | 0.011329 | 0.011337 | 0.011464 | 0.011430 |
| 0.011498 | 0.011431 | 0.011430 | 0.011530 | 0.011463 | 0.011765 | 0.011631 |
| 0.011664 | 0.011531 | 0.011396 | 0.011497 | 0.011295 | 0.011530 | 0.011329 |
| 0.011396 | 0.011396 | 0.011362 | 0.011329 | 0.011362 | 0.011329 | 0.011430 |

|          |          |          |          |          |          |          |
|----------|----------|----------|----------|----------|----------|----------|
| 0.011329 | 0.011430 | 0.011430 | 0.011329 | 0.011431 | 0.011530 | 0.011533 |
| 0.011463 | 0.011430 | 0.011329 | 0.011263 | 0.011396 | 0.011329 | 0.011262 |
| 0.011366 | 0.011463 | 0.011262 | 0.011463 | 0.011295 | 0.011396 | 0.011363 |
| 0.011396 | 0.011362 | 0.011329 | 0.011363 | 0.011396 | 0.011262 | 0.011329 |
| 0.011363 | 0.011362 | 0.011430 | 0.011362 | 0.011396 | 0.011430 | 0.011665 |
| 0.011698 | 0.011631 | 0.011698 | 0.011532 | 0.011699 | 0.011396 | 0.011362 |
| 0.011398 | 0.011667 | 0.011518 | 0.011300 | 0.011705 | 0.011265 | 0.011414 |
| 0.011705 | 0.011672 | 0.011564 | 0.011766 | 0.011470 | 0.011631 | 0.011530 |
| 0.011530 | 0.011698 | 0.011558 | 0.011431 | 0.011479 | 0.011430 | 0.011500 |
| 0.011597 | 0.011499 | 0.011635 | 0.011635 | 0.011631 | 0.011698 | 0.011806 |
| 0.011534 | 0.011637 | 0.011568 | 0.011568 | 0.011834 | 0.011295 | 0.011498 |
| 0.011396 | 0.011396 | 0.011295 | 0.011295 | 0.011295 | 0.011362 | 0.011429 |
| 0.011295 | 0.011362 | 0.011262 | 0.011430 | 0.011295 | 0.011362 | 0.011429 |
| 0.011362 | 0.011732 | 0.011631 | 0.011664 | 0.011262 | 0.011362 | 0.011396 |
| 0.011396 | 0.011362 | 0.011430 | 0.011463 | 0.011329 | 0.011329 | 0.011329 |
| 0.011799 | 0.011497 | 0.011497 | 0.011295 | 0.011396 | 0.011497 | 0.011329 |
| 0.011329 | 0.011396 | 0.011362 | 0.011463 | 0.011329 | 0.011463 | 0.011530 |
| 0.011530 | 0.011362 | 0.011362 | 0.011295 | 0.011295 | 0.011463 | 0.011396 |
| 0.011295 | 0.011396 | 0.011262 | 0.011295 | 0.011430 | 0.011564 | 0.011329 |
| 0.011296 | 0.011429 | 0.011363 | 0.011262 | 0.011530 | 0.011262 | 0.011430 |
| 0.011437 | 0.011329 | 0.011564 | 0.011463 | 0.011497 | 0.011362 | 0.011463 |
| 0.011329 | 0.011597 | 0.011262 | 0.011530 | 0.011329 | 0.011329 | 0.011262 |
| 0.011429 | 0.011698 | 0.011396 | 0.011463 | 0.011295 | 0.011631 | 0.011329 |
| 0.011329 | 0.011329 | 0.011362 | 0.011396 | 0.011362 | 0.011463 | 0.011530 |
| 0.011530 | 0.011497 | 0.011396 | 0.011497 | 0.011396 | 0.011329 | 0.011295 |
| 0.011329 | 0.011329 | 0.011396 | 0.011329 | 0.011228 | 0.011463 | 0.011329 |
| 0.011362 | 0.011362 | 0.011497 | 0.011530 | 0.011429 | 0.011295 | 0.011362 |
| 0.011429 | 0.011362 | 0.011463 | 0.011329 | 0.011463 | 0.011564 | 0.011799 |
| 0.011362 | 0.011698 | 0.011371 | 0.017899 | 0.011322 | 0.011550 | 0.011653 |
| 0.011614 | 0.011658 | 0.011427 | 0.011350 | 0.011774 | 0.011682 | 0.011425 |
| 0.011582 | 0.011671 | 0.011255 | 0.011312 | 0.011334 | 0.011406 | 0.011361 |
| 0.011576 | 0.011544 | 0.011505 | 0.011391 | 0.011497 | 0.011530 | 0.011534 |
| 0.011335 | 0.011497 | 0.011497 | 0.011463 | 0.011430 | 0.011430 | 0.011396 |
| 0.011430 | 0.011362 | 0.011396 | 0.011430 | 0.011396 | 0.011329 | 0.011362 |
| 0.011362 | 0.011430 | 0.011329 | 0.011430 | 0.011463 | 0.011497 | 0.011396 |
| 0.011429 | 0.011396 | 0.011665 | 0.011665 | 0.011463 | 0.011498 | 0.011531 |
| 0.011295 | 0.011295 | 0.011329 | 0.011363 | 0.011295 | 0.011530 | 0.011530 |
| 0.011564 | 0.011564 | 0.011497 | 0.011597 | 0.011698 | 0.011599 | 0.011362 |
| 0.011430 | 0.011497 | 0.011463 | 0.011363 | 0.011430 | 0.011396 | 0.011430 |
| 0.011497 | 0.011497 | 0.011530 | 0.011430 | 0.011330 | 0.011597 | 0.011497 |
| 0.011433 | 0.011329 | 0.011430 | 0.011531 | 0.011430 | 0.011564 | 0.011597 |
| 0.011766 | 0.011470 | 0.011631 | 0.011530 | 0.011530 | 0.011698 | 0.011329 |
| 0.011498 | 0.011396 | 0.011362 | 0.011362 | 0.011430 | 0.011329 | 0.011430 |
| 0.011463 | 0.011497 | 0.011396 | 0.011429 | 0.011396 | 0.011665 | 0.011665 |
| 0.011463 | 0.011498 | 0.011564 | 0.011496 | 0.012137 | 0.011560 | 0.011482 |
| 0.011552 | 0.011511 | 0.011622 | 0.011510 | 0.011620 | 0.011543 | 0.011509 |
| 0.012091 | 0.011406 | 0.011540 | 0.011475 | 0.011749 | 0.011604 | 0.011639 |
| 0.012114 | 0.011588 | 0.011669 | 0.011732 | 0.011597 | 0.011597 | 0.011635 |
| 0.011295 | 0.011396 | 0.011597 | 0.011564 | 0.011567 | 0.011564 | 0.011532 |
| 0.011396 | 0.011262 | 0.011295 | 0.011396 | 0.011228 | 0.011362 | 0.011262 |
| 0.011396 | 0.011429 | 0.011329 | 0.011295 | 0.011396 | 0.011329 | 0.011362 |
| 0.011362 | 0.011295 | 0.011362 | 0.011396 | 0.011295 | 0.011429 | 0.011530 |
| 0.011430 | 0.011497 | 0.011430 | 0.011430 | 0.011362 | 0.011698 | 0.011396 |
| 0.011443 | 0.011362 | 0.011598 | 0.011603 | 0.000000 | 0.011396 | 0.011463 |
| 0.011463 | 0.011329 | 0.011362 | 0.011329 | 0.011497 | 0.011497 | 0.011430 |
| 0.011429 | 0.011564 | 0.011664 | 0.011463 | 0.011665 | 0.011665 | 0.011530 |
| 0.011362 | 0.011429 | 0.011463 | 0.011799 | 0.011430 | 0.000000 | 0.011430 |
| 0.011463 | 0.011396 | 0.011396 | 0.011698 | 0.011564 | 0.011665 | 0.011396 |
| 0.011497 | 0.011564 | 0.011429 | 0.011497 | 0.011463 | 0.011329 | 0.011597 |
| 0.011429 | 0.011396 | 0.011396 | 0.011564 | 0.011396 | 0.011497 | 0.011665 |

|          |          |          |          |          |          |          |
|----------|----------|----------|----------|----------|----------|----------|
| 0.011429 | 0.011739 | 0.011732 | 0.011589 | 0.011342 | 0.011502 | 0.011370 |
| 0.011335 | 0.011800 | 0.011341 | 0.011552 | 0.011353 | 0.011468 | 0.011485 |
| 0.011570 | 0.011258 | 0.011450 | 0.011325 | 0.011330 | 0.011529 | 0.011425 |
| 0.011437 | 0.011296 | 0.011483 | 0.011412 | 0.011431 | 0.011564 | 0.011631 |
| 0.011631 | 0.011497 | 0.011601 | 0.011603 | 0.011738 | 0.011767 | 0.011430 |
| 0.011664 | 0.011531 | 0.011396 | 0.011497 | 0.011295 | 0.011530 | 0.011329 |
| 0.011396 | 0.011396 | 0.011362 | 0.011329 | 0.011362 | 0.011329 | 0.011430 |
| 0.011410 | 0.011410 | 0.011403 | 0.011437 | 0.011574 | 0.011470 | 0.011538 |
| 0.011537 | 0.011464 | 0.011282 | 0.011240 | 0.011399 | 0.011569 | 0.011569 |
| 0.011363 | 0.011433 | 0.011666 | 0.011635 | 0.011565 | 0.011599 | 0.011530 |
| 0.011463 | 0.011530 | 0.011530 | 0.011429 | 0.011934 | 0.011597 | 0.011665 |
| 0.011698 | 0.011665 | 0.011401 | 0.011476 | 0.011362 | 0.011564 | 0.011530 |
| 0.011565 | 0.011597 | 0.011597 | 0.011597 | 0.011729 | 0.011732 | 0.011373 |
| 0.011263 | 0.011268 | 0.011367 | 0.011332 | 0.011436 | 0.011284 | 0.011536 |
| 0.011403 | 0.011543 | 0.011299 | 0.011435 | 0.011397 | 0.011471 | 0.011295 |
| 0.011329 | 0.011329 | 0.011329 | 0.011362 | 0.011564 | 0.011530 | 0.011463 |
| 0.011564 | 0.011631 | 0.011362 | 0.011362 | 0.011396 | 0.011396 | 0.011398 |
| 0.011466 | 0.011396 | 0.011396 | 0.011431 | 0.011564 | 0.011631 | 0.011631 |
| 0.011497 | 0.011601 | 0.011603 | 0.011738 | 0.011767 | 0.011430 | 0.011597 |
| 0.011530 | 0.011530 | 0.011365 | 0.011548 | 0.011477 | 0.011503 | 0.011376 |
| 0.011473 | 0.011698 | 0.011526 | 0.011434 | 0.011262 | 0.011463 | 0.011329 |
| 0.011430 | 0.011430 | 0.011329 | 0.011431 | 0.011530 | 0.011533 | 0.011430 |
| 0.011329 | 0.011263 | 0.011396 | 0.011329 | 0.011262 | 0.011366 | 0.011463 |
| 0.011430 | 0.011362 | 0.011396 | 0.011430 | 0.011396 | 0.011329 | 0.011530 |
| 0.011396 | 0.011430 | 0.011429 | 0.011362 | 0.011430 | 0.011665 | 0.011329 |
| 0.011362 | 0.011698 | 0.011362 | 0.011329 | 0.011362 | 0.011664 | 0.011317 |
| 0.011791 | 0.011315 | 0.011361 | 0.011584 | 0.011630 | 0.011563 | 0.011269 |
| 0.011323 | 0.011530 | 0.011631 | 0.011739 | 0.011599 | 0.011737 | 0.011868 |
| 0.011767 | 0.011804 | 0.011765 | 0.012017 | 0.011732 | 0.012607 | 0.011768 |
| 0.012507 | 0.012275 | 0.012409 | 0.012681 | 0.011732 | 0.011430 | 0.011732 |
| 0.012171 | 0.012106 | 0.011698 | 0.011598 | 0.011666 | 0.011666 | 0.011635 |
| 0.011530 | 0.011535 | 0.011597 | 0.011565 | 0.011935 | 0.012001 | 0.012002 |
| 0.011901 | 0.012002 | 0.012106 | 0.011872 | 0.012172 | 0.012178 | 0.012239 |
| 0.012239 | 0.012273 | 0.012221 | 0.012240 | 0.012241 | 0.011463 | 0.011766 |
| 0.011834 | 0.012337 | 0.011840 | 0.012068 | 0.012541 | 0.011604 | 0.011497 |
| 0.011463 | 0.011463 | 0.011934 | 0.012006 | 0.012081 | 0.011799 | 0.011465 |
| S558     | 0.011732 | 0.011732 | 0.012068 | 0.011832 | 0.011832 | 0.011900 |
| 0.011671 | 0.011603 | 0.011899 | 0.011329 | 0.011396 | 0.011363 | 0.011329 |
| 0.011362 | 0.011530 | 0.011329 | 0.011362 | 0.011429 | 0.011396 | 0.011362 |
| 0.011329 | 0.011362 | 0.011463 | 0.011329 | 0.011363 | 0.011362 | 0.011637 |
| 0.011597 | 0.011362 | 0.011262 | 0.011496 | 0.011429 | 0.011396 | 0.011429 |
| 0.011396 | 0.011496 | 0.011329 | 0.011396 | 0.011362 | 0.011396 | 0.011564 |
| 0.011329 | 0.011396 | 0.011362 | 0.011295 | 0.011463 | 0.011496 | 0.011429 |
| 0.011396 | 0.011497 | 0.011463 | 0.011664 | 0.011329 | 0.011664 | 0.011329 |
| 0.011362 | 0.011463 | 0.011463 | 0.011664 | 0.011698 | 0.011463 | 0.011564 |
| 0.011429 | 0.011496 | 0.011396 | 0.011631 | 0.011799 | 0.011396 | 0.011463 |
| 0.011362 | 0.011463 | 0.011429 | 0.011496 | 0.011429 | 0.011362 | 0.011362 |
| 0.011329 | 0.011362 | 0.011329 | 0.011429 | 0.011396 | 0.011430 | 0.011496 |
| 0.011429 | 0.011396 | 0.011463 | 0.011362 | 0.011429 | 0.011329 | 0.011396 |
| 0.011564 | 0.011496 | 0.011664 | 0.011564 | 0.011396 | 0.011631 | 0.011329 |
| 0.011505 | 0.011658 | 0.011551 | 0.011216 | 0.011247 | 0.011391 | 0.011375 |
| 0.012121 | 0.011569 | 0.011266 | 0.011631 | 0.011631 | 0.011429 | 0.011463 |
| 0.011463 | 0.011429 | 0.011496 | 0.011396 | 0.011496 | 0.011429 | 0.011429 |
| 0.011396 | 0.011496 | 0.011698 | 0.011564 | 0.011463 | 0.011429 | 0.011362 |
| 0.011329 | 0.011329 | 0.011396 | 0.011362 | 0.011564 | 0.011530 | 0.011463 |
| 0.011564 | 0.011631 | 0.011362 | 0.011362 | 0.011396 | 0.011396 | 0.011398 |
| 0.011466 | 0.011396 | 0.011396 | 0.011276 | 0.011313 | 0.011306 | 0.011396 |
| 0.011399 | 0.011335 | 0.011318 | 0.011371 | 0.011298 | 0.011334 | 0.011364 |
| 0.011636 | 0.011405 | 0.011439 | 0.011329 | 0.011337 | 0.011464 | 0.011430 |
| 0.011497 | 0.011431 | 0.011430 | 0.011530 | 0.011463 | 0.011832 | 0.011631 |

|          |          |          |          |          |          |          |
|----------|----------|----------|----------|----------|----------|----------|
| 0.011664 | 0.011530 | 0.011396 | 0.011497 | 0.011295 | 0.011530 | 0.011329 |
| 0.011396 | 0.011396 | 0.011362 | 0.011329 | 0.011362 | 0.011329 | 0.011429 |
| 0.011396 | 0.011497 | 0.011430 | 0.011329 | 0.011431 | 0.011530 | 0.011533 |
| 0.011530 | 0.011430 | 0.011329 | 0.011263 | 0.011396 | 0.011329 | 0.011262 |
| 0.011366 | 0.011530 | 0.011329 | 0.011530 | 0.011295 | 0.011396 | 0.011362 |
| 0.011463 | 0.011362 | 0.011396 | 0.011362 | 0.011396 | 0.011262 | 0.011396 |
| 0.011430 | 0.011362 | 0.011429 | 0.011362 | 0.011396 | 0.011429 | 0.011665 |
| 0.011698 | 0.011631 | 0.011698 | 0.011465 | 0.011698 | 0.011396 | 0.011362 |
| 0.011398 | 0.011667 | 0.011563 | 0.011266 | 0.011705 | 0.011265 | 0.011375 |
| 0.011705 | 0.011672 | 0.011564 | 0.011765 | 0.011470 | 0.011631 | 0.011597 |
| 0.011530 | 0.011698 | 0.011557 | 0.011390 | 0.011479 | 0.011429 | 0.011500 |
| 0.011597 | 0.011499 | 0.011635 | 0.011703 | 0.011631 | 0.011698 | 0.011805 |
| 0.011534 | 0.011705 | 0.011568 | 0.011567 | 0.011834 | 0.011295 | 0.011498 |
| 0.011463 | 0.011396 | 0.011295 | 0.011295 | 0.011362 | 0.011362 | 0.011362 |
| 0.011362 | 0.011429 | 0.011329 | 0.011429 | 0.011362 | 0.011362 | 0.011429 |
| 0.011362 | 0.011731 | 0.011631 | 0.011664 | 0.011262 | 0.011362 | 0.011396 |
| 0.011396 | 0.011362 | 0.011429 | 0.011463 | 0.011329 | 0.011329 | 0.011329 |
| 0.011799 | 0.011496 | 0.011496 | 0.011295 | 0.011396 | 0.011564 | 0.011329 |
| 0.011329 | 0.011396 | 0.011362 | 0.011530 | 0.011329 | 0.011463 | 0.011597 |
| 0.011530 | 0.011362 | 0.011362 | 0.011295 | 0.011295 | 0.011463 | 0.011396 |
| 0.011295 | 0.011396 | 0.011262 | 0.011295 | 0.011429 | 0.011564 | 0.011329 |
| 0.011295 | 0.011429 | 0.011363 | 0.011262 | 0.011530 | 0.011262 | 0.011429 |
| 0.011505 | 0.011329 | 0.011564 | 0.011463 | 0.011496 | 0.011362 | 0.011396 |
| 0.011329 | 0.011664 | 0.011262 | 0.011530 | 0.011329 | 0.011329 | 0.011262 |
| 0.011496 | 0.011698 | 0.011396 | 0.011463 | 0.011295 | 0.011631 | 0.011329 |
| 0.011329 | 0.011329 | 0.011362 | 0.011463 | 0.011362 | 0.011463 | 0.011530 |
| 0.011530 | 0.011496 | 0.011329 | 0.011497 | 0.011463 | 0.011262 | 0.011295 |
| 0.011329 | 0.011262 | 0.011396 | 0.011329 | 0.011295 | 0.011463 | 0.011329 |
| 0.011362 | 0.011362 | 0.011496 | 0.011530 | 0.011429 | 0.011362 | 0.011362 |
| 0.011429 | 0.011362 | 0.011463 | 0.011329 | 0.011463 | 0.011564 | 0.011799 |
| 0.011362 | 0.011698 | 0.011336 | 0.017861 | 0.011191 | 0.011488 | 0.011618 |
| 0.011579 | 0.011623 | 0.011374 | 0.011350 | 0.011664 | 0.011647 | 0.011303 |
| 0.011582 | 0.011487 | 0.011138 | 0.011311 | 0.011294 | 0.011258 | 0.011318 |
| 0.011576 | 0.011470 | 0.011468 | 0.011259 | 0.011496 | 0.011530 | 0.011534 |
| 0.011404 | 0.011497 | 0.011497 | 0.011463 | 0.011429 | 0.011430 | 0.011396 |
| 0.011429 | 0.011362 | 0.011396 | 0.011429 | 0.011396 | 0.011329 | 0.011362 |
| 0.011362 | 0.011429 | 0.011329 | 0.011430 | 0.011463 | 0.011497 | 0.011396 |
| 0.011429 | 0.011396 | 0.011665 | 0.011665 | 0.011463 | 0.011497 | 0.011530 |
| 0.011295 | 0.011295 | 0.011329 | 0.011430 | 0.011295 | 0.011530 | 0.011530 |
| 0.011564 | 0.011564 | 0.011496 | 0.011597 | 0.011698 | 0.011599 | 0.011429 |
| 0.011429 | 0.011497 | 0.011530 | 0.011362 | 0.011429 | 0.011396 | 0.011429 |
| 0.011497 | 0.011497 | 0.011530 | 0.011497 | 0.011397 | 0.011597 | 0.011564 |
| 0.011433 | 0.011329 | 0.011429 | 0.011463 | 0.011430 | 0.011564 | 0.011597 |
| 0.011765 | 0.011470 | 0.011631 | 0.011597 | 0.011530 | 0.011698 | 0.011329 |
| 0.011498 | 0.011396 | 0.011362 | 0.011362 | 0.011429 | 0.011329 | 0.011430 |
| 0.011463 | 0.011497 | 0.011396 | 0.011429 | 0.011396 | 0.011665 | 0.011665 |
| 0.011463 | 0.011497 | 0.011564 | 0.011496 | 0.012136 | 0.011560 | 0.011482 |
| 0.011552 | 0.011511 | 0.011622 | 0.011510 | 0.011620 | 0.011543 | 0.011508 |
| 0.012090 | 0.011406 | 0.011540 | 0.011475 | 0.011749 | 0.011604 | 0.011707 |
| 0.012114 | 0.011588 | 0.011669 | 0.011731 | 0.011597 | 0.011597 | 0.011635 |
| 0.011295 | 0.011463 | 0.011597 | 0.011563 | 0.011567 | 0.011564 | 0.011532 |
| 0.011396 | 0.011329 | 0.011362 | 0.011396 | 0.011295 | 0.011362 | 0.011262 |
| 0.011396 | 0.011429 | 0.011329 | 0.011295 | 0.011396 | 0.011329 | 0.011362 |
| 0.011362 | 0.011295 | 0.011362 | 0.011396 | 0.011295 | 0.011496 | 0.011530 |
| 0.011429 | 0.011496 | 0.011429 | 0.011429 | 0.011362 | 0.011698 | 0.011396 |
| 0.011443 | 0.011362 | 0.011598 | 0.011603 | 0.011396 | 0.000000 | 0.011463 |
| 0.011463 | 0.011396 | 0.011362 | 0.011396 | 0.011496 | 0.011496 | 0.011429 |
| 0.011429 | 0.011564 | 0.011664 | 0.011463 | 0.011664 | 0.011664 | 0.011530 |
| 0.011362 | 0.011429 | 0.011463 | 0.011799 | 0.011430 | 0.011396 | 0.011429 |
| 0.011463 | 0.011396 | 0.011396 | 0.011698 | 0.011631 | 0.011664 | 0.011396 |

|          |          |          |          |          |          |          |
|----------|----------|----------|----------|----------|----------|----------|
| 0.011496 | 0.011564 | 0.011429 | 0.011496 | 0.011463 | 0.011329 | 0.011597 |
| 0.011429 | 0.011396 | 0.011396 | 0.011564 | 0.011396 | 0.011496 | 0.011664 |
| 0.011429 | 0.011739 | 0.011731 | 0.011507 | 0.011342 | 0.011502 | 0.011267 |
| 0.011280 | 0.011761 | 0.011306 | 0.011417 | 0.011255 | 0.011213 | 0.011379 |
| 0.011570 | 0.000000 | 0.011339 | 0.011192 | 0.011222 | 0.011395 | 0.011344 |
| 0.011437 | 0.011296 | 0.011448 | 0.011377 | 0.011431 | 0.011564 | 0.011631 |
| 0.011631 | 0.011497 | 0.011567 | 0.011603 | 0.011738 | 0.011767 | 0.011429 |
| 0.011664 | 0.011530 | 0.011396 | 0.011497 | 0.011295 | 0.011530 | 0.011329 |
| 0.011396 | 0.011396 | 0.011362 | 0.011329 | 0.011362 | 0.011329 | 0.011429 |
| 0.011409 | 0.011410 | 0.011403 | 0.011437 | 0.011573 | 0.011538 | 0.011538 |
| 0.011537 | 0.011464 | 0.011282 | 0.011276 | 0.011399 | 0.011568 | 0.011569 |
| 0.011363 | 0.011433 | 0.011666 | 0.011635 | 0.011565 | 0.011599 | 0.011530 |
| 0.011463 | 0.011530 | 0.011530 | 0.011429 | 0.011933 | 0.011597 | 0.011664 |
| 0.011698 | 0.011701 | 0.011401 | 0.011441 | 0.011362 | 0.011564 | 0.011530 |
| 0.011565 | 0.011597 | 0.011597 | 0.011597 | 0.011689 | 0.011732 | 0.011372 |
| 0.011263 | 0.011268 | 0.011366 | 0.011332 | 0.011436 | 0.011284 | 0.011536 |
| 0.011403 | 0.011586 | 0.011346 | 0.011435 | 0.011396 | 0.011471 | 0.011362 |
| 0.011329 | 0.011329 | 0.011396 | 0.011362 | 0.011564 | 0.011530 | 0.011463 |
| 0.011564 | 0.011631 | 0.011362 | 0.011362 | 0.011396 | 0.011396 | 0.011398 |
| 0.011466 | 0.011396 | 0.011396 | 0.011431 | 0.011564 | 0.011631 | 0.011631 |
| 0.011497 | 0.011567 | 0.011603 | 0.011738 | 0.011767 | 0.011429 | 0.011597 |
| 0.011530 | 0.011530 | 0.011297 | 0.011547 | 0.011477 | 0.011503 | 0.011375 |
| 0.011542 | 0.011744 | 0.011526 | 0.011434 | 0.011329 | 0.011530 | 0.011396 |
| 0.011497 | 0.011430 | 0.011329 | 0.011431 | 0.011530 | 0.011533 | 0.011430 |
| 0.011329 | 0.011263 | 0.011396 | 0.011329 | 0.011262 | 0.011366 | 0.011530 |
| 0.011429 | 0.011362 | 0.011396 | 0.011429 | 0.011396 | 0.011329 | 0.011530 |
| 0.011396 | 0.011429 | 0.011429 | 0.011362 | 0.011429 | 0.011664 | 0.011329 |
| 0.011362 | 0.011698 | 0.011362 | 0.011396 | 0.011362 | 0.011664 | 0.011274 |
| 0.011791 | 0.011273 | 0.011361 | 0.011503 | 0.011589 | 0.011527 | 0.011227 |
| 0.011323 | 0.011530 | 0.011631 | 0.011739 | 0.011599 | 0.011703 | 0.011867 |
| 0.011767 | 0.011804 | 0.011765 | 0.011983 | 0.011731 | 0.012606 | 0.011768 |
| 0.012507 | 0.012274 | 0.012408 | 0.012680 | 0.011731 | 0.011430 | 0.011732 |
| 0.012171 | 0.012106 | 0.011698 | 0.011597 | 0.011665 | 0.011665 | 0.011635 |
| 0.011530 | 0.011501 | 0.011597 | 0.011565 | 0.011934 | 0.012000 | 0.012002 |
| 0.011901 | 0.012002 | 0.012105 | 0.011838 | 0.012171 | 0.012178 | 0.012238 |
| 0.012239 | 0.012273 | 0.012186 | 0.012239 | 0.012240 | 0.011463 | 0.011766 |
| 0.011834 | 0.012337 | 0.011840 | 0.012068 | 0.012541 | 0.011603 | 0.011497 |
| 0.011463 | 0.011463 | 0.011934 | 0.012006 | 0.012080 | 0.011799 | 0.011465 |
| S559     | 0.011732 | 0.011732 | 0.012068 | 0.011832 | 0.011832 | 0.011900 |
| 0.011739 | 0.011671 | 0.011899 | 0.011329 | 0.011396 | 0.011363 | 0.011329 |
| 0.011362 | 0.011530 | 0.011329 | 0.011362 | 0.011429 | 0.011396 | 0.011362 |
| 0.011329 | 0.011362 | 0.011463 | 0.011329 | 0.011363 | 0.011362 | 0.011705 |
| 0.011597 | 0.011362 | 0.011262 | 0.011496 | 0.011429 | 0.011396 | 0.011429 |
| 0.011396 | 0.011496 | 0.011396 | 0.011396 | 0.011429 | 0.011396 | 0.011564 |
| 0.011329 | 0.011396 | 0.011429 | 0.011362 | 0.011463 | 0.011496 | 0.011429 |
| 0.011396 | 0.011564 | 0.011463 | 0.011731 | 0.011396 | 0.011664 | 0.011396 |
| 0.011362 | 0.011463 | 0.011530 | 0.011664 | 0.011765 | 0.011463 | 0.011564 |
| 0.011429 | 0.011497 | 0.011396 | 0.011631 | 0.011866 | 0.011396 | 0.011463 |
| 0.011362 | 0.011463 | 0.011429 | 0.011496 | 0.011429 | 0.011429 | 0.011429 |
| 0.011329 | 0.011362 | 0.011329 | 0.011429 | 0.011396 | 0.011430 | 0.011496 |
| 0.011429 | 0.011396 | 0.011463 | 0.011362 | 0.011496 | 0.011329 | 0.011396 |
| 0.011564 | 0.011295 | 0.011463 | 0.011564 | 0.011396 | 0.011631 | 0.011396 |
| 0.011579 | 0.011733 | 0.011626 | 0.011295 | 0.011321 | 0.011391 | 0.011533 |
| 0.012158 | 0.011569 | 0.011307 | 0.011631 | 0.011631 | 0.011429 | 0.011530 |
| 0.011463 | 0.011429 | 0.011496 | 0.011396 | 0.011497 | 0.011429 | 0.011429 |
| 0.011396 | 0.011496 | 0.011698 | 0.011564 | 0.011463 | 0.011429 | 0.011362 |
| 0.011329 | 0.011329 | 0.011396 | 0.011362 | 0.011564 | 0.011530 | 0.011463 |
| 0.011564 | 0.011631 | 0.011362 | 0.011362 | 0.011396 | 0.011396 | 0.011398 |
| 0.011466 | 0.011396 | 0.011396 | 0.011240 | 0.011313 | 0.011306 | 0.011396 |
| 0.011399 | 0.011335 | 0.011355 | 0.011371 | 0.011298 | 0.011334 | 0.011364 |

|          |          |          |          |          |          |          |
|----------|----------|----------|----------|----------|----------|----------|
| 0.011600 | 0.011405 | 0.011439 | 0.011329 | 0.011337 | 0.011464 | 0.011430 |
| 0.011497 | 0.011431 | 0.011430 | 0.011530 | 0.011463 | 0.011832 | 0.011631 |
| 0.011664 | 0.011530 | 0.011396 | 0.011497 | 0.011295 | 0.011530 | 0.011329 |
| 0.011396 | 0.011396 | 0.011362 | 0.011329 | 0.011362 | 0.011329 | 0.011429 |
| 0.011396 | 0.011497 | 0.011362 | 0.011329 | 0.011431 | 0.011530 | 0.011533 |
| 0.011530 | 0.011430 | 0.011329 | 0.011263 | 0.011396 | 0.011329 | 0.011262 |
| 0.011366 | 0.011530 | 0.011329 | 0.011530 | 0.011295 | 0.011396 | 0.011362 |
| 0.011463 | 0.011362 | 0.011396 | 0.011362 | 0.011396 | 0.011262 | 0.011396 |
| 0.011430 | 0.011362 | 0.011430 | 0.011362 | 0.011396 | 0.011429 | 0.011665 |
| 0.011765 | 0.011698 | 0.011765 | 0.011532 | 0.011766 | 0.011396 | 0.011295 |
| 0.011398 | 0.011626 | 0.011517 | 0.011300 | 0.011773 | 0.011265 | 0.011414 |
| 0.011773 | 0.011672 | 0.011564 | 0.011765 | 0.011470 | 0.011631 | 0.011597 |
| 0.011530 | 0.011698 | 0.011557 | 0.011390 | 0.011479 | 0.011429 | 0.011500 |
| 0.011597 | 0.011499 | 0.011635 | 0.011703 | 0.011631 | 0.011698 | 0.011805 |
| 0.011534 | 0.011705 | 0.011636 | 0.011567 | 0.011834 | 0.011295 | 0.011498 |
| 0.011463 | 0.011396 | 0.011295 | 0.011295 | 0.011362 | 0.011362 | 0.011429 |
| 0.011362 | 0.011429 | 0.011329 | 0.011429 | 0.011362 | 0.011362 | 0.011429 |
| 0.011362 | 0.011799 | 0.011698 | 0.011732 | 0.011262 | 0.011362 | 0.011396 |
| 0.011396 | 0.011362 | 0.011429 | 0.011463 | 0.011329 | 0.011329 | 0.011329 |
| 0.011866 | 0.011496 | 0.011496 | 0.011295 | 0.011396 | 0.011564 | 0.011329 |
| 0.011329 | 0.011396 | 0.011362 | 0.011530 | 0.011329 | 0.011463 | 0.011597 |
| 0.011530 | 0.011362 | 0.011362 | 0.011295 | 0.011295 | 0.011463 | 0.011396 |
| 0.011295 | 0.011396 | 0.011262 | 0.011295 | 0.011429 | 0.011564 | 0.011329 |
| 0.011295 | 0.011429 | 0.011363 | 0.011262 | 0.011597 | 0.011262 | 0.011429 |
| 0.011505 | 0.011329 | 0.011631 | 0.011463 | 0.011496 | 0.011362 | 0.011463 |
| 0.011329 | 0.011664 | 0.011262 | 0.011530 | 0.011329 | 0.011329 | 0.011262 |
| 0.011496 | 0.011698 | 0.011396 | 0.011463 | 0.011295 | 0.011698 | 0.011329 |
| 0.011329 | 0.011329 | 0.011362 | 0.011463 | 0.011362 | 0.011463 | 0.011530 |
| 0.011530 | 0.011496 | 0.011396 | 0.011497 | 0.011463 | 0.011329 | 0.011295 |
| 0.011329 | 0.011329 | 0.011396 | 0.011329 | 0.011295 | 0.011463 | 0.011329 |
| 0.011362 | 0.011362 | 0.011496 | 0.011530 | 0.011429 | 0.011362 | 0.011362 |
| 0.011429 | 0.011362 | 0.011463 | 0.011329 | 0.011463 | 0.011564 | 0.011866 |
| 0.011362 | 0.011765 | 0.011371 | 0.017899 | 0.011387 | 0.011488 | 0.011723 |
| 0.011683 | 0.011729 | 0.011532 | 0.011408 | 0.011829 | 0.011751 | 0.011425 |
| 0.011629 | 0.011610 | 0.011255 | 0.011395 | 0.011372 | 0.011455 | 0.011318 |
| 0.011576 | 0.011507 | 0.011542 | 0.011325 | 0.011497 | 0.011530 | 0.011534 |
| 0.011404 | 0.011497 | 0.011497 | 0.011463 | 0.011429 | 0.011430 | 0.011396 |
| 0.011429 | 0.011362 | 0.011396 | 0.011430 | 0.011396 | 0.011329 | 0.011362 |
| 0.011362 | 0.011430 | 0.011329 | 0.011430 | 0.011463 | 0.011497 | 0.011396 |
| 0.011429 | 0.011396 | 0.011732 | 0.011732 | 0.011463 | 0.011497 | 0.011530 |
| 0.011295 | 0.011295 | 0.011329 | 0.011430 | 0.011295 | 0.011530 | 0.011530 |
| 0.011564 | 0.011564 | 0.011497 | 0.011597 | 0.011765 | 0.011599 | 0.011429 |
| 0.011430 | 0.011497 | 0.011530 | 0.011362 | 0.011430 | 0.011396 | 0.011429 |
| 0.011497 | 0.011497 | 0.011530 | 0.011497 | 0.011397 | 0.011597 | 0.011564 |
| 0.011433 | 0.011329 | 0.011429 | 0.011530 | 0.011430 | 0.011564 | 0.011597 |
| 0.011765 | 0.011470 | 0.011631 | 0.011597 | 0.011530 | 0.011698 | 0.011329 |
| 0.011498 | 0.011396 | 0.011362 | 0.011362 | 0.011430 | 0.011329 | 0.011430 |
| 0.011463 | 0.011497 | 0.011396 | 0.011429 | 0.011396 | 0.011732 | 0.011732 |
| 0.011463 | 0.011497 | 0.011564 | 0.011496 | 0.012137 | 0.011560 | 0.011482 |
| 0.011552 | 0.011511 | 0.011622 | 0.011510 | 0.011620 | 0.011543 | 0.011508 |
| 0.012090 | 0.011406 | 0.011540 | 0.011475 | 0.011749 | 0.011604 | 0.011707 |
| 0.012114 | 0.011588 | 0.011669 | 0.011732 | 0.011597 | 0.011597 | 0.011635 |
| 0.011295 | 0.011463 | 0.011597 | 0.011564 | 0.011567 | 0.011564 | 0.011532 |
| 0.011396 | 0.011329 | 0.011362 | 0.011396 | 0.011295 | 0.011362 | 0.011262 |
| 0.011396 | 0.011429 | 0.011329 | 0.011295 | 0.011396 | 0.011329 | 0.011362 |
| 0.011362 | 0.011295 | 0.011362 | 0.011396 | 0.011295 | 0.011496 | 0.011530 |
| 0.011429 | 0.011496 | 0.011429 | 0.011429 | 0.011362 | 0.011765 | 0.011396 |
| 0.011443 | 0.011362 | 0.011598 | 0.011603 | 0.011463 | 0.011463 | 0.000000 |
| 0.011463 | 0.011396 | 0.011362 | 0.011396 | 0.011496 | 0.011496 | 0.011429 |
| 0.011429 | 0.011564 | 0.011731 | 0.011463 | 0.011664 | 0.011664 | 0.011530 |



|          |          |          |          |          |          |          |
|----------|----------|----------|----------|----------|----------|----------|
| 0.011362 | 0.011429 | 0.011463 | 0.011866 | 0.011430 | 0.011463 | 0.011429 |
| 0.011463 | 0.011396 | 0.011396 | 0.011698 | 0.011631 | 0.011664 | 0.011396 |
| 0.011497 | 0.011564 | 0.011429 | 0.011497 | 0.011463 | 0.011329 | 0.011664 |
| 0.011429 | 0.011396 | 0.011396 | 0.011564 | 0.011396 | 0.011496 | 0.011732 |
| 0.011429 | 0.011807 | 0.011799 | 0.011588 | 0.011342 | 0.011502 | 0.011318 |
| 0.011280 | 0.011800 | 0.011341 | 0.011551 | 0.011353 | 0.011467 | 0.011485 |
| 0.011621 | 0.011323 | 0.011450 | 0.011324 | 0.011330 | 0.011529 | 0.011506 |
| 0.011512 | 0.011414 | 0.011483 | 0.011412 | 0.011431 | 0.011564 | 0.011631 |
| 0.011564 | 0.011497 | 0.011601 | 0.011603 | 0.011738 | 0.011732 | 0.011429 |
| 0.011664 | 0.011530 | 0.011396 | 0.011497 | 0.011295 | 0.011530 | 0.011329 |
| 0.011396 | 0.011396 | 0.011362 | 0.011329 | 0.011362 | 0.011329 | 0.011429 |
| 0.011409 | 0.011410 | 0.011403 | 0.011437 | 0.011573 | 0.011538 | 0.011538 |
| 0.011537 | 0.011464 | 0.011245 | 0.011240 | 0.011399 | 0.011568 | 0.011569 |
| 0.011363 | 0.011433 | 0.011666 | 0.011635 | 0.011565 | 0.011599 | 0.011530 |
| 0.011463 | 0.011530 | 0.011530 | 0.011429 | 0.012001 | 0.011597 | 0.011665 |
| 0.011698 | 0.011772 | 0.011401 | 0.011476 | 0.011362 | 0.011564 | 0.011530 |
| 0.011565 | 0.011597 | 0.011597 | 0.011597 | 0.011768 | 0.011732 | 0.011372 |
| 0.011263 | 0.011268 | 0.011367 | 0.011332 | 0.011436 | 0.011284 | 0.011604 |
| 0.011403 | 0.011543 | 0.011298 | 0.011397 | 0.011396 | 0.011471 | 0.011362 |
| 0.011329 | 0.011329 | 0.011396 | 0.011362 | 0.011564 | 0.011530 | 0.011463 |
| 0.011564 | 0.011631 | 0.011362 | 0.011362 | 0.011396 | 0.011396 | 0.011398 |
| 0.011466 | 0.011396 | 0.011396 | 0.011431 | 0.011564 | 0.011631 | 0.011564 |
| 0.011497 | 0.011601 | 0.011603 | 0.011738 | 0.011732 | 0.011429 | 0.011597 |
| 0.011530 | 0.011530 | 0.011365 | 0.011547 | 0.011477 | 0.011503 | 0.011375 |
| 0.011542 | 0.011789 | 0.011526 | 0.011434 | 0.011329 | 0.011530 | 0.011396 |
| 0.011497 | 0.011362 | 0.011329 | 0.011431 | 0.011530 | 0.011533 | 0.011430 |
| 0.011329 | 0.011263 | 0.011396 | 0.011329 | 0.011262 | 0.011366 | 0.011530 |
| 0.011429 | 0.011362 | 0.011396 | 0.011430 | 0.011396 | 0.011329 | 0.011530 |
| 0.011396 | 0.011429 | 0.011429 | 0.011362 | 0.011429 | 0.011664 | 0.011329 |
| 0.011362 | 0.011765 | 0.011362 | 0.011396 | 0.011362 | 0.011731 | 0.011317 |
| 0.011847 | 0.011315 | 0.011361 | 0.011543 | 0.011630 | 0.011563 | 0.011227 |
| 0.011323 | 0.011530 | 0.011631 | 0.011739 | 0.011599 | 0.011737 | 0.011867 |
| 0.011767 | 0.011804 | 0.011765 | 0.012017 | 0.011732 | 0.012606 | 0.011768 |
| 0.012507 | 0.012274 | 0.012408 | 0.012680 | 0.011731 | 0.011430 | 0.011732 |
| 0.012171 | 0.012106 | 0.011698 | 0.011597 | 0.011665 | 0.011665 | 0.011635 |
| 0.011530 | 0.011535 | 0.011597 | 0.011565 | 0.011935 | 0.012001 | 0.012002 |
| 0.011901 | 0.012002 | 0.012106 | 0.011872 | 0.012171 | 0.012178 | 0.012238 |
| 0.012239 | 0.012273 | 0.012221 | 0.012239 | 0.012241 | 0.011463 | 0.011766 |
| 0.011834 | 0.012337 | 0.011840 | 0.012068 | 0.012541 | 0.011604 | 0.011497 |
| 0.011463 | 0.011463 | 0.011934 | 0.011965 | 0.012081 | 0.011799 | 0.011465 |
| S560     | 0.011732 | 0.011732 | 0.012068 | 0.011832 | 0.011832 | 0.011900 |
| 0.011739 | 0.011671 | 0.011900 | 0.011329 | 0.011396 | 0.011363 | 0.011329 |
| 0.011362 | 0.011530 | 0.011329 | 0.011362 | 0.011429 | 0.011396 | 0.011362 |
| 0.011329 | 0.011362 | 0.011463 | 0.011329 | 0.011363 | 0.011362 | 0.011705 |
| 0.011597 | 0.011362 | 0.011262 | 0.011496 | 0.011362 | 0.011396 | 0.011429 |
| 0.011396 | 0.011497 | 0.011396 | 0.011396 | 0.011429 | 0.011396 | 0.011564 |
| 0.011329 | 0.011396 | 0.011429 | 0.011362 | 0.011463 | 0.011497 | 0.011429 |
| 0.011396 | 0.011564 | 0.011463 | 0.011732 | 0.011396 | 0.011664 | 0.011396 |
| 0.011362 | 0.011463 | 0.011530 | 0.011664 | 0.011698 | 0.011463 | 0.011564 |
| 0.011429 | 0.011497 | 0.011396 | 0.011631 | 0.011866 | 0.011396 | 0.011463 |
| 0.011362 | 0.011463 | 0.011429 | 0.011497 | 0.011429 | 0.011429 | 0.011429 |
| 0.011329 | 0.011362 | 0.011329 | 0.011429 | 0.011396 | 0.011430 | 0.011496 |
| 0.011429 | 0.011396 | 0.011463 | 0.011362 | 0.011496 | 0.011329 | 0.011396 |
| 0.011564 | 0.011496 | 0.011732 | 0.011564 | 0.011396 | 0.011631 | 0.011396 |
| 0.011579 | 0.011807 | 0.011626 | 0.011295 | 0.011321 | 0.011428 | 0.011533 |
| 0.012158 | 0.011620 | 0.011349 | 0.011631 | 0.011631 | 0.011429 | 0.011530 |
| 0.011463 | 0.011429 | 0.011496 | 0.011396 | 0.011497 | 0.011429 | 0.011429 |
| 0.011396 | 0.011496 | 0.011698 | 0.011564 | 0.011463 | 0.011430 | 0.011362 |
| 0.011329 | 0.011329 | 0.011396 | 0.011362 | 0.011564 | 0.011530 | 0.011463 |
| 0.011564 | 0.011631 | 0.011362 | 0.011362 | 0.011396 | 0.011396 | 0.011398 |

|          |          |          |          |          |          |          |
|----------|----------|----------|----------|----------|----------|----------|
| 0.011466 | 0.011396 | 0.011396 | 0.011276 | 0.011349 | 0.011306 | 0.011396 |
| 0.011399 | 0.011335 | 0.011392 | 0.011371 | 0.011298 | 0.011334 | 0.011364 |
| 0.011636 | 0.011405 | 0.011439 | 0.011329 | 0.011337 | 0.011464 | 0.011430 |
| 0.011498 | 0.011431 | 0.011430 | 0.011530 | 0.011463 | 0.011833 | 0.011631 |
| 0.011664 | 0.011530 | 0.011396 | 0.011497 | 0.011295 | 0.011530 | 0.011329 |
| 0.011396 | 0.011396 | 0.011362 | 0.011329 | 0.011362 | 0.011329 | 0.011430 |
| 0.011396 | 0.011497 | 0.011430 | 0.011329 | 0.011431 | 0.011530 | 0.011533 |
| 0.011531 | 0.011430 | 0.011329 | 0.011263 | 0.011396 | 0.011329 | 0.011262 |
| 0.011366 | 0.011531 | 0.011329 | 0.011531 | 0.011295 | 0.011396 | 0.011362 |
| 0.011463 | 0.011362 | 0.011396 | 0.011363 | 0.011396 | 0.011262 | 0.011396 |
| 0.011430 | 0.011362 | 0.011430 | 0.011362 | 0.011396 | 0.011430 | 0.011665 |
| 0.011698 | 0.011698 | 0.011766 | 0.011532 | 0.011766 | 0.011396 | 0.011362 |
| 0.011398 | 0.011667 | 0.011563 | 0.011300 | 0.011773 | 0.011265 | 0.011414 |
| 0.011773 | 0.011672 | 0.011564 | 0.011765 | 0.011470 | 0.011631 | 0.011598 |
| 0.011530 | 0.011698 | 0.011558 | 0.011390 | 0.011479 | 0.011430 | 0.011500 |
| 0.011597 | 0.011499 | 0.011635 | 0.011703 | 0.011631 | 0.011698 | 0.011806 |
| 0.011534 | 0.011705 | 0.011636 | 0.011500 | 0.011834 | 0.011295 | 0.011498 |
| 0.011463 | 0.011396 | 0.011295 | 0.011295 | 0.011362 | 0.011362 | 0.011429 |
| 0.011362 | 0.011429 | 0.011329 | 0.011429 | 0.011362 | 0.011362 | 0.011429 |
| 0.011362 | 0.011799 | 0.011698 | 0.011732 | 0.011262 | 0.011362 | 0.011396 |
| 0.011396 | 0.011362 | 0.011429 | 0.011463 | 0.011329 | 0.011329 | 0.011329 |
| 0.011866 | 0.011497 | 0.011497 | 0.011295 | 0.011396 | 0.011564 | 0.011329 |
| 0.011329 | 0.011396 | 0.011362 | 0.011530 | 0.011329 | 0.011463 | 0.011597 |
| 0.011463 | 0.011362 | 0.011362 | 0.011295 | 0.011295 | 0.011463 | 0.011396 |
| 0.011295 | 0.011396 | 0.011262 | 0.011295 | 0.011429 | 0.011564 | 0.011329 |
| 0.011295 | 0.011429 | 0.011363 | 0.011262 | 0.011597 | 0.011262 | 0.011429 |
| 0.011505 | 0.011329 | 0.011631 | 0.011463 | 0.011497 | 0.011362 | 0.011463 |
| 0.011329 | 0.011664 | 0.011262 | 0.011530 | 0.011329 | 0.011329 | 0.011262 |
| 0.011497 | 0.011698 | 0.011396 | 0.011463 | 0.011295 | 0.011698 | 0.011329 |
| 0.011329 | 0.011329 | 0.011362 | 0.011463 | 0.011362 | 0.011463 | 0.011530 |
| 0.011530 | 0.011497 | 0.011396 | 0.011497 | 0.011463 | 0.011262 | 0.011295 |
| 0.011329 | 0.011262 | 0.011396 | 0.011329 | 0.011295 | 0.011463 | 0.011329 |
| 0.011362 | 0.011362 | 0.011497 | 0.011530 | 0.011429 | 0.011362 | 0.011362 |
| 0.011429 | 0.011362 | 0.011463 | 0.011329 | 0.011463 | 0.011564 | 0.011799 |
| 0.011362 | 0.011765 | 0.011371 | 0.011786 | 0.011453 | 0.011611 | 0.011723 |
| 0.011683 | 0.011729 | 0.011532 | 0.011524 | 0.011885 | 0.011751 | 0.011546 |
| 0.011630 | 0.011732 | 0.011294 | 0.011395 | 0.011373 | 0.011455 | 0.011361 |
| 0.011623 | 0.011544 | 0.011542 | 0.011391 | 0.011497 | 0.011530 | 0.011500 |
| 0.011404 | 0.011497 | 0.011497 | 0.011463 | 0.011430 | 0.011430 | 0.011396 |
| 0.011430 | 0.011362 | 0.011396 | 0.011430 | 0.011396 | 0.011329 | 0.011362 |
| 0.011362 | 0.011430 | 0.011329 | 0.011430 | 0.011463 | 0.011497 | 0.011396 |
| 0.011429 | 0.011329 | 0.011732 | 0.011732 | 0.011463 | 0.011497 | 0.011530 |
| 0.011295 | 0.011295 | 0.011329 | 0.011430 | 0.011295 | 0.011530 | 0.011530 |
| 0.011564 | 0.011564 | 0.011497 | 0.011597 | 0.011766 | 0.011599 | 0.011430 |
| 0.011430 | 0.011497 | 0.011530 | 0.011362 | 0.011430 | 0.011396 | 0.011430 |
| 0.011497 | 0.011497 | 0.011530 | 0.011497 | 0.011397 | 0.011597 | 0.011564 |
| 0.011433 | 0.011329 | 0.011430 | 0.011530 | 0.011430 | 0.011564 | 0.011597 |
| 0.011765 | 0.011470 | 0.011631 | 0.011598 | 0.011530 | 0.011698 | 0.011329 |
| 0.011498 | 0.011396 | 0.011362 | 0.011362 | 0.011430 | 0.011329 | 0.011430 |
| 0.011463 | 0.011497 | 0.011396 | 0.011429 | 0.011329 | 0.011732 | 0.011732 |
| 0.011463 | 0.011497 | 0.011564 | 0.011496 | 0.012137 | 0.011525 | 0.011482 |
| 0.011482 | 0.011476 | 0.011622 | 0.011510 | 0.011620 | 0.011543 | 0.011508 |
| 0.012090 | 0.011406 | 0.011540 | 0.011475 | 0.011749 | 0.011604 | 0.011707 |
| 0.012114 | 0.011588 | 0.011669 | 0.011732 | 0.011597 | 0.011597 | 0.011635 |
| 0.011295 | 0.011463 | 0.011597 | 0.011564 | 0.011567 | 0.011564 | 0.011532 |
| 0.011396 | 0.011329 | 0.011362 | 0.011396 | 0.011295 | 0.011362 | 0.011262 |
| 0.011396 | 0.011429 | 0.011329 | 0.011295 | 0.011396 | 0.011329 | 0.011362 |
| 0.011362 | 0.011295 | 0.011362 | 0.011396 | 0.011295 | 0.011497 | 0.011530 |
| 0.011429 | 0.011497 | 0.011429 | 0.011429 | 0.011362 | 0.011698 | 0.011396 |
| 0.011443 | 0.011362 | 0.011598 | 0.011603 | 0.011463 | 0.011463 | 0.011463 |

|          |          |          |          |          |          |          |
|----------|----------|----------|----------|----------|----------|----------|
| 0.000000 | 0.011396 | 0.011362 | 0.011396 | 0.011497 | 0.011497 | 0.011429 |
| 0.011429 | 0.011564 | 0.011732 | 0.011463 | 0.011665 | 0.011665 | 0.011530 |
| 0.011362 | 0.011429 | 0.000000 | 0.011866 | 0.011430 | 0.011463 | 0.011429 |
| 0.011463 | 0.011396 | 0.011396 | 0.011698 | 0.011631 | 0.011665 | 0.011396 |
| 0.011429 | 0.011564 | 0.011429 | 0.011429 | 0.011463 | 0.011329 | 0.011664 |
| 0.011429 | 0.011396 | 0.011396 | 0.011564 | 0.011396 | 0.011497 | 0.011732 |
| 0.011429 | 0.011807 | 0.011732 | 0.011629 | 0.011399 | 0.011502 | 0.011422 |
| 0.011390 | 0.011839 | 0.011341 | 0.011596 | 0.011402 | 0.011519 | 0.011538 |
| 0.011672 | 0.011258 | 0.011506 | 0.011391 | 0.011384 | 0.011529 | 0.011506 |
| 0.011512 | 0.011414 | 0.011483 | 0.011412 | 0.011431 | 0.011564 | 0.011631 |
| 0.011631 | 0.011497 | 0.011601 | 0.011603 | 0.011738 | 0.011767 | 0.011429 |
| 0.011664 | 0.011530 | 0.011396 | 0.011497 | 0.011295 | 0.011530 | 0.011329 |
| 0.011396 | 0.011396 | 0.011362 | 0.011329 | 0.011362 | 0.011329 | 0.011430 |
| 0.011410 | 0.011410 | 0.011403 | 0.011437 | 0.011574 | 0.011539 | 0.011470 |
| 0.011537 | 0.011464 | 0.011245 | 0.011204 | 0.011399 | 0.011569 | 0.011569 |
| 0.011363 | 0.011433 | 0.011666 | 0.011635 | 0.011531 | 0.011599 | 0.011530 |
| 0.011463 | 0.011530 | 0.011530 | 0.011429 | 0.012001 | 0.011564 | 0.011665 |
| 0.011698 | 0.011772 | 0.011401 | 0.011476 | 0.011362 | 0.011564 | 0.011530 |
| 0.011565 | 0.011597 | 0.011597 | 0.011597 | 0.011768 | 0.011732 | 0.011372 |
| 0.011263 | 0.011268 | 0.011367 | 0.011332 | 0.011436 | 0.011284 | 0.011604 |
| 0.011403 | 0.011586 | 0.011346 | 0.011435 | 0.011397 | 0.011471 | 0.011362 |
| 0.011329 | 0.011329 | 0.011396 | 0.011362 | 0.011564 | 0.011530 | 0.011463 |
| 0.011564 | 0.011631 | 0.011362 | 0.011362 | 0.011396 | 0.011396 | 0.011398 |
| 0.011466 | 0.011396 | 0.011396 | 0.011431 | 0.011564 | 0.011631 | 0.011631 |
| 0.011497 | 0.011601 | 0.011603 | 0.011738 | 0.011767 | 0.011429 | 0.011597 |
| 0.011530 | 0.011530 | 0.011365 | 0.011548 | 0.011442 | 0.011503 | 0.011376 |
| 0.011542 | 0.011744 | 0.011526 | 0.011434 | 0.011329 | 0.011531 | 0.011396 |
| 0.011497 | 0.011430 | 0.011329 | 0.011431 | 0.011530 | 0.011533 | 0.011430 |
| 0.011329 | 0.011263 | 0.011396 | 0.011329 | 0.011262 | 0.011366 | 0.011531 |
| 0.011430 | 0.011362 | 0.011396 | 0.011430 | 0.011396 | 0.011329 | 0.011530 |
| 0.011396 | 0.011429 | 0.011429 | 0.011362 | 0.011429 | 0.011665 | 0.011329 |
| 0.011362 | 0.011698 | 0.011362 | 0.011396 | 0.011362 | 0.011732 | 0.011360 |
| 0.011904 | 0.011358 | 0.011411 | 0.011584 | 0.011671 | 0.011563 | 0.011269 |
| 0.011375 | 0.011530 | 0.011631 | 0.011739 | 0.011599 | 0.011737 | 0.011867 |
| 0.011767 | 0.011804 | 0.011765 | 0.012017 | 0.011732 | 0.012607 | 0.011768 |
| 0.012507 | 0.012275 | 0.012409 | 0.012680 | 0.011732 | 0.011430 | 0.011732 |
| 0.012103 | 0.012106 | 0.011698 | 0.011598 | 0.011666 | 0.011666 | 0.011635 |
| 0.011530 | 0.011535 | 0.011597 | 0.011565 | 0.011935 | 0.012001 | 0.012002 |
| 0.011901 | 0.012002 | 0.012106 | 0.011805 | 0.012172 | 0.012178 | 0.012239 |
| 0.012239 | 0.012273 | 0.012221 | 0.012240 | 0.012241 | 0.011463 | 0.011766 |
| 0.011834 | 0.012337 | 0.011840 | 0.012068 | 0.012542 | 0.011604 | 0.011497 |
| 0.011463 | 0.011463 | 0.011934 | 0.012006 | 0.012081 | 0.011799 | 0.011465 |
| S561     | 0.011664 | 0.011664 | 0.012001 | 0.011765 | 0.011765 | 0.011832 |
| 0.011671 | 0.011603 | 0.011832 | 0.011262 | 0.011329 | 0.011296 | 0.011262 |
| 0.011295 | 0.011463 | 0.011262 | 0.011295 | 0.011362 | 0.011329 | 0.011295 |
| 0.011262 | 0.011295 | 0.011396 | 0.011262 | 0.011228 | 0.011295 | 0.011637 |
| 0.011530 | 0.011295 | 0.011195 | 0.011429 | 0.011295 | 0.011329 | 0.011295 |
| 0.011329 | 0.011362 | 0.011329 | 0.011329 | 0.011362 | 0.011329 | 0.011497 |
| 0.011262 | 0.011329 | 0.011362 | 0.011295 | 0.011396 | 0.011429 | 0.011362 |
| 0.011329 | 0.011497 | 0.011396 | 0.011664 | 0.011329 | 0.011530 | 0.011329 |
| 0.011295 | 0.011396 | 0.011463 | 0.011530 | 0.011698 | 0.011396 | 0.011497 |
| 0.011295 | 0.011362 | 0.011329 | 0.011496 | 0.011799 | 0.011329 | 0.011396 |
| 0.011295 | 0.011396 | 0.011362 | 0.011429 | 0.011362 | 0.011362 | 0.011362 |
| 0.011262 | 0.011295 | 0.011262 | 0.011362 | 0.011329 | 0.011363 | 0.011429 |
| 0.011362 | 0.011329 | 0.011329 | 0.011295 | 0.011429 | 0.011195 | 0.011329 |
| 0.011496 | 0.011429 | 0.011664 | 0.011497 | 0.011329 | 0.011497 | 0.011329 |
| 0.011505 | 0.011733 | 0.011551 | 0.011256 | 0.011247 | 0.011355 | 0.011454 |
| 0.012085 | 0.011467 | 0.011266 | 0.011564 | 0.011564 | 0.011362 | 0.011463 |
| 0.011396 | 0.011362 | 0.011429 | 0.011329 | 0.011430 | 0.011295 | 0.011362 |
| 0.011329 | 0.011429 | 0.011631 | 0.011496 | 0.011396 | 0.011362 | 0.011228 |

|          |          |          |          |          |          |          |
|----------|----------|----------|----------|----------|----------|----------|
| 0.011262 | 0.011262 | 0.011262 | 0.011295 | 0.011497 | 0.011463 | 0.011396 |
| 0.011497 | 0.011564 | 0.011295 | 0.011295 | 0.011329 | 0.011329 | 0.011330 |
| 0.011398 | 0.011329 | 0.011329 | 0.011168 | 0.011277 | 0.011236 | 0.011329 |
| 0.011331 | 0.011266 | 0.011319 | 0.011302 | 0.011230 | 0.011266 | 0.011297 |
| 0.011564 | 0.011336 | 0.011301 | 0.011262 | 0.011268 | 0.011397 | 0.011363 |
| 0.011430 | 0.011364 | 0.011363 | 0.011463 | 0.011396 | 0.011698 | 0.011564 |
| 0.011597 | 0.011463 | 0.011329 | 0.011430 | 0.011228 | 0.011463 | 0.011262 |
| 0.011329 | 0.011329 | 0.011295 | 0.011262 | 0.011295 | 0.011262 | 0.011362 |
| 0.011262 | 0.011362 | 0.011363 | 0.011262 | 0.011363 | 0.011463 | 0.011466 |
| 0.011396 | 0.011363 | 0.011262 | 0.011195 | 0.011329 | 0.011262 | 0.011195 |
| 0.011298 | 0.011396 | 0.011195 | 0.011396 | 0.011228 | 0.011329 | 0.011295 |
| 0.011329 | 0.011295 | 0.011262 | 0.011295 | 0.011329 | 0.011195 | 0.011262 |
| 0.011295 | 0.011295 | 0.011362 | 0.011295 | 0.011329 | 0.011362 | 0.011597 |
| 0.011698 | 0.011631 | 0.011698 | 0.011465 | 0.011699 | 0.011329 | 0.011295 |
| 0.011330 | 0.011586 | 0.011426 | 0.011232 | 0.011705 | 0.011197 | 0.011336 |
| 0.011705 | 0.011604 | 0.011496 | 0.011698 | 0.011402 | 0.011564 | 0.011463 |
| 0.011463 | 0.011631 | 0.011486 | 0.011307 | 0.011354 | 0.011362 | 0.011432 |
| 0.011530 | 0.011431 | 0.011567 | 0.011568 | 0.011564 | 0.011631 | 0.011738 |
| 0.011466 | 0.011569 | 0.011568 | 0.011500 | 0.011767 | 0.011228 | 0.011431 |
| 0.011329 | 0.011329 | 0.011228 | 0.011228 | 0.011228 | 0.011295 | 0.011362 |
| 0.011228 | 0.011295 | 0.011194 | 0.011362 | 0.011228 | 0.011295 | 0.011362 |
| 0.011295 | 0.011732 | 0.011631 | 0.011664 | 0.011195 | 0.011295 | 0.011329 |
| 0.011329 | 0.011295 | 0.011362 | 0.011396 | 0.011262 | 0.011262 | 0.011262 |
| 0.011799 | 0.011429 | 0.011429 | 0.011228 | 0.011329 | 0.011430 | 0.011262 |
| 0.011262 | 0.011329 | 0.011295 | 0.011396 | 0.011262 | 0.011396 | 0.011463 |
| 0.011463 | 0.011295 | 0.011295 | 0.011228 | 0.011228 | 0.011396 | 0.011329 |
| 0.011228 | 0.011329 | 0.011195 | 0.011228 | 0.011362 | 0.011497 | 0.011262 |
| 0.011228 | 0.011362 | 0.011295 | 0.011195 | 0.011530 | 0.011195 | 0.011362 |
| 0.011368 | 0.011262 | 0.011564 | 0.011396 | 0.011429 | 0.011295 | 0.011396 |
| 0.011262 | 0.011530 | 0.011195 | 0.011463 | 0.011262 | 0.011262 | 0.011195 |
| 0.011362 | 0.011631 | 0.011329 | 0.011396 | 0.011228 | 0.011631 | 0.011262 |
| 0.011262 | 0.011262 | 0.011295 | 0.011329 | 0.011295 | 0.011396 | 0.011463 |
| 0.011463 | 0.011429 | 0.011329 | 0.011430 | 0.011329 | 0.011262 | 0.011228 |
| 0.011262 | 0.011262 | 0.011329 | 0.011262 | 0.011161 | 0.011396 | 0.011262 |
| 0.011295 | 0.011295 | 0.011429 | 0.011463 | 0.011362 | 0.011228 | 0.011295 |
| 0.011362 | 0.011295 | 0.011396 | 0.011262 | 0.011396 | 0.011497 | 0.011799 |
| 0.011295 | 0.011698 | 0.011302 | 0.017823 | 0.011257 | 0.011427 | 0.011653 |
| 0.011614 | 0.011658 | 0.011322 | 0.011292 | 0.011719 | 0.011682 | 0.011364 |
| 0.011487 | 0.011610 | 0.011216 | 0.011228 | 0.011255 | 0.011357 | 0.011318 |
| 0.011482 | 0.011470 | 0.011431 | 0.011259 | 0.011429 | 0.011463 | 0.011466 |
| 0.011266 | 0.011430 | 0.011429 | 0.011396 | 0.011362 | 0.011363 | 0.011329 |
| 0.011362 | 0.011295 | 0.011329 | 0.011362 | 0.011329 | 0.011262 | 0.011295 |
| 0.011295 | 0.011362 | 0.011262 | 0.011363 | 0.011396 | 0.011430 | 0.011329 |
| 0.011362 | 0.011329 | 0.011665 | 0.011665 | 0.011396 | 0.011430 | 0.011463 |
| 0.011228 | 0.011228 | 0.011262 | 0.011295 | 0.011228 | 0.011463 | 0.011463 |
| 0.011497 | 0.011496 | 0.011429 | 0.011530 | 0.011698 | 0.011532 | 0.011295 |
| 0.011362 | 0.011430 | 0.011396 | 0.011295 | 0.011362 | 0.011329 | 0.011362 |
| 0.011430 | 0.011430 | 0.011463 | 0.011363 | 0.011262 | 0.011530 | 0.011430 |
| 0.011365 | 0.011262 | 0.011362 | 0.011463 | 0.011363 | 0.011497 | 0.011530 |
| 0.011698 | 0.011402 | 0.011564 | 0.011463 | 0.011463 | 0.011631 | 0.011262 |
| 0.011431 | 0.011329 | 0.011295 | 0.011295 | 0.011362 | 0.011262 | 0.011363 |
| 0.011396 | 0.011430 | 0.011329 | 0.011362 | 0.011329 | 0.011665 | 0.011665 |
| 0.011396 | 0.011430 | 0.011496 | 0.011429 | 0.012069 | 0.011453 | 0.011412 |
| 0.011482 | 0.011442 | 0.011552 | 0.011441 | 0.011550 | 0.011474 | 0.011440 |
| 0.012022 | 0.011337 | 0.011471 | 0.011406 | 0.011680 | 0.011536 | 0.011571 |
| 0.012046 | 0.011475 | 0.011601 | 0.011664 | 0.011530 | 0.011530 | 0.011567 |
| 0.011228 | 0.011329 | 0.011530 | 0.011496 | 0.011499 | 0.011496 | 0.011464 |
| 0.011329 | 0.011194 | 0.011228 | 0.011329 | 0.011161 | 0.011295 | 0.011195 |
| 0.011329 | 0.011362 | 0.011262 | 0.011228 | 0.011329 | 0.011262 | 0.011295 |
| 0.011295 | 0.011228 | 0.011295 | 0.011329 | 0.011228 | 0.011362 | 0.011463 |

|          |          |          |          |          |          |          |
|----------|----------|----------|----------|----------|----------|----------|
| 0.011362 | 0.011429 | 0.011362 | 0.011362 | 0.011295 | 0.011698 | 0.011329 |
| 0.011373 | 0.011295 | 0.011531 | 0.011535 | 0.011329 | 0.011396 | 0.011396 |
| 0.011396 | 0.000000 | 0.011295 | 0.000000 | 0.011429 | 0.011429 | 0.011362 |
| 0.011362 | 0.011497 | 0.011664 | 0.011396 | 0.011597 | 0.011597 | 0.011463 |
| 0.011295 | 0.011362 | 0.011396 | 0.011799 | 0.011362 | 0.011329 | 0.011362 |
| 0.011396 | 0.011329 | 0.011329 | 0.011631 | 0.011497 | 0.011597 | 0.011329 |
| 0.011430 | 0.011497 | 0.011362 | 0.011430 | 0.011396 | 0.011262 | 0.011597 |
| 0.011362 | 0.011329 | 0.011329 | 0.011497 | 0.011329 | 0.011429 | 0.011665 |
| 0.011362 | 0.011739 | 0.011732 | 0.011548 | 0.011229 | 0.011434 | 0.011267 |
| 0.011225 | 0.011761 | 0.011271 | 0.011507 | 0.011255 | 0.011417 | 0.011379 |
| 0.011468 | 0.011192 | 0.011339 | 0.011192 | 0.011222 | 0.011395 | 0.011385 |
| 0.011399 | 0.011257 | 0.011413 | 0.011342 | 0.011364 | 0.011497 | 0.011564 |
| 0.011564 | 0.011430 | 0.011534 | 0.011535 | 0.011670 | 0.011696 | 0.011362 |
| 0.011597 | 0.011463 | 0.011329 | 0.011430 | 0.011228 | 0.011463 | 0.011262 |
| 0.011329 | 0.011329 | 0.011295 | 0.011262 | 0.011295 | 0.011262 | 0.011362 |
| 0.011340 | 0.011340 | 0.011334 | 0.011368 | 0.011505 | 0.011402 | 0.011470 |
| 0.011469 | 0.011396 | 0.011208 | 0.011204 | 0.011331 | 0.011501 | 0.011501 |
| 0.011296 | 0.011365 | 0.011599 | 0.011567 | 0.011497 | 0.011531 | 0.011463 |
| 0.011396 | 0.011463 | 0.011463 | 0.011362 | 0.011934 | 0.011530 | 0.011598 |
| 0.011631 | 0.011701 | 0.011333 | 0.011407 | 0.011295 | 0.011497 | 0.011463 |
| 0.011498 | 0.011530 | 0.011530 | 0.011530 | 0.011689 | 0.011664 | 0.011303 |
| 0.011196 | 0.011199 | 0.011299 | 0.011264 | 0.011368 | 0.011210 | 0.011536 |
| 0.011335 | 0.011455 | 0.011203 | 0.011360 | 0.011329 | 0.011402 | 0.011228 |
| 0.011262 | 0.011262 | 0.011262 | 0.011295 | 0.011497 | 0.011463 | 0.011396 |
| 0.011497 | 0.011564 | 0.011295 | 0.011295 | 0.011329 | 0.011329 | 0.011330 |
| 0.011398 | 0.011329 | 0.011329 | 0.011364 | 0.011497 | 0.011564 | 0.011564 |
| 0.011430 | 0.011534 | 0.011535 | 0.011670 | 0.011696 | 0.011362 | 0.011530 |
| 0.011463 | 0.011463 | 0.011297 | 0.011478 | 0.011408 | 0.011435 | 0.011305 |
| 0.011405 | 0.011653 | 0.011441 | 0.011366 | 0.011195 | 0.011396 | 0.011262 |
| 0.011362 | 0.011363 | 0.011262 | 0.011363 | 0.011463 | 0.011466 | 0.011363 |
| 0.011262 | 0.011195 | 0.011329 | 0.011262 | 0.011195 | 0.011298 | 0.011396 |
| 0.011362 | 0.011295 | 0.011329 | 0.011362 | 0.011329 | 0.011262 | 0.011463 |
| 0.011329 | 0.011362 | 0.011362 | 0.011295 | 0.011362 | 0.011597 | 0.011262 |
| 0.011295 | 0.011698 | 0.011295 | 0.011262 | 0.011295 | 0.011664 | 0.011232 |
| 0.011679 | 0.011273 | 0.011261 | 0.011463 | 0.011549 | 0.011491 | 0.011186 |
| 0.011218 | 0.011463 | 0.011564 | 0.011671 | 0.011532 | 0.011669 | 0.011800 |
| 0.011700 | 0.011737 | 0.011698 | 0.011949 | 0.011664 | 0.012539 | 0.011700 |
| 0.012439 | 0.012207 | 0.012341 | 0.012613 | 0.011664 | 0.011363 | 0.011665 |
| 0.012104 | 0.012038 | 0.011631 | 0.011530 | 0.011598 | 0.011598 | 0.011567 |
| 0.011463 | 0.011467 | 0.011530 | 0.011497 | 0.011867 | 0.011933 | 0.011935 |
| 0.011834 | 0.011935 | 0.012038 | 0.011804 | 0.012104 | 0.012110 | 0.012171 |
| 0.012172 | 0.012206 | 0.012152 | 0.012172 | 0.012173 | 0.011396 | 0.011699 |
| 0.011767 | 0.012270 | 0.011772 | 0.012001 | 0.012474 | 0.011536 | 0.011430 |
| 0.011396 | 0.011396 | 0.011867 | 0.011883 | 0.012010 | 0.011732 | 0.011397 |
| S562     | 0.011631 | 0.011631 | 0.011967 | 0.011731 | 0.011731 | 0.011799 |
| 0.011637 | 0.011569 | 0.011799 | 0.011228 | 0.011295 | 0.011262 | 0.011228 |
| 0.011262 | 0.011429 | 0.011228 | 0.011262 | 0.011329 | 0.011295 | 0.011262 |
| 0.011228 | 0.011262 | 0.011362 | 0.011228 | 0.011262 | 0.011262 | 0.011603 |
| 0.011496 | 0.011262 | 0.011161 | 0.011396 | 0.011329 | 0.011295 | 0.011329 |
| 0.011295 | 0.011396 | 0.011295 | 0.011295 | 0.011329 | 0.011295 | 0.011463 |
| 0.011228 | 0.011295 | 0.011329 | 0.011262 | 0.011362 | 0.011396 | 0.011329 |
| 0.011295 | 0.011463 | 0.011362 | 0.011631 | 0.011295 | 0.011564 | 0.011295 |
| 0.011262 | 0.011362 | 0.011429 | 0.011564 | 0.011664 | 0.011362 | 0.011463 |
| 0.011329 | 0.011396 | 0.011295 | 0.011530 | 0.011765 | 0.011295 | 0.011362 |
| 0.011262 | 0.011362 | 0.011329 | 0.011396 | 0.011329 | 0.011329 | 0.011329 |
| 0.011228 | 0.011262 | 0.011228 | 0.011329 | 0.011295 | 0.011329 | 0.011396 |
| 0.011329 | 0.011295 | 0.011362 | 0.011262 | 0.011396 | 0.011228 | 0.011295 |
| 0.011463 | 0.011396 | 0.011631 | 0.011463 | 0.011295 | 0.011530 | 0.011295 |
| 0.011468 | 0.011695 | 0.011513 | 0.011216 | 0.011172 | 0.011281 | 0.011375 |
| 0.012011 | 0.011416 | 0.011184 | 0.011530 | 0.011530 | 0.011329 | 0.011429 |

|          |          |          |          |          |          |          |
|----------|----------|----------|----------|----------|----------|----------|
| 0.011362 | 0.011329 | 0.011396 | 0.011295 | 0.011396 | 0.011329 | 0.011329 |
| 0.011295 | 0.011396 | 0.011597 | 0.011463 | 0.011362 | 0.011329 | 0.011262 |
| 0.011228 | 0.011228 | 0.011295 | 0.011262 | 0.011463 | 0.011429 | 0.011362 |
| 0.011463 | 0.011530 | 0.011262 | 0.011262 | 0.011295 | 0.011295 | 0.011297 |
| 0.011364 | 0.011295 | 0.011295 | 0.011168 | 0.011241 | 0.011200 | 0.011296 |
| 0.011297 | 0.011232 | 0.011282 | 0.011267 | 0.011196 | 0.011231 | 0.011263 |
| 0.011528 | 0.011301 | 0.011336 | 0.011228 | 0.011233 | 0.011363 | 0.011329 |
| 0.011396 | 0.011330 | 0.011329 | 0.011429 | 0.011362 | 0.011732 | 0.011530 |
| 0.011564 | 0.011429 | 0.011295 | 0.011396 | 0.011195 | 0.011429 | 0.011228 |
| 0.011295 | 0.011295 | 0.011262 | 0.011228 | 0.011262 | 0.011228 | 0.011329 |
| 0.011295 | 0.011396 | 0.011329 | 0.011228 | 0.011330 | 0.011430 | 0.011432 |
| 0.011430 | 0.011329 | 0.011228 | 0.011161 | 0.011295 | 0.011228 | 0.011161 |
| 0.011264 | 0.011430 | 0.011228 | 0.011430 | 0.011195 | 0.011295 | 0.011262 |
| 0.011362 | 0.011262 | 0.011295 | 0.011262 | 0.011295 | 0.011161 | 0.011295 |
| 0.011329 | 0.011262 | 0.011329 | 0.011262 | 0.011295 | 0.011329 | 0.011564 |
| 0.011664 | 0.011597 | 0.011665 | 0.011431 | 0.011665 | 0.011295 | 0.011262 |
| 0.011297 | 0.011545 | 0.011380 | 0.011197 | 0.011671 | 0.011163 | 0.011257 |
| 0.011671 | 0.011570 | 0.011463 | 0.011664 | 0.011333 | 0.011530 | 0.011497 |
| 0.011429 | 0.011597 | 0.011451 | 0.011266 | 0.011354 | 0.011329 | 0.011398 |
| 0.011497 | 0.011397 | 0.011533 | 0.011601 | 0.011530 | 0.011597 | 0.011704 |
| 0.011432 | 0.011603 | 0.011534 | 0.011466 | 0.011733 | 0.011194 | 0.011397 |
| 0.011362 | 0.011295 | 0.011194 | 0.011194 | 0.011262 | 0.011262 | 0.011329 |
| 0.011262 | 0.011329 | 0.011228 | 0.011329 | 0.011262 | 0.011262 | 0.011329 |
| 0.011262 | 0.011698 | 0.011597 | 0.011631 | 0.011161 | 0.011262 | 0.011295 |
| 0.011295 | 0.011262 | 0.011329 | 0.011362 | 0.011228 | 0.011228 | 0.011228 |
| 0.011765 | 0.011396 | 0.011396 | 0.011194 | 0.011295 | 0.011463 | 0.011228 |
| 0.011228 | 0.011295 | 0.011262 | 0.011429 | 0.011228 | 0.011362 | 0.011496 |
| 0.011429 | 0.011262 | 0.011262 | 0.011194 | 0.011194 | 0.011362 | 0.011295 |
| 0.011194 | 0.011295 | 0.011161 | 0.011194 | 0.011329 | 0.011463 | 0.011228 |
| 0.011195 | 0.011329 | 0.011262 | 0.011161 | 0.011496 | 0.011161 | 0.011329 |
| 0.011402 | 0.011228 | 0.011530 | 0.011362 | 0.011396 | 0.011262 | 0.011362 |
| 0.011228 | 0.011564 | 0.011161 | 0.011429 | 0.011228 | 0.011228 | 0.011161 |
| 0.011396 | 0.011597 | 0.011295 | 0.011362 | 0.011194 | 0.011597 | 0.011228 |
| 0.011228 | 0.011228 | 0.011262 | 0.011362 | 0.011262 | 0.011362 | 0.011429 |
| 0.011429 | 0.011396 | 0.011295 | 0.011396 | 0.011362 | 0.011228 | 0.011194 |
| 0.011228 | 0.011228 | 0.011295 | 0.011228 | 0.011194 | 0.011362 | 0.011228 |
| 0.011262 | 0.011262 | 0.011396 | 0.011429 | 0.011329 | 0.011262 | 0.011262 |
| 0.011329 | 0.011262 | 0.011362 | 0.011228 | 0.011362 | 0.011463 | 0.011765 |
| 0.011262 | 0.011664 | 0.011267 | 0.017747 | 0.011191 | 0.011427 | 0.011618 |
| 0.011579 | 0.011623 | 0.011270 | 0.011176 | 0.011719 | 0.011647 | 0.011303 |
| 0.011487 | 0.011548 | 0.011177 | 0.011270 | 0.011216 | 0.011356 | 0.011275 |
| 0.011482 | 0.011395 | 0.011394 | 0.011193 | 0.011396 | 0.011429 | 0.011432 |
| 0.011301 | 0.011396 | 0.011396 | 0.011362 | 0.011329 | 0.011329 | 0.011295 |
| 0.011329 | 0.011262 | 0.011295 | 0.011329 | 0.011295 | 0.011228 | 0.011262 |
| 0.011262 | 0.011329 | 0.011228 | 0.011329 | 0.011362 | 0.011396 | 0.011295 |
| 0.011329 | 0.011295 | 0.011631 | 0.011631 | 0.011362 | 0.011396 | 0.011430 |
| 0.011195 | 0.011195 | 0.011228 | 0.011329 | 0.011195 | 0.011429 | 0.011429 |
| 0.011463 | 0.011463 | 0.011396 | 0.011496 | 0.011665 | 0.011498 | 0.011329 |
| 0.011329 | 0.011396 | 0.011429 | 0.011262 | 0.011329 | 0.011295 | 0.011329 |
| 0.011396 | 0.011396 | 0.011429 | 0.011396 | 0.011296 | 0.011497 | 0.011463 |
| 0.011331 | 0.011228 | 0.011329 | 0.011430 | 0.011329 | 0.011463 | 0.011496 |
| 0.011664 | 0.011333 | 0.011530 | 0.011497 | 0.011429 | 0.011597 | 0.011228 |
| 0.011397 | 0.011295 | 0.011262 | 0.011262 | 0.011329 | 0.011228 | 0.011329 |
| 0.011362 | 0.011396 | 0.011295 | 0.011329 | 0.011295 | 0.011631 | 0.011631 |
| 0.011362 | 0.011396 | 0.011463 | 0.011396 | 0.012035 | 0.011453 | 0.011377 |
| 0.011447 | 0.011407 | 0.011517 | 0.011406 | 0.011515 | 0.011439 | 0.011405 |
| 0.011987 | 0.011302 | 0.011437 | 0.011371 | 0.011645 | 0.011502 | 0.011604 |
| 0.012012 | 0.011475 | 0.011567 | 0.011631 | 0.011496 | 0.011497 | 0.011533 |
| 0.011194 | 0.011362 | 0.011496 | 0.011463 | 0.011466 | 0.011463 | 0.011431 |
| 0.011295 | 0.011228 | 0.011262 | 0.011295 | 0.011194 | 0.011262 | 0.011161 |

|          |          |          |          |          |          |          |
|----------|----------|----------|----------|----------|----------|----------|
| 0.011295 | 0.011329 | 0.011228 | 0.011194 | 0.011295 | 0.011228 | 0.011262 |
| 0.011262 | 0.011194 | 0.011262 | 0.011295 | 0.011194 | 0.011396 | 0.011429 |
| 0.011329 | 0.011396 | 0.011329 | 0.011329 | 0.011262 | 0.011664 | 0.011295 |
| 0.011338 | 0.011262 | 0.011497 | 0.011501 | 0.011362 | 0.011362 | 0.011362 |
| 0.011362 | 0.011295 | 0.000000 | 0.011295 | 0.011396 | 0.011396 | 0.011329 |
| 0.011329 | 0.011463 | 0.011631 | 0.011362 | 0.011564 | 0.011564 | 0.011429 |
| 0.011262 | 0.011329 | 0.011362 | 0.011765 | 0.011329 | 0.011362 | 0.011329 |
| 0.011362 | 0.011295 | 0.011295 | 0.011597 | 0.011530 | 0.011564 | 0.011295 |
| 0.011396 | 0.011463 | 0.011329 | 0.011396 | 0.011362 | 0.011228 | 0.011564 |
| 0.011329 | 0.011295 | 0.011295 | 0.011463 | 0.011295 | 0.011396 | 0.011631 |
| 0.011329 | 0.011705 | 0.011698 | 0.011467 | 0.011173 | 0.011400 | 0.011267 |
| 0.011225 | 0.011683 | 0.011236 | 0.011417 | 0.011255 | 0.011366 | 0.011379 |
| 0.011417 | 0.011126 | 0.011339 | 0.011126 | 0.011168 | 0.011328 | 0.011344 |
| 0.011399 | 0.011257 | 0.011377 | 0.011272 | 0.011330 | 0.011463 | 0.011530 |
| 0.011530 | 0.011396 | 0.011500 | 0.011501 | 0.011636 | 0.011661 | 0.011329 |
| 0.011564 | 0.011429 | 0.011295 | 0.011396 | 0.011195 | 0.011429 | 0.011228 |
| 0.011295 | 0.011295 | 0.011262 | 0.011228 | 0.011262 | 0.011228 | 0.011329 |
| 0.011305 | 0.011305 | 0.011300 | 0.011334 | 0.011471 | 0.011436 | 0.011436 |
| 0.011435 | 0.011363 | 0.011171 | 0.011168 | 0.011297 | 0.011467 | 0.011467 |
| 0.011262 | 0.011331 | 0.011565 | 0.011533 | 0.011464 | 0.011498 | 0.011429 |
| 0.011362 | 0.011429 | 0.011429 | 0.011329 | 0.011900 | 0.011496 | 0.011564 |
| 0.011597 | 0.011665 | 0.011299 | 0.011372 | 0.011262 | 0.011463 | 0.011429 |
| 0.011464 | 0.011496 | 0.011496 | 0.011496 | 0.011610 | 0.011631 | 0.011268 |
| 0.011162 | 0.011164 | 0.011264 | 0.011230 | 0.011333 | 0.011172 | 0.011502 |
| 0.011300 | 0.011455 | 0.011156 | 0.011322 | 0.011296 | 0.011368 | 0.011262 |
| 0.011228 | 0.011228 | 0.011295 | 0.011262 | 0.011463 | 0.011429 | 0.011362 |
| 0.011463 | 0.011530 | 0.011262 | 0.011262 | 0.011295 | 0.011295 | 0.011297 |
| 0.011364 | 0.011295 | 0.011295 | 0.011330 | 0.011463 | 0.011530 | 0.011530 |
| 0.011396 | 0.011500 | 0.011501 | 0.011636 | 0.011661 | 0.011329 | 0.011496 |
| 0.011429 | 0.011429 | 0.011229 | 0.011443 | 0.011373 | 0.011401 | 0.011270 |
| 0.011439 | 0.011607 | 0.011399 | 0.011332 | 0.011228 | 0.011430 | 0.011295 |
| 0.011396 | 0.011329 | 0.011228 | 0.011330 | 0.011430 | 0.011432 | 0.011329 |
| 0.011228 | 0.011161 | 0.011295 | 0.011228 | 0.011161 | 0.011264 | 0.011430 |
| 0.011329 | 0.011262 | 0.011295 | 0.011329 | 0.011295 | 0.011228 | 0.011430 |
| 0.011295 | 0.011329 | 0.011329 | 0.011262 | 0.011329 | 0.011564 | 0.011228 |
| 0.011262 | 0.011664 | 0.011262 | 0.011295 | 0.011262 | 0.011631 | 0.011189 |
| 0.011622 | 0.011188 | 0.011261 | 0.011422 | 0.011508 | 0.011455 | 0.011144 |
| 0.011165 | 0.011429 | 0.011530 | 0.011637 | 0.011498 | 0.011635 | 0.011766 |
| 0.011666 | 0.011703 | 0.011664 | 0.011914 | 0.011631 | 0.012505 | 0.011666 |
| 0.012405 | 0.012173 | 0.012307 | 0.012578 | 0.011631 | 0.011329 | 0.011631 |
| 0.012070 | 0.012004 | 0.011597 | 0.011497 | 0.011565 | 0.011565 | 0.011534 |
| 0.011429 | 0.011433 | 0.011496 | 0.011464 | 0.011833 | 0.011900 | 0.011901 |
| 0.011800 | 0.011901 | 0.012004 | 0.011770 | 0.012070 | 0.012076 | 0.012137 |
| 0.012138 | 0.012171 | 0.012118 | 0.012138 | 0.012139 | 0.011362 | 0.011665 |
| 0.011733 | 0.012236 | 0.011738 | 0.011967 | 0.012440 | 0.011502 | 0.011396 |
| 0.011362 | 0.011362 | 0.011833 | 0.011842 | 0.011975 | 0.011698 | 0.011363 |
| S563     | 0.011664 | 0.011664 | 0.012001 | 0.011765 | 0.011765 | 0.011832 |
| 0.011671 | 0.011603 | 0.011832 | 0.011262 | 0.011329 | 0.011296 | 0.011262 |
| 0.011295 | 0.011463 | 0.011262 | 0.011295 | 0.011362 | 0.011329 | 0.011295 |
| 0.011262 | 0.011295 | 0.011396 | 0.011262 | 0.011228 | 0.011295 | 0.011637 |
| 0.011530 | 0.011295 | 0.011195 | 0.011429 | 0.011295 | 0.011329 | 0.011295 |
| 0.011329 | 0.011362 | 0.011329 | 0.011329 | 0.011362 | 0.011329 | 0.011497 |
| 0.011262 | 0.011329 | 0.011362 | 0.011295 | 0.011396 | 0.011429 | 0.011362 |
| 0.011329 | 0.011497 | 0.011396 | 0.011664 | 0.011329 | 0.011530 | 0.011329 |
| 0.011295 | 0.011396 | 0.011463 | 0.011530 | 0.011698 | 0.011396 | 0.011497 |
| 0.011295 | 0.011362 | 0.011329 | 0.011496 | 0.011799 | 0.011329 | 0.011396 |
| 0.011295 | 0.011396 | 0.011362 | 0.011429 | 0.011362 | 0.011362 | 0.011362 |
| 0.011262 | 0.011295 | 0.011262 | 0.011362 | 0.011329 | 0.011363 | 0.011429 |
| 0.011362 | 0.011329 | 0.011329 | 0.011295 | 0.011429 | 0.011195 | 0.011329 |
| 0.011496 | 0.011429 | 0.011664 | 0.011497 | 0.011329 | 0.011497 | 0.011329 |

|          |          |          |          |          |          |          |
|----------|----------|----------|----------|----------|----------|----------|
| 0.011505 | 0.011733 | 0.011551 | 0.011256 | 0.011247 | 0.011355 | 0.011454 |
| 0.012085 | 0.011467 | 0.011266 | 0.011564 | 0.011564 | 0.011362 | 0.011463 |
| 0.011396 | 0.011362 | 0.011429 | 0.011329 | 0.011430 | 0.011295 | 0.011362 |
| 0.011329 | 0.011429 | 0.011631 | 0.011496 | 0.011396 | 0.011362 | 0.011228 |
| 0.011262 | 0.011262 | 0.011262 | 0.011295 | 0.011497 | 0.011463 | 0.011396 |
| 0.011497 | 0.011564 | 0.011295 | 0.011295 | 0.011329 | 0.011329 | 0.011330 |
| 0.011398 | 0.011329 | 0.011329 | 0.011168 | 0.011277 | 0.011236 | 0.011329 |
| 0.011331 | 0.011266 | 0.011319 | 0.011302 | 0.011230 | 0.011266 | 0.011297 |
| 0.011564 | 0.011336 | 0.011301 | 0.011262 | 0.011268 | 0.011397 | 0.011363 |
| 0.011430 | 0.011364 | 0.011363 | 0.011463 | 0.011396 | 0.011698 | 0.011564 |
| 0.011597 | 0.011463 | 0.011329 | 0.011430 | 0.011228 | 0.011463 | 0.011262 |
| 0.011329 | 0.011329 | 0.011295 | 0.011262 | 0.011295 | 0.011262 | 0.011362 |
| 0.011262 | 0.011362 | 0.011363 | 0.011262 | 0.011363 | 0.011463 | 0.011466 |
| 0.011396 | 0.011363 | 0.011262 | 0.011195 | 0.011329 | 0.011262 | 0.011195 |
| 0.011298 | 0.011396 | 0.011195 | 0.011396 | 0.011228 | 0.011329 | 0.011295 |
| 0.011329 | 0.011295 | 0.011262 | 0.011295 | 0.011329 | 0.011195 | 0.011262 |
| 0.011295 | 0.011295 | 0.011362 | 0.011295 | 0.011329 | 0.011362 | 0.011597 |
| 0.011698 | 0.011631 | 0.011698 | 0.011465 | 0.011699 | 0.011329 | 0.011295 |
| 0.011330 | 0.011586 | 0.011426 | 0.011232 | 0.011705 | 0.011197 | 0.011336 |
| 0.011705 | 0.011604 | 0.011496 | 0.011698 | 0.011402 | 0.011564 | 0.011463 |
| 0.011463 | 0.011631 | 0.011486 | 0.011307 | 0.011354 | 0.011362 | 0.011432 |
| 0.011530 | 0.011431 | 0.011567 | 0.011568 | 0.011564 | 0.011631 | 0.011738 |
| 0.011466 | 0.011569 | 0.011568 | 0.011500 | 0.011767 | 0.011228 | 0.011431 |
| 0.011329 | 0.011329 | 0.011228 | 0.011228 | 0.011228 | 0.011295 | 0.011362 |
| 0.011228 | 0.011295 | 0.011194 | 0.011362 | 0.011228 | 0.011295 | 0.011362 |
| 0.011295 | 0.011732 | 0.011631 | 0.011664 | 0.011195 | 0.011295 | 0.011329 |
| 0.011329 | 0.011295 | 0.011362 | 0.011396 | 0.011262 | 0.011262 | 0.011262 |
| 0.011799 | 0.011429 | 0.011429 | 0.011228 | 0.011329 | 0.011430 | 0.011262 |
| 0.011262 | 0.011329 | 0.011295 | 0.011396 | 0.011262 | 0.011396 | 0.011463 |
| 0.011463 | 0.011295 | 0.011295 | 0.011228 | 0.011228 | 0.011396 | 0.011329 |
| 0.011228 | 0.011329 | 0.011195 | 0.011228 | 0.011362 | 0.011497 | 0.011262 |
| 0.011228 | 0.011362 | 0.011295 | 0.011195 | 0.011530 | 0.011195 | 0.011362 |
| 0.011368 | 0.011262 | 0.011564 | 0.011396 | 0.011429 | 0.011295 | 0.011396 |
| 0.011262 | 0.011530 | 0.011195 | 0.011463 | 0.011262 | 0.011262 | 0.011195 |
| 0.011362 | 0.011631 | 0.011329 | 0.011396 | 0.011228 | 0.011631 | 0.011262 |
| 0.011262 | 0.011262 | 0.011295 | 0.011329 | 0.011295 | 0.011396 | 0.011463 |
| 0.011463 | 0.011429 | 0.011329 | 0.011430 | 0.011329 | 0.011262 | 0.011228 |
| 0.011262 | 0.011262 | 0.011329 | 0.011262 | 0.011161 | 0.011396 | 0.011262 |
| 0.011295 | 0.011295 | 0.011429 | 0.011463 | 0.011362 | 0.011228 | 0.011295 |
| 0.011362 | 0.011295 | 0.011396 | 0.011262 | 0.011396 | 0.011497 | 0.011799 |
| 0.011295 | 0.011698 | 0.011302 | 0.017823 | 0.011257 | 0.011427 | 0.011653 |
| 0.011614 | 0.011658 | 0.011322 | 0.011292 | 0.011719 | 0.011682 | 0.011364 |
| 0.011487 | 0.011610 | 0.011216 | 0.011228 | 0.011255 | 0.011357 | 0.011318 |
| 0.011482 | 0.011470 | 0.011431 | 0.011259 | 0.011429 | 0.011463 | 0.011466 |
| 0.011266 | 0.011430 | 0.011429 | 0.011396 | 0.011362 | 0.011363 | 0.011329 |
| 0.011362 | 0.011295 | 0.011329 | 0.011362 | 0.011329 | 0.011262 | 0.011295 |
| 0.011295 | 0.011362 | 0.011262 | 0.011363 | 0.011396 | 0.011430 | 0.011329 |
| 0.011362 | 0.011329 | 0.011665 | 0.011665 | 0.011396 | 0.011430 | 0.011463 |
| 0.011228 | 0.011228 | 0.011262 | 0.011295 | 0.011228 | 0.011463 | 0.011463 |
| 0.011497 | 0.011496 | 0.011429 | 0.011530 | 0.011698 | 0.011532 | 0.011295 |
| 0.011362 | 0.011430 | 0.011396 | 0.011295 | 0.011362 | 0.011329 | 0.011362 |
| 0.011430 | 0.011430 | 0.011463 | 0.011363 | 0.011262 | 0.011530 | 0.011430 |
| 0.011365 | 0.011262 | 0.011362 | 0.011463 | 0.011363 | 0.011497 | 0.011530 |
| 0.011698 | 0.011402 | 0.011564 | 0.011463 | 0.011463 | 0.011631 | 0.011262 |
| 0.011431 | 0.011329 | 0.011295 | 0.011295 | 0.011362 | 0.011262 | 0.011363 |
| 0.011396 | 0.011430 | 0.011329 | 0.011362 | 0.011329 | 0.011665 | 0.011665 |
| 0.011396 | 0.011430 | 0.011496 | 0.011429 | 0.012069 | 0.011453 | 0.011412 |
| 0.011482 | 0.011442 | 0.011552 | 0.011441 | 0.011550 | 0.011474 | 0.011440 |
| 0.012022 | 0.011337 | 0.011471 | 0.011406 | 0.011680 | 0.011536 | 0.011571 |
| 0.012046 | 0.011475 | 0.011601 | 0.011664 | 0.011530 | 0.011530 | 0.011567 |



|          |          |          |          |          |          |          |
|----------|----------|----------|----------|----------|----------|----------|
| 0.011228 | 0.011329 | 0.011530 | 0.011496 | 0.011499 | 0.011496 | 0.011464 |
| 0.011329 | 0.011194 | 0.011228 | 0.011329 | 0.011161 | 0.011295 | 0.011195 |
| 0.011329 | 0.011362 | 0.011262 | 0.011228 | 0.011329 | 0.011262 | 0.011295 |
| 0.011295 | 0.011228 | 0.011295 | 0.011329 | 0.011228 | 0.011362 | 0.011463 |
| 0.011362 | 0.011429 | 0.011362 | 0.011362 | 0.011295 | 0.011698 | 0.011329 |
| 0.011373 | 0.011295 | 0.011531 | 0.011535 | 0.011329 | 0.011396 | 0.011396 |
| 0.011396 | 0.000000 | 0.011295 | 0.000000 | 0.011429 | 0.011429 | 0.011362 |
| 0.011362 | 0.011497 | 0.011664 | 0.011396 | 0.011597 | 0.011597 | 0.011463 |
| 0.011295 | 0.011362 | 0.011396 | 0.011799 | 0.011362 | 0.011329 | 0.011362 |
| 0.011396 | 0.011329 | 0.011329 | 0.011631 | 0.011497 | 0.011597 | 0.011329 |
| 0.011430 | 0.011497 | 0.011362 | 0.011430 | 0.011396 | 0.011262 | 0.011597 |
| 0.011362 | 0.011329 | 0.011329 | 0.011497 | 0.011329 | 0.011429 | 0.011665 |
| 0.011362 | 0.011739 | 0.011732 | 0.011548 | 0.011229 | 0.011434 | 0.011267 |
| 0.011225 | 0.011761 | 0.011271 | 0.011507 | 0.011255 | 0.011417 | 0.011379 |
| 0.011468 | 0.011192 | 0.011339 | 0.011192 | 0.011222 | 0.011395 | 0.011385 |
| 0.011399 | 0.011257 | 0.011413 | 0.011342 | 0.011364 | 0.011497 | 0.011564 |
| 0.011564 | 0.011430 | 0.011534 | 0.011535 | 0.011670 | 0.011696 | 0.011362 |
| 0.011597 | 0.011463 | 0.011329 | 0.011430 | 0.011228 | 0.011463 | 0.011262 |
| 0.011329 | 0.011329 | 0.011295 | 0.011262 | 0.011295 | 0.011262 | 0.011362 |
| 0.011340 | 0.011340 | 0.011334 | 0.011368 | 0.011505 | 0.011402 | 0.011470 |
| 0.011469 | 0.011396 | 0.011208 | 0.011204 | 0.011331 | 0.011501 | 0.011501 |
| 0.011296 | 0.011365 | 0.011599 | 0.011567 | 0.011497 | 0.011531 | 0.011463 |
| 0.011396 | 0.011463 | 0.011463 | 0.011362 | 0.011934 | 0.011530 | 0.011598 |
| 0.011631 | 0.011701 | 0.011333 | 0.011407 | 0.011295 | 0.011497 | 0.011463 |
| 0.011498 | 0.011530 | 0.011530 | 0.011530 | 0.011689 | 0.011664 | 0.011303 |
| 0.011196 | 0.011199 | 0.011299 | 0.011264 | 0.011368 | 0.011210 | 0.011536 |
| 0.011335 | 0.011455 | 0.011203 | 0.011360 | 0.011329 | 0.011402 | 0.011228 |
| 0.011262 | 0.011262 | 0.011262 | 0.011295 | 0.011497 | 0.011463 | 0.011396 |
| 0.011497 | 0.011564 | 0.011295 | 0.011295 | 0.011329 | 0.011329 | 0.011330 |
| 0.011398 | 0.011329 | 0.011329 | 0.011364 | 0.011497 | 0.011564 | 0.011564 |
| 0.011430 | 0.011534 | 0.011535 | 0.011670 | 0.011696 | 0.011362 | 0.011530 |
| 0.011463 | 0.011463 | 0.011297 | 0.011478 | 0.011408 | 0.011435 | 0.011305 |
| 0.011405 | 0.011653 | 0.011441 | 0.011366 | 0.011195 | 0.011396 | 0.011262 |
| 0.011362 | 0.011363 | 0.011262 | 0.011363 | 0.011463 | 0.011466 | 0.011363 |
| 0.011262 | 0.011195 | 0.011329 | 0.011262 | 0.011195 | 0.011298 | 0.011396 |
| 0.011362 | 0.011295 | 0.011329 | 0.011362 | 0.011329 | 0.011262 | 0.011463 |
| 0.011329 | 0.011362 | 0.011362 | 0.011295 | 0.011362 | 0.011597 | 0.011262 |
| 0.011295 | 0.011698 | 0.011295 | 0.011262 | 0.011295 | 0.011664 | 0.011232 |
| 0.011679 | 0.011273 | 0.011261 | 0.011463 | 0.011549 | 0.011491 | 0.011186 |
| 0.011218 | 0.011463 | 0.011564 | 0.011671 | 0.011532 | 0.011669 | 0.011800 |
| 0.011700 | 0.011737 | 0.011698 | 0.011949 | 0.011664 | 0.012539 | 0.011700 |
| 0.012439 | 0.012207 | 0.012341 | 0.012613 | 0.011664 | 0.011363 | 0.011665 |
| 0.012104 | 0.012038 | 0.011631 | 0.011530 | 0.011598 | 0.011598 | 0.011567 |
| 0.011463 | 0.011467 | 0.011530 | 0.011497 | 0.011867 | 0.011933 | 0.011935 |
| 0.011834 | 0.011935 | 0.012038 | 0.011804 | 0.012104 | 0.012110 | 0.012171 |
| 0.012172 | 0.012206 | 0.012152 | 0.012172 | 0.012173 | 0.011396 | 0.011699 |
| 0.011767 | 0.012270 | 0.011772 | 0.012001 | 0.012474 | 0.011536 | 0.011430 |
| 0.011396 | 0.011396 | 0.011867 | 0.011883 | 0.012010 | 0.011732 | 0.011397 |
| S564     | 0.011765 | 0.011765 | 0.012101 | 0.011866 | 0.011866 | 0.011933 |
| 0.011773 | 0.011705 | 0.011866 | 0.011362 | 0.011429 | 0.011397 | 0.011362 |
| 0.011396 | 0.011497 | 0.011362 | 0.011396 | 0.011463 | 0.011429 | 0.011396 |
| 0.011362 | 0.011396 | 0.011496 | 0.011363 | 0.011396 | 0.011396 | 0.011739 |
| 0.011631 | 0.011396 | 0.011295 | 0.011530 | 0.011463 | 0.011429 | 0.011463 |
| 0.011429 | 0.011530 | 0.011429 | 0.011429 | 0.011463 | 0.011429 | 0.011597 |
| 0.011362 | 0.011429 | 0.011463 | 0.011396 | 0.011496 | 0.011530 | 0.011463 |
| 0.011429 | 0.011597 | 0.011497 | 0.011765 | 0.011429 | 0.011698 | 0.011429 |
| 0.011396 | 0.011497 | 0.011564 | 0.011698 | 0.011799 | 0.011497 | 0.011597 |
| 0.011463 | 0.011530 | 0.011429 | 0.011664 | 0.011900 | 0.011228 | 0.011497 |
| 0.011396 | 0.011496 | 0.011463 | 0.011530 | 0.011463 | 0.011463 | 0.011463 |
| 0.011362 | 0.011396 | 0.011362 | 0.011463 | 0.011429 | 0.011464 | 0.011530 |

|          |          |          |          |          |          |          |
|----------|----------|----------|----------|----------|----------|----------|
| 0.011463 | 0.011429 | 0.011496 | 0.011396 | 0.011530 | 0.011362 | 0.011429 |
| 0.011597 | 0.011530 | 0.011765 | 0.011597 | 0.011429 | 0.011664 | 0.011362 |
| 0.011616 | 0.011845 | 0.011664 | 0.011373 | 0.011359 | 0.011465 | 0.011572 |
| 0.012195 | 0.011721 | 0.011390 | 0.011664 | 0.011664 | 0.011463 | 0.011564 |
| 0.011497 | 0.011463 | 0.011530 | 0.011429 | 0.011530 | 0.011463 | 0.011463 |
| 0.011429 | 0.011530 | 0.011732 | 0.011530 | 0.011497 | 0.011463 | 0.011396 |
| 0.011362 | 0.011362 | 0.011430 | 0.011396 | 0.011597 | 0.011564 | 0.011497 |
| 0.011597 | 0.011665 | 0.011396 | 0.011396 | 0.011430 | 0.011429 | 0.011432 |
| 0.011500 | 0.011430 | 0.011430 | 0.011312 | 0.011386 | 0.011341 | 0.011430 |
| 0.011433 | 0.011370 | 0.011429 | 0.011405 | 0.011332 | 0.011368 | 0.011398 |
| 0.011672 | 0.011439 | 0.011473 | 0.011363 | 0.011371 | 0.011498 | 0.011464 |
| 0.011531 | 0.011465 | 0.011464 | 0.011564 | 0.011496 | 0.011866 | 0.011665 |
| 0.011698 | 0.011564 | 0.011429 | 0.011530 | 0.011329 | 0.011564 | 0.011362 |
| 0.011429 | 0.011429 | 0.011396 | 0.011362 | 0.011396 | 0.011362 | 0.011463 |
| 0.011430 | 0.011530 | 0.011463 | 0.011362 | 0.011397 | 0.011564 | 0.011567 |
| 0.011564 | 0.011463 | 0.011362 | 0.011296 | 0.011429 | 0.011362 | 0.011295 |
| 0.011400 | 0.011564 | 0.011362 | 0.011564 | 0.011329 | 0.011430 | 0.011396 |
| 0.011497 | 0.011396 | 0.011430 | 0.011396 | 0.011430 | 0.011295 | 0.011430 |
| 0.011463 | 0.011396 | 0.011463 | 0.011396 | 0.011429 | 0.011463 | 0.011698 |
| 0.011799 | 0.011732 | 0.011799 | 0.011566 | 0.011799 | 0.011429 | 0.011396 |
| 0.011432 | 0.011667 | 0.011518 | 0.011335 | 0.011739 | 0.011299 | 0.011336 |
| 0.011807 | 0.011706 | 0.011597 | 0.011799 | 0.011504 | 0.011664 | 0.011631 |
| 0.011564 | 0.011732 | 0.011557 | 0.011390 | 0.011479 | 0.011463 | 0.011534 |
| 0.011631 | 0.011499 | 0.011669 | 0.011703 | 0.011664 | 0.011732 | 0.011805 |
| 0.011568 | 0.011705 | 0.011670 | 0.011533 | 0.011868 | 0.011329 | 0.011532 |
| 0.011496 | 0.011429 | 0.011329 | 0.011329 | 0.011396 | 0.011329 | 0.011463 |
| 0.011396 | 0.011463 | 0.011362 | 0.011463 | 0.011396 | 0.011396 | 0.011463 |
| 0.011396 | 0.011832 | 0.011732 | 0.011765 | 0.011295 | 0.011396 | 0.011429 |
| 0.011429 | 0.011396 | 0.011463 | 0.011497 | 0.011362 | 0.011362 | 0.011362 |
| 0.011899 | 0.011530 | 0.011530 | 0.011329 | 0.011429 | 0.011597 | 0.011362 |
| 0.011362 | 0.011429 | 0.011396 | 0.011564 | 0.011362 | 0.011496 | 0.011631 |
| 0.011564 | 0.011396 | 0.011396 | 0.011329 | 0.011329 | 0.011497 | 0.011429 |
| 0.011329 | 0.011429 | 0.011295 | 0.011329 | 0.011396 | 0.011598 | 0.011329 |
| 0.011329 | 0.011463 | 0.011396 | 0.011295 | 0.011631 | 0.011295 | 0.011396 |
| 0.011505 | 0.011362 | 0.011664 | 0.011497 | 0.011530 | 0.011396 | 0.011496 |
| 0.011362 | 0.011698 | 0.011295 | 0.011564 | 0.011362 | 0.011362 | 0.011295 |
| 0.011530 | 0.011732 | 0.011429 | 0.011497 | 0.011329 | 0.011732 | 0.011362 |
| 0.011362 | 0.011362 | 0.011396 | 0.011497 | 0.011396 | 0.011496 | 0.011564 |
| 0.011564 | 0.011530 | 0.011429 | 0.011530 | 0.011496 | 0.011362 | 0.011329 |
| 0.011362 | 0.011362 | 0.011429 | 0.011362 | 0.011329 | 0.011429 | 0.011362 |
| 0.011396 | 0.011396 | 0.011463 | 0.011564 | 0.011463 | 0.011396 | 0.011396 |
| 0.011463 | 0.011396 | 0.011429 | 0.011362 | 0.011496 | 0.011463 | 0.011900 |
| 0.011396 | 0.011799 | 0.011405 | 0.017936 | 0.011584 | 0.011549 | 0.011758 |
| 0.011718 | 0.011764 | 0.011584 | 0.011524 | 0.011885 | 0.011785 | 0.011546 |
| 0.011724 | 0.011732 | 0.011333 | 0.011437 | 0.011411 | 0.011455 | 0.011447 |
| 0.011717 | 0.011582 | 0.011579 | 0.011391 | 0.011530 | 0.011564 | 0.011567 |
| 0.011404 | 0.011530 | 0.011530 | 0.011497 | 0.011463 | 0.011463 | 0.011430 |
| 0.011463 | 0.011396 | 0.011429 | 0.011463 | 0.011430 | 0.011362 | 0.011396 |
| 0.011396 | 0.011463 | 0.011362 | 0.011463 | 0.011497 | 0.011530 | 0.011429 |
| 0.011463 | 0.011430 | 0.011765 | 0.011765 | 0.011497 | 0.011464 | 0.011564 |
| 0.011329 | 0.011329 | 0.011362 | 0.011463 | 0.011329 | 0.011564 | 0.011564 |
| 0.011597 | 0.011597 | 0.011530 | 0.011631 | 0.011799 | 0.011633 | 0.011463 |
| 0.011463 | 0.011530 | 0.011564 | 0.011396 | 0.011463 | 0.011430 | 0.011463 |
| 0.011531 | 0.011530 | 0.011564 | 0.011531 | 0.011431 | 0.011631 | 0.011597 |
| 0.011467 | 0.011362 | 0.011463 | 0.011564 | 0.011463 | 0.011598 | 0.011631 |
| 0.011799 | 0.011504 | 0.011664 | 0.011631 | 0.011564 | 0.011732 | 0.011363 |
| 0.011532 | 0.011363 | 0.011396 | 0.011396 | 0.011463 | 0.011362 | 0.011463 |
| 0.011497 | 0.011530 | 0.011429 | 0.011463 | 0.011430 | 0.011765 | 0.011765 |
| 0.011497 | 0.011464 | 0.011597 | 0.011530 | 0.012170 | 0.011560 | 0.011482 |
| 0.011482 | 0.011511 | 0.011622 | 0.011510 | 0.011620 | 0.011543 | 0.011543 |

|          |          |          |          |          |          |          |
|----------|----------|----------|----------|----------|----------|----------|
| 0.012090 | 0.011406 | 0.011540 | 0.011475 | 0.011749 | 0.011638 | 0.011707 |
| 0.012114 | 0.011588 | 0.011703 | 0.011765 | 0.011631 | 0.011631 | 0.011668 |
| 0.011329 | 0.011497 | 0.011631 | 0.011597 | 0.011601 | 0.011597 | 0.011565 |
| 0.011429 | 0.011362 | 0.011396 | 0.011429 | 0.011329 | 0.011396 | 0.011295 |
| 0.011429 | 0.011463 | 0.011362 | 0.011329 | 0.011429 | 0.011362 | 0.011396 |
| 0.011396 | 0.011329 | 0.011396 | 0.011429 | 0.011329 | 0.011530 | 0.011564 |
| 0.011463 | 0.011530 | 0.011463 | 0.011463 | 0.011396 | 0.011799 | 0.011429 |
| 0.011443 | 0.011396 | 0.011631 | 0.011603 | 0.011497 | 0.011496 | 0.011496 |
| 0.011497 | 0.011429 | 0.011396 | 0.011429 | 0.000000 | 0.011530 | 0.011463 |
| 0.011463 | 0.011597 | 0.011765 | 0.011496 | 0.011698 | 0.011698 | 0.011564 |
| 0.011396 | 0.011463 | 0.011497 | 0.011900 | 0.011463 | 0.011497 | 0.011463 |
| 0.011496 | 0.011429 | 0.011429 | 0.011732 | 0.011665 | 0.011698 | 0.011429 |
| 0.011530 | 0.011597 | 0.011463 | 0.011530 | 0.011496 | 0.011362 | 0.011698 |
| 0.011463 | 0.011429 | 0.011429 | 0.011597 | 0.011429 | 0.011530 | 0.011765 |
| 0.011463 | 0.011841 | 0.011832 | 0.011670 | 0.011512 | 0.011536 | 0.011421 |
| 0.011335 | 0.011878 | 0.011376 | 0.011641 | 0.011499 | 0.011620 | 0.011644 |
| 0.011723 | 0.011455 | 0.011617 | 0.011523 | 0.011491 | 0.011663 | 0.011547 |
| 0.011550 | 0.011454 | 0.011518 | 0.011448 | 0.011465 | 0.011597 | 0.011665 |
| 0.011665 | 0.011531 | 0.011635 | 0.011636 | 0.011772 | 0.011767 | 0.011463 |
| 0.011698 | 0.011564 | 0.011429 | 0.011530 | 0.011329 | 0.011564 | 0.011362 |
| 0.011429 | 0.011429 | 0.011396 | 0.011362 | 0.011396 | 0.011362 | 0.011463 |
| 0.011444 | 0.011445 | 0.011437 | 0.011471 | 0.011608 | 0.011573 | 0.011572 |
| 0.011571 | 0.011497 | 0.011245 | 0.011312 | 0.011365 | 0.011602 | 0.011603 |
| 0.011396 | 0.011467 | 0.011700 | 0.011669 | 0.011531 | 0.011565 | 0.011564 |
| 0.011496 | 0.011564 | 0.011564 | 0.011463 | 0.012034 | 0.011631 | 0.011698 |
| 0.011732 | 0.011808 | 0.011435 | 0.011511 | 0.011396 | 0.011597 | 0.011564 |
| 0.011598 | 0.011631 | 0.011631 | 0.011631 | 0.011768 | 0.011765 | 0.011372 |
| 0.011263 | 0.011268 | 0.011367 | 0.011332 | 0.011436 | 0.011247 | 0.011604 |
| 0.011403 | 0.011586 | 0.011298 | 0.011435 | 0.011430 | 0.011505 | 0.011396 |
| 0.011362 | 0.011362 | 0.011430 | 0.011396 | 0.011597 | 0.011564 | 0.011497 |
| 0.011597 | 0.011665 | 0.011396 | 0.011396 | 0.011430 | 0.011429 | 0.011432 |
| 0.011500 | 0.011430 | 0.011430 | 0.011465 | 0.011597 | 0.011665 | 0.011665 |
| 0.011531 | 0.011635 | 0.011636 | 0.011772 | 0.011767 | 0.011463 | 0.011631 |
| 0.011564 | 0.011564 | 0.011398 | 0.011582 | 0.011442 | 0.011537 | 0.011411 |
| 0.011577 | 0.011835 | 0.011568 | 0.011468 | 0.011362 | 0.011564 | 0.011430 |
| 0.011530 | 0.011463 | 0.011362 | 0.011397 | 0.011564 | 0.011567 | 0.011463 |
| 0.011362 | 0.011296 | 0.011429 | 0.011362 | 0.011295 | 0.011400 | 0.011564 |
| 0.011463 | 0.011396 | 0.011429 | 0.011463 | 0.011430 | 0.011362 | 0.011564 |
| 0.011429 | 0.011463 | 0.011463 | 0.011396 | 0.011463 | 0.011698 | 0.011362 |
| 0.011396 | 0.011799 | 0.011396 | 0.011429 | 0.011396 | 0.011765 | 0.011403 |
| 0.011960 | 0.011400 | 0.011511 | 0.011624 | 0.011712 | 0.011599 | 0.011353 |
| 0.011480 | 0.011564 | 0.011664 | 0.011773 | 0.011632 | 0.011771 | 0.011901 |
| 0.011800 | 0.011804 | 0.011799 | 0.012051 | 0.011765 | 0.012640 | 0.011801 |
| 0.012540 | 0.012308 | 0.012442 | 0.012714 | 0.011765 | 0.011463 | 0.011766 |
| 0.012205 | 0.012140 | 0.011732 | 0.011631 | 0.011699 | 0.011699 | 0.011635 |
| 0.011564 | 0.011569 | 0.011631 | 0.011598 | 0.011968 | 0.012034 | 0.012036 |
| 0.011935 | 0.012035 | 0.012139 | 0.011906 | 0.012205 | 0.012212 | 0.012272 |
| 0.012273 | 0.012307 | 0.012255 | 0.012273 | 0.012274 | 0.011496 | 0.011800 |
| 0.011868 | 0.012371 | 0.011874 | 0.012102 | 0.012575 | 0.011638 | 0.011531 |
| 0.011496 | 0.011496 | 0.011968 | 0.012006 | 0.012116 | 0.011832 | 0.011498 |
| S565     | 0.011765 | 0.011765 | 0.012101 | 0.011866 | 0.011866 | 0.011933 |
| 0.011773 | 0.011705 | 0.011933 | 0.011362 | 0.011429 | 0.011397 | 0.011362 |
| 0.011396 | 0.011564 | 0.011362 | 0.011396 | 0.011463 | 0.011429 | 0.011396 |
| 0.011362 | 0.011396 | 0.011496 | 0.011363 | 0.011396 | 0.011396 | 0.011739 |
| 0.011631 | 0.011396 | 0.011295 | 0.011530 | 0.011463 | 0.011429 | 0.011463 |
| 0.011429 | 0.011530 | 0.011429 | 0.011429 | 0.011463 | 0.011429 | 0.011597 |
| 0.011362 | 0.011429 | 0.011463 | 0.011396 | 0.011496 | 0.011530 | 0.011463 |
| 0.011429 | 0.011597 | 0.011497 | 0.011765 | 0.011429 | 0.011698 | 0.011429 |
| 0.011396 | 0.011497 | 0.011564 | 0.011698 | 0.011799 | 0.011497 | 0.011597 |
| 0.011463 | 0.011530 | 0.011429 | 0.011664 | 0.011900 | 0.011429 | 0.011497 |

|          |          |          |          |          |          |          |
|----------|----------|----------|----------|----------|----------|----------|
| 0.011396 | 0.011496 | 0.011463 | 0.011530 | 0.011463 | 0.011463 | 0.011463 |
| 0.011362 | 0.011396 | 0.011362 | 0.011463 | 0.011429 | 0.011464 | 0.011530 |
| 0.011463 | 0.011429 | 0.011497 | 0.011396 | 0.011530 | 0.011362 | 0.011429 |
| 0.011597 | 0.011530 | 0.011765 | 0.011597 | 0.011429 | 0.011664 | 0.011429 |
| 0.011616 | 0.011845 | 0.011664 | 0.011334 | 0.011359 | 0.011428 | 0.011572 |
| 0.012195 | 0.011569 | 0.011348 | 0.011664 | 0.011664 | 0.011463 | 0.011564 |
| 0.011497 | 0.011463 | 0.011530 | 0.011429 | 0.011530 | 0.011463 | 0.011463 |
| 0.011429 | 0.011530 | 0.011732 | 0.011597 | 0.011497 | 0.011463 | 0.011396 |
| 0.011362 | 0.011362 | 0.011430 | 0.011396 | 0.011597 | 0.011564 | 0.011497 |
| 0.011597 | 0.011665 | 0.011396 | 0.011396 | 0.011430 | 0.011429 | 0.011432 |
| 0.011500 | 0.011430 | 0.011430 | 0.011312 | 0.011386 | 0.011341 | 0.011430 |
| 0.011433 | 0.011370 | 0.011429 | 0.011405 | 0.011332 | 0.011369 | 0.011398 |
| 0.011672 | 0.011439 | 0.011473 | 0.011363 | 0.011371 | 0.011498 | 0.011464 |
| 0.011531 | 0.011465 | 0.011464 | 0.011564 | 0.011496 | 0.011866 | 0.011665 |
| 0.011698 | 0.011564 | 0.011429 | 0.011530 | 0.011329 | 0.011564 | 0.011362 |
| 0.011429 | 0.011429 | 0.011396 | 0.011362 | 0.011396 | 0.011362 | 0.011463 |
| 0.011430 | 0.011530 | 0.011463 | 0.011362 | 0.011431 | 0.011564 | 0.011567 |
| 0.011564 | 0.011463 | 0.011362 | 0.011296 | 0.011430 | 0.011362 | 0.011295 |
| 0.011400 | 0.011564 | 0.011362 | 0.011564 | 0.011329 | 0.011430 | 0.011396 |
| 0.011497 | 0.011396 | 0.011430 | 0.011396 | 0.011430 | 0.011295 | 0.011430 |
| 0.011463 | 0.011396 | 0.011463 | 0.011396 | 0.011429 | 0.011463 | 0.011698 |
| 0.011799 | 0.011732 | 0.011799 | 0.011566 | 0.011799 | 0.011429 | 0.011396 |
| 0.011432 | 0.011667 | 0.011335 | 0.011335 | 0.011773 | 0.011299 | 0.011414 |
| 0.011807 | 0.011706 | 0.011597 | 0.011799 | 0.011504 | 0.011664 | 0.011631 |
| 0.011564 | 0.011732 | 0.011593 | 0.011431 | 0.011479 | 0.011463 | 0.011534 |
| 0.011631 | 0.011532 | 0.011669 | 0.011737 | 0.011665 | 0.011732 | 0.011839 |
| 0.011568 | 0.011739 | 0.011670 | 0.011601 | 0.011868 | 0.011329 | 0.011532 |
| 0.011496 | 0.011429 | 0.011329 | 0.011329 | 0.011396 | 0.011396 | 0.011463 |
| 0.011396 | 0.011463 | 0.011362 | 0.011463 | 0.011396 | 0.011396 | 0.011463 |
| 0.011396 | 0.011832 | 0.011732 | 0.011765 | 0.011295 | 0.011396 | 0.011429 |
| 0.011429 | 0.011396 | 0.011463 | 0.011497 | 0.011362 | 0.011362 | 0.011362 |
| 0.011900 | 0.011530 | 0.011530 | 0.011329 | 0.011429 | 0.011597 | 0.011362 |
| 0.011362 | 0.011429 | 0.011396 | 0.011564 | 0.011362 | 0.011496 | 0.011631 |
| 0.011564 | 0.011396 | 0.011396 | 0.011329 | 0.011329 | 0.011497 | 0.011429 |
| 0.011329 | 0.011429 | 0.011295 | 0.011329 | 0.011463 | 0.011598 | 0.011362 |
| 0.011329 | 0.011463 | 0.011396 | 0.011295 | 0.011631 | 0.011295 | 0.011463 |
| 0.011540 | 0.011362 | 0.011664 | 0.011497 | 0.011530 | 0.011396 | 0.011496 |
| 0.011362 | 0.011698 | 0.011295 | 0.011564 | 0.011362 | 0.011362 | 0.011295 |
| 0.011530 | 0.011732 | 0.011429 | 0.011497 | 0.011329 | 0.011732 | 0.011362 |
| 0.011362 | 0.011362 | 0.011396 | 0.011497 | 0.011396 | 0.011496 | 0.011564 |
| 0.011564 | 0.011530 | 0.011429 | 0.011530 | 0.011496 | 0.011362 | 0.011329 |
| 0.011362 | 0.011362 | 0.011429 | 0.011362 | 0.011329 | 0.011497 | 0.011362 |
| 0.011396 | 0.011396 | 0.011463 | 0.011564 | 0.011463 | 0.011396 | 0.011396 |
| 0.011463 | 0.011396 | 0.011496 | 0.011362 | 0.011497 | 0.011597 | 0.011900 |
| 0.011396 | 0.011799 | 0.011405 | 0.017899 | 0.011453 | 0.011611 | 0.011758 |
| 0.011718 | 0.011764 | 0.011479 | 0.011466 | 0.011939 | 0.011785 | 0.011546 |
| 0.011582 | 0.011732 | 0.011333 | 0.011395 | 0.011333 | 0.011505 | 0.011404 |
| 0.011576 | 0.011582 | 0.011542 | 0.011457 | 0.011530 | 0.011564 | 0.011568 |
| 0.011438 | 0.011530 | 0.011530 | 0.011497 | 0.011463 | 0.011463 | 0.011430 |
| 0.011463 | 0.011396 | 0.011429 | 0.011463 | 0.011430 | 0.011362 | 0.011396 |
| 0.011396 | 0.011463 | 0.011362 | 0.011463 | 0.011497 | 0.011530 | 0.011429 |
| 0.011463 | 0.011430 | 0.011766 | 0.011765 | 0.011497 | 0.011531 | 0.011564 |
| 0.011329 | 0.011329 | 0.011362 | 0.011463 | 0.011329 | 0.011564 | 0.011564 |
| 0.011597 | 0.011597 | 0.011530 | 0.011631 | 0.011799 | 0.011633 | 0.011463 |
| 0.011463 | 0.011530 | 0.011564 | 0.011396 | 0.011463 | 0.011430 | 0.011463 |
| 0.011531 | 0.011530 | 0.011564 | 0.011531 | 0.011431 | 0.011631 | 0.011597 |
| 0.011467 | 0.011362 | 0.011463 | 0.011564 | 0.011463 | 0.011598 | 0.011631 |
| 0.011799 | 0.011504 | 0.011664 | 0.011631 | 0.011564 | 0.011732 | 0.011363 |
| 0.011532 | 0.011430 | 0.011396 | 0.011396 | 0.011463 | 0.011362 | 0.011463 |
| 0.011497 | 0.011530 | 0.011429 | 0.011463 | 0.011430 | 0.011766 | 0.011765 |

|          |          |          |          |          |          |          |
|----------|----------|----------|----------|----------|----------|----------|
| 0.011497 | 0.011531 | 0.011597 | 0.011530 | 0.012170 | 0.011596 | 0.011517 |
| 0.011552 | 0.011546 | 0.011658 | 0.011545 | 0.011655 | 0.011577 | 0.011543 |
| 0.012125 | 0.011441 | 0.011574 | 0.011510 | 0.011783 | 0.011638 | 0.011741 |
| 0.012148 | 0.011626 | 0.011703 | 0.011765 | 0.011631 | 0.011631 | 0.011668 |
| 0.011329 | 0.011497 | 0.011631 | 0.011597 | 0.011601 | 0.011597 | 0.011565 |
| 0.011429 | 0.011362 | 0.011396 | 0.011429 | 0.011329 | 0.011396 | 0.011295 |
| 0.011429 | 0.011463 | 0.011362 | 0.011329 | 0.011429 | 0.011362 | 0.011396 |
| 0.011396 | 0.011329 | 0.011396 | 0.011429 | 0.011329 | 0.011530 | 0.011564 |
| 0.011463 | 0.011530 | 0.011463 | 0.011463 | 0.011396 | 0.011799 | 0.011429 |
| 0.011478 | 0.011396 | 0.011631 | 0.011637 | 0.011497 | 0.011496 | 0.011496 |
| 0.011497 | 0.011429 | 0.011396 | 0.011429 | 0.011530 | 0.000000 | 0.011463 |
| 0.011463 | 0.011597 | 0.011765 | 0.011496 | 0.011698 | 0.011698 | 0.011564 |
| 0.011396 | 0.011463 | 0.011497 | 0.011900 | 0.011463 | 0.011497 | 0.011463 |
| 0.011497 | 0.011429 | 0.011429 | 0.011732 | 0.011665 | 0.011698 | 0.011429 |
| 0.011530 | 0.011597 | 0.011463 | 0.011530 | 0.011496 | 0.011362 | 0.011698 |
| 0.011463 | 0.011429 | 0.011429 | 0.011597 | 0.011429 | 0.011530 | 0.011765 |
| 0.011463 | 0.011841 | 0.011832 | 0.011670 | 0.011399 | 0.011536 | 0.011370 |
| 0.011445 | 0.011878 | 0.011376 | 0.011596 | 0.011451 | 0.011569 | 0.011538 |
| 0.011621 | 0.011323 | 0.011505 | 0.011390 | 0.011384 | 0.011462 | 0.011547 |
| 0.011550 | 0.011454 | 0.011518 | 0.011448 | 0.011465 | 0.011597 | 0.011665 |
| 0.011665 | 0.011531 | 0.011635 | 0.011636 | 0.011772 | 0.011802 | 0.011463 |
| 0.011698 | 0.011564 | 0.011429 | 0.011530 | 0.011329 | 0.011564 | 0.011362 |
| 0.011429 | 0.011429 | 0.011396 | 0.011362 | 0.011396 | 0.011362 | 0.011463 |
| 0.011444 | 0.011410 | 0.011437 | 0.011471 | 0.011608 | 0.011573 | 0.011538 |
| 0.011571 | 0.011497 | 0.011245 | 0.011276 | 0.011433 | 0.011602 | 0.011603 |
| 0.011396 | 0.011467 | 0.011700 | 0.011669 | 0.011598 | 0.011632 | 0.011564 |
| 0.011496 | 0.011564 | 0.011564 | 0.011463 | 0.012034 | 0.011631 | 0.011698 |
| 0.011732 | 0.011772 | 0.011435 | 0.011511 | 0.011396 | 0.011597 | 0.011564 |
| 0.011598 | 0.011631 | 0.011631 | 0.011631 | 0.011768 | 0.011765 | 0.011407 |
| 0.011297 | 0.011303 | 0.011401 | 0.011366 | 0.011436 | 0.011284 | 0.011638 |
| 0.011437 | 0.011586 | 0.011346 | 0.011435 | 0.011228 | 0.011505 | 0.011396 |
| 0.011362 | 0.011362 | 0.011430 | 0.011396 | 0.011597 | 0.011564 | 0.011497 |
| 0.011597 | 0.011665 | 0.011396 | 0.011396 | 0.011430 | 0.011429 | 0.011432 |
| 0.011500 | 0.011430 | 0.011430 | 0.011465 | 0.011597 | 0.011665 | 0.011665 |
| 0.011531 | 0.011635 | 0.011636 | 0.011772 | 0.011802 | 0.011463 | 0.011631 |
| 0.011564 | 0.011564 | 0.011398 | 0.011547 | 0.011477 | 0.011503 | 0.011411 |
| 0.011542 | 0.011652 | 0.011399 | 0.011468 | 0.011362 | 0.011564 | 0.011430 |
| 0.011530 | 0.011463 | 0.011362 | 0.011431 | 0.011564 | 0.011567 | 0.011463 |
| 0.011362 | 0.011296 | 0.011430 | 0.011362 | 0.011295 | 0.011400 | 0.011564 |
| 0.011463 | 0.011396 | 0.011429 | 0.011463 | 0.011430 | 0.011362 | 0.011564 |
| 0.011429 | 0.011463 | 0.011463 | 0.011396 | 0.011463 | 0.011698 | 0.011362 |
| 0.011396 | 0.011799 | 0.011396 | 0.011429 | 0.011396 | 0.011765 | 0.011360 |
| 0.011847 | 0.011400 | 0.011361 | 0.011624 | 0.011712 | 0.011599 | 0.011311 |
| 0.011270 | 0.011564 | 0.011664 | 0.011773 | 0.011632 | 0.011771 | 0.011901 |
| 0.011801 | 0.011838 | 0.011799 | 0.012051 | 0.011765 | 0.012640 | 0.011801 |
| 0.012540 | 0.012308 | 0.012442 | 0.012714 | 0.011765 | 0.011463 | 0.011766 |
| 0.012205 | 0.012140 | 0.011732 | 0.011631 | 0.011699 | 0.011699 | 0.011669 |
| 0.011564 | 0.011569 | 0.011631 | 0.011598 | 0.011968 | 0.012034 | 0.012036 |
| 0.011935 | 0.012036 | 0.012139 | 0.011906 | 0.012205 | 0.012212 | 0.012272 |
| 0.012273 | 0.012307 | 0.012255 | 0.012273 | 0.012274 | 0.011496 | 0.011800 |
| 0.011868 | 0.012371 | 0.011874 | 0.012102 | 0.012541 | 0.011638 | 0.011531 |
| 0.011496 | 0.011496 | 0.011968 | 0.012048 | 0.012116 | 0.011832 | 0.011498 |
| S566     | 0.011698 | 0.011698 | 0.012034 | 0.011799 | 0.011799 | 0.011866 |
| 0.011671 | 0.011603 | 0.011866 | 0.011295 | 0.011362 | 0.011329 | 0.011228 |
| 0.011329 | 0.011496 | 0.011295 | 0.011329 | 0.011396 | 0.011362 | 0.011329 |
| 0.011295 | 0.011329 | 0.011429 | 0.011295 | 0.011329 | 0.011329 | 0.011637 |
| 0.011564 | 0.011329 | 0.011228 | 0.011463 | 0.011396 | 0.011362 | 0.011396 |
| 0.011362 | 0.011463 | 0.011362 | 0.011362 | 0.011396 | 0.011362 | 0.011530 |
| 0.011295 | 0.011362 | 0.011396 | 0.011329 | 0.011429 | 0.011463 | 0.011396 |
| 0.011362 | 0.011530 | 0.011430 | 0.011698 | 0.011362 | 0.011631 | 0.011362 |

|          |          |          |          |          |          |          |
|----------|----------|----------|----------|----------|----------|----------|
| 0.011329 | 0.011429 | 0.011497 | 0.011631 | 0.011732 | 0.011429 | 0.011530 |
| 0.011396 | 0.011463 | 0.011362 | 0.011597 | 0.011832 | 0.011362 | 0.011429 |
| 0.011329 | 0.011429 | 0.011396 | 0.011463 | 0.011396 | 0.011396 | 0.011396 |
| 0.011295 | 0.011329 | 0.011295 | 0.011396 | 0.011362 | 0.011397 | 0.011463 |
| 0.011262 | 0.011362 | 0.011429 | 0.011329 | 0.011463 | 0.011295 | 0.011362 |
| 0.011530 | 0.011463 | 0.011698 | 0.011530 | 0.011362 | 0.011564 | 0.011362 |
| 0.011505 | 0.011733 | 0.011551 | 0.011255 | 0.011284 | 0.011391 | 0.011454 |
| 0.012121 | 0.011467 | 0.011266 | 0.011597 | 0.011597 | 0.011396 | 0.011497 |
| 0.011429 | 0.011396 | 0.011463 | 0.011362 | 0.011463 | 0.011396 | 0.011396 |
| 0.011362 | 0.011463 | 0.011664 | 0.011530 | 0.011295 | 0.011396 | 0.011329 |
| 0.011295 | 0.011295 | 0.011362 | 0.011329 | 0.011530 | 0.011497 | 0.011429 |
| 0.011530 | 0.011597 | 0.011329 | 0.011329 | 0.011362 | 0.011362 | 0.011364 |
| 0.011432 | 0.011362 | 0.011362 | 0.011240 | 0.011313 | 0.011271 | 0.011363 |
| 0.011365 | 0.011301 | 0.011355 | 0.011336 | 0.011264 | 0.011300 | 0.011330 |
| 0.011600 | 0.011370 | 0.011405 | 0.011296 | 0.011233 | 0.011430 | 0.011396 |
| 0.011464 | 0.011397 | 0.011396 | 0.011496 | 0.011429 | 0.011799 | 0.011598 |
| 0.011631 | 0.011497 | 0.011362 | 0.011463 | 0.011262 | 0.011496 | 0.011295 |
| 0.011362 | 0.011362 | 0.011329 | 0.011295 | 0.011329 | 0.011295 | 0.011396 |
| 0.011362 | 0.011463 | 0.011396 | 0.011295 | 0.011397 | 0.011497 | 0.011499 |
| 0.011497 | 0.011396 | 0.011295 | 0.011229 | 0.011362 | 0.011295 | 0.011228 |
| 0.011298 | 0.011497 | 0.011295 | 0.011497 | 0.011262 | 0.011228 | 0.011329 |
| 0.011430 | 0.011329 | 0.011362 | 0.011329 | 0.011362 | 0.011228 | 0.011362 |
| 0.011396 | 0.011329 | 0.011396 | 0.011329 | 0.011362 | 0.011396 | 0.011631 |
| 0.011732 | 0.011664 | 0.011732 | 0.011498 | 0.011732 | 0.011362 | 0.011329 |
| 0.011364 | 0.011626 | 0.011472 | 0.011266 | 0.011739 | 0.011231 | 0.011375 |
| 0.011705 | 0.011604 | 0.011530 | 0.011732 | 0.011436 | 0.011597 | 0.011564 |
| 0.011496 | 0.011664 | 0.011522 | 0.011349 | 0.011437 | 0.011396 | 0.011466 |
| 0.011497 | 0.011465 | 0.011601 | 0.011669 | 0.011597 | 0.011665 | 0.011772 |
| 0.011500 | 0.011671 | 0.011602 | 0.011534 | 0.011800 | 0.011262 | 0.011465 |
| 0.011429 | 0.011362 | 0.011262 | 0.011262 | 0.011329 | 0.011329 | 0.011396 |
| 0.011329 | 0.011396 | 0.011295 | 0.011396 | 0.011329 | 0.011329 | 0.011396 |
| 0.011329 | 0.011765 | 0.011664 | 0.011698 | 0.011228 | 0.011329 | 0.011362 |
| 0.011228 | 0.011329 | 0.011396 | 0.011429 | 0.011295 | 0.011295 | 0.011295 |
| 0.011832 | 0.011463 | 0.011463 | 0.011262 | 0.011362 | 0.011530 | 0.011295 |
| 0.011295 | 0.011362 | 0.011329 | 0.011497 | 0.011295 | 0.011429 | 0.011564 |
| 0.011496 | 0.011329 | 0.011329 | 0.011262 | 0.011262 | 0.011429 | 0.011362 |
| 0.011262 | 0.011362 | 0.011228 | 0.011262 | 0.011396 | 0.011530 | 0.011295 |
| 0.011262 | 0.011396 | 0.011329 | 0.011228 | 0.011564 | 0.011228 | 0.011396 |
| 0.011471 | 0.011295 | 0.011597 | 0.011430 | 0.011463 | 0.011329 | 0.011429 |
| 0.011295 | 0.011631 | 0.011228 | 0.011497 | 0.011295 | 0.011295 | 0.011228 |
| 0.011463 | 0.011665 | 0.011362 | 0.011429 | 0.011262 | 0.011664 | 0.011295 |
| 0.011295 | 0.011295 | 0.011329 | 0.011429 | 0.011329 | 0.011429 | 0.011496 |
| 0.011497 | 0.011463 | 0.011362 | 0.011463 | 0.011429 | 0.011295 | 0.011262 |
| 0.011295 | 0.011295 | 0.011362 | 0.011295 | 0.011262 | 0.011429 | 0.011295 |
| 0.011329 | 0.011329 | 0.011463 | 0.011496 | 0.011396 | 0.011329 | 0.011329 |
| 0.011396 | 0.011329 | 0.011429 | 0.011295 | 0.011429 | 0.011530 | 0.011832 |
| 0.011329 | 0.011732 | 0.011336 | 0.017861 | 0.011322 | 0.011427 | 0.011688 |
| 0.011648 | 0.011693 | 0.011322 | 0.011234 | 0.011719 | 0.011716 | 0.011364 |
| 0.011582 | 0.011549 | 0.011216 | 0.011270 | 0.011333 | 0.011357 | 0.011318 |
| 0.011529 | 0.011507 | 0.011505 | 0.011325 | 0.011329 | 0.011497 | 0.011500 |
| 0.011369 | 0.011463 | 0.011463 | 0.011429 | 0.011396 | 0.011396 | 0.011362 |
| 0.011396 | 0.011329 | 0.011362 | 0.011396 | 0.011228 | 0.011295 | 0.011329 |
| 0.011329 | 0.011396 | 0.011295 | 0.011396 | 0.011430 | 0.011463 | 0.011362 |
| 0.011396 | 0.011362 | 0.011698 | 0.011698 | 0.011430 | 0.011464 | 0.011497 |
| 0.011262 | 0.011262 | 0.011295 | 0.011396 | 0.011262 | 0.011497 | 0.011497 |
| 0.011530 | 0.011530 | 0.011329 | 0.011564 | 0.011732 | 0.011565 | 0.011396 |
| 0.011396 | 0.011463 | 0.011497 | 0.011329 | 0.011396 | 0.011362 | 0.011396 |
| 0.011463 | 0.011463 | 0.011497 | 0.011463 | 0.011363 | 0.011564 | 0.011530 |
| 0.011399 | 0.011295 | 0.011396 | 0.011497 | 0.011396 | 0.011530 | 0.011564 |
| 0.011732 | 0.011436 | 0.011597 | 0.011564 | 0.011496 | 0.011664 | 0.011295 |

|          |          |          |          |          |          |          |
|----------|----------|----------|----------|----------|----------|----------|
| 0.011464 | 0.011363 | 0.011329 | 0.011329 | 0.011396 | 0.011295 | 0.011396 |
| 0.011430 | 0.011463 | 0.011362 | 0.011396 | 0.011362 | 0.011698 | 0.011698 |
| 0.011430 | 0.011464 | 0.011530 | 0.011463 | 0.012103 | 0.011525 | 0.011447 |
| 0.011517 | 0.011476 | 0.011587 | 0.011476 | 0.011585 | 0.011508 | 0.011474 |
| 0.012056 | 0.011372 | 0.011505 | 0.011441 | 0.011714 | 0.011502 | 0.011673 |
| 0.012080 | 0.011550 | 0.011635 | 0.011698 | 0.011564 | 0.011564 | 0.011601 |
| 0.011262 | 0.011429 | 0.011564 | 0.011530 | 0.011533 | 0.011530 | 0.011498 |
| 0.011362 | 0.011295 | 0.011329 | 0.011362 | 0.011262 | 0.011329 | 0.011228 |
| 0.011362 | 0.011396 | 0.011295 | 0.011262 | 0.011362 | 0.011295 | 0.011329 |
| 0.011329 | 0.011262 | 0.011329 | 0.011362 | 0.011262 | 0.011463 | 0.011496 |
| 0.011396 | 0.011463 | 0.011396 | 0.011396 | 0.011329 | 0.011732 | 0.011362 |
| 0.011408 | 0.011329 | 0.011564 | 0.011569 | 0.011430 | 0.011429 | 0.011429 |
| 0.011429 | 0.011362 | 0.011329 | 0.011362 | 0.011463 | 0.011463 | 0.000000 |
| 0.011396 | 0.011530 | 0.011698 | 0.011429 | 0.011631 | 0.011631 | 0.011496 |
| 0.011329 | 0.011396 | 0.011429 | 0.011832 | 0.011396 | 0.011430 | 0.011262 |
| 0.011429 | 0.011362 | 0.011362 | 0.011665 | 0.011597 | 0.011631 | 0.011362 |
| 0.011463 | 0.011530 | 0.011329 | 0.011463 | 0.011429 | 0.011295 | 0.011631 |
| 0.011396 | 0.011362 | 0.011362 | 0.011530 | 0.011362 | 0.011463 | 0.011698 |
| 0.011396 | 0.011739 | 0.011765 | 0.011548 | 0.011286 | 0.011468 | 0.011267 |
| 0.011225 | 0.011761 | 0.011306 | 0.011507 | 0.011353 | 0.011467 | 0.011485 |
| 0.011519 | 0.011324 | 0.011450 | 0.011258 | 0.011330 | 0.011395 | 0.011425 |
| 0.011437 | 0.011336 | 0.011448 | 0.011377 | 0.011397 | 0.011530 | 0.011597 |
| 0.011597 | 0.011464 | 0.011567 | 0.011569 | 0.011704 | 0.011696 | 0.011396 |
| 0.011631 | 0.011497 | 0.011362 | 0.011463 | 0.011262 | 0.011496 | 0.011295 |
| 0.011362 | 0.011362 | 0.011329 | 0.011295 | 0.011329 | 0.011295 | 0.011396 |
| 0.011375 | 0.011375 | 0.011368 | 0.011403 | 0.011539 | 0.011504 | 0.011504 |
| 0.011503 | 0.011430 | 0.011245 | 0.011240 | 0.011365 | 0.011535 | 0.011535 |
| 0.011329 | 0.011399 | 0.011632 | 0.011601 | 0.011531 | 0.011565 | 0.011496 |
| 0.011429 | 0.011496 | 0.011496 | 0.011396 | 0.011967 | 0.011564 | 0.011631 |
| 0.011665 | 0.011737 | 0.011367 | 0.011337 | 0.011329 | 0.011530 | 0.011496 |
| 0.011531 | 0.011564 | 0.011564 | 0.011564 | 0.011689 | 0.011698 | 0.011338 |
| 0.011229 | 0.011233 | 0.011333 | 0.011298 | 0.011402 | 0.011247 | 0.011570 |
| 0.011369 | 0.011499 | 0.011298 | 0.011360 | 0.011363 | 0.011437 | 0.011329 |
| 0.011295 | 0.011295 | 0.011362 | 0.011329 | 0.011530 | 0.011497 | 0.011429 |
| 0.011530 | 0.011597 | 0.011329 | 0.011329 | 0.011362 | 0.011362 | 0.011364 |
| 0.011432 | 0.011362 | 0.011362 | 0.011397 | 0.011530 | 0.011597 | 0.011597 |
| 0.011464 | 0.011567 | 0.011569 | 0.011704 | 0.011696 | 0.011396 | 0.011564 |
| 0.011496 | 0.011496 | 0.011331 | 0.011513 | 0.011442 | 0.011469 | 0.011340 |
| 0.011473 | 0.011744 | 0.011483 | 0.011400 | 0.011295 | 0.011497 | 0.011362 |
| 0.011463 | 0.011396 | 0.011295 | 0.011397 | 0.011497 | 0.011499 | 0.011396 |
| 0.011295 | 0.011229 | 0.011362 | 0.011295 | 0.011228 | 0.011298 | 0.011497 |
| 0.011396 | 0.011329 | 0.011362 | 0.011396 | 0.011228 | 0.011295 | 0.011497 |
| 0.011362 | 0.011396 | 0.011396 | 0.011329 | 0.011396 | 0.011631 | 0.011295 |
| 0.011329 | 0.011732 | 0.011329 | 0.011362 | 0.011329 | 0.011698 | 0.011275 |
| 0.011735 | 0.011273 | 0.011311 | 0.011543 | 0.011589 | 0.011527 | 0.011227 |
| 0.011270 | 0.011496 | 0.011597 | 0.011705 | 0.011565 | 0.011703 | 0.011834 |
| 0.011733 | 0.011770 | 0.011731 | 0.011983 | 0.011698 | 0.012573 | 0.011734 |
| 0.012473 | 0.012241 | 0.012375 | 0.012646 | 0.011698 | 0.011396 | 0.011699 |
| 0.012137 | 0.012072 | 0.011664 | 0.011564 | 0.011632 | 0.011632 | 0.011601 |
| 0.011496 | 0.011501 | 0.011564 | 0.011531 | 0.011901 | 0.011967 | 0.011968 |
| 0.011868 | 0.011968 | 0.012072 | 0.011838 | 0.012138 | 0.012144 | 0.012205 |
| 0.012205 | 0.012239 | 0.012186 | 0.012206 | 0.012207 | 0.011429 | 0.011732 |
| 0.011800 | 0.012303 | 0.011806 | 0.012034 | 0.012508 | 0.011570 | 0.011464 |
| 0.011429 | 0.011429 | 0.011900 | 0.011924 | 0.012045 | 0.011765 | 0.011431 |
| s567     | 0.011698 | 0.011698 | 0.012034 | 0.011799 | 0.011799 | 0.011866 |
| 0.011705 | 0.011637 | 0.011866 | 0.011295 | 0.011362 | 0.011329 | 0.011295 |
| 0.011329 | 0.011496 | 0.011295 | 0.011329 | 0.011329 | 0.011362 | 0.011329 |
| 0.011295 | 0.011329 | 0.011429 | 0.011295 | 0.011329 | 0.011329 | 0.011671 |
| 0.011564 | 0.011329 | 0.011228 | 0.011463 | 0.011396 | 0.011362 | 0.011396 |
| 0.011362 | 0.011463 | 0.011362 | 0.011362 | 0.011396 | 0.011362 | 0.011530 |

|          |          |          |          |          |          |          |
|----------|----------|----------|----------|----------|----------|----------|
| 0.011295 | 0.011362 | 0.011396 | 0.011329 | 0.011429 | 0.011463 | 0.011396 |
| 0.011362 | 0.011530 | 0.011430 | 0.011698 | 0.011362 | 0.011631 | 0.011362 |
| 0.011329 | 0.011429 | 0.011496 | 0.011631 | 0.011731 | 0.011429 | 0.011530 |
| 0.011396 | 0.011463 | 0.011362 | 0.011597 | 0.011832 | 0.011362 | 0.011429 |
| 0.011329 | 0.011429 | 0.011396 | 0.011463 | 0.011396 | 0.011396 | 0.011396 |
| 0.011295 | 0.011329 | 0.011295 | 0.011396 | 0.011362 | 0.011397 | 0.011463 |
| 0.011396 | 0.011362 | 0.011429 | 0.011329 | 0.011463 | 0.011295 | 0.011362 |
| 0.011530 | 0.011463 | 0.011698 | 0.011530 | 0.011362 | 0.011597 | 0.011362 |
| 0.011542 | 0.011770 | 0.011588 | 0.011295 | 0.011284 | 0.011391 | 0.011493 |
| 0.012121 | 0.011518 | 0.011266 | 0.011597 | 0.011597 | 0.011396 | 0.011496 |
| 0.011429 | 0.011396 | 0.011463 | 0.011362 | 0.011463 | 0.011396 | 0.011396 |
| 0.011362 | 0.011463 | 0.011664 | 0.011530 | 0.011429 | 0.011396 | 0.011329 |
| 0.011295 | 0.011295 | 0.011362 | 0.011329 | 0.011530 | 0.011497 | 0.011429 |
| 0.011530 | 0.011597 | 0.011329 | 0.011329 | 0.011362 | 0.011362 | 0.011364 |
| 0.011432 | 0.011362 | 0.011362 | 0.011240 | 0.011313 | 0.011271 | 0.011363 |
| 0.011365 | 0.011301 | 0.011355 | 0.011336 | 0.011264 | 0.011300 | 0.011330 |
| 0.011600 | 0.011370 | 0.011405 | 0.011296 | 0.011302 | 0.011430 | 0.011396 |
| 0.011464 | 0.011397 | 0.011396 | 0.011496 | 0.011429 | 0.011799 | 0.011597 |
| 0.011631 | 0.011497 | 0.011362 | 0.011463 | 0.011262 | 0.011496 | 0.011295 |
| 0.011362 | 0.011362 | 0.011329 | 0.011295 | 0.011329 | 0.011295 | 0.011396 |
| 0.011362 | 0.011463 | 0.011396 | 0.011295 | 0.011397 | 0.011497 | 0.011499 |
| 0.011497 | 0.011396 | 0.011295 | 0.011229 | 0.011362 | 0.011295 | 0.011228 |
| 0.011298 | 0.011497 | 0.011295 | 0.011497 | 0.011262 | 0.011362 | 0.011329 |
| 0.011430 | 0.011329 | 0.011362 | 0.011329 | 0.011362 | 0.011228 | 0.011362 |
| 0.011396 | 0.011329 | 0.011396 | 0.011329 | 0.011362 | 0.011396 | 0.011631 |
| 0.011732 | 0.011664 | 0.011732 | 0.011498 | 0.011732 | 0.011362 | 0.011329 |
| 0.011364 | 0.011626 | 0.011517 | 0.011266 | 0.011705 | 0.011231 | 0.011375 |
| 0.011739 | 0.011638 | 0.011530 | 0.011732 | 0.011436 | 0.011597 | 0.011564 |
| 0.011496 | 0.011664 | 0.011522 | 0.011390 | 0.011437 | 0.011396 | 0.011466 |
| 0.011564 | 0.011465 | 0.011601 | 0.011669 | 0.011597 | 0.011664 | 0.011771 |
| 0.011500 | 0.011671 | 0.011602 | 0.011533 | 0.011800 | 0.011262 | 0.011464 |
| 0.011429 | 0.011362 | 0.011262 | 0.011262 | 0.011329 | 0.011329 | 0.011396 |
| 0.011329 | 0.011396 | 0.011295 | 0.011396 | 0.011329 | 0.011329 | 0.011396 |
| 0.011329 | 0.011765 | 0.011664 | 0.011698 | 0.011228 | 0.011329 | 0.011362 |
| 0.011362 | 0.011329 | 0.011396 | 0.011429 | 0.011295 | 0.011295 | 0.011295 |
| 0.011832 | 0.011463 | 0.011463 | 0.011262 | 0.011362 | 0.011530 | 0.011295 |
| 0.011295 | 0.011362 | 0.011329 | 0.011496 | 0.011295 | 0.011429 | 0.011563 |
| 0.011496 | 0.011329 | 0.011329 | 0.011262 | 0.011262 | 0.011429 | 0.011362 |
| 0.011262 | 0.011362 | 0.011228 | 0.011262 | 0.011396 | 0.011530 | 0.011295 |
| 0.011262 | 0.011396 | 0.011329 | 0.011228 | 0.011564 | 0.011228 | 0.011396 |
| 0.011471 | 0.011295 | 0.011597 | 0.011429 | 0.011463 | 0.011329 | 0.011429 |
| 0.011295 | 0.011631 | 0.011228 | 0.011496 | 0.011295 | 0.011295 | 0.011228 |
| 0.011463 | 0.011665 | 0.011362 | 0.011429 | 0.011262 | 0.011664 | 0.011295 |
| 0.011295 | 0.011295 | 0.011329 | 0.011429 | 0.011329 | 0.011429 | 0.011496 |
| 0.011496 | 0.011463 | 0.011362 | 0.011463 | 0.011429 | 0.011295 | 0.011262 |
| 0.011295 | 0.011295 | 0.011362 | 0.011295 | 0.011262 | 0.011429 | 0.011295 |
| 0.011329 | 0.011329 | 0.011463 | 0.011496 | 0.011396 | 0.011329 | 0.011329 |
| 0.011396 | 0.011329 | 0.011429 | 0.011295 | 0.011429 | 0.011530 | 0.011832 |
| 0.011329 | 0.011732 | 0.011336 | 0.017823 | 0.011257 | 0.011549 | 0.011688 |
| 0.011648 | 0.011693 | 0.011374 | 0.011292 | 0.011884 | 0.011716 | 0.011546 |
| 0.011487 | 0.011671 | 0.011255 | 0.011270 | 0.011294 | 0.011455 | 0.011361 |
| 0.011576 | 0.011507 | 0.011468 | 0.011193 | 0.011463 | 0.011497 | 0.011500 |
| 0.011369 | 0.011463 | 0.011463 | 0.011429 | 0.011396 | 0.011396 | 0.011362 |
| 0.011396 | 0.011329 | 0.011362 | 0.011396 | 0.011362 | 0.011295 | 0.011329 |
| 0.011329 | 0.011396 | 0.011295 | 0.011396 | 0.011362 | 0.011396 | 0.011362 |
| 0.011396 | 0.011362 | 0.011698 | 0.011698 | 0.011430 | 0.011464 | 0.011497 |
| 0.011262 | 0.011262 | 0.011295 | 0.011396 | 0.011262 | 0.011497 | 0.011497 |
| 0.011530 | 0.011530 | 0.011463 | 0.011564 | 0.011732 | 0.011565 | 0.011396 |
| 0.011396 | 0.011463 | 0.011497 | 0.011329 | 0.011396 | 0.011362 | 0.011396 |
| 0.011463 | 0.011463 | 0.011497 | 0.011463 | 0.011363 | 0.011564 | 0.011530 |



|          |          |          |          |          |          |          |
|----------|----------|----------|----------|----------|----------|----------|
| 0.011399 | 0.011295 | 0.011329 | 0.011497 | 0.011396 | 0.011530 | 0.011496 |
| 0.011732 | 0.011436 | 0.011597 | 0.011564 | 0.011496 | 0.011664 | 0.011295 |
| 0.011464 | 0.011363 | 0.011329 | 0.011329 | 0.011396 | 0.011295 | 0.011396 |
| 0.011362 | 0.011396 | 0.011362 | 0.011396 | 0.011362 | 0.011698 | 0.011698 |
| 0.011430 | 0.011464 | 0.011530 | 0.011463 | 0.012103 | 0.011524 | 0.011447 |
| 0.011517 | 0.011476 | 0.011447 | 0.011476 | 0.011585 | 0.011508 | 0.011474 |
| 0.012056 | 0.011372 | 0.011505 | 0.011440 | 0.011714 | 0.011570 | 0.011673 |
| 0.012080 | 0.011475 | 0.011635 | 0.011698 | 0.011564 | 0.011564 | 0.011601 |
| 0.011262 | 0.011429 | 0.011563 | 0.011530 | 0.011533 | 0.011530 | 0.011498 |
| 0.011362 | 0.011295 | 0.011329 | 0.011362 | 0.011262 | 0.011329 | 0.011228 |
| 0.011362 | 0.011396 | 0.011295 | 0.011262 | 0.011362 | 0.011295 | 0.011329 |
| 0.011329 | 0.011262 | 0.011329 | 0.011362 | 0.011262 | 0.011463 | 0.011496 |
| 0.011396 | 0.011463 | 0.011396 | 0.011396 | 0.011329 | 0.011731 | 0.011362 |
| 0.011408 | 0.011329 | 0.011564 | 0.011569 | 0.011429 | 0.011429 | 0.011429 |
| 0.011429 | 0.011362 | 0.011329 | 0.011362 | 0.011463 | 0.011463 | 0.011396 |
| 0.000000 | 0.011530 | 0.011698 | 0.011429 | 0.011631 | 0.011631 | 0.011496 |
| 0.011329 | 0.011396 | 0.011429 | 0.011832 | 0.011396 | 0.011429 | 0.011396 |
| 0.011429 | 0.011362 | 0.011362 | 0.011664 | 0.011597 | 0.011631 | 0.011362 |
| 0.011463 | 0.011530 | 0.011396 | 0.011463 | 0.011429 | 0.011295 | 0.011631 |
| 0.011396 | 0.011362 | 0.011362 | 0.011530 | 0.011362 | 0.011463 | 0.011698 |
| 0.011396 | 0.011773 | 0.011765 | 0.011588 | 0.011286 | 0.011468 | 0.011267 |
| 0.011335 | 0.011800 | 0.011306 | 0.011462 | 0.011353 | 0.011416 | 0.011379 |
| 0.011570 | 0.011192 | 0.011339 | 0.011192 | 0.011222 | 0.011395 | 0.011466 |
| 0.011475 | 0.011375 | 0.011448 | 0.011377 | 0.011364 | 0.011530 | 0.011597 |
| 0.011597 | 0.011464 | 0.011567 | 0.011569 | 0.011670 | 0.011696 | 0.011396 |
| 0.011631 | 0.011497 | 0.011362 | 0.011463 | 0.011262 | 0.011496 | 0.011295 |
| 0.011362 | 0.011362 | 0.011329 | 0.011295 | 0.011329 | 0.011295 | 0.011396 |
| 0.011375 | 0.011375 | 0.011368 | 0.011403 | 0.011539 | 0.011504 | 0.011504 |
| 0.011503 | 0.011430 | 0.011245 | 0.011240 | 0.011365 | 0.011534 | 0.011535 |
| 0.011329 | 0.011399 | 0.011632 | 0.011601 | 0.011531 | 0.011565 | 0.011496 |
| 0.011429 | 0.011496 | 0.011496 | 0.011396 | 0.011967 | 0.011564 | 0.011631 |
| 0.011665 | 0.011701 | 0.011367 | 0.011441 | 0.011329 | 0.011530 | 0.011496 |
| 0.011531 | 0.011564 | 0.011564 | 0.011564 | 0.011689 | 0.011698 | 0.011338 |
| 0.011229 | 0.011233 | 0.011332 | 0.011298 | 0.011402 | 0.011209 | 0.011570 |
| 0.011369 | 0.011499 | 0.011251 | 0.011397 | 0.011363 | 0.011436 | 0.011329 |
| 0.011295 | 0.011295 | 0.011362 | 0.011329 | 0.011530 | 0.011497 | 0.011429 |
| 0.011530 | 0.011597 | 0.011329 | 0.011329 | 0.011362 | 0.011362 | 0.011364 |
| 0.011432 | 0.011362 | 0.011362 | 0.011364 | 0.011530 | 0.011597 | 0.011597 |
| 0.011464 | 0.011567 | 0.011569 | 0.011670 | 0.011696 | 0.011396 | 0.011496 |
| 0.011496 | 0.011496 | 0.011331 | 0.011478 | 0.011442 | 0.011469 | 0.011340 |
| 0.011508 | 0.011698 | 0.011526 | 0.011400 | 0.011295 | 0.011497 | 0.011362 |
| 0.011463 | 0.011396 | 0.011295 | 0.011397 | 0.011497 | 0.011499 | 0.011396 |
| 0.011295 | 0.011229 | 0.011362 | 0.011295 | 0.011228 | 0.011298 | 0.011497 |
| 0.011396 | 0.011329 | 0.011362 | 0.011396 | 0.011362 | 0.011295 | 0.011497 |
| 0.011362 | 0.011396 | 0.011396 | 0.011329 | 0.011396 | 0.011631 | 0.011295 |
| 0.011329 | 0.011731 | 0.011329 | 0.011362 | 0.011329 | 0.011698 | 0.011274 |
| 0.011735 | 0.011273 | 0.011261 | 0.011543 | 0.011630 | 0.011527 | 0.011269 |
| 0.011218 | 0.011496 | 0.011597 | 0.011705 | 0.011565 | 0.011703 | 0.011834 |
| 0.011733 | 0.011770 | 0.011731 | 0.011983 | 0.011698 | 0.012572 | 0.011734 |
| 0.012473 | 0.012240 | 0.012375 | 0.012646 | 0.011698 | 0.011396 | 0.011698 |
| 0.012137 | 0.012072 | 0.011664 | 0.011564 | 0.011632 | 0.011632 | 0.011601 |
| 0.011496 | 0.011501 | 0.011563 | 0.011531 | 0.011901 | 0.011900 | 0.011968 |
| 0.011867 | 0.011968 | 0.012072 | 0.011838 | 0.012138 | 0.012144 | 0.012205 |
| 0.012205 | 0.012239 | 0.012186 | 0.012205 | 0.012207 | 0.011429 | 0.011732 |
| 0.011800 | 0.012303 | 0.011806 | 0.012034 | 0.012508 | 0.011569 | 0.011463 |
| 0.011429 | 0.011429 | 0.011900 | 0.011965 | 0.012010 | 0.011765 | 0.011431 |
| S568     | 0.011832 | 0.011832 | 0.012101 | 0.011933 | 0.011933 | 0.012000 |
| 0.011841 | 0.011773 | 0.012000 | 0.011430 | 0.011429 | 0.011464 | 0.011429 |
| 0.011463 | 0.011631 | 0.011429 | 0.011463 | 0.011530 | 0.011497 | 0.011463 |
| 0.011429 | 0.011463 | 0.011564 | 0.011430 | 0.011463 | 0.011463 | 0.011807 |

|          |          |          |          |          |          |          |
|----------|----------|----------|----------|----------|----------|----------|
| 0.011698 | 0.011463 | 0.011362 | 0.011597 | 0.011530 | 0.011497 | 0.011530 |
| 0.011497 | 0.011597 | 0.011496 | 0.011497 | 0.011530 | 0.011496 | 0.011664 |
| 0.011429 | 0.011496 | 0.011530 | 0.011463 | 0.011564 | 0.011597 | 0.011530 |
| 0.011497 | 0.011665 | 0.011564 | 0.011832 | 0.011496 | 0.011765 | 0.011496 |
| 0.011463 | 0.011564 | 0.011631 | 0.011765 | 0.011866 | 0.011564 | 0.011664 |
| 0.011530 | 0.011597 | 0.011429 | 0.011731 | 0.011967 | 0.011497 | 0.011564 |
| 0.011463 | 0.011530 | 0.011396 | 0.011597 | 0.011530 | 0.011530 | 0.011530 |
| 0.011429 | 0.011463 | 0.011429 | 0.011530 | 0.011496 | 0.011531 | 0.011597 |
| 0.011530 | 0.011496 | 0.011564 | 0.011463 | 0.011597 | 0.011429 | 0.011496 |
| 0.011664 | 0.011597 | 0.011832 | 0.011664 | 0.011497 | 0.011664 | 0.011496 |
| 0.011654 | 0.011882 | 0.011702 | 0.011412 | 0.011359 | 0.011502 | 0.011572 |
| 0.012195 | 0.011671 | 0.011349 | 0.011731 | 0.011732 | 0.011530 | 0.011631 |
| 0.011564 | 0.011530 | 0.011597 | 0.011496 | 0.011597 | 0.011530 | 0.011530 |
| 0.011496 | 0.011597 | 0.011799 | 0.011664 | 0.011564 | 0.011530 | 0.011463 |
| 0.011430 | 0.011429 | 0.011497 | 0.011463 | 0.011665 | 0.011631 | 0.011564 |
| 0.011665 | 0.011732 | 0.011463 | 0.011463 | 0.011497 | 0.011497 | 0.011499 |
| 0.011567 | 0.011497 | 0.011497 | 0.011348 | 0.011422 | 0.011376 | 0.011497 |
| 0.011501 | 0.011438 | 0.011466 | 0.011474 | 0.011366 | 0.011403 | 0.011432 |
| 0.011708 | 0.011474 | 0.011508 | 0.011430 | 0.011440 | 0.011565 | 0.011531 |
| 0.011598 | 0.011532 | 0.011531 | 0.011631 | 0.011564 | 0.011933 | 0.011732 |
| 0.011765 | 0.011631 | 0.011497 | 0.011598 | 0.011396 | 0.011631 | 0.011430 |
| 0.011497 | 0.011496 | 0.011463 | 0.011429 | 0.011463 | 0.011430 | 0.011530 |
| 0.011497 | 0.011597 | 0.011530 | 0.011429 | 0.011532 | 0.011631 | 0.011635 |
| 0.011631 | 0.011530 | 0.011430 | 0.011364 | 0.011497 | 0.011430 | 0.011363 |
| 0.011468 | 0.011631 | 0.011430 | 0.011631 | 0.011396 | 0.011497 | 0.011463 |
| 0.011564 | 0.011463 | 0.011497 | 0.011463 | 0.011497 | 0.011362 | 0.011497 |
| 0.011530 | 0.011463 | 0.011530 | 0.011463 | 0.011497 | 0.011530 | 0.011765 |
| 0.011866 | 0.011799 | 0.011866 | 0.011600 | 0.011867 | 0.011497 | 0.011463 |
| 0.011499 | 0.011748 | 0.011701 | 0.011369 | 0.011875 | 0.011367 | 0.011454 |
| 0.011875 | 0.011774 | 0.011664 | 0.011866 | 0.011572 | 0.011732 | 0.011698 |
| 0.011631 | 0.011799 | 0.011664 | 0.011513 | 0.011563 | 0.011530 | 0.011602 |
| 0.011698 | 0.011600 | 0.011736 | 0.011805 | 0.011732 | 0.011799 | 0.011907 |
| 0.011602 | 0.011807 | 0.011703 | 0.011635 | 0.011935 | 0.011396 | 0.011599 |
| 0.011564 | 0.011497 | 0.011396 | 0.011396 | 0.011463 | 0.011463 | 0.011530 |
| 0.011463 | 0.011530 | 0.011429 | 0.011530 | 0.011463 | 0.011463 | 0.011530 |
| 0.011463 | 0.011899 | 0.011799 | 0.011832 | 0.011362 | 0.011463 | 0.011497 |
| 0.011497 | 0.011463 | 0.011530 | 0.011564 | 0.011429 | 0.011429 | 0.011429 |
| 0.011967 | 0.011597 | 0.011597 | 0.011396 | 0.011496 | 0.011665 | 0.011429 |
| 0.011429 | 0.011496 | 0.011463 | 0.011631 | 0.011429 | 0.011564 | 0.011698 |
| 0.011631 | 0.011463 | 0.011463 | 0.011396 | 0.011396 | 0.011564 | 0.011496 |
| 0.011396 | 0.011496 | 0.011362 | 0.011396 | 0.011530 | 0.011665 | 0.011429 |
| 0.011396 | 0.011530 | 0.011430 | 0.011362 | 0.011698 | 0.011362 | 0.011530 |
| 0.011608 | 0.011429 | 0.011732 | 0.011564 | 0.011597 | 0.011463 | 0.011564 |
| 0.011429 | 0.011765 | 0.011362 | 0.011631 | 0.011429 | 0.011429 | 0.011362 |
| 0.011597 | 0.011799 | 0.011429 | 0.011564 | 0.011396 | 0.011799 | 0.011429 |
| 0.011429 | 0.011429 | 0.011463 | 0.011564 | 0.011463 | 0.011564 | 0.011631 |
| 0.011631 | 0.011597 | 0.011496 | 0.011597 | 0.011564 | 0.011429 | 0.011396 |
| 0.011429 | 0.011429 | 0.011429 | 0.011429 | 0.011396 | 0.011564 | 0.011429 |
| 0.011463 | 0.011463 | 0.011597 | 0.011631 | 0.011530 | 0.011463 | 0.011463 |
| 0.011463 | 0.011463 | 0.011564 | 0.011429 | 0.011564 | 0.011664 | 0.011967 |
| 0.011463 | 0.011866 | 0.011440 | 0.017899 | 0.011453 | 0.011549 | 0.011793 |
| 0.011752 | 0.011799 | 0.011584 | 0.011525 | 0.011994 | 0.011820 | 0.011607 |
| 0.011677 | 0.011793 | 0.011372 | 0.011479 | 0.011451 | 0.011554 | 0.011447 |
| 0.011670 | 0.011582 | 0.011579 | 0.011523 | 0.011597 | 0.011631 | 0.011635 |
| 0.011507 | 0.011597 | 0.011597 | 0.011564 | 0.011530 | 0.011530 | 0.011497 |
| 0.011530 | 0.011463 | 0.011497 | 0.011530 | 0.011497 | 0.011430 | 0.011463 |
| 0.011463 | 0.011530 | 0.011430 | 0.011530 | 0.011564 | 0.011597 | 0.011496 |
| 0.011530 | 0.011497 | 0.011833 | 0.011833 | 0.011564 | 0.011598 | 0.011631 |
| 0.011396 | 0.011396 | 0.011430 | 0.011530 | 0.011396 | 0.011631 | 0.011631 |
| 0.011665 | 0.011664 | 0.011597 | 0.011698 | 0.011866 | 0.011700 | 0.011530 |

|          |          |          |          |          |          |          |
|----------|----------|----------|----------|----------|----------|----------|
| 0.011530 | 0.011597 | 0.011631 | 0.011463 | 0.011530 | 0.011497 | 0.011530 |
| 0.011598 | 0.011598 | 0.011631 | 0.011598 | 0.011498 | 0.011698 | 0.011665 |
| 0.011534 | 0.011430 | 0.011530 | 0.011631 | 0.011530 | 0.011665 | 0.011698 |
| 0.011866 | 0.011572 | 0.011732 | 0.011698 | 0.011631 | 0.011799 | 0.011430 |
| 0.011599 | 0.011497 | 0.011463 | 0.011463 | 0.011530 | 0.011430 | 0.011530 |
| 0.011564 | 0.011597 | 0.011496 | 0.011530 | 0.011497 | 0.011833 | 0.011833 |
| 0.011564 | 0.011598 | 0.011664 | 0.011597 | 0.012238 | 0.011632 | 0.011588 |
| 0.011623 | 0.011615 | 0.011693 | 0.011614 | 0.011690 | 0.011612 | 0.011577 |
| 0.012194 | 0.011510 | 0.011642 | 0.011579 | 0.011818 | 0.011672 | 0.011809 |
| 0.012216 | 0.011663 | 0.011770 | 0.011832 | 0.011698 | 0.011698 | 0.011736 |
| 0.011396 | 0.011564 | 0.011698 | 0.011664 | 0.011668 | 0.011664 | 0.011633 |
| 0.011429 | 0.011429 | 0.011463 | 0.011496 | 0.011396 | 0.011463 | 0.011362 |
| 0.011496 | 0.011530 | 0.011429 | 0.011396 | 0.011429 | 0.011429 | 0.011463 |
| 0.011463 | 0.011396 | 0.011463 | 0.011497 | 0.011396 | 0.011597 | 0.011631 |
| 0.011530 | 0.011597 | 0.011530 | 0.011530 | 0.011463 | 0.011866 | 0.011496 |
| 0.011547 | 0.011463 | 0.011699 | 0.011705 | 0.011564 | 0.011564 | 0.011564 |
| 0.011564 | 0.011497 | 0.011463 | 0.011497 | 0.011597 | 0.011597 | 0.011530 |
| 0.011530 | 0.000000 | 0.011832 | 0.011564 | 0.011765 | 0.011765 | 0.011631 |
| 0.011463 | 0.011530 | 0.011564 | 0.011967 | 0.011497 | 0.011564 | 0.011530 |
| 0.011564 | 0.011496 | 0.011496 | 0.011799 | 0.011732 | 0.011765 | 0.011497 |
| 0.011597 | 0.011664 | 0.011530 | 0.011597 | 0.011564 | 0.011429 | 0.011765 |
| 0.011530 | 0.011496 | 0.011496 | 0.011664 | 0.011497 | 0.011597 | 0.011832 |
| 0.011530 | 0.011909 | 0.011900 | 0.011670 | 0.011399 | 0.011604 | 0.011473 |
| 0.011390 | 0.011878 | 0.011411 | 0.011596 | 0.011451 | 0.011569 | 0.011538 |
| 0.011672 | 0.011390 | 0.011506 | 0.011391 | 0.011384 | 0.011462 | 0.011547 |
| 0.011588 | 0.011454 | 0.011553 | 0.011448 | 0.011532 | 0.011665 | 0.011732 |
| 0.011732 | 0.011598 | 0.011703 | 0.011704 | 0.011840 | 0.011873 | 0.011530 |
| 0.011765 | 0.011631 | 0.011497 | 0.011598 | 0.011396 | 0.011631 | 0.011430 |
| 0.011497 | 0.011496 | 0.011463 | 0.011429 | 0.011463 | 0.011430 | 0.011530 |
| 0.011514 | 0.011445 | 0.011505 | 0.011505 | 0.011642 | 0.011641 | 0.011606 |
| 0.011639 | 0.011565 | 0.011319 | 0.011348 | 0.011501 | 0.011670 | 0.011671 |
| 0.011464 | 0.011534 | 0.011767 | 0.011736 | 0.011666 | 0.011700 | 0.011631 |
| 0.011564 | 0.011631 | 0.011631 | 0.011530 | 0.012102 | 0.011698 | 0.011765 |
| 0.011799 | 0.011879 | 0.011504 | 0.011580 | 0.011463 | 0.011664 | 0.011631 |
| 0.011666 | 0.011698 | 0.011698 | 0.011698 | 0.011886 | 0.011832 | 0.011476 |
| 0.011364 | 0.011372 | 0.011469 | 0.011434 | 0.011538 | 0.011359 | 0.011706 |
| 0.011506 | 0.011674 | 0.011441 | 0.011510 | 0.011497 | 0.011539 | 0.011463 |
| 0.011430 | 0.011429 | 0.011497 | 0.011463 | 0.011665 | 0.011631 | 0.011564 |
| 0.011665 | 0.011732 | 0.011463 | 0.011463 | 0.011497 | 0.011497 | 0.011499 |
| 0.011567 | 0.011497 | 0.011497 | 0.011532 | 0.011665 | 0.011732 | 0.011732 |
| 0.011598 | 0.011703 | 0.011704 | 0.011840 | 0.011873 | 0.011530 | 0.011698 |
| 0.011631 | 0.011631 | 0.011466 | 0.011652 | 0.011581 | 0.011605 | 0.011446 |
| 0.011646 | 0.011835 | 0.011526 | 0.011536 | 0.011430 | 0.011631 | 0.011497 |
| 0.011597 | 0.011530 | 0.011429 | 0.011532 | 0.011631 | 0.011635 | 0.011530 |
| 0.011430 | 0.011364 | 0.011497 | 0.011430 | 0.011363 | 0.011468 | 0.011631 |
| 0.011530 | 0.011463 | 0.011497 | 0.011530 | 0.011497 | 0.011430 | 0.011631 |
| 0.011496 | 0.011530 | 0.011530 | 0.011463 | 0.011530 | 0.011765 | 0.011429 |
| 0.011463 | 0.011866 | 0.011463 | 0.011497 | 0.011463 | 0.011832 | 0.011360 |
| 0.011848 | 0.011315 | 0.011461 | 0.011543 | 0.011671 | 0.011634 | 0.011353 |
| 0.011428 | 0.011631 | 0.011732 | 0.011841 | 0.011700 | 0.011805 | 0.011968 |
| 0.011868 | 0.011906 | 0.011866 | 0.012086 | 0.011832 | 0.012708 | 0.011869 |
| 0.012608 | 0.012376 | 0.012510 | 0.012782 | 0.011832 | 0.011530 | 0.011833 |
| 0.012272 | 0.012174 | 0.011799 | 0.011698 | 0.011766 | 0.011766 | 0.011737 |
| 0.011631 | 0.011603 | 0.011698 | 0.011665 | 0.012036 | 0.012101 | 0.012103 |
| 0.012002 | 0.012103 | 0.012207 | 0.011940 | 0.012273 | 0.012280 | 0.012340 |
| 0.012340 | 0.012374 | 0.012289 | 0.012341 | 0.012342 | 0.011564 | 0.011867 |
| 0.011935 | 0.012438 | 0.011908 | 0.012169 | 0.012643 | 0.011705 | 0.011598 |
| 0.011564 | 0.011564 | 0.012035 | 0.012048 | 0.012186 | 0.011900 | 0.011566 |
| S569     | 0.012000 | 0.012000 | 0.012068 | 0.011832 | 0.011832 | 0.011900 |
| 0.011332 | 0.011264 | 0.011900 | 0.011597 | 0.011664 | 0.011632 | 0.011597 |

|          |          |          |          |          |          |          |
|----------|----------|----------|----------|----------|----------|----------|
| 0.011564 | 0.011799 | 0.011530 | 0.011631 | 0.011698 | 0.011664 | 0.011631 |
| 0.011597 | 0.011631 | 0.011463 | 0.011598 | 0.011631 | 0.011631 | 0.011298 |
| 0.011597 | 0.011631 | 0.011530 | 0.011497 | 0.011698 | 0.011664 | 0.011698 |
| 0.011664 | 0.011765 | 0.011664 | 0.011664 | 0.011698 | 0.011664 | 0.011832 |
| 0.011530 | 0.011664 | 0.011698 | 0.011631 | 0.011664 | 0.011765 | 0.011698 |
| 0.011664 | 0.011832 | 0.011732 | 0.011329 | 0.011664 | 0.011933 | 0.011664 |
| 0.011631 | 0.011665 | 0.011799 | 0.011933 | 0.011429 | 0.011664 | 0.011765 |
| 0.011698 | 0.011765 | 0.011664 | 0.011899 | 0.011463 | 0.011664 | 0.011732 |
| 0.011631 | 0.011731 | 0.011698 | 0.011765 | 0.011698 | 0.011698 | 0.011698 |
| 0.011597 | 0.011631 | 0.011597 | 0.011631 | 0.011664 | 0.011700 | 0.011765 |
| 0.011698 | 0.011664 | 0.011731 | 0.011631 | 0.011429 | 0.011597 | 0.011664 |
| 0.011832 | 0.011765 | 0.011530 | 0.011832 | 0.011664 | 0.011900 | 0.011664 |
| 0.011876 | 0.011359 | 0.011890 | 0.011607 | 0.011583 | 0.011686 | 0.011493 |
| 0.012121 | 0.011467 | 0.011637 | 0.011899 | 0.011899 | 0.011631 | 0.011530 |
| 0.011732 | 0.011698 | 0.011765 | 0.011664 | 0.011765 | 0.011698 | 0.011698 |
| 0.011664 | 0.011698 | 0.011967 | 0.011832 | 0.011732 | 0.011698 | 0.011631 |
| 0.011597 | 0.011530 | 0.011665 | 0.011631 | 0.011564 | 0.011530 | 0.011463 |
| 0.011564 | 0.011631 | 0.011631 | 0.011631 | 0.011665 | 0.011665 | 0.011668 |
| 0.011703 | 0.011665 | 0.011665 | 0.011528 | 0.011603 | 0.011551 | 0.011665 |
| 0.011636 | 0.011576 | 0.011651 | 0.011612 | 0.011570 | 0.011574 | 0.011634 |
| 0.011528 | 0.011646 | 0.011680 | 0.011598 | 0.011579 | 0.011733 | 0.011632 |
| 0.011699 | 0.011701 | 0.011699 | 0.011799 | 0.011731 | 0.012101 | 0.011833 |
| 0.011664 | 0.011732 | 0.011664 | 0.011698 | 0.011564 | 0.011530 | 0.011598 |
| 0.011664 | 0.011664 | 0.011631 | 0.011597 | 0.011631 | 0.011597 | 0.011698 |
| 0.011665 | 0.011765 | 0.011698 | 0.011597 | 0.011700 | 0.011799 | 0.011804 |
| 0.011799 | 0.011698 | 0.011597 | 0.011532 | 0.011665 | 0.011597 | 0.011530 |
| 0.011536 | 0.011799 | 0.011597 | 0.011799 | 0.011564 | 0.011665 | 0.011631 |
| 0.011732 | 0.011631 | 0.011665 | 0.011631 | 0.011665 | 0.011530 | 0.011665 |
| 0.011698 | 0.011631 | 0.011698 | 0.011631 | 0.011665 | 0.011698 | 0.011934 |
| 0.011362 | 0.011295 | 0.011362 | 0.011802 | 0.011430 | 0.011665 | 0.011631 |
| 0.011601 | 0.011909 | 0.011701 | 0.011575 | 0.011365 | 0.011538 | 0.011729 |
| 0.011366 | 0.011604 | 0.011832 | 0.012034 | 0.011743 | 0.011900 | 0.011866 |
| 0.011799 | 0.011967 | 0.011842 | 0.011761 | 0.011773 | 0.011698 | 0.011771 |
| 0.011866 | 0.011769 | 0.011906 | 0.011974 | 0.011900 | 0.011967 | 0.012077 |
| 0.011805 | 0.011977 | 0.011839 | 0.011770 | 0.012103 | 0.011564 | 0.011768 |
| 0.011731 | 0.011664 | 0.011564 | 0.011564 | 0.011631 | 0.011631 | 0.011698 |
| 0.011631 | 0.011698 | 0.011597 | 0.011631 | 0.011631 | 0.011631 | 0.011698 |
| 0.011631 | 0.011396 | 0.011295 | 0.011329 | 0.011530 | 0.011631 | 0.011664 |
| 0.011664 | 0.011564 | 0.011698 | 0.011664 | 0.011597 | 0.011597 | 0.011597 |
| 0.011463 | 0.011698 | 0.011765 | 0.011564 | 0.011664 | 0.011832 | 0.011597 |
| 0.011597 | 0.011664 | 0.011631 | 0.011799 | 0.011597 | 0.011530 | 0.011664 |
| 0.011597 | 0.011631 | 0.011631 | 0.011564 | 0.011564 | 0.011732 | 0.011664 |
| 0.011564 | 0.011664 | 0.011530 | 0.011564 | 0.011698 | 0.011497 | 0.011597 |
| 0.011564 | 0.011698 | 0.011631 | 0.011530 | 0.011262 | 0.011530 | 0.011698 |
| 0.011779 | 0.011597 | 0.011228 | 0.011732 | 0.011698 | 0.011631 | 0.011731 |
| 0.011597 | 0.011933 | 0.011530 | 0.011530 | 0.011530 | 0.011530 | 0.011530 |
| 0.011765 | 0.011631 | 0.011664 | 0.011732 | 0.011564 | 0.011295 | 0.011530 |
| 0.011597 | 0.011597 | 0.011631 | 0.011732 | 0.011631 | 0.011731 | 0.011799 |
| 0.011799 | 0.011765 | 0.011664 | 0.011765 | 0.011731 | 0.011597 | 0.011564 |
| 0.011597 | 0.011597 | 0.011664 | 0.011530 | 0.011564 | 0.011732 | 0.011597 |
| 0.011564 | 0.011631 | 0.011765 | 0.011732 | 0.011698 | 0.011631 | 0.011631 |
| 0.011698 | 0.011631 | 0.011731 | 0.011597 | 0.011731 | 0.011832 | 0.011530 |
| 0.011631 | 0.011429 | 0.011647 | 0.018163 | 0.011518 | 0.011611 | 0.011304 |
| 0.011268 | 0.011306 | 0.011846 | 0.011640 | 0.011500 | 0.011336 | 0.011789 |
| 0.011677 | 0.011549 | 0.011567 | 0.011688 | 0.011529 | 0.011603 | 0.011706 |
| 0.011389 | 0.011507 | 0.011357 | 0.011523 | 0.011765 | 0.011799 | 0.011804 |
| 0.011678 | 0.011765 | 0.011765 | 0.011665 | 0.011698 | 0.011698 | 0.011665 |
| 0.011698 | 0.011631 | 0.011664 | 0.011698 | 0.011665 | 0.011597 | 0.011631 |
| 0.011631 | 0.011698 | 0.011597 | 0.011698 | 0.011732 | 0.011765 | 0.011664 |
| 0.011631 | 0.011597 | 0.011396 | 0.011396 | 0.011732 | 0.011766 | 0.011799 |

|          |          |          |          |          |          |          |
|----------|----------|----------|----------|----------|----------|----------|
| 0.011564 | 0.011564 | 0.011597 | 0.011698 | 0.011564 | 0.011799 | 0.011799 |
| 0.011833 | 0.011832 | 0.011765 | 0.011866 | 0.011429 | 0.011869 | 0.011698 |
| 0.011698 | 0.011765 | 0.011799 | 0.011631 | 0.011698 | 0.011665 | 0.011698 |
| 0.011766 | 0.011766 | 0.011799 | 0.011766 | 0.011666 | 0.011866 | 0.011833 |
| 0.011704 | 0.011597 | 0.011698 | 0.011799 | 0.011698 | 0.011766 | 0.011866 |
| 0.012034 | 0.011743 | 0.011900 | 0.011866 | 0.011799 | 0.011967 | 0.011598 |
| 0.011768 | 0.011665 | 0.011631 | 0.011631 | 0.011698 | 0.011597 | 0.011698 |
| 0.011732 | 0.011765 | 0.011664 | 0.011631 | 0.011597 | 0.011396 | 0.011396 |
| 0.011732 | 0.011766 | 0.011832 | 0.011765 | 0.012339 | 0.011846 | 0.011764 |
| 0.011763 | 0.011788 | 0.011904 | 0.011788 | 0.011900 | 0.011819 | 0.011750 |
| 0.012297 | 0.011683 | 0.011814 | 0.011752 | 0.012025 | 0.011877 | 0.011979 |
| 0.012318 | 0.011814 | 0.011906 | 0.012000 | 0.011866 | 0.011597 | 0.011871 |
| 0.011564 | 0.011732 | 0.011866 | 0.011832 | 0.011804 | 0.011564 | 0.011532 |
| 0.011664 | 0.011597 | 0.011631 | 0.011664 | 0.011564 | 0.011631 | 0.011530 |
| 0.011597 | 0.011631 | 0.011597 | 0.011564 | 0.011664 | 0.011597 | 0.011631 |
| 0.011631 | 0.011564 | 0.011631 | 0.011664 | 0.011564 | 0.011765 | 0.011799 |
| 0.011698 | 0.011698 | 0.011698 | 0.011698 | 0.011631 | 0.011429 | 0.011664 |
| 0.011443 | 0.011631 | 0.011598 | 0.011603 | 0.011664 | 0.011664 | 0.011731 |
| 0.011732 | 0.011664 | 0.011631 | 0.011664 | 0.011765 | 0.011765 | 0.011698 |
| 0.011698 | 0.011832 | 0.000000 | 0.011731 | 0.011933 | 0.011933 | 0.011799 |
| 0.011631 | 0.011698 | 0.011732 | 0.011530 | 0.011698 | 0.011664 | 0.011698 |
| 0.011731 | 0.011597 | 0.011597 | 0.011900 | 0.011900 | 0.011866 | 0.011664 |
| 0.011765 | 0.011765 | 0.011698 | 0.011765 | 0.011731 | 0.011597 | 0.011262 |
| 0.011698 | 0.011664 | 0.011597 | 0.011832 | 0.011664 | 0.011765 | 0.011530 |
| 0.011698 | 0.011400 | 0.011396 | 0.011589 | 0.011512 | 0.011706 | 0.011473 |
| 0.011445 | 0.011800 | 0.011622 | 0.011730 | 0.011695 | 0.011518 | 0.011538 |
| 0.011570 | 0.011455 | 0.011617 | 0.011523 | 0.011491 | 0.011730 | 0.011831 |
| 0.011814 | 0.011729 | 0.011694 | 0.011694 | 0.011701 | 0.011564 | 0.011631 |
| 0.011631 | 0.011699 | 0.011804 | 0.011603 | 0.011942 | 0.011979 | 0.011698 |
| 0.011664 | 0.011732 | 0.011664 | 0.011698 | 0.011564 | 0.011530 | 0.011598 |
| 0.011664 | 0.011664 | 0.011631 | 0.011597 | 0.011631 | 0.011597 | 0.011698 |
| 0.011654 | 0.011655 | 0.011642 | 0.011677 | 0.011813 | 0.011778 | 0.011777 |
| 0.011776 | 0.011733 | 0.011540 | 0.011528 | 0.011636 | 0.011806 | 0.011807 |
| 0.011632 | 0.011670 | 0.011936 | 0.011905 | 0.011834 | 0.011801 | 0.011799 |
| 0.011664 | 0.011799 | 0.011799 | 0.011698 | 0.011664 | 0.011866 | 0.011933 |
| 0.011967 | 0.011345 | 0.011606 | 0.011753 | 0.011631 | 0.011832 | 0.011799 |
| 0.011834 | 0.011866 | 0.011866 | 0.011866 | 0.011965 | 0.012000 | 0.011650 |
| 0.011533 | 0.011545 | 0.011639 | 0.011604 | 0.011641 | 0.011583 | 0.011196 |
| 0.011678 | 0.011455 | 0.011680 | 0.011697 | 0.011665 | 0.011642 | 0.011631 |
| 0.011597 | 0.011530 | 0.011665 | 0.011631 | 0.011564 | 0.011530 | 0.011463 |
| 0.011564 | 0.011631 | 0.011631 | 0.011631 | 0.011665 | 0.011665 | 0.011668 |
| 0.011703 | 0.011665 | 0.011665 | 0.011701 | 0.011564 | 0.011631 | 0.011631 |
| 0.011699 | 0.011804 | 0.011603 | 0.011942 | 0.011979 | 0.011698 | 0.011866 |
| 0.011799 | 0.011799 | 0.011635 | 0.011826 | 0.011755 | 0.011775 | 0.011656 |
| 0.011818 | 0.012017 | 0.011865 | 0.011706 | 0.011597 | 0.011799 | 0.011665 |
| 0.011765 | 0.011698 | 0.011597 | 0.011700 | 0.011799 | 0.011804 | 0.011698 |
| 0.011597 | 0.011532 | 0.011665 | 0.011597 | 0.011530 | 0.011536 | 0.011799 |
| 0.011698 | 0.011631 | 0.011664 | 0.011698 | 0.011665 | 0.011597 | 0.011530 |
| 0.011664 | 0.011698 | 0.011698 | 0.011631 | 0.011698 | 0.011933 | 0.011530 |
| 0.011631 | 0.011429 | 0.011631 | 0.011664 | 0.011631 | 0.011329 | 0.011660 |
| 0.011904 | 0.011485 | 0.011461 | 0.011543 | 0.011630 | 0.011563 | 0.011436 |
| 0.011428 | 0.011530 | 0.011631 | 0.011739 | 0.011599 | 0.011737 | 0.011868 |
| 0.011767 | 0.011804 | 0.011765 | 0.012017 | 0.011732 | 0.012607 | 0.011768 |
| 0.012507 | 0.012275 | 0.012409 | 0.012681 | 0.011664 | 0.011631 | 0.011732 |
| 0.012373 | 0.012106 | 0.011698 | 0.011598 | 0.011666 | 0.011666 | 0.011601 |
| 0.011530 | 0.011535 | 0.011597 | 0.011565 | 0.011935 | 0.012001 | 0.012002 |
| 0.011902 | 0.012002 | 0.012106 | 0.011872 | 0.012374 | 0.012381 | 0.012441 |
| 0.012442 | 0.012475 | 0.012426 | 0.012442 | 0.012443 | 0.011731 | 0.011968 |
| 0.012036 | 0.012539 | 0.012044 | 0.012001 | 0.012474 | 0.011536 | 0.011430 |
| 0.011329 | 0.011396 | 0.011934 | 0.011965 | 0.012046 | 0.011732 | 0.011465 |

|          |          |          |          |          |          |          |
|----------|----------|----------|----------|----------|----------|----------|
| S570     | 0.011732 | 0.011732 | 0.012068 | 0.011832 | 0.011832 | 0.011900 |
| 0.011739 | 0.011671 | 0.011899 | 0.011329 | 0.011396 | 0.011363 | 0.011329 |
| 0.011362 | 0.011530 | 0.011329 | 0.011362 | 0.011429 | 0.011396 | 0.011362 |
| 0.011329 | 0.011362 | 0.011463 | 0.011329 | 0.011362 | 0.011362 | 0.011705 |
| 0.011597 | 0.011362 | 0.011262 | 0.011496 | 0.011429 | 0.011396 | 0.011429 |
| 0.011396 | 0.011496 | 0.011396 | 0.011396 | 0.011429 | 0.011396 | 0.011564 |
| 0.011329 | 0.011396 | 0.011429 | 0.011362 | 0.011463 | 0.011496 | 0.011429 |
| 0.011396 | 0.011564 | 0.011463 | 0.011731 | 0.011396 | 0.011597 | 0.011396 |
| 0.011362 | 0.011463 | 0.011530 | 0.011597 | 0.011765 | 0.011463 | 0.011564 |
| 0.011429 | 0.011496 | 0.011396 | 0.011631 | 0.011866 | 0.011396 | 0.011463 |
| 0.011362 | 0.011463 | 0.011429 | 0.011496 | 0.011429 | 0.011429 | 0.011429 |
| 0.011329 | 0.011362 | 0.011329 | 0.011429 | 0.011329 | 0.011430 | 0.011496 |
| 0.011429 | 0.011396 | 0.011463 | 0.011362 | 0.011496 | 0.011329 | 0.011396 |
| 0.011563 | 0.011496 | 0.011731 | 0.011564 | 0.011396 | 0.011631 | 0.011396 |
| 0.011505 | 0.011732 | 0.011551 | 0.011216 | 0.011284 | 0.011391 | 0.011414 |
| 0.012158 | 0.011569 | 0.011266 | 0.011631 | 0.011631 | 0.011429 | 0.011530 |
| 0.011463 | 0.011429 | 0.011496 | 0.011396 | 0.011496 | 0.011429 | 0.011429 |
| 0.011396 | 0.011496 | 0.011698 | 0.011564 | 0.011463 | 0.011429 | 0.011362 |
| 0.011329 | 0.011329 | 0.011396 | 0.011362 | 0.011564 | 0.011530 | 0.011463 |
| 0.011564 | 0.011631 | 0.011362 | 0.011362 | 0.011396 | 0.011396 | 0.011398 |
| 0.011466 | 0.011396 | 0.011396 | 0.011276 | 0.011313 | 0.011306 | 0.011396 |
| 0.011399 | 0.011335 | 0.011355 | 0.011371 | 0.011298 | 0.011334 | 0.011364 |
| 0.011636 | 0.011405 | 0.011439 | 0.011329 | 0.011337 | 0.011464 | 0.011430 |
| 0.011497 | 0.011431 | 0.011430 | 0.011530 | 0.011463 | 0.011832 | 0.011631 |
| 0.011664 | 0.011530 | 0.011396 | 0.011497 | 0.011295 | 0.011530 | 0.011329 |
| 0.011396 | 0.011396 | 0.011362 | 0.011329 | 0.011362 | 0.011329 | 0.011429 |
| 0.011396 | 0.011497 | 0.011429 | 0.011329 | 0.011431 | 0.011530 | 0.011533 |
| 0.011530 | 0.011430 | 0.011329 | 0.011263 | 0.011396 | 0.011329 | 0.011262 |
| 0.011366 | 0.011530 | 0.011329 | 0.011530 | 0.011228 | 0.011396 | 0.011295 |
| 0.011463 | 0.011362 | 0.011396 | 0.011295 | 0.011329 | 0.011262 | 0.011396 |
| 0.011429 | 0.011362 | 0.011429 | 0.011362 | 0.011396 | 0.011429 | 0.011665 |
| 0.011765 | 0.011698 | 0.011765 | 0.011532 | 0.011765 | 0.011396 | 0.011362 |
| 0.011398 | 0.011707 | 0.011517 | 0.011266 | 0.011773 | 0.011265 | 0.011375 |
| 0.011773 | 0.011672 | 0.011563 | 0.011765 | 0.011470 | 0.011631 | 0.011597 |
| 0.011530 | 0.011698 | 0.011557 | 0.011431 | 0.011479 | 0.011429 | 0.011500 |
| 0.011597 | 0.011499 | 0.011635 | 0.011703 | 0.011631 | 0.011698 | 0.011805 |
| 0.011534 | 0.011705 | 0.011636 | 0.011567 | 0.011834 | 0.011295 | 0.011498 |
| 0.011463 | 0.011396 | 0.011295 | 0.011295 | 0.011362 | 0.011362 | 0.011429 |
| 0.011362 | 0.011429 | 0.011329 | 0.011429 | 0.011362 | 0.011362 | 0.011429 |
| 0.011362 | 0.011799 | 0.011698 | 0.011731 | 0.011262 | 0.011362 | 0.011396 |
| 0.011396 | 0.011295 | 0.011429 | 0.011463 | 0.011329 | 0.011329 | 0.011329 |
| 0.011866 | 0.011496 | 0.011463 | 0.011295 | 0.011396 | 0.011564 | 0.011329 |
| 0.011329 | 0.011396 | 0.011362 | 0.011530 | 0.011329 | 0.011463 | 0.011597 |
| 0.011530 | 0.011362 | 0.011362 | 0.011295 | 0.011295 | 0.011463 | 0.011396 |
| 0.011295 | 0.011396 | 0.011262 | 0.011295 | 0.011429 | 0.011564 | 0.011329 |
| 0.011295 | 0.011429 | 0.011363 | 0.011262 | 0.011597 | 0.011262 | 0.011429 |
| 0.011505 | 0.011329 | 0.011631 | 0.011463 | 0.011496 | 0.011362 | 0.011463 |
| 0.011329 | 0.011597 | 0.011262 | 0.011530 | 0.011329 | 0.011329 | 0.011262 |
| 0.011496 | 0.011698 | 0.011396 | 0.011429 | 0.011295 | 0.011698 | 0.011329 |
| 0.011329 | 0.011329 | 0.011362 | 0.011463 | 0.011362 | 0.011463 | 0.011530 |
| 0.011530 | 0.011429 | 0.011396 | 0.011496 | 0.011463 | 0.011329 | 0.011295 |
| 0.011329 | 0.011329 | 0.011396 | 0.011329 | 0.011295 | 0.011463 | 0.011329 |
| 0.011362 | 0.011362 | 0.011496 | 0.011530 | 0.011429 | 0.011362 | 0.011362 |
| 0.011429 | 0.011362 | 0.011463 | 0.011329 | 0.011463 | 0.011564 | 0.011866 |
| 0.011362 | 0.011765 | 0.011371 | 0.017898 | 0.011257 | 0.011427 | 0.011723 |
| 0.011683 | 0.011728 | 0.011322 | 0.011350 | 0.011664 | 0.011751 | 0.011303 |
| 0.011582 | 0.011487 | 0.011177 | 0.011270 | 0.011333 | 0.011258 | 0.011318 |
| 0.011576 | 0.011507 | 0.011542 | 0.011391 | 0.011496 | 0.011530 | 0.011534 |
| 0.011404 | 0.011497 | 0.011497 | 0.011463 | 0.011429 | 0.011430 | 0.011396 |
| 0.011429 | 0.011362 | 0.011329 | 0.011429 | 0.011396 | 0.011329 | 0.011362 |

|          |          |          |          |          |          |          |
|----------|----------|----------|----------|----------|----------|----------|
| 0.011362 | 0.011429 | 0.011329 | 0.011430 | 0.011463 | 0.011497 | 0.011396 |
| 0.011429 | 0.011396 | 0.011732 | 0.011732 | 0.011463 | 0.011497 | 0.011530 |
| 0.011295 | 0.011295 | 0.011329 | 0.011429 | 0.011295 | 0.011530 | 0.011530 |
| 0.011564 | 0.011563 | 0.011496 | 0.011597 | 0.011765 | 0.011599 | 0.011429 |
| 0.011429 | 0.011497 | 0.011530 | 0.011362 | 0.011429 | 0.011396 | 0.011429 |
| 0.011497 | 0.011497 | 0.011530 | 0.011497 | 0.011397 | 0.011597 | 0.011564 |
| 0.011433 | 0.011329 | 0.011429 | 0.011530 | 0.011430 | 0.011564 | 0.011597 |
| 0.011765 | 0.011470 | 0.011631 | 0.011597 | 0.011530 | 0.011698 | 0.011329 |
| 0.011498 | 0.011396 | 0.011362 | 0.011362 | 0.011429 | 0.011329 | 0.011430 |
| 0.011463 | 0.011497 | 0.011396 | 0.011429 | 0.011396 | 0.011732 | 0.011732 |
| 0.011463 | 0.011497 | 0.011564 | 0.011497 | 0.012136 | 0.011560 | 0.011482 |
| 0.011552 | 0.011511 | 0.011622 | 0.011510 | 0.011620 | 0.011543 | 0.011508 |
| 0.012090 | 0.011406 | 0.011540 | 0.011475 | 0.011749 | 0.011604 | 0.011706 |
| 0.012114 | 0.011588 | 0.011669 | 0.011731 | 0.011597 | 0.011597 | 0.011635 |
| 0.011295 | 0.011463 | 0.011597 | 0.011564 | 0.011567 | 0.011564 | 0.011532 |
| 0.011396 | 0.011329 | 0.011362 | 0.011396 | 0.011295 | 0.011362 | 0.011262 |
| 0.011396 | 0.011429 | 0.011329 | 0.011295 | 0.011396 | 0.011329 | 0.011362 |
| 0.011362 | 0.011295 | 0.011362 | 0.011396 | 0.011295 | 0.011496 | 0.011530 |
| 0.011429 | 0.011496 | 0.011429 | 0.011429 | 0.011362 | 0.011765 | 0.011396 |
| 0.011443 | 0.011362 | 0.011598 | 0.011603 | 0.011463 | 0.011463 | 0.011463 |
| 0.011463 | 0.011396 | 0.011362 | 0.011396 | 0.011496 | 0.011496 | 0.011429 |
| 0.011429 | 0.011564 | 0.011731 | 0.000000 | 0.011664 | 0.011664 | 0.011530 |
| 0.011362 | 0.011429 | 0.011463 | 0.011866 | 0.011430 | 0.011463 | 0.011429 |
| 0.011463 | 0.011396 | 0.011396 | 0.011631 | 0.011631 | 0.011597 | 0.011396 |
| 0.011496 | 0.011564 | 0.011429 | 0.011496 | 0.011463 | 0.011329 | 0.011664 |
| 0.011429 | 0.011396 | 0.011396 | 0.011564 | 0.011396 | 0.011463 | 0.011731 |
| 0.011429 | 0.011807 | 0.011799 | 0.011507 | 0.011342 | 0.011502 | 0.011318 |
| 0.011225 | 0.011761 | 0.011341 | 0.011417 | 0.011304 | 0.011366 | 0.011379 |
| 0.011570 | 0.011192 | 0.011338 | 0.011192 | 0.011222 | 0.011328 | 0.011385 |
| 0.011437 | 0.011336 | 0.011483 | 0.011412 | 0.011431 | 0.011564 | 0.011631 |
| 0.011631 | 0.011497 | 0.011601 | 0.011603 | 0.011738 | 0.011767 | 0.011429 |
| 0.011664 | 0.011530 | 0.011396 | 0.011497 | 0.011295 | 0.011530 | 0.011329 |
| 0.011396 | 0.011396 | 0.011362 | 0.011329 | 0.011362 | 0.011329 | 0.011429 |
| 0.011409 | 0.011375 | 0.011403 | 0.011437 | 0.011573 | 0.011538 | 0.011538 |
| 0.011537 | 0.011464 | 0.011245 | 0.011276 | 0.011399 | 0.011568 | 0.011569 |
| 0.011363 | 0.011433 | 0.011666 | 0.011635 | 0.011565 | 0.011531 | 0.011530 |
| 0.011463 | 0.011530 | 0.011530 | 0.011429 | 0.012000 | 0.011530 | 0.011664 |
| 0.011698 | 0.011772 | 0.011401 | 0.011441 | 0.011362 | 0.011564 | 0.011530 |
| 0.011565 | 0.011597 | 0.011597 | 0.011597 | 0.011768 | 0.011731 | 0.011372 |
| 0.011263 | 0.011268 | 0.011366 | 0.011332 | 0.011436 | 0.011284 | 0.011604 |
| 0.011403 | 0.011586 | 0.011298 | 0.011435 | 0.011396 | 0.011471 | 0.011362 |
| 0.011329 | 0.011329 | 0.011396 | 0.011362 | 0.011564 | 0.011530 | 0.011463 |
| 0.011564 | 0.011631 | 0.011362 | 0.011362 | 0.011396 | 0.011396 | 0.011398 |
| 0.011466 | 0.011396 | 0.011396 | 0.011431 | 0.011564 | 0.011631 | 0.011631 |
| 0.011497 | 0.011601 | 0.011603 | 0.011738 | 0.011767 | 0.011429 | 0.011597 |
| 0.011530 | 0.011530 | 0.011365 | 0.011547 | 0.011477 | 0.011503 | 0.011340 |
| 0.011542 | 0.011744 | 0.011568 | 0.011434 | 0.011329 | 0.011530 | 0.011396 |
| 0.011497 | 0.011429 | 0.011329 | 0.011431 | 0.011530 | 0.011533 | 0.011430 |
| 0.011329 | 0.011263 | 0.011396 | 0.011329 | 0.011262 | 0.011366 | 0.011530 |
| 0.011429 | 0.011362 | 0.011329 | 0.011429 | 0.011396 | 0.011329 | 0.011530 |
| 0.011396 | 0.011429 | 0.011429 | 0.011362 | 0.011429 | 0.011664 | 0.011329 |
| 0.011362 | 0.011765 | 0.011362 | 0.011396 | 0.011362 | 0.011731 | 0.011274 |
| 0.011791 | 0.011273 | 0.011361 | 0.011543 | 0.011589 | 0.011563 | 0.011227 |
| 0.011323 | 0.011530 | 0.011631 | 0.011739 | 0.011599 | 0.011737 | 0.011867 |
| 0.011767 | 0.011804 | 0.011765 | 0.012017 | 0.011731 | 0.012606 | 0.011768 |
| 0.012507 | 0.012274 | 0.012408 | 0.012680 | 0.011731 | 0.011430 | 0.011732 |
| 0.012171 | 0.012106 | 0.011698 | 0.011597 | 0.011665 | 0.011665 | 0.011635 |
| 0.011530 | 0.011535 | 0.011597 | 0.011565 | 0.011934 | 0.012000 | 0.012002 |
| 0.011901 | 0.012002 | 0.012105 | 0.011872 | 0.012171 | 0.012178 | 0.012238 |
| 0.012239 | 0.012273 | 0.012220 | 0.012239 | 0.012240 | 0.011463 | 0.011766 |

|          |          |          |          |          |          |          |
|----------|----------|----------|----------|----------|----------|----------|
| 0.011834 | 0.012270 | 0.011840 | 0.012068 | 0.012541 | 0.011603 | 0.011497 |
| 0.011463 | 0.011463 | 0.011934 | 0.012006 | 0.012080 | 0.011799 | 0.011465 |
| S571     | 0.011933 | 0.011933 | 0.012270 | 0.012034 | 0.012034 | 0.012101 |
| 0.011943 | 0.011875 | 0.012101 | 0.011530 | 0.011597 | 0.011565 | 0.011530 |
| 0.011564 | 0.011732 | 0.011530 | 0.011564 | 0.011631 | 0.011597 | 0.011564 |
| 0.011530 | 0.011564 | 0.011664 | 0.011531 | 0.011564 | 0.011564 | 0.011909 |
| 0.011799 | 0.011564 | 0.011463 | 0.011698 | 0.011631 | 0.011597 | 0.011631 |
| 0.011597 | 0.011698 | 0.011597 | 0.011597 | 0.011631 | 0.011597 | 0.011765 |
| 0.011530 | 0.011597 | 0.011631 | 0.011564 | 0.011664 | 0.011698 | 0.011631 |
| 0.011597 | 0.011766 | 0.011665 | 0.011933 | 0.011597 | 0.011866 | 0.011597 |
| 0.011564 | 0.011665 | 0.011732 | 0.011866 | 0.011967 | 0.011665 | 0.011765 |
| 0.011631 | 0.011698 | 0.011597 | 0.011832 | 0.012068 | 0.011597 | 0.011665 |
| 0.011564 | 0.011664 | 0.011631 | 0.011698 | 0.011631 | 0.011631 | 0.011631 |
| 0.011530 | 0.011564 | 0.011530 | 0.011631 | 0.011597 | 0.011632 | 0.011698 |
| 0.011631 | 0.011597 | 0.011664 | 0.011564 | 0.011698 | 0.011530 | 0.011597 |
| 0.011765 | 0.011698 | 0.011933 | 0.011765 | 0.011597 | 0.011833 | 0.011597 |
| 0.011691 | 0.011882 | 0.011740 | 0.011334 | 0.011433 | 0.011539 | 0.011611 |
| 0.012268 | 0.011620 | 0.011472 | 0.011832 | 0.011832 | 0.011631 | 0.011732 |
| 0.011665 | 0.011631 | 0.011698 | 0.011597 | 0.011698 | 0.011631 | 0.011631 |
| 0.011597 | 0.011698 | 0.011900 | 0.011765 | 0.011665 | 0.011631 | 0.011564 |
| 0.011530 | 0.011530 | 0.011598 | 0.011564 | 0.011766 | 0.011732 | 0.011665 |
| 0.011766 | 0.011833 | 0.011564 | 0.011564 | 0.011598 | 0.011597 | 0.011601 |
| 0.011669 | 0.011598 | 0.011530 | 0.011384 | 0.011494 | 0.011481 | 0.011598 |
| 0.011602 | 0.011473 | 0.011503 | 0.011543 | 0.011502 | 0.011506 | 0.011567 |
| 0.011780 | 0.011577 | 0.011611 | 0.011531 | 0.011510 | 0.011666 | 0.011632 |
| 0.011700 | 0.011633 | 0.011632 | 0.011664 | 0.011664 | 0.012034 | 0.011833 |
| 0.011866 | 0.011732 | 0.011597 | 0.011698 | 0.011497 | 0.011732 | 0.011530 |
| 0.011597 | 0.011597 | 0.011564 | 0.011530 | 0.011564 | 0.011530 | 0.011564 |
| 0.011598 | 0.011698 | 0.011631 | 0.011530 | 0.011633 | 0.011732 | 0.011736 |
| 0.011732 | 0.011631 | 0.011530 | 0.011465 | 0.011597 | 0.011530 | 0.011463 |
| 0.011570 | 0.011732 | 0.011530 | 0.011732 | 0.011497 | 0.011598 | 0.011564 |
| 0.011665 | 0.011564 | 0.011598 | 0.011564 | 0.011598 | 0.011463 | 0.011598 |
| 0.011631 | 0.011564 | 0.011631 | 0.011564 | 0.011597 | 0.011564 | 0.011866 |
| 0.011967 | 0.011900 | 0.011967 | 0.011735 | 0.011968 | 0.011597 | 0.011564 |
| 0.011601 | 0.011869 | 0.011746 | 0.011506 | 0.011977 | 0.011435 | 0.011572 |
| 0.011977 | 0.011843 | 0.011765 | 0.011967 | 0.011675 | 0.011833 | 0.011799 |
| 0.011732 | 0.011900 | 0.011735 | 0.011555 | 0.011689 | 0.011631 | 0.011703 |
| 0.011799 | 0.011701 | 0.011838 | 0.011906 | 0.011833 | 0.011900 | 0.011975 |
| 0.011737 | 0.011875 | 0.011839 | 0.011771 | 0.012036 | 0.011497 | 0.011667 |
| 0.011664 | 0.011597 | 0.011497 | 0.011497 | 0.011564 | 0.011497 | 0.011631 |
| 0.011564 | 0.011631 | 0.011530 | 0.011631 | 0.011564 | 0.011564 | 0.011631 |
| 0.011564 | 0.012000 | 0.011900 | 0.011933 | 0.011463 | 0.011564 | 0.011597 |
| 0.011597 | 0.011564 | 0.011631 | 0.011665 | 0.011530 | 0.011530 | 0.011530 |
| 0.012068 | 0.011698 | 0.011698 | 0.011497 | 0.011597 | 0.011766 | 0.011530 |
| 0.011530 | 0.011597 | 0.011564 | 0.011732 | 0.011530 | 0.011664 | 0.011799 |
| 0.011732 | 0.011564 | 0.011564 | 0.011497 | 0.011497 | 0.011665 | 0.011597 |
| 0.011497 | 0.011597 | 0.011463 | 0.011497 | 0.011631 | 0.011766 | 0.011530 |
| 0.011497 | 0.011631 | 0.011564 | 0.011463 | 0.011799 | 0.011463 | 0.011564 |
| 0.011677 | 0.011530 | 0.011833 | 0.011665 | 0.011698 | 0.011564 | 0.011664 |
| 0.011530 | 0.011866 | 0.011463 | 0.011732 | 0.011530 | 0.011530 | 0.011463 |
| 0.011698 | 0.011900 | 0.011597 | 0.011665 | 0.011497 | 0.011900 | 0.011530 |
| 0.011530 | 0.011530 | 0.011564 | 0.011665 | 0.011564 | 0.011664 | 0.011732 |
| 0.011732 | 0.011698 | 0.011597 | 0.011698 | 0.011664 | 0.011530 | 0.011497 |
| 0.011530 | 0.011530 | 0.011597 | 0.011530 | 0.011497 | 0.011665 | 0.011530 |
| 0.011564 | 0.011564 | 0.011698 | 0.011732 | 0.011631 | 0.011564 | 0.011564 |
| 0.011631 | 0.011564 | 0.011664 | 0.011530 | 0.011664 | 0.011765 | 0.012068 |
| 0.011564 | 0.011967 | 0.011474 | 0.018012 | 0.011519 | 0.011549 | 0.011828 |
| 0.011822 | 0.011834 | 0.011479 | 0.011350 | 0.011774 | 0.011889 | 0.011485 |
| 0.011677 | 0.011671 | 0.011372 | 0.011437 | 0.011451 | 0.011455 | 0.011361 |
| 0.011623 | 0.011656 | 0.011653 | 0.011589 | 0.011698 | 0.011732 | 0.011737 |



|          |          |          |          |          |          |          |
|----------|----------|----------|----------|----------|----------|----------|
| 0.011576 | 0.011698 | 0.011698 | 0.011665 | 0.011631 | 0.011631 | 0.011598 |
| 0.011631 | 0.011564 | 0.011597 | 0.011631 | 0.011598 | 0.011530 | 0.011564 |
| 0.011564 | 0.011631 | 0.011530 | 0.011631 | 0.011665 | 0.011698 | 0.011597 |
| 0.011631 | 0.011598 | 0.011934 | 0.011934 | 0.011665 | 0.011699 | 0.011732 |
| 0.011497 | 0.011497 | 0.011530 | 0.011631 | 0.011497 | 0.011732 | 0.011732 |
| 0.011766 | 0.011765 | 0.011698 | 0.011799 | 0.011967 | 0.011801 | 0.011631 |
| 0.011631 | 0.011698 | 0.011732 | 0.011564 | 0.011631 | 0.011598 | 0.011631 |
| 0.011699 | 0.011699 | 0.011732 | 0.011699 | 0.011599 | 0.011799 | 0.011766 |
| 0.011636 | 0.011530 | 0.011631 | 0.011732 | 0.011631 | 0.011766 | 0.011799 |
| 0.011967 | 0.011675 | 0.011833 | 0.011799 | 0.011732 | 0.011900 | 0.011531 |
| 0.011700 | 0.011598 | 0.011564 | 0.011564 | 0.011631 | 0.011530 | 0.011631 |
| 0.011665 | 0.011698 | 0.011597 | 0.011631 | 0.011598 | 0.011934 | 0.011934 |
| 0.011665 | 0.011699 | 0.011765 | 0.011698 | 0.012339 | 0.011739 | 0.011658 |
| 0.011693 | 0.011684 | 0.011798 | 0.011684 | 0.011795 | 0.011716 | 0.011716 |
| 0.012262 | 0.011579 | 0.011711 | 0.011648 | 0.011921 | 0.011809 | 0.011877 |
| 0.012284 | 0.011777 | 0.011872 | 0.011933 | 0.011799 | 0.011799 | 0.011838 |
| 0.011497 | 0.011665 | 0.011799 | 0.011765 | 0.011770 | 0.011765 | 0.011734 |
| 0.011597 | 0.011530 | 0.011564 | 0.011597 | 0.011497 | 0.011564 | 0.011463 |
| 0.011597 | 0.011631 | 0.011530 | 0.011497 | 0.011597 | 0.011530 | 0.011564 |
| 0.011564 | 0.011497 | 0.011564 | 0.011597 | 0.011497 | 0.011698 | 0.011732 |
| 0.011631 | 0.011698 | 0.011631 | 0.011631 | 0.011564 | 0.011967 | 0.011597 |
| 0.011617 | 0.011564 | 0.011800 | 0.011773 | 0.011665 | 0.011664 | 0.011664 |
| 0.011665 | 0.011597 | 0.011564 | 0.011597 | 0.011698 | 0.011698 | 0.011631 |
| 0.011631 | 0.011765 | 0.011933 | 0.011664 | 0.000000 | 0.000000 | 0.011732 |
| 0.011564 | 0.011631 | 0.011665 | 0.012068 | 0.011631 | 0.011665 | 0.011631 |
| 0.011664 | 0.011597 | 0.011597 | 0.011900 | 0.011833 | 0.011866 | 0.011597 |
| 0.011698 | 0.011765 | 0.011631 | 0.011698 | 0.011664 | 0.011530 | 0.011866 |
| 0.011631 | 0.011597 | 0.011597 | 0.011765 | 0.011597 | 0.011698 | 0.011933 |
| 0.011631 | 0.012011 | 0.012001 | 0.011711 | 0.011512 | 0.011672 | 0.011370 |
| 0.011335 | 0.011917 | 0.011447 | 0.011641 | 0.011499 | 0.011620 | 0.011592 |
| 0.011723 | 0.011455 | 0.011561 | 0.011457 | 0.011438 | 0.011596 | 0.011628 |
| 0.011625 | 0.011532 | 0.011589 | 0.011518 | 0.011566 | 0.011765 | 0.011833 |
| 0.011833 | 0.011699 | 0.011804 | 0.011806 | 0.011942 | 0.011873 | 0.011631 |
| 0.011866 | 0.011732 | 0.011597 | 0.011698 | 0.011497 | 0.011732 | 0.011530 |
| 0.011597 | 0.011597 | 0.011564 | 0.011530 | 0.011564 | 0.011530 | 0.011564 |
| 0.011584 | 0.011550 | 0.011574 | 0.011642 | 0.011745 | 0.011709 | 0.011709 |
| 0.011708 | 0.011666 | 0.011429 | 0.011420 | 0.011602 | 0.011772 | 0.011773 |
| 0.011565 | 0.011636 | 0.011868 | 0.011804 | 0.011767 | 0.011801 | 0.011732 |
| 0.011664 | 0.011732 | 0.011732 | 0.011631 | 0.012203 | 0.011799 | 0.011866 |
| 0.011900 | 0.011951 | 0.011606 | 0.011684 | 0.011564 | 0.011765 | 0.011732 |
| 0.011767 | 0.011799 | 0.011799 | 0.011799 | 0.011965 | 0.011933 | 0.011546 |
| 0.011466 | 0.011476 | 0.011537 | 0.011502 | 0.011607 | 0.011471 | 0.011808 |
| 0.011575 | 0.011806 | 0.011489 | 0.011622 | 0.011598 | 0.011676 | 0.011564 |
| 0.011530 | 0.011530 | 0.011598 | 0.011564 | 0.011766 | 0.011732 | 0.011665 |
| 0.011766 | 0.011833 | 0.011564 | 0.011564 | 0.011598 | 0.011597 | 0.011601 |
| 0.011669 | 0.011598 | 0.011530 | 0.011566 | 0.011765 | 0.011833 | 0.011833 |
| 0.011699 | 0.011804 | 0.011806 | 0.011942 | 0.011873 | 0.011631 | 0.011799 |
| 0.011732 | 0.011732 | 0.011568 | 0.011757 | 0.011686 | 0.011707 | 0.011516 |
| 0.011715 | 0.011835 | 0.011738 | 0.011638 | 0.011530 | 0.011732 | 0.011598 |
| 0.011698 | 0.011631 | 0.011530 | 0.011633 | 0.011732 | 0.011736 | 0.011631 |
| 0.011530 | 0.011465 | 0.011597 | 0.011530 | 0.011463 | 0.011570 | 0.011732 |
| 0.011631 | 0.011564 | 0.011597 | 0.011631 | 0.011598 | 0.011530 | 0.011732 |
| 0.011597 | 0.011631 | 0.011631 | 0.011564 | 0.011631 | 0.011866 | 0.011530 |
| 0.011564 | 0.011967 | 0.011564 | 0.011597 | 0.011564 | 0.011933 | 0.011489 |
| 0.012016 | 0.011485 | 0.011411 | 0.011704 | 0.011793 | 0.011670 | 0.011395 |
| 0.011375 | 0.011732 | 0.011832 | 0.011943 | 0.011801 | 0.011906 | 0.012070 |
| 0.011969 | 0.011974 | 0.011967 | 0.012189 | 0.011933 | 0.012809 | 0.011970 |
| 0.012709 | 0.012477 | 0.012611 | 0.012884 | 0.011933 | 0.011631 | 0.011934 |
| 0.012373 | 0.012309 | 0.011900 | 0.011799 | 0.011868 | 0.011868 | 0.011838 |
| 0.011732 | 0.011705 | 0.011799 | 0.011767 | 0.012137 | 0.012203 | 0.012204 |

|          |          |          |          |          |          |          |
|----------|----------|----------|----------|----------|----------|----------|
| 0.012104 | 0.012204 | 0.012308 | 0.012076 | 0.012374 | 0.012382 | 0.012441 |
| 0.012374 | 0.012476 | 0.012426 | 0.012442 | 0.012444 | 0.011664 | 0.011968 |
| 0.012036 | 0.012539 | 0.012044 | 0.012203 | 0.012744 | 0.011808 | 0.011699 |
| 0.011664 | 0.011664 | 0.012136 | 0.012212 | 0.012222 | 0.012001 | 0.011667 |
| S572     | 0.011933 | 0.011933 | 0.012270 | 0.012034 | 0.012034 | 0.012101 |
| 0.011943 | 0.011875 | 0.012101 | 0.011530 | 0.011597 | 0.011565 | 0.011530 |
| 0.011564 | 0.011732 | 0.011530 | 0.011564 | 0.011631 | 0.011597 | 0.011564 |
| 0.011530 | 0.011564 | 0.011664 | 0.011531 | 0.011564 | 0.011564 | 0.011909 |
| 0.011799 | 0.011564 | 0.011463 | 0.011698 | 0.011631 | 0.011597 | 0.011631 |
| 0.011597 | 0.011698 | 0.011597 | 0.011597 | 0.011631 | 0.011597 | 0.011765 |
| 0.011530 | 0.011597 | 0.011631 | 0.011564 | 0.011664 | 0.011698 | 0.011631 |
| 0.011597 | 0.011766 | 0.011665 | 0.011933 | 0.011597 | 0.011866 | 0.011597 |
| 0.011564 | 0.011665 | 0.011732 | 0.011866 | 0.011967 | 0.011665 | 0.011765 |
| 0.011631 | 0.011698 | 0.011597 | 0.011832 | 0.012068 | 0.011597 | 0.011665 |
| 0.011564 | 0.011664 | 0.011631 | 0.011698 | 0.011631 | 0.011631 | 0.011631 |
| 0.011530 | 0.011564 | 0.011530 | 0.011631 | 0.011597 | 0.011632 | 0.011698 |
| 0.011631 | 0.011597 | 0.011664 | 0.011564 | 0.011698 | 0.011530 | 0.011597 |
| 0.011765 | 0.011698 | 0.011933 | 0.011765 | 0.011597 | 0.011833 | 0.011597 |
| 0.011691 | 0.011882 | 0.011740 | 0.011334 | 0.011433 | 0.011539 | 0.011611 |
| 0.012268 | 0.011620 | 0.011472 | 0.011832 | 0.011832 | 0.011631 | 0.011732 |
| 0.011665 | 0.011631 | 0.011698 | 0.011597 | 0.011698 | 0.011631 | 0.011631 |
| 0.011597 | 0.011698 | 0.011900 | 0.011765 | 0.011665 | 0.011631 | 0.011564 |
| 0.011530 | 0.011530 | 0.011598 | 0.011564 | 0.011766 | 0.011732 | 0.011665 |
| 0.011766 | 0.011833 | 0.011564 | 0.011564 | 0.011598 | 0.011597 | 0.011601 |
| 0.011669 | 0.011598 | 0.011530 | 0.011384 | 0.011494 | 0.011481 | 0.011598 |
| 0.011602 | 0.011473 | 0.011503 | 0.011543 | 0.011502 | 0.011506 | 0.011567 |
| 0.011780 | 0.011577 | 0.011611 | 0.011531 | 0.011510 | 0.011666 | 0.011632 |
| 0.011700 | 0.011633 | 0.011632 | 0.011664 | 0.011664 | 0.012034 | 0.011833 |
| 0.011866 | 0.011732 | 0.011597 | 0.011698 | 0.011497 | 0.011732 | 0.011530 |
| 0.011597 | 0.011597 | 0.011564 | 0.011530 | 0.011564 | 0.011530 | 0.011564 |
| 0.011598 | 0.011698 | 0.011631 | 0.011530 | 0.011633 | 0.011732 | 0.011736 |
| 0.011732 | 0.011631 | 0.011530 | 0.011465 | 0.011597 | 0.011530 | 0.011463 |
| 0.011570 | 0.011732 | 0.011530 | 0.011732 | 0.011497 | 0.011598 | 0.011564 |
| 0.011665 | 0.011564 | 0.011598 | 0.011564 | 0.011598 | 0.011463 | 0.011598 |
| 0.011631 | 0.011564 | 0.011631 | 0.011564 | 0.011597 | 0.011564 | 0.011866 |
| 0.011967 | 0.011900 | 0.011967 | 0.011735 | 0.011968 | 0.011597 | 0.011564 |
| 0.011601 | 0.011869 | 0.011746 | 0.011506 | 0.011977 | 0.011435 | 0.011572 |
| 0.011977 | 0.011843 | 0.011765 | 0.011967 | 0.011675 | 0.011833 | 0.011799 |
| 0.011732 | 0.011900 | 0.011735 | 0.011555 | 0.011689 | 0.011631 | 0.011703 |
| 0.011799 | 0.011701 | 0.011838 | 0.011906 | 0.011833 | 0.011900 | 0.011975 |
| 0.011737 | 0.011875 | 0.011839 | 0.011771 | 0.012036 | 0.011497 | 0.011667 |
| 0.011664 | 0.011597 | 0.011497 | 0.011497 | 0.011564 | 0.011497 | 0.011631 |
| 0.011564 | 0.011631 | 0.011530 | 0.011631 | 0.011564 | 0.011564 | 0.011631 |
| 0.011564 | 0.012000 | 0.011900 | 0.011933 | 0.011463 | 0.011564 | 0.011597 |
| 0.011597 | 0.011564 | 0.011631 | 0.011665 | 0.011530 | 0.011530 | 0.011530 |
| 0.012068 | 0.011698 | 0.011698 | 0.011497 | 0.011597 | 0.011766 | 0.011530 |
| 0.011530 | 0.011597 | 0.011564 | 0.011732 | 0.011530 | 0.011664 | 0.011799 |
| 0.011732 | 0.011564 | 0.011564 | 0.011497 | 0.011497 | 0.011665 | 0.011597 |
| 0.011497 | 0.011597 | 0.011463 | 0.011497 | 0.011631 | 0.011766 | 0.011530 |
| 0.011497 | 0.011631 | 0.011564 | 0.011463 | 0.011799 | 0.011463 | 0.011564 |
| 0.011677 | 0.011530 | 0.011833 | 0.011665 | 0.011698 | 0.011564 | 0.011664 |
| 0.011530 | 0.011866 | 0.011463 | 0.011732 | 0.011530 | 0.011530 | 0.011463 |
| 0.011698 | 0.011900 | 0.011597 | 0.011665 | 0.011497 | 0.011900 | 0.011530 |
| 0.011530 | 0.011530 | 0.011564 | 0.011665 | 0.011564 | 0.011664 | 0.011732 |
| 0.011732 | 0.011698 | 0.011597 | 0.011698 | 0.011664 | 0.011530 | 0.011497 |
| 0.011530 | 0.011530 | 0.011597 | 0.011530 | 0.011497 | 0.011665 | 0.011530 |
| 0.011564 | 0.011564 | 0.011698 | 0.011732 | 0.011631 | 0.011564 | 0.011564 |
| 0.011631 | 0.011564 | 0.011664 | 0.011530 | 0.011664 | 0.011765 | 0.012068 |
| 0.011564 | 0.011967 | 0.011474 | 0.018012 | 0.011519 | 0.011549 | 0.011828 |
| 0.011822 | 0.011834 | 0.011479 | 0.011350 | 0.011774 | 0.011889 | 0.011485 |

|          |          |          |          |          |          |          |
|----------|----------|----------|----------|----------|----------|----------|
| 0.011677 | 0.011671 | 0.011372 | 0.011437 | 0.011451 | 0.011455 | 0.011361 |
| 0.011623 | 0.011656 | 0.011653 | 0.011589 | 0.011698 | 0.011732 | 0.011737 |
| 0.011576 | 0.011698 | 0.011698 | 0.011665 | 0.011631 | 0.011631 | 0.011598 |
| 0.011631 | 0.011564 | 0.011597 | 0.011631 | 0.011598 | 0.011530 | 0.011564 |
| 0.011564 | 0.011631 | 0.011530 | 0.011631 | 0.011665 | 0.011698 | 0.011597 |
| 0.011631 | 0.011598 | 0.011934 | 0.011934 | 0.011665 | 0.011699 | 0.011732 |
| 0.011497 | 0.011497 | 0.011530 | 0.011631 | 0.011497 | 0.011732 | 0.011732 |
| 0.011766 | 0.011765 | 0.011698 | 0.011799 | 0.011967 | 0.011801 | 0.011631 |
| 0.011631 | 0.011698 | 0.011732 | 0.011564 | 0.011631 | 0.011598 | 0.011631 |
| 0.011699 | 0.011699 | 0.011732 | 0.011699 | 0.011599 | 0.011799 | 0.011766 |
| 0.011636 | 0.011530 | 0.011631 | 0.011732 | 0.011631 | 0.011766 | 0.011799 |
| 0.011967 | 0.011675 | 0.011833 | 0.011799 | 0.011732 | 0.011900 | 0.011531 |
| 0.011700 | 0.011598 | 0.011564 | 0.011564 | 0.011631 | 0.011530 | 0.011631 |
| 0.011665 | 0.011698 | 0.011597 | 0.011631 | 0.011598 | 0.011934 | 0.011934 |
| 0.011665 | 0.011699 | 0.011765 | 0.011698 | 0.012339 | 0.011739 | 0.011658 |
| 0.011693 | 0.011684 | 0.011798 | 0.011684 | 0.011795 | 0.011716 | 0.011716 |
| 0.012262 | 0.011579 | 0.011711 | 0.011648 | 0.011921 | 0.011809 | 0.011877 |
| 0.012284 | 0.011777 | 0.011872 | 0.011933 | 0.011799 | 0.011799 | 0.011838 |
| 0.011497 | 0.011665 | 0.011799 | 0.011765 | 0.011770 | 0.011765 | 0.011734 |
| 0.011597 | 0.011530 | 0.011564 | 0.011597 | 0.011497 | 0.011564 | 0.011463 |
| 0.011597 | 0.011631 | 0.011530 | 0.011497 | 0.011597 | 0.011530 | 0.011564 |
| 0.011564 | 0.011497 | 0.011564 | 0.011597 | 0.011497 | 0.011698 | 0.011732 |
| 0.011631 | 0.011698 | 0.011631 | 0.011631 | 0.011564 | 0.011967 | 0.011597 |
| 0.011617 | 0.011564 | 0.011800 | 0.011773 | 0.011665 | 0.011664 | 0.011664 |
| 0.011665 | 0.011597 | 0.011564 | 0.011597 | 0.011698 | 0.011698 | 0.011631 |
| 0.011631 | 0.011765 | 0.011933 | 0.011664 | 0.000000 | 0.000000 | 0.011732 |
| 0.011564 | 0.011631 | 0.011665 | 0.012068 | 0.011631 | 0.011665 | 0.011631 |
| 0.011664 | 0.011597 | 0.011597 | 0.011900 | 0.011833 | 0.011866 | 0.011597 |
| 0.011698 | 0.011765 | 0.011631 | 0.011698 | 0.011664 | 0.011530 | 0.011866 |
| 0.011631 | 0.011597 | 0.011597 | 0.011765 | 0.011597 | 0.011698 | 0.011933 |
| 0.011631 | 0.012011 | 0.012001 | 0.011711 | 0.011512 | 0.011672 | 0.011370 |
| 0.011335 | 0.011917 | 0.011447 | 0.011641 | 0.011499 | 0.011620 | 0.011592 |
| 0.011723 | 0.011455 | 0.011561 | 0.011457 | 0.011438 | 0.011596 | 0.011628 |
| 0.011625 | 0.011532 | 0.011589 | 0.011518 | 0.011566 | 0.011765 | 0.011833 |
| 0.011833 | 0.011699 | 0.011804 | 0.011806 | 0.011942 | 0.011873 | 0.011631 |
| 0.011866 | 0.011732 | 0.011597 | 0.011698 | 0.011497 | 0.011732 | 0.011530 |
| 0.011597 | 0.011597 | 0.011564 | 0.011530 | 0.011564 | 0.011530 | 0.011564 |
| 0.011584 | 0.011550 | 0.011574 | 0.011642 | 0.011745 | 0.011709 | 0.011709 |
| 0.011708 | 0.011666 | 0.011429 | 0.011420 | 0.011602 | 0.011772 | 0.011773 |
| 0.011565 | 0.011636 | 0.011868 | 0.011804 | 0.011767 | 0.011801 | 0.011732 |
| 0.011664 | 0.011732 | 0.011732 | 0.011631 | 0.012203 | 0.011799 | 0.011866 |
| 0.011900 | 0.011951 | 0.011606 | 0.011684 | 0.011564 | 0.011765 | 0.011732 |
| 0.011767 | 0.011799 | 0.011799 | 0.011799 | 0.011965 | 0.011933 | 0.011546 |
| 0.011466 | 0.011476 | 0.011537 | 0.011502 | 0.011607 | 0.011471 | 0.011808 |
| 0.011575 | 0.011806 | 0.011489 | 0.011622 | 0.011598 | 0.011676 | 0.011564 |
| 0.011530 | 0.011530 | 0.011598 | 0.011564 | 0.011766 | 0.011732 | 0.011665 |
| 0.011766 | 0.011833 | 0.011564 | 0.011564 | 0.011598 | 0.011597 | 0.011601 |
| 0.011669 | 0.011598 | 0.011530 | 0.011566 | 0.011765 | 0.011833 | 0.011833 |
| 0.011699 | 0.011804 | 0.011806 | 0.011942 | 0.011873 | 0.011631 | 0.011799 |
| 0.011732 | 0.011732 | 0.011568 | 0.011757 | 0.011686 | 0.011707 | 0.011516 |
| 0.011715 | 0.011835 | 0.011738 | 0.011638 | 0.011530 | 0.011732 | 0.011598 |
| 0.011698 | 0.011631 | 0.011530 | 0.011633 | 0.011732 | 0.011736 | 0.011631 |
| 0.011530 | 0.011465 | 0.011597 | 0.011530 | 0.011463 | 0.011570 | 0.011732 |
| 0.011631 | 0.011564 | 0.011597 | 0.011631 | 0.011598 | 0.011530 | 0.011732 |
| 0.011597 | 0.011631 | 0.011631 | 0.011564 | 0.011631 | 0.011866 | 0.011530 |
| 0.011564 | 0.011967 | 0.011564 | 0.011597 | 0.011564 | 0.011933 | 0.011489 |
| 0.012016 | 0.011485 | 0.011411 | 0.011704 | 0.011793 | 0.011670 | 0.011395 |
| 0.011375 | 0.011732 | 0.011832 | 0.011943 | 0.011801 | 0.011906 | 0.012070 |
| 0.011969 | 0.011974 | 0.011967 | 0.012189 | 0.011933 | 0.012809 | 0.011970 |
| 0.012709 | 0.012477 | 0.012611 | 0.012884 | 0.011933 | 0.011631 | 0.011934 |

|          |          |          |          |          |          |          |
|----------|----------|----------|----------|----------|----------|----------|
| 0.012373 | 0.012309 | 0.011900 | 0.011799 | 0.011868 | 0.011868 | 0.011838 |
| 0.011732 | 0.011705 | 0.011799 | 0.011767 | 0.012137 | 0.012203 | 0.012204 |
| 0.012104 | 0.012204 | 0.012308 | 0.012076 | 0.012374 | 0.012382 | 0.012441 |
| 0.012374 | 0.012476 | 0.012426 | 0.012442 | 0.012444 | 0.011664 | 0.011968 |
| 0.012036 | 0.012539 | 0.012044 | 0.012203 | 0.012744 | 0.011808 | 0.011699 |
| 0.011664 | 0.011664 | 0.012136 | 0.012212 | 0.012222 | 0.012001 | 0.011667 |
| S573     | 0.011799 | 0.011799 | 0.012135 | 0.011899 | 0.011899 | 0.011967 |
| 0.011773 | 0.011705 | 0.011967 | 0.011396 | 0.011463 | 0.011430 | 0.011396 |
| 0.011429 | 0.011597 | 0.011396 | 0.011429 | 0.011496 | 0.011463 | 0.011429 |
| 0.011396 | 0.011429 | 0.011530 | 0.011396 | 0.011430 | 0.011429 | 0.011671 |
| 0.011664 | 0.011429 | 0.011329 | 0.011564 | 0.011496 | 0.011463 | 0.011496 |
| 0.011463 | 0.011530 | 0.011463 | 0.011463 | 0.011496 | 0.011463 | 0.011631 |
| 0.011396 | 0.011463 | 0.011496 | 0.011429 | 0.011530 | 0.011564 | 0.011496 |
| 0.011463 | 0.011631 | 0.011530 | 0.011799 | 0.011463 | 0.011731 | 0.011463 |
| 0.011429 | 0.011530 | 0.011597 | 0.011731 | 0.011832 | 0.011530 | 0.011631 |
| 0.011496 | 0.011564 | 0.011463 | 0.011698 | 0.011933 | 0.011463 | 0.011530 |
| 0.011429 | 0.011530 | 0.011496 | 0.011564 | 0.011496 | 0.011496 | 0.011496 |
| 0.011396 | 0.011429 | 0.011396 | 0.011496 | 0.011463 | 0.011498 | 0.011496 |
| 0.011496 | 0.011463 | 0.011530 | 0.011429 | 0.011564 | 0.011396 | 0.011463 |
| 0.011564 | 0.011564 | 0.011799 | 0.011631 | 0.011463 | 0.011698 | 0.011463 |
| 0.011579 | 0.011807 | 0.011664 | 0.011334 | 0.011359 | 0.011465 | 0.011493 |
| 0.012195 | 0.011670 | 0.011348 | 0.011698 | 0.011698 | 0.011496 | 0.011597 |
| 0.011530 | 0.011496 | 0.011564 | 0.011463 | 0.011564 | 0.011496 | 0.011496 |
| 0.011463 | 0.011563 | 0.011765 | 0.011631 | 0.011496 | 0.011497 | 0.011430 |
| 0.011396 | 0.011396 | 0.011463 | 0.011429 | 0.011631 | 0.011597 | 0.011530 |
| 0.011631 | 0.011698 | 0.011429 | 0.011429 | 0.011463 | 0.011463 | 0.011465 |
| 0.011533 | 0.011463 | 0.011463 | 0.011348 | 0.011422 | 0.011376 | 0.011464 |
| 0.011467 | 0.011404 | 0.011466 | 0.011440 | 0.011366 | 0.011403 | 0.011432 |
| 0.011636 | 0.011474 | 0.011508 | 0.011396 | 0.011406 | 0.011531 | 0.011497 |
| 0.011565 | 0.011498 | 0.011497 | 0.011597 | 0.011530 | 0.011900 | 0.011698 |
| 0.011731 | 0.011597 | 0.011463 | 0.011564 | 0.011362 | 0.011597 | 0.011396 |
| 0.011463 | 0.011463 | 0.011429 | 0.011396 | 0.011429 | 0.011396 | 0.011497 |
| 0.011463 | 0.011564 | 0.011497 | 0.011396 | 0.011498 | 0.011597 | 0.011601 |
| 0.011598 | 0.011497 | 0.011396 | 0.011330 | 0.011463 | 0.011396 | 0.011329 |
| 0.011434 | 0.011598 | 0.011396 | 0.011598 | 0.011362 | 0.011463 | 0.011429 |
| 0.011530 | 0.011429 | 0.011463 | 0.011430 | 0.011463 | 0.011329 | 0.011463 |
| 0.011497 | 0.011429 | 0.011497 | 0.011429 | 0.011463 | 0.011497 | 0.011732 |
| 0.011832 | 0.011765 | 0.011833 | 0.011599 | 0.011833 | 0.011463 | 0.011429 |
| 0.011465 | 0.011788 | 0.011655 | 0.011369 | 0.011841 | 0.011333 | 0.011454 |
| 0.011841 | 0.011706 | 0.011631 | 0.011832 | 0.011538 | 0.011698 | 0.011664 |
| 0.011597 | 0.011765 | 0.011629 | 0.011472 | 0.011521 | 0.011497 | 0.011568 |
| 0.011664 | 0.011566 | 0.011702 | 0.011771 | 0.011698 | 0.011765 | 0.011873 |
| 0.011602 | 0.011773 | 0.011703 | 0.011635 | 0.011901 | 0.011362 | 0.011566 |
| 0.011530 | 0.011463 | 0.011362 | 0.011362 | 0.011429 | 0.011429 | 0.011496 |
| 0.011429 | 0.011496 | 0.011396 | 0.011496 | 0.011429 | 0.011429 | 0.011496 |
| 0.011429 | 0.011866 | 0.011765 | 0.011799 | 0.011329 | 0.011429 | 0.011463 |
| 0.011463 | 0.011429 | 0.011496 | 0.011530 | 0.011362 | 0.011362 | 0.011362 |
| 0.011933 | 0.011564 | 0.011564 | 0.011362 | 0.011463 | 0.011631 | 0.011396 |
| 0.011396 | 0.011463 | 0.011429 | 0.011597 | 0.011396 | 0.011530 | 0.011664 |
| 0.011597 | 0.011429 | 0.011429 | 0.011362 | 0.011362 | 0.011530 | 0.011463 |
| 0.011362 | 0.011463 | 0.011329 | 0.011362 | 0.011497 | 0.011631 | 0.011396 |
| 0.011363 | 0.011496 | 0.011430 | 0.011329 | 0.011664 | 0.011329 | 0.011496 |
| 0.011574 | 0.011396 | 0.011698 | 0.011530 | 0.011564 | 0.011429 | 0.011530 |
| 0.011396 | 0.011731 | 0.011329 | 0.011597 | 0.011396 | 0.011396 | 0.011329 |
| 0.011564 | 0.011766 | 0.011463 | 0.011530 | 0.011362 | 0.011765 | 0.011396 |
| 0.011396 | 0.011396 | 0.011429 | 0.011530 | 0.011429 | 0.011530 | 0.011597 |
| 0.011597 | 0.011564 | 0.011463 | 0.011564 | 0.011530 | 0.011396 | 0.011362 |
| 0.011396 | 0.011396 | 0.011463 | 0.011396 | 0.011362 | 0.011530 | 0.011396 |
| 0.011429 | 0.011429 | 0.011564 | 0.011597 | 0.011496 | 0.011429 | 0.011429 |
| 0.011496 | 0.011429 | 0.011530 | 0.011396 | 0.011530 | 0.011631 | 0.011933 |

|          |          |          |          |          |          |          |
|----------|----------|----------|----------|----------|----------|----------|
| 0.011429 | 0.011832 | 0.011440 | 0.017936 | 0.011387 | 0.011427 | 0.011793 |
| 0.011752 | 0.011799 | 0.011427 | 0.011408 | 0.011884 | 0.011820 | 0.011425 |
| 0.011677 | 0.011671 | 0.011294 | 0.011353 | 0.011450 | 0.011455 | 0.011361 |
| 0.011670 | 0.011582 | 0.011579 | 0.011523 | 0.011564 | 0.011597 | 0.011601 |
| 0.011472 | 0.011564 | 0.011564 | 0.011530 | 0.011497 | 0.011497 | 0.011463 |
| 0.011497 | 0.011429 | 0.011463 | 0.011497 | 0.011463 | 0.011396 | 0.011429 |
| 0.011429 | 0.011497 | 0.011396 | 0.011497 | 0.011530 | 0.011564 | 0.011463 |
| 0.011496 | 0.011463 | 0.011799 | 0.011799 | 0.011530 | 0.011565 | 0.011598 |
| 0.011362 | 0.011362 | 0.011396 | 0.011497 | 0.011362 | 0.011597 | 0.011597 |
| 0.011631 | 0.011631 | 0.011564 | 0.011664 | 0.011833 | 0.011666 | 0.011497 |
| 0.011497 | 0.011564 | 0.011597 | 0.011429 | 0.011497 | 0.011463 | 0.011497 |
| 0.011564 | 0.011564 | 0.011597 | 0.011564 | 0.011464 | 0.011665 | 0.011631 |
| 0.011500 | 0.011396 | 0.011497 | 0.011598 | 0.011497 | 0.011631 | 0.011664 |
| 0.011832 | 0.011538 | 0.011698 | 0.011664 | 0.011597 | 0.011765 | 0.011396 |
| 0.011565 | 0.011464 | 0.011429 | 0.011429 | 0.011497 | 0.011396 | 0.011497 |
| 0.011530 | 0.011564 | 0.011463 | 0.011496 | 0.011463 | 0.011799 | 0.011799 |
| 0.011530 | 0.011565 | 0.011631 | 0.011564 | 0.012204 | 0.011632 | 0.011552 |
| 0.011623 | 0.011580 | 0.011693 | 0.011580 | 0.011690 | 0.011612 | 0.011577 |
| 0.012159 | 0.011475 | 0.011608 | 0.011544 | 0.011818 | 0.011672 | 0.011775 |
| 0.012182 | 0.011626 | 0.011736 | 0.011799 | 0.011664 | 0.011664 | 0.011702 |
| 0.011362 | 0.011530 | 0.011664 | 0.011631 | 0.011634 | 0.011631 | 0.011599 |
| 0.011463 | 0.011396 | 0.011429 | 0.011463 | 0.011362 | 0.011429 | 0.011329 |
| 0.011463 | 0.011496 | 0.011396 | 0.011362 | 0.011463 | 0.011396 | 0.011429 |
| 0.011429 | 0.011362 | 0.011429 | 0.011463 | 0.011362 | 0.011530 | 0.011597 |
| 0.011496 | 0.011564 | 0.011496 | 0.011496 | 0.011429 | 0.011832 | 0.011463 |
| 0.011512 | 0.011429 | 0.011665 | 0.011671 | 0.011530 | 0.011530 | 0.011530 |
| 0.011530 | 0.011463 | 0.011429 | 0.011463 | 0.011564 | 0.011564 | 0.011496 |
| 0.011496 | 0.011631 | 0.011799 | 0.011530 | 0.011732 | 0.011732 | 0.000000 |
| 0.011429 | 0.011496 | 0.011530 | 0.011933 | 0.011497 | 0.011530 | 0.011496 |
| 0.011530 | 0.011463 | 0.011463 | 0.011765 | 0.011698 | 0.011732 | 0.011463 |
| 0.011564 | 0.011631 | 0.011496 | 0.011564 | 0.011530 | 0.011396 | 0.011731 |
| 0.011496 | 0.011463 | 0.011463 | 0.011631 | 0.011463 | 0.011564 | 0.011799 |
| 0.011496 | 0.011841 | 0.011866 | 0.011588 | 0.011399 | 0.011570 | 0.011421 |
| 0.011280 | 0.011839 | 0.011411 | 0.011551 | 0.011353 | 0.011518 | 0.011538 |
| 0.011672 | 0.011324 | 0.011505 | 0.011390 | 0.011384 | 0.011462 | 0.011506 |
| 0.011512 | 0.011414 | 0.011553 | 0.011448 | 0.011498 | 0.011631 | 0.011698 |
| 0.011698 | 0.011564 | 0.011669 | 0.011670 | 0.011806 | 0.011802 | 0.011496 |
| 0.011731 | 0.011597 | 0.011463 | 0.011564 | 0.011362 | 0.011597 | 0.011396 |
| 0.011463 | 0.011463 | 0.011429 | 0.011396 | 0.011429 | 0.011396 | 0.011497 |
| 0.011479 | 0.011480 | 0.011403 | 0.011505 | 0.011642 | 0.011607 | 0.011606 |
| 0.011605 | 0.011531 | 0.011356 | 0.011348 | 0.011467 | 0.011636 | 0.011637 |
| 0.011430 | 0.011500 | 0.011733 | 0.011702 | 0.011632 | 0.011666 | 0.011597 |
| 0.011530 | 0.011597 | 0.011597 | 0.011496 | 0.012068 | 0.011664 | 0.011732 |
| 0.011765 | 0.011843 | 0.011469 | 0.011545 | 0.011429 | 0.011631 | 0.011597 |
| 0.011632 | 0.011664 | 0.011664 | 0.011664 | 0.011846 | 0.011799 | 0.011442 |
| 0.011331 | 0.011337 | 0.011435 | 0.011400 | 0.011504 | 0.011321 | 0.011672 |
| 0.011437 | 0.011543 | 0.011251 | 0.011397 | 0.011464 | 0.011539 | 0.011430 |
| 0.011396 | 0.011396 | 0.011463 | 0.011429 | 0.011631 | 0.011597 | 0.011530 |
| 0.011631 | 0.011698 | 0.011429 | 0.011429 | 0.011463 | 0.011463 | 0.011465 |
| 0.011533 | 0.011463 | 0.011463 | 0.011498 | 0.011631 | 0.011698 | 0.011698 |
| 0.011564 | 0.011669 | 0.011670 | 0.011806 | 0.011802 | 0.011496 | 0.011664 |
| 0.011597 | 0.011597 | 0.011432 | 0.011617 | 0.011477 | 0.011571 | 0.011446 |
| 0.011577 | 0.011835 | 0.011611 | 0.011502 | 0.011396 | 0.011598 | 0.011463 |
| 0.011564 | 0.011497 | 0.011396 | 0.011498 | 0.011597 | 0.011601 | 0.011497 |
| 0.011396 | 0.011330 | 0.011463 | 0.011396 | 0.011329 | 0.011434 | 0.011598 |
| 0.011497 | 0.011429 | 0.011463 | 0.011497 | 0.011463 | 0.011396 | 0.011597 |
| 0.011463 | 0.011496 | 0.011496 | 0.011429 | 0.011496 | 0.011732 | 0.011396 |
| 0.011429 | 0.011832 | 0.011429 | 0.011463 | 0.011429 | 0.011799 | 0.011360 |
| 0.011847 | 0.011358 | 0.011461 | 0.011624 | 0.011671 | 0.011634 | 0.011311 |
| 0.011427 | 0.011597 | 0.011698 | 0.011807 | 0.011666 | 0.011805 | 0.011935 |

|          |          |          |          |          |          |          |
|----------|----------|----------|----------|----------|----------|----------|
| 0.011834 | 0.011804 | 0.011832 | 0.012085 | 0.011799 | 0.012674 | 0.011835 |
| 0.012574 | 0.012342 | 0.012476 | 0.012748 | 0.011799 | 0.011497 | 0.011799 |
| 0.012238 | 0.012173 | 0.011765 | 0.011665 | 0.011733 | 0.011733 | 0.011703 |
| 0.011597 | 0.011603 | 0.011664 | 0.011632 | 0.012002 | 0.012068 | 0.012069 |
| 0.011968 | 0.012069 | 0.012173 | 0.011940 | 0.012239 | 0.012245 | 0.012306 |
| 0.012306 | 0.012340 | 0.012289 | 0.012307 | 0.012308 | 0.011530 | 0.011833 |
| 0.011901 | 0.012404 | 0.011908 | 0.012135 | 0.012609 | 0.011671 | 0.011564 |
| 0.011530 | 0.011530 | 0.012001 | 0.012006 | 0.012151 | 0.011866 | 0.011532 |
| S574     | 0.011631 | 0.011631 | 0.011967 | 0.011731 | 0.011731 | 0.011799 |
| 0.011637 | 0.011569 | 0.011799 | 0.011228 | 0.011295 | 0.011262 | 0.011228 |
| 0.011262 | 0.011429 | 0.011228 | 0.011262 | 0.011329 | 0.011295 | 0.011262 |
| 0.011228 | 0.011262 | 0.011362 | 0.011228 | 0.011262 | 0.011262 | 0.011603 |
| 0.011496 | 0.011262 | 0.011161 | 0.011396 | 0.011329 | 0.011295 | 0.011329 |
| 0.011295 | 0.011396 | 0.011295 | 0.011295 | 0.011329 | 0.011295 | 0.011463 |
| 0.011228 | 0.011295 | 0.011329 | 0.011262 | 0.011362 | 0.011396 | 0.011329 |
| 0.011295 | 0.011463 | 0.011362 | 0.011631 | 0.011295 | 0.011564 | 0.011295 |
| 0.011262 | 0.011362 | 0.011429 | 0.011564 | 0.011664 | 0.011362 | 0.011463 |
| 0.011329 | 0.011396 | 0.011295 | 0.011530 | 0.011765 | 0.011295 | 0.011362 |
| 0.011262 | 0.011362 | 0.011329 | 0.011396 | 0.011329 | 0.011329 | 0.011329 |
| 0.011228 | 0.011262 | 0.011228 | 0.011329 | 0.011295 | 0.011329 | 0.011396 |
| 0.011329 | 0.011295 | 0.011362 | 0.011262 | 0.011396 | 0.011228 | 0.011295 |
| 0.011463 | 0.011396 | 0.011631 | 0.011463 | 0.011295 | 0.011530 | 0.011295 |
| 0.011431 | 0.011658 | 0.011475 | 0.011177 | 0.011172 | 0.011281 | 0.011375 |
| 0.012011 | 0.011467 | 0.011184 | 0.011530 | 0.011530 | 0.011329 | 0.011429 |
| 0.011362 | 0.011329 | 0.011396 | 0.011295 | 0.011396 | 0.011329 | 0.011329 |
| 0.011295 | 0.011396 | 0.011597 | 0.011463 | 0.011362 | 0.011329 | 0.011262 |
| 0.011228 | 0.011228 | 0.011295 | 0.011262 | 0.011463 | 0.011429 | 0.011362 |
| 0.011463 | 0.011530 | 0.011262 | 0.011262 | 0.011295 | 0.011295 | 0.011297 |
| 0.011364 | 0.011295 | 0.011295 | 0.011168 | 0.011241 | 0.011200 | 0.011296 |
| 0.011297 | 0.011232 | 0.011245 | 0.011267 | 0.011196 | 0.011231 | 0.011263 |
| 0.011528 | 0.011301 | 0.011336 | 0.011228 | 0.011233 | 0.011363 | 0.011329 |
| 0.011396 | 0.011330 | 0.011329 | 0.011429 | 0.011362 | 0.011731 | 0.011530 |
| 0.011563 | 0.011429 | 0.011295 | 0.011396 | 0.011195 | 0.011429 | 0.011228 |
| 0.011295 | 0.011295 | 0.011262 | 0.011228 | 0.011262 | 0.011228 | 0.011329 |
| 0.011295 | 0.011396 | 0.011329 | 0.011228 | 0.011330 | 0.011430 | 0.011432 |
| 0.011430 | 0.011329 | 0.011228 | 0.011161 | 0.011295 | 0.011228 | 0.011161 |
| 0.011264 | 0.011430 | 0.011228 | 0.011430 | 0.011195 | 0.011295 | 0.011262 |
| 0.011362 | 0.011262 | 0.011295 | 0.011262 | 0.011295 | 0.011161 | 0.011295 |
| 0.011329 | 0.011262 | 0.011329 | 0.011262 | 0.011295 | 0.011329 | 0.011564 |
| 0.011664 | 0.011597 | 0.011665 | 0.011431 | 0.011665 | 0.011295 | 0.011262 |
| 0.011297 | 0.011545 | 0.011426 | 0.011163 | 0.011671 | 0.011163 | 0.011257 |
| 0.011671 | 0.011570 | 0.011463 | 0.011664 | 0.011367 | 0.011530 | 0.011497 |
| 0.011429 | 0.011597 | 0.011451 | 0.011307 | 0.011312 | 0.011329 | 0.011398 |
| 0.011497 | 0.011397 | 0.011533 | 0.011601 | 0.011530 | 0.011597 | 0.011704 |
| 0.011432 | 0.011603 | 0.011534 | 0.011466 | 0.011733 | 0.011194 | 0.011397 |
| 0.011362 | 0.011295 | 0.011194 | 0.011194 | 0.011262 | 0.011262 | 0.011329 |
| 0.011262 | 0.011329 | 0.011228 | 0.011329 | 0.011262 | 0.011262 | 0.011329 |
| 0.011262 | 0.011698 | 0.011597 | 0.011631 | 0.011161 | 0.011262 | 0.011295 |
| 0.011295 | 0.011262 | 0.011329 | 0.011362 | 0.011228 | 0.011228 | 0.011228 |
| 0.011765 | 0.011396 | 0.011396 | 0.011194 | 0.011295 | 0.011463 | 0.011228 |
| 0.011228 | 0.011295 | 0.011262 | 0.011429 | 0.011228 | 0.011362 | 0.011496 |
| 0.011429 | 0.011262 | 0.011262 | 0.011194 | 0.011194 | 0.011362 | 0.011295 |
| 0.011194 | 0.011295 | 0.011161 | 0.011194 | 0.011329 | 0.011463 | 0.011228 |
| 0.011195 | 0.011329 | 0.011262 | 0.011161 | 0.011496 | 0.011161 | 0.011329 |
| 0.011402 | 0.011228 | 0.011530 | 0.011362 | 0.011396 | 0.011262 | 0.011362 |
| 0.011228 | 0.011564 | 0.011161 | 0.011429 | 0.011228 | 0.011228 | 0.011161 |
| 0.011396 | 0.011597 | 0.011295 | 0.011362 | 0.011194 | 0.011597 | 0.011228 |
| 0.011228 | 0.011228 | 0.011262 | 0.011362 | 0.011262 | 0.011362 | 0.011429 |
| 0.011429 | 0.011396 | 0.011295 | 0.011396 | 0.011362 | 0.011228 | 0.011194 |
| 0.011228 | 0.011228 | 0.011295 | 0.011228 | 0.011194 | 0.011362 | 0.011161 |

|          |          |          |          |          |          |          |
|----------|----------|----------|----------|----------|----------|----------|
| 0.011262 | 0.011262 | 0.011396 | 0.011429 | 0.011329 | 0.011262 | 0.011262 |
| 0.011329 | 0.011262 | 0.011362 | 0.011228 | 0.011362 | 0.011463 | 0.011765 |
| 0.011262 | 0.011664 | 0.011233 | 0.017747 | 0.011257 | 0.011366 | 0.011583 |
| 0.011545 | 0.011588 | 0.011270 | 0.011234 | 0.011664 | 0.011612 | 0.011303 |
| 0.011487 | 0.011487 | 0.011138 | 0.011228 | 0.011216 | 0.011258 | 0.011232 |
| 0.011482 | 0.011395 | 0.011394 | 0.011259 | 0.011396 | 0.011429 | 0.011432 |
| 0.011301 | 0.011396 | 0.011396 | 0.011362 | 0.011329 | 0.011329 | 0.011295 |
| 0.011329 | 0.011262 | 0.011295 | 0.011329 | 0.011295 | 0.011228 | 0.011262 |
| 0.011262 | 0.011329 | 0.011228 | 0.011329 | 0.011362 | 0.011396 | 0.011295 |
| 0.011329 | 0.011295 | 0.011631 | 0.011631 | 0.011362 | 0.011396 | 0.011430 |
| 0.011195 | 0.011195 | 0.011228 | 0.011329 | 0.011195 | 0.011429 | 0.011429 |
| 0.011463 | 0.011463 | 0.011396 | 0.011496 | 0.011665 | 0.011498 | 0.011329 |
| 0.011329 | 0.011396 | 0.011429 | 0.011262 | 0.011329 | 0.011295 | 0.011329 |
| 0.011396 | 0.011396 | 0.011429 | 0.011396 | 0.011296 | 0.011497 | 0.011463 |
| 0.011331 | 0.011228 | 0.011329 | 0.011430 | 0.011329 | 0.011463 | 0.011496 |
| 0.011664 | 0.011367 | 0.011530 | 0.011497 | 0.011429 | 0.011597 | 0.011228 |
| 0.011397 | 0.011295 | 0.011262 | 0.011262 | 0.011329 | 0.011228 | 0.011329 |
| 0.011362 | 0.011396 | 0.011295 | 0.011329 | 0.011295 | 0.011631 | 0.011631 |
| 0.011362 | 0.011396 | 0.011463 | 0.011396 | 0.012035 | 0.011453 | 0.011377 |
| 0.011447 | 0.011407 | 0.011517 | 0.011406 | 0.011515 | 0.011439 | 0.011405 |
| 0.011987 | 0.011302 | 0.011437 | 0.011371 | 0.011645 | 0.011502 | 0.011604 |
| 0.012012 | 0.011475 | 0.011567 | 0.011631 | 0.011496 | 0.011496 | 0.011533 |
| 0.011194 | 0.011362 | 0.011496 | 0.011463 | 0.011466 | 0.011463 | 0.011431 |
| 0.011295 | 0.011228 | 0.011262 | 0.011295 | 0.011194 | 0.011262 | 0.011161 |
| 0.011295 | 0.011329 | 0.011228 | 0.011194 | 0.011295 | 0.011228 | 0.011262 |
| 0.011262 | 0.011194 | 0.011262 | 0.011295 | 0.011194 | 0.011396 | 0.011429 |
| 0.011329 | 0.011396 | 0.011329 | 0.011329 | 0.011262 | 0.011664 | 0.011295 |
| 0.011338 | 0.011262 | 0.011497 | 0.011501 | 0.011362 | 0.011362 | 0.011362 |
| 0.011362 | 0.011295 | 0.011262 | 0.011295 | 0.011396 | 0.011396 | 0.011329 |
| 0.011329 | 0.011463 | 0.011631 | 0.011362 | 0.011564 | 0.011564 | 0.011429 |
| 0.000000 | 0.011329 | 0.011362 | 0.011765 | 0.011329 | 0.011362 | 0.011329 |
| 0.011362 | 0.011295 | 0.011295 | 0.011597 | 0.011530 | 0.011564 | 0.011295 |
| 0.011396 | 0.011463 | 0.011329 | 0.011396 | 0.011362 | 0.011228 | 0.011564 |
| 0.011329 | 0.011295 | 0.011295 | 0.011463 | 0.011295 | 0.011396 | 0.011631 |
| 0.011329 | 0.011705 | 0.011698 | 0.011467 | 0.011229 | 0.011400 | 0.011267 |
| 0.011170 | 0.011683 | 0.011201 | 0.011417 | 0.011255 | 0.011366 | 0.011379 |
| 0.011468 | 0.011126 | 0.011338 | 0.011126 | 0.011222 | 0.011395 | 0.011344 |
| 0.011362 | 0.011257 | 0.011342 | 0.011272 | 0.011330 | 0.011463 | 0.011530 |
| 0.011530 | 0.011396 | 0.011500 | 0.011501 | 0.011636 | 0.011661 | 0.011329 |
| 0.011563 | 0.011429 | 0.011295 | 0.011396 | 0.011195 | 0.011429 | 0.011228 |
| 0.011295 | 0.011295 | 0.011262 | 0.011228 | 0.011262 | 0.011228 | 0.011329 |
| 0.011305 | 0.011305 | 0.011300 | 0.011334 | 0.011471 | 0.011436 | 0.011436 |
| 0.011435 | 0.011363 | 0.011171 | 0.011168 | 0.011297 | 0.011467 | 0.011467 |
| 0.011262 | 0.011331 | 0.011565 | 0.011533 | 0.011464 | 0.011498 | 0.011429 |
| 0.011362 | 0.011429 | 0.011429 | 0.011329 | 0.011900 | 0.011496 | 0.011564 |
| 0.011597 | 0.011665 | 0.011299 | 0.011372 | 0.011262 | 0.011463 | 0.011429 |
| 0.011464 | 0.011496 | 0.011496 | 0.011496 | 0.011650 | 0.011631 | 0.011268 |
| 0.011162 | 0.011164 | 0.011264 | 0.011230 | 0.011333 | 0.011172 | 0.011502 |
| 0.011300 | 0.011455 | 0.011203 | 0.011322 | 0.011296 | 0.011368 | 0.011262 |
| 0.011228 | 0.011228 | 0.011295 | 0.011262 | 0.011463 | 0.011429 | 0.011362 |
| 0.011463 | 0.011530 | 0.011262 | 0.011262 | 0.011295 | 0.011295 | 0.011297 |
| 0.011364 | 0.011295 | 0.011295 | 0.011330 | 0.011463 | 0.011530 | 0.011530 |
| 0.011396 | 0.011500 | 0.011501 | 0.011636 | 0.011661 | 0.011329 | 0.011496 |
| 0.011429 | 0.011429 | 0.011263 | 0.011443 | 0.011373 | 0.011401 | 0.011270 |
| 0.011439 | 0.011652 | 0.011441 | 0.011332 | 0.011228 | 0.011430 | 0.011295 |
| 0.011396 | 0.011329 | 0.011228 | 0.011330 | 0.011430 | 0.011432 | 0.011329 |
| 0.011228 | 0.011161 | 0.011295 | 0.011228 | 0.011161 | 0.011264 | 0.011430 |
| 0.011329 | 0.011262 | 0.011295 | 0.011329 | 0.011295 | 0.011228 | 0.011430 |
| 0.011295 | 0.011329 | 0.011329 | 0.011262 | 0.011329 | 0.011564 | 0.011228 |
| 0.011262 | 0.011664 | 0.011262 | 0.011295 | 0.011262 | 0.011631 | 0.011189 |

|          |          |          |          |          |          |          |
|----------|----------|----------|----------|----------|----------|----------|
| 0.011678 | 0.011188 | 0.011261 | 0.011422 | 0.011508 | 0.011419 | 0.011144 |
| 0.011218 | 0.011429 | 0.011530 | 0.011637 | 0.011498 | 0.011601 | 0.011766 |
| 0.011666 | 0.011703 | 0.011664 | 0.011880 | 0.011631 | 0.012505 | 0.011666 |
| 0.012405 | 0.012173 | 0.012307 | 0.012578 | 0.011631 | 0.011329 | 0.011631 |
| 0.012070 | 0.012004 | 0.011597 | 0.011497 | 0.011564 | 0.011564 | 0.011534 |
| 0.011429 | 0.011399 | 0.011496 | 0.011464 | 0.011833 | 0.011900 | 0.011901 |
| 0.011800 | 0.011901 | 0.012004 | 0.011737 | 0.012070 | 0.012076 | 0.012137 |
| 0.012138 | 0.012171 | 0.012084 | 0.012138 | 0.012139 | 0.011362 | 0.011665 |
| 0.011733 | 0.012236 | 0.011738 | 0.011967 | 0.012440 | 0.011502 | 0.011396 |
| 0.011362 | 0.011362 | 0.011833 | 0.011883 | 0.011975 | 0.011698 | 0.011363 |
| s575     | 0.011698 | 0.011698 | 0.012034 | 0.011799 | 0.011799 | 0.011866 |
| 0.011705 | 0.011637 | 0.011866 | 0.011295 | 0.011362 | 0.011329 | 0.011295 |
| 0.011329 | 0.011496 | 0.011295 | 0.011329 | 0.011396 | 0.011362 | 0.011329 |
| 0.011295 | 0.011329 | 0.011429 | 0.011295 | 0.011329 | 0.011329 | 0.011671 |
| 0.011564 | 0.011329 | 0.011228 | 0.011463 | 0.011396 | 0.011362 | 0.011396 |
| 0.011362 | 0.011463 | 0.011362 | 0.011362 | 0.011396 | 0.011362 | 0.011530 |
| 0.011295 | 0.011362 | 0.011396 | 0.011329 | 0.011429 | 0.011463 | 0.011396 |
| 0.011362 | 0.011530 | 0.011430 | 0.011698 | 0.011362 | 0.011631 | 0.011362 |
| 0.011329 | 0.011429 | 0.011497 | 0.011631 | 0.011732 | 0.011429 | 0.011530 |
| 0.011396 | 0.011463 | 0.011362 | 0.011597 | 0.011832 | 0.011362 | 0.011429 |
| 0.011329 | 0.011429 | 0.011396 | 0.011463 | 0.011396 | 0.011396 | 0.011396 |
| 0.011295 | 0.011329 | 0.011295 | 0.011396 | 0.011362 | 0.011397 | 0.011463 |
| 0.011396 | 0.011362 | 0.011429 | 0.011329 | 0.011463 | 0.011295 | 0.011362 |
| 0.011530 | 0.011463 | 0.011698 | 0.011530 | 0.011362 | 0.011597 | 0.011362 |
| 0.011542 | 0.011770 | 0.011588 | 0.011295 | 0.011284 | 0.011391 | 0.011493 |
| 0.012121 | 0.011518 | 0.011266 | 0.011597 | 0.011597 | 0.011396 | 0.011497 |
| 0.011429 | 0.011396 | 0.011463 | 0.011362 | 0.011463 | 0.011396 | 0.011396 |
| 0.011362 | 0.011463 | 0.011664 | 0.011530 | 0.011429 | 0.011396 | 0.011329 |
| 0.011295 | 0.011295 | 0.011362 | 0.011329 | 0.011530 | 0.011497 | 0.011429 |
| 0.011530 | 0.011597 | 0.011329 | 0.011329 | 0.011362 | 0.011362 | 0.011364 |
| 0.011432 | 0.011362 | 0.011362 | 0.011240 | 0.011313 | 0.011271 | 0.011363 |
| 0.011365 | 0.011301 | 0.011318 | 0.011336 | 0.011264 | 0.011300 | 0.011330 |
| 0.011600 | 0.011370 | 0.011405 | 0.011296 | 0.011302 | 0.011430 | 0.011396 |
| 0.011464 | 0.011397 | 0.011396 | 0.011496 | 0.011429 | 0.011799 | 0.011598 |
| 0.011631 | 0.011497 | 0.011362 | 0.011463 | 0.011262 | 0.011497 | 0.011295 |
| 0.011362 | 0.011362 | 0.011329 | 0.011295 | 0.011329 | 0.011295 | 0.011396 |
| 0.011362 | 0.011463 | 0.011396 | 0.011295 | 0.011397 | 0.011497 | 0.011499 |
| 0.011497 | 0.011396 | 0.011295 | 0.011229 | 0.011362 | 0.011295 | 0.011228 |
| 0.011332 | 0.011497 | 0.011295 | 0.011497 | 0.011262 | 0.011362 | 0.011329 |
| 0.011430 | 0.011329 | 0.011362 | 0.011329 | 0.011362 | 0.011228 | 0.011362 |
| 0.011396 | 0.011329 | 0.011396 | 0.011329 | 0.011362 | 0.011396 | 0.011631 |
| 0.011732 | 0.011664 | 0.011732 | 0.011498 | 0.011732 | 0.011362 | 0.011329 |
| 0.011364 | 0.011667 | 0.011518 | 0.011266 | 0.011739 | 0.011231 | 0.011375 |
| 0.011739 | 0.011638 | 0.011530 | 0.011732 | 0.011436 | 0.011597 | 0.011564 |
| 0.011496 | 0.011664 | 0.011522 | 0.011390 | 0.011395 | 0.011396 | 0.011466 |
| 0.011564 | 0.011465 | 0.011601 | 0.011669 | 0.011597 | 0.011665 | 0.011772 |
| 0.011500 | 0.011671 | 0.011602 | 0.011534 | 0.011800 | 0.011262 | 0.011465 |
| 0.011429 | 0.011362 | 0.011262 | 0.011262 | 0.011329 | 0.011329 | 0.011396 |
| 0.011329 | 0.011396 | 0.011295 | 0.011396 | 0.011329 | 0.011329 | 0.011396 |
| 0.011329 | 0.011765 | 0.011664 | 0.011698 | 0.011228 | 0.011329 | 0.011362 |
| 0.011362 | 0.011329 | 0.011396 | 0.011429 | 0.011295 | 0.011295 | 0.011295 |
| 0.011832 | 0.011463 | 0.011463 | 0.011262 | 0.011362 | 0.011530 | 0.011295 |
| 0.011295 | 0.011362 | 0.011329 | 0.011497 | 0.011295 | 0.011429 | 0.011564 |
| 0.011496 | 0.011329 | 0.011329 | 0.011262 | 0.011262 | 0.011429 | 0.011362 |
| 0.011262 | 0.011362 | 0.011228 | 0.011262 | 0.011396 | 0.011530 | 0.011295 |
| 0.011262 | 0.011396 | 0.011329 | 0.011228 | 0.011564 | 0.011228 | 0.011396 |
| 0.011471 | 0.011295 | 0.011597 | 0.011430 | 0.011463 | 0.011329 | 0.011429 |
| 0.011295 | 0.011631 | 0.011228 | 0.011497 | 0.011295 | 0.011295 | 0.011228 |
| 0.011463 | 0.011665 | 0.011362 | 0.011429 | 0.011262 | 0.011664 | 0.011295 |
| 0.011295 | 0.011295 | 0.011329 | 0.011429 | 0.011329 | 0.011429 | 0.011228 |



|          |          |          |          |          |          |          |
|----------|----------|----------|----------|----------|----------|----------|
| 0.011497 | 0.011463 | 0.011362 | 0.011463 | 0.011429 | 0.011295 | 0.011262 |
| 0.011295 | 0.011295 | 0.011362 | 0.011295 | 0.011262 | 0.011429 | 0.011228 |
| 0.011329 | 0.011329 | 0.011463 | 0.011496 | 0.011396 | 0.011329 | 0.011329 |
| 0.011396 | 0.011329 | 0.011429 | 0.011295 | 0.011429 | 0.011530 | 0.011832 |
| 0.011329 | 0.011732 | 0.011336 | 0.017823 | 0.011387 | 0.011488 | 0.011688 |
| 0.011648 | 0.011693 | 0.011322 | 0.011234 | 0.011829 | 0.011647 | 0.011485 |
| 0.011582 | 0.011671 | 0.011255 | 0.011311 | 0.011294 | 0.011455 | 0.011318 |
| 0.011529 | 0.011507 | 0.011468 | 0.011259 | 0.011463 | 0.011497 | 0.011500 |
| 0.011369 | 0.011463 | 0.011463 | 0.011429 | 0.011396 | 0.011396 | 0.011363 |
| 0.011396 | 0.011329 | 0.011362 | 0.011396 | 0.011362 | 0.011295 | 0.011329 |
| 0.011329 | 0.011396 | 0.011295 | 0.011396 | 0.011430 | 0.011463 | 0.011362 |
| 0.011396 | 0.011362 | 0.011698 | 0.011698 | 0.011430 | 0.011464 | 0.011497 |
| 0.011262 | 0.011262 | 0.011295 | 0.011396 | 0.011262 | 0.011497 | 0.011497 |
| 0.011530 | 0.011530 | 0.011463 | 0.011564 | 0.011732 | 0.011565 | 0.011396 |
| 0.011396 | 0.011463 | 0.011497 | 0.011329 | 0.011396 | 0.011362 | 0.011396 |
| 0.011463 | 0.011463 | 0.011497 | 0.011463 | 0.011363 | 0.011564 | 0.011530 |
| 0.011399 | 0.011295 | 0.011396 | 0.011497 | 0.011396 | 0.011530 | 0.011564 |
| 0.011732 | 0.011436 | 0.011597 | 0.011564 | 0.011496 | 0.011664 | 0.011295 |
| 0.011464 | 0.011363 | 0.011329 | 0.011329 | 0.011396 | 0.011295 | 0.011396 |
| 0.011430 | 0.011463 | 0.011362 | 0.011396 | 0.011362 | 0.011698 | 0.011698 |
| 0.011430 | 0.011464 | 0.011530 | 0.011463 | 0.012103 | 0.011524 | 0.011447 |
| 0.011517 | 0.011476 | 0.011587 | 0.011476 | 0.011585 | 0.011508 | 0.011474 |
| 0.012056 | 0.011372 | 0.011505 | 0.011441 | 0.011714 | 0.011570 | 0.011673 |
| 0.012080 | 0.011550 | 0.011635 | 0.011698 | 0.011564 | 0.011564 | 0.011601 |
| 0.011262 | 0.011429 | 0.011564 | 0.011530 | 0.011533 | 0.011530 | 0.011498 |
| 0.011362 | 0.011295 | 0.011329 | 0.011362 | 0.011262 | 0.011329 | 0.011228 |
| 0.011362 | 0.011396 | 0.011295 | 0.011262 | 0.011362 | 0.011295 | 0.011329 |
| 0.011329 | 0.011262 | 0.011329 | 0.011362 | 0.011262 | 0.011463 | 0.011496 |
| 0.011396 | 0.011463 | 0.011396 | 0.011396 | 0.011329 | 0.011732 | 0.011362 |
| 0.011408 | 0.011329 | 0.011564 | 0.011569 | 0.011429 | 0.011429 | 0.011429 |
| 0.011429 | 0.011362 | 0.011329 | 0.011362 | 0.011463 | 0.011463 | 0.011396 |
| 0.011396 | 0.011530 | 0.011698 | 0.011429 | 0.011631 | 0.011631 | 0.011496 |
| 0.011329 | 0.000000 | 0.011429 | 0.011832 | 0.011396 | 0.011429 | 0.011396 |
| 0.011429 | 0.011362 | 0.011362 | 0.011665 | 0.011597 | 0.011631 | 0.011362 |
| 0.011463 | 0.011530 | 0.011396 | 0.011463 | 0.011429 | 0.011295 | 0.011631 |
| 0.011396 | 0.011362 | 0.011362 | 0.011530 | 0.011362 | 0.011463 | 0.011698 |
| 0.011396 | 0.011773 | 0.011765 | 0.011589 | 0.011229 | 0.011468 | 0.011370 |
| 0.011280 | 0.011800 | 0.011306 | 0.011507 | 0.011402 | 0.011518 | 0.011485 |
| 0.011570 | 0.011324 | 0.011450 | 0.011192 | 0.011168 | 0.011462 | 0.011466 |
| 0.011475 | 0.011375 | 0.011448 | 0.011377 | 0.011397 | 0.011530 | 0.011597 |
| 0.011597 | 0.011464 | 0.011567 | 0.011569 | 0.011704 | 0.011732 | 0.011396 |
| 0.011631 | 0.011497 | 0.011362 | 0.011463 | 0.011262 | 0.011497 | 0.011295 |
| 0.011362 | 0.011362 | 0.011329 | 0.011295 | 0.011329 | 0.011295 | 0.011396 |
| 0.011375 | 0.011375 | 0.011368 | 0.011403 | 0.011539 | 0.011504 | 0.011504 |
| 0.011503 | 0.011430 | 0.011245 | 0.011240 | 0.011365 | 0.011535 | 0.011535 |
| 0.011329 | 0.011399 | 0.011632 | 0.011601 | 0.011531 | 0.011565 | 0.011496 |
| 0.011429 | 0.011496 | 0.011496 | 0.011396 | 0.011967 | 0.011564 | 0.011631 |
| 0.011665 | 0.011737 | 0.011367 | 0.011441 | 0.011329 | 0.011530 | 0.011497 |
| 0.011531 | 0.011564 | 0.011564 | 0.011564 | 0.011689 | 0.011698 | 0.011338 |
| 0.011229 | 0.011233 | 0.011333 | 0.011298 | 0.011402 | 0.011209 | 0.011570 |
| 0.011369 | 0.011499 | 0.011251 | 0.011397 | 0.011363 | 0.011437 | 0.011329 |
| 0.011295 | 0.011295 | 0.011362 | 0.011329 | 0.011530 | 0.011497 | 0.011429 |
| 0.011530 | 0.011597 | 0.011329 | 0.011329 | 0.011362 | 0.011362 | 0.011364 |
| 0.011432 | 0.011362 | 0.011362 | 0.011397 | 0.011530 | 0.011597 | 0.011597 |
| 0.011464 | 0.011567 | 0.011569 | 0.011704 | 0.011732 | 0.011396 | 0.011564 |
| 0.011497 | 0.011497 | 0.011331 | 0.011513 | 0.011442 | 0.011469 | 0.011340 |
| 0.011473 | 0.011653 | 0.011526 | 0.011400 | 0.011295 | 0.011497 | 0.011362 |
| 0.011463 | 0.011396 | 0.011295 | 0.011397 | 0.011497 | 0.011499 | 0.011396 |
| 0.011295 | 0.011229 | 0.011362 | 0.011295 | 0.011228 | 0.011332 | 0.011497 |
| 0.011396 | 0.011329 | 0.011362 | 0.011396 | 0.011362 | 0.011295 | 0.011497 |

|          |          |          |          |          |          |          |
|----------|----------|----------|----------|----------|----------|----------|
| 0.011362 | 0.011396 | 0.011396 | 0.011329 | 0.011396 | 0.011631 | 0.011295 |
| 0.011329 | 0.011732 | 0.011329 | 0.011362 | 0.011329 | 0.011698 | 0.011274 |
| 0.011735 | 0.011315 | 0.011311 | 0.011543 | 0.011630 | 0.011527 | 0.011269 |
| 0.011270 | 0.011496 | 0.011597 | 0.011705 | 0.011565 | 0.011703 | 0.011834 |
| 0.011733 | 0.011770 | 0.011732 | 0.011983 | 0.011698 | 0.012573 | 0.011734 |
| 0.012473 | 0.012241 | 0.012375 | 0.012646 | 0.011698 | 0.011396 | 0.011699 |
| 0.012137 | 0.012072 | 0.011664 | 0.011564 | 0.011632 | 0.011632 | 0.011601 |
| 0.011496 | 0.011501 | 0.011564 | 0.011531 | 0.011901 | 0.011967 | 0.011968 |
| 0.011868 | 0.011968 | 0.012072 | 0.011838 | 0.012138 | 0.012144 | 0.012205 |
| 0.012205 | 0.012239 | 0.012186 | 0.012205 | 0.012207 | 0.011429 | 0.011732 |
| 0.011800 | 0.012303 | 0.011806 | 0.012034 | 0.012508 | 0.011570 | 0.011464 |
| 0.011429 | 0.011429 | 0.011900 | 0.011924 | 0.012045 | 0.011765 | 0.011431 |
| S576     | 0.011732 | 0.011732 | 0.012068 | 0.011832 | 0.011832 | 0.011900 |
| 0.011739 | 0.011671 | 0.011900 | 0.011329 | 0.011396 | 0.011363 | 0.011329 |
| 0.011362 | 0.011530 | 0.011329 | 0.011362 | 0.011429 | 0.011396 | 0.011362 |
| 0.011329 | 0.011362 | 0.011463 | 0.011329 | 0.011363 | 0.011362 | 0.011705 |
| 0.011597 | 0.011362 | 0.011262 | 0.011496 | 0.011362 | 0.011396 | 0.011429 |
| 0.011396 | 0.011497 | 0.011396 | 0.011396 | 0.011429 | 0.011396 | 0.011564 |
| 0.011329 | 0.011396 | 0.011429 | 0.011362 | 0.011463 | 0.011497 | 0.011429 |
| 0.011396 | 0.011564 | 0.011463 | 0.011732 | 0.011396 | 0.011664 | 0.011396 |
| 0.011362 | 0.011463 | 0.011530 | 0.011664 | 0.011698 | 0.011463 | 0.011564 |
| 0.011429 | 0.011497 | 0.011396 | 0.011631 | 0.011866 | 0.011396 | 0.011463 |
| 0.011362 | 0.011463 | 0.011429 | 0.011497 | 0.011429 | 0.011429 | 0.011429 |
| 0.011329 | 0.011362 | 0.011329 | 0.011429 | 0.011396 | 0.011430 | 0.011496 |
| 0.011429 | 0.011396 | 0.011463 | 0.011362 | 0.011496 | 0.011329 | 0.011396 |
| 0.011564 | 0.011496 | 0.011732 | 0.011564 | 0.011396 | 0.011631 | 0.011396 |
| 0.011579 | 0.011807 | 0.011626 | 0.011295 | 0.011321 | 0.011428 | 0.011533 |
| 0.012158 | 0.011620 | 0.011349 | 0.011631 | 0.011631 | 0.011429 | 0.011530 |
| 0.011463 | 0.011429 | 0.011496 | 0.011396 | 0.011497 | 0.011429 | 0.011429 |
| 0.011396 | 0.011496 | 0.011698 | 0.011564 | 0.011463 | 0.011430 | 0.011362 |
| 0.011329 | 0.011329 | 0.011396 | 0.011362 | 0.011564 | 0.011530 | 0.011463 |
| 0.011564 | 0.011631 | 0.011362 | 0.011362 | 0.011396 | 0.011396 | 0.011398 |
| 0.011466 | 0.011396 | 0.011396 | 0.011276 | 0.011349 | 0.011306 | 0.011396 |
| 0.011399 | 0.011335 | 0.011392 | 0.011371 | 0.011298 | 0.011334 | 0.011364 |
| 0.011636 | 0.011405 | 0.011439 | 0.011329 | 0.011337 | 0.011464 | 0.011430 |
| 0.011498 | 0.011431 | 0.011430 | 0.011530 | 0.011463 | 0.011833 | 0.011631 |
| 0.011664 | 0.011530 | 0.011396 | 0.011497 | 0.011295 | 0.011530 | 0.011329 |
| 0.011396 | 0.011396 | 0.011362 | 0.011329 | 0.011362 | 0.011329 | 0.011430 |
| 0.011396 | 0.011497 | 0.011430 | 0.011329 | 0.011431 | 0.011530 | 0.011533 |
| 0.011531 | 0.011430 | 0.011329 | 0.011263 | 0.011396 | 0.011329 | 0.011262 |
| 0.011366 | 0.011531 | 0.011329 | 0.011531 | 0.011295 | 0.011396 | 0.011362 |
| 0.011463 | 0.011362 | 0.011396 | 0.011363 | 0.011396 | 0.011262 | 0.011396 |
| 0.011430 | 0.011362 | 0.011430 | 0.011362 | 0.011396 | 0.011430 | 0.011665 |
| 0.011698 | 0.011698 | 0.011766 | 0.011532 | 0.011766 | 0.011396 | 0.011362 |
| 0.011398 | 0.011667 | 0.011563 | 0.011300 | 0.011773 | 0.011265 | 0.011414 |
| 0.011773 | 0.011672 | 0.011564 | 0.011765 | 0.011470 | 0.011631 | 0.011598 |
| 0.011530 | 0.011698 | 0.011558 | 0.011390 | 0.011479 | 0.011430 | 0.011500 |
| 0.011597 | 0.011499 | 0.011635 | 0.011703 | 0.011631 | 0.011698 | 0.011806 |
| 0.011534 | 0.011705 | 0.011636 | 0.011500 | 0.011834 | 0.011295 | 0.011498 |
| 0.011463 | 0.011396 | 0.011295 | 0.011295 | 0.011362 | 0.011362 | 0.011429 |
| 0.011362 | 0.011429 | 0.011329 | 0.011429 | 0.011362 | 0.011362 | 0.011429 |
| 0.011362 | 0.011799 | 0.011698 | 0.011732 | 0.011262 | 0.011362 | 0.011396 |
| 0.011396 | 0.011362 | 0.011429 | 0.011463 | 0.011329 | 0.011329 | 0.011329 |
| 0.011866 | 0.011497 | 0.011497 | 0.011295 | 0.011396 | 0.011564 | 0.011329 |
| 0.011329 | 0.011396 | 0.011362 | 0.011530 | 0.011329 | 0.011463 | 0.011597 |
| 0.011463 | 0.011362 | 0.011362 | 0.011295 | 0.011295 | 0.011463 | 0.011396 |
| 0.011295 | 0.011396 | 0.011262 | 0.011295 | 0.011429 | 0.011564 | 0.011329 |
| 0.011295 | 0.011429 | 0.011363 | 0.011262 | 0.011597 | 0.011262 | 0.011429 |
| 0.011505 | 0.011329 | 0.011631 | 0.011463 | 0.011497 | 0.011362 | 0.011463 |
| 0.011329 | 0.011664 | 0.011262 | 0.011530 | 0.011329 | 0.011329 | 0.011262 |

|          |          |          |          |          |          |          |
|----------|----------|----------|----------|----------|----------|----------|
| 0.011497 | 0.011698 | 0.011396 | 0.011463 | 0.011295 | 0.011698 | 0.011329 |
| 0.011329 | 0.011329 | 0.011362 | 0.011463 | 0.011362 | 0.011463 | 0.011530 |
| 0.011530 | 0.011497 | 0.011396 | 0.011497 | 0.011463 | 0.011262 | 0.011295 |
| 0.011329 | 0.011262 | 0.011396 | 0.011329 | 0.011295 | 0.011463 | 0.011329 |
| 0.011362 | 0.011362 | 0.011497 | 0.011530 | 0.011429 | 0.011362 | 0.011362 |
| 0.011429 | 0.011362 | 0.011463 | 0.011329 | 0.011463 | 0.011564 | 0.011799 |
| 0.011362 | 0.011765 | 0.011371 | 0.017786 | 0.011453 | 0.011611 | 0.011723 |
| 0.011683 | 0.011729 | 0.011532 | 0.011524 | 0.011885 | 0.011751 | 0.011546 |
| 0.011630 | 0.011732 | 0.011294 | 0.011395 | 0.011373 | 0.011455 | 0.011361 |
| 0.011623 | 0.011544 | 0.011542 | 0.011391 | 0.011497 | 0.011530 | 0.011500 |
| 0.011404 | 0.011497 | 0.011497 | 0.011463 | 0.011430 | 0.011430 | 0.011396 |
| 0.011430 | 0.011362 | 0.011396 | 0.011430 | 0.011396 | 0.011329 | 0.011362 |
| 0.011362 | 0.011430 | 0.011329 | 0.011430 | 0.011463 | 0.011497 | 0.011396 |
| 0.011429 | 0.011329 | 0.011732 | 0.011732 | 0.011463 | 0.011497 | 0.011530 |
| 0.011295 | 0.011295 | 0.011329 | 0.011430 | 0.011295 | 0.011530 | 0.011530 |
| 0.011564 | 0.011564 | 0.011497 | 0.011597 | 0.011766 | 0.011599 | 0.011430 |
| 0.011430 | 0.011497 | 0.011530 | 0.011362 | 0.011430 | 0.011396 | 0.011430 |
| 0.011497 | 0.011497 | 0.011530 | 0.011497 | 0.011397 | 0.011597 | 0.011564 |
| 0.011433 | 0.011329 | 0.011430 | 0.011530 | 0.011430 | 0.011564 | 0.011597 |
| 0.011765 | 0.011470 | 0.011631 | 0.011598 | 0.011530 | 0.011698 | 0.011329 |
| 0.011498 | 0.011396 | 0.011362 | 0.011362 | 0.011430 | 0.011329 | 0.011430 |
| 0.011463 | 0.011497 | 0.011396 | 0.011429 | 0.011329 | 0.011732 | 0.011732 |
| 0.011463 | 0.011497 | 0.011564 | 0.011496 | 0.012137 | 0.011525 | 0.011482 |
| 0.011482 | 0.011476 | 0.011622 | 0.011510 | 0.011620 | 0.011543 | 0.011508 |
| 0.012090 | 0.011406 | 0.011540 | 0.011475 | 0.011749 | 0.011604 | 0.011707 |
| 0.012114 | 0.011588 | 0.011669 | 0.011732 | 0.011597 | 0.011597 | 0.011635 |
| 0.011295 | 0.011463 | 0.011597 | 0.011564 | 0.011567 | 0.011564 | 0.011532 |
| 0.011396 | 0.011329 | 0.011362 | 0.011396 | 0.011295 | 0.011362 | 0.011262 |
| 0.011396 | 0.011429 | 0.011329 | 0.011295 | 0.011396 | 0.011329 | 0.011362 |
| 0.011362 | 0.011295 | 0.011362 | 0.011396 | 0.011295 | 0.011497 | 0.011530 |
| 0.011429 | 0.011497 | 0.011429 | 0.011429 | 0.011362 | 0.011698 | 0.011396 |
| 0.011443 | 0.011362 | 0.011598 | 0.011603 | 0.011463 | 0.011463 | 0.011463 |
| 0.000000 | 0.011396 | 0.011362 | 0.011396 | 0.011497 | 0.011497 | 0.011429 |
| 0.011429 | 0.011564 | 0.011732 | 0.011463 | 0.011665 | 0.011665 | 0.011530 |
| 0.011362 | 0.011429 | 0.000000 | 0.011866 | 0.011430 | 0.011463 | 0.011429 |
| 0.011463 | 0.011396 | 0.011396 | 0.011698 | 0.011631 | 0.011665 | 0.011396 |
| 0.011429 | 0.011564 | 0.011429 | 0.011429 | 0.011463 | 0.011329 | 0.011664 |
| 0.011429 | 0.011396 | 0.011396 | 0.011564 | 0.011396 | 0.011497 | 0.011732 |
| 0.011429 | 0.011807 | 0.011732 | 0.011629 | 0.011399 | 0.011502 | 0.011422 |
| 0.011390 | 0.011839 | 0.011341 | 0.011596 | 0.011402 | 0.011519 | 0.011538 |
| 0.011672 | 0.011258 | 0.011506 | 0.011391 | 0.011384 | 0.011529 | 0.011506 |
| 0.011512 | 0.011414 | 0.011483 | 0.011412 | 0.011431 | 0.011564 | 0.011631 |
| 0.011631 | 0.011497 | 0.011601 | 0.011603 | 0.011738 | 0.011767 | 0.011429 |
| 0.011664 | 0.011530 | 0.011396 | 0.011497 | 0.011295 | 0.011530 | 0.011329 |
| 0.011396 | 0.011396 | 0.011362 | 0.011329 | 0.011362 | 0.011329 | 0.011430 |
| 0.011410 | 0.011410 | 0.011403 | 0.011437 | 0.011574 | 0.011539 | 0.011470 |
| 0.011537 | 0.011464 | 0.011245 | 0.011204 | 0.011399 | 0.011569 | 0.011569 |
| 0.011363 | 0.011433 | 0.011666 | 0.011635 | 0.011531 | 0.011599 | 0.011530 |
| 0.011463 | 0.011530 | 0.011530 | 0.011429 | 0.012001 | 0.011564 | 0.011665 |
| 0.011698 | 0.011772 | 0.011401 | 0.011476 | 0.011362 | 0.011564 | 0.011530 |
| 0.011565 | 0.011597 | 0.011597 | 0.011597 | 0.011768 | 0.011732 | 0.011372 |
| 0.011263 | 0.011268 | 0.011367 | 0.011332 | 0.011436 | 0.011284 | 0.011604 |
| 0.011403 | 0.011586 | 0.011346 | 0.011435 | 0.011397 | 0.011471 | 0.011362 |
| 0.011329 | 0.011329 | 0.011396 | 0.011362 | 0.011564 | 0.011530 | 0.011463 |
| 0.011564 | 0.011631 | 0.011362 | 0.011362 | 0.011396 | 0.011396 | 0.011398 |
| 0.011466 | 0.011396 | 0.011396 | 0.011431 | 0.011564 | 0.011631 | 0.011631 |
| 0.011497 | 0.011601 | 0.011603 | 0.011738 | 0.011767 | 0.011429 | 0.011597 |
| 0.011530 | 0.011530 | 0.011365 | 0.011548 | 0.011442 | 0.011503 | 0.011376 |
| 0.011542 | 0.011744 | 0.011526 | 0.011434 | 0.011329 | 0.011531 | 0.011396 |
| 0.011497 | 0.011430 | 0.011329 | 0.011431 | 0.011530 | 0.011533 | 0.011430 |

|          |          |          |          |          |          |          |
|----------|----------|----------|----------|----------|----------|----------|
| 0.011329 | 0.011263 | 0.011396 | 0.011329 | 0.011262 | 0.011366 | 0.011531 |
| 0.011430 | 0.011362 | 0.011396 | 0.011430 | 0.011396 | 0.011329 | 0.011530 |
| 0.011396 | 0.011429 | 0.011429 | 0.011362 | 0.011429 | 0.011665 | 0.011329 |
| 0.011362 | 0.011698 | 0.011362 | 0.011396 | 0.011362 | 0.011732 | 0.011360 |
| 0.011904 | 0.011358 | 0.011411 | 0.011584 | 0.011671 | 0.011563 | 0.011269 |
| 0.011375 | 0.011530 | 0.011631 | 0.011739 | 0.011599 | 0.011737 | 0.011867 |
| 0.011767 | 0.011804 | 0.011765 | 0.012017 | 0.011732 | 0.012607 | 0.011768 |
| 0.012507 | 0.012275 | 0.012409 | 0.012680 | 0.011732 | 0.011430 | 0.011732 |
| 0.012103 | 0.012106 | 0.011698 | 0.011598 | 0.011666 | 0.011666 | 0.011635 |
| 0.011530 | 0.011535 | 0.011597 | 0.011565 | 0.011935 | 0.012001 | 0.012002 |
| 0.011901 | 0.012002 | 0.012106 | 0.011805 | 0.012172 | 0.012178 | 0.012239 |
| 0.012239 | 0.012273 | 0.012221 | 0.012240 | 0.012241 | 0.011463 | 0.011766 |
| 0.011834 | 0.012337 | 0.011840 | 0.012068 | 0.012542 | 0.011604 | 0.011497 |
| 0.011463 | 0.011463 | 0.011934 | 0.012006 | 0.012081 | 0.011799 | 0.011465 |
| S577     | 0.012135 | 0.012135 | 0.012203 | 0.011967 | 0.011967 | 0.012034 |
| 0.011536 | 0.011468 | 0.012034 | 0.011732 | 0.011799 | 0.011767 | 0.011732 |
| 0.011698 | 0.011933 | 0.011664 | 0.011765 | 0.011832 | 0.011799 | 0.011765 |
| 0.011732 | 0.011765 | 0.011597 | 0.011732 | 0.011766 | 0.011765 | 0.011501 |
| 0.011732 | 0.011765 | 0.011664 | 0.011631 | 0.011832 | 0.011799 | 0.011833 |
| 0.011799 | 0.011900 | 0.011799 | 0.011799 | 0.011832 | 0.011799 | 0.011967 |
| 0.011664 | 0.011799 | 0.011832 | 0.011765 | 0.011799 | 0.011900 | 0.011832 |
| 0.011799 | 0.011967 | 0.011867 | 0.011530 | 0.011799 | 0.012068 | 0.011799 |
| 0.011765 | 0.011799 | 0.011933 | 0.012068 | 0.011496 | 0.011799 | 0.011900 |
| 0.011832 | 0.011900 | 0.011799 | 0.012034 | 0.011665 | 0.011799 | 0.011866 |
| 0.011765 | 0.011866 | 0.011833 | 0.011900 | 0.011832 | 0.011832 | 0.011832 |
| 0.011732 | 0.011765 | 0.011732 | 0.011765 | 0.011799 | 0.011835 | 0.011900 |
| 0.011833 | 0.011799 | 0.011866 | 0.011765 | 0.011698 | 0.011732 | 0.011799 |
| 0.011967 | 0.011900 | 0.011463 | 0.011967 | 0.011799 | 0.012034 | 0.011799 |
| 0.011988 | 0.011546 | 0.011966 | 0.011724 | 0.011657 | 0.011834 | 0.011572 |
| 0.012158 | 0.011416 | 0.011596 | 0.012034 | 0.012034 | 0.011765 | 0.011664 |
| 0.011866 | 0.011832 | 0.011900 | 0.011799 | 0.011900 | 0.011832 | 0.011832 |
| 0.011799 | 0.011832 | 0.012102 | 0.011967 | 0.011866 | 0.011833 | 0.011766 |
| 0.011732 | 0.011665 | 0.011799 | 0.011766 | 0.011699 | 0.011665 | 0.011598 |
| 0.011698 | 0.011766 | 0.011765 | 0.011765 | 0.011799 | 0.011799 | 0.011803 |
| 0.011872 | 0.011799 | 0.011799 | 0.011636 | 0.011711 | 0.011691 | 0.011800 |
| 0.011772 | 0.011713 | 0.011725 | 0.011716 | 0.011706 | 0.011711 | 0.011770 |
| 0.011600 | 0.011784 | 0.011784 | 0.011733 | 0.011683 | 0.011868 | 0.011767 |
| 0.011834 | 0.011836 | 0.011834 | 0.011933 | 0.011866 | 0.012236 | 0.011968 |
| 0.011799 | 0.011867 | 0.011799 | 0.011833 | 0.011698 | 0.011665 | 0.011732 |
| 0.011799 | 0.011799 | 0.011765 | 0.011732 | 0.011765 | 0.011732 | 0.011833 |
| 0.011799 | 0.011900 | 0.011833 | 0.011732 | 0.011836 | 0.011934 | 0.011939 |
| 0.011934 | 0.011833 | 0.011732 | 0.011667 | 0.011799 | 0.011732 | 0.011665 |
| 0.011672 | 0.011934 | 0.011732 | 0.011934 | 0.011698 | 0.011799 | 0.011766 |
| 0.011867 | 0.011765 | 0.011799 | 0.011766 | 0.011799 | 0.011665 | 0.011799 |
| 0.011833 | 0.011766 | 0.011833 | 0.011765 | 0.011799 | 0.011833 | 0.012068 |
| 0.011564 | 0.011497 | 0.011564 | 0.011937 | 0.011362 | 0.011799 | 0.011766 |
| 0.011736 | 0.012112 | 0.011792 | 0.011712 | 0.011569 | 0.011674 | 0.011887 |
| 0.011569 | 0.011707 | 0.011967 | 0.012169 | 0.011846 | 0.012034 | 0.012001 |
| 0.011933 | 0.012101 | 0.011984 | 0.011843 | 0.011815 | 0.011833 | 0.011906 |
| 0.012001 | 0.011904 | 0.012041 | 0.012110 | 0.012034 | 0.012102 | 0.012213 |
| 0.011940 | 0.012113 | 0.011975 | 0.011974 | 0.012238 | 0.011698 | 0.011903 |
| 0.011866 | 0.011799 | 0.011698 | 0.011698 | 0.011765 | 0.011765 | 0.011832 |
| 0.011765 | 0.011833 | 0.011732 | 0.011765 | 0.011765 | 0.011765 | 0.011832 |
| 0.011765 | 0.011597 | 0.011497 | 0.011530 | 0.011664 | 0.011765 | 0.011799 |
| 0.011799 | 0.011698 | 0.011833 | 0.011799 | 0.011732 | 0.011732 | 0.011732 |
| 0.011664 | 0.011832 | 0.011900 | 0.011698 | 0.011799 | 0.011967 | 0.011732 |
| 0.011732 | 0.011799 | 0.011765 | 0.011933 | 0.011732 | 0.011665 | 0.011732 |
| 0.011732 | 0.011765 | 0.011765 | 0.011698 | 0.011698 | 0.011866 | 0.011799 |
| 0.011698 | 0.011799 | 0.011665 | 0.011698 | 0.011833 | 0.011631 | 0.011732 |
| 0.011699 | 0.011832 | 0.011766 | 0.011665 | 0.011362 | 0.011665 | 0.011833 |

|          |          |          |          |          |          |          |
|----------|----------|----------|----------|----------|----------|----------|
| 0.011916 | 0.011732 | 0.011429 | 0.011866 | 0.011833 | 0.011765 | 0.011866 |
| 0.011732 | 0.012068 | 0.011664 | 0.011732 | 0.011664 | 0.011664 | 0.011664 |
| 0.011900 | 0.011766 | 0.011799 | 0.011866 | 0.011698 | 0.011497 | 0.011664 |
| 0.011732 | 0.011732 | 0.011698 | 0.011866 | 0.011765 | 0.011866 | 0.011933 |
| 0.011933 | 0.011900 | 0.011799 | 0.011900 | 0.011866 | 0.011732 | 0.011698 |
| 0.011732 | 0.011732 | 0.011799 | 0.011664 | 0.011698 | 0.011866 | 0.011732 |
| 0.011698 | 0.011765 | 0.011900 | 0.011866 | 0.011832 | 0.011765 | 0.011766 |
| 0.011832 | 0.011765 | 0.011866 | 0.011732 | 0.011866 | 0.011967 | 0.011597 |
| 0.011765 | 0.011497 | 0.011785 | 0.018239 | 0.011453 | 0.011794 | 0.011514 |
| 0.011475 | 0.011482 | 0.011899 | 0.011641 | 0.011610 | 0.011544 | 0.011911 |
| 0.011725 | 0.011549 | 0.011685 | 0.011772 | 0.011646 | 0.011752 | 0.011835 |
| 0.011389 | 0.011582 | 0.011468 | 0.011523 | 0.011900 | 0.011934 | 0.011906 |
| 0.011816 | 0.011900 | 0.011900 | 0.011799 | 0.011833 | 0.011833 | 0.011800 |
| 0.011833 | 0.011765 | 0.011799 | 0.011833 | 0.011799 | 0.011732 | 0.011765 |
| 0.011765 | 0.011833 | 0.011732 | 0.011833 | 0.011866 | 0.011900 | 0.011799 |
| 0.011765 | 0.011732 | 0.011463 | 0.011463 | 0.011866 | 0.011901 | 0.011934 |
| 0.011631 | 0.011698 | 0.011732 | 0.011833 | 0.011698 | 0.011934 | 0.011934 |
| 0.011967 | 0.011967 | 0.011900 | 0.012001 | 0.011497 | 0.012004 | 0.011833 |
| 0.011833 | 0.011900 | 0.011934 | 0.011766 | 0.011766 | 0.011799 | 0.011833 |
| 0.011901 | 0.011900 | 0.011934 | 0.011901 | 0.011801 | 0.012001 | 0.011967 |
| 0.011839 | 0.011732 | 0.011833 | 0.011934 | 0.011833 | 0.011900 | 0.012000 |
| 0.012169 | 0.011846 | 0.012034 | 0.012001 | 0.011933 | 0.012101 | 0.011732 |
| 0.011903 | 0.011800 | 0.011765 | 0.011765 | 0.011833 | 0.011732 | 0.011833 |
| 0.011866 | 0.011900 | 0.011799 | 0.011765 | 0.011732 | 0.011463 | 0.011463 |
| 0.011866 | 0.011901 | 0.011967 | 0.011900 | 0.012474 | 0.011954 | 0.011905 |
| 0.011939 | 0.011927 | 0.012045 | 0.011926 | 0.012041 | 0.011957 | 0.011888 |
| 0.012435 | 0.011822 | 0.011951 | 0.011856 | 0.012163 | 0.012013 | 0.012116 |
| 0.012455 | 0.011928 | 0.012075 | 0.012135 | 0.012001 | 0.011732 | 0.012041 |
| 0.011698 | 0.011866 | 0.012000 | 0.011967 | 0.011973 | 0.011698 | 0.011667 |
| 0.011799 | 0.011732 | 0.011765 | 0.011799 | 0.011698 | 0.011765 | 0.011664 |
| 0.011732 | 0.011765 | 0.011732 | 0.011698 | 0.011799 | 0.011732 | 0.011765 |
| 0.011765 | 0.011698 | 0.011765 | 0.011799 | 0.011698 | 0.011900 | 0.011933 |
| 0.011833 | 0.011833 | 0.011832 | 0.011833 | 0.011765 | 0.011496 | 0.011799 |
| 0.011582 | 0.011765 | 0.011732 | 0.011739 | 0.011799 | 0.011799 | 0.011866 |
| 0.011866 | 0.011799 | 0.011765 | 0.011799 | 0.011900 | 0.011900 | 0.011832 |
| 0.011832 | 0.011967 | 0.011530 | 0.011866 | 0.012068 | 0.012068 | 0.011933 |
| 0.011765 | 0.011832 | 0.011866 | 0.000000 | 0.011833 | 0.011799 | 0.011833 |
| 0.011866 | 0.011732 | 0.011732 | 0.012035 | 0.012034 | 0.012001 | 0.011799 |
| 0.011900 | 0.011967 | 0.011832 | 0.011900 | 0.011866 | 0.011732 | 0.011463 |
| 0.011832 | 0.011799 | 0.011732 | 0.011967 | 0.011799 | 0.011900 | 0.011732 |
| 0.011832 | 0.011603 | 0.011564 | 0.011670 | 0.011342 | 0.011842 | 0.011525 |
| 0.011610 | 0.011839 | 0.011693 | 0.011820 | 0.011695 | 0.011569 | 0.011592 |
| 0.011519 | 0.011455 | 0.011673 | 0.011457 | 0.011545 | 0.011596 | 0.011872 |
| 0.011927 | 0.011808 | 0.011836 | 0.011765 | 0.011836 | 0.011698 | 0.011766 |
| 0.011766 | 0.011834 | 0.011940 | 0.011738 | 0.012078 | 0.012086 | 0.011833 |
| 0.011799 | 0.011867 | 0.011799 | 0.011833 | 0.011698 | 0.011665 | 0.011732 |
| 0.011799 | 0.011799 | 0.011765 | 0.011732 | 0.011765 | 0.011732 | 0.011833 |
| 0.011759 | 0.011795 | 0.011780 | 0.011814 | 0.011950 | 0.011915 | 0.011914 |
| 0.011912 | 0.011868 | 0.011651 | 0.011600 | 0.011772 | 0.011942 | 0.011943 |
| 0.011767 | 0.011806 | 0.012071 | 0.012041 | 0.011969 | 0.012003 | 0.011933 |
| 0.011866 | 0.011933 | 0.011933 | 0.011832 | 0.011732 | 0.012001 | 0.012068 |
| 0.012102 | 0.011523 | 0.011743 | 0.011892 | 0.011765 | 0.011967 | 0.011933 |
| 0.011969 | 0.012000 | 0.012001 | 0.012001 | 0.012083 | 0.012135 | 0.011789 |
| 0.011669 | 0.011684 | 0.011775 | 0.011740 | 0.011778 | 0.011695 | 0.011400 |
| 0.011815 | 0.011499 | 0.011680 | 0.011810 | 0.011800 | 0.011847 | 0.011766 |
| 0.011732 | 0.011665 | 0.011799 | 0.011766 | 0.011699 | 0.011665 | 0.011598 |
| 0.011698 | 0.011766 | 0.011765 | 0.011765 | 0.011799 | 0.011799 | 0.011803 |
| 0.011872 | 0.011799 | 0.011799 | 0.011836 | 0.011698 | 0.011766 | 0.011766 |
| 0.011834 | 0.011940 | 0.011738 | 0.012078 | 0.012086 | 0.011833 | 0.012001 |
| 0.011933 | 0.011933 | 0.011771 | 0.011931 | 0.011895 | 0.011912 | 0.011796 |

|          |          |          |          |          |          |          |
|----------|----------|----------|----------|----------|----------|----------|
| 0.011956 | 0.012200 | 0.011907 | 0.011842 | 0.011732 | 0.011934 | 0.011799 |
| 0.011900 | 0.011833 | 0.011732 | 0.011836 | 0.011934 | 0.011939 | 0.011833 |
| 0.011732 | 0.011667 | 0.011799 | 0.011732 | 0.011665 | 0.011672 | 0.011934 |
| 0.011833 | 0.011765 | 0.011799 | 0.011833 | 0.011799 | 0.011732 | 0.011665 |
| 0.011799 | 0.011833 | 0.011832 | 0.011765 | 0.011832 | 0.012068 | 0.011664 |
| 0.011765 | 0.011496 | 0.011765 | 0.011799 | 0.011765 | 0.011530 | 0.011660 |
| 0.011791 | 0.011443 | 0.011411 | 0.011503 | 0.011630 | 0.011635 | 0.011478 |
| 0.011375 | 0.011665 | 0.011765 | 0.011876 | 0.011734 | 0.011873 | 0.012002 |
| 0.011902 | 0.011940 | 0.011900 | 0.012120 | 0.011866 | 0.012742 | 0.011903 |
| 0.012642 | 0.012410 | 0.012544 | 0.012816 | 0.011799 | 0.011766 | 0.011867 |
| 0.012508 | 0.012242 | 0.011833 | 0.011732 | 0.011800 | 0.011800 | 0.011771 |
| 0.011665 | 0.011671 | 0.011732 | 0.011699 | 0.012070 | 0.012136 | 0.012137 |
| 0.012037 | 0.012137 | 0.012241 | 0.012008 | 0.012509 | 0.012517 | 0.012576 |
| 0.012577 | 0.012611 | 0.012563 | 0.012577 | 0.012579 | 0.011866 | 0.012103 |
| 0.012171 | 0.012674 | 0.012180 | 0.012136 | 0.012609 | 0.011672 | 0.011565 |
| 0.011463 | 0.011530 | 0.012069 | 0.012089 | 0.012187 | 0.011866 | 0.011600 |
| S578     | 0.011699 | 0.011699 | 0.012035 | 0.011799 | 0.011799 | 0.011867 |
| 0.011672 | 0.011638 | 0.011867 | 0.011295 | 0.011362 | 0.011330 | 0.011295 |
| 0.011329 | 0.011497 | 0.011295 | 0.011329 | 0.011396 | 0.011362 | 0.011329 |
| 0.011295 | 0.011329 | 0.011430 | 0.011296 | 0.011329 | 0.011329 | 0.011672 |
| 0.011564 | 0.011329 | 0.011228 | 0.011463 | 0.011396 | 0.011363 | 0.011396 |
| 0.011362 | 0.011463 | 0.011362 | 0.011362 | 0.011396 | 0.011362 | 0.011530 |
| 0.011295 | 0.011362 | 0.011396 | 0.011329 | 0.011430 | 0.011463 | 0.011396 |
| 0.011362 | 0.011530 | 0.011430 | 0.011698 | 0.011362 | 0.011631 | 0.011362 |
| 0.011329 | 0.011430 | 0.011497 | 0.011631 | 0.011732 | 0.011430 | 0.011530 |
| 0.011396 | 0.011463 | 0.011362 | 0.011598 | 0.011833 | 0.011362 | 0.011430 |
| 0.011329 | 0.011430 | 0.011396 | 0.011463 | 0.011396 | 0.011396 | 0.011396 |
| 0.011295 | 0.011329 | 0.011295 | 0.011396 | 0.011362 | 0.011397 | 0.011463 |
| 0.011396 | 0.011362 | 0.011430 | 0.011329 | 0.011463 | 0.011295 | 0.011362 |
| 0.011530 | 0.011195 | 0.011698 | 0.011530 | 0.011362 | 0.011598 | 0.011362 |
| 0.011543 | 0.011771 | 0.011589 | 0.011295 | 0.011284 | 0.011392 | 0.011494 |
| 0.012122 | 0.011569 | 0.011266 | 0.011598 | 0.011598 | 0.011396 | 0.011497 |
| 0.011430 | 0.011396 | 0.011463 | 0.011362 | 0.011463 | 0.011396 | 0.011396 |
| 0.011362 | 0.011463 | 0.011665 | 0.011530 | 0.011430 | 0.011396 | 0.011329 |
| 0.011295 | 0.011295 | 0.011363 | 0.011329 | 0.011531 | 0.011497 | 0.011430 |
| 0.011531 | 0.011598 | 0.011329 | 0.011329 | 0.011363 | 0.011363 | 0.011364 |
| 0.011432 | 0.011363 | 0.011363 | 0.011240 | 0.011313 | 0.011271 | 0.011363 |
| 0.011365 | 0.011301 | 0.011356 | 0.011336 | 0.011264 | 0.011300 | 0.011331 |
| 0.011601 | 0.011371 | 0.011405 | 0.011296 | 0.011302 | 0.011430 | 0.011397 |
| 0.011464 | 0.011397 | 0.011397 | 0.011497 | 0.011430 | 0.011799 | 0.011598 |
| 0.011631 | 0.011497 | 0.011362 | 0.011463 | 0.011262 | 0.011497 | 0.011295 |
| 0.011362 | 0.011362 | 0.011329 | 0.011295 | 0.011329 | 0.011295 | 0.011396 |
| 0.011363 | 0.011463 | 0.011396 | 0.011295 | 0.011397 | 0.011497 | 0.011500 |
| 0.011497 | 0.011396 | 0.011295 | 0.011229 | 0.011363 | 0.011295 | 0.011228 |
| 0.011332 | 0.011497 | 0.011295 | 0.011497 | 0.011262 | 0.011363 | 0.011329 |
| 0.011430 | 0.011329 | 0.011363 | 0.011329 | 0.011363 | 0.011228 | 0.011363 |
| 0.011396 | 0.011329 | 0.011396 | 0.011329 | 0.011363 | 0.011396 | 0.011632 |
| 0.011732 | 0.011665 | 0.011732 | 0.011499 | 0.011732 | 0.011363 | 0.011329 |
| 0.011364 | 0.011627 | 0.011472 | 0.011266 | 0.011739 | 0.011231 | 0.011375 |
| 0.011740 | 0.011639 | 0.011530 | 0.011732 | 0.011436 | 0.011598 | 0.011564 |
| 0.011497 | 0.011665 | 0.011522 | 0.011349 | 0.011354 | 0.011396 | 0.011466 |
| 0.011497 | 0.011465 | 0.011602 | 0.011670 | 0.011598 | 0.011665 | 0.011738 |
| 0.011500 | 0.011672 | 0.011602 | 0.011534 | 0.011801 | 0.011262 | 0.011465 |
| 0.011430 | 0.011362 | 0.011262 | 0.011262 | 0.011329 | 0.011329 | 0.011396 |
| 0.011329 | 0.011396 | 0.011295 | 0.011396 | 0.011329 | 0.011329 | 0.011396 |
| 0.011329 | 0.011766 | 0.011665 | 0.011698 | 0.011228 | 0.011329 | 0.011362 |
| 0.011362 | 0.011329 | 0.011396 | 0.011430 | 0.011295 | 0.011295 | 0.011295 |
| 0.011833 | 0.011463 | 0.011463 | 0.011262 | 0.011362 | 0.011530 | 0.011295 |
| 0.011295 | 0.011362 | 0.011329 | 0.011497 | 0.011295 | 0.011430 | 0.011564 |
| 0.011497 | 0.011329 | 0.011329 | 0.011262 | 0.011262 | 0.011430 | 0.011362 |

|          |          |          |          |          |          |          |
|----------|----------|----------|----------|----------|----------|----------|
| 0.011262 | 0.011362 | 0.011228 | 0.011262 | 0.011396 | 0.011531 | 0.011295 |
| 0.011262 | 0.011396 | 0.011329 | 0.011228 | 0.011564 | 0.011228 | 0.011396 |
| 0.011471 | 0.011295 | 0.011598 | 0.011430 | 0.011463 | 0.011329 | 0.011430 |
| 0.011295 | 0.011631 | 0.011228 | 0.011497 | 0.011295 | 0.011295 | 0.011228 |
| 0.011463 | 0.011665 | 0.011362 | 0.011430 | 0.011262 | 0.011665 | 0.011295 |
| 0.011295 | 0.011295 | 0.011329 | 0.011430 | 0.011329 | 0.011430 | 0.011497 |
| 0.011497 | 0.011463 | 0.011362 | 0.011463 | 0.011430 | 0.011295 | 0.011262 |
| 0.011295 | 0.011295 | 0.011362 | 0.011295 | 0.011262 | 0.011430 | 0.011295 |
| 0.011329 | 0.011329 | 0.011463 | 0.011497 | 0.011396 | 0.011329 | 0.011329 |
| 0.011396 | 0.011329 | 0.011430 | 0.011295 | 0.011430 | 0.011530 | 0.011799 |
| 0.011329 | 0.011732 | 0.011336 | 0.017830 | 0.011257 | 0.011427 | 0.011688 |
| 0.011649 | 0.011694 | 0.011375 | 0.011351 | 0.011774 | 0.011717 | 0.011425 |
| 0.011535 | 0.011610 | 0.011255 | 0.011312 | 0.011256 | 0.011356 | 0.011319 |
| 0.011577 | 0.011507 | 0.011468 | 0.011325 | 0.011463 | 0.011497 | 0.011500 |
| 0.011370 | 0.011463 | 0.011463 | 0.011430 | 0.011396 | 0.011396 | 0.011363 |
| 0.011396 | 0.011329 | 0.011363 | 0.011396 | 0.011363 | 0.011295 | 0.011329 |
| 0.011329 | 0.011396 | 0.011295 | 0.011396 | 0.011430 | 0.011463 | 0.011363 |
| 0.011396 | 0.011363 | 0.011699 | 0.011699 | 0.011430 | 0.011464 | 0.011497 |
| 0.011262 | 0.011262 | 0.011295 | 0.011396 | 0.011262 | 0.011497 | 0.011497 |
| 0.011531 | 0.011530 | 0.011463 | 0.011564 | 0.011732 | 0.011566 | 0.011396 |
| 0.011396 | 0.011463 | 0.011497 | 0.011329 | 0.011396 | 0.011363 | 0.011396 |
| 0.011464 | 0.011464 | 0.011497 | 0.011464 | 0.011363 | 0.011564 | 0.011531 |
| 0.011399 | 0.011295 | 0.011396 | 0.011497 | 0.011396 | 0.011531 | 0.011564 |
| 0.011732 | 0.011436 | 0.011598 | 0.011564 | 0.011497 | 0.011665 | 0.011296 |
| 0.011431 | 0.011363 | 0.011329 | 0.011329 | 0.011396 | 0.011295 | 0.011396 |
| 0.011430 | 0.011463 | 0.011363 | 0.011396 | 0.011363 | 0.011699 | 0.011699 |
| 0.011430 | 0.011464 | 0.011530 | 0.011463 | 0.012104 | 0.011525 | 0.011447 |
| 0.011517 | 0.011477 | 0.011588 | 0.011476 | 0.011586 | 0.011509 | 0.011474 |
| 0.012057 | 0.011372 | 0.011506 | 0.011441 | 0.011715 | 0.011503 | 0.011673 |
| 0.012081 | 0.011551 | 0.011635 | 0.011698 | 0.011564 | 0.011564 | 0.011601 |
| 0.011262 | 0.011430 | 0.011564 | 0.011530 | 0.011534 | 0.011530 | 0.011498 |
| 0.011362 | 0.011295 | 0.011329 | 0.011362 | 0.011262 | 0.011329 | 0.011228 |
| 0.011362 | 0.011396 | 0.011295 | 0.011262 | 0.011362 | 0.011295 | 0.011329 |
| 0.011329 | 0.011262 | 0.011329 | 0.011362 | 0.011262 | 0.011463 | 0.011497 |
| 0.011396 | 0.011463 | 0.011396 | 0.011396 | 0.011329 | 0.011732 | 0.011362 |
| 0.011408 | 0.011329 | 0.011564 | 0.011569 | 0.011430 | 0.011430 | 0.011430 |
| 0.011430 | 0.011362 | 0.011329 | 0.011362 | 0.011463 | 0.011463 | 0.011396 |
| 0.011396 | 0.011497 | 0.011698 | 0.011430 | 0.011631 | 0.011631 | 0.011497 |
| 0.011329 | 0.011396 | 0.011430 | 0.011833 | 0.000000 | 0.011430 | 0.011396 |
| 0.011430 | 0.011362 | 0.011362 | 0.011665 | 0.011598 | 0.011631 | 0.011362 |
| 0.011463 | 0.011530 | 0.011396 | 0.011463 | 0.011430 | 0.011295 | 0.011631 |
| 0.011396 | 0.011362 | 0.011362 | 0.011530 | 0.011362 | 0.011463 | 0.011698 |
| 0.011396 | 0.011774 | 0.011766 | 0.011589 | 0.011286 | 0.011468 | 0.011319 |
| 0.011280 | 0.011801 | 0.011306 | 0.011507 | 0.011402 | 0.011468 | 0.011432 |
| 0.011520 | 0.011192 | 0.011395 | 0.011193 | 0.011330 | 0.011396 | 0.011466 |
| 0.011475 | 0.011375 | 0.011448 | 0.011377 | 0.011397 | 0.011531 | 0.011598 |
| 0.011598 | 0.011464 | 0.011568 | 0.011569 | 0.011705 | 0.011732 | 0.011396 |
| 0.011631 | 0.011497 | 0.011362 | 0.011463 | 0.011262 | 0.011497 | 0.011295 |
| 0.011362 | 0.011362 | 0.011329 | 0.011295 | 0.011329 | 0.011295 | 0.011396 |
| 0.011375 | 0.011375 | 0.011369 | 0.011403 | 0.011540 | 0.011505 | 0.011504 |
| 0.011503 | 0.011430 | 0.011245 | 0.011240 | 0.011365 | 0.011535 | 0.011536 |
| 0.011329 | 0.011399 | 0.011633 | 0.011601 | 0.011531 | 0.011565 | 0.011497 |
| 0.011430 | 0.011497 | 0.011497 | 0.011396 | 0.011968 | 0.011564 | 0.011631 |
| 0.011665 | 0.011701 | 0.011367 | 0.011442 | 0.011329 | 0.011531 | 0.011497 |
| 0.011531 | 0.011564 | 0.011564 | 0.011564 | 0.011690 | 0.011698 | 0.011338 |
| 0.011229 | 0.011233 | 0.011333 | 0.011298 | 0.011402 | 0.011210 | 0.011570 |
| 0.011369 | 0.011455 | 0.011203 | 0.011398 | 0.011363 | 0.011437 | 0.011329 |
| 0.011295 | 0.011295 | 0.011363 | 0.011329 | 0.011531 | 0.011497 | 0.011430 |
| 0.011531 | 0.011598 | 0.011329 | 0.011329 | 0.011363 | 0.011363 | 0.011364 |
| 0.011432 | 0.011363 | 0.011363 | 0.011397 | 0.011531 | 0.011598 | 0.011598 |

|          |          |          |          |          |          |          |
|----------|----------|----------|----------|----------|----------|----------|
| 0.011464 | 0.011568 | 0.011569 | 0.011705 | 0.011732 | 0.011396 | 0.011564 |
| 0.011497 | 0.011497 | 0.011331 | 0.011513 | 0.011443 | 0.011469 | 0.011341 |
| 0.011508 | 0.011653 | 0.011526 | 0.011400 | 0.011295 | 0.011497 | 0.011363 |
| 0.011463 | 0.011396 | 0.011295 | 0.011397 | 0.011497 | 0.011500 | 0.011396 |
| 0.011295 | 0.011229 | 0.011363 | 0.011295 | 0.011228 | 0.011332 | 0.011497 |
| 0.011396 | 0.011329 | 0.011363 | 0.011396 | 0.011363 | 0.011295 | 0.011497 |
| 0.011362 | 0.011396 | 0.011396 | 0.011329 | 0.011396 | 0.011631 | 0.011295 |
| 0.011329 | 0.011732 | 0.011329 | 0.011362 | 0.011329 | 0.011698 | 0.011275 |
| 0.011735 | 0.011315 | 0.011361 | 0.011544 | 0.011631 | 0.011527 | 0.011269 |
| 0.011270 | 0.011497 | 0.011598 | 0.011706 | 0.011566 | 0.011704 | 0.011834 |
| 0.011734 | 0.011771 | 0.011732 | 0.011984 | 0.011698 | 0.012574 | 0.011734 |
| 0.012474 | 0.012242 | 0.012376 | 0.012647 | 0.011698 | 0.011396 | 0.011699 |
| 0.012138 | 0.012073 | 0.011665 | 0.011564 | 0.011632 | 0.011632 | 0.011602 |
| 0.011497 | 0.011501 | 0.011564 | 0.011531 | 0.011901 | 0.011968 | 0.011969 |
| 0.011868 | 0.011969 | 0.012073 | 0.011839 | 0.012138 | 0.012145 | 0.012206 |
| 0.012206 | 0.012240 | 0.012187 | 0.012206 | 0.012208 | 0.011430 | 0.011733 |
| 0.011801 | 0.012304 | 0.011806 | 0.012035 | 0.012509 | 0.011570 | 0.011464 |
| 0.011430 | 0.011430 | 0.011901 | 0.011966 | 0.012046 | 0.011766 | 0.011431 |
| S579     | 0.011732 | 0.011732 | 0.012068 | 0.011832 | 0.011832 | 0.011900 |
| 0.011671 | 0.011603 | 0.011900 | 0.011329 | 0.011396 | 0.011363 | 0.011329 |
| 0.011362 | 0.011530 | 0.011329 | 0.011362 | 0.011429 | 0.011396 | 0.011362 |
| 0.011329 | 0.011362 | 0.011463 | 0.011329 | 0.011295 | 0.011362 | 0.011637 |
| 0.011597 | 0.011362 | 0.011262 | 0.011497 | 0.011362 | 0.011396 | 0.011362 |
| 0.011396 | 0.011429 | 0.011396 | 0.011396 | 0.011429 | 0.011396 | 0.011564 |
| 0.011329 | 0.011396 | 0.011430 | 0.011362 | 0.011463 | 0.011497 | 0.011430 |
| 0.011396 | 0.011564 | 0.011463 | 0.011664 | 0.011396 | 0.011597 | 0.011396 |
| 0.011362 | 0.011463 | 0.011530 | 0.011597 | 0.011698 | 0.011463 | 0.011564 |
| 0.011362 | 0.011430 | 0.011396 | 0.011564 | 0.011799 | 0.011396 | 0.011463 |
| 0.011362 | 0.011463 | 0.011430 | 0.011497 | 0.011429 | 0.011429 | 0.011429 |
| 0.011329 | 0.011362 | 0.011329 | 0.011430 | 0.011396 | 0.011430 | 0.011497 |
| 0.011430 | 0.011396 | 0.011396 | 0.011362 | 0.011429 | 0.011262 | 0.011396 |
| 0.011564 | 0.011497 | 0.011664 | 0.011564 | 0.011396 | 0.011564 | 0.011396 |
| 0.011542 | 0.011695 | 0.011589 | 0.011295 | 0.011322 | 0.011428 | 0.011493 |
| 0.012158 | 0.011569 | 0.011307 | 0.011631 | 0.011631 | 0.011429 | 0.011463 |
| 0.011463 | 0.011429 | 0.011497 | 0.011396 | 0.011497 | 0.011362 | 0.011429 |
| 0.011396 | 0.011496 | 0.011698 | 0.011564 | 0.011463 | 0.011430 | 0.011295 |
| 0.011329 | 0.011329 | 0.011329 | 0.011362 | 0.011564 | 0.011530 | 0.011463 |
| 0.011564 | 0.011631 | 0.011362 | 0.011362 | 0.011396 | 0.011396 | 0.011398 |
| 0.011466 | 0.011396 | 0.011396 | 0.011240 | 0.011350 | 0.011306 | 0.011396 |
| 0.011399 | 0.011335 | 0.011392 | 0.011371 | 0.011298 | 0.011334 | 0.011364 |
| 0.011636 | 0.011405 | 0.011370 | 0.011329 | 0.011337 | 0.011464 | 0.011430 |
| 0.011498 | 0.011431 | 0.011430 | 0.011530 | 0.011463 | 0.011765 | 0.011631 |
| 0.011664 | 0.011531 | 0.011396 | 0.011497 | 0.011295 | 0.011530 | 0.011329 |
| 0.011396 | 0.011396 | 0.011362 | 0.011329 | 0.011362 | 0.011329 | 0.011430 |
| 0.011329 | 0.011430 | 0.011430 | 0.011329 | 0.011431 | 0.011531 | 0.011533 |
| 0.011463 | 0.011430 | 0.011329 | 0.011263 | 0.011396 | 0.011329 | 0.011262 |
| 0.011366 | 0.011463 | 0.011262 | 0.011463 | 0.011295 | 0.011396 | 0.011363 |
| 0.011396 | 0.011362 | 0.011329 | 0.011363 | 0.011396 | 0.011262 | 0.011329 |
| 0.011363 | 0.011362 | 0.011430 | 0.011362 | 0.011396 | 0.011430 | 0.011665 |
| 0.011698 | 0.011631 | 0.011698 | 0.011532 | 0.011699 | 0.011396 | 0.011362 |
| 0.011398 | 0.011667 | 0.011518 | 0.011300 | 0.011705 | 0.011265 | 0.011414 |
| 0.011705 | 0.011672 | 0.011564 | 0.011766 | 0.011470 | 0.011631 | 0.011530 |
| 0.011530 | 0.011698 | 0.011558 | 0.011431 | 0.011479 | 0.011430 | 0.011500 |
| 0.011597 | 0.011499 | 0.011635 | 0.011635 | 0.011631 | 0.011698 | 0.011806 |
| 0.011534 | 0.011637 | 0.011568 | 0.011568 | 0.011834 | 0.011295 | 0.011498 |
| 0.011396 | 0.011396 | 0.011295 | 0.011295 | 0.011295 | 0.011362 | 0.011429 |
| 0.011295 | 0.011362 | 0.011262 | 0.011430 | 0.011295 | 0.011362 | 0.011429 |
| 0.011362 | 0.011732 | 0.011631 | 0.011664 | 0.011262 | 0.011362 | 0.011396 |
| 0.011396 | 0.011362 | 0.011430 | 0.011463 | 0.011329 | 0.011329 | 0.011329 |
| 0.011799 | 0.011497 | 0.011497 | 0.011295 | 0.011396 | 0.011497 | 0.011329 |



|          |          |          |          |          |          |          |
|----------|----------|----------|----------|----------|----------|----------|
| 0.011329 | 0.011396 | 0.011362 | 0.011463 | 0.011329 | 0.011463 | 0.011530 |
| 0.011530 | 0.011362 | 0.011362 | 0.011295 | 0.011295 | 0.011463 | 0.011396 |
| 0.011295 | 0.011396 | 0.011262 | 0.011295 | 0.011430 | 0.011564 | 0.011329 |
| 0.011296 | 0.011429 | 0.011363 | 0.011262 | 0.011530 | 0.011262 | 0.011430 |
| 0.011437 | 0.011329 | 0.011564 | 0.011463 | 0.011497 | 0.011362 | 0.011463 |
| 0.011329 | 0.011597 | 0.011262 | 0.011530 | 0.011329 | 0.011329 | 0.011262 |
| 0.011429 | 0.011698 | 0.011396 | 0.011463 | 0.011295 | 0.011631 | 0.011329 |
| 0.011329 | 0.011329 | 0.011362 | 0.011396 | 0.011362 | 0.011463 | 0.011530 |
| 0.011530 | 0.011497 | 0.011396 | 0.011497 | 0.011396 | 0.011329 | 0.011295 |
| 0.011329 | 0.011329 | 0.011396 | 0.011329 | 0.011228 | 0.011463 | 0.011329 |
| 0.011362 | 0.011362 | 0.011497 | 0.011530 | 0.011429 | 0.011295 | 0.011362 |
| 0.011430 | 0.011362 | 0.011463 | 0.011329 | 0.011463 | 0.011564 | 0.011799 |
| 0.011362 | 0.011698 | 0.011371 | 0.017899 | 0.011322 | 0.011550 | 0.011653 |
| 0.011614 | 0.011658 | 0.011427 | 0.011350 | 0.011775 | 0.011682 | 0.011425 |
| 0.011582 | 0.011671 | 0.011255 | 0.011312 | 0.011334 | 0.011406 | 0.011361 |
| 0.011576 | 0.011544 | 0.011505 | 0.011391 | 0.011497 | 0.011530 | 0.011534 |
| 0.011335 | 0.011497 | 0.011497 | 0.011463 | 0.011430 | 0.011430 | 0.011396 |
| 0.011430 | 0.011362 | 0.011396 | 0.011430 | 0.011396 | 0.011329 | 0.011362 |
| 0.011362 | 0.011430 | 0.011329 | 0.011430 | 0.011463 | 0.011497 | 0.011396 |
| 0.011429 | 0.011396 | 0.011665 | 0.011665 | 0.011463 | 0.011498 | 0.011531 |
| 0.011295 | 0.011295 | 0.011329 | 0.011363 | 0.011295 | 0.011530 | 0.011530 |
| 0.011564 | 0.011564 | 0.011497 | 0.011597 | 0.011698 | 0.011599 | 0.011362 |
| 0.011430 | 0.011497 | 0.011463 | 0.011363 | 0.011430 | 0.011396 | 0.011430 |
| 0.011497 | 0.011497 | 0.011530 | 0.011430 | 0.011330 | 0.011597 | 0.011497 |
| 0.011433 | 0.011329 | 0.011430 | 0.011531 | 0.011430 | 0.011564 | 0.011597 |
| 0.011766 | 0.011470 | 0.011631 | 0.011530 | 0.011530 | 0.011698 | 0.011329 |
| 0.011498 | 0.011396 | 0.011362 | 0.011362 | 0.011430 | 0.011329 | 0.011430 |
| 0.011463 | 0.011497 | 0.011396 | 0.011429 | 0.011396 | 0.011665 | 0.011665 |
| 0.011463 | 0.011498 | 0.011564 | 0.011497 | 0.012137 | 0.011560 | 0.011482 |
| 0.011552 | 0.011511 | 0.011622 | 0.011510 | 0.011620 | 0.011543 | 0.011509 |
| 0.012091 | 0.011406 | 0.011540 | 0.011475 | 0.011749 | 0.011604 | 0.011639 |
| 0.012114 | 0.011588 | 0.011669 | 0.011732 | 0.011597 | 0.011597 | 0.011635 |
| 0.011295 | 0.011396 | 0.011597 | 0.011564 | 0.011567 | 0.011564 | 0.011532 |
| 0.011396 | 0.011262 | 0.011295 | 0.011396 | 0.011228 | 0.011362 | 0.011262 |
| 0.011396 | 0.011429 | 0.011329 | 0.011295 | 0.011396 | 0.011329 | 0.011362 |
| 0.011362 | 0.011295 | 0.011362 | 0.011396 | 0.011295 | 0.011429 | 0.011530 |
| 0.011430 | 0.011497 | 0.011430 | 0.011430 | 0.011362 | 0.011698 | 0.011396 |
| 0.011443 | 0.011362 | 0.011598 | 0.011603 | 0.000000 | 0.011396 | 0.011463 |
| 0.011463 | 0.011329 | 0.011362 | 0.011329 | 0.011497 | 0.011497 | 0.011430 |
| 0.011429 | 0.011564 | 0.011664 | 0.011463 | 0.011665 | 0.011665 | 0.011530 |
| 0.011362 | 0.011429 | 0.011463 | 0.011799 | 0.011430 | 0.000000 | 0.011430 |
| 0.011463 | 0.011396 | 0.011396 | 0.011698 | 0.011564 | 0.011665 | 0.011396 |
| 0.011497 | 0.011564 | 0.011429 | 0.011497 | 0.011463 | 0.011329 | 0.011597 |
| 0.011429 | 0.011396 | 0.011396 | 0.011564 | 0.011396 | 0.011497 | 0.011665 |
| 0.011429 | 0.011739 | 0.011732 | 0.011589 | 0.011342 | 0.011502 | 0.011370 |
| 0.011335 | 0.011800 | 0.011341 | 0.011552 | 0.011353 | 0.011468 | 0.011485 |
| 0.011570 | 0.011258 | 0.011450 | 0.011325 | 0.011330 | 0.011529 | 0.011425 |
| 0.011437 | 0.011296 | 0.011483 | 0.011413 | 0.011431 | 0.011564 | 0.011631 |
| 0.011631 | 0.011497 | 0.011601 | 0.011603 | 0.011738 | 0.011767 | 0.011430 |
| 0.011664 | 0.011531 | 0.011396 | 0.011497 | 0.011295 | 0.011530 | 0.011329 |
| 0.011396 | 0.011396 | 0.011362 | 0.011329 | 0.011362 | 0.011329 | 0.011430 |
| 0.011410 | 0.011410 | 0.011403 | 0.011437 | 0.011574 | 0.011470 | 0.011538 |
| 0.011537 | 0.011464 | 0.011282 | 0.011240 | 0.011399 | 0.011569 | 0.011569 |
| 0.011363 | 0.011433 | 0.011666 | 0.011635 | 0.011565 | 0.011599 | 0.011530 |
| 0.011463 | 0.011530 | 0.011530 | 0.011429 | 0.011934 | 0.011597 | 0.011665 |
| 0.011699 | 0.011665 | 0.011401 | 0.011476 | 0.011362 | 0.011564 | 0.011530 |
| 0.011565 | 0.011597 | 0.011597 | 0.011597 | 0.011729 | 0.011732 | 0.011373 |
| 0.011263 | 0.011268 | 0.011367 | 0.011332 | 0.011436 | 0.011284 | 0.011536 |
| 0.011403 | 0.011543 | 0.011299 | 0.011435 | 0.011397 | 0.011471 | 0.011295 |
| 0.011329 | 0.011329 | 0.011329 | 0.011362 | 0.011564 | 0.011530 | 0.011463 |

|          |          |          |          |          |          |          |
|----------|----------|----------|----------|----------|----------|----------|
| 0.011564 | 0.011631 | 0.011362 | 0.011362 | 0.011396 | 0.011396 | 0.011398 |
| 0.011466 | 0.011396 | 0.011396 | 0.011431 | 0.011564 | 0.011631 | 0.011631 |
| 0.011497 | 0.011601 | 0.011603 | 0.011738 | 0.011767 | 0.011430 | 0.011597 |
| 0.011530 | 0.011530 | 0.011365 | 0.011548 | 0.011477 | 0.011503 | 0.011376 |
| 0.011474 | 0.011698 | 0.011526 | 0.011434 | 0.011262 | 0.011463 | 0.011329 |
| 0.011430 | 0.011430 | 0.011329 | 0.011431 | 0.011531 | 0.011533 | 0.011430 |
| 0.011329 | 0.011263 | 0.011396 | 0.011329 | 0.011262 | 0.011366 | 0.011463 |
| 0.011430 | 0.011362 | 0.011396 | 0.011430 | 0.011396 | 0.011329 | 0.011530 |
| 0.011396 | 0.011430 | 0.011429 | 0.011362 | 0.011430 | 0.011665 | 0.011329 |
| 0.011362 | 0.011698 | 0.011362 | 0.011329 | 0.011362 | 0.011664 | 0.011317 |
| 0.011791 | 0.011315 | 0.011361 | 0.011584 | 0.011630 | 0.011563 | 0.011269 |
| 0.011323 | 0.011530 | 0.011631 | 0.011739 | 0.011599 | 0.011737 | 0.011868 |
| 0.011767 | 0.011804 | 0.011765 | 0.012017 | 0.011732 | 0.012607 | 0.011768 |
| 0.012507 | 0.012275 | 0.012409 | 0.012681 | 0.011732 | 0.011430 | 0.011732 |
| 0.012171 | 0.012106 | 0.011698 | 0.011598 | 0.011666 | 0.011666 | 0.011635 |
| 0.011530 | 0.011535 | 0.011597 | 0.011565 | 0.011935 | 0.012001 | 0.012002 |
| 0.011902 | 0.012002 | 0.012106 | 0.011872 | 0.012172 | 0.012178 | 0.012239 |
| 0.012240 | 0.012273 | 0.012221 | 0.012240 | 0.012241 | 0.011463 | 0.011766 |
| 0.011834 | 0.012337 | 0.011840 | 0.012068 | 0.012542 | 0.011604 | 0.011497 |
| 0.011463 | 0.011463 | 0.011934 | 0.012006 | 0.012081 | 0.011799 | 0.011465 |
| S580     | 0.011698 | 0.011698 | 0.012034 | 0.011799 | 0.011799 | 0.011866 |
| 0.011705 | 0.011637 | 0.011866 | 0.011295 | 0.011362 | 0.011329 | 0.011295 |
| 0.011329 | 0.011497 | 0.011295 | 0.011329 | 0.011396 | 0.011362 | 0.011329 |
| 0.011295 | 0.011329 | 0.011429 | 0.011295 | 0.011329 | 0.011329 | 0.011671 |
| 0.011564 | 0.011329 | 0.011228 | 0.011463 | 0.011396 | 0.011362 | 0.011396 |
| 0.011362 | 0.011463 | 0.011362 | 0.011362 | 0.011396 | 0.011362 | 0.011530 |
| 0.011295 | 0.011362 | 0.011396 | 0.011329 | 0.011429 | 0.011463 | 0.011396 |
| 0.011362 | 0.011530 | 0.011430 | 0.011698 | 0.011362 | 0.011631 | 0.011362 |
| 0.011329 | 0.011430 | 0.011497 | 0.011631 | 0.011732 | 0.011429 | 0.011530 |
| 0.011396 | 0.011463 | 0.011362 | 0.011597 | 0.011833 | 0.011362 | 0.011429 |
| 0.011329 | 0.011429 | 0.011396 | 0.011463 | 0.011396 | 0.011396 | 0.011396 |
| 0.011295 | 0.011329 | 0.011295 | 0.011396 | 0.011362 | 0.011397 | 0.011463 |
| 0.000000 | 0.011362 | 0.011429 | 0.011329 | 0.011463 | 0.011295 | 0.011362 |
| 0.011530 | 0.011463 | 0.011698 | 0.011530 | 0.011362 | 0.011597 | 0.011362 |
| 0.011542 | 0.011770 | 0.011588 | 0.011295 | 0.011284 | 0.011355 | 0.011493 |
| 0.012121 | 0.011518 | 0.011266 | 0.011597 | 0.011597 | 0.011396 | 0.011497 |
| 0.011429 | 0.011396 | 0.011463 | 0.011362 | 0.011463 | 0.011396 | 0.011396 |
| 0.011362 | 0.011463 | 0.011664 | 0.011530 | 0.011295 | 0.011396 | 0.011329 |
| 0.011295 | 0.011295 | 0.011362 | 0.011329 | 0.011530 | 0.011497 | 0.011430 |
| 0.011530 | 0.011597 | 0.011329 | 0.011329 | 0.011362 | 0.011362 | 0.011364 |
| 0.011432 | 0.011362 | 0.011362 | 0.011240 | 0.011313 | 0.011271 | 0.011363 |
| 0.011365 | 0.011301 | 0.011318 | 0.011336 | 0.011264 | 0.011300 | 0.011330 |
| 0.011600 | 0.011370 | 0.011405 | 0.011296 | 0.011302 | 0.011430 | 0.011397 |
| 0.011464 | 0.011397 | 0.011396 | 0.011496 | 0.011429 | 0.011799 | 0.011598 |
| 0.011631 | 0.011497 | 0.011362 | 0.011463 | 0.011262 | 0.011497 | 0.011295 |
| 0.011362 | 0.011362 | 0.011329 | 0.011295 | 0.011329 | 0.011295 | 0.011396 |
| 0.011362 | 0.011463 | 0.011396 | 0.011295 | 0.011397 | 0.011497 | 0.011500 |
| 0.011497 | 0.011396 | 0.011295 | 0.011229 | 0.011362 | 0.011295 | 0.011228 |
| 0.011298 | 0.011497 | 0.011295 | 0.011497 | 0.011262 | 0.011228 | 0.011329 |
| 0.011430 | 0.011329 | 0.011362 | 0.011329 | 0.011362 | 0.011228 | 0.011362 |
| 0.011396 | 0.011329 | 0.011396 | 0.011329 | 0.011362 | 0.011396 | 0.011631 |
| 0.011732 | 0.011664 | 0.011732 | 0.011498 | 0.011732 | 0.011362 | 0.011329 |
| 0.011364 | 0.011667 | 0.011472 | 0.011266 | 0.011739 | 0.011231 | 0.011375 |
| 0.011739 | 0.011638 | 0.011530 | 0.011732 | 0.011436 | 0.011597 | 0.011564 |
| 0.011497 | 0.011664 | 0.011522 | 0.011349 | 0.011354 | 0.011396 | 0.011466 |
| 0.011564 | 0.011465 | 0.011601 | 0.011669 | 0.011597 | 0.011665 | 0.011772 |
| 0.011500 | 0.011671 | 0.011602 | 0.011534 | 0.011800 | 0.011262 | 0.011465 |
| 0.011429 | 0.011362 | 0.011262 | 0.011262 | 0.011329 | 0.011329 | 0.011396 |
| 0.011329 | 0.011329 | 0.011295 | 0.011396 | 0.011329 | 0.011329 | 0.011396 |
| 0.011329 | 0.011765 | 0.011664 | 0.011698 | 0.011228 | 0.011329 | 0.011362 |

|          |          |          |          |          |          |          |
|----------|----------|----------|----------|----------|----------|----------|
| 0.011228 | 0.011329 | 0.011396 | 0.011429 | 0.011295 | 0.011295 | 0.011295 |
| 0.011832 | 0.011463 | 0.011463 | 0.011262 | 0.011362 | 0.011530 | 0.011295 |
| 0.011295 | 0.011362 | 0.011329 | 0.011497 | 0.011295 | 0.011429 | 0.011564 |
| 0.011497 | 0.011329 | 0.011329 | 0.011262 | 0.011262 | 0.011430 | 0.011362 |
| 0.011262 | 0.011362 | 0.011228 | 0.011262 | 0.011396 | 0.011530 | 0.011295 |
| 0.011262 | 0.011396 | 0.011329 | 0.011228 | 0.011564 | 0.011228 | 0.011396 |
| 0.011471 | 0.011295 | 0.011597 | 0.011430 | 0.011463 | 0.011262 | 0.011429 |
| 0.011295 | 0.011631 | 0.011228 | 0.011497 | 0.011295 | 0.011295 | 0.011228 |
| 0.011463 | 0.011665 | 0.011362 | 0.011429 | 0.011262 | 0.011664 | 0.011295 |
| 0.011295 | 0.011295 | 0.011329 | 0.011429 | 0.011329 | 0.011429 | 0.011497 |
| 0.011497 | 0.011463 | 0.011362 | 0.011463 | 0.011429 | 0.011295 | 0.011262 |
| 0.011295 | 0.011295 | 0.011362 | 0.011295 | 0.011262 | 0.011429 | 0.011295 |
| 0.011329 | 0.011329 | 0.011463 | 0.011497 | 0.011396 | 0.011329 | 0.011329 |
| 0.011396 | 0.011329 | 0.011429 | 0.011295 | 0.011429 | 0.011530 | 0.011832 |
| 0.011329 | 0.011732 | 0.011336 | 0.017861 | 0.011322 | 0.011549 | 0.011688 |
| 0.011648 | 0.011693 | 0.011427 | 0.011350 | 0.011774 | 0.011716 | 0.011425 |
| 0.011630 | 0.011610 | 0.011216 | 0.011353 | 0.011333 | 0.011455 | 0.011361 |
| 0.011623 | 0.011470 | 0.011505 | 0.011193 | 0.011329 | 0.011497 | 0.011500 |
| 0.011369 | 0.011463 | 0.011463 | 0.011430 | 0.011396 | 0.011396 | 0.011363 |
| 0.011396 | 0.011329 | 0.011362 | 0.011396 | 0.011228 | 0.011295 | 0.011329 |
| 0.011329 | 0.011396 | 0.011295 | 0.011396 | 0.011430 | 0.011463 | 0.011362 |
| 0.011396 | 0.011362 | 0.011698 | 0.011698 | 0.011362 | 0.011464 | 0.011497 |
| 0.011262 | 0.011262 | 0.011295 | 0.011396 | 0.011262 | 0.011497 | 0.011497 |
| 0.011530 | 0.011530 | 0.011329 | 0.011564 | 0.011732 | 0.011565 | 0.011396 |
| 0.011396 | 0.011463 | 0.011497 | 0.011329 | 0.011396 | 0.011362 | 0.011396 |
| 0.011463 | 0.011463 | 0.011497 | 0.011463 | 0.011363 | 0.011564 | 0.011530 |
| 0.011399 | 0.011295 | 0.011396 | 0.011497 | 0.011396 | 0.011530 | 0.011564 |
| 0.011732 | 0.011436 | 0.011597 | 0.011564 | 0.011497 | 0.011664 | 0.011295 |
| 0.011464 | 0.011363 | 0.011329 | 0.011329 | 0.011396 | 0.011295 | 0.011396 |
| 0.011430 | 0.011463 | 0.011362 | 0.011396 | 0.011362 | 0.011698 | 0.011698 |
| 0.011362 | 0.011464 | 0.011530 | 0.011463 | 0.012103 | 0.011525 | 0.011447 |
| 0.011517 | 0.011476 | 0.011587 | 0.011476 | 0.011585 | 0.011508 | 0.011474 |
| 0.012056 | 0.011372 | 0.011505 | 0.011441 | 0.011714 | 0.011570 | 0.011673 |
| 0.012080 | 0.011550 | 0.011635 | 0.011698 | 0.011564 | 0.011564 | 0.011601 |
| 0.011262 | 0.011429 | 0.011564 | 0.011530 | 0.011533 | 0.011530 | 0.011498 |
| 0.011362 | 0.011295 | 0.011329 | 0.011362 | 0.011262 | 0.011329 | 0.011228 |
| 0.011362 | 0.011396 | 0.011295 | 0.011262 | 0.011362 | 0.011295 | 0.011329 |
| 0.011329 | 0.011262 | 0.011329 | 0.011362 | 0.011262 | 0.011463 | 0.011497 |
| 0.011396 | 0.011463 | 0.011396 | 0.011396 | 0.011329 | 0.011732 | 0.011362 |
| 0.011408 | 0.011329 | 0.011564 | 0.011569 | 0.011430 | 0.011429 | 0.011429 |
| 0.011429 | 0.011362 | 0.011329 | 0.011362 | 0.011463 | 0.011463 | 0.011262 |
| 0.011396 | 0.011530 | 0.011698 | 0.011429 | 0.011631 | 0.011631 | 0.011496 |
| 0.011329 | 0.011396 | 0.011429 | 0.011833 | 0.011396 | 0.011430 | 0.000000 |
| 0.011429 | 0.011362 | 0.011362 | 0.011665 | 0.011597 | 0.011631 | 0.011362 |
| 0.011463 | 0.011530 | 0.011396 | 0.011463 | 0.011429 | 0.011295 | 0.011631 |
| 0.011396 | 0.011362 | 0.011362 | 0.011530 | 0.011362 | 0.011463 | 0.011698 |
| 0.011396 | 0.011773 | 0.011765 | 0.011548 | 0.011342 | 0.011468 | 0.011318 |
| 0.011335 | 0.011761 | 0.011306 | 0.011507 | 0.011353 | 0.011467 | 0.011485 |
| 0.011570 | 0.011258 | 0.011450 | 0.011324 | 0.011330 | 0.011529 | 0.011466 |
| 0.011475 | 0.011375 | 0.011448 | 0.011377 | 0.011397 | 0.011530 | 0.011598 |
| 0.011597 | 0.011464 | 0.011567 | 0.011569 | 0.011704 | 0.011732 | 0.011396 |
| 0.011631 | 0.011497 | 0.011362 | 0.011463 | 0.011262 | 0.011497 | 0.011295 |
| 0.011362 | 0.011362 | 0.011329 | 0.011295 | 0.011329 | 0.011295 | 0.011396 |
| 0.011375 | 0.011375 | 0.011368 | 0.011403 | 0.011539 | 0.011504 | 0.011504 |
| 0.011503 | 0.011430 | 0.011245 | 0.011240 | 0.011365 | 0.011535 | 0.011535 |
| 0.011329 | 0.011399 | 0.011633 | 0.011601 | 0.011531 | 0.011565 | 0.011496 |
| 0.011429 | 0.011497 | 0.011496 | 0.011396 | 0.011967 | 0.011564 | 0.011631 |
| 0.011665 | 0.011737 | 0.011333 | 0.011337 | 0.011329 | 0.011530 | 0.011497 |
| 0.011531 | 0.011564 | 0.011564 | 0.011564 | 0.011729 | 0.011698 | 0.011338 |
| 0.011229 | 0.011233 | 0.011333 | 0.011298 | 0.011402 | 0.011247 | 0.011570 |

|          |          |          |          |          |          |          |
|----------|----------|----------|----------|----------|----------|----------|
| 0.011369 | 0.011499 | 0.011298 | 0.011397 | 0.011363 | 0.011437 | 0.011329 |
| 0.011295 | 0.011295 | 0.011362 | 0.011329 | 0.011530 | 0.011497 | 0.011430 |
| 0.011530 | 0.011597 | 0.011329 | 0.011329 | 0.011362 | 0.011362 | 0.011364 |
| 0.011432 | 0.011362 | 0.011362 | 0.011397 | 0.011530 | 0.011598 | 0.011597 |
| 0.011464 | 0.011567 | 0.011569 | 0.011704 | 0.011732 | 0.011396 | 0.011564 |
| 0.011497 | 0.011497 | 0.011331 | 0.011513 | 0.011442 | 0.011469 | 0.011341 |
| 0.011508 | 0.011744 | 0.011526 | 0.011400 | 0.011295 | 0.011497 | 0.011362 |
| 0.011463 | 0.011396 | 0.011295 | 0.011397 | 0.011497 | 0.011500 | 0.011396 |
| 0.011295 | 0.011229 | 0.011362 | 0.011295 | 0.011228 | 0.011298 | 0.011497 |
| 0.011396 | 0.011329 | 0.011362 | 0.011396 | 0.011228 | 0.011295 | 0.011497 |
| 0.011362 | 0.011396 | 0.011396 | 0.011329 | 0.011396 | 0.011631 | 0.011295 |
| 0.011329 | 0.011732 | 0.011329 | 0.011362 | 0.011329 | 0.011698 | 0.011275 |
| 0.011791 | 0.011273 | 0.011361 | 0.011503 | 0.011589 | 0.011527 | 0.011227 |
| 0.011323 | 0.011496 | 0.011597 | 0.011705 | 0.011565 | 0.011703 | 0.011834 |
| 0.011733 | 0.011770 | 0.011732 | 0.011983 | 0.011698 | 0.012573 | 0.011734 |
| 0.012473 | 0.012241 | 0.012375 | 0.012646 | 0.011698 | 0.011396 | 0.011699 |
| 0.012137 | 0.012072 | 0.011664 | 0.011564 | 0.011632 | 0.011632 | 0.011601 |
| 0.011496 | 0.011501 | 0.011564 | 0.011531 | 0.011901 | 0.011967 | 0.011968 |
| 0.011868 | 0.011968 | 0.012072 | 0.011838 | 0.012138 | 0.012144 | 0.012205 |
| 0.012206 | 0.012239 | 0.012186 | 0.012206 | 0.012207 | 0.011429 | 0.011732 |
| 0.011800 | 0.012303 | 0.011806 | 0.012034 | 0.012508 | 0.011570 | 0.011464 |
| 0.011429 | 0.011429 | 0.011900 | 0.011883 | 0.012045 | 0.011765 | 0.011431 |
| S581     | 0.011732 | 0.011732 | 0.012068 | 0.011832 | 0.011832 | 0.011900 |
| 0.011739 | 0.011671 | 0.011899 | 0.011329 | 0.011396 | 0.011363 | 0.011329 |
| 0.011362 | 0.011530 | 0.011329 | 0.011362 | 0.011429 | 0.011396 | 0.011362 |
| 0.011329 | 0.011362 | 0.011463 | 0.011329 | 0.011363 | 0.011362 | 0.011705 |
| 0.011597 | 0.011362 | 0.011262 | 0.011496 | 0.011429 | 0.011396 | 0.011429 |
| 0.011396 | 0.011496 | 0.011396 | 0.011396 | 0.011429 | 0.011396 | 0.011564 |
| 0.011329 | 0.011396 | 0.011429 | 0.011362 | 0.011463 | 0.011429 | 0.011429 |
| 0.011396 | 0.011564 | 0.011463 | 0.011732 | 0.011396 | 0.011664 | 0.011396 |
| 0.011362 | 0.011463 | 0.011530 | 0.011664 | 0.011765 | 0.011463 | 0.011564 |
| 0.011429 | 0.011497 | 0.011396 | 0.011631 | 0.011866 | 0.011396 | 0.011463 |
| 0.011362 | 0.011463 | 0.011429 | 0.011496 | 0.011429 | 0.011429 | 0.011429 |
| 0.011329 | 0.011362 | 0.011329 | 0.011429 | 0.011396 | 0.011430 | 0.011496 |
| 0.011429 | 0.011396 | 0.011463 | 0.011362 | 0.011496 | 0.011329 | 0.011396 |
| 0.011564 | 0.011496 | 0.011731 | 0.011564 | 0.011396 | 0.011631 | 0.011396 |
| 0.011579 | 0.011807 | 0.011588 | 0.011334 | 0.011247 | 0.011428 | 0.011493 |
| 0.012121 | 0.011467 | 0.011266 | 0.011429 | 0.011429 | 0.011429 | 0.011530 |
| 0.011463 | 0.011429 | 0.011496 | 0.011396 | 0.011497 | 0.011429 | 0.011429 |
| 0.011396 | 0.011496 | 0.011698 | 0.011564 | 0.011463 | 0.011430 | 0.011362 |
| 0.011329 | 0.011329 | 0.011396 | 0.011362 | 0.011564 | 0.011530 | 0.011463 |
| 0.011564 | 0.011631 | 0.011362 | 0.011362 | 0.011396 | 0.011396 | 0.011398 |
| 0.011466 | 0.011396 | 0.011396 | 0.011240 | 0.011313 | 0.011306 | 0.011396 |
| 0.011399 | 0.011335 | 0.011355 | 0.011371 | 0.011298 | 0.011334 | 0.011364 |
| 0.011564 | 0.011370 | 0.011405 | 0.011329 | 0.011302 | 0.011464 | 0.011430 |
| 0.011497 | 0.011431 | 0.011430 | 0.011530 | 0.011463 | 0.011832 | 0.011631 |
| 0.011664 | 0.011530 | 0.011396 | 0.011497 | 0.011295 | 0.011530 | 0.011329 |
| 0.011396 | 0.011396 | 0.011362 | 0.011329 | 0.011362 | 0.011329 | 0.011429 |
| 0.011396 | 0.011497 | 0.011430 | 0.011329 | 0.011431 | 0.011530 | 0.011499 |
| 0.011530 | 0.011430 | 0.011329 | 0.011263 | 0.011396 | 0.011329 | 0.011262 |
| 0.011366 | 0.011530 | 0.011329 | 0.011530 | 0.011295 | 0.011396 | 0.011362 |
| 0.011463 | 0.011362 | 0.011396 | 0.011362 | 0.011396 | 0.011262 | 0.011396 |
| 0.011430 | 0.011362 | 0.011430 | 0.011362 | 0.011396 | 0.011430 | 0.011665 |
| 0.011765 | 0.011698 | 0.011765 | 0.011465 | 0.011766 | 0.011396 | 0.011362 |
| 0.011398 | 0.011667 | 0.011426 | 0.011266 | 0.011773 | 0.011265 | 0.011414 |
| 0.011773 | 0.011672 | 0.011362 | 0.011765 | 0.011470 | 0.011429 | 0.011597 |
| 0.011530 | 0.011496 | 0.011558 | 0.011225 | 0.011395 | 0.011430 | 0.011500 |
| 0.011597 | 0.011499 | 0.011398 | 0.011703 | 0.011631 | 0.011698 | 0.011805 |
| 0.011534 | 0.011705 | 0.011636 | 0.011567 | 0.011834 | 0.011295 | 0.011498 |
| 0.011463 | 0.011396 | 0.011295 | 0.011295 | 0.011362 | 0.011362 | 0.011429 |

|          |          |          |          |          |          |          |
|----------|----------|----------|----------|----------|----------|----------|
| 0.011362 | 0.011429 | 0.011329 | 0.011429 | 0.011362 | 0.011362 | 0.011429 |
| 0.011362 | 0.011799 | 0.011698 | 0.011732 | 0.011262 | 0.011362 | 0.011396 |
| 0.011396 | 0.011362 | 0.011429 | 0.011463 | 0.011329 | 0.011329 | 0.011329 |
| 0.011866 | 0.011496 | 0.011496 | 0.011295 | 0.011396 | 0.011564 | 0.011329 |
| 0.011329 | 0.011396 | 0.011362 | 0.011530 | 0.011329 | 0.011463 | 0.011597 |
| 0.011530 | 0.011362 | 0.011362 | 0.011295 | 0.011295 | 0.011463 | 0.011396 |
| 0.011295 | 0.011396 | 0.011262 | 0.011295 | 0.011429 | 0.011564 | 0.011329 |
| 0.011295 | 0.011429 | 0.011363 | 0.011262 | 0.011597 | 0.011262 | 0.011429 |
| 0.011505 | 0.011329 | 0.011631 | 0.011463 | 0.011496 | 0.011362 | 0.011463 |
| 0.011329 | 0.011664 | 0.011262 | 0.011530 | 0.011329 | 0.011329 | 0.011262 |
| 0.011496 | 0.011698 | 0.011396 | 0.011463 | 0.011295 | 0.011698 | 0.011329 |
| 0.011329 | 0.011329 | 0.011362 | 0.011463 | 0.011362 | 0.011463 | 0.011530 |
| 0.011530 | 0.011496 | 0.011396 | 0.011497 | 0.011463 | 0.011329 | 0.011295 |
| 0.011329 | 0.011329 | 0.011396 | 0.011329 | 0.011295 | 0.011463 | 0.011329 |
| 0.011362 | 0.011362 | 0.011496 | 0.011530 | 0.011429 | 0.011362 | 0.011362 |
| 0.011429 | 0.011362 | 0.011463 | 0.011329 | 0.011463 | 0.011362 | 0.011866 |
| 0.011362 | 0.011765 | 0.011371 | 0.011785 | 0.011191 | 0.011366 | 0.011723 |
| 0.011683 | 0.011729 | 0.011374 | 0.011292 | 0.011774 | 0.011751 | 0.011485 |
| 0.011534 | 0.011610 | 0.011294 | 0.011353 | 0.011333 | 0.011406 | 0.011361 |
| 0.011529 | 0.011507 | 0.011505 | 0.011325 | 0.011497 | 0.011530 | 0.011534 |
| 0.011404 | 0.011497 | 0.011429 | 0.011463 | 0.011429 | 0.011430 | 0.011396 |
| 0.011362 | 0.011362 | 0.011195 | 0.011430 | 0.011396 | 0.011329 | 0.011362 |
| 0.011362 | 0.011430 | 0.011329 | 0.011430 | 0.011463 | 0.011497 | 0.011396 |
| 0.011429 | 0.011396 | 0.011732 | 0.011732 | 0.011463 | 0.011497 | 0.011530 |
| 0.011295 | 0.011295 | 0.011329 | 0.011430 | 0.011295 | 0.011530 | 0.011530 |
| 0.011362 | 0.011362 | 0.011497 | 0.011396 | 0.011765 | 0.011397 | 0.011429 |
| 0.011228 | 0.011497 | 0.011530 | 0.011362 | 0.011430 | 0.011396 | 0.011362 |
| 0.011295 | 0.011295 | 0.011329 | 0.011497 | 0.011397 | 0.011597 | 0.011564 |
| 0.011433 | 0.011329 | 0.011429 | 0.011530 | 0.011430 | 0.011564 | 0.011597 |
| 0.011765 | 0.011470 | 0.011429 | 0.011597 | 0.011530 | 0.011496 | 0.011329 |
| 0.011431 | 0.011396 | 0.011362 | 0.011362 | 0.011430 | 0.011329 | 0.011430 |
| 0.011463 | 0.011497 | 0.011396 | 0.011429 | 0.011396 | 0.011732 | 0.011732 |
| 0.011463 | 0.011497 | 0.011564 | 0.011496 | 0.012137 | 0.011382 | 0.011482 |
| 0.011552 | 0.011372 | 0.011622 | 0.011510 | 0.011375 | 0.011543 | 0.011370 |
| 0.012090 | 0.011406 | 0.011540 | 0.011406 | 0.011749 | 0.011604 | 0.011707 |
| 0.012114 | 0.011588 | 0.011669 | 0.011732 | 0.011597 | 0.011597 | 0.011635 |
| 0.011295 | 0.011463 | 0.011597 | 0.011564 | 0.011567 | 0.011564 | 0.011532 |
| 0.011396 | 0.011329 | 0.011362 | 0.011396 | 0.011295 | 0.011362 | 0.011262 |
| 0.011396 | 0.011429 | 0.011329 | 0.011295 | 0.011396 | 0.011329 | 0.011362 |
| 0.011362 | 0.011295 | 0.011362 | 0.011396 | 0.011295 | 0.011496 | 0.011530 |
| 0.011429 | 0.011496 | 0.011429 | 0.011429 | 0.011362 | 0.011765 | 0.011396 |
| 0.011443 | 0.011362 | 0.011598 | 0.011603 | 0.011463 | 0.011463 | 0.011463 |
| 0.011463 | 0.011396 | 0.011362 | 0.011396 | 0.011496 | 0.011497 | 0.011429 |
| 0.011429 | 0.011564 | 0.011731 | 0.011463 | 0.011664 | 0.011664 | 0.011530 |
| 0.011362 | 0.011429 | 0.011463 | 0.011866 | 0.011430 | 0.011463 | 0.011429 |
| 0.000000 | 0.011396 | 0.011396 | 0.011698 | 0.011631 | 0.011664 | 0.011396 |
| 0.011497 | 0.011564 | 0.011429 | 0.011497 | 0.011463 | 0.011329 | 0.011664 |
| 0.011429 | 0.011396 | 0.011396 | 0.011564 | 0.011396 | 0.011496 | 0.011732 |
| 0.011429 | 0.011807 | 0.011799 | 0.011548 | 0.011173 | 0.011502 | 0.011267 |
| 0.011335 | 0.011800 | 0.011306 | 0.011507 | 0.011353 | 0.011467 | 0.011432 |
| 0.011468 | 0.011192 | 0.011339 | 0.011126 | 0.011276 | 0.011328 | 0.011466 |
| 0.011512 | 0.011375 | 0.011483 | 0.011377 | 0.011431 | 0.011564 | 0.011631 |
| 0.011631 | 0.011497 | 0.011601 | 0.011603 | 0.011738 | 0.011767 | 0.011429 |
| 0.011664 | 0.011530 | 0.011396 | 0.011497 | 0.011295 | 0.011530 | 0.011329 |
| 0.011396 | 0.011396 | 0.011362 | 0.011329 | 0.011362 | 0.011329 | 0.011429 |
| 0.011235 | 0.011375 | 0.011403 | 0.011437 | 0.011573 | 0.011538 | 0.011470 |
| 0.011537 | 0.011464 | 0.011208 | 0.011168 | 0.011399 | 0.011568 | 0.011569 |
| 0.011363 | 0.011433 | 0.011666 | 0.011635 | 0.011363 | 0.011599 | 0.011530 |
| 0.011463 | 0.011530 | 0.011463 | 0.011429 | 0.012001 | 0.011396 | 0.011463 |
| 0.011698 | 0.011737 | 0.011401 | 0.011476 | 0.011362 | 0.011564 | 0.011530 |

|          |          |          |          |          |          |          |
|----------|----------|----------|----------|----------|----------|----------|
| 0.011565 | 0.011597 | 0.011396 | 0.011396 | 0.011729 | 0.011732 | 0.011372 |
| 0.011263 | 0.011268 | 0.011367 | 0.011332 | 0.011436 | 0.011284 | 0.011604 |
| 0.011403 | 0.011499 | 0.011203 | 0.011435 | 0.011396 | 0.011471 | 0.011362 |
| 0.011329 | 0.011329 | 0.011396 | 0.011362 | 0.011564 | 0.011530 | 0.011463 |
| 0.011564 | 0.011631 | 0.011362 | 0.011362 | 0.011396 | 0.011396 | 0.011398 |
| 0.011466 | 0.011396 | 0.011396 | 0.011431 | 0.011564 | 0.011631 | 0.011631 |
| 0.011497 | 0.011601 | 0.011603 | 0.011738 | 0.011767 | 0.011429 | 0.011597 |
| 0.011530 | 0.011530 | 0.011364 | 0.011513 | 0.011477 | 0.011503 | 0.011375 |
| 0.011542 | 0.011744 | 0.011483 | 0.011434 | 0.011329 | 0.011530 | 0.011396 |
| 0.011497 | 0.011430 | 0.011329 | 0.011431 | 0.011530 | 0.011499 | 0.011430 |
| 0.011329 | 0.011263 | 0.011396 | 0.011329 | 0.011262 | 0.011366 | 0.011530 |
| 0.011362 | 0.011362 | 0.011195 | 0.011430 | 0.011396 | 0.011329 | 0.011530 |
| 0.011396 | 0.011429 | 0.011429 | 0.011362 | 0.011429 | 0.011664 | 0.011329 |
| 0.011362 | 0.011765 | 0.011362 | 0.011396 | 0.011362 | 0.011732 | 0.011232 |
| 0.011678 | 0.011273 | 0.011311 | 0.011543 | 0.011589 | 0.011527 | 0.011227 |
| 0.011218 | 0.011530 | 0.011631 | 0.011739 | 0.011599 | 0.011737 | 0.011867 |
| 0.011767 | 0.011804 | 0.011765 | 0.012017 | 0.011731 | 0.012606 | 0.011768 |
| 0.012439 | 0.012274 | 0.012408 | 0.012680 | 0.011731 | 0.011430 | 0.011732 |
| 0.012171 | 0.012106 | 0.011698 | 0.011597 | 0.011665 | 0.011665 | 0.011567 |
| 0.011530 | 0.011535 | 0.011597 | 0.011565 | 0.011935 | 0.012001 | 0.012002 |
| 0.011901 | 0.012002 | 0.012106 | 0.011872 | 0.012171 | 0.012178 | 0.012238 |
| 0.012239 | 0.012273 | 0.012221 | 0.012239 | 0.012241 | 0.011463 | 0.011766 |
| 0.011834 | 0.012337 | 0.011840 | 0.012068 | 0.012541 | 0.011604 | 0.011497 |
| 0.011429 | 0.011463 | 0.011934 | 0.011965 | 0.012081 | 0.011799 | 0.011465 |
| S582     | 0.011664 | 0.011664 | 0.011933 | 0.011698 | 0.011698 | 0.011765 |
| 0.011603 | 0.011535 | 0.011765 | 0.011262 | 0.011329 | 0.011296 | 0.011262 |
| 0.011228 | 0.011463 | 0.011194 | 0.011295 | 0.011362 | 0.011329 | 0.011295 |
| 0.011262 | 0.011295 | 0.011329 | 0.011262 | 0.011295 | 0.011295 | 0.011569 |
| 0.011463 | 0.011295 | 0.011194 | 0.011362 | 0.011362 | 0.011329 | 0.011362 |
| 0.011329 | 0.011429 | 0.011329 | 0.011329 | 0.011362 | 0.011329 | 0.011496 |
| 0.011194 | 0.011329 | 0.011362 | 0.011295 | 0.011329 | 0.011429 | 0.011362 |
| 0.011329 | 0.011497 | 0.011396 | 0.011597 | 0.011329 | 0.011597 | 0.011329 |
| 0.011295 | 0.011329 | 0.011463 | 0.011597 | 0.011631 | 0.011329 | 0.011429 |
| 0.011362 | 0.011429 | 0.011329 | 0.011563 | 0.011732 | 0.011329 | 0.011396 |
| 0.011295 | 0.011396 | 0.011362 | 0.011429 | 0.011362 | 0.011362 | 0.011362 |
| 0.011262 | 0.011295 | 0.011262 | 0.011295 | 0.011329 | 0.011363 | 0.011429 |
| 0.011362 | 0.011329 | 0.011396 | 0.011295 | 0.011362 | 0.011262 | 0.011329 |
| 0.011496 | 0.011429 | 0.011664 | 0.011496 | 0.011329 | 0.011564 | 0.011329 |
| 0.011431 | 0.011583 | 0.011513 | 0.011177 | 0.011209 | 0.011318 | 0.011296 |
| 0.011975 | 0.011365 | 0.011225 | 0.011563 | 0.011564 | 0.011295 | 0.011396 |
| 0.011396 | 0.011362 | 0.011429 | 0.011329 | 0.011429 | 0.011362 | 0.011362 |
| 0.011329 | 0.011362 | 0.011631 | 0.011496 | 0.011396 | 0.011362 | 0.011295 |
| 0.011262 | 0.011195 | 0.011329 | 0.011295 | 0.011429 | 0.011396 | 0.011329 |
| 0.011429 | 0.011497 | 0.011295 | 0.011295 | 0.011329 | 0.011329 | 0.011330 |
| 0.011398 | 0.011329 | 0.011329 | 0.011204 | 0.011277 | 0.011235 | 0.011329 |
| 0.011331 | 0.011266 | 0.011282 | 0.011302 | 0.011230 | 0.011266 | 0.011297 |
| 0.011492 | 0.011336 | 0.011370 | 0.011262 | 0.011268 | 0.011397 | 0.011296 |
| 0.011363 | 0.011363 | 0.011363 | 0.011463 | 0.011396 | 0.011765 | 0.011497 |
| 0.011530 | 0.011396 | 0.011329 | 0.011362 | 0.011228 | 0.011396 | 0.011262 |
| 0.011329 | 0.011329 | 0.011295 | 0.011262 | 0.011295 | 0.011262 | 0.011362 |
| 0.011329 | 0.011429 | 0.011362 | 0.011262 | 0.011363 | 0.011463 | 0.011466 |
| 0.011463 | 0.011362 | 0.011262 | 0.011195 | 0.011329 | 0.011262 | 0.011195 |
| 0.011298 | 0.011463 | 0.011262 | 0.011463 | 0.011228 | 0.011329 | 0.011295 |
| 0.011396 | 0.011295 | 0.011329 | 0.011295 | 0.011329 | 0.011195 | 0.011329 |
| 0.011362 | 0.011295 | 0.011362 | 0.011295 | 0.011329 | 0.011362 | 0.011597 |
| 0.011631 | 0.011564 | 0.011631 | 0.011431 | 0.011631 | 0.011329 | 0.011295 |
| 0.011263 | 0.011505 | 0.011380 | 0.011197 | 0.011637 | 0.011197 | 0.011296 |
| 0.011637 | 0.011536 | 0.011496 | 0.011698 | 0.011402 | 0.011564 | 0.011530 |
| 0.011463 | 0.011631 | 0.011486 | 0.011307 | 0.011395 | 0.011362 | 0.011432 |
| 0.011530 | 0.011431 | 0.011567 | 0.011635 | 0.011564 | 0.011631 | 0.011738 |

|          |          |          |          |          |          |          |
|----------|----------|----------|----------|----------|----------|----------|
| 0.011466 | 0.011637 | 0.011568 | 0.011500 | 0.011766 | 0.011228 | 0.011431 |
| 0.011396 | 0.011329 | 0.011228 | 0.011228 | 0.011295 | 0.011295 | 0.011362 |
| 0.011295 | 0.011362 | 0.011262 | 0.011295 | 0.011295 | 0.011295 | 0.011362 |
| 0.011295 | 0.011664 | 0.011564 | 0.011597 | 0.011194 | 0.011295 | 0.011329 |
| 0.011329 | 0.011295 | 0.011362 | 0.011329 | 0.011262 | 0.011262 | 0.011262 |
| 0.011731 | 0.011362 | 0.011429 | 0.011228 | 0.011329 | 0.011497 | 0.011262 |
| 0.011262 | 0.011329 | 0.011295 | 0.011463 | 0.011262 | 0.011396 | 0.011530 |
| 0.011463 | 0.011295 | 0.011295 | 0.011228 | 0.011228 | 0.011396 | 0.011329 |
| 0.011228 | 0.011329 | 0.011194 | 0.011228 | 0.011362 | 0.011430 | 0.011262 |
| 0.011228 | 0.011362 | 0.011295 | 0.011194 | 0.011463 | 0.011195 | 0.011362 |
| 0.011437 | 0.011262 | 0.011496 | 0.011396 | 0.011362 | 0.011295 | 0.011396 |
| 0.011262 | 0.011597 | 0.011194 | 0.011396 | 0.011194 | 0.011194 | 0.011194 |
| 0.011429 | 0.011564 | 0.011329 | 0.011396 | 0.011228 | 0.011564 | 0.011194 |
| 0.011262 | 0.011262 | 0.011295 | 0.011396 | 0.011295 | 0.011396 | 0.011463 |
| 0.011463 | 0.011429 | 0.011329 | 0.011429 | 0.011396 | 0.011262 | 0.011228 |
| 0.011262 | 0.011262 | 0.011329 | 0.011194 | 0.011228 | 0.011396 | 0.011262 |
| 0.011228 | 0.011295 | 0.011429 | 0.011396 | 0.011362 | 0.011295 | 0.011295 |
| 0.011362 | 0.011295 | 0.011396 | 0.011262 | 0.011396 | 0.011496 | 0.011731 |
| 0.011295 | 0.011631 | 0.011267 | 0.011785 | 0.011257 | 0.011366 | 0.011548 |
| 0.011510 | 0.011553 | 0.011270 | 0.011234 | 0.011664 | 0.011578 | 0.011364 |
| 0.011440 | 0.011487 | 0.011138 | 0.011270 | 0.011177 | 0.011258 | 0.011232 |
| 0.011389 | 0.011358 | 0.011357 | 0.011126 | 0.011429 | 0.011463 | 0.011466 |
| 0.011335 | 0.011429 | 0.011429 | 0.011329 | 0.011362 | 0.011362 | 0.011329 |
| 0.011362 | 0.011295 | 0.011329 | 0.011362 | 0.011329 | 0.011262 | 0.011295 |
| 0.011295 | 0.011362 | 0.011195 | 0.011362 | 0.011396 | 0.011429 | 0.011329 |
| 0.011295 | 0.011262 | 0.011597 | 0.011597 | 0.011396 | 0.011430 | 0.011463 |
| 0.011228 | 0.011228 | 0.011262 | 0.011362 | 0.011228 | 0.011463 | 0.011463 |
| 0.011497 | 0.011496 | 0.011429 | 0.011530 | 0.011631 | 0.011532 | 0.011362 |
| 0.011362 | 0.011429 | 0.011463 | 0.011295 | 0.011362 | 0.011329 | 0.011362 |
| 0.011430 | 0.011430 | 0.011463 | 0.011430 | 0.011330 | 0.011530 | 0.011497 |
| 0.011365 | 0.011262 | 0.011362 | 0.011463 | 0.011362 | 0.011430 | 0.011530 |
| 0.011698 | 0.011402 | 0.011564 | 0.011530 | 0.011463 | 0.011631 | 0.011262 |
| 0.011431 | 0.011329 | 0.011295 | 0.011295 | 0.011362 | 0.011195 | 0.011362 |
| 0.011396 | 0.011429 | 0.011329 | 0.011295 | 0.011262 | 0.011597 | 0.011597 |
| 0.011396 | 0.011430 | 0.011496 | 0.011429 | 0.011934 | 0.011489 | 0.011412 |
| 0.011482 | 0.011441 | 0.011552 | 0.011441 | 0.011550 | 0.011474 | 0.011439 |
| 0.011884 | 0.011337 | 0.011471 | 0.011406 | 0.011680 | 0.011536 | 0.011638 |
| 0.011910 | 0.011437 | 0.011601 | 0.011664 | 0.011530 | 0.011463 | 0.011567 |
| 0.011228 | 0.011396 | 0.011530 | 0.011496 | 0.011499 | 0.011429 | 0.011397 |
| 0.011329 | 0.011262 | 0.011295 | 0.011329 | 0.011228 | 0.011295 | 0.011194 |
| 0.011262 | 0.011295 | 0.011262 | 0.011228 | 0.011329 | 0.011262 | 0.011295 |
| 0.011295 | 0.011228 | 0.011295 | 0.011329 | 0.011228 | 0.011429 | 0.011463 |
| 0.011362 | 0.011362 | 0.011362 | 0.011362 | 0.011295 | 0.011631 | 0.011329 |
| 0.011304 | 0.011295 | 0.011463 | 0.011467 | 0.011396 | 0.011396 | 0.011396 |
| 0.011396 | 0.011329 | 0.011295 | 0.011329 | 0.011429 | 0.011429 | 0.011362 |
| 0.011362 | 0.011496 | 0.011597 | 0.011396 | 0.011597 | 0.011597 | 0.011463 |
| 0.011295 | 0.011362 | 0.011396 | 0.011732 | 0.011362 | 0.011396 | 0.011362 |
| 0.011396 | 0.000000 | 0.000000 | 0.011564 | 0.011564 | 0.011530 | 0.011329 |
| 0.011429 | 0.011496 | 0.011362 | 0.011429 | 0.011396 | 0.011262 | 0.011530 |
| 0.011362 | 0.011329 | 0.000000 | 0.011496 | 0.011329 | 0.011429 | 0.011664 |
| 0.011362 | 0.011671 | 0.011664 | 0.011385 | 0.000000 | 0.011366 | 0.011215 |
| 0.011170 | 0.011605 | 0.011236 | 0.011328 | 0.011158 | 0.011315 | 0.011273 |
| 0.011366 | 0.011192 | 0.011339 | 0.011126 | 0.011222 | 0.011328 | 0.011385 |
| 0.011399 | 0.011296 | 0.011307 | 0.011307 | 0.011363 | 0.011429 | 0.011497 |
| 0.011497 | 0.011363 | 0.011466 | 0.011467 | 0.011603 | 0.011625 | 0.011362 |
| 0.011530 | 0.011396 | 0.011329 | 0.011362 | 0.011228 | 0.011396 | 0.011262 |
| 0.011329 | 0.011329 | 0.011295 | 0.011262 | 0.011295 | 0.011262 | 0.011362 |
| 0.011340 | 0.011340 | 0.011334 | 0.011368 | 0.011505 | 0.011470 | 0.011470 |
| 0.011469 | 0.011396 | 0.011208 | 0.011204 | 0.011331 | 0.011501 | 0.011501 |
| 0.011296 | 0.011365 | 0.011599 | 0.011567 | 0.011497 | 0.011531 | 0.011463 |

|          |          |          |          |          |          |          |
|----------|----------|----------|----------|----------|----------|----------|
| 0.011396 | 0.011463 | 0.011463 | 0.011362 | 0.011866 | 0.011530 | 0.011597 |
| 0.011631 | 0.011630 | 0.011333 | 0.011407 | 0.011295 | 0.011497 | 0.011463 |
| 0.011497 | 0.011530 | 0.011530 | 0.011530 | 0.011689 | 0.011664 | 0.011303 |
| 0.011195 | 0.011199 | 0.011298 | 0.011264 | 0.011299 | 0.011209 | 0.011468 |
| 0.011335 | 0.011367 | 0.011203 | 0.011360 | 0.011329 | 0.011402 | 0.011295 |
| 0.011262 | 0.011195 | 0.011329 | 0.011295 | 0.011429 | 0.011396 | 0.011329 |
| 0.011429 | 0.011497 | 0.011295 | 0.011295 | 0.011329 | 0.011329 | 0.011330 |
| 0.011398 | 0.011329 | 0.011329 | 0.011363 | 0.011429 | 0.011497 | 0.011497 |
| 0.011363 | 0.011466 | 0.011467 | 0.011603 | 0.011625 | 0.011362 | 0.011530 |
| 0.011463 | 0.011463 | 0.011297 | 0.011478 | 0.011408 | 0.011435 | 0.011270 |
| 0.011473 | 0.011561 | 0.011399 | 0.011366 | 0.011262 | 0.011463 | 0.011329 |
| 0.011429 | 0.011362 | 0.011262 | 0.011363 | 0.011463 | 0.011466 | 0.011362 |
| 0.011262 | 0.011195 | 0.011329 | 0.011262 | 0.011195 | 0.011298 | 0.011463 |
| 0.011362 | 0.011295 | 0.011329 | 0.011362 | 0.011329 | 0.011262 | 0.011396 |
| 0.011329 | 0.011362 | 0.011362 | 0.011295 | 0.011362 | 0.011597 | 0.011194 |
| 0.011295 | 0.011631 | 0.011295 | 0.011329 | 0.011295 | 0.011597 | 0.011232 |
| 0.011510 | 0.011230 | 0.011161 | 0.011382 | 0.011467 | 0.011383 | 0.011186 |
| 0.011113 | 0.011396 | 0.011496 | 0.011603 | 0.011464 | 0.011568 | 0.011733 |
| 0.011632 | 0.011669 | 0.011631 | 0.011846 | 0.011597 | 0.012472 | 0.011633 |
| 0.012372 | 0.012139 | 0.012273 | 0.012545 | 0.011597 | 0.011295 | 0.011598 |
| 0.012036 | 0.011937 | 0.011564 | 0.011463 | 0.011531 | 0.011531 | 0.011500 |
| 0.011396 | 0.011365 | 0.011463 | 0.011430 | 0.011800 | 0.011866 | 0.011867 |
| 0.011766 | 0.011867 | 0.011970 | 0.011703 | 0.011969 | 0.011974 | 0.012036 |
| 0.012037 | 0.012070 | 0.011981 | 0.012037 | 0.012038 | 0.011396 | 0.011631 |
| 0.011699 | 0.012202 | 0.011704 | 0.011933 | 0.012406 | 0.011468 | 0.011363 |
| 0.011329 | 0.011329 | 0.011799 | 0.011842 | 0.011940 | 0.011664 | 0.011330 |
| S583     | 0.011664 | 0.011664 | 0.011933 | 0.011698 | 0.011698 | 0.011765 |
| 0.011603 | 0.011535 | 0.011765 | 0.011262 | 0.011329 | 0.011296 | 0.011262 |
| 0.011228 | 0.011463 | 0.011194 | 0.011295 | 0.011362 | 0.011329 | 0.011295 |
| 0.011262 | 0.011295 | 0.011329 | 0.011262 | 0.011295 | 0.011295 | 0.011569 |
| 0.011463 | 0.011295 | 0.011194 | 0.011362 | 0.011362 | 0.011329 | 0.011362 |
| 0.011329 | 0.011429 | 0.011329 | 0.011329 | 0.011362 | 0.011329 | 0.011496 |
| 0.011194 | 0.011329 | 0.011362 | 0.011295 | 0.011329 | 0.011429 | 0.011362 |
| 0.011329 | 0.011497 | 0.011396 | 0.011597 | 0.011329 | 0.011597 | 0.011329 |
| 0.011295 | 0.011329 | 0.011463 | 0.011597 | 0.011631 | 0.011329 | 0.011429 |
| 0.011362 | 0.011429 | 0.011329 | 0.011563 | 0.011732 | 0.011329 | 0.011396 |
| 0.011295 | 0.011396 | 0.011362 | 0.011429 | 0.011362 | 0.011362 | 0.011362 |
| 0.011262 | 0.011295 | 0.011262 | 0.011295 | 0.011329 | 0.011363 | 0.011429 |
| 0.011362 | 0.011329 | 0.011396 | 0.011295 | 0.011362 | 0.011262 | 0.011329 |
| 0.011496 | 0.011429 | 0.011664 | 0.011496 | 0.011329 | 0.011564 | 0.011329 |
| 0.011431 | 0.011583 | 0.011513 | 0.011177 | 0.011209 | 0.011318 | 0.011296 |
| 0.011975 | 0.011365 | 0.011225 | 0.011563 | 0.011564 | 0.011295 | 0.011396 |
| 0.011396 | 0.011362 | 0.011429 | 0.011329 | 0.011429 | 0.011362 | 0.011362 |
| 0.011329 | 0.011362 | 0.011631 | 0.011496 | 0.011396 | 0.011362 | 0.011295 |
| 0.011262 | 0.011195 | 0.011329 | 0.011295 | 0.011429 | 0.011396 | 0.011329 |
| 0.011429 | 0.011497 | 0.011295 | 0.011295 | 0.011329 | 0.011329 | 0.011330 |
| 0.011398 | 0.011329 | 0.011329 | 0.011204 | 0.011277 | 0.011235 | 0.011329 |
| 0.011331 | 0.011266 | 0.011282 | 0.011302 | 0.011230 | 0.011266 | 0.011297 |
| 0.011492 | 0.011336 | 0.011370 | 0.011262 | 0.011268 | 0.011397 | 0.011296 |
| 0.011363 | 0.011363 | 0.011363 | 0.011463 | 0.011396 | 0.011765 | 0.011497 |
| 0.011530 | 0.011396 | 0.011329 | 0.011362 | 0.011228 | 0.011396 | 0.011262 |
| 0.011329 | 0.011329 | 0.011295 | 0.011262 | 0.011295 | 0.011262 | 0.011362 |
| 0.011329 | 0.011429 | 0.011362 | 0.011262 | 0.011363 | 0.011463 | 0.011466 |
| 0.011463 | 0.011362 | 0.011262 | 0.011195 | 0.011329 | 0.011262 | 0.011195 |
| 0.011298 | 0.011463 | 0.011262 | 0.011463 | 0.011228 | 0.011329 | 0.011295 |
| 0.011396 | 0.011295 | 0.011329 | 0.011295 | 0.011329 | 0.011195 | 0.011329 |
| 0.011362 | 0.011295 | 0.011362 | 0.011295 | 0.011329 | 0.011362 | 0.011597 |
| 0.011631 | 0.011564 | 0.011631 | 0.011431 | 0.011631 | 0.011329 | 0.011295 |
| 0.011263 | 0.011505 | 0.011380 | 0.011197 | 0.011637 | 0.011197 | 0.011296 |
| 0.011637 | 0.011536 | 0.011496 | 0.011698 | 0.011402 | 0.011564 | 0.011530 |



|          |          |          |          |          |          |          |
|----------|----------|----------|----------|----------|----------|----------|
| 0.011463 | 0.011631 | 0.011486 | 0.011307 | 0.011395 | 0.011362 | 0.011432 |
| 0.011530 | 0.011431 | 0.011567 | 0.011635 | 0.011564 | 0.011631 | 0.011738 |
| 0.011466 | 0.011637 | 0.011568 | 0.011500 | 0.011766 | 0.011228 | 0.011431 |
| 0.011396 | 0.011329 | 0.011228 | 0.011228 | 0.011295 | 0.011295 | 0.011362 |
| 0.011295 | 0.011362 | 0.011262 | 0.011295 | 0.011295 | 0.011295 | 0.011362 |
| 0.011295 | 0.011664 | 0.011564 | 0.011597 | 0.011194 | 0.011295 | 0.011329 |
| 0.011329 | 0.011295 | 0.011362 | 0.011329 | 0.011262 | 0.011262 | 0.011262 |
| 0.011731 | 0.011362 | 0.011429 | 0.011228 | 0.011329 | 0.011497 | 0.011262 |
| 0.011262 | 0.011329 | 0.011295 | 0.011463 | 0.011262 | 0.011396 | 0.011530 |
| 0.011463 | 0.011295 | 0.011295 | 0.011228 | 0.011228 | 0.011396 | 0.011329 |
| 0.011228 | 0.011329 | 0.011194 | 0.011228 | 0.011362 | 0.011430 | 0.011262 |
| 0.011228 | 0.011362 | 0.011295 | 0.011194 | 0.011463 | 0.011195 | 0.011362 |
| 0.011437 | 0.011262 | 0.011496 | 0.011396 | 0.011362 | 0.011295 | 0.011396 |
| 0.011262 | 0.011597 | 0.011194 | 0.011396 | 0.011194 | 0.011194 | 0.011194 |
| 0.011429 | 0.011564 | 0.011329 | 0.011396 | 0.011228 | 0.011564 | 0.011194 |
| 0.011262 | 0.011262 | 0.011295 | 0.011396 | 0.011295 | 0.011396 | 0.011463 |
| 0.011463 | 0.011429 | 0.011329 | 0.011429 | 0.011396 | 0.011262 | 0.011228 |
| 0.011262 | 0.011262 | 0.011329 | 0.011194 | 0.011228 | 0.011396 | 0.011262 |
| 0.011228 | 0.011295 | 0.011429 | 0.011396 | 0.011362 | 0.011295 | 0.011295 |
| 0.011362 | 0.011295 | 0.011396 | 0.011262 | 0.011396 | 0.011496 | 0.011731 |
| 0.011295 | 0.011631 | 0.011267 | 0.017785 | 0.011257 | 0.011366 | 0.011548 |
| 0.011510 | 0.011553 | 0.011270 | 0.011234 | 0.011664 | 0.011578 | 0.011364 |
| 0.011440 | 0.011487 | 0.011138 | 0.011270 | 0.011177 | 0.011258 | 0.011232 |
| 0.011389 | 0.011358 | 0.011357 | 0.011126 | 0.011429 | 0.011463 | 0.011466 |
| 0.011335 | 0.011429 | 0.011429 | 0.011329 | 0.011362 | 0.011362 | 0.011329 |
| 0.011362 | 0.011295 | 0.011329 | 0.011362 | 0.011329 | 0.011262 | 0.011295 |
| 0.011295 | 0.011362 | 0.011195 | 0.011362 | 0.011396 | 0.011429 | 0.011329 |
| 0.011295 | 0.011262 | 0.011597 | 0.011597 | 0.011396 | 0.011430 | 0.011463 |
| 0.011228 | 0.011228 | 0.011262 | 0.011362 | 0.011228 | 0.011463 | 0.011463 |
| 0.011497 | 0.011496 | 0.011429 | 0.011530 | 0.011631 | 0.011532 | 0.011362 |
| 0.011362 | 0.011429 | 0.011463 | 0.011295 | 0.011362 | 0.011329 | 0.011362 |
| 0.011430 | 0.011430 | 0.011463 | 0.011430 | 0.011330 | 0.011530 | 0.011497 |
| 0.011365 | 0.011262 | 0.011362 | 0.011463 | 0.011362 | 0.011430 | 0.011530 |
| 0.011698 | 0.011402 | 0.011564 | 0.011530 | 0.011463 | 0.011631 | 0.011262 |
| 0.011431 | 0.011329 | 0.011295 | 0.011295 | 0.011362 | 0.011195 | 0.011362 |
| 0.011396 | 0.011429 | 0.011329 | 0.011295 | 0.011262 | 0.011597 | 0.011597 |
| 0.011396 | 0.011430 | 0.011496 | 0.011429 | 0.011934 | 0.011489 | 0.011412 |
| 0.011482 | 0.011441 | 0.011552 | 0.011441 | 0.011550 | 0.011474 | 0.011439 |
| 0.011884 | 0.011337 | 0.011471 | 0.011406 | 0.011680 | 0.011536 | 0.011638 |
| 0.011910 | 0.011437 | 0.011601 | 0.011664 | 0.011530 | 0.011463 | 0.011567 |
| 0.011228 | 0.011396 | 0.011530 | 0.011496 | 0.011499 | 0.011429 | 0.011397 |
| 0.011329 | 0.011262 | 0.011295 | 0.011329 | 0.011228 | 0.011295 | 0.011194 |
| 0.011262 | 0.011295 | 0.011262 | 0.011228 | 0.011329 | 0.011262 | 0.011295 |
| 0.011295 | 0.011228 | 0.011295 | 0.011329 | 0.011228 | 0.011429 | 0.011463 |
| 0.011362 | 0.011362 | 0.011362 | 0.011362 | 0.011295 | 0.011631 | 0.011329 |
| 0.011304 | 0.011295 | 0.011463 | 0.011467 | 0.011396 | 0.011396 | 0.011396 |
| 0.011396 | 0.011329 | 0.011295 | 0.011329 | 0.011429 | 0.011429 | 0.011362 |
| 0.011362 | 0.011496 | 0.011597 | 0.011396 | 0.011597 | 0.011597 | 0.011463 |
| 0.011295 | 0.011362 | 0.011396 | 0.011732 | 0.011362 | 0.011396 | 0.011362 |
| 0.011396 | 0.000000 | 0.000000 | 0.011564 | 0.011564 | 0.011530 | 0.011329 |
| 0.011429 | 0.011496 | 0.011362 | 0.011429 | 0.011396 | 0.011262 | 0.011530 |
| 0.011362 | 0.011329 | 0.000000 | 0.011496 | 0.011329 | 0.011429 | 0.011664 |
| 0.011362 | 0.011671 | 0.011664 | 0.011385 | 0.000000 | 0.011366 | 0.011215 |
| 0.011170 | 0.011605 | 0.011236 | 0.011328 | 0.011158 | 0.011315 | 0.011273 |
| 0.011366 | 0.011192 | 0.011339 | 0.011126 | 0.011222 | 0.011328 | 0.011385 |
| 0.011399 | 0.011296 | 0.011307 | 0.011307 | 0.011363 | 0.011429 | 0.011497 |
| 0.011497 | 0.011363 | 0.011466 | 0.011467 | 0.011603 | 0.011625 | 0.011362 |
| 0.011530 | 0.011396 | 0.011329 | 0.011362 | 0.011228 | 0.011396 | 0.011262 |
| 0.011329 | 0.011329 | 0.011295 | 0.011262 | 0.011295 | 0.011262 | 0.011362 |
| 0.011340 | 0.011340 | 0.011334 | 0.011368 | 0.011505 | 0.011470 | 0.011470 |

|          |          |          |          |          |          |          |
|----------|----------|----------|----------|----------|----------|----------|
| 0.011469 | 0.011396 | 0.011208 | 0.011204 | 0.011331 | 0.011501 | 0.011501 |
| 0.011296 | 0.011365 | 0.011599 | 0.011567 | 0.011497 | 0.011531 | 0.011463 |
| 0.011396 | 0.011463 | 0.011463 | 0.011362 | 0.011866 | 0.011530 | 0.011597 |
| 0.011631 | 0.011630 | 0.011333 | 0.011407 | 0.011295 | 0.011497 | 0.011463 |
| 0.011497 | 0.011530 | 0.011530 | 0.011530 | 0.011689 | 0.011664 | 0.011303 |
| 0.011195 | 0.011199 | 0.011298 | 0.011264 | 0.011299 | 0.011209 | 0.011468 |
| 0.011335 | 0.011367 | 0.011203 | 0.011360 | 0.011329 | 0.011402 | 0.011295 |
| 0.011262 | 0.011195 | 0.011329 | 0.011295 | 0.011429 | 0.011396 | 0.011329 |
| 0.011429 | 0.011497 | 0.011295 | 0.011295 | 0.011329 | 0.011329 | 0.011330 |
| 0.011398 | 0.011329 | 0.011329 | 0.011363 | 0.011429 | 0.011497 | 0.011497 |
| 0.011363 | 0.011466 | 0.011467 | 0.011603 | 0.011625 | 0.011362 | 0.011530 |
| 0.011463 | 0.011463 | 0.011297 | 0.011478 | 0.011408 | 0.011435 | 0.011270 |
| 0.011473 | 0.011561 | 0.011399 | 0.011366 | 0.011262 | 0.011463 | 0.011329 |
| 0.011429 | 0.011362 | 0.011262 | 0.011363 | 0.011463 | 0.011466 | 0.011362 |
| 0.011262 | 0.011195 | 0.011329 | 0.011262 | 0.011195 | 0.011298 | 0.011463 |
| 0.011362 | 0.011295 | 0.011329 | 0.011362 | 0.011329 | 0.011262 | 0.011396 |
| 0.011329 | 0.011362 | 0.011362 | 0.011295 | 0.011362 | 0.011597 | 0.011194 |
| 0.011295 | 0.011631 | 0.011295 | 0.011329 | 0.011295 | 0.011597 | 0.011232 |
| 0.011510 | 0.011230 | 0.011161 | 0.011382 | 0.011467 | 0.011383 | 0.011186 |
| 0.011113 | 0.011396 | 0.011496 | 0.011603 | 0.011464 | 0.011568 | 0.011733 |
| 0.011632 | 0.011669 | 0.011631 | 0.011846 | 0.011597 | 0.012472 | 0.011633 |
| 0.012372 | 0.012139 | 0.012273 | 0.012545 | 0.011597 | 0.011295 | 0.011598 |
| 0.012036 | 0.011937 | 0.011564 | 0.011463 | 0.011531 | 0.011531 | 0.011500 |
| 0.011396 | 0.011365 | 0.011463 | 0.011430 | 0.011800 | 0.011866 | 0.011867 |
| 0.011766 | 0.011867 | 0.011970 | 0.011703 | 0.011969 | 0.011974 | 0.012036 |
| 0.012037 | 0.012070 | 0.011981 | 0.012037 | 0.012038 | 0.011396 | 0.011631 |
| 0.011699 | 0.012202 | 0.011704 | 0.011933 | 0.012406 | 0.011468 | 0.011363 |
| 0.011329 | 0.011329 | 0.011799 | 0.011842 | 0.011940 | 0.011664 | 0.011330 |
| S584     | 0.011967 | 0.011967 | 0.012236 | 0.012001 | 0.012001 | 0.012068 |
| 0.011910 | 0.011842 | 0.012068 | 0.011564 | 0.011631 | 0.011531 | 0.011564 |
| 0.011530 | 0.011765 | 0.011497 | 0.011597 | 0.011665 | 0.011631 | 0.011597 |
| 0.011564 | 0.011597 | 0.011631 | 0.011564 | 0.011598 | 0.011597 | 0.011875 |
| 0.011765 | 0.011597 | 0.011497 | 0.011664 | 0.011665 | 0.011631 | 0.011665 |
| 0.011631 | 0.011732 | 0.011631 | 0.011631 | 0.011665 | 0.011631 | 0.011799 |
| 0.011497 | 0.011631 | 0.011665 | 0.011597 | 0.011631 | 0.011732 | 0.011665 |
| 0.011631 | 0.011799 | 0.011699 | 0.011900 | 0.011631 | 0.011832 | 0.011631 |
| 0.011597 | 0.011631 | 0.011765 | 0.011832 | 0.011934 | 0.011631 | 0.011732 |
| 0.011665 | 0.011732 | 0.011631 | 0.011866 | 0.012035 | 0.011631 | 0.011698 |
| 0.011597 | 0.011698 | 0.011665 | 0.011732 | 0.011665 | 0.011665 | 0.011665 |
| 0.011564 | 0.011597 | 0.011564 | 0.011598 | 0.011631 | 0.011666 | 0.011732 |
| 0.011665 | 0.011631 | 0.011698 | 0.011597 | 0.011665 | 0.011564 | 0.011631 |
| 0.011799 | 0.011732 | 0.011967 | 0.011799 | 0.011631 | 0.011866 | 0.011631 |
| 0.011839 | 0.011957 | 0.011815 | 0.011490 | 0.011471 | 0.011649 | 0.011612 |
| 0.012305 | 0.011620 | 0.011513 | 0.011866 | 0.011866 | 0.011597 | 0.011698 |
| 0.011698 | 0.011665 | 0.011732 | 0.011631 | 0.011732 | 0.011665 | 0.011664 |
| 0.011631 | 0.011664 | 0.011934 | 0.011799 | 0.011698 | 0.011665 | 0.011598 |
| 0.011564 | 0.011497 | 0.011631 | 0.011598 | 0.011732 | 0.011698 | 0.011631 |
| 0.011732 | 0.011799 | 0.011598 | 0.011598 | 0.011631 | 0.011631 | 0.011635 |
| 0.011703 | 0.011631 | 0.011631 | 0.011528 | 0.011530 | 0.011551 | 0.011632 |
| 0.011636 | 0.011576 | 0.011577 | 0.011612 | 0.011536 | 0.011574 | 0.011533 |
| 0.011780 | 0.011647 | 0.011646 | 0.011565 | 0.011544 | 0.011700 | 0.011531 |
| 0.011599 | 0.011667 | 0.011666 | 0.011765 | 0.011698 | 0.012068 | 0.011800 |
| 0.011832 | 0.011699 | 0.011631 | 0.011665 | 0.011530 | 0.011698 | 0.011564 |
| 0.011631 | 0.011631 | 0.011598 | 0.011564 | 0.011597 | 0.011564 | 0.011665 |
| 0.011631 | 0.011732 | 0.011665 | 0.011564 | 0.011667 | 0.011766 | 0.011770 |
| 0.011766 | 0.011665 | 0.011564 | 0.011499 | 0.011631 | 0.011564 | 0.011497 |
| 0.011604 | 0.011766 | 0.011564 | 0.011766 | 0.011463 | 0.011631 | 0.011530 |
| 0.011699 | 0.011598 | 0.011631 | 0.011530 | 0.011564 | 0.011497 | 0.011631 |
| 0.011665 | 0.011598 | 0.011665 | 0.011598 | 0.011631 | 0.011665 | 0.011900 |
| 0.011934 | 0.011866 | 0.011934 | 0.011768 | 0.011934 | 0.011631 | 0.011598 |

|          |          |          |          |          |          |          |
|----------|----------|----------|----------|----------|----------|----------|
| 0.011567 | 0.011869 | 0.011655 | 0.011541 | 0.011943 | 0.011504 | 0.011651 |
| 0.011944 | 0.011843 | 0.011799 | 0.012001 | 0.011709 | 0.011866 | 0.011833 |
| 0.011765 | 0.011933 | 0.011771 | 0.011637 | 0.011731 | 0.011665 | 0.011737 |
| 0.011833 | 0.011735 | 0.011872 | 0.011941 | 0.011866 | 0.011934 | 0.012043 |
| 0.011771 | 0.011943 | 0.011873 | 0.011805 | 0.012070 | 0.011530 | 0.011734 |
| 0.011698 | 0.011631 | 0.011530 | 0.011530 | 0.011597 | 0.011597 | 0.011664 |
| 0.011597 | 0.011665 | 0.011564 | 0.011597 | 0.011597 | 0.011597 | 0.011664 |
| 0.011597 | 0.011967 | 0.011866 | 0.011900 | 0.011497 | 0.011597 | 0.011631 |
| 0.011631 | 0.011530 | 0.011665 | 0.011631 | 0.011564 | 0.011564 | 0.011564 |
| 0.012034 | 0.011665 | 0.011732 | 0.011530 | 0.011631 | 0.011799 | 0.011564 |
| 0.011564 | 0.011631 | 0.011597 | 0.011766 | 0.011564 | 0.011698 | 0.011832 |
| 0.011765 | 0.011597 | 0.011597 | 0.011530 | 0.011530 | 0.011698 | 0.011631 |
| 0.011530 | 0.011631 | 0.011497 | 0.011530 | 0.011665 | 0.011732 | 0.011564 |
| 0.011531 | 0.011665 | 0.011598 | 0.011497 | 0.011765 | 0.011497 | 0.011665 |
| 0.011711 | 0.011497 | 0.011799 | 0.011698 | 0.011665 | 0.011597 | 0.011698 |
| 0.011564 | 0.011832 | 0.011497 | 0.011698 | 0.011497 | 0.011497 | 0.011497 |
| 0.011732 | 0.011867 | 0.011631 | 0.011631 | 0.011530 | 0.011866 | 0.011497 |
| 0.011564 | 0.011564 | 0.011597 | 0.011698 | 0.011597 | 0.011698 | 0.011765 |
| 0.011765 | 0.011664 | 0.011631 | 0.011732 | 0.011698 | 0.011564 | 0.011530 |
| 0.011564 | 0.011564 | 0.011631 | 0.011497 | 0.011530 | 0.011698 | 0.011564 |
| 0.011530 | 0.011597 | 0.011732 | 0.011698 | 0.011665 | 0.011597 | 0.011598 |
| 0.011665 | 0.011597 | 0.011698 | 0.011564 | 0.011698 | 0.011799 | 0.012034 |
| 0.011597 | 0.011934 | 0.011613 | 0.018088 | 0.011453 | 0.011733 | 0.011898 |
| 0.011857 | 0.011905 | 0.011636 | 0.011524 | 0.011940 | 0.011924 | 0.011607 |
| 0.011677 | 0.011732 | 0.011490 | 0.011605 | 0.011451 | 0.011554 | 0.011534 |
| 0.011623 | 0.011656 | 0.011691 | 0.011524 | 0.011732 | 0.011766 | 0.011771 |
| 0.011644 | 0.011732 | 0.011732 | 0.011564 | 0.011665 | 0.011665 | 0.011631 |
| 0.011665 | 0.011597 | 0.011564 | 0.011665 | 0.011631 | 0.011564 | 0.011598 |
| 0.011598 | 0.011665 | 0.011564 | 0.011665 | 0.011699 | 0.011732 | 0.011631 |
| 0.011597 | 0.011564 | 0.011900 | 0.011900 | 0.011699 | 0.011733 | 0.011766 |
| 0.011530 | 0.011530 | 0.011564 | 0.011665 | 0.011530 | 0.011766 | 0.011766 |
| 0.011799 | 0.011799 | 0.011732 | 0.011833 | 0.011934 | 0.011835 | 0.011665 |
| 0.011665 | 0.011732 | 0.011766 | 0.011598 | 0.011665 | 0.011631 | 0.011665 |
| 0.011733 | 0.011732 | 0.011766 | 0.011733 | 0.011633 | 0.011833 | 0.011799 |
| 0.011670 | 0.011564 | 0.011665 | 0.011766 | 0.011665 | 0.011732 | 0.011832 |
| 0.012001 | 0.011709 | 0.011866 | 0.011833 | 0.011765 | 0.011933 | 0.011564 |
| 0.011734 | 0.011632 | 0.011598 | 0.011598 | 0.011665 | 0.011564 | 0.011665 |
| 0.011699 | 0.011732 | 0.011631 | 0.011597 | 0.011564 | 0.011900 | 0.011900 |
| 0.011699 | 0.011733 | 0.011799 | 0.011732 | 0.012306 | 0.011811 | 0.011693 |
| 0.011799 | 0.011754 | 0.011834 | 0.011718 | 0.011866 | 0.011785 | 0.011750 |
| 0.012263 | 0.011649 | 0.011780 | 0.011718 | 0.011990 | 0.011843 | 0.011945 |
| 0.012285 | 0.011739 | 0.011906 | 0.011967 | 0.011832 | 0.011765 | 0.011871 |
| 0.011530 | 0.011698 | 0.011832 | 0.011799 | 0.011804 | 0.011732 | 0.011700 |
| 0.011631 | 0.011564 | 0.011597 | 0.011631 | 0.011530 | 0.011597 | 0.011497 |
| 0.011564 | 0.011597 | 0.011564 | 0.011530 | 0.011631 | 0.011564 | 0.011597 |
| 0.011597 | 0.011530 | 0.011597 | 0.011631 | 0.011530 | 0.011732 | 0.011765 |
| 0.011665 | 0.011665 | 0.011665 | 0.011665 | 0.011597 | 0.011934 | 0.011631 |
| 0.011582 | 0.011597 | 0.011766 | 0.011739 | 0.011698 | 0.011698 | 0.011698 |
| 0.011698 | 0.011631 | 0.011597 | 0.011631 | 0.011732 | 0.011732 | 0.011665 |
| 0.011664 | 0.011799 | 0.011900 | 0.011631 | 0.011900 | 0.011900 | 0.011765 |
| 0.011597 | 0.011665 | 0.011698 | 0.012035 | 0.011665 | 0.011698 | 0.011665 |
| 0.011698 | 0.011564 | 0.011564 | 0.000000 | 0.011867 | 0.011161 | 0.011631 |
| 0.011732 | 0.011799 | 0.011665 | 0.011732 | 0.011698 | 0.011564 | 0.011833 |
| 0.011664 | 0.011631 | 0.011564 | 0.011799 | 0.011631 | 0.011732 | 0.011900 |
| 0.011664 | 0.011977 | 0.011967 | 0.011670 | 0.011399 | 0.011672 | 0.011422 |
| 0.011555 | 0.011917 | 0.011552 | 0.011641 | 0.011451 | 0.011569 | 0.011538 |
| 0.011672 | 0.011455 | 0.011617 | 0.011523 | 0.011492 | 0.011663 | 0.011709 |
| 0.011776 | 0.011611 | 0.011659 | 0.011659 | 0.011667 | 0.011732 | 0.011799 |
| 0.011799 | 0.011666 | 0.011771 | 0.011772 | 0.011874 | 0.011909 | 0.011665 |
| 0.011832 | 0.011699 | 0.011631 | 0.011665 | 0.011530 | 0.011698 | 0.011564 |

|          |          |          |          |          |          |          |
|----------|----------|----------|----------|----------|----------|----------|
| 0.011631 | 0.011631 | 0.011598 | 0.011564 | 0.011597 | 0.011564 | 0.011665 |
| 0.011654 | 0.011655 | 0.011643 | 0.011677 | 0.011813 | 0.011778 | 0.011778 |
| 0.011776 | 0.011699 | 0.011503 | 0.011492 | 0.011636 | 0.011806 | 0.011807 |
| 0.011598 | 0.011670 | 0.011902 | 0.011872 | 0.011801 | 0.011835 | 0.011765 |
| 0.011698 | 0.011765 | 0.011765 | 0.011665 | 0.012169 | 0.011765 | 0.011900 |
| 0.011934 | 0.011951 | 0.011640 | 0.011719 | 0.011597 | 0.011799 | 0.011765 |
| 0.011801 | 0.011832 | 0.011833 | 0.011833 | 0.011965 | 0.011967 | 0.011615 |
| 0.011500 | 0.011510 | 0.011605 | 0.011502 | 0.011607 | 0.011545 | 0.011774 |
| 0.011643 | 0.011762 | 0.011632 | 0.011660 | 0.011632 | 0.011711 | 0.011598 |
| 0.011564 | 0.011497 | 0.011631 | 0.011598 | 0.011732 | 0.011698 | 0.011631 |
| 0.011732 | 0.011799 | 0.011598 | 0.011598 | 0.011631 | 0.011631 | 0.011635 |
| 0.011703 | 0.011631 | 0.011631 | 0.011667 | 0.011732 | 0.011799 | 0.011799 |
| 0.011666 | 0.011771 | 0.011772 | 0.011874 | 0.011909 | 0.011665 | 0.011833 |
| 0.011765 | 0.011765 | 0.011601 | 0.011757 | 0.011721 | 0.011741 | 0.011621 |
| 0.011784 | 0.011881 | 0.011738 | 0.011672 | 0.011564 | 0.011766 | 0.011631 |
| 0.011732 | 0.011665 | 0.011564 | 0.011667 | 0.011766 | 0.011770 | 0.011665 |
| 0.011564 | 0.011499 | 0.011631 | 0.011564 | 0.011497 | 0.011604 | 0.011766 |
| 0.011665 | 0.011597 | 0.011564 | 0.011665 | 0.011631 | 0.011564 | 0.011698 |
| 0.011631 | 0.011665 | 0.011664 | 0.011597 | 0.011665 | 0.011900 | 0.011497 |
| 0.011597 | 0.011934 | 0.011597 | 0.011631 | 0.011597 | 0.011900 | 0.011489 |
| 0.011848 | 0.011528 | 0.011411 | 0.011705 | 0.011753 | 0.011707 | 0.011437 |
| 0.011375 | 0.011698 | 0.011799 | 0.011910 | 0.011767 | 0.011906 | 0.012036 |
| 0.011936 | 0.011974 | 0.011933 | 0.012189 | 0.011900 | 0.012775 | 0.011937 |
| 0.012676 | 0.012444 | 0.012578 | 0.012850 | 0.011900 | 0.011598 | 0.011901 |
| 0.012340 | 0.012275 | 0.011866 | 0.011766 | 0.011834 | 0.011834 | 0.011805 |
| 0.011698 | 0.011705 | 0.011765 | 0.011733 | 0.012103 | 0.012169 | 0.012171 |
| 0.012070 | 0.012171 | 0.012275 | 0.012042 | 0.012341 | 0.012314 | 0.012407 |
| 0.012408 | 0.012442 | 0.012392 | 0.012409 | 0.012410 | 0.011698 | 0.011935 |
| 0.012003 | 0.012506 | 0.012010 | 0.012237 | 0.012710 | 0.011774 | 0.011666 |
| 0.011631 | 0.011631 | 0.012103 | 0.012171 | 0.012257 | 0.011967 | 0.011633 |
| S585     | 0.011900 | 0.011900 | 0.012236 | 0.012001 | 0.012001 | 0.012068 |
| 0.011910 | 0.011841 | 0.012068 | 0.011497 | 0.011564 | 0.011532 | 0.011497 |
| 0.011530 | 0.011698 | 0.011497 | 0.011530 | 0.011597 | 0.011564 | 0.011530 |
| 0.011497 | 0.011530 | 0.011631 | 0.011497 | 0.011463 | 0.011530 | 0.011875 |
| 0.011765 | 0.011530 | 0.011429 | 0.011664 | 0.011530 | 0.011564 | 0.011530 |
| 0.011564 | 0.011597 | 0.011564 | 0.011564 | 0.011597 | 0.011564 | 0.011732 |
| 0.011497 | 0.011564 | 0.011597 | 0.011530 | 0.011631 | 0.011665 | 0.011597 |
| 0.011564 | 0.011732 | 0.011631 | 0.011900 | 0.011564 | 0.011765 | 0.011564 |
| 0.011530 | 0.011631 | 0.011698 | 0.011765 | 0.011933 | 0.011631 | 0.011732 |
| 0.011530 | 0.011597 | 0.011564 | 0.011732 | 0.012035 | 0.011564 | 0.011631 |
| 0.011530 | 0.011631 | 0.011597 | 0.011665 | 0.011597 | 0.011597 | 0.011597 |
| 0.011497 | 0.011530 | 0.011497 | 0.011597 | 0.011564 | 0.011599 | 0.011664 |
| 0.011597 | 0.011564 | 0.011564 | 0.011530 | 0.011664 | 0.011429 | 0.011564 |
| 0.011732 | 0.011664 | 0.011900 | 0.011732 | 0.011564 | 0.011732 | 0.011564 |
| 0.011728 | 0.011957 | 0.011778 | 0.011490 | 0.011471 | 0.011576 | 0.011690 |
| 0.012305 | 0.011721 | 0.011431 | 0.011799 | 0.011732 | 0.011597 | 0.011698 |
| 0.011631 | 0.011597 | 0.011664 | 0.011564 | 0.011665 | 0.011530 | 0.011597 |
| 0.011564 | 0.011664 | 0.011866 | 0.011732 | 0.011631 | 0.011598 | 0.011463 |
| 0.011497 | 0.011497 | 0.011497 | 0.011530 | 0.011732 | 0.011698 | 0.011631 |
| 0.011732 | 0.011799 | 0.011530 | 0.011530 | 0.011564 | 0.011564 | 0.011533 |
| 0.011601 | 0.011564 | 0.011564 | 0.011348 | 0.011458 | 0.011446 | 0.011565 |
| 0.011568 | 0.011473 | 0.011503 | 0.011543 | 0.011434 | 0.011471 | 0.011533 |
| 0.011780 | 0.011543 | 0.011542 | 0.011497 | 0.011510 | 0.011632 | 0.011599 |
| 0.011666 | 0.011600 | 0.011598 | 0.011698 | 0.011631 | 0.011933 | 0.011800 |
| 0.011832 | 0.011699 | 0.011564 | 0.011665 | 0.011463 | 0.011698 | 0.011497 |
| 0.011564 | 0.011564 | 0.011530 | 0.011497 | 0.011530 | 0.011497 | 0.011598 |
| 0.011497 | 0.011598 | 0.011598 | 0.011497 | 0.011600 | 0.011699 | 0.011703 |
| 0.011631 | 0.011598 | 0.011497 | 0.011431 | 0.011564 | 0.011497 | 0.011430 |
| 0.011536 | 0.011631 | 0.011430 | 0.011631 | 0.011463 | 0.011564 | 0.011530 |
| 0.011564 | 0.011530 | 0.011497 | 0.011531 | 0.011564 | 0.011430 | 0.011497 |

|          |          |          |          |          |          |          |
|----------|----------|----------|----------|----------|----------|----------|
| 0.011530 | 0.011530 | 0.011598 | 0.011530 | 0.011564 | 0.011598 | 0.011833 |
| 0.011934 | 0.011866 | 0.011934 | 0.011701 | 0.011934 | 0.011564 | 0.011530 |
| 0.011567 | 0.011748 | 0.011609 | 0.011472 | 0.011909 | 0.011435 | 0.011572 |
| 0.011943 | 0.011843 | 0.011732 | 0.011934 | 0.011607 | 0.011799 | 0.011698 |
| 0.011698 | 0.011866 | 0.011664 | 0.011555 | 0.011605 | 0.011598 | 0.011669 |
| 0.011765 | 0.011600 | 0.011804 | 0.011805 | 0.011799 | 0.011867 | 0.011975 |
| 0.011669 | 0.011807 | 0.011771 | 0.011703 | 0.012003 | 0.011463 | 0.011667 |
| 0.011564 | 0.011564 | 0.011463 | 0.011463 | 0.011463 | 0.011530 | 0.011597 |
| 0.011463 | 0.011530 | 0.011429 | 0.011597 | 0.011463 | 0.011530 | 0.011597 |
| 0.011530 | 0.011967 | 0.011866 | 0.011900 | 0.011429 | 0.011530 | 0.011564 |
| 0.011564 | 0.011530 | 0.011597 | 0.011631 | 0.011497 | 0.011497 | 0.011497 |
| 0.012034 | 0.011665 | 0.011665 | 0.011463 | 0.011564 | 0.011665 | 0.011429 |
| 0.011497 | 0.011564 | 0.011530 | 0.011631 | 0.011497 | 0.011631 | 0.011698 |
| 0.011698 | 0.011530 | 0.011530 | 0.011463 | 0.011463 | 0.011631 | 0.011564 |
| 0.011463 | 0.011564 | 0.011430 | 0.011463 | 0.011598 | 0.011732 | 0.011497 |
| 0.011464 | 0.011597 | 0.011531 | 0.011430 | 0.011765 | 0.011430 | 0.011597 |
| 0.011437 | 0.011497 | 0.011799 | 0.011631 | 0.011665 | 0.011530 | 0.011631 |
| 0.011497 | 0.011765 | 0.011429 | 0.011698 | 0.011497 | 0.011497 | 0.011429 |
| 0.011597 | 0.011867 | 0.011564 | 0.011631 | 0.011463 | 0.011866 | 0.011497 |
| 0.011497 | 0.011497 | 0.011530 | 0.011564 | 0.011530 | 0.011631 | 0.011698 |
| 0.011698 | 0.011665 | 0.011564 | 0.011665 | 0.011564 | 0.011497 | 0.011463 |
| 0.011497 | 0.011497 | 0.011564 | 0.011497 | 0.011396 | 0.011631 | 0.011497 |
| 0.011530 | 0.011530 | 0.011665 | 0.011698 | 0.011597 | 0.011463 | 0.011530 |
| 0.011597 | 0.011530 | 0.011631 | 0.011497 | 0.011631 | 0.011732 | 0.012034 |
| 0.011530 | 0.011934 | 0.011509 | 0.018012 | 0.011453 | 0.011672 | 0.011863 |
| 0.011856 | 0.011870 | 0.011584 | 0.011525 | 0.011939 | 0.011924 | 0.011546 |
| 0.011772 | 0.011732 | 0.011411 | 0.011437 | 0.011490 | 0.011604 | 0.011577 |
| 0.011811 | 0.011619 | 0.011654 | 0.011523 | 0.011665 | 0.011698 | 0.011703 |
| 0.011507 | 0.011665 | 0.011665 | 0.011631 | 0.011598 | 0.011598 | 0.011564 |
| 0.011598 | 0.011530 | 0.011564 | 0.011598 | 0.011564 | 0.011497 | 0.011530 |
| 0.011530 | 0.011598 | 0.011497 | 0.011598 | 0.011631 | 0.011665 | 0.011564 |
| 0.011597 | 0.011564 | 0.011900 | 0.011900 | 0.011631 | 0.011666 | 0.011699 |
| 0.011463 | 0.011463 | 0.011497 | 0.011530 | 0.011463 | 0.011698 | 0.011698 |
| 0.011732 | 0.011732 | 0.011665 | 0.011765 | 0.011934 | 0.011768 | 0.011530 |
| 0.011598 | 0.011665 | 0.011631 | 0.011530 | 0.011598 | 0.011564 | 0.011598 |
| 0.011665 | 0.011665 | 0.011698 | 0.011598 | 0.011498 | 0.011765 | 0.011631 |
| 0.011602 | 0.011497 | 0.011598 | 0.011699 | 0.011598 | 0.011732 | 0.011765 |
| 0.011934 | 0.011607 | 0.011799 | 0.011698 | 0.011698 | 0.011866 | 0.011497 |
| 0.011667 | 0.011565 | 0.011530 | 0.011530 | 0.011598 | 0.011497 | 0.011598 |
| 0.011631 | 0.011665 | 0.011564 | 0.011597 | 0.011564 | 0.011900 | 0.011900 |
| 0.011631 | 0.011666 | 0.011732 | 0.011664 | 0.012305 | 0.011703 | 0.011623 |
| 0.011658 | 0.011650 | 0.011763 | 0.011649 | 0.011795 | 0.011681 | 0.011647 |
| 0.012228 | 0.011545 | 0.011677 | 0.011648 | 0.011887 | 0.011775 | 0.011809 |
| 0.012285 | 0.011701 | 0.011804 | 0.011900 | 0.011765 | 0.011765 | 0.011770 |
| 0.011463 | 0.011564 | 0.011765 | 0.011732 | 0.011702 | 0.011732 | 0.011700 |
| 0.011564 | 0.011429 | 0.011463 | 0.011564 | 0.011396 | 0.011530 | 0.011429 |
| 0.011564 | 0.011597 | 0.011497 | 0.011463 | 0.011564 | 0.011497 | 0.011530 |
| 0.011530 | 0.011463 | 0.011530 | 0.011564 | 0.011463 | 0.011597 | 0.011698 |
| 0.011597 | 0.011665 | 0.011597 | 0.011597 | 0.011530 | 0.011933 | 0.011564 |
| 0.011547 | 0.011530 | 0.011766 | 0.011773 | 0.011564 | 0.011631 | 0.011631 |
| 0.011631 | 0.011497 | 0.011530 | 0.011497 | 0.011665 | 0.011665 | 0.011597 |
| 0.011597 | 0.011732 | 0.011900 | 0.011631 | 0.011833 | 0.011833 | 0.011698 |
| 0.011530 | 0.011597 | 0.011631 | 0.012034 | 0.011598 | 0.011564 | 0.011597 |
| 0.011631 | 0.011564 | 0.011564 | 0.011867 | 0.000000 | 0.011833 | 0.011564 |
| 0.011665 | 0.011732 | 0.011597 | 0.011665 | 0.011631 | 0.011497 | 0.011833 |
| 0.011597 | 0.011564 | 0.011564 | 0.011732 | 0.011564 | 0.011665 | 0.011900 |
| 0.011597 | 0.011977 | 0.011967 | 0.011711 | 0.011455 | 0.011672 | 0.011473 |
| 0.011500 | 0.011917 | 0.011482 | 0.011686 | 0.011500 | 0.011621 | 0.011592 |
| 0.011723 | 0.011455 | 0.011561 | 0.011457 | 0.011438 | 0.011596 | 0.011587 |
| 0.011625 | 0.011454 | 0.011624 | 0.011553 | 0.011600 | 0.011732 | 0.011799 |

|          |          |          |          |          |          |          |
|----------|----------|----------|----------|----------|----------|----------|
| 0.011799 | 0.011666 | 0.011771 | 0.011772 | 0.011908 | 0.011944 | 0.011597 |
| 0.011832 | 0.011699 | 0.011564 | 0.011665 | 0.011463 | 0.011698 | 0.011497 |
| 0.011564 | 0.011564 | 0.011530 | 0.011497 | 0.011530 | 0.011497 | 0.011598 |
| 0.011584 | 0.011550 | 0.011574 | 0.011574 | 0.011711 | 0.011641 | 0.011709 |
| 0.011708 | 0.011632 | 0.011430 | 0.011420 | 0.011568 | 0.011670 | 0.011739 |
| 0.011531 | 0.011602 | 0.011835 | 0.011804 | 0.011733 | 0.011767 | 0.011698 |
| 0.011631 | 0.011698 | 0.011698 | 0.011597 | 0.012169 | 0.011765 | 0.011833 |
| 0.011867 | 0.011915 | 0.011572 | 0.011615 | 0.011530 | 0.011732 | 0.011698 |
| 0.011733 | 0.011765 | 0.011765 | 0.011765 | 0.011926 | 0.011900 | 0.011546 |
| 0.011432 | 0.011406 | 0.011537 | 0.011502 | 0.011573 | 0.011433 | 0.011774 |
| 0.011575 | 0.011586 | 0.011346 | 0.011547 | 0.011565 | 0.011608 | 0.011463 |
| 0.011497 | 0.011497 | 0.011497 | 0.011530 | 0.011732 | 0.011698 | 0.011631 |
| 0.011732 | 0.011799 | 0.011530 | 0.011530 | 0.011564 | 0.011564 | 0.011533 |
| 0.011601 | 0.011564 | 0.011564 | 0.011600 | 0.011732 | 0.011799 | 0.011799 |
| 0.011666 | 0.011771 | 0.011772 | 0.011908 | 0.011944 | 0.011597 | 0.011765 |
| 0.011698 | 0.011698 | 0.011534 | 0.011687 | 0.011616 | 0.011639 | 0.011516 |
| 0.011646 | 0.011881 | 0.011695 | 0.011604 | 0.011430 | 0.011631 | 0.011497 |
| 0.011598 | 0.011598 | 0.011497 | 0.011600 | 0.011699 | 0.011703 | 0.011598 |
| 0.011497 | 0.011431 | 0.011564 | 0.011497 | 0.011430 | 0.011536 | 0.011631 |
| 0.011598 | 0.011530 | 0.011564 | 0.011598 | 0.011564 | 0.011497 | 0.011698 |
| 0.011564 | 0.011597 | 0.011597 | 0.011530 | 0.011597 | 0.011833 | 0.011497 |
| 0.011530 | 0.011933 | 0.011530 | 0.011497 | 0.011530 | 0.011900 | 0.011446 |
| 0.011904 | 0.011400 | 0.011512 | 0.011624 | 0.011753 | 0.011706 | 0.011395 |
| 0.011480 | 0.011698 | 0.011799 | 0.011909 | 0.011767 | 0.011906 | 0.012036 |
| 0.011935 | 0.011974 | 0.011933 | 0.012189 | 0.011900 | 0.012775 | 0.011937 |
| 0.012676 | 0.012444 | 0.012578 | 0.012850 | 0.011900 | 0.011598 | 0.011901 |
| 0.012340 | 0.012275 | 0.011866 | 0.011766 | 0.011834 | 0.011834 | 0.011805 |
| 0.011698 | 0.011705 | 0.011765 | 0.011699 | 0.012103 | 0.012169 | 0.012171 |
| 0.012070 | 0.012171 | 0.012275 | 0.012042 | 0.012340 | 0.012348 | 0.012407 |
| 0.012408 | 0.012442 | 0.012392 | 0.012408 | 0.012410 | 0.011631 | 0.011934 |
| 0.012003 | 0.012506 | 0.011976 | 0.012237 | 0.012710 | 0.011774 | 0.011665 |
| 0.011631 | 0.011631 | 0.012103 | 0.012130 | 0.012187 | 0.011967 | 0.011633 |
| S586     | 0.011933 | 0.011933 | 0.012202 | 0.011967 | 0.011967 | 0.012034 |
| 0.011875 | 0.011807 | 0.012034 | 0.011530 | 0.011597 | 0.011565 | 0.011530 |
| 0.011497 | 0.011665 | 0.011463 | 0.011564 | 0.011631 | 0.011597 | 0.011564 |
| 0.011530 | 0.011564 | 0.011597 | 0.011531 | 0.011564 | 0.011564 | 0.011841 |
| 0.011732 | 0.011564 | 0.011463 | 0.011631 | 0.011631 | 0.011597 | 0.011631 |
| 0.011597 | 0.011698 | 0.011597 | 0.011597 | 0.011631 | 0.011597 | 0.011765 |
| 0.011463 | 0.011597 | 0.011631 | 0.011564 | 0.011597 | 0.011698 | 0.011631 |
| 0.011597 | 0.011765 | 0.011665 | 0.011866 | 0.011597 | 0.011799 | 0.011597 |
| 0.011564 | 0.011598 | 0.011732 | 0.011799 | 0.011900 | 0.011597 | 0.011698 |
| 0.011631 | 0.011698 | 0.011597 | 0.011832 | 0.012001 | 0.011597 | 0.011665 |
| 0.011564 | 0.011664 | 0.011631 | 0.011698 | 0.011631 | 0.011631 | 0.011631 |
| 0.011530 | 0.011564 | 0.011530 | 0.011564 | 0.011597 | 0.011632 | 0.011698 |
| 0.011631 | 0.011597 | 0.011664 | 0.011564 | 0.011631 | 0.011530 | 0.011597 |
| 0.011765 | 0.011698 | 0.011933 | 0.011765 | 0.011597 | 0.011833 | 0.011597 |
| 0.011802 | 0.011920 | 0.011777 | 0.011451 | 0.011433 | 0.011612 | 0.011572 |
| 0.012268 | 0.011620 | 0.011513 | 0.011832 | 0.011832 | 0.011564 | 0.011665 |
| 0.011665 | 0.011631 | 0.011698 | 0.011597 | 0.011698 | 0.011631 | 0.011631 |
| 0.011597 | 0.011631 | 0.011900 | 0.011765 | 0.011665 | 0.011631 | 0.011564 |
| 0.011530 | 0.011463 | 0.011598 | 0.011564 | 0.011698 | 0.011665 | 0.011598 |
| 0.011698 | 0.011765 | 0.011564 | 0.011564 | 0.011598 | 0.011597 | 0.011601 |
| 0.011669 | 0.011598 | 0.011598 | 0.011492 | 0.011494 | 0.011516 | 0.011598 |
| 0.011602 | 0.011541 | 0.011540 | 0.011578 | 0.011502 | 0.011540 | 0.011567 |
| 0.011744 | 0.011612 | 0.011611 | 0.011531 | 0.011510 | 0.011666 | 0.011497 |
| 0.011565 | 0.011633 | 0.011632 | 0.011731 | 0.011664 | 0.012034 | 0.011766 |
| 0.011799 | 0.011665 | 0.011597 | 0.011631 | 0.011497 | 0.011665 | 0.011530 |
| 0.011597 | 0.011597 | 0.011564 | 0.011530 | 0.011564 | 0.011530 | 0.011631 |
| 0.011598 | 0.011698 | 0.011631 | 0.011530 | 0.011633 | 0.011732 | 0.011736 |
| 0.011732 | 0.011631 | 0.011530 | 0.011465 | 0.011597 | 0.011530 | 0.011463 |

|          |          |          |          |          |          |          |
|----------|----------|----------|----------|----------|----------|----------|
| 0.011570 | 0.011732 | 0.011530 | 0.011732 | 0.011429 | 0.011598 | 0.011497 |
| 0.011665 | 0.011564 | 0.011598 | 0.011497 | 0.011530 | 0.011463 | 0.011598 |
| 0.011631 | 0.011564 | 0.011631 | 0.011564 | 0.011597 | 0.011631 | 0.011866 |
| 0.011900 | 0.011833 | 0.011900 | 0.011735 | 0.011900 | 0.011597 | 0.011564 |
| 0.011533 | 0.011829 | 0.011609 | 0.011506 | 0.011909 | 0.011469 | 0.011611 |
| 0.011909 | 0.011809 | 0.011765 | 0.011967 | 0.011675 | 0.011833 | 0.011799 |
| 0.011732 | 0.011900 | 0.011735 | 0.011596 | 0.011689 | 0.011631 | 0.011703 |
| 0.011799 | 0.011701 | 0.011838 | 0.011906 | 0.011833 | 0.011900 | 0.012009 |
| 0.011737 | 0.011909 | 0.011839 | 0.011771 | 0.012036 | 0.011496 | 0.011701 |
| 0.011664 | 0.011597 | 0.011496 | 0.011496 | 0.011564 | 0.011564 | 0.011631 |
| 0.011564 | 0.011631 | 0.011530 | 0.011564 | 0.011564 | 0.011564 | 0.011631 |
| 0.011564 | 0.011933 | 0.011833 | 0.011866 | 0.011463 | 0.011564 | 0.011597 |
| 0.011597 | 0.011496 | 0.011631 | 0.011597 | 0.011530 | 0.011530 | 0.011530 |
| 0.012000 | 0.011631 | 0.011698 | 0.011497 | 0.011597 | 0.011766 | 0.011530 |
| 0.011530 | 0.011597 | 0.011564 | 0.011732 | 0.011530 | 0.011664 | 0.011799 |
| 0.011732 | 0.011564 | 0.011564 | 0.011497 | 0.011496 | 0.011665 | 0.011597 |
| 0.011497 | 0.011597 | 0.011463 | 0.011497 | 0.011631 | 0.011698 | 0.011530 |
| 0.011497 | 0.011631 | 0.011564 | 0.011463 | 0.011732 | 0.011463 | 0.011631 |
| 0.011677 | 0.011530 | 0.011765 | 0.011665 | 0.011631 | 0.011564 | 0.011664 |
| 0.011530 | 0.011799 | 0.011463 | 0.011665 | 0.011463 | 0.011463 | 0.011463 |
| 0.011698 | 0.011833 | 0.011597 | 0.011597 | 0.011496 | 0.011833 | 0.011463 |
| 0.011530 | 0.011530 | 0.011564 | 0.011665 | 0.011564 | 0.011664 | 0.011732 |
| 0.011732 | 0.011631 | 0.011597 | 0.011698 | 0.011664 | 0.011530 | 0.011497 |
| 0.011530 | 0.011530 | 0.011597 | 0.011463 | 0.011497 | 0.011665 | 0.011530 |
| 0.011497 | 0.011564 | 0.011698 | 0.011665 | 0.011631 | 0.011564 | 0.011564 |
| 0.011631 | 0.011564 | 0.011664 | 0.011530 | 0.011664 | 0.011765 | 0.012001 |
| 0.011564 | 0.011900 | 0.011578 | 0.018088 | 0.011453 | 0.011733 | 0.011863 |
| 0.011822 | 0.011870 | 0.011636 | 0.011466 | 0.011939 | 0.011889 | 0.011607 |
| 0.011630 | 0.011732 | 0.011450 | 0.011605 | 0.011451 | 0.011554 | 0.011533 |
| 0.011623 | 0.011619 | 0.011691 | 0.011457 | 0.011698 | 0.011732 | 0.011737 |
| 0.011610 | 0.011698 | 0.011698 | 0.011530 | 0.011631 | 0.011631 | 0.011598 |
| 0.011631 | 0.011564 | 0.011530 | 0.011631 | 0.011598 | 0.011530 | 0.011564 |
| 0.011564 | 0.011631 | 0.011530 | 0.011631 | 0.011665 | 0.011698 | 0.011597 |
| 0.011564 | 0.011530 | 0.011866 | 0.011866 | 0.011665 | 0.011699 | 0.011732 |
| 0.011497 | 0.011497 | 0.011530 | 0.011631 | 0.011497 | 0.011732 | 0.011732 |
| 0.011766 | 0.011765 | 0.011698 | 0.011799 | 0.011900 | 0.011801 | 0.011631 |
| 0.011631 | 0.011698 | 0.011732 | 0.011564 | 0.011631 | 0.011598 | 0.011631 |
| 0.011699 | 0.011698 | 0.011732 | 0.011699 | 0.011599 | 0.011799 | 0.011766 |
| 0.011636 | 0.011530 | 0.011631 | 0.011732 | 0.011631 | 0.011699 | 0.011799 |
| 0.011967 | 0.011675 | 0.011833 | 0.011799 | 0.011732 | 0.011900 | 0.011531 |
| 0.011700 | 0.011598 | 0.011564 | 0.011564 | 0.011631 | 0.011530 | 0.011631 |
| 0.011665 | 0.011698 | 0.011597 | 0.011564 | 0.011530 | 0.011866 | 0.011866 |
| 0.011665 | 0.011699 | 0.011765 | 0.011698 | 0.012272 | 0.011775 | 0.011658 |
| 0.011763 | 0.011719 | 0.011798 | 0.011684 | 0.011830 | 0.011750 | 0.011715 |
| 0.012228 | 0.011614 | 0.011745 | 0.011683 | 0.011956 | 0.011809 | 0.011911 |
| 0.012251 | 0.011701 | 0.011872 | 0.011933 | 0.011799 | 0.011732 | 0.011838 |
| 0.011496 | 0.011665 | 0.011799 | 0.011765 | 0.011770 | 0.011698 | 0.011667 |
| 0.011597 | 0.011530 | 0.011564 | 0.011597 | 0.011497 | 0.011564 | 0.011463 |
| 0.011530 | 0.011564 | 0.011530 | 0.011497 | 0.011597 | 0.011530 | 0.011564 |
| 0.011564 | 0.011496 | 0.011564 | 0.011597 | 0.011496 | 0.011698 | 0.011732 |
| 0.011631 | 0.011631 | 0.011631 | 0.011631 | 0.011564 | 0.011900 | 0.011597 |
| 0.011547 | 0.011564 | 0.011732 | 0.011705 | 0.011665 | 0.011664 | 0.011664 |
| 0.011665 | 0.011597 | 0.011564 | 0.011597 | 0.011698 | 0.011698 | 0.011631 |
| 0.011631 | 0.011765 | 0.011866 | 0.011597 | 0.011866 | 0.011866 | 0.011732 |
| 0.011564 | 0.011631 | 0.011665 | 0.012001 | 0.011631 | 0.011665 | 0.011631 |
| 0.011664 | 0.011530 | 0.011530 | 0.011161 | 0.011833 | 0.000000 | 0.011597 |
| 0.011698 | 0.011765 | 0.011631 | 0.011698 | 0.011664 | 0.011530 | 0.011799 |
| 0.011631 | 0.011597 | 0.011530 | 0.011765 | 0.011597 | 0.011698 | 0.011866 |
| 0.011631 | 0.011943 | 0.011933 | 0.011629 | 0.011342 | 0.011638 | 0.011370 |
| 0.011555 | 0.011878 | 0.011517 | 0.011641 | 0.011402 | 0.011518 | 0.011485 |

|          |          |          |          |          |          |          |
|----------|----------|----------|----------|----------|----------|----------|
| 0.011672 | 0.011455 | 0.011561 | 0.011457 | 0.011438 | 0.011596 | 0.011669 |
| 0.011738 | 0.011572 | 0.011624 | 0.011624 | 0.011633 | 0.011698 | 0.011766 |
| 0.011766 | 0.011632 | 0.011737 | 0.011738 | 0.011840 | 0.011873 | 0.011631 |
| 0.011799 | 0.011665 | 0.011597 | 0.011631 | 0.011497 | 0.011665 | 0.011530 |
| 0.011597 | 0.011597 | 0.011564 | 0.011530 | 0.011564 | 0.011530 | 0.011631 |
| 0.011619 | 0.011620 | 0.011608 | 0.011642 | 0.011779 | 0.011744 | 0.011743 |
| 0.011742 | 0.011666 | 0.011466 | 0.011456 | 0.011602 | 0.011772 | 0.011773 |
| 0.011565 | 0.011636 | 0.011868 | 0.011838 | 0.011767 | 0.011801 | 0.011732 |
| 0.011664 | 0.011732 | 0.011732 | 0.011631 | 0.012135 | 0.011732 | 0.011866 |
| 0.011900 | 0.011915 | 0.011606 | 0.011684 | 0.011564 | 0.011765 | 0.011732 |
| 0.011767 | 0.011799 | 0.011799 | 0.011799 | 0.011925 | 0.011933 | 0.011581 |
| 0.011432 | 0.011476 | 0.011571 | 0.011536 | 0.011573 | 0.011508 | 0.011740 |
| 0.011609 | 0.011718 | 0.011584 | 0.011622 | 0.011598 | 0.011676 | 0.011564 |
| 0.011530 | 0.011463 | 0.011598 | 0.011564 | 0.011698 | 0.011665 | 0.011598 |
| 0.011698 | 0.011765 | 0.011564 | 0.011564 | 0.011598 | 0.011597 | 0.011601 |
| 0.011669 | 0.011598 | 0.011598 | 0.011633 | 0.011698 | 0.011766 | 0.011766 |
| 0.011632 | 0.011737 | 0.011738 | 0.011840 | 0.011873 | 0.011631 | 0.011799 |
| 0.011732 | 0.011732 | 0.011567 | 0.011722 | 0.011686 | 0.011707 | 0.011586 |
| 0.011749 | 0.011835 | 0.011695 | 0.011638 | 0.011530 | 0.011732 | 0.011598 |
| 0.011698 | 0.011631 | 0.011530 | 0.011633 | 0.011732 | 0.011736 | 0.011631 |
| 0.011530 | 0.011465 | 0.011597 | 0.011530 | 0.011463 | 0.011570 | 0.011732 |
| 0.011631 | 0.011564 | 0.011530 | 0.011631 | 0.011598 | 0.011530 | 0.011665 |
| 0.011597 | 0.011631 | 0.011631 | 0.011564 | 0.011631 | 0.011866 | 0.011463 |
| 0.011564 | 0.011900 | 0.011564 | 0.011597 | 0.011564 | 0.011866 | 0.011489 |
| 0.011791 | 0.011443 | 0.011361 | 0.011664 | 0.011712 | 0.011670 | 0.011395 |
| 0.011323 | 0.011664 | 0.011765 | 0.011875 | 0.011734 | 0.011872 | 0.012002 |
| 0.011902 | 0.011940 | 0.011900 | 0.012154 | 0.011866 | 0.012741 | 0.011903 |
| 0.012642 | 0.012410 | 0.012544 | 0.012816 | 0.011866 | 0.011564 | 0.011867 |
| 0.012306 | 0.012241 | 0.011833 | 0.011732 | 0.011800 | 0.011800 | 0.011771 |
| 0.011664 | 0.011671 | 0.011732 | 0.011699 | 0.012070 | 0.012135 | 0.012137 |
| 0.012036 | 0.012137 | 0.012241 | 0.012008 | 0.012307 | 0.012280 | 0.012374 |
| 0.012374 | 0.012408 | 0.012358 | 0.012375 | 0.012376 | 0.011664 | 0.011901 |
| 0.011969 | 0.012472 | 0.011976 | 0.012203 | 0.012676 | 0.011740 | 0.011632 |
| 0.011597 | 0.011597 | 0.012069 | 0.012130 | 0.012222 | 0.011933 | 0.011599 |
| S587     | 0.011664 | 0.011664 | 0.012001 | 0.011765 | 0.011765 | 0.011832 |
| 0.011671 | 0.011603 | 0.011832 | 0.011262 | 0.011329 | 0.011296 | 0.011262 |
| 0.011295 | 0.011463 | 0.011262 | 0.011295 | 0.011362 | 0.011329 | 0.011295 |
| 0.011262 | 0.011295 | 0.011396 | 0.011262 | 0.011295 | 0.011295 | 0.011637 |
| 0.011530 | 0.011295 | 0.011194 | 0.011429 | 0.011362 | 0.011329 | 0.011362 |
| 0.011329 | 0.011429 | 0.011329 | 0.011329 | 0.011362 | 0.011329 | 0.011497 |
| 0.011262 | 0.011329 | 0.011362 | 0.011295 | 0.011396 | 0.011429 | 0.011362 |
| 0.011329 | 0.011497 | 0.011396 | 0.011664 | 0.011329 | 0.011597 | 0.011329 |
| 0.011295 | 0.011396 | 0.011463 | 0.011597 | 0.011698 | 0.011396 | 0.011496 |
| 0.011362 | 0.011429 | 0.011329 | 0.011564 | 0.011799 | 0.011329 | 0.011396 |
| 0.011295 | 0.011396 | 0.011362 | 0.011429 | 0.011362 | 0.011362 | 0.011362 |
| 0.011262 | 0.011295 | 0.011262 | 0.011362 | 0.011329 | 0.011363 | 0.011429 |
| 0.011362 | 0.011329 | 0.011396 | 0.011295 | 0.011429 | 0.011262 | 0.011329 |
| 0.011496 | 0.011429 | 0.011664 | 0.011497 | 0.011329 | 0.011564 | 0.011329 |
| 0.011505 | 0.011733 | 0.011551 | 0.011255 | 0.011210 | 0.011355 | 0.011415 |
| 0.012048 | 0.011467 | 0.011225 | 0.011564 | 0.011564 | 0.011362 | 0.011463 |
| 0.011396 | 0.011362 | 0.011429 | 0.011329 | 0.011429 | 0.011362 | 0.011362 |
| 0.011329 | 0.011429 | 0.011631 | 0.011496 | 0.011396 | 0.011362 | 0.011295 |
| 0.011262 | 0.011262 | 0.011329 | 0.011295 | 0.011497 | 0.011463 | 0.011396 |
| 0.011497 | 0.011564 | 0.011295 | 0.011295 | 0.011329 | 0.011329 | 0.011330 |
| 0.011398 | 0.011329 | 0.011329 | 0.011204 | 0.011277 | 0.011236 | 0.011329 |
| 0.011331 | 0.011266 | 0.011318 | 0.011302 | 0.011230 | 0.011266 | 0.011297 |
| 0.011564 | 0.011336 | 0.011370 | 0.011262 | 0.011268 | 0.011397 | 0.011363 |
| 0.011430 | 0.011364 | 0.011363 | 0.011463 | 0.011396 | 0.011765 | 0.011564 |
| 0.011597 | 0.011463 | 0.011329 | 0.011430 | 0.011228 | 0.011463 | 0.011262 |
| 0.011329 | 0.011329 | 0.011295 | 0.011194 | 0.011295 | 0.011262 | 0.011362 |



|          |          |          |          |          |          |          |
|----------|----------|----------|----------|----------|----------|----------|
| 0.011329 | 0.011430 | 0.011362 | 0.011262 | 0.011363 | 0.011463 | 0.011466 |
| 0.011463 | 0.011362 | 0.011262 | 0.011195 | 0.011329 | 0.011262 | 0.011195 |
| 0.011298 | 0.011463 | 0.011262 | 0.011463 | 0.011228 | 0.011329 | 0.011295 |
| 0.011396 | 0.011295 | 0.011329 | 0.011295 | 0.011329 | 0.011195 | 0.011329 |
| 0.011362 | 0.011295 | 0.011362 | 0.011295 | 0.011329 | 0.011362 | 0.011597 |
| 0.011698 | 0.011631 | 0.011698 | 0.011465 | 0.011698 | 0.011329 | 0.011295 |
| 0.011330 | 0.011586 | 0.011380 | 0.011232 | 0.011705 | 0.011197 | 0.011336 |
| 0.011705 | 0.011604 | 0.011496 | 0.011698 | 0.011402 | 0.011564 | 0.011530 |
| 0.011463 | 0.011631 | 0.011486 | 0.011349 | 0.011395 | 0.011362 | 0.011432 |
| 0.011530 | 0.011431 | 0.011567 | 0.011635 | 0.011564 | 0.011631 | 0.011738 |
| 0.011466 | 0.011637 | 0.011568 | 0.011500 | 0.011767 | 0.011228 | 0.011431 |
| 0.011396 | 0.011329 | 0.011228 | 0.011228 | 0.011295 | 0.011295 | 0.011362 |
| 0.011295 | 0.011362 | 0.011262 | 0.011362 | 0.011295 | 0.011295 | 0.011362 |
| 0.011295 | 0.011731 | 0.011631 | 0.011664 | 0.011194 | 0.011295 | 0.011329 |
| 0.011329 | 0.011295 | 0.011362 | 0.011396 | 0.011262 | 0.011262 | 0.011262 |
| 0.011799 | 0.011429 | 0.011429 | 0.011228 | 0.011329 | 0.011497 | 0.011262 |
| 0.011262 | 0.011329 | 0.011295 | 0.011463 | 0.011262 | 0.011396 | 0.011530 |
| 0.011463 | 0.011295 | 0.011295 | 0.011228 | 0.011228 | 0.011396 | 0.011329 |
| 0.011228 | 0.011329 | 0.011195 | 0.011228 | 0.011362 | 0.011497 | 0.011262 |
| 0.011228 | 0.011362 | 0.011295 | 0.011195 | 0.011530 | 0.011195 | 0.011362 |
| 0.011437 | 0.011262 | 0.011564 | 0.011396 | 0.011429 | 0.011295 | 0.011396 |
| 0.011262 | 0.011597 | 0.011194 | 0.011463 | 0.011262 | 0.011262 | 0.011194 |
| 0.011429 | 0.011631 | 0.011329 | 0.011396 | 0.011228 | 0.011631 | 0.011262 |
| 0.011262 | 0.011262 | 0.011295 | 0.011396 | 0.011295 | 0.011396 | 0.011463 |
| 0.011463 | 0.011429 | 0.011329 | 0.011430 | 0.011396 | 0.011262 | 0.011228 |
| 0.011262 | 0.011262 | 0.011329 | 0.011262 | 0.011228 | 0.011396 | 0.011262 |
| 0.011295 | 0.011295 | 0.011429 | 0.011463 | 0.011362 | 0.011295 | 0.011295 |
| 0.011362 | 0.011295 | 0.011396 | 0.011262 | 0.011396 | 0.011496 | 0.011799 |
| 0.011295 | 0.011698 | 0.011302 | 0.017785 | 0.011257 | 0.011549 | 0.011653 |
| 0.011614 | 0.011658 | 0.011374 | 0.011292 | 0.011829 | 0.011682 | 0.011425 |
| 0.011535 | 0.011671 | 0.011216 | 0.011312 | 0.011294 | 0.011406 | 0.011318 |
| 0.011529 | 0.011433 | 0.011431 | 0.011259 | 0.011429 | 0.011463 | 0.011466 |
| 0.011335 | 0.011430 | 0.011429 | 0.011396 | 0.011362 | 0.011362 | 0.011329 |
| 0.011362 | 0.011295 | 0.011329 | 0.011362 | 0.011329 | 0.011262 | 0.011295 |
| 0.011295 | 0.011362 | 0.011262 | 0.011363 | 0.011396 | 0.011430 | 0.011329 |
| 0.011362 | 0.011329 | 0.011665 | 0.011665 | 0.011396 | 0.011430 | 0.011463 |
| 0.011228 | 0.011228 | 0.011262 | 0.011362 | 0.011228 | 0.011463 | 0.011463 |
| 0.011497 | 0.011496 | 0.011429 | 0.011530 | 0.011698 | 0.011532 | 0.011362 |
| 0.011362 | 0.011430 | 0.011463 | 0.011295 | 0.011362 | 0.011329 | 0.011362 |
| 0.011430 | 0.011430 | 0.011463 | 0.011430 | 0.011330 | 0.011530 | 0.011497 |
| 0.011365 | 0.011262 | 0.011362 | 0.011463 | 0.011363 | 0.011497 | 0.011530 |
| 0.011698 | 0.011402 | 0.011564 | 0.011530 | 0.011463 | 0.011631 | 0.011262 |
| 0.011431 | 0.011329 | 0.011295 | 0.011295 | 0.011362 | 0.011262 | 0.011363 |
| 0.011396 | 0.011430 | 0.011329 | 0.011362 | 0.011329 | 0.011665 | 0.011665 |
| 0.011396 | 0.011430 | 0.011496 | 0.011429 | 0.012069 | 0.011489 | 0.011412 |
| 0.011482 | 0.011442 | 0.011552 | 0.011441 | 0.011550 | 0.011474 | 0.011439 |
| 0.012022 | 0.011337 | 0.011471 | 0.011406 | 0.011680 | 0.011536 | 0.011639 |
| 0.012046 | 0.011512 | 0.011601 | 0.011664 | 0.011530 | 0.011530 | 0.011567 |
| 0.011228 | 0.011396 | 0.011530 | 0.011496 | 0.011499 | 0.011496 | 0.011464 |
| 0.011329 | 0.011262 | 0.011295 | 0.011329 | 0.011228 | 0.011295 | 0.011194 |
| 0.011329 | 0.011362 | 0.011262 | 0.011228 | 0.011329 | 0.011262 | 0.011295 |
| 0.011295 | 0.011228 | 0.011295 | 0.011329 | 0.011228 | 0.011429 | 0.011463 |
| 0.011362 | 0.011429 | 0.011362 | 0.011362 | 0.011295 | 0.011698 | 0.011329 |
| 0.011373 | 0.011295 | 0.011530 | 0.011535 | 0.011396 | 0.011396 | 0.011396 |
| 0.011396 | 0.011329 | 0.011295 | 0.011329 | 0.011429 | 0.011429 | 0.011362 |
| 0.011362 | 0.011497 | 0.011664 | 0.011396 | 0.011597 | 0.011597 | 0.011463 |
| 0.011295 | 0.011362 | 0.011396 | 0.011799 | 0.011362 | 0.011396 | 0.011362 |
| 0.011396 | 0.011329 | 0.011329 | 0.011631 | 0.011564 | 0.011597 | 0.000000 |
| 0.011362 | 0.011497 | 0.011362 | 0.011362 | 0.011396 | 0.011262 | 0.011597 |
| 0.011362 | 0.011329 | 0.011329 | 0.011497 | 0.000000 | 0.011429 | 0.011664 |

|          |          |          |          |          |          |          |
|----------|----------|----------|----------|----------|----------|----------|
| 0.011362 | 0.011739 | 0.011732 | 0.011507 | 0.011229 | 0.011434 | 0.011267 |
| 0.011335 | 0.011722 | 0.011271 | 0.011462 | 0.011304 | 0.011417 | 0.011432 |
| 0.011468 | 0.011192 | 0.011339 | 0.011192 | 0.011276 | 0.011395 | 0.011425 |
| 0.011437 | 0.011296 | 0.011412 | 0.011272 | 0.011364 | 0.011497 | 0.011564 |
| 0.011564 | 0.011430 | 0.011534 | 0.011535 | 0.011670 | 0.011626 | 0.011362 |
| 0.011597 | 0.011463 | 0.011329 | 0.011430 | 0.011228 | 0.011463 | 0.011262 |
| 0.011329 | 0.011329 | 0.011295 | 0.011194 | 0.011295 | 0.011262 | 0.011362 |
| 0.011340 | 0.011340 | 0.011334 | 0.011368 | 0.011505 | 0.011470 | 0.011470 |
| 0.011469 | 0.011396 | 0.011208 | 0.011168 | 0.011331 | 0.011501 | 0.011501 |
| 0.011296 | 0.011365 | 0.011599 | 0.011567 | 0.011497 | 0.011531 | 0.011463 |
| 0.011396 | 0.011463 | 0.011463 | 0.011362 | 0.011866 | 0.011530 | 0.011597 |
| 0.011631 | 0.011665 | 0.011333 | 0.011407 | 0.011295 | 0.011497 | 0.011463 |
| 0.011497 | 0.011530 | 0.011530 | 0.011530 | 0.011650 | 0.011664 | 0.011303 |
| 0.011195 | 0.011199 | 0.011299 | 0.011264 | 0.011368 | 0.011210 | 0.011536 |
| 0.011335 | 0.011455 | 0.011251 | 0.011360 | 0.011329 | 0.011402 | 0.011295 |
| 0.011262 | 0.011262 | 0.011329 | 0.011295 | 0.011497 | 0.011463 | 0.011396 |
| 0.011497 | 0.011564 | 0.011295 | 0.011295 | 0.011329 | 0.011329 | 0.011330 |
| 0.011398 | 0.011329 | 0.011329 | 0.011364 | 0.011497 | 0.011564 | 0.011564 |
| 0.011430 | 0.011534 | 0.011535 | 0.011670 | 0.011626 | 0.011362 | 0.011530 |
| 0.011463 | 0.011463 | 0.011297 | 0.011478 | 0.011373 | 0.011435 | 0.011305 |
| 0.011473 | 0.011653 | 0.011441 | 0.011366 | 0.011262 | 0.011463 | 0.011329 |
| 0.011430 | 0.011362 | 0.011262 | 0.011363 | 0.011463 | 0.011466 | 0.011362 |
| 0.011262 | 0.011195 | 0.011329 | 0.011262 | 0.011195 | 0.011298 | 0.011463 |
| 0.011362 | 0.011295 | 0.011329 | 0.011362 | 0.011329 | 0.011262 | 0.011463 |
| 0.011329 | 0.011362 | 0.011362 | 0.011295 | 0.011362 | 0.011530 | 0.011262 |
| 0.011295 | 0.011698 | 0.011295 | 0.011329 | 0.011295 | 0.011664 | 0.011232 |
| 0.011735 | 0.011230 | 0.011311 | 0.011463 | 0.011549 | 0.011491 | 0.011186 |
| 0.011218 | 0.011463 | 0.011564 | 0.011671 | 0.011531 | 0.011669 | 0.011800 |
| 0.011699 | 0.011737 | 0.011698 | 0.011949 | 0.011664 | 0.012539 | 0.011700 |
| 0.012439 | 0.012207 | 0.012341 | 0.012613 | 0.011664 | 0.011363 | 0.011665 |
| 0.012103 | 0.012038 | 0.011631 | 0.011530 | 0.011598 | 0.011598 | 0.011567 |
| 0.011463 | 0.011467 | 0.011530 | 0.011497 | 0.011867 | 0.011933 | 0.011935 |
| 0.011834 | 0.011934 | 0.012038 | 0.011804 | 0.012104 | 0.012110 | 0.012171 |
| 0.012172 | 0.012205 | 0.012152 | 0.012172 | 0.012173 | 0.011396 | 0.011699 |
| 0.011767 | 0.012270 | 0.011772 | 0.012001 | 0.012474 | 0.011536 | 0.011430 |
| 0.011396 | 0.011396 | 0.011867 | 0.011883 | 0.012010 | 0.011732 | 0.011397 |
| S588     | 0.011765 | 0.011765 | 0.012102 | 0.011866 | 0.011866 | 0.011933 |
| 0.011739 | 0.011671 | 0.011933 | 0.011362 | 0.011429 | 0.011397 | 0.011362 |
| 0.011396 | 0.011564 | 0.011362 | 0.011396 | 0.011463 | 0.011429 | 0.011396 |
| 0.011362 | 0.011396 | 0.011496 | 0.011363 | 0.011396 | 0.011396 | 0.011705 |
| 0.011631 | 0.011396 | 0.011295 | 0.011530 | 0.011463 | 0.011430 | 0.011463 |
| 0.011429 | 0.011530 | 0.011429 | 0.011429 | 0.011463 | 0.011429 | 0.011597 |
| 0.011362 | 0.011429 | 0.011463 | 0.011396 | 0.011496 | 0.011530 | 0.011463 |
| 0.011429 | 0.011597 | 0.011497 | 0.011765 | 0.011429 | 0.011698 | 0.011429 |
| 0.011396 | 0.011497 | 0.011564 | 0.011698 | 0.011799 | 0.011497 | 0.011597 |
| 0.011463 | 0.011463 | 0.011430 | 0.011664 | 0.011900 | 0.011429 | 0.011497 |
| 0.011396 | 0.011496 | 0.011463 | 0.011530 | 0.011463 | 0.011463 | 0.011463 |
| 0.011362 | 0.011396 | 0.011362 | 0.011463 | 0.011429 | 0.011464 | 0.011530 |
| 0.011463 | 0.011429 | 0.011497 | 0.011396 | 0.011530 | 0.011362 | 0.011429 |
| 0.011597 | 0.011530 | 0.011765 | 0.011597 | 0.011429 | 0.011664 | 0.011429 |
| 0.011579 | 0.011807 | 0.011626 | 0.011334 | 0.011359 | 0.011465 | 0.011533 |
| 0.012195 | 0.011670 | 0.011349 | 0.011664 | 0.011664 | 0.011463 | 0.011564 |
| 0.011497 | 0.011463 | 0.011530 | 0.011429 | 0.011530 | 0.011463 | 0.011463 |
| 0.011429 | 0.011530 | 0.011732 | 0.011597 | 0.011497 | 0.011463 | 0.011396 |
| 0.011362 | 0.011362 | 0.011430 | 0.011396 | 0.011597 | 0.011564 | 0.011497 |
| 0.011597 | 0.011665 | 0.011396 | 0.011396 | 0.011430 | 0.011429 | 0.011432 |
| 0.011500 | 0.011430 | 0.011430 | 0.011312 | 0.011386 | 0.011341 | 0.011430 |
| 0.011433 | 0.011370 | 0.011429 | 0.011405 | 0.011332 | 0.011369 | 0.011398 |
| 0.011672 | 0.011439 | 0.011474 | 0.011363 | 0.011371 | 0.011498 | 0.011464 |
| 0.011531 | 0.011465 | 0.011464 | 0.011564 | 0.011496 | 0.011866 | 0.011665 |

|          |          |          |          |          |          |          |
|----------|----------|----------|----------|----------|----------|----------|
| 0.011698 | 0.011564 | 0.011429 | 0.011530 | 0.011329 | 0.011564 | 0.011362 |
| 0.011429 | 0.011429 | 0.011396 | 0.011295 | 0.011396 | 0.011362 | 0.011463 |
| 0.011430 | 0.011530 | 0.011463 | 0.011362 | 0.011465 | 0.011564 | 0.011567 |
| 0.011564 | 0.011463 | 0.011362 | 0.011296 | 0.011430 | 0.011362 | 0.011295 |
| 0.011400 | 0.011564 | 0.011362 | 0.011564 | 0.011329 | 0.011430 | 0.011396 |
| 0.011497 | 0.011396 | 0.011430 | 0.011396 | 0.011430 | 0.011295 | 0.011430 |
| 0.011463 | 0.011396 | 0.011463 | 0.011396 | 0.011430 | 0.011463 | 0.011698 |
| 0.011799 | 0.011732 | 0.011799 | 0.011566 | 0.011799 | 0.011429 | 0.011396 |
| 0.011432 | 0.011707 | 0.011563 | 0.011335 | 0.011807 | 0.011299 | 0.011454 |
| 0.011773 | 0.011706 | 0.011597 | 0.011799 | 0.011504 | 0.011665 | 0.011631 |
| 0.011564 | 0.011732 | 0.011593 | 0.011472 | 0.011521 | 0.011463 | 0.011534 |
| 0.011631 | 0.011532 | 0.011669 | 0.011737 | 0.011665 | 0.011732 | 0.011839 |
| 0.011568 | 0.011739 | 0.011670 | 0.011601 | 0.011868 | 0.011329 | 0.011532 |
| 0.011496 | 0.011429 | 0.011329 | 0.011329 | 0.011396 | 0.011396 | 0.011463 |
| 0.011396 | 0.011463 | 0.011362 | 0.011463 | 0.011396 | 0.011396 | 0.011463 |
| 0.011396 | 0.011832 | 0.011732 | 0.011765 | 0.011295 | 0.011396 | 0.011430 |
| 0.011429 | 0.011396 | 0.011463 | 0.011497 | 0.011362 | 0.011362 | 0.011362 |
| 0.011900 | 0.011530 | 0.011530 | 0.011329 | 0.011429 | 0.011597 | 0.011362 |
| 0.011362 | 0.011429 | 0.011396 | 0.011564 | 0.011362 | 0.011497 | 0.011631 |
| 0.011564 | 0.011396 | 0.011396 | 0.011329 | 0.011329 | 0.011497 | 0.011429 |
| 0.011329 | 0.011429 | 0.011295 | 0.011329 | 0.011463 | 0.011598 | 0.011362 |
| 0.011329 | 0.011463 | 0.011396 | 0.011295 | 0.011631 | 0.011295 | 0.011463 |
| 0.011540 | 0.011362 | 0.011664 | 0.011497 | 0.011530 | 0.011396 | 0.011497 |
| 0.011362 | 0.011698 | 0.011295 | 0.011564 | 0.011362 | 0.011362 | 0.011295 |
| 0.011530 | 0.011732 | 0.011430 | 0.011497 | 0.011329 | 0.011732 | 0.011362 |
| 0.011362 | 0.011362 | 0.011396 | 0.011497 | 0.011396 | 0.011497 | 0.011564 |
| 0.011564 | 0.011463 | 0.011429 | 0.011530 | 0.011496 | 0.011362 | 0.011329 |
| 0.011362 | 0.011362 | 0.011430 | 0.011362 | 0.011329 | 0.011497 | 0.011362 |
| 0.011396 | 0.011396 | 0.011530 | 0.011564 | 0.011463 | 0.011396 | 0.011396 |
| 0.011463 | 0.011396 | 0.011496 | 0.011362 | 0.011497 | 0.011597 | 0.011900 |
| 0.011396 | 0.011799 | 0.011405 | 0.017937 | 0.011453 | 0.011549 | 0.011758 |
| 0.011718 | 0.011764 | 0.011479 | 0.011408 | 0.011884 | 0.011785 | 0.011546 |
| 0.011630 | 0.011732 | 0.011294 | 0.011353 | 0.011412 | 0.011455 | 0.011404 |
| 0.011670 | 0.011582 | 0.011579 | 0.011457 | 0.011530 | 0.011564 | 0.011568 |
| 0.011438 | 0.011530 | 0.011530 | 0.011497 | 0.011463 | 0.011463 | 0.011430 |
| 0.011463 | 0.011396 | 0.011429 | 0.011463 | 0.011430 | 0.011362 | 0.011396 |
| 0.011396 | 0.011463 | 0.011362 | 0.011463 | 0.011497 | 0.011530 | 0.011429 |
| 0.011463 | 0.011430 | 0.011766 | 0.011766 | 0.011497 | 0.011531 | 0.011564 |
| 0.011329 | 0.011329 | 0.011362 | 0.011463 | 0.011329 | 0.011564 | 0.011564 |
| 0.011597 | 0.011597 | 0.011530 | 0.011631 | 0.011799 | 0.011633 | 0.011463 |
| 0.011463 | 0.011530 | 0.011564 | 0.011396 | 0.011463 | 0.011430 | 0.011463 |
| 0.011531 | 0.011530 | 0.011564 | 0.011531 | 0.011431 | 0.011631 | 0.011597 |
| 0.011467 | 0.011362 | 0.011463 | 0.011564 | 0.011463 | 0.011598 | 0.011631 |
| 0.011799 | 0.011504 | 0.011665 | 0.011631 | 0.011564 | 0.011732 | 0.011363 |
| 0.011532 | 0.011430 | 0.011396 | 0.011396 | 0.011463 | 0.011362 | 0.011463 |
| 0.011497 | 0.011530 | 0.011429 | 0.011463 | 0.011430 | 0.011766 | 0.011766 |
| 0.011497 | 0.011531 | 0.011597 | 0.011530 | 0.012170 | 0.011596 | 0.011517 |
| 0.011588 | 0.011546 | 0.011658 | 0.011545 | 0.011655 | 0.011577 | 0.011543 |
| 0.012125 | 0.011441 | 0.011574 | 0.011510 | 0.011783 | 0.011638 | 0.011741 |
| 0.012148 | 0.011626 | 0.011703 | 0.011765 | 0.011631 | 0.011631 | 0.011668 |
| 0.011329 | 0.011497 | 0.011631 | 0.011597 | 0.011601 | 0.011597 | 0.011565 |
| 0.011429 | 0.011362 | 0.011396 | 0.011429 | 0.011329 | 0.011396 | 0.011295 |
| 0.011429 | 0.011463 | 0.011362 | 0.011329 | 0.011429 | 0.011362 | 0.011396 |
| 0.011396 | 0.011329 | 0.011396 | 0.011430 | 0.011329 | 0.011530 | 0.011564 |
| 0.011463 | 0.011530 | 0.011463 | 0.011463 | 0.011396 | 0.011799 | 0.011429 |
| 0.011478 | 0.011396 | 0.011631 | 0.011637 | 0.011497 | 0.011496 | 0.011497 |
| 0.011429 | 0.011430 | 0.011396 | 0.011430 | 0.011530 | 0.011530 | 0.011463 |
| 0.011463 | 0.011597 | 0.011765 | 0.011496 | 0.011698 | 0.011698 | 0.011564 |
| 0.011396 | 0.011463 | 0.011429 | 0.011900 | 0.011463 | 0.011497 | 0.011463 |
| 0.011497 | 0.011429 | 0.011429 | 0.011732 | 0.011665 | 0.011698 | 0.011362 |

|          |          |          |          |          |          |          |
|----------|----------|----------|----------|----------|----------|----------|
| 0.000000 | 0.011530 | 0.011463 | 0.000000 | 0.011496 | 0.011228 | 0.011698 |
| 0.011463 | 0.011429 | 0.011429 | 0.011597 | 0.011362 | 0.011530 | 0.011765 |
| 0.011463 | 0.011807 | 0.011832 | 0.011629 | 0.011399 | 0.011536 | 0.011370 |
| 0.011390 | 0.011839 | 0.011306 | 0.011596 | 0.011451 | 0.011518 | 0.011538 |
| 0.011672 | 0.011324 | 0.011506 | 0.011391 | 0.011384 | 0.011462 | 0.011506 |
| 0.011512 | 0.011414 | 0.011518 | 0.011448 | 0.011465 | 0.011597 | 0.011665 |
| 0.011665 | 0.011531 | 0.011635 | 0.011636 | 0.011772 | 0.011802 | 0.011463 |
| 0.011698 | 0.011564 | 0.011429 | 0.011530 | 0.011329 | 0.011564 | 0.011362 |
| 0.011429 | 0.011429 | 0.011396 | 0.011295 | 0.011396 | 0.011362 | 0.011463 |
| 0.011444 | 0.011445 | 0.011437 | 0.011471 | 0.011608 | 0.011573 | 0.011572 |
| 0.011571 | 0.011497 | 0.011282 | 0.011276 | 0.011433 | 0.011602 | 0.011603 |
| 0.011397 | 0.011467 | 0.011700 | 0.011669 | 0.011598 | 0.011632 | 0.011564 |
| 0.011496 | 0.011564 | 0.011564 | 0.011463 | 0.011967 | 0.011631 | 0.011698 |
| 0.011732 | 0.011808 | 0.011435 | 0.011511 | 0.011396 | 0.011597 | 0.011564 |
| 0.011598 | 0.011631 | 0.011631 | 0.011631 | 0.011807 | 0.011765 | 0.011407 |
| 0.011297 | 0.011303 | 0.011401 | 0.011366 | 0.011470 | 0.011321 | 0.011638 |
| 0.011437 | 0.011630 | 0.011346 | 0.011435 | 0.011430 | 0.011505 | 0.011396 |
| 0.011362 | 0.011362 | 0.011430 | 0.011396 | 0.011597 | 0.011564 | 0.011497 |
| 0.011597 | 0.011665 | 0.011396 | 0.011396 | 0.011430 | 0.011429 | 0.011432 |
| 0.011500 | 0.011430 | 0.011430 | 0.011465 | 0.011597 | 0.011665 | 0.011665 |
| 0.011531 | 0.011635 | 0.011636 | 0.011772 | 0.011802 | 0.011463 | 0.011631 |
| 0.011564 | 0.011564 | 0.011398 | 0.011582 | 0.011512 | 0.011537 | 0.011376 |
| 0.011577 | 0.011835 | 0.011568 | 0.011468 | 0.011362 | 0.011564 | 0.011430 |
| 0.011530 | 0.011463 | 0.011362 | 0.011465 | 0.011564 | 0.011567 | 0.011463 |
| 0.011362 | 0.011296 | 0.011430 | 0.011362 | 0.011295 | 0.011400 | 0.011564 |
| 0.011463 | 0.011396 | 0.011429 | 0.011463 | 0.011430 | 0.011362 | 0.011564 |
| 0.011429 | 0.011463 | 0.011463 | 0.011396 | 0.011463 | 0.011631 | 0.011362 |
| 0.011396 | 0.011799 | 0.011396 | 0.011429 | 0.011396 | 0.011765 | 0.011360 |
| 0.011848 | 0.011315 | 0.011411 | 0.011624 | 0.011671 | 0.011599 | 0.011311 |
| 0.011375 | 0.011564 | 0.011664 | 0.011773 | 0.011633 | 0.011771 | 0.011901 |
| 0.011801 | 0.011838 | 0.011799 | 0.012051 | 0.011765 | 0.012640 | 0.011802 |
| 0.012540 | 0.012308 | 0.012442 | 0.012714 | 0.011765 | 0.011463 | 0.011766 |
| 0.012137 | 0.012072 | 0.011732 | 0.011631 | 0.011699 | 0.011699 | 0.011669 |
| 0.011564 | 0.011569 | 0.011631 | 0.011598 | 0.011968 | 0.012034 | 0.012036 |
| 0.011935 | 0.012036 | 0.012139 | 0.011906 | 0.012205 | 0.012212 | 0.012272 |
| 0.012273 | 0.012307 | 0.012255 | 0.012273 | 0.012275 | 0.011496 | 0.011800 |
| 0.011868 | 0.012371 | 0.011874 | 0.012102 | 0.012575 | 0.011638 | 0.011531 |
| 0.011496 | 0.011496 | 0.011968 | 0.012048 | 0.012116 | 0.011832 | 0.011498 |
| S589     | 0.011832 | 0.011832 | 0.012169 | 0.011933 | 0.011933 | 0.012000 |
| 0.011773 | 0.011705 | 0.012000 | 0.011430 | 0.011496 | 0.011464 | 0.011429 |
| 0.011463 | 0.011631 | 0.011429 | 0.011463 | 0.011530 | 0.011497 | 0.011463 |
| 0.011429 | 0.011463 | 0.011564 | 0.011396 | 0.011430 | 0.011463 | 0.011739 |
| 0.011698 | 0.011463 | 0.011362 | 0.011597 | 0.011530 | 0.011497 | 0.011530 |
| 0.011497 | 0.011597 | 0.011496 | 0.011497 | 0.011530 | 0.011496 | 0.011664 |
| 0.011429 | 0.011496 | 0.011530 | 0.011463 | 0.011564 | 0.011597 | 0.011530 |
| 0.011497 | 0.011665 | 0.011564 | 0.011832 | 0.011496 | 0.011765 | 0.011496 |
| 0.011463 | 0.011564 | 0.011631 | 0.011765 | 0.011866 | 0.011564 | 0.011664 |
| 0.011530 | 0.011530 | 0.011497 | 0.011731 | 0.011967 | 0.011497 | 0.011564 |
| 0.011463 | 0.011564 | 0.011530 | 0.011597 | 0.011530 | 0.011530 | 0.011530 |
| 0.011429 | 0.011463 | 0.011429 | 0.011530 | 0.011496 | 0.011531 | 0.011597 |
| 0.011530 | 0.011496 | 0.011564 | 0.011463 | 0.011597 | 0.011429 | 0.011496 |
| 0.011664 | 0.011597 | 0.011832 | 0.011664 | 0.011429 | 0.011732 | 0.011496 |
| 0.011654 | 0.011882 | 0.011702 | 0.011412 | 0.011396 | 0.011539 | 0.011533 |
| 0.012231 | 0.011671 | 0.011390 | 0.011731 | 0.011732 | 0.011530 | 0.011564 |
| 0.011564 | 0.011530 | 0.011597 | 0.011496 | 0.011597 | 0.011530 | 0.011530 |
| 0.011496 | 0.011597 | 0.011799 | 0.011664 | 0.011564 | 0.011530 | 0.011463 |
| 0.011430 | 0.011429 | 0.011497 | 0.011463 | 0.011665 | 0.011631 | 0.011564 |
| 0.011665 | 0.011732 | 0.011463 | 0.011463 | 0.011497 | 0.011497 | 0.011499 |
| 0.011533 | 0.011429 | 0.011497 | 0.011384 | 0.011458 | 0.011411 | 0.011497 |
| 0.011501 | 0.011438 | 0.011503 | 0.011474 | 0.011400 | 0.011437 | 0.011466 |

|          |          |          |          |          |          |          |
|----------|----------|----------|----------|----------|----------|----------|
| 0.011744 | 0.011508 | 0.011542 | 0.011430 | 0.011440 | 0.011565 | 0.011531 |
| 0.011598 | 0.011397 | 0.011397 | 0.011631 | 0.011564 | 0.011933 | 0.011732 |
| 0.011765 | 0.011631 | 0.011497 | 0.011598 | 0.011396 | 0.011631 | 0.011430 |
| 0.011497 | 0.011496 | 0.011463 | 0.011429 | 0.011463 | 0.011430 | 0.011530 |
| 0.011497 | 0.011597 | 0.011530 | 0.011362 | 0.011532 | 0.011631 | 0.011635 |
| 0.011631 | 0.011530 | 0.011430 | 0.011364 | 0.011497 | 0.011430 | 0.011363 |
| 0.011468 | 0.011631 | 0.011430 | 0.011631 | 0.011396 | 0.011497 | 0.011463 |
| 0.011497 | 0.011463 | 0.011430 | 0.011463 | 0.011497 | 0.011362 | 0.011497 |
| 0.011530 | 0.011463 | 0.011530 | 0.011463 | 0.011497 | 0.011530 | 0.011765 |
| 0.011866 | 0.011799 | 0.011866 | 0.011633 | 0.011867 | 0.011497 | 0.011463 |
| 0.011499 | 0.011788 | 0.011517 | 0.011403 | 0.011841 | 0.011367 | 0.011532 |
| 0.011807 | 0.011740 | 0.011664 | 0.011866 | 0.011572 | 0.011732 | 0.011698 |
| 0.011631 | 0.011799 | 0.011664 | 0.011555 | 0.011563 | 0.011530 | 0.011602 |
| 0.011698 | 0.011600 | 0.011736 | 0.011805 | 0.011732 | 0.011799 | 0.011839 |
| 0.011635 | 0.011807 | 0.011737 | 0.011601 | 0.011935 | 0.011396 | 0.011599 |
| 0.011496 | 0.011497 | 0.011396 | 0.011396 | 0.011463 | 0.011463 | 0.011530 |
| 0.011463 | 0.011530 | 0.011429 | 0.011530 | 0.011463 | 0.011463 | 0.011530 |
| 0.011463 | 0.011899 | 0.011799 | 0.011832 | 0.011362 | 0.011463 | 0.011497 |
| 0.011497 | 0.011463 | 0.011530 | 0.011564 | 0.011429 | 0.011429 | 0.011429 |
| 0.011967 | 0.011597 | 0.011597 | 0.011396 | 0.011496 | 0.011665 | 0.011429 |
| 0.011429 | 0.011463 | 0.011463 | 0.011631 | 0.011429 | 0.011564 | 0.011698 |
| 0.011631 | 0.011463 | 0.011463 | 0.011396 | 0.011396 | 0.011564 | 0.011496 |
| 0.011396 | 0.011496 | 0.011362 | 0.011396 | 0.011530 | 0.011665 | 0.011429 |
| 0.011396 | 0.011530 | 0.011463 | 0.011362 | 0.011698 | 0.011362 | 0.011530 |
| 0.011608 | 0.011429 | 0.011732 | 0.011564 | 0.011597 | 0.011463 | 0.011564 |
| 0.011429 | 0.011765 | 0.011362 | 0.011631 | 0.011429 | 0.011429 | 0.011362 |
| 0.011597 | 0.011799 | 0.011497 | 0.011564 | 0.011396 | 0.011799 | 0.011429 |
| 0.011429 | 0.011429 | 0.011463 | 0.011564 | 0.011463 | 0.011564 | 0.011631 |
| 0.011631 | 0.011530 | 0.011496 | 0.011597 | 0.011564 | 0.011429 | 0.011396 |
| 0.011429 | 0.011429 | 0.011497 | 0.011429 | 0.011396 | 0.011564 | 0.011429 |
| 0.011463 | 0.011463 | 0.011597 | 0.011631 | 0.011530 | 0.011463 | 0.011463 |
| 0.011530 | 0.011463 | 0.011564 | 0.011429 | 0.011564 | 0.011664 | 0.011967 |
| 0.011463 | 0.011866 | 0.011474 | 0.017974 | 0.011453 | 0.011611 | 0.011828 |
| 0.011787 | 0.011834 | 0.011479 | 0.011466 | 0.011829 | 0.011854 | 0.011425 |
| 0.011630 | 0.011671 | 0.011372 | 0.011437 | 0.011490 | 0.011406 | 0.011490 |
| 0.011670 | 0.011619 | 0.011616 | 0.011391 | 0.011597 | 0.011631 | 0.011635 |
| 0.011507 | 0.011597 | 0.011597 | 0.011564 | 0.011530 | 0.011530 | 0.011497 |
| 0.011530 | 0.011463 | 0.011497 | 0.011530 | 0.011497 | 0.011430 | 0.011463 |
| 0.011463 | 0.011530 | 0.011430 | 0.011530 | 0.011564 | 0.011597 | 0.011497 |
| 0.011530 | 0.011497 | 0.011833 | 0.011833 | 0.011564 | 0.011598 | 0.011631 |
| 0.011396 | 0.011396 | 0.011430 | 0.011530 | 0.011396 | 0.011631 | 0.011631 |
| 0.011665 | 0.011664 | 0.011597 | 0.011698 | 0.011866 | 0.011700 | 0.011530 |
| 0.011530 | 0.011597 | 0.011631 | 0.011463 | 0.011530 | 0.011497 | 0.011530 |
| 0.011598 | 0.011598 | 0.011631 | 0.011598 | 0.011498 | 0.011698 | 0.011665 |
| 0.011534 | 0.011430 | 0.011530 | 0.011631 | 0.011530 | 0.011665 | 0.011698 |
| 0.011866 | 0.011572 | 0.011732 | 0.011698 | 0.011631 | 0.011799 | 0.011430 |
| 0.011599 | 0.011497 | 0.011463 | 0.011463 | 0.011530 | 0.011430 | 0.011530 |
| 0.011564 | 0.011597 | 0.011497 | 0.011530 | 0.011497 | 0.011833 | 0.011833 |
| 0.011564 | 0.011598 | 0.011664 | 0.011597 | 0.012238 | 0.011667 | 0.011588 |
| 0.011587 | 0.011615 | 0.011728 | 0.011614 | 0.011725 | 0.011646 | 0.011612 |
| 0.012193 | 0.011510 | 0.011642 | 0.011579 | 0.011852 | 0.011706 | 0.011809 |
| 0.012216 | 0.011701 | 0.011736 | 0.011832 | 0.011698 | 0.011698 | 0.011702 |
| 0.011396 | 0.011564 | 0.011698 | 0.011664 | 0.011635 | 0.011664 | 0.011633 |
| 0.011496 | 0.011429 | 0.011463 | 0.011496 | 0.011396 | 0.011463 | 0.011362 |
| 0.011496 | 0.011530 | 0.011429 | 0.011396 | 0.011497 | 0.011429 | 0.011463 |
| 0.011463 | 0.011396 | 0.011463 | 0.011497 | 0.011396 | 0.011597 | 0.011631 |
| 0.011530 | 0.011597 | 0.011530 | 0.011530 | 0.011463 | 0.011866 | 0.011496 |
| 0.011547 | 0.011463 | 0.011699 | 0.011705 | 0.011564 | 0.011564 | 0.011564 |
| 0.011564 | 0.011497 | 0.011463 | 0.011497 | 0.011597 | 0.011597 | 0.011530 |
| 0.011530 | 0.011664 | 0.011765 | 0.011564 | 0.011765 | 0.011765 | 0.011631 |

|          |          |          |          |          |          |          |
|----------|----------|----------|----------|----------|----------|----------|
| 0.011463 | 0.011530 | 0.011564 | 0.011967 | 0.011530 | 0.011564 | 0.011530 |
| 0.011564 | 0.011496 | 0.011496 | 0.011799 | 0.011732 | 0.011765 | 0.011497 |
| 0.011530 | 0.000000 | 0.011530 | 0.011530 | 0.011564 | 0.011362 | 0.011765 |
| 0.011530 | 0.011496 | 0.011496 | 0.011664 | 0.011497 | 0.011530 | 0.011832 |
| 0.011530 | 0.011841 | 0.011900 | 0.011670 | 0.011455 | 0.011604 | 0.011370 |
| 0.011390 | 0.011878 | 0.011447 | 0.011596 | 0.011402 | 0.011518 | 0.011432 |
| 0.011672 | 0.011324 | 0.011506 | 0.011325 | 0.011384 | 0.011529 | 0.011547 |
| 0.011550 | 0.011414 | 0.011589 | 0.011483 | 0.011532 | 0.011665 | 0.011732 |
| 0.011732 | 0.011598 | 0.011703 | 0.011704 | 0.011840 | 0.011838 | 0.011530 |
| 0.011765 | 0.011631 | 0.011497 | 0.011598 | 0.011396 | 0.011631 | 0.011430 |
| 0.011497 | 0.011496 | 0.011463 | 0.011429 | 0.011463 | 0.011430 | 0.011530 |
| 0.011514 | 0.011515 | 0.011505 | 0.011540 | 0.011676 | 0.011641 | 0.011641 |
| 0.011639 | 0.011565 | 0.011319 | 0.011312 | 0.011501 | 0.011602 | 0.011671 |
| 0.011464 | 0.011534 | 0.011767 | 0.011736 | 0.011666 | 0.011632 | 0.011631 |
| 0.011564 | 0.011631 | 0.011631 | 0.011530 | 0.012102 | 0.011698 | 0.011765 |
| 0.011799 | 0.011879 | 0.011504 | 0.011580 | 0.011463 | 0.011664 | 0.011631 |
| 0.011666 | 0.011698 | 0.011698 | 0.011698 | 0.011807 | 0.011832 | 0.011476 |
| 0.011364 | 0.011372 | 0.011469 | 0.011434 | 0.011538 | 0.011396 | 0.011706 |
| 0.011506 | 0.011718 | 0.011441 | 0.011510 | 0.011497 | 0.011505 | 0.011463 |
| 0.011430 | 0.011429 | 0.011497 | 0.011463 | 0.011665 | 0.011631 | 0.011564 |
| 0.011665 | 0.011732 | 0.011463 | 0.011463 | 0.011497 | 0.011497 | 0.011499 |
| 0.011533 | 0.011429 | 0.011497 | 0.011532 | 0.011665 | 0.011732 | 0.011732 |
| 0.011598 | 0.011703 | 0.011704 | 0.011840 | 0.011838 | 0.011530 | 0.011698 |
| 0.011631 | 0.011631 | 0.011466 | 0.011652 | 0.011581 | 0.011605 | 0.011446 |
| 0.011646 | 0.011881 | 0.011653 | 0.011536 | 0.011430 | 0.011631 | 0.011497 |
| 0.011597 | 0.011530 | 0.011362 | 0.011532 | 0.011631 | 0.011635 | 0.011530 |
| 0.011430 | 0.011364 | 0.011497 | 0.011430 | 0.011363 | 0.011468 | 0.011631 |
| 0.011530 | 0.011463 | 0.011497 | 0.011530 | 0.011497 | 0.011430 | 0.011631 |
| 0.011496 | 0.011530 | 0.011530 | 0.011463 | 0.011530 | 0.011765 | 0.011429 |
| 0.011463 | 0.011866 | 0.011463 | 0.011497 | 0.011463 | 0.011832 | 0.011403 |
| 0.011960 | 0.011400 | 0.011461 | 0.011664 | 0.011712 | 0.011670 | 0.011353 |
| 0.011428 | 0.011631 | 0.011732 | 0.011841 | 0.011700 | 0.011838 | 0.011968 |
| 0.011868 | 0.011906 | 0.011866 | 0.012051 | 0.011832 | 0.012640 | 0.011869 |
| 0.012608 | 0.012376 | 0.012442 | 0.012782 | 0.011832 | 0.011530 | 0.011833 |
| 0.012272 | 0.012207 | 0.011799 | 0.011631 | 0.011766 | 0.011766 | 0.011669 |
| 0.011631 | 0.011637 | 0.011698 | 0.011632 | 0.012036 | 0.012101 | 0.012103 |
| 0.012002 | 0.012103 | 0.012207 | 0.011974 | 0.012273 | 0.012280 | 0.012340 |
| 0.012340 | 0.012374 | 0.012323 | 0.012341 | 0.012342 | 0.011564 | 0.011867 |
| 0.011935 | 0.012438 | 0.011942 | 0.012169 | 0.012643 | 0.011705 | 0.011598 |
| 0.011564 | 0.011564 | 0.012035 | 0.012130 | 0.012151 | 0.011900 | 0.011566 |
| S590     | 0.011698 | 0.011698 | 0.012034 | 0.011799 | 0.011799 | 0.011866 |
| 0.011705 | 0.011637 | 0.011866 | 0.011295 | 0.011362 | 0.011329 | 0.011295 |
| 0.011329 | 0.011496 | 0.011295 | 0.011329 | 0.011396 | 0.011362 | 0.011329 |
| 0.011295 | 0.011329 | 0.011429 | 0.011295 | 0.011329 | 0.011329 | 0.011671 |
| 0.011564 | 0.011329 | 0.011228 | 0.011463 | 0.011396 | 0.011362 | 0.011396 |
| 0.011362 | 0.011463 | 0.011362 | 0.011362 | 0.011396 | 0.011362 | 0.011530 |
| 0.011295 | 0.011362 | 0.011396 | 0.011329 | 0.011429 | 0.011463 | 0.011396 |
| 0.011362 | 0.011530 | 0.011430 | 0.011698 | 0.011362 | 0.011631 | 0.011362 |
| 0.011329 | 0.011429 | 0.011496 | 0.011631 | 0.011732 | 0.011429 | 0.011530 |
| 0.011396 | 0.011463 | 0.011362 | 0.011597 | 0.011832 | 0.011362 | 0.011429 |
| 0.011329 | 0.011429 | 0.011396 | 0.011463 | 0.011396 | 0.011396 | 0.011396 |
| 0.011295 | 0.011329 | 0.011295 | 0.011396 | 0.011362 | 0.011397 | 0.011463 |
| 0.011396 | 0.011362 | 0.011429 | 0.011329 | 0.011463 | 0.011295 | 0.011362 |
| 0.011530 | 0.011463 | 0.011698 | 0.011530 | 0.011362 | 0.011597 | 0.011362 |
| 0.011505 | 0.011733 | 0.011551 | 0.011216 | 0.011247 | 0.011355 | 0.011454 |
| 0.012085 | 0.011467 | 0.011266 | 0.011564 | 0.011597 | 0.011396 | 0.011496 |
| 0.011429 | 0.011396 | 0.011463 | 0.011362 | 0.011463 | 0.011396 | 0.011396 |
| 0.011362 | 0.011463 | 0.011664 | 0.011530 | 0.011429 | 0.011396 | 0.011329 |
| 0.011295 | 0.011295 | 0.011362 | 0.011329 | 0.011530 | 0.011497 | 0.011429 |
| 0.011530 | 0.011597 | 0.011329 | 0.011329 | 0.011362 | 0.011362 | 0.011364 |

|          |          |          |          |          |          |          |
|----------|----------|----------|----------|----------|----------|----------|
| 0.011432 | 0.011362 | 0.011362 | 0.011240 | 0.011313 | 0.011271 | 0.011363 |
| 0.011365 | 0.011301 | 0.011318 | 0.011336 | 0.011264 | 0.011300 | 0.011330 |
| 0.011600 | 0.011370 | 0.011405 | 0.011296 | 0.011302 | 0.011430 | 0.011396 |
| 0.011464 | 0.011397 | 0.011396 | 0.011496 | 0.011429 | 0.011799 | 0.011598 |
| 0.011631 | 0.011497 | 0.011362 | 0.011463 | 0.011262 | 0.011496 | 0.011295 |
| 0.011362 | 0.011362 | 0.011329 | 0.011295 | 0.011329 | 0.011295 | 0.011396 |
| 0.011362 | 0.011463 | 0.011396 | 0.011295 | 0.011397 | 0.011497 | 0.011499 |
| 0.011497 | 0.011396 | 0.011295 | 0.011229 | 0.011362 | 0.011295 | 0.011228 |
| 0.011332 | 0.011497 | 0.011295 | 0.011497 | 0.011262 | 0.011362 | 0.011329 |
| 0.011430 | 0.011329 | 0.011362 | 0.011329 | 0.011362 | 0.011228 | 0.011362 |
| 0.011396 | 0.011329 | 0.011396 | 0.011329 | 0.011362 | 0.011396 | 0.011631 |
| 0.011732 | 0.011664 | 0.011732 | 0.011498 | 0.011732 | 0.011362 | 0.011329 |
| 0.011364 | 0.011667 | 0.011426 | 0.011266 | 0.011739 | 0.011231 | 0.011375 |
| 0.011739 | 0.011638 | 0.011530 | 0.011732 | 0.011436 | 0.011597 | 0.011564 |
| 0.011496 | 0.011664 | 0.011486 | 0.011307 | 0.011395 | 0.011396 | 0.011466 |
| 0.011497 | 0.011465 | 0.011601 | 0.011669 | 0.011597 | 0.011665 | 0.011772 |
| 0.011500 | 0.011637 | 0.011602 | 0.011534 | 0.011800 | 0.011262 | 0.011431 |
| 0.011429 | 0.011362 | 0.011262 | 0.011262 | 0.011329 | 0.011329 | 0.011396 |
| 0.011329 | 0.011396 | 0.011295 | 0.011396 | 0.011329 | 0.011329 | 0.011396 |
| 0.011329 | 0.011765 | 0.011664 | 0.011698 | 0.011228 | 0.011329 | 0.011362 |
| 0.011362 | 0.011329 | 0.011396 | 0.011429 | 0.011295 | 0.011295 | 0.011295 |
| 0.011832 | 0.011463 | 0.011463 | 0.011262 | 0.011362 | 0.011530 | 0.011295 |
| 0.011295 | 0.011362 | 0.011329 | 0.011497 | 0.011295 | 0.011429 | 0.011564 |
| 0.011496 | 0.011329 | 0.011329 | 0.011262 | 0.011262 | 0.011429 | 0.011362 |
| 0.011262 | 0.011362 | 0.011228 | 0.011262 | 0.011396 | 0.011530 | 0.011295 |
| 0.011262 | 0.011396 | 0.011329 | 0.011228 | 0.011564 | 0.011228 | 0.011396 |
| 0.011437 | 0.011295 | 0.011597 | 0.011429 | 0.011463 | 0.011329 | 0.011429 |
| 0.011295 | 0.011631 | 0.011228 | 0.011496 | 0.011295 | 0.011295 | 0.011228 |
| 0.011463 | 0.011665 | 0.011362 | 0.011429 | 0.011262 | 0.011664 | 0.011295 |
| 0.011295 | 0.011295 | 0.011329 | 0.011429 | 0.011329 | 0.011429 | 0.011496 |
| 0.011496 | 0.011463 | 0.011362 | 0.011463 | 0.011429 | 0.011295 | 0.011262 |
| 0.011295 | 0.011295 | 0.011362 | 0.011295 | 0.011262 | 0.011429 | 0.011295 |
| 0.011329 | 0.011329 | 0.011463 | 0.011496 | 0.011194 | 0.011329 | 0.011329 |
| 0.011396 | 0.011329 | 0.011429 | 0.011295 | 0.011429 | 0.011530 | 0.011832 |
| 0.011329 | 0.011732 | 0.011302 | 0.017823 | 0.011191 | 0.011488 | 0.011653 |
| 0.011614 | 0.011658 | 0.011427 | 0.011350 | 0.011774 | 0.011682 | 0.011425 |
| 0.011487 | 0.011610 | 0.011216 | 0.011311 | 0.011294 | 0.011356 | 0.011275 |
| 0.011482 | 0.011470 | 0.011468 | 0.011193 | 0.011463 | 0.011497 | 0.011500 |
| 0.011335 | 0.011463 | 0.011463 | 0.011429 | 0.011396 | 0.011396 | 0.011362 |
| 0.011396 | 0.011329 | 0.011362 | 0.011396 | 0.011362 | 0.011295 | 0.011329 |
| 0.011329 | 0.011396 | 0.011295 | 0.011396 | 0.011430 | 0.011463 | 0.011362 |
| 0.011396 | 0.011362 | 0.011698 | 0.011698 | 0.011430 | 0.011464 | 0.011497 |
| 0.011262 | 0.011262 | 0.011295 | 0.011396 | 0.011262 | 0.011497 | 0.011497 |
| 0.011530 | 0.011530 | 0.011463 | 0.011564 | 0.011732 | 0.011565 | 0.011396 |
| 0.011396 | 0.011463 | 0.011497 | 0.011329 | 0.011396 | 0.011362 | 0.011396 |
| 0.011463 | 0.011463 | 0.011497 | 0.011463 | 0.011363 | 0.011564 | 0.011530 |
| 0.011399 | 0.011295 | 0.011396 | 0.011497 | 0.011396 | 0.011530 | 0.011564 |
| 0.011732 | 0.011436 | 0.011597 | 0.011564 | 0.011496 | 0.011664 | 0.011295 |
| 0.011464 | 0.011363 | 0.011329 | 0.011329 | 0.011396 | 0.011295 | 0.011396 |
| 0.011430 | 0.011463 | 0.011362 | 0.011396 | 0.011362 | 0.011698 | 0.011698 |
| 0.011430 | 0.011464 | 0.011530 | 0.011463 | 0.012103 | 0.011489 | 0.011412 |
| 0.011482 | 0.011442 | 0.011552 | 0.011441 | 0.011550 | 0.011474 | 0.011474 |
| 0.012021 | 0.011337 | 0.011471 | 0.011406 | 0.011680 | 0.011502 | 0.011673 |
| 0.012080 | 0.011512 | 0.011635 | 0.011698 | 0.011564 | 0.011564 | 0.011601 |
| 0.011262 | 0.011429 | 0.011564 | 0.011530 | 0.011533 | 0.011530 | 0.011498 |
| 0.011362 | 0.011295 | 0.011329 | 0.011362 | 0.011262 | 0.011329 | 0.011228 |
| 0.011362 | 0.011396 | 0.011295 | 0.011262 | 0.011362 | 0.011295 | 0.011329 |
| 0.011329 | 0.011262 | 0.011329 | 0.011362 | 0.011262 | 0.011463 | 0.011496 |
| 0.011396 | 0.011463 | 0.011396 | 0.011396 | 0.011329 | 0.011732 | 0.011362 |
| 0.011373 | 0.011329 | 0.011564 | 0.011535 | 0.011429 | 0.011429 | 0.011429 |

|          |          |          |          |          |          |          |
|----------|----------|----------|----------|----------|----------|----------|
| 0.011429 | 0.011362 | 0.011329 | 0.011362 | 0.011463 | 0.011463 | 0.011329 |
| 0.011396 | 0.011530 | 0.011698 | 0.011429 | 0.011631 | 0.011631 | 0.011496 |
| 0.011329 | 0.011396 | 0.011429 | 0.011832 | 0.011396 | 0.011429 | 0.011396 |
| 0.011429 | 0.011362 | 0.011362 | 0.011665 | 0.011597 | 0.011631 | 0.011362 |
| 0.011463 | 0.011530 | 0.000000 | 0.011463 | 0.011429 | 0.011295 | 0.011631 |
| 0.011396 | 0.011362 | 0.011362 | 0.011530 | 0.011362 | 0.011463 | 0.011698 |
| 0.011396 | 0.011773 | 0.011765 | 0.011548 | 0.011173 | 0.011468 | 0.011215 |
| 0.011280 | 0.011761 | 0.011271 | 0.011507 | 0.011304 | 0.011366 | 0.011379 |
| 0.011519 | 0.011192 | 0.011339 | 0.011126 | 0.011222 | 0.011328 | 0.011425 |
| 0.011437 | 0.011336 | 0.011412 | 0.011342 | 0.011397 | 0.011530 | 0.011597 |
| 0.011597 | 0.011464 | 0.011567 | 0.011569 | 0.011704 | 0.011732 | 0.011396 |
| 0.011631 | 0.011497 | 0.011362 | 0.011463 | 0.011262 | 0.011496 | 0.011295 |
| 0.011362 | 0.011362 | 0.011329 | 0.011295 | 0.011329 | 0.011295 | 0.011396 |
| 0.011375 | 0.011375 | 0.011368 | 0.011403 | 0.011539 | 0.011504 | 0.011504 |
| 0.011469 | 0.011430 | 0.011208 | 0.011240 | 0.011365 | 0.011535 | 0.011535 |
| 0.011329 | 0.011399 | 0.011632 | 0.011601 | 0.011531 | 0.011565 | 0.011496 |
| 0.011429 | 0.011496 | 0.011496 | 0.011396 | 0.011967 | 0.011564 | 0.011631 |
| 0.011665 | 0.011737 | 0.011367 | 0.011441 | 0.011329 | 0.011530 | 0.011496 |
| 0.011531 | 0.011564 | 0.011564 | 0.011564 | 0.011728 | 0.011698 | 0.011303 |
| 0.011229 | 0.011199 | 0.011298 | 0.011264 | 0.011368 | 0.011209 | 0.011536 |
| 0.011335 | 0.011455 | 0.011251 | 0.011360 | 0.011363 | 0.011437 | 0.011329 |
| 0.011295 | 0.011295 | 0.011362 | 0.011329 | 0.011530 | 0.011497 | 0.011429 |
| 0.011530 | 0.011597 | 0.011329 | 0.011329 | 0.011362 | 0.011362 | 0.011364 |
| 0.011432 | 0.011362 | 0.011362 | 0.011397 | 0.011530 | 0.011597 | 0.011597 |
| 0.011464 | 0.011567 | 0.011569 | 0.011704 | 0.011732 | 0.011396 | 0.011564 |
| 0.011496 | 0.011496 | 0.011331 | 0.011513 | 0.011442 | 0.011469 | 0.011340 |
| 0.011508 | 0.011698 | 0.011441 | 0.011400 | 0.011295 | 0.011497 | 0.011362 |
| 0.011463 | 0.011396 | 0.011295 | 0.011397 | 0.011497 | 0.011499 | 0.011396 |
| 0.011295 | 0.011229 | 0.011362 | 0.011295 | 0.011228 | 0.011332 | 0.011497 |
| 0.011396 | 0.011329 | 0.011362 | 0.011396 | 0.011362 | 0.011295 | 0.011497 |
| 0.011362 | 0.011396 | 0.011396 | 0.011329 | 0.011396 | 0.011631 | 0.011295 |
| 0.011329 | 0.011732 | 0.011329 | 0.011362 | 0.011329 | 0.011698 | 0.011274 |
| 0.011678 | 0.011230 | 0.011211 | 0.011503 | 0.011589 | 0.011491 | 0.011186 |
| 0.011165 | 0.011496 | 0.011597 | 0.011705 | 0.011565 | 0.011669 | 0.011834 |
| 0.011733 | 0.011737 | 0.011731 | 0.011949 | 0.011698 | 0.012573 | 0.011734 |
| 0.012473 | 0.012241 | 0.012375 | 0.012646 | 0.011631 | 0.011396 | 0.011698 |
| 0.012137 | 0.012072 | 0.011664 | 0.011564 | 0.011632 | 0.011632 | 0.011601 |
| 0.011496 | 0.011467 | 0.011564 | 0.011531 | 0.011901 | 0.011967 | 0.011968 |
| 0.011867 | 0.011968 | 0.012072 | 0.011804 | 0.012138 | 0.012144 | 0.012205 |
| 0.012205 | 0.012239 | 0.012152 | 0.012205 | 0.012207 | 0.011429 | 0.011732 |
| 0.011800 | 0.012303 | 0.011806 | 0.012034 | 0.012508 | 0.011570 | 0.011464 |
| 0.011429 | 0.011429 | 0.011900 | 0.011924 | 0.012045 | 0.011765 | 0.011431 |
| S591     | 0.011765 | 0.011765 | 0.012102 | 0.011866 | 0.011866 | 0.011933 |
| 0.011739 | 0.011671 | 0.011933 | 0.011362 | 0.011429 | 0.011397 | 0.011362 |
| 0.011396 | 0.011564 | 0.011362 | 0.011396 | 0.011463 | 0.011429 | 0.011396 |
| 0.011362 | 0.011396 | 0.011496 | 0.011363 | 0.011396 | 0.011396 | 0.011705 |
| 0.011631 | 0.011396 | 0.011295 | 0.011530 | 0.011463 | 0.011430 | 0.011463 |
| 0.011429 | 0.011530 | 0.011429 | 0.011429 | 0.011463 | 0.011429 | 0.011597 |
| 0.011362 | 0.011429 | 0.011463 | 0.011396 | 0.011496 | 0.011530 | 0.011463 |
| 0.011429 | 0.011597 | 0.011497 | 0.011765 | 0.011429 | 0.011698 | 0.011429 |
| 0.011396 | 0.011497 | 0.011564 | 0.011698 | 0.011799 | 0.011497 | 0.011597 |
| 0.011463 | 0.011463 | 0.011430 | 0.011664 | 0.011900 | 0.011429 | 0.011497 |
| 0.011396 | 0.011496 | 0.011463 | 0.011530 | 0.011463 | 0.011463 | 0.011463 |
| 0.011362 | 0.011396 | 0.011362 | 0.011463 | 0.011429 | 0.011464 | 0.011530 |
| 0.011463 | 0.011429 | 0.011497 | 0.011396 | 0.011530 | 0.011362 | 0.011429 |
| 0.011597 | 0.011530 | 0.011765 | 0.011597 | 0.011429 | 0.011664 | 0.011429 |
| 0.011579 | 0.011807 | 0.011626 | 0.011334 | 0.011359 | 0.011465 | 0.011533 |
| 0.012195 | 0.011670 | 0.011349 | 0.011664 | 0.011664 | 0.011463 | 0.011564 |
| 0.011497 | 0.011463 | 0.011530 | 0.011429 | 0.011530 | 0.011463 | 0.011463 |
| 0.011429 | 0.011530 | 0.011732 | 0.011597 | 0.011497 | 0.011463 | 0.011396 |



|          |          |          |          |          |          |          |
|----------|----------|----------|----------|----------|----------|----------|
| 0.011362 | 0.011362 | 0.011430 | 0.011396 | 0.011597 | 0.011564 | 0.011497 |
| 0.011597 | 0.011665 | 0.011396 | 0.011396 | 0.011430 | 0.011429 | 0.011432 |
| 0.011500 | 0.011430 | 0.011430 | 0.011312 | 0.011386 | 0.011341 | 0.011430 |
| 0.011433 | 0.011370 | 0.011429 | 0.011405 | 0.011332 | 0.011369 | 0.011398 |
| 0.011672 | 0.011439 | 0.011474 | 0.011363 | 0.011371 | 0.011498 | 0.011464 |
| 0.011531 | 0.011465 | 0.011464 | 0.011564 | 0.011496 | 0.011866 | 0.011665 |
| 0.011698 | 0.011564 | 0.011429 | 0.011530 | 0.011329 | 0.011564 | 0.011362 |
| 0.011429 | 0.011429 | 0.011396 | 0.011295 | 0.011396 | 0.011362 | 0.011463 |
| 0.011430 | 0.011530 | 0.011463 | 0.011362 | 0.011465 | 0.011564 | 0.011567 |
| 0.011564 | 0.011463 | 0.011362 | 0.011296 | 0.011430 | 0.011362 | 0.011295 |
| 0.011400 | 0.011564 | 0.011362 | 0.011564 | 0.011329 | 0.011430 | 0.011396 |
| 0.011497 | 0.011396 | 0.011430 | 0.011396 | 0.011430 | 0.011295 | 0.011430 |
| 0.011463 | 0.011396 | 0.011463 | 0.011396 | 0.011430 | 0.011463 | 0.011698 |
| 0.011799 | 0.011732 | 0.011799 | 0.011566 | 0.011799 | 0.011429 | 0.011396 |
| 0.011432 | 0.011707 | 0.011563 | 0.011335 | 0.011807 | 0.011299 | 0.011454 |
| 0.011773 | 0.011706 | 0.011597 | 0.011799 | 0.011504 | 0.011665 | 0.011631 |
| 0.011564 | 0.011732 | 0.011593 | 0.011472 | 0.011521 | 0.011463 | 0.011534 |
| 0.011631 | 0.011532 | 0.011669 | 0.011737 | 0.011665 | 0.011732 | 0.011839 |
| 0.011568 | 0.011739 | 0.011670 | 0.011601 | 0.011868 | 0.011329 | 0.011532 |
| 0.011496 | 0.011429 | 0.011329 | 0.011329 | 0.011396 | 0.011396 | 0.011463 |
| 0.011396 | 0.011463 | 0.011362 | 0.011463 | 0.011396 | 0.011396 | 0.011463 |
| 0.011396 | 0.011832 | 0.011732 | 0.011765 | 0.011295 | 0.011396 | 0.011430 |
| 0.011429 | 0.011396 | 0.011463 | 0.011497 | 0.011362 | 0.011362 | 0.011362 |
| 0.011900 | 0.011530 | 0.011530 | 0.011329 | 0.011429 | 0.011597 | 0.011362 |
| 0.011362 | 0.011429 | 0.011396 | 0.011564 | 0.011362 | 0.011497 | 0.011631 |
| 0.011564 | 0.011396 | 0.011396 | 0.011329 | 0.011329 | 0.011497 | 0.011429 |
| 0.011329 | 0.011429 | 0.011295 | 0.011329 | 0.011463 | 0.011598 | 0.011362 |
| 0.011329 | 0.011463 | 0.011396 | 0.011295 | 0.011631 | 0.011295 | 0.011463 |
| 0.011540 | 0.011362 | 0.011664 | 0.011497 | 0.011530 | 0.011396 | 0.011497 |
| 0.011362 | 0.011698 | 0.011295 | 0.011564 | 0.011362 | 0.011362 | 0.011295 |
| 0.011530 | 0.011732 | 0.011430 | 0.011497 | 0.011329 | 0.011732 | 0.011362 |
| 0.011362 | 0.011362 | 0.011396 | 0.011497 | 0.011396 | 0.011497 | 0.011564 |
| 0.011564 | 0.011463 | 0.011429 | 0.011530 | 0.011496 | 0.011362 | 0.011329 |
| 0.011362 | 0.011362 | 0.011430 | 0.011362 | 0.011329 | 0.011497 | 0.011362 |
| 0.011396 | 0.011396 | 0.011530 | 0.011564 | 0.011463 | 0.011396 | 0.011396 |
| 0.011463 | 0.011396 | 0.011496 | 0.011362 | 0.011497 | 0.011597 | 0.011900 |
| 0.011396 | 0.011799 | 0.011405 | 0.017937 | 0.011453 | 0.011549 | 0.011758 |
| 0.011718 | 0.011764 | 0.011479 | 0.011408 | 0.011884 | 0.011785 | 0.011546 |
| 0.011630 | 0.011732 | 0.011294 | 0.011353 | 0.011412 | 0.011455 | 0.011404 |
| 0.011670 | 0.011582 | 0.011579 | 0.011457 | 0.011530 | 0.011564 | 0.011568 |
| 0.011438 | 0.011530 | 0.011530 | 0.011497 | 0.011463 | 0.011463 | 0.011430 |
| 0.011463 | 0.011396 | 0.011429 | 0.011463 | 0.011430 | 0.011362 | 0.011396 |
| 0.011396 | 0.011463 | 0.011362 | 0.011463 | 0.011497 | 0.011530 | 0.011429 |
| 0.011463 | 0.011430 | 0.011766 | 0.011766 | 0.011497 | 0.011531 | 0.011564 |
| 0.011329 | 0.011329 | 0.011362 | 0.011463 | 0.011329 | 0.011564 | 0.011564 |
| 0.011597 | 0.011597 | 0.011530 | 0.011631 | 0.011799 | 0.011633 | 0.011463 |
| 0.011463 | 0.011530 | 0.011564 | 0.011396 | 0.011463 | 0.011430 | 0.011463 |
| 0.011531 | 0.011530 | 0.011564 | 0.011531 | 0.011431 | 0.011631 | 0.011597 |
| 0.011467 | 0.011362 | 0.011463 | 0.011564 | 0.011463 | 0.011598 | 0.011631 |
| 0.011799 | 0.011504 | 0.011665 | 0.011631 | 0.011564 | 0.011732 | 0.011363 |
| 0.011532 | 0.011430 | 0.011396 | 0.011396 | 0.011463 | 0.011362 | 0.011463 |
| 0.011497 | 0.011530 | 0.011429 | 0.011463 | 0.011430 | 0.011766 | 0.011766 |
| 0.011497 | 0.011531 | 0.011597 | 0.011530 | 0.012170 | 0.011596 | 0.011517 |
| 0.011588 | 0.011546 | 0.011658 | 0.011545 | 0.011655 | 0.011577 | 0.011543 |
| 0.012125 | 0.011441 | 0.011574 | 0.011510 | 0.011783 | 0.011638 | 0.011741 |
| 0.012148 | 0.011626 | 0.011703 | 0.011765 | 0.011631 | 0.011631 | 0.011668 |
| 0.011329 | 0.011497 | 0.011631 | 0.011597 | 0.011601 | 0.011597 | 0.011565 |
| 0.011429 | 0.011362 | 0.011396 | 0.011429 | 0.011329 | 0.011396 | 0.011295 |
| 0.011429 | 0.011463 | 0.011362 | 0.011329 | 0.011429 | 0.011362 | 0.011396 |
| 0.011396 | 0.011329 | 0.011396 | 0.011430 | 0.011329 | 0.011530 | 0.011564 |

|          |          |          |          |          |          |          |
|----------|----------|----------|----------|----------|----------|----------|
| 0.011463 | 0.011530 | 0.011463 | 0.011463 | 0.011396 | 0.011799 | 0.011429 |
| 0.011478 | 0.011396 | 0.011631 | 0.011637 | 0.011497 | 0.011496 | 0.011497 |
| 0.011429 | 0.011430 | 0.011396 | 0.011430 | 0.011530 | 0.011530 | 0.011463 |
| 0.011463 | 0.011597 | 0.011765 | 0.011496 | 0.011698 | 0.011698 | 0.011564 |
| 0.011396 | 0.011463 | 0.011429 | 0.011900 | 0.011463 | 0.011497 | 0.011463 |
| 0.011497 | 0.011429 | 0.011429 | 0.011732 | 0.011665 | 0.011698 | 0.011362 |
| 0.000000 | 0.011530 | 0.011463 | 0.000000 | 0.011496 | 0.011228 | 0.011698 |
| 0.011463 | 0.011429 | 0.011429 | 0.011597 | 0.011362 | 0.011530 | 0.011765 |
| 0.011463 | 0.011807 | 0.011832 | 0.011629 | 0.011399 | 0.011536 | 0.011370 |
| 0.011390 | 0.011839 | 0.011306 | 0.011596 | 0.011451 | 0.011518 | 0.011538 |
| 0.011672 | 0.011324 | 0.011506 | 0.011391 | 0.011384 | 0.011462 | 0.011506 |
| 0.011512 | 0.011414 | 0.011518 | 0.011448 | 0.011465 | 0.011597 | 0.011665 |
| 0.011665 | 0.011531 | 0.011635 | 0.011636 | 0.011772 | 0.011802 | 0.011463 |
| 0.011698 | 0.011564 | 0.011429 | 0.011530 | 0.011329 | 0.011564 | 0.011362 |
| 0.011429 | 0.011429 | 0.011396 | 0.011295 | 0.011396 | 0.011362 | 0.011463 |
| 0.011444 | 0.011445 | 0.011437 | 0.011471 | 0.011608 | 0.011573 | 0.011572 |
| 0.011571 | 0.011497 | 0.011282 | 0.011276 | 0.011433 | 0.011602 | 0.011603 |
| 0.011397 | 0.011467 | 0.011700 | 0.011669 | 0.011598 | 0.011632 | 0.011564 |
| 0.011496 | 0.011564 | 0.011564 | 0.011463 | 0.011967 | 0.011631 | 0.011698 |
| 0.011732 | 0.011808 | 0.011435 | 0.011511 | 0.011396 | 0.011597 | 0.011564 |
| 0.011598 | 0.011631 | 0.011631 | 0.011631 | 0.011807 | 0.011765 | 0.011407 |
| 0.011297 | 0.011303 | 0.011401 | 0.011366 | 0.011470 | 0.011321 | 0.011638 |
| 0.011437 | 0.011630 | 0.011346 | 0.011435 | 0.011430 | 0.011505 | 0.011396 |
| 0.011362 | 0.011362 | 0.011430 | 0.011396 | 0.011597 | 0.011564 | 0.011497 |
| 0.011597 | 0.011665 | 0.011396 | 0.011396 | 0.011430 | 0.011429 | 0.011432 |
| 0.011500 | 0.011430 | 0.011430 | 0.011465 | 0.011597 | 0.011665 | 0.011665 |
| 0.011531 | 0.011635 | 0.011636 | 0.011772 | 0.011802 | 0.011463 | 0.011631 |
| 0.011564 | 0.011564 | 0.011398 | 0.011582 | 0.011512 | 0.011537 | 0.011376 |
| 0.011577 | 0.011835 | 0.011568 | 0.011468 | 0.011362 | 0.011564 | 0.011430 |
| 0.011530 | 0.011463 | 0.011362 | 0.011465 | 0.011564 | 0.011567 | 0.011463 |
| 0.011362 | 0.011296 | 0.011430 | 0.011362 | 0.011295 | 0.011400 | 0.011564 |
| 0.011463 | 0.011396 | 0.011429 | 0.011463 | 0.011430 | 0.011362 | 0.011564 |
| 0.011429 | 0.011463 | 0.011463 | 0.011396 | 0.011463 | 0.011631 | 0.011362 |
| 0.011396 | 0.011799 | 0.011396 | 0.011429 | 0.011396 | 0.011765 | 0.011360 |
| 0.011848 | 0.011315 | 0.011411 | 0.011624 | 0.011671 | 0.011599 | 0.011311 |
| 0.011375 | 0.011564 | 0.011664 | 0.011773 | 0.011633 | 0.011771 | 0.011901 |
| 0.011801 | 0.011838 | 0.011799 | 0.012051 | 0.011765 | 0.012640 | 0.011802 |
| 0.012540 | 0.012308 | 0.012442 | 0.012714 | 0.011765 | 0.011463 | 0.011766 |
| 0.012137 | 0.012072 | 0.011732 | 0.011631 | 0.011699 | 0.011699 | 0.011669 |
| 0.011564 | 0.011569 | 0.011631 | 0.011598 | 0.011968 | 0.012034 | 0.012036 |
| 0.011935 | 0.012036 | 0.012139 | 0.011906 | 0.012205 | 0.012212 | 0.012272 |
| 0.012273 | 0.012307 | 0.012255 | 0.012273 | 0.012275 | 0.011496 | 0.011800 |
| 0.011868 | 0.012371 | 0.011874 | 0.012102 | 0.012575 | 0.011638 | 0.011531 |
| 0.011496 | 0.011496 | 0.011968 | 0.012048 | 0.012116 | 0.011832 | 0.011498 |
| S592     | 0.011732 | 0.011732 | 0.012068 | 0.011832 | 0.011832 | 0.011899 |
| 0.011705 | 0.011637 | 0.011899 | 0.011329 | 0.011396 | 0.011363 | 0.011329 |
| 0.011362 | 0.011530 | 0.011329 | 0.011362 | 0.011429 | 0.011396 | 0.011362 |
| 0.011329 | 0.011362 | 0.011463 | 0.011329 | 0.011363 | 0.011362 | 0.011671 |
| 0.011597 | 0.011362 | 0.011262 | 0.011496 | 0.011429 | 0.011396 | 0.011429 |
| 0.011396 | 0.011496 | 0.011396 | 0.011396 | 0.011429 | 0.011396 | 0.011564 |
| 0.011329 | 0.011396 | 0.011429 | 0.011362 | 0.011463 | 0.011496 | 0.011429 |
| 0.011396 | 0.011564 | 0.011463 | 0.011731 | 0.011396 | 0.011664 | 0.011396 |
| 0.011362 | 0.011463 | 0.011530 | 0.011664 | 0.011765 | 0.011463 | 0.011564 |
| 0.011429 | 0.011496 | 0.011396 | 0.011631 | 0.011866 | 0.011396 | 0.011463 |
| 0.011362 | 0.011463 | 0.011429 | 0.011496 | 0.011429 | 0.011429 | 0.011429 |
| 0.011329 | 0.011362 | 0.011329 | 0.011429 | 0.011396 | 0.011430 | 0.011496 |
| 0.011429 | 0.011396 | 0.011463 | 0.011362 | 0.011496 | 0.011329 | 0.011396 |
| 0.011564 | 0.011496 | 0.011731 | 0.011564 | 0.011396 | 0.011631 | 0.011396 |
| 0.011505 | 0.011733 | 0.011513 | 0.011216 | 0.011247 | 0.011355 | 0.011414 |
| 0.012085 | 0.011518 | 0.011225 | 0.011631 | 0.011631 | 0.011429 | 0.011530 |

|          |          |          |          |          |          |          |
|----------|----------|----------|----------|----------|----------|----------|
| 0.011463 | 0.011429 | 0.011496 | 0.011396 | 0.011496 | 0.011429 | 0.011429 |
| 0.011396 | 0.011496 | 0.011698 | 0.011563 | 0.011463 | 0.011429 | 0.011362 |
| 0.011329 | 0.011329 | 0.011396 | 0.011362 | 0.011564 | 0.011530 | 0.011463 |
| 0.011564 | 0.011631 | 0.011362 | 0.011362 | 0.011396 | 0.011396 | 0.011398 |
| 0.011466 | 0.011396 | 0.011396 | 0.011240 | 0.011313 | 0.011271 | 0.011396 |
| 0.011365 | 0.011301 | 0.011318 | 0.011336 | 0.011298 | 0.011300 | 0.011364 |
| 0.011600 | 0.011370 | 0.011405 | 0.011329 | 0.011302 | 0.011464 | 0.011430 |
| 0.011497 | 0.011431 | 0.011430 | 0.011530 | 0.011463 | 0.011765 | 0.011631 |
| 0.011664 | 0.011530 | 0.011396 | 0.011497 | 0.011295 | 0.011530 | 0.011329 |
| 0.011396 | 0.011396 | 0.011362 | 0.011329 | 0.011362 | 0.011329 | 0.011429 |
| 0.011396 | 0.011497 | 0.011430 | 0.011329 | 0.011431 | 0.011530 | 0.011533 |
| 0.011530 | 0.011430 | 0.011329 | 0.011263 | 0.011396 | 0.011329 | 0.011262 |
| 0.011366 | 0.011530 | 0.011329 | 0.011530 | 0.011295 | 0.011396 | 0.011362 |
| 0.011463 | 0.011362 | 0.011396 | 0.011362 | 0.011396 | 0.011262 | 0.011396 |
| 0.011430 | 0.011362 | 0.011430 | 0.011362 | 0.011396 | 0.011429 | 0.011665 |
| 0.011765 | 0.011698 | 0.011765 | 0.011532 | 0.011766 | 0.011396 | 0.011362 |
| 0.011398 | 0.011667 | 0.011517 | 0.011266 | 0.011773 | 0.011265 | 0.011336 |
| 0.011739 | 0.011672 | 0.011564 | 0.011765 | 0.011470 | 0.011631 | 0.011597 |
| 0.011530 | 0.011698 | 0.011557 | 0.011390 | 0.011395 | 0.011429 | 0.011500 |
| 0.011597 | 0.011499 | 0.011635 | 0.011703 | 0.011631 | 0.011698 | 0.011805 |
| 0.011534 | 0.011705 | 0.011636 | 0.011567 | 0.011834 | 0.011295 | 0.011498 |
| 0.011463 | 0.011396 | 0.011295 | 0.011295 | 0.011362 | 0.011362 | 0.011429 |
| 0.011362 | 0.011429 | 0.011329 | 0.011429 | 0.011362 | 0.011362 | 0.011429 |
| 0.011362 | 0.011799 | 0.011698 | 0.011731 | 0.011262 | 0.011362 | 0.011396 |
| 0.011396 | 0.011362 | 0.011429 | 0.011463 | 0.011329 | 0.011329 | 0.011329 |
| 0.011866 | 0.011496 | 0.011496 | 0.011295 | 0.011396 | 0.011564 | 0.011329 |
| 0.011329 | 0.011396 | 0.011362 | 0.011530 | 0.011329 | 0.011463 | 0.011597 |
| 0.011530 | 0.011362 | 0.011362 | 0.011295 | 0.011295 | 0.011463 | 0.011396 |
| 0.011295 | 0.011396 | 0.011262 | 0.011295 | 0.011429 | 0.011564 | 0.011329 |
| 0.011295 | 0.011429 | 0.011363 | 0.011262 | 0.011597 | 0.011262 | 0.011429 |
| 0.011505 | 0.011329 | 0.011631 | 0.011463 | 0.011496 | 0.011362 | 0.011463 |
| 0.011329 | 0.011664 | 0.011262 | 0.011530 | 0.011329 | 0.011329 | 0.011262 |
| 0.011496 | 0.011698 | 0.011396 | 0.011463 | 0.011295 | 0.011698 | 0.011329 |
| 0.011329 | 0.011329 | 0.011362 | 0.011463 | 0.011362 | 0.011463 | 0.011530 |
| 0.011530 | 0.011496 | 0.011396 | 0.011497 | 0.011463 | 0.011329 | 0.011295 |
| 0.011329 | 0.011329 | 0.011396 | 0.011329 | 0.011295 | 0.011463 | 0.011329 |
| 0.011362 | 0.011362 | 0.011496 | 0.011530 | 0.011429 | 0.011362 | 0.011362 |
| 0.011429 | 0.011362 | 0.011463 | 0.011329 | 0.011463 | 0.011564 | 0.011866 |
| 0.011362 | 0.011765 | 0.011336 | 0.017823 | 0.011191 | 0.011366 | 0.011688 |
| 0.011648 | 0.011693 | 0.011322 | 0.011292 | 0.011664 | 0.011716 | 0.011303 |
| 0.011534 | 0.011487 | 0.011177 | 0.011270 | 0.011255 | 0.011258 | 0.011275 |
| 0.011529 | 0.011470 | 0.011468 | 0.011325 | 0.011496 | 0.011530 | 0.011534 |
| 0.011404 | 0.011497 | 0.011497 | 0.011463 | 0.011429 | 0.011430 | 0.011396 |
| 0.011429 | 0.011362 | 0.011396 | 0.011430 | 0.011396 | 0.011329 | 0.011362 |
| 0.011362 | 0.011430 | 0.011329 | 0.011430 | 0.011463 | 0.011497 | 0.011396 |
| 0.011429 | 0.011396 | 0.011732 | 0.011732 | 0.011463 | 0.011497 | 0.011530 |
| 0.011295 | 0.011295 | 0.011329 | 0.011430 | 0.011295 | 0.011530 | 0.011530 |
| 0.011564 | 0.011564 | 0.011496 | 0.011597 | 0.011765 | 0.011599 | 0.011429 |
| 0.011430 | 0.011497 | 0.011530 | 0.011362 | 0.011362 | 0.011396 | 0.011429 |
| 0.011497 | 0.011497 | 0.011530 | 0.011497 | 0.011397 | 0.011597 | 0.011564 |
| 0.011433 | 0.011329 | 0.011429 | 0.011530 | 0.011430 | 0.011564 | 0.011597 |
| 0.011765 | 0.011470 | 0.011631 | 0.011597 | 0.011530 | 0.011698 | 0.011329 |
| 0.011498 | 0.011396 | 0.011362 | 0.011362 | 0.011430 | 0.011329 | 0.011430 |
| 0.011463 | 0.011497 | 0.011396 | 0.011429 | 0.011396 | 0.011732 | 0.011732 |
| 0.011463 | 0.011497 | 0.011563 | 0.011496 | 0.012136 | 0.011560 | 0.011482 |
| 0.011552 | 0.011511 | 0.011622 | 0.011510 | 0.011620 | 0.011543 | 0.011474 |
| 0.012090 | 0.011406 | 0.011540 | 0.011475 | 0.011749 | 0.011604 | 0.011707 |
| 0.012114 | 0.011588 | 0.011669 | 0.011732 | 0.011597 | 0.011597 | 0.011635 |
| 0.011295 | 0.011463 | 0.011597 | 0.011563 | 0.011567 | 0.011563 | 0.011532 |
| 0.011396 | 0.011329 | 0.011362 | 0.011396 | 0.011295 | 0.011362 | 0.011262 |

|          |          |          |          |          |          |          |
|----------|----------|----------|----------|----------|----------|----------|
| 0.011396 | 0.011429 | 0.011329 | 0.011295 | 0.011396 | 0.011329 | 0.011362 |
| 0.011362 | 0.011295 | 0.011362 | 0.011396 | 0.011295 | 0.011496 | 0.011530 |
| 0.011429 | 0.011496 | 0.011429 | 0.011429 | 0.011362 | 0.011765 | 0.011396 |
| 0.011443 | 0.011362 | 0.011598 | 0.011603 | 0.011463 | 0.011463 | 0.011463 |
| 0.011463 | 0.011396 | 0.011362 | 0.011396 | 0.011496 | 0.011496 | 0.011429 |
| 0.011429 | 0.011564 | 0.011731 | 0.011463 | 0.011664 | 0.011664 | 0.011530 |
| 0.011362 | 0.011429 | 0.011463 | 0.011866 | 0.011430 | 0.011463 | 0.011429 |
| 0.011463 | 0.011396 | 0.011396 | 0.011698 | 0.011631 | 0.011664 | 0.011396 |
| 0.011496 | 0.011564 | 0.011429 | 0.011496 | 0.000000 | 0.011329 | 0.011664 |
| 0.011429 | 0.011396 | 0.011396 | 0.011564 | 0.011396 | 0.011496 | 0.011732 |
| 0.011429 | 0.011773 | 0.011799 | 0.011507 | 0.011173 | 0.011502 | 0.011318 |
| 0.011170 | 0.011722 | 0.011306 | 0.011462 | 0.011304 | 0.011416 | 0.011432 |
| 0.011468 | 0.011126 | 0.011394 | 0.011126 | 0.011222 | 0.011328 | 0.011385 |
| 0.011437 | 0.011336 | 0.011448 | 0.011377 | 0.011431 | 0.011564 | 0.011631 |
| 0.011631 | 0.011497 | 0.011601 | 0.011602 | 0.011738 | 0.011767 | 0.011429 |
| 0.011664 | 0.011530 | 0.011396 | 0.011497 | 0.011295 | 0.011530 | 0.011329 |
| 0.011396 | 0.011396 | 0.011362 | 0.011329 | 0.011362 | 0.011329 | 0.011429 |
| 0.011375 | 0.011375 | 0.011368 | 0.011403 | 0.011539 | 0.011504 | 0.011504 |
| 0.011503 | 0.011464 | 0.011208 | 0.011204 | 0.011365 | 0.011534 | 0.011535 |
| 0.011363 | 0.011331 | 0.011666 | 0.011635 | 0.011565 | 0.011599 | 0.011530 |
| 0.011463 | 0.011530 | 0.011530 | 0.011429 | 0.012000 | 0.011597 | 0.011665 |
| 0.011698 | 0.011772 | 0.011401 | 0.011476 | 0.011362 | 0.011564 | 0.011530 |
| 0.011565 | 0.011597 | 0.011597 | 0.011597 | 0.011728 | 0.011731 | 0.011372 |
| 0.011263 | 0.011268 | 0.011367 | 0.011332 | 0.011436 | 0.011284 | 0.011604 |
| 0.011369 | 0.011543 | 0.011203 | 0.011360 | 0.011396 | 0.011436 | 0.011362 |
| 0.011329 | 0.011329 | 0.011396 | 0.011362 | 0.011564 | 0.011530 | 0.011463 |
| 0.011564 | 0.011631 | 0.011362 | 0.011362 | 0.011396 | 0.011396 | 0.011398 |
| 0.011466 | 0.011396 | 0.011396 | 0.011431 | 0.011564 | 0.011631 | 0.011631 |
| 0.011497 | 0.011601 | 0.011602 | 0.011738 | 0.011767 | 0.011429 | 0.011597 |
| 0.011530 | 0.011530 | 0.011364 | 0.011547 | 0.011442 | 0.011503 | 0.011375 |
| 0.011542 | 0.011789 | 0.011526 | 0.011434 | 0.011329 | 0.011530 | 0.011396 |
| 0.011497 | 0.011430 | 0.011329 | 0.011431 | 0.011530 | 0.011533 | 0.011430 |
| 0.011329 | 0.011263 | 0.011396 | 0.011329 | 0.011262 | 0.011366 | 0.011530 |
| 0.011429 | 0.011362 | 0.011396 | 0.011430 | 0.011396 | 0.011329 | 0.011530 |
| 0.011396 | 0.011429 | 0.011429 | 0.011362 | 0.011429 | 0.011664 | 0.011329 |
| 0.011362 | 0.011765 | 0.011362 | 0.011396 | 0.011362 | 0.011731 | 0.011232 |
| 0.011622 | 0.011230 | 0.011311 | 0.011503 | 0.011549 | 0.011527 | 0.011186 |
| 0.011218 | 0.011530 | 0.011631 | 0.011739 | 0.011599 | 0.011703 | 0.011867 |
| 0.011767 | 0.011804 | 0.011765 | 0.011983 | 0.011731 | 0.012606 | 0.011768 |
| 0.012507 | 0.012274 | 0.012408 | 0.012680 | 0.011731 | 0.011430 | 0.011732 |
| 0.012171 | 0.012106 | 0.011698 | 0.011597 | 0.011665 | 0.011665 | 0.011635 |
| 0.011530 | 0.011467 | 0.011597 | 0.011564 | 0.011934 | 0.012000 | 0.012002 |
| 0.011901 | 0.012002 | 0.012105 | 0.011838 | 0.012171 | 0.012178 | 0.012238 |
| 0.012239 | 0.012273 | 0.012186 | 0.012239 | 0.012240 | 0.011463 | 0.011766 |
| 0.011834 | 0.012337 | 0.011840 | 0.012068 | 0.012541 | 0.011603 | 0.011497 |
| 0.011463 | 0.011463 | 0.011934 | 0.011965 | 0.012045 | 0.011799 | 0.011465 |
| S593     | 0.011597 | 0.011597 | 0.011933 | 0.011698 | 0.011698 | 0.011765 |
| 0.011603 | 0.011535 | 0.011765 | 0.011195 | 0.011262 | 0.011229 | 0.011194 |
| 0.011228 | 0.011396 | 0.011194 | 0.011228 | 0.011295 | 0.011262 | 0.011228 |
| 0.011194 | 0.011228 | 0.011329 | 0.011195 | 0.011228 | 0.011228 | 0.011569 |
| 0.011463 | 0.011228 | 0.011127 | 0.011362 | 0.011295 | 0.011262 | 0.011295 |
| 0.011262 | 0.011362 | 0.011262 | 0.011262 | 0.011295 | 0.011262 | 0.011429 |
| 0.011194 | 0.011262 | 0.011295 | 0.011228 | 0.011329 | 0.011362 | 0.011295 |
| 0.011262 | 0.011429 | 0.011329 | 0.011597 | 0.011262 | 0.011530 | 0.011262 |
| 0.011228 | 0.011329 | 0.011396 | 0.011530 | 0.011631 | 0.011329 | 0.011429 |
| 0.011295 | 0.011295 | 0.011262 | 0.011496 | 0.011732 | 0.011262 | 0.011329 |
| 0.011228 | 0.011329 | 0.011295 | 0.011362 | 0.011295 | 0.011295 | 0.011295 |
| 0.011194 | 0.011228 | 0.011194 | 0.011295 | 0.011262 | 0.011296 | 0.011362 |
| 0.011295 | 0.011262 | 0.011329 | 0.011228 | 0.011362 | 0.011195 | 0.011262 |
| 0.011429 | 0.011362 | 0.011597 | 0.011429 | 0.011262 | 0.011497 | 0.011262 |

|          |          |          |          |          |          |          |
|----------|----------|----------|----------|----------|----------|----------|
| 0.011431 | 0.011658 | 0.011475 | 0.011177 | 0.011172 | 0.011281 | 0.011375 |
| 0.012011 | 0.011467 | 0.011184 | 0.011496 | 0.011496 | 0.011295 | 0.011396 |
| 0.011329 | 0.011295 | 0.011362 | 0.011262 | 0.011362 | 0.011295 | 0.011295 |
| 0.011262 | 0.011362 | 0.011564 | 0.011429 | 0.011329 | 0.011295 | 0.011228 |
| 0.011195 | 0.011195 | 0.011262 | 0.011228 | 0.011429 | 0.011396 | 0.011329 |
| 0.011429 | 0.011497 | 0.011228 | 0.011228 | 0.011262 | 0.011262 | 0.011263 |
| 0.011331 | 0.011262 | 0.011262 | 0.011132 | 0.011205 | 0.011165 | 0.011262 |
| 0.011263 | 0.011198 | 0.011245 | 0.011233 | 0.011162 | 0.011197 | 0.011229 |
| 0.011492 | 0.011267 | 0.011301 | 0.011195 | 0.011199 | 0.011329 | 0.011296 |
| 0.011363 | 0.011296 | 0.011296 | 0.011396 | 0.011329 | 0.011698 | 0.011497 |
| 0.011530 | 0.011396 | 0.011262 | 0.011362 | 0.011161 | 0.011396 | 0.011195 |
| 0.011262 | 0.011262 | 0.011228 | 0.011195 | 0.011228 | 0.011195 | 0.011295 |
| 0.011262 | 0.011362 | 0.011295 | 0.011195 | 0.011296 | 0.011396 | 0.011398 |
| 0.011396 | 0.011295 | 0.011195 | 0.011128 | 0.011262 | 0.011195 | 0.011128 |
| 0.011230 | 0.011396 | 0.011195 | 0.011396 | 0.011161 | 0.011262 | 0.011228 |
| 0.011329 | 0.011228 | 0.011262 | 0.011228 | 0.011262 | 0.011127 | 0.011262 |
| 0.011295 | 0.011228 | 0.011295 | 0.011228 | 0.011262 | 0.011295 | 0.011530 |
| 0.011631 | 0.011564 | 0.011631 | 0.011397 | 0.011631 | 0.011262 | 0.011228 |
| 0.011263 | 0.011505 | 0.011335 | 0.011163 | 0.011637 | 0.011129 | 0.011257 |
| 0.011637 | 0.011536 | 0.011429 | 0.011631 | 0.011333 | 0.011497 | 0.011463 |
| 0.011396 | 0.011564 | 0.011415 | 0.011266 | 0.011312 | 0.011295 | 0.011365 |
| 0.011463 | 0.011364 | 0.011500 | 0.011568 | 0.011497 | 0.011564 | 0.011670 |
| 0.011399 | 0.011569 | 0.011500 | 0.011432 | 0.011699 | 0.011161 | 0.011363 |
| 0.011329 | 0.011262 | 0.011161 | 0.011161 | 0.011228 | 0.011228 | 0.011295 |
| 0.011228 | 0.011295 | 0.011194 | 0.011295 | 0.011228 | 0.011228 | 0.011295 |
| 0.011228 | 0.011664 | 0.011564 | 0.011597 | 0.011127 | 0.011228 | 0.011262 |
| 0.011262 | 0.011228 | 0.011295 | 0.011329 | 0.011194 | 0.011194 | 0.011194 |
| 0.011731 | 0.011362 | 0.011362 | 0.011161 | 0.011262 | 0.011430 | 0.011195 |
| 0.011194 | 0.011262 | 0.011228 | 0.011396 | 0.011194 | 0.011329 | 0.011463 |
| 0.011396 | 0.011228 | 0.011228 | 0.011161 | 0.011161 | 0.011329 | 0.011262 |
| 0.011161 | 0.011262 | 0.011127 | 0.011161 | 0.011295 | 0.011430 | 0.011195 |
| 0.011161 | 0.011295 | 0.011228 | 0.011127 | 0.011463 | 0.011127 | 0.011295 |
| 0.011368 | 0.011195 | 0.011497 | 0.011329 | 0.011362 | 0.011228 | 0.011329 |
| 0.011194 | 0.011530 | 0.011127 | 0.011396 | 0.011194 | 0.011194 | 0.011127 |
| 0.011362 | 0.011564 | 0.011262 | 0.011329 | 0.011161 | 0.011564 | 0.011194 |
| 0.011195 | 0.011194 | 0.011228 | 0.011329 | 0.011228 | 0.011329 | 0.011396 |
| 0.011396 | 0.011295 | 0.011262 | 0.011362 | 0.011329 | 0.011194 | 0.011161 |
| 0.011194 | 0.011194 | 0.011262 | 0.011194 | 0.011161 | 0.011329 | 0.011194 |
| 0.011228 | 0.011228 | 0.011362 | 0.011396 | 0.011295 | 0.011228 | 0.011228 |
| 0.011295 | 0.011228 | 0.011329 | 0.011194 | 0.011329 | 0.011429 | 0.011732 |
| 0.011228 | 0.011631 | 0.011233 | 0.011748 | 0.011257 | 0.011305 | 0.011583 |
| 0.011545 | 0.011588 | 0.011270 | 0.011234 | 0.011664 | 0.011613 | 0.011303 |
| 0.011487 | 0.011487 | 0.011138 | 0.011186 | 0.011216 | 0.011258 | 0.011232 |
| 0.011482 | 0.011395 | 0.011394 | 0.011259 | 0.011362 | 0.011396 | 0.011398 |
| 0.011266 | 0.011362 | 0.011362 | 0.011329 | 0.011295 | 0.011295 | 0.011262 |
| 0.011295 | 0.011228 | 0.011262 | 0.011295 | 0.011262 | 0.011195 | 0.011228 |
| 0.011228 | 0.011295 | 0.011195 | 0.011295 | 0.011329 | 0.011362 | 0.011262 |
| 0.011295 | 0.011262 | 0.011597 | 0.011597 | 0.011329 | 0.011363 | 0.011396 |
| 0.011161 | 0.011161 | 0.011195 | 0.011295 | 0.011161 | 0.011396 | 0.011396 |
| 0.011429 | 0.011429 | 0.011362 | 0.011463 | 0.011631 | 0.011464 | 0.011295 |
| 0.011295 | 0.011362 | 0.011396 | 0.011228 | 0.011295 | 0.011262 | 0.011295 |
| 0.011363 | 0.011362 | 0.011396 | 0.011363 | 0.011262 | 0.011463 | 0.011430 |
| 0.011297 | 0.011195 | 0.011295 | 0.011396 | 0.011295 | 0.011430 | 0.011463 |
| 0.011631 | 0.011333 | 0.011497 | 0.011463 | 0.011396 | 0.011564 | 0.011195 |
| 0.011363 | 0.011262 | 0.011228 | 0.011228 | 0.011295 | 0.011195 | 0.011295 |
| 0.011329 | 0.011362 | 0.011262 | 0.011295 | 0.011262 | 0.011597 | 0.011597 |
| 0.011329 | 0.011363 | 0.011429 | 0.011362 | 0.012002 | 0.011417 | 0.011341 |
| 0.011412 | 0.011372 | 0.011482 | 0.011372 | 0.011480 | 0.011405 | 0.011370 |
| 0.011953 | 0.011268 | 0.011403 | 0.011337 | 0.011611 | 0.011468 | 0.011571 |
| 0.011978 | 0.011437 | 0.011533 | 0.011597 | 0.011463 | 0.011463 | 0.011499 |

|          |          |          |          |          |          |          |
|----------|----------|----------|----------|----------|----------|----------|
| 0.011161 | 0.011329 | 0.011463 | 0.011429 | 0.011432 | 0.011429 | 0.011397 |
| 0.011262 | 0.011194 | 0.011228 | 0.011262 | 0.011161 | 0.011228 | 0.011127 |
| 0.011262 | 0.011295 | 0.011194 | 0.011161 | 0.011262 | 0.011194 | 0.011228 |
| 0.011228 | 0.011161 | 0.011228 | 0.011262 | 0.011161 | 0.011362 | 0.011396 |
| 0.011295 | 0.011362 | 0.011295 | 0.011295 | 0.011228 | 0.011631 | 0.011262 |
| 0.011304 | 0.011228 | 0.011463 | 0.011467 | 0.011329 | 0.011329 | 0.011329 |
| 0.011329 | 0.011262 | 0.011228 | 0.011262 | 0.011362 | 0.011362 | 0.011295 |
| 0.011295 | 0.011429 | 0.011597 | 0.011329 | 0.011530 | 0.011530 | 0.011396 |
| 0.011228 | 0.011295 | 0.011329 | 0.011732 | 0.011295 | 0.011329 | 0.011295 |
| 0.011329 | 0.011262 | 0.011262 | 0.011564 | 0.011497 | 0.011530 | 0.011262 |
| 0.011228 | 0.011362 | 0.011295 | 0.011228 | 0.011329 | 0.000000 | 0.011530 |
| 0.011295 | 0.011262 | 0.011262 | 0.011429 | 0.011262 | 0.011362 | 0.011597 |
| 0.011295 | 0.011671 | 0.011664 | 0.011467 | 0.011229 | 0.011366 | 0.011215 |
| 0.011170 | 0.011683 | 0.011201 | 0.011417 | 0.011255 | 0.011366 | 0.011379 |
| 0.011468 | 0.011192 | 0.011339 | 0.011192 | 0.011222 | 0.011328 | 0.011344 |
| 0.011362 | 0.011257 | 0.011342 | 0.011272 | 0.011296 | 0.011429 | 0.011497 |
| 0.011497 | 0.011363 | 0.011466 | 0.011467 | 0.011603 | 0.011626 | 0.011295 |
| 0.011530 | 0.011396 | 0.011262 | 0.011362 | 0.011161 | 0.011396 | 0.011195 |
| 0.011262 | 0.011262 | 0.011228 | 0.011195 | 0.011228 | 0.011195 | 0.011295 |
| 0.011270 | 0.011270 | 0.011266 | 0.011300 | 0.011437 | 0.011402 | 0.011402 |
| 0.011401 | 0.011329 | 0.011134 | 0.011132 | 0.011263 | 0.011433 | 0.011433 |
| 0.011228 | 0.011297 | 0.011531 | 0.011500 | 0.011430 | 0.011464 | 0.011396 |
| 0.011329 | 0.011396 | 0.011396 | 0.011295 | 0.011866 | 0.011463 | 0.011530 |
| 0.011564 | 0.011630 | 0.011265 | 0.011337 | 0.011228 | 0.011429 | 0.011396 |
| 0.011430 | 0.011463 | 0.011463 | 0.011463 | 0.011611 | 0.011597 | 0.011234 |
| 0.011128 | 0.011130 | 0.011230 | 0.011196 | 0.011299 | 0.011135 | 0.011468 |
| 0.011266 | 0.011411 | 0.011108 | 0.011285 | 0.011262 | 0.011334 | 0.011228 |
| 0.011195 | 0.011195 | 0.011262 | 0.011228 | 0.011429 | 0.011396 | 0.011329 |
| 0.011429 | 0.011497 | 0.011228 | 0.011228 | 0.011262 | 0.011262 | 0.011263 |
| 0.011331 | 0.011262 | 0.011262 | 0.011296 | 0.011429 | 0.011497 | 0.011497 |
| 0.011363 | 0.011466 | 0.011467 | 0.011603 | 0.011626 | 0.011295 | 0.011463 |
| 0.011396 | 0.011396 | 0.011229 | 0.011408 | 0.011338 | 0.011367 | 0.011200 |
| 0.011405 | 0.011607 | 0.011399 | 0.011298 | 0.011195 | 0.011396 | 0.011262 |
| 0.011362 | 0.011295 | 0.011195 | 0.011296 | 0.011396 | 0.011398 | 0.011295 |
| 0.011195 | 0.011128 | 0.011262 | 0.011195 | 0.011128 | 0.011230 | 0.011396 |
| 0.011295 | 0.011228 | 0.011262 | 0.011295 | 0.011262 | 0.011195 | 0.011396 |
| 0.011262 | 0.011295 | 0.011295 | 0.011228 | 0.011295 | 0.011530 | 0.011194 |
| 0.011228 | 0.011631 | 0.011228 | 0.011262 | 0.011228 | 0.011597 | 0.011189 |
| 0.011679 | 0.011188 | 0.011261 | 0.011422 | 0.011508 | 0.011419 | 0.011144 |
| 0.011218 | 0.011396 | 0.011496 | 0.011603 | 0.011464 | 0.011601 | 0.011733 |
| 0.011632 | 0.011669 | 0.011631 | 0.011880 | 0.011597 | 0.012472 | 0.011633 |
| 0.012372 | 0.012139 | 0.012273 | 0.012545 | 0.011597 | 0.011295 | 0.011598 |
| 0.012036 | 0.011971 | 0.011564 | 0.011463 | 0.011531 | 0.011531 | 0.011500 |
| 0.011396 | 0.011399 | 0.011463 | 0.011430 | 0.011800 | 0.011866 | 0.011867 |
| 0.011767 | 0.011867 | 0.011970 | 0.011737 | 0.012037 | 0.012042 | 0.012104 |
| 0.012104 | 0.012138 | 0.012084 | 0.012104 | 0.012106 | 0.011329 | 0.011631 |
| 0.011699 | 0.012202 | 0.011704 | 0.011933 | 0.012406 | 0.011468 | 0.011363 |
| 0.011329 | 0.011329 | 0.011799 | 0.011842 | 0.011940 | 0.011664 | 0.011330 |
| S594     | 0.011933 | 0.011933 | 0.012001 | 0.011765 | 0.011765 | 0.011832 |
| 0.011230 | 0.011162 | 0.011832 | 0.011530 | 0.011597 | 0.011565 | 0.011530 |
| 0.011496 | 0.011731 | 0.011463 | 0.011564 | 0.011631 | 0.011597 | 0.011564 |
| 0.011530 | 0.011564 | 0.011396 | 0.011531 | 0.011564 | 0.011564 | 0.011196 |
| 0.011530 | 0.011564 | 0.011463 | 0.011429 | 0.011631 | 0.011597 | 0.011631 |
| 0.011597 | 0.011698 | 0.011597 | 0.011597 | 0.011631 | 0.011597 | 0.011765 |
| 0.011463 | 0.011597 | 0.011631 | 0.011564 | 0.011597 | 0.011698 | 0.011631 |
| 0.011597 | 0.011765 | 0.011665 | 0.011262 | 0.011597 | 0.011866 | 0.011597 |
| 0.011564 | 0.011597 | 0.011732 | 0.011866 | 0.011362 | 0.011597 | 0.011698 |
| 0.011631 | 0.011698 | 0.011597 | 0.011832 | 0.011396 | 0.011597 | 0.011664 |
| 0.011564 | 0.011664 | 0.011631 | 0.011698 | 0.011631 | 0.011631 | 0.011631 |
| 0.011530 | 0.011564 | 0.011530 | 0.011564 | 0.011597 | 0.011632 | 0.011698 |

|          |          |          |          |          |          |          |
|----------|----------|----------|----------|----------|----------|----------|
| 0.011631 | 0.011597 | 0.011664 | 0.011564 | 0.011429 | 0.011530 | 0.011597 |
| 0.011765 | 0.011698 | 0.011463 | 0.011765 | 0.011597 | 0.011832 | 0.011597 |
| 0.011765 | 0.011247 | 0.011777 | 0.011490 | 0.011508 | 0.011649 | 0.011375 |
| 0.012048 | 0.011315 | 0.011513 | 0.011832 | 0.011832 | 0.011564 | 0.011463 |
| 0.011664 | 0.011631 | 0.011698 | 0.011597 | 0.011698 | 0.011631 | 0.011631 |
| 0.011597 | 0.011631 | 0.011900 | 0.011765 | 0.011664 | 0.011631 | 0.011564 |
| 0.011530 | 0.011463 | 0.011597 | 0.011564 | 0.011497 | 0.011463 | 0.011396 |
| 0.011497 | 0.011564 | 0.011564 | 0.011564 | 0.011597 | 0.011597 | 0.011601 |
| 0.011669 | 0.011597 | 0.011597 | 0.011456 | 0.011530 | 0.011481 | 0.011598 |
| 0.011568 | 0.011507 | 0.011577 | 0.011543 | 0.011502 | 0.011505 | 0.011567 |
| 0.011456 | 0.011577 | 0.011611 | 0.011531 | 0.011510 | 0.011666 | 0.011565 |
| 0.011632 | 0.011633 | 0.011632 | 0.011731 | 0.011664 | 0.012034 | 0.011766 |
| 0.011597 | 0.011665 | 0.011597 | 0.011631 | 0.011497 | 0.011463 | 0.011530 |
| 0.011597 | 0.011597 | 0.011564 | 0.011530 | 0.011564 | 0.011530 | 0.011631 |
| 0.011597 | 0.011698 | 0.011631 | 0.011530 | 0.011633 | 0.011732 | 0.011736 |
| 0.011732 | 0.011631 | 0.011530 | 0.011465 | 0.011597 | 0.011530 | 0.011463 |
| 0.011468 | 0.011732 | 0.011530 | 0.011732 | 0.011497 | 0.011598 | 0.011564 |
| 0.011665 | 0.011564 | 0.011597 | 0.011564 | 0.011597 | 0.011463 | 0.011597 |
| 0.011631 | 0.011564 | 0.011631 | 0.011564 | 0.011597 | 0.011631 | 0.011866 |
| 0.011295 | 0.011228 | 0.011295 | 0.011734 | 0.011362 | 0.011597 | 0.011564 |
| 0.011533 | 0.011869 | 0.011609 | 0.011506 | 0.011298 | 0.011469 | 0.011650 |
| 0.011264 | 0.011536 | 0.011765 | 0.011967 | 0.011675 | 0.011832 | 0.011799 |
| 0.011732 | 0.011900 | 0.011771 | 0.011678 | 0.011647 | 0.011631 | 0.011703 |
| 0.011799 | 0.011701 | 0.011838 | 0.011906 | 0.011832 | 0.011900 | 0.012009 |
| 0.011737 | 0.011909 | 0.011771 | 0.011770 | 0.012036 | 0.011496 | 0.011700 |
| 0.011664 | 0.011597 | 0.011496 | 0.011496 | 0.011564 | 0.011564 | 0.011631 |
| 0.011564 | 0.011631 | 0.011530 | 0.011564 | 0.011564 | 0.011564 | 0.011631 |
| 0.011564 | 0.011329 | 0.011228 | 0.011262 | 0.011463 | 0.011564 | 0.011597 |
| 0.011597 | 0.011496 | 0.011631 | 0.011597 | 0.011530 | 0.011530 | 0.011530 |
| 0.011396 | 0.011631 | 0.011698 | 0.011496 | 0.011597 | 0.011765 | 0.011530 |
| 0.011530 | 0.011597 | 0.011564 | 0.011732 | 0.011530 | 0.011463 | 0.011597 |
| 0.011530 | 0.011564 | 0.011564 | 0.011496 | 0.011496 | 0.011664 | 0.011597 |
| 0.011496 | 0.011597 | 0.011463 | 0.011496 | 0.011631 | 0.011430 | 0.011530 |
| 0.011497 | 0.011631 | 0.011564 | 0.011463 | 0.011194 | 0.011463 | 0.011631 |
| 0.011711 | 0.011530 | 0.011161 | 0.011665 | 0.011631 | 0.011564 | 0.011664 |
| 0.011530 | 0.011866 | 0.011463 | 0.011463 | 0.011463 | 0.011463 | 0.011463 |
| 0.011698 | 0.011564 | 0.011597 | 0.011664 | 0.011496 | 0.011228 | 0.011463 |
| 0.011530 | 0.011530 | 0.011564 | 0.011664 | 0.011564 | 0.011664 | 0.011731 |
| 0.011732 | 0.011698 | 0.011597 | 0.011698 | 0.011664 | 0.011530 | 0.011496 |
| 0.011530 | 0.011530 | 0.011597 | 0.011463 | 0.011496 | 0.011664 | 0.011530 |
| 0.011496 | 0.011564 | 0.011698 | 0.011664 | 0.011631 | 0.011564 | 0.011564 |
| 0.011631 | 0.011564 | 0.011664 | 0.011530 | 0.011664 | 0.011765 | 0.011463 |
| 0.011564 | 0.011362 | 0.011578 | 0.018087 | 0.011257 | 0.011549 | 0.011235 |
| 0.011199 | 0.011236 | 0.011689 | 0.011466 | 0.011335 | 0.011267 | 0.011607 |
| 0.011535 | 0.011365 | 0.011450 | 0.011521 | 0.011490 | 0.011455 | 0.011533 |
| 0.011248 | 0.011433 | 0.011283 | 0.011457 | 0.011698 | 0.011732 | 0.011737 |
| 0.011610 | 0.011698 | 0.011698 | 0.011597 | 0.011631 | 0.011631 | 0.011598 |
| 0.011631 | 0.011564 | 0.011597 | 0.011631 | 0.011598 | 0.011530 | 0.011564 |
| 0.011564 | 0.011631 | 0.011530 | 0.011631 | 0.011665 | 0.011698 | 0.011597 |
| 0.011564 | 0.011530 | 0.011329 | 0.011329 | 0.011665 | 0.011699 | 0.011732 |
| 0.011497 | 0.011497 | 0.011530 | 0.011631 | 0.011497 | 0.011732 | 0.011732 |
| 0.011765 | 0.011765 | 0.011698 | 0.011799 | 0.011362 | 0.011801 | 0.011631 |
| 0.011631 | 0.011698 | 0.011732 | 0.011564 | 0.011631 | 0.011597 | 0.011631 |
| 0.011699 | 0.011698 | 0.011732 | 0.011699 | 0.011599 | 0.011799 | 0.011765 |
| 0.011636 | 0.011530 | 0.011631 | 0.011732 | 0.011631 | 0.011698 | 0.011799 |
| 0.011967 | 0.011675 | 0.011832 | 0.011799 | 0.011732 | 0.011900 | 0.011531 |
| 0.011700 | 0.011598 | 0.011564 | 0.011564 | 0.011631 | 0.011530 | 0.011631 |
| 0.011665 | 0.011698 | 0.011597 | 0.011564 | 0.011530 | 0.011329 | 0.011329 |
| 0.011665 | 0.011699 | 0.011765 | 0.011698 | 0.012271 | 0.011775 | 0.011693 |
| 0.011763 | 0.011719 | 0.011833 | 0.011718 | 0.011830 | 0.011750 | 0.011681 |

|          |          |          |          |          |          |          |
|----------|----------|----------|----------|----------|----------|----------|
| 0.012228 | 0.011614 | 0.011745 | 0.011683 | 0.011956 | 0.011808 | 0.011911 |
| 0.012250 | 0.011739 | 0.011872 | 0.011933 | 0.011799 | 0.011530 | 0.011837 |
| 0.011496 | 0.011664 | 0.011799 | 0.011765 | 0.011770 | 0.011496 | 0.011464 |
| 0.011597 | 0.011530 | 0.011564 | 0.011597 | 0.011496 | 0.011564 | 0.011463 |
| 0.011530 | 0.011564 | 0.011530 | 0.011496 | 0.011597 | 0.011530 | 0.011564 |
| 0.011564 | 0.011496 | 0.011564 | 0.011597 | 0.011496 | 0.011698 | 0.011731 |
| 0.011631 | 0.011631 | 0.011631 | 0.011631 | 0.011564 | 0.011362 | 0.011597 |
| 0.011373 | 0.011564 | 0.011531 | 0.011535 | 0.011597 | 0.011597 | 0.011664 |
| 0.011664 | 0.011597 | 0.011564 | 0.011597 | 0.011698 | 0.011698 | 0.011631 |
| 0.011631 | 0.011765 | 0.011262 | 0.011664 | 0.011866 | 0.011866 | 0.011731 |
| 0.011564 | 0.011631 | 0.011664 | 0.011463 | 0.011631 | 0.011597 | 0.011631 |
| 0.011664 | 0.011530 | 0.011530 | 0.011833 | 0.011833 | 0.011799 | 0.011597 |
| 0.011698 | 0.011765 | 0.011631 | 0.011698 | 0.011664 | 0.011530 | 0.000000 |
| 0.011631 | 0.011597 | 0.011530 | 0.011765 | 0.011597 | 0.011698 | 0.011329 |
| 0.011631 | 0.011298 | 0.011329 | 0.011467 | 0.011342 | 0.011638 | 0.011370 |
| 0.011390 | 0.011683 | 0.011552 | 0.011596 | 0.011548 | 0.011366 | 0.011326 |
| 0.011417 | 0.011192 | 0.011394 | 0.011258 | 0.011330 | 0.011462 | 0.011709 |
| 0.011701 | 0.011611 | 0.011624 | 0.011624 | 0.011633 | 0.011497 | 0.011564 |
| 0.011564 | 0.011632 | 0.011736 | 0.011535 | 0.011874 | 0.011908 | 0.011631 |
| 0.011597 | 0.011665 | 0.011597 | 0.011631 | 0.011497 | 0.011463 | 0.011530 |
| 0.011597 | 0.011597 | 0.011564 | 0.011530 | 0.011564 | 0.011530 | 0.011631 |
| 0.011584 | 0.011585 | 0.011574 | 0.011608 | 0.011744 | 0.011709 | 0.011709 |
| 0.011673 | 0.011665 | 0.011429 | 0.011420 | 0.011568 | 0.011704 | 0.011739 |
| 0.011565 | 0.011602 | 0.011868 | 0.011838 | 0.011767 | 0.011801 | 0.011731 |
| 0.011664 | 0.011732 | 0.011731 | 0.011631 | 0.011597 | 0.011799 | 0.011866 |
| 0.011900 | 0.011274 | 0.011538 | 0.011684 | 0.011564 | 0.011765 | 0.011732 |
| 0.011767 | 0.011799 | 0.011799 | 0.011799 | 0.011886 | 0.011933 | 0.011580 |
| 0.011466 | 0.011476 | 0.011571 | 0.011536 | 0.011573 | 0.011508 | 0.011128 |
| 0.011609 | 0.011367 | 0.011536 | 0.011585 | 0.011598 | 0.011642 | 0.011564 |
| 0.011530 | 0.011463 | 0.011597 | 0.011564 | 0.011497 | 0.011463 | 0.011396 |
| 0.011497 | 0.011564 | 0.011564 | 0.011564 | 0.011597 | 0.011597 | 0.011601 |
| 0.011669 | 0.011597 | 0.011597 | 0.011633 | 0.011497 | 0.011564 | 0.011564 |
| 0.011632 | 0.011736 | 0.011535 | 0.011874 | 0.011908 | 0.011631 | 0.011799 |
| 0.011732 | 0.011732 | 0.011567 | 0.011756 | 0.011651 | 0.011673 | 0.011551 |
| 0.011749 | 0.011926 | 0.011780 | 0.011638 | 0.011530 | 0.011732 | 0.011597 |
| 0.011698 | 0.011631 | 0.011530 | 0.011633 | 0.011732 | 0.011736 | 0.011631 |
| 0.011530 | 0.011465 | 0.011597 | 0.011530 | 0.011463 | 0.011468 | 0.011732 |
| 0.011631 | 0.011564 | 0.011597 | 0.011631 | 0.011598 | 0.011530 | 0.011463 |
| 0.011597 | 0.011631 | 0.011631 | 0.011564 | 0.011631 | 0.011866 | 0.011463 |
| 0.011564 | 0.011362 | 0.011564 | 0.011597 | 0.011564 | 0.011262 | 0.011489 |
| 0.011735 | 0.011358 | 0.011311 | 0.011463 | 0.011508 | 0.011491 | 0.011269 |
| 0.011270 | 0.011463 | 0.011564 | 0.011671 | 0.011532 | 0.011669 | 0.011800 |
| 0.011700 | 0.011737 | 0.011698 | 0.011949 | 0.011664 | 0.012539 | 0.011700 |
| 0.012439 | 0.012207 | 0.012341 | 0.012613 | 0.011597 | 0.011564 | 0.011665 |
| 0.012306 | 0.012039 | 0.011631 | 0.011530 | 0.011598 | 0.011598 | 0.011534 |
| 0.011463 | 0.011467 | 0.011530 | 0.011497 | 0.011868 | 0.011934 | 0.011935 |
| 0.011834 | 0.011935 | 0.012038 | 0.011805 | 0.012306 | 0.012313 | 0.012373 |
| 0.012374 | 0.012408 | 0.012357 | 0.012374 | 0.012376 | 0.011664 | 0.011900 |
| 0.011969 | 0.012472 | 0.011976 | 0.011934 | 0.012407 | 0.011468 | 0.011363 |
| 0.011262 | 0.011329 | 0.011867 | 0.011883 | 0.011975 | 0.011664 | 0.011397 |
| S595     | 0.011698 | 0.011698 | 0.012034 | 0.011799 | 0.011799 | 0.011866 |
| 0.011705 | 0.011637 | 0.011866 | 0.011295 | 0.011362 | 0.011329 | 0.011295 |
| 0.011329 | 0.011496 | 0.011295 | 0.011329 | 0.011396 | 0.011362 | 0.011329 |
| 0.011295 | 0.011329 | 0.011429 | 0.011295 | 0.011329 | 0.011329 | 0.011671 |
| 0.011564 | 0.011329 | 0.011228 | 0.011463 | 0.011396 | 0.011362 | 0.011396 |
| 0.011362 | 0.011463 | 0.011362 | 0.011295 | 0.011396 | 0.011362 | 0.011530 |
| 0.011295 | 0.011362 | 0.011396 | 0.011329 | 0.011429 | 0.011463 | 0.011396 |
| 0.011362 | 0.011530 | 0.011430 | 0.011698 | 0.011362 | 0.011631 | 0.011362 |
| 0.011329 | 0.011429 | 0.011496 | 0.011631 | 0.011731 | 0.011429 | 0.011530 |
| 0.011396 | 0.011463 | 0.011362 | 0.011597 | 0.011832 | 0.011362 | 0.011429 |



|          |          |          |          |          |          |          |
|----------|----------|----------|----------|----------|----------|----------|
| 0.011329 | 0.011429 | 0.011396 | 0.011463 | 0.011396 | 0.011396 | 0.011396 |
| 0.011295 | 0.011329 | 0.011295 | 0.011396 | 0.011362 | 0.011397 | 0.011463 |
| 0.011396 | 0.011362 | 0.011429 | 0.011329 | 0.011463 | 0.011295 | 0.011362 |
| 0.011530 | 0.011463 | 0.011698 | 0.011530 | 0.011362 | 0.011597 | 0.011362 |
| 0.011542 | 0.011770 | 0.011588 | 0.011295 | 0.011284 | 0.011391 | 0.011493 |
| 0.012121 | 0.011518 | 0.011307 | 0.011597 | 0.011597 | 0.011396 | 0.011496 |
| 0.011429 | 0.011396 | 0.011463 | 0.011362 | 0.011463 | 0.011396 | 0.011396 |
| 0.011362 | 0.011463 | 0.011664 | 0.011530 | 0.011429 | 0.011396 | 0.011329 |
| 0.011295 | 0.011295 | 0.011362 | 0.011329 | 0.011530 | 0.011497 | 0.011429 |
| 0.011530 | 0.011597 | 0.011329 | 0.011329 | 0.011362 | 0.011362 | 0.011364 |
| 0.011432 | 0.011362 | 0.011362 | 0.011240 | 0.011313 | 0.011271 | 0.011363 |
| 0.011365 | 0.011301 | 0.011355 | 0.011336 | 0.011264 | 0.011300 | 0.011330 |
| 0.011600 | 0.011370 | 0.011404 | 0.011296 | 0.011302 | 0.011430 | 0.011396 |
| 0.011464 | 0.011397 | 0.011396 | 0.011496 | 0.011429 | 0.011799 | 0.011597 |
| 0.011631 | 0.011497 | 0.011362 | 0.011463 | 0.011262 | 0.011496 | 0.011295 |
| 0.011362 | 0.011362 | 0.011329 | 0.011295 | 0.011329 | 0.011295 | 0.011396 |
| 0.011362 | 0.011463 | 0.011396 | 0.011295 | 0.011397 | 0.011497 | 0.011432 |
| 0.011497 | 0.011396 | 0.011295 | 0.011229 | 0.011362 | 0.011295 | 0.011228 |
| 0.011298 | 0.011497 | 0.011295 | 0.011497 | 0.011262 | 0.011362 | 0.011329 |
| 0.011429 | 0.011329 | 0.011362 | 0.011329 | 0.011362 | 0.011228 | 0.011362 |
| 0.011396 | 0.011329 | 0.011396 | 0.011329 | 0.011362 | 0.011396 | 0.011631 |
| 0.011732 | 0.011664 | 0.011732 | 0.011498 | 0.011732 | 0.011362 | 0.011329 |
| 0.011364 | 0.011626 | 0.011426 | 0.011232 | 0.011739 | 0.011231 | 0.011336 |
| 0.011739 | 0.011638 | 0.011530 | 0.011732 | 0.011436 | 0.011597 | 0.011564 |
| 0.011496 | 0.011664 | 0.011522 | 0.011390 | 0.011437 | 0.011396 | 0.011466 |
| 0.011564 | 0.011465 | 0.011601 | 0.011669 | 0.011597 | 0.011664 | 0.011771 |
| 0.011500 | 0.011671 | 0.011602 | 0.011533 | 0.011800 | 0.011262 | 0.011464 |
| 0.011429 | 0.011362 | 0.011262 | 0.011262 | 0.011329 | 0.011329 | 0.011396 |
| 0.011329 | 0.011396 | 0.011295 | 0.011396 | 0.011329 | 0.011329 | 0.011396 |
| 0.011329 | 0.011765 | 0.011664 | 0.011698 | 0.011228 | 0.011329 | 0.011362 |
| 0.011362 | 0.011329 | 0.011396 | 0.011429 | 0.011295 | 0.011295 | 0.011295 |
| 0.011832 | 0.011463 | 0.011463 | 0.011262 | 0.011362 | 0.011530 | 0.011295 |
| 0.011295 | 0.011362 | 0.011329 | 0.011496 | 0.011295 | 0.011429 | 0.011564 |
| 0.011496 | 0.011329 | 0.011329 | 0.011262 | 0.011262 | 0.011429 | 0.011362 |
| 0.011262 | 0.011362 | 0.011228 | 0.011262 | 0.011396 | 0.011530 | 0.011295 |
| 0.011262 | 0.011396 | 0.011329 | 0.011228 | 0.011564 | 0.011228 | 0.011396 |
| 0.011471 | 0.011295 | 0.011597 | 0.011429 | 0.011463 | 0.011329 | 0.011429 |
| 0.011295 | 0.011631 | 0.011228 | 0.011496 | 0.011295 | 0.011295 | 0.011228 |
| 0.011463 | 0.011665 | 0.011362 | 0.011429 | 0.011262 | 0.011664 | 0.011295 |
| 0.011295 | 0.011228 | 0.011329 | 0.011429 | 0.011329 | 0.011429 | 0.011496 |
| 0.011496 | 0.011463 | 0.011362 | 0.011463 | 0.011429 | 0.011295 | 0.011262 |
| 0.011295 | 0.011295 | 0.011362 | 0.011295 | 0.011262 | 0.011429 | 0.011295 |
| 0.011329 | 0.011329 | 0.011463 | 0.011496 | 0.011396 | 0.011329 | 0.011329 |
| 0.011396 | 0.011329 | 0.011295 | 0.011295 | 0.011429 | 0.011530 | 0.011832 |
| 0.011329 | 0.011731 | 0.011336 | 0.017861 | 0.011257 | 0.011427 | 0.011688 |
| 0.011648 | 0.011693 | 0.011374 | 0.011176 | 0.011719 | 0.011716 | 0.011364 |
| 0.011582 | 0.011487 | 0.011255 | 0.011270 | 0.011333 | 0.011307 | 0.011318 |
| 0.011576 | 0.011507 | 0.011505 | 0.011391 | 0.011463 | 0.011497 | 0.011500 |
| 0.011369 | 0.011463 | 0.011463 | 0.011429 | 0.011396 | 0.011396 | 0.011362 |
| 0.011396 | 0.011329 | 0.011362 | 0.011396 | 0.011362 | 0.011295 | 0.011329 |
| 0.011329 | 0.011396 | 0.011295 | 0.011396 | 0.011429 | 0.011463 | 0.011362 |
| 0.011396 | 0.011362 | 0.011698 | 0.011698 | 0.011429 | 0.011464 | 0.011497 |
| 0.011262 | 0.011262 | 0.011295 | 0.011396 | 0.011262 | 0.011497 | 0.011497 |
| 0.011530 | 0.011530 | 0.011463 | 0.011564 | 0.011732 | 0.011565 | 0.011396 |
| 0.011396 | 0.011463 | 0.011497 | 0.011329 | 0.011396 | 0.011362 | 0.011396 |
| 0.011463 | 0.011463 | 0.011497 | 0.011463 | 0.011363 | 0.011564 | 0.011530 |
| 0.011399 | 0.011295 | 0.011396 | 0.011497 | 0.011396 | 0.011530 | 0.011563 |
| 0.011732 | 0.011436 | 0.011597 | 0.011564 | 0.011496 | 0.011664 | 0.011295 |
| 0.011464 | 0.011363 | 0.011329 | 0.011329 | 0.011396 | 0.011295 | 0.011396 |
| 0.011429 | 0.011463 | 0.011362 | 0.011396 | 0.011362 | 0.011698 | 0.011698 |

|          |          |          |          |          |          |          |
|----------|----------|----------|----------|----------|----------|----------|
| 0.011429 | 0.011464 | 0.011530 | 0.011463 | 0.012103 | 0.011524 | 0.011447 |
| 0.011517 | 0.011476 | 0.011587 | 0.011268 | 0.011585 | 0.011508 | 0.011474 |
| 0.012056 | 0.011372 | 0.011505 | 0.011440 | 0.011714 | 0.011570 | 0.011672 |
| 0.012080 | 0.011550 | 0.011635 | 0.011698 | 0.011564 | 0.011564 | 0.011601 |
| 0.011262 | 0.011429 | 0.011563 | 0.011530 | 0.011533 | 0.011530 | 0.011498 |
| 0.011362 | 0.011295 | 0.011329 | 0.011362 | 0.011262 | 0.011329 | 0.011228 |
| 0.011362 | 0.011396 | 0.011295 | 0.011262 | 0.011362 | 0.011295 | 0.011329 |
| 0.011329 | 0.011262 | 0.011329 | 0.011362 | 0.011262 | 0.011463 | 0.011496 |
| 0.011396 | 0.011463 | 0.011396 | 0.011396 | 0.011329 | 0.011731 | 0.011362 |
| 0.011408 | 0.011329 | 0.011564 | 0.011569 | 0.011429 | 0.011429 | 0.011429 |
| 0.011429 | 0.011362 | 0.011329 | 0.011362 | 0.011463 | 0.011463 | 0.011396 |
| 0.011396 | 0.011530 | 0.011698 | 0.011429 | 0.011631 | 0.011631 | 0.011496 |
| 0.011329 | 0.011396 | 0.011429 | 0.011832 | 0.011396 | 0.011429 | 0.011396 |
| 0.011429 | 0.011362 | 0.011362 | 0.011664 | 0.011597 | 0.011631 | 0.011362 |
| 0.011463 | 0.011530 | 0.011396 | 0.011463 | 0.011429 | 0.011295 | 0.011631 |
| 0.000000 | 0.011362 | 0.011362 | 0.011530 | 0.011362 | 0.011463 | 0.011698 |
| 0.011396 | 0.011773 | 0.011765 | 0.011588 | 0.011399 | 0.011468 | 0.011370 |
| 0.011225 | 0.011800 | 0.011306 | 0.011507 | 0.011402 | 0.011416 | 0.011379 |
| 0.011570 | 0.011192 | 0.011338 | 0.011192 | 0.011276 | 0.011395 | 0.011466 |
| 0.011475 | 0.011375 | 0.011448 | 0.011377 | 0.011397 | 0.011530 | 0.011597 |
| 0.011597 | 0.011464 | 0.011567 | 0.011569 | 0.011670 | 0.011732 | 0.011396 |
| 0.011631 | 0.011497 | 0.011362 | 0.011463 | 0.011262 | 0.011496 | 0.011295 |
| 0.011362 | 0.011362 | 0.011329 | 0.011295 | 0.011329 | 0.011295 | 0.011396 |
| 0.011375 | 0.011375 | 0.011368 | 0.011403 | 0.011539 | 0.011504 | 0.011504 |
| 0.011503 | 0.011430 | 0.011245 | 0.011240 | 0.011365 | 0.011534 | 0.011535 |
| 0.011329 | 0.011399 | 0.011632 | 0.011601 | 0.011531 | 0.011565 | 0.011496 |
| 0.011429 | 0.011496 | 0.011496 | 0.011396 | 0.011967 | 0.011564 | 0.011631 |
| 0.011665 | 0.011736 | 0.011367 | 0.011441 | 0.011329 | 0.011530 | 0.011496 |
| 0.011531 | 0.011563 | 0.011564 | 0.011564 | 0.011689 | 0.011698 | 0.011338 |
| 0.011229 | 0.011233 | 0.011332 | 0.011298 | 0.011402 | 0.011247 | 0.011570 |
| 0.011369 | 0.011543 | 0.011251 | 0.011397 | 0.011363 | 0.011436 | 0.011329 |
| 0.011295 | 0.011295 | 0.011362 | 0.011329 | 0.011530 | 0.011497 | 0.011429 |
| 0.011530 | 0.011597 | 0.011329 | 0.011329 | 0.011362 | 0.011362 | 0.011364 |
| 0.011432 | 0.011362 | 0.011362 | 0.011397 | 0.011530 | 0.011597 | 0.011597 |
| 0.011464 | 0.011567 | 0.011569 | 0.011670 | 0.011732 | 0.011396 | 0.011564 |
| 0.011496 | 0.011496 | 0.011331 | 0.011513 | 0.011442 | 0.011469 | 0.011305 |
| 0.011473 | 0.011607 | 0.011483 | 0.011400 | 0.011295 | 0.011497 | 0.011362 |
| 0.011463 | 0.011396 | 0.011295 | 0.011397 | 0.011497 | 0.011432 | 0.011396 |
| 0.011295 | 0.011229 | 0.011362 | 0.011295 | 0.011228 | 0.011298 | 0.011497 |
| 0.011396 | 0.011329 | 0.011362 | 0.011396 | 0.011362 | 0.011295 | 0.011497 |
| 0.011362 | 0.011396 | 0.011396 | 0.011329 | 0.011396 | 0.011631 | 0.011295 |
| 0.011329 | 0.011731 | 0.011329 | 0.011362 | 0.011329 | 0.011698 | 0.011274 |
| 0.011791 | 0.011315 | 0.011311 | 0.011543 | 0.011630 | 0.011527 | 0.011227 |
| 0.011270 | 0.011496 | 0.011597 | 0.011705 | 0.011565 | 0.011703 | 0.011834 |
| 0.011733 | 0.011770 | 0.011731 | 0.011983 | 0.011698 | 0.012572 | 0.011734 |
| 0.012473 | 0.012240 | 0.012375 | 0.012646 | 0.011698 | 0.011396 | 0.011698 |
| 0.012137 | 0.012072 | 0.011664 | 0.011564 | 0.011632 | 0.011632 | 0.011601 |
| 0.011496 | 0.011501 | 0.011564 | 0.011531 | 0.011901 | 0.011967 | 0.011968 |
| 0.011867 | 0.011968 | 0.012072 | 0.011838 | 0.012138 | 0.012144 | 0.012205 |
| 0.012205 | 0.012239 | 0.012186 | 0.012205 | 0.012207 | 0.011429 | 0.011732 |
| 0.011800 | 0.012303 | 0.011806 | 0.012034 | 0.012508 | 0.011569 | 0.011464 |
| 0.011429 | 0.011429 | 0.011900 | 0.011965 | 0.012045 | 0.011765 | 0.011431 |
| s596     | 0.011664 | 0.011664 | 0.012001 | 0.011765 | 0.011765 | 0.011832 |
| 0.011637 | 0.011569 | 0.011832 | 0.011262 | 0.011329 | 0.011296 | 0.011262 |
| 0.011295 | 0.011463 | 0.011262 | 0.011295 | 0.011362 | 0.011329 | 0.011295 |
| 0.011262 | 0.011295 | 0.011396 | 0.011262 | 0.011295 | 0.011295 | 0.011603 |
| 0.011530 | 0.011295 | 0.011194 | 0.011429 | 0.011362 | 0.011329 | 0.011362 |
| 0.011329 | 0.011429 | 0.011329 | 0.011329 | 0.011362 | 0.011329 | 0.011496 |
| 0.011262 | 0.011329 | 0.011362 | 0.011295 | 0.011396 | 0.011429 | 0.011362 |
| 0.011329 | 0.011497 | 0.011396 | 0.011664 | 0.011329 | 0.011597 | 0.011329 |

|          |          |          |          |          |          |          |
|----------|----------|----------|----------|----------|----------|----------|
| 0.011295 | 0.011396 | 0.011463 | 0.011597 | 0.011698 | 0.011396 | 0.011496 |
| 0.011362 | 0.011429 | 0.011329 | 0.011564 | 0.011799 | 0.011329 | 0.011396 |
| 0.011295 | 0.011396 | 0.011362 | 0.011429 | 0.011362 | 0.011362 | 0.011362 |
| 0.011262 | 0.011295 | 0.011262 | 0.011362 | 0.011329 | 0.011363 | 0.011429 |
| 0.011362 | 0.011329 | 0.011396 | 0.011295 | 0.011429 | 0.011262 | 0.011329 |
| 0.011496 | 0.011429 | 0.011664 | 0.011497 | 0.011329 | 0.011564 | 0.011329 |
| 0.011468 | 0.011695 | 0.011513 | 0.011216 | 0.011209 | 0.011318 | 0.011414 |
| 0.012048 | 0.011518 | 0.011225 | 0.011564 | 0.011564 | 0.011362 | 0.011463 |
| 0.011396 | 0.011362 | 0.011429 | 0.011329 | 0.011429 | 0.011362 | 0.011362 |
| 0.011329 | 0.011429 | 0.011631 | 0.011496 | 0.011396 | 0.011362 | 0.011295 |
| 0.011262 | 0.011262 | 0.011329 | 0.011295 | 0.011497 | 0.011463 | 0.011396 |
| 0.011497 | 0.011564 | 0.011295 | 0.011295 | 0.011329 | 0.011329 | 0.011330 |
| 0.011398 | 0.011329 | 0.011329 | 0.011168 | 0.011241 | 0.011236 | 0.011329 |
| 0.011331 | 0.011232 | 0.011282 | 0.011302 | 0.011230 | 0.011266 | 0.011297 |
| 0.011564 | 0.011336 | 0.011370 | 0.011262 | 0.011268 | 0.011397 | 0.011363 |
| 0.011430 | 0.011363 | 0.011363 | 0.011463 | 0.011396 | 0.011765 | 0.011564 |
| 0.011597 | 0.011463 | 0.011329 | 0.011430 | 0.011228 | 0.011463 | 0.011262 |
| 0.011262 | 0.011329 | 0.011295 | 0.011262 | 0.011228 | 0.011262 | 0.011362 |
| 0.011329 | 0.011429 | 0.011362 | 0.011262 | 0.011363 | 0.011463 | 0.011466 |
| 0.011463 | 0.011362 | 0.011262 | 0.011195 | 0.011329 | 0.011262 | 0.011195 |
| 0.011298 | 0.011463 | 0.011262 | 0.011463 | 0.011127 | 0.011329 | 0.011295 |
| 0.011396 | 0.011295 | 0.011329 | 0.011295 | 0.011329 | 0.011195 | 0.011329 |
| 0.011362 | 0.011295 | 0.011362 | 0.011295 | 0.011329 | 0.011362 | 0.011597 |
| 0.011698 | 0.011631 | 0.011698 | 0.011465 | 0.011698 | 0.011329 | 0.011295 |
| 0.011330 | 0.011586 | 0.011472 | 0.011232 | 0.011705 | 0.011197 | 0.011296 |
| 0.011671 | 0.011604 | 0.011496 | 0.011698 | 0.011402 | 0.011564 | 0.011530 |
| 0.011463 | 0.011631 | 0.011486 | 0.011349 | 0.011354 | 0.011362 | 0.011432 |
| 0.011530 | 0.011431 | 0.011567 | 0.011635 | 0.011564 | 0.011631 | 0.011738 |
| 0.011466 | 0.011637 | 0.011568 | 0.011500 | 0.011767 | 0.011228 | 0.011431 |
| 0.011396 | 0.011329 | 0.011228 | 0.011228 | 0.011295 | 0.011295 | 0.011362 |
| 0.011295 | 0.011362 | 0.011262 | 0.011362 | 0.011295 | 0.011295 | 0.011362 |
| 0.011295 | 0.011731 | 0.011631 | 0.011664 | 0.011194 | 0.011295 | 0.011329 |
| 0.011329 | 0.011295 | 0.011362 | 0.011396 | 0.011262 | 0.011262 | 0.011262 |
| 0.011799 | 0.011429 | 0.011429 | 0.011228 | 0.011329 | 0.011497 | 0.011194 |
| 0.011262 | 0.011329 | 0.011295 | 0.011463 | 0.011262 | 0.011396 | 0.011530 |
| 0.011463 | 0.011295 | 0.011295 | 0.011228 | 0.011228 | 0.011396 | 0.011329 |
| 0.011228 | 0.011329 | 0.011195 | 0.011228 | 0.011362 | 0.011497 | 0.011262 |
| 0.011228 | 0.011362 | 0.011295 | 0.011195 | 0.011530 | 0.011195 | 0.011362 |
| 0.011437 | 0.011262 | 0.011564 | 0.011396 | 0.011429 | 0.011295 | 0.011396 |
| 0.011262 | 0.011597 | 0.011194 | 0.011463 | 0.011262 | 0.011262 | 0.011194 |
| 0.011429 | 0.011631 | 0.011329 | 0.011396 | 0.011228 | 0.011631 | 0.011262 |
| 0.011262 | 0.011262 | 0.011295 | 0.011396 | 0.011295 | 0.011396 | 0.011463 |
| 0.011463 | 0.011429 | 0.011329 | 0.011429 | 0.011396 | 0.011262 | 0.011161 |
| 0.011262 | 0.011262 | 0.011329 | 0.011262 | 0.011228 | 0.011396 | 0.011262 |
| 0.011295 | 0.011295 | 0.011429 | 0.011463 | 0.011362 | 0.011295 | 0.011295 |
| 0.011362 | 0.011295 | 0.011396 | 0.011262 | 0.011396 | 0.011496 | 0.011799 |
| 0.011295 | 0.011698 | 0.011267 | 0.011785 | 0.011257 | 0.011488 | 0.011618 |
| 0.011614 | 0.011623 | 0.011374 | 0.011350 | 0.011774 | 0.011682 | 0.011425 |
| 0.011487 | 0.011610 | 0.011177 | 0.011270 | 0.011255 | 0.011356 | 0.011275 |
| 0.011529 | 0.011433 | 0.011431 | 0.011193 | 0.011429 | 0.011463 | 0.011466 |
| 0.011335 | 0.011429 | 0.011429 | 0.011396 | 0.011362 | 0.011362 | 0.011329 |
| 0.011362 | 0.011295 | 0.011329 | 0.011362 | 0.011329 | 0.011262 | 0.011295 |
| 0.011295 | 0.011362 | 0.011262 | 0.011362 | 0.011396 | 0.011429 | 0.011329 |
| 0.011362 | 0.011329 | 0.011665 | 0.011665 | 0.011396 | 0.011430 | 0.011463 |
| 0.011228 | 0.011228 | 0.011262 | 0.011362 | 0.011228 | 0.011463 | 0.011463 |
| 0.011497 | 0.011496 | 0.011429 | 0.011530 | 0.011698 | 0.011532 | 0.011362 |
| 0.011362 | 0.011429 | 0.011463 | 0.011295 | 0.011362 | 0.011329 | 0.011362 |
| 0.011430 | 0.011430 | 0.011463 | 0.011430 | 0.011330 | 0.011530 | 0.011497 |
| 0.011365 | 0.011262 | 0.011362 | 0.011463 | 0.011362 | 0.011497 | 0.011530 |
| 0.011698 | 0.011402 | 0.011564 | 0.011530 | 0.011463 | 0.011631 | 0.011262 |

|          |          |          |          |          |          |          |
|----------|----------|----------|----------|----------|----------|----------|
| 0.011431 | 0.011329 | 0.011295 | 0.011295 | 0.011362 | 0.011262 | 0.011362 |
| 0.011396 | 0.011429 | 0.011329 | 0.011362 | 0.011329 | 0.011665 | 0.011665 |
| 0.011396 | 0.011430 | 0.011429 | 0.011429 | 0.012069 | 0.011489 | 0.011412 |
| 0.011482 | 0.011442 | 0.011552 | 0.011441 | 0.011550 | 0.011474 | 0.011439 |
| 0.012021 | 0.011337 | 0.011471 | 0.011406 | 0.011680 | 0.011536 | 0.011639 |
| 0.012046 | 0.011512 | 0.011601 | 0.011664 | 0.011530 | 0.011530 | 0.011567 |
| 0.011228 | 0.011396 | 0.011530 | 0.011496 | 0.011499 | 0.011496 | 0.011464 |
| 0.011329 | 0.011262 | 0.011295 | 0.011329 | 0.011228 | 0.011295 | 0.011194 |
| 0.011329 | 0.011362 | 0.011262 | 0.011228 | 0.011329 | 0.011262 | 0.011295 |
| 0.011295 | 0.011228 | 0.011295 | 0.011329 | 0.011228 | 0.011429 | 0.011463 |
| 0.011362 | 0.011429 | 0.011362 | 0.011362 | 0.011295 | 0.011698 | 0.011329 |
| 0.011373 | 0.011295 | 0.011530 | 0.011535 | 0.011396 | 0.011396 | 0.011396 |
| 0.011396 | 0.011329 | 0.011295 | 0.011329 | 0.011429 | 0.011429 | 0.011362 |
| 0.011362 | 0.011496 | 0.011664 | 0.011396 | 0.011597 | 0.011597 | 0.011463 |
| 0.011295 | 0.011362 | 0.011396 | 0.011799 | 0.011362 | 0.011396 | 0.011362 |
| 0.011396 | 0.011329 | 0.011329 | 0.011631 | 0.011564 | 0.011597 | 0.011329 |
| 0.011429 | 0.011496 | 0.011362 | 0.011429 | 0.011396 | 0.011262 | 0.011597 |
| 0.011362 | 0.000000 | 0.011329 | 0.011496 | 0.011329 | 0.011429 | 0.011664 |
| 0.011362 | 0.011705 | 0.011731 | 0.011507 | 0.011286 | 0.011434 | 0.011267 |
| 0.011280 | 0.011722 | 0.011236 | 0.011417 | 0.011255 | 0.011366 | 0.011379 |
| 0.011519 | 0.011192 | 0.011339 | 0.011192 | 0.011222 | 0.011395 | 0.011385 |
| 0.011399 | 0.011296 | 0.011377 | 0.011307 | 0.011364 | 0.011497 | 0.011564 |
| 0.011564 | 0.011430 | 0.011533 | 0.011535 | 0.011670 | 0.011696 | 0.011362 |
| 0.011597 | 0.011463 | 0.011329 | 0.011430 | 0.011228 | 0.011463 | 0.011262 |
| 0.011262 | 0.011329 | 0.011295 | 0.011262 | 0.011228 | 0.011262 | 0.011362 |
| 0.011340 | 0.011340 | 0.011334 | 0.011368 | 0.011505 | 0.011470 | 0.011470 |
| 0.011469 | 0.011396 | 0.011208 | 0.011204 | 0.011331 | 0.011501 | 0.011501 |
| 0.011296 | 0.011365 | 0.011397 | 0.011567 | 0.011497 | 0.011531 | 0.011463 |
| 0.011396 | 0.011463 | 0.011463 | 0.011362 | 0.011933 | 0.011530 | 0.011597 |
| 0.011430 | 0.011665 | 0.011333 | 0.011407 | 0.011295 | 0.011497 | 0.011463 |
| 0.011497 | 0.011530 | 0.011530 | 0.011530 | 0.011650 | 0.011664 | 0.011303 |
| 0.011195 | 0.011199 | 0.011298 | 0.011264 | 0.011368 | 0.011172 | 0.011536 |
| 0.011335 | 0.011455 | 0.011203 | 0.011322 | 0.011329 | 0.011402 | 0.011295 |
| 0.011262 | 0.011262 | 0.011329 | 0.011295 | 0.011497 | 0.011463 | 0.011396 |
| 0.011497 | 0.011564 | 0.011295 | 0.011295 | 0.011329 | 0.011329 | 0.011330 |
| 0.011398 | 0.011329 | 0.011329 | 0.011364 | 0.011497 | 0.011564 | 0.011564 |
| 0.011430 | 0.011533 | 0.011535 | 0.011670 | 0.011696 | 0.011362 | 0.011530 |
| 0.011463 | 0.011463 | 0.011297 | 0.011478 | 0.011408 | 0.011435 | 0.011270 |
| 0.011473 | 0.011652 | 0.011441 | 0.011366 | 0.011262 | 0.011463 | 0.011329 |
| 0.011429 | 0.011362 | 0.011262 | 0.011363 | 0.011463 | 0.011466 | 0.011362 |
| 0.011262 | 0.011195 | 0.011329 | 0.011262 | 0.011195 | 0.011298 | 0.011463 |
| 0.011362 | 0.011295 | 0.011329 | 0.011362 | 0.011329 | 0.011262 | 0.011463 |
| 0.011329 | 0.011362 | 0.011362 | 0.011295 | 0.011362 | 0.011597 | 0.011262 |
| 0.011295 | 0.011698 | 0.011295 | 0.011329 | 0.011295 | 0.011664 | 0.011232 |
| 0.011735 | 0.011230 | 0.011311 | 0.011463 | 0.011549 | 0.011455 | 0.011186 |
| 0.011270 | 0.011463 | 0.011564 | 0.011671 | 0.011531 | 0.011669 | 0.011800 |
| 0.011699 | 0.011737 | 0.011698 | 0.011949 | 0.011664 | 0.012539 | 0.011700 |
| 0.012439 | 0.012207 | 0.012341 | 0.012612 | 0.011664 | 0.011362 | 0.011665 |
| 0.012103 | 0.012038 | 0.011631 | 0.011530 | 0.011598 | 0.011598 | 0.011567 |
| 0.011463 | 0.011467 | 0.011530 | 0.011497 | 0.011867 | 0.011933 | 0.011935 |
| 0.011766 | 0.011934 | 0.012038 | 0.011804 | 0.012104 | 0.012110 | 0.012171 |
| 0.012172 | 0.012205 | 0.012152 | 0.012172 | 0.012173 | 0.011396 | 0.011699 |
| 0.011766 | 0.012270 | 0.011772 | 0.012001 | 0.012474 | 0.011536 | 0.011430 |
| 0.011396 | 0.011396 | 0.011867 | 0.011883 | 0.011940 | 0.011731 | 0.011397 |
| s597     | 0.011664 | 0.011664 | 0.011933 | 0.011698 | 0.011698 | 0.011765 |
| 0.011603 | 0.011535 | 0.011765 | 0.011262 | 0.011329 | 0.011296 | 0.011262 |
| 0.011228 | 0.011463 | 0.011194 | 0.011295 | 0.011362 | 0.011329 | 0.011295 |
| 0.011262 | 0.011295 | 0.011329 | 0.011262 | 0.011295 | 0.011295 | 0.011569 |
| 0.011463 | 0.011295 | 0.011194 | 0.011362 | 0.011362 | 0.011329 | 0.011362 |
| 0.011329 | 0.011429 | 0.011329 | 0.011329 | 0.011362 | 0.011329 | 0.011496 |

|          |          |          |          |          |          |          |
|----------|----------|----------|----------|----------|----------|----------|
| 0.011194 | 0.011329 | 0.011362 | 0.011295 | 0.011329 | 0.011429 | 0.011362 |
| 0.011329 | 0.011497 | 0.011396 | 0.011597 | 0.011329 | 0.011597 | 0.011329 |
| 0.011295 | 0.011329 | 0.011463 | 0.011597 | 0.011631 | 0.011329 | 0.011429 |
| 0.011362 | 0.011429 | 0.011329 | 0.011563 | 0.011732 | 0.011329 | 0.011396 |
| 0.011295 | 0.011396 | 0.011362 | 0.011429 | 0.011362 | 0.011362 | 0.011362 |
| 0.011262 | 0.011295 | 0.011262 | 0.011295 | 0.011329 | 0.011363 | 0.011429 |
| 0.011362 | 0.011329 | 0.011396 | 0.011295 | 0.011362 | 0.011262 | 0.011329 |
| 0.011496 | 0.011429 | 0.011664 | 0.011496 | 0.011329 | 0.011564 | 0.011329 |
| 0.011431 | 0.011583 | 0.011513 | 0.011177 | 0.011209 | 0.011318 | 0.011296 |
| 0.011975 | 0.011365 | 0.011225 | 0.011563 | 0.011564 | 0.011295 | 0.011396 |
| 0.011396 | 0.011362 | 0.011429 | 0.011329 | 0.011429 | 0.011362 | 0.011362 |
| 0.011329 | 0.011362 | 0.011631 | 0.011496 | 0.011396 | 0.011362 | 0.011295 |
| 0.011262 | 0.011195 | 0.011329 | 0.011295 | 0.011429 | 0.011396 | 0.011329 |
| 0.011429 | 0.011497 | 0.011295 | 0.011295 | 0.011329 | 0.011329 | 0.011330 |
| 0.011398 | 0.011329 | 0.011329 | 0.011204 | 0.011277 | 0.011235 | 0.011329 |
| 0.011331 | 0.011266 | 0.011282 | 0.011302 | 0.011230 | 0.011266 | 0.011297 |
| 0.011492 | 0.011336 | 0.011370 | 0.011262 | 0.011268 | 0.011397 | 0.011296 |
| 0.011363 | 0.011363 | 0.011363 | 0.011463 | 0.011396 | 0.011765 | 0.011497 |
| 0.011530 | 0.011396 | 0.011329 | 0.011362 | 0.011228 | 0.011396 | 0.011262 |
| 0.011329 | 0.011329 | 0.011295 | 0.011262 | 0.011295 | 0.011262 | 0.011362 |
| 0.011329 | 0.011429 | 0.011362 | 0.011262 | 0.011363 | 0.011463 | 0.011466 |
| 0.011463 | 0.011362 | 0.011262 | 0.011195 | 0.011329 | 0.011262 | 0.011195 |
| 0.011298 | 0.011463 | 0.011262 | 0.011463 | 0.011228 | 0.011329 | 0.011295 |
| 0.011396 | 0.011295 | 0.011329 | 0.011295 | 0.011329 | 0.011195 | 0.011329 |
| 0.011362 | 0.011295 | 0.011362 | 0.011295 | 0.011329 | 0.011362 | 0.011597 |
| 0.011631 | 0.011564 | 0.011631 | 0.011431 | 0.011631 | 0.011329 | 0.011295 |
| 0.011263 | 0.011505 | 0.011380 | 0.011197 | 0.011637 | 0.011197 | 0.011296 |
| 0.011637 | 0.011536 | 0.011496 | 0.011698 | 0.011402 | 0.011564 | 0.011530 |
| 0.011463 | 0.011631 | 0.011486 | 0.011307 | 0.011395 | 0.011362 | 0.011432 |
| 0.011530 | 0.011431 | 0.011567 | 0.011635 | 0.011564 | 0.011631 | 0.011738 |
| 0.011466 | 0.011637 | 0.011568 | 0.011500 | 0.011766 | 0.011228 | 0.011431 |
| 0.011396 | 0.011329 | 0.011228 | 0.011228 | 0.011295 | 0.011295 | 0.011362 |
| 0.011295 | 0.011362 | 0.011262 | 0.011295 | 0.011295 | 0.011295 | 0.011362 |
| 0.011295 | 0.011664 | 0.011564 | 0.011597 | 0.011194 | 0.011295 | 0.011329 |
| 0.011329 | 0.011295 | 0.011362 | 0.011329 | 0.011262 | 0.011262 | 0.011262 |
| 0.011731 | 0.011362 | 0.011429 | 0.011228 | 0.011329 | 0.011497 | 0.011262 |
| 0.011262 | 0.011329 | 0.011295 | 0.011463 | 0.011262 | 0.011396 | 0.011530 |
| 0.011463 | 0.011295 | 0.011295 | 0.011228 | 0.011228 | 0.011396 | 0.011329 |
| 0.011228 | 0.011329 | 0.011194 | 0.011228 | 0.011362 | 0.011430 | 0.011262 |
| 0.011228 | 0.011362 | 0.011295 | 0.011194 | 0.011463 | 0.011195 | 0.011362 |
| 0.011437 | 0.011262 | 0.011496 | 0.011396 | 0.011362 | 0.011295 | 0.011396 |
| 0.011262 | 0.011597 | 0.011194 | 0.011396 | 0.011194 | 0.011194 | 0.011194 |
| 0.011429 | 0.011564 | 0.011329 | 0.011396 | 0.011228 | 0.011564 | 0.011194 |
| 0.011262 | 0.011262 | 0.011295 | 0.011396 | 0.011295 | 0.011396 | 0.011463 |
| 0.011463 | 0.011429 | 0.011329 | 0.011429 | 0.011396 | 0.011262 | 0.011228 |
| 0.011262 | 0.011262 | 0.011329 | 0.011194 | 0.011228 | 0.011396 | 0.011262 |
| 0.011228 | 0.011295 | 0.011429 | 0.011396 | 0.011362 | 0.011295 | 0.011295 |
| 0.011362 | 0.011295 | 0.011396 | 0.011262 | 0.011396 | 0.011496 | 0.011731 |
| 0.011295 | 0.011631 | 0.011267 | 0.017785 | 0.011257 | 0.011366 | 0.011548 |
| 0.011510 | 0.011553 | 0.011270 | 0.011234 | 0.011664 | 0.011578 | 0.011364 |
| 0.011440 | 0.011487 | 0.011138 | 0.011270 | 0.011177 | 0.011258 | 0.011232 |
| 0.011389 | 0.011358 | 0.011357 | 0.011126 | 0.011429 | 0.011463 | 0.011466 |
| 0.011335 | 0.011429 | 0.011429 | 0.011329 | 0.011362 | 0.011362 | 0.011329 |
| 0.011362 | 0.011295 | 0.011329 | 0.011362 | 0.011329 | 0.011262 | 0.011295 |
| 0.011295 | 0.011362 | 0.011195 | 0.011362 | 0.011396 | 0.011429 | 0.011329 |
| 0.011295 | 0.011262 | 0.011597 | 0.011597 | 0.011396 | 0.011430 | 0.011463 |
| 0.011228 | 0.011228 | 0.011262 | 0.011362 | 0.011228 | 0.011463 | 0.011463 |
| 0.011497 | 0.011496 | 0.011429 | 0.011530 | 0.011631 | 0.011532 | 0.011362 |
| 0.011362 | 0.011429 | 0.011463 | 0.011295 | 0.011362 | 0.011329 | 0.011362 |
| 0.011430 | 0.011430 | 0.011463 | 0.011430 | 0.011330 | 0.011530 | 0.011497 |

|          |          |          |          |          |          |          |
|----------|----------|----------|----------|----------|----------|----------|
| 0.011365 | 0.011262 | 0.011362 | 0.011463 | 0.011362 | 0.011430 | 0.011530 |
| 0.011698 | 0.011402 | 0.011564 | 0.011530 | 0.011463 | 0.011631 | 0.011262 |
| 0.011431 | 0.011329 | 0.011295 | 0.011295 | 0.011362 | 0.011195 | 0.011362 |
| 0.011396 | 0.011429 | 0.011329 | 0.011295 | 0.011262 | 0.011597 | 0.011597 |
| 0.011396 | 0.011430 | 0.011496 | 0.011429 | 0.011934 | 0.011489 | 0.011412 |
| 0.011482 | 0.011441 | 0.011552 | 0.011441 | 0.011550 | 0.011474 | 0.011439 |
| 0.011884 | 0.011337 | 0.011471 | 0.011406 | 0.011680 | 0.011536 | 0.011638 |
| 0.011910 | 0.011437 | 0.011601 | 0.011664 | 0.011530 | 0.011463 | 0.011567 |
| 0.011228 | 0.011396 | 0.011530 | 0.011496 | 0.011499 | 0.011429 | 0.011397 |
| 0.011329 | 0.011262 | 0.011295 | 0.011329 | 0.011228 | 0.011295 | 0.011194 |
| 0.011262 | 0.011295 | 0.011262 | 0.011228 | 0.011329 | 0.011262 | 0.011295 |
| 0.011295 | 0.011228 | 0.011295 | 0.011329 | 0.011228 | 0.011429 | 0.011463 |
| 0.011362 | 0.011362 | 0.011362 | 0.011362 | 0.011295 | 0.011631 | 0.011329 |
| 0.011304 | 0.011295 | 0.011463 | 0.011467 | 0.011396 | 0.011396 | 0.011396 |
| 0.011396 | 0.011329 | 0.011295 | 0.011329 | 0.011429 | 0.011429 | 0.011362 |
| 0.011362 | 0.011496 | 0.011597 | 0.011396 | 0.011597 | 0.011597 | 0.011463 |
| 0.011295 | 0.011362 | 0.011396 | 0.011732 | 0.011362 | 0.011396 | 0.011362 |
| 0.011396 | 0.000000 | 0.000000 | 0.011564 | 0.011564 | 0.011530 | 0.011329 |
| 0.011429 | 0.011496 | 0.011362 | 0.011429 | 0.011396 | 0.011262 | 0.011530 |
| 0.011362 | 0.011329 | 0.000000 | 0.011496 | 0.011329 | 0.011429 | 0.011664 |
| 0.011362 | 0.011671 | 0.011664 | 0.011385 | 0.000000 | 0.011366 | 0.011215 |
| 0.011170 | 0.011605 | 0.011236 | 0.011328 | 0.011158 | 0.011315 | 0.011273 |
| 0.011366 | 0.011192 | 0.011339 | 0.011126 | 0.011222 | 0.011328 | 0.011385 |
| 0.011399 | 0.011296 | 0.011307 | 0.011307 | 0.011363 | 0.011429 | 0.011497 |
| 0.011497 | 0.011363 | 0.011466 | 0.011467 | 0.011603 | 0.011625 | 0.011362 |
| 0.011530 | 0.011396 | 0.011329 | 0.011362 | 0.011228 | 0.011396 | 0.011262 |
| 0.011329 | 0.011329 | 0.011295 | 0.011262 | 0.011295 | 0.011262 | 0.011362 |
| 0.011340 | 0.011340 | 0.011334 | 0.011368 | 0.011505 | 0.011470 | 0.011470 |
| 0.011469 | 0.011396 | 0.011208 | 0.011204 | 0.011331 | 0.011501 | 0.011501 |
| 0.011296 | 0.011365 | 0.011599 | 0.011567 | 0.011497 | 0.011531 | 0.011463 |
| 0.011396 | 0.011463 | 0.011463 | 0.011362 | 0.011866 | 0.011530 | 0.011597 |
| 0.011631 | 0.011630 | 0.011333 | 0.011407 | 0.011295 | 0.011497 | 0.011463 |
| 0.011497 | 0.011530 | 0.011530 | 0.011530 | 0.011689 | 0.011664 | 0.011303 |
| 0.011195 | 0.011199 | 0.011298 | 0.011264 | 0.011299 | 0.011209 | 0.011468 |
| 0.011335 | 0.011367 | 0.011203 | 0.011360 | 0.011329 | 0.011402 | 0.011295 |
| 0.011262 | 0.011195 | 0.011329 | 0.011295 | 0.011429 | 0.011396 | 0.011329 |
| 0.011429 | 0.011497 | 0.011295 | 0.011295 | 0.011329 | 0.011329 | 0.011330 |
| 0.011398 | 0.011329 | 0.011329 | 0.011363 | 0.011429 | 0.011497 | 0.011497 |
| 0.011363 | 0.011466 | 0.011467 | 0.011603 | 0.011625 | 0.011362 | 0.011530 |
| 0.011463 | 0.011463 | 0.011297 | 0.011478 | 0.011408 | 0.011435 | 0.011270 |
| 0.011473 | 0.011561 | 0.011399 | 0.011366 | 0.011262 | 0.011463 | 0.011329 |
| 0.011429 | 0.011362 | 0.011262 | 0.011363 | 0.011463 | 0.011466 | 0.011362 |
| 0.011262 | 0.011195 | 0.011329 | 0.011262 | 0.011195 | 0.011298 | 0.011463 |
| 0.011362 | 0.011295 | 0.011329 | 0.011362 | 0.011329 | 0.011262 | 0.011396 |
| 0.011329 | 0.011362 | 0.011362 | 0.011295 | 0.011362 | 0.011597 | 0.011194 |
| 0.011295 | 0.011631 | 0.011295 | 0.011329 | 0.011295 | 0.011597 | 0.011232 |
| 0.011510 | 0.011230 | 0.011161 | 0.011382 | 0.011467 | 0.011383 | 0.011186 |
| 0.011113 | 0.011396 | 0.011496 | 0.011603 | 0.011464 | 0.011568 | 0.011733 |
| 0.011632 | 0.011669 | 0.011631 | 0.011846 | 0.011597 | 0.012472 | 0.011633 |
| 0.012372 | 0.012139 | 0.012273 | 0.012545 | 0.011597 | 0.011295 | 0.011598 |
| 0.012036 | 0.011937 | 0.011564 | 0.011463 | 0.011531 | 0.011531 | 0.011500 |
| 0.011396 | 0.011365 | 0.011463 | 0.011430 | 0.011800 | 0.011866 | 0.011867 |
| 0.011766 | 0.011867 | 0.011970 | 0.011703 | 0.011969 | 0.011974 | 0.012036 |
| 0.012037 | 0.012070 | 0.011981 | 0.012037 | 0.012038 | 0.011396 | 0.011631 |
| 0.011699 | 0.012202 | 0.011704 | 0.011933 | 0.012406 | 0.011468 | 0.011363 |
| 0.011329 | 0.011329 | 0.011799 | 0.011842 | 0.011940 | 0.011664 | 0.011330 |
| S598     | 0.011832 | 0.011832 | 0.012169 | 0.011933 | 0.011933 | 0.012000 |
| 0.011841 | 0.011773 | 0.012000 | 0.011430 | 0.011496 | 0.011464 | 0.011429 |
| 0.011463 | 0.011631 | 0.011429 | 0.011463 | 0.011530 | 0.011497 | 0.011463 |
| 0.011429 | 0.011463 | 0.011564 | 0.011430 | 0.011463 | 0.011463 | 0.011807 |

|          |          |          |          |          |          |          |
|----------|----------|----------|----------|----------|----------|----------|
| 0.011698 | 0.011463 | 0.011362 | 0.011597 | 0.011530 | 0.011497 | 0.011530 |
| 0.011497 | 0.011597 | 0.011496 | 0.011497 | 0.011530 | 0.011496 | 0.011664 |
| 0.011429 | 0.011496 | 0.011530 | 0.011463 | 0.011564 | 0.011597 | 0.011530 |
| 0.011497 | 0.011665 | 0.011564 | 0.011832 | 0.011496 | 0.011765 | 0.011496 |
| 0.011463 | 0.011564 | 0.011631 | 0.011765 | 0.011866 | 0.011564 | 0.011664 |
| 0.011530 | 0.011597 | 0.011497 | 0.011731 | 0.011967 | 0.011497 | 0.011564 |
| 0.011463 | 0.011564 | 0.011530 | 0.011597 | 0.011530 | 0.011530 | 0.011530 |
| 0.011429 | 0.011463 | 0.011429 | 0.011530 | 0.011496 | 0.011531 | 0.011597 |
| 0.011530 | 0.011496 | 0.011564 | 0.011463 | 0.011597 | 0.011429 | 0.011496 |
| 0.011664 | 0.011597 | 0.011832 | 0.011664 | 0.011497 | 0.011732 | 0.011496 |
| 0.011579 | 0.011807 | 0.011664 | 0.011334 | 0.011396 | 0.011428 | 0.011533 |
| 0.012231 | 0.011620 | 0.011348 | 0.011731 | 0.011732 | 0.011530 | 0.011631 |
| 0.011564 | 0.011530 | 0.011530 | 0.011496 | 0.011597 | 0.011530 | 0.011530 |
| 0.011496 | 0.011597 | 0.011799 | 0.011664 | 0.011564 | 0.011530 | 0.011463 |
| 0.011430 | 0.011429 | 0.011497 | 0.011463 | 0.011665 | 0.011631 | 0.011564 |
| 0.011665 | 0.011732 | 0.011463 | 0.011463 | 0.011497 | 0.011497 | 0.011465 |
| 0.011533 | 0.011497 | 0.011497 | 0.011348 | 0.011422 | 0.011411 | 0.011497 |
| 0.011501 | 0.011404 | 0.011466 | 0.011474 | 0.011400 | 0.011437 | 0.011466 |
| 0.011744 | 0.011508 | 0.011542 | 0.011430 | 0.011440 | 0.011565 | 0.011531 |
| 0.011598 | 0.011532 | 0.011531 | 0.011631 | 0.011564 | 0.011933 | 0.011732 |
| 0.011765 | 0.011631 | 0.011497 | 0.011598 | 0.011396 | 0.011631 | 0.011430 |
| 0.011497 | 0.011496 | 0.011463 | 0.011429 | 0.011463 | 0.011430 | 0.011530 |
| 0.011497 | 0.011597 | 0.011530 | 0.011429 | 0.011532 | 0.011631 | 0.011635 |
| 0.011631 | 0.011530 | 0.011430 | 0.011364 | 0.011497 | 0.011430 | 0.011363 |
| 0.011468 | 0.011631 | 0.011430 | 0.011631 | 0.011396 | 0.011497 | 0.011463 |
| 0.011564 | 0.011463 | 0.011497 | 0.011463 | 0.011497 | 0.011362 | 0.011497 |
| 0.011530 | 0.011463 | 0.011530 | 0.011463 | 0.011497 | 0.011530 | 0.011765 |
| 0.011866 | 0.011799 | 0.011866 | 0.011633 | 0.011867 | 0.011497 | 0.011463 |
| 0.011499 | 0.011788 | 0.011563 | 0.011403 | 0.011875 | 0.011367 | 0.011532 |
| 0.011841 | 0.011774 | 0.011664 | 0.011866 | 0.011572 | 0.011732 | 0.011698 |
| 0.011564 | 0.011799 | 0.011664 | 0.011472 | 0.011521 | 0.011530 | 0.011602 |
| 0.011698 | 0.011600 | 0.011736 | 0.011805 | 0.011732 | 0.011799 | 0.011907 |
| 0.011635 | 0.011807 | 0.011737 | 0.011669 | 0.011935 | 0.011396 | 0.011599 |
| 0.011564 | 0.011497 | 0.011396 | 0.011396 | 0.011463 | 0.011463 | 0.011530 |
| 0.011463 | 0.011530 | 0.011429 | 0.011530 | 0.011463 | 0.011463 | 0.011530 |
| 0.011463 | 0.011899 | 0.011799 | 0.011832 | 0.011362 | 0.011463 | 0.011497 |
| 0.011497 | 0.011463 | 0.011530 | 0.011564 | 0.011429 | 0.011429 | 0.011429 |
| 0.011967 | 0.011597 | 0.011597 | 0.011396 | 0.011496 | 0.011665 | 0.011429 |
| 0.011429 | 0.011496 | 0.011463 | 0.011631 | 0.011429 | 0.011564 | 0.011698 |
| 0.011631 | 0.011463 | 0.011463 | 0.011396 | 0.011396 | 0.011564 | 0.011496 |
| 0.011396 | 0.011496 | 0.011362 | 0.011396 | 0.011530 | 0.011665 | 0.011429 |
| 0.011396 | 0.011530 | 0.011463 | 0.011362 | 0.011698 | 0.011362 | 0.011530 |
| 0.011608 | 0.011429 | 0.011732 | 0.011564 | 0.011597 | 0.011463 | 0.011564 |
| 0.011429 | 0.011765 | 0.011362 | 0.011631 | 0.011429 | 0.011429 | 0.011362 |
| 0.011597 | 0.011799 | 0.011497 | 0.011564 | 0.011396 | 0.011799 | 0.011429 |
| 0.011429 | 0.011429 | 0.011463 | 0.011564 | 0.011463 | 0.011564 | 0.011631 |
| 0.011631 | 0.011597 | 0.011496 | 0.011597 | 0.011564 | 0.011429 | 0.011396 |
| 0.011429 | 0.011429 | 0.011497 | 0.011429 | 0.011396 | 0.011564 | 0.011429 |
| 0.011463 | 0.011463 | 0.011597 | 0.011631 | 0.011530 | 0.011463 | 0.011463 |
| 0.011530 | 0.011463 | 0.011564 | 0.011429 | 0.011564 | 0.011664 | 0.011967 |
| 0.011463 | 0.011866 | 0.011440 | 0.017898 | 0.011257 | 0.011611 | 0.011758 |
| 0.011718 | 0.011764 | 0.011479 | 0.011582 | 0.011829 | 0.011820 | 0.011485 |
| 0.011724 | 0.011671 | 0.011255 | 0.011395 | 0.011411 | 0.011455 | 0.011404 |
| 0.011670 | 0.011582 | 0.011616 | 0.011457 | 0.011597 | 0.011631 | 0.011635 |
| 0.011507 | 0.011597 | 0.011597 | 0.011564 | 0.011530 | 0.011530 | 0.011497 |
| 0.011530 | 0.011463 | 0.011497 | 0.011530 | 0.011497 | 0.011430 | 0.011463 |
| 0.011463 | 0.011530 | 0.011430 | 0.011530 | 0.011564 | 0.011597 | 0.011496 |
| 0.011530 | 0.011497 | 0.011833 | 0.011833 | 0.011564 | 0.011598 | 0.011631 |
| 0.011396 | 0.011396 | 0.011430 | 0.011530 | 0.011396 | 0.011631 | 0.011631 |
| 0.011665 | 0.011664 | 0.011597 | 0.011698 | 0.011866 | 0.011700 | 0.011530 |

|          |          |          |          |          |          |          |
|----------|----------|----------|----------|----------|----------|----------|
| 0.011530 | 0.011597 | 0.011631 | 0.011463 | 0.011530 | 0.011497 | 0.011530 |
| 0.011598 | 0.011598 | 0.011631 | 0.011598 | 0.011498 | 0.011698 | 0.011665 |
| 0.011534 | 0.011430 | 0.011530 | 0.011631 | 0.011530 | 0.011665 | 0.011698 |
| 0.011866 | 0.011572 | 0.011732 | 0.011698 | 0.011564 | 0.011799 | 0.011430 |
| 0.011599 | 0.011497 | 0.011463 | 0.011463 | 0.011530 | 0.011430 | 0.011530 |
| 0.011564 | 0.011597 | 0.011496 | 0.011530 | 0.011497 | 0.011833 | 0.011833 |
| 0.011564 | 0.011598 | 0.011664 | 0.011597 | 0.012238 | 0.011667 | 0.011588 |
| 0.011623 | 0.011615 | 0.011728 | 0.011614 | 0.011725 | 0.011646 | 0.011612 |
| 0.012194 | 0.011510 | 0.011642 | 0.011579 | 0.011852 | 0.011706 | 0.011809 |
| 0.012216 | 0.011701 | 0.011736 | 0.011832 | 0.011698 | 0.011698 | 0.011702 |
| 0.011396 | 0.011564 | 0.011698 | 0.011664 | 0.011634 | 0.011664 | 0.011633 |
| 0.011496 | 0.011429 | 0.011463 | 0.011496 | 0.011396 | 0.011463 | 0.011362 |
| 0.011496 | 0.011530 | 0.011429 | 0.011396 | 0.011497 | 0.011429 | 0.011463 |
| 0.011463 | 0.011396 | 0.011463 | 0.011497 | 0.011396 | 0.011597 | 0.011631 |
| 0.011530 | 0.011597 | 0.011530 | 0.011530 | 0.011463 | 0.011866 | 0.011496 |
| 0.011547 | 0.011463 | 0.011699 | 0.011705 | 0.011564 | 0.011564 | 0.011564 |
| 0.011564 | 0.011497 | 0.011463 | 0.011497 | 0.011597 | 0.011597 | 0.011530 |
| 0.011530 | 0.011664 | 0.011832 | 0.011564 | 0.011765 | 0.011765 | 0.011631 |
| 0.011463 | 0.011530 | 0.011564 | 0.011967 | 0.011530 | 0.011564 | 0.011530 |
| 0.011564 | 0.011496 | 0.011496 | 0.011799 | 0.011732 | 0.011765 | 0.011497 |
| 0.011597 | 0.011664 | 0.011530 | 0.011597 | 0.011564 | 0.011429 | 0.011765 |
| 0.011530 | 0.011496 | 0.011496 | 0.000000 | 0.011497 | 0.011597 | 0.011832 |
| 0.011530 | 0.011909 | 0.011900 | 0.011588 | 0.011342 | 0.011604 | 0.011473 |
| 0.011390 | 0.011878 | 0.011411 | 0.011551 | 0.011402 | 0.011518 | 0.011538 |
| 0.011621 | 0.011258 | 0.011505 | 0.011258 | 0.011383 | 0.011395 | 0.011506 |
| 0.011512 | 0.011454 | 0.011518 | 0.011483 | 0.011532 | 0.011665 | 0.011732 |
| 0.011732 | 0.011598 | 0.011669 | 0.011704 | 0.011840 | 0.011873 | 0.011530 |
| 0.011765 | 0.011631 | 0.011497 | 0.011598 | 0.011396 | 0.011631 | 0.011430 |
| 0.011497 | 0.011496 | 0.011463 | 0.011429 | 0.011463 | 0.011430 | 0.011530 |
| 0.011514 | 0.011515 | 0.011505 | 0.011540 | 0.011676 | 0.011641 | 0.011641 |
| 0.011639 | 0.011565 | 0.011393 | 0.011384 | 0.011501 | 0.011670 | 0.011671 |
| 0.011464 | 0.011534 | 0.011767 | 0.011736 | 0.011666 | 0.011700 | 0.011631 |
| 0.011564 | 0.011631 | 0.011631 | 0.011530 | 0.012102 | 0.011698 | 0.011765 |
| 0.011799 | 0.011879 | 0.011504 | 0.011580 | 0.011463 | 0.011664 | 0.011631 |
| 0.011666 | 0.011698 | 0.011698 | 0.011698 | 0.011847 | 0.011832 | 0.011476 |
| 0.011364 | 0.011372 | 0.011469 | 0.011434 | 0.011538 | 0.011396 | 0.011706 |
| 0.011506 | 0.011586 | 0.011346 | 0.011472 | 0.011497 | 0.011573 | 0.011463 |
| 0.011430 | 0.011429 | 0.011497 | 0.011463 | 0.011665 | 0.011631 | 0.011564 |
| 0.011665 | 0.011732 | 0.011463 | 0.011463 | 0.011497 | 0.011497 | 0.011465 |
| 0.011533 | 0.011497 | 0.011497 | 0.011532 | 0.011665 | 0.011732 | 0.011732 |
| 0.011598 | 0.011669 | 0.011704 | 0.011840 | 0.011873 | 0.011530 | 0.011698 |
| 0.011631 | 0.011631 | 0.011466 | 0.011652 | 0.011581 | 0.011605 | 0.011481 |
| 0.011646 | 0.011835 | 0.011568 | 0.011536 | 0.011430 | 0.011631 | 0.011497 |
| 0.011597 | 0.011530 | 0.011429 | 0.011532 | 0.011631 | 0.011635 | 0.011530 |
| 0.011430 | 0.011364 | 0.011497 | 0.011430 | 0.011363 | 0.011468 | 0.011631 |
| 0.011530 | 0.011463 | 0.011497 | 0.011530 | 0.011497 | 0.011430 | 0.011631 |
| 0.011496 | 0.011530 | 0.011530 | 0.011463 | 0.011530 | 0.011765 | 0.011429 |
| 0.011463 | 0.011866 | 0.011463 | 0.011497 | 0.011463 | 0.011832 | 0.011360 |
| 0.011735 | 0.011358 | 0.011411 | 0.011583 | 0.011671 | 0.011634 | 0.011311 |
| 0.011375 | 0.011631 | 0.011732 | 0.011841 | 0.011700 | 0.011838 | 0.011968 |
| 0.011868 | 0.011906 | 0.011866 | 0.012120 | 0.011832 | 0.012708 | 0.011869 |
| 0.012608 | 0.012376 | 0.012510 | 0.012782 | 0.011832 | 0.011530 | 0.011833 |
| 0.012272 | 0.012207 | 0.011799 | 0.011698 | 0.011766 | 0.011766 | 0.011737 |
| 0.011631 | 0.011637 | 0.011698 | 0.011665 | 0.012036 | 0.012101 | 0.012103 |
| 0.012002 | 0.012103 | 0.012207 | 0.011974 | 0.012273 | 0.012280 | 0.012340 |
| 0.012340 | 0.012374 | 0.012323 | 0.012307 | 0.012342 | 0.011564 | 0.011867 |
| 0.011935 | 0.012438 | 0.011942 | 0.012169 | 0.012643 | 0.011705 | 0.011598 |
| 0.011564 | 0.011564 | 0.012035 | 0.012089 | 0.012151 | 0.011900 | 0.011566 |
| S599     | 0.011664 | 0.011664 | 0.012001 | 0.011765 | 0.011765 | 0.011832 |
| 0.011671 | 0.011603 | 0.011832 | 0.011262 | 0.011329 | 0.011296 | 0.011262 |



|          |          |          |          |          |          |          |
|----------|----------|----------|----------|----------|----------|----------|
| 0.011295 | 0.011463 | 0.011262 | 0.011295 | 0.011362 | 0.011329 | 0.011295 |
| 0.011262 | 0.011295 | 0.011396 | 0.011262 | 0.011295 | 0.011295 | 0.011637 |
| 0.011530 | 0.011295 | 0.011194 | 0.011429 | 0.011362 | 0.011329 | 0.011362 |
| 0.011329 | 0.011429 | 0.011329 | 0.011329 | 0.011362 | 0.011329 | 0.011497 |
| 0.011262 | 0.011329 | 0.011362 | 0.011295 | 0.011396 | 0.011429 | 0.011362 |
| 0.011329 | 0.011497 | 0.011396 | 0.011664 | 0.011329 | 0.011597 | 0.011329 |
| 0.011295 | 0.011396 | 0.011463 | 0.011597 | 0.011698 | 0.011396 | 0.011496 |
| 0.011362 | 0.011429 | 0.011329 | 0.011564 | 0.011799 | 0.011329 | 0.011396 |
| 0.011295 | 0.011396 | 0.011362 | 0.011429 | 0.011362 | 0.011362 | 0.011362 |
| 0.011262 | 0.011295 | 0.011262 | 0.011362 | 0.011329 | 0.011363 | 0.011429 |
| 0.011362 | 0.011329 | 0.011396 | 0.011295 | 0.011429 | 0.011262 | 0.011329 |
| 0.011496 | 0.011429 | 0.011664 | 0.011497 | 0.011329 | 0.011564 | 0.011329 |
| 0.011505 | 0.011733 | 0.011551 | 0.011255 | 0.011210 | 0.011355 | 0.011415 |
| 0.012048 | 0.011467 | 0.011225 | 0.011564 | 0.011564 | 0.011362 | 0.011463 |
| 0.011396 | 0.011362 | 0.011429 | 0.011329 | 0.011429 | 0.011362 | 0.011362 |
| 0.011329 | 0.011429 | 0.011631 | 0.011496 | 0.011396 | 0.011362 | 0.011295 |
| 0.011262 | 0.011262 | 0.011329 | 0.011295 | 0.011497 | 0.011463 | 0.011396 |
| 0.011497 | 0.011564 | 0.011295 | 0.011295 | 0.011329 | 0.011329 | 0.011330 |
| 0.011398 | 0.011329 | 0.011329 | 0.011204 | 0.011277 | 0.011236 | 0.011329 |
| 0.011331 | 0.011266 | 0.011318 | 0.011302 | 0.011230 | 0.011266 | 0.011297 |
| 0.011564 | 0.011336 | 0.011370 | 0.011262 | 0.011268 | 0.011397 | 0.011363 |
| 0.011430 | 0.011364 | 0.011363 | 0.011463 | 0.011396 | 0.011765 | 0.011564 |
| 0.011597 | 0.011463 | 0.011329 | 0.011430 | 0.011228 | 0.011463 | 0.011262 |
| 0.011329 | 0.011329 | 0.011295 | 0.011194 | 0.011295 | 0.011262 | 0.011362 |
| 0.011329 | 0.011430 | 0.011362 | 0.011262 | 0.011363 | 0.011463 | 0.011466 |
| 0.011463 | 0.011362 | 0.011262 | 0.011195 | 0.011329 | 0.011262 | 0.011195 |
| 0.011298 | 0.011463 | 0.011262 | 0.011463 | 0.011228 | 0.011329 | 0.011295 |
| 0.011396 | 0.011295 | 0.011329 | 0.011295 | 0.011329 | 0.011195 | 0.011329 |
| 0.011362 | 0.011295 | 0.011362 | 0.011295 | 0.011329 | 0.011362 | 0.011597 |
| 0.011698 | 0.011631 | 0.011698 | 0.011465 | 0.011698 | 0.011329 | 0.011295 |
| 0.011330 | 0.011586 | 0.011380 | 0.011232 | 0.011705 | 0.011197 | 0.011336 |
| 0.011705 | 0.011604 | 0.011496 | 0.011698 | 0.011402 | 0.011564 | 0.011530 |
| 0.011463 | 0.011631 | 0.011486 | 0.011349 | 0.011395 | 0.011362 | 0.011432 |
| 0.011530 | 0.011431 | 0.011567 | 0.011635 | 0.011564 | 0.011631 | 0.011738 |
| 0.011466 | 0.011637 | 0.011568 | 0.011500 | 0.011767 | 0.011228 | 0.011431 |
| 0.011396 | 0.011329 | 0.011228 | 0.011228 | 0.011295 | 0.011295 | 0.011362 |
| 0.011295 | 0.011362 | 0.011262 | 0.011362 | 0.011295 | 0.011295 | 0.011362 |
| 0.011295 | 0.011731 | 0.011631 | 0.011664 | 0.011194 | 0.011295 | 0.011329 |
| 0.011329 | 0.011295 | 0.011362 | 0.011396 | 0.011262 | 0.011262 | 0.011262 |
| 0.011799 | 0.011429 | 0.011429 | 0.011228 | 0.011329 | 0.011497 | 0.011262 |
| 0.011262 | 0.011329 | 0.011295 | 0.011463 | 0.011262 | 0.011396 | 0.011530 |
| 0.011463 | 0.011295 | 0.011295 | 0.011228 | 0.011228 | 0.011396 | 0.011329 |
| 0.011228 | 0.011329 | 0.011195 | 0.011228 | 0.011362 | 0.011497 | 0.011262 |
| 0.011228 | 0.011362 | 0.011295 | 0.011195 | 0.011530 | 0.011195 | 0.011362 |
| 0.011437 | 0.011262 | 0.011564 | 0.011396 | 0.011429 | 0.011295 | 0.011396 |
| 0.011262 | 0.011597 | 0.011194 | 0.011463 | 0.011262 | 0.011262 | 0.011194 |
| 0.011429 | 0.011631 | 0.011329 | 0.011396 | 0.011228 | 0.011631 | 0.011262 |
| 0.011262 | 0.011262 | 0.011295 | 0.011396 | 0.011295 | 0.011396 | 0.011463 |
| 0.011463 | 0.011429 | 0.011329 | 0.011430 | 0.011396 | 0.011262 | 0.011228 |
| 0.011262 | 0.011262 | 0.011329 | 0.011262 | 0.011228 | 0.011396 | 0.011262 |
| 0.011295 | 0.011295 | 0.011429 | 0.011463 | 0.011362 | 0.011295 | 0.011295 |
| 0.011362 | 0.011295 | 0.011396 | 0.011262 | 0.011396 | 0.011496 | 0.011799 |
| 0.011295 | 0.011698 | 0.011302 | 0.017785 | 0.011257 | 0.011549 | 0.011653 |
| 0.011614 | 0.011658 | 0.011374 | 0.011292 | 0.011829 | 0.011682 | 0.011425 |
| 0.011535 | 0.011671 | 0.011216 | 0.011312 | 0.011294 | 0.011406 | 0.011318 |
| 0.011529 | 0.011433 | 0.011431 | 0.011259 | 0.011429 | 0.011463 | 0.011466 |
| 0.011335 | 0.011430 | 0.011429 | 0.011396 | 0.011362 | 0.011362 | 0.011329 |
| 0.011362 | 0.011295 | 0.011329 | 0.011362 | 0.011329 | 0.011262 | 0.011295 |
| 0.011295 | 0.011362 | 0.011262 | 0.011363 | 0.011396 | 0.011430 | 0.011329 |
| 0.011362 | 0.011329 | 0.011665 | 0.011665 | 0.011396 | 0.011430 | 0.011463 |

|          |          |          |          |          |          |          |
|----------|----------|----------|----------|----------|----------|----------|
| 0.011228 | 0.011228 | 0.011262 | 0.011362 | 0.011228 | 0.011463 | 0.011463 |
| 0.011497 | 0.011496 | 0.011429 | 0.011530 | 0.011698 | 0.011532 | 0.011362 |
| 0.011362 | 0.011430 | 0.011463 | 0.011295 | 0.011362 | 0.011329 | 0.011362 |
| 0.011430 | 0.011430 | 0.011463 | 0.011430 | 0.011330 | 0.011530 | 0.011497 |
| 0.011365 | 0.011262 | 0.011362 | 0.011463 | 0.011363 | 0.011497 | 0.011530 |
| 0.011698 | 0.011402 | 0.011564 | 0.011530 | 0.011463 | 0.011631 | 0.011262 |
| 0.011431 | 0.011329 | 0.011295 | 0.011295 | 0.011362 | 0.011262 | 0.011363 |
| 0.011396 | 0.011430 | 0.011329 | 0.011362 | 0.011329 | 0.011665 | 0.011665 |
| 0.011396 | 0.011430 | 0.011496 | 0.011429 | 0.012069 | 0.011489 | 0.011412 |
| 0.011482 | 0.011442 | 0.011552 | 0.011441 | 0.011550 | 0.011474 | 0.011439 |
| 0.012022 | 0.011337 | 0.011471 | 0.011406 | 0.011680 | 0.011536 | 0.011639 |
| 0.012046 | 0.011512 | 0.011601 | 0.011664 | 0.011530 | 0.011530 | 0.011567 |
| 0.011228 | 0.011396 | 0.011530 | 0.011496 | 0.011499 | 0.011496 | 0.011464 |
| 0.011329 | 0.011262 | 0.011295 | 0.011329 | 0.011228 | 0.011295 | 0.011194 |
| 0.011329 | 0.011362 | 0.011262 | 0.011228 | 0.011329 | 0.011262 | 0.011295 |
| 0.011295 | 0.011228 | 0.011295 | 0.011329 | 0.011228 | 0.011429 | 0.011463 |
| 0.011362 | 0.011429 | 0.011362 | 0.011362 | 0.011295 | 0.011698 | 0.011329 |
| 0.011373 | 0.011295 | 0.011530 | 0.011535 | 0.011396 | 0.011396 | 0.011396 |
| 0.011396 | 0.011329 | 0.011295 | 0.011329 | 0.011429 | 0.011429 | 0.011362 |
| 0.011362 | 0.011497 | 0.011664 | 0.011396 | 0.011597 | 0.011597 | 0.011463 |
| 0.011295 | 0.011362 | 0.011396 | 0.011799 | 0.011362 | 0.011396 | 0.011362 |
| 0.011396 | 0.011329 | 0.011329 | 0.011631 | 0.011564 | 0.011597 | 0.000000 |
| 0.011362 | 0.011497 | 0.011362 | 0.011362 | 0.011396 | 0.011262 | 0.011597 |
| 0.011362 | 0.011329 | 0.011329 | 0.011497 | 0.000000 | 0.011429 | 0.011664 |
| 0.011362 | 0.011739 | 0.011732 | 0.011507 | 0.011229 | 0.011434 | 0.011267 |
| 0.011335 | 0.011722 | 0.011271 | 0.011462 | 0.011304 | 0.011417 | 0.011432 |
| 0.011468 | 0.011192 | 0.011339 | 0.011192 | 0.011276 | 0.011395 | 0.011425 |
| 0.011437 | 0.011296 | 0.011412 | 0.011272 | 0.011364 | 0.011497 | 0.011564 |
| 0.011564 | 0.011430 | 0.011534 | 0.011535 | 0.011670 | 0.011626 | 0.011362 |
| 0.011597 | 0.011463 | 0.011329 | 0.011430 | 0.011228 | 0.011463 | 0.011262 |
| 0.011329 | 0.011329 | 0.011295 | 0.011194 | 0.011295 | 0.011262 | 0.011362 |
| 0.011340 | 0.011340 | 0.011334 | 0.011368 | 0.011505 | 0.011470 | 0.011470 |
| 0.011469 | 0.011396 | 0.011208 | 0.011168 | 0.011331 | 0.011501 | 0.011501 |
| 0.011296 | 0.011365 | 0.011599 | 0.011567 | 0.011497 | 0.011531 | 0.011463 |
| 0.011396 | 0.011463 | 0.011463 | 0.011362 | 0.011866 | 0.011530 | 0.011597 |
| 0.011631 | 0.011665 | 0.011333 | 0.011407 | 0.011295 | 0.011497 | 0.011463 |
| 0.011497 | 0.011530 | 0.011530 | 0.011530 | 0.011650 | 0.011664 | 0.011303 |
| 0.011195 | 0.011199 | 0.011299 | 0.011264 | 0.011368 | 0.011210 | 0.011536 |
| 0.011335 | 0.011455 | 0.011251 | 0.011360 | 0.011329 | 0.011402 | 0.011295 |
| 0.011262 | 0.011262 | 0.011329 | 0.011295 | 0.011497 | 0.011463 | 0.011396 |
| 0.011497 | 0.011564 | 0.011295 | 0.011295 | 0.011329 | 0.011329 | 0.011330 |
| 0.011398 | 0.011329 | 0.011329 | 0.011364 | 0.011497 | 0.011564 | 0.011564 |
| 0.011430 | 0.011534 | 0.011535 | 0.011670 | 0.011626 | 0.011362 | 0.011530 |
| 0.011463 | 0.011463 | 0.011297 | 0.011478 | 0.011373 | 0.011435 | 0.011305 |
| 0.011473 | 0.011653 | 0.011441 | 0.011366 | 0.011262 | 0.011463 | 0.011329 |
| 0.011430 | 0.011362 | 0.011262 | 0.011363 | 0.011463 | 0.011466 | 0.011362 |
| 0.011262 | 0.011195 | 0.011329 | 0.011262 | 0.011195 | 0.011298 | 0.011463 |
| 0.011362 | 0.011295 | 0.011329 | 0.011362 | 0.011329 | 0.011262 | 0.011463 |
| 0.011329 | 0.011362 | 0.011362 | 0.011295 | 0.011362 | 0.011530 | 0.011262 |
| 0.011295 | 0.011698 | 0.011295 | 0.011329 | 0.011295 | 0.011664 | 0.011232 |
| 0.011735 | 0.011230 | 0.011311 | 0.011463 | 0.011549 | 0.011491 | 0.011186 |
| 0.011218 | 0.011463 | 0.011564 | 0.011671 | 0.011531 | 0.011669 | 0.011800 |
| 0.011699 | 0.011737 | 0.011698 | 0.011949 | 0.011664 | 0.012539 | 0.011700 |
| 0.012439 | 0.012207 | 0.012341 | 0.012613 | 0.011664 | 0.011363 | 0.011665 |
| 0.012103 | 0.012038 | 0.011631 | 0.011530 | 0.011598 | 0.011598 | 0.011567 |
| 0.011463 | 0.011467 | 0.011530 | 0.011497 | 0.011867 | 0.011933 | 0.011935 |
| 0.011834 | 0.011934 | 0.012038 | 0.011804 | 0.012104 | 0.012110 | 0.012171 |
| 0.012172 | 0.012205 | 0.012152 | 0.012172 | 0.012173 | 0.011396 | 0.011699 |
| 0.011767 | 0.012270 | 0.011772 | 0.012001 | 0.012474 | 0.011536 | 0.011430 |
| 0.011396 | 0.011396 | 0.011867 | 0.011883 | 0.012010 | 0.011732 | 0.011397 |

|          |          |          |          |          |          |          |
|----------|----------|----------|----------|----------|----------|----------|
| S600     | 0.011765 | 0.011765 | 0.012101 | 0.011866 | 0.011866 | 0.011933 |
| 0.011773 | 0.011705 | 0.011933 | 0.011362 | 0.011429 | 0.011397 | 0.011362 |
| 0.011396 | 0.011564 | 0.011362 | 0.011396 | 0.011463 | 0.011429 | 0.011396 |
| 0.011362 | 0.011396 | 0.011496 | 0.011363 | 0.011396 | 0.011396 | 0.011739 |
| 0.011631 | 0.011396 | 0.011295 | 0.011530 | 0.011463 | 0.011429 | 0.011463 |
| 0.011429 | 0.011530 | 0.011429 | 0.011429 | 0.011463 | 0.011429 | 0.011597 |
| 0.011362 | 0.011429 | 0.011463 | 0.011396 | 0.011496 | 0.011530 | 0.011463 |
| 0.011429 | 0.011597 | 0.011497 | 0.011765 | 0.011429 | 0.011698 | 0.011429 |
| 0.011396 | 0.011497 | 0.011564 | 0.011698 | 0.011799 | 0.011496 | 0.011597 |
| 0.011463 | 0.011530 | 0.011429 | 0.011664 | 0.011900 | 0.011429 | 0.011496 |
| 0.011396 | 0.011496 | 0.011463 | 0.011530 | 0.011463 | 0.011463 | 0.011463 |
| 0.011362 | 0.011396 | 0.011362 | 0.011463 | 0.011396 | 0.011464 | 0.011530 |
| 0.011463 | 0.011429 | 0.011496 | 0.011396 | 0.011530 | 0.011362 | 0.011429 |
| 0.011597 | 0.011530 | 0.011765 | 0.011597 | 0.011429 | 0.011664 | 0.011429 |
| 0.011579 | 0.011807 | 0.011664 | 0.011334 | 0.011359 | 0.011428 | 0.011533 |
| 0.012195 | 0.011620 | 0.011348 | 0.011664 | 0.011664 | 0.011463 | 0.011564 |
| 0.011496 | 0.011463 | 0.011530 | 0.011429 | 0.011530 | 0.011463 | 0.011463 |
| 0.011429 | 0.011530 | 0.011732 | 0.011597 | 0.011496 | 0.011463 | 0.011396 |
| 0.011362 | 0.011362 | 0.011430 | 0.011396 | 0.011597 | 0.011564 | 0.011497 |
| 0.011597 | 0.011665 | 0.011396 | 0.011396 | 0.011430 | 0.011429 | 0.011432 |
| 0.011500 | 0.011429 | 0.011430 | 0.011312 | 0.011386 | 0.011341 | 0.011430 |
| 0.011433 | 0.011369 | 0.011429 | 0.011405 | 0.011332 | 0.011368 | 0.011398 |
| 0.011672 | 0.011439 | 0.011473 | 0.011363 | 0.011371 | 0.011497 | 0.011464 |
| 0.011531 | 0.011465 | 0.011464 | 0.011563 | 0.011496 | 0.011866 | 0.011665 |
| 0.011698 | 0.011564 | 0.011429 | 0.011530 | 0.011329 | 0.011564 | 0.011362 |
| 0.011429 | 0.011429 | 0.011396 | 0.011362 | 0.011396 | 0.011362 | 0.011463 |
| 0.011430 | 0.011530 | 0.011463 | 0.011362 | 0.011464 | 0.011564 | 0.011567 |
| 0.011564 | 0.011463 | 0.011362 | 0.011296 | 0.011429 | 0.011362 | 0.011295 |
| 0.011400 | 0.011564 | 0.011362 | 0.011564 | 0.011329 | 0.011430 | 0.011396 |
| 0.011497 | 0.011396 | 0.011430 | 0.011396 | 0.011430 | 0.011295 | 0.011430 |
| 0.011463 | 0.011396 | 0.011463 | 0.011396 | 0.011429 | 0.011463 | 0.011698 |
| 0.011799 | 0.011732 | 0.011799 | 0.011566 | 0.011799 | 0.011429 | 0.011396 |
| 0.011432 | 0.011747 | 0.011517 | 0.011335 | 0.011807 | 0.011299 | 0.011414 |
| 0.011807 | 0.011672 | 0.011597 | 0.011799 | 0.011504 | 0.011664 | 0.011631 |
| 0.011564 | 0.011732 | 0.011593 | 0.011390 | 0.011479 | 0.011463 | 0.011534 |
| 0.011631 | 0.011532 | 0.011669 | 0.011737 | 0.011664 | 0.011732 | 0.011839 |
| 0.011568 | 0.011739 | 0.011669 | 0.011601 | 0.011868 | 0.011329 | 0.011532 |
| 0.011496 | 0.011429 | 0.011329 | 0.011329 | 0.011396 | 0.011396 | 0.011463 |
| 0.011396 | 0.011463 | 0.011362 | 0.011463 | 0.011396 | 0.011396 | 0.011463 |
| 0.011396 | 0.011832 | 0.011732 | 0.011765 | 0.011295 | 0.011396 | 0.011429 |
| 0.011429 | 0.011396 | 0.011463 | 0.011496 | 0.011362 | 0.011362 | 0.011362 |
| 0.011899 | 0.011530 | 0.011262 | 0.011329 | 0.011429 | 0.011597 | 0.011362 |
| 0.011362 | 0.011429 | 0.011396 | 0.011564 | 0.011362 | 0.011496 | 0.011631 |
| 0.011564 | 0.011396 | 0.011396 | 0.011329 | 0.011329 | 0.011497 | 0.011429 |
| 0.011329 | 0.011429 | 0.011295 | 0.011329 | 0.011463 | 0.011598 | 0.011362 |
| 0.011329 | 0.011463 | 0.011396 | 0.011295 | 0.011631 | 0.011295 | 0.011463 |
| 0.011539 | 0.011362 | 0.011664 | 0.011497 | 0.011530 | 0.011396 | 0.011496 |
| 0.011362 | 0.011698 | 0.011295 | 0.011564 | 0.011362 | 0.011362 | 0.011295 |
| 0.011530 | 0.011732 | 0.011429 | 0.011228 | 0.011329 | 0.011732 | 0.011362 |
| 0.011362 | 0.011362 | 0.011396 | 0.011496 | 0.011396 | 0.011496 | 0.011564 |
| 0.011564 | 0.011530 | 0.011429 | 0.011530 | 0.011496 | 0.011362 | 0.011329 |
| 0.011362 | 0.011362 | 0.011429 | 0.011362 | 0.011329 | 0.011496 | 0.011362 |
| 0.011396 | 0.011396 | 0.011530 | 0.011564 | 0.011463 | 0.011396 | 0.011396 |
| 0.011463 | 0.011396 | 0.011496 | 0.011362 | 0.011496 | 0.011597 | 0.011900 |
| 0.011396 | 0.011799 | 0.011405 | 0.017936 | 0.011191 | 0.011549 | 0.011758 |
| 0.011718 | 0.011764 | 0.011479 | 0.011408 | 0.011719 | 0.011785 | 0.011364 |
| 0.011629 | 0.011610 | 0.011255 | 0.011395 | 0.011411 | 0.011356 | 0.011404 |
| 0.011623 | 0.011582 | 0.011579 | 0.011325 | 0.011530 | 0.011564 | 0.011567 |
| 0.011438 | 0.011530 | 0.011530 | 0.011497 | 0.011463 | 0.011463 | 0.011430 |
| 0.011463 | 0.011396 | 0.011429 | 0.011463 | 0.011430 | 0.011362 | 0.011396 |

|          |          |          |          |          |          |          |
|----------|----------|----------|----------|----------|----------|----------|
| 0.011396 | 0.011463 | 0.011362 | 0.011463 | 0.011497 | 0.011530 | 0.011429 |
| 0.011463 | 0.011430 | 0.011765 | 0.011765 | 0.011497 | 0.011531 | 0.011564 |
| 0.011329 | 0.011329 | 0.011362 | 0.011463 | 0.011329 | 0.011564 | 0.011564 |
| 0.011597 | 0.011597 | 0.011530 | 0.011631 | 0.011799 | 0.011633 | 0.011463 |
| 0.011463 | 0.011530 | 0.011564 | 0.011396 | 0.011463 | 0.011429 | 0.011463 |
| 0.011531 | 0.011530 | 0.011564 | 0.011530 | 0.011431 | 0.011631 | 0.011597 |
| 0.011467 | 0.011362 | 0.011463 | 0.011564 | 0.011463 | 0.011598 | 0.011631 |
| 0.011799 | 0.011504 | 0.011664 | 0.011631 | 0.011564 | 0.011732 | 0.011363 |
| 0.011532 | 0.011430 | 0.011396 | 0.011396 | 0.011463 | 0.011362 | 0.011463 |
| 0.011497 | 0.011530 | 0.011429 | 0.011463 | 0.011430 | 0.011765 | 0.011765 |
| 0.011497 | 0.011531 | 0.011597 | 0.011530 | 0.012170 | 0.011596 | 0.011517 |
| 0.011587 | 0.011546 | 0.011657 | 0.011545 | 0.011655 | 0.011577 | 0.011543 |
| 0.012125 | 0.011441 | 0.011574 | 0.011510 | 0.011783 | 0.011638 | 0.011741 |
| 0.012148 | 0.011626 | 0.011703 | 0.011765 | 0.011631 | 0.011631 | 0.011668 |
| 0.011329 | 0.011497 | 0.011631 | 0.011597 | 0.011601 | 0.011597 | 0.011565 |
| 0.011429 | 0.011362 | 0.011396 | 0.011429 | 0.011329 | 0.011396 | 0.011295 |
| 0.011429 | 0.011463 | 0.011362 | 0.011329 | 0.011429 | 0.011362 | 0.011396 |
| 0.011396 | 0.011329 | 0.011396 | 0.011429 | 0.011329 | 0.011530 | 0.011564 |
| 0.011463 | 0.011530 | 0.011463 | 0.011463 | 0.011396 | 0.011799 | 0.011429 |
| 0.011478 | 0.011396 | 0.011631 | 0.011637 | 0.011497 | 0.011496 | 0.011496 |
| 0.011497 | 0.011429 | 0.011396 | 0.011429 | 0.011530 | 0.011530 | 0.011463 |
| 0.011463 | 0.011597 | 0.011765 | 0.011463 | 0.011698 | 0.011698 | 0.011564 |
| 0.011396 | 0.011463 | 0.011497 | 0.011900 | 0.011463 | 0.011497 | 0.011463 |
| 0.011496 | 0.011429 | 0.011429 | 0.011732 | 0.011665 | 0.011698 | 0.011429 |
| 0.011530 | 0.011530 | 0.011463 | 0.011530 | 0.011496 | 0.011362 | 0.011698 |
| 0.011463 | 0.011429 | 0.011429 | 0.011597 | 0.011429 | 0.000000 | 0.011765 |
| 0.011463 | 0.011841 | 0.011832 | 0.011629 | 0.011342 | 0.011536 | 0.011318 |
| 0.011335 | 0.011839 | 0.011376 | 0.011462 | 0.011207 | 0.011366 | 0.011326 |
| 0.011570 | 0.011126 | 0.011283 | 0.011126 | 0.011168 | 0.011261 | 0.011466 |
| 0.011550 | 0.011414 | 0.011518 | 0.011448 | 0.011465 | 0.011597 | 0.011665 |
| 0.011665 | 0.011531 | 0.011635 | 0.011636 | 0.011772 | 0.011802 | 0.011463 |
| 0.011698 | 0.011564 | 0.011429 | 0.011530 | 0.011329 | 0.011564 | 0.011362 |
| 0.011429 | 0.011429 | 0.011396 | 0.011362 | 0.011396 | 0.011362 | 0.011463 |
| 0.011444 | 0.011130 | 0.011437 | 0.011471 | 0.011608 | 0.011573 | 0.011572 |
| 0.011571 | 0.011497 | 0.011245 | 0.011276 | 0.011433 | 0.011602 | 0.011603 |
| 0.011396 | 0.011467 | 0.011700 | 0.011669 | 0.011598 | 0.011632 | 0.011564 |
| 0.011496 | 0.011564 | 0.011564 | 0.011463 | 0.012034 | 0.011631 | 0.011698 |
| 0.011732 | 0.011808 | 0.011435 | 0.011476 | 0.011396 | 0.011597 | 0.011564 |
| 0.011598 | 0.011631 | 0.011631 | 0.011631 | 0.011768 | 0.011765 | 0.011407 |
| 0.011297 | 0.011303 | 0.011401 | 0.011366 | 0.011470 | 0.011321 | 0.011638 |
| 0.011437 | 0.011586 | 0.011298 | 0.011435 | 0.011430 | 0.011505 | 0.011396 |
| 0.011362 | 0.011362 | 0.011430 | 0.011396 | 0.011597 | 0.011564 | 0.011497 |
| 0.011597 | 0.011665 | 0.011396 | 0.011396 | 0.011430 | 0.011429 | 0.011432 |
| 0.011500 | 0.011429 | 0.011430 | 0.011465 | 0.011597 | 0.011665 | 0.011665 |
| 0.011531 | 0.011635 | 0.011636 | 0.011772 | 0.011802 | 0.011463 | 0.011631 |
| 0.011564 | 0.011564 | 0.011398 | 0.011582 | 0.011512 | 0.011537 | 0.011411 |
| 0.011577 | 0.011835 | 0.011568 | 0.011468 | 0.011362 | 0.011564 | 0.011430 |
| 0.011530 | 0.011463 | 0.011362 | 0.011464 | 0.011564 | 0.011567 | 0.011463 |
| 0.011362 | 0.011296 | 0.011429 | 0.011362 | 0.011295 | 0.011400 | 0.011564 |
| 0.011463 | 0.011396 | 0.011429 | 0.011463 | 0.011430 | 0.011362 | 0.011564 |
| 0.011429 | 0.011463 | 0.011463 | 0.011396 | 0.011463 | 0.011698 | 0.011362 |
| 0.011396 | 0.011799 | 0.011396 | 0.011429 | 0.011396 | 0.011765 | 0.011360 |
| 0.011791 | 0.011358 | 0.011411 | 0.011583 | 0.011671 | 0.011599 | 0.011353 |
| 0.011375 | 0.011564 | 0.011664 | 0.011773 | 0.011632 | 0.011771 | 0.011901 |
| 0.011800 | 0.011838 | 0.011799 | 0.012051 | 0.011765 | 0.012640 | 0.011801 |
| 0.012540 | 0.012308 | 0.012408 | 0.012714 | 0.011765 | 0.011463 | 0.011766 |
| 0.012204 | 0.012140 | 0.011732 | 0.011631 | 0.011699 | 0.011699 | 0.011635 |
| 0.011564 | 0.011569 | 0.011631 | 0.011598 | 0.011968 | 0.012034 | 0.012036 |
| 0.011935 | 0.012035 | 0.012139 | 0.011906 | 0.012205 | 0.012212 | 0.012272 |
| 0.012273 | 0.012307 | 0.012255 | 0.012273 | 0.012274 | 0.011496 | 0.011800 |

|          |          |          |          |          |          |          |
|----------|----------|----------|----------|----------|----------|----------|
| 0.011867 | 0.012337 | 0.011874 | 0.012102 | 0.012575 | 0.011637 | 0.011531 |
| 0.011496 | 0.011496 | 0.011968 | 0.012048 | 0.012080 | 0.011832 | 0.011498 |
| S601     | 0.012001 | 0.012001 | 0.012135 | 0.011900 | 0.011900 | 0.011967 |
| 0.011502 | 0.011434 | 0.011967 | 0.011597 | 0.011664 | 0.011632 | 0.011597 |
| 0.011631 | 0.011799 | 0.011597 | 0.011631 | 0.011698 | 0.011664 | 0.011631 |
| 0.011597 | 0.011631 | 0.011530 | 0.011598 | 0.011631 | 0.011631 | 0.011468 |
| 0.011665 | 0.011631 | 0.011530 | 0.011564 | 0.011698 | 0.011665 | 0.011698 |
| 0.011664 | 0.011765 | 0.011664 | 0.011664 | 0.011698 | 0.011664 | 0.011833 |
| 0.011597 | 0.011664 | 0.011698 | 0.011631 | 0.011732 | 0.011765 | 0.011698 |
| 0.011664 | 0.011833 | 0.011732 | 0.011530 | 0.011664 | 0.011933 | 0.011664 |
| 0.011631 | 0.011732 | 0.011799 | 0.011933 | 0.011631 | 0.011732 | 0.011832 |
| 0.011698 | 0.011765 | 0.011665 | 0.011899 | 0.011665 | 0.011664 | 0.011732 |
| 0.011631 | 0.011732 | 0.011698 | 0.011765 | 0.011698 | 0.011698 | 0.011698 |
| 0.011597 | 0.011631 | 0.011597 | 0.011698 | 0.011664 | 0.011700 | 0.011765 |
| 0.011698 | 0.011664 | 0.011732 | 0.011631 | 0.011564 | 0.011597 | 0.011664 |
| 0.011832 | 0.011765 | 0.011597 | 0.011833 | 0.011664 | 0.011900 | 0.011664 |
| 0.011839 | 0.011546 | 0.011891 | 0.011568 | 0.011620 | 0.011723 | 0.011572 |
| 0.012231 | 0.011467 | 0.011637 | 0.011900 | 0.011900 | 0.011698 | 0.011732 |
| 0.011732 | 0.011698 | 0.011765 | 0.011664 | 0.011765 | 0.011698 | 0.011698 |
| 0.011664 | 0.011765 | 0.011967 | 0.011832 | 0.011732 | 0.011698 | 0.011631 |
| 0.011598 | 0.011597 | 0.011665 | 0.011631 | 0.011631 | 0.011598 | 0.011530 |
| 0.011631 | 0.011698 | 0.011631 | 0.011631 | 0.011665 | 0.011665 | 0.011668 |
| 0.011736 | 0.011665 | 0.011665 | 0.011564 | 0.011639 | 0.011586 | 0.011665 |
| 0.011670 | 0.011610 | 0.011688 | 0.011647 | 0.011570 | 0.011608 | 0.011635 |
| 0.011636 | 0.011681 | 0.011715 | 0.011598 | 0.011613 | 0.011733 | 0.011699 |
| 0.011767 | 0.011701 | 0.011699 | 0.011799 | 0.011732 | 0.012101 | 0.011900 |
| 0.011732 | 0.011799 | 0.011665 | 0.011766 | 0.011564 | 0.011597 | 0.011598 |
| 0.011664 | 0.011664 | 0.011631 | 0.011597 | 0.011631 | 0.011597 | 0.011698 |
| 0.011665 | 0.011766 | 0.011698 | 0.011597 | 0.011701 | 0.011799 | 0.011804 |
| 0.011799 | 0.011699 | 0.011597 | 0.011532 | 0.011665 | 0.011598 | 0.011531 |
| 0.011536 | 0.011799 | 0.011598 | 0.011799 | 0.011564 | 0.011665 | 0.011631 |
| 0.011732 | 0.011631 | 0.011665 | 0.011631 | 0.011665 | 0.011530 | 0.011665 |
| 0.011698 | 0.011631 | 0.011698 | 0.011631 | 0.011665 | 0.011698 | 0.011934 |
| 0.011564 | 0.011497 | 0.011564 | 0.011802 | 0.011631 | 0.011665 | 0.011631 |
| 0.011668 | 0.011991 | 0.011746 | 0.011575 | 0.011569 | 0.011538 | 0.011650 |
| 0.011536 | 0.011673 | 0.011832 | 0.012034 | 0.011743 | 0.011900 | 0.011866 |
| 0.011799 | 0.011967 | 0.011806 | 0.011678 | 0.011731 | 0.011698 | 0.011771 |
| 0.011866 | 0.011769 | 0.011906 | 0.011974 | 0.011900 | 0.011967 | 0.012077 |
| 0.011805 | 0.011977 | 0.011839 | 0.011838 | 0.012104 | 0.011564 | 0.011768 |
| 0.011732 | 0.011664 | 0.011564 | 0.011564 | 0.011631 | 0.011631 | 0.011698 |
| 0.011631 | 0.011698 | 0.011597 | 0.011698 | 0.011631 | 0.011631 | 0.011698 |
| 0.011631 | 0.011597 | 0.011497 | 0.011530 | 0.011530 | 0.011631 | 0.011665 |
| 0.011664 | 0.011564 | 0.011698 | 0.011732 | 0.011597 | 0.011597 | 0.011597 |
| 0.011665 | 0.011765 | 0.011765 | 0.011564 | 0.011664 | 0.011833 | 0.011597 |
| 0.011597 | 0.011664 | 0.011631 | 0.011799 | 0.011597 | 0.011530 | 0.011664 |
| 0.011597 | 0.011631 | 0.011631 | 0.011564 | 0.011564 | 0.011732 | 0.011664 |
| 0.011564 | 0.011664 | 0.011530 | 0.011564 | 0.011698 | 0.011564 | 0.011597 |
| 0.011564 | 0.011698 | 0.011632 | 0.011530 | 0.011463 | 0.011530 | 0.011698 |
| 0.011745 | 0.011597 | 0.011430 | 0.011732 | 0.011765 | 0.011631 | 0.011732 |
| 0.011597 | 0.011933 | 0.011530 | 0.011665 | 0.011597 | 0.011597 | 0.011530 |
| 0.011765 | 0.011699 | 0.011665 | 0.011732 | 0.011564 | 0.011497 | 0.011597 |
| 0.011597 | 0.011597 | 0.011631 | 0.011732 | 0.011631 | 0.011732 | 0.011799 |
| 0.011799 | 0.011765 | 0.011664 | 0.011765 | 0.011732 | 0.011597 | 0.011564 |
| 0.011597 | 0.011597 | 0.011665 | 0.011597 | 0.011564 | 0.011732 | 0.011597 |
| 0.011631 | 0.011631 | 0.011765 | 0.011799 | 0.011698 | 0.011631 | 0.011631 |
| 0.011698 | 0.011631 | 0.011732 | 0.011597 | 0.011732 | 0.011832 | 0.011732 |
| 0.011631 | 0.011631 | 0.011647 | 0.018163 | 0.011191 | 0.011733 | 0.011514 |
| 0.011476 | 0.011518 | 0.011741 | 0.011466 | 0.011555 | 0.011544 | 0.011607 |
| 0.011677 | 0.011488 | 0.011568 | 0.011563 | 0.011607 | 0.011603 | 0.011620 |
| 0.011483 | 0.011619 | 0.011505 | 0.011656 | 0.011765 | 0.011799 | 0.011805 |

|          |          |          |          |          |          |          |
|----------|----------|----------|----------|----------|----------|----------|
| 0.011679 | 0.011765 | 0.011765 | 0.011732 | 0.011698 | 0.011699 | 0.011665 |
| 0.011698 | 0.011631 | 0.011665 | 0.011698 | 0.011665 | 0.011598 | 0.011631 |
| 0.011631 | 0.011698 | 0.011598 | 0.011699 | 0.011732 | 0.011765 | 0.011664 |
| 0.011698 | 0.011665 | 0.011598 | 0.011598 | 0.011732 | 0.011767 | 0.011799 |
| 0.011564 | 0.011564 | 0.011598 | 0.011698 | 0.011564 | 0.011799 | 0.011799 |
| 0.011833 | 0.011832 | 0.011765 | 0.011866 | 0.011631 | 0.011869 | 0.011698 |
| 0.011698 | 0.011766 | 0.011799 | 0.011631 | 0.011698 | 0.011665 | 0.011698 |
| 0.011766 | 0.011766 | 0.011799 | 0.011766 | 0.011666 | 0.011866 | 0.011833 |
| 0.011704 | 0.011598 | 0.011698 | 0.011799 | 0.011699 | 0.011833 | 0.011866 |
| 0.012034 | 0.011743 | 0.011900 | 0.011866 | 0.011799 | 0.011967 | 0.011598 |
| 0.011768 | 0.011665 | 0.011631 | 0.011631 | 0.011698 | 0.011598 | 0.011699 |
| 0.011732 | 0.011765 | 0.011664 | 0.011698 | 0.011665 | 0.011598 | 0.011598 |
| 0.011732 | 0.011767 | 0.011832 | 0.011765 | 0.012406 | 0.011846 | 0.011728 |
| 0.011834 | 0.011789 | 0.011904 | 0.011753 | 0.011900 | 0.011819 | 0.011784 |
| 0.012331 | 0.011683 | 0.011814 | 0.011752 | 0.012025 | 0.011877 | 0.011979 |
| 0.012387 | 0.011852 | 0.011939 | 0.012001 | 0.011866 | 0.011665 | 0.011905 |
| 0.011564 | 0.011732 | 0.011866 | 0.011832 | 0.011837 | 0.011631 | 0.011599 |
| 0.011664 | 0.011597 | 0.011631 | 0.011664 | 0.011564 | 0.011631 | 0.011530 |
| 0.011664 | 0.011698 | 0.011597 | 0.011564 | 0.011664 | 0.011597 | 0.011631 |
| 0.011631 | 0.011564 | 0.011631 | 0.011665 | 0.011564 | 0.011765 | 0.011799 |
| 0.011698 | 0.011765 | 0.011698 | 0.011698 | 0.011631 | 0.011631 | 0.011664 |
| 0.011478 | 0.011631 | 0.011665 | 0.011671 | 0.011665 | 0.011664 | 0.011732 |
| 0.011732 | 0.011665 | 0.011631 | 0.011665 | 0.011765 | 0.011765 | 0.011698 |
| 0.011698 | 0.011832 | 0.011530 | 0.011731 | 0.011933 | 0.011933 | 0.011799 |
| 0.011631 | 0.011698 | 0.011732 | 0.011732 | 0.011698 | 0.011665 | 0.011698 |
| 0.011732 | 0.011664 | 0.011664 | 0.011900 | 0.011900 | 0.011866 | 0.011664 |
| 0.011765 | 0.011832 | 0.011698 | 0.011765 | 0.011732 | 0.011597 | 0.011329 |
| 0.011698 | 0.011664 | 0.011664 | 0.011832 | 0.011664 | 0.011765 | 0.000000 |
| 0.011698 | 0.011570 | 0.011597 | 0.011670 | 0.011455 | 0.011774 | 0.011473 |
| 0.011555 | 0.011878 | 0.011622 | 0.011775 | 0.011646 | 0.011468 | 0.011432 |
| 0.011622 | 0.011192 | 0.011394 | 0.011258 | 0.011330 | 0.011395 | 0.011750 |
| 0.011738 | 0.011690 | 0.011765 | 0.011694 | 0.011701 | 0.011631 | 0.011699 |
| 0.011698 | 0.011767 | 0.011838 | 0.011671 | 0.012010 | 0.012050 | 0.011698 |
| 0.011732 | 0.011799 | 0.011665 | 0.011766 | 0.011564 | 0.011597 | 0.011598 |
| 0.011664 | 0.011664 | 0.011631 | 0.011597 | 0.011631 | 0.011597 | 0.011698 |
| 0.011689 | 0.011690 | 0.011677 | 0.011711 | 0.011847 | 0.011812 | 0.011812 |
| 0.011776 | 0.011733 | 0.011503 | 0.011528 | 0.011670 | 0.011806 | 0.011841 |
| 0.011632 | 0.011704 | 0.011936 | 0.011906 | 0.011834 | 0.011868 | 0.011799 |
| 0.011732 | 0.011799 | 0.011799 | 0.011698 | 0.011866 | 0.011866 | 0.011934 |
| 0.011967 | 0.011559 | 0.011606 | 0.011753 | 0.011631 | 0.011833 | 0.011799 |
| 0.011834 | 0.011866 | 0.011866 | 0.011866 | 0.011925 | 0.012001 | 0.011650 |
| 0.011533 | 0.011545 | 0.011639 | 0.011604 | 0.011709 | 0.011583 | 0.011400 |
| 0.011678 | 0.011543 | 0.011584 | 0.011660 | 0.011666 | 0.011745 | 0.011631 |
| 0.011598 | 0.011597 | 0.011665 | 0.011631 | 0.011631 | 0.011598 | 0.011530 |
| 0.011631 | 0.011698 | 0.011631 | 0.011631 | 0.011665 | 0.011665 | 0.011668 |
| 0.011736 | 0.011665 | 0.011665 | 0.011701 | 0.011631 | 0.011699 | 0.011698 |
| 0.011767 | 0.011838 | 0.011671 | 0.012010 | 0.012050 | 0.011698 | 0.011866 |
| 0.011799 | 0.011799 | 0.011635 | 0.011791 | 0.011721 | 0.011741 | 0.011621 |
| 0.011818 | 0.012063 | 0.011907 | 0.011706 | 0.011598 | 0.011799 | 0.011665 |
| 0.011766 | 0.011698 | 0.011597 | 0.011701 | 0.011799 | 0.011804 | 0.011699 |
| 0.011597 | 0.011532 | 0.011665 | 0.011598 | 0.011531 | 0.011536 | 0.011799 |
| 0.011698 | 0.011631 | 0.011665 | 0.011698 | 0.011665 | 0.011598 | 0.011598 |
| 0.011664 | 0.011698 | 0.011698 | 0.011631 | 0.011698 | 0.011933 | 0.011597 |
| 0.011631 | 0.011631 | 0.011631 | 0.011664 | 0.011631 | 0.011530 | 0.011617 |
| 0.011960 | 0.011485 | 0.011461 | 0.011664 | 0.011712 | 0.011635 | 0.011395 |
| 0.011375 | 0.011597 | 0.011698 | 0.011808 | 0.011666 | 0.011805 | 0.011935 |
| 0.011835 | 0.011872 | 0.011833 | 0.012086 | 0.011799 | 0.012674 | 0.011836 |
| 0.012507 | 0.012342 | 0.012477 | 0.012749 | 0.011732 | 0.011699 | 0.011800 |
| 0.012441 | 0.012174 | 0.011698 | 0.011665 | 0.011733 | 0.011733 | 0.011669 |
| 0.011597 | 0.011603 | 0.011664 | 0.011632 | 0.012003 | 0.012068 | 0.012070 |

|          |          |          |          |          |          |          |
|----------|----------|----------|----------|----------|----------|----------|
| 0.011969 | 0.012070 | 0.012174 | 0.011940 | 0.012441 | 0.012449 | 0.012508 |
| 0.012509 | 0.012543 | 0.012494 | 0.012510 | 0.012511 | 0.011732 | 0.012035 |
| 0.012103 | 0.012539 | 0.012112 | 0.012069 | 0.012542 | 0.011604 | 0.011497 |
| 0.011463 | 0.011463 | 0.012002 | 0.012048 | 0.012152 | 0.011799 | 0.011532 |
| S602     | 0.011698 | 0.011698 | 0.011933 | 0.011799 | 0.011799 | 0.011866 |
| 0.011705 | 0.011637 | 0.011866 | 0.011228 | 0.011362 | 0.011262 | 0.011295 |
| 0.011329 | 0.011496 | 0.011295 | 0.011329 | 0.011396 | 0.011362 | 0.011329 |
| 0.011295 | 0.011329 | 0.011429 | 0.011295 | 0.011329 | 0.011329 | 0.011671 |
| 0.011564 | 0.011329 | 0.011228 | 0.011463 | 0.011396 | 0.011295 | 0.011396 |
| 0.011362 | 0.011463 | 0.011362 | 0.011362 | 0.011396 | 0.011362 | 0.011530 |
| 0.011295 | 0.011362 | 0.011396 | 0.011329 | 0.011429 | 0.011463 | 0.011396 |
| 0.011362 | 0.011530 | 0.011430 | 0.011698 | 0.011362 | 0.011631 | 0.011362 |
| 0.011329 | 0.011429 | 0.011496 | 0.011631 | 0.011731 | 0.011429 | 0.011530 |
| 0.011396 | 0.011463 | 0.011362 | 0.011597 | 0.011832 | 0.011362 | 0.011429 |
| 0.011329 | 0.011429 | 0.011396 | 0.011463 | 0.011396 | 0.011396 | 0.011396 |
| 0.011295 | 0.011329 | 0.011295 | 0.011396 | 0.011362 | 0.011397 | 0.011463 |
| 0.011396 | 0.011362 | 0.011429 | 0.011329 | 0.011463 | 0.011295 | 0.011362 |
| 0.011530 | 0.011463 | 0.011698 | 0.011530 | 0.011362 | 0.011597 | 0.011362 |
| 0.011468 | 0.011695 | 0.011513 | 0.011216 | 0.011209 | 0.011318 | 0.011414 |
| 0.012048 | 0.011518 | 0.011225 | 0.011597 | 0.011597 | 0.011396 | 0.011496 |
| 0.011429 | 0.011396 | 0.011463 | 0.011362 | 0.011463 | 0.011396 | 0.011396 |
| 0.011362 | 0.011463 | 0.011664 | 0.011530 | 0.011429 | 0.011396 | 0.011329 |
| 0.011295 | 0.011295 | 0.011362 | 0.011329 | 0.011530 | 0.011497 | 0.011429 |
| 0.011530 | 0.011597 | 0.011329 | 0.011329 | 0.011362 | 0.011362 | 0.011364 |
| 0.011432 | 0.011362 | 0.011362 | 0.011168 | 0.011241 | 0.011200 | 0.011296 |
| 0.011297 | 0.011232 | 0.011282 | 0.011267 | 0.011196 | 0.011231 | 0.011263 |
| 0.011528 | 0.011301 | 0.011336 | 0.011228 | 0.011233 | 0.011363 | 0.011329 |
| 0.011396 | 0.011330 | 0.011329 | 0.011496 | 0.011429 | 0.011799 | 0.011597 |
| 0.011631 | 0.011497 | 0.011362 | 0.011463 | 0.011262 | 0.011496 | 0.011295 |
| 0.011362 | 0.011362 | 0.011329 | 0.011295 | 0.011329 | 0.011295 | 0.011396 |
| 0.011362 | 0.011463 | 0.011396 | 0.011295 | 0.011397 | 0.011497 | 0.011499 |
| 0.011497 | 0.011396 | 0.011295 | 0.011229 | 0.011362 | 0.011295 | 0.011228 |
| 0.011332 | 0.011497 | 0.011295 | 0.011497 | 0.011262 | 0.011362 | 0.011329 |
| 0.011430 | 0.011329 | 0.011362 | 0.011329 | 0.011362 | 0.011228 | 0.011362 |
| 0.011396 | 0.011329 | 0.011396 | 0.011329 | 0.011362 | 0.011396 | 0.011631 |
| 0.011732 | 0.011664 | 0.011732 | 0.011498 | 0.011732 | 0.011362 | 0.011329 |
| 0.011297 | 0.011586 | 0.011380 | 0.011266 | 0.011739 | 0.011163 | 0.011296 |
| 0.011739 | 0.011570 | 0.011530 | 0.011732 | 0.011367 | 0.011597 | 0.011564 |
| 0.011496 | 0.011664 | 0.011451 | 0.011266 | 0.011312 | 0.011329 | 0.011398 |
| 0.011497 | 0.011397 | 0.011601 | 0.011601 | 0.011530 | 0.011597 | 0.011704 |
| 0.011432 | 0.011603 | 0.011534 | 0.011466 | 0.011733 | 0.011262 | 0.011397 |
| 0.011429 | 0.011362 | 0.011262 | 0.011262 | 0.011329 | 0.011329 | 0.011396 |
| 0.011329 | 0.011396 | 0.011295 | 0.011396 | 0.011329 | 0.011329 | 0.011396 |
| 0.011329 | 0.011765 | 0.011664 | 0.011698 | 0.011228 | 0.011329 | 0.011362 |
| 0.011362 | 0.011329 | 0.011396 | 0.011429 | 0.011295 | 0.011295 | 0.011295 |
| 0.011832 | 0.011463 | 0.011463 | 0.011262 | 0.011362 | 0.011530 | 0.011295 |
| 0.011295 | 0.011362 | 0.011329 | 0.011496 | 0.011295 | 0.011429 | 0.011563 |
| 0.011496 | 0.011329 | 0.011329 | 0.011262 | 0.011262 | 0.011429 | 0.011362 |
| 0.011262 | 0.011362 | 0.011161 | 0.011194 | 0.011329 | 0.011463 | 0.011228 |
| 0.011195 | 0.011329 | 0.011262 | 0.011161 | 0.011564 | 0.011161 | 0.011329 |
| 0.011402 | 0.011295 | 0.011530 | 0.011362 | 0.011463 | 0.011329 | 0.011429 |
| 0.011295 | 0.011631 | 0.011228 | 0.011496 | 0.011295 | 0.011295 | 0.011228 |
| 0.011463 | 0.011665 | 0.011362 | 0.011429 | 0.011262 | 0.011664 | 0.011295 |
| 0.011295 | 0.011295 | 0.011329 | 0.011429 | 0.011329 | 0.011429 | 0.011496 |
| 0.011496 | 0.011463 | 0.011362 | 0.011463 | 0.011429 | 0.011295 | 0.011262 |
| 0.011295 | 0.011295 | 0.011362 | 0.011295 | 0.011262 | 0.011429 | 0.011295 |
| 0.011329 | 0.011329 | 0.011463 | 0.011496 | 0.011396 | 0.011329 | 0.011329 |
| 0.011396 | 0.011329 | 0.011429 | 0.011295 | 0.011429 | 0.011530 | 0.011765 |
| 0.011194 | 0.011732 | 0.011267 | 0.011785 | 0.011257 | 0.011366 | 0.011618 |
| 0.011579 | 0.011623 | 0.011374 | 0.011350 | 0.011719 | 0.011647 | 0.011364 |

|          |          |          |          |          |          |          |
|----------|----------|----------|----------|----------|----------|----------|
| 0.011534 | 0.011610 | 0.011177 | 0.011270 | 0.011255 | 0.011356 | 0.011275 |
| 0.011529 | 0.011433 | 0.011431 | 0.011259 | 0.011463 | 0.011497 | 0.011500 |
| 0.011301 | 0.011463 | 0.011463 | 0.011429 | 0.011396 | 0.011396 | 0.011362 |
| 0.011396 | 0.011329 | 0.011362 | 0.011396 | 0.011362 | 0.011295 | 0.011329 |
| 0.011329 | 0.011396 | 0.011295 | 0.011396 | 0.011429 | 0.011463 | 0.011362 |
| 0.011396 | 0.011362 | 0.011698 | 0.011698 | 0.011430 | 0.011464 | 0.011497 |
| 0.011262 | 0.011262 | 0.011295 | 0.011396 | 0.011262 | 0.011497 | 0.011497 |
| 0.011530 | 0.011530 | 0.011396 | 0.011564 | 0.011732 | 0.011565 | 0.011396 |
| 0.011396 | 0.011463 | 0.011497 | 0.011329 | 0.011396 | 0.011362 | 0.011396 |
| 0.011463 | 0.011463 | 0.011497 | 0.011463 | 0.011363 | 0.011564 | 0.011530 |
| 0.011399 | 0.011295 | 0.011396 | 0.011497 | 0.011396 | 0.011530 | 0.011563 |
| 0.011732 | 0.011367 | 0.011597 | 0.011564 | 0.011496 | 0.011664 | 0.011228 |
| 0.011464 | 0.011295 | 0.011329 | 0.011329 | 0.011396 | 0.011295 | 0.011396 |
| 0.011429 | 0.011463 | 0.011362 | 0.011396 | 0.011362 | 0.011698 | 0.011698 |
| 0.011430 | 0.011464 | 0.011530 | 0.011463 | 0.012035 | 0.011453 | 0.011377 |
| 0.011447 | 0.011476 | 0.011517 | 0.011476 | 0.011515 | 0.011439 | 0.011370 |
| 0.011987 | 0.011302 | 0.011505 | 0.011371 | 0.011645 | 0.011502 | 0.011604 |
| 0.012012 | 0.011475 | 0.011635 | 0.011698 | 0.011564 | 0.011564 | 0.011601 |
| 0.011262 | 0.011429 | 0.011563 | 0.011530 | 0.011533 | 0.011530 | 0.011498 |
| 0.011362 | 0.011295 | 0.011329 | 0.011362 | 0.011262 | 0.011329 | 0.011228 |
| 0.011362 | 0.011396 | 0.011295 | 0.011262 | 0.011362 | 0.011295 | 0.011329 |
| 0.011329 | 0.011262 | 0.011329 | 0.011362 | 0.011262 | 0.011463 | 0.011496 |
| 0.011396 | 0.011463 | 0.011396 | 0.011396 | 0.011329 | 0.011731 | 0.011362 |
| 0.011338 | 0.011262 | 0.011497 | 0.011501 | 0.011429 | 0.011429 | 0.011429 |
| 0.011429 | 0.011362 | 0.011329 | 0.011362 | 0.011463 | 0.011463 | 0.011396 |
| 0.011396 | 0.011530 | 0.011698 | 0.011429 | 0.011631 | 0.011631 | 0.011496 |
| 0.011329 | 0.011396 | 0.011429 | 0.011832 | 0.011396 | 0.011429 | 0.011396 |
| 0.011429 | 0.011362 | 0.011362 | 0.011664 | 0.011597 | 0.011631 | 0.011362 |
| 0.011463 | 0.011530 | 0.011396 | 0.011463 | 0.011429 | 0.011295 | 0.011631 |
| 0.011396 | 0.011362 | 0.011362 | 0.011530 | 0.011362 | 0.011463 | 0.011698 |
| 0.000000 | 0.011773 | 0.011765 | 0.011507 | 0.011286 | 0.011400 | 0.011267 |
| 0.011280 | 0.011722 | 0.011236 | 0.011417 | 0.011255 | 0.011366 | 0.011379 |
| 0.011519 | 0.011192 | 0.011338 | 0.011192 | 0.011222 | 0.011395 | 0.011344 |
| 0.011399 | 0.011257 | 0.011377 | 0.011307 | 0.011397 | 0.011530 | 0.011597 |
| 0.011597 | 0.011464 | 0.011567 | 0.011569 | 0.011704 | 0.011732 | 0.011396 |
| 0.011631 | 0.011497 | 0.011362 | 0.011463 | 0.011262 | 0.011496 | 0.011295 |
| 0.011362 | 0.011362 | 0.011329 | 0.011295 | 0.011329 | 0.011295 | 0.011396 |
| 0.011305 | 0.011305 | 0.011300 | 0.011334 | 0.011471 | 0.011436 | 0.011436 |
| 0.011435 | 0.011363 | 0.011171 | 0.011168 | 0.011297 | 0.011467 | 0.011467 |
| 0.011262 | 0.011331 | 0.011565 | 0.011533 | 0.011464 | 0.011498 | 0.011496 |
| 0.011429 | 0.011496 | 0.011496 | 0.011396 | 0.011967 | 0.011564 | 0.011631 |
| 0.011665 | 0.011736 | 0.011299 | 0.011372 | 0.011262 | 0.011530 | 0.011496 |
| 0.011531 | 0.011564 | 0.011564 | 0.011564 | 0.011610 | 0.011698 | 0.011268 |
| 0.011162 | 0.011164 | 0.011264 | 0.011230 | 0.011333 | 0.011172 | 0.011502 |
| 0.011300 | 0.011411 | 0.011156 | 0.011322 | 0.011296 | 0.011368 | 0.011329 |
| 0.011295 | 0.011295 | 0.011362 | 0.011329 | 0.011530 | 0.011497 | 0.011429 |
| 0.011530 | 0.011597 | 0.011329 | 0.011329 | 0.011362 | 0.011362 | 0.011364 |
| 0.011432 | 0.011362 | 0.011362 | 0.011397 | 0.011530 | 0.011597 | 0.011597 |
| 0.011464 | 0.011567 | 0.011569 | 0.011704 | 0.011732 | 0.011396 | 0.011564 |
| 0.011496 | 0.011496 | 0.011331 | 0.011443 | 0.011442 | 0.011469 | 0.011270 |
| 0.011439 | 0.011652 | 0.011441 | 0.011332 | 0.011295 | 0.011497 | 0.011362 |
| 0.011463 | 0.011396 | 0.011295 | 0.011397 | 0.011497 | 0.011499 | 0.011396 |
| 0.011295 | 0.011229 | 0.011362 | 0.011295 | 0.011228 | 0.011332 | 0.011497 |
| 0.011396 | 0.011329 | 0.011362 | 0.011396 | 0.011362 | 0.011295 | 0.011430 |
| 0.011362 | 0.011396 | 0.011396 | 0.011329 | 0.011396 | 0.011631 | 0.011295 |
| 0.011329 | 0.011731 | 0.011329 | 0.011362 | 0.011329 | 0.011698 | 0.011232 |
| 0.011678 | 0.011230 | 0.011311 | 0.011463 | 0.011549 | 0.011455 | 0.011186 |
| 0.011270 | 0.011496 | 0.011597 | 0.011637 | 0.011498 | 0.011635 | 0.011834 |
| 0.011666 | 0.011703 | 0.011731 | 0.011914 | 0.011698 | 0.012572 | 0.011666 |
| 0.012405 | 0.012173 | 0.012307 | 0.012578 | 0.011698 | 0.011329 | 0.011698 |



|          |          |          |          |          |          |          |
|----------|----------|----------|----------|----------|----------|----------|
| 0.012070 | 0.012072 | 0.011597 | 0.011564 | 0.011564 | 0.011564 | 0.011601 |
| 0.011496 | 0.011501 | 0.011563 | 0.011464 | 0.011833 | 0.011900 | 0.011901 |
| 0.011800 | 0.011901 | 0.012004 | 0.011770 | 0.012070 | 0.012076 | 0.012137 |
| 0.012138 | 0.012172 | 0.012118 | 0.012138 | 0.012139 | 0.011429 | 0.011665 |
| 0.011733 | 0.012303 | 0.011738 | 0.012034 | 0.012508 | 0.011502 | 0.011396 |
| 0.011429 | 0.011429 | 0.011833 | 0.011883 | 0.011975 | 0.011765 | 0.011363 |
| S603     | 0.012079 | 0.012079 | 0.012114 | 0.011875 | 0.011875 | 0.011943 |
| 0.011332 | 0.011264 | 0.011909 | 0.011672 | 0.011739 | 0.011707 | 0.011637 |
| 0.011603 | 0.011875 | 0.011603 | 0.011705 | 0.011739 | 0.011705 | 0.011705 |
| 0.011671 | 0.011705 | 0.011535 | 0.011672 | 0.011706 | 0.011705 | 0.011264 |
| 0.011671 | 0.011705 | 0.011603 | 0.011569 | 0.011773 | 0.011739 | 0.011773 |
| 0.011739 | 0.011841 | 0.011739 | 0.011739 | 0.011773 | 0.011739 | 0.011909 |
| 0.011603 | 0.011739 | 0.011773 | 0.011705 | 0.011739 | 0.011841 | 0.011773 |
| 0.011739 | 0.011909 | 0.011774 | 0.011400 | 0.011739 | 0.011977 | 0.011739 |
| 0.011705 | 0.011739 | 0.011875 | 0.011977 | 0.011501 | 0.011739 | 0.011841 |
| 0.011773 | 0.011841 | 0.011739 | 0.011977 | 0.011535 | 0.011739 | 0.011807 |
| 0.011705 | 0.011807 | 0.011773 | 0.011841 | 0.011705 | 0.011773 | 0.011773 |
| 0.011637 | 0.011705 | 0.011671 | 0.011705 | 0.011739 | 0.011741 | 0.011807 |
| 0.011773 | 0.011705 | 0.011807 | 0.011671 | 0.011569 | 0.011671 | 0.011739 |
| 0.011875 | 0.011841 | 0.011603 | 0.011909 | 0.011705 | 0.011943 | 0.011739 |
| 0.011881 | 0.011361 | 0.011895 | 0.011610 | 0.011665 | 0.011806 | 0.011496 |
| 0.012209 | 0.011316 | 0.011599 | 0.011977 | 0.011977 | 0.011705 | 0.011569 |
| 0.011773 | 0.011773 | 0.011841 | 0.011739 | 0.011841 | 0.011773 | 0.011705 |
| 0.011671 | 0.011739 | 0.012045 | 0.011909 | 0.011773 | 0.011774 | 0.011706 |
| 0.011672 | 0.011604 | 0.011740 | 0.011672 | 0.011638 | 0.011604 | 0.011536 |
| 0.011638 | 0.011706 | 0.011705 | 0.011705 | 0.011740 | 0.011739 | 0.011744 |
| 0.011813 | 0.011706 | 0.011740 | 0.011570 | 0.011682 | 0.011628 | 0.011706 |
| 0.011711 | 0.011651 | 0.011733 | 0.011688 | 0.011645 | 0.011649 | 0.011709 |
| 0.011607 | 0.011723 | 0.011757 | 0.011672 | 0.011620 | 0.011775 | 0.011707 |
| 0.011741 | 0.011776 | 0.011775 | 0.011841 | 0.011807 | 0.012113 | 0.011876 |
| 0.011739 | 0.011808 | 0.011739 | 0.011774 | 0.011638 | 0.011604 | 0.011672 |
| 0.011739 | 0.011739 | 0.011705 | 0.011671 | 0.011705 | 0.011672 | 0.011773 |
| 0.011740 | 0.011842 | 0.011774 | 0.011672 | 0.011776 | 0.011876 | 0.011881 |
| 0.011876 | 0.011740 | 0.011672 | 0.011606 | 0.011739 | 0.011672 | 0.011604 |
| 0.011610 | 0.011876 | 0.011672 | 0.011876 | 0.011637 | 0.011740 | 0.011706 |
| 0.011774 | 0.011672 | 0.011706 | 0.011706 | 0.011740 | 0.011604 | 0.011740 |
| 0.011774 | 0.011706 | 0.011740 | 0.011672 | 0.011706 | 0.011774 | 0.012012 |
| 0.011434 | 0.011366 | 0.011434 | 0.011879 | 0.011502 | 0.011739 | 0.011706 |
| 0.011675 | 0.011919 | 0.011710 | 0.011615 | 0.011438 | 0.011612 | 0.011818 |
| 0.011434 | 0.011680 | 0.011909 | 0.012113 | 0.011820 | 0.011977 | 0.011943 |
| 0.011875 | 0.012045 | 0.011923 | 0.011771 | 0.011783 | 0.011774 | 0.011848 |
| 0.011943 | 0.011811 | 0.011984 | 0.012053 | 0.011943 | 0.012011 | 0.012054 |
| 0.011848 | 0.012056 | 0.011916 | 0.011916 | 0.012184 | 0.011637 | 0.011844 |
| 0.011773 | 0.011739 | 0.011637 | 0.011637 | 0.011705 | 0.011705 | 0.011773 |
| 0.011705 | 0.011773 | 0.011671 | 0.011705 | 0.011705 | 0.011671 | 0.011773 |
| 0.011705 | 0.011467 | 0.011366 | 0.011400 | 0.011603 | 0.011705 | 0.011705 |
| 0.011739 | 0.011637 | 0.011773 | 0.011739 | 0.011671 | 0.011671 | 0.011671 |
| 0.011467 | 0.011773 | 0.011841 | 0.011637 | 0.011739 | 0.011909 | 0.011671 |
| 0.011671 | 0.011705 | 0.011705 | 0.011875 | 0.011671 | 0.011603 | 0.011739 |
| 0.011671 | 0.011705 | 0.011705 | 0.011637 | 0.011637 | 0.011807 | 0.011739 |
| 0.011637 | 0.011739 | 0.011603 | 0.011637 | 0.011773 | 0.011570 | 0.011671 |
| 0.011638 | 0.011773 | 0.011672 | 0.011603 | 0.011332 | 0.011603 | 0.011773 |
| 0.011857 | 0.011671 | 0.011298 | 0.011808 | 0.011773 | 0.011671 | 0.011807 |
| 0.011671 | 0.011977 | 0.011603 | 0.011603 | 0.011603 | 0.011603 | 0.011603 |
| 0.011841 | 0.011706 | 0.011739 | 0.011807 | 0.011637 | 0.011366 | 0.011603 |
| 0.011671 | 0.011671 | 0.011705 | 0.011807 | 0.011705 | 0.011807 | 0.011875 |
| 0.011875 | 0.011841 | 0.011739 | 0.011841 | 0.011807 | 0.011671 | 0.011637 |
| 0.011671 | 0.011671 | 0.011739 | 0.011603 | 0.011637 | 0.011807 | 0.011671 |
| 0.011637 | 0.011705 | 0.011841 | 0.011807 | 0.011773 | 0.011705 | 0.011705 |
| 0.011739 | 0.011705 | 0.011773 | 0.011671 | 0.011807 | 0.011909 | 0.011603 |

|          |          |          |          |          |          |          |
|----------|----------|----------|----------|----------|----------|----------|
| 0.011705 | 0.011501 | 0.011724 | 0.018292 | 0.011325 | 0.011616 | 0.011378 |
| 0.011340 | 0.011381 | 0.011694 | 0.011470 | 0.011392 | 0.011409 | 0.011673 |
| 0.011586 | 0.011430 | 0.011570 | 0.011566 | 0.011614 | 0.011558 | 0.011623 |
| 0.011296 | 0.011588 | 0.011398 | 0.011665 | 0.011841 | 0.011875 | 0.011881 |
| 0.011755 | 0.011841 | 0.011841 | 0.011740 | 0.011739 | 0.011740 | 0.011740 |
| 0.011739 | 0.011671 | 0.011739 | 0.011774 | 0.011740 | 0.011672 | 0.011706 |
| 0.011706 | 0.011774 | 0.011672 | 0.011774 | 0.011808 | 0.011841 | 0.011739 |
| 0.011671 | 0.011672 | 0.011468 | 0.011468 | 0.011808 | 0.011843 | 0.011876 |
| 0.011638 | 0.011638 | 0.011672 | 0.011774 | 0.011638 | 0.011876 | 0.011876 |
| 0.011910 | 0.011909 | 0.011841 | 0.011943 | 0.011502 | 0.011946 | 0.011773 |
| 0.011774 | 0.011842 | 0.011876 | 0.011706 | 0.011774 | 0.011740 | 0.011773 |
| 0.011842 | 0.011842 | 0.011876 | 0.011842 | 0.011742 | 0.011944 | 0.011876 |
| 0.011780 | 0.011672 | 0.011774 | 0.011876 | 0.011774 | 0.011842 | 0.011943 |
| 0.012113 | 0.011820 | 0.011977 | 0.011943 | 0.011875 | 0.012045 | 0.011672 |
| 0.011844 | 0.011740 | 0.011706 | 0.011706 | 0.011774 | 0.011672 | 0.011774 |
| 0.011808 | 0.011841 | 0.011739 | 0.011671 | 0.011672 | 0.011468 | 0.011468 |
| 0.011808 | 0.011843 | 0.011909 | 0.011841 | 0.012319 | 0.011928 | 0.011843 |
| 0.011914 | 0.011867 | 0.011985 | 0.011866 | 0.011981 | 0.011898 | 0.011793 |
| 0.012276 | 0.011761 | 0.011892 | 0.011830 | 0.012036 | 0.011955 | 0.012059 |
| 0.012299 | 0.011900 | 0.012018 | 0.012079 | 0.011943 | 0.011671 | 0.011983 |
| 0.011637 | 0.011807 | 0.011943 | 0.011909 | 0.011915 | 0.011637 | 0.011605 |
| 0.011739 | 0.011671 | 0.011705 | 0.011739 | 0.011637 | 0.011705 | 0.011603 |
| 0.011671 | 0.011705 | 0.011671 | 0.011637 | 0.011739 | 0.011671 | 0.011705 |
| 0.011705 | 0.011637 | 0.011705 | 0.011739 | 0.011637 | 0.011841 | 0.011875 |
| 0.011773 | 0.011773 | 0.011773 | 0.011773 | 0.011705 | 0.011501 | 0.011739 |
| 0.011518 | 0.011705 | 0.011672 | 0.011678 | 0.011739 | 0.011739 | 0.011807 |
| 0.011807 | 0.011739 | 0.011705 | 0.011739 | 0.011841 | 0.011841 | 0.011739 |
| 0.011773 | 0.011909 | 0.011400 | 0.011807 | 0.012011 | 0.012011 | 0.011841 |
| 0.011705 | 0.011773 | 0.011807 | 0.011603 | 0.011774 | 0.011739 | 0.011773 |
| 0.011807 | 0.011671 | 0.011671 | 0.011977 | 0.011977 | 0.011943 | 0.011739 |
| 0.011807 | 0.011841 | 0.011773 | 0.011807 | 0.011773 | 0.011671 | 0.011298 |
| 0.011773 | 0.011705 | 0.011671 | 0.011909 | 0.011739 | 0.011841 | 0.011570 |
| 0.011773 | 0.000000 | 0.011467 | 0.011510 | 0.011345 | 0.011782 | 0.011476 |
| 0.011448 | 0.011804 | 0.011664 | 0.011690 | 0.011699 | 0.011419 | 0.011328 |
| 0.011471 | 0.011260 | 0.011453 | 0.011327 | 0.011332 | 0.011534 | 0.011836 |
| 0.011818 | 0.011733 | 0.011773 | 0.011773 | 0.011776 | 0.011638 | 0.011706 |
| 0.011706 | 0.011774 | 0.011881 | 0.011678 | 0.012021 | 0.012062 | 0.011773 |
| 0.011739 | 0.011808 | 0.011739 | 0.011774 | 0.011638 | 0.011604 | 0.011672 |
| 0.011739 | 0.011739 | 0.011705 | 0.011671 | 0.011705 | 0.011672 | 0.011773 |
| 0.011696 | 0.011733 | 0.011719 | 0.011719 | 0.011856 | 0.011821 | 0.011820 |
| 0.011819 | 0.011775 | 0.011583 | 0.011569 | 0.011711 | 0.011814 | 0.011884 |
| 0.011707 | 0.011746 | 0.011980 | 0.011984 | 0.011911 | 0.011945 | 0.011875 |
| 0.011807 | 0.011875 | 0.011875 | 0.011773 | 0.011739 | 0.011943 | 0.011977 |
| 0.012012 | 0.011384 | 0.011681 | 0.011832 | 0.011705 | 0.011875 | 0.011875 |
| 0.011843 | 0.011943 | 0.011943 | 0.011943 | 0.012057 | 0.012079 | 0.011727 |
| 0.011607 | 0.011621 | 0.011715 | 0.011679 | 0.011717 | 0.011627 | 0.011266 |
| 0.011754 | 0.011416 | 0.011641 | 0.011736 | 0.011740 | 0.011787 | 0.011706 |
| 0.011672 | 0.011604 | 0.011740 | 0.011672 | 0.011638 | 0.011604 | 0.011536 |
| 0.011638 | 0.011706 | 0.011705 | 0.011705 | 0.011740 | 0.011739 | 0.011744 |
| 0.011813 | 0.011706 | 0.011740 | 0.011776 | 0.011638 | 0.011706 | 0.011706 |
| 0.011774 | 0.011881 | 0.011678 | 0.012021 | 0.012062 | 0.011773 | 0.011943 |
| 0.011875 | 0.011875 | 0.011710 | 0.011906 | 0.011834 | 0.011818 | 0.011734 |
| 0.011897 | 0.012172 | 0.011963 | 0.011782 | 0.011672 | 0.011876 | 0.011740 |
| 0.011842 | 0.011774 | 0.011672 | 0.011776 | 0.011876 | 0.011881 | 0.011740 |
| 0.011672 | 0.011606 | 0.011739 | 0.011672 | 0.011604 | 0.011610 | 0.011876 |
| 0.011739 | 0.011671 | 0.011739 | 0.011774 | 0.011740 | 0.011672 | 0.011604 |
| 0.011739 | 0.011773 | 0.011739 | 0.011705 | 0.011773 | 0.012011 | 0.011603 |
| 0.011705 | 0.011501 | 0.011705 | 0.011739 | 0.011705 | 0.011400 | 0.011535 |
| 0.011797 | 0.011402 | 0.011363 | 0.011632 | 0.011634 | 0.011642 | 0.011355 |
| 0.011325 | 0.011603 | 0.011705 | 0.011816 | 0.011673 | 0.011813 | 0.011945 |

|          |          |          |          |          |          |          |
|----------|----------|----------|----------|----------|----------|----------|
| 0.011843 | 0.011847 | 0.011841 | 0.012028 | 0.011773 | 0.012522 | 0.011810 |
| 0.012558 | 0.012255 | 0.012390 | 0.012733 | 0.011705 | 0.011706 | 0.011808 |
| 0.012354 | 0.012118 | 0.011773 | 0.011604 | 0.011741 | 0.011741 | 0.011642 |
| 0.011603 | 0.011609 | 0.011671 | 0.011639 | 0.012013 | 0.012046 | 0.012081 |
| 0.011945 | 0.012047 | 0.012186 | 0.011916 | 0.012355 | 0.012362 | 0.012423 |
| 0.012423 | 0.012423 | 0.012372 | 0.012389 | 0.012391 | 0.011807 | 0.011978 |
| 0.012115 | 0.012590 | 0.012021 | 0.012046 | 0.012524 | 0.011610 | 0.011502 |
| 0.011400 | 0.011468 | 0.012012 | 0.012020 | 0.012129 | 0.011807 | 0.011537 |
| S604     | 0.012068 | 0.012068 | 0.012135 | 0.011900 | 0.011900 | 0.011967 |
| 0.011400 | 0.011332 | 0.011967 | 0.011665 | 0.011731 | 0.011700 | 0.011664 |
| 0.011631 | 0.011866 | 0.011597 | 0.011698 | 0.011765 | 0.011732 | 0.011698 |
| 0.011664 | 0.011698 | 0.011530 | 0.011665 | 0.011699 | 0.011698 | 0.011366 |
| 0.011664 | 0.011698 | 0.011597 | 0.011564 | 0.011698 | 0.011732 | 0.011765 |
| 0.011732 | 0.011832 | 0.011732 | 0.011732 | 0.011765 | 0.011731 | 0.011900 |
| 0.011597 | 0.011731 | 0.011765 | 0.011698 | 0.011731 | 0.011832 | 0.011765 |
| 0.011732 | 0.011900 | 0.011799 | 0.011396 | 0.011731 | 0.012000 | 0.011731 |
| 0.011698 | 0.011732 | 0.011866 | 0.012000 | 0.011496 | 0.011732 | 0.011832 |
| 0.011765 | 0.011832 | 0.011732 | 0.011967 | 0.011530 | 0.011732 | 0.011799 |
| 0.011698 | 0.011799 | 0.011765 | 0.011832 | 0.011765 | 0.011765 | 0.011765 |
| 0.011664 | 0.011698 | 0.011664 | 0.011698 | 0.011731 | 0.011767 | 0.011832 |
| 0.011765 | 0.011731 | 0.011799 | 0.011698 | 0.011564 | 0.011664 | 0.011731 |
| 0.011899 | 0.011832 | 0.011597 | 0.011900 | 0.011732 | 0.011967 | 0.011731 |
| 0.011950 | 0.011434 | 0.011966 | 0.011646 | 0.011657 | 0.011797 | 0.011572 |
| 0.012195 | 0.011416 | 0.011719 | 0.011967 | 0.011967 | 0.011698 | 0.011597 |
| 0.011799 | 0.011765 | 0.011832 | 0.011732 | 0.011832 | 0.011765 | 0.011765 |
| 0.011731 | 0.011765 | 0.012034 | 0.011899 | 0.011799 | 0.011765 | 0.011698 |
| 0.011665 | 0.011597 | 0.011732 | 0.011698 | 0.011631 | 0.011598 | 0.011530 |
| 0.011631 | 0.011698 | 0.011698 | 0.011698 | 0.011732 | 0.011732 | 0.011736 |
| 0.011804 | 0.011732 | 0.011732 | 0.011600 | 0.011675 | 0.011621 | 0.011733 |
| 0.011704 | 0.011644 | 0.011724 | 0.011681 | 0.011638 | 0.011643 | 0.011702 |
| 0.011600 | 0.011715 | 0.011749 | 0.011665 | 0.011648 | 0.011800 | 0.011699 |
| 0.011767 | 0.011768 | 0.011766 | 0.011866 | 0.011799 | 0.012169 | 0.011900 |
| 0.011732 | 0.011799 | 0.011732 | 0.011766 | 0.011631 | 0.011597 | 0.011665 |
| 0.011732 | 0.011731 | 0.011698 | 0.011664 | 0.011698 | 0.011665 | 0.011765 |
| 0.011732 | 0.011833 | 0.011766 | 0.011665 | 0.011768 | 0.011866 | 0.011871 |
| 0.011866 | 0.011766 | 0.011665 | 0.011600 | 0.011732 | 0.011665 | 0.011598 |
| 0.011604 | 0.011867 | 0.011665 | 0.011867 | 0.011631 | 0.011732 | 0.011698 |
| 0.011799 | 0.011698 | 0.011732 | 0.011698 | 0.011732 | 0.011597 | 0.011732 |
| 0.011766 | 0.011698 | 0.011765 | 0.011698 | 0.011732 | 0.011765 | 0.012001 |
| 0.011295 | 0.011362 | 0.011430 | 0.011869 | 0.011497 | 0.011732 | 0.011698 |
| 0.011668 | 0.011990 | 0.011701 | 0.011643 | 0.011433 | 0.011606 | 0.011808 |
| 0.011434 | 0.011672 | 0.011899 | 0.012101 | 0.011812 | 0.011967 | 0.011933 |
| 0.011866 | 0.012034 | 0.011913 | 0.011720 | 0.011773 | 0.011765 | 0.011839 |
| 0.011933 | 0.011836 | 0.011973 | 0.012042 | 0.011967 | 0.012034 | 0.012145 |
| 0.011873 | 0.012045 | 0.011907 | 0.011906 | 0.012171 | 0.011631 | 0.011835 |
| 0.011799 | 0.011732 | 0.011631 | 0.011631 | 0.011698 | 0.011698 | 0.011765 |
| 0.011698 | 0.011765 | 0.011664 | 0.011698 | 0.011698 | 0.011698 | 0.011765 |
| 0.011698 | 0.011463 | 0.011362 | 0.011396 | 0.011597 | 0.011698 | 0.011732 |
| 0.011732 | 0.011631 | 0.011765 | 0.011732 | 0.011664 | 0.011664 | 0.011664 |
| 0.011530 | 0.011765 | 0.011832 | 0.011631 | 0.011731 | 0.011900 | 0.011664 |
| 0.011664 | 0.011731 | 0.011698 | 0.011866 | 0.011664 | 0.011597 | 0.011732 |
| 0.011664 | 0.011698 | 0.011698 | 0.011631 | 0.011631 | 0.011799 | 0.011731 |
| 0.011631 | 0.011731 | 0.011597 | 0.011631 | 0.011765 | 0.011564 | 0.011665 |
| 0.011631 | 0.011765 | 0.011699 | 0.011597 | 0.011329 | 0.011597 | 0.011765 |
| 0.011848 | 0.011664 | 0.011295 | 0.011799 | 0.011765 | 0.011698 | 0.011799 |
| 0.011664 | 0.012000 | 0.011597 | 0.011597 | 0.011597 | 0.011597 | 0.011597 |
| 0.011832 | 0.011698 | 0.011732 | 0.011799 | 0.011631 | 0.011362 | 0.011597 |
| 0.011664 | 0.011664 | 0.011698 | 0.011799 | 0.011698 | 0.011799 | 0.011866 |
| 0.011866 | 0.011832 | 0.011731 | 0.011832 | 0.011799 | 0.011664 | 0.011631 |
| 0.011664 | 0.011664 | 0.011732 | 0.011597 | 0.011631 | 0.011799 | 0.011664 |

|          |          |          |          |          |          |          |
|----------|----------|----------|----------|----------|----------|----------|
| 0.011631 | 0.011698 | 0.011832 | 0.011799 | 0.011765 | 0.011698 | 0.011698 |
| 0.011765 | 0.011698 | 0.011799 | 0.011664 | 0.011799 | 0.011899 | 0.011597 |
| 0.011698 | 0.011496 | 0.011716 | 0.018239 | 0.011322 | 0.011733 | 0.011374 |
| 0.011337 | 0.011377 | 0.011899 | 0.011698 | 0.011555 | 0.011405 | 0.011850 |
| 0.011724 | 0.011549 | 0.011645 | 0.011730 | 0.011646 | 0.011603 | 0.011663 |
| 0.011342 | 0.011582 | 0.011431 | 0.011523 | 0.011832 | 0.011866 | 0.011838 |
| 0.011747 | 0.011833 | 0.011832 | 0.011732 | 0.011765 | 0.011766 | 0.011732 |
| 0.011765 | 0.011698 | 0.011732 | 0.011765 | 0.011732 | 0.011665 | 0.011698 |
| 0.011698 | 0.011765 | 0.011665 | 0.011766 | 0.011799 | 0.011833 | 0.011732 |
| 0.011698 | 0.011665 | 0.011463 | 0.011463 | 0.011799 | 0.011834 | 0.011866 |
| 0.011631 | 0.011631 | 0.011665 | 0.011766 | 0.011631 | 0.011866 | 0.011866 |
| 0.011900 | 0.011899 | 0.011832 | 0.011933 | 0.011497 | 0.011936 | 0.011765 |
| 0.011765 | 0.011833 | 0.011866 | 0.011698 | 0.011765 | 0.011732 | 0.011765 |
| 0.011833 | 0.011833 | 0.011866 | 0.011833 | 0.011734 | 0.011933 | 0.011900 |
| 0.011771 | 0.011665 | 0.011765 | 0.011866 | 0.011766 | 0.011833 | 0.011933 |
| 0.012101 | 0.011812 | 0.011967 | 0.011933 | 0.011866 | 0.012034 | 0.011665 |
| 0.011835 | 0.011733 | 0.011698 | 0.011698 | 0.011765 | 0.011665 | 0.011766 |
| 0.011799 | 0.011833 | 0.011732 | 0.011698 | 0.011665 | 0.011463 | 0.011463 |
| 0.011799 | 0.011834 | 0.011899 | 0.011832 | 0.012406 | 0.011882 | 0.011834 |
| 0.011904 | 0.011823 | 0.011974 | 0.011857 | 0.011970 | 0.011888 | 0.011819 |
| 0.012365 | 0.011753 | 0.011882 | 0.011821 | 0.012094 | 0.011945 | 0.012047 |
| 0.012387 | 0.011890 | 0.012007 | 0.012068 | 0.011933 | 0.011665 | 0.011973 |
| 0.011631 | 0.011799 | 0.011933 | 0.011899 | 0.011905 | 0.011631 | 0.011599 |
| 0.011731 | 0.011664 | 0.011698 | 0.011731 | 0.011631 | 0.011698 | 0.011597 |
| 0.011664 | 0.011698 | 0.011664 | 0.011631 | 0.011732 | 0.011664 | 0.011698 |
| 0.011698 | 0.011631 | 0.011698 | 0.011732 | 0.011631 | 0.011832 | 0.011866 |
| 0.011765 | 0.011765 | 0.011765 | 0.011765 | 0.011698 | 0.011496 | 0.011731 |
| 0.011513 | 0.011698 | 0.011665 | 0.011671 | 0.011732 | 0.011731 | 0.011799 |
| 0.011732 | 0.011732 | 0.011698 | 0.011732 | 0.011832 | 0.011832 | 0.011765 |
| 0.011765 | 0.011900 | 0.011396 | 0.011799 | 0.012001 | 0.012001 | 0.011866 |
| 0.011698 | 0.011765 | 0.011732 | 0.011564 | 0.011766 | 0.011732 | 0.011765 |
| 0.011799 | 0.011664 | 0.011664 | 0.011967 | 0.011967 | 0.011933 | 0.011732 |
| 0.011832 | 0.011900 | 0.011765 | 0.011832 | 0.011799 | 0.011664 | 0.011329 |
| 0.011765 | 0.011731 | 0.011664 | 0.011900 | 0.011732 | 0.011832 | 0.011597 |
| 0.011765 | 0.011467 | 0.000000 | 0.011629 | 0.011399 | 0.011774 | 0.011576 |
| 0.011555 | 0.011878 | 0.011692 | 0.011820 | 0.011744 | 0.011518 | 0.011538 |
| 0.011570 | 0.011324 | 0.011617 | 0.011324 | 0.011492 | 0.011596 | 0.011912 |
| 0.011889 | 0.011808 | 0.011765 | 0.011765 | 0.011768 | 0.011631 | 0.011698 |
| 0.011698 | 0.011766 | 0.011872 | 0.011670 | 0.012010 | 0.012050 | 0.011765 |
| 0.011732 | 0.011799 | 0.011732 | 0.011766 | 0.011631 | 0.011597 | 0.011665 |
| 0.011732 | 0.011731 | 0.011698 | 0.011664 | 0.011698 | 0.011665 | 0.011765 |
| 0.011724 | 0.011725 | 0.011711 | 0.011745 | 0.011882 | 0.011846 | 0.011846 |
| 0.011844 | 0.011800 | 0.011614 | 0.011600 | 0.011704 | 0.011874 | 0.011875 |
| 0.011699 | 0.011738 | 0.012003 | 0.011973 | 0.011868 | 0.011935 | 0.011866 |
| 0.011799 | 0.011866 | 0.011866 | 0.011765 | 0.011732 | 0.011900 | 0.012001 |
| 0.012035 | 0.011416 | 0.011674 | 0.011823 | 0.011698 | 0.011900 | 0.011866 |
| 0.011901 | 0.011933 | 0.011933 | 0.011933 | 0.012043 | 0.012068 | 0.011719 |
| 0.011601 | 0.011614 | 0.011707 | 0.011672 | 0.011709 | 0.011657 | 0.011264 |
| 0.011746 | 0.011411 | 0.011632 | 0.011772 | 0.011733 | 0.011779 | 0.011698 |
| 0.011665 | 0.011597 | 0.011732 | 0.011698 | 0.011631 | 0.011598 | 0.011530 |
| 0.011631 | 0.011698 | 0.011698 | 0.011698 | 0.011732 | 0.011732 | 0.011736 |
| 0.011804 | 0.011732 | 0.011732 | 0.011768 | 0.011631 | 0.011698 | 0.011698 |
| 0.011766 | 0.011872 | 0.011670 | 0.012010 | 0.012050 | 0.011765 | 0.011933 |
| 0.011866 | 0.011866 | 0.011703 | 0.011861 | 0.011825 | 0.011844 | 0.011726 |
| 0.011887 | 0.012109 | 0.011865 | 0.011774 | 0.011665 | 0.011867 | 0.011732 |
| 0.011833 | 0.011766 | 0.011665 | 0.011768 | 0.011866 | 0.011871 | 0.011766 |
| 0.011665 | 0.011600 | 0.011732 | 0.011665 | 0.011598 | 0.011604 | 0.011867 |
| 0.011765 | 0.011698 | 0.011732 | 0.011765 | 0.011732 | 0.011665 | 0.011598 |
| 0.011731 | 0.011765 | 0.011765 | 0.011698 | 0.011765 | 0.012000 | 0.011597 |
| 0.011698 | 0.011496 | 0.011698 | 0.011732 | 0.011698 | 0.011396 | 0.011703 |

|          |          |          |          |          |          |          |
|----------|----------|----------|----------|----------|----------|----------|
| 0.011847 | 0.011528 | 0.011411 | 0.011624 | 0.011712 | 0.011635 | 0.011436 |
| 0.011375 | 0.011597 | 0.011698 | 0.011807 | 0.011666 | 0.011805 | 0.011935 |
| 0.011834 | 0.011872 | 0.011832 | 0.012086 | 0.011799 | 0.012674 | 0.011835 |
| 0.012574 | 0.012342 | 0.012476 | 0.012748 | 0.011732 | 0.011698 | 0.011800 |
| 0.012441 | 0.012174 | 0.011765 | 0.011665 | 0.011733 | 0.011733 | 0.011669 |
| 0.011597 | 0.011603 | 0.011664 | 0.011632 | 0.012002 | 0.012068 | 0.012070 |
| 0.011969 | 0.012069 | 0.012173 | 0.011872 | 0.012441 | 0.012449 | 0.012508 |
| 0.012509 | 0.012543 | 0.012494 | 0.012509 | 0.012511 | 0.011799 | 0.012035 |
| 0.012103 | 0.012606 | 0.012112 | 0.012068 | 0.012542 | 0.011604 | 0.011497 |
| 0.011396 | 0.011463 | 0.012002 | 0.012006 | 0.012116 | 0.011799 | 0.011532 |
| S605     | 0.011670 | 0.011670 | 0.011711 | 0.011629 | 0.011629 | 0.011711 |
| 0.011510 | 0.011428 | 0.011629 | 0.011467 | 0.011507 | 0.011467 | 0.011426 |
| 0.011385 | 0.011670 | 0.011385 | 0.011507 | 0.011507 | 0.011507 | 0.011467 |
| 0.011467 | 0.011507 | 0.011304 | 0.011426 | 0.011508 | 0.011426 | 0.011510 |
| 0.011223 | 0.011507 | 0.011385 | 0.011304 | 0.011548 | 0.011507 | 0.011426 |
| 0.011507 | 0.011629 | 0.011548 | 0.011548 | 0.011548 | 0.011548 | 0.011751 |
| 0.011345 | 0.011548 | 0.011548 | 0.011507 | 0.011548 | 0.011670 | 0.011589 |
| 0.011548 | 0.011670 | 0.011508 | 0.011589 | 0.011507 | 0.011792 | 0.011507 |
| 0.011507 | 0.011548 | 0.011589 | 0.011792 | 0.011629 | 0.011548 | 0.011629 |
| 0.011588 | 0.011548 | 0.011507 | 0.011751 | 0.011589 | 0.011548 | 0.011589 |
| 0.011507 | 0.011548 | 0.011589 | 0.011629 | 0.011467 | 0.011548 | 0.011548 |
| 0.011467 | 0.011467 | 0.011426 | 0.011385 | 0.011507 | 0.011548 | 0.011629 |
| 0.011548 | 0.011467 | 0.011629 | 0.011385 | 0.011588 | 0.011467 | 0.011467 |
| 0.011670 | 0.011629 | 0.011629 | 0.011670 | 0.011507 | 0.011711 | 0.011548 |
| 0.011670 | 0.011589 | 0.011760 | 0.011440 | 0.011430 | 0.011531 | 0.011307 |
| 0.011307 | 0.011322 | 0.011448 | 0.011710 | 0.011670 | 0.011467 | 0.011507 |
| 0.011548 | 0.011548 | 0.011670 | 0.011548 | 0.011589 | 0.011548 | 0.011507 |
| 0.011467 | 0.011467 | 0.011833 | 0.011710 | 0.011589 | 0.011589 | 0.011507 |
| 0.011426 | 0.011385 | 0.011548 | 0.011426 | 0.011385 | 0.011345 | 0.011263 |
| 0.011385 | 0.011467 | 0.011467 | 0.011467 | 0.011507 | 0.011507 | 0.011508 |
| 0.011590 | 0.011548 | 0.011548 | 0.011396 | 0.011439 | 0.011441 | 0.011507 |
| 0.011507 | 0.011467 | 0.011519 | 0.011507 | 0.011431 | 0.011472 | 0.011509 |
| 0.011442 | 0.011516 | 0.011509 | 0.011467 | 0.011426 | 0.011548 | 0.011507 |
| 0.011589 | 0.011548 | 0.011548 | 0.011588 | 0.011548 | 0.011833 | 0.011711 |
| 0.011345 | 0.011629 | 0.011507 | 0.011589 | 0.011426 | 0.011101 | 0.011385 |
| 0.011507 | 0.011507 | 0.011467 | 0.011467 | 0.011467 | 0.011467 | 0.011589 |
| 0.011507 | 0.011629 | 0.011548 | 0.011467 | 0.011550 | 0.011711 | 0.011671 |
| 0.011670 | 0.011588 | 0.011426 | 0.011386 | 0.011548 | 0.011426 | 0.011385 |
| 0.011388 | 0.011670 | 0.011467 | 0.011670 | 0.011385 | 0.011507 | 0.011467 |
| 0.011629 | 0.011467 | 0.011548 | 0.011467 | 0.011507 | 0.011385 | 0.011507 |
| 0.011548 | 0.011507 | 0.011507 | 0.011467 | 0.011507 | 0.011548 | 0.011670 |
| 0.011589 | 0.011467 | 0.011589 | 0.011670 | 0.011589 | 0.011507 | 0.011507 |
| 0.011468 | 0.011701 | 0.011566 | 0.011432 | 0.011636 | 0.011349 | 0.011534 |
| 0.011592 | 0.011512 | 0.011629 | 0.011914 | 0.011555 | 0.011751 | 0.011711 |
| 0.011670 | 0.011751 | 0.011751 | 0.011558 | 0.011517 | 0.011589 | 0.011676 |
| 0.011792 | 0.011631 | 0.011711 | 0.011754 | 0.011588 | 0.011833 | 0.012003 |
| 0.011591 | 0.011760 | 0.011717 | 0.011757 | 0.011997 | 0.011426 | 0.011591 |
| 0.011548 | 0.011507 | 0.011385 | 0.011385 | 0.011467 | 0.011507 | 0.011548 |
| 0.011507 | 0.011589 | 0.011467 | 0.011467 | 0.011426 | 0.011507 | 0.011507 |
| 0.011507 | 0.011629 | 0.011507 | 0.011548 | 0.011385 | 0.011507 | 0.011548 |
| 0.011548 | 0.011467 | 0.011589 | 0.011548 | 0.011426 | 0.011426 | 0.011426 |
| 0.011670 | 0.011507 | 0.011670 | 0.011426 | 0.011507 | 0.011629 | 0.011426 |
| 0.011426 | 0.011426 | 0.011507 | 0.011629 | 0.011467 | 0.011385 | 0.011507 |
| 0.011467 | 0.011507 | 0.011507 | 0.011426 | 0.011385 | 0.011507 | 0.011507 |
| 0.011426 | 0.011548 | 0.011385 | 0.011385 | 0.011589 | 0.011386 | 0.011426 |
| 0.011426 | 0.011588 | 0.011426 | 0.011385 | 0.011426 | 0.011385 | 0.011589 |
| 0.011601 | 0.011467 | 0.011467 | 0.011589 | 0.011589 | 0.011467 | 0.011548 |
| 0.011467 | 0.011792 | 0.011385 | 0.011467 | 0.011385 | 0.011385 | 0.011385 |
| 0.011548 | 0.011548 | 0.011507 | 0.011629 | 0.011426 | 0.011507 | 0.011385 |
| 0.011467 | 0.011467 | 0.011467 | 0.011507 | 0.011507 | 0.011629 | 0.011711 |

|          |          |          |          |          |          |          |
|----------|----------|----------|----------|----------|----------|----------|
| 0.011670 | 0.011589 | 0.011548 | 0.011670 | 0.011629 | 0.011467 | 0.011426 |
| 0.011467 | 0.011467 | 0.011507 | 0.011345 | 0.011426 | 0.011589 | 0.011467 |
| 0.011385 | 0.011467 | 0.011588 | 0.011629 | 0.011548 | 0.011507 | 0.011507 |
| 0.011507 | 0.011467 | 0.011548 | 0.011426 | 0.011629 | 0.011711 | 0.011670 |
| 0.011467 | 0.011589 | 0.011507 | 0.018771 | 0.011388 | 0.011755 | 0.011548 |
| 0.011507 | 0.011548 | 0.011661 | 0.011493 | 0.011683 | 0.011548 | 0.011688 |
| 0.011511 | 0.011439 | 0.011390 | 0.011534 | 0.011414 | 0.011582 | 0.011524 |
| 0.011406 | 0.011182 | 0.011355 | 0.011135 | 0.011629 | 0.011670 | 0.011633 |
| 0.011515 | 0.011629 | 0.011588 | 0.011507 | 0.011548 | 0.011548 | 0.011548 |
| 0.011548 | 0.011467 | 0.011467 | 0.011589 | 0.011507 | 0.011467 | 0.011507 |
| 0.011507 | 0.011548 | 0.011385 | 0.011548 | 0.011629 | 0.011670 | 0.011548 |
| 0.011507 | 0.011467 | 0.011467 | 0.011467 | 0.011630 | 0.011671 | 0.011670 |
| 0.011385 | 0.011426 | 0.011426 | 0.011589 | 0.011426 | 0.011670 | 0.011670 |
| 0.011629 | 0.011629 | 0.011629 | 0.011670 | 0.011589 | 0.011672 | 0.011589 |
| 0.011548 | 0.011629 | 0.011711 | 0.011507 | 0.011507 | 0.011467 | 0.011589 |
| 0.011548 | 0.011548 | 0.011589 | 0.011548 | 0.011549 | 0.011670 | 0.011670 |
| 0.011594 | 0.011426 | 0.011507 | 0.011711 | 0.011507 | 0.011629 | 0.011751 |
| 0.011914 | 0.011555 | 0.011751 | 0.011711 | 0.011670 | 0.011751 | 0.011467 |
| 0.011672 | 0.011548 | 0.011507 | 0.011507 | 0.011548 | 0.011385 | 0.011548 |
| 0.011629 | 0.011670 | 0.011548 | 0.011507 | 0.011467 | 0.011467 | 0.011467 |
| 0.011630 | 0.011671 | 0.011588 | 0.011588 | 0.012159 | 0.011703 | 0.011572 |
| 0.011735 | 0.011641 | 0.011741 | 0.011607 | 0.011688 | 0.011726 | 0.011594 |
| 0.012095 | 0.011519 | 0.011638 | 0.011602 | 0.011890 | 0.011756 | 0.011756 |
| 0.012173 | 0.011659 | 0.011549 | 0.011548 | 0.011548 | 0.011263 | 0.011508 |
| 0.011426 | 0.011467 | 0.011589 | 0.011548 | 0.011549 | 0.011101 | 0.011385 |
| 0.011507 | 0.011467 | 0.011507 | 0.011507 | 0.011426 | 0.011467 | 0.011385 |
| 0.011467 | 0.011507 | 0.011467 | 0.011426 | 0.011548 | 0.011467 | 0.011507 |
| 0.011507 | 0.011426 | 0.011507 | 0.011507 | 0.011426 | 0.011629 | 0.011711 |
| 0.011548 | 0.011589 | 0.011589 | 0.011548 | 0.011426 | 0.011629 | 0.011548 |
| 0.011273 | 0.011426 | 0.011223 | 0.011225 | 0.011589 | 0.011507 | 0.011588 |
| 0.011629 | 0.011548 | 0.011467 | 0.011548 | 0.011670 | 0.011670 | 0.011548 |
| 0.011588 | 0.011670 | 0.011589 | 0.011507 | 0.011711 | 0.011711 | 0.011588 |
| 0.011467 | 0.011589 | 0.011629 | 0.011670 | 0.011589 | 0.011589 | 0.011548 |
| 0.011548 | 0.011385 | 0.011385 | 0.011670 | 0.011711 | 0.011629 | 0.011507 |
| 0.011629 | 0.011670 | 0.011548 | 0.011629 | 0.011507 | 0.011467 | 0.011467 |
| 0.011588 | 0.011507 | 0.011385 | 0.011588 | 0.011507 | 0.011629 | 0.011670 |
| 0.011507 | 0.011510 | 0.011629 | 0.000000 | 0.011289 | 0.011548 | 0.011115 |
| 0.011491 | 0.011636 | 0.011385 | 0.011564 | 0.011407 | 0.011417 | 0.011379 |
| 0.011164 | 0.011324 | 0.011394 | 0.011258 | 0.011330 | 0.011529 | 0.011582 |
| 0.011641 | 0.011522 | 0.011548 | 0.011512 | 0.011591 | 0.011101 | 0.011182 |
| 0.011467 | 0.011589 | 0.011672 | 0.011348 | 0.011714 | 0.011830 | 0.011507 |
| 0.011345 | 0.011629 | 0.011507 | 0.011589 | 0.011426 | 0.011101 | 0.011385 |
| 0.011507 | 0.011507 | 0.011467 | 0.011467 | 0.011467 | 0.011467 | 0.011589 |
| 0.011510 | 0.011520 | 0.011548 | 0.011472 | 0.011718 | 0.011630 | 0.011634 |
| 0.011633 | 0.011467 | 0.011364 | 0.011355 | 0.011548 | 0.011711 | 0.011671 |
| 0.011467 | 0.011589 | 0.011873 | 0.011711 | 0.011711 | 0.011711 | 0.011507 |
| 0.011588 | 0.011711 | 0.011629 | 0.011548 | 0.011915 | 0.011629 | 0.011792 |
| 0.011914 | 0.011536 | 0.011474 | 0.011606 | 0.011507 | 0.011711 | 0.011670 |
| 0.011549 | 0.011670 | 0.011711 | 0.011711 | 0.011677 | 0.011873 | 0.011523 |
| 0.011388 | 0.011395 | 0.011512 | 0.011472 | 0.011474 | 0.011426 | 0.011430 |
| 0.011557 | 0.011379 | 0.011525 | 0.011601 | 0.011548 | 0.011595 | 0.011507 |
| 0.011426 | 0.011385 | 0.011548 | 0.011426 | 0.011385 | 0.011345 | 0.011263 |
| 0.011385 | 0.011467 | 0.011467 | 0.011467 | 0.011507 | 0.011507 | 0.011508 |
| 0.011590 | 0.011548 | 0.011548 | 0.011591 | 0.011101 | 0.011182 | 0.011467 |
| 0.011589 | 0.011672 | 0.011348 | 0.011714 | 0.011830 | 0.011507 | 0.011751 |
| 0.011670 | 0.011670 | 0.011428 | 0.011689 | 0.011648 | 0.011514 | 0.011527 |
| 0.011558 | 0.011940 | 0.011678 | 0.011593 | 0.011467 | 0.011670 | 0.011507 |
| 0.011629 | 0.011548 | 0.011467 | 0.011550 | 0.011711 | 0.011671 | 0.011588 |
| 0.011426 | 0.011386 | 0.011548 | 0.011426 | 0.011385 | 0.011388 | 0.011670 |
| 0.011548 | 0.011467 | 0.011467 | 0.011589 | 0.011507 | 0.011467 | 0.011345 |

|          |          |          |          |          |          |          |
|----------|----------|----------|----------|----------|----------|----------|
| 0.011507 | 0.011589 | 0.011589 | 0.011507 | 0.011589 | 0.011751 | 0.011345 |
| 0.011507 | 0.011629 | 0.011507 | 0.011507 | 0.011467 | 0.011589 | 0.011459 |
| 0.011688 | 0.011321 | 0.011319 | 0.011103 | 0.011187 | 0.011101 | 0.011276 |
| 0.011277 | 0.011385 | 0.011507 | 0.011636 | 0.011467 | 0.011629 | 0.011792 |
| 0.011671 | 0.011675 | 0.011670 | 0.011839 | 0.011507 | 0.012566 | 0.011670 |
| 0.012322 | 0.012159 | 0.012366 | 0.012446 | 0.011467 | 0.011467 | 0.011629 |
| 0.012241 | 0.011793 | 0.011548 | 0.011467 | 0.011507 | 0.011507 | 0.011511 |
| 0.011385 | 0.011386 | 0.011426 | 0.011426 | 0.011711 | 0.011752 | 0.011792 |
| 0.011589 | 0.011629 | 0.011833 | 0.011589 | 0.012159 | 0.012208 | 0.012200 |
| 0.012282 | 0.012241 | 0.012200 | 0.012241 | 0.012241 | 0.011548 | 0.011751 |
| 0.011833 | 0.012403 | 0.011919 | 0.011833 | 0.011630 | 0.011427 | 0.011345 |
| 0.011304 | 0.011304 | 0.011752 | 0.011752 | 0.011842 | 0.011548 | 0.011304 |
| S606     | 0.011399 | 0.011399 | 0.011568 | 0.011455 | 0.011455 | 0.011512 |
| 0.011402 | 0.011288 | 0.011512 | 0.011173 | 0.011286 | 0.011229 | 0.011173 |
| 0.011117 | 0.011342 | 0.000000 | 0.011229 | 0.011173 | 0.011229 | 0.011229 |
| 0.011229 | 0.011229 | 0.011117 | 0.011173 | 0.011230 | 0.011117 | 0.011402 |
| 0.011342 | 0.011229 | 0.011117 | 0.011117 | 0.011173 | 0.011229 | 0.011117 |
| 0.011229 | 0.011399 | 0.011342 | 0.011342 | 0.011342 | 0.011229 | 0.011568 |
| 0.000000 | 0.011286 | 0.011342 | 0.011286 | 0.011286 | 0.011399 | 0.011286 |
| 0.011286 | 0.011455 | 0.011229 | 0.011455 | 0.011286 | 0.011455 | 0.011286 |
| 0.011229 | 0.011286 | 0.011399 | 0.011455 | 0.011399 | 0.011117 | 0.011286 |
| 0.011286 | 0.011286 | 0.011229 | 0.011511 | 0.011455 | 0.011342 | 0.011342 |
| 0.011286 | 0.011229 | 0.011286 | 0.011455 | 0.011229 | 0.011342 | 0.011342 |
| 0.011229 | 0.011229 | 0.011173 | 0.011117 | 0.011286 | 0.011229 | 0.011399 |
| 0.011342 | 0.011173 | 0.011229 | 0.011117 | 0.011399 | 0.011173 | 0.011173 |
| 0.011455 | 0.011342 | 0.011455 | 0.011399 | 0.011286 | 0.011455 | 0.011342 |
| 0.011289 | 0.011518 | 0.011399 | 0.011177 | 0.011173 | 0.011180 | 0.011118 |
| 0.011117 | 0.011188 | 0.011173 | 0.011399 | 0.011342 | 0.011173 | 0.011286 |
| 0.011342 | 0.011229 | 0.011399 | 0.011286 | 0.011286 | 0.011286 | 0.011229 |
| 0.011173 | 0.011229 | 0.011399 | 0.011399 | 0.011399 | 0.011286 | 0.011229 |
| 0.011173 | 0.011117 | 0.011229 | 0.011173 | 0.011117 | 0.011173 | 0.000000 |
| 0.011229 | 0.011342 | 0.011173 | 0.011173 | 0.011173 | 0.011173 | 0.011173 |
| 0.011173 | 0.011286 | 0.011286 | 0.011117 | 0.011173 | 0.011174 | 0.011173 |
| 0.011229 | 0.011229 | 0.011229 | 0.011229 | 0.011173 | 0.011230 | 0.011286 |
| 0.011231 | 0.011287 | 0.011229 | 0.011229 | 0.011117 | 0.011342 | 0.000000 |
| 0.011173 | 0.011286 | 0.011286 | 0.011286 | 0.011286 | 0.011737 | 0.011399 |
| 0.011455 | 0.011286 | 0.011173 | 0.011286 | 0.011173 | 0.011229 | 0.011117 |
| 0.011173 | 0.011229 | 0.011173 | 0.011229 | 0.011229 | 0.011229 | 0.011342 |
| 0.011173 | 0.011342 | 0.011286 | 0.011117 | 0.011230 | 0.011512 | 0.011512 |
| 0.011342 | 0.011286 | 0.011117 | 0.011117 | 0.011342 | 0.011117 | 0.011117 |
| 0.011287 | 0.011342 | 0.011173 | 0.011342 | 0.011117 | 0.011286 | 0.011173 |
| 0.011342 | 0.011229 | 0.011229 | 0.011173 | 0.011173 | 0.011117 | 0.011229 |
| 0.011286 | 0.011286 | 0.011286 | 0.011229 | 0.011229 | 0.011286 | 0.011399 |
| 0.011399 | 0.011342 | 0.011455 | 0.011399 | 0.011399 | 0.011173 | 0.011229 |
| 0.011174 | 0.011327 | 0.011358 | 0.011176 | 0.011515 | 0.011118 | 0.011322 |
| 0.011402 | 0.011346 | 0.011286 | 0.011455 | 0.011287 | 0.011455 | 0.011455 |
| 0.011455 | 0.011455 | 0.011352 | 0.011127 | 0.011190 | 0.011342 | 0.011342 |
| 0.011286 | 0.011343 | 0.011399 | 0.011401 | 0.011286 | 0.011342 | 0.011916 |
| 0.011286 | 0.011404 | 0.011512 | 0.011399 | 0.011682 | 0.011173 | 0.011400 |
| 0.011229 | 0.011229 | 0.011117 | 0.011117 | 0.011173 | 0.011286 | 0.011286 |
| 0.011229 | 0.011286 | 0.011173 | 0.011229 | 0.011229 | 0.011286 | 0.011229 |
| 0.011229 | 0.011568 | 0.011399 | 0.011399 | 0.011117 | 0.011229 | 0.011342 |
| 0.011286 | 0.011229 | 0.011229 | 0.011230 | 0.011173 | 0.011173 | 0.011173 |
| 0.011624 | 0.011229 | 0.011286 | 0.011173 | 0.011286 | 0.011342 | 0.011173 |
| 0.011173 | 0.011173 | 0.011229 | 0.011399 | 0.011229 | 0.011230 | 0.011286 |
| 0.011342 | 0.011229 | 0.011286 | 0.011117 | 0.011117 | 0.011173 | 0.011286 |
| 0.011117 | 0.011286 | 0.011117 | 0.011117 | 0.011229 | 0.011173 | 0.011230 |
| 0.011173 | 0.011286 | 0.011173 | 0.011117 | 0.011286 | 0.011117 | 0.011399 |
| 0.011235 | 0.011230 | 0.011342 | 0.011342 | 0.011286 | 0.011229 | 0.011342 |
| 0.011229 | 0.011455 | 0.011117 | 0.011229 | 0.000000 | 0.000000 | 0.011117 |

|          |          |          |          |          |          |          |
|----------|----------|----------|----------|----------|----------|----------|
| 0.011229 | 0.011399 | 0.011229 | 0.011342 | 0.011117 | 0.011342 | 0.000000 |
| 0.011229 | 0.011229 | 0.011229 | 0.011229 | 0.011286 | 0.011399 | 0.011342 |
| 0.011399 | 0.011173 | 0.011342 | 0.011399 | 0.011342 | 0.011229 | 0.011173 |
| 0.011173 | 0.011229 | 0.011229 | 0.000000 | 0.011117 | 0.011399 | 0.011173 |
| 0.000000 | 0.011173 | 0.011342 | 0.011229 | 0.011173 | 0.011173 | 0.011229 |
| 0.011229 | 0.011173 | 0.011286 | 0.011173 | 0.011342 | 0.011455 | 0.011512 |
| 0.011286 | 0.011399 | 0.011173 | 0.011231 | 0.011205 | 0.011369 | 0.011342 |
| 0.011399 | 0.011399 | 0.011265 | 0.011284 | 0.011368 | 0.011399 | 0.011398 |
| 0.011430 | 0.011150 | 0.011118 | 0.011188 | 0.011119 | 0.011133 | 0.011123 |
| 0.011242 | 0.011173 | 0.011230 | 0.000000 | 0.011342 | 0.011399 | 0.011287 |
| 0.011232 | 0.011229 | 0.011342 | 0.011229 | 0.011286 | 0.011286 | 0.011230 |
| 0.011286 | 0.011229 | 0.011117 | 0.011286 | 0.011286 | 0.011229 | 0.011173 |
| 0.011173 | 0.011342 | 0.011117 | 0.011286 | 0.011286 | 0.011286 | 0.011173 |
| 0.011229 | 0.011230 | 0.011286 | 0.011286 | 0.011342 | 0.011399 | 0.011455 |
| 0.011117 | 0.011173 | 0.011173 | 0.011286 | 0.011117 | 0.011399 | 0.011399 |
| 0.011229 | 0.011286 | 0.011455 | 0.011286 | 0.011286 | 0.011287 | 0.011173 |
| 0.011229 | 0.011342 | 0.011455 | 0.011286 | 0.011286 | 0.011173 | 0.011342 |
| 0.011286 | 0.011286 | 0.011342 | 0.011286 | 0.011230 | 0.011399 | 0.011342 |
| 0.011345 | 0.011173 | 0.011229 | 0.011342 | 0.011286 | 0.011399 | 0.011399 |
| 0.011455 | 0.011287 | 0.011455 | 0.011455 | 0.011455 | 0.011455 | 0.011173 |
| 0.011400 | 0.011342 | 0.011173 | 0.011173 | 0.011342 | 0.011117 | 0.011286 |
| 0.011286 | 0.011286 | 0.011173 | 0.011229 | 0.011230 | 0.011286 | 0.011286 |
| 0.011342 | 0.011399 | 0.011342 | 0.011342 | 0.011738 | 0.011347 | 0.011177 |
| 0.011404 | 0.011346 | 0.011409 | 0.011410 | 0.011405 | 0.011461 | 0.011342 |
| 0.011810 | 0.011175 | 0.011346 | 0.011232 | 0.011404 | 0.011286 | 0.011459 |
| 0.011808 | 0.011240 | 0.011173 | 0.011229 | 0.011229 | 0.000000 | 0.011173 |
| 0.011173 | 0.011117 | 0.011229 | 0.011229 | 0.011173 | 0.011229 | 0.011286 |
| 0.011286 | 0.011173 | 0.011229 | 0.011229 | 0.011117 | 0.011229 | 0.011117 |
| 0.011173 | 0.011229 | 0.011173 | 0.011173 | 0.011286 | 0.011173 | 0.011286 |
| 0.011286 | 0.011117 | 0.011286 | 0.011286 | 0.011173 | 0.011399 | 0.011342 |
| 0.011229 | 0.011286 | 0.011286 | 0.011286 | 0.011117 | 0.011399 | 0.011286 |
| 0.000000 | 0.011173 | 0.011342 | 0.011347 | 0.011342 | 0.011342 | 0.011342 |
| 0.011399 | 0.011229 | 0.011173 | 0.011229 | 0.011512 | 0.011399 | 0.011286 |
| 0.011286 | 0.011399 | 0.011512 | 0.011342 | 0.011512 | 0.011512 | 0.011399 |
| 0.011229 | 0.011229 | 0.011399 | 0.011342 | 0.011286 | 0.011342 | 0.011342 |
| 0.011173 | 0.000000 | 0.000000 | 0.011399 | 0.011455 | 0.011342 | 0.011229 |
| 0.011399 | 0.011455 | 0.011173 | 0.011399 | 0.011173 | 0.011229 | 0.011342 |
| 0.011399 | 0.011286 | 0.000000 | 0.011342 | 0.011229 | 0.011342 | 0.011455 |
| 0.011286 | 0.011345 | 0.011399 | 0.011289 | 0.000000 | 0.011173 | 0.011128 |
| 0.011147 | 0.011512 | 0.011117 | 0.011247 | 0.000000 | 0.011252 | 0.011191 |
| 0.011180 | 0.011137 | 0.011259 | 0.011132 | 0.011126 | 0.011275 | 0.011296 |
| 0.011404 | 0.011235 | 0.011230 | 0.011173 | 0.011344 | 0.011229 | 0.011342 |
| 0.011286 | 0.011286 | 0.011344 | 0.011174 | 0.011458 | 0.011541 | 0.011173 |
| 0.011455 | 0.011286 | 0.011173 | 0.011286 | 0.011173 | 0.011229 | 0.011117 |
| 0.011173 | 0.011229 | 0.011173 | 0.011229 | 0.011229 | 0.011229 | 0.011342 |
| 0.011173 | 0.011232 | 0.011342 | 0.011173 | 0.011455 | 0.011286 | 0.011400 |
| 0.011400 | 0.011117 | 0.011120 | 0.011118 | 0.011342 | 0.011512 | 0.011343 |
| 0.011229 | 0.011286 | 0.011624 | 0.011455 | 0.011342 | 0.011455 | 0.011229 |
| 0.011342 | 0.011455 | 0.011229 | 0.011229 | 0.011737 | 0.011229 | 0.011342 |
| 0.011681 | 0.011356 | 0.011176 | 0.011293 | 0.011229 | 0.011230 | 0.011399 |
| 0.011230 | 0.011455 | 0.011286 | 0.011286 | 0.011316 | 0.011624 | 0.011232 |
| 0.011117 | 0.011118 | 0.011232 | 0.011232 | 0.011175 | 0.011119 | 0.011289 |
| 0.011346 | 0.011194 | 0.011132 | 0.011302 | 0.011229 | 0.011173 | 0.011229 |
| 0.011173 | 0.011117 | 0.011229 | 0.011173 | 0.011117 | 0.011173 | 0.000000 |
| 0.011229 | 0.011342 | 0.011173 | 0.011173 | 0.011173 | 0.011173 | 0.011173 |
| 0.011173 | 0.011286 | 0.011286 | 0.011344 | 0.011229 | 0.011342 | 0.011286 |
| 0.011286 | 0.011344 | 0.011174 | 0.011458 | 0.011541 | 0.011173 | 0.011342 |
| 0.011399 | 0.011399 | 0.011174 | 0.011406 | 0.011409 | 0.011290 | 0.011299 |
| 0.011291 | 0.011586 | 0.011404 | 0.011230 | 0.011173 | 0.011342 | 0.011173 |
| 0.011342 | 0.011286 | 0.011117 | 0.011230 | 0.011512 | 0.011512 | 0.011286 |



|          |          |          |          |          |          |          |
|----------|----------|----------|----------|----------|----------|----------|
| 0.011117 | 0.011117 | 0.011342 | 0.011117 | 0.011117 | 0.011287 | 0.011342 |
| 0.011286 | 0.011229 | 0.011117 | 0.011286 | 0.011286 | 0.011229 | 0.011230 |
| 0.011229 | 0.011342 | 0.011286 | 0.011229 | 0.011286 | 0.011568 | 0.000000 |
| 0.011286 | 0.011399 | 0.011229 | 0.011229 | 0.011173 | 0.011455 | 0.011118 |
| 0.011561 | 0.011173 | 0.011122 | 0.011229 | 0.011286 | 0.011229 | 0.011118 |
| 0.000000 | 0.011286 | 0.011399 | 0.011568 | 0.011342 | 0.011568 | 0.011681 |
| 0.011569 | 0.011630 | 0.011512 | 0.011794 | 0.011342 | 0.012472 | 0.011399 |
| 0.012077 | 0.011963 | 0.012194 | 0.012135 | 0.011286 | 0.011230 | 0.011625 |
| 0.011964 | 0.011795 | 0.011399 | 0.011399 | 0.011455 | 0.011455 | 0.011287 |
| 0.011286 | 0.011286 | 0.011342 | 0.011286 | 0.011568 | 0.011512 | 0.011681 |
| 0.011455 | 0.011512 | 0.011624 | 0.011399 | 0.011851 | 0.011800 | 0.011851 |
| 0.011964 | 0.011851 | 0.011908 | 0.011795 | 0.011851 | 0.011229 | 0.011455 |
| 0.011568 | 0.011907 | 0.011572 | 0.011738 | 0.011512 | 0.011230 | 0.011229 |
| 0.011173 | 0.011173 | 0.011625 | 0.011566 | 0.011748 | 0.011455 | 0.011173 |
| S607     | 0.011774 | 0.011774 | 0.011842 | 0.011808 | 0.011808 | 0.011842 |
| 0.011714 | 0.011610 | 0.011808 | 0.011366 | 0.011434 | 0.011400 | 0.011366 |
| 0.011332 | 0.011570 | 0.011298 | 0.011400 | 0.011468 | 0.011434 | 0.011400 |
| 0.011366 | 0.011400 | 0.011434 | 0.011366 | 0.011400 | 0.011400 | 0.011679 |
| 0.011570 | 0.011400 | 0.011298 | 0.011468 | 0.011468 | 0.011434 | 0.011468 |
| 0.011434 | 0.011536 | 0.011434 | 0.011434 | 0.011468 | 0.011434 | 0.011604 |
| 0.011298 | 0.011434 | 0.011468 | 0.011400 | 0.011434 | 0.011536 | 0.011468 |
| 0.011434 | 0.011604 | 0.011502 | 0.011706 | 0.011434 | 0.011706 | 0.011434 |
| 0.011400 | 0.011434 | 0.011570 | 0.011706 | 0.011740 | 0.011434 | 0.011536 |
| 0.011468 | 0.011502 | 0.011434 | 0.011638 | 0.011842 | 0.011434 | 0.011502 |
| 0.011400 | 0.011502 | 0.011468 | 0.011536 | 0.011468 | 0.011468 | 0.011468 |
| 0.011366 | 0.011400 | 0.011332 | 0.011366 | 0.011434 | 0.011469 | 0.011536 |
| 0.011468 | 0.011434 | 0.011502 | 0.011400 | 0.011468 | 0.011366 | 0.011434 |
| 0.011604 | 0.011536 | 0.011774 | 0.011570 | 0.011434 | 0.011672 | 0.011434 |
| 0.011579 | 0.011770 | 0.011626 | 0.011295 | 0.011284 | 0.011465 | 0.011415 |
| 0.012085 | 0.011416 | 0.011307 | 0.011672 | 0.011672 | 0.011400 | 0.011502 |
| 0.011502 | 0.011468 | 0.011536 | 0.011434 | 0.011536 | 0.011468 | 0.011468 |
| 0.011434 | 0.011468 | 0.011740 | 0.011604 | 0.011502 | 0.011468 | 0.011400 |
| 0.011366 | 0.011298 | 0.011434 | 0.011400 | 0.011536 | 0.011502 | 0.011434 |
| 0.011536 | 0.011604 | 0.011400 | 0.011400 | 0.011434 | 0.011434 | 0.011436 |
| 0.011505 | 0.011434 | 0.011434 | 0.011312 | 0.011387 | 0.011344 | 0.011434 |
| 0.011437 | 0.011371 | 0.011392 | 0.011405 | 0.011335 | 0.011372 | 0.011402 |
| 0.011600 | 0.011443 | 0.011476 | 0.011366 | 0.011372 | 0.011502 | 0.011400 |
| 0.011468 | 0.011469 | 0.011468 | 0.011570 | 0.011502 | 0.011876 | 0.011570 |
| 0.011638 | 0.011502 | 0.011434 | 0.011468 | 0.011332 | 0.011502 | 0.011366 |
| 0.011434 | 0.011434 | 0.011400 | 0.011366 | 0.011400 | 0.011366 | 0.011468 |
| 0.011400 | 0.011536 | 0.011468 | 0.011366 | 0.011469 | 0.011570 | 0.011539 |
| 0.011570 | 0.011468 | 0.011366 | 0.011299 | 0.011434 | 0.011366 | 0.011298 |
| 0.011404 | 0.011570 | 0.011366 | 0.011570 | 0.011332 | 0.011400 | 0.011400 |
| 0.011502 | 0.011400 | 0.011434 | 0.011400 | 0.011434 | 0.011298 | 0.011434 |
| 0.011434 | 0.011400 | 0.011468 | 0.011400 | 0.011434 | 0.011468 | 0.011672 |
| 0.011740 | 0.011672 | 0.011740 | 0.011572 | 0.011740 | 0.011434 | 0.011400 |
| 0.011368 | 0.011674 | 0.011337 | 0.011338 | 0.011747 | 0.011302 | 0.011457 |
| 0.011748 | 0.011645 | 0.011604 | 0.011808 | 0.011510 | 0.011672 | 0.011638 |
| 0.011570 | 0.011740 | 0.011600 | 0.011436 | 0.011484 | 0.011468 | 0.011540 |
| 0.011638 | 0.011538 | 0.011677 | 0.011746 | 0.011672 | 0.011740 | 0.011849 |
| 0.011574 | 0.011747 | 0.011677 | 0.011608 | 0.011877 | 0.011332 | 0.011538 |
| 0.011502 | 0.011434 | 0.011332 | 0.011298 | 0.011400 | 0.011400 | 0.011468 |
| 0.011400 | 0.011468 | 0.011366 | 0.011400 | 0.011400 | 0.011400 | 0.011468 |
| 0.011400 | 0.011706 | 0.011672 | 0.011706 | 0.011298 | 0.011400 | 0.011434 |
| 0.011434 | 0.011400 | 0.011468 | 0.011434 | 0.011366 | 0.011366 | 0.011366 |
| 0.011842 | 0.011434 | 0.011536 | 0.011332 | 0.011434 | 0.011604 | 0.011366 |
| 0.011332 | 0.011434 | 0.011400 | 0.011570 | 0.011366 | 0.011502 | 0.011638 |
| 0.011570 | 0.011400 | 0.011400 | 0.011332 | 0.011332 | 0.011502 | 0.011434 |
| 0.011332 | 0.011434 | 0.011298 | 0.011332 | 0.011468 | 0.011536 | 0.011366 |
| 0.011332 | 0.011468 | 0.011400 | 0.011298 | 0.011570 | 0.011298 | 0.011468 |

|          |          |          |          |          |          |          |
|----------|----------|----------|----------|----------|----------|----------|
| 0.011545 | 0.011366 | 0.011604 | 0.011502 | 0.011468 | 0.011400 | 0.011502 |
| 0.011366 | 0.011706 | 0.011298 | 0.011502 | 0.011298 | 0.011298 | 0.011298 |
| 0.011536 | 0.011673 | 0.011434 | 0.011502 | 0.011332 | 0.011672 | 0.011298 |
| 0.011366 | 0.011366 | 0.011400 | 0.011468 | 0.011400 | 0.011502 | 0.011570 |
| 0.011570 | 0.011536 | 0.011434 | 0.011536 | 0.011502 | 0.011366 | 0.011332 |
| 0.011366 | 0.011366 | 0.011434 | 0.011298 | 0.011332 | 0.011502 | 0.011366 |
| 0.011332 | 0.011400 | 0.011536 | 0.011502 | 0.011468 | 0.011400 | 0.011400 |
| 0.011468 | 0.011400 | 0.011502 | 0.011366 | 0.011502 | 0.011604 | 0.011774 |
| 0.011400 | 0.011740 | 0.011405 | 0.017899 | 0.011322 | 0.011488 | 0.011653 |
| 0.011649 | 0.011658 | 0.011427 | 0.011408 | 0.011719 | 0.011717 | 0.011303 |
| 0.011440 | 0.011488 | 0.011333 | 0.011353 | 0.011333 | 0.011258 | 0.011361 |
| 0.011436 | 0.011470 | 0.011431 | 0.011325 | 0.011536 | 0.011570 | 0.011574 |
| 0.011443 | 0.011536 | 0.011536 | 0.011434 | 0.011468 | 0.011468 | 0.011434 |
| 0.011468 | 0.011400 | 0.011434 | 0.011468 | 0.011400 | 0.011366 | 0.011400 |
| 0.011400 | 0.011468 | 0.011366 | 0.011468 | 0.011502 | 0.011536 | 0.011434 |
| 0.011400 | 0.011366 | 0.011706 | 0.011706 | 0.011502 | 0.011537 | 0.011570 |
| 0.011332 | 0.011332 | 0.011366 | 0.011468 | 0.011332 | 0.011570 | 0.011570 |
| 0.011604 | 0.011604 | 0.011536 | 0.011638 | 0.011740 | 0.011640 | 0.011468 |
| 0.011468 | 0.011536 | 0.011570 | 0.011400 | 0.011468 | 0.011400 | 0.011468 |
| 0.011536 | 0.011536 | 0.011570 | 0.011536 | 0.011435 | 0.011638 | 0.011604 |
| 0.011472 | 0.011332 | 0.011468 | 0.011570 | 0.011468 | 0.011536 | 0.011638 |
| 0.011808 | 0.011510 | 0.011672 | 0.011638 | 0.011570 | 0.011740 | 0.011366 |
| 0.011538 | 0.011434 | 0.011400 | 0.011400 | 0.011468 | 0.011366 | 0.011468 |
| 0.011502 | 0.011536 | 0.011434 | 0.011400 | 0.011366 | 0.011706 | 0.011706 |
| 0.011502 | 0.011537 | 0.011604 | 0.011536 | 0.012115 | 0.011603 | 0.011523 |
| 0.011594 | 0.011552 | 0.011665 | 0.011551 | 0.011662 | 0.011584 | 0.011549 |
| 0.012069 | 0.011446 | 0.011581 | 0.011515 | 0.011792 | 0.011646 | 0.011749 |
| 0.012092 | 0.011556 | 0.011471 | 0.011468 | 0.011468 | 0.011434 | 0.011437 |
| 0.011332 | 0.011366 | 0.011502 | 0.011468 | 0.011471 | 0.011536 | 0.011503 |
| 0.011434 | 0.011366 | 0.011400 | 0.011434 | 0.011332 | 0.011366 | 0.011298 |
| 0.011366 | 0.011400 | 0.011366 | 0.011332 | 0.011434 | 0.011366 | 0.011400 |
| 0.011400 | 0.011332 | 0.011400 | 0.011434 | 0.011332 | 0.011536 | 0.011570 |
| 0.011468 | 0.011468 | 0.011468 | 0.011468 | 0.011400 | 0.011740 | 0.011434 |
| 0.011413 | 0.011400 | 0.011570 | 0.011575 | 0.011502 | 0.011502 | 0.011502 |
| 0.011502 | 0.011434 | 0.011400 | 0.011434 | 0.011536 | 0.011536 | 0.011468 |
| 0.011468 | 0.011604 | 0.011706 | 0.011502 | 0.011672 | 0.011672 | 0.011570 |
| 0.011400 | 0.011468 | 0.011502 | 0.011842 | 0.011468 | 0.011502 | 0.011468 |
| 0.011502 | 0.011366 | 0.011366 | 0.011672 | 0.011672 | 0.011638 | 0.011434 |
| 0.011536 | 0.011604 | 0.011468 | 0.011536 | 0.011502 | 0.011366 | 0.011638 |
| 0.011468 | 0.011434 | 0.011366 | 0.011604 | 0.011434 | 0.011536 | 0.011774 |
| 0.011400 | 0.011782 | 0.011774 | 0.011548 | 0.011173 | 0.000000 | 0.011164 |
| 0.011280 | 0.011761 | 0.011376 | 0.011462 | 0.011207 | 0.011366 | 0.011326 |
| 0.011468 | 0.011258 | 0.011394 | 0.011258 | 0.011276 | 0.011328 | 0.011506 |
| 0.011512 | 0.011375 | 0.011412 | 0.011412 | 0.011470 | 0.011536 | 0.011604 |
| 0.011570 | 0.011468 | 0.011574 | 0.011575 | 0.011712 | 0.011704 | 0.011434 |
| 0.011638 | 0.011502 | 0.011434 | 0.011468 | 0.011332 | 0.011502 | 0.011366 |
| 0.011434 | 0.011434 | 0.011400 | 0.011366 | 0.011400 | 0.011366 | 0.011468 |
| 0.011446 | 0.011448 | 0.011437 | 0.011476 | 0.011613 | 0.011576 | 0.011577 |
| 0.011577 | 0.011502 | 0.011282 | 0.011312 | 0.011437 | 0.011608 | 0.011575 |
| 0.011400 | 0.011471 | 0.011707 | 0.011674 | 0.011604 | 0.011638 | 0.011570 |
| 0.011502 | 0.011570 | 0.011570 | 0.011468 | 0.011979 | 0.011638 | 0.011706 |
| 0.011740 | 0.011746 | 0.011440 | 0.011516 | 0.011400 | 0.011604 | 0.011570 |
| 0.011605 | 0.011570 | 0.011638 | 0.011638 | 0.011776 | 0.011774 | 0.011376 |
| 0.011300 | 0.011306 | 0.011405 | 0.011370 | 0.011406 | 0.011287 | 0.011576 |
| 0.011442 | 0.011505 | 0.011302 | 0.011477 | 0.011434 | 0.011510 | 0.011400 |
| 0.011366 | 0.011298 | 0.011434 | 0.011400 | 0.011536 | 0.011502 | 0.011434 |
| 0.011536 | 0.011604 | 0.011400 | 0.011400 | 0.011434 | 0.011434 | 0.011436 |
| 0.011505 | 0.011434 | 0.011434 | 0.011470 | 0.011536 | 0.011604 | 0.011570 |
| 0.011468 | 0.011574 | 0.011575 | 0.011712 | 0.011704 | 0.011434 | 0.011638 |
| 0.011570 | 0.011570 | 0.011402 | 0.011588 | 0.011482 | 0.011543 | 0.011379 |

|          |          |          |          |          |          |          |
|----------|----------|----------|----------|----------|----------|----------|
| 0.011583 | 0.011800 | 0.011532 | 0.011473 | 0.011366 | 0.011570 | 0.011400 |
| 0.011536 | 0.011468 | 0.011366 | 0.011469 | 0.011570 | 0.011539 | 0.011468 |
| 0.011366 | 0.011299 | 0.011434 | 0.011366 | 0.011298 | 0.011404 | 0.011570 |
| 0.011468 | 0.011400 | 0.011434 | 0.011468 | 0.011400 | 0.011366 | 0.011502 |
| 0.011434 | 0.011468 | 0.011468 | 0.011400 | 0.011468 | 0.011706 | 0.011298 |
| 0.011400 | 0.011740 | 0.011400 | 0.011434 | 0.011400 | 0.011706 | 0.011317 |
| 0.011735 | 0.011358 | 0.011211 | 0.011503 | 0.011549 | 0.011527 | 0.011227 |
| 0.011165 | 0.011502 | 0.011604 | 0.011712 | 0.011571 | 0.011676 | 0.011843 |
| 0.011741 | 0.011779 | 0.011740 | 0.011958 | 0.011706 | 0.012558 | 0.011741 |
| 0.012456 | 0.012253 | 0.012391 | 0.012664 | 0.011706 | 0.011400 | 0.011706 |
| 0.012150 | 0.012084 | 0.011672 | 0.011570 | 0.011638 | 0.011638 | 0.011608 |
| 0.011502 | 0.011472 | 0.011570 | 0.011536 | 0.011843 | 0.011910 | 0.011876 |
| 0.011808 | 0.011911 | 0.012014 | 0.011778 | 0.012150 | 0.012156 | 0.012218 |
| 0.012218 | 0.012218 | 0.012189 | 0.012184 | 0.012186 | 0.011502 | 0.011706 |
| 0.011808 | 0.012285 | 0.011815 | 0.012013 | 0.012525 | 0.011575 | 0.011468 |
| 0.011434 | 0.011434 | 0.011876 | 0.011977 | 0.012046 | 0.011774 | 0.011435 |
| S608     | 0.011370 | 0.011370 | 0.011473 | 0.011421 | 0.011421 | 0.011473 |
| 0.011424 | 0.011320 | 0.011421 | 0.011267 | 0.011318 | 0.011267 | 0.011215 |
| 0.011163 | 0.011421 | 0.011163 | 0.011267 | 0.011267 | 0.011318 | 0.011267 |
| 0.011215 | 0.011318 | 0.011163 | 0.011215 | 0.011215 | 0.011163 | 0.011424 |
| 0.011267 | 0.011267 | 0.011163 | 0.011215 | 0.011267 | 0.011267 | 0.011163 |
| 0.011318 | 0.011370 | 0.011267 | 0.011370 | 0.011267 | 0.011267 | 0.011525 |
| 0.011112 | 0.011318 | 0.011318 | 0.011215 | 0.011370 | 0.011421 | 0.011370 |
| 0.011370 | 0.011473 | 0.011318 | 0.011473 | 0.011267 | 0.011421 | 0.011267 |
| 0.011267 | 0.011370 | 0.011267 | 0.011421 | 0.011473 | 0.011163 | 0.011422 |
| 0.011370 | 0.011267 | 0.011215 | 0.011525 | 0.011473 | 0.011267 | 0.011421 |
| 0.011318 | 0.011318 | 0.011370 | 0.011473 | 0.011215 | 0.011267 | 0.011267 |
| 0.011267 | 0.011267 | 0.011215 | 0.011215 | 0.011215 | 0.011267 | 0.011421 |
| 0.011318 | 0.011318 | 0.011370 | 0.011163 | 0.011370 | 0.011215 | 0.011215 |
| 0.011525 | 0.011370 | 0.011473 | 0.011422 | 0.011370 | 0.011473 | 0.011318 |
| 0.011380 | 0.011491 | 0.011473 | 0.011222 | 0.011163 | 0.011223 | 0.011168 |
| 0.011164 | 0.011236 | 0.011220 | 0.011473 | 0.011421 | 0.011267 | 0.011318 |
| 0.011370 | 0.011267 | 0.011421 | 0.011318 | 0.011473 | 0.011267 | 0.011267 |
| 0.011215 | 0.011267 | 0.011473 | 0.011628 | 0.011267 | 0.011370 | 0.011267 |
| 0.011215 | 0.011163 | 0.011267 | 0.011215 | 0.011267 | 0.011215 | 0.011215 |
| 0.011318 | 0.011318 | 0.011215 | 0.011215 | 0.011215 | 0.011215 | 0.011215 |
| 0.011215 | 0.011267 | 0.011267 | 0.011167 | 0.011219 | 0.011220 | 0.011215 |
| 0.011318 | 0.011267 | 0.011270 | 0.011267 | 0.011217 | 0.011270 | 0.011319 |
| 0.011274 | 0.011322 | 0.011319 | 0.011267 | 0.011163 | 0.011370 | 0.011215 |
| 0.011318 | 0.011267 | 0.011267 | 0.011318 | 0.011318 | 0.011731 | 0.011473 |
| 0.011370 | 0.011370 | 0.011215 | 0.011370 | 0.011215 | 0.011112 | 0.011164 |
| 0.011215 | 0.011267 | 0.011215 | 0.011267 | 0.011267 | 0.011267 | 0.011318 |
| 0.011267 | 0.011318 | 0.011318 | 0.011163 | 0.011267 | 0.011370 | 0.011318 |
| 0.011318 | 0.011267 | 0.011163 | 0.011164 | 0.011318 | 0.011164 | 0.011164 |
| 0.011319 | 0.011318 | 0.011215 | 0.011318 | 0.011164 | 0.011267 | 0.011215 |
| 0.011318 | 0.011215 | 0.011267 | 0.011267 | 0.011267 | 0.011164 | 0.011215 |
| 0.011318 | 0.011267 | 0.011318 | 0.011267 | 0.011267 | 0.011370 | 0.011525 |
| 0.011473 | 0.011370 | 0.011421 | 0.011370 | 0.011422 | 0.011267 | 0.011267 |
| 0.011268 | 0.011360 | 0.011330 | 0.011165 | 0.011476 | 0.011165 | 0.011352 |
| 0.011424 | 0.011371 | 0.011421 | 0.011525 | 0.011373 | 0.011525 | 0.011525 |
| 0.011525 | 0.011628 | 0.011436 | 0.011254 | 0.011253 | 0.011370 | 0.011421 |
| 0.011576 | 0.011267 | 0.011421 | 0.011370 | 0.011318 | 0.011318 | 0.011576 |
| 0.011424 | 0.011370 | 0.011530 | 0.011530 | 0.011628 | 0.011215 | 0.011370 |
| 0.011267 | 0.011215 | 0.011163 | 0.011163 | 0.011215 | 0.011318 | 0.011318 |
| 0.011267 | 0.011318 | 0.011215 | 0.011215 | 0.011215 | 0.011318 | 0.011267 |
| 0.011318 | 0.011576 | 0.011370 | 0.011318 | 0.011163 | 0.011215 | 0.011267 |
| 0.011318 | 0.011215 | 0.011318 | 0.011318 | 0.011215 | 0.011215 | 0.011215 |
| 0.011576 | 0.011267 | 0.011370 | 0.011215 | 0.011267 | 0.011370 | 0.011215 |
| 0.011215 | 0.011215 | 0.011318 | 0.011421 | 0.011163 | 0.011267 | 0.011370 |
| 0.011370 | 0.011318 | 0.011267 | 0.011215 | 0.011215 | 0.011267 | 0.011370 |

|          |          |          |          |          |          |          |
|----------|----------|----------|----------|----------|----------|----------|
| 0.011215 | 0.011370 | 0.011163 | 0.011163 | 0.011370 | 0.011267 | 0.011267 |
| 0.011215 | 0.011370 | 0.011267 | 0.011163 | 0.011267 | 0.011164 | 0.011370 |
| 0.011375 | 0.011267 | 0.011370 | 0.011370 | 0.011370 | 0.011267 | 0.011267 |
| 0.011267 | 0.011421 | 0.011163 | 0.011267 | 0.011164 | 0.011164 | 0.011163 |
| 0.011370 | 0.011370 | 0.011215 | 0.011370 | 0.011163 | 0.011370 | 0.011164 |
| 0.011215 | 0.011267 | 0.011267 | 0.011267 | 0.011318 | 0.011421 | 0.011473 |
| 0.011422 | 0.011318 | 0.011267 | 0.011422 | 0.011421 | 0.011215 | 0.011215 |
| 0.011215 | 0.011215 | 0.011215 | 0.011112 | 0.011163 | 0.011318 | 0.011215 |
| 0.011163 | 0.011267 | 0.011318 | 0.011370 | 0.011215 | 0.011215 | 0.011267 |
| 0.011215 | 0.011267 | 0.011267 | 0.011267 | 0.011370 | 0.011370 | 0.011473 |
| 0.011267 | 0.011422 | 0.011215 | 0.019829 | 0.011209 | 0.011266 | 0.011370 |
| 0.011370 | 0.011422 | 0.011337 | 0.011332 | 0.011495 | 0.011525 | 0.011302 |
| 0.011381 | 0.011234 | 0.011168 | 0.011238 | 0.011167 | 0.011128 | 0.011245 |
| 0.011285 | 0.011112 | 0.011267 | 0.011142 | 0.011370 | 0.011370 | 0.011372 |
| 0.011268 | 0.011318 | 0.011473 | 0.011267 | 0.011267 | 0.011267 | 0.011318 |
| 0.011267 | 0.011215 | 0.011215 | 0.011421 | 0.011267 | 0.011267 | 0.011267 |
| 0.011267 | 0.011370 | 0.011215 | 0.011267 | 0.011318 | 0.011318 | 0.011267 |
| 0.011318 | 0.011215 | 0.011318 | 0.011318 | 0.011422 | 0.011421 | 0.011421 |
| 0.011163 | 0.011163 | 0.011215 | 0.011318 | 0.011163 | 0.011421 | 0.011421 |
| 0.011318 | 0.011421 | 0.011421 | 0.011370 | 0.011422 | 0.011371 | 0.011318 |
| 0.011318 | 0.011267 | 0.011421 | 0.011318 | 0.011318 | 0.011215 | 0.011318 |
| 0.011370 | 0.011370 | 0.011421 | 0.011318 | 0.011267 | 0.011421 | 0.011473 |
| 0.011321 | 0.011215 | 0.011318 | 0.011318 | 0.011318 | 0.011421 | 0.011525 |
| 0.011525 | 0.011373 | 0.011525 | 0.011525 | 0.011525 | 0.011628 | 0.011215 |
| 0.011423 | 0.011370 | 0.011267 | 0.011267 | 0.011370 | 0.011215 | 0.011267 |
| 0.011318 | 0.011318 | 0.011267 | 0.011318 | 0.011215 | 0.011318 | 0.011318 |
| 0.011422 | 0.011421 | 0.011318 | 0.011318 | 0.011887 | 0.011334 | 0.011328 |
| 0.011485 | 0.011325 | 0.011328 | 0.011379 | 0.011380 | 0.011480 | 0.011377 |
| 0.011945 | 0.011323 | 0.011528 | 0.011270 | 0.011373 | 0.011529 | 0.011422 |
| 0.011943 | 0.011292 | 0.011267 | 0.011318 | 0.011267 | 0.011215 | 0.011215 |
| 0.011215 | 0.011215 | 0.011267 | 0.011267 | 0.011267 | 0.011112 | 0.011215 |
| 0.011318 | 0.011215 | 0.011267 | 0.011267 | 0.011163 | 0.011267 | 0.011163 |
| 0.011215 | 0.011267 | 0.011215 | 0.011215 | 0.011318 | 0.011267 | 0.011267 |
| 0.011267 | 0.011215 | 0.011318 | 0.011267 | 0.011215 | 0.011370 | 0.011525 |
| 0.011318 | 0.011370 | 0.011370 | 0.011318 | 0.011163 | 0.011473 | 0.011318 |
| 0.011167 | 0.011215 | 0.011267 | 0.011267 | 0.011370 | 0.011267 | 0.011318 |
| 0.011422 | 0.011267 | 0.011267 | 0.011267 | 0.011421 | 0.011370 | 0.011267 |
| 0.011267 | 0.011473 | 0.011473 | 0.011318 | 0.011370 | 0.011370 | 0.011421 |
| 0.011267 | 0.011370 | 0.011422 | 0.011525 | 0.011319 | 0.011370 | 0.011318 |
| 0.011267 | 0.011215 | 0.011215 | 0.011422 | 0.011473 | 0.011370 | 0.011267 |
| 0.011370 | 0.011370 | 0.011215 | 0.011370 | 0.011318 | 0.011215 | 0.011370 |
| 0.011370 | 0.011267 | 0.011215 | 0.011473 | 0.011267 | 0.011318 | 0.011473 |
| 0.011267 | 0.011476 | 0.011576 | 0.011115 | 0.011128 | 0.011164 | 0.000000 |
| 0.011147 | 0.011486 | 0.011164 | 0.011286 | 0.011119 | 0.011243 | 0.011304 |
| 0.000000 | 0.011216 | 0.011365 | 0.011208 | 0.011250 | 0.011432 | 0.011384 |
| 0.011379 | 0.011270 | 0.011270 | 0.011318 | 0.011319 | 0.011112 | 0.011267 |
| 0.011318 | 0.011370 | 0.011529 | 0.011269 | 0.011527 | 0.011602 | 0.011215 |
| 0.011370 | 0.011370 | 0.011215 | 0.011370 | 0.011215 | 0.011112 | 0.011164 |
| 0.011215 | 0.011267 | 0.011215 | 0.011267 | 0.011267 | 0.011267 | 0.011318 |
| 0.011271 | 0.011272 | 0.011370 | 0.011217 | 0.011479 | 0.011319 | 0.011371 |
| 0.011527 | 0.011164 | 0.011169 | 0.011167 | 0.011370 | 0.011473 | 0.011525 |
| 0.011267 | 0.011421 | 0.011576 | 0.011525 | 0.011421 | 0.011525 | 0.011370 |
| 0.011318 | 0.011422 | 0.011318 | 0.011318 | 0.011835 | 0.011318 | 0.011576 |
| 0.011680 | 0.011383 | 0.011270 | 0.011433 | 0.011215 | 0.011318 | 0.011370 |
| 0.011267 | 0.011473 | 0.011318 | 0.011318 | 0.011353 | 0.011680 | 0.011217 |
| 0.011163 | 0.011164 | 0.011267 | 0.011267 | 0.011217 | 0.011173 | 0.011318 |
| 0.011373 | 0.011262 | 0.011210 | 0.011402 | 0.011267 | 0.011322 | 0.011267 |
| 0.011215 | 0.011163 | 0.011267 | 0.011215 | 0.011267 | 0.011215 | 0.011215 |
| 0.011318 | 0.011318 | 0.011215 | 0.011215 | 0.011215 | 0.011215 | 0.011215 |
| 0.011215 | 0.011267 | 0.011267 | 0.011319 | 0.011112 | 0.011267 | 0.011318 |

|          |          |          |          |          |          |          |
|----------|----------|----------|----------|----------|----------|----------|
| 0.011370 | 0.011529 | 0.011269 | 0.011527 | 0.011602 | 0.011215 | 0.011473 |
| 0.011370 | 0.011370 | 0.011164 | 0.011326 | 0.011433 | 0.011321 | 0.011221 |
| 0.011270 | 0.011611 | 0.011510 | 0.011321 | 0.011215 | 0.011318 | 0.011267 |
| 0.011318 | 0.011318 | 0.011163 | 0.011267 | 0.011370 | 0.011318 | 0.011267 |
| 0.011163 | 0.011164 | 0.011318 | 0.011164 | 0.011164 | 0.011319 | 0.011318 |
| 0.011267 | 0.011215 | 0.011215 | 0.011421 | 0.011267 | 0.011267 | 0.011112 |
| 0.011215 | 0.011422 | 0.011421 | 0.011267 | 0.011370 | 0.011576 | 0.011112 |
| 0.011318 | 0.011473 | 0.011267 | 0.011267 | 0.011267 | 0.011473 | 0.011223 |
| 0.011474 | 0.011172 | 0.011176 | 0.011114 | 0.011165 | 0.011113 | 0.011169 |
| 0.011119 | 0.011215 | 0.011370 | 0.011479 | 0.011318 | 0.011473 | 0.011628 |
| 0.011576 | 0.011576 | 0.011525 | 0.011680 | 0.011267 | 0.012248 | 0.011473 |
| 0.012145 | 0.011783 | 0.012041 | 0.012249 | 0.011318 | 0.011215 | 0.011473 |
| 0.012042 | 0.011525 | 0.011318 | 0.011318 | 0.011267 | 0.011267 | 0.011216 |
| 0.011215 | 0.011215 | 0.011267 | 0.011215 | 0.011628 | 0.011473 | 0.011731 |
| 0.011473 | 0.011473 | 0.011731 | 0.011421 | 0.011990 | 0.011945 | 0.012042 |
| 0.012094 | 0.012042 | 0.011938 | 0.011990 | 0.012042 | 0.011318 | 0.011473 |
| 0.011628 | 0.011835 | 0.011630 | 0.011628 | 0.011576 | 0.011318 | 0.011267 |
| 0.011215 | 0.011215 | 0.011628 | 0.011691 | 0.011731 | 0.011370 | 0.011215 |
| S609     | 0.011500 | 0.011500 | 0.011610 | 0.011719 | 0.011719 | 0.011720 |
| 0.011393 | 0.011393 | 0.011610 | 0.011170 | 0.011225 | 0.011170 | 0.011115 |
| 0.011170 | 0.011335 | 0.011170 | 0.011170 | 0.011280 | 0.011280 | 0.011280 |
| 0.011115 | 0.011280 | 0.011390 | 0.011115 | 0.011280 | 0.011225 | 0.011448 |
| 0.011555 | 0.011225 | 0.011115 | 0.011390 | 0.011170 | 0.011335 | 0.011280 |
| 0.011170 | 0.011335 | 0.011225 | 0.011225 | 0.011390 | 0.011280 | 0.011445 |
| 0.011170 | 0.011280 | 0.011390 | 0.011280 | 0.011225 | 0.011335 | 0.011225 |
| 0.011170 | 0.011555 | 0.011225 | 0.011445 | 0.011335 | 0.011500 | 0.011335 |
| 0.011115 | 0.011225 | 0.011445 | 0.011500 | 0.011664 | 0.011280 | 0.011390 |
| 0.011280 | 0.011280 | 0.011225 | 0.011445 | 0.011665 | 0.011225 | 0.011335 |
| 0.011225 | 0.011335 | 0.011335 | 0.011390 | 0.011225 | 0.011280 | 0.011280 |
| 0.011170 | 0.011225 | 0.011170 | 0.011225 | 0.011170 | 0.011280 | 0.011335 |
| 0.011335 | 0.011115 | 0.011280 | 0.011115 | 0.011280 | 0.011225 | 0.011170 |
| 0.011280 | 0.011280 | 0.011609 | 0.011335 | 0.011225 | 0.011500 | 0.011170 |
| 0.011343 | 0.011513 | 0.011528 | 0.011174 | 0.011178 | 0.011292 | 0.011424 |
| 0.012412 | 0.011356 | 0.011190 | 0.011390 | 0.011445 | 0.011225 | 0.011280 |
| 0.011280 | 0.011225 | 0.011390 | 0.011280 | 0.011335 | 0.011335 | 0.011225 |
| 0.011170 | 0.011170 | 0.011335 | 0.011335 | 0.011225 | 0.011390 | 0.011280 |
| 0.011170 | 0.011115 | 0.011225 | 0.011170 | 0.011445 | 0.011335 | 0.011335 |
| 0.011445 | 0.011554 | 0.011225 | 0.011225 | 0.011280 | 0.011280 | 0.011280 |
| 0.011335 | 0.011335 | 0.011280 | 0.011117 | 0.011119 | 0.011175 | 0.011280 |
| 0.011225 | 0.011225 | 0.011235 | 0.011225 | 0.011115 | 0.011226 | 0.011170 |
| 0.011407 | 0.011227 | 0.011339 | 0.011170 | 0.011115 | 0.011280 | 0.011170 |
| 0.011280 | 0.011280 | 0.011280 | 0.011335 | 0.011335 | 0.011500 | 0.011335 |
| 0.011555 | 0.011390 | 0.011225 | 0.011390 | 0.011170 | 0.011445 | 0.011170 |
| 0.011225 | 0.011225 | 0.011115 | 0.011225 | 0.011225 | 0.011225 | 0.011335 |
| 0.011225 | 0.011445 | 0.011225 | 0.011225 | 0.011281 | 0.011500 | 0.011445 |
| 0.011555 | 0.011335 | 0.011115 | 0.011115 | 0.011280 | 0.011115 | 0.011115 |
| 0.011283 | 0.011555 | 0.011170 | 0.011555 | 0.011170 | 0.011225 | 0.011225 |
| 0.011445 | 0.011115 | 0.011280 | 0.011225 | 0.011280 | 0.011115 | 0.011225 |
| 0.011225 | 0.011225 | 0.011280 | 0.011115 | 0.011225 | 0.011225 | 0.011555 |
| 0.011555 | 0.011445 | 0.011555 | 0.011390 | 0.011610 | 0.011225 | 0.011225 |
| 0.011225 | 0.011330 | 0.011438 | 0.011172 | 0.011448 | 0.011116 | 0.011125 |
| 0.011614 | 0.011447 | 0.011390 | 0.011445 | 0.011284 | 0.011500 | 0.011390 |
| 0.011335 | 0.011554 | 0.011418 | 0.011243 | 0.011253 | 0.011390 | 0.011394 |
| 0.011555 | 0.011336 | 0.011560 | 0.011728 | 0.011390 | 0.011610 | 0.011673 |
| 0.011225 | 0.011730 | 0.011335 | 0.011335 | 0.011610 | 0.011115 | 0.011336 |
| 0.011335 | 0.011280 | 0.011115 | 0.011115 | 0.011170 | 0.011170 | 0.011225 |
| 0.011280 | 0.011390 | 0.011225 | 0.011170 | 0.011280 | 0.011225 | 0.011335 |
| 0.011280 | 0.011609 | 0.011445 | 0.011500 | 0.011115 | 0.011280 | 0.011225 |
| 0.011170 | 0.011170 | 0.011335 | 0.011390 | 0.011170 | 0.011170 | 0.011170 |
| 0.011774 | 0.011280 | 0.011335 | 0.011170 | 0.011335 | 0.011445 | 0.011170 |

|          |          |          |          |          |          |          |
|----------|----------|----------|----------|----------|----------|----------|
| 0.011170 | 0.011170 | 0.011170 | 0.011445 | 0.011170 | 0.011390 | 0.011500 |
| 0.011445 | 0.011170 | 0.011280 | 0.011115 | 0.011115 | 0.011170 | 0.011280 |
| 0.011115 | 0.011225 | 0.011115 | 0.011170 | 0.011280 | 0.011390 | 0.011170 |
| 0.011170 | 0.011280 | 0.011115 | 0.011115 | 0.011445 | 0.011115 | 0.011170 |
| 0.011457 | 0.011170 | 0.011445 | 0.011335 | 0.011280 | 0.011225 | 0.011445 |
| 0.011115 | 0.011500 | 0.011115 | 0.011225 | 0.011170 | 0.011170 | 0.011115 |
| 0.011225 | 0.011445 | 0.011225 | 0.011335 | 0.011170 | 0.011445 | 0.011170 |
| 0.011170 | 0.011170 | 0.011280 | 0.011280 | 0.011225 | 0.011390 | 0.011390 |
| 0.011335 | 0.011445 | 0.011280 | 0.011280 | 0.011335 | 0.011225 | 0.011170 |
| 0.011170 | 0.011225 | 0.011225 | 0.011170 | 0.011170 | 0.011390 | 0.011170 |
| 0.011225 | 0.011170 | 0.011280 | 0.011390 | 0.011225 | 0.011225 | 0.011225 |
| 0.011225 | 0.011115 | 0.011335 | 0.011170 | 0.011280 | 0.011390 | 0.011719 |
| 0.011225 | 0.011665 | 0.011170 | 0.013441 | 0.011160 | 0.011366 | 0.011445 |
| 0.011500 | 0.011500 | 0.011264 | 0.011309 | 0.011732 | 0.011445 | 0.011347 |
| 0.011502 | 0.011457 | 0.011120 | 0.011119 | 0.011188 | 0.011180 | 0.011229 |
| 0.011408 | 0.011423 | 0.011355 | 0.000000 | 0.011280 | 0.011500 | 0.011337 |
| 0.011343 | 0.011390 | 0.011225 | 0.011170 | 0.011280 | 0.011280 | 0.011280 |
| 0.011280 | 0.011115 | 0.011280 | 0.011280 | 0.011225 | 0.011115 | 0.011170 |
| 0.011170 | 0.011280 | 0.011115 | 0.011280 | 0.011280 | 0.011445 | 0.011225 |
| 0.011335 | 0.011225 | 0.011555 | 0.011555 | 0.011390 | 0.011336 | 0.011390 |
| 0.011170 | 0.011115 | 0.011225 | 0.011280 | 0.011115 | 0.011335 | 0.011335 |
| 0.011500 | 0.011390 | 0.011335 | 0.011500 | 0.011609 | 0.011500 | 0.011335 |
| 0.011280 | 0.011390 | 0.011500 | 0.011170 | 0.011225 | 0.011225 | 0.011335 |
| 0.011280 | 0.011280 | 0.011335 | 0.011390 | 0.011335 | 0.011500 | 0.011335 |
| 0.011226 | 0.011115 | 0.011280 | 0.011390 | 0.011280 | 0.011445 | 0.011445 |
| 0.011445 | 0.011284 | 0.011500 | 0.011390 | 0.011335 | 0.011554 | 0.011170 |
| 0.011335 | 0.011225 | 0.011170 | 0.011170 | 0.011280 | 0.011115 | 0.011280 |
| 0.011280 | 0.011445 | 0.011225 | 0.011335 | 0.011225 | 0.011555 | 0.011555 |
| 0.011390 | 0.011336 | 0.011445 | 0.011335 | 0.011995 | 0.011401 | 0.011177 |
| 0.011343 | 0.011342 | 0.011465 | 0.011288 | 0.011515 | 0.011229 | 0.011446 |
| 0.011856 | 0.011230 | 0.011229 | 0.011286 | 0.011681 | 0.011505 | 0.011733 |
| 0.011844 | 0.011364 | 0.011280 | 0.011280 | 0.011335 | 0.011335 | 0.011280 |
| 0.011115 | 0.011170 | 0.011335 | 0.011280 | 0.011280 | 0.011500 | 0.011390 |
| 0.011280 | 0.011225 | 0.011225 | 0.011115 | 0.011170 | 0.011115 | 0.011115 |
| 0.011225 | 0.011225 | 0.011115 | 0.011115 | 0.011225 | 0.011225 | 0.011280 |
| 0.011280 | 0.011170 | 0.011170 | 0.011170 | 0.011115 | 0.011335 | 0.011390 |
| 0.011280 | 0.011280 | 0.011280 | 0.011225 | 0.011225 | 0.011664 | 0.011280 |
| 0.011345 | 0.011170 | 0.011555 | 0.011562 | 0.011335 | 0.011280 | 0.011280 |
| 0.011390 | 0.011225 | 0.011225 | 0.011225 | 0.011335 | 0.011445 | 0.011225 |
| 0.011335 | 0.011390 | 0.011445 | 0.011225 | 0.011335 | 0.011335 | 0.011280 |
| 0.011170 | 0.011280 | 0.011390 | 0.011610 | 0.011280 | 0.011335 | 0.011335 |
| 0.011335 | 0.011170 | 0.011170 | 0.011555 | 0.011500 | 0.011555 | 0.011335 |
| 0.011390 | 0.011390 | 0.011280 | 0.011390 | 0.011170 | 0.011170 | 0.011390 |
| 0.011225 | 0.011280 | 0.011170 | 0.011390 | 0.011335 | 0.011335 | 0.011555 |
| 0.011280 | 0.011448 | 0.011555 | 0.011491 | 0.011147 | 0.011280 | 0.011147 |
| 0.000000 | 0.011614 | 0.011172 | 0.011269 | 0.011211 | 0.011437 | 0.011300 |
| 0.011455 | 0.011153 | 0.011318 | 0.011156 | 0.011220 | 0.011362 | 0.011388 |
| 0.011410 | 0.011314 | 0.011225 | 0.011230 | 0.011281 | 0.011500 | 0.011445 |
| 0.011500 | 0.011335 | 0.011391 | 0.011449 | 0.011559 | 0.011524 | 0.011170 |
| 0.011555 | 0.011390 | 0.011225 | 0.011390 | 0.011170 | 0.011445 | 0.011170 |
| 0.011225 | 0.011225 | 0.011115 | 0.011225 | 0.011225 | 0.011225 | 0.011335 |
| 0.011281 | 0.011286 | 0.011225 | 0.011170 | 0.011445 | 0.011445 | 0.011447 |
| 0.011281 | 0.011225 | 0.011120 | 0.011117 | 0.011280 | 0.011445 | 0.011391 |
| 0.011280 | 0.011225 | 0.011500 | 0.011445 | 0.011280 | 0.011280 | 0.011280 |
| 0.011445 | 0.011335 | 0.011335 | 0.011225 | 0.011720 | 0.011335 | 0.011555 |
| 0.011609 | 0.011475 | 0.011227 | 0.011286 | 0.011225 | 0.011445 | 0.011500 |
| 0.011170 | 0.011390 | 0.011445 | 0.011445 | 0.011508 | 0.011445 | 0.011290 |
| 0.011116 | 0.011118 | 0.011229 | 0.011172 | 0.011228 | 0.011121 | 0.011396 |
| 0.011287 | 0.011341 | 0.011134 | 0.011241 | 0.011225 | 0.011170 | 0.011280 |
| 0.011170 | 0.011115 | 0.011225 | 0.011170 | 0.011445 | 0.011335 | 0.011335 |

|          |          |          |          |          |          |          |
|----------|----------|----------|----------|----------|----------|----------|
| 0.011445 | 0.011554 | 0.011225 | 0.011225 | 0.011280 | 0.011280 | 0.011280 |
| 0.011335 | 0.011335 | 0.011280 | 0.011281 | 0.011500 | 0.011445 | 0.011500 |
| 0.011335 | 0.011391 | 0.011449 | 0.011559 | 0.011524 | 0.011170 | 0.011445 |
| 0.011500 | 0.011500 | 0.011226 | 0.011402 | 0.011284 | 0.011283 | 0.011286 |
| 0.011452 | 0.011654 | 0.011331 | 0.011337 | 0.011170 | 0.011555 | 0.011225 |
| 0.011445 | 0.011225 | 0.011225 | 0.011281 | 0.011500 | 0.011445 | 0.011335 |
| 0.011115 | 0.011115 | 0.011280 | 0.011115 | 0.011115 | 0.011283 | 0.011555 |
| 0.011280 | 0.011115 | 0.011280 | 0.011280 | 0.011225 | 0.011115 | 0.011445 |
| 0.011225 | 0.011225 | 0.011335 | 0.011115 | 0.011280 | 0.011390 | 0.011170 |
| 0.011225 | 0.011664 | 0.011115 | 0.011225 | 0.011225 | 0.011445 | 0.011191 |
| 0.011588 | 0.011192 | 0.011208 | 0.011438 | 0.011443 | 0.011457 | 0.011122 |
| 0.011141 | 0.011390 | 0.011500 | 0.011609 | 0.011445 | 0.011610 | 0.011719 |
| 0.011665 | 0.011615 | 0.011609 | 0.011842 | 0.011555 | 0.012655 | 0.011665 |
| 0.012160 | 0.012215 | 0.012274 | 0.012492 | 0.011664 | 0.011170 | 0.011719 |
| 0.011940 | 0.011830 | 0.011555 | 0.011445 | 0.011500 | 0.011500 | 0.011614 |
| 0.011390 | 0.011392 | 0.011500 | 0.011445 | 0.011940 | 0.011995 | 0.011830 |
| 0.011664 | 0.011884 | 0.011829 | 0.011720 | 0.011996 | 0.011948 | 0.012105 |
| 0.011996 | 0.012161 | 0.012050 | 0.012051 | 0.011996 | 0.011335 | 0.011609 |
| 0.011665 | 0.012325 | 0.011667 | 0.011774 | 0.011555 | 0.011394 | 0.011335 |
| 0.011335 | 0.011280 | 0.011610 | 0.011907 | 0.011964 | 0.011774 | 0.011280 |
| S610     | 0.011917 | 0.011917 | 0.011605 | 0.011527 | 0.011527 | 0.011605 |
| 0.011765 | 0.011648 | 0.011527 | 0.011683 | 0.011722 | 0.011683 | 0.011644 |
| 0.011605 | 0.011878 | 0.011605 | 0.011683 | 0.011722 | 0.011722 | 0.011683 |
| 0.011683 | 0.011722 | 0.011527 | 0.011645 | 0.011684 | 0.011644 | 0.011726 |
| 0.011644 | 0.011722 | 0.011605 | 0.011527 | 0.011761 | 0.011683 | 0.011644 |
| 0.011722 | 0.011878 | 0.011761 | 0.011761 | 0.011761 | 0.011761 | 0.011956 |
| 0.011566 | 0.011761 | 0.011761 | 0.011722 | 0.011761 | 0.011839 | 0.011800 |
| 0.011761 | 0.011917 | 0.011723 | 0.011800 | 0.011722 | 0.011956 | 0.011722 |
| 0.011722 | 0.011761 | 0.011878 | 0.011956 | 0.011800 | 0.011722 | 0.011839 |
| 0.011800 | 0.011761 | 0.011722 | 0.011995 | 0.011800 | 0.011761 | 0.011800 |
| 0.011722 | 0.011761 | 0.011800 | 0.011839 | 0.011722 | 0.011800 | 0.011800 |
| 0.011683 | 0.011683 | 0.011644 | 0.011605 | 0.011761 | 0.011722 | 0.011839 |
| 0.011761 | 0.011683 | 0.011839 | 0.011605 | 0.011800 | 0.011683 | 0.011683 |
| 0.011878 | 0.011839 | 0.011839 | 0.011878 | 0.011722 | 0.011917 | 0.011761 |
| 0.011905 | 0.011784 | 0.011947 | 0.011638 | 0.011657 | 0.011682 | 0.011548 |
| 0.011527 | 0.011474 | 0.011685 | 0.011917 | 0.011878 | 0.011683 | 0.011722 |
| 0.011761 | 0.011761 | 0.011878 | 0.011761 | 0.011800 | 0.011761 | 0.011722 |
| 0.011683 | 0.011722 | 0.012073 | 0.011917 | 0.011800 | 0.011800 | 0.011722 |
| 0.011683 | 0.011605 | 0.011761 | 0.011644 | 0.011644 | 0.011605 | 0.011527 |
| 0.011644 | 0.011722 | 0.011683 | 0.011683 | 0.011722 | 0.011722 | 0.011723 |
| 0.011801 | 0.011761 | 0.011761 | 0.011624 | 0.011664 | 0.011668 | 0.011722 |
| 0.011761 | 0.011683 | 0.011739 | 0.011722 | 0.011651 | 0.011691 | 0.011725 |
| 0.011669 | 0.011735 | 0.011724 | 0.011683 | 0.011644 | 0.011761 | 0.011683 |
| 0.011761 | 0.011761 | 0.011761 | 0.011800 | 0.011839 | 0.012151 | 0.011917 |
| 0.011722 | 0.011839 | 0.011722 | 0.011800 | 0.011644 | 0.011566 | 0.011605 |
| 0.011722 | 0.011722 | 0.011683 | 0.011683 | 0.011683 | 0.011683 | 0.011800 |
| 0.011722 | 0.011839 | 0.011761 | 0.011683 | 0.011764 | 0.011917 | 0.011845 |
| 0.011878 | 0.011800 | 0.011683 | 0.011608 | 0.011761 | 0.011683 | 0.011566 |
| 0.011611 | 0.011839 | 0.011683 | 0.011878 | 0.011605 | 0.011722 | 0.011683 |
| 0.011839 | 0.011683 | 0.011761 | 0.011683 | 0.011722 | 0.011605 | 0.011722 |
| 0.011761 | 0.011722 | 0.011722 | 0.011683 | 0.011722 | 0.011761 | 0.011878 |
| 0.011839 | 0.011683 | 0.011800 | 0.011917 | 0.011800 | 0.011722 | 0.011722 |
| 0.011686 | 0.011957 | 0.011700 | 0.011655 | 0.011848 | 0.011614 | 0.011741 |
| 0.011805 | 0.011728 | 0.011878 | 0.012151 | 0.011849 | 0.011956 | 0.011917 |
| 0.011839 | 0.011995 | 0.011927 | 0.011594 | 0.011641 | 0.011800 | 0.011885 |
| 0.011995 | 0.011842 | 0.011924 | 0.011964 | 0.011800 | 0.012034 | 0.012123 |
| 0.011843 | 0.011966 | 0.011964 | 0.011963 | 0.012191 | 0.011644 | 0.011763 |
| 0.011722 | 0.011722 | 0.011605 | 0.011605 | 0.011722 | 0.011722 | 0.011761 |
| 0.011722 | 0.011800 | 0.011683 | 0.011683 | 0.011722 | 0.011722 | 0.011683 |
| 0.011722 | 0.011839 | 0.011722 | 0.011761 | 0.011605 | 0.011722 | 0.011761 |

|          |          |          |          |          |          |          |
|----------|----------|----------|----------|----------|----------|----------|
| 0.011761 | 0.011683 | 0.011800 | 0.011761 | 0.011683 | 0.011683 | 0.011683 |
| 0.011800 | 0.011722 | 0.011878 | 0.011644 | 0.011722 | 0.011839 | 0.011644 |
| 0.011644 | 0.011644 | 0.011722 | 0.011878 | 0.011683 | 0.011527 | 0.011644 |
| 0.011605 | 0.011722 | 0.011722 | 0.011644 | 0.011644 | 0.011761 | 0.011761 |
| 0.011644 | 0.011761 | 0.011605 | 0.011605 | 0.011800 | 0.011567 | 0.011683 |
| 0.011645 | 0.011800 | 0.011645 | 0.011605 | 0.011644 | 0.011605 | 0.011800 |
| 0.011816 | 0.011683 | 0.011683 | 0.011800 | 0.011800 | 0.011683 | 0.011761 |
| 0.011683 | 0.011956 | 0.011605 | 0.011683 | 0.011605 | 0.011605 | 0.011605 |
| 0.011800 | 0.011761 | 0.011722 | 0.011839 | 0.011644 | 0.011722 | 0.011605 |
| 0.011683 | 0.011683 | 0.011683 | 0.011722 | 0.011722 | 0.011839 | 0.011917 |
| 0.011878 | 0.011800 | 0.011761 | 0.011878 | 0.011839 | 0.011683 | 0.011644 |
| 0.011683 | 0.011683 | 0.011722 | 0.011566 | 0.011644 | 0.011800 | 0.011683 |
| 0.011605 | 0.011683 | 0.011800 | 0.011800 | 0.011761 | 0.011722 | 0.011722 |
| 0.011761 | 0.011683 | 0.011761 | 0.011644 | 0.011839 | 0.011917 | 0.011839 |
| 0.011722 | 0.011761 | 0.011722 | 0.018687 | 0.011519 | 0.011895 | 0.011770 |
| 0.011690 | 0.011770 | 0.011838 | 0.011608 | 0.011750 | 0.011769 | 0.011813 |
| 0.011357 | 0.011574 | 0.011631 | 0.011763 | 0.011610 | 0.011643 | 0.011709 |
| 0.011499 | 0.011566 | 0.011583 | 0.011473 | 0.011839 | 0.011917 | 0.011882 |
| 0.011699 | 0.011839 | 0.011839 | 0.011722 | 0.011761 | 0.011762 | 0.011761 |
| 0.011761 | 0.011683 | 0.011683 | 0.011800 | 0.011722 | 0.011683 | 0.011722 |
| 0.011722 | 0.011761 | 0.011605 | 0.011761 | 0.011839 | 0.011878 | 0.011722 |
| 0.011722 | 0.011683 | 0.011644 | 0.011644 | 0.011839 | 0.011840 | 0.011917 |
| 0.011605 | 0.011644 | 0.011644 | 0.011800 | 0.011644 | 0.011878 | 0.011878 |
| 0.011839 | 0.011878 | 0.011839 | 0.011878 | 0.011761 | 0.011881 | 0.011800 |
| 0.011761 | 0.011839 | 0.011917 | 0.011644 | 0.011722 | 0.011683 | 0.011761 |
| 0.011800 | 0.011800 | 0.011839 | 0.011761 | 0.011763 | 0.011917 | 0.011878 |
| 0.011807 | 0.011644 | 0.011722 | 0.011917 | 0.011722 | 0.011839 | 0.011956 |
| 0.012151 | 0.011849 | 0.011956 | 0.011917 | 0.011839 | 0.011995 | 0.011683 |
| 0.011842 | 0.011761 | 0.011722 | 0.011722 | 0.011761 | 0.011605 | 0.011761 |
| 0.011839 | 0.011878 | 0.011722 | 0.011722 | 0.011683 | 0.011644 | 0.011644 |
| 0.011839 | 0.011840 | 0.011878 | 0.011878 | 0.012386 | 0.011887 | 0.011800 |
| 0.011916 | 0.011821 | 0.011962 | 0.011787 | 0.011869 | 0.011904 | 0.011807 |
| 0.012339 | 0.011745 | 0.011857 | 0.011785 | 0.012062 | 0.011969 | 0.011969 |
| 0.012363 | 0.011814 | 0.011762 | 0.011761 | 0.011761 | 0.011527 | 0.011723 |
| 0.011644 | 0.011683 | 0.011800 | 0.011761 | 0.011762 | 0.011566 | 0.011294 |
| 0.011722 | 0.011683 | 0.011722 | 0.011722 | 0.011644 | 0.011683 | 0.011605 |
| 0.011683 | 0.011722 | 0.011683 | 0.011644 | 0.011761 | 0.011683 | 0.011722 |
| 0.011683 | 0.011644 | 0.011722 | 0.011761 | 0.011644 | 0.011878 | 0.011917 |
| 0.011761 | 0.011800 | 0.011800 | 0.011761 | 0.011644 | 0.011800 | 0.011761 |
| 0.011466 | 0.011683 | 0.011644 | 0.011611 | 0.011800 | 0.011761 | 0.011800 |
| 0.011839 | 0.011761 | 0.011683 | 0.011761 | 0.011878 | 0.011878 | 0.011761 |
| 0.011800 | 0.011878 | 0.011800 | 0.011761 | 0.011917 | 0.011917 | 0.011839 |
| 0.011683 | 0.011800 | 0.011839 | 0.011839 | 0.011801 | 0.011800 | 0.011761 |
| 0.011800 | 0.011605 | 0.011605 | 0.011917 | 0.011917 | 0.011878 | 0.011722 |
| 0.011839 | 0.011878 | 0.011761 | 0.011839 | 0.011722 | 0.011683 | 0.011683 |
| 0.011800 | 0.011722 | 0.011605 | 0.011878 | 0.011722 | 0.011839 | 0.011878 |
| 0.011722 | 0.011804 | 0.011878 | 0.011636 | 0.011512 | 0.011761 | 0.011486 |
| 0.011614 | 0.000000 | 0.011605 | 0.011730 | 0.011695 | 0.011722 | 0.011538 |
| 0.011468 | 0.011455 | 0.011617 | 0.011457 | 0.011599 | 0.011663 | 0.011833 |
| 0.011881 | 0.011758 | 0.011769 | 0.011729 | 0.011725 | 0.011566 | 0.011566 |
| 0.011683 | 0.011723 | 0.011884 | 0.011610 | 0.011843 | 0.011922 | 0.011683 |
| 0.011722 | 0.011839 | 0.011722 | 0.011800 | 0.011644 | 0.011566 | 0.011605 |
| 0.011722 | 0.011722 | 0.011683 | 0.011683 | 0.011683 | 0.011683 | 0.011800 |
| 0.011727 | 0.011780 | 0.011723 | 0.011730 | 0.011926 | 0.011841 | 0.011806 |
| 0.011844 | 0.011722 | 0.011601 | 0.011625 | 0.011761 | 0.011917 | 0.011879 |
| 0.011683 | 0.011800 | 0.012073 | 0.011996 | 0.011917 | 0.011956 | 0.011917 |
| 0.011800 | 0.011917 | 0.011878 | 0.011761 | 0.012073 | 0.011878 | 0.011995 |
| 0.012112 | 0.011764 | 0.011694 | 0.011824 | 0.011722 | 0.011878 | 0.011917 |
| 0.011840 | 0.011917 | 0.011917 | 0.011917 | 0.012018 | 0.012112 | 0.011707 |
| 0.011570 | 0.011585 | 0.011693 | 0.011652 | 0.011656 | 0.011632 | 0.011612 |



|          |          |          |          |          |          |          |
|----------|----------|----------|----------|----------|----------|----------|
| 0.011736 | 0.011515 | 0.011615 | 0.011754 | 0.011761 | 0.011809 | 0.011722 |
| 0.011683 | 0.011605 | 0.011761 | 0.011644 | 0.011644 | 0.011605 | 0.011527 |
| 0.011644 | 0.011722 | 0.011683 | 0.011683 | 0.011722 | 0.011722 | 0.011723 |
| 0.011801 | 0.011761 | 0.011761 | 0.011725 | 0.011566 | 0.011566 | 0.011683 |
| 0.011723 | 0.011884 | 0.011610 | 0.011843 | 0.011922 | 0.011683 | 0.011956 |
| 0.011917 | 0.011917 | 0.011687 | 0.011822 | 0.011784 | 0.011732 | 0.011547 |
| 0.011738 | 0.011800 | 0.011896 | 0.011808 | 0.011683 | 0.011878 | 0.011722 |
| 0.011839 | 0.011761 | 0.011683 | 0.011764 | 0.011917 | 0.011845 | 0.011800 |
| 0.011683 | 0.011608 | 0.011761 | 0.011683 | 0.011566 | 0.011611 | 0.011839 |
| 0.011761 | 0.011683 | 0.011683 | 0.011800 | 0.011722 | 0.011683 | 0.011566 |
| 0.011722 | 0.011800 | 0.011800 | 0.011722 | 0.011800 | 0.011956 | 0.011566 |
| 0.011722 | 0.011800 | 0.011722 | 0.011722 | 0.011683 | 0.011800 | 0.011624 |
| 0.011397 | 0.011576 | 0.011417 | 0.011596 | 0.011678 | 0.011566 | 0.011441 |
| 0.011381 | 0.011294 | 0.011294 | 0.011336 | 0.011255 | 0.011333 | 0.011333 |
| 0.011216 | 0.011413 | 0.011216 | 0.011722 | 0.011449 | 0.012424 | 0.011566 |
| 0.012190 | 0.012034 | 0.012271 | 0.012386 | 0.011683 | 0.011527 | 0.011488 |
| 0.012269 | 0.011644 | 0.011449 | 0.011372 | 0.011410 | 0.011410 | 0.011453 |
| 0.011294 | 0.011294 | 0.011333 | 0.011333 | 0.011917 | 0.011956 | 0.011995 |
| 0.011800 | 0.011917 | 0.012034 | 0.011801 | 0.012386 | 0.012474 | 0.012426 |
| 0.012503 | 0.012464 | 0.012425 | 0.012425 | 0.012464 | 0.011839 | 0.011995 |
| 0.012073 | 0.012502 | 0.012078 | 0.012073 | 0.011879 | 0.011646 | 0.011566 |
| 0.011527 | 0.011527 | 0.011956 | 0.011975 | 0.012124 | 0.011761 | 0.011527 |
| S611     | 0.011622 | 0.011622 | 0.011728 | 0.011692 | 0.011692 | 0.011728 |
| 0.011593 | 0.011487 | 0.011692 | 0.011201 | 0.011236 | 0.011236 | 0.011201 |
| 0.011236 | 0.011411 | 0.011201 | 0.011236 | 0.011306 | 0.011271 | 0.011236 |
| 0.011201 | 0.011236 | 0.011341 | 0.011201 | 0.011236 | 0.011201 | 0.011558 |
| 0.011446 | 0.011236 | 0.011131 | 0.011376 | 0.011271 | 0.011271 | 0.011201 |
| 0.011271 | 0.011376 | 0.011271 | 0.011271 | 0.011306 | 0.011271 | 0.011447 |
| 0.011201 | 0.011271 | 0.011306 | 0.011236 | 0.011341 | 0.011376 | 0.011306 |
| 0.011271 | 0.011447 | 0.011271 | 0.011622 | 0.011271 | 0.011552 | 0.011271 |
| 0.011236 | 0.011341 | 0.011376 | 0.011552 | 0.011657 | 0.011341 | 0.011447 |
| 0.011306 | 0.011341 | 0.011236 | 0.011482 | 0.011693 | 0.011271 | 0.011341 |
| 0.011236 | 0.011306 | 0.011306 | 0.011341 | 0.011271 | 0.011306 | 0.011306 |
| 0.011201 | 0.011201 | 0.011166 | 0.011271 | 0.011271 | 0.011271 | 0.011376 |
| 0.011306 | 0.011271 | 0.011341 | 0.011201 | 0.011376 | 0.011201 | 0.011236 |
| 0.011411 | 0.011376 | 0.011587 | 0.011411 | 0.011271 | 0.011517 | 0.011271 |
| 0.011360 | 0.011626 | 0.011437 | 0.011139 | 0.011135 | 0.011283 | 0.011296 |
| 0.011975 | 0.011365 | 0.011102 | 0.011482 | 0.011446 | 0.011271 | 0.011376 |
| 0.011341 | 0.011271 | 0.011376 | 0.011271 | 0.011341 | 0.011271 | 0.011306 |
| 0.011271 | 0.011341 | 0.011552 | 0.011446 | 0.011341 | 0.011306 | 0.011236 |
| 0.011201 | 0.011201 | 0.011271 | 0.011201 | 0.011446 | 0.011411 | 0.011341 |
| 0.011446 | 0.011517 | 0.011236 | 0.011236 | 0.011271 | 0.011271 | 0.011271 |
| 0.011342 | 0.011271 | 0.011271 | 0.011133 | 0.011171 | 0.011170 | 0.011271 |
| 0.011273 | 0.011202 | 0.011246 | 0.011237 | 0.011167 | 0.011204 | 0.011237 |
| 0.011502 | 0.011240 | 0.011309 | 0.011201 | 0.011202 | 0.011341 | 0.011306 |
| 0.011376 | 0.011307 | 0.011306 | 0.011376 | 0.011341 | 0.011728 | 0.011482 |
| 0.011552 | 0.011411 | 0.011271 | 0.011376 | 0.011166 | 0.011376 | 0.011166 |
| 0.011271 | 0.011271 | 0.011201 | 0.011201 | 0.011201 | 0.011201 | 0.011306 |
| 0.011236 | 0.011376 | 0.011306 | 0.011201 | 0.011307 | 0.011411 | 0.011378 |
| 0.011411 | 0.011306 | 0.011201 | 0.011131 | 0.011271 | 0.011201 | 0.011131 |
| 0.011238 | 0.011412 | 0.011201 | 0.011412 | 0.011166 | 0.011236 | 0.011236 |
| 0.011341 | 0.011236 | 0.011271 | 0.011236 | 0.011271 | 0.011131 | 0.011236 |
| 0.011271 | 0.011236 | 0.011306 | 0.011236 | 0.011271 | 0.011306 | 0.011482 |
| 0.011657 | 0.011517 | 0.011657 | 0.011411 | 0.011657 | 0.011271 | 0.011236 |
| 0.011272 | 0.011526 | 0.011397 | 0.011167 | 0.011664 | 0.011132 | 0.011265 |
| 0.011629 | 0.011557 | 0.011411 | 0.011622 | 0.011346 | 0.011482 | 0.011482 |
| 0.011411 | 0.011517 | 0.011433 | 0.011234 | 0.011280 | 0.011306 | 0.011379 |
| 0.011482 | 0.011378 | 0.011485 | 0.011591 | 0.011376 | 0.011587 | 0.011698 |
| 0.011378 | 0.011593 | 0.011485 | 0.011449 | 0.011728 | 0.011166 | 0.011377 |
| 0.011306 | 0.011236 | 0.011131 | 0.011131 | 0.011236 | 0.011236 | 0.011306 |

|          |          |          |           |          |          |          |
|----------|----------|----------|-----------|----------|----------|----------|
| 0.011236 | 0.011306 | 0.011201 | 0.011306  | 0.011236 | 0.011236 | 0.011271 |
| 0.011236 | 0.011692 | 0.011587 | 0.011622  | 0.011131 | 0.011236 | 0.011271 |
| 0.011271 | 0.011236 | 0.011306 | 0.011341  | 0.011201 | 0.011201 | 0.011201 |
| 0.011763 | 0.011341 | 0.011376 | 0.011166  | 0.011271 | 0.011447 | 0.011166 |
| 0.011166 | 0.011236 | 0.011236 | 0.011376  | 0.011201 | 0.011341 | 0.011446 |
| 0.011411 | 0.011236 | 0.011236 | 0.011166  | 0.011166 | 0.011271 | 0.011271 |
| 0.011166 | 0.011271 | 0.011131 | 0.011166  | 0.011306 | 0.011447 | 0.011201 |
| 0.011166 | 0.011306 | 0.011236 | 0.011131  | 0.011482 | 0.011131 | 0.011306 |
| 0.011383 | 0.011201 | 0.011517 | 0.011306  | 0.011376 | 0.011236 | 0.011341 |
| 0.011201 | 0.011552 | 0.011131 | 0.011411  | 0.011201 | 0.011201 | 0.011131 |
| 0.011306 | 0.011587 | 0.011236 | 0.011341  | 0.011166 | 0.011587 | 0.011201 |
| 0.011201 | 0.011201 | 0.011201 | 0.011306  | 0.011236 | 0.011341 | 0.011411 |
| 0.011411 | 0.011341 | 0.011271 | 0.011376  | 0.011341 | 0.011201 | 0.011166 |
| 0.011201 | 0.011201 | 0.011236 | 0.011201  | 0.011166 | 0.011306 | 0.011201 |
| 0.011236 | 0.011201 | 0.011306 | 0.011411  | 0.011271 | 0.011236 | 0.011236 |
| 0.011306 | 0.011236 | 0.011341 | 0.011201  | 0.011341 | 0.011411 | 0.011692 |
| 0.011236 | 0.011622 | 0.011236 | 0.0117710 | 0.011126 | 0.011371 | 0.011557 |
| 0.011557 | 0.011557 | 0.011220 | 0.011176  | 0.011664 | 0.011628 | 0.011245 |
| 0.011392 | 0.011426 | 0.011100 | 0.011187  | 0.011218 | 0.011210 | 0.011191 |
| 0.011389 | 0.011358 | 0.011360 | 0.011193  | 0.011341 | 0.011411 | 0.011414 |
| 0.011276 | 0.011376 | 0.011341 | 0.011341  | 0.011271 | 0.011271 | 0.011271 |
| 0.011306 | 0.011236 | 0.011236 | 0.011306  | 0.011236 | 0.011201 | 0.011236 |
| 0.011236 | 0.011271 | 0.011166 | 0.011271  | 0.011341 | 0.011376 | 0.011271 |
| 0.011306 | 0.011271 | 0.011587 | 0.011587  | 0.011341 | 0.011377 | 0.011411 |
| 0.011131 | 0.011166 | 0.011201 | 0.011306  | 0.011166 | 0.011411 | 0.011411 |
| 0.011411 | 0.011411 | 0.011341 | 0.011446  | 0.011657 | 0.011448 | 0.011306 |
| 0.011271 | 0.011376 | 0.011411 | 0.011236  | 0.011236 | 0.011201 | 0.011306 |
| 0.011341 | 0.011341 | 0.011376 | 0.011341  | 0.011271 | 0.011446 | 0.011446 |
| 0.011308 | 0.011166 | 0.011306 | 0.011411  | 0.011306 | 0.011447 | 0.011446 |
| 0.011622 | 0.011346 | 0.011482 | 0.011482  | 0.011411 | 0.011517 | 0.011201 |
| 0.011377 | 0.011271 | 0.011236 | 0.011236  | 0.011271 | 0.011166 | 0.011271 |
| 0.011341 | 0.011376 | 0.011271 | 0.011306  | 0.011271 | 0.011587 | 0.011587 |
| 0.011341 | 0.011377 | 0.011411 | 0.011376  | 0.012045 | 0.011397 | 0.011318 |
| 0.011426 | 0.011351 | 0.011502 | 0.011314  | 0.011463 | 0.011421 | 0.011348 |
| 0.011995 | 0.011278 | 0.011419 | 0.011350  | 0.011637 | 0.011452 | 0.011594 |
| 0.012020 | 0.011456 | 0.011307 | 0.011306  | 0.011306 | 0.011341 | 0.011271 |
| 0.011166 | 0.011201 | 0.011341 | 0.011306  | 0.011306 | 0.011411 | 0.011411 |
| 0.011236 | 0.011201 | 0.011236 | 0.011236  | 0.011166 | 0.011201 | 0.011131 |
| 0.011271 | 0.011306 | 0.011201 | 0.011166  | 0.011271 | 0.011201 | 0.011236 |
| 0.011236 | 0.011166 | 0.011236 | 0.011271  | 0.011166 | 0.011376 | 0.011411 |
| 0.011271 | 0.011376 | 0.011306 | 0.011271  | 0.011166 | 0.011657 | 0.011271 |
| 0.011315 | 0.011201 | 0.011446 | 0.011450  | 0.011341 | 0.011306 | 0.011341 |
| 0.011341 | 0.011271 | 0.011236 | 0.011271  | 0.011376 | 0.011376 | 0.011306 |
| 0.011306 | 0.011411 | 0.011622 | 0.011341  | 0.011447 | 0.011447 | 0.011411 |
| 0.011201 | 0.011306 | 0.011341 | 0.011693  | 0.011306 | 0.011341 | 0.011306 |
| 0.011306 | 0.011236 | 0.011236 | 0.011552  | 0.011482 | 0.011517 | 0.011271 |
| 0.011306 | 0.011447 | 0.011271 | 0.011306  | 0.011306 | 0.011201 | 0.011552 |
| 0.011306 | 0.011236 | 0.011236 | 0.011411  | 0.011271 | 0.011376 | 0.011622 |
| 0.011236 | 0.011664 | 0.011692 | 0.011385  | 0.011117 | 0.011376 | 0.011164 |
| 0.011172 | 0.011605 | 0.000000 | 0.011328  | 0.011158 | 0.011264 | 0.011273 |
| 0.011366 | 0.000000 | 0.011227 | 0.000000  | 0.011114 | 0.011261 | 0.011304 |
| 0.011327 | 0.011178 | 0.011311 | 0.011240  | 0.011307 | 0.011411 | 0.011482 |
| 0.011482 | 0.011377 | 0.011485 | 0.011486  | 0.011627 | 0.011615 | 0.011236 |
| 0.011552 | 0.011411 | 0.011271 | 0.011376  | 0.011166 | 0.011376 | 0.011166 |
| 0.011271 | 0.011271 | 0.011201 | 0.011201  | 0.011201 | 0.011201 | 0.011306 |
| 0.011240 | 0.011278 | 0.011273 | 0.011275  | 0.011453 | 0.011379 | 0.011417 |
| 0.011416 | 0.011271 | 0.011136 | 0.011134  | 0.011273 | 0.011450 | 0.011379 |
| 0.011236 | 0.011308 | 0.011552 | 0.011483  | 0.011411 | 0.011482 | 0.011411 |
| 0.011306 | 0.011411 | 0.011411 | 0.011271  | 0.011904 | 0.011447 | 0.011517 |
| 0.011587 | 0.011619 | 0.011239 | 0.011313  | 0.011236 | 0.011447 | 0.011411 |

|          |          |          |          |          |          |          |
|----------|----------|----------|----------|----------|----------|----------|
| 0.011412 | 0.011411 | 0.011411 | 0.011411 | 0.011555 | 0.011622 | 0.011242 |
| 0.011131 | 0.011133 | 0.011238 | 0.011202 | 0.011311 | 0.011139 | 0.011487 |
| 0.011276 | 0.011428 | 0.011160 | 0.011257 | 0.011271 | 0.011346 | 0.011236 |
| 0.011201 | 0.011201 | 0.011271 | 0.011201 | 0.011446 | 0.011411 | 0.011341 |
| 0.011446 | 0.011517 | 0.011236 | 0.011236 | 0.011271 | 0.011271 | 0.011271 |
| 0.011342 | 0.011271 | 0.011271 | 0.011307 | 0.011411 | 0.011482 | 0.011482 |
| 0.011377 | 0.011485 | 0.011486 | 0.011627 | 0.011615 | 0.011236 | 0.011446 |
| 0.011411 | 0.011411 | 0.011202 | 0.011423 | 0.011351 | 0.011345 | 0.011243 |
| 0.011276 | 0.011630 | 0.011373 | 0.011309 | 0.011201 | 0.011412 | 0.011236 |
| 0.011376 | 0.011306 | 0.011201 | 0.011307 | 0.011411 | 0.011378 | 0.011306 |
| 0.011201 | 0.011131 | 0.011271 | 0.011201 | 0.011131 | 0.011238 | 0.011412 |
| 0.011306 | 0.011236 | 0.011236 | 0.011306 | 0.011236 | 0.011201 | 0.011376 |
| 0.011271 | 0.011306 | 0.011306 | 0.011236 | 0.011306 | 0.011517 | 0.011201 |
| 0.011236 | 0.011657 | 0.011236 | 0.011271 | 0.011236 | 0.011622 | 0.011103 |
| 0.011566 | 0.011103 | 0.011161 | 0.011382 | 0.011386 | 0.011419 | 0.000000 |
| 0.011113 | 0.011411 | 0.011517 | 0.011628 | 0.011482 | 0.011623 | 0.011763 |
| 0.011658 | 0.011697 | 0.011657 | 0.011912 | 0.011587 | 0.012431 | 0.011657 |
| 0.012326 | 0.012150 | 0.012294 | 0.012609 | 0.011552 | 0.011271 | 0.011622 |
| 0.012045 | 0.011728 | 0.011587 | 0.011482 | 0.011552 | 0.011552 | 0.011520 |
| 0.011411 | 0.011413 | 0.011482 | 0.011447 | 0.011798 | 0.011868 | 0.011833 |
| 0.011728 | 0.011833 | 0.011939 | 0.011728 | 0.012045 | 0.012086 | 0.012151 |
| 0.012151 | 0.012151 | 0.012116 | 0.012116 | 0.012116 | 0.011341 | 0.011622 |
| 0.011693 | 0.012220 | 0.011732 | 0.011868 | 0.011693 | 0.011450 | 0.011376 |
| 0.011341 | 0.011341 | 0.011728 | 0.011841 | 0.011889 | 0.011622 | 0.011341 |
| S612     | 0.011641 | 0.011641 | 0.011820 | 0.011730 | 0.011730 | 0.011820 |
| 0.011600 | 0.011555 | 0.011686 | 0.011417 | 0.011462 | 0.011417 | 0.011373 |
| 0.011328 | 0.011596 | 0.011283 | 0.011417 | 0.011417 | 0.011462 | 0.011417 |
| 0.011417 | 0.011462 | 0.011507 | 0.011373 | 0.011418 | 0.011373 | 0.011645 |
| 0.011641 | 0.011462 | 0.011328 | 0.011507 | 0.011507 | 0.011417 | 0.011373 |
| 0.011462 | 0.011596 | 0.011507 | 0.011462 | 0.011507 | 0.011462 | 0.011730 |
| 0.011283 | 0.011417 | 0.011507 | 0.011417 | 0.011507 | 0.011596 | 0.011551 |
| 0.011507 | 0.011686 | 0.011463 | 0.011730 | 0.011462 | 0.011596 | 0.011462 |
| 0.011462 | 0.011507 | 0.011551 | 0.011596 | 0.011775 | 0.011417 | 0.011596 |
| 0.011551 | 0.011507 | 0.011462 | 0.011685 | 0.011641 | 0.011507 | 0.011552 |
| 0.011462 | 0.011507 | 0.011552 | 0.011596 | 0.011462 | 0.011462 | 0.011462 |
| 0.011417 | 0.011417 | 0.011373 | 0.011328 | 0.011462 | 0.011417 | 0.011596 |
| 0.011507 | 0.011417 | 0.011596 | 0.011328 | 0.011462 | 0.011417 | 0.011328 |
| 0.011596 | 0.011596 | 0.011820 | 0.011552 | 0.011462 | 0.011730 | 0.011507 |
| 0.011552 | 0.011596 | 0.011686 | 0.011332 | 0.011377 | 0.011391 | 0.011467 |
| 0.011462 | 0.011461 | 0.011381 | 0.011641 | 0.011551 | 0.011373 | 0.011462 |
| 0.011507 | 0.011507 | 0.011641 | 0.011507 | 0.011552 | 0.011507 | 0.011462 |
| 0.011417 | 0.011462 | 0.011775 | 0.011596 | 0.011507 | 0.011507 | 0.011462 |
| 0.011373 | 0.011328 | 0.011507 | 0.011373 | 0.011641 | 0.011552 | 0.011507 |
| 0.011596 | 0.011686 | 0.011373 | 0.011373 | 0.011373 | 0.011373 | 0.011373 |
| 0.011418 | 0.011507 | 0.011507 | 0.011339 | 0.011385 | 0.011387 | 0.011462 |
| 0.011417 | 0.011417 | 0.011469 | 0.011462 | 0.011377 | 0.011423 | 0.011419 |
| 0.011576 | 0.011425 | 0.011464 | 0.011373 | 0.011373 | 0.011507 | 0.011418 |
| 0.011507 | 0.011507 | 0.011507 | 0.011551 | 0.011551 | 0.011909 | 0.011641 |
| 0.011730 | 0.011596 | 0.011417 | 0.011552 | 0.011373 | 0.011551 | 0.011328 |
| 0.011373 | 0.011417 | 0.011417 | 0.011417 | 0.011417 | 0.011417 | 0.011551 |
| 0.011462 | 0.011596 | 0.011462 | 0.011417 | 0.011509 | 0.011641 | 0.011600 |
| 0.011596 | 0.011551 | 0.011373 | 0.011330 | 0.011507 | 0.011373 | 0.011328 |
| 0.011467 | 0.011596 | 0.011417 | 0.011596 | 0.011328 | 0.011462 | 0.011417 |
| 0.011552 | 0.011373 | 0.011462 | 0.011373 | 0.011417 | 0.011328 | 0.011462 |
| 0.011507 | 0.011462 | 0.011462 | 0.011373 | 0.011462 | 0.011507 | 0.011641 |
| 0.011730 | 0.011596 | 0.011686 | 0.011462 | 0.011730 | 0.011462 | 0.011462 |
| 0.011374 | 0.011550 | 0.011484 | 0.011333 | 0.011782 | 0.011332 | 0.011422 |
| 0.011735 | 0.011646 | 0.011551 | 0.011820 | 0.011559 | 0.011596 | 0.011686 |
| 0.011641 | 0.011685 | 0.011675 | 0.011338 | 0.011337 | 0.011552 | 0.011602 |
| 0.011730 | 0.011553 | 0.011596 | 0.011688 | 0.011551 | 0.011820 | 0.012006 |

|          |          |          |          |          |          |          |
|----------|----------|----------|----------|----------|----------|----------|
| 0.011599 | 0.011694 | 0.011647 | 0.011692 | 0.011866 | 0.011373 | 0.011464 |
| 0.011417 | 0.011417 | 0.011328 | 0.011328 | 0.011417 | 0.011462 | 0.011462 |
| 0.011462 | 0.011552 | 0.011417 | 0.011373 | 0.011462 | 0.011462 | 0.011462 |
| 0.011462 | 0.011775 | 0.011596 | 0.011596 | 0.011328 | 0.011417 | 0.011507 |
| 0.011507 | 0.011373 | 0.011507 | 0.011507 | 0.011373 | 0.011373 | 0.011373 |
| 0.011775 | 0.011417 | 0.011596 | 0.011373 | 0.011462 | 0.011596 | 0.011373 |
| 0.011373 | 0.011373 | 0.011462 | 0.011596 | 0.011417 | 0.011551 | 0.011730 |
| 0.011641 | 0.011462 | 0.011462 | 0.011373 | 0.011373 | 0.011462 | 0.011417 |
| 0.011373 | 0.011507 | 0.011328 | 0.011328 | 0.011507 | 0.011462 | 0.011373 |
| 0.011373 | 0.011507 | 0.011329 | 0.011328 | 0.011596 | 0.011328 | 0.011551 |
| 0.011610 | 0.011418 | 0.011596 | 0.011552 | 0.011552 | 0.011417 | 0.011507 |
| 0.011417 | 0.011596 | 0.011328 | 0.011283 | 0.011284 | 0.011284 | 0.011328 |
| 0.011551 | 0.011685 | 0.011462 | 0.011552 | 0.011328 | 0.011596 | 0.011284 |
| 0.011417 | 0.011373 | 0.011417 | 0.011462 | 0.011462 | 0.011551 | 0.011686 |
| 0.011552 | 0.011462 | 0.011417 | 0.011641 | 0.011596 | 0.011417 | 0.011373 |
| 0.011373 | 0.011417 | 0.011462 | 0.011283 | 0.011373 | 0.011551 | 0.011373 |
| 0.011283 | 0.011417 | 0.011507 | 0.011507 | 0.011462 | 0.011462 | 0.011418 |
| 0.011507 | 0.011417 | 0.011462 | 0.011373 | 0.011596 | 0.011641 | 0.011820 |
| 0.011373 | 0.011730 | 0.011462 | 0.018819 | 0.011388 | 0.011540 | 0.011686 |
| 0.011596 | 0.011641 | 0.011433 | 0.011472 | 0.011847 | 0.011641 | 0.011458 |
| 0.011436 | 0.011623 | 0.011329 | 0.011425 | 0.011347 | 0.011403 | 0.011369 |
| 0.011543 | 0.011507 | 0.011512 | 0.011442 | 0.011507 | 0.011641 | 0.011510 |
| 0.011470 | 0.011507 | 0.011596 | 0.011462 | 0.011507 | 0.011507 | 0.011507 |
| 0.011417 | 0.011373 | 0.011373 | 0.011551 | 0.011462 | 0.011417 | 0.011462 |
| 0.011462 | 0.011507 | 0.011328 | 0.011507 | 0.011596 | 0.011507 | 0.011462 |
| 0.011462 | 0.011373 | 0.011596 | 0.011596 | 0.011596 | 0.011642 | 0.011596 |
| 0.011328 | 0.011328 | 0.011373 | 0.011507 | 0.011373 | 0.011596 | 0.011596 |
| 0.011551 | 0.011551 | 0.011551 | 0.011596 | 0.011730 | 0.011598 | 0.011507 |
| 0.011462 | 0.011596 | 0.011686 | 0.011328 | 0.011462 | 0.011417 | 0.011507 |
| 0.011462 | 0.011462 | 0.011507 | 0.011507 | 0.011508 | 0.011596 | 0.011551 |
| 0.011557 | 0.011373 | 0.011373 | 0.011686 | 0.011462 | 0.011552 | 0.011685 |
| 0.011820 | 0.011559 | 0.011596 | 0.011686 | 0.011641 | 0.011685 | 0.011418 |
| 0.011598 | 0.011507 | 0.011462 | 0.011462 | 0.011507 | 0.011328 | 0.011507 |
| 0.011596 | 0.011507 | 0.011462 | 0.011462 | 0.011373 | 0.011596 | 0.011596 |
| 0.011596 | 0.011642 | 0.011551 | 0.011596 | 0.012223 | 0.011534 | 0.011531 |
| 0.011665 | 0.011562 | 0.011624 | 0.011570 | 0.011522 | 0.011656 | 0.011557 |
| 0.012155 | 0.011520 | 0.011605 | 0.011565 | 0.011882 | 0.011691 | 0.011736 |
| 0.012149 | 0.011521 | 0.011418 | 0.011462 | 0.011417 | 0.011507 | 0.011373 |
| 0.011373 | 0.011417 | 0.011507 | 0.011462 | 0.011418 | 0.011551 | 0.011462 |
| 0.011462 | 0.011417 | 0.011462 | 0.011328 | 0.011373 | 0.011373 | 0.011328 |
| 0.011417 | 0.011462 | 0.011417 | 0.011373 | 0.011462 | 0.011417 | 0.011417 |
| 0.011462 | 0.011373 | 0.011462 | 0.011462 | 0.011373 | 0.011596 | 0.011641 |
| 0.011507 | 0.011552 | 0.011462 | 0.011507 | 0.011373 | 0.011775 | 0.011417 |
| 0.011482 | 0.011418 | 0.011641 | 0.011648 | 0.011552 | 0.011417 | 0.011551 |
| 0.011596 | 0.011507 | 0.011417 | 0.011507 | 0.011641 | 0.011596 | 0.011507 |
| 0.011462 | 0.011596 | 0.011730 | 0.011417 | 0.011641 | 0.011641 | 0.011551 |
| 0.011417 | 0.011507 | 0.011596 | 0.011820 | 0.011507 | 0.011552 | 0.011507 |
| 0.011507 | 0.011328 | 0.011328 | 0.011641 | 0.011686 | 0.011641 | 0.011462 |
| 0.011596 | 0.011596 | 0.011507 | 0.011596 | 0.011462 | 0.011417 | 0.011596 |
| 0.011507 | 0.011417 | 0.011328 | 0.011551 | 0.011462 | 0.011462 | 0.011775 |
| 0.011417 | 0.011690 | 0.011820 | 0.011564 | 0.011247 | 0.011462 | 0.011286 |
| 0.011269 | 0.011730 | 0.011328 | 0.000000 | 0.011213 | 0.011428 | 0.011326 |
| 0.011617 | 0.011258 | 0.011394 | 0.011325 | 0.011330 | 0.011462 | 0.011529 |
| 0.011563 | 0.011467 | 0.011373 | 0.011467 | 0.011463 | 0.011551 | 0.011551 |
| 0.011641 | 0.011463 | 0.011643 | 0.011554 | 0.011463 | 0.011670 | 0.011417 |
| 0.011730 | 0.011596 | 0.011417 | 0.011552 | 0.011373 | 0.011551 | 0.011328 |
| 0.011373 | 0.011417 | 0.011417 | 0.011417 | 0.011417 | 0.011417 | 0.011551 |
| 0.011420 | 0.011428 | 0.011507 | 0.011468 | 0.011603 | 0.011463 | 0.011555 |
| 0.011555 | 0.011417 | 0.011348 | 0.011339 | 0.011507 | 0.011596 | 0.011597 |
| 0.011417 | 0.011507 | 0.011641 | 0.011686 | 0.011641 | 0.011641 | 0.011596 |

|          |          |          |          |          |          |          |
|----------|----------|----------|----------|----------|----------|----------|
| 0.011507 | 0.011596 | 0.011641 | 0.011507 | 0.012088 | 0.011596 | 0.011641 |
| 0.011820 | 0.011624 | 0.011288 | 0.011522 | 0.011417 | 0.011641 | 0.011641 |
| 0.011507 | 0.011596 | 0.011641 | 0.011641 | 0.011723 | 0.011775 | 0.011476 |
| 0.011331 | 0.011336 | 0.011467 | 0.011423 | 0.011379 | 0.011358 | 0.011557 |
| 0.011516 | 0.011524 | 0.011382 | 0.011509 | 0.011507 | 0.011558 | 0.011462 |
| 0.011373 | 0.011328 | 0.011507 | 0.011373 | 0.011641 | 0.011552 | 0.011507 |
| 0.011596 | 0.011686 | 0.011373 | 0.011373 | 0.011373 | 0.011373 | 0.011373 |
| 0.011418 | 0.011507 | 0.011507 | 0.011463 | 0.011551 | 0.011551 | 0.011641 |
| 0.011463 | 0.011643 | 0.011554 | 0.011463 | 0.011670 | 0.011417 | 0.011685 |
| 0.011641 | 0.011641 | 0.011375 | 0.011565 | 0.011615 | 0.011514 | 0.011431 |
| 0.011517 | 0.011669 | 0.011573 | 0.011513 | 0.011417 | 0.011596 | 0.011462 |
| 0.011596 | 0.011462 | 0.011417 | 0.011509 | 0.011641 | 0.011600 | 0.011551 |
| 0.011373 | 0.011330 | 0.011507 | 0.011373 | 0.011328 | 0.011467 | 0.011596 |
| 0.011417 | 0.011373 | 0.011373 | 0.011551 | 0.011462 | 0.011417 | 0.011551 |
| 0.011462 | 0.011507 | 0.011551 | 0.011462 | 0.011462 | 0.011641 | 0.011283 |
| 0.011462 | 0.011775 | 0.011462 | 0.011462 | 0.011417 | 0.011730 | 0.011351 |
| 0.011681 | 0.011304 | 0.011285 | 0.011577 | 0.011664 | 0.011551 | 0.011299 |
| 0.011235 | 0.011462 | 0.011596 | 0.011694 | 0.011551 | 0.011730 | 0.011864 |
| 0.011776 | 0.011736 | 0.011730 | 0.011954 | 0.011596 | 0.012670 | 0.011775 |
| 0.012447 | 0.012267 | 0.012536 | 0.012537 | 0.011686 | 0.011283 | 0.011730 |
| 0.012179 | 0.011865 | 0.011641 | 0.011552 | 0.011462 | 0.011462 | 0.011600 |
| 0.011462 | 0.011462 | 0.011507 | 0.011462 | 0.011910 | 0.011954 | 0.011999 |
| 0.011775 | 0.011954 | 0.012088 | 0.011820 | 0.012224 | 0.012187 | 0.012269 |
| 0.012268 | 0.012313 | 0.012268 | 0.012269 | 0.012314 | 0.011551 | 0.011775 |
| 0.011820 | 0.012357 | 0.011824 | 0.011954 | 0.011775 | 0.011464 | 0.011507 |
| 0.011462 | 0.011462 | 0.011909 | 0.012004 | 0.012133 | 0.011775 | 0.011462 |
| S613     | 0.011402 | 0.011402 | 0.011793 | 0.011695 | 0.011695 | 0.011744 |
| 0.011601 | 0.011503 | 0.011695 | 0.011207 | 0.011304 | 0.011255 | 0.011207 |
| 0.011158 | 0.011451 | 0.011109 | 0.011255 | 0.011255 | 0.011304 | 0.011255 |
| 0.011255 | 0.011304 | 0.011353 | 0.011207 | 0.011207 | 0.011207 | 0.011601 |
| 0.011499 | 0.011304 | 0.011158 | 0.011353 | 0.011255 | 0.011255 | 0.011158 |
| 0.011304 | 0.011402 | 0.011353 | 0.011353 | 0.011353 | 0.011353 | 0.011597 |
| 0.011109 | 0.011353 | 0.011353 | 0.011304 | 0.011353 | 0.011451 | 0.011402 |
| 0.011353 | 0.011499 | 0.011304 | 0.011646 | 0.011304 | 0.011499 | 0.011304 |
| 0.011255 | 0.011353 | 0.011353 | 0.011499 | 0.011646 | 0.011255 | 0.011451 |
| 0.011304 | 0.011304 | 0.011304 | 0.011499 | 0.011695 | 0.011353 | 0.011353 |
| 0.011304 | 0.011304 | 0.011402 | 0.011451 | 0.011255 | 0.011353 | 0.011353 |
| 0.011255 | 0.011255 | 0.011207 | 0.011158 | 0.011353 | 0.011255 | 0.011451 |
| 0.011353 | 0.011255 | 0.011402 | 0.011158 | 0.011402 | 0.011207 | 0.011207 |
| 0.011499 | 0.011402 | 0.011695 | 0.011499 | 0.011304 | 0.011548 | 0.011353 |
| 0.011451 | 0.011695 | 0.011548 | 0.011209 | 0.011207 | 0.011315 | 0.011304 |
| 0.011304 | 0.011355 | 0.011161 | 0.011499 | 0.011499 | 0.011207 | 0.011304 |
| 0.011353 | 0.011255 | 0.011451 | 0.011304 | 0.011353 | 0.011304 | 0.011255 |
| 0.011207 | 0.011255 | 0.011548 | 0.011499 | 0.011353 | 0.011304 | 0.011255 |
| 0.011158 | 0.011158 | 0.011304 | 0.011207 | 0.011499 | 0.011451 | 0.011353 |
| 0.011499 | 0.011597 | 0.011207 | 0.011207 | 0.011255 | 0.011255 | 0.011256 |
| 0.011305 | 0.011304 | 0.011353 | 0.011162 | 0.011213 | 0.011214 | 0.011255 |
| 0.011304 | 0.011255 | 0.011308 | 0.011304 | 0.011209 | 0.011259 | 0.011306 |
| 0.011421 | 0.011310 | 0.011207 | 0.011255 | 0.011158 | 0.011353 | 0.011207 |
| 0.011304 | 0.011304 | 0.011304 | 0.011353 | 0.011353 | 0.011695 | 0.011548 |
| 0.011597 | 0.011402 | 0.011255 | 0.011402 | 0.011207 | 0.011402 | 0.011158 |
| 0.011255 | 0.011255 | 0.011207 | 0.011255 | 0.011255 | 0.011255 | 0.011402 |
| 0.011255 | 0.011402 | 0.011304 | 0.011207 | 0.011354 | 0.011499 | 0.011500 |
| 0.011402 | 0.011402 | 0.011158 | 0.011158 | 0.011353 | 0.011158 | 0.011158 |
| 0.011307 | 0.011402 | 0.011207 | 0.011402 | 0.011158 | 0.011304 | 0.011207 |
| 0.011304 | 0.011255 | 0.011304 | 0.011207 | 0.011255 | 0.011158 | 0.011255 |
| 0.011304 | 0.011304 | 0.011304 | 0.011255 | 0.011255 | 0.011304 | 0.011499 |
| 0.011646 | 0.011548 | 0.011646 | 0.011499 | 0.011597 | 0.011255 | 0.011255 |
| 0.011207 | 0.011414 | 0.011322 | 0.011160 | 0.011704 | 0.011160 | 0.011341 |
| 0.011650 | 0.011504 | 0.011402 | 0.011646 | 0.011407 | 0.011499 | 0.011451 |

|          |          |          |          |          |          |          |
|----------|----------|----------|----------|----------|----------|----------|
| 0.011451 | 0.011646 | 0.011473 | 0.011296 | 0.011177 | 0.011402 | 0.011406 |
| 0.011646 | 0.011403 | 0.011451 | 0.011550 | 0.011353 | 0.011597 | 0.011848 |
| 0.011355 | 0.011555 | 0.011504 | 0.011553 | 0.011598 | 0.011207 | 0.011354 |
| 0.011255 | 0.011304 | 0.011158 | 0.011158 | 0.011207 | 0.011304 | 0.011304 |
| 0.011255 | 0.011304 | 0.011207 | 0.011255 | 0.011255 | 0.011304 | 0.011255 |
| 0.011304 | 0.011743 | 0.011597 | 0.011548 | 0.011158 | 0.011304 | 0.011353 |
| 0.011353 | 0.011255 | 0.011304 | 0.011353 | 0.011207 | 0.011207 | 0.011207 |
| 0.011744 | 0.011255 | 0.011304 | 0.011207 | 0.011304 | 0.011353 | 0.011207 |
| 0.011207 | 0.011207 | 0.011304 | 0.011402 | 0.011255 | 0.011451 | 0.011548 |
| 0.011548 | 0.011304 | 0.011304 | 0.011207 | 0.011207 | 0.011304 | 0.011255 |
| 0.011207 | 0.011353 | 0.011158 | 0.011158 | 0.011402 | 0.011402 | 0.011207 |
| 0.011207 | 0.011402 | 0.011207 | 0.011158 | 0.011499 | 0.011158 | 0.011402 |
| 0.011361 | 0.011255 | 0.011548 | 0.011353 | 0.011402 | 0.011255 | 0.011353 |
| 0.011255 | 0.011499 | 0.011158 | 0.011255 | 0.011109 | 0.011109 | 0.011158 |
| 0.011353 | 0.011548 | 0.011304 | 0.011304 | 0.011207 | 0.011597 | 0.011109 |
| 0.011255 | 0.011255 | 0.011255 | 0.011255 | 0.011304 | 0.011402 | 0.011499 |
| 0.011499 | 0.011304 | 0.011353 | 0.011500 | 0.011353 | 0.011255 | 0.011207 |
| 0.011255 | 0.011255 | 0.011304 | 0.011109 | 0.011158 | 0.011353 | 0.011255 |
| 0.011109 | 0.011255 | 0.011402 | 0.011402 | 0.011207 | 0.011207 | 0.011304 |
| 0.011304 | 0.011255 | 0.011304 | 0.011207 | 0.011353 | 0.011548 | 0.011695 |
| 0.011207 | 0.011548 | 0.011207 | 0.020012 | 0.011191 | 0.011497 | 0.011548 |
| 0.011548 | 0.011597 | 0.011327 | 0.011288 | 0.011684 | 0.011597 | 0.011403 |
| 0.011341 | 0.011507 | 0.011158 | 0.011173 | 0.011113 | 0.011240 | 0.011281 |
| 0.011397 | 0.011353 | 0.011357 | 0.000000 | 0.011402 | 0.011402 | 0.011404 |
| 0.011210 | 0.011402 | 0.011451 | 0.011255 | 0.011353 | 0.011353 | 0.011256 |
| 0.011353 | 0.011255 | 0.011255 | 0.011353 | 0.011304 | 0.011207 | 0.011255 |
| 0.011255 | 0.011353 | 0.011158 | 0.011353 | 0.011451 | 0.011451 | 0.011255 |
| 0.011255 | 0.011255 | 0.011499 | 0.011499 | 0.011402 | 0.011500 | 0.011499 |
| 0.011158 | 0.011207 | 0.011207 | 0.011353 | 0.011158 | 0.011402 | 0.011402 |
| 0.011451 | 0.011402 | 0.011451 | 0.011499 | 0.011597 | 0.011501 | 0.011207 |
| 0.011353 | 0.011402 | 0.011451 | 0.011255 | 0.011304 | 0.011207 | 0.011402 |
| 0.011353 | 0.011353 | 0.011402 | 0.011304 | 0.011304 | 0.011451 | 0.011402 |
| 0.011406 | 0.011207 | 0.011304 | 0.011499 | 0.011304 | 0.011451 | 0.011548 |
| 0.011646 | 0.011407 | 0.011499 | 0.011451 | 0.011451 | 0.011646 | 0.011207 |
| 0.011452 | 0.011353 | 0.011255 | 0.011255 | 0.011353 | 0.011158 | 0.011353 |
| 0.011451 | 0.011451 | 0.011255 | 0.011255 | 0.011255 | 0.011499 | 0.011499 |
| 0.011402 | 0.011500 | 0.011353 | 0.011402 | 0.011940 | 0.011417 | 0.011314 |
| 0.011563 | 0.011360 | 0.011416 | 0.011362 | 0.011414 | 0.011461 | 0.011406 |
| 0.011907 | 0.011312 | 0.011458 | 0.011261 | 0.011660 | 0.011602 | 0.011552 |
| 0.011953 | 0.011437 | 0.011256 | 0.011304 | 0.011304 | 0.011353 | 0.011256 |
| 0.011207 | 0.011207 | 0.011353 | 0.011304 | 0.011256 | 0.011402 | 0.011402 |
| 0.011304 | 0.011207 | 0.011207 | 0.011255 | 0.011158 | 0.011255 | 0.011158 |
| 0.011255 | 0.011304 | 0.011207 | 0.011207 | 0.011353 | 0.011255 | 0.011255 |
| 0.011304 | 0.011207 | 0.011304 | 0.011353 | 0.011207 | 0.011402 | 0.011548 |
| 0.011353 | 0.011402 | 0.011402 | 0.011353 | 0.011158 | 0.011646 | 0.011353 |
| 0.011314 | 0.011207 | 0.011499 | 0.011505 | 0.011353 | 0.011255 | 0.011353 |
| 0.011402 | 0.011255 | 0.011255 | 0.011255 | 0.011499 | 0.011451 | 0.011353 |
| 0.011353 | 0.011451 | 0.011695 | 0.011304 | 0.011499 | 0.011499 | 0.011353 |
| 0.011255 | 0.011402 | 0.011402 | 0.011695 | 0.011402 | 0.011353 | 0.011353 |
| 0.011353 | 0.011158 | 0.011158 | 0.011451 | 0.011500 | 0.011402 | 0.011304 |
| 0.011451 | 0.011402 | 0.011304 | 0.011451 | 0.011304 | 0.011255 | 0.011548 |
| 0.011402 | 0.011255 | 0.011158 | 0.011402 | 0.011304 | 0.011207 | 0.011646 |
| 0.011255 | 0.011699 | 0.011744 | 0.011407 | 0.000000 | 0.011207 | 0.011119 |
| 0.011211 | 0.011695 | 0.011158 | 0.011213 | 0.000000 | 0.011334 | 0.011171 |
| 0.011352 | 0.011126 | 0.011235 | 0.011129 | 0.011170 | 0.011261 | 0.011357 |
| 0.011402 | 0.011255 | 0.011207 | 0.011308 | 0.011353 | 0.011402 | 0.011451 |
| 0.011499 | 0.011353 | 0.011452 | 0.011452 | 0.011452 | 0.011623 | 0.011255 |
| 0.011597 | 0.011402 | 0.011255 | 0.011402 | 0.011207 | 0.011402 | 0.011158 |
| 0.011255 | 0.011255 | 0.011207 | 0.011255 | 0.011255 | 0.011255 | 0.011402 |
| 0.011306 | 0.011161 | 0.011353 | 0.011209 | 0.011505 | 0.011256 | 0.011454 |

|          |          |          |          |          |          |          |
|----------|----------|----------|----------|----------|----------|----------|
| 0.011355 | 0.011255 | 0.011113 | 0.011162 | 0.011353 | 0.011500 | 0.011451 |
| 0.011255 | 0.011353 | 0.011597 | 0.011597 | 0.011499 | 0.011402 | 0.011402 |
| 0.011402 | 0.011402 | 0.011353 | 0.011255 | 0.011988 | 0.011402 | 0.011597 |
| 0.011744 | 0.011581 | 0.011260 | 0.011363 | 0.011255 | 0.011255 | 0.011402 |
| 0.011305 | 0.011451 | 0.011451 | 0.011451 | 0.011401 | 0.011695 | 0.011261 |
| 0.011159 | 0.011161 | 0.011307 | 0.011259 | 0.011210 | 0.011114 | 0.011505 |
| 0.011356 | 0.011372 | 0.011130 | 0.011326 | 0.011255 | 0.011308 | 0.011255 |
| 0.011158 | 0.011158 | 0.011304 | 0.011207 | 0.011499 | 0.011451 | 0.011353 |
| 0.011499 | 0.011597 | 0.011207 | 0.011207 | 0.011255 | 0.011255 | 0.011256 |
| 0.011305 | 0.011304 | 0.011353 | 0.011353 | 0.011402 | 0.011451 | 0.011499 |
| 0.011353 | 0.011452 | 0.011452 | 0.011452 | 0.011623 | 0.011255 | 0.011499 |
| 0.011402 | 0.011402 | 0.011208 | 0.011362 | 0.011465 | 0.011359 | 0.011316 |
| 0.011309 | 0.011664 | 0.011490 | 0.011308 | 0.011207 | 0.011402 | 0.011255 |
| 0.011402 | 0.011304 | 0.011207 | 0.011354 | 0.011499 | 0.011500 | 0.011402 |
| 0.011158 | 0.011158 | 0.011353 | 0.011158 | 0.011158 | 0.011307 | 0.011402 |
| 0.011353 | 0.011255 | 0.011255 | 0.011353 | 0.011304 | 0.011207 | 0.011402 |
| 0.011304 | 0.011402 | 0.011402 | 0.011255 | 0.011402 | 0.011597 | 0.011109 |
| 0.011304 | 0.011646 | 0.011255 | 0.011255 | 0.011255 | 0.011646 | 0.011112 |
| 0.011502 | 0.011217 | 0.011118 | 0.011411 | 0.011451 | 0.011402 | 0.011161 |
| 0.000000 | 0.011402 | 0.011499 | 0.011695 | 0.011499 | 0.011695 | 0.011841 |
| 0.011744 | 0.011750 | 0.011695 | 0.011890 | 0.011548 | 0.012526 | 0.011597 |
| 0.012380 | 0.012086 | 0.012379 | 0.012380 | 0.011548 | 0.011207 | 0.011695 |
| 0.011989 | 0.011842 | 0.011499 | 0.011500 | 0.011499 | 0.011499 | 0.011552 |
| 0.011402 | 0.011402 | 0.011451 | 0.011451 | 0.011842 | 0.011841 | 0.011890 |
| 0.011695 | 0.011792 | 0.011988 | 0.011646 | 0.011989 | 0.011946 | 0.012038 |
| 0.012087 | 0.012038 | 0.012038 | 0.011989 | 0.012038 | 0.011353 | 0.011451 |
| 0.011646 | 0.012135 | 0.011650 | 0.011890 | 0.011744 | 0.011403 | 0.011402 |
| 0.011353 | 0.011353 | 0.011841 | 0.011829 | 0.011939 | 0.011646 | 0.011353 |
| S614     | 0.011518 | 0.011518 | 0.011824 | 0.011722 | 0.011722 | 0.011824 |
| 0.011368 | 0.011317 | 0.011671 | 0.011366 | 0.011416 | 0.011264 | 0.011315 |
| 0.011315 | 0.011417 | 0.011264 | 0.011315 | 0.011366 | 0.011417 | 0.011366 |
| 0.011315 | 0.011417 | 0.011366 | 0.011315 | 0.011366 | 0.011264 | 0.011419 |
| 0.011518 | 0.011417 | 0.011264 | 0.011366 | 0.011417 | 0.011366 | 0.011315 |
| 0.011417 | 0.011569 | 0.011366 | 0.011417 | 0.011213 | 0.011366 | 0.011722 |
| 0.011264 | 0.011416 | 0.011213 | 0.011315 | 0.011518 | 0.011467 | 0.011518 |
| 0.011417 | 0.011366 | 0.011417 | 0.011366 | 0.011162 | 0.011671 | 0.011162 |
| 0.011315 | 0.011518 | 0.011366 | 0.011671 | 0.011569 | 0.011417 | 0.011518 |
| 0.011518 | 0.011467 | 0.011366 | 0.011569 | 0.011518 | 0.011467 | 0.011467 |
| 0.011366 | 0.011417 | 0.011518 | 0.011569 | 0.011366 | 0.011366 | 0.011366 |
| 0.011366 | 0.011366 | 0.011315 | 0.011315 | 0.011416 | 0.011366 | 0.011518 |
| 0.011467 | 0.011366 | 0.011569 | 0.011264 | 0.011416 | 0.011366 | 0.011315 |
| 0.011467 | 0.011467 | 0.011518 | 0.011519 | 0.011417 | 0.011620 | 0.011366 |
| 0.011468 | 0.011417 | 0.011620 | 0.011319 | 0.011315 | 0.011332 | 0.011315 |
| 0.011315 | 0.011249 | 0.011322 | 0.011518 | 0.011569 | 0.011315 | 0.011417 |
| 0.011467 | 0.011366 | 0.011569 | 0.011416 | 0.011468 | 0.011467 | 0.011366 |
| 0.011315 | 0.011366 | 0.011518 | 0.011518 | 0.011467 | 0.011417 | 0.011417 |
| 0.011315 | 0.011315 | 0.011467 | 0.011315 | 0.011366 | 0.011417 | 0.011315 |
| 0.011467 | 0.011569 | 0.011315 | 0.011315 | 0.011366 | 0.011366 | 0.011366 |
| 0.011417 | 0.011417 | 0.011467 | 0.011273 | 0.011273 | 0.011328 | 0.011366 |
| 0.011315 | 0.011366 | 0.011423 | 0.011417 | 0.011319 | 0.011371 | 0.011316 |
| 0.011382 | 0.011373 | 0.011418 | 0.011315 | 0.011264 | 0.011467 | 0.011366 |
| 0.011468 | 0.011417 | 0.011417 | 0.011467 | 0.011416 | 0.011773 | 0.011671 |
| 0.011620 | 0.011569 | 0.011264 | 0.011518 | 0.011315 | 0.011417 | 0.011264 |
| 0.011366 | 0.011366 | 0.011366 | 0.011366 | 0.011366 | 0.011366 | 0.011518 |
| 0.011417 | 0.011518 | 0.011417 | 0.011315 | 0.011367 | 0.011620 | 0.011570 |
| 0.011518 | 0.011467 | 0.011264 | 0.011265 | 0.011467 | 0.011264 | 0.011264 |
| 0.011368 | 0.011519 | 0.011366 | 0.011518 | 0.011264 | 0.011417 | 0.011315 |
| 0.011518 | 0.011366 | 0.011366 | 0.011315 | 0.011366 | 0.011264 | 0.011417 |
| 0.011467 | 0.011416 | 0.011416 | 0.011315 | 0.011366 | 0.011467 | 0.011620 |
| 0.011417 | 0.011366 | 0.011417 | 0.011417 | 0.011417 | 0.011366 | 0.011366 |

|          |          |          |          |          |          |          |
|----------|----------|----------|----------|----------|----------|----------|
| 0.011316 | 0.011432 | 0.011604 | 0.011268 | 0.011576 | 0.011266 | 0.011413 |
| 0.011471 | 0.011472 | 0.011518 | 0.011620 | 0.011472 | 0.011620 | 0.011569 |
| 0.011518 | 0.011671 | 0.011603 | 0.011444 | 0.011314 | 0.011519 | 0.011524 |
| 0.011722 | 0.011519 | 0.011468 | 0.011623 | 0.011467 | 0.011467 | 0.011986 |
| 0.011470 | 0.011629 | 0.011524 | 0.011626 | 0.011672 | 0.011315 | 0.011520 |
| 0.011366 | 0.011417 | 0.011264 | 0.011264 | 0.011366 | 0.011366 | 0.011366 |
| 0.011416 | 0.011518 | 0.011366 | 0.011417 | 0.011417 | 0.011416 | 0.011315 |
| 0.011417 | 0.011569 | 0.011417 | 0.011366 | 0.011264 | 0.011417 | 0.011468 |
| 0.011467 | 0.011315 | 0.011417 | 0.011467 | 0.011264 | 0.011264 | 0.011264 |
| 0.011569 | 0.011366 | 0.011467 | 0.011315 | 0.011416 | 0.011519 | 0.011264 |
| 0.011315 | 0.011315 | 0.011416 | 0.011518 | 0.011366 | 0.011366 | 0.011569 |
| 0.011417 | 0.011417 | 0.011416 | 0.011315 | 0.011264 | 0.011315 | 0.011366 |
| 0.011315 | 0.011467 | 0.011264 | 0.011264 | 0.011366 | 0.011315 | 0.011315 |
| 0.011315 | 0.011416 | 0.011264 | 0.011264 | 0.011366 | 0.011264 | 0.011467 |
| 0.011479 | 0.011315 | 0.011315 | 0.011468 | 0.011467 | 0.011366 | 0.011213 |
| 0.011315 | 0.011671 | 0.011264 | 0.011315 | 0.011264 | 0.011264 | 0.011264 |
| 0.011467 | 0.011518 | 0.011366 | 0.011467 | 0.011315 | 0.011417 | 0.011264 |
| 0.011366 | 0.011315 | 0.011366 | 0.011417 | 0.011366 | 0.011518 | 0.011620 |
| 0.011519 | 0.011467 | 0.011315 | 0.011518 | 0.011569 | 0.011264 | 0.011315 |
| 0.011366 | 0.011264 | 0.011366 | 0.011264 | 0.011315 | 0.011518 | 0.011366 |
| 0.011264 | 0.011366 | 0.011518 | 0.011467 | 0.011315 | 0.011366 | 0.011366 |
| 0.011417 | 0.011366 | 0.011416 | 0.011315 | 0.011467 | 0.011671 | 0.011620 |
| 0.011315 | 0.011518 | 0.011315 | 0.020525 | 0.011334 | 0.011761 | 0.011468 |
| 0.011366 | 0.011468 | 0.011473 | 0.011287 | 0.011704 | 0.011417 | 0.011566 |
| 0.011630 | 0.011589 | 0.011264 | 0.011355 | 0.011279 | 0.011485 | 0.011346 |
| 0.011413 | 0.011366 | 0.011374 | 0.011150 | 0.011467 | 0.011518 | 0.011520 |
| 0.011425 | 0.011467 | 0.011467 | 0.011366 | 0.011417 | 0.011417 | 0.011417 |
| 0.011417 | 0.011366 | 0.011366 | 0.011467 | 0.011417 | 0.011366 | 0.011366 |
| 0.011366 | 0.011467 | 0.011264 | 0.011417 | 0.011518 | 0.011467 | 0.011366 |
| 0.011467 | 0.011417 | 0.011366 | 0.011366 | 0.011519 | 0.011571 | 0.011467 |
| 0.011264 | 0.011315 | 0.011315 | 0.011518 | 0.011264 | 0.011518 | 0.011518 |
| 0.011569 | 0.011518 | 0.011518 | 0.011620 | 0.011467 | 0.011623 | 0.011417 |
| 0.011467 | 0.011518 | 0.011671 | 0.011366 | 0.011417 | 0.011366 | 0.011468 |
| 0.011417 | 0.011417 | 0.011467 | 0.011467 | 0.011367 | 0.011518 | 0.011518 |
| 0.011473 | 0.011315 | 0.011417 | 0.011468 | 0.011366 | 0.011569 | 0.011671 |
| 0.011620 | 0.011472 | 0.011620 | 0.011569 | 0.011518 | 0.011671 | 0.011315 |
| 0.011468 | 0.011468 | 0.011366 | 0.011366 | 0.011467 | 0.011264 | 0.011417 |
| 0.011518 | 0.011467 | 0.011366 | 0.011467 | 0.011417 | 0.011366 | 0.011366 |
| 0.011519 | 0.011571 | 0.011417 | 0.011467 | 0.012029 | 0.011539 | 0.011385 |
| 0.011592 | 0.011475 | 0.011491 | 0.011485 | 0.011477 | 0.011476 | 0.011473 |
| 0.012102 | 0.011373 | 0.011475 | 0.011375 | 0.011530 | 0.011677 | 0.011625 |
| 0.012044 | 0.011583 | 0.011418 | 0.011417 | 0.011416 | 0.011315 | 0.011366 |
| 0.011315 | 0.011366 | 0.011417 | 0.011417 | 0.011417 | 0.011417 | 0.011467 |
| 0.011416 | 0.011366 | 0.011417 | 0.011315 | 0.011315 | 0.011315 | 0.011264 |
| 0.011366 | 0.011417 | 0.011315 | 0.011315 | 0.011417 | 0.011366 | 0.011366 |
| 0.011366 | 0.011315 | 0.011417 | 0.011366 | 0.011315 | 0.011569 | 0.011569 |
| 0.011417 | 0.011467 | 0.011417 | 0.011417 | 0.011264 | 0.011569 | 0.011416 |
| 0.011329 | 0.011315 | 0.011518 | 0.011525 | 0.011468 | 0.011213 | 0.011467 |
| 0.011519 | 0.011417 | 0.011366 | 0.011417 | 0.011620 | 0.011569 | 0.011467 |
| 0.011416 | 0.011569 | 0.011518 | 0.011366 | 0.011620 | 0.011620 | 0.011518 |
| 0.011366 | 0.011518 | 0.011519 | 0.011569 | 0.011468 | 0.011468 | 0.011467 |
| 0.011467 | 0.011315 | 0.011315 | 0.011569 | 0.011621 | 0.011518 | 0.011417 |
| 0.011518 | 0.011518 | 0.011366 | 0.011518 | 0.011416 | 0.011366 | 0.011366 |
| 0.011416 | 0.011366 | 0.011315 | 0.011518 | 0.011417 | 0.011366 | 0.011468 |
| 0.011366 | 0.011419 | 0.011518 | 0.011417 | 0.011252 | 0.011366 | 0.011243 |
| 0.011437 | 0.011722 | 0.011264 | 0.011428 | 0.011334 | 0.000000 | 0.011340 |
| 0.011365 | 0.011195 | 0.011295 | 0.011271 | 0.011350 | 0.011418 | 0.011479 |
| 0.011473 | 0.011417 | 0.011366 | 0.011370 | 0.011519 | 0.011417 | 0.011468 |
| 0.011518 | 0.011519 | 0.011622 | 0.011419 | 0.011622 | 0.011808 | 0.011366 |
| 0.011620 | 0.011569 | 0.011264 | 0.011518 | 0.011315 | 0.011417 | 0.011264 |



|          |          |          |          |          |          |          |
|----------|----------|----------|----------|----------|----------|----------|
| 0.011366 | 0.011366 | 0.011366 | 0.011366 | 0.011366 | 0.011366 | 0.011518 |
| 0.011368 | 0.011323 | 0.011417 | 0.011319 | 0.011525 | 0.011468 | 0.011522 |
| 0.011522 | 0.011366 | 0.011279 | 0.011272 | 0.011467 | 0.011519 | 0.011570 |
| 0.011366 | 0.011417 | 0.011569 | 0.011672 | 0.011569 | 0.011569 | 0.011366 |
| 0.011518 | 0.011467 | 0.011416 | 0.011416 | 0.011824 | 0.011518 | 0.011722 |
| 0.011722 | 0.011385 | 0.011320 | 0.011483 | 0.011366 | 0.011620 | 0.011518 |
| 0.011366 | 0.011569 | 0.011569 | 0.011569 | 0.011469 | 0.011824 | 0.011431 |
| 0.011266 | 0.011271 | 0.011421 | 0.011319 | 0.011373 | 0.011291 | 0.011318 |
| 0.011477 | 0.011266 | 0.011291 | 0.011520 | 0.011366 | 0.011319 | 0.011417 |
| 0.011315 | 0.011315 | 0.011467 | 0.011315 | 0.011366 | 0.011417 | 0.011315 |
| 0.011467 | 0.011569 | 0.011315 | 0.011315 | 0.011366 | 0.011366 | 0.011366 |
| 0.011417 | 0.011417 | 0.011467 | 0.011519 | 0.011417 | 0.011468 | 0.011518 |
| 0.011519 | 0.011622 | 0.011419 | 0.011622 | 0.011808 | 0.011366 | 0.011671 |
| 0.011518 | 0.011518 | 0.011214 | 0.011478 | 0.011537 | 0.011474 | 0.011431 |
| 0.011476 | 0.011951 | 0.011638 | 0.011418 | 0.011366 | 0.011518 | 0.011417 |
| 0.011518 | 0.011417 | 0.011315 | 0.011367 | 0.011620 | 0.011570 | 0.011467 |
| 0.011264 | 0.011265 | 0.011467 | 0.011264 | 0.011264 | 0.011368 | 0.011519 |
| 0.011417 | 0.011366 | 0.011366 | 0.011467 | 0.011417 | 0.011366 | 0.011416 |
| 0.011366 | 0.011467 | 0.011518 | 0.011315 | 0.011417 | 0.011518 | 0.011264 |
| 0.011366 | 0.011569 | 0.011315 | 0.011417 | 0.011366 | 0.011366 | 0.011274 |
| 0.011871 | 0.011326 | 0.011365 | 0.011427 | 0.011519 | 0.011417 | 0.011267 |
| 0.011247 | 0.011467 | 0.011569 | 0.011732 | 0.011518 | 0.011722 | 0.011875 |
| 0.011774 | 0.011780 | 0.011722 | 0.011978 | 0.011569 | 0.012692 | 0.011825 |
| 0.012488 | 0.012232 | 0.012488 | 0.012438 | 0.011518 | 0.011417 | 0.011722 |
| 0.012233 | 0.011876 | 0.011620 | 0.011569 | 0.011518 | 0.011518 | 0.011521 |
| 0.011467 | 0.011468 | 0.011518 | 0.011519 | 0.011672 | 0.011824 | 0.011773 |
| 0.011569 | 0.011620 | 0.011824 | 0.011518 | 0.012131 | 0.012088 | 0.012183 |
| 0.012182 | 0.012233 | 0.012131 | 0.012131 | 0.012233 | 0.011416 | 0.011620 |
| 0.011824 | 0.012283 | 0.011727 | 0.011824 | 0.011620 | 0.011265 | 0.011315 |
| 0.011315 | 0.011315 | 0.011825 | 0.011755 | 0.011977 | 0.011620 | 0.011264 |
| S615     | 0.011538 | 0.011538 | 0.011698 | 0.011591 | 0.011591 | 0.011698 |
| 0.011328 | 0.011274 | 0.011538 | 0.011273 | 0.011379 | 0.011379 | 0.011326 |
| 0.011273 | 0.011485 | 0.011220 | 0.011326 | 0.011379 | 0.011432 | 0.011379 |
| 0.011379 | 0.011432 | 0.011326 | 0.011326 | 0.011326 | 0.011273 | 0.011381 |
| 0.011485 | 0.011432 | 0.011273 | 0.011326 | 0.011379 | 0.011379 | 0.011273 |
| 0.011432 | 0.011485 | 0.011485 | 0.011432 | 0.011485 | 0.011379 | 0.011751 |
| 0.011220 | 0.011379 | 0.011485 | 0.011379 | 0.011432 | 0.011538 | 0.011538 |
| 0.011485 | 0.011645 | 0.011432 | 0.011432 | 0.011432 | 0.011591 | 0.011432 |
| 0.011379 | 0.011432 | 0.011485 | 0.011591 | 0.011538 | 0.011273 | 0.011538 |
| 0.011485 | 0.011379 | 0.011379 | 0.011538 | 0.011432 | 0.011485 | 0.011485 |
| 0.011432 | 0.011432 | 0.011485 | 0.011591 | 0.011379 | 0.011432 | 0.011432 |
| 0.011379 | 0.011379 | 0.011326 | 0.011273 | 0.011379 | 0.011379 | 0.011591 |
| 0.011485 | 0.011379 | 0.011538 | 0.011273 | 0.011432 | 0.011326 | 0.011326 |
| 0.011538 | 0.011485 | 0.011591 | 0.011485 | 0.011326 | 0.011591 | 0.011432 |
| 0.011432 | 0.011432 | 0.011645 | 0.011326 | 0.011326 | 0.011340 | 0.011273 |
| 0.011273 | 0.011307 | 0.011330 | 0.011538 | 0.011538 | 0.011326 | 0.011432 |
| 0.011485 | 0.011379 | 0.011591 | 0.011432 | 0.011538 | 0.011432 | 0.011379 |
| 0.011326 | 0.011379 | 0.011592 | 0.011538 | 0.011485 | 0.011432 | 0.011379 |
| 0.011273 | 0.011273 | 0.011432 | 0.011326 | 0.011326 | 0.011326 | 0.011273 |
| 0.011326 | 0.011485 | 0.011326 | 0.011326 | 0.011326 | 0.011326 | 0.011326 |
| 0.011326 | 0.011326 | 0.011485 | 0.011279 | 0.011334 | 0.011337 | 0.011326 |
| 0.011326 | 0.011379 | 0.011439 | 0.011432 | 0.011276 | 0.011385 | 0.011381 |
| 0.011282 | 0.011387 | 0.011380 | 0.011326 | 0.011273 | 0.011485 | 0.011326 |
| 0.011432 | 0.011432 | 0.011432 | 0.011485 | 0.011432 | 0.011804 | 0.011645 |
| 0.011591 | 0.011538 | 0.011273 | 0.011538 | 0.011326 | 0.011379 | 0.011273 |
| 0.011326 | 0.011379 | 0.011379 | 0.011379 | 0.011379 | 0.011379 | 0.011538 |
| 0.011379 | 0.011485 | 0.011432 | 0.011326 | 0.011434 | 0.011645 | 0.011539 |
| 0.011485 | 0.011485 | 0.011273 | 0.011274 | 0.011485 | 0.011273 | 0.011273 |
| 0.011381 | 0.011485 | 0.011326 | 0.011485 | 0.011273 | 0.011432 | 0.011326 |
| 0.011326 | 0.011326 | 0.011220 | 0.011326 | 0.011379 | 0.011273 | 0.011379 |

|          |          |          |          |          |          |          |
|----------|----------|----------|----------|----------|----------|----------|
| 0.011432 | 0.011432 | 0.011432 | 0.011273 | 0.011379 | 0.011432 | 0.011644 |
| 0.011379 | 0.011379 | 0.011432 | 0.011432 | 0.011432 | 0.011379 | 0.011379 |
| 0.011327 | 0.011382 | 0.011406 | 0.011276 | 0.011597 | 0.011222 | 0.011365 |
| 0.011435 | 0.011382 | 0.011485 | 0.011645 | 0.011492 | 0.011591 | 0.011592 |
| 0.011591 | 0.011644 | 0.011624 | 0.011382 | 0.011325 | 0.011538 | 0.011544 |
| 0.011751 | 0.011486 | 0.011485 | 0.011541 | 0.011485 | 0.011538 | 0.011919 |
| 0.011435 | 0.011546 | 0.011598 | 0.011651 | 0.011699 | 0.011326 | 0.011487 |
| 0.011220 | 0.011379 | 0.011273 | 0.011273 | 0.011326 | 0.011432 | 0.011432 |
| 0.011379 | 0.011432 | 0.011326 | 0.011326 | 0.011379 | 0.011432 | 0.011326 |
| 0.011432 | 0.011591 | 0.011379 | 0.011326 | 0.011273 | 0.011379 | 0.011485 |
| 0.011485 | 0.011326 | 0.011432 | 0.011485 | 0.011273 | 0.011273 | 0.011273 |
| 0.011591 | 0.011273 | 0.011432 | 0.011326 | 0.011432 | 0.011432 | 0.011273 |
| 0.011326 | 0.011326 | 0.011432 | 0.011538 | 0.011379 | 0.011379 | 0.011538 |
| 0.011379 | 0.011432 | 0.011432 | 0.011326 | 0.011273 | 0.011379 | 0.011379 |
| 0.011326 | 0.011485 | 0.011273 | 0.011273 | 0.011379 | 0.011273 | 0.011326 |
| 0.011326 | 0.011432 | 0.011273 | 0.011273 | 0.011379 | 0.011273 | 0.011538 |
| 0.011443 | 0.011379 | 0.011326 | 0.011485 | 0.011432 | 0.011379 | 0.011485 |
| 0.011379 | 0.011591 | 0.011273 | 0.011220 | 0.011220 | 0.011220 | 0.011273 |
| 0.011432 | 0.011379 | 0.011379 | 0.011432 | 0.011273 | 0.011379 | 0.011220 |
| 0.011326 | 0.011326 | 0.011379 | 0.011326 | 0.011432 | 0.011538 | 0.011644 |
| 0.011485 | 0.011432 | 0.011379 | 0.011592 | 0.011538 | 0.011379 | 0.011326 |
| 0.011326 | 0.011379 | 0.011379 | 0.011220 | 0.011273 | 0.011538 | 0.011326 |
| 0.011220 | 0.011379 | 0.011485 | 0.011485 | 0.011326 | 0.011326 | 0.011379 |
| 0.011432 | 0.011379 | 0.011379 | 0.011326 | 0.011485 | 0.011644 | 0.011591 |
| 0.011326 | 0.011485 | 0.011326 | 0.020196 | 0.011388 | 0.011624 | 0.011379 |
| 0.011379 | 0.011379 | 0.011481 | 0.011436 | 0.011585 | 0.011379 | 0.011556 |
| 0.011507 | 0.011376 | 0.011273 | 0.011299 | 0.011283 | 0.011311 | 0.011294 |
| 0.011348 | 0.011326 | 0.011326 | 0.011240 | 0.011432 | 0.011538 | 0.011435 |
| 0.011387 | 0.011432 | 0.011538 | 0.011379 | 0.011432 | 0.011433 | 0.011432 |
| 0.011379 | 0.011326 | 0.011326 | 0.011432 | 0.011432 | 0.011326 | 0.011379 |
| 0.011379 | 0.011485 | 0.011273 | 0.011432 | 0.011538 | 0.011432 | 0.011379 |
| 0.011432 | 0.011326 | 0.011379 | 0.011379 | 0.011539 | 0.011646 | 0.011538 |
| 0.011273 | 0.011273 | 0.011326 | 0.011379 | 0.011273 | 0.011538 | 0.011538 |
| 0.011538 | 0.011485 | 0.011538 | 0.011591 | 0.011485 | 0.011594 | 0.011379 |
| 0.011432 | 0.011538 | 0.011644 | 0.011326 | 0.011432 | 0.011326 | 0.011485 |
| 0.011379 | 0.011379 | 0.011432 | 0.011379 | 0.011326 | 0.011591 | 0.011485 |
| 0.011544 | 0.011273 | 0.011326 | 0.011591 | 0.011432 | 0.011538 | 0.011644 |
| 0.011645 | 0.011492 | 0.011591 | 0.011592 | 0.011591 | 0.011644 | 0.011326 |
| 0.011540 | 0.011485 | 0.011379 | 0.011379 | 0.011485 | 0.011273 | 0.011432 |
| 0.011538 | 0.011432 | 0.011379 | 0.011432 | 0.011326 | 0.011379 | 0.011379 |
| 0.011539 | 0.011646 | 0.011432 | 0.011485 | 0.012017 | 0.011512 | 0.011400 |
| 0.011616 | 0.011496 | 0.011455 | 0.011393 | 0.011446 | 0.011553 | 0.011491 |
| 0.012094 | 0.011390 | 0.011493 | 0.011390 | 0.011606 | 0.011704 | 0.011596 |
| 0.012034 | 0.011482 | 0.011380 | 0.011432 | 0.011379 | 0.011273 | 0.011326 |
| 0.011326 | 0.011326 | 0.011432 | 0.011432 | 0.011379 | 0.011379 | 0.011326 |
| 0.011432 | 0.011326 | 0.011326 | 0.011326 | 0.011273 | 0.011326 | 0.011273 |
| 0.011326 | 0.011326 | 0.011273 | 0.011326 | 0.011326 | 0.011379 | 0.011379 |
| 0.011432 | 0.011326 | 0.011326 | 0.011379 | 0.011326 | 0.011485 | 0.011538 |
| 0.011379 | 0.011432 | 0.011326 | 0.011379 | 0.011273 | 0.011538 | 0.011379 |
| 0.011285 | 0.011326 | 0.011485 | 0.011492 | 0.011485 | 0.011379 | 0.011485 |
| 0.011538 | 0.011379 | 0.011379 | 0.011379 | 0.011644 | 0.011538 | 0.011485 |
| 0.011379 | 0.011538 | 0.011538 | 0.011379 | 0.011592 | 0.011592 | 0.011538 |
| 0.011379 | 0.011485 | 0.011538 | 0.011592 | 0.011432 | 0.011485 | 0.011485 |
| 0.011432 | 0.011273 | 0.011273 | 0.011538 | 0.011592 | 0.011485 | 0.011432 |
| 0.011538 | 0.011432 | 0.011379 | 0.011538 | 0.011432 | 0.011379 | 0.011326 |
| 0.011379 | 0.011379 | 0.011273 | 0.011538 | 0.011432 | 0.011326 | 0.011432 |
| 0.011379 | 0.011328 | 0.011538 | 0.011379 | 0.011191 | 0.011326 | 0.011304 |
| 0.011300 | 0.011538 | 0.011273 | 0.011326 | 0.011171 | 0.011340 | 0.000000 |
| 0.011359 | 0.011261 | 0.011339 | 0.011259 | 0.011344 | 0.011395 | 0.011491 |
| 0.011538 | 0.011326 | 0.011273 | 0.011438 | 0.011486 | 0.011379 | 0.011432 |

|          |          |          |          |          |          |          |
|----------|----------|----------|----------|----------|----------|----------|
| 0.011485 | 0.011486 | 0.011646 | 0.011327 | 0.011433 | 0.011561 | 0.011379 |
| 0.011591 | 0.011538 | 0.011273 | 0.011538 | 0.011326 | 0.011379 | 0.011273 |
| 0.011326 | 0.011379 | 0.011379 | 0.011379 | 0.011379 | 0.011379 | 0.011538 |
| 0.011381 | 0.011280 | 0.011485 | 0.011330 | 0.011545 | 0.011379 | 0.011542 |
| 0.011543 | 0.011326 | 0.011289 | 0.011282 | 0.011485 | 0.011432 | 0.011539 |
| 0.011379 | 0.011485 | 0.011591 | 0.011645 | 0.011591 | 0.011591 | 0.011379 |
| 0.011485 | 0.011485 | 0.011432 | 0.011379 | 0.011911 | 0.011485 | 0.011645 |
| 0.011804 | 0.011396 | 0.011278 | 0.011446 | 0.011379 | 0.011432 | 0.011538 |
| 0.011326 | 0.011538 | 0.011538 | 0.011538 | 0.011488 | 0.011751 | 0.011391 |
| 0.011275 | 0.011280 | 0.011437 | 0.011384 | 0.011333 | 0.011298 | 0.011329 |
| 0.011495 | 0.011338 | 0.011366 | 0.011478 | 0.011379 | 0.011384 | 0.011379 |
| 0.011273 | 0.011273 | 0.011432 | 0.011326 | 0.011326 | 0.011326 | 0.011273 |
| 0.011326 | 0.011485 | 0.011326 | 0.011326 | 0.011326 | 0.011326 | 0.011326 |
| 0.011326 | 0.011326 | 0.011485 | 0.011486 | 0.011379 | 0.011432 | 0.011485 |
| 0.011486 | 0.011646 | 0.011327 | 0.011433 | 0.011561 | 0.011379 | 0.011591 |
| 0.011538 | 0.011538 | 0.011274 | 0.011333 | 0.011498 | 0.011437 | 0.011443 |
| 0.011437 | 0.011769 | 0.011526 | 0.011436 | 0.011326 | 0.011485 | 0.011379 |
| 0.011485 | 0.011432 | 0.011326 | 0.011434 | 0.011645 | 0.011539 | 0.011485 |
| 0.011273 | 0.011274 | 0.011485 | 0.011273 | 0.011273 | 0.011381 | 0.011485 |
| 0.011379 | 0.011326 | 0.011326 | 0.011432 | 0.011432 | 0.011326 | 0.011379 |
| 0.011379 | 0.011485 | 0.011538 | 0.011379 | 0.011326 | 0.011485 | 0.011220 |
| 0.011432 | 0.011538 | 0.011379 | 0.011379 | 0.011379 | 0.011432 | 0.011222 |
| 0.011589 | 0.011334 | 0.011299 | 0.011388 | 0.011432 | 0.011379 | 0.011273 |
| 0.011243 | 0.011326 | 0.011485 | 0.011600 | 0.011432 | 0.011644 | 0.011698 |
| 0.011592 | 0.011650 | 0.011538 | 0.011751 | 0.011432 | 0.012443 | 0.011698 |
| 0.012337 | 0.012123 | 0.012390 | 0.012231 | 0.011432 | 0.011273 | 0.011645 |
| 0.012177 | 0.011805 | 0.011485 | 0.011326 | 0.011326 | 0.011326 | 0.011274 |
| 0.011326 | 0.011326 | 0.011379 | 0.011273 | 0.011698 | 0.011751 | 0.011804 |
| 0.011592 | 0.011698 | 0.011910 | 0.011591 | 0.012071 | 0.012025 | 0.012178 |
| 0.012178 | 0.012178 | 0.012124 | 0.012124 | 0.012231 | 0.011432 | 0.011591 |
| 0.011751 | 0.012230 | 0.011702 | 0.011804 | 0.011592 | 0.011274 | 0.011326 |
| 0.011273 | 0.011220 | 0.011751 | 0.011861 | 0.011911 | 0.011538 | 0.011273 |
| S616     | 0.011672 | 0.011672 | 0.011672 | 0.011570 | 0.011570 | 0.011621 |
| 0.011523 | 0.011420 | 0.011570 | 0.011468 | 0.011468 | 0.011468 | 0.011417 |
| 0.011366 | 0.011621 | 0.011315 | 0.011417 | 0.011468 | 0.011468 | 0.011468 |
| 0.011468 | 0.011468 | 0.011213 | 0.011418 | 0.011469 | 0.011366 | 0.011523 |
| 0.011264 | 0.011468 | 0.011366 | 0.011213 | 0.011519 | 0.011468 | 0.011366 |
| 0.011519 | 0.011570 | 0.011570 | 0.011570 | 0.011570 | 0.011468 | 0.011774 |
| 0.011315 | 0.011519 | 0.011570 | 0.011417 | 0.011519 | 0.011672 | 0.011621 |
| 0.011570 | 0.011672 | 0.011519 | 0.011621 | 0.011519 | 0.011723 | 0.011519 |
| 0.011468 | 0.011519 | 0.011621 | 0.011723 | 0.011570 | 0.011366 | 0.011519 |
| 0.011519 | 0.011468 | 0.011519 | 0.011723 | 0.011519 | 0.011570 | 0.011570 |
| 0.011519 | 0.011468 | 0.011570 | 0.011672 | 0.011468 | 0.011468 | 0.011468 |
| 0.011468 | 0.011468 | 0.011417 | 0.011366 | 0.011468 | 0.011468 | 0.011621 |
| 0.011570 | 0.011468 | 0.011570 | 0.011366 | 0.011570 | 0.011417 | 0.011468 |
| 0.011672 | 0.011621 | 0.011621 | 0.011570 | 0.011519 | 0.011723 | 0.011519 |
| 0.011525 | 0.011577 | 0.011724 | 0.011428 | 0.011417 | 0.011431 | 0.011267 |
| 0.011264 | 0.011228 | 0.011417 | 0.011672 | 0.011519 | 0.011417 | 0.011519 |
| 0.011570 | 0.011519 | 0.011672 | 0.011519 | 0.011621 | 0.011519 | 0.011519 |
| 0.011468 | 0.011468 | 0.011723 | 0.011621 | 0.011621 | 0.011520 | 0.011468 |
| 0.011417 | 0.011366 | 0.011468 | 0.011366 | 0.011366 | 0.011264 | 0.011213 |
| 0.011315 | 0.011315 | 0.011417 | 0.011417 | 0.011417 | 0.011417 | 0.011418 |
| 0.011469 | 0.011519 | 0.011519 | 0.011377 | 0.011428 | 0.011429 | 0.011468 |
| 0.011468 | 0.011468 | 0.011475 | 0.011468 | 0.011371 | 0.011475 | 0.011522 |
| 0.011325 | 0.011527 | 0.011470 | 0.011468 | 0.011417 | 0.011570 | 0.011468 |
| 0.011570 | 0.011519 | 0.011519 | 0.011621 | 0.011570 | 0.011876 | 0.011672 |
| 0.011315 | 0.011519 | 0.011417 | 0.011519 | 0.011417 | 0.011111 | 0.011366 |
| 0.011468 | 0.011468 | 0.011417 | 0.011468 | 0.011468 | 0.011468 | 0.011570 |
| 0.011468 | 0.011570 | 0.011519 | 0.011366 | 0.011519 | 0.011621 | 0.011571 |
| 0.011570 | 0.011519 | 0.011366 | 0.011366 | 0.011570 | 0.011366 | 0.011366 |

|          |          |          |          |          |          |          |
|----------|----------|----------|----------|----------|----------|----------|
| 0.011369 | 0.011570 | 0.011417 | 0.011570 | 0.011366 | 0.011519 | 0.011468 |
| 0.011570 | 0.011417 | 0.011468 | 0.011468 | 0.011468 | 0.011366 | 0.011468 |
| 0.011519 | 0.011519 | 0.011519 | 0.011417 | 0.011519 | 0.011519 | 0.011672 |
| 0.011622 | 0.011468 | 0.011519 | 0.011621 | 0.011519 | 0.011468 | 0.011519 |
| 0.011418 | 0.011603 | 0.011515 | 0.011420 | 0.011678 | 0.011372 | 0.011534 |
| 0.011523 | 0.011422 | 0.011672 | 0.011775 | 0.011575 | 0.011723 | 0.011723 |
| 0.011723 | 0.011723 | 0.011704 | 0.011487 | 0.011488 | 0.011570 | 0.011672 |
| 0.011621 | 0.011623 | 0.011672 | 0.011727 | 0.011570 | 0.011723 | 0.012142 |
| 0.011625 | 0.011733 | 0.011731 | 0.011627 | 0.011878 | 0.011417 | 0.011624 |
| 0.011468 | 0.011468 | 0.011366 | 0.011366 | 0.011417 | 0.011519 | 0.011468 |
| 0.011468 | 0.011519 | 0.011417 | 0.011417 | 0.011366 | 0.011519 | 0.011417 |
| 0.011468 | 0.011672 | 0.011468 | 0.011519 | 0.011366 | 0.011468 | 0.011570 |
| 0.011570 | 0.011468 | 0.011570 | 0.011468 | 0.011468 | 0.011468 | 0.011468 |
| 0.011723 | 0.011519 | 0.011570 | 0.011417 | 0.011519 | 0.011519 | 0.011417 |
| 0.011417 | 0.011417 | 0.011468 | 0.011621 | 0.011417 | 0.011366 | 0.011468 |
| 0.011468 | 0.011519 | 0.011519 | 0.011417 | 0.011366 | 0.011468 | 0.011519 |
| 0.011417 | 0.011570 | 0.011366 | 0.011366 | 0.011468 | 0.011264 | 0.011468 |
| 0.011418 | 0.011519 | 0.011418 | 0.011366 | 0.011366 | 0.011366 | 0.011621 |
| 0.011480 | 0.011468 | 0.011468 | 0.011570 | 0.011468 | 0.011468 | 0.011570 |
| 0.011468 | 0.011723 | 0.011366 | 0.011417 | 0.011315 | 0.011315 | 0.011366 |
| 0.011519 | 0.011417 | 0.011519 | 0.011570 | 0.011366 | 0.011468 | 0.011315 |
| 0.011366 | 0.011468 | 0.011468 | 0.011417 | 0.011519 | 0.011672 | 0.011723 |
| 0.011570 | 0.011570 | 0.011468 | 0.011672 | 0.011570 | 0.011468 | 0.011417 |
| 0.011417 | 0.011468 | 0.011519 | 0.011315 | 0.011366 | 0.011621 | 0.011417 |
| 0.011315 | 0.011417 | 0.011570 | 0.011519 | 0.011519 | 0.011417 | 0.011468 |
| 0.011468 | 0.011468 | 0.011468 | 0.011417 | 0.011621 | 0.011723 | 0.011519 |
| 0.011519 | 0.011520 | 0.011519 | 0.019986 | 0.011333 | 0.011709 | 0.011468 |
| 0.011519 | 0.011520 | 0.011563 | 0.011392 | 0.011678 | 0.011571 | 0.011666 |
| 0.011494 | 0.011300 | 0.011375 | 0.011516 | 0.011372 | 0.011446 | 0.011514 |
| 0.011327 | 0.011111 | 0.011315 | 0.011145 | 0.011621 | 0.011672 | 0.011574 |
| 0.011475 | 0.011519 | 0.011621 | 0.011519 | 0.011519 | 0.011520 | 0.011469 |
| 0.011519 | 0.011417 | 0.011417 | 0.011570 | 0.011519 | 0.011468 | 0.011468 |
| 0.011468 | 0.011570 | 0.011366 | 0.011570 | 0.011621 | 0.011519 | 0.011468 |
| 0.011519 | 0.011417 | 0.011417 | 0.011417 | 0.011622 | 0.011672 | 0.011672 |
| 0.011366 | 0.011366 | 0.011417 | 0.011468 | 0.011417 | 0.011723 | 0.011723 |
| 0.011519 | 0.011672 | 0.011672 | 0.011570 | 0.011519 | 0.011573 | 0.011468 |
| 0.011519 | 0.011570 | 0.011723 | 0.011519 | 0.011519 | 0.011366 | 0.011570 |
| 0.011519 | 0.011519 | 0.011570 | 0.011468 | 0.011470 | 0.011672 | 0.011570 |
| 0.011575 | 0.011366 | 0.011468 | 0.011723 | 0.011519 | 0.011621 | 0.011672 |
| 0.011775 | 0.011575 | 0.011723 | 0.011723 | 0.011723 | 0.011723 | 0.011468 |
| 0.011674 | 0.011570 | 0.011468 | 0.011468 | 0.011570 | 0.011366 | 0.011570 |
| 0.011621 | 0.011519 | 0.011468 | 0.011519 | 0.011417 | 0.011417 | 0.011417 |
| 0.011622 | 0.011672 | 0.011621 | 0.011621 | 0.012235 | 0.011645 | 0.011537 |
| 0.011636 | 0.011635 | 0.011753 | 0.011586 | 0.011642 | 0.011741 | 0.011576 |
| 0.012209 | 0.011534 | 0.011684 | 0.011531 | 0.011793 | 0.011627 | 0.011781 |
| 0.012254 | 0.011623 | 0.011418 | 0.011468 | 0.011468 | 0.011213 | 0.011418 |
| 0.011417 | 0.011417 | 0.011519 | 0.011468 | 0.011418 | 0.011111 | 0.011315 |
| 0.011519 | 0.011417 | 0.011468 | 0.011519 | 0.011366 | 0.011468 | 0.011366 |
| 0.011417 | 0.011417 | 0.011417 | 0.011417 | 0.011519 | 0.011468 | 0.011519 |
| 0.011519 | 0.011417 | 0.011417 | 0.011519 | 0.011417 | 0.011570 | 0.011570 |
| 0.011417 | 0.011468 | 0.011468 | 0.011468 | 0.011417 | 0.011570 | 0.011519 |
| 0.011218 | 0.011417 | 0.011264 | 0.011267 | 0.011570 | 0.011570 | 0.011621 |
| 0.011672 | 0.011468 | 0.011417 | 0.011468 | 0.011723 | 0.011621 | 0.011519 |
| 0.011570 | 0.011672 | 0.011570 | 0.011570 | 0.011723 | 0.011723 | 0.011672 |
| 0.011468 | 0.011570 | 0.011672 | 0.011519 | 0.011520 | 0.011570 | 0.011570 |
| 0.011468 | 0.011366 | 0.011366 | 0.011672 | 0.011723 | 0.011672 | 0.011468 |
| 0.011672 | 0.011672 | 0.011519 | 0.011672 | 0.011468 | 0.011468 | 0.011417 |
| 0.011570 | 0.011519 | 0.011366 | 0.011621 | 0.011468 | 0.011570 | 0.011622 |
| 0.011519 | 0.011471 | 0.011570 | 0.011164 | 0.011180 | 0.011468 | 0.000000 |
| 0.011455 | 0.011468 | 0.011366 | 0.011617 | 0.011352 | 0.011365 | 0.011359 |

|          |          |          |          |          |          |          |
|----------|----------|----------|----------|----------|----------|----------|
| 0.000000 | 0.011278 | 0.011364 | 0.011198 | 0.011304 | 0.011471 | 0.011592 |
| 0.011629 | 0.011480 | 0.011468 | 0.011468 | 0.011572 | 0.011111 | 0.011213 |
| 0.011366 | 0.011519 | 0.011626 | 0.011266 | 0.011676 | 0.011653 | 0.011417 |
| 0.011315 | 0.011519 | 0.011417 | 0.011519 | 0.011417 | 0.011111 | 0.011366 |
| 0.011468 | 0.011468 | 0.011417 | 0.011468 | 0.011468 | 0.011468 | 0.011570 |
| 0.011470 | 0.011479 | 0.011571 | 0.011474 | 0.011784 | 0.011520 | 0.011625 |
| 0.011677 | 0.011366 | 0.011386 | 0.011375 | 0.011570 | 0.011774 | 0.011571 |
| 0.011468 | 0.011570 | 0.011877 | 0.011673 | 0.011672 | 0.011774 | 0.011519 |
| 0.011519 | 0.011723 | 0.011519 | 0.011519 | 0.011826 | 0.011570 | 0.011672 |
| 0.012030 | 0.011486 | 0.011425 | 0.011639 | 0.011519 | 0.011519 | 0.011672 |
| 0.011469 | 0.011723 | 0.011570 | 0.011570 | 0.011636 | 0.011877 | 0.011478 |
| 0.011369 | 0.011373 | 0.011474 | 0.011474 | 0.011477 | 0.011392 | 0.011422 |
| 0.011582 | 0.011313 | 0.011466 | 0.011507 | 0.011570 | 0.011578 | 0.011468 |
| 0.011417 | 0.011366 | 0.011468 | 0.011366 | 0.011366 | 0.011264 | 0.011213 |
| 0.011315 | 0.011315 | 0.011417 | 0.011417 | 0.011417 | 0.011417 | 0.011418 |
| 0.011469 | 0.011519 | 0.011519 | 0.011572 | 0.011111 | 0.011213 | 0.011366 |
| 0.011519 | 0.011626 | 0.011266 | 0.011676 | 0.011653 | 0.011417 | 0.011621 |
| 0.011672 | 0.011672 | 0.011419 | 0.011585 | 0.011582 | 0.011474 | 0.011536 |
| 0.011474 | 0.011924 | 0.011671 | 0.011576 | 0.011417 | 0.011570 | 0.011468 |
| 0.011570 | 0.011519 | 0.011366 | 0.011519 | 0.011621 | 0.011571 | 0.011519 |
| 0.011366 | 0.011366 | 0.011570 | 0.011366 | 0.011366 | 0.011369 | 0.011570 |
| 0.011519 | 0.011417 | 0.011417 | 0.011570 | 0.011519 | 0.011468 | 0.011315 |
| 0.011417 | 0.011570 | 0.011570 | 0.011468 | 0.011468 | 0.011672 | 0.011315 |
| 0.011519 | 0.011570 | 0.011468 | 0.011468 | 0.011417 | 0.011621 | 0.011366 |
| 0.011592 | 0.011273 | 0.011225 | 0.011112 | 0.011162 | 0.011111 | 0.011216 |
| 0.011172 | 0.011315 | 0.011468 | 0.011570 | 0.011417 | 0.011621 | 0.011723 |
| 0.011571 | 0.011627 | 0.011519 | 0.011877 | 0.011417 | 0.012439 | 0.011519 |
| 0.012235 | 0.012030 | 0.012341 | 0.012339 | 0.011366 | 0.011417 | 0.011570 |
| 0.012389 | 0.011775 | 0.011519 | 0.011417 | 0.011417 | 0.011417 | 0.011369 |
| 0.011315 | 0.011315 | 0.011366 | 0.011315 | 0.011673 | 0.011622 | 0.011775 |
| 0.011570 | 0.011621 | 0.011877 | 0.011570 | 0.012235 | 0.012244 | 0.012287 |
| 0.012389 | 0.012287 | 0.012338 | 0.012236 | 0.012287 | 0.011519 | 0.011826 |
| 0.011775 | 0.012337 | 0.011934 | 0.011877 | 0.011673 | 0.011419 | 0.011315 |
| 0.011264 | 0.011213 | 0.011621 | 0.011662 | 0.011889 | 0.011519 | 0.011264 |
| S617     | 0.011389 | 0.011389 | 0.011653 | 0.011587 | 0.011587 | 0.011653 |
| 0.011260 | 0.011193 | 0.011521 | 0.000000 | 0.011126 | 0.011126 | 0.000000 |
| 0.011192 | 0.011126 | 0.011126 | 0.011126 | 0.000000 | 0.011192 | 0.011192 |
| 0.011126 | 0.011192 | 0.011258 | 0.000000 | 0.011126 | 0.000000 | 0.011326 |
| 0.011455 | 0.011258 | 0.000000 | 0.011258 | 0.011126 | 0.011192 | 0.000000 |
| 0.011258 | 0.011324 | 0.011258 | 0.011258 | 0.011258 | 0.011192 | 0.011587 |
| 0.011126 | 0.011126 | 0.011258 | 0.011126 | 0.011323 | 0.011258 | 0.011324 |
| 0.011192 | 0.011455 | 0.011258 | 0.011324 | 0.011192 | 0.011389 | 0.011192 |
| 0.011126 | 0.011323 | 0.011258 | 0.011389 | 0.011455 | 0.011192 | 0.011455 |
| 0.011258 | 0.011192 | 0.011192 | 0.011323 | 0.011324 | 0.011324 | 0.011324 |
| 0.011258 | 0.011258 | 0.011389 | 0.011389 | 0.011192 | 0.011192 | 0.011192 |
| 0.011192 | 0.011192 | 0.011126 | 0.011192 | 0.011192 | 0.011126 | 0.011324 |
| 0.011258 | 0.011192 | 0.011192 | 0.000000 | 0.011258 | 0.011126 | 0.011126 |
| 0.011258 | 0.011258 | 0.011323 | 0.011258 | 0.011258 | 0.011324 | 0.011192 |
| 0.011324 | 0.011324 | 0.011455 | 0.011126 | 0.011126 | 0.011129 | 0.011192 |
| 0.011192 | 0.011214 | 0.011127 | 0.011258 | 0.011258 | 0.011258 | 0.011324 |
| 0.011324 | 0.011126 | 0.011389 | 0.011258 | 0.011258 | 0.011258 | 0.011192 |
| 0.011126 | 0.011323 | 0.011192 | 0.011389 | 0.011324 | 0.011258 | 0.011192 |
| 0.000000 | 0.011126 | 0.011258 | 0.011126 | 0.011258 | 0.011258 | 0.011192 |
| 0.011324 | 0.011455 | 0.011126 | 0.011126 | 0.011126 | 0.011126 | 0.011126 |
| 0.011126 | 0.011258 | 0.011324 | 0.000000 | 0.011130 | 0.011130 | 0.011126 |
| 0.011126 | 0.011192 | 0.011262 | 0.011258 | 0.000000 | 0.011195 | 0.011127 |
| 0.011200 | 0.011196 | 0.011127 | 0.011126 | 0.000000 | 0.011324 | 0.011126 |
| 0.011258 | 0.011258 | 0.011258 | 0.011324 | 0.011258 | 0.011653 | 0.011521 |
| 0.011587 | 0.011389 | 0.000000 | 0.011521 | 0.011126 | 0.011324 | 0.000000 |
| 0.000000 | 0.011126 | 0.011126 | 0.011192 | 0.011192 | 0.011192 | 0.011389 |

|          |          |          |          |          |          |          |
|----------|----------|----------|----------|----------|----------|----------|
| 0.011126 | 0.011258 | 0.011258 | 0.011126 | 0.011259 | 0.011455 | 0.011390 |
| 0.011324 | 0.011258 | 0.000000 | 0.000000 | 0.011323 | 0.000000 | 0.000000 |
| 0.011193 | 0.011324 | 0.011126 | 0.011324 | 0.000000 | 0.011258 | 0.011126 |
| 0.011258 | 0.011126 | 0.011126 | 0.000000 | 0.011126 | 0.000000 | 0.011192 |
| 0.011258 | 0.011192 | 0.011258 | 0.000000 | 0.011192 | 0.011258 | 0.011324 |
| 0.011324 | 0.011258 | 0.011324 | 0.011192 | 0.011324 | 0.011192 | 0.011192 |
| 0.011259 | 0.011220 | 0.011316 | 0.000000 | 0.011457 | 0.000000 | 0.011213 |
| 0.011393 | 0.011259 | 0.011258 | 0.011258 | 0.011326 | 0.011389 | 0.011324 |
| 0.011324 | 0.011389 | 0.011415 | 0.011137 | 0.000000 | 0.011324 | 0.011394 |
| 0.011389 | 0.011324 | 0.011258 | 0.011391 | 0.011324 | 0.011324 | 0.011927 |
| 0.011193 | 0.011396 | 0.011261 | 0.011394 | 0.011522 | 0.011126 | 0.011259 |
| 0.011126 | 0.011192 | 0.000000 | 0.000000 | 0.011126 | 0.011258 | 0.011126 |
| 0.011126 | 0.011258 | 0.011126 | 0.011258 | 0.011192 | 0.011258 | 0.011126 |
| 0.011192 | 0.011521 | 0.011192 | 0.011192 | 0.000000 | 0.011192 | 0.011258 |
| 0.011258 | 0.011126 | 0.011192 | 0.011455 | 0.000000 | 0.000000 | 0.000000 |
| 0.011521 | 0.011192 | 0.011192 | 0.011126 | 0.011258 | 0.011192 | 0.000000 |
| 0.011126 | 0.011126 | 0.011258 | 0.011258 | 0.011192 | 0.011192 | 0.011324 |
| 0.011324 | 0.011258 | 0.011258 | 0.011126 | 0.000000 | 0.011126 | 0.011192 |
| 0.011126 | 0.011323 | 0.000000 | 0.000000 | 0.011192 | 0.011192 | 0.011126 |
| 0.011126 | 0.011258 | 0.000000 | 0.000000 | 0.011258 | 0.000000 | 0.011258 |
| 0.011265 | 0.011126 | 0.011192 | 0.011324 | 0.011389 | 0.011192 | 0.011258 |
| 0.000000 | 0.011389 | 0.000000 | 0.011126 | 0.011126 | 0.011126 | 0.000000 |
| 0.011192 | 0.011258 | 0.011192 | 0.011258 | 0.000000 | 0.011192 | 0.011126 |
| 0.011126 | 0.011126 | 0.011192 | 0.011126 | 0.011258 | 0.011324 | 0.011455 |
| 0.011258 | 0.011192 | 0.011126 | 0.011389 | 0.011324 | 0.011126 | 0.011126 |
| 0.011126 | 0.011126 | 0.011192 | 0.011126 | 0.000000 | 0.011324 | 0.000000 |
| 0.011126 | 0.011192 | 0.011324 | 0.011323 | 0.000000 | 0.011126 | 0.011192 |
| 0.011258 | 0.011192 | 0.011192 | 0.011126 | 0.011324 | 0.011455 | 0.011521 |
| 0.011126 | 0.011324 | 0.011126 | 0.011192 | 0.011132 | 0.011397 | 0.011258 |
| 0.011258 | 0.011324 | 0.011226 | 0.011151 | 0.011441 | 0.011258 | 0.011316 |
| 0.011480 | 0.011338 | 0.000000 | 0.000000 | 0.011197 | 0.011274 | 0.011129 |
| 0.011278 | 0.011258 | 0.011258 | 0.011174 | 0.011324 | 0.011389 | 0.011259 |
| 0.011128 | 0.011258 | 0.011258 | 0.011324 | 0.011192 | 0.011192 | 0.011126 |
| 0.011192 | 0.011126 | 0.000000 | 0.011324 | 0.011258 | 0.000000 | 0.011192 |
| 0.011192 | 0.011258 | 0.000000 | 0.011258 | 0.011324 | 0.011258 | 0.011192 |
| 0.011323 | 0.011258 | 0.011258 | 0.011258 | 0.011324 | 0.011456 | 0.011258 |
| 0.000000 | 0.000000 | 0.011126 | 0.011192 | 0.000000 | 0.011258 | 0.011258 |
| 0.011324 | 0.011258 | 0.011389 | 0.011324 | 0.011258 | 0.011325 | 0.011126 |
| 0.011126 | 0.011389 | 0.011455 | 0.011126 | 0.011258 | 0.011126 | 0.011258 |
| 0.000000 | 0.000000 | 0.011126 | 0.000000 | 0.011126 | 0.011324 | 0.011258 |
| 0.011261 | 0.000000 | 0.011126 | 0.011389 | 0.011192 | 0.011389 | 0.011258 |
| 0.011258 | 0.011326 | 0.011389 | 0.011324 | 0.011324 | 0.011389 | 0.011126 |
| 0.011258 | 0.011324 | 0.011192 | 0.011192 | 0.011258 | 0.000000 | 0.011258 |
| 0.011324 | 0.011258 | 0.011192 | 0.011323 | 0.011258 | 0.011258 | 0.011258 |
| 0.011324 | 0.011456 | 0.011258 | 0.011324 | 0.011917 | 0.011334 | 0.011130 |
| 0.011403 | 0.011330 | 0.011130 | 0.011197 | 0.011264 | 0.011263 | 0.011261 |
| 0.011940 | 0.011196 | 0.011263 | 0.011129 | 0.011400 | 0.011327 | 0.011460 |
| 0.011935 | 0.011357 | 0.011126 | 0.011258 | 0.011192 | 0.011192 | 0.011126 |
| 0.011126 | 0.011126 | 0.011258 | 0.011258 | 0.011126 | 0.011324 | 0.011258 |
| 0.011192 | 0.011126 | 0.011126 | 0.011126 | 0.000000 | 0.011126 | 0.000000 |
| 0.011258 | 0.011258 | 0.000000 | 0.011126 | 0.011126 | 0.011192 | 0.011192 |
| 0.011258 | 0.011126 | 0.011126 | 0.011192 | 0.011126 | 0.011324 | 0.011192 |
| 0.011126 | 0.011389 | 0.011126 | 0.011192 | 0.000000 | 0.011455 | 0.011126 |
| 0.011199 | 0.011126 | 0.011455 | 0.011462 | 0.011258 | 0.000000 | 0.011323 |
| 0.011258 | 0.011192 | 0.011126 | 0.011192 | 0.011455 | 0.011323 | 0.011324 |
| 0.011192 | 0.011390 | 0.011455 | 0.011192 | 0.011455 | 0.011455 | 0.011324 |
| 0.011126 | 0.011324 | 0.011258 | 0.011455 | 0.011192 | 0.011258 | 0.011258 |
| 0.011192 | 0.011192 | 0.011192 | 0.011455 | 0.011455 | 0.011455 | 0.011192 |
| 0.011324 | 0.011324 | 0.011192 | 0.011324 | 0.011126 | 0.011192 | 0.011192 |
| 0.011192 | 0.011192 | 0.011192 | 0.011258 | 0.011192 | 0.011126 | 0.011192 |

|          |          |          |          |          |          |          |
|----------|----------|----------|----------|----------|----------|----------|
| 0.011192 | 0.011260 | 0.011324 | 0.011324 | 0.011137 | 0.011258 | 0.011216 |
| 0.011153 | 0.011455 | 0.000000 | 0.011258 | 0.011126 | 0.011195 | 0.011261 |
| 0.011278 | 0.000000 | 0.000000 | 0.000000 | 0.011128 | 0.011215 | 0.011192 |
| 0.011324 | 0.011126 | 0.011192 | 0.011260 | 0.011324 | 0.011324 | 0.011389 |
| 0.011389 | 0.011456 | 0.011522 | 0.011193 | 0.011457 | 0.011611 | 0.011192 |
| 0.011587 | 0.011389 | 0.000000 | 0.011521 | 0.011126 | 0.011324 | 0.000000 |
| 0.000000 | 0.011126 | 0.011126 | 0.011192 | 0.011192 | 0.011192 | 0.011389 |
| 0.011127 | 0.000000 | 0.011324 | 0.011128 | 0.011395 | 0.011192 | 0.011392 |
| 0.011327 | 0.011126 | 0.000000 | 0.000000 | 0.011324 | 0.011389 | 0.011390 |
| 0.011192 | 0.011192 | 0.011389 | 0.011521 | 0.011324 | 0.011258 | 0.011192 |
| 0.011192 | 0.011258 | 0.011192 | 0.011192 | 0.011917 | 0.011258 | 0.011455 |
| 0.011587 | 0.011199 | 0.000000 | 0.011265 | 0.011192 | 0.011192 | 0.011389 |
| 0.011126 | 0.011389 | 0.011258 | 0.011258 | 0.011286 | 0.011587 | 0.011197 |
| 0.000000 | 0.000000 | 0.011261 | 0.011128 | 0.011196 | 0.000000 | 0.011194 |
| 0.011328 | 0.011226 | 0.000000 | 0.011279 | 0.011126 | 0.011127 | 0.011192 |
| 0.000000 | 0.011126 | 0.011258 | 0.011126 | 0.011258 | 0.011258 | 0.011192 |
| 0.011324 | 0.011455 | 0.011126 | 0.011126 | 0.011126 | 0.011126 | 0.011126 |
| 0.011126 | 0.011258 | 0.011324 | 0.011324 | 0.011324 | 0.011389 | 0.011389 |
| 0.011456 | 0.011522 | 0.011193 | 0.011457 | 0.011611 | 0.011192 | 0.011258 |
| 0.011389 | 0.011389 | 0.000000 | 0.011194 | 0.011331 | 0.011260 | 0.011265 |
| 0.011260 | 0.011672 | 0.011381 | 0.011193 | 0.011126 | 0.011324 | 0.011126 |
| 0.011258 | 0.011258 | 0.011126 | 0.011259 | 0.011455 | 0.011390 | 0.011258 |
| 0.000000 | 0.000000 | 0.011323 | 0.000000 | 0.000000 | 0.011193 | 0.011324 |
| 0.011192 | 0.011126 | 0.000000 | 0.011324 | 0.011258 | 0.000000 | 0.011324 |
| 0.011192 | 0.011324 | 0.011192 | 0.011126 | 0.011126 | 0.011324 | 0.011126 |
| 0.011258 | 0.011455 | 0.011126 | 0.000000 | 0.011192 | 0.011324 | 0.000000 |
| 0.011599 | 0.011130 | 0.011209 | 0.011333 | 0.011455 | 0.011324 | 0.000000 |
| 0.011136 | 0.011258 | 0.011323 | 0.011455 | 0.011323 | 0.011587 | 0.011587 |
| 0.011522 | 0.011593 | 0.011455 | 0.011785 | 0.011389 | 0.012642 | 0.011521 |
| 0.012313 | 0.012114 | 0.012444 | 0.012050 | 0.011389 | 0.011192 | 0.011653 |
| 0.011917 | 0.011851 | 0.011389 | 0.011389 | 0.011258 | 0.011258 | 0.011326 |
| 0.011258 | 0.011258 | 0.011258 | 0.011258 | 0.011587 | 0.011653 | 0.011587 |
| 0.011455 | 0.011587 | 0.011653 | 0.011389 | 0.011983 | 0.011925 | 0.012116 |
| 0.012116 | 0.012116 | 0.012049 | 0.012050 | 0.012116 | 0.011192 | 0.011521 |
| 0.011653 | 0.012115 | 0.011658 | 0.011719 | 0.011521 | 0.011193 | 0.011258 |
| 0.011192 | 0.011126 | 0.011653 | 0.011465 | 0.011983 | 0.011521 | 0.011192 |
| S618     | 0.011506 | 0.011506 | 0.011728 | 0.011617 | 0.011617 | 0.011728 |
| 0.011453 | 0.011397 | 0.011561 | 0.011227 | 0.011339 | 0.011339 | 0.011283 |
| 0.011339 | 0.011450 | 0.011283 | 0.011283 | 0.011338 | 0.011394 | 0.011339 |
| 0.011339 | 0.011394 | 0.011394 | 0.011283 | 0.011283 | 0.011227 | 0.011509 |
| 0.011561 | 0.011339 | 0.011227 | 0.011394 | 0.011339 | 0.011339 | 0.011227 |
| 0.011394 | 0.011450 | 0.011394 | 0.011394 | 0.011450 | 0.011339 | 0.011673 |
| 0.011283 | 0.011338 | 0.011450 | 0.011339 | 0.011505 | 0.011505 | 0.011506 |
| 0.011450 | 0.011617 | 0.011394 | 0.011506 | 0.011394 | 0.011561 | 0.011394 |
| 0.011339 | 0.011506 | 0.011394 | 0.011561 | 0.011617 | 0.011283 | 0.011561 |
| 0.011450 | 0.011339 | 0.011339 | 0.011505 | 0.011506 | 0.011450 | 0.011450 |
| 0.011394 | 0.011394 | 0.011394 | 0.011561 | 0.011339 | 0.011394 | 0.011394 |
| 0.011338 | 0.011339 | 0.011283 | 0.011339 | 0.011283 | 0.011339 | 0.011505 |
| 0.011450 | 0.011338 | 0.011450 | 0.011227 | 0.011505 | 0.011283 | 0.011283 |
| 0.011505 | 0.011450 | 0.011561 | 0.011450 | 0.011394 | 0.011506 | 0.011394 |
| 0.011394 | 0.011506 | 0.011617 | 0.011283 | 0.011283 | 0.011236 | 0.011339 |
| 0.011339 | 0.011374 | 0.011286 | 0.011450 | 0.011505 | 0.011394 | 0.011506 |
| 0.011450 | 0.011339 | 0.011561 | 0.011394 | 0.011506 | 0.011394 | 0.011339 |
| 0.011283 | 0.011450 | 0.011561 | 0.011505 | 0.011450 | 0.011394 | 0.011339 |
| 0.011227 | 0.011338 | 0.011339 | 0.011283 | 0.011394 | 0.011394 | 0.011339 |
| 0.011450 | 0.011561 | 0.011283 | 0.011283 | 0.011283 | 0.011283 | 0.011283 |
| 0.011283 | 0.011394 | 0.011394 | 0.011231 | 0.011287 | 0.011288 | 0.011283 |
| 0.011283 | 0.011339 | 0.011343 | 0.011339 | 0.011230 | 0.011344 | 0.011340 |
| 0.011346 | 0.011344 | 0.011340 | 0.011283 | 0.011227 | 0.011450 | 0.011394 |
| 0.011506 | 0.011394 | 0.011394 | 0.011450 | 0.011394 | 0.011784 | 0.011729 |

|          |          |          |          |          |          |          |
|----------|----------|----------|----------|----------|----------|----------|
| 0.011617 | 0.011506 | 0.011227 | 0.011561 | 0.011283 | 0.011394 | 0.011227 |
| 0.011283 | 0.011338 | 0.011339 | 0.011339 | 0.011338 | 0.011339 | 0.011450 |
| 0.011339 | 0.011283 | 0.011394 | 0.011227 | 0.011340 | 0.011617 | 0.011506 |
| 0.011394 | 0.011394 | 0.011227 | 0.011228 | 0.011394 | 0.011227 | 0.011227 |
| 0.011340 | 0.011394 | 0.011283 | 0.011394 | 0.011227 | 0.011394 | 0.011283 |
| 0.011394 | 0.011283 | 0.011283 | 0.011283 | 0.011283 | 0.011227 | 0.011339 |
| 0.011394 | 0.011394 | 0.011394 | 0.011227 | 0.011339 | 0.011394 | 0.011617 |
| 0.011450 | 0.011450 | 0.011506 | 0.011394 | 0.011506 | 0.011339 | 0.011338 |
| 0.011396 | 0.011458 | 0.011567 | 0.011230 | 0.011679 | 0.011174 | 0.011314 |
| 0.011510 | 0.011454 | 0.011450 | 0.011617 | 0.011456 | 0.011561 | 0.011561 |
| 0.011561 | 0.011617 | 0.011528 | 0.011328 | 0.011267 | 0.011506 | 0.011506 |
| 0.011673 | 0.011451 | 0.011450 | 0.011452 | 0.011450 | 0.011450 | 0.012017 |
| 0.011397 | 0.011456 | 0.011568 | 0.011567 | 0.011674 | 0.011283 | 0.011452 |
| 0.011283 | 0.011339 | 0.011227 | 0.011227 | 0.011283 | 0.011394 | 0.011394 |
| 0.011227 | 0.011394 | 0.011283 | 0.011394 | 0.011283 | 0.011394 | 0.011283 |
| 0.011394 | 0.011673 | 0.011450 | 0.011394 | 0.011227 | 0.011339 | 0.011450 |
| 0.011450 | 0.011283 | 0.011394 | 0.011506 | 0.011227 | 0.011227 | 0.011227 |
| 0.011673 | 0.011339 | 0.011394 | 0.011283 | 0.011394 | 0.011394 | 0.011227 |
| 0.011283 | 0.011283 | 0.011394 | 0.011506 | 0.011339 | 0.011339 | 0.011394 |
| 0.011450 | 0.011394 | 0.011394 | 0.011283 | 0.011227 | 0.011283 | 0.011338 |
| 0.011283 | 0.011450 | 0.011227 | 0.011227 | 0.011339 | 0.011339 | 0.011283 |
| 0.011283 | 0.011394 | 0.011228 | 0.011227 | 0.011450 | 0.011227 | 0.011506 |
| 0.011405 | 0.011339 | 0.011394 | 0.011450 | 0.011506 | 0.011339 | 0.011450 |
| 0.011338 | 0.011561 | 0.011227 | 0.011283 | 0.011283 | 0.011283 | 0.011227 |
| 0.011394 | 0.011450 | 0.011339 | 0.011394 | 0.011227 | 0.011450 | 0.011283 |
| 0.011283 | 0.011283 | 0.011339 | 0.011283 | 0.011394 | 0.011506 | 0.011561 |
| 0.011450 | 0.011394 | 0.011339 | 0.011561 | 0.011505 | 0.011339 | 0.011283 |
| 0.011283 | 0.011339 | 0.011339 | 0.011283 | 0.011227 | 0.011506 | 0.011283 |
| 0.011283 | 0.011339 | 0.011450 | 0.011561 | 0.011283 | 0.011283 | 0.011283 |
| 0.011283 | 0.011339 | 0.011339 | 0.011283 | 0.011450 | 0.011617 | 0.011673 |
| 0.011283 | 0.011561 | 0.011283 | 0.020415 | 0.011260 | 0.011571 | 0.011506 |
| 0.011450 | 0.011506 | 0.011352 | 0.011367 | 0.011616 | 0.011450 | 0.011362 |
| 0.011579 | 0.011484 | 0.011227 | 0.011249 | 0.011352 | 0.011325 | 0.011245 |
| 0.011417 | 0.011338 | 0.011394 | 0.011420 | 0.011394 | 0.011506 | 0.011397 |
| 0.011344 | 0.011339 | 0.011505 | 0.011450 | 0.011339 | 0.011339 | 0.011395 |
| 0.011339 | 0.011283 | 0.011283 | 0.011506 | 0.011394 | 0.011283 | 0.011339 |
| 0.011339 | 0.011450 | 0.011227 | 0.011394 | 0.011450 | 0.011339 | 0.011339 |
| 0.011505 | 0.011394 | 0.011450 | 0.011450 | 0.011506 | 0.011563 | 0.011506 |
| 0.011227 | 0.011227 | 0.011283 | 0.011339 | 0.011227 | 0.011505 | 0.011505 |
| 0.011450 | 0.011450 | 0.011506 | 0.011506 | 0.011561 | 0.011508 | 0.011339 |
| 0.011394 | 0.011450 | 0.011561 | 0.011283 | 0.011394 | 0.011283 | 0.011450 |
| 0.011338 | 0.011338 | 0.011394 | 0.011227 | 0.011283 | 0.011561 | 0.011450 |
| 0.011454 | 0.011227 | 0.011283 | 0.011506 | 0.011394 | 0.011617 | 0.011617 |
| 0.011617 | 0.011456 | 0.011561 | 0.011561 | 0.011561 | 0.011617 | 0.011283 |
| 0.011507 | 0.011450 | 0.011339 | 0.011339 | 0.011450 | 0.011227 | 0.011394 |
| 0.011450 | 0.011339 | 0.011339 | 0.011505 | 0.011394 | 0.011450 | 0.011450 |
| 0.011506 | 0.011563 | 0.011394 | 0.011450 | 0.012120 | 0.011476 | 0.011354 |
| 0.011527 | 0.011461 | 0.011413 | 0.011352 | 0.011407 | 0.011520 | 0.011455 |
| 0.012202 | 0.011349 | 0.011458 | 0.011348 | 0.011518 | 0.011623 | 0.011510 |
| 0.012138 | 0.011560 | 0.011339 | 0.011394 | 0.011339 | 0.011339 | 0.011283 |
| 0.011283 | 0.011283 | 0.011394 | 0.011394 | 0.011339 | 0.011394 | 0.011394 |
| 0.011394 | 0.011283 | 0.011283 | 0.011283 | 0.011227 | 0.011283 | 0.011227 |
| 0.011394 | 0.011394 | 0.011227 | 0.011283 | 0.011283 | 0.011338 | 0.011339 |
| 0.011394 | 0.011283 | 0.011283 | 0.011339 | 0.011283 | 0.011450 | 0.011506 |
| 0.011339 | 0.011506 | 0.011283 | 0.011339 | 0.011227 | 0.011617 | 0.011338 |
| 0.011352 | 0.011283 | 0.011561 | 0.011569 | 0.011450 | 0.011339 | 0.011450 |
| 0.011506 | 0.011339 | 0.011339 | 0.011339 | 0.011617 | 0.011505 | 0.011450 |
| 0.011339 | 0.011506 | 0.011617 | 0.011338 | 0.011561 | 0.011561 | 0.011505 |
| 0.011338 | 0.011450 | 0.011506 | 0.011673 | 0.011395 | 0.011450 | 0.011450 |
| 0.011339 | 0.011339 | 0.011339 | 0.011617 | 0.011561 | 0.011561 | 0.011339 |



|          |          |          |          |          |          |          |
|----------|----------|----------|----------|----------|----------|----------|
| 0.011506 | 0.011506 | 0.011339 | 0.011506 | 0.011394 | 0.011339 | 0.011394 |
| 0.011338 | 0.011339 | 0.011339 | 0.011505 | 0.011339 | 0.011283 | 0.011394 |
| 0.011338 | 0.011453 | 0.011617 | 0.011394 | 0.011259 | 0.011394 | 0.011365 |
| 0.011318 | 0.011617 | 0.011227 | 0.011394 | 0.011235 | 0.011295 | 0.011339 |
| 0.011364 | 0.000000 | 0.000000 | 0.011192 | 0.011299 | 0.011333 | 0.011456 |
| 0.011450 | 0.011283 | 0.011394 | 0.011394 | 0.011395 | 0.011394 | 0.011450 |
| 0.011561 | 0.011506 | 0.011675 | 0.011396 | 0.011507 | 0.011585 | 0.011339 |
| 0.011617 | 0.011506 | 0.011227 | 0.011561 | 0.011283 | 0.011394 | 0.011227 |
| 0.011283 | 0.011338 | 0.011339 | 0.011339 | 0.011338 | 0.011339 | 0.011450 |
| 0.011341 | 0.011232 | 0.011450 | 0.011287 | 0.011512 | 0.011339 | 0.011509 |
| 0.011510 | 0.011227 | 0.011239 | 0.011233 | 0.011450 | 0.011506 | 0.011506 |
| 0.011338 | 0.011450 | 0.011506 | 0.011561 | 0.011561 | 0.011561 | 0.011339 |
| 0.011450 | 0.011450 | 0.011339 | 0.011339 | 0.012008 | 0.011450 | 0.011617 |
| 0.011784 | 0.011468 | 0.011231 | 0.011407 | 0.011338 | 0.011394 | 0.011506 |
| 0.011283 | 0.011505 | 0.011450 | 0.011450 | 0.011440 | 0.011728 | 0.011346 |
| 0.011229 | 0.011231 | 0.011343 | 0.011343 | 0.011403 | 0.011245 | 0.011399 |
| 0.011460 | 0.011418 | 0.011296 | 0.011433 | 0.011339 | 0.011343 | 0.011339 |
| 0.011227 | 0.011338 | 0.011339 | 0.011283 | 0.011394 | 0.011394 | 0.011339 |
| 0.011450 | 0.011561 | 0.011283 | 0.011283 | 0.011283 | 0.011283 | 0.011283 |
| 0.011283 | 0.011394 | 0.011394 | 0.011395 | 0.011394 | 0.011450 | 0.011561 |
| 0.011506 | 0.011675 | 0.011396 | 0.011507 | 0.011585 | 0.011339 | 0.011561 |
| 0.011506 | 0.011506 | 0.011172 | 0.011289 | 0.011460 | 0.011340 | 0.011405 |
| 0.011399 | 0.011725 | 0.011614 | 0.011398 | 0.011283 | 0.011394 | 0.011339 |
| 0.011283 | 0.011394 | 0.011227 | 0.011340 | 0.011617 | 0.011506 | 0.011394 |
| 0.011227 | 0.011228 | 0.011394 | 0.011227 | 0.011227 | 0.011340 | 0.011394 |
| 0.011339 | 0.011283 | 0.011283 | 0.011506 | 0.011394 | 0.011283 | 0.011450 |
| 0.011338 | 0.011450 | 0.011506 | 0.011339 | 0.011283 | 0.011450 | 0.011283 |
| 0.011394 | 0.011617 | 0.011339 | 0.011227 | 0.011283 | 0.011506 | 0.011172 |
| 0.011678 | 0.011290 | 0.011369 | 0.011405 | 0.011506 | 0.011394 | 0.011227 |
| 0.011308 | 0.011394 | 0.011561 | 0.011683 | 0.011505 | 0.011728 | 0.011784 |
| 0.011673 | 0.011735 | 0.011617 | 0.011896 | 0.011450 | 0.012509 | 0.011673 |
| 0.012342 | 0.012063 | 0.012398 | 0.012231 | 0.011450 | 0.011339 | 0.011728 |
| 0.012287 | 0.011896 | 0.011561 | 0.011506 | 0.011394 | 0.011394 | 0.011452 |
| 0.011394 | 0.011394 | 0.011450 | 0.011394 | 0.011729 | 0.011784 | 0.011840 |
| 0.011617 | 0.011728 | 0.011951 | 0.011617 | 0.012175 | 0.012128 | 0.012288 |
| 0.012287 | 0.012287 | 0.012231 | 0.012232 | 0.012344 | 0.011394 | 0.011673 |
| 0.011840 | 0.012175 | 0.011789 | 0.011896 | 0.011673 | 0.011340 | 0.011394 |
| 0.011339 | 0.011283 | 0.011840 | 0.011944 | 0.012007 | 0.011617 | 0.011339 |
| S619     | 0.011390 | 0.011390 | 0.011523 | 0.011456 | 0.011456 | 0.011523 |
| 0.011327 | 0.011260 | 0.011456 | 0.000000 | 0.011192 | 0.011192 | 0.000000 |
| 0.011192 | 0.011258 | 0.011126 | 0.011126 | 0.011192 | 0.011192 | 0.011192 |
| 0.011192 | 0.011192 | 0.011192 | 0.000000 | 0.011126 | 0.000000 | 0.011394 |
| 0.011456 | 0.011192 | 0.000000 | 0.011192 | 0.011126 | 0.011192 | 0.000000 |
| 0.011258 | 0.011324 | 0.011258 | 0.011192 | 0.011324 | 0.011126 | 0.011523 |
| 0.011126 | 0.011192 | 0.011324 | 0.011126 | 0.011324 | 0.011258 | 0.011324 |
| 0.011258 | 0.011457 | 0.011192 | 0.011390 | 0.011258 | 0.011324 | 0.011258 |
| 0.011192 | 0.011325 | 0.011258 | 0.011324 | 0.011523 | 0.011126 | 0.011324 |
| 0.011258 | 0.011192 | 0.011192 | 0.011390 | 0.011391 | 0.011324 | 0.011324 |
| 0.011258 | 0.011258 | 0.011258 | 0.011390 | 0.011192 | 0.011192 | 0.011192 |
| 0.011192 | 0.011192 | 0.011126 | 0.011192 | 0.011126 | 0.011192 | 0.011324 |
| 0.011324 | 0.011192 | 0.011126 | 0.000000 | 0.011324 | 0.011126 | 0.011126 |
| 0.011324 | 0.011258 | 0.011390 | 0.011258 | 0.011258 | 0.011390 | 0.011258 |
| 0.011258 | 0.011390 | 0.011457 | 0.011126 | 0.011126 | 0.000000 | 0.011126 |
| 0.011126 | 0.011203 | 0.011128 | 0.011258 | 0.011258 | 0.011258 | 0.011391 |
| 0.011324 | 0.011192 | 0.011390 | 0.011258 | 0.011391 | 0.011258 | 0.011192 |
| 0.011126 | 0.011324 | 0.011391 | 0.011258 | 0.011324 | 0.011259 | 0.011192 |
| 0.000000 | 0.011126 | 0.011192 | 0.000000 | 0.011192 | 0.011192 | 0.011126 |
| 0.011258 | 0.011390 | 0.011126 | 0.011126 | 0.011126 | 0.011126 | 0.011126 |
| 0.011127 | 0.011258 | 0.011258 | 0.000000 | 0.011128 | 0.011128 | 0.011126 |
| 0.000000 | 0.011192 | 0.011192 | 0.011192 | 0.000000 | 0.011195 | 0.011193 |

|          |          |          |          |          |          |          |
|----------|----------|----------|----------|----------|----------|----------|
| 0.011196 | 0.011195 | 0.011127 | 0.011126 | 0.000000 | 0.011324 | 0.011126 |
| 0.011258 | 0.011258 | 0.011258 | 0.011324 | 0.011258 | 0.011655 | 0.011523 |
| 0.011522 | 0.011258 | 0.000000 | 0.011391 | 0.011126 | 0.011258 | 0.000000 |
| 0.000000 | 0.011192 | 0.011126 | 0.011192 | 0.011192 | 0.011192 | 0.011324 |
| 0.011126 | 0.011258 | 0.011258 | 0.000000 | 0.011193 | 0.011457 | 0.011391 |
| 0.011258 | 0.011192 | 0.000000 | 0.000000 | 0.011258 | 0.000000 | 0.000000 |
| 0.011193 | 0.011258 | 0.011126 | 0.011258 | 0.000000 | 0.011258 | 0.011126 |
| 0.011258 | 0.011126 | 0.011126 | 0.000000 | 0.000000 | 0.000000 | 0.011192 |
| 0.011258 | 0.011258 | 0.011258 | 0.000000 | 0.011192 | 0.011258 | 0.011390 |
| 0.011324 | 0.011324 | 0.011390 | 0.011258 | 0.011390 | 0.011192 | 0.011192 |
| 0.011259 | 0.011217 | 0.011402 | 0.000000 | 0.011526 | 0.000000 | 0.011212 |
| 0.011394 | 0.011260 | 0.011258 | 0.011457 | 0.011328 | 0.011324 | 0.011457 |
| 0.011324 | 0.011390 | 0.011340 | 0.000000 | 0.000000 | 0.011325 | 0.011324 |
| 0.011324 | 0.011325 | 0.011324 | 0.011260 | 0.011258 | 0.011324 | 0.011930 |
| 0.011194 | 0.011262 | 0.011328 | 0.011328 | 0.011590 | 0.011126 | 0.011260 |
| 0.011126 | 0.011192 | 0.000000 | 0.000000 | 0.011126 | 0.011258 | 0.011192 |
| 0.011192 | 0.011258 | 0.011126 | 0.011258 | 0.011126 | 0.011258 | 0.011126 |
| 0.011192 | 0.011589 | 0.011258 | 0.011258 | 0.000000 | 0.011192 | 0.011258 |
| 0.011258 | 0.011126 | 0.011192 | 0.011258 | 0.000000 | 0.000000 | 0.000000 |
| 0.011589 | 0.011192 | 0.011258 | 0.011126 | 0.011258 | 0.011258 | 0.000000 |
| 0.011126 | 0.011126 | 0.011258 | 0.011324 | 0.011192 | 0.011126 | 0.011324 |
| 0.011258 | 0.011258 | 0.011258 | 0.011126 | 0.000000 | 0.011126 | 0.011192 |
| 0.011126 | 0.011324 | 0.000000 | 0.000000 | 0.011126 | 0.011193 | 0.011126 |
| 0.011126 | 0.011192 | 0.000000 | 0.000000 | 0.011324 | 0.000000 | 0.011324 |
| 0.011197 | 0.011192 | 0.011258 | 0.011325 | 0.011324 | 0.011192 | 0.011324 |
| 0.011126 | 0.011324 | 0.000000 | 0.011126 | 0.011126 | 0.011126 | 0.000000 |
| 0.011192 | 0.011258 | 0.011192 | 0.011258 | 0.000000 | 0.011258 | 0.011126 |
| 0.011126 | 0.011126 | 0.011192 | 0.011126 | 0.011258 | 0.011324 | 0.011324 |
| 0.011258 | 0.011192 | 0.011126 | 0.011391 | 0.011324 | 0.011192 | 0.011126 |
| 0.011126 | 0.011192 | 0.011192 | 0.011126 | 0.000000 | 0.011390 | 0.000000 |
| 0.011126 | 0.011192 | 0.011324 | 0.011324 | 0.000000 | 0.011126 | 0.011126 |
| 0.011126 | 0.011192 | 0.011192 | 0.011126 | 0.011324 | 0.011456 | 0.011523 |
| 0.011126 | 0.011457 | 0.011126 | 0.011126 | 0.011133 | 0.011409 | 0.011325 |
| 0.011324 | 0.011391 | 0.011140 | 0.011146 | 0.011443 | 0.011258 | 0.011228 |
| 0.011473 | 0.011246 | 0.000000 | 0.000000 | 0.011197 | 0.011206 | 0.000000 |
| 0.011266 | 0.011192 | 0.011258 | 0.011170 | 0.011258 | 0.011390 | 0.011260 |
| 0.011128 | 0.011126 | 0.011324 | 0.011324 | 0.011126 | 0.011126 | 0.011193 |
| 0.011192 | 0.011126 | 0.000000 | 0.011324 | 0.011258 | 0.000000 | 0.011192 |
| 0.011192 | 0.011258 | 0.000000 | 0.011258 | 0.011258 | 0.011126 | 0.011192 |
| 0.011390 | 0.011258 | 0.011324 | 0.011324 | 0.011325 | 0.011391 | 0.011390 |
| 0.000000 | 0.000000 | 0.011126 | 0.011192 | 0.000000 | 0.011324 | 0.011324 |
| 0.011192 | 0.011258 | 0.011390 | 0.011192 | 0.011324 | 0.011193 | 0.011126 |
| 0.011192 | 0.011324 | 0.011456 | 0.011126 | 0.011258 | 0.000000 | 0.011258 |
| 0.011126 | 0.011126 | 0.011192 | 0.011126 | 0.000000 | 0.011390 | 0.011192 |
| 0.011261 | 0.000000 | 0.011126 | 0.011390 | 0.011258 | 0.011457 | 0.011390 |
| 0.011457 | 0.011328 | 0.011324 | 0.011457 | 0.011324 | 0.011390 | 0.011126 |
| 0.011259 | 0.011325 | 0.011192 | 0.011192 | 0.011258 | 0.000000 | 0.011258 |
| 0.011258 | 0.011126 | 0.011192 | 0.011390 | 0.011258 | 0.011324 | 0.011324 |
| 0.011325 | 0.011391 | 0.011258 | 0.011324 | 0.011920 | 0.011271 | 0.000000 |
| 0.011335 | 0.011265 | 0.011200 | 0.011198 | 0.011268 | 0.011402 | 0.011261 |
| 0.012013 | 0.011129 | 0.011263 | 0.011198 | 0.011401 | 0.011328 | 0.011328 |
| 0.011938 | 0.011357 | 0.011127 | 0.011192 | 0.011192 | 0.011126 | 0.011127 |
| 0.011126 | 0.000000 | 0.011192 | 0.011192 | 0.011127 | 0.011258 | 0.011258 |
| 0.011258 | 0.011126 | 0.011126 | 0.011126 | 0.000000 | 0.011126 | 0.000000 |
| 0.011258 | 0.011258 | 0.000000 | 0.011126 | 0.011126 | 0.000000 | 0.011192 |
| 0.011258 | 0.000000 | 0.011126 | 0.011192 | 0.011126 | 0.011324 | 0.011192 |
| 0.011126 | 0.011324 | 0.000000 | 0.011192 | 0.000000 | 0.011523 | 0.011192 |
| 0.011129 | 0.011126 | 0.011456 | 0.011464 | 0.011325 | 0.011192 | 0.011324 |
| 0.011391 | 0.011192 | 0.011126 | 0.011192 | 0.011523 | 0.011390 | 0.011258 |
| 0.011192 | 0.011391 | 0.011523 | 0.011192 | 0.011457 | 0.011457 | 0.011390 |

|          |          |          |          |          |          |          |
|----------|----------|----------|----------|----------|----------|----------|
| 0.011126 | 0.011192 | 0.011391 | 0.011457 | 0.011193 | 0.011325 | 0.011324 |
| 0.011126 | 0.011126 | 0.011126 | 0.011523 | 0.011457 | 0.011457 | 0.011192 |
| 0.011391 | 0.011325 | 0.011126 | 0.011391 | 0.011126 | 0.011192 | 0.011258 |
| 0.011192 | 0.011192 | 0.011126 | 0.011258 | 0.011192 | 0.011126 | 0.011258 |
| 0.011192 | 0.011327 | 0.011324 | 0.011258 | 0.011132 | 0.011258 | 0.011208 |
| 0.011156 | 0.011457 | 0.000000 | 0.011325 | 0.011129 | 0.011271 | 0.011259 |
| 0.011198 | 0.000000 | 0.011192 | 0.000000 | 0.000000 | 0.011207 | 0.011258 |
| 0.011324 | 0.011192 | 0.011192 | 0.011192 | 0.011259 | 0.011258 | 0.011324 |
| 0.011390 | 0.011325 | 0.011458 | 0.011127 | 0.011392 | 0.011477 | 0.011192 |
| 0.011522 | 0.011258 | 0.000000 | 0.011391 | 0.011126 | 0.011258 | 0.000000 |
| 0.000000 | 0.011192 | 0.011126 | 0.011192 | 0.011192 | 0.011192 | 0.011324 |
| 0.011193 | 0.000000 | 0.011325 | 0.011128 | 0.011396 | 0.011126 | 0.011393 |
| 0.011394 | 0.000000 | 0.000000 | 0.000000 | 0.011324 | 0.011391 | 0.011325 |
| 0.011192 | 0.011258 | 0.011390 | 0.011457 | 0.011324 | 0.011324 | 0.011192 |
| 0.011324 | 0.011324 | 0.011192 | 0.011126 | 0.011986 | 0.011192 | 0.011324 |
| 0.011589 | 0.011268 | 0.000000 | 0.011266 | 0.011126 | 0.011192 | 0.011390 |
| 0.011126 | 0.011390 | 0.011126 | 0.011126 | 0.011286 | 0.011589 | 0.011196 |
| 0.000000 | 0.000000 | 0.011195 | 0.011195 | 0.011196 | 0.000000 | 0.011262 |
| 0.011332 | 0.011222 | 0.000000 | 0.011208 | 0.011192 | 0.011195 | 0.011192 |
| 0.000000 | 0.011126 | 0.011192 | 0.000000 | 0.011192 | 0.011192 | 0.011126 |
| 0.011258 | 0.011390 | 0.011126 | 0.011126 | 0.011126 | 0.011126 | 0.011126 |
| 0.011127 | 0.011258 | 0.011258 | 0.011259 | 0.011258 | 0.011324 | 0.011390 |
| 0.011325 | 0.011458 | 0.011127 | 0.011392 | 0.011477 | 0.011192 | 0.011324 |
| 0.011390 | 0.011390 | 0.011127 | 0.011196 | 0.011329 | 0.011260 | 0.011265 |
| 0.011194 | 0.011592 | 0.011464 | 0.011194 | 0.011126 | 0.011258 | 0.011126 |
| 0.011258 | 0.011258 | 0.000000 | 0.011193 | 0.011457 | 0.011391 | 0.011192 |
| 0.000000 | 0.000000 | 0.011258 | 0.000000 | 0.000000 | 0.011193 | 0.011258 |
| 0.011192 | 0.011126 | 0.000000 | 0.011324 | 0.011258 | 0.000000 | 0.011324 |
| 0.011192 | 0.011324 | 0.011258 | 0.011192 | 0.000000 | 0.011324 | 0.011126 |
| 0.011258 | 0.011523 | 0.011192 | 0.011126 | 0.011126 | 0.011390 | 0.000000 |
| 0.011577 | 0.011129 | 0.011201 | 0.011266 | 0.011390 | 0.011258 | 0.000000 |
| 0.011131 | 0.011258 | 0.011390 | 0.011523 | 0.011324 | 0.011589 | 0.011655 |
| 0.011523 | 0.011595 | 0.011456 | 0.011787 | 0.011324 | 0.012581 | 0.011523 |
| 0.012184 | 0.012051 | 0.012449 | 0.011987 | 0.011324 | 0.011192 | 0.011655 |
| 0.012119 | 0.011788 | 0.011456 | 0.011390 | 0.011258 | 0.011258 | 0.011326 |
| 0.011258 | 0.011258 | 0.011324 | 0.011258 | 0.011655 | 0.011721 | 0.011721 |
| 0.011523 | 0.011655 | 0.011721 | 0.011522 | 0.011986 | 0.011928 | 0.012120 |
| 0.012119 | 0.012053 | 0.012053 | 0.011987 | 0.012053 | 0.011192 | 0.011589 |
| 0.011721 | 0.012052 | 0.011727 | 0.011787 | 0.011523 | 0.011193 | 0.011258 |
| 0.011192 | 0.011126 | 0.011655 | 0.011635 | 0.011986 | 0.011523 | 0.011192 |
| S620     | 0.011384 | 0.011384 | 0.011653 | 0.011545 | 0.011545 | 0.011599 |
| 0.011332 | 0.011278 | 0.011491 | 0.011168 | 0.011276 | 0.011222 | 0.011168 |
| 0.011222 | 0.011330 | 0.011168 | 0.011222 | 0.011222 | 0.011276 | 0.011222 |
| 0.011222 | 0.011276 | 0.011276 | 0.011168 | 0.011168 | 0.011168 | 0.011386 |
| 0.011438 | 0.011276 | 0.011114 | 0.011276 | 0.011222 | 0.011222 | 0.011114 |
| 0.011276 | 0.011330 | 0.011330 | 0.011276 | 0.011330 | 0.011276 | 0.011599 |
| 0.011168 | 0.011222 | 0.011330 | 0.011222 | 0.011437 | 0.011437 | 0.011384 |
| 0.011330 | 0.011492 | 0.011222 | 0.011384 | 0.011276 | 0.011437 | 0.011276 |
| 0.011222 | 0.011438 | 0.011330 | 0.011437 | 0.011491 | 0.011276 | 0.011545 |
| 0.011276 | 0.011222 | 0.011222 | 0.011383 | 0.011384 | 0.011330 | 0.011330 |
| 0.011276 | 0.011276 | 0.011330 | 0.011438 | 0.011222 | 0.011276 | 0.011276 |
| 0.011222 | 0.011222 | 0.011168 | 0.011222 | 0.011222 | 0.011222 | 0.011437 |
| 0.011330 | 0.011222 | 0.011384 | 0.011114 | 0.011384 | 0.011168 | 0.011168 |
| 0.011437 | 0.011383 | 0.011437 | 0.011384 | 0.011276 | 0.011438 | 0.011330 |
| 0.011330 | 0.011384 | 0.011546 | 0.011168 | 0.011168 | 0.011228 | 0.011222 |
| 0.011222 | 0.011245 | 0.011170 | 0.011437 | 0.011384 | 0.011276 | 0.011384 |
| 0.011330 | 0.011222 | 0.011437 | 0.011276 | 0.011384 | 0.011276 | 0.011222 |
| 0.011168 | 0.011330 | 0.011492 | 0.011437 | 0.011330 | 0.011276 | 0.011222 |
| 0.011114 | 0.011222 | 0.011276 | 0.011168 | 0.011276 | 0.011276 | 0.011222 |
| 0.011330 | 0.011437 | 0.011168 | 0.011168 | 0.011168 | 0.011168 | 0.011168 |

|          |          |          |          |          |          |          |
|----------|----------|----------|----------|----------|----------|----------|
| 0.011168 | 0.011276 | 0.011330 | 0.011117 | 0.011173 | 0.011174 | 0.011168 |
| 0.011222 | 0.011222 | 0.011276 | 0.011276 | 0.011170 | 0.011225 | 0.011223 |
| 0.011289 | 0.011226 | 0.011169 | 0.011168 | 0.011114 | 0.011330 | 0.011276 |
| 0.011384 | 0.011276 | 0.011276 | 0.011330 | 0.011276 | 0.011599 | 0.011545 |
| 0.011545 | 0.011491 | 0.011168 | 0.011492 | 0.011168 | 0.011330 | 0.011114 |
| 0.011168 | 0.011222 | 0.011168 | 0.011222 | 0.011222 | 0.011222 | 0.011384 |
| 0.011222 | 0.011330 | 0.011276 | 0.011168 | 0.011277 | 0.011491 | 0.011384 |
| 0.011384 | 0.011384 | 0.011114 | 0.011114 | 0.011330 | 0.011114 | 0.011114 |
| 0.011223 | 0.011384 | 0.011168 | 0.011384 | 0.011114 | 0.011276 | 0.011168 |
| 0.011276 | 0.011168 | 0.011222 | 0.011168 | 0.011222 | 0.011114 | 0.011222 |
| 0.011276 | 0.011276 | 0.011276 | 0.011168 | 0.011222 | 0.011276 | 0.011437 |
| 0.011384 | 0.011330 | 0.011384 | 0.011276 | 0.011384 | 0.011222 | 0.011222 |
| 0.011277 | 0.011385 | 0.011413 | 0.011115 | 0.011551 | 0.011115 | 0.011246 |
| 0.011441 | 0.011387 | 0.011330 | 0.011546 | 0.011333 | 0.011437 | 0.011438 |
| 0.011438 | 0.011491 | 0.011464 | 0.011126 | 0.011126 | 0.011384 | 0.011388 |
| 0.011545 | 0.011331 | 0.011384 | 0.011385 | 0.011330 | 0.011492 | 0.011877 |
| 0.011277 | 0.011389 | 0.011387 | 0.011496 | 0.011546 | 0.011168 | 0.011331 |
| 0.011168 | 0.011222 | 0.011114 | 0.011114 | 0.011168 | 0.011276 | 0.011222 |
| 0.011222 | 0.011276 | 0.011168 | 0.011276 | 0.011222 | 0.011276 | 0.011222 |
| 0.011276 | 0.011545 | 0.011330 | 0.011276 | 0.011114 | 0.011222 | 0.011330 |
| 0.011330 | 0.011168 | 0.011276 | 0.011438 | 0.011114 | 0.011114 | 0.011114 |
| 0.011545 | 0.011222 | 0.011276 | 0.011168 | 0.011276 | 0.011276 | 0.011114 |
| 0.011168 | 0.011168 | 0.011276 | 0.011384 | 0.011222 | 0.011222 | 0.011330 |
| 0.011330 | 0.011276 | 0.011276 | 0.011168 | 0.011114 | 0.011222 | 0.011222 |
| 0.011168 | 0.011330 | 0.011114 | 0.011114 | 0.011330 | 0.011222 | 0.011168 |
| 0.011168 | 0.011330 | 0.011114 | 0.011114 | 0.011330 | 0.011114 | 0.011384 |
| 0.011282 | 0.011222 | 0.011276 | 0.011330 | 0.011491 | 0.011222 | 0.011330 |
| 0.011222 | 0.011437 | 0.011114 | 0.011168 | 0.011168 | 0.011168 | 0.011114 |
| 0.011276 | 0.011437 | 0.011222 | 0.011276 | 0.011114 | 0.011330 | 0.011168 |
| 0.011222 | 0.011168 | 0.011222 | 0.011168 | 0.011276 | 0.011384 | 0.011330 |
| 0.011384 | 0.011276 | 0.011222 | 0.011438 | 0.011330 | 0.011222 | 0.011168 |
| 0.011168 | 0.011222 | 0.011222 | 0.011168 | 0.011114 | 0.011330 | 0.011168 |
| 0.011168 | 0.011222 | 0.011330 | 0.011437 | 0.011114 | 0.011168 | 0.011222 |
| 0.011276 | 0.011222 | 0.011276 | 0.011168 | 0.011330 | 0.011491 | 0.011545 |
| 0.011168 | 0.011384 | 0.011168 | 0.020169 | 0.011194 | 0.011529 | 0.011330 |
| 0.011330 | 0.011330 | 0.011204 | 0.011137 | 0.011517 | 0.011222 | 0.011348 |
| 0.011471 | 0.011297 | 0.011114 | 0.011182 | 0.011230 | 0.011252 | 0.011120 |
| 0.011294 | 0.011276 | 0.011276 | 0.011153 | 0.011330 | 0.011384 | 0.011278 |
| 0.011171 | 0.011330 | 0.011384 | 0.011330 | 0.011330 | 0.011330 | 0.011222 |
| 0.011222 | 0.011168 | 0.011168 | 0.011384 | 0.011276 | 0.011168 | 0.011222 |
| 0.011222 | 0.011330 | 0.011114 | 0.011276 | 0.011384 | 0.011330 | 0.011222 |
| 0.011384 | 0.011276 | 0.011330 | 0.011330 | 0.011384 | 0.011493 | 0.011438 |
| 0.011114 | 0.011114 | 0.011168 | 0.011276 | 0.011114 | 0.011384 | 0.011384 |
| 0.011384 | 0.011330 | 0.011384 | 0.011437 | 0.011438 | 0.011439 | 0.011168 |
| 0.011276 | 0.011384 | 0.011491 | 0.011168 | 0.011276 | 0.011168 | 0.011330 |
| 0.011276 | 0.011276 | 0.011330 | 0.011276 | 0.011222 | 0.011437 | 0.011276 |
| 0.011388 | 0.011168 | 0.011168 | 0.011438 | 0.011276 | 0.011491 | 0.011437 |
| 0.011546 | 0.011333 | 0.011437 | 0.011438 | 0.011438 | 0.011491 | 0.011168 |
| 0.011439 | 0.011330 | 0.011222 | 0.011222 | 0.011330 | 0.011114 | 0.011276 |
| 0.011384 | 0.011330 | 0.011222 | 0.011384 | 0.011276 | 0.011330 | 0.011330 |
| 0.011384 | 0.011493 | 0.011276 | 0.011330 | 0.011924 | 0.011343 | 0.011174 |
| 0.011506 | 0.011337 | 0.011288 | 0.011283 | 0.011340 | 0.011393 | 0.011333 |
| 0.011999 | 0.011227 | 0.011335 | 0.011227 | 0.011559 | 0.011496 | 0.011441 |
| 0.011938 | 0.011426 | 0.011168 | 0.011276 | 0.011222 | 0.011222 | 0.011168 |
| 0.011168 | 0.011114 | 0.011276 | 0.011276 | 0.011168 | 0.011330 | 0.011276 |
| 0.011276 | 0.011168 | 0.011168 | 0.011168 | 0.011114 | 0.011168 | 0.011114 |
| 0.011330 | 0.011384 | 0.011168 | 0.011168 | 0.011222 | 0.011222 | 0.011222 |
| 0.011276 | 0.011168 | 0.011276 | 0.011222 | 0.011168 | 0.011330 | 0.011437 |
| 0.011330 | 0.011491 | 0.011276 | 0.011330 | 0.011114 | 0.011491 | 0.011222 |
| 0.011229 | 0.011168 | 0.011438 | 0.011443 | 0.011330 | 0.011222 | 0.011330 |

|          |          |          |          |          |          |          |
|----------|----------|----------|----------|----------|----------|----------|
| 0.011384 | 0.011222 | 0.011168 | 0.011222 | 0.011491 | 0.011384 | 0.011330 |
| 0.011222 | 0.011384 | 0.011491 | 0.011222 | 0.011438 | 0.011438 | 0.011384 |
| 0.011222 | 0.011168 | 0.011384 | 0.011545 | 0.011330 | 0.011330 | 0.011330 |
| 0.011276 | 0.011222 | 0.011222 | 0.011492 | 0.011438 | 0.011438 | 0.011276 |
| 0.011384 | 0.011384 | 0.011222 | 0.011384 | 0.011222 | 0.011222 | 0.011330 |
| 0.011276 | 0.011222 | 0.011222 | 0.011383 | 0.011276 | 0.011168 | 0.011330 |
| 0.011222 | 0.011332 | 0.011492 | 0.011330 | 0.011126 | 0.011276 | 0.011250 |
| 0.011220 | 0.011599 | 0.011114 | 0.011330 | 0.011170 | 0.011350 | 0.011344 |
| 0.011304 | 0.011128 | 0.011299 | 0.000000 | 0.000000 | 0.011265 | 0.011330 |
| 0.011384 | 0.011222 | 0.011222 | 0.011279 | 0.011330 | 0.011330 | 0.011384 |
| 0.011437 | 0.011438 | 0.011601 | 0.011277 | 0.011439 | 0.011683 | 0.011222 |
| 0.011545 | 0.011491 | 0.011168 | 0.011492 | 0.011168 | 0.011330 | 0.011114 |
| 0.011168 | 0.011222 | 0.011168 | 0.011222 | 0.011222 | 0.011222 | 0.011384 |
| 0.011223 | 0.011116 | 0.011330 | 0.011170 | 0.011388 | 0.011222 | 0.011386 |
| 0.011332 | 0.011168 | 0.011119 | 0.011117 | 0.011330 | 0.011384 | 0.011438 |
| 0.011222 | 0.011330 | 0.011491 | 0.011492 | 0.011437 | 0.011384 | 0.011222 |
| 0.011330 | 0.011330 | 0.011276 | 0.011222 | 0.011869 | 0.011330 | 0.011438 |
| 0.011653 | 0.011346 | 0.011116 | 0.011339 | 0.011168 | 0.011222 | 0.011384 |
| 0.011168 | 0.011383 | 0.011384 | 0.011384 | 0.011308 | 0.011599 | 0.011228 |
| 0.011115 | 0.011116 | 0.011279 | 0.011225 | 0.011281 | 0.011120 | 0.011279 |
| 0.011336 | 0.011270 | 0.011138 | 0.011359 | 0.011222 | 0.011225 | 0.011222 |
| 0.011114 | 0.011222 | 0.011276 | 0.011168 | 0.011276 | 0.011276 | 0.011222 |
| 0.011330 | 0.011437 | 0.011168 | 0.011168 | 0.011168 | 0.011168 | 0.011168 |
| 0.011168 | 0.011276 | 0.011330 | 0.011330 | 0.011330 | 0.011384 | 0.011437 |
| 0.011438 | 0.011601 | 0.011277 | 0.011439 | 0.011683 | 0.011222 | 0.011384 |
| 0.011384 | 0.011384 | 0.011169 | 0.011282 | 0.011451 | 0.011280 | 0.011285 |
| 0.011280 | 0.011648 | 0.011526 | 0.011278 | 0.011168 | 0.011384 | 0.011222 |
| 0.011330 | 0.011276 | 0.011168 | 0.011277 | 0.011491 | 0.011384 | 0.011384 |
| 0.011114 | 0.011114 | 0.011330 | 0.011114 | 0.011114 | 0.011223 | 0.011384 |
| 0.011222 | 0.011168 | 0.011168 | 0.011384 | 0.011276 | 0.011168 | 0.011330 |
| 0.011276 | 0.011330 | 0.011330 | 0.011222 | 0.011276 | 0.011491 | 0.011168 |
| 0.011276 | 0.011491 | 0.011222 | 0.011222 | 0.011222 | 0.011384 | 0.011116 |
| 0.011532 | 0.011173 | 0.011239 | 0.011338 | 0.011384 | 0.011330 | 0.011115 |
| 0.011184 | 0.011276 | 0.011383 | 0.011545 | 0.011383 | 0.011599 | 0.011761 |
| 0.011654 | 0.011605 | 0.011599 | 0.011761 | 0.011384 | 0.012517 | 0.011599 |
| 0.012248 | 0.012031 | 0.012355 | 0.012140 | 0.011437 | 0.011222 | 0.011599 |
| 0.012086 | 0.011762 | 0.011437 | 0.011384 | 0.011276 | 0.011276 | 0.011331 |
| 0.011276 | 0.011276 | 0.011330 | 0.011276 | 0.011708 | 0.011707 | 0.011761 |
| 0.011545 | 0.011653 | 0.011815 | 0.011545 | 0.012032 | 0.011930 | 0.012087 |
| 0.012086 | 0.012086 | 0.012032 | 0.012032 | 0.012086 | 0.011222 | 0.011491 |
| 0.011653 | 0.012139 | 0.011657 | 0.011761 | 0.011545 | 0.011223 | 0.011276 |
| 0.011222 | 0.011222 | 0.011707 | 0.011738 | 0.011869 | 0.011545 | 0.011222 |
| S621     | 0.011596 | 0.011596 | 0.011596 | 0.011663 | 0.011663 | 0.011730 |
| 0.011534 | 0.011466 | 0.011663 | 0.011261 | 0.011395 | 0.011395 | 0.011261 |
| 0.011395 | 0.011462 | 0.011328 | 0.011328 | 0.011328 | 0.011395 | 0.011395 |
| 0.011328 | 0.011395 | 0.011395 | 0.011329 | 0.011262 | 0.011261 | 0.011602 |
| 0.011663 | 0.011395 | 0.011261 | 0.011395 | 0.011328 | 0.011395 | 0.011261 |
| 0.011462 | 0.011462 | 0.011529 | 0.011395 | 0.011529 | 0.011328 | 0.011730 |
| 0.011328 | 0.011395 | 0.011529 | 0.011328 | 0.011529 | 0.011462 | 0.011529 |
| 0.011529 | 0.011663 | 0.011462 | 0.011596 | 0.011462 | 0.011529 | 0.011462 |
| 0.011395 | 0.011529 | 0.011529 | 0.011529 | 0.011730 | 0.011328 | 0.011462 |
| 0.011462 | 0.011328 | 0.011194 | 0.011529 | 0.011596 | 0.011462 | 0.011529 |
| 0.011462 | 0.011395 | 0.011328 | 0.011663 | 0.011395 | 0.011395 | 0.011395 |
| 0.011395 | 0.011395 | 0.011328 | 0.011395 | 0.011328 | 0.011395 | 0.011596 |
| 0.011529 | 0.011395 | 0.011395 | 0.011261 | 0.011596 | 0.011328 | 0.011328 |
| 0.011596 | 0.011462 | 0.011596 | 0.011462 | 0.011462 | 0.011663 | 0.011462 |
| 0.011395 | 0.011596 | 0.011664 | 0.011328 | 0.011328 | 0.011269 | 0.011328 |
| 0.011328 | 0.011438 | 0.011328 | 0.011462 | 0.011462 | 0.011462 | 0.011596 |
| 0.011462 | 0.011395 | 0.011596 | 0.011462 | 0.011529 | 0.011462 | 0.011395 |
| 0.011328 | 0.011529 | 0.011664 | 0.011529 | 0.011462 | 0.011462 | 0.011395 |

|          |          |          |          |          |          |          |
|----------|----------|----------|----------|----------|----------|----------|
| 0.011261 | 0.011395 | 0.011395 | 0.011261 | 0.011395 | 0.011395 | 0.011328 |
| 0.011462 | 0.011596 | 0.011328 | 0.011328 | 0.011328 | 0.011328 | 0.011329 |
| 0.011329 | 0.011462 | 0.011328 | 0.011266 | 0.011334 | 0.011335 | 0.011328 |
| 0.011261 | 0.011395 | 0.011402 | 0.011395 | 0.011265 | 0.011403 | 0.011398 |
| 0.011404 | 0.011403 | 0.011330 | 0.011328 | 0.011261 | 0.011462 | 0.011328 |
| 0.011462 | 0.011462 | 0.011462 | 0.011529 | 0.011462 | 0.011864 | 0.011730 |
| 0.011797 | 0.011462 | 0.011261 | 0.011529 | 0.011328 | 0.011529 | 0.011261 |
| 0.011261 | 0.011395 | 0.011261 | 0.011395 | 0.011395 | 0.011395 | 0.011395 |
| 0.011328 | 0.011395 | 0.011462 | 0.011261 | 0.011397 | 0.011663 | 0.011597 |
| 0.011462 | 0.011462 | 0.011261 | 0.011262 | 0.011529 | 0.011261 | 0.011261 |
| 0.011398 | 0.011462 | 0.011328 | 0.011462 | 0.011261 | 0.011462 | 0.011328 |
| 0.011462 | 0.011328 | 0.011328 | 0.011328 | 0.011328 | 0.011261 | 0.011395 |
| 0.011462 | 0.011462 | 0.011395 | 0.011261 | 0.011395 | 0.011462 | 0.011596 |
| 0.011462 | 0.011529 | 0.011596 | 0.011462 | 0.011596 | 0.011328 | 0.011395 |
| 0.011464 | 0.011467 | 0.011574 | 0.011265 | 0.011669 | 0.011197 | 0.011371 |
| 0.011602 | 0.011532 | 0.011462 | 0.011731 | 0.011535 | 0.011529 | 0.011596 |
| 0.011596 | 0.011529 | 0.011553 | 0.011364 | 0.011294 | 0.011529 | 0.011529 |
| 0.011529 | 0.011396 | 0.011529 | 0.011397 | 0.011462 | 0.011529 | 0.012146 |
| 0.011398 | 0.011402 | 0.011604 | 0.011536 | 0.011799 | 0.011328 | 0.011532 |
| 0.011328 | 0.011395 | 0.011261 | 0.011261 | 0.011328 | 0.011462 | 0.011395 |
| 0.011395 | 0.011462 | 0.011328 | 0.011462 | 0.011395 | 0.011462 | 0.011328 |
| 0.011395 | 0.011730 | 0.011529 | 0.011462 | 0.011261 | 0.011395 | 0.011395 |
| 0.011462 | 0.011328 | 0.011328 | 0.011395 | 0.011261 | 0.011261 | 0.011261 |
| 0.011730 | 0.011395 | 0.011395 | 0.011328 | 0.011462 | 0.011462 | 0.011261 |
| 0.011328 | 0.011328 | 0.011395 | 0.011596 | 0.011328 | 0.011328 | 0.011596 |
| 0.011529 | 0.011462 | 0.011462 | 0.011328 | 0.011261 | 0.011395 | 0.011395 |
| 0.011328 | 0.011529 | 0.011261 | 0.011261 | 0.011328 | 0.011396 | 0.011328 |
| 0.011329 | 0.011395 | 0.011262 | 0.011261 | 0.011529 | 0.011261 | 0.011462 |
| 0.011408 | 0.011395 | 0.011462 | 0.011462 | 0.011529 | 0.011395 | 0.011529 |
| 0.011395 | 0.011529 | 0.011261 | 0.011328 | 0.011328 | 0.011328 | 0.011261 |
| 0.011395 | 0.011529 | 0.011194 | 0.011395 | 0.011261 | 0.011462 | 0.011328 |
| 0.011328 | 0.011328 | 0.011328 | 0.011328 | 0.011462 | 0.011529 | 0.011596 |
| 0.011462 | 0.011261 | 0.011328 | 0.011664 | 0.011529 | 0.011395 | 0.011328 |
| 0.011328 | 0.011395 | 0.011194 | 0.011328 | 0.011261 | 0.011529 | 0.011328 |
| 0.011328 | 0.011328 | 0.011529 | 0.011529 | 0.011261 | 0.011328 | 0.011328 |
| 0.011261 | 0.011395 | 0.011395 | 0.011328 | 0.011529 | 0.011596 | 0.011730 |
| 0.011328 | 0.011529 | 0.011328 | 0.011395 | 0.011274 | 0.011661 | 0.011597 |
| 0.011529 | 0.011597 | 0.011392 | 0.011427 | 0.011620 | 0.011462 | 0.011575 |
| 0.011689 | 0.011542 | 0.011261 | 0.011210 | 0.011408 | 0.011440 | 0.011278 |
| 0.011487 | 0.011462 | 0.011462 | 0.011387 | 0.011462 | 0.011596 | 0.011465 |
| 0.011334 | 0.011395 | 0.011529 | 0.011529 | 0.011395 | 0.011396 | 0.011396 |
| 0.011395 | 0.011328 | 0.011261 | 0.011462 | 0.011462 | 0.011261 | 0.011328 |
| 0.011328 | 0.011529 | 0.011261 | 0.011395 | 0.011395 | 0.011328 | 0.011328 |
| 0.011529 | 0.011462 | 0.011529 | 0.011529 | 0.011530 | 0.011598 | 0.011462 |
| 0.011261 | 0.011261 | 0.011328 | 0.011395 | 0.011261 | 0.011529 | 0.011529 |
| 0.011395 | 0.011462 | 0.011596 | 0.011462 | 0.011529 | 0.011465 | 0.011328 |
| 0.011395 | 0.011529 | 0.011663 | 0.011328 | 0.011395 | 0.011261 | 0.011529 |
| 0.011328 | 0.011328 | 0.011395 | 0.011395 | 0.011261 | 0.011663 | 0.011395 |
| 0.011467 | 0.011261 | 0.011328 | 0.011596 | 0.011462 | 0.011663 | 0.011596 |
| 0.011731 | 0.011535 | 0.011529 | 0.011596 | 0.011596 | 0.011529 | 0.011328 |
| 0.011464 | 0.011529 | 0.011328 | 0.011328 | 0.011529 | 0.011261 | 0.011395 |
| 0.011395 | 0.011328 | 0.011328 | 0.011529 | 0.011462 | 0.011529 | 0.011529 |
| 0.011530 | 0.011598 | 0.011462 | 0.011462 | 0.012200 | 0.011485 | 0.011409 |
| 0.011545 | 0.011475 | 0.011482 | 0.011409 | 0.011481 | 0.011615 | 0.011400 |
| 0.012300 | 0.011339 | 0.011472 | 0.011407 | 0.011614 | 0.011535 | 0.011467 |
| 0.012225 | 0.011571 | 0.011329 | 0.011395 | 0.011395 | 0.011328 | 0.011329 |
| 0.011328 | 0.011328 | 0.011328 | 0.011328 | 0.011329 | 0.011529 | 0.011462 |
| 0.011462 | 0.011328 | 0.011328 | 0.011328 | 0.011261 | 0.011328 | 0.011261 |
| 0.011462 | 0.011462 | 0.011261 | 0.011328 | 0.011328 | 0.011328 | 0.011395 |
| 0.011462 | 0.011261 | 0.011328 | 0.011328 | 0.011328 | 0.011462 | 0.011395 |

|          |          |          |          |          |          |          |
|----------|----------|----------|----------|----------|----------|----------|
| 0.011328 | 0.011529 | 0.011261 | 0.011395 | 0.011261 | 0.011730 | 0.011395 |
| 0.011339 | 0.011328 | 0.011663 | 0.011674 | 0.011529 | 0.011395 | 0.011529 |
| 0.011529 | 0.011395 | 0.011328 | 0.011395 | 0.011663 | 0.011462 | 0.011395 |
| 0.011395 | 0.011462 | 0.011730 | 0.011328 | 0.011596 | 0.011596 | 0.011462 |
| 0.011395 | 0.011462 | 0.011529 | 0.011596 | 0.011396 | 0.011529 | 0.011529 |
| 0.011328 | 0.011328 | 0.011328 | 0.011663 | 0.011596 | 0.011596 | 0.011395 |
| 0.011462 | 0.011529 | 0.011328 | 0.011462 | 0.011328 | 0.011328 | 0.011462 |
| 0.011395 | 0.011395 | 0.011328 | 0.011395 | 0.011395 | 0.011261 | 0.011395 |
| 0.011395 | 0.011534 | 0.011596 | 0.011529 | 0.011275 | 0.011328 | 0.011432 |
| 0.011362 | 0.011663 | 0.011261 | 0.011462 | 0.011261 | 0.011418 | 0.011395 |
| 0.011471 | 0.011215 | 0.011333 | 0.011207 | 0.011265 | 0.000000 | 0.011462 |
| 0.011529 | 0.011328 | 0.011462 | 0.011328 | 0.011328 | 0.011529 | 0.011596 |
| 0.011596 | 0.011462 | 0.011598 | 0.011397 | 0.011531 | 0.011553 | 0.011261 |
| 0.011797 | 0.011462 | 0.011261 | 0.011529 | 0.011328 | 0.011529 | 0.011261 |
| 0.011261 | 0.011395 | 0.011261 | 0.011395 | 0.011395 | 0.011395 | 0.011395 |
| 0.011397 | 0.011267 | 0.011529 | 0.011334 | 0.011606 | 0.011329 | 0.011601 |
| 0.011534 | 0.011261 | 0.011275 | 0.011268 | 0.011462 | 0.011529 | 0.011529 |
| 0.011395 | 0.011462 | 0.011596 | 0.011664 | 0.011529 | 0.011529 | 0.011395 |
| 0.011529 | 0.011529 | 0.011395 | 0.011328 | 0.012066 | 0.011395 | 0.011596 |
| 0.011865 | 0.011483 | 0.011267 | 0.011406 | 0.011395 | 0.011395 | 0.011596 |
| 0.011262 | 0.011596 | 0.011395 | 0.011395 | 0.011514 | 0.011730 | 0.011402 |
| 0.011264 | 0.011266 | 0.011401 | 0.011401 | 0.011474 | 0.011277 | 0.011469 |
| 0.011536 | 0.011464 | 0.011315 | 0.011426 | 0.011328 | 0.011402 | 0.011395 |
| 0.011261 | 0.011395 | 0.011395 | 0.011261 | 0.011395 | 0.011395 | 0.011328 |
| 0.011462 | 0.011596 | 0.011328 | 0.011328 | 0.011328 | 0.011328 | 0.011329 |
| 0.011329 | 0.011462 | 0.011328 | 0.011328 | 0.011529 | 0.011596 | 0.011596 |
| 0.011462 | 0.011598 | 0.011397 | 0.011531 | 0.011553 | 0.011261 | 0.011529 |
| 0.011596 | 0.011596 | 0.011262 | 0.011337 | 0.011537 | 0.011469 | 0.011404 |
| 0.011397 | 0.011785 | 0.011635 | 0.011331 | 0.011328 | 0.011462 | 0.011328 |
| 0.011395 | 0.011462 | 0.011261 | 0.011397 | 0.011663 | 0.011597 | 0.011462 |
| 0.011261 | 0.011262 | 0.011529 | 0.011261 | 0.011261 | 0.011398 | 0.011462 |
| 0.011395 | 0.011328 | 0.011261 | 0.011462 | 0.011462 | 0.011261 | 0.011529 |
| 0.011328 | 0.011462 | 0.011462 | 0.011395 | 0.011261 | 0.011529 | 0.011328 |
| 0.011462 | 0.011730 | 0.011395 | 0.011328 | 0.011328 | 0.011596 | 0.011194 |
| 0.011712 | 0.011333 | 0.011424 | 0.011538 | 0.011663 | 0.011529 | 0.011261 |
| 0.011351 | 0.011462 | 0.011529 | 0.011730 | 0.011529 | 0.011730 | 0.011797 |
| 0.011731 | 0.011806 | 0.011663 | 0.011932 | 0.011529 | 0.012603 | 0.011596 |
| 0.012401 | 0.012133 | 0.012469 | 0.012201 | 0.011529 | 0.011395 | 0.011865 |
| 0.012335 | 0.012000 | 0.011529 | 0.011596 | 0.011462 | 0.011462 | 0.011532 |
| 0.011462 | 0.011462 | 0.011529 | 0.011462 | 0.011798 | 0.011797 | 0.011864 |
| 0.011730 | 0.011797 | 0.011998 | 0.011730 | 0.012268 | 0.012211 | 0.012335 |
| 0.012402 | 0.012335 | 0.012335 | 0.012268 | 0.012335 | 0.011395 | 0.011730 |
| 0.011932 | 0.012201 | 0.011871 | 0.011999 | 0.011730 | 0.011397 | 0.011462 |
| 0.011395 | 0.011328 | 0.011798 | 0.011944 | 0.012133 | 0.011663 | 0.011395 |
| S622     | 0.011506 | 0.011506 | 0.011953 | 0.011912 | 0.011912 | 0.011953 |
| 0.011754 | 0.011672 | 0.011872 | 0.011344 | 0.011385 | 0.011344 | 0.011303 |
| 0.011344 | 0.011587 | 0.011344 | 0.011385 | 0.011385 | 0.011385 | 0.011344 |
| 0.011344 | 0.011385 | 0.011506 | 0.011304 | 0.011304 | 0.011304 | 0.011754 |
| 0.011628 | 0.011385 | 0.011263 | 0.011547 | 0.011385 | 0.011425 | 0.011263 |
| 0.011385 | 0.011506 | 0.011425 | 0.011425 | 0.011425 | 0.011425 | 0.011628 |
| 0.011303 | 0.011425 | 0.011425 | 0.011385 | 0.011506 | 0.011506 | 0.011466 |
| 0.011425 | 0.011587 | 0.011385 | 0.011831 | 0.011385 | 0.011628 | 0.011385 |
| 0.011385 | 0.011506 | 0.011425 | 0.011628 | 0.011831 | 0.011506 | 0.011628 |
| 0.011425 | 0.011506 | 0.011385 | 0.011628 | 0.011912 | 0.011425 | 0.011466 |
| 0.011385 | 0.011425 | 0.011466 | 0.011506 | 0.011385 | 0.011425 | 0.011425 |
| 0.011344 | 0.011344 | 0.011303 | 0.011385 | 0.011425 | 0.011425 | 0.011547 |
| 0.011466 | 0.011385 | 0.011466 | 0.011263 | 0.011547 | 0.011303 | 0.011385 |
| 0.011587 | 0.011547 | 0.011750 | 0.011587 | 0.011385 | 0.011628 | 0.011425 |
| 0.011548 | 0.011840 | 0.011640 | 0.011318 | 0.011272 | 0.011398 | 0.011437 |
| 0.011438 | 0.011607 | 0.011280 | 0.011628 | 0.011547 | 0.011425 | 0.011506 |

|          |          |          |          |          |          |          |
|----------|----------|----------|----------|----------|----------|----------|
| 0.011425 | 0.011385 | 0.011547 | 0.011425 | 0.011466 | 0.011385 | 0.011385 |
| 0.011344 | 0.011466 | 0.011709 | 0.011587 | 0.011425 | 0.011425 | 0.011344 |
| 0.011263 | 0.011344 | 0.011385 | 0.011303 | 0.011628 | 0.011587 | 0.011506 |
| 0.011628 | 0.011709 | 0.011385 | 0.011385 | 0.011425 | 0.011425 | 0.011426 |
| 0.011507 | 0.011385 | 0.011425 | 0.011272 | 0.011315 | 0.011316 | 0.011344 |
| 0.011387 | 0.011347 | 0.011401 | 0.011387 | 0.011307 | 0.011351 | 0.011386 |
| 0.011660 | 0.011394 | 0.011348 | 0.011344 | 0.011306 | 0.011425 | 0.011466 |
| 0.011547 | 0.011426 | 0.011425 | 0.011506 | 0.011466 | 0.011790 | 0.011669 |
| 0.011750 | 0.011587 | 0.011385 | 0.011547 | 0.011304 | 0.011547 | 0.011304 |
| 0.011425 | 0.011425 | 0.011344 | 0.011344 | 0.011344 | 0.011344 | 0.011466 |
| 0.011344 | 0.011466 | 0.011466 | 0.011303 | 0.011467 | 0.011587 | 0.011550 |
| 0.011466 | 0.011466 | 0.011344 | 0.011264 | 0.011425 | 0.011344 | 0.011263 |
| 0.011388 | 0.011466 | 0.011304 | 0.011466 | 0.011263 | 0.011385 | 0.011344 |
| 0.011385 | 0.011344 | 0.011385 | 0.011344 | 0.011385 | 0.011263 | 0.011344 |
| 0.011385 | 0.011385 | 0.011385 | 0.011344 | 0.011385 | 0.011425 | 0.011263 |
| 0.011871 | 0.011709 | 0.011831 | 0.011547 | 0.011790 | 0.011425 | 0.011385 |
| 0.011427 | 0.011650 | 0.011449 | 0.011267 | 0.011882 | 0.011266 | 0.011437 |
| 0.011877 | 0.011715 | 0.011506 | 0.011790 | 0.011470 | 0.011628 | 0.011587 |
| 0.011547 | 0.011668 | 0.011620 | 0.011363 | 0.011369 | 0.011466 | 0.011551 |
| 0.011385 | 0.011507 | 0.011588 | 0.011712 | 0.011466 | 0.011709 | 0.011878 |
| 0.011509 | 0.011717 | 0.011551 | 0.011633 | 0.011832 | 0.011303 | 0.011467 |
| 0.011425 | 0.011385 | 0.011263 | 0.011263 | 0.011303 | 0.011385 | 0.011466 |
| 0.011344 | 0.011385 | 0.011304 | 0.011425 | 0.011344 | 0.011385 | 0.011385 |
| 0.011385 | 0.011912 | 0.011790 | 0.011790 | 0.011263 | 0.011385 | 0.011425 |
| 0.011425 | 0.011344 | 0.011425 | 0.011506 | 0.011303 | 0.011303 | 0.011303 |
| 0.011912 | 0.011506 | 0.011466 | 0.011303 | 0.011385 | 0.011547 | 0.011303 |
| 0.011303 | 0.011344 | 0.011385 | 0.011466 | 0.011344 | 0.011506 | 0.011587 |
| 0.011587 | 0.011385 | 0.011385 | 0.011304 | 0.011304 | 0.011425 | 0.011385 |
| 0.011304 | 0.011425 | 0.011263 | 0.011304 | 0.011466 | 0.011628 | 0.011304 |
| 0.011304 | 0.011466 | 0.011304 | 0.011263 | 0.011669 | 0.011263 | 0.011466 |
| 0.011433 | 0.011344 | 0.011709 | 0.011425 | 0.011547 | 0.011344 | 0.011425 |
| 0.011344 | 0.011628 | 0.011263 | 0.011587 | 0.011344 | 0.011344 | 0.011263 |
| 0.011425 | 0.011750 | 0.011385 | 0.011466 | 0.011304 | 0.011790 | 0.011344 |
| 0.011344 | 0.011344 | 0.011344 | 0.011466 | 0.011385 | 0.011506 | 0.011587 |
| 0.011587 | 0.011466 | 0.011425 | 0.011547 | 0.011466 | 0.011344 | 0.011303 |
| 0.011344 | 0.011344 | 0.011385 | 0.011303 | 0.011263 | 0.011466 | 0.011344 |
| 0.011385 | 0.011344 | 0.011466 | 0.011587 | 0.011385 | 0.011303 | 0.011385 |
| 0.011425 | 0.011385 | 0.011425 | 0.011303 | 0.011466 | 0.011587 | 0.011871 |
| 0.011303 | 0.011790 | 0.011385 | 0.018640 | 0.011322 | 0.011657 | 0.011709 |
| 0.011750 | 0.011750 | 0.011408 | 0.011443 | 0.011863 | 0.011790 | 0.011385 |
| 0.011618 | 0.011656 | 0.011270 | 0.011395 | 0.011365 | 0.011381 | 0.011399 |
| 0.011618 | 0.011521 | 0.011527 | 0.011270 | 0.011506 | 0.011506 | 0.011509 |
| 0.011349 | 0.011466 | 0.011506 | 0.011466 | 0.011425 | 0.011425 | 0.011385 |
| 0.011425 | 0.011344 | 0.011344 | 0.011466 | 0.011385 | 0.011344 | 0.011385 |
| 0.011385 | 0.011425 | 0.011303 | 0.011425 | 0.011506 | 0.011547 | 0.011425 |
| 0.011466 | 0.011425 | 0.011790 | 0.011790 | 0.011506 | 0.011548 | 0.011547 |
| 0.011263 | 0.011303 | 0.011303 | 0.011425 | 0.011303 | 0.011547 | 0.011547 |
| 0.011547 | 0.011506 | 0.011506 | 0.011587 | 0.011790 | 0.011589 | 0.011385 |
| 0.011425 | 0.011506 | 0.011547 | 0.011385 | 0.011385 | 0.011303 | 0.011466 |
| 0.011466 | 0.011466 | 0.011506 | 0.011425 | 0.011386 | 0.011587 | 0.011547 |
| 0.011470 | 0.011303 | 0.011425 | 0.011587 | 0.011425 | 0.011628 | 0.011222 |
| 0.011790 | 0.011470 | 0.011628 | 0.011587 | 0.011547 | 0.011668 | 0.011344 |
| 0.011508 | 0.011425 | 0.011385 | 0.011385 | 0.011425 | 0.011303 | 0.011425 |
| 0.011506 | 0.011547 | 0.011425 | 0.011466 | 0.011425 | 0.011790 | 0.011790 |
| 0.011506 | 0.011548 | 0.011547 | 0.011506 | 0.012116 | 0.011531 | 0.011443 |
| 0.011608 | 0.011474 | 0.011654 | 0.011480 | 0.011562 | 0.011558 | 0.011473 |
| 0.012052 | 0.011435 | 0.011554 | 0.011476 | 0.011764 | 0.011346 | 0.011714 |
| 0.012129 | 0.011611 | 0.011467 | 0.011466 | 0.011466 | 0.011506 | 0.011426 |
| 0.011303 | 0.011303 | 0.011506 | 0.011466 | 0.011466 | 0.011587 | 0.011587 |
| 0.011385 | 0.011303 | 0.011344 | 0.011385 | 0.011263 | 0.011344 | 0.011263 |



|          |          |          |          |          |          |          |
|----------|----------|----------|----------|----------|----------|----------|
| 0.011425 | 0.011466 | 0.011344 | 0.011303 | 0.011425 | 0.011344 | 0.011344 |
| 0.011385 | 0.011303 | 0.011385 | 0.011425 | 0.011304 | 0.011506 | 0.011304 |
| 0.011425 | 0.011547 | 0.011466 | 0.011425 | 0.011303 | 0.011831 | 0.011425 |
| 0.011484 | 0.011344 | 0.011628 | 0.011635 | 0.011425 | 0.011344 | 0.011506 |
| 0.011506 | 0.011385 | 0.011344 | 0.011385 | 0.011547 | 0.011547 | 0.011425 |
| 0.011466 | 0.011547 | 0.011831 | 0.011385 | 0.011628 | 0.011628 | 0.011506 |
| 0.011344 | 0.011466 | 0.011506 | 0.011872 | 0.011466 | 0.011425 | 0.011466 |
| 0.011466 | 0.011385 | 0.011385 | 0.011709 | 0.011587 | 0.011669 | 0.011425 |
| 0.011506 | 0.011547 | 0.011425 | 0.011506 | 0.011385 | 0.011344 | 0.011709 |
| 0.011466 | 0.011385 | 0.011385 | 0.011506 | 0.011425 | 0.011466 | 0.011750 |
| 0.011344 | 0.011836 | 0.011912 | 0.011582 | 0.011296 | 0.011506 | 0.011384 |
| 0.011388 | 0.011833 | 0.011304 | 0.011529 | 0.011357 | 0.011479 | 0.011491 |
| 0.011592 | 0.011192 | 0.011456 | 0.011258 | 0.011330 | 0.011462 | 0.000000 |
| 0.011466 | 0.011307 | 0.011425 | 0.011393 | 0.011468 | 0.011587 | 0.011669 |
| 0.011668 | 0.011547 | 0.011629 | 0.011591 | 0.011713 | 0.011786 | 0.011385 |
| 0.011750 | 0.011587 | 0.011385 | 0.011547 | 0.011304 | 0.011547 | 0.011304 |
| 0.011425 | 0.011425 | 0.011344 | 0.011344 | 0.011344 | 0.011344 | 0.011466 |
| 0.011390 | 0.011355 | 0.011429 | 0.011392 | 0.011598 | 0.011429 | 0.011514 |
| 0.011513 | 0.011385 | 0.011280 | 0.011273 | 0.011428 | 0.011592 | 0.011552 |
| 0.011385 | 0.011469 | 0.011710 | 0.011630 | 0.011587 | 0.011547 | 0.011506 |
| 0.011466 | 0.011547 | 0.011547 | 0.011425 | 0.012156 | 0.011587 | 0.011669 |
| 0.011790 | 0.011837 | 0.011349 | 0.011478 | 0.011344 | 0.011425 | 0.011506 |
| 0.011507 | 0.011547 | 0.011506 | 0.011506 | 0.011583 | 0.011750 | 0.011354 |
| 0.011265 | 0.011269 | 0.011388 | 0.011348 | 0.011473 | 0.011287 | 0.011675 |
| 0.011433 | 0.011597 | 0.011296 | 0.011468 | 0.011425 | 0.011516 | 0.011344 |
| 0.011263 | 0.011344 | 0.011385 | 0.011303 | 0.011628 | 0.011587 | 0.011506 |
| 0.011628 | 0.011709 | 0.011385 | 0.011385 | 0.011425 | 0.011425 | 0.011426 |
| 0.011507 | 0.011385 | 0.011425 | 0.011468 | 0.011587 | 0.011669 | 0.011668 |
| 0.011547 | 0.011629 | 0.011591 | 0.011713 | 0.011786 | 0.011385 | 0.011222 |
| 0.011506 | 0.011506 | 0.011305 | 0.011478 | 0.011524 | 0.011472 | 0.011399 |
| 0.011393 | 0.011448 | 0.011216 | 0.011429 | 0.011304 | 0.011466 | 0.011344 |
| 0.011466 | 0.011466 | 0.011303 | 0.011467 | 0.011587 | 0.011550 | 0.011466 |
| 0.011344 | 0.011264 | 0.011425 | 0.011344 | 0.011263 | 0.011388 | 0.011466 |
| 0.011425 | 0.011344 | 0.011344 | 0.011466 | 0.011385 | 0.011344 | 0.011547 |
| 0.011425 | 0.011466 | 0.011182 | 0.011385 | 0.011466 | 0.011709 | 0.011303 |
| 0.011385 | 0.011831 | 0.011385 | 0.011385 | 0.011344 | 0.011831 | 0.011293 |
| 0.011765 | 0.011288 | 0.011383 | 0.011544 | 0.011582 | 0.011547 | 0.011244 |
| 0.011339 | 0.011587 | 0.011709 | 0.011840 | 0.011668 | 0.011832 | 0.011993 |
| 0.011872 | 0.011878 | 0.011872 | 0.012042 | 0.011750 | 0.012725 | 0.011872 |
| 0.012563 | 0.012318 | 0.012567 | 0.012768 | 0.011709 | 0.011425 | 0.011831 |
| 0.012157 | 0.011953 | 0.011790 | 0.011669 | 0.011709 | 0.011709 | 0.011714 |
| 0.011587 | 0.011589 | 0.011669 | 0.011628 | 0.011994 | 0.011993 | 0.012075 |
| 0.011871 | 0.011953 | 0.012196 | 0.011871 | 0.012157 | 0.012082 | 0.012157 |
| 0.012238 | 0.012157 | 0.012157 | 0.012198 | 0.012198 | 0.011425 | 0.011750 |
| 0.011831 | 0.012237 | 0.011876 | 0.012034 | 0.011832 | 0.011630 | 0.011547 |
| 0.011506 | 0.011506 | 0.011953 | 0.011957 | 0.012054 | 0.011831 | 0.011506 |
| S623     | 0.011550 | 0.011550 | 0.011927 | 0.011889 | 0.011889 | 0.011927 |
| 0.011742 | 0.011666 | 0.011852 | 0.011362 | 0.011399 | 0.011362 | 0.011324 |
| 0.011362 | 0.011588 | 0.011362 | 0.011399 | 0.011399 | 0.011399 | 0.011362 |
| 0.011362 | 0.011399 | 0.011512 | 0.011324 | 0.011362 | 0.011362 | 0.011742 |
| 0.011663 | 0.011362 | 0.011286 | 0.011550 | 0.011399 | 0.011437 | 0.011362 |
| 0.011399 | 0.011512 | 0.011437 | 0.011437 | 0.011437 | 0.011437 | 0.011625 |
| 0.011362 | 0.011437 | 0.011437 | 0.011399 | 0.011512 | 0.011550 | 0.011475 |
| 0.011437 | 0.011588 | 0.011437 | 0.011814 | 0.011399 | 0.011663 | 0.011399 |
| 0.011399 | 0.011512 | 0.011475 | 0.011663 | 0.011814 | 0.011512 | 0.011625 |
| 0.011437 | 0.011512 | 0.011399 | 0.011625 | 0.011927 | 0.011437 | 0.011512 |
| 0.011399 | 0.011437 | 0.011475 | 0.011512 | 0.011399 | 0.011437 | 0.011437 |
| 0.011362 | 0.011362 | 0.011324 | 0.011399 | 0.011437 | 0.011437 | 0.011550 |
| 0.011475 | 0.011399 | 0.011475 | 0.011286 | 0.011550 | 0.011324 | 0.011399 |
| 0.011588 | 0.011550 | 0.011776 | 0.011588 | 0.011399 | 0.011625 | 0.011437 |

|          |          |          |          |          |          |          |
|----------|----------|----------|----------|----------|----------|----------|
| 0.011551 | 0.011822 | 0.011649 | 0.011342 | 0.011341 | 0.011455 | 0.011537 |
| 0.012240 | 0.011636 | 0.011358 | 0.011625 | 0.011663 | 0.011437 | 0.011512 |
| 0.011475 | 0.011362 | 0.011550 | 0.011437 | 0.011475 | 0.011399 | 0.011399 |
| 0.011362 | 0.011475 | 0.011625 | 0.011588 | 0.011475 | 0.011437 | 0.011362 |
| 0.011286 | 0.011362 | 0.011399 | 0.011324 | 0.011625 | 0.011588 | 0.011512 |
| 0.011625 | 0.011701 | 0.011399 | 0.011399 | 0.011437 | 0.011437 | 0.011437 |
| 0.011513 | 0.011399 | 0.011437 | 0.011296 | 0.011341 | 0.011337 | 0.011362 |
| 0.011402 | 0.011364 | 0.011423 | 0.011402 | 0.011327 | 0.011368 | 0.011401 |
| 0.011697 | 0.011409 | 0.011368 | 0.011362 | 0.011327 | 0.011475 | 0.011475 |
| 0.011550 | 0.011438 | 0.011437 | 0.011512 | 0.011475 | 0.011776 | 0.011663 |
| 0.011738 | 0.011588 | 0.011399 | 0.011550 | 0.011324 | 0.011588 | 0.011324 |
| 0.011437 | 0.011437 | 0.011362 | 0.011362 | 0.011362 | 0.011362 | 0.011475 |
| 0.011362 | 0.011512 | 0.011475 | 0.011324 | 0.011476 | 0.011588 | 0.011553 |
| 0.011475 | 0.011475 | 0.011362 | 0.011287 | 0.011437 | 0.011362 | 0.011286 |
| 0.011403 | 0.011475 | 0.011324 | 0.011475 | 0.011324 | 0.011399 | 0.011399 |
| 0.011437 | 0.011362 | 0.011399 | 0.011399 | 0.011437 | 0.011286 | 0.011362 |
| 0.011399 | 0.011399 | 0.011437 | 0.011362 | 0.011399 | 0.011437 | 0.011663 |
| 0.011852 | 0.011701 | 0.011814 | 0.011550 | 0.011852 | 0.011437 | 0.011399 |
| 0.011438 | 0.011652 | 0.011631 | 0.011328 | 0.011861 | 0.011290 | 0.011459 |
| 0.011856 | 0.011746 | 0.011588 | 0.011701 | 0.011443 | 0.011701 | 0.011588 |
| 0.011550 | 0.011738 | 0.011618 | 0.011475 | 0.011390 | 0.011475 | 0.011554 |
| 0.011663 | 0.011513 | 0.011663 | 0.011703 | 0.011475 | 0.011625 | 0.011857 |
| 0.011515 | 0.011708 | 0.011592 | 0.011630 | 0.011739 | 0.011324 | 0.011476 |
| 0.011437 | 0.011399 | 0.011286 | 0.011286 | 0.011324 | 0.011399 | 0.011475 |
| 0.011362 | 0.011399 | 0.011324 | 0.011437 | 0.011362 | 0.011399 | 0.011475 |
| 0.011399 | 0.011889 | 0.011776 | 0.011814 | 0.011286 | 0.011399 | 0.011437 |
| 0.011437 | 0.011399 | 0.011437 | 0.011512 | 0.011324 | 0.011324 | 0.011324 |
| 0.011927 | 0.011512 | 0.011512 | 0.011324 | 0.011437 | 0.011550 | 0.011324 |
| 0.011324 | 0.011362 | 0.011399 | 0.011512 | 0.011362 | 0.011512 | 0.011625 |
| 0.011588 | 0.011399 | 0.011399 | 0.011324 | 0.011324 | 0.011437 | 0.011399 |
| 0.011324 | 0.011437 | 0.011286 | 0.011324 | 0.011475 | 0.011626 | 0.011324 |
| 0.011324 | 0.011475 | 0.011324 | 0.011286 | 0.011663 | 0.011286 | 0.011475 |
| 0.011522 | 0.011362 | 0.011701 | 0.011475 | 0.011550 | 0.011362 | 0.011475 |
| 0.011362 | 0.011663 | 0.011286 | 0.011588 | 0.011362 | 0.011362 | 0.011286 |
| 0.011437 | 0.011776 | 0.011399 | 0.011512 | 0.011324 | 0.011776 | 0.011362 |
| 0.011362 | 0.011362 | 0.011399 | 0.011475 | 0.011399 | 0.011512 | 0.011588 |
| 0.011588 | 0.011550 | 0.011437 | 0.011550 | 0.011475 | 0.011362 | 0.011324 |
| 0.011362 | 0.011362 | 0.011399 | 0.011362 | 0.011286 | 0.011475 | 0.011362 |
| 0.011399 | 0.011362 | 0.011475 | 0.011588 | 0.011437 | 0.011324 | 0.011399 |
| 0.011437 | 0.011399 | 0.011437 | 0.011324 | 0.011512 | 0.011625 | 0.011852 |
| 0.011362 | 0.011776 | 0.011399 | 0.018333 | 0.011322 | 0.011518 | 0.011701 |
| 0.011738 | 0.011739 | 0.011538 | 0.011486 | 0.011775 | 0.011776 | 0.011485 |
| 0.011693 | 0.011557 | 0.011259 | 0.011411 | 0.011390 | 0.011360 | 0.011415 |
| 0.011686 | 0.011581 | 0.011573 | 0.011340 | 0.011550 | 0.011550 | 0.011516 |
| 0.011367 | 0.011437 | 0.011512 | 0.011475 | 0.011437 | 0.011437 | 0.011400 |
| 0.011437 | 0.011362 | 0.011437 | 0.011475 | 0.011399 | 0.011362 | 0.011399 |
| 0.011399 | 0.011437 | 0.011324 | 0.011437 | 0.011512 | 0.011550 | 0.011437 |
| 0.011475 | 0.011437 | 0.011776 | 0.011776 | 0.011512 | 0.011551 | 0.011475 |
| 0.011324 | 0.011324 | 0.011324 | 0.011437 | 0.011324 | 0.011588 | 0.011588 |
| 0.011625 | 0.011588 | 0.011512 | 0.011663 | 0.011852 | 0.011665 | 0.011437 |
| 0.011475 | 0.011550 | 0.011550 | 0.011399 | 0.011399 | 0.011324 | 0.011475 |
| 0.011475 | 0.011475 | 0.011512 | 0.011512 | 0.011400 | 0.011588 | 0.011550 |
| 0.011479 | 0.011324 | 0.011437 | 0.011588 | 0.011362 | 0.011625 | 0.011588 |
| 0.011701 | 0.011443 | 0.011701 | 0.011588 | 0.011550 | 0.011738 | 0.011362 |
| 0.011552 | 0.011437 | 0.011399 | 0.011399 | 0.011437 | 0.011324 | 0.011437 |
| 0.011512 | 0.011550 | 0.011437 | 0.011475 | 0.011437 | 0.011776 | 0.011776 |
| 0.011512 | 0.011551 | 0.011550 | 0.011512 | 0.012154 | 0.011614 | 0.011494 |
| 0.011606 | 0.011559 | 0.011650 | 0.011488 | 0.011641 | 0.011483 | 0.011519 |
| 0.012095 | 0.011446 | 0.011557 | 0.011407 | 0.011674 | 0.011629 | 0.011705 |
| 0.012167 | 0.011652 | 0.011475 | 0.011475 | 0.011475 | 0.011512 | 0.011437 |

|          |          |          |          |          |          |          |
|----------|----------|----------|----------|----------|----------|----------|
| 0.011324 | 0.011324 | 0.011512 | 0.011475 | 0.011475 | 0.011625 | 0.011588 |
| 0.011399 | 0.011324 | 0.011362 | 0.011399 | 0.011286 | 0.011362 | 0.011286 |
| 0.011437 | 0.011475 | 0.011362 | 0.011324 | 0.011437 | 0.011362 | 0.011399 |
| 0.011399 | 0.011324 | 0.011399 | 0.011437 | 0.011324 | 0.011512 | 0.011588 |
| 0.011437 | 0.011550 | 0.011475 | 0.011437 | 0.011399 | 0.011814 | 0.011437 |
| 0.011492 | 0.011362 | 0.011663 | 0.011670 | 0.011437 | 0.011437 | 0.011512 |
| 0.011512 | 0.011399 | 0.011399 | 0.011399 | 0.011550 | 0.011550 | 0.011437 |
| 0.011475 | 0.011588 | 0.011814 | 0.011437 | 0.011625 | 0.011625 | 0.011512 |
| 0.011362 | 0.011475 | 0.011512 | 0.011927 | 0.011475 | 0.011437 | 0.011475 |
| 0.011512 | 0.011399 | 0.011399 | 0.011776 | 0.011625 | 0.011738 | 0.011437 |
| 0.011512 | 0.011550 | 0.011437 | 0.011512 | 0.011437 | 0.011362 | 0.011701 |
| 0.011475 | 0.011399 | 0.011399 | 0.011512 | 0.011437 | 0.011550 | 0.011738 |
| 0.011399 | 0.011818 | 0.011889 | 0.011641 | 0.011404 | 0.011512 | 0.011379 |
| 0.011410 | 0.011881 | 0.011327 | 0.011563 | 0.011402 | 0.011473 | 0.011538 |
| 0.011629 | 0.011324 | 0.011450 | 0.011324 | 0.011384 | 0.011529 | 0.011466 |
| 0.000000 | 0.011341 | 0.011475 | 0.011407 | 0.011476 | 0.011625 | 0.011701 |
| 0.011663 | 0.011550 | 0.011627 | 0.011668 | 0.011744 | 0.011775 | 0.011399 |
| 0.011738 | 0.011588 | 0.011399 | 0.011550 | 0.011324 | 0.011588 | 0.011324 |
| 0.011437 | 0.011437 | 0.011362 | 0.011362 | 0.011362 | 0.011362 | 0.011475 |
| 0.011443 | 0.011452 | 0.011440 | 0.011406 | 0.011597 | 0.011517 | 0.011519 |
| 0.011519 | 0.011399 | 0.011305 | 0.011298 | 0.011440 | 0.011592 | 0.011555 |
| 0.011399 | 0.011478 | 0.011739 | 0.011627 | 0.011625 | 0.011588 | 0.011512 |
| 0.011512 | 0.011475 | 0.011475 | 0.011437 | 0.012116 | 0.011663 | 0.011701 |
| 0.011776 | 0.011779 | 0.011405 | 0.011526 | 0.011399 | 0.011437 | 0.011550 |
| 0.011513 | 0.011550 | 0.011550 | 0.011550 | 0.011502 | 0.011738 | 0.011371 |
| 0.011288 | 0.011292 | 0.011403 | 0.011365 | 0.011482 | 0.011311 | 0.011669 |
| 0.011444 | 0.011599 | 0.011381 | 0.011478 | 0.011437 | 0.011521 | 0.011362 |
| 0.011286 | 0.011362 | 0.011399 | 0.011324 | 0.011625 | 0.011588 | 0.011512 |
| 0.011625 | 0.011701 | 0.011399 | 0.011399 | 0.011437 | 0.011437 | 0.011437 |
| 0.011513 | 0.011399 | 0.011437 | 0.011476 | 0.011625 | 0.011701 | 0.011663 |
| 0.011550 | 0.011627 | 0.011668 | 0.011744 | 0.011775 | 0.011399 | 0.011588 |
| 0.011550 | 0.011550 | 0.011364 | 0.011527 | 0.011529 | 0.011481 | 0.011413 |
| 0.011485 | 0.011833 | 0.011542 | 0.011442 | 0.011324 | 0.011475 | 0.011362 |
| 0.011512 | 0.011475 | 0.011324 | 0.011476 | 0.011588 | 0.011553 | 0.011475 |
| 0.011362 | 0.011287 | 0.011437 | 0.011362 | 0.011286 | 0.011403 | 0.011475 |
| 0.011437 | 0.011362 | 0.011437 | 0.011475 | 0.011399 | 0.011362 | 0.011550 |
| 0.011437 | 0.011475 | 0.011475 | 0.011399 | 0.011475 | 0.011701 | 0.011362 |
| 0.011399 | 0.011814 | 0.011399 | 0.011399 | 0.011362 | 0.011814 | 0.011374 |
| 0.011928 | 0.011368 | 0.011472 | 0.011613 | 0.011648 | 0.011594 | 0.011322 |
| 0.011384 | 0.011588 | 0.011701 | 0.011822 | 0.011663 | 0.011815 | 0.011965 |
| 0.011852 | 0.011857 | 0.011852 | 0.012013 | 0.011738 | 0.012682 | 0.011852 |
| 0.012607 | 0.012304 | 0.012535 | 0.012646 | 0.011738 | 0.011437 | 0.011814 |
| 0.012192 | 0.011965 | 0.011738 | 0.011663 | 0.011738 | 0.011738 | 0.011706 |
| 0.011588 | 0.011590 | 0.011663 | 0.011625 | 0.012003 | 0.012002 | 0.012040 |
| 0.011889 | 0.011965 | 0.012153 | 0.011851 | 0.012192 | 0.012161 | 0.012306 |
| 0.012306 | 0.012230 | 0.012192 | 0.012230 | 0.012230 | 0.011475 | 0.011776 |
| 0.011889 | 0.012343 | 0.011858 | 0.012003 | 0.011814 | 0.011669 | 0.011550 |
| 0.011512 | 0.011512 | 0.011927 | 0.012017 | 0.012106 | 0.011852 | 0.011513 |
| s624     | 0.011454 | 0.011454 | 0.011847 | 0.011769 | 0.011769 | 0.011847 |
| 0.011654 | 0.011575 | 0.011769 | 0.011257 | 0.011296 | 0.011257 | 0.011218 |
| 0.011257 | 0.011454 | 0.011257 | 0.011296 | 0.011296 | 0.011296 | 0.011257 |
| 0.011257 | 0.011296 | 0.011414 | 0.011218 | 0.011178 | 0.011218 | 0.011654 |
| 0.011532 | 0.011296 | 0.011178 | 0.011454 | 0.011257 | 0.011296 | 0.011139 |
| 0.011296 | 0.011375 | 0.011336 | 0.011336 | 0.011336 | 0.011336 | 0.011532 |
| 0.011218 | 0.011336 | 0.011336 | 0.011296 | 0.011414 | 0.011414 | 0.011375 |
| 0.011336 | 0.011493 | 0.011296 | 0.011729 | 0.011296 | 0.011493 | 0.011296 |
| 0.011296 | 0.011414 | 0.011414 | 0.011493 | 0.011769 | 0.011414 | 0.011532 |
| 0.011296 | 0.011336 | 0.011296 | 0.011493 | 0.011808 | 0.011336 | 0.011414 |
| 0.011296 | 0.011296 | 0.011375 | 0.011414 | 0.011296 | 0.011336 | 0.011336 |
| 0.011257 | 0.011257 | 0.011218 | 0.011296 | 0.011336 | 0.011336 | 0.011414 |

|          |          |          |          |          |          |          |
|----------|----------|----------|----------|----------|----------|----------|
| 0.011375 | 0.011296 | 0.011336 | 0.011178 | 0.011454 | 0.011178 | 0.011296 |
| 0.011454 | 0.011454 | 0.011690 | 0.011493 | 0.011296 | 0.011493 | 0.011336 |
| 0.011419 | 0.011743 | 0.011542 | 0.011229 | 0.011223 | 0.011309 | 0.011384 |
| 0.011381 | 0.011485 | 0.011230 | 0.011532 | 0.011454 | 0.011336 | 0.011414 |
| 0.011336 | 0.011336 | 0.011454 | 0.011336 | 0.011375 | 0.011257 | 0.011296 |
| 0.011257 | 0.011375 | 0.011650 | 0.011493 | 0.011336 | 0.011336 | 0.011218 |
| 0.011257 | 0.011257 | 0.011257 | 0.011218 | 0.011532 | 0.011493 | 0.011414 |
| 0.011532 | 0.011611 | 0.011257 | 0.011257 | 0.011296 | 0.011296 | 0.011296 |
| 0.011376 | 0.011296 | 0.011336 | 0.011142 | 0.011225 | 0.011226 | 0.011296 |
| 0.011338 | 0.011259 | 0.011307 | 0.011298 | 0.011220 | 0.011261 | 0.011298 |
| 0.011558 | 0.011303 | 0.011220 | 0.011257 | 0.011219 | 0.011336 | 0.011375 |
| 0.011454 | 0.011297 | 0.011296 | 0.011375 | 0.011375 | 0.011690 | 0.011572 |
| 0.011650 | 0.011493 | 0.011296 | 0.011454 | 0.011218 | 0.011454 | 0.011178 |
| 0.011336 | 0.011296 | 0.011257 | 0.011257 | 0.011257 | 0.011257 | 0.011375 |
| 0.011218 | 0.011336 | 0.011375 | 0.011218 | 0.011337 | 0.011493 | 0.011456 |
| 0.011336 | 0.011375 | 0.011257 | 0.011179 | 0.011336 | 0.011257 | 0.011178 |
| 0.011299 | 0.011336 | 0.011178 | 0.011336 | 0.011178 | 0.011296 | 0.011257 |
| 0.011296 | 0.011257 | 0.011257 | 0.011257 | 0.011296 | 0.011178 | 0.011218 |
| 0.011257 | 0.011296 | 0.011296 | 0.011257 | 0.011296 | 0.011375 | 0.011532 |
| 0.011769 | 0.011611 | 0.011729 | 0.011454 | 0.011729 | 0.011296 | 0.011296 |
| 0.011337 | 0.011491 | 0.011332 | 0.011180 | 0.011777 | 0.011180 | 0.011335 |
| 0.011773 | 0.011616 | 0.011454 | 0.011729 | 0.011379 | 0.011532 | 0.011454 |
| 0.011454 | 0.011572 | 0.011519 | 0.011305 | 0.011308 | 0.011375 | 0.011457 |
| 0.011572 | 0.011415 | 0.011493 | 0.011534 | 0.011375 | 0.011650 | 0.011774 |
| 0.011416 | 0.011538 | 0.011536 | 0.011536 | 0.011809 | 0.011218 | 0.011376 |
| 0.011257 | 0.011296 | 0.011178 | 0.011178 | 0.011178 | 0.011296 | 0.011375 |
| 0.011218 | 0.011296 | 0.011178 | 0.011336 | 0.011218 | 0.011296 | 0.011296 |
| 0.011296 | 0.011768 | 0.011690 | 0.011690 | 0.011178 | 0.011296 | 0.011336 |
| 0.011336 | 0.011257 | 0.011336 | 0.011414 | 0.011257 | 0.011257 | 0.011257 |
| 0.011768 | 0.011414 | 0.011454 | 0.011218 | 0.011296 | 0.011414 | 0.011218 |
| 0.011218 | 0.011257 | 0.011296 | 0.011336 | 0.011257 | 0.011414 | 0.011454 |
| 0.011493 | 0.011296 | 0.011296 | 0.011218 | 0.011218 | 0.011336 | 0.011336 |
| 0.011218 | 0.011336 | 0.011178 | 0.011218 | 0.011375 | 0.011533 | 0.011257 |
| 0.011218 | 0.011375 | 0.011218 | 0.011178 | 0.011572 | 0.011178 | 0.011375 |
| 0.011342 | 0.011257 | 0.011611 | 0.011375 | 0.011454 | 0.011257 | 0.011336 |
| 0.011257 | 0.011493 | 0.011178 | 0.011454 | 0.011257 | 0.011257 | 0.011178 |
| 0.011296 | 0.011650 | 0.011296 | 0.011414 | 0.011218 | 0.011690 | 0.011257 |
| 0.011257 | 0.011257 | 0.011257 | 0.011296 | 0.011296 | 0.011414 | 0.011493 |
| 0.011493 | 0.011375 | 0.011336 | 0.011454 | 0.011336 | 0.011257 | 0.011218 |
| 0.011257 | 0.011257 | 0.011296 | 0.011218 | 0.011139 | 0.011375 | 0.011257 |
| 0.011296 | 0.011257 | 0.011375 | 0.011493 | 0.011296 | 0.011218 | 0.011296 |
| 0.011336 | 0.011296 | 0.011336 | 0.011218 | 0.011414 | 0.011493 | 0.011808 |
| 0.011257 | 0.011729 | 0.011296 | 0.018314 | 0.011257 | 0.011491 | 0.011650 |
| 0.011650 | 0.011651 | 0.011341 | 0.011311 | 0.011682 | 0.011690 | 0.011374 |
| 0.011505 | 0.011509 | 0.011183 | 0.011249 | 0.011233 | 0.011321 | 0.011297 |
| 0.011505 | 0.011461 | 0.011429 | 0.011198 | 0.011414 | 0.011454 | 0.011416 |
| 0.011220 | 0.011375 | 0.011414 | 0.011375 | 0.011336 | 0.011336 | 0.011296 |
| 0.011336 | 0.011257 | 0.011257 | 0.011375 | 0.011296 | 0.011257 | 0.011296 |
| 0.011296 | 0.011336 | 0.011218 | 0.011336 | 0.011414 | 0.011454 | 0.011336 |
| 0.011375 | 0.011336 | 0.011690 | 0.011690 | 0.011414 | 0.011454 | 0.011454 |
| 0.011178 | 0.011218 | 0.011218 | 0.011296 | 0.011218 | 0.011414 | 0.011414 |
| 0.011414 | 0.011454 | 0.011414 | 0.011454 | 0.011729 | 0.011455 | 0.011296 |
| 0.011336 | 0.011414 | 0.011414 | 0.011296 | 0.011296 | 0.011257 | 0.011375 |
| 0.011375 | 0.011375 | 0.011414 | 0.011257 | 0.011258 | 0.011454 | 0.011414 |
| 0.011378 | 0.011218 | 0.011336 | 0.011493 | 0.011336 | 0.011493 | 0.011532 |
| 0.011729 | 0.011379 | 0.011532 | 0.011454 | 0.011454 | 0.011572 | 0.011257 |
| 0.011415 | 0.011336 | 0.011296 | 0.011296 | 0.011336 | 0.011218 | 0.011336 |
| 0.011414 | 0.011454 | 0.011336 | 0.011375 | 0.011336 | 0.011690 | 0.011690 |
| 0.011414 | 0.011454 | 0.011454 | 0.011414 | 0.012045 | 0.011433 | 0.011390 |
| 0.011509 | 0.011381 | 0.011554 | 0.011385 | 0.011465 | 0.011503 | 0.011380 |

|          |          |          |          |          |          |          |
|----------|----------|----------|----------|----------|----------|----------|
| 0.011982 | 0.011343 | 0.011459 | 0.011423 | 0.011702 | 0.011536 | 0.011536 |
| 0.012057 | 0.011504 | 0.011336 | 0.011336 | 0.011336 | 0.011414 | 0.011297 |
| 0.011218 | 0.011178 | 0.011375 | 0.011336 | 0.011336 | 0.011454 | 0.011493 |
| 0.011296 | 0.011178 | 0.011218 | 0.011296 | 0.011139 | 0.011257 | 0.011178 |
| 0.011336 | 0.011375 | 0.011257 | 0.011218 | 0.011336 | 0.011257 | 0.011257 |
| 0.011296 | 0.011218 | 0.011218 | 0.011336 | 0.011218 | 0.011375 | 0.011493 |
| 0.011336 | 0.011454 | 0.011375 | 0.011336 | 0.011218 | 0.011769 | 0.011336 |
| 0.011388 | 0.011257 | 0.011532 | 0.011538 | 0.011296 | 0.011296 | 0.011414 |
| 0.011414 | 0.011257 | 0.011257 | 0.011257 | 0.011454 | 0.011454 | 0.011336 |
| 0.011375 | 0.011454 | 0.011729 | 0.011336 | 0.011532 | 0.011532 | 0.011414 |
| 0.011257 | 0.011375 | 0.011414 | 0.011808 | 0.011375 | 0.011296 | 0.011375 |
| 0.011375 | 0.011296 | 0.011296 | 0.011611 | 0.011454 | 0.011572 | 0.011296 |
| 0.011414 | 0.011414 | 0.011336 | 0.011414 | 0.011336 | 0.011257 | 0.011611 |
| 0.011375 | 0.011296 | 0.011296 | 0.011454 | 0.011296 | 0.011414 | 0.011690 |
| 0.011257 | 0.011733 | 0.011808 | 0.011522 | 0.011235 | 0.011375 | 0.011270 |
| 0.011314 | 0.011758 | 0.011178 | 0.011467 | 0.011255 | 0.011417 | 0.011326 |
| 0.011480 | 0.011126 | 0.011283 | 0.011192 | 0.011222 | 0.011328 | 0.011307 |
| 0.011341 | 0.000000 | 0.011336 | 0.011339 | 0.011376 | 0.011454 | 0.011572 |
| 0.011572 | 0.011454 | 0.011536 | 0.011496 | 0.011614 | 0.011640 | 0.011296 |
| 0.011650 | 0.011493 | 0.011296 | 0.011454 | 0.011218 | 0.011454 | 0.011178 |
| 0.011336 | 0.011296 | 0.011257 | 0.011257 | 0.011257 | 0.011257 | 0.011375 |
| 0.011300 | 0.011305 | 0.011338 | 0.011301 | 0.011501 | 0.011299 | 0.011420 |
| 0.011420 | 0.011296 | 0.011188 | 0.011184 | 0.011338 | 0.011497 | 0.011458 |
| 0.011257 | 0.011378 | 0.011612 | 0.011455 | 0.011493 | 0.011454 | 0.011414 |
| 0.011375 | 0.011493 | 0.011493 | 0.011336 | 0.012045 | 0.011493 | 0.011572 |
| 0.011690 | 0.011645 | 0.011260 | 0.011385 | 0.011257 | 0.011493 | 0.011454 |
| 0.011415 | 0.011493 | 0.011414 | 0.011414 | 0.011568 | 0.011650 | 0.011304 |
| 0.011179 | 0.011182 | 0.011299 | 0.011259 | 0.011381 | 0.011192 | 0.011577 |
| 0.011341 | 0.011475 | 0.011175 | 0.011367 | 0.011336 | 0.011422 | 0.011218 |
| 0.011257 | 0.011257 | 0.011257 | 0.011218 | 0.011532 | 0.011493 | 0.011414 |
| 0.011532 | 0.011611 | 0.011257 | 0.011257 | 0.011296 | 0.011296 | 0.011296 |
| 0.011376 | 0.011296 | 0.011336 | 0.011376 | 0.011454 | 0.011572 | 0.011572 |
| 0.011454 | 0.011536 | 0.011496 | 0.011614 | 0.011640 | 0.011296 | 0.011532 |
| 0.011454 | 0.011454 | 0.011219 | 0.011385 | 0.011428 | 0.011380 | 0.011307 |
| 0.011262 | 0.011544 | 0.011415 | 0.011339 | 0.011178 | 0.011336 | 0.011218 |
| 0.011336 | 0.011375 | 0.011218 | 0.011337 | 0.011493 | 0.011456 | 0.011375 |
| 0.011257 | 0.011179 | 0.011336 | 0.011257 | 0.011178 | 0.011299 | 0.011336 |
| 0.011336 | 0.011257 | 0.011257 | 0.011375 | 0.011296 | 0.011257 | 0.011454 |
| 0.011336 | 0.011375 | 0.011375 | 0.011296 | 0.011375 | 0.011572 | 0.011218 |
| 0.011296 | 0.011769 | 0.011296 | 0.011257 | 0.011257 | 0.011729 | 0.011240 |
| 0.011697 | 0.011236 | 0.011270 | 0.011486 | 0.011523 | 0.011454 | 0.011191 |
| 0.011225 | 0.011493 | 0.011611 | 0.011737 | 0.011572 | 0.011729 | 0.011887 |
| 0.011769 | 0.011774 | 0.011769 | 0.011972 | 0.011650 | 0.012636 | 0.011769 |
| 0.012439 | 0.012241 | 0.012482 | 0.012638 | 0.011611 | 0.011336 | 0.011729 |
| 0.012085 | 0.011848 | 0.011650 | 0.011572 | 0.011611 | 0.011611 | 0.011615 |
| 0.011493 | 0.011493 | 0.011572 | 0.011532 | 0.011808 | 0.011887 | 0.011887 |
| 0.011729 | 0.011808 | 0.012044 | 0.011729 | 0.012045 | 0.012092 | 0.012085 |
| 0.012164 | 0.012124 | 0.012085 | 0.012124 | 0.012124 | 0.011375 | 0.011650 |
| 0.011769 | 0.012242 | 0.011772 | 0.011966 | 0.011769 | 0.011534 | 0.011454 |
| 0.011414 | 0.011414 | 0.011847 | 0.011876 | 0.011984 | 0.011650 | 0.011414 |
| s625     | 0.011765 | 0.011765 | 0.011800 | 0.011765 | 0.011765 | 0.011800 |
| 0.011666 | 0.011595 | 0.011765 | 0.011342 | 0.011377 | 0.011377 | 0.011342 |
| 0.011307 | 0.011553 | 0.011201 | 0.011377 | 0.011448 | 0.011412 | 0.011377 |
| 0.011342 | 0.011377 | 0.011412 | 0.011307 | 0.011378 | 0.011342 | 0.011666 |
| 0.011553 | 0.011377 | 0.011272 | 0.011448 | 0.011412 | 0.011412 | 0.011448 |
| 0.011412 | 0.011518 | 0.011412 | 0.011412 | 0.011448 | 0.011412 | 0.011589 |
| 0.011272 | 0.011412 | 0.011448 | 0.011377 | 0.011412 | 0.011518 | 0.011448 |
| 0.011412 | 0.011589 | 0.011448 | 0.011694 | 0.011412 | 0.011694 | 0.011412 |
| 0.011377 | 0.011413 | 0.011518 | 0.011694 | 0.011730 | 0.011413 | 0.011518 |
| 0.011448 | 0.011518 | 0.011377 | 0.011624 | 0.011836 | 0.011412 | 0.011483 |

|          |          |          |           |          |          |          |
|----------|----------|----------|-----------|----------|----------|----------|
| 0.011377 | 0.011448 | 0.011448 | 0.011483  | 0.011412 | 0.011412 | 0.011412 |
| 0.011342 | 0.011342 | 0.011307 | 0.011307  | 0.011412 | 0.011412 | 0.011518 |
| 0.011448 | 0.011412 | 0.011483 | 0.011342  | 0.011448 | 0.011342 | 0.011377 |
| 0.011553 | 0.011518 | 0.011765 | 0.011553  | 0.011377 | 0.011659 | 0.011412 |
| 0.011505 | 0.011695 | 0.011594 | 0.011295  | 0.011289 | 0.011395 | 0.011415 |
| 0.012070 | 0.011525 | 0.011307 | 0.011659  | 0.011624 | 0.011272 | 0.011448 |
| 0.011483 | 0.011448 | 0.011518 | 0.011412  | 0.011448 | 0.011412 | 0.011448 |
| 0.011412 | 0.011412 | 0.011694 | 0.011483  | 0.011483 | 0.011448 | 0.011377 |
| 0.011342 | 0.011272 | 0.011412 | 0.011342  | 0.011518 | 0.011483 | 0.011412 |
| 0.011518 | 0.011589 | 0.011377 | 0.011377  | 0.011412 | 0.011412 | 0.011413 |
| 0.011484 | 0.011412 | 0.011412 | 0.011282  | 0.011322 | 0.011318 | 0.011412 |
| 0.011415 | 0.011344 | 0.011402 | 0.011382  | 0.011309 | 0.011348 | 0.011379 |
| 0.011584 | 0.011385 | 0.011420 | 0.011342  | 0.011347 | 0.011483 | 0.011377 |
| 0.011448 | 0.011449 | 0.011448 | 0.011518  | 0.011483 | 0.011871 | 0.011554 |
| 0.011624 | 0.011412 | 0.011412 | 0.011448  | 0.011307 | 0.011483 | 0.011307 |
| 0.011412 | 0.011412 | 0.011342 | 0.011342  | 0.011342 | 0.011342 | 0.011448 |
| 0.011377 | 0.011518 | 0.011448 | 0.011342  | 0.011449 | 0.011553 | 0.011521 |
| 0.011553 | 0.011448 | 0.011342 | 0.011272  | 0.011412 | 0.011342 | 0.011272 |
| 0.011381 | 0.011554 | 0.011342 | 0.011554  | 0.011307 | 0.011377 | 0.011377 |
| 0.011483 | 0.011377 | 0.011342 | 0.011307  | 0.011342 | 0.011272 | 0.011377 |
| 0.011412 | 0.011377 | 0.011448 | 0.011377  | 0.011412 | 0.011448 | 0.011624 |
| 0.011730 | 0.011659 | 0.011730 | 0.011553  | 0.011730 | 0.011412 | 0.011377 |
| 0.011272 | 0.011611 | 0.011447 | 0.011311  | 0.011737 | 0.011275 | 0.011390 |
| 0.011737 | 0.011631 | 0.011589 | 0.011765  | 0.011490 | 0.011659 | 0.011624 |
| 0.011518 | 0.011694 | 0.011584 | 0.011406  | 0.011410 | 0.011448 | 0.011522 |
| 0.011624 | 0.011520 | 0.011664 | 0.011735  | 0.011518 | 0.011730 | 0.011843 |
| 0.011522 | 0.011737 | 0.011628 | 0.011593  | 0.011872 | 0.011307 | 0.011484 |
| 0.011448 | 0.011377 | 0.011272 | 0.011272  | 0.011342 | 0.011377 | 0.011448 |
| 0.011377 | 0.011448 | 0.011342 | 0.011377  | 0.011377 | 0.011377 | 0.011448 |
| 0.011377 | 0.011765 | 0.011659 | 0.011694  | 0.011272 | 0.011377 | 0.011413 |
| 0.011412 | 0.011377 | 0.011448 | 0.011413  | 0.011342 | 0.011342 | 0.011342 |
| 0.011835 | 0.011412 | 0.011518 | 0.011307  | 0.011412 | 0.011589 | 0.011307 |
| 0.011307 | 0.011377 | 0.011377 | 0.011553  | 0.011342 | 0.011483 | 0.011624 |
| 0.011553 | 0.011377 | 0.011377 | 0.011307  | 0.011307 | 0.011413 | 0.011412 |
| 0.011307 | 0.011412 | 0.011272 | 0.011307  | 0.011448 | 0.011518 | 0.011342 |
| 0.011307 | 0.011448 | 0.011342 | 0.011272  | 0.011553 | 0.011272 | 0.011448 |
| 0.011527 | 0.011342 | 0.011589 | 0.011483  | 0.011448 | 0.011377 | 0.011483 |
| 0.011342 | 0.011694 | 0.011272 | 0.011483  | 0.011201 | 0.011201 | 0.011272 |
| 0.011448 | 0.011659 | 0.011377 | 0.011483  | 0.011307 | 0.011659 | 0.011201 |
| 0.011342 | 0.011342 | 0.011377 | 0.011483  | 0.011377 | 0.011483 | 0.011553 |
| 0.011553 | 0.011518 | 0.011412 | 0.011518  | 0.011483 | 0.011342 | 0.011307 |
| 0.011342 | 0.011342 | 0.011377 | 0.011272  | 0.011307 | 0.011448 | 0.011342 |
| 0.011236 | 0.011342 | 0.011483 | 0.011483  | 0.011412 | 0.011377 | 0.011377 |
| 0.011448 | 0.011377 | 0.011483 | 0.011307  | 0.011483 | 0.011589 | 0.011765 |
| 0.011377 | 0.011694 | 0.011342 | 0.0117897 | 0.011257 | 0.011427 | 0.011589 |
| 0.011589 | 0.011593 | 0.011427 | 0.011414  | 0.011664 | 0.011624 | 0.011364 |
| 0.011589 | 0.011488 | 0.011255 | 0.011357  | 0.011258 | 0.011258 | 0.011318 |
| 0.011536 | 0.011479 | 0.011439 | 0.011195  | 0.011518 | 0.011553 | 0.011486 |
| 0.011421 | 0.011483 | 0.011483 | 0.011412  | 0.011413 | 0.011413 | 0.011413 |
| 0.011448 | 0.011377 | 0.011412 | 0.011448  | 0.011377 | 0.011342 | 0.011377 |
| 0.011377 | 0.011412 | 0.011307 | 0.011413  | 0.011483 | 0.011518 | 0.011412 |
| 0.011377 | 0.011342 | 0.011659 | 0.011659  | 0.011483 | 0.011519 | 0.011553 |
| 0.011307 | 0.011307 | 0.011342 | 0.011448  | 0.011307 | 0.011553 | 0.011553 |
| 0.011589 | 0.011589 | 0.011483 | 0.011624  | 0.011730 | 0.011590 | 0.011448 |
| 0.011448 | 0.011518 | 0.011553 | 0.011377  | 0.011377 | 0.011342 | 0.011448 |
| 0.011518 | 0.011518 | 0.011553 | 0.011518  | 0.011413 | 0.011589 | 0.011589 |
| 0.011451 | 0.011307 | 0.011412 | 0.011553  | 0.011448 | 0.011518 | 0.011588 |
| 0.011765 | 0.011490 | 0.011659 | 0.011624  | 0.011518 | 0.011694 | 0.011342 |
| 0.011520 | 0.011413 | 0.011377 | 0.011377  | 0.011412 | 0.011307 | 0.011413 |
| 0.011483 | 0.011518 | 0.011412 | 0.011377  | 0.011342 | 0.011659 | 0.011659 |

|          |          |          |          |          |          |          |
|----------|----------|----------|----------|----------|----------|----------|
| 0.011483 | 0.011519 | 0.011553 | 0.011518 | 0.012118 | 0.011581 | 0.011467 |
| 0.011574 | 0.011530 | 0.011651 | 0.011461 | 0.011644 | 0.011567 | 0.011527 |
| 0.012034 | 0.011424 | 0.011528 | 0.011496 | 0.011783 | 0.011632 | 0.011739 |
| 0.012095 | 0.011535 | 0.011448 | 0.011448 | 0.011448 | 0.011412 | 0.011413 |
| 0.011307 | 0.011342 | 0.011483 | 0.011448 | 0.011448 | 0.011518 | 0.011483 |
| 0.011377 | 0.011342 | 0.011377 | 0.011377 | 0.011307 | 0.011342 | 0.011272 |
| 0.011342 | 0.011377 | 0.011342 | 0.011307 | 0.011412 | 0.011342 | 0.011377 |
| 0.011377 | 0.011307 | 0.011377 | 0.011413 | 0.011307 | 0.011518 | 0.011553 |
| 0.011412 | 0.011448 | 0.011448 | 0.011412 | 0.011377 | 0.011730 | 0.011412 |
| 0.011389 | 0.011342 | 0.011553 | 0.011558 | 0.011483 | 0.011448 | 0.011483 |
| 0.011483 | 0.011413 | 0.011377 | 0.011413 | 0.011518 | 0.011518 | 0.011448 |
| 0.011448 | 0.011553 | 0.011694 | 0.011483 | 0.011589 | 0.011589 | 0.011553 |
| 0.011342 | 0.011448 | 0.011483 | 0.011836 | 0.011448 | 0.011483 | 0.011448 |
| 0.011483 | 0.011307 | 0.011307 | 0.011659 | 0.011624 | 0.011624 | 0.011412 |
| 0.011518 | 0.011589 | 0.011412 | 0.011518 | 0.011448 | 0.011342 | 0.011624 |
| 0.011448 | 0.011377 | 0.011307 | 0.011518 | 0.011412 | 0.011518 | 0.011765 |
| 0.011377 | 0.011773 | 0.011765 | 0.011548 | 0.011230 | 0.011412 | 0.011270 |
| 0.011225 | 0.011769 | 0.011311 | 0.011373 | 0.011207 | 0.011366 | 0.011273 |
| 0.011468 | 0.011192 | 0.011394 | 0.011192 | 0.011222 | 0.011462 | 0.011425 |
| 0.011475 | 0.011336 | 0.000000 | 0.011384 | 0.011449 | 0.011518 | 0.011589 |
| 0.011553 | 0.011448 | 0.011521 | 0.011522 | 0.011593 | 0.011654 | 0.011377 |
| 0.011624 | 0.011412 | 0.011412 | 0.011448 | 0.011307 | 0.011483 | 0.011307 |
| 0.011412 | 0.011412 | 0.011342 | 0.011342 | 0.011342 | 0.011342 | 0.011448 |
| 0.011421 | 0.011426 | 0.011416 | 0.011419 | 0.011598 | 0.011559 | 0.011561 |
| 0.011524 | 0.011412 | 0.011291 | 0.011285 | 0.011415 | 0.011593 | 0.011522 |
| 0.011377 | 0.011451 | 0.011695 | 0.011590 | 0.011589 | 0.011554 | 0.011518 |
| 0.011483 | 0.011553 | 0.011553 | 0.011412 | 0.011977 | 0.011624 | 0.011695 |
| 0.011730 | 0.011695 | 0.011382 | 0.011496 | 0.011377 | 0.011589 | 0.011553 |
| 0.011554 | 0.011553 | 0.011589 | 0.011589 | 0.011595 | 0.011694 | 0.011388 |
| 0.011273 | 0.011279 | 0.011382 | 0.011345 | 0.011383 | 0.011257 | 0.011559 |
| 0.011420 | 0.011425 | 0.011308 | 0.011455 | 0.011412 | 0.011491 | 0.011377 |
| 0.011342 | 0.011272 | 0.011412 | 0.011342 | 0.011518 | 0.011483 | 0.011412 |
| 0.011518 | 0.011589 | 0.011377 | 0.011377 | 0.011412 | 0.011412 | 0.011413 |
| 0.011484 | 0.011412 | 0.011412 | 0.011449 | 0.011518 | 0.011589 | 0.011553 |
| 0.011448 | 0.011521 | 0.011522 | 0.011593 | 0.011654 | 0.011377 | 0.011588 |
| 0.011553 | 0.011553 | 0.011344 | 0.011535 | 0.011498 | 0.011489 | 0.011390 |
| 0.011565 | 0.011780 | 0.011551 | 0.011452 | 0.011342 | 0.011554 | 0.011377 |
| 0.011518 | 0.011448 | 0.011342 | 0.011449 | 0.011553 | 0.011521 | 0.011448 |
| 0.011342 | 0.011272 | 0.011412 | 0.011342 | 0.011272 | 0.011381 | 0.011554 |
| 0.011448 | 0.011377 | 0.011412 | 0.011448 | 0.011377 | 0.011342 | 0.011448 |
| 0.011412 | 0.011448 | 0.011448 | 0.011377 | 0.011448 | 0.011659 | 0.011272 |
| 0.011377 | 0.011730 | 0.011377 | 0.011412 | 0.011342 | 0.011694 | 0.011317 |
| 0.011622 | 0.011315 | 0.011315 | 0.011463 | 0.011508 | 0.011459 | 0.011269 |
| 0.011327 | 0.011483 | 0.011589 | 0.011701 | 0.011553 | 0.011695 | 0.011835 |
| 0.011730 | 0.011769 | 0.011730 | 0.011986 | 0.011624 | 0.012542 | 0.011730 |
| 0.012436 | 0.012224 | 0.012368 | 0.012685 | 0.011659 | 0.011342 | 0.011694 |
| 0.012119 | 0.011871 | 0.011659 | 0.011554 | 0.011624 | 0.011624 | 0.011593 |
| 0.011483 | 0.011485 | 0.011553 | 0.011518 | 0.011906 | 0.011977 | 0.011941 |
| 0.011836 | 0.011941 | 0.012047 | 0.011836 | 0.012154 | 0.012161 | 0.012225 |
| 0.012225 | 0.012225 | 0.012189 | 0.012189 | 0.012190 | 0.011483 | 0.011695 |
| 0.011800 | 0.012294 | 0.011805 | 0.011977 | 0.011801 | 0.011558 | 0.011448 |
| 0.011412 | 0.011412 | 0.011800 | 0.011952 | 0.011964 | 0.011730 | 0.011413 |
| s626     | 0.011694 | 0.011694 | 0.011800 | 0.011730 | 0.011730 | 0.011800 |
| 0.011702 | 0.011595 | 0.011765 | 0.011272 | 0.011307 | 0.011307 | 0.011272 |
| 0.011307 | 0.011448 | 0.011272 | 0.011307 | 0.011377 | 0.011342 | 0.011307 |
| 0.011272 | 0.011307 | 0.011412 | 0.011272 | 0.011307 | 0.011272 | 0.011666 |
| 0.011553 | 0.011307 | 0.011201 | 0.011448 | 0.011342 | 0.011236 | 0.011377 |
| 0.011342 | 0.011448 | 0.011342 | 0.011342 | 0.011377 | 0.011342 | 0.011518 |
| 0.011272 | 0.011342 | 0.011377 | 0.011307 | 0.011412 | 0.011448 | 0.011377 |
| 0.011342 | 0.011518 | 0.011377 | 0.011694 | 0.011342 | 0.011624 | 0.011342 |

|          |          |          |           |          |          |          |
|----------|----------|----------|-----------|----------|----------|----------|
| 0.011307 | 0.011413 | 0.011448 | 0.011624  | 0.011730 | 0.011412 | 0.011483 |
| 0.011377 | 0.011412 | 0.011307 | 0.011553  | 0.011835 | 0.011342 | 0.011412 |
| 0.011307 | 0.011342 | 0.011377 | 0.011412  | 0.011342 | 0.011377 | 0.011377 |
| 0.011272 | 0.011272 | 0.011236 | 0.011342  | 0.011342 | 0.011342 | 0.011412 |
| 0.011377 | 0.011342 | 0.011377 | 0.011272  | 0.011448 | 0.011272 | 0.011307 |
| 0.011448 | 0.011448 | 0.011694 | 0.011483  | 0.011342 | 0.011589 | 0.011342 |
| 0.011401 | 0.011747 | 0.011523 | 0.011220  | 0.011211 | 0.011324 | 0.011418 |
| 0.012058 | 0.011518 | 0.011185 | 0.011518  | 0.011553 | 0.011342 | 0.011448 |
| 0.011412 | 0.011377 | 0.011448 | 0.011342  | 0.011412 | 0.011342 | 0.011377 |
| 0.011342 | 0.011412 | 0.011624 | 0.011518  | 0.011412 | 0.011377 | 0.011307 |
| 0.011272 | 0.011272 | 0.011307 | 0.011272  | 0.011518 | 0.011483 | 0.011412 |
| 0.011518 | 0.011589 | 0.011272 | 0.011272  | 0.011307 | 0.011307 | 0.011307 |
| 0.011378 | 0.011342 | 0.011342 | 0.011171  | 0.011210 | 0.011207 | 0.011342 |
| 0.011309 | 0.011238 | 0.011288 | 0.011275  | 0.011238 | 0.011240 | 0.011273 |
| 0.011544 | 0.011277 | 0.011348 | 0.011272  | 0.011240 | 0.011377 | 0.011377 |
| 0.011448 | 0.011307 | 0.011342 | 0.011412  | 0.011412 | 0.011800 | 0.011553 |
| 0.011624 | 0.011412 | 0.011342 | 0.011412  | 0.011236 | 0.011483 | 0.011201 |
| 0.011342 | 0.011307 | 0.011272 | 0.011272  | 0.011272 | 0.011272 | 0.011377 |
| 0.011307 | 0.011448 | 0.011377 | 0.011236  | 0.011343 | 0.011483 | 0.011450 |
| 0.011448 | 0.011377 | 0.011272 | 0.011202  | 0.011342 | 0.011272 | 0.011201 |
| 0.011310 | 0.011448 | 0.011272 | 0.011448  | 0.011236 | 0.011307 | 0.011307 |
| 0.011412 | 0.011307 | 0.011342 | 0.011307  | 0.011307 | 0.011201 | 0.011307 |
| 0.011342 | 0.011307 | 0.011377 | 0.011307  | 0.011342 | 0.011377 | 0.011553 |
| 0.011730 | 0.011659 | 0.011730 | 0.011483  | 0.011730 | 0.011307 | 0.011307 |
| 0.011343 | 0.011648 | 0.011496 | 0.011239  | 0.011736 | 0.011203 | 0.011347 |
| 0.011702 | 0.011630 | 0.011518 | 0.011694  | 0.011383 | 0.011589 | 0.011553 |
| 0.011483 | 0.011624 | 0.011471 | 0.011322  | 0.011326 | 0.011377 | 0.011451 |
| 0.011553 | 0.011449 | 0.011593 | 0.011557  | 0.011448 | 0.011659 | 0.011771 |
| 0.011451 | 0.011558 | 0.011557 | 0.011486  | 0.011801 | 0.011236 | 0.011449 |
| 0.011342 | 0.011307 | 0.011201 | 0.011201  | 0.011307 | 0.011307 | 0.011377 |
| 0.011307 | 0.011377 | 0.011272 | 0.011377  | 0.011307 | 0.011307 | 0.011377 |
| 0.011307 | 0.011729 | 0.011659 | 0.011694  | 0.011201 | 0.011307 | 0.011342 |
| 0.011342 | 0.011307 | 0.011377 | 0.011377  | 0.011272 | 0.011272 | 0.011272 |
| 0.011800 | 0.011412 | 0.011448 | 0.011236  | 0.011342 | 0.011483 | 0.011236 |
| 0.011236 | 0.011307 | 0.011307 | 0.011483  | 0.011272 | 0.011342 | 0.011553 |
| 0.011483 | 0.011307 | 0.011307 | 0.011236  | 0.011236 | 0.011342 | 0.011342 |
| 0.011236 | 0.011342 | 0.011201 | 0.011236  | 0.011377 | 0.011518 | 0.011272 |
| 0.011237 | 0.011377 | 0.011307 | 0.011201  | 0.011553 | 0.011201 | 0.011377 |
| 0.011455 | 0.011272 | 0.011589 | 0.011413  | 0.011448 | 0.011307 | 0.011412 |
| 0.011272 | 0.011624 | 0.011201 | 0.011448  | 0.011272 | 0.011272 | 0.011201 |
| 0.011377 | 0.011659 | 0.011307 | 0.011412  | 0.011236 | 0.011659 | 0.011272 |
| 0.011272 | 0.011272 | 0.011307 | 0.011377  | 0.011307 | 0.011412 | 0.011483 |
| 0.011483 | 0.011377 | 0.011342 | 0.011448  | 0.011412 | 0.011272 | 0.011236 |
| 0.011272 | 0.011272 | 0.011307 | 0.011272  | 0.011236 | 0.011377 | 0.011272 |
| 0.011307 | 0.011272 | 0.011412 | 0.011483  | 0.011342 | 0.011307 | 0.011307 |
| 0.011377 | 0.011307 | 0.011412 | 0.011272  | 0.011412 | 0.011518 | 0.011765 |
| 0.011307 | 0.011694 | 0.011307 | 0.0117894 | 0.011322 | 0.011314 | 0.011630 |
| 0.011630 | 0.011635 | 0.011220 | 0.011292  | 0.011798 | 0.011665 | 0.011431 |
| 0.011541 | 0.011503 | 0.011180 | 0.011275  | 0.011260 | 0.011314 | 0.011281 |
| 0.011536 | 0.011436 | 0.011435 | 0.011259  | 0.011448 | 0.011483 | 0.011450 |
| 0.011349 | 0.011448 | 0.011412 | 0.011412  | 0.011342 | 0.011342 | 0.011342 |
| 0.011377 | 0.011307 | 0.011342 | 0.011377  | 0.011307 | 0.011272 | 0.011307 |
| 0.011307 | 0.011342 | 0.011236 | 0.011342  | 0.011377 | 0.011412 | 0.011342 |
| 0.011377 | 0.011342 | 0.011659 | 0.011659  | 0.011413 | 0.011448 | 0.011483 |
| 0.011236 | 0.011236 | 0.011272 | 0.011377  | 0.011236 | 0.011448 | 0.011448 |
| 0.011448 | 0.011518 | 0.011412 | 0.011483  | 0.011730 | 0.011484 | 0.011377 |
| 0.011377 | 0.011377 | 0.011483 | 0.011307  | 0.011307 | 0.011272 | 0.011377 |
| 0.011413 | 0.011412 | 0.011448 | 0.011412  | 0.011343 | 0.011483 | 0.011518 |
| 0.011380 | 0.011236 | 0.011377 | 0.011448  | 0.011377 | 0.011483 | 0.011518 |
| 0.011694 | 0.011383 | 0.011589 | 0.011553  | 0.011483 | 0.011624 | 0.011272 |



|          |          |          |          |          |          |          |
|----------|----------|----------|----------|----------|----------|----------|
| 0.011449 | 0.011342 | 0.011307 | 0.011307 | 0.011342 | 0.011236 | 0.011342 |
| 0.011377 | 0.011412 | 0.011342 | 0.011377 | 0.011342 | 0.011659 | 0.011659 |
| 0.011413 | 0.011448 | 0.011483 | 0.011448 | 0.012118 | 0.011473 | 0.011393 |
| 0.011427 | 0.011461 | 0.011577 | 0.011388 | 0.011575 | 0.011495 | 0.011458 |
| 0.012070 | 0.011351 | 0.011492 | 0.011387 | 0.011711 | 0.011560 | 0.011560 |
| 0.012094 | 0.011497 | 0.011343 | 0.011342 | 0.011342 | 0.011412 | 0.011307 |
| 0.011236 | 0.011272 | 0.011377 | 0.011342 | 0.011342 | 0.011483 | 0.011483 |
| 0.011307 | 0.011272 | 0.011307 | 0.011307 | 0.011236 | 0.011272 | 0.011201 |
| 0.011342 | 0.011377 | 0.011272 | 0.011236 | 0.011342 | 0.011272 | 0.011307 |
| 0.011307 | 0.011236 | 0.011307 | 0.011342 | 0.011236 | 0.011448 | 0.011483 |
| 0.011342 | 0.011448 | 0.011377 | 0.011342 | 0.011307 | 0.011730 | 0.011342 |
| 0.011389 | 0.011272 | 0.011553 | 0.011558 | 0.011412 | 0.011377 | 0.011412 |
| 0.011412 | 0.011342 | 0.011272 | 0.011342 | 0.011448 | 0.011448 | 0.011377 |
| 0.011377 | 0.011448 | 0.011694 | 0.011412 | 0.011518 | 0.011518 | 0.011448 |
| 0.011272 | 0.011377 | 0.011412 | 0.011765 | 0.011377 | 0.011413 | 0.011377 |
| 0.011377 | 0.011307 | 0.011307 | 0.011659 | 0.011553 | 0.011624 | 0.011272 |
| 0.011448 | 0.011483 | 0.011342 | 0.011448 | 0.011377 | 0.011272 | 0.011624 |
| 0.011377 | 0.011307 | 0.011307 | 0.011483 | 0.011272 | 0.011448 | 0.011694 |
| 0.011307 | 0.011773 | 0.011765 | 0.011512 | 0.011173 | 0.011412 | 0.011318 |
| 0.011230 | 0.011729 | 0.011240 | 0.011467 | 0.011308 | 0.011370 | 0.011438 |
| 0.011468 | 0.011260 | 0.011394 | 0.011192 | 0.011279 | 0.011328 | 0.011393 |
| 0.011407 | 0.011339 | 0.011384 | 0.000000 | 0.011378 | 0.011483 | 0.011589 |
| 0.011553 | 0.011413 | 0.011521 | 0.011558 | 0.011700 | 0.011654 | 0.011307 |
| 0.011624 | 0.011412 | 0.011342 | 0.011412 | 0.011236 | 0.011483 | 0.011201 |
| 0.011342 | 0.011307 | 0.011272 | 0.011272 | 0.011272 | 0.011272 | 0.011377 |
| 0.011315 | 0.011316 | 0.011309 | 0.011311 | 0.011490 | 0.011452 | 0.011453 |
| 0.011453 | 0.011342 | 0.011175 | 0.011172 | 0.011309 | 0.011486 | 0.011416 |
| 0.011236 | 0.011344 | 0.011589 | 0.011520 | 0.011518 | 0.011518 | 0.011483 |
| 0.011412 | 0.011483 | 0.011448 | 0.011342 | 0.011977 | 0.011553 | 0.011624 |
| 0.011659 | 0.011693 | 0.011347 | 0.011423 | 0.011307 | 0.011518 | 0.011483 |
| 0.011484 | 0.011483 | 0.011518 | 0.011518 | 0.011595 | 0.011694 | 0.011315 |
| 0.011202 | 0.011206 | 0.011310 | 0.011274 | 0.011383 | 0.011178 | 0.011559 |
| 0.011348 | 0.011472 | 0.011210 | 0.011297 | 0.011342 | 0.011383 | 0.011307 |
| 0.011272 | 0.011272 | 0.011307 | 0.011272 | 0.011518 | 0.011483 | 0.011412 |
| 0.011518 | 0.011589 | 0.011272 | 0.011272 | 0.011307 | 0.011307 | 0.011307 |
| 0.011378 | 0.011342 | 0.011342 | 0.011378 | 0.011483 | 0.011589 | 0.011553 |
| 0.011413 | 0.011521 | 0.011558 | 0.011700 | 0.011654 | 0.011307 | 0.011518 |
| 0.011483 | 0.011483 | 0.011273 | 0.011461 | 0.011424 | 0.011418 | 0.011317 |
| 0.011493 | 0.011726 | 0.011461 | 0.011381 | 0.011272 | 0.011448 | 0.011307 |
| 0.011448 | 0.011377 | 0.011236 | 0.011343 | 0.011483 | 0.011450 | 0.011377 |
| 0.011272 | 0.011202 | 0.011342 | 0.011272 | 0.011201 | 0.011310 | 0.011448 |
| 0.011377 | 0.011307 | 0.011342 | 0.011377 | 0.011307 | 0.011272 | 0.011448 |
| 0.011342 | 0.011377 | 0.011377 | 0.011307 | 0.011377 | 0.011553 | 0.011272 |
| 0.011307 | 0.011730 | 0.011307 | 0.011342 | 0.011272 | 0.011694 | 0.011234 |
| 0.011631 | 0.011189 | 0.011314 | 0.011427 | 0.011513 | 0.011500 | 0.011187 |
| 0.011270 | 0.011483 | 0.011589 | 0.011701 | 0.011553 | 0.011694 | 0.011835 |
| 0.011730 | 0.011769 | 0.011730 | 0.011985 | 0.011659 | 0.012506 | 0.011730 |
| 0.012436 | 0.012188 | 0.012333 | 0.012613 | 0.011624 | 0.011342 | 0.011694 |
| 0.012118 | 0.011871 | 0.011624 | 0.011554 | 0.011624 | 0.011624 | 0.011593 |
| 0.011483 | 0.011483 | 0.011553 | 0.011518 | 0.011800 | 0.011906 | 0.011835 |
| 0.011765 | 0.011871 | 0.011976 | 0.011765 | 0.012119 | 0.012160 | 0.012225 |
| 0.012225 | 0.012225 | 0.012189 | 0.012189 | 0.012189 | 0.011412 | 0.011694 |
| 0.011800 | 0.012224 | 0.011805 | 0.011977 | 0.011801 | 0.011558 | 0.011448 |
| 0.011412 | 0.011412 | 0.011800 | 0.011835 | 0.011964 | 0.011659 | 0.011413 |
| s627     | 0.011701 | 0.011701 | 0.011971 | 0.011734 | 0.011734 | 0.011802 |
| 0.011708 | 0.011640 | 0.011734 | 0.011296 | 0.011363 | 0.011330 | 0.011296 |
| 0.011330 | 0.011498 | 0.011296 | 0.011330 | 0.011397 | 0.011364 | 0.011330 |
| 0.011296 | 0.011330 | 0.011431 | 0.011296 | 0.011330 | 0.011330 | 0.011674 |
| 0.011566 | 0.011330 | 0.011229 | 0.011465 | 0.011397 | 0.011364 | 0.011397 |
| 0.011364 | 0.011465 | 0.011364 | 0.011364 | 0.011397 | 0.011364 | 0.011532 |

|          |          |          |          |          |          |          |
|----------|----------|----------|----------|----------|----------|----------|
| 0.011296 | 0.011364 | 0.011397 | 0.011330 | 0.011431 | 0.011465 | 0.011397 |
| 0.011364 | 0.011532 | 0.011431 | 0.011701 | 0.011364 | 0.011633 | 0.011364 |
| 0.011330 | 0.011431 | 0.011498 | 0.011633 | 0.011734 | 0.011431 | 0.011532 |
| 0.011397 | 0.011465 | 0.011364 | 0.011599 | 0.011836 | 0.011364 | 0.011431 |
| 0.011330 | 0.011431 | 0.011397 | 0.011465 | 0.011397 | 0.011397 | 0.011397 |
| 0.011296 | 0.011330 | 0.011296 | 0.011397 | 0.011363 | 0.011398 | 0.011465 |
| 0.011397 | 0.011364 | 0.011431 | 0.011330 | 0.011465 | 0.011296 | 0.011364 |
| 0.011532 | 0.011465 | 0.011701 | 0.011532 | 0.011364 | 0.011600 | 0.011363 |
| 0.011544 | 0.011735 | 0.011591 | 0.011296 | 0.011285 | 0.011356 | 0.011495 |
| 0.012126 | 0.011572 | 0.011308 | 0.011599 | 0.011600 | 0.011397 | 0.011498 |
| 0.011431 | 0.011397 | 0.011465 | 0.011364 | 0.011465 | 0.011397 | 0.011397 |
| 0.011363 | 0.011465 | 0.011667 | 0.011532 | 0.011431 | 0.011397 | 0.011330 |
| 0.011296 | 0.011296 | 0.011364 | 0.011330 | 0.011532 | 0.011498 | 0.011431 |
| 0.011532 | 0.011599 | 0.011330 | 0.011330 | 0.011364 | 0.011363 | 0.011365 |
| 0.011433 | 0.011364 | 0.011094 | 0.011241 | 0.011314 | 0.011271 | 0.011364 |
| 0.011366 | 0.011302 | 0.011357 | 0.011337 | 0.011265 | 0.011301 | 0.011331 |
| 0.011602 | 0.011372 | 0.011406 | 0.011296 | 0.011303 | 0.011432 | 0.011398 |
| 0.011465 | 0.011399 | 0.011398 | 0.011498 | 0.011431 | 0.011802 | 0.011600 |
| 0.011633 | 0.011498 | 0.011364 | 0.011465 | 0.011262 | 0.011498 | 0.011296 |
| 0.011364 | 0.011364 | 0.011330 | 0.011296 | 0.011330 | 0.011296 | 0.011128 |
| 0.011364 | 0.011465 | 0.011397 | 0.011296 | 0.011398 | 0.011465 | 0.011501 |
| 0.011498 | 0.011397 | 0.011296 | 0.011229 | 0.011363 | 0.011296 | 0.011229 |
| 0.011333 | 0.011499 | 0.011296 | 0.011499 | 0.011262 | 0.011364 | 0.011330 |
| 0.011431 | 0.011330 | 0.011364 | 0.011330 | 0.011364 | 0.011229 | 0.011364 |
| 0.011397 | 0.011330 | 0.011397 | 0.011330 | 0.011363 | 0.011397 | 0.011633 |
| 0.011734 | 0.011667 | 0.011734 | 0.011500 | 0.011735 | 0.011363 | 0.011330 |
| 0.011365 | 0.011628 | 0.011474 | 0.011267 | 0.011742 | 0.011197 | 0.011297 |
| 0.011742 | 0.011606 | 0.011532 | 0.011735 | 0.011437 | 0.011600 | 0.011566 |
| 0.011498 | 0.011667 | 0.011524 | 0.011350 | 0.011397 | 0.011397 | 0.011468 |
| 0.011566 | 0.011467 | 0.011603 | 0.011672 | 0.011600 | 0.011667 | 0.011775 |
| 0.011502 | 0.011674 | 0.011604 | 0.011536 | 0.011804 | 0.011262 | 0.011399 |
| 0.011431 | 0.011364 | 0.011262 | 0.011262 | 0.011330 | 0.011330 | 0.011397 |
| 0.011330 | 0.011397 | 0.011296 | 0.011397 | 0.011330 | 0.011330 | 0.011397 |
| 0.011330 | 0.011768 | 0.011667 | 0.011701 | 0.011229 | 0.011330 | 0.011364 |
| 0.011364 | 0.011330 | 0.011397 | 0.011431 | 0.011296 | 0.011296 | 0.011296 |
| 0.011836 | 0.011465 | 0.011465 | 0.011262 | 0.011363 | 0.011532 | 0.011296 |
| 0.011296 | 0.011363 | 0.011330 | 0.011498 | 0.011296 | 0.011431 | 0.011566 |
| 0.011498 | 0.011330 | 0.011330 | 0.011262 | 0.011262 | 0.011431 | 0.011364 |
| 0.011262 | 0.011363 | 0.011229 | 0.011262 | 0.011397 | 0.011532 | 0.011296 |
| 0.011195 | 0.011397 | 0.011330 | 0.011229 | 0.011566 | 0.011229 | 0.011330 |
| 0.011473 | 0.011296 | 0.011600 | 0.011431 | 0.011465 | 0.011330 | 0.011431 |
| 0.011296 | 0.011633 | 0.011229 | 0.011498 | 0.011296 | 0.011296 | 0.011229 |
| 0.011465 | 0.011667 | 0.011364 | 0.011431 | 0.011262 | 0.011667 | 0.011296 |
| 0.011296 | 0.011296 | 0.011330 | 0.011431 | 0.011330 | 0.011397 | 0.011498 |
| 0.011498 | 0.011465 | 0.011363 | 0.011465 | 0.011431 | 0.011296 | 0.011262 |
| 0.011296 | 0.011296 | 0.011364 | 0.011296 | 0.011262 | 0.011431 | 0.011296 |
| 0.011330 | 0.011330 | 0.011465 | 0.011498 | 0.011397 | 0.011330 | 0.011330 |
| 0.011397 | 0.011330 | 0.011431 | 0.011296 | 0.011431 | 0.011532 | 0.011836 |
| 0.011330 | 0.011735 | 0.011337 | 0.017890 | 0.011323 | 0.011552 | 0.011691 |
| 0.011651 | 0.011696 | 0.011376 | 0.011352 | 0.011779 | 0.011719 | 0.011427 |
| 0.011535 | 0.011612 | 0.011256 | 0.011355 | 0.011335 | 0.011308 | 0.011363 |
| 0.011579 | 0.011509 | 0.011507 | 0.011392 | 0.011465 | 0.011498 | 0.011502 |
| 0.011371 | 0.011465 | 0.011465 | 0.011431 | 0.011397 | 0.011398 | 0.011364 |
| 0.011397 | 0.011330 | 0.011364 | 0.011330 | 0.011364 | 0.011296 | 0.011330 |
| 0.011330 | 0.011397 | 0.011296 | 0.011397 | 0.011431 | 0.011465 | 0.011363 |
| 0.011397 | 0.011364 | 0.011701 | 0.011701 | 0.011431 | 0.011465 | 0.011498 |
| 0.011262 | 0.011262 | 0.011296 | 0.011397 | 0.011262 | 0.011498 | 0.011498 |
| 0.011532 | 0.011532 | 0.011465 | 0.011566 | 0.011734 | 0.011567 | 0.011397 |
| 0.011397 | 0.011465 | 0.011498 | 0.011262 | 0.011397 | 0.011364 | 0.011397 |
| 0.011465 | 0.011465 | 0.011498 | 0.011465 | 0.011364 | 0.011566 | 0.011532 |

|          |          |          |          |          |          |          |
|----------|----------|----------|----------|----------|----------|----------|
| 0.011400 | 0.011296 | 0.011397 | 0.011498 | 0.011397 | 0.011532 | 0.011566 |
| 0.011735 | 0.011437 | 0.011600 | 0.011566 | 0.011498 | 0.011667 | 0.011296 |
| 0.011466 | 0.011364 | 0.011330 | 0.011330 | 0.011397 | 0.011296 | 0.011397 |
| 0.011431 | 0.011465 | 0.011363 | 0.011397 | 0.011364 | 0.011701 | 0.011701 |
| 0.011431 | 0.011465 | 0.011532 | 0.011465 | 0.012107 | 0.011527 | 0.011449 |
| 0.011519 | 0.011478 | 0.011519 | 0.011478 | 0.011587 | 0.011510 | 0.011476 |
| 0.012060 | 0.011373 | 0.011507 | 0.011442 | 0.011717 | 0.011573 | 0.011675 |
| 0.012085 | 0.011514 | 0.011400 | 0.011397 | 0.011397 | 0.011431 | 0.011366 |
| 0.011262 | 0.011296 | 0.011431 | 0.011397 | 0.011399 | 0.011532 | 0.011432 |
| 0.011363 | 0.011296 | 0.011330 | 0.011364 | 0.011262 | 0.011330 | 0.011229 |
| 0.011364 | 0.011397 | 0.011296 | 0.011262 | 0.011364 | 0.011296 | 0.011330 |
| 0.011330 | 0.011262 | 0.011330 | 0.011364 | 0.011262 | 0.011465 | 0.011498 |
| 0.011397 | 0.011465 | 0.011397 | 0.011397 | 0.011330 | 0.011734 | 0.011364 |
| 0.011410 | 0.011330 | 0.011566 | 0.011571 | 0.011431 | 0.011431 | 0.011431 |
| 0.011431 | 0.011364 | 0.011330 | 0.011364 | 0.011465 | 0.011465 | 0.011397 |
| 0.011364 | 0.011532 | 0.011701 | 0.011431 | 0.011566 | 0.011566 | 0.011498 |
| 0.011330 | 0.011397 | 0.011431 | 0.011836 | 0.011397 | 0.011431 | 0.011397 |
| 0.011431 | 0.011363 | 0.011363 | 0.011667 | 0.011600 | 0.011633 | 0.011364 |
| 0.011465 | 0.011532 | 0.011397 | 0.011465 | 0.011431 | 0.011296 | 0.011633 |
| 0.011397 | 0.011364 | 0.011363 | 0.011532 | 0.011364 | 0.011465 | 0.011701 |
| 0.011397 | 0.011776 | 0.011768 | 0.011591 | 0.011344 | 0.011470 | 0.011319 |
| 0.011281 | 0.011725 | 0.011307 | 0.011463 | 0.011353 | 0.011519 | 0.011486 |
| 0.011572 | 0.011324 | 0.011395 | 0.011259 | 0.011330 | 0.011328 | 0.011468 |
| 0.011476 | 0.011376 | 0.011449 | 0.011378 | 0.000000 | 0.011532 | 0.011532 |
| 0.011599 | 0.011397 | 0.011569 | 0.011571 | 0.011637 | 0.011591 | 0.011397 |
| 0.011633 | 0.011498 | 0.011364 | 0.011465 | 0.011262 | 0.011498 | 0.011296 |
| 0.011364 | 0.011364 | 0.011330 | 0.011296 | 0.011330 | 0.011296 | 0.011128 |
| 0.011376 | 0.011376 | 0.011370 | 0.011404 | 0.011541 | 0.011506 | 0.011506 |
| 0.011505 | 0.011431 | 0.011172 | 0.011205 | 0.011366 | 0.011536 | 0.011537 |
| 0.011330 | 0.011400 | 0.011635 | 0.011603 | 0.011533 | 0.011567 | 0.011498 |
| 0.011431 | 0.011498 | 0.011498 | 0.011397 | 0.011971 | 0.011566 | 0.011634 |
| 0.011667 | 0.011740 | 0.011368 | 0.011443 | 0.011330 | 0.011498 | 0.011498 |
| 0.011533 | 0.011566 | 0.011566 | 0.011566 | 0.011690 | 0.011701 | 0.011339 |
| 0.011230 | 0.011234 | 0.011334 | 0.011299 | 0.011403 | 0.011248 | 0.011572 |
| 0.011370 | 0.011412 | 0.011108 | 0.011361 | 0.011364 | 0.011438 | 0.011330 |
| 0.011296 | 0.011296 | 0.011364 | 0.011330 | 0.011532 | 0.011498 | 0.011431 |
| 0.011532 | 0.011599 | 0.011330 | 0.011330 | 0.011364 | 0.011363 | 0.011365 |
| 0.011433 | 0.011364 | 0.011094 | 0.000000 | 0.011532 | 0.011532 | 0.011599 |
| 0.011397 | 0.011569 | 0.011571 | 0.011637 | 0.011591 | 0.011397 | 0.011566 |
| 0.011498 | 0.011498 | 0.011332 | 0.011514 | 0.011444 | 0.011470 | 0.011271 |
| 0.011475 | 0.011656 | 0.011443 | 0.011401 | 0.011296 | 0.011499 | 0.011364 |
| 0.011465 | 0.011397 | 0.011296 | 0.011398 | 0.011465 | 0.011501 | 0.011397 |
| 0.011296 | 0.011229 | 0.011363 | 0.011296 | 0.011229 | 0.011333 | 0.011499 |
| 0.011397 | 0.011330 | 0.011364 | 0.011330 | 0.011364 | 0.011296 | 0.011498 |
| 0.011364 | 0.011397 | 0.011397 | 0.011330 | 0.011397 | 0.011633 | 0.011296 |
| 0.011330 | 0.011734 | 0.011330 | 0.011364 | 0.011330 | 0.011701 | 0.011319 |
| 0.011681 | 0.011316 | 0.011363 | 0.011545 | 0.011633 | 0.011529 | 0.011270 |
| 0.011324 | 0.011431 | 0.011532 | 0.011640 | 0.011499 | 0.011637 | 0.011769 |
| 0.011668 | 0.011705 | 0.011667 | 0.011918 | 0.011633 | 0.012444 | 0.011669 |
| 0.012411 | 0.012109 | 0.012244 | 0.012584 | 0.011701 | 0.011330 | 0.011633 |
| 0.012074 | 0.012008 | 0.011600 | 0.011499 | 0.011566 | 0.011566 | 0.011604 |
| 0.011431 | 0.011435 | 0.011498 | 0.011465 | 0.011904 | 0.011971 | 0.011972 |
| 0.011871 | 0.011972 | 0.012076 | 0.011841 | 0.012142 | 0.012148 | 0.012209 |
| 0.012210 | 0.012244 | 0.012191 | 0.012210 | 0.012211 | 0.011431 | 0.011735 |
| 0.011803 | 0.012309 | 0.011775 | 0.012039 | 0.012513 | 0.011572 | 0.011465 |
| 0.011431 | 0.011431 | 0.011870 | 0.011968 | 0.012047 | 0.011768 | 0.011432 |
| S628     | 0.011833 | 0.011833 | 0.011900 | 0.011665 | 0.011665 | 0.011732 |
| 0.011570 | 0.011502 | 0.011665 | 0.011430 | 0.011497 | 0.011464 | 0.011429 |
| 0.011396 | 0.011597 | 0.011362 | 0.011463 | 0.011530 | 0.011497 | 0.011463 |
| 0.011429 | 0.011463 | 0.011295 | 0.011430 | 0.011463 | 0.011463 | 0.011536 |

|          |          |          |          |          |          |          |
|----------|----------|----------|----------|----------|----------|----------|
| 0.011195 | 0.011463 | 0.011362 | 0.011329 | 0.011530 | 0.011497 | 0.011530 |
| 0.011497 | 0.011597 | 0.011497 | 0.011497 | 0.011530 | 0.011497 | 0.011665 |
| 0.011362 | 0.011497 | 0.011530 | 0.011463 | 0.011497 | 0.011597 | 0.011530 |
| 0.011497 | 0.011665 | 0.011564 | 0.011564 | 0.011497 | 0.011765 | 0.011497 |
| 0.011463 | 0.011497 | 0.011631 | 0.011765 | 0.011598 | 0.011497 | 0.011597 |
| 0.011530 | 0.011597 | 0.011497 | 0.011732 | 0.011698 | 0.011497 | 0.011564 |
| 0.011463 | 0.011564 | 0.011530 | 0.011597 | 0.011530 | 0.011530 | 0.011530 |
| 0.011429 | 0.011463 | 0.011429 | 0.011463 | 0.011497 | 0.011531 | 0.011597 |
| 0.011530 | 0.011497 | 0.011564 | 0.011463 | 0.011530 | 0.011429 | 0.011497 |
| 0.011665 | 0.011597 | 0.011631 | 0.011665 | 0.011497 | 0.011665 | 0.011497 |
| 0.011691 | 0.011620 | 0.011702 | 0.011451 | 0.011359 | 0.011539 | 0.011257 |
| 0.011902 | 0.011264 | 0.011390 | 0.011732 | 0.011732 | 0.011463 | 0.011564 |
| 0.011564 | 0.011530 | 0.011597 | 0.011497 | 0.011597 | 0.011530 | 0.011530 |
| 0.011497 | 0.011530 | 0.011799 | 0.011665 | 0.011564 | 0.011530 | 0.011463 |
| 0.011429 | 0.011362 | 0.011497 | 0.011463 | 0.011396 | 0.011362 | 0.011295 |
| 0.011396 | 0.011463 | 0.011463 | 0.011463 | 0.011497 | 0.011497 | 0.011499 |
| 0.011567 | 0.011497 | 0.011497 | 0.011384 | 0.011422 | 0.011411 | 0.011497 |
| 0.011500 | 0.011438 | 0.011466 | 0.011474 | 0.011400 | 0.011437 | 0.011465 |
| 0.011456 | 0.011508 | 0.011508 | 0.011430 | 0.011440 | 0.011565 | 0.011464 |
| 0.011531 | 0.011532 | 0.011531 | 0.011631 | 0.011564 | 0.011866 | 0.011665 |
| 0.011362 | 0.011564 | 0.011497 | 0.011530 | 0.011396 | 0.011094 | 0.011430 |
| 0.011497 | 0.011497 | 0.011463 | 0.011429 | 0.011463 | 0.011429 | 0.011530 |
| 0.011497 | 0.011597 | 0.011530 | 0.011429 | 0.011532 | 0.011631 | 0.011635 |
| 0.011631 | 0.011530 | 0.011429 | 0.011364 | 0.011497 | 0.011429 | 0.011362 |
| 0.011366 | 0.011631 | 0.011430 | 0.011631 | 0.011396 | 0.011497 | 0.011463 |
| 0.011564 | 0.011463 | 0.011497 | 0.011463 | 0.011497 | 0.011362 | 0.011497 |
| 0.011530 | 0.011463 | 0.011530 | 0.011463 | 0.011497 | 0.011530 | 0.011765 |
| 0.011598 | 0.011530 | 0.011598 | 0.011633 | 0.011598 | 0.011497 | 0.011463 |
| 0.011432 | 0.011707 | 0.011563 | 0.011403 | 0.011603 | 0.011367 | 0.011454 |
| 0.011604 | 0.011502 | 0.011665 | 0.011866 | 0.011572 | 0.011732 | 0.011698 |
| 0.011631 | 0.011799 | 0.011664 | 0.011554 | 0.011605 | 0.011530 | 0.011602 |
| 0.011698 | 0.011600 | 0.011737 | 0.011805 | 0.011732 | 0.011799 | 0.011907 |
| 0.011636 | 0.011807 | 0.011738 | 0.011669 | 0.011935 | 0.011396 | 0.011600 |
| 0.011497 | 0.011497 | 0.011396 | 0.011396 | 0.011463 | 0.011463 | 0.011530 |
| 0.011463 | 0.011530 | 0.011429 | 0.011463 | 0.011396 | 0.011463 | 0.011530 |
| 0.011463 | 0.011631 | 0.011530 | 0.011564 | 0.011362 | 0.011463 | 0.011497 |
| 0.011497 | 0.011463 | 0.011530 | 0.011497 | 0.011429 | 0.011429 | 0.011429 |
| 0.011698 | 0.011530 | 0.011597 | 0.011396 | 0.011497 | 0.011665 | 0.011429 |
| 0.011429 | 0.011497 | 0.011463 | 0.011631 | 0.011429 | 0.011362 | 0.011497 |
| 0.011430 | 0.011463 | 0.011463 | 0.011396 | 0.011396 | 0.011564 | 0.011497 |
| 0.011396 | 0.011497 | 0.011362 | 0.011396 | 0.011530 | 0.011396 | 0.011430 |
| 0.011396 | 0.011530 | 0.011464 | 0.011362 | 0.011430 | 0.011362 | 0.011530 |
| 0.011608 | 0.011429 | 0.011463 | 0.011564 | 0.011530 | 0.011463 | 0.011564 |
| 0.011429 | 0.011765 | 0.011362 | 0.011564 | 0.011362 | 0.011362 | 0.011362 |
| 0.011597 | 0.011531 | 0.011497 | 0.011564 | 0.011396 | 0.011530 | 0.011362 |
| 0.011429 | 0.011429 | 0.011463 | 0.011564 | 0.011463 | 0.011564 | 0.011631 |
| 0.011631 | 0.011597 | 0.011497 | 0.011597 | 0.011564 | 0.011429 | 0.011396 |
| 0.011429 | 0.011429 | 0.011497 | 0.011362 | 0.011396 | 0.011564 | 0.011429 |
| 0.011396 | 0.011463 | 0.011597 | 0.011564 | 0.011530 | 0.011463 | 0.011463 |
| 0.011530 | 0.011463 | 0.011564 | 0.011429 | 0.011564 | 0.011665 | 0.011698 |
| 0.011463 | 0.011598 | 0.011474 | 0.017936 | 0.011387 | 0.011733 | 0.011548 |
| 0.011510 | 0.011553 | 0.011636 | 0.011408 | 0.011665 | 0.011578 | 0.011668 |
| 0.011487 | 0.011426 | 0.011411 | 0.011521 | 0.011411 | 0.011603 | 0.011533 |
| 0.011342 | 0.011135 | 0.011320 | 0.011126 | 0.011597 | 0.011631 | 0.011635 |
| 0.011507 | 0.011597 | 0.011597 | 0.011497 | 0.011530 | 0.011531 | 0.011497 |
| 0.011530 | 0.011463 | 0.011497 | 0.011530 | 0.011497 | 0.011429 | 0.011463 |
| 0.011463 | 0.011530 | 0.011429 | 0.011530 | 0.011564 | 0.011597 | 0.011497 |
| 0.011463 | 0.011429 | 0.011564 | 0.011564 | 0.011564 | 0.011598 | 0.011631 |
| 0.011396 | 0.011396 | 0.011429 | 0.011530 | 0.011396 | 0.011631 | 0.011631 |
| 0.011665 | 0.011665 | 0.011597 | 0.011698 | 0.011598 | 0.011700 | 0.011530 |

|          |          |          |          |          |          |          |
|----------|----------|----------|----------|----------|----------|----------|
| 0.011530 | 0.011597 | 0.011631 | 0.011463 | 0.011530 | 0.011497 | 0.011530 |
| 0.011598 | 0.011598 | 0.011631 | 0.011598 | 0.011498 | 0.011698 | 0.011665 |
| 0.011534 | 0.011429 | 0.011530 | 0.011631 | 0.011530 | 0.011597 | 0.011698 |
| 0.011866 | 0.011572 | 0.011732 | 0.011698 | 0.011631 | 0.011799 | 0.011430 |
| 0.011599 | 0.011497 | 0.011463 | 0.011463 | 0.011530 | 0.011429 | 0.011530 |
| 0.011564 | 0.011597 | 0.011497 | 0.011463 | 0.011429 | 0.011564 | 0.011564 |
| 0.011564 | 0.011598 | 0.011665 | 0.011597 | 0.012171 | 0.011668 | 0.011588 |
| 0.011658 | 0.011615 | 0.011728 | 0.011615 | 0.011725 | 0.011647 | 0.011612 |
| 0.012125 | 0.011510 | 0.011643 | 0.011579 | 0.011852 | 0.011707 | 0.011809 |
| 0.012148 | 0.011625 | 0.011534 | 0.011530 | 0.011530 | 0.011295 | 0.011500 |
| 0.011396 | 0.011429 | 0.011564 | 0.011530 | 0.011533 | 0.000000 | 0.011363 |
| 0.011497 | 0.011429 | 0.011463 | 0.011497 | 0.011396 | 0.011463 | 0.011362 |
| 0.011429 | 0.011463 | 0.011429 | 0.011396 | 0.011497 | 0.011429 | 0.011463 |
| 0.011463 | 0.011396 | 0.011463 | 0.011497 | 0.011396 | 0.011597 | 0.011631 |
| 0.011530 | 0.011530 | 0.011530 | 0.011530 | 0.011463 | 0.011598 | 0.011497 |
| 0.011269 | 0.011463 | 0.011195 | 0.011196 | 0.011564 | 0.011564 | 0.011564 |
| 0.011564 | 0.011497 | 0.011463 | 0.011497 | 0.011597 | 0.011597 | 0.011530 |
| 0.011530 | 0.011665 | 0.011564 | 0.011564 | 0.011765 | 0.011765 | 0.011631 |
| 0.011463 | 0.011530 | 0.011564 | 0.011698 | 0.011531 | 0.011564 | 0.011530 |
| 0.011564 | 0.011429 | 0.011429 | 0.011732 | 0.011732 | 0.011698 | 0.011497 |
| 0.011597 | 0.011665 | 0.011530 | 0.011597 | 0.011564 | 0.011429 | 0.011497 |
| 0.011530 | 0.011497 | 0.011429 | 0.011665 | 0.011497 | 0.011597 | 0.011631 |
| 0.011530 | 0.011638 | 0.011631 | 0.011101 | 0.011229 | 0.011536 | 0.011112 |
| 0.011500 | 0.011566 | 0.011411 | 0.011551 | 0.011402 | 0.011417 | 0.011379 |
| 0.011111 | 0.011324 | 0.011394 | 0.011258 | 0.011330 | 0.011529 | 0.011587 |
| 0.011625 | 0.011454 | 0.011518 | 0.011483 | 0.011532 | 0.000000 | 0.011195 |
| 0.011463 | 0.011531 | 0.011635 | 0.011433 | 0.011772 | 0.011802 | 0.011530 |
| 0.011362 | 0.011564 | 0.011497 | 0.011530 | 0.011396 | 0.011094 | 0.011430 |
| 0.011497 | 0.011497 | 0.011463 | 0.011429 | 0.011463 | 0.011429 | 0.011530 |
| 0.011514 | 0.011515 | 0.011505 | 0.011540 | 0.011676 | 0.011641 | 0.011640 |
| 0.011639 | 0.011564 | 0.011392 | 0.011384 | 0.011500 | 0.011670 | 0.011671 |
| 0.011464 | 0.011534 | 0.011767 | 0.011736 | 0.011665 | 0.011699 | 0.011631 |
| 0.011564 | 0.011631 | 0.011631 | 0.011530 | 0.011833 | 0.011698 | 0.011766 |
| 0.011799 | 0.011594 | 0.011504 | 0.011580 | 0.011463 | 0.011665 | 0.011631 |
| 0.011666 | 0.011698 | 0.011698 | 0.011698 | 0.011846 | 0.011833 | 0.011477 |
| 0.011365 | 0.011372 | 0.011469 | 0.011434 | 0.011470 | 0.011396 | 0.011434 |
| 0.011506 | 0.011367 | 0.011489 | 0.011547 | 0.011497 | 0.011573 | 0.011463 |
| 0.011429 | 0.011362 | 0.011497 | 0.011463 | 0.011396 | 0.011362 | 0.011295 |
| 0.011396 | 0.011463 | 0.011463 | 0.011463 | 0.011497 | 0.011497 | 0.011499 |
| 0.011567 | 0.011497 | 0.011497 | 0.011532 | 0.000000 | 0.011195 | 0.011463 |
| 0.011531 | 0.011635 | 0.011433 | 0.011772 | 0.011802 | 0.011530 | 0.011698 |
| 0.011631 | 0.011631 | 0.011466 | 0.011652 | 0.011581 | 0.011571 | 0.011481 |
| 0.011646 | 0.011835 | 0.011611 | 0.011536 | 0.011430 | 0.011631 | 0.011497 |
| 0.011597 | 0.011530 | 0.011429 | 0.011532 | 0.011631 | 0.011635 | 0.011530 |
| 0.011429 | 0.011364 | 0.011497 | 0.011429 | 0.011362 | 0.011366 | 0.011631 |
| 0.011530 | 0.011463 | 0.011497 | 0.011530 | 0.011497 | 0.011429 | 0.011362 |
| 0.011497 | 0.011530 | 0.011530 | 0.011463 | 0.011530 | 0.011765 | 0.011362 |
| 0.011463 | 0.011598 | 0.011463 | 0.011497 | 0.011463 | 0.011564 | 0.011403 |
| 0.011622 | 0.011273 | 0.011261 | 0.000000 | 0.011142 | 0.011132 | 0.011227 |
| 0.011218 | 0.011362 | 0.011463 | 0.011569 | 0.011430 | 0.011568 | 0.011699 |
| 0.011598 | 0.011635 | 0.011597 | 0.011846 | 0.011564 | 0.012438 | 0.011599 |
| 0.012338 | 0.012106 | 0.012240 | 0.012511 | 0.011564 | 0.011463 | 0.011564 |
| 0.012204 | 0.011937 | 0.011530 | 0.011430 | 0.011497 | 0.011497 | 0.011466 |
| 0.011362 | 0.011332 | 0.011429 | 0.011396 | 0.011766 | 0.011833 | 0.011834 |
| 0.011733 | 0.011834 | 0.011937 | 0.011703 | 0.012205 | 0.012211 | 0.012272 |
| 0.012273 | 0.012306 | 0.012255 | 0.012273 | 0.012274 | 0.011564 | 0.011799 |
| 0.011867 | 0.012371 | 0.011874 | 0.011900 | 0.012373 | 0.011434 | 0.011329 |
| 0.011295 | 0.011295 | 0.011766 | 0.011800 | 0.011904 | 0.011631 | 0.011296 |
| S629     | 0.011900 | 0.011900 | 0.011900 | 0.011665 | 0.011665 | 0.011732 |
| 0.011638 | 0.011570 | 0.011665 | 0.011497 | 0.011564 | 0.011531 | 0.011497 |

|          |          |          |          |          |          |          |
|----------|----------|----------|----------|----------|----------|----------|
| 0.011463 | 0.011698 | 0.011429 | 0.011530 | 0.011597 | 0.011564 | 0.011530 |
| 0.011497 | 0.011530 | 0.011362 | 0.011497 | 0.011531 | 0.011530 | 0.011604 |
| 0.011262 | 0.011530 | 0.011429 | 0.011396 | 0.011597 | 0.011564 | 0.011598 |
| 0.011564 | 0.011665 | 0.011564 | 0.011564 | 0.011597 | 0.011564 | 0.011732 |
| 0.011430 | 0.011564 | 0.011597 | 0.011530 | 0.011564 | 0.011665 | 0.011597 |
| 0.011564 | 0.011732 | 0.011632 | 0.011631 | 0.011564 | 0.011833 | 0.011564 |
| 0.011530 | 0.011564 | 0.011698 | 0.011833 | 0.011665 | 0.011564 | 0.011665 |
| 0.011597 | 0.011665 | 0.011564 | 0.011799 | 0.011766 | 0.011564 | 0.011631 |
| 0.011530 | 0.011631 | 0.011598 | 0.011665 | 0.011597 | 0.011597 | 0.011597 |
| 0.011497 | 0.011530 | 0.011497 | 0.011530 | 0.011564 | 0.011599 | 0.011665 |
| 0.011598 | 0.011564 | 0.011631 | 0.011530 | 0.011597 | 0.011497 | 0.011564 |
| 0.011732 | 0.011665 | 0.011698 | 0.011732 | 0.011564 | 0.011732 | 0.011564 |
| 0.011728 | 0.011621 | 0.011777 | 0.011490 | 0.011471 | 0.011575 | 0.011336 |
| 0.012011 | 0.011365 | 0.011513 | 0.011799 | 0.011799 | 0.011530 | 0.011631 |
| 0.011631 | 0.011597 | 0.011665 | 0.011564 | 0.011665 | 0.011597 | 0.011597 |
| 0.011564 | 0.011597 | 0.011866 | 0.011732 | 0.011631 | 0.011598 | 0.011530 |
| 0.011497 | 0.011429 | 0.011564 | 0.011530 | 0.011463 | 0.011430 | 0.011362 |
| 0.011463 | 0.011530 | 0.011530 | 0.011530 | 0.011564 | 0.011564 | 0.011567 |
| 0.011635 | 0.011564 | 0.011564 | 0.011456 | 0.011494 | 0.011481 | 0.011564 |
| 0.011568 | 0.011507 | 0.011540 | 0.011543 | 0.011468 | 0.011506 | 0.011533 |
| 0.011528 | 0.011577 | 0.011577 | 0.011497 | 0.011510 | 0.011632 | 0.011531 |
| 0.011598 | 0.011599 | 0.011598 | 0.011698 | 0.011631 | 0.011934 | 0.011732 |
| 0.011430 | 0.011631 | 0.011564 | 0.011598 | 0.011463 | 0.011161 | 0.011497 |
| 0.011564 | 0.011564 | 0.011530 | 0.011497 | 0.011530 | 0.011497 | 0.011597 |
| 0.011564 | 0.011665 | 0.011598 | 0.011497 | 0.011599 | 0.011698 | 0.011702 |
| 0.011698 | 0.011598 | 0.011497 | 0.011431 | 0.011564 | 0.011497 | 0.011430 |
| 0.011434 | 0.011698 | 0.011497 | 0.011698 | 0.011463 | 0.011564 | 0.011530 |
| 0.011631 | 0.011530 | 0.011564 | 0.011530 | 0.011564 | 0.011430 | 0.011564 |
| 0.011598 | 0.011530 | 0.011597 | 0.011530 | 0.011564 | 0.011597 | 0.011833 |
| 0.011665 | 0.011598 | 0.011665 | 0.011701 | 0.011665 | 0.011564 | 0.011530 |
| 0.011499 | 0.011788 | 0.011609 | 0.011472 | 0.011671 | 0.011435 | 0.011532 |
| 0.011672 | 0.011570 | 0.011732 | 0.011934 | 0.011641 | 0.011799 | 0.011766 |
| 0.011698 | 0.011866 | 0.011736 | 0.011555 | 0.011647 | 0.011598 | 0.011670 |
| 0.011766 | 0.011668 | 0.011804 | 0.011873 | 0.011799 | 0.011867 | 0.011976 |
| 0.011704 | 0.011875 | 0.011805 | 0.011737 | 0.012003 | 0.011463 | 0.011600 |
| 0.011631 | 0.011564 | 0.011463 | 0.011463 | 0.011530 | 0.011530 | 0.011597 |
| 0.011530 | 0.011598 | 0.011497 | 0.011530 | 0.011463 | 0.011530 | 0.011597 |
| 0.011530 | 0.011698 | 0.011598 | 0.011631 | 0.011429 | 0.011530 | 0.011564 |
| 0.011564 | 0.011530 | 0.011598 | 0.011564 | 0.011497 | 0.011497 | 0.011497 |
| 0.011766 | 0.011597 | 0.011665 | 0.011463 | 0.011564 | 0.011732 | 0.011497 |
| 0.011497 | 0.011564 | 0.011530 | 0.011698 | 0.011497 | 0.011430 | 0.011564 |
| 0.011497 | 0.011530 | 0.011530 | 0.011463 | 0.011463 | 0.011631 | 0.011564 |
| 0.011463 | 0.011564 | 0.011430 | 0.011463 | 0.011598 | 0.011464 | 0.011497 |
| 0.011464 | 0.011597 | 0.011531 | 0.011430 | 0.011497 | 0.011430 | 0.011598 |
| 0.011677 | 0.011497 | 0.011531 | 0.011631 | 0.011598 | 0.011530 | 0.011631 |
| 0.011497 | 0.011833 | 0.011429 | 0.011631 | 0.011430 | 0.011430 | 0.011429 |
| 0.011665 | 0.011598 | 0.011564 | 0.011631 | 0.011463 | 0.011598 | 0.011430 |
| 0.011497 | 0.011497 | 0.011530 | 0.011631 | 0.011530 | 0.011631 | 0.011698 |
| 0.011698 | 0.011665 | 0.011564 | 0.011665 | 0.011631 | 0.011497 | 0.011463 |
| 0.011497 | 0.011497 | 0.011564 | 0.011430 | 0.011463 | 0.011631 | 0.011497 |
| 0.011463 | 0.011530 | 0.011665 | 0.011631 | 0.011597 | 0.011530 | 0.011530 |
| 0.011597 | 0.011530 | 0.011631 | 0.011497 | 0.011631 | 0.011732 | 0.011766 |
| 0.011530 | 0.011665 | 0.011543 | 0.018050 | 0.011453 | 0.011672 | 0.011619 |
| 0.011579 | 0.011623 | 0.011741 | 0.011524 | 0.011610 | 0.011647 | 0.011728 |
| 0.011535 | 0.011365 | 0.011450 | 0.011605 | 0.011490 | 0.011554 | 0.011576 |
| 0.011436 | 0.011247 | 0.011431 | 0.011325 | 0.011665 | 0.011698 | 0.011703 |
| 0.011576 | 0.011665 | 0.011665 | 0.011564 | 0.011598 | 0.011598 | 0.011564 |
| 0.011598 | 0.011530 | 0.011564 | 0.011597 | 0.011564 | 0.011497 | 0.011530 |
| 0.011530 | 0.011597 | 0.011497 | 0.011598 | 0.011631 | 0.011665 | 0.011564 |
| 0.011530 | 0.011497 | 0.011631 | 0.011631 | 0.011631 | 0.011666 | 0.011698 |

|          |          |          |          |          |          |          |
|----------|----------|----------|----------|----------|----------|----------|
| 0.011463 | 0.011463 | 0.011497 | 0.011598 | 0.011463 | 0.011698 | 0.011698 |
| 0.011732 | 0.011732 | 0.011665 | 0.011765 | 0.011665 | 0.011768 | 0.011598 |
| 0.011597 | 0.011665 | 0.011698 | 0.011463 | 0.011597 | 0.011564 | 0.011598 |
| 0.011665 | 0.011665 | 0.011698 | 0.011665 | 0.011565 | 0.011765 | 0.011732 |
| 0.011602 | 0.011497 | 0.011597 | 0.011698 | 0.011598 | 0.011665 | 0.011765 |
| 0.011934 | 0.011641 | 0.011799 | 0.011766 | 0.011698 | 0.011866 | 0.011497 |
| 0.011667 | 0.011564 | 0.011530 | 0.011530 | 0.011597 | 0.011497 | 0.011598 |
| 0.011631 | 0.011665 | 0.011564 | 0.011530 | 0.011497 | 0.011631 | 0.011631 |
| 0.011631 | 0.011666 | 0.011732 | 0.011665 | 0.012238 | 0.011739 | 0.011658 |
| 0.011728 | 0.011685 | 0.011799 | 0.011684 | 0.011796 | 0.011716 | 0.011681 |
| 0.012194 | 0.011580 | 0.011711 | 0.011648 | 0.011922 | 0.011775 | 0.011877 |
| 0.012217 | 0.011663 | 0.011601 | 0.011597 | 0.011597 | 0.011362 | 0.011567 |
| 0.011463 | 0.011497 | 0.011631 | 0.011597 | 0.011601 | 0.011195 | 0.011363 |
| 0.011564 | 0.011497 | 0.011530 | 0.011564 | 0.011463 | 0.011530 | 0.011429 |
| 0.011497 | 0.011530 | 0.011497 | 0.011463 | 0.011564 | 0.011497 | 0.011530 |
| 0.011530 | 0.011463 | 0.011530 | 0.011564 | 0.011463 | 0.011665 | 0.011698 |
| 0.011598 | 0.011598 | 0.011597 | 0.011598 | 0.011530 | 0.011665 | 0.011564 |
| 0.011339 | 0.011530 | 0.011262 | 0.011264 | 0.011631 | 0.011631 | 0.011631 |
| 0.011631 | 0.011564 | 0.011530 | 0.011564 | 0.011665 | 0.011665 | 0.011597 |
| 0.011597 | 0.011732 | 0.011631 | 0.011631 | 0.011833 | 0.011833 | 0.011698 |
| 0.011530 | 0.011597 | 0.011631 | 0.011766 | 0.011598 | 0.011631 | 0.011598 |
| 0.011631 | 0.011497 | 0.011497 | 0.011799 | 0.011799 | 0.011766 | 0.011564 |
| 0.011665 | 0.011732 | 0.011597 | 0.011665 | 0.011631 | 0.011497 | 0.011564 |
| 0.011597 | 0.011564 | 0.011497 | 0.011732 | 0.011564 | 0.011665 | 0.011699 |
| 0.011597 | 0.011706 | 0.011698 | 0.011182 | 0.011342 | 0.011604 | 0.011267 |
| 0.011445 | 0.011566 | 0.011482 | 0.011551 | 0.011451 | 0.011468 | 0.011432 |
| 0.011213 | 0.011389 | 0.011450 | 0.011324 | 0.011384 | 0.011596 | 0.011669 |
| 0.011701 | 0.011572 | 0.011589 | 0.011589 | 0.011532 | 0.011195 | 0.000000 |
| 0.011530 | 0.011531 | 0.011703 | 0.011501 | 0.011772 | 0.011802 | 0.011598 |
| 0.011430 | 0.011631 | 0.011564 | 0.011598 | 0.011463 | 0.011161 | 0.011497 |
| 0.011564 | 0.011564 | 0.011530 | 0.011497 | 0.011530 | 0.011497 | 0.011597 |
| 0.011584 | 0.011585 | 0.011574 | 0.011608 | 0.011745 | 0.011709 | 0.011709 |
| 0.011708 | 0.011632 | 0.011466 | 0.011456 | 0.011568 | 0.011738 | 0.011739 |
| 0.011531 | 0.011602 | 0.011835 | 0.011804 | 0.011733 | 0.011767 | 0.011698 |
| 0.011631 | 0.011698 | 0.011698 | 0.011597 | 0.011901 | 0.011766 | 0.011833 |
| 0.011866 | 0.011666 | 0.011572 | 0.011649 | 0.011530 | 0.011698 | 0.011698 |
| 0.011733 | 0.011765 | 0.011766 | 0.011766 | 0.011925 | 0.011900 | 0.011546 |
| 0.011432 | 0.011441 | 0.011537 | 0.011502 | 0.011539 | 0.011471 | 0.011502 |
| 0.011575 | 0.011411 | 0.011537 | 0.011585 | 0.011565 | 0.011642 | 0.011530 |
| 0.011497 | 0.011429 | 0.011564 | 0.011530 | 0.011463 | 0.011430 | 0.011362 |
| 0.011463 | 0.011530 | 0.011530 | 0.011530 | 0.011564 | 0.011564 | 0.011567 |
| 0.011635 | 0.011564 | 0.011564 | 0.011532 | 0.011195 | 0.000000 | 0.011530 |
| 0.011531 | 0.011703 | 0.011501 | 0.011772 | 0.011802 | 0.011598 | 0.011765 |
| 0.011698 | 0.011698 | 0.011534 | 0.011722 | 0.011651 | 0.011639 | 0.011516 |
| 0.011715 | 0.011835 | 0.011653 | 0.011604 | 0.011497 | 0.011698 | 0.011564 |
| 0.011665 | 0.011598 | 0.011497 | 0.011599 | 0.011698 | 0.011702 | 0.011598 |
| 0.011497 | 0.011431 | 0.011564 | 0.011497 | 0.011430 | 0.011434 | 0.011698 |
| 0.011598 | 0.011530 | 0.011564 | 0.011597 | 0.011564 | 0.011497 | 0.011430 |
| 0.011564 | 0.011598 | 0.011597 | 0.011530 | 0.011597 | 0.011833 | 0.011430 |
| 0.011530 | 0.011665 | 0.011530 | 0.011564 | 0.011530 | 0.011631 | 0.011532 |
| 0.011622 | 0.011400 | 0.011361 | 0.011181 | 0.011264 | 0.011204 | 0.011353 |
| 0.011323 | 0.011362 | 0.011463 | 0.011570 | 0.011431 | 0.011568 | 0.011699 |
| 0.011599 | 0.011635 | 0.011598 | 0.011846 | 0.011564 | 0.012439 | 0.011599 |
| 0.012338 | 0.012106 | 0.012240 | 0.012511 | 0.011631 | 0.011463 | 0.011564 |
| 0.012204 | 0.011937 | 0.011530 | 0.011430 | 0.011497 | 0.011497 | 0.011534 |
| 0.011362 | 0.011365 | 0.011430 | 0.011396 | 0.011834 | 0.011900 | 0.011901 |
| 0.011801 | 0.011901 | 0.012005 | 0.011771 | 0.012273 | 0.012280 | 0.012340 |
| 0.012340 | 0.012374 | 0.012323 | 0.012341 | 0.012342 | 0.011631 | 0.011867 |
| 0.011935 | 0.012439 | 0.011942 | 0.011968 | 0.012440 | 0.011502 | 0.011396 |
| 0.011362 | 0.011362 | 0.011833 | 0.011883 | 0.011975 | 0.011698 | 0.011364 |

|          |          |          |          |          |          |          |
|----------|----------|----------|----------|----------|----------|----------|
| S630     | 0.011900 | 0.011900 | 0.011900 | 0.011665 | 0.011665 | 0.011732 |
| 0.011638 | 0.011570 | 0.011732 | 0.011497 | 0.011564 | 0.011498 | 0.011497 |
| 0.011463 | 0.011698 | 0.011429 | 0.011530 | 0.011597 | 0.011564 | 0.011530 |
| 0.011497 | 0.011530 | 0.011228 | 0.011497 | 0.011531 | 0.011530 | 0.011604 |
| 0.011497 | 0.011530 | 0.011429 | 0.011262 | 0.011597 | 0.011564 | 0.011597 |
| 0.011564 | 0.011665 | 0.011564 | 0.011564 | 0.011597 | 0.011564 | 0.011732 |
| 0.011429 | 0.011564 | 0.011597 | 0.011530 | 0.011564 | 0.011665 | 0.011597 |
| 0.011564 | 0.011732 | 0.011631 | 0.011631 | 0.011564 | 0.011833 | 0.011564 |
| 0.011530 | 0.011564 | 0.011698 | 0.011833 | 0.011665 | 0.011564 | 0.011665 |
| 0.011597 | 0.011665 | 0.011564 | 0.011799 | 0.011766 | 0.011564 | 0.011631 |
| 0.011530 | 0.011631 | 0.011597 | 0.011665 | 0.011597 | 0.011597 | 0.011597 |
| 0.011497 | 0.011530 | 0.011497 | 0.011530 | 0.011564 | 0.011599 | 0.011665 |
| 0.011597 | 0.011564 | 0.011631 | 0.011530 | 0.011597 | 0.011497 | 0.011564 |
| 0.011732 | 0.011665 | 0.011631 | 0.011732 | 0.011564 | 0.011799 | 0.011564 |
| 0.011728 | 0.011583 | 0.011739 | 0.011451 | 0.011433 | 0.011539 | 0.011296 |
| 0.011938 | 0.011365 | 0.011472 | 0.011799 | 0.011799 | 0.011530 | 0.011631 |
| 0.011631 | 0.011597 | 0.011665 | 0.011564 | 0.011665 | 0.011597 | 0.011597 |
| 0.011564 | 0.011597 | 0.011866 | 0.011732 | 0.011631 | 0.011598 | 0.011530 |
| 0.011497 | 0.011429 | 0.011564 | 0.011530 | 0.011396 | 0.011362 | 0.011295 |
| 0.011396 | 0.011463 | 0.011530 | 0.011530 | 0.011564 | 0.011564 | 0.011567 |
| 0.011635 | 0.011564 | 0.011564 | 0.011420 | 0.011494 | 0.011446 | 0.011531 |
| 0.011534 | 0.011473 | 0.011503 | 0.011509 | 0.011434 | 0.011471 | 0.011499 |
| 0.011492 | 0.011543 | 0.011577 | 0.011464 | 0.011475 | 0.011598 | 0.011497 |
| 0.011565 | 0.011566 | 0.011564 | 0.011698 | 0.011631 | 0.012001 | 0.011665 |
| 0.011564 | 0.011631 | 0.011564 | 0.011597 | 0.011463 | 0.011430 | 0.011497 |
| 0.011564 | 0.011564 | 0.011530 | 0.011497 | 0.011530 | 0.011497 | 0.011597 |
| 0.011564 | 0.011665 | 0.011530 | 0.011497 | 0.011566 | 0.011698 | 0.011702 |
| 0.011698 | 0.011530 | 0.011497 | 0.011431 | 0.011564 | 0.011497 | 0.011430 |
| 0.011434 | 0.011698 | 0.011497 | 0.011698 | 0.011463 | 0.011564 | 0.011530 |
| 0.011631 | 0.011530 | 0.011564 | 0.011530 | 0.011564 | 0.011430 | 0.011564 |
| 0.011597 | 0.011530 | 0.011597 | 0.011530 | 0.011564 | 0.011597 | 0.011833 |
| 0.011665 | 0.011597 | 0.011665 | 0.011701 | 0.011665 | 0.011564 | 0.011530 |
| 0.011499 | 0.011667 | 0.011609 | 0.011472 | 0.011671 | 0.011435 | 0.011532 |
| 0.011672 | 0.011536 | 0.011732 | 0.011934 | 0.011641 | 0.011799 | 0.011766 |
| 0.011698 | 0.011866 | 0.011736 | 0.011637 | 0.011605 | 0.011598 | 0.011669 |
| 0.011766 | 0.011634 | 0.011804 | 0.011873 | 0.011799 | 0.011867 | 0.011975 |
| 0.011703 | 0.011841 | 0.011771 | 0.011737 | 0.011969 | 0.011463 | 0.011633 |
| 0.011631 | 0.011564 | 0.011463 | 0.011463 | 0.011530 | 0.011530 | 0.011597 |
| 0.011530 | 0.011597 | 0.011497 | 0.011530 | 0.011530 | 0.011530 | 0.011597 |
| 0.011530 | 0.011698 | 0.011598 | 0.011631 | 0.011429 | 0.011530 | 0.011564 |
| 0.011564 | 0.011530 | 0.011597 | 0.011564 | 0.011497 | 0.011497 | 0.011497 |
| 0.011766 | 0.011597 | 0.011665 | 0.011463 | 0.011564 | 0.011732 | 0.011497 |
| 0.011497 | 0.011564 | 0.011530 | 0.011698 | 0.011497 | 0.011430 | 0.011564 |
| 0.011497 | 0.011530 | 0.011530 | 0.011463 | 0.011463 | 0.011631 | 0.011564 |
| 0.011463 | 0.011564 | 0.011430 | 0.011463 | 0.011597 | 0.011463 | 0.011497 |
| 0.011464 | 0.011597 | 0.011531 | 0.011430 | 0.011497 | 0.011430 | 0.011597 |
| 0.011642 | 0.011497 | 0.011530 | 0.011631 | 0.011597 | 0.011530 | 0.011631 |
| 0.011497 | 0.011833 | 0.011429 | 0.011631 | 0.011430 | 0.011430 | 0.011429 |
| 0.011665 | 0.011598 | 0.011564 | 0.011631 | 0.011463 | 0.011598 | 0.011430 |
| 0.011497 | 0.011497 | 0.011530 | 0.011631 | 0.011530 | 0.011631 | 0.011698 |
| 0.011698 | 0.011665 | 0.011564 | 0.011665 | 0.011631 | 0.011497 | 0.011463 |
| 0.011497 | 0.011497 | 0.011564 | 0.011429 | 0.011463 | 0.011631 | 0.011497 |
| 0.011463 | 0.011530 | 0.011665 | 0.011631 | 0.011597 | 0.011530 | 0.011530 |
| 0.011597 | 0.011530 | 0.011631 | 0.011497 | 0.011631 | 0.011732 | 0.011698 |
| 0.011530 | 0.011665 | 0.011509 | 0.018049 | 0.011518 | 0.011733 | 0.011583 |
| 0.011545 | 0.011588 | 0.011584 | 0.011408 | 0.011719 | 0.011613 | 0.011789 |
| 0.011534 | 0.011426 | 0.011450 | 0.011521 | 0.011411 | 0.011603 | 0.011533 |
| 0.011389 | 0.011395 | 0.011357 | 0.011193 | 0.011665 | 0.011698 | 0.011703 |
| 0.011541 | 0.011665 | 0.011665 | 0.011564 | 0.011598 | 0.011598 | 0.011564 |
| 0.011597 | 0.011530 | 0.011564 | 0.011597 | 0.011564 | 0.011497 | 0.011530 |



|          |          |          |          |          |          |          |
|----------|----------|----------|----------|----------|----------|----------|
| 0.011530 | 0.011597 | 0.011497 | 0.011597 | 0.011631 | 0.011665 | 0.011564 |
| 0.011530 | 0.011497 | 0.011631 | 0.011631 | 0.011631 | 0.011666 | 0.011698 |
| 0.011463 | 0.011463 | 0.011497 | 0.011597 | 0.011463 | 0.011698 | 0.011698 |
| 0.011732 | 0.011732 | 0.011665 | 0.011765 | 0.011665 | 0.011768 | 0.011597 |
| 0.011597 | 0.011665 | 0.011698 | 0.011530 | 0.011597 | 0.011564 | 0.011597 |
| 0.011665 | 0.011665 | 0.011698 | 0.011665 | 0.011565 | 0.011765 | 0.011732 |
| 0.011602 | 0.011497 | 0.011597 | 0.011698 | 0.011597 | 0.011665 | 0.011765 |
| 0.011934 | 0.011641 | 0.011799 | 0.011766 | 0.011698 | 0.011866 | 0.011497 |
| 0.011667 | 0.011564 | 0.011530 | 0.011530 | 0.011597 | 0.011497 | 0.011597 |
| 0.011631 | 0.011665 | 0.011564 | 0.011530 | 0.011497 | 0.011631 | 0.011631 |
| 0.011631 | 0.011666 | 0.011732 | 0.011665 | 0.012204 | 0.011703 | 0.011658 |
| 0.011693 | 0.011685 | 0.011763 | 0.011684 | 0.011761 | 0.011716 | 0.011646 |
| 0.012194 | 0.011545 | 0.011677 | 0.011614 | 0.011887 | 0.011775 | 0.011843 |
| 0.012183 | 0.011663 | 0.011601 | 0.011597 | 0.011597 | 0.011295 | 0.011567 |
| 0.011463 | 0.011497 | 0.011631 | 0.011597 | 0.011601 | 0.011463 | 0.011431 |
| 0.011564 | 0.011497 | 0.011530 | 0.011564 | 0.011463 | 0.011530 | 0.011429 |
| 0.011497 | 0.011530 | 0.011497 | 0.011463 | 0.011564 | 0.011497 | 0.011530 |
| 0.011530 | 0.011463 | 0.011530 | 0.011564 | 0.011463 | 0.011665 | 0.011698 |
| 0.011597 | 0.011597 | 0.011597 | 0.011597 | 0.011530 | 0.011665 | 0.011564 |
| 0.011269 | 0.011530 | 0.011464 | 0.011467 | 0.011631 | 0.011631 | 0.011564 |
| 0.011631 | 0.011564 | 0.011530 | 0.011564 | 0.011665 | 0.011665 | 0.011597 |
| 0.011597 | 0.011732 | 0.011631 | 0.011631 | 0.011833 | 0.011833 | 0.011698 |
| 0.011530 | 0.011597 | 0.011631 | 0.011766 | 0.011598 | 0.011631 | 0.011597 |
| 0.011631 | 0.011497 | 0.011497 | 0.011799 | 0.011799 | 0.011766 | 0.011564 |
| 0.011665 | 0.011732 | 0.011597 | 0.011665 | 0.011631 | 0.011497 | 0.011564 |
| 0.011597 | 0.011564 | 0.011497 | 0.011732 | 0.011564 | 0.011665 | 0.011698 |
| 0.011597 | 0.011706 | 0.011698 | 0.011467 | 0.011286 | 0.011570 | 0.011318 |
| 0.011500 | 0.011683 | 0.011482 | 0.011641 | 0.011499 | 0.011518 | 0.011485 |
| 0.011366 | 0.011389 | 0.011561 | 0.011390 | 0.011437 | 0.011596 | 0.011668 |
| 0.011663 | 0.011572 | 0.011553 | 0.011553 | 0.011599 | 0.011463 | 0.011530 |
| 0.000000 | 0.011598 | 0.011703 | 0.011433 | 0.011840 | 0.011838 | 0.011597 |
| 0.011564 | 0.011631 | 0.011564 | 0.011597 | 0.011463 | 0.011430 | 0.011497 |
| 0.011564 | 0.011564 | 0.011530 | 0.011497 | 0.011530 | 0.011497 | 0.011597 |
| 0.011549 | 0.011550 | 0.011540 | 0.011574 | 0.011710 | 0.011675 | 0.011675 |
| 0.011673 | 0.011598 | 0.011429 | 0.011420 | 0.011534 | 0.011704 | 0.011705 |
| 0.011497 | 0.011568 | 0.011801 | 0.011770 | 0.011699 | 0.011733 | 0.011698 |
| 0.011631 | 0.011698 | 0.011698 | 0.011597 | 0.011900 | 0.011765 | 0.011833 |
| 0.011866 | 0.011666 | 0.011572 | 0.011614 | 0.011530 | 0.011732 | 0.011698 |
| 0.011733 | 0.011765 | 0.011765 | 0.011765 | 0.011925 | 0.011900 | 0.011511 |
| 0.011432 | 0.011441 | 0.011503 | 0.011468 | 0.011539 | 0.011396 | 0.011468 |
| 0.011540 | 0.011367 | 0.011441 | 0.011547 | 0.011531 | 0.011608 | 0.011530 |
| 0.011497 | 0.011429 | 0.011564 | 0.011530 | 0.011396 | 0.011362 | 0.011295 |
| 0.011396 | 0.011463 | 0.011530 | 0.011530 | 0.011564 | 0.011564 | 0.011567 |
| 0.011635 | 0.011564 | 0.011564 | 0.011599 | 0.011463 | 0.011530 | 0.000000 |
| 0.011598 | 0.011703 | 0.011433 | 0.011840 | 0.011838 | 0.011597 | 0.011765 |
| 0.011698 | 0.011698 | 0.011534 | 0.011687 | 0.011651 | 0.011673 | 0.011516 |
| 0.011680 | 0.011926 | 0.011611 | 0.011604 | 0.011497 | 0.011698 | 0.011564 |
| 0.011665 | 0.011530 | 0.011497 | 0.011566 | 0.011698 | 0.011702 | 0.011530 |
| 0.011497 | 0.011431 | 0.011564 | 0.011497 | 0.011430 | 0.011434 | 0.011698 |
| 0.011597 | 0.011530 | 0.011564 | 0.011597 | 0.011564 | 0.011497 | 0.011430 |
| 0.011564 | 0.011597 | 0.011597 | 0.011530 | 0.011597 | 0.011833 | 0.011429 |
| 0.011530 | 0.011665 | 0.011530 | 0.011564 | 0.011530 | 0.011631 | 0.011489 |
| 0.011678 | 0.011400 | 0.011311 | 0.011423 | 0.011508 | 0.011419 | 0.011311 |
| 0.011270 | 0.011430 | 0.011530 | 0.011603 | 0.011498 | 0.011635 | 0.011766 |
| 0.011632 | 0.011669 | 0.011665 | 0.011880 | 0.011631 | 0.012506 | 0.011633 |
| 0.012338 | 0.012139 | 0.012307 | 0.012579 | 0.011631 | 0.011530 | 0.011631 |
| 0.012272 | 0.012005 | 0.011598 | 0.011497 | 0.011531 | 0.011531 | 0.011534 |
| 0.011430 | 0.011433 | 0.011497 | 0.011430 | 0.011834 | 0.011900 | 0.011867 |
| 0.011801 | 0.011901 | 0.011971 | 0.011737 | 0.012272 | 0.012279 | 0.012340 |
| 0.012306 | 0.012340 | 0.012323 | 0.012307 | 0.012342 | 0.011631 | 0.011867 |

|          |          |          |          |          |          |          |
|----------|----------|----------|----------|----------|----------|----------|
| 0.011901 | 0.012439 | 0.011942 | 0.011968 | 0.012440 | 0.011468 | 0.011396 |
| 0.011362 | 0.011362 | 0.011833 | 0.011842 | 0.011940 | 0.011698 | 0.011363 |
| S631     | 0.011766 | 0.011766 | 0.011968 | 0.011733 | 0.011733 | 0.011800 |
| 0.011707 | 0.011604 | 0.011733 | 0.011363 | 0.011430 | 0.011397 | 0.011363 |
| 0.011329 | 0.011565 | 0.011296 | 0.011396 | 0.011464 | 0.011430 | 0.011396 |
| 0.011363 | 0.011396 | 0.011430 | 0.011363 | 0.011397 | 0.011396 | 0.011672 |
| 0.011564 | 0.011396 | 0.011296 | 0.011464 | 0.011464 | 0.011430 | 0.011464 |
| 0.011430 | 0.011531 | 0.011430 | 0.011430 | 0.011464 | 0.011430 | 0.011598 |
| 0.011296 | 0.011430 | 0.011464 | 0.011396 | 0.011430 | 0.011531 | 0.011464 |
| 0.011430 | 0.011598 | 0.011498 | 0.011699 | 0.011430 | 0.011699 | 0.011430 |
| 0.011396 | 0.011430 | 0.011565 | 0.011699 | 0.011733 | 0.011430 | 0.011262 |
| 0.011464 | 0.011531 | 0.011430 | 0.011665 | 0.011834 | 0.011430 | 0.011497 |
| 0.011396 | 0.011497 | 0.011464 | 0.011531 | 0.011464 | 0.011464 | 0.011464 |
| 0.011363 | 0.011396 | 0.011363 | 0.011397 | 0.011430 | 0.011464 | 0.011531 |
| 0.011464 | 0.011430 | 0.011497 | 0.011396 | 0.011464 | 0.011363 | 0.011430 |
| 0.011598 | 0.011531 | 0.011766 | 0.011598 | 0.011430 | 0.011665 | 0.011430 |
| 0.011617 | 0.011733 | 0.011665 | 0.011373 | 0.011359 | 0.011429 | 0.011494 |
| 0.012122 | 0.011518 | 0.011390 | 0.011665 | 0.011665 | 0.011396 | 0.011497 |
| 0.011497 | 0.011464 | 0.011531 | 0.011430 | 0.011531 | 0.011464 | 0.011464 |
| 0.011430 | 0.011464 | 0.011733 | 0.011598 | 0.011497 | 0.011464 | 0.011396 |
| 0.011363 | 0.011296 | 0.011430 | 0.011396 | 0.011531 | 0.011497 | 0.011430 |
| 0.011531 | 0.011598 | 0.011396 | 0.011396 | 0.011430 | 0.011430 | 0.011432 |
| 0.011500 | 0.011430 | 0.011430 | 0.011312 | 0.011386 | 0.011341 | 0.011430 |
| 0.011433 | 0.011370 | 0.011430 | 0.011406 | 0.011332 | 0.011369 | 0.011398 |
| 0.011565 | 0.011440 | 0.011474 | 0.011363 | 0.011372 | 0.011498 | 0.011397 |
| 0.011464 | 0.011465 | 0.011464 | 0.011564 | 0.011497 | 0.011867 | 0.011598 |
| 0.011632 | 0.011228 | 0.011430 | 0.011128 | 0.011329 | 0.011497 | 0.011363 |
| 0.011430 | 0.011430 | 0.011396 | 0.011363 | 0.011396 | 0.011363 | 0.011464 |
| 0.011430 | 0.011531 | 0.011464 | 0.011363 | 0.011465 | 0.011565 | 0.011568 |
| 0.011565 | 0.011464 | 0.011363 | 0.011297 | 0.011430 | 0.011363 | 0.011296 |
| 0.011400 | 0.011565 | 0.011363 | 0.011565 | 0.011329 | 0.011430 | 0.011396 |
| 0.011497 | 0.011396 | 0.011430 | 0.011396 | 0.011430 | 0.011296 | 0.011430 |
| 0.011464 | 0.011396 | 0.011464 | 0.011396 | 0.011430 | 0.011464 | 0.011699 |
| 0.011665 | 0.011665 | 0.011733 | 0.011566 | 0.011733 | 0.011430 | 0.011396 |
| 0.011364 | 0.011627 | 0.011518 | 0.011335 | 0.011706 | 0.011299 | 0.011375 |
| 0.011740 | 0.011639 | 0.011598 | 0.011800 | 0.011505 | 0.011666 | 0.011632 |
| 0.011565 | 0.011733 | 0.011594 | 0.011390 | 0.011480 | 0.011464 | 0.011535 |
| 0.011632 | 0.011533 | 0.011670 | 0.011738 | 0.011666 | 0.011666 | 0.011841 |
| 0.011569 | 0.011740 | 0.011671 | 0.011602 | 0.011869 | 0.011329 | 0.011465 |
| 0.011497 | 0.011430 | 0.011329 | 0.011329 | 0.011396 | 0.011396 | 0.011464 |
| 0.011396 | 0.011464 | 0.011363 | 0.011396 | 0.011396 | 0.011396 | 0.011464 |
| 0.011396 | 0.011766 | 0.011666 | 0.011699 | 0.011296 | 0.011396 | 0.011430 |
| 0.011430 | 0.011396 | 0.011464 | 0.011161 | 0.011363 | 0.011363 | 0.011363 |
| 0.011834 | 0.011464 | 0.011531 | 0.011329 | 0.011430 | 0.011598 | 0.011363 |
| 0.011363 | 0.011430 | 0.011396 | 0.011565 | 0.011363 | 0.011497 | 0.011632 |
| 0.011565 | 0.011396 | 0.011396 | 0.011329 | 0.011329 | 0.011497 | 0.011430 |
| 0.011329 | 0.011430 | 0.011296 | 0.011329 | 0.011464 | 0.011531 | 0.011363 |
| 0.011329 | 0.011464 | 0.011397 | 0.011296 | 0.011565 | 0.011296 | 0.011464 |
| 0.011540 | 0.011363 | 0.011598 | 0.011497 | 0.011464 | 0.011396 | 0.011497 |
| 0.011363 | 0.011699 | 0.011296 | 0.011497 | 0.011296 | 0.011296 | 0.011296 |
| 0.011531 | 0.011666 | 0.011430 | 0.011497 | 0.011329 | 0.011666 | 0.011296 |
| 0.011363 | 0.011363 | 0.011396 | 0.011497 | 0.011329 | 0.011497 | 0.011564 |
| 0.011565 | 0.011531 | 0.011430 | 0.011531 | 0.011497 | 0.011363 | 0.011329 |
| 0.011363 | 0.011363 | 0.011430 | 0.011296 | 0.011329 | 0.011497 | 0.011363 |
| 0.011329 | 0.011396 | 0.011531 | 0.011497 | 0.011464 | 0.011396 | 0.011397 |
| 0.011464 | 0.011396 | 0.011497 | 0.011363 | 0.011497 | 0.011598 | 0.011834 |
| 0.011396 | 0.011733 | 0.011406 | 0.017943 | 0.011388 | 0.011488 | 0.011689 |
| 0.011649 | 0.011694 | 0.011584 | 0.011525 | 0.011830 | 0.011717 | 0.011486 |
| 0.011535 | 0.011549 | 0.011334 | 0.011438 | 0.011256 | 0.011456 | 0.011448 |
| 0.011577 | 0.011508 | 0.011506 | 0.011325 | 0.011531 | 0.011565 | 0.011568 |

|          |          |          |          |          |          |          |
|----------|----------|----------|----------|----------|----------|----------|
| 0.011439 | 0.011531 | 0.011531 | 0.011430 | 0.011464 | 0.011464 | 0.011430 |
| 0.011464 | 0.011396 | 0.011430 | 0.011464 | 0.011430 | 0.011363 | 0.011396 |
| 0.011396 | 0.011464 | 0.011363 | 0.011464 | 0.011497 | 0.011531 | 0.011430 |
| 0.011396 | 0.011363 | 0.011699 | 0.011699 | 0.011497 | 0.011532 | 0.011565 |
| 0.011329 | 0.011329 | 0.011363 | 0.011464 | 0.011329 | 0.011565 | 0.011565 |
| 0.011598 | 0.011598 | 0.011531 | 0.011632 | 0.011733 | 0.011634 | 0.011464 |
| 0.011464 | 0.011531 | 0.011565 | 0.011329 | 0.011464 | 0.011430 | 0.011464 |
| 0.011531 | 0.011531 | 0.011564 | 0.011531 | 0.011431 | 0.011632 | 0.011598 |
| 0.011467 | 0.011363 | 0.011464 | 0.011565 | 0.011464 | 0.011531 | 0.011632 |
| 0.011800 | 0.011505 | 0.011666 | 0.011632 | 0.011565 | 0.011733 | 0.011363 |
| 0.011532 | 0.011430 | 0.011396 | 0.011396 | 0.011464 | 0.011363 | 0.011464 |
| 0.011497 | 0.011531 | 0.011430 | 0.011396 | 0.011363 | 0.011699 | 0.011699 |
| 0.011497 | 0.011532 | 0.011598 | 0.011531 | 0.012105 | 0.011597 | 0.011518 |
| 0.011588 | 0.011547 | 0.011659 | 0.011546 | 0.011656 | 0.011578 | 0.011544 |
| 0.012058 | 0.011442 | 0.011575 | 0.011510 | 0.011715 | 0.011639 | 0.011742 |
| 0.012082 | 0.011513 | 0.011467 | 0.011464 | 0.011464 | 0.011430 | 0.011432 |
| 0.011329 | 0.011363 | 0.011497 | 0.011464 | 0.011466 | 0.011531 | 0.011431 |
| 0.011430 | 0.011363 | 0.011396 | 0.011430 | 0.011329 | 0.011396 | 0.011296 |
| 0.011363 | 0.011396 | 0.011363 | 0.011329 | 0.011430 | 0.011363 | 0.011396 |
| 0.011396 | 0.011329 | 0.011396 | 0.011430 | 0.011329 | 0.011531 | 0.011564 |
| 0.011464 | 0.011464 | 0.011464 | 0.011464 | 0.011396 | 0.011733 | 0.011430 |
| 0.011409 | 0.011396 | 0.011565 | 0.011570 | 0.011497 | 0.011497 | 0.011497 |
| 0.011497 | 0.011430 | 0.011396 | 0.011430 | 0.011531 | 0.011531 | 0.011464 |
| 0.011464 | 0.011598 | 0.011699 | 0.011497 | 0.011699 | 0.011699 | 0.011564 |
| 0.011396 | 0.011464 | 0.011497 | 0.011834 | 0.011464 | 0.011497 | 0.011464 |
| 0.011497 | 0.011363 | 0.011363 | 0.011666 | 0.011666 | 0.011632 | 0.011430 |
| 0.011531 | 0.011598 | 0.011464 | 0.011531 | 0.011497 | 0.011363 | 0.011632 |
| 0.011464 | 0.011430 | 0.011363 | 0.011598 | 0.011430 | 0.011531 | 0.011767 |
| 0.011464 | 0.011774 | 0.011766 | 0.011589 | 0.011286 | 0.011468 | 0.011370 |
| 0.011335 | 0.011723 | 0.011377 | 0.011463 | 0.011353 | 0.011519 | 0.011486 |
| 0.011519 | 0.011456 | 0.011506 | 0.011325 | 0.011438 | 0.011462 | 0.011547 |
| 0.011550 | 0.011454 | 0.011448 | 0.011413 | 0.011397 | 0.011531 | 0.011531 |
| 0.011598 | 0.000000 | 0.011229 | 0.011569 | 0.011569 | 0.011308 | 0.011430 |
| 0.011632 | 0.011228 | 0.011430 | 0.011128 | 0.011329 | 0.011497 | 0.011363 |
| 0.011430 | 0.011430 | 0.011396 | 0.011363 | 0.011396 | 0.011363 | 0.011464 |
| 0.011445 | 0.011410 | 0.011437 | 0.011471 | 0.011608 | 0.011573 | 0.011573 |
| 0.011572 | 0.011498 | 0.011319 | 0.011313 | 0.011433 | 0.011603 | 0.011604 |
| 0.011397 | 0.011467 | 0.011700 | 0.011669 | 0.011599 | 0.011633 | 0.011564 |
| 0.011497 | 0.011565 | 0.011564 | 0.011464 | 0.011969 | 0.011632 | 0.011699 |
| 0.011733 | 0.011702 | 0.011436 | 0.011511 | 0.011396 | 0.011564 | 0.011565 |
| 0.011599 | 0.011632 | 0.011632 | 0.011632 | 0.011768 | 0.011766 | 0.011408 |
| 0.011297 | 0.011303 | 0.011401 | 0.011366 | 0.011402 | 0.011322 | 0.011571 |
| 0.011438 | 0.011411 | 0.011251 | 0.011435 | 0.011430 | 0.011505 | 0.011396 |
| 0.011363 | 0.011296 | 0.011430 | 0.011396 | 0.011531 | 0.011497 | 0.011430 |
| 0.011531 | 0.011598 | 0.011396 | 0.011396 | 0.011430 | 0.011430 | 0.011432 |
| 0.011500 | 0.011430 | 0.011430 | 0.011397 | 0.011531 | 0.011531 | 0.011598 |
| 0.000000 | 0.011229 | 0.011569 | 0.011569 | 0.011308 | 0.011430 | 0.011632 |
| 0.011565 | 0.011565 | 0.011399 | 0.011583 | 0.011512 | 0.011537 | 0.011376 |
| 0.011577 | 0.011699 | 0.011526 | 0.011469 | 0.011363 | 0.011565 | 0.011430 |
| 0.011531 | 0.011464 | 0.011363 | 0.011465 | 0.011565 | 0.011568 | 0.011464 |
| 0.011363 | 0.011297 | 0.011430 | 0.011363 | 0.011296 | 0.011400 | 0.011565 |
| 0.011464 | 0.011396 | 0.011430 | 0.011464 | 0.011430 | 0.011363 | 0.011497 |
| 0.011430 | 0.011464 | 0.011464 | 0.011396 | 0.011464 | 0.011699 | 0.011296 |
| 0.011396 | 0.011733 | 0.011396 | 0.011430 | 0.011396 | 0.011699 | 0.011403 |
| 0.011679 | 0.011400 | 0.011361 | 0.011543 | 0.011631 | 0.011527 | 0.011353 |
| 0.011270 | 0.011430 | 0.011531 | 0.011638 | 0.011498 | 0.011636 | 0.011767 |
| 0.011666 | 0.011704 | 0.011665 | 0.011915 | 0.011632 | 0.012508 | 0.011667 |
| 0.012407 | 0.012174 | 0.012309 | 0.012580 | 0.011699 | 0.011329 | 0.011632 |
| 0.012071 | 0.012005 | 0.011598 | 0.011497 | 0.011565 | 0.011565 | 0.011602 |
| 0.011430 | 0.011434 | 0.011497 | 0.011464 | 0.011902 | 0.011969 | 0.011969 |

|          |          |          |          |          |          |          |
|----------|----------|----------|----------|----------|----------|----------|
| 0.011869 | 0.011969 | 0.012073 | 0.011839 | 0.012139 | 0.012145 | 0.012206 |
| 0.012207 | 0.012240 | 0.012188 | 0.012207 | 0.012208 | 0.011497 | 0.011733 |
| 0.011801 | 0.012306 | 0.011807 | 0.012036 | 0.012509 | 0.011570 | 0.011464 |
| 0.011430 | 0.011430 | 0.011868 | 0.011924 | 0.012046 | 0.011766 | 0.011431 |
| S632     | 0.011872 | 0.011872 | 0.012143 | 0.011906 | 0.011906 | 0.011973 |
| 0.011813 | 0.011744 | 0.011906 | 0.011466 | 0.011533 | 0.011501 | 0.011466 |
| 0.011432 | 0.011669 | 0.011398 | 0.011500 | 0.011567 | 0.011533 | 0.011500 |
| 0.011466 | 0.011500 | 0.011533 | 0.011466 | 0.011500 | 0.011500 | 0.011779 |
| 0.011669 | 0.011500 | 0.011398 | 0.011567 | 0.011567 | 0.011534 | 0.011567 |
| 0.011533 | 0.011635 | 0.011533 | 0.011534 | 0.011567 | 0.011533 | 0.011703 |
| 0.011398 | 0.011533 | 0.011567 | 0.011500 | 0.011533 | 0.011635 | 0.011567 |
| 0.011533 | 0.011703 | 0.011602 | 0.011804 | 0.011533 | 0.011804 | 0.011533 |
| 0.011500 | 0.011534 | 0.011635 | 0.011804 | 0.011838 | 0.011534 | 0.011364 |
| 0.011567 | 0.011635 | 0.011534 | 0.011770 | 0.011940 | 0.011533 | 0.011601 |
| 0.011500 | 0.011601 | 0.011567 | 0.011635 | 0.011567 | 0.011567 | 0.011567 |
| 0.011466 | 0.011500 | 0.011466 | 0.011500 | 0.011533 | 0.011568 | 0.011635 |
| 0.011567 | 0.011533 | 0.011601 | 0.011500 | 0.011567 | 0.011466 | 0.011533 |
| 0.011703 | 0.011635 | 0.011872 | 0.011703 | 0.011534 | 0.011770 | 0.011533 |
| 0.011693 | 0.011847 | 0.011783 | 0.011452 | 0.011474 | 0.011579 | 0.011574 |
| 0.012240 | 0.011676 | 0.011475 | 0.011736 | 0.011770 | 0.011500 | 0.011601 |
| 0.011601 | 0.011567 | 0.011635 | 0.011533 | 0.011635 | 0.011567 | 0.011567 |
| 0.011533 | 0.011567 | 0.011838 | 0.011702 | 0.011601 | 0.011568 | 0.011500 |
| 0.011466 | 0.011398 | 0.011534 | 0.011500 | 0.011635 | 0.011601 | 0.011533 |
| 0.011635 | 0.011703 | 0.011500 | 0.011500 | 0.011534 | 0.011533 | 0.011536 |
| 0.011605 | 0.011533 | 0.011533 | 0.011386 | 0.011497 | 0.011449 | 0.011534 |
| 0.011503 | 0.011475 | 0.011543 | 0.011512 | 0.011436 | 0.011474 | 0.011502 |
| 0.011676 | 0.011546 | 0.011580 | 0.011466 | 0.011478 | 0.011602 | 0.011500 |
| 0.011568 | 0.011569 | 0.011568 | 0.011669 | 0.011601 | 0.011973 | 0.011703 |
| 0.011736 | 0.011331 | 0.011533 | 0.011229 | 0.011432 | 0.011601 | 0.011466 |
| 0.011534 | 0.011533 | 0.011500 | 0.011466 | 0.011500 | 0.011466 | 0.011567 |
| 0.011534 | 0.011635 | 0.011567 | 0.011466 | 0.011569 | 0.011669 | 0.011673 |
| 0.011669 | 0.011567 | 0.011466 | 0.011400 | 0.011533 | 0.011466 | 0.011398 |
| 0.011505 | 0.011669 | 0.011466 | 0.011669 | 0.011432 | 0.011534 | 0.011500 |
| 0.011567 | 0.011500 | 0.011534 | 0.011500 | 0.011533 | 0.011398 | 0.011533 |
| 0.011567 | 0.011500 | 0.011567 | 0.011500 | 0.011533 | 0.011567 | 0.011804 |
| 0.011770 | 0.011770 | 0.011838 | 0.011671 | 0.011838 | 0.011533 | 0.011500 |
| 0.011468 | 0.011752 | 0.011659 | 0.011440 | 0.011778 | 0.011403 | 0.011496 |
| 0.011847 | 0.011745 | 0.011669 | 0.011906 | 0.011610 | 0.011770 | 0.011737 |
| 0.011669 | 0.011838 | 0.011705 | 0.011432 | 0.011525 | 0.011568 | 0.011640 |
| 0.011737 | 0.011638 | 0.011775 | 0.011844 | 0.011770 | 0.011770 | 0.011947 |
| 0.011640 | 0.011847 | 0.011776 | 0.011707 | 0.011975 | 0.011432 | 0.011637 |
| 0.011601 | 0.011533 | 0.011432 | 0.011432 | 0.011500 | 0.011500 | 0.011567 |
| 0.011500 | 0.011567 | 0.011466 | 0.011500 | 0.011500 | 0.011500 | 0.011567 |
| 0.011500 | 0.011872 | 0.011770 | 0.011804 | 0.011398 | 0.011500 | 0.011534 |
| 0.011534 | 0.011500 | 0.011567 | 0.011263 | 0.011466 | 0.011466 | 0.011466 |
| 0.011940 | 0.011567 | 0.011635 | 0.011432 | 0.011533 | 0.011703 | 0.011466 |
| 0.011466 | 0.011533 | 0.011500 | 0.011669 | 0.011466 | 0.011601 | 0.011736 |
| 0.011669 | 0.011500 | 0.011500 | 0.011432 | 0.011432 | 0.011601 | 0.011500 |
| 0.011432 | 0.011533 | 0.011398 | 0.011432 | 0.011567 | 0.011635 | 0.011466 |
| 0.011432 | 0.011567 | 0.011500 | 0.011398 | 0.011669 | 0.011398 | 0.011567 |
| 0.011646 | 0.011466 | 0.011703 | 0.011601 | 0.011567 | 0.011500 | 0.011601 |
| 0.011466 | 0.011804 | 0.011398 | 0.011601 | 0.011398 | 0.011398 | 0.011398 |
| 0.011635 | 0.011771 | 0.011534 | 0.011601 | 0.011432 | 0.011770 | 0.011398 |
| 0.011466 | 0.011466 | 0.011500 | 0.011601 | 0.011432 | 0.011601 | 0.011669 |
| 0.011669 | 0.011635 | 0.011533 | 0.011635 | 0.011601 | 0.011466 | 0.011432 |
| 0.011466 | 0.011466 | 0.011534 | 0.011398 | 0.011432 | 0.011601 | 0.011466 |
| 0.011432 | 0.011500 | 0.011635 | 0.011601 | 0.011567 | 0.011500 | 0.011500 |
| 0.011567 | 0.011500 | 0.011601 | 0.011466 | 0.011601 | 0.011703 | 0.011940 |
| 0.011500 | 0.011838 | 0.011512 | 0.018098 | 0.011520 | 0.011550 | 0.011798 |
| 0.011757 | 0.011804 | 0.011638 | 0.011645 | 0.011943 | 0.011825 | 0.011609 |

|          |          |          |          |          |          |          |
|----------|----------|----------|----------|----------|----------|----------|
| 0.011777 | 0.011674 | 0.011413 | 0.011563 | 0.011374 | 0.011556 | 0.011535 |
| 0.011723 | 0.011623 | 0.011620 | 0.011394 | 0.011635 | 0.011669 | 0.011673 |
| 0.011545 | 0.011635 | 0.011601 | 0.011533 | 0.011567 | 0.011568 | 0.011534 |
| 0.011567 | 0.011500 | 0.011533 | 0.011567 | 0.011534 | 0.011466 | 0.011500 |
| 0.011500 | 0.011567 | 0.011466 | 0.011567 | 0.011601 | 0.011635 | 0.011533 |
| 0.011500 | 0.011466 | 0.011804 | 0.011804 | 0.011601 | 0.011636 | 0.011669 |
| 0.011432 | 0.011432 | 0.011466 | 0.011567 | 0.011432 | 0.011669 | 0.011669 |
| 0.011703 | 0.011669 | 0.011635 | 0.011736 | 0.011838 | 0.011738 | 0.011567 |
| 0.011567 | 0.011635 | 0.011669 | 0.011500 | 0.011567 | 0.011533 | 0.011567 |
| 0.011568 | 0.011601 | 0.011635 | 0.011635 | 0.011535 | 0.011736 | 0.011703 |
| 0.011572 | 0.011466 | 0.011567 | 0.011669 | 0.011567 | 0.011635 | 0.011736 |
| 0.011906 | 0.011610 | 0.011770 | 0.011737 | 0.011669 | 0.011838 | 0.011466 |
| 0.011637 | 0.011534 | 0.011500 | 0.011500 | 0.011567 | 0.011466 | 0.011567 |
| 0.011601 | 0.011635 | 0.011533 | 0.011500 | 0.011466 | 0.011804 | 0.011804 |
| 0.011601 | 0.011636 | 0.011702 | 0.011635 | 0.012212 | 0.011672 | 0.011627 |
| 0.011698 | 0.011619 | 0.011768 | 0.011653 | 0.011730 | 0.011685 | 0.011616 |
| 0.012167 | 0.011548 | 0.011681 | 0.011617 | 0.011823 | 0.011745 | 0.011849 |
| 0.012190 | 0.011629 | 0.011571 | 0.011567 | 0.011567 | 0.011533 | 0.011537 |
| 0.011432 | 0.011466 | 0.011601 | 0.011567 | 0.011571 | 0.011635 | 0.011603 |
| 0.011533 | 0.011466 | 0.011500 | 0.011533 | 0.011432 | 0.011500 | 0.011398 |
| 0.011466 | 0.011500 | 0.011466 | 0.011432 | 0.011534 | 0.011466 | 0.011500 |
| 0.011500 | 0.011432 | 0.011500 | 0.011534 | 0.011432 | 0.011635 | 0.011669 |
| 0.011567 | 0.011567 | 0.011567 | 0.011567 | 0.011500 | 0.011838 | 0.011533 |
| 0.011516 | 0.011500 | 0.011669 | 0.011675 | 0.011601 | 0.011567 | 0.011601 |
| 0.011601 | 0.011534 | 0.011500 | 0.011534 | 0.011635 | 0.011635 | 0.011567 |
| 0.011567 | 0.011703 | 0.011804 | 0.011601 | 0.011804 | 0.011804 | 0.011669 |
| 0.011500 | 0.011567 | 0.011601 | 0.011940 | 0.011568 | 0.011601 | 0.011567 |
| 0.011601 | 0.011466 | 0.011466 | 0.011771 | 0.011771 | 0.011737 | 0.011534 |
| 0.011635 | 0.011703 | 0.011567 | 0.011635 | 0.011601 | 0.011466 | 0.011736 |
| 0.011567 | 0.011533 | 0.011466 | 0.011669 | 0.011534 | 0.011635 | 0.011838 |
| 0.011567 | 0.011881 | 0.011872 | 0.011672 | 0.011344 | 0.011574 | 0.011529 |
| 0.011391 | 0.011884 | 0.011485 | 0.011643 | 0.011452 | 0.011622 | 0.011646 |
| 0.011626 | 0.011522 | 0.011675 | 0.011458 | 0.011601 | 0.011598 | 0.011629 |
| 0.011627 | 0.011536 | 0.011521 | 0.011521 | 0.011569 | 0.011635 | 0.011703 |
| 0.011703 | 0.011229 | 0.000000 | 0.011571 | 0.011743 | 0.011487 | 0.011534 |
| 0.011736 | 0.011331 | 0.011533 | 0.011229 | 0.011432 | 0.011601 | 0.011466 |
| 0.011534 | 0.011533 | 0.011500 | 0.011466 | 0.011500 | 0.011466 | 0.011567 |
| 0.011517 | 0.011518 | 0.011543 | 0.011577 | 0.011715 | 0.011679 | 0.011679 |
| 0.011678 | 0.011602 | 0.011432 | 0.011423 | 0.011538 | 0.011708 | 0.011709 |
| 0.011500 | 0.011572 | 0.011806 | 0.011775 | 0.011704 | 0.011738 | 0.011669 |
| 0.011601 | 0.011669 | 0.011669 | 0.011567 | 0.012075 | 0.011737 | 0.011804 |
| 0.011838 | 0.011814 | 0.011541 | 0.011618 | 0.011500 | 0.011703 | 0.011669 |
| 0.011704 | 0.011736 | 0.011736 | 0.011736 | 0.011852 | 0.011872 | 0.011514 |
| 0.011401 | 0.011409 | 0.011506 | 0.011471 | 0.011508 | 0.011436 | 0.011676 |
| 0.011544 | 0.011545 | 0.011348 | 0.011589 | 0.011534 | 0.011611 | 0.011500 |
| 0.011466 | 0.011398 | 0.011534 | 0.011500 | 0.011635 | 0.011601 | 0.011533 |
| 0.011635 | 0.011703 | 0.011500 | 0.011500 | 0.011534 | 0.011533 | 0.011536 |
| 0.011605 | 0.011533 | 0.011533 | 0.011569 | 0.011635 | 0.011703 | 0.011703 |
| 0.011229 | 0.000000 | 0.011571 | 0.011743 | 0.011487 | 0.011534 | 0.011736 |
| 0.011669 | 0.011669 | 0.011503 | 0.011690 | 0.011620 | 0.011643 | 0.011518 |
| 0.011684 | 0.011886 | 0.011657 | 0.011573 | 0.011466 | 0.011669 | 0.011534 |
| 0.011635 | 0.011567 | 0.011466 | 0.011569 | 0.011669 | 0.011673 | 0.011567 |
| 0.011466 | 0.011400 | 0.011533 | 0.011466 | 0.011398 | 0.011505 | 0.011669 |
| 0.011567 | 0.011500 | 0.011533 | 0.011567 | 0.011534 | 0.011466 | 0.011601 |
| 0.011533 | 0.011567 | 0.011567 | 0.011500 | 0.011567 | 0.011804 | 0.011398 |
| 0.011500 | 0.011838 | 0.011500 | 0.011533 | 0.011500 | 0.011804 | 0.011492 |
| 0.011854 | 0.011489 | 0.011515 | 0.011628 | 0.011717 | 0.011602 | 0.011439 |
| 0.011431 | 0.011601 | 0.011703 | 0.011812 | 0.011670 | 0.011810 | 0.011941 |
| 0.011839 | 0.011878 | 0.011838 | 0.012093 | 0.011804 | 0.012685 | 0.011840 |
| 0.012584 | 0.012351 | 0.012486 | 0.012759 | 0.011804 | 0.011500 | 0.011804 |

|          |          |          |          |          |          |          |
|----------|----------|----------|----------|----------|----------|----------|
| 0.012246 | 0.012181 | 0.011770 | 0.011669 | 0.011737 | 0.011737 | 0.011708 |
| 0.011601 | 0.011606 | 0.011669 | 0.011636 | 0.012008 | 0.012075 | 0.012076 |
| 0.011975 | 0.012076 | 0.012181 | 0.011946 | 0.012247 | 0.012254 | 0.012314 |
| 0.012315 | 0.012349 | 0.012297 | 0.012315 | 0.012317 | 0.011601 | 0.011839 |
| 0.011907 | 0.012380 | 0.011914 | 0.012143 | 0.012619 | 0.011676 | 0.011568 |
| 0.011533 | 0.011533 | 0.012008 | 0.011972 | 0.012158 | 0.011872 | 0.011535 |
| S633     | 0.011874 | 0.011874 | 0.011874 | 0.011636 | 0.011636 | 0.011704 |
| 0.011609 | 0.011540 | 0.011704 | 0.011467 | 0.011535 | 0.011502 | 0.011467 |
| 0.011433 | 0.011670 | 0.011365 | 0.011501 | 0.011569 | 0.011535 | 0.011501 |
| 0.011467 | 0.011501 | 0.011264 | 0.011467 | 0.011501 | 0.011501 | 0.011575 |
| 0.011467 | 0.011501 | 0.011399 | 0.011297 | 0.011569 | 0.011535 | 0.011569 |
| 0.011535 | 0.011636 | 0.011535 | 0.011535 | 0.011569 | 0.011535 | 0.011704 |
| 0.011399 | 0.011535 | 0.011569 | 0.011501 | 0.011535 | 0.011636 | 0.011569 |
| 0.011535 | 0.011704 | 0.011603 | 0.011603 | 0.011535 | 0.011806 | 0.011535 |
| 0.011501 | 0.011535 | 0.011670 | 0.011806 | 0.011637 | 0.011535 | 0.011636 |
| 0.011569 | 0.011636 | 0.011535 | 0.011772 | 0.011739 | 0.011535 | 0.011603 |
| 0.011501 | 0.011603 | 0.011569 | 0.011636 | 0.011569 | 0.011569 | 0.011569 |
| 0.011467 | 0.011501 | 0.011467 | 0.011501 | 0.011535 | 0.011570 | 0.011603 |
| 0.011569 | 0.011535 | 0.011603 | 0.011501 | 0.011569 | 0.011467 | 0.011535 |
| 0.011636 | 0.011636 | 0.011670 | 0.011704 | 0.011535 | 0.011772 | 0.011535 |
| 0.011734 | 0.011663 | 0.011708 | 0.011376 | 0.011399 | 0.011581 | 0.011219 |
| 0.011947 | 0.011266 | 0.011435 | 0.011772 | 0.011772 | 0.011467 | 0.011603 |
| 0.011603 | 0.011569 | 0.011636 | 0.011535 | 0.011636 | 0.011569 | 0.011569 |
| 0.011535 | 0.011569 | 0.011840 | 0.011670 | 0.011603 | 0.011569 | 0.011501 |
| 0.011467 | 0.011399 | 0.011535 | 0.011501 | 0.011297 | 0.011196 | 0.011196 |
| 0.011230 | 0.011297 | 0.011501 | 0.011501 | 0.011535 | 0.011535 | 0.011537 |
| 0.011606 | 0.011535 | 0.011535 | 0.011423 | 0.011425 | 0.011450 | 0.011535 |
| 0.011539 | 0.011476 | 0.011470 | 0.011513 | 0.011403 | 0.011475 | 0.011503 |
| 0.011497 | 0.011547 | 0.011582 | 0.011467 | 0.011479 | 0.011604 | 0.011501 |
| 0.011569 | 0.011571 | 0.011569 | 0.011670 | 0.011603 | 0.011976 | 0.011704 |
| 0.011535 | 0.011603 | 0.011535 | 0.011569 | 0.011433 | 0.011399 | 0.011467 |
| 0.011535 | 0.011535 | 0.011467 | 0.011467 | 0.011501 | 0.011467 | 0.011569 |
| 0.011535 | 0.011636 | 0.011569 | 0.011467 | 0.011570 | 0.011670 | 0.011674 |
| 0.011670 | 0.011569 | 0.011467 | 0.011401 | 0.011535 | 0.011467 | 0.011399 |
| 0.011403 | 0.011670 | 0.011467 | 0.011670 | 0.011433 | 0.011535 | 0.011501 |
| 0.011569 | 0.011501 | 0.011535 | 0.011501 | 0.011535 | 0.011399 | 0.011535 |
| 0.011569 | 0.011501 | 0.011569 | 0.011501 | 0.011535 | 0.011569 | 0.011806 |
| 0.011637 | 0.011569 | 0.011637 | 0.011673 | 0.011637 | 0.011535 | 0.011501 |
| 0.011435 | 0.011795 | 0.011660 | 0.011441 | 0.011608 | 0.011404 | 0.011576 |
| 0.011643 | 0.011541 | 0.011704 | 0.011908 | 0.011612 | 0.011772 | 0.011738 |
| 0.011670 | 0.011840 | 0.011706 | 0.011476 | 0.011568 | 0.011569 | 0.011641 |
| 0.011738 | 0.011639 | 0.011777 | 0.011846 | 0.011772 | 0.011840 | 0.011950 |
| 0.011641 | 0.011849 | 0.011778 | 0.011709 | 0.011978 | 0.011433 | 0.011639 |
| 0.011603 | 0.011535 | 0.011433 | 0.011433 | 0.011501 | 0.011501 | 0.011569 |
| 0.011501 | 0.011569 | 0.011467 | 0.011501 | 0.011501 | 0.011501 | 0.011569 |
| 0.011501 | 0.011670 | 0.011569 | 0.011603 | 0.011399 | 0.011501 | 0.011535 |
| 0.011535 | 0.011501 | 0.011569 | 0.011535 | 0.011467 | 0.011467 | 0.011467 |
| 0.011738 | 0.011569 | 0.011636 | 0.011433 | 0.011535 | 0.011704 | 0.011467 |
| 0.011467 | 0.011535 | 0.011501 | 0.011670 | 0.011467 | 0.011399 | 0.011535 |
| 0.011467 | 0.011467 | 0.011501 | 0.011433 | 0.011433 | 0.011603 | 0.011535 |
| 0.011433 | 0.011501 | 0.011399 | 0.011433 | 0.011569 | 0.011433 | 0.011467 |
| 0.011433 | 0.011569 | 0.011501 | 0.011399 | 0.011467 | 0.011399 | 0.011569 |
| 0.011648 | 0.011467 | 0.011501 | 0.011603 | 0.011569 | 0.011501 | 0.011603 |
| 0.011467 | 0.011806 | 0.011399 | 0.011603 | 0.011365 | 0.011365 | 0.011399 |
| 0.011636 | 0.011569 | 0.011535 | 0.011603 | 0.011433 | 0.011569 | 0.011365 |
| 0.011467 | 0.011467 | 0.011501 | 0.011603 | 0.011501 | 0.011603 | 0.011670 |
| 0.011670 | 0.011636 | 0.011535 | 0.011637 | 0.011603 | 0.011467 | 0.011433 |
| 0.011467 | 0.011467 | 0.011535 | 0.011399 | 0.011433 | 0.011603 | 0.011467 |
| 0.011399 | 0.011501 | 0.011636 | 0.011603 | 0.011569 | 0.011501 | 0.011501 |
| 0.011569 | 0.011501 | 0.011603 | 0.011467 | 0.011603 | 0.011704 | 0.011738 |

|          |          |          |          |          |          |          |
|----------|----------|----------|----------|----------|----------|----------|
| 0.011501 | 0.011637 | 0.011513 | 0.018120 | 0.011323 | 0.011678 | 0.011588 |
| 0.011549 | 0.011593 | 0.011484 | 0.011236 | 0.011502 | 0.011618 | 0.011548 |
| 0.011444 | 0.011184 | 0.011375 | 0.011525 | 0.011375 | 0.011409 | 0.011494 |
| 0.011298 | 0.011324 | 0.011397 | 0.011260 | 0.011636 | 0.011670 | 0.011675 |
| 0.011546 | 0.011636 | 0.011636 | 0.011535 | 0.011569 | 0.011569 | 0.011535 |
| 0.011569 | 0.011501 | 0.011535 | 0.011569 | 0.011535 | 0.011467 | 0.011501 |
| 0.011501 | 0.011569 | 0.011467 | 0.011569 | 0.011603 | 0.011636 | 0.011535 |
| 0.011501 | 0.011467 | 0.011569 | 0.011569 | 0.011603 | 0.011637 | 0.011670 |
| 0.011433 | 0.011433 | 0.011467 | 0.011569 | 0.011433 | 0.011636 | 0.011636 |
| 0.011704 | 0.011704 | 0.011636 | 0.011738 | 0.011637 | 0.011740 | 0.011569 |
| 0.011569 | 0.011636 | 0.011670 | 0.011501 | 0.011569 | 0.011535 | 0.011569 |
| 0.011637 | 0.011637 | 0.011670 | 0.011637 | 0.011536 | 0.011738 | 0.011704 |
| 0.011573 | 0.011467 | 0.011569 | 0.011670 | 0.011569 | 0.011637 | 0.011738 |
| 0.011908 | 0.011612 | 0.011772 | 0.011738 | 0.011670 | 0.011840 | 0.011467 |
| 0.011638 | 0.011535 | 0.011501 | 0.011501 | 0.011569 | 0.011467 | 0.011569 |
| 0.011603 | 0.011636 | 0.011535 | 0.011501 | 0.011467 | 0.011569 | 0.011569 |
| 0.011603 | 0.011637 | 0.011704 | 0.011637 | 0.012215 | 0.011709 | 0.011628 |
| 0.011699 | 0.011655 | 0.011770 | 0.011655 | 0.011767 | 0.011687 | 0.011652 |
| 0.012170 | 0.011550 | 0.011683 | 0.011619 | 0.011895 | 0.011747 | 0.011851 |
| 0.012193 | 0.011669 | 0.011538 | 0.011569 | 0.011569 | 0.011196 | 0.011538 |
| 0.011433 | 0.011467 | 0.011603 | 0.011569 | 0.011538 | 0.011433 | 0.011400 |
| 0.011535 | 0.011467 | 0.011501 | 0.011535 | 0.011433 | 0.011501 | 0.011399 |
| 0.011467 | 0.011501 | 0.011467 | 0.011433 | 0.011535 | 0.011467 | 0.011501 |
| 0.011501 | 0.011433 | 0.011501 | 0.011535 | 0.011433 | 0.011636 | 0.011670 |
| 0.011569 | 0.011569 | 0.011569 | 0.011569 | 0.011501 | 0.011637 | 0.011535 |
| 0.011236 | 0.011501 | 0.011467 | 0.011471 | 0.011603 | 0.011603 | 0.011603 |
| 0.011603 | 0.011535 | 0.011501 | 0.011535 | 0.011636 | 0.011636 | 0.011569 |
| 0.011569 | 0.011704 | 0.011603 | 0.011603 | 0.011806 | 0.011806 | 0.011670 |
| 0.011501 | 0.011569 | 0.011603 | 0.011738 | 0.011569 | 0.011603 | 0.011569 |
| 0.011603 | 0.011467 | 0.011467 | 0.011772 | 0.011772 | 0.011738 | 0.011535 |
| 0.011636 | 0.011704 | 0.011569 | 0.011636 | 0.011602 | 0.011467 | 0.011535 |
| 0.011569 | 0.011535 | 0.011467 | 0.011704 | 0.011535 | 0.011636 | 0.011671 |
| 0.011569 | 0.011678 | 0.011670 | 0.011348 | 0.011174 | 0.011575 | 0.011269 |
| 0.011449 | 0.011610 | 0.011486 | 0.011554 | 0.011452 | 0.011419 | 0.011327 |
| 0.011266 | 0.011193 | 0.011396 | 0.011127 | 0.011277 | 0.011397 | 0.011591 |
| 0.011668 | 0.011496 | 0.011522 | 0.011558 | 0.011571 | 0.011433 | 0.011501 |
| 0.011433 | 0.011569 | 0.011571 | 0.000000 | 0.011779 | 0.011845 | 0.011569 |
| 0.011535 | 0.011603 | 0.011535 | 0.011569 | 0.011433 | 0.011399 | 0.011467 |
| 0.011535 | 0.011535 | 0.011467 | 0.011467 | 0.011501 | 0.011467 | 0.011569 |
| 0.011554 | 0.011555 | 0.011544 | 0.011579 | 0.011717 | 0.011681 | 0.011681 |
| 0.011679 | 0.011603 | 0.011433 | 0.011424 | 0.011539 | 0.011710 | 0.011711 |
| 0.011502 | 0.011573 | 0.011808 | 0.011777 | 0.011705 | 0.011740 | 0.011670 |
| 0.011603 | 0.011670 | 0.011670 | 0.011569 | 0.011874 | 0.011738 | 0.011806 |
| 0.011840 | 0.011636 | 0.011542 | 0.011585 | 0.011501 | 0.011704 | 0.011670 |
| 0.011706 | 0.011738 | 0.011738 | 0.011738 | 0.011853 | 0.011874 | 0.011516 |
| 0.011402 | 0.011410 | 0.011507 | 0.011472 | 0.011509 | 0.011437 | 0.011472 |
| 0.011545 | 0.011281 | 0.011444 | 0.011590 | 0.011535 | 0.011613 | 0.011501 |
| 0.011467 | 0.011399 | 0.011535 | 0.011501 | 0.011297 | 0.011196 | 0.011196 |
| 0.011230 | 0.011297 | 0.011501 | 0.011501 | 0.011535 | 0.011535 | 0.011537 |
| 0.011606 | 0.011535 | 0.011535 | 0.011571 | 0.011433 | 0.011501 | 0.011433 |
| 0.011569 | 0.011571 | 0.000000 | 0.011779 | 0.011845 | 0.011569 | 0.011738 |
| 0.011670 | 0.011670 | 0.011504 | 0.011692 | 0.011622 | 0.011645 | 0.011520 |
| 0.011685 | 0.011796 | 0.011701 | 0.011575 | 0.011467 | 0.011670 | 0.011535 |
| 0.011636 | 0.011569 | 0.011467 | 0.011570 | 0.011670 | 0.011674 | 0.011569 |
| 0.011467 | 0.011401 | 0.011535 | 0.011467 | 0.011399 | 0.011403 | 0.011670 |
| 0.011569 | 0.011501 | 0.011535 | 0.011569 | 0.011535 | 0.011467 | 0.011399 |
| 0.011535 | 0.011569 | 0.011569 | 0.011501 | 0.011569 | 0.011806 | 0.011399 |
| 0.011501 | 0.011637 | 0.011501 | 0.011535 | 0.011501 | 0.011603 | 0.011406 |
| 0.011625 | 0.011275 | 0.011212 | 0.011345 | 0.011430 | 0.011422 | 0.011229 |
| 0.011167 | 0.011399 | 0.011501 | 0.011608 | 0.011468 | 0.011607 | 0.011739 |

|          |          |          |          |          |          |          |
|----------|----------|----------|----------|----------|----------|----------|
| 0.011638 | 0.011675 | 0.011637 | 0.011819 | 0.011603 | 0.012486 | 0.011638 |
| 0.012384 | 0.012150 | 0.012285 | 0.012559 | 0.011569 | 0.011501 | 0.011603 |
| 0.012215 | 0.011980 | 0.011569 | 0.011467 | 0.011535 | 0.011535 | 0.011504 |
| 0.011399 | 0.011403 | 0.011467 | 0.011434 | 0.011807 | 0.011840 | 0.011875 |
| 0.011774 | 0.011875 | 0.011979 | 0.011743 | 0.012250 | 0.012257 | 0.012318 |
| 0.012318 | 0.012352 | 0.012301 | 0.012318 | 0.012320 | 0.011603 | 0.011840 |
| 0.011909 | 0.012418 | 0.011916 | 0.011942 | 0.012419 | 0.011472 | 0.011366 |
| 0.011331 | 0.011331 | 0.011807 | 0.011848 | 0.011948 | 0.011670 | 0.011332 |
| S634     | 0.012010 | 0.012010 | 0.012214 | 0.011976 | 0.011976 | 0.012044 |
| 0.011952 | 0.011884 | 0.011976 | 0.011603 | 0.011670 | 0.011638 | 0.011602 |
| 0.011569 | 0.011806 | 0.011467 | 0.011636 | 0.011704 | 0.011670 | 0.011569 |
| 0.011602 | 0.011636 | 0.011670 | 0.011603 | 0.011637 | 0.011636 | 0.011918 |
| 0.011806 | 0.011636 | 0.011535 | 0.011704 | 0.011704 | 0.011671 | 0.011704 |
| 0.011670 | 0.011772 | 0.011670 | 0.011670 | 0.011704 | 0.011670 | 0.011840 |
| 0.011535 | 0.011670 | 0.011704 | 0.011636 | 0.011670 | 0.011772 | 0.011704 |
| 0.011670 | 0.011840 | 0.011739 | 0.011942 | 0.011670 | 0.011942 | 0.011670 |
| 0.011636 | 0.011671 | 0.011806 | 0.011942 | 0.011976 | 0.011670 | 0.011704 |
| 0.011704 | 0.011772 | 0.011670 | 0.011908 | 0.012078 | 0.011670 | 0.011704 |
| 0.011636 | 0.011738 | 0.011704 | 0.011738 | 0.011704 | 0.011704 | 0.011704 |
| 0.011602 | 0.011636 | 0.011603 | 0.011637 | 0.011670 | 0.011706 | 0.011772 |
| 0.011704 | 0.011670 | 0.011738 | 0.011636 | 0.011704 | 0.011603 | 0.011670 |
| 0.011840 | 0.011772 | 0.012010 | 0.011840 | 0.011670 | 0.011908 | 0.011670 |
| 0.011808 | 0.011926 | 0.011858 | 0.011532 | 0.011549 | 0.011692 | 0.011654 |
| 0.011650 | 0.011778 | 0.011516 | 0.011908 | 0.011908 | 0.011569 | 0.011738 |
| 0.011738 | 0.011704 | 0.011772 | 0.011670 | 0.011772 | 0.011704 | 0.011704 |
| 0.011670 | 0.011704 | 0.011976 | 0.011772 | 0.011738 | 0.011705 | 0.011636 |
| 0.011602 | 0.011535 | 0.011670 | 0.011636 | 0.011772 | 0.011738 | 0.011670 |
| 0.011772 | 0.011840 | 0.011636 | 0.011636 | 0.011670 | 0.011670 | 0.011674 |
| 0.011743 | 0.011670 | 0.011670 | 0.011496 | 0.011571 | 0.011520 | 0.011671 |
| 0.011641 | 0.011581 | 0.011618 | 0.011617 | 0.011540 | 0.011579 | 0.011572 |
| 0.011787 | 0.011652 | 0.011686 | 0.011603 | 0.011583 | 0.011705 | 0.011637 |
| 0.011705 | 0.011673 | 0.011705 | 0.011806 | 0.011738 | 0.012112 | 0.011840 |
| 0.011874 | 0.011670 | 0.011670 | 0.011636 | 0.011569 | 0.011738 | 0.011603 |
| 0.011670 | 0.011670 | 0.011636 | 0.011603 | 0.011636 | 0.011603 | 0.011704 |
| 0.011670 | 0.011772 | 0.011704 | 0.011602 | 0.011707 | 0.011772 | 0.011811 |
| 0.011806 | 0.011705 | 0.011603 | 0.011537 | 0.011670 | 0.011603 | 0.011535 |
| 0.011643 | 0.011806 | 0.011603 | 0.011806 | 0.011569 | 0.011670 | 0.011636 |
| 0.011738 | 0.011636 | 0.011670 | 0.011636 | 0.011670 | 0.011535 | 0.011670 |
| 0.011704 | 0.011636 | 0.011704 | 0.011636 | 0.011670 | 0.011704 | 0.011942 |
| 0.011874 | 0.011908 | 0.011976 | 0.011809 | 0.011976 | 0.011670 | 0.011636 |
| 0.011538 | 0.011877 | 0.011708 | 0.011580 | 0.011986 | 0.011542 | 0.011656 |
| 0.011986 | 0.011884 | 0.011840 | 0.012044 | 0.011750 | 0.011874 | 0.011874 |
| 0.011806 | 0.011942 | 0.011814 | 0.011643 | 0.011695 | 0.011705 | 0.011778 |
| 0.011874 | 0.011776 | 0.011914 | 0.011983 | 0.011874 | 0.011976 | 0.012087 |
| 0.011812 | 0.011986 | 0.011915 | 0.011846 | 0.012114 | 0.011569 | 0.011707 |
| 0.011738 | 0.011670 | 0.011569 | 0.011569 | 0.011636 | 0.011636 | 0.011670 |
| 0.011636 | 0.011704 | 0.011603 | 0.011636 | 0.011636 | 0.011636 | 0.011704 |
| 0.011636 | 0.012010 | 0.011908 | 0.011942 | 0.011535 | 0.011636 | 0.011670 |
| 0.011670 | 0.011636 | 0.011704 | 0.011603 | 0.011602 | 0.011602 | 0.011602 |
| 0.012078 | 0.011704 | 0.011772 | 0.011569 | 0.011670 | 0.011840 | 0.011603 |
| 0.011602 | 0.011670 | 0.011636 | 0.011806 | 0.011602 | 0.011738 | 0.011874 |
| 0.011806 | 0.011636 | 0.011636 | 0.011569 | 0.011569 | 0.011738 | 0.011670 |
| 0.011569 | 0.011670 | 0.011535 | 0.011569 | 0.011704 | 0.011773 | 0.011603 |
| 0.011569 | 0.011670 | 0.011637 | 0.011535 | 0.011806 | 0.011535 | 0.011704 |
| 0.011787 | 0.011569 | 0.011840 | 0.011739 | 0.011704 | 0.011636 | 0.011738 |
| 0.011602 | 0.011942 | 0.011535 | 0.011738 | 0.011467 | 0.011467 | 0.011535 |
| 0.011772 | 0.011908 | 0.011670 | 0.011738 | 0.011569 | 0.011908 | 0.011467 |
| 0.011603 | 0.011602 | 0.011636 | 0.011738 | 0.011636 | 0.011704 | 0.011806 |
| 0.011806 | 0.011772 | 0.011670 | 0.011772 | 0.011738 | 0.011603 | 0.011569 |
| 0.011602 | 0.011603 | 0.011670 | 0.011535 | 0.011569 | 0.011738 | 0.011602 |



|          |          |          |          |          |          |          |
|----------|----------|----------|----------|----------|----------|----------|
| 0.011501 | 0.011636 | 0.011772 | 0.011738 | 0.011704 | 0.011636 | 0.011637 |
| 0.011704 | 0.011636 | 0.011738 | 0.011602 | 0.011738 | 0.011840 | 0.012078 |
| 0.011636 | 0.011976 | 0.011652 | 0.018187 | 0.011455 | 0.011740 | 0.011941 |
| 0.011864 | 0.011948 | 0.011746 | 0.011704 | 0.012002 | 0.011932 | 0.011489 |
| 0.011680 | 0.011798 | 0.011492 | 0.011652 | 0.011532 | 0.011607 | 0.011581 |
| 0.011817 | 0.011660 | 0.011695 | 0.011393 | 0.011772 | 0.011806 | 0.011811 |
| 0.011685 | 0.011772 | 0.011772 | 0.011670 | 0.011704 | 0.011705 | 0.011671 |
| 0.011704 | 0.011636 | 0.011670 | 0.011704 | 0.011670 | 0.011603 | 0.011636 |
| 0.011636 | 0.011704 | 0.011602 | 0.011704 | 0.011738 | 0.011772 | 0.011670 |
| 0.011636 | 0.011603 | 0.011942 | 0.011942 | 0.011739 | 0.011773 | 0.011806 |
| 0.011569 | 0.011569 | 0.011602 | 0.011704 | 0.011569 | 0.011806 | 0.011806 |
| 0.011840 | 0.011840 | 0.011772 | 0.011874 | 0.011976 | 0.011876 | 0.011704 |
| 0.011704 | 0.011772 | 0.011806 | 0.011569 | 0.011704 | 0.011670 | 0.011704 |
| 0.011773 | 0.011772 | 0.011806 | 0.011772 | 0.011672 | 0.011874 | 0.011840 |
| 0.011710 | 0.011603 | 0.011704 | 0.011806 | 0.011704 | 0.011772 | 0.011874 |
| 0.012044 | 0.011750 | 0.011874 | 0.011874 | 0.011806 | 0.011942 | 0.011603 |
| 0.011775 | 0.011671 | 0.011636 | 0.011636 | 0.011704 | 0.011602 | 0.011704 |
| 0.011738 | 0.011772 | 0.011670 | 0.011636 | 0.011603 | 0.011942 | 0.011942 |
| 0.011739 | 0.011773 | 0.011840 | 0.011772 | 0.012352 | 0.011818 | 0.011771 |
| 0.011841 | 0.011760 | 0.011877 | 0.011795 | 0.011873 | 0.011827 | 0.011756 |
| 0.012309 | 0.011690 | 0.011787 | 0.011759 | 0.012034 | 0.011885 | 0.011988 |
| 0.012331 | 0.011745 | 0.011709 | 0.011704 | 0.011704 | 0.011670 | 0.011674 |
| 0.011569 | 0.011603 | 0.011738 | 0.011704 | 0.011709 | 0.011772 | 0.011672 |
| 0.011670 | 0.011602 | 0.011636 | 0.011670 | 0.011569 | 0.011636 | 0.011535 |
| 0.011602 | 0.011636 | 0.011603 | 0.011569 | 0.011670 | 0.011602 | 0.011636 |
| 0.011636 | 0.011569 | 0.011636 | 0.011670 | 0.011569 | 0.011772 | 0.011806 |
| 0.011704 | 0.011704 | 0.011704 | 0.011704 | 0.011636 | 0.011976 | 0.011670 |
| 0.011658 | 0.011637 | 0.011807 | 0.011814 | 0.011738 | 0.011738 | 0.011738 |
| 0.011738 | 0.011670 | 0.011636 | 0.011670 | 0.011772 | 0.011772 | 0.011704 |
| 0.011670 | 0.011840 | 0.011942 | 0.011738 | 0.011942 | 0.011942 | 0.011806 |
| 0.011636 | 0.011704 | 0.011738 | 0.012078 | 0.011705 | 0.011738 | 0.011704 |
| 0.011738 | 0.011603 | 0.011603 | 0.011874 | 0.011908 | 0.011840 | 0.011670 |
| 0.011772 | 0.011840 | 0.011704 | 0.011772 | 0.011738 | 0.011603 | 0.011874 |
| 0.011670 | 0.011670 | 0.011603 | 0.011840 | 0.011670 | 0.011772 | 0.012010 |
| 0.011704 | 0.012021 | 0.012010 | 0.011714 | 0.011458 | 0.011712 | 0.011527 |
| 0.011559 | 0.011843 | 0.011627 | 0.011463 | 0.011452 | 0.011622 | 0.011433 |
| 0.011676 | 0.011457 | 0.011507 | 0.011392 | 0.011439 | 0.011531 | 0.011713 |
| 0.011744 | 0.011614 | 0.011593 | 0.011700 | 0.011637 | 0.011772 | 0.011772 |
| 0.011840 | 0.011569 | 0.011743 | 0.011779 | 0.000000 | 0.011628 | 0.011704 |
| 0.011874 | 0.011670 | 0.011670 | 0.011636 | 0.011569 | 0.011738 | 0.011603 |
| 0.011670 | 0.011670 | 0.011636 | 0.011603 | 0.011636 | 0.011603 | 0.011704 |
| 0.011624 | 0.011660 | 0.011648 | 0.011683 | 0.011820 | 0.011784 | 0.011784 |
| 0.011783 | 0.011739 | 0.011544 | 0.011532 | 0.011642 | 0.011813 | 0.011814 |
| 0.011603 | 0.011676 | 0.011910 | 0.011879 | 0.011807 | 0.011842 | 0.011806 |
| 0.011738 | 0.011806 | 0.011806 | 0.011704 | 0.012214 | 0.011874 | 0.011942 |
| 0.011976 | 0.011959 | 0.011680 | 0.011760 | 0.011637 | 0.011806 | 0.011806 |
| 0.011842 | 0.011874 | 0.011874 | 0.011874 | 0.012011 | 0.012010 | 0.011621 |
| 0.011538 | 0.011550 | 0.011645 | 0.011575 | 0.011647 | 0.011513 | 0.011815 |
| 0.011684 | 0.011724 | 0.011590 | 0.011666 | 0.011671 | 0.011717 | 0.011636 |
| 0.011602 | 0.011535 | 0.011670 | 0.011636 | 0.011772 | 0.011738 | 0.011670 |
| 0.011772 | 0.011840 | 0.011636 | 0.011636 | 0.011670 | 0.011670 | 0.011674 |
| 0.011743 | 0.011670 | 0.011670 | 0.011637 | 0.011772 | 0.011772 | 0.011840 |
| 0.011569 | 0.011743 | 0.011779 | 0.000000 | 0.011628 | 0.011704 | 0.011874 |
| 0.011806 | 0.011806 | 0.011606 | 0.011834 | 0.011762 | 0.011782 | 0.011591 |
| 0.011790 | 0.011752 | 0.011745 | 0.011712 | 0.011603 | 0.011806 | 0.011670 |
| 0.011772 | 0.011704 | 0.011602 | 0.011707 | 0.011772 | 0.011811 | 0.011705 |
| 0.011603 | 0.011537 | 0.011670 | 0.011603 | 0.011535 | 0.011643 | 0.011806 |
| 0.011704 | 0.011636 | 0.011670 | 0.011704 | 0.011670 | 0.011603 | 0.011738 |
| 0.011636 | 0.011704 | 0.011704 | 0.011636 | 0.011704 | 0.011942 | 0.011535 |
| 0.011636 | 0.011976 | 0.011636 | 0.011670 | 0.011636 | 0.011942 | 0.011535 |

|          |          |          |          |          |          |          |
|----------|----------|----------|----------|----------|----------|----------|
| 0.011796 | 0.011488 | 0.011566 | 0.011668 | 0.011757 | 0.011711 | 0.011481 |
| 0.011537 | 0.011670 | 0.011772 | 0.011883 | 0.011740 | 0.011880 | 0.011977 |
| 0.011909 | 0.011948 | 0.011908 | 0.012164 | 0.011874 | 0.012758 | 0.011911 |
| 0.012657 | 0.012422 | 0.012558 | 0.012832 | 0.011942 | 0.011569 | 0.011874 |
| 0.012317 | 0.012252 | 0.011840 | 0.011739 | 0.011807 | 0.011807 | 0.011846 |
| 0.011670 | 0.011677 | 0.011738 | 0.011705 | 0.012147 | 0.012214 | 0.012215 |
| 0.012114 | 0.012215 | 0.012320 | 0.012085 | 0.012386 | 0.012394 | 0.012454 |
| 0.012455 | 0.012489 | 0.012439 | 0.012455 | 0.012456 | 0.011738 | 0.011976 |
| 0.012045 | 0.012554 | 0.012053 | 0.012282 | 0.012760 | 0.011815 | 0.011705 |
| 0.011670 | 0.011670 | 0.012146 | 0.012058 | 0.012230 | 0.012010 | 0.011673 |
| S635     | 0.012050 | 0.012050 | 0.012227 | 0.011979 | 0.011979 | 0.012050 |
| 0.011990 | 0.011919 | 0.011979 | 0.011626 | 0.011696 | 0.011662 | 0.011626 |
| 0.011590 | 0.011838 | 0.011555 | 0.011625 | 0.011732 | 0.011696 | 0.011661 |
| 0.011590 | 0.011661 | 0.011696 | 0.011626 | 0.011662 | 0.011661 | 0.011954 |
| 0.011838 | 0.011661 | 0.011555 | 0.011732 | 0.011732 | 0.011696 | 0.011696 |
| 0.011696 | 0.011767 | 0.011696 | 0.011696 | 0.011732 | 0.011696 | 0.011873 |
| 0.011555 | 0.011696 | 0.011696 | 0.011661 | 0.011696 | 0.011767 | 0.011732 |
| 0.011661 | 0.011838 | 0.011768 | 0.011979 | 0.011696 | 0.011979 | 0.011696 |
| 0.011661 | 0.011697 | 0.011838 | 0.011979 | 0.012015 | 0.011696 | 0.011519 |
| 0.011732 | 0.011767 | 0.011661 | 0.011944 | 0.012121 | 0.011661 | 0.011767 |
| 0.011661 | 0.011732 | 0.011732 | 0.011767 | 0.011732 | 0.011732 | 0.011732 |
| 0.011590 | 0.011661 | 0.011625 | 0.011661 | 0.011696 | 0.011698 | 0.011802 |
| 0.011732 | 0.011696 | 0.011767 | 0.011661 | 0.011732 | 0.011626 | 0.011696 |
| 0.011873 | 0.011802 | 0.012015 | 0.011873 | 0.011696 | 0.011944 | 0.011696 |
| 0.011843 | 0.011927 | 0.011934 | 0.011596 | 0.011608 | 0.011681 | 0.011724 |
| 0.012407 | 0.011704 | 0.011582 | 0.011873 | 0.011944 | 0.011625 | 0.011767 |
| 0.011767 | 0.011732 | 0.011802 | 0.011661 | 0.011802 | 0.011696 | 0.011731 |
| 0.011696 | 0.011732 | 0.011979 | 0.011838 | 0.011767 | 0.011732 | 0.011661 |
| 0.011626 | 0.011555 | 0.011696 | 0.011661 | 0.011802 | 0.011767 | 0.011696 |
| 0.011802 | 0.011838 | 0.011661 | 0.011661 | 0.011696 | 0.011696 | 0.011700 |
| 0.011772 | 0.011661 | 0.011626 | 0.011553 | 0.011670 | 0.011615 | 0.011662 |
| 0.011702 | 0.011639 | 0.011682 | 0.011641 | 0.011597 | 0.011601 | 0.011629 |
| 0.011819 | 0.011714 | 0.011748 | 0.011626 | 0.011606 | 0.011768 | 0.011662 |
| 0.011733 | 0.011699 | 0.011697 | 0.011838 | 0.011767 | 0.012156 | 0.011873 |
| 0.011908 | 0.011484 | 0.011661 | 0.011378 | 0.011590 | 0.011767 | 0.011626 |
| 0.011696 | 0.011696 | 0.011661 | 0.011625 | 0.011661 | 0.011625 | 0.011661 |
| 0.011696 | 0.011802 | 0.011696 | 0.011625 | 0.011734 | 0.011767 | 0.011806 |
| 0.011838 | 0.011732 | 0.011625 | 0.011556 | 0.011696 | 0.011626 | 0.011555 |
| 0.011667 | 0.011838 | 0.011626 | 0.011838 | 0.011590 | 0.011696 | 0.011661 |
| 0.011732 | 0.011625 | 0.011696 | 0.011661 | 0.011696 | 0.011555 | 0.011696 |
| 0.011732 | 0.011661 | 0.011732 | 0.011625 | 0.011696 | 0.011696 | 0.011979 |
| 0.011908 | 0.011944 | 0.012015 | 0.011841 | 0.012015 | 0.011696 | 0.011661 |
| 0.011593 | 0.011822 | 0.011731 | 0.011529 | 0.011953 | 0.011562 | 0.011597 |
| 0.012026 | 0.011882 | 0.011873 | 0.012015 | 0.011780 | 0.011944 | 0.011873 |
| 0.011838 | 0.011979 | 0.011848 | 0.011582 | 0.011725 | 0.011732 | 0.011809 |
| 0.011909 | 0.011771 | 0.011951 | 0.012023 | 0.011909 | 0.011944 | 0.012131 |
| 0.011844 | 0.012026 | 0.011916 | 0.011880 | 0.012123 | 0.011590 | 0.011663 |
| 0.011767 | 0.011696 | 0.011590 | 0.011590 | 0.011661 | 0.011625 | 0.011732 |
| 0.011661 | 0.011732 | 0.011625 | 0.011661 | 0.011661 | 0.011661 | 0.011732 |
| 0.011661 | 0.012050 | 0.011944 | 0.011979 | 0.011555 | 0.011661 | 0.011626 |
| 0.011696 | 0.011661 | 0.011732 | 0.011413 | 0.011625 | 0.011625 | 0.011625 |
| 0.012121 | 0.011732 | 0.011802 | 0.011590 | 0.011696 | 0.011838 | 0.011626 |
| 0.011625 | 0.011696 | 0.011661 | 0.011838 | 0.011626 | 0.011767 | 0.011873 |
| 0.011838 | 0.011661 | 0.011661 | 0.011590 | 0.011590 | 0.011767 | 0.011696 |
| 0.011590 | 0.011696 | 0.011555 | 0.011590 | 0.011732 | 0.011803 | 0.011626 |
| 0.011591 | 0.011732 | 0.011662 | 0.011555 | 0.011838 | 0.011555 | 0.011696 |
| 0.011818 | 0.011626 | 0.011873 | 0.011767 | 0.011732 | 0.011661 | 0.011767 |
| 0.011625 | 0.011979 | 0.011555 | 0.011767 | 0.011555 | 0.011555 | 0.011555 |
| 0.011767 | 0.011944 | 0.011661 | 0.011767 | 0.011590 | 0.011944 | 0.011555 |
| 0.011626 | 0.011625 | 0.011626 | 0.011732 | 0.011590 | 0.011732 | 0.011838 |

|          |          |          |          |          |          |          |
|----------|----------|----------|----------|----------|----------|----------|
| 0.011838 | 0.011802 | 0.011696 | 0.011803 | 0.011767 | 0.011625 | 0.011590 |
| 0.011625 | 0.011625 | 0.011661 | 0.011555 | 0.011590 | 0.011767 | 0.011626 |
| 0.011590 | 0.011661 | 0.011802 | 0.011732 | 0.011732 | 0.011661 | 0.011661 |
| 0.011732 | 0.011661 | 0.011767 | 0.011626 | 0.011767 | 0.011838 | 0.012121 |
| 0.011661 | 0.012015 | 0.011642 | 0.018498 | 0.011474 | 0.011704 | 0.011942 |
| 0.011862 | 0.011950 | 0.011721 | 0.011670 | 0.012037 | 0.011969 | 0.011698 |
| 0.011708 | 0.011766 | 0.011555 | 0.011590 | 0.011472 | 0.011579 | 0.011603 |
| 0.011753 | 0.011765 | 0.011723 | 0.011549 | 0.011802 | 0.011838 | 0.011843 |
| 0.011712 | 0.011802 | 0.011802 | 0.011696 | 0.011732 | 0.011732 | 0.011697 |
| 0.011732 | 0.011625 | 0.011696 | 0.011732 | 0.011696 | 0.011626 | 0.011661 |
| 0.011661 | 0.011696 | 0.011626 | 0.011696 | 0.011767 | 0.011802 | 0.011696 |
| 0.011626 | 0.011626 | 0.011979 | 0.011979 | 0.011767 | 0.011804 | 0.011838 |
| 0.011555 | 0.011590 | 0.011626 | 0.011696 | 0.011590 | 0.011802 | 0.011802 |
| 0.011873 | 0.011873 | 0.011802 | 0.011908 | 0.012015 | 0.011911 | 0.011732 |
| 0.011732 | 0.011802 | 0.011838 | 0.011590 | 0.011732 | 0.011696 | 0.011732 |
| 0.011732 | 0.011732 | 0.011732 | 0.011803 | 0.011698 | 0.011873 | 0.011873 |
| 0.011737 | 0.011626 | 0.011732 | 0.011802 | 0.011732 | 0.011803 | 0.011908 |
| 0.012015 | 0.011780 | 0.011944 | 0.011873 | 0.011838 | 0.011979 | 0.011626 |
| 0.011769 | 0.011697 | 0.011661 | 0.011661 | 0.011696 | 0.011626 | 0.011696 |
| 0.011767 | 0.011802 | 0.011696 | 0.011626 | 0.011626 | 0.011979 | 0.011979 |
| 0.011767 | 0.011804 | 0.011873 | 0.011802 | 0.012300 | 0.011853 | 0.011803 |
| 0.011839 | 0.011792 | 0.011839 | 0.011791 | 0.011910 | 0.011860 | 0.011787 |
| 0.012255 | 0.011717 | 0.011854 | 0.011790 | 0.012004 | 0.011920 | 0.012028 |
| 0.012278 | 0.011817 | 0.011737 | 0.011732 | 0.011732 | 0.011696 | 0.011701 |
| 0.011590 | 0.011626 | 0.011767 | 0.011732 | 0.011736 | 0.011802 | 0.011698 |
| 0.011696 | 0.011626 | 0.011626 | 0.011661 | 0.011590 | 0.011661 | 0.011555 |
| 0.011626 | 0.011661 | 0.011625 | 0.011590 | 0.011696 | 0.011625 | 0.011590 |
| 0.011661 | 0.011590 | 0.011661 | 0.011696 | 0.011590 | 0.011767 | 0.011838 |
| 0.011732 | 0.011732 | 0.011732 | 0.011732 | 0.011590 | 0.012015 | 0.011696 |
| 0.011684 | 0.011661 | 0.011839 | 0.011846 | 0.011767 | 0.011767 | 0.011732 |
| 0.011767 | 0.011696 | 0.011661 | 0.011696 | 0.011767 | 0.011802 | 0.011696 |
| 0.011696 | 0.011873 | 0.011979 | 0.011767 | 0.011873 | 0.011873 | 0.011802 |
| 0.011661 | 0.011732 | 0.011767 | 0.012086 | 0.011732 | 0.011767 | 0.011732 |
| 0.011767 | 0.011625 | 0.011625 | 0.011909 | 0.011944 | 0.011873 | 0.011626 |
| 0.011802 | 0.011838 | 0.011732 | 0.011802 | 0.011767 | 0.011626 | 0.011908 |
| 0.011732 | 0.011696 | 0.011625 | 0.011873 | 0.011626 | 0.011802 | 0.012050 |
| 0.011732 | 0.012062 | 0.012050 | 0.011830 | 0.011541 | 0.011704 | 0.011602 |
| 0.011524 | 0.011922 | 0.011615 | 0.011670 | 0.011623 | 0.011808 | 0.011561 |
| 0.011653 | 0.011611 | 0.011585 | 0.011477 | 0.011683 | 0.011553 | 0.011786 |
| 0.011775 | 0.011640 | 0.011654 | 0.011654 | 0.011591 | 0.011802 | 0.011802 |
| 0.011838 | 0.011308 | 0.011487 | 0.011845 | 0.011628 | 0.000000 | 0.011732 |
| 0.011908 | 0.011484 | 0.011661 | 0.011378 | 0.011590 | 0.011767 | 0.011626 |
| 0.011696 | 0.011696 | 0.011661 | 0.011625 | 0.011661 | 0.011625 | 0.011661 |
| 0.011686 | 0.011686 | 0.011673 | 0.011745 | 0.011889 | 0.011852 | 0.011851 |
| 0.011849 | 0.011768 | 0.011566 | 0.011552 | 0.011702 | 0.011881 | 0.011882 |
| 0.011662 | 0.011738 | 0.011946 | 0.011879 | 0.011874 | 0.011875 | 0.011838 |
| 0.011767 | 0.011838 | 0.011838 | 0.011731 | 0.012227 | 0.011873 | 0.011980 |
| 0.012015 | 0.011960 | 0.011706 | 0.011790 | 0.011661 | 0.011838 | 0.011838 |
| 0.011875 | 0.011908 | 0.011909 | 0.011909 | 0.011968 | 0.012050 | 0.011682 |
| 0.011559 | 0.011571 | 0.011670 | 0.011633 | 0.011636 | 0.011533 | 0.011848 |
| 0.011711 | 0.011662 | 0.011412 | 0.011693 | 0.011697 | 0.011781 | 0.011661 |
| 0.011626 | 0.011555 | 0.011696 | 0.011661 | 0.011802 | 0.011767 | 0.011696 |
| 0.011802 | 0.011838 | 0.011661 | 0.011661 | 0.011696 | 0.011696 | 0.011700 |
| 0.011772 | 0.011661 | 0.011626 | 0.011591 | 0.011802 | 0.011802 | 0.011838 |
| 0.011308 | 0.011487 | 0.011845 | 0.011628 | 0.000000 | 0.011732 | 0.011908 |
| 0.011838 | 0.011838 | 0.011664 | 0.011865 | 0.011791 | 0.011813 | 0.011614 |
| 0.011820 | 0.011968 | 0.011730 | 0.011740 | 0.011626 | 0.011838 | 0.011696 |
| 0.011802 | 0.011696 | 0.011625 | 0.011734 | 0.011767 | 0.011806 | 0.011732 |
| 0.011625 | 0.011556 | 0.011696 | 0.011626 | 0.011555 | 0.011667 | 0.011838 |
| 0.011732 | 0.011625 | 0.011696 | 0.011732 | 0.011696 | 0.011626 | 0.011767 |

|          |          |          |          |          |          |          |
|----------|----------|----------|----------|----------|----------|----------|
| 0.011696 | 0.011732 | 0.011732 | 0.011661 | 0.011732 | 0.011979 | 0.011555 |
| 0.011661 | 0.012015 | 0.011661 | 0.011696 | 0.011661 | 0.011979 | 0.011511 |
| 0.011833 | 0.011643 | 0.011537 | 0.011782 | 0.011875 | 0.011740 | 0.011500 |
| 0.011449 | 0.011696 | 0.011802 | 0.011918 | 0.011769 | 0.011915 | 0.012051 |
| 0.011946 | 0.011986 | 0.011944 | 0.012212 | 0.011873 | 0.012617 | 0.011947 |
| 0.012653 | 0.012409 | 0.012550 | 0.012801 | 0.011944 | 0.011590 | 0.011909 |
| 0.012335 | 0.012268 | 0.011838 | 0.011767 | 0.011839 | 0.011839 | 0.011880 |
| 0.011696 | 0.011703 | 0.011767 | 0.011732 | 0.012122 | 0.012192 | 0.012229 |
| 0.012123 | 0.012193 | 0.012338 | 0.012022 | 0.012336 | 0.012341 | 0.012407 |
| 0.012408 | 0.012443 | 0.012390 | 0.012408 | 0.012409 | 0.011767 | 0.011980 |
| 0.012087 | 0.012617 | 0.012060 | 0.012298 | 0.012797 | 0.011811 | 0.011732 |
| 0.011696 | 0.011696 | 0.012192 | 0.012149 | 0.012280 | 0.011944 | 0.011699 |
| S636     | 0.011698 | 0.011698 | 0.012034 | 0.011799 | 0.011799 | 0.011866 |
| 0.011705 | 0.011637 | 0.011866 | 0.011295 | 0.011362 | 0.011296 | 0.011295 |
| 0.011329 | 0.011497 | 0.011295 | 0.011329 | 0.011396 | 0.011362 | 0.011329 |
| 0.011295 | 0.011329 | 0.011429 | 0.011295 | 0.011329 | 0.011329 | 0.011671 |
| 0.011564 | 0.011329 | 0.011228 | 0.011463 | 0.011396 | 0.011362 | 0.011396 |
| 0.011362 | 0.011463 | 0.011362 | 0.011362 | 0.011396 | 0.011362 | 0.011530 |
| 0.011295 | 0.011362 | 0.011396 | 0.011329 | 0.011429 | 0.011463 | 0.011396 |
| 0.011362 | 0.011530 | 0.011430 | 0.011698 | 0.011362 | 0.011631 | 0.011362 |
| 0.011329 | 0.011430 | 0.011497 | 0.011631 | 0.011732 | 0.011429 | 0.011530 |
| 0.011396 | 0.011463 | 0.011362 | 0.011597 | 0.011833 | 0.011362 | 0.011429 |
| 0.011329 | 0.011429 | 0.011396 | 0.011463 | 0.011396 | 0.011396 | 0.011396 |
| 0.011295 | 0.011329 | 0.011295 | 0.011396 | 0.011362 | 0.011363 | 0.011463 |
| 0.011396 | 0.011362 | 0.011429 | 0.011329 | 0.011463 | 0.011295 | 0.011362 |
| 0.011530 | 0.011463 | 0.011698 | 0.011530 | 0.011362 | 0.011597 | 0.011362 |
| 0.011468 | 0.011695 | 0.011513 | 0.011216 | 0.011210 | 0.011318 | 0.011415 |
| 0.012011 | 0.011467 | 0.011143 | 0.011597 | 0.011597 | 0.011396 | 0.011497 |
| 0.011429 | 0.011396 | 0.011463 | 0.011362 | 0.011463 | 0.011396 | 0.011396 |
| 0.011362 | 0.011463 | 0.011664 | 0.011530 | 0.011429 | 0.011396 | 0.011329 |
| 0.011295 | 0.011295 | 0.011362 | 0.011329 | 0.011530 | 0.011497 | 0.011430 |
| 0.011530 | 0.011597 | 0.011329 | 0.011329 | 0.011362 | 0.011362 | 0.011364 |
| 0.011432 | 0.011362 | 0.011329 | 0.011168 | 0.011241 | 0.011236 | 0.011329 |
| 0.011331 | 0.011232 | 0.011282 | 0.011302 | 0.011230 | 0.011266 | 0.011297 |
| 0.011564 | 0.011336 | 0.011370 | 0.011262 | 0.011268 | 0.011397 | 0.011363 |
| 0.011430 | 0.011364 | 0.011363 | 0.011496 | 0.011429 | 0.011799 | 0.011598 |
| 0.011631 | 0.011497 | 0.011362 | 0.011463 | 0.011262 | 0.011497 | 0.011295 |
| 0.011362 | 0.011362 | 0.011329 | 0.011295 | 0.011329 | 0.011295 | 0.011396 |
| 0.011362 | 0.011463 | 0.011396 | 0.011295 | 0.011397 | 0.011497 | 0.011500 |
| 0.011497 | 0.011362 | 0.011295 | 0.011229 | 0.011362 | 0.011295 | 0.011228 |
| 0.011332 | 0.011497 | 0.011295 | 0.011497 | 0.011262 | 0.011363 | 0.011329 |
| 0.011430 | 0.011329 | 0.011362 | 0.011329 | 0.011362 | 0.011228 | 0.011362 |
| 0.011396 | 0.011329 | 0.011396 | 0.011329 | 0.011362 | 0.011396 | 0.011631 |
| 0.011732 | 0.011664 | 0.011732 | 0.011465 | 0.011732 | 0.011362 | 0.011329 |
| 0.011330 | 0.011586 | 0.011426 | 0.011232 | 0.011739 | 0.011197 | 0.011336 |
| 0.011739 | 0.011638 | 0.011530 | 0.011732 | 0.011436 | 0.011597 | 0.011564 |
| 0.011497 | 0.011664 | 0.011486 | 0.011307 | 0.011354 | 0.011396 | 0.011466 |
| 0.011564 | 0.011465 | 0.011601 | 0.011669 | 0.011597 | 0.011665 | 0.011772 |
| 0.011500 | 0.011671 | 0.011602 | 0.011534 | 0.011800 | 0.011262 | 0.011465 |
| 0.011429 | 0.011362 | 0.011262 | 0.011262 | 0.011329 | 0.011329 | 0.011396 |
| 0.011329 | 0.011396 | 0.011295 | 0.011396 | 0.011329 | 0.011329 | 0.011396 |
| 0.011329 | 0.011765 | 0.011664 | 0.011698 | 0.011228 | 0.011329 | 0.011362 |
| 0.011362 | 0.011329 | 0.011396 | 0.011429 | 0.011295 | 0.011295 | 0.011295 |
| 0.011832 | 0.011463 | 0.011463 | 0.011262 | 0.011362 | 0.011530 | 0.011295 |
| 0.011295 | 0.011362 | 0.011329 | 0.011497 | 0.011295 | 0.011429 | 0.011564 |
| 0.011497 | 0.011329 | 0.011329 | 0.011262 | 0.011262 | 0.011430 | 0.011362 |
| 0.011262 | 0.011362 | 0.011228 | 0.011262 | 0.011396 | 0.011530 | 0.011295 |
| 0.011262 | 0.011396 | 0.011329 | 0.011228 | 0.011564 | 0.011228 | 0.011396 |
| 0.011471 | 0.011295 | 0.011597 | 0.011430 | 0.011463 | 0.011329 | 0.011429 |
| 0.011295 | 0.011631 | 0.011228 | 0.011497 | 0.011295 | 0.011295 | 0.011228 |

|          |          |          |          |          |          |          |
|----------|----------|----------|----------|----------|----------|----------|
| 0.011463 | 0.011665 | 0.011362 | 0.011429 | 0.011262 | 0.011664 | 0.011295 |
| 0.011295 | 0.011295 | 0.011329 | 0.011429 | 0.011329 | 0.011429 | 0.011497 |
| 0.011497 | 0.011463 | 0.011362 | 0.011463 | 0.011429 | 0.011295 | 0.011262 |
| 0.011295 | 0.011295 | 0.011362 | 0.011295 | 0.011262 | 0.011429 | 0.011295 |
| 0.011329 | 0.011329 | 0.011463 | 0.011497 | 0.011396 | 0.011329 | 0.011329 |
| 0.011396 | 0.011329 | 0.011429 | 0.011295 | 0.011429 | 0.011530 | 0.011832 |
| 0.011329 | 0.011732 | 0.011267 | 0.017785 | 0.011257 | 0.011366 | 0.011618 |
| 0.011614 | 0.011623 | 0.011270 | 0.011234 | 0.011719 | 0.011682 | 0.011303 |
| 0.011487 | 0.011487 | 0.011177 | 0.011228 | 0.011216 | 0.011307 | 0.011275 |
| 0.011482 | 0.011433 | 0.011431 | 0.011259 | 0.011463 | 0.011497 | 0.011500 |
| 0.011369 | 0.011463 | 0.011463 | 0.011430 | 0.011396 | 0.011396 | 0.011363 |
| 0.011396 | 0.011329 | 0.011362 | 0.011396 | 0.011363 | 0.011295 | 0.011329 |
| 0.011329 | 0.011396 | 0.011295 | 0.011396 | 0.011430 | 0.011463 | 0.011362 |
| 0.011396 | 0.011362 | 0.011698 | 0.011698 | 0.011430 | 0.011464 | 0.011497 |
| 0.011262 | 0.011262 | 0.011295 | 0.011396 | 0.011262 | 0.011497 | 0.011497 |
| 0.011530 | 0.011530 | 0.011463 | 0.011564 | 0.011732 | 0.011565 | 0.011396 |
| 0.011396 | 0.011463 | 0.011497 | 0.011329 | 0.011396 | 0.011362 | 0.011396 |
| 0.011430 | 0.011430 | 0.011497 | 0.011430 | 0.011330 | 0.011564 | 0.011530 |
| 0.011399 | 0.011295 | 0.011396 | 0.011497 | 0.011396 | 0.011530 | 0.011564 |
| 0.011732 | 0.011436 | 0.011597 | 0.011564 | 0.011497 | 0.011664 | 0.011295 |
| 0.011464 | 0.011363 | 0.011329 | 0.011329 | 0.011396 | 0.011295 | 0.011396 |
| 0.011430 | 0.011463 | 0.011362 | 0.011396 | 0.011362 | 0.011698 | 0.011698 |
| 0.011430 | 0.011464 | 0.011530 | 0.011463 | 0.012103 | 0.011525 | 0.011447 |
| 0.011482 | 0.011476 | 0.011587 | 0.011476 | 0.011585 | 0.011508 | 0.011474 |
| 0.012056 | 0.011372 | 0.011505 | 0.011441 | 0.011714 | 0.011570 | 0.011673 |
| 0.012080 | 0.011475 | 0.011635 | 0.011698 | 0.011564 | 0.011564 | 0.011601 |
| 0.011262 | 0.011429 | 0.011564 | 0.011530 | 0.011533 | 0.011530 | 0.011464 |
| 0.011362 | 0.011295 | 0.011329 | 0.011362 | 0.011262 | 0.011329 | 0.011228 |
| 0.011362 | 0.011396 | 0.011295 | 0.011262 | 0.011362 | 0.011295 | 0.011329 |
| 0.011329 | 0.011262 | 0.011329 | 0.011362 | 0.011262 | 0.011463 | 0.011497 |
| 0.011396 | 0.011463 | 0.011396 | 0.011396 | 0.011329 | 0.011732 | 0.011362 |
| 0.011408 | 0.011329 | 0.011564 | 0.011569 | 0.011430 | 0.011429 | 0.011429 |
| 0.011429 | 0.011362 | 0.011329 | 0.011362 | 0.011463 | 0.011463 | 0.011396 |
| 0.011396 | 0.011530 | 0.011698 | 0.011429 | 0.011631 | 0.011631 | 0.011496 |
| 0.011329 | 0.011396 | 0.011429 | 0.011833 | 0.011396 | 0.011430 | 0.011396 |
| 0.011429 | 0.011362 | 0.011362 | 0.011665 | 0.011597 | 0.011631 | 0.011362 |
| 0.011463 | 0.011530 | 0.011396 | 0.011463 | 0.011429 | 0.011295 | 0.011631 |
| 0.011396 | 0.011362 | 0.011362 | 0.011530 | 0.011362 | 0.011463 | 0.011698 |
| 0.011396 | 0.011773 | 0.011765 | 0.011507 | 0.011173 | 0.011434 | 0.011215 |
| 0.011170 | 0.011683 | 0.011236 | 0.011417 | 0.011255 | 0.011366 | 0.011379 |
| 0.011417 | 0.011192 | 0.011339 | 0.011192 | 0.011222 | 0.011261 | 0.011385 |
| 0.011399 | 0.011296 | 0.011377 | 0.011307 | 0.011397 | 0.011530 | 0.011598 |
| 0.011597 | 0.011430 | 0.011534 | 0.011569 | 0.011704 | 0.011732 | 0.000000 |
| 0.011631 | 0.011497 | 0.011362 | 0.011463 | 0.011262 | 0.011497 | 0.011295 |
| 0.011362 | 0.011362 | 0.011329 | 0.011295 | 0.011329 | 0.011295 | 0.011396 |
| 0.011340 | 0.011340 | 0.011334 | 0.011368 | 0.011505 | 0.011470 | 0.011470 |
| 0.011469 | 0.011396 | 0.011171 | 0.011204 | 0.011331 | 0.011501 | 0.011501 |
| 0.011296 | 0.011365 | 0.011599 | 0.011567 | 0.011497 | 0.011531 | 0.011496 |
| 0.011429 | 0.011497 | 0.011496 | 0.011396 | 0.011967 | 0.011564 | 0.011631 |
| 0.011665 | 0.011701 | 0.011367 | 0.011407 | 0.011329 | 0.011530 | 0.011497 |
| 0.011531 | 0.011564 | 0.011564 | 0.011564 | 0.011650 | 0.011698 | 0.011338 |
| 0.011229 | 0.011233 | 0.011333 | 0.011298 | 0.011402 | 0.011210 | 0.011570 |
| 0.011369 | 0.011367 | 0.000000 | 0.011322 | 0.011329 | 0.011402 | 0.011329 |
| 0.011295 | 0.011295 | 0.011362 | 0.011329 | 0.011530 | 0.011497 | 0.011430 |
| 0.011530 | 0.011597 | 0.011329 | 0.011329 | 0.011362 | 0.011362 | 0.011364 |
| 0.011432 | 0.011362 | 0.011329 | 0.011397 | 0.011530 | 0.011598 | 0.011597 |
| 0.011430 | 0.011534 | 0.011569 | 0.011704 | 0.011732 | 0.000000 | 0.011564 |
| 0.011497 | 0.011497 | 0.011331 | 0.011513 | 0.011408 | 0.011469 | 0.011305 |
| 0.011473 | 0.011698 | 0.011441 | 0.011400 | 0.011295 | 0.011497 | 0.011362 |
| 0.011463 | 0.011396 | 0.011295 | 0.011397 | 0.011497 | 0.011500 | 0.011362 |

|          |          |          |          |          |          |          |
|----------|----------|----------|----------|----------|----------|----------|
| 0.011295 | 0.011229 | 0.011362 | 0.011295 | 0.011228 | 0.011332 | 0.011497 |
| 0.011396 | 0.011329 | 0.011362 | 0.011396 | 0.011363 | 0.011295 | 0.011497 |
| 0.011362 | 0.011396 | 0.011396 | 0.011329 | 0.011396 | 0.011631 | 0.011295 |
| 0.011329 | 0.011732 | 0.011329 | 0.011362 | 0.011329 | 0.011698 | 0.011189 |
| 0.011622 | 0.011145 | 0.011261 | 0.011382 | 0.011508 | 0.011455 | 0.011144 |
| 0.011218 | 0.011496 | 0.011597 | 0.011671 | 0.011531 | 0.011669 | 0.011800 |
| 0.011733 | 0.011770 | 0.011732 | 0.011949 | 0.011698 | 0.012573 | 0.011700 |
| 0.012473 | 0.012207 | 0.012375 | 0.012579 | 0.011698 | 0.011396 | 0.011665 |
| 0.012137 | 0.012038 | 0.011664 | 0.011564 | 0.011598 | 0.011598 | 0.011601 |
| 0.011496 | 0.011467 | 0.011564 | 0.011497 | 0.011867 | 0.011967 | 0.011935 |
| 0.011868 | 0.011934 | 0.012038 | 0.011804 | 0.012104 | 0.012110 | 0.012205 |
| 0.012172 | 0.012205 | 0.012152 | 0.012172 | 0.012173 | 0.011429 | 0.011732 |
| 0.011767 | 0.012303 | 0.011772 | 0.012034 | 0.012474 | 0.011536 | 0.011430 |
| 0.011429 | 0.011429 | 0.011900 | 0.011883 | 0.011975 | 0.011765 | 0.011397 |
| S637     | 0.011933 | 0.011933 | 0.012001 | 0.011765 | 0.011765 | 0.011832 |
| 0.011671 | 0.011603 | 0.011832 | 0.011530 | 0.011597 | 0.011565 | 0.011530 |
| 0.011496 | 0.011731 | 0.011463 | 0.011564 | 0.011631 | 0.011597 | 0.011564 |
| 0.011530 | 0.011564 | 0.011396 | 0.011530 | 0.011564 | 0.011564 | 0.011637 |
| 0.011429 | 0.011564 | 0.011463 | 0.011429 | 0.011631 | 0.011597 | 0.011631 |
| 0.011597 | 0.011698 | 0.011597 | 0.011597 | 0.011631 | 0.011597 | 0.011765 |
| 0.011463 | 0.011597 | 0.011631 | 0.011564 | 0.011597 | 0.011698 | 0.011631 |
| 0.011597 | 0.011765 | 0.011665 | 0.011664 | 0.011597 | 0.011866 | 0.011597 |
| 0.011564 | 0.011597 | 0.011731 | 0.011866 | 0.011698 | 0.011597 | 0.011698 |
| 0.011631 | 0.011698 | 0.011597 | 0.011832 | 0.011799 | 0.011597 | 0.011664 |
| 0.011564 | 0.011664 | 0.011631 | 0.011698 | 0.011631 | 0.011631 | 0.011631 |
| 0.011530 | 0.011564 | 0.011530 | 0.011564 | 0.011597 | 0.011632 | 0.011698 |
| 0.011631 | 0.011597 | 0.011664 | 0.011563 | 0.011631 | 0.011530 | 0.011597 |
| 0.011765 | 0.011698 | 0.011732 | 0.011765 | 0.011597 | 0.011765 | 0.011597 |
| 0.011765 | 0.011695 | 0.011777 | 0.011529 | 0.011545 | 0.011649 | 0.011415 |
| 0.012085 | 0.011416 | 0.011596 | 0.011832 | 0.011832 | 0.011564 | 0.011664 |
| 0.011664 | 0.011631 | 0.011698 | 0.011597 | 0.011698 | 0.011631 | 0.011631 |
| 0.011597 | 0.011631 | 0.011899 | 0.011765 | 0.011664 | 0.011631 | 0.011564 |
| 0.011530 | 0.011463 | 0.011597 | 0.011564 | 0.011497 | 0.011463 | 0.011396 |
| 0.011497 | 0.011564 | 0.011564 | 0.011564 | 0.011597 | 0.011597 | 0.011601 |
| 0.011669 | 0.011597 | 0.011597 | 0.011492 | 0.011566 | 0.011516 | 0.011598 |
| 0.011602 | 0.011541 | 0.011614 | 0.011578 | 0.011502 | 0.011540 | 0.011567 |
| 0.011564 | 0.011612 | 0.011646 | 0.011531 | 0.011544 | 0.011666 | 0.011565 |
| 0.011632 | 0.011633 | 0.011632 | 0.011731 | 0.011664 | 0.011967 | 0.011766 |
| 0.000000 | 0.011665 | 0.011597 | 0.011631 | 0.011497 | 0.011329 | 0.011530 |
| 0.011597 | 0.011597 | 0.011564 | 0.011530 | 0.011564 | 0.011530 | 0.011631 |
| 0.011597 | 0.011698 | 0.011631 | 0.011530 | 0.011633 | 0.011732 | 0.011736 |
| 0.011732 | 0.011631 | 0.011530 | 0.011465 | 0.011597 | 0.011530 | 0.011463 |
| 0.011468 | 0.011732 | 0.011530 | 0.011732 | 0.011497 | 0.011597 | 0.011564 |
| 0.011665 | 0.011564 | 0.011597 | 0.011564 | 0.011597 | 0.011463 | 0.011597 |
| 0.011631 | 0.011564 | 0.011631 | 0.011564 | 0.011597 | 0.011631 | 0.011866 |
| 0.011698 | 0.011631 | 0.011698 | 0.011734 | 0.011699 | 0.011597 | 0.011564 |
| 0.011533 | 0.011828 | 0.011609 | 0.011506 | 0.011705 | 0.011469 | 0.011611 |
| 0.011705 | 0.011604 | 0.011765 | 0.011967 | 0.011675 | 0.011832 | 0.011799 |
| 0.011731 | 0.011900 | 0.011771 | 0.011596 | 0.011731 | 0.011631 | 0.011703 |
| 0.011799 | 0.011701 | 0.011838 | 0.011906 | 0.011832 | 0.011900 | 0.012009 |
| 0.011737 | 0.011909 | 0.011839 | 0.011770 | 0.012036 | 0.011496 | 0.011700 |
| 0.011664 | 0.011597 | 0.011496 | 0.011496 | 0.011564 | 0.011564 | 0.011631 |
| 0.011564 | 0.011631 | 0.011530 | 0.011564 | 0.011496 | 0.011564 | 0.011631 |
| 0.011564 | 0.011732 | 0.011631 | 0.011664 | 0.011463 | 0.011564 | 0.011597 |
| 0.011597 | 0.011564 | 0.011631 | 0.011597 | 0.011530 | 0.011530 | 0.011530 |
| 0.011799 | 0.011631 | 0.011698 | 0.011496 | 0.011597 | 0.011765 | 0.011530 |
| 0.011530 | 0.011597 | 0.011564 | 0.011732 | 0.011530 | 0.011463 | 0.011597 |
| 0.011530 | 0.011564 | 0.011564 | 0.011496 | 0.011496 | 0.011664 | 0.011597 |
| 0.011496 | 0.011597 | 0.011463 | 0.011496 | 0.011631 | 0.011497 | 0.011530 |
| 0.011497 | 0.011631 | 0.011564 | 0.011463 | 0.011530 | 0.011463 | 0.011631 |

|          |          |          |          |          |          |          |
|----------|----------|----------|----------|----------|----------|----------|
| 0.011711 | 0.011530 | 0.011564 | 0.011665 | 0.011631 | 0.011564 | 0.011664 |
| 0.011530 | 0.011866 | 0.011463 | 0.011664 | 0.011463 | 0.011463 | 0.011463 |
| 0.011698 | 0.011631 | 0.011597 | 0.011664 | 0.011496 | 0.011631 | 0.011463 |
| 0.011530 | 0.011530 | 0.011564 | 0.011664 | 0.011564 | 0.011664 | 0.011731 |
| 0.011731 | 0.011698 | 0.011597 | 0.011698 | 0.011664 | 0.011530 | 0.011496 |
| 0.011530 | 0.011530 | 0.011597 | 0.011463 | 0.011496 | 0.011664 | 0.011530 |
| 0.011496 | 0.011564 | 0.011698 | 0.011664 | 0.011631 | 0.011564 | 0.011564 |
| 0.011631 | 0.011564 | 0.011664 | 0.011530 | 0.011664 | 0.011765 | 0.011799 |
| 0.011564 | 0.011698 | 0.011578 | 0.018125 | 0.011649 | 0.011672 | 0.011653 |
| 0.011614 | 0.011658 | 0.011741 | 0.011582 | 0.011720 | 0.011682 | 0.011789 |
| 0.011724 | 0.011488 | 0.011489 | 0.011646 | 0.011529 | 0.011702 | 0.011619 |
| 0.011530 | 0.011321 | 0.011468 | 0.011391 | 0.011698 | 0.011732 | 0.011737 |
| 0.011610 | 0.011698 | 0.011698 | 0.011597 | 0.011631 | 0.011631 | 0.011598 |
| 0.011631 | 0.011564 | 0.011597 | 0.011631 | 0.011597 | 0.011530 | 0.011564 |
| 0.011564 | 0.011631 | 0.011530 | 0.011631 | 0.011665 | 0.011698 | 0.011597 |
| 0.011564 | 0.011530 | 0.011665 | 0.011665 | 0.011665 | 0.011699 | 0.011732 |
| 0.011497 | 0.011497 | 0.011530 | 0.011631 | 0.011497 | 0.011732 | 0.011732 |
| 0.011765 | 0.011765 | 0.011698 | 0.011799 | 0.011698 | 0.011801 | 0.011631 |
| 0.011631 | 0.011698 | 0.011732 | 0.011564 | 0.011631 | 0.011597 | 0.011631 |
| 0.011699 | 0.011698 | 0.011732 | 0.011698 | 0.011599 | 0.011799 | 0.011765 |
| 0.011636 | 0.011530 | 0.011631 | 0.011732 | 0.011631 | 0.011698 | 0.011799 |
| 0.011967 | 0.011675 | 0.011832 | 0.011799 | 0.011731 | 0.011900 | 0.011531 |
| 0.011700 | 0.011598 | 0.011564 | 0.011564 | 0.011631 | 0.011530 | 0.011631 |
| 0.011665 | 0.011698 | 0.011597 | 0.011564 | 0.011530 | 0.011665 | 0.011665 |
| 0.011665 | 0.011699 | 0.011765 | 0.011698 | 0.012271 | 0.011775 | 0.011693 |
| 0.011763 | 0.011719 | 0.011833 | 0.011718 | 0.011830 | 0.011750 | 0.011715 |
| 0.012228 | 0.011614 | 0.011745 | 0.011683 | 0.011955 | 0.011808 | 0.011911 |
| 0.012250 | 0.011739 | 0.011872 | 0.011933 | 0.011799 | 0.011530 | 0.011837 |
| 0.011496 | 0.011664 | 0.011799 | 0.011765 | 0.011770 | 0.011362 | 0.011464 |
| 0.011597 | 0.011530 | 0.011564 | 0.011597 | 0.011496 | 0.011564 | 0.011463 |
| 0.011530 | 0.011564 | 0.011530 | 0.011496 | 0.011597 | 0.011530 | 0.011564 |
| 0.011564 | 0.011496 | 0.011564 | 0.011597 | 0.011496 | 0.011698 | 0.011731 |
| 0.011631 | 0.011631 | 0.011631 | 0.011631 | 0.011564 | 0.011698 | 0.011597 |
| 0.011373 | 0.011564 | 0.011430 | 0.011433 | 0.011664 | 0.011664 | 0.011664 |
| 0.011664 | 0.011597 | 0.011564 | 0.011597 | 0.011698 | 0.011698 | 0.011631 |
| 0.011631 | 0.011765 | 0.011664 | 0.011664 | 0.011866 | 0.011866 | 0.011731 |
| 0.011563 | 0.011631 | 0.011664 | 0.011799 | 0.011631 | 0.011664 | 0.011631 |
| 0.011664 | 0.011530 | 0.011530 | 0.011832 | 0.011832 | 0.011799 | 0.011597 |
| 0.011698 | 0.011765 | 0.011631 | 0.011698 | 0.011664 | 0.011530 | 0.011597 |
| 0.011631 | 0.011597 | 0.011530 | 0.011765 | 0.011597 | 0.011698 | 0.011732 |
| 0.011631 | 0.011739 | 0.011732 | 0.011345 | 0.011455 | 0.011638 | 0.011370 |
| 0.011555 | 0.011722 | 0.011552 | 0.011730 | 0.011597 | 0.011620 | 0.011591 |
| 0.011315 | 0.011587 | 0.011617 | 0.011522 | 0.011545 | 0.011797 | 0.011750 |
| 0.011738 | 0.011650 | 0.011624 | 0.011624 | 0.011633 | 0.011362 | 0.011430 |
| 0.011564 | 0.011632 | 0.011736 | 0.011535 | 0.011874 | 0.011908 | 0.011631 |
| 0.000000 | 0.011665 | 0.011597 | 0.011631 | 0.011497 | 0.011329 | 0.011530 |
| 0.011597 | 0.011597 | 0.011564 | 0.011530 | 0.011564 | 0.011530 | 0.011631 |
| 0.011619 | 0.011620 | 0.011608 | 0.011642 | 0.011779 | 0.011743 | 0.011743 |
| 0.011742 | 0.011665 | 0.011503 | 0.011492 | 0.011602 | 0.011772 | 0.011773 |
| 0.011565 | 0.011636 | 0.011868 | 0.011838 | 0.011766 | 0.011801 | 0.011731 |
| 0.011664 | 0.011731 | 0.011731 | 0.011631 | 0.011934 | 0.011799 | 0.011866 |
| 0.011900 | 0.011701 | 0.011606 | 0.011684 | 0.011564 | 0.011765 | 0.011732 |
| 0.011767 | 0.011799 | 0.011799 | 0.011799 | 0.011925 | 0.011933 | 0.011580 |
| 0.011466 | 0.011476 | 0.011571 | 0.011536 | 0.011573 | 0.011508 | 0.011536 |
| 0.011609 | 0.011499 | 0.011632 | 0.011660 | 0.011598 | 0.011676 | 0.011564 |
| 0.011530 | 0.011463 | 0.011597 | 0.011564 | 0.011497 | 0.011463 | 0.011396 |
| 0.011497 | 0.011564 | 0.011564 | 0.011564 | 0.011597 | 0.011597 | 0.011601 |
| 0.011669 | 0.011597 | 0.011597 | 0.011633 | 0.011362 | 0.011430 | 0.011564 |
| 0.011632 | 0.011736 | 0.011535 | 0.011874 | 0.011908 | 0.011631 | 0.011799 |
| 0.011732 | 0.011732 | 0.011567 | 0.011756 | 0.011686 | 0.011673 | 0.011586 |

|          |          |          |          |          |          |          |
|----------|----------|----------|----------|----------|----------|----------|
| 0.011749 | 0.012017 | 0.011738 | 0.011638 | 0.011530 | 0.011732 | 0.011597 |
| 0.011698 | 0.011631 | 0.011530 | 0.011633 | 0.011732 | 0.011736 | 0.011631 |
| 0.011530 | 0.011465 | 0.011597 | 0.011530 | 0.011463 | 0.011468 | 0.011732 |
| 0.011631 | 0.011564 | 0.011597 | 0.011631 | 0.011597 | 0.011530 | 0.011463 |
| 0.011597 | 0.011631 | 0.011631 | 0.011564 | 0.011631 | 0.011866 | 0.011463 |
| 0.011564 | 0.011698 | 0.011564 | 0.011597 | 0.011563 | 0.011664 | 0.011617 |
| 0.011904 | 0.011485 | 0.011461 | 0.011342 | 0.011427 | 0.011347 | 0.011436 |
| 0.011428 | 0.011463 | 0.011564 | 0.011671 | 0.011532 | 0.011669 | 0.011800 |
| 0.011700 | 0.011737 | 0.011698 | 0.011949 | 0.011664 | 0.012539 | 0.011700 |
| 0.012439 | 0.012207 | 0.012341 | 0.012613 | 0.011664 | 0.011564 | 0.011665 |
| 0.012306 | 0.012038 | 0.011631 | 0.011530 | 0.011598 | 0.011598 | 0.011568 |
| 0.011463 | 0.011467 | 0.011530 | 0.011497 | 0.011867 | 0.011933 | 0.011935 |
| 0.011834 | 0.011935 | 0.012038 | 0.011804 | 0.012306 | 0.012313 | 0.012373 |
| 0.012374 | 0.012408 | 0.012357 | 0.012374 | 0.012376 | 0.011664 | 0.011900 |
| 0.011968 | 0.012472 | 0.011976 | 0.012001 | 0.012474 | 0.011536 | 0.011430 |
| 0.011396 | 0.011396 | 0.011867 | 0.011883 | 0.012010 | 0.011732 | 0.011397 |
| S638     | 0.011799 | 0.011799 | 0.012068 | 0.011833 | 0.011833 | 0.011900 |
| 0.011740 | 0.011672 | 0.011833 | 0.011396 | 0.011463 | 0.011430 | 0.011396 |
| 0.011362 | 0.011597 | 0.011329 | 0.011430 | 0.011497 | 0.011463 | 0.011430 |
| 0.011396 | 0.011430 | 0.011463 | 0.011396 | 0.011430 | 0.011430 | 0.011706 |
| 0.011597 | 0.011430 | 0.011329 | 0.011497 | 0.011497 | 0.011463 | 0.011497 |
| 0.011463 | 0.011564 | 0.011463 | 0.011463 | 0.011497 | 0.011463 | 0.011631 |
| 0.011329 | 0.011463 | 0.011497 | 0.011429 | 0.011463 | 0.011564 | 0.011497 |
| 0.011463 | 0.011631 | 0.011531 | 0.011732 | 0.011463 | 0.011732 | 0.011463 |
| 0.011429 | 0.011463 | 0.011598 | 0.011732 | 0.011766 | 0.011463 | 0.011295 |
| 0.011497 | 0.011564 | 0.011463 | 0.011698 | 0.011867 | 0.011463 | 0.011530 |
| 0.011430 | 0.011530 | 0.011497 | 0.011564 | 0.011497 | 0.011497 | 0.011497 |
| 0.011396 | 0.011429 | 0.011396 | 0.011430 | 0.011463 | 0.011498 | 0.011564 |
| 0.011497 | 0.011463 | 0.011530 | 0.011429 | 0.011497 | 0.011396 | 0.011463 |
| 0.011631 | 0.011564 | 0.011799 | 0.011631 | 0.011463 | 0.011698 | 0.011463 |
| 0.011654 | 0.011807 | 0.011702 | 0.011412 | 0.011396 | 0.011465 | 0.011533 |
| 0.012158 | 0.011518 | 0.011431 | 0.011698 | 0.011698 | 0.011429 | 0.011530 |
| 0.011530 | 0.011497 | 0.011564 | 0.011463 | 0.011564 | 0.011497 | 0.011497 |
| 0.011463 | 0.011497 | 0.011766 | 0.011631 | 0.011530 | 0.011497 | 0.011430 |
| 0.011396 | 0.011329 | 0.011463 | 0.011430 | 0.011564 | 0.011530 | 0.011463 |
| 0.011564 | 0.011631 | 0.011429 | 0.011429 | 0.011463 | 0.011463 | 0.011465 |
| 0.011533 | 0.011463 | 0.011463 | 0.011312 | 0.011422 | 0.011341 | 0.011464 |
| 0.011467 | 0.011404 | 0.011466 | 0.011440 | 0.011366 | 0.011403 | 0.011432 |
| 0.011564 | 0.011439 | 0.011508 | 0.011396 | 0.011406 | 0.011531 | 0.011430 |
| 0.011498 | 0.011498 | 0.011497 | 0.011597 | 0.011530 | 0.011900 | 0.011631 |
| 0.011665 | 0.000000 | 0.011463 | 0.011228 | 0.011362 | 0.011530 | 0.011396 |
| 0.011463 | 0.011463 | 0.011430 | 0.011396 | 0.011430 | 0.011396 | 0.011497 |
| 0.011463 | 0.011564 | 0.011497 | 0.011396 | 0.011498 | 0.011598 | 0.011601 |
| 0.011598 | 0.011497 | 0.011396 | 0.011330 | 0.011463 | 0.011396 | 0.011329 |
| 0.011434 | 0.011598 | 0.011396 | 0.011598 | 0.011362 | 0.011463 | 0.011430 |
| 0.011530 | 0.011430 | 0.011463 | 0.011362 | 0.011396 | 0.011329 | 0.011463 |
| 0.011497 | 0.011430 | 0.011497 | 0.011429 | 0.011463 | 0.011497 | 0.011732 |
| 0.011698 | 0.011698 | 0.011766 | 0.011600 | 0.011766 | 0.011463 | 0.011430 |
| 0.011398 | 0.011586 | 0.011518 | 0.011369 | 0.011739 | 0.011333 | 0.011414 |
| 0.011773 | 0.011672 | 0.011631 | 0.011833 | 0.011538 | 0.011698 | 0.011665 |
| 0.011598 | 0.011765 | 0.011629 | 0.011390 | 0.011480 | 0.011497 | 0.011568 |
| 0.011665 | 0.011566 | 0.011703 | 0.011771 | 0.011698 | 0.011698 | 0.011874 |
| 0.011602 | 0.011773 | 0.011704 | 0.011635 | 0.011902 | 0.011362 | 0.011566 |
| 0.011530 | 0.011463 | 0.011362 | 0.011362 | 0.011430 | 0.011430 | 0.011497 |
| 0.011429 | 0.011497 | 0.011396 | 0.011430 | 0.011430 | 0.011430 | 0.011497 |
| 0.011430 | 0.011799 | 0.011698 | 0.011732 | 0.011329 | 0.011430 | 0.011463 |
| 0.011463 | 0.011430 | 0.011497 | 0.011195 | 0.011396 | 0.011396 | 0.011396 |
| 0.011866 | 0.011497 | 0.011564 | 0.011362 | 0.011463 | 0.011631 | 0.011396 |
| 0.011396 | 0.011463 | 0.011429 | 0.011598 | 0.011396 | 0.011530 | 0.011665 |
| 0.011597 | 0.011430 | 0.011430 | 0.011362 | 0.011362 | 0.011530 | 0.011463 |



|          |          |          |          |          |          |          |
|----------|----------|----------|----------|----------|----------|----------|
| 0.011362 | 0.011463 | 0.011329 | 0.011362 | 0.011497 | 0.011564 | 0.011396 |
| 0.011363 | 0.011497 | 0.011430 | 0.011329 | 0.011597 | 0.011329 | 0.011497 |
| 0.011574 | 0.011396 | 0.011631 | 0.011530 | 0.011497 | 0.011430 | 0.011530 |
| 0.011396 | 0.011732 | 0.011329 | 0.011530 | 0.011329 | 0.011329 | 0.011329 |
| 0.011564 | 0.011699 | 0.011463 | 0.011530 | 0.011362 | 0.011698 | 0.011329 |
| 0.011396 | 0.011396 | 0.011430 | 0.011530 | 0.011362 | 0.011530 | 0.011597 |
| 0.011598 | 0.011564 | 0.011463 | 0.011564 | 0.011530 | 0.011396 | 0.011362 |
| 0.011396 | 0.011396 | 0.011463 | 0.011329 | 0.011362 | 0.011530 | 0.011396 |
| 0.011362 | 0.011430 | 0.011564 | 0.011530 | 0.011497 | 0.011429 | 0.011430 |
| 0.011497 | 0.011429 | 0.011530 | 0.011396 | 0.011530 | 0.011631 | 0.011866 |
| 0.011430 | 0.011766 | 0.011440 | 0.017974 | 0.011388 | 0.011549 | 0.011723 |
| 0.011683 | 0.011729 | 0.011584 | 0.011466 | 0.011884 | 0.011751 | 0.011607 |
| 0.011677 | 0.011610 | 0.011372 | 0.011479 | 0.011294 | 0.011455 | 0.011447 |
| 0.011623 | 0.011544 | 0.011542 | 0.011325 | 0.011564 | 0.011597 | 0.011601 |
| 0.011473 | 0.011564 | 0.011564 | 0.011463 | 0.011497 | 0.011497 | 0.011463 |
| 0.011497 | 0.011429 | 0.011463 | 0.011497 | 0.011463 | 0.011396 | 0.011429 |
| 0.011429 | 0.011497 | 0.011396 | 0.011497 | 0.011530 | 0.011564 | 0.011463 |
| 0.011430 | 0.011396 | 0.011732 | 0.011732 | 0.011531 | 0.011565 | 0.011598 |
| 0.011362 | 0.011362 | 0.011396 | 0.011497 | 0.011362 | 0.011598 | 0.011598 |
| 0.011631 | 0.011631 | 0.011564 | 0.011665 | 0.011766 | 0.011666 | 0.011497 |
| 0.011497 | 0.011564 | 0.011598 | 0.011430 | 0.011497 | 0.011463 | 0.011497 |
| 0.011564 | 0.011564 | 0.011597 | 0.011564 | 0.011464 | 0.011665 | 0.011631 |
| 0.011501 | 0.011396 | 0.011497 | 0.011598 | 0.011497 | 0.011564 | 0.011665 |
| 0.011833 | 0.011538 | 0.011698 | 0.011665 | 0.011598 | 0.011765 | 0.011396 |
| 0.011566 | 0.011464 | 0.011429 | 0.011429 | 0.011497 | 0.011396 | 0.011497 |
| 0.011530 | 0.011564 | 0.011463 | 0.011430 | 0.011396 | 0.011732 | 0.011732 |
| 0.011531 | 0.011565 | 0.011631 | 0.011564 | 0.012137 | 0.011632 | 0.011553 |
| 0.011623 | 0.011581 | 0.011693 | 0.011580 | 0.011691 | 0.011612 | 0.011578 |
| 0.012091 | 0.011476 | 0.011608 | 0.011545 | 0.011749 | 0.011673 | 0.011775 |
| 0.012115 | 0.011588 | 0.011534 | 0.011497 | 0.011530 | 0.011463 | 0.011500 |
| 0.011362 | 0.011396 | 0.011530 | 0.011497 | 0.011500 | 0.011564 | 0.011532 |
| 0.011463 | 0.011396 | 0.011430 | 0.011463 | 0.011362 | 0.011430 | 0.011329 |
| 0.011396 | 0.011430 | 0.011396 | 0.011362 | 0.011463 | 0.011396 | 0.011430 |
| 0.011429 | 0.011362 | 0.011430 | 0.011463 | 0.011362 | 0.011564 | 0.011597 |
| 0.011497 | 0.011497 | 0.011497 | 0.011497 | 0.011430 | 0.011766 | 0.011463 |
| 0.011443 | 0.011430 | 0.011598 | 0.011603 | 0.011531 | 0.011530 | 0.011530 |
| 0.011530 | 0.011463 | 0.011429 | 0.011463 | 0.011564 | 0.011564 | 0.011497 |
| 0.011497 | 0.011631 | 0.011732 | 0.011530 | 0.011732 | 0.011732 | 0.011597 |
| 0.011429 | 0.011497 | 0.011530 | 0.011867 | 0.011497 | 0.011531 | 0.011497 |
| 0.011530 | 0.011396 | 0.011396 | 0.011699 | 0.011699 | 0.011665 | 0.011463 |
| 0.011564 | 0.011631 | 0.011497 | 0.011564 | 0.011530 | 0.011396 | 0.011665 |
| 0.011497 | 0.011463 | 0.011396 | 0.011631 | 0.011463 | 0.011564 | 0.011799 |
| 0.011497 | 0.011808 | 0.011799 | 0.011629 | 0.011286 | 0.011502 | 0.011370 |
| 0.011390 | 0.011839 | 0.011411 | 0.011596 | 0.011402 | 0.011569 | 0.011538 |
| 0.011519 | 0.011389 | 0.011506 | 0.011258 | 0.011491 | 0.011462 | 0.011587 |
| 0.011588 | 0.011493 | 0.011412 | 0.011412 | 0.011498 | 0.011564 | 0.011631 |
| 0.011631 | 0.011228 | 0.011331 | 0.011603 | 0.011670 | 0.011484 | 0.011497 |
| 0.011665 | 0.000000 | 0.011463 | 0.011228 | 0.011362 | 0.011530 | 0.011396 |
| 0.011463 | 0.011463 | 0.011430 | 0.011396 | 0.011430 | 0.011396 | 0.011497 |
| 0.011479 | 0.011410 | 0.011471 | 0.011505 | 0.011642 | 0.011607 | 0.011607 |
| 0.011605 | 0.011531 | 0.011319 | 0.011312 | 0.011467 | 0.011636 | 0.011637 |
| 0.011430 | 0.011501 | 0.011734 | 0.011703 | 0.011632 | 0.011666 | 0.011597 |
| 0.011530 | 0.011597 | 0.011597 | 0.011497 | 0.012001 | 0.011665 | 0.011732 |
| 0.011766 | 0.011701 | 0.011470 | 0.011511 | 0.011430 | 0.011631 | 0.011597 |
| 0.011632 | 0.011665 | 0.011665 | 0.011665 | 0.011768 | 0.011799 | 0.011442 |
| 0.011331 | 0.011337 | 0.011435 | 0.011400 | 0.011436 | 0.011322 | 0.011604 |
| 0.011472 | 0.011411 | 0.011203 | 0.011472 | 0.011464 | 0.011539 | 0.011430 |
| 0.011396 | 0.011329 | 0.011463 | 0.011430 | 0.011564 | 0.011530 | 0.011463 |
| 0.011564 | 0.011631 | 0.011429 | 0.011429 | 0.011463 | 0.011463 | 0.011465 |
| 0.011533 | 0.011463 | 0.011463 | 0.011498 | 0.011564 | 0.011631 | 0.011631 |

|          |          |          |          |          |          |          |
|----------|----------|----------|----------|----------|----------|----------|
| 0.011228 | 0.011331 | 0.011603 | 0.011670 | 0.011484 | 0.011497 | 0.011665 |
| 0.011597 | 0.011597 | 0.011432 | 0.011617 | 0.011547 | 0.011571 | 0.011446 |
| 0.011611 | 0.011789 | 0.011483 | 0.011502 | 0.011396 | 0.011598 | 0.011463 |
| 0.011564 | 0.011497 | 0.011396 | 0.011498 | 0.011598 | 0.011601 | 0.011497 |
| 0.011396 | 0.011330 | 0.011463 | 0.011396 | 0.011329 | 0.011434 | 0.011598 |
| 0.011497 | 0.011429 | 0.011463 | 0.011497 | 0.011463 | 0.011396 | 0.011530 |
| 0.011463 | 0.011497 | 0.011497 | 0.011429 | 0.011497 | 0.011732 | 0.011329 |
| 0.011430 | 0.011766 | 0.011429 | 0.011463 | 0.011429 | 0.011732 | 0.011446 |
| 0.011791 | 0.011443 | 0.011411 | 0.011584 | 0.011671 | 0.011563 | 0.011395 |
| 0.011270 | 0.011530 | 0.011631 | 0.011739 | 0.011599 | 0.011737 | 0.011867 |
| 0.011767 | 0.011804 | 0.011765 | 0.012017 | 0.011732 | 0.012607 | 0.011768 |
| 0.012507 | 0.012275 | 0.012409 | 0.012680 | 0.011732 | 0.011430 | 0.011732 |
| 0.012171 | 0.012106 | 0.011698 | 0.011598 | 0.011666 | 0.011666 | 0.011635 |
| 0.011530 | 0.011535 | 0.011597 | 0.011565 | 0.011935 | 0.012001 | 0.012002 |
| 0.011902 | 0.012002 | 0.012106 | 0.011872 | 0.012172 | 0.012178 | 0.012239 |
| 0.012239 | 0.012273 | 0.012221 | 0.012240 | 0.012241 | 0.011530 | 0.011766 |
| 0.011834 | 0.012338 | 0.011840 | 0.012069 | 0.012541 | 0.011604 | 0.011497 |
| 0.011463 | 0.011463 | 0.011934 | 0.011924 | 0.012081 | 0.011799 | 0.011465 |
| S639     | 0.011664 | 0.011664 | 0.012001 | 0.011765 | 0.011765 | 0.011832 |
| 0.011671 | 0.011603 | 0.011799 | 0.011262 | 0.011329 | 0.011296 | 0.011262 |
| 0.011295 | 0.011463 | 0.011262 | 0.011295 | 0.011362 | 0.011329 | 0.011295 |
| 0.011262 | 0.011295 | 0.011396 | 0.011262 | 0.011295 | 0.011295 | 0.011637 |
| 0.011530 | 0.011295 | 0.011195 | 0.011429 | 0.011362 | 0.011329 | 0.011362 |
| 0.011329 | 0.011429 | 0.011329 | 0.011329 | 0.011362 | 0.011329 | 0.011497 |
| 0.011262 | 0.011329 | 0.011362 | 0.011295 | 0.011396 | 0.011429 | 0.011362 |
| 0.011329 | 0.011497 | 0.011396 | 0.011664 | 0.011329 | 0.011597 | 0.011329 |
| 0.011295 | 0.011396 | 0.011463 | 0.011597 | 0.011698 | 0.011396 | 0.011497 |
| 0.011362 | 0.011429 | 0.011329 | 0.011564 | 0.011799 | 0.011329 | 0.011396 |
| 0.011295 | 0.011396 | 0.011362 | 0.011429 | 0.011362 | 0.011362 | 0.011362 |
| 0.011262 | 0.011295 | 0.011262 | 0.011362 | 0.011329 | 0.011363 | 0.011429 |
| 0.011362 | 0.011329 | 0.011396 | 0.011295 | 0.011429 | 0.011262 | 0.011329 |
| 0.011496 | 0.011429 | 0.011664 | 0.011497 | 0.011329 | 0.011564 | 0.011329 |
| 0.011468 | 0.011695 | 0.011513 | 0.011216 | 0.011209 | 0.011355 | 0.011414 |
| 0.012048 | 0.011467 | 0.011225 | 0.011564 | 0.011564 | 0.011362 | 0.011463 |
| 0.011396 | 0.011362 | 0.011429 | 0.011329 | 0.011429 | 0.011362 | 0.011362 |
| 0.011329 | 0.011429 | 0.011631 | 0.011496 | 0.011396 | 0.011362 | 0.011295 |
| 0.011262 | 0.011262 | 0.011329 | 0.011295 | 0.011497 | 0.011463 | 0.011396 |
| 0.011497 | 0.011564 | 0.011295 | 0.011295 | 0.011329 | 0.011329 | 0.011330 |
| 0.011398 | 0.011329 | 0.011329 | 0.011204 | 0.011277 | 0.011236 | 0.011329 |
| 0.011331 | 0.011266 | 0.011318 | 0.011302 | 0.011230 | 0.011266 | 0.011297 |
| 0.011564 | 0.011336 | 0.011370 | 0.011262 | 0.011268 | 0.011397 | 0.011363 |
| 0.011430 | 0.011363 | 0.011363 | 0.011463 | 0.011396 | 0.011765 | 0.011564 |
| 0.011597 | 0.011463 | 0.000000 | 0.011430 | 0.011228 | 0.011463 | 0.011262 |
| 0.011329 | 0.011329 | 0.011295 | 0.011262 | 0.011295 | 0.011262 | 0.011362 |
| 0.011329 | 0.011429 | 0.011362 | 0.011262 | 0.011363 | 0.011463 | 0.011466 |
| 0.011463 | 0.011362 | 0.011262 | 0.011195 | 0.011329 | 0.011262 | 0.011195 |
| 0.011298 | 0.011463 | 0.011262 | 0.011463 | 0.011228 | 0.011329 | 0.011295 |
| 0.011396 | 0.011295 | 0.011329 | 0.011295 | 0.011329 | 0.011195 | 0.011329 |
| 0.011362 | 0.011295 | 0.011362 | 0.011295 | 0.011329 | 0.011362 | 0.011597 |
| 0.011698 | 0.011631 | 0.011698 | 0.011465 | 0.011698 | 0.011329 | 0.011295 |
| 0.011330 | 0.011586 | 0.011472 | 0.011232 | 0.011705 | 0.011197 | 0.011336 |
| 0.011705 | 0.011604 | 0.011496 | 0.011698 | 0.011402 | 0.011564 | 0.011530 |
| 0.011463 | 0.011631 | 0.011487 | 0.011349 | 0.011396 | 0.011362 | 0.011432 |
| 0.011530 | 0.011431 | 0.011567 | 0.011635 | 0.011564 | 0.011631 | 0.011738 |
| 0.011466 | 0.011637 | 0.011568 | 0.011500 | 0.011767 | 0.011228 | 0.011431 |
| 0.011396 | 0.011329 | 0.011228 | 0.011228 | 0.011295 | 0.011295 | 0.011362 |
| 0.011295 | 0.011362 | 0.011262 | 0.011362 | 0.011295 | 0.011295 | 0.011362 |
| 0.011295 | 0.011732 | 0.011631 | 0.011664 | 0.011195 | 0.011295 | 0.011329 |
| 0.011329 | 0.011295 | 0.011362 | 0.011396 | 0.011262 | 0.011262 | 0.011262 |
| 0.011799 | 0.011429 | 0.011429 | 0.011228 | 0.011329 | 0.011497 | 0.011262 |

|          |          |          |          |          |          |          |
|----------|----------|----------|----------|----------|----------|----------|
| 0.011262 | 0.011329 | 0.011295 | 0.011463 | 0.011262 | 0.011396 | 0.011530 |
| 0.011396 | 0.011295 | 0.011295 | 0.011228 | 0.011228 | 0.011396 | 0.011329 |
| 0.011228 | 0.011329 | 0.011195 | 0.011228 | 0.011362 | 0.011497 | 0.011262 |
| 0.011228 | 0.011362 | 0.011295 | 0.011195 | 0.011530 | 0.011195 | 0.011362 |
| 0.011437 | 0.011262 | 0.011564 | 0.011396 | 0.011429 | 0.011295 | 0.011396 |
| 0.011262 | 0.011597 | 0.011195 | 0.011463 | 0.011262 | 0.011262 | 0.011195 |
| 0.011429 | 0.011631 | 0.011329 | 0.011396 | 0.011228 | 0.011631 | 0.011262 |
| 0.011262 | 0.011262 | 0.011295 | 0.011396 | 0.011295 | 0.011396 | 0.011463 |
| 0.011463 | 0.011429 | 0.011329 | 0.011430 | 0.011396 | 0.011262 | 0.011228 |
| 0.011262 | 0.011262 | 0.011329 | 0.011262 | 0.011228 | 0.011396 | 0.011262 |
| 0.011295 | 0.011295 | 0.011429 | 0.011463 | 0.011362 | 0.011295 | 0.011295 |
| 0.011362 | 0.011295 | 0.011396 | 0.011262 | 0.011396 | 0.011497 | 0.011799 |
| 0.011295 | 0.011698 | 0.011302 | 0.017747 | 0.011126 | 0.011427 | 0.011653 |
| 0.011614 | 0.011658 | 0.011270 | 0.011234 | 0.011664 | 0.011682 | 0.011303 |
| 0.011440 | 0.011487 | 0.011177 | 0.011270 | 0.011216 | 0.011258 | 0.011275 |
| 0.011482 | 0.011433 | 0.011431 | 0.011259 | 0.011429 | 0.011463 | 0.011466 |
| 0.011335 | 0.011429 | 0.011429 | 0.011396 | 0.011362 | 0.011363 | 0.011329 |
| 0.011362 | 0.011295 | 0.011329 | 0.011362 | 0.011329 | 0.011262 | 0.011295 |
| 0.011295 | 0.011362 | 0.011262 | 0.011362 | 0.011396 | 0.011429 | 0.011329 |
| 0.011362 | 0.011329 | 0.011665 | 0.011665 | 0.011396 | 0.011430 | 0.011463 |
| 0.011228 | 0.011228 | 0.011262 | 0.011362 | 0.011228 | 0.011463 | 0.011463 |
| 0.011497 | 0.011496 | 0.011429 | 0.011530 | 0.011698 | 0.011532 | 0.011362 |
| 0.011362 | 0.011429 | 0.011463 | 0.011228 | 0.011362 | 0.011329 | 0.011362 |
| 0.011430 | 0.011430 | 0.011463 | 0.011430 | 0.011330 | 0.011530 | 0.011497 |
| 0.011365 | 0.011262 | 0.011362 | 0.011463 | 0.011362 | 0.011497 | 0.011530 |
| 0.011698 | 0.011402 | 0.011564 | 0.011530 | 0.011463 | 0.011631 | 0.011262 |
| 0.011431 | 0.011329 | 0.011295 | 0.011295 | 0.011362 | 0.011262 | 0.011362 |
| 0.011396 | 0.011429 | 0.011329 | 0.011362 | 0.011329 | 0.011665 | 0.011665 |
| 0.011396 | 0.011430 | 0.011496 | 0.011429 | 0.012069 | 0.011489 | 0.011412 |
| 0.011482 | 0.011442 | 0.011552 | 0.011441 | 0.011550 | 0.011405 | 0.011439 |
| 0.012022 | 0.011337 | 0.011471 | 0.011406 | 0.011680 | 0.011536 | 0.011639 |
| 0.012046 | 0.011475 | 0.011432 | 0.011497 | 0.011396 | 0.011396 | 0.011398 |
| 0.011228 | 0.011262 | 0.011396 | 0.011362 | 0.011364 | 0.011496 | 0.011464 |
| 0.011329 | 0.011262 | 0.011295 | 0.011329 | 0.011228 | 0.011295 | 0.011195 |
| 0.011329 | 0.011362 | 0.011262 | 0.011228 | 0.011329 | 0.011262 | 0.011295 |
| 0.011295 | 0.011228 | 0.011295 | 0.011329 | 0.011228 | 0.011429 | 0.011463 |
| 0.011362 | 0.011429 | 0.011362 | 0.011362 | 0.011295 | 0.011698 | 0.011329 |
| 0.011373 | 0.011295 | 0.011531 | 0.011535 | 0.011396 | 0.011396 | 0.011396 |
| 0.011396 | 0.011329 | 0.011295 | 0.011329 | 0.011429 | 0.011429 | 0.011362 |
| 0.011362 | 0.011497 | 0.011664 | 0.011396 | 0.011597 | 0.011597 | 0.011463 |
| 0.011295 | 0.011362 | 0.011396 | 0.011799 | 0.011362 | 0.011396 | 0.011362 |
| 0.011396 | 0.011329 | 0.011329 | 0.011631 | 0.011564 | 0.011597 | 0.011329 |
| 0.011429 | 0.011497 | 0.011362 | 0.011429 | 0.011396 | 0.011262 | 0.011597 |
| 0.011362 | 0.011329 | 0.011329 | 0.011497 | 0.011329 | 0.011429 | 0.011665 |
| 0.011362 | 0.011739 | 0.011732 | 0.011507 | 0.011173 | 0.011434 | 0.011215 |
| 0.011225 | 0.011722 | 0.011271 | 0.011417 | 0.011255 | 0.011264 | 0.011273 |
| 0.011417 | 0.000000 | 0.011227 | 0.000000 | 0.011168 | 0.011261 | 0.011385 |
| 0.011399 | 0.011296 | 0.011412 | 0.011342 | 0.011364 | 0.011497 | 0.011564 |
| 0.011564 | 0.011430 | 0.011533 | 0.011535 | 0.011670 | 0.011661 | 0.011362 |
| 0.011597 | 0.011463 | 0.000000 | 0.011430 | 0.011228 | 0.011463 | 0.011262 |
| 0.011329 | 0.011329 | 0.011295 | 0.011262 | 0.011295 | 0.011262 | 0.011362 |
| 0.011340 | 0.011340 | 0.011334 | 0.011368 | 0.011505 | 0.011470 | 0.011470 |
| 0.011469 | 0.011396 | 0.011208 | 0.011204 | 0.011331 | 0.011501 | 0.011501 |
| 0.011296 | 0.011365 | 0.011599 | 0.011567 | 0.011497 | 0.011531 | 0.011463 |
| 0.011396 | 0.011463 | 0.011463 | 0.011362 | 0.011933 | 0.011530 | 0.011597 |
| 0.011631 | 0.011701 | 0.011333 | 0.011407 | 0.011295 | 0.011497 | 0.011463 |
| 0.011497 | 0.011530 | 0.011530 | 0.011530 | 0.011689 | 0.011664 | 0.011303 |
| 0.011195 | 0.011199 | 0.011299 | 0.011264 | 0.011368 | 0.011210 | 0.011536 |
| 0.011335 | 0.011499 | 0.011251 | 0.011360 | 0.011329 | 0.011402 | 0.011295 |
| 0.011262 | 0.011262 | 0.011329 | 0.011295 | 0.011497 | 0.011463 | 0.011396 |

|          |          |          |          |          |          |          |
|----------|----------|----------|----------|----------|----------|----------|
| 0.011497 | 0.011564 | 0.011295 | 0.011295 | 0.011329 | 0.011329 | 0.011330 |
| 0.011398 | 0.011329 | 0.011329 | 0.011364 | 0.011497 | 0.011564 | 0.011564 |
| 0.011430 | 0.011533 | 0.011535 | 0.011670 | 0.011661 | 0.011362 | 0.011530 |
| 0.011463 | 0.011463 | 0.011297 | 0.011478 | 0.011408 | 0.011435 | 0.011305 |
| 0.011473 | 0.011698 | 0.011441 | 0.011366 | 0.011262 | 0.011463 | 0.011329 |
| 0.011429 | 0.011362 | 0.011262 | 0.011363 | 0.011463 | 0.011466 | 0.011362 |
| 0.011262 | 0.011195 | 0.011329 | 0.011262 | 0.011195 | 0.011298 | 0.011463 |
| 0.011362 | 0.011295 | 0.011329 | 0.011362 | 0.011329 | 0.011262 | 0.011463 |
| 0.011329 | 0.011362 | 0.011362 | 0.011295 | 0.011362 | 0.011597 | 0.011262 |
| 0.011295 | 0.011698 | 0.011295 | 0.011329 | 0.011295 | 0.011664 | 0.011189 |
| 0.011622 | 0.011230 | 0.011261 | 0.011422 | 0.011508 | 0.011455 | 0.011144 |
| 0.011165 | 0.011463 | 0.011564 | 0.011671 | 0.011531 | 0.011669 | 0.011800 |
| 0.011699 | 0.011737 | 0.011698 | 0.011949 | 0.011664 | 0.012539 | 0.011700 |
| 0.012439 | 0.012207 | 0.012341 | 0.012612 | 0.011664 | 0.011362 | 0.011665 |
| 0.012103 | 0.012038 | 0.011631 | 0.011530 | 0.011598 | 0.011598 | 0.011567 |
| 0.011463 | 0.011467 | 0.011530 | 0.011497 | 0.011867 | 0.011933 | 0.011935 |
| 0.011834 | 0.011934 | 0.012038 | 0.011804 | 0.012104 | 0.012110 | 0.012171 |
| 0.012172 | 0.012205 | 0.012152 | 0.012172 | 0.012173 | 0.011396 | 0.011699 |
| 0.011766 | 0.012270 | 0.011772 | 0.012001 | 0.012474 | 0.011536 | 0.011430 |
| 0.011396 | 0.011396 | 0.011867 | 0.011883 | 0.012010 | 0.011732 | 0.011397 |
| S640     | 0.011766 | 0.011766 | 0.012035 | 0.011799 | 0.011799 | 0.011866 |
| 0.011706 | 0.011638 | 0.011799 | 0.011363 | 0.011429 | 0.011397 | 0.011362 |
| 0.011329 | 0.011564 | 0.011295 | 0.011396 | 0.011463 | 0.011430 | 0.011396 |
| 0.011362 | 0.011396 | 0.011430 | 0.011363 | 0.011396 | 0.011396 | 0.011672 |
| 0.011564 | 0.011396 | 0.011295 | 0.011463 | 0.011463 | 0.011430 | 0.011463 |
| 0.011430 | 0.011530 | 0.011430 | 0.011430 | 0.011463 | 0.011430 | 0.011598 |
| 0.011295 | 0.011430 | 0.011463 | 0.011396 | 0.011430 | 0.011530 | 0.011463 |
| 0.011430 | 0.011598 | 0.011497 | 0.011698 | 0.011430 | 0.011698 | 0.011430 |
| 0.011396 | 0.011430 | 0.011564 | 0.011698 | 0.011732 | 0.011430 | 0.011262 |
| 0.011463 | 0.011530 | 0.011430 | 0.011665 | 0.011833 | 0.011430 | 0.011497 |
| 0.011396 | 0.011497 | 0.011463 | 0.011530 | 0.011463 | 0.011463 | 0.011463 |
| 0.011362 | 0.011396 | 0.011362 | 0.011396 | 0.011429 | 0.011464 | 0.011530 |
| 0.011463 | 0.011430 | 0.011497 | 0.011396 | 0.011463 | 0.011362 | 0.011430 |
| 0.011597 | 0.011530 | 0.011765 | 0.011598 | 0.011430 | 0.011665 | 0.011429 |
| 0.011616 | 0.011770 | 0.011664 | 0.011373 | 0.011359 | 0.011465 | 0.011493 |
| 0.012121 | 0.011518 | 0.011390 | 0.011665 | 0.011665 | 0.011396 | 0.011497 |
| 0.011497 | 0.011463 | 0.011530 | 0.011430 | 0.011530 | 0.011463 | 0.011463 |
| 0.011429 | 0.011463 | 0.011732 | 0.011597 | 0.011497 | 0.011463 | 0.011396 |
| 0.011362 | 0.011295 | 0.011430 | 0.011396 | 0.011530 | 0.011497 | 0.011430 |
| 0.011530 | 0.011597 | 0.011396 | 0.011396 | 0.011430 | 0.011429 | 0.011432 |
| 0.011500 | 0.011430 | 0.011430 | 0.011312 | 0.011386 | 0.011341 | 0.011430 |
| 0.011433 | 0.011370 | 0.011429 | 0.011405 | 0.011332 | 0.011369 | 0.011398 |
| 0.011564 | 0.011439 | 0.011474 | 0.011363 | 0.011371 | 0.011498 | 0.011397 |
| 0.011464 | 0.011465 | 0.011464 | 0.011564 | 0.011497 | 0.011866 | 0.011598 |
| 0.011631 | 0.011228 | 0.011430 | 0.000000 | 0.011329 | 0.011497 | 0.011362 |
| 0.011430 | 0.011430 | 0.011396 | 0.011362 | 0.011396 | 0.011362 | 0.011463 |
| 0.011430 | 0.011530 | 0.011463 | 0.011362 | 0.011465 | 0.011564 | 0.011567 |
| 0.011564 | 0.011463 | 0.011362 | 0.011296 | 0.011430 | 0.011362 | 0.011295 |
| 0.011400 | 0.011564 | 0.011362 | 0.011564 | 0.011329 | 0.011430 | 0.011396 |
| 0.011497 | 0.011396 | 0.011430 | 0.011396 | 0.011430 | 0.011295 | 0.011430 |
| 0.011463 | 0.011396 | 0.011463 | 0.011396 | 0.011430 | 0.011463 | 0.011698 |
| 0.011665 | 0.011665 | 0.011732 | 0.011566 | 0.011732 | 0.011429 | 0.011396 |
| 0.011364 | 0.011626 | 0.011518 | 0.011335 | 0.011705 | 0.011299 | 0.011375 |
| 0.011739 | 0.011638 | 0.011597 | 0.011799 | 0.011504 | 0.011665 | 0.011631 |
| 0.011564 | 0.011732 | 0.011593 | 0.011431 | 0.011522 | 0.011463 | 0.011534 |
| 0.011631 | 0.011533 | 0.011669 | 0.011737 | 0.011665 | 0.011665 | 0.011840 |
| 0.011568 | 0.011739 | 0.011670 | 0.011602 | 0.011868 | 0.011329 | 0.011532 |
| 0.011497 | 0.011430 | 0.011329 | 0.011329 | 0.011396 | 0.011396 | 0.011463 |
| 0.011396 | 0.011463 | 0.011362 | 0.011396 | 0.011396 | 0.011396 | 0.011463 |
| 0.011396 | 0.011765 | 0.011665 | 0.011698 | 0.011295 | 0.011396 | 0.011430 |

|          |          |          |          |          |          |          |
|----------|----------|----------|----------|----------|----------|----------|
| 0.011430 | 0.011396 | 0.011463 | 0.011161 | 0.011362 | 0.011362 | 0.011362 |
| 0.011833 | 0.011463 | 0.011530 | 0.011329 | 0.011429 | 0.011598 | 0.011362 |
| 0.011362 | 0.011429 | 0.011396 | 0.011564 | 0.011362 | 0.011497 | 0.011631 |
| 0.011564 | 0.011396 | 0.011396 | 0.011329 | 0.011329 | 0.011497 | 0.011429 |
| 0.011329 | 0.011429 | 0.011295 | 0.011329 | 0.011463 | 0.011531 | 0.011362 |
| 0.011329 | 0.011463 | 0.011396 | 0.011295 | 0.011564 | 0.011295 | 0.011463 |
| 0.011540 | 0.011362 | 0.011598 | 0.011497 | 0.011463 | 0.011396 | 0.011497 |
| 0.011362 | 0.011698 | 0.011295 | 0.011497 | 0.011295 | 0.011295 | 0.011295 |
| 0.011530 | 0.011665 | 0.011430 | 0.011497 | 0.011329 | 0.011665 | 0.011295 |
| 0.011362 | 0.011362 | 0.011396 | 0.011497 | 0.011329 | 0.011497 | 0.011564 |
| 0.011564 | 0.011530 | 0.011429 | 0.011531 | 0.011497 | 0.011362 | 0.011329 |
| 0.011362 | 0.011362 | 0.011430 | 0.011295 | 0.011329 | 0.011497 | 0.011362 |
| 0.011329 | 0.011396 | 0.011530 | 0.011497 | 0.011463 | 0.011396 | 0.011396 |
| 0.011463 | 0.011396 | 0.011497 | 0.011362 | 0.011497 | 0.011597 | 0.011833 |
| 0.011396 | 0.011732 | 0.011405 | 0.017937 | 0.011453 | 0.011549 | 0.011688 |
| 0.011649 | 0.011694 | 0.011584 | 0.011525 | 0.011885 | 0.011716 | 0.011546 |
| 0.011630 | 0.011610 | 0.011333 | 0.011437 | 0.011255 | 0.011505 | 0.011447 |
| 0.011576 | 0.011507 | 0.011505 | 0.011259 | 0.011530 | 0.011564 | 0.011568 |
| 0.011438 | 0.011530 | 0.011530 | 0.011430 | 0.011463 | 0.011463 | 0.011430 |
| 0.011463 | 0.011396 | 0.011430 | 0.011463 | 0.011430 | 0.011362 | 0.011396 |
| 0.011396 | 0.011463 | 0.011362 | 0.011463 | 0.011497 | 0.011530 | 0.011429 |
| 0.011396 | 0.011363 | 0.011698 | 0.011698 | 0.011497 | 0.011531 | 0.011564 |
| 0.011329 | 0.011329 | 0.011362 | 0.011463 | 0.011329 | 0.011564 | 0.011564 |
| 0.011597 | 0.011597 | 0.011530 | 0.011631 | 0.011732 | 0.011633 | 0.011463 |
| 0.011463 | 0.011530 | 0.011564 | 0.011396 | 0.011463 | 0.011430 | 0.011463 |
| 0.011531 | 0.011530 | 0.011564 | 0.011531 | 0.011431 | 0.011631 | 0.011597 |
| 0.011467 | 0.011362 | 0.011463 | 0.011564 | 0.011463 | 0.011531 | 0.011631 |
| 0.011799 | 0.011504 | 0.011665 | 0.011631 | 0.011564 | 0.011732 | 0.011363 |
| 0.011532 | 0.011430 | 0.011396 | 0.011396 | 0.011463 | 0.011362 | 0.011463 |
| 0.011497 | 0.011530 | 0.011429 | 0.011396 | 0.011363 | 0.011698 | 0.011698 |
| 0.011497 | 0.011531 | 0.011597 | 0.011530 | 0.012104 | 0.011596 | 0.011518 |
| 0.011588 | 0.011546 | 0.011658 | 0.011545 | 0.011655 | 0.011578 | 0.011543 |
| 0.012057 | 0.011441 | 0.011574 | 0.011510 | 0.011715 | 0.011639 | 0.011741 |
| 0.012081 | 0.011550 | 0.011500 | 0.011463 | 0.011497 | 0.011430 | 0.011466 |
| 0.011329 | 0.011362 | 0.011497 | 0.011463 | 0.011466 | 0.011530 | 0.011498 |
| 0.011429 | 0.011362 | 0.011396 | 0.011430 | 0.011329 | 0.011396 | 0.011295 |
| 0.011362 | 0.011396 | 0.011362 | 0.011329 | 0.011430 | 0.011362 | 0.011396 |
| 0.011396 | 0.011329 | 0.011396 | 0.011430 | 0.011329 | 0.011530 | 0.011564 |
| 0.011463 | 0.011463 | 0.011463 | 0.011463 | 0.011396 | 0.011732 | 0.011430 |
| 0.011408 | 0.011396 | 0.011564 | 0.011569 | 0.011497 | 0.011497 | 0.011497 |
| 0.011497 | 0.011430 | 0.011396 | 0.011430 | 0.011530 | 0.011530 | 0.011463 |
| 0.011463 | 0.011598 | 0.011698 | 0.011497 | 0.011698 | 0.011698 | 0.011564 |
| 0.011396 | 0.011463 | 0.011497 | 0.011833 | 0.011463 | 0.011497 | 0.011463 |
| 0.011497 | 0.011362 | 0.011362 | 0.011665 | 0.011665 | 0.011631 | 0.011430 |
| 0.011530 | 0.011598 | 0.011463 | 0.011530 | 0.011497 | 0.011362 | 0.011631 |
| 0.011463 | 0.011430 | 0.011362 | 0.011598 | 0.011430 | 0.011530 | 0.011766 |
| 0.011463 | 0.011774 | 0.011766 | 0.011589 | 0.011286 | 0.011468 | 0.011370 |
| 0.011390 | 0.011800 | 0.011376 | 0.011552 | 0.011402 | 0.011518 | 0.011538 |
| 0.011519 | 0.011521 | 0.011561 | 0.011391 | 0.011492 | 0.011529 | 0.011547 |
| 0.011550 | 0.011454 | 0.011448 | 0.011412 | 0.011465 | 0.011530 | 0.011598 |
| 0.011597 | 0.011128 | 0.011229 | 0.011569 | 0.011636 | 0.011378 | 0.011463 |
| 0.011631 | 0.011228 | 0.011430 | 0.000000 | 0.011329 | 0.011497 | 0.011362 |
| 0.011430 | 0.011430 | 0.011396 | 0.011362 | 0.011396 | 0.011362 | 0.011463 |
| 0.011444 | 0.011410 | 0.011437 | 0.011471 | 0.011608 | 0.011573 | 0.011572 |
| 0.011571 | 0.011497 | 0.011319 | 0.011312 | 0.011433 | 0.011602 | 0.011603 |
| 0.011397 | 0.011467 | 0.011700 | 0.011669 | 0.011598 | 0.011632 | 0.011564 |
| 0.011497 | 0.011564 | 0.011564 | 0.011463 | 0.011968 | 0.011631 | 0.011699 |
| 0.011732 | 0.011701 | 0.011435 | 0.011511 | 0.011396 | 0.011597 | 0.011564 |
| 0.011599 | 0.011631 | 0.011631 | 0.011631 | 0.011768 | 0.011766 | 0.011407 |
| 0.011297 | 0.011303 | 0.011401 | 0.011366 | 0.011402 | 0.011284 | 0.011570 |

|          |          |          |          |          |          |          |
|----------|----------|----------|----------|----------|----------|----------|
| 0.011438 | 0.011411 | 0.011251 | 0.011472 | 0.011430 | 0.011505 | 0.011396 |
| 0.011362 | 0.011295 | 0.011430 | 0.011396 | 0.011530 | 0.011497 | 0.011430 |
| 0.011530 | 0.011597 | 0.011396 | 0.011396 | 0.011430 | 0.011429 | 0.011432 |
| 0.011500 | 0.011430 | 0.011430 | 0.011465 | 0.011530 | 0.011598 | 0.011597 |
| 0.011128 | 0.011229 | 0.011569 | 0.011636 | 0.011378 | 0.011463 | 0.011631 |
| 0.011564 | 0.011564 | 0.011398 | 0.011582 | 0.011512 | 0.011537 | 0.011411 |
| 0.011577 | 0.011744 | 0.011483 | 0.011468 | 0.011362 | 0.011564 | 0.011430 |
| 0.011530 | 0.011463 | 0.011362 | 0.011465 | 0.011564 | 0.011567 | 0.011463 |
| 0.011362 | 0.011296 | 0.011430 | 0.011362 | 0.011295 | 0.011400 | 0.011564 |
| 0.011463 | 0.011396 | 0.011430 | 0.011463 | 0.011430 | 0.011362 | 0.011497 |
| 0.011430 | 0.011463 | 0.011463 | 0.011396 | 0.011463 | 0.011698 | 0.011295 |
| 0.011396 | 0.011732 | 0.011396 | 0.011430 | 0.011396 | 0.011698 | 0.011403 |
| 0.011791 | 0.011400 | 0.011361 | 0.011543 | 0.011630 | 0.011527 | 0.011353 |
| 0.011270 | 0.011497 | 0.011598 | 0.011705 | 0.011565 | 0.011703 | 0.011834 |
| 0.011733 | 0.011771 | 0.011732 | 0.011983 | 0.011698 | 0.012573 | 0.011734 |
| 0.012473 | 0.012241 | 0.012375 | 0.012647 | 0.011698 | 0.011396 | 0.011699 |
| 0.012137 | 0.012072 | 0.011665 | 0.011564 | 0.011632 | 0.011632 | 0.011602 |
| 0.011497 | 0.011501 | 0.011564 | 0.011531 | 0.011901 | 0.011967 | 0.011968 |
| 0.011868 | 0.011968 | 0.012072 | 0.011838 | 0.012138 | 0.012144 | 0.012205 |
| 0.012206 | 0.012239 | 0.012187 | 0.012206 | 0.012207 | 0.011497 | 0.011732 |
| 0.011800 | 0.012304 | 0.011806 | 0.012035 | 0.012508 | 0.011570 | 0.011464 |
| 0.011430 | 0.011429 | 0.011901 | 0.011883 | 0.012046 | 0.011765 | 0.011431 |
| S641     | 0.011564 | 0.011564 | 0.011900 | 0.011665 | 0.011665 | 0.011732 |
| 0.011570 | 0.011502 | 0.011665 | 0.011161 | 0.011228 | 0.011195 | 0.011161 |
| 0.011195 | 0.011362 | 0.011161 | 0.011195 | 0.011262 | 0.011228 | 0.011195 |
| 0.011161 | 0.011195 | 0.011295 | 0.011161 | 0.011195 | 0.011195 | 0.011536 |
| 0.011429 | 0.011195 | 0.011094 | 0.011329 | 0.011262 | 0.011228 | 0.011262 |
| 0.011228 | 0.011329 | 0.011228 | 0.011228 | 0.011262 | 0.011228 | 0.011396 |
| 0.011161 | 0.011228 | 0.011262 | 0.011195 | 0.011295 | 0.011329 | 0.011262 |
| 0.011228 | 0.011396 | 0.011295 | 0.011564 | 0.011228 | 0.011497 | 0.011228 |
| 0.011195 | 0.011295 | 0.011362 | 0.011497 | 0.011597 | 0.011295 | 0.011396 |
| 0.011262 | 0.011329 | 0.011228 | 0.011463 | 0.011698 | 0.011228 | 0.011295 |
| 0.011195 | 0.011295 | 0.011262 | 0.011329 | 0.011262 | 0.011262 | 0.011262 |
| 0.011161 | 0.011195 | 0.011161 | 0.011262 | 0.011228 | 0.011262 | 0.011329 |
| 0.011262 | 0.011228 | 0.011295 | 0.011195 | 0.011329 | 0.011161 | 0.011228 |
| 0.011396 | 0.011329 | 0.011564 | 0.011396 | 0.011228 | 0.011463 | 0.011228 |
| 0.011394 | 0.011620 | 0.011437 | 0.011138 | 0.011135 | 0.011244 | 0.011336 |
| 0.011975 | 0.011416 | 0.011143 | 0.011463 | 0.011463 | 0.011262 | 0.011362 |
| 0.011295 | 0.011262 | 0.011329 | 0.011228 | 0.011329 | 0.011262 | 0.011262 |
| 0.011228 | 0.011329 | 0.011530 | 0.011396 | 0.011295 | 0.011262 | 0.011195 |
| 0.011161 | 0.011161 | 0.011228 | 0.011195 | 0.011396 | 0.011362 | 0.011295 |
| 0.011396 | 0.011463 | 0.011195 | 0.011195 | 0.011228 | 0.011228 | 0.011229 |
| 0.011297 | 0.011228 | 0.011228 | 0.011096 | 0.011169 | 0.011130 | 0.011228 |
| 0.011230 | 0.011163 | 0.011208 | 0.011198 | 0.011128 | 0.011163 | 0.011195 |
| 0.011456 | 0.011233 | 0.011267 | 0.011161 | 0.011164 | 0.011296 | 0.011262 |
| 0.011329 | 0.011262 | 0.011262 | 0.011362 | 0.011295 | 0.011665 | 0.011463 |
| 0.011497 | 0.011362 | 0.011228 | 0.011329 | 0.000000 | 0.011362 | 0.011161 |
| 0.011228 | 0.011228 | 0.011195 | 0.011094 | 0.011195 | 0.011094 | 0.011262 |
| 0.011228 | 0.011329 | 0.011262 | 0.011161 | 0.011262 | 0.011362 | 0.011364 |
| 0.011362 | 0.011262 | 0.011161 | 0.011094 | 0.011228 | 0.011161 | 0.011094 |
| 0.011196 | 0.011362 | 0.011161 | 0.011362 | 0.011127 | 0.011228 | 0.011195 |
| 0.011295 | 0.011195 | 0.011228 | 0.011195 | 0.011228 | 0.011094 | 0.011228 |
| 0.011262 | 0.011195 | 0.011262 | 0.011195 | 0.011228 | 0.011262 | 0.011497 |
| 0.011597 | 0.011530 | 0.011597 | 0.011363 | 0.011597 | 0.011228 | 0.011195 |
| 0.011229 | 0.011505 | 0.011335 | 0.011129 | 0.011603 | 0.011094 | 0.011218 |
| 0.011603 | 0.011502 | 0.011396 | 0.011597 | 0.011299 | 0.011463 | 0.011430 |
| 0.011362 | 0.011530 | 0.011380 | 0.011225 | 0.011270 | 0.011262 | 0.011331 |
| 0.011430 | 0.011330 | 0.011466 | 0.011534 | 0.011463 | 0.011530 | 0.011636 |
| 0.011365 | 0.011535 | 0.011466 | 0.011398 | 0.011666 | 0.011127 | 0.011330 |
| 0.011295 | 0.011228 | 0.011127 | 0.011127 | 0.011195 | 0.011195 | 0.011262 |

|          |          |          |          |          |          |          |
|----------|----------|----------|----------|----------|----------|----------|
| 0.011195 | 0.011262 | 0.011161 | 0.011262 | 0.011195 | 0.011195 | 0.011262 |
| 0.011195 | 0.011631 | 0.011530 | 0.011564 | 0.011094 | 0.011195 | 0.011228 |
| 0.011228 | 0.011195 | 0.011262 | 0.011295 | 0.011161 | 0.011161 | 0.011161 |
| 0.011698 | 0.011329 | 0.011329 | 0.011127 | 0.011228 | 0.011396 | 0.011161 |
| 0.011161 | 0.011228 | 0.011195 | 0.011362 | 0.011161 | 0.011295 | 0.011429 |
| 0.011362 | 0.011195 | 0.011195 | 0.011127 | 0.011127 | 0.011295 | 0.011228 |
| 0.011127 | 0.011228 | 0.011094 | 0.011127 | 0.011262 | 0.011396 | 0.011161 |
| 0.011128 | 0.011262 | 0.011195 | 0.011094 | 0.011429 | 0.011094 | 0.011262 |
| 0.011334 | 0.011161 | 0.011463 | 0.011295 | 0.011329 | 0.011195 | 0.011295 |
| 0.011161 | 0.011497 | 0.011094 | 0.011362 | 0.011161 | 0.011161 | 0.011094 |
| 0.011329 | 0.011531 | 0.011228 | 0.011295 | 0.011127 | 0.011530 | 0.011161 |
| 0.011161 | 0.011161 | 0.011195 | 0.011295 | 0.011195 | 0.011295 | 0.011362 |
| 0.011362 | 0.011329 | 0.011228 | 0.011329 | 0.011295 | 0.011161 | 0.011127 |
| 0.011161 | 0.011161 | 0.011228 | 0.011161 | 0.011127 | 0.011295 | 0.011161 |
| 0.011195 | 0.011195 | 0.011329 | 0.011362 | 0.011262 | 0.011195 | 0.011195 |
| 0.011262 | 0.011195 | 0.011295 | 0.011161 | 0.011295 | 0.011396 | 0.011698 |
| 0.011195 | 0.011597 | 0.011198 | 0.017710 | 0.011191 | 0.011366 | 0.011548 |
| 0.011510 | 0.011553 | 0.011270 | 0.011234 | 0.011664 | 0.011578 | 0.011303 |
| 0.011440 | 0.011487 | 0.011099 | 0.011186 | 0.011177 | 0.011258 | 0.011189 |
| 0.011436 | 0.011358 | 0.011357 | 0.011126 | 0.011329 | 0.011362 | 0.011365 |
| 0.011232 | 0.011329 | 0.011329 | 0.011295 | 0.011262 | 0.011262 | 0.011228 |
| 0.011262 | 0.011195 | 0.011228 | 0.011262 | 0.011228 | 0.011161 | 0.011195 |
| 0.011195 | 0.011262 | 0.011161 | 0.011262 | 0.011295 | 0.011329 | 0.011228 |
| 0.011262 | 0.011228 | 0.011564 | 0.011564 | 0.011295 | 0.011329 | 0.011362 |
| 0.011127 | 0.011127 | 0.011161 | 0.011262 | 0.011127 | 0.011362 | 0.011362 |
| 0.011396 | 0.011396 | 0.011329 | 0.011429 | 0.011597 | 0.011431 | 0.011262 |
| 0.011262 | 0.011329 | 0.011362 | 0.011195 | 0.011262 | 0.011228 | 0.011262 |
| 0.011329 | 0.011329 | 0.011362 | 0.011329 | 0.011229 | 0.011430 | 0.011396 |
| 0.011263 | 0.011161 | 0.011262 | 0.011362 | 0.011262 | 0.011396 | 0.011429 |
| 0.011597 | 0.011299 | 0.011463 | 0.011430 | 0.011362 | 0.011530 | 0.011161 |
| 0.011330 | 0.011228 | 0.011195 | 0.011195 | 0.011262 | 0.011161 | 0.011262 |
| 0.011295 | 0.011329 | 0.011228 | 0.011262 | 0.011228 | 0.011564 | 0.011564 |
| 0.011295 | 0.011329 | 0.011396 | 0.011329 | 0.011968 | 0.011382 | 0.011306 |
| 0.011377 | 0.011338 | 0.011447 | 0.011337 | 0.011445 | 0.011371 | 0.011336 |
| 0.011919 | 0.011233 | 0.011369 | 0.011302 | 0.011577 | 0.011434 | 0.011537 |
| 0.011944 | 0.011399 | 0.011297 | 0.011262 | 0.011295 | 0.011295 | 0.011263 |
| 0.011127 | 0.011161 | 0.011295 | 0.011262 | 0.011263 | 0.011396 | 0.011363 |
| 0.011228 | 0.011161 | 0.011195 | 0.011228 | 0.011127 | 0.011195 | 0.011094 |
| 0.011228 | 0.011262 | 0.011161 | 0.011127 | 0.011228 | 0.011161 | 0.011195 |
| 0.011195 | 0.011127 | 0.011195 | 0.011228 | 0.011127 | 0.011329 | 0.011362 |
| 0.011262 | 0.011329 | 0.011262 | 0.011262 | 0.011195 | 0.011597 | 0.011228 |
| 0.011269 | 0.011195 | 0.011430 | 0.011433 | 0.011295 | 0.011295 | 0.011295 |
| 0.011295 | 0.011228 | 0.011195 | 0.011228 | 0.011329 | 0.011329 | 0.011262 |
| 0.011262 | 0.011396 | 0.011564 | 0.011295 | 0.011497 | 0.011497 | 0.011362 |
| 0.011195 | 0.011262 | 0.011295 | 0.011698 | 0.011262 | 0.011295 | 0.011262 |
| 0.011295 | 0.011228 | 0.011228 | 0.011530 | 0.011463 | 0.011497 | 0.011228 |
| 0.011329 | 0.011396 | 0.011262 | 0.011329 | 0.011295 | 0.011161 | 0.011497 |
| 0.011262 | 0.011228 | 0.011228 | 0.011396 | 0.011228 | 0.011329 | 0.011564 |
| 0.011262 | 0.011638 | 0.011631 | 0.011426 | 0.011173 | 0.011332 | 0.011215 |
| 0.011170 | 0.011644 | 0.011166 | 0.011373 | 0.011207 | 0.011315 | 0.011326 |
| 0.011417 | 0.011126 | 0.011283 | 0.011126 | 0.011168 | 0.011328 | 0.011304 |
| 0.011324 | 0.011218 | 0.011307 | 0.011236 | 0.011262 | 0.011396 | 0.011463 |
| 0.011463 | 0.011329 | 0.011432 | 0.011433 | 0.011569 | 0.011590 | 0.011262 |
| 0.011497 | 0.011362 | 0.011228 | 0.011329 | 0.000000 | 0.011362 | 0.011161 |
| 0.011228 | 0.011228 | 0.011195 | 0.011094 | 0.011195 | 0.011094 | 0.011262 |
| 0.011235 | 0.011235 | 0.011231 | 0.011266 | 0.011402 | 0.011368 | 0.011367 |
| 0.011367 | 0.011296 | 0.011097 | 0.011096 | 0.011230 | 0.011399 | 0.011399 |
| 0.011195 | 0.011263 | 0.011498 | 0.011466 | 0.011396 | 0.011430 | 0.011362 |
| 0.011295 | 0.011362 | 0.011362 | 0.011262 | 0.011833 | 0.011430 | 0.011497 |
| 0.011530 | 0.011594 | 0.011231 | 0.011303 | 0.011195 | 0.011396 | 0.011362 |

|          |          |          |          |          |          |          |
|----------|----------|----------|----------|----------|----------|----------|
| 0.011397 | 0.011429 | 0.011429 | 0.011429 | 0.011571 | 0.011564 | 0.011199 |
| 0.011094 | 0.011095 | 0.011196 | 0.011162 | 0.011265 | 0.011098 | 0.011434 |
| 0.011232 | 0.011323 | 0.011108 | 0.011248 | 0.011228 | 0.011300 | 0.011195 |
| 0.011161 | 0.011161 | 0.011228 | 0.011195 | 0.011396 | 0.011362 | 0.011295 |
| 0.011396 | 0.011463 | 0.011195 | 0.011195 | 0.011228 | 0.011228 | 0.011229 |
| 0.011297 | 0.011228 | 0.011228 | 0.011262 | 0.011396 | 0.011463 | 0.011463 |
| 0.011329 | 0.011432 | 0.011433 | 0.011569 | 0.011590 | 0.011262 | 0.011429 |
| 0.011362 | 0.011362 | 0.011196 | 0.011373 | 0.011303 | 0.011333 | 0.011200 |
| 0.011370 | 0.011561 | 0.011357 | 0.011264 | 0.011161 | 0.011362 | 0.011228 |
| 0.011329 | 0.011262 | 0.011161 | 0.011262 | 0.011362 | 0.011364 | 0.011262 |
| 0.011161 | 0.011094 | 0.011228 | 0.011161 | 0.011094 | 0.011196 | 0.011362 |
| 0.011262 | 0.011195 | 0.011228 | 0.011262 | 0.011228 | 0.011161 | 0.011362 |
| 0.011228 | 0.011262 | 0.011262 | 0.011195 | 0.011262 | 0.011497 | 0.011161 |
| 0.011195 | 0.011597 | 0.011195 | 0.011228 | 0.011195 | 0.011564 | 0.011146 |
| 0.011622 | 0.011145 | 0.011211 | 0.011382 | 0.011467 | 0.011383 | 0.011102 |
| 0.011165 | 0.011362 | 0.011463 | 0.011569 | 0.011430 | 0.011568 | 0.011699 |
| 0.011598 | 0.011635 | 0.011597 | 0.011846 | 0.011564 | 0.012438 | 0.011599 |
| 0.012338 | 0.012105 | 0.012240 | 0.012511 | 0.011564 | 0.011262 | 0.011564 |
| 0.012002 | 0.011937 | 0.011530 | 0.011430 | 0.011497 | 0.011497 | 0.011466 |
| 0.011362 | 0.011365 | 0.011429 | 0.011396 | 0.011766 | 0.011833 | 0.011834 |
| 0.011733 | 0.011833 | 0.011937 | 0.011703 | 0.012003 | 0.012008 | 0.012070 |
| 0.012070 | 0.012104 | 0.012050 | 0.012070 | 0.012072 | 0.011295 | 0.011598 |
| 0.011665 | 0.012169 | 0.011670 | 0.011900 | 0.012373 | 0.011434 | 0.011329 |
| 0.011295 | 0.011295 | 0.011766 | 0.011801 | 0.011904 | 0.011631 | 0.011296 |
| S642     | 0.011799 | 0.011799 | 0.011866 | 0.011631 | 0.011631 | 0.011698 |
| 0.011536 | 0.011468 | 0.011631 | 0.011396 | 0.011463 | 0.011430 | 0.011396 |
| 0.011362 | 0.011597 | 0.011329 | 0.011429 | 0.011496 | 0.011463 | 0.011429 |
| 0.011396 | 0.011429 | 0.011262 | 0.011396 | 0.011430 | 0.011429 | 0.011502 |
| 0.011161 | 0.011429 | 0.011329 | 0.011295 | 0.011496 | 0.011463 | 0.011497 |
| 0.011463 | 0.011564 | 0.011463 | 0.011463 | 0.011496 | 0.011463 | 0.011631 |
| 0.011329 | 0.011463 | 0.011496 | 0.011429 | 0.011463 | 0.011564 | 0.011496 |
| 0.011463 | 0.011631 | 0.011530 | 0.011530 | 0.011463 | 0.011732 | 0.011463 |
| 0.011429 | 0.011463 | 0.011597 | 0.011732 | 0.011564 | 0.011463 | 0.011564 |
| 0.011496 | 0.011564 | 0.011463 | 0.011698 | 0.011665 | 0.011463 | 0.011530 |
| 0.011429 | 0.011530 | 0.011497 | 0.011564 | 0.011496 | 0.011497 | 0.011497 |
| 0.011396 | 0.011429 | 0.011396 | 0.011429 | 0.011463 | 0.011498 | 0.011564 |
| 0.011497 | 0.011463 | 0.011530 | 0.011429 | 0.011496 | 0.011396 | 0.011463 |
| 0.011631 | 0.011564 | 0.011597 | 0.011631 | 0.011463 | 0.011631 | 0.011463 |
| 0.011653 | 0.011583 | 0.011664 | 0.011412 | 0.011359 | 0.011502 | 0.011257 |
| 0.011902 | 0.011264 | 0.011390 | 0.011698 | 0.011698 | 0.011429 | 0.011530 |
| 0.011530 | 0.011496 | 0.011564 | 0.011463 | 0.011564 | 0.011496 | 0.011496 |
| 0.011463 | 0.011496 | 0.011765 | 0.011631 | 0.011530 | 0.011497 | 0.011429 |
| 0.011396 | 0.011329 | 0.011463 | 0.011429 | 0.011362 | 0.011329 | 0.011262 |
| 0.011362 | 0.011429 | 0.011429 | 0.011429 | 0.011463 | 0.011463 | 0.011465 |
| 0.011533 | 0.011463 | 0.011463 | 0.011348 | 0.011386 | 0.011376 | 0.011464 |
| 0.011467 | 0.011404 | 0.011429 | 0.011440 | 0.011366 | 0.011403 | 0.011432 |
| 0.011420 | 0.011474 | 0.011473 | 0.011396 | 0.011406 | 0.011531 | 0.011430 |
| 0.011497 | 0.011498 | 0.011497 | 0.011597 | 0.011530 | 0.011832 | 0.011631 |
| 0.011329 | 0.011530 | 0.011463 | 0.011497 | 0.011362 | 0.000000 | 0.011396 |
| 0.011463 | 0.011463 | 0.011429 | 0.011396 | 0.011429 | 0.011396 | 0.011497 |
| 0.011463 | 0.011564 | 0.011497 | 0.011396 | 0.011498 | 0.011597 | 0.011601 |
| 0.011597 | 0.011497 | 0.011396 | 0.011330 | 0.011463 | 0.011396 | 0.011329 |
| 0.011332 | 0.011598 | 0.011396 | 0.011597 | 0.011362 | 0.011463 | 0.011429 |
| 0.011530 | 0.011429 | 0.011463 | 0.011429 | 0.011463 | 0.011329 | 0.011463 |
| 0.011497 | 0.011429 | 0.011497 | 0.011429 | 0.011463 | 0.011497 | 0.011732 |
| 0.011564 | 0.011497 | 0.011564 | 0.011599 | 0.011564 | 0.011463 | 0.011429 |
| 0.011398 | 0.011667 | 0.011517 | 0.011369 | 0.011569 | 0.011333 | 0.011414 |
| 0.011569 | 0.011468 | 0.011631 | 0.011833 | 0.011538 | 0.011698 | 0.011665 |
| 0.011597 | 0.011765 | 0.011629 | 0.011513 | 0.011563 | 0.011497 | 0.011568 |
| 0.011665 | 0.011566 | 0.011703 | 0.011771 | 0.011698 | 0.011765 | 0.011873 |



|          |          |          |          |          |          |          |
|----------|----------|----------|----------|----------|----------|----------|
| 0.011602 | 0.011773 | 0.011703 | 0.011635 | 0.011901 | 0.011362 | 0.011566 |
| 0.011530 | 0.011463 | 0.011362 | 0.011362 | 0.011429 | 0.011429 | 0.011496 |
| 0.011429 | 0.011497 | 0.011396 | 0.011429 | 0.011362 | 0.011429 | 0.011496 |
| 0.011429 | 0.011597 | 0.011497 | 0.011530 | 0.011329 | 0.011429 | 0.011463 |
| 0.011463 | 0.011429 | 0.011497 | 0.011463 | 0.011396 | 0.011396 | 0.011396 |
| 0.011665 | 0.011496 | 0.011564 | 0.011362 | 0.011463 | 0.011631 | 0.011396 |
| 0.011396 | 0.011463 | 0.011429 | 0.011597 | 0.011396 | 0.011329 | 0.011463 |
| 0.011396 | 0.011429 | 0.011429 | 0.011362 | 0.011362 | 0.011530 | 0.011463 |
| 0.011362 | 0.011463 | 0.011329 | 0.011362 | 0.011497 | 0.011363 | 0.011396 |
| 0.011363 | 0.011497 | 0.011430 | 0.011329 | 0.011396 | 0.011329 | 0.011497 |
| 0.011574 | 0.011396 | 0.011430 | 0.011530 | 0.011497 | 0.011429 | 0.011530 |
| 0.011396 | 0.011732 | 0.011329 | 0.011530 | 0.011329 | 0.011329 | 0.011329 |
| 0.011564 | 0.011497 | 0.011463 | 0.011530 | 0.011362 | 0.011497 | 0.011329 |
| 0.011396 | 0.011396 | 0.011429 | 0.011530 | 0.011429 | 0.011530 | 0.011597 |
| 0.011597 | 0.011564 | 0.011463 | 0.011564 | 0.011530 | 0.011396 | 0.011362 |
| 0.011396 | 0.011396 | 0.011463 | 0.011329 | 0.011362 | 0.011530 | 0.011396 |
| 0.011362 | 0.011429 | 0.011564 | 0.011530 | 0.011496 | 0.011429 | 0.011430 |
| 0.011496 | 0.011429 | 0.011530 | 0.011396 | 0.011530 | 0.011631 | 0.011665 |
| 0.011429 | 0.011564 | 0.011440 | 0.017936 | 0.011387 | 0.011672 | 0.011514 |
| 0.011475 | 0.011518 | 0.011636 | 0.011408 | 0.011610 | 0.011544 | 0.011668 |
| 0.011487 | 0.011365 | 0.011372 | 0.011479 | 0.011372 | 0.011554 | 0.011490 |
| 0.011342 | 0.011135 | 0.011320 | 0.011126 | 0.011564 | 0.011597 | 0.011601 |
| 0.011472 | 0.011564 | 0.011564 | 0.011463 | 0.011497 | 0.011497 | 0.011463 |
| 0.011497 | 0.011429 | 0.011463 | 0.011497 | 0.011463 | 0.011396 | 0.011429 |
| 0.011429 | 0.011497 | 0.011396 | 0.011497 | 0.011530 | 0.011564 | 0.011463 |
| 0.011429 | 0.011396 | 0.011530 | 0.011530 | 0.011530 | 0.011564 | 0.011597 |
| 0.011362 | 0.011362 | 0.011396 | 0.011497 | 0.011362 | 0.011597 | 0.011597 |
| 0.011631 | 0.011631 | 0.011564 | 0.011664 | 0.011564 | 0.011666 | 0.011497 |
| 0.011497 | 0.011564 | 0.011597 | 0.011429 | 0.011497 | 0.011463 | 0.011497 |
| 0.011564 | 0.011564 | 0.011597 | 0.011564 | 0.011464 | 0.011665 | 0.011631 |
| 0.011500 | 0.011396 | 0.011497 | 0.011597 | 0.011497 | 0.011564 | 0.011664 |
| 0.011833 | 0.011538 | 0.011698 | 0.011665 | 0.011597 | 0.011765 | 0.011396 |
| 0.011565 | 0.011463 | 0.011429 | 0.011429 | 0.011497 | 0.011396 | 0.011497 |
| 0.011530 | 0.011564 | 0.011463 | 0.011429 | 0.011396 | 0.011530 | 0.011530 |
| 0.011530 | 0.011564 | 0.011631 | 0.011564 | 0.012137 | 0.011632 | 0.011553 |
| 0.011623 | 0.011580 | 0.011693 | 0.011580 | 0.011690 | 0.011612 | 0.011577 |
| 0.012090 | 0.011476 | 0.011608 | 0.011544 | 0.011818 | 0.011672 | 0.011775 |
| 0.012114 | 0.011588 | 0.011669 | 0.011698 | 0.011664 | 0.011396 | 0.011635 |
| 0.011362 | 0.011530 | 0.011664 | 0.011631 | 0.011635 | 0.011094 | 0.011330 |
| 0.011463 | 0.011396 | 0.011429 | 0.011463 | 0.011362 | 0.011429 | 0.011329 |
| 0.011396 | 0.011429 | 0.011396 | 0.011362 | 0.011463 | 0.011396 | 0.011429 |
| 0.011429 | 0.011362 | 0.011429 | 0.011463 | 0.011362 | 0.011564 | 0.011597 |
| 0.011497 | 0.011497 | 0.011496 | 0.011497 | 0.011429 | 0.011564 | 0.011463 |
| 0.011234 | 0.011429 | 0.011161 | 0.011162 | 0.011530 | 0.011530 | 0.011530 |
| 0.011530 | 0.011463 | 0.011429 | 0.011463 | 0.011564 | 0.011564 | 0.011496 |
| 0.011496 | 0.011631 | 0.011530 | 0.011530 | 0.011732 | 0.011732 | 0.011597 |
| 0.011429 | 0.011497 | 0.011530 | 0.011665 | 0.011497 | 0.011530 | 0.011497 |
| 0.011530 | 0.011396 | 0.011396 | 0.011698 | 0.011698 | 0.011665 | 0.011463 |
| 0.011564 | 0.011631 | 0.011496 | 0.011564 | 0.011530 | 0.011396 | 0.011463 |
| 0.011496 | 0.011463 | 0.011396 | 0.011631 | 0.011463 | 0.011564 | 0.011597 |
| 0.011496 | 0.011604 | 0.011597 | 0.011101 | 0.011229 | 0.011502 | 0.011112 |
| 0.011445 | 0.011566 | 0.011376 | 0.011551 | 0.011402 | 0.011417 | 0.011379 |
| 0.011111 | 0.011324 | 0.011394 | 0.011258 | 0.011330 | 0.011529 | 0.011547 |
| 0.011588 | 0.011454 | 0.011483 | 0.011483 | 0.011498 | 0.011094 | 0.011161 |
| 0.011430 | 0.011497 | 0.011601 | 0.011399 | 0.011738 | 0.011767 | 0.011497 |
| 0.011329 | 0.011530 | 0.011463 | 0.011497 | 0.011362 | 0.000000 | 0.011396 |
| 0.011463 | 0.011463 | 0.011429 | 0.011396 | 0.011429 | 0.011396 | 0.011497 |
| 0.011479 | 0.011480 | 0.011471 | 0.011505 | 0.011642 | 0.011607 | 0.011606 |
| 0.011605 | 0.011531 | 0.011356 | 0.011348 | 0.011467 | 0.011636 | 0.011637 |
| 0.011430 | 0.011500 | 0.011733 | 0.011702 | 0.011632 | 0.011666 | 0.011597 |

|          |          |          |          |          |          |          |
|----------|----------|----------|----------|----------|----------|----------|
| 0.011530 | 0.011597 | 0.011597 | 0.011497 | 0.011799 | 0.011664 | 0.011732 |
| 0.011765 | 0.011559 | 0.011469 | 0.011545 | 0.011429 | 0.011631 | 0.011597 |
| 0.011632 | 0.011664 | 0.011664 | 0.011664 | 0.011807 | 0.011799 | 0.011442 |
| 0.011331 | 0.011337 | 0.011435 | 0.011400 | 0.011436 | 0.011359 | 0.011400 |
| 0.011472 | 0.011323 | 0.011441 | 0.011510 | 0.011464 | 0.011539 | 0.011429 |
| 0.011396 | 0.011329 | 0.011463 | 0.011429 | 0.011362 | 0.011329 | 0.011262 |
| 0.011362 | 0.011429 | 0.011429 | 0.011429 | 0.011463 | 0.011463 | 0.011465 |
| 0.011533 | 0.011463 | 0.011463 | 0.011498 | 0.011094 | 0.011161 | 0.011430 |
| 0.011497 | 0.011601 | 0.011399 | 0.011738 | 0.011767 | 0.011497 | 0.011664 |
| 0.011597 | 0.011597 | 0.011432 | 0.011617 | 0.011547 | 0.011537 | 0.011446 |
| 0.011611 | 0.011789 | 0.011568 | 0.011502 | 0.011396 | 0.011597 | 0.011463 |
| 0.011564 | 0.011497 | 0.011396 | 0.011498 | 0.011597 | 0.011601 | 0.011497 |
| 0.011396 | 0.011330 | 0.011463 | 0.011396 | 0.011329 | 0.011332 | 0.011598 |
| 0.011497 | 0.011429 | 0.011463 | 0.011497 | 0.011463 | 0.011396 | 0.011329 |
| 0.011463 | 0.011497 | 0.011497 | 0.011429 | 0.011496 | 0.011732 | 0.011329 |
| 0.011429 | 0.011564 | 0.011429 | 0.011463 | 0.011429 | 0.011530 | 0.011403 |
| 0.011622 | 0.011273 | 0.011261 | 0.000000 | 0.011142 | 0.011096 | 0.011227 |
| 0.011218 | 0.011329 | 0.011429 | 0.011535 | 0.011397 | 0.011534 | 0.011665 |
| 0.011565 | 0.011601 | 0.011564 | 0.011812 | 0.011530 | 0.012404 | 0.011566 |
| 0.012305 | 0.012072 | 0.012206 | 0.012477 | 0.011530 | 0.011430 | 0.011531 |
| 0.012171 | 0.011903 | 0.011497 | 0.011396 | 0.011464 | 0.011464 | 0.011432 |
| 0.011329 | 0.011332 | 0.011396 | 0.011363 | 0.011733 | 0.011799 | 0.011800 |
| 0.011699 | 0.011800 | 0.011903 | 0.011669 | 0.012171 | 0.012178 | 0.012238 |
| 0.012239 | 0.012273 | 0.012220 | 0.012239 | 0.012240 | 0.011530 | 0.011766 |
| 0.011834 | 0.012337 | 0.011840 | 0.011866 | 0.012339 | 0.011400 | 0.011296 |
| 0.011262 | 0.011262 | 0.011732 | 0.011759 | 0.011869 | 0.011597 | 0.011262 |
| S643     | 0.011598 | 0.011598 | 0.011934 | 0.011698 | 0.011698 | 0.011766 |
| 0.011604 | 0.011536 | 0.011698 | 0.011195 | 0.011262 | 0.011229 | 0.011195 |
| 0.011228 | 0.011396 | 0.011195 | 0.011228 | 0.011295 | 0.011262 | 0.011228 |
| 0.011195 | 0.011228 | 0.011329 | 0.011195 | 0.011228 | 0.011228 | 0.011570 |
| 0.011463 | 0.011228 | 0.011127 | 0.011362 | 0.011295 | 0.011262 | 0.011295 |
| 0.011262 | 0.011362 | 0.011262 | 0.011262 | 0.011295 | 0.011262 | 0.011430 |
| 0.011195 | 0.011262 | 0.011295 | 0.011228 | 0.011329 | 0.011362 | 0.011295 |
| 0.011262 | 0.011430 | 0.011329 | 0.011598 | 0.011262 | 0.011530 | 0.011262 |
| 0.011228 | 0.011329 | 0.011396 | 0.011530 | 0.011631 | 0.011329 | 0.011430 |
| 0.011295 | 0.011362 | 0.011262 | 0.011497 | 0.011732 | 0.011262 | 0.011329 |
| 0.011228 | 0.011329 | 0.011295 | 0.011362 | 0.011295 | 0.011295 | 0.011295 |
| 0.011195 | 0.011228 | 0.011195 | 0.011295 | 0.011262 | 0.011296 | 0.011362 |
| 0.011295 | 0.011262 | 0.011329 | 0.011228 | 0.011362 | 0.011195 | 0.011262 |
| 0.011430 | 0.011362 | 0.011598 | 0.011430 | 0.011262 | 0.011497 | 0.011262 |
| 0.011394 | 0.011621 | 0.011438 | 0.011138 | 0.011098 | 0.011244 | 0.011296 |
| 0.011938 | 0.011365 | 0.011102 | 0.011497 | 0.011497 | 0.011295 | 0.011396 |
| 0.011329 | 0.011295 | 0.011362 | 0.011262 | 0.011362 | 0.011295 | 0.011295 |
| 0.011262 | 0.011362 | 0.011564 | 0.011430 | 0.011329 | 0.011295 | 0.011228 |
| 0.011195 | 0.011195 | 0.011262 | 0.011228 | 0.011430 | 0.011396 | 0.011329 |
| 0.011430 | 0.011497 | 0.011228 | 0.011228 | 0.011262 | 0.011262 | 0.011263 |
| 0.011331 | 0.011262 | 0.011262 | 0.011132 | 0.011205 | 0.011165 | 0.011262 |
| 0.011263 | 0.011198 | 0.011208 | 0.011233 | 0.011162 | 0.011197 | 0.011229 |
| 0.011492 | 0.011267 | 0.011301 | 0.011195 | 0.011199 | 0.011329 | 0.011296 |
| 0.011363 | 0.011296 | 0.011296 | 0.011396 | 0.011329 | 0.011698 | 0.011497 |
| 0.011530 | 0.011396 | 0.011262 | 0.011362 | 0.011161 | 0.011396 | 0.000000 |
| 0.011262 | 0.011262 | 0.011228 | 0.011195 | 0.011228 | 0.011195 | 0.011295 |
| 0.011262 | 0.011362 | 0.011295 | 0.011195 | 0.011296 | 0.011396 | 0.011398 |
| 0.011396 | 0.011295 | 0.011195 | 0.011128 | 0.011262 | 0.011195 | 0.011128 |
| 0.011230 | 0.011396 | 0.011195 | 0.011396 | 0.011161 | 0.011262 | 0.011228 |
| 0.011329 | 0.011228 | 0.011262 | 0.011228 | 0.011262 | 0.011127 | 0.011262 |
| 0.011295 | 0.011228 | 0.011295 | 0.011228 | 0.011262 | 0.011295 | 0.011530 |
| 0.011631 | 0.011564 | 0.011631 | 0.011397 | 0.011631 | 0.011262 | 0.011228 |
| 0.011263 | 0.011545 | 0.011335 | 0.011129 | 0.011637 | 0.011129 | 0.011257 |
| 0.011638 | 0.011536 | 0.011430 | 0.011631 | 0.011333 | 0.011497 | 0.011463 |

|          |          |          |          |          |          |          |
|----------|----------|----------|----------|----------|----------|----------|
| 0.011396 | 0.011564 | 0.011416 | 0.011266 | 0.011228 | 0.011295 | 0.011365 |
| 0.011463 | 0.011364 | 0.011500 | 0.011568 | 0.011497 | 0.011564 | 0.011670 |
| 0.011399 | 0.011570 | 0.011501 | 0.011432 | 0.011700 | 0.011161 | 0.011364 |
| 0.011329 | 0.011262 | 0.011161 | 0.011161 | 0.011228 | 0.011228 | 0.011295 |
| 0.011228 | 0.011295 | 0.011195 | 0.011295 | 0.011228 | 0.011228 | 0.011295 |
| 0.011228 | 0.011665 | 0.011564 | 0.011598 | 0.011127 | 0.011228 | 0.011262 |
| 0.011262 | 0.011228 | 0.011295 | 0.011329 | 0.011195 | 0.011195 | 0.011195 |
| 0.011732 | 0.011362 | 0.011362 | 0.011161 | 0.011262 | 0.011430 | 0.011195 |
| 0.011195 | 0.011262 | 0.011228 | 0.011396 | 0.011195 | 0.011329 | 0.011463 |
| 0.011396 | 0.011228 | 0.011228 | 0.011161 | 0.011161 | 0.011329 | 0.011262 |
| 0.011161 | 0.011262 | 0.011127 | 0.011161 | 0.011295 | 0.011430 | 0.011195 |
| 0.011161 | 0.011295 | 0.011228 | 0.011127 | 0.011463 | 0.011127 | 0.011295 |
| 0.011368 | 0.011195 | 0.011497 | 0.011329 | 0.011362 | 0.011228 | 0.011329 |
| 0.011195 | 0.011530 | 0.011127 | 0.011396 | 0.011195 | 0.011195 | 0.011127 |
| 0.011362 | 0.011564 | 0.011262 | 0.011329 | 0.011161 | 0.011564 | 0.011195 |
| 0.011195 | 0.011195 | 0.011228 | 0.011329 | 0.011228 | 0.011329 | 0.011396 |
| 0.011396 | 0.011362 | 0.011262 | 0.011363 | 0.011329 | 0.011195 | 0.011161 |
| 0.011195 | 0.011195 | 0.011262 | 0.011195 | 0.011161 | 0.011329 | 0.011195 |
| 0.011228 | 0.011228 | 0.011362 | 0.011396 | 0.011295 | 0.011228 | 0.011228 |
| 0.011295 | 0.011228 | 0.011329 | 0.011195 | 0.011329 | 0.011430 | 0.011732 |
| 0.011228 | 0.011631 | 0.011198 | 0.017674 | 0.011126 | 0.011366 | 0.011549 |
| 0.011510 | 0.011553 | 0.011217 | 0.011176 | 0.011665 | 0.011578 | 0.011243 |
| 0.011392 | 0.011488 | 0.000000 | 0.011186 | 0.011177 | 0.011258 | 0.011189 |
| 0.011389 | 0.011321 | 0.011320 | 0.011126 | 0.011362 | 0.011396 | 0.011398 |
| 0.011266 | 0.011362 | 0.011362 | 0.011329 | 0.011295 | 0.011295 | 0.011262 |
| 0.011295 | 0.011228 | 0.011262 | 0.011295 | 0.011262 | 0.011195 | 0.011228 |
| 0.011228 | 0.011295 | 0.011195 | 0.011295 | 0.011329 | 0.011362 | 0.011262 |
| 0.011295 | 0.011262 | 0.011598 | 0.011598 | 0.011329 | 0.011363 | 0.011396 |
| 0.011161 | 0.011161 | 0.011195 | 0.011295 | 0.011161 | 0.011396 | 0.011396 |
| 0.011430 | 0.011430 | 0.011362 | 0.011463 | 0.011631 | 0.011464 | 0.011295 |
| 0.011295 | 0.011362 | 0.011396 | 0.011228 | 0.011295 | 0.011262 | 0.011295 |
| 0.011363 | 0.011363 | 0.011396 | 0.011363 | 0.011262 | 0.011463 | 0.011430 |
| 0.011297 | 0.011195 | 0.011295 | 0.011396 | 0.011295 | 0.011430 | 0.011463 |
| 0.011631 | 0.011333 | 0.011497 | 0.011463 | 0.011396 | 0.011564 | 0.011195 |
| 0.011363 | 0.011262 | 0.011228 | 0.011228 | 0.011295 | 0.011195 | 0.011295 |
| 0.011329 | 0.011362 | 0.011262 | 0.011295 | 0.011262 | 0.011598 | 0.011598 |
| 0.011329 | 0.011363 | 0.011430 | 0.011362 | 0.012002 | 0.011418 | 0.011342 |
| 0.011412 | 0.011372 | 0.011482 | 0.011372 | 0.011480 | 0.011405 | 0.011371 |
| 0.011953 | 0.011268 | 0.011403 | 0.011337 | 0.011611 | 0.011469 | 0.011571 |
| 0.011979 | 0.011437 | 0.011331 | 0.011295 | 0.011329 | 0.011329 | 0.011297 |
| 0.011161 | 0.011195 | 0.011329 | 0.011295 | 0.011297 | 0.011430 | 0.011397 |
| 0.011262 | 0.011195 | 0.011228 | 0.011262 | 0.011161 | 0.011228 | 0.011127 |
| 0.011262 | 0.011295 | 0.011195 | 0.011161 | 0.011262 | 0.011195 | 0.011228 |
| 0.011228 | 0.011161 | 0.011228 | 0.011262 | 0.011161 | 0.011362 | 0.011396 |
| 0.011295 | 0.011362 | 0.011295 | 0.011295 | 0.011228 | 0.011631 | 0.011262 |
| 0.011304 | 0.011228 | 0.011464 | 0.011467 | 0.011329 | 0.011329 | 0.011329 |
| 0.011329 | 0.011262 | 0.011228 | 0.011262 | 0.011362 | 0.011362 | 0.011295 |
| 0.011295 | 0.011430 | 0.011598 | 0.011329 | 0.011530 | 0.011530 | 0.011396 |
| 0.011228 | 0.011295 | 0.011329 | 0.011732 | 0.011295 | 0.011329 | 0.011295 |
| 0.011329 | 0.011262 | 0.011262 | 0.011564 | 0.011497 | 0.011530 | 0.011262 |
| 0.011362 | 0.011430 | 0.011295 | 0.011362 | 0.011329 | 0.011195 | 0.011530 |
| 0.011295 | 0.011262 | 0.011262 | 0.011430 | 0.011262 | 0.011362 | 0.011598 |
| 0.011295 | 0.011672 | 0.011665 | 0.011385 | 0.011117 | 0.011366 | 0.011164 |
| 0.011170 | 0.011605 | 0.011166 | 0.011328 | 0.011158 | 0.011264 | 0.011273 |
| 0.011366 | 0.000000 | 0.011227 | 0.000000 | 0.011114 | 0.011261 | 0.011304 |
| 0.011324 | 0.011178 | 0.011307 | 0.011201 | 0.011296 | 0.011430 | 0.011497 |
| 0.011497 | 0.011363 | 0.011466 | 0.011467 | 0.011603 | 0.011626 | 0.011295 |
| 0.011530 | 0.011396 | 0.011262 | 0.011362 | 0.011161 | 0.011396 | 0.000000 |
| 0.011262 | 0.011262 | 0.011228 | 0.011195 | 0.011228 | 0.011195 | 0.011295 |
| 0.011270 | 0.011270 | 0.011266 | 0.011300 | 0.011437 | 0.011402 | 0.011402 |

|          |          |          |          |          |          |          |
|----------|----------|----------|----------|----------|----------|----------|
| 0.011401 | 0.011329 | 0.011134 | 0.011132 | 0.011263 | 0.011433 | 0.011433 |
| 0.011228 | 0.011297 | 0.011532 | 0.011500 | 0.011430 | 0.011464 | 0.011396 |
| 0.011329 | 0.011396 | 0.011396 | 0.011295 | 0.011867 | 0.011463 | 0.011531 |
| 0.011564 | 0.011630 | 0.011265 | 0.011337 | 0.011228 | 0.011430 | 0.011396 |
| 0.011430 | 0.011463 | 0.011463 | 0.011463 | 0.011611 | 0.011598 | 0.011234 |
| 0.011128 | 0.011130 | 0.011231 | 0.011196 | 0.011299 | 0.011135 | 0.011468 |
| 0.011266 | 0.011411 | 0.011156 | 0.011285 | 0.011262 | 0.011334 | 0.011228 |
| 0.011195 | 0.011195 | 0.011262 | 0.011228 | 0.011430 | 0.011396 | 0.011329 |
| 0.011430 | 0.011497 | 0.011228 | 0.011228 | 0.011262 | 0.011262 | 0.011263 |
| 0.011331 | 0.011262 | 0.011262 | 0.011296 | 0.011430 | 0.011497 | 0.011497 |
| 0.011363 | 0.011466 | 0.011467 | 0.011603 | 0.011626 | 0.011295 | 0.011463 |
| 0.011396 | 0.011396 | 0.011229 | 0.011408 | 0.011338 | 0.011367 | 0.011235 |
| 0.011405 | 0.011607 | 0.011399 | 0.011298 | 0.011195 | 0.011396 | 0.011262 |
| 0.011362 | 0.011295 | 0.011195 | 0.011296 | 0.011396 | 0.011398 | 0.011295 |
| 0.011195 | 0.011128 | 0.011262 | 0.011195 | 0.011128 | 0.011230 | 0.011396 |
| 0.011295 | 0.011228 | 0.011262 | 0.011295 | 0.011262 | 0.011195 | 0.011396 |
| 0.011262 | 0.011295 | 0.011295 | 0.011228 | 0.011295 | 0.011530 | 0.011195 |
| 0.011228 | 0.011631 | 0.011228 | 0.011262 | 0.011228 | 0.011598 | 0.011103 |
| 0.011566 | 0.011103 | 0.011161 | 0.011342 | 0.011427 | 0.011383 | 0.000000 |
| 0.011113 | 0.011396 | 0.011497 | 0.011603 | 0.011464 | 0.011568 | 0.011733 |
| 0.011632 | 0.011669 | 0.011631 | 0.011846 | 0.011598 | 0.012472 | 0.011633 |
| 0.012372 | 0.012140 | 0.012274 | 0.012545 | 0.011598 | 0.011295 | 0.011598 |
| 0.012036 | 0.011971 | 0.011564 | 0.011463 | 0.011531 | 0.011531 | 0.011500 |
| 0.011396 | 0.011365 | 0.011463 | 0.011430 | 0.011800 | 0.011867 | 0.011868 |
| 0.011767 | 0.011867 | 0.011971 | 0.011703 | 0.012037 | 0.012042 | 0.012104 |
| 0.012104 | 0.012138 | 0.012050 | 0.012105 | 0.012106 | 0.011329 | 0.011632 |
| 0.011699 | 0.012203 | 0.011704 | 0.011934 | 0.012407 | 0.011468 | 0.011363 |
| 0.011329 | 0.011329 | 0.011800 | 0.011842 | 0.011940 | 0.011665 | 0.011330 |
| S644     | 0.011664 | 0.011664 | 0.012001 | 0.011765 | 0.011765 | 0.011832 |
| 0.011671 | 0.011603 | 0.011832 | 0.011262 | 0.011329 | 0.011296 | 0.011262 |
| 0.011295 | 0.011463 | 0.011262 | 0.011295 | 0.011362 | 0.011329 | 0.011295 |
| 0.011262 | 0.011295 | 0.011396 | 0.011262 | 0.011295 | 0.011295 | 0.011637 |
| 0.011530 | 0.011295 | 0.011194 | 0.011429 | 0.011362 | 0.011329 | 0.011362 |
| 0.011329 | 0.011429 | 0.011329 | 0.011329 | 0.011362 | 0.011329 | 0.011497 |
| 0.011262 | 0.011329 | 0.011362 | 0.011295 | 0.011396 | 0.011429 | 0.011362 |
| 0.011329 | 0.011497 | 0.011396 | 0.011664 | 0.011329 | 0.011597 | 0.011329 |
| 0.011295 | 0.011396 | 0.011463 | 0.011597 | 0.011698 | 0.011329 | 0.011496 |
| 0.011362 | 0.011429 | 0.011329 | 0.011564 | 0.011799 | 0.011329 | 0.011396 |
| 0.011295 | 0.011396 | 0.011362 | 0.011429 | 0.011362 | 0.011362 | 0.011362 |
| 0.011262 | 0.011295 | 0.011262 | 0.011362 | 0.011329 | 0.011363 | 0.011429 |
| 0.011362 | 0.011329 | 0.011396 | 0.011295 | 0.011429 | 0.011262 | 0.011329 |
| 0.011496 | 0.011429 | 0.011664 | 0.011497 | 0.011329 | 0.011564 | 0.011329 |
| 0.011505 | 0.011733 | 0.011513 | 0.011216 | 0.011210 | 0.011355 | 0.011415 |
| 0.012048 | 0.011467 | 0.011184 | 0.011564 | 0.011564 | 0.011362 | 0.011463 |
| 0.011396 | 0.011362 | 0.011429 | 0.011329 | 0.011429 | 0.011362 | 0.011362 |
| 0.011329 | 0.011429 | 0.011631 | 0.011496 | 0.011396 | 0.011362 | 0.011295 |
| 0.011262 | 0.011262 | 0.011329 | 0.011295 | 0.011497 | 0.011463 | 0.011396 |
| 0.011497 | 0.011564 | 0.011295 | 0.011295 | 0.011329 | 0.011329 | 0.011330 |
| 0.011398 | 0.011329 | 0.011329 | 0.011168 | 0.011241 | 0.011200 | 0.011329 |
| 0.011297 | 0.011232 | 0.011282 | 0.011267 | 0.011230 | 0.011232 | 0.011297 |
| 0.011528 | 0.011302 | 0.011336 | 0.011262 | 0.011233 | 0.011397 | 0.011363 |
| 0.011430 | 0.011364 | 0.011363 | 0.011463 | 0.011396 | 0.011765 | 0.011564 |
| 0.011597 | 0.011463 | 0.011329 | 0.011430 | 0.011228 | 0.011463 | 0.011262 |
| 0.000000 | 0.011329 | 0.011295 | 0.011262 | 0.011295 | 0.011262 | 0.011362 |
| 0.011329 | 0.011430 | 0.011362 | 0.011262 | 0.011363 | 0.011463 | 0.011466 |
| 0.011463 | 0.011362 | 0.011262 | 0.011195 | 0.011329 | 0.011262 | 0.011195 |
| 0.011298 | 0.011463 | 0.011262 | 0.011463 | 0.011195 | 0.011329 | 0.011295 |
| 0.011396 | 0.011295 | 0.011329 | 0.011295 | 0.011329 | 0.011195 | 0.011329 |
| 0.011362 | 0.011295 | 0.011362 | 0.011295 | 0.011329 | 0.011362 | 0.011597 |
| 0.011698 | 0.011631 | 0.011698 | 0.011465 | 0.011698 | 0.011329 | 0.011295 |

|          |          |          |          |          |          |          |
|----------|----------|----------|----------|----------|----------|----------|
| 0.011330 | 0.011626 | 0.011472 | 0.011232 | 0.011671 | 0.011197 | 0.011336 |
| 0.011705 | 0.011604 | 0.011496 | 0.011698 | 0.011402 | 0.011564 | 0.011530 |
| 0.011463 | 0.011631 | 0.011486 | 0.011307 | 0.011228 | 0.011362 | 0.011432 |
| 0.011530 | 0.011431 | 0.011567 | 0.011635 | 0.011564 | 0.011631 | 0.011738 |
| 0.011466 | 0.011637 | 0.011568 | 0.011500 | 0.011767 | 0.011228 | 0.011431 |
| 0.011396 | 0.011329 | 0.011228 | 0.011228 | 0.011295 | 0.011295 | 0.011362 |
| 0.011295 | 0.011362 | 0.011262 | 0.011362 | 0.011295 | 0.011295 | 0.011362 |
| 0.011295 | 0.011731 | 0.011631 | 0.011664 | 0.011194 | 0.011295 | 0.011329 |
| 0.011329 | 0.011295 | 0.011362 | 0.011396 | 0.011262 | 0.011262 | 0.011262 |
| 0.011799 | 0.011429 | 0.011429 | 0.011228 | 0.011329 | 0.011497 | 0.011262 |
| 0.011262 | 0.011329 | 0.011295 | 0.011463 | 0.011262 | 0.011396 | 0.011530 |
| 0.011463 | 0.011295 | 0.011295 | 0.011228 | 0.011228 | 0.011396 | 0.011329 |
| 0.011228 | 0.011329 | 0.011195 | 0.011228 | 0.011362 | 0.011497 | 0.011262 |
| 0.011228 | 0.011362 | 0.011295 | 0.011195 | 0.011530 | 0.011195 | 0.011362 |
| 0.011437 | 0.011262 | 0.011564 | 0.011396 | 0.011429 | 0.011295 | 0.011396 |
| 0.011262 | 0.011597 | 0.011194 | 0.011463 | 0.011262 | 0.011262 | 0.011194 |
| 0.011429 | 0.011631 | 0.011329 | 0.011396 | 0.011228 | 0.011631 | 0.011262 |
| 0.011262 | 0.011262 | 0.011295 | 0.011396 | 0.011295 | 0.011396 | 0.011463 |
| 0.011463 | 0.011429 | 0.011329 | 0.011430 | 0.011396 | 0.011262 | 0.011228 |
| 0.011262 | 0.011262 | 0.011329 | 0.011262 | 0.011228 | 0.011396 | 0.011262 |
| 0.011295 | 0.011295 | 0.011429 | 0.011463 | 0.011362 | 0.011295 | 0.011295 |
| 0.011362 | 0.011295 | 0.011396 | 0.011262 | 0.011396 | 0.011496 | 0.011799 |
| 0.011295 | 0.011698 | 0.011302 | 0.017785 | 0.011126 | 0.011427 | 0.011653 |
| 0.011614 | 0.011658 | 0.011270 | 0.011292 | 0.011719 | 0.011682 | 0.011364 |
| 0.011440 | 0.011548 | 0.011177 | 0.011228 | 0.011216 | 0.011307 | 0.011275 |
| 0.011482 | 0.011433 | 0.011394 | 0.011193 | 0.011429 | 0.011463 | 0.011466 |
| 0.011335 | 0.011430 | 0.011429 | 0.011396 | 0.011362 | 0.011362 | 0.011329 |
| 0.011362 | 0.011295 | 0.011329 | 0.011362 | 0.011329 | 0.011262 | 0.011295 |
| 0.011295 | 0.011362 | 0.011262 | 0.011363 | 0.011396 | 0.011430 | 0.011329 |
| 0.011362 | 0.011329 | 0.011665 | 0.011665 | 0.011396 | 0.011430 | 0.011463 |
| 0.011228 | 0.011228 | 0.011262 | 0.011362 | 0.011228 | 0.011463 | 0.011463 |
| 0.011497 | 0.011496 | 0.011429 | 0.011530 | 0.011698 | 0.011532 | 0.011362 |
| 0.011362 | 0.011430 | 0.011463 | 0.011295 | 0.011362 | 0.011329 | 0.011362 |
| 0.011430 | 0.011430 | 0.011463 | 0.011430 | 0.011330 | 0.011530 | 0.011497 |
| 0.011365 | 0.011262 | 0.011362 | 0.011463 | 0.011295 | 0.011497 | 0.011530 |
| 0.011698 | 0.011402 | 0.011564 | 0.011530 | 0.011463 | 0.011631 | 0.011262 |
| 0.011431 | 0.011329 | 0.011295 | 0.011295 | 0.011362 | 0.011262 | 0.011363 |
| 0.011396 | 0.011430 | 0.011329 | 0.011362 | 0.011329 | 0.011665 | 0.011665 |
| 0.011396 | 0.011430 | 0.011429 | 0.011429 | 0.012069 | 0.011489 | 0.011412 |
| 0.011482 | 0.011442 | 0.011552 | 0.011441 | 0.011550 | 0.011474 | 0.011405 |
| 0.012022 | 0.011337 | 0.011471 | 0.011406 | 0.011680 | 0.011536 | 0.011639 |
| 0.012046 | 0.011512 | 0.011601 | 0.011664 | 0.011530 | 0.011530 | 0.011567 |
| 0.011228 | 0.011396 | 0.011530 | 0.011496 | 0.011499 | 0.011496 | 0.011464 |
| 0.011329 | 0.011262 | 0.011295 | 0.011329 | 0.011228 | 0.011295 | 0.011194 |
| 0.011329 | 0.011362 | 0.011262 | 0.011228 | 0.011329 | 0.011262 | 0.011295 |
| 0.011295 | 0.011228 | 0.011295 | 0.011329 | 0.011228 | 0.011429 | 0.011463 |
| 0.011362 | 0.011429 | 0.011362 | 0.011362 | 0.011295 | 0.011698 | 0.011329 |
| 0.011373 | 0.011295 | 0.011530 | 0.011535 | 0.011396 | 0.011396 | 0.011396 |
| 0.011396 | 0.011329 | 0.011295 | 0.011329 | 0.011429 | 0.011429 | 0.011362 |
| 0.011362 | 0.011497 | 0.011664 | 0.011396 | 0.011597 | 0.011597 | 0.011463 |
| 0.011295 | 0.011362 | 0.011396 | 0.011799 | 0.011362 | 0.011396 | 0.011362 |
| 0.011396 | 0.011329 | 0.011329 | 0.011631 | 0.011564 | 0.011597 | 0.011329 |
| 0.011429 | 0.011497 | 0.011362 | 0.011429 | 0.011396 | 0.011262 | 0.011597 |
| 0.011362 | 0.011262 | 0.011329 | 0.011497 | 0.011329 | 0.011429 | 0.011664 |
| 0.011362 | 0.011739 | 0.011732 | 0.011507 | 0.011173 | 0.011434 | 0.011215 |
| 0.011225 | 0.011722 | 0.011271 | 0.011373 | 0.011255 | 0.011366 | 0.011326 |
| 0.011468 | 0.000000 | 0.011283 | 0.000000 | 0.011168 | 0.011261 | 0.011425 |
| 0.011437 | 0.011336 | 0.011412 | 0.011342 | 0.011364 | 0.011497 | 0.011564 |
| 0.011564 | 0.011430 | 0.011534 | 0.011535 | 0.011670 | 0.011696 | 0.011362 |
| 0.011597 | 0.011463 | 0.011329 | 0.011430 | 0.011228 | 0.011463 | 0.011262 |

|          |          |          |          |          |          |          |
|----------|----------|----------|----------|----------|----------|----------|
| 0.000000 | 0.011329 | 0.011295 | 0.011262 | 0.011295 | 0.011262 | 0.011362 |
| 0.011305 | 0.011305 | 0.011300 | 0.011334 | 0.011471 | 0.011436 | 0.011436 |
| 0.011435 | 0.011396 | 0.011171 | 0.011168 | 0.011297 | 0.011467 | 0.011467 |
| 0.011296 | 0.011331 | 0.011531 | 0.011567 | 0.011497 | 0.011531 | 0.011463 |
| 0.011396 | 0.011463 | 0.011463 | 0.011362 | 0.011933 | 0.011530 | 0.011597 |
| 0.011564 | 0.011630 | 0.011333 | 0.011407 | 0.011295 | 0.011497 | 0.011463 |
| 0.011497 | 0.011530 | 0.011530 | 0.011530 | 0.011611 | 0.011664 | 0.011303 |
| 0.011195 | 0.011199 | 0.011299 | 0.011264 | 0.011368 | 0.011172 | 0.011536 |
| 0.011300 | 0.011367 | 0.011108 | 0.011322 | 0.011329 | 0.011368 | 0.011295 |
| 0.011262 | 0.011262 | 0.011329 | 0.011295 | 0.011497 | 0.011463 | 0.011396 |
| 0.011497 | 0.011564 | 0.011295 | 0.011295 | 0.011329 | 0.011329 | 0.011330 |
| 0.011398 | 0.011329 | 0.011329 | 0.011364 | 0.011497 | 0.011564 | 0.011564 |
| 0.011430 | 0.011534 | 0.011535 | 0.011670 | 0.011696 | 0.011362 | 0.011530 |
| 0.011463 | 0.011463 | 0.011297 | 0.011443 | 0.011408 | 0.011435 | 0.011305 |
| 0.011473 | 0.011698 | 0.011483 | 0.011366 | 0.011262 | 0.011463 | 0.011329 |
| 0.011430 | 0.011362 | 0.011262 | 0.011363 | 0.011463 | 0.011466 | 0.011362 |
| 0.011262 | 0.011195 | 0.011329 | 0.011262 | 0.011195 | 0.011298 | 0.011463 |
| 0.011362 | 0.011295 | 0.011329 | 0.011362 | 0.011329 | 0.011262 | 0.011463 |
| 0.011329 | 0.011362 | 0.011362 | 0.011295 | 0.011362 | 0.011597 | 0.011262 |
| 0.011295 | 0.011698 | 0.011295 | 0.011329 | 0.011295 | 0.011664 | 0.011189 |
| 0.011622 | 0.011230 | 0.011261 | 0.011463 | 0.011549 | 0.011491 | 0.011186 |
| 0.011218 | 0.011463 | 0.011564 | 0.011671 | 0.011531 | 0.011669 | 0.011800 |
| 0.011699 | 0.011737 | 0.011698 | 0.011949 | 0.011664 | 0.012539 | 0.011700 |
| 0.012439 | 0.012207 | 0.012341 | 0.012613 | 0.011664 | 0.011363 | 0.011665 |
| 0.012103 | 0.012038 | 0.011631 | 0.011530 | 0.011598 | 0.011598 | 0.011567 |
| 0.011463 | 0.011467 | 0.011530 | 0.011497 | 0.011867 | 0.011933 | 0.011935 |
| 0.011834 | 0.011934 | 0.012038 | 0.011804 | 0.012104 | 0.012110 | 0.012171 |
| 0.012172 | 0.012205 | 0.012152 | 0.012172 | 0.012173 | 0.011396 | 0.011699 |
| 0.011767 | 0.012270 | 0.011772 | 0.012001 | 0.012474 | 0.011536 | 0.011430 |
| 0.011396 | 0.011396 | 0.011867 | 0.011883 | 0.011940 | 0.011732 | 0.011397 |
| S645     | 0.011664 | 0.011664 | 0.012001 | 0.011765 | 0.011765 | 0.011832 |
| 0.011671 | 0.011603 | 0.011832 | 0.011262 | 0.011329 | 0.011296 | 0.011262 |
| 0.011295 | 0.011463 | 0.011262 | 0.011295 | 0.011362 | 0.011329 | 0.011295 |
| 0.011262 | 0.011295 | 0.011396 | 0.011262 | 0.011295 | 0.011295 | 0.011637 |
| 0.011530 | 0.011295 | 0.011194 | 0.011429 | 0.011362 | 0.011329 | 0.011362 |
| 0.011329 | 0.011429 | 0.011329 | 0.011329 | 0.011362 | 0.011329 | 0.011496 |
| 0.011262 | 0.011329 | 0.011362 | 0.011295 | 0.011396 | 0.011429 | 0.011362 |
| 0.011329 | 0.011497 | 0.011396 | 0.011664 | 0.011329 | 0.011597 | 0.011329 |
| 0.011295 | 0.011396 | 0.011463 | 0.011597 | 0.011698 | 0.011396 | 0.011496 |
| 0.011362 | 0.011429 | 0.011329 | 0.011564 | 0.011799 | 0.011329 | 0.011396 |
| 0.011295 | 0.011396 | 0.011362 | 0.011429 | 0.011362 | 0.011362 | 0.011362 |
| 0.011262 | 0.011295 | 0.011262 | 0.011362 | 0.011329 | 0.011363 | 0.011429 |
| 0.011362 | 0.011329 | 0.011396 | 0.011295 | 0.011429 | 0.011262 | 0.011329 |
| 0.011496 | 0.011429 | 0.011664 | 0.011497 | 0.011329 | 0.011564 | 0.011329 |
| 0.011505 | 0.011733 | 0.011513 | 0.011216 | 0.011172 | 0.011355 | 0.011414 |
| 0.012048 | 0.011467 | 0.011184 | 0.011564 | 0.011564 | 0.011362 | 0.011463 |
| 0.011396 | 0.011362 | 0.011429 | 0.011329 | 0.011429 | 0.011362 | 0.011362 |
| 0.011329 | 0.011429 | 0.011631 | 0.011496 | 0.011396 | 0.011362 | 0.011295 |
| 0.011262 | 0.011262 | 0.011329 | 0.011295 | 0.011497 | 0.011463 | 0.011396 |
| 0.011497 | 0.011564 | 0.011295 | 0.011295 | 0.011329 | 0.011329 | 0.011330 |
| 0.011398 | 0.011329 | 0.011329 | 0.011204 | 0.011277 | 0.011236 | 0.011329 |
| 0.011331 | 0.011266 | 0.011282 | 0.011302 | 0.011230 | 0.011266 | 0.011297 |
| 0.011564 | 0.011336 | 0.011370 | 0.011262 | 0.011268 | 0.011397 | 0.011363 |
| 0.011430 | 0.011363 | 0.011363 | 0.011463 | 0.011396 | 0.011765 | 0.011564 |
| 0.011597 | 0.011463 | 0.011329 | 0.011430 | 0.011228 | 0.011463 | 0.011262 |
| 0.011329 | 0.000000 | 0.011295 | 0.011262 | 0.011295 | 0.011262 | 0.011362 |
| 0.011329 | 0.011429 | 0.011362 | 0.011262 | 0.011363 | 0.011463 | 0.011466 |
| 0.011463 | 0.011362 | 0.011262 | 0.011195 | 0.011329 | 0.011262 | 0.011195 |
| 0.011298 | 0.011463 | 0.011262 | 0.011463 | 0.011228 | 0.011329 | 0.011295 |
| 0.011396 | 0.011295 | 0.011329 | 0.011295 | 0.011329 | 0.011195 | 0.011329 |

|          |          |          |          |          |          |          |
|----------|----------|----------|----------|----------|----------|----------|
| 0.011362 | 0.011295 | 0.011362 | 0.011295 | 0.011329 | 0.011362 | 0.011597 |
| 0.011698 | 0.011631 | 0.011698 | 0.011465 | 0.011698 | 0.011329 | 0.011295 |
| 0.011330 | 0.011545 | 0.011380 | 0.011232 | 0.011705 | 0.011197 | 0.011296 |
| 0.011705 | 0.011604 | 0.011496 | 0.011698 | 0.011402 | 0.011564 | 0.011530 |
| 0.011463 | 0.011631 | 0.011486 | 0.011349 | 0.011354 | 0.011362 | 0.011432 |
| 0.011530 | 0.011431 | 0.011567 | 0.011635 | 0.011564 | 0.011631 | 0.011738 |
| 0.011466 | 0.011637 | 0.011568 | 0.011500 | 0.011767 | 0.011228 | 0.011431 |
| 0.011396 | 0.011329 | 0.011228 | 0.011228 | 0.011295 | 0.011295 | 0.011362 |
| 0.011295 | 0.011362 | 0.011262 | 0.011362 | 0.011295 | 0.011295 | 0.011362 |
| 0.011295 | 0.011731 | 0.011631 | 0.011664 | 0.011194 | 0.011295 | 0.011329 |
| 0.011329 | 0.011295 | 0.011362 | 0.011396 | 0.011262 | 0.011262 | 0.011262 |
| 0.011799 | 0.011429 | 0.011429 | 0.011228 | 0.011329 | 0.011497 | 0.011262 |
| 0.011262 | 0.011329 | 0.011295 | 0.011463 | 0.011262 | 0.011396 | 0.011530 |
| 0.011463 | 0.011295 | 0.011295 | 0.011228 | 0.011228 | 0.011396 | 0.011329 |
| 0.011228 | 0.011329 | 0.011195 | 0.011228 | 0.011362 | 0.011497 | 0.011262 |
| 0.011228 | 0.011362 | 0.011295 | 0.011195 | 0.011530 | 0.011195 | 0.011362 |
| 0.011437 | 0.011262 | 0.011564 | 0.011396 | 0.011429 | 0.011295 | 0.011396 |
| 0.011262 | 0.011597 | 0.011194 | 0.011463 | 0.011262 | 0.011262 | 0.011194 |
| 0.011429 | 0.011631 | 0.011329 | 0.011396 | 0.011228 | 0.011631 | 0.011262 |
| 0.011262 | 0.011262 | 0.011295 | 0.011396 | 0.011295 | 0.011396 | 0.011463 |
| 0.011463 | 0.011429 | 0.011329 | 0.011429 | 0.011396 | 0.011262 | 0.011228 |
| 0.011262 | 0.011262 | 0.011329 | 0.011262 | 0.011228 | 0.011396 | 0.011262 |
| 0.011295 | 0.011295 | 0.011429 | 0.011463 | 0.011362 | 0.011295 | 0.011295 |
| 0.011362 | 0.011295 | 0.011396 | 0.011262 | 0.011396 | 0.011496 | 0.011799 |
| 0.011295 | 0.011698 | 0.011302 | 0.017785 | 0.011191 | 0.011427 | 0.011653 |
| 0.011614 | 0.011658 | 0.011270 | 0.011234 | 0.011774 | 0.011682 | 0.011303 |
| 0.011487 | 0.011548 | 0.011216 | 0.011228 | 0.011294 | 0.011356 | 0.011232 |
| 0.011482 | 0.011433 | 0.011394 | 0.011259 | 0.011429 | 0.011463 | 0.011466 |
| 0.011335 | 0.011429 | 0.011429 | 0.011396 | 0.011362 | 0.011362 | 0.011329 |
| 0.011362 | 0.011295 | 0.011329 | 0.011362 | 0.011329 | 0.011262 | 0.011295 |
| 0.011295 | 0.011362 | 0.011262 | 0.011362 | 0.011396 | 0.011429 | 0.011329 |
| 0.011362 | 0.011329 | 0.011665 | 0.011665 | 0.011396 | 0.011430 | 0.011463 |
| 0.011228 | 0.011228 | 0.011262 | 0.011362 | 0.011228 | 0.011463 | 0.011463 |
| 0.011497 | 0.011496 | 0.011429 | 0.011530 | 0.011698 | 0.011532 | 0.011362 |
| 0.011362 | 0.011429 | 0.011463 | 0.011295 | 0.011362 | 0.011329 | 0.011362 |
| 0.011430 | 0.011430 | 0.011463 | 0.011430 | 0.011330 | 0.011530 | 0.011497 |
| 0.011365 | 0.011262 | 0.011362 | 0.011463 | 0.011362 | 0.011497 | 0.011530 |
| 0.011698 | 0.011402 | 0.011564 | 0.011530 | 0.011463 | 0.011631 | 0.011262 |
| 0.011431 | 0.011329 | 0.011295 | 0.011295 | 0.011362 | 0.011262 | 0.011362 |
| 0.011396 | 0.011429 | 0.011329 | 0.011362 | 0.011329 | 0.011665 | 0.011665 |
| 0.011396 | 0.011430 | 0.011496 | 0.011429 | 0.012069 | 0.011489 | 0.011412 |
| 0.011482 | 0.011442 | 0.011552 | 0.011441 | 0.011550 | 0.011474 | 0.011439 |
| 0.012021 | 0.011337 | 0.011471 | 0.011406 | 0.011680 | 0.011536 | 0.011639 |
| 0.012046 | 0.011512 | 0.011601 | 0.011664 | 0.011530 | 0.011530 | 0.011567 |
| 0.011228 | 0.011396 | 0.011530 | 0.011496 | 0.011499 | 0.011496 | 0.011464 |
| 0.011329 | 0.011262 | 0.011295 | 0.011329 | 0.011228 | 0.011295 | 0.011194 |
| 0.011329 | 0.011362 | 0.011262 | 0.011228 | 0.011329 | 0.011262 | 0.011295 |
| 0.011295 | 0.011228 | 0.011295 | 0.011329 | 0.011228 | 0.011429 | 0.011463 |
| 0.011362 | 0.011429 | 0.011362 | 0.011362 | 0.011295 | 0.011698 | 0.011329 |
| 0.011373 | 0.011295 | 0.011530 | 0.011535 | 0.011396 | 0.011396 | 0.011396 |
| 0.011396 | 0.011329 | 0.011295 | 0.011329 | 0.011429 | 0.011429 | 0.011362 |
| 0.011362 | 0.011496 | 0.011664 | 0.011396 | 0.011597 | 0.011597 | 0.011463 |
| 0.011295 | 0.011362 | 0.011396 | 0.011799 | 0.011362 | 0.011396 | 0.011362 |
| 0.011396 | 0.011329 | 0.011329 | 0.011631 | 0.011564 | 0.011597 | 0.011329 |
| 0.011429 | 0.011496 | 0.011362 | 0.011429 | 0.011396 | 0.011262 | 0.011597 |
| 0.011362 | 0.011329 | 0.011329 | 0.011496 | 0.011329 | 0.011429 | 0.011664 |
| 0.011362 | 0.011739 | 0.011731 | 0.011507 | 0.011229 | 0.011434 | 0.011267 |
| 0.011225 | 0.011722 | 0.011271 | 0.011417 | 0.011255 | 0.011366 | 0.011379 |
| 0.011468 | 0.011126 | 0.011338 | 0.011192 | 0.011222 | 0.011395 | 0.011425 |
| 0.011437 | 0.011296 | 0.011412 | 0.011307 | 0.011364 | 0.011497 | 0.011564 |

|          |          |          |          |          |          |          |
|----------|----------|----------|----------|----------|----------|----------|
| 0.011564 | 0.011430 | 0.011533 | 0.011535 | 0.011670 | 0.011696 | 0.011362 |
| 0.011597 | 0.011463 | 0.011329 | 0.011430 | 0.011228 | 0.011463 | 0.011262 |
| 0.011329 | 0.000000 | 0.011295 | 0.011262 | 0.011295 | 0.011262 | 0.011362 |
| 0.011340 | 0.011340 | 0.011334 | 0.011368 | 0.011505 | 0.011470 | 0.011470 |
| 0.011469 | 0.011396 | 0.011208 | 0.011204 | 0.011331 | 0.011501 | 0.011501 |
| 0.011296 | 0.011365 | 0.011599 | 0.011567 | 0.011497 | 0.011531 | 0.011463 |
| 0.011396 | 0.011463 | 0.011463 | 0.011362 | 0.011933 | 0.011530 | 0.011597 |
| 0.011631 | 0.011701 | 0.011299 | 0.011407 | 0.011295 | 0.011497 | 0.011463 |
| 0.011497 | 0.011530 | 0.011530 | 0.011530 | 0.011650 | 0.011664 | 0.011303 |
| 0.011195 | 0.011164 | 0.011298 | 0.011264 | 0.011368 | 0.011172 | 0.011536 |
| 0.011335 | 0.011455 | 0.011203 | 0.011360 | 0.011329 | 0.011402 | 0.011295 |
| 0.011262 | 0.011262 | 0.011329 | 0.011295 | 0.011497 | 0.011463 | 0.011396 |
| 0.011497 | 0.011564 | 0.011295 | 0.011295 | 0.011329 | 0.011329 | 0.011330 |
| 0.011398 | 0.011329 | 0.011329 | 0.011364 | 0.011497 | 0.011564 | 0.011564 |
| 0.011430 | 0.011533 | 0.011535 | 0.011670 | 0.011696 | 0.011362 | 0.011530 |
| 0.011463 | 0.011463 | 0.011297 | 0.011443 | 0.011408 | 0.011435 | 0.011305 |
| 0.011473 | 0.011698 | 0.011441 | 0.011366 | 0.011262 | 0.011463 | 0.011329 |
| 0.011429 | 0.011362 | 0.011262 | 0.011363 | 0.011463 | 0.011466 | 0.011362 |
| 0.011262 | 0.011195 | 0.011329 | 0.011262 | 0.011195 | 0.011298 | 0.011463 |
| 0.011362 | 0.011295 | 0.011329 | 0.011362 | 0.011329 | 0.011262 | 0.011463 |
| 0.011329 | 0.011362 | 0.011362 | 0.011295 | 0.011362 | 0.011597 | 0.011262 |
| 0.011295 | 0.011698 | 0.011295 | 0.011329 | 0.011295 | 0.011664 | 0.011189 |
| 0.011678 | 0.011230 | 0.011261 | 0.011463 | 0.011549 | 0.011491 | 0.011144 |
| 0.011218 | 0.011463 | 0.011564 | 0.011671 | 0.011531 | 0.011669 | 0.011800 |
| 0.011699 | 0.011737 | 0.011698 | 0.011949 | 0.011664 | 0.012539 | 0.011700 |
| 0.012439 | 0.012207 | 0.012341 | 0.012545 | 0.011664 | 0.011362 | 0.011665 |
| 0.012103 | 0.012038 | 0.011631 | 0.011530 | 0.011598 | 0.011598 | 0.011567 |
| 0.011463 | 0.011467 | 0.011530 | 0.011497 | 0.011867 | 0.011933 | 0.011935 |
| 0.011834 | 0.011934 | 0.012038 | 0.011804 | 0.012104 | 0.012110 | 0.012171 |
| 0.012172 | 0.012205 | 0.012152 | 0.012172 | 0.012173 | 0.011396 | 0.011699 |
| 0.011766 | 0.012270 | 0.011772 | 0.012001 | 0.012474 | 0.011536 | 0.011430 |
| 0.011396 | 0.011396 | 0.011867 | 0.011883 | 0.012010 | 0.011731 | 0.011397 |
| S646     | 0.011631 | 0.011631 | 0.011967 | 0.011732 | 0.011732 | 0.011799 |
| 0.011638 | 0.011570 | 0.011732 | 0.011228 | 0.011295 | 0.011262 | 0.011228 |
| 0.011262 | 0.011429 | 0.011228 | 0.011262 | 0.011329 | 0.011295 | 0.011262 |
| 0.011228 | 0.011262 | 0.011362 | 0.011228 | 0.011262 | 0.011262 | 0.011604 |
| 0.011497 | 0.011262 | 0.011161 | 0.011396 | 0.011329 | 0.011295 | 0.011329 |
| 0.011295 | 0.011396 | 0.011295 | 0.011295 | 0.011329 | 0.011295 | 0.011463 |
| 0.011228 | 0.011295 | 0.011329 | 0.011262 | 0.011362 | 0.011396 | 0.011329 |
| 0.011295 | 0.011463 | 0.011363 | 0.011631 | 0.011295 | 0.011564 | 0.011295 |
| 0.011262 | 0.011362 | 0.011430 | 0.011564 | 0.011665 | 0.011362 | 0.011463 |
| 0.011329 | 0.011396 | 0.011295 | 0.011530 | 0.011766 | 0.011295 | 0.011362 |
| 0.011262 | 0.011362 | 0.011329 | 0.011396 | 0.011329 | 0.011329 | 0.011329 |
| 0.011228 | 0.011262 | 0.011228 | 0.011329 | 0.011295 | 0.011329 | 0.011396 |
| 0.011329 | 0.011295 | 0.011362 | 0.011262 | 0.011396 | 0.011228 | 0.011295 |
| 0.011463 | 0.011396 | 0.011631 | 0.011463 | 0.011295 | 0.011530 | 0.011295 |
| 0.011431 | 0.011658 | 0.011475 | 0.011177 | 0.011172 | 0.011281 | 0.011375 |
| 0.012011 | 0.011416 | 0.011184 | 0.011530 | 0.011530 | 0.011329 | 0.011430 |
| 0.011362 | 0.011329 | 0.011396 | 0.011295 | 0.011396 | 0.011329 | 0.011329 |
| 0.011295 | 0.011396 | 0.011597 | 0.011463 | 0.011362 | 0.011329 | 0.011262 |
| 0.011228 | 0.011228 | 0.011295 | 0.011262 | 0.011463 | 0.011429 | 0.011362 |
| 0.011463 | 0.011530 | 0.011262 | 0.011262 | 0.011295 | 0.011295 | 0.011297 |
| 0.011364 | 0.011295 | 0.011295 | 0.011168 | 0.011241 | 0.011200 | 0.011296 |
| 0.011297 | 0.011232 | 0.011245 | 0.011267 | 0.011196 | 0.011231 | 0.011263 |
| 0.011528 | 0.011301 | 0.011336 | 0.011228 | 0.011233 | 0.011363 | 0.011329 |
| 0.011396 | 0.011330 | 0.011329 | 0.011429 | 0.011362 | 0.011732 | 0.011530 |
| 0.011564 | 0.011430 | 0.011295 | 0.011396 | 0.011195 | 0.011429 | 0.011228 |
| 0.011295 | 0.011295 | 0.000000 | 0.011228 | 0.011262 | 0.011228 | 0.011329 |
| 0.011295 | 0.011396 | 0.011329 | 0.011228 | 0.011330 | 0.011430 | 0.011432 |
| 0.011430 | 0.011329 | 0.011228 | 0.011161 | 0.011295 | 0.011228 | 0.011161 |



|          |          |          |          |          |          |          |
|----------|----------|----------|----------|----------|----------|----------|
| 0.011264 | 0.011430 | 0.011228 | 0.011430 | 0.011195 | 0.011295 | 0.011262 |
| 0.011362 | 0.011262 | 0.011295 | 0.011262 | 0.011295 | 0.011161 | 0.011295 |
| 0.011329 | 0.011262 | 0.011329 | 0.011262 | 0.011295 | 0.011329 | 0.011564 |
| 0.011665 | 0.011597 | 0.011665 | 0.011397 | 0.011665 | 0.011295 | 0.011262 |
| 0.011297 | 0.011505 | 0.011380 | 0.011163 | 0.011671 | 0.011163 | 0.011257 |
| 0.011671 | 0.011570 | 0.011463 | 0.011665 | 0.011368 | 0.011530 | 0.011497 |
| 0.011429 | 0.011597 | 0.011451 | 0.011266 | 0.011312 | 0.011329 | 0.011399 |
| 0.011497 | 0.011398 | 0.011534 | 0.011602 | 0.011530 | 0.011598 | 0.011704 |
| 0.011433 | 0.011603 | 0.011534 | 0.011466 | 0.011733 | 0.011195 | 0.011397 |
| 0.011362 | 0.011295 | 0.011195 | 0.011195 | 0.011262 | 0.011262 | 0.011329 |
| 0.011262 | 0.011329 | 0.011228 | 0.011329 | 0.011262 | 0.011262 | 0.011329 |
| 0.011262 | 0.011698 | 0.011597 | 0.011631 | 0.011161 | 0.011262 | 0.011295 |
| 0.011295 | 0.011262 | 0.011329 | 0.011362 | 0.011228 | 0.011228 | 0.011228 |
| 0.011765 | 0.011396 | 0.011396 | 0.011195 | 0.011295 | 0.011463 | 0.011228 |
| 0.011228 | 0.011295 | 0.011262 | 0.011430 | 0.011228 | 0.011362 | 0.011497 |
| 0.011429 | 0.011262 | 0.011262 | 0.011195 | 0.011195 | 0.011362 | 0.011295 |
| 0.011195 | 0.011295 | 0.011161 | 0.011195 | 0.011329 | 0.011463 | 0.011228 |
| 0.011195 | 0.011329 | 0.011262 | 0.011161 | 0.011497 | 0.011161 | 0.011329 |
| 0.011403 | 0.011228 | 0.011530 | 0.011362 | 0.011396 | 0.011262 | 0.011362 |
| 0.011228 | 0.011564 | 0.011161 | 0.011430 | 0.011228 | 0.011228 | 0.011161 |
| 0.011396 | 0.011564 | 0.011295 | 0.011362 | 0.011195 | 0.011597 | 0.011228 |
| 0.011228 | 0.011228 | 0.011262 | 0.011362 | 0.011262 | 0.011362 | 0.011429 |
| 0.011430 | 0.011396 | 0.011295 | 0.011396 | 0.011362 | 0.011228 | 0.011195 |
| 0.011228 | 0.011228 | 0.011295 | 0.011228 | 0.011195 | 0.011362 | 0.011228 |
| 0.011262 | 0.011262 | 0.011396 | 0.011429 | 0.011329 | 0.011262 | 0.011262 |
| 0.011329 | 0.011262 | 0.011362 | 0.011228 | 0.011362 | 0.011463 | 0.011765 |
| 0.011262 | 0.011665 | 0.011233 | 0.017747 | 0.011191 | 0.011305 | 0.011583 |
| 0.011545 | 0.011588 | 0.011217 | 0.011234 | 0.011609 | 0.011612 | 0.011242 |
| 0.011487 | 0.011426 | 0.011138 | 0.011144 | 0.011216 | 0.011208 | 0.011189 |
| 0.011482 | 0.011395 | 0.011394 | 0.011259 | 0.011396 | 0.011430 | 0.011432 |
| 0.011301 | 0.011396 | 0.011396 | 0.011362 | 0.011329 | 0.011329 | 0.011295 |
| 0.011329 | 0.011262 | 0.011295 | 0.011329 | 0.011295 | 0.011228 | 0.011262 |
| 0.011262 | 0.011329 | 0.011228 | 0.011329 | 0.011362 | 0.011396 | 0.011295 |
| 0.011329 | 0.011295 | 0.011631 | 0.011631 | 0.011362 | 0.011396 | 0.011430 |
| 0.011195 | 0.011195 | 0.011228 | 0.011329 | 0.011195 | 0.011429 | 0.011429 |
| 0.011463 | 0.011463 | 0.011396 | 0.011497 | 0.011665 | 0.011498 | 0.011329 |
| 0.011329 | 0.011396 | 0.011429 | 0.011262 | 0.011329 | 0.011295 | 0.011329 |
| 0.011396 | 0.011396 | 0.011429 | 0.011396 | 0.011296 | 0.011497 | 0.011463 |
| 0.011331 | 0.011228 | 0.011329 | 0.011430 | 0.011329 | 0.011463 | 0.011497 |
| 0.011665 | 0.011368 | 0.011530 | 0.011497 | 0.011429 | 0.011597 | 0.011228 |
| 0.011397 | 0.011295 | 0.011262 | 0.011262 | 0.011329 | 0.011228 | 0.011329 |
| 0.011362 | 0.011396 | 0.011295 | 0.011329 | 0.011295 | 0.011631 | 0.011631 |
| 0.011362 | 0.011396 | 0.011463 | 0.011396 | 0.012036 | 0.011417 | 0.011342 |
| 0.011412 | 0.011407 | 0.011482 | 0.011372 | 0.011515 | 0.011440 | 0.011405 |
| 0.011988 | 0.011303 | 0.011437 | 0.011372 | 0.011646 | 0.011502 | 0.011605 |
| 0.012012 | 0.011437 | 0.011365 | 0.011329 | 0.011362 | 0.011362 | 0.011331 |
| 0.011195 | 0.011228 | 0.011362 | 0.011329 | 0.011331 | 0.011463 | 0.011431 |
| 0.011295 | 0.011228 | 0.011262 | 0.011295 | 0.011195 | 0.011262 | 0.011161 |
| 0.011295 | 0.011329 | 0.011228 | 0.011195 | 0.011295 | 0.011228 | 0.011262 |
| 0.011262 | 0.011195 | 0.011262 | 0.011295 | 0.011195 | 0.011396 | 0.011429 |
| 0.011329 | 0.011396 | 0.011329 | 0.011329 | 0.011262 | 0.011665 | 0.011295 |
| 0.011304 | 0.011262 | 0.011497 | 0.011501 | 0.011362 | 0.011362 | 0.011362 |
| 0.011362 | 0.011295 | 0.011262 | 0.011295 | 0.011396 | 0.011396 | 0.011329 |
| 0.011329 | 0.011463 | 0.011631 | 0.011362 | 0.011564 | 0.011564 | 0.011429 |
| 0.011262 | 0.011329 | 0.011362 | 0.011765 | 0.011329 | 0.011362 | 0.011329 |
| 0.011362 | 0.011295 | 0.011295 | 0.011598 | 0.011530 | 0.011564 | 0.011295 |
| 0.011396 | 0.011463 | 0.011329 | 0.011396 | 0.011362 | 0.011228 | 0.011564 |
| 0.011329 | 0.011295 | 0.011295 | 0.011463 | 0.011295 | 0.011396 | 0.011631 |
| 0.011329 | 0.011705 | 0.011698 | 0.011467 | 0.011173 | 0.011400 | 0.011215 |
| 0.011115 | 0.011683 | 0.011201 | 0.011417 | 0.011207 | 0.011366 | 0.011379 |

|          |          |          |          |          |          |          |
|----------|----------|----------|----------|----------|----------|----------|
| 0.011417 | 0.011126 | 0.011339 | 0.011126 | 0.011168 | 0.011261 | 0.011344 |
| 0.011362 | 0.011257 | 0.011342 | 0.011272 | 0.011330 | 0.011463 | 0.011530 |
| 0.011530 | 0.011396 | 0.011500 | 0.011467 | 0.011636 | 0.011661 | 0.011329 |
| 0.011564 | 0.011430 | 0.011295 | 0.011396 | 0.011195 | 0.011429 | 0.011228 |
| 0.011295 | 0.011295 | 0.000000 | 0.011228 | 0.011262 | 0.011228 | 0.011329 |
| 0.011305 | 0.011305 | 0.011300 | 0.011334 | 0.011471 | 0.011436 | 0.011436 |
| 0.011435 | 0.011363 | 0.011171 | 0.011168 | 0.011297 | 0.011467 | 0.011467 |
| 0.011262 | 0.011331 | 0.011565 | 0.011533 | 0.011464 | 0.011498 | 0.011429 |
| 0.011362 | 0.011429 | 0.011429 | 0.011329 | 0.011900 | 0.011497 | 0.011564 |
| 0.011597 | 0.011666 | 0.011299 | 0.011372 | 0.011262 | 0.011463 | 0.011430 |
| 0.011464 | 0.011497 | 0.011497 | 0.011497 | 0.011650 | 0.011631 | 0.011268 |
| 0.011162 | 0.011164 | 0.011265 | 0.011230 | 0.011334 | 0.011135 | 0.011502 |
| 0.011300 | 0.011367 | 0.011156 | 0.011285 | 0.011296 | 0.011368 | 0.011262 |
| 0.011228 | 0.011228 | 0.011295 | 0.011262 | 0.011463 | 0.011429 | 0.011362 |
| 0.011463 | 0.011530 | 0.011262 | 0.011262 | 0.011295 | 0.011295 | 0.011297 |
| 0.011364 | 0.011295 | 0.011295 | 0.011330 | 0.011463 | 0.011530 | 0.011530 |
| 0.011396 | 0.011500 | 0.011467 | 0.011636 | 0.011661 | 0.011329 | 0.011497 |
| 0.011430 | 0.011430 | 0.011263 | 0.011443 | 0.011338 | 0.011401 | 0.011200 |
| 0.011439 | 0.011607 | 0.011441 | 0.011332 | 0.011228 | 0.011430 | 0.011295 |
| 0.011396 | 0.011329 | 0.011228 | 0.011330 | 0.011430 | 0.011432 | 0.011329 |
| 0.011228 | 0.011161 | 0.011295 | 0.011228 | 0.011161 | 0.011264 | 0.011430 |
| 0.011329 | 0.011262 | 0.011295 | 0.011329 | 0.011295 | 0.011228 | 0.011430 |
| 0.011228 | 0.011329 | 0.011329 | 0.011262 | 0.011329 | 0.011564 | 0.011228 |
| 0.011262 | 0.011665 | 0.011262 | 0.011295 | 0.011262 | 0.011631 | 0.011189 |
| 0.011622 | 0.011188 | 0.011211 | 0.011422 | 0.011508 | 0.011419 | 0.011144 |
| 0.011218 | 0.011429 | 0.011530 | 0.011603 | 0.011498 | 0.011601 | 0.011766 |
| 0.011666 | 0.011703 | 0.011665 | 0.011880 | 0.011631 | 0.012506 | 0.011666 |
| 0.012405 | 0.012173 | 0.012307 | 0.012578 | 0.011631 | 0.011329 | 0.011631 |
| 0.012070 | 0.011971 | 0.011597 | 0.011497 | 0.011564 | 0.011564 | 0.011534 |
| 0.011429 | 0.011399 | 0.011497 | 0.011464 | 0.011833 | 0.011900 | 0.011901 |
| 0.011800 | 0.011901 | 0.012004 | 0.011737 | 0.012070 | 0.012076 | 0.012137 |
| 0.012138 | 0.012172 | 0.012084 | 0.012138 | 0.012139 | 0.011362 | 0.011665 |
| 0.011733 | 0.012236 | 0.011738 | 0.011967 | 0.012440 | 0.011502 | 0.011396 |
| 0.011362 | 0.011362 | 0.011833 | 0.011842 | 0.011975 | 0.011698 | 0.011363 |
| S647     | 0.011597 | 0.011597 | 0.011933 | 0.011698 | 0.011698 | 0.011765 |
| 0.011603 | 0.011536 | 0.011765 | 0.011195 | 0.011262 | 0.011228 | 0.011194 |
| 0.011228 | 0.011396 | 0.011194 | 0.011228 | 0.011295 | 0.011262 | 0.011228 |
| 0.011194 | 0.011228 | 0.011329 | 0.011195 | 0.011228 | 0.011228 | 0.011569 |
| 0.011463 | 0.011228 | 0.011127 | 0.011362 | 0.011295 | 0.011262 | 0.011295 |
| 0.011262 | 0.011362 | 0.011262 | 0.011262 | 0.011295 | 0.011262 | 0.011429 |
| 0.011194 | 0.011262 | 0.011295 | 0.011228 | 0.011329 | 0.011362 | 0.011295 |
| 0.011262 | 0.011429 | 0.011329 | 0.011597 | 0.011262 | 0.011530 | 0.011262 |
| 0.011228 | 0.011329 | 0.011396 | 0.011530 | 0.011631 | 0.011329 | 0.011429 |
| 0.011295 | 0.011362 | 0.011262 | 0.011496 | 0.011732 | 0.011262 | 0.011329 |
| 0.011228 | 0.011329 | 0.011295 | 0.011362 | 0.011295 | 0.011295 | 0.011295 |
| 0.011194 | 0.011228 | 0.011195 | 0.011295 | 0.011262 | 0.011296 | 0.011362 |
| 0.011295 | 0.011262 | 0.011329 | 0.011228 | 0.011362 | 0.011195 | 0.011262 |
| 0.011429 | 0.011362 | 0.011597 | 0.011429 | 0.011262 | 0.011497 | 0.011262 |
| 0.011431 | 0.011658 | 0.011475 | 0.011177 | 0.011172 | 0.011281 | 0.011375 |
| 0.012011 | 0.011467 | 0.011184 | 0.011496 | 0.011496 | 0.011295 | 0.011396 |
| 0.011329 | 0.011295 | 0.011362 | 0.011262 | 0.011362 | 0.011295 | 0.011295 |
| 0.011262 | 0.011362 | 0.011564 | 0.011429 | 0.011329 | 0.011295 | 0.011228 |
| 0.011195 | 0.011195 | 0.011262 | 0.011228 | 0.011429 | 0.011396 | 0.011329 |
| 0.011429 | 0.011497 | 0.011228 | 0.011228 | 0.011262 | 0.011262 | 0.011263 |
| 0.011331 | 0.011262 | 0.011262 | 0.011132 | 0.011205 | 0.011165 | 0.011262 |
| 0.011263 | 0.011198 | 0.011245 | 0.011233 | 0.011162 | 0.011197 | 0.011229 |
| 0.011492 | 0.011267 | 0.011301 | 0.011195 | 0.011199 | 0.011329 | 0.011296 |
| 0.011363 | 0.011296 | 0.011296 | 0.011396 | 0.011329 | 0.011698 | 0.011497 |
| 0.011530 | 0.011396 | 0.011262 | 0.011362 | 0.011094 | 0.011396 | 0.011195 |
| 0.011262 | 0.011262 | 0.011228 | 0.000000 | 0.011228 | 0.011127 | 0.011295 |

|          |          |          |          |          |          |          |
|----------|----------|----------|----------|----------|----------|----------|
| 0.011262 | 0.011362 | 0.011295 | 0.011195 | 0.011296 | 0.011396 | 0.011398 |
| 0.011396 | 0.011295 | 0.011195 | 0.011128 | 0.011262 | 0.011195 | 0.011127 |
| 0.011230 | 0.011396 | 0.011195 | 0.011396 | 0.011161 | 0.011262 | 0.011228 |
| 0.011329 | 0.011228 | 0.011262 | 0.011228 | 0.011262 | 0.011127 | 0.011262 |
| 0.011295 | 0.011228 | 0.011295 | 0.011228 | 0.011262 | 0.011295 | 0.011530 |
| 0.011631 | 0.011564 | 0.011631 | 0.011397 | 0.011631 | 0.011262 | 0.011228 |
| 0.011263 | 0.011545 | 0.011380 | 0.011163 | 0.011637 | 0.011129 | 0.011257 |
| 0.011637 | 0.011536 | 0.011429 | 0.011631 | 0.011333 | 0.011497 | 0.011463 |
| 0.011396 | 0.011564 | 0.011415 | 0.011266 | 0.011312 | 0.011295 | 0.011365 |
| 0.011463 | 0.011364 | 0.011500 | 0.011568 | 0.011497 | 0.011564 | 0.011670 |
| 0.011399 | 0.011569 | 0.011500 | 0.011432 | 0.011699 | 0.011161 | 0.011363 |
| 0.011329 | 0.011262 | 0.011161 | 0.011161 | 0.011228 | 0.011228 | 0.011295 |
| 0.011228 | 0.011295 | 0.011195 | 0.011295 | 0.011228 | 0.011228 | 0.011295 |
| 0.011228 | 0.011664 | 0.011564 | 0.011597 | 0.011127 | 0.011228 | 0.011262 |
| 0.011262 | 0.011228 | 0.011295 | 0.011329 | 0.011194 | 0.011194 | 0.011194 |
| 0.011732 | 0.011362 | 0.011362 | 0.011161 | 0.011262 | 0.011429 | 0.011195 |
| 0.011194 | 0.011262 | 0.011228 | 0.011396 | 0.011194 | 0.011329 | 0.011463 |
| 0.011396 | 0.011228 | 0.011228 | 0.011161 | 0.011161 | 0.011329 | 0.011262 |
| 0.011161 | 0.011262 | 0.011127 | 0.011161 | 0.011295 | 0.011430 | 0.011195 |
| 0.011161 | 0.011295 | 0.011228 | 0.011127 | 0.011463 | 0.011127 | 0.011295 |
| 0.011368 | 0.011195 | 0.011497 | 0.011329 | 0.011362 | 0.011228 | 0.011329 |
| 0.011194 | 0.011530 | 0.011127 | 0.011396 | 0.011195 | 0.011195 | 0.011127 |
| 0.011362 | 0.011564 | 0.011262 | 0.011329 | 0.011161 | 0.011564 | 0.011195 |
| 0.011195 | 0.011194 | 0.011228 | 0.011329 | 0.011228 | 0.011329 | 0.011396 |
| 0.011396 | 0.011362 | 0.011262 | 0.011362 | 0.011329 | 0.011195 | 0.011161 |
| 0.011194 | 0.011195 | 0.011262 | 0.011194 | 0.011161 | 0.011329 | 0.011194 |
| 0.011228 | 0.011228 | 0.011362 | 0.011396 | 0.011295 | 0.011228 | 0.011228 |
| 0.011295 | 0.011228 | 0.011329 | 0.011194 | 0.011329 | 0.011429 | 0.011732 |
| 0.011228 | 0.011631 | 0.011233 | 0.017747 | 0.011257 | 0.011427 | 0.011583 |
| 0.011545 | 0.011588 | 0.011322 | 0.011292 | 0.011719 | 0.011612 | 0.011364 |
| 0.011487 | 0.011549 | 0.011138 | 0.011228 | 0.011216 | 0.011307 | 0.011232 |
| 0.011482 | 0.011395 | 0.011394 | 0.011193 | 0.011362 | 0.011396 | 0.011398 |
| 0.011266 | 0.011362 | 0.011362 | 0.011329 | 0.011295 | 0.011295 | 0.011262 |
| 0.011295 | 0.011228 | 0.011262 | 0.011295 | 0.011262 | 0.011195 | 0.011228 |
| 0.011228 | 0.011295 | 0.011195 | 0.011295 | 0.011329 | 0.011362 | 0.011262 |
| 0.011295 | 0.011262 | 0.011597 | 0.011597 | 0.011329 | 0.011363 | 0.011396 |
| 0.011161 | 0.011161 | 0.011195 | 0.011295 | 0.011161 | 0.011396 | 0.011396 |
| 0.011429 | 0.011429 | 0.011362 | 0.011463 | 0.011631 | 0.011464 | 0.011295 |
| 0.011295 | 0.011362 | 0.011396 | 0.011228 | 0.011295 | 0.011262 | 0.011295 |
| 0.011363 | 0.011362 | 0.011396 | 0.011363 | 0.011262 | 0.011463 | 0.011429 |
| 0.011297 | 0.011195 | 0.011295 | 0.011396 | 0.011295 | 0.011430 | 0.011463 |
| 0.011631 | 0.011333 | 0.011497 | 0.011463 | 0.011396 | 0.011564 | 0.011195 |
| 0.011363 | 0.011262 | 0.011228 | 0.011228 | 0.011295 | 0.011195 | 0.011295 |
| 0.011329 | 0.011362 | 0.011262 | 0.011295 | 0.011262 | 0.011597 | 0.011597 |
| 0.011329 | 0.011363 | 0.011429 | 0.011362 | 0.012002 | 0.011417 | 0.011342 |
| 0.011412 | 0.011372 | 0.011482 | 0.011372 | 0.011480 | 0.011405 | 0.011370 |
| 0.011953 | 0.011268 | 0.011403 | 0.011337 | 0.011611 | 0.011468 | 0.011571 |
| 0.011978 | 0.011437 | 0.011398 | 0.011463 | 0.011329 | 0.011329 | 0.011364 |
| 0.011161 | 0.011195 | 0.011329 | 0.011295 | 0.011297 | 0.011429 | 0.011397 |
| 0.011262 | 0.011194 | 0.011228 | 0.011262 | 0.011161 | 0.011228 | 0.011127 |
| 0.011262 | 0.011295 | 0.011195 | 0.011161 | 0.011262 | 0.011194 | 0.011228 |
| 0.011228 | 0.011161 | 0.011228 | 0.011262 | 0.011161 | 0.011362 | 0.011396 |
| 0.011295 | 0.011362 | 0.011295 | 0.011295 | 0.011228 | 0.011631 | 0.011262 |
| 0.011304 | 0.011228 | 0.011463 | 0.011467 | 0.011329 | 0.011329 | 0.011329 |
| 0.011329 | 0.011262 | 0.011228 | 0.011262 | 0.011362 | 0.011362 | 0.011295 |
| 0.011295 | 0.011429 | 0.011597 | 0.011329 | 0.011530 | 0.011530 | 0.011396 |
| 0.011228 | 0.011295 | 0.011329 | 0.011732 | 0.011295 | 0.011329 | 0.011295 |
| 0.011329 | 0.011262 | 0.011262 | 0.011564 | 0.011497 | 0.011530 | 0.011194 |
| 0.011295 | 0.011429 | 0.011295 | 0.011295 | 0.011329 | 0.011195 | 0.011530 |
| 0.011295 | 0.011262 | 0.011262 | 0.011429 | 0.011194 | 0.011362 | 0.011597 |

|          |          |          |          |          |          |          |
|----------|----------|----------|----------|----------|----------|----------|
| 0.011295 | 0.011671 | 0.011664 | 0.011467 | 0.011229 | 0.011366 | 0.011267 |
| 0.011225 | 0.011683 | 0.011201 | 0.011417 | 0.011255 | 0.011366 | 0.011379 |
| 0.011468 | 0.011192 | 0.011339 | 0.011192 | 0.011222 | 0.011395 | 0.011344 |
| 0.011362 | 0.011257 | 0.011342 | 0.011272 | 0.011296 | 0.011429 | 0.011497 |
| 0.011497 | 0.011363 | 0.011466 | 0.011467 | 0.011603 | 0.011625 | 0.011295 |
| 0.011530 | 0.011396 | 0.011262 | 0.011362 | 0.011094 | 0.011396 | 0.011195 |
| 0.011262 | 0.011262 | 0.011228 | 0.000000 | 0.011228 | 0.011127 | 0.011295 |
| 0.011270 | 0.011270 | 0.011266 | 0.011300 | 0.011436 | 0.011402 | 0.011402 |
| 0.011401 | 0.011329 | 0.011134 | 0.011132 | 0.011263 | 0.011433 | 0.011433 |
| 0.011228 | 0.011297 | 0.011531 | 0.011500 | 0.011430 | 0.011464 | 0.011396 |
| 0.011329 | 0.011396 | 0.011396 | 0.011295 | 0.011799 | 0.011463 | 0.011530 |
| 0.011564 | 0.011630 | 0.011265 | 0.011337 | 0.011228 | 0.011429 | 0.011396 |
| 0.011430 | 0.011463 | 0.011463 | 0.011463 | 0.011610 | 0.011597 | 0.011234 |
| 0.011128 | 0.011130 | 0.011230 | 0.011196 | 0.011299 | 0.011135 | 0.011468 |
| 0.011266 | 0.011367 | 0.011156 | 0.011285 | 0.011262 | 0.011334 | 0.011228 |
| 0.011195 | 0.011195 | 0.011262 | 0.011228 | 0.011429 | 0.011396 | 0.011329 |
| 0.011429 | 0.011497 | 0.011228 | 0.011228 | 0.011262 | 0.011262 | 0.011263 |
| 0.011331 | 0.011262 | 0.011262 | 0.011296 | 0.011429 | 0.011497 | 0.011497 |
| 0.011363 | 0.011466 | 0.011467 | 0.011603 | 0.011625 | 0.011295 | 0.011463 |
| 0.011396 | 0.011396 | 0.011229 | 0.011408 | 0.011338 | 0.011367 | 0.011235 |
| 0.011404 | 0.011607 | 0.011399 | 0.011298 | 0.011195 | 0.011396 | 0.011262 |
| 0.011362 | 0.011295 | 0.011195 | 0.011296 | 0.011396 | 0.011398 | 0.011295 |
| 0.011195 | 0.011128 | 0.011262 | 0.011195 | 0.011127 | 0.011230 | 0.011396 |
| 0.011295 | 0.011228 | 0.011262 | 0.011295 | 0.011262 | 0.011195 | 0.011396 |
| 0.011262 | 0.011295 | 0.011295 | 0.011228 | 0.011295 | 0.011463 | 0.011194 |
| 0.011228 | 0.011631 | 0.011228 | 0.011262 | 0.011228 | 0.011597 | 0.011189 |
| 0.011678 | 0.011188 | 0.011261 | 0.011422 | 0.011508 | 0.011419 | 0.011144 |
| 0.011218 | 0.011396 | 0.011497 | 0.011603 | 0.011464 | 0.011601 | 0.011733 |
| 0.011632 | 0.011669 | 0.011631 | 0.011880 | 0.011597 | 0.012472 | 0.011633 |
| 0.012372 | 0.012139 | 0.012273 | 0.012545 | 0.011597 | 0.011295 | 0.011598 |
| 0.012036 | 0.011971 | 0.011564 | 0.011463 | 0.011531 | 0.011531 | 0.011500 |
| 0.011396 | 0.011399 | 0.011463 | 0.011430 | 0.011800 | 0.011866 | 0.011867 |
| 0.011767 | 0.011867 | 0.011970 | 0.011737 | 0.012036 | 0.012042 | 0.012103 |
| 0.012104 | 0.012138 | 0.012084 | 0.012104 | 0.012105 | 0.011329 | 0.011631 |
| 0.011699 | 0.012202 | 0.011704 | 0.011934 | 0.012406 | 0.011468 | 0.011363 |
| 0.011329 | 0.011329 | 0.011799 | 0.011842 | 0.011940 | 0.011664 | 0.011330 |
| S648     | 0.011631 | 0.011631 | 0.011967 | 0.011731 | 0.011731 | 0.011799 |
| 0.011637 | 0.011569 | 0.011799 | 0.011228 | 0.011295 | 0.011262 | 0.011228 |
| 0.011262 | 0.011429 | 0.011228 | 0.011262 | 0.011329 | 0.011295 | 0.011262 |
| 0.011228 | 0.011262 | 0.011362 | 0.011228 | 0.011262 | 0.011262 | 0.011603 |
| 0.011496 | 0.011262 | 0.011161 | 0.011396 | 0.011329 | 0.011295 | 0.011329 |
| 0.011295 | 0.011396 | 0.011295 | 0.011295 | 0.011329 | 0.011295 | 0.011463 |
| 0.011228 | 0.011295 | 0.011329 | 0.011262 | 0.011362 | 0.011396 | 0.011329 |
| 0.011295 | 0.011463 | 0.011362 | 0.011631 | 0.011295 | 0.011564 | 0.011295 |
| 0.011262 | 0.011362 | 0.011429 | 0.011564 | 0.011664 | 0.011362 | 0.011463 |
| 0.011329 | 0.011396 | 0.011295 | 0.011530 | 0.011765 | 0.011295 | 0.011362 |
| 0.011262 | 0.011362 | 0.011329 | 0.011396 | 0.011329 | 0.011329 | 0.011329 |
| 0.011228 | 0.011262 | 0.011228 | 0.011329 | 0.011295 | 0.011329 | 0.011396 |
| 0.011329 | 0.011295 | 0.011362 | 0.011262 | 0.011396 | 0.011228 | 0.011295 |
| 0.011463 | 0.011396 | 0.011631 | 0.011463 | 0.011295 | 0.011530 | 0.011295 |
| 0.011431 | 0.011658 | 0.011475 | 0.011177 | 0.011172 | 0.011281 | 0.011375 |
| 0.012011 | 0.011467 | 0.011184 | 0.011530 | 0.011530 | 0.011329 | 0.011429 |
| 0.011362 | 0.011329 | 0.011396 | 0.011295 | 0.011396 | 0.011329 | 0.011329 |
| 0.011295 | 0.011396 | 0.011597 | 0.011463 | 0.011362 | 0.011329 | 0.011262 |
| 0.011228 | 0.011228 | 0.011295 | 0.011262 | 0.011463 | 0.011429 | 0.011362 |
| 0.011463 | 0.011530 | 0.011262 | 0.011262 | 0.011295 | 0.011295 | 0.011297 |
| 0.011364 | 0.011295 | 0.011295 | 0.011132 | 0.011205 | 0.011200 | 0.011296 |
| 0.011297 | 0.011198 | 0.011245 | 0.011267 | 0.011196 | 0.011231 | 0.011263 |
| 0.011528 | 0.011301 | 0.011336 | 0.011228 | 0.011233 | 0.011363 | 0.011329 |
| 0.011396 | 0.011330 | 0.011329 | 0.011429 | 0.011362 | 0.011732 | 0.011530 |

|          |          |          |          |          |          |          |
|----------|----------|----------|----------|----------|----------|----------|
| 0.011564 | 0.011430 | 0.011295 | 0.011396 | 0.011195 | 0.011429 | 0.011228 |
| 0.011295 | 0.011295 | 0.011262 | 0.011228 | 0.000000 | 0.011228 | 0.011329 |
| 0.011295 | 0.011396 | 0.011329 | 0.011228 | 0.011330 | 0.011430 | 0.011432 |
| 0.011430 | 0.011329 | 0.011228 | 0.011161 | 0.011295 | 0.011228 | 0.011161 |
| 0.011264 | 0.011430 | 0.011228 | 0.011430 | 0.011195 | 0.011295 | 0.011262 |
| 0.011362 | 0.011262 | 0.011295 | 0.011262 | 0.011295 | 0.011161 | 0.011295 |
| 0.011329 | 0.011262 | 0.011329 | 0.011262 | 0.011295 | 0.011329 | 0.011564 |
| 0.011664 | 0.011597 | 0.011665 | 0.011431 | 0.011665 | 0.011295 | 0.011262 |
| 0.011297 | 0.011586 | 0.011426 | 0.011197 | 0.011671 | 0.011163 | 0.011296 |
| 0.011671 | 0.011570 | 0.011463 | 0.011664 | 0.011367 | 0.011530 | 0.011497 |
| 0.011429 | 0.011597 | 0.011451 | 0.011307 | 0.011354 | 0.011329 | 0.011398 |
| 0.011497 | 0.011397 | 0.011533 | 0.011601 | 0.011530 | 0.011597 | 0.011704 |
| 0.011432 | 0.011603 | 0.011534 | 0.011466 | 0.011733 | 0.011194 | 0.011397 |
| 0.011362 | 0.011295 | 0.011194 | 0.011194 | 0.011262 | 0.011262 | 0.011329 |
| 0.011262 | 0.011329 | 0.011228 | 0.011329 | 0.011262 | 0.011262 | 0.011329 |
| 0.011262 | 0.011698 | 0.011597 | 0.011631 | 0.011161 | 0.011262 | 0.011295 |
| 0.011295 | 0.011262 | 0.011329 | 0.011362 | 0.011228 | 0.011228 | 0.011228 |
| 0.011765 | 0.011396 | 0.011396 | 0.011194 | 0.011295 | 0.011463 | 0.011161 |
| 0.011228 | 0.011295 | 0.011262 | 0.011429 | 0.011228 | 0.011362 | 0.011496 |
| 0.011429 | 0.011262 | 0.011262 | 0.011194 | 0.011194 | 0.011362 | 0.011295 |
| 0.011194 | 0.011295 | 0.011161 | 0.011194 | 0.011329 | 0.011463 | 0.011228 |
| 0.011195 | 0.011329 | 0.011262 | 0.011161 | 0.011496 | 0.011161 | 0.011329 |
| 0.011402 | 0.011228 | 0.011530 | 0.011362 | 0.011396 | 0.011262 | 0.011362 |
| 0.011228 | 0.011564 | 0.011161 | 0.011429 | 0.011228 | 0.011228 | 0.011161 |
| 0.011396 | 0.011597 | 0.011295 | 0.011362 | 0.011194 | 0.011597 | 0.011228 |
| 0.011228 | 0.011228 | 0.011262 | 0.011362 | 0.011262 | 0.011362 | 0.011429 |
| 0.011429 | 0.011396 | 0.011295 | 0.011396 | 0.011362 | 0.011228 | 0.011194 |
| 0.011228 | 0.011228 | 0.011295 | 0.011228 | 0.011194 | 0.011362 | 0.011228 |
| 0.011262 | 0.011262 | 0.011396 | 0.011429 | 0.011329 | 0.011262 | 0.011262 |
| 0.011329 | 0.011262 | 0.011362 | 0.011228 | 0.011362 | 0.011463 | 0.011765 |
| 0.011262 | 0.011664 | 0.011233 | 0.017747 | 0.011257 | 0.011427 | 0.011583 |
| 0.011579 | 0.011588 | 0.011322 | 0.011292 | 0.011719 | 0.011647 | 0.011364 |
| 0.011487 | 0.011548 | 0.011138 | 0.011228 | 0.011216 | 0.011307 | 0.011232 |
| 0.011482 | 0.011395 | 0.011394 | 0.011193 | 0.011396 | 0.011429 | 0.011432 |
| 0.011301 | 0.011396 | 0.011396 | 0.011362 | 0.011329 | 0.011329 | 0.011295 |
| 0.011329 | 0.011262 | 0.011295 | 0.011329 | 0.011295 | 0.011228 | 0.011262 |
| 0.011262 | 0.011329 | 0.011228 | 0.011329 | 0.011362 | 0.011396 | 0.011295 |
| 0.011329 | 0.011295 | 0.011631 | 0.011631 | 0.011362 | 0.011396 | 0.011430 |
| 0.011195 | 0.011195 | 0.011228 | 0.011329 | 0.011195 | 0.011429 | 0.011429 |
| 0.011463 | 0.011463 | 0.011396 | 0.011497 | 0.011665 | 0.011498 | 0.011329 |
| 0.011329 | 0.011396 | 0.011429 | 0.011262 | 0.011329 | 0.011295 | 0.011329 |
| 0.011396 | 0.011396 | 0.011429 | 0.011396 | 0.011296 | 0.011497 | 0.011463 |
| 0.011331 | 0.011228 | 0.011329 | 0.011430 | 0.011329 | 0.011463 | 0.011496 |
| 0.011664 | 0.011367 | 0.011530 | 0.011497 | 0.011429 | 0.011597 | 0.011228 |
| 0.011397 | 0.011295 | 0.011262 | 0.011262 | 0.011329 | 0.011228 | 0.011329 |
| 0.011362 | 0.011396 | 0.011295 | 0.011329 | 0.011295 | 0.011631 | 0.011631 |
| 0.011362 | 0.011396 | 0.011463 | 0.011396 | 0.012035 | 0.011453 | 0.011377 |
| 0.011447 | 0.011407 | 0.011517 | 0.011406 | 0.011515 | 0.011439 | 0.011405 |
| 0.011987 | 0.011302 | 0.011437 | 0.011371 | 0.011645 | 0.011502 | 0.011604 |
| 0.012012 | 0.011475 | 0.011567 | 0.011631 | 0.011496 | 0.011496 | 0.011533 |
| 0.011194 | 0.011362 | 0.011496 | 0.011463 | 0.011466 | 0.011463 | 0.011431 |
| 0.011295 | 0.011228 | 0.011262 | 0.011295 | 0.011194 | 0.011262 | 0.011161 |
| 0.011295 | 0.011329 | 0.011228 | 0.011194 | 0.011295 | 0.011228 | 0.011262 |
| 0.011262 | 0.011194 | 0.011262 | 0.011295 | 0.011194 | 0.011396 | 0.011429 |
| 0.011329 | 0.011396 | 0.011329 | 0.011329 | 0.011262 | 0.011664 | 0.011295 |
| 0.011338 | 0.011262 | 0.011497 | 0.011501 | 0.011362 | 0.011362 | 0.011362 |
| 0.011362 | 0.011295 | 0.011262 | 0.011295 | 0.011396 | 0.011396 | 0.011329 |
| 0.011329 | 0.011463 | 0.011631 | 0.011362 | 0.011564 | 0.011564 | 0.011429 |
| 0.011262 | 0.011329 | 0.011362 | 0.011765 | 0.011329 | 0.011362 | 0.011329 |
| 0.011362 | 0.011295 | 0.011295 | 0.011597 | 0.011530 | 0.011564 | 0.011295 |

|          |          |          |          |          |          |          |
|----------|----------|----------|----------|----------|----------|----------|
| 0.011396 | 0.011463 | 0.011329 | 0.011396 | 0.011362 | 0.011228 | 0.011564 |
| 0.011329 | 0.011228 | 0.011295 | 0.011463 | 0.011295 | 0.011396 | 0.011631 |
| 0.011329 | 0.011705 | 0.011698 | 0.011467 | 0.011229 | 0.011400 | 0.011267 |
| 0.011225 | 0.011683 | 0.011201 | 0.011417 | 0.011255 | 0.011366 | 0.011379 |
| 0.011468 | 0.011192 | 0.011338 | 0.011192 | 0.011222 | 0.011395 | 0.011344 |
| 0.011362 | 0.011257 | 0.011342 | 0.011272 | 0.011330 | 0.011463 | 0.011530 |
| 0.011530 | 0.011396 | 0.011500 | 0.011501 | 0.011636 | 0.011661 | 0.011329 |
| 0.011564 | 0.011430 | 0.011295 | 0.011396 | 0.011195 | 0.011429 | 0.011228 |
| 0.011295 | 0.011295 | 0.011262 | 0.011228 | 0.000000 | 0.011228 | 0.011329 |
| 0.011305 | 0.011305 | 0.011300 | 0.011334 | 0.011471 | 0.011436 | 0.011436 |
| 0.011435 | 0.011363 | 0.011171 | 0.011168 | 0.011297 | 0.011467 | 0.011467 |
| 0.011262 | 0.011331 | 0.011565 | 0.011533 | 0.011464 | 0.011498 | 0.011429 |
| 0.011362 | 0.011429 | 0.011429 | 0.011329 | 0.011900 | 0.011496 | 0.011564 |
| 0.011597 | 0.011665 | 0.011299 | 0.011372 | 0.011262 | 0.011463 | 0.011429 |
| 0.011464 | 0.011496 | 0.011496 | 0.011496 | 0.011650 | 0.011631 | 0.011268 |
| 0.011162 | 0.011164 | 0.011264 | 0.011230 | 0.011333 | 0.011172 | 0.011502 |
| 0.011300 | 0.011455 | 0.011203 | 0.011322 | 0.011296 | 0.011368 | 0.011262 |
| 0.011228 | 0.011228 | 0.011295 | 0.011262 | 0.011463 | 0.011429 | 0.011362 |
| 0.011463 | 0.011530 | 0.011262 | 0.011262 | 0.011295 | 0.011295 | 0.011297 |
| 0.011364 | 0.011295 | 0.011295 | 0.011330 | 0.011463 | 0.011530 | 0.011530 |
| 0.011396 | 0.011500 | 0.011501 | 0.011636 | 0.011661 | 0.011329 | 0.011496 |
| 0.011429 | 0.011429 | 0.011263 | 0.011443 | 0.011373 | 0.011401 | 0.011270 |
| 0.011439 | 0.011652 | 0.011399 | 0.011332 | 0.011228 | 0.011430 | 0.011295 |
| 0.011396 | 0.011329 | 0.011228 | 0.011330 | 0.011430 | 0.011432 | 0.011329 |
| 0.011228 | 0.011161 | 0.011295 | 0.011228 | 0.011161 | 0.011264 | 0.011430 |
| 0.011329 | 0.011262 | 0.011295 | 0.011329 | 0.011295 | 0.011228 | 0.011430 |
| 0.011295 | 0.011329 | 0.011329 | 0.011262 | 0.011329 | 0.011564 | 0.011228 |
| 0.011262 | 0.011664 | 0.011262 | 0.011295 | 0.011262 | 0.011631 | 0.011189 |
| 0.011678 | 0.011188 | 0.011261 | 0.011422 | 0.011508 | 0.011419 | 0.011144 |
| 0.011218 | 0.011429 | 0.011530 | 0.011637 | 0.011498 | 0.011635 | 0.011766 |
| 0.011666 | 0.011703 | 0.011664 | 0.011914 | 0.011631 | 0.012438 | 0.011666 |
| 0.012405 | 0.012105 | 0.012240 | 0.012578 | 0.011631 | 0.011329 | 0.011631 |
| 0.012070 | 0.012004 | 0.011597 | 0.011497 | 0.011564 | 0.011564 | 0.011534 |
| 0.011429 | 0.011433 | 0.011496 | 0.011464 | 0.011833 | 0.011900 | 0.011901 |
| 0.011733 | 0.011901 | 0.011970 | 0.011770 | 0.012070 | 0.012076 | 0.012137 |
| 0.012138 | 0.012172 | 0.012118 | 0.012138 | 0.012139 | 0.011362 | 0.011665 |
| 0.011733 | 0.012236 | 0.011738 | 0.011967 | 0.012440 | 0.011502 | 0.011396 |
| 0.011362 | 0.011362 | 0.011833 | 0.011883 | 0.011939 | 0.011698 | 0.011363 |
| S649     | 0.011597 | 0.011597 | 0.011934 | 0.011698 | 0.011698 | 0.011765 |
| 0.011604 | 0.011536 | 0.011698 | 0.011195 | 0.011262 | 0.011228 | 0.011195 |
| 0.011228 | 0.011396 | 0.011195 | 0.011228 | 0.011295 | 0.011262 | 0.011228 |
| 0.011195 | 0.011228 | 0.011329 | 0.011195 | 0.011228 | 0.011228 | 0.011570 |
| 0.011463 | 0.011228 | 0.011127 | 0.011362 | 0.011295 | 0.011262 | 0.011295 |
| 0.011262 | 0.011362 | 0.011262 | 0.011262 | 0.011295 | 0.011262 | 0.011430 |
| 0.011195 | 0.011262 | 0.011295 | 0.011228 | 0.011329 | 0.011362 | 0.011295 |
| 0.011262 | 0.011430 | 0.011329 | 0.011597 | 0.011262 | 0.011530 | 0.011262 |
| 0.011228 | 0.011329 | 0.011396 | 0.011530 | 0.011631 | 0.011329 | 0.011429 |
| 0.011295 | 0.011362 | 0.011262 | 0.011497 | 0.011732 | 0.011262 | 0.011329 |
| 0.011228 | 0.011329 | 0.011295 | 0.011362 | 0.011295 | 0.011295 | 0.011295 |
| 0.011195 | 0.011228 | 0.011195 | 0.011295 | 0.011262 | 0.011296 | 0.011362 |
| 0.011295 | 0.011262 | 0.011329 | 0.011228 | 0.011362 | 0.011195 | 0.011262 |
| 0.011429 | 0.011362 | 0.011597 | 0.011430 | 0.011262 | 0.011497 | 0.011262 |
| 0.011431 | 0.011658 | 0.011475 | 0.011177 | 0.011172 | 0.011281 | 0.011375 |
| 0.012011 | 0.011467 | 0.011184 | 0.011497 | 0.011497 | 0.011295 | 0.011396 |
| 0.011329 | 0.011295 | 0.011362 | 0.011262 | 0.011362 | 0.011295 | 0.011295 |
| 0.011262 | 0.011362 | 0.011564 | 0.011429 | 0.011329 | 0.011295 | 0.011228 |
| 0.011195 | 0.011195 | 0.011262 | 0.011228 | 0.011429 | 0.011396 | 0.011329 |
| 0.011429 | 0.011497 | 0.011228 | 0.011228 | 0.011262 | 0.011262 | 0.011263 |
| 0.011331 | 0.011262 | 0.011262 | 0.011132 | 0.011205 | 0.011165 | 0.011262 |
| 0.011263 | 0.011198 | 0.011245 | 0.011233 | 0.011162 | 0.011197 | 0.011229 |

|          |          |          |          |          |          |          |
|----------|----------|----------|----------|----------|----------|----------|
| 0.011492 | 0.011267 | 0.011301 | 0.011195 | 0.011199 | 0.011329 | 0.011296 |
| 0.011363 | 0.011296 | 0.011296 | 0.011396 | 0.011329 | 0.011698 | 0.011497 |
| 0.011530 | 0.011396 | 0.011262 | 0.011362 | 0.011094 | 0.011396 | 0.011195 |
| 0.011262 | 0.011262 | 0.011228 | 0.011127 | 0.011228 | 0.000000 | 0.011295 |
| 0.011262 | 0.011362 | 0.011295 | 0.011195 | 0.011296 | 0.011396 | 0.011398 |
| 0.011396 | 0.011295 | 0.011195 | 0.011128 | 0.011262 | 0.011195 | 0.011127 |
| 0.011230 | 0.011396 | 0.011195 | 0.011396 | 0.011161 | 0.011262 | 0.011228 |
| 0.011329 | 0.011228 | 0.011262 | 0.011228 | 0.011262 | 0.011127 | 0.011262 |
| 0.011295 | 0.011228 | 0.011295 | 0.011228 | 0.011262 | 0.011295 | 0.011530 |
| 0.011631 | 0.011564 | 0.011631 | 0.011397 | 0.011631 | 0.011262 | 0.011228 |
| 0.011263 | 0.011545 | 0.011380 | 0.011163 | 0.011637 | 0.011129 | 0.011257 |
| 0.011637 | 0.011536 | 0.011429 | 0.011631 | 0.011333 | 0.011497 | 0.011463 |
| 0.011396 | 0.011564 | 0.011416 | 0.011266 | 0.011312 | 0.011295 | 0.011365 |
| 0.011463 | 0.011364 | 0.011500 | 0.011568 | 0.011497 | 0.011564 | 0.011670 |
| 0.011399 | 0.011569 | 0.011500 | 0.011432 | 0.011700 | 0.011161 | 0.011364 |
| 0.011329 | 0.011262 | 0.011161 | 0.011161 | 0.011228 | 0.011228 | 0.011295 |
| 0.011228 | 0.011295 | 0.011195 | 0.011295 | 0.011228 | 0.011228 | 0.011295 |
| 0.011228 | 0.011665 | 0.011564 | 0.011597 | 0.011127 | 0.011228 | 0.011262 |
| 0.011262 | 0.011228 | 0.011295 | 0.011329 | 0.011195 | 0.011195 | 0.011195 |
| 0.011665 | 0.011362 | 0.011362 | 0.011161 | 0.011262 | 0.011430 | 0.011195 |
| 0.011195 | 0.011262 | 0.011228 | 0.011396 | 0.011195 | 0.011329 | 0.011463 |
| 0.011396 | 0.011228 | 0.011228 | 0.011161 | 0.011161 | 0.011329 | 0.011262 |
| 0.011161 | 0.011262 | 0.011127 | 0.011161 | 0.011295 | 0.011430 | 0.011195 |
| 0.011161 | 0.011295 | 0.011228 | 0.011127 | 0.011463 | 0.011127 | 0.011295 |
| 0.011368 | 0.011195 | 0.011497 | 0.011329 | 0.011362 | 0.011228 | 0.011329 |
| 0.011195 | 0.011530 | 0.011127 | 0.011396 | 0.011195 | 0.011195 | 0.011127 |
| 0.011362 | 0.011564 | 0.011262 | 0.011329 | 0.011161 | 0.011564 | 0.011195 |
| 0.011195 | 0.011195 | 0.011228 | 0.011329 | 0.011228 | 0.011329 | 0.011396 |
| 0.011396 | 0.011362 | 0.011262 | 0.011362 | 0.011329 | 0.011195 | 0.011161 |
| 0.011195 | 0.011195 | 0.011262 | 0.011195 | 0.011161 | 0.011329 | 0.011195 |
| 0.011228 | 0.011228 | 0.011362 | 0.011396 | 0.011295 | 0.011228 | 0.011228 |
| 0.011295 | 0.011228 | 0.011329 | 0.011195 | 0.011329 | 0.011429 | 0.011732 |
| 0.011228 | 0.011631 | 0.011233 | 0.017747 | 0.011257 | 0.011427 | 0.011583 |
| 0.011545 | 0.011588 | 0.011322 | 0.011292 | 0.011719 | 0.011612 | 0.011364 |
| 0.011487 | 0.011549 | 0.011138 | 0.011228 | 0.011216 | 0.011307 | 0.011232 |
| 0.011482 | 0.011395 | 0.011394 | 0.011126 | 0.011362 | 0.011396 | 0.011398 |
| 0.011266 | 0.011362 | 0.011362 | 0.011329 | 0.011295 | 0.011295 | 0.011262 |
| 0.011295 | 0.011228 | 0.011262 | 0.011295 | 0.011262 | 0.011195 | 0.011228 |
| 0.011228 | 0.011295 | 0.011195 | 0.011295 | 0.011329 | 0.011362 | 0.011262 |
| 0.011295 | 0.011262 | 0.011597 | 0.011597 | 0.011329 | 0.011363 | 0.011396 |
| 0.011161 | 0.011161 | 0.011195 | 0.011295 | 0.011161 | 0.011396 | 0.011396 |
| 0.011429 | 0.011429 | 0.011362 | 0.011463 | 0.011631 | 0.011464 | 0.011295 |
| 0.011295 | 0.011362 | 0.011396 | 0.011228 | 0.011295 | 0.011262 | 0.011295 |
| 0.011363 | 0.011362 | 0.011396 | 0.011363 | 0.011262 | 0.011463 | 0.011429 |
| 0.011297 | 0.011195 | 0.011295 | 0.011396 | 0.011295 | 0.011430 | 0.011463 |
| 0.011631 | 0.011333 | 0.011497 | 0.011463 | 0.011396 | 0.011564 | 0.011195 |
| 0.011363 | 0.011262 | 0.011228 | 0.011228 | 0.011295 | 0.011195 | 0.011295 |
| 0.011329 | 0.011362 | 0.011262 | 0.011295 | 0.011262 | 0.011597 | 0.011597 |
| 0.011329 | 0.011363 | 0.011429 | 0.011362 | 0.012002 | 0.011417 | 0.011342 |
| 0.011412 | 0.011372 | 0.011482 | 0.011372 | 0.011480 | 0.011405 | 0.011371 |
| 0.011953 | 0.011268 | 0.011403 | 0.011337 | 0.011611 | 0.011468 | 0.011571 |
| 0.011978 | 0.011437 | 0.011297 | 0.011295 | 0.011295 | 0.011329 | 0.011263 |
| 0.011161 | 0.011195 | 0.011329 | 0.011295 | 0.011297 | 0.011429 | 0.011397 |
| 0.011262 | 0.011195 | 0.011228 | 0.011262 | 0.011161 | 0.011228 | 0.011127 |
| 0.011262 | 0.011295 | 0.011195 | 0.011161 | 0.011262 | 0.011195 | 0.011228 |
| 0.011228 | 0.011161 | 0.011228 | 0.011262 | 0.011161 | 0.011362 | 0.011396 |
| 0.011295 | 0.011362 | 0.011295 | 0.011295 | 0.011228 | 0.011631 | 0.011262 |
| 0.011304 | 0.011228 | 0.011463 | 0.011467 | 0.011329 | 0.011329 | 0.011329 |
| 0.011329 | 0.011262 | 0.011228 | 0.011262 | 0.011362 | 0.011362 | 0.011295 |
| 0.011295 | 0.011430 | 0.011597 | 0.011329 | 0.011530 | 0.011530 | 0.011396 |

|          |          |          |          |          |          |          |
|----------|----------|----------|----------|----------|----------|----------|
| 0.011228 | 0.011295 | 0.011329 | 0.011732 | 0.011295 | 0.011329 | 0.011295 |
| 0.011329 | 0.011262 | 0.011262 | 0.011564 | 0.011497 | 0.011530 | 0.011262 |
| 0.011362 | 0.011430 | 0.011295 | 0.011362 | 0.011329 | 0.011195 | 0.011530 |
| 0.011295 | 0.011262 | 0.011262 | 0.011430 | 0.011262 | 0.011362 | 0.011597 |
| 0.011295 | 0.011672 | 0.011665 | 0.011467 | 0.011229 | 0.011366 | 0.011267 |
| 0.011225 | 0.011683 | 0.011201 | 0.011417 | 0.011255 | 0.011366 | 0.011379 |
| 0.011468 | 0.011192 | 0.011339 | 0.011192 | 0.011222 | 0.011395 | 0.011344 |
| 0.011362 | 0.011257 | 0.011342 | 0.011272 | 0.011296 | 0.011429 | 0.011497 |
| 0.011497 | 0.011363 | 0.011466 | 0.011467 | 0.011603 | 0.011625 | 0.011295 |
| 0.011530 | 0.011396 | 0.011262 | 0.011362 | 0.011094 | 0.011396 | 0.011195 |
| 0.011262 | 0.011262 | 0.011228 | 0.011127 | 0.011228 | 0.000000 | 0.011295 |
| 0.011270 | 0.011270 | 0.011266 | 0.011300 | 0.011436 | 0.011402 | 0.011402 |
| 0.011401 | 0.011329 | 0.011134 | 0.011132 | 0.011263 | 0.011433 | 0.011433 |
| 0.011228 | 0.011297 | 0.011531 | 0.011500 | 0.011430 | 0.011464 | 0.011396 |
| 0.011329 | 0.011396 | 0.011396 | 0.011295 | 0.011866 | 0.011463 | 0.011530 |
| 0.011564 | 0.011630 | 0.011265 | 0.011337 | 0.011228 | 0.011430 | 0.011396 |
| 0.011430 | 0.011463 | 0.011463 | 0.011463 | 0.011610 | 0.011597 | 0.011234 |
| 0.011128 | 0.011130 | 0.011231 | 0.011196 | 0.011299 | 0.011135 | 0.011468 |
| 0.011266 | 0.011367 | 0.011156 | 0.011285 | 0.011262 | 0.011334 | 0.011228 |
| 0.011195 | 0.011195 | 0.011262 | 0.011228 | 0.011429 | 0.011396 | 0.011329 |
| 0.011429 | 0.011497 | 0.011228 | 0.011228 | 0.011262 | 0.011262 | 0.011263 |
| 0.011331 | 0.011262 | 0.011262 | 0.011296 | 0.011429 | 0.011497 | 0.011497 |
| 0.011363 | 0.011466 | 0.011467 | 0.011603 | 0.011625 | 0.011295 | 0.011463 |
| 0.011396 | 0.011396 | 0.011229 | 0.011408 | 0.011338 | 0.011367 | 0.011235 |
| 0.011404 | 0.011607 | 0.011399 | 0.011298 | 0.011195 | 0.011396 | 0.011262 |
| 0.011362 | 0.011295 | 0.011195 | 0.011296 | 0.011396 | 0.011398 | 0.011295 |
| 0.011195 | 0.011128 | 0.011262 | 0.011195 | 0.011127 | 0.011230 | 0.011396 |
| 0.011295 | 0.011228 | 0.011262 | 0.011295 | 0.011262 | 0.011195 | 0.011396 |
| 0.011262 | 0.011295 | 0.011295 | 0.011228 | 0.011295 | 0.011530 | 0.011195 |
| 0.011228 | 0.011631 | 0.011228 | 0.011262 | 0.011228 | 0.011597 | 0.011189 |
| 0.011622 | 0.011188 | 0.011261 | 0.011422 | 0.011508 | 0.011419 | 0.011144 |
| 0.011218 | 0.011396 | 0.011497 | 0.011603 | 0.011464 | 0.011601 | 0.011733 |
| 0.011632 | 0.011669 | 0.011631 | 0.011880 | 0.011597 | 0.012472 | 0.011633 |
| 0.012372 | 0.012139 | 0.012273 | 0.012545 | 0.011597 | 0.011295 | 0.011598 |
| 0.012036 | 0.011971 | 0.011564 | 0.011463 | 0.011531 | 0.011531 | 0.011500 |
| 0.011396 | 0.011399 | 0.011463 | 0.011430 | 0.011800 | 0.011866 | 0.011867 |
| 0.011767 | 0.011867 | 0.011970 | 0.011737 | 0.012036 | 0.012042 | 0.012103 |
| 0.012104 | 0.012138 | 0.012084 | 0.012104 | 0.012105 | 0.011329 | 0.011631 |
| 0.011699 | 0.012203 | 0.011704 | 0.011934 | 0.012406 | 0.011468 | 0.011363 |
| 0.011329 | 0.011329 | 0.011799 | 0.011842 | 0.011940 | 0.011665 | 0.011330 |
| S650     | 0.011698 | 0.011698 | 0.012035 | 0.011799 | 0.011799 | 0.011866 |
| 0.011706 | 0.011638 | 0.011799 | 0.011295 | 0.011362 | 0.011329 | 0.011295 |
| 0.011329 | 0.011497 | 0.011295 | 0.011329 | 0.011396 | 0.011362 | 0.011329 |
| 0.011295 | 0.011329 | 0.011429 | 0.011295 | 0.011329 | 0.011329 | 0.011672 |
| 0.011564 | 0.011329 | 0.011228 | 0.011463 | 0.011396 | 0.011362 | 0.011396 |
| 0.011362 | 0.011463 | 0.011362 | 0.011362 | 0.011396 | 0.011362 | 0.011530 |
| 0.011295 | 0.011362 | 0.011396 | 0.011329 | 0.011429 | 0.011463 | 0.011396 |
| 0.011362 | 0.011530 | 0.011430 | 0.011698 | 0.011362 | 0.011631 | 0.011362 |
| 0.011329 | 0.011430 | 0.011497 | 0.011631 | 0.011732 | 0.011430 | 0.011530 |
| 0.011396 | 0.011463 | 0.011362 | 0.011597 | 0.011833 | 0.011362 | 0.011430 |
| 0.011329 | 0.011429 | 0.011396 | 0.011463 | 0.011396 | 0.011396 | 0.011396 |
| 0.011295 | 0.011329 | 0.011295 | 0.011396 | 0.011362 | 0.011397 | 0.011463 |
| 0.011396 | 0.011362 | 0.011429 | 0.011329 | 0.011463 | 0.011295 | 0.011362 |
| 0.011530 | 0.011463 | 0.011698 | 0.011530 | 0.011362 | 0.011597 | 0.011362 |
| 0.011542 | 0.011770 | 0.011588 | 0.011295 | 0.011284 | 0.011391 | 0.011493 |
| 0.012121 | 0.011569 | 0.011307 | 0.011597 | 0.011597 | 0.011396 | 0.011497 |
| 0.011430 | 0.011396 | 0.011463 | 0.011362 | 0.011463 | 0.011396 | 0.011396 |
| 0.011362 | 0.011463 | 0.011665 | 0.011530 | 0.011430 | 0.011396 | 0.011329 |
| 0.011295 | 0.011295 | 0.011362 | 0.011329 | 0.011530 | 0.011497 | 0.011429 |
| 0.011530 | 0.011597 | 0.011329 | 0.011329 | 0.011362 | 0.011362 | 0.011364 |



|          |          |          |          |          |          |          |
|----------|----------|----------|----------|----------|----------|----------|
| 0.011432 | 0.011362 | 0.011094 | 0.011240 | 0.011313 | 0.011271 | 0.011363 |
| 0.011365 | 0.011301 | 0.011355 | 0.011336 | 0.011264 | 0.011300 | 0.011330 |
| 0.011600 | 0.011370 | 0.011405 | 0.011296 | 0.011302 | 0.011430 | 0.011396 |
| 0.011464 | 0.011397 | 0.011396 | 0.011497 | 0.011429 | 0.011799 | 0.011598 |
| 0.011631 | 0.011497 | 0.011362 | 0.011463 | 0.011262 | 0.011497 | 0.011295 |
| 0.011362 | 0.011362 | 0.011329 | 0.011295 | 0.011329 | 0.011295 | 0.000000 |
| 0.011362 | 0.011463 | 0.011396 | 0.011295 | 0.011397 | 0.011497 | 0.011499 |
| 0.011497 | 0.011396 | 0.011295 | 0.011229 | 0.011362 | 0.011295 | 0.011228 |
| 0.011332 | 0.011497 | 0.011295 | 0.011497 | 0.011262 | 0.011362 | 0.011329 |
| 0.011430 | 0.011329 | 0.011362 | 0.011329 | 0.011362 | 0.011228 | 0.011362 |
| 0.011396 | 0.011329 | 0.011396 | 0.011329 | 0.011362 | 0.011396 | 0.011631 |
| 0.011732 | 0.011665 | 0.011732 | 0.011498 | 0.011732 | 0.011362 | 0.011329 |
| 0.011364 | 0.011626 | 0.011472 | 0.011266 | 0.011739 | 0.011197 | 0.011296 |
| 0.011739 | 0.011604 | 0.011530 | 0.011732 | 0.011436 | 0.011597 | 0.011564 |
| 0.011497 | 0.011664 | 0.011522 | 0.011390 | 0.011438 | 0.011396 | 0.011466 |
| 0.011564 | 0.011465 | 0.011601 | 0.011669 | 0.011598 | 0.011665 | 0.011772 |
| 0.011500 | 0.011671 | 0.011602 | 0.011534 | 0.011801 | 0.011262 | 0.011465 |
| 0.011429 | 0.011362 | 0.011262 | 0.011262 | 0.011329 | 0.011329 | 0.011396 |
| 0.011329 | 0.011396 | 0.011295 | 0.011396 | 0.011329 | 0.011329 | 0.011396 |
| 0.011329 | 0.011765 | 0.011665 | 0.011698 | 0.011228 | 0.011329 | 0.011362 |
| 0.011362 | 0.011329 | 0.011396 | 0.011430 | 0.011295 | 0.011295 | 0.011295 |
| 0.011833 | 0.011463 | 0.011463 | 0.011262 | 0.011362 | 0.011530 | 0.011295 |
| 0.011295 | 0.011362 | 0.011329 | 0.011497 | 0.011295 | 0.011429 | 0.011564 |
| 0.011497 | 0.011329 | 0.011329 | 0.011262 | 0.011262 | 0.011430 | 0.011362 |
| 0.011262 | 0.011362 | 0.011228 | 0.011262 | 0.011396 | 0.011531 | 0.011295 |
| 0.011195 | 0.011396 | 0.011329 | 0.011228 | 0.011564 | 0.011228 | 0.011329 |
| 0.011471 | 0.011295 | 0.011597 | 0.011430 | 0.011463 | 0.011329 | 0.011429 |
| 0.011295 | 0.011631 | 0.011228 | 0.011497 | 0.011295 | 0.011295 | 0.011228 |
| 0.011463 | 0.011665 | 0.011362 | 0.011430 | 0.011262 | 0.011665 | 0.011295 |
| 0.011295 | 0.011295 | 0.011329 | 0.011430 | 0.011329 | 0.011429 | 0.011497 |
| 0.011497 | 0.011463 | 0.011362 | 0.011463 | 0.011429 | 0.011295 | 0.011262 |
| 0.011295 | 0.011295 | 0.011362 | 0.011295 | 0.011262 | 0.011430 | 0.011295 |
| 0.011329 | 0.011329 | 0.011463 | 0.011497 | 0.011396 | 0.011329 | 0.011329 |
| 0.011396 | 0.011329 | 0.011429 | 0.011295 | 0.011429 | 0.011530 | 0.011833 |
| 0.011329 | 0.011732 | 0.011336 | 0.017861 | 0.011388 | 0.011549 | 0.011688 |
| 0.011648 | 0.011693 | 0.011374 | 0.011350 | 0.011829 | 0.011716 | 0.011485 |
| 0.011629 | 0.011671 | 0.011255 | 0.011353 | 0.011333 | 0.011356 | 0.011361 |
| 0.011576 | 0.011507 | 0.011505 | 0.011391 | 0.011463 | 0.011497 | 0.011500 |
| 0.011369 | 0.011463 | 0.011463 | 0.011429 | 0.011396 | 0.011396 | 0.011363 |
| 0.011396 | 0.011329 | 0.011362 | 0.011329 | 0.011362 | 0.011295 | 0.011329 |
| 0.011329 | 0.011396 | 0.011295 | 0.011396 | 0.011430 | 0.011463 | 0.011362 |
| 0.011396 | 0.011362 | 0.011698 | 0.011698 | 0.011430 | 0.011464 | 0.011497 |
| 0.011262 | 0.011262 | 0.011295 | 0.011396 | 0.011262 | 0.011497 | 0.011497 |
| 0.011530 | 0.011530 | 0.011463 | 0.011564 | 0.011732 | 0.011565 | 0.011396 |
| 0.011396 | 0.011463 | 0.011497 | 0.011329 | 0.011396 | 0.011362 | 0.011396 |
| 0.011463 | 0.011463 | 0.011497 | 0.011463 | 0.011363 | 0.011564 | 0.011530 |
| 0.011399 | 0.011295 | 0.011396 | 0.011497 | 0.011396 | 0.011530 | 0.011564 |
| 0.011732 | 0.011436 | 0.011597 | 0.011564 | 0.011497 | 0.011664 | 0.011295 |
| 0.011464 | 0.011363 | 0.011329 | 0.011329 | 0.011396 | 0.011295 | 0.011396 |
| 0.011430 | 0.011463 | 0.011362 | 0.011396 | 0.011362 | 0.011698 | 0.011698 |
| 0.011430 | 0.011464 | 0.011530 | 0.011463 | 0.012103 | 0.011453 | 0.011447 |
| 0.011517 | 0.011407 | 0.011587 | 0.011476 | 0.011585 | 0.011509 | 0.011474 |
| 0.012056 | 0.011372 | 0.011506 | 0.011441 | 0.011715 | 0.011570 | 0.011673 |
| 0.012080 | 0.011550 | 0.011432 | 0.011429 | 0.011429 | 0.011429 | 0.011398 |
| 0.011262 | 0.011295 | 0.011429 | 0.011396 | 0.011398 | 0.011530 | 0.011498 |
| 0.011362 | 0.011295 | 0.011329 | 0.011362 | 0.011262 | 0.011329 | 0.011228 |
| 0.011362 | 0.011396 | 0.011295 | 0.011262 | 0.011362 | 0.011295 | 0.011329 |
| 0.011329 | 0.011262 | 0.011329 | 0.011362 | 0.011262 | 0.011463 | 0.011497 |
| 0.011396 | 0.011463 | 0.011396 | 0.011396 | 0.011329 | 0.011732 | 0.011362 |
| 0.011408 | 0.011329 | 0.011564 | 0.011569 | 0.011430 | 0.011429 | 0.011429 |

|          |          |          |          |          |          |          |
|----------|----------|----------|----------|----------|----------|----------|
| 0.011430 | 0.011362 | 0.011329 | 0.011362 | 0.011463 | 0.011463 | 0.011396 |
| 0.011396 | 0.011530 | 0.011698 | 0.011429 | 0.011564 | 0.011564 | 0.011497 |
| 0.011329 | 0.011396 | 0.011430 | 0.011833 | 0.011396 | 0.011430 | 0.011396 |
| 0.011429 | 0.011362 | 0.011362 | 0.011665 | 0.011598 | 0.011631 | 0.011362 |
| 0.011463 | 0.011530 | 0.011396 | 0.011463 | 0.011429 | 0.011295 | 0.011631 |
| 0.011396 | 0.011362 | 0.011362 | 0.011530 | 0.011362 | 0.011463 | 0.011698 |
| 0.011396 | 0.011773 | 0.011765 | 0.011589 | 0.011342 | 0.011468 | 0.011318 |
| 0.011335 | 0.011800 | 0.011306 | 0.011551 | 0.011402 | 0.011518 | 0.011538 |
| 0.011570 | 0.011389 | 0.011450 | 0.011324 | 0.011384 | 0.011395 | 0.011466 |
| 0.011475 | 0.011375 | 0.011448 | 0.011377 | 0.011128 | 0.011530 | 0.011597 |
| 0.011597 | 0.011464 | 0.011567 | 0.011569 | 0.011704 | 0.011661 | 0.011396 |
| 0.011631 | 0.011497 | 0.011362 | 0.011463 | 0.011262 | 0.011497 | 0.011295 |
| 0.011362 | 0.011362 | 0.011329 | 0.011295 | 0.011329 | 0.011295 | 0.000000 |
| 0.011375 | 0.011375 | 0.011368 | 0.011403 | 0.011539 | 0.011504 | 0.011504 |
| 0.011503 | 0.011430 | 0.011171 | 0.011204 | 0.011365 | 0.011535 | 0.011535 |
| 0.011329 | 0.011399 | 0.011632 | 0.011601 | 0.011531 | 0.011565 | 0.011497 |
| 0.011429 | 0.011497 | 0.011497 | 0.011396 | 0.011967 | 0.011564 | 0.011631 |
| 0.011665 | 0.011737 | 0.011367 | 0.011441 | 0.011329 | 0.011530 | 0.011497 |
| 0.011531 | 0.011564 | 0.011564 | 0.011564 | 0.011689 | 0.011698 | 0.011338 |
| 0.011229 | 0.011233 | 0.011333 | 0.011298 | 0.011402 | 0.011247 | 0.011570 |
| 0.011369 | 0.011455 | 0.011156 | 0.011397 | 0.011363 | 0.011437 | 0.011329 |
| 0.011295 | 0.011295 | 0.011362 | 0.011329 | 0.011530 | 0.011497 | 0.011429 |
| 0.011530 | 0.011597 | 0.011329 | 0.011329 | 0.011362 | 0.011362 | 0.011364 |
| 0.011432 | 0.011362 | 0.011094 | 0.011128 | 0.011530 | 0.011597 | 0.011597 |
| 0.011464 | 0.011567 | 0.011569 | 0.011704 | 0.011661 | 0.011396 | 0.011564 |
| 0.011497 | 0.011497 | 0.011331 | 0.011513 | 0.011442 | 0.011469 | 0.011305 |
| 0.011473 | 0.011744 | 0.011441 | 0.011400 | 0.011295 | 0.011497 | 0.011362 |
| 0.011463 | 0.011396 | 0.011295 | 0.011397 | 0.011497 | 0.011499 | 0.011396 |
| 0.011295 | 0.011229 | 0.011362 | 0.011295 | 0.011228 | 0.011332 | 0.011497 |
| 0.011396 | 0.011329 | 0.011362 | 0.011329 | 0.011362 | 0.011295 | 0.011497 |
| 0.011362 | 0.011396 | 0.011396 | 0.011329 | 0.011396 | 0.011631 | 0.011295 |
| 0.011329 | 0.011732 | 0.011329 | 0.011362 | 0.011329 | 0.011698 | 0.011317 |
| 0.011791 | 0.011315 | 0.011361 | 0.011543 | 0.011630 | 0.011527 | 0.011269 |
| 0.011323 | 0.011497 | 0.011597 | 0.011705 | 0.011565 | 0.011703 | 0.011834 |
| 0.011733 | 0.011771 | 0.011732 | 0.011983 | 0.011698 | 0.012539 | 0.011734 |
| 0.012473 | 0.012207 | 0.012341 | 0.012646 | 0.011698 | 0.011396 | 0.011699 |
| 0.012137 | 0.012072 | 0.011665 | 0.011564 | 0.011632 | 0.011632 | 0.011601 |
| 0.011497 | 0.011501 | 0.011564 | 0.011531 | 0.011901 | 0.011967 | 0.011968 |
| 0.011868 | 0.011968 | 0.012072 | 0.011838 | 0.012138 | 0.012144 | 0.012205 |
| 0.012205 | 0.012239 | 0.012186 | 0.012206 | 0.012207 | 0.011429 | 0.011732 |
| 0.011800 | 0.012304 | 0.011806 | 0.012035 | 0.012508 | 0.011570 | 0.011464 |
| 0.011429 | 0.011429 | 0.011900 | 0.011965 | 0.012045 | 0.011765 | 0.011431 |
| S651     | 0.011689 | 0.011689 | 0.011794 | 0.011759 | 0.011759 | 0.011829 |
| 0.011661 | 0.011555 | 0.011724 | 0.011270 | 0.011340 | 0.011305 | 0.011270 |
| 0.011305 | 0.011479 | 0.011270 | 0.011305 | 0.011375 | 0.011340 | 0.011305 |
| 0.011270 | 0.011305 | 0.011409 | 0.011270 | 0.011305 | 0.011305 | 0.011626 |
| 0.011549 | 0.011305 | 0.011200 | 0.011444 | 0.011340 | 0.011340 | 0.011305 |
| 0.011305 | 0.011444 | 0.011340 | 0.011340 | 0.011375 | 0.011340 | 0.011514 |
| 0.011270 | 0.011340 | 0.011375 | 0.011270 | 0.011409 | 0.011409 | 0.011340 |
| 0.011340 | 0.011514 | 0.011410 | 0.011654 | 0.011340 | 0.011619 | 0.011340 |
| 0.011305 | 0.011410 | 0.011479 | 0.011619 | 0.011654 | 0.011410 | 0.011514 |
| 0.011375 | 0.011444 | 0.011340 | 0.011584 | 0.011759 | 0.011340 | 0.011410 |
| 0.011305 | 0.011409 | 0.011375 | 0.011444 | 0.011375 | 0.011340 | 0.011340 |
| 0.011270 | 0.011305 | 0.011235 | 0.011305 | 0.011340 | 0.011375 | 0.011444 |
| 0.011375 | 0.011305 | 0.011409 | 0.011305 | 0.011444 | 0.011270 | 0.011305 |
| 0.011514 | 0.011444 | 0.011654 | 0.011444 | 0.011305 | 0.011584 | 0.011340 |
| 0.011512 | 0.011705 | 0.011483 | 0.011257 | 0.011212 | 0.011362 | 0.011417 |
| 0.011917 | 0.011475 | 0.011185 | 0.011409 | 0.011409 | 0.011375 | 0.011444 |
| 0.011410 | 0.011375 | 0.011444 | 0.011340 | 0.011410 | 0.011375 | 0.011375 |
| 0.011340 | 0.011444 | 0.011654 | 0.011479 | 0.011410 | 0.011375 | 0.011305 |

|          |          |          |          |          |          |          |
|----------|----------|----------|----------|----------|----------|----------|
| 0.011270 | 0.011270 | 0.011340 | 0.011270 | 0.011514 | 0.011479 | 0.011409 |
| 0.011514 | 0.011584 | 0.011305 | 0.011305 | 0.011340 | 0.011340 | 0.011341 |
| 0.011412 | 0.011340 | 0.011340 | 0.011206 | 0.011245 | 0.011241 | 0.011340 |
| 0.011340 | 0.011272 | 0.011286 | 0.011306 | 0.011236 | 0.011272 | 0.011305 |
| 0.011535 | 0.011344 | 0.011307 | 0.011270 | 0.011236 | 0.011410 | 0.011375 |
| 0.011445 | 0.011375 | 0.011375 | 0.011444 | 0.011409 | 0.011759 | 0.011549 |
| 0.011619 | 0.011479 | 0.011340 | 0.011444 | 0.011235 | 0.011479 | 0.011270 |
| 0.011305 | 0.011340 | 0.011305 | 0.011270 | 0.011305 | 0.011270 | 0.011375 |
| 0.011305 | 0.011444 | 0.011375 | 0.011270 | 0.011376 | 0.011479 | 0.011482 |
| 0.011479 | 0.011375 | 0.011270 | 0.011201 | 0.011340 | 0.011270 | 0.011200 |
| 0.011308 | 0.011479 | 0.011270 | 0.011479 | 0.011235 | 0.011340 | 0.011305 |
| 0.011410 | 0.011305 | 0.011340 | 0.011305 | 0.011340 | 0.011200 | 0.011340 |
| 0.011375 | 0.011305 | 0.011375 | 0.011305 | 0.011340 | 0.011375 | 0.011619 |
| 0.011689 | 0.011549 | 0.011689 | 0.011411 | 0.011689 | 0.011340 | 0.011305 |
| 0.011341 | 0.011608 | 0.011396 | 0.011203 | 0.011696 | 0.011202 | 0.011347 |
| 0.011696 | 0.011625 | 0.011340 | 0.011724 | 0.011380 | 0.011410 | 0.011549 |
| 0.011444 | 0.011479 | 0.011504 | 0.011188 | 0.011319 | 0.011375 | 0.011448 |
| 0.011549 | 0.011446 | 0.011447 | 0.011659 | 0.011584 | 0.011654 | 0.011765 |
| 0.011481 | 0.011660 | 0.011588 | 0.011517 | 0.011795 | 0.011235 | 0.011446 |
| 0.011409 | 0.011340 | 0.011235 | 0.011235 | 0.011305 | 0.011305 | 0.011375 |
| 0.011305 | 0.011375 | 0.011270 | 0.011375 | 0.011305 | 0.011305 | 0.011375 |
| 0.011305 | 0.011724 | 0.011619 | 0.011654 | 0.011200 | 0.011305 | 0.011340 |
| 0.011340 | 0.011305 | 0.011375 | 0.011410 | 0.011270 | 0.011270 | 0.011270 |
| 0.011794 | 0.011409 | 0.011444 | 0.011235 | 0.011340 | 0.011514 | 0.011270 |
| 0.011235 | 0.011305 | 0.011305 | 0.011479 | 0.011270 | 0.011409 | 0.011514 |
| 0.011479 | 0.011305 | 0.011305 | 0.011200 | 0.011235 | 0.011410 | 0.011340 |
| 0.011200 | 0.011340 | 0.011200 | 0.011235 | 0.011375 | 0.011514 | 0.011270 |
| 0.011235 | 0.011375 | 0.011270 | 0.011200 | 0.011514 | 0.011200 | 0.011375 |
| 0.011452 | 0.011270 | 0.011549 | 0.011375 | 0.011444 | 0.011305 | 0.011409 |
| 0.011270 | 0.011619 | 0.011200 | 0.011444 | 0.011270 | 0.011270 | 0.011200 |
| 0.011409 | 0.011654 | 0.011340 | 0.011410 | 0.011235 | 0.011619 | 0.011270 |
| 0.011270 | 0.011270 | 0.011305 | 0.011410 | 0.011305 | 0.011409 | 0.011479 |
| 0.011444 | 0.011444 | 0.011305 | 0.011410 | 0.011409 | 0.011270 | 0.011235 |
| 0.011270 | 0.011270 | 0.011340 | 0.011270 | 0.011235 | 0.011410 | 0.011270 |
| 0.011305 | 0.011305 | 0.011409 | 0.011479 | 0.011375 | 0.011305 | 0.011305 |
| 0.011375 | 0.011235 | 0.011409 | 0.011235 | 0.011409 | 0.011340 | 0.011724 |
| 0.011305 | 0.011689 | 0.011310 | 0.017889 | 0.011258 | 0.011490 | 0.011637 |
| 0.011597 | 0.011637 | 0.011324 | 0.011238 | 0.011780 | 0.011631 | 0.011489 |
| 0.011495 | 0.011612 | 0.011217 | 0.011231 | 0.011259 | 0.011408 | 0.011276 |
| 0.011490 | 0.011439 | 0.011437 | 0.011194 | 0.011444 | 0.011479 | 0.011447 |
| 0.011346 | 0.011409 | 0.011409 | 0.011409 | 0.011375 | 0.011375 | 0.011340 |
| 0.011305 | 0.011305 | 0.011165 | 0.011375 | 0.011340 | 0.011270 | 0.011305 |
| 0.011305 | 0.011375 | 0.011270 | 0.011375 | 0.011409 | 0.011444 | 0.011340 |
| 0.011375 | 0.011340 | 0.011619 | 0.011619 | 0.011410 | 0.011445 | 0.011479 |
| 0.011235 | 0.011235 | 0.011270 | 0.011375 | 0.011235 | 0.011479 | 0.011479 |
| 0.011340 | 0.011340 | 0.011444 | 0.011375 | 0.011689 | 0.011376 | 0.011375 |
| 0.011200 | 0.011444 | 0.011479 | 0.011305 | 0.011375 | 0.011270 | 0.011305 |
| 0.011270 | 0.011270 | 0.011305 | 0.011444 | 0.011340 | 0.011549 | 0.011514 |
| 0.011377 | 0.011270 | 0.011340 | 0.011444 | 0.011340 | 0.011514 | 0.011549 |
| 0.011724 | 0.011380 | 0.011410 | 0.011549 | 0.011444 | 0.011479 | 0.011270 |
| 0.011411 | 0.011340 | 0.011305 | 0.011305 | 0.011375 | 0.011270 | 0.011375 |
| 0.011409 | 0.011444 | 0.011340 | 0.011375 | 0.011340 | 0.011619 | 0.011619 |
| 0.011410 | 0.011445 | 0.011514 | 0.011444 | 0.012110 | 0.011318 | 0.011427 |
| 0.011499 | 0.011347 | 0.011572 | 0.011457 | 0.011385 | 0.011455 | 0.011342 |
| 0.012061 | 0.011312 | 0.011452 | 0.011420 | 0.011705 | 0.011520 | 0.011662 |
| 0.012086 | 0.011491 | 0.011377 | 0.011375 | 0.011375 | 0.011409 | 0.011342 |
| 0.011235 | 0.011270 | 0.011409 | 0.011375 | 0.011377 | 0.011514 | 0.011481 |
| 0.011340 | 0.011270 | 0.011305 | 0.011340 | 0.011235 | 0.011305 | 0.011200 |
| 0.011340 | 0.011375 | 0.011270 | 0.011235 | 0.011340 | 0.011270 | 0.011305 |
| 0.011305 | 0.011235 | 0.011305 | 0.011305 | 0.011235 | 0.011444 | 0.011479 |

|          |          |          |          |          |          |          |
|----------|----------|----------|----------|----------|----------|----------|
| 0.011375 | 0.011444 | 0.011375 | 0.011375 | 0.011305 | 0.011654 | 0.011340 |
| 0.011386 | 0.011305 | 0.011549 | 0.011554 | 0.011410 | 0.011409 | 0.011409 |
| 0.011410 | 0.011340 | 0.011305 | 0.011340 | 0.011444 | 0.011444 | 0.011375 |
| 0.011375 | 0.011514 | 0.011654 | 0.011409 | 0.011584 | 0.011584 | 0.011479 |
| 0.011305 | 0.011375 | 0.011410 | 0.011759 | 0.011375 | 0.011410 | 0.011375 |
| 0.011235 | 0.011340 | 0.011340 | 0.011654 | 0.011584 | 0.011619 | 0.011340 |
| 0.011444 | 0.011514 | 0.011375 | 0.011444 | 0.011375 | 0.011270 | 0.011584 |
| 0.011375 | 0.011340 | 0.011340 | 0.011514 | 0.011340 | 0.011444 | 0.011689 |
| 0.011305 | 0.011696 | 0.011724 | 0.011510 | 0.011173 | 0.011446 | 0.011271 |
| 0.011281 | 0.011727 | 0.011240 | 0.011420 | 0.011306 | 0.011368 | 0.011381 |
| 0.011470 | 0.011127 | 0.011341 | 0.011193 | 0.011223 | 0.011397 | 0.011390 |
| 0.011443 | 0.011300 | 0.011421 | 0.011315 | 0.011376 | 0.011514 | 0.011584 |
| 0.011549 | 0.011445 | 0.011517 | 0.011554 | 0.011624 | 0.011686 | 0.011340 |
| 0.011619 | 0.011479 | 0.011340 | 0.011444 | 0.011235 | 0.011479 | 0.011270 |
| 0.011305 | 0.011340 | 0.011305 | 0.011270 | 0.011305 | 0.011270 | 0.011375 |
| 0.000000 | 0.011310 | 0.011341 | 0.011377 | 0.011518 | 0.011480 | 0.011411 |
| 0.011446 | 0.011409 | 0.011172 | 0.011133 | 0.011340 | 0.011514 | 0.011515 |
| 0.011305 | 0.011375 | 0.011619 | 0.011585 | 0.011340 | 0.011514 | 0.011479 |
| 0.011409 | 0.011479 | 0.011479 | 0.011375 | 0.011934 | 0.011340 | 0.011445 |
| 0.011654 | 0.011654 | 0.011309 | 0.011420 | 0.011305 | 0.011514 | 0.011479 |
| 0.011515 | 0.011479 | 0.011375 | 0.011375 | 0.011591 | 0.011654 | 0.011313 |
| 0.011201 | 0.011205 | 0.011308 | 0.011272 | 0.011344 | 0.011177 | 0.011520 |
| 0.011345 | 0.011421 | 0.011207 | 0.011331 | 0.011340 | 0.011412 | 0.011305 |
| 0.011270 | 0.011270 | 0.011340 | 0.011270 | 0.011514 | 0.011479 | 0.011409 |
| 0.011514 | 0.011584 | 0.011305 | 0.011305 | 0.011340 | 0.011340 | 0.011341 |
| 0.011412 | 0.011340 | 0.011340 | 0.011376 | 0.011514 | 0.011584 | 0.011549 |
| 0.011445 | 0.011517 | 0.011554 | 0.011624 | 0.011686 | 0.011340 | 0.011549 |
| 0.011479 | 0.011479 | 0.011306 | 0.011458 | 0.011421 | 0.011450 | 0.011315 |
| 0.011419 | 0.011634 | 0.011413 | 0.011343 | 0.011270 | 0.011479 | 0.011305 |
| 0.011444 | 0.011375 | 0.011270 | 0.011376 | 0.011479 | 0.011482 | 0.011375 |
| 0.011270 | 0.011201 | 0.011340 | 0.011270 | 0.011200 | 0.011308 | 0.011479 |
| 0.011305 | 0.011305 | 0.011165 | 0.011375 | 0.011340 | 0.011270 | 0.011479 |
| 0.011340 | 0.011375 | 0.011375 | 0.011305 | 0.011375 | 0.011584 | 0.011270 |
| 0.011305 | 0.011654 | 0.011305 | 0.011305 | 0.011270 | 0.011654 | 0.011190 |
| 0.011679 | 0.011231 | 0.011265 | 0.011465 | 0.011552 | 0.011461 | 0.011186 |
| 0.011221 | 0.011479 | 0.011584 | 0.011695 | 0.011550 | 0.011693 | 0.011830 |
| 0.011725 | 0.011763 | 0.011724 | 0.011984 | 0.011654 | 0.012564 | 0.011725 |
| 0.012319 | 0.012252 | 0.012392 | 0.012639 | 0.011689 | 0.011375 | 0.011689 |
| 0.012145 | 0.012078 | 0.011654 | 0.011549 | 0.011619 | 0.011619 | 0.011518 |
| 0.011479 | 0.011484 | 0.011549 | 0.011514 | 0.011864 | 0.011934 | 0.011899 |
| 0.011829 | 0.011934 | 0.011971 | 0.011798 | 0.012110 | 0.012152 | 0.012215 |
| 0.012215 | 0.012250 | 0.012191 | 0.012215 | 0.012217 | 0.011409 | 0.011689 |
| 0.011724 | 0.012319 | 0.011801 | 0.011969 | 0.012496 | 0.011554 | 0.011444 |
| 0.011409 | 0.011409 | 0.011899 | 0.011901 | 0.011999 | 0.011759 | 0.011410 |
| S652     | 0.011690 | 0.011690 | 0.011795 | 0.011760 | 0.011760 | 0.011830 |
| 0.011662 | 0.011556 | 0.011760 | 0.011270 | 0.011340 | 0.011305 | 0.011270 |
| 0.011305 | 0.011480 | 0.011270 | 0.011305 | 0.011375 | 0.011340 | 0.011305 |
| 0.011270 | 0.011305 | 0.011410 | 0.011270 | 0.011305 | 0.011305 | 0.011627 |
| 0.011550 | 0.011305 | 0.011200 | 0.011445 | 0.011340 | 0.011340 | 0.011340 |
| 0.011305 | 0.011445 | 0.011340 | 0.011340 | 0.011375 | 0.011340 | 0.011515 |
| 0.011270 | 0.011340 | 0.011375 | 0.011270 | 0.011410 | 0.011445 | 0.011340 |
| 0.011340 | 0.011515 | 0.011410 | 0.011655 | 0.011340 | 0.011620 | 0.011340 |
| 0.011305 | 0.011410 | 0.011480 | 0.011620 | 0.011655 | 0.011410 | 0.011480 |
| 0.011375 | 0.011445 | 0.011340 | 0.011585 | 0.011795 | 0.011340 | 0.011410 |
| 0.011305 | 0.011410 | 0.011305 | 0.011445 | 0.011375 | 0.011340 | 0.011340 |
| 0.011270 | 0.011305 | 0.011270 | 0.011340 | 0.011305 | 0.011376 | 0.011445 |
| 0.011375 | 0.011305 | 0.011410 | 0.011305 | 0.011445 | 0.011270 | 0.011305 |
| 0.011515 | 0.011445 | 0.011690 | 0.011480 | 0.011340 | 0.011585 | 0.011340 |
| 0.011523 | 0.011720 | 0.011525 | 0.011261 | 0.011252 | 0.011328 | 0.011465 |
| 0.011474 | 0.011530 | 0.011230 | 0.011550 | 0.011550 | 0.011375 | 0.011445 |

|          |          |          |          |          |          |          |
|----------|----------|----------|----------|----------|----------|----------|
| 0.011410 | 0.011375 | 0.011445 | 0.011340 | 0.011445 | 0.011375 | 0.011375 |
| 0.011340 | 0.011445 | 0.011655 | 0.011515 | 0.011410 | 0.011375 | 0.011305 |
| 0.011270 | 0.011270 | 0.011340 | 0.011270 | 0.011515 | 0.011480 | 0.011410 |
| 0.011515 | 0.011585 | 0.011305 | 0.011305 | 0.011340 | 0.011340 | 0.011342 |
| 0.011413 | 0.011340 | 0.011340 | 0.011206 | 0.011281 | 0.011238 | 0.011340 |
| 0.011340 | 0.011273 | 0.011325 | 0.011309 | 0.011235 | 0.011270 | 0.011305 |
| 0.011568 | 0.011341 | 0.011378 | 0.011270 | 0.011273 | 0.011410 | 0.011375 |
| 0.011445 | 0.011375 | 0.011375 | 0.011410 | 0.011410 | 0.011795 | 0.011550 |
| 0.011620 | 0.011410 | 0.011340 | 0.011410 | 0.011235 | 0.011480 | 0.011270 |
| 0.011305 | 0.011340 | 0.011305 | 0.011270 | 0.011305 | 0.011270 | 0.011375 |
| 0.011305 | 0.011445 | 0.011375 | 0.011270 | 0.011376 | 0.011480 | 0.011483 |
| 0.011480 | 0.011375 | 0.011270 | 0.011201 | 0.011340 | 0.011270 | 0.011200 |
| 0.011308 | 0.011480 | 0.011270 | 0.011480 | 0.011235 | 0.011340 | 0.011305 |
| 0.011410 | 0.011305 | 0.011340 | 0.011305 | 0.011340 | 0.011200 | 0.011340 |
| 0.011375 | 0.011305 | 0.011375 | 0.011305 | 0.011340 | 0.011375 | 0.011620 |
| 0.011690 | 0.011620 | 0.011690 | 0.011482 | 0.011690 | 0.011340 | 0.011305 |
| 0.011341 | 0.011649 | 0.011442 | 0.011239 | 0.011697 | 0.011202 | 0.011306 |
| 0.011697 | 0.011626 | 0.011445 | 0.011725 | 0.011380 | 0.011550 | 0.011550 |
| 0.011480 | 0.011620 | 0.011502 | 0.011274 | 0.011362 | 0.011375 | 0.011448 |
| 0.011550 | 0.011447 | 0.011518 | 0.011660 | 0.011585 | 0.011620 | 0.011766 |
| 0.011482 | 0.011660 | 0.011585 | 0.011515 | 0.011796 | 0.011235 | 0.011445 |
| 0.011410 | 0.011340 | 0.011235 | 0.011235 | 0.011305 | 0.011305 | 0.011375 |
| 0.011305 | 0.011375 | 0.011270 | 0.011375 | 0.011305 | 0.011305 | 0.011375 |
| 0.011305 | 0.011725 | 0.011620 | 0.011655 | 0.011200 | 0.011305 | 0.011340 |
| 0.011340 | 0.011305 | 0.011340 | 0.011375 | 0.011270 | 0.011270 | 0.011270 |
| 0.011795 | 0.011410 | 0.011200 | 0.011235 | 0.011340 | 0.011515 | 0.011270 |
| 0.011235 | 0.011305 | 0.011305 | 0.011480 | 0.011270 | 0.011410 | 0.011515 |
| 0.011480 | 0.011270 | 0.011305 | 0.011200 | 0.011235 | 0.011410 | 0.011340 |
| 0.011200 | 0.011305 | 0.011200 | 0.011235 | 0.011375 | 0.011515 | 0.011270 |
| 0.011235 | 0.011375 | 0.011305 | 0.011200 | 0.011515 | 0.011200 | 0.011375 |
| 0.011452 | 0.011270 | 0.011550 | 0.011410 | 0.011445 | 0.011305 | 0.011410 |
| 0.011270 | 0.011620 | 0.011200 | 0.011445 | 0.011270 | 0.011270 | 0.011200 |
| 0.011445 | 0.011655 | 0.011340 | 0.011165 | 0.011235 | 0.011620 | 0.011270 |
| 0.011270 | 0.011270 | 0.011305 | 0.011410 | 0.011270 | 0.011410 | 0.011445 |
| 0.011445 | 0.011445 | 0.011305 | 0.011410 | 0.011410 | 0.011270 | 0.011235 |
| 0.011270 | 0.011270 | 0.011340 | 0.011270 | 0.011235 | 0.011410 | 0.011270 |
| 0.011305 | 0.011305 | 0.011445 | 0.011480 | 0.011375 | 0.011305 | 0.011305 |
| 0.011375 | 0.011235 | 0.011410 | 0.011270 | 0.011410 | 0.011480 | 0.011725 |
| 0.011305 | 0.011690 | 0.011311 | 0.018075 | 0.011128 | 0.011501 | 0.011640 |
| 0.011599 | 0.011644 | 0.011441 | 0.011360 | 0.011686 | 0.011669 | 0.011314 |
| 0.011549 | 0.011559 | 0.011181 | 0.011320 | 0.011261 | 0.011316 | 0.011281 |
| 0.011543 | 0.011481 | 0.011480 | 0.011196 | 0.011445 | 0.011480 | 0.011483 |
| 0.011345 | 0.011375 | 0.011445 | 0.011410 | 0.011375 | 0.011375 | 0.011340 |
| 0.011375 | 0.011305 | 0.011305 | 0.011375 | 0.011340 | 0.011270 | 0.011305 |
| 0.011305 | 0.011375 | 0.011270 | 0.011375 | 0.011410 | 0.011445 | 0.011340 |
| 0.011375 | 0.011340 | 0.011620 | 0.011620 | 0.011410 | 0.011446 | 0.011480 |
| 0.011235 | 0.011235 | 0.011270 | 0.011375 | 0.011235 | 0.011480 | 0.011480 |
| 0.011480 | 0.011445 | 0.011445 | 0.011515 | 0.011690 | 0.011516 | 0.011375 |
| 0.011340 | 0.011410 | 0.011480 | 0.011305 | 0.011375 | 0.011270 | 0.011375 |
| 0.011410 | 0.011410 | 0.011445 | 0.011445 | 0.011341 | 0.011550 | 0.011515 |
| 0.011378 | 0.011270 | 0.011375 | 0.011445 | 0.011340 | 0.011515 | 0.011550 |
| 0.011725 | 0.011380 | 0.011550 | 0.011550 | 0.011480 | 0.011620 | 0.011270 |
| 0.011446 | 0.011340 | 0.011305 | 0.011305 | 0.011375 | 0.011270 | 0.011375 |
| 0.011410 | 0.011445 | 0.011340 | 0.011375 | 0.011340 | 0.011620 | 0.011620 |
| 0.011410 | 0.011446 | 0.011515 | 0.011445 | 0.012076 | 0.011466 | 0.011427 |
| 0.011496 | 0.011420 | 0.011568 | 0.011457 | 0.011495 | 0.011489 | 0.011415 |
| 0.012025 | 0.011346 | 0.011486 | 0.011418 | 0.011664 | 0.011554 | 0.011662 |
| 0.012050 | 0.011527 | 0.011377 | 0.011375 | 0.011375 | 0.011410 | 0.011342 |
| 0.011235 | 0.011270 | 0.011410 | 0.011375 | 0.011377 | 0.011515 | 0.011481 |
| 0.011340 | 0.011270 | 0.011305 | 0.011340 | 0.011235 | 0.011305 | 0.011200 |

|          |          |          |          |          |          |          |
|----------|----------|----------|----------|----------|----------|----------|
| 0.011340 | 0.011375 | 0.011270 | 0.011235 | 0.011340 | 0.011270 | 0.011305 |
| 0.011305 | 0.011235 | 0.011305 | 0.011340 | 0.011235 | 0.011445 | 0.011480 |
| 0.011375 | 0.011445 | 0.011375 | 0.011375 | 0.011235 | 0.011655 | 0.011340 |
| 0.011385 | 0.011305 | 0.011550 | 0.011554 | 0.011410 | 0.011410 | 0.011410 |
| 0.011410 | 0.011340 | 0.011305 | 0.011340 | 0.011445 | 0.011410 | 0.011375 |
| 0.011375 | 0.011445 | 0.011655 | 0.011375 | 0.011550 | 0.011550 | 0.011480 |
| 0.011305 | 0.011375 | 0.011410 | 0.011795 | 0.011375 | 0.011410 | 0.011375 |
| 0.011375 | 0.011340 | 0.011340 | 0.011655 | 0.011550 | 0.011620 | 0.011340 |
| 0.011445 | 0.011515 | 0.011375 | 0.011445 | 0.011375 | 0.011270 | 0.011585 |
| 0.011375 | 0.011340 | 0.011340 | 0.011515 | 0.011340 | 0.011130 | 0.011690 |
| 0.011305 | 0.011733 | 0.011725 | 0.011520 | 0.011232 | 0.011448 | 0.011272 |
| 0.011286 | 0.011780 | 0.011278 | 0.011428 | 0.011161 | 0.011323 | 0.011280 |
| 0.011479 | 0.000000 | 0.011232 | 0.000000 | 0.011116 | 0.011267 | 0.011355 |
| 0.011452 | 0.011305 | 0.011426 | 0.011316 | 0.011376 | 0.011515 | 0.011585 |
| 0.011550 | 0.011410 | 0.011518 | 0.011555 | 0.011660 | 0.011686 | 0.011340 |
| 0.011620 | 0.011410 | 0.011340 | 0.011410 | 0.011235 | 0.011480 | 0.011270 |
| 0.011305 | 0.011340 | 0.011305 | 0.011270 | 0.011305 | 0.011270 | 0.011375 |
| 0.011310 | 0.000000 | 0.011342 | 0.011375 | 0.011515 | 0.011481 | 0.011480 |
| 0.011480 | 0.011410 | 0.011208 | 0.011205 | 0.011340 | 0.011515 | 0.011480 |
| 0.011305 | 0.011375 | 0.011585 | 0.011585 | 0.011480 | 0.011550 | 0.011480 |
| 0.011410 | 0.011480 | 0.011480 | 0.011375 | 0.011935 | 0.011480 | 0.011585 |
| 0.011620 | 0.011692 | 0.011345 | 0.011419 | 0.011305 | 0.011515 | 0.011480 |
| 0.011516 | 0.011480 | 0.011515 | 0.011515 | 0.011714 | 0.011690 | 0.011313 |
| 0.011201 | 0.011204 | 0.011308 | 0.011272 | 0.011343 | 0.011215 | 0.011519 |
| 0.011345 | 0.011467 | 0.011207 | 0.011329 | 0.011305 | 0.011410 | 0.011305 |
| 0.011270 | 0.011270 | 0.011340 | 0.011270 | 0.011515 | 0.011480 | 0.011410 |
| 0.011515 | 0.011585 | 0.011305 | 0.011305 | 0.011340 | 0.011340 | 0.011342 |
| 0.011413 | 0.011340 | 0.011340 | 0.011376 | 0.011515 | 0.011585 | 0.011550 |
| 0.011410 | 0.011518 | 0.011555 | 0.011660 | 0.011686 | 0.011340 | 0.011550 |
| 0.011480 | 0.011480 | 0.011307 | 0.011494 | 0.011421 | 0.011451 | 0.011315 |
| 0.011455 | 0.011678 | 0.011455 | 0.011344 | 0.011270 | 0.011480 | 0.011305 |
| 0.011445 | 0.011375 | 0.011270 | 0.011376 | 0.011480 | 0.011483 | 0.011375 |
| 0.011270 | 0.011201 | 0.011340 | 0.011270 | 0.011200 | 0.011308 | 0.011480 |
| 0.011375 | 0.011305 | 0.011305 | 0.011375 | 0.011340 | 0.011270 | 0.011480 |
| 0.011340 | 0.011375 | 0.011375 | 0.011305 | 0.011375 | 0.011585 | 0.011270 |
| 0.011305 | 0.011655 | 0.011305 | 0.011305 | 0.011305 | 0.011655 | 0.011237 |
| 0.011689 | 0.011233 | 0.011319 | 0.011470 | 0.011563 | 0.011506 | 0.011232 |
| 0.011276 | 0.011480 | 0.011585 | 0.011696 | 0.011551 | 0.011694 | 0.011831 |
| 0.011725 | 0.011763 | 0.011725 | 0.011985 | 0.011655 | 0.012602 | 0.011726 |
| 0.012321 | 0.012254 | 0.012359 | 0.012571 | 0.011655 | 0.011375 | 0.011690 |
| 0.012111 | 0.012079 | 0.011655 | 0.011550 | 0.011620 | 0.011620 | 0.011554 |
| 0.011480 | 0.011484 | 0.011550 | 0.011515 | 0.011900 | 0.011970 | 0.011935 |
| 0.011865 | 0.011936 | 0.012008 | 0.011835 | 0.012112 | 0.012118 | 0.012182 |
| 0.012182 | 0.012217 | 0.012124 | 0.012182 | 0.012184 | 0.011410 | 0.011690 |
| 0.011760 | 0.012216 | 0.011802 | 0.012006 | 0.012533 | 0.011520 | 0.011445 |
| 0.011410 | 0.011410 | 0.011865 | 0.011898 | 0.011966 | 0.011725 | 0.011411 |
| s653     | 0.011677 | 0.011677 | 0.011780 | 0.011745 | 0.011745 | 0.011780 |
| 0.011649 | 0.011545 | 0.011745 | 0.011266 | 0.011334 | 0.011300 | 0.011266 |
| 0.011300 | 0.011471 | 0.011266 | 0.011231 | 0.011368 | 0.011334 | 0.011231 |
| 0.011266 | 0.011300 | 0.011403 | 0.011266 | 0.011300 | 0.011300 | 0.011545 |
| 0.011540 | 0.011300 | 0.011197 | 0.011437 | 0.011368 | 0.011334 | 0.011368 |
| 0.011334 | 0.011437 | 0.011334 | 0.011334 | 0.011300 | 0.011334 | 0.011505 |
| 0.011266 | 0.011334 | 0.011300 | 0.011300 | 0.011403 | 0.011368 | 0.011368 |
| 0.011334 | 0.011437 | 0.011403 | 0.011642 | 0.011266 | 0.011608 | 0.011266 |
| 0.011300 | 0.011403 | 0.011471 | 0.011608 | 0.011677 | 0.011403 | 0.011505 |
| 0.011368 | 0.011437 | 0.011334 | 0.011540 | 0.011780 | 0.011334 | 0.011403 |
| 0.011300 | 0.011403 | 0.011368 | 0.011437 | 0.011368 | 0.011368 | 0.011368 |
| 0.011266 | 0.011300 | 0.011231 | 0.011334 | 0.011334 | 0.011369 | 0.011437 |
| 0.011368 | 0.011334 | 0.011403 | 0.011300 | 0.011437 | 0.011266 | 0.011300 |
| 0.011505 | 0.011437 | 0.011677 | 0.011437 | 0.011334 | 0.011574 | 0.011334 |

|          |          |          |          |          |          |          |
|----------|----------|----------|----------|----------|----------|----------|
| 0.011509 | 0.011701 | 0.011551 | 0.011256 | 0.011247 | 0.011320 | 0.011454 |
| 0.012086 | 0.011569 | 0.011184 | 0.011505 | 0.011574 | 0.011368 | 0.011437 |
| 0.011403 | 0.011368 | 0.011437 | 0.011334 | 0.011437 | 0.011368 | 0.011368 |
| 0.011334 | 0.011437 | 0.011643 | 0.011505 | 0.011403 | 0.011369 | 0.011300 |
| 0.011266 | 0.011266 | 0.011266 | 0.011300 | 0.011505 | 0.011471 | 0.011403 |
| 0.011505 | 0.011574 | 0.011300 | 0.011300 | 0.011334 | 0.011334 | 0.011336 |
| 0.011405 | 0.011334 | 0.011334 | 0.011204 | 0.011278 | 0.011237 | 0.011334 |
| 0.011334 | 0.011268 | 0.011319 | 0.011302 | 0.011233 | 0.011268 | 0.011301 |
| 0.011564 | 0.011339 | 0.011372 | 0.011197 | 0.011268 | 0.011403 | 0.011369 |
| 0.011437 | 0.011368 | 0.011368 | 0.011471 | 0.011403 | 0.011711 | 0.011540 |
| 0.011608 | 0.011471 | 0.011334 | 0.011437 | 0.011231 | 0.011471 | 0.011266 |
| 0.011300 | 0.011334 | 0.011300 | 0.011266 | 0.011300 | 0.011266 | 0.011368 |
| 0.011300 | 0.011437 | 0.011368 | 0.011266 | 0.011370 | 0.011471 | 0.011474 |
| 0.011471 | 0.011368 | 0.011266 | 0.011198 | 0.011334 | 0.011266 | 0.011197 |
| 0.011233 | 0.011471 | 0.011266 | 0.011471 | 0.011232 | 0.011300 | 0.011300 |
| 0.011403 | 0.011300 | 0.011334 | 0.011300 | 0.011334 | 0.011197 | 0.011334 |
| 0.011334 | 0.011231 | 0.011368 | 0.011300 | 0.011334 | 0.011368 | 0.011608 |
| 0.011677 | 0.011608 | 0.011677 | 0.011473 | 0.011677 | 0.011334 | 0.011231 |
| 0.011336 | 0.011598 | 0.011433 | 0.011235 | 0.011683 | 0.011199 | 0.011300 |
| 0.011684 | 0.011615 | 0.011505 | 0.011711 | 0.011408 | 0.011574 | 0.011540 |
| 0.011403 | 0.011642 | 0.011496 | 0.011355 | 0.011358 | 0.011300 | 0.011440 |
| 0.011540 | 0.011438 | 0.011543 | 0.011647 | 0.011574 | 0.011643 | 0.011752 |
| 0.011475 | 0.011649 | 0.011509 | 0.011509 | 0.011746 | 0.011231 | 0.011438 |
| 0.011403 | 0.011334 | 0.011231 | 0.011197 | 0.011300 | 0.011300 | 0.011368 |
| 0.011300 | 0.011368 | 0.011266 | 0.011300 | 0.011300 | 0.011231 | 0.011300 |
| 0.011300 | 0.011711 | 0.011608 | 0.011642 | 0.011197 | 0.011300 | 0.011334 |
| 0.011334 | 0.011300 | 0.011368 | 0.011403 | 0.011266 | 0.011266 | 0.011266 |
| 0.011780 | 0.011403 | 0.011437 | 0.011231 | 0.011334 | 0.011437 | 0.011266 |
| 0.011231 | 0.011300 | 0.011300 | 0.011471 | 0.011266 | 0.011403 | 0.011540 |
| 0.011471 | 0.011300 | 0.011231 | 0.011231 | 0.011231 | 0.011403 | 0.011334 |
| 0.011231 | 0.011334 | 0.011197 | 0.011231 | 0.011368 | 0.011506 | 0.011266 |
| 0.011232 | 0.011368 | 0.011300 | 0.011197 | 0.011505 | 0.011197 | 0.011368 |
| 0.011444 | 0.011266 | 0.011540 | 0.011403 | 0.011368 | 0.011300 | 0.011334 |
| 0.011266 | 0.011608 | 0.011197 | 0.011437 | 0.011266 | 0.011266 | 0.011197 |
| 0.011437 | 0.011643 | 0.011334 | 0.011403 | 0.011231 | 0.011608 | 0.011266 |
| 0.011266 | 0.011197 | 0.011300 | 0.011403 | 0.011300 | 0.011403 | 0.011471 |
| 0.011437 | 0.011437 | 0.011334 | 0.011437 | 0.011403 | 0.011266 | 0.011231 |
| 0.011266 | 0.011266 | 0.011334 | 0.011266 | 0.011231 | 0.011403 | 0.011266 |
| 0.011300 | 0.011300 | 0.011437 | 0.011471 | 0.011368 | 0.011300 | 0.011300 |
| 0.011368 | 0.011266 | 0.011403 | 0.011266 | 0.011403 | 0.011505 | 0.011711 |
| 0.011300 | 0.011677 | 0.011304 | 0.017887 | 0.011388 | 0.011427 | 0.011623 |
| 0.011584 | 0.011628 | 0.011427 | 0.011351 | 0.011776 | 0.011652 | 0.011425 |
| 0.011535 | 0.011610 | 0.011217 | 0.011312 | 0.011295 | 0.011357 | 0.011276 |
| 0.011577 | 0.011470 | 0.011468 | 0.011259 | 0.011437 | 0.011471 | 0.011474 |
| 0.011340 | 0.011437 | 0.011437 | 0.011403 | 0.011369 | 0.011369 | 0.011334 |
| 0.011368 | 0.011300 | 0.011334 | 0.011368 | 0.011300 | 0.011266 | 0.011300 |
| 0.011300 | 0.011368 | 0.011266 | 0.011369 | 0.011403 | 0.011437 | 0.011334 |
| 0.011368 | 0.011334 | 0.011608 | 0.011608 | 0.011403 | 0.011369 | 0.011471 |
| 0.011231 | 0.011231 | 0.011266 | 0.011368 | 0.011231 | 0.011471 | 0.011471 |
| 0.011505 | 0.011505 | 0.011437 | 0.011540 | 0.011677 | 0.011541 | 0.011368 |
| 0.011368 | 0.011437 | 0.011471 | 0.011300 | 0.011368 | 0.011300 | 0.011300 |
| 0.011437 | 0.011437 | 0.011471 | 0.011437 | 0.011335 | 0.011540 | 0.011505 |
| 0.011371 | 0.011266 | 0.011368 | 0.011471 | 0.011334 | 0.011506 | 0.011540 |
| 0.011711 | 0.011408 | 0.011574 | 0.011540 | 0.011403 | 0.011642 | 0.011266 |
| 0.011369 | 0.011334 | 0.011300 | 0.011300 | 0.011368 | 0.011266 | 0.011369 |
| 0.011403 | 0.011437 | 0.011334 | 0.011368 | 0.011334 | 0.011608 | 0.011608 |
| 0.011403 | 0.011369 | 0.011505 | 0.011437 | 0.012089 | 0.011498 | 0.011419 |
| 0.011491 | 0.011450 | 0.011562 | 0.011449 | 0.011524 | 0.011483 | 0.011445 |
| 0.012042 | 0.011343 | 0.011480 | 0.011413 | 0.011692 | 0.011546 | 0.011650 |
| 0.012065 | 0.011483 | 0.011371 | 0.011368 | 0.011368 | 0.011403 | 0.011336 |

|          |          |          |          |          |          |          |
|----------|----------|----------|----------|----------|----------|----------|
| 0.011231 | 0.011266 | 0.011403 | 0.011368 | 0.011371 | 0.011505 | 0.011472 |
| 0.011334 | 0.011197 | 0.011300 | 0.011334 | 0.011231 | 0.011266 | 0.011197 |
| 0.011266 | 0.011300 | 0.011266 | 0.011231 | 0.011334 | 0.011266 | 0.011300 |
| 0.011231 | 0.011231 | 0.011300 | 0.011334 | 0.011231 | 0.011437 | 0.011471 |
| 0.011368 | 0.011368 | 0.011368 | 0.011368 | 0.011300 | 0.011677 | 0.011334 |
| 0.011380 | 0.011300 | 0.011540 | 0.011544 | 0.011403 | 0.011403 | 0.011403 |
| 0.011403 | 0.011334 | 0.011300 | 0.011334 | 0.011437 | 0.011437 | 0.011368 |
| 0.011368 | 0.011505 | 0.011642 | 0.011403 | 0.011574 | 0.011574 | 0.011403 |
| 0.011300 | 0.011368 | 0.011403 | 0.011780 | 0.011369 | 0.011403 | 0.011368 |
| 0.011403 | 0.011334 | 0.011334 | 0.011643 | 0.011574 | 0.011608 | 0.011334 |
| 0.011437 | 0.011505 | 0.011368 | 0.011437 | 0.011368 | 0.011266 | 0.011574 |
| 0.011368 | 0.011334 | 0.011334 | 0.011505 | 0.011334 | 0.011437 | 0.011677 |
| 0.011300 | 0.011719 | 0.011711 | 0.011548 | 0.011342 | 0.011437 | 0.011370 |
| 0.011225 | 0.011723 | 0.011273 | 0.011507 | 0.011353 | 0.011417 | 0.011485 |
| 0.011571 | 0.011324 | 0.011450 | 0.011325 | 0.011330 | 0.011529 | 0.011429 |
| 0.011440 | 0.011338 | 0.011416 | 0.011309 | 0.011370 | 0.011505 | 0.011574 |
| 0.011540 | 0.011437 | 0.011543 | 0.011544 | 0.011648 | 0.011673 | 0.011334 |
| 0.011608 | 0.011471 | 0.011334 | 0.011437 | 0.011231 | 0.011471 | 0.011266 |
| 0.011300 | 0.011334 | 0.011300 | 0.011266 | 0.011300 | 0.011266 | 0.011368 |
| 0.011341 | 0.011342 | 0.000000 | 0.011372 | 0.011509 | 0.011472 | 0.011405 |
| 0.011473 | 0.011403 | 0.011208 | 0.011168 | 0.011334 | 0.011506 | 0.011472 |
| 0.011300 | 0.011368 | 0.011608 | 0.011574 | 0.011505 | 0.011540 | 0.011471 |
| 0.011403 | 0.011471 | 0.011471 | 0.011368 | 0.011917 | 0.011505 | 0.011608 |
| 0.011642 | 0.011679 | 0.011339 | 0.011413 | 0.011300 | 0.011505 | 0.011471 |
| 0.011506 | 0.011471 | 0.011540 | 0.011540 | 0.011619 | 0.011677 | 0.011308 |
| 0.011198 | 0.011202 | 0.011303 | 0.011268 | 0.011339 | 0.011175 | 0.011511 |
| 0.011270 | 0.011417 | 0.011157 | 0.011288 | 0.011334 | 0.011406 | 0.011300 |
| 0.011266 | 0.011266 | 0.011266 | 0.011300 | 0.011505 | 0.011471 | 0.011403 |
| 0.011505 | 0.011574 | 0.011300 | 0.011300 | 0.011334 | 0.011334 | 0.011336 |
| 0.011405 | 0.011334 | 0.011334 | 0.011370 | 0.011505 | 0.011574 | 0.011540 |
| 0.011437 | 0.011543 | 0.011544 | 0.011648 | 0.011673 | 0.011334 | 0.011540 |
| 0.011471 | 0.011471 | 0.011301 | 0.011486 | 0.011378 | 0.011442 | 0.011310 |
| 0.011482 | 0.011621 | 0.011492 | 0.011372 | 0.011266 | 0.011471 | 0.011300 |
| 0.011437 | 0.011368 | 0.011266 | 0.011370 | 0.011471 | 0.011474 | 0.011368 |
| 0.011266 | 0.011198 | 0.011334 | 0.011266 | 0.011197 | 0.011233 | 0.011471 |
| 0.011368 | 0.011300 | 0.011334 | 0.011368 | 0.011300 | 0.011266 | 0.011471 |
| 0.011334 | 0.011368 | 0.011368 | 0.011300 | 0.011368 | 0.011574 | 0.011266 |
| 0.011300 | 0.011677 | 0.011300 | 0.011300 | 0.011300 | 0.011642 | 0.011275 |
| 0.011735 | 0.011273 | 0.011361 | 0.011503 | 0.011590 | 0.011495 | 0.011228 |
| 0.011323 | 0.011471 | 0.011505 | 0.011614 | 0.011472 | 0.011612 | 0.011746 |
| 0.011643 | 0.011681 | 0.011643 | 0.011966 | 0.011643 | 0.012535 | 0.011712 |
| 0.012398 | 0.012228 | 0.012366 | 0.012608 | 0.011677 | 0.011368 | 0.011608 |
| 0.012124 | 0.011989 | 0.011642 | 0.011540 | 0.011608 | 0.011608 | 0.011578 |
| 0.011471 | 0.011475 | 0.011540 | 0.011506 | 0.011883 | 0.011951 | 0.011917 |
| 0.011848 | 0.011951 | 0.011988 | 0.011818 | 0.012124 | 0.012130 | 0.012193 |
| 0.012192 | 0.012192 | 0.012164 | 0.012158 | 0.012160 | 0.011403 | 0.011677 |
| 0.011745 | 0.012295 | 0.011786 | 0.011986 | 0.012502 | 0.011545 | 0.011437 |
| 0.011403 | 0.011403 | 0.011883 | 0.011852 | 0.011975 | 0.011745 | 0.011404 |
| s654     | 0.011711 | 0.011711 | 0.011814 | 0.011780 | 0.011780 | 0.011848 |
| 0.011649 | 0.011545 | 0.011780 | 0.011300 | 0.011368 | 0.011334 | 0.011300 |
| 0.011334 | 0.011505 | 0.011300 | 0.011334 | 0.011403 | 0.011368 | 0.011334 |
| 0.011300 | 0.011334 | 0.011437 | 0.011300 | 0.011334 | 0.011334 | 0.011615 |
| 0.011574 | 0.011334 | 0.011231 | 0.011471 | 0.011368 | 0.011368 | 0.011403 |
| 0.011334 | 0.011471 | 0.011368 | 0.011368 | 0.011403 | 0.011368 | 0.011540 |
| 0.011300 | 0.011368 | 0.011403 | 0.011334 | 0.011437 | 0.011471 | 0.011368 |
| 0.011368 | 0.011540 | 0.011437 | 0.011677 | 0.011368 | 0.011642 | 0.011368 |
| 0.011334 | 0.011437 | 0.011505 | 0.011642 | 0.011677 | 0.011437 | 0.011540 |
| 0.011403 | 0.011471 | 0.011368 | 0.011608 | 0.011814 | 0.011368 | 0.011437 |
| 0.011334 | 0.011437 | 0.011403 | 0.011471 | 0.011197 | 0.011403 | 0.011403 |
| 0.011300 | 0.011334 | 0.011300 | 0.011403 | 0.011368 | 0.011403 | 0.011471 |



|          |          |          |          |          |          |          |
|----------|----------|----------|----------|----------|----------|----------|
| 0.011403 | 0.011334 | 0.011437 | 0.011197 | 0.011471 | 0.011300 | 0.011334 |
| 0.011540 | 0.011471 | 0.011711 | 0.011505 | 0.011368 | 0.011608 | 0.011368 |
| 0.011476 | 0.011670 | 0.011480 | 0.011179 | 0.011211 | 0.011360 | 0.011419 |
| 0.012097 | 0.011421 | 0.011227 | 0.011608 | 0.011608 | 0.011403 | 0.011471 |
| 0.011437 | 0.011403 | 0.011471 | 0.011368 | 0.011471 | 0.011403 | 0.011403 |
| 0.011368 | 0.011266 | 0.011677 | 0.011540 | 0.011437 | 0.011403 | 0.011334 |
| 0.011300 | 0.011300 | 0.011368 | 0.011334 | 0.011540 | 0.011505 | 0.011437 |
| 0.011540 | 0.011608 | 0.011334 | 0.011334 | 0.011368 | 0.011368 | 0.011370 |
| 0.011439 | 0.011368 | 0.011368 | 0.011204 | 0.011313 | 0.011271 | 0.011368 |
| 0.011368 | 0.011303 | 0.011321 | 0.011339 | 0.011266 | 0.011300 | 0.011334 |
| 0.011600 | 0.011302 | 0.011407 | 0.011300 | 0.011305 | 0.011437 | 0.011403 |
| 0.011471 | 0.011403 | 0.011403 | 0.011471 | 0.011437 | 0.011814 | 0.011574 |
| 0.011642 | 0.011505 | 0.011368 | 0.011471 | 0.011266 | 0.011505 | 0.011300 |
| 0.011334 | 0.011368 | 0.011334 | 0.011300 | 0.011334 | 0.011300 | 0.011403 |
| 0.011368 | 0.011471 | 0.011403 | 0.011300 | 0.011404 | 0.011505 | 0.011439 |
| 0.011505 | 0.011403 | 0.011300 | 0.011198 | 0.011368 | 0.011300 | 0.011232 |
| 0.011303 | 0.011505 | 0.011300 | 0.011505 | 0.011266 | 0.011368 | 0.011334 |
| 0.011437 | 0.011334 | 0.011368 | 0.011334 | 0.011368 | 0.011231 | 0.011368 |
| 0.011403 | 0.011334 | 0.011403 | 0.011334 | 0.011368 | 0.011403 | 0.011642 |
| 0.011711 | 0.011642 | 0.011711 | 0.011473 | 0.011711 | 0.011368 | 0.011334 |
| 0.011370 | 0.011637 | 0.011481 | 0.011235 | 0.011718 | 0.011234 | 0.011341 |
| 0.011684 | 0.011649 | 0.011505 | 0.011745 | 0.011408 | 0.011608 | 0.011574 |
| 0.011505 | 0.011677 | 0.011529 | 0.011352 | 0.011398 | 0.011403 | 0.011474 |
| 0.011574 | 0.011473 | 0.011578 | 0.011682 | 0.011608 | 0.011677 | 0.011786 |
| 0.011507 | 0.011682 | 0.011608 | 0.011540 | 0.011815 | 0.011266 | 0.011472 |
| 0.011437 | 0.011368 | 0.011266 | 0.011266 | 0.011334 | 0.011334 | 0.011403 |
| 0.011334 | 0.011403 | 0.011300 | 0.011403 | 0.011334 | 0.011334 | 0.011403 |
| 0.011334 | 0.011745 | 0.011642 | 0.011677 | 0.011231 | 0.011334 | 0.011368 |
| 0.011368 | 0.011334 | 0.011403 | 0.011437 | 0.011300 | 0.011300 | 0.011300 |
| 0.011814 | 0.011437 | 0.011471 | 0.011266 | 0.011368 | 0.011540 | 0.011300 |
| 0.011300 | 0.011334 | 0.011334 | 0.011505 | 0.011300 | 0.011437 | 0.011540 |
| 0.011505 | 0.011300 | 0.011334 | 0.011231 | 0.011266 | 0.011437 | 0.011368 |
| 0.011231 | 0.011334 | 0.011231 | 0.011266 | 0.011403 | 0.011540 | 0.011300 |
| 0.011266 | 0.011403 | 0.011334 | 0.011231 | 0.011540 | 0.011231 | 0.011403 |
| 0.011479 | 0.011300 | 0.011574 | 0.011437 | 0.011471 | 0.011334 | 0.011437 |
| 0.011300 | 0.011642 | 0.011231 | 0.011471 | 0.011300 | 0.011300 | 0.011231 |
| 0.011471 | 0.011677 | 0.011368 | 0.011437 | 0.011266 | 0.011642 | 0.011300 |
| 0.011300 | 0.011300 | 0.011334 | 0.011437 | 0.011334 | 0.011437 | 0.011505 |
| 0.011471 | 0.011471 | 0.011368 | 0.011471 | 0.011437 | 0.011300 | 0.011266 |
| 0.011300 | 0.011300 | 0.011368 | 0.011300 | 0.011266 | 0.011437 | 0.011300 |
| 0.011334 | 0.011334 | 0.011471 | 0.011505 | 0.011403 | 0.011334 | 0.011334 |
| 0.011266 | 0.011266 | 0.011437 | 0.011300 | 0.011437 | 0.011540 | 0.011745 |
| 0.011334 | 0.011711 | 0.011306 | 0.017961 | 0.011194 | 0.011306 | 0.011629 |
| 0.011589 | 0.011634 | 0.011326 | 0.011296 | 0.011675 | 0.011658 | 0.011308 |
| 0.011445 | 0.011489 | 0.011179 | 0.011272 | 0.011258 | 0.011261 | 0.011190 |
| 0.011441 | 0.011475 | 0.011473 | 0.011397 | 0.011471 | 0.011505 | 0.011509 |
| 0.011374 | 0.011437 | 0.011471 | 0.011437 | 0.011403 | 0.011403 | 0.011369 |
| 0.011403 | 0.011334 | 0.011368 | 0.011403 | 0.011368 | 0.011300 | 0.011334 |
| 0.011334 | 0.011403 | 0.011300 | 0.011403 | 0.011437 | 0.011471 | 0.011368 |
| 0.011403 | 0.011368 | 0.011642 | 0.011642 | 0.011437 | 0.011472 | 0.011505 |
| 0.011266 | 0.011266 | 0.011300 | 0.011403 | 0.011266 | 0.011505 | 0.011505 |
| 0.011540 | 0.011505 | 0.011471 | 0.011574 | 0.011711 | 0.011575 | 0.011403 |
| 0.011403 | 0.011437 | 0.011505 | 0.011334 | 0.011403 | 0.011368 | 0.011403 |
| 0.011471 | 0.011471 | 0.011505 | 0.011471 | 0.011369 | 0.011574 | 0.011540 |
| 0.011406 | 0.011266 | 0.011403 | 0.011471 | 0.011368 | 0.011540 | 0.011574 |
| 0.011745 | 0.011408 | 0.011608 | 0.011574 | 0.011505 | 0.011677 | 0.011300 |
| 0.011472 | 0.011369 | 0.011334 | 0.011334 | 0.011403 | 0.011300 | 0.011403 |
| 0.011437 | 0.011471 | 0.011368 | 0.011403 | 0.011368 | 0.011642 | 0.011642 |
| 0.011437 | 0.011472 | 0.011540 | 0.011471 | 0.012089 | 0.011530 | 0.011455 |
| 0.011522 | 0.011483 | 0.011593 | 0.011484 | 0.011557 | 0.011516 | 0.011476 |

|          |          |          |          |          |          |          |
|----------|----------|----------|----------|----------|----------|----------|
| 0.012040 | 0.011376 | 0.011513 | 0.011446 | 0.011722 | 0.011578 | 0.011684 |
| 0.012065 | 0.011556 | 0.011405 | 0.011403 | 0.011403 | 0.011437 | 0.011371 |
| 0.011266 | 0.011300 | 0.011437 | 0.011403 | 0.011405 | 0.011540 | 0.011472 |
| 0.011368 | 0.011300 | 0.011334 | 0.011368 | 0.011266 | 0.011334 | 0.011231 |
| 0.011368 | 0.011403 | 0.011300 | 0.011266 | 0.011368 | 0.011300 | 0.011334 |
| 0.011334 | 0.011266 | 0.011334 | 0.011368 | 0.011266 | 0.011471 | 0.011505 |
| 0.011403 | 0.011471 | 0.011403 | 0.011403 | 0.011334 | 0.011677 | 0.011368 |
| 0.011413 | 0.011334 | 0.011574 | 0.011579 | 0.011437 | 0.011437 | 0.011437 |
| 0.011437 | 0.011368 | 0.011334 | 0.011368 | 0.011471 | 0.011471 | 0.011403 |
| 0.011403 | 0.011505 | 0.011677 | 0.011437 | 0.011642 | 0.011642 | 0.011505 |
| 0.011334 | 0.011403 | 0.011437 | 0.011814 | 0.011403 | 0.011437 | 0.011403 |
| 0.011437 | 0.011368 | 0.011368 | 0.011677 | 0.011574 | 0.011642 | 0.011368 |
| 0.011471 | 0.011540 | 0.011403 | 0.011471 | 0.011403 | 0.011300 | 0.011608 |
| 0.011403 | 0.011368 | 0.011368 | 0.011540 | 0.011368 | 0.011471 | 0.011711 |
| 0.011334 | 0.011719 | 0.011745 | 0.011472 | 0.011173 | 0.011476 | 0.011217 |
| 0.011170 | 0.011730 | 0.011275 | 0.011468 | 0.011209 | 0.011319 | 0.011330 |
| 0.011474 | 0.011128 | 0.011287 | 0.011128 | 0.011170 | 0.011334 | 0.011392 |
| 0.011406 | 0.011301 | 0.011419 | 0.011311 | 0.011404 | 0.011540 | 0.011608 |
| 0.011574 | 0.011471 | 0.011577 | 0.011579 | 0.011683 | 0.011745 | 0.011368 |
| 0.011642 | 0.011505 | 0.011368 | 0.011471 | 0.011266 | 0.011505 | 0.011300 |
| 0.011334 | 0.011368 | 0.011334 | 0.011300 | 0.011334 | 0.011300 | 0.011403 |
| 0.011377 | 0.011375 | 0.011372 | 0.000000 | 0.011540 | 0.011509 | 0.011507 |
| 0.011506 | 0.011231 | 0.011208 | 0.011204 | 0.011368 | 0.011540 | 0.011506 |
| 0.011334 | 0.011403 | 0.011642 | 0.011610 | 0.011540 | 0.011574 | 0.011505 |
| 0.011437 | 0.011505 | 0.011505 | 0.011403 | 0.011951 | 0.011540 | 0.011643 |
| 0.011677 | 0.011715 | 0.011373 | 0.011447 | 0.011334 | 0.011540 | 0.011505 |
| 0.011335 | 0.011540 | 0.011574 | 0.011574 | 0.011740 | 0.011711 | 0.011343 |
| 0.011233 | 0.011236 | 0.011338 | 0.011302 | 0.011372 | 0.011249 | 0.011544 |
| 0.011374 | 0.011501 | 0.011252 | 0.011361 | 0.011368 | 0.011437 | 0.011334 |
| 0.011300 | 0.011300 | 0.011368 | 0.011334 | 0.011540 | 0.011505 | 0.011437 |
| 0.011540 | 0.011608 | 0.011334 | 0.011334 | 0.011368 | 0.011368 | 0.011370 |
| 0.011439 | 0.011368 | 0.011368 | 0.011404 | 0.011540 | 0.011608 | 0.011574 |
| 0.011471 | 0.011577 | 0.011579 | 0.011683 | 0.011745 | 0.011368 | 0.011574 |
| 0.011505 | 0.011505 | 0.011336 | 0.011521 | 0.011449 | 0.011269 | 0.011310 |
| 0.011482 | 0.011667 | 0.011491 | 0.011407 | 0.011300 | 0.011505 | 0.011368 |
| 0.011471 | 0.011403 | 0.011300 | 0.011404 | 0.011505 | 0.011439 | 0.011403 |
| 0.011300 | 0.011198 | 0.011368 | 0.011300 | 0.011232 | 0.011303 | 0.011505 |
| 0.011403 | 0.011334 | 0.011368 | 0.011403 | 0.011368 | 0.011300 | 0.011505 |
| 0.011368 | 0.011403 | 0.011403 | 0.011334 | 0.011403 | 0.011608 | 0.011300 |
| 0.011334 | 0.011677 | 0.011334 | 0.011334 | 0.011334 | 0.011677 | 0.011191 |
| 0.011679 | 0.011188 | 0.011213 | 0.011504 | 0.011514 | 0.011499 | 0.011103 |
| 0.011167 | 0.011505 | 0.011608 | 0.011717 | 0.011575 | 0.011681 | 0.011849 |
| 0.011745 | 0.011783 | 0.011745 | 0.011965 | 0.011677 | 0.012603 | 0.011746 |
| 0.012398 | 0.012228 | 0.012366 | 0.012608 | 0.011711 | 0.011403 | 0.011711 |
| 0.012123 | 0.012057 | 0.011677 | 0.011574 | 0.011642 | 0.011642 | 0.011612 |
| 0.011505 | 0.011475 | 0.011574 | 0.011540 | 0.011917 | 0.011985 | 0.011985 |
| 0.011884 | 0.011986 | 0.011987 | 0.011818 | 0.012124 | 0.012130 | 0.012192 |
| 0.012192 | 0.012226 | 0.012138 | 0.012192 | 0.012194 | 0.011437 | 0.011745 |
| 0.011780 | 0.012260 | 0.011820 | 0.012054 | 0.012536 | 0.011579 | 0.011471 |
| 0.011437 | 0.011437 | 0.011917 | 0.011966 | 0.012021 | 0.011780 | 0.011438 |
| s655     | 0.011847 | 0.011847 | 0.011950 | 0.011916 | 0.011916 | 0.011984 |
| 0.011787 | 0.011683 | 0.011916 | 0.011437 | 0.011505 | 0.011471 | 0.011437 |
| 0.011471 | 0.011642 | 0.011436 | 0.011471 | 0.011539 | 0.011505 | 0.011471 |
| 0.011437 | 0.011471 | 0.011573 | 0.011437 | 0.011471 | 0.011471 | 0.011752 |
| 0.011710 | 0.011471 | 0.011368 | 0.011608 | 0.011505 | 0.011505 | 0.011539 |
| 0.011471 | 0.011608 | 0.011505 | 0.011505 | 0.011539 | 0.011505 | 0.011676 |
| 0.011437 | 0.011505 | 0.011539 | 0.011471 | 0.011573 | 0.011608 | 0.011505 |
| 0.011505 | 0.011676 | 0.011574 | 0.011813 | 0.011505 | 0.011779 | 0.011505 |
| 0.011471 | 0.011574 | 0.011642 | 0.011779 | 0.011813 | 0.011573 | 0.011676 |
| 0.011539 | 0.011608 | 0.011505 | 0.011744 | 0.011950 | 0.011505 | 0.011573 |

|          |          |          |          |          |          |          |
|----------|----------|----------|----------|----------|----------|----------|
| 0.011471 | 0.011573 | 0.011539 | 0.011608 | 0.011539 | 0.011539 | 0.011539 |
| 0.011436 | 0.011471 | 0.011436 | 0.011539 | 0.011505 | 0.011540 | 0.011608 |
| 0.011539 | 0.011471 | 0.011573 | 0.011471 | 0.011608 | 0.011437 | 0.011471 |
| 0.011676 | 0.011608 | 0.011847 | 0.011642 | 0.011505 | 0.011745 | 0.011505 |
| 0.011664 | 0.011859 | 0.011670 | 0.011415 | 0.011437 | 0.011548 | 0.011617 |
| 0.012280 | 0.011730 | 0.011435 | 0.011744 | 0.011745 | 0.011539 | 0.011608 |
| 0.011573 | 0.011539 | 0.011608 | 0.011505 | 0.011608 | 0.011539 | 0.011539 |
| 0.011505 | 0.011607 | 0.011813 | 0.011676 | 0.011573 | 0.011539 | 0.011471 |
| 0.011437 | 0.011436 | 0.011505 | 0.011471 | 0.011676 | 0.011642 | 0.011573 |
| 0.011676 | 0.011744 | 0.011471 | 0.011471 | 0.011505 | 0.011505 | 0.011508 |
| 0.011577 | 0.011505 | 0.011505 | 0.011384 | 0.011458 | 0.011411 | 0.011505 |
| 0.011505 | 0.011442 | 0.011508 | 0.011478 | 0.011403 | 0.011437 | 0.011471 |
| 0.011744 | 0.011509 | 0.011546 | 0.011437 | 0.011444 | 0.011573 | 0.011539 |
| 0.011608 | 0.011539 | 0.011539 | 0.011607 | 0.011573 | 0.011950 | 0.011711 |
| 0.011779 | 0.011642 | 0.011505 | 0.011608 | 0.011402 | 0.011642 | 0.011437 |
| 0.011471 | 0.011505 | 0.011471 | 0.011436 | 0.011471 | 0.011436 | 0.011539 |
| 0.011505 | 0.011608 | 0.011539 | 0.011436 | 0.011541 | 0.011642 | 0.011646 |
| 0.011642 | 0.011539 | 0.011436 | 0.011369 | 0.011505 | 0.011437 | 0.011368 |
| 0.011475 | 0.011642 | 0.011437 | 0.011642 | 0.011402 | 0.011505 | 0.011471 |
| 0.011573 | 0.011471 | 0.011505 | 0.011471 | 0.011505 | 0.011368 | 0.011505 |
| 0.011539 | 0.011471 | 0.011539 | 0.011471 | 0.011505 | 0.011539 | 0.011779 |
| 0.011847 | 0.011779 | 0.011847 | 0.011575 | 0.011847 | 0.011505 | 0.011471 |
| 0.011507 | 0.011802 | 0.011622 | 0.011410 | 0.011856 | 0.011373 | 0.011460 |
| 0.011822 | 0.011787 | 0.011642 | 0.011882 | 0.011547 | 0.011745 | 0.011711 |
| 0.011642 | 0.011813 | 0.011673 | 0.011561 | 0.011609 | 0.011539 | 0.011612 |
| 0.011710 | 0.011610 | 0.011715 | 0.011819 | 0.011745 | 0.011813 | 0.011889 |
| 0.011644 | 0.011821 | 0.011745 | 0.011676 | 0.011882 | 0.011402 | 0.011609 |
| 0.011573 | 0.011505 | 0.011402 | 0.011402 | 0.011471 | 0.011471 | 0.011539 |
| 0.011471 | 0.011539 | 0.011436 | 0.011539 | 0.011471 | 0.011471 | 0.011539 |
| 0.011471 | 0.011881 | 0.011779 | 0.011813 | 0.011368 | 0.011471 | 0.011505 |
| 0.011505 | 0.011471 | 0.011539 | 0.011573 | 0.011436 | 0.011436 | 0.011436 |
| 0.011950 | 0.011573 | 0.011608 | 0.011334 | 0.011505 | 0.011676 | 0.011437 |
| 0.011436 | 0.011471 | 0.011471 | 0.011642 | 0.011437 | 0.011573 | 0.011676 |
| 0.011642 | 0.011436 | 0.011471 | 0.011368 | 0.011402 | 0.011574 | 0.011505 |
| 0.011368 | 0.011471 | 0.011368 | 0.011402 | 0.011539 | 0.011676 | 0.011437 |
| 0.011403 | 0.011539 | 0.011471 | 0.011368 | 0.011676 | 0.011368 | 0.011539 |
| 0.011618 | 0.011437 | 0.011710 | 0.011574 | 0.011608 | 0.011471 | 0.011573 |
| 0.011436 | 0.011779 | 0.011368 | 0.011608 | 0.011436 | 0.011436 | 0.011368 |
| 0.011608 | 0.011813 | 0.011505 | 0.011573 | 0.011402 | 0.011779 | 0.011436 |
| 0.011437 | 0.011436 | 0.011471 | 0.011573 | 0.011471 | 0.011573 | 0.011642 |
| 0.011608 | 0.011608 | 0.011505 | 0.011608 | 0.011573 | 0.011436 | 0.011402 |
| 0.011436 | 0.011436 | 0.011505 | 0.011437 | 0.011402 | 0.011573 | 0.011437 |
| 0.011471 | 0.011471 | 0.011608 | 0.011642 | 0.011539 | 0.011471 | 0.011471 |
| 0.011539 | 0.011402 | 0.011573 | 0.011437 | 0.011573 | 0.011676 | 0.011882 |
| 0.011471 | 0.011847 | 0.011481 | 0.018141 | 0.011460 | 0.011672 | 0.011806 |
| 0.011764 | 0.011812 | 0.011591 | 0.011473 | 0.012008 | 0.011833 | 0.011678 |
| 0.011685 | 0.011854 | 0.011376 | 0.011441 | 0.011494 | 0.011561 | 0.011493 |
| 0.011726 | 0.011662 | 0.011660 | 0.011397 | 0.011608 | 0.011642 | 0.011646 |
| 0.011514 | 0.011573 | 0.011608 | 0.011573 | 0.011539 | 0.011540 | 0.011505 |
| 0.011539 | 0.011471 | 0.011505 | 0.011539 | 0.011505 | 0.011437 | 0.011471 |
| 0.011471 | 0.011539 | 0.011437 | 0.011539 | 0.011573 | 0.011608 | 0.011505 |
| 0.011539 | 0.011505 | 0.011779 | 0.011779 | 0.011574 | 0.011609 | 0.011642 |
| 0.011402 | 0.011402 | 0.011437 | 0.011539 | 0.011402 | 0.011642 | 0.011642 |
| 0.011676 | 0.011642 | 0.011608 | 0.011710 | 0.011847 | 0.011712 | 0.011539 |
| 0.011539 | 0.011608 | 0.011642 | 0.011471 | 0.011539 | 0.011505 | 0.011539 |
| 0.011608 | 0.011608 | 0.011642 | 0.011608 | 0.011506 | 0.011710 | 0.011676 |
| 0.011544 | 0.011437 | 0.011539 | 0.011608 | 0.011505 | 0.011676 | 0.011710 |
| 0.011882 | 0.011547 | 0.011745 | 0.011711 | 0.011642 | 0.011813 | 0.011437 |
| 0.011609 | 0.011505 | 0.011471 | 0.011471 | 0.011539 | 0.011437 | 0.011539 |
| 0.011573 | 0.011608 | 0.011505 | 0.011539 | 0.011505 | 0.011779 | 0.011779 |

|          |          |          |          |          |          |          |
|----------|----------|----------|----------|----------|----------|----------|
| 0.011574 | 0.011609 | 0.011676 | 0.011608 | 0.012225 | 0.011675 | 0.011598 |
| 0.011665 | 0.011624 | 0.011736 | 0.011625 | 0.011699 | 0.011655 | 0.011615 |
| 0.012180 | 0.011516 | 0.011651 | 0.011586 | 0.011861 | 0.011715 | 0.011823 |
| 0.012203 | 0.011708 | 0.011543 | 0.011539 | 0.011539 | 0.011573 | 0.011508 |
| 0.011402 | 0.011437 | 0.011573 | 0.011539 | 0.011542 | 0.011676 | 0.011643 |
| 0.011505 | 0.011437 | 0.011471 | 0.011505 | 0.011402 | 0.011471 | 0.011368 |
| 0.011505 | 0.011539 | 0.011436 | 0.011402 | 0.011505 | 0.011436 | 0.011471 |
| 0.011471 | 0.011402 | 0.011471 | 0.011505 | 0.011402 | 0.011608 | 0.011642 |
| 0.011539 | 0.011608 | 0.011539 | 0.011539 | 0.011471 | 0.011813 | 0.011505 |
| 0.011554 | 0.011471 | 0.011710 | 0.011717 | 0.011574 | 0.011573 | 0.011573 |
| 0.011574 | 0.011505 | 0.011471 | 0.011505 | 0.011608 | 0.011608 | 0.011539 |
| 0.011539 | 0.011642 | 0.011813 | 0.011573 | 0.011745 | 0.011745 | 0.011642 |
| 0.011471 | 0.011539 | 0.011574 | 0.011950 | 0.011540 | 0.011574 | 0.011539 |
| 0.011573 | 0.011505 | 0.011505 | 0.011813 | 0.011711 | 0.011779 | 0.011505 |
| 0.011608 | 0.011676 | 0.011539 | 0.011608 | 0.011539 | 0.011437 | 0.011744 |
| 0.011539 | 0.011505 | 0.011505 | 0.011676 | 0.011505 | 0.011608 | 0.011847 |
| 0.011471 | 0.011856 | 0.011882 | 0.011718 | 0.011455 | 0.011613 | 0.011479 |
| 0.011445 | 0.011926 | 0.011453 | 0.011603 | 0.011505 | 0.011525 | 0.011545 |
| 0.011784 | 0.011395 | 0.011512 | 0.011396 | 0.011388 | 0.011606 | 0.011598 |
| 0.011597 | 0.011501 | 0.011598 | 0.011490 | 0.011541 | 0.011676 | 0.011745 |
| 0.011710 | 0.011608 | 0.011715 | 0.011717 | 0.011820 | 0.011889 | 0.011505 |
| 0.011779 | 0.011642 | 0.011505 | 0.011608 | 0.011402 | 0.011642 | 0.011437 |
| 0.011471 | 0.011505 | 0.011471 | 0.011436 | 0.011471 | 0.011436 | 0.011539 |
| 0.011518 | 0.011515 | 0.011509 | 0.011540 | 0.000000 | 0.011646 | 0.011645 |
| 0.011644 | 0.011573 | 0.011356 | 0.011384 | 0.011505 | 0.011608 | 0.011643 |
| 0.011471 | 0.011539 | 0.011779 | 0.011746 | 0.011676 | 0.011710 | 0.011642 |
| 0.011573 | 0.011608 | 0.011642 | 0.011539 | 0.012087 | 0.011676 | 0.011779 |
| 0.011813 | 0.011860 | 0.011512 | 0.011588 | 0.011471 | 0.011676 | 0.011642 |
| 0.011677 | 0.011676 | 0.011710 | 0.011710 | 0.011819 | 0.011847 | 0.011484 |
| 0.011370 | 0.011377 | 0.011476 | 0.011441 | 0.011510 | 0.011400 | 0.011683 |
| 0.011514 | 0.011722 | 0.011491 | 0.011511 | 0.011505 | 0.011574 | 0.011471 |
| 0.011437 | 0.011436 | 0.011505 | 0.011471 | 0.011676 | 0.011642 | 0.011573 |
| 0.011676 | 0.011744 | 0.011471 | 0.011471 | 0.011505 | 0.011505 | 0.011508 |
| 0.011577 | 0.011505 | 0.011505 | 0.011541 | 0.011676 | 0.011745 | 0.011710 |
| 0.011608 | 0.011715 | 0.011717 | 0.011820 | 0.011889 | 0.011505 | 0.011710 |
| 0.011642 | 0.011642 | 0.011473 | 0.011663 | 0.011590 | 0.011615 | 0.011488 |
| 0.011657 | 0.011807 | 0.011706 | 0.011510 | 0.011437 | 0.011642 | 0.011505 |
| 0.011608 | 0.011539 | 0.011436 | 0.011541 | 0.011642 | 0.011646 | 0.011539 |
| 0.011436 | 0.011369 | 0.011505 | 0.011437 | 0.011368 | 0.011475 | 0.011642 |
| 0.011539 | 0.011471 | 0.011505 | 0.011539 | 0.011505 | 0.011437 | 0.011642 |
| 0.011505 | 0.011539 | 0.011539 | 0.011471 | 0.011539 | 0.011676 | 0.011437 |
| 0.011471 | 0.011813 | 0.011471 | 0.011471 | 0.011471 | 0.011813 | 0.011450 |
| 0.011960 | 0.011400 | 0.011467 | 0.011705 | 0.011760 | 0.011681 | 0.011398 |
| 0.011379 | 0.011642 | 0.011745 | 0.011855 | 0.011711 | 0.011853 | 0.011985 |
| 0.011882 | 0.011921 | 0.011882 | 0.012139 | 0.011813 | 0.012739 | 0.011883 |
| 0.012534 | 0.012399 | 0.012502 | 0.012744 | 0.011847 | 0.011539 | 0.011847 |
| 0.012260 | 0.012229 | 0.011813 | 0.011711 | 0.011779 | 0.011779 | 0.011750 |
| 0.011642 | 0.011648 | 0.011710 | 0.011676 | 0.012053 | 0.012122 | 0.012121 |
| 0.012020 | 0.012122 | 0.012158 | 0.011990 | 0.012260 | 0.012267 | 0.012329 |
| 0.012329 | 0.012294 | 0.012312 | 0.012260 | 0.012262 | 0.011573 | 0.011882 |
| 0.011916 | 0.012396 | 0.011958 | 0.012156 | 0.012672 | 0.011717 | 0.011608 |
| 0.011573 | 0.011573 | 0.012053 | 0.012131 | 0.012162 | 0.011916 | 0.011575 |
| s656     | 0.011812 | 0.011812 | 0.011915 | 0.011880 | 0.011880 | 0.011949 |
| 0.011752 | 0.011648 | 0.011880 | 0.011402 | 0.011470 | 0.011436 | 0.011402 |
| 0.011436 | 0.011607 | 0.011402 | 0.011436 | 0.011504 | 0.011470 | 0.011436 |
| 0.011402 | 0.011436 | 0.011538 | 0.011402 | 0.011300 | 0.011436 | 0.011717 |
| 0.011675 | 0.011436 | 0.011333 | 0.011573 | 0.011436 | 0.011470 | 0.011436 |
| 0.011470 | 0.011504 | 0.011470 | 0.011470 | 0.011504 | 0.011470 | 0.011641 |
| 0.011402 | 0.011470 | 0.011504 | 0.011436 | 0.011538 | 0.011573 | 0.011504 |
| 0.011470 | 0.011641 | 0.011539 | 0.011778 | 0.011470 | 0.011675 | 0.011470 |

|          |          |          |          |          |          |          |
|----------|----------|----------|----------|----------|----------|----------|
| 0.011436 | 0.011539 | 0.011607 | 0.011675 | 0.011812 | 0.011538 | 0.011641 |
| 0.011436 | 0.011504 | 0.011470 | 0.011641 | 0.011915 | 0.011470 | 0.011538 |
| 0.011436 | 0.011538 | 0.011504 | 0.011573 | 0.011504 | 0.011504 | 0.011504 |
| 0.011402 | 0.011436 | 0.011402 | 0.011470 | 0.011470 | 0.011505 | 0.011573 |
| 0.011504 | 0.011470 | 0.011470 | 0.011436 | 0.011573 | 0.011333 | 0.011436 |
| 0.011641 | 0.011573 | 0.011812 | 0.011573 | 0.011470 | 0.011641 | 0.011470 |
| 0.011622 | 0.011815 | 0.011627 | 0.011373 | 0.011359 | 0.011506 | 0.011534 |
| 0.012124 | 0.011519 | 0.011308 | 0.011709 | 0.011709 | 0.011504 | 0.011573 |
| 0.011538 | 0.011504 | 0.011573 | 0.011470 | 0.011573 | 0.011436 | 0.011470 |
| 0.011436 | 0.011573 | 0.011778 | 0.011641 | 0.011538 | 0.011504 | 0.011368 |
| 0.011402 | 0.011402 | 0.011402 | 0.011436 | 0.011641 | 0.011607 | 0.011538 |
| 0.011641 | 0.011709 | 0.011436 | 0.011436 | 0.011470 | 0.011470 | 0.011473 |
| 0.011542 | 0.011470 | 0.011470 | 0.011312 | 0.011386 | 0.011378 | 0.011470 |
| 0.011470 | 0.011405 | 0.011430 | 0.011440 | 0.011371 | 0.011405 | 0.011437 |
| 0.011709 | 0.011477 | 0.011406 | 0.011402 | 0.011407 | 0.011538 | 0.011504 |
| 0.011573 | 0.011504 | 0.011504 | 0.011607 | 0.011538 | 0.011846 | 0.011675 |
| 0.011743 | 0.011607 | 0.011470 | 0.011573 | 0.011368 | 0.011607 | 0.011402 |
| 0.011436 | 0.011470 | 0.011436 | 0.011402 | 0.011436 | 0.011402 | 0.011504 |
| 0.011368 | 0.011504 | 0.011504 | 0.011402 | 0.011506 | 0.011607 | 0.011610 |
| 0.011538 | 0.011504 | 0.011402 | 0.011335 | 0.011470 | 0.011402 | 0.011334 |
| 0.011440 | 0.011539 | 0.011333 | 0.011539 | 0.011368 | 0.011470 | 0.011436 |
| 0.011470 | 0.011436 | 0.011402 | 0.011436 | 0.011470 | 0.011333 | 0.011402 |
| 0.011436 | 0.011436 | 0.011504 | 0.011436 | 0.011470 | 0.011504 | 0.011744 |
| 0.011812 | 0.011743 | 0.011812 | 0.011609 | 0.011812 | 0.011470 | 0.011436 |
| 0.011472 | 0.011719 | 0.011434 | 0.011339 | 0.011785 | 0.011337 | 0.011419 |
| 0.011786 | 0.011751 | 0.011641 | 0.011846 | 0.011547 | 0.011709 | 0.011607 |
| 0.011607 | 0.011778 | 0.011639 | 0.011522 | 0.011527 | 0.011504 | 0.011577 |
| 0.011675 | 0.011575 | 0.011680 | 0.011714 | 0.011709 | 0.011778 | 0.011888 |
| 0.011611 | 0.011716 | 0.011714 | 0.011645 | 0.011916 | 0.011368 | 0.011574 |
| 0.011470 | 0.011470 | 0.011368 | 0.011368 | 0.011368 | 0.011436 | 0.011504 |
| 0.011368 | 0.011436 | 0.011333 | 0.011504 | 0.011368 | 0.011436 | 0.011504 |
| 0.011436 | 0.011846 | 0.011744 | 0.011778 | 0.011333 | 0.011436 | 0.011470 |
| 0.011470 | 0.011436 | 0.011504 | 0.011538 | 0.011402 | 0.011402 | 0.011402 |
| 0.011914 | 0.011538 | 0.011573 | 0.011368 | 0.011470 | 0.011573 | 0.011402 |
| 0.011368 | 0.011436 | 0.011436 | 0.011538 | 0.011402 | 0.011538 | 0.011607 |
| 0.011607 | 0.011436 | 0.011436 | 0.011368 | 0.011368 | 0.011539 | 0.011470 |
| 0.011368 | 0.011470 | 0.011333 | 0.011368 | 0.011504 | 0.011641 | 0.011402 |
| 0.011368 | 0.011504 | 0.011436 | 0.011333 | 0.011641 | 0.011333 | 0.011504 |
| 0.011513 | 0.011402 | 0.011675 | 0.011539 | 0.011573 | 0.011436 | 0.011538 |
| 0.011402 | 0.011675 | 0.011333 | 0.011573 | 0.011402 | 0.011402 | 0.011333 |
| 0.011504 | 0.011778 | 0.011470 | 0.011538 | 0.011368 | 0.011744 | 0.011402 |
| 0.011402 | 0.011402 | 0.011436 | 0.011470 | 0.011436 | 0.011538 | 0.011607 |
| 0.011573 | 0.011573 | 0.011470 | 0.011573 | 0.011470 | 0.011402 | 0.011368 |
| 0.011402 | 0.011402 | 0.011470 | 0.011402 | 0.011299 | 0.011538 | 0.011402 |
| 0.011436 | 0.011436 | 0.011573 | 0.011607 | 0.011504 | 0.011368 | 0.011436 |
| 0.011504 | 0.011368 | 0.011538 | 0.011402 | 0.011538 | 0.011641 | 0.011846 |
| 0.011436 | 0.011812 | 0.011444 | 0.017971 | 0.011191 | 0.011673 | 0.011766 |
| 0.011725 | 0.011771 | 0.011480 | 0.011409 | 0.011776 | 0.011793 | 0.011487 |
| 0.011583 | 0.011733 | 0.011334 | 0.011354 | 0.011373 | 0.011506 | 0.011448 |
| 0.011530 | 0.011583 | 0.011543 | 0.011259 | 0.011573 | 0.011607 | 0.011611 |
| 0.011410 | 0.011573 | 0.011573 | 0.011538 | 0.011504 | 0.011505 | 0.011470 |
| 0.011504 | 0.011436 | 0.011470 | 0.011504 | 0.011470 | 0.011402 | 0.011436 |
| 0.011436 | 0.011504 | 0.011402 | 0.011504 | 0.011538 | 0.011573 | 0.011470 |
| 0.011504 | 0.011470 | 0.011744 | 0.011744 | 0.011539 | 0.011574 | 0.011607 |
| 0.011368 | 0.011368 | 0.011402 | 0.011436 | 0.011368 | 0.011607 | 0.011607 |
| 0.011641 | 0.011641 | 0.011573 | 0.011675 | 0.011812 | 0.011677 | 0.011436 |
| 0.011504 | 0.011573 | 0.011538 | 0.011436 | 0.011504 | 0.011436 | 0.011504 |
| 0.011573 | 0.011573 | 0.011607 | 0.011504 | 0.011403 | 0.011675 | 0.011573 |
| 0.011508 | 0.011402 | 0.011504 | 0.011607 | 0.011470 | 0.011641 | 0.011675 |
| 0.011846 | 0.011547 | 0.011709 | 0.011607 | 0.011607 | 0.011778 | 0.011402 |

|          |          |          |          |          |          |          |
|----------|----------|----------|----------|----------|----------|----------|
| 0.011574 | 0.011470 | 0.011436 | 0.011436 | 0.011504 | 0.011402 | 0.011504 |
| 0.011538 | 0.011573 | 0.011470 | 0.011504 | 0.011470 | 0.011744 | 0.011744 |
| 0.011539 | 0.011574 | 0.011641 | 0.011573 | 0.012223 | 0.011642 | 0.011562 |
| 0.011632 | 0.011590 | 0.011704 | 0.011589 | 0.011666 | 0.011622 | 0.011583 |
| 0.012179 | 0.011483 | 0.011618 | 0.011553 | 0.011831 | 0.011683 | 0.011718 |
| 0.012201 | 0.011674 | 0.011508 | 0.011504 | 0.011504 | 0.011538 | 0.011473 |
| 0.011368 | 0.011333 | 0.011538 | 0.011504 | 0.011507 | 0.011641 | 0.011608 |
| 0.011470 | 0.011333 | 0.011368 | 0.011470 | 0.011299 | 0.011436 | 0.011333 |
| 0.011470 | 0.011504 | 0.011402 | 0.011368 | 0.011470 | 0.011402 | 0.011436 |
| 0.011436 | 0.011368 | 0.011436 | 0.011470 | 0.011368 | 0.011504 | 0.011607 |
| 0.011504 | 0.011573 | 0.011504 | 0.011504 | 0.011436 | 0.011812 | 0.011470 |
| 0.011521 | 0.011436 | 0.011675 | 0.011681 | 0.011470 | 0.011538 | 0.011538 |
| 0.011539 | 0.011402 | 0.011436 | 0.011402 | 0.011573 | 0.011573 | 0.011504 |
| 0.011504 | 0.011641 | 0.011778 | 0.011538 | 0.011709 | 0.011709 | 0.011607 |
| 0.011436 | 0.011504 | 0.011539 | 0.011915 | 0.011505 | 0.011470 | 0.011504 |
| 0.011538 | 0.011470 | 0.011470 | 0.011778 | 0.011641 | 0.011744 | 0.011470 |
| 0.011573 | 0.011641 | 0.011504 | 0.011573 | 0.011504 | 0.011402 | 0.011709 |
| 0.011504 | 0.011470 | 0.011470 | 0.011641 | 0.011470 | 0.011573 | 0.011812 |
| 0.011436 | 0.011821 | 0.011846 | 0.011630 | 0.011286 | 0.011576 | 0.011319 |
| 0.011445 | 0.011841 | 0.011379 | 0.011463 | 0.011256 | 0.011468 | 0.011379 |
| 0.011520 | 0.011192 | 0.011339 | 0.011126 | 0.011222 | 0.011329 | 0.011429 |
| 0.011517 | 0.011299 | 0.011559 | 0.011452 | 0.011506 | 0.011641 | 0.011709 |
| 0.011675 | 0.011573 | 0.011679 | 0.011681 | 0.011784 | 0.011852 | 0.011470 |
| 0.011743 | 0.011607 | 0.011470 | 0.011573 | 0.011368 | 0.011607 | 0.011402 |
| 0.011436 | 0.011470 | 0.011436 | 0.011402 | 0.011436 | 0.011402 | 0.011504 |
| 0.011480 | 0.011481 | 0.011472 | 0.011509 | 0.011646 | 0.000000 | 0.011610 |
| 0.011609 | 0.011538 | 0.011134 | 0.011312 | 0.011470 | 0.011641 | 0.011642 |
| 0.011436 | 0.011504 | 0.011744 | 0.011710 | 0.011641 | 0.011675 | 0.011607 |
| 0.011538 | 0.011607 | 0.011607 | 0.011504 | 0.012052 | 0.011641 | 0.011744 |
| 0.011778 | 0.011749 | 0.011477 | 0.011553 | 0.011436 | 0.011641 | 0.011607 |
| 0.011642 | 0.011607 | 0.011675 | 0.011675 | 0.011737 | 0.011812 | 0.011448 |
| 0.011335 | 0.011342 | 0.011441 | 0.011406 | 0.011477 | 0.011326 | 0.011648 |
| 0.011478 | 0.011549 | 0.011302 | 0.011401 | 0.011470 | 0.011543 | 0.011368 |
| 0.011402 | 0.011402 | 0.011402 | 0.011436 | 0.011641 | 0.011607 | 0.011538 |
| 0.011641 | 0.011709 | 0.011436 | 0.011436 | 0.011470 | 0.011470 | 0.011473 |
| 0.011542 | 0.011470 | 0.011470 | 0.011506 | 0.011641 | 0.011709 | 0.011675 |
| 0.011573 | 0.011679 | 0.011681 | 0.011784 | 0.011852 | 0.011470 | 0.011675 |
| 0.011607 | 0.011607 | 0.011438 | 0.011626 | 0.011554 | 0.011580 | 0.011416 |
| 0.011551 | 0.011759 | 0.011619 | 0.011510 | 0.011333 | 0.011539 | 0.011368 |
| 0.011504 | 0.011504 | 0.011402 | 0.011506 | 0.011607 | 0.011610 | 0.011504 |
| 0.011402 | 0.011335 | 0.011470 | 0.011402 | 0.011334 | 0.011440 | 0.011539 |
| 0.011504 | 0.011436 | 0.011470 | 0.011504 | 0.011470 | 0.011402 | 0.011607 |
| 0.011470 | 0.011504 | 0.011504 | 0.011436 | 0.011504 | 0.011709 | 0.011402 |
| 0.011436 | 0.011812 | 0.011436 | 0.011368 | 0.011436 | 0.011778 | 0.011318 |
| 0.011679 | 0.011358 | 0.011311 | 0.011624 | 0.011672 | 0.011604 | 0.011312 |
| 0.011271 | 0.011607 | 0.011709 | 0.011819 | 0.011676 | 0.011817 | 0.011950 |
| 0.011847 | 0.011886 | 0.011846 | 0.012102 | 0.011778 | 0.012702 | 0.011848 |
| 0.012531 | 0.012363 | 0.012500 | 0.012742 | 0.011812 | 0.011504 | 0.011812 |
| 0.012258 | 0.012192 | 0.011778 | 0.011675 | 0.011675 | 0.011675 | 0.011714 |
| 0.011607 | 0.011612 | 0.011675 | 0.011641 | 0.012018 | 0.012086 | 0.012051 |
| 0.011983 | 0.012086 | 0.012122 | 0.011954 | 0.012258 | 0.012265 | 0.012327 |
| 0.012327 | 0.012361 | 0.012305 | 0.012327 | 0.012329 | 0.011538 | 0.011812 |
| 0.011846 | 0.012428 | 0.011922 | 0.012120 | 0.012635 | 0.011682 | 0.011573 |
| 0.011538 | 0.011538 | 0.012017 | 0.012098 | 0.012119 | 0.011880 | 0.011540 |
| s657     | 0.011812 | 0.011812 | 0.011914 | 0.011880 | 0.011880 | 0.011948 |
| 0.011751 | 0.011647 | 0.011880 | 0.011402 | 0.011470 | 0.011436 | 0.011402 |
| 0.011436 | 0.011606 | 0.011402 | 0.011367 | 0.011504 | 0.011470 | 0.011436 |
| 0.011402 | 0.011436 | 0.011538 | 0.011402 | 0.011436 | 0.011436 | 0.011716 |
| 0.011675 | 0.011436 | 0.011333 | 0.011572 | 0.011504 | 0.011470 | 0.011504 |
| 0.011470 | 0.011572 | 0.011470 | 0.011470 | 0.011436 | 0.011470 | 0.011641 |

|          |          |          |          |          |          |          |
|----------|----------|----------|----------|----------|----------|----------|
| 0.011402 | 0.011470 | 0.011436 | 0.011436 | 0.011538 | 0.011504 | 0.011504 |
| 0.011470 | 0.011573 | 0.011539 | 0.011777 | 0.011402 | 0.011743 | 0.011402 |
| 0.011436 | 0.011538 | 0.011607 | 0.011743 | 0.011709 | 0.011538 | 0.011641 |
| 0.011504 | 0.011572 | 0.011470 | 0.011709 | 0.011914 | 0.011470 | 0.011538 |
| 0.011436 | 0.011538 | 0.011504 | 0.011572 | 0.011504 | 0.011504 | 0.011504 |
| 0.011402 | 0.011436 | 0.011402 | 0.011504 | 0.011470 | 0.011505 | 0.011572 |
| 0.011504 | 0.011436 | 0.011538 | 0.011436 | 0.011572 | 0.011402 | 0.011436 |
| 0.011641 | 0.011572 | 0.011811 | 0.011607 | 0.011470 | 0.011709 | 0.011470 |
| 0.011587 | 0.011781 | 0.011592 | 0.011336 | 0.011361 | 0.011471 | 0.011536 |
| 0.012203 | 0.011572 | 0.011309 | 0.011572 | 0.011641 | 0.011504 | 0.011572 |
| 0.011538 | 0.011504 | 0.011572 | 0.011470 | 0.011572 | 0.011504 | 0.011504 |
| 0.011470 | 0.011572 | 0.011777 | 0.011640 | 0.011538 | 0.011504 | 0.011436 |
| 0.011402 | 0.011402 | 0.011470 | 0.011436 | 0.011641 | 0.011606 | 0.011538 |
| 0.011641 | 0.011709 | 0.011436 | 0.011436 | 0.011470 | 0.011470 | 0.011472 |
| 0.011541 | 0.011470 | 0.011470 | 0.011349 | 0.011423 | 0.011377 | 0.011470 |
| 0.011470 | 0.011406 | 0.011469 | 0.011442 | 0.011370 | 0.011405 | 0.011436 |
| 0.011710 | 0.011475 | 0.011510 | 0.011402 | 0.011408 | 0.011538 | 0.011504 |
| 0.011573 | 0.011504 | 0.011504 | 0.011572 | 0.011538 | 0.011846 | 0.011675 |
| 0.011743 | 0.011607 | 0.011470 | 0.011572 | 0.011367 | 0.011606 | 0.011402 |
| 0.011436 | 0.011470 | 0.011436 | 0.011402 | 0.011436 | 0.011402 | 0.011504 |
| 0.011470 | 0.011572 | 0.011504 | 0.011402 | 0.011506 | 0.011607 | 0.011610 |
| 0.011607 | 0.011504 | 0.011402 | 0.011334 | 0.011470 | 0.011402 | 0.011333 |
| 0.011440 | 0.011607 | 0.011402 | 0.011607 | 0.011368 | 0.011470 | 0.011436 |
| 0.011538 | 0.011436 | 0.011470 | 0.011436 | 0.011470 | 0.011333 | 0.011470 |
| 0.011504 | 0.011436 | 0.011504 | 0.011436 | 0.011470 | 0.011504 | 0.011743 |
| 0.011811 | 0.011743 | 0.011811 | 0.011540 | 0.011812 | 0.011470 | 0.011436 |
| 0.011472 | 0.011759 | 0.011619 | 0.011339 | 0.011819 | 0.011337 | 0.011379 |
| 0.011785 | 0.011751 | 0.011572 | 0.011846 | 0.011511 | 0.011641 | 0.011675 |
| 0.011538 | 0.011709 | 0.011639 | 0.011437 | 0.011569 | 0.011504 | 0.011576 |
| 0.011675 | 0.011574 | 0.011645 | 0.011783 | 0.011709 | 0.011777 | 0.011887 |
| 0.011611 | 0.011785 | 0.011645 | 0.011644 | 0.011881 | 0.011367 | 0.011574 |
| 0.011538 | 0.011470 | 0.011367 | 0.011367 | 0.011436 | 0.011436 | 0.011504 |
| 0.011436 | 0.011504 | 0.011402 | 0.011504 | 0.011436 | 0.011436 | 0.011436 |
| 0.011436 | 0.011845 | 0.011743 | 0.011777 | 0.011333 | 0.011436 | 0.011470 |
| 0.011470 | 0.011436 | 0.011504 | 0.011538 | 0.011402 | 0.011402 | 0.011402 |
| 0.011914 | 0.011538 | 0.011572 | 0.011367 | 0.011470 | 0.011573 | 0.011402 |
| 0.011402 | 0.011436 | 0.011436 | 0.011607 | 0.011402 | 0.011538 | 0.011675 |
| 0.011606 | 0.011436 | 0.011436 | 0.011367 | 0.011367 | 0.011538 | 0.011470 |
| 0.011367 | 0.011470 | 0.011333 | 0.011367 | 0.011504 | 0.011641 | 0.011402 |
| 0.011368 | 0.011504 | 0.011436 | 0.011333 | 0.011641 | 0.011333 | 0.011504 |
| 0.011582 | 0.011402 | 0.011675 | 0.011538 | 0.011572 | 0.011436 | 0.011470 |
| 0.011402 | 0.011743 | 0.011333 | 0.011572 | 0.011402 | 0.011402 | 0.011333 |
| 0.011572 | 0.011778 | 0.011470 | 0.011538 | 0.011367 | 0.011743 | 0.011402 |
| 0.011402 | 0.011402 | 0.011436 | 0.011538 | 0.011436 | 0.011538 | 0.011572 |
| 0.011572 | 0.011572 | 0.011470 | 0.011538 | 0.011538 | 0.011333 | 0.011367 |
| 0.011402 | 0.011333 | 0.011470 | 0.011402 | 0.011367 | 0.011470 | 0.011402 |
| 0.011436 | 0.011436 | 0.011572 | 0.011606 | 0.011504 | 0.011436 | 0.011436 |
| 0.011504 | 0.011367 | 0.011538 | 0.011402 | 0.011538 | 0.011572 | 0.011777 |
| 0.011436 | 0.011812 | 0.011445 | 0.018006 | 0.011456 | 0.011676 | 0.011768 |
| 0.011727 | 0.011774 | 0.011483 | 0.011469 | 0.011949 | 0.011796 | 0.011552 |
| 0.011537 | 0.011736 | 0.011296 | 0.011398 | 0.011375 | 0.011509 | 0.011406 |
| 0.011627 | 0.011585 | 0.011546 | 0.011393 | 0.011572 | 0.011606 | 0.011610 |
| 0.011479 | 0.011538 | 0.011572 | 0.011538 | 0.011504 | 0.011504 | 0.011470 |
| 0.011231 | 0.011436 | 0.011402 | 0.011504 | 0.011470 | 0.011402 | 0.011436 |
| 0.011436 | 0.011504 | 0.011402 | 0.011504 | 0.011538 | 0.011572 | 0.011470 |
| 0.011504 | 0.011402 | 0.011743 | 0.011743 | 0.011538 | 0.011505 | 0.011538 |
| 0.011367 | 0.011367 | 0.011402 | 0.011504 | 0.011367 | 0.011606 | 0.011606 |
| 0.011572 | 0.011572 | 0.011572 | 0.011606 | 0.011811 | 0.011608 | 0.011504 |
| 0.011436 | 0.011572 | 0.011606 | 0.011436 | 0.011504 | 0.011436 | 0.011368 |
| 0.011504 | 0.011504 | 0.011538 | 0.011572 | 0.011471 | 0.011675 | 0.011641 |

|          |          |          |          |          |          |          |
|----------|----------|----------|----------|----------|----------|----------|
| 0.011508 | 0.011402 | 0.011504 | 0.011572 | 0.011470 | 0.011641 | 0.011675 |
| 0.011846 | 0.011511 | 0.011641 | 0.011675 | 0.011538 | 0.011709 | 0.011402 |
| 0.011505 | 0.011470 | 0.011436 | 0.011436 | 0.011504 | 0.011402 | 0.011504 |
| 0.011538 | 0.011572 | 0.011470 | 0.011504 | 0.011402 | 0.011743 | 0.011743 |
| 0.011538 | 0.011505 | 0.011640 | 0.011572 | 0.012223 | 0.011568 | 0.011561 |
| 0.011631 | 0.011554 | 0.011703 | 0.011589 | 0.011629 | 0.011621 | 0.011547 |
| 0.012178 | 0.011482 | 0.011618 | 0.011552 | 0.011830 | 0.011682 | 0.011787 |
| 0.012201 | 0.011673 | 0.011507 | 0.011504 | 0.011504 | 0.011538 | 0.011473 |
| 0.011367 | 0.011402 | 0.011538 | 0.011504 | 0.011507 | 0.011640 | 0.011608 |
| 0.011470 | 0.011402 | 0.011436 | 0.011470 | 0.011367 | 0.011436 | 0.011333 |
| 0.011470 | 0.011504 | 0.011402 | 0.011367 | 0.011470 | 0.011402 | 0.011436 |
| 0.011367 | 0.011367 | 0.011436 | 0.011402 | 0.011367 | 0.011572 | 0.011606 |
| 0.011504 | 0.011572 | 0.011504 | 0.011504 | 0.011436 | 0.011709 | 0.011470 |
| 0.011520 | 0.011436 | 0.011675 | 0.011681 | 0.011538 | 0.011538 | 0.011538 |
| 0.011470 | 0.011470 | 0.011436 | 0.011470 | 0.011572 | 0.011538 | 0.011504 |
| 0.011504 | 0.011606 | 0.011777 | 0.011538 | 0.011709 | 0.011709 | 0.011606 |
| 0.011436 | 0.011504 | 0.011470 | 0.011914 | 0.011504 | 0.011538 | 0.011504 |
| 0.011470 | 0.011470 | 0.011470 | 0.011778 | 0.011709 | 0.011743 | 0.011470 |
| 0.011572 | 0.011641 | 0.011504 | 0.011572 | 0.011504 | 0.011402 | 0.011709 |
| 0.011504 | 0.011470 | 0.011470 | 0.011641 | 0.011470 | 0.011572 | 0.011812 |
| 0.011436 | 0.011820 | 0.011846 | 0.011634 | 0.011400 | 0.011577 | 0.011371 |
| 0.011447 | 0.011806 | 0.011417 | 0.011555 | 0.011454 | 0.011522 | 0.011542 |
| 0.011625 | 0.011392 | 0.011509 | 0.011393 | 0.011386 | 0.011601 | 0.011514 |
| 0.011519 | 0.011420 | 0.011561 | 0.011453 | 0.011506 | 0.011640 | 0.011709 |
| 0.011675 | 0.011573 | 0.011679 | 0.011681 | 0.011784 | 0.011851 | 0.011470 |
| 0.011743 | 0.011607 | 0.011470 | 0.011572 | 0.011367 | 0.011606 | 0.011402 |
| 0.011436 | 0.011470 | 0.011436 | 0.011402 | 0.011436 | 0.011402 | 0.011504 |
| 0.011411 | 0.011480 | 0.011405 | 0.011507 | 0.011645 | 0.011610 | 0.000000 |
| 0.011608 | 0.011538 | 0.011319 | 0.000000 | 0.011470 | 0.011641 | 0.011641 |
| 0.011436 | 0.011504 | 0.011743 | 0.011710 | 0.011572 | 0.011675 | 0.011606 |
| 0.011538 | 0.011606 | 0.011606 | 0.011504 | 0.012051 | 0.011572 | 0.011675 |
| 0.011777 | 0.011785 | 0.011442 | 0.011553 | 0.011436 | 0.011641 | 0.011606 |
| 0.011642 | 0.011606 | 0.011606 | 0.011606 | 0.011776 | 0.011812 | 0.011448 |
| 0.011335 | 0.011342 | 0.011441 | 0.011405 | 0.011477 | 0.011288 | 0.011647 |
| 0.011478 | 0.011592 | 0.011349 | 0.011476 | 0.011436 | 0.011542 | 0.011436 |
| 0.011402 | 0.011402 | 0.011470 | 0.011436 | 0.011641 | 0.011606 | 0.011538 |
| 0.011641 | 0.011709 | 0.011436 | 0.011436 | 0.011470 | 0.011470 | 0.011472 |
| 0.011541 | 0.011470 | 0.011470 | 0.011506 | 0.011640 | 0.011709 | 0.011675 |
| 0.011573 | 0.011679 | 0.011681 | 0.011784 | 0.011851 | 0.011470 | 0.011675 |
| 0.011606 | 0.011606 | 0.011438 | 0.011626 | 0.011554 | 0.011580 | 0.011452 |
| 0.011620 | 0.011804 | 0.011574 | 0.011509 | 0.011402 | 0.011607 | 0.011470 |
| 0.011572 | 0.011504 | 0.011402 | 0.011506 | 0.011607 | 0.011610 | 0.011504 |
| 0.011402 | 0.011334 | 0.011470 | 0.011402 | 0.011333 | 0.011440 | 0.011607 |
| 0.011231 | 0.011436 | 0.011402 | 0.011504 | 0.011470 | 0.011402 | 0.011606 |
| 0.011470 | 0.011504 | 0.011504 | 0.011436 | 0.011504 | 0.011709 | 0.011402 |
| 0.011436 | 0.011709 | 0.011436 | 0.011436 | 0.011436 | 0.011777 | 0.011319 |
| 0.011795 | 0.011359 | 0.011363 | 0.011626 | 0.011676 | 0.011607 | 0.011313 |
| 0.011324 | 0.011606 | 0.011641 | 0.011750 | 0.011607 | 0.011748 | 0.011881 |
| 0.011778 | 0.011816 | 0.011777 | 0.012102 | 0.011777 | 0.012701 | 0.011847 |
| 0.012462 | 0.012362 | 0.012499 | 0.012706 | 0.011811 | 0.011504 | 0.011743 |
| 0.012257 | 0.012123 | 0.011777 | 0.011675 | 0.011743 | 0.011743 | 0.011645 |
| 0.011606 | 0.011612 | 0.011675 | 0.011641 | 0.012017 | 0.012085 | 0.012051 |
| 0.011983 | 0.012085 | 0.012122 | 0.011953 | 0.012258 | 0.012264 | 0.012326 |
| 0.012326 | 0.012360 | 0.012308 | 0.012326 | 0.012328 | 0.011538 | 0.011812 |
| 0.011880 | 0.012427 | 0.011922 | 0.012120 | 0.012634 | 0.011647 | 0.011572 |
| 0.011538 | 0.011538 | 0.011948 | 0.012052 | 0.012122 | 0.011880 | 0.011539 |
| S658     | 0.011810 | 0.011810 | 0.011912 | 0.011878 | 0.011878 | 0.011946 |
| 0.011750 | 0.011646 | 0.011878 | 0.011401 | 0.011469 | 0.011435 | 0.011401 |
| 0.011435 | 0.011605 | 0.011401 | 0.011435 | 0.011503 | 0.011469 | 0.011435 |
| 0.011401 | 0.011435 | 0.011537 | 0.011401 | 0.011435 | 0.011435 | 0.011715 |



|          |          |          |          |          |          |          |
|----------|----------|----------|----------|----------|----------|----------|
| 0.011673 | 0.011435 | 0.011333 | 0.011571 | 0.011469 | 0.011469 | 0.011503 |
| 0.011469 | 0.011571 | 0.011469 | 0.011469 | 0.011503 | 0.011469 | 0.011639 |
| 0.011401 | 0.011469 | 0.011503 | 0.011435 | 0.011537 | 0.011571 | 0.011503 |
| 0.011469 | 0.011640 | 0.011538 | 0.011776 | 0.011469 | 0.011742 | 0.011469 |
| 0.011435 | 0.011537 | 0.011605 | 0.011742 | 0.011776 | 0.011537 | 0.011639 |
| 0.011503 | 0.011571 | 0.011469 | 0.011708 | 0.011912 | 0.011469 | 0.011537 |
| 0.011435 | 0.011537 | 0.011503 | 0.011571 | 0.011503 | 0.011503 | 0.011503 |
| 0.011401 | 0.011435 | 0.011401 | 0.011503 | 0.011469 | 0.011504 | 0.011571 |
| 0.011503 | 0.011435 | 0.011537 | 0.011435 | 0.011571 | 0.011401 | 0.011435 |
| 0.011639 | 0.011571 | 0.011810 | 0.011605 | 0.011469 | 0.011708 | 0.011469 |
| 0.011587 | 0.011780 | 0.011630 | 0.011335 | 0.011398 | 0.011471 | 0.011536 |
| 0.012239 | 0.011676 | 0.011351 | 0.011708 | 0.011708 | 0.011503 | 0.011571 |
| 0.011469 | 0.011503 | 0.011571 | 0.011469 | 0.011571 | 0.011503 | 0.011503 |
| 0.011469 | 0.011571 | 0.011776 | 0.011639 | 0.011537 | 0.011503 | 0.011435 |
| 0.011401 | 0.011401 | 0.011469 | 0.011435 | 0.011639 | 0.011605 | 0.011537 |
| 0.011639 | 0.011708 | 0.011435 | 0.011435 | 0.011469 | 0.011469 | 0.011471 |
| 0.011540 | 0.011469 | 0.011469 | 0.011348 | 0.011422 | 0.011376 | 0.011469 |
| 0.011469 | 0.011406 | 0.011468 | 0.011442 | 0.011369 | 0.011403 | 0.011435 |
| 0.011708 | 0.011474 | 0.011509 | 0.011401 | 0.011408 | 0.011469 | 0.011503 |
| 0.011571 | 0.011503 | 0.011503 | 0.011537 | 0.011537 | 0.011912 | 0.011674 |
| 0.011742 | 0.011605 | 0.011469 | 0.011571 | 0.011367 | 0.011605 | 0.011401 |
| 0.011435 | 0.011469 | 0.011435 | 0.011401 | 0.011435 | 0.011401 | 0.011503 |
| 0.011469 | 0.011571 | 0.011503 | 0.011401 | 0.011505 | 0.011605 | 0.011609 |
| 0.011605 | 0.011503 | 0.011401 | 0.011334 | 0.011469 | 0.011401 | 0.011333 |
| 0.011439 | 0.011605 | 0.011401 | 0.011605 | 0.011367 | 0.011469 | 0.011435 |
| 0.011537 | 0.011435 | 0.011469 | 0.011435 | 0.011469 | 0.011333 | 0.011469 |
| 0.011503 | 0.011435 | 0.011435 | 0.011435 | 0.011469 | 0.011503 | 0.011742 |
| 0.011810 | 0.011742 | 0.011810 | 0.011607 | 0.011810 | 0.011469 | 0.011435 |
| 0.011471 | 0.011756 | 0.011570 | 0.011373 | 0.011818 | 0.011337 | 0.011379 |
| 0.011784 | 0.011749 | 0.011639 | 0.011844 | 0.011511 | 0.011708 | 0.011674 |
| 0.011605 | 0.011776 | 0.011636 | 0.011477 | 0.011397 | 0.011503 | 0.011575 |
| 0.011674 | 0.011573 | 0.011678 | 0.011781 | 0.011708 | 0.011776 | 0.011885 |
| 0.011610 | 0.011781 | 0.011712 | 0.011643 | 0.011913 | 0.011367 | 0.011571 |
| 0.011537 | 0.011469 | 0.011367 | 0.011367 | 0.011435 | 0.011435 | 0.011503 |
| 0.011435 | 0.011503 | 0.011401 | 0.011503 | 0.011435 | 0.011435 | 0.011503 |
| 0.011435 | 0.011844 | 0.011742 | 0.011776 | 0.011333 | 0.011435 | 0.011469 |
| 0.011469 | 0.011435 | 0.011469 | 0.011537 | 0.011401 | 0.011401 | 0.011401 |
| 0.011912 | 0.011537 | 0.011571 | 0.011367 | 0.011469 | 0.011640 | 0.011401 |
| 0.011401 | 0.011435 | 0.011435 | 0.011605 | 0.011401 | 0.011537 | 0.011639 |
| 0.011605 | 0.011435 | 0.011435 | 0.011367 | 0.011367 | 0.011537 | 0.011469 |
| 0.011367 | 0.011401 | 0.011333 | 0.011367 | 0.011503 | 0.011639 | 0.011401 |
| 0.011367 | 0.011503 | 0.011435 | 0.011333 | 0.011639 | 0.011333 | 0.011503 |
| 0.011581 | 0.011401 | 0.011673 | 0.011537 | 0.011571 | 0.011435 | 0.011537 |
| 0.011401 | 0.011742 | 0.011333 | 0.011571 | 0.011401 | 0.011401 | 0.011333 |
| 0.011571 | 0.011776 | 0.011469 | 0.011537 | 0.011367 | 0.011742 | 0.011401 |
| 0.011401 | 0.011401 | 0.011435 | 0.011537 | 0.011435 | 0.011537 | 0.011605 |
| 0.011571 | 0.011571 | 0.011469 | 0.011537 | 0.011537 | 0.011401 | 0.011367 |
| 0.011401 | 0.011401 | 0.011469 | 0.011401 | 0.011367 | 0.011537 | 0.011401 |
| 0.011435 | 0.011435 | 0.011571 | 0.011605 | 0.011503 | 0.011435 | 0.011435 |
| 0.011503 | 0.011367 | 0.011537 | 0.011401 | 0.011537 | 0.011639 | 0.011844 |
| 0.011435 | 0.011810 | 0.011445 | 0.018077 | 0.011391 | 0.011491 | 0.011767 |
| 0.011727 | 0.011774 | 0.011483 | 0.011528 | 0.011948 | 0.011795 | 0.011551 |
| 0.011729 | 0.011674 | 0.011296 | 0.011398 | 0.011453 | 0.011508 | 0.011406 |
| 0.011722 | 0.011622 | 0.011620 | 0.011459 | 0.011571 | 0.011605 | 0.011609 |
| 0.011477 | 0.011571 | 0.011571 | 0.011537 | 0.011503 | 0.011503 | 0.011469 |
| 0.011503 | 0.011435 | 0.011469 | 0.011503 | 0.011469 | 0.011401 | 0.011435 |
| 0.011435 | 0.011503 | 0.011401 | 0.011503 | 0.011537 | 0.011571 | 0.011469 |
| 0.011503 | 0.011469 | 0.011742 | 0.011742 | 0.011537 | 0.011572 | 0.011605 |
| 0.011367 | 0.011367 | 0.011401 | 0.011503 | 0.011367 | 0.011605 | 0.011605 |
| 0.011639 | 0.011639 | 0.011571 | 0.011673 | 0.011810 | 0.011675 | 0.011435 |

|          |          |          |          |          |          |          |
|----------|----------|----------|----------|----------|----------|----------|
| 0.011503 | 0.011537 | 0.011605 | 0.011435 | 0.011503 | 0.011469 | 0.011503 |
| 0.011571 | 0.011571 | 0.011605 | 0.011571 | 0.011470 | 0.011673 | 0.011639 |
| 0.011473 | 0.011401 | 0.011503 | 0.011571 | 0.011469 | 0.011639 | 0.011673 |
| 0.011844 | 0.011511 | 0.011708 | 0.011674 | 0.011605 | 0.011776 | 0.011401 |
| 0.011573 | 0.011469 | 0.011435 | 0.011435 | 0.011503 | 0.011401 | 0.011503 |
| 0.011537 | 0.011571 | 0.011469 | 0.011503 | 0.011469 | 0.011742 | 0.011742 |
| 0.011537 | 0.011572 | 0.011639 | 0.011571 | 0.012220 | 0.011602 | 0.011559 |
| 0.011629 | 0.011552 | 0.011700 | 0.011587 | 0.011626 | 0.011619 | 0.011546 |
| 0.012173 | 0.011480 | 0.011615 | 0.011550 | 0.011826 | 0.011681 | 0.011784 |
| 0.012197 | 0.011670 | 0.011506 | 0.011503 | 0.011503 | 0.011537 | 0.011472 |
| 0.011367 | 0.011401 | 0.011537 | 0.011503 | 0.011506 | 0.011639 | 0.011607 |
| 0.011469 | 0.011401 | 0.011435 | 0.011469 | 0.011367 | 0.011435 | 0.011333 |
| 0.011469 | 0.011503 | 0.011401 | 0.011367 | 0.011469 | 0.011401 | 0.011435 |
| 0.011435 | 0.011367 | 0.011435 | 0.011469 | 0.011367 | 0.011571 | 0.011605 |
| 0.011503 | 0.011571 | 0.011503 | 0.011503 | 0.011435 | 0.011776 | 0.011469 |
| 0.011519 | 0.011435 | 0.011673 | 0.011678 | 0.011537 | 0.011537 | 0.011537 |
| 0.011537 | 0.011469 | 0.011435 | 0.011469 | 0.011571 | 0.011571 | 0.011503 |
| 0.011503 | 0.011639 | 0.011776 | 0.011537 | 0.011708 | 0.011708 | 0.011605 |
| 0.011435 | 0.011503 | 0.011537 | 0.011912 | 0.011503 | 0.011537 | 0.011503 |
| 0.011537 | 0.011469 | 0.011469 | 0.011776 | 0.011708 | 0.011742 | 0.011469 |
| 0.011571 | 0.011639 | 0.011469 | 0.011571 | 0.011503 | 0.011401 | 0.011673 |
| 0.011503 | 0.011469 | 0.011469 | 0.011639 | 0.011469 | 0.011571 | 0.011776 |
| 0.011435 | 0.011819 | 0.011844 | 0.011633 | 0.011400 | 0.011577 | 0.011527 |
| 0.011281 | 0.011844 | 0.011416 | 0.011555 | 0.011355 | 0.011522 | 0.011543 |
| 0.011677 | 0.011327 | 0.011510 | 0.011394 | 0.011332 | 0.011534 | 0.011513 |
| 0.011519 | 0.011420 | 0.011524 | 0.011453 | 0.011505 | 0.011639 | 0.011708 |
| 0.011673 | 0.011572 | 0.011678 | 0.011679 | 0.011783 | 0.011849 | 0.011469 |
| 0.011742 | 0.011605 | 0.011469 | 0.011571 | 0.011367 | 0.011605 | 0.011401 |
| 0.011435 | 0.011469 | 0.011435 | 0.011401 | 0.011435 | 0.011401 | 0.011503 |
| 0.011446 | 0.011480 | 0.011473 | 0.011506 | 0.011644 | 0.011609 | 0.011608 |
| 0.000000 | 0.011537 | 0.011319 | 0.011312 | 0.011469 | 0.011605 | 0.011640 |
| 0.011435 | 0.011503 | 0.011708 | 0.011709 | 0.011639 | 0.011673 | 0.011605 |
| 0.011537 | 0.011605 | 0.011605 | 0.011503 | 0.012049 | 0.011639 | 0.011742 |
| 0.011742 | 0.011819 | 0.011475 | 0.011551 | 0.011435 | 0.011639 | 0.011605 |
| 0.011641 | 0.011639 | 0.011674 | 0.011674 | 0.011855 | 0.011810 | 0.011446 |
| 0.011335 | 0.011341 | 0.011439 | 0.011404 | 0.011475 | 0.011362 | 0.011645 |
| 0.011476 | 0.011589 | 0.011395 | 0.011474 | 0.011469 | 0.011540 | 0.011435 |
| 0.011401 | 0.011401 | 0.011469 | 0.011435 | 0.011639 | 0.011605 | 0.011537 |
| 0.011639 | 0.011708 | 0.011435 | 0.011435 | 0.011469 | 0.011469 | 0.011471 |
| 0.011540 | 0.011469 | 0.011469 | 0.011505 | 0.011639 | 0.011708 | 0.011673 |
| 0.011572 | 0.011678 | 0.011679 | 0.011783 | 0.011849 | 0.011469 | 0.011673 |
| 0.011605 | 0.011605 | 0.011437 | 0.011589 | 0.011552 | 0.011579 | 0.011450 |
| 0.011619 | 0.011847 | 0.011658 | 0.011474 | 0.011401 | 0.011605 | 0.011469 |
| 0.011571 | 0.011503 | 0.011401 | 0.011505 | 0.011605 | 0.011609 | 0.011503 |
| 0.011401 | 0.011334 | 0.011469 | 0.011401 | 0.011333 | 0.011439 | 0.011605 |
| 0.011503 | 0.011435 | 0.011469 | 0.011503 | 0.011469 | 0.011401 | 0.011605 |
| 0.011469 | 0.011503 | 0.011503 | 0.011435 | 0.011503 | 0.011708 | 0.011401 |
| 0.011435 | 0.011776 | 0.011435 | 0.011435 | 0.011435 | 0.011776 | 0.011362 |
| 0.011851 | 0.011359 | 0.011464 | 0.011626 | 0.011675 | 0.011606 | 0.011313 |
| 0.011378 | 0.011605 | 0.011708 | 0.011817 | 0.011675 | 0.011815 | 0.011947 |
| 0.011844 | 0.011881 | 0.011844 | 0.012099 | 0.011776 | 0.012698 | 0.011845 |
| 0.012527 | 0.012359 | 0.012496 | 0.012737 | 0.011810 | 0.011503 | 0.011810 |
| 0.012255 | 0.012189 | 0.011776 | 0.011674 | 0.011742 | 0.011742 | 0.011712 |
| 0.011605 | 0.011611 | 0.011673 | 0.011640 | 0.012015 | 0.012083 | 0.012083 |
| 0.011982 | 0.012083 | 0.012119 | 0.011952 | 0.012255 | 0.012262 | 0.012323 |
| 0.012323 | 0.012357 | 0.012272 | 0.012323 | 0.012326 | 0.011537 | 0.011844 |
| 0.011878 | 0.012425 | 0.011920 | 0.012152 | 0.012631 | 0.011680 | 0.011571 |
| 0.011537 | 0.011537 | 0.012015 | 0.012048 | 0.012122 | 0.011878 | 0.011539 |
| s659     | 0.011733 | 0.011733 | 0.011867 | 0.011834 | 0.011834 | 0.011901 |
| 0.011707 | 0.011604 | 0.011834 | 0.011329 | 0.011396 | 0.011363 | 0.011329 |

|          |          |          |          |          |          |          |
|----------|----------|----------|----------|----------|----------|----------|
| 0.011363 | 0.011531 | 0.011329 | 0.011363 | 0.011430 | 0.011396 | 0.011363 |
| 0.011329 | 0.011363 | 0.011464 | 0.011329 | 0.011363 | 0.011363 | 0.011672 |
| 0.011598 | 0.011363 | 0.011262 | 0.011497 | 0.011430 | 0.011396 | 0.011430 |
| 0.011396 | 0.011497 | 0.011396 | 0.011396 | 0.011430 | 0.011396 | 0.011565 |
| 0.011329 | 0.011396 | 0.011430 | 0.011363 | 0.011464 | 0.011497 | 0.011430 |
| 0.011396 | 0.011565 | 0.011464 | 0.011733 | 0.011396 | 0.011665 | 0.011396 |
| 0.011363 | 0.011464 | 0.011531 | 0.011665 | 0.011766 | 0.011464 | 0.011565 |
| 0.011430 | 0.011497 | 0.011329 | 0.011632 | 0.011868 | 0.011396 | 0.011464 |
| 0.011363 | 0.011464 | 0.011430 | 0.011497 | 0.011228 | 0.011430 | 0.011430 |
| 0.011329 | 0.011363 | 0.011329 | 0.011430 | 0.011396 | 0.011431 | 0.011497 |
| 0.011430 | 0.011396 | 0.011464 | 0.011228 | 0.011497 | 0.011329 | 0.011396 |
| 0.011564 | 0.011497 | 0.011733 | 0.011565 | 0.011396 | 0.011632 | 0.011396 |
| 0.011468 | 0.011695 | 0.011513 | 0.011216 | 0.011210 | 0.011355 | 0.011415 |
| 0.012085 | 0.011416 | 0.011184 | 0.011632 | 0.011632 | 0.011430 | 0.011531 |
| 0.011464 | 0.011430 | 0.011497 | 0.011396 | 0.011497 | 0.011430 | 0.011430 |
| 0.011396 | 0.011296 | 0.011699 | 0.011564 | 0.011464 | 0.011430 | 0.011363 |
| 0.011329 | 0.011329 | 0.011396 | 0.011363 | 0.011564 | 0.011531 | 0.011464 |
| 0.011564 | 0.011632 | 0.011363 | 0.011363 | 0.011396 | 0.011396 | 0.011398 |
| 0.011466 | 0.011396 | 0.011396 | 0.011240 | 0.011313 | 0.011271 | 0.011396 |
| 0.011399 | 0.011335 | 0.011318 | 0.011371 | 0.011298 | 0.011334 | 0.011364 |
| 0.011636 | 0.011336 | 0.011439 | 0.011329 | 0.011337 | 0.011464 | 0.011430 |
| 0.011497 | 0.011431 | 0.011430 | 0.011531 | 0.011464 | 0.011834 | 0.011598 |
| 0.011665 | 0.011531 | 0.011396 | 0.011497 | 0.011296 | 0.011531 | 0.011329 |
| 0.011396 | 0.011396 | 0.011363 | 0.011329 | 0.011363 | 0.011329 | 0.011430 |
| 0.011396 | 0.011497 | 0.011430 | 0.011329 | 0.011431 | 0.011531 | 0.011500 |
| 0.011531 | 0.011430 | 0.011329 | 0.011229 | 0.011396 | 0.011329 | 0.011262 |
| 0.011332 | 0.011531 | 0.011329 | 0.011531 | 0.011296 | 0.011396 | 0.011363 |
| 0.011464 | 0.011363 | 0.011396 | 0.011363 | 0.011396 | 0.011262 | 0.011396 |
| 0.011430 | 0.011363 | 0.011430 | 0.011363 | 0.011396 | 0.011430 | 0.011665 |
| 0.011766 | 0.011699 | 0.011766 | 0.011465 | 0.011767 | 0.011396 | 0.011363 |
| 0.011398 | 0.011626 | 0.011426 | 0.011232 | 0.011740 | 0.011265 | 0.011336 |
| 0.011740 | 0.011672 | 0.011564 | 0.011767 | 0.011471 | 0.011632 | 0.011598 |
| 0.011531 | 0.011699 | 0.011523 | 0.011390 | 0.011396 | 0.011430 | 0.011467 |
| 0.011598 | 0.011499 | 0.011636 | 0.011704 | 0.011632 | 0.011699 | 0.011807 |
| 0.011535 | 0.011706 | 0.011636 | 0.011568 | 0.011835 | 0.011296 | 0.011499 |
| 0.011464 | 0.011396 | 0.011296 | 0.011296 | 0.011363 | 0.011363 | 0.011430 |
| 0.011363 | 0.011430 | 0.011329 | 0.011430 | 0.011363 | 0.011363 | 0.011430 |
| 0.011363 | 0.011800 | 0.011699 | 0.011733 | 0.011262 | 0.011363 | 0.011396 |
| 0.011396 | 0.011363 | 0.011430 | 0.011464 | 0.011329 | 0.011329 | 0.011329 |
| 0.011867 | 0.011464 | 0.011497 | 0.011296 | 0.011396 | 0.011565 | 0.011329 |
| 0.011329 | 0.011396 | 0.011363 | 0.011531 | 0.011329 | 0.011464 | 0.011598 |
| 0.011531 | 0.011363 | 0.011363 | 0.011296 | 0.011296 | 0.011464 | 0.011396 |
| 0.011296 | 0.011396 | 0.011262 | 0.011296 | 0.011430 | 0.011565 | 0.011329 |
| 0.011296 | 0.011430 | 0.011363 | 0.011262 | 0.011598 | 0.011262 | 0.011430 |
| 0.011506 | 0.011329 | 0.011632 | 0.011464 | 0.011497 | 0.011363 | 0.011464 |
| 0.011329 | 0.011665 | 0.011262 | 0.011531 | 0.011329 | 0.011329 | 0.011262 |
| 0.011497 | 0.011666 | 0.011329 | 0.011464 | 0.011296 | 0.011699 | 0.011329 |
| 0.011329 | 0.011329 | 0.011363 | 0.011464 | 0.011363 | 0.011464 | 0.011531 |
| 0.011531 | 0.011497 | 0.011396 | 0.011497 | 0.011464 | 0.011329 | 0.011296 |
| 0.011329 | 0.011329 | 0.011329 | 0.011329 | 0.011296 | 0.011464 | 0.011329 |
| 0.011363 | 0.011363 | 0.011497 | 0.011531 | 0.011430 | 0.011363 | 0.011363 |
| 0.011296 | 0.011363 | 0.011464 | 0.011329 | 0.011464 | 0.011565 | 0.011800 |
| 0.011363 | 0.011766 | 0.011302 | 0.011785 | 0.011126 | 0.011427 | 0.011653 |
| 0.011614 | 0.011658 | 0.011217 | 0.011176 | 0.011719 | 0.011682 | 0.011364 |
| 0.011392 | 0.011549 | 0.011177 | 0.011228 | 0.011255 | 0.011307 | 0.011232 |
| 0.011389 | 0.011470 | 0.011431 | 0.011259 | 0.011497 | 0.011531 | 0.011534 |
| 0.011370 | 0.011497 | 0.011497 | 0.011464 | 0.011430 | 0.011430 | 0.011397 |
| 0.011430 | 0.011363 | 0.011396 | 0.011430 | 0.011396 | 0.011329 | 0.011363 |
| 0.011363 | 0.011430 | 0.011329 | 0.011363 | 0.011464 | 0.011497 | 0.011396 |
| 0.011430 | 0.011396 | 0.011733 | 0.011733 | 0.011464 | 0.011498 | 0.011531 |

|          |          |          |          |          |          |          |
|----------|----------|----------|----------|----------|----------|----------|
| 0.011296 | 0.011296 | 0.011329 | 0.011430 | 0.011296 | 0.011531 | 0.011531 |
| 0.011564 | 0.011564 | 0.011497 | 0.011598 | 0.011766 | 0.011600 | 0.011430 |
| 0.011430 | 0.011497 | 0.011531 | 0.011363 | 0.011430 | 0.011396 | 0.011430 |
| 0.011497 | 0.011497 | 0.011531 | 0.011497 | 0.011397 | 0.011598 | 0.011565 |
| 0.011433 | 0.011329 | 0.011430 | 0.011531 | 0.011430 | 0.011565 | 0.011598 |
| 0.011767 | 0.011471 | 0.011632 | 0.011598 | 0.011531 | 0.011699 | 0.011329 |
| 0.011499 | 0.011397 | 0.011363 | 0.011363 | 0.011430 | 0.011329 | 0.011363 |
| 0.011464 | 0.011497 | 0.011396 | 0.011430 | 0.011396 | 0.011733 | 0.011733 |
| 0.011464 | 0.011498 | 0.011564 | 0.011497 | 0.012138 | 0.011561 | 0.011448 |
| 0.011553 | 0.011512 | 0.011588 | 0.011511 | 0.011621 | 0.011544 | 0.011509 |
| 0.012092 | 0.011407 | 0.011541 | 0.011475 | 0.011749 | 0.011605 | 0.011707 |
| 0.012115 | 0.011550 | 0.011433 | 0.011430 | 0.011430 | 0.011464 | 0.011399 |
| 0.011296 | 0.011329 | 0.011464 | 0.011430 | 0.011432 | 0.011564 | 0.011498 |
| 0.011396 | 0.011329 | 0.011363 | 0.011396 | 0.011296 | 0.011363 | 0.011262 |
| 0.011396 | 0.011430 | 0.011329 | 0.011296 | 0.011396 | 0.011329 | 0.011363 |
| 0.011363 | 0.011296 | 0.011363 | 0.011396 | 0.011296 | 0.011497 | 0.011531 |
| 0.011430 | 0.011497 | 0.011430 | 0.011430 | 0.011363 | 0.011766 | 0.011396 |
| 0.011409 | 0.011363 | 0.011598 | 0.011569 | 0.011464 | 0.011464 | 0.011464 |
| 0.011464 | 0.011396 | 0.011363 | 0.011396 | 0.011497 | 0.011497 | 0.011430 |
| 0.011430 | 0.011565 | 0.011733 | 0.011464 | 0.011666 | 0.011666 | 0.011531 |
| 0.011363 | 0.011430 | 0.011464 | 0.011868 | 0.011430 | 0.011464 | 0.011430 |
| 0.011464 | 0.011396 | 0.011396 | 0.011699 | 0.011632 | 0.011666 | 0.011396 |
| 0.011497 | 0.011565 | 0.011430 | 0.011497 | 0.011464 | 0.011329 | 0.011665 |
| 0.011430 | 0.011396 | 0.011396 | 0.011565 | 0.011396 | 0.011497 | 0.011733 |
| 0.011363 | 0.011775 | 0.011800 | 0.011467 | 0.011117 | 0.011502 | 0.011164 |
| 0.011225 | 0.011722 | 0.011271 | 0.011417 | 0.011255 | 0.011366 | 0.011326 |
| 0.011366 | 0.011126 | 0.011227 | 0.000000 | 0.011168 | 0.011261 | 0.011385 |
| 0.011399 | 0.011296 | 0.011412 | 0.011342 | 0.011431 | 0.011564 | 0.011632 |
| 0.011598 | 0.011498 | 0.011602 | 0.011603 | 0.011739 | 0.011768 | 0.011396 |
| 0.011665 | 0.011531 | 0.011396 | 0.011497 | 0.011296 | 0.011531 | 0.011329 |
| 0.011396 | 0.011396 | 0.011363 | 0.011329 | 0.011363 | 0.011329 | 0.011430 |
| 0.011409 | 0.011410 | 0.011403 | 0.011231 | 0.011573 | 0.011538 | 0.011538 |
| 0.011537 | 0.000000 | 0.011245 | 0.011240 | 0.011399 | 0.011568 | 0.011569 |
| 0.011363 | 0.011433 | 0.011666 | 0.011635 | 0.011565 | 0.011599 | 0.011531 |
| 0.011464 | 0.011531 | 0.011531 | 0.011430 | 0.012002 | 0.011598 | 0.011666 |
| 0.011699 | 0.011738 | 0.011402 | 0.011476 | 0.011363 | 0.011565 | 0.011531 |
| 0.011364 | 0.011564 | 0.011598 | 0.011598 | 0.011768 | 0.011733 | 0.011338 |
| 0.011263 | 0.011234 | 0.011367 | 0.011332 | 0.011437 | 0.011210 | 0.011604 |
| 0.011403 | 0.011499 | 0.011251 | 0.011322 | 0.011396 | 0.011471 | 0.011363 |
| 0.011329 | 0.011329 | 0.011396 | 0.011363 | 0.011564 | 0.011531 | 0.011464 |
| 0.011564 | 0.011632 | 0.011363 | 0.011363 | 0.011396 | 0.011396 | 0.011398 |
| 0.011466 | 0.011396 | 0.011396 | 0.011431 | 0.011564 | 0.011632 | 0.011598 |
| 0.011498 | 0.011602 | 0.011603 | 0.011739 | 0.011768 | 0.011396 | 0.011598 |
| 0.011531 | 0.011531 | 0.011365 | 0.011548 | 0.011478 | 0.011299 | 0.011305 |
| 0.011508 | 0.011653 | 0.011526 | 0.011434 | 0.011329 | 0.011531 | 0.011396 |
| 0.011497 | 0.011430 | 0.011329 | 0.011431 | 0.011531 | 0.011500 | 0.011430 |
| 0.011329 | 0.011229 | 0.011396 | 0.011329 | 0.011262 | 0.011332 | 0.011531 |
| 0.011430 | 0.011363 | 0.011396 | 0.011430 | 0.011396 | 0.011329 | 0.011531 |
| 0.011396 | 0.011430 | 0.011430 | 0.011363 | 0.011430 | 0.011666 | 0.011329 |
| 0.011363 | 0.011766 | 0.011363 | 0.011396 | 0.011363 | 0.011733 | 0.011103 |
| 0.011566 | 0.011188 | 0.011161 | 0.011503 | 0.011508 | 0.011491 | 0.011144 |
| 0.011113 | 0.011531 | 0.011632 | 0.011739 | 0.011599 | 0.011670 | 0.011868 |
| 0.011767 | 0.011805 | 0.011766 | 0.011949 | 0.011733 | 0.012609 | 0.011768 |
| 0.012474 | 0.012241 | 0.012410 | 0.012681 | 0.011733 | 0.011430 | 0.011733 |
| 0.012171 | 0.012039 | 0.011699 | 0.011598 | 0.011665 | 0.011665 | 0.011636 |
| 0.011531 | 0.011468 | 0.011598 | 0.011565 | 0.011935 | 0.012002 | 0.012002 |
| 0.011902 | 0.012002 | 0.012072 | 0.011804 | 0.012172 | 0.012178 | 0.012239 |
| 0.012239 | 0.012273 | 0.012153 | 0.012239 | 0.012241 | 0.011464 | 0.011767 |
| 0.011834 | 0.012339 | 0.011840 | 0.012070 | 0.012543 | 0.011604 | 0.011497 |
| 0.011464 | 0.011464 | 0.011935 | 0.011965 | 0.012080 | 0.011800 | 0.011465 |

|          |          |          |          |          |          |          |
|----------|----------|----------|----------|----------|----------|----------|
| S660     | 0.011540 | 0.011540 | 0.011651 | 0.011614 | 0.011614 | 0.011614 |
| 0.011546 | 0.011434 | 0.011577 | 0.011097 | 0.011171 | 0.011171 | 0.011134 |
| 0.011134 | 0.011356 | 0.011134 | 0.011134 | 0.011208 | 0.011208 | 0.011171 |
| 0.011134 | 0.011171 | 0.011282 | 0.011134 | 0.011134 | 0.011171 | 0.011508 |
| 0.011429 | 0.011171 | 0.000000 | 0.011319 | 0.011208 | 0.011208 | 0.011171 |
| 0.011171 | 0.011282 | 0.011208 | 0.011208 | 0.011208 | 0.011208 | 0.011393 |
| 0.011134 | 0.011208 | 0.011245 | 0.011134 | 0.011282 | 0.011319 | 0.011208 |
| 0.011208 | 0.011393 | 0.011245 | 0.011540 | 0.011208 | 0.011503 | 0.011208 |
| 0.011171 | 0.011282 | 0.011319 | 0.011503 | 0.011540 | 0.011282 | 0.011393 |
| 0.011245 | 0.011319 | 0.011208 | 0.011429 | 0.011614 | 0.011134 | 0.011282 |
| 0.011171 | 0.011282 | 0.011171 | 0.011319 | 0.011171 | 0.011208 | 0.011208 |
| 0.011134 | 0.011171 | 0.011097 | 0.011208 | 0.011171 | 0.011245 | 0.011319 |
| 0.011245 | 0.011134 | 0.011282 | 0.011134 | 0.011319 | 0.011134 | 0.011171 |
| 0.011392 | 0.011282 | 0.011503 | 0.011319 | 0.011208 | 0.011466 | 0.011208 |
| 0.011341 | 0.011586 | 0.011342 | 0.011102 | 0.011100 | 0.011180 | 0.011313 |
| 0.011295 | 0.011386 | 0.011104 | 0.011429 | 0.011356 | 0.011245 | 0.011282 |
| 0.011245 | 0.011245 | 0.011282 | 0.011208 | 0.011319 | 0.011245 | 0.011171 |
| 0.011134 | 0.011282 | 0.011540 | 0.011393 | 0.011282 | 0.011245 | 0.011171 |
| 0.011134 | 0.011134 | 0.011208 | 0.011134 | 0.011392 | 0.011356 | 0.011282 |
| 0.011392 | 0.011466 | 0.011171 | 0.011171 | 0.011208 | 0.011208 | 0.011209 |
| 0.011283 | 0.011208 | 0.011134 | 0.000000 | 0.011138 | 0.011098 | 0.011171 |
| 0.011208 | 0.011135 | 0.011178 | 0.011171 | 0.011097 | 0.011134 | 0.011171 |
| 0.011437 | 0.011208 | 0.011246 | 0.011134 | 0.011134 | 0.011245 | 0.011245 |
| 0.011319 | 0.011245 | 0.011245 | 0.011245 | 0.011245 | 0.011651 | 0.011430 |
| 0.011503 | 0.011319 | 0.011208 | 0.011319 | 0.011097 | 0.011356 | 0.011134 |
| 0.011171 | 0.011208 | 0.011171 | 0.011134 | 0.011171 | 0.011134 | 0.011171 |
| 0.011171 | 0.011319 | 0.011245 | 0.011097 | 0.011246 | 0.011356 | 0.011321 |
| 0.011319 | 0.011245 | 0.011134 | 0.000000 | 0.011208 | 0.011134 | 0.000000 |
| 0.011172 | 0.011319 | 0.011134 | 0.011319 | 0.011097 | 0.011171 | 0.011171 |
| 0.011282 | 0.011134 | 0.011208 | 0.011171 | 0.011208 | 0.000000 | 0.011208 |
| 0.011208 | 0.011171 | 0.011208 | 0.011171 | 0.011171 | 0.011245 | 0.011503 |
| 0.011577 | 0.011429 | 0.011540 | 0.011357 | 0.011577 | 0.011208 | 0.011171 |
| 0.011209 | 0.011503 | 0.011209 | 0.011098 | 0.011583 | 0.000000 | 0.011189 |
| 0.011583 | 0.011507 | 0.011319 | 0.011614 | 0.011211 | 0.011430 | 0.011430 |
| 0.011356 | 0.011466 | 0.011331 | 0.011151 | 0.011196 | 0.011245 | 0.011284 |
| 0.011430 | 0.011282 | 0.011395 | 0.011543 | 0.011429 | 0.011540 | 0.011431 |
| 0.011319 | 0.011540 | 0.011466 | 0.011393 | 0.011688 | 0.011097 | 0.011319 |
| 0.011282 | 0.011171 | 0.011097 | 0.000000 | 0.011171 | 0.011171 | 0.011245 |
| 0.011134 | 0.011208 | 0.011134 | 0.011245 | 0.011171 | 0.011171 | 0.011208 |
| 0.011171 | 0.011614 | 0.011466 | 0.011503 | 0.000000 | 0.011171 | 0.011208 |
| 0.011208 | 0.011171 | 0.011208 | 0.011282 | 0.011134 | 0.011134 | 0.011134 |
| 0.011688 | 0.011282 | 0.011282 | 0.000000 | 0.011171 | 0.011393 | 0.011134 |
| 0.011097 | 0.011134 | 0.011171 | 0.011356 | 0.011134 | 0.011245 | 0.011356 |
| 0.011319 | 0.011134 | 0.011171 | 0.000000 | 0.000000 | 0.011282 | 0.011208 |
| 0.000000 | 0.011171 | 0.000000 | 0.011097 | 0.011245 | 0.011392 | 0.011134 |
| 0.000000 | 0.011245 | 0.011171 | 0.000000 | 0.011393 | 0.000000 | 0.011245 |
| 0.011322 | 0.011134 | 0.011429 | 0.011245 | 0.011319 | 0.011171 | 0.011245 |
| 0.011134 | 0.011503 | 0.000000 | 0.011282 | 0.011134 | 0.011134 | 0.000000 |
| 0.011245 | 0.011504 | 0.011208 | 0.011245 | 0.011097 | 0.011466 | 0.011134 |
| 0.011134 | 0.011134 | 0.011171 | 0.011282 | 0.011171 | 0.011282 | 0.011319 |
| 0.011319 | 0.011319 | 0.011171 | 0.011282 | 0.011282 | 0.011134 | 0.011097 |
| 0.011134 | 0.011134 | 0.011208 | 0.011134 | 0.011097 | 0.011245 | 0.011134 |
| 0.011171 | 0.011134 | 0.011245 | 0.011356 | 0.011245 | 0.011171 | 0.011171 |
| 0.011208 | 0.011097 | 0.011245 | 0.011134 | 0.011282 | 0.011282 | 0.011577 |
| 0.011171 | 0.011577 | 0.011173 | 0.018064 | 0.011131 | 0.011193 | 0.011516 |
| 0.011475 | 0.011516 | 0.011174 | 0.011185 | 0.011656 | 0.011549 | 0.011261 |
| 0.011365 | 0.011453 | 0.000000 | 0.011150 | 0.011144 | 0.011220 | 0.011106 |
| 0.011411 | 0.011339 | 0.011338 | 0.011131 | 0.011319 | 0.011319 | 0.011321 |
| 0.011210 | 0.011245 | 0.011319 | 0.011282 | 0.011245 | 0.011245 | 0.011208 |
| 0.011208 | 0.011134 | 0.011171 | 0.011171 | 0.011171 | 0.011134 | 0.011171 |

|          |          |          |          |          |          |          |
|----------|----------|----------|----------|----------|----------|----------|
| 0.011171 | 0.011245 | 0.011134 | 0.011245 | 0.011208 | 0.011319 | 0.011208 |
| 0.011208 | 0.011208 | 0.011503 | 0.011503 | 0.011282 | 0.011319 | 0.011356 |
| 0.011097 | 0.011097 | 0.011134 | 0.011245 | 0.000000 | 0.011356 | 0.011356 |
| 0.011319 | 0.011319 | 0.011319 | 0.011356 | 0.011577 | 0.011357 | 0.011245 |
| 0.011208 | 0.011245 | 0.011356 | 0.011134 | 0.011245 | 0.011134 | 0.011245 |
| 0.011282 | 0.011282 | 0.011319 | 0.011319 | 0.011208 | 0.011429 | 0.011356 |
| 0.011247 | 0.011097 | 0.011245 | 0.011282 | 0.011208 | 0.011393 | 0.011429 |
| 0.011614 | 0.011211 | 0.011430 | 0.011430 | 0.011356 | 0.011466 | 0.011134 |
| 0.011320 | 0.011208 | 0.011171 | 0.011171 | 0.011245 | 0.011134 | 0.011245 |
| 0.011208 | 0.011319 | 0.011208 | 0.011208 | 0.011208 | 0.011503 | 0.011503 |
| 0.011282 | 0.011319 | 0.011356 | 0.011282 | 0.011984 | 0.011331 | 0.011291 |
| 0.011365 | 0.011287 | 0.011440 | 0.011325 | 0.011364 | 0.011360 | 0.011247 |
| 0.011921 | 0.011210 | 0.011358 | 0.011285 | 0.011582 | 0.011395 | 0.011544 |
| 0.011913 | 0.011387 | 0.011246 | 0.011245 | 0.011245 | 0.011282 | 0.011209 |
| 0.011097 | 0.011134 | 0.011282 | 0.011245 | 0.011246 | 0.011392 | 0.011319 |
| 0.011208 | 0.011134 | 0.011171 | 0.011208 | 0.011097 | 0.011134 | 0.000000 |
| 0.011208 | 0.011245 | 0.011134 | 0.011097 | 0.011208 | 0.011134 | 0.011171 |
| 0.011171 | 0.011097 | 0.011171 | 0.011171 | 0.011097 | 0.011282 | 0.011356 |
| 0.011245 | 0.011319 | 0.011245 | 0.011245 | 0.011134 | 0.011540 | 0.011208 |
| 0.011249 | 0.011171 | 0.011429 | 0.011430 | 0.011282 | 0.011282 | 0.011245 |
| 0.011245 | 0.011208 | 0.011171 | 0.011208 | 0.011245 | 0.011245 | 0.011245 |
| 0.011245 | 0.011319 | 0.011540 | 0.011245 | 0.011429 | 0.011429 | 0.011356 |
| 0.011171 | 0.011245 | 0.011245 | 0.011651 | 0.011245 | 0.011282 | 0.011245 |
| 0.011208 | 0.011208 | 0.011208 | 0.011503 | 0.011430 | 0.011466 | 0.011208 |
| 0.011282 | 0.011319 | 0.011208 | 0.011282 | 0.011208 | 0.011134 | 0.011429 |
| 0.011245 | 0.011208 | 0.011208 | 0.011393 | 0.011208 | 0.011245 | 0.011503 |
| 0.011171 | 0.011583 | 0.011614 | 0.011364 | 0.011120 | 0.011282 | 0.011169 |
| 0.011120 | 0.011601 | 0.011136 | 0.011348 | 0.011113 | 0.011279 | 0.011289 |
| 0.011386 | 0.000000 | 0.011239 | 0.000000 | 0.011119 | 0.011275 | 0.011280 |
| 0.011305 | 0.011188 | 0.011291 | 0.011175 | 0.011172 | 0.011392 | 0.011466 |
| 0.011429 | 0.011319 | 0.011432 | 0.011433 | 0.011544 | 0.011566 | 0.011171 |
| 0.011503 | 0.011319 | 0.011208 | 0.011319 | 0.011097 | 0.011356 | 0.011134 |
| 0.011171 | 0.011208 | 0.011171 | 0.011134 | 0.011171 | 0.011134 | 0.011171 |
| 0.011172 | 0.011208 | 0.011208 | 0.011208 | 0.011356 | 0.011134 | 0.011319 |
| 0.011319 | 0.011245 | 0.000000 | 0.000000 | 0.011208 | 0.011356 | 0.011319 |
| 0.011171 | 0.011208 | 0.011429 | 0.011430 | 0.011356 | 0.011429 | 0.011319 |
| 0.011282 | 0.011319 | 0.011319 | 0.011208 | 0.011725 | 0.011356 | 0.011467 |
| 0.011503 | 0.011531 | 0.011210 | 0.011288 | 0.011134 | 0.011356 | 0.011319 |
| 0.011319 | 0.011356 | 0.011393 | 0.011393 | 0.011489 | 0.011540 | 0.011174 |
| 0.000000 | 0.000000 | 0.011172 | 0.011134 | 0.011209 | 0.000000 | 0.011394 |
| 0.011210 | 0.011345 | 0.000000 | 0.011222 | 0.011134 | 0.011282 | 0.011171 |
| 0.011134 | 0.011134 | 0.011208 | 0.011134 | 0.011392 | 0.011356 | 0.011282 |
| 0.011392 | 0.011466 | 0.011171 | 0.011171 | 0.011208 | 0.011208 | 0.011209 |
| 0.011283 | 0.011208 | 0.011134 | 0.011172 | 0.011392 | 0.011466 | 0.011429 |
| 0.011319 | 0.011432 | 0.011433 | 0.011544 | 0.011566 | 0.011171 | 0.011429 |
| 0.011319 | 0.011319 | 0.011172 | 0.011328 | 0.011289 | 0.011248 | 0.011137 |
| 0.011250 | 0.011462 | 0.011290 | 0.011210 | 0.011134 | 0.011319 | 0.011171 |
| 0.011319 | 0.011245 | 0.011097 | 0.011246 | 0.011356 | 0.011321 | 0.011245 |
| 0.011134 | 0.000000 | 0.011208 | 0.011134 | 0.000000 | 0.011172 | 0.011319 |
| 0.011208 | 0.011134 | 0.011171 | 0.011171 | 0.011171 | 0.011134 | 0.011245 |
| 0.011208 | 0.011245 | 0.011245 | 0.011171 | 0.011245 | 0.011466 | 0.011134 |
| 0.011171 | 0.011540 | 0.011171 | 0.011171 | 0.011134 | 0.011540 | 0.011106 |
| 0.011536 | 0.011105 | 0.011168 | 0.011359 | 0.011453 | 0.011370 | 0.000000 |
| 0.011116 | 0.011319 | 0.011429 | 0.011545 | 0.011393 | 0.011544 | 0.011689 |
| 0.011540 | 0.011614 | 0.011577 | 0.011812 | 0.011503 | 0.012317 | 0.011578 |
| 0.012243 | 0.012060 | 0.012169 | 0.012432 | 0.011577 | 0.011245 | 0.011540 |
| 0.011947 | 0.011950 | 0.011503 | 0.011393 | 0.011429 | 0.011429 | 0.011432 |
| 0.011319 | 0.011321 | 0.011393 | 0.011356 | 0.011762 | 0.011799 | 0.011762 |
| 0.011688 | 0.011799 | 0.011875 | 0.011692 | 0.011985 | 0.011991 | 0.012096 |
| 0.012059 | 0.012059 | 0.011990 | 0.012022 | 0.012024 | 0.011245 | 0.011577 |

|          |          |          |          |          |          |          |
|----------|----------|----------|----------|----------|----------|----------|
| 0.011614 | 0.012095 | 0.011694 | 0.011799 | 0.012430 | 0.011396 | 0.011319 |
| 0.011282 | 0.011282 | 0.011799 | 0.011809 | 0.011894 | 0.011651 | 0.011282 |
| S661     | 0.011564 | 0.011564 | 0.011672 | 0.011636 | 0.011636 | 0.011672 |
| 0.011533 | 0.011424 | 0.011600 | 0.011132 | 0.011168 | 0.011168 | 0.011132 |
| 0.011132 | 0.011348 | 0.011132 | 0.011132 | 0.011204 | 0.011204 | 0.011168 |
| 0.011132 | 0.011168 | 0.011276 | 0.011132 | 0.011168 | 0.011168 | 0.011497 |
| 0.011420 | 0.011168 | 0.000000 | 0.011312 | 0.011204 | 0.011204 | 0.011132 |
| 0.011168 | 0.011276 | 0.011204 | 0.011204 | 0.011204 | 0.011204 | 0.011384 |
| 0.011132 | 0.011204 | 0.011204 | 0.011132 | 0.011276 | 0.011276 | 0.011204 |
| 0.011204 | 0.011348 | 0.011240 | 0.011528 | 0.011168 | 0.011492 | 0.011168 |
| 0.011168 | 0.011276 | 0.011348 | 0.011492 | 0.011492 | 0.011276 | 0.011384 |
| 0.011240 | 0.011312 | 0.011204 | 0.011420 | 0.011600 | 0.011204 | 0.011276 |
| 0.011168 | 0.011276 | 0.011240 | 0.011312 | 0.011204 | 0.011204 | 0.011204 |
| 0.011132 | 0.011168 | 0.011096 | 0.011204 | 0.011204 | 0.011241 | 0.011312 |
| 0.011240 | 0.011132 | 0.011276 | 0.011132 | 0.011312 | 0.011132 | 0.011168 |
| 0.011384 | 0.011276 | 0.011492 | 0.011312 | 0.011204 | 0.011456 | 0.011204 |
| 0.011333 | 0.011570 | 0.011373 | 0.011101 | 0.011099 | 0.011177 | 0.011305 |
| 0.011289 | 0.011374 | 0.011103 | 0.011348 | 0.011348 | 0.011240 | 0.011276 |
| 0.011240 | 0.011240 | 0.011312 | 0.011204 | 0.011312 | 0.011240 | 0.011168 |
| 0.011132 | 0.011276 | 0.011528 | 0.011384 | 0.011276 | 0.011240 | 0.011168 |
| 0.011132 | 0.011132 | 0.011204 | 0.011132 | 0.011384 | 0.011348 | 0.011276 |
| 0.011384 | 0.011456 | 0.011168 | 0.011168 | 0.011204 | 0.011204 | 0.011205 |
| 0.011278 | 0.011204 | 0.011168 | 0.000000 | 0.011136 | 0.011097 | 0.011204 |
| 0.011204 | 0.011133 | 0.011175 | 0.011168 | 0.011096 | 0.011132 | 0.011168 |
| 0.011428 | 0.011205 | 0.011241 | 0.011132 | 0.011132 | 0.011240 | 0.011240 |
| 0.011312 | 0.011240 | 0.011240 | 0.011240 | 0.011276 | 0.011600 | 0.011420 |
| 0.011492 | 0.011312 | 0.011204 | 0.011312 | 0.011096 | 0.011348 | 0.011132 |
| 0.011168 | 0.011204 | 0.011168 | 0.011132 | 0.011168 | 0.011132 | 0.011204 |
| 0.011168 | 0.011312 | 0.011240 | 0.011096 | 0.011241 | 0.011348 | 0.011314 |
| 0.011348 | 0.011240 | 0.011132 | 0.000000 | 0.011204 | 0.011132 | 0.000000 |
| 0.011170 | 0.011348 | 0.011132 | 0.011348 | 0.011096 | 0.011168 | 0.011168 |
| 0.011276 | 0.011132 | 0.011204 | 0.011168 | 0.011204 | 0.000000 | 0.011204 |
| 0.011204 | 0.011168 | 0.011204 | 0.011168 | 0.011168 | 0.011240 | 0.011492 |
| 0.011564 | 0.011420 | 0.011528 | 0.011313 | 0.011564 | 0.011204 | 0.011168 |
| 0.011205 | 0.011492 | 0.011306 | 0.011097 | 0.011570 | 0.000000 | 0.011187 |
| 0.011569 | 0.011496 | 0.011276 | 0.011600 | 0.011243 | 0.011384 | 0.011384 |
| 0.011312 | 0.011456 | 0.011326 | 0.011105 | 0.011194 | 0.011240 | 0.011314 |
| 0.011420 | 0.011277 | 0.011387 | 0.011496 | 0.011420 | 0.011528 | 0.011641 |
| 0.011312 | 0.011496 | 0.011420 | 0.011384 | 0.011673 | 0.011096 | 0.011313 |
| 0.011276 | 0.011204 | 0.011096 | 0.000000 | 0.011168 | 0.011168 | 0.011240 |
| 0.011168 | 0.011240 | 0.011132 | 0.011240 | 0.011168 | 0.011132 | 0.011168 |
| 0.011168 | 0.011600 | 0.011456 | 0.011492 | 0.000000 | 0.011168 | 0.011204 |
| 0.011204 | 0.011168 | 0.011204 | 0.011276 | 0.011132 | 0.011132 | 0.011132 |
| 0.011672 | 0.011276 | 0.011312 | 0.011096 | 0.011204 | 0.011348 | 0.011132 |
| 0.011096 | 0.011132 | 0.011168 | 0.011348 | 0.011132 | 0.011276 | 0.011348 |
| 0.011348 | 0.011132 | 0.011168 | 0.000000 | 0.011096 | 0.011276 | 0.011204 |
| 0.000000 | 0.011168 | 0.000000 | 0.011096 | 0.011240 | 0.011384 | 0.011132 |
| 0.011096 | 0.011240 | 0.011168 | 0.000000 | 0.011384 | 0.000000 | 0.011240 |
| 0.011317 | 0.011132 | 0.011420 | 0.011240 | 0.011312 | 0.011132 | 0.011240 |
| 0.011132 | 0.011492 | 0.000000 | 0.011276 | 0.011132 | 0.011132 | 0.000000 |
| 0.011276 | 0.011529 | 0.011204 | 0.011276 | 0.011096 | 0.011456 | 0.011132 |
| 0.011132 | 0.011132 | 0.011132 | 0.011276 | 0.011168 | 0.011276 | 0.011312 |
| 0.011312 | 0.011312 | 0.011168 | 0.011276 | 0.011276 | 0.011096 | 0.011096 |
| 0.011132 | 0.011096 | 0.011204 | 0.011132 | 0.011096 | 0.011240 | 0.011132 |
| 0.011168 | 0.011168 | 0.011276 | 0.011348 | 0.011240 | 0.011168 | 0.011168 |
| 0.011204 | 0.011096 | 0.011276 | 0.011132 | 0.011240 | 0.011312 | 0.011528 |
| 0.011168 | 0.011564 | 0.011170 | 0.018021 | 0.011128 | 0.011252 | 0.011504 |
| 0.011464 | 0.011504 | 0.011170 | 0.011180 | 0.011635 | 0.011536 | 0.011253 |
| 0.011405 | 0.011438 | 0.000000 | 0.011148 | 0.011142 | 0.011215 | 0.011150 |
| 0.011401 | 0.011331 | 0.011331 | 0.011130 | 0.011312 | 0.011348 | 0.011350 |

|          |          |          |          |          |          |          |
|----------|----------|----------|----------|----------|----------|----------|
| 0.011207 | 0.011240 | 0.011312 | 0.011276 | 0.011240 | 0.011240 | 0.011204 |
| 0.011096 | 0.011132 | 0.011132 | 0.011240 | 0.011168 | 0.011132 | 0.011168 |
| 0.011168 | 0.011240 | 0.011132 | 0.011240 | 0.011240 | 0.011312 | 0.011204 |
| 0.011240 | 0.011168 | 0.011492 | 0.011492 | 0.011276 | 0.011277 | 0.011312 |
| 0.000000 | 0.011096 | 0.011132 | 0.011240 | 0.011096 | 0.011312 | 0.011312 |
| 0.011276 | 0.011276 | 0.011312 | 0.011312 | 0.011564 | 0.011313 | 0.011240 |
| 0.011168 | 0.011276 | 0.011348 | 0.011168 | 0.011240 | 0.011132 | 0.011168 |
| 0.011240 | 0.011240 | 0.011276 | 0.011312 | 0.011205 | 0.011420 | 0.011348 |
| 0.011242 | 0.011096 | 0.011240 | 0.011312 | 0.011204 | 0.011384 | 0.011420 |
| 0.011600 | 0.011243 | 0.011384 | 0.011384 | 0.011312 | 0.011456 | 0.011132 |
| 0.011277 | 0.011204 | 0.011168 | 0.011168 | 0.011240 | 0.011132 | 0.011240 |
| 0.011240 | 0.011312 | 0.011204 | 0.011240 | 0.011168 | 0.011492 | 0.011492 |
| 0.011276 | 0.011277 | 0.011384 | 0.011312 | 0.011925 | 0.011289 | 0.011287 |
| 0.011359 | 0.011283 | 0.011434 | 0.011320 | 0.011359 | 0.011355 | 0.011278 |
| 0.011870 | 0.011208 | 0.011353 | 0.011281 | 0.011572 | 0.011387 | 0.011497 |
| 0.011898 | 0.011382 | 0.011242 | 0.011240 | 0.011240 | 0.011276 | 0.011205 |
| 0.011096 | 0.011132 | 0.011276 | 0.011240 | 0.011242 | 0.011384 | 0.011349 |
| 0.011204 | 0.011132 | 0.011168 | 0.011204 | 0.011096 | 0.011132 | 0.000000 |
| 0.011204 | 0.011240 | 0.011132 | 0.011096 | 0.011204 | 0.011132 | 0.011168 |
| 0.011132 | 0.011096 | 0.011168 | 0.011132 | 0.011096 | 0.011276 | 0.011348 |
| 0.011240 | 0.011312 | 0.011240 | 0.011240 | 0.011096 | 0.011492 | 0.011204 |
| 0.011246 | 0.011168 | 0.011420 | 0.011423 | 0.011240 | 0.011276 | 0.011240 |
| 0.011204 | 0.011204 | 0.011168 | 0.011204 | 0.011312 | 0.011276 | 0.011240 |
| 0.011240 | 0.011348 | 0.011528 | 0.011276 | 0.011420 | 0.011420 | 0.011348 |
| 0.011168 | 0.011240 | 0.011204 | 0.011600 | 0.011240 | 0.011240 | 0.011240 |
| 0.011168 | 0.011204 | 0.011204 | 0.011492 | 0.011420 | 0.011456 | 0.011168 |
| 0.011276 | 0.011312 | 0.011240 | 0.011276 | 0.011204 | 0.011132 | 0.011420 |
| 0.011240 | 0.011204 | 0.011204 | 0.011384 | 0.011168 | 0.011276 | 0.011528 |
| 0.011168 | 0.011569 | 0.011600 | 0.011355 | 0.011118 | 0.011312 | 0.011167 |
| 0.011117 | 0.011625 | 0.011134 | 0.011339 | 0.011162 | 0.011272 | 0.011282 |
| 0.011375 | 0.000000 | 0.011233 | 0.000000 | 0.011117 | 0.011268 | 0.011273 |
| 0.011298 | 0.011184 | 0.011285 | 0.011172 | 0.011205 | 0.011384 | 0.011456 |
| 0.011420 | 0.011313 | 0.011423 | 0.011424 | 0.011532 | 0.011552 | 0.011204 |
| 0.011492 | 0.011312 | 0.011204 | 0.011312 | 0.011096 | 0.011348 | 0.011132 |
| 0.011168 | 0.011204 | 0.011168 | 0.011132 | 0.011168 | 0.011132 | 0.011204 |
| 0.011133 | 0.011205 | 0.011168 | 0.011204 | 0.011384 | 0.011312 | 0.000000 |
| 0.011312 | 0.011240 | 0.000000 | 0.000000 | 0.011204 | 0.011348 | 0.011312 |
| 0.011168 | 0.011240 | 0.011456 | 0.011457 | 0.011312 | 0.011420 | 0.011348 |
| 0.011276 | 0.011348 | 0.011312 | 0.011204 | 0.011781 | 0.011312 | 0.011420 |
| 0.011528 | 0.011519 | 0.011207 | 0.011282 | 0.011168 | 0.011348 | 0.011348 |
| 0.011349 | 0.011348 | 0.011348 | 0.011348 | 0.011521 | 0.011564 | 0.011172 |
| 0.000000 | 0.000000 | 0.011170 | 0.011133 | 0.011206 | 0.000000 | 0.011388 |
| 0.011170 | 0.011341 | 0.000000 | 0.011219 | 0.011168 | 0.011276 | 0.011168 |
| 0.011132 | 0.011132 | 0.011204 | 0.011132 | 0.011384 | 0.011348 | 0.011276 |
| 0.011384 | 0.011456 | 0.011168 | 0.011168 | 0.011204 | 0.011204 | 0.011205 |
| 0.011278 | 0.011204 | 0.011168 | 0.011205 | 0.011384 | 0.011456 | 0.011420 |
| 0.011313 | 0.011423 | 0.011424 | 0.011532 | 0.011552 | 0.011204 | 0.011420 |
| 0.011348 | 0.011348 | 0.011169 | 0.011358 | 0.011283 | 0.011279 | 0.011173 |
| 0.011208 | 0.011504 | 0.011331 | 0.011206 | 0.011132 | 0.011348 | 0.011168 |
| 0.011312 | 0.011240 | 0.011096 | 0.011241 | 0.011348 | 0.011314 | 0.011240 |
| 0.011132 | 0.000000 | 0.011204 | 0.011132 | 0.000000 | 0.011170 | 0.011348 |
| 0.011096 | 0.011132 | 0.011132 | 0.011240 | 0.011168 | 0.011132 | 0.011348 |
| 0.011204 | 0.011240 | 0.011240 | 0.011168 | 0.011240 | 0.011456 | 0.011132 |
| 0.011168 | 0.011492 | 0.011168 | 0.011168 | 0.011132 | 0.011528 | 0.011105 |
| 0.011579 | 0.011104 | 0.011164 | 0.011351 | 0.011441 | 0.011362 | 0.000000 |
| 0.011114 | 0.011348 | 0.011420 | 0.011533 | 0.011385 | 0.011532 | 0.011673 |
| 0.011528 | 0.011603 | 0.011564 | 0.011866 | 0.011528 | 0.012358 | 0.011601 |
| 0.012178 | 0.012071 | 0.012178 | 0.012470 | 0.011456 | 0.011240 | 0.011528 |
| 0.011925 | 0.011928 | 0.011528 | 0.011420 | 0.011492 | 0.011492 | 0.011423 |
| 0.011348 | 0.011351 | 0.011420 | 0.011384 | 0.011709 | 0.011781 | 0.011744 |



|          |          |          |           |          |          |          |
|----------|----------|----------|-----------|----------|----------|----------|
| 0.011672 | 0.011781 | 0.011818 | 0.011640  | 0.011926 | 0.011967 | 0.012034 |
| 0.012034 | 0.011998 | 0.011930 | 0.011962  | 0.011964 | 0.011276 | 0.011564 |
| 0.011600 | 0.012105 | 0.011642 | 0.011817  | 0.012395 | 0.011388 | 0.011312 |
| 0.011276 | 0.011276 | 0.011709 | 0.011754  | 0.011836 | 0.011600 | 0.011277 |
| S662     | 0.011670 | 0.011670 | 0.011772  | 0.011738 | 0.011738 | 0.011806 |
| 0.011643 | 0.011540 | 0.011670 | 0.011263  | 0.011331 | 0.011298 | 0.011263 |
| 0.011297 | 0.011399 | 0.011263 | 0.011297  | 0.011365 | 0.011331 | 0.011297 |
| 0.011263 | 0.011297 | 0.011399 | 0.011264  | 0.011298 | 0.011297 | 0.011608 |
| 0.011534 | 0.011297 | 0.011196 | 0.011433  | 0.011365 | 0.011331 | 0.011365 |
| 0.011331 | 0.011433 | 0.011331 | 0.011331  | 0.011365 | 0.011331 | 0.011501 |
| 0.011263 | 0.011331 | 0.011365 | 0.011297  | 0.011399 | 0.011433 | 0.011365 |
| 0.011331 | 0.011501 | 0.011399 | 0.011636  | 0.011331 | 0.011602 | 0.011331 |
| 0.011297 | 0.011399 | 0.011467 | 0.011602  | 0.011670 | 0.011399 | 0.011501 |
| 0.011365 | 0.011433 | 0.011331 | 0.011568  | 0.011772 | 0.011264 | 0.011399 |
| 0.011297 | 0.011399 | 0.011365 | 0.011433  | 0.011365 | 0.011365 | 0.011365 |
| 0.011263 | 0.011297 | 0.011263 | 0.011365  | 0.011331 | 0.011366 | 0.011433 |
| 0.011365 | 0.011331 | 0.011399 | 0.011297  | 0.011433 | 0.011263 | 0.011297 |
| 0.011500 | 0.011433 | 0.011670 | 0.011467  | 0.011331 | 0.011568 | 0.011263 |
| 0.011509 | 0.011700 | 0.011551 | 0.011256  | 0.011247 | 0.011357 | 0.011454 |
| 0.012085 | 0.011569 | 0.011266 | 0.011568  | 0.011568 | 0.011365 | 0.011433 |
| 0.011399 | 0.011365 | 0.011433 | 0.011331  | 0.011433 | 0.011365 | 0.011365 |
| 0.011331 | 0.011433 | 0.011636 | 0.011433  | 0.011399 | 0.011365 | 0.011297 |
| 0.011263 | 0.011263 | 0.011331 | 0.011297  | 0.011500 | 0.011467 | 0.011399 |
| 0.011500 | 0.011568 | 0.011297 | 0.011297  | 0.011331 | 0.011331 | 0.011333 |
| 0.011401 | 0.011331 | 0.011331 | 0.011204  | 0.011277 | 0.011236 | 0.011331 |
| 0.011331 | 0.011266 | 0.011318 | 0.011302  | 0.011231 | 0.011266 | 0.011298 |
| 0.011564 | 0.011336 | 0.011370 | 0.011263  | 0.011268 | 0.011399 | 0.011365 |
| 0.011433 | 0.011365 | 0.011365 | 0.011467  | 0.011399 | 0.011772 | 0.011535 |
| 0.011602 | 0.011467 | 0.011331 | 0.011433  | 0.011230 | 0.011467 | 0.011263 |
| 0.011297 | 0.011331 | 0.011297 | 0.011263  | 0.011297 | 0.011263 | 0.011365 |
| 0.011331 | 0.011433 | 0.011365 | 0.011263  | 0.011298 | 0.011467 | 0.011469 |
| 0.011467 | 0.011365 | 0.011263 | 0.011196  | 0.011331 | 0.011263 | 0.011196 |
| 0.011300 | 0.011467 | 0.011263 | 0.011467  | 0.011230 | 0.011331 | 0.011297 |
| 0.011399 | 0.011297 | 0.011331 | 0.011297  | 0.011331 | 0.011196 | 0.011331 |
| 0.011365 | 0.011297 | 0.011365 | 0.011297  | 0.011331 | 0.011365 | 0.011602 |
| 0.011670 | 0.011602 | 0.011670 | 0.011468  | 0.011670 | 0.011331 | 0.011297 |
| 0.011333 | 0.011631 | 0.011384 | 0.011233  | 0.011608 | 0.011198 | 0.011258 |
| 0.011677 | 0.011608 | 0.011500 | 0.011704  | 0.011405 | 0.011568 | 0.011535 |
| 0.011467 | 0.011636 | 0.011491 | 0.011351  | 0.011397 | 0.011365 | 0.011436 |
| 0.011534 | 0.011434 | 0.011538 | 0.011641  | 0.011568 | 0.011636 | 0.011744 |
| 0.011470 | 0.011642 | 0.011572 | 0.011504  | 0.011772 | 0.011230 | 0.011434 |
| 0.011399 | 0.011331 | 0.011230 | 0.011230  | 0.011297 | 0.011230 | 0.011365 |
| 0.011297 | 0.011365 | 0.011263 | 0.011365  | 0.011297 | 0.011297 | 0.011365 |
| 0.011297 | 0.011704 | 0.011602 | 0.011636  | 0.011196 | 0.011297 | 0.011331 |
| 0.011331 | 0.011297 | 0.011365 | 0.011399  | 0.011263 | 0.011263 | 0.011263 |
| 0.011772 | 0.011399 | 0.011433 | 0.011230  | 0.011331 | 0.011501 | 0.011263 |
| 0.011263 | 0.011297 | 0.011297 | 0.011467  | 0.011263 | 0.011399 | 0.011534 |
| 0.011467 | 0.011297 | 0.011297 | 0.011230  | 0.011230 | 0.011399 | 0.011331 |
| 0.011230 | 0.011331 | 0.011196 | 0.011230  | 0.011365 | 0.011501 | 0.011230 |
| 0.011230 | 0.011365 | 0.011298 | 0.011196  | 0.011500 | 0.011196 | 0.011297 |
| 0.011440 | 0.011263 | 0.011534 | 0.011399  | 0.011433 | 0.011297 | 0.011399 |
| 0.011263 | 0.011602 | 0.011196 | 0.011433  | 0.011263 | 0.011263 | 0.011196 |
| 0.011433 | 0.011636 | 0.011331 | 0.011399  | 0.011230 | 0.011602 | 0.011263 |
| 0.011263 | 0.011263 | 0.011297 | 0.011399  | 0.011297 | 0.011399 | 0.011467 |
| 0.011433 | 0.011433 | 0.011331 | 0.011433  | 0.011399 | 0.011263 | 0.011230 |
| 0.011263 | 0.011263 | 0.011331 | 0.011263  | 0.011230 | 0.011399 | 0.011263 |
| 0.011297 | 0.011297 | 0.011433 | 0.011467  | 0.011365 | 0.011297 | 0.011297 |
| 0.011365 | 0.011263 | 0.011399 | 0.011263  | 0.011399 | 0.011433 | 0.011704 |
| 0.011297 | 0.011670 | 0.011304 | 0.0117879 | 0.011388 | 0.011366 | 0.011622 |
| 0.011583 | 0.011627 | 0.011427 | 0.011408  | 0.011774 | 0.011651 | 0.011364 |

|          |          |          |          |          |          |          |
|----------|----------|----------|----------|----------|----------|----------|
| 0.011582 | 0.011610 | 0.011216 | 0.011311 | 0.011294 | 0.011357 | 0.011318 |
| 0.011576 | 0.011470 | 0.011468 | 0.011259 | 0.011433 | 0.011467 | 0.011470 |
| 0.011337 | 0.011433 | 0.011433 | 0.011399 | 0.011365 | 0.011365 | 0.011331 |
| 0.011365 | 0.011297 | 0.011331 | 0.011365 | 0.011331 | 0.011263 | 0.011297 |
| 0.011297 | 0.011365 | 0.011263 | 0.011365 | 0.011399 | 0.011433 | 0.011331 |
| 0.011365 | 0.011331 | 0.011602 | 0.011602 | 0.011399 | 0.011366 | 0.011467 |
| 0.011230 | 0.011230 | 0.011263 | 0.011365 | 0.011230 | 0.011467 | 0.011467 |
| 0.011500 | 0.011500 | 0.011433 | 0.011534 | 0.011670 | 0.011536 | 0.011365 |
| 0.011365 | 0.011433 | 0.011467 | 0.011297 | 0.011365 | 0.011331 | 0.011365 |
| 0.011433 | 0.011433 | 0.011467 | 0.011433 | 0.011332 | 0.011534 | 0.011501 |
| 0.011368 | 0.011263 | 0.011365 | 0.011467 | 0.011331 | 0.011501 | 0.011534 |
| 0.011704 | 0.011405 | 0.011568 | 0.011535 | 0.011467 | 0.011636 | 0.011264 |
| 0.011434 | 0.011264 | 0.011297 | 0.011297 | 0.011365 | 0.011263 | 0.011365 |
| 0.011399 | 0.011433 | 0.011331 | 0.011365 | 0.011331 | 0.011602 | 0.011602 |
| 0.011399 | 0.011366 | 0.011500 | 0.011433 | 0.012078 | 0.011493 | 0.011415 |
| 0.011486 | 0.011445 | 0.011556 | 0.011445 | 0.011519 | 0.011478 | 0.011440 |
| 0.012030 | 0.011339 | 0.011475 | 0.011409 | 0.011685 | 0.011541 | 0.011643 |
| 0.012054 | 0.011516 | 0.011367 | 0.011365 | 0.011365 | 0.011399 | 0.011333 |
| 0.011230 | 0.011263 | 0.011399 | 0.011365 | 0.011367 | 0.011500 | 0.011468 |
| 0.011331 | 0.011263 | 0.011297 | 0.011331 | 0.011230 | 0.011297 | 0.011196 |
| 0.011331 | 0.011365 | 0.011263 | 0.011230 | 0.011331 | 0.011263 | 0.011297 |
| 0.011297 | 0.011230 | 0.011297 | 0.011331 | 0.011230 | 0.011433 | 0.011467 |
| 0.011365 | 0.011433 | 0.011365 | 0.011365 | 0.011297 | 0.011670 | 0.011331 |
| 0.011376 | 0.011297 | 0.011534 | 0.011539 | 0.011399 | 0.011399 | 0.011399 |
| 0.011399 | 0.011331 | 0.011297 | 0.011331 | 0.011365 | 0.011433 | 0.011365 |
| 0.011365 | 0.011501 | 0.011636 | 0.011399 | 0.011602 | 0.011602 | 0.011467 |
| 0.011297 | 0.011365 | 0.011399 | 0.011772 | 0.011365 | 0.011399 | 0.011365 |
| 0.011399 | 0.011331 | 0.011331 | 0.011636 | 0.011568 | 0.011602 | 0.011331 |
| 0.011433 | 0.011501 | 0.011365 | 0.011433 | 0.011365 | 0.011263 | 0.011568 |
| 0.011365 | 0.011331 | 0.011331 | 0.011501 | 0.011331 | 0.011433 | 0.011670 |
| 0.011297 | 0.011711 | 0.011704 | 0.011548 | 0.011342 | 0.011437 | 0.011370 |
| 0.011280 | 0.011761 | 0.011273 | 0.011507 | 0.011353 | 0.011467 | 0.011485 |
| 0.011570 | 0.011324 | 0.011450 | 0.011324 | 0.011330 | 0.011462 | 0.011428 |
| 0.011440 | 0.011338 | 0.011415 | 0.011309 | 0.011366 | 0.011500 | 0.011568 |
| 0.011534 | 0.011433 | 0.011538 | 0.011539 | 0.011642 | 0.011702 | 0.011331 |
| 0.011602 | 0.011467 | 0.011331 | 0.011433 | 0.011230 | 0.011467 | 0.011263 |
| 0.011297 | 0.011331 | 0.011297 | 0.011263 | 0.011297 | 0.011263 | 0.011365 |
| 0.011340 | 0.011340 | 0.011334 | 0.011368 | 0.011505 | 0.011470 | 0.011470 |
| 0.011469 | 0.011399 | 0.011208 | 0.011204 | 0.000000 | 0.011501 | 0.011501 |
| 0.011297 | 0.011365 | 0.011602 | 0.011570 | 0.011501 | 0.011467 | 0.011467 |
| 0.011399 | 0.011467 | 0.011467 | 0.011365 | 0.011907 | 0.011501 | 0.011602 |
| 0.011636 | 0.011671 | 0.011336 | 0.011409 | 0.011297 | 0.011500 | 0.011467 |
| 0.011501 | 0.011500 | 0.011534 | 0.011534 | 0.011692 | 0.011670 | 0.011305 |
| 0.011197 | 0.011200 | 0.011300 | 0.011266 | 0.011336 | 0.011173 | 0.011505 |
| 0.011336 | 0.011500 | 0.011203 | 0.011360 | 0.011331 | 0.011402 | 0.011297 |
| 0.011263 | 0.011263 | 0.011331 | 0.011297 | 0.011500 | 0.011467 | 0.011399 |
| 0.011500 | 0.011568 | 0.011297 | 0.011297 | 0.011331 | 0.011331 | 0.011333 |
| 0.011401 | 0.011331 | 0.011331 | 0.011366 | 0.011500 | 0.011568 | 0.011534 |
| 0.011433 | 0.011538 | 0.011539 | 0.011642 | 0.011702 | 0.011331 | 0.011534 |
| 0.011467 | 0.011467 | 0.011299 | 0.011481 | 0.011340 | 0.011438 | 0.011272 |
| 0.011477 | 0.011659 | 0.011443 | 0.011369 | 0.011263 | 0.011467 | 0.011331 |
| 0.011433 | 0.011365 | 0.011263 | 0.011298 | 0.011467 | 0.011469 | 0.011365 |
| 0.011263 | 0.011196 | 0.011331 | 0.011263 | 0.011196 | 0.011300 | 0.011467 |
| 0.011365 | 0.011297 | 0.011331 | 0.011365 | 0.011331 | 0.011263 | 0.011467 |
| 0.011331 | 0.011365 | 0.011365 | 0.011297 | 0.011365 | 0.011568 | 0.011263 |
| 0.011297 | 0.011670 | 0.011297 | 0.011297 | 0.011297 | 0.011636 | 0.011274 |
| 0.011791 | 0.011273 | 0.011361 | 0.011503 | 0.011589 | 0.011494 | 0.011227 |
| 0.011323 | 0.011467 | 0.011568 | 0.011676 | 0.011535 | 0.011674 | 0.011806 |
| 0.011704 | 0.011742 | 0.011704 | 0.011955 | 0.011636 | 0.012552 | 0.011705 |
| 0.012383 | 0.012215 | 0.012352 | 0.012591 | 0.011670 | 0.011365 | 0.011670 |

|          |          |          |          |          |          |          |
|----------|----------|----------|----------|----------|----------|----------|
| 0.012112 | 0.012047 | 0.011636 | 0.011535 | 0.011602 | 0.011602 | 0.011572 |
| 0.011467 | 0.011471 | 0.011534 | 0.011501 | 0.011874 | 0.011941 | 0.011941 |
| 0.011841 | 0.011942 | 0.011977 | 0.011810 | 0.012112 | 0.012118 | 0.012180 |
| 0.012180 | 0.012214 | 0.012161 | 0.012180 | 0.012182 | 0.011399 | 0.011704 |
| 0.011738 | 0.012281 | 0.011778 | 0.012009 | 0.012486 | 0.011539 | 0.011433 |
| 0.011399 | 0.011399 | 0.011874 | 0.011883 | 0.012010 | 0.011738 | 0.011400 |
| S663     | 0.011840 | 0.011840 | 0.011942 | 0.011908 | 0.011908 | 0.011976 |
| 0.011746 | 0.011643 | 0.011908 | 0.011433 | 0.011501 | 0.011467 | 0.011433 |
| 0.011467 | 0.011636 | 0.011433 | 0.011467 | 0.011535 | 0.011501 | 0.011467 |
| 0.011433 | 0.011467 | 0.011568 | 0.011433 | 0.011467 | 0.011467 | 0.011711 |
| 0.011704 | 0.011467 | 0.011365 | 0.011602 | 0.011535 | 0.011501 | 0.011535 |
| 0.011501 | 0.011602 | 0.011501 | 0.011501 | 0.011535 | 0.011501 | 0.011670 |
| 0.011433 | 0.011501 | 0.011535 | 0.011467 | 0.011568 | 0.011602 | 0.011535 |
| 0.011501 | 0.011670 | 0.011569 | 0.011806 | 0.011501 | 0.011772 | 0.011501 |
| 0.011467 | 0.011569 | 0.011636 | 0.011772 | 0.011840 | 0.011568 | 0.011670 |
| 0.011535 | 0.011602 | 0.011501 | 0.011738 | 0.011942 | 0.011501 | 0.011568 |
| 0.011467 | 0.011568 | 0.011535 | 0.011602 | 0.011535 | 0.011535 | 0.011535 |
| 0.011433 | 0.011467 | 0.011433 | 0.011535 | 0.011501 | 0.011535 | 0.011602 |
| 0.011535 | 0.011501 | 0.011568 | 0.011467 | 0.011602 | 0.011433 | 0.011467 |
| 0.011670 | 0.011602 | 0.011840 | 0.011636 | 0.011433 | 0.011738 | 0.011501 |
| 0.011659 | 0.011851 | 0.011702 | 0.011412 | 0.011433 | 0.011543 | 0.011612 |
| 0.012268 | 0.011772 | 0.011431 | 0.011738 | 0.011738 | 0.011534 | 0.011602 |
| 0.011568 | 0.011535 | 0.011602 | 0.011501 | 0.011602 | 0.011535 | 0.011534 |
| 0.011501 | 0.011602 | 0.011806 | 0.011670 | 0.011568 | 0.011535 | 0.011467 |
| 0.011433 | 0.011433 | 0.011501 | 0.011467 | 0.011670 | 0.011636 | 0.011568 |
| 0.011670 | 0.011738 | 0.011467 | 0.011467 | 0.011501 | 0.011501 | 0.011503 |
| 0.011572 | 0.011433 | 0.011501 | 0.011384 | 0.011458 | 0.011411 | 0.011501 |
| 0.011501 | 0.011438 | 0.011503 | 0.011474 | 0.011403 | 0.011437 | 0.011468 |
| 0.011744 | 0.011508 | 0.011543 | 0.011433 | 0.011441 | 0.011569 | 0.011535 |
| 0.011603 | 0.011535 | 0.011535 | 0.011636 | 0.011568 | 0.011942 | 0.011704 |
| 0.011772 | 0.011636 | 0.011501 | 0.011602 | 0.011399 | 0.011636 | 0.011433 |
| 0.011467 | 0.011501 | 0.011467 | 0.011433 | 0.011467 | 0.011433 | 0.011535 |
| 0.011501 | 0.011602 | 0.011535 | 0.011433 | 0.011536 | 0.011636 | 0.011640 |
| 0.011636 | 0.011535 | 0.011433 | 0.011366 | 0.011501 | 0.011433 | 0.011365 |
| 0.011471 | 0.011636 | 0.011433 | 0.011636 | 0.011399 | 0.011501 | 0.011467 |
| 0.011501 | 0.011467 | 0.011433 | 0.011467 | 0.011501 | 0.011365 | 0.011501 |
| 0.011535 | 0.011467 | 0.011535 | 0.011467 | 0.011501 | 0.011535 | 0.011772 |
| 0.011840 | 0.011772 | 0.011840 | 0.011638 | 0.011840 | 0.011501 | 0.011467 |
| 0.011503 | 0.011795 | 0.011476 | 0.011406 | 0.011848 | 0.011370 | 0.011496 |
| 0.011780 | 0.011780 | 0.011670 | 0.011874 | 0.011577 | 0.011738 | 0.011704 |
| 0.011636 | 0.011806 | 0.011670 | 0.011517 | 0.011523 | 0.011535 | 0.011607 |
| 0.011704 | 0.011536 | 0.011709 | 0.011812 | 0.011738 | 0.011806 | 0.011847 |
| 0.011641 | 0.011813 | 0.011743 | 0.011675 | 0.011943 | 0.011399 | 0.011604 |
| 0.011501 | 0.011501 | 0.011399 | 0.011399 | 0.011467 | 0.011467 | 0.011535 |
| 0.011467 | 0.011535 | 0.011433 | 0.011535 | 0.011467 | 0.011467 | 0.011534 |
| 0.011467 | 0.011874 | 0.011772 | 0.011806 | 0.011365 | 0.011467 | 0.011501 |
| 0.011501 | 0.011467 | 0.011535 | 0.011568 | 0.011433 | 0.011433 | 0.011433 |
| 0.011941 | 0.011568 | 0.011602 | 0.011399 | 0.011501 | 0.011670 | 0.011433 |
| 0.011433 | 0.011467 | 0.011467 | 0.011636 | 0.011433 | 0.011568 | 0.011704 |
| 0.011636 | 0.011467 | 0.011467 | 0.011399 | 0.011399 | 0.011569 | 0.011501 |
| 0.011399 | 0.011501 | 0.011365 | 0.011399 | 0.011535 | 0.011670 | 0.011433 |
| 0.011399 | 0.011534 | 0.011467 | 0.011365 | 0.011670 | 0.011365 | 0.011535 |
| 0.011613 | 0.011433 | 0.011704 | 0.011569 | 0.011602 | 0.011467 | 0.011568 |
| 0.011433 | 0.011772 | 0.011365 | 0.011602 | 0.011433 | 0.011433 | 0.011365 |
| 0.011602 | 0.011806 | 0.011501 | 0.011568 | 0.011399 | 0.011772 | 0.011433 |
| 0.011433 | 0.011433 | 0.011467 | 0.011568 | 0.011467 | 0.011568 | 0.011636 |
| 0.011602 | 0.011602 | 0.011501 | 0.011603 | 0.011568 | 0.011433 | 0.011399 |
| 0.011433 | 0.011433 | 0.011501 | 0.011433 | 0.011399 | 0.011568 | 0.011433 |
| 0.011467 | 0.011467 | 0.011602 | 0.011636 | 0.011535 | 0.011467 | 0.011467 |
| 0.011535 | 0.011433 | 0.011568 | 0.011433 | 0.011568 | 0.011670 | 0.011874 |

|          |          |          |          |          |          |          |
|----------|----------|----------|----------|----------|----------|----------|
| 0.011467 | 0.011840 | 0.011478 | 0.018072 | 0.011453 | 0.011611 | 0.011799 |
| 0.011758 | 0.011805 | 0.011584 | 0.011524 | 0.011885 | 0.011826 | 0.011547 |
| 0.011772 | 0.011732 | 0.011372 | 0.011437 | 0.011490 | 0.011455 | 0.011491 |
| 0.011765 | 0.011656 | 0.011654 | 0.011523 | 0.011602 | 0.011636 | 0.011640 |
| 0.011511 | 0.011602 | 0.011602 | 0.011568 | 0.011535 | 0.011535 | 0.011501 |
| 0.011535 | 0.011467 | 0.011501 | 0.011535 | 0.011501 | 0.011433 | 0.011467 |
| 0.011467 | 0.011535 | 0.011433 | 0.011535 | 0.011568 | 0.011602 | 0.011501 |
| 0.011535 | 0.011501 | 0.011772 | 0.011772 | 0.011569 | 0.011603 | 0.011636 |
| 0.011399 | 0.011399 | 0.011433 | 0.011535 | 0.011399 | 0.011636 | 0.011636 |
| 0.011670 | 0.011670 | 0.011602 | 0.011704 | 0.011840 | 0.011706 | 0.011535 |
| 0.011535 | 0.011602 | 0.011636 | 0.011467 | 0.011535 | 0.011501 | 0.011535 |
| 0.011603 | 0.011602 | 0.011636 | 0.011602 | 0.011502 | 0.011704 | 0.011636 |
| 0.011539 | 0.011433 | 0.011535 | 0.011636 | 0.011501 | 0.011670 | 0.011704 |
| 0.011874 | 0.011577 | 0.011738 | 0.011704 | 0.011636 | 0.011806 | 0.011433 |
| 0.011604 | 0.011501 | 0.011467 | 0.011467 | 0.011535 | 0.011433 | 0.011535 |
| 0.011568 | 0.011602 | 0.011501 | 0.011535 | 0.011501 | 0.011772 | 0.011772 |
| 0.011569 | 0.011603 | 0.011670 | 0.011602 | 0.012248 | 0.011673 | 0.011593 |
| 0.011663 | 0.011620 | 0.011734 | 0.011620 | 0.011696 | 0.011652 | 0.011613 |
| 0.012204 | 0.011514 | 0.011648 | 0.011583 | 0.011859 | 0.011713 | 0.011815 |
| 0.012226 | 0.011707 | 0.011538 | 0.011535 | 0.011534 | 0.011568 | 0.011504 |
| 0.011399 | 0.011433 | 0.011568 | 0.011535 | 0.011538 | 0.011670 | 0.011638 |
| 0.011501 | 0.011433 | 0.011467 | 0.011501 | 0.011399 | 0.011467 | 0.011365 |
| 0.011501 | 0.011535 | 0.011433 | 0.011399 | 0.011501 | 0.011433 | 0.011467 |
| 0.011467 | 0.011399 | 0.011467 | 0.011501 | 0.011399 | 0.011602 | 0.011636 |
| 0.011535 | 0.011602 | 0.011535 | 0.011535 | 0.011467 | 0.011840 | 0.011501 |
| 0.011552 | 0.011467 | 0.011704 | 0.011710 | 0.011569 | 0.011568 | 0.011568 |
| 0.011569 | 0.011501 | 0.011467 | 0.011501 | 0.011602 | 0.011602 | 0.011535 |
| 0.011534 | 0.011670 | 0.011806 | 0.011568 | 0.011772 | 0.011772 | 0.011636 |
| 0.011467 | 0.011535 | 0.011569 | 0.011942 | 0.011535 | 0.011569 | 0.011535 |
| 0.011568 | 0.011501 | 0.011501 | 0.011806 | 0.011670 | 0.011772 | 0.011501 |
| 0.011602 | 0.011602 | 0.011535 | 0.011602 | 0.011534 | 0.011433 | 0.011704 |
| 0.011534 | 0.011501 | 0.011501 | 0.011670 | 0.011501 | 0.011602 | 0.011806 |
| 0.011467 | 0.011814 | 0.011874 | 0.011711 | 0.011512 | 0.011608 | 0.011473 |
| 0.011445 | 0.011917 | 0.011450 | 0.011596 | 0.011500 | 0.011519 | 0.011432 |
| 0.011774 | 0.011389 | 0.011506 | 0.011391 | 0.011384 | 0.011529 | 0.011592 |
| 0.011592 | 0.011497 | 0.011593 | 0.011486 | 0.011536 | 0.011670 | 0.011738 |
| 0.011704 | 0.011603 | 0.011708 | 0.011710 | 0.011813 | 0.011881 | 0.011501 |
| 0.011772 | 0.011636 | 0.011501 | 0.011602 | 0.011399 | 0.011636 | 0.011433 |
| 0.011467 | 0.011501 | 0.011467 | 0.011433 | 0.011467 | 0.011433 | 0.011535 |
| 0.011514 | 0.011515 | 0.011506 | 0.011540 | 0.011608 | 0.011641 | 0.011641 |
| 0.011605 | 0.011568 | 0.011356 | 0.011348 | 0.011501 | 0.000000 | 0.011671 |
| 0.011467 | 0.011535 | 0.011772 | 0.011740 | 0.011670 | 0.011704 | 0.011636 |
| 0.011568 | 0.011602 | 0.011636 | 0.011534 | 0.012078 | 0.011670 | 0.011772 |
| 0.011806 | 0.011851 | 0.011508 | 0.011584 | 0.011467 | 0.011670 | 0.011636 |
| 0.011671 | 0.011670 | 0.011704 | 0.011704 | 0.011850 | 0.011840 | 0.011480 |
| 0.011367 | 0.011375 | 0.011472 | 0.011437 | 0.011509 | 0.011399 | 0.011677 |
| 0.011509 | 0.011632 | 0.011394 | 0.011510 | 0.011501 | 0.011574 | 0.011467 |
| 0.011433 | 0.011433 | 0.011501 | 0.011467 | 0.011670 | 0.011636 | 0.011568 |
| 0.011670 | 0.011738 | 0.011467 | 0.011467 | 0.011501 | 0.011501 | 0.011503 |
| 0.011572 | 0.011433 | 0.011501 | 0.011536 | 0.011670 | 0.011738 | 0.011704 |
| 0.011603 | 0.011708 | 0.011710 | 0.011813 | 0.011881 | 0.011501 | 0.011704 |
| 0.011636 | 0.011636 | 0.011469 | 0.011657 | 0.011550 | 0.011610 | 0.011413 |
| 0.011651 | 0.011844 | 0.011699 | 0.011540 | 0.011433 | 0.011636 | 0.011501 |
| 0.011602 | 0.011535 | 0.011433 | 0.011536 | 0.011636 | 0.011640 | 0.011535 |
| 0.011433 | 0.011366 | 0.011501 | 0.011433 | 0.011365 | 0.011471 | 0.011636 |
| 0.011535 | 0.011467 | 0.011501 | 0.011535 | 0.011501 | 0.011433 | 0.011636 |
| 0.011501 | 0.011535 | 0.011535 | 0.011467 | 0.011535 | 0.011738 | 0.011433 |
| 0.011467 | 0.011840 | 0.011467 | 0.011467 | 0.011467 | 0.011806 | 0.011446 |
| 0.012017 | 0.011443 | 0.011562 | 0.011705 | 0.011753 | 0.011675 | 0.011395 |
| 0.011480 | 0.011636 | 0.011738 | 0.011847 | 0.011705 | 0.011845 | 0.011976 |

|          |          |          |          |          |          |          |
|----------|----------|----------|----------|----------|----------|----------|
| 0.011874 | 0.011913 | 0.011874 | 0.012059 | 0.011806 | 0.012655 | 0.011875 |
| 0.012553 | 0.012386 | 0.012488 | 0.012762 | 0.011840 | 0.011535 | 0.011840 |
| 0.012282 | 0.012217 | 0.011806 | 0.011636 | 0.011772 | 0.011772 | 0.011675 |
| 0.011636 | 0.011642 | 0.011704 | 0.011636 | 0.012044 | 0.012111 | 0.012111 |
| 0.012011 | 0.012112 | 0.012148 | 0.011981 | 0.012283 | 0.012290 | 0.012350 |
| 0.012350 | 0.012384 | 0.012334 | 0.012350 | 0.012353 | 0.011568 | 0.011874 |
| 0.011908 | 0.012451 | 0.011949 | 0.012180 | 0.012656 | 0.011711 | 0.011602 |
| 0.011568 | 0.011568 | 0.012044 | 0.012130 | 0.012187 | 0.011908 | 0.011570 |
| S664     | 0.011841 | 0.011841 | 0.011943 | 0.011909 | 0.011909 | 0.011977 |
| 0.011816 | 0.011712 | 0.011909 | 0.011433 | 0.011501 | 0.011468 | 0.011433 |
| 0.011467 | 0.011637 | 0.011433 | 0.011467 | 0.011535 | 0.011501 | 0.011467 |
| 0.011433 | 0.011467 | 0.011569 | 0.011434 | 0.011434 | 0.011467 | 0.011781 |
| 0.011705 | 0.011467 | 0.011366 | 0.011603 | 0.011535 | 0.011501 | 0.011535 |
| 0.011501 | 0.011603 | 0.011501 | 0.011501 | 0.011535 | 0.011501 | 0.011671 |
| 0.011433 | 0.011501 | 0.011535 | 0.011467 | 0.011569 | 0.011603 | 0.011535 |
| 0.011501 | 0.011671 | 0.011570 | 0.011807 | 0.011501 | 0.011773 | 0.011501 |
| 0.011467 | 0.011569 | 0.011637 | 0.011773 | 0.011841 | 0.011569 | 0.011671 |
| 0.011535 | 0.011603 | 0.011501 | 0.011739 | 0.011943 | 0.011501 | 0.011569 |
| 0.011467 | 0.011569 | 0.011535 | 0.011603 | 0.011535 | 0.011535 | 0.011535 |
| 0.011433 | 0.011467 | 0.011433 | 0.011535 | 0.011501 | 0.011536 | 0.011603 |
| 0.011535 | 0.011501 | 0.011569 | 0.011467 | 0.011603 | 0.011433 | 0.011467 |
| 0.011671 | 0.011603 | 0.011841 | 0.011637 | 0.011501 | 0.011739 | 0.011501 |
| 0.011622 | 0.011815 | 0.011665 | 0.011373 | 0.011359 | 0.011469 | 0.011573 |
| 0.012197 | 0.011620 | 0.011390 | 0.011739 | 0.011739 | 0.011535 | 0.011603 |
| 0.011569 | 0.011535 | 0.011603 | 0.011501 | 0.011603 | 0.011535 | 0.011535 |
| 0.011501 | 0.011603 | 0.011807 | 0.011671 | 0.011569 | 0.011535 | 0.011467 |
| 0.011433 | 0.011433 | 0.011501 | 0.011467 | 0.011671 | 0.011637 | 0.011569 |
| 0.011671 | 0.011739 | 0.011467 | 0.011467 | 0.011501 | 0.011501 | 0.011504 |
| 0.011573 | 0.011501 | 0.011501 | 0.011312 | 0.011422 | 0.011376 | 0.011501 |
| 0.011501 | 0.011439 | 0.011430 | 0.011440 | 0.011369 | 0.011403 | 0.011469 |
| 0.011673 | 0.011474 | 0.011543 | 0.011433 | 0.011406 | 0.011569 | 0.011535 |
| 0.011603 | 0.011535 | 0.011535 | 0.011637 | 0.011569 | 0.011943 | 0.011705 |
| 0.011773 | 0.011637 | 0.011501 | 0.011603 | 0.011399 | 0.011637 | 0.011433 |
| 0.011467 | 0.011501 | 0.011467 | 0.011433 | 0.011467 | 0.011433 | 0.011535 |
| 0.011501 | 0.011603 | 0.011535 | 0.011433 | 0.011537 | 0.011637 | 0.011641 |
| 0.011637 | 0.011535 | 0.011433 | 0.011367 | 0.011501 | 0.011433 | 0.011366 |
| 0.011472 | 0.011637 | 0.011400 | 0.011637 | 0.011400 | 0.011501 | 0.011467 |
| 0.011569 | 0.011467 | 0.011501 | 0.011467 | 0.011501 | 0.011366 | 0.011501 |
| 0.011535 | 0.011467 | 0.011535 | 0.011467 | 0.011501 | 0.011535 | 0.011773 |
| 0.011841 | 0.011773 | 0.011841 | 0.011605 | 0.011841 | 0.011501 | 0.011467 |
| 0.011504 | 0.011755 | 0.011569 | 0.011372 | 0.011849 | 0.011370 | 0.011378 |
| 0.011850 | 0.011781 | 0.011671 | 0.011875 | 0.011578 | 0.011739 | 0.011705 |
| 0.011637 | 0.011807 | 0.011635 | 0.011435 | 0.011439 | 0.011535 | 0.011607 |
| 0.011705 | 0.011605 | 0.011710 | 0.011813 | 0.011739 | 0.011807 | 0.011916 |
| 0.011607 | 0.011814 | 0.011710 | 0.011641 | 0.011944 | 0.011399 | 0.011605 |
| 0.011569 | 0.011501 | 0.011399 | 0.011399 | 0.011467 | 0.011467 | 0.011535 |
| 0.011467 | 0.011535 | 0.011433 | 0.011535 | 0.011467 | 0.011467 | 0.011535 |
| 0.011467 | 0.011875 | 0.011773 | 0.011807 | 0.011366 | 0.011467 | 0.011501 |
| 0.011501 | 0.011467 | 0.011535 | 0.011569 | 0.011433 | 0.011433 | 0.011433 |
| 0.011943 | 0.011569 | 0.011603 | 0.011399 | 0.011501 | 0.011671 | 0.011433 |
| 0.011433 | 0.011467 | 0.011467 | 0.011637 | 0.011433 | 0.011569 | 0.011705 |
| 0.011637 | 0.011467 | 0.011467 | 0.011399 | 0.011399 | 0.011569 | 0.011501 |
| 0.011399 | 0.011501 | 0.011366 | 0.011399 | 0.011535 | 0.011671 | 0.011433 |
| 0.011400 | 0.011535 | 0.011468 | 0.011366 | 0.011671 | 0.011366 | 0.011535 |
| 0.011614 | 0.011433 | 0.011705 | 0.011569 | 0.011603 | 0.011467 | 0.011569 |
| 0.011433 | 0.011773 | 0.011366 | 0.011603 | 0.011433 | 0.011433 | 0.011366 |
| 0.011603 | 0.011807 | 0.011501 | 0.011569 | 0.011399 | 0.011773 | 0.011433 |
| 0.011433 | 0.011433 | 0.011467 | 0.011569 | 0.011467 | 0.011569 | 0.011637 |
| 0.011603 | 0.011603 | 0.011501 | 0.011603 | 0.011569 | 0.011433 | 0.011399 |
| 0.011433 | 0.011433 | 0.011501 | 0.011433 | 0.011399 | 0.011569 | 0.011433 |

|          |          |          |          |          |          |          |
|----------|----------|----------|----------|----------|----------|----------|
| 0.011467 | 0.011467 | 0.011603 | 0.011637 | 0.011535 | 0.011467 | 0.011467 |
| 0.011535 | 0.011433 | 0.011569 | 0.011433 | 0.011569 | 0.011671 | 0.011875 |
| 0.011467 | 0.011841 | 0.011408 | 0.018006 | 0.011388 | 0.011551 | 0.011729 |
| 0.011689 | 0.011735 | 0.011533 | 0.011525 | 0.011887 | 0.011757 | 0.011548 |
| 0.011678 | 0.011734 | 0.011334 | 0.011396 | 0.011412 | 0.011506 | 0.011405 |
| 0.011624 | 0.011583 | 0.011580 | 0.011325 | 0.011603 | 0.011637 | 0.011641 |
| 0.011477 | 0.011603 | 0.011603 | 0.011569 | 0.011535 | 0.011536 | 0.011502 |
| 0.011535 | 0.011467 | 0.011501 | 0.011535 | 0.011501 | 0.011433 | 0.011467 |
| 0.011467 | 0.011535 | 0.011433 | 0.011535 | 0.011569 | 0.011603 | 0.011501 |
| 0.011535 | 0.011501 | 0.011773 | 0.011773 | 0.011569 | 0.011604 | 0.011637 |
| 0.011399 | 0.011399 | 0.011433 | 0.011535 | 0.011399 | 0.011637 | 0.011637 |
| 0.011671 | 0.011671 | 0.011603 | 0.011705 | 0.011841 | 0.011707 | 0.011535 |
| 0.011535 | 0.011603 | 0.011637 | 0.011467 | 0.011535 | 0.011501 | 0.011535 |
| 0.011603 | 0.011603 | 0.011637 | 0.011603 | 0.011502 | 0.011705 | 0.011671 |
| 0.011539 | 0.011433 | 0.011535 | 0.011637 | 0.011501 | 0.011671 | 0.011705 |
| 0.011875 | 0.011578 | 0.011739 | 0.011705 | 0.011637 | 0.011807 | 0.011434 |
| 0.011605 | 0.011468 | 0.011467 | 0.011467 | 0.011535 | 0.011433 | 0.011535 |
| 0.011569 | 0.011603 | 0.011501 | 0.011535 | 0.011501 | 0.011773 | 0.011773 |
| 0.011569 | 0.011604 | 0.011671 | 0.011603 | 0.012249 | 0.011638 | 0.011594 |
| 0.011628 | 0.011621 | 0.011699 | 0.011586 | 0.011661 | 0.011653 | 0.011579 |
| 0.012206 | 0.011480 | 0.011649 | 0.011549 | 0.011825 | 0.011679 | 0.011816 |
| 0.012228 | 0.011669 | 0.011539 | 0.011535 | 0.011535 | 0.011569 | 0.011504 |
| 0.011399 | 0.011433 | 0.011569 | 0.011535 | 0.011538 | 0.011671 | 0.011605 |
| 0.011501 | 0.011433 | 0.011467 | 0.011501 | 0.011399 | 0.011467 | 0.011366 |
| 0.011501 | 0.011535 | 0.011433 | 0.011399 | 0.011501 | 0.011433 | 0.011467 |
| 0.011467 | 0.011399 | 0.011467 | 0.011501 | 0.011399 | 0.011603 | 0.011637 |
| 0.011535 | 0.011603 | 0.011535 | 0.011535 | 0.011467 | 0.011841 | 0.011501 |
| 0.011518 | 0.011467 | 0.011705 | 0.011711 | 0.011569 | 0.011569 | 0.011569 |
| 0.011569 | 0.011501 | 0.011467 | 0.011501 | 0.011603 | 0.011603 | 0.011535 |
| 0.011535 | 0.011671 | 0.011807 | 0.011569 | 0.011773 | 0.011773 | 0.011637 |
| 0.011467 | 0.011535 | 0.011569 | 0.011943 | 0.011536 | 0.011569 | 0.011535 |
| 0.011569 | 0.011501 | 0.011501 | 0.011807 | 0.011739 | 0.011773 | 0.011501 |
| 0.011603 | 0.011671 | 0.011535 | 0.011603 | 0.011535 | 0.011433 | 0.011739 |
| 0.011535 | 0.011501 | 0.011501 | 0.011671 | 0.011501 | 0.011603 | 0.011841 |
| 0.011467 | 0.011884 | 0.011875 | 0.011671 | 0.011343 | 0.011575 | 0.011525 |
| 0.011391 | 0.011879 | 0.011379 | 0.011597 | 0.011451 | 0.011570 | 0.011539 |
| 0.011571 | 0.011390 | 0.011506 | 0.011325 | 0.011438 | 0.011529 | 0.011552 |
| 0.011555 | 0.011458 | 0.011522 | 0.011416 | 0.011537 | 0.011671 | 0.011739 |
| 0.011705 | 0.011604 | 0.011709 | 0.011711 | 0.011814 | 0.011882 | 0.011501 |
| 0.011773 | 0.011637 | 0.011501 | 0.011603 | 0.011399 | 0.011637 | 0.011433 |
| 0.011467 | 0.011501 | 0.011467 | 0.011433 | 0.011467 | 0.011433 | 0.011535 |
| 0.011515 | 0.011480 | 0.011472 | 0.011506 | 0.011643 | 0.011642 | 0.011641 |
| 0.011640 | 0.011569 | 0.011319 | 0.011312 | 0.011501 | 0.011671 | 0.000000 |
| 0.011467 | 0.011535 | 0.011773 | 0.011741 | 0.011671 | 0.011705 | 0.011637 |
| 0.011569 | 0.011637 | 0.011637 | 0.011535 | 0.012079 | 0.011671 | 0.011773 |
| 0.011807 | 0.011853 | 0.011508 | 0.011550 | 0.011467 | 0.011671 | 0.011637 |
| 0.011672 | 0.011671 | 0.011705 | 0.011705 | 0.011851 | 0.011841 | 0.011481 |
| 0.011368 | 0.011375 | 0.011473 | 0.011438 | 0.011475 | 0.011362 | 0.011678 |
| 0.011510 | 0.011589 | 0.011299 | 0.011511 | 0.011501 | 0.011540 | 0.011467 |
| 0.011433 | 0.011433 | 0.011501 | 0.011467 | 0.011671 | 0.011637 | 0.011569 |
| 0.011671 | 0.011739 | 0.011467 | 0.011467 | 0.011501 | 0.011501 | 0.011504 |
| 0.011573 | 0.011501 | 0.011501 | 0.011537 | 0.011671 | 0.011739 | 0.011705 |
| 0.011604 | 0.011709 | 0.011711 | 0.011814 | 0.011882 | 0.011501 | 0.011705 |
| 0.011637 | 0.011637 | 0.011436 | 0.011658 | 0.011550 | 0.011611 | 0.011414 |
| 0.011617 | 0.011845 | 0.011614 | 0.011541 | 0.011400 | 0.011637 | 0.011501 |
| 0.011603 | 0.011535 | 0.011433 | 0.011537 | 0.011637 | 0.011641 | 0.011535 |
| 0.011433 | 0.011367 | 0.011501 | 0.011433 | 0.011366 | 0.011472 | 0.011637 |
| 0.011535 | 0.011467 | 0.011501 | 0.011535 | 0.011501 | 0.011433 | 0.011637 |
| 0.011501 | 0.011535 | 0.011535 | 0.011467 | 0.011535 | 0.011739 | 0.011433 |
| 0.011467 | 0.011841 | 0.011467 | 0.011467 | 0.011467 | 0.011807 | 0.011361 |

|          |          |          |          |          |          |          |
|----------|----------|----------|----------|----------|----------|----------|
| 0.011736 | 0.011358 | 0.011412 | 0.011585 | 0.011713 | 0.011604 | 0.011312 |
| 0.011375 | 0.011637 | 0.011739 | 0.011848 | 0.011706 | 0.011812 | 0.011978 |
| 0.011875 | 0.011914 | 0.011875 | 0.012095 | 0.011807 | 0.012725 | 0.011876 |
| 0.012555 | 0.012388 | 0.012524 | 0.012764 | 0.011841 | 0.011535 | 0.011841 |
| 0.012284 | 0.012185 | 0.011807 | 0.011705 | 0.011773 | 0.011773 | 0.011744 |
| 0.011637 | 0.011608 | 0.011705 | 0.011671 | 0.012045 | 0.012113 | 0.012113 |
| 0.012012 | 0.012113 | 0.012149 | 0.011948 | 0.012284 | 0.012291 | 0.012352 |
| 0.012352 | 0.012386 | 0.012266 | 0.012352 | 0.012354 | 0.011569 | 0.011875 |
| 0.011909 | 0.012453 | 0.011950 | 0.012181 | 0.012659 | 0.011712 | 0.011603 |
| 0.011569 | 0.011569 | 0.012045 | 0.012049 | 0.012152 | 0.011909 | 0.011571 |
| S665     | 0.011632 | 0.011632 | 0.011767 | 0.011733 | 0.011733 | 0.011800 |
| 0.011639 | 0.011536 | 0.011733 | 0.011228 | 0.011296 | 0.011262 | 0.011228 |
| 0.011262 | 0.011430 | 0.011228 | 0.011262 | 0.011329 | 0.011296 | 0.011262 |
| 0.011228 | 0.011262 | 0.011363 | 0.011229 | 0.011262 | 0.011262 | 0.011604 |
| 0.011497 | 0.011262 | 0.011161 | 0.011396 | 0.011329 | 0.011296 | 0.011329 |
| 0.011296 | 0.011396 | 0.011296 | 0.011296 | 0.011329 | 0.011296 | 0.011464 |
| 0.011228 | 0.011296 | 0.011329 | 0.011262 | 0.011363 | 0.011396 | 0.011329 |
| 0.011296 | 0.011464 | 0.011363 | 0.011632 | 0.011296 | 0.011565 | 0.011296 |
| 0.011262 | 0.011363 | 0.011430 | 0.011565 | 0.011666 | 0.011363 | 0.011464 |
| 0.011329 | 0.011397 | 0.011296 | 0.011531 | 0.011767 | 0.011296 | 0.011363 |
| 0.011262 | 0.011363 | 0.011329 | 0.011396 | 0.011329 | 0.011329 | 0.011329 |
| 0.011228 | 0.011262 | 0.011228 | 0.011329 | 0.011296 | 0.011330 | 0.011396 |
| 0.011329 | 0.011296 | 0.011363 | 0.011262 | 0.011396 | 0.011228 | 0.011296 |
| 0.011464 | 0.011396 | 0.011632 | 0.011430 | 0.011296 | 0.011531 | 0.011296 |
| 0.011468 | 0.011695 | 0.011513 | 0.011216 | 0.011172 | 0.011318 | 0.011375 |
| 0.012011 | 0.011467 | 0.011184 | 0.011531 | 0.011531 | 0.011329 | 0.011430 |
| 0.011363 | 0.011329 | 0.011396 | 0.011296 | 0.011397 | 0.011329 | 0.011329 |
| 0.011296 | 0.011396 | 0.011598 | 0.011464 | 0.011363 | 0.011329 | 0.011262 |
| 0.011228 | 0.011228 | 0.011296 | 0.011262 | 0.011464 | 0.011430 | 0.011363 |
| 0.011464 | 0.011531 | 0.011262 | 0.011262 | 0.011296 | 0.011296 | 0.011297 |
| 0.011365 | 0.011296 | 0.011296 | 0.011168 | 0.011241 | 0.011200 | 0.011296 |
| 0.011297 | 0.011232 | 0.011282 | 0.011267 | 0.011196 | 0.011231 | 0.011263 |
| 0.011528 | 0.011301 | 0.011336 | 0.011228 | 0.011233 | 0.011363 | 0.011329 |
| 0.011397 | 0.011330 | 0.011329 | 0.011430 | 0.011363 | 0.011733 | 0.011497 |
| 0.011565 | 0.011430 | 0.011296 | 0.011397 | 0.011195 | 0.011430 | 0.011228 |
| 0.011296 | 0.011296 | 0.011262 | 0.011228 | 0.011262 | 0.011228 | 0.011329 |
| 0.011296 | 0.011396 | 0.011329 | 0.011228 | 0.011330 | 0.011430 | 0.011433 |
| 0.011430 | 0.011329 | 0.011228 | 0.011162 | 0.011296 | 0.011228 | 0.011161 |
| 0.011264 | 0.011430 | 0.011228 | 0.011430 | 0.011195 | 0.011296 | 0.011262 |
| 0.011363 | 0.011262 | 0.011296 | 0.011262 | 0.011296 | 0.011161 | 0.011296 |
| 0.011329 | 0.011262 | 0.011329 | 0.011262 | 0.011296 | 0.011329 | 0.011565 |
| 0.011666 | 0.011598 | 0.011666 | 0.011431 | 0.011666 | 0.011296 | 0.011262 |
| 0.011297 | 0.011586 | 0.011426 | 0.011198 | 0.011672 | 0.011163 | 0.011257 |
| 0.011672 | 0.011570 | 0.011464 | 0.011666 | 0.011368 | 0.011531 | 0.011497 |
| 0.011430 | 0.011598 | 0.011452 | 0.011308 | 0.011354 | 0.011329 | 0.011399 |
| 0.011497 | 0.011398 | 0.011534 | 0.011603 | 0.011531 | 0.011598 | 0.011705 |
| 0.011433 | 0.011604 | 0.011535 | 0.011467 | 0.011734 | 0.011195 | 0.011398 |
| 0.011363 | 0.011296 | 0.011195 | 0.011195 | 0.011262 | 0.011262 | 0.011329 |
| 0.011262 | 0.011329 | 0.011228 | 0.011329 | 0.011262 | 0.011262 | 0.011329 |
| 0.011262 | 0.011699 | 0.011598 | 0.011632 | 0.011161 | 0.011262 | 0.011296 |
| 0.011296 | 0.011262 | 0.011329 | 0.011363 | 0.011228 | 0.011228 | 0.011228 |
| 0.011767 | 0.011363 | 0.011396 | 0.011195 | 0.011296 | 0.011464 | 0.011228 |
| 0.011228 | 0.011296 | 0.011262 | 0.011430 | 0.011228 | 0.011363 | 0.011497 |
| 0.011430 | 0.011262 | 0.011262 | 0.011195 | 0.011195 | 0.011363 | 0.011296 |
| 0.011195 | 0.011296 | 0.011161 | 0.011195 | 0.011329 | 0.011464 | 0.011228 |
| 0.011195 | 0.011329 | 0.011262 | 0.011161 | 0.011497 | 0.011161 | 0.011329 |
| 0.011403 | 0.011228 | 0.011531 | 0.011363 | 0.011396 | 0.011262 | 0.011363 |
| 0.011228 | 0.011565 | 0.011161 | 0.011430 | 0.011228 | 0.011228 | 0.011161 |
| 0.011396 | 0.011599 | 0.011296 | 0.011363 | 0.011195 | 0.011598 | 0.011228 |
| 0.011228 | 0.011228 | 0.011262 | 0.011363 | 0.011262 | 0.011363 | 0.011430 |

|          |          |          |          |          |          |          |
|----------|----------|----------|----------|----------|----------|----------|
| 0.011397 | 0.011396 | 0.011296 | 0.011397 | 0.011363 | 0.011228 | 0.011195 |
| 0.011228 | 0.011228 | 0.011296 | 0.011228 | 0.011195 | 0.011363 | 0.011228 |
| 0.011262 | 0.011262 | 0.011396 | 0.011430 | 0.011329 | 0.011262 | 0.011262 |
| 0.011329 | 0.011262 | 0.011363 | 0.011228 | 0.011363 | 0.011464 | 0.011699 |
| 0.011262 | 0.011666 | 0.011267 | 0.017750 | 0.011257 | 0.011488 | 0.011618 |
| 0.011579 | 0.011623 | 0.011322 | 0.011292 | 0.011774 | 0.011647 | 0.011364 |
| 0.011487 | 0.011609 | 0.011177 | 0.011270 | 0.011255 | 0.011356 | 0.011275 |
| 0.011482 | 0.011395 | 0.011394 | 0.011126 | 0.011396 | 0.011430 | 0.011433 |
| 0.011301 | 0.011396 | 0.011396 | 0.011363 | 0.011329 | 0.011329 | 0.011296 |
| 0.011329 | 0.011262 | 0.011296 | 0.011329 | 0.011296 | 0.011228 | 0.011262 |
| 0.011262 | 0.011329 | 0.011228 | 0.011329 | 0.011363 | 0.011396 | 0.011296 |
| 0.011329 | 0.011296 | 0.011632 | 0.011632 | 0.011363 | 0.011397 | 0.011430 |
| 0.011195 | 0.011195 | 0.011228 | 0.011329 | 0.011195 | 0.011430 | 0.011430 |
| 0.011464 | 0.011464 | 0.011396 | 0.011497 | 0.011666 | 0.011499 | 0.011329 |
| 0.011329 | 0.011396 | 0.011430 | 0.011262 | 0.011329 | 0.011296 | 0.011329 |
| 0.011397 | 0.011396 | 0.011430 | 0.011397 | 0.011296 | 0.011497 | 0.011464 |
| 0.011332 | 0.011228 | 0.011329 | 0.011430 | 0.011329 | 0.011464 | 0.011497 |
| 0.011666 | 0.011368 | 0.011531 | 0.011497 | 0.011430 | 0.011598 | 0.011228 |
| 0.011397 | 0.011296 | 0.011262 | 0.011262 | 0.011329 | 0.011228 | 0.011329 |
| 0.011363 | 0.011396 | 0.011296 | 0.011329 | 0.011296 | 0.011632 | 0.011632 |
| 0.011363 | 0.011397 | 0.011464 | 0.011396 | 0.012037 | 0.011453 | 0.011377 |
| 0.011447 | 0.011408 | 0.011517 | 0.011407 | 0.011516 | 0.011440 | 0.011405 |
| 0.011989 | 0.011303 | 0.011438 | 0.011372 | 0.011646 | 0.011503 | 0.011605 |
| 0.012013 | 0.011475 | 0.011331 | 0.011329 | 0.011329 | 0.011363 | 0.011297 |
| 0.011195 | 0.011228 | 0.011363 | 0.011329 | 0.011331 | 0.011464 | 0.011431 |
| 0.011296 | 0.011228 | 0.011262 | 0.011296 | 0.011195 | 0.011262 | 0.011161 |
| 0.011296 | 0.011329 | 0.011228 | 0.011195 | 0.011296 | 0.011228 | 0.011262 |
| 0.011262 | 0.011195 | 0.011262 | 0.011296 | 0.011195 | 0.011396 | 0.011430 |
| 0.011329 | 0.011396 | 0.011329 | 0.011329 | 0.011262 | 0.011666 | 0.011296 |
| 0.011339 | 0.011262 | 0.011497 | 0.011502 | 0.011363 | 0.011363 | 0.011363 |
| 0.011363 | 0.011296 | 0.011262 | 0.011296 | 0.011396 | 0.011396 | 0.011329 |
| 0.011329 | 0.011464 | 0.011632 | 0.011363 | 0.011565 | 0.011565 | 0.011430 |
| 0.011262 | 0.011329 | 0.011363 | 0.011767 | 0.011329 | 0.011363 | 0.011329 |
| 0.011363 | 0.011296 | 0.011296 | 0.011598 | 0.011531 | 0.011565 | 0.011296 |
| 0.011397 | 0.011464 | 0.011329 | 0.011397 | 0.011363 | 0.011228 | 0.011565 |
| 0.011329 | 0.011296 | 0.011296 | 0.011464 | 0.011296 | 0.011396 | 0.011632 |
| 0.011262 | 0.011707 | 0.011699 | 0.011467 | 0.011229 | 0.011400 | 0.011267 |
| 0.011280 | 0.011683 | 0.011236 | 0.011417 | 0.011255 | 0.011366 | 0.011379 |
| 0.011468 | 0.011192 | 0.011338 | 0.011192 | 0.011222 | 0.011395 | 0.011385 |
| 0.011399 | 0.011257 | 0.011377 | 0.011236 | 0.011330 | 0.011464 | 0.011531 |
| 0.011497 | 0.011397 | 0.011500 | 0.011502 | 0.011603 | 0.011662 | 0.011296 |
| 0.011565 | 0.011430 | 0.011296 | 0.011397 | 0.011195 | 0.011430 | 0.011228 |
| 0.011296 | 0.011296 | 0.011262 | 0.011228 | 0.011262 | 0.011228 | 0.011329 |
| 0.011305 | 0.011305 | 0.011300 | 0.011334 | 0.011471 | 0.011436 | 0.011436 |
| 0.011435 | 0.011363 | 0.011171 | 0.011168 | 0.011297 | 0.011467 | 0.011467 |
| 0.000000 | 0.011331 | 0.011565 | 0.011533 | 0.011464 | 0.011498 | 0.011430 |
| 0.011329 | 0.011430 | 0.011430 | 0.011329 | 0.011901 | 0.011497 | 0.011565 |
| 0.011598 | 0.011667 | 0.011299 | 0.011372 | 0.011262 | 0.011464 | 0.011430 |
| 0.011465 | 0.011464 | 0.011497 | 0.011497 | 0.011650 | 0.011632 | 0.011269 |
| 0.011162 | 0.011164 | 0.011265 | 0.011230 | 0.011334 | 0.011098 | 0.011502 |
| 0.011301 | 0.011411 | 0.011108 | 0.011322 | 0.011296 | 0.011368 | 0.011262 |
| 0.011228 | 0.011228 | 0.011296 | 0.011262 | 0.011464 | 0.011430 | 0.011363 |
| 0.011464 | 0.011531 | 0.011262 | 0.011262 | 0.011296 | 0.011296 | 0.011297 |
| 0.011365 | 0.011296 | 0.011296 | 0.011330 | 0.011464 | 0.011531 | 0.011497 |
| 0.011397 | 0.011500 | 0.011502 | 0.011603 | 0.011662 | 0.011296 | 0.011497 |
| 0.011430 | 0.011430 | 0.011263 | 0.011443 | 0.011373 | 0.011401 | 0.011200 |
| 0.011439 | 0.011516 | 0.011357 | 0.011332 | 0.011228 | 0.011430 | 0.011296 |
| 0.011396 | 0.011329 | 0.011228 | 0.011330 | 0.011430 | 0.011433 | 0.011329 |
| 0.011228 | 0.011162 | 0.011296 | 0.011228 | 0.011161 | 0.011264 | 0.011430 |
| 0.011329 | 0.011262 | 0.011296 | 0.011329 | 0.011296 | 0.011228 | 0.011430 |



|          |          |          |          |          |          |          |
|----------|----------|----------|----------|----------|----------|----------|
| 0.011296 | 0.011329 | 0.011329 | 0.011262 | 0.011329 | 0.011565 | 0.011228 |
| 0.011262 | 0.011666 | 0.011262 | 0.011262 | 0.011262 | 0.011632 | 0.011189 |
| 0.011678 | 0.011188 | 0.011261 | 0.011422 | 0.011508 | 0.011455 | 0.011144 |
| 0.011218 | 0.011430 | 0.011531 | 0.011637 | 0.011498 | 0.011636 | 0.011767 |
| 0.011666 | 0.011703 | 0.011666 | 0.011915 | 0.011632 | 0.012508 | 0.011667 |
| 0.012373 | 0.012173 | 0.012309 | 0.012580 | 0.011632 | 0.011329 | 0.011632 |
| 0.012071 | 0.012006 | 0.011598 | 0.011498 | 0.011565 | 0.011565 | 0.011535 |
| 0.011430 | 0.011400 | 0.011497 | 0.011464 | 0.011834 | 0.011901 | 0.011901 |
| 0.011801 | 0.011902 | 0.012004 | 0.011771 | 0.012071 | 0.012077 | 0.012138 |
| 0.012138 | 0.012172 | 0.012119 | 0.012138 | 0.012140 | 0.011363 | 0.011666 |
| 0.011733 | 0.012238 | 0.011739 | 0.011969 | 0.012442 | 0.011502 | 0.011397 |
| 0.011363 | 0.011363 | 0.011834 | 0.011800 | 0.011975 | 0.011699 | 0.011364 |
| S666     | 0.011704 | 0.011704 | 0.011806 | 0.011772 | 0.011772 | 0.011839 |
| 0.011677 | 0.011574 | 0.011772 | 0.011297 | 0.011365 | 0.011331 | 0.011297 |
| 0.011331 | 0.011501 | 0.011297 | 0.011331 | 0.011331 | 0.011365 | 0.011331 |
| 0.011297 | 0.011331 | 0.011433 | 0.011298 | 0.011331 | 0.011331 | 0.011643 |
| 0.011568 | 0.011331 | 0.011230 | 0.011467 | 0.011399 | 0.011365 | 0.011399 |
| 0.011365 | 0.011467 | 0.011365 | 0.011365 | 0.011399 | 0.011365 | 0.011534 |
| 0.011297 | 0.011365 | 0.011399 | 0.011331 | 0.011433 | 0.011467 | 0.011399 |
| 0.011365 | 0.011535 | 0.011433 | 0.011670 | 0.011365 | 0.011636 | 0.011365 |
| 0.011331 | 0.011433 | 0.011501 | 0.011636 | 0.011704 | 0.011433 | 0.011534 |
| 0.011399 | 0.011467 | 0.011365 | 0.011602 | 0.011806 | 0.011365 | 0.011433 |
| 0.011331 | 0.011433 | 0.011399 | 0.011467 | 0.011399 | 0.011399 | 0.011399 |
| 0.011297 | 0.011331 | 0.011297 | 0.011399 | 0.011365 | 0.011400 | 0.011467 |
| 0.011399 | 0.011365 | 0.011433 | 0.011331 | 0.011467 | 0.011297 | 0.011331 |
| 0.011534 | 0.011467 | 0.011704 | 0.011501 | 0.011365 | 0.011602 | 0.011365 |
| 0.011546 | 0.011738 | 0.011588 | 0.011295 | 0.011284 | 0.011394 | 0.011493 |
| 0.012121 | 0.011620 | 0.011307 | 0.011602 | 0.011602 | 0.011399 | 0.011467 |
| 0.011433 | 0.011399 | 0.011467 | 0.011365 | 0.011467 | 0.011399 | 0.011399 |
| 0.011365 | 0.011467 | 0.011670 | 0.011534 | 0.011433 | 0.011399 | 0.011331 |
| 0.011297 | 0.011297 | 0.011365 | 0.011331 | 0.011534 | 0.011500 | 0.011433 |
| 0.011534 | 0.011602 | 0.011331 | 0.011331 | 0.011365 | 0.011365 | 0.011367 |
| 0.011435 | 0.011365 | 0.011365 | 0.011204 | 0.011313 | 0.011271 | 0.011365 |
| 0.011365 | 0.011301 | 0.011355 | 0.011336 | 0.011266 | 0.011300 | 0.011332 |
| 0.011600 | 0.011370 | 0.011405 | 0.011297 | 0.011302 | 0.011433 | 0.011399 |
| 0.011467 | 0.011399 | 0.011399 | 0.011500 | 0.011433 | 0.011738 | 0.011568 |
| 0.011636 | 0.011501 | 0.011365 | 0.011467 | 0.011263 | 0.011500 | 0.011297 |
| 0.011331 | 0.011365 | 0.011331 | 0.011297 | 0.011331 | 0.011297 | 0.011399 |
| 0.011365 | 0.011467 | 0.011399 | 0.011297 | 0.011400 | 0.011501 | 0.011503 |
| 0.011501 | 0.011399 | 0.011297 | 0.011230 | 0.011365 | 0.011297 | 0.011230 |
| 0.011334 | 0.011501 | 0.011297 | 0.011501 | 0.011263 | 0.011365 | 0.011331 |
| 0.011433 | 0.011331 | 0.011365 | 0.011331 | 0.011365 | 0.011230 | 0.011365 |
| 0.011399 | 0.011331 | 0.011399 | 0.011331 | 0.011365 | 0.011399 | 0.011636 |
| 0.011704 | 0.011636 | 0.011704 | 0.011502 | 0.011704 | 0.011365 | 0.011331 |
| 0.011367 | 0.011590 | 0.011430 | 0.011268 | 0.011711 | 0.011232 | 0.011337 |
| 0.011711 | 0.011643 | 0.011534 | 0.011738 | 0.011439 | 0.011602 | 0.011568 |
| 0.011501 | 0.011670 | 0.011526 | 0.011393 | 0.011397 | 0.011399 | 0.011470 |
| 0.011568 | 0.011468 | 0.011572 | 0.011675 | 0.011602 | 0.011670 | 0.011778 |
| 0.011504 | 0.011676 | 0.011606 | 0.011538 | 0.011806 | 0.011263 | 0.011468 |
| 0.011433 | 0.011365 | 0.011263 | 0.011263 | 0.011331 | 0.011331 | 0.011399 |
| 0.011331 | 0.011399 | 0.011297 | 0.011399 | 0.011331 | 0.011331 | 0.011399 |
| 0.011331 | 0.011738 | 0.011636 | 0.011670 | 0.011230 | 0.011331 | 0.011365 |
| 0.011365 | 0.011331 | 0.011399 | 0.011433 | 0.011297 | 0.011297 | 0.011297 |
| 0.011805 | 0.011433 | 0.011467 | 0.011263 | 0.011365 | 0.011535 | 0.011297 |
| 0.011297 | 0.011331 | 0.011331 | 0.011501 | 0.011297 | 0.011433 | 0.011568 |
| 0.011500 | 0.011331 | 0.011331 | 0.011263 | 0.011263 | 0.011433 | 0.011365 |
| 0.011263 | 0.011365 | 0.011230 | 0.011263 | 0.011399 | 0.011535 | 0.011297 |
| 0.011264 | 0.011399 | 0.011331 | 0.011230 | 0.011534 | 0.011230 | 0.011331 |
| 0.011474 | 0.011297 | 0.011568 | 0.011433 | 0.011467 | 0.011331 | 0.011433 |
| 0.011297 | 0.011636 | 0.011230 | 0.011467 | 0.011297 | 0.011297 | 0.011230 |

|          |          |          |          |          |          |          |
|----------|----------|----------|----------|----------|----------|----------|
| 0.011467 | 0.011670 | 0.011365 | 0.011433 | 0.011263 | 0.011636 | 0.011297 |
| 0.011297 | 0.011297 | 0.011331 | 0.011433 | 0.011331 | 0.011433 | 0.011500 |
| 0.011467 | 0.011467 | 0.011365 | 0.011467 | 0.011433 | 0.011297 | 0.011263 |
| 0.011297 | 0.011297 | 0.011365 | 0.011297 | 0.011263 | 0.011433 | 0.011297 |
| 0.011331 | 0.011331 | 0.011467 | 0.011501 | 0.011399 | 0.011331 | 0.011331 |
| 0.011399 | 0.011297 | 0.011365 | 0.011297 | 0.011433 | 0.011534 | 0.011738 |
| 0.011331 | 0.011704 | 0.011338 | 0.017917 | 0.011257 | 0.011427 | 0.011658 |
| 0.011618 | 0.011663 | 0.011427 | 0.011466 | 0.011664 | 0.011686 | 0.011303 |
| 0.011629 | 0.011549 | 0.011255 | 0.011353 | 0.011333 | 0.011307 | 0.011361 |
| 0.011623 | 0.011507 | 0.011505 | 0.011391 | 0.011467 | 0.011501 | 0.011504 |
| 0.011372 | 0.011467 | 0.011467 | 0.011433 | 0.011399 | 0.011399 | 0.011365 |
| 0.011399 | 0.011331 | 0.011365 | 0.011399 | 0.011365 | 0.011297 | 0.011331 |
| 0.011331 | 0.011399 | 0.011297 | 0.011399 | 0.011433 | 0.011467 | 0.011365 |
| 0.011399 | 0.011365 | 0.011636 | 0.011636 | 0.011433 | 0.011467 | 0.011501 |
| 0.011263 | 0.011263 | 0.011297 | 0.011399 | 0.011263 | 0.011500 | 0.011500 |
| 0.011534 | 0.011534 | 0.011467 | 0.011568 | 0.011704 | 0.011570 | 0.011399 |
| 0.011399 | 0.011467 | 0.011501 | 0.011331 | 0.011399 | 0.011365 | 0.011399 |
| 0.011467 | 0.011467 | 0.011500 | 0.011467 | 0.011366 | 0.011568 | 0.011534 |
| 0.011334 | 0.011297 | 0.011399 | 0.011501 | 0.011365 | 0.011534 | 0.011568 |
| 0.011738 | 0.011439 | 0.011602 | 0.011568 | 0.011501 | 0.011670 | 0.011297 |
| 0.011468 | 0.011365 | 0.011331 | 0.011331 | 0.011399 | 0.011297 | 0.011399 |
| 0.011433 | 0.011467 | 0.011365 | 0.011399 | 0.011365 | 0.011636 | 0.011636 |
| 0.011433 | 0.011467 | 0.011534 | 0.011467 | 0.012112 | 0.011529 | 0.011451 |
| 0.011521 | 0.011480 | 0.011592 | 0.011480 | 0.011554 | 0.011513 | 0.011475 |
| 0.012065 | 0.011374 | 0.011510 | 0.011444 | 0.011720 | 0.011575 | 0.011678 |
| 0.012089 | 0.011554 | 0.011401 | 0.011399 | 0.011399 | 0.011433 | 0.011367 |
| 0.011263 | 0.011297 | 0.011433 | 0.011399 | 0.011401 | 0.011534 | 0.011502 |
| 0.011365 | 0.011297 | 0.011331 | 0.011365 | 0.011263 | 0.011331 | 0.011230 |
| 0.011365 | 0.011399 | 0.011297 | 0.011263 | 0.011365 | 0.011297 | 0.011331 |
| 0.011331 | 0.011263 | 0.011331 | 0.011365 | 0.011263 | 0.011467 | 0.011500 |
| 0.011399 | 0.011467 | 0.011399 | 0.011399 | 0.011331 | 0.011704 | 0.011365 |
| 0.011411 | 0.011331 | 0.011568 | 0.011573 | 0.011433 | 0.011433 | 0.011433 |
| 0.011433 | 0.011365 | 0.011331 | 0.011365 | 0.011467 | 0.011467 | 0.011399 |
| 0.011399 | 0.011534 | 0.011670 | 0.011433 | 0.011636 | 0.011636 | 0.011500 |
| 0.011331 | 0.011399 | 0.011433 | 0.011806 | 0.011399 | 0.011433 | 0.011399 |
| 0.011433 | 0.011365 | 0.011365 | 0.011670 | 0.011602 | 0.011636 | 0.011365 |
| 0.011467 | 0.011534 | 0.011399 | 0.011467 | 0.011331 | 0.011297 | 0.011602 |
| 0.011399 | 0.011365 | 0.011365 | 0.011534 | 0.011365 | 0.011467 | 0.011704 |
| 0.011331 | 0.011746 | 0.011738 | 0.011589 | 0.011286 | 0.011471 | 0.011421 |
| 0.011225 | 0.011800 | 0.011308 | 0.011507 | 0.011353 | 0.011417 | 0.011485 |
| 0.011570 | 0.011192 | 0.011450 | 0.011258 | 0.011330 | 0.011462 | 0.011469 |
| 0.011478 | 0.011378 | 0.011451 | 0.011344 | 0.011400 | 0.011534 | 0.011602 |
| 0.011568 | 0.011467 | 0.011572 | 0.011573 | 0.011676 | 0.011738 | 0.011365 |
| 0.011636 | 0.011501 | 0.011365 | 0.011467 | 0.011263 | 0.011500 | 0.011297 |
| 0.011331 | 0.011365 | 0.011331 | 0.011297 | 0.011331 | 0.011297 | 0.011399 |
| 0.011375 | 0.011375 | 0.011368 | 0.011403 | 0.011539 | 0.011504 | 0.011504 |
| 0.011503 | 0.011433 | 0.011208 | 0.011240 | 0.011365 | 0.011535 | 0.011535 |
| 0.011331 | 0.000000 | 0.011636 | 0.011604 | 0.011534 | 0.011568 | 0.011500 |
| 0.011433 | 0.011501 | 0.011500 | 0.011399 | 0.011941 | 0.011534 | 0.011636 |
| 0.011670 | 0.011707 | 0.011370 | 0.011444 | 0.011331 | 0.011534 | 0.011501 |
| 0.011535 | 0.011534 | 0.011568 | 0.011568 | 0.011692 | 0.011704 | 0.011340 |
| 0.011231 | 0.011235 | 0.011335 | 0.011300 | 0.011370 | 0.011248 | 0.011540 |
| 0.011371 | 0.011500 | 0.011251 | 0.011398 | 0.011365 | 0.011437 | 0.011331 |
| 0.011297 | 0.011297 | 0.011365 | 0.011331 | 0.011534 | 0.011500 | 0.011433 |
| 0.011534 | 0.011602 | 0.011331 | 0.011331 | 0.011365 | 0.011365 | 0.011367 |
| 0.011435 | 0.011365 | 0.011365 | 0.011400 | 0.011534 | 0.011602 | 0.011568 |
| 0.011467 | 0.011572 | 0.011573 | 0.011676 | 0.011738 | 0.011365 | 0.011568 |
| 0.011501 | 0.011501 | 0.011333 | 0.011516 | 0.011445 | 0.011472 | 0.011343 |
| 0.011477 | 0.011751 | 0.011529 | 0.011403 | 0.011297 | 0.011501 | 0.011365 |
| 0.011467 | 0.011399 | 0.011297 | 0.011400 | 0.011501 | 0.011503 | 0.011399 |

|          |          |          |          |          |          |          |
|----------|----------|----------|----------|----------|----------|----------|
| 0.011297 | 0.011230 | 0.011365 | 0.011297 | 0.011230 | 0.011334 | 0.011501 |
| 0.011399 | 0.011331 | 0.011365 | 0.011399 | 0.011365 | 0.011297 | 0.011500 |
| 0.011365 | 0.011399 | 0.011399 | 0.011331 | 0.011399 | 0.011602 | 0.011297 |
| 0.011331 | 0.011704 | 0.011331 | 0.011331 | 0.011331 | 0.011670 | 0.011317 |
| 0.011735 | 0.011315 | 0.011411 | 0.011543 | 0.011630 | 0.011530 | 0.011269 |
| 0.011375 | 0.011500 | 0.011602 | 0.011710 | 0.011569 | 0.011708 | 0.011840 |
| 0.011738 | 0.011776 | 0.011738 | 0.011990 | 0.011670 | 0.012586 | 0.011739 |
| 0.012417 | 0.012249 | 0.012386 | 0.012625 | 0.011704 | 0.011399 | 0.011704 |
| 0.012146 | 0.012081 | 0.011670 | 0.011569 | 0.011636 | 0.011636 | 0.011606 |
| 0.011500 | 0.011505 | 0.011568 | 0.011534 | 0.011908 | 0.011975 | 0.011975 |
| 0.011875 | 0.011976 | 0.012011 | 0.011844 | 0.012146 | 0.012152 | 0.012214 |
| 0.012214 | 0.012248 | 0.012196 | 0.012214 | 0.012216 | 0.011433 | 0.011738 |
| 0.011772 | 0.012315 | 0.011812 | 0.012043 | 0.012520 | 0.011573 | 0.011467 |
| 0.011433 | 0.011433 | 0.011907 | 0.011965 | 0.012045 | 0.011772 | 0.011434 |
| S667     | 0.011936 | 0.011936 | 0.012071 | 0.012037 | 0.012037 | 0.012104 |
| 0.011912 | 0.011810 | 0.012037 | 0.011531 | 0.011599 | 0.011566 | 0.011531 |
| 0.011565 | 0.011734 | 0.011531 | 0.011565 | 0.011632 | 0.011599 | 0.011565 |
| 0.011531 | 0.011565 | 0.011666 | 0.011532 | 0.011566 | 0.011565 | 0.011878 |
| 0.011801 | 0.011565 | 0.011464 | 0.011700 | 0.011632 | 0.011599 | 0.011633 |
| 0.011599 | 0.011700 | 0.011531 | 0.011599 | 0.011632 | 0.011599 | 0.011767 |
| 0.011531 | 0.011599 | 0.011632 | 0.011565 | 0.011666 | 0.011700 | 0.011632 |
| 0.011599 | 0.011767 | 0.011667 | 0.011936 | 0.011599 | 0.011868 | 0.011599 |
| 0.011565 | 0.011666 | 0.011734 | 0.011868 | 0.011969 | 0.011666 | 0.011767 |
| 0.011632 | 0.011700 | 0.011599 | 0.011835 | 0.012071 | 0.011599 | 0.011666 |
| 0.011565 | 0.011666 | 0.011633 | 0.011700 | 0.011632 | 0.011632 | 0.011632 |
| 0.011531 | 0.011565 | 0.011531 | 0.011633 | 0.011599 | 0.011634 | 0.011700 |
| 0.011633 | 0.011599 | 0.011666 | 0.011565 | 0.011700 | 0.011531 | 0.011599 |
| 0.011767 | 0.011700 | 0.011936 | 0.011734 | 0.011599 | 0.011835 | 0.011599 |
| 0.011803 | 0.012033 | 0.011853 | 0.011568 | 0.011545 | 0.011650 | 0.011769 |
| 0.012378 | 0.011925 | 0.011596 | 0.011835 | 0.011835 | 0.011632 | 0.011734 |
| 0.011666 | 0.011632 | 0.011700 | 0.011599 | 0.011700 | 0.011632 | 0.011632 |
| 0.011599 | 0.011700 | 0.011902 | 0.011767 | 0.011666 | 0.011633 | 0.011565 |
| 0.011531 | 0.011531 | 0.011599 | 0.011565 | 0.011767 | 0.011733 | 0.011666 |
| 0.011767 | 0.011835 | 0.011565 | 0.011565 | 0.011599 | 0.011599 | 0.011602 |
| 0.011670 | 0.011599 | 0.011599 | 0.011492 | 0.011530 | 0.011446 | 0.011599 |
| 0.011602 | 0.011541 | 0.011614 | 0.011578 | 0.011502 | 0.011540 | 0.011567 |
| 0.011780 | 0.011577 | 0.011646 | 0.011531 | 0.011544 | 0.011666 | 0.011633 |
| 0.011700 | 0.011633 | 0.011632 | 0.011733 | 0.011666 | 0.012037 | 0.011801 |
| 0.011868 | 0.011734 | 0.011599 | 0.011700 | 0.011498 | 0.011733 | 0.011532 |
| 0.011531 | 0.011599 | 0.011565 | 0.011531 | 0.011565 | 0.011531 | 0.011632 |
| 0.011599 | 0.011700 | 0.011633 | 0.011531 | 0.011634 | 0.011734 | 0.011738 |
| 0.011734 | 0.011632 | 0.011531 | 0.011466 | 0.011599 | 0.011531 | 0.011464 |
| 0.011571 | 0.011734 | 0.011531 | 0.011734 | 0.011397 | 0.011599 | 0.011565 |
| 0.011666 | 0.011565 | 0.011599 | 0.011565 | 0.011599 | 0.011464 | 0.011599 |
| 0.011633 | 0.011565 | 0.011632 | 0.011565 | 0.011599 | 0.011632 | 0.011868 |
| 0.011969 | 0.011902 | 0.011969 | 0.011736 | 0.011970 | 0.011599 | 0.011565 |
| 0.011602 | 0.011870 | 0.011610 | 0.011507 | 0.011979 | 0.011470 | 0.011533 |
| 0.011946 | 0.011878 | 0.011767 | 0.011970 | 0.011676 | 0.011835 | 0.011801 |
| 0.011734 | 0.011902 | 0.011702 | 0.011597 | 0.011564 | 0.011633 | 0.011671 |
| 0.011801 | 0.011702 | 0.011840 | 0.011909 | 0.011835 | 0.011902 | 0.012012 |
| 0.011739 | 0.011877 | 0.011840 | 0.011772 | 0.012038 | 0.011498 | 0.011668 |
| 0.011666 | 0.011599 | 0.011498 | 0.011498 | 0.011565 | 0.011565 | 0.011632 |
| 0.011565 | 0.011633 | 0.011531 | 0.011632 | 0.011565 | 0.011565 | 0.011599 |
| 0.011565 | 0.012003 | 0.011902 | 0.011936 | 0.011464 | 0.011565 | 0.011599 |
| 0.011599 | 0.011565 | 0.011633 | 0.011666 | 0.011531 | 0.011531 | 0.011531 |
| 0.012071 | 0.011666 | 0.011700 | 0.011498 | 0.011599 | 0.011767 | 0.011531 |
| 0.011531 | 0.011565 | 0.011565 | 0.011734 | 0.011531 | 0.011666 | 0.011801 |
| 0.011734 | 0.011565 | 0.011565 | 0.011498 | 0.011498 | 0.011666 | 0.011599 |
| 0.011498 | 0.011599 | 0.011464 | 0.011498 | 0.011632 | 0.011768 | 0.011531 |
| 0.011498 | 0.011632 | 0.011566 | 0.011464 | 0.011801 | 0.011464 | 0.011632 |

|          |          |          |          |          |          |          |
|----------|----------|----------|----------|----------|----------|----------|
| 0.011678 | 0.011531 | 0.011835 | 0.011666 | 0.011700 | 0.011565 | 0.011666 |
| 0.011531 | 0.011868 | 0.011464 | 0.011734 | 0.011531 | 0.011531 | 0.011464 |
| 0.011700 | 0.011903 | 0.011599 | 0.011666 | 0.011498 | 0.011902 | 0.011531 |
| 0.011531 | 0.011531 | 0.011565 | 0.011666 | 0.011565 | 0.011666 | 0.011734 |
| 0.011700 | 0.011700 | 0.011599 | 0.011700 | 0.011666 | 0.011531 | 0.011430 |
| 0.011531 | 0.011531 | 0.011599 | 0.011531 | 0.011498 | 0.011666 | 0.011531 |
| 0.011565 | 0.011565 | 0.011700 | 0.011734 | 0.011632 | 0.011565 | 0.011565 |
| 0.011632 | 0.011565 | 0.011666 | 0.011531 | 0.011666 | 0.011767 | 0.012003 |
| 0.011565 | 0.011970 | 0.011578 | 0.018097 | 0.011453 | 0.011733 | 0.011933 |
| 0.011892 | 0.011941 | 0.011689 | 0.011698 | 0.011994 | 0.011959 | 0.011668 |
| 0.011819 | 0.011915 | 0.011528 | 0.011563 | 0.011607 | 0.011603 | 0.011576 |
| 0.011858 | 0.011768 | 0.011765 | 0.011523 | 0.011700 | 0.011734 | 0.011738 |
| 0.011576 | 0.011700 | 0.011700 | 0.011666 | 0.011633 | 0.011633 | 0.011599 |
| 0.011633 | 0.011565 | 0.011599 | 0.011632 | 0.011599 | 0.011531 | 0.011565 |
| 0.011565 | 0.011632 | 0.011531 | 0.011633 | 0.011666 | 0.011700 | 0.011599 |
| 0.011632 | 0.011599 | 0.011936 | 0.011936 | 0.011666 | 0.011701 | 0.011734 |
| 0.011498 | 0.011498 | 0.011531 | 0.011633 | 0.011498 | 0.011734 | 0.011734 |
| 0.011767 | 0.011767 | 0.011633 | 0.011801 | 0.011969 | 0.011803 | 0.011633 |
| 0.011632 | 0.011700 | 0.011734 | 0.011565 | 0.011632 | 0.011599 | 0.011633 |
| 0.011700 | 0.011700 | 0.011733 | 0.011700 | 0.011600 | 0.011801 | 0.011767 |
| 0.011604 | 0.011531 | 0.011632 | 0.011734 | 0.011633 | 0.011767 | 0.011801 |
| 0.011970 | 0.011676 | 0.011835 | 0.011801 | 0.011734 | 0.011902 | 0.011532 |
| 0.011702 | 0.011599 | 0.011565 | 0.011565 | 0.011632 | 0.011531 | 0.011633 |
| 0.011666 | 0.011700 | 0.011599 | 0.011632 | 0.011599 | 0.011936 | 0.011936 |
| 0.011666 | 0.011701 | 0.011700 | 0.011700 | 0.012341 | 0.011705 | 0.011625 |
| 0.011730 | 0.011686 | 0.011800 | 0.011686 | 0.011762 | 0.011683 | 0.011716 |
| 0.012266 | 0.011546 | 0.011713 | 0.011649 | 0.011923 | 0.011811 | 0.011913 |
| 0.012321 | 0.011702 | 0.011637 | 0.011632 | 0.011632 | 0.011666 | 0.011602 |
| 0.011498 | 0.011531 | 0.011666 | 0.011632 | 0.011636 | 0.011767 | 0.011735 |
| 0.011599 | 0.011531 | 0.011565 | 0.011599 | 0.011498 | 0.011565 | 0.011464 |
| 0.011599 | 0.011632 | 0.011531 | 0.011498 | 0.011599 | 0.011531 | 0.011565 |
| 0.011565 | 0.011498 | 0.011565 | 0.011599 | 0.011498 | 0.011700 | 0.011734 |
| 0.011633 | 0.011700 | 0.011632 | 0.011633 | 0.011565 | 0.011969 | 0.011599 |
| 0.011584 | 0.011565 | 0.011801 | 0.011774 | 0.011666 | 0.011666 | 0.011666 |
| 0.011666 | 0.011599 | 0.011565 | 0.011599 | 0.011700 | 0.011700 | 0.011632 |
| 0.011632 | 0.011767 | 0.011936 | 0.011666 | 0.011868 | 0.011868 | 0.011733 |
| 0.011565 | 0.011632 | 0.011666 | 0.012071 | 0.011633 | 0.011666 | 0.011633 |
| 0.011666 | 0.011599 | 0.011599 | 0.011902 | 0.011835 | 0.011868 | 0.011599 |
| 0.011700 | 0.011767 | 0.011632 | 0.011700 | 0.011666 | 0.011531 | 0.011868 |
| 0.011632 | 0.011397 | 0.011599 | 0.011767 | 0.011599 | 0.011700 | 0.011936 |
| 0.011565 | 0.011980 | 0.012003 | 0.011873 | 0.011624 | 0.011707 | 0.011576 |
| 0.011500 | 0.012073 | 0.011552 | 0.011641 | 0.011597 | 0.011569 | 0.011591 |
| 0.011877 | 0.011389 | 0.011506 | 0.011390 | 0.011491 | 0.011596 | 0.011710 |
| 0.011739 | 0.011612 | 0.011695 | 0.011589 | 0.011635 | 0.011767 | 0.011835 |
| 0.011801 | 0.011700 | 0.011806 | 0.011808 | 0.011910 | 0.011946 | 0.011599 |
| 0.011868 | 0.011734 | 0.011599 | 0.011700 | 0.011498 | 0.011733 | 0.011532 |
| 0.011531 | 0.011599 | 0.011565 | 0.011531 | 0.011565 | 0.011531 | 0.011632 |
| 0.011619 | 0.011585 | 0.011608 | 0.011642 | 0.011779 | 0.011744 | 0.011743 |
| 0.011708 | 0.011666 | 0.011429 | 0.011456 | 0.011602 | 0.011772 | 0.011773 |
| 0.011565 | 0.011636 | 0.000000 | 0.011838 | 0.011767 | 0.011801 | 0.011733 |
| 0.011666 | 0.011734 | 0.011733 | 0.011632 | 0.012206 | 0.011801 | 0.011869 |
| 0.011498 | 0.011953 | 0.011607 | 0.011685 | 0.011565 | 0.011767 | 0.011734 |
| 0.011769 | 0.011767 | 0.011801 | 0.011801 | 0.011847 | 0.011936 | 0.011512 |
| 0.011467 | 0.011407 | 0.011538 | 0.011503 | 0.011608 | 0.011359 | 0.011775 |
| 0.011576 | 0.011675 | 0.011489 | 0.011510 | 0.011599 | 0.011676 | 0.011565 |
| 0.011531 | 0.011531 | 0.011599 | 0.011565 | 0.011767 | 0.011733 | 0.011666 |
| 0.011767 | 0.011835 | 0.011565 | 0.011565 | 0.011599 | 0.011599 | 0.011602 |
| 0.011670 | 0.011599 | 0.011599 | 0.011635 | 0.011767 | 0.011835 | 0.011801 |
| 0.011700 | 0.011806 | 0.011808 | 0.011910 | 0.011946 | 0.011599 | 0.011801 |
| 0.011734 | 0.011734 | 0.011568 | 0.011757 | 0.011687 | 0.011709 | 0.011481 |

|          |          |          |          |          |          |          |
|----------|----------|----------|----------|----------|----------|----------|
| 0.011750 | 0.011837 | 0.011611 | 0.011605 | 0.011531 | 0.011734 | 0.011599 |
| 0.011700 | 0.011633 | 0.011531 | 0.011634 | 0.011734 | 0.011738 | 0.011632 |
| 0.011531 | 0.011466 | 0.011599 | 0.011531 | 0.011464 | 0.011571 | 0.011734 |
| 0.011633 | 0.011565 | 0.011599 | 0.011632 | 0.011599 | 0.011531 | 0.011733 |
| 0.011599 | 0.011633 | 0.011632 | 0.011565 | 0.011632 | 0.011868 | 0.011531 |
| 0.011565 | 0.011969 | 0.011565 | 0.011565 | 0.011565 | 0.011936 | 0.011532 |
| 0.012072 | 0.011613 | 0.011662 | 0.011825 | 0.011915 | 0.011779 | 0.011520 |
| 0.011585 | 0.011733 | 0.011835 | 0.011944 | 0.011802 | 0.011942 | 0.012072 |
| 0.011970 | 0.011975 | 0.011969 | 0.012224 | 0.011936 | 0.012814 | 0.011971 |
| 0.012679 | 0.012479 | 0.012615 | 0.012886 | 0.011936 | 0.011632 | 0.011936 |
| 0.012375 | 0.012311 | 0.011902 | 0.011801 | 0.011868 | 0.011868 | 0.011840 |
| 0.011733 | 0.011740 | 0.011801 | 0.011767 | 0.012138 | 0.012206 | 0.012205 |
| 0.012106 | 0.012206 | 0.012276 | 0.012076 | 0.012376 | 0.012383 | 0.012443 |
| 0.012443 | 0.012477 | 0.012428 | 0.012443 | 0.012446 | 0.011666 | 0.011970 |
| 0.012037 | 0.012543 | 0.012045 | 0.012273 | 0.012747 | 0.011808 | 0.011700 |
| 0.011666 | 0.011666 | 0.012138 | 0.012089 | 0.012257 | 0.012003 | 0.011668 |
| S668     | 0.011905 | 0.011905 | 0.012041 | 0.012007 | 0.012007 | 0.012075 |
| 0.011915 | 0.011813 | 0.012007 | 0.011500 | 0.011567 | 0.011534 | 0.011500 |
| 0.011533 | 0.011702 | 0.011499 | 0.011533 | 0.011601 | 0.011567 | 0.011533 |
| 0.011500 | 0.011533 | 0.011635 | 0.011500 | 0.011534 | 0.011533 | 0.011881 |
| 0.011770 | 0.011533 | 0.011432 | 0.011668 | 0.011601 | 0.011567 | 0.011601 |
| 0.011567 | 0.011669 | 0.011567 | 0.011567 | 0.011601 | 0.011567 | 0.011736 |
| 0.011500 | 0.011567 | 0.011601 | 0.011533 | 0.011635 | 0.011669 | 0.011601 |
| 0.011567 | 0.011737 | 0.011635 | 0.011905 | 0.011567 | 0.011838 | 0.011567 |
| 0.011533 | 0.011635 | 0.011703 | 0.011838 | 0.011939 | 0.011635 | 0.011736 |
| 0.011601 | 0.011669 | 0.011567 | 0.011804 | 0.012041 | 0.011567 | 0.011635 |
| 0.011533 | 0.011635 | 0.011601 | 0.011669 | 0.011601 | 0.011601 | 0.011601 |
| 0.011499 | 0.011533 | 0.011500 | 0.011567 | 0.011567 | 0.011534 | 0.011668 |
| 0.011601 | 0.011567 | 0.011635 | 0.011533 | 0.011668 | 0.011500 | 0.011533 |
| 0.011736 | 0.011668 | 0.011905 | 0.011703 | 0.011567 | 0.011804 | 0.011567 |
| 0.011693 | 0.011922 | 0.011740 | 0.011412 | 0.011471 | 0.011540 | 0.011651 |
| 0.012305 | 0.011722 | 0.011431 | 0.011804 | 0.011804 | 0.011601 | 0.011703 |
| 0.011635 | 0.011601 | 0.011668 | 0.011567 | 0.011669 | 0.011601 | 0.011601 |
| 0.011567 | 0.011668 | 0.011872 | 0.011736 | 0.011635 | 0.011601 | 0.011533 |
| 0.011500 | 0.011499 | 0.011567 | 0.011533 | 0.011736 | 0.011702 | 0.011635 |
| 0.011736 | 0.011804 | 0.011533 | 0.011533 | 0.011567 | 0.011567 | 0.011536 |
| 0.011605 | 0.011567 | 0.011567 | 0.011420 | 0.011494 | 0.011482 | 0.011567 |
| 0.011570 | 0.011473 | 0.011540 | 0.011544 | 0.011470 | 0.011507 | 0.011535 |
| 0.011817 | 0.011579 | 0.011612 | 0.011500 | 0.011510 | 0.011635 | 0.011601 |
| 0.011669 | 0.011601 | 0.011601 | 0.011702 | 0.011635 | 0.012007 | 0.011770 |
| 0.011838 | 0.011703 | 0.011567 | 0.011669 | 0.011466 | 0.011702 | 0.011500 |
| 0.011567 | 0.011567 | 0.011533 | 0.011500 | 0.011533 | 0.011500 | 0.011601 |
| 0.011533 | 0.011669 | 0.011601 | 0.011499 | 0.011603 | 0.011702 | 0.011706 |
| 0.011703 | 0.011601 | 0.011500 | 0.011434 | 0.011567 | 0.011500 | 0.011432 |
| 0.011539 | 0.011703 | 0.011500 | 0.011703 | 0.011466 | 0.011567 | 0.011533 |
| 0.011635 | 0.011533 | 0.011567 | 0.011533 | 0.011567 | 0.011432 | 0.011567 |
| 0.011601 | 0.011533 | 0.011601 | 0.011533 | 0.011567 | 0.011601 | 0.011838 |
| 0.011939 | 0.011871 | 0.011939 | 0.011705 | 0.011940 | 0.011567 | 0.011533 |
| 0.011570 | 0.011833 | 0.011751 | 0.011474 | 0.011914 | 0.011403 | 0.011534 |
| 0.011949 | 0.011846 | 0.011736 | 0.011939 | 0.011645 | 0.011804 | 0.011770 |
| 0.011702 | 0.011871 | 0.011740 | 0.011558 | 0.011566 | 0.011601 | 0.011673 |
| 0.011770 | 0.011671 | 0.011809 | 0.011878 | 0.011804 | 0.011872 | 0.011981 |
| 0.011639 | 0.011880 | 0.011810 | 0.011741 | 0.011974 | 0.011466 | 0.011670 |
| 0.011635 | 0.011567 | 0.011466 | 0.011466 | 0.011533 | 0.011533 | 0.011601 |
| 0.011533 | 0.011601 | 0.011500 | 0.011601 | 0.011533 | 0.011533 | 0.011601 |
| 0.011533 | 0.011973 | 0.011872 | 0.011905 | 0.011432 | 0.011533 | 0.011567 |
| 0.011567 | 0.011533 | 0.011601 | 0.011635 | 0.011499 | 0.011499 | 0.011499 |
| 0.012041 | 0.011635 | 0.011669 | 0.011466 | 0.011567 | 0.011737 | 0.011500 |
| 0.011466 | 0.011533 | 0.011533 | 0.011703 | 0.011500 | 0.011635 | 0.011770 |
| 0.011702 | 0.011533 | 0.011533 | 0.011466 | 0.011466 | 0.011635 | 0.011567 |

|          |          |          |          |          |          |          |
|----------|----------|----------|----------|----------|----------|----------|
| 0.011466 | 0.011567 | 0.011432 | 0.011466 | 0.011601 | 0.011736 | 0.011500 |
| 0.011466 | 0.011601 | 0.011534 | 0.011432 | 0.011770 | 0.011432 | 0.011601 |
| 0.011680 | 0.011500 | 0.011804 | 0.011635 | 0.011669 | 0.011533 | 0.011635 |
| 0.011499 | 0.011838 | 0.011432 | 0.011703 | 0.011499 | 0.011499 | 0.011432 |
| 0.011669 | 0.011872 | 0.011567 | 0.011635 | 0.011466 | 0.011872 | 0.011499 |
| 0.011500 | 0.011499 | 0.011533 | 0.011635 | 0.011533 | 0.011635 | 0.011702 |
| 0.011669 | 0.011669 | 0.011567 | 0.011669 | 0.011635 | 0.011500 | 0.011466 |
| 0.011499 | 0.011500 | 0.011567 | 0.011500 | 0.011466 | 0.011635 | 0.011500 |
| 0.011533 | 0.011533 | 0.011669 | 0.011669 | 0.011601 | 0.011533 | 0.011534 |
| 0.011601 | 0.011533 | 0.011635 | 0.011500 | 0.011635 | 0.011736 | 0.011973 |
| 0.011533 | 0.011939 | 0.011510 | 0.017995 | 0.011453 | 0.011427 | 0.011830 |
| 0.011824 | 0.011837 | 0.011479 | 0.011467 | 0.011885 | 0.011892 | 0.011547 |
| 0.011677 | 0.011671 | 0.011412 | 0.011354 | 0.011451 | 0.011505 | 0.011491 |
| 0.011671 | 0.011694 | 0.011654 | 0.011722 | 0.011669 | 0.011702 | 0.011707 |
| 0.011579 | 0.011668 | 0.011669 | 0.011635 | 0.011601 | 0.011601 | 0.011534 |
| 0.011601 | 0.011533 | 0.011567 | 0.011601 | 0.011567 | 0.011500 | 0.011533 |
| 0.011533 | 0.011601 | 0.011500 | 0.011601 | 0.011635 | 0.011668 | 0.011567 |
| 0.011601 | 0.011567 | 0.011905 | 0.011905 | 0.011635 | 0.011670 | 0.011703 |
| 0.011466 | 0.011466 | 0.011500 | 0.011601 | 0.011466 | 0.011702 | 0.011702 |
| 0.011736 | 0.011736 | 0.011669 | 0.011770 | 0.011939 | 0.011772 | 0.011601 |
| 0.011601 | 0.011669 | 0.011702 | 0.011533 | 0.011601 | 0.011533 | 0.011601 |
| 0.011669 | 0.011668 | 0.011702 | 0.011669 | 0.011568 | 0.011770 | 0.011736 |
| 0.011606 | 0.011500 | 0.011601 | 0.011703 | 0.011601 | 0.011736 | 0.011770 |
| 0.011939 | 0.011645 | 0.011804 | 0.011770 | 0.011702 | 0.011871 | 0.011500 |
| 0.011670 | 0.011568 | 0.011533 | 0.011533 | 0.011601 | 0.011500 | 0.011601 |
| 0.011635 | 0.011668 | 0.011567 | 0.011601 | 0.011567 | 0.011905 | 0.011905 |
| 0.011635 | 0.011670 | 0.011736 | 0.011668 | 0.012313 | 0.011743 | 0.011662 |
| 0.011697 | 0.011689 | 0.011803 | 0.011688 | 0.011800 | 0.011720 | 0.011684 |
| 0.012271 | 0.011582 | 0.011715 | 0.011652 | 0.011926 | 0.011779 | 0.011882 |
| 0.012292 | 0.011743 | 0.011571 | 0.011601 | 0.011601 | 0.011635 | 0.011536 |
| 0.011466 | 0.011500 | 0.011635 | 0.011601 | 0.011570 | 0.011736 | 0.011704 |
| 0.011567 | 0.011500 | 0.011533 | 0.011567 | 0.011466 | 0.011533 | 0.011432 |
| 0.011567 | 0.011601 | 0.011500 | 0.011466 | 0.011567 | 0.011499 | 0.011533 |
| 0.011533 | 0.011466 | 0.011466 | 0.011567 | 0.011466 | 0.011669 | 0.011702 |
| 0.011601 | 0.011669 | 0.011601 | 0.011601 | 0.011533 | 0.011939 | 0.011567 |
| 0.011621 | 0.011533 | 0.011770 | 0.011777 | 0.011635 | 0.011635 | 0.011635 |
| 0.011635 | 0.011567 | 0.011533 | 0.011567 | 0.011669 | 0.011669 | 0.011601 |
| 0.011601 | 0.011736 | 0.011905 | 0.011635 | 0.011804 | 0.011804 | 0.011702 |
| 0.011533 | 0.011601 | 0.011635 | 0.012041 | 0.011601 | 0.011635 | 0.011601 |
| 0.011635 | 0.011567 | 0.011567 | 0.011872 | 0.011804 | 0.011838 | 0.011567 |
| 0.011669 | 0.011736 | 0.011601 | 0.011669 | 0.011635 | 0.011500 | 0.011838 |
| 0.011601 | 0.011567 | 0.011567 | 0.011736 | 0.011567 | 0.011669 | 0.011906 |
| 0.011533 | 0.011984 | 0.011973 | 0.011711 | 0.011455 | 0.011674 | 0.011525 |
| 0.011445 | 0.011996 | 0.011483 | 0.011686 | 0.011597 | 0.011672 | 0.011645 |
| 0.011673 | 0.011521 | 0.011561 | 0.011457 | 0.011492 | 0.011664 | 0.011630 |
| 0.011627 | 0.011455 | 0.011590 | 0.011520 | 0.011603 | 0.011736 | 0.011804 |
| 0.011770 | 0.011669 | 0.011775 | 0.011777 | 0.011879 | 0.011879 | 0.011567 |
| 0.011838 | 0.011703 | 0.011567 | 0.011669 | 0.011466 | 0.011702 | 0.011500 |
| 0.011567 | 0.011567 | 0.011533 | 0.011500 | 0.011533 | 0.011500 | 0.011601 |
| 0.011585 | 0.011585 | 0.011574 | 0.011610 | 0.011746 | 0.011710 | 0.011710 |
| 0.011709 | 0.011635 | 0.011430 | 0.011457 | 0.011570 | 0.011740 | 0.011741 |
| 0.011533 | 0.011604 | 0.011838 | 0.000000 | 0.011736 | 0.011770 | 0.011702 |
| 0.011635 | 0.011702 | 0.011702 | 0.011601 | 0.012177 | 0.011770 | 0.011838 |
| 0.011872 | 0.011849 | 0.011507 | 0.011652 | 0.011533 | 0.011736 | 0.011702 |
| 0.011738 | 0.011702 | 0.011770 | 0.011770 | 0.011850 | 0.011905 | 0.011549 |
| 0.011435 | 0.011444 | 0.011540 | 0.011505 | 0.011611 | 0.011398 | 0.011778 |
| 0.011578 | 0.011589 | 0.011300 | 0.011625 | 0.011567 | 0.011644 | 0.011533 |
| 0.011500 | 0.011499 | 0.011567 | 0.011533 | 0.011736 | 0.011702 | 0.011635 |
| 0.011736 | 0.011804 | 0.011533 | 0.011533 | 0.011567 | 0.011567 | 0.011536 |
| 0.011605 | 0.011567 | 0.011567 | 0.011603 | 0.011736 | 0.011804 | 0.011770 |

|          |          |          |          |          |          |          |
|----------|----------|----------|----------|----------|----------|----------|
| 0.011669 | 0.011775 | 0.011777 | 0.011879 | 0.011879 | 0.011567 | 0.011770 |
| 0.011702 | 0.011702 | 0.011536 | 0.011725 | 0.011654 | 0.011677 | 0.011553 |
| 0.011719 | 0.011933 | 0.011655 | 0.011573 | 0.011500 | 0.011703 | 0.011533 |
| 0.011669 | 0.011601 | 0.011499 | 0.011603 | 0.011702 | 0.011706 | 0.011601 |
| 0.011500 | 0.011434 | 0.011567 | 0.011500 | 0.011432 | 0.011539 | 0.011703 |
| 0.011601 | 0.011533 | 0.011567 | 0.011601 | 0.011567 | 0.011500 | 0.011702 |
| 0.011567 | 0.011601 | 0.011601 | 0.011533 | 0.011601 | 0.011838 | 0.011500 |
| 0.011533 | 0.011939 | 0.011533 | 0.011533 | 0.011533 | 0.011905 | 0.011360 |
| 0.011904 | 0.011443 | 0.011462 | 0.011705 | 0.011794 | 0.011708 | 0.011395 |
| 0.011428 | 0.011702 | 0.011804 | 0.011914 | 0.011771 | 0.011911 | 0.012042 |
| 0.011940 | 0.011979 | 0.011939 | 0.012194 | 0.011905 | 0.012786 | 0.011941 |
| 0.012651 | 0.012450 | 0.012587 | 0.012826 | 0.011905 | 0.011601 | 0.011905 |
| 0.012347 | 0.012282 | 0.011872 | 0.011770 | 0.011838 | 0.011838 | 0.011809 |
| 0.011702 | 0.011709 | 0.011770 | 0.011736 | 0.012109 | 0.012176 | 0.012142 |
| 0.012075 | 0.012177 | 0.012247 | 0.012046 | 0.012347 | 0.012354 | 0.012415 |
| 0.012415 | 0.012449 | 0.012398 | 0.012415 | 0.012417 | 0.011635 | 0.011906 |
| 0.012007 | 0.012515 | 0.012015 | 0.012210 | 0.012720 | 0.011777 | 0.011669 |
| 0.011635 | 0.011635 | 0.012109 | 0.012133 | 0.012222 | 0.011973 | 0.011636 |
| S669     | 0.011834 | 0.011834 | 0.011969 | 0.011935 | 0.011935 | 0.012002 |
| 0.011843 | 0.011741 | 0.011935 | 0.011430 | 0.011497 | 0.011464 | 0.011430 |
| 0.011464 | 0.011632 | 0.011430 | 0.011464 | 0.011531 | 0.011497 | 0.011464 |
| 0.011430 | 0.011464 | 0.011565 | 0.011430 | 0.011464 | 0.011464 | 0.011809 |
| 0.011699 | 0.011464 | 0.011363 | 0.011598 | 0.011497 | 0.011497 | 0.011531 |
| 0.011497 | 0.011598 | 0.011497 | 0.011497 | 0.011531 | 0.011497 | 0.011666 |
| 0.011430 | 0.011497 | 0.011531 | 0.011464 | 0.011565 | 0.011531 | 0.011531 |
| 0.011497 | 0.011666 | 0.011565 | 0.011834 | 0.011497 | 0.011767 | 0.011497 |
| 0.011464 | 0.011565 | 0.011632 | 0.011767 | 0.011868 | 0.011565 | 0.011666 |
| 0.011531 | 0.011598 | 0.011497 | 0.011733 | 0.011969 | 0.011497 | 0.011565 |
| 0.011464 | 0.011565 | 0.011531 | 0.011598 | 0.011531 | 0.011531 | 0.011531 |
| 0.011430 | 0.011464 | 0.011430 | 0.011531 | 0.011497 | 0.011532 | 0.011598 |
| 0.011531 | 0.011497 | 0.011565 | 0.011464 | 0.011598 | 0.011430 | 0.011497 |
| 0.011666 | 0.011598 | 0.011834 | 0.011632 | 0.011497 | 0.011733 | 0.011497 |
| 0.011691 | 0.011920 | 0.011702 | 0.011412 | 0.011396 | 0.011539 | 0.011611 |
| 0.012231 | 0.011569 | 0.011390 | 0.011531 | 0.011464 | 0.011531 | 0.011632 |
| 0.011565 | 0.011531 | 0.011598 | 0.011497 | 0.011598 | 0.011531 | 0.011531 |
| 0.011497 | 0.011598 | 0.011800 | 0.011665 | 0.011565 | 0.011531 | 0.011464 |
| 0.011430 | 0.011430 | 0.011497 | 0.011464 | 0.011666 | 0.011632 | 0.011565 |
| 0.011665 | 0.011733 | 0.011464 | 0.011464 | 0.011497 | 0.011497 | 0.011500 |
| 0.011568 | 0.011497 | 0.011497 | 0.011384 | 0.011422 | 0.011411 | 0.011497 |
| 0.011500 | 0.011438 | 0.011466 | 0.011474 | 0.011400 | 0.011437 | 0.011466 |
| 0.011708 | 0.011508 | 0.011508 | 0.011430 | 0.011406 | 0.011565 | 0.011531 |
| 0.011598 | 0.011532 | 0.011531 | 0.011632 | 0.011565 | 0.011935 | 0.011699 |
| 0.011766 | 0.011632 | 0.011497 | 0.011598 | 0.011396 | 0.011632 | 0.011430 |
| 0.011497 | 0.011497 | 0.011464 | 0.011430 | 0.011464 | 0.011430 | 0.011531 |
| 0.011497 | 0.011598 | 0.011531 | 0.011430 | 0.011533 | 0.011632 | 0.011636 |
| 0.011632 | 0.011531 | 0.011430 | 0.011364 | 0.011497 | 0.011430 | 0.011363 |
| 0.011468 | 0.011632 | 0.011430 | 0.011632 | 0.011397 | 0.011497 | 0.011464 |
| 0.011565 | 0.011464 | 0.011497 | 0.011464 | 0.011497 | 0.011363 | 0.011497 |
| 0.011531 | 0.011464 | 0.011531 | 0.011464 | 0.011497 | 0.011531 | 0.011766 |
| 0.011834 | 0.011800 | 0.011868 | 0.011566 | 0.011868 | 0.011497 | 0.011464 |
| 0.011500 | 0.011829 | 0.011518 | 0.011369 | 0.011876 | 0.011367 | 0.011493 |
| 0.011877 | 0.011775 | 0.011464 | 0.011868 | 0.011573 | 0.011464 | 0.011699 |
| 0.011632 | 0.011531 | 0.011665 | 0.011308 | 0.011564 | 0.011531 | 0.011603 |
| 0.011699 | 0.011600 | 0.011602 | 0.011806 | 0.011733 | 0.011800 | 0.011909 |
| 0.011637 | 0.011808 | 0.011738 | 0.011602 | 0.011936 | 0.011396 | 0.011600 |
| 0.011565 | 0.011497 | 0.011396 | 0.011396 | 0.011464 | 0.011464 | 0.011531 |
| 0.011464 | 0.011531 | 0.011430 | 0.011531 | 0.011464 | 0.011464 | 0.011531 |
| 0.011464 | 0.011901 | 0.011800 | 0.011834 | 0.011363 | 0.011464 | 0.011497 |
| 0.011497 | 0.011464 | 0.011531 | 0.011565 | 0.011430 | 0.011430 | 0.011430 |
| 0.011969 | 0.011565 | 0.011598 | 0.011396 | 0.011497 | 0.011666 | 0.011430 |

|          |          |          |          |          |          |          |
|----------|----------|----------|----------|----------|----------|----------|
| 0.011430 | 0.011497 | 0.011464 | 0.011632 | 0.011430 | 0.011565 | 0.011699 |
| 0.011632 | 0.011464 | 0.011464 | 0.011396 | 0.011396 | 0.011565 | 0.011497 |
| 0.011396 | 0.011497 | 0.011363 | 0.011396 | 0.011464 | 0.011666 | 0.011430 |
| 0.011397 | 0.011531 | 0.011464 | 0.011363 | 0.011699 | 0.011363 | 0.011531 |
| 0.011609 | 0.011430 | 0.011733 | 0.011565 | 0.011598 | 0.011464 | 0.011565 |
| 0.011430 | 0.011767 | 0.011363 | 0.011632 | 0.011430 | 0.011430 | 0.011363 |
| 0.011598 | 0.011801 | 0.011497 | 0.011565 | 0.011396 | 0.011800 | 0.011430 |
| 0.011430 | 0.011430 | 0.011464 | 0.011565 | 0.011464 | 0.011565 | 0.011632 |
| 0.011598 | 0.011598 | 0.011497 | 0.011598 | 0.011565 | 0.011430 | 0.011396 |
| 0.011430 | 0.011430 | 0.011497 | 0.011430 | 0.011396 | 0.011565 | 0.011430 |
| 0.011464 | 0.011464 | 0.011598 | 0.011632 | 0.011531 | 0.011464 | 0.011464 |
| 0.011531 | 0.011464 | 0.011565 | 0.011430 | 0.011565 | 0.011464 | 0.011901 |
| 0.011464 | 0.011868 | 0.011474 | 0.017900 | 0.011322 | 0.011488 | 0.011828 |
| 0.011787 | 0.011834 | 0.011532 | 0.011524 | 0.011830 | 0.011855 | 0.011546 |
| 0.011629 | 0.011671 | 0.011411 | 0.011437 | 0.011450 | 0.011455 | 0.011490 |
| 0.011576 | 0.011619 | 0.011616 | 0.011523 | 0.011598 | 0.011632 | 0.011568 |
| 0.011507 | 0.011598 | 0.011464 | 0.011565 | 0.011531 | 0.011531 | 0.011498 |
| 0.011464 | 0.011464 | 0.011296 | 0.011531 | 0.011497 | 0.011430 | 0.011464 |
| 0.011464 | 0.011531 | 0.011430 | 0.011531 | 0.011565 | 0.011598 | 0.011497 |
| 0.011531 | 0.011497 | 0.011834 | 0.011834 | 0.011565 | 0.011599 | 0.011632 |
| 0.011396 | 0.011396 | 0.011430 | 0.011531 | 0.011396 | 0.011632 | 0.011632 |
| 0.011396 | 0.011464 | 0.011598 | 0.011430 | 0.011868 | 0.011431 | 0.011531 |
| 0.011329 | 0.011598 | 0.011632 | 0.011464 | 0.011531 | 0.011497 | 0.011464 |
| 0.011397 | 0.011396 | 0.011430 | 0.011598 | 0.011498 | 0.011699 | 0.011666 |
| 0.011535 | 0.011430 | 0.011531 | 0.011632 | 0.011531 | 0.011666 | 0.011699 |
| 0.011868 | 0.011573 | 0.011464 | 0.011699 | 0.011632 | 0.011531 | 0.011430 |
| 0.011532 | 0.011498 | 0.011464 | 0.011464 | 0.011531 | 0.011430 | 0.011531 |
| 0.011565 | 0.011598 | 0.011497 | 0.011531 | 0.011497 | 0.011834 | 0.011834 |
| 0.011565 | 0.011599 | 0.011665 | 0.011598 | 0.012239 | 0.011203 | 0.011589 |
| 0.011588 | 0.011199 | 0.011729 | 0.011615 | 0.011586 | 0.011648 | 0.011405 |
| 0.012196 | 0.011511 | 0.011644 | 0.011579 | 0.011853 | 0.011708 | 0.011810 |
| 0.012217 | 0.011701 | 0.011534 | 0.011531 | 0.011531 | 0.011565 | 0.011500 |
| 0.011396 | 0.011430 | 0.011565 | 0.011531 | 0.011534 | 0.011665 | 0.011633 |
| 0.011497 | 0.011430 | 0.011464 | 0.011497 | 0.011396 | 0.011464 | 0.011363 |
| 0.011497 | 0.011531 | 0.011430 | 0.011396 | 0.011497 | 0.011430 | 0.011464 |
| 0.011464 | 0.011396 | 0.011464 | 0.011497 | 0.011396 | 0.011598 | 0.011632 |
| 0.011531 | 0.011598 | 0.011531 | 0.011531 | 0.011464 | 0.011868 | 0.011497 |
| 0.011548 | 0.011464 | 0.011699 | 0.011705 | 0.011565 | 0.011565 | 0.011565 |
| 0.011531 | 0.011497 | 0.011464 | 0.011497 | 0.011531 | 0.011598 | 0.011531 |
| 0.011531 | 0.011666 | 0.011834 | 0.011565 | 0.011767 | 0.011767 | 0.011632 |
| 0.011464 | 0.011531 | 0.011531 | 0.011969 | 0.011531 | 0.011565 | 0.011531 |
| 0.011363 | 0.011497 | 0.011497 | 0.011801 | 0.011733 | 0.011767 | 0.011497 |
| 0.011598 | 0.011666 | 0.011531 | 0.011598 | 0.011565 | 0.011430 | 0.011767 |
| 0.011531 | 0.011497 | 0.011497 | 0.011666 | 0.011497 | 0.011598 | 0.011834 |
| 0.011464 | 0.011911 | 0.011868 | 0.011711 | 0.011342 | 0.011604 | 0.011421 |
| 0.011280 | 0.011917 | 0.011411 | 0.011641 | 0.011499 | 0.011569 | 0.011591 |
| 0.011672 | 0.011324 | 0.011561 | 0.011324 | 0.011437 | 0.011529 | 0.011587 |
| 0.011625 | 0.011493 | 0.011589 | 0.011518 | 0.011533 | 0.011665 | 0.011733 |
| 0.011699 | 0.011599 | 0.011704 | 0.011705 | 0.011807 | 0.011874 | 0.011497 |
| 0.011766 | 0.011632 | 0.011497 | 0.011598 | 0.011396 | 0.011632 | 0.011430 |
| 0.011497 | 0.011497 | 0.011464 | 0.011430 | 0.011464 | 0.011430 | 0.011531 |
| 0.011340 | 0.011480 | 0.011505 | 0.011540 | 0.011676 | 0.011641 | 0.011572 |
| 0.011639 | 0.011565 | 0.011356 | 0.011312 | 0.011501 | 0.011670 | 0.011671 |
| 0.011464 | 0.011534 | 0.011767 | 0.011736 | 0.000000 | 0.011700 | 0.011632 |
| 0.011565 | 0.011632 | 0.011632 | 0.011531 | 0.012104 | 0.011228 | 0.011497 |
| 0.011800 | 0.011809 | 0.011470 | 0.011580 | 0.011464 | 0.011666 | 0.011632 |
| 0.011667 | 0.011666 | 0.011430 | 0.011430 | 0.011886 | 0.011834 | 0.011477 |
| 0.011365 | 0.011372 | 0.011469 | 0.011434 | 0.011539 | 0.011396 | 0.011706 |
| 0.011507 | 0.011630 | 0.011394 | 0.011547 | 0.011497 | 0.011573 | 0.011464 |
| 0.011430 | 0.011430 | 0.011497 | 0.011464 | 0.011666 | 0.011632 | 0.011565 |



|          |          |          |          |          |          |          |
|----------|----------|----------|----------|----------|----------|----------|
| 0.011665 | 0.011733 | 0.011464 | 0.011464 | 0.011497 | 0.011497 | 0.011500 |
| 0.011568 | 0.011497 | 0.011497 | 0.011533 | 0.011665 | 0.011733 | 0.011699 |
| 0.011599 | 0.011704 | 0.011705 | 0.011807 | 0.011874 | 0.011497 | 0.011699 |
| 0.011632 | 0.011632 | 0.011466 | 0.011617 | 0.011582 | 0.011606 | 0.011481 |
| 0.011646 | 0.011882 | 0.011610 | 0.011537 | 0.011430 | 0.011632 | 0.011497 |
| 0.011598 | 0.011531 | 0.011430 | 0.011533 | 0.011632 | 0.011636 | 0.011531 |
| 0.011430 | 0.011364 | 0.011497 | 0.011430 | 0.011363 | 0.011468 | 0.011632 |
| 0.011464 | 0.011464 | 0.011296 | 0.011531 | 0.011497 | 0.011430 | 0.011632 |
| 0.011497 | 0.011531 | 0.011531 | 0.011464 | 0.011531 | 0.011767 | 0.011430 |
| 0.011464 | 0.011868 | 0.011464 | 0.011464 | 0.011464 | 0.011834 | 0.011403 |
| 0.011847 | 0.011443 | 0.011361 | 0.011664 | 0.011752 | 0.011635 | 0.011353 |
| 0.011323 | 0.011632 | 0.011733 | 0.011841 | 0.011700 | 0.011839 | 0.011969 |
| 0.011868 | 0.011906 | 0.011867 | 0.012120 | 0.011834 | 0.012711 | 0.011869 |
| 0.012508 | 0.012376 | 0.012512 | 0.012783 | 0.011834 | 0.011531 | 0.011834 |
| 0.012273 | 0.012209 | 0.011800 | 0.011700 | 0.011767 | 0.011767 | 0.011670 |
| 0.011632 | 0.011637 | 0.011699 | 0.011666 | 0.012036 | 0.012103 | 0.012103 |
| 0.012004 | 0.012104 | 0.012207 | 0.011940 | 0.012273 | 0.012280 | 0.012341 |
| 0.012341 | 0.012374 | 0.012324 | 0.012341 | 0.012343 | 0.011565 | 0.011868 |
| 0.011935 | 0.012441 | 0.011909 | 0.012171 | 0.012644 | 0.011706 | 0.011598 |
| 0.011531 | 0.011565 | 0.012036 | 0.012130 | 0.012186 | 0.011901 | 0.011566 |
| S670     | 0.011868 | 0.011868 | 0.012003 | 0.011969 | 0.011969 | 0.012037 |
| 0.011877 | 0.011775 | 0.011902 | 0.011464 | 0.011531 | 0.011498 | 0.011464 |
| 0.011498 | 0.011599 | 0.011464 | 0.011498 | 0.011565 | 0.011531 | 0.011498 |
| 0.011464 | 0.011498 | 0.011599 | 0.011397 | 0.011498 | 0.011498 | 0.011843 |
| 0.011733 | 0.011498 | 0.011397 | 0.011632 | 0.011565 | 0.011531 | 0.011565 |
| 0.011531 | 0.011632 | 0.011531 | 0.011531 | 0.011565 | 0.011531 | 0.011700 |
| 0.011464 | 0.011531 | 0.011565 | 0.011498 | 0.011599 | 0.011632 | 0.011565 |
| 0.011531 | 0.011700 | 0.011599 | 0.011868 | 0.011531 | 0.011801 | 0.011531 |
| 0.011498 | 0.011599 | 0.011666 | 0.011801 | 0.011902 | 0.011599 | 0.011700 |
| 0.011565 | 0.011632 | 0.011531 | 0.011767 | 0.012003 | 0.011464 | 0.011599 |
| 0.011498 | 0.011599 | 0.011565 | 0.011632 | 0.011565 | 0.011565 | 0.011565 |
| 0.011464 | 0.011498 | 0.011464 | 0.011565 | 0.011531 | 0.011566 | 0.011632 |
| 0.011565 | 0.011531 | 0.011599 | 0.011498 | 0.011632 | 0.011464 | 0.011531 |
| 0.011699 | 0.011632 | 0.011868 | 0.011666 | 0.011531 | 0.011767 | 0.011464 |
| 0.011654 | 0.011883 | 0.011664 | 0.011373 | 0.011471 | 0.011502 | 0.011611 |
| 0.012305 | 0.011772 | 0.011431 | 0.011767 | 0.011767 | 0.011565 | 0.011666 |
| 0.011599 | 0.011565 | 0.011632 | 0.011531 | 0.011632 | 0.011565 | 0.011565 |
| 0.011531 | 0.011632 | 0.011834 | 0.011632 | 0.011599 | 0.011565 | 0.011498 |
| 0.011464 | 0.011464 | 0.011531 | 0.011498 | 0.011700 | 0.011666 | 0.011599 |
| 0.011700 | 0.011767 | 0.011498 | 0.011498 | 0.011531 | 0.011531 | 0.011534 |
| 0.011568 | 0.011531 | 0.011531 | 0.011420 | 0.011494 | 0.011446 | 0.011531 |
| 0.011534 | 0.011473 | 0.011540 | 0.011509 | 0.011434 | 0.011471 | 0.011499 |
| 0.011780 | 0.011543 | 0.011577 | 0.011464 | 0.011475 | 0.011599 | 0.011565 |
| 0.011632 | 0.011566 | 0.011565 | 0.011666 | 0.011599 | 0.011969 | 0.011733 |
| 0.011801 | 0.011666 | 0.011531 | 0.011632 | 0.011430 | 0.011666 | 0.011464 |
| 0.011531 | 0.011531 | 0.011498 | 0.011464 | 0.011498 | 0.011464 | 0.011565 |
| 0.011531 | 0.011632 | 0.011565 | 0.011464 | 0.011499 | 0.011666 | 0.011602 |
| 0.011666 | 0.011565 | 0.011464 | 0.011398 | 0.011531 | 0.011464 | 0.011397 |
| 0.011503 | 0.011666 | 0.011464 | 0.011666 | 0.011430 | 0.011531 | 0.011498 |
| 0.011599 | 0.011498 | 0.011531 | 0.011498 | 0.011531 | 0.011397 | 0.011531 |
| 0.011565 | 0.011498 | 0.011565 | 0.011498 | 0.011531 | 0.011565 | 0.011801 |
| 0.011902 | 0.011834 | 0.011902 | 0.011668 | 0.011902 | 0.011531 | 0.011498 |
| 0.011534 | 0.011870 | 0.011610 | 0.011438 | 0.011842 | 0.011402 | 0.011493 |
| 0.011911 | 0.011775 | 0.011699 | 0.011902 | 0.011608 | 0.011767 | 0.011733 |
| 0.011599 | 0.011834 | 0.011701 | 0.011473 | 0.011522 | 0.011565 | 0.011637 |
| 0.011733 | 0.011634 | 0.011772 | 0.011840 | 0.011767 | 0.011834 | 0.011943 |
| 0.011671 | 0.011842 | 0.011772 | 0.011636 | 0.011970 | 0.011430 | 0.011634 |
| 0.011599 | 0.011531 | 0.011430 | 0.011430 | 0.011498 | 0.011430 | 0.011565 |
| 0.011498 | 0.011565 | 0.011464 | 0.011565 | 0.011498 | 0.011498 | 0.011565 |
| 0.011498 | 0.011935 | 0.011834 | 0.011868 | 0.011397 | 0.011498 | 0.011531 |

|          |          |          |          |          |          |          |
|----------|----------|----------|----------|----------|----------|----------|
| 0.011531 | 0.011498 | 0.011565 | 0.011599 | 0.011464 | 0.011464 | 0.011464 |
| 0.012003 | 0.011599 | 0.011632 | 0.011430 | 0.011531 | 0.011700 | 0.011464 |
| 0.011464 | 0.011498 | 0.011498 | 0.011666 | 0.011464 | 0.011599 | 0.011733 |
| 0.011666 | 0.011498 | 0.011498 | 0.011430 | 0.011430 | 0.011599 | 0.011531 |
| 0.011430 | 0.011531 | 0.011397 | 0.011430 | 0.011565 | 0.011700 | 0.011430 |
| 0.011431 | 0.011565 | 0.011498 | 0.011397 | 0.011733 | 0.011397 | 0.011498 |
| 0.011643 | 0.011464 | 0.011767 | 0.011599 | 0.011632 | 0.011498 | 0.011599 |
| 0.011464 | 0.011801 | 0.011397 | 0.011666 | 0.011464 | 0.011464 | 0.011397 |
| 0.011632 | 0.011835 | 0.011531 | 0.011599 | 0.011430 | 0.011834 | 0.011464 |
| 0.011464 | 0.011464 | 0.011498 | 0.011599 | 0.011498 | 0.011599 | 0.011666 |
| 0.011632 | 0.011632 | 0.011531 | 0.011632 | 0.011599 | 0.011464 | 0.011430 |
| 0.011464 | 0.011464 | 0.011531 | 0.011464 | 0.011430 | 0.011599 | 0.011464 |
| 0.011498 | 0.011498 | 0.011632 | 0.011666 | 0.011565 | 0.011498 | 0.011498 |
| 0.011565 | 0.011498 | 0.011599 | 0.011464 | 0.011599 | 0.011632 | 0.011935 |
| 0.011498 | 0.011902 | 0.011509 | 0.018017 | 0.011387 | 0.011488 | 0.011828 |
| 0.011788 | 0.011835 | 0.011532 | 0.011640 | 0.011719 | 0.011855 | 0.011364 |
| 0.011772 | 0.011610 | 0.011372 | 0.011521 | 0.011451 | 0.011356 | 0.011447 |
| 0.011764 | 0.011693 | 0.011691 | 0.011523 | 0.011632 | 0.011666 | 0.011670 |
| 0.011542 | 0.011632 | 0.011632 | 0.011599 | 0.011565 | 0.011565 | 0.011532 |
| 0.011565 | 0.011498 | 0.011531 | 0.011565 | 0.011531 | 0.011464 | 0.011498 |
| 0.011498 | 0.011565 | 0.011464 | 0.011565 | 0.011599 | 0.011632 | 0.011531 |
| 0.011565 | 0.011531 | 0.011868 | 0.011868 | 0.011599 | 0.011566 | 0.011666 |
| 0.011430 | 0.011430 | 0.011464 | 0.011565 | 0.011430 | 0.011666 | 0.011666 |
| 0.011699 | 0.011699 | 0.011632 | 0.011733 | 0.011902 | 0.011668 | 0.011565 |
| 0.011565 | 0.011632 | 0.011666 | 0.011498 | 0.011565 | 0.011531 | 0.011565 |
| 0.011632 | 0.011632 | 0.011666 | 0.011632 | 0.011532 | 0.011733 | 0.011700 |
| 0.011569 | 0.011464 | 0.011565 | 0.011666 | 0.011565 | 0.011700 | 0.011733 |
| 0.011902 | 0.011608 | 0.011767 | 0.011733 | 0.011599 | 0.011834 | 0.011464 |
| 0.011634 | 0.011464 | 0.011498 | 0.011498 | 0.011565 | 0.011464 | 0.011565 |
| 0.011599 | 0.011632 | 0.011531 | 0.011565 | 0.011531 | 0.011868 | 0.011868 |
| 0.011599 | 0.011566 | 0.011699 | 0.011632 | 0.012273 | 0.011668 | 0.011624 |
| 0.011623 | 0.011616 | 0.011764 | 0.011651 | 0.011726 | 0.011682 | 0.011613 |
| 0.012231 | 0.011546 | 0.011678 | 0.011614 | 0.011888 | 0.011742 | 0.011844 |
| 0.012252 | 0.011739 | 0.011535 | 0.011565 | 0.011565 | 0.011599 | 0.011500 |
| 0.011430 | 0.011464 | 0.011599 | 0.011565 | 0.011534 | 0.011699 | 0.011668 |
| 0.011531 | 0.011464 | 0.011498 | 0.011531 | 0.011430 | 0.011498 | 0.011397 |
| 0.011531 | 0.011565 | 0.011464 | 0.011430 | 0.011531 | 0.011464 | 0.011464 |
| 0.011498 | 0.011430 | 0.011498 | 0.011531 | 0.011430 | 0.011632 | 0.011666 |
| 0.011565 | 0.011632 | 0.011565 | 0.011565 | 0.011498 | 0.011902 | 0.011531 |
| 0.011583 | 0.011498 | 0.011733 | 0.011740 | 0.011599 | 0.011599 | 0.011599 |
| 0.011599 | 0.011531 | 0.011498 | 0.011531 | 0.011565 | 0.011632 | 0.011565 |
| 0.011565 | 0.011700 | 0.011801 | 0.011531 | 0.011801 | 0.011801 | 0.011666 |
| 0.011498 | 0.011565 | 0.011599 | 0.012003 | 0.011565 | 0.011599 | 0.011565 |
| 0.011599 | 0.011531 | 0.011531 | 0.011835 | 0.011767 | 0.011801 | 0.011531 |
| 0.011632 | 0.011632 | 0.011565 | 0.011632 | 0.011599 | 0.011464 | 0.011801 |
| 0.011565 | 0.011531 | 0.011531 | 0.011700 | 0.011531 | 0.011632 | 0.011868 |
| 0.011498 | 0.011945 | 0.011935 | 0.011711 | 0.011455 | 0.011638 | 0.011525 |
| 0.011280 | 0.011956 | 0.011482 | 0.011641 | 0.011402 | 0.011569 | 0.011591 |
| 0.011774 | 0.011258 | 0.011561 | 0.011324 | 0.011384 | 0.011529 | 0.011547 |
| 0.011588 | 0.011454 | 0.011554 | 0.011518 | 0.011567 | 0.011699 | 0.011767 |
| 0.011733 | 0.011633 | 0.011738 | 0.011740 | 0.011842 | 0.011875 | 0.011531 |
| 0.011801 | 0.011666 | 0.011531 | 0.011632 | 0.011430 | 0.011666 | 0.011464 |
| 0.011531 | 0.011531 | 0.011498 | 0.011464 | 0.011498 | 0.011464 | 0.011565 |
| 0.011514 | 0.011550 | 0.011540 | 0.011574 | 0.011710 | 0.011675 | 0.011675 |
| 0.011673 | 0.011599 | 0.011429 | 0.011420 | 0.011467 | 0.011704 | 0.011705 |
| 0.011498 | 0.011568 | 0.011801 | 0.011770 | 0.011700 | 0.000000 | 0.011666 |
| 0.011599 | 0.011666 | 0.011666 | 0.011565 | 0.012138 | 0.011733 | 0.011801 |
| 0.011834 | 0.011917 | 0.011505 | 0.011615 | 0.011498 | 0.011700 | 0.011666 |
| 0.011701 | 0.011699 | 0.011733 | 0.011733 | 0.011886 | 0.011868 | 0.011512 |
| 0.011399 | 0.011407 | 0.011503 | 0.011468 | 0.011574 | 0.011434 | 0.011741 |

|          |          |          |          |          |          |          |
|----------|----------|----------|----------|----------|----------|----------|
| 0.011541 | 0.011631 | 0.011441 | 0.011585 | 0.011531 | 0.011539 | 0.011498 |
| 0.011464 | 0.011464 | 0.011531 | 0.011498 | 0.011700 | 0.011666 | 0.011599 |
| 0.011700 | 0.011767 | 0.011498 | 0.011498 | 0.011531 | 0.011531 | 0.011534 |
| 0.011568 | 0.011531 | 0.011531 | 0.011567 | 0.011699 | 0.011767 | 0.011733 |
| 0.011633 | 0.011738 | 0.011740 | 0.011842 | 0.011875 | 0.011531 | 0.011733 |
| 0.011666 | 0.011666 | 0.011500 | 0.011687 | 0.011548 | 0.011640 | 0.011516 |
| 0.011681 | 0.011974 | 0.011738 | 0.011571 | 0.011464 | 0.011666 | 0.011531 |
| 0.011632 | 0.011565 | 0.011464 | 0.011499 | 0.011666 | 0.011602 | 0.011565 |
| 0.011464 | 0.011398 | 0.011531 | 0.011464 | 0.011397 | 0.011503 | 0.011666 |
| 0.011565 | 0.011498 | 0.011531 | 0.011565 | 0.011531 | 0.011464 | 0.011666 |
| 0.011531 | 0.011565 | 0.011565 | 0.011498 | 0.011565 | 0.011801 | 0.011464 |
| 0.011498 | 0.011902 | 0.011498 | 0.011498 | 0.011498 | 0.011868 | 0.011446 |
| 0.011847 | 0.011443 | 0.011561 | 0.011664 | 0.011752 | 0.011671 | 0.011353 |
| 0.011532 | 0.011666 | 0.011767 | 0.011876 | 0.011734 | 0.011873 | 0.012004 |
| 0.011902 | 0.011941 | 0.011902 | 0.012155 | 0.011801 | 0.012745 | 0.011903 |
| 0.012611 | 0.012411 | 0.012546 | 0.012818 | 0.011868 | 0.011565 | 0.011868 |
| 0.012307 | 0.012243 | 0.011834 | 0.011734 | 0.011801 | 0.011801 | 0.011772 |
| 0.011666 | 0.011672 | 0.011733 | 0.011700 | 0.012071 | 0.012138 | 0.012104 |
| 0.012038 | 0.012138 | 0.012241 | 0.012008 | 0.012308 | 0.012315 | 0.012375 |
| 0.012375 | 0.012409 | 0.012359 | 0.012375 | 0.012377 | 0.011599 | 0.011902 |
| 0.011969 | 0.012475 | 0.011977 | 0.012205 | 0.012679 | 0.011740 | 0.011632 |
| 0.011599 | 0.011598 | 0.012070 | 0.012089 | 0.012222 | 0.011935 | 0.011600 |
| S671     | 0.011530 | 0.011530 | 0.012135 | 0.011900 | 0.011900 | 0.011967 |
| 0.011807 | 0.011739 | 0.011967 | 0.011396 | 0.011463 | 0.011430 | 0.011396 |
| 0.011429 | 0.011597 | 0.011396 | 0.011429 | 0.011496 | 0.011463 | 0.011429 |
| 0.011396 | 0.011429 | 0.011530 | 0.011396 | 0.011430 | 0.011429 | 0.011773 |
| 0.011664 | 0.011429 | 0.011329 | 0.011564 | 0.011496 | 0.011463 | 0.011496 |
| 0.011463 | 0.011564 | 0.011463 | 0.011463 | 0.011496 | 0.011463 | 0.011631 |
| 0.011396 | 0.011463 | 0.011496 | 0.011429 | 0.011530 | 0.011564 | 0.011496 |
| 0.011463 | 0.011631 | 0.011530 | 0.011799 | 0.011463 | 0.011731 | 0.011463 |
| 0.011429 | 0.011530 | 0.011597 | 0.011731 | 0.011832 | 0.011530 | 0.011631 |
| 0.011496 | 0.011564 | 0.011463 | 0.011698 | 0.011933 | 0.011463 | 0.011530 |
| 0.011429 | 0.011530 | 0.011496 | 0.011564 | 0.011496 | 0.011496 | 0.011496 |
| 0.011396 | 0.011429 | 0.011396 | 0.011496 | 0.011463 | 0.011498 | 0.011564 |
| 0.011496 | 0.011463 | 0.011530 | 0.011429 | 0.011564 | 0.011396 | 0.011463 |
| 0.011631 | 0.011564 | 0.011799 | 0.011631 | 0.011463 | 0.011698 | 0.011463 |
| 0.011579 | 0.011807 | 0.011626 | 0.011334 | 0.011396 | 0.011465 | 0.011533 |
| 0.012231 | 0.011467 | 0.011348 | 0.011698 | 0.011698 | 0.011496 | 0.011597 |
| 0.011530 | 0.011429 | 0.011362 | 0.011463 | 0.011564 | 0.011496 | 0.011362 |
| 0.011396 | 0.011564 | 0.011698 | 0.011631 | 0.011530 | 0.011497 | 0.011430 |
| 0.011396 | 0.011396 | 0.011463 | 0.011429 | 0.011631 | 0.011597 | 0.011530 |
| 0.011631 | 0.011698 | 0.011429 | 0.011429 | 0.011463 | 0.011463 | 0.011465 |
| 0.011533 | 0.011463 | 0.011463 | 0.011348 | 0.011422 | 0.011376 | 0.011464 |
| 0.011467 | 0.011404 | 0.011466 | 0.011440 | 0.011366 | 0.011403 | 0.011432 |
| 0.011708 | 0.011474 | 0.011508 | 0.011396 | 0.011406 | 0.011531 | 0.011497 |
| 0.011565 | 0.011498 | 0.011497 | 0.011463 | 0.011194 | 0.011899 | 0.011698 |
| 0.011731 | 0.011597 | 0.011463 | 0.011564 | 0.011362 | 0.011597 | 0.011396 |
| 0.011463 | 0.011463 | 0.011429 | 0.011396 | 0.011429 | 0.011396 | 0.011497 |
| 0.011463 | 0.011564 | 0.011497 | 0.011396 | 0.011498 | 0.011597 | 0.011601 |
| 0.011597 | 0.011497 | 0.011396 | 0.011330 | 0.011463 | 0.011396 | 0.011329 |
| 0.011434 | 0.011598 | 0.011396 | 0.011598 | 0.011362 | 0.011463 | 0.011429 |
| 0.011530 | 0.011429 | 0.011463 | 0.011430 | 0.011463 | 0.011329 | 0.011463 |
| 0.011497 | 0.011429 | 0.011497 | 0.011429 | 0.011329 | 0.011497 | 0.011732 |
| 0.011832 | 0.011765 | 0.011833 | 0.011599 | 0.011833 | 0.011329 | 0.011429 |
| 0.011466 | 0.011788 | 0.011517 | 0.011335 | 0.011841 | 0.011333 | 0.011414 |
| 0.011841 | 0.011740 | 0.011597 | 0.011765 | 0.011265 | 0.011698 | 0.011664 |
| 0.011597 | 0.011765 | 0.011451 | 0.011225 | 0.011354 | 0.011497 | 0.011500 |
| 0.011665 | 0.011431 | 0.011669 | 0.011771 | 0.011564 | 0.011698 | 0.011738 |
| 0.011466 | 0.011739 | 0.011466 | 0.011635 | 0.011834 | 0.011362 | 0.011566 |
| 0.011530 | 0.011463 | 0.011362 | 0.011362 | 0.011429 | 0.011429 | 0.011496 |

|          |          |          |          |          |          |          |
|----------|----------|----------|----------|----------|----------|----------|
| 0.011429 | 0.011496 | 0.011396 | 0.011496 | 0.011429 | 0.011429 | 0.011496 |
| 0.011429 | 0.011866 | 0.011765 | 0.011799 | 0.011329 | 0.011429 | 0.011463 |
| 0.011463 | 0.011429 | 0.011496 | 0.011530 | 0.011396 | 0.011396 | 0.011396 |
| 0.011933 | 0.011564 | 0.011564 | 0.011362 | 0.011463 | 0.011631 | 0.011396 |
| 0.011396 | 0.011463 | 0.011429 | 0.011597 | 0.011396 | 0.011530 | 0.011664 |
| 0.011597 | 0.011429 | 0.011429 | 0.011362 | 0.011362 | 0.011530 | 0.011463 |
| 0.011362 | 0.011463 | 0.011329 | 0.011362 | 0.011496 | 0.011631 | 0.011396 |
| 0.011363 | 0.011496 | 0.011430 | 0.011329 | 0.011664 | 0.011329 | 0.011496 |
| 0.011505 | 0.011396 | 0.011698 | 0.011530 | 0.011564 | 0.011429 | 0.011530 |
| 0.011396 | 0.011731 | 0.011329 | 0.011597 | 0.011396 | 0.011396 | 0.011329 |
| 0.011564 | 0.011766 | 0.011463 | 0.011530 | 0.011362 | 0.011765 | 0.011396 |
| 0.011396 | 0.011396 | 0.011429 | 0.011530 | 0.011429 | 0.011530 | 0.011597 |
| 0.011597 | 0.011564 | 0.011463 | 0.011564 | 0.011530 | 0.011396 | 0.011362 |
| 0.011396 | 0.011396 | 0.011463 | 0.011396 | 0.011362 | 0.011530 | 0.011396 |
| 0.011429 | 0.011429 | 0.011564 | 0.011597 | 0.011496 | 0.011429 | 0.011429 |
| 0.011496 | 0.011429 | 0.011530 | 0.011396 | 0.011530 | 0.011631 | 0.011933 |
| 0.011429 | 0.011832 | 0.011440 | 0.017936 | 0.011191 | 0.011427 | 0.011758 |
| 0.011718 | 0.011764 | 0.011322 | 0.011292 | 0.011719 | 0.011785 | 0.011303 |
| 0.011487 | 0.011487 | 0.011294 | 0.011270 | 0.011411 | 0.011307 | 0.011275 |
| 0.011482 | 0.011619 | 0.011616 | 0.011523 | 0.011564 | 0.011329 | 0.011534 |
| 0.011438 | 0.011564 | 0.011564 | 0.011530 | 0.011497 | 0.011497 | 0.011463 |
| 0.011497 | 0.011429 | 0.011463 | 0.011497 | 0.011463 | 0.011396 | 0.011295 |
| 0.011295 | 0.011497 | 0.011396 | 0.011497 | 0.011530 | 0.011564 | 0.011329 |
| 0.011496 | 0.011463 | 0.011799 | 0.011799 | 0.011530 | 0.011565 | 0.011597 |
| 0.011362 | 0.011362 | 0.011396 | 0.011497 | 0.011362 | 0.011597 | 0.011597 |
| 0.011631 | 0.011597 | 0.011564 | 0.011664 | 0.011833 | 0.011666 | 0.011497 |
| 0.011497 | 0.011564 | 0.011597 | 0.011429 | 0.011497 | 0.011463 | 0.011497 |
| 0.011564 | 0.011564 | 0.011597 | 0.011564 | 0.011464 | 0.011665 | 0.011631 |
| 0.011500 | 0.011396 | 0.011497 | 0.011597 | 0.011497 | 0.011631 | 0.011664 |
| 0.011765 | 0.011265 | 0.011698 | 0.011664 | 0.011597 | 0.011765 | 0.011396 |
| 0.011565 | 0.011464 | 0.011295 | 0.011295 | 0.011497 | 0.011396 | 0.011497 |
| 0.011530 | 0.011564 | 0.011329 | 0.011496 | 0.011463 | 0.011799 | 0.011799 |
| 0.011530 | 0.011565 | 0.011295 | 0.011228 | 0.012170 | 0.011560 | 0.011306 |
| 0.011587 | 0.011546 | 0.011622 | 0.011510 | 0.011620 | 0.011508 | 0.011577 |
| 0.012056 | 0.011233 | 0.011368 | 0.011406 | 0.011714 | 0.011638 | 0.011741 |
| 0.012080 | 0.011550 | 0.011736 | 0.011799 | 0.011664 | 0.011664 | 0.011702 |
| 0.011362 | 0.011530 | 0.011664 | 0.011631 | 0.011635 | 0.011631 | 0.011599 |
| 0.011463 | 0.011396 | 0.011429 | 0.011463 | 0.011362 | 0.011429 | 0.011329 |
| 0.011463 | 0.011496 | 0.011396 | 0.011362 | 0.011463 | 0.011396 | 0.011429 |
| 0.011429 | 0.011362 | 0.011429 | 0.011463 | 0.011362 | 0.011564 | 0.011597 |
| 0.011496 | 0.011564 | 0.011496 | 0.011496 | 0.011429 | 0.011832 | 0.011463 |
| 0.011478 | 0.011429 | 0.011665 | 0.011671 | 0.011530 | 0.011530 | 0.011530 |
| 0.011530 | 0.011463 | 0.011429 | 0.011463 | 0.011564 | 0.011564 | 0.011496 |
| 0.011496 | 0.011631 | 0.011799 | 0.011530 | 0.011732 | 0.011732 | 0.011597 |
| 0.011429 | 0.011496 | 0.011530 | 0.011933 | 0.011497 | 0.011530 | 0.011496 |
| 0.011530 | 0.011463 | 0.011463 | 0.011765 | 0.011698 | 0.011732 | 0.011463 |
| 0.011564 | 0.011631 | 0.011496 | 0.011564 | 0.011530 | 0.011396 | 0.011731 |
| 0.011496 | 0.011463 | 0.011463 | 0.011631 | 0.011463 | 0.011564 | 0.011799 |
| 0.011496 | 0.011875 | 0.011866 | 0.011507 | 0.011229 | 0.011570 | 0.011370 |
| 0.011280 | 0.011917 | 0.011411 | 0.011596 | 0.011402 | 0.011366 | 0.011379 |
| 0.011519 | 0.011192 | 0.011339 | 0.011192 | 0.011222 | 0.011395 | 0.011506 |
| 0.011512 | 0.011414 | 0.011518 | 0.011483 | 0.011498 | 0.011631 | 0.011698 |
| 0.011698 | 0.011564 | 0.011669 | 0.011670 | 0.011806 | 0.011838 | 0.011496 |
| 0.011731 | 0.011597 | 0.011463 | 0.011564 | 0.011362 | 0.011597 | 0.011396 |
| 0.011463 | 0.011463 | 0.011429 | 0.011396 | 0.011429 | 0.011396 | 0.011497 |
| 0.011479 | 0.011480 | 0.011471 | 0.011505 | 0.011642 | 0.011607 | 0.011606 |
| 0.011605 | 0.011531 | 0.011319 | 0.011348 | 0.011467 | 0.011636 | 0.011637 |
| 0.011430 | 0.011500 | 0.011733 | 0.011702 | 0.011632 | 0.011666 | 0.000000 |
| 0.011530 | 0.011530 | 0.011530 | 0.011497 | 0.012034 | 0.011664 | 0.011732 |
| 0.011765 | 0.011843 | 0.011469 | 0.011545 | 0.011429 | 0.011497 | 0.011329 |

|          |          |          |          |          |          |          |
|----------|----------|----------|----------|----------|----------|----------|
| 0.011632 | 0.011530 | 0.011664 | 0.011664 | 0.011728 | 0.011664 | 0.011442 |
| 0.011331 | 0.011303 | 0.011401 | 0.011400 | 0.011504 | 0.011321 | 0.011672 |
| 0.011472 | 0.011499 | 0.011156 | 0.011397 | 0.011464 | 0.011539 | 0.011430 |
| 0.011396 | 0.011396 | 0.011463 | 0.011429 | 0.011631 | 0.011597 | 0.011530 |
| 0.011631 | 0.011698 | 0.011429 | 0.011429 | 0.011463 | 0.011463 | 0.011465 |
| 0.011533 | 0.011463 | 0.011463 | 0.011498 | 0.011631 | 0.011698 | 0.011698 |
| 0.011564 | 0.011669 | 0.011670 | 0.011806 | 0.011838 | 0.011496 | 0.011664 |
| 0.011329 | 0.011329 | 0.011432 | 0.011617 | 0.011547 | 0.011571 | 0.011446 |
| 0.011611 | 0.011789 | 0.011653 | 0.011468 | 0.011396 | 0.011598 | 0.011463 |
| 0.011564 | 0.011497 | 0.011396 | 0.011498 | 0.011597 | 0.011601 | 0.011497 |
| 0.011396 | 0.011330 | 0.011463 | 0.011396 | 0.011329 | 0.011434 | 0.011598 |
| 0.011497 | 0.011429 | 0.011463 | 0.011497 | 0.011463 | 0.011396 | 0.011598 |
| 0.011463 | 0.011496 | 0.011496 | 0.011429 | 0.011496 | 0.011732 | 0.011396 |
| 0.011429 | 0.011832 | 0.011429 | 0.011463 | 0.011429 | 0.011799 | 0.011274 |
| 0.011735 | 0.011230 | 0.011261 | 0.011624 | 0.011671 | 0.011634 | 0.011186 |
| 0.011218 | 0.011597 | 0.011698 | 0.011807 | 0.011666 | 0.011805 | 0.011935 |
| 0.011834 | 0.011872 | 0.011832 | 0.012085 | 0.011799 | 0.012606 | 0.011835 |
| 0.012574 | 0.012274 | 0.012408 | 0.012748 | 0.011799 | 0.011497 | 0.011799 |
| 0.012204 | 0.012173 | 0.011765 | 0.011665 | 0.011733 | 0.011733 | 0.011703 |
| 0.011597 | 0.011603 | 0.011664 | 0.011632 | 0.012002 | 0.012068 | 0.012069 |
| 0.011968 | 0.012069 | 0.012173 | 0.011940 | 0.012205 | 0.012212 | 0.012272 |
| 0.012273 | 0.012306 | 0.012255 | 0.012273 | 0.012274 | 0.011194 | 0.011799 |
| 0.011901 | 0.012404 | 0.011874 | 0.012135 | 0.012609 | 0.011671 | 0.011564 |
| 0.011530 | 0.011530 | 0.012001 | 0.011924 | 0.012151 | 0.011866 | 0.011532 |
| S672     | 0.011732 | 0.011732 | 0.012068 | 0.011832 | 0.011832 | 0.011900 |
| 0.011739 | 0.011671 | 0.011899 | 0.011329 | 0.011396 | 0.011363 | 0.011329 |
| 0.011362 | 0.011530 | 0.011329 | 0.011362 | 0.011429 | 0.011396 | 0.011362 |
| 0.011329 | 0.011362 | 0.011463 | 0.011329 | 0.011363 | 0.011362 | 0.011705 |
| 0.011597 | 0.011362 | 0.011262 | 0.011496 | 0.011429 | 0.011396 | 0.011429 |
| 0.011396 | 0.011496 | 0.011396 | 0.011396 | 0.011429 | 0.011396 | 0.011564 |
| 0.011329 | 0.011396 | 0.011429 | 0.011362 | 0.011463 | 0.011496 | 0.011429 |
| 0.011396 | 0.011564 | 0.011463 | 0.011731 | 0.011396 | 0.011664 | 0.011396 |
| 0.011362 | 0.011463 | 0.011530 | 0.011664 | 0.011765 | 0.011463 | 0.011564 |
| 0.011429 | 0.011496 | 0.011396 | 0.011631 | 0.011866 | 0.011396 | 0.011463 |
| 0.011362 | 0.011463 | 0.011429 | 0.011496 | 0.011429 | 0.011429 | 0.011429 |
| 0.011329 | 0.011362 | 0.011329 | 0.011429 | 0.011396 | 0.011430 | 0.011496 |
| 0.011429 | 0.011396 | 0.011463 | 0.011362 | 0.011429 | 0.011329 | 0.011396 |
| 0.011564 | 0.011496 | 0.011731 | 0.011564 | 0.011396 | 0.011631 | 0.011396 |
| 0.011579 | 0.011807 | 0.011588 | 0.011334 | 0.011284 | 0.011391 | 0.011493 |
| 0.012121 | 0.011518 | 0.011266 | 0.011631 | 0.011631 | 0.011429 | 0.011530 |
| 0.011463 | 0.011429 | 0.011496 | 0.011396 | 0.011496 | 0.011429 | 0.011429 |
| 0.011396 | 0.011496 | 0.011698 | 0.011564 | 0.011463 | 0.011429 | 0.011362 |
| 0.011329 | 0.011329 | 0.011396 | 0.011362 | 0.011564 | 0.011530 | 0.011463 |
| 0.011564 | 0.011631 | 0.011362 | 0.011362 | 0.011396 | 0.011396 | 0.011398 |
| 0.011466 | 0.011396 | 0.011396 | 0.011276 | 0.011313 | 0.011306 | 0.011396 |
| 0.011399 | 0.011335 | 0.011355 | 0.011371 | 0.011298 | 0.011334 | 0.011364 |
| 0.011636 | 0.011405 | 0.011405 | 0.011329 | 0.011337 | 0.011464 | 0.011430 |
| 0.011497 | 0.011431 | 0.011430 | 0.011530 | 0.011463 | 0.011832 | 0.011631 |
| 0.011664 | 0.011530 | 0.011396 | 0.011497 | 0.011295 | 0.011530 | 0.011329 |
| 0.011396 | 0.011396 | 0.011362 | 0.011329 | 0.011362 | 0.011329 | 0.011429 |
| 0.011396 | 0.011497 | 0.011430 | 0.011329 | 0.011431 | 0.011530 | 0.011533 |
| 0.011530 | 0.011430 | 0.011329 | 0.011263 | 0.011396 | 0.011329 | 0.011262 |
| 0.011366 | 0.011530 | 0.011329 | 0.011530 | 0.011295 | 0.011396 | 0.011362 |
| 0.011463 | 0.011362 | 0.011396 | 0.011362 | 0.011396 | 0.011262 | 0.011396 |
| 0.011430 | 0.011362 | 0.011429 | 0.011362 | 0.011396 | 0.011429 | 0.011665 |
| 0.011765 | 0.011698 | 0.011765 | 0.011532 | 0.011766 | 0.011396 | 0.011362 |
| 0.011398 | 0.011667 | 0.011517 | 0.011300 | 0.011773 | 0.011265 | 0.011414 |
| 0.011773 | 0.011672 | 0.011564 | 0.011765 | 0.011470 | 0.011631 | 0.011597 |
| 0.011530 | 0.011698 | 0.011557 | 0.011431 | 0.011437 | 0.011429 | 0.011500 |
| 0.011597 | 0.011499 | 0.011635 | 0.011703 | 0.011631 | 0.011698 | 0.011805 |

|          |          |          |          |          |          |          |
|----------|----------|----------|----------|----------|----------|----------|
| 0.011534 | 0.011705 | 0.011636 | 0.011567 | 0.011834 | 0.011295 | 0.011498 |
| 0.011463 | 0.011396 | 0.011295 | 0.011295 | 0.011362 | 0.011362 | 0.011429 |
| 0.011362 | 0.011429 | 0.011329 | 0.011429 | 0.011362 | 0.011362 | 0.011429 |
| 0.011362 | 0.011799 | 0.011698 | 0.011732 | 0.011262 | 0.011362 | 0.011396 |
| 0.011396 | 0.011362 | 0.011429 | 0.011463 | 0.011329 | 0.011329 | 0.011329 |
| 0.011866 | 0.011496 | 0.011496 | 0.011295 | 0.011396 | 0.011564 | 0.011329 |
| 0.011329 | 0.011396 | 0.011362 | 0.011530 | 0.011329 | 0.011463 | 0.011597 |
| 0.011530 | 0.011362 | 0.011362 | 0.011295 | 0.011295 | 0.011463 | 0.011396 |
| 0.011295 | 0.011396 | 0.011262 | 0.011295 | 0.011429 | 0.011564 | 0.011329 |
| 0.011295 | 0.011429 | 0.011363 | 0.011262 | 0.011597 | 0.011262 | 0.011429 |
| 0.011505 | 0.011329 | 0.011631 | 0.011463 | 0.011496 | 0.011362 | 0.011463 |
| 0.011329 | 0.011664 | 0.011262 | 0.011530 | 0.011329 | 0.011329 | 0.011262 |
| 0.011496 | 0.011698 | 0.011396 | 0.011463 | 0.011295 | 0.011698 | 0.011329 |
| 0.011329 | 0.011329 | 0.011362 | 0.011463 | 0.011362 | 0.011463 | 0.011530 |
| 0.011530 | 0.011496 | 0.011396 | 0.011497 | 0.011463 | 0.011329 | 0.011295 |
| 0.011329 | 0.011329 | 0.011396 | 0.011329 | 0.011295 | 0.011463 | 0.011329 |
| 0.011362 | 0.011362 | 0.011496 | 0.011530 | 0.011429 | 0.011362 | 0.011362 |
| 0.011429 | 0.011362 | 0.011463 | 0.011329 | 0.011463 | 0.011564 | 0.011866 |
| 0.011362 | 0.011765 | 0.011371 | 0.017823 | 0.011387 | 0.011672 | 0.011723 |
| 0.011683 | 0.011728 | 0.011427 | 0.011350 | 0.011884 | 0.011751 | 0.011607 |
| 0.011534 | 0.011732 | 0.011294 | 0.011353 | 0.011294 | 0.011504 | 0.011404 |
| 0.011529 | 0.011507 | 0.011505 | 0.011126 | 0.011496 | 0.011530 | 0.011534 |
| 0.011404 | 0.011497 | 0.011497 | 0.011463 | 0.011429 | 0.011430 | 0.011396 |
| 0.011429 | 0.011362 | 0.011396 | 0.011429 | 0.011396 | 0.011329 | 0.011362 |
| 0.011362 | 0.011429 | 0.011329 | 0.011430 | 0.011463 | 0.011497 | 0.011396 |
| 0.011429 | 0.011396 | 0.011732 | 0.011732 | 0.011396 | 0.011497 | 0.011530 |
| 0.011295 | 0.011295 | 0.011329 | 0.011430 | 0.011295 | 0.011530 | 0.011530 |
| 0.011564 | 0.011564 | 0.011496 | 0.011597 | 0.011765 | 0.011599 | 0.011429 |
| 0.011429 | 0.011497 | 0.011530 | 0.011362 | 0.011429 | 0.011396 | 0.011429 |
| 0.011497 | 0.011497 | 0.011530 | 0.011497 | 0.011397 | 0.011597 | 0.011564 |
| 0.011433 | 0.011329 | 0.011429 | 0.011530 | 0.011430 | 0.011564 | 0.011597 |
| 0.011765 | 0.011470 | 0.011631 | 0.011597 | 0.011530 | 0.011698 | 0.011329 |
| 0.011498 | 0.011396 | 0.011362 | 0.011362 | 0.011429 | 0.011329 | 0.011430 |
| 0.011463 | 0.011497 | 0.011396 | 0.011429 | 0.011396 | 0.011732 | 0.011732 |
| 0.011396 | 0.011497 | 0.011564 | 0.011497 | 0.012136 | 0.011560 | 0.011482 |
| 0.011552 | 0.011511 | 0.011622 | 0.011510 | 0.011620 | 0.011543 | 0.011508 |
| 0.012090 | 0.011406 | 0.011540 | 0.011475 | 0.011749 | 0.011604 | 0.011707 |
| 0.012114 | 0.011588 | 0.011669 | 0.011731 | 0.011597 | 0.011597 | 0.011635 |
| 0.011295 | 0.011463 | 0.011597 | 0.011564 | 0.011567 | 0.011564 | 0.011532 |
| 0.011396 | 0.011329 | 0.011362 | 0.011396 | 0.011295 | 0.011362 | 0.011262 |
| 0.011396 | 0.011429 | 0.011329 | 0.011295 | 0.011396 | 0.011329 | 0.011362 |
| 0.011362 | 0.011295 | 0.011362 | 0.011396 | 0.011295 | 0.011496 | 0.011530 |
| 0.011429 | 0.011496 | 0.011429 | 0.011429 | 0.011362 | 0.011765 | 0.011396 |
| 0.011443 | 0.011362 | 0.011598 | 0.011603 | 0.011463 | 0.011463 | 0.011463 |
| 0.011463 | 0.011396 | 0.011362 | 0.011396 | 0.011496 | 0.011496 | 0.011429 |
| 0.011429 | 0.011564 | 0.011664 | 0.011463 | 0.011664 | 0.011664 | 0.011530 |
| 0.011362 | 0.011429 | 0.011463 | 0.011866 | 0.011430 | 0.011463 | 0.011429 |
| 0.011463 | 0.011396 | 0.011396 | 0.011698 | 0.011631 | 0.011664 | 0.011396 |
| 0.011496 | 0.011564 | 0.011429 | 0.011496 | 0.011463 | 0.011329 | 0.011664 |
| 0.011429 | 0.011396 | 0.011396 | 0.011564 | 0.011396 | 0.011496 | 0.011732 |
| 0.011429 | 0.011807 | 0.011799 | 0.011588 | 0.011342 | 0.011502 | 0.011318 |
| 0.011445 | 0.011800 | 0.011306 | 0.011507 | 0.011402 | 0.011518 | 0.011485 |
| 0.011519 | 0.011192 | 0.011450 | 0.011324 | 0.011330 | 0.011529 | 0.011466 |
| 0.011512 | 0.011375 | 0.011483 | 0.011412 | 0.011431 | 0.011564 | 0.011631 |
| 0.011631 | 0.011497 | 0.011601 | 0.011603 | 0.011738 | 0.011767 | 0.011429 |
| 0.011664 | 0.011530 | 0.011396 | 0.011497 | 0.011295 | 0.011530 | 0.011329 |
| 0.011396 | 0.011396 | 0.011362 | 0.011329 | 0.011362 | 0.011329 | 0.011429 |
| 0.011409 | 0.011410 | 0.011403 | 0.011437 | 0.011573 | 0.011538 | 0.011538 |
| 0.011537 | 0.011464 | 0.011282 | 0.011276 | 0.011399 | 0.011568 | 0.011569 |
| 0.011329 | 0.011433 | 0.011666 | 0.011635 | 0.011565 | 0.011599 | 0.011530 |

|          |          |          |          |          |          |          |
|----------|----------|----------|----------|----------|----------|----------|
| 0.000000 | 0.011530 | 0.011530 | 0.011429 | 0.012000 | 0.011597 | 0.011664 |
| 0.011698 | 0.011772 | 0.011401 | 0.011476 | 0.011362 | 0.011564 | 0.011530 |
| 0.011565 | 0.011597 | 0.011597 | 0.011597 | 0.011728 | 0.011732 | 0.011372 |
| 0.011263 | 0.011268 | 0.011367 | 0.011332 | 0.011436 | 0.011209 | 0.011604 |
| 0.011403 | 0.011543 | 0.011251 | 0.011435 | 0.011396 | 0.011471 | 0.011362 |
| 0.011329 | 0.011329 | 0.011396 | 0.011362 | 0.011564 | 0.011530 | 0.011463 |
| 0.011564 | 0.011631 | 0.011362 | 0.011362 | 0.011396 | 0.011396 | 0.011398 |
| 0.011466 | 0.011396 | 0.011396 | 0.011431 | 0.011564 | 0.011631 | 0.011631 |
| 0.011497 | 0.011601 | 0.011603 | 0.011738 | 0.011767 | 0.011429 | 0.011597 |
| 0.011530 | 0.011530 | 0.011365 | 0.011547 | 0.011477 | 0.011503 | 0.011340 |
| 0.011542 | 0.011653 | 0.011484 | 0.011434 | 0.011329 | 0.011530 | 0.011396 |
| 0.011497 | 0.011430 | 0.011329 | 0.011431 | 0.011530 | 0.011533 | 0.011430 |
| 0.011329 | 0.011263 | 0.011396 | 0.011329 | 0.011262 | 0.011366 | 0.011530 |
| 0.011429 | 0.011362 | 0.011396 | 0.011429 | 0.011396 | 0.011329 | 0.011530 |
| 0.011396 | 0.011429 | 0.011429 | 0.011362 | 0.011429 | 0.011664 | 0.011329 |
| 0.011362 | 0.011765 | 0.011362 | 0.011396 | 0.011362 | 0.011731 | 0.011274 |
| 0.011735 | 0.011315 | 0.011311 | 0.011543 | 0.011630 | 0.011527 | 0.011269 |
| 0.011270 | 0.011530 | 0.011631 | 0.011739 | 0.011599 | 0.011737 | 0.011867 |
| 0.011767 | 0.011804 | 0.011765 | 0.012017 | 0.011732 | 0.012606 | 0.011768 |
| 0.012507 | 0.012274 | 0.012408 | 0.012680 | 0.011731 | 0.011430 | 0.011732 |
| 0.012171 | 0.012106 | 0.011698 | 0.011597 | 0.011665 | 0.011665 | 0.011635 |
| 0.011530 | 0.011535 | 0.011597 | 0.011565 | 0.011934 | 0.012000 | 0.012002 |
| 0.011901 | 0.012002 | 0.012105 | 0.011872 | 0.012171 | 0.012178 | 0.012238 |
| 0.012239 | 0.012273 | 0.012220 | 0.012239 | 0.012240 | 0.011463 | 0.011766 |
| 0.011834 | 0.012337 | 0.011840 | 0.012068 | 0.012541 | 0.011604 | 0.011497 |
| 0.011463 | 0.011463 | 0.011934 | 0.011965 | 0.012080 | 0.011799 | 0.011465 |
| S673     | 0.011732 | 0.011732 | 0.012135 | 0.011900 | 0.011900 | 0.011967 |
| 0.011807 | 0.011739 | 0.011967 | 0.011396 | 0.011463 | 0.011430 | 0.011396 |
| 0.011429 | 0.011597 | 0.011396 | 0.011429 | 0.011496 | 0.011463 | 0.011429 |
| 0.011396 | 0.011429 | 0.011530 | 0.011396 | 0.011430 | 0.011429 | 0.011773 |
| 0.011664 | 0.011429 | 0.011329 | 0.011564 | 0.011496 | 0.011463 | 0.011497 |
| 0.011463 | 0.011564 | 0.011463 | 0.011463 | 0.011496 | 0.011463 | 0.011631 |
| 0.011396 | 0.011463 | 0.011496 | 0.011429 | 0.011530 | 0.011564 | 0.011496 |
| 0.011463 | 0.011631 | 0.011530 | 0.011799 | 0.011463 | 0.011732 | 0.011463 |
| 0.011429 | 0.011530 | 0.011597 | 0.011732 | 0.011832 | 0.011530 | 0.011631 |
| 0.011496 | 0.011564 | 0.011463 | 0.011698 | 0.011933 | 0.011463 | 0.011530 |
| 0.011429 | 0.011530 | 0.011497 | 0.011564 | 0.011496 | 0.011496 | 0.011496 |
| 0.011396 | 0.011429 | 0.011396 | 0.011497 | 0.011463 | 0.011498 | 0.011564 |
| 0.011497 | 0.011463 | 0.011530 | 0.011429 | 0.011564 | 0.011396 | 0.011463 |
| 0.011631 | 0.011564 | 0.011799 | 0.011631 | 0.011463 | 0.011698 | 0.011463 |
| 0.011654 | 0.011882 | 0.011702 | 0.011373 | 0.011396 | 0.011502 | 0.011611 |
| 0.012231 | 0.011620 | 0.011431 | 0.011698 | 0.011698 | 0.011496 | 0.011597 |
| 0.011530 | 0.011295 | 0.011496 | 0.011463 | 0.011564 | 0.011496 | 0.011429 |
| 0.011396 | 0.011564 | 0.011564 | 0.011631 | 0.011530 | 0.011497 | 0.011430 |
| 0.011396 | 0.011396 | 0.011463 | 0.011429 | 0.011631 | 0.011597 | 0.011530 |
| 0.011631 | 0.011698 | 0.011429 | 0.011429 | 0.011463 | 0.011463 | 0.011465 |
| 0.011533 | 0.011463 | 0.011463 | 0.011348 | 0.011422 | 0.011376 | 0.011464 |
| 0.011467 | 0.011335 | 0.011466 | 0.011440 | 0.011366 | 0.011403 | 0.011432 |
| 0.011708 | 0.011474 | 0.011508 | 0.011396 | 0.011406 | 0.011531 | 0.011497 |
| 0.011565 | 0.011498 | 0.011497 | 0.011530 | 0.011463 | 0.011900 | 0.011698 |
| 0.011731 | 0.011597 | 0.011463 | 0.011564 | 0.011362 | 0.011597 | 0.011396 |
| 0.011463 | 0.011463 | 0.011429 | 0.011396 | 0.011429 | 0.011396 | 0.011497 |
| 0.011463 | 0.011564 | 0.011497 | 0.011396 | 0.011498 | 0.011598 | 0.011601 |
| 0.011598 | 0.011497 | 0.011396 | 0.011330 | 0.011463 | 0.011396 | 0.011329 |
| 0.011434 | 0.011598 | 0.011396 | 0.011598 | 0.011362 | 0.011463 | 0.011430 |
| 0.011530 | 0.011429 | 0.011463 | 0.011430 | 0.011463 | 0.011329 | 0.011463 |
| 0.011497 | 0.011429 | 0.011497 | 0.011429 | 0.011396 | 0.011497 | 0.011732 |
| 0.011833 | 0.011765 | 0.011833 | 0.011600 | 0.011833 | 0.011396 | 0.011429 |
| 0.011466 | 0.011707 | 0.011472 | 0.011369 | 0.011841 | 0.011333 | 0.011454 |
| 0.011841 | 0.011740 | 0.011597 | 0.011631 | 0.011538 | 0.011698 | 0.011665 |

|          |          |          |          |          |          |          |
|----------|----------|----------|----------|----------|----------|----------|
| 0.011597 | 0.011765 | 0.011558 | 0.011472 | 0.011521 | 0.011497 | 0.011500 |
| 0.011665 | 0.011499 | 0.011703 | 0.011771 | 0.011631 | 0.011564 | 0.011806 |
| 0.011534 | 0.011773 | 0.011636 | 0.011635 | 0.011699 | 0.011362 | 0.011566 |
| 0.011530 | 0.011463 | 0.011362 | 0.011362 | 0.011429 | 0.011429 | 0.011496 |
| 0.011429 | 0.011497 | 0.011396 | 0.011496 | 0.011429 | 0.011429 | 0.011496 |
| 0.011429 | 0.011866 | 0.011765 | 0.011799 | 0.011329 | 0.011429 | 0.011463 |
| 0.011463 | 0.011429 | 0.011497 | 0.011530 | 0.011396 | 0.011396 | 0.011396 |
| 0.011933 | 0.011564 | 0.011564 | 0.011362 | 0.011463 | 0.011631 | 0.011396 |
| 0.011396 | 0.011463 | 0.011429 | 0.011597 | 0.011396 | 0.011530 | 0.011664 |
| 0.011597 | 0.011429 | 0.011429 | 0.011362 | 0.011362 | 0.011530 | 0.011463 |
| 0.011362 | 0.011463 | 0.011329 | 0.011362 | 0.011497 | 0.011631 | 0.011396 |
| 0.011363 | 0.011497 | 0.011430 | 0.011329 | 0.011664 | 0.011329 | 0.011497 |
| 0.011574 | 0.011396 | 0.011698 | 0.011530 | 0.011564 | 0.011429 | 0.011530 |
| 0.011396 | 0.011732 | 0.011329 | 0.011597 | 0.011396 | 0.011396 | 0.011329 |
| 0.011564 | 0.011766 | 0.011463 | 0.011530 | 0.011362 | 0.011765 | 0.011396 |
| 0.011396 | 0.011396 | 0.011429 | 0.011530 | 0.011429 | 0.011530 | 0.011597 |
| 0.011597 | 0.011564 | 0.011463 | 0.011564 | 0.011530 | 0.011396 | 0.011362 |
| 0.011396 | 0.011396 | 0.011463 | 0.011396 | 0.011362 | 0.011530 | 0.011396 |
| 0.011429 | 0.011429 | 0.011564 | 0.011597 | 0.011496 | 0.011429 | 0.011429 |
| 0.011496 | 0.011429 | 0.011530 | 0.011396 | 0.011530 | 0.011631 | 0.011933 |
| 0.011429 | 0.011832 | 0.011440 | 0.017975 | 0.011322 | 0.011549 | 0.011793 |
| 0.011752 | 0.011799 | 0.011532 | 0.011524 | 0.011829 | 0.011820 | 0.011485 |
| 0.011630 | 0.011671 | 0.011372 | 0.011395 | 0.011411 | 0.011455 | 0.011447 |
| 0.011670 | 0.011619 | 0.011579 | 0.011391 | 0.011564 | 0.011530 | 0.011568 |
| 0.011472 | 0.011564 | 0.011564 | 0.011530 | 0.011497 | 0.011497 | 0.011463 |
| 0.011497 | 0.011429 | 0.011463 | 0.011497 | 0.011463 | 0.011396 | 0.011362 |
| 0.011362 | 0.011497 | 0.011396 | 0.011497 | 0.011530 | 0.011564 | 0.011396 |
| 0.011496 | 0.011463 | 0.011799 | 0.011799 | 0.011530 | 0.011565 | 0.011530 |
| 0.011362 | 0.011362 | 0.011396 | 0.011497 | 0.011362 | 0.011597 | 0.011597 |
| 0.011631 | 0.011597 | 0.011564 | 0.011664 | 0.011833 | 0.011666 | 0.011497 |
| 0.011497 | 0.011564 | 0.011597 | 0.011430 | 0.011497 | 0.011463 | 0.011497 |
| 0.011564 | 0.011564 | 0.011597 | 0.011564 | 0.011464 | 0.011665 | 0.011631 |
| 0.011500 | 0.011396 | 0.011497 | 0.011598 | 0.011430 | 0.011631 | 0.011664 |
| 0.011631 | 0.011538 | 0.011698 | 0.011665 | 0.011597 | 0.011765 | 0.011396 |
| 0.011566 | 0.011464 | 0.011362 | 0.011362 | 0.011497 | 0.011396 | 0.011497 |
| 0.011530 | 0.011564 | 0.011396 | 0.011496 | 0.011463 | 0.011799 | 0.011799 |
| 0.011530 | 0.011565 | 0.011564 | 0.011496 | 0.012170 | 0.011632 | 0.011482 |
| 0.011623 | 0.011580 | 0.011693 | 0.011580 | 0.011690 | 0.011405 | 0.011577 |
| 0.012125 | 0.011406 | 0.011540 | 0.011337 | 0.011611 | 0.011672 | 0.011775 |
| 0.012148 | 0.011663 | 0.011736 | 0.011799 | 0.011664 | 0.011664 | 0.011702 |
| 0.011362 | 0.011530 | 0.011664 | 0.011631 | 0.011635 | 0.011631 | 0.011599 |
| 0.011463 | 0.011396 | 0.011429 | 0.011463 | 0.011362 | 0.011429 | 0.011329 |
| 0.011463 | 0.011496 | 0.011396 | 0.011362 | 0.011463 | 0.011396 | 0.011429 |
| 0.011429 | 0.011362 | 0.011429 | 0.011463 | 0.011362 | 0.011564 | 0.011597 |
| 0.011497 | 0.011564 | 0.011496 | 0.011497 | 0.011429 | 0.011832 | 0.011463 |
| 0.011512 | 0.011429 | 0.011665 | 0.011671 | 0.011530 | 0.011530 | 0.011530 |
| 0.011530 | 0.011463 | 0.011429 | 0.011463 | 0.011564 | 0.011564 | 0.011496 |
| 0.011496 | 0.011631 | 0.011799 | 0.011530 | 0.011732 | 0.011732 | 0.011597 |
| 0.011429 | 0.011496 | 0.011530 | 0.011933 | 0.011497 | 0.011530 | 0.011497 |
| 0.011530 | 0.011463 | 0.011463 | 0.011765 | 0.011698 | 0.011732 | 0.011463 |
| 0.011564 | 0.011631 | 0.011496 | 0.011564 | 0.011530 | 0.011396 | 0.011732 |
| 0.011496 | 0.011463 | 0.011463 | 0.011631 | 0.011463 | 0.011564 | 0.011799 |
| 0.011496 | 0.011875 | 0.011866 | 0.011711 | 0.011455 | 0.011570 | 0.011422 |
| 0.011335 | 0.011917 | 0.011411 | 0.011596 | 0.011402 | 0.011467 | 0.011485 |
| 0.011723 | 0.011258 | 0.011450 | 0.011324 | 0.011330 | 0.011529 | 0.011547 |
| 0.011475 | 0.011493 | 0.011553 | 0.011483 | 0.011498 | 0.011631 | 0.011698 |
| 0.011698 | 0.011565 | 0.011669 | 0.011670 | 0.011806 | 0.011838 | 0.011497 |
| 0.011731 | 0.011597 | 0.011463 | 0.011564 | 0.011362 | 0.011597 | 0.011396 |
| 0.011463 | 0.011463 | 0.011429 | 0.011396 | 0.011429 | 0.011396 | 0.011497 |
| 0.011479 | 0.011480 | 0.011471 | 0.011505 | 0.011608 | 0.011607 | 0.011606 |



|          |          |          |          |          |          |          |
|----------|----------|----------|----------|----------|----------|----------|
| 0.011605 | 0.011531 | 0.011319 | 0.011348 | 0.011467 | 0.011602 | 0.011637 |
| 0.011430 | 0.011501 | 0.011734 | 0.011702 | 0.011632 | 0.011666 | 0.011530 |
| 0.011530 | 0.000000 | 0.011396 | 0.011497 | 0.012034 | 0.011664 | 0.011732 |
| 0.011766 | 0.011843 | 0.011469 | 0.011545 | 0.011429 | 0.011564 | 0.011530 |
| 0.011632 | 0.011597 | 0.011664 | 0.011664 | 0.011453 | 0.011732 | 0.011442 |
| 0.011331 | 0.011337 | 0.011435 | 0.011400 | 0.011504 | 0.011359 | 0.011672 |
| 0.011472 | 0.011543 | 0.011298 | 0.011510 | 0.011464 | 0.011539 | 0.011430 |
| 0.011396 | 0.011396 | 0.011463 | 0.011429 | 0.011631 | 0.011597 | 0.011530 |
| 0.011631 | 0.011698 | 0.011429 | 0.011429 | 0.011463 | 0.011463 | 0.011465 |
| 0.011533 | 0.011463 | 0.011463 | 0.011498 | 0.011631 | 0.011698 | 0.011698 |
| 0.011565 | 0.011669 | 0.011670 | 0.011806 | 0.011838 | 0.011497 | 0.011664 |
| 0.011530 | 0.011530 | 0.011432 | 0.011617 | 0.011512 | 0.011571 | 0.011376 |
| 0.011611 | 0.011789 | 0.011568 | 0.011502 | 0.011396 | 0.011598 | 0.011463 |
| 0.011564 | 0.011497 | 0.011396 | 0.011498 | 0.011598 | 0.011601 | 0.011497 |
| 0.011396 | 0.011330 | 0.011463 | 0.011396 | 0.011329 | 0.011434 | 0.011598 |
| 0.011497 | 0.011429 | 0.011463 | 0.011497 | 0.011463 | 0.011396 | 0.011598 |
| 0.011463 | 0.011497 | 0.011496 | 0.011429 | 0.011496 | 0.011732 | 0.011396 |
| 0.011429 | 0.011832 | 0.011429 | 0.011463 | 0.011429 | 0.011799 | 0.011446 |
| 0.011960 | 0.011443 | 0.011411 | 0.011664 | 0.011752 | 0.011634 | 0.011353 |
| 0.011375 | 0.011597 | 0.011698 | 0.011807 | 0.011666 | 0.011805 | 0.011935 |
| 0.011834 | 0.011872 | 0.011832 | 0.012086 | 0.011799 | 0.012606 | 0.011835 |
| 0.012574 | 0.012275 | 0.012375 | 0.012680 | 0.011799 | 0.011497 | 0.011799 |
| 0.012205 | 0.012173 | 0.011765 | 0.011665 | 0.011733 | 0.011733 | 0.011703 |
| 0.011597 | 0.011603 | 0.011664 | 0.011632 | 0.011934 | 0.012000 | 0.012002 |
| 0.011901 | 0.012002 | 0.012105 | 0.011872 | 0.012205 | 0.012212 | 0.012272 |
| 0.012273 | 0.012307 | 0.012255 | 0.012273 | 0.012274 | 0.011463 | 0.011800 |
| 0.011901 | 0.012404 | 0.011874 | 0.012135 | 0.012609 | 0.011671 | 0.011564 |
| 0.011530 | 0.011530 | 0.012001 | 0.012048 | 0.012116 | 0.011866 | 0.011532 |
| S674     | 0.011732 | 0.011732 | 0.012135 | 0.011899 | 0.011899 | 0.011967 |
| 0.011807 | 0.011739 | 0.011967 | 0.011396 | 0.011463 | 0.011430 | 0.011396 |
| 0.011429 | 0.011597 | 0.011396 | 0.011429 | 0.011496 | 0.011463 | 0.011429 |
| 0.011396 | 0.011429 | 0.011530 | 0.011396 | 0.011430 | 0.011429 | 0.011773 |
| 0.011664 | 0.011429 | 0.011329 | 0.011563 | 0.011496 | 0.011463 | 0.011496 |
| 0.011463 | 0.011564 | 0.011463 | 0.011463 | 0.011496 | 0.011463 | 0.011631 |
| 0.011396 | 0.011463 | 0.011496 | 0.011429 | 0.011530 | 0.011564 | 0.011496 |
| 0.011463 | 0.011631 | 0.011530 | 0.011799 | 0.011463 | 0.011731 | 0.011463 |
| 0.011429 | 0.011530 | 0.011597 | 0.011731 | 0.011832 | 0.011530 | 0.011631 |
| 0.011496 | 0.011564 | 0.011463 | 0.011698 | 0.011933 | 0.011463 | 0.011530 |
| 0.011429 | 0.011530 | 0.011496 | 0.011564 | 0.011496 | 0.011496 | 0.011496 |
| 0.011396 | 0.011429 | 0.011396 | 0.011496 | 0.011463 | 0.011498 | 0.011563 |
| 0.011496 | 0.011463 | 0.011530 | 0.011429 | 0.011563 | 0.011396 | 0.011463 |
| 0.011631 | 0.011563 | 0.011799 | 0.011631 | 0.011463 | 0.011698 | 0.011463 |
| 0.011653 | 0.011882 | 0.011702 | 0.011373 | 0.011359 | 0.011502 | 0.011611 |
| 0.012195 | 0.011467 | 0.011390 | 0.011698 | 0.011698 | 0.011496 | 0.011597 |
| 0.011530 | 0.011295 | 0.011496 | 0.011463 | 0.011564 | 0.011496 | 0.011429 |
| 0.011396 | 0.011563 | 0.011564 | 0.011631 | 0.011530 | 0.011497 | 0.011429 |
| 0.011396 | 0.011396 | 0.011463 | 0.011429 | 0.011631 | 0.011597 | 0.011530 |
| 0.011631 | 0.011698 | 0.011429 | 0.011429 | 0.011463 | 0.011463 | 0.011465 |
| 0.011533 | 0.011463 | 0.011463 | 0.011312 | 0.011422 | 0.011376 | 0.011464 |
| 0.011467 | 0.011404 | 0.011466 | 0.011440 | 0.011366 | 0.011403 | 0.011432 |
| 0.011672 | 0.011439 | 0.011508 | 0.011396 | 0.011406 | 0.011531 | 0.011497 |
| 0.011565 | 0.011498 | 0.011497 | 0.011530 | 0.011463 | 0.011899 | 0.011698 |
| 0.011731 | 0.011597 | 0.011463 | 0.011564 | 0.011362 | 0.011597 | 0.011396 |
| 0.011463 | 0.011463 | 0.011429 | 0.011396 | 0.011429 | 0.011396 | 0.011497 |
| 0.011463 | 0.011564 | 0.011497 | 0.011396 | 0.011498 | 0.011597 | 0.011567 |
| 0.011597 | 0.011497 | 0.011396 | 0.011330 | 0.011463 | 0.011396 | 0.011329 |
| 0.011434 | 0.011598 | 0.011396 | 0.011597 | 0.011362 | 0.011463 | 0.011429 |
| 0.011530 | 0.011429 | 0.011463 | 0.011429 | 0.011463 | 0.011329 | 0.011463 |
| 0.011497 | 0.011429 | 0.011497 | 0.011429 | 0.011396 | 0.011497 | 0.011732 |
| 0.011832 | 0.011765 | 0.011833 | 0.011599 | 0.011833 | 0.011396 | 0.011429 |

|          |          |          |          |          |          |          |
|----------|----------|----------|----------|----------|----------|----------|
| 0.011465 | 0.011667 | 0.011380 | 0.011369 | 0.011841 | 0.011333 | 0.011493 |
| 0.011841 | 0.011740 | 0.011597 | 0.011631 | 0.011538 | 0.011698 | 0.011664 |
| 0.011597 | 0.011765 | 0.011522 | 0.011431 | 0.011437 | 0.011497 | 0.011500 |
| 0.011664 | 0.011499 | 0.011702 | 0.011771 | 0.011631 | 0.011564 | 0.011805 |
| 0.011534 | 0.011773 | 0.011636 | 0.011635 | 0.011699 | 0.011362 | 0.011566 |
| 0.011530 | 0.011463 | 0.011362 | 0.011362 | 0.011429 | 0.011429 | 0.011496 |
| 0.011429 | 0.011496 | 0.011396 | 0.011496 | 0.011429 | 0.011429 | 0.011496 |
| 0.011429 | 0.011866 | 0.011765 | 0.011799 | 0.011329 | 0.011429 | 0.011463 |
| 0.011463 | 0.011429 | 0.011496 | 0.011530 | 0.011396 | 0.011396 | 0.011396 |
| 0.011933 | 0.011564 | 0.011564 | 0.011362 | 0.011463 | 0.011631 | 0.011396 |
| 0.011396 | 0.011463 | 0.011429 | 0.011597 | 0.011396 | 0.011530 | 0.011664 |
| 0.011597 | 0.011429 | 0.011429 | 0.011362 | 0.011362 | 0.011530 | 0.011463 |
| 0.011362 | 0.011463 | 0.011329 | 0.011362 | 0.011496 | 0.011631 | 0.011396 |
| 0.011363 | 0.011496 | 0.011430 | 0.011329 | 0.011664 | 0.011329 | 0.011496 |
| 0.011574 | 0.011396 | 0.011698 | 0.011530 | 0.011564 | 0.011429 | 0.011530 |
| 0.011396 | 0.011731 | 0.011329 | 0.011597 | 0.011396 | 0.011396 | 0.011329 |
| 0.011564 | 0.011766 | 0.011463 | 0.011530 | 0.011362 | 0.011765 | 0.011396 |
| 0.011396 | 0.011396 | 0.011429 | 0.011530 | 0.011429 | 0.011530 | 0.011597 |
| 0.011597 | 0.011564 | 0.011463 | 0.011564 | 0.011530 | 0.011396 | 0.011362 |
| 0.011396 | 0.011396 | 0.011463 | 0.011396 | 0.011362 | 0.011530 | 0.011396 |
| 0.011429 | 0.011429 | 0.011564 | 0.011597 | 0.011496 | 0.011429 | 0.011429 |
| 0.011496 | 0.011429 | 0.011530 | 0.011396 | 0.011530 | 0.011631 | 0.011933 |
| 0.011429 | 0.011832 | 0.011440 | 0.017974 | 0.011191 | 0.011549 | 0.011793 |
| 0.011752 | 0.011799 | 0.011479 | 0.011350 | 0.011719 | 0.011820 | 0.011303 |
| 0.011534 | 0.011671 | 0.011372 | 0.011395 | 0.011372 | 0.011406 | 0.011361 |
| 0.011529 | 0.011619 | 0.011579 | 0.011457 | 0.011564 | 0.011530 | 0.011601 |
| 0.011472 | 0.011564 | 0.011564 | 0.011530 | 0.011496 | 0.011497 | 0.011463 |
| 0.011497 | 0.011429 | 0.011463 | 0.011497 | 0.011463 | 0.011396 | 0.011362 |
| 0.011362 | 0.011497 | 0.011396 | 0.011497 | 0.011530 | 0.011564 | 0.011396 |
| 0.011496 | 0.011463 | 0.011799 | 0.011799 | 0.011530 | 0.011564 | 0.011530 |
| 0.011362 | 0.011362 | 0.011396 | 0.011497 | 0.011362 | 0.011597 | 0.011597 |
| 0.011631 | 0.011597 | 0.011564 | 0.011664 | 0.011833 | 0.011666 | 0.011497 |
| 0.011497 | 0.011564 | 0.011597 | 0.011429 | 0.011497 | 0.011463 | 0.011497 |
| 0.011564 | 0.011564 | 0.011597 | 0.011564 | 0.011464 | 0.011665 | 0.011631 |
| 0.011500 | 0.011396 | 0.011497 | 0.011597 | 0.011429 | 0.011631 | 0.011664 |
| 0.011631 | 0.011538 | 0.011698 | 0.011664 | 0.011597 | 0.011765 | 0.011396 |
| 0.011565 | 0.011463 | 0.011362 | 0.011362 | 0.011497 | 0.011396 | 0.011497 |
| 0.011530 | 0.011564 | 0.011396 | 0.011496 | 0.011463 | 0.011799 | 0.011799 |
| 0.011530 | 0.011564 | 0.011564 | 0.011496 | 0.012170 | 0.011632 | 0.011482 |
| 0.011623 | 0.011580 | 0.011693 | 0.011580 | 0.011690 | 0.011405 | 0.011577 |
| 0.012124 | 0.011406 | 0.011540 | 0.011129 | 0.011611 | 0.011672 | 0.011775 |
| 0.012148 | 0.011663 | 0.011736 | 0.011799 | 0.011664 | 0.011664 | 0.011702 |
| 0.011362 | 0.011530 | 0.011664 | 0.011631 | 0.011635 | 0.011631 | 0.011599 |
| 0.011463 | 0.011396 | 0.011429 | 0.011463 | 0.011362 | 0.011429 | 0.011329 |
| 0.011463 | 0.011496 | 0.011396 | 0.011362 | 0.011463 | 0.011396 | 0.011429 |
| 0.011429 | 0.011362 | 0.011429 | 0.011463 | 0.011362 | 0.011564 | 0.011597 |
| 0.011496 | 0.011564 | 0.011496 | 0.011496 | 0.011429 | 0.011832 | 0.011463 |
| 0.011512 | 0.011429 | 0.011665 | 0.011671 | 0.011530 | 0.011530 | 0.011530 |
| 0.011530 | 0.011463 | 0.011429 | 0.011463 | 0.011564 | 0.011564 | 0.011496 |
| 0.011496 | 0.011631 | 0.011799 | 0.011530 | 0.011732 | 0.011732 | 0.011597 |
| 0.011429 | 0.011496 | 0.011530 | 0.011933 | 0.011497 | 0.011530 | 0.011496 |
| 0.011463 | 0.011463 | 0.011463 | 0.011765 | 0.011698 | 0.011732 | 0.011463 |
| 0.011564 | 0.011631 | 0.011496 | 0.011564 | 0.011530 | 0.011396 | 0.011731 |
| 0.011496 | 0.011463 | 0.011463 | 0.011631 | 0.011463 | 0.011564 | 0.011799 |
| 0.011496 | 0.011875 | 0.011866 | 0.011629 | 0.011229 | 0.011570 | 0.011318 |
| 0.011335 | 0.011878 | 0.011411 | 0.011641 | 0.011353 | 0.011416 | 0.011432 |
| 0.011519 | 0.011192 | 0.011339 | 0.011192 | 0.011276 | 0.011395 | 0.011547 |
| 0.011475 | 0.011493 | 0.011553 | 0.011448 | 0.011498 | 0.011631 | 0.011698 |
| 0.011698 | 0.011564 | 0.011669 | 0.011670 | 0.011806 | 0.011838 | 0.011496 |
| 0.011731 | 0.011597 | 0.011463 | 0.011564 | 0.011362 | 0.011597 | 0.011396 |

|          |          |          |          |          |          |          |
|----------|----------|----------|----------|----------|----------|----------|
| 0.011463 | 0.011463 | 0.011429 | 0.011396 | 0.011429 | 0.011396 | 0.011497 |
| 0.011479 | 0.011480 | 0.011471 | 0.011505 | 0.011642 | 0.011607 | 0.011606 |
| 0.011605 | 0.011531 | 0.011319 | 0.011312 | 0.011467 | 0.011636 | 0.011637 |
| 0.011430 | 0.011500 | 0.011733 | 0.011702 | 0.011632 | 0.011666 | 0.011530 |
| 0.011530 | 0.011396 | 0.000000 | 0.011497 | 0.012034 | 0.011664 | 0.011732 |
| 0.011765 | 0.011808 | 0.011469 | 0.011545 | 0.011429 | 0.011564 | 0.011530 |
| 0.011632 | 0.011597 | 0.011664 | 0.011664 | 0.011610 | 0.011732 | 0.011442 |
| 0.011331 | 0.011337 | 0.011435 | 0.011400 | 0.011504 | 0.011359 | 0.011672 |
| 0.011472 | 0.011543 | 0.011251 | 0.011510 | 0.011464 | 0.011539 | 0.011429 |
| 0.011396 | 0.011396 | 0.011463 | 0.011429 | 0.011631 | 0.011597 | 0.011530 |
| 0.011631 | 0.011698 | 0.011429 | 0.011429 | 0.011463 | 0.011463 | 0.011465 |
| 0.011533 | 0.011463 | 0.011463 | 0.011498 | 0.011631 | 0.011698 | 0.011698 |
| 0.011564 | 0.011669 | 0.011670 | 0.011806 | 0.011838 | 0.011496 | 0.011664 |
| 0.011530 | 0.011530 | 0.011432 | 0.011617 | 0.011547 | 0.011571 | 0.011446 |
| 0.011611 | 0.011744 | 0.011484 | 0.011502 | 0.011396 | 0.011597 | 0.011463 |
| 0.011564 | 0.011497 | 0.011396 | 0.011498 | 0.011597 | 0.011567 | 0.011497 |
| 0.011396 | 0.011330 | 0.011463 | 0.011396 | 0.011329 | 0.011434 | 0.011598 |
| 0.011497 | 0.011429 | 0.011463 | 0.011497 | 0.011463 | 0.011396 | 0.011598 |
| 0.011463 | 0.011496 | 0.011496 | 0.011429 | 0.011496 | 0.011731 | 0.011396 |
| 0.011429 | 0.011832 | 0.011429 | 0.011463 | 0.011429 | 0.011799 | 0.011317 |
| 0.011791 | 0.011315 | 0.011311 | 0.011624 | 0.011671 | 0.011634 | 0.011227 |
| 0.011218 | 0.011597 | 0.011698 | 0.011807 | 0.011666 | 0.011804 | 0.011935 |
| 0.011834 | 0.011872 | 0.011832 | 0.012051 | 0.011799 | 0.012606 | 0.011835 |
| 0.012574 | 0.012274 | 0.012408 | 0.012680 | 0.011799 | 0.011497 | 0.011799 |
| 0.012204 | 0.012173 | 0.011765 | 0.011665 | 0.011733 | 0.011733 | 0.011703 |
| 0.011597 | 0.011603 | 0.011664 | 0.011632 | 0.012002 | 0.012068 | 0.012069 |
| 0.011968 | 0.012069 | 0.012173 | 0.011940 | 0.012205 | 0.012211 | 0.012272 |
| 0.012273 | 0.012306 | 0.012255 | 0.012273 | 0.012274 | 0.011463 | 0.011799 |
| 0.011901 | 0.012404 | 0.011874 | 0.012135 | 0.012609 | 0.011671 | 0.011564 |
| 0.011530 | 0.011530 | 0.012001 | 0.012048 | 0.012151 | 0.011866 | 0.011532 |
| S675     | 0.011698 | 0.011698 | 0.012034 | 0.011799 | 0.011799 | 0.011866 |
| 0.011705 | 0.011637 | 0.011799 | 0.011295 | 0.011362 | 0.011329 | 0.011295 |
| 0.011329 | 0.011497 | 0.011295 | 0.011329 | 0.011396 | 0.011362 | 0.011329 |
| 0.011295 | 0.011329 | 0.011429 | 0.011295 | 0.011329 | 0.011329 | 0.011671 |
| 0.011564 | 0.011329 | 0.011228 | 0.011463 | 0.011396 | 0.011362 | 0.011396 |
| 0.011362 | 0.011463 | 0.011362 | 0.011362 | 0.011396 | 0.011362 | 0.011530 |
| 0.011295 | 0.011362 | 0.011396 | 0.011329 | 0.011429 | 0.011463 | 0.011396 |
| 0.011362 | 0.011530 | 0.011430 | 0.011698 | 0.011362 | 0.011631 | 0.011362 |
| 0.011329 | 0.011430 | 0.011497 | 0.011631 | 0.011732 | 0.011429 | 0.011530 |
| 0.011396 | 0.011463 | 0.011362 | 0.011597 | 0.011832 | 0.011362 | 0.011429 |
| 0.011329 | 0.011429 | 0.011396 | 0.011463 | 0.011396 | 0.011396 | 0.011396 |
| 0.011295 | 0.011329 | 0.011295 | 0.011396 | 0.011362 | 0.011397 | 0.011463 |
| 0.011396 | 0.011362 | 0.011429 | 0.011329 | 0.011463 | 0.011295 | 0.011362 |
| 0.011530 | 0.011463 | 0.011698 | 0.011530 | 0.011362 | 0.011597 | 0.011362 |
| 0.011505 | 0.011732 | 0.011551 | 0.011216 | 0.011247 | 0.011318 | 0.011454 |
| 0.012085 | 0.011467 | 0.011266 | 0.011597 | 0.011597 | 0.011396 | 0.011497 |
| 0.011429 | 0.011396 | 0.011463 | 0.011362 | 0.011463 | 0.011396 | 0.011396 |
| 0.011362 | 0.011463 | 0.011664 | 0.011530 | 0.011429 | 0.011396 | 0.011329 |
| 0.011295 | 0.011295 | 0.011362 | 0.011329 | 0.011530 | 0.011497 | 0.011429 |
| 0.011530 | 0.011597 | 0.011329 | 0.011329 | 0.011362 | 0.011362 | 0.011330 |
| 0.011398 | 0.011362 | 0.011362 | 0.011204 | 0.011277 | 0.011271 | 0.011363 |
| 0.011365 | 0.011266 | 0.011355 | 0.011336 | 0.011264 | 0.011300 | 0.011330 |
| 0.011600 | 0.011370 | 0.011404 | 0.011296 | 0.011233 | 0.011430 | 0.011396 |
| 0.011464 | 0.011397 | 0.011396 | 0.011497 | 0.011429 | 0.011799 | 0.011597 |
| 0.011631 | 0.011497 | 0.011362 | 0.011463 | 0.011262 | 0.011497 | 0.011295 |
| 0.011362 | 0.011362 | 0.011329 | 0.011295 | 0.011329 | 0.011295 | 0.011396 |
| 0.011362 | 0.011463 | 0.011396 | 0.011295 | 0.011397 | 0.011497 | 0.011499 |
| 0.011497 | 0.011396 | 0.011295 | 0.011229 | 0.011362 | 0.011295 | 0.011228 |
| 0.011332 | 0.011497 | 0.011295 | 0.011497 | 0.011262 | 0.011362 | 0.011329 |
| 0.011429 | 0.011329 | 0.011362 | 0.011329 | 0.011362 | 0.011228 | 0.011362 |

|          |          |          |          |          |          |          |
|----------|----------|----------|----------|----------|----------|----------|
| 0.011396 | 0.011329 | 0.011396 | 0.011329 | 0.011362 | 0.011396 | 0.011631 |
| 0.011732 | 0.011664 | 0.011732 | 0.011498 | 0.011732 | 0.011362 | 0.011329 |
| 0.011364 | 0.011626 | 0.011472 | 0.011266 | 0.011739 | 0.011231 | 0.011375 |
| 0.011739 | 0.011638 | 0.011530 | 0.011732 | 0.011436 | 0.011597 | 0.011564 |
| 0.011496 | 0.011664 | 0.011522 | 0.011307 | 0.011396 | 0.011396 | 0.011466 |
| 0.011564 | 0.011465 | 0.011601 | 0.011669 | 0.011597 | 0.011665 | 0.011772 |
| 0.011500 | 0.011671 | 0.011602 | 0.011534 | 0.011800 | 0.011262 | 0.011465 |
| 0.011429 | 0.011362 | 0.011262 | 0.011262 | 0.011329 | 0.011329 | 0.011396 |
| 0.011329 | 0.011396 | 0.011295 | 0.011396 | 0.011329 | 0.011329 | 0.011396 |
| 0.011329 | 0.011765 | 0.011664 | 0.011698 | 0.011228 | 0.011329 | 0.011362 |
| 0.011362 | 0.011329 | 0.011396 | 0.011429 | 0.011295 | 0.011295 | 0.011295 |
| 0.011832 | 0.011463 | 0.011463 | 0.011262 | 0.011362 | 0.011530 | 0.011295 |
| 0.011295 | 0.011362 | 0.011329 | 0.011497 | 0.011295 | 0.011429 | 0.011564 |
| 0.011497 | 0.011329 | 0.011329 | 0.011262 | 0.011262 | 0.011429 | 0.011362 |
| 0.011262 | 0.011362 | 0.011228 | 0.011262 | 0.011396 | 0.011530 | 0.011295 |
| 0.011262 | 0.011396 | 0.011329 | 0.011228 | 0.011564 | 0.011228 | 0.011396 |
| 0.011471 | 0.011295 | 0.011597 | 0.011430 | 0.011463 | 0.011329 | 0.011429 |
| 0.011295 | 0.011631 | 0.011228 | 0.011497 | 0.011295 | 0.011295 | 0.011228 |
| 0.011463 | 0.011665 | 0.011362 | 0.011429 | 0.011262 | 0.011664 | 0.011295 |
| 0.011295 | 0.011295 | 0.011329 | 0.011429 | 0.011329 | 0.011429 | 0.011429 |
| 0.011497 | 0.011463 | 0.011362 | 0.011463 | 0.011429 | 0.011295 | 0.011262 |
| 0.011295 | 0.011295 | 0.011362 | 0.011295 | 0.011262 | 0.011429 | 0.011295 |
| 0.011329 | 0.011329 | 0.011463 | 0.011497 | 0.011396 | 0.011329 | 0.011329 |
| 0.011396 | 0.011329 | 0.011429 | 0.011295 | 0.011429 | 0.011530 | 0.011832 |
| 0.011329 | 0.011732 | 0.011302 | 0.017823 | 0.011191 | 0.011427 | 0.011653 |
| 0.011614 | 0.011658 | 0.011427 | 0.011408 | 0.011719 | 0.011716 | 0.011364 |
| 0.011534 | 0.011549 | 0.011216 | 0.011311 | 0.011294 | 0.011307 | 0.011275 |
| 0.011482 | 0.011470 | 0.011468 | 0.011325 | 0.011463 | 0.011497 | 0.011500 |
| 0.011369 | 0.011463 | 0.011463 | 0.011429 | 0.011396 | 0.011396 | 0.011363 |
| 0.011396 | 0.011329 | 0.011362 | 0.011396 | 0.011362 | 0.011295 | 0.011329 |
| 0.011329 | 0.011396 | 0.011295 | 0.011396 | 0.011429 | 0.011463 | 0.011362 |
| 0.011396 | 0.011362 | 0.011698 | 0.011698 | 0.011430 | 0.011464 | 0.011497 |
| 0.011262 | 0.011262 | 0.011295 | 0.011396 | 0.011262 | 0.011497 | 0.011497 |
| 0.011530 | 0.011530 | 0.011463 | 0.011564 | 0.011732 | 0.011565 | 0.011396 |
| 0.011396 | 0.011463 | 0.011497 | 0.011329 | 0.011396 | 0.011362 | 0.011396 |
| 0.011463 | 0.011463 | 0.011497 | 0.011463 | 0.011363 | 0.011564 | 0.011530 |
| 0.011399 | 0.011295 | 0.011396 | 0.011497 | 0.011396 | 0.011530 | 0.011564 |
| 0.011732 | 0.011436 | 0.011597 | 0.011564 | 0.011496 | 0.011664 | 0.011295 |
| 0.011464 | 0.011363 | 0.011329 | 0.011329 | 0.011396 | 0.011295 | 0.011396 |
| 0.011429 | 0.011463 | 0.011362 | 0.011396 | 0.011362 | 0.011698 | 0.011698 |
| 0.011430 | 0.011464 | 0.011530 | 0.011463 | 0.012103 | 0.011524 | 0.011447 |
| 0.011517 | 0.011476 | 0.011482 | 0.011476 | 0.011585 | 0.011509 | 0.011474 |
| 0.012056 | 0.011372 | 0.011506 | 0.011441 | 0.011714 | 0.011570 | 0.011673 |
| 0.012080 | 0.011512 | 0.011534 | 0.011564 | 0.011564 | 0.011564 | 0.011500 |
| 0.011262 | 0.011429 | 0.011564 | 0.011530 | 0.011500 | 0.011530 | 0.011498 |
| 0.011362 | 0.011295 | 0.011329 | 0.011362 | 0.011262 | 0.011329 | 0.011228 |
| 0.011362 | 0.011396 | 0.011228 | 0.011262 | 0.011362 | 0.011295 | 0.011329 |
| 0.011329 | 0.011262 | 0.011329 | 0.011362 | 0.011262 | 0.011463 | 0.011497 |
| 0.011396 | 0.011463 | 0.011396 | 0.011396 | 0.011329 | 0.011732 | 0.011362 |
| 0.011408 | 0.011329 | 0.011564 | 0.011569 | 0.011429 | 0.011429 | 0.011429 |
| 0.011429 | 0.011362 | 0.011329 | 0.011362 | 0.011463 | 0.011463 | 0.011396 |
| 0.011396 | 0.011530 | 0.011698 | 0.011429 | 0.011631 | 0.011631 | 0.011496 |
| 0.011329 | 0.011396 | 0.011429 | 0.011832 | 0.011396 | 0.011429 | 0.011396 |
| 0.011429 | 0.011362 | 0.011362 | 0.011665 | 0.011597 | 0.011631 | 0.011362 |
| 0.011463 | 0.011530 | 0.011396 | 0.011463 | 0.011429 | 0.011295 | 0.011631 |
| 0.011396 | 0.011362 | 0.011362 | 0.011530 | 0.011362 | 0.011463 | 0.011698 |
| 0.011396 | 0.011773 | 0.011765 | 0.011548 | 0.011229 | 0.011468 | 0.011318 |
| 0.011225 | 0.011761 | 0.011271 | 0.011507 | 0.011255 | 0.011416 | 0.011379 |
| 0.011519 | 0.011192 | 0.011339 | 0.011126 | 0.011222 | 0.011328 | 0.011425 |
| 0.011437 | 0.011336 | 0.011412 | 0.011342 | 0.011397 | 0.011530 | 0.011597 |

|          |          |          |          |          |          |          |
|----------|----------|----------|----------|----------|----------|----------|
| 0.011597 | 0.011464 | 0.011567 | 0.011569 | 0.011704 | 0.011731 | 0.011396 |
| 0.011631 | 0.011497 | 0.011362 | 0.011463 | 0.011262 | 0.011497 | 0.011295 |
| 0.011362 | 0.011362 | 0.011329 | 0.011295 | 0.011329 | 0.011295 | 0.011396 |
| 0.011375 | 0.011375 | 0.011368 | 0.011403 | 0.011539 | 0.011504 | 0.011504 |
| 0.011503 | 0.011430 | 0.011208 | 0.011204 | 0.011365 | 0.011534 | 0.011535 |
| 0.011329 | 0.011399 | 0.011632 | 0.011601 | 0.011531 | 0.011565 | 0.011497 |
| 0.011429 | 0.011497 | 0.011497 | 0.000000 | 0.011967 | 0.011564 | 0.011631 |
| 0.011665 | 0.011701 | 0.011367 | 0.011407 | 0.011329 | 0.011530 | 0.011497 |
| 0.011531 | 0.011564 | 0.011564 | 0.011564 | 0.011728 | 0.011698 | 0.011338 |
| 0.011229 | 0.011233 | 0.011333 | 0.011298 | 0.011402 | 0.011247 | 0.011570 |
| 0.011369 | 0.011455 | 0.011203 | 0.011360 | 0.011363 | 0.011368 | 0.011329 |
| 0.011295 | 0.011295 | 0.011362 | 0.011329 | 0.011530 | 0.011497 | 0.011429 |
| 0.011530 | 0.011597 | 0.011329 | 0.011329 | 0.011362 | 0.011362 | 0.011330 |
| 0.011398 | 0.011362 | 0.011362 | 0.011397 | 0.011530 | 0.011597 | 0.011597 |
| 0.011464 | 0.011567 | 0.011569 | 0.011704 | 0.011731 | 0.011396 | 0.011564 |
| 0.011497 | 0.011497 | 0.011331 | 0.011513 | 0.011442 | 0.011469 | 0.011340 |
| 0.011508 | 0.011652 | 0.011484 | 0.011400 | 0.011295 | 0.011497 | 0.011362 |
| 0.011463 | 0.011396 | 0.011295 | 0.011397 | 0.011497 | 0.011499 | 0.011396 |
| 0.011295 | 0.011229 | 0.011362 | 0.011295 | 0.011228 | 0.011332 | 0.011497 |
| 0.011396 | 0.011329 | 0.011362 | 0.011396 | 0.011362 | 0.011295 | 0.011497 |
| 0.011362 | 0.011396 | 0.011396 | 0.011329 | 0.011396 | 0.011631 | 0.011295 |
| 0.011329 | 0.011732 | 0.011329 | 0.011362 | 0.011329 | 0.011698 | 0.011275 |
| 0.011734 | 0.011273 | 0.011261 | 0.011503 | 0.011589 | 0.011491 | 0.011186 |
| 0.011218 | 0.011497 | 0.011597 | 0.011705 | 0.011565 | 0.011703 | 0.011834 |
| 0.011733 | 0.011770 | 0.011732 | 0.011983 | 0.011698 | 0.012573 | 0.011734 |
| 0.012473 | 0.012240 | 0.012374 | 0.012646 | 0.011698 | 0.011396 | 0.011698 |
| 0.012137 | 0.012072 | 0.011665 | 0.011564 | 0.011632 | 0.011632 | 0.011601 |
| 0.011497 | 0.011501 | 0.011564 | 0.011531 | 0.011901 | 0.011967 | 0.011968 |
| 0.011868 | 0.011968 | 0.012072 | 0.011838 | 0.012137 | 0.012144 | 0.012205 |
| 0.012205 | 0.012239 | 0.012186 | 0.012205 | 0.012206 | 0.011429 | 0.011732 |
| 0.011800 | 0.012303 | 0.011806 | 0.011967 | 0.012508 | 0.011570 | 0.011464 |
| 0.011429 | 0.011429 | 0.011900 | 0.011965 | 0.012010 | 0.011765 | 0.011431 |
| S676     | 0.012236 | 0.012236 | 0.012338 | 0.012102 | 0.012102 | 0.012169 |
| 0.011671 | 0.011603 | 0.012169 | 0.011866 | 0.011933 | 0.011902 | 0.011866 |
| 0.011832 | 0.012068 | 0.011799 | 0.011900 | 0.011967 | 0.011933 | 0.011900 |
| 0.011866 | 0.011900 | 0.011732 | 0.011867 | 0.011901 | 0.011900 | 0.011637 |
| 0.011866 | 0.011900 | 0.011799 | 0.011765 | 0.011967 | 0.011934 | 0.011967 |
| 0.011933 | 0.012034 | 0.011933 | 0.011933 | 0.011967 | 0.011933 | 0.012102 |
| 0.011799 | 0.011933 | 0.011967 | 0.011900 | 0.011933 | 0.012034 | 0.011967 |
| 0.011933 | 0.012102 | 0.012001 | 0.011664 | 0.011933 | 0.012202 | 0.011933 |
| 0.011900 | 0.011934 | 0.012068 | 0.012202 | 0.011631 | 0.011934 | 0.012034 |
| 0.011967 | 0.012034 | 0.011934 | 0.012169 | 0.011799 | 0.011933 | 0.012001 |
| 0.011900 | 0.012000 | 0.011967 | 0.012034 | 0.011967 | 0.011967 | 0.011967 |
| 0.011866 | 0.011900 | 0.011866 | 0.011900 | 0.011933 | 0.011969 | 0.012034 |
| 0.011967 | 0.011933 | 0.012001 | 0.011900 | 0.011832 | 0.011866 | 0.011933 |
| 0.012101 | 0.012034 | 0.011799 | 0.012102 | 0.011933 | 0.012169 | 0.011933 |
| 0.012174 | 0.011733 | 0.012193 | 0.011881 | 0.011882 | 0.012018 | 0.011809 |
| 0.012378 | 0.011773 | 0.011843 | 0.012169 | 0.012169 | 0.011900 | 0.011799 |
| 0.012001 | 0.011933 | 0.012000 | 0.011933 | 0.012034 | 0.011967 | 0.011933 |
| 0.011900 | 0.011967 | 0.012203 | 0.012101 | 0.012001 | 0.011967 | 0.011900 |
| 0.011866 | 0.011799 | 0.011934 | 0.011900 | 0.011833 | 0.011800 | 0.011732 |
| 0.011833 | 0.011900 | 0.011900 | 0.011900 | 0.011934 | 0.011934 | 0.011939 |
| 0.012007 | 0.011934 | 0.011934 | 0.011816 | 0.011892 | 0.011832 | 0.011935 |
| 0.011907 | 0.011851 | 0.011946 | 0.011889 | 0.011842 | 0.011848 | 0.011905 |
| 0.011817 | 0.011923 | 0.011956 | 0.011868 | 0.011856 | 0.012003 | 0.011902 |
| 0.011969 | 0.011971 | 0.011969 | 0.012034 | 0.011967 | 0.012371 | 0.012102 |
| 0.011934 | 0.012001 | 0.011933 | 0.011968 | 0.011833 | 0.011799 | 0.011867 |
| 0.011933 | 0.011933 | 0.011900 | 0.011799 | 0.011900 | 0.011866 | 0.011967 |
| 0.011934 | 0.012035 | 0.011968 | 0.011866 | 0.011971 | 0.012068 | 0.012075 |
| 0.012069 | 0.011968 | 0.011866 | 0.011802 | 0.011934 | 0.011867 | 0.011800 |

|          |          |          |          |          |          |          |
|----------|----------|----------|----------|----------|----------|----------|
| 0.011808 | 0.012069 | 0.011867 | 0.012069 | 0.011833 | 0.011934 | 0.011900 |
| 0.012001 | 0.011900 | 0.011934 | 0.011900 | 0.011934 | 0.011799 | 0.011934 |
| 0.011968 | 0.011900 | 0.011967 | 0.011900 | 0.011900 | 0.011967 | 0.012203 |
| 0.011698 | 0.011631 | 0.011698 | 0.012072 | 0.011631 | 0.011900 | 0.011900 |
| 0.011838 | 0.012274 | 0.011975 | 0.011850 | 0.011705 | 0.011777 | 0.011966 |
| 0.011705 | 0.011877 | 0.012034 | 0.012270 | 0.012017 | 0.012169 | 0.012136 |
| 0.012068 | 0.012236 | 0.012091 | 0.011926 | 0.011899 | 0.011967 | 0.012008 |
| 0.012135 | 0.012005 | 0.012177 | 0.012246 | 0.012135 | 0.012203 | 0.012315 |
| 0.012042 | 0.012249 | 0.012076 | 0.012109 | 0.012340 | 0.011832 | 0.012038 |
| 0.012000 | 0.011933 | 0.011832 | 0.011832 | 0.011900 | 0.011900 | 0.011967 |
| 0.011900 | 0.011967 | 0.011866 | 0.011900 | 0.011900 | 0.011900 | 0.011967 |
| 0.011900 | 0.011732 | 0.011631 | 0.011664 | 0.011799 | 0.011900 | 0.011934 |
| 0.011933 | 0.011832 | 0.011967 | 0.011934 | 0.011866 | 0.011866 | 0.011866 |
| 0.011799 | 0.011967 | 0.012034 | 0.011832 | 0.011933 | 0.012102 | 0.011866 |
| 0.011866 | 0.011933 | 0.011900 | 0.012068 | 0.011866 | 0.011799 | 0.011933 |
| 0.011866 | 0.011900 | 0.011900 | 0.011832 | 0.011832 | 0.012001 | 0.011933 |
| 0.011832 | 0.011933 | 0.011799 | 0.011833 | 0.011967 | 0.011766 | 0.011866 |
| 0.011833 | 0.011967 | 0.011901 | 0.011799 | 0.011496 | 0.011799 | 0.011967 |
| 0.012054 | 0.011866 | 0.011564 | 0.012001 | 0.011967 | 0.011900 | 0.012001 |
| 0.011866 | 0.012202 | 0.011799 | 0.011866 | 0.011799 | 0.011799 | 0.011799 |
| 0.012034 | 0.011900 | 0.011934 | 0.012001 | 0.011832 | 0.011631 | 0.011799 |
| 0.011866 | 0.011866 | 0.011900 | 0.012001 | 0.011900 | 0.012001 | 0.012068 |
| 0.012068 | 0.012034 | 0.011933 | 0.012035 | 0.012000 | 0.011866 | 0.011832 |
| 0.011866 | 0.011866 | 0.011934 | 0.011799 | 0.011832 | 0.012001 | 0.011866 |
| 0.011832 | 0.011900 | 0.012034 | 0.012001 | 0.011967 | 0.011900 | 0.011900 |
| 0.011967 | 0.011900 | 0.012000 | 0.011866 | 0.012001 | 0.012101 | 0.011732 |
| 0.011900 | 0.011631 | 0.011923 | 0.018466 | 0.011978 | 0.011794 | 0.011653 |
| 0.011614 | 0.011658 | 0.012161 | 0.011989 | 0.011940 | 0.011682 | 0.012094 |
| 0.012010 | 0.011793 | 0.011880 | 0.011982 | 0.011802 | 0.011999 | 0.012007 |
| 0.011671 | 0.011806 | 0.011654 | 0.011987 | 0.012034 | 0.012035 | 0.012076 |
| 0.011954 | 0.012035 | 0.012034 | 0.011934 | 0.011967 | 0.011968 | 0.011934 |
| 0.011967 | 0.011900 | 0.011934 | 0.011967 | 0.011934 | 0.011867 | 0.011866 |
| 0.011866 | 0.011967 | 0.011866 | 0.011968 | 0.012001 | 0.012035 | 0.011900 |
| 0.011900 | 0.011867 | 0.011597 | 0.011597 | 0.012001 | 0.012036 | 0.012069 |
| 0.011833 | 0.011833 | 0.011866 | 0.011968 | 0.011833 | 0.012068 | 0.012068 |
| 0.012102 | 0.012034 | 0.012034 | 0.012135 | 0.011631 | 0.012139 | 0.011967 |
| 0.011967 | 0.012035 | 0.012068 | 0.011900 | 0.011967 | 0.011934 | 0.011967 |
| 0.012035 | 0.012035 | 0.012068 | 0.012035 | 0.011936 | 0.012135 | 0.012102 |
| 0.011975 | 0.011867 | 0.011967 | 0.012069 | 0.011968 | 0.012035 | 0.012135 |
| 0.012270 | 0.012017 | 0.012169 | 0.012136 | 0.012068 | 0.012236 | 0.011867 |
| 0.012038 | 0.011935 | 0.011866 | 0.011866 | 0.011967 | 0.011866 | 0.011968 |
| 0.012001 | 0.012035 | 0.011900 | 0.011900 | 0.011867 | 0.011597 | 0.011597 |
| 0.012001 | 0.012036 | 0.012068 | 0.012000 | 0.012542 | 0.012097 | 0.012010 |
| 0.012080 | 0.012066 | 0.012186 | 0.012065 | 0.012181 | 0.012061 | 0.012026 |
| 0.012504 | 0.011926 | 0.012054 | 0.011925 | 0.012266 | 0.012149 | 0.012252 |
| 0.012523 | 0.012041 | 0.012211 | 0.012270 | 0.012135 | 0.011866 | 0.012176 |
| 0.011832 | 0.012001 | 0.012135 | 0.012101 | 0.012108 | 0.011833 | 0.011802 |
| 0.011866 | 0.011866 | 0.011832 | 0.011933 | 0.011832 | 0.011900 | 0.011799 |
| 0.011866 | 0.011900 | 0.011866 | 0.011832 | 0.011933 | 0.011866 | 0.011900 |
| 0.011900 | 0.011832 | 0.011900 | 0.011934 | 0.011832 | 0.012034 | 0.012068 |
| 0.011967 | 0.011967 | 0.011967 | 0.011967 | 0.011900 | 0.011631 | 0.011933 |
| 0.011722 | 0.011900 | 0.011867 | 0.011875 | 0.011934 | 0.011933 | 0.012001 |
| 0.012001 | 0.011934 | 0.011900 | 0.011934 | 0.012034 | 0.012034 | 0.011967 |
| 0.011967 | 0.012102 | 0.011664 | 0.012000 | 0.012203 | 0.012203 | 0.012068 |
| 0.011900 | 0.011967 | 0.012001 | 0.011732 | 0.011968 | 0.011934 | 0.011967 |
| 0.012001 | 0.011866 | 0.011866 | 0.012169 | 0.012169 | 0.012135 | 0.011866 |
| 0.011967 | 0.012102 | 0.011967 | 0.011967 | 0.012000 | 0.011866 | 0.011597 |
| 0.011967 | 0.011933 | 0.011866 | 0.012102 | 0.011866 | 0.012034 | 0.011866 |
| 0.011967 | 0.011739 | 0.011732 | 0.011915 | 0.011737 | 0.011979 | 0.011835 |
| 0.011720 | 0.012073 | 0.011904 | 0.012088 | 0.011988 | 0.011824 | 0.011911 |

|          |          |          |          |          |          |          |
|----------|----------|----------|----------|----------|----------|----------|
| 0.011826 | 0.011917 | 0.012008 | 0.011986 | 0.011869 | 0.012066 | 0.012156 |
| 0.012116 | 0.012045 | 0.011977 | 0.011977 | 0.011971 | 0.011833 | 0.011901 |
| 0.011900 | 0.011969 | 0.012075 | 0.011874 | 0.012214 | 0.012227 | 0.011967 |
| 0.011934 | 0.012001 | 0.011933 | 0.011968 | 0.011833 | 0.011799 | 0.011867 |
| 0.011933 | 0.011933 | 0.011900 | 0.011799 | 0.011900 | 0.011866 | 0.011967 |
| 0.011934 | 0.011935 | 0.011917 | 0.011951 | 0.012087 | 0.012052 | 0.012051 |
| 0.012049 | 0.012002 | 0.011725 | 0.011781 | 0.011907 | 0.012078 | 0.012079 |
| 0.011901 | 0.011941 | 0.012206 | 0.012177 | 0.012104 | 0.012138 | 0.012034 |
| 0.012000 | 0.012034 | 0.012034 | 0.011967 | 0.000000 | 0.012135 | 0.012203 |
| 0.012237 | 0.011630 | 0.011879 | 0.012031 | 0.011900 | 0.012068 | 0.012034 |
| 0.012104 | 0.012101 | 0.012135 | 0.012135 | 0.012122 | 0.012236 | 0.011928 |
| 0.011804 | 0.011822 | 0.011912 | 0.011876 | 0.011915 | 0.011844 | 0.011536 |
| 0.011952 | 0.011719 | 0.011823 | 0.011960 | 0.011935 | 0.011985 | 0.011900 |
| 0.011866 | 0.011799 | 0.011934 | 0.011900 | 0.011833 | 0.011800 | 0.011732 |
| 0.011833 | 0.011900 | 0.011900 | 0.011900 | 0.011934 | 0.011934 | 0.011939 |
| 0.012007 | 0.011934 | 0.011934 | 0.011971 | 0.011833 | 0.011901 | 0.011900 |
| 0.011969 | 0.012075 | 0.011874 | 0.012214 | 0.012227 | 0.011967 | 0.012135 |
| 0.012034 | 0.012034 | 0.011906 | 0.012105 | 0.012034 | 0.011980 | 0.011902 |
| 0.012094 | 0.012292 | 0.012034 | 0.011978 | 0.011867 | 0.012069 | 0.011934 |
| 0.012035 | 0.011968 | 0.011866 | 0.011971 | 0.012068 | 0.012075 | 0.011968 |
| 0.011866 | 0.011802 | 0.011934 | 0.011867 | 0.011800 | 0.011808 | 0.012069 |
| 0.011967 | 0.011900 | 0.011934 | 0.011967 | 0.011934 | 0.011867 | 0.011799 |
| 0.011933 | 0.011967 | 0.011967 | 0.011900 | 0.011967 | 0.012135 | 0.011799 |
| 0.011900 | 0.011631 | 0.011900 | 0.011933 | 0.011900 | 0.011664 | 0.011961 |
| 0.012185 | 0.011698 | 0.011762 | 0.011745 | 0.011916 | 0.011850 | 0.011688 |
| 0.011743 | 0.011799 | 0.011900 | 0.012012 | 0.011869 | 0.012008 | 0.012137 |
| 0.012037 | 0.012076 | 0.012034 | 0.012258 | 0.012001 | 0.012843 | 0.012038 |
| 0.012777 | 0.012512 | 0.012646 | 0.012952 | 0.011933 | 0.011900 | 0.012002 |
| 0.012576 | 0.012377 | 0.011967 | 0.011867 | 0.011935 | 0.011935 | 0.011906 |
| 0.011799 | 0.011807 | 0.011866 | 0.011834 | 0.012205 | 0.012270 | 0.012272 |
| 0.012172 | 0.012272 | 0.012377 | 0.012144 | 0.012577 | 0.012586 | 0.012610 |
| 0.012645 | 0.012679 | 0.012632 | 0.012645 | 0.012647 | 0.011967 | 0.012170 |
| 0.012306 | 0.012809 | 0.012248 | 0.012271 | 0.012744 | 0.011808 | 0.011699 |
| 0.011597 | 0.011665 | 0.012204 | 0.012171 | 0.012328 | 0.012001 | 0.011735 |
| S677     | 0.011866 | 0.011866 | 0.012202 | 0.011967 | 0.011967 | 0.012034 |
| 0.011875 | 0.011807 | 0.012034 | 0.011463 | 0.011530 | 0.011498 | 0.011463 |
| 0.011496 | 0.011664 | 0.011463 | 0.011496 | 0.011564 | 0.011530 | 0.011496 |
| 0.011463 | 0.011497 | 0.011597 | 0.011463 | 0.011497 | 0.011496 | 0.011841 |
| 0.011732 | 0.011497 | 0.011396 | 0.011631 | 0.011530 | 0.011530 | 0.011564 |
| 0.011530 | 0.011597 | 0.011530 | 0.011530 | 0.011564 | 0.011530 | 0.011698 |
| 0.011463 | 0.011530 | 0.011564 | 0.011496 | 0.011597 | 0.011564 | 0.011564 |
| 0.011530 | 0.011698 | 0.011598 | 0.011866 | 0.011530 | 0.011732 | 0.011530 |
| 0.011496 | 0.011597 | 0.011664 | 0.011732 | 0.011900 | 0.011597 | 0.011698 |
| 0.011564 | 0.011597 | 0.011530 | 0.011765 | 0.012001 | 0.011530 | 0.011597 |
| 0.011497 | 0.011597 | 0.011564 | 0.011631 | 0.011564 | 0.011564 | 0.011564 |
| 0.011463 | 0.011496 | 0.011463 | 0.011564 | 0.011530 | 0.011565 | 0.011631 |
| 0.011564 | 0.011530 | 0.011597 | 0.011496 | 0.011631 | 0.011463 | 0.011530 |
| 0.011698 | 0.011631 | 0.011866 | 0.011698 | 0.011530 | 0.011765 | 0.011530 |
| 0.011728 | 0.011957 | 0.011664 | 0.011373 | 0.011321 | 0.011576 | 0.011572 |
| 0.012231 | 0.011467 | 0.011348 | 0.011564 | 0.011496 | 0.011564 | 0.011664 |
| 0.011597 | 0.011564 | 0.011631 | 0.011530 | 0.011631 | 0.011564 | 0.011564 |
| 0.011530 | 0.011631 | 0.011832 | 0.011698 | 0.011597 | 0.011564 | 0.011497 |
| 0.011463 | 0.011463 | 0.011530 | 0.011497 | 0.011698 | 0.011665 | 0.011597 |
| 0.011698 | 0.011765 | 0.011497 | 0.011497 | 0.011530 | 0.011530 | 0.011533 |
| 0.011601 | 0.011530 | 0.011530 | 0.011384 | 0.011386 | 0.011411 | 0.011531 |
| 0.011501 | 0.011438 | 0.011429 | 0.011474 | 0.011434 | 0.011437 | 0.011499 |
| 0.011708 | 0.011508 | 0.011508 | 0.011464 | 0.011406 | 0.011599 | 0.011565 |
| 0.011632 | 0.011566 | 0.011565 | 0.011664 | 0.011597 | 0.011967 | 0.011766 |
| 0.011799 | 0.011665 | 0.011530 | 0.011631 | 0.011430 | 0.011664 | 0.011463 |
| 0.011530 | 0.011530 | 0.011497 | 0.011463 | 0.011496 | 0.011463 | 0.011564 |

|          |          |          |          |          |          |          |
|----------|----------|----------|----------|----------|----------|----------|
| 0.011530 | 0.011631 | 0.011564 | 0.011463 | 0.011566 | 0.011665 | 0.011635 |
| 0.011665 | 0.011564 | 0.011463 | 0.011397 | 0.011530 | 0.011463 | 0.011396 |
| 0.011502 | 0.011665 | 0.011463 | 0.011665 | 0.011362 | 0.011530 | 0.011430 |
| 0.011598 | 0.011497 | 0.011530 | 0.011430 | 0.011463 | 0.011396 | 0.011530 |
| 0.011564 | 0.011497 | 0.011564 | 0.011497 | 0.011530 | 0.011564 | 0.011799 |
| 0.011866 | 0.011832 | 0.011900 | 0.011600 | 0.011900 | 0.011530 | 0.011497 |
| 0.011533 | 0.011829 | 0.011518 | 0.011403 | 0.011909 | 0.011401 | 0.011532 |
| 0.011909 | 0.011808 | 0.011496 | 0.011900 | 0.011607 | 0.011497 | 0.011732 |
| 0.011664 | 0.011564 | 0.011700 | 0.011390 | 0.011563 | 0.011564 | 0.011635 |
| 0.011732 | 0.011634 | 0.011635 | 0.011839 | 0.011765 | 0.011833 | 0.011941 |
| 0.011669 | 0.011841 | 0.011771 | 0.011703 | 0.011969 | 0.011429 | 0.011633 |
| 0.011597 | 0.011530 | 0.011429 | 0.011429 | 0.011497 | 0.011497 | 0.011564 |
| 0.011496 | 0.011564 | 0.011463 | 0.011564 | 0.011497 | 0.011496 | 0.011564 |
| 0.011497 | 0.011933 | 0.011832 | 0.011866 | 0.011396 | 0.011497 | 0.011530 |
| 0.011530 | 0.011429 | 0.011564 | 0.011597 | 0.011463 | 0.011463 | 0.011463 |
| 0.012000 | 0.011631 | 0.011631 | 0.011429 | 0.011530 | 0.011665 | 0.011463 |
| 0.011463 | 0.011530 | 0.011496 | 0.011665 | 0.011463 | 0.011597 | 0.011732 |
| 0.011664 | 0.011497 | 0.011496 | 0.011429 | 0.011429 | 0.011597 | 0.011530 |
| 0.011429 | 0.011530 | 0.011396 | 0.011429 | 0.011564 | 0.011698 | 0.011463 |
| 0.011430 | 0.011564 | 0.011497 | 0.011396 | 0.011732 | 0.011396 | 0.011564 |
| 0.011642 | 0.011463 | 0.011765 | 0.011597 | 0.011631 | 0.011497 | 0.011597 |
| 0.011463 | 0.011732 | 0.011396 | 0.011664 | 0.011463 | 0.011463 | 0.011396 |
| 0.011631 | 0.011833 | 0.011530 | 0.011597 | 0.011429 | 0.011832 | 0.011463 |
| 0.011463 | 0.011463 | 0.011496 | 0.011564 | 0.011496 | 0.011597 | 0.011664 |
| 0.011664 | 0.011564 | 0.011530 | 0.011631 | 0.011597 | 0.011463 | 0.011429 |
| 0.011463 | 0.011463 | 0.011530 | 0.011463 | 0.011429 | 0.011597 | 0.011463 |
| 0.011496 | 0.011497 | 0.011631 | 0.011664 | 0.011564 | 0.011496 | 0.011497 |
| 0.011564 | 0.011496 | 0.011597 | 0.011463 | 0.011597 | 0.011497 | 0.012001 |
| 0.011497 | 0.011900 | 0.011509 | 0.017937 | 0.011257 | 0.011550 | 0.011863 |
| 0.011822 | 0.011870 | 0.011427 | 0.011408 | 0.011775 | 0.011889 | 0.011486 |
| 0.011534 | 0.011610 | 0.011372 | 0.011437 | 0.011411 | 0.011406 | 0.011447 |
| 0.011482 | 0.011582 | 0.011616 | 0.011457 | 0.011631 | 0.011665 | 0.011601 |
| 0.011541 | 0.011631 | 0.011564 | 0.011597 | 0.011564 | 0.011564 | 0.011531 |
| 0.011497 | 0.011497 | 0.011262 | 0.011564 | 0.011530 | 0.011463 | 0.011497 |
| 0.011497 | 0.011564 | 0.011463 | 0.011564 | 0.011598 | 0.011631 | 0.011530 |
| 0.011564 | 0.011530 | 0.011866 | 0.011866 | 0.011598 | 0.011632 | 0.011665 |
| 0.011430 | 0.011430 | 0.011463 | 0.011564 | 0.011430 | 0.011665 | 0.011665 |
| 0.011429 | 0.011496 | 0.011631 | 0.011463 | 0.011900 | 0.011464 | 0.011564 |
| 0.011362 | 0.011631 | 0.011665 | 0.011497 | 0.011564 | 0.011530 | 0.011497 |
| 0.011430 | 0.011430 | 0.011463 | 0.011631 | 0.011532 | 0.011732 | 0.011698 |
| 0.011568 | 0.011463 | 0.011564 | 0.011665 | 0.011564 | 0.011698 | 0.011732 |
| 0.011900 | 0.011607 | 0.011497 | 0.011732 | 0.011664 | 0.011564 | 0.011463 |
| 0.011566 | 0.011531 | 0.011497 | 0.011497 | 0.011564 | 0.011463 | 0.011564 |
| 0.011598 | 0.011631 | 0.011530 | 0.011564 | 0.011530 | 0.011866 | 0.011866 |
| 0.011598 | 0.011632 | 0.011698 | 0.011631 | 0.012271 | 0.011239 | 0.011623 |
| 0.011693 | 0.011234 | 0.011763 | 0.011649 | 0.011620 | 0.011681 | 0.011405 |
| 0.012228 | 0.011545 | 0.011677 | 0.011614 | 0.011887 | 0.011740 | 0.011843 |
| 0.012250 | 0.011739 | 0.011804 | 0.011866 | 0.011732 | 0.011732 | 0.011770 |
| 0.011429 | 0.011597 | 0.011732 | 0.011698 | 0.011702 | 0.011698 | 0.011667 |
| 0.011530 | 0.011463 | 0.011497 | 0.011530 | 0.011429 | 0.011497 | 0.011396 |
| 0.011530 | 0.011564 | 0.011463 | 0.011429 | 0.011530 | 0.011463 | 0.011497 |
| 0.011496 | 0.011429 | 0.011497 | 0.011530 | 0.011429 | 0.011597 | 0.011664 |
| 0.011564 | 0.011631 | 0.011564 | 0.011564 | 0.011496 | 0.011900 | 0.011530 |
| 0.011582 | 0.011497 | 0.011732 | 0.011739 | 0.011597 | 0.011597 | 0.011597 |
| 0.011564 | 0.011530 | 0.011496 | 0.011530 | 0.011631 | 0.011631 | 0.011564 |
| 0.011564 | 0.011698 | 0.011866 | 0.011530 | 0.011799 | 0.011799 | 0.011664 |
| 0.011496 | 0.011564 | 0.011564 | 0.012001 | 0.011564 | 0.011597 | 0.011564 |
| 0.011396 | 0.011530 | 0.011530 | 0.011765 | 0.011765 | 0.011732 | 0.011530 |
| 0.011631 | 0.011698 | 0.011564 | 0.011631 | 0.011597 | 0.011463 | 0.011799 |
| 0.011564 | 0.011530 | 0.011530 | 0.011698 | 0.011530 | 0.011631 | 0.011866 |



|          |          |          |          |          |          |          |
|----------|----------|----------|----------|----------|----------|----------|
| 0.011564 | 0.011943 | 0.011900 | 0.011629 | 0.011229 | 0.011638 | 0.011318 |
| 0.011335 | 0.011878 | 0.011447 | 0.011596 | 0.011402 | 0.011518 | 0.011485 |
| 0.011570 | 0.011258 | 0.011450 | 0.011192 | 0.011330 | 0.011395 | 0.011587 |
| 0.011663 | 0.011493 | 0.011624 | 0.011553 | 0.011566 | 0.011698 | 0.011766 |
| 0.011765 | 0.011632 | 0.011737 | 0.011738 | 0.011874 | 0.011873 | 0.011564 |
| 0.011799 | 0.011665 | 0.011530 | 0.011631 | 0.011430 | 0.011664 | 0.011463 |
| 0.011530 | 0.011530 | 0.011497 | 0.011463 | 0.011496 | 0.011463 | 0.011564 |
| 0.011340 | 0.011480 | 0.011505 | 0.011540 | 0.011676 | 0.011641 | 0.011572 |
| 0.011639 | 0.011598 | 0.011356 | 0.011312 | 0.011501 | 0.011670 | 0.011671 |
| 0.011497 | 0.011534 | 0.011801 | 0.011770 | 0.011228 | 0.011733 | 0.011664 |
| 0.011597 | 0.011664 | 0.011664 | 0.011564 | 0.012135 | 0.000000 | 0.011530 |
| 0.011833 | 0.011844 | 0.011504 | 0.011615 | 0.011497 | 0.011698 | 0.011664 |
| 0.011699 | 0.011732 | 0.011463 | 0.011463 | 0.011925 | 0.011866 | 0.011511 |
| 0.011398 | 0.011406 | 0.011503 | 0.011468 | 0.011573 | 0.011433 | 0.011740 |
| 0.011506 | 0.011674 | 0.011394 | 0.011547 | 0.011531 | 0.011573 | 0.011497 |
| 0.011463 | 0.011463 | 0.011530 | 0.011497 | 0.011698 | 0.011665 | 0.011597 |
| 0.011698 | 0.011765 | 0.011497 | 0.011497 | 0.011530 | 0.011530 | 0.011533 |
| 0.011601 | 0.011530 | 0.011530 | 0.011566 | 0.011698 | 0.011766 | 0.011765 |
| 0.011632 | 0.011737 | 0.011738 | 0.011874 | 0.011873 | 0.011564 | 0.011732 |
| 0.011664 | 0.011664 | 0.011500 | 0.011652 | 0.011581 | 0.011639 | 0.011516 |
| 0.011680 | 0.011972 | 0.011611 | 0.011570 | 0.011463 | 0.011665 | 0.011530 |
| 0.011631 | 0.011564 | 0.011463 | 0.011566 | 0.011665 | 0.011635 | 0.011564 |
| 0.011463 | 0.011397 | 0.011530 | 0.011463 | 0.011396 | 0.011502 | 0.011665 |
| 0.011497 | 0.011497 | 0.011262 | 0.011564 | 0.011530 | 0.011463 | 0.011665 |
| 0.011530 | 0.011564 | 0.011564 | 0.011496 | 0.011564 | 0.011799 | 0.011463 |
| 0.011497 | 0.011900 | 0.011496 | 0.011530 | 0.011496 | 0.011866 | 0.011317 |
| 0.011735 | 0.011358 | 0.011261 | 0.011624 | 0.011671 | 0.011670 | 0.011269 |
| 0.011218 | 0.011664 | 0.011765 | 0.011875 | 0.011734 | 0.011872 | 0.012002 |
| 0.011902 | 0.011940 | 0.011900 | 0.012154 | 0.011866 | 0.012741 | 0.011903 |
| 0.012574 | 0.012410 | 0.012544 | 0.012816 | 0.011866 | 0.011564 | 0.011867 |
| 0.012306 | 0.012241 | 0.011832 | 0.011732 | 0.011800 | 0.011800 | 0.011703 |
| 0.011664 | 0.011671 | 0.011732 | 0.011699 | 0.012069 | 0.012135 | 0.012137 |
| 0.012036 | 0.012137 | 0.012241 | 0.011974 | 0.012306 | 0.012313 | 0.012373 |
| 0.012374 | 0.012408 | 0.012357 | 0.012374 | 0.012376 | 0.011597 | 0.011901 |
| 0.011969 | 0.012472 | 0.011942 | 0.012203 | 0.012676 | 0.011739 | 0.011632 |
| 0.011564 | 0.011597 | 0.012069 | 0.012130 | 0.012186 | 0.011933 | 0.011599 |
| S678     | 0.011933 | 0.011933 | 0.012270 | 0.012034 | 0.012034 | 0.012102 |
| 0.011909 | 0.011841 | 0.012101 | 0.011530 | 0.011597 | 0.011565 | 0.011530 |
| 0.011564 | 0.011732 | 0.011530 | 0.011564 | 0.011631 | 0.011597 | 0.011564 |
| 0.011530 | 0.011564 | 0.011664 | 0.011531 | 0.011564 | 0.011564 | 0.011875 |
| 0.011799 | 0.011564 | 0.011463 | 0.011698 | 0.011631 | 0.011598 | 0.011631 |
| 0.011597 | 0.011698 | 0.011597 | 0.011597 | 0.011631 | 0.011597 | 0.011765 |
| 0.011530 | 0.011597 | 0.011631 | 0.011564 | 0.011665 | 0.011631 | 0.011631 |
| 0.011597 | 0.011766 | 0.011665 | 0.011933 | 0.011597 | 0.011866 | 0.011597 |
| 0.011564 | 0.011665 | 0.011732 | 0.011866 | 0.011967 | 0.011665 | 0.011765 |
| 0.011631 | 0.011698 | 0.011598 | 0.011832 | 0.012068 | 0.011597 | 0.011665 |
| 0.011564 | 0.011664 | 0.011631 | 0.011698 | 0.011631 | 0.011631 | 0.011631 |
| 0.011530 | 0.011564 | 0.011530 | 0.011631 | 0.011597 | 0.011633 | 0.011698 |
| 0.011631 | 0.011597 | 0.011665 | 0.011564 | 0.011698 | 0.011530 | 0.011597 |
| 0.011765 | 0.011698 | 0.011933 | 0.011766 | 0.011597 | 0.011833 | 0.011597 |
| 0.011765 | 0.011995 | 0.011778 | 0.011529 | 0.011508 | 0.011613 | 0.011690 |
| 0.012341 | 0.011620 | 0.011431 | 0.011631 | 0.011564 | 0.011631 | 0.011732 |
| 0.011665 | 0.011631 | 0.011698 | 0.011597 | 0.011698 | 0.011631 | 0.011631 |
| 0.011597 | 0.011698 | 0.011900 | 0.011765 | 0.011665 | 0.011564 | 0.011564 |
| 0.011530 | 0.011530 | 0.011598 | 0.011564 | 0.011766 | 0.011732 | 0.011665 |
| 0.011766 | 0.011833 | 0.011564 | 0.011564 | 0.011598 | 0.011598 | 0.011601 |
| 0.011669 | 0.011598 | 0.011598 | 0.011492 | 0.011530 | 0.011516 | 0.011598 |
| 0.011602 | 0.011542 | 0.011540 | 0.011578 | 0.011502 | 0.011540 | 0.011567 |
| 0.011816 | 0.011612 | 0.011612 | 0.011531 | 0.011510 | 0.011666 | 0.011632 |
| 0.011700 | 0.011633 | 0.011632 | 0.011732 | 0.011664 | 0.012034 | 0.011833 |

|          |          |          |          |          |          |          |
|----------|----------|----------|----------|----------|----------|----------|
| 0.011866 | 0.011732 | 0.011597 | 0.011699 | 0.011497 | 0.011732 | 0.011531 |
| 0.011597 | 0.011597 | 0.011564 | 0.011530 | 0.011564 | 0.011530 | 0.011631 |
| 0.011598 | 0.011698 | 0.011631 | 0.011530 | 0.011633 | 0.011732 | 0.011736 |
| 0.011732 | 0.011631 | 0.011530 | 0.011465 | 0.011598 | 0.011530 | 0.011463 |
| 0.011570 | 0.011732 | 0.011497 | 0.011732 | 0.011497 | 0.011598 | 0.011564 |
| 0.011665 | 0.011564 | 0.011598 | 0.011564 | 0.011598 | 0.011463 | 0.011598 |
| 0.011631 | 0.011564 | 0.011631 | 0.011564 | 0.011598 | 0.011631 | 0.011866 |
| 0.011967 | 0.011900 | 0.011968 | 0.011667 | 0.011968 | 0.011597 | 0.011564 |
| 0.011601 | 0.011910 | 0.011701 | 0.011438 | 0.011943 | 0.011470 | 0.011611 |
| 0.011943 | 0.011877 | 0.011564 | 0.011967 | 0.011675 | 0.011564 | 0.011799 |
| 0.011732 | 0.011631 | 0.011771 | 0.011514 | 0.011647 | 0.011631 | 0.011703 |
| 0.011799 | 0.011701 | 0.011703 | 0.011907 | 0.011833 | 0.011900 | 0.012009 |
| 0.011737 | 0.011909 | 0.011839 | 0.011771 | 0.012036 | 0.011497 | 0.011701 |
| 0.011664 | 0.011597 | 0.011497 | 0.011497 | 0.011564 | 0.011564 | 0.011631 |
| 0.011564 | 0.011631 | 0.011530 | 0.011631 | 0.011564 | 0.011564 | 0.011631 |
| 0.011564 | 0.012000 | 0.011900 | 0.011933 | 0.011463 | 0.011564 | 0.011598 |
| 0.011597 | 0.011564 | 0.011631 | 0.011665 | 0.011530 | 0.011530 | 0.011530 |
| 0.012068 | 0.011698 | 0.011698 | 0.011497 | 0.011597 | 0.011766 | 0.011530 |
| 0.011530 | 0.011597 | 0.011564 | 0.011732 | 0.011530 | 0.011665 | 0.011799 |
| 0.011732 | 0.011564 | 0.011564 | 0.011497 | 0.011497 | 0.011665 | 0.011597 |
| 0.011497 | 0.011597 | 0.011463 | 0.011497 | 0.011631 | 0.011766 | 0.011530 |
| 0.011497 | 0.011631 | 0.011564 | 0.011463 | 0.011799 | 0.011463 | 0.011631 |
| 0.011711 | 0.011530 | 0.011833 | 0.011665 | 0.011698 | 0.011564 | 0.011665 |
| 0.011530 | 0.011866 | 0.011463 | 0.011732 | 0.011530 | 0.011530 | 0.011463 |
| 0.011698 | 0.011900 | 0.011598 | 0.011665 | 0.011497 | 0.011900 | 0.011530 |
| 0.011530 | 0.011530 | 0.011564 | 0.011665 | 0.011564 | 0.011665 | 0.011732 |
| 0.011732 | 0.011698 | 0.011597 | 0.011698 | 0.011664 | 0.011530 | 0.011497 |
| 0.011530 | 0.011530 | 0.011598 | 0.011530 | 0.011497 | 0.011665 | 0.011530 |
| 0.011564 | 0.011564 | 0.011698 | 0.011732 | 0.011631 | 0.011564 | 0.011564 |
| 0.011631 | 0.011564 | 0.011664 | 0.011530 | 0.011665 | 0.011564 | 0.012068 |
| 0.011564 | 0.011967 | 0.011578 | 0.017975 | 0.011453 | 0.011794 | 0.011933 |
| 0.011891 | 0.011940 | 0.011532 | 0.011466 | 0.011995 | 0.011958 | 0.011729 |
| 0.011772 | 0.011854 | 0.011490 | 0.011479 | 0.011529 | 0.011703 | 0.011620 |
| 0.011670 | 0.011731 | 0.011691 | 0.011391 | 0.011698 | 0.011732 | 0.011737 |
| 0.011610 | 0.011698 | 0.011631 | 0.011665 | 0.011631 | 0.011631 | 0.011598 |
| 0.011564 | 0.011564 | 0.011396 | 0.011631 | 0.011598 | 0.011531 | 0.011564 |
| 0.011564 | 0.011631 | 0.011530 | 0.011631 | 0.011665 | 0.011698 | 0.011597 |
| 0.011631 | 0.011598 | 0.011934 | 0.011934 | 0.011665 | 0.011699 | 0.011732 |
| 0.011497 | 0.011497 | 0.011530 | 0.011631 | 0.011497 | 0.011732 | 0.011732 |
| 0.011497 | 0.011564 | 0.011698 | 0.011530 | 0.011968 | 0.011532 | 0.011631 |
| 0.011430 | 0.011698 | 0.011732 | 0.011564 | 0.011631 | 0.011598 | 0.011564 |
| 0.011497 | 0.011497 | 0.011530 | 0.011699 | 0.011599 | 0.011799 | 0.011766 |
| 0.011602 | 0.011531 | 0.011631 | 0.011732 | 0.011631 | 0.011766 | 0.011799 |
| 0.011967 | 0.011675 | 0.011564 | 0.011799 | 0.011732 | 0.011631 | 0.011531 |
| 0.011633 | 0.011598 | 0.011564 | 0.011564 | 0.011631 | 0.011530 | 0.011631 |
| 0.011665 | 0.011698 | 0.011597 | 0.011631 | 0.011598 | 0.011934 | 0.011934 |
| 0.011665 | 0.011699 | 0.011765 | 0.011698 | 0.012272 | 0.011525 | 0.011693 |
| 0.011728 | 0.011511 | 0.011834 | 0.011718 | 0.011690 | 0.011750 | 0.011509 |
| 0.012228 | 0.011614 | 0.011745 | 0.011683 | 0.011956 | 0.011809 | 0.011911 |
| 0.012250 | 0.011814 | 0.011872 | 0.011933 | 0.011799 | 0.011799 | 0.011838 |
| 0.011497 | 0.011665 | 0.011799 | 0.011765 | 0.011770 | 0.011765 | 0.011734 |
| 0.011597 | 0.011530 | 0.011564 | 0.011597 | 0.011497 | 0.011564 | 0.011463 |
| 0.011597 | 0.011631 | 0.011530 | 0.011497 | 0.011597 | 0.011530 | 0.011564 |
| 0.011564 | 0.011497 | 0.011564 | 0.011598 | 0.011497 | 0.011698 | 0.011732 |
| 0.011631 | 0.011698 | 0.011631 | 0.011631 | 0.011564 | 0.011967 | 0.011597 |
| 0.011652 | 0.011564 | 0.011800 | 0.011807 | 0.011665 | 0.011664 | 0.011665 |
| 0.011665 | 0.011598 | 0.011564 | 0.011598 | 0.011698 | 0.011698 | 0.011631 |
| 0.011631 | 0.011765 | 0.011933 | 0.011664 | 0.011866 | 0.011866 | 0.011732 |
| 0.011564 | 0.011631 | 0.011665 | 0.012068 | 0.011631 | 0.011665 | 0.011631 |
| 0.011463 | 0.011597 | 0.011597 | 0.011900 | 0.011833 | 0.011866 | 0.011597 |

|          |          |          |          |          |          |          |
|----------|----------|----------|----------|----------|----------|----------|
| 0.011698 | 0.011765 | 0.011631 | 0.011698 | 0.011665 | 0.011530 | 0.011866 |
| 0.011631 | 0.011597 | 0.011597 | 0.011765 | 0.011597 | 0.011698 | 0.011934 |
| 0.011631 | 0.011977 | 0.012001 | 0.011792 | 0.011342 | 0.011706 | 0.011576 |
| 0.011555 | 0.011995 | 0.011517 | 0.011641 | 0.011597 | 0.011722 | 0.011645 |
| 0.011672 | 0.011455 | 0.011617 | 0.011324 | 0.011438 | 0.011596 | 0.011669 |
| 0.011701 | 0.011572 | 0.011695 | 0.011624 | 0.011634 | 0.011766 | 0.011833 |
| 0.011833 | 0.011699 | 0.011804 | 0.011806 | 0.011942 | 0.011980 | 0.011631 |
| 0.011866 | 0.011732 | 0.011597 | 0.011699 | 0.011497 | 0.011732 | 0.011531 |
| 0.011597 | 0.011597 | 0.011564 | 0.011530 | 0.011564 | 0.011530 | 0.011631 |
| 0.011445 | 0.011585 | 0.011608 | 0.011643 | 0.011779 | 0.011744 | 0.011675 |
| 0.011742 | 0.011666 | 0.011467 | 0.011420 | 0.011602 | 0.011772 | 0.011773 |
| 0.011565 | 0.011636 | 0.011869 | 0.011838 | 0.011497 | 0.011801 | 0.011732 |
| 0.011664 | 0.011732 | 0.011732 | 0.011631 | 0.012203 | 0.011530 | 0.000000 |
| 0.011900 | 0.011915 | 0.011606 | 0.011684 | 0.011564 | 0.011765 | 0.011732 |
| 0.011767 | 0.011799 | 0.011530 | 0.011530 | 0.011926 | 0.011933 | 0.011581 |
| 0.011466 | 0.011476 | 0.011571 | 0.011536 | 0.011641 | 0.011471 | 0.011808 |
| 0.011609 | 0.011718 | 0.011489 | 0.011585 | 0.011598 | 0.011676 | 0.011564 |
| 0.011530 | 0.011530 | 0.011598 | 0.011564 | 0.011766 | 0.011732 | 0.011665 |
| 0.011766 | 0.011833 | 0.011564 | 0.011564 | 0.011598 | 0.011598 | 0.011601 |
| 0.011669 | 0.011598 | 0.011598 | 0.011634 | 0.011766 | 0.011833 | 0.011833 |
| 0.011699 | 0.011804 | 0.011806 | 0.011942 | 0.011980 | 0.011631 | 0.011799 |
| 0.011732 | 0.011732 | 0.011568 | 0.011687 | 0.011686 | 0.011673 | 0.011586 |
| 0.011749 | 0.011926 | 0.011653 | 0.011638 | 0.011497 | 0.011732 | 0.011598 |
| 0.011698 | 0.011631 | 0.011530 | 0.011633 | 0.011732 | 0.011736 | 0.011631 |
| 0.011530 | 0.011465 | 0.011598 | 0.011530 | 0.011463 | 0.011570 | 0.011732 |
| 0.011564 | 0.011564 | 0.011396 | 0.011631 | 0.011598 | 0.011531 | 0.011732 |
| 0.011597 | 0.011631 | 0.011631 | 0.011564 | 0.011631 | 0.011866 | 0.011530 |
| 0.011564 | 0.011967 | 0.011564 | 0.011597 | 0.011564 | 0.011933 | 0.011446 |
| 0.011847 | 0.011528 | 0.011411 | 0.011785 | 0.011834 | 0.011742 | 0.011478 |
| 0.011375 | 0.011732 | 0.011833 | 0.011943 | 0.011801 | 0.011940 | 0.012070 |
| 0.011969 | 0.012008 | 0.011967 | 0.012223 | 0.011933 | 0.012809 | 0.011970 |
| 0.012642 | 0.012478 | 0.012612 | 0.012884 | 0.011933 | 0.011631 | 0.011934 |
| 0.012306 | 0.012309 | 0.011900 | 0.011799 | 0.011868 | 0.011868 | 0.011771 |
| 0.011732 | 0.011739 | 0.011799 | 0.011767 | 0.012137 | 0.012203 | 0.012204 |
| 0.012104 | 0.012204 | 0.012309 | 0.012076 | 0.012307 | 0.012280 | 0.012374 |
| 0.012374 | 0.012408 | 0.012358 | 0.012375 | 0.012376 | 0.011664 | 0.011901 |
| 0.012036 | 0.012539 | 0.011976 | 0.012270 | 0.012744 | 0.011808 | 0.011699 |
| 0.011631 | 0.011664 | 0.012136 | 0.012213 | 0.012292 | 0.012001 | 0.011667 |
| S679     | 0.011967 | 0.011967 | 0.012304 | 0.012068 | 0.012068 | 0.012136 |
| 0.011944 | 0.011876 | 0.012068 | 0.011564 | 0.011631 | 0.011599 | 0.011564 |
| 0.011597 | 0.011766 | 0.011564 | 0.011597 | 0.011665 | 0.011631 | 0.011597 |
| 0.011564 | 0.011597 | 0.011698 | 0.011564 | 0.011598 | 0.011597 | 0.011910 |
| 0.011833 | 0.011598 | 0.011497 | 0.011732 | 0.011665 | 0.011631 | 0.011665 |
| 0.011631 | 0.011732 | 0.011631 | 0.011631 | 0.011665 | 0.011631 | 0.011799 |
| 0.011564 | 0.011631 | 0.011665 | 0.011597 | 0.011698 | 0.011732 | 0.011665 |
| 0.011631 | 0.011799 | 0.011699 | 0.011967 | 0.011631 | 0.011900 | 0.011631 |
| 0.011597 | 0.011699 | 0.011766 | 0.011900 | 0.012001 | 0.011698 | 0.011799 |
| 0.011665 | 0.011732 | 0.011631 | 0.011866 | 0.012102 | 0.011631 | 0.011698 |
| 0.011597 | 0.011698 | 0.011665 | 0.011732 | 0.011665 | 0.011665 | 0.011665 |
| 0.011564 | 0.011597 | 0.011564 | 0.011665 | 0.011631 | 0.011666 | 0.011732 |
| 0.011665 | 0.011631 | 0.011698 | 0.011597 | 0.011732 | 0.011564 | 0.011631 |
| 0.011799 | 0.011732 | 0.011967 | 0.011799 | 0.011631 | 0.011866 | 0.011631 |
| 0.011839 | 0.012069 | 0.011890 | 0.011607 | 0.011583 | 0.011686 | 0.011808 |
| 0.012415 | 0.012027 | 0.011637 | 0.011866 | 0.011866 | 0.011665 | 0.011766 |
| 0.011698 | 0.011665 | 0.011732 | 0.011631 | 0.011732 | 0.011665 | 0.011665 |
| 0.011631 | 0.011732 | 0.011934 | 0.011799 | 0.011698 | 0.011665 | 0.011598 |
| 0.011564 | 0.011564 | 0.011631 | 0.011597 | 0.011799 | 0.011766 | 0.011698 |
| 0.011799 | 0.011866 | 0.011597 | 0.011597 | 0.011631 | 0.011631 | 0.011634 |
| 0.011703 | 0.011631 | 0.011631 | 0.011528 | 0.011603 | 0.011516 | 0.011632 |
| 0.011636 | 0.011576 | 0.011651 | 0.011612 | 0.011536 | 0.011574 | 0.011601 |

|          |          |          |          |          |          |          |
|----------|----------|----------|----------|----------|----------|----------|
| 0.011852 | 0.011646 | 0.011680 | 0.011565 | 0.011579 | 0.011699 | 0.011666 |
| 0.011733 | 0.011667 | 0.011665 | 0.011765 | 0.011698 | 0.012068 | 0.011867 |
| 0.011900 | 0.011766 | 0.011631 | 0.011732 | 0.011530 | 0.011765 | 0.011564 |
| 0.011564 | 0.011631 | 0.011597 | 0.011564 | 0.011597 | 0.011564 | 0.011665 |
| 0.011631 | 0.011732 | 0.011665 | 0.011564 | 0.011599 | 0.011766 | 0.011770 |
| 0.011766 | 0.011665 | 0.011564 | 0.011499 | 0.011631 | 0.011564 | 0.011497 |
| 0.011604 | 0.011766 | 0.011564 | 0.011766 | 0.011430 | 0.011631 | 0.011597 |
| 0.011698 | 0.011597 | 0.011631 | 0.011598 | 0.011631 | 0.011497 | 0.011631 |
| 0.011665 | 0.011597 | 0.011665 | 0.011597 | 0.011631 | 0.011665 | 0.011900 |
| 0.012001 | 0.011934 | 0.012001 | 0.011768 | 0.012001 | 0.011631 | 0.011597 |
| 0.011634 | 0.011829 | 0.011701 | 0.011540 | 0.012011 | 0.011503 | 0.011611 |
| 0.011978 | 0.011911 | 0.011799 | 0.012001 | 0.011709 | 0.011866 | 0.011833 |
| 0.011766 | 0.011934 | 0.011771 | 0.011678 | 0.011605 | 0.011665 | 0.011737 |
| 0.011833 | 0.011735 | 0.011872 | 0.011941 | 0.011867 | 0.011934 | 0.012044 |
| 0.011771 | 0.011909 | 0.011873 | 0.011805 | 0.012070 | 0.011530 | 0.011701 |
| 0.011698 | 0.011631 | 0.011530 | 0.011530 | 0.011597 | 0.011597 | 0.011665 |
| 0.011597 | 0.011665 | 0.011564 | 0.011665 | 0.011597 | 0.011597 | 0.011665 |
| 0.011597 | 0.012034 | 0.011934 | 0.011967 | 0.011497 | 0.011597 | 0.011631 |
| 0.011631 | 0.011597 | 0.011665 | 0.011698 | 0.011564 | 0.011564 | 0.011564 |
| 0.012102 | 0.011732 | 0.011732 | 0.011530 | 0.011631 | 0.011799 | 0.011564 |
| 0.011564 | 0.011631 | 0.011597 | 0.011766 | 0.011564 | 0.011698 | 0.011833 |
| 0.011766 | 0.011597 | 0.011597 | 0.011530 | 0.011530 | 0.011698 | 0.011631 |
| 0.011530 | 0.011631 | 0.011497 | 0.011530 | 0.011665 | 0.011800 | 0.011564 |
| 0.011531 | 0.011665 | 0.011598 | 0.011497 | 0.011833 | 0.011497 | 0.011665 |
| 0.011711 | 0.011564 | 0.011866 | 0.011699 | 0.011732 | 0.011597 | 0.011698 |
| 0.011564 | 0.011900 | 0.011497 | 0.011766 | 0.011564 | 0.011564 | 0.011497 |
| 0.011732 | 0.011934 | 0.011631 | 0.011698 | 0.011530 | 0.011934 | 0.011564 |
| 0.011564 | 0.011564 | 0.011597 | 0.011698 | 0.011597 | 0.011698 | 0.011766 |
| 0.011766 | 0.011732 | 0.011631 | 0.011732 | 0.011698 | 0.011564 | 0.011463 |
| 0.011564 | 0.011564 | 0.011631 | 0.011564 | 0.011530 | 0.011698 | 0.011564 |
| 0.011597 | 0.011597 | 0.011732 | 0.011766 | 0.011665 | 0.011597 | 0.011598 |
| 0.011665 | 0.011597 | 0.011698 | 0.011564 | 0.011698 | 0.011799 | 0.012102 |
| 0.011597 | 0.012001 | 0.011612 | 0.018125 | 0.011781 | 0.011794 | 0.011967 |
| 0.011926 | 0.011975 | 0.011741 | 0.011698 | 0.012159 | 0.011993 | 0.011789 |
| 0.011914 | 0.012037 | 0.011567 | 0.011647 | 0.011646 | 0.011751 | 0.011663 |
| 0.011999 | 0.011805 | 0.011802 | 0.011590 | 0.011732 | 0.011766 | 0.011771 |
| 0.011610 | 0.011732 | 0.011732 | 0.011698 | 0.011665 | 0.011665 | 0.011632 |
| 0.011665 | 0.011597 | 0.011631 | 0.011665 | 0.011631 | 0.011564 | 0.011597 |
| 0.011597 | 0.011665 | 0.011564 | 0.011665 | 0.011698 | 0.011732 | 0.011631 |
| 0.011665 | 0.011631 | 0.011967 | 0.011967 | 0.011699 | 0.011733 | 0.011766 |
| 0.011530 | 0.011530 | 0.011564 | 0.011665 | 0.011530 | 0.011766 | 0.011766 |
| 0.011799 | 0.011799 | 0.011665 | 0.011833 | 0.012001 | 0.011835 | 0.011597 |
| 0.011665 | 0.011732 | 0.011766 | 0.011597 | 0.011665 | 0.011631 | 0.011665 |
| 0.011732 | 0.011732 | 0.011765 | 0.011732 | 0.011633 | 0.011833 | 0.011799 |
| 0.011670 | 0.011564 | 0.011665 | 0.011766 | 0.011665 | 0.011799 | 0.011833 |
| 0.012001 | 0.011709 | 0.011866 | 0.011833 | 0.011766 | 0.011934 | 0.011564 |
| 0.011734 | 0.011632 | 0.011597 | 0.011597 | 0.011665 | 0.011564 | 0.011665 |
| 0.011698 | 0.011732 | 0.011631 | 0.011665 | 0.011631 | 0.011967 | 0.011967 |
| 0.011699 | 0.011733 | 0.011732 | 0.011732 | 0.012373 | 0.011739 | 0.011694 |
| 0.011764 | 0.011719 | 0.011834 | 0.011719 | 0.011796 | 0.011716 | 0.011750 |
| 0.012297 | 0.011580 | 0.011746 | 0.011683 | 0.011956 | 0.011843 | 0.011946 |
| 0.012353 | 0.011776 | 0.011669 | 0.011665 | 0.011665 | 0.011698 | 0.011635 |
| 0.011530 | 0.011564 | 0.011698 | 0.011665 | 0.011669 | 0.011799 | 0.011768 |
| 0.011631 | 0.011564 | 0.011597 | 0.011631 | 0.011530 | 0.011597 | 0.011497 |
| 0.011631 | 0.011665 | 0.011564 | 0.011530 | 0.011631 | 0.011564 | 0.011597 |
| 0.011597 | 0.011530 | 0.011597 | 0.011631 | 0.011530 | 0.011732 | 0.011766 |
| 0.011665 | 0.011732 | 0.011665 | 0.011665 | 0.011597 | 0.012001 | 0.011631 |
| 0.011652 | 0.011598 | 0.011833 | 0.011807 | 0.011698 | 0.011698 | 0.011698 |
| 0.011698 | 0.011631 | 0.011597 | 0.011631 | 0.011732 | 0.011732 | 0.011665 |
| 0.011665 | 0.011799 | 0.011967 | 0.011698 | 0.011900 | 0.011900 | 0.011765 |

|          |          |          |          |          |          |          |
|----------|----------|----------|----------|----------|----------|----------|
| 0.011597 | 0.011665 | 0.011698 | 0.012102 | 0.011665 | 0.011699 | 0.011665 |
| 0.011698 | 0.011631 | 0.011631 | 0.011934 | 0.011867 | 0.011900 | 0.011631 |
| 0.011732 | 0.011799 | 0.011665 | 0.011732 | 0.011698 | 0.011564 | 0.011900 |
| 0.011665 | 0.011430 | 0.011631 | 0.011799 | 0.011631 | 0.011732 | 0.011967 |
| 0.011665 | 0.012012 | 0.012035 | 0.011914 | 0.011681 | 0.011740 | 0.011680 |
| 0.011609 | 0.012112 | 0.011587 | 0.011820 | 0.011744 | 0.011722 | 0.011804 |
| 0.012030 | 0.011587 | 0.011784 | 0.011589 | 0.011653 | 0.011865 | 0.011790 |
| 0.011776 | 0.011690 | 0.011730 | 0.011659 | 0.011667 | 0.011799 | 0.011866 |
| 0.011866 | 0.011733 | 0.011838 | 0.011840 | 0.011976 | 0.012015 | 0.011665 |
| 0.011900 | 0.011766 | 0.011631 | 0.011732 | 0.011530 | 0.011765 | 0.011564 |
| 0.011564 | 0.011631 | 0.011597 | 0.011564 | 0.011597 | 0.011564 | 0.011665 |
| 0.011654 | 0.011620 | 0.011642 | 0.011677 | 0.011813 | 0.011778 | 0.011777 |
| 0.011742 | 0.011699 | 0.011503 | 0.011528 | 0.011636 | 0.011806 | 0.011807 |
| 0.011598 | 0.011670 | 0.011498 | 0.011872 | 0.011800 | 0.011834 | 0.011765 |
| 0.011698 | 0.011766 | 0.011765 | 0.011665 | 0.012237 | 0.011833 | 0.011900 |
| 0.000000 | 0.011987 | 0.011640 | 0.011684 | 0.011598 | 0.011799 | 0.011766 |
| 0.011801 | 0.011833 | 0.011833 | 0.011833 | 0.011847 | 0.011967 | 0.011581 |
| 0.011500 | 0.011476 | 0.011571 | 0.011536 | 0.011641 | 0.011434 | 0.011808 |
| 0.011609 | 0.011718 | 0.011489 | 0.011585 | 0.011632 | 0.011710 | 0.011598 |
| 0.011564 | 0.011564 | 0.011631 | 0.011597 | 0.011799 | 0.011766 | 0.011698 |
| 0.011799 | 0.011866 | 0.011597 | 0.011597 | 0.011631 | 0.011631 | 0.011634 |
| 0.011703 | 0.011631 | 0.011631 | 0.011667 | 0.011799 | 0.011866 | 0.011866 |
| 0.011733 | 0.011838 | 0.011840 | 0.011976 | 0.012015 | 0.011665 | 0.011833 |
| 0.011766 | 0.011766 | 0.011601 | 0.011791 | 0.011721 | 0.011741 | 0.011516 |
| 0.011783 | 0.011789 | 0.011695 | 0.011638 | 0.011564 | 0.011766 | 0.011631 |
| 0.011732 | 0.011665 | 0.011564 | 0.011599 | 0.011766 | 0.011770 | 0.011665 |
| 0.011564 | 0.011499 | 0.011631 | 0.011564 | 0.011497 | 0.011604 | 0.011766 |
| 0.011665 | 0.011597 | 0.011631 | 0.011665 | 0.011631 | 0.011564 | 0.011766 |
| 0.011631 | 0.011665 | 0.011665 | 0.011597 | 0.011665 | 0.011900 | 0.011564 |
| 0.011597 | 0.012001 | 0.011597 | 0.011631 | 0.011597 | 0.011967 | 0.011660 |
| 0.012185 | 0.011613 | 0.011762 | 0.011866 | 0.011956 | 0.011814 | 0.011604 |
| 0.011743 | 0.011765 | 0.011866 | 0.011977 | 0.011835 | 0.011974 | 0.012103 |
| 0.012003 | 0.012008 | 0.012001 | 0.012257 | 0.011967 | 0.012843 | 0.012004 |
| 0.012743 | 0.012511 | 0.012645 | 0.012917 | 0.011967 | 0.011665 | 0.011968 |
| 0.012407 | 0.012342 | 0.011934 | 0.011833 | 0.011901 | 0.011901 | 0.011873 |
| 0.011765 | 0.011773 | 0.011833 | 0.011800 | 0.012170 | 0.012237 | 0.012238 |
| 0.012138 | 0.012238 | 0.012342 | 0.012109 | 0.012408 | 0.012415 | 0.012475 |
| 0.012475 | 0.012509 | 0.012460 | 0.012475 | 0.012477 | 0.011698 | 0.012001 |
| 0.012070 | 0.012574 | 0.012078 | 0.012304 | 0.012778 | 0.011841 | 0.011733 |
| 0.011698 | 0.011698 | 0.012170 | 0.012171 | 0.012292 | 0.012035 | 0.011701 |
| S680     | 0.012057 | 0.012057 | 0.012129 | 0.011879 | 0.011879 | 0.011951 |
| 0.011348 | 0.011276 | 0.011951 | 0.011630 | 0.011701 | 0.011667 | 0.011630 |
| 0.011594 | 0.011843 | 0.011558 | 0.011665 | 0.011701 | 0.011701 | 0.011665 |
| 0.011630 | 0.011665 | 0.011487 | 0.011630 | 0.011666 | 0.011630 | 0.011312 |
| 0.011630 | 0.011665 | 0.011558 | 0.011523 | 0.011737 | 0.011701 | 0.011737 |
| 0.011701 | 0.011808 | 0.011701 | 0.011701 | 0.011737 | 0.011665 | 0.011879 |
| 0.011559 | 0.011701 | 0.011737 | 0.011630 | 0.011701 | 0.011772 | 0.011737 |
| 0.011701 | 0.011879 | 0.011773 | 0.011345 | 0.011701 | 0.011915 | 0.011701 |
| 0.011665 | 0.011701 | 0.011844 | 0.011915 | 0.011416 | 0.011665 | 0.011772 |
| 0.011737 | 0.011808 | 0.011701 | 0.011915 | 0.011345 | 0.011701 | 0.011772 |
| 0.011665 | 0.011772 | 0.011737 | 0.011808 | 0.011737 | 0.011701 | 0.011701 |
| 0.011630 | 0.011665 | 0.011630 | 0.011666 | 0.011701 | 0.011703 | 0.011772 |
| 0.011737 | 0.011701 | 0.011737 | 0.011665 | 0.011523 | 0.011630 | 0.011701 |
| 0.011843 | 0.011772 | 0.011558 | 0.011844 | 0.011701 | 0.011950 | 0.011701 |
| 0.011846 | 0.011337 | 0.011860 | 0.011560 | 0.011577 | 0.011646 | 0.011479 |
| 0.012145 | 0.011381 | 0.011580 | 0.011915 | 0.011879 | 0.011665 | 0.011558 |
| 0.011737 | 0.011737 | 0.011808 | 0.011701 | 0.011808 | 0.011737 | 0.011736 |
| 0.011701 | 0.011701 | 0.011986 | 0.011879 | 0.011772 | 0.011737 | 0.011666 |
| 0.011630 | 0.011559 | 0.011666 | 0.011666 | 0.011595 | 0.011559 | 0.011488 |
| 0.011595 | 0.011595 | 0.011666 | 0.011666 | 0.011666 | 0.011666 | 0.011669 |

|          |          |          |          |          |          |          |
|----------|----------|----------|----------|----------|----------|----------|
| 0.011742 | 0.011701 | 0.011701 | 0.011518 | 0.011598 | 0.011581 | 0.011702 |
| 0.011635 | 0.011607 | 0.011611 | 0.011647 | 0.011601 | 0.011606 | 0.011669 |
| 0.011519 | 0.011682 | 0.011718 | 0.011631 | 0.011611 | 0.011738 | 0.011631 |
| 0.011702 | 0.011740 | 0.011738 | 0.011843 | 0.011772 | 0.012164 | 0.011880 |
| 0.011701 | 0.011701 | 0.011701 | 0.011701 | 0.011594 | 0.011559 | 0.011630 |
| 0.011630 | 0.011701 | 0.011666 | 0.011630 | 0.011665 | 0.011630 | 0.011737 |
| 0.011701 | 0.011808 | 0.011701 | 0.011630 | 0.011739 | 0.011844 | 0.011849 |
| 0.011808 | 0.011737 | 0.011630 | 0.011561 | 0.011701 | 0.011630 | 0.011559 |
| 0.011565 | 0.011809 | 0.011630 | 0.011809 | 0.011594 | 0.011701 | 0.011666 |
| 0.011773 | 0.011666 | 0.011701 | 0.011666 | 0.011701 | 0.011559 | 0.011701 |
| 0.011737 | 0.011666 | 0.011737 | 0.011666 | 0.011701 | 0.011737 | 0.011986 |
| 0.011381 | 0.011309 | 0.011238 | 0.011740 | 0.011416 | 0.011701 | 0.011666 |
| 0.011634 | 0.011915 | 0.011737 | 0.011569 | 0.011383 | 0.011567 | 0.011728 |
| 0.011384 | 0.011638 | 0.011843 | 0.012022 | 0.011785 | 0.011915 | 0.011915 |
| 0.011844 | 0.011986 | 0.011850 | 0.011676 | 0.011771 | 0.011737 | 0.011814 |
| 0.011915 | 0.011812 | 0.011955 | 0.011956 | 0.011915 | 0.011987 | 0.012067 |
| 0.011850 | 0.011961 | 0.011851 | 0.011850 | 0.012095 | 0.011594 | 0.011811 |
| 0.011737 | 0.011665 | 0.011594 | 0.011594 | 0.011665 | 0.011665 | 0.011701 |
| 0.011665 | 0.011737 | 0.011630 | 0.011665 | 0.011665 | 0.011665 | 0.011736 |
| 0.011665 | 0.011380 | 0.011167 | 0.011203 | 0.011558 | 0.011665 | 0.011701 |
| 0.011701 | 0.011594 | 0.011737 | 0.011666 | 0.011630 | 0.011630 | 0.011630 |
| 0.011487 | 0.011737 | 0.011808 | 0.011594 | 0.011701 | 0.011879 | 0.011630 |
| 0.011630 | 0.011701 | 0.011665 | 0.011844 | 0.011630 | 0.011559 | 0.011701 |
| 0.011630 | 0.011665 | 0.011665 | 0.011594 | 0.011594 | 0.011772 | 0.011701 |
| 0.011594 | 0.011701 | 0.011559 | 0.011594 | 0.011701 | 0.011523 | 0.011630 |
| 0.011595 | 0.011701 | 0.011666 | 0.011559 | 0.011274 | 0.011559 | 0.011737 |
| 0.011824 | 0.011630 | 0.011238 | 0.011773 | 0.011701 | 0.011665 | 0.011772 |
| 0.011630 | 0.011915 | 0.011558 | 0.011416 | 0.011559 | 0.011559 | 0.011558 |
| 0.011808 | 0.011666 | 0.011701 | 0.011772 | 0.011594 | 0.011096 | 0.011559 |
| 0.011630 | 0.011630 | 0.011665 | 0.011772 | 0.011665 | 0.011772 | 0.011843 |
| 0.011808 | 0.011808 | 0.011665 | 0.011772 | 0.011772 | 0.011630 | 0.011594 |
| 0.011630 | 0.011630 | 0.011701 | 0.011559 | 0.011594 | 0.011772 | 0.011630 |
| 0.011594 | 0.011665 | 0.011772 | 0.011737 | 0.011737 | 0.011665 | 0.011666 |
| 0.011737 | 0.011665 | 0.011772 | 0.011630 | 0.011772 | 0.011843 | 0.011523 |
| 0.011665 | 0.011416 | 0.011646 | 0.017922 | 0.011267 | 0.011655 | 0.011282 |
| 0.011207 | 0.011284 | 0.011840 | 0.011608 | 0.011355 | 0.011316 | 0.011649 |
| 0.011607 | 0.011389 | 0.011516 | 0.011683 | 0.011550 | 0.011536 | 0.011658 |
| 0.011258 | 0.011457 | 0.011296 | 0.011471 | 0.011808 | 0.011844 | 0.011814 |
| 0.011715 | 0.011808 | 0.011808 | 0.011701 | 0.011737 | 0.011737 | 0.011702 |
| 0.011701 | 0.011665 | 0.011665 | 0.011737 | 0.011701 | 0.011630 | 0.011666 |
| 0.011666 | 0.011737 | 0.011630 | 0.011737 | 0.011773 | 0.011737 | 0.011665 |
| 0.011665 | 0.011630 | 0.011345 | 0.011345 | 0.011737 | 0.011773 | 0.011844 |
| 0.011594 | 0.011594 | 0.011630 | 0.011701 | 0.011594 | 0.011808 | 0.011808 |
| 0.011844 | 0.011843 | 0.011808 | 0.011879 | 0.011416 | 0.011882 | 0.011737 |
| 0.011701 | 0.011808 | 0.011844 | 0.011666 | 0.011737 | 0.011701 | 0.011701 |
| 0.011773 | 0.011773 | 0.011808 | 0.011809 | 0.011667 | 0.011915 | 0.011808 |
| 0.011743 | 0.011630 | 0.011701 | 0.011844 | 0.011737 | 0.011773 | 0.011879 |
| 0.012022 | 0.011785 | 0.011915 | 0.011915 | 0.011844 | 0.011986 | 0.011630 |
| 0.011775 | 0.011702 | 0.011666 | 0.011666 | 0.011737 | 0.011630 | 0.011737 |
| 0.011773 | 0.011737 | 0.011665 | 0.011665 | 0.011630 | 0.011345 | 0.011345 |
| 0.011737 | 0.011773 | 0.011843 | 0.011808 | 0.012417 | 0.011818 | 0.011805 |
| 0.011841 | 0.011794 | 0.011879 | 0.011830 | 0.011951 | 0.011827 | 0.011792 |
| 0.012333 | 0.011720 | 0.011858 | 0.011756 | 0.012045 | 0.011924 | 0.011997 |
| 0.012395 | 0.011822 | 0.011957 | 0.012057 | 0.011879 | 0.011630 | 0.011921 |
| 0.011594 | 0.011772 | 0.011915 | 0.011879 | 0.011849 | 0.011594 | 0.011525 |
| 0.011701 | 0.011630 | 0.011665 | 0.011701 | 0.011594 | 0.011665 | 0.011558 |
| 0.011594 | 0.011630 | 0.011630 | 0.011594 | 0.011701 | 0.011630 | 0.011665 |
| 0.011665 | 0.011594 | 0.011630 | 0.011701 | 0.011594 | 0.011808 | 0.011808 |
| 0.011665 | 0.011701 | 0.011701 | 0.011665 | 0.011665 | 0.011416 | 0.011701 |
| 0.011467 | 0.011665 | 0.011631 | 0.011636 | 0.011665 | 0.011701 | 0.011772 |

|          |          |          |          |          |          |          |
|----------|----------|----------|----------|----------|----------|----------|
| 0.011772 | 0.011701 | 0.011665 | 0.011701 | 0.011808 | 0.011772 | 0.011737 |
| 0.011701 | 0.011879 | 0.011345 | 0.011772 | 0.011951 | 0.011951 | 0.011843 |
| 0.011665 | 0.011737 | 0.011772 | 0.011523 | 0.011701 | 0.011665 | 0.011737 |
| 0.011737 | 0.011630 | 0.011630 | 0.011951 | 0.011915 | 0.011915 | 0.011665 |
| 0.011808 | 0.011879 | 0.011737 | 0.011808 | 0.011772 | 0.011630 | 0.011274 |
| 0.011736 | 0.011665 | 0.011630 | 0.011879 | 0.011665 | 0.011808 | 0.011559 |
| 0.011736 | 0.011384 | 0.011416 | 0.011536 | 0.011356 | 0.011746 | 0.011383 |
| 0.011475 | 0.011764 | 0.011619 | 0.011624 | 0.011581 | 0.011385 | 0.011396 |
| 0.011486 | 0.011199 | 0.011468 | 0.011268 | 0.011346 | 0.011483 | 0.011837 |
| 0.011779 | 0.011645 | 0.011695 | 0.011693 | 0.011740 | 0.011594 | 0.011666 |
| 0.011666 | 0.011702 | 0.011814 | 0.011636 | 0.011959 | 0.011960 | 0.011701 |
| 0.011701 | 0.011701 | 0.011701 | 0.011701 | 0.011594 | 0.011559 | 0.011630 |
| 0.011630 | 0.011701 | 0.011666 | 0.011630 | 0.011665 | 0.011630 | 0.011737 |
| 0.011654 | 0.011692 | 0.011679 | 0.011715 | 0.011860 | 0.011749 | 0.011785 |
| 0.011819 | 0.011738 | 0.011531 | 0.011519 | 0.011671 | 0.011851 | 0.011853 |
| 0.011667 | 0.011707 | 0.011953 | 0.011849 | 0.011809 | 0.011917 | 0.011843 |
| 0.011772 | 0.011843 | 0.011808 | 0.011701 | 0.011630 | 0.011844 | 0.011915 |
| 0.011987 | 0.000000 | 0.011636 | 0.011793 | 0.011665 | 0.011879 | 0.011844 |
| 0.011881 | 0.011915 | 0.011879 | 0.011879 | 0.012009 | 0.011951 | 0.011685 |
| 0.011562 | 0.011574 | 0.011673 | 0.011637 | 0.011676 | 0.011612 | 0.011204 |
| 0.011714 | 0.011428 | 0.011661 | 0.011736 | 0.011702 | 0.011751 | 0.011666 |
| 0.011630 | 0.011559 | 0.011666 | 0.011666 | 0.011595 | 0.011559 | 0.011488 |
| 0.011595 | 0.011595 | 0.011666 | 0.011666 | 0.011666 | 0.011666 | 0.011669 |
| 0.011742 | 0.011701 | 0.011701 | 0.011740 | 0.011594 | 0.011666 | 0.011666 |
| 0.011702 | 0.011814 | 0.011636 | 0.011959 | 0.011960 | 0.011701 | 0.011879 |
| 0.011844 | 0.011844 | 0.011634 | 0.011872 | 0.011759 | 0.011782 | 0.011656 |
| 0.011865 | 0.012026 | 0.011818 | 0.011745 | 0.011630 | 0.011809 | 0.011701 |
| 0.011808 | 0.011701 | 0.011630 | 0.011739 | 0.011844 | 0.011849 | 0.011737 |
| 0.011630 | 0.011561 | 0.011701 | 0.011630 | 0.011559 | 0.011565 | 0.011809 |
| 0.011701 | 0.011665 | 0.011665 | 0.011737 | 0.011701 | 0.011630 | 0.011559 |
| 0.011665 | 0.011737 | 0.011737 | 0.011665 | 0.011701 | 0.011951 | 0.011559 |
| 0.011665 | 0.011416 | 0.011665 | 0.011701 | 0.011630 | 0.011345 | 0.011604 |
| 0.011773 | 0.011421 | 0.011378 | 0.011488 | 0.011578 | 0.011556 | 0.011372 |
| 0.011335 | 0.011559 | 0.011666 | 0.011781 | 0.011632 | 0.011742 | 0.011917 |
| 0.011810 | 0.011850 | 0.011808 | 0.012036 | 0.011772 | 0.012701 | 0.011811 |
| 0.012559 | 0.012313 | 0.012491 | 0.012780 | 0.011665 | 0.011666 | 0.011738 |
| 0.012453 | 0.012098 | 0.011737 | 0.011595 | 0.011702 | 0.011702 | 0.011599 |
| 0.011559 | 0.011528 | 0.011630 | 0.011595 | 0.011917 | 0.011987 | 0.011988 |
| 0.011917 | 0.012024 | 0.012098 | 0.011814 | 0.012454 | 0.012462 | 0.012525 |
| 0.012526 | 0.012562 | 0.012474 | 0.012490 | 0.012528 | 0.011772 | 0.012023 |
| 0.012024 | 0.012557 | 0.012104 | 0.011987 | 0.012524 | 0.011565 | 0.011453 |
| 0.011345 | 0.011416 | 0.011988 | 0.012019 | 0.012104 | 0.011772 | 0.011489 |
| S681     | 0.011674 | 0.011674 | 0.011948 | 0.011777 | 0.011777 | 0.011845 |
| 0.011612 | 0.011543 | 0.011845 | 0.011265 | 0.011333 | 0.011300 | 0.011265 |
| 0.011299 | 0.011469 | 0.011265 | 0.011299 | 0.011367 | 0.011333 | 0.011265 |
| 0.011265 | 0.011299 | 0.011401 | 0.011231 | 0.011299 | 0.011299 | 0.011578 |
| 0.011538 | 0.011299 | 0.011197 | 0.011435 | 0.011367 | 0.011333 | 0.011367 |
| 0.011333 | 0.011435 | 0.011333 | 0.011333 | 0.011367 | 0.011333 | 0.011504 |
| 0.011265 | 0.011333 | 0.011367 | 0.011299 | 0.011401 | 0.011435 | 0.011367 |
| 0.011333 | 0.011504 | 0.011401 | 0.011606 | 0.011333 | 0.011606 | 0.011333 |
| 0.011299 | 0.011401 | 0.011469 | 0.011606 | 0.011640 | 0.011401 | 0.011503 |
| 0.011367 | 0.011435 | 0.011333 | 0.011572 | 0.011743 | 0.011333 | 0.011401 |
| 0.011299 | 0.011401 | 0.011367 | 0.011435 | 0.011367 | 0.011367 | 0.011367 |
| 0.011265 | 0.011299 | 0.011265 | 0.011367 | 0.011333 | 0.011368 | 0.011435 |
| 0.011333 | 0.011333 | 0.011401 | 0.011299 | 0.011367 | 0.011265 | 0.011333 |
| 0.011503 | 0.011435 | 0.011606 | 0.011504 | 0.011333 | 0.011572 | 0.011333 |
| 0.011437 | 0.011630 | 0.011520 | 0.011219 | 0.011212 | 0.011360 | 0.011381 |
| 0.012065 | 0.011371 | 0.011144 | 0.011572 | 0.011572 | 0.011367 | 0.011469 |
| 0.011401 | 0.011367 | 0.011435 | 0.011333 | 0.011435 | 0.011367 | 0.011367 |
| 0.011333 | 0.011435 | 0.011640 | 0.011504 | 0.011401 | 0.011367 | 0.011299 |

|          |          |          |          |          |          |          |
|----------|----------|----------|----------|----------|----------|----------|
| 0.011265 | 0.011231 | 0.011333 | 0.011299 | 0.011504 | 0.011435 | 0.011401 |
| 0.011504 | 0.011572 | 0.011299 | 0.011299 | 0.011333 | 0.011333 | 0.011335 |
| 0.011404 | 0.011333 | 0.011333 | 0.011206 | 0.011244 | 0.011238 | 0.011333 |
| 0.011336 | 0.011270 | 0.011285 | 0.011306 | 0.011233 | 0.011269 | 0.011300 |
| 0.011499 | 0.011340 | 0.011340 | 0.011265 | 0.011271 | 0.011402 | 0.011368 |
| 0.011436 | 0.011368 | 0.011368 | 0.011469 | 0.011401 | 0.011777 | 0.011572 |
| 0.011606 | 0.011470 | 0.011333 | 0.011435 | 0.011231 | 0.011469 | 0.011265 |
| 0.011333 | 0.011299 | 0.011299 | 0.011265 | 0.011299 | 0.011265 | 0.011367 |
| 0.011333 | 0.011435 | 0.011367 | 0.011265 | 0.011368 | 0.011470 | 0.011472 |
| 0.011470 | 0.011367 | 0.011265 | 0.011197 | 0.011333 | 0.011265 | 0.011197 |
| 0.011302 | 0.011470 | 0.011265 | 0.011470 | 0.011231 | 0.011333 | 0.011299 |
| 0.011401 | 0.011299 | 0.011333 | 0.011299 | 0.011333 | 0.011197 | 0.011333 |
| 0.011367 | 0.011265 | 0.011367 | 0.011299 | 0.011333 | 0.011367 | 0.011606 |
| 0.011640 | 0.011572 | 0.011640 | 0.011471 | 0.011640 | 0.011333 | 0.011299 |
| 0.011335 | 0.011636 | 0.011431 | 0.011235 | 0.011646 | 0.011199 | 0.011299 |
| 0.011647 | 0.011543 | 0.011503 | 0.011708 | 0.011407 | 0.011572 | 0.011538 |
| 0.011435 | 0.011640 | 0.011494 | 0.011312 | 0.011359 | 0.011367 | 0.011438 |
| 0.011538 | 0.011437 | 0.011576 | 0.011645 | 0.011572 | 0.011640 | 0.011714 |
| 0.011473 | 0.011646 | 0.011576 | 0.011507 | 0.011778 | 0.011231 | 0.011437 |
| 0.011401 | 0.011333 | 0.011231 | 0.011231 | 0.011299 | 0.011299 | 0.011367 |
| 0.011299 | 0.011333 | 0.011265 | 0.011367 | 0.011299 | 0.011299 | 0.011367 |
| 0.011299 | 0.011606 | 0.011572 | 0.011606 | 0.011197 | 0.011299 | 0.011333 |
| 0.011333 | 0.011231 | 0.011367 | 0.011401 | 0.011265 | 0.011265 | 0.011265 |
| 0.011742 | 0.011435 | 0.011435 | 0.011231 | 0.011333 | 0.011504 | 0.011265 |
| 0.011265 | 0.011333 | 0.011299 | 0.011469 | 0.011265 | 0.011401 | 0.011538 |
| 0.011469 | 0.011299 | 0.011299 | 0.011231 | 0.011231 | 0.011401 | 0.011333 |
| 0.011231 | 0.011333 | 0.011197 | 0.011231 | 0.011367 | 0.011436 | 0.011265 |
| 0.011231 | 0.011367 | 0.011299 | 0.011197 | 0.011469 | 0.011197 | 0.011367 |
| 0.011443 | 0.011265 | 0.011504 | 0.011401 | 0.011435 | 0.011299 | 0.011401 |
| 0.011265 | 0.011606 | 0.011197 | 0.011401 | 0.011265 | 0.011265 | 0.011197 |
| 0.011435 | 0.011572 | 0.011333 | 0.011401 | 0.011163 | 0.011572 | 0.011265 |
| 0.011265 | 0.011265 | 0.011299 | 0.011401 | 0.011299 | 0.011401 | 0.011469 |
| 0.011469 | 0.011299 | 0.011333 | 0.011435 | 0.011401 | 0.011265 | 0.011231 |
| 0.011197 | 0.011265 | 0.011333 | 0.011265 | 0.011231 | 0.011367 | 0.011265 |
| 0.011299 | 0.011299 | 0.011435 | 0.011469 | 0.011367 | 0.011299 | 0.011299 |
| 0.011367 | 0.011299 | 0.011401 | 0.011265 | 0.011401 | 0.011503 | 0.011674 |
| 0.011299 | 0.011640 | 0.011306 | 0.017824 | 0.011127 | 0.011433 | 0.011592 |
| 0.011552 | 0.011596 | 0.011327 | 0.011297 | 0.011674 | 0.011621 | 0.011369 |
| 0.011494 | 0.011495 | 0.011179 | 0.011273 | 0.011259 | 0.011310 | 0.011236 |
| 0.011347 | 0.011439 | 0.011324 | 0.011195 | 0.011435 | 0.011470 | 0.011473 |
| 0.011339 | 0.011435 | 0.011435 | 0.011401 | 0.011367 | 0.011367 | 0.011333 |
| 0.011333 | 0.011299 | 0.011333 | 0.011367 | 0.011333 | 0.011265 | 0.011299 |
| 0.011299 | 0.011367 | 0.011265 | 0.011367 | 0.011401 | 0.011435 | 0.011333 |
| 0.011367 | 0.011333 | 0.011606 | 0.011606 | 0.011401 | 0.011436 | 0.011436 |
| 0.011231 | 0.011231 | 0.011265 | 0.011367 | 0.011231 | 0.011470 | 0.011470 |
| 0.011504 | 0.011503 | 0.011435 | 0.011538 | 0.011640 | 0.011505 | 0.011367 |
| 0.011367 | 0.011435 | 0.011470 | 0.011299 | 0.011367 | 0.011333 | 0.011367 |
| 0.011436 | 0.011436 | 0.011470 | 0.011436 | 0.011334 | 0.011538 | 0.011504 |
| 0.011370 | 0.011265 | 0.011367 | 0.011470 | 0.011367 | 0.011504 | 0.011538 |
| 0.011708 | 0.011407 | 0.011572 | 0.011538 | 0.011435 | 0.011640 | 0.011265 |
| 0.011437 | 0.011333 | 0.011299 | 0.011299 | 0.011367 | 0.011265 | 0.011367 |
| 0.011401 | 0.011435 | 0.011333 | 0.011367 | 0.011333 | 0.011606 | 0.011606 |
| 0.011401 | 0.011436 | 0.011503 | 0.011435 | 0.012085 | 0.011423 | 0.011382 |
| 0.011489 | 0.011377 | 0.011524 | 0.011447 | 0.011523 | 0.011446 | 0.011411 |
| 0.012037 | 0.011342 | 0.011478 | 0.011412 | 0.011690 | 0.011544 | 0.011648 |
| 0.012061 | 0.011482 | 0.011610 | 0.011674 | 0.011538 | 0.011538 | 0.011575 |
| 0.011231 | 0.011401 | 0.011538 | 0.011503 | 0.011507 | 0.011503 | 0.011471 |
| 0.011333 | 0.011265 | 0.011299 | 0.011333 | 0.011231 | 0.011299 | 0.011197 |
| 0.011333 | 0.011367 | 0.011265 | 0.011231 | 0.011333 | 0.011265 | 0.011299 |
| 0.011265 | 0.011231 | 0.011299 | 0.011299 | 0.011231 | 0.011435 | 0.011469 |



|          |          |          |          |          |          |          |
|----------|----------|----------|----------|----------|----------|----------|
| 0.011367 | 0.011435 | 0.011367 | 0.011367 | 0.011299 | 0.011640 | 0.011333 |
| 0.011379 | 0.011299 | 0.011538 | 0.011543 | 0.011401 | 0.011401 | 0.011401 |
| 0.011401 | 0.011333 | 0.011299 | 0.011333 | 0.011435 | 0.011435 | 0.011367 |
| 0.011367 | 0.011504 | 0.011606 | 0.011401 | 0.011606 | 0.011606 | 0.011469 |
| 0.011299 | 0.011367 | 0.011401 | 0.011743 | 0.011367 | 0.011401 | 0.011333 |
| 0.011401 | 0.011333 | 0.011333 | 0.011640 | 0.011572 | 0.011606 | 0.011333 |
| 0.011435 | 0.011504 | 0.011367 | 0.011435 | 0.011401 | 0.011265 | 0.011538 |
| 0.011367 | 0.011333 | 0.011333 | 0.011504 | 0.011333 | 0.011435 | 0.011606 |
| 0.011299 | 0.011681 | 0.011674 | 0.011474 | 0.011176 | 0.011440 | 0.011270 |
| 0.011227 | 0.011694 | 0.011239 | 0.011288 | 0.011260 | 0.011320 | 0.011278 |
| 0.011425 | 0.000000 | 0.011231 | 0.000000 | 0.011116 | 0.011267 | 0.011349 |
| 0.011405 | 0.011260 | 0.011382 | 0.011347 | 0.011368 | 0.011504 | 0.011572 |
| 0.011572 | 0.011436 | 0.011541 | 0.011542 | 0.011680 | 0.011706 | 0.011367 |
| 0.011606 | 0.011470 | 0.011333 | 0.011435 | 0.011231 | 0.011469 | 0.011265 |
| 0.011333 | 0.011299 | 0.011299 | 0.011265 | 0.011299 | 0.011265 | 0.011367 |
| 0.011309 | 0.011345 | 0.011339 | 0.011373 | 0.011512 | 0.011477 | 0.011442 |
| 0.011475 | 0.011402 | 0.011210 | 0.011207 | 0.011336 | 0.011508 | 0.011508 |
| 0.011299 | 0.011370 | 0.011607 | 0.011507 | 0.011470 | 0.011505 | 0.011469 |
| 0.011401 | 0.011469 | 0.011469 | 0.011367 | 0.011879 | 0.011504 | 0.011606 |
| 0.011640 | 0.011636 | 0.000000 | 0.011412 | 0.011299 | 0.011504 | 0.011469 |
| 0.011504 | 0.011538 | 0.011503 | 0.011503 | 0.011658 | 0.011674 | 0.011307 |
| 0.011198 | 0.011201 | 0.011302 | 0.011267 | 0.011372 | 0.011212 | 0.011474 |
| 0.011339 | 0.011372 | 0.011206 | 0.011327 | 0.011333 | 0.011408 | 0.011299 |
| 0.011265 | 0.011231 | 0.011333 | 0.011299 | 0.011504 | 0.011435 | 0.011401 |
| 0.011504 | 0.011572 | 0.011299 | 0.011299 | 0.011333 | 0.011333 | 0.011335 |
| 0.011404 | 0.011333 | 0.011333 | 0.011368 | 0.011504 | 0.011572 | 0.011572 |
| 0.011436 | 0.011541 | 0.011542 | 0.011680 | 0.011706 | 0.011367 | 0.011538 |
| 0.011469 | 0.011469 | 0.011301 | 0.011484 | 0.011413 | 0.011441 | 0.011274 |
| 0.011445 | 0.011662 | 0.011448 | 0.011371 | 0.011265 | 0.011470 | 0.011333 |
| 0.011435 | 0.011367 | 0.011265 | 0.011368 | 0.011470 | 0.011472 | 0.011367 |
| 0.011265 | 0.011197 | 0.011333 | 0.011265 | 0.011197 | 0.011302 | 0.011470 |
| 0.011333 | 0.011299 | 0.011333 | 0.011367 | 0.011333 | 0.011265 | 0.011470 |
| 0.011333 | 0.011367 | 0.011367 | 0.011299 | 0.011367 | 0.011606 | 0.011265 |
| 0.011299 | 0.011640 | 0.011299 | 0.011333 | 0.011299 | 0.011606 | 0.011148 |
| 0.011636 | 0.011147 | 0.011264 | 0.011429 | 0.011516 | 0.011425 | 0.011145 |
| 0.011221 | 0.011469 | 0.011572 | 0.011681 | 0.011539 | 0.011679 | 0.011778 |
| 0.011710 | 0.011747 | 0.011708 | 0.011963 | 0.011674 | 0.012563 | 0.011711 |
| 0.012461 | 0.012225 | 0.012362 | 0.012603 | 0.011674 | 0.011367 | 0.011675 |
| 0.012120 | 0.012054 | 0.011640 | 0.011504 | 0.011607 | 0.011607 | 0.011576 |
| 0.011469 | 0.011474 | 0.011538 | 0.011504 | 0.011880 | 0.011947 | 0.011949 |
| 0.011846 | 0.011948 | 0.012054 | 0.011816 | 0.012121 | 0.012127 | 0.012189 |
| 0.012189 | 0.012224 | 0.012170 | 0.012190 | 0.012191 | 0.011401 | 0.011709 |
| 0.011744 | 0.012289 | 0.011783 | 0.011948 | 0.012428 | 0.011473 | 0.011368 |
| 0.011333 | 0.011333 | 0.011880 | 0.011895 | 0.012026 | 0.011742 | 0.011402 |
| S682     | 0.011753 | 0.011753 | 0.011892 | 0.011857 | 0.011857 | 0.011927 |
| 0.011761 | 0.011656 | 0.011857 | 0.011337 | 0.011407 | 0.011372 | 0.011337 |
| 0.011372 | 0.011545 | 0.011337 | 0.011372 | 0.011441 | 0.011372 | 0.011372 |
| 0.011337 | 0.011337 | 0.011476 | 0.011338 | 0.011372 | 0.011372 | 0.011726 |
| 0.011580 | 0.011372 | 0.011268 | 0.011511 | 0.011441 | 0.011407 | 0.011441 |
| 0.011407 | 0.011476 | 0.011407 | 0.011407 | 0.011441 | 0.011407 | 0.011580 |
| 0.011337 | 0.011407 | 0.011441 | 0.011372 | 0.011441 | 0.011511 | 0.011441 |
| 0.011407 | 0.011580 | 0.011476 | 0.011753 | 0.011407 | 0.011684 | 0.011407 |
| 0.011372 | 0.011441 | 0.011545 | 0.011684 | 0.011788 | 0.011476 | 0.011580 |
| 0.011441 | 0.011476 | 0.011407 | 0.011649 | 0.011892 | 0.011407 | 0.011476 |
| 0.011372 | 0.011441 | 0.011441 | 0.011511 | 0.011441 | 0.011441 | 0.011441 |
| 0.011337 | 0.011372 | 0.011337 | 0.011441 | 0.011372 | 0.011442 | 0.011511 |
| 0.011337 | 0.011407 | 0.011476 | 0.011372 | 0.011511 | 0.011337 | 0.011407 |
| 0.011580 | 0.011511 | 0.011753 | 0.011545 | 0.011407 | 0.011649 | 0.011407 |
| 0.011595 | 0.011830 | 0.011604 | 0.011342 | 0.011291 | 0.011439 | 0.011507 |
| 0.012154 | 0.011586 | 0.011315 | 0.011649 | 0.011649 | 0.011441 | 0.011545 |

|          |          |          |          |          |          |          |
|----------|----------|----------|----------|----------|----------|----------|
| 0.011476 | 0.011441 | 0.011511 | 0.011407 | 0.011511 | 0.011441 | 0.011441 |
| 0.011407 | 0.011510 | 0.011719 | 0.011580 | 0.011372 | 0.011441 | 0.011372 |
| 0.011337 | 0.011337 | 0.011407 | 0.011372 | 0.011580 | 0.011545 | 0.011476 |
| 0.011580 | 0.011649 | 0.011372 | 0.011372 | 0.011407 | 0.011407 | 0.011409 |
| 0.011479 | 0.011407 | 0.011407 | 0.011245 | 0.011283 | 0.011276 | 0.011372 |
| 0.011409 | 0.011344 | 0.011364 | 0.011380 | 0.011304 | 0.011342 | 0.011373 |
| 0.011615 | 0.011414 | 0.011415 | 0.011337 | 0.011345 | 0.011476 | 0.011441 |
| 0.011511 | 0.011442 | 0.011441 | 0.011545 | 0.011476 | 0.011857 | 0.011615 |
| 0.011684 | 0.011511 | 0.011407 | 0.011511 | 0.011303 | 0.011545 | 0.011337 |
| 0.011407 | 0.011407 | 0.011372 | 0.011337 | 0.011372 | 0.011337 | 0.011441 |
| 0.011407 | 0.011511 | 0.011441 | 0.011337 | 0.011443 | 0.011545 | 0.011548 |
| 0.011545 | 0.011441 | 0.011337 | 0.011269 | 0.011407 | 0.011337 | 0.011268 |
| 0.011376 | 0.011545 | 0.011337 | 0.011545 | 0.011303 | 0.011303 | 0.011372 |
| 0.011476 | 0.011372 | 0.011407 | 0.011372 | 0.011407 | 0.011268 | 0.011407 |
| 0.011441 | 0.011372 | 0.011441 | 0.011372 | 0.011407 | 0.011441 | 0.011684 |
| 0.011788 | 0.011718 | 0.011788 | 0.011547 | 0.011788 | 0.011407 | 0.011372 |
| 0.011409 | 0.011724 | 0.011532 | 0.011272 | 0.011795 | 0.011271 | 0.011344 |
| 0.011796 | 0.011690 | 0.011545 | 0.011788 | 0.011483 | 0.011649 | 0.011615 |
| 0.011511 | 0.011718 | 0.011537 | 0.011357 | 0.011492 | 0.011441 | 0.011514 |
| 0.011615 | 0.011512 | 0.011654 | 0.011724 | 0.011615 | 0.011719 | 0.011795 |
| 0.011548 | 0.011725 | 0.011652 | 0.011583 | 0.011858 | 0.011303 | 0.011511 |
| 0.011476 | 0.011407 | 0.011303 | 0.011303 | 0.011372 | 0.011372 | 0.011441 |
| 0.011372 | 0.011441 | 0.011337 | 0.011441 | 0.011372 | 0.011372 | 0.011441 |
| 0.011337 | 0.011822 | 0.011719 | 0.011753 | 0.011268 | 0.011372 | 0.011407 |
| 0.011303 | 0.011372 | 0.011441 | 0.011476 | 0.011337 | 0.011337 | 0.011337 |
| 0.011892 | 0.011476 | 0.011476 | 0.011303 | 0.011407 | 0.011545 | 0.011337 |
| 0.011337 | 0.011407 | 0.011372 | 0.011545 | 0.011303 | 0.011476 | 0.011615 |
| 0.011545 | 0.011372 | 0.011372 | 0.011303 | 0.011303 | 0.011476 | 0.011407 |
| 0.011303 | 0.011407 | 0.011268 | 0.011303 | 0.011441 | 0.011580 | 0.011337 |
| 0.011303 | 0.011441 | 0.011372 | 0.011268 | 0.011615 | 0.011268 | 0.011441 |
| 0.011519 | 0.011337 | 0.011649 | 0.011476 | 0.011511 | 0.011372 | 0.011476 |
| 0.011337 | 0.011684 | 0.011268 | 0.011545 | 0.011337 | 0.011337 | 0.011268 |
| 0.011511 | 0.011719 | 0.011407 | 0.011441 | 0.011303 | 0.011719 | 0.011337 |
| 0.011337 | 0.011337 | 0.011372 | 0.011441 | 0.011372 | 0.011476 | 0.011545 |
| 0.011511 | 0.011511 | 0.011407 | 0.011511 | 0.011476 | 0.011337 | 0.011303 |
| 0.011337 | 0.011337 | 0.011407 | 0.011337 | 0.011303 | 0.011476 | 0.011337 |
| 0.011372 | 0.011372 | 0.011511 | 0.011545 | 0.011441 | 0.011372 | 0.011372 |
| 0.011441 | 0.011372 | 0.011476 | 0.011337 | 0.011476 | 0.011580 | 0.011823 |
| 0.011372 | 0.011788 | 0.011380 | 0.017950 | 0.011264 | 0.011499 | 0.011743 |
| 0.011702 | 0.011748 | 0.011493 | 0.011420 | 0.011741 | 0.011772 | 0.011375 |
| 0.011650 | 0.011562 | 0.011261 | 0.011405 | 0.011382 | 0.011416 | 0.011415 |
| 0.011642 | 0.011521 | 0.011557 | 0.011334 | 0.011095 | 0.011545 | 0.011549 |
| 0.011414 | 0.011511 | 0.011511 | 0.011476 | 0.011441 | 0.011442 | 0.011407 |
| 0.011441 | 0.011372 | 0.011407 | 0.011407 | 0.011303 | 0.011337 | 0.011372 |
| 0.011372 | 0.011441 | 0.011337 | 0.011441 | 0.011476 | 0.011511 | 0.011407 |
| 0.011441 | 0.011407 | 0.011753 | 0.011753 | 0.011441 | 0.011511 | 0.011545 |
| 0.011303 | 0.011303 | 0.011337 | 0.011441 | 0.011303 | 0.011545 | 0.011545 |
| 0.011580 | 0.011545 | 0.011407 | 0.011615 | 0.011788 | 0.011616 | 0.011441 |
| 0.011441 | 0.011441 | 0.011545 | 0.011372 | 0.011441 | 0.011407 | 0.011441 |
| 0.011511 | 0.011511 | 0.011545 | 0.011511 | 0.011408 | 0.011615 | 0.011511 |
| 0.011445 | 0.011337 | 0.011441 | 0.011545 | 0.011441 | 0.011580 | 0.011614 |
| 0.011788 | 0.011483 | 0.011649 | 0.011615 | 0.011511 | 0.011718 | 0.011337 |
| 0.011512 | 0.011407 | 0.011372 | 0.011372 | 0.011441 | 0.011337 | 0.011441 |
| 0.011476 | 0.011511 | 0.011407 | 0.011441 | 0.011407 | 0.011753 | 0.011753 |
| 0.011441 | 0.011511 | 0.011580 | 0.011476 | 0.012170 | 0.011574 | 0.011496 |
| 0.011566 | 0.011524 | 0.011638 | 0.011525 | 0.011637 | 0.011558 | 0.011522 |
| 0.012124 | 0.011416 | 0.011554 | 0.011487 | 0.011768 | 0.011621 | 0.011727 |
| 0.012147 | 0.011525 | 0.011444 | 0.011441 | 0.011441 | 0.011476 | 0.011409 |
| 0.011303 | 0.011337 | 0.011476 | 0.011441 | 0.011444 | 0.011580 | 0.011547 |
| 0.011407 | 0.011337 | 0.011372 | 0.011407 | 0.011303 | 0.011372 | 0.011268 |

|          |          |          |          |          |          |          |
|----------|----------|----------|----------|----------|----------|----------|
| 0.011407 | 0.011441 | 0.011337 | 0.011303 | 0.011407 | 0.011337 | 0.011372 |
| 0.011372 | 0.011303 | 0.011372 | 0.011407 | 0.011303 | 0.011476 | 0.011545 |
| 0.011441 | 0.011511 | 0.011441 | 0.011441 | 0.011372 | 0.011788 | 0.011407 |
| 0.011454 | 0.011372 | 0.011580 | 0.011585 | 0.011476 | 0.011441 | 0.011476 |
| 0.011476 | 0.011407 | 0.011372 | 0.011407 | 0.011511 | 0.011511 | 0.011337 |
| 0.011441 | 0.011580 | 0.011753 | 0.011441 | 0.011684 | 0.011684 | 0.011545 |
| 0.011372 | 0.011441 | 0.011476 | 0.011892 | 0.011442 | 0.011476 | 0.011337 |
| 0.011476 | 0.011407 | 0.011407 | 0.011719 | 0.011615 | 0.011684 | 0.011407 |
| 0.011511 | 0.011580 | 0.011441 | 0.011511 | 0.011476 | 0.011337 | 0.011684 |
| 0.011441 | 0.011407 | 0.011407 | 0.011580 | 0.011407 | 0.011476 | 0.011753 |
| 0.011372 | 0.011832 | 0.011823 | 0.011606 | 0.011293 | 0.011516 | 0.011433 |
| 0.011286 | 0.011824 | 0.011313 | 0.011522 | 0.011363 | 0.011483 | 0.011446 |
| 0.011639 | 0.011265 | 0.011407 | 0.011266 | 0.011339 | 0.011406 | 0.011478 |
| 0.011526 | 0.011385 | 0.011496 | 0.011423 | 0.011443 | 0.011580 | 0.011649 |
| 0.011614 | 0.011511 | 0.011618 | 0.011585 | 0.011760 | 0.011790 | 0.011407 |
| 0.011684 | 0.011511 | 0.011407 | 0.011511 | 0.011303 | 0.011545 | 0.011337 |
| 0.011407 | 0.011407 | 0.011372 | 0.011337 | 0.011372 | 0.011337 | 0.011441 |
| 0.011420 | 0.011419 | 0.011413 | 0.011447 | 0.011588 | 0.011553 | 0.011553 |
| 0.011551 | 0.011476 | 0.011288 | 0.011282 | 0.011409 | 0.011584 | 0.011550 |
| 0.011372 | 0.011444 | 0.011685 | 0.011652 | 0.011580 | 0.011615 | 0.011545 |
| 0.011476 | 0.011545 | 0.011545 | 0.011407 | 0.012031 | 0.011615 | 0.011684 |
| 0.011684 | 0.011793 | 0.011412 | 0.000000 | 0.011372 | 0.011580 | 0.011545 |
| 0.011581 | 0.011580 | 0.011615 | 0.011615 | 0.011666 | 0.011719 | 0.011382 |
| 0.011270 | 0.011274 | 0.011376 | 0.011340 | 0.011447 | 0.011214 | 0.011620 |
| 0.011379 | 0.011510 | 0.011255 | 0.011407 | 0.011407 | 0.011482 | 0.011372 |
| 0.011337 | 0.011337 | 0.011407 | 0.011372 | 0.011580 | 0.011545 | 0.011476 |
| 0.011580 | 0.011649 | 0.011372 | 0.011372 | 0.011407 | 0.011407 | 0.011409 |
| 0.011479 | 0.011407 | 0.011407 | 0.011443 | 0.011580 | 0.011649 | 0.011614 |
| 0.011511 | 0.011618 | 0.011585 | 0.011760 | 0.011790 | 0.011407 | 0.011614 |
| 0.011545 | 0.011545 | 0.011374 | 0.011562 | 0.011454 | 0.011517 | 0.011385 |
| 0.011522 | 0.011763 | 0.011540 | 0.011446 | 0.011337 | 0.011545 | 0.011407 |
| 0.011511 | 0.011441 | 0.011337 | 0.011443 | 0.011545 | 0.011548 | 0.011441 |
| 0.011337 | 0.011269 | 0.011407 | 0.011337 | 0.011268 | 0.011376 | 0.011545 |
| 0.011441 | 0.011372 | 0.011407 | 0.011407 | 0.011303 | 0.011337 | 0.011545 |
| 0.011407 | 0.011441 | 0.011441 | 0.011372 | 0.011441 | 0.011684 | 0.011337 |
| 0.011372 | 0.011788 | 0.011372 | 0.011407 | 0.011372 | 0.011753 | 0.011326 |
| 0.011755 | 0.011279 | 0.011423 | 0.011557 | 0.011649 | 0.011541 | 0.011276 |
| 0.011386 | 0.011545 | 0.011649 | 0.011759 | 0.011616 | 0.011758 | 0.011893 |
| 0.011788 | 0.011827 | 0.011788 | 0.012047 | 0.011753 | 0.012656 | 0.011789 |
| 0.012483 | 0.012312 | 0.012451 | 0.012661 | 0.011753 | 0.011441 | 0.011753 |
| 0.012205 | 0.012138 | 0.011719 | 0.011615 | 0.011684 | 0.011684 | 0.011654 |
| 0.011545 | 0.011550 | 0.011615 | 0.011580 | 0.011962 | 0.012031 | 0.012031 |
| 0.011893 | 0.012031 | 0.012137 | 0.011897 | 0.012206 | 0.012212 | 0.012275 |
| 0.012275 | 0.012310 | 0.012257 | 0.012275 | 0.012277 | 0.011476 | 0.011788 |
| 0.011788 | 0.012309 | 0.011864 | 0.012066 | 0.012588 | 0.011550 | 0.011511 |
| 0.011476 | 0.011476 | 0.011927 | 0.011821 | 0.012077 | 0.011823 | 0.011477 |
| s683     | 0.011631 | 0.011631 | 0.011799 | 0.011732 | 0.011732 | 0.011799 |
| 0.011637 | 0.011570 | 0.011799 | 0.011228 | 0.011295 | 0.011262 | 0.011228 |
| 0.011262 | 0.011429 | 0.011228 | 0.011262 | 0.011329 | 0.011295 | 0.011262 |
| 0.011228 | 0.011262 | 0.011362 | 0.011228 | 0.011262 | 0.011262 | 0.011603 |
| 0.011497 | 0.011262 | 0.011161 | 0.011396 | 0.011329 | 0.011295 | 0.011329 |
| 0.011295 | 0.011396 | 0.011295 | 0.011295 | 0.011329 | 0.011295 | 0.011463 |
| 0.011228 | 0.011295 | 0.011329 | 0.011262 | 0.011362 | 0.011396 | 0.011329 |
| 0.011295 | 0.011463 | 0.011363 | 0.011631 | 0.011295 | 0.011564 | 0.011295 |
| 0.011262 | 0.011362 | 0.011396 | 0.011564 | 0.011664 | 0.011362 | 0.011463 |
| 0.011329 | 0.011396 | 0.011295 | 0.011530 | 0.011765 | 0.011295 | 0.011362 |
| 0.011262 | 0.011362 | 0.011329 | 0.011396 | 0.011329 | 0.011329 | 0.011329 |
| 0.011228 | 0.011262 | 0.011228 | 0.011329 | 0.011295 | 0.011329 | 0.011396 |
| 0.011329 | 0.011295 | 0.011362 | 0.011262 | 0.011396 | 0.011228 | 0.011295 |
| 0.011463 | 0.011396 | 0.011631 | 0.011463 | 0.011295 | 0.011530 | 0.011295 |

|          |          |          |          |          |          |          |
|----------|----------|----------|----------|----------|----------|----------|
| 0.011468 | 0.011695 | 0.011513 | 0.011216 | 0.011210 | 0.011318 | 0.011414 |
| 0.012048 | 0.011467 | 0.011225 | 0.011530 | 0.011530 | 0.011329 | 0.011429 |
| 0.011362 | 0.011329 | 0.011396 | 0.011295 | 0.011396 | 0.011329 | 0.011329 |
| 0.011295 | 0.011396 | 0.011597 | 0.011463 | 0.011362 | 0.011329 | 0.011262 |
| 0.011228 | 0.011228 | 0.011295 | 0.011262 | 0.011463 | 0.011430 | 0.011362 |
| 0.011463 | 0.011530 | 0.011262 | 0.011262 | 0.011295 | 0.011295 | 0.011297 |
| 0.011364 | 0.011295 | 0.011295 | 0.011168 | 0.011241 | 0.011200 | 0.011296 |
| 0.011297 | 0.011232 | 0.011245 | 0.011267 | 0.011196 | 0.011231 | 0.011263 |
| 0.011528 | 0.011301 | 0.011336 | 0.011228 | 0.011233 | 0.011363 | 0.011329 |
| 0.011396 | 0.011330 | 0.011329 | 0.011429 | 0.011362 | 0.011732 | 0.011530 |
| 0.011564 | 0.011430 | 0.011295 | 0.011396 | 0.011195 | 0.011429 | 0.011228 |
| 0.011295 | 0.011295 | 0.011262 | 0.011228 | 0.011262 | 0.011228 | 0.011329 |
| 0.011295 | 0.011396 | 0.011329 | 0.011228 | 0.011330 | 0.011430 | 0.011432 |
| 0.011430 | 0.011329 | 0.011228 | 0.011161 | 0.011295 | 0.011228 | 0.011161 |
| 0.011264 | 0.011430 | 0.011228 | 0.011430 | 0.011195 | 0.011295 | 0.011262 |
| 0.011362 | 0.011262 | 0.011295 | 0.011262 | 0.011295 | 0.011161 | 0.011295 |
| 0.011329 | 0.011262 | 0.011329 | 0.011262 | 0.011295 | 0.011329 | 0.011564 |
| 0.011665 | 0.011597 | 0.011665 | 0.011431 | 0.011665 | 0.011295 | 0.011262 |
| 0.011297 | 0.011586 | 0.011335 | 0.011197 | 0.011671 | 0.011163 | 0.011257 |
| 0.011671 | 0.011570 | 0.011463 | 0.011665 | 0.011368 | 0.011530 | 0.011497 |
| 0.011429 | 0.011597 | 0.011415 | 0.011266 | 0.011312 | 0.011329 | 0.011398 |
| 0.011497 | 0.011397 | 0.011534 | 0.011601 | 0.011530 | 0.011597 | 0.011704 |
| 0.011432 | 0.011569 | 0.011534 | 0.011466 | 0.011733 | 0.011195 | 0.011397 |
| 0.011362 | 0.011228 | 0.011195 | 0.011195 | 0.011262 | 0.011262 | 0.011329 |
| 0.011262 | 0.011329 | 0.011228 | 0.011329 | 0.011262 | 0.011262 | 0.011329 |
| 0.011262 | 0.011698 | 0.011597 | 0.011631 | 0.011161 | 0.011262 | 0.011295 |
| 0.011295 | 0.011262 | 0.011329 | 0.011362 | 0.011228 | 0.011228 | 0.011228 |
| 0.011765 | 0.011396 | 0.011396 | 0.011195 | 0.011295 | 0.011463 | 0.011228 |
| 0.011228 | 0.011295 | 0.011262 | 0.011429 | 0.011228 | 0.011362 | 0.011497 |
| 0.011429 | 0.011262 | 0.011262 | 0.011195 | 0.011195 | 0.011362 | 0.011295 |
| 0.011195 | 0.011295 | 0.011161 | 0.011195 | 0.011329 | 0.011463 | 0.011228 |
| 0.011161 | 0.011329 | 0.011262 | 0.011161 | 0.011497 | 0.011161 | 0.011329 |
| 0.011368 | 0.011228 | 0.011530 | 0.011362 | 0.011396 | 0.011262 | 0.011362 |
| 0.011228 | 0.011564 | 0.011161 | 0.011429 | 0.011228 | 0.011228 | 0.011161 |
| 0.011396 | 0.011598 | 0.011295 | 0.011362 | 0.011195 | 0.011597 | 0.011228 |
| 0.011228 | 0.011228 | 0.011262 | 0.011362 | 0.011262 | 0.011362 | 0.011429 |
| 0.011429 | 0.011396 | 0.011295 | 0.011329 | 0.011362 | 0.011228 | 0.011195 |
| 0.011228 | 0.011228 | 0.011295 | 0.011228 | 0.011195 | 0.011362 | 0.011228 |
| 0.011262 | 0.011262 | 0.011396 | 0.011429 | 0.011329 | 0.011262 | 0.011262 |
| 0.011329 | 0.011262 | 0.011362 | 0.011228 | 0.011362 | 0.011463 | 0.011698 |
| 0.011262 | 0.011665 | 0.011267 | 0.017785 | 0.011257 | 0.011427 | 0.011618 |
| 0.011579 | 0.011623 | 0.011322 | 0.011292 | 0.011664 | 0.011647 | 0.011303 |
| 0.011534 | 0.011549 | 0.011177 | 0.011270 | 0.011255 | 0.011356 | 0.011275 |
| 0.011482 | 0.011433 | 0.011431 | 0.011193 | 0.011396 | 0.011430 | 0.011432 |
| 0.011266 | 0.011396 | 0.011396 | 0.011362 | 0.011329 | 0.011329 | 0.011295 |
| 0.011329 | 0.011262 | 0.011295 | 0.011329 | 0.011295 | 0.011228 | 0.011262 |
| 0.011262 | 0.011329 | 0.011228 | 0.011329 | 0.011362 | 0.011396 | 0.011295 |
| 0.011329 | 0.011295 | 0.011631 | 0.011631 | 0.011362 | 0.011396 | 0.011430 |
| 0.011195 | 0.011195 | 0.011228 | 0.011329 | 0.011195 | 0.011430 | 0.011430 |
| 0.011463 | 0.011463 | 0.011396 | 0.011497 | 0.011665 | 0.011498 | 0.011329 |
| 0.011329 | 0.011396 | 0.011430 | 0.011262 | 0.011329 | 0.011295 | 0.011329 |
| 0.011396 | 0.011396 | 0.011430 | 0.011396 | 0.011296 | 0.011497 | 0.011463 |
| 0.011331 | 0.011228 | 0.011329 | 0.011430 | 0.011329 | 0.011463 | 0.011497 |
| 0.011665 | 0.011368 | 0.011530 | 0.011497 | 0.011429 | 0.011597 | 0.011228 |
| 0.011397 | 0.011296 | 0.011262 | 0.011262 | 0.011329 | 0.011228 | 0.011329 |
| 0.011362 | 0.011396 | 0.011295 | 0.011329 | 0.011295 | 0.011631 | 0.011631 |
| 0.011362 | 0.011396 | 0.011463 | 0.011396 | 0.012035 | 0.011417 | 0.011342 |
| 0.011412 | 0.011372 | 0.011482 | 0.011372 | 0.011480 | 0.011405 | 0.011405 |
| 0.011953 | 0.011268 | 0.011403 | 0.011337 | 0.011611 | 0.011502 | 0.011604 |
| 0.012012 | 0.011437 | 0.011567 | 0.011631 | 0.011497 | 0.011497 | 0.011533 |

|          |          |          |          |          |          |          |
|----------|----------|----------|----------|----------|----------|----------|
| 0.011195 | 0.011362 | 0.011496 | 0.011463 | 0.011466 | 0.011463 | 0.011431 |
| 0.011295 | 0.011228 | 0.011262 | 0.011295 | 0.011195 | 0.011262 | 0.011161 |
| 0.011295 | 0.011329 | 0.011228 | 0.011195 | 0.011295 | 0.011228 | 0.011262 |
| 0.011262 | 0.011195 | 0.011262 | 0.011295 | 0.011195 | 0.011396 | 0.011429 |
| 0.011329 | 0.011396 | 0.011329 | 0.011329 | 0.011262 | 0.011664 | 0.011295 |
| 0.011304 | 0.011262 | 0.011497 | 0.011467 | 0.011362 | 0.011362 | 0.011362 |
| 0.011362 | 0.011295 | 0.011262 | 0.011295 | 0.011396 | 0.011396 | 0.011329 |
| 0.011329 | 0.011463 | 0.011631 | 0.011362 | 0.011564 | 0.011564 | 0.011429 |
| 0.011262 | 0.011329 | 0.011362 | 0.011765 | 0.011329 | 0.011362 | 0.011329 |
| 0.011362 | 0.011295 | 0.011295 | 0.011597 | 0.011530 | 0.011564 | 0.011295 |
| 0.011396 | 0.011463 | 0.011329 | 0.011396 | 0.011362 | 0.011228 | 0.011564 |
| 0.011329 | 0.011295 | 0.011295 | 0.011463 | 0.011295 | 0.011396 | 0.011631 |
| 0.011262 | 0.011705 | 0.011698 | 0.011507 | 0.011229 | 0.011400 | 0.011215 |
| 0.011225 | 0.011722 | 0.011236 | 0.011417 | 0.011255 | 0.011366 | 0.011379 |
| 0.011519 | 0.011192 | 0.011338 | 0.011126 | 0.011168 | 0.011395 | 0.011344 |
| 0.011399 | 0.011257 | 0.011377 | 0.011307 | 0.011330 | 0.011463 | 0.011530 |
| 0.011530 | 0.011396 | 0.011500 | 0.011501 | 0.011637 | 0.011661 | 0.011329 |
| 0.011564 | 0.011430 | 0.011295 | 0.011396 | 0.011195 | 0.011429 | 0.011228 |
| 0.011295 | 0.011295 | 0.011262 | 0.011228 | 0.011262 | 0.011228 | 0.011329 |
| 0.011305 | 0.011305 | 0.011300 | 0.011334 | 0.011471 | 0.011436 | 0.011436 |
| 0.011435 | 0.011363 | 0.011134 | 0.011168 | 0.011297 | 0.011467 | 0.011467 |
| 0.011262 | 0.011331 | 0.011565 | 0.011533 | 0.011464 | 0.011498 | 0.011429 |
| 0.011362 | 0.011429 | 0.011429 | 0.011329 | 0.011900 | 0.011497 | 0.011564 |
| 0.011598 | 0.011665 | 0.011299 | 0.011372 | 0.000000 | 0.011463 | 0.011429 |
| 0.011464 | 0.011496 | 0.011497 | 0.011497 | 0.011650 | 0.011631 | 0.011234 |
| 0.011128 | 0.011130 | 0.011230 | 0.011196 | 0.011299 | 0.011135 | 0.011468 |
| 0.011266 | 0.011411 | 0.011156 | 0.011285 | 0.011296 | 0.011368 | 0.011262 |
| 0.011228 | 0.011228 | 0.011295 | 0.011262 | 0.011463 | 0.011430 | 0.011362 |
| 0.011463 | 0.011530 | 0.011262 | 0.011262 | 0.011295 | 0.011295 | 0.011297 |
| 0.011364 | 0.011295 | 0.011295 | 0.011330 | 0.011463 | 0.011530 | 0.011530 |
| 0.011396 | 0.011500 | 0.011501 | 0.011637 | 0.011661 | 0.011329 | 0.011497 |
| 0.011429 | 0.011429 | 0.011263 | 0.011443 | 0.011373 | 0.011401 | 0.011270 |
| 0.011439 | 0.011607 | 0.011399 | 0.011332 | 0.011228 | 0.011430 | 0.011295 |
| 0.011396 | 0.011329 | 0.011228 | 0.011330 | 0.011430 | 0.011432 | 0.011329 |
| 0.011228 | 0.011161 | 0.011295 | 0.011228 | 0.011161 | 0.011264 | 0.011430 |
| 0.011329 | 0.011262 | 0.011295 | 0.011329 | 0.011295 | 0.011228 | 0.011430 |
| 0.011295 | 0.011329 | 0.011329 | 0.011262 | 0.011329 | 0.011564 | 0.011228 |
| 0.011262 | 0.011664 | 0.011262 | 0.011295 | 0.011262 | 0.011631 | 0.011232 |
| 0.011678 | 0.011230 | 0.011261 | 0.011463 | 0.011549 | 0.011455 | 0.011186 |
| 0.011218 | 0.011429 | 0.011530 | 0.011637 | 0.011498 | 0.011635 | 0.011767 |
| 0.011666 | 0.011669 | 0.011664 | 0.011914 | 0.011631 | 0.012506 | 0.011666 |
| 0.012405 | 0.012173 | 0.012307 | 0.012578 | 0.011631 | 0.011329 | 0.011631 |
| 0.012070 | 0.012005 | 0.011597 | 0.011497 | 0.011565 | 0.011565 | 0.011534 |
| 0.011429 | 0.011433 | 0.011497 | 0.011464 | 0.011833 | 0.011900 | 0.011901 |
| 0.011800 | 0.011901 | 0.012004 | 0.011770 | 0.012070 | 0.012076 | 0.012137 |
| 0.012138 | 0.012171 | 0.012118 | 0.012138 | 0.012139 | 0.011362 | 0.011665 |
| 0.011733 | 0.012236 | 0.011738 | 0.011967 | 0.012441 | 0.011502 | 0.011396 |
| 0.011362 | 0.011362 | 0.011833 | 0.011842 | 0.011975 | 0.011698 | 0.011363 |
| s684     | 0.011698 | 0.011698 | 0.012135 | 0.011900 | 0.011900 | 0.011967 |
| 0.011807 | 0.011740 | 0.011900 | 0.011430 | 0.011497 | 0.011464 | 0.011429 |
| 0.011463 | 0.011631 | 0.011429 | 0.011463 | 0.011530 | 0.011497 | 0.011463 |
| 0.011429 | 0.011463 | 0.011564 | 0.011430 | 0.011463 | 0.011463 | 0.011773 |
| 0.011698 | 0.011463 | 0.011362 | 0.011597 | 0.011530 | 0.011497 | 0.011530 |
| 0.011497 | 0.011597 | 0.011497 | 0.011497 | 0.011530 | 0.011497 | 0.011664 |
| 0.011429 | 0.011497 | 0.011530 | 0.011463 | 0.011564 | 0.011597 | 0.011530 |
| 0.011497 | 0.011665 | 0.011564 | 0.011832 | 0.011497 | 0.011765 | 0.011497 |
| 0.011463 | 0.011564 | 0.011631 | 0.011765 | 0.011866 | 0.011564 | 0.011664 |
| 0.011530 | 0.011597 | 0.011497 | 0.011732 | 0.011967 | 0.011497 | 0.011564 |
| 0.011463 | 0.011564 | 0.011530 | 0.011597 | 0.011530 | 0.011530 | 0.011530 |
| 0.011429 | 0.011463 | 0.011429 | 0.011530 | 0.011497 | 0.011531 | 0.011597 |

|          |          |          |          |          |          |          |
|----------|----------|----------|----------|----------|----------|----------|
| 0.011530 | 0.011497 | 0.011564 | 0.011463 | 0.011597 | 0.011429 | 0.011497 |
| 0.011664 | 0.011597 | 0.011832 | 0.011664 | 0.011497 | 0.011732 | 0.011497 |
| 0.011653 | 0.011882 | 0.011702 | 0.011373 | 0.011433 | 0.011539 | 0.011611 |
| 0.012268 | 0.011467 | 0.011431 | 0.011732 | 0.011732 | 0.011530 | 0.011631 |
| 0.011564 | 0.011463 | 0.011463 | 0.011497 | 0.011597 | 0.011530 | 0.011262 |
| 0.011295 | 0.011597 | 0.011732 | 0.011664 | 0.011564 | 0.011530 | 0.011463 |
| 0.011430 | 0.011430 | 0.011497 | 0.011463 | 0.011665 | 0.011631 | 0.011564 |
| 0.011665 | 0.011698 | 0.011463 | 0.011463 | 0.011497 | 0.011497 | 0.011499 |
| 0.011567 | 0.011497 | 0.011497 | 0.011384 | 0.011458 | 0.011411 | 0.011497 |
| 0.011500 | 0.011438 | 0.011503 | 0.011474 | 0.011400 | 0.011437 | 0.011465 |
| 0.011744 | 0.011508 | 0.011542 | 0.011430 | 0.011441 | 0.011565 | 0.011531 |
| 0.011598 | 0.011532 | 0.011531 | 0.011362 | 0.011429 | 0.011933 | 0.011732 |
| 0.011765 | 0.011631 | 0.011497 | 0.011597 | 0.011396 | 0.011631 | 0.011430 |
| 0.011497 | 0.011497 | 0.011463 | 0.011429 | 0.011463 | 0.011430 | 0.011530 |
| 0.011497 | 0.011597 | 0.011530 | 0.011430 | 0.011532 | 0.011631 | 0.011635 |
| 0.011631 | 0.011530 | 0.011430 | 0.011364 | 0.011497 | 0.011430 | 0.011363 |
| 0.011468 | 0.011631 | 0.011430 | 0.011631 | 0.011396 | 0.011497 | 0.011463 |
| 0.011564 | 0.011396 | 0.011497 | 0.011463 | 0.011497 | 0.011362 | 0.011497 |
| 0.011530 | 0.011463 | 0.011530 | 0.011463 | 0.011295 | 0.011530 | 0.011765 |
| 0.011866 | 0.011799 | 0.011866 | 0.011633 | 0.011866 | 0.011362 | 0.011463 |
| 0.011499 | 0.011667 | 0.011518 | 0.011403 | 0.011875 | 0.011367 | 0.011493 |
| 0.011841 | 0.011774 | 0.011631 | 0.011799 | 0.011504 | 0.011732 | 0.011698 |
| 0.011631 | 0.011799 | 0.011558 | 0.011431 | 0.011521 | 0.011530 | 0.011534 |
| 0.011698 | 0.011397 | 0.011737 | 0.011805 | 0.011530 | 0.011732 | 0.011772 |
| 0.011432 | 0.011807 | 0.011602 | 0.011669 | 0.011868 | 0.011396 | 0.011566 |
| 0.011564 | 0.011497 | 0.011396 | 0.011396 | 0.011463 | 0.011463 | 0.011530 |
| 0.011463 | 0.011530 | 0.011429 | 0.011530 | 0.011463 | 0.011463 | 0.011530 |
| 0.011463 | 0.011900 | 0.011799 | 0.011832 | 0.011362 | 0.011463 | 0.011497 |
| 0.011497 | 0.011463 | 0.011530 | 0.011564 | 0.011429 | 0.011429 | 0.011429 |
| 0.011967 | 0.011597 | 0.011597 | 0.011396 | 0.011497 | 0.011665 | 0.011429 |
| 0.011429 | 0.011497 | 0.011463 | 0.011631 | 0.011429 | 0.011564 | 0.011698 |
| 0.011631 | 0.011463 | 0.011463 | 0.011396 | 0.011396 | 0.011564 | 0.011497 |
| 0.011396 | 0.011497 | 0.011362 | 0.011396 | 0.011530 | 0.011665 | 0.011430 |
| 0.011396 | 0.011530 | 0.011464 | 0.011362 | 0.011698 | 0.011362 | 0.011530 |
| 0.011574 | 0.011429 | 0.011732 | 0.011564 | 0.011597 | 0.011463 | 0.011564 |
| 0.011429 | 0.011765 | 0.011362 | 0.011631 | 0.011429 | 0.011429 | 0.011362 |
| 0.011597 | 0.011799 | 0.011497 | 0.011564 | 0.011396 | 0.011799 | 0.011429 |
| 0.011429 | 0.011429 | 0.011463 | 0.011564 | 0.011463 | 0.011564 | 0.011631 |
| 0.011631 | 0.011597 | 0.011497 | 0.011597 | 0.011564 | 0.011429 | 0.011396 |
| 0.011429 | 0.011429 | 0.011497 | 0.011429 | 0.011396 | 0.011564 | 0.011429 |
| 0.011463 | 0.011463 | 0.011597 | 0.011631 | 0.011530 | 0.011463 | 0.011463 |
| 0.011530 | 0.011463 | 0.011564 | 0.011429 | 0.011564 | 0.011664 | 0.011967 |
| 0.011463 | 0.011866 | 0.011474 | 0.018013 | 0.011191 | 0.011549 | 0.011828 |
| 0.011787 | 0.011834 | 0.011322 | 0.011350 | 0.011664 | 0.011854 | 0.011303 |
| 0.011487 | 0.011671 | 0.011372 | 0.011228 | 0.011333 | 0.011504 | 0.011404 |
| 0.011529 | 0.011656 | 0.011505 | 0.011457 | 0.011597 | 0.011497 | 0.011567 |
| 0.011507 | 0.011597 | 0.011597 | 0.011564 | 0.011530 | 0.011530 | 0.011497 |
| 0.011530 | 0.011396 | 0.011497 | 0.011530 | 0.011497 | 0.011429 | 0.011329 |
| 0.011329 | 0.011530 | 0.011430 | 0.011530 | 0.011564 | 0.011597 | 0.011362 |
| 0.011530 | 0.011497 | 0.011833 | 0.011833 | 0.011564 | 0.011598 | 0.011631 |
| 0.011396 | 0.011396 | 0.011430 | 0.011530 | 0.011396 | 0.011631 | 0.011631 |
| 0.011665 | 0.011631 | 0.011597 | 0.011698 | 0.011866 | 0.011700 | 0.011530 |
| 0.011530 | 0.011597 | 0.011631 | 0.011430 | 0.011530 | 0.011497 | 0.011530 |
| 0.011598 | 0.011598 | 0.011631 | 0.011598 | 0.011498 | 0.011698 | 0.011597 |
| 0.011534 | 0.011429 | 0.011530 | 0.011631 | 0.011530 | 0.011665 | 0.011698 |
| 0.011799 | 0.011504 | 0.011732 | 0.011698 | 0.011631 | 0.011799 | 0.011430 |
| 0.011599 | 0.011497 | 0.011329 | 0.011329 | 0.011530 | 0.011430 | 0.011530 |
| 0.011564 | 0.011597 | 0.011362 | 0.011530 | 0.011497 | 0.011833 | 0.011833 |
| 0.011564 | 0.011598 | 0.011530 | 0.011463 | 0.012204 | 0.011632 | 0.011447 |
| 0.011623 | 0.011615 | 0.011728 | 0.011545 | 0.011725 | 0.011543 | 0.011612 |

|          |          |          |          |          |          |          |
|----------|----------|----------|----------|----------|----------|----------|
| 0.012159 | 0.011337 | 0.011506 | 0.011510 | 0.011783 | 0.011707 | 0.011809 |
| 0.012148 | 0.011626 | 0.011703 | 0.011698 | 0.011698 | 0.011698 | 0.011669 |
| 0.011396 | 0.011564 | 0.011698 | 0.011664 | 0.011669 | 0.011664 | 0.011599 |
| 0.011497 | 0.011429 | 0.011463 | 0.011497 | 0.011396 | 0.011463 | 0.011362 |
| 0.011497 | 0.011530 | 0.011429 | 0.011396 | 0.011497 | 0.011429 | 0.011463 |
| 0.011463 | 0.011396 | 0.011463 | 0.011497 | 0.011396 | 0.011597 | 0.011631 |
| 0.011530 | 0.011597 | 0.011530 | 0.011530 | 0.011463 | 0.011866 | 0.011497 |
| 0.011513 | 0.011463 | 0.011699 | 0.011705 | 0.011564 | 0.011564 | 0.011564 |
| 0.011564 | 0.011497 | 0.011463 | 0.011497 | 0.011597 | 0.011597 | 0.011530 |
| 0.011530 | 0.011664 | 0.011832 | 0.011564 | 0.011765 | 0.011765 | 0.011631 |
| 0.011463 | 0.011530 | 0.011564 | 0.011967 | 0.011531 | 0.011564 | 0.011530 |
| 0.011564 | 0.011497 | 0.011497 | 0.011799 | 0.011732 | 0.011765 | 0.011497 |
| 0.011597 | 0.011664 | 0.011530 | 0.011597 | 0.011564 | 0.011429 | 0.011765 |
| 0.011530 | 0.011497 | 0.011497 | 0.011664 | 0.011497 | 0.011597 | 0.011833 |
| 0.011530 | 0.011875 | 0.011900 | 0.011711 | 0.011230 | 0.011604 | 0.011318 |
| 0.011445 | 0.011878 | 0.011447 | 0.011641 | 0.011255 | 0.011620 | 0.011432 |
| 0.011519 | 0.011192 | 0.011394 | 0.011192 | 0.011222 | 0.011395 | 0.011425 |
| 0.011437 | 0.011493 | 0.011589 | 0.011518 | 0.011498 | 0.011665 | 0.011698 |
| 0.011732 | 0.011564 | 0.011703 | 0.011704 | 0.011806 | 0.011838 | 0.011530 |
| 0.011765 | 0.011631 | 0.011497 | 0.011597 | 0.011396 | 0.011631 | 0.011430 |
| 0.011497 | 0.011497 | 0.011463 | 0.011429 | 0.011463 | 0.011430 | 0.011530 |
| 0.011514 | 0.011515 | 0.011505 | 0.011540 | 0.011676 | 0.011641 | 0.011641 |
| 0.011639 | 0.011565 | 0.011356 | 0.011348 | 0.011500 | 0.011670 | 0.011671 |
| 0.011464 | 0.011534 | 0.011767 | 0.011736 | 0.011666 | 0.011700 | 0.011497 |
| 0.011564 | 0.011564 | 0.011564 | 0.011530 | 0.012068 | 0.011698 | 0.011765 |
| 0.011799 | 0.011879 | 0.011504 | 0.011580 | 0.011463 | 0.000000 | 0.011497 |
| 0.011666 | 0.011564 | 0.011698 | 0.011698 | 0.011650 | 0.011698 | 0.011477 |
| 0.011365 | 0.011372 | 0.011469 | 0.011434 | 0.011538 | 0.011359 | 0.011706 |
| 0.011506 | 0.011543 | 0.011203 | 0.011435 | 0.011497 | 0.011573 | 0.011463 |
| 0.011430 | 0.011430 | 0.011497 | 0.011463 | 0.011665 | 0.011631 | 0.011564 |
| 0.011665 | 0.011698 | 0.011463 | 0.011463 | 0.011497 | 0.011497 | 0.011499 |
| 0.011567 | 0.011497 | 0.011497 | 0.011498 | 0.011665 | 0.011698 | 0.011732 |
| 0.011564 | 0.011703 | 0.011704 | 0.011806 | 0.011838 | 0.011530 | 0.011698 |
| 0.011497 | 0.011497 | 0.011466 | 0.011652 | 0.011581 | 0.011605 | 0.011481 |
| 0.011646 | 0.011653 | 0.011653 | 0.011536 | 0.011430 | 0.011631 | 0.011497 |
| 0.011597 | 0.011530 | 0.011430 | 0.011532 | 0.011631 | 0.011635 | 0.011530 |
| 0.011430 | 0.011364 | 0.011497 | 0.011430 | 0.011363 | 0.011468 | 0.011631 |
| 0.011530 | 0.011396 | 0.011497 | 0.011530 | 0.011497 | 0.011429 | 0.011631 |
| 0.011497 | 0.011530 | 0.011530 | 0.011463 | 0.011530 | 0.011765 | 0.011429 |
| 0.011463 | 0.011866 | 0.011463 | 0.011497 | 0.011463 | 0.011832 | 0.011446 |
| 0.011678 | 0.011443 | 0.011261 | 0.011704 | 0.011752 | 0.011670 | 0.011353 |
| 0.011270 | 0.011597 | 0.011698 | 0.011773 | 0.011666 | 0.011805 | 0.011935 |
| 0.011834 | 0.011872 | 0.011832 | 0.012085 | 0.011799 | 0.012606 | 0.011835 |
| 0.012574 | 0.012274 | 0.012408 | 0.012747 | 0.011832 | 0.011497 | 0.011799 |
| 0.012204 | 0.012173 | 0.011765 | 0.011665 | 0.011733 | 0.011733 | 0.011737 |
| 0.011597 | 0.011603 | 0.011664 | 0.011632 | 0.012035 | 0.012102 | 0.012103 |
| 0.012002 | 0.012103 | 0.012207 | 0.011974 | 0.012239 | 0.012245 | 0.012306 |
| 0.012306 | 0.012340 | 0.012220 | 0.012306 | 0.012308 | 0.011429 | 0.011833 |
| 0.011935 | 0.012438 | 0.011908 | 0.012169 | 0.012643 | 0.011705 | 0.011598 |
| 0.011564 | 0.011564 | 0.012035 | 0.012048 | 0.012186 | 0.011900 | 0.011566 |
| s685     | 0.011262 | 0.011262 | 0.012135 | 0.011900 | 0.011900 | 0.011967 |
| 0.011807 | 0.011739 | 0.011967 | 0.011396 | 0.011463 | 0.011430 | 0.011396 |
| 0.011429 | 0.011597 | 0.011396 | 0.011429 | 0.011496 | 0.011463 | 0.011429 |
| 0.011396 | 0.011429 | 0.011530 | 0.011396 | 0.011430 | 0.011429 | 0.011773 |
| 0.011664 | 0.011429 | 0.011329 | 0.011564 | 0.011496 | 0.011463 | 0.011497 |
| 0.011463 | 0.011564 | 0.011463 | 0.011463 | 0.011496 | 0.011463 | 0.011631 |
| 0.011396 | 0.011463 | 0.011497 | 0.011429 | 0.011530 | 0.011564 | 0.011497 |
| 0.011463 | 0.011631 | 0.011530 | 0.011799 | 0.011463 | 0.011732 | 0.011463 |
| 0.011429 | 0.011530 | 0.011597 | 0.011732 | 0.011832 | 0.011530 | 0.011631 |
| 0.011496 | 0.011564 | 0.011463 | 0.011698 | 0.011933 | 0.011463 | 0.011530 |

|          |          |          |          |          |          |          |
|----------|----------|----------|----------|----------|----------|----------|
| 0.011429 | 0.011530 | 0.011497 | 0.011564 | 0.011496 | 0.011497 | 0.011497 |
| 0.011396 | 0.011429 | 0.011396 | 0.011497 | 0.011463 | 0.011498 | 0.011564 |
| 0.011497 | 0.011463 | 0.011530 | 0.011429 | 0.011564 | 0.011396 | 0.011463 |
| 0.011631 | 0.011564 | 0.011799 | 0.011631 | 0.011463 | 0.011698 | 0.011463 |
| 0.011616 | 0.011845 | 0.011664 | 0.011373 | 0.011396 | 0.011465 | 0.011572 |
| 0.012231 | 0.011620 | 0.011348 | 0.011698 | 0.011698 | 0.011496 | 0.011597 |
| 0.011530 | 0.011429 | 0.011362 | 0.011463 | 0.011564 | 0.011497 | 0.011362 |
| 0.011396 | 0.011564 | 0.011698 | 0.011631 | 0.011530 | 0.011497 | 0.011430 |
| 0.011396 | 0.011396 | 0.011463 | 0.011430 | 0.011631 | 0.011598 | 0.011530 |
| 0.011631 | 0.011698 | 0.011430 | 0.011430 | 0.011463 | 0.011463 | 0.011466 |
| 0.011534 | 0.011463 | 0.011463 | 0.011348 | 0.011422 | 0.011376 | 0.011464 |
| 0.011467 | 0.011404 | 0.011466 | 0.011440 | 0.011366 | 0.011403 | 0.011432 |
| 0.011708 | 0.011474 | 0.011508 | 0.011396 | 0.011406 | 0.011531 | 0.011497 |
| 0.011565 | 0.011498 | 0.011497 | 0.011463 | 0.011262 | 0.011900 | 0.011698 |
| 0.011732 | 0.011597 | 0.011463 | 0.011564 | 0.011362 | 0.011597 | 0.011396 |
| 0.011463 | 0.011463 | 0.011430 | 0.011396 | 0.011429 | 0.011396 | 0.011497 |
| 0.011463 | 0.011564 | 0.011497 | 0.011396 | 0.011498 | 0.011598 | 0.011601 |
| 0.011598 | 0.011497 | 0.011396 | 0.011330 | 0.011463 | 0.011396 | 0.011329 |
| 0.011434 | 0.011598 | 0.011396 | 0.011598 | 0.011362 | 0.011463 | 0.011430 |
| 0.011530 | 0.011430 | 0.011463 | 0.011430 | 0.011463 | 0.011329 | 0.011463 |
| 0.011497 | 0.011430 | 0.011497 | 0.011430 | 0.011329 | 0.011497 | 0.011732 |
| 0.011833 | 0.011765 | 0.011833 | 0.011600 | 0.011833 | 0.011329 | 0.011430 |
| 0.011466 | 0.011788 | 0.011518 | 0.011369 | 0.011841 | 0.011333 | 0.011414 |
| 0.011841 | 0.011740 | 0.011597 | 0.011765 | 0.011333 | 0.011698 | 0.011665 |
| 0.011597 | 0.011765 | 0.011451 | 0.011349 | 0.011437 | 0.011497 | 0.011500 |
| 0.011665 | 0.011431 | 0.011669 | 0.011771 | 0.011564 | 0.011698 | 0.011738 |
| 0.011466 | 0.011739 | 0.011466 | 0.011635 | 0.011834 | 0.011362 | 0.011566 |
| 0.011530 | 0.011463 | 0.011362 | 0.011362 | 0.011429 | 0.011429 | 0.011496 |
| 0.011429 | 0.011497 | 0.011396 | 0.011496 | 0.011429 | 0.011429 | 0.011496 |
| 0.011429 | 0.011866 | 0.011765 | 0.011799 | 0.011329 | 0.011429 | 0.011463 |
| 0.011463 | 0.011429 | 0.011497 | 0.011530 | 0.011396 | 0.011396 | 0.011396 |
| 0.011933 | 0.011564 | 0.011564 | 0.011362 | 0.011463 | 0.011631 | 0.011396 |
| 0.011396 | 0.011463 | 0.011429 | 0.011597 | 0.011396 | 0.011530 | 0.011664 |
| 0.011597 | 0.011429 | 0.011429 | 0.011362 | 0.011362 | 0.011530 | 0.011463 |
| 0.011362 | 0.011463 | 0.011329 | 0.011362 | 0.011497 | 0.011631 | 0.011396 |
| 0.011363 | 0.011497 | 0.011430 | 0.011329 | 0.011664 | 0.011329 | 0.011497 |
| 0.011437 | 0.011396 | 0.011698 | 0.011530 | 0.011564 | 0.011429 | 0.011530 |
| 0.011396 | 0.011732 | 0.011329 | 0.011597 | 0.011396 | 0.011396 | 0.011329 |
| 0.011564 | 0.011766 | 0.011463 | 0.011530 | 0.011362 | 0.011765 | 0.011396 |
| 0.011396 | 0.011396 | 0.011429 | 0.011530 | 0.011429 | 0.011530 | 0.011597 |
| 0.011597 | 0.011564 | 0.011463 | 0.011564 | 0.011530 | 0.011396 | 0.011362 |
| 0.011396 | 0.011396 | 0.011463 | 0.011396 | 0.011362 | 0.011530 | 0.011396 |
| 0.011429 | 0.011429 | 0.011564 | 0.011597 | 0.011496 | 0.011429 | 0.011430 |
| 0.011497 | 0.011429 | 0.011530 | 0.011396 | 0.011530 | 0.011631 | 0.011933 |
| 0.011429 | 0.011832 | 0.011440 | 0.017975 | 0.011387 | 0.011611 | 0.011793 |
| 0.011752 | 0.011799 | 0.011532 | 0.011466 | 0.011939 | 0.011820 | 0.011546 |
| 0.011629 | 0.011732 | 0.011333 | 0.011437 | 0.011451 | 0.011505 | 0.011447 |
| 0.011623 | 0.011619 | 0.011616 | 0.011325 | 0.011564 | 0.000000 | 0.011534 |
| 0.011438 | 0.011564 | 0.011564 | 0.011530 | 0.011497 | 0.011497 | 0.011463 |
| 0.011497 | 0.011429 | 0.011463 | 0.011497 | 0.011463 | 0.011396 | 0.011295 |
| 0.011295 | 0.011497 | 0.011396 | 0.011497 | 0.011530 | 0.011564 | 0.011329 |
| 0.011496 | 0.011463 | 0.011799 | 0.011799 | 0.011530 | 0.011565 | 0.011598 |
| 0.011362 | 0.011362 | 0.011396 | 0.011497 | 0.011362 | 0.011598 | 0.011598 |
| 0.011631 | 0.011597 | 0.011564 | 0.011665 | 0.011833 | 0.011666 | 0.011497 |
| 0.011497 | 0.011564 | 0.011597 | 0.011430 | 0.011497 | 0.011463 | 0.011497 |
| 0.011564 | 0.011564 | 0.011597 | 0.011564 | 0.011464 | 0.011665 | 0.011631 |
| 0.011500 | 0.011396 | 0.011497 | 0.011598 | 0.011497 | 0.011631 | 0.011664 |
| 0.011765 | 0.011333 | 0.011698 | 0.011665 | 0.011597 | 0.011765 | 0.011396 |
| 0.011566 | 0.011464 | 0.011295 | 0.011295 | 0.011497 | 0.011396 | 0.011497 |
| 0.011530 | 0.011564 | 0.011329 | 0.011496 | 0.011463 | 0.011799 | 0.011799 |



|          |          |          |          |          |          |          |
|----------|----------|----------|----------|----------|----------|----------|
| 0.011530 | 0.011565 | 0.011362 | 0.011295 | 0.012170 | 0.011560 | 0.011377 |
| 0.011587 | 0.011546 | 0.011622 | 0.011510 | 0.011620 | 0.011509 | 0.011577 |
| 0.012056 | 0.011302 | 0.011437 | 0.011406 | 0.011714 | 0.011638 | 0.011741 |
| 0.012080 | 0.011550 | 0.011736 | 0.011799 | 0.011664 | 0.011665 | 0.011702 |
| 0.011362 | 0.011530 | 0.011664 | 0.011631 | 0.011635 | 0.011631 | 0.011599 |
| 0.011463 | 0.011396 | 0.011429 | 0.011463 | 0.011362 | 0.011429 | 0.011329 |
| 0.011463 | 0.011496 | 0.011396 | 0.011362 | 0.011463 | 0.011396 | 0.011429 |
| 0.011429 | 0.011362 | 0.011429 | 0.011463 | 0.011362 | 0.011564 | 0.011597 |
| 0.011497 | 0.011564 | 0.011496 | 0.011497 | 0.011429 | 0.011832 | 0.011463 |
| 0.011478 | 0.011429 | 0.011665 | 0.011671 | 0.011530 | 0.011530 | 0.011530 |
| 0.011530 | 0.011463 | 0.011429 | 0.011463 | 0.011564 | 0.011564 | 0.011496 |
| 0.011496 | 0.011631 | 0.011799 | 0.011530 | 0.011732 | 0.011732 | 0.011597 |
| 0.011429 | 0.011497 | 0.011530 | 0.011933 | 0.011497 | 0.011530 | 0.011497 |
| 0.011530 | 0.011463 | 0.011463 | 0.011765 | 0.011698 | 0.011732 | 0.011463 |
| 0.011564 | 0.011631 | 0.011496 | 0.011564 | 0.011530 | 0.011396 | 0.011732 |
| 0.011496 | 0.011463 | 0.011463 | 0.011631 | 0.011463 | 0.011564 | 0.011799 |
| 0.011496 | 0.011875 | 0.011866 | 0.011670 | 0.011399 | 0.011570 | 0.011370 |
| 0.011500 | 0.011917 | 0.011411 | 0.011641 | 0.011402 | 0.011518 | 0.011538 |
| 0.011672 | 0.011389 | 0.011506 | 0.011390 | 0.011384 | 0.011596 | 0.011506 |
| 0.011550 | 0.011454 | 0.011553 | 0.011483 | 0.011498 | 0.011631 | 0.011698 |
| 0.011698 | 0.011565 | 0.011669 | 0.011670 | 0.011806 | 0.011838 | 0.011497 |
| 0.011732 | 0.011597 | 0.011463 | 0.011564 | 0.011362 | 0.011597 | 0.011396 |
| 0.011463 | 0.011463 | 0.011430 | 0.011396 | 0.011429 | 0.011396 | 0.011497 |
| 0.011479 | 0.011480 | 0.011471 | 0.011505 | 0.011642 | 0.011607 | 0.011606 |
| 0.011605 | 0.011531 | 0.011319 | 0.011348 | 0.011467 | 0.011636 | 0.011637 |
| 0.011430 | 0.011501 | 0.011734 | 0.011702 | 0.011632 | 0.011666 | 0.011329 |
| 0.011530 | 0.011530 | 0.011530 | 0.011497 | 0.012034 | 0.011664 | 0.011732 |
| 0.011766 | 0.011844 | 0.011469 | 0.011545 | 0.011429 | 0.011497 | 0.000000 |
| 0.011632 | 0.011530 | 0.011664 | 0.011664 | 0.011768 | 0.011665 | 0.011442 |
| 0.011331 | 0.011303 | 0.011401 | 0.011400 | 0.011504 | 0.011321 | 0.011672 |
| 0.011472 | 0.011543 | 0.011298 | 0.011397 | 0.011464 | 0.011539 | 0.011430 |
| 0.011396 | 0.011396 | 0.011463 | 0.011430 | 0.011631 | 0.011598 | 0.011530 |
| 0.011631 | 0.011698 | 0.011430 | 0.011430 | 0.011463 | 0.011463 | 0.011466 |
| 0.011534 | 0.011463 | 0.011463 | 0.011498 | 0.011631 | 0.011698 | 0.011698 |
| 0.011565 | 0.011669 | 0.011670 | 0.011806 | 0.011838 | 0.011497 | 0.011664 |
| 0.000000 | 0.000000 | 0.011432 | 0.011617 | 0.011547 | 0.011571 | 0.011446 |
| 0.011611 | 0.011790 | 0.011653 | 0.011502 | 0.011396 | 0.011598 | 0.011463 |
| 0.011564 | 0.011497 | 0.011396 | 0.011498 | 0.011598 | 0.011601 | 0.011497 |
| 0.011396 | 0.011330 | 0.011463 | 0.011396 | 0.011329 | 0.011434 | 0.011598 |
| 0.011497 | 0.011429 | 0.011463 | 0.011497 | 0.011463 | 0.011396 | 0.011598 |
| 0.011463 | 0.011497 | 0.011497 | 0.011429 | 0.011496 | 0.011732 | 0.011396 |
| 0.011429 | 0.011832 | 0.011429 | 0.011463 | 0.011429 | 0.011799 | 0.011403 |
| 0.011903 | 0.011358 | 0.011411 | 0.011624 | 0.011671 | 0.011635 | 0.011353 |
| 0.011375 | 0.011597 | 0.011698 | 0.011807 | 0.011666 | 0.011805 | 0.011935 |
| 0.011834 | 0.011872 | 0.011832 | 0.012086 | 0.011799 | 0.012539 | 0.011835 |
| 0.012574 | 0.012207 | 0.012341 | 0.012748 | 0.011799 | 0.011497 | 0.011799 |
| 0.012205 | 0.012174 | 0.011765 | 0.011665 | 0.011733 | 0.011733 | 0.011703 |
| 0.011597 | 0.011603 | 0.011664 | 0.011632 | 0.012002 | 0.012068 | 0.012070 |
| 0.011969 | 0.012069 | 0.012173 | 0.011940 | 0.012205 | 0.012212 | 0.012272 |
| 0.012273 | 0.012307 | 0.012255 | 0.012273 | 0.012274 | 0.011262 | 0.011800 |
| 0.011901 | 0.012404 | 0.011874 | 0.012135 | 0.012609 | 0.011672 | 0.011564 |
| 0.011530 | 0.011530 | 0.012001 | 0.011965 | 0.012151 | 0.011866 | 0.011532 |
| s686     | 0.011834 | 0.011834 | 0.012171 | 0.011935 | 0.011935 | 0.012002 |
| 0.011775 | 0.011707 | 0.012002 | 0.011430 | 0.011497 | 0.011465 | 0.011430 |
| 0.011464 | 0.011632 | 0.011430 | 0.011464 | 0.011531 | 0.011497 | 0.011464 |
| 0.011430 | 0.011464 | 0.011565 | 0.011431 | 0.011464 | 0.011464 | 0.011741 |
| 0.011699 | 0.011464 | 0.011363 | 0.011598 | 0.011531 | 0.011498 | 0.011531 |
| 0.011497 | 0.011598 | 0.011497 | 0.011497 | 0.011531 | 0.011497 | 0.011666 |
| 0.011430 | 0.011497 | 0.011531 | 0.011464 | 0.011565 | 0.011598 | 0.011531 |
| 0.011497 | 0.011666 | 0.011565 | 0.011834 | 0.011497 | 0.011767 | 0.011497 |

|          |          |          |          |          |          |          |
|----------|----------|----------|----------|----------|----------|----------|
| 0.011464 | 0.011565 | 0.011632 | 0.011767 | 0.011868 | 0.011565 | 0.011666 |
| 0.011531 | 0.011598 | 0.011498 | 0.011733 | 0.011969 | 0.011497 | 0.011565 |
| 0.011464 | 0.011565 | 0.011531 | 0.011598 | 0.011329 | 0.011531 | 0.011531 |
| 0.011430 | 0.011464 | 0.011430 | 0.011531 | 0.011497 | 0.011532 | 0.011598 |
| 0.011531 | 0.011497 | 0.011565 | 0.011329 | 0.011598 | 0.011430 | 0.011497 |
| 0.011666 | 0.011598 | 0.011834 | 0.011666 | 0.011497 | 0.011733 | 0.011497 |
| 0.011580 | 0.011809 | 0.011627 | 0.011295 | 0.011359 | 0.011503 | 0.011534 |
| 0.012234 | 0.011467 | 0.011349 | 0.011733 | 0.011733 | 0.011531 | 0.011632 |
| 0.011565 | 0.011531 | 0.011598 | 0.011497 | 0.011598 | 0.011531 | 0.011531 |
| 0.011497 | 0.011397 | 0.011800 | 0.011666 | 0.011565 | 0.011531 | 0.011464 |
| 0.011430 | 0.011430 | 0.011498 | 0.011464 | 0.011666 | 0.011632 | 0.011565 |
| 0.011666 | 0.011733 | 0.011464 | 0.011464 | 0.011498 | 0.011498 | 0.011500 |
| 0.011568 | 0.011498 | 0.011498 | 0.011349 | 0.011459 | 0.011412 | 0.011498 |
| 0.011501 | 0.011439 | 0.011467 | 0.011475 | 0.011401 | 0.011438 | 0.011466 |
| 0.011746 | 0.011440 | 0.011543 | 0.011431 | 0.011441 | 0.011566 | 0.011532 |
| 0.011600 | 0.011533 | 0.011532 | 0.011632 | 0.011565 | 0.011935 | 0.011733 |
| 0.011767 | 0.011632 | 0.011497 | 0.011599 | 0.011397 | 0.011632 | 0.011430 |
| 0.011497 | 0.011497 | 0.011464 | 0.011430 | 0.011464 | 0.011430 | 0.011531 |
| 0.011498 | 0.011599 | 0.011531 | 0.011430 | 0.011533 | 0.011632 | 0.011602 |
| 0.011632 | 0.011531 | 0.011430 | 0.011331 | 0.011498 | 0.011430 | 0.011363 |
| 0.011435 | 0.011632 | 0.011430 | 0.011632 | 0.011397 | 0.011498 | 0.011464 |
| 0.011565 | 0.011464 | 0.011498 | 0.011464 | 0.011498 | 0.011363 | 0.011498 |
| 0.011531 | 0.011464 | 0.011531 | 0.011464 | 0.011498 | 0.011531 | 0.011767 |
| 0.011868 | 0.011800 | 0.011868 | 0.011601 | 0.011868 | 0.011498 | 0.011464 |
| 0.011500 | 0.011790 | 0.011657 | 0.011369 | 0.011876 | 0.011368 | 0.011454 |
| 0.011809 | 0.011776 | 0.011666 | 0.011868 | 0.011573 | 0.011733 | 0.011700 |
| 0.011632 | 0.011800 | 0.011666 | 0.011432 | 0.011565 | 0.011531 | 0.011603 |
| 0.011700 | 0.011601 | 0.011738 | 0.011806 | 0.011733 | 0.011801 | 0.011909 |
| 0.011637 | 0.011809 | 0.011739 | 0.011670 | 0.011937 | 0.011396 | 0.011601 |
| 0.011565 | 0.011497 | 0.011396 | 0.011396 | 0.011464 | 0.011464 | 0.011531 |
| 0.011464 | 0.011531 | 0.011430 | 0.011531 | 0.011464 | 0.011464 | 0.011531 |
| 0.011464 | 0.011901 | 0.011800 | 0.011834 | 0.011363 | 0.011464 | 0.011498 |
| 0.011497 | 0.011464 | 0.011531 | 0.011565 | 0.011430 | 0.011430 | 0.011430 |
| 0.011969 | 0.011598 | 0.011598 | 0.011397 | 0.011497 | 0.011666 | 0.011430 |
| 0.011430 | 0.011497 | 0.011464 | 0.011632 | 0.011430 | 0.011565 | 0.011699 |
| 0.011632 | 0.011464 | 0.011464 | 0.011397 | 0.011396 | 0.011565 | 0.011497 |
| 0.011397 | 0.011497 | 0.011363 | 0.011397 | 0.011531 | 0.011666 | 0.011430 |
| 0.011397 | 0.011531 | 0.011464 | 0.011363 | 0.011699 | 0.011363 | 0.011531 |
| 0.011609 | 0.011430 | 0.011733 | 0.011565 | 0.011598 | 0.011464 | 0.011565 |
| 0.011430 | 0.011767 | 0.011363 | 0.011632 | 0.011430 | 0.011430 | 0.011363 |
| 0.011598 | 0.011801 | 0.011498 | 0.011565 | 0.011396 | 0.011800 | 0.011430 |
| 0.011430 | 0.011430 | 0.011464 | 0.011565 | 0.011464 | 0.011565 | 0.011632 |
| 0.011632 | 0.011598 | 0.011497 | 0.011599 | 0.011565 | 0.011430 | 0.011397 |
| 0.011430 | 0.011430 | 0.011498 | 0.011430 | 0.011397 | 0.011565 | 0.011430 |
| 0.011464 | 0.011464 | 0.011598 | 0.011632 | 0.011531 | 0.011464 | 0.011464 |
| 0.011397 | 0.011464 | 0.011565 | 0.011430 | 0.011565 | 0.011666 | 0.011969 |
| 0.011464 | 0.011868 | 0.011441 | 0.017982 | 0.011191 | 0.011367 | 0.011794 |
| 0.011754 | 0.011801 | 0.011323 | 0.011235 | 0.011666 | 0.011821 | 0.011304 |
| 0.011487 | 0.011489 | 0.011295 | 0.011270 | 0.011451 | 0.011258 | 0.011276 |
| 0.011484 | 0.011619 | 0.011618 | 0.011590 | 0.011598 | 0.011632 | 0.011636 |
| 0.011508 | 0.011599 | 0.011598 | 0.011565 | 0.011531 | 0.011531 | 0.011498 |
| 0.011531 | 0.011464 | 0.011497 | 0.011531 | 0.011498 | 0.011430 | 0.011464 |
| 0.011464 | 0.011531 | 0.011430 | 0.011531 | 0.011498 | 0.011599 | 0.011497 |
| 0.011531 | 0.011498 | 0.011834 | 0.011834 | 0.011565 | 0.011599 | 0.011632 |
| 0.011397 | 0.011397 | 0.011430 | 0.011531 | 0.011397 | 0.011632 | 0.011632 |
| 0.011666 | 0.011666 | 0.011598 | 0.011699 | 0.011868 | 0.011701 | 0.011531 |
| 0.011531 | 0.011599 | 0.011632 | 0.011464 | 0.011531 | 0.011498 | 0.011531 |
| 0.011599 | 0.011599 | 0.011632 | 0.011599 | 0.011499 | 0.011700 | 0.011666 |
| 0.011535 | 0.011430 | 0.011531 | 0.011632 | 0.011531 | 0.011666 | 0.011699 |
| 0.011868 | 0.011573 | 0.011733 | 0.011700 | 0.011632 | 0.011800 | 0.011431 |

|          |          |          |          |          |          |          |
|----------|----------|----------|----------|----------|----------|----------|
| 0.011600 | 0.011498 | 0.011464 | 0.011464 | 0.011531 | 0.011430 | 0.011531 |
| 0.011498 | 0.011599 | 0.011497 | 0.011531 | 0.011498 | 0.011834 | 0.011834 |
| 0.011565 | 0.011599 | 0.011666 | 0.011598 | 0.012240 | 0.011633 | 0.011589 |
| 0.011659 | 0.011616 | 0.011729 | 0.011616 | 0.011727 | 0.011648 | 0.011613 |
| 0.012196 | 0.011511 | 0.011644 | 0.011580 | 0.011854 | 0.011708 | 0.011811 |
| 0.012219 | 0.011665 | 0.011772 | 0.011834 | 0.011699 | 0.011699 | 0.011737 |
| 0.011396 | 0.011565 | 0.011699 | 0.011666 | 0.011670 | 0.011666 | 0.011600 |
| 0.011497 | 0.011430 | 0.011464 | 0.011497 | 0.011397 | 0.011464 | 0.011363 |
| 0.011497 | 0.011531 | 0.011430 | 0.011397 | 0.011497 | 0.011430 | 0.011464 |
| 0.011464 | 0.011396 | 0.011464 | 0.011498 | 0.011396 | 0.011598 | 0.011632 |
| 0.011531 | 0.011598 | 0.011531 | 0.011531 | 0.011464 | 0.011868 | 0.011497 |
| 0.011548 | 0.011464 | 0.011700 | 0.011706 | 0.011565 | 0.011565 | 0.011565 |
| 0.011565 | 0.011498 | 0.011464 | 0.011498 | 0.011598 | 0.011598 | 0.011531 |
| 0.011531 | 0.011666 | 0.011834 | 0.011565 | 0.011767 | 0.011767 | 0.011632 |
| 0.011464 | 0.011531 | 0.011565 | 0.011969 | 0.011531 | 0.011565 | 0.011531 |
| 0.011565 | 0.011497 | 0.011497 | 0.011801 | 0.011733 | 0.011767 | 0.011497 |
| 0.011598 | 0.011666 | 0.011531 | 0.011598 | 0.011565 | 0.011430 | 0.011767 |
| 0.011531 | 0.011497 | 0.011497 | 0.011666 | 0.011497 | 0.011598 | 0.011834 |
| 0.011531 | 0.011843 | 0.011901 | 0.011549 | 0.011230 | 0.011605 | 0.011267 |
| 0.011170 | 0.011840 | 0.011412 | 0.011507 | 0.011305 | 0.011366 | 0.011326 |
| 0.011469 | 0.011126 | 0.011283 | 0.011126 | 0.011168 | 0.011262 | 0.011507 |
| 0.011513 | 0.011415 | 0.011554 | 0.011484 | 0.011533 | 0.011666 | 0.011733 |
| 0.011733 | 0.011599 | 0.011704 | 0.011706 | 0.011842 | 0.011875 | 0.011531 |
| 0.011767 | 0.011632 | 0.011497 | 0.011599 | 0.011397 | 0.011632 | 0.011430 |
| 0.011497 | 0.011497 | 0.011464 | 0.011430 | 0.011464 | 0.011430 | 0.011531 |
| 0.011515 | 0.011516 | 0.011506 | 0.011335 | 0.011677 | 0.011642 | 0.011642 |
| 0.011641 | 0.011364 | 0.011319 | 0.011349 | 0.011501 | 0.011671 | 0.011672 |
| 0.011465 | 0.011535 | 0.011769 | 0.011738 | 0.011667 | 0.011701 | 0.011632 |
| 0.011565 | 0.011632 | 0.011632 | 0.011531 | 0.012104 | 0.011699 | 0.011767 |
| 0.011801 | 0.011881 | 0.011504 | 0.011581 | 0.011464 | 0.011666 | 0.011632 |
| 0.000000 | 0.011699 | 0.011699 | 0.011699 | 0.011847 | 0.011834 | 0.011477 |
| 0.011365 | 0.011372 | 0.011470 | 0.011435 | 0.011539 | 0.011397 | 0.011707 |
| 0.011507 | 0.011720 | 0.011395 | 0.011473 | 0.011498 | 0.011575 | 0.011464 |
| 0.011430 | 0.011430 | 0.011498 | 0.011464 | 0.011666 | 0.011632 | 0.011565 |
| 0.011666 | 0.011733 | 0.011464 | 0.011464 | 0.011498 | 0.011498 | 0.011500 |
| 0.011568 | 0.011498 | 0.011498 | 0.011533 | 0.011666 | 0.011733 | 0.011733 |
| 0.011599 | 0.011704 | 0.011706 | 0.011842 | 0.011875 | 0.011531 | 0.011699 |
| 0.011632 | 0.011632 | 0.011467 | 0.011653 | 0.011583 | 0.011401 | 0.011446 |
| 0.011612 | 0.011790 | 0.011654 | 0.011537 | 0.011430 | 0.011632 | 0.011498 |
| 0.011599 | 0.011531 | 0.011430 | 0.011533 | 0.011632 | 0.011602 | 0.011531 |
| 0.011430 | 0.011331 | 0.011498 | 0.011430 | 0.011363 | 0.011435 | 0.011632 |
| 0.011531 | 0.011464 | 0.011497 | 0.011531 | 0.011498 | 0.011430 | 0.011632 |
| 0.011497 | 0.011531 | 0.011531 | 0.011464 | 0.011531 | 0.011767 | 0.011430 |
| 0.011464 | 0.011868 | 0.011464 | 0.011497 | 0.011464 | 0.011834 | 0.011232 |
| 0.011736 | 0.011273 | 0.011261 | 0.011624 | 0.011590 | 0.011636 | 0.011186 |
| 0.011165 | 0.011632 | 0.011733 | 0.011843 | 0.011701 | 0.011806 | 0.011970 |
| 0.011870 | 0.011908 | 0.011868 | 0.012088 | 0.011834 | 0.012711 | 0.011871 |
| 0.012611 | 0.012345 | 0.012513 | 0.012751 | 0.011834 | 0.011531 | 0.011835 |
| 0.012275 | 0.012176 | 0.011800 | 0.011700 | 0.011768 | 0.011768 | 0.011738 |
| 0.011632 | 0.011604 | 0.011699 | 0.011667 | 0.012038 | 0.012104 | 0.012105 |
| 0.012004 | 0.012105 | 0.012142 | 0.011942 | 0.012275 | 0.012282 | 0.012342 |
| 0.012343 | 0.012377 | 0.012291 | 0.012343 | 0.012345 | 0.011565 | 0.011869 |
| 0.011937 | 0.012441 | 0.011944 | 0.012104 | 0.012646 | 0.011707 | 0.011599 |
| 0.011565 | 0.011565 | 0.012037 | 0.012091 | 0.012188 | 0.011901 | 0.011567 |
| s687     | 0.011732 | 0.011732 | 0.012169 | 0.011967 | 0.011967 | 0.012034 |
| 0.011875 | 0.011807 | 0.012034 | 0.011463 | 0.011530 | 0.011464 | 0.011463 |
| 0.011496 | 0.011664 | 0.011463 | 0.011496 | 0.011564 | 0.011530 | 0.011496 |
| 0.011463 | 0.011496 | 0.011597 | 0.011463 | 0.011497 | 0.011496 | 0.011841 |
| 0.011731 | 0.011496 | 0.011396 | 0.011631 | 0.011564 | 0.011530 | 0.011564 |
| 0.011530 | 0.011631 | 0.011530 | 0.011530 | 0.011564 | 0.011530 | 0.011698 |

|          |          |          |          |          |          |          |
|----------|----------|----------|----------|----------|----------|----------|
| 0.011463 | 0.011530 | 0.011564 | 0.011496 | 0.011597 | 0.011631 | 0.011564 |
| 0.011530 | 0.011698 | 0.011598 | 0.011866 | 0.011530 | 0.011799 | 0.011530 |
| 0.011496 | 0.011597 | 0.011664 | 0.011799 | 0.011899 | 0.011597 | 0.011698 |
| 0.011564 | 0.011631 | 0.011530 | 0.011765 | 0.012000 | 0.011530 | 0.011597 |
| 0.011496 | 0.011597 | 0.011564 | 0.011631 | 0.011564 | 0.011564 | 0.011564 |
| 0.011463 | 0.011496 | 0.011463 | 0.011564 | 0.011530 | 0.011565 | 0.011631 |
| 0.011564 | 0.011530 | 0.011597 | 0.011496 | 0.011631 | 0.011463 | 0.011530 |
| 0.011698 | 0.011631 | 0.011866 | 0.011698 | 0.011530 | 0.011765 | 0.011530 |
| 0.011616 | 0.011845 | 0.011702 | 0.011334 | 0.011396 | 0.011465 | 0.011572 |
| 0.012231 | 0.011670 | 0.011390 | 0.011765 | 0.011765 | 0.011563 | 0.011664 |
| 0.011597 | 0.011496 | 0.011496 | 0.011530 | 0.011631 | 0.011564 | 0.011429 |
| 0.011463 | 0.011631 | 0.011765 | 0.011698 | 0.011597 | 0.011564 | 0.011497 |
| 0.011463 | 0.011463 | 0.011530 | 0.011497 | 0.011698 | 0.011665 | 0.011597 |
| 0.011698 | 0.011765 | 0.011497 | 0.011497 | 0.011530 | 0.011530 | 0.011533 |
| 0.011601 | 0.011530 | 0.011530 | 0.011348 | 0.011422 | 0.011411 | 0.011497 |
| 0.011500 | 0.011404 | 0.011466 | 0.011440 | 0.011400 | 0.011437 | 0.011465 |
| 0.011708 | 0.011508 | 0.011508 | 0.011430 | 0.011406 | 0.011565 | 0.011531 |
| 0.011598 | 0.011532 | 0.011531 | 0.011530 | 0.011463 | 0.011967 | 0.011765 |
| 0.011799 | 0.011665 | 0.011530 | 0.011631 | 0.011429 | 0.011664 | 0.011463 |
| 0.011530 | 0.011530 | 0.011497 | 0.011463 | 0.011496 | 0.011463 | 0.011564 |
| 0.011530 | 0.011631 | 0.011564 | 0.011463 | 0.011566 | 0.011665 | 0.011668 |
| 0.011665 | 0.011564 | 0.011463 | 0.011397 | 0.011530 | 0.011463 | 0.011396 |
| 0.011502 | 0.011665 | 0.011463 | 0.011665 | 0.011429 | 0.011530 | 0.011497 |
| 0.011597 | 0.011497 | 0.011530 | 0.011497 | 0.011530 | 0.011396 | 0.011530 |
| 0.011564 | 0.011497 | 0.011564 | 0.011497 | 0.011396 | 0.011564 | 0.011799 |
| 0.011900 | 0.011832 | 0.011900 | 0.011667 | 0.011900 | 0.011396 | 0.011497 |
| 0.011533 | 0.011788 | 0.011609 | 0.011437 | 0.011908 | 0.011401 | 0.011414 |
| 0.011909 | 0.011774 | 0.011664 | 0.011832 | 0.011538 | 0.011765 | 0.011732 |
| 0.011664 | 0.011832 | 0.011593 | 0.011472 | 0.011521 | 0.011564 | 0.011568 |
| 0.011732 | 0.011465 | 0.011770 | 0.011838 | 0.011631 | 0.011765 | 0.011805 |
| 0.011534 | 0.011807 | 0.011602 | 0.011703 | 0.011834 | 0.011429 | 0.011599 |
| 0.011597 | 0.011530 | 0.011429 | 0.011429 | 0.011496 | 0.011496 | 0.011564 |
| 0.011496 | 0.011564 | 0.011463 | 0.011564 | 0.011496 | 0.011496 | 0.011563 |
| 0.011496 | 0.011933 | 0.011832 | 0.011866 | 0.011396 | 0.011496 | 0.011530 |
| 0.011530 | 0.011496 | 0.011564 | 0.011597 | 0.011463 | 0.011463 | 0.011463 |
| 0.012000 | 0.011631 | 0.011631 | 0.011429 | 0.011530 | 0.011698 | 0.011463 |
| 0.011463 | 0.011530 | 0.011496 | 0.011664 | 0.011463 | 0.011597 | 0.011731 |
| 0.011664 | 0.011496 | 0.011496 | 0.011429 | 0.011429 | 0.011597 | 0.011530 |
| 0.011429 | 0.011530 | 0.011396 | 0.011429 | 0.011564 | 0.011698 | 0.011463 |
| 0.011430 | 0.011564 | 0.011497 | 0.011396 | 0.011731 | 0.011396 | 0.011564 |
| 0.011574 | 0.011463 | 0.011765 | 0.011597 | 0.011631 | 0.011496 | 0.011597 |
| 0.011463 | 0.011799 | 0.011396 | 0.011664 | 0.011463 | 0.011463 | 0.011396 |
| 0.011631 | 0.011833 | 0.011530 | 0.011597 | 0.011429 | 0.011832 | 0.011463 |
| 0.011463 | 0.011463 | 0.011496 | 0.011597 | 0.011496 | 0.011597 | 0.011664 |
| 0.011664 | 0.011631 | 0.011530 | 0.011631 | 0.011597 | 0.011463 | 0.011429 |
| 0.011463 | 0.011463 | 0.011530 | 0.011463 | 0.011429 | 0.011597 | 0.011463 |
| 0.011496 | 0.011496 | 0.011631 | 0.011664 | 0.011564 | 0.011496 | 0.011497 |
| 0.011564 | 0.011496 | 0.011597 | 0.011463 | 0.011597 | 0.011698 | 0.012000 |
| 0.011496 | 0.011900 | 0.011440 | 0.017936 | 0.011387 | 0.011549 | 0.011793 |
| 0.011752 | 0.011799 | 0.011479 | 0.011524 | 0.011884 | 0.011820 | 0.011485 |
| 0.011677 | 0.011671 | 0.011333 | 0.011353 | 0.011411 | 0.011455 | 0.011361 |
| 0.011670 | 0.011619 | 0.011579 | 0.011391 | 0.011631 | 0.011530 | 0.011601 |
| 0.011507 | 0.011631 | 0.011631 | 0.011597 | 0.011564 | 0.011564 | 0.011530 |
| 0.011564 | 0.011496 | 0.011530 | 0.011564 | 0.011530 | 0.011463 | 0.011362 |
| 0.011362 | 0.011564 | 0.011463 | 0.011564 | 0.011597 | 0.011631 | 0.011396 |
| 0.011564 | 0.011530 | 0.011866 | 0.011866 | 0.011597 | 0.011632 | 0.011665 |
| 0.011429 | 0.011429 | 0.011463 | 0.011564 | 0.011429 | 0.011665 | 0.011665 |
| 0.011698 | 0.011664 | 0.011631 | 0.011732 | 0.011900 | 0.011734 | 0.011564 |
| 0.011564 | 0.011631 | 0.011665 | 0.011497 | 0.011564 | 0.011530 | 0.011564 |
| 0.011631 | 0.011631 | 0.011665 | 0.011631 | 0.011532 | 0.011732 | 0.011698 |

|          |          |          |          |          |          |          |
|----------|----------|----------|----------|----------|----------|----------|
| 0.011568 | 0.011463 | 0.011564 | 0.011665 | 0.011564 | 0.011698 | 0.011731 |
| 0.011832 | 0.011538 | 0.011765 | 0.011732 | 0.011664 | 0.011832 | 0.011463 |
| 0.011633 | 0.011531 | 0.011362 | 0.011362 | 0.011564 | 0.011463 | 0.011564 |
| 0.011597 | 0.011631 | 0.011396 | 0.011564 | 0.011530 | 0.011866 | 0.011866 |
| 0.011597 | 0.011632 | 0.011564 | 0.011496 | 0.012204 | 0.011667 | 0.011517 |
| 0.011658 | 0.011650 | 0.011728 | 0.011614 | 0.011725 | 0.011612 | 0.011612 |
| 0.012193 | 0.011372 | 0.011540 | 0.011510 | 0.011783 | 0.011740 | 0.011809 |
| 0.012148 | 0.011626 | 0.011804 | 0.011866 | 0.011732 | 0.011732 | 0.011770 |
| 0.011429 | 0.011597 | 0.011731 | 0.011698 | 0.011702 | 0.011698 | 0.011666 |
| 0.011530 | 0.011463 | 0.011496 | 0.011530 | 0.011429 | 0.011496 | 0.011396 |
| 0.011530 | 0.011564 | 0.011463 | 0.011429 | 0.011530 | 0.011463 | 0.011496 |
| 0.011496 | 0.011429 | 0.011496 | 0.011530 | 0.011429 | 0.011631 | 0.011664 |
| 0.011564 | 0.011631 | 0.011564 | 0.011564 | 0.011496 | 0.011899 | 0.011530 |
| 0.011582 | 0.011497 | 0.011698 | 0.011705 | 0.011597 | 0.011597 | 0.011597 |
| 0.011597 | 0.011530 | 0.011496 | 0.011530 | 0.011631 | 0.011631 | 0.011564 |
| 0.011564 | 0.011698 | 0.011866 | 0.011597 | 0.011799 | 0.011799 | 0.011664 |
| 0.011496 | 0.011564 | 0.011597 | 0.012000 | 0.011564 | 0.011597 | 0.011564 |
| 0.011597 | 0.011530 | 0.011530 | 0.011832 | 0.011765 | 0.011799 | 0.011530 |
| 0.011631 | 0.011698 | 0.011564 | 0.011631 | 0.011597 | 0.011463 | 0.011799 |
| 0.011563 | 0.011530 | 0.011530 | 0.011698 | 0.011530 | 0.011631 | 0.011866 |
| 0.011564 | 0.011943 | 0.011933 | 0.011670 | 0.011455 | 0.011570 | 0.011473 |
| 0.011390 | 0.011917 | 0.011411 | 0.011596 | 0.011451 | 0.011569 | 0.011538 |
| 0.011723 | 0.011389 | 0.011505 | 0.011390 | 0.011383 | 0.011596 | 0.011547 |
| 0.011550 | 0.011493 | 0.011553 | 0.011483 | 0.011566 | 0.011698 | 0.011765 |
| 0.011765 | 0.011632 | 0.011736 | 0.011738 | 0.011874 | 0.011908 | 0.011564 |
| 0.011799 | 0.011665 | 0.011530 | 0.011631 | 0.011429 | 0.011664 | 0.011463 |
| 0.011530 | 0.011530 | 0.011497 | 0.011463 | 0.011496 | 0.011463 | 0.011564 |
| 0.011479 | 0.011480 | 0.011471 | 0.011540 | 0.011676 | 0.011607 | 0.011606 |
| 0.011639 | 0.011564 | 0.011356 | 0.011348 | 0.011500 | 0.011670 | 0.011671 |
| 0.011464 | 0.011534 | 0.011767 | 0.011702 | 0.011666 | 0.011699 | 0.011530 |
| 0.011597 | 0.011597 | 0.011597 | 0.011564 | 0.012101 | 0.011732 | 0.011799 |
| 0.011833 | 0.011915 | 0.011538 | 0.011580 | 0.011496 | 0.011564 | 0.011530 |
| 0.011699 | 0.000000 | 0.011731 | 0.011731 | 0.011728 | 0.011732 | 0.011476 |
| 0.011398 | 0.011406 | 0.011469 | 0.011434 | 0.011573 | 0.011359 | 0.011706 |
| 0.011506 | 0.011630 | 0.011394 | 0.011472 | 0.011497 | 0.011573 | 0.011497 |
| 0.011463 | 0.011463 | 0.011530 | 0.011497 | 0.011698 | 0.011665 | 0.011597 |
| 0.011698 | 0.011765 | 0.011497 | 0.011497 | 0.011530 | 0.011530 | 0.011533 |
| 0.011601 | 0.011530 | 0.011530 | 0.011566 | 0.011698 | 0.011765 | 0.011765 |
| 0.011632 | 0.011736 | 0.011738 | 0.011874 | 0.011908 | 0.011564 | 0.011732 |
| 0.011530 | 0.011530 | 0.011500 | 0.011617 | 0.011616 | 0.011639 | 0.011481 |
| 0.011680 | 0.011880 | 0.011610 | 0.011570 | 0.011463 | 0.011665 | 0.011530 |
| 0.011631 | 0.011564 | 0.011463 | 0.011566 | 0.011665 | 0.011668 | 0.011564 |
| 0.011463 | 0.011397 | 0.011530 | 0.011463 | 0.011396 | 0.011502 | 0.011665 |
| 0.011564 | 0.011496 | 0.011530 | 0.011564 | 0.011530 | 0.011463 | 0.011665 |
| 0.011530 | 0.011564 | 0.011564 | 0.011496 | 0.011564 | 0.011799 | 0.011463 |
| 0.011496 | 0.011899 | 0.011496 | 0.011530 | 0.011496 | 0.011866 | 0.011403 |
| 0.011959 | 0.011443 | 0.011461 | 0.011664 | 0.011752 | 0.011634 | 0.011353 |
| 0.011427 | 0.011664 | 0.011765 | 0.011841 | 0.011733 | 0.011872 | 0.012002 |
| 0.011868 | 0.011906 | 0.011899 | 0.012120 | 0.011866 | 0.012606 | 0.011869 |
| 0.012641 | 0.012241 | 0.012408 | 0.012815 | 0.011866 | 0.011564 | 0.011867 |
| 0.012238 | 0.012241 | 0.011832 | 0.011732 | 0.011766 | 0.011766 | 0.011770 |
| 0.011664 | 0.011671 | 0.011731 | 0.011665 | 0.012069 | 0.012135 | 0.012036 |
| 0.012002 | 0.012136 | 0.012207 | 0.011974 | 0.012239 | 0.012245 | 0.012306 |
| 0.012306 | 0.012340 | 0.012289 | 0.012307 | 0.012342 | 0.011463 | 0.011867 |
| 0.011935 | 0.012472 | 0.011908 | 0.012202 | 0.012676 | 0.011705 | 0.011598 |
| 0.011597 | 0.011597 | 0.012068 | 0.012047 | 0.012151 | 0.011933 | 0.011599 |
| S688     | 0.011866 | 0.011866 | 0.012202 | 0.011967 | 0.011967 | 0.012034 |
| 0.011875 | 0.011807 | 0.012034 | 0.011463 | 0.011530 | 0.011498 | 0.011463 |
| 0.011496 | 0.011664 | 0.011463 | 0.011496 | 0.011564 | 0.011530 | 0.011496 |
| 0.011463 | 0.011496 | 0.011597 | 0.011463 | 0.011497 | 0.011496 | 0.011841 |

|          |          |          |          |          |          |          |
|----------|----------|----------|----------|----------|----------|----------|
| 0.011731 | 0.011497 | 0.011396 | 0.011631 | 0.011564 | 0.011530 | 0.011564 |
| 0.011530 | 0.011631 | 0.011530 | 0.011530 | 0.011564 | 0.011530 | 0.011698 |
| 0.011463 | 0.011530 | 0.011564 | 0.011496 | 0.011597 | 0.011564 | 0.011564 |
| 0.011530 | 0.011698 | 0.011598 | 0.011866 | 0.011530 | 0.011799 | 0.011530 |
| 0.011496 | 0.011597 | 0.011664 | 0.011799 | 0.011900 | 0.011597 | 0.011698 |
| 0.011564 | 0.011631 | 0.011530 | 0.011765 | 0.012001 | 0.011530 | 0.011597 |
| 0.011496 | 0.011597 | 0.011564 | 0.011631 | 0.011564 | 0.011564 | 0.011564 |
| 0.011463 | 0.011496 | 0.011463 | 0.011564 | 0.011530 | 0.011565 | 0.011631 |
| 0.011564 | 0.011530 | 0.011597 | 0.011496 | 0.011631 | 0.011463 | 0.011530 |
| 0.011698 | 0.011631 | 0.011866 | 0.011698 | 0.011530 | 0.011765 | 0.011530 |
| 0.011691 | 0.011920 | 0.011702 | 0.011451 | 0.011396 | 0.011539 | 0.011533 |
| 0.012231 | 0.011518 | 0.011390 | 0.011564 | 0.011496 | 0.011564 | 0.011664 |
| 0.011597 | 0.011564 | 0.011631 | 0.011530 | 0.011631 | 0.011564 | 0.011564 |
| 0.011530 | 0.011631 | 0.011832 | 0.011698 | 0.011597 | 0.011564 | 0.011497 |
| 0.011463 | 0.011463 | 0.011530 | 0.011497 | 0.011698 | 0.011665 | 0.011597 |
| 0.011698 | 0.011765 | 0.011497 | 0.011497 | 0.011530 | 0.011530 | 0.011533 |
| 0.011601 | 0.011530 | 0.011530 | 0.011384 | 0.011422 | 0.011446 | 0.011531 |
| 0.011534 | 0.011438 | 0.011466 | 0.011509 | 0.011434 | 0.011471 | 0.011499 |
| 0.011744 | 0.011543 | 0.011542 | 0.011464 | 0.011440 | 0.011599 | 0.011565 |
| 0.011632 | 0.011566 | 0.011565 | 0.011664 | 0.011597 | 0.011967 | 0.011766 |
| 0.011799 | 0.011665 | 0.011530 | 0.011631 | 0.011429 | 0.011664 | 0.011463 |
| 0.011530 | 0.011530 | 0.011497 | 0.011463 | 0.011496 | 0.011463 | 0.011564 |
| 0.011530 | 0.011631 | 0.011564 | 0.011463 | 0.011566 | 0.011665 | 0.011669 |
| 0.011665 | 0.011564 | 0.011463 | 0.011397 | 0.011530 | 0.011463 | 0.011396 |
| 0.011502 | 0.011665 | 0.011463 | 0.011665 | 0.011429 | 0.011530 | 0.011497 |
| 0.011598 | 0.011497 | 0.011530 | 0.011497 | 0.011530 | 0.011396 | 0.011530 |
| 0.011564 | 0.011497 | 0.011564 | 0.011497 | 0.011530 | 0.011564 | 0.011799 |
| 0.011900 | 0.011832 | 0.011900 | 0.011599 | 0.011900 | 0.011530 | 0.011497 |
| 0.011533 | 0.011788 | 0.011472 | 0.011403 | 0.011909 | 0.011401 | 0.011532 |
| 0.011909 | 0.011774 | 0.011496 | 0.011900 | 0.011572 | 0.011496 | 0.011732 |
| 0.011664 | 0.011564 | 0.011700 | 0.011431 | 0.011605 | 0.011564 | 0.011635 |
| 0.011732 | 0.011634 | 0.011635 | 0.011839 | 0.011765 | 0.011833 | 0.011941 |
| 0.011669 | 0.011841 | 0.011771 | 0.011703 | 0.011969 | 0.011429 | 0.011633 |
| 0.011597 | 0.011530 | 0.011429 | 0.011429 | 0.011496 | 0.011496 | 0.011564 |
| 0.011496 | 0.011564 | 0.011463 | 0.011564 | 0.011496 | 0.011496 | 0.011564 |
| 0.011496 | 0.011933 | 0.011832 | 0.011866 | 0.011396 | 0.011496 | 0.011530 |
| 0.011530 | 0.011496 | 0.011564 | 0.011597 | 0.011463 | 0.011463 | 0.011463 |
| 0.012000 | 0.011631 | 0.011631 | 0.011429 | 0.011530 | 0.011698 | 0.011463 |
| 0.011463 | 0.011530 | 0.011496 | 0.011665 | 0.011463 | 0.011597 | 0.011731 |
| 0.011664 | 0.011496 | 0.011496 | 0.011429 | 0.011429 | 0.011597 | 0.011530 |
| 0.011429 | 0.011530 | 0.011396 | 0.011429 | 0.011564 | 0.011698 | 0.011463 |
| 0.011430 | 0.011564 | 0.011497 | 0.011396 | 0.011732 | 0.011396 | 0.011564 |
| 0.011642 | 0.011463 | 0.011765 | 0.011597 | 0.011631 | 0.011496 | 0.011597 |
| 0.011463 | 0.011799 | 0.011396 | 0.011664 | 0.011463 | 0.011463 | 0.011396 |
| 0.011631 | 0.011833 | 0.011530 | 0.011597 | 0.011429 | 0.011832 | 0.011463 |
| 0.011463 | 0.011463 | 0.011496 | 0.011597 | 0.011496 | 0.011597 | 0.011664 |
| 0.011664 | 0.011631 | 0.011530 | 0.011631 | 0.011597 | 0.011463 | 0.011429 |
| 0.011463 | 0.011463 | 0.011530 | 0.011463 | 0.011429 | 0.011597 | 0.011463 |
| 0.011496 | 0.011496 | 0.011631 | 0.011664 | 0.011564 | 0.011496 | 0.011497 |
| 0.011564 | 0.011496 | 0.011597 | 0.011463 | 0.011597 | 0.011496 | 0.012000 |
| 0.011496 | 0.011900 | 0.011474 | 0.011789 | 0.011322 | 0.011672 | 0.011828 |
| 0.011822 | 0.011834 | 0.011479 | 0.011466 | 0.011774 | 0.011889 | 0.011485 |
| 0.011629 | 0.011610 | 0.011372 | 0.011437 | 0.011451 | 0.011406 | 0.011533 |
| 0.011576 | 0.011619 | 0.011616 | 0.011325 | 0.011631 | 0.011665 | 0.011669 |
| 0.011541 | 0.011631 | 0.011564 | 0.011597 | 0.011564 | 0.011564 | 0.011530 |
| 0.011497 | 0.011497 | 0.011329 | 0.011564 | 0.011530 | 0.011463 | 0.011497 |
| 0.011497 | 0.011564 | 0.011463 | 0.011564 | 0.011597 | 0.011631 | 0.011530 |
| 0.011564 | 0.011530 | 0.011866 | 0.011866 | 0.011598 | 0.011632 | 0.011665 |
| 0.011430 | 0.011430 | 0.011463 | 0.011564 | 0.011430 | 0.011665 | 0.011665 |
| 0.011429 | 0.011496 | 0.011631 | 0.011463 | 0.011900 | 0.011464 | 0.011564 |

|          |          |          |          |          |          |          |
|----------|----------|----------|----------|----------|----------|----------|
| 0.011362 | 0.011631 | 0.011665 | 0.011497 | 0.011564 | 0.011530 | 0.011497 |
| 0.011430 | 0.011430 | 0.011463 | 0.011631 | 0.011532 | 0.011732 | 0.011698 |
| 0.011568 | 0.011463 | 0.011564 | 0.011665 | 0.011564 | 0.011698 | 0.011731 |
| 0.011900 | 0.011572 | 0.011496 | 0.011732 | 0.011664 | 0.011564 | 0.011463 |
| 0.011566 | 0.011531 | 0.011497 | 0.011497 | 0.011564 | 0.011463 | 0.011564 |
| 0.011597 | 0.011631 | 0.011530 | 0.011564 | 0.011530 | 0.011866 | 0.011866 |
| 0.011598 | 0.011632 | 0.011698 | 0.011631 | 0.012271 | 0.011453 | 0.011623 |
| 0.011693 | 0.011442 | 0.011763 | 0.011649 | 0.011620 | 0.011681 | 0.011439 |
| 0.012228 | 0.011545 | 0.011677 | 0.011613 | 0.011887 | 0.011740 | 0.011843 |
| 0.012250 | 0.011739 | 0.011804 | 0.011866 | 0.011732 | 0.011732 | 0.011770 |
| 0.011429 | 0.011597 | 0.011731 | 0.011698 | 0.011702 | 0.011698 | 0.011667 |
| 0.011530 | 0.011463 | 0.011496 | 0.011530 | 0.011429 | 0.011496 | 0.011396 |
| 0.011530 | 0.011564 | 0.011463 | 0.011429 | 0.011530 | 0.011463 | 0.011496 |
| 0.011496 | 0.011429 | 0.011496 | 0.011530 | 0.011429 | 0.011631 | 0.011664 |
| 0.011564 | 0.011631 | 0.011564 | 0.011564 | 0.011496 | 0.011900 | 0.011530 |
| 0.011582 | 0.011497 | 0.011732 | 0.011739 | 0.011597 | 0.011597 | 0.011597 |
| 0.011597 | 0.011530 | 0.011496 | 0.011530 | 0.011631 | 0.011631 | 0.011564 |
| 0.011564 | 0.011698 | 0.011866 | 0.011597 | 0.011799 | 0.011799 | 0.011664 |
| 0.011496 | 0.011564 | 0.011597 | 0.012001 | 0.011564 | 0.011597 | 0.011564 |
| 0.011396 | 0.011530 | 0.011530 | 0.011833 | 0.011765 | 0.011799 | 0.011530 |
| 0.011631 | 0.011698 | 0.011564 | 0.011631 | 0.011597 | 0.011463 | 0.011799 |
| 0.011564 | 0.011530 | 0.011530 | 0.011698 | 0.011530 | 0.011631 | 0.011866 |
| 0.011564 | 0.011943 | 0.011933 | 0.011711 | 0.011286 | 0.011638 | 0.011318 |
| 0.011445 | 0.011917 | 0.011411 | 0.011641 | 0.011451 | 0.011569 | 0.011538 |
| 0.011570 | 0.011258 | 0.011450 | 0.011126 | 0.011384 | 0.011395 | 0.011506 |
| 0.011550 | 0.011414 | 0.011589 | 0.011518 | 0.011566 | 0.011698 | 0.011766 |
| 0.011765 | 0.011632 | 0.011736 | 0.011738 | 0.011874 | 0.011909 | 0.011564 |
| 0.011799 | 0.011665 | 0.011530 | 0.011631 | 0.011429 | 0.011664 | 0.011463 |
| 0.011530 | 0.011530 | 0.011497 | 0.011463 | 0.011496 | 0.011463 | 0.011564 |
| 0.011375 | 0.011515 | 0.011540 | 0.011574 | 0.011710 | 0.011675 | 0.011606 |
| 0.011674 | 0.011598 | 0.011393 | 0.011348 | 0.011534 | 0.011704 | 0.011705 |
| 0.011497 | 0.011568 | 0.011801 | 0.011770 | 0.011430 | 0.011733 | 0.011664 |
| 0.011597 | 0.011664 | 0.011664 | 0.011564 | 0.012135 | 0.011463 | 0.011530 |
| 0.011833 | 0.011879 | 0.011503 | 0.011615 | 0.011497 | 0.011698 | 0.011664 |
| 0.011699 | 0.011731 | 0.000000 | 0.000000 | 0.011886 | 0.011866 | 0.011511 |
| 0.011398 | 0.011406 | 0.011503 | 0.011468 | 0.011573 | 0.011433 | 0.011740 |
| 0.011540 | 0.011630 | 0.011346 | 0.011585 | 0.011531 | 0.011608 | 0.011497 |
| 0.011463 | 0.011463 | 0.011530 | 0.011497 | 0.011698 | 0.011665 | 0.011597 |
| 0.011698 | 0.011765 | 0.011497 | 0.011497 | 0.011530 | 0.011530 | 0.011533 |
| 0.011601 | 0.011530 | 0.011530 | 0.011566 | 0.011698 | 0.011766 | 0.011765 |
| 0.011632 | 0.011736 | 0.011738 | 0.011874 | 0.011909 | 0.011564 | 0.011732 |
| 0.011664 | 0.011664 | 0.011500 | 0.011652 | 0.011616 | 0.011605 | 0.011481 |
| 0.011680 | 0.011926 | 0.011483 | 0.011570 | 0.011463 | 0.011665 | 0.011530 |
| 0.011631 | 0.011564 | 0.011463 | 0.011566 | 0.011665 | 0.011669 | 0.011564 |
| 0.011463 | 0.011397 | 0.011530 | 0.011463 | 0.011396 | 0.011502 | 0.011665 |
| 0.011497 | 0.011497 | 0.011329 | 0.011564 | 0.011530 | 0.011463 | 0.011665 |
| 0.011530 | 0.011564 | 0.011564 | 0.011496 | 0.011564 | 0.011799 | 0.011463 |
| 0.011496 | 0.011900 | 0.011496 | 0.011530 | 0.011496 | 0.011866 | 0.011403 |
| 0.011847 | 0.011443 | 0.011361 | 0.011664 | 0.011752 | 0.011634 | 0.011395 |
| 0.011323 | 0.011664 | 0.011765 | 0.011875 | 0.011734 | 0.011872 | 0.012002 |
| 0.011902 | 0.011940 | 0.011899 | 0.012154 | 0.011866 | 0.012674 | 0.011903 |
| 0.012574 | 0.012410 | 0.012476 | 0.012815 | 0.011866 | 0.011564 | 0.011867 |
| 0.012306 | 0.012241 | 0.011832 | 0.011732 | 0.011800 | 0.011800 | 0.011703 |
| 0.011664 | 0.011671 | 0.011731 | 0.011699 | 0.012069 | 0.012135 | 0.012137 |
| 0.012036 | 0.012137 | 0.012241 | 0.012008 | 0.012306 | 0.012313 | 0.012373 |
| 0.012374 | 0.012408 | 0.012357 | 0.012374 | 0.012376 | 0.011597 | 0.011901 |
| 0.011969 | 0.012472 | 0.011976 | 0.012203 | 0.012676 | 0.011739 | 0.011632 |
| 0.011564 | 0.011597 | 0.012069 | 0.012171 | 0.012186 | 0.011933 | 0.011599 |
| S689     | 0.011866 | 0.011866 | 0.012202 | 0.011967 | 0.011967 | 0.012034 |
| 0.011875 | 0.011807 | 0.012034 | 0.011463 | 0.011530 | 0.011498 | 0.011463 |

|          |          |          |          |          |          |          |
|----------|----------|----------|----------|----------|----------|----------|
| 0.011496 | 0.011664 | 0.011463 | 0.011496 | 0.011564 | 0.011530 | 0.011496 |
| 0.011463 | 0.011496 | 0.011597 | 0.011463 | 0.011497 | 0.011496 | 0.011841 |
| 0.011731 | 0.011497 | 0.011396 | 0.011631 | 0.011564 | 0.011530 | 0.011564 |
| 0.011530 | 0.011631 | 0.011530 | 0.011530 | 0.011564 | 0.011530 | 0.011698 |
| 0.011463 | 0.011530 | 0.011564 | 0.011496 | 0.011597 | 0.011564 | 0.011564 |
| 0.011530 | 0.011698 | 0.011598 | 0.011866 | 0.011530 | 0.011799 | 0.011530 |
| 0.011496 | 0.011597 | 0.011664 | 0.011799 | 0.011900 | 0.011597 | 0.011698 |
| 0.011564 | 0.011631 | 0.011530 | 0.011765 | 0.012001 | 0.011530 | 0.011597 |
| 0.011496 | 0.011597 | 0.011564 | 0.011631 | 0.011564 | 0.011564 | 0.011564 |
| 0.011463 | 0.011496 | 0.011463 | 0.011564 | 0.011530 | 0.011565 | 0.011631 |
| 0.011564 | 0.011530 | 0.011597 | 0.011496 | 0.011631 | 0.011463 | 0.011530 |
| 0.011698 | 0.011631 | 0.011866 | 0.011698 | 0.011530 | 0.011765 | 0.011530 |
| 0.011691 | 0.011920 | 0.011702 | 0.011451 | 0.011396 | 0.011539 | 0.011533 |
| 0.012231 | 0.011518 | 0.011390 | 0.011564 | 0.011496 | 0.011564 | 0.011664 |
| 0.011597 | 0.011564 | 0.011631 | 0.011530 | 0.011631 | 0.011564 | 0.011564 |
| 0.011530 | 0.011631 | 0.011832 | 0.011698 | 0.011597 | 0.011564 | 0.011497 |
| 0.011463 | 0.011463 | 0.011530 | 0.011497 | 0.011698 | 0.011665 | 0.011597 |
| 0.011698 | 0.011765 | 0.011497 | 0.011497 | 0.011530 | 0.011530 | 0.011533 |
| 0.011601 | 0.011530 | 0.011530 | 0.011384 | 0.011422 | 0.011446 | 0.011531 |
| 0.011534 | 0.011438 | 0.011466 | 0.011509 | 0.011434 | 0.011471 | 0.011499 |
| 0.011744 | 0.011543 | 0.011542 | 0.011464 | 0.011440 | 0.011599 | 0.011565 |
| 0.011632 | 0.011566 | 0.011565 | 0.011664 | 0.011597 | 0.011967 | 0.011766 |
| 0.011799 | 0.011665 | 0.011530 | 0.011631 | 0.011429 | 0.011664 | 0.011463 |
| 0.011530 | 0.011530 | 0.011497 | 0.011463 | 0.011496 | 0.011463 | 0.011564 |
| 0.011530 | 0.011631 | 0.011564 | 0.011463 | 0.011566 | 0.011665 | 0.011669 |
| 0.011665 | 0.011564 | 0.011463 | 0.011397 | 0.011530 | 0.011463 | 0.011396 |
| 0.011502 | 0.011665 | 0.011463 | 0.011665 | 0.011429 | 0.011530 | 0.011497 |
| 0.011598 | 0.011497 | 0.011530 | 0.011497 | 0.011530 | 0.011396 | 0.011530 |
| 0.011564 | 0.011497 | 0.011564 | 0.011497 | 0.011530 | 0.011564 | 0.011799 |
| 0.011900 | 0.011832 | 0.011900 | 0.011599 | 0.011900 | 0.011530 | 0.011497 |
| 0.011533 | 0.011788 | 0.011472 | 0.011403 | 0.011909 | 0.011401 | 0.011532 |
| 0.011909 | 0.011774 | 0.011496 | 0.011900 | 0.011572 | 0.011496 | 0.011732 |
| 0.011664 | 0.011564 | 0.011700 | 0.011431 | 0.011605 | 0.011564 | 0.011635 |
| 0.011732 | 0.011634 | 0.011635 | 0.011839 | 0.011765 | 0.011833 | 0.011941 |
| 0.011669 | 0.011841 | 0.011771 | 0.011703 | 0.011969 | 0.011429 | 0.011633 |
| 0.011597 | 0.011530 | 0.011429 | 0.011429 | 0.011496 | 0.011496 | 0.011564 |
| 0.011496 | 0.011564 | 0.011463 | 0.011564 | 0.011496 | 0.011496 | 0.011564 |
| 0.011496 | 0.011933 | 0.011832 | 0.011866 | 0.011396 | 0.011496 | 0.011530 |
| 0.011530 | 0.011496 | 0.011564 | 0.011597 | 0.011463 | 0.011463 | 0.011463 |
| 0.012000 | 0.011631 | 0.011631 | 0.011429 | 0.011530 | 0.011698 | 0.011463 |
| 0.011463 | 0.011530 | 0.011496 | 0.011665 | 0.011463 | 0.011597 | 0.011731 |
| 0.011664 | 0.011496 | 0.011496 | 0.011429 | 0.011429 | 0.011597 | 0.011530 |
| 0.011429 | 0.011530 | 0.011396 | 0.011429 | 0.011564 | 0.011698 | 0.011463 |
| 0.011430 | 0.011564 | 0.011497 | 0.011396 | 0.011732 | 0.011396 | 0.011564 |
| 0.011642 | 0.011463 | 0.011765 | 0.011597 | 0.011631 | 0.011496 | 0.011597 |
| 0.011463 | 0.011799 | 0.011396 | 0.011664 | 0.011463 | 0.011463 | 0.011396 |
| 0.011631 | 0.011833 | 0.011530 | 0.011597 | 0.011429 | 0.011832 | 0.011463 |
| 0.011463 | 0.011463 | 0.011496 | 0.011597 | 0.011496 | 0.011597 | 0.011664 |
| 0.011664 | 0.011631 | 0.011530 | 0.011631 | 0.011597 | 0.011463 | 0.011429 |
| 0.011463 | 0.011463 | 0.011530 | 0.011463 | 0.011429 | 0.011597 | 0.011463 |
| 0.011496 | 0.011496 | 0.011631 | 0.011664 | 0.011564 | 0.011496 | 0.011497 |
| 0.011564 | 0.011496 | 0.011597 | 0.011463 | 0.011597 | 0.011496 | 0.012000 |
| 0.011496 | 0.011900 | 0.011474 | 0.017899 | 0.011322 | 0.011672 | 0.011828 |
| 0.011822 | 0.011834 | 0.011479 | 0.011466 | 0.011774 | 0.011889 | 0.011485 |
| 0.011629 | 0.011610 | 0.011372 | 0.011437 | 0.011451 | 0.011406 | 0.011533 |
| 0.011576 | 0.011619 | 0.011616 | 0.011325 | 0.011631 | 0.011665 | 0.011669 |
| 0.011541 | 0.011631 | 0.011564 | 0.011597 | 0.011564 | 0.011564 | 0.011530 |
| 0.011497 | 0.011497 | 0.011329 | 0.011564 | 0.011530 | 0.011463 | 0.011497 |
| 0.011497 | 0.011564 | 0.011463 | 0.011564 | 0.011597 | 0.011631 | 0.011530 |
| 0.011564 | 0.011530 | 0.011866 | 0.011866 | 0.011598 | 0.011632 | 0.011665 |



|          |          |          |          |          |          |          |
|----------|----------|----------|----------|----------|----------|----------|
| 0.011430 | 0.011430 | 0.011463 | 0.011564 | 0.011430 | 0.011665 | 0.011665 |
| 0.011429 | 0.011496 | 0.011631 | 0.011463 | 0.011900 | 0.011464 | 0.011564 |
| 0.011362 | 0.011631 | 0.011665 | 0.011497 | 0.011564 | 0.011530 | 0.011497 |
| 0.011430 | 0.011430 | 0.011463 | 0.011631 | 0.011532 | 0.011732 | 0.011698 |
| 0.011568 | 0.011463 | 0.011564 | 0.011665 | 0.011564 | 0.011698 | 0.011731 |
| 0.011900 | 0.011572 | 0.011496 | 0.011732 | 0.011664 | 0.011564 | 0.011463 |
| 0.011566 | 0.011531 | 0.011497 | 0.011497 | 0.011564 | 0.011463 | 0.011564 |
| 0.011597 | 0.011631 | 0.011530 | 0.011564 | 0.011530 | 0.011866 | 0.011866 |
| 0.011598 | 0.011632 | 0.011698 | 0.011631 | 0.012271 | 0.011453 | 0.011623 |
| 0.011693 | 0.011442 | 0.011763 | 0.011649 | 0.011620 | 0.011681 | 0.011439 |
| 0.012228 | 0.011545 | 0.011677 | 0.011613 | 0.011887 | 0.011740 | 0.011843 |
| 0.012250 | 0.011739 | 0.011804 | 0.011866 | 0.011732 | 0.011732 | 0.011770 |
| 0.011429 | 0.011597 | 0.011731 | 0.011698 | 0.011702 | 0.011698 | 0.011667 |
| 0.011530 | 0.011463 | 0.011496 | 0.011530 | 0.011429 | 0.011496 | 0.011396 |
| 0.011530 | 0.011564 | 0.011463 | 0.011429 | 0.011530 | 0.011463 | 0.011496 |
| 0.011496 | 0.011429 | 0.011496 | 0.011530 | 0.011429 | 0.011631 | 0.011664 |
| 0.011564 | 0.011631 | 0.011564 | 0.011564 | 0.011496 | 0.011900 | 0.011530 |
| 0.011582 | 0.011497 | 0.011732 | 0.011739 | 0.011597 | 0.011597 | 0.011597 |
| 0.011597 | 0.011530 | 0.011496 | 0.011530 | 0.011631 | 0.011631 | 0.011564 |
| 0.011564 | 0.011698 | 0.011866 | 0.011597 | 0.011799 | 0.011799 | 0.011664 |
| 0.011496 | 0.011564 | 0.011597 | 0.012001 | 0.011564 | 0.011597 | 0.011564 |
| 0.011396 | 0.011530 | 0.011530 | 0.011833 | 0.011765 | 0.011799 | 0.011530 |
| 0.011631 | 0.011698 | 0.011564 | 0.011631 | 0.011597 | 0.011463 | 0.011799 |
| 0.011564 | 0.011530 | 0.011530 | 0.011698 | 0.011530 | 0.011631 | 0.011866 |
| 0.011564 | 0.011943 | 0.011933 | 0.011711 | 0.011286 | 0.011638 | 0.011318 |
| 0.011445 | 0.011917 | 0.011411 | 0.011641 | 0.011451 | 0.011569 | 0.011538 |
| 0.011570 | 0.011258 | 0.011450 | 0.011126 | 0.011384 | 0.011395 | 0.011506 |
| 0.011550 | 0.011414 | 0.011589 | 0.011518 | 0.011566 | 0.011698 | 0.011766 |
| 0.011765 | 0.011632 | 0.011736 | 0.011738 | 0.011874 | 0.011909 | 0.011564 |
| 0.011799 | 0.011665 | 0.011530 | 0.011631 | 0.011429 | 0.011664 | 0.011463 |
| 0.011530 | 0.011530 | 0.011497 | 0.011463 | 0.011496 | 0.011463 | 0.011564 |
| 0.011375 | 0.011515 | 0.011540 | 0.011574 | 0.011710 | 0.011675 | 0.011606 |
| 0.011674 | 0.011598 | 0.011393 | 0.011348 | 0.011534 | 0.011704 | 0.011705 |
| 0.011497 | 0.011568 | 0.011801 | 0.011770 | 0.011430 | 0.011733 | 0.011664 |
| 0.011597 | 0.011664 | 0.011664 | 0.011564 | 0.012135 | 0.011463 | 0.011530 |
| 0.011833 | 0.011879 | 0.011503 | 0.011615 | 0.011497 | 0.011698 | 0.011664 |
| 0.011699 | 0.011731 | 0.000000 | 0.000000 | 0.011886 | 0.011866 | 0.011511 |
| 0.011398 | 0.011406 | 0.011503 | 0.011468 | 0.011573 | 0.011433 | 0.011740 |
| 0.011540 | 0.011630 | 0.011346 | 0.011585 | 0.011531 | 0.011608 | 0.011497 |
| 0.011463 | 0.011463 | 0.011530 | 0.011497 | 0.011698 | 0.011665 | 0.011597 |
| 0.011698 | 0.011765 | 0.011497 | 0.011497 | 0.011530 | 0.011530 | 0.011533 |
| 0.011601 | 0.011530 | 0.011530 | 0.011566 | 0.011698 | 0.011766 | 0.011765 |
| 0.011632 | 0.011736 | 0.011738 | 0.011874 | 0.011909 | 0.011564 | 0.011732 |
| 0.011664 | 0.011664 | 0.011500 | 0.011652 | 0.011616 | 0.011605 | 0.011481 |
| 0.011680 | 0.011926 | 0.011483 | 0.011570 | 0.011463 | 0.011665 | 0.011530 |
| 0.011631 | 0.011564 | 0.011463 | 0.011566 | 0.011665 | 0.011669 | 0.011564 |
| 0.011463 | 0.011397 | 0.011530 | 0.011463 | 0.011396 | 0.011502 | 0.011665 |
| 0.011497 | 0.011497 | 0.011329 | 0.011564 | 0.011530 | 0.011463 | 0.011665 |
| 0.011530 | 0.011564 | 0.011564 | 0.011496 | 0.011564 | 0.011799 | 0.011463 |
| 0.011496 | 0.011900 | 0.011496 | 0.011530 | 0.011496 | 0.011866 | 0.011403 |
| 0.011847 | 0.011443 | 0.011361 | 0.011664 | 0.011752 | 0.011634 | 0.011395 |
| 0.011323 | 0.011664 | 0.011765 | 0.011875 | 0.011734 | 0.011872 | 0.012002 |
| 0.011902 | 0.011940 | 0.011899 | 0.012154 | 0.011866 | 0.012674 | 0.011903 |
| 0.012574 | 0.012410 | 0.012476 | 0.012815 | 0.011866 | 0.011564 | 0.011867 |
| 0.012306 | 0.012241 | 0.011832 | 0.011732 | 0.011800 | 0.011800 | 0.011703 |
| 0.011664 | 0.011671 | 0.011731 | 0.011699 | 0.012069 | 0.012135 | 0.012137 |
| 0.012036 | 0.012137 | 0.012241 | 0.012008 | 0.012306 | 0.012313 | 0.012373 |
| 0.012374 | 0.012408 | 0.012357 | 0.012374 | 0.012376 | 0.011597 | 0.011901 |
| 0.011969 | 0.012472 | 0.011976 | 0.012203 | 0.012676 | 0.011739 | 0.011632 |
| 0.011564 | 0.011597 | 0.012069 | 0.012171 | 0.012186 | 0.011933 | 0.011599 |

|          |          |          |          |          |          |          |
|----------|----------|----------|----------|----------|----------|----------|
| S690     | 0.012004 | 0.012004 | 0.012201 | 0.012161 | 0.012161 | 0.012240 |
| 0.011897 | 0.011857 | 0.012122 | 0.011610 | 0.011689 | 0.011611 | 0.011610 |
| 0.011650 | 0.011847 | 0.011571 | 0.011571 | 0.011650 | 0.011689 | 0.011571 |
| 0.011610 | 0.011650 | 0.011768 | 0.011572 | 0.011651 | 0.011650 | 0.011937 |
| 0.011886 | 0.011611 | 0.011532 | 0.011807 | 0.011729 | 0.011689 | 0.011689 |
| 0.011689 | 0.011807 | 0.011610 | 0.011611 | 0.011650 | 0.011650 | 0.011886 |
| 0.011610 | 0.011650 | 0.011611 | 0.011610 | 0.011768 | 0.011729 | 0.011728 |
| 0.011650 | 0.011808 | 0.011690 | 0.011965 | 0.011611 | 0.011925 | 0.011611 |
| 0.011610 | 0.011768 | 0.011768 | 0.011925 | 0.011965 | 0.011689 | 0.011768 |
| 0.011728 | 0.011807 | 0.011650 | 0.011886 | 0.012083 | 0.011650 | 0.011729 |
| 0.011650 | 0.011689 | 0.011729 | 0.011768 | 0.011728 | 0.011650 | 0.011650 |
| 0.011610 | 0.011610 | 0.011610 | 0.011729 | 0.011650 | 0.011690 | 0.011768 |
| 0.011729 | 0.011650 | 0.011729 | 0.011650 | 0.011689 | 0.011611 | 0.011689 |
| 0.011807 | 0.011807 | 0.012004 | 0.011847 | 0.011689 | 0.011847 | 0.011650 |
| 0.011539 | 0.011848 | 0.011853 | 0.011426 | 0.011411 | 0.011574 | 0.011706 |
| 0.012478 | 0.011585 | 0.011391 | 0.011886 | 0.011925 | 0.011689 | 0.011807 |
| 0.011729 | 0.011532 | 0.011728 | 0.011689 | 0.011768 | 0.011728 | 0.011650 |
| 0.011610 | 0.011807 | 0.011768 | 0.011768 | 0.011768 | 0.011689 | 0.011650 |
| 0.011610 | 0.011610 | 0.011650 | 0.011650 | 0.011846 | 0.011807 | 0.011728 |
| 0.011846 | 0.011886 | 0.011650 | 0.011650 | 0.011689 | 0.011689 | 0.011654 |
| 0.011694 | 0.011650 | 0.011650 | 0.011481 | 0.011611 | 0.011593 | 0.011689 |
| 0.011652 | 0.011582 | 0.011622 | 0.011583 | 0.011578 | 0.011620 | 0.011613 |
| 0.011902 | 0.011663 | 0.011743 | 0.011571 | 0.011584 | 0.011729 | 0.011729 |
| 0.011808 | 0.011729 | 0.011729 | 0.011768 | 0.011689 | 0.012122 | 0.011807 |
| 0.011925 | 0.011768 | 0.011689 | 0.011768 | 0.011571 | 0.011807 | 0.011611 |
| 0.011611 | 0.011650 | 0.011650 | 0.011610 | 0.011650 | 0.011610 | 0.011689 |
| 0.011650 | 0.011768 | 0.011729 | 0.011571 | 0.011731 | 0.011807 | 0.011811 |
| 0.011807 | 0.011728 | 0.011571 | 0.011534 | 0.011650 | 0.011571 | 0.011532 |
| 0.011617 | 0.011808 | 0.011611 | 0.011807 | 0.011571 | 0.011689 | 0.011650 |
| 0.011768 | 0.011650 | 0.011650 | 0.011650 | 0.011650 | 0.011532 | 0.011689 |
| 0.011729 | 0.011610 | 0.011689 | 0.011650 | 0.011610 | 0.011689 | 0.012004 |
| 0.011965 | 0.011846 | 0.011965 | 0.011692 | 0.012044 | 0.011571 | 0.011610 |
| 0.011653 | 0.011804 | 0.011746 | 0.011542 | 0.012010 | 0.011538 | 0.011651 |
| 0.011977 | 0.011973 | 0.011846 | 0.011807 | 0.011769 | 0.011886 | 0.011886 |
| 0.011768 | 0.012043 | 0.011689 | 0.011650 | 0.011741 | 0.011689 | 0.011695 |
| 0.011807 | 0.011613 | 0.011813 | 0.011973 | 0.011807 | 0.011807 | 0.012053 |
| 0.011734 | 0.011976 | 0.011814 | 0.011774 | 0.011887 | 0.011571 | 0.011770 |
| 0.011728 | 0.011650 | 0.011571 | 0.011571 | 0.011571 | 0.011650 | 0.011610 |
| 0.011610 | 0.011729 | 0.011610 | 0.011729 | 0.011610 | 0.011610 | 0.011689 |
| 0.011650 | 0.012004 | 0.011925 | 0.011965 | 0.011532 | 0.011571 | 0.011650 |
| 0.011689 | 0.011610 | 0.011729 | 0.011729 | 0.011610 | 0.011610 | 0.011610 |
| 0.012122 | 0.011728 | 0.011807 | 0.011532 | 0.011689 | 0.011807 | 0.011611 |
| 0.011610 | 0.011650 | 0.011610 | 0.011847 | 0.011571 | 0.011728 | 0.011886 |
| 0.011847 | 0.011650 | 0.011610 | 0.011571 | 0.011571 | 0.011729 | 0.011689 |
| 0.011571 | 0.011689 | 0.011532 | 0.011571 | 0.011689 | 0.011768 | 0.011610 |
| 0.011572 | 0.011689 | 0.011650 | 0.011532 | 0.011846 | 0.011532 | 0.011650 |
| 0.011663 | 0.011571 | 0.011846 | 0.011768 | 0.011807 | 0.011650 | 0.011650 |
| 0.011571 | 0.011925 | 0.011532 | 0.011768 | 0.011571 | 0.011571 | 0.011532 |
| 0.011807 | 0.012005 | 0.011650 | 0.011768 | 0.011571 | 0.011925 | 0.011571 |
| 0.011611 | 0.011532 | 0.011610 | 0.011768 | 0.011610 | 0.011728 | 0.011846 |
| 0.011807 | 0.011807 | 0.011610 | 0.011807 | 0.011768 | 0.011571 | 0.011571 |
| 0.011610 | 0.011571 | 0.011650 | 0.011610 | 0.011571 | 0.011728 | 0.011571 |
| 0.011610 | 0.011610 | 0.011768 | 0.011768 | 0.011728 | 0.011650 | 0.011611 |
| 0.011728 | 0.011610 | 0.011768 | 0.011610 | 0.011768 | 0.011846 | 0.012043 |
| 0.011611 | 0.012004 | 0.011627 | 0.019049 | 0.011286 | 0.011637 | 0.011873 |
| 0.011825 | 0.011839 | 0.011363 | 0.011459 | 0.012102 | 0.011903 | 0.011644 |
| 0.011607 | 0.011862 | 0.011471 | 0.011495 | 0.011513 | 0.011582 | 0.011410 |
| 0.011663 | 0.011714 | 0.011621 | 0.011446 | 0.011768 | 0.011768 | 0.011807 |
| 0.011665 | 0.011728 | 0.011807 | 0.011689 | 0.011729 | 0.011729 | 0.011650 |
| 0.011689 | 0.011650 | 0.011689 | 0.011729 | 0.011689 | 0.011571 | 0.011532 |

|          |          |          |          |          |          |          |
|----------|----------|----------|----------|----------|----------|----------|
| 0.011532 | 0.011689 | 0.011610 | 0.011650 | 0.011729 | 0.011650 | 0.011571 |
| 0.011728 | 0.011689 | 0.011965 | 0.011965 | 0.011728 | 0.011769 | 0.011728 |
| 0.011532 | 0.011571 | 0.011610 | 0.011650 | 0.011571 | 0.011847 | 0.011847 |
| 0.011846 | 0.011846 | 0.011729 | 0.011886 | 0.012004 | 0.011886 | 0.011729 |
| 0.011729 | 0.011807 | 0.011807 | 0.011650 | 0.011728 | 0.011650 | 0.011650 |
| 0.011807 | 0.011807 | 0.011846 | 0.011807 | 0.011691 | 0.011925 | 0.011768 |
| 0.011692 | 0.011611 | 0.011689 | 0.011689 | 0.011689 | 0.011768 | 0.011886 |
| 0.011807 | 0.011769 | 0.011886 | 0.011886 | 0.011768 | 0.012043 | 0.011611 |
| 0.011731 | 0.011690 | 0.011532 | 0.011532 | 0.011689 | 0.011610 | 0.011650 |
| 0.011729 | 0.011650 | 0.011571 | 0.011728 | 0.011689 | 0.011965 | 0.011965 |
| 0.011728 | 0.011769 | 0.011728 | 0.011728 | 0.012399 | 0.011810 | 0.011682 |
| 0.011761 | 0.011752 | 0.011846 | 0.011793 | 0.011757 | 0.011625 | 0.011746 |
| 0.012311 | 0.011586 | 0.011664 | 0.011545 | 0.011829 | 0.011858 | 0.011978 |
| 0.012296 | 0.011720 | 0.011694 | 0.011689 | 0.011728 | 0.011728 | 0.011654 |
| 0.011571 | 0.011611 | 0.011768 | 0.011728 | 0.011694 | 0.011846 | 0.011849 |
| 0.011689 | 0.011571 | 0.011650 | 0.011689 | 0.011571 | 0.011610 | 0.011532 |
| 0.011689 | 0.011728 | 0.011610 | 0.011571 | 0.011689 | 0.011610 | 0.011650 |
| 0.011571 | 0.011571 | 0.011650 | 0.011611 | 0.011571 | 0.011807 | 0.011807 |
| 0.011729 | 0.011807 | 0.011689 | 0.011729 | 0.011610 | 0.011965 | 0.011650 |
| 0.011715 | 0.011650 | 0.011886 | 0.011855 | 0.011729 | 0.011689 | 0.011768 |
| 0.011768 | 0.011689 | 0.011610 | 0.011689 | 0.011768 | 0.011768 | 0.011689 |
| 0.011689 | 0.011886 | 0.011965 | 0.011768 | 0.011965 | 0.011965 | 0.011846 |
| 0.011650 | 0.011689 | 0.011768 | 0.012083 | 0.011690 | 0.011729 | 0.011729 |
| 0.011729 | 0.011689 | 0.011689 | 0.011965 | 0.011926 | 0.011925 | 0.011650 |
| 0.011807 | 0.011807 | 0.011728 | 0.011807 | 0.011728 | 0.011611 | 0.011886 |
| 0.011689 | 0.011650 | 0.011689 | 0.011847 | 0.011650 | 0.011768 | 0.011925 |
| 0.011610 | 0.012057 | 0.012043 | 0.011677 | 0.011316 | 0.011776 | 0.011353 |
| 0.011508 | 0.012018 | 0.011555 | 0.011723 | 0.011401 | 0.011469 | 0.011488 |
| 0.011636 | 0.011286 | 0.011440 | 0.011286 | 0.011308 | 0.011514 | 0.011583 |
| 0.011502 | 0.011568 | 0.011595 | 0.011595 | 0.011690 | 0.011846 | 0.011925 |
| 0.011925 | 0.011768 | 0.011852 | 0.011853 | 0.012011 | 0.011968 | 0.011650 |
| 0.011925 | 0.011768 | 0.011689 | 0.011768 | 0.011571 | 0.011807 | 0.011611 |
| 0.011611 | 0.011650 | 0.011650 | 0.011610 | 0.011650 | 0.011610 | 0.011689 |
| 0.011591 | 0.011714 | 0.011619 | 0.011740 | 0.011819 | 0.011737 | 0.011776 |
| 0.011855 | 0.011768 | 0.011489 | 0.011521 | 0.011692 | 0.011850 | 0.011851 |
| 0.011650 | 0.011692 | 0.011847 | 0.011850 | 0.011886 | 0.011886 | 0.011728 |
| 0.011728 | 0.011453 | 0.011610 | 0.011728 | 0.012122 | 0.011925 | 0.011926 |
| 0.011847 | 0.012009 | 0.011658 | 0.011666 | 0.011650 | 0.011650 | 0.011768 |
| 0.011847 | 0.011728 | 0.011886 | 0.011886 | 0.000000 | 0.011965 | 0.011589 |
| 0.011496 | 0.011507 | 0.011579 | 0.011538 | 0.011581 | 0.011537 | 0.011777 |
| 0.011583 | 0.011769 | 0.011554 | 0.011716 | 0.011689 | 0.011739 | 0.011650 |
| 0.011610 | 0.011610 | 0.011650 | 0.011650 | 0.011846 | 0.011807 | 0.011728 |
| 0.011846 | 0.011886 | 0.011650 | 0.011650 | 0.011689 | 0.011689 | 0.011654 |
| 0.011694 | 0.011650 | 0.011650 | 0.011690 | 0.011846 | 0.011925 | 0.011925 |
| 0.011768 | 0.011852 | 0.011853 | 0.012011 | 0.011968 | 0.011650 | 0.011886 |
| 0.011768 | 0.011768 | 0.011574 | 0.011832 | 0.011790 | 0.011735 | 0.011635 |
| 0.011785 | 0.012056 | 0.011647 | 0.011733 | 0.011611 | 0.011807 | 0.011650 |
| 0.011768 | 0.011729 | 0.011571 | 0.011731 | 0.011807 | 0.011811 | 0.011728 |
| 0.011571 | 0.011534 | 0.011650 | 0.011571 | 0.011532 | 0.011617 | 0.011808 |
| 0.011689 | 0.011650 | 0.011689 | 0.011729 | 0.011689 | 0.011571 | 0.011846 |
| 0.011650 | 0.011650 | 0.011728 | 0.011610 | 0.011689 | 0.011965 | 0.011610 |
| 0.011650 | 0.011965 | 0.011610 | 0.011689 | 0.011610 | 0.011965 | 0.011408 |
| 0.011909 | 0.011406 | 0.011351 | 0.011712 | 0.011727 | 0.011695 | 0.011354 |
| 0.011303 | 0.011846 | 0.011925 | 0.012052 | 0.011887 | 0.012051 | 0.012123 |
| 0.012084 | 0.012051 | 0.012043 | 0.012380 | 0.012004 | 0.012635 | 0.012124 |
| 0.012872 | 0.012441 | 0.012595 | 0.012995 | 0.012043 | 0.011729 | 0.012043 |
| 0.012439 | 0.012483 | 0.012043 | 0.011926 | 0.011965 | 0.011965 | 0.011932 |
| 0.011846 | 0.011855 | 0.011925 | 0.011807 | 0.012241 | 0.012162 | 0.012319 |
| 0.012242 | 0.012319 | 0.012480 | 0.012129 | 0.012478 | 0.012406 | 0.012557 |
| 0.012439 | 0.012558 | 0.012541 | 0.012518 | 0.012481 | 0.011689 | 0.012044 |

|          |          |          |          |          |          |          |
|----------|----------|----------|----------|----------|----------|----------|
| 0.012201 | 0.012635 | 0.012090 | 0.012359 | 0.012951 | 0.011812 | 0.011768 |
| 0.011728 | 0.011728 | 0.012201 | 0.012283 | 0.012195 | 0.012122 | 0.011730 |
| S691     | 0.011866 | 0.011866 | 0.012337 | 0.012101 | 0.012101 | 0.012169 |
| 0.012011 | 0.011943 | 0.012169 | 0.011597 | 0.011664 | 0.011632 | 0.011597 |
| 0.011631 | 0.011799 | 0.011597 | 0.011631 | 0.011698 | 0.011664 | 0.011631 |
| 0.011597 | 0.011631 | 0.011731 | 0.011598 | 0.011631 | 0.011631 | 0.011977 |
| 0.011866 | 0.011631 | 0.011530 | 0.011765 | 0.011698 | 0.011665 | 0.011698 |
| 0.011664 | 0.011765 | 0.011664 | 0.011664 | 0.011698 | 0.011664 | 0.011832 |
| 0.011597 | 0.011664 | 0.011698 | 0.011631 | 0.011731 | 0.011765 | 0.011698 |
| 0.011664 | 0.011833 | 0.011732 | 0.012000 | 0.011664 | 0.011933 | 0.011664 |
| 0.011631 | 0.011732 | 0.011799 | 0.011933 | 0.012034 | 0.011732 | 0.011832 |
| 0.011698 | 0.011765 | 0.011664 | 0.011899 | 0.012135 | 0.011664 | 0.011732 |
| 0.011631 | 0.011732 | 0.011698 | 0.011765 | 0.011698 | 0.011698 | 0.011698 |
| 0.011597 | 0.011631 | 0.011597 | 0.011698 | 0.011664 | 0.011700 | 0.011765 |
| 0.011698 | 0.011664 | 0.011732 | 0.011631 | 0.011765 | 0.011597 | 0.011664 |
| 0.011832 | 0.011765 | 0.012000 | 0.011832 | 0.011664 | 0.011900 | 0.011664 |
| 0.011802 | 0.012032 | 0.011890 | 0.011529 | 0.011620 | 0.011686 | 0.011769 |
| 0.012451 | 0.011823 | 0.011513 | 0.011899 | 0.011900 | 0.011698 | 0.011799 |
| 0.011732 | 0.011631 | 0.011631 | 0.011664 | 0.011765 | 0.011698 | 0.011564 |
| 0.011597 | 0.011765 | 0.011900 | 0.011832 | 0.011732 | 0.011698 | 0.011631 |
| 0.011597 | 0.011597 | 0.011665 | 0.011631 | 0.011833 | 0.011799 | 0.011732 |
| 0.011833 | 0.011900 | 0.011631 | 0.011631 | 0.011665 | 0.011665 | 0.011668 |
| 0.011736 | 0.011665 | 0.011665 | 0.011564 | 0.011639 | 0.011586 | 0.011665 |
| 0.011670 | 0.011610 | 0.011688 | 0.011647 | 0.011570 | 0.011608 | 0.011634 |
| 0.011924 | 0.011681 | 0.011715 | 0.011598 | 0.011613 | 0.011733 | 0.011699 |
| 0.011767 | 0.011701 | 0.011699 | 0.011664 | 0.011597 | 0.012101 | 0.011900 |
| 0.011933 | 0.011799 | 0.011664 | 0.011766 | 0.011564 | 0.011799 | 0.011598 |
| 0.011664 | 0.011664 | 0.011631 | 0.011597 | 0.011631 | 0.011597 | 0.011698 |
| 0.011665 | 0.011766 | 0.011698 | 0.011597 | 0.011701 | 0.011799 | 0.011804 |
| 0.011799 | 0.011698 | 0.011597 | 0.011532 | 0.011665 | 0.011597 | 0.011531 |
| 0.011638 | 0.011799 | 0.011598 | 0.011799 | 0.011564 | 0.011665 | 0.011631 |
| 0.011732 | 0.011631 | 0.011665 | 0.011631 | 0.011665 | 0.011530 | 0.011665 |
| 0.011698 | 0.011631 | 0.011698 | 0.011631 | 0.011530 | 0.011698 | 0.011934 |
| 0.012034 | 0.011967 | 0.012035 | 0.011802 | 0.012035 | 0.011530 | 0.011631 |
| 0.011634 | 0.012031 | 0.011701 | 0.011506 | 0.012011 | 0.011538 | 0.011611 |
| 0.012045 | 0.011945 | 0.011799 | 0.011967 | 0.011607 | 0.011900 | 0.011866 |
| 0.011799 | 0.011967 | 0.011735 | 0.011472 | 0.011647 | 0.011698 | 0.011703 |
| 0.011866 | 0.011634 | 0.011906 | 0.011974 | 0.011765 | 0.011900 | 0.011874 |
| 0.011669 | 0.011977 | 0.011771 | 0.011838 | 0.012036 | 0.011564 | 0.011768 |
| 0.011732 | 0.011664 | 0.011564 | 0.011564 | 0.011631 | 0.011631 | 0.011698 |
| 0.011631 | 0.011698 | 0.011597 | 0.011698 | 0.011631 | 0.011631 | 0.011698 |
| 0.011631 | 0.012068 | 0.011967 | 0.012000 | 0.011530 | 0.011631 | 0.011664 |
| 0.011664 | 0.011631 | 0.011698 | 0.011732 | 0.011597 | 0.011597 | 0.011597 |
| 0.012135 | 0.011765 | 0.011765 | 0.011564 | 0.011664 | 0.011833 | 0.011597 |
| 0.011597 | 0.011664 | 0.011631 | 0.011799 | 0.011597 | 0.011732 | 0.011866 |
| 0.011799 | 0.011631 | 0.011631 | 0.011564 | 0.011564 | 0.011732 | 0.011664 |
| 0.011564 | 0.011664 | 0.011530 | 0.011564 | 0.011698 | 0.011833 | 0.011597 |
| 0.011564 | 0.011698 | 0.011631 | 0.011530 | 0.011866 | 0.011530 | 0.011698 |
| 0.011745 | 0.011597 | 0.011900 | 0.011732 | 0.011765 | 0.011631 | 0.011732 |
| 0.011597 | 0.011933 | 0.011530 | 0.011799 | 0.011597 | 0.011597 | 0.011530 |
| 0.011765 | 0.011967 | 0.011664 | 0.011732 | 0.011564 | 0.011967 | 0.011597 |
| 0.011597 | 0.011597 | 0.011631 | 0.011732 | 0.011631 | 0.011732 | 0.011799 |
| 0.011799 | 0.011765 | 0.011664 | 0.011765 | 0.011732 | 0.011597 | 0.011564 |
| 0.011597 | 0.011597 | 0.011664 | 0.011597 | 0.011564 | 0.011732 | 0.011597 |
| 0.011631 | 0.011631 | 0.011698 | 0.011799 | 0.011698 | 0.011631 | 0.011631 |
| 0.011698 | 0.011631 | 0.011732 | 0.011597 | 0.011732 | 0.011832 | 0.012135 |
| 0.011631 | 0.012034 | 0.011647 | 0.018088 | 0.011584 | 0.011488 | 0.011967 |
| 0.011926 | 0.011975 | 0.011636 | 0.011699 | 0.012049 | 0.011993 | 0.011546 |
| 0.011867 | 0.011732 | 0.011528 | 0.011479 | 0.011568 | 0.011653 | 0.011533 |
| 0.011858 | 0.011842 | 0.011765 | 0.011854 | 0.011765 | 0.011665 | 0.011331 |

|          |          |          |          |          |          |          |
|----------|----------|----------|----------|----------|----------|----------|
| 0.011679 | 0.011765 | 0.011765 | 0.011732 | 0.011631 | 0.011631 | 0.011665 |
| 0.011698 | 0.011631 | 0.011664 | 0.011698 | 0.011665 | 0.011597 | 0.011497 |
| 0.011497 | 0.011698 | 0.011597 | 0.011698 | 0.011732 | 0.011765 | 0.011530 |
| 0.011698 | 0.011665 | 0.012001 | 0.012001 | 0.011732 | 0.011766 | 0.011799 |
| 0.011564 | 0.011564 | 0.011597 | 0.011698 | 0.011564 | 0.011799 | 0.011799 |
| 0.011833 | 0.011799 | 0.011765 | 0.011866 | 0.012035 | 0.011869 | 0.011698 |
| 0.011698 | 0.011765 | 0.011799 | 0.011631 | 0.011698 | 0.011665 | 0.011698 |
| 0.011766 | 0.011766 | 0.011799 | 0.011766 | 0.011666 | 0.011866 | 0.011833 |
| 0.011704 | 0.011597 | 0.011698 | 0.011799 | 0.011698 | 0.011833 | 0.011866 |
| 0.011967 | 0.011607 | 0.011900 | 0.011866 | 0.011799 | 0.011967 | 0.011598 |
| 0.011768 | 0.011665 | 0.011497 | 0.011497 | 0.011698 | 0.011597 | 0.011698 |
| 0.011732 | 0.011765 | 0.011530 | 0.011698 | 0.011665 | 0.012001 | 0.012001 |
| 0.011732 | 0.011766 | 0.011698 | 0.011631 | 0.012373 | 0.011810 | 0.011658 |
| 0.011834 | 0.011754 | 0.011904 | 0.011753 | 0.011865 | 0.011750 | 0.011750 |
| 0.012331 | 0.011545 | 0.011677 | 0.011683 | 0.011956 | 0.011877 | 0.011979 |
| 0.012318 | 0.011814 | 0.011939 | 0.012000 | 0.011866 | 0.011866 | 0.011905 |
| 0.011564 | 0.011732 | 0.011866 | 0.011832 | 0.011837 | 0.011832 | 0.011801 |
| 0.011664 | 0.011597 | 0.011631 | 0.011664 | 0.011564 | 0.011631 | 0.011530 |
| 0.011664 | 0.011698 | 0.011597 | 0.011564 | 0.011664 | 0.011597 | 0.011631 |
| 0.011631 | 0.011564 | 0.011631 | 0.011664 | 0.011564 | 0.011765 | 0.011799 |
| 0.011698 | 0.011765 | 0.011698 | 0.011698 | 0.011631 | 0.012034 | 0.011664 |
| 0.011721 | 0.011631 | 0.011867 | 0.011875 | 0.011732 | 0.011732 | 0.011732 |
| 0.011732 | 0.011664 | 0.011631 | 0.011664 | 0.011765 | 0.011765 | 0.011698 |
| 0.011698 | 0.011832 | 0.012000 | 0.011731 | 0.011933 | 0.011933 | 0.011799 |
| 0.011631 | 0.011698 | 0.011732 | 0.012135 | 0.011698 | 0.011732 | 0.011698 |
| 0.011732 | 0.011664 | 0.011664 | 0.011967 | 0.011900 | 0.011933 | 0.011664 |
| 0.011765 | 0.011832 | 0.011698 | 0.011765 | 0.011731 | 0.011597 | 0.011933 |
| 0.011698 | 0.011664 | 0.011664 | 0.011832 | 0.011664 | 0.011765 | 0.012001 |
| 0.011698 | 0.012079 | 0.012068 | 0.011873 | 0.011624 | 0.011774 | 0.011680 |
| 0.011445 | 0.012112 | 0.011622 | 0.011775 | 0.011695 | 0.011824 | 0.011751 |
| 0.011877 | 0.011587 | 0.011728 | 0.011589 | 0.011599 | 0.011730 | 0.011750 |
| 0.011738 | 0.011650 | 0.011694 | 0.011694 | 0.011701 | 0.011833 | 0.011900 |
| 0.011900 | 0.011766 | 0.011872 | 0.011874 | 0.012010 | 0.012050 | 0.011698 |
| 0.011933 | 0.011799 | 0.011664 | 0.011766 | 0.011564 | 0.011799 | 0.011598 |
| 0.011664 | 0.011664 | 0.011631 | 0.011597 | 0.011631 | 0.011597 | 0.011698 |
| 0.011654 | 0.011690 | 0.011677 | 0.011711 | 0.011847 | 0.011812 | 0.011812 |
| 0.011810 | 0.011733 | 0.011540 | 0.011564 | 0.011670 | 0.011840 | 0.011841 |
| 0.011632 | 0.011704 | 0.011936 | 0.011905 | 0.011834 | 0.011868 | 0.011664 |
| 0.011732 | 0.011732 | 0.011732 | 0.011698 | 0.012236 | 0.011866 | 0.011933 |
| 0.011967 | 0.011951 | 0.011674 | 0.011719 | 0.011631 | 0.011698 | 0.011665 |
| 0.011834 | 0.011732 | 0.011866 | 0.011866 | 0.011965 | 0.000000 | 0.011650 |
| 0.011533 | 0.011545 | 0.011639 | 0.011604 | 0.011709 | 0.011545 | 0.011876 |
| 0.011678 | 0.011718 | 0.011441 | 0.011660 | 0.011666 | 0.011745 | 0.011631 |
| 0.011597 | 0.011597 | 0.011665 | 0.011631 | 0.011833 | 0.011799 | 0.011732 |
| 0.011833 | 0.011900 | 0.011631 | 0.011631 | 0.011665 | 0.011665 | 0.011668 |
| 0.011736 | 0.011665 | 0.011665 | 0.011701 | 0.011833 | 0.011900 | 0.011900 |
| 0.011766 | 0.011872 | 0.011874 | 0.012010 | 0.012050 | 0.011698 | 0.011866 |
| 0.011665 | 0.011665 | 0.011635 | 0.011791 | 0.011755 | 0.011775 | 0.011656 |
| 0.011818 | 0.012017 | 0.011780 | 0.011706 | 0.011598 | 0.011799 | 0.011665 |
| 0.011766 | 0.011698 | 0.011597 | 0.011701 | 0.011799 | 0.011804 | 0.011698 |
| 0.011597 | 0.011532 | 0.011665 | 0.011597 | 0.011531 | 0.011638 | 0.011799 |
| 0.011698 | 0.011631 | 0.011664 | 0.011698 | 0.011665 | 0.011597 | 0.011799 |
| 0.011664 | 0.011698 | 0.011698 | 0.011631 | 0.011698 | 0.011933 | 0.011597 |
| 0.011631 | 0.012034 | 0.011631 | 0.011664 | 0.011631 | 0.012000 | 0.011532 |
| 0.012129 | 0.011613 | 0.011662 | 0.011825 | 0.011915 | 0.011814 | 0.011520 |
| 0.011638 | 0.011799 | 0.011900 | 0.012011 | 0.011868 | 0.012008 | 0.012137 |
| 0.012036 | 0.012075 | 0.012034 | 0.012291 | 0.012000 | 0.012809 | 0.012038 |
| 0.012777 | 0.012477 | 0.012611 | 0.012951 | 0.012000 | 0.011698 | 0.012001 |
| 0.012407 | 0.012376 | 0.011967 | 0.011866 | 0.011935 | 0.011935 | 0.011906 |
| 0.011799 | 0.011807 | 0.011866 | 0.011834 | 0.012204 | 0.012270 | 0.012272 |

|          |          |          |          |          |          |          |
|----------|----------|----------|----------|----------|----------|----------|
| 0.012171 | 0.012271 | 0.012376 | 0.012143 | 0.012408 | 0.012415 | 0.012475 |
| 0.012475 | 0.012509 | 0.012460 | 0.012476 | 0.012477 | 0.011597 | 0.012002 |
| 0.012103 | 0.012606 | 0.012078 | 0.012337 | 0.012811 | 0.011875 | 0.011766 |
| 0.011732 | 0.011731 | 0.012203 | 0.012171 | 0.012363 | 0.012068 | 0.011734 |
| S692     | 0.011650 | 0.011650 | 0.011719 | 0.011685 | 0.011685 | 0.011719 |
| 0.011657 | 0.011587 | 0.011754 | 0.011234 | 0.011303 | 0.011269 | 0.011234 |
| 0.011268 | 0.011442 | 0.011234 | 0.011234 | 0.011303 | 0.011303 | 0.011268 |
| 0.011234 | 0.011268 | 0.011372 | 0.011234 | 0.011269 | 0.011268 | 0.011622 |
| 0.011511 | 0.011234 | 0.011164 | 0.011407 | 0.011338 | 0.011303 | 0.011338 |
| 0.011303 | 0.011407 | 0.011303 | 0.011303 | 0.011303 | 0.011303 | 0.011442 |
| 0.011234 | 0.011303 | 0.011338 | 0.011268 | 0.011372 | 0.011407 | 0.011338 |
| 0.011303 | 0.011477 | 0.011373 | 0.011650 | 0.011303 | 0.011581 | 0.011303 |
| 0.011268 | 0.011372 | 0.011407 | 0.011581 | 0.011685 | 0.011338 | 0.011476 |
| 0.011338 | 0.011407 | 0.011303 | 0.011546 | 0.011789 | 0.011268 | 0.011372 |
| 0.011268 | 0.011372 | 0.011303 | 0.011407 | 0.011303 | 0.011338 | 0.011338 |
| 0.011234 | 0.011268 | 0.011234 | 0.011338 | 0.011303 | 0.011338 | 0.011372 |
| 0.011338 | 0.011303 | 0.011372 | 0.011268 | 0.011407 | 0.011234 | 0.011303 |
| 0.011476 | 0.011407 | 0.011650 | 0.011477 | 0.011303 | 0.011546 | 0.011303 |
| 0.011481 | 0.011715 | 0.011526 | 0.011222 | 0.011215 | 0.011327 | 0.011426 |
| 0.012083 | 0.011482 | 0.011230 | 0.011546 | 0.011546 | 0.011338 | 0.011442 |
| 0.011372 | 0.011338 | 0.011407 | 0.011303 | 0.011407 | 0.011338 | 0.011338 |
| 0.011303 | 0.011407 | 0.011615 | 0.011476 | 0.011372 | 0.011338 | 0.011268 |
| 0.011234 | 0.011234 | 0.011303 | 0.011268 | 0.011477 | 0.011442 | 0.011372 |
| 0.011477 | 0.011546 | 0.011268 | 0.011268 | 0.011303 | 0.011303 | 0.011305 |
| 0.011375 | 0.011303 | 0.011303 | 0.011171 | 0.011245 | 0.011203 | 0.011303 |
| 0.011305 | 0.011238 | 0.011251 | 0.011239 | 0.011200 | 0.011237 | 0.011269 |
| 0.011539 | 0.011309 | 0.011345 | 0.011234 | 0.011239 | 0.011373 | 0.011338 |
| 0.011407 | 0.011339 | 0.011338 | 0.011407 | 0.011372 | 0.011754 | 0.011511 |
| 0.011580 | 0.011442 | 0.011303 | 0.011407 | 0.011199 | 0.011442 | 0.011234 |
| 0.011303 | 0.011303 | 0.011268 | 0.011234 | 0.011268 | 0.011234 | 0.011338 |
| 0.011303 | 0.011373 | 0.011338 | 0.011234 | 0.011304 | 0.011442 | 0.011444 |
| 0.011442 | 0.011338 | 0.011234 | 0.011165 | 0.011303 | 0.011234 | 0.011164 |
| 0.011271 | 0.011442 | 0.011234 | 0.011442 | 0.011199 | 0.011303 | 0.011268 |
| 0.011373 | 0.011268 | 0.011303 | 0.011268 | 0.011303 | 0.011164 | 0.011303 |
| 0.011338 | 0.011268 | 0.011338 | 0.011268 | 0.011303 | 0.011338 | 0.011581 |
| 0.011685 | 0.011615 | 0.011685 | 0.011443 | 0.011685 | 0.011303 | 0.011268 |
| 0.011305 | 0.011562 | 0.011433 | 0.011202 | 0.011692 | 0.011166 | 0.011303 |
| 0.011692 | 0.011587 | 0.011476 | 0.011685 | 0.011378 | 0.011546 | 0.011511 |
| 0.011442 | 0.011615 | 0.011419 | 0.011309 | 0.011355 | 0.011338 | 0.011372 |
| 0.011477 | 0.011407 | 0.011547 | 0.011616 | 0.011546 | 0.011581 | 0.011512 |
| 0.011445 | 0.011616 | 0.011550 | 0.011480 | 0.011754 | 0.011199 | 0.011407 |
| 0.011372 | 0.011268 | 0.011199 | 0.011199 | 0.011268 | 0.011268 | 0.011338 |
| 0.011268 | 0.011338 | 0.011234 | 0.011338 | 0.011268 | 0.011268 | 0.011338 |
| 0.011268 | 0.011685 | 0.011615 | 0.011650 | 0.011164 | 0.011268 | 0.011303 |
| 0.011303 | 0.011268 | 0.011303 | 0.011372 | 0.011234 | 0.011234 | 0.011234 |
| 0.011789 | 0.011372 | 0.011407 | 0.011199 | 0.011268 | 0.011477 | 0.011234 |
| 0.011234 | 0.011303 | 0.011268 | 0.011442 | 0.011234 | 0.011338 | 0.011476 |
| 0.011407 | 0.011268 | 0.011268 | 0.011199 | 0.011199 | 0.011372 | 0.011303 |
| 0.011199 | 0.011303 | 0.011164 | 0.011199 | 0.011338 | 0.011477 | 0.011234 |
| 0.011199 | 0.011338 | 0.011269 | 0.011164 | 0.011511 | 0.011164 | 0.011338 |
| 0.011411 | 0.011234 | 0.011546 | 0.011372 | 0.011407 | 0.011268 | 0.011338 |
| 0.011234 | 0.011581 | 0.011164 | 0.011442 | 0.011234 | 0.011234 | 0.011164 |
| 0.011407 | 0.011581 | 0.011303 | 0.011372 | 0.011199 | 0.011615 | 0.011234 |
| 0.011234 | 0.011234 | 0.011268 | 0.011372 | 0.011268 | 0.011372 | 0.011442 |
| 0.011442 | 0.011372 | 0.011303 | 0.011407 | 0.011372 | 0.011234 | 0.011199 |
| 0.011234 | 0.011234 | 0.011303 | 0.011234 | 0.011199 | 0.011338 | 0.011234 |
| 0.011268 | 0.011268 | 0.011372 | 0.011442 | 0.011338 | 0.011268 | 0.011234 |
| 0.011303 | 0.011268 | 0.011338 | 0.011234 | 0.011372 | 0.011442 | 0.011719 |
| 0.011268 | 0.011685 | 0.011274 | 0.017991 | 0.011260 | 0.011511 | 0.011637 |
| 0.011597 | 0.011642 | 0.011328 | 0.011240 | 0.011746 | 0.011667 | 0.011376 |

|          |          |          |          |          |          |          |
|----------|----------|----------|----------|----------|----------|----------|
| 0.011449 | 0.011634 | 0.011181 | 0.011234 | 0.011222 | 0.011316 | 0.011239 |
| 0.011493 | 0.011446 | 0.011405 | 0.011194 | 0.011407 | 0.011442 | 0.011445 |
| 0.011305 | 0.011372 | 0.011407 | 0.011373 | 0.011338 | 0.011338 | 0.011303 |
| 0.011338 | 0.011268 | 0.011303 | 0.011338 | 0.011303 | 0.011234 | 0.011268 |
| 0.011268 | 0.011338 | 0.011234 | 0.011338 | 0.011373 | 0.011407 | 0.011303 |
| 0.011338 | 0.011303 | 0.011650 | 0.011650 | 0.011373 | 0.011373 | 0.011442 |
| 0.011199 | 0.011199 | 0.011234 | 0.011338 | 0.011199 | 0.011442 | 0.011442 |
| 0.011477 | 0.011476 | 0.011407 | 0.011511 | 0.011685 | 0.011513 | 0.011338 |
| 0.011338 | 0.011338 | 0.011442 | 0.011268 | 0.011338 | 0.011303 | 0.011338 |
| 0.011407 | 0.011407 | 0.011442 | 0.011407 | 0.011304 | 0.011511 | 0.011477 |
| 0.011305 | 0.011234 | 0.011338 | 0.011407 | 0.011338 | 0.011477 | 0.011511 |
| 0.011685 | 0.011378 | 0.011546 | 0.011511 | 0.011442 | 0.011615 | 0.011234 |
| 0.011374 | 0.011303 | 0.011268 | 0.011268 | 0.011338 | 0.011234 | 0.011338 |
| 0.011373 | 0.011407 | 0.011303 | 0.011338 | 0.011303 | 0.011650 | 0.011650 |
| 0.011373 | 0.011373 | 0.011476 | 0.011407 | 0.012067 | 0.011460 | 0.011380 |
| 0.011453 | 0.011414 | 0.011522 | 0.011413 | 0.011524 | 0.011447 | 0.011380 |
| 0.012005 | 0.011307 | 0.011445 | 0.011377 | 0.011622 | 0.011480 | 0.011617 |
| 0.012002 | 0.011476 | 0.011549 | 0.011650 | 0.011511 | 0.011511 | 0.011549 |
| 0.011199 | 0.011372 | 0.011511 | 0.011476 | 0.011444 | 0.011476 | 0.011408 |
| 0.011303 | 0.011234 | 0.011268 | 0.011303 | 0.011199 | 0.011268 | 0.011164 |
| 0.011303 | 0.011338 | 0.011234 | 0.011199 | 0.011303 | 0.011234 | 0.011268 |
| 0.011268 | 0.011199 | 0.011268 | 0.011303 | 0.011199 | 0.011407 | 0.011442 |
| 0.011338 | 0.011407 | 0.011338 | 0.011338 | 0.011268 | 0.011685 | 0.011303 |
| 0.011343 | 0.011268 | 0.011511 | 0.011512 | 0.011373 | 0.011372 | 0.011372 |
| 0.011372 | 0.011303 | 0.011268 | 0.011303 | 0.011372 | 0.011407 | 0.011338 |
| 0.011338 | 0.011476 | 0.011650 | 0.011372 | 0.011546 | 0.011546 | 0.011442 |
| 0.011268 | 0.011338 | 0.011372 | 0.011789 | 0.011338 | 0.011373 | 0.011338 |
| 0.011372 | 0.011303 | 0.011303 | 0.011615 | 0.011546 | 0.011581 | 0.011303 |
| 0.011407 | 0.011476 | 0.011303 | 0.011407 | 0.011372 | 0.011234 | 0.011580 |
| 0.011338 | 0.011303 | 0.011303 | 0.011476 | 0.011303 | 0.011407 | 0.011650 |
| 0.011268 | 0.011727 | 0.011719 | 0.011523 | 0.011232 | 0.011376 | 0.011217 |
| 0.011290 | 0.011707 | 0.011242 | 0.011476 | 0.011261 | 0.011431 | 0.011391 |
| 0.011478 | 0.011197 | 0.011346 | 0.011196 | 0.011228 | 0.011402 | 0.011354 |
| 0.011371 | 0.011304 | 0.011388 | 0.011315 | 0.011339 | 0.011477 | 0.011546 |
| 0.011511 | 0.011408 | 0.011514 | 0.011516 | 0.011621 | 0.011682 | 0.011338 |
| 0.011580 | 0.011442 | 0.011303 | 0.011407 | 0.011199 | 0.011442 | 0.011234 |
| 0.011303 | 0.011303 | 0.011268 | 0.011234 | 0.011268 | 0.011234 | 0.011338 |
| 0.011313 | 0.011313 | 0.011308 | 0.011343 | 0.011484 | 0.011448 | 0.011448 |
| 0.011446 | 0.011338 | 0.011174 | 0.011172 | 0.011305 | 0.011480 | 0.011481 |
| 0.011269 | 0.011340 | 0.011512 | 0.011549 | 0.011477 | 0.011512 | 0.011442 |
| 0.011372 | 0.011442 | 0.011442 | 0.011338 | 0.011928 | 0.011511 | 0.011581 |
| 0.011581 | 0.011685 | 0.011307 | 0.011382 | 0.011234 | 0.011477 | 0.011442 |
| 0.011477 | 0.011476 | 0.011511 | 0.011511 | 0.011589 | 0.011650 | 0.000000 |
| 0.011164 | 0.011165 | 0.011234 | 0.011234 | 0.011340 | 0.011172 | 0.011511 |
| 0.011305 | 0.011455 | 0.011203 | 0.011324 | 0.011303 | 0.011378 | 0.011268 |
| 0.011234 | 0.011234 | 0.011303 | 0.011268 | 0.011477 | 0.011442 | 0.011372 |
| 0.011477 | 0.011546 | 0.011268 | 0.011268 | 0.011303 | 0.011303 | 0.011305 |
| 0.011375 | 0.011303 | 0.011303 | 0.011339 | 0.011477 | 0.011546 | 0.011511 |
| 0.011408 | 0.011514 | 0.011516 | 0.011621 | 0.011682 | 0.011338 | 0.011511 |
| 0.011442 | 0.011442 | 0.011270 | 0.011420 | 0.011383 | 0.011412 | 0.011241 |
| 0.011452 | 0.011533 | 0.011451 | 0.011306 | 0.011234 | 0.011442 | 0.011303 |
| 0.011373 | 0.011338 | 0.011234 | 0.011304 | 0.011442 | 0.011444 | 0.011338 |
| 0.011234 | 0.011165 | 0.011303 | 0.011234 | 0.011164 | 0.011271 | 0.011442 |
| 0.011338 | 0.011268 | 0.011303 | 0.011338 | 0.011303 | 0.011234 | 0.011338 |
| 0.011303 | 0.011338 | 0.011338 | 0.011268 | 0.011338 | 0.011581 | 0.011234 |
| 0.011268 | 0.011685 | 0.011268 | 0.011303 | 0.011268 | 0.011650 | 0.011236 |
| 0.011632 | 0.011236 | 0.011265 | 0.011479 | 0.011565 | 0.011469 | 0.011191 |
| 0.011222 | 0.011407 | 0.011511 | 0.011620 | 0.011478 | 0.011620 | 0.011755 |
| 0.011650 | 0.011720 | 0.011615 | 0.011837 | 0.011581 | 0.012484 | 0.011547 |
| 0.012346 | 0.012140 | 0.012279 | 0.012489 | 0.011650 | 0.011338 | 0.011616 |

|          |          |          |          |          |          |          |
|----------|----------|----------|----------|----------|----------|----------|
| 0.012068 | 0.012001 | 0.011581 | 0.011477 | 0.011546 | 0.011546 | 0.011514 |
| 0.011407 | 0.011411 | 0.011476 | 0.011442 | 0.011859 | 0.011893 | 0.011928 |
| 0.011790 | 0.011894 | 0.012035 | 0.011793 | 0.012104 | 0.012040 | 0.012173 |
| 0.012138 | 0.012208 | 0.012118 | 0.012173 | 0.012175 | 0.011372 | 0.011685 |
| 0.011720 | 0.012276 | 0.011761 | 0.011998 | 0.012487 | 0.011516 | 0.011407 |
| 0.011372 | 0.011372 | 0.011859 | 0.011885 | 0.011933 | 0.011719 | 0.011374 |
| s693     | 0.011533 | 0.011533 | 0.011703 | 0.011601 | 0.011601 | 0.011635 |
| 0.011539 | 0.011471 | 0.011669 | 0.011128 | 0.011195 | 0.011162 | 0.011128 |
| 0.011162 | 0.011297 | 0.011128 | 0.011162 | 0.011229 | 0.011195 | 0.011162 |
| 0.011128 | 0.011162 | 0.011263 | 0.011128 | 0.011162 | 0.011162 | 0.011505 |
| 0.011398 | 0.011162 | 0.000000 | 0.011297 | 0.011229 | 0.011195 | 0.011229 |
| 0.011195 | 0.011297 | 0.011195 | 0.011195 | 0.011195 | 0.011195 | 0.011364 |
| 0.011128 | 0.011195 | 0.011229 | 0.011162 | 0.011263 | 0.011297 | 0.011229 |
| 0.011195 | 0.011364 | 0.011263 | 0.011533 | 0.011195 | 0.011466 | 0.011195 |
| 0.011162 | 0.011263 | 0.011297 | 0.011466 | 0.011567 | 0.011263 | 0.011364 |
| 0.011229 | 0.011297 | 0.011196 | 0.011432 | 0.011669 | 0.011162 | 0.011263 |
| 0.011162 | 0.011263 | 0.011229 | 0.011297 | 0.011195 | 0.011229 | 0.011229 |
| 0.011128 | 0.011162 | 0.011128 | 0.011229 | 0.011195 | 0.011230 | 0.011297 |
| 0.011229 | 0.011195 | 0.011263 | 0.011162 | 0.011297 | 0.011128 | 0.011195 |
| 0.011364 | 0.011297 | 0.011533 | 0.011364 | 0.011195 | 0.011432 | 0.011195 |
| 0.011359 | 0.011587 | 0.011402 | 0.011100 | 0.011098 | 0.011209 | 0.011298 |
| 0.011945 | 0.011369 | 0.011102 | 0.011432 | 0.011432 | 0.011229 | 0.011331 |
| 0.011263 | 0.011229 | 0.011297 | 0.011195 | 0.011297 | 0.011229 | 0.011229 |
| 0.011195 | 0.011297 | 0.011500 | 0.011364 | 0.011263 | 0.011229 | 0.011162 |
| 0.011128 | 0.011128 | 0.011196 | 0.011162 | 0.011365 | 0.011331 | 0.011263 |
| 0.011365 | 0.011432 | 0.011162 | 0.011162 | 0.011196 | 0.011196 | 0.011196 |
| 0.011265 | 0.011196 | 0.011196 | 0.000000 | 0.011133 | 0.011096 | 0.011196 |
| 0.011197 | 0.011130 | 0.011172 | 0.011165 | 0.011095 | 0.011129 | 0.011162 |
| 0.011423 | 0.011199 | 0.011234 | 0.011128 | 0.011130 | 0.011263 | 0.011230 |
| 0.011297 | 0.011230 | 0.011230 | 0.011331 | 0.011263 | 0.011635 | 0.011432 |
| 0.011466 | 0.011331 | 0.011195 | 0.011297 | 0.011094 | 0.011331 | 0.011128 |
| 0.011195 | 0.011195 | 0.011162 | 0.011128 | 0.011162 | 0.011128 | 0.011229 |
| 0.011196 | 0.011297 | 0.011229 | 0.011128 | 0.011230 | 0.011331 | 0.011333 |
| 0.011331 | 0.011229 | 0.011128 | 0.000000 | 0.011196 | 0.011128 | 0.000000 |
| 0.011163 | 0.011331 | 0.011128 | 0.011331 | 0.011094 | 0.011196 | 0.011162 |
| 0.011263 | 0.011162 | 0.011196 | 0.011162 | 0.011196 | 0.000000 | 0.011196 |
| 0.011229 | 0.011162 | 0.011229 | 0.011162 | 0.011196 | 0.011229 | 0.011466 |
| 0.011567 | 0.011500 | 0.011568 | 0.011332 | 0.011568 | 0.011196 | 0.011162 |
| 0.011196 | 0.011468 | 0.011289 | 0.011095 | 0.011573 | 0.000000 | 0.011179 |
| 0.011573 | 0.011471 | 0.011364 | 0.011567 | 0.011267 | 0.011432 | 0.011398 |
| 0.011331 | 0.011500 | 0.011344 | 0.011184 | 0.011228 | 0.011229 | 0.011299 |
| 0.011398 | 0.011298 | 0.011435 | 0.011502 | 0.011432 | 0.011500 | 0.011399 |
| 0.011333 | 0.011502 | 0.011435 | 0.011367 | 0.011636 | 0.011094 | 0.011298 |
| 0.011263 | 0.011162 | 0.011094 | 0.011094 | 0.011162 | 0.011162 | 0.011229 |
| 0.011162 | 0.011229 | 0.011128 | 0.011229 | 0.011162 | 0.011162 | 0.011229 |
| 0.011162 | 0.011601 | 0.011500 | 0.011533 | 0.000000 | 0.011162 | 0.011196 |
| 0.011195 | 0.011162 | 0.011229 | 0.011263 | 0.011128 | 0.011128 | 0.011128 |
| 0.011669 | 0.011297 | 0.011297 | 0.011094 | 0.011162 | 0.011365 | 0.011128 |
| 0.011128 | 0.011195 | 0.011162 | 0.011331 | 0.011128 | 0.011229 | 0.011364 |
| 0.011297 | 0.011162 | 0.011162 | 0.011094 | 0.011094 | 0.011263 | 0.011195 |
| 0.011094 | 0.011195 | 0.000000 | 0.011094 | 0.011229 | 0.011365 | 0.011128 |
| 0.011094 | 0.011229 | 0.011162 | 0.000000 | 0.011398 | 0.000000 | 0.011229 |
| 0.011300 | 0.011128 | 0.011432 | 0.011263 | 0.011297 | 0.011162 | 0.011229 |
| 0.011128 | 0.011466 | 0.000000 | 0.011331 | 0.011128 | 0.011128 | 0.000000 |
| 0.011297 | 0.011466 | 0.011196 | 0.011263 | 0.011094 | 0.011500 | 0.011128 |
| 0.011128 | 0.011128 | 0.011162 | 0.011263 | 0.011162 | 0.011263 | 0.011331 |
| 0.011331 | 0.011297 | 0.011195 | 0.011297 | 0.011263 | 0.011128 | 0.011094 |
| 0.011128 | 0.011128 | 0.011196 | 0.011128 | 0.011094 | 0.011229 | 0.011128 |
| 0.011162 | 0.011162 | 0.011263 | 0.011331 | 0.011229 | 0.011162 | 0.011162 |
| 0.011195 | 0.011162 | 0.011229 | 0.011128 | 0.011263 | 0.011331 | 0.011601 |



|          |          |          |          |          |          |          |
|----------|----------|----------|----------|----------|----------|----------|
| 0.011162 | 0.011567 | 0.011165 | 0.017724 | 0.011127 | 0.011308 | 0.011517 |
| 0.011478 | 0.011521 | 0.011219 | 0.011178 | 0.011616 | 0.011547 | 0.011245 |
| 0.011347 | 0.011431 | 0.000000 | 0.011145 | 0.011139 | 0.011210 | 0.011147 |
| 0.011392 | 0.011323 | 0.011322 | 0.011126 | 0.011297 | 0.011331 | 0.011333 |
| 0.011198 | 0.011297 | 0.011297 | 0.011263 | 0.011229 | 0.011229 | 0.011195 |
| 0.011229 | 0.011162 | 0.011195 | 0.011229 | 0.011196 | 0.011128 | 0.011162 |
| 0.011162 | 0.011229 | 0.011128 | 0.011229 | 0.011263 | 0.011297 | 0.011196 |
| 0.011229 | 0.011196 | 0.011534 | 0.011534 | 0.011263 | 0.011297 | 0.011331 |
| 0.011094 | 0.011094 | 0.011128 | 0.011229 | 0.011094 | 0.011331 | 0.011331 |
| 0.011365 | 0.011364 | 0.011297 | 0.011398 | 0.011568 | 0.011399 | 0.011229 |
| 0.011229 | 0.011263 | 0.011331 | 0.011162 | 0.011229 | 0.011196 | 0.011229 |
| 0.011297 | 0.011297 | 0.011331 | 0.011297 | 0.011196 | 0.011398 | 0.011365 |
| 0.011231 | 0.011128 | 0.011229 | 0.011297 | 0.011229 | 0.011365 | 0.011398 |
| 0.011567 | 0.011267 | 0.011432 | 0.011398 | 0.011331 | 0.011500 | 0.011128 |
| 0.011298 | 0.011196 | 0.011162 | 0.011162 | 0.011229 | 0.011128 | 0.011229 |
| 0.011263 | 0.011297 | 0.011196 | 0.011229 | 0.011196 | 0.011534 | 0.011534 |
| 0.011263 | 0.011297 | 0.011364 | 0.011297 | 0.011941 | 0.011346 | 0.011271 |
| 0.011342 | 0.011303 | 0.011411 | 0.011303 | 0.011410 | 0.011336 | 0.011269 |
| 0.011884 | 0.011199 | 0.011334 | 0.011268 | 0.011542 | 0.011403 | 0.011504 |
| 0.011912 | 0.011362 | 0.011469 | 0.011533 | 0.011398 | 0.011398 | 0.011435 |
| 0.011094 | 0.011263 | 0.011398 | 0.011364 | 0.011366 | 0.011364 | 0.011298 |
| 0.011195 | 0.011128 | 0.011162 | 0.011195 | 0.011094 | 0.011162 | 0.000000 |
| 0.011195 | 0.011229 | 0.011128 | 0.011094 | 0.011195 | 0.011128 | 0.011162 |
| 0.011162 | 0.011094 | 0.011162 | 0.011196 | 0.011094 | 0.011297 | 0.011331 |
| 0.011229 | 0.011297 | 0.011229 | 0.011229 | 0.011162 | 0.011567 | 0.011195 |
| 0.011234 | 0.011162 | 0.011398 | 0.011400 | 0.011263 | 0.011263 | 0.011263 |
| 0.011263 | 0.011196 | 0.011162 | 0.011196 | 0.011263 | 0.011297 | 0.011229 |
| 0.011229 | 0.011364 | 0.011533 | 0.011263 | 0.011466 | 0.011466 | 0.011331 |
| 0.011162 | 0.011229 | 0.011263 | 0.011669 | 0.011229 | 0.011263 | 0.011229 |
| 0.011263 | 0.011195 | 0.011195 | 0.011500 | 0.011432 | 0.011432 | 0.011195 |
| 0.011297 | 0.011364 | 0.011229 | 0.011297 | 0.011263 | 0.011128 | 0.011466 |
| 0.011229 | 0.011195 | 0.011195 | 0.011364 | 0.011195 | 0.011297 | 0.011533 |
| 0.011162 | 0.011607 | 0.011601 | 0.011388 | 0.011117 | 0.011300 | 0.011163 |
| 0.011116 | 0.011570 | 0.011131 | 0.011331 | 0.011159 | 0.011266 | 0.011275 |
| 0.011369 | 0.000000 | 0.011229 | 0.000000 | 0.011115 | 0.011264 | 0.011265 |
| 0.011288 | 0.011179 | 0.011273 | 0.011202 | 0.011230 | 0.011365 | 0.011432 |
| 0.011432 | 0.011297 | 0.011401 | 0.011402 | 0.011538 | 0.011559 | 0.011229 |
| 0.011466 | 0.011331 | 0.011195 | 0.011297 | 0.011094 | 0.011331 | 0.011128 |
| 0.011195 | 0.011195 | 0.011162 | 0.011128 | 0.011162 | 0.011128 | 0.011229 |
| 0.011201 | 0.011201 | 0.011198 | 0.011233 | 0.011370 | 0.011335 | 0.011335 |
| 0.011335 | 0.011263 | 0.000000 | 0.000000 | 0.011197 | 0.011367 | 0.011368 |
| 0.011162 | 0.011231 | 0.011467 | 0.011435 | 0.011365 | 0.011399 | 0.011331 |
| 0.011263 | 0.011331 | 0.011331 | 0.011229 | 0.011804 | 0.011398 | 0.011466 |
| 0.011500 | 0.011562 | 0.011198 | 0.011270 | 0.011128 | 0.011365 | 0.011331 |
| 0.011365 | 0.011398 | 0.011398 | 0.011398 | 0.011496 | 0.011533 | 0.011164 |
| 0.000000 | 0.000000 | 0.011162 | 0.011128 | 0.011231 | 0.000000 | 0.011400 |
| 0.011198 | 0.011323 | 0.000000 | 0.011210 | 0.011196 | 0.011267 | 0.011162 |
| 0.011128 | 0.011128 | 0.011196 | 0.011162 | 0.011365 | 0.011331 | 0.011263 |
| 0.011365 | 0.011432 | 0.011162 | 0.011162 | 0.011196 | 0.011196 | 0.011196 |
| 0.011265 | 0.011196 | 0.011196 | 0.011230 | 0.011365 | 0.011432 | 0.011432 |
| 0.011297 | 0.011401 | 0.011402 | 0.011538 | 0.011559 | 0.011229 | 0.011398 |
| 0.011331 | 0.011331 | 0.011162 | 0.011306 | 0.011270 | 0.011300 | 0.011131 |
| 0.011338 | 0.011473 | 0.011315 | 0.011231 | 0.011128 | 0.011331 | 0.011196 |
| 0.011297 | 0.011229 | 0.011128 | 0.011230 | 0.011331 | 0.011333 | 0.011229 |
| 0.011128 | 0.000000 | 0.011196 | 0.011128 | 0.000000 | 0.011163 | 0.011331 |
| 0.011229 | 0.011162 | 0.011195 | 0.011229 | 0.011196 | 0.011128 | 0.011229 |
| 0.011195 | 0.011229 | 0.011229 | 0.011162 | 0.011229 | 0.011466 | 0.011128 |
| 0.011162 | 0.011567 | 0.011162 | 0.011195 | 0.011162 | 0.011533 | 0.011104 |
| 0.011515 | 0.011103 | 0.011162 | 0.011344 | 0.011430 | 0.011349 | 0.000000 |
| 0.011113 | 0.011297 | 0.011398 | 0.011505 | 0.011365 | 0.011503 | 0.011636 |

|          |          |          |          |          |          |          |
|----------|----------|----------|----------|----------|----------|----------|
| 0.011534 | 0.011603 | 0.011533 | 0.011748 | 0.011500 | 0.012380 | 0.011501 |
| 0.012279 | 0.012045 | 0.012180 | 0.012419 | 0.011533 | 0.011229 | 0.011500 |
| 0.011941 | 0.011875 | 0.011466 | 0.011365 | 0.011433 | 0.011433 | 0.011401 |
| 0.011297 | 0.011299 | 0.011364 | 0.011331 | 0.011737 | 0.011770 | 0.011805 |
| 0.011670 | 0.011771 | 0.011909 | 0.011673 | 0.011975 | 0.011981 | 0.012043 |
| 0.012044 | 0.012078 | 0.012022 | 0.012044 | 0.012045 | 0.011263 | 0.011568 |
| 0.011636 | 0.012143 | 0.011641 | 0.011872 | 0.012348 | 0.011402 | 0.011297 |
| 0.011263 | 0.011263 | 0.011737 | 0.011759 | 0.011875 | 0.011601 | 0.011264 |
| S694     | 0.011510 | 0.011510 | 0.011718 | 0.011580 | 0.011580 | 0.011614 |
| 0.011551 | 0.011481 | 0.011649 | 0.011130 | 0.011199 | 0.011164 | 0.011130 |
| 0.011164 | 0.011337 | 0.011130 | 0.011164 | 0.011233 | 0.011199 | 0.011164 |
| 0.011130 | 0.011164 | 0.011268 | 0.011130 | 0.011164 | 0.011164 | 0.011516 |
| 0.011406 | 0.011130 | 0.000000 | 0.011303 | 0.011233 | 0.011199 | 0.011233 |
| 0.011199 | 0.011303 | 0.011199 | 0.011199 | 0.011199 | 0.011199 | 0.011337 |
| 0.011130 | 0.011199 | 0.011233 | 0.011164 | 0.011268 | 0.011303 | 0.011233 |
| 0.011199 | 0.011372 | 0.011268 | 0.011545 | 0.011199 | 0.011476 | 0.011199 |
| 0.011164 | 0.011268 | 0.011303 | 0.011476 | 0.011580 | 0.011268 | 0.011372 |
| 0.011199 | 0.011303 | 0.011199 | 0.011406 | 0.011684 | 0.011164 | 0.011268 |
| 0.011164 | 0.011268 | 0.011199 | 0.011303 | 0.011199 | 0.011233 | 0.011233 |
| 0.011130 | 0.011164 | 0.011130 | 0.011233 | 0.011199 | 0.011199 | 0.011268 |
| 0.011233 | 0.011199 | 0.011268 | 0.011164 | 0.011303 | 0.011130 | 0.011199 |
| 0.011372 | 0.011303 | 0.011545 | 0.011372 | 0.011199 | 0.011441 | 0.011199 |
| 0.011365 | 0.011597 | 0.011408 | 0.011101 | 0.011099 | 0.011213 | 0.011303 |
| 0.011968 | 0.011376 | 0.011103 | 0.011441 | 0.011441 | 0.011233 | 0.011337 |
| 0.011268 | 0.011233 | 0.011303 | 0.011199 | 0.011268 | 0.011233 | 0.011233 |
| 0.011199 | 0.011303 | 0.011510 | 0.011372 | 0.011268 | 0.011233 | 0.011164 |
| 0.011130 | 0.011130 | 0.011199 | 0.011164 | 0.011372 | 0.011337 | 0.011268 |
| 0.011372 | 0.011441 | 0.011164 | 0.011164 | 0.011199 | 0.011199 | 0.011200 |
| 0.011269 | 0.011199 | 0.011199 | 0.000000 | 0.011134 | 0.011096 | 0.011199 |
| 0.011200 | 0.011131 | 0.011136 | 0.011132 | 0.011095 | 0.000000 | 0.011165 |
| 0.011429 | 0.011202 | 0.011238 | 0.011130 | 0.011132 | 0.011268 | 0.011234 |
| 0.011303 | 0.011234 | 0.011234 | 0.011337 | 0.011233 | 0.011649 | 0.011441 |
| 0.011476 | 0.011337 | 0.011199 | 0.011303 | 0.011095 | 0.011337 | 0.011130 |
| 0.011199 | 0.011164 | 0.011164 | 0.011130 | 0.011164 | 0.011130 | 0.011233 |
| 0.011199 | 0.011268 | 0.011233 | 0.011130 | 0.011199 | 0.011337 | 0.011339 |
| 0.011337 | 0.011233 | 0.011130 | 0.000000 | 0.011199 | 0.011130 | 0.000000 |
| 0.011165 | 0.011337 | 0.011130 | 0.011337 | 0.011095 | 0.011199 | 0.011164 |
| 0.011268 | 0.011164 | 0.011199 | 0.011164 | 0.011199 | 0.000000 | 0.011199 |
| 0.011233 | 0.011164 | 0.011233 | 0.011164 | 0.011199 | 0.011233 | 0.011476 |
| 0.011580 | 0.011510 | 0.011580 | 0.011338 | 0.011580 | 0.011199 | 0.011164 |
| 0.011200 | 0.011478 | 0.011293 | 0.011096 | 0.011585 | 0.000000 | 0.011182 |
| 0.011586 | 0.011481 | 0.011337 | 0.011580 | 0.011201 | 0.011441 | 0.011407 |
| 0.011337 | 0.011510 | 0.011346 | 0.011184 | 0.011228 | 0.011233 | 0.011303 |
| 0.011372 | 0.011303 | 0.011441 | 0.011510 | 0.011441 | 0.011476 | 0.011406 |
| 0.011339 | 0.011512 | 0.011408 | 0.011373 | 0.011650 | 0.011095 | 0.011303 |
| 0.011268 | 0.011164 | 0.011095 | 0.011095 | 0.011164 | 0.011164 | 0.011233 |
| 0.011164 | 0.011233 | 0.011130 | 0.011233 | 0.011164 | 0.011164 | 0.011233 |
| 0.011164 | 0.011614 | 0.011510 | 0.011545 | 0.000000 | 0.011164 | 0.011199 |
| 0.011199 | 0.011164 | 0.011199 | 0.011268 | 0.011130 | 0.011130 | 0.011130 |
| 0.011683 | 0.011303 | 0.011303 | 0.011095 | 0.011164 | 0.011372 | 0.011130 |
| 0.011130 | 0.011199 | 0.011164 | 0.011337 | 0.011130 | 0.011233 | 0.011337 |
| 0.011303 | 0.011164 | 0.011164 | 0.011095 | 0.011095 | 0.011268 | 0.011199 |
| 0.011095 | 0.011199 | 0.000000 | 0.011095 | 0.011233 | 0.011372 | 0.011130 |
| 0.011095 | 0.011233 | 0.011164 | 0.000000 | 0.011406 | 0.000000 | 0.011233 |
| 0.011306 | 0.011130 | 0.011441 | 0.011268 | 0.011303 | 0.011164 | 0.011233 |
| 0.011130 | 0.011476 | 0.000000 | 0.011337 | 0.011130 | 0.011130 | 0.000000 |
| 0.011303 | 0.011476 | 0.011199 | 0.011268 | 0.011095 | 0.011510 | 0.011130 |
| 0.011130 | 0.011130 | 0.011164 | 0.011268 | 0.011164 | 0.011268 | 0.011337 |
| 0.011337 | 0.011268 | 0.011199 | 0.011303 | 0.011233 | 0.011130 | 0.011095 |
| 0.011130 | 0.011130 | 0.011199 | 0.011130 | 0.011095 | 0.011233 | 0.011130 |

|          |          |          |          |          |          |          |
|----------|----------|----------|----------|----------|----------|----------|
| 0.011164 | 0.011164 | 0.011268 | 0.011337 | 0.011233 | 0.011164 | 0.011130 |
| 0.011199 | 0.011164 | 0.011233 | 0.011130 | 0.011268 | 0.011337 | 0.011614 |
| 0.011164 | 0.011580 | 0.011167 | 0.017905 | 0.011127 | 0.011317 | 0.011528 |
| 0.011489 | 0.011532 | 0.011221 | 0.011179 | 0.011630 | 0.011559 | 0.011250 |
| 0.011351 | 0.011439 | 0.000000 | 0.011147 | 0.011141 | 0.011162 | 0.011150 |
| 0.011395 | 0.011330 | 0.011328 | 0.011127 | 0.011303 | 0.011303 | 0.011339 |
| 0.011199 | 0.011268 | 0.011303 | 0.011268 | 0.011233 | 0.011233 | 0.011199 |
| 0.011233 | 0.011164 | 0.011199 | 0.011233 | 0.011199 | 0.011130 | 0.011164 |
| 0.011164 | 0.011233 | 0.011130 | 0.011233 | 0.011268 | 0.011303 | 0.011199 |
| 0.011233 | 0.011199 | 0.011545 | 0.011545 | 0.011268 | 0.011268 | 0.011303 |
| 0.011095 | 0.011095 | 0.011130 | 0.011233 | 0.011095 | 0.011337 | 0.011337 |
| 0.011372 | 0.011337 | 0.011303 | 0.011406 | 0.011580 | 0.011408 | 0.011233 |
| 0.011233 | 0.011268 | 0.011303 | 0.011164 | 0.011233 | 0.011199 | 0.011233 |
| 0.011303 | 0.011303 | 0.011337 | 0.011303 | 0.011199 | 0.011372 | 0.011372 |
| 0.011200 | 0.011130 | 0.011233 | 0.011303 | 0.011233 | 0.011372 | 0.011406 |
| 0.011580 | 0.011201 | 0.011441 | 0.011407 | 0.011337 | 0.011510 | 0.011130 |
| 0.011303 | 0.011199 | 0.011164 | 0.011164 | 0.011233 | 0.011130 | 0.011233 |
| 0.011268 | 0.011303 | 0.011199 | 0.011233 | 0.011199 | 0.011545 | 0.011545 |
| 0.011268 | 0.011268 | 0.011337 | 0.011268 | 0.011927 | 0.011350 | 0.011273 |
| 0.011345 | 0.011307 | 0.011414 | 0.011307 | 0.011415 | 0.011340 | 0.011273 |
| 0.011863 | 0.011201 | 0.011338 | 0.011271 | 0.011514 | 0.011373 | 0.011511 |
| 0.011897 | 0.011362 | 0.011479 | 0.011545 | 0.011406 | 0.011406 | 0.011444 |
| 0.011095 | 0.011268 | 0.011406 | 0.011372 | 0.011374 | 0.011372 | 0.011303 |
| 0.011199 | 0.011130 | 0.011164 | 0.011199 | 0.011095 | 0.011164 | 0.000000 |
| 0.011199 | 0.011233 | 0.011130 | 0.011095 | 0.011199 | 0.011130 | 0.011164 |
| 0.011164 | 0.011095 | 0.011164 | 0.011199 | 0.011095 | 0.011303 | 0.011337 |
| 0.011233 | 0.011303 | 0.011233 | 0.011233 | 0.011164 | 0.011580 | 0.011199 |
| 0.011237 | 0.011164 | 0.011407 | 0.011407 | 0.011268 | 0.011268 | 0.011268 |
| 0.011268 | 0.011199 | 0.011164 | 0.011199 | 0.011268 | 0.011303 | 0.011233 |
| 0.011233 | 0.011372 | 0.011545 | 0.011268 | 0.011476 | 0.011476 | 0.011337 |
| 0.011164 | 0.011233 | 0.011268 | 0.011684 | 0.011233 | 0.011268 | 0.011233 |
| 0.011268 | 0.011199 | 0.011199 | 0.011510 | 0.011406 | 0.011476 | 0.011199 |
| 0.011303 | 0.011372 | 0.011199 | 0.011303 | 0.011268 | 0.011130 | 0.011476 |
| 0.011233 | 0.011199 | 0.011199 | 0.011372 | 0.011199 | 0.011303 | 0.011545 |
| 0.011164 | 0.011621 | 0.011614 | 0.011395 | 0.011118 | 0.011306 | 0.011164 |
| 0.011118 | 0.011585 | 0.011133 | 0.011336 | 0.011161 | 0.011271 | 0.011280 |
| 0.011373 | 0.000000 | 0.011231 | 0.000000 | 0.011116 | 0.011266 | 0.011269 |
| 0.011292 | 0.011182 | 0.011279 | 0.011206 | 0.011234 | 0.011372 | 0.011441 |
| 0.011441 | 0.011303 | 0.011409 | 0.011410 | 0.011550 | 0.011571 | 0.011233 |
| 0.011476 | 0.011337 | 0.011199 | 0.011303 | 0.011095 | 0.011337 | 0.011130 |
| 0.011199 | 0.011164 | 0.011164 | 0.011130 | 0.011164 | 0.011130 | 0.011233 |
| 0.011205 | 0.011204 | 0.011202 | 0.011236 | 0.011377 | 0.011342 | 0.011342 |
| 0.011341 | 0.011234 | 0.000000 | 0.000000 | 0.011200 | 0.011375 | 0.011375 |
| 0.011164 | 0.011235 | 0.011407 | 0.011444 | 0.011372 | 0.011407 | 0.011303 |
| 0.011268 | 0.011337 | 0.011337 | 0.011233 | 0.011822 | 0.011406 | 0.011476 |
| 0.011476 | 0.011574 | 0.011201 | 0.011274 | 0.011130 | 0.011372 | 0.011303 |
| 0.011372 | 0.011406 | 0.011406 | 0.011406 | 0.011507 | 0.011545 | 0.011165 |
| 0.000000 | 0.000000 | 0.011130 | 0.011130 | 0.011234 | 0.000000 | 0.011407 |
| 0.011200 | 0.011323 | 0.000000 | 0.011210 | 0.011199 | 0.011271 | 0.011164 |
| 0.011130 | 0.011130 | 0.011199 | 0.011164 | 0.011372 | 0.011337 | 0.011268 |
| 0.011372 | 0.011441 | 0.011164 | 0.011164 | 0.011199 | 0.011199 | 0.011200 |
| 0.011269 | 0.011199 | 0.011199 | 0.011234 | 0.011372 | 0.011441 | 0.011441 |
| 0.011303 | 0.011409 | 0.011410 | 0.011550 | 0.011571 | 0.011233 | 0.011406 |
| 0.011303 | 0.011303 | 0.011165 | 0.011312 | 0.011275 | 0.011306 | 0.011133 |
| 0.011345 | 0.011437 | 0.011322 | 0.011200 | 0.011130 | 0.011337 | 0.011199 |
| 0.011268 | 0.011233 | 0.011130 | 0.011199 | 0.011337 | 0.011339 | 0.011233 |
| 0.011130 | 0.000000 | 0.011199 | 0.011130 | 0.000000 | 0.011165 | 0.011337 |
| 0.011233 | 0.011164 | 0.011199 | 0.011233 | 0.011199 | 0.011130 | 0.011233 |
| 0.011199 | 0.011233 | 0.011233 | 0.011164 | 0.011233 | 0.011476 | 0.011130 |
| 0.011164 | 0.011580 | 0.011164 | 0.011199 | 0.011164 | 0.011545 | 0.011104 |

|          |          |          |          |          |          |          |
|----------|----------|----------|----------|----------|----------|----------|
| 0.011516 | 0.011104 | 0.011163 | 0.011352 | 0.011437 | 0.011357 | 0.000000 |
| 0.011114 | 0.011303 | 0.011406 | 0.011515 | 0.011373 | 0.011514 | 0.011615 |
| 0.011546 | 0.011615 | 0.011545 | 0.011695 | 0.011476 | 0.012377 | 0.011477 |
| 0.012274 | 0.012034 | 0.012172 | 0.012313 | 0.011545 | 0.011233 | 0.011511 |
| 0.011928 | 0.011895 | 0.011476 | 0.011372 | 0.011442 | 0.011442 | 0.011409 |
| 0.011303 | 0.011305 | 0.011372 | 0.011338 | 0.011754 | 0.011787 | 0.011823 |
| 0.011685 | 0.011788 | 0.011930 | 0.011688 | 0.011963 | 0.011933 | 0.012032 |
| 0.012033 | 0.012068 | 0.011976 | 0.012033 | 0.012034 | 0.011233 | 0.011580 |
| 0.011650 | 0.012100 | 0.011655 | 0.011892 | 0.012380 | 0.011411 | 0.011303 |
| 0.011268 | 0.011268 | 0.011753 | 0.011761 | 0.011896 | 0.011614 | 0.011269 |
| S695     | 0.011605 | 0.011605 | 0.011741 | 0.011707 | 0.011707 | 0.011741 |
| 0.011646 | 0.011577 | 0.011775 | 0.011230 | 0.011298 | 0.011265 | 0.011230 |
| 0.011264 | 0.011435 | 0.011230 | 0.011264 | 0.011332 | 0.011298 | 0.011264 |
| 0.011230 | 0.011264 | 0.011366 | 0.011231 | 0.011265 | 0.011264 | 0.011611 |
| 0.011503 | 0.000000 | 0.011162 | 0.011401 | 0.011333 | 0.011298 | 0.011333 |
| 0.011298 | 0.011401 | 0.011298 | 0.011299 | 0.011298 | 0.011298 | 0.011469 |
| 0.011230 | 0.011298 | 0.011333 | 0.011264 | 0.011367 | 0.011401 | 0.011333 |
| 0.011298 | 0.011469 | 0.011367 | 0.011639 | 0.011298 | 0.011571 | 0.011298 |
| 0.011264 | 0.011367 | 0.011401 | 0.011571 | 0.011673 | 0.011367 | 0.011469 |
| 0.011332 | 0.011401 | 0.011299 | 0.011537 | 0.011775 | 0.011264 | 0.011367 |
| 0.011264 | 0.011366 | 0.011333 | 0.011401 | 0.011298 | 0.011333 | 0.011333 |
| 0.011230 | 0.011264 | 0.011230 | 0.011333 | 0.011298 | 0.011333 | 0.011401 |
| 0.011333 | 0.011298 | 0.011367 | 0.011264 | 0.011401 | 0.011230 | 0.011298 |
| 0.011469 | 0.011401 | 0.011639 | 0.011469 | 0.011299 | 0.011537 | 0.011298 |
| 0.011472 | 0.011702 | 0.011518 | 0.011219 | 0.011212 | 0.011284 | 0.011418 |
| 0.012062 | 0.011524 | 0.011227 | 0.011537 | 0.011537 | 0.011332 | 0.011435 |
| 0.011367 | 0.011332 | 0.011401 | 0.011298 | 0.011401 | 0.011333 | 0.011332 |
| 0.011298 | 0.011400 | 0.011605 | 0.011469 | 0.011367 | 0.011333 | 0.011265 |
| 0.011231 | 0.011230 | 0.011299 | 0.011265 | 0.011469 | 0.011435 | 0.011367 |
| 0.011469 | 0.011537 | 0.011265 | 0.011265 | 0.011299 | 0.011299 | 0.011300 |
| 0.011369 | 0.011299 | 0.011299 | 0.011169 | 0.011207 | 0.000000 | 0.011299 |
| 0.011300 | 0.011234 | 0.000000 | 0.000000 | 0.011198 | 0.011233 | 0.011265 |
| 0.011533 | 0.011304 | 0.011339 | 0.011231 | 0.011235 | 0.011367 | 0.011333 |
| 0.011401 | 0.011333 | 0.011333 | 0.011400 | 0.011332 | 0.011741 | 0.011503 |
| 0.011571 | 0.011435 | 0.011299 | 0.011401 | 0.011196 | 0.011435 | 0.011231 |
| 0.011299 | 0.011298 | 0.011265 | 0.011230 | 0.011264 | 0.011231 | 0.011333 |
| 0.011299 | 0.011401 | 0.011333 | 0.011230 | 0.011334 | 0.011435 | 0.011437 |
| 0.011435 | 0.011333 | 0.011231 | 0.011163 | 0.011299 | 0.011231 | 0.011163 |
| 0.011267 | 0.011435 | 0.011231 | 0.011435 | 0.011196 | 0.011299 | 0.011265 |
| 0.011367 | 0.011265 | 0.011299 | 0.011265 | 0.011299 | 0.011162 | 0.011299 |
| 0.011333 | 0.011265 | 0.011333 | 0.011265 | 0.011299 | 0.011333 | 0.011571 |
| 0.011673 | 0.011605 | 0.011673 | 0.011436 | 0.011673 | 0.011299 | 0.011265 |
| 0.011300 | 0.011593 | 0.011382 | 0.011199 | 0.011680 | 0.011164 | 0.011298 |
| 0.011680 | 0.011577 | 0.011469 | 0.011673 | 0.011337 | 0.011537 | 0.011503 |
| 0.011435 | 0.011605 | 0.011416 | 0.011225 | 0.011312 | 0.011333 | 0.011369 |
| 0.011503 | 0.011401 | 0.011538 | 0.011606 | 0.011537 | 0.011605 | 0.011503 |
| 0.011438 | 0.011606 | 0.011506 | 0.011472 | 0.011741 | 0.011196 | 0.011401 |
| 0.011366 | 0.011264 | 0.011196 | 0.011196 | 0.011264 | 0.011264 | 0.011332 |
| 0.011264 | 0.011333 | 0.011230 | 0.011333 | 0.011264 | 0.011264 | 0.011332 |
| 0.011264 | 0.011707 | 0.011605 | 0.011639 | 0.011162 | 0.011264 | 0.011299 |
| 0.011299 | 0.011264 | 0.011299 | 0.011367 | 0.011230 | 0.011230 | 0.011230 |
| 0.011775 | 0.011367 | 0.011401 | 0.011196 | 0.011264 | 0.011469 | 0.011230 |
| 0.011230 | 0.011298 | 0.011264 | 0.011435 | 0.011230 | 0.011332 | 0.011469 |
| 0.011401 | 0.011264 | 0.011264 | 0.011196 | 0.011196 | 0.011367 | 0.011298 |
| 0.011196 | 0.011298 | 0.011162 | 0.011196 | 0.011333 | 0.011469 | 0.011230 |
| 0.011196 | 0.011332 | 0.011265 | 0.011162 | 0.011503 | 0.011162 | 0.011332 |
| 0.011405 | 0.011230 | 0.011537 | 0.011367 | 0.011401 | 0.011264 | 0.011333 |
| 0.011230 | 0.011571 | 0.011162 | 0.011435 | 0.011230 | 0.011230 | 0.011162 |
| 0.011401 | 0.011571 | 0.011299 | 0.011367 | 0.011196 | 0.011605 | 0.011230 |
| 0.011230 | 0.011230 | 0.011264 | 0.011367 | 0.011264 | 0.011367 | 0.011435 |

|          |          |          |          |          |          |          |
|----------|----------|----------|----------|----------|----------|----------|
| 0.011435 | 0.011401 | 0.011298 | 0.011401 | 0.011366 | 0.011230 | 0.011196 |
| 0.011230 | 0.011230 | 0.011299 | 0.011230 | 0.011196 | 0.011333 | 0.011230 |
| 0.011264 | 0.011264 | 0.011367 | 0.011435 | 0.011332 | 0.011264 | 0.011265 |
| 0.011333 | 0.011264 | 0.011332 | 0.011230 | 0.011367 | 0.011435 | 0.011707 |
| 0.011264 | 0.011673 | 0.011270 | 0.017885 | 0.011260 | 0.011436 | 0.011626 |
| 0.011586 | 0.011631 | 0.011326 | 0.011296 | 0.011785 | 0.011655 | 0.011431 |
| 0.011444 | 0.011619 | 0.011179 | 0.011273 | 0.011258 | 0.011360 | 0.011279 |
| 0.011488 | 0.011438 | 0.011436 | 0.011193 | 0.011401 | 0.011401 | 0.011438 |
| 0.011266 | 0.011401 | 0.011401 | 0.011367 | 0.011333 | 0.011333 | 0.011298 |
| 0.011333 | 0.011264 | 0.011299 | 0.011333 | 0.011299 | 0.011231 | 0.011265 |
| 0.011265 | 0.011333 | 0.011231 | 0.011333 | 0.011367 | 0.011401 | 0.011298 |
| 0.011333 | 0.011299 | 0.011639 | 0.011639 | 0.011367 | 0.011401 | 0.011401 |
| 0.011196 | 0.011196 | 0.011231 | 0.011333 | 0.011196 | 0.011435 | 0.011435 |
| 0.011469 | 0.011469 | 0.011401 | 0.011503 | 0.011673 | 0.011504 | 0.011333 |
| 0.011333 | 0.011333 | 0.011435 | 0.011265 | 0.011333 | 0.011299 | 0.011333 |
| 0.011401 | 0.011401 | 0.011435 | 0.011401 | 0.011299 | 0.011469 | 0.011469 |
| 0.011335 | 0.011231 | 0.011333 | 0.011401 | 0.011333 | 0.011469 | 0.011503 |
| 0.011673 | 0.011337 | 0.011537 | 0.011503 | 0.011435 | 0.011605 | 0.011231 |
| 0.011402 | 0.011299 | 0.011265 | 0.011265 | 0.011333 | 0.011231 | 0.011333 |
| 0.011367 | 0.011401 | 0.011298 | 0.011333 | 0.011299 | 0.011639 | 0.011639 |
| 0.011367 | 0.011401 | 0.011435 | 0.011367 | 0.012049 | 0.011453 | 0.011342 |
| 0.011447 | 0.011408 | 0.011482 | 0.011408 | 0.011515 | 0.011440 | 0.011375 |
| 0.011989 | 0.011302 | 0.011438 | 0.011371 | 0.011646 | 0.011507 | 0.011607 |
| 0.012019 | 0.011437 | 0.011575 | 0.011639 | 0.011503 | 0.011503 | 0.011540 |
| 0.011196 | 0.011367 | 0.011503 | 0.011469 | 0.011471 | 0.011469 | 0.011402 |
| 0.011298 | 0.011230 | 0.011264 | 0.011298 | 0.011196 | 0.011264 | 0.011162 |
| 0.011298 | 0.011332 | 0.011230 | 0.011196 | 0.011298 | 0.011230 | 0.011264 |
| 0.011264 | 0.011196 | 0.011264 | 0.011299 | 0.011196 | 0.011401 | 0.011435 |
| 0.011333 | 0.011401 | 0.011333 | 0.011333 | 0.011264 | 0.011673 | 0.011298 |
| 0.011305 | 0.011264 | 0.011503 | 0.011503 | 0.011367 | 0.011366 | 0.011367 |
| 0.011367 | 0.011299 | 0.011264 | 0.011299 | 0.011367 | 0.011401 | 0.011333 |
| 0.011332 | 0.011469 | 0.011639 | 0.011366 | 0.011537 | 0.011537 | 0.011435 |
| 0.011264 | 0.011333 | 0.011367 | 0.011775 | 0.011333 | 0.011367 | 0.011333 |
| 0.011367 | 0.011298 | 0.011298 | 0.011605 | 0.011537 | 0.011571 | 0.011299 |
| 0.011401 | 0.011469 | 0.011298 | 0.011401 | 0.011367 | 0.011230 | 0.011571 |
| 0.011332 | 0.011298 | 0.011298 | 0.011469 | 0.011299 | 0.011401 | 0.011639 |
| 0.011264 | 0.011715 | 0.011707 | 0.011512 | 0.011232 | 0.011405 | 0.011267 |
| 0.011229 | 0.011693 | 0.011238 | 0.011467 | 0.011307 | 0.011421 | 0.011437 |
| 0.011474 | 0.011261 | 0.011343 | 0.011195 | 0.011279 | 0.011401 | 0.011388 |
| 0.011403 | 0.011299 | 0.011382 | 0.011310 | 0.011334 | 0.011469 | 0.011537 |
| 0.011503 | 0.011401 | 0.011506 | 0.011507 | 0.011645 | 0.011670 | 0.011333 |
| 0.011571 | 0.011435 | 0.011299 | 0.011401 | 0.011196 | 0.011435 | 0.011231 |
| 0.011299 | 0.011298 | 0.011265 | 0.011230 | 0.011264 | 0.011231 | 0.011333 |
| 0.011308 | 0.011308 | 0.011303 | 0.011338 | 0.011476 | 0.011441 | 0.011441 |
| 0.011439 | 0.011367 | 0.011172 | 0.011170 | 0.011300 | 0.011472 | 0.011473 |
| 0.011265 | 0.011335 | 0.011538 | 0.011540 | 0.011469 | 0.011503 | 0.011401 |
| 0.011367 | 0.011435 | 0.011435 | 0.011333 | 0.011912 | 0.011503 | 0.011571 |
| 0.011571 | 0.011673 | 0.011302 | 0.011376 | 0.011230 | 0.011469 | 0.011401 |
| 0.011470 | 0.011469 | 0.011503 | 0.011503 | 0.011579 | 0.011639 | 0.011234 |
| 0.011162 | 0.011130 | 0.000000 | 0.011231 | 0.011300 | 0.011135 | 0.011503 |
| 0.011301 | 0.011411 | 0.011108 | 0.011285 | 0.011299 | 0.011372 | 0.011265 |
| 0.011231 | 0.011230 | 0.011299 | 0.011265 | 0.011469 | 0.011435 | 0.011367 |
| 0.011469 | 0.011537 | 0.011265 | 0.011265 | 0.011299 | 0.011299 | 0.011300 |
| 0.011369 | 0.011299 | 0.011299 | 0.011334 | 0.011469 | 0.011537 | 0.011503 |
| 0.011401 | 0.011506 | 0.011507 | 0.011645 | 0.011670 | 0.011333 | 0.011503 |
| 0.011401 | 0.011401 | 0.011266 | 0.011413 | 0.011342 | 0.011406 | 0.011237 |
| 0.011444 | 0.011522 | 0.011444 | 0.011301 | 0.011231 | 0.011435 | 0.011299 |
| 0.011401 | 0.011333 | 0.011230 | 0.011334 | 0.011435 | 0.011437 | 0.011333 |
| 0.011231 | 0.011163 | 0.011299 | 0.011231 | 0.011163 | 0.011267 | 0.011435 |
| 0.011333 | 0.011264 | 0.011299 | 0.011333 | 0.011299 | 0.011231 | 0.011333 |

|          |          |          |          |          |          |          |
|----------|----------|----------|----------|----------|----------|----------|
| 0.011298 | 0.011333 | 0.011332 | 0.011264 | 0.011333 | 0.011571 | 0.011230 |
| 0.011264 | 0.011673 | 0.011264 | 0.011298 | 0.011264 | 0.011639 | 0.011191 |
| 0.011631 | 0.011232 | 0.011263 | 0.011469 | 0.011554 | 0.011461 | 0.011188 |
| 0.011220 | 0.011401 | 0.011503 | 0.011611 | 0.011470 | 0.011609 | 0.011742 |
| 0.011639 | 0.011707 | 0.011639 | 0.011857 | 0.011605 | 0.012492 | 0.011640 |
| 0.012356 | 0.012154 | 0.012290 | 0.012531 | 0.011639 | 0.011333 | 0.011605 |
| 0.011981 | 0.011983 | 0.011571 | 0.011469 | 0.011537 | 0.011537 | 0.011506 |
| 0.011401 | 0.011404 | 0.011469 | 0.011435 | 0.011844 | 0.011878 | 0.011912 |
| 0.011776 | 0.011879 | 0.012017 | 0.011780 | 0.012084 | 0.012090 | 0.012152 |
| 0.012152 | 0.012186 | 0.012098 | 0.012152 | 0.012086 | 0.011332 | 0.011674 |
| 0.011742 | 0.012253 | 0.011748 | 0.011980 | 0.012460 | 0.011508 | 0.011401 |
| 0.011366 | 0.011366 | 0.011844 | 0.011842 | 0.011988 | 0.011707 | 0.011368 |
| S696     | 0.011604 | 0.011604 | 0.011706 | 0.011672 | 0.011672 | 0.011706 |
| 0.011610 | 0.011541 | 0.011740 | 0.011196 | 0.011264 | 0.011162 | 0.011196 |
| 0.011230 | 0.011400 | 0.011196 | 0.011230 | 0.011298 | 0.011264 | 0.011230 |
| 0.011196 | 0.011230 | 0.011332 | 0.011196 | 0.011230 | 0.011230 | 0.011576 |
| 0.011468 | 0.011230 | 0.011128 | 0.011366 | 0.011298 | 0.011264 | 0.011298 |
| 0.011264 | 0.011366 | 0.011264 | 0.011264 | 0.011264 | 0.011264 | 0.011434 |
| 0.011196 | 0.011264 | 0.011298 | 0.011230 | 0.011332 | 0.011366 | 0.011298 |
| 0.011264 | 0.011434 | 0.011332 | 0.011604 | 0.011264 | 0.011536 | 0.011264 |
| 0.011230 | 0.011332 | 0.011366 | 0.011536 | 0.011638 | 0.011332 | 0.011434 |
| 0.011298 | 0.011366 | 0.011264 | 0.011502 | 0.011740 | 0.011230 | 0.011332 |
| 0.011230 | 0.011332 | 0.011298 | 0.011366 | 0.011264 | 0.011298 | 0.011298 |
| 0.011196 | 0.011230 | 0.011196 | 0.011298 | 0.011264 | 0.011299 | 0.011366 |
| 0.011298 | 0.011264 | 0.011332 | 0.011230 | 0.011366 | 0.011196 | 0.011264 |
| 0.011434 | 0.011366 | 0.011604 | 0.011434 | 0.011264 | 0.011502 | 0.011264 |
| 0.011435 | 0.011665 | 0.011480 | 0.011179 | 0.011174 | 0.011284 | 0.011379 |
| 0.012023 | 0.011474 | 0.011185 | 0.011502 | 0.011502 | 0.011298 | 0.011400 |
| 0.011332 | 0.011298 | 0.011366 | 0.011264 | 0.011366 | 0.011298 | 0.011298 |
| 0.011264 | 0.011366 | 0.011570 | 0.011434 | 0.011332 | 0.011298 | 0.011230 |
| 0.011196 | 0.011196 | 0.011264 | 0.011230 | 0.011434 | 0.011400 | 0.011332 |
| 0.011434 | 0.011502 | 0.011230 | 0.011230 | 0.011264 | 0.011264 | 0.011265 |
| 0.011334 | 0.011264 | 0.011264 | 0.011133 | 0.011206 | 0.011166 | 0.011264 |
| 0.011266 | 0.011199 | 0.011247 | 0.011235 | 0.011163 | 0.011199 | 0.000000 |
| 0.011496 | 0.011269 | 0.011304 | 0.011196 | 0.011200 | 0.011332 | 0.011298 |
| 0.011366 | 0.011299 | 0.011298 | 0.011366 | 0.011332 | 0.011706 | 0.011468 |
| 0.011536 | 0.011400 | 0.011264 | 0.011366 | 0.011162 | 0.011400 | 0.011196 |
| 0.011264 | 0.011264 | 0.011230 | 0.011196 | 0.011230 | 0.011196 | 0.011298 |
| 0.011264 | 0.011332 | 0.011298 | 0.011196 | 0.011299 | 0.011400 | 0.011402 |
| 0.011400 | 0.011298 | 0.011196 | 0.011129 | 0.011264 | 0.011196 | 0.011128 |
| 0.011232 | 0.011400 | 0.011196 | 0.011400 | 0.011162 | 0.011264 | 0.011230 |
| 0.011332 | 0.011230 | 0.011264 | 0.011230 | 0.011264 | 0.011128 | 0.011264 |
| 0.011298 | 0.011230 | 0.011298 | 0.011230 | 0.011264 | 0.011298 | 0.011536 |
| 0.011638 | 0.011570 | 0.011638 | 0.011401 | 0.011638 | 0.011264 | 0.011230 |
| 0.011265 | 0.011551 | 0.011380 | 0.011164 | 0.011644 | 0.011129 | 0.011258 |
| 0.011644 | 0.011541 | 0.011434 | 0.011638 | 0.011337 | 0.011502 | 0.011468 |
| 0.011400 | 0.011570 | 0.011416 | 0.011267 | 0.011312 | 0.011298 | 0.011368 |
| 0.011468 | 0.011367 | 0.011505 | 0.011572 | 0.011502 | 0.011536 | 0.011469 |
| 0.011403 | 0.011570 | 0.011505 | 0.011437 | 0.011706 | 0.011162 | 0.011366 |
| 0.011332 | 0.011230 | 0.011162 | 0.011162 | 0.011230 | 0.011230 | 0.011298 |
| 0.011230 | 0.011298 | 0.011196 | 0.011298 | 0.011230 | 0.011230 | 0.011298 |
| 0.011230 | 0.011672 | 0.011570 | 0.011604 | 0.011128 | 0.011230 | 0.011264 |
| 0.011264 | 0.011230 | 0.011264 | 0.011332 | 0.011196 | 0.011196 | 0.011196 |
| 0.011740 | 0.011332 | 0.011366 | 0.011162 | 0.011230 | 0.011434 | 0.011196 |
| 0.011196 | 0.011264 | 0.011230 | 0.011400 | 0.011196 | 0.011298 | 0.011434 |
| 0.011366 | 0.011230 | 0.011230 | 0.011162 | 0.011162 | 0.011332 | 0.011264 |
| 0.011162 | 0.011264 | 0.011128 | 0.011162 | 0.011298 | 0.011434 | 0.011196 |
| 0.011162 | 0.011298 | 0.011230 | 0.011128 | 0.011468 | 0.011128 | 0.011298 |
| 0.011369 | 0.000000 | 0.011502 | 0.011332 | 0.011366 | 0.011230 | 0.011298 |
| 0.011196 | 0.011536 | 0.011128 | 0.011400 | 0.011196 | 0.011196 | 0.011128 |

|          |          |          |          |          |          |          |
|----------|----------|----------|----------|----------|----------|----------|
| 0.011366 | 0.011536 | 0.011264 | 0.011332 | 0.011162 | 0.011570 | 0.011196 |
| 0.011196 | 0.011196 | 0.011230 | 0.011332 | 0.011230 | 0.011332 | 0.011400 |
| 0.011400 | 0.011366 | 0.011264 | 0.011366 | 0.011332 | 0.011196 | 0.011162 |
| 0.011196 | 0.011196 | 0.011264 | 0.011196 | 0.011162 | 0.011298 | 0.011196 |
| 0.011230 | 0.011230 | 0.011332 | 0.011400 | 0.011298 | 0.011230 | 0.011230 |
| 0.011298 | 0.011230 | 0.011298 | 0.011196 | 0.011332 | 0.011400 | 0.011672 |
| 0.011230 | 0.011638 | 0.011235 | 0.017831 | 0.011194 | 0.011372 | 0.011589 |
| 0.011550 | 0.011594 | 0.011326 | 0.011296 | 0.011675 | 0.011619 | 0.011308 |
| 0.011444 | 0.011496 | 0.011139 | 0.011230 | 0.011218 | 0.011211 | 0.011235 |
| 0.011488 | 0.011399 | 0.011398 | 0.011259 | 0.011366 | 0.011400 | 0.011403 |
| 0.011267 | 0.011366 | 0.011366 | 0.011332 | 0.011298 | 0.011298 | 0.011264 |
| 0.011298 | 0.011230 | 0.011264 | 0.011298 | 0.011264 | 0.011196 | 0.011230 |
| 0.011230 | 0.011298 | 0.011196 | 0.011298 | 0.011332 | 0.011366 | 0.011264 |
| 0.011298 | 0.011264 | 0.011604 | 0.011604 | 0.011332 | 0.011367 | 0.011400 |
| 0.011162 | 0.011162 | 0.011196 | 0.011298 | 0.011162 | 0.011400 | 0.011400 |
| 0.011434 | 0.011434 | 0.011366 | 0.011468 | 0.011638 | 0.011469 | 0.011298 |
| 0.011298 | 0.011298 | 0.011400 | 0.011230 | 0.011298 | 0.011264 | 0.011298 |
| 0.011366 | 0.011366 | 0.011400 | 0.011366 | 0.011265 | 0.011468 | 0.011434 |
| 0.011300 | 0.011196 | 0.011298 | 0.011366 | 0.011298 | 0.011434 | 0.011468 |
| 0.011638 | 0.011337 | 0.011502 | 0.011468 | 0.011400 | 0.011570 | 0.011196 |
| 0.011367 | 0.011264 | 0.011230 | 0.011230 | 0.011298 | 0.011196 | 0.011298 |
| 0.011332 | 0.011366 | 0.011264 | 0.011298 | 0.011264 | 0.011604 | 0.011604 |
| 0.011332 | 0.011367 | 0.011434 | 0.011366 | 0.012012 | 0.011418 | 0.011342 |
| 0.011412 | 0.011373 | 0.011482 | 0.011373 | 0.011481 | 0.011406 | 0.011339 |
| 0.011956 | 0.011268 | 0.011404 | 0.011337 | 0.011578 | 0.011473 | 0.011573 |
| 0.011983 | 0.011437 | 0.011539 | 0.011604 | 0.011468 | 0.011468 | 0.011505 |
| 0.011162 | 0.011332 | 0.011468 | 0.011434 | 0.011436 | 0.011434 | 0.011367 |
| 0.011264 | 0.011196 | 0.011230 | 0.011264 | 0.011162 | 0.011230 | 0.011128 |
| 0.011264 | 0.011298 | 0.011196 | 0.011162 | 0.011264 | 0.011196 | 0.011230 |
| 0.011230 | 0.011162 | 0.011230 | 0.011264 | 0.011162 | 0.011366 | 0.011400 |
| 0.011298 | 0.011366 | 0.011298 | 0.011298 | 0.011230 | 0.011638 | 0.011264 |
| 0.011304 | 0.011230 | 0.011468 | 0.011468 | 0.011332 | 0.011332 | 0.011332 |
| 0.011332 | 0.011264 | 0.011230 | 0.011264 | 0.011332 | 0.011366 | 0.011298 |
| 0.011298 | 0.011434 | 0.011604 | 0.011332 | 0.011502 | 0.011502 | 0.011400 |
| 0.011230 | 0.011298 | 0.011332 | 0.011740 | 0.011298 | 0.011332 | 0.011298 |
| 0.011332 | 0.011264 | 0.011264 | 0.011502 | 0.011502 | 0.011536 | 0.011264 |
| 0.011366 | 0.011434 | 0.011264 | 0.011366 | 0.011332 | 0.011196 | 0.011536 |
| 0.011298 | 0.011264 | 0.011264 | 0.011434 | 0.011264 | 0.011366 | 0.011604 |
| 0.011230 | 0.011679 | 0.011672 | 0.011472 | 0.011232 | 0.011370 | 0.011267 |
| 0.011172 | 0.011652 | 0.011202 | 0.011423 | 0.011259 | 0.011319 | 0.011384 |
| 0.011474 | 0.011128 | 0.011343 | 0.011195 | 0.011225 | 0.011401 | 0.011348 |
| 0.011365 | 0.011259 | 0.011345 | 0.011274 | 0.011299 | 0.011434 | 0.011502 |
| 0.011468 | 0.011366 | 0.011471 | 0.011472 | 0.011575 | 0.011633 | 0.011298 |
| 0.011536 | 0.011400 | 0.011264 | 0.011366 | 0.011162 | 0.011400 | 0.011196 |
| 0.011264 | 0.011264 | 0.011230 | 0.011196 | 0.011230 | 0.011196 | 0.011298 |
| 0.011272 | 0.011272 | 0.011268 | 0.011302 | 0.011441 | 0.011406 | 0.011405 |
| 0.011404 | 0.011332 | 0.011134 | 0.011133 | 0.011266 | 0.011437 | 0.011438 |
| 0.011230 | 0.011300 | 0.011503 | 0.011505 | 0.011434 | 0.011468 | 0.011400 |
| 0.011332 | 0.011400 | 0.011400 | 0.011298 | 0.011876 | 0.011468 | 0.011536 |
| 0.011536 | 0.011637 | 0.011267 | 0.011340 | 0.011196 | 0.011434 | 0.011400 |
| 0.011435 | 0.011434 | 0.011468 | 0.011468 | 0.011538 | 0.011604 | 0.011234 |
| 0.011128 | 0.011130 | 0.011231 | 0.000000 | 0.011300 | 0.011135 | 0.011469 |
| 0.011267 | 0.011411 | 0.011156 | 0.011285 | 0.011264 | 0.011337 | 0.011230 |
| 0.011196 | 0.011196 | 0.011264 | 0.011230 | 0.011434 | 0.011400 | 0.011332 |
| 0.011434 | 0.011502 | 0.011230 | 0.011230 | 0.011264 | 0.011264 | 0.011265 |
| 0.011334 | 0.011264 | 0.011264 | 0.011299 | 0.011434 | 0.011502 | 0.011468 |
| 0.011366 | 0.011471 | 0.011472 | 0.011575 | 0.011633 | 0.011298 | 0.011468 |
| 0.011400 | 0.011400 | 0.011197 | 0.011377 | 0.011341 | 0.011336 | 0.011202 |
| 0.011409 | 0.011567 | 0.011401 | 0.011267 | 0.011196 | 0.011400 | 0.011264 |
| 0.011332 | 0.011298 | 0.011196 | 0.011299 | 0.011400 | 0.011402 | 0.011298 |

|          |          |          |          |          |          |          |
|----------|----------|----------|----------|----------|----------|----------|
| 0.011196 | 0.011129 | 0.011264 | 0.011196 | 0.011128 | 0.011232 | 0.011400 |
| 0.011298 | 0.011230 | 0.011264 | 0.011298 | 0.011264 | 0.011196 | 0.011298 |
| 0.011264 | 0.011298 | 0.011298 | 0.011230 | 0.011298 | 0.011536 | 0.011196 |
| 0.011230 | 0.011638 | 0.011230 | 0.011264 | 0.011230 | 0.011604 | 0.011190 |
| 0.011631 | 0.011190 | 0.011263 | 0.011427 | 0.011514 | 0.011423 | 0.011145 |
| 0.011220 | 0.011366 | 0.011468 | 0.011575 | 0.011435 | 0.011574 | 0.011707 |
| 0.011604 | 0.011672 | 0.011604 | 0.011820 | 0.011570 | 0.012455 | 0.011605 |
| 0.012319 | 0.012117 | 0.012254 | 0.012494 | 0.011604 | 0.011298 | 0.011570 |
| 0.012013 | 0.011947 | 0.011536 | 0.011434 | 0.011502 | 0.011502 | 0.011471 |
| 0.011366 | 0.011369 | 0.011434 | 0.011400 | 0.011809 | 0.011842 | 0.011876 |
| 0.011741 | 0.011843 | 0.011981 | 0.011744 | 0.012048 | 0.012019 | 0.012116 |
| 0.012116 | 0.012150 | 0.012062 | 0.012116 | 0.012118 | 0.011332 | 0.011638 |
| 0.011706 | 0.012216 | 0.011712 | 0.011944 | 0.012423 | 0.011472 | 0.011366 |
| 0.011332 | 0.011332 | 0.011808 | 0.011842 | 0.011950 | 0.011672 | 0.011333 |
| S697     | 0.011709 | 0.011709 | 0.011812 | 0.011641 | 0.011641 | 0.011675 |
| 0.011648 | 0.011579 | 0.011709 | 0.011299 | 0.011368 | 0.011334 | 0.011299 |
| 0.011265 | 0.011470 | 0.011231 | 0.011333 | 0.011402 | 0.011368 | 0.011333 |
| 0.011299 | 0.011333 | 0.011368 | 0.011300 | 0.011334 | 0.011333 | 0.011613 |
| 0.011504 | 0.011299 | 0.011231 | 0.011402 | 0.011368 | 0.011368 | 0.011402 |
| 0.011333 | 0.011470 | 0.011368 | 0.011368 | 0.011368 | 0.011368 | 0.011538 |
| 0.011231 | 0.011368 | 0.011402 | 0.011333 | 0.011368 | 0.011470 | 0.011368 |
| 0.011368 | 0.011539 | 0.011436 | 0.011641 | 0.011368 | 0.011641 | 0.011368 |
| 0.011333 | 0.011368 | 0.011470 | 0.011641 | 0.011641 | 0.011368 | 0.011470 |
| 0.011368 | 0.011470 | 0.011368 | 0.011607 | 0.011778 | 0.011333 | 0.011436 |
| 0.011333 | 0.011436 | 0.011402 | 0.011470 | 0.011368 | 0.011402 | 0.011402 |
| 0.011299 | 0.011333 | 0.011299 | 0.011334 | 0.011368 | 0.011403 | 0.011470 |
| 0.011402 | 0.011368 | 0.011436 | 0.011333 | 0.011402 | 0.011299 | 0.011368 |
| 0.011538 | 0.011470 | 0.011709 | 0.011538 | 0.011368 | 0.011607 | 0.011368 |
| 0.011551 | 0.011706 | 0.011521 | 0.011260 | 0.011250 | 0.011398 | 0.011381 |
| 0.012030 | 0.011476 | 0.011270 | 0.011607 | 0.011607 | 0.011333 | 0.011436 |
| 0.011436 | 0.011402 | 0.011470 | 0.011368 | 0.011470 | 0.011402 | 0.011402 |
| 0.011368 | 0.011402 | 0.011675 | 0.011538 | 0.011436 | 0.011402 | 0.011334 |
| 0.011299 | 0.011231 | 0.011368 | 0.011334 | 0.011470 | 0.011436 | 0.011368 |
| 0.011470 | 0.011539 | 0.011334 | 0.011334 | 0.011368 | 0.011368 | 0.011370 |
| 0.011439 | 0.011368 | 0.011368 | 0.011206 | 0.011279 | 0.011237 | 0.011368 |
| 0.011336 | 0.011270 | 0.011286 | 0.011271 | 0.011266 | 0.011268 | 0.011335 |
| 0.011496 | 0.011339 | 0.011376 | 0.011300 | 0.011271 | 0.011437 | 0.011334 |
| 0.011403 | 0.011403 | 0.011402 | 0.011470 | 0.011436 | 0.011812 | 0.011505 |
| 0.011573 | 0.011436 | 0.011368 | 0.011402 | 0.011265 | 0.011436 | 0.011299 |
| 0.011368 | 0.011368 | 0.011334 | 0.011299 | 0.011333 | 0.011299 | 0.011402 |
| 0.011368 | 0.011470 | 0.011402 | 0.011299 | 0.011403 | 0.011505 | 0.011507 |
| 0.011505 | 0.011402 | 0.011299 | 0.011232 | 0.011368 | 0.011299 | 0.011231 |
| 0.011337 | 0.011505 | 0.011299 | 0.011505 | 0.011265 | 0.011368 | 0.011334 |
| 0.011436 | 0.011334 | 0.011368 | 0.011334 | 0.011368 | 0.011231 | 0.011368 |
| 0.011402 | 0.011334 | 0.011402 | 0.011334 | 0.011368 | 0.011402 | 0.011641 |
| 0.011675 | 0.011607 | 0.011675 | 0.011506 | 0.011676 | 0.011368 | 0.011334 |
| 0.011301 | 0.011472 | 0.011477 | 0.011270 | 0.011682 | 0.011234 | 0.011339 |
| 0.011682 | 0.011579 | 0.011504 | 0.011744 | 0.011408 | 0.011607 | 0.011573 |
| 0.011504 | 0.011675 | 0.011523 | 0.011390 | 0.011396 | 0.011402 | 0.011473 |
| 0.011573 | 0.011472 | 0.011610 | 0.011678 | 0.011607 | 0.011675 | 0.011574 |
| 0.011506 | 0.011677 | 0.011608 | 0.011539 | 0.011813 | 0.011265 | 0.011471 |
| 0.011436 | 0.011333 | 0.011265 | 0.011265 | 0.011333 | 0.011333 | 0.011402 |
| 0.011333 | 0.011402 | 0.011299 | 0.011333 | 0.011333 | 0.011333 | 0.011402 |
| 0.011333 | 0.011709 | 0.011607 | 0.011641 | 0.011231 | 0.011333 | 0.011368 |
| 0.011368 | 0.011333 | 0.011368 | 0.011368 | 0.011299 | 0.011299 | 0.011299 |
| 0.011778 | 0.011402 | 0.011470 | 0.011265 | 0.011333 | 0.011539 | 0.011299 |
| 0.011299 | 0.011368 | 0.011333 | 0.011504 | 0.011299 | 0.011402 | 0.011504 |
| 0.011470 | 0.011299 | 0.011333 | 0.011231 | 0.011265 | 0.011436 | 0.011368 |
| 0.011231 | 0.011333 | 0.011231 | 0.011265 | 0.011402 | 0.011470 | 0.011299 |
| 0.011265 | 0.011402 | 0.011333 | 0.011231 | 0.011504 | 0.011231 | 0.011402 |



|          |          |          |          |          |          |          |
|----------|----------|----------|----------|----------|----------|----------|
| 0.011476 | 0.011299 | 0.011538 | 0.011436 | 0.011402 | 0.011333 | 0.011402 |
| 0.011299 | 0.011641 | 0.011231 | 0.011436 | 0.011231 | 0.011231 | 0.011231 |
| 0.011470 | 0.011573 | 0.011368 | 0.011436 | 0.011265 | 0.011607 | 0.011231 |
| 0.011299 | 0.011299 | 0.011333 | 0.011436 | 0.011333 | 0.011436 | 0.011504 |
| 0.011504 | 0.011470 | 0.011368 | 0.011470 | 0.011402 | 0.011299 | 0.011265 |
| 0.011299 | 0.011299 | 0.011368 | 0.011231 | 0.011265 | 0.011402 | 0.011299 |
| 0.011265 | 0.011333 | 0.011436 | 0.011402 | 0.011402 | 0.011333 | 0.011334 |
| 0.011402 | 0.011333 | 0.011402 | 0.011299 | 0.011436 | 0.011504 | 0.011709 |
| 0.011333 | 0.011675 | 0.011341 | 0.017995 | 0.011329 | 0.011434 | 0.011629 |
| 0.011589 | 0.011633 | 0.011381 | 0.011358 | 0.011736 | 0.011658 | 0.011435 |
| 0.011448 | 0.011556 | 0.011219 | 0.011317 | 0.011220 | 0.011313 | 0.011323 |
| 0.011491 | 0.011402 | 0.011400 | 0.011194 | 0.011470 | 0.011504 | 0.011508 |
| 0.011371 | 0.011470 | 0.011470 | 0.011368 | 0.011402 | 0.011402 | 0.011368 |
| 0.011402 | 0.011333 | 0.011368 | 0.011402 | 0.011368 | 0.011299 | 0.011334 |
| 0.011334 | 0.011402 | 0.011299 | 0.011402 | 0.011436 | 0.011470 | 0.011368 |
| 0.011333 | 0.011299 | 0.011641 | 0.011641 | 0.011436 | 0.011471 | 0.011505 |
| 0.011265 | 0.011265 | 0.011299 | 0.011402 | 0.011265 | 0.011504 | 0.011504 |
| 0.011539 | 0.011504 | 0.011470 | 0.011573 | 0.011675 | 0.011574 | 0.011402 |
| 0.011402 | 0.011436 | 0.011504 | 0.011334 | 0.011402 | 0.011368 | 0.011402 |
| 0.011471 | 0.011470 | 0.011504 | 0.011471 | 0.011369 | 0.011539 | 0.011539 |
| 0.011405 | 0.011299 | 0.011402 | 0.011436 | 0.011402 | 0.011436 | 0.011572 |
| 0.011744 | 0.011408 | 0.011607 | 0.011573 | 0.011504 | 0.011675 | 0.011300 |
| 0.011472 | 0.011368 | 0.011334 | 0.011334 | 0.011402 | 0.011299 | 0.011402 |
| 0.011436 | 0.011470 | 0.011368 | 0.011333 | 0.011299 | 0.011641 | 0.011641 |
| 0.011436 | 0.011471 | 0.011538 | 0.011470 | 0.012019 | 0.011525 | 0.011450 |
| 0.011518 | 0.011478 | 0.011588 | 0.011479 | 0.011587 | 0.011511 | 0.011409 |
| 0.011960 | 0.011372 | 0.011507 | 0.011442 | 0.011716 | 0.011576 | 0.011679 |
| 0.011989 | 0.011475 | 0.011645 | 0.011709 | 0.011573 | 0.011504 | 0.011610 |
| 0.011265 | 0.011436 | 0.011572 | 0.011538 | 0.011542 | 0.011470 | 0.011403 |
| 0.011368 | 0.011299 | 0.011333 | 0.011368 | 0.011265 | 0.011333 | 0.011231 |
| 0.011299 | 0.011333 | 0.011299 | 0.011265 | 0.011368 | 0.011299 | 0.011333 |
| 0.011333 | 0.011265 | 0.011333 | 0.011368 | 0.011265 | 0.011470 | 0.011504 |
| 0.011402 | 0.011402 | 0.011402 | 0.011402 | 0.011333 | 0.011641 | 0.011368 |
| 0.011340 | 0.011333 | 0.011505 | 0.011506 | 0.011436 | 0.011436 | 0.011436 |
| 0.011436 | 0.011368 | 0.011333 | 0.011368 | 0.011436 | 0.011436 | 0.011402 |
| 0.011402 | 0.011538 | 0.011641 | 0.011436 | 0.011607 | 0.011607 | 0.011504 |
| 0.011333 | 0.011402 | 0.011436 | 0.011778 | 0.011402 | 0.011436 | 0.011402 |
| 0.011436 | 0.011299 | 0.011299 | 0.011607 | 0.011573 | 0.011573 | 0.011368 |
| 0.011470 | 0.011538 | 0.011368 | 0.011470 | 0.011436 | 0.011299 | 0.011573 |
| 0.011402 | 0.011368 | 0.011299 | 0.011538 | 0.011368 | 0.011470 | 0.011709 |
| 0.011333 | 0.011717 | 0.011709 | 0.011474 | 0.011175 | 0.011406 | 0.011217 |
| 0.011228 | 0.011656 | 0.011311 | 0.011379 | 0.011210 | 0.011373 | 0.011333 |
| 0.011477 | 0.011196 | 0.011403 | 0.011196 | 0.011281 | 0.011474 | 0.011473 |
| 0.011482 | 0.011381 | 0.011383 | 0.011383 | 0.011403 | 0.011470 | 0.011539 |
| 0.011539 | 0.011402 | 0.011508 | 0.011509 | 0.011647 | 0.011636 | 0.011402 |
| 0.011573 | 0.011436 | 0.011368 | 0.011402 | 0.011265 | 0.011436 | 0.011299 |
| 0.011368 | 0.011368 | 0.011334 | 0.011299 | 0.011333 | 0.011299 | 0.011402 |
| 0.011344 | 0.011343 | 0.011339 | 0.011372 | 0.011510 | 0.011477 | 0.011477 |
| 0.011475 | 0.011437 | 0.011209 | 0.011206 | 0.011336 | 0.011509 | 0.011475 |
| 0.011334 | 0.011370 | 0.011608 | 0.011611 | 0.011539 | 0.011574 | 0.011504 |
| 0.011436 | 0.011504 | 0.011504 | 0.011402 | 0.011915 | 0.011573 | 0.011641 |
| 0.011641 | 0.011676 | 0.011372 | 0.011447 | 0.011299 | 0.011538 | 0.011504 |
| 0.011539 | 0.011573 | 0.011573 | 0.011573 | 0.011581 | 0.011709 | 0.011340 |
| 0.011231 | 0.011234 | 0.011300 | 0.011300 | 0.000000 | 0.011247 | 0.011506 |
| 0.011337 | 0.011455 | 0.011251 | 0.011360 | 0.011368 | 0.011406 | 0.011334 |
| 0.011299 | 0.011231 | 0.011368 | 0.011334 | 0.011470 | 0.011436 | 0.011368 |
| 0.011470 | 0.011539 | 0.011334 | 0.011334 | 0.011368 | 0.011368 | 0.011370 |
| 0.011439 | 0.011368 | 0.011368 | 0.011403 | 0.011470 | 0.011539 | 0.011539 |
| 0.011402 | 0.011508 | 0.011509 | 0.011647 | 0.011636 | 0.011402 | 0.011573 |
| 0.011504 | 0.011504 | 0.011336 | 0.011450 | 0.011378 | 0.011476 | 0.011310 |

|          |          |          |          |          |          |          |
|----------|----------|----------|----------|----------|----------|----------|
| 0.011516 | 0.011525 | 0.011404 | 0.011371 | 0.011299 | 0.011505 | 0.011368 |
| 0.011470 | 0.011402 | 0.011299 | 0.011403 | 0.011505 | 0.011507 | 0.011402 |
| 0.011299 | 0.011232 | 0.011368 | 0.011299 | 0.011231 | 0.011337 | 0.011505 |
| 0.011402 | 0.011333 | 0.011368 | 0.011402 | 0.011368 | 0.011299 | 0.011334 |
| 0.011368 | 0.011402 | 0.011402 | 0.011333 | 0.011402 | 0.011641 | 0.011231 |
| 0.011333 | 0.011641 | 0.011333 | 0.011368 | 0.011333 | 0.011641 | 0.011279 |
| 0.011630 | 0.011275 | 0.011265 | 0.011427 | 0.011517 | 0.011462 | 0.011231 |
| 0.011168 | 0.011402 | 0.011504 | 0.011613 | 0.011471 | 0.011611 | 0.011745 |
| 0.011642 | 0.011711 | 0.011641 | 0.011860 | 0.011538 | 0.012497 | 0.011643 |
| 0.012292 | 0.012158 | 0.012261 | 0.012537 | 0.011641 | 0.011334 | 0.011607 |
| 0.012019 | 0.011987 | 0.011573 | 0.011470 | 0.011539 | 0.011539 | 0.011507 |
| 0.011402 | 0.011405 | 0.011470 | 0.011437 | 0.011847 | 0.011880 | 0.011916 |
| 0.011779 | 0.011881 | 0.012021 | 0.011783 | 0.012054 | 0.012060 | 0.012122 |
| 0.012123 | 0.012157 | 0.012068 | 0.012123 | 0.012124 | 0.011436 | 0.011676 |
| 0.011745 | 0.012189 | 0.011750 | 0.011983 | 0.012465 | 0.011510 | 0.011402 |
| 0.011368 | 0.011368 | 0.011847 | 0.011842 | 0.011956 | 0.011709 | 0.011369 |
| S698     | 0.011545 | 0.011545 | 0.011657 | 0.011620 | 0.011620 | 0.011620 |
| 0.011589 | 0.011514 | 0.011695 | 0.011135 | 0.011210 | 0.011172 | 0.011135 |
| 0.011172 | 0.011321 | 0.011135 | 0.011135 | 0.011172 | 0.011209 | 0.011098 |
| 0.011135 | 0.011172 | 0.011284 | 0.011135 | 0.011172 | 0.011172 | 0.011551 |
| 0.011433 | 0.011135 | 0.000000 | 0.011321 | 0.011210 | 0.011209 | 0.011247 |
| 0.011172 | 0.011321 | 0.011209 | 0.011210 | 0.011209 | 0.011209 | 0.011359 |
| 0.011135 | 0.011172 | 0.011247 | 0.011172 | 0.011284 | 0.011321 | 0.011210 |
| 0.011209 | 0.011396 | 0.011284 | 0.011583 | 0.011209 | 0.011508 | 0.011209 |
| 0.011172 | 0.011284 | 0.011321 | 0.011508 | 0.011545 | 0.011209 | 0.011396 |
| 0.011209 | 0.011321 | 0.011210 | 0.011471 | 0.011695 | 0.011172 | 0.011284 |
| 0.011172 | 0.011247 | 0.011209 | 0.011284 | 0.011209 | 0.011247 | 0.011247 |
| 0.011135 | 0.011172 | 0.011135 | 0.011247 | 0.011209 | 0.011210 | 0.011284 |
| 0.011247 | 0.011172 | 0.011284 | 0.011172 | 0.011284 | 0.011135 | 0.011209 |
| 0.011396 | 0.011321 | 0.011583 | 0.011396 | 0.011172 | 0.011471 | 0.011209 |
| 0.011308 | 0.011601 | 0.011394 | 0.011104 | 0.011102 | 0.011226 | 0.011324 |
| 0.012045 | 0.011399 | 0.000000 | 0.011471 | 0.011471 | 0.011247 | 0.011359 |
| 0.011284 | 0.011247 | 0.011321 | 0.011209 | 0.011284 | 0.011247 | 0.011247 |
| 0.011209 | 0.011321 | 0.011433 | 0.011396 | 0.011284 | 0.011247 | 0.011172 |
| 0.011135 | 0.011135 | 0.011210 | 0.011172 | 0.011396 | 0.011359 | 0.011284 |
| 0.011396 | 0.011471 | 0.011135 | 0.011135 | 0.011172 | 0.011172 | 0.011173 |
| 0.011211 | 0.011210 | 0.011210 | 0.000000 | 0.011139 | 0.011098 | 0.011210 |
| 0.011211 | 0.011137 | 0.011142 | 0.011137 | 0.011098 | 0.011136 | 0.011173 |
| 0.011453 | 0.011174 | 0.011252 | 0.011098 | 0.011137 | 0.011284 | 0.011247 |
| 0.011322 | 0.011210 | 0.011210 | 0.011284 | 0.011209 | 0.011695 | 0.011396 |
| 0.011508 | 0.011322 | 0.011210 | 0.011284 | 0.011098 | 0.011359 | 0.011135 |
| 0.011172 | 0.011172 | 0.011135 | 0.011135 | 0.011172 | 0.011135 | 0.011247 |
| 0.011210 | 0.011284 | 0.011210 | 0.011135 | 0.011210 | 0.011359 | 0.011361 |
| 0.011359 | 0.011247 | 0.011135 | 0.000000 | 0.011210 | 0.011135 | 0.000000 |
| 0.011136 | 0.011359 | 0.011135 | 0.011359 | 0.011098 | 0.011210 | 0.011135 |
| 0.011284 | 0.011172 | 0.011210 | 0.011135 | 0.011172 | 0.000000 | 0.011210 |
| 0.011210 | 0.011135 | 0.011247 | 0.011172 | 0.011210 | 0.011247 | 0.011508 |
| 0.011583 | 0.011545 | 0.011620 | 0.011323 | 0.011620 | 0.011172 | 0.011135 |
| 0.011211 | 0.011513 | 0.011310 | 0.011099 | 0.011625 | 0.000000 | 0.011191 |
| 0.011551 | 0.011514 | 0.011359 | 0.011471 | 0.011212 | 0.011471 | 0.011433 |
| 0.011359 | 0.011545 | 0.011327 | 0.011191 | 0.011232 | 0.011210 | 0.011284 |
| 0.011359 | 0.011284 | 0.011471 | 0.011545 | 0.011471 | 0.011508 | 0.011396 |
| 0.011360 | 0.011546 | 0.011433 | 0.011359 | 0.011583 | 0.011098 | 0.011284 |
| 0.011284 | 0.011172 | 0.011098 | 0.011098 | 0.011172 | 0.011172 | 0.011247 |
| 0.011172 | 0.011210 | 0.011135 | 0.011247 | 0.011172 | 0.011135 | 0.011247 |
| 0.011172 | 0.011620 | 0.011545 | 0.011583 | 0.000000 | 0.011135 | 0.011210 |
| 0.011210 | 0.011172 | 0.011172 | 0.011284 | 0.011135 | 0.011135 | 0.011135 |
| 0.011732 | 0.011284 | 0.011284 | 0.011098 | 0.011172 | 0.011396 | 0.011135 |
| 0.011135 | 0.011209 | 0.011135 | 0.011359 | 0.011135 | 0.011247 | 0.011359 |
| 0.011321 | 0.011098 | 0.011135 | 0.000000 | 0.011098 | 0.011284 | 0.011172 |

|          |          |          |          |          |          |          |
|----------|----------|----------|----------|----------|----------|----------|
| 0.000000 | 0.011098 | 0.000000 | 0.011098 | 0.011247 | 0.011359 | 0.011135 |
| 0.011098 | 0.011247 | 0.011172 | 0.000000 | 0.011433 | 0.000000 | 0.011247 |
| 0.011325 | 0.011135 | 0.011471 | 0.011284 | 0.011321 | 0.011172 | 0.011247 |
| 0.011135 | 0.011508 | 0.000000 | 0.011359 | 0.011135 | 0.011135 | 0.000000 |
| 0.011321 | 0.011508 | 0.011210 | 0.011284 | 0.011098 | 0.011545 | 0.011135 |
| 0.011135 | 0.011098 | 0.011172 | 0.011284 | 0.011172 | 0.011284 | 0.011359 |
| 0.011359 | 0.011284 | 0.011209 | 0.011321 | 0.011247 | 0.011135 | 0.000000 |
| 0.011135 | 0.011135 | 0.011210 | 0.011135 | 0.011098 | 0.011209 | 0.011098 |
| 0.011172 | 0.011172 | 0.011247 | 0.011321 | 0.011209 | 0.011172 | 0.011135 |
| 0.011209 | 0.011172 | 0.011247 | 0.011135 | 0.011247 | 0.011359 | 0.011657 |
| 0.011172 | 0.011583 | 0.011176 | 0.018427 | 0.011131 | 0.011267 | 0.011566 |
| 0.011523 | 0.011571 | 0.011229 | 0.011190 | 0.011683 | 0.011599 | 0.011267 |
| 0.011373 | 0.011467 | 0.000000 | 0.011152 | 0.011148 | 0.011170 | 0.011155 |
| 0.011421 | 0.011353 | 0.011346 | 0.011132 | 0.011284 | 0.011321 | 0.011323 |
| 0.011210 | 0.011210 | 0.011321 | 0.011284 | 0.011247 | 0.011247 | 0.011172 |
| 0.011172 | 0.011172 | 0.011210 | 0.011210 | 0.011210 | 0.011135 | 0.011135 |
| 0.011135 | 0.011210 | 0.011135 | 0.011247 | 0.011284 | 0.011284 | 0.011172 |
| 0.011247 | 0.011172 | 0.011546 | 0.011546 | 0.011284 | 0.011285 | 0.011284 |
| 0.011098 | 0.011098 | 0.011135 | 0.011210 | 0.011098 | 0.011359 | 0.011359 |
| 0.011359 | 0.011359 | 0.011321 | 0.011359 | 0.011620 | 0.011397 | 0.011210 |
| 0.011247 | 0.011247 | 0.011322 | 0.011172 | 0.011247 | 0.011210 | 0.011247 |
| 0.011322 | 0.011322 | 0.011359 | 0.011322 | 0.011210 | 0.011396 | 0.011359 |
| 0.011211 | 0.011135 | 0.011210 | 0.011247 | 0.011247 | 0.011396 | 0.011396 |
| 0.011471 | 0.011212 | 0.011471 | 0.011433 | 0.011359 | 0.011545 | 0.011135 |
| 0.011322 | 0.011210 | 0.011135 | 0.011135 | 0.011210 | 0.011135 | 0.011247 |
| 0.011284 | 0.011284 | 0.011172 | 0.011247 | 0.011172 | 0.011546 | 0.011546 |
| 0.011284 | 0.011285 | 0.011359 | 0.011284 | 0.011957 | 0.011366 | 0.011287 |
| 0.011362 | 0.011324 | 0.011399 | 0.011325 | 0.011440 | 0.011360 | 0.011288 |
| 0.011886 | 0.011210 | 0.011359 | 0.011285 | 0.011546 | 0.011359 | 0.011546 |
| 0.011886 | 0.011334 | 0.011436 | 0.011545 | 0.011396 | 0.011433 | 0.011436 |
| 0.011098 | 0.011284 | 0.011396 | 0.011359 | 0.011323 | 0.011396 | 0.011322 |
| 0.011209 | 0.011098 | 0.011172 | 0.011209 | 0.011098 | 0.011172 | 0.000000 |
| 0.011209 | 0.011247 | 0.011135 | 0.011098 | 0.011209 | 0.011135 | 0.011172 |
| 0.011172 | 0.011098 | 0.011172 | 0.011172 | 0.011098 | 0.011321 | 0.011359 |
| 0.011247 | 0.011321 | 0.011247 | 0.011247 | 0.011172 | 0.011545 | 0.011172 |
| 0.011248 | 0.011172 | 0.011433 | 0.011434 | 0.011284 | 0.011284 | 0.011284 |
| 0.011284 | 0.011210 | 0.011172 | 0.011210 | 0.011247 | 0.011284 | 0.011247 |
| 0.011209 | 0.011359 | 0.011583 | 0.011284 | 0.011471 | 0.011471 | 0.011321 |
| 0.011172 | 0.011209 | 0.011284 | 0.011695 | 0.011210 | 0.011284 | 0.011247 |
| 0.011284 | 0.011209 | 0.011209 | 0.011545 | 0.011433 | 0.011508 | 0.011210 |
| 0.011321 | 0.011396 | 0.011209 | 0.011321 | 0.011284 | 0.011135 | 0.011508 |
| 0.011247 | 0.011172 | 0.011209 | 0.011396 | 0.011210 | 0.011321 | 0.011583 |
| 0.011172 | 0.011627 | 0.011657 | 0.011426 | 0.011119 | 0.011287 | 0.011173 |
| 0.011121 | 0.011632 | 0.011139 | 0.011358 | 0.011114 | 0.011291 | 0.011298 |
| 0.011392 | 0.000000 | 0.011245 | 0.000000 | 0.011120 | 0.011277 | 0.011287 |
| 0.011311 | 0.011192 | 0.011257 | 0.011178 | 0.011248 | 0.011396 | 0.011471 |
| 0.011396 | 0.011322 | 0.011436 | 0.011437 | 0.011513 | 0.011533 | 0.011210 |
| 0.011508 | 0.011322 | 0.011210 | 0.011284 | 0.011098 | 0.011359 | 0.011135 |
| 0.011172 | 0.011172 | 0.011135 | 0.011135 | 0.011172 | 0.011135 | 0.011247 |
| 0.011177 | 0.011215 | 0.011175 | 0.011249 | 0.011400 | 0.011326 | 0.011288 |
| 0.011362 | 0.011210 | 0.000000 | 0.000000 | 0.011173 | 0.011399 | 0.011362 |
| 0.011098 | 0.011248 | 0.011359 | 0.011398 | 0.011396 | 0.011434 | 0.011321 |
| 0.011209 | 0.011359 | 0.011359 | 0.011247 | 0.011844 | 0.011433 | 0.011471 |
| 0.011434 | 0.011612 | 0.011212 | 0.011214 | 0.011135 | 0.011359 | 0.011321 |
| 0.011397 | 0.011359 | 0.011433 | 0.011433 | 0.011537 | 0.011545 | 0.011172 |
| 0.000000 | 0.000000 | 0.011135 | 0.011135 | 0.011247 | 0.000000 | 0.011433 |
| 0.011172 | 0.011325 | 0.000000 | 0.011217 | 0.011210 | 0.011249 | 0.011172 |
| 0.011135 | 0.011135 | 0.011210 | 0.011172 | 0.011396 | 0.011359 | 0.011284 |
| 0.011396 | 0.011471 | 0.011135 | 0.011135 | 0.011172 | 0.011172 | 0.011173 |
| 0.011211 | 0.011210 | 0.011210 | 0.011248 | 0.011396 | 0.011471 | 0.011396 |

|          |          |          |          |          |          |          |
|----------|----------|----------|----------|----------|----------|----------|
| 0.011322 | 0.011436 | 0.011437 | 0.011513 | 0.011533 | 0.011210 | 0.011396 |
| 0.011321 | 0.011321 | 0.011173 | 0.011292 | 0.011291 | 0.011287 | 0.011138 |
| 0.011367 | 0.011465 | 0.011339 | 0.011173 | 0.011135 | 0.011359 | 0.011210 |
| 0.011284 | 0.011210 | 0.011135 | 0.011210 | 0.011359 | 0.011361 | 0.011247 |
| 0.011135 | 0.000000 | 0.011210 | 0.011135 | 0.000000 | 0.011136 | 0.011359 |
| 0.011172 | 0.011172 | 0.011210 | 0.011210 | 0.011210 | 0.011135 | 0.011247 |
| 0.011209 | 0.011210 | 0.011247 | 0.011172 | 0.011247 | 0.011508 | 0.011135 |
| 0.011172 | 0.011545 | 0.011172 | 0.011209 | 0.011172 | 0.011583 | 0.011108 |
| 0.011531 | 0.011107 | 0.011170 | 0.011375 | 0.011472 | 0.011381 | 0.000000 |
| 0.011119 | 0.011321 | 0.011433 | 0.011547 | 0.011397 | 0.011549 | 0.011658 |
| 0.011583 | 0.011657 | 0.011545 | 0.011744 | 0.011508 | 0.012442 | 0.011434 |
| 0.012256 | 0.012072 | 0.012184 | 0.012297 | 0.011583 | 0.011247 | 0.011546 |
| 0.011920 | 0.011960 | 0.011471 | 0.011396 | 0.011471 | 0.011471 | 0.011436 |
| 0.011321 | 0.011324 | 0.011396 | 0.011322 | 0.011808 | 0.011732 | 0.011845 |
| 0.011733 | 0.011845 | 0.011997 | 0.011736 | 0.011996 | 0.011926 | 0.012070 |
| 0.012033 | 0.012108 | 0.012010 | 0.012033 | 0.012072 | 0.011247 | 0.011620 |
| 0.011583 | 0.012181 | 0.011664 | 0.011882 | 0.012482 | 0.011438 | 0.011322 |
| 0.011284 | 0.011284 | 0.011770 | 0.011741 | 0.011924 | 0.011620 | 0.011285 |
| S699     | 0.011876 | 0.011876 | 0.011706 | 0.011672 | 0.011672 | 0.011706 |
| 0.011198 | 0.011129 | 0.011740 | 0.011468 | 0.011536 | 0.011503 | 0.011468 |
| 0.011434 | 0.011672 | 0.011400 | 0.011502 | 0.011570 | 0.011536 | 0.011502 |
| 0.011468 | 0.011502 | 0.011332 | 0.011468 | 0.011502 | 0.011502 | 0.011163 |
| 0.011468 | 0.011502 | 0.011400 | 0.011366 | 0.011570 | 0.011536 | 0.011570 |
| 0.011536 | 0.011638 | 0.011536 | 0.011536 | 0.011536 | 0.011536 | 0.011706 |
| 0.011400 | 0.011536 | 0.011570 | 0.011502 | 0.011536 | 0.011638 | 0.011570 |
| 0.011536 | 0.011706 | 0.011604 | 0.011196 | 0.011536 | 0.011808 | 0.011536 |
| 0.011502 | 0.011536 | 0.011638 | 0.011808 | 0.011298 | 0.011536 | 0.011638 |
| 0.011570 | 0.011638 | 0.011536 | 0.011774 | 0.011332 | 0.011502 | 0.011604 |
| 0.011502 | 0.011604 | 0.011570 | 0.011638 | 0.011536 | 0.011570 | 0.011570 |
| 0.011468 | 0.011502 | 0.011468 | 0.011502 | 0.011536 | 0.011571 | 0.011638 |
| 0.011570 | 0.011536 | 0.011604 | 0.011502 | 0.011366 | 0.011468 | 0.011536 |
| 0.011706 | 0.011638 | 0.011400 | 0.011706 | 0.011536 | 0.011774 | 0.011536 |
| 0.011734 | 0.011211 | 0.011746 | 0.011456 | 0.011438 | 0.011582 | 0.011339 |
| 0.011986 | 0.011318 | 0.011476 | 0.011774 | 0.011774 | 0.011502 | 0.011400 |
| 0.011604 | 0.011570 | 0.011638 | 0.011536 | 0.011638 | 0.011570 | 0.011570 |
| 0.011536 | 0.011570 | 0.011842 | 0.011706 | 0.011604 | 0.011570 | 0.011502 |
| 0.011468 | 0.011400 | 0.011536 | 0.011502 | 0.011434 | 0.011400 | 0.011332 |
| 0.011434 | 0.011502 | 0.011502 | 0.011502 | 0.011536 | 0.011536 | 0.011539 |
| 0.011608 | 0.011536 | 0.011536 | 0.011387 | 0.011462 | 0.011414 | 0.011536 |
| 0.011505 | 0.011443 | 0.011508 | 0.011479 | 0.011438 | 0.011441 | 0.011504 |
| 0.011387 | 0.011513 | 0.011548 | 0.011468 | 0.011445 | 0.011605 | 0.011502 |
| 0.011570 | 0.011571 | 0.011570 | 0.011672 | 0.011604 | 0.011978 | 0.011672 |
| 0.011536 | 0.011604 | 0.011536 | 0.011570 | 0.011434 | 0.011400 | 0.011468 |
| 0.011536 | 0.011536 | 0.011502 | 0.011468 | 0.011502 | 0.011468 | 0.011570 |
| 0.011536 | 0.011638 | 0.011570 | 0.011468 | 0.011572 | 0.011672 | 0.011676 |
| 0.011672 | 0.011570 | 0.011468 | 0.011402 | 0.011536 | 0.011468 | 0.011400 |
| 0.011404 | 0.011672 | 0.011468 | 0.011672 | 0.011434 | 0.011536 | 0.011502 |
| 0.011604 | 0.011502 | 0.011536 | 0.011502 | 0.011536 | 0.011400 | 0.011536 |
| 0.011570 | 0.011502 | 0.011570 | 0.011502 | 0.011536 | 0.011570 | 0.011808 |
| 0.011230 | 0.011162 | 0.011230 | 0.011674 | 0.011298 | 0.011536 | 0.011502 |
| 0.011471 | 0.011797 | 0.011565 | 0.011442 | 0.011232 | 0.011405 | 0.011575 |
| 0.011232 | 0.011473 | 0.011706 | 0.011910 | 0.011613 | 0.011774 | 0.011740 |
| 0.011672 | 0.011842 | 0.011701 | 0.011597 | 0.011605 | 0.011570 | 0.011642 |
| 0.011740 | 0.011639 | 0.011777 | 0.011844 | 0.011774 | 0.011842 | 0.011742 |
| 0.011677 | 0.011843 | 0.011710 | 0.011710 | 0.011978 | 0.011434 | 0.011638 |
| 0.011604 | 0.011502 | 0.011434 | 0.011434 | 0.011502 | 0.011502 | 0.011570 |
| 0.011502 | 0.011570 | 0.011468 | 0.011502 | 0.011502 | 0.011502 | 0.011570 |
| 0.011502 | 0.011264 | 0.011162 | 0.011196 | 0.011400 | 0.011502 | 0.011536 |
| 0.011536 | 0.011434 | 0.011570 | 0.011536 | 0.011468 | 0.011468 | 0.011468 |
| 0.011332 | 0.011536 | 0.011638 | 0.011434 | 0.011502 | 0.011706 | 0.011468 |

|          |          |          |          |          |          |          |
|----------|----------|----------|----------|----------|----------|----------|
| 0.011468 | 0.011536 | 0.011502 | 0.011672 | 0.011468 | 0.011366 | 0.011502 |
| 0.011434 | 0.011502 | 0.011502 | 0.011434 | 0.011434 | 0.011604 | 0.011536 |
| 0.011434 | 0.011536 | 0.011400 | 0.011434 | 0.011570 | 0.011366 | 0.011468 |
| 0.011434 | 0.011570 | 0.011502 | 0.011400 | 0.011128 | 0.011400 | 0.011570 |
| 0.011645 | 0.011468 | 0.011094 | 0.011604 | 0.011570 | 0.011502 | 0.011570 |
| 0.011468 | 0.011808 | 0.011400 | 0.011400 | 0.011400 | 0.011400 | 0.011400 |
| 0.011638 | 0.011468 | 0.011536 | 0.011604 | 0.011434 | 0.011162 | 0.011400 |
| 0.011468 | 0.011468 | 0.011502 | 0.011604 | 0.011502 | 0.011604 | 0.011672 |
| 0.011672 | 0.011638 | 0.011536 | 0.011638 | 0.011604 | 0.011468 | 0.011434 |
| 0.011468 | 0.011468 | 0.011536 | 0.011400 | 0.011434 | 0.011570 | 0.011468 |
| 0.011434 | 0.011502 | 0.011604 | 0.011604 | 0.011570 | 0.011502 | 0.011502 |
| 0.011570 | 0.011502 | 0.011570 | 0.011468 | 0.011604 | 0.011672 | 0.011332 |
| 0.011502 | 0.011298 | 0.011514 | 0.018100 | 0.011260 | 0.011559 | 0.011166 |
| 0.011130 | 0.011167 | 0.011697 | 0.011472 | 0.011339 | 0.011200 | 0.011615 |
| 0.011492 | 0.011370 | 0.011415 | 0.011527 | 0.011416 | 0.011460 | 0.011540 |
| 0.011250 | 0.011362 | 0.011210 | 0.011325 | 0.011638 | 0.011672 | 0.011677 |
| 0.011541 | 0.011638 | 0.011638 | 0.011536 | 0.011570 | 0.011570 | 0.011536 |
| 0.011570 | 0.011502 | 0.011536 | 0.011570 | 0.011536 | 0.011468 | 0.011502 |
| 0.011502 | 0.011570 | 0.011468 | 0.011570 | 0.011604 | 0.011638 | 0.011536 |
| 0.011502 | 0.011468 | 0.011264 | 0.011264 | 0.011604 | 0.011639 | 0.011672 |
| 0.011434 | 0.011434 | 0.011468 | 0.011570 | 0.011434 | 0.011672 | 0.011672 |
| 0.011706 | 0.011706 | 0.011638 | 0.011740 | 0.011298 | 0.011742 | 0.011570 |
| 0.011570 | 0.011570 | 0.011672 | 0.011502 | 0.011570 | 0.011536 | 0.011570 |
| 0.011638 | 0.011638 | 0.011672 | 0.011638 | 0.011537 | 0.011740 | 0.011706 |
| 0.011574 | 0.011468 | 0.011570 | 0.011638 | 0.011570 | 0.011638 | 0.011740 |
| 0.011910 | 0.011613 | 0.011774 | 0.011740 | 0.011672 | 0.011842 | 0.011468 |
| 0.011640 | 0.011537 | 0.011502 | 0.011502 | 0.011570 | 0.011468 | 0.011570 |
| 0.011604 | 0.011638 | 0.011536 | 0.011502 | 0.011468 | 0.011264 | 0.011264 |
| 0.011604 | 0.011639 | 0.011706 | 0.011638 | 0.012217 | 0.011703 | 0.011624 |
| 0.011693 | 0.011651 | 0.011763 | 0.011650 | 0.011760 | 0.011682 | 0.011583 |
| 0.012161 | 0.011545 | 0.011678 | 0.011614 | 0.011887 | 0.011747 | 0.011846 |
| 0.012189 | 0.011663 | 0.011813 | 0.011876 | 0.011740 | 0.011468 | 0.011779 |
| 0.011434 | 0.011604 | 0.011740 | 0.011706 | 0.011710 | 0.011434 | 0.011367 |
| 0.011536 | 0.011468 | 0.011502 | 0.011536 | 0.011434 | 0.011502 | 0.011400 |
| 0.011468 | 0.011502 | 0.011468 | 0.011434 | 0.011536 | 0.011468 | 0.011502 |
| 0.011502 | 0.011434 | 0.011502 | 0.011536 | 0.011434 | 0.011638 | 0.011672 |
| 0.011570 | 0.011570 | 0.011570 | 0.011570 | 0.011502 | 0.011298 | 0.011536 |
| 0.011305 | 0.011502 | 0.011468 | 0.011469 | 0.011536 | 0.011536 | 0.011604 |
| 0.011604 | 0.011536 | 0.011502 | 0.011536 | 0.011604 | 0.011638 | 0.011570 |
| 0.011570 | 0.011706 | 0.011196 | 0.011604 | 0.011808 | 0.011808 | 0.011672 |
| 0.011502 | 0.011570 | 0.011604 | 0.011400 | 0.011570 | 0.011536 | 0.011570 |
| 0.011604 | 0.011468 | 0.011468 | 0.011774 | 0.011774 | 0.011740 | 0.011536 |
| 0.011638 | 0.011706 | 0.011536 | 0.011638 | 0.011604 | 0.011468 | 0.011128 |
| 0.011570 | 0.011536 | 0.011468 | 0.011706 | 0.011536 | 0.011638 | 0.011400 |
| 0.011502 | 0.011266 | 0.011264 | 0.011430 | 0.011289 | 0.011576 | 0.011318 |
| 0.011396 | 0.011612 | 0.011487 | 0.011557 | 0.011505 | 0.011318 | 0.011329 |
| 0.011422 | 0.011194 | 0.011399 | 0.011262 | 0.011279 | 0.011469 | 0.011675 |
| 0.011669 | 0.011577 | 0.011559 | 0.011559 | 0.011572 | 0.011434 | 0.011502 |
| 0.011468 | 0.011571 | 0.011676 | 0.011472 | 0.011815 | 0.011848 | 0.011570 |
| 0.011536 | 0.011604 | 0.011536 | 0.011570 | 0.011434 | 0.011400 | 0.011468 |
| 0.011536 | 0.011536 | 0.011502 | 0.011468 | 0.011502 | 0.011468 | 0.011570 |
| 0.011520 | 0.011519 | 0.011511 | 0.011544 | 0.011683 | 0.011648 | 0.011647 |
| 0.011645 | 0.011604 | 0.011394 | 0.011388 | 0.011505 | 0.011677 | 0.011678 |
| 0.011502 | 0.011540 | 0.011775 | 0.011778 | 0.011706 | 0.011741 | 0.011672 |
| 0.011604 | 0.011672 | 0.011672 | 0.011570 | 0.011536 | 0.011740 | 0.011808 |
| 0.011808 | 0.011204 | 0.011474 | 0.011620 | 0.011468 | 0.011706 | 0.011672 |
| 0.011707 | 0.011706 | 0.011740 | 0.011740 | 0.011777 | 0.011876 | 0.011511 |
| 0.011400 | 0.011407 | 0.011503 | 0.011469 | 0.011506 | 0.011433 | 0.000000 |
| 0.011541 | 0.011280 | 0.011489 | 0.011547 | 0.011536 | 0.011579 | 0.011502 |
| 0.011468 | 0.011400 | 0.011536 | 0.011502 | 0.011434 | 0.011400 | 0.011332 |

|          |          |          |          |          |          |          |
|----------|----------|----------|----------|----------|----------|----------|
| 0.011434 | 0.011502 | 0.011502 | 0.011502 | 0.011536 | 0.011536 | 0.011539 |
| 0.011608 | 0.011536 | 0.011536 | 0.011572 | 0.011434 | 0.011502 | 0.011468 |
| 0.011571 | 0.011676 | 0.011472 | 0.011815 | 0.011848 | 0.011570 | 0.011740 |
| 0.011672 | 0.011672 | 0.011505 | 0.011658 | 0.011623 | 0.011646 | 0.011485 |
| 0.011688 | 0.011844 | 0.011699 | 0.011576 | 0.011468 | 0.011672 | 0.011536 |
| 0.011638 | 0.011570 | 0.011468 | 0.011572 | 0.011672 | 0.011676 | 0.011570 |
| 0.011468 | 0.011402 | 0.011536 | 0.011468 | 0.011400 | 0.011404 | 0.011672 |
| 0.011570 | 0.011502 | 0.011536 | 0.011570 | 0.011536 | 0.011468 | 0.011298 |
| 0.011536 | 0.011570 | 0.011570 | 0.011502 | 0.011570 | 0.011808 | 0.011400 |
| 0.011502 | 0.011298 | 0.011502 | 0.011536 | 0.011502 | 0.011196 | 0.011495 |
| 0.011687 | 0.011318 | 0.011314 | 0.011387 | 0.011472 | 0.011424 | 0.011272 |
| 0.011273 | 0.011366 | 0.011468 | 0.011575 | 0.011435 | 0.011574 | 0.011707 |
| 0.011604 | 0.011673 | 0.011604 | 0.011821 | 0.011570 | 0.012455 | 0.011605 |
| 0.012320 | 0.012118 | 0.012254 | 0.012494 | 0.011536 | 0.011502 | 0.011570 |
| 0.012218 | 0.011948 | 0.011536 | 0.011434 | 0.011502 | 0.011502 | 0.011437 |
| 0.011366 | 0.011369 | 0.011434 | 0.011400 | 0.011809 | 0.011842 | 0.011877 |
| 0.011741 | 0.011843 | 0.011981 | 0.011745 | 0.012253 | 0.012260 | 0.012321 |
| 0.012321 | 0.012355 | 0.012304 | 0.012321 | 0.012323 | 0.011604 | 0.011843 |
| 0.011911 | 0.012421 | 0.011918 | 0.011876 | 0.012355 | 0.011404 | 0.011298 |
| 0.011196 | 0.011264 | 0.011809 | 0.011801 | 0.011915 | 0.011604 | 0.011333 |
| S700     | 0.011678 | 0.011678 | 0.011746 | 0.011712 | 0.011712 | 0.011746 |
| 0.011685 | 0.011615 | 0.011780 | 0.011266 | 0.011335 | 0.011301 | 0.011266 |
| 0.011300 | 0.011472 | 0.011266 | 0.011300 | 0.011335 | 0.011335 | 0.011232 |
| 0.011266 | 0.011300 | 0.011403 | 0.011266 | 0.011301 | 0.011300 | 0.011650 |
| 0.011540 | 0.011300 | 0.011197 | 0.011437 | 0.011369 | 0.011335 | 0.011369 |
| 0.011335 | 0.011437 | 0.011335 | 0.011335 | 0.011335 | 0.011335 | 0.011506 |
| 0.011266 | 0.011335 | 0.011369 | 0.011300 | 0.011403 | 0.011437 | 0.011369 |
| 0.011335 | 0.011506 | 0.011403 | 0.011678 | 0.011335 | 0.011609 | 0.011335 |
| 0.011300 | 0.011403 | 0.011437 | 0.011609 | 0.011712 | 0.011403 | 0.011506 |
| 0.011369 | 0.011437 | 0.011335 | 0.011575 | 0.011815 | 0.011300 | 0.011403 |
| 0.011300 | 0.011403 | 0.011369 | 0.011437 | 0.011335 | 0.011369 | 0.011369 |
| 0.011266 | 0.011300 | 0.011266 | 0.011369 | 0.011335 | 0.011370 | 0.011437 |
| 0.011369 | 0.011335 | 0.011403 | 0.011300 | 0.011437 | 0.011266 | 0.011335 |
| 0.011506 | 0.011437 | 0.011678 | 0.011506 | 0.011335 | 0.011575 | 0.011335 |
| 0.011513 | 0.011745 | 0.011559 | 0.011260 | 0.011251 | 0.011361 | 0.011461 |
| 0.012106 | 0.011528 | 0.011186 | 0.011575 | 0.011575 | 0.011369 | 0.011472 |
| 0.011403 | 0.011369 | 0.011437 | 0.011335 | 0.011403 | 0.011369 | 0.011369 |
| 0.011334 | 0.011437 | 0.011643 | 0.011506 | 0.011403 | 0.011369 | 0.011300 |
| 0.011266 | 0.011266 | 0.011335 | 0.011300 | 0.011506 | 0.011472 | 0.011403 |
| 0.011506 | 0.011575 | 0.011300 | 0.011300 | 0.011335 | 0.011335 | 0.011336 |
| 0.011406 | 0.011335 | 0.011335 | 0.011207 | 0.011282 | 0.011239 | 0.011335 |
| 0.011336 | 0.011270 | 0.011324 | 0.011306 | 0.011234 | 0.011270 | 0.011302 |
| 0.011574 | 0.011341 | 0.011376 | 0.011198 | 0.011272 | 0.011404 | 0.011369 |
| 0.011438 | 0.011370 | 0.011369 | 0.011437 | 0.011403 | 0.011781 | 0.011541 |
| 0.011609 | 0.011472 | 0.011335 | 0.011438 | 0.011232 | 0.011472 | 0.011266 |
| 0.011300 | 0.011335 | 0.011300 | 0.011266 | 0.011300 | 0.011266 | 0.011369 |
| 0.011335 | 0.011438 | 0.011369 | 0.011266 | 0.011370 | 0.011472 | 0.011475 |
| 0.011472 | 0.011369 | 0.011266 | 0.011198 | 0.011335 | 0.011266 | 0.011198 |
| 0.011234 | 0.011472 | 0.011266 | 0.011472 | 0.011232 | 0.011335 | 0.011300 |
| 0.011403 | 0.011300 | 0.011335 | 0.011300 | 0.011335 | 0.011198 | 0.011335 |
| 0.011369 | 0.011232 | 0.011369 | 0.011300 | 0.011335 | 0.011369 | 0.011609 |
| 0.011712 | 0.011643 | 0.011712 | 0.011474 | 0.011712 | 0.011335 | 0.011232 |
| 0.011336 | 0.011640 | 0.011478 | 0.011236 | 0.011719 | 0.011200 | 0.011341 |
| 0.011720 | 0.011616 | 0.011506 | 0.011712 | 0.011409 | 0.011575 | 0.011541 |
| 0.011472 | 0.011643 | 0.011489 | 0.011350 | 0.011354 | 0.011300 | 0.011440 |
| 0.011540 | 0.011438 | 0.011576 | 0.011644 | 0.011575 | 0.011643 | 0.011541 |
| 0.011475 | 0.011645 | 0.011579 | 0.011509 | 0.011781 | 0.011232 | 0.011438 |
| 0.011403 | 0.011300 | 0.011232 | 0.011232 | 0.011300 | 0.011300 | 0.011369 |
| 0.011300 | 0.011369 | 0.011266 | 0.011369 | 0.011300 | 0.011163 | 0.011369 |
| 0.011300 | 0.011746 | 0.011643 | 0.011678 | 0.011197 | 0.011300 | 0.011335 |

|          |          |          |          |          |          |          |
|----------|----------|----------|----------|----------|----------|----------|
| 0.011335 | 0.011300 | 0.011335 | 0.011403 | 0.011266 | 0.011266 | 0.011266 |
| 0.011815 | 0.011403 | 0.011437 | 0.011232 | 0.011300 | 0.011506 | 0.011266 |
| 0.011266 | 0.011334 | 0.011300 | 0.011472 | 0.011266 | 0.011369 | 0.011506 |
| 0.011437 | 0.011300 | 0.011232 | 0.011232 | 0.011232 | 0.011403 | 0.011335 |
| 0.011232 | 0.011335 | 0.011197 | 0.011232 | 0.011369 | 0.011506 | 0.011266 |
| 0.011232 | 0.011369 | 0.011301 | 0.011197 | 0.011540 | 0.011197 | 0.011369 |
| 0.011442 | 0.011266 | 0.011575 | 0.011403 | 0.011437 | 0.011300 | 0.011369 |
| 0.011266 | 0.011609 | 0.011197 | 0.011472 | 0.011266 | 0.011266 | 0.011197 |
| 0.011437 | 0.011609 | 0.011335 | 0.011403 | 0.011232 | 0.011643 | 0.011266 |
| 0.011266 | 0.011197 | 0.011300 | 0.011403 | 0.011300 | 0.011403 | 0.011472 |
| 0.011472 | 0.011403 | 0.011335 | 0.011438 | 0.011403 | 0.011266 | 0.011232 |
| 0.011266 | 0.011266 | 0.011335 | 0.011266 | 0.011232 | 0.011369 | 0.011266 |
| 0.011300 | 0.011300 | 0.011403 | 0.011472 | 0.011369 | 0.011300 | 0.011300 |
| 0.011369 | 0.011300 | 0.011369 | 0.011266 | 0.011403 | 0.011472 | 0.011746 |
| 0.011300 | 0.011712 | 0.011307 | 0.017981 | 0.011392 | 0.011503 | 0.011666 |
| 0.011626 | 0.011671 | 0.011382 | 0.011358 | 0.011848 | 0.011695 | 0.011497 |
| 0.011544 | 0.011624 | 0.011219 | 0.011274 | 0.011300 | 0.011413 | 0.011325 |
| 0.011587 | 0.011478 | 0.011476 | 0.011193 | 0.011437 | 0.011472 | 0.011475 |
| 0.011337 | 0.011438 | 0.011437 | 0.011403 | 0.011369 | 0.011369 | 0.011335 |
| 0.011369 | 0.011300 | 0.011335 | 0.011335 | 0.011335 | 0.011266 | 0.011300 |
| 0.011300 | 0.011369 | 0.011266 | 0.011369 | 0.011403 | 0.011438 | 0.011335 |
| 0.011369 | 0.011335 | 0.011678 | 0.011678 | 0.011403 | 0.011438 | 0.011472 |
| 0.011232 | 0.011232 | 0.011266 | 0.011369 | 0.011232 | 0.011403 | 0.011403 |
| 0.011506 | 0.011506 | 0.011437 | 0.011540 | 0.011712 | 0.011542 | 0.011369 |
| 0.011369 | 0.011403 | 0.011438 | 0.011300 | 0.011369 | 0.011335 | 0.011369 |
| 0.011438 | 0.011438 | 0.011472 | 0.011438 | 0.011335 | 0.011506 | 0.011506 |
| 0.011372 | 0.011266 | 0.011369 | 0.011438 | 0.011335 | 0.011438 | 0.011540 |
| 0.011712 | 0.011409 | 0.011575 | 0.011541 | 0.011472 | 0.011643 | 0.011266 |
| 0.011439 | 0.011335 | 0.011300 | 0.011300 | 0.011369 | 0.011266 | 0.011369 |
| 0.011403 | 0.011438 | 0.011335 | 0.011369 | 0.011335 | 0.011678 | 0.011678 |
| 0.011403 | 0.011438 | 0.011506 | 0.011437 | 0.012090 | 0.011493 | 0.011414 |
| 0.011486 | 0.011446 | 0.011555 | 0.011446 | 0.011555 | 0.011478 | 0.011411 |
| 0.012030 | 0.011340 | 0.011475 | 0.011409 | 0.011686 | 0.011545 | 0.011646 |
| 0.012061 | 0.011476 | 0.011613 | 0.011678 | 0.011540 | 0.011540 | 0.011578 |
| 0.011232 | 0.011403 | 0.011540 | 0.011506 | 0.011509 | 0.011506 | 0.011439 |
| 0.011334 | 0.011197 | 0.011300 | 0.011335 | 0.011232 | 0.011300 | 0.011197 |
| 0.011335 | 0.011369 | 0.011266 | 0.011232 | 0.011335 | 0.011266 | 0.011300 |
| 0.011300 | 0.011232 | 0.011300 | 0.011335 | 0.011232 | 0.011437 | 0.011472 |
| 0.011369 | 0.011437 | 0.011369 | 0.011369 | 0.011300 | 0.011712 | 0.011335 |
| 0.011378 | 0.011300 | 0.011540 | 0.011541 | 0.011403 | 0.011403 | 0.011403 |
| 0.011403 | 0.011335 | 0.011300 | 0.011335 | 0.011403 | 0.011437 | 0.011369 |
| 0.011369 | 0.011506 | 0.011678 | 0.011403 | 0.011575 | 0.011575 | 0.011437 |
| 0.011300 | 0.011369 | 0.011403 | 0.011815 | 0.011369 | 0.011403 | 0.011369 |
| 0.011403 | 0.011335 | 0.011335 | 0.011643 | 0.011575 | 0.011609 | 0.011335 |
| 0.011437 | 0.011506 | 0.011335 | 0.011437 | 0.011369 | 0.011266 | 0.011609 |
| 0.011369 | 0.011335 | 0.011335 | 0.011506 | 0.011335 | 0.011437 | 0.011678 |
| 0.011300 | 0.011754 | 0.011746 | 0.011557 | 0.011346 | 0.011442 | 0.011373 |
| 0.011287 | 0.011736 | 0.011276 | 0.011516 | 0.011356 | 0.011477 | 0.011495 |
| 0.011582 | 0.011328 | 0.011460 | 0.011332 | 0.011336 | 0.011536 | 0.011433 |
| 0.011444 | 0.011341 | 0.011420 | 0.011348 | 0.011370 | 0.011506 | 0.011575 |
| 0.011540 | 0.011438 | 0.011544 | 0.011545 | 0.011684 | 0.011711 | 0.011369 |
| 0.011609 | 0.011472 | 0.011335 | 0.011438 | 0.011232 | 0.011472 | 0.011266 |
| 0.011300 | 0.011335 | 0.011300 | 0.011266 | 0.011300 | 0.011266 | 0.011369 |
| 0.011345 | 0.011345 | 0.011270 | 0.011374 | 0.011514 | 0.011478 | 0.011478 |
| 0.011476 | 0.011403 | 0.011210 | 0.011170 | 0.011336 | 0.011509 | 0.011510 |
| 0.011301 | 0.011371 | 0.011576 | 0.011578 | 0.011507 | 0.011541 | 0.011472 |
| 0.011403 | 0.011472 | 0.011472 | 0.011369 | 0.011952 | 0.011506 | 0.011609 |
| 0.011609 | 0.011714 | 0.011339 | 0.011379 | 0.011266 | 0.011506 | 0.011472 |
| 0.011507 | 0.011506 | 0.011540 | 0.011540 | 0.011583 | 0.011678 | 0.011305 |
| 0.011198 | 0.011200 | 0.011301 | 0.011267 | 0.011337 | 0.011172 | 0.011541 |

|          |          |          |          |          |          |          |
|----------|----------|----------|----------|----------|----------|----------|
| 0.000000 | 0.011455 | 0.011203 | 0.011322 | 0.011335 | 0.011409 | 0.011300 |
| 0.011266 | 0.011266 | 0.011335 | 0.011300 | 0.011506 | 0.011472 | 0.011403 |
| 0.011506 | 0.011575 | 0.011300 | 0.011300 | 0.011335 | 0.011335 | 0.011336 |
| 0.011406 | 0.011335 | 0.011335 | 0.011370 | 0.011506 | 0.011575 | 0.011540 |
| 0.011438 | 0.011544 | 0.011545 | 0.011684 | 0.011711 | 0.011369 | 0.011540 |
| 0.011472 | 0.011472 | 0.011302 | 0.011451 | 0.011415 | 0.011443 | 0.011275 |
| 0.011483 | 0.011667 | 0.011491 | 0.011338 | 0.011266 | 0.011472 | 0.011335 |
| 0.011438 | 0.011369 | 0.011266 | 0.011370 | 0.011472 | 0.011475 | 0.011369 |
| 0.011266 | 0.011198 | 0.011335 | 0.011266 | 0.011198 | 0.011234 | 0.011472 |
| 0.011369 | 0.011300 | 0.011335 | 0.011335 | 0.011335 | 0.011266 | 0.011369 |
| 0.011335 | 0.011369 | 0.011369 | 0.011300 | 0.011369 | 0.011575 | 0.011266 |
| 0.011300 | 0.011712 | 0.011300 | 0.011335 | 0.011300 | 0.011678 | 0.011280 |
| 0.011743 | 0.011277 | 0.011316 | 0.011513 | 0.011599 | 0.011500 | 0.011231 |
| 0.011275 | 0.011437 | 0.011540 | 0.011649 | 0.011507 | 0.011648 | 0.011747 |
| 0.011678 | 0.011747 | 0.011678 | 0.011898 | 0.011609 | 0.012537 | 0.011645 |
| 0.012366 | 0.012196 | 0.012334 | 0.012577 | 0.011678 | 0.011369 | 0.011644 |
| 0.012057 | 0.012025 | 0.011575 | 0.011506 | 0.011575 | 0.011575 | 0.011544 |
| 0.011437 | 0.011441 | 0.011506 | 0.011472 | 0.011885 | 0.011918 | 0.011953 |
| 0.011816 | 0.011919 | 0.012059 | 0.011820 | 0.012126 | 0.012133 | 0.012195 |
| 0.012195 | 0.012229 | 0.012141 | 0.012195 | 0.012197 | 0.011403 | 0.011713 |
| 0.011781 | 0.012296 | 0.011788 | 0.012021 | 0.012505 | 0.011546 | 0.011438 |
| 0.011403 | 0.011403 | 0.011884 | 0.011883 | 0.012029 | 0.011746 | 0.011404 |
| S701     | 0.011806 | 0.011806 | 0.011630 | 0.011543 | 0.011543 | 0.011586 |
| 0.011461 | 0.011327 | 0.011586 | 0.011367 | 0.011455 | 0.011455 | 0.011367 |
| 0.011367 | 0.011630 | 0.011323 | 0.011411 | 0.011455 | 0.011455 | 0.011367 |
| 0.011367 | 0.011411 | 0.011236 | 0.011411 | 0.011411 | 0.011455 | 0.011372 |
| 0.011367 | 0.011411 | 0.011323 | 0.011279 | 0.011411 | 0.011455 | 0.011499 |
| 0.011455 | 0.011543 | 0.011499 | 0.011499 | 0.011455 | 0.011455 | 0.011586 |
| 0.011323 | 0.011455 | 0.011499 | 0.011455 | 0.011499 | 0.011543 | 0.011455 |
| 0.011499 | 0.011586 | 0.011499 | 0.011455 | 0.011455 | 0.011674 | 0.011455 |
| 0.011455 | 0.011499 | 0.011586 | 0.011674 | 0.011411 | 0.011367 | 0.011411 |
| 0.011411 | 0.011586 | 0.011499 | 0.011630 | 0.011587 | 0.011455 | 0.011586 |
| 0.011411 | 0.011586 | 0.011499 | 0.011586 | 0.011499 | 0.011543 | 0.011543 |
| 0.011411 | 0.011411 | 0.011411 | 0.011367 | 0.011499 | 0.011412 | 0.011543 |
| 0.011499 | 0.011455 | 0.011367 | 0.011455 | 0.011411 | 0.011323 | 0.011455 |
| 0.011630 | 0.011586 | 0.011543 | 0.011674 | 0.011411 | 0.011718 | 0.011499 |
| 0.011591 | 0.011449 | 0.011546 | 0.011415 | 0.011399 | 0.011542 | 0.011266 |
| 0.012107 | 0.000000 | 0.011372 | 0.011762 | 0.011718 | 0.011411 | 0.011543 |
| 0.011586 | 0.011499 | 0.011455 | 0.011455 | 0.011499 | 0.011455 | 0.011499 |
| 0.011499 | 0.011543 | 0.011718 | 0.011630 | 0.011586 | 0.011543 | 0.011411 |
| 0.011411 | 0.011323 | 0.011411 | 0.011455 | 0.011323 | 0.011279 | 0.011192 |
| 0.011323 | 0.011411 | 0.011367 | 0.011367 | 0.011367 | 0.011367 | 0.011368 |
| 0.011412 | 0.011499 | 0.011411 | 0.011335 | 0.011425 | 0.011371 | 0.011455 |
| 0.011456 | 0.011371 | 0.011445 | 0.011421 | 0.011368 | 0.011413 | 0.011456 |
| 0.011244 | 0.011459 | 0.011509 | 0.011367 | 0.011422 | 0.011587 | 0.011323 |
| 0.011411 | 0.011499 | 0.011499 | 0.011543 | 0.011411 | 0.011894 | 0.011587 |
| 0.011499 | 0.011411 | 0.011499 | 0.011411 | 0.011323 | 0.011323 | 0.011411 |
| 0.011367 | 0.011455 | 0.011367 | 0.011367 | 0.011455 | 0.011367 | 0.011455 |
| 0.011367 | 0.011543 | 0.011499 | 0.011411 | 0.011500 | 0.011630 | 0.011635 |
| 0.011586 | 0.011499 | 0.011367 | 0.011325 | 0.011499 | 0.011367 | 0.011323 |
| 0.011283 | 0.011587 | 0.011367 | 0.011587 | 0.011367 | 0.011499 | 0.011411 |
| 0.011543 | 0.011455 | 0.011455 | 0.011411 | 0.011455 | 0.011323 | 0.011455 |
| 0.011455 | 0.011411 | 0.011543 | 0.011455 | 0.011455 | 0.011543 | 0.011806 |
| 0.011455 | 0.011411 | 0.011499 | 0.011545 | 0.011499 | 0.011411 | 0.011411 |
| 0.011369 | 0.011691 | 0.011525 | 0.011374 | 0.011503 | 0.011327 | 0.011524 |
| 0.011372 | 0.011327 | 0.011586 | 0.011762 | 0.011418 | 0.011674 | 0.011674 |
| 0.011543 | 0.011718 | 0.011588 | 0.011447 | 0.011525 | 0.011455 | 0.011587 |
| 0.011543 | 0.011499 | 0.011674 | 0.011762 | 0.011630 | 0.011806 | 0.011674 |
| 0.011457 | 0.011762 | 0.011630 | 0.011630 | 0.011894 | 0.011367 | 0.011455 |
| 0.011455 | 0.011367 | 0.011367 | 0.011367 | 0.011411 | 0.011455 | 0.011499 |



|          |          |          |          |          |          |          |
|----------|----------|----------|----------|----------|----------|----------|
| 0.011411 | 0.011367 | 0.011367 | 0.011455 | 0.011411 | 0.011411 | 0.011543 |
| 0.011411 | 0.011499 | 0.011367 | 0.011455 | 0.011323 | 0.011411 | 0.011411 |
| 0.011455 | 0.011367 | 0.011455 | 0.011411 | 0.011411 | 0.011411 | 0.011411 |
| 0.011543 | 0.011411 | 0.011499 | 0.011367 | 0.011411 | 0.011674 | 0.011411 |
| 0.011411 | 0.011455 | 0.011455 | 0.011543 | 0.011411 | 0.011279 | 0.011367 |
| 0.011367 | 0.011367 | 0.011411 | 0.011323 | 0.011323 | 0.011499 | 0.011455 |
| 0.011323 | 0.011367 | 0.011323 | 0.011367 | 0.011499 | 0.000000 | 0.011411 |
| 0.011323 | 0.011455 | 0.011411 | 0.011323 | 0.011236 | 0.011323 | 0.011499 |
| 0.011544 | 0.011411 | 0.011323 | 0.011587 | 0.011499 | 0.011455 | 0.011499 |
| 0.011411 | 0.011674 | 0.011323 | 0.011455 | 0.011323 | 0.011323 | 0.011323 |
| 0.011455 | 0.011324 | 0.011499 | 0.011499 | 0.011367 | 0.011367 | 0.011323 |
| 0.011411 | 0.011367 | 0.011411 | 0.011543 | 0.011367 | 0.011543 | 0.011674 |
| 0.011630 | 0.011586 | 0.011499 | 0.011586 | 0.011455 | 0.011411 | 0.011323 |
| 0.011411 | 0.011411 | 0.011499 | 0.011323 | 0.011323 | 0.011455 | 0.011367 |
| 0.011367 | 0.011455 | 0.011499 | 0.011455 | 0.011499 | 0.011411 | 0.011367 |
| 0.011499 | 0.011411 | 0.011543 | 0.011367 | 0.011543 | 0.011630 | 0.011543 |
| 0.011455 | 0.011455 | 0.011464 | 0.013308 | 0.011295 | 0.011520 | 0.011334 |
| 0.011333 | 0.011383 | 0.011639 | 0.011426 | 0.011569 | 0.011378 | 0.011691 |
| 0.011430 | 0.011218 | 0.011365 | 0.011429 | 0.011360 | 0.011310 | 0.011492 |
| 0.011240 | 0.011305 | 0.011203 | 0.011228 | 0.011543 | 0.011543 | 0.011501 |
| 0.011455 | 0.011455 | 0.011543 | 0.011455 | 0.011499 | 0.011499 | 0.011455 |
| 0.011455 | 0.011455 | 0.011455 | 0.011411 | 0.011499 | 0.011411 | 0.011367 |
| 0.011367 | 0.011499 | 0.011411 | 0.011543 | 0.011543 | 0.011543 | 0.011367 |
| 0.011367 | 0.011367 | 0.011323 | 0.011323 | 0.011499 | 0.011500 | 0.011630 |
| 0.011367 | 0.011367 | 0.011367 | 0.011455 | 0.011367 | 0.011630 | 0.011630 |
| 0.011586 | 0.011586 | 0.011630 | 0.011586 | 0.011411 | 0.011631 | 0.011455 |
| 0.011499 | 0.011543 | 0.011543 | 0.011367 | 0.011499 | 0.011499 | 0.011455 |
| 0.011586 | 0.011586 | 0.011586 | 0.011586 | 0.011455 | 0.011674 | 0.011543 |
| 0.011457 | 0.011411 | 0.011455 | 0.011543 | 0.011455 | 0.011587 | 0.011674 |
| 0.011762 | 0.011418 | 0.011674 | 0.011674 | 0.011543 | 0.011718 | 0.011411 |
| 0.011544 | 0.011411 | 0.011367 | 0.011367 | 0.011499 | 0.011411 | 0.011543 |
| 0.011543 | 0.011543 | 0.011367 | 0.011367 | 0.011367 | 0.011323 | 0.011323 |
| 0.011499 | 0.011500 | 0.011543 | 0.011499 | 0.012246 | 0.011595 | 0.011544 |
| 0.011634 | 0.011587 | 0.011719 | 0.011544 | 0.011633 | 0.011631 | 0.011545 |
| 0.012161 | 0.011455 | 0.011455 | 0.011500 | 0.011850 | 0.011587 | 0.011806 |
| 0.012158 | 0.011511 | 0.011368 | 0.011411 | 0.011411 | 0.011192 | 0.011368 |
| 0.011367 | 0.011367 | 0.011455 | 0.011411 | 0.011368 | 0.011367 | 0.011236 |
| 0.011411 | 0.011323 | 0.011323 | 0.011499 | 0.011323 | 0.011455 | 0.011323 |
| 0.011411 | 0.011455 | 0.011411 | 0.011367 | 0.011499 | 0.011411 | 0.011455 |
| 0.011455 | 0.011367 | 0.011455 | 0.011455 | 0.011367 | 0.011543 | 0.011586 |
| 0.011455 | 0.011499 | 0.011499 | 0.011499 | 0.011455 | 0.011411 | 0.011455 |
| 0.011192 | 0.011455 | 0.011367 | 0.011367 | 0.011543 | 0.011586 | 0.011543 |
| 0.011586 | 0.011455 | 0.011455 | 0.011455 | 0.011586 | 0.011586 | 0.011499 |
| 0.011499 | 0.011674 | 0.011455 | 0.011586 | 0.011806 | 0.011806 | 0.011543 |
| 0.011455 | 0.011499 | 0.011586 | 0.011499 | 0.011455 | 0.011543 | 0.011499 |
| 0.011499 | 0.011367 | 0.011367 | 0.011762 | 0.011586 | 0.011718 | 0.011455 |
| 0.011630 | 0.011718 | 0.011455 | 0.011630 | 0.011543 | 0.011411 | 0.011367 |
| 0.011543 | 0.011455 | 0.011367 | 0.011586 | 0.011455 | 0.011586 | 0.011543 |
| 0.011411 | 0.011416 | 0.011411 | 0.011379 | 0.011194 | 0.011505 | 0.011262 |
| 0.011341 | 0.011515 | 0.011428 | 0.011524 | 0.011372 | 0.011266 | 0.011338 |
| 0.011313 | 0.011226 | 0.011418 | 0.011222 | 0.011270 | 0.011464 | 0.011597 |
| 0.011599 | 0.011475 | 0.011425 | 0.011472 | 0.011412 | 0.011367 | 0.011411 |
| 0.011367 | 0.011411 | 0.011545 | 0.011281 | 0.011724 | 0.011662 | 0.011367 |
| 0.011499 | 0.011411 | 0.011499 | 0.011411 | 0.011323 | 0.011323 | 0.011411 |
| 0.011367 | 0.011455 | 0.011367 | 0.011367 | 0.011455 | 0.011367 | 0.011455 |
| 0.011421 | 0.011467 | 0.011417 | 0.011501 | 0.011722 | 0.011549 | 0.011592 |
| 0.011589 | 0.011499 | 0.011345 | 0.011341 | 0.011500 | 0.011632 | 0.011589 |
| 0.011411 | 0.011500 | 0.011675 | 0.011589 | 0.011630 | 0.011631 | 0.011499 |
| 0.011543 | 0.011543 | 0.011543 | 0.011455 | 0.011719 | 0.011674 | 0.011718 |
| 0.011718 | 0.011428 | 0.011372 | 0.011510 | 0.011411 | 0.011543 | 0.011543 |

|          |          |          |          |          |          |          |
|----------|----------|----------|----------|----------|----------|----------|
| 0.011720 | 0.011630 | 0.011630 | 0.011630 | 0.011769 | 0.011718 | 0.011455 |
| 0.011323 | 0.011323 | 0.011411 | 0.011411 | 0.011455 | 0.011325 | 0.011280 |
| 0.011455 | 0.000000 | 0.011353 | 0.011464 | 0.011499 | 0.011457 | 0.011411 |
| 0.011411 | 0.011323 | 0.011411 | 0.011455 | 0.011323 | 0.011279 | 0.011192 |
| 0.011323 | 0.011411 | 0.011367 | 0.011367 | 0.011367 | 0.011367 | 0.011368 |
| 0.011412 | 0.011499 | 0.011411 | 0.011412 | 0.011367 | 0.011411 | 0.011367 |
| 0.011411 | 0.011545 | 0.011281 | 0.011724 | 0.011662 | 0.011367 | 0.011674 |
| 0.011543 | 0.011543 | 0.011458 | 0.011607 | 0.011510 | 0.011506 | 0.011381 |
| 0.011646 | 0.011658 | 0.011552 | 0.011458 | 0.011367 | 0.011587 | 0.011367 |
| 0.011543 | 0.011499 | 0.011411 | 0.011500 | 0.011630 | 0.011635 | 0.011499 |
| 0.011367 | 0.011325 | 0.011499 | 0.011367 | 0.011323 | 0.011283 | 0.011587 |
| 0.011455 | 0.011455 | 0.011455 | 0.011411 | 0.011499 | 0.011411 | 0.011192 |
| 0.011411 | 0.011499 | 0.011499 | 0.011455 | 0.011499 | 0.011806 | 0.011323 |
| 0.011411 | 0.011411 | 0.011455 | 0.011455 | 0.011411 | 0.011455 | 0.011441 |
| 0.011589 | 0.011277 | 0.011188 | 0.011320 | 0.011379 | 0.011341 | 0.011223 |
| 0.011197 | 0.011236 | 0.011323 | 0.011455 | 0.011280 | 0.011458 | 0.011587 |
| 0.011499 | 0.011586 | 0.011411 | 0.011592 | 0.011455 | 0.012421 | 0.011368 |
| 0.012158 | 0.012028 | 0.012161 | 0.012250 | 0.011543 | 0.011411 | 0.011499 |
| 0.012202 | 0.011985 | 0.011367 | 0.011323 | 0.011411 | 0.011411 | 0.011325 |
| 0.011236 | 0.011238 | 0.011323 | 0.011236 | 0.011718 | 0.011587 | 0.011630 |
| 0.011632 | 0.011675 | 0.011808 | 0.011590 | 0.012291 | 0.012211 | 0.012379 |
| 0.012335 | 0.012379 | 0.012268 | 0.012247 | 0.012293 | 0.011455 | 0.011894 |
| 0.011762 | 0.012465 | 0.011859 | 0.011675 | 0.012422 | 0.011238 | 0.000000 |
| 0.011148 | 0.011148 | 0.011718 | 0.011642 | 0.011838 | 0.011586 | 0.011148 |
| S702     | 0.011584 | 0.011584 | 0.011680 | 0.011584 | 0.011584 | 0.011632 |
| 0.011690 | 0.011544 | 0.011680 | 0.011108 | 0.011203 | 0.011203 | 0.011108 |
| 0.011203 | 0.011394 | 0.011156 | 0.011108 | 0.011203 | 0.011203 | 0.011108 |
| 0.011156 | 0.011156 | 0.011298 | 0.011156 | 0.011156 | 0.011203 | 0.011544 |
| 0.011441 | 0.011108 | 0.000000 | 0.011346 | 0.011156 | 0.011203 | 0.011251 |
| 0.011156 | 0.011298 | 0.011251 | 0.011251 | 0.011203 | 0.011203 | 0.011346 |
| 0.011156 | 0.011203 | 0.011251 | 0.011203 | 0.011298 | 0.011298 | 0.011156 |
| 0.011203 | 0.011441 | 0.011251 | 0.011680 | 0.011203 | 0.011441 | 0.011203 |
| 0.011203 | 0.011298 | 0.011346 | 0.011441 | 0.011584 | 0.011156 | 0.011298 |
| 0.011203 | 0.011298 | 0.011251 | 0.011489 | 0.011823 | 0.011156 | 0.011346 |
| 0.011156 | 0.011298 | 0.011203 | 0.011346 | 0.011251 | 0.011298 | 0.011298 |
| 0.011156 | 0.011156 | 0.011156 | 0.011203 | 0.011156 | 0.011156 | 0.011298 |
| 0.011298 | 0.011203 | 0.011108 | 0.011203 | 0.011346 | 0.000000 | 0.011203 |
| 0.011394 | 0.011346 | 0.011680 | 0.011394 | 0.011156 | 0.011489 | 0.011203 |
| 0.011323 | 0.011696 | 0.011273 | 0.011116 | 0.011114 | 0.011216 | 0.011342 |
| 0.012254 | 0.011487 | 0.000000 | 0.011489 | 0.011489 | 0.011251 | 0.011394 |
| 0.011346 | 0.011251 | 0.011203 | 0.011203 | 0.011203 | 0.011203 | 0.011251 |
| 0.011251 | 0.011394 | 0.011489 | 0.011298 | 0.011298 | 0.011299 | 0.011156 |
| 0.011156 | 0.011156 | 0.011156 | 0.011203 | 0.011394 | 0.011346 | 0.011251 |
| 0.011394 | 0.011394 | 0.011108 | 0.011108 | 0.011108 | 0.011108 | 0.011108 |
| 0.011156 | 0.011203 | 0.011108 | 0.000000 | 0.011160 | 0.011108 | 0.011203 |
| 0.011203 | 0.011108 | 0.011113 | 0.011109 | 0.000000 | 0.011156 | 0.011204 |
| 0.011409 | 0.011204 | 0.011207 | 0.011108 | 0.011159 | 0.011346 | 0.011156 |
| 0.011251 | 0.011251 | 0.011251 | 0.011298 | 0.011108 | 0.011680 | 0.011441 |
| 0.011632 | 0.011203 | 0.011251 | 0.011251 | 0.011108 | 0.011441 | 0.011156 |
| 0.011108 | 0.011203 | 0.011156 | 0.011156 | 0.011203 | 0.011156 | 0.011156 |
| 0.011108 | 0.011298 | 0.011251 | 0.011108 | 0.011251 | 0.011156 | 0.011349 |
| 0.011346 | 0.011251 | 0.011108 | 0.000000 | 0.011251 | 0.011108 | 0.000000 |
| 0.011157 | 0.011346 | 0.000000 | 0.011346 | 0.011108 | 0.011251 | 0.011156 |
| 0.011251 | 0.011156 | 0.011203 | 0.011156 | 0.011203 | 0.000000 | 0.011203 |
| 0.011203 | 0.011156 | 0.011298 | 0.011156 | 0.011156 | 0.011298 | 0.011489 |
| 0.011632 | 0.011632 | 0.011727 | 0.011252 | 0.011632 | 0.011156 | 0.011156 |
| 0.011204 | 0.011514 | 0.011373 | 0.011109 | 0.011636 | 0.000000 | 0.011116 |
| 0.011593 | 0.011495 | 0.011346 | 0.011537 | 0.000000 | 0.011441 | 0.011489 |
| 0.011298 | 0.011536 | 0.011346 | 0.011162 | 0.011258 | 0.011203 | 0.011251 |
| 0.011298 | 0.011251 | 0.011441 | 0.011489 | 0.011346 | 0.011584 | 0.011394 |

|          |          |          |          |          |          |          |
|----------|----------|----------|----------|----------|----------|----------|
| 0.011204 | 0.011489 | 0.011394 | 0.011394 | 0.011680 | 0.000000 | 0.011203 |
| 0.011203 | 0.011108 | 0.011108 | 0.011108 | 0.011156 | 0.011203 | 0.011251 |
| 0.011108 | 0.011108 | 0.011108 | 0.011298 | 0.011156 | 0.011156 | 0.011298 |
| 0.011156 | 0.011727 | 0.011584 | 0.011680 | 0.000000 | 0.011108 | 0.011203 |
| 0.011203 | 0.011203 | 0.011203 | 0.011251 | 0.011156 | 0.011156 | 0.011156 |
| 0.011775 | 0.011251 | 0.011251 | 0.011108 | 0.011203 | 0.011441 | 0.011156 |
| 0.011156 | 0.011203 | 0.011108 | 0.011298 | 0.000000 | 0.011298 | 0.011394 |
| 0.011394 | 0.011108 | 0.011156 | 0.000000 | 0.000000 | 0.011203 | 0.011203 |
| 0.000000 | 0.011108 | 0.000000 | 0.011108 | 0.011251 | 0.011394 | 0.011156 |
| 0.000000 | 0.011203 | 0.011156 | 0.000000 | 0.011441 | 0.000000 | 0.011251 |
| 0.011251 | 0.011156 | 0.011537 | 0.011346 | 0.011346 | 0.011203 | 0.011251 |
| 0.011156 | 0.011441 | 0.000000 | 0.011394 | 0.011156 | 0.011156 | 0.000000 |
| 0.011203 | 0.011442 | 0.011251 | 0.011203 | 0.011108 | 0.011584 | 0.011156 |
| 0.011108 | 0.011108 | 0.011156 | 0.011298 | 0.011108 | 0.011203 | 0.011441 |
| 0.011346 | 0.011298 | 0.011251 | 0.011346 | 0.011251 | 0.011156 | 0.000000 |
| 0.011156 | 0.011156 | 0.011251 | 0.011156 | 0.000000 | 0.011156 | 0.011108 |
| 0.011203 | 0.011203 | 0.011203 | 0.011298 | 0.011251 | 0.011108 | 0.011108 |
| 0.011251 | 0.011156 | 0.011251 | 0.011108 | 0.011298 | 0.011346 | 0.011727 |
| 0.011203 | 0.011584 | 0.011207 | 0.011860 | 0.011145 | 0.011141 | 0.011555 |
| 0.011554 | 0.011661 | 0.011195 | 0.011214 | 0.011690 | 0.011603 | 0.011315 |
| 0.011396 | 0.011484 | 0.000000 | 0.011117 | 0.011169 | 0.011196 | 0.011118 |
| 0.011514 | 0.011437 | 0.011423 | 0.011154 | 0.011298 | 0.011298 | 0.011204 |
| 0.011203 | 0.011203 | 0.011298 | 0.011298 | 0.011251 | 0.011251 | 0.011203 |
| 0.011203 | 0.011156 | 0.011203 | 0.011156 | 0.011251 | 0.000000 | 0.011108 |
| 0.011108 | 0.011251 | 0.011156 | 0.011299 | 0.011203 | 0.011251 | 0.011108 |
| 0.011203 | 0.011203 | 0.011489 | 0.011489 | 0.011251 | 0.011251 | 0.011346 |
| 0.011108 | 0.011108 | 0.011108 | 0.011156 | 0.011108 | 0.011346 | 0.011346 |
| 0.011298 | 0.011346 | 0.011394 | 0.011298 | 0.011584 | 0.011346 | 0.011203 |
| 0.011251 | 0.011251 | 0.011298 | 0.011108 | 0.011251 | 0.011251 | 0.011203 |
| 0.011298 | 0.011298 | 0.011298 | 0.011298 | 0.011203 | 0.011394 | 0.011298 |
| 0.011204 | 0.011108 | 0.011203 | 0.011298 | 0.011203 | 0.011441 | 0.011441 |
| 0.011537 | 0.000000 | 0.011441 | 0.011489 | 0.011298 | 0.011536 | 0.011156 |
| 0.011299 | 0.011156 | 0.011108 | 0.011108 | 0.011251 | 0.011156 | 0.011299 |
| 0.011203 | 0.011251 | 0.011108 | 0.011203 | 0.011203 | 0.011489 | 0.011489 |
| 0.011251 | 0.011251 | 0.011251 | 0.011203 | 0.012110 | 0.011350 | 0.011251 |
| 0.011395 | 0.011346 | 0.011489 | 0.011251 | 0.011395 | 0.011394 | 0.011252 |
| 0.012014 | 0.011108 | 0.011156 | 0.011251 | 0.011632 | 0.011346 | 0.011537 |
| 0.012014 | 0.011351 | 0.011108 | 0.011156 | 0.011156 | 0.011251 | 0.011108 |
| 0.000000 | 0.000000 | 0.011156 | 0.011108 | 0.011108 | 0.011489 | 0.011347 |
| 0.011156 | 0.000000 | 0.000000 | 0.011251 | 0.000000 | 0.011203 | 0.000000 |
| 0.011251 | 0.011298 | 0.011156 | 0.011108 | 0.011251 | 0.011108 | 0.011203 |
| 0.011203 | 0.000000 | 0.011108 | 0.011156 | 0.000000 | 0.011298 | 0.011346 |
| 0.011203 | 0.011346 | 0.011251 | 0.011251 | 0.011203 | 0.011584 | 0.011203 |
| 0.011251 | 0.011203 | 0.011441 | 0.011441 | 0.011299 | 0.011346 | 0.011298 |
| 0.011346 | 0.011203 | 0.011156 | 0.011203 | 0.011298 | 0.011346 | 0.011298 |
| 0.011251 | 0.011441 | 0.011680 | 0.011298 | 0.011489 | 0.011489 | 0.011251 |
| 0.011203 | 0.011251 | 0.011346 | 0.011680 | 0.011203 | 0.011299 | 0.011298 |
| 0.011203 | 0.011203 | 0.011203 | 0.011632 | 0.011346 | 0.011584 | 0.011251 |
| 0.011346 | 0.011441 | 0.011251 | 0.011346 | 0.011203 | 0.011108 | 0.011536 |
| 0.011251 | 0.011203 | 0.011203 | 0.011346 | 0.011251 | 0.011298 | 0.011584 |
| 0.011156 | 0.011641 | 0.011632 | 0.011525 | 0.011132 | 0.011302 | 0.011210 |
| 0.011134 | 0.011615 | 0.011160 | 0.011382 | 0.011130 | 0.011291 | 0.011366 |
| 0.011466 | 0.000000 | 0.011296 | 0.000000 | 0.011138 | 0.011315 | 0.011296 |
| 0.011381 | 0.011175 | 0.011308 | 0.011210 | 0.011108 | 0.011489 | 0.011537 |
| 0.011441 | 0.011251 | 0.011348 | 0.011444 | 0.011590 | 0.011412 | 0.000000 |
| 0.011632 | 0.011203 | 0.011251 | 0.011251 | 0.011108 | 0.011441 | 0.011156 |
| 0.011108 | 0.011203 | 0.011156 | 0.011156 | 0.011203 | 0.011156 | 0.011156 |
| 0.011207 | 0.011207 | 0.011157 | 0.011252 | 0.011491 | 0.011302 | 0.011349 |
| 0.011395 | 0.011251 | 0.000000 | 0.000000 | 0.011203 | 0.011394 | 0.011299 |
| 0.011108 | 0.011251 | 0.011489 | 0.011300 | 0.011394 | 0.011441 | 0.011156 |

|          |          |          |          |          |          |          |
|----------|----------|----------|----------|----------|----------|----------|
| 0.011251 | 0.011298 | 0.011251 | 0.011203 | 0.011823 | 0.011394 | 0.011489 |
| 0.011489 | 0.011661 | 0.011206 | 0.011255 | 0.011156 | 0.011203 | 0.011298 |
| 0.011395 | 0.011394 | 0.011346 | 0.011346 | 0.011554 | 0.011441 | 0.011203 |
| 0.000000 | 0.000000 | 0.011108 | 0.011156 | 0.011251 | 0.000000 | 0.011489 |
| 0.011203 | 0.011353 | 0.000000 | 0.000000 | 0.011251 | 0.011252 | 0.011156 |
| 0.011156 | 0.011156 | 0.011156 | 0.011203 | 0.011394 | 0.011346 | 0.011251 |
| 0.011394 | 0.011394 | 0.011108 | 0.011108 | 0.011108 | 0.011108 | 0.011108 |
| 0.011156 | 0.011203 | 0.011108 | 0.011108 | 0.011489 | 0.011537 | 0.011441 |
| 0.011251 | 0.011348 | 0.011444 | 0.011590 | 0.011412 | 0.000000 | 0.011441 |
| 0.011298 | 0.011298 | 0.011156 | 0.011356 | 0.011206 | 0.011254 | 0.011109 |
| 0.011402 | 0.011444 | 0.011351 | 0.011204 | 0.000000 | 0.011346 | 0.011108 |
| 0.011298 | 0.011251 | 0.011108 | 0.011251 | 0.011156 | 0.011349 | 0.011251 |
| 0.011108 | 0.000000 | 0.011251 | 0.011108 | 0.000000 | 0.011157 | 0.011346 |
| 0.011203 | 0.011156 | 0.011203 | 0.011156 | 0.011251 | 0.000000 | 0.011298 |
| 0.011203 | 0.011251 | 0.011251 | 0.011203 | 0.011251 | 0.011537 | 0.011156 |
| 0.011156 | 0.011584 | 0.011203 | 0.011203 | 0.011108 | 0.011680 | 0.011119 |
| 0.011548 | 0.011119 | 0.011130 | 0.011458 | 0.011586 | 0.011468 | 0.000000 |
| 0.011134 | 0.011346 | 0.011394 | 0.011585 | 0.011394 | 0.011541 | 0.011680 |
| 0.011584 | 0.011727 | 0.011489 | 0.011785 | 0.011537 | 0.012347 | 0.011442 |
| 0.012157 | 0.012064 | 0.012112 | 0.012448 | 0.011632 | 0.011251 | 0.011537 |
| 0.012014 | 0.012017 | 0.011489 | 0.011441 | 0.011537 | 0.011537 | 0.011444 |
| 0.011346 | 0.011350 | 0.011441 | 0.011346 | 0.011918 | 0.011823 | 0.011823 |
| 0.011776 | 0.011870 | 0.012016 | 0.011828 | 0.012157 | 0.012070 | 0.012253 |
| 0.012158 | 0.012301 | 0.012179 | 0.012158 | 0.012160 | 0.011108 | 0.011727 |
| 0.011537 | 0.012157 | 0.011735 | 0.011966 | 0.012826 | 0.011543 | 0.011346 |
| 0.011346 | 0.011298 | 0.011870 | 0.011677 | 0.011906 | 0.011680 | 0.011347 |
| S703     | 0.011510 | 0.011510 | 0.011697 | 0.011622 | 0.011622 | 0.011660 |
| 0.011661 | 0.011548 | 0.011622 | 0.011248 | 0.011360 | 0.011323 | 0.011248 |
| 0.011285 | 0.011472 | 0.011285 | 0.011322 | 0.011322 | 0.011322 | 0.011248 |
| 0.011285 | 0.011322 | 0.011435 | 0.011285 | 0.011323 | 0.011322 | 0.011585 |
| 0.011547 | 0.011285 | 0.011210 | 0.011472 | 0.011360 | 0.011360 | 0.011397 |
| 0.011322 | 0.011472 | 0.011360 | 0.011360 | 0.011322 | 0.011360 | 0.011510 |
| 0.011285 | 0.011360 | 0.011360 | 0.011322 | 0.011435 | 0.011472 | 0.011360 |
| 0.011360 | 0.011510 | 0.011398 | 0.011697 | 0.011322 | 0.011622 | 0.011322 |
| 0.011322 | 0.011435 | 0.011435 | 0.011622 | 0.011660 | 0.011435 | 0.011510 |
| 0.011360 | 0.011472 | 0.011360 | 0.011622 | 0.011847 | 0.011322 | 0.011435 |
| 0.011285 | 0.011397 | 0.011360 | 0.011472 | 0.011285 | 0.011397 | 0.011397 |
| 0.011248 | 0.011322 | 0.011285 | 0.011397 | 0.011360 | 0.011361 | 0.011435 |
| 0.011397 | 0.011285 | 0.011435 | 0.011285 | 0.011435 | 0.011248 | 0.011322 |
| 0.011547 | 0.011472 | 0.011735 | 0.011510 | 0.011322 | 0.011585 | 0.011360 |
| 0.011471 | 0.011722 | 0.011558 | 0.011278 | 0.011269 | 0.011348 | 0.011495 |
| 0.012204 | 0.011515 | 0.011241 | 0.011622 | 0.011622 | 0.011397 | 0.011435 |
| 0.011397 | 0.011360 | 0.011322 | 0.011360 | 0.011397 | 0.011397 | 0.011285 |
| 0.011285 | 0.011435 | 0.011660 | 0.011547 | 0.011397 | 0.011398 | 0.011322 |
| 0.011285 | 0.011285 | 0.011360 | 0.011285 | 0.011547 | 0.011510 | 0.011435 |
| 0.011547 | 0.011622 | 0.011322 | 0.011322 | 0.011360 | 0.011360 | 0.011362 |
| 0.011438 | 0.011360 | 0.011360 | 0.011219 | 0.011297 | 0.011251 | 0.011322 |
| 0.011360 | 0.011289 | 0.011307 | 0.011290 | 0.011248 | 0.011286 | 0.011323 |
| 0.011613 | 0.011325 | 0.011403 | 0.011248 | 0.011252 | 0.011397 | 0.011397 |
| 0.011435 | 0.011398 | 0.011397 | 0.011360 | 0.011285 | 0.011735 | 0.011510 |
| 0.011660 | 0.011472 | 0.011360 | 0.011472 | 0.011248 | 0.011510 | 0.011285 |
| 0.011322 | 0.011360 | 0.011285 | 0.011285 | 0.011322 | 0.011285 | 0.011397 |
| 0.011360 | 0.011435 | 0.011397 | 0.011285 | 0.011361 | 0.011472 | 0.011513 |
| 0.011510 | 0.011360 | 0.011285 | 0.011211 | 0.011360 | 0.011285 | 0.011210 |
| 0.011288 | 0.011510 | 0.011285 | 0.011510 | 0.011248 | 0.011360 | 0.011285 |
| 0.011435 | 0.011285 | 0.011360 | 0.011323 | 0.011360 | 0.011210 | 0.011360 |
| 0.011360 | 0.011285 | 0.011360 | 0.011285 | 0.011285 | 0.011397 | 0.011660 |
| 0.011735 | 0.011660 | 0.011735 | 0.011474 | 0.011735 | 0.011285 | 0.011285 |
| 0.011362 | 0.011605 | 0.011415 | 0.011214 | 0.011742 | 0.011212 | 0.011322 |
| 0.011736 | 0.011667 | 0.011510 | 0.011697 | 0.011289 | 0.011622 | 0.011585 |

|          |          |          |          |          |          |          |
|----------|----------|----------|----------|----------|----------|----------|
| 0.011510 | 0.011697 | 0.011516 | 0.011360 | 0.011360 | 0.011360 | 0.011435 |
| 0.011510 | 0.011398 | 0.011585 | 0.011697 | 0.011547 | 0.011622 | 0.011510 |
| 0.011399 | 0.011697 | 0.011547 | 0.011510 | 0.011848 | 0.011248 | 0.011397 |
| 0.011435 | 0.011322 | 0.011248 | 0.011248 | 0.011322 | 0.011322 | 0.011360 |
| 0.011322 | 0.011360 | 0.011285 | 0.011397 | 0.011322 | 0.011248 | 0.011360 |
| 0.011322 | 0.011735 | 0.011660 | 0.011697 | 0.011210 | 0.011322 | 0.011322 |
| 0.011360 | 0.011322 | 0.011360 | 0.011435 | 0.011285 | 0.011285 | 0.011285 |
| 0.011810 | 0.011397 | 0.011397 | 0.011248 | 0.011322 | 0.011547 | 0.011285 |
| 0.011285 | 0.011285 | 0.011285 | 0.011510 | 0.011285 | 0.011397 | 0.011510 |
| 0.011472 | 0.011285 | 0.011285 | 0.011210 | 0.011248 | 0.011435 | 0.011322 |
| 0.011210 | 0.011285 | 0.011210 | 0.011248 | 0.011397 | 0.011547 | 0.011285 |
| 0.011248 | 0.011360 | 0.011285 | 0.011210 | 0.011547 | 0.011210 | 0.011397 |
| 0.011472 | 0.011285 | 0.011585 | 0.011435 | 0.011472 | 0.011285 | 0.011360 |
| 0.011285 | 0.011622 | 0.011210 | 0.011472 | 0.011285 | 0.011285 | 0.011210 |
| 0.011472 | 0.011660 | 0.011360 | 0.011360 | 0.011248 | 0.011660 | 0.011285 |
| 0.011285 | 0.011248 | 0.011322 | 0.011435 | 0.011285 | 0.011397 | 0.011510 |
| 0.011472 | 0.011435 | 0.011360 | 0.011435 | 0.011397 | 0.011285 | 0.011248 |
| 0.011285 | 0.011285 | 0.011360 | 0.011285 | 0.011248 | 0.011397 | 0.011285 |
| 0.011322 | 0.011322 | 0.011435 | 0.011510 | 0.011360 | 0.011322 | 0.011248 |
| 0.011322 | 0.011285 | 0.011360 | 0.011285 | 0.011435 | 0.011510 | 0.011772 |
| 0.011322 | 0.011735 | 0.011330 | 0.018591 | 0.011272 | 0.011394 | 0.011685 |
| 0.011602 | 0.011691 | 0.011398 | 0.011382 | 0.011856 | 0.011677 | 0.011397 |
| 0.011481 | 0.011589 | 0.011233 | 0.011288 | 0.011323 | 0.011332 | 0.011297 |
| 0.011529 | 0.011518 | 0.011515 | 0.011282 | 0.011472 | 0.011397 | 0.011438 |
| 0.011360 | 0.011435 | 0.011435 | 0.011435 | 0.011360 | 0.011360 | 0.011322 |
| 0.011360 | 0.011285 | 0.011360 | 0.011360 | 0.011360 | 0.011285 | 0.011248 |
| 0.011248 | 0.011397 | 0.011285 | 0.011397 | 0.011435 | 0.011472 | 0.011285 |
| 0.011360 | 0.011360 | 0.011660 | 0.011660 | 0.011435 | 0.011436 | 0.011472 |
| 0.011248 | 0.011248 | 0.011285 | 0.011397 | 0.011248 | 0.011510 | 0.011510 |
| 0.011510 | 0.011510 | 0.011472 | 0.011547 | 0.011735 | 0.011549 | 0.011360 |
| 0.011397 | 0.011397 | 0.011435 | 0.011285 | 0.011397 | 0.011360 | 0.011397 |
| 0.011472 | 0.011472 | 0.011510 | 0.011472 | 0.011360 | 0.011547 | 0.011435 |
| 0.011362 | 0.011285 | 0.011397 | 0.011435 | 0.011360 | 0.011547 | 0.011585 |
| 0.011697 | 0.011289 | 0.011622 | 0.011585 | 0.011510 | 0.011697 | 0.011285 |
| 0.011473 | 0.011285 | 0.011248 | 0.011248 | 0.011397 | 0.011285 | 0.011397 |
| 0.011435 | 0.011472 | 0.011285 | 0.011360 | 0.011360 | 0.011660 | 0.011660 |
| 0.011435 | 0.011436 | 0.011435 | 0.011360 | 0.012036 | 0.011520 | 0.011435 |
| 0.011514 | 0.011477 | 0.011548 | 0.011435 | 0.011554 | 0.011511 | 0.011402 |
| 0.011961 | 0.011323 | 0.011472 | 0.011436 | 0.011622 | 0.011510 | 0.011698 |
| 0.011998 | 0.011525 | 0.011362 | 0.011397 | 0.011397 | 0.011435 | 0.011362 |
| 0.011248 | 0.011285 | 0.011435 | 0.011397 | 0.011362 | 0.011547 | 0.011436 |
| 0.011360 | 0.011248 | 0.011285 | 0.011360 | 0.011248 | 0.011322 | 0.011210 |
| 0.011360 | 0.011397 | 0.011285 | 0.011248 | 0.011360 | 0.011285 | 0.011322 |
| 0.011322 | 0.011248 | 0.011322 | 0.011360 | 0.011248 | 0.011472 | 0.011510 |
| 0.011397 | 0.011472 | 0.011397 | 0.011397 | 0.011322 | 0.011660 | 0.011360 |
| 0.011398 | 0.011322 | 0.011547 | 0.011547 | 0.011435 | 0.011435 | 0.011397 |
| 0.011435 | 0.011360 | 0.011322 | 0.011360 | 0.011435 | 0.011435 | 0.011360 |
| 0.011397 | 0.011510 | 0.011697 | 0.011435 | 0.011622 | 0.011622 | 0.011397 |
| 0.011322 | 0.011397 | 0.011435 | 0.011810 | 0.011398 | 0.011435 | 0.011397 |
| 0.011435 | 0.011360 | 0.011360 | 0.011660 | 0.011547 | 0.011622 | 0.011360 |
| 0.011435 | 0.011510 | 0.011360 | 0.011435 | 0.011360 | 0.011285 | 0.011585 |
| 0.011397 | 0.011322 | 0.011360 | 0.011472 | 0.011360 | 0.011435 | 0.011660 |
| 0.011322 | 0.011736 | 0.011772 | 0.011601 | 0.011302 | 0.011477 | 0.011402 |
| 0.011241 | 0.011754 | 0.011257 | 0.011509 | 0.011326 | 0.011520 | 0.011478 |
| 0.011507 | 0.011279 | 0.011433 | 0.011208 | 0.011359 | 0.011426 | 0.011468 |
| 0.011478 | 0.011367 | 0.011455 | 0.011297 | 0.011361 | 0.011547 | 0.011585 |
| 0.011547 | 0.011435 | 0.011589 | 0.011590 | 0.011666 | 0.011693 | 0.011322 |
| 0.011660 | 0.011472 | 0.011360 | 0.011472 | 0.011248 | 0.011510 | 0.011285 |
| 0.011322 | 0.011360 | 0.011285 | 0.011285 | 0.011322 | 0.011285 | 0.011397 |
| 0.011331 | 0.011329 | 0.011288 | 0.011361 | 0.011511 | 0.011401 | 0.011476 |

|          |          |          |          |          |          |          |
|----------|----------|----------|----------|----------|----------|----------|
| 0.011474 | 0.011322 | 0.011222 | 0.011219 | 0.011360 | 0.011510 | 0.011511 |
| 0.011322 | 0.011398 | 0.011510 | 0.011625 | 0.011547 | 0.011585 | 0.011397 |
| 0.011435 | 0.011510 | 0.011510 | 0.011360 | 0.011960 | 0.011547 | 0.011585 |
| 0.011585 | 0.011736 | 0.011327 | 0.011407 | 0.011285 | 0.011435 | 0.011397 |
| 0.011473 | 0.011472 | 0.011585 | 0.011585 | 0.011716 | 0.011660 | 0.011324 |
| 0.011210 | 0.011210 | 0.011285 | 0.011285 | 0.011360 | 0.011217 | 0.011547 |
| 0.011322 | 0.011464 | 0.000000 | 0.000000 | 0.011360 | 0.011398 | 0.011322 |
| 0.011285 | 0.011285 | 0.011360 | 0.011285 | 0.011547 | 0.011510 | 0.011435 |
| 0.011547 | 0.011622 | 0.011322 | 0.011322 | 0.011360 | 0.011360 | 0.011362 |
| 0.011438 | 0.011360 | 0.011360 | 0.011361 | 0.011547 | 0.011585 | 0.011547 |
| 0.011435 | 0.011589 | 0.011590 | 0.011666 | 0.011693 | 0.011322 | 0.011585 |
| 0.011397 | 0.011397 | 0.011286 | 0.011487 | 0.011369 | 0.011441 | 0.011295 |
| 0.011522 | 0.011576 | 0.011434 | 0.011363 | 0.011285 | 0.011510 | 0.011360 |
| 0.011435 | 0.011397 | 0.011285 | 0.011361 | 0.011472 | 0.011513 | 0.011360 |
| 0.011285 | 0.011211 | 0.011360 | 0.011285 | 0.011210 | 0.011288 | 0.011510 |
| 0.011360 | 0.011285 | 0.011360 | 0.011360 | 0.011360 | 0.011285 | 0.011397 |
| 0.011360 | 0.011360 | 0.011360 | 0.011322 | 0.011397 | 0.011622 | 0.011285 |
| 0.011285 | 0.011660 | 0.011322 | 0.011322 | 0.011322 | 0.011697 | 0.011251 |
| 0.011605 | 0.011293 | 0.011281 | 0.011552 | 0.011646 | 0.011543 | 0.011201 |
| 0.011237 | 0.011435 | 0.011547 | 0.011660 | 0.011511 | 0.011664 | 0.011773 |
| 0.011697 | 0.011735 | 0.011697 | 0.011785 | 0.011547 | 0.012485 | 0.011511 |
| 0.012223 | 0.012075 | 0.012226 | 0.012414 | 0.011697 | 0.011360 | 0.011660 |
| 0.011961 | 0.012000 | 0.011547 | 0.011510 | 0.011585 | 0.011585 | 0.011588 |
| 0.011435 | 0.011439 | 0.011510 | 0.011472 | 0.011923 | 0.011885 | 0.011997 |
| 0.011811 | 0.011923 | 0.012037 | 0.011814 | 0.012074 | 0.012042 | 0.012149 |
| 0.012149 | 0.012149 | 0.012013 | 0.012074 | 0.012113 | 0.011322 | 0.011697 |
| 0.011772 | 0.012298 | 0.011741 | 0.012035 | 0.012600 | 0.011591 | 0.011472 |
| 0.011435 | 0.011435 | 0.011960 | 0.011948 | 0.011960 | 0.011810 | 0.011436 |
| S704     | 0.011666 | 0.011666 | 0.011800 | 0.011766 | 0.011766 | 0.011834 |
| 0.011673 | 0.011570 | 0.011766 | 0.011262 | 0.011329 | 0.011296 | 0.011262 |
| 0.011296 | 0.011464 | 0.011262 | 0.011296 | 0.011363 | 0.011329 | 0.011296 |
| 0.011262 | 0.011296 | 0.011396 | 0.011262 | 0.011296 | 0.011296 | 0.011638 |
| 0.011531 | 0.011296 | 0.011195 | 0.011430 | 0.011363 | 0.011329 | 0.011363 |
| 0.011329 | 0.011430 | 0.011329 | 0.011329 | 0.011363 | 0.011329 | 0.011497 |
| 0.011262 | 0.011329 | 0.011363 | 0.011296 | 0.011396 | 0.011430 | 0.011363 |
| 0.011329 | 0.011497 | 0.011397 | 0.011665 | 0.011329 | 0.011598 | 0.011329 |
| 0.011296 | 0.011397 | 0.011464 | 0.011598 | 0.011699 | 0.011396 | 0.011497 |
| 0.011363 | 0.011430 | 0.011329 | 0.011564 | 0.011800 | 0.011329 | 0.011396 |
| 0.011296 | 0.011396 | 0.011363 | 0.011430 | 0.011363 | 0.011363 | 0.011363 |
| 0.011262 | 0.011296 | 0.011262 | 0.011363 | 0.011329 | 0.011363 | 0.011430 |
| 0.011363 | 0.011329 | 0.011396 | 0.011296 | 0.011430 | 0.011262 | 0.011329 |
| 0.011497 | 0.011430 | 0.011665 | 0.011497 | 0.011329 | 0.011565 | 0.011329 |
| 0.011505 | 0.011733 | 0.011551 | 0.011177 | 0.011247 | 0.011355 | 0.011454 |
| 0.012085 | 0.011467 | 0.011266 | 0.011564 | 0.011565 | 0.011363 | 0.011464 |
| 0.011396 | 0.011363 | 0.011430 | 0.011329 | 0.011430 | 0.011363 | 0.011363 |
| 0.011329 | 0.011430 | 0.011632 | 0.011497 | 0.011396 | 0.011363 | 0.011296 |
| 0.011262 | 0.011262 | 0.011329 | 0.011296 | 0.011497 | 0.011464 | 0.011396 |
| 0.011497 | 0.011564 | 0.011296 | 0.011296 | 0.011329 | 0.011329 | 0.011331 |
| 0.011399 | 0.011329 | 0.011329 | 0.011204 | 0.011277 | 0.011236 | 0.011329 |
| 0.011331 | 0.011266 | 0.011318 | 0.011302 | 0.011230 | 0.011266 | 0.011297 |
| 0.011564 | 0.011336 | 0.011370 | 0.011262 | 0.011268 | 0.011397 | 0.011363 |
| 0.011430 | 0.011364 | 0.011363 | 0.011464 | 0.011396 | 0.011767 | 0.011531 |
| 0.011598 | 0.011464 | 0.011329 | 0.011430 | 0.011228 | 0.011464 | 0.011262 |
| 0.011329 | 0.011329 | 0.011296 | 0.011262 | 0.011296 | 0.011262 | 0.011363 |
| 0.011329 | 0.011430 | 0.011363 | 0.011262 | 0.011364 | 0.011464 | 0.011466 |
| 0.011464 | 0.011363 | 0.011262 | 0.011195 | 0.011329 | 0.011262 | 0.011195 |
| 0.011298 | 0.011464 | 0.011262 | 0.011464 | 0.011228 | 0.011329 | 0.011296 |
| 0.011396 | 0.011296 | 0.011329 | 0.011296 | 0.011329 | 0.011195 | 0.011329 |
| 0.011363 | 0.011296 | 0.011363 | 0.011296 | 0.011329 | 0.011363 | 0.011598 |
| 0.011699 | 0.011632 | 0.011699 | 0.011465 | 0.011699 | 0.011329 | 0.011296 |

|          |          |          |          |          |          |          |
|----------|----------|----------|----------|----------|----------|----------|
| 0.011331 | 0.011586 | 0.011197 | 0.011232 | 0.011706 | 0.011197 | 0.011336 |
| 0.011706 | 0.011604 | 0.011497 | 0.011699 | 0.011402 | 0.011565 | 0.011531 |
| 0.011464 | 0.011632 | 0.011487 | 0.011308 | 0.011396 | 0.011363 | 0.011433 |
| 0.011531 | 0.011431 | 0.011568 | 0.011636 | 0.011565 | 0.011632 | 0.011739 |
| 0.011467 | 0.011638 | 0.011568 | 0.011500 | 0.011767 | 0.011228 | 0.011431 |
| 0.011396 | 0.011329 | 0.011228 | 0.011228 | 0.011296 | 0.011296 | 0.011363 |
| 0.011296 | 0.011363 | 0.011262 | 0.011363 | 0.011296 | 0.011296 | 0.011363 |
| 0.011296 | 0.011733 | 0.011632 | 0.011666 | 0.011195 | 0.011296 | 0.011329 |
| 0.011329 | 0.011296 | 0.011363 | 0.011396 | 0.011262 | 0.011262 | 0.011262 |
| 0.011800 | 0.011396 | 0.011430 | 0.011228 | 0.011329 | 0.011497 | 0.011262 |
| 0.011262 | 0.011329 | 0.011296 | 0.011464 | 0.011262 | 0.011396 | 0.011531 |
| 0.011464 | 0.011296 | 0.011296 | 0.011228 | 0.011228 | 0.011397 | 0.011329 |
| 0.011228 | 0.011329 | 0.011195 | 0.011228 | 0.011363 | 0.011498 | 0.011262 |
| 0.011229 | 0.011363 | 0.011296 | 0.011195 | 0.011531 | 0.011195 | 0.011363 |
| 0.011437 | 0.011262 | 0.011565 | 0.011397 | 0.011430 | 0.011296 | 0.011396 |
| 0.011262 | 0.011598 | 0.011195 | 0.011464 | 0.011262 | 0.011262 | 0.011195 |
| 0.011430 | 0.011632 | 0.011329 | 0.011396 | 0.011228 | 0.011632 | 0.011262 |
| 0.011262 | 0.011262 | 0.011296 | 0.011396 | 0.011296 | 0.011396 | 0.011464 |
| 0.011464 | 0.011430 | 0.011329 | 0.011430 | 0.011396 | 0.011262 | 0.011228 |
| 0.011262 | 0.011262 | 0.011329 | 0.011262 | 0.011228 | 0.011396 | 0.011262 |
| 0.011296 | 0.011296 | 0.011363 | 0.011464 | 0.011363 | 0.011296 | 0.011296 |
| 0.011363 | 0.011296 | 0.011396 | 0.011262 | 0.011396 | 0.011497 | 0.011733 |
| 0.011296 | 0.011699 | 0.011302 | 0.017823 | 0.011257 | 0.011427 | 0.011653 |
| 0.011614 | 0.011658 | 0.011427 | 0.011408 | 0.011719 | 0.011682 | 0.011364 |
| 0.011487 | 0.011548 | 0.011216 | 0.011312 | 0.011294 | 0.011307 | 0.011232 |
| 0.011482 | 0.011470 | 0.011468 | 0.011391 | 0.011430 | 0.011464 | 0.011467 |
| 0.011335 | 0.011430 | 0.011430 | 0.011396 | 0.011363 | 0.011363 | 0.011329 |
| 0.011363 | 0.011296 | 0.011329 | 0.011363 | 0.011329 | 0.011262 | 0.011296 |
| 0.011296 | 0.011363 | 0.011262 | 0.011363 | 0.011396 | 0.011430 | 0.011329 |
| 0.011363 | 0.011329 | 0.011665 | 0.011665 | 0.011397 | 0.011431 | 0.011464 |
| 0.011228 | 0.011228 | 0.011262 | 0.011363 | 0.011228 | 0.011464 | 0.011464 |
| 0.011497 | 0.011497 | 0.011430 | 0.011531 | 0.011699 | 0.011532 | 0.011363 |
| 0.011363 | 0.011430 | 0.011464 | 0.011296 | 0.011363 | 0.011329 | 0.011363 |
| 0.011430 | 0.011430 | 0.011464 | 0.011430 | 0.011330 | 0.011531 | 0.011497 |
| 0.011366 | 0.011262 | 0.011363 | 0.011464 | 0.011363 | 0.011497 | 0.011531 |
| 0.011699 | 0.011402 | 0.011565 | 0.011531 | 0.011464 | 0.011632 | 0.011262 |
| 0.011431 | 0.011329 | 0.011296 | 0.011296 | 0.011363 | 0.011262 | 0.011363 |
| 0.011396 | 0.011430 | 0.011329 | 0.011363 | 0.011329 | 0.011665 | 0.011665 |
| 0.011397 | 0.011431 | 0.011497 | 0.011430 | 0.012070 | 0.011489 | 0.011412 |
| 0.011482 | 0.011442 | 0.011552 | 0.011442 | 0.011551 | 0.011475 | 0.011440 |
| 0.012023 | 0.011337 | 0.011472 | 0.011406 | 0.011680 | 0.011537 | 0.011639 |
| 0.012047 | 0.011512 | 0.011365 | 0.011363 | 0.011363 | 0.011396 | 0.011331 |
| 0.011228 | 0.011262 | 0.011396 | 0.011363 | 0.011365 | 0.011497 | 0.011465 |
| 0.011329 | 0.011262 | 0.011296 | 0.011329 | 0.011228 | 0.011296 | 0.011195 |
| 0.011329 | 0.011363 | 0.011262 | 0.011228 | 0.011329 | 0.011262 | 0.011296 |
| 0.011296 | 0.011228 | 0.011296 | 0.011329 | 0.011228 | 0.011430 | 0.011464 |
| 0.011363 | 0.011430 | 0.011363 | 0.011363 | 0.011296 | 0.011699 | 0.011329 |
| 0.011374 | 0.011296 | 0.011531 | 0.011535 | 0.011397 | 0.011396 | 0.011396 |
| 0.011397 | 0.011329 | 0.011296 | 0.011329 | 0.011430 | 0.011228 | 0.011363 |
| 0.011363 | 0.011497 | 0.011665 | 0.011396 | 0.011598 | 0.011598 | 0.011464 |
| 0.011296 | 0.011363 | 0.011397 | 0.011800 | 0.011363 | 0.011397 | 0.011363 |
| 0.011396 | 0.011329 | 0.011329 | 0.011632 | 0.011565 | 0.011598 | 0.011329 |
| 0.011430 | 0.011497 | 0.011363 | 0.011430 | 0.011396 | 0.011262 | 0.011598 |
| 0.011363 | 0.011329 | 0.011329 | 0.011497 | 0.011329 | 0.011430 | 0.011666 |
| 0.011296 | 0.011740 | 0.011733 | 0.011548 | 0.011229 | 0.011434 | 0.011267 |
| 0.011225 | 0.011761 | 0.011271 | 0.011507 | 0.011255 | 0.011366 | 0.011379 |
| 0.011570 | 0.011126 | 0.011339 | 0.011192 | 0.011222 | 0.011328 | 0.011425 |
| 0.011437 | 0.011336 | 0.011412 | 0.011342 | 0.011364 | 0.011497 | 0.011565 |
| 0.011531 | 0.011430 | 0.011534 | 0.011535 | 0.011671 | 0.011697 | 0.011329 |
| 0.011598 | 0.011464 | 0.011329 | 0.011430 | 0.011228 | 0.011464 | 0.011262 |

|          |          |          |          |          |          |          |
|----------|----------|----------|----------|----------|----------|----------|
| 0.011329 | 0.011329 | 0.011296 | 0.011262 | 0.011296 | 0.011262 | 0.011363 |
| 0.011340 | 0.011305 | 0.011334 | 0.011368 | 0.011505 | 0.011470 | 0.011436 |
| 0.011469 | 0.011396 | 0.011134 | 0.011168 | 0.011331 | 0.011501 | 0.011501 |
| 0.011296 | 0.011365 | 0.011599 | 0.011567 | 0.011497 | 0.011531 | 0.011464 |
| 0.011396 | 0.011464 | 0.011464 | 0.011363 | 0.011935 | 0.011531 | 0.011598 |
| 0.011632 | 0.011702 | 0.011333 | 0.011407 | 0.011296 | 0.011497 | 0.011464 |
| 0.011498 | 0.011497 | 0.011531 | 0.011531 | 0.011689 | 0.011666 | 0.011303 |
| 0.011196 | 0.011199 | 0.011299 | 0.011264 | 0.011368 | 0.011210 | 0.011536 |
| 0.011335 | 0.011499 | 0.011251 | 0.011360 | 0.000000 | 0.011402 | 0.011296 |
| 0.011262 | 0.011262 | 0.011329 | 0.011296 | 0.011497 | 0.011464 | 0.011396 |
| 0.011497 | 0.011564 | 0.011296 | 0.011296 | 0.011329 | 0.011329 | 0.011331 |
| 0.011399 | 0.011329 | 0.011329 | 0.011364 | 0.011497 | 0.011565 | 0.011531 |
| 0.011430 | 0.011534 | 0.011535 | 0.011671 | 0.011697 | 0.011329 | 0.011531 |
| 0.011464 | 0.011464 | 0.011297 | 0.011478 | 0.011373 | 0.011435 | 0.011305 |
| 0.011474 | 0.011653 | 0.011357 | 0.011366 | 0.011262 | 0.011464 | 0.011329 |
| 0.011430 | 0.011363 | 0.011262 | 0.011364 | 0.011464 | 0.011466 | 0.011363 |
| 0.011262 | 0.011195 | 0.011329 | 0.011262 | 0.011195 | 0.011298 | 0.011464 |
| 0.011363 | 0.011296 | 0.011329 | 0.011363 | 0.011329 | 0.011262 | 0.011464 |
| 0.011329 | 0.011363 | 0.011363 | 0.011296 | 0.011363 | 0.011598 | 0.011262 |
| 0.011296 | 0.011699 | 0.011296 | 0.011329 | 0.011296 | 0.011665 | 0.011275 |
| 0.011791 | 0.011273 | 0.011261 | 0.011503 | 0.011589 | 0.011491 | 0.011144 |
| 0.011165 | 0.011464 | 0.011565 | 0.011671 | 0.011532 | 0.011670 | 0.011801 |
| 0.011700 | 0.011737 | 0.011699 | 0.011949 | 0.011665 | 0.012542 | 0.011700 |
| 0.012407 | 0.012207 | 0.012342 | 0.012613 | 0.011665 | 0.011363 | 0.011666 |
| 0.012104 | 0.012039 | 0.011632 | 0.011531 | 0.011598 | 0.011598 | 0.011568 |
| 0.011464 | 0.011468 | 0.011531 | 0.011497 | 0.011868 | 0.011935 | 0.011935 |
| 0.011835 | 0.011935 | 0.012038 | 0.011804 | 0.012104 | 0.012110 | 0.012172 |
| 0.012172 | 0.012205 | 0.012153 | 0.012172 | 0.012174 | 0.011396 | 0.011699 |
| 0.011767 | 0.012272 | 0.011773 | 0.012002 | 0.012475 | 0.011536 | 0.011430 |
| 0.011396 | 0.011396 | 0.011868 | 0.011924 | 0.012010 | 0.011733 | 0.011397 |
| S705     | 0.011745 | 0.011745 | 0.011848 | 0.011813 | 0.011813 | 0.011882 |
| 0.011718 | 0.011614 | 0.011813 | 0.011334 | 0.011402 | 0.011368 | 0.011334 |
| 0.011368 | 0.011539 | 0.011334 | 0.011368 | 0.011437 | 0.011402 | 0.011368 |
| 0.011334 | 0.011368 | 0.011471 | 0.011334 | 0.011368 | 0.011368 | 0.011683 |
| 0.011608 | 0.011368 | 0.011265 | 0.011505 | 0.011402 | 0.011402 | 0.011437 |
| 0.011368 | 0.011505 | 0.011402 | 0.011402 | 0.011437 | 0.011402 | 0.011573 |
| 0.011334 | 0.011402 | 0.011437 | 0.011368 | 0.011471 | 0.011505 | 0.011402 |
| 0.011402 | 0.011574 | 0.011471 | 0.011710 | 0.011402 | 0.011676 | 0.011402 |
| 0.011368 | 0.011471 | 0.011539 | 0.011676 | 0.011710 | 0.011471 | 0.011573 |
| 0.011437 | 0.011505 | 0.011402 | 0.011642 | 0.011848 | 0.011402 | 0.011471 |
| 0.011368 | 0.011471 | 0.011437 | 0.011505 | 0.011437 | 0.011437 | 0.011437 |
| 0.011334 | 0.011368 | 0.011334 | 0.011437 | 0.011402 | 0.011437 | 0.011505 |
| 0.011437 | 0.011368 | 0.011471 | 0.011368 | 0.011505 | 0.011334 | 0.011368 |
| 0.011573 | 0.011505 | 0.011745 | 0.011539 | 0.011402 | 0.011574 | 0.011402 |
| 0.011589 | 0.011784 | 0.011594 | 0.011258 | 0.011324 | 0.011435 | 0.011538 |
| 0.012133 | 0.011473 | 0.011310 | 0.011642 | 0.011642 | 0.011437 | 0.011505 |
| 0.011471 | 0.011437 | 0.011505 | 0.011402 | 0.011505 | 0.011437 | 0.011437 |
| 0.011402 | 0.011505 | 0.011710 | 0.011573 | 0.011471 | 0.011437 | 0.011368 |
| 0.011334 | 0.011334 | 0.011402 | 0.011368 | 0.011573 | 0.011539 | 0.011471 |
| 0.011573 | 0.011642 | 0.011368 | 0.011368 | 0.011402 | 0.011402 | 0.011404 |
| 0.011439 | 0.011402 | 0.011402 | 0.011276 | 0.011349 | 0.011306 | 0.011402 |
| 0.011402 | 0.011338 | 0.011396 | 0.011374 | 0.011300 | 0.011334 | 0.011368 |
| 0.011636 | 0.011405 | 0.011442 | 0.011334 | 0.011270 | 0.011471 | 0.011437 |
| 0.011505 | 0.011437 | 0.011437 | 0.011505 | 0.011471 | 0.011779 | 0.011608 |
| 0.011676 | 0.011539 | 0.011402 | 0.011505 | 0.011300 | 0.011539 | 0.011334 |
| 0.011368 | 0.011402 | 0.011368 | 0.011334 | 0.011368 | 0.011334 | 0.011437 |
| 0.011402 | 0.011505 | 0.011437 | 0.011334 | 0.011438 | 0.011539 | 0.011542 |
| 0.011539 | 0.011437 | 0.011334 | 0.011266 | 0.011402 | 0.011334 | 0.011266 |
| 0.011372 | 0.011539 | 0.011334 | 0.011539 | 0.011300 | 0.011402 | 0.011368 |
| 0.011471 | 0.011368 | 0.011402 | 0.011368 | 0.011402 | 0.011266 | 0.011402 |



|          |          |          |          |          |          |          |
|----------|----------|----------|----------|----------|----------|----------|
| 0.011437 | 0.011368 | 0.011437 | 0.011368 | 0.011402 | 0.011437 | 0.011676 |
| 0.011745 | 0.011676 | 0.011745 | 0.011541 | 0.011745 | 0.011402 | 0.011368 |
| 0.011404 | 0.011719 | 0.011528 | 0.011305 | 0.011752 | 0.011234 | 0.011421 |
| 0.011683 | 0.011683 | 0.011539 | 0.011779 | 0.011443 | 0.011642 | 0.011539 |
| 0.011471 | 0.011710 | 0.011529 | 0.011310 | 0.011397 | 0.011437 | 0.011509 |
| 0.011608 | 0.011507 | 0.011612 | 0.011716 | 0.011642 | 0.011711 | 0.011820 |
| 0.011541 | 0.011717 | 0.011642 | 0.011505 | 0.011848 | 0.011300 | 0.011506 |
| 0.011471 | 0.011402 | 0.011300 | 0.011300 | 0.011368 | 0.011368 | 0.011437 |
| 0.011368 | 0.011437 | 0.011334 | 0.011437 | 0.011368 | 0.011368 | 0.011437 |
| 0.011368 | 0.011779 | 0.011676 | 0.011710 | 0.011265 | 0.011368 | 0.011402 |
| 0.011402 | 0.011368 | 0.011437 | 0.011471 | 0.011334 | 0.011334 | 0.011334 |
| 0.011847 | 0.011471 | 0.011505 | 0.011300 | 0.011402 | 0.011574 | 0.011334 |
| 0.011334 | 0.011368 | 0.011368 | 0.011539 | 0.011334 | 0.011471 | 0.011573 |
| 0.011539 | 0.011334 | 0.011368 | 0.011266 | 0.011300 | 0.011471 | 0.011402 |
| 0.011266 | 0.011368 | 0.011265 | 0.011300 | 0.011437 | 0.011573 | 0.011334 |
| 0.011300 | 0.011437 | 0.011368 | 0.011265 | 0.011573 | 0.011266 | 0.011437 |
| 0.011514 | 0.011334 | 0.011608 | 0.011471 | 0.011505 | 0.011368 | 0.011471 |
| 0.011334 | 0.011676 | 0.011265 | 0.011505 | 0.011334 | 0.011334 | 0.011265 |
| 0.011505 | 0.011711 | 0.011402 | 0.011471 | 0.011300 | 0.011676 | 0.011334 |
| 0.011334 | 0.011334 | 0.011368 | 0.011471 | 0.011368 | 0.011471 | 0.011471 |
| 0.011505 | 0.011505 | 0.011402 | 0.011505 | 0.011471 | 0.011334 | 0.011300 |
| 0.011334 | 0.011334 | 0.011402 | 0.011334 | 0.011300 | 0.011471 | 0.011334 |
| 0.011368 | 0.011368 | 0.011505 | 0.011539 | 0.011437 | 0.011368 | 0.011368 |
| 0.011437 | 0.011300 | 0.011471 | 0.011334 | 0.011471 | 0.011573 | 0.011779 |
| 0.011368 | 0.011745 | 0.011306 | 0.018033 | 0.011260 | 0.011366 | 0.011699 |
| 0.011659 | 0.011705 | 0.011432 | 0.011355 | 0.011730 | 0.011728 | 0.011308 |
| 0.011493 | 0.011549 | 0.011297 | 0.011230 | 0.011337 | 0.011311 | 0.011234 |
| 0.011488 | 0.011550 | 0.011548 | 0.011464 | 0.011505 | 0.011539 | 0.011543 |
| 0.011409 | 0.011471 | 0.011505 | 0.011471 | 0.011437 | 0.011437 | 0.011403 |
| 0.011437 | 0.011368 | 0.011402 | 0.011437 | 0.011402 | 0.011334 | 0.011368 |
| 0.011368 | 0.011437 | 0.011334 | 0.011437 | 0.011471 | 0.011505 | 0.011402 |
| 0.011437 | 0.011402 | 0.011676 | 0.011676 | 0.011402 | 0.011506 | 0.011539 |
| 0.011300 | 0.011300 | 0.011334 | 0.011437 | 0.011300 | 0.011539 | 0.011539 |
| 0.011573 | 0.011539 | 0.011505 | 0.011608 | 0.011745 | 0.011609 | 0.011437 |
| 0.011437 | 0.011471 | 0.011539 | 0.011368 | 0.011437 | 0.011402 | 0.011437 |
| 0.011505 | 0.011505 | 0.011539 | 0.011505 | 0.011403 | 0.011608 | 0.011573 |
| 0.011440 | 0.011334 | 0.011437 | 0.011505 | 0.011402 | 0.011574 | 0.011608 |
| 0.011779 | 0.011443 | 0.011642 | 0.011539 | 0.011471 | 0.011710 | 0.011334 |
| 0.011506 | 0.011403 | 0.011368 | 0.011368 | 0.011437 | 0.011334 | 0.011437 |
| 0.011471 | 0.011505 | 0.011402 | 0.011437 | 0.011402 | 0.011676 | 0.011676 |
| 0.011402 | 0.011506 | 0.011573 | 0.011505 | 0.012122 | 0.011530 | 0.011491 |
| 0.011486 | 0.011518 | 0.011558 | 0.011519 | 0.011557 | 0.011515 | 0.011511 |
| 0.012075 | 0.011375 | 0.011547 | 0.011480 | 0.011756 | 0.011612 | 0.011719 |
| 0.012099 | 0.011555 | 0.011405 | 0.011437 | 0.011436 | 0.011471 | 0.011370 |
| 0.011300 | 0.011334 | 0.011471 | 0.011437 | 0.011405 | 0.011573 | 0.011541 |
| 0.011402 | 0.011334 | 0.011368 | 0.011402 | 0.011300 | 0.011368 | 0.011265 |
| 0.011402 | 0.011437 | 0.011266 | 0.011300 | 0.011402 | 0.011334 | 0.011368 |
| 0.011368 | 0.011300 | 0.011368 | 0.011402 | 0.011300 | 0.011505 | 0.011539 |
| 0.011437 | 0.011505 | 0.011437 | 0.011437 | 0.011368 | 0.011710 | 0.011402 |
| 0.011448 | 0.011368 | 0.011608 | 0.011613 | 0.011471 | 0.011471 | 0.011471 |
| 0.011471 | 0.011402 | 0.011368 | 0.011402 | 0.011505 | 0.011505 | 0.011437 |
| 0.011436 | 0.011539 | 0.011642 | 0.011471 | 0.011676 | 0.011676 | 0.011539 |
| 0.011368 | 0.011437 | 0.011471 | 0.011847 | 0.011437 | 0.011471 | 0.011437 |
| 0.011471 | 0.011402 | 0.011402 | 0.011711 | 0.011608 | 0.011676 | 0.011402 |
| 0.011505 | 0.011505 | 0.011437 | 0.011505 | 0.011436 | 0.011334 | 0.011642 |
| 0.011436 | 0.011402 | 0.011402 | 0.011573 | 0.011402 | 0.011505 | 0.011745 |
| 0.011368 | 0.011787 | 0.011779 | 0.011595 | 0.011173 | 0.011510 | 0.011322 |
| 0.011170 | 0.011809 | 0.011346 | 0.011558 | 0.011308 | 0.011319 | 0.011384 |
| 0.011578 | 0.011127 | 0.011343 | 0.011195 | 0.011225 | 0.011402 | 0.011516 |
| 0.011521 | 0.011422 | 0.011491 | 0.011383 | 0.011438 | 0.011573 | 0.011642 |

|          |          |          |          |          |          |          |
|----------|----------|----------|----------|----------|----------|----------|
| 0.011608 | 0.011505 | 0.011611 | 0.011613 | 0.011717 | 0.011781 | 0.011402 |
| 0.011676 | 0.011539 | 0.011402 | 0.011505 | 0.011300 | 0.011539 | 0.011334 |
| 0.011368 | 0.011402 | 0.011368 | 0.011334 | 0.011368 | 0.011334 | 0.011437 |
| 0.011412 | 0.011410 | 0.011406 | 0.011437 | 0.011574 | 0.011543 | 0.011542 |
| 0.011540 | 0.011471 | 0.011282 | 0.011276 | 0.011402 | 0.011574 | 0.011540 |
| 0.011368 | 0.011437 | 0.011676 | 0.011644 | 0.011573 | 0.011539 | 0.011539 |
| 0.011471 | 0.011539 | 0.011539 | 0.011368 | 0.011985 | 0.011573 | 0.011676 |
| 0.011710 | 0.011751 | 0.011408 | 0.011482 | 0.011368 | 0.011573 | 0.011539 |
| 0.011575 | 0.011573 | 0.011608 | 0.011608 | 0.011739 | 0.011745 | 0.011378 |
| 0.011267 | 0.011271 | 0.011372 | 0.011337 | 0.011406 | 0.011249 | 0.011579 |
| 0.011409 | 0.011457 | 0.011252 | 0.011398 | 0.011402 | 0.000000 | 0.011368 |
| 0.011334 | 0.011334 | 0.011402 | 0.011368 | 0.011573 | 0.011539 | 0.011471 |
| 0.011573 | 0.011642 | 0.011368 | 0.011368 | 0.011402 | 0.011402 | 0.011404 |
| 0.011439 | 0.011402 | 0.011402 | 0.011438 | 0.011573 | 0.011642 | 0.011608 |
| 0.011505 | 0.011611 | 0.011613 | 0.011717 | 0.011781 | 0.011402 | 0.011608 |
| 0.011539 | 0.011539 | 0.011370 | 0.011556 | 0.011484 | 0.011511 | 0.011345 |
| 0.011551 | 0.011714 | 0.011490 | 0.011406 | 0.011334 | 0.011539 | 0.011402 |
| 0.011505 | 0.011437 | 0.011334 | 0.011438 | 0.011539 | 0.011542 | 0.011437 |
| 0.011334 | 0.011266 | 0.011402 | 0.011334 | 0.011266 | 0.011372 | 0.011539 |
| 0.011437 | 0.011368 | 0.011402 | 0.011437 | 0.011402 | 0.011334 | 0.011539 |
| 0.011402 | 0.011437 | 0.011437 | 0.011368 | 0.011437 | 0.011642 | 0.011334 |
| 0.011368 | 0.011710 | 0.011368 | 0.011368 | 0.011368 | 0.011710 | 0.011277 |
| 0.011792 | 0.011273 | 0.011264 | 0.011544 | 0.011637 | 0.011572 | 0.011145 |
| 0.011220 | 0.011539 | 0.011642 | 0.011751 | 0.011609 | 0.011749 | 0.011882 |
| 0.011779 | 0.011817 | 0.011779 | 0.012034 | 0.011710 | 0.012636 | 0.011780 |
| 0.012431 | 0.012296 | 0.012399 | 0.012641 | 0.011745 | 0.011437 | 0.011745 |
| 0.012157 | 0.012125 | 0.011710 | 0.011608 | 0.011676 | 0.011676 | 0.011646 |
| 0.011539 | 0.011544 | 0.011608 | 0.011574 | 0.011950 | 0.012019 | 0.012019 |
| 0.011917 | 0.012019 | 0.012055 | 0.011887 | 0.012157 | 0.012164 | 0.012226 |
| 0.012226 | 0.012260 | 0.012207 | 0.012226 | 0.012228 | 0.011471 | 0.011779 |
| 0.011813 | 0.012293 | 0.011854 | 0.012088 | 0.012569 | 0.011613 | 0.011505 |
| 0.011471 | 0.011471 | 0.011950 | 0.011965 | 0.012056 | 0.011813 | 0.011472 |
| S706     | 0.011631 | 0.011631 | 0.011967 | 0.011732 | 0.011732 | 0.011799 |
| 0.011638 | 0.011570 | 0.011732 | 0.011228 | 0.011295 | 0.011262 | 0.011228 |
| 0.011262 | 0.011430 | 0.011228 | 0.011262 | 0.011329 | 0.011295 | 0.011262 |
| 0.011228 | 0.011262 | 0.011362 | 0.011228 | 0.011195 | 0.011262 | 0.011604 |
| 0.011497 | 0.011262 | 0.011161 | 0.011396 | 0.011262 | 0.011295 | 0.011262 |
| 0.011295 | 0.011329 | 0.011295 | 0.011295 | 0.011329 | 0.011295 | 0.011463 |
| 0.011228 | 0.011295 | 0.011329 | 0.011262 | 0.011362 | 0.011396 | 0.011329 |
| 0.011295 | 0.011463 | 0.011363 | 0.011631 | 0.011295 | 0.011497 | 0.011295 |
| 0.011262 | 0.011363 | 0.011430 | 0.011497 | 0.011665 | 0.011362 | 0.011463 |
| 0.011262 | 0.011329 | 0.011295 | 0.011463 | 0.011766 | 0.011295 | 0.011362 |
| 0.011262 | 0.011362 | 0.011329 | 0.011396 | 0.011329 | 0.011329 | 0.011329 |
| 0.011228 | 0.011262 | 0.011228 | 0.011329 | 0.011295 | 0.011329 | 0.011396 |
| 0.011329 | 0.011295 | 0.011295 | 0.011262 | 0.011396 | 0.011161 | 0.011295 |
| 0.011463 | 0.011396 | 0.011631 | 0.011463 | 0.011295 | 0.011463 | 0.011295 |
| 0.011468 | 0.011695 | 0.011513 | 0.011216 | 0.011210 | 0.011318 | 0.011415 |
| 0.012048 | 0.011467 | 0.011225 | 0.011530 | 0.011530 | 0.011329 | 0.011430 |
| 0.011362 | 0.011329 | 0.011396 | 0.011295 | 0.011396 | 0.011262 | 0.011329 |
| 0.011295 | 0.011396 | 0.011598 | 0.011463 | 0.011362 | 0.011329 | 0.000000 |
| 0.011228 | 0.011228 | 0.011228 | 0.011262 | 0.011463 | 0.011430 | 0.011362 |
| 0.011463 | 0.011530 | 0.011262 | 0.011262 | 0.011295 | 0.011295 | 0.011297 |
| 0.011364 | 0.011295 | 0.011295 | 0.011132 | 0.011241 | 0.011201 | 0.011296 |
| 0.011297 | 0.011232 | 0.011282 | 0.011267 | 0.011196 | 0.011232 | 0.011263 |
| 0.011528 | 0.011302 | 0.011267 | 0.011228 | 0.011233 | 0.011363 | 0.011329 |
| 0.011397 | 0.011330 | 0.011329 | 0.011429 | 0.011362 | 0.011665 | 0.011531 |
| 0.011564 | 0.011430 | 0.011295 | 0.011396 | 0.011195 | 0.011429 | 0.011228 |
| 0.011295 | 0.011295 | 0.011262 | 0.011228 | 0.011262 | 0.011228 | 0.011329 |
| 0.011228 | 0.011329 | 0.011329 | 0.011228 | 0.011330 | 0.011430 | 0.011432 |
| 0.011362 | 0.011329 | 0.011228 | 0.011161 | 0.011295 | 0.011228 | 0.011161 |

|          |          |          |          |          |          |          |
|----------|----------|----------|----------|----------|----------|----------|
| 0.011264 | 0.011362 | 0.011161 | 0.011362 | 0.011195 | 0.011295 | 0.011262 |
| 0.011295 | 0.011262 | 0.011228 | 0.011262 | 0.011295 | 0.011161 | 0.011228 |
| 0.011262 | 0.011262 | 0.011329 | 0.011262 | 0.011295 | 0.011329 | 0.011564 |
| 0.011665 | 0.011597 | 0.011665 | 0.011431 | 0.011665 | 0.011295 | 0.011262 |
| 0.011297 | 0.011545 | 0.011335 | 0.011198 | 0.011671 | 0.011163 | 0.011296 |
| 0.011637 | 0.011570 | 0.011463 | 0.011665 | 0.011368 | 0.011530 | 0.011430 |
| 0.011430 | 0.011597 | 0.011451 | 0.011307 | 0.011354 | 0.011329 | 0.011399 |
| 0.011497 | 0.011398 | 0.011534 | 0.011534 | 0.011530 | 0.011598 | 0.011704 |
| 0.011433 | 0.011536 | 0.011534 | 0.011466 | 0.011733 | 0.011195 | 0.011397 |
| 0.011295 | 0.011295 | 0.011195 | 0.011195 | 0.011195 | 0.011262 | 0.011329 |
| 0.011195 | 0.011262 | 0.011161 | 0.011329 | 0.011195 | 0.011262 | 0.011329 |
| 0.011262 | 0.011698 | 0.011598 | 0.011631 | 0.011161 | 0.011262 | 0.011295 |
| 0.011295 | 0.011262 | 0.011329 | 0.011362 | 0.011228 | 0.011228 | 0.011228 |
| 0.011765 | 0.011396 | 0.011396 | 0.011195 | 0.011295 | 0.011396 | 0.011228 |
| 0.011228 | 0.011295 | 0.011262 | 0.011362 | 0.011228 | 0.011362 | 0.011429 |
| 0.011430 | 0.011262 | 0.011262 | 0.011195 | 0.011195 | 0.011363 | 0.011295 |
| 0.011195 | 0.011295 | 0.011161 | 0.011195 | 0.011329 | 0.011463 | 0.011228 |
| 0.011195 | 0.011329 | 0.011262 | 0.011161 | 0.011497 | 0.011161 | 0.011329 |
| 0.011334 | 0.011228 | 0.011530 | 0.011363 | 0.011396 | 0.011262 | 0.011362 |
| 0.011228 | 0.011497 | 0.011161 | 0.011430 | 0.011228 | 0.011228 | 0.011161 |
| 0.011329 | 0.011598 | 0.011295 | 0.011362 | 0.011195 | 0.011598 | 0.011228 |
| 0.011228 | 0.011228 | 0.011262 | 0.011295 | 0.011262 | 0.011362 | 0.011430 |
| 0.011430 | 0.011396 | 0.011295 | 0.011396 | 0.011295 | 0.011228 | 0.011195 |
| 0.011228 | 0.011228 | 0.011295 | 0.011228 | 0.011127 | 0.011362 | 0.011228 |
| 0.011262 | 0.011262 | 0.011396 | 0.011430 | 0.011329 | 0.011195 | 0.011262 |
| 0.011329 | 0.011262 | 0.011362 | 0.011228 | 0.011362 | 0.011463 | 0.011766 |
| 0.011262 | 0.011665 | 0.011267 | 0.011785 | 0.011257 | 0.011488 | 0.011618 |
| 0.011579 | 0.011623 | 0.011322 | 0.011292 | 0.011719 | 0.011647 | 0.011364 |
| 0.011487 | 0.011610 | 0.011177 | 0.011228 | 0.011216 | 0.011357 | 0.011275 |
| 0.011482 | 0.011433 | 0.011394 | 0.011126 | 0.011396 | 0.011430 | 0.011432 |
| 0.011232 | 0.011396 | 0.011396 | 0.011362 | 0.011329 | 0.011329 | 0.011295 |
| 0.011329 | 0.011262 | 0.011295 | 0.011329 | 0.011295 | 0.011228 | 0.011262 |
| 0.011262 | 0.011329 | 0.011228 | 0.011329 | 0.011362 | 0.011396 | 0.011295 |
| 0.011329 | 0.011295 | 0.011631 | 0.011631 | 0.011363 | 0.011397 | 0.011430 |
| 0.011195 | 0.011195 | 0.011228 | 0.011262 | 0.011195 | 0.011430 | 0.011430 |
| 0.011463 | 0.011463 | 0.011396 | 0.011497 | 0.011665 | 0.011498 | 0.011262 |
| 0.011329 | 0.011396 | 0.011362 | 0.011262 | 0.011329 | 0.011295 | 0.011329 |
| 0.011396 | 0.011396 | 0.011430 | 0.011329 | 0.011229 | 0.011497 | 0.011396 |
| 0.011331 | 0.011228 | 0.011329 | 0.011430 | 0.011329 | 0.011463 | 0.011497 |
| 0.011665 | 0.011368 | 0.011530 | 0.011430 | 0.011430 | 0.011597 | 0.011228 |
| 0.011397 | 0.011296 | 0.011262 | 0.011262 | 0.011329 | 0.011228 | 0.011329 |
| 0.011362 | 0.011396 | 0.011295 | 0.011329 | 0.011295 | 0.011631 | 0.011631 |
| 0.011363 | 0.011397 | 0.011463 | 0.011396 | 0.012036 | 0.011453 | 0.011377 |
| 0.011447 | 0.011407 | 0.011517 | 0.011407 | 0.011515 | 0.011440 | 0.011405 |
| 0.011988 | 0.011303 | 0.011437 | 0.011372 | 0.011646 | 0.011502 | 0.011537 |
| 0.012012 | 0.011475 | 0.011331 | 0.011329 | 0.011329 | 0.011362 | 0.011297 |
| 0.011195 | 0.011161 | 0.011362 | 0.011329 | 0.011331 | 0.011463 | 0.011431 |
| 0.011295 | 0.011161 | 0.011195 | 0.011295 | 0.011127 | 0.011262 | 0.011161 |
| 0.011295 | 0.011329 | 0.011228 | 0.011195 | 0.011295 | 0.011228 | 0.011262 |
| 0.011262 | 0.011195 | 0.011262 | 0.011295 | 0.011195 | 0.011329 | 0.011430 |
| 0.011329 | 0.011396 | 0.011329 | 0.011329 | 0.011262 | 0.011665 | 0.011295 |
| 0.011339 | 0.011262 | 0.011497 | 0.011501 | 0.011295 | 0.011362 | 0.011362 |
| 0.011362 | 0.011228 | 0.011262 | 0.011228 | 0.011396 | 0.011396 | 0.011329 |
| 0.011329 | 0.011463 | 0.011631 | 0.011362 | 0.011564 | 0.011564 | 0.011430 |
| 0.011262 | 0.011329 | 0.011362 | 0.011766 | 0.011329 | 0.011295 | 0.011329 |
| 0.011362 | 0.011295 | 0.011295 | 0.011598 | 0.011463 | 0.011564 | 0.011295 |
| 0.011396 | 0.011463 | 0.011329 | 0.011396 | 0.011362 | 0.011228 | 0.011564 |
| 0.011329 | 0.011295 | 0.011295 | 0.011463 | 0.011295 | 0.011396 | 0.011631 |
| 0.011329 | 0.011706 | 0.011698 | 0.011507 | 0.011229 | 0.011400 | 0.011267 |
| 0.011280 | 0.011722 | 0.011236 | 0.011462 | 0.011255 | 0.011417 | 0.011379 |

|          |          |          |          |          |          |          |
|----------|----------|----------|----------|----------|----------|----------|
| 0.011468 | 0.011192 | 0.011339 | 0.011192 | 0.011222 | 0.011395 | 0.011344 |
| 0.011362 | 0.011218 | 0.011377 | 0.011307 | 0.011330 | 0.011463 | 0.011530 |
| 0.011530 | 0.011396 | 0.011500 | 0.011501 | 0.011636 | 0.011661 | 0.011329 |
| 0.011564 | 0.011430 | 0.011295 | 0.011396 | 0.011195 | 0.011429 | 0.011228 |
| 0.011295 | 0.011295 | 0.011262 | 0.011228 | 0.011262 | 0.011228 | 0.011329 |
| 0.011305 | 0.011305 | 0.011300 | 0.011334 | 0.011471 | 0.011368 | 0.011436 |
| 0.011435 | 0.011363 | 0.011171 | 0.011168 | 0.011297 | 0.011467 | 0.011467 |
| 0.011262 | 0.011331 | 0.011565 | 0.011533 | 0.011464 | 0.011498 | 0.011430 |
| 0.011362 | 0.011430 | 0.011429 | 0.011329 | 0.011900 | 0.011497 | 0.011564 |
| 0.011598 | 0.011666 | 0.011299 | 0.011372 | 0.011262 | 0.011463 | 0.011430 |
| 0.011464 | 0.011497 | 0.011497 | 0.011497 | 0.011650 | 0.011631 | 0.011268 |
| 0.011162 | 0.011164 | 0.011265 | 0.011230 | 0.011334 | 0.011172 | 0.011502 |
| 0.011300 | 0.011411 | 0.011156 | 0.011322 | 0.011296 | 0.011368 | 0.000000 |
| 0.011228 | 0.011228 | 0.011228 | 0.011262 | 0.011463 | 0.011430 | 0.011362 |
| 0.011463 | 0.011530 | 0.011262 | 0.011262 | 0.011295 | 0.011295 | 0.011297 |
| 0.011364 | 0.011295 | 0.011295 | 0.011330 | 0.011463 | 0.011530 | 0.011530 |
| 0.011396 | 0.011500 | 0.011501 | 0.011636 | 0.011661 | 0.011329 | 0.011497 |
| 0.011430 | 0.011430 | 0.011263 | 0.011443 | 0.011373 | 0.011401 | 0.011270 |
| 0.011370 | 0.011607 | 0.011399 | 0.011332 | 0.011161 | 0.011362 | 0.011228 |
| 0.011329 | 0.011329 | 0.011228 | 0.011330 | 0.011430 | 0.011432 | 0.011329 |
| 0.011228 | 0.011161 | 0.011295 | 0.011228 | 0.011161 | 0.011264 | 0.011362 |
| 0.011329 | 0.011262 | 0.011295 | 0.011329 | 0.011295 | 0.011228 | 0.011430 |
| 0.011295 | 0.011329 | 0.011329 | 0.011262 | 0.011329 | 0.011564 | 0.011228 |
| 0.011262 | 0.011665 | 0.011262 | 0.011228 | 0.011262 | 0.011631 | 0.011232 |
| 0.011679 | 0.011230 | 0.011261 | 0.011463 | 0.011549 | 0.011455 | 0.011186 |
| 0.011218 | 0.011430 | 0.011530 | 0.011637 | 0.011498 | 0.011635 | 0.011766 |
| 0.011666 | 0.011703 | 0.011665 | 0.011915 | 0.011631 | 0.012506 | 0.011667 |
| 0.012406 | 0.012173 | 0.012307 | 0.012579 | 0.011631 | 0.011329 | 0.011631 |
| 0.012070 | 0.012005 | 0.011598 | 0.011497 | 0.011565 | 0.011565 | 0.011534 |
| 0.011430 | 0.011433 | 0.011497 | 0.011464 | 0.011834 | 0.011900 | 0.011901 |
| 0.011801 | 0.011901 | 0.012004 | 0.011771 | 0.012070 | 0.012076 | 0.012137 |
| 0.012138 | 0.012172 | 0.012118 | 0.012138 | 0.012139 | 0.011362 | 0.011665 |
| 0.011733 | 0.012237 | 0.011738 | 0.011968 | 0.012440 | 0.011502 | 0.011396 |
| 0.011362 | 0.011362 | 0.011833 | 0.011883 | 0.011975 | 0.011698 | 0.011363 |
| S707     | 0.011597 | 0.011597 | 0.011934 | 0.011698 | 0.011698 | 0.011765 |
| 0.011604 | 0.011536 | 0.011698 | 0.011195 | 0.011262 | 0.011228 | 0.011195 |
| 0.011228 | 0.011396 | 0.011195 | 0.011228 | 0.011295 | 0.011262 | 0.011228 |
| 0.011195 | 0.011228 | 0.011329 | 0.011195 | 0.011228 | 0.011228 | 0.011570 |
| 0.011463 | 0.011228 | 0.011127 | 0.011362 | 0.011295 | 0.011262 | 0.011295 |
| 0.011262 | 0.011362 | 0.011262 | 0.011262 | 0.011295 | 0.011262 | 0.011430 |
| 0.011195 | 0.011262 | 0.011295 | 0.011228 | 0.011329 | 0.011362 | 0.011295 |
| 0.011262 | 0.011430 | 0.011329 | 0.011597 | 0.011262 | 0.011530 | 0.011262 |
| 0.011228 | 0.011329 | 0.011396 | 0.011530 | 0.011631 | 0.011329 | 0.011430 |
| 0.011295 | 0.011362 | 0.011262 | 0.011497 | 0.011732 | 0.011262 | 0.011329 |
| 0.011228 | 0.011329 | 0.011295 | 0.011362 | 0.011295 | 0.011295 | 0.011295 |
| 0.011195 | 0.011228 | 0.011195 | 0.011295 | 0.011262 | 0.011296 | 0.011362 |
| 0.011295 | 0.011262 | 0.011329 | 0.011228 | 0.011362 | 0.011195 | 0.011262 |
| 0.011429 | 0.011362 | 0.011597 | 0.011430 | 0.011262 | 0.011497 | 0.011262 |
| 0.011394 | 0.011620 | 0.011475 | 0.011138 | 0.011172 | 0.011244 | 0.011336 |
| 0.012011 | 0.011416 | 0.011184 | 0.011497 | 0.011497 | 0.011295 | 0.011396 |
| 0.011329 | 0.011295 | 0.011362 | 0.011262 | 0.011362 | 0.011295 | 0.011295 |
| 0.011262 | 0.011362 | 0.011564 | 0.011429 | 0.011329 | 0.011295 | 0.011228 |
| 0.000000 | 0.011195 | 0.011262 | 0.011228 | 0.011429 | 0.011396 | 0.011329 |
| 0.011429 | 0.011497 | 0.011228 | 0.011228 | 0.011262 | 0.011262 | 0.011263 |
| 0.011331 | 0.011262 | 0.011262 | 0.011132 | 0.011205 | 0.011165 | 0.011262 |
| 0.011263 | 0.011198 | 0.011245 | 0.011233 | 0.011162 | 0.011197 | 0.011229 |
| 0.011492 | 0.011267 | 0.011301 | 0.011195 | 0.011199 | 0.011329 | 0.011296 |
| 0.011363 | 0.011296 | 0.011296 | 0.011396 | 0.011329 | 0.011698 | 0.011497 |
| 0.011530 | 0.011396 | 0.011262 | 0.011362 | 0.011161 | 0.011396 | 0.011195 |
| 0.011262 | 0.011262 | 0.011228 | 0.011195 | 0.011228 | 0.011195 | 0.011295 |

|          |          |          |          |          |          |          |
|----------|----------|----------|----------|----------|----------|----------|
| 0.011262 | 0.011362 | 0.011295 | 0.011195 | 0.011296 | 0.011396 | 0.011398 |
| 0.011396 | 0.011295 | 0.011195 | 0.011128 | 0.011262 | 0.011195 | 0.011127 |
| 0.011230 | 0.011396 | 0.011195 | 0.011396 | 0.011161 | 0.011262 | 0.011228 |
| 0.011329 | 0.011228 | 0.011262 | 0.011228 | 0.011262 | 0.011127 | 0.011262 |
| 0.011295 | 0.011228 | 0.011295 | 0.011228 | 0.011262 | 0.011228 | 0.011530 |
| 0.011631 | 0.011564 | 0.011631 | 0.011397 | 0.011631 | 0.011262 | 0.011228 |
| 0.011263 | 0.011505 | 0.011380 | 0.011129 | 0.011637 | 0.011129 | 0.011257 |
| 0.011637 | 0.011536 | 0.011429 | 0.011631 | 0.011333 | 0.011497 | 0.011463 |
| 0.011396 | 0.011564 | 0.011416 | 0.011266 | 0.011312 | 0.011295 | 0.011365 |
| 0.011463 | 0.011364 | 0.011500 | 0.011568 | 0.011497 | 0.011564 | 0.011670 |
| 0.011399 | 0.011569 | 0.011500 | 0.011432 | 0.011700 | 0.011161 | 0.011364 |
| 0.011329 | 0.011262 | 0.011161 | 0.011161 | 0.011228 | 0.011228 | 0.011295 |
| 0.011228 | 0.011295 | 0.011195 | 0.011295 | 0.011228 | 0.011228 | 0.011295 |
| 0.011228 | 0.011665 | 0.011564 | 0.011597 | 0.011127 | 0.011228 | 0.011262 |
| 0.011262 | 0.011228 | 0.011295 | 0.011329 | 0.011195 | 0.011195 | 0.011195 |
| 0.011732 | 0.011362 | 0.011362 | 0.011161 | 0.011262 | 0.011430 | 0.011195 |
| 0.011195 | 0.011262 | 0.011228 | 0.011396 | 0.011195 | 0.011329 | 0.011463 |
| 0.011396 | 0.011228 | 0.011228 | 0.011161 | 0.011161 | 0.011329 | 0.011262 |
| 0.011161 | 0.011262 | 0.011127 | 0.011161 | 0.011295 | 0.011430 | 0.011195 |
| 0.011161 | 0.011295 | 0.011228 | 0.011127 | 0.011463 | 0.011127 | 0.011295 |
| 0.011368 | 0.011195 | 0.011497 | 0.011329 | 0.011362 | 0.011228 | 0.011329 |
| 0.011195 | 0.011530 | 0.011127 | 0.011396 | 0.011195 | 0.011195 | 0.011127 |
| 0.011362 | 0.011564 | 0.011262 | 0.011329 | 0.011161 | 0.011564 | 0.011195 |
| 0.011195 | 0.011195 | 0.011228 | 0.011329 | 0.011228 | 0.011329 | 0.011396 |
| 0.011396 | 0.011362 | 0.011262 | 0.011362 | 0.011329 | 0.011195 | 0.011161 |
| 0.011195 | 0.011195 | 0.011262 | 0.011195 | 0.011161 | 0.011329 | 0.011195 |
| 0.011228 | 0.011228 | 0.011362 | 0.011396 | 0.011295 | 0.011228 | 0.011228 |
| 0.011295 | 0.011228 | 0.011329 | 0.011195 | 0.011329 | 0.011429 | 0.011732 |
| 0.011228 | 0.011631 | 0.011233 | 0.017747 | 0.011126 | 0.011366 | 0.011583 |
| 0.011545 | 0.011588 | 0.011217 | 0.011234 | 0.011609 | 0.011612 | 0.011242 |
| 0.011440 | 0.011487 | 0.011099 | 0.011144 | 0.011177 | 0.011258 | 0.011146 |
| 0.011436 | 0.011395 | 0.011357 | 0.011193 | 0.011362 | 0.011396 | 0.011398 |
| 0.011266 | 0.011362 | 0.011362 | 0.011329 | 0.011295 | 0.011295 | 0.011262 |
| 0.011295 | 0.011228 | 0.011262 | 0.011295 | 0.011262 | 0.011195 | 0.011228 |
| 0.011228 | 0.011295 | 0.011195 | 0.011295 | 0.011329 | 0.011362 | 0.011262 |
| 0.011295 | 0.011262 | 0.011597 | 0.011597 | 0.011329 | 0.011363 | 0.011396 |
| 0.011161 | 0.011161 | 0.011195 | 0.011295 | 0.011161 | 0.011396 | 0.011396 |
| 0.011429 | 0.011429 | 0.011362 | 0.011463 | 0.011631 | 0.011464 | 0.011295 |
| 0.011295 | 0.011362 | 0.011396 | 0.011228 | 0.011295 | 0.011262 | 0.011295 |
| 0.011363 | 0.011362 | 0.011396 | 0.011363 | 0.011262 | 0.011463 | 0.011429 |
| 0.011297 | 0.011195 | 0.011295 | 0.011396 | 0.011295 | 0.011430 | 0.011396 |
| 0.011631 | 0.011333 | 0.011497 | 0.011463 | 0.011396 | 0.011564 | 0.011195 |
| 0.011363 | 0.011262 | 0.011228 | 0.011228 | 0.011295 | 0.011195 | 0.011295 |
| 0.011329 | 0.011362 | 0.011262 | 0.011295 | 0.011262 | 0.011597 | 0.011597 |
| 0.011329 | 0.011363 | 0.011429 | 0.011362 | 0.012002 | 0.011417 | 0.011342 |
| 0.011412 | 0.011372 | 0.011482 | 0.011372 | 0.011480 | 0.011405 | 0.011371 |
| 0.011953 | 0.011268 | 0.011403 | 0.011337 | 0.011611 | 0.011468 | 0.011571 |
| 0.011978 | 0.011437 | 0.011297 | 0.011295 | 0.011295 | 0.011329 | 0.011263 |
| 0.011161 | 0.011195 | 0.011329 | 0.011295 | 0.011297 | 0.011429 | 0.011397 |
| 0.011262 | 0.011195 | 0.011228 | 0.011262 | 0.011161 | 0.011228 | 0.011127 |
| 0.011262 | 0.011295 | 0.011195 | 0.011161 | 0.011262 | 0.011195 | 0.011228 |
| 0.011228 | 0.011161 | 0.011228 | 0.011262 | 0.011161 | 0.011362 | 0.011396 |
| 0.011295 | 0.011362 | 0.011295 | 0.011295 | 0.011228 | 0.011631 | 0.011262 |
| 0.011304 | 0.011228 | 0.011463 | 0.011467 | 0.011329 | 0.011329 | 0.011329 |
| 0.011329 | 0.011262 | 0.011228 | 0.011262 | 0.011362 | 0.011362 | 0.011295 |
| 0.011295 | 0.011430 | 0.011597 | 0.011329 | 0.011530 | 0.011530 | 0.011396 |
| 0.011228 | 0.011295 | 0.011329 | 0.011732 | 0.011295 | 0.011329 | 0.011295 |
| 0.011329 | 0.011262 | 0.011262 | 0.011564 | 0.011497 | 0.011530 | 0.011262 |
| 0.011362 | 0.011430 | 0.011295 | 0.011362 | 0.011329 | 0.011195 | 0.011530 |
| 0.011295 | 0.011262 | 0.011262 | 0.011430 | 0.011262 | 0.011362 | 0.011598 |

|          |          |          |          |          |          |          |
|----------|----------|----------|----------|----------|----------|----------|
| 0.011295 | 0.011672 | 0.011665 | 0.011426 | 0.011173 | 0.011366 | 0.011215 |
| 0.011170 | 0.011683 | 0.011201 | 0.011373 | 0.011158 | 0.011315 | 0.011273 |
| 0.011417 | 0.000000 | 0.011227 | 0.000000 | 0.011114 | 0.011261 | 0.011263 |
| 0.011286 | 0.011257 | 0.011342 | 0.011272 | 0.011296 | 0.011429 | 0.011497 |
| 0.011497 | 0.011363 | 0.011466 | 0.011467 | 0.011602 | 0.011626 | 0.011295 |
| 0.011530 | 0.011396 | 0.011262 | 0.011362 | 0.011161 | 0.011396 | 0.011195 |
| 0.011262 | 0.011262 | 0.011228 | 0.011195 | 0.011228 | 0.011195 | 0.011295 |
| 0.011270 | 0.011270 | 0.011266 | 0.011300 | 0.011437 | 0.011402 | 0.011402 |
| 0.011401 | 0.011329 | 0.011134 | 0.011132 | 0.011263 | 0.011433 | 0.011433 |
| 0.011228 | 0.011297 | 0.011531 | 0.011500 | 0.011430 | 0.011464 | 0.011396 |
| 0.011329 | 0.011396 | 0.011396 | 0.011295 | 0.011866 | 0.011463 | 0.011530 |
| 0.011564 | 0.011630 | 0.011265 | 0.011337 | 0.011228 | 0.011430 | 0.011396 |
| 0.011430 | 0.011463 | 0.011463 | 0.011463 | 0.011610 | 0.011597 | 0.011234 |
| 0.011128 | 0.011130 | 0.011231 | 0.011196 | 0.011299 | 0.011135 | 0.011468 |
| 0.011266 | 0.011411 | 0.011156 | 0.011285 | 0.011262 | 0.011334 | 0.011228 |
| 0.000000 | 0.011195 | 0.011262 | 0.011228 | 0.011429 | 0.011396 | 0.011329 |
| 0.011429 | 0.011497 | 0.011228 | 0.011228 | 0.011262 | 0.011262 | 0.011263 |
| 0.011331 | 0.011262 | 0.011262 | 0.011296 | 0.011429 | 0.011497 | 0.011497 |
| 0.011363 | 0.011466 | 0.011467 | 0.011602 | 0.011626 | 0.011295 | 0.011396 |
| 0.011396 | 0.011396 | 0.011229 | 0.011408 | 0.011338 | 0.011367 | 0.011235 |
| 0.011405 | 0.011561 | 0.011399 | 0.011298 | 0.011195 | 0.011396 | 0.011262 |
| 0.011362 | 0.011295 | 0.011195 | 0.011296 | 0.011396 | 0.011398 | 0.011295 |
| 0.011195 | 0.011128 | 0.011262 | 0.011195 | 0.011127 | 0.011230 | 0.011396 |
| 0.011295 | 0.011228 | 0.011262 | 0.011295 | 0.011262 | 0.011195 | 0.011396 |
| 0.011262 | 0.011295 | 0.011295 | 0.011228 | 0.011295 | 0.011530 | 0.011195 |
| 0.011228 | 0.011631 | 0.011228 | 0.011262 | 0.011228 | 0.011597 | 0.011189 |
| 0.011622 | 0.011188 | 0.011211 | 0.011422 | 0.011508 | 0.011419 | 0.011144 |
| 0.011165 | 0.011396 | 0.011497 | 0.011603 | 0.011464 | 0.011601 | 0.011733 |
| 0.011632 | 0.011669 | 0.011631 | 0.011880 | 0.011597 | 0.012472 | 0.011633 |
| 0.012372 | 0.012139 | 0.012273 | 0.012545 | 0.011597 | 0.011295 | 0.011598 |
| 0.012036 | 0.011971 | 0.011564 | 0.011463 | 0.011531 | 0.011531 | 0.011500 |
| 0.011396 | 0.011399 | 0.011463 | 0.011430 | 0.011800 | 0.011866 | 0.011867 |
| 0.011767 | 0.011867 | 0.011970 | 0.011737 | 0.012036 | 0.012042 | 0.012104 |
| 0.012104 | 0.012138 | 0.012084 | 0.012104 | 0.012105 | 0.011329 | 0.011631 |
| 0.011699 | 0.012203 | 0.011704 | 0.011934 | 0.012406 | 0.011468 | 0.011363 |
| 0.011329 | 0.011329 | 0.011799 | 0.011842 | 0.011940 | 0.011665 | 0.011330 |
| S708     | 0.011597 | 0.011597 | 0.011866 | 0.011631 | 0.011631 | 0.011698 |
| 0.011536 | 0.011468 | 0.011631 | 0.011195 | 0.011262 | 0.011228 | 0.011195 |
| 0.011161 | 0.011396 | 0.011127 | 0.011228 | 0.011295 | 0.011262 | 0.011228 |
| 0.011195 | 0.011228 | 0.011262 | 0.011195 | 0.011228 | 0.011228 | 0.011502 |
| 0.011396 | 0.011228 | 0.011127 | 0.011295 | 0.011295 | 0.011262 | 0.011295 |
| 0.011262 | 0.011362 | 0.011262 | 0.011262 | 0.011295 | 0.011262 | 0.011429 |
| 0.011127 | 0.011262 | 0.011295 | 0.011228 | 0.011262 | 0.011362 | 0.011295 |
| 0.011262 | 0.011430 | 0.011329 | 0.011530 | 0.011262 | 0.011530 | 0.011262 |
| 0.011228 | 0.011262 | 0.011396 | 0.011530 | 0.011564 | 0.011262 | 0.011362 |
| 0.011295 | 0.011362 | 0.011262 | 0.011497 | 0.011665 | 0.011262 | 0.011329 |
| 0.011228 | 0.011329 | 0.011295 | 0.011362 | 0.011295 | 0.011295 | 0.011295 |
| 0.011195 | 0.011228 | 0.011195 | 0.011228 | 0.011262 | 0.011296 | 0.011362 |
| 0.011295 | 0.011262 | 0.011329 | 0.011228 | 0.011295 | 0.011195 | 0.011262 |
| 0.011429 | 0.011362 | 0.011597 | 0.011430 | 0.011262 | 0.011497 | 0.011262 |
| 0.011431 | 0.011583 | 0.011475 | 0.011177 | 0.011172 | 0.011281 | 0.011296 |
| 0.011938 | 0.011365 | 0.011184 | 0.011497 | 0.011497 | 0.011228 | 0.011329 |
| 0.011329 | 0.011295 | 0.011362 | 0.011262 | 0.011362 | 0.011295 | 0.011295 |
| 0.011262 | 0.011295 | 0.011564 | 0.011429 | 0.011329 | 0.011295 | 0.011228 |
| 0.011195 | 0.000000 | 0.011262 | 0.011228 | 0.011362 | 0.011329 | 0.011262 |
| 0.011362 | 0.011429 | 0.011228 | 0.011228 | 0.011262 | 0.011262 | 0.011263 |
| 0.011331 | 0.011262 | 0.011262 | 0.011132 | 0.011205 | 0.011165 | 0.011262 |
| 0.011263 | 0.011198 | 0.011245 | 0.011233 | 0.011162 | 0.011197 | 0.011229 |
| 0.011420 | 0.011267 | 0.011301 | 0.011195 | 0.011199 | 0.011329 | 0.011228 |
| 0.011296 | 0.011296 | 0.011296 | 0.011396 | 0.011329 | 0.011698 | 0.011430 |

|          |          |          |          |          |          |          |
|----------|----------|----------|----------|----------|----------|----------|
| 0.011463 | 0.011329 | 0.011262 | 0.011295 | 0.011161 | 0.011329 | 0.011195 |
| 0.011262 | 0.011262 | 0.011228 | 0.011195 | 0.011228 | 0.011195 | 0.011295 |
| 0.011262 | 0.011362 | 0.011295 | 0.011195 | 0.011296 | 0.011396 | 0.011398 |
| 0.011396 | 0.011295 | 0.011195 | 0.011128 | 0.011262 | 0.011195 | 0.011127 |
| 0.011230 | 0.011396 | 0.011195 | 0.011396 | 0.011161 | 0.011262 | 0.011228 |
| 0.011329 | 0.011228 | 0.011262 | 0.011228 | 0.011262 | 0.011127 | 0.011262 |
| 0.011295 | 0.011228 | 0.011295 | 0.011228 | 0.011262 | 0.011295 | 0.011530 |
| 0.011564 | 0.011497 | 0.011564 | 0.011397 | 0.011564 | 0.011262 | 0.011228 |
| 0.011195 | 0.011464 | 0.011335 | 0.011163 | 0.011569 | 0.011129 | 0.011257 |
| 0.011569 | 0.011434 | 0.011429 | 0.011631 | 0.011333 | 0.011497 | 0.011463 |
| 0.011396 | 0.011564 | 0.011416 | 0.011266 | 0.011312 | 0.011295 | 0.011365 |
| 0.011463 | 0.011364 | 0.011500 | 0.011568 | 0.011497 | 0.011564 | 0.011670 |
| 0.011399 | 0.011569 | 0.011500 | 0.011432 | 0.011699 | 0.011161 | 0.011364 |
| 0.011329 | 0.011262 | 0.011161 | 0.011161 | 0.011228 | 0.011228 | 0.011295 |
| 0.011228 | 0.011295 | 0.011195 | 0.011228 | 0.011228 | 0.011228 | 0.011295 |
| 0.011228 | 0.011597 | 0.011497 | 0.011530 | 0.011127 | 0.011228 | 0.011262 |
| 0.011262 | 0.011228 | 0.011295 | 0.011262 | 0.011195 | 0.011195 | 0.011195 |
| 0.011665 | 0.011295 | 0.011362 | 0.011161 | 0.011262 | 0.011430 | 0.011195 |
| 0.011195 | 0.011262 | 0.011228 | 0.011396 | 0.011195 | 0.011329 | 0.011463 |
| 0.011396 | 0.011228 | 0.011228 | 0.011161 | 0.011161 | 0.011329 | 0.011262 |
| 0.011161 | 0.011262 | 0.011127 | 0.011161 | 0.011295 | 0.011363 | 0.011195 |
| 0.011161 | 0.011295 | 0.011228 | 0.011127 | 0.011396 | 0.011127 | 0.011295 |
| 0.011368 | 0.011195 | 0.011430 | 0.011329 | 0.011295 | 0.011228 | 0.011329 |
| 0.011195 | 0.011530 | 0.011127 | 0.011329 | 0.011127 | 0.011127 | 0.011127 |
| 0.011362 | 0.011497 | 0.011262 | 0.011329 | 0.011161 | 0.011497 | 0.011127 |
| 0.011195 | 0.011195 | 0.011228 | 0.011329 | 0.011228 | 0.011329 | 0.011396 |
| 0.011396 | 0.011362 | 0.011262 | 0.011362 | 0.011329 | 0.011195 | 0.011161 |
| 0.011195 | 0.011195 | 0.011262 | 0.011127 | 0.011161 | 0.011329 | 0.011195 |
| 0.011161 | 0.011228 | 0.011362 | 0.011329 | 0.011295 | 0.011228 | 0.011228 |
| 0.011295 | 0.011228 | 0.011329 | 0.011195 | 0.011329 | 0.011429 | 0.011665 |
| 0.011228 | 0.011564 | 0.011233 | 0.017747 | 0.011257 | 0.011305 | 0.011514 |
| 0.011475 | 0.011517 | 0.011270 | 0.011234 | 0.011609 | 0.011543 | 0.011303 |
| 0.011392 | 0.011426 | 0.011138 | 0.011228 | 0.011138 | 0.011208 | 0.011232 |
| 0.011389 | 0.011321 | 0.011320 | 0.011126 | 0.011362 | 0.011396 | 0.011398 |
| 0.011266 | 0.011362 | 0.011362 | 0.011262 | 0.011295 | 0.011295 | 0.011262 |
| 0.011295 | 0.011228 | 0.011262 | 0.011295 | 0.011262 | 0.011195 | 0.011228 |
| 0.011228 | 0.011295 | 0.011195 | 0.011295 | 0.011329 | 0.011362 | 0.011262 |
| 0.011228 | 0.011195 | 0.011530 | 0.011530 | 0.011329 | 0.011363 | 0.011396 |
| 0.011161 | 0.011161 | 0.011195 | 0.011295 | 0.011161 | 0.011396 | 0.011396 |
| 0.011429 | 0.011429 | 0.011362 | 0.011463 | 0.011564 | 0.011464 | 0.011295 |
| 0.011295 | 0.011362 | 0.011396 | 0.011228 | 0.011295 | 0.011262 | 0.011295 |
| 0.011363 | 0.011362 | 0.011396 | 0.011362 | 0.011262 | 0.011463 | 0.011429 |
| 0.011297 | 0.011195 | 0.011295 | 0.011396 | 0.011295 | 0.011362 | 0.011463 |
| 0.011631 | 0.011333 | 0.011497 | 0.011463 | 0.011396 | 0.011564 | 0.011195 |
| 0.011363 | 0.011262 | 0.011228 | 0.011228 | 0.011295 | 0.011195 | 0.011295 |
| 0.011329 | 0.011362 | 0.011262 | 0.011228 | 0.011195 | 0.011530 | 0.011530 |
| 0.011329 | 0.011363 | 0.011429 | 0.011362 | 0.011935 | 0.011417 | 0.011342 |
| 0.011412 | 0.011372 | 0.011482 | 0.011372 | 0.011480 | 0.011405 | 0.011371 |
| 0.011884 | 0.011268 | 0.011403 | 0.011337 | 0.011611 | 0.011468 | 0.011571 |
| 0.011910 | 0.011362 | 0.011297 | 0.011295 | 0.011295 | 0.011262 | 0.011263 |
| 0.011161 | 0.011195 | 0.011329 | 0.011295 | 0.011297 | 0.011362 | 0.011330 |
| 0.011262 | 0.011195 | 0.011228 | 0.011262 | 0.011161 | 0.011228 | 0.011127 |
| 0.011195 | 0.011228 | 0.011195 | 0.011161 | 0.011262 | 0.011195 | 0.011228 |
| 0.011228 | 0.011161 | 0.011228 | 0.011262 | 0.011161 | 0.011362 | 0.011396 |
| 0.011295 | 0.011295 | 0.011295 | 0.011295 | 0.011228 | 0.011564 | 0.011262 |
| 0.011234 | 0.011228 | 0.011396 | 0.011400 | 0.011329 | 0.011329 | 0.011329 |
| 0.011329 | 0.011262 | 0.011228 | 0.011262 | 0.011362 | 0.011362 | 0.011295 |
| 0.011295 | 0.011429 | 0.011530 | 0.011329 | 0.011530 | 0.011530 | 0.011396 |
| 0.011228 | 0.011295 | 0.011329 | 0.011665 | 0.011295 | 0.011329 | 0.011295 |
| 0.011329 | 0.011195 | 0.011195 | 0.011497 | 0.011497 | 0.011463 | 0.011262 |

|          |          |          |          |          |          |          |
|----------|----------|----------|----------|----------|----------|----------|
| 0.011362 | 0.011429 | 0.011295 | 0.011362 | 0.011329 | 0.011195 | 0.011463 |
| 0.011295 | 0.011262 | 0.011195 | 0.011429 | 0.011262 | 0.011362 | 0.011597 |
| 0.011295 | 0.011604 | 0.011597 | 0.011385 | 0.011117 | 0.011298 | 0.011163 |
| 0.011115 | 0.011605 | 0.011201 | 0.011328 | 0.011158 | 0.011315 | 0.011273 |
| 0.011366 | 0.011126 | 0.011338 | 0.011126 | 0.011222 | 0.011395 | 0.011344 |
| 0.011362 | 0.011257 | 0.011272 | 0.011272 | 0.011296 | 0.011362 | 0.011429 |
| 0.011429 | 0.011296 | 0.011398 | 0.011399 | 0.011535 | 0.011555 | 0.011295 |
| 0.011463 | 0.011329 | 0.011262 | 0.011295 | 0.011161 | 0.011329 | 0.011195 |
| 0.011262 | 0.011262 | 0.011228 | 0.011195 | 0.011228 | 0.011195 | 0.011295 |
| 0.011270 | 0.011270 | 0.011266 | 0.011300 | 0.011436 | 0.011402 | 0.011402 |
| 0.011401 | 0.011329 | 0.011134 | 0.011132 | 0.011263 | 0.011433 | 0.011433 |
| 0.011228 | 0.011297 | 0.011531 | 0.011499 | 0.011430 | 0.011464 | 0.011396 |
| 0.011329 | 0.011396 | 0.011396 | 0.011295 | 0.011799 | 0.011463 | 0.011530 |
| 0.011564 | 0.011559 | 0.011231 | 0.011337 | 0.011228 | 0.011430 | 0.011396 |
| 0.011430 | 0.011463 | 0.011463 | 0.011463 | 0.011610 | 0.011597 | 0.011234 |
| 0.011128 | 0.011130 | 0.011230 | 0.011196 | 0.011231 | 0.011135 | 0.011400 |
| 0.011266 | 0.011323 | 0.011156 | 0.011285 | 0.011262 | 0.011334 | 0.011228 |
| 0.011195 | 0.000000 | 0.011262 | 0.011228 | 0.011362 | 0.011329 | 0.011262 |
| 0.011362 | 0.011429 | 0.011228 | 0.011228 | 0.011262 | 0.011262 | 0.011263 |
| 0.011331 | 0.011262 | 0.011262 | 0.011296 | 0.011362 | 0.011429 | 0.011429 |
| 0.011296 | 0.011398 | 0.011399 | 0.011535 | 0.011555 | 0.011295 | 0.011463 |
| 0.011396 | 0.011396 | 0.011229 | 0.011408 | 0.011338 | 0.011367 | 0.011235 |
| 0.011404 | 0.011561 | 0.011357 | 0.011298 | 0.011195 | 0.011396 | 0.011262 |
| 0.011362 | 0.011295 | 0.011195 | 0.011296 | 0.011396 | 0.011398 | 0.011295 |
| 0.011195 | 0.011128 | 0.011262 | 0.011195 | 0.011127 | 0.011230 | 0.011396 |
| 0.011295 | 0.011228 | 0.011262 | 0.011295 | 0.011262 | 0.011195 | 0.011329 |
| 0.011262 | 0.011295 | 0.011295 | 0.011228 | 0.011295 | 0.011530 | 0.011127 |
| 0.011228 | 0.011564 | 0.011228 | 0.011262 | 0.011228 | 0.011530 | 0.011189 |
| 0.011566 | 0.011188 | 0.011161 | 0.011342 | 0.011426 | 0.011347 | 0.011144 |
| 0.011113 | 0.011329 | 0.011430 | 0.011535 | 0.011397 | 0.011534 | 0.011665 |
| 0.011565 | 0.011601 | 0.011564 | 0.011812 | 0.011530 | 0.012405 | 0.011565 |
| 0.012304 | 0.012072 | 0.012206 | 0.012477 | 0.011530 | 0.011228 | 0.011530 |
| 0.011969 | 0.011903 | 0.011497 | 0.011396 | 0.011464 | 0.011464 | 0.011432 |
| 0.011329 | 0.011331 | 0.011396 | 0.011363 | 0.011733 | 0.011799 | 0.011800 |
| 0.011699 | 0.011800 | 0.011903 | 0.011669 | 0.011969 | 0.011974 | 0.012036 |
| 0.012037 | 0.012070 | 0.012015 | 0.012037 | 0.012038 | 0.011329 | 0.011564 |
| 0.011632 | 0.012136 | 0.011636 | 0.011867 | 0.012339 | 0.011400 | 0.011295 |
| 0.011262 | 0.011262 | 0.011732 | 0.011759 | 0.011869 | 0.011597 | 0.011262 |
| S709     | 0.011665 | 0.011665 | 0.012001 | 0.011765 | 0.011765 | 0.011833 |
| 0.011672 | 0.011604 | 0.011765 | 0.011262 | 0.011329 | 0.011296 | 0.011262 |
| 0.011295 | 0.011463 | 0.011262 | 0.011295 | 0.011362 | 0.011329 | 0.011295 |
| 0.011262 | 0.011295 | 0.011396 | 0.011262 | 0.011228 | 0.011295 | 0.011638 |
| 0.011530 | 0.011295 | 0.011195 | 0.011429 | 0.011295 | 0.011329 | 0.011295 |
| 0.011329 | 0.011362 | 0.011329 | 0.011329 | 0.011362 | 0.011329 | 0.011497 |
| 0.011262 | 0.011329 | 0.011362 | 0.011295 | 0.011396 | 0.011430 | 0.011362 |
| 0.011329 | 0.011497 | 0.011396 | 0.011665 | 0.011329 | 0.011530 | 0.011329 |
| 0.011295 | 0.011396 | 0.011463 | 0.011530 | 0.011698 | 0.011396 | 0.011497 |
| 0.011295 | 0.011362 | 0.011329 | 0.011497 | 0.011799 | 0.011329 | 0.011396 |
| 0.011295 | 0.011396 | 0.011362 | 0.011430 | 0.011362 | 0.011362 | 0.011362 |
| 0.011262 | 0.011295 | 0.011262 | 0.011362 | 0.011329 | 0.011363 | 0.011429 |
| 0.011362 | 0.011329 | 0.011262 | 0.011295 | 0.011429 | 0.011195 | 0.011329 |
| 0.011497 | 0.011429 | 0.011665 | 0.011497 | 0.011329 | 0.011497 | 0.011329 |
| 0.011505 | 0.011733 | 0.011551 | 0.011255 | 0.011247 | 0.011355 | 0.011454 |
| 0.012085 | 0.011467 | 0.011266 | 0.011564 | 0.011564 | 0.011362 | 0.011463 |
| 0.011396 | 0.011362 | 0.011429 | 0.011329 | 0.011430 | 0.011295 | 0.011362 |
| 0.011329 | 0.011429 | 0.011631 | 0.011497 | 0.011396 | 0.011363 | 0.011228 |
| 0.011262 | 0.011262 | 0.000000 | 0.011295 | 0.011497 | 0.011463 | 0.011396 |
| 0.011497 | 0.011564 | 0.011295 | 0.011295 | 0.011329 | 0.011329 | 0.011330 |
| 0.011398 | 0.011329 | 0.011329 | 0.011168 | 0.011277 | 0.011236 | 0.011329 |
| 0.011331 | 0.011266 | 0.011318 | 0.011302 | 0.011230 | 0.011266 | 0.011297 |



|          |          |          |          |          |          |          |
|----------|----------|----------|----------|----------|----------|----------|
| 0.011564 | 0.011336 | 0.011301 | 0.011262 | 0.011268 | 0.011397 | 0.011363 |
| 0.011430 | 0.011364 | 0.011363 | 0.011463 | 0.011396 | 0.011698 | 0.011564 |
| 0.011597 | 0.011463 | 0.011329 | 0.011430 | 0.011228 | 0.011463 | 0.011262 |
| 0.011329 | 0.011329 | 0.011295 | 0.011262 | 0.011295 | 0.011262 | 0.011362 |
| 0.011262 | 0.011362 | 0.011362 | 0.011262 | 0.011363 | 0.011463 | 0.011466 |
| 0.011329 | 0.011362 | 0.011262 | 0.011195 | 0.011329 | 0.011262 | 0.011195 |
| 0.011298 | 0.011329 | 0.011195 | 0.011329 | 0.011228 | 0.011329 | 0.011295 |
| 0.011329 | 0.011295 | 0.011262 | 0.011295 | 0.011329 | 0.011195 | 0.011262 |
| 0.011295 | 0.011295 | 0.011362 | 0.011295 | 0.011329 | 0.011362 | 0.011597 |
| 0.011698 | 0.011631 | 0.011698 | 0.011465 | 0.011698 | 0.011329 | 0.011295 |
| 0.011330 | 0.011505 | 0.011380 | 0.011232 | 0.011671 | 0.011197 | 0.011336 |
| 0.011705 | 0.011604 | 0.011497 | 0.011698 | 0.011402 | 0.011564 | 0.011463 |
| 0.011463 | 0.011631 | 0.011487 | 0.011349 | 0.011396 | 0.011363 | 0.011433 |
| 0.011530 | 0.011431 | 0.011568 | 0.011568 | 0.011564 | 0.011631 | 0.011738 |
| 0.011466 | 0.011569 | 0.011568 | 0.011500 | 0.011767 | 0.011228 | 0.011431 |
| 0.011329 | 0.011329 | 0.011228 | 0.011228 | 0.011228 | 0.011295 | 0.011362 |
| 0.011228 | 0.011295 | 0.011195 | 0.011295 | 0.011228 | 0.011295 | 0.011362 |
| 0.011295 | 0.011732 | 0.011631 | 0.011665 | 0.011195 | 0.011295 | 0.011329 |
| 0.011329 | 0.011295 | 0.011362 | 0.011396 | 0.011262 | 0.011262 | 0.011262 |
| 0.011799 | 0.011430 | 0.011430 | 0.011228 | 0.011329 | 0.011430 | 0.011262 |
| 0.011262 | 0.011329 | 0.011295 | 0.011396 | 0.011262 | 0.011396 | 0.011463 |
| 0.011463 | 0.011295 | 0.011295 | 0.011228 | 0.011228 | 0.011396 | 0.011329 |
| 0.011228 | 0.011329 | 0.011195 | 0.011228 | 0.011362 | 0.011497 | 0.011262 |
| 0.011228 | 0.011362 | 0.011296 | 0.011195 | 0.011530 | 0.011195 | 0.011362 |
| 0.011368 | 0.011262 | 0.011564 | 0.011396 | 0.011362 | 0.011295 | 0.011396 |
| 0.011262 | 0.011530 | 0.011195 | 0.011463 | 0.011262 | 0.011262 | 0.011195 |
| 0.011362 | 0.011631 | 0.011329 | 0.011396 | 0.011228 | 0.011631 | 0.011262 |
| 0.011262 | 0.011262 | 0.011295 | 0.011329 | 0.011295 | 0.011396 | 0.011463 |
| 0.011463 | 0.011430 | 0.011329 | 0.011430 | 0.011329 | 0.011262 | 0.011228 |
| 0.011262 | 0.011262 | 0.011329 | 0.011262 | 0.011161 | 0.011396 | 0.011262 |
| 0.011295 | 0.011295 | 0.011430 | 0.011463 | 0.011362 | 0.011228 | 0.011295 |
| 0.011362 | 0.011295 | 0.011396 | 0.011262 | 0.011396 | 0.011497 | 0.011799 |
| 0.011295 | 0.011698 | 0.011302 | 0.017823 | 0.011257 | 0.011427 | 0.011653 |
| 0.011614 | 0.011658 | 0.011374 | 0.011292 | 0.011719 | 0.011682 | 0.011364 |
| 0.011535 | 0.011610 | 0.011216 | 0.011270 | 0.011255 | 0.011356 | 0.011318 |
| 0.011529 | 0.011470 | 0.011431 | 0.011259 | 0.011430 | 0.011463 | 0.011466 |
| 0.011266 | 0.011430 | 0.011430 | 0.011396 | 0.011362 | 0.011363 | 0.011329 |
| 0.011362 | 0.011295 | 0.011329 | 0.011362 | 0.011329 | 0.011262 | 0.011295 |
| 0.011295 | 0.011362 | 0.011262 | 0.011363 | 0.011396 | 0.011430 | 0.011329 |
| 0.011362 | 0.011329 | 0.011665 | 0.011665 | 0.011396 | 0.011430 | 0.011463 |
| 0.011228 | 0.011228 | 0.011262 | 0.011295 | 0.011228 | 0.011463 | 0.011463 |
| 0.011497 | 0.011497 | 0.011430 | 0.011530 | 0.011698 | 0.011532 | 0.011295 |
| 0.011362 | 0.011430 | 0.011396 | 0.011295 | 0.011362 | 0.011329 | 0.011362 |
| 0.011430 | 0.011430 | 0.011463 | 0.011363 | 0.011262 | 0.011530 | 0.011429 |
| 0.011365 | 0.011262 | 0.011362 | 0.011463 | 0.011363 | 0.011497 | 0.011530 |
| 0.011698 | 0.011402 | 0.011564 | 0.011463 | 0.011463 | 0.011631 | 0.011262 |
| 0.011431 | 0.011329 | 0.011295 | 0.011295 | 0.011362 | 0.011262 | 0.011363 |
| 0.011396 | 0.011430 | 0.011329 | 0.011362 | 0.011329 | 0.011665 | 0.011665 |
| 0.011396 | 0.011430 | 0.011497 | 0.011429 | 0.012070 | 0.011489 | 0.011412 |
| 0.011482 | 0.011442 | 0.011552 | 0.011441 | 0.011550 | 0.011474 | 0.011440 |
| 0.012022 | 0.011337 | 0.011471 | 0.011406 | 0.011680 | 0.011537 | 0.011571 |
| 0.012047 | 0.011512 | 0.011365 | 0.011362 | 0.011362 | 0.011396 | 0.011331 |
| 0.011228 | 0.011195 | 0.011396 | 0.011362 | 0.011364 | 0.011497 | 0.011464 |
| 0.011329 | 0.011195 | 0.011228 | 0.011329 | 0.011161 | 0.011295 | 0.011195 |
| 0.011262 | 0.011295 | 0.011262 | 0.011228 | 0.011329 | 0.011262 | 0.011295 |
| 0.011295 | 0.011228 | 0.011295 | 0.011329 | 0.011228 | 0.011362 | 0.011463 |
| 0.011362 | 0.011362 | 0.011362 | 0.011362 | 0.011295 | 0.011698 | 0.011329 |
| 0.011373 | 0.011295 | 0.011531 | 0.011535 | 0.011329 | 0.011396 | 0.011396 |
| 0.011396 | 0.011262 | 0.011295 | 0.011262 | 0.011430 | 0.011430 | 0.011362 |
| 0.011362 | 0.011497 | 0.011665 | 0.011396 | 0.011598 | 0.011598 | 0.011463 |

|          |          |          |          |          |          |          |
|----------|----------|----------|----------|----------|----------|----------|
| 0.011295 | 0.011362 | 0.011396 | 0.011799 | 0.011363 | 0.011329 | 0.011362 |
| 0.011396 | 0.011329 | 0.011329 | 0.011631 | 0.011497 | 0.011598 | 0.011329 |
| 0.011430 | 0.011497 | 0.011362 | 0.011430 | 0.011396 | 0.011262 | 0.011597 |
| 0.011362 | 0.011329 | 0.011329 | 0.011497 | 0.011329 | 0.011430 | 0.011665 |
| 0.011362 | 0.011740 | 0.011732 | 0.011548 | 0.011229 | 0.011434 | 0.011267 |
| 0.011225 | 0.011761 | 0.011271 | 0.011507 | 0.011304 | 0.011467 | 0.011432 |
| 0.011468 | 0.011258 | 0.011339 | 0.011192 | 0.011276 | 0.011395 | 0.011385 |
| 0.011399 | 0.011257 | 0.011412 | 0.011307 | 0.011364 | 0.011497 | 0.011564 |
| 0.011564 | 0.011430 | 0.011534 | 0.011535 | 0.011670 | 0.011696 | 0.011362 |
| 0.011597 | 0.011463 | 0.011329 | 0.011430 | 0.011228 | 0.011463 | 0.011262 |
| 0.011329 | 0.011329 | 0.011295 | 0.011262 | 0.011295 | 0.011262 | 0.011362 |
| 0.011340 | 0.011340 | 0.011266 | 0.011368 | 0.011505 | 0.011402 | 0.011470 |
| 0.011469 | 0.011396 | 0.011208 | 0.011204 | 0.011331 | 0.011501 | 0.011501 |
| 0.011296 | 0.011365 | 0.011599 | 0.011567 | 0.011497 | 0.011531 | 0.011463 |
| 0.011396 | 0.011463 | 0.011463 | 0.011362 | 0.011934 | 0.011530 | 0.011598 |
| 0.011631 | 0.011666 | 0.011333 | 0.011407 | 0.011295 | 0.011497 | 0.011463 |
| 0.011498 | 0.011530 | 0.011530 | 0.011530 | 0.011650 | 0.011665 | 0.011303 |
| 0.011196 | 0.011199 | 0.011299 | 0.011264 | 0.011368 | 0.011210 | 0.011536 |
| 0.011335 | 0.011411 | 0.011156 | 0.011360 | 0.011329 | 0.011402 | 0.011228 |
| 0.011262 | 0.011262 | 0.000000 | 0.011295 | 0.011497 | 0.011463 | 0.011396 |
| 0.011497 | 0.011564 | 0.011295 | 0.011295 | 0.011329 | 0.011329 | 0.011330 |
| 0.011398 | 0.011329 | 0.011329 | 0.011364 | 0.011497 | 0.011564 | 0.011564 |
| 0.011430 | 0.011534 | 0.011535 | 0.011670 | 0.011696 | 0.011362 | 0.011530 |
| 0.011463 | 0.011463 | 0.011297 | 0.011478 | 0.011408 | 0.011435 | 0.011305 |
| 0.011405 | 0.011561 | 0.011441 | 0.011366 | 0.011195 | 0.011329 | 0.011262 |
| 0.011362 | 0.011362 | 0.011262 | 0.011363 | 0.011463 | 0.011466 | 0.011362 |
| 0.011262 | 0.011195 | 0.011329 | 0.011262 | 0.011195 | 0.011298 | 0.011329 |
| 0.011362 | 0.011295 | 0.011329 | 0.011362 | 0.011329 | 0.011262 | 0.011463 |
| 0.011329 | 0.011362 | 0.011362 | 0.011295 | 0.011362 | 0.011598 | 0.011262 |
| 0.011295 | 0.011698 | 0.011295 | 0.011262 | 0.011295 | 0.011665 | 0.011275 |
| 0.011735 | 0.011273 | 0.011311 | 0.011503 | 0.011589 | 0.011491 | 0.011227 |
| 0.011218 | 0.011463 | 0.011564 | 0.011671 | 0.011531 | 0.011669 | 0.011800 |
| 0.011699 | 0.011669 | 0.011698 | 0.011949 | 0.011665 | 0.012540 | 0.011700 |
| 0.012439 | 0.012207 | 0.012341 | 0.012613 | 0.011665 | 0.011363 | 0.011665 |
| 0.012103 | 0.012038 | 0.011631 | 0.011531 | 0.011598 | 0.011598 | 0.011568 |
| 0.011463 | 0.011467 | 0.011530 | 0.011497 | 0.011867 | 0.011934 | 0.011935 |
| 0.011834 | 0.011934 | 0.012038 | 0.011804 | 0.012104 | 0.012110 | 0.012171 |
| 0.012172 | 0.012205 | 0.012152 | 0.012172 | 0.012173 | 0.011396 | 0.011699 |
| 0.011767 | 0.012270 | 0.011772 | 0.012001 | 0.012474 | 0.011536 | 0.011430 |
| 0.011396 | 0.011396 | 0.011867 | 0.011883 | 0.012010 | 0.011732 | 0.011397 |
| S710     | 0.011631 | 0.011631 | 0.011967 | 0.011732 | 0.011732 | 0.011799 |
| 0.011604 | 0.011536 | 0.011732 | 0.011228 | 0.011295 | 0.011262 | 0.011228 |
| 0.011262 | 0.011429 | 0.011228 | 0.011262 | 0.011329 | 0.011295 | 0.011262 |
| 0.011228 | 0.011262 | 0.011362 | 0.011228 | 0.011262 | 0.011262 | 0.011570 |
| 0.011497 | 0.011262 | 0.011161 | 0.011396 | 0.011329 | 0.011295 | 0.011329 |
| 0.011295 | 0.011396 | 0.011295 | 0.011295 | 0.011329 | 0.011295 | 0.011463 |
| 0.011228 | 0.011295 | 0.011329 | 0.011262 | 0.011362 | 0.011396 | 0.011329 |
| 0.011295 | 0.011463 | 0.011363 | 0.011631 | 0.011295 | 0.011564 | 0.011295 |
| 0.011262 | 0.011362 | 0.011430 | 0.011564 | 0.011665 | 0.011362 | 0.011463 |
| 0.011329 | 0.011396 | 0.011295 | 0.011530 | 0.011766 | 0.011295 | 0.011362 |
| 0.011262 | 0.011362 | 0.011329 | 0.011396 | 0.011329 | 0.011329 | 0.011329 |
| 0.011228 | 0.011262 | 0.011228 | 0.011329 | 0.011295 | 0.011329 | 0.011396 |
| 0.011329 | 0.011295 | 0.011362 | 0.011262 | 0.011396 | 0.011228 | 0.011295 |
| 0.011463 | 0.011396 | 0.011631 | 0.011463 | 0.011295 | 0.011530 | 0.011295 |
| 0.011394 | 0.011620 | 0.011437 | 0.011138 | 0.011172 | 0.011281 | 0.011336 |
| 0.012011 | 0.011365 | 0.011143 | 0.011530 | 0.011530 | 0.011329 | 0.011430 |
| 0.011362 | 0.011329 | 0.011396 | 0.011295 | 0.011396 | 0.011329 | 0.011329 |
| 0.011295 | 0.011396 | 0.011597 | 0.011463 | 0.011362 | 0.011329 | 0.011262 |
| 0.011228 | 0.011228 | 0.011295 | 0.000000 | 0.011463 | 0.011429 | 0.011362 |
| 0.011463 | 0.011530 | 0.011262 | 0.011262 | 0.011295 | 0.011295 | 0.011297 |

|          |          |          |          |          |          |          |
|----------|----------|----------|----------|----------|----------|----------|
| 0.011364 | 0.011295 | 0.011295 | 0.011168 | 0.011241 | 0.011200 | 0.011296 |
| 0.011297 | 0.011232 | 0.011245 | 0.011267 | 0.011196 | 0.011231 | 0.011263 |
| 0.011528 | 0.011301 | 0.011336 | 0.011228 | 0.011233 | 0.011363 | 0.011329 |
| 0.011396 | 0.011330 | 0.011329 | 0.011429 | 0.011362 | 0.011698 | 0.011530 |
| 0.011564 | 0.011430 | 0.011295 | 0.011396 | 0.011195 | 0.011429 | 0.011228 |
| 0.011295 | 0.011295 | 0.011262 | 0.011228 | 0.011262 | 0.011228 | 0.011329 |
| 0.011295 | 0.011396 | 0.011329 | 0.011228 | 0.011330 | 0.011430 | 0.011432 |
| 0.011430 | 0.011329 | 0.011228 | 0.011161 | 0.011295 | 0.011228 | 0.011161 |
| 0.011264 | 0.011430 | 0.011228 | 0.011430 | 0.011195 | 0.011295 | 0.011262 |
| 0.011362 | 0.011262 | 0.011295 | 0.011262 | 0.011295 | 0.011161 | 0.011295 |
| 0.011329 | 0.011262 | 0.011329 | 0.011262 | 0.011295 | 0.011329 | 0.011564 |
| 0.011665 | 0.011597 | 0.011665 | 0.011397 | 0.011665 | 0.011295 | 0.011262 |
| 0.011263 | 0.011545 | 0.011335 | 0.011163 | 0.011671 | 0.011163 | 0.011257 |
| 0.011637 | 0.011570 | 0.011463 | 0.011665 | 0.011368 | 0.011530 | 0.011497 |
| 0.011430 | 0.011597 | 0.011451 | 0.011307 | 0.011354 | 0.011329 | 0.011399 |
| 0.011497 | 0.011398 | 0.011534 | 0.011602 | 0.011530 | 0.011598 | 0.011704 |
| 0.011433 | 0.011603 | 0.011534 | 0.011466 | 0.011733 | 0.011195 | 0.011397 |
| 0.011362 | 0.011295 | 0.011195 | 0.011195 | 0.011262 | 0.011262 | 0.011329 |
| 0.011262 | 0.011329 | 0.011228 | 0.011329 | 0.011262 | 0.011262 | 0.011329 |
| 0.011262 | 0.011698 | 0.011597 | 0.011631 | 0.011161 | 0.011262 | 0.011295 |
| 0.011295 | 0.011262 | 0.011329 | 0.011362 | 0.011228 | 0.011228 | 0.011228 |
| 0.011765 | 0.011396 | 0.011396 | 0.011195 | 0.011295 | 0.011463 | 0.011228 |
| 0.011228 | 0.011295 | 0.011262 | 0.011430 | 0.011228 | 0.011362 | 0.011497 |
| 0.011429 | 0.011262 | 0.011262 | 0.011195 | 0.011195 | 0.011362 | 0.011295 |
| 0.011195 | 0.011295 | 0.011161 | 0.011195 | 0.011329 | 0.011463 | 0.011228 |
| 0.011195 | 0.011329 | 0.011262 | 0.011161 | 0.011497 | 0.011161 | 0.011329 |
| 0.011403 | 0.011228 | 0.011530 | 0.011362 | 0.011396 | 0.011262 | 0.011362 |
| 0.011228 | 0.011564 | 0.011161 | 0.011430 | 0.011228 | 0.011228 | 0.011161 |
| 0.011396 | 0.011564 | 0.011295 | 0.011362 | 0.011195 | 0.011597 | 0.011228 |
| 0.011228 | 0.011228 | 0.011262 | 0.011362 | 0.011262 | 0.011362 | 0.011429 |
| 0.011430 | 0.011396 | 0.011295 | 0.011396 | 0.011362 | 0.011228 | 0.011195 |
| 0.011228 | 0.011228 | 0.011295 | 0.011228 | 0.011195 | 0.011295 | 0.011228 |
| 0.011262 | 0.011262 | 0.011396 | 0.011429 | 0.011329 | 0.011262 | 0.011262 |
| 0.011329 | 0.011262 | 0.011362 | 0.011228 | 0.011362 | 0.011463 | 0.011765 |
| 0.011262 | 0.011665 | 0.011233 | 0.017747 | 0.011126 | 0.011366 | 0.011583 |
| 0.011545 | 0.011588 | 0.011270 | 0.011234 | 0.011664 | 0.011612 | 0.011303 |
| 0.011440 | 0.011487 | 0.011099 | 0.011186 | 0.011216 | 0.011258 | 0.011189 |
| 0.011389 | 0.011395 | 0.011394 | 0.011259 | 0.011396 | 0.011430 | 0.011432 |
| 0.011301 | 0.011396 | 0.011396 | 0.011362 | 0.011329 | 0.011329 | 0.011295 |
| 0.011329 | 0.011262 | 0.011295 | 0.011329 | 0.011295 | 0.011228 | 0.011262 |
| 0.011262 | 0.011329 | 0.011228 | 0.011329 | 0.011362 | 0.011396 | 0.011295 |
| 0.011329 | 0.011295 | 0.011631 | 0.011631 | 0.011362 | 0.011396 | 0.011430 |
| 0.011195 | 0.011195 | 0.011228 | 0.011329 | 0.011195 | 0.011429 | 0.011429 |
| 0.011463 | 0.011463 | 0.011396 | 0.011497 | 0.011665 | 0.011498 | 0.011329 |
| 0.011329 | 0.011396 | 0.011429 | 0.011262 | 0.011329 | 0.011161 | 0.011329 |
| 0.011396 | 0.011396 | 0.011429 | 0.011396 | 0.011296 | 0.011497 | 0.011463 |
| 0.011331 | 0.011228 | 0.011329 | 0.011430 | 0.011329 | 0.011463 | 0.011497 |
| 0.011665 | 0.011368 | 0.011530 | 0.011497 | 0.011430 | 0.011597 | 0.011228 |
| 0.011397 | 0.011295 | 0.011262 | 0.011262 | 0.011329 | 0.011228 | 0.011329 |
| 0.011362 | 0.011396 | 0.011295 | 0.011329 | 0.011295 | 0.011631 | 0.011631 |
| 0.011362 | 0.011396 | 0.011463 | 0.011396 | 0.012036 | 0.011453 | 0.011377 |
| 0.011447 | 0.011407 | 0.011517 | 0.011407 | 0.011515 | 0.011440 | 0.011405 |
| 0.011988 | 0.011303 | 0.011437 | 0.011372 | 0.011646 | 0.011502 | 0.011605 |
| 0.012012 | 0.011475 | 0.011331 | 0.011329 | 0.011329 | 0.011362 | 0.011297 |
| 0.011195 | 0.011228 | 0.011362 | 0.011329 | 0.011331 | 0.011463 | 0.011431 |
| 0.011295 | 0.011228 | 0.011262 | 0.011295 | 0.011195 | 0.011262 | 0.011161 |
| 0.011295 | 0.011329 | 0.011228 | 0.011195 | 0.011295 | 0.011228 | 0.011262 |
| 0.011262 | 0.011195 | 0.011262 | 0.011295 | 0.011195 | 0.011396 | 0.011429 |
| 0.011329 | 0.011396 | 0.011329 | 0.011329 | 0.011262 | 0.011665 | 0.011295 |
| 0.011339 | 0.011262 | 0.011497 | 0.011501 | 0.011362 | 0.011362 | 0.011362 |

|          |          |          |          |          |          |          |
|----------|----------|----------|----------|----------|----------|----------|
| 0.011362 | 0.011295 | 0.011262 | 0.011295 | 0.011396 | 0.011396 | 0.011329 |
| 0.011329 | 0.011463 | 0.011631 | 0.011362 | 0.011564 | 0.011564 | 0.011429 |
| 0.011262 | 0.011329 | 0.011362 | 0.011766 | 0.011329 | 0.011362 | 0.011329 |
| 0.011362 | 0.011295 | 0.011295 | 0.011598 | 0.011530 | 0.011564 | 0.011295 |
| 0.011396 | 0.011463 | 0.011329 | 0.011396 | 0.011362 | 0.011228 | 0.011564 |
| 0.011329 | 0.011295 | 0.011295 | 0.011463 | 0.011295 | 0.011396 | 0.011631 |
| 0.011329 | 0.011672 | 0.011698 | 0.011426 | 0.011173 | 0.011400 | 0.011215 |
| 0.011170 | 0.011644 | 0.011201 | 0.011373 | 0.011207 | 0.011315 | 0.011326 |
| 0.011366 | 0.011126 | 0.011283 | 0.000000 | 0.011168 | 0.011261 | 0.011303 |
| 0.011324 | 0.011218 | 0.011342 | 0.011272 | 0.011330 | 0.011463 | 0.011530 |
| 0.011530 | 0.011396 | 0.011500 | 0.011501 | 0.011636 | 0.011661 | 0.011329 |
| 0.011564 | 0.011430 | 0.011295 | 0.011396 | 0.011195 | 0.011429 | 0.011228 |
| 0.011295 | 0.011295 | 0.011262 | 0.011228 | 0.011262 | 0.011228 | 0.011329 |
| 0.011270 | 0.011270 | 0.011300 | 0.011334 | 0.011471 | 0.011436 | 0.011436 |
| 0.011435 | 0.011363 | 0.011134 | 0.011132 | 0.011297 | 0.011467 | 0.011467 |
| 0.011262 | 0.011331 | 0.011565 | 0.011533 | 0.011464 | 0.011498 | 0.011429 |
| 0.011362 | 0.011429 | 0.011429 | 0.011329 | 0.011900 | 0.011497 | 0.011564 |
| 0.011597 | 0.011666 | 0.011299 | 0.011372 | 0.011262 | 0.011463 | 0.011430 |
| 0.011464 | 0.011497 | 0.011497 | 0.011497 | 0.011650 | 0.011631 | 0.011268 |
| 0.011162 | 0.011164 | 0.011265 | 0.011230 | 0.011334 | 0.011172 | 0.011502 |
| 0.011300 | 0.011455 | 0.011203 | 0.011285 | 0.011296 | 0.011368 | 0.011262 |
| 0.011228 | 0.011228 | 0.011295 | 0.000000 | 0.011463 | 0.011429 | 0.011362 |
| 0.011463 | 0.011530 | 0.011262 | 0.011262 | 0.011295 | 0.011295 | 0.011297 |
| 0.011364 | 0.011295 | 0.011295 | 0.011330 | 0.011463 | 0.011530 | 0.011530 |
| 0.011396 | 0.011500 | 0.011501 | 0.011636 | 0.011661 | 0.011329 | 0.011497 |
| 0.011430 | 0.011430 | 0.011263 | 0.011443 | 0.011373 | 0.011401 | 0.011235 |
| 0.011439 | 0.011561 | 0.011357 | 0.011332 | 0.011228 | 0.011430 | 0.011295 |
| 0.011396 | 0.011329 | 0.011228 | 0.011330 | 0.011430 | 0.011432 | 0.011329 |
| 0.011228 | 0.011161 | 0.011295 | 0.011228 | 0.011161 | 0.011264 | 0.011430 |
| 0.011329 | 0.011262 | 0.011295 | 0.011329 | 0.011295 | 0.011228 | 0.011430 |
| 0.011295 | 0.011329 | 0.011329 | 0.011262 | 0.011329 | 0.011564 | 0.011228 |
| 0.011262 | 0.011665 | 0.011262 | 0.011295 | 0.011262 | 0.011631 | 0.011146 |
| 0.011566 | 0.011145 | 0.011161 | 0.011422 | 0.011467 | 0.011419 | 0.011102 |
| 0.011113 | 0.011429 | 0.011530 | 0.011637 | 0.011498 | 0.011601 | 0.011766 |
| 0.011666 | 0.011703 | 0.011665 | 0.011880 | 0.011631 | 0.012506 | 0.011666 |
| 0.012405 | 0.012173 | 0.012307 | 0.012578 | 0.011631 | 0.011329 | 0.011631 |
| 0.012070 | 0.011971 | 0.011597 | 0.011497 | 0.011564 | 0.011564 | 0.011534 |
| 0.011429 | 0.011399 | 0.011497 | 0.011464 | 0.011833 | 0.011900 | 0.011901 |
| 0.011800 | 0.011901 | 0.012004 | 0.011737 | 0.012070 | 0.012076 | 0.012137 |
| 0.012138 | 0.012172 | 0.012084 | 0.012138 | 0.012139 | 0.011362 | 0.011665 |
| 0.011733 | 0.012237 | 0.011738 | 0.011967 | 0.012440 | 0.011502 | 0.011396 |
| 0.011362 | 0.011362 | 0.011833 | 0.011883 | 0.011975 | 0.011698 | 0.011363 |
| S711     | 0.011833 | 0.011833 | 0.011833 | 0.011597 | 0.011597 | 0.011665 |
| 0.011570 | 0.011502 | 0.011665 | 0.011430 | 0.011497 | 0.011464 | 0.011429 |
| 0.011396 | 0.011631 | 0.011362 | 0.011463 | 0.011530 | 0.011497 | 0.011463 |
| 0.011429 | 0.011463 | 0.011228 | 0.011430 | 0.011463 | 0.011463 | 0.011536 |
| 0.011430 | 0.011463 | 0.011362 | 0.011262 | 0.011530 | 0.011497 | 0.011530 |
| 0.011497 | 0.011597 | 0.011497 | 0.011497 | 0.011530 | 0.011497 | 0.011665 |
| 0.011362 | 0.011497 | 0.011530 | 0.011463 | 0.011497 | 0.011597 | 0.011530 |
| 0.011497 | 0.011665 | 0.011564 | 0.011564 | 0.011497 | 0.011765 | 0.011497 |
| 0.011463 | 0.011497 | 0.011631 | 0.011765 | 0.011598 | 0.011497 | 0.011597 |
| 0.011530 | 0.011597 | 0.011497 | 0.011732 | 0.011699 | 0.011497 | 0.011564 |
| 0.011463 | 0.011564 | 0.011530 | 0.011597 | 0.011530 | 0.011530 | 0.011530 |
| 0.011429 | 0.011463 | 0.011429 | 0.011463 | 0.011497 | 0.011531 | 0.011597 |
| 0.011530 | 0.011497 | 0.011564 | 0.011463 | 0.011530 | 0.011429 | 0.011497 |
| 0.011665 | 0.011597 | 0.011631 | 0.011665 | 0.011497 | 0.011732 | 0.011497 |
| 0.011691 | 0.011621 | 0.011739 | 0.011451 | 0.011433 | 0.011539 | 0.011257 |
| 0.011902 | 0.011365 | 0.011472 | 0.011732 | 0.011732 | 0.011463 | 0.011564 |
| 0.011564 | 0.011530 | 0.011597 | 0.011497 | 0.011597 | 0.011530 | 0.011530 |
| 0.011497 | 0.011530 | 0.011799 | 0.011665 | 0.011564 | 0.011530 | 0.011463 |

|          |          |          |          |          |          |          |
|----------|----------|----------|----------|----------|----------|----------|
| 0.011429 | 0.011362 | 0.011497 | 0.011463 | 0.000000 | 0.011228 | 0.011161 |
| 0.011262 | 0.011329 | 0.011463 | 0.011463 | 0.011497 | 0.011497 | 0.011499 |
| 0.011567 | 0.011497 | 0.011497 | 0.011384 | 0.011458 | 0.011411 | 0.011497 |
| 0.011500 | 0.011438 | 0.011503 | 0.011474 | 0.011400 | 0.011437 | 0.011465 |
| 0.011456 | 0.011508 | 0.011542 | 0.011430 | 0.011440 | 0.011565 | 0.011464 |
| 0.011531 | 0.011532 | 0.011531 | 0.011631 | 0.011564 | 0.011934 | 0.011665 |
| 0.011497 | 0.011564 | 0.011497 | 0.011530 | 0.011396 | 0.011362 | 0.011430 |
| 0.011497 | 0.011497 | 0.011463 | 0.011429 | 0.011463 | 0.011429 | 0.011530 |
| 0.011497 | 0.011597 | 0.011530 | 0.011429 | 0.011532 | 0.011631 | 0.011635 |
| 0.011631 | 0.011530 | 0.011429 | 0.011364 | 0.011497 | 0.011429 | 0.011362 |
| 0.011332 | 0.011631 | 0.011430 | 0.011631 | 0.011396 | 0.011497 | 0.011463 |
| 0.011564 | 0.011463 | 0.011497 | 0.011463 | 0.011497 | 0.011362 | 0.011497 |
| 0.011530 | 0.011463 | 0.011530 | 0.011463 | 0.011497 | 0.011530 | 0.011765 |
| 0.011598 | 0.011530 | 0.011598 | 0.011633 | 0.011598 | 0.011497 | 0.011463 |
| 0.011432 | 0.011747 | 0.011609 | 0.011403 | 0.011603 | 0.011367 | 0.011532 |
| 0.011604 | 0.011502 | 0.011665 | 0.011866 | 0.011572 | 0.011732 | 0.011698 |
| 0.011631 | 0.011799 | 0.011664 | 0.011513 | 0.011563 | 0.011530 | 0.011602 |
| 0.011698 | 0.011600 | 0.011737 | 0.011805 | 0.011732 | 0.011799 | 0.011908 |
| 0.011636 | 0.011807 | 0.011738 | 0.011669 | 0.011935 | 0.011396 | 0.011600 |
| 0.011564 | 0.011497 | 0.011396 | 0.011396 | 0.011463 | 0.011463 | 0.011530 |
| 0.011463 | 0.011530 | 0.011429 | 0.011463 | 0.011463 | 0.011463 | 0.011530 |
| 0.011463 | 0.011631 | 0.011530 | 0.011564 | 0.011362 | 0.011463 | 0.011497 |
| 0.011497 | 0.011463 | 0.011530 | 0.011497 | 0.011429 | 0.011429 | 0.011429 |
| 0.011698 | 0.011530 | 0.011597 | 0.011396 | 0.011497 | 0.011665 | 0.011429 |
| 0.011429 | 0.011497 | 0.011463 | 0.011631 | 0.011429 | 0.011362 | 0.011497 |
| 0.011430 | 0.011463 | 0.011463 | 0.011396 | 0.011396 | 0.011564 | 0.011497 |
| 0.011396 | 0.011497 | 0.011362 | 0.011396 | 0.011530 | 0.011396 | 0.011430 |
| 0.011396 | 0.011530 | 0.011464 | 0.011362 | 0.011430 | 0.011362 | 0.011530 |
| 0.011608 | 0.011430 | 0.011463 | 0.011564 | 0.011530 | 0.011463 | 0.011564 |
| 0.011429 | 0.011765 | 0.011362 | 0.011564 | 0.011362 | 0.011362 | 0.011362 |
| 0.011597 | 0.011531 | 0.011497 | 0.011564 | 0.011396 | 0.011530 | 0.011362 |
| 0.011429 | 0.011429 | 0.011463 | 0.011564 | 0.011463 | 0.011564 | 0.011631 |
| 0.011631 | 0.011597 | 0.011497 | 0.011598 | 0.011564 | 0.011429 | 0.011396 |
| 0.011429 | 0.011429 | 0.011497 | 0.011362 | 0.011396 | 0.011564 | 0.011429 |
| 0.011396 | 0.011463 | 0.011597 | 0.011564 | 0.011530 | 0.011463 | 0.011463 |
| 0.011530 | 0.011463 | 0.011564 | 0.011429 | 0.011564 | 0.011665 | 0.011698 |
| 0.011463 | 0.011598 | 0.011474 | 0.018012 | 0.011322 | 0.011672 | 0.011549 |
| 0.011510 | 0.011553 | 0.011584 | 0.011292 | 0.011665 | 0.011578 | 0.011668 |
| 0.011440 | 0.011304 | 0.011411 | 0.011479 | 0.011411 | 0.011554 | 0.011490 |
| 0.011389 | 0.011358 | 0.011357 | 0.011193 | 0.011597 | 0.011631 | 0.011635 |
| 0.011507 | 0.011597 | 0.011597 | 0.011497 | 0.011530 | 0.011531 | 0.011497 |
| 0.011530 | 0.011463 | 0.011497 | 0.011530 | 0.011497 | 0.011429 | 0.011463 |
| 0.011463 | 0.011530 | 0.011429 | 0.011530 | 0.011564 | 0.011597 | 0.011497 |
| 0.011463 | 0.011430 | 0.011564 | 0.011564 | 0.011564 | 0.011598 | 0.011631 |
| 0.011396 | 0.011396 | 0.011429 | 0.011530 | 0.011396 | 0.011631 | 0.011631 |
| 0.011665 | 0.011665 | 0.011597 | 0.011698 | 0.011598 | 0.011700 | 0.011530 |
| 0.011530 | 0.011597 | 0.011631 | 0.011463 | 0.011530 | 0.011497 | 0.011530 |
| 0.011598 | 0.011598 | 0.011631 | 0.011598 | 0.011498 | 0.011698 | 0.011665 |
| 0.011534 | 0.011429 | 0.011530 | 0.011631 | 0.011530 | 0.011597 | 0.011698 |
| 0.011866 | 0.011572 | 0.011732 | 0.011698 | 0.011631 | 0.011799 | 0.011430 |
| 0.011599 | 0.011497 | 0.011463 | 0.011463 | 0.011530 | 0.011429 | 0.011530 |
| 0.011564 | 0.011597 | 0.011497 | 0.011463 | 0.011430 | 0.011564 | 0.011564 |
| 0.011564 | 0.011598 | 0.011665 | 0.011597 | 0.012171 | 0.011668 | 0.011588 |
| 0.011658 | 0.011615 | 0.011728 | 0.011615 | 0.011725 | 0.011647 | 0.011612 |
| 0.012125 | 0.011510 | 0.011643 | 0.011579 | 0.011852 | 0.011707 | 0.011809 |
| 0.012149 | 0.011625 | 0.011534 | 0.011530 | 0.011530 | 0.011161 | 0.011500 |
| 0.011396 | 0.011429 | 0.011564 | 0.011530 | 0.011533 | 0.011396 | 0.011363 |
| 0.011497 | 0.011429 | 0.011463 | 0.011497 | 0.011396 | 0.011463 | 0.011362 |
| 0.011429 | 0.011463 | 0.011429 | 0.011396 | 0.011497 | 0.011429 | 0.011463 |
| 0.011463 | 0.011396 | 0.011463 | 0.011497 | 0.011396 | 0.011597 | 0.011631 |

|          |          |          |          |          |          |          |
|----------|----------|----------|----------|----------|----------|----------|
| 0.011530 | 0.011530 | 0.011530 | 0.011530 | 0.011463 | 0.011598 | 0.011497 |
| 0.011199 | 0.011463 | 0.011430 | 0.011434 | 0.011564 | 0.011564 | 0.011564 |
| 0.011564 | 0.011497 | 0.011463 | 0.011497 | 0.011597 | 0.011597 | 0.011530 |
| 0.011530 | 0.011665 | 0.011564 | 0.011564 | 0.011766 | 0.011766 | 0.011631 |
| 0.011463 | 0.011530 | 0.011564 | 0.011699 | 0.011531 | 0.011564 | 0.011530 |
| 0.011564 | 0.011429 | 0.011429 | 0.011732 | 0.011732 | 0.011698 | 0.011497 |
| 0.011597 | 0.011665 | 0.011530 | 0.011597 | 0.011564 | 0.011429 | 0.011497 |
| 0.011530 | 0.011497 | 0.011429 | 0.011665 | 0.011497 | 0.011597 | 0.011631 |
| 0.011530 | 0.011638 | 0.011631 | 0.011385 | 0.011117 | 0.011536 | 0.011267 |
| 0.011445 | 0.011644 | 0.011446 | 0.011641 | 0.011499 | 0.011366 | 0.011326 |
| 0.011366 | 0.011258 | 0.011394 | 0.011192 | 0.011276 | 0.011395 | 0.011628 |
| 0.011625 | 0.011532 | 0.011518 | 0.011518 | 0.011532 | 0.011396 | 0.011463 |
| 0.011396 | 0.011531 | 0.011635 | 0.011297 | 0.011772 | 0.011802 | 0.011530 |
| 0.011497 | 0.011564 | 0.011497 | 0.011530 | 0.011396 | 0.011362 | 0.011430 |
| 0.011497 | 0.011497 | 0.011463 | 0.011429 | 0.011463 | 0.011429 | 0.011530 |
| 0.011514 | 0.011515 | 0.011505 | 0.011540 | 0.011676 | 0.011641 | 0.011641 |
| 0.011639 | 0.011564 | 0.011392 | 0.011384 | 0.011500 | 0.011670 | 0.011671 |
| 0.011464 | 0.011534 | 0.011767 | 0.011736 | 0.011666 | 0.011700 | 0.011631 |
| 0.011564 | 0.011631 | 0.011631 | 0.011530 | 0.011833 | 0.011698 | 0.011766 |
| 0.011799 | 0.011595 | 0.011504 | 0.011580 | 0.011463 | 0.011665 | 0.011631 |
| 0.011666 | 0.011698 | 0.011698 | 0.011698 | 0.011846 | 0.011833 | 0.011477 |
| 0.011365 | 0.011372 | 0.011469 | 0.011434 | 0.011470 | 0.011396 | 0.011434 |
| 0.011506 | 0.011323 | 0.011394 | 0.011547 | 0.011497 | 0.011573 | 0.011463 |
| 0.011429 | 0.011362 | 0.011497 | 0.011463 | 0.000000 | 0.011228 | 0.011161 |
| 0.011262 | 0.011329 | 0.011463 | 0.011463 | 0.011497 | 0.011497 | 0.011499 |
| 0.011567 | 0.011497 | 0.011497 | 0.011532 | 0.011396 | 0.011463 | 0.011396 |
| 0.011531 | 0.011635 | 0.011297 | 0.011772 | 0.011802 | 0.011530 | 0.011698 |
| 0.011631 | 0.011631 | 0.011466 | 0.011652 | 0.011581 | 0.011605 | 0.011481 |
| 0.011646 | 0.011789 | 0.011653 | 0.011536 | 0.011430 | 0.011631 | 0.011497 |
| 0.011597 | 0.011530 | 0.011429 | 0.011532 | 0.011631 | 0.011635 | 0.011530 |
| 0.011429 | 0.011364 | 0.011497 | 0.011429 | 0.011362 | 0.011332 | 0.011631 |
| 0.011530 | 0.011463 | 0.011497 | 0.011530 | 0.011497 | 0.011429 | 0.011362 |
| 0.011497 | 0.011530 | 0.011530 | 0.011463 | 0.011530 | 0.011765 | 0.011362 |
| 0.011463 | 0.011598 | 0.011463 | 0.011497 | 0.011463 | 0.011564 | 0.011446 |
| 0.011566 | 0.011230 | 0.011211 | 0.011382 | 0.011467 | 0.011383 | 0.011269 |
| 0.011165 | 0.011362 | 0.011463 | 0.011569 | 0.011431 | 0.011568 | 0.011699 |
| 0.011599 | 0.011635 | 0.011597 | 0.011846 | 0.011564 | 0.012439 | 0.011599 |
| 0.012338 | 0.012106 | 0.012240 | 0.012511 | 0.011564 | 0.011463 | 0.011564 |
| 0.012204 | 0.011937 | 0.011530 | 0.011430 | 0.011497 | 0.011497 | 0.011466 |
| 0.011362 | 0.011365 | 0.011430 | 0.011396 | 0.011767 | 0.011833 | 0.011834 |
| 0.011733 | 0.011834 | 0.011937 | 0.011703 | 0.012205 | 0.012212 | 0.012272 |
| 0.012273 | 0.012306 | 0.012255 | 0.012273 | 0.012274 | 0.011564 | 0.011799 |
| 0.011867 | 0.012371 | 0.011874 | 0.011900 | 0.012373 | 0.011434 | 0.011329 |
| 0.011295 | 0.011295 | 0.011766 | 0.011800 | 0.011905 | 0.011631 | 0.011296 |
| S712     | 0.011799 | 0.011799 | 0.011799 | 0.011564 | 0.011564 | 0.011631 |
| 0.011536 | 0.011468 | 0.011631 | 0.011396 | 0.011463 | 0.011430 | 0.011396 |
| 0.011362 | 0.011597 | 0.011329 | 0.011429 | 0.011497 | 0.011463 | 0.011429 |
| 0.011396 | 0.011430 | 0.011195 | 0.011396 | 0.011430 | 0.011429 | 0.011502 |
| 0.011396 | 0.011430 | 0.011329 | 0.011228 | 0.011497 | 0.011463 | 0.011497 |
| 0.011463 | 0.011564 | 0.011463 | 0.011463 | 0.011497 | 0.011463 | 0.011631 |
| 0.011329 | 0.011463 | 0.011497 | 0.011430 | 0.011463 | 0.011564 | 0.011497 |
| 0.011463 | 0.011631 | 0.011531 | 0.011530 | 0.011463 | 0.011732 | 0.011463 |
| 0.011429 | 0.011463 | 0.011597 | 0.011732 | 0.011564 | 0.011463 | 0.011564 |
| 0.011497 | 0.011564 | 0.011463 | 0.011698 | 0.011665 | 0.011463 | 0.011530 |
| 0.011430 | 0.011530 | 0.011497 | 0.011564 | 0.011497 | 0.011497 | 0.011497 |
| 0.011396 | 0.011430 | 0.011396 | 0.011430 | 0.011463 | 0.011498 | 0.011564 |
| 0.011497 | 0.011463 | 0.011530 | 0.011429 | 0.011497 | 0.011396 | 0.011463 |
| 0.011631 | 0.011564 | 0.011598 | 0.011631 | 0.011463 | 0.011698 | 0.011463 |
| 0.011653 | 0.011583 | 0.011702 | 0.011373 | 0.011396 | 0.011502 | 0.011218 |
| 0.011865 | 0.011213 | 0.011431 | 0.011698 | 0.011698 | 0.011430 | 0.011530 |

|          |          |          |          |          |          |          |
|----------|----------|----------|----------|----------|----------|----------|
| 0.011530 | 0.011497 | 0.011564 | 0.011463 | 0.011564 | 0.011497 | 0.011497 |
| 0.011463 | 0.011497 | 0.011766 | 0.011631 | 0.011530 | 0.011497 | 0.011430 |
| 0.011396 | 0.011329 | 0.011463 | 0.011429 | 0.011228 | 0.000000 | 0.011127 |
| 0.011161 | 0.011228 | 0.011429 | 0.011429 | 0.011463 | 0.011463 | 0.011465 |
| 0.011533 | 0.011463 | 0.011463 | 0.011348 | 0.011422 | 0.011376 | 0.011464 |
| 0.011467 | 0.011404 | 0.011466 | 0.011440 | 0.011366 | 0.011403 | 0.011432 |
| 0.011420 | 0.011474 | 0.011508 | 0.011396 | 0.011406 | 0.011531 | 0.011430 |
| 0.011497 | 0.011498 | 0.011497 | 0.011597 | 0.011530 | 0.011900 | 0.011631 |
| 0.011463 | 0.011530 | 0.011463 | 0.011497 | 0.011362 | 0.011329 | 0.011396 |
| 0.011463 | 0.011463 | 0.011429 | 0.011396 | 0.011429 | 0.011396 | 0.011497 |
| 0.011463 | 0.011564 | 0.011497 | 0.011396 | 0.011498 | 0.011597 | 0.011601 |
| 0.011598 | 0.011497 | 0.011396 | 0.011330 | 0.011463 | 0.011396 | 0.011329 |
| 0.011332 | 0.011598 | 0.011396 | 0.011598 | 0.011362 | 0.011463 | 0.011429 |
| 0.011530 | 0.011429 | 0.011463 | 0.011430 | 0.011463 | 0.011329 | 0.011463 |
| 0.011497 | 0.011429 | 0.011497 | 0.011429 | 0.011463 | 0.011497 | 0.011732 |
| 0.011564 | 0.011497 | 0.011564 | 0.011599 | 0.011564 | 0.011463 | 0.011429 |
| 0.011398 | 0.011667 | 0.011563 | 0.011369 | 0.011569 | 0.011333 | 0.011454 |
| 0.011570 | 0.011468 | 0.011631 | 0.011833 | 0.011538 | 0.011698 | 0.011665 |
| 0.011597 | 0.011765 | 0.011629 | 0.011431 | 0.011522 | 0.011497 | 0.011568 |
| 0.011665 | 0.011566 | 0.011703 | 0.011771 | 0.011698 | 0.011766 | 0.011874 |
| 0.011602 | 0.011773 | 0.011704 | 0.011635 | 0.011902 | 0.011362 | 0.011566 |
| 0.011530 | 0.011463 | 0.011362 | 0.011362 | 0.011429 | 0.011430 | 0.011497 |
| 0.011430 | 0.011497 | 0.011396 | 0.011430 | 0.011430 | 0.011429 | 0.011497 |
| 0.011430 | 0.011597 | 0.011497 | 0.011530 | 0.011329 | 0.011429 | 0.011463 |
| 0.011463 | 0.011429 | 0.011497 | 0.011463 | 0.011396 | 0.011396 | 0.011396 |
| 0.011665 | 0.011497 | 0.011564 | 0.011362 | 0.011463 | 0.011631 | 0.011396 |
| 0.011396 | 0.011463 | 0.011429 | 0.011598 | 0.011396 | 0.011329 | 0.011463 |
| 0.011396 | 0.011430 | 0.011429 | 0.011362 | 0.011362 | 0.011530 | 0.011463 |
| 0.011362 | 0.011463 | 0.011329 | 0.011362 | 0.011497 | 0.011363 | 0.011396 |
| 0.011363 | 0.011497 | 0.011430 | 0.011329 | 0.011396 | 0.011329 | 0.011497 |
| 0.011574 | 0.011396 | 0.011430 | 0.011531 | 0.011497 | 0.011429 | 0.011530 |
| 0.011396 | 0.011732 | 0.011329 | 0.011530 | 0.011329 | 0.011329 | 0.011329 |
| 0.011564 | 0.011497 | 0.011463 | 0.011530 | 0.011362 | 0.011497 | 0.011329 |
| 0.011396 | 0.011396 | 0.011429 | 0.011530 | 0.011429 | 0.011530 | 0.011597 |
| 0.011597 | 0.011564 | 0.011463 | 0.011564 | 0.011530 | 0.011396 | 0.011362 |
| 0.011396 | 0.011396 | 0.011463 | 0.011329 | 0.011362 | 0.011530 | 0.011396 |
| 0.011362 | 0.011430 | 0.011564 | 0.011530 | 0.011497 | 0.011429 | 0.011430 |
| 0.011497 | 0.011430 | 0.011530 | 0.011396 | 0.011530 | 0.011631 | 0.011665 |
| 0.011429 | 0.011564 | 0.011440 | 0.017974 | 0.011322 | 0.011549 | 0.011514 |
| 0.011475 | 0.011518 | 0.011479 | 0.011234 | 0.011555 | 0.011544 | 0.011607 |
| 0.011392 | 0.011243 | 0.011372 | 0.011395 | 0.011372 | 0.011455 | 0.011404 |
| 0.011248 | 0.011321 | 0.011320 | 0.011259 | 0.011564 | 0.011598 | 0.011601 |
| 0.011473 | 0.011564 | 0.011564 | 0.011463 | 0.011497 | 0.011497 | 0.011463 |
| 0.011497 | 0.011429 | 0.011463 | 0.011497 | 0.011463 | 0.011396 | 0.011429 |
| 0.011429 | 0.011497 | 0.011396 | 0.011497 | 0.011530 | 0.011564 | 0.011463 |
| 0.011429 | 0.011396 | 0.011530 | 0.011530 | 0.011530 | 0.011565 | 0.011598 |
| 0.011362 | 0.011362 | 0.011396 | 0.011497 | 0.011362 | 0.011597 | 0.011597 |
| 0.011631 | 0.011631 | 0.011564 | 0.011665 | 0.011564 | 0.011666 | 0.011497 |
| 0.011497 | 0.011564 | 0.011597 | 0.011429 | 0.011497 | 0.011463 | 0.011497 |
| 0.011564 | 0.011564 | 0.011597 | 0.011564 | 0.011464 | 0.011665 | 0.011631 |
| 0.011501 | 0.011396 | 0.011497 | 0.011598 | 0.011497 | 0.011564 | 0.011665 |
| 0.011833 | 0.011538 | 0.011698 | 0.011665 | 0.011597 | 0.011765 | 0.011396 |
| 0.011565 | 0.011464 | 0.011429 | 0.011429 | 0.011497 | 0.011396 | 0.011497 |
| 0.011530 | 0.011564 | 0.011463 | 0.011429 | 0.011396 | 0.011530 | 0.011530 |
| 0.011530 | 0.011565 | 0.011631 | 0.011564 | 0.012137 | 0.011632 | 0.011553 |
| 0.011623 | 0.011580 | 0.011693 | 0.011580 | 0.011691 | 0.011612 | 0.011578 |
| 0.012091 | 0.011476 | 0.011608 | 0.011545 | 0.011818 | 0.011673 | 0.011775 |
| 0.012115 | 0.011588 | 0.011500 | 0.011497 | 0.011497 | 0.011127 | 0.011466 |
| 0.011362 | 0.011396 | 0.011530 | 0.011497 | 0.011500 | 0.011362 | 0.011330 |
| 0.011463 | 0.011396 | 0.011429 | 0.011463 | 0.011362 | 0.011430 | 0.011329 |

|          |          |          |          |          |          |          |
|----------|----------|----------|----------|----------|----------|----------|
| 0.011396 | 0.011429 | 0.011396 | 0.011362 | 0.011463 | 0.011396 | 0.011429 |
| 0.011429 | 0.011362 | 0.011430 | 0.011463 | 0.011362 | 0.011564 | 0.011597 |
| 0.011497 | 0.011497 | 0.011497 | 0.011497 | 0.011429 | 0.011564 | 0.011463 |
| 0.011165 | 0.011430 | 0.011396 | 0.011400 | 0.011530 | 0.011530 | 0.011530 |
| 0.011530 | 0.011463 | 0.011429 | 0.011463 | 0.011564 | 0.011564 | 0.011497 |
| 0.011497 | 0.011631 | 0.011530 | 0.011530 | 0.011732 | 0.011732 | 0.011597 |
| 0.011429 | 0.011497 | 0.011530 | 0.011665 | 0.011497 | 0.011530 | 0.011497 |
| 0.011530 | 0.011396 | 0.011396 | 0.011698 | 0.011698 | 0.011665 | 0.011463 |
| 0.011564 | 0.011631 | 0.011497 | 0.011564 | 0.011530 | 0.011396 | 0.011463 |
| 0.011497 | 0.011463 | 0.011396 | 0.011631 | 0.011463 | 0.011564 | 0.011598 |
| 0.011497 | 0.011604 | 0.011598 | 0.011345 | 0.011173 | 0.011502 | 0.011215 |
| 0.011335 | 0.011605 | 0.011411 | 0.011552 | 0.011451 | 0.011417 | 0.011326 |
| 0.011264 | 0.011258 | 0.011394 | 0.011192 | 0.011276 | 0.011395 | 0.011587 |
| 0.011588 | 0.011493 | 0.011483 | 0.011483 | 0.011498 | 0.011362 | 0.011430 |
| 0.011362 | 0.011497 | 0.011601 | 0.011196 | 0.011738 | 0.011767 | 0.011497 |
| 0.011463 | 0.011530 | 0.011463 | 0.011497 | 0.011362 | 0.011329 | 0.011396 |
| 0.011463 | 0.011463 | 0.011429 | 0.011396 | 0.011429 | 0.011396 | 0.011497 |
| 0.011479 | 0.011480 | 0.011471 | 0.011505 | 0.011642 | 0.011607 | 0.011606 |
| 0.011605 | 0.011531 | 0.011356 | 0.011348 | 0.011467 | 0.011636 | 0.011637 |
| 0.011430 | 0.011500 | 0.011733 | 0.011702 | 0.011632 | 0.011666 | 0.011597 |
| 0.011530 | 0.011597 | 0.011597 | 0.011497 | 0.011800 | 0.011665 | 0.011732 |
| 0.011766 | 0.011559 | 0.011435 | 0.011545 | 0.011430 | 0.011631 | 0.011598 |
| 0.011632 | 0.011665 | 0.011665 | 0.011665 | 0.011807 | 0.011799 | 0.011442 |
| 0.011331 | 0.011337 | 0.011435 | 0.011400 | 0.011436 | 0.011359 | 0.011400 |
| 0.011472 | 0.011279 | 0.011346 | 0.011510 | 0.011464 | 0.011539 | 0.011430 |
| 0.011396 | 0.011329 | 0.011463 | 0.011429 | 0.011228 | 0.000000 | 0.011127 |
| 0.011161 | 0.011228 | 0.011429 | 0.011429 | 0.011463 | 0.011463 | 0.011465 |
| 0.011533 | 0.011463 | 0.011463 | 0.011498 | 0.011362 | 0.011430 | 0.011362 |
| 0.011497 | 0.011601 | 0.011196 | 0.011738 | 0.011767 | 0.011497 | 0.011665 |
| 0.011598 | 0.011598 | 0.011432 | 0.011617 | 0.011547 | 0.011571 | 0.011446 |
| 0.011611 | 0.011698 | 0.011611 | 0.011502 | 0.011396 | 0.011598 | 0.011463 |
| 0.011564 | 0.011497 | 0.011396 | 0.011498 | 0.011597 | 0.011601 | 0.011497 |
| 0.011396 | 0.011330 | 0.011463 | 0.011396 | 0.011329 | 0.011332 | 0.011598 |
| 0.011497 | 0.011429 | 0.011463 | 0.011497 | 0.011463 | 0.011396 | 0.011329 |
| 0.011463 | 0.011497 | 0.011497 | 0.011429 | 0.011497 | 0.011732 | 0.011329 |
| 0.011430 | 0.011564 | 0.011429 | 0.011463 | 0.011429 | 0.011530 | 0.011403 |
| 0.011622 | 0.011273 | 0.011161 | 0.011342 | 0.011427 | 0.011347 | 0.011227 |
| 0.011113 | 0.011329 | 0.011430 | 0.011536 | 0.011397 | 0.011534 | 0.011666 |
| 0.011565 | 0.011601 | 0.011564 | 0.011812 | 0.011530 | 0.012405 | 0.011566 |
| 0.012305 | 0.012072 | 0.012206 | 0.012478 | 0.011530 | 0.011430 | 0.011531 |
| 0.012171 | 0.011903 | 0.011497 | 0.011396 | 0.011464 | 0.011464 | 0.011432 |
| 0.011329 | 0.011332 | 0.011396 | 0.011363 | 0.011733 | 0.011799 | 0.011800 |
| 0.011700 | 0.011800 | 0.011903 | 0.011669 | 0.012171 | 0.012178 | 0.012238 |
| 0.012239 | 0.012273 | 0.012220 | 0.012239 | 0.012241 | 0.011530 | 0.011766 |
| 0.011834 | 0.012338 | 0.011840 | 0.011867 | 0.012339 | 0.011400 | 0.011296 |
| 0.011262 | 0.011262 | 0.011732 | 0.011759 | 0.011869 | 0.011598 | 0.011262 |
| S713     | 0.011732 | 0.011732 | 0.011732 | 0.011497 | 0.011497 | 0.011564 |
| 0.011468 | 0.011400 | 0.011564 | 0.011329 | 0.011396 | 0.011363 | 0.011329 |
| 0.011295 | 0.011530 | 0.011262 | 0.011362 | 0.011429 | 0.011396 | 0.011362 |
| 0.011329 | 0.011362 | 0.011127 | 0.011329 | 0.011363 | 0.011362 | 0.011434 |
| 0.011329 | 0.011362 | 0.011262 | 0.011161 | 0.011429 | 0.011396 | 0.011430 |
| 0.011396 | 0.011497 | 0.011396 | 0.011396 | 0.011429 | 0.011396 | 0.011564 |
| 0.011262 | 0.011396 | 0.011429 | 0.011362 | 0.011396 | 0.011497 | 0.011429 |
| 0.011396 | 0.011564 | 0.011463 | 0.011463 | 0.011396 | 0.011665 | 0.011396 |
| 0.011362 | 0.011396 | 0.011530 | 0.011665 | 0.011497 | 0.011396 | 0.011497 |
| 0.011429 | 0.011497 | 0.011396 | 0.011631 | 0.011598 | 0.011396 | 0.011463 |
| 0.011362 | 0.011463 | 0.011430 | 0.011497 | 0.011429 | 0.011429 | 0.011429 |
| 0.011329 | 0.011362 | 0.011329 | 0.011362 | 0.011396 | 0.011430 | 0.011497 |
| 0.011430 | 0.011396 | 0.011463 | 0.011362 | 0.011429 | 0.011329 | 0.011396 |
| 0.011564 | 0.011497 | 0.011530 | 0.011564 | 0.011396 | 0.011631 | 0.011396 |



|          |          |          |          |          |          |          |
|----------|----------|----------|----------|----------|----------|----------|
| 0.011579 | 0.011508 | 0.011626 | 0.011334 | 0.011321 | 0.011428 | 0.011139 |
| 0.011792 | 0.011213 | 0.011348 | 0.011631 | 0.011631 | 0.011362 | 0.011463 |
| 0.011463 | 0.011429 | 0.011497 | 0.011396 | 0.011497 | 0.011429 | 0.011429 |
| 0.011396 | 0.011429 | 0.011698 | 0.011564 | 0.011463 | 0.011430 | 0.011362 |
| 0.011329 | 0.011262 | 0.011396 | 0.011362 | 0.011161 | 0.011127 | 0.000000 |
| 0.011161 | 0.011228 | 0.011362 | 0.011362 | 0.011396 | 0.011396 | 0.011398 |
| 0.011466 | 0.011396 | 0.011396 | 0.011276 | 0.011349 | 0.011306 | 0.011396 |
| 0.011399 | 0.011335 | 0.011392 | 0.011371 | 0.011298 | 0.011334 | 0.011364 |
| 0.011348 | 0.011405 | 0.011439 | 0.011329 | 0.011337 | 0.011464 | 0.011363 |
| 0.011430 | 0.011431 | 0.011430 | 0.011530 | 0.011463 | 0.011833 | 0.011564 |
| 0.011396 | 0.011463 | 0.011396 | 0.011430 | 0.011295 | 0.011262 | 0.011329 |
| 0.011396 | 0.011396 | 0.011362 | 0.011329 | 0.011362 | 0.011329 | 0.011429 |
| 0.011396 | 0.011497 | 0.011430 | 0.011329 | 0.011431 | 0.011530 | 0.011533 |
| 0.011530 | 0.011430 | 0.011329 | 0.011263 | 0.011396 | 0.011329 | 0.011262 |
| 0.011264 | 0.011530 | 0.011329 | 0.011530 | 0.011295 | 0.011396 | 0.011362 |
| 0.011463 | 0.011362 | 0.011396 | 0.011362 | 0.011396 | 0.011262 | 0.011396 |
| 0.011430 | 0.011362 | 0.011429 | 0.011362 | 0.011396 | 0.011429 | 0.011665 |
| 0.011497 | 0.011430 | 0.011497 | 0.011532 | 0.011497 | 0.011396 | 0.011362 |
| 0.011330 | 0.011626 | 0.011472 | 0.011300 | 0.011501 | 0.011265 | 0.011414 |
| 0.011502 | 0.011400 | 0.011564 | 0.011766 | 0.011470 | 0.011631 | 0.011598 |
| 0.011530 | 0.011698 | 0.011558 | 0.011390 | 0.011438 | 0.011430 | 0.011500 |
| 0.011598 | 0.011499 | 0.011635 | 0.011703 | 0.011631 | 0.011698 | 0.011806 |
| 0.011534 | 0.011705 | 0.011636 | 0.011568 | 0.011834 | 0.011295 | 0.011498 |
| 0.011463 | 0.011396 | 0.011295 | 0.011295 | 0.011362 | 0.011362 | 0.011429 |
| 0.011362 | 0.011430 | 0.011329 | 0.011362 | 0.011362 | 0.011362 | 0.011429 |
| 0.011362 | 0.011530 | 0.011430 | 0.011463 | 0.011262 | 0.011362 | 0.011396 |
| 0.011396 | 0.011362 | 0.011430 | 0.011396 | 0.011329 | 0.011329 | 0.011329 |
| 0.011598 | 0.011429 | 0.011497 | 0.011295 | 0.011396 | 0.011564 | 0.011329 |
| 0.011329 | 0.011396 | 0.011362 | 0.011530 | 0.011329 | 0.011262 | 0.011396 |
| 0.011329 | 0.011362 | 0.011362 | 0.011295 | 0.011295 | 0.011463 | 0.011396 |
| 0.011295 | 0.011396 | 0.011262 | 0.011295 | 0.011430 | 0.011295 | 0.011329 |
| 0.011295 | 0.011430 | 0.011363 | 0.011262 | 0.011329 | 0.011262 | 0.011430 |
| 0.011505 | 0.011329 | 0.011362 | 0.011463 | 0.011430 | 0.011362 | 0.011463 |
| 0.011329 | 0.011665 | 0.011262 | 0.011463 | 0.011262 | 0.011262 | 0.011262 |
| 0.011497 | 0.011430 | 0.011396 | 0.011463 | 0.011295 | 0.011430 | 0.011262 |
| 0.011329 | 0.011329 | 0.011362 | 0.011463 | 0.011362 | 0.011463 | 0.011530 |
| 0.011530 | 0.011497 | 0.011396 | 0.011497 | 0.011463 | 0.011329 | 0.011295 |
| 0.011329 | 0.011329 | 0.011396 | 0.011262 | 0.011295 | 0.011463 | 0.011329 |
| 0.011295 | 0.011362 | 0.011497 | 0.011463 | 0.011429 | 0.011362 | 0.011362 |
| 0.011429 | 0.011362 | 0.011463 | 0.011329 | 0.011463 | 0.011564 | 0.011598 |
| 0.011362 | 0.011497 | 0.011371 | 0.017898 | 0.011257 | 0.011549 | 0.011444 |
| 0.011406 | 0.011447 | 0.011427 | 0.011234 | 0.011500 | 0.011475 | 0.011546 |
| 0.011392 | 0.011182 | 0.011294 | 0.011353 | 0.011294 | 0.011406 | 0.011361 |
| 0.011248 | 0.011246 | 0.011246 | 0.011126 | 0.011497 | 0.011530 | 0.011534 |
| 0.011404 | 0.011497 | 0.011497 | 0.011396 | 0.011430 | 0.011430 | 0.011396 |
| 0.011430 | 0.011362 | 0.011396 | 0.011429 | 0.011396 | 0.011329 | 0.011362 |
| 0.011362 | 0.011429 | 0.011329 | 0.011430 | 0.011463 | 0.011497 | 0.011396 |
| 0.011362 | 0.011329 | 0.011463 | 0.011463 | 0.011463 | 0.011497 | 0.011530 |
| 0.011295 | 0.011295 | 0.011329 | 0.011430 | 0.011295 | 0.011530 | 0.011530 |
| 0.011564 | 0.011564 | 0.011497 | 0.011597 | 0.011497 | 0.011599 | 0.011430 |
| 0.011429 | 0.011497 | 0.011530 | 0.011362 | 0.011429 | 0.011396 | 0.011430 |
| 0.011497 | 0.011497 | 0.011530 | 0.011497 | 0.011397 | 0.011597 | 0.011564 |
| 0.011433 | 0.011329 | 0.011429 | 0.011530 | 0.011430 | 0.011497 | 0.011597 |
| 0.011766 | 0.011470 | 0.011631 | 0.011598 | 0.011530 | 0.011698 | 0.011329 |
| 0.011498 | 0.011396 | 0.011362 | 0.011362 | 0.011429 | 0.011329 | 0.011430 |
| 0.011463 | 0.011497 | 0.011396 | 0.011362 | 0.011329 | 0.011463 | 0.011463 |
| 0.011463 | 0.011497 | 0.011564 | 0.011497 | 0.012070 | 0.011560 | 0.011482 |
| 0.011552 | 0.011511 | 0.011623 | 0.011511 | 0.011620 | 0.011543 | 0.011508 |
| 0.012022 | 0.011406 | 0.011540 | 0.011475 | 0.011749 | 0.011605 | 0.011707 |
| 0.012046 | 0.011512 | 0.011432 | 0.011429 | 0.011429 | 0.000000 | 0.011398 |

|          |          |          |          |          |          |          |
|----------|----------|----------|----------|----------|----------|----------|
| 0.011295 | 0.011329 | 0.011463 | 0.011429 | 0.011432 | 0.011295 | 0.011262 |
| 0.011396 | 0.011329 | 0.011362 | 0.011396 | 0.011295 | 0.011362 | 0.011262 |
| 0.011329 | 0.011362 | 0.011329 | 0.011295 | 0.011396 | 0.011329 | 0.011362 |
| 0.011362 | 0.011295 | 0.011362 | 0.011396 | 0.011295 | 0.011497 | 0.011530 |
| 0.011430 | 0.011430 | 0.011429 | 0.011430 | 0.011362 | 0.011497 | 0.011396 |
| 0.011095 | 0.011362 | 0.011329 | 0.011332 | 0.011463 | 0.011463 | 0.011463 |
| 0.011463 | 0.011396 | 0.011362 | 0.011396 | 0.011497 | 0.011497 | 0.011429 |
| 0.011429 | 0.011564 | 0.011463 | 0.011463 | 0.011665 | 0.011665 | 0.011530 |
| 0.011362 | 0.011429 | 0.011463 | 0.011598 | 0.011430 | 0.011463 | 0.011430 |
| 0.011463 | 0.011329 | 0.011329 | 0.011631 | 0.011631 | 0.011598 | 0.011396 |
| 0.011497 | 0.011564 | 0.011429 | 0.011497 | 0.011463 | 0.011329 | 0.011396 |
| 0.011429 | 0.011396 | 0.011329 | 0.011564 | 0.011396 | 0.011497 | 0.011530 |
| 0.011429 | 0.011536 | 0.011530 | 0.011263 | 0.000000 | 0.011434 | 0.011215 |
| 0.011335 | 0.011527 | 0.011341 | 0.011507 | 0.011353 | 0.011315 | 0.011273 |
| 0.011213 | 0.011192 | 0.011339 | 0.011126 | 0.011222 | 0.011328 | 0.011506 |
| 0.011512 | 0.011414 | 0.011412 | 0.011412 | 0.011431 | 0.011295 | 0.011362 |
| 0.011295 | 0.011430 | 0.011533 | 0.011196 | 0.011670 | 0.011696 | 0.011430 |
| 0.011396 | 0.011463 | 0.011396 | 0.011430 | 0.011295 | 0.011262 | 0.011329 |
| 0.011396 | 0.011396 | 0.011362 | 0.011329 | 0.011362 | 0.011329 | 0.011429 |
| 0.011409 | 0.011410 | 0.011403 | 0.011437 | 0.011573 | 0.011538 | 0.011538 |
| 0.011537 | 0.011464 | 0.011282 | 0.011276 | 0.011399 | 0.011568 | 0.011569 |
| 0.011363 | 0.011433 | 0.011666 | 0.011635 | 0.011565 | 0.011599 | 0.011530 |
| 0.011463 | 0.011530 | 0.011530 | 0.011429 | 0.011732 | 0.011597 | 0.011665 |
| 0.011698 | 0.011488 | 0.011401 | 0.011476 | 0.011362 | 0.011564 | 0.011530 |
| 0.011565 | 0.011597 | 0.011597 | 0.011597 | 0.011728 | 0.011732 | 0.011372 |
| 0.011263 | 0.011268 | 0.011367 | 0.011332 | 0.011368 | 0.011284 | 0.011332 |
| 0.011403 | 0.011192 | 0.011251 | 0.011435 | 0.011396 | 0.011471 | 0.011362 |
| 0.011329 | 0.011262 | 0.011396 | 0.011362 | 0.011161 | 0.011127 | 0.000000 |
| 0.011161 | 0.011228 | 0.011362 | 0.011362 | 0.011396 | 0.011396 | 0.011398 |
| 0.011466 | 0.011396 | 0.011396 | 0.011431 | 0.011295 | 0.011362 | 0.011295 |
| 0.011430 | 0.011533 | 0.011196 | 0.011670 | 0.011696 | 0.011430 | 0.011597 |
| 0.011530 | 0.011530 | 0.011365 | 0.011547 | 0.011477 | 0.011503 | 0.011375 |
| 0.011542 | 0.011698 | 0.011526 | 0.011434 | 0.011329 | 0.011530 | 0.011396 |
| 0.011497 | 0.011430 | 0.011329 | 0.011431 | 0.011530 | 0.011533 | 0.011430 |
| 0.011329 | 0.011263 | 0.011396 | 0.011329 | 0.011262 | 0.011264 | 0.011530 |
| 0.011430 | 0.011362 | 0.011396 | 0.011429 | 0.011396 | 0.011329 | 0.011262 |
| 0.011396 | 0.011430 | 0.011429 | 0.011362 | 0.011429 | 0.011665 | 0.011262 |
| 0.011362 | 0.011497 | 0.011362 | 0.011396 | 0.011362 | 0.011463 | 0.011317 |
| 0.011510 | 0.011188 | 0.011161 | 0.011262 | 0.011345 | 0.011276 | 0.011144 |
| 0.011113 | 0.011262 | 0.011362 | 0.011468 | 0.011330 | 0.011466 | 0.011598 |
| 0.011498 | 0.011534 | 0.011497 | 0.011744 | 0.011463 | 0.012338 | 0.011498 |
| 0.012237 | 0.012004 | 0.012139 | 0.012410 | 0.011463 | 0.011362 | 0.011463 |
| 0.012103 | 0.011836 | 0.011430 | 0.011329 | 0.011396 | 0.011396 | 0.011365 |
| 0.011262 | 0.011264 | 0.011329 | 0.011296 | 0.011666 | 0.011732 | 0.011733 |
| 0.011632 | 0.011733 | 0.011836 | 0.011601 | 0.012104 | 0.012110 | 0.012171 |
| 0.012172 | 0.012205 | 0.012152 | 0.012172 | 0.012173 | 0.011463 | 0.011699 |
| 0.011766 | 0.012270 | 0.011772 | 0.011799 | 0.012272 | 0.011332 | 0.011228 |
| 0.011195 | 0.011195 | 0.011665 | 0.011677 | 0.011799 | 0.011530 | 0.011195 |
| S714     | 0.011833 | 0.011833 | 0.011833 | 0.011597 | 0.011597 | 0.011665 |
| 0.011570 | 0.011502 | 0.011665 | 0.011430 | 0.011497 | 0.011464 | 0.011429 |
| 0.011396 | 0.011631 | 0.011362 | 0.011463 | 0.011530 | 0.011497 | 0.011463 |
| 0.011429 | 0.011463 | 0.011228 | 0.011430 | 0.011463 | 0.011463 | 0.011536 |
| 0.011430 | 0.011463 | 0.011362 | 0.011262 | 0.011530 | 0.011497 | 0.011530 |
| 0.011497 | 0.011597 | 0.011497 | 0.011497 | 0.011530 | 0.011497 | 0.011665 |
| 0.011362 | 0.011497 | 0.011530 | 0.011463 | 0.011497 | 0.011597 | 0.011530 |
| 0.011497 | 0.011665 | 0.011564 | 0.011564 | 0.011497 | 0.011765 | 0.011497 |
| 0.011463 | 0.011497 | 0.011631 | 0.011765 | 0.011598 | 0.011497 | 0.011597 |
| 0.011530 | 0.011597 | 0.011497 | 0.011732 | 0.011699 | 0.011497 | 0.011564 |
| 0.011463 | 0.011564 | 0.011530 | 0.011597 | 0.011530 | 0.011530 | 0.011530 |
| 0.011429 | 0.011463 | 0.011429 | 0.011463 | 0.011497 | 0.011531 | 0.011597 |

|          |          |          |          |          |          |          |
|----------|----------|----------|----------|----------|----------|----------|
| 0.011530 | 0.011497 | 0.011564 | 0.011463 | 0.011530 | 0.011429 | 0.011497 |
| 0.011665 | 0.011597 | 0.011631 | 0.011665 | 0.011497 | 0.011732 | 0.011497 |
| 0.011691 | 0.011621 | 0.011739 | 0.011412 | 0.011433 | 0.011539 | 0.011257 |
| 0.011902 | 0.011314 | 0.011472 | 0.011732 | 0.011732 | 0.011463 | 0.011564 |
| 0.011564 | 0.011530 | 0.011597 | 0.011497 | 0.011597 | 0.011530 | 0.011530 |
| 0.011497 | 0.011530 | 0.011799 | 0.011665 | 0.011564 | 0.011530 | 0.011463 |
| 0.011429 | 0.011362 | 0.011497 | 0.011463 | 0.011262 | 0.011161 | 0.011161 |
| 0.000000 | 0.011262 | 0.011463 | 0.011463 | 0.011497 | 0.011497 | 0.011499 |
| 0.011567 | 0.011497 | 0.011497 | 0.011384 | 0.011458 | 0.011411 | 0.011497 |
| 0.011500 | 0.011438 | 0.011503 | 0.011474 | 0.011400 | 0.011437 | 0.011465 |
| 0.011456 | 0.011508 | 0.011542 | 0.011430 | 0.011440 | 0.011565 | 0.011464 |
| 0.011531 | 0.011532 | 0.011531 | 0.011631 | 0.011564 | 0.011934 | 0.011665 |
| 0.011497 | 0.011564 | 0.011497 | 0.011530 | 0.011396 | 0.011362 | 0.011430 |
| 0.011497 | 0.011497 | 0.011463 | 0.011429 | 0.011463 | 0.011429 | 0.011530 |
| 0.011497 | 0.011597 | 0.011530 | 0.011429 | 0.011532 | 0.011631 | 0.011635 |
| 0.011631 | 0.011530 | 0.011429 | 0.011364 | 0.011497 | 0.011429 | 0.011362 |
| 0.011366 | 0.011631 | 0.011430 | 0.011631 | 0.011396 | 0.011497 | 0.011463 |
| 0.011564 | 0.011463 | 0.011497 | 0.011463 | 0.011497 | 0.011362 | 0.011497 |
| 0.011530 | 0.011463 | 0.011530 | 0.011463 | 0.011497 | 0.011530 | 0.011765 |
| 0.011598 | 0.011530 | 0.011598 | 0.011633 | 0.011598 | 0.011497 | 0.011463 |
| 0.011432 | 0.011747 | 0.011609 | 0.011403 | 0.011603 | 0.011367 | 0.011532 |
| 0.011604 | 0.011502 | 0.011665 | 0.011866 | 0.011572 | 0.011732 | 0.011698 |
| 0.011631 | 0.011799 | 0.011664 | 0.011472 | 0.011563 | 0.011530 | 0.011602 |
| 0.011698 | 0.011600 | 0.011737 | 0.011805 | 0.011732 | 0.011799 | 0.011908 |
| 0.011636 | 0.011807 | 0.011738 | 0.011669 | 0.011935 | 0.011396 | 0.011600 |
| 0.011564 | 0.011497 | 0.011396 | 0.011396 | 0.011463 | 0.011463 | 0.011530 |
| 0.011463 | 0.011530 | 0.011429 | 0.011463 | 0.011463 | 0.011463 | 0.011530 |
| 0.011463 | 0.011631 | 0.011530 | 0.011564 | 0.011362 | 0.011463 | 0.011497 |
| 0.011497 | 0.011463 | 0.011530 | 0.011497 | 0.011429 | 0.011429 | 0.011429 |
| 0.011698 | 0.011530 | 0.011597 | 0.011396 | 0.011497 | 0.011665 | 0.011429 |
| 0.011429 | 0.011497 | 0.011463 | 0.011631 | 0.011429 | 0.011362 | 0.011497 |
| 0.011430 | 0.011463 | 0.011463 | 0.011396 | 0.011396 | 0.011564 | 0.011497 |
| 0.011396 | 0.011497 | 0.011362 | 0.011396 | 0.011530 | 0.011396 | 0.011430 |
| 0.011396 | 0.011530 | 0.011464 | 0.011362 | 0.011430 | 0.011362 | 0.011530 |
| 0.011608 | 0.011430 | 0.011463 | 0.011564 | 0.011530 | 0.011463 | 0.011564 |
| 0.011429 | 0.011765 | 0.011362 | 0.011564 | 0.011362 | 0.011362 | 0.011362 |
| 0.011597 | 0.011531 | 0.011497 | 0.011564 | 0.011396 | 0.011530 | 0.011362 |
| 0.011429 | 0.011429 | 0.011463 | 0.011564 | 0.011463 | 0.011564 | 0.011631 |
| 0.011631 | 0.011597 | 0.011497 | 0.011597 | 0.011564 | 0.011429 | 0.011396 |
| 0.011429 | 0.011429 | 0.011497 | 0.011362 | 0.011396 | 0.011564 | 0.011429 |
| 0.011396 | 0.011463 | 0.011597 | 0.011564 | 0.011530 | 0.011463 | 0.011463 |
| 0.011530 | 0.011463 | 0.011564 | 0.011429 | 0.011564 | 0.011665 | 0.011698 |
| 0.011463 | 0.011598 | 0.011474 | 0.018012 | 0.011387 | 0.011672 | 0.011549 |
| 0.011510 | 0.011553 | 0.011584 | 0.011350 | 0.011610 | 0.011578 | 0.011668 |
| 0.011487 | 0.011304 | 0.011411 | 0.011479 | 0.011411 | 0.011504 | 0.011447 |
| 0.011342 | 0.011358 | 0.011357 | 0.011193 | 0.011597 | 0.011631 | 0.011635 |
| 0.011507 | 0.011597 | 0.011597 | 0.011497 | 0.011530 | 0.011531 | 0.011497 |
| 0.011530 | 0.011463 | 0.011497 | 0.011530 | 0.011497 | 0.011429 | 0.011463 |
| 0.011463 | 0.011530 | 0.011429 | 0.011530 | 0.011564 | 0.011597 | 0.011497 |
| 0.011463 | 0.011430 | 0.011564 | 0.011564 | 0.011564 | 0.011598 | 0.011631 |
| 0.011396 | 0.011396 | 0.011429 | 0.011530 | 0.011396 | 0.011631 | 0.011631 |
| 0.011665 | 0.011665 | 0.011597 | 0.011698 | 0.011598 | 0.011700 | 0.011530 |
| 0.011530 | 0.011597 | 0.011631 | 0.011463 | 0.011530 | 0.011497 | 0.011530 |
| 0.011598 | 0.011598 | 0.011631 | 0.011598 | 0.011498 | 0.011698 | 0.011665 |
| 0.011534 | 0.011429 | 0.011530 | 0.011631 | 0.011530 | 0.011597 | 0.011698 |
| 0.011866 | 0.011572 | 0.011732 | 0.011698 | 0.011631 | 0.011799 | 0.011430 |
| 0.011599 | 0.011497 | 0.011463 | 0.011463 | 0.011530 | 0.011429 | 0.011530 |
| 0.011564 | 0.011597 | 0.011497 | 0.011463 | 0.011430 | 0.011564 | 0.011564 |
| 0.011564 | 0.011598 | 0.011665 | 0.011597 | 0.012171 | 0.011668 | 0.011588 |
| 0.011658 | 0.011615 | 0.011728 | 0.011615 | 0.011726 | 0.011647 | 0.011612 |

|          |          |          |          |          |          |          |
|----------|----------|----------|----------|----------|----------|----------|
| 0.012125 | 0.011510 | 0.011643 | 0.011579 | 0.011852 | 0.011707 | 0.011809 |
| 0.012149 | 0.011625 | 0.011534 | 0.011530 | 0.011530 | 0.011161 | 0.011500 |
| 0.011396 | 0.011429 | 0.011564 | 0.011530 | 0.011533 | 0.011396 | 0.011363 |
| 0.011497 | 0.011429 | 0.011463 | 0.011497 | 0.011396 | 0.011463 | 0.011362 |
| 0.011429 | 0.011463 | 0.011429 | 0.011396 | 0.011497 | 0.011429 | 0.011463 |
| 0.011463 | 0.011396 | 0.011463 | 0.011497 | 0.011396 | 0.011597 | 0.011631 |
| 0.011530 | 0.011530 | 0.011530 | 0.011530 | 0.011463 | 0.011598 | 0.011497 |
| 0.011199 | 0.011463 | 0.011430 | 0.011434 | 0.011564 | 0.011564 | 0.011564 |
| 0.011564 | 0.011497 | 0.011463 | 0.011497 | 0.011597 | 0.011597 | 0.011530 |
| 0.011530 | 0.011665 | 0.011564 | 0.011564 | 0.011766 | 0.011766 | 0.011631 |
| 0.011463 | 0.011530 | 0.011564 | 0.011698 | 0.011531 | 0.011564 | 0.011530 |
| 0.011564 | 0.011429 | 0.011429 | 0.011732 | 0.011732 | 0.011698 | 0.011497 |
| 0.011597 | 0.011665 | 0.011530 | 0.011597 | 0.011564 | 0.011429 | 0.011497 |
| 0.011530 | 0.011497 | 0.011429 | 0.011665 | 0.011497 | 0.011597 | 0.011631 |
| 0.011530 | 0.011638 | 0.011631 | 0.011385 | 0.011229 | 0.011536 | 0.011318 |
| 0.011445 | 0.011644 | 0.011446 | 0.011596 | 0.011499 | 0.011467 | 0.011326 |
| 0.011315 | 0.011324 | 0.011450 | 0.011258 | 0.011330 | 0.011462 | 0.011628 |
| 0.011625 | 0.011532 | 0.011518 | 0.011518 | 0.011532 | 0.011396 | 0.011463 |
| 0.011396 | 0.011531 | 0.011635 | 0.011230 | 0.011772 | 0.011802 | 0.011530 |
| 0.011497 | 0.011564 | 0.011497 | 0.011530 | 0.011396 | 0.011362 | 0.011430 |
| 0.011497 | 0.011497 | 0.011463 | 0.011429 | 0.011463 | 0.011429 | 0.011530 |
| 0.011514 | 0.011515 | 0.011505 | 0.011540 | 0.011676 | 0.011641 | 0.011641 |
| 0.011639 | 0.011564 | 0.011392 | 0.011384 | 0.011500 | 0.011670 | 0.011671 |
| 0.011464 | 0.011534 | 0.011767 | 0.011736 | 0.011665 | 0.011700 | 0.011631 |
| 0.011564 | 0.011631 | 0.011631 | 0.011530 | 0.011833 | 0.011698 | 0.011766 |
| 0.011799 | 0.011595 | 0.011504 | 0.011580 | 0.011463 | 0.011665 | 0.011631 |
| 0.011666 | 0.011698 | 0.011698 | 0.011698 | 0.011846 | 0.011833 | 0.011477 |
| 0.011365 | 0.011372 | 0.011469 | 0.011434 | 0.011470 | 0.011396 | 0.011434 |
| 0.011506 | 0.011323 | 0.011394 | 0.011547 | 0.011497 | 0.011573 | 0.011463 |
| 0.011429 | 0.011362 | 0.011497 | 0.011463 | 0.011262 | 0.011161 | 0.011161 |
| 0.000000 | 0.011262 | 0.011463 | 0.011463 | 0.011497 | 0.011497 | 0.011499 |
| 0.011567 | 0.011497 | 0.011497 | 0.011532 | 0.011396 | 0.011463 | 0.011396 |
| 0.011531 | 0.011635 | 0.011230 | 0.011772 | 0.011802 | 0.011530 | 0.011698 |
| 0.011631 | 0.011631 | 0.011466 | 0.011652 | 0.011581 | 0.011605 | 0.011481 |
| 0.011646 | 0.011789 | 0.011653 | 0.011536 | 0.011430 | 0.011631 | 0.011497 |
| 0.011597 | 0.011530 | 0.011429 | 0.011532 | 0.011631 | 0.011635 | 0.011530 |
| 0.011429 | 0.011364 | 0.011497 | 0.011429 | 0.011362 | 0.011366 | 0.011631 |
| 0.011530 | 0.011463 | 0.011497 | 0.011530 | 0.011497 | 0.011429 | 0.011362 |
| 0.011497 | 0.011530 | 0.011530 | 0.011463 | 0.011530 | 0.011765 | 0.011362 |
| 0.011463 | 0.011598 | 0.011463 | 0.011497 | 0.011463 | 0.011564 | 0.011446 |
| 0.011678 | 0.011315 | 0.011261 | 0.011382 | 0.011467 | 0.011383 | 0.011269 |
| 0.011218 | 0.011362 | 0.011463 | 0.011569 | 0.011430 | 0.011568 | 0.011699 |
| 0.011599 | 0.011635 | 0.011597 | 0.011846 | 0.011564 | 0.012439 | 0.011599 |
| 0.012338 | 0.012106 | 0.012240 | 0.012511 | 0.011564 | 0.011463 | 0.011564 |
| 0.012204 | 0.011937 | 0.011530 | 0.011430 | 0.011497 | 0.011497 | 0.011466 |
| 0.011362 | 0.011365 | 0.011430 | 0.011396 | 0.011766 | 0.011833 | 0.011834 |
| 0.011733 | 0.011834 | 0.011937 | 0.011703 | 0.012205 | 0.012212 | 0.012272 |
| 0.012273 | 0.012306 | 0.012255 | 0.012273 | 0.012274 | 0.011564 | 0.011799 |
| 0.011867 | 0.012371 | 0.011874 | 0.011900 | 0.012373 | 0.011434 | 0.011329 |
| 0.011295 | 0.011295 | 0.011766 | 0.011801 | 0.011905 | 0.011631 | 0.011296 |
| S715     | 0.011900 | 0.011900 | 0.011900 | 0.011665 | 0.011665 | 0.011732 |
| 0.011638 | 0.011570 | 0.011732 | 0.011497 | 0.011564 | 0.011531 | 0.011497 |
| 0.011463 | 0.011698 | 0.011429 | 0.011530 | 0.011597 | 0.011564 | 0.011530 |
| 0.011497 | 0.011530 | 0.011295 | 0.011497 | 0.011531 | 0.011530 | 0.011604 |
| 0.011497 | 0.011530 | 0.011429 | 0.011329 | 0.011597 | 0.011564 | 0.011597 |
| 0.011564 | 0.011665 | 0.011564 | 0.011564 | 0.011597 | 0.011564 | 0.011732 |
| 0.011429 | 0.011564 | 0.011597 | 0.011530 | 0.011564 | 0.011665 | 0.011597 |
| 0.011564 | 0.011732 | 0.011631 | 0.011631 | 0.011564 | 0.011833 | 0.011564 |
| 0.011530 | 0.011564 | 0.011698 | 0.011833 | 0.011665 | 0.011564 | 0.011665 |
| 0.011597 | 0.011665 | 0.011564 | 0.011799 | 0.011766 | 0.011564 | 0.011631 |

|          |          |          |          |          |          |          |
|----------|----------|----------|----------|----------|----------|----------|
| 0.011530 | 0.011631 | 0.011597 | 0.011665 | 0.011597 | 0.011597 | 0.011597 |
| 0.011497 | 0.011530 | 0.011497 | 0.011530 | 0.011564 | 0.011599 | 0.011665 |
| 0.011597 | 0.011564 | 0.011631 | 0.011530 | 0.011597 | 0.011497 | 0.011564 |
| 0.011732 | 0.011665 | 0.011698 | 0.011732 | 0.011564 | 0.011799 | 0.011564 |
| 0.011765 | 0.011695 | 0.011815 | 0.011490 | 0.011508 | 0.011539 | 0.011336 |
| 0.011975 | 0.011314 | 0.011554 | 0.011799 | 0.011799 | 0.011530 | 0.011631 |
| 0.011631 | 0.011597 | 0.011665 | 0.011564 | 0.011665 | 0.011597 | 0.011597 |
| 0.011564 | 0.011597 | 0.011866 | 0.011732 | 0.011631 | 0.011598 | 0.011530 |
| 0.011497 | 0.011429 | 0.011564 | 0.011530 | 0.011329 | 0.011228 | 0.011228 |
| 0.011262 | 0.000000 | 0.011530 | 0.011530 | 0.011564 | 0.011564 | 0.011567 |
| 0.011635 | 0.011564 | 0.011564 | 0.011456 | 0.011530 | 0.011481 | 0.011564 |
| 0.011568 | 0.011507 | 0.011577 | 0.011543 | 0.011468 | 0.011505 | 0.011533 |
| 0.011528 | 0.011577 | 0.011611 | 0.011497 | 0.011510 | 0.011632 | 0.011531 |
| 0.011598 | 0.011599 | 0.011598 | 0.011698 | 0.011631 | 0.012001 | 0.011732 |
| 0.011564 | 0.011631 | 0.011564 | 0.011597 | 0.011463 | 0.011429 | 0.011497 |
| 0.011564 | 0.011564 | 0.011530 | 0.011497 | 0.011530 | 0.011497 | 0.011597 |
| 0.011564 | 0.011665 | 0.011597 | 0.011497 | 0.011532 | 0.011698 | 0.011702 |
| 0.011698 | 0.011598 | 0.011497 | 0.011364 | 0.011564 | 0.011497 | 0.011430 |
| 0.011434 | 0.011698 | 0.011497 | 0.011698 | 0.011463 | 0.011564 | 0.011530 |
| 0.011631 | 0.011530 | 0.011564 | 0.011530 | 0.011564 | 0.011430 | 0.011564 |
| 0.011597 | 0.011530 | 0.011597 | 0.011530 | 0.011564 | 0.011597 | 0.011833 |
| 0.011665 | 0.011597 | 0.011665 | 0.011701 | 0.011665 | 0.011564 | 0.011530 |
| 0.011499 | 0.011707 | 0.011563 | 0.011403 | 0.011671 | 0.011435 | 0.011572 |
| 0.011672 | 0.011570 | 0.011732 | 0.011934 | 0.011641 | 0.011799 | 0.011766 |
| 0.011698 | 0.011866 | 0.011736 | 0.011555 | 0.011647 | 0.011598 | 0.011669 |
| 0.011766 | 0.011668 | 0.011804 | 0.011873 | 0.011799 | 0.011867 | 0.011975 |
| 0.011703 | 0.011875 | 0.011805 | 0.011737 | 0.012003 | 0.011463 | 0.011667 |
| 0.011631 | 0.011564 | 0.011463 | 0.011463 | 0.011530 | 0.011530 | 0.011597 |
| 0.011530 | 0.011597 | 0.011497 | 0.011530 | 0.011530 | 0.011530 | 0.011597 |
| 0.011530 | 0.011698 | 0.011598 | 0.011631 | 0.011429 | 0.011530 | 0.011564 |
| 0.011564 | 0.011530 | 0.011597 | 0.011564 | 0.011497 | 0.011497 | 0.011497 |
| 0.011765 | 0.011597 | 0.011665 | 0.011463 | 0.011564 | 0.011732 | 0.011497 |
| 0.011497 | 0.011564 | 0.011530 | 0.011698 | 0.011497 | 0.011430 | 0.011564 |
| 0.011497 | 0.011530 | 0.011530 | 0.011463 | 0.011463 | 0.011631 | 0.011564 |
| 0.011463 | 0.011564 | 0.011430 | 0.011463 | 0.011597 | 0.011463 | 0.011497 |
| 0.011464 | 0.011597 | 0.011531 | 0.011430 | 0.011497 | 0.011430 | 0.011597 |
| 0.011677 | 0.011497 | 0.011530 | 0.011631 | 0.011597 | 0.011530 | 0.011631 |
| 0.011497 | 0.011833 | 0.011429 | 0.011631 | 0.011430 | 0.011430 | 0.011429 |
| 0.011665 | 0.011598 | 0.011564 | 0.011631 | 0.011463 | 0.011598 | 0.011430 |
| 0.011497 | 0.011497 | 0.011530 | 0.011631 | 0.011530 | 0.011631 | 0.011698 |
| 0.011698 | 0.011665 | 0.011564 | 0.011665 | 0.011631 | 0.011497 | 0.011463 |
| 0.011497 | 0.011497 | 0.011564 | 0.011429 | 0.011463 | 0.011631 | 0.011497 |
| 0.011463 | 0.011530 | 0.011665 | 0.011631 | 0.011597 | 0.011530 | 0.011530 |
| 0.011597 | 0.011530 | 0.011631 | 0.011497 | 0.011631 | 0.011732 | 0.011766 |
| 0.011530 | 0.011665 | 0.011543 | 0.018087 | 0.011518 | 0.011794 | 0.011618 |
| 0.011579 | 0.011623 | 0.011584 | 0.011350 | 0.011719 | 0.011647 | 0.011789 |
| 0.011487 | 0.011426 | 0.011489 | 0.011563 | 0.011411 | 0.011603 | 0.011533 |
| 0.011342 | 0.011433 | 0.011431 | 0.011193 | 0.011665 | 0.011698 | 0.011703 |
| 0.011576 | 0.011665 | 0.011665 | 0.011564 | 0.011597 | 0.011598 | 0.011564 |
| 0.011597 | 0.011530 | 0.011564 | 0.011597 | 0.011564 | 0.011497 | 0.011530 |
| 0.011530 | 0.011597 | 0.011497 | 0.011597 | 0.011631 | 0.011665 | 0.011564 |
| 0.011530 | 0.011497 | 0.011631 | 0.011631 | 0.011631 | 0.011598 | 0.011698 |
| 0.011463 | 0.011463 | 0.011497 | 0.011597 | 0.011463 | 0.011698 | 0.011698 |
| 0.011732 | 0.011732 | 0.011665 | 0.011765 | 0.011665 | 0.011768 | 0.011597 |
| 0.011597 | 0.011665 | 0.011698 | 0.011530 | 0.011597 | 0.011564 | 0.011597 |
| 0.011665 | 0.011665 | 0.011698 | 0.011665 | 0.011565 | 0.011765 | 0.011732 |
| 0.011602 | 0.011497 | 0.011597 | 0.011698 | 0.011597 | 0.011665 | 0.011765 |
| 0.011934 | 0.011641 | 0.011799 | 0.011766 | 0.011698 | 0.011866 | 0.011497 |
| 0.011667 | 0.011564 | 0.011530 | 0.011530 | 0.011597 | 0.011497 | 0.011597 |
| 0.011631 | 0.011665 | 0.011564 | 0.011530 | 0.011497 | 0.011631 | 0.011631 |

|          |          |          |          |          |          |          |
|----------|----------|----------|----------|----------|----------|----------|
| 0.011631 | 0.011598 | 0.011732 | 0.011665 | 0.012238 | 0.011739 | 0.011658 |
| 0.011728 | 0.011685 | 0.011798 | 0.011684 | 0.011796 | 0.011716 | 0.011681 |
| 0.012194 | 0.011580 | 0.011711 | 0.011648 | 0.011921 | 0.011775 | 0.011877 |
| 0.012217 | 0.011701 | 0.011601 | 0.011597 | 0.011597 | 0.011228 | 0.011567 |
| 0.011463 | 0.011497 | 0.011631 | 0.011597 | 0.011601 | 0.011463 | 0.011431 |
| 0.011564 | 0.011497 | 0.011530 | 0.011564 | 0.011463 | 0.011530 | 0.011429 |
| 0.011497 | 0.011530 | 0.011497 | 0.011463 | 0.011564 | 0.011497 | 0.011530 |
| 0.011530 | 0.011463 | 0.011530 | 0.011564 | 0.011463 | 0.011665 | 0.011698 |
| 0.011597 | 0.011597 | 0.011597 | 0.011597 | 0.011530 | 0.011665 | 0.011564 |
| 0.011269 | 0.011530 | 0.011497 | 0.011501 | 0.011631 | 0.011631 | 0.011631 |
| 0.011631 | 0.011564 | 0.011530 | 0.011564 | 0.011665 | 0.011665 | 0.011597 |
| 0.011597 | 0.011732 | 0.011631 | 0.011631 | 0.011833 | 0.011833 | 0.011698 |
| 0.011530 | 0.011597 | 0.011631 | 0.011766 | 0.011598 | 0.011631 | 0.011597 |
| 0.011631 | 0.011497 | 0.011497 | 0.011799 | 0.011799 | 0.011765 | 0.011564 |
| 0.011665 | 0.011732 | 0.011597 | 0.011665 | 0.011631 | 0.011497 | 0.011564 |
| 0.011597 | 0.011564 | 0.011497 | 0.011732 | 0.011564 | 0.011665 | 0.011698 |
| 0.011597 | 0.011706 | 0.011698 | 0.011467 | 0.011342 | 0.011604 | 0.011318 |
| 0.011554 | 0.011722 | 0.011517 | 0.011686 | 0.011597 | 0.011569 | 0.011485 |
| 0.011315 | 0.011455 | 0.011561 | 0.011390 | 0.011437 | 0.011596 | 0.011709 |
| 0.011701 | 0.011611 | 0.011589 | 0.011589 | 0.011599 | 0.011463 | 0.011530 |
| 0.011463 | 0.011598 | 0.011703 | 0.011297 | 0.011840 | 0.011838 | 0.011597 |
| 0.011564 | 0.011631 | 0.011564 | 0.011597 | 0.011463 | 0.011429 | 0.011497 |
| 0.011564 | 0.011564 | 0.011530 | 0.011497 | 0.011530 | 0.011497 | 0.011597 |
| 0.011584 | 0.011585 | 0.011574 | 0.011608 | 0.011744 | 0.011709 | 0.011709 |
| 0.011708 | 0.011632 | 0.011466 | 0.011456 | 0.011568 | 0.011738 | 0.011739 |
| 0.011531 | 0.011602 | 0.011835 | 0.011804 | 0.011733 | 0.011767 | 0.011698 |
| 0.011631 | 0.011698 | 0.011698 | 0.011597 | 0.011900 | 0.011765 | 0.011833 |
| 0.011866 | 0.011595 | 0.011572 | 0.011649 | 0.011530 | 0.011698 | 0.011698 |
| 0.011733 | 0.011765 | 0.011765 | 0.011765 | 0.011886 | 0.011900 | 0.011546 |
| 0.011432 | 0.011441 | 0.011537 | 0.011502 | 0.011539 | 0.011471 | 0.011502 |
| 0.011575 | 0.011411 | 0.011394 | 0.011622 | 0.011564 | 0.011642 | 0.011530 |
| 0.011497 | 0.011429 | 0.011564 | 0.011530 | 0.011329 | 0.011228 | 0.011228 |
| 0.011262 | 0.000000 | 0.011530 | 0.011530 | 0.011564 | 0.011564 | 0.011567 |
| 0.011635 | 0.011564 | 0.011564 | 0.011599 | 0.011463 | 0.011530 | 0.011463 |
| 0.011598 | 0.011703 | 0.011297 | 0.011840 | 0.011838 | 0.011597 | 0.011765 |
| 0.011698 | 0.011698 | 0.011534 | 0.011721 | 0.011651 | 0.011673 | 0.011481 |
| 0.011714 | 0.011698 | 0.011653 | 0.011604 | 0.011497 | 0.011698 | 0.011564 |
| 0.011665 | 0.011597 | 0.011497 | 0.011532 | 0.011698 | 0.011702 | 0.011598 |
| 0.011497 | 0.011364 | 0.011564 | 0.011497 | 0.011430 | 0.011434 | 0.011698 |
| 0.011597 | 0.011530 | 0.011564 | 0.011597 | 0.011564 | 0.011497 | 0.011430 |
| 0.011564 | 0.011597 | 0.011597 | 0.011530 | 0.011597 | 0.011833 | 0.011429 |
| 0.011530 | 0.011665 | 0.011530 | 0.011564 | 0.011530 | 0.011631 | 0.011532 |
| 0.011678 | 0.011400 | 0.011261 | 0.011463 | 0.011549 | 0.011455 | 0.011353 |
| 0.011218 | 0.011430 | 0.011530 | 0.011637 | 0.011498 | 0.011635 | 0.011766 |
| 0.011666 | 0.011703 | 0.011665 | 0.011915 | 0.011631 | 0.012506 | 0.011667 |
| 0.012406 | 0.012173 | 0.012307 | 0.012579 | 0.011631 | 0.011530 | 0.011631 |
| 0.012272 | 0.012005 | 0.011598 | 0.011497 | 0.011565 | 0.011565 | 0.011534 |
| 0.011430 | 0.011433 | 0.011497 | 0.011464 | 0.011834 | 0.011900 | 0.011901 |
| 0.011801 | 0.011901 | 0.012004 | 0.011771 | 0.012272 | 0.012279 | 0.012340 |
| 0.012340 | 0.012374 | 0.012323 | 0.012340 | 0.012342 | 0.011631 | 0.011867 |
| 0.011935 | 0.012439 | 0.011942 | 0.011968 | 0.012440 | 0.011502 | 0.011396 |
| 0.011362 | 0.011362 | 0.011833 | 0.011883 | 0.011975 | 0.011698 | 0.011363 |
| s716     | 0.011631 | 0.011631 | 0.011967 | 0.011732 | 0.011732 | 0.011799 |
| 0.011638 | 0.011570 | 0.011732 | 0.011228 | 0.011295 | 0.011262 | 0.011228 |
| 0.011262 | 0.011429 | 0.011228 | 0.011262 | 0.011329 | 0.011295 | 0.011262 |
| 0.011228 | 0.011262 | 0.011362 | 0.011228 | 0.011262 | 0.011262 | 0.011604 |
| 0.011497 | 0.011262 | 0.011161 | 0.011396 | 0.011329 | 0.011295 | 0.011329 |
| 0.011295 | 0.011396 | 0.011295 | 0.011295 | 0.011329 | 0.011295 | 0.011463 |
| 0.011228 | 0.011295 | 0.011329 | 0.011262 | 0.011362 | 0.011396 | 0.011329 |
| 0.011295 | 0.011463 | 0.011363 | 0.011631 | 0.011295 | 0.011564 | 0.011295 |

|          |          |          |          |          |          |          |
|----------|----------|----------|----------|----------|----------|----------|
| 0.011262 | 0.011362 | 0.011429 | 0.011564 | 0.011665 | 0.011362 | 0.011463 |
| 0.011329 | 0.011396 | 0.011295 | 0.011530 | 0.011765 | 0.011295 | 0.011362 |
| 0.011262 | 0.011362 | 0.011329 | 0.011396 | 0.011329 | 0.011329 | 0.011329 |
| 0.011228 | 0.011262 | 0.011228 | 0.011329 | 0.011295 | 0.011329 | 0.011396 |
| 0.011329 | 0.011295 | 0.011362 | 0.011262 | 0.011396 | 0.011228 | 0.011295 |
| 0.011463 | 0.011396 | 0.011631 | 0.011463 | 0.011295 | 0.011530 | 0.011295 |
| 0.011468 | 0.011695 | 0.011475 | 0.011177 | 0.011135 | 0.011318 | 0.011375 |
| 0.012011 | 0.011416 | 0.011143 | 0.011530 | 0.011530 | 0.011329 | 0.011429 |
| 0.011362 | 0.011329 | 0.011396 | 0.011295 | 0.011396 | 0.011329 | 0.011329 |
| 0.011295 | 0.011396 | 0.011597 | 0.011463 | 0.011362 | 0.011329 | 0.011262 |
| 0.011228 | 0.011228 | 0.011295 | 0.011262 | 0.011463 | 0.011429 | 0.011362 |
| 0.011463 | 0.011530 | 0.000000 | 0.000000 | 0.011094 | 0.011094 | 0.011094 |
| 0.011162 | 0.011295 | 0.011295 | 0.011168 | 0.011241 | 0.011200 | 0.011296 |
| 0.011297 | 0.011232 | 0.011245 | 0.011267 | 0.011196 | 0.011231 | 0.011263 |
| 0.011456 | 0.011301 | 0.011336 | 0.011228 | 0.011233 | 0.011363 | 0.011329 |
| 0.011396 | 0.011330 | 0.011329 | 0.011429 | 0.011362 | 0.011732 | 0.011530 |
| 0.011564 | 0.011429 | 0.011295 | 0.011396 | 0.011195 | 0.011429 | 0.011228 |
| 0.011295 | 0.011295 | 0.011262 | 0.011228 | 0.011262 | 0.011228 | 0.011329 |
| 0.011295 | 0.011396 | 0.011329 | 0.011228 | 0.011330 | 0.011429 | 0.011432 |
| 0.011430 | 0.011329 | 0.011228 | 0.011161 | 0.011295 | 0.011228 | 0.011161 |
| 0.011264 | 0.011430 | 0.011228 | 0.011430 | 0.011195 | 0.011295 | 0.011262 |
| 0.011362 | 0.011262 | 0.011295 | 0.011262 | 0.011295 | 0.011161 | 0.011295 |
| 0.011329 | 0.011262 | 0.011329 | 0.011262 | 0.011295 | 0.011329 | 0.011564 |
| 0.011665 | 0.011597 | 0.011665 | 0.011431 | 0.011665 | 0.011295 | 0.011262 |
| 0.011297 | 0.011545 | 0.011380 | 0.011197 | 0.011671 | 0.011163 | 0.011257 |
| 0.011671 | 0.011502 | 0.011463 | 0.011665 | 0.011368 | 0.011530 | 0.011497 |
| 0.011429 | 0.011597 | 0.011451 | 0.011307 | 0.011270 | 0.011329 | 0.011399 |
| 0.011497 | 0.011398 | 0.011534 | 0.011602 | 0.011530 | 0.011598 | 0.011704 |
| 0.011433 | 0.011603 | 0.011534 | 0.011466 | 0.011733 | 0.011195 | 0.011397 |
| 0.011362 | 0.011295 | 0.011195 | 0.011195 | 0.011262 | 0.011262 | 0.011329 |
| 0.011262 | 0.011329 | 0.011228 | 0.011329 | 0.011262 | 0.011262 | 0.011329 |
| 0.011262 | 0.011698 | 0.011597 | 0.011631 | 0.011161 | 0.011262 | 0.011295 |
| 0.011295 | 0.011262 | 0.011329 | 0.011362 | 0.011228 | 0.011228 | 0.011228 |
| 0.011765 | 0.011396 | 0.011396 | 0.011195 | 0.011295 | 0.011463 | 0.011228 |
| 0.011228 | 0.011295 | 0.011262 | 0.011430 | 0.011228 | 0.011362 | 0.011497 |
| 0.011429 | 0.011262 | 0.011262 | 0.011195 | 0.011195 | 0.011362 | 0.011295 |
| 0.011195 | 0.011295 | 0.011161 | 0.011195 | 0.011329 | 0.011463 | 0.011228 |
| 0.011195 | 0.011329 | 0.011262 | 0.011161 | 0.011497 | 0.011161 | 0.011329 |
| 0.011403 | 0.011228 | 0.011530 | 0.011363 | 0.011396 | 0.011262 | 0.011362 |
| 0.011228 | 0.011564 | 0.011161 | 0.011429 | 0.011228 | 0.011228 | 0.011161 |
| 0.011396 | 0.011531 | 0.011295 | 0.011362 | 0.011195 | 0.011597 | 0.011228 |
| 0.011228 | 0.011228 | 0.011262 | 0.011362 | 0.011262 | 0.011362 | 0.011429 |
| 0.011429 | 0.011396 | 0.011295 | 0.011396 | 0.011362 | 0.011228 | 0.011195 |
| 0.011228 | 0.011228 | 0.011295 | 0.011228 | 0.011195 | 0.011362 | 0.011228 |
| 0.011262 | 0.011262 | 0.011396 | 0.011429 | 0.011329 | 0.011262 | 0.011262 |
| 0.011329 | 0.011262 | 0.011362 | 0.011228 | 0.011362 | 0.011463 | 0.011765 |
| 0.011262 | 0.011665 | 0.011267 | 0.017747 | 0.011191 | 0.011427 | 0.011618 |
| 0.011579 | 0.011623 | 0.011270 | 0.011234 | 0.011719 | 0.011647 | 0.011303 |
| 0.011440 | 0.011549 | 0.011177 | 0.011228 | 0.011255 | 0.011307 | 0.011232 |
| 0.011436 | 0.011395 | 0.011357 | 0.011193 | 0.011396 | 0.011430 | 0.011432 |
| 0.011301 | 0.011396 | 0.011396 | 0.011362 | 0.011329 | 0.011329 | 0.011295 |
| 0.011329 | 0.011262 | 0.011295 | 0.011329 | 0.011295 | 0.011228 | 0.011262 |
| 0.011262 | 0.011329 | 0.011228 | 0.011329 | 0.011362 | 0.011396 | 0.011295 |
| 0.011329 | 0.011295 | 0.011631 | 0.011631 | 0.011362 | 0.011396 | 0.011430 |
| 0.011195 | 0.011195 | 0.011228 | 0.011329 | 0.011195 | 0.011429 | 0.011429 |
| 0.011463 | 0.011463 | 0.011396 | 0.011497 | 0.011665 | 0.011498 | 0.011329 |
| 0.011329 | 0.011396 | 0.011429 | 0.011262 | 0.011329 | 0.011295 | 0.011329 |
| 0.011396 | 0.011396 | 0.011429 | 0.011396 | 0.011296 | 0.011497 | 0.011463 |
| 0.011331 | 0.011228 | 0.011329 | 0.011430 | 0.011329 | 0.011463 | 0.011497 |
| 0.011665 | 0.011368 | 0.011530 | 0.011497 | 0.011429 | 0.011597 | 0.011228 |

|          |          |          |          |          |          |          |
|----------|----------|----------|----------|----------|----------|----------|
| 0.011397 | 0.011295 | 0.011262 | 0.011262 | 0.011329 | 0.011228 | 0.011329 |
| 0.011362 | 0.011396 | 0.011295 | 0.011329 | 0.011295 | 0.011631 | 0.011631 |
| 0.011362 | 0.011396 | 0.011463 | 0.011396 | 0.012036 | 0.011453 | 0.011377 |
| 0.011447 | 0.011407 | 0.011517 | 0.011407 | 0.011515 | 0.011440 | 0.011405 |
| 0.011987 | 0.011303 | 0.011437 | 0.011372 | 0.011646 | 0.011502 | 0.011605 |
| 0.012012 | 0.011475 | 0.011128 | 0.011127 | 0.011127 | 0.011362 | 0.011094 |
| 0.011195 | 0.011228 | 0.011161 | 0.011127 | 0.011128 | 0.011463 | 0.011431 |
| 0.011295 | 0.011228 | 0.011262 | 0.011295 | 0.011195 | 0.011262 | 0.011161 |
| 0.011295 | 0.011329 | 0.011228 | 0.011195 | 0.011295 | 0.011228 | 0.011262 |
| 0.011262 | 0.011195 | 0.011262 | 0.011295 | 0.011195 | 0.011396 | 0.011429 |
| 0.011329 | 0.011396 | 0.011329 | 0.011329 | 0.011262 | 0.011665 | 0.011295 |
| 0.011339 | 0.011262 | 0.011497 | 0.011501 | 0.011362 | 0.011362 | 0.011362 |
| 0.011362 | 0.011295 | 0.011262 | 0.011295 | 0.011396 | 0.011396 | 0.011329 |
| 0.011329 | 0.011463 | 0.011631 | 0.011362 | 0.011564 | 0.011564 | 0.011429 |
| 0.011262 | 0.011329 | 0.011362 | 0.011765 | 0.011329 | 0.011362 | 0.011329 |
| 0.011362 | 0.011295 | 0.011295 | 0.011598 | 0.011530 | 0.011564 | 0.011295 |
| 0.011396 | 0.011463 | 0.011329 | 0.011396 | 0.011362 | 0.011228 | 0.011564 |
| 0.011329 | 0.011295 | 0.011295 | 0.011463 | 0.011295 | 0.011396 | 0.011631 |
| 0.011329 | 0.011705 | 0.011698 | 0.011467 | 0.011173 | 0.011400 | 0.011215 |
| 0.011225 | 0.011683 | 0.011236 | 0.011373 | 0.011207 | 0.011315 | 0.011326 |
| 0.011417 | 0.011126 | 0.011283 | 0.011126 | 0.011168 | 0.011328 | 0.011385 |
| 0.011399 | 0.011257 | 0.011377 | 0.011272 | 0.011330 | 0.011463 | 0.011530 |
| 0.011530 | 0.011396 | 0.011500 | 0.011501 | 0.011636 | 0.011661 | 0.011329 |
| 0.011564 | 0.011429 | 0.011295 | 0.011396 | 0.011195 | 0.011429 | 0.011228 |
| 0.011295 | 0.011295 | 0.011262 | 0.011228 | 0.011262 | 0.011228 | 0.011329 |
| 0.011305 | 0.011305 | 0.011300 | 0.011334 | 0.011471 | 0.011436 | 0.011436 |
| 0.011435 | 0.011363 | 0.011171 | 0.011168 | 0.011297 | 0.011467 | 0.011467 |
| 0.011262 | 0.011331 | 0.011565 | 0.011533 | 0.011464 | 0.011498 | 0.011429 |
| 0.011362 | 0.011429 | 0.011429 | 0.011329 | 0.011900 | 0.011497 | 0.011564 |
| 0.011597 | 0.011666 | 0.011299 | 0.011372 | 0.011262 | 0.011463 | 0.011430 |
| 0.011464 | 0.011497 | 0.011497 | 0.011497 | 0.011650 | 0.011631 | 0.011268 |
| 0.011162 | 0.011164 | 0.011265 | 0.011230 | 0.011334 | 0.011135 | 0.011502 |
| 0.011300 | 0.011367 | 0.011108 | 0.011322 | 0.011296 | 0.011368 | 0.011262 |
| 0.011228 | 0.011228 | 0.011295 | 0.011262 | 0.011463 | 0.011429 | 0.011362 |
| 0.011463 | 0.011530 | 0.000000 | 0.000000 | 0.011094 | 0.011094 | 0.011094 |
| 0.011162 | 0.011295 | 0.011295 | 0.011330 | 0.011463 | 0.011530 | 0.011530 |
| 0.011396 | 0.011500 | 0.011501 | 0.011636 | 0.011661 | 0.011329 | 0.011497 |
| 0.011430 | 0.011430 | 0.011263 | 0.011443 | 0.011373 | 0.011401 | 0.011270 |
| 0.011439 | 0.011652 | 0.011399 | 0.011332 | 0.011228 | 0.011430 | 0.011295 |
| 0.011396 | 0.011329 | 0.011228 | 0.011330 | 0.011429 | 0.011432 | 0.011329 |
| 0.011228 | 0.011161 | 0.011295 | 0.011228 | 0.011161 | 0.011264 | 0.011430 |
| 0.011329 | 0.011262 | 0.011295 | 0.011329 | 0.011295 | 0.011228 | 0.011430 |
| 0.011295 | 0.011329 | 0.011329 | 0.011262 | 0.011329 | 0.011564 | 0.011228 |
| 0.011262 | 0.011665 | 0.011262 | 0.011295 | 0.011262 | 0.011631 | 0.011146 |
| 0.011622 | 0.011188 | 0.011211 | 0.011422 | 0.011508 | 0.011455 | 0.011102 |
| 0.011165 | 0.011429 | 0.011530 | 0.011637 | 0.011498 | 0.011635 | 0.011766 |
| 0.011666 | 0.011703 | 0.011665 | 0.011914 | 0.011631 | 0.012506 | 0.011666 |
| 0.012405 | 0.012173 | 0.012307 | 0.012578 | 0.011631 | 0.011329 | 0.011631 |
| 0.012070 | 0.012004 | 0.011597 | 0.011497 | 0.011564 | 0.011564 | 0.011534 |
| 0.011429 | 0.011433 | 0.011497 | 0.011464 | 0.011833 | 0.011900 | 0.011901 |
| 0.011800 | 0.011901 | 0.012004 | 0.011770 | 0.012070 | 0.012076 | 0.012137 |
| 0.012138 | 0.012171 | 0.012118 | 0.012138 | 0.012139 | 0.011362 | 0.011665 |
| 0.011733 | 0.012236 | 0.011738 | 0.011967 | 0.012406 | 0.011502 | 0.011396 |
| 0.011362 | 0.011362 | 0.011833 | 0.011842 | 0.011975 | 0.011698 | 0.011363 |
| s717     | 0.011631 | 0.011631 | 0.011967 | 0.011732 | 0.011732 | 0.011799 |
| 0.011638 | 0.011570 | 0.011732 | 0.011228 | 0.011295 | 0.011262 | 0.011228 |
| 0.011262 | 0.011429 | 0.011228 | 0.011262 | 0.011329 | 0.011295 | 0.011262 |
| 0.011228 | 0.011262 | 0.011362 | 0.011228 | 0.011262 | 0.011262 | 0.011604 |
| 0.011497 | 0.011262 | 0.011161 | 0.011396 | 0.011329 | 0.011295 | 0.011329 |
| 0.011295 | 0.011396 | 0.011295 | 0.011295 | 0.011329 | 0.011295 | 0.011463 |



|          |          |          |          |          |          |          |
|----------|----------|----------|----------|----------|----------|----------|
| 0.011228 | 0.011295 | 0.011329 | 0.011262 | 0.011362 | 0.011396 | 0.011329 |
| 0.011295 | 0.011463 | 0.011363 | 0.011631 | 0.011295 | 0.011564 | 0.011295 |
| 0.011262 | 0.011362 | 0.011429 | 0.011564 | 0.011665 | 0.011362 | 0.011463 |
| 0.011329 | 0.011396 | 0.011295 | 0.011530 | 0.011765 | 0.011295 | 0.011362 |
| 0.011262 | 0.011362 | 0.011329 | 0.011396 | 0.011329 | 0.011329 | 0.011329 |
| 0.011228 | 0.011262 | 0.011228 | 0.011329 | 0.011295 | 0.011329 | 0.011396 |
| 0.011329 | 0.011295 | 0.011362 | 0.011262 | 0.011396 | 0.011228 | 0.011295 |
| 0.011463 | 0.011396 | 0.011631 | 0.011463 | 0.011295 | 0.011530 | 0.011295 |
| 0.011468 | 0.011695 | 0.011475 | 0.011177 | 0.011135 | 0.011318 | 0.011375 |
| 0.012011 | 0.011416 | 0.011143 | 0.011530 | 0.011530 | 0.011329 | 0.011429 |
| 0.011362 | 0.011329 | 0.011396 | 0.011295 | 0.011396 | 0.011329 | 0.011329 |
| 0.011295 | 0.011396 | 0.011597 | 0.011463 | 0.011362 | 0.011329 | 0.011262 |
| 0.011228 | 0.011228 | 0.011295 | 0.011262 | 0.011463 | 0.011429 | 0.011362 |
| 0.011463 | 0.011530 | 0.000000 | 0.000000 | 0.011094 | 0.011094 | 0.011094 |
| 0.011162 | 0.011295 | 0.011295 | 0.011168 | 0.011241 | 0.011200 | 0.011296 |
| 0.011297 | 0.011232 | 0.011245 | 0.011267 | 0.011196 | 0.011231 | 0.011263 |
| 0.011456 | 0.011301 | 0.011336 | 0.011228 | 0.011233 | 0.011363 | 0.011329 |
| 0.011396 | 0.011330 | 0.011329 | 0.011429 | 0.011362 | 0.011732 | 0.011530 |
| 0.011564 | 0.011429 | 0.011295 | 0.011396 | 0.011195 | 0.011429 | 0.011228 |
| 0.011295 | 0.011295 | 0.011262 | 0.011228 | 0.011262 | 0.011228 | 0.011329 |
| 0.011295 | 0.011396 | 0.011329 | 0.011228 | 0.011330 | 0.011429 | 0.011432 |
| 0.011430 | 0.011329 | 0.011228 | 0.011161 | 0.011295 | 0.011228 | 0.011161 |
| 0.011264 | 0.011430 | 0.011228 | 0.011430 | 0.011195 | 0.011295 | 0.011262 |
| 0.011362 | 0.011262 | 0.011295 | 0.011262 | 0.011295 | 0.011161 | 0.011295 |
| 0.011329 | 0.011262 | 0.011329 | 0.011262 | 0.011295 | 0.011329 | 0.011564 |
| 0.011665 | 0.011597 | 0.011665 | 0.011431 | 0.011665 | 0.011295 | 0.011262 |
| 0.011297 | 0.011545 | 0.011380 | 0.011197 | 0.011671 | 0.011163 | 0.011257 |
| 0.011671 | 0.011502 | 0.011463 | 0.011665 | 0.011368 | 0.011530 | 0.011497 |
| 0.011429 | 0.011597 | 0.011451 | 0.011307 | 0.011270 | 0.011329 | 0.011399 |
| 0.011497 | 0.011398 | 0.011534 | 0.011602 | 0.011530 | 0.011598 | 0.011704 |
| 0.011433 | 0.011603 | 0.011534 | 0.011466 | 0.011733 | 0.011195 | 0.011397 |
| 0.011362 | 0.011295 | 0.011195 | 0.011195 | 0.011262 | 0.011262 | 0.011329 |
| 0.011262 | 0.011329 | 0.011228 | 0.011329 | 0.011262 | 0.011262 | 0.011329 |
| 0.011262 | 0.011698 | 0.011597 | 0.011631 | 0.011161 | 0.011262 | 0.011295 |
| 0.011295 | 0.011262 | 0.011329 | 0.011362 | 0.011228 | 0.011228 | 0.011228 |
| 0.011765 | 0.011396 | 0.011396 | 0.011195 | 0.011295 | 0.011463 | 0.011228 |
| 0.011228 | 0.011295 | 0.011262 | 0.011430 | 0.011228 | 0.011362 | 0.011497 |
| 0.011429 | 0.011262 | 0.011262 | 0.011195 | 0.011195 | 0.011362 | 0.011295 |
| 0.011195 | 0.011295 | 0.011161 | 0.011195 | 0.011329 | 0.011463 | 0.011228 |
| 0.011195 | 0.011329 | 0.011262 | 0.011161 | 0.011497 | 0.011161 | 0.011329 |
| 0.011403 | 0.011228 | 0.011530 | 0.011363 | 0.011396 | 0.011262 | 0.011362 |
| 0.011228 | 0.011564 | 0.011161 | 0.011429 | 0.011228 | 0.011228 | 0.011161 |
| 0.011396 | 0.011531 | 0.011295 | 0.011362 | 0.011195 | 0.011597 | 0.011228 |
| 0.011228 | 0.011228 | 0.011262 | 0.011362 | 0.011262 | 0.011362 | 0.011429 |
| 0.011429 | 0.011396 | 0.011295 | 0.011396 | 0.011362 | 0.011228 | 0.011195 |
| 0.011228 | 0.011228 | 0.011295 | 0.011228 | 0.011195 | 0.011362 | 0.011228 |
| 0.011262 | 0.011262 | 0.011396 | 0.011429 | 0.011329 | 0.011262 | 0.011262 |
| 0.011329 | 0.011262 | 0.011362 | 0.011228 | 0.011362 | 0.011463 | 0.011765 |
| 0.011262 | 0.011665 | 0.011267 | 0.017747 | 0.011191 | 0.011427 | 0.011618 |
| 0.011579 | 0.011623 | 0.011270 | 0.011234 | 0.011719 | 0.011647 | 0.011303 |
| 0.011440 | 0.011549 | 0.011177 | 0.011228 | 0.011255 | 0.011307 | 0.011232 |
| 0.011436 | 0.011395 | 0.011357 | 0.011193 | 0.011396 | 0.011430 | 0.011432 |
| 0.011301 | 0.011396 | 0.011396 | 0.011362 | 0.011329 | 0.011329 | 0.011295 |
| 0.011329 | 0.011262 | 0.011295 | 0.011329 | 0.011295 | 0.011228 | 0.011262 |
| 0.011262 | 0.011329 | 0.011228 | 0.011329 | 0.011362 | 0.011396 | 0.011295 |
| 0.011329 | 0.011295 | 0.011631 | 0.011631 | 0.011362 | 0.011396 | 0.011430 |
| 0.011195 | 0.011195 | 0.011228 | 0.011329 | 0.011195 | 0.011429 | 0.011429 |
| 0.011463 | 0.011463 | 0.011396 | 0.011497 | 0.011665 | 0.011498 | 0.011329 |
| 0.011329 | 0.011396 | 0.011429 | 0.011262 | 0.011329 | 0.011295 | 0.011329 |
| 0.011396 | 0.011396 | 0.011429 | 0.011396 | 0.011296 | 0.011497 | 0.011463 |

|          |          |          |          |          |          |          |
|----------|----------|----------|----------|----------|----------|----------|
| 0.011331 | 0.011228 | 0.011329 | 0.011430 | 0.011329 | 0.011463 | 0.011497 |
| 0.011665 | 0.011368 | 0.011530 | 0.011497 | 0.011429 | 0.011597 | 0.011228 |
| 0.011397 | 0.011295 | 0.011262 | 0.011262 | 0.011329 | 0.011228 | 0.011329 |
| 0.011362 | 0.011396 | 0.011295 | 0.011329 | 0.011295 | 0.011631 | 0.011631 |
| 0.011362 | 0.011396 | 0.011463 | 0.011396 | 0.012036 | 0.011453 | 0.011377 |
| 0.011447 | 0.011407 | 0.011517 | 0.011407 | 0.011515 | 0.011440 | 0.011405 |
| 0.011987 | 0.011303 | 0.011437 | 0.011372 | 0.011646 | 0.011502 | 0.011605 |
| 0.012012 | 0.011475 | 0.011128 | 0.011127 | 0.011127 | 0.011362 | 0.011094 |
| 0.011195 | 0.011228 | 0.011161 | 0.011127 | 0.011128 | 0.011463 | 0.011431 |
| 0.011295 | 0.011228 | 0.011262 | 0.011295 | 0.011195 | 0.011262 | 0.011161 |
| 0.011295 | 0.011329 | 0.011228 | 0.011195 | 0.011295 | 0.011228 | 0.011262 |
| 0.011262 | 0.011195 | 0.011262 | 0.011295 | 0.011195 | 0.011396 | 0.011429 |
| 0.011329 | 0.011396 | 0.011329 | 0.011329 | 0.011262 | 0.011665 | 0.011295 |
| 0.011339 | 0.011262 | 0.011497 | 0.011501 | 0.011362 | 0.011362 | 0.011362 |
| 0.011362 | 0.011295 | 0.011262 | 0.011295 | 0.011396 | 0.011396 | 0.011329 |
| 0.011329 | 0.011463 | 0.011631 | 0.011362 | 0.011564 | 0.011564 | 0.011429 |
| 0.011262 | 0.011329 | 0.011362 | 0.011765 | 0.011329 | 0.011362 | 0.011329 |
| 0.011362 | 0.011295 | 0.011295 | 0.011598 | 0.011530 | 0.011564 | 0.011295 |
| 0.011396 | 0.011463 | 0.011329 | 0.011396 | 0.011362 | 0.011228 | 0.011564 |
| 0.011329 | 0.011295 | 0.011295 | 0.011463 | 0.011295 | 0.011396 | 0.011631 |
| 0.011329 | 0.011705 | 0.011698 | 0.011467 | 0.011173 | 0.011400 | 0.011215 |
| 0.011225 | 0.011683 | 0.011236 | 0.011373 | 0.011207 | 0.011315 | 0.011326 |
| 0.011417 | 0.011126 | 0.011283 | 0.011126 | 0.011168 | 0.011328 | 0.011385 |
| 0.011399 | 0.011257 | 0.011377 | 0.011272 | 0.011330 | 0.011463 | 0.011530 |
| 0.011530 | 0.011396 | 0.011500 | 0.011501 | 0.011636 | 0.011661 | 0.011329 |
| 0.011564 | 0.011429 | 0.011295 | 0.011396 | 0.011195 | 0.011429 | 0.011228 |
| 0.011295 | 0.011295 | 0.011262 | 0.011228 | 0.011262 | 0.011228 | 0.011329 |
| 0.011305 | 0.011305 | 0.011300 | 0.011334 | 0.011471 | 0.011436 | 0.011436 |
| 0.011435 | 0.011363 | 0.011171 | 0.011168 | 0.011297 | 0.011467 | 0.011467 |
| 0.011262 | 0.011331 | 0.011565 | 0.011533 | 0.011464 | 0.011498 | 0.011429 |
| 0.011362 | 0.011429 | 0.011429 | 0.011329 | 0.011900 | 0.011497 | 0.011564 |
| 0.011597 | 0.011666 | 0.011299 | 0.011372 | 0.011262 | 0.011463 | 0.011430 |
| 0.011464 | 0.011497 | 0.011497 | 0.011497 | 0.011650 | 0.011631 | 0.011268 |
| 0.011162 | 0.011164 | 0.011265 | 0.011230 | 0.011334 | 0.011135 | 0.011502 |
| 0.011300 | 0.011367 | 0.011108 | 0.011322 | 0.011296 | 0.011368 | 0.011262 |
| 0.011228 | 0.011228 | 0.011295 | 0.011262 | 0.011463 | 0.011429 | 0.011362 |
| 0.011463 | 0.011530 | 0.000000 | 0.000000 | 0.011094 | 0.011094 | 0.011094 |
| 0.011162 | 0.011295 | 0.011295 | 0.011330 | 0.011463 | 0.011530 | 0.011530 |
| 0.011396 | 0.011500 | 0.011501 | 0.011636 | 0.011661 | 0.011329 | 0.011497 |
| 0.011430 | 0.011430 | 0.011263 | 0.011443 | 0.011373 | 0.011401 | 0.011270 |
| 0.011439 | 0.011652 | 0.011399 | 0.011332 | 0.011228 | 0.011430 | 0.011295 |
| 0.011396 | 0.011329 | 0.011228 | 0.011330 | 0.011429 | 0.011432 | 0.011329 |
| 0.011228 | 0.011161 | 0.011295 | 0.011228 | 0.011161 | 0.011264 | 0.011430 |
| 0.011329 | 0.011262 | 0.011295 | 0.011329 | 0.011295 | 0.011228 | 0.011430 |
| 0.011295 | 0.011329 | 0.011329 | 0.011262 | 0.011329 | 0.011564 | 0.011228 |
| 0.011262 | 0.011665 | 0.011262 | 0.011295 | 0.011262 | 0.011631 | 0.011146 |
| 0.011622 | 0.011188 | 0.011211 | 0.011422 | 0.011508 | 0.011455 | 0.011102 |
| 0.011165 | 0.011429 | 0.011530 | 0.011637 | 0.011498 | 0.011635 | 0.011766 |
| 0.011666 | 0.011703 | 0.011665 | 0.011914 | 0.011631 | 0.012506 | 0.011666 |
| 0.012405 | 0.012173 | 0.012307 | 0.012578 | 0.011631 | 0.011329 | 0.011631 |
| 0.012070 | 0.012004 | 0.011597 | 0.011497 | 0.011564 | 0.011564 | 0.011534 |
| 0.011429 | 0.011433 | 0.011497 | 0.011464 | 0.011833 | 0.011900 | 0.011901 |
| 0.011800 | 0.011901 | 0.012004 | 0.011770 | 0.012070 | 0.012076 | 0.012137 |
| 0.012138 | 0.012171 | 0.012118 | 0.012138 | 0.012139 | 0.011362 | 0.011665 |
| 0.011733 | 0.012236 | 0.011738 | 0.011967 | 0.012406 | 0.011502 | 0.011396 |
| 0.011362 | 0.011362 | 0.011833 | 0.011842 | 0.011975 | 0.011698 | 0.011363 |
| S718     | 0.011665 | 0.011665 | 0.012001 | 0.011766 | 0.011766 | 0.011833 |
| 0.011672 | 0.011604 | 0.011766 | 0.011262 | 0.011329 | 0.011296 | 0.011262 |
| 0.011295 | 0.011463 | 0.011262 | 0.011295 | 0.011362 | 0.011329 | 0.011295 |
| 0.011262 | 0.011295 | 0.011396 | 0.011262 | 0.011295 | 0.011295 | 0.011638 |

|          |          |          |          |          |          |          |
|----------|----------|----------|----------|----------|----------|----------|
| 0.011530 | 0.011295 | 0.011195 | 0.011430 | 0.011362 | 0.011329 | 0.011362 |
| 0.011329 | 0.011430 | 0.011329 | 0.011329 | 0.011362 | 0.011329 | 0.011497 |
| 0.011262 | 0.011329 | 0.011362 | 0.011295 | 0.011396 | 0.011430 | 0.011362 |
| 0.011329 | 0.011497 | 0.011396 | 0.011665 | 0.011329 | 0.011597 | 0.011329 |
| 0.011295 | 0.011396 | 0.011463 | 0.011597 | 0.011698 | 0.011396 | 0.011497 |
| 0.011362 | 0.011430 | 0.011329 | 0.011564 | 0.011799 | 0.011329 | 0.011396 |
| 0.011295 | 0.011396 | 0.011362 | 0.011430 | 0.011362 | 0.011362 | 0.011362 |
| 0.011262 | 0.011295 | 0.011262 | 0.011362 | 0.011329 | 0.011363 | 0.011430 |
| 0.011362 | 0.011329 | 0.011396 | 0.011295 | 0.011430 | 0.011262 | 0.011329 |
| 0.011497 | 0.011430 | 0.011665 | 0.011497 | 0.011329 | 0.011564 | 0.011329 |
| 0.011505 | 0.011733 | 0.011513 | 0.011217 | 0.011172 | 0.011355 | 0.011415 |
| 0.012048 | 0.011416 | 0.011143 | 0.011564 | 0.011564 | 0.011362 | 0.011463 |
| 0.011396 | 0.011362 | 0.011430 | 0.011329 | 0.011430 | 0.011362 | 0.011362 |
| 0.011329 | 0.011430 | 0.011631 | 0.011497 | 0.011396 | 0.011363 | 0.011295 |
| 0.011262 | 0.011262 | 0.011329 | 0.011295 | 0.011497 | 0.011463 | 0.011396 |
| 0.011497 | 0.011564 | 0.011094 | 0.011094 | 0.000000 | 0.000000 | 0.000000 |
| 0.011128 | 0.011329 | 0.011329 | 0.011204 | 0.011277 | 0.011236 | 0.011329 |
| 0.011331 | 0.011266 | 0.011282 | 0.011302 | 0.011230 | 0.011266 | 0.011297 |
| 0.011492 | 0.011336 | 0.011370 | 0.011262 | 0.011268 | 0.011397 | 0.011363 |
| 0.011430 | 0.011364 | 0.011363 | 0.011463 | 0.011396 | 0.011766 | 0.011564 |
| 0.011597 | 0.011463 | 0.011329 | 0.011430 | 0.011228 | 0.011463 | 0.011262 |
| 0.011329 | 0.011329 | 0.011295 | 0.011262 | 0.011295 | 0.011262 | 0.011362 |
| 0.011329 | 0.011430 | 0.011362 | 0.011262 | 0.011363 | 0.011463 | 0.011466 |
| 0.011463 | 0.011363 | 0.011262 | 0.011195 | 0.011329 | 0.011262 | 0.011195 |
| 0.011298 | 0.011463 | 0.011262 | 0.011463 | 0.011228 | 0.011329 | 0.011295 |
| 0.011396 | 0.011295 | 0.011329 | 0.011295 | 0.011329 | 0.011195 | 0.011329 |
| 0.011362 | 0.011295 | 0.011362 | 0.011295 | 0.011329 | 0.011362 | 0.011598 |
| 0.011698 | 0.011631 | 0.011698 | 0.011465 | 0.011698 | 0.011329 | 0.011295 |
| 0.011330 | 0.011586 | 0.011380 | 0.011197 | 0.011705 | 0.011197 | 0.011296 |
| 0.011706 | 0.011536 | 0.011497 | 0.011698 | 0.011402 | 0.011564 | 0.011530 |
| 0.011463 | 0.011631 | 0.011487 | 0.011349 | 0.011312 | 0.011363 | 0.011433 |
| 0.011531 | 0.011431 | 0.011568 | 0.011636 | 0.011564 | 0.011631 | 0.011738 |
| 0.011466 | 0.011637 | 0.011568 | 0.011500 | 0.011767 | 0.011228 | 0.011431 |
| 0.011396 | 0.011329 | 0.011228 | 0.011228 | 0.011295 | 0.011295 | 0.011362 |
| 0.011295 | 0.011362 | 0.011262 | 0.011362 | 0.011295 | 0.011295 | 0.011362 |
| 0.011295 | 0.011732 | 0.011631 | 0.011665 | 0.011195 | 0.011295 | 0.011329 |
| 0.011329 | 0.011295 | 0.011362 | 0.011396 | 0.011262 | 0.011262 | 0.011262 |
| 0.011799 | 0.011430 | 0.011430 | 0.011228 | 0.011329 | 0.011497 | 0.011262 |
| 0.011262 | 0.011329 | 0.011295 | 0.011463 | 0.011262 | 0.011396 | 0.011530 |
| 0.011463 | 0.011295 | 0.011295 | 0.011228 | 0.011228 | 0.011396 | 0.011329 |
| 0.011228 | 0.011329 | 0.011195 | 0.011228 | 0.011362 | 0.011497 | 0.011262 |
| 0.011228 | 0.011362 | 0.011296 | 0.011195 | 0.011530 | 0.011195 | 0.011362 |
| 0.011437 | 0.011262 | 0.011564 | 0.011396 | 0.011430 | 0.011295 | 0.011396 |
| 0.011262 | 0.011597 | 0.011195 | 0.011463 | 0.011262 | 0.011262 | 0.011195 |
| 0.011430 | 0.011564 | 0.011329 | 0.011396 | 0.011228 | 0.011631 | 0.011262 |
| 0.011262 | 0.011262 | 0.011295 | 0.011396 | 0.011295 | 0.011396 | 0.011463 |
| 0.011463 | 0.011430 | 0.011329 | 0.011430 | 0.011396 | 0.011262 | 0.011228 |
| 0.011262 | 0.011262 | 0.011329 | 0.011262 | 0.011228 | 0.011396 | 0.011262 |
| 0.011295 | 0.011295 | 0.011430 | 0.011463 | 0.011362 | 0.011295 | 0.011295 |
| 0.011362 | 0.011295 | 0.011396 | 0.011262 | 0.011396 | 0.011497 | 0.011799 |
| 0.011295 | 0.011698 | 0.011302 | 0.017749 | 0.011191 | 0.011488 | 0.011653 |
| 0.011614 | 0.011658 | 0.011270 | 0.011234 | 0.011774 | 0.011682 | 0.011364 |
| 0.011440 | 0.011610 | 0.011216 | 0.011228 | 0.011255 | 0.011356 | 0.011275 |
| 0.011436 | 0.011433 | 0.011357 | 0.011193 | 0.011430 | 0.011463 | 0.011466 |
| 0.011335 | 0.011430 | 0.011430 | 0.011396 | 0.011362 | 0.011363 | 0.011329 |
| 0.011362 | 0.011295 | 0.011329 | 0.011362 | 0.011329 | 0.011262 | 0.011295 |
| 0.011295 | 0.011362 | 0.011262 | 0.011362 | 0.011396 | 0.011430 | 0.011329 |
| 0.011362 | 0.011329 | 0.011665 | 0.011665 | 0.011396 | 0.011430 | 0.011463 |
| 0.011228 | 0.011228 | 0.011262 | 0.011362 | 0.011228 | 0.011463 | 0.011463 |
| 0.011497 | 0.011497 | 0.011430 | 0.011530 | 0.011698 | 0.011532 | 0.011362 |

|          |          |          |          |          |          |          |
|----------|----------|----------|----------|----------|----------|----------|
| 0.011362 | 0.011430 | 0.011463 | 0.011295 | 0.011362 | 0.011329 | 0.011362 |
| 0.011430 | 0.011430 | 0.011463 | 0.011430 | 0.011330 | 0.011530 | 0.011497 |
| 0.011365 | 0.011262 | 0.011362 | 0.011463 | 0.011362 | 0.011497 | 0.011530 |
| 0.011698 | 0.011402 | 0.011564 | 0.011530 | 0.011463 | 0.011631 | 0.011262 |
| 0.011431 | 0.011329 | 0.011295 | 0.011295 | 0.011362 | 0.011262 | 0.011362 |
| 0.011396 | 0.011430 | 0.011329 | 0.011362 | 0.011329 | 0.011665 | 0.011665 |
| 0.011396 | 0.011430 | 0.011497 | 0.011430 | 0.012070 | 0.011489 | 0.011412 |
| 0.011482 | 0.011442 | 0.011552 | 0.011441 | 0.011550 | 0.011474 | 0.011440 |
| 0.012022 | 0.011337 | 0.011471 | 0.011406 | 0.011680 | 0.011537 | 0.011639 |
| 0.012047 | 0.011512 | 0.011094 | 0.011161 | 0.011094 | 0.011396 | 0.000000 |
| 0.011228 | 0.011262 | 0.011195 | 0.011161 | 0.011094 | 0.011497 | 0.011464 |
| 0.011329 | 0.011262 | 0.011295 | 0.011329 | 0.011228 | 0.011295 | 0.011195 |
| 0.011329 | 0.011362 | 0.011262 | 0.011228 | 0.011329 | 0.011262 | 0.011295 |
| 0.011295 | 0.011228 | 0.011295 | 0.011329 | 0.011228 | 0.011430 | 0.011463 |
| 0.011362 | 0.011430 | 0.011362 | 0.011362 | 0.011295 | 0.011698 | 0.011329 |
| 0.011373 | 0.011295 | 0.011531 | 0.011535 | 0.011396 | 0.011396 | 0.011396 |
| 0.011396 | 0.011329 | 0.011295 | 0.011329 | 0.011430 | 0.011430 | 0.011362 |
| 0.011362 | 0.011497 | 0.011665 | 0.011396 | 0.011598 | 0.011598 | 0.011463 |
| 0.011295 | 0.011362 | 0.011396 | 0.011799 | 0.011363 | 0.011396 | 0.011362 |
| 0.011396 | 0.011329 | 0.011329 | 0.011631 | 0.011564 | 0.011598 | 0.011329 |
| 0.011430 | 0.011497 | 0.011362 | 0.011430 | 0.011396 | 0.011262 | 0.011597 |
| 0.011362 | 0.011329 | 0.011329 | 0.011497 | 0.011329 | 0.011430 | 0.011665 |
| 0.011362 | 0.011740 | 0.011732 | 0.011507 | 0.011173 | 0.011434 | 0.011215 |
| 0.011280 | 0.011722 | 0.011271 | 0.011373 | 0.011255 | 0.011366 | 0.011326 |
| 0.011417 | 0.011126 | 0.011283 | 0.011126 | 0.011168 | 0.011328 | 0.011425 |
| 0.011437 | 0.011296 | 0.011412 | 0.011307 | 0.011364 | 0.011497 | 0.011564 |
| 0.011564 | 0.011430 | 0.011534 | 0.011535 | 0.011670 | 0.011696 | 0.011362 |
| 0.011597 | 0.011463 | 0.011329 | 0.011430 | 0.011228 | 0.011463 | 0.011262 |
| 0.011329 | 0.011329 | 0.011295 | 0.011262 | 0.011295 | 0.011262 | 0.011362 |
| 0.011340 | 0.011340 | 0.011334 | 0.011368 | 0.011505 | 0.011470 | 0.011470 |
| 0.011469 | 0.011396 | 0.011208 | 0.011204 | 0.011331 | 0.011501 | 0.011501 |
| 0.011296 | 0.011365 | 0.011599 | 0.011567 | 0.011497 | 0.011531 | 0.011463 |
| 0.011396 | 0.011463 | 0.011463 | 0.011362 | 0.011934 | 0.011530 | 0.011598 |
| 0.011631 | 0.011666 | 0.011333 | 0.011407 | 0.011295 | 0.011497 | 0.011463 |
| 0.011498 | 0.011530 | 0.011530 | 0.011530 | 0.011689 | 0.011665 | 0.011303 |
| 0.011196 | 0.011199 | 0.011299 | 0.011264 | 0.011368 | 0.011172 | 0.011536 |
| 0.011335 | 0.011367 | 0.011108 | 0.011360 | 0.011329 | 0.011402 | 0.011295 |
| 0.011262 | 0.011262 | 0.011329 | 0.011295 | 0.011497 | 0.011463 | 0.011396 |
| 0.011497 | 0.011564 | 0.011094 | 0.011094 | 0.000000 | 0.000000 | 0.000000 |
| 0.011128 | 0.011329 | 0.011329 | 0.011364 | 0.011497 | 0.011564 | 0.011564 |
| 0.011430 | 0.011534 | 0.011535 | 0.011670 | 0.011696 | 0.011362 | 0.011530 |
| 0.011463 | 0.011463 | 0.011297 | 0.011478 | 0.011408 | 0.011435 | 0.011305 |
| 0.011473 | 0.011698 | 0.011399 | 0.011366 | 0.011262 | 0.011463 | 0.011329 |
| 0.011430 | 0.011362 | 0.011262 | 0.011363 | 0.011463 | 0.011466 | 0.011363 |
| 0.011262 | 0.011195 | 0.011329 | 0.011262 | 0.011195 | 0.011298 | 0.011463 |
| 0.011362 | 0.011295 | 0.011329 | 0.011362 | 0.011329 | 0.011262 | 0.011463 |
| 0.011329 | 0.011362 | 0.011362 | 0.011295 | 0.011362 | 0.011598 | 0.011262 |
| 0.011295 | 0.011698 | 0.011295 | 0.011329 | 0.011295 | 0.011665 | 0.011146 |
| 0.011622 | 0.011230 | 0.011211 | 0.011463 | 0.011549 | 0.011491 | 0.011144 |
| 0.011165 | 0.011463 | 0.011564 | 0.011671 | 0.011532 | 0.011669 | 0.011800 |
| 0.011700 | 0.011737 | 0.011698 | 0.011949 | 0.011665 | 0.012540 | 0.011700 |
| 0.012439 | 0.012207 | 0.012341 | 0.012612 | 0.011665 | 0.011362 | 0.011665 |
| 0.012103 | 0.012038 | 0.011631 | 0.011531 | 0.011598 | 0.011598 | 0.011568 |
| 0.011463 | 0.011467 | 0.011530 | 0.011497 | 0.011867 | 0.011934 | 0.011935 |
| 0.011834 | 0.011935 | 0.012038 | 0.011804 | 0.012104 | 0.012110 | 0.012171 |
| 0.012172 | 0.012205 | 0.012152 | 0.012172 | 0.012173 | 0.011396 | 0.011699 |
| 0.011699 | 0.012270 | 0.011772 | 0.012001 | 0.012441 | 0.011536 | 0.011430 |
| 0.011396 | 0.011396 | 0.011867 | 0.011883 | 0.012010 | 0.011732 | 0.011397 |
| S719     | 0.011665 | 0.011665 | 0.012001 | 0.011765 | 0.011765 | 0.011833 |
| 0.011672 | 0.011604 | 0.011765 | 0.011262 | 0.011329 | 0.011296 | 0.011262 |

|          |          |          |          |          |          |          |
|----------|----------|----------|----------|----------|----------|----------|
| 0.011295 | 0.011463 | 0.011262 | 0.011295 | 0.011362 | 0.011329 | 0.011295 |
| 0.011262 | 0.011295 | 0.011396 | 0.011262 | 0.011295 | 0.011295 | 0.011638 |
| 0.011530 | 0.011295 | 0.011195 | 0.011429 | 0.011362 | 0.011329 | 0.011362 |
| 0.011329 | 0.011429 | 0.011329 | 0.011329 | 0.011362 | 0.011329 | 0.011497 |
| 0.011262 | 0.011329 | 0.011362 | 0.011295 | 0.011396 | 0.011429 | 0.011362 |
| 0.011329 | 0.011497 | 0.011396 | 0.011665 | 0.011329 | 0.011597 | 0.011329 |
| 0.011295 | 0.011396 | 0.011463 | 0.011597 | 0.011698 | 0.011396 | 0.011497 |
| 0.011362 | 0.011429 | 0.011329 | 0.011564 | 0.011799 | 0.011329 | 0.011396 |
| 0.011295 | 0.011396 | 0.011362 | 0.011429 | 0.011362 | 0.011362 | 0.011362 |
| 0.011262 | 0.011295 | 0.011262 | 0.011362 | 0.011329 | 0.011363 | 0.011429 |
| 0.011362 | 0.011329 | 0.011396 | 0.011295 | 0.011429 | 0.011262 | 0.011329 |
| 0.011497 | 0.011429 | 0.011665 | 0.011497 | 0.011329 | 0.011564 | 0.011329 |
| 0.011505 | 0.011732 | 0.011513 | 0.011216 | 0.011172 | 0.011355 | 0.011414 |
| 0.012048 | 0.011416 | 0.011143 | 0.011564 | 0.011564 | 0.011362 | 0.011463 |
| 0.011396 | 0.011362 | 0.011429 | 0.011329 | 0.011429 | 0.011362 | 0.011362 |
| 0.011329 | 0.011429 | 0.011631 | 0.011497 | 0.011396 | 0.011362 | 0.011295 |
| 0.011262 | 0.011262 | 0.011329 | 0.011295 | 0.011497 | 0.011463 | 0.011396 |
| 0.011497 | 0.011564 | 0.011094 | 0.011094 | 0.000000 | 0.000000 | 0.000000 |
| 0.011128 | 0.011329 | 0.011329 | 0.011204 | 0.011277 | 0.011235 | 0.011329 |
| 0.011331 | 0.011266 | 0.011282 | 0.011302 | 0.011230 | 0.011266 | 0.011297 |
| 0.011492 | 0.011336 | 0.011370 | 0.011262 | 0.011268 | 0.011397 | 0.011363 |
| 0.011430 | 0.011363 | 0.011363 | 0.011463 | 0.011396 | 0.011765 | 0.011564 |
| 0.011597 | 0.011463 | 0.011329 | 0.011429 | 0.011228 | 0.011463 | 0.011262 |
| 0.011329 | 0.011329 | 0.011295 | 0.011262 | 0.011295 | 0.011262 | 0.011362 |
| 0.011329 | 0.011429 | 0.011362 | 0.011262 | 0.011363 | 0.011463 | 0.011466 |
| 0.011463 | 0.011362 | 0.011262 | 0.011195 | 0.011329 | 0.011262 | 0.011195 |
| 0.011298 | 0.011463 | 0.011262 | 0.011463 | 0.011228 | 0.011329 | 0.011295 |
| 0.011396 | 0.011295 | 0.011329 | 0.011295 | 0.011329 | 0.011195 | 0.011329 |
| 0.011362 | 0.011295 | 0.011362 | 0.011295 | 0.011329 | 0.011362 | 0.011597 |
| 0.011698 | 0.011631 | 0.011698 | 0.011465 | 0.011698 | 0.011329 | 0.011295 |
| 0.011330 | 0.011586 | 0.011380 | 0.011197 | 0.011705 | 0.011197 | 0.011296 |
| 0.011705 | 0.011536 | 0.011497 | 0.011698 | 0.011402 | 0.011564 | 0.011530 |
| 0.011463 | 0.011631 | 0.011487 | 0.011349 | 0.011312 | 0.011362 | 0.011432 |
| 0.011530 | 0.011431 | 0.011567 | 0.011636 | 0.011564 | 0.011631 | 0.011738 |
| 0.011466 | 0.011637 | 0.011568 | 0.011500 | 0.011767 | 0.011228 | 0.011431 |
| 0.011396 | 0.011329 | 0.011228 | 0.011228 | 0.011295 | 0.011295 | 0.011362 |
| 0.011295 | 0.011362 | 0.011262 | 0.011362 | 0.011295 | 0.011295 | 0.011362 |
| 0.011295 | 0.011732 | 0.011631 | 0.011665 | 0.011195 | 0.011295 | 0.011329 |
| 0.011329 | 0.011295 | 0.011362 | 0.011396 | 0.011262 | 0.011262 | 0.011262 |
| 0.011799 | 0.011429 | 0.011429 | 0.011228 | 0.011329 | 0.011497 | 0.011262 |
| 0.011262 | 0.011329 | 0.011295 | 0.011463 | 0.011262 | 0.011396 | 0.011530 |
| 0.011463 | 0.011295 | 0.011295 | 0.011228 | 0.011228 | 0.011396 | 0.011329 |
| 0.011228 | 0.011329 | 0.011195 | 0.011228 | 0.011362 | 0.011497 | 0.011262 |
| 0.011228 | 0.011362 | 0.011296 | 0.011195 | 0.011530 | 0.011195 | 0.011362 |
| 0.011437 | 0.011262 | 0.011564 | 0.011396 | 0.011429 | 0.011295 | 0.011396 |
| 0.011262 | 0.011597 | 0.011195 | 0.011463 | 0.011262 | 0.011262 | 0.011195 |
| 0.011429 | 0.011564 | 0.011329 | 0.011396 | 0.011228 | 0.011631 | 0.011262 |
| 0.011262 | 0.011262 | 0.011295 | 0.011396 | 0.011295 | 0.011396 | 0.011463 |
| 0.011463 | 0.011429 | 0.011329 | 0.011430 | 0.011396 | 0.011262 | 0.011228 |
| 0.011262 | 0.011262 | 0.011329 | 0.011262 | 0.011228 | 0.011396 | 0.011262 |
| 0.011295 | 0.011295 | 0.011429 | 0.011463 | 0.011362 | 0.011295 | 0.011295 |
| 0.011362 | 0.011295 | 0.011396 | 0.011262 | 0.011396 | 0.011497 | 0.011799 |
| 0.011295 | 0.011698 | 0.011302 | 0.017747 | 0.011191 | 0.011488 | 0.011653 |
| 0.011614 | 0.011658 | 0.011270 | 0.011234 | 0.011774 | 0.011681 | 0.011364 |
| 0.011440 | 0.011610 | 0.011216 | 0.011228 | 0.011255 | 0.011356 | 0.011275 |
| 0.011436 | 0.011433 | 0.011357 | 0.011193 | 0.011429 | 0.011463 | 0.011466 |
| 0.011335 | 0.011429 | 0.011429 | 0.011396 | 0.011362 | 0.011363 | 0.011329 |
| 0.011362 | 0.011295 | 0.011329 | 0.011362 | 0.011329 | 0.011262 | 0.011295 |
| 0.011295 | 0.011362 | 0.011262 | 0.011362 | 0.011396 | 0.011429 | 0.011329 |
| 0.011362 | 0.011329 | 0.011665 | 0.011665 | 0.011396 | 0.011430 | 0.011463 |

|          |          |          |          |          |          |          |
|----------|----------|----------|----------|----------|----------|----------|
| 0.011228 | 0.011228 | 0.011262 | 0.011362 | 0.011228 | 0.011463 | 0.011463 |
| 0.011497 | 0.011497 | 0.011429 | 0.011530 | 0.011698 | 0.011532 | 0.011362 |
| 0.011362 | 0.011429 | 0.011463 | 0.011295 | 0.011362 | 0.011329 | 0.011362 |
| 0.011430 | 0.011430 | 0.011463 | 0.011430 | 0.011330 | 0.011530 | 0.011497 |
| 0.011365 | 0.011262 | 0.011362 | 0.011463 | 0.011362 | 0.011497 | 0.011530 |
| 0.011698 | 0.011402 | 0.011564 | 0.011530 | 0.011463 | 0.011631 | 0.011262 |
| 0.011431 | 0.011329 | 0.011295 | 0.011295 | 0.011362 | 0.011262 | 0.011362 |
| 0.011396 | 0.011429 | 0.011329 | 0.011362 | 0.011329 | 0.011665 | 0.011665 |
| 0.011396 | 0.011430 | 0.011497 | 0.011430 | 0.012070 | 0.011489 | 0.011412 |
| 0.011482 | 0.011442 | 0.011552 | 0.011441 | 0.011550 | 0.011474 | 0.011439 |
| 0.012022 | 0.011337 | 0.011471 | 0.011406 | 0.011680 | 0.011536 | 0.011639 |
| 0.012046 | 0.011512 | 0.011094 | 0.011161 | 0.011094 | 0.011396 | 0.000000 |
| 0.011228 | 0.011262 | 0.011195 | 0.011161 | 0.011094 | 0.011497 | 0.011464 |
| 0.011329 | 0.011262 | 0.011295 | 0.011329 | 0.011228 | 0.011295 | 0.011195 |
| 0.011329 | 0.011362 | 0.011262 | 0.011228 | 0.011329 | 0.011262 | 0.011295 |
| 0.011295 | 0.011228 | 0.011295 | 0.011329 | 0.011228 | 0.011429 | 0.011463 |
| 0.011362 | 0.011429 | 0.011362 | 0.011362 | 0.011295 | 0.011698 | 0.011329 |
| 0.011373 | 0.011295 | 0.011531 | 0.011535 | 0.011396 | 0.011396 | 0.011396 |
| 0.011396 | 0.011329 | 0.011295 | 0.011329 | 0.011429 | 0.011429 | 0.011362 |
| 0.011362 | 0.011497 | 0.011665 | 0.011396 | 0.011597 | 0.011597 | 0.011463 |
| 0.011295 | 0.011362 | 0.011396 | 0.011799 | 0.011363 | 0.011396 | 0.011362 |
| 0.011396 | 0.011329 | 0.011329 | 0.011631 | 0.011564 | 0.011597 | 0.011329 |
| 0.011429 | 0.011497 | 0.011362 | 0.011429 | 0.011396 | 0.011262 | 0.011597 |
| 0.011362 | 0.011329 | 0.011329 | 0.011497 | 0.011329 | 0.011429 | 0.011665 |
| 0.011362 | 0.011739 | 0.011732 | 0.011507 | 0.011173 | 0.011434 | 0.011215 |
| 0.011280 | 0.011722 | 0.011271 | 0.011373 | 0.011255 | 0.011366 | 0.011326 |
| 0.011417 | 0.011126 | 0.011283 | 0.011126 | 0.011168 | 0.011328 | 0.011425 |
| 0.011437 | 0.011296 | 0.011412 | 0.011307 | 0.011363 | 0.011497 | 0.011564 |
| 0.011564 | 0.011430 | 0.011533 | 0.011535 | 0.011670 | 0.011696 | 0.011362 |
| 0.011597 | 0.011463 | 0.011329 | 0.011429 | 0.011228 | 0.011463 | 0.011262 |
| 0.011329 | 0.011329 | 0.011295 | 0.011262 | 0.011295 | 0.011262 | 0.011362 |
| 0.011340 | 0.011340 | 0.011334 | 0.011368 | 0.011505 | 0.011470 | 0.011470 |
| 0.011469 | 0.011396 | 0.011208 | 0.011204 | 0.011331 | 0.011501 | 0.011501 |
| 0.011296 | 0.011365 | 0.011599 | 0.011567 | 0.011497 | 0.011531 | 0.011463 |
| 0.011396 | 0.011463 | 0.011463 | 0.011362 | 0.011934 | 0.011530 | 0.011598 |
| 0.011631 | 0.011666 | 0.011333 | 0.011407 | 0.011295 | 0.011497 | 0.011463 |
| 0.011498 | 0.011530 | 0.011530 | 0.011530 | 0.011689 | 0.011665 | 0.011303 |
| 0.011196 | 0.011199 | 0.011299 | 0.011264 | 0.011368 | 0.011172 | 0.011536 |
| 0.011335 | 0.011367 | 0.011108 | 0.011360 | 0.011329 | 0.011402 | 0.011295 |
| 0.011262 | 0.011262 | 0.011329 | 0.011295 | 0.011497 | 0.011463 | 0.011396 |
| 0.011497 | 0.011564 | 0.011094 | 0.011094 | 0.000000 | 0.000000 | 0.000000 |
| 0.011128 | 0.011329 | 0.011329 | 0.011363 | 0.011497 | 0.011564 | 0.011564 |
| 0.011430 | 0.011533 | 0.011535 | 0.011670 | 0.011696 | 0.011362 | 0.011530 |
| 0.011463 | 0.011463 | 0.011297 | 0.011478 | 0.011408 | 0.011435 | 0.011305 |
| 0.011473 | 0.011698 | 0.011399 | 0.011366 | 0.011262 | 0.011463 | 0.011329 |
| 0.011429 | 0.011362 | 0.011262 | 0.011363 | 0.011463 | 0.011466 | 0.011362 |
| 0.011262 | 0.011195 | 0.011329 | 0.011262 | 0.011195 | 0.011298 | 0.011463 |
| 0.011362 | 0.011295 | 0.011329 | 0.011362 | 0.011329 | 0.011262 | 0.011463 |
| 0.011329 | 0.011362 | 0.011362 | 0.011295 | 0.011362 | 0.011597 | 0.011262 |
| 0.011295 | 0.011698 | 0.011295 | 0.011329 | 0.011295 | 0.011665 | 0.011146 |
| 0.011622 | 0.011230 | 0.011211 | 0.011463 | 0.011549 | 0.011491 | 0.011144 |
| 0.011165 | 0.011463 | 0.011564 | 0.011671 | 0.011531 | 0.011669 | 0.011800 |
| 0.011699 | 0.011737 | 0.011698 | 0.011948 | 0.011665 | 0.012539 | 0.011700 |
| 0.012439 | 0.012207 | 0.012341 | 0.012612 | 0.011665 | 0.011362 | 0.011665 |
| 0.012103 | 0.012038 | 0.011631 | 0.011530 | 0.011598 | 0.011598 | 0.011568 |
| 0.011463 | 0.011467 | 0.011530 | 0.011497 | 0.011867 | 0.011934 | 0.011935 |
| 0.011834 | 0.011934 | 0.012038 | 0.011804 | 0.012104 | 0.012110 | 0.012171 |
| 0.012171 | 0.012205 | 0.012152 | 0.012172 | 0.012173 | 0.011396 | 0.011699 |
| 0.011699 | 0.012270 | 0.011772 | 0.012001 | 0.012440 | 0.011536 | 0.011430 |
| 0.011396 | 0.011396 | 0.011867 | 0.011883 | 0.012010 | 0.011732 | 0.011397 |

|          |          |          |          |          |          |          |
|----------|----------|----------|----------|----------|----------|----------|
| S720     | 0.011668 | 0.011668 | 0.012007 | 0.011770 | 0.011770 | 0.011837 |
| 0.011675 | 0.011607 | 0.011770 | 0.011263 | 0.011330 | 0.011297 | 0.011263 |
| 0.011297 | 0.011465 | 0.011263 | 0.011297 | 0.011364 | 0.011330 | 0.011297 |
| 0.011263 | 0.011297 | 0.011398 | 0.011263 | 0.011297 | 0.011297 | 0.011641 |
| 0.011533 | 0.011297 | 0.011195 | 0.011432 | 0.011364 | 0.011330 | 0.011364 |
| 0.011330 | 0.011432 | 0.011330 | 0.011330 | 0.011364 | 0.011330 | 0.011499 |
| 0.011263 | 0.011330 | 0.011364 | 0.011297 | 0.011398 | 0.011432 | 0.011364 |
| 0.011330 | 0.011499 | 0.011398 | 0.011668 | 0.011330 | 0.011601 | 0.011330 |
| 0.011297 | 0.011398 | 0.011465 | 0.011601 | 0.011702 | 0.011398 | 0.011499 |
| 0.011364 | 0.011432 | 0.011330 | 0.011567 | 0.011803 | 0.011330 | 0.011398 |
| 0.011297 | 0.011398 | 0.011364 | 0.011432 | 0.011364 | 0.011364 | 0.011364 |
| 0.011263 | 0.011297 | 0.011263 | 0.011364 | 0.011330 | 0.011331 | 0.011432 |
| 0.011364 | 0.011330 | 0.011398 | 0.011297 | 0.011432 | 0.011263 | 0.011330 |
| 0.011465 | 0.011432 | 0.011668 | 0.011499 | 0.011330 | 0.011567 | 0.011330 |
| 0.011506 | 0.011733 | 0.011513 | 0.011217 | 0.011172 | 0.011355 | 0.011415 |
| 0.012049 | 0.011417 | 0.011143 | 0.011567 | 0.011533 | 0.011364 | 0.011432 |
| 0.011398 | 0.011364 | 0.011432 | 0.011330 | 0.011432 | 0.011364 | 0.011364 |
| 0.011330 | 0.011432 | 0.011634 | 0.011499 | 0.011398 | 0.011364 | 0.011297 |
| 0.011263 | 0.011263 | 0.011330 | 0.011297 | 0.011499 | 0.011465 | 0.011398 |
| 0.011499 | 0.011567 | 0.011094 | 0.011094 | 0.000000 | 0.000000 | 0.000000 |
| 0.011128 | 0.011330 | 0.011330 | 0.011204 | 0.011277 | 0.011237 | 0.011331 |
| 0.011333 | 0.011267 | 0.011283 | 0.011303 | 0.011231 | 0.011267 | 0.011298 |
| 0.011495 | 0.011338 | 0.011372 | 0.011263 | 0.011269 | 0.011399 | 0.011365 |
| 0.011432 | 0.011365 | 0.011365 | 0.011465 | 0.011398 | 0.011770 | 0.011567 |
| 0.011601 | 0.011465 | 0.011330 | 0.011432 | 0.011229 | 0.011465 | 0.011263 |
| 0.011330 | 0.011330 | 0.011297 | 0.011263 | 0.011297 | 0.011263 | 0.011364 |
| 0.011330 | 0.011432 | 0.011364 | 0.011263 | 0.011365 | 0.011465 | 0.011468 |
| 0.011466 | 0.011364 | 0.011263 | 0.011196 | 0.011330 | 0.011263 | 0.011195 |
| 0.011299 | 0.011466 | 0.011263 | 0.011466 | 0.011229 | 0.011330 | 0.011297 |
| 0.011398 | 0.011297 | 0.011330 | 0.011297 | 0.011330 | 0.011195 | 0.011330 |
| 0.011364 | 0.011297 | 0.011364 | 0.011297 | 0.011330 | 0.011364 | 0.011601 |
| 0.011702 | 0.011634 | 0.011702 | 0.011467 | 0.011702 | 0.011330 | 0.011297 |
| 0.011332 | 0.011589 | 0.011383 | 0.011198 | 0.011709 | 0.011197 | 0.011298 |
| 0.011709 | 0.011539 | 0.011499 | 0.011702 | 0.011404 | 0.011567 | 0.011533 |
| 0.011465 | 0.011634 | 0.011489 | 0.011351 | 0.011314 | 0.011364 | 0.011435 |
| 0.011533 | 0.011433 | 0.011570 | 0.011639 | 0.011567 | 0.011635 | 0.011742 |
| 0.011469 | 0.011641 | 0.011571 | 0.011503 | 0.011771 | 0.011229 | 0.011433 |
| 0.011398 | 0.011330 | 0.011229 | 0.011229 | 0.011297 | 0.011297 | 0.011364 |
| 0.011297 | 0.011364 | 0.011263 | 0.011364 | 0.011297 | 0.011297 | 0.011364 |
| 0.011297 | 0.011736 | 0.011634 | 0.011668 | 0.011195 | 0.011297 | 0.011330 |
| 0.011330 | 0.011297 | 0.011364 | 0.011398 | 0.011263 | 0.011263 | 0.011263 |
| 0.011803 | 0.011432 | 0.011432 | 0.011229 | 0.011330 | 0.011499 | 0.011263 |
| 0.011263 | 0.011330 | 0.011297 | 0.011465 | 0.011263 | 0.011398 | 0.011533 |
| 0.011465 | 0.011297 | 0.011297 | 0.011229 | 0.011229 | 0.011330 | 0.011330 |
| 0.011229 | 0.011330 | 0.011195 | 0.011229 | 0.011364 | 0.011500 | 0.011263 |
| 0.011229 | 0.011364 | 0.011297 | 0.011195 | 0.011533 | 0.011195 | 0.011364 |
| 0.011439 | 0.011263 | 0.011567 | 0.011398 | 0.011432 | 0.011297 | 0.011398 |
| 0.011263 | 0.011601 | 0.011195 | 0.011465 | 0.011263 | 0.011263 | 0.011195 |
| 0.011398 | 0.011567 | 0.011330 | 0.011398 | 0.011229 | 0.011634 | 0.011263 |
| 0.011263 | 0.011263 | 0.011297 | 0.011398 | 0.011297 | 0.011398 | 0.011465 |
| 0.011465 | 0.011432 | 0.011330 | 0.011432 | 0.011398 | 0.011263 | 0.011229 |
| 0.011263 | 0.011263 | 0.011330 | 0.011263 | 0.011229 | 0.011398 | 0.011263 |
| 0.011297 | 0.011297 | 0.011432 | 0.011465 | 0.011364 | 0.011297 | 0.011297 |
| 0.011364 | 0.011297 | 0.011398 | 0.011263 | 0.011364 | 0.011499 | 0.011803 |
| 0.011297 | 0.011702 | 0.011302 | 0.011755 | 0.011191 | 0.011488 | 0.011654 |
| 0.011616 | 0.011659 | 0.011270 | 0.011235 | 0.011774 | 0.011685 | 0.011364 |
| 0.011440 | 0.011610 | 0.011216 | 0.011228 | 0.011256 | 0.011356 | 0.011276 |
| 0.011436 | 0.011433 | 0.011357 | 0.011193 | 0.011432 | 0.011466 | 0.011468 |
| 0.011337 | 0.011432 | 0.011432 | 0.011398 | 0.011364 | 0.011364 | 0.011331 |
| 0.011364 | 0.011297 | 0.011330 | 0.011364 | 0.011330 | 0.011263 | 0.011297 |

|          |          |          |          |          |          |          |
|----------|----------|----------|----------|----------|----------|----------|
| 0.011297 | 0.011364 | 0.011263 | 0.011364 | 0.011398 | 0.011432 | 0.011330 |
| 0.011364 | 0.011330 | 0.011668 | 0.011668 | 0.011398 | 0.011432 | 0.011465 |
| 0.011229 | 0.011229 | 0.011263 | 0.011364 | 0.011229 | 0.011465 | 0.011465 |
| 0.011499 | 0.011499 | 0.011432 | 0.011533 | 0.011702 | 0.011534 | 0.011364 |
| 0.011364 | 0.011432 | 0.011465 | 0.011297 | 0.011364 | 0.011330 | 0.011364 |
| 0.011432 | 0.011432 | 0.011465 | 0.011432 | 0.011331 | 0.011533 | 0.011499 |
| 0.011367 | 0.011263 | 0.011364 | 0.011465 | 0.011364 | 0.011499 | 0.011533 |
| 0.011702 | 0.011404 | 0.011567 | 0.011533 | 0.011465 | 0.011634 | 0.011263 |
| 0.011433 | 0.011331 | 0.011297 | 0.011297 | 0.011364 | 0.011263 | 0.011364 |
| 0.011398 | 0.011432 | 0.011330 | 0.011364 | 0.011330 | 0.011668 | 0.011668 |
| 0.011398 | 0.011432 | 0.011499 | 0.011432 | 0.012076 | 0.011492 | 0.011379 |
| 0.011483 | 0.011444 | 0.011555 | 0.011409 | 0.011553 | 0.011477 | 0.011442 |
| 0.012028 | 0.011339 | 0.011474 | 0.011408 | 0.011684 | 0.011539 | 0.011642 |
| 0.012052 | 0.011515 | 0.011094 | 0.011162 | 0.011094 | 0.011398 | 0.000000 |
| 0.011229 | 0.011263 | 0.011195 | 0.011162 | 0.011094 | 0.011499 | 0.011467 |
| 0.011330 | 0.011263 | 0.011297 | 0.011330 | 0.011229 | 0.011297 | 0.011195 |
| 0.011330 | 0.011364 | 0.011263 | 0.011229 | 0.011330 | 0.011263 | 0.011297 |
| 0.011297 | 0.011229 | 0.011297 | 0.011330 | 0.011229 | 0.011432 | 0.011465 |
| 0.011364 | 0.011432 | 0.011364 | 0.011364 | 0.011297 | 0.011702 | 0.011330 |
| 0.011375 | 0.011297 | 0.011533 | 0.011538 | 0.011398 | 0.011398 | 0.011398 |
| 0.011398 | 0.011330 | 0.011297 | 0.011330 | 0.011432 | 0.011432 | 0.011364 |
| 0.011364 | 0.011499 | 0.011668 | 0.011398 | 0.011601 | 0.011601 | 0.011465 |
| 0.011297 | 0.011364 | 0.011398 | 0.011803 | 0.011364 | 0.011398 | 0.011364 |
| 0.011398 | 0.011330 | 0.011330 | 0.011635 | 0.011533 | 0.011601 | 0.011330 |
| 0.011432 | 0.011499 | 0.011364 | 0.011432 | 0.011398 | 0.011263 | 0.011601 |
| 0.011364 | 0.011330 | 0.011330 | 0.011465 | 0.011330 | 0.011432 | 0.011668 |
| 0.011364 | 0.011744 | 0.011736 | 0.011508 | 0.011173 | 0.011436 | 0.011215 |
| 0.011280 | 0.011723 | 0.011271 | 0.011373 | 0.011256 | 0.011366 | 0.011326 |
| 0.011418 | 0.011126 | 0.011283 | 0.011126 | 0.011168 | 0.011329 | 0.011426 |
| 0.011437 | 0.011296 | 0.011413 | 0.011307 | 0.011365 | 0.011499 | 0.011567 |
| 0.011567 | 0.011432 | 0.011536 | 0.011537 | 0.011674 | 0.011700 | 0.011364 |
| 0.011601 | 0.011465 | 0.011330 | 0.011432 | 0.011229 | 0.011465 | 0.011263 |
| 0.011330 | 0.011330 | 0.011297 | 0.011263 | 0.011297 | 0.011263 | 0.011364 |
| 0.011341 | 0.011342 | 0.011336 | 0.011370 | 0.011508 | 0.011473 | 0.011472 |
| 0.011471 | 0.011398 | 0.011209 | 0.011205 | 0.011333 | 0.011503 | 0.011504 |
| 0.011297 | 0.011367 | 0.011602 | 0.011536 | 0.011500 | 0.011534 | 0.011465 |
| 0.011398 | 0.011465 | 0.011465 | 0.011330 | 0.011939 | 0.011533 | 0.011601 |
| 0.011634 | 0.011669 | 0.011335 | 0.011409 | 0.011297 | 0.011499 | 0.011466 |
| 0.011500 | 0.011533 | 0.011533 | 0.011533 | 0.011654 | 0.011668 | 0.011305 |
| 0.011196 | 0.011200 | 0.011300 | 0.011265 | 0.011370 | 0.011173 | 0.011539 |
| 0.011336 | 0.011368 | 0.011108 | 0.011362 | 0.011331 | 0.011404 | 0.011297 |
| 0.011263 | 0.011263 | 0.011330 | 0.011297 | 0.011499 | 0.011465 | 0.011398 |
| 0.011499 | 0.011567 | 0.011094 | 0.011094 | 0.000000 | 0.000000 | 0.000000 |
| 0.011128 | 0.011330 | 0.011330 | 0.011365 | 0.011499 | 0.011567 | 0.011567 |
| 0.011432 | 0.011536 | 0.011537 | 0.011674 | 0.011700 | 0.011364 | 0.011533 |
| 0.011466 | 0.011466 | 0.011298 | 0.011480 | 0.011410 | 0.011437 | 0.011307 |
| 0.011476 | 0.011703 | 0.011401 | 0.011368 | 0.011263 | 0.011466 | 0.011330 |
| 0.011432 | 0.011364 | 0.011263 | 0.011365 | 0.011465 | 0.011468 | 0.011364 |
| 0.011263 | 0.011196 | 0.011330 | 0.011263 | 0.011195 | 0.011299 | 0.011466 |
| 0.011364 | 0.011297 | 0.011330 | 0.011364 | 0.011330 | 0.011263 | 0.011466 |
| 0.011330 | 0.011364 | 0.011364 | 0.011297 | 0.011364 | 0.011601 | 0.011263 |
| 0.011297 | 0.011702 | 0.011297 | 0.011330 | 0.011297 | 0.011668 | 0.011146 |
| 0.011623 | 0.011230 | 0.011211 | 0.011463 | 0.011549 | 0.011491 | 0.011144 |
| 0.011165 | 0.011465 | 0.011567 | 0.011675 | 0.011534 | 0.011673 | 0.011804 |
| 0.011703 | 0.011741 | 0.011702 | 0.011954 | 0.011668 | 0.012548 | 0.011704 |
| 0.012413 | 0.012214 | 0.012348 | 0.012621 | 0.011668 | 0.011364 | 0.011668 |
| 0.012076 | 0.012044 | 0.011634 | 0.011533 | 0.011601 | 0.011601 | 0.011571 |
| 0.011465 | 0.011470 | 0.011533 | 0.011500 | 0.011872 | 0.011939 | 0.011940 |
| 0.011839 | 0.011906 | 0.012044 | 0.011809 | 0.012110 | 0.012116 | 0.012178 |
| 0.012178 | 0.012212 | 0.012159 | 0.012178 | 0.012179 | 0.011398 | 0.011702 |



|          |          |          |          |          |          |          |
|----------|----------|----------|----------|----------|----------|----------|
| 0.011703 | 0.012277 | 0.011776 | 0.012007 | 0.012448 | 0.011538 | 0.011432 |
| 0.011398 | 0.011398 | 0.011871 | 0.011889 | 0.012011 | 0.011736 | 0.011399 |
| S721     | 0.011737 | 0.011737 | 0.012075 | 0.011838 | 0.011838 | 0.011906 |
| 0.011744 | 0.011676 | 0.011838 | 0.011331 | 0.011398 | 0.011365 | 0.011331 |
| 0.011364 | 0.011533 | 0.011331 | 0.011364 | 0.011432 | 0.011398 | 0.011364 |
| 0.011331 | 0.011364 | 0.011466 | 0.011331 | 0.011365 | 0.011364 | 0.011710 |
| 0.011601 | 0.011364 | 0.011263 | 0.011500 | 0.011432 | 0.011398 | 0.011432 |
| 0.011398 | 0.011500 | 0.011398 | 0.011398 | 0.011432 | 0.011398 | 0.011567 |
| 0.011331 | 0.011398 | 0.011432 | 0.011364 | 0.011466 | 0.011500 | 0.011432 |
| 0.011398 | 0.011567 | 0.011466 | 0.011736 | 0.011398 | 0.011669 | 0.011398 |
| 0.011364 | 0.011466 | 0.011533 | 0.011669 | 0.011770 | 0.011466 | 0.011567 |
| 0.011432 | 0.011500 | 0.011398 | 0.011635 | 0.011872 | 0.011398 | 0.011466 |
| 0.011364 | 0.011466 | 0.011432 | 0.011500 | 0.011432 | 0.011432 | 0.011432 |
| 0.011331 | 0.011364 | 0.011331 | 0.011432 | 0.011398 | 0.011399 | 0.011500 |
| 0.011432 | 0.011398 | 0.011466 | 0.011364 | 0.011500 | 0.011331 | 0.011398 |
| 0.011533 | 0.011500 | 0.011736 | 0.011567 | 0.011398 | 0.011635 | 0.011398 |
| 0.011580 | 0.011809 | 0.011589 | 0.011256 | 0.011247 | 0.011429 | 0.011494 |
| 0.012123 | 0.011417 | 0.011184 | 0.011635 | 0.011601 | 0.011432 | 0.011500 |
| 0.011466 | 0.011432 | 0.011500 | 0.011398 | 0.011500 | 0.011432 | 0.011432 |
| 0.011398 | 0.011500 | 0.011703 | 0.011567 | 0.011466 | 0.011432 | 0.011364 |
| 0.011331 | 0.011331 | 0.011398 | 0.011364 | 0.011567 | 0.011533 | 0.011466 |
| 0.011567 | 0.011635 | 0.011162 | 0.011162 | 0.011128 | 0.011128 | 0.011128 |
| 0.000000 | 0.011398 | 0.011398 | 0.011276 | 0.011350 | 0.011307 | 0.011399 |
| 0.011401 | 0.011336 | 0.011357 | 0.011373 | 0.011300 | 0.011336 | 0.011366 |
| 0.011568 | 0.011407 | 0.011442 | 0.011331 | 0.011339 | 0.011467 | 0.011433 |
| 0.011500 | 0.011433 | 0.011433 | 0.011533 | 0.011466 | 0.011838 | 0.011635 |
| 0.011669 | 0.011533 | 0.011398 | 0.011500 | 0.011297 | 0.011533 | 0.011331 |
| 0.011398 | 0.011398 | 0.011364 | 0.011331 | 0.011364 | 0.011331 | 0.011432 |
| 0.011398 | 0.011500 | 0.011432 | 0.011331 | 0.011433 | 0.011533 | 0.011537 |
| 0.011534 | 0.011432 | 0.011331 | 0.011264 | 0.011398 | 0.011331 | 0.011263 |
| 0.011368 | 0.011534 | 0.011331 | 0.011534 | 0.011297 | 0.011398 | 0.011364 |
| 0.011466 | 0.011364 | 0.011398 | 0.011364 | 0.011398 | 0.011263 | 0.011398 |
| 0.011398 | 0.011364 | 0.011432 | 0.011364 | 0.011398 | 0.011432 | 0.011669 |
| 0.011770 | 0.011703 | 0.011770 | 0.011501 | 0.011770 | 0.011398 | 0.011364 |
| 0.011400 | 0.011672 | 0.011476 | 0.011267 | 0.011778 | 0.011266 | 0.011377 |
| 0.011778 | 0.011608 | 0.011567 | 0.011770 | 0.011473 | 0.011635 | 0.011601 |
| 0.011533 | 0.011703 | 0.011561 | 0.011393 | 0.011356 | 0.011432 | 0.011503 |
| 0.011601 | 0.011502 | 0.011639 | 0.011708 | 0.011635 | 0.011703 | 0.011811 |
| 0.011537 | 0.011710 | 0.011640 | 0.011537 | 0.011806 | 0.011297 | 0.011501 |
| 0.011466 | 0.011398 | 0.011297 | 0.011297 | 0.011364 | 0.011364 | 0.011432 |
| 0.011364 | 0.011432 | 0.011331 | 0.011432 | 0.011364 | 0.011364 | 0.011432 |
| 0.011364 | 0.011804 | 0.011703 | 0.011736 | 0.011263 | 0.011364 | 0.011398 |
| 0.011398 | 0.011364 | 0.011432 | 0.011466 | 0.011331 | 0.011331 | 0.011331 |
| 0.011872 | 0.011500 | 0.011500 | 0.011297 | 0.011398 | 0.011567 | 0.011331 |
| 0.011331 | 0.011398 | 0.011364 | 0.011534 | 0.011331 | 0.011466 | 0.011601 |
| 0.011533 | 0.011364 | 0.011364 | 0.011297 | 0.011297 | 0.011398 | 0.011398 |
| 0.011297 | 0.011398 | 0.011263 | 0.011297 | 0.011432 | 0.011568 | 0.011331 |
| 0.011297 | 0.011432 | 0.011365 | 0.011263 | 0.011601 | 0.011263 | 0.011432 |
| 0.011508 | 0.011331 | 0.011635 | 0.011466 | 0.011500 | 0.011364 | 0.011466 |
| 0.011331 | 0.011669 | 0.011263 | 0.011533 | 0.011331 | 0.011331 | 0.011263 |
| 0.011466 | 0.011635 | 0.011398 | 0.011466 | 0.011297 | 0.011703 | 0.011331 |
| 0.011331 | 0.011331 | 0.011364 | 0.011466 | 0.011364 | 0.011466 | 0.011533 |
| 0.011533 | 0.011500 | 0.011398 | 0.011500 | 0.011466 | 0.011331 | 0.011297 |
| 0.011331 | 0.011331 | 0.011398 | 0.011331 | 0.011297 | 0.011466 | 0.011331 |
| 0.011364 | 0.011364 | 0.011500 | 0.011533 | 0.011432 | 0.011364 | 0.011365 |
| 0.011432 | 0.011364 | 0.011466 | 0.011331 | 0.011432 | 0.011567 | 0.011872 |
| 0.011364 | 0.011770 | 0.011371 | 0.011798 | 0.011192 | 0.011549 | 0.011724 |
| 0.011686 | 0.011730 | 0.011323 | 0.011293 | 0.011829 | 0.011755 | 0.011425 |
| 0.011440 | 0.011671 | 0.011295 | 0.011270 | 0.011256 | 0.011406 | 0.011319 |
| 0.011436 | 0.011508 | 0.011394 | 0.011259 | 0.011500 | 0.011534 | 0.011537 |

|          |          |          |          |          |          |          |
|----------|----------|----------|----------|----------|----------|----------|
| 0.011406 | 0.011500 | 0.011500 | 0.011466 | 0.011432 | 0.011432 | 0.011398 |
| 0.011432 | 0.011364 | 0.011398 | 0.011398 | 0.011398 | 0.011331 | 0.011364 |
| 0.011364 | 0.011432 | 0.011331 | 0.011432 | 0.011466 | 0.011500 | 0.011398 |
| 0.011432 | 0.011398 | 0.011736 | 0.011736 | 0.011466 | 0.011500 | 0.011534 |
| 0.011297 | 0.011297 | 0.011331 | 0.011432 | 0.011297 | 0.011533 | 0.011533 |
| 0.011567 | 0.011567 | 0.011500 | 0.011601 | 0.011770 | 0.011603 | 0.011432 |
| 0.011432 | 0.011500 | 0.011533 | 0.011364 | 0.011432 | 0.011398 | 0.011432 |
| 0.011500 | 0.011500 | 0.011533 | 0.011500 | 0.011399 | 0.011601 | 0.011567 |
| 0.011435 | 0.011331 | 0.011432 | 0.011534 | 0.011432 | 0.011567 | 0.011601 |
| 0.011770 | 0.011473 | 0.011635 | 0.011601 | 0.011533 | 0.011703 | 0.011331 |
| 0.011501 | 0.011399 | 0.011364 | 0.011364 | 0.011432 | 0.011331 | 0.011432 |
| 0.011466 | 0.011500 | 0.011398 | 0.011432 | 0.011398 | 0.011736 | 0.011736 |
| 0.011466 | 0.011500 | 0.011567 | 0.011500 | 0.012144 | 0.011564 | 0.011450 |
| 0.011519 | 0.011514 | 0.011627 | 0.011479 | 0.011624 | 0.011547 | 0.011512 |
| 0.012098 | 0.011409 | 0.011543 | 0.011478 | 0.011754 | 0.011608 | 0.011711 |
| 0.012122 | 0.011592 | 0.011162 | 0.011229 | 0.011162 | 0.011466 | 0.011128 |
| 0.011297 | 0.011331 | 0.011263 | 0.011229 | 0.011162 | 0.011567 | 0.011535 |
| 0.011398 | 0.011331 | 0.011364 | 0.011398 | 0.011297 | 0.011364 | 0.011263 |
| 0.011398 | 0.011432 | 0.011331 | 0.011297 | 0.011398 | 0.011331 | 0.011364 |
| 0.011364 | 0.011297 | 0.011364 | 0.011398 | 0.011297 | 0.011500 | 0.011533 |
| 0.011432 | 0.011500 | 0.011432 | 0.011432 | 0.011297 | 0.011770 | 0.011398 |
| 0.011446 | 0.011365 | 0.011602 | 0.011607 | 0.011466 | 0.011466 | 0.011466 |
| 0.011466 | 0.011398 | 0.011364 | 0.011398 | 0.011500 | 0.011500 | 0.011432 |
| 0.011432 | 0.011567 | 0.011703 | 0.011466 | 0.011669 | 0.011669 | 0.011533 |
| 0.011364 | 0.011432 | 0.011466 | 0.011872 | 0.011432 | 0.011466 | 0.011432 |
| 0.011466 | 0.011398 | 0.011398 | 0.011703 | 0.011601 | 0.011669 | 0.011398 |
| 0.011500 | 0.011533 | 0.011432 | 0.011500 | 0.011466 | 0.011331 | 0.011669 |
| 0.011432 | 0.011398 | 0.011398 | 0.011533 | 0.011398 | 0.011500 | 0.011736 |
| 0.011432 | 0.011813 | 0.011804 | 0.011590 | 0.011173 | 0.011505 | 0.011215 |
| 0.011335 | 0.011801 | 0.011342 | 0.011418 | 0.011305 | 0.011417 | 0.011326 |
| 0.011469 | 0.011126 | 0.011283 | 0.011127 | 0.011168 | 0.011329 | 0.011507 |
| 0.011513 | 0.011376 | 0.011484 | 0.011378 | 0.011433 | 0.011567 | 0.011635 |
| 0.011635 | 0.011500 | 0.011605 | 0.011606 | 0.011743 | 0.011772 | 0.011432 |
| 0.011669 | 0.011533 | 0.011398 | 0.011500 | 0.011297 | 0.011533 | 0.011331 |
| 0.011398 | 0.011398 | 0.011364 | 0.011331 | 0.011364 | 0.011331 | 0.011432 |
| 0.011412 | 0.011413 | 0.011405 | 0.011439 | 0.011577 | 0.011542 | 0.011541 |
| 0.011540 | 0.011466 | 0.011283 | 0.011278 | 0.011401 | 0.011572 | 0.011573 |
| 0.011365 | 0.011435 | 0.011670 | 0.011605 | 0.011568 | 0.011568 | 0.011533 |
| 0.011466 | 0.011533 | 0.011533 | 0.011398 | 0.012007 | 0.011601 | 0.011669 |
| 0.011703 | 0.011742 | 0.011404 | 0.011479 | 0.011364 | 0.011567 | 0.011534 |
| 0.011568 | 0.011601 | 0.011601 | 0.011601 | 0.011694 | 0.011736 | 0.011375 |
| 0.011265 | 0.011269 | 0.011369 | 0.011334 | 0.011439 | 0.011211 | 0.011608 |
| 0.011406 | 0.011412 | 0.011156 | 0.011438 | 0.011399 | 0.011439 | 0.011364 |
| 0.011331 | 0.011331 | 0.011398 | 0.011364 | 0.011567 | 0.011533 | 0.011466 |
| 0.011567 | 0.011635 | 0.011162 | 0.011162 | 0.011128 | 0.011128 | 0.011128 |
| 0.000000 | 0.011398 | 0.011398 | 0.011433 | 0.011567 | 0.011635 | 0.011635 |
| 0.011500 | 0.011605 | 0.011606 | 0.011743 | 0.011772 | 0.011432 | 0.011601 |
| 0.011534 | 0.011534 | 0.011367 | 0.011551 | 0.011480 | 0.011506 | 0.011378 |
| 0.011511 | 0.011750 | 0.011487 | 0.011436 | 0.011331 | 0.011534 | 0.011398 |
| 0.011500 | 0.011432 | 0.011331 | 0.011433 | 0.011533 | 0.011537 | 0.011432 |
| 0.011331 | 0.011264 | 0.011398 | 0.011331 | 0.011263 | 0.011368 | 0.011534 |
| 0.011432 | 0.011364 | 0.011398 | 0.011398 | 0.011398 | 0.011331 | 0.011534 |
| 0.011398 | 0.011432 | 0.011432 | 0.011364 | 0.011432 | 0.011669 | 0.011331 |
| 0.011364 | 0.011770 | 0.011364 | 0.011398 | 0.011364 | 0.011736 | 0.011189 |
| 0.011680 | 0.011316 | 0.011211 | 0.011544 | 0.011631 | 0.011564 | 0.011186 |
| 0.011166 | 0.011533 | 0.011635 | 0.011744 | 0.011602 | 0.011741 | 0.011873 |
| 0.011772 | 0.011810 | 0.011770 | 0.012024 | 0.011736 | 0.012617 | 0.011772 |
| 0.012483 | 0.012283 | 0.012418 | 0.012691 | 0.011736 | 0.011432 | 0.011737 |
| 0.012144 | 0.012113 | 0.011703 | 0.011601 | 0.011670 | 0.011670 | 0.011639 |
| 0.011533 | 0.011538 | 0.011601 | 0.011568 | 0.011940 | 0.012007 | 0.012008 |

|          |          |          |          |          |          |          |
|----------|----------|----------|----------|----------|----------|----------|
| 0.011907 | 0.011974 | 0.012113 | 0.011878 | 0.012179 | 0.012185 | 0.012246 |
| 0.012247 | 0.012281 | 0.012228 | 0.012247 | 0.012249 | 0.011466 | 0.011771 |
| 0.011771 | 0.012346 | 0.011845 | 0.012075 | 0.012518 | 0.011607 | 0.011500 |
| 0.011466 | 0.011466 | 0.011940 | 0.011973 | 0.012082 | 0.011804 | 0.011467 |
| S722     | 0.011665 | 0.011665 | 0.012001 | 0.011765 | 0.011765 | 0.011833 |
| 0.011638 | 0.011570 | 0.011765 | 0.011262 | 0.011329 | 0.011296 | 0.011262 |
| 0.011295 | 0.011463 | 0.011262 | 0.011295 | 0.011362 | 0.011329 | 0.011295 |
| 0.011262 | 0.011295 | 0.011396 | 0.011262 | 0.011295 | 0.011295 | 0.011604 |
| 0.011530 | 0.011295 | 0.011195 | 0.011429 | 0.011362 | 0.011329 | 0.011362 |
| 0.011329 | 0.011430 | 0.011329 | 0.011329 | 0.011362 | 0.011329 | 0.011497 |
| 0.011262 | 0.011329 | 0.011362 | 0.011295 | 0.011396 | 0.011429 | 0.011362 |
| 0.011329 | 0.011497 | 0.011396 | 0.011665 | 0.011329 | 0.011597 | 0.011329 |
| 0.011295 | 0.011396 | 0.011463 | 0.011597 | 0.011698 | 0.011396 | 0.011497 |
| 0.011362 | 0.011430 | 0.011329 | 0.011564 | 0.011799 | 0.011329 | 0.011396 |
| 0.011295 | 0.011396 | 0.011362 | 0.011430 | 0.011362 | 0.011362 | 0.011362 |
| 0.011262 | 0.011295 | 0.011262 | 0.011362 | 0.011329 | 0.011363 | 0.011429 |
| 0.011362 | 0.011329 | 0.011396 | 0.011295 | 0.011429 | 0.011262 | 0.011329 |
| 0.011497 | 0.011429 | 0.011665 | 0.011497 | 0.011262 | 0.011564 | 0.011329 |
| 0.011505 | 0.011733 | 0.011551 | 0.011255 | 0.011247 | 0.011355 | 0.011415 |
| 0.012085 | 0.011518 | 0.011266 | 0.011564 | 0.011564 | 0.011362 | 0.011463 |
| 0.011396 | 0.011362 | 0.011429 | 0.011329 | 0.011430 | 0.011362 | 0.011362 |
| 0.011329 | 0.011429 | 0.011631 | 0.011497 | 0.011396 | 0.011363 | 0.011295 |
| 0.011262 | 0.011262 | 0.011329 | 0.011295 | 0.011497 | 0.011463 | 0.011396 |
| 0.011497 | 0.011564 | 0.011295 | 0.011295 | 0.011329 | 0.011329 | 0.011330 |
| 0.011398 | 0.000000 | 0.011329 | 0.011204 | 0.011277 | 0.011236 | 0.011329 |
| 0.011331 | 0.011266 | 0.011318 | 0.011302 | 0.011230 | 0.011266 | 0.011297 |
| 0.011564 | 0.011336 | 0.011370 | 0.011262 | 0.011268 | 0.011397 | 0.011363 |
| 0.011430 | 0.011363 | 0.011363 | 0.011463 | 0.011396 | 0.011766 | 0.011564 |
| 0.011597 | 0.011463 | 0.011329 | 0.011430 | 0.011228 | 0.011463 | 0.011262 |
| 0.011329 | 0.011329 | 0.011295 | 0.011262 | 0.011295 | 0.011262 | 0.011362 |
| 0.011329 | 0.011429 | 0.011362 | 0.011262 | 0.011363 | 0.011463 | 0.011466 |
| 0.011463 | 0.011362 | 0.011262 | 0.011195 | 0.011329 | 0.011262 | 0.011195 |
| 0.011298 | 0.011463 | 0.011262 | 0.011463 | 0.011228 | 0.011329 | 0.011295 |
| 0.011329 | 0.011295 | 0.011262 | 0.011295 | 0.011329 | 0.011195 | 0.011329 |
| 0.011362 | 0.011295 | 0.011362 | 0.011295 | 0.011329 | 0.011362 | 0.011597 |
| 0.011698 | 0.011631 | 0.011698 | 0.011465 | 0.011698 | 0.011329 | 0.011295 |
| 0.011330 | 0.011586 | 0.011289 | 0.011232 | 0.011705 | 0.011163 | 0.011296 |
| 0.011671 | 0.011604 | 0.011497 | 0.011698 | 0.011368 | 0.011564 | 0.011530 |
| 0.011463 | 0.011631 | 0.011487 | 0.011349 | 0.011396 | 0.011363 | 0.011432 |
| 0.011530 | 0.011431 | 0.011567 | 0.011636 | 0.011564 | 0.011631 | 0.011670 |
| 0.011466 | 0.011637 | 0.011568 | 0.011500 | 0.011767 | 0.011228 | 0.011431 |
| 0.011329 | 0.011329 | 0.011228 | 0.011228 | 0.011295 | 0.011295 | 0.011362 |
| 0.011295 | 0.011362 | 0.011262 | 0.011362 | 0.011295 | 0.011295 | 0.011362 |
| 0.011295 | 0.011732 | 0.011631 | 0.011665 | 0.011195 | 0.011295 | 0.011329 |
| 0.011329 | 0.011295 | 0.011362 | 0.011396 | 0.011262 | 0.011262 | 0.011262 |
| 0.011799 | 0.011430 | 0.011430 | 0.011228 | 0.011329 | 0.011497 | 0.011262 |
| 0.011262 | 0.011329 | 0.011295 | 0.011463 | 0.011262 | 0.011396 | 0.011530 |
| 0.011463 | 0.011295 | 0.011295 | 0.011228 | 0.011228 | 0.011396 | 0.011329 |
| 0.011228 | 0.011329 | 0.011195 | 0.011228 | 0.011362 | 0.011497 | 0.011262 |
| 0.011228 | 0.011362 | 0.011296 | 0.011195 | 0.011530 | 0.011195 | 0.011362 |
| 0.011437 | 0.011262 | 0.011564 | 0.011396 | 0.011430 | 0.011295 | 0.011396 |
| 0.011262 | 0.011597 | 0.011195 | 0.011463 | 0.011262 | 0.011262 | 0.011195 |
| 0.011429 | 0.011631 | 0.011329 | 0.011396 | 0.011228 | 0.011631 | 0.011262 |
| 0.011262 | 0.011262 | 0.011295 | 0.011396 | 0.011295 | 0.011396 | 0.011463 |
| 0.011463 | 0.011430 | 0.011329 | 0.011430 | 0.011396 | 0.011262 | 0.011228 |
| 0.011262 | 0.011262 | 0.011329 | 0.011262 | 0.011228 | 0.011396 | 0.011262 |
| 0.011295 | 0.011295 | 0.011430 | 0.011463 | 0.011362 | 0.011295 | 0.011295 |
| 0.011362 | 0.011295 | 0.011396 | 0.011262 | 0.011396 | 0.011497 | 0.011799 |
| 0.011295 | 0.011698 | 0.011302 | 0.017823 | 0.011322 | 0.011488 | 0.011653 |
| 0.011614 | 0.011658 | 0.011427 | 0.011350 | 0.011774 | 0.011682 | 0.011425 |

|          |          |          |          |          |          |          |
|----------|----------|----------|----------|----------|----------|----------|
| 0.011535 | 0.011610 | 0.011177 | 0.011311 | 0.011294 | 0.011356 | 0.011318 |
| 0.011529 | 0.011470 | 0.011468 | 0.011259 | 0.011430 | 0.011463 | 0.011466 |
| 0.011335 | 0.011429 | 0.011429 | 0.011396 | 0.011362 | 0.011363 | 0.011329 |
| 0.011362 | 0.011295 | 0.011329 | 0.011362 | 0.011329 | 0.011262 | 0.011295 |
| 0.011295 | 0.011362 | 0.011262 | 0.011362 | 0.011396 | 0.011429 | 0.011329 |
| 0.011362 | 0.011329 | 0.011665 | 0.011665 | 0.011396 | 0.011430 | 0.011463 |
| 0.011228 | 0.011228 | 0.011262 | 0.011362 | 0.011228 | 0.011463 | 0.011463 |
| 0.011497 | 0.011497 | 0.011430 | 0.011530 | 0.011698 | 0.011532 | 0.011362 |
| 0.011362 | 0.011429 | 0.011463 | 0.011295 | 0.011362 | 0.011329 | 0.011362 |
| 0.011430 | 0.011430 | 0.011463 | 0.011430 | 0.011330 | 0.011463 | 0.011497 |
| 0.011365 | 0.011262 | 0.011362 | 0.011463 | 0.011362 | 0.011497 | 0.011530 |
| 0.011698 | 0.011368 | 0.011564 | 0.011530 | 0.011463 | 0.011631 | 0.011262 |
| 0.011431 | 0.011329 | 0.011295 | 0.011295 | 0.011362 | 0.011262 | 0.011362 |
| 0.011396 | 0.011429 | 0.011329 | 0.011362 | 0.011329 | 0.011665 | 0.011665 |
| 0.011396 | 0.011430 | 0.011497 | 0.011429 | 0.012070 | 0.011489 | 0.011412 |
| 0.011482 | 0.011442 | 0.011552 | 0.011441 | 0.011550 | 0.011474 | 0.011440 |
| 0.012022 | 0.011337 | 0.011471 | 0.011406 | 0.011680 | 0.011536 | 0.011639 |
| 0.012046 | 0.011512 | 0.011365 | 0.011362 | 0.011362 | 0.011396 | 0.011331 |
| 0.011228 | 0.011262 | 0.011396 | 0.011362 | 0.011364 | 0.011497 | 0.011464 |
| 0.011329 | 0.011262 | 0.011295 | 0.011329 | 0.011228 | 0.011295 | 0.011195 |
| 0.011329 | 0.011362 | 0.011262 | 0.011228 | 0.011329 | 0.011262 | 0.011295 |
| 0.011295 | 0.011228 | 0.011295 | 0.011329 | 0.011228 | 0.011430 | 0.011463 |
| 0.011362 | 0.011430 | 0.011362 | 0.011362 | 0.011295 | 0.011698 | 0.011329 |
| 0.011373 | 0.011295 | 0.011531 | 0.011535 | 0.011396 | 0.011396 | 0.011396 |
| 0.011396 | 0.011329 | 0.011295 | 0.011329 | 0.011430 | 0.011430 | 0.011362 |
| 0.011362 | 0.011497 | 0.011665 | 0.011396 | 0.011598 | 0.011598 | 0.011463 |
| 0.011295 | 0.011362 | 0.011396 | 0.011799 | 0.011363 | 0.011396 | 0.011362 |
| 0.011396 | 0.011329 | 0.011329 | 0.011631 | 0.011564 | 0.011598 | 0.011329 |
| 0.011430 | 0.011429 | 0.011362 | 0.011430 | 0.011396 | 0.011262 | 0.011597 |
| 0.011362 | 0.011329 | 0.011329 | 0.011497 | 0.011329 | 0.011429 | 0.011665 |
| 0.011362 | 0.011706 | 0.011732 | 0.011548 | 0.011286 | 0.011434 | 0.011267 |
| 0.011335 | 0.011761 | 0.011271 | 0.011507 | 0.011304 | 0.011417 | 0.011326 |
| 0.011519 | 0.011258 | 0.011394 | 0.011258 | 0.011276 | 0.011462 | 0.011385 |
| 0.011399 | 0.011296 | 0.011412 | 0.011342 | 0.011364 | 0.011497 | 0.011564 |
| 0.011564 | 0.011430 | 0.011533 | 0.011535 | 0.011670 | 0.011661 | 0.011362 |
| 0.011597 | 0.011463 | 0.011329 | 0.011430 | 0.011228 | 0.011463 | 0.011262 |
| 0.011329 | 0.011329 | 0.011295 | 0.011262 | 0.011295 | 0.011262 | 0.011362 |
| 0.011340 | 0.011340 | 0.011334 | 0.011368 | 0.011505 | 0.011470 | 0.011470 |
| 0.011469 | 0.011396 | 0.011208 | 0.011204 | 0.011331 | 0.011433 | 0.011501 |
| 0.011296 | 0.011365 | 0.011599 | 0.011567 | 0.011497 | 0.011531 | 0.011463 |
| 0.011396 | 0.011463 | 0.011463 | 0.011362 | 0.011934 | 0.011530 | 0.011598 |
| 0.011631 | 0.011701 | 0.011333 | 0.011407 | 0.011295 | 0.011497 | 0.011463 |
| 0.011498 | 0.011530 | 0.011530 | 0.011530 | 0.011650 | 0.011665 | 0.011303 |
| 0.011196 | 0.011199 | 0.011299 | 0.011264 | 0.011368 | 0.011210 | 0.011536 |
| 0.011335 | 0.011499 | 0.011203 | 0.011360 | 0.011329 | 0.011402 | 0.011295 |
| 0.011262 | 0.011262 | 0.011329 | 0.011295 | 0.011497 | 0.011463 | 0.011396 |
| 0.011497 | 0.011564 | 0.011295 | 0.011295 | 0.011329 | 0.011329 | 0.011330 |
| 0.011398 | 0.000000 | 0.011329 | 0.011364 | 0.011497 | 0.011564 | 0.011564 |
| 0.011430 | 0.011533 | 0.011535 | 0.011670 | 0.011661 | 0.011362 | 0.011530 |
| 0.011463 | 0.011463 | 0.011297 | 0.011478 | 0.011408 | 0.011435 | 0.011305 |
| 0.011473 | 0.011652 | 0.011441 | 0.011366 | 0.011262 | 0.011463 | 0.011329 |
| 0.011429 | 0.011362 | 0.011262 | 0.011363 | 0.011463 | 0.011466 | 0.011362 |
| 0.011262 | 0.011195 | 0.011329 | 0.011262 | 0.011195 | 0.011298 | 0.011463 |
| 0.011362 | 0.011295 | 0.011329 | 0.011362 | 0.011329 | 0.011262 | 0.011463 |
| 0.011329 | 0.011362 | 0.011362 | 0.011295 | 0.011362 | 0.011598 | 0.011262 |
| 0.011295 | 0.011698 | 0.011295 | 0.011329 | 0.011295 | 0.011665 | 0.011274 |
| 0.011791 | 0.011273 | 0.011311 | 0.011503 | 0.011589 | 0.011491 | 0.011227 |
| 0.011270 | 0.011463 | 0.011564 | 0.011671 | 0.011531 | 0.011669 | 0.011800 |
| 0.011699 | 0.011737 | 0.011698 | 0.011880 | 0.011665 | 0.012472 | 0.011700 |
| 0.012439 | 0.012207 | 0.012307 | 0.012612 | 0.011665 | 0.011362 | 0.011665 |

|          |          |          |          |          |          |          |
|----------|----------|----------|----------|----------|----------|----------|
| 0.012103 | 0.012038 | 0.011631 | 0.011463 | 0.011598 | 0.011598 | 0.011500 |
| 0.011463 | 0.011467 | 0.011530 | 0.011464 | 0.011867 | 0.011934 | 0.011935 |
| 0.011834 | 0.011934 | 0.012038 | 0.011804 | 0.012104 | 0.012110 | 0.012171 |
| 0.012172 | 0.012205 | 0.012152 | 0.012172 | 0.012173 | 0.011396 | 0.011699 |
| 0.011766 | 0.012270 | 0.011772 | 0.012001 | 0.012474 | 0.011536 | 0.011430 |
| 0.011396 | 0.011396 | 0.011867 | 0.011924 | 0.012010 | 0.011732 | 0.011397 |
| S723     | 0.011665 | 0.011665 | 0.012001 | 0.011765 | 0.011765 | 0.011833 |
| 0.011672 | 0.011604 | 0.011765 | 0.011262 | 0.011329 | 0.011296 | 0.011262 |
| 0.011295 | 0.011463 | 0.011262 | 0.011295 | 0.011362 | 0.011329 | 0.011295 |
| 0.011262 | 0.011295 | 0.011396 | 0.011262 | 0.011296 | 0.011295 | 0.011638 |
| 0.011530 | 0.011295 | 0.011195 | 0.011429 | 0.011362 | 0.011329 | 0.011362 |
| 0.011329 | 0.011430 | 0.011329 | 0.011329 | 0.011362 | 0.011329 | 0.011497 |
| 0.011262 | 0.011329 | 0.011362 | 0.011295 | 0.011396 | 0.011430 | 0.011362 |
| 0.011329 | 0.011497 | 0.011396 | 0.011665 | 0.011329 | 0.011597 | 0.011329 |
| 0.011295 | 0.011396 | 0.011463 | 0.011597 | 0.011698 | 0.011396 | 0.011497 |
| 0.011362 | 0.011430 | 0.011329 | 0.011564 | 0.011799 | 0.011329 | 0.011396 |
| 0.011295 | 0.011396 | 0.011362 | 0.011430 | 0.011362 | 0.011362 | 0.011362 |
| 0.011262 | 0.011295 | 0.011262 | 0.011362 | 0.011329 | 0.011363 | 0.011429 |
| 0.011362 | 0.011329 | 0.011396 | 0.011295 | 0.011429 | 0.011262 | 0.011329 |
| 0.011497 | 0.011429 | 0.011665 | 0.011497 | 0.011329 | 0.011564 | 0.011329 |
| 0.011505 | 0.011733 | 0.011551 | 0.011255 | 0.011247 | 0.011355 | 0.011454 |
| 0.012085 | 0.011518 | 0.011266 | 0.011564 | 0.011564 | 0.011362 | 0.011463 |
| 0.011396 | 0.011362 | 0.011429 | 0.011329 | 0.011430 | 0.011362 | 0.011362 |
| 0.011329 | 0.011429 | 0.011631 | 0.011497 | 0.011396 | 0.011363 | 0.011295 |
| 0.011262 | 0.011262 | 0.011329 | 0.011295 | 0.011497 | 0.011463 | 0.011396 |
| 0.011497 | 0.011564 | 0.011295 | 0.011295 | 0.011329 | 0.011329 | 0.011330 |
| 0.011398 | 0.011329 | 0.000000 | 0.011204 | 0.011277 | 0.011236 | 0.011329 |
| 0.011331 | 0.011266 | 0.011318 | 0.011302 | 0.011230 | 0.011266 | 0.011297 |
| 0.011564 | 0.011336 | 0.011370 | 0.011262 | 0.011268 | 0.011397 | 0.011363 |
| 0.011430 | 0.011363 | 0.011363 | 0.011463 | 0.011396 | 0.011766 | 0.011564 |
| 0.011597 | 0.011463 | 0.011329 | 0.011430 | 0.011228 | 0.011463 | 0.011262 |
| 0.011329 | 0.011329 | 0.011295 | 0.011262 | 0.011295 | 0.011262 | 0.011094 |
| 0.011329 | 0.011430 | 0.011362 | 0.011262 | 0.011363 | 0.011463 | 0.011466 |
| 0.011463 | 0.011362 | 0.011262 | 0.011195 | 0.011329 | 0.011262 | 0.011195 |
| 0.011298 | 0.011463 | 0.011262 | 0.011463 | 0.011228 | 0.011329 | 0.011295 |
| 0.011396 | 0.011295 | 0.011329 | 0.011295 | 0.011329 | 0.011195 | 0.011329 |
| 0.011362 | 0.011295 | 0.011362 | 0.011295 | 0.011329 | 0.011362 | 0.011597 |
| 0.011698 | 0.011631 | 0.011698 | 0.011465 | 0.011698 | 0.011329 | 0.011295 |
| 0.011330 | 0.011586 | 0.011426 | 0.011232 | 0.011705 | 0.011163 | 0.011257 |
| 0.011705 | 0.011570 | 0.011497 | 0.011698 | 0.011402 | 0.011564 | 0.011530 |
| 0.011463 | 0.011631 | 0.011487 | 0.011349 | 0.011396 | 0.011363 | 0.011433 |
| 0.011530 | 0.011431 | 0.011568 | 0.011636 | 0.011564 | 0.011631 | 0.011738 |
| 0.011466 | 0.011637 | 0.011568 | 0.011500 | 0.011767 | 0.011228 | 0.011431 |
| 0.011396 | 0.011329 | 0.011228 | 0.011228 | 0.011295 | 0.011295 | 0.011362 |
| 0.011295 | 0.011362 | 0.011262 | 0.011362 | 0.011295 | 0.011295 | 0.011362 |
| 0.011295 | 0.011732 | 0.011631 | 0.011665 | 0.011195 | 0.011295 | 0.011329 |
| 0.011329 | 0.011295 | 0.011362 | 0.011396 | 0.011262 | 0.011262 | 0.011262 |
| 0.011799 | 0.011430 | 0.011430 | 0.011228 | 0.011329 | 0.011497 | 0.011262 |
| 0.011262 | 0.011329 | 0.011295 | 0.011463 | 0.011262 | 0.011396 | 0.011530 |
| 0.011463 | 0.011295 | 0.011295 | 0.011228 | 0.011228 | 0.011396 | 0.011329 |
| 0.011228 | 0.011329 | 0.011195 | 0.011228 | 0.011362 | 0.011497 | 0.011262 |
| 0.011161 | 0.011362 | 0.011296 | 0.011195 | 0.011530 | 0.011195 | 0.011295 |
| 0.011437 | 0.011262 | 0.011564 | 0.011396 | 0.011430 | 0.011295 | 0.011396 |
| 0.011262 | 0.011597 | 0.011195 | 0.011463 | 0.011262 | 0.011262 | 0.011195 |
| 0.011430 | 0.011631 | 0.011329 | 0.011396 | 0.011228 | 0.011631 | 0.011262 |
| 0.011262 | 0.011262 | 0.011295 | 0.011396 | 0.011295 | 0.011396 | 0.011463 |
| 0.011463 | 0.011430 | 0.011329 | 0.011430 | 0.011396 | 0.011262 | 0.011228 |
| 0.011262 | 0.011262 | 0.011329 | 0.011262 | 0.011228 | 0.011396 | 0.011262 |
| 0.011295 | 0.011295 | 0.011430 | 0.011463 | 0.011362 | 0.011295 | 0.011295 |
| 0.011362 | 0.011295 | 0.011396 | 0.011262 | 0.011396 | 0.011497 | 0.011799 |

|          |          |          |          |          |          |          |
|----------|----------|----------|----------|----------|----------|----------|
| 0.011295 | 0.011698 | 0.011302 | 0.017823 | 0.011322 | 0.011549 | 0.011653 |
| 0.011614 | 0.011658 | 0.011322 | 0.011292 | 0.011774 | 0.011682 | 0.011425 |
| 0.011582 | 0.011610 | 0.011216 | 0.011311 | 0.011294 | 0.011307 | 0.011318 |
| 0.011529 | 0.011470 | 0.011468 | 0.011325 | 0.011430 | 0.011463 | 0.011466 |
| 0.011335 | 0.011430 | 0.011430 | 0.011396 | 0.011362 | 0.011363 | 0.011329 |
| 0.011362 | 0.011295 | 0.011329 | 0.011295 | 0.011329 | 0.011262 | 0.011295 |
| 0.011295 | 0.011362 | 0.011262 | 0.011362 | 0.011396 | 0.011430 | 0.011329 |
| 0.011362 | 0.011329 | 0.011665 | 0.011665 | 0.011396 | 0.011430 | 0.011463 |
| 0.011228 | 0.011228 | 0.011262 | 0.011362 | 0.011228 | 0.011463 | 0.011463 |
| 0.011497 | 0.011497 | 0.011430 | 0.011530 | 0.011698 | 0.011532 | 0.011362 |
| 0.011362 | 0.011430 | 0.011463 | 0.011295 | 0.011362 | 0.011329 | 0.011362 |
| 0.011430 | 0.011430 | 0.011463 | 0.011430 | 0.011330 | 0.011530 | 0.011497 |
| 0.011365 | 0.011262 | 0.011362 | 0.011463 | 0.011362 | 0.011497 | 0.011530 |
| 0.011698 | 0.011402 | 0.011564 | 0.011530 | 0.011463 | 0.011631 | 0.011262 |
| 0.011431 | 0.011329 | 0.011295 | 0.011295 | 0.011362 | 0.011262 | 0.011362 |
| 0.011396 | 0.011430 | 0.011329 | 0.011362 | 0.011329 | 0.011665 | 0.011665 |
| 0.011396 | 0.011430 | 0.011497 | 0.011430 | 0.012070 | 0.011489 | 0.011412 |
| 0.011482 | 0.011442 | 0.011552 | 0.011441 | 0.011550 | 0.011474 | 0.011440 |
| 0.012022 | 0.011337 | 0.011471 | 0.011406 | 0.011680 | 0.011537 | 0.011639 |
| 0.012047 | 0.011512 | 0.011365 | 0.011362 | 0.011362 | 0.011396 | 0.011331 |
| 0.011228 | 0.011262 | 0.011396 | 0.011362 | 0.011364 | 0.011497 | 0.011464 |
| 0.011329 | 0.011262 | 0.011295 | 0.011329 | 0.011228 | 0.011295 | 0.011195 |
| 0.011329 | 0.011362 | 0.011262 | 0.011228 | 0.011329 | 0.011262 | 0.011295 |
| 0.011295 | 0.011228 | 0.011295 | 0.011329 | 0.011228 | 0.011430 | 0.011463 |
| 0.011362 | 0.011430 | 0.011362 | 0.011362 | 0.011295 | 0.011698 | 0.011329 |
| 0.011373 | 0.011295 | 0.011531 | 0.011535 | 0.011396 | 0.011396 | 0.011396 |
| 0.011396 | 0.011329 | 0.011295 | 0.011329 | 0.011430 | 0.011430 | 0.011362 |
| 0.011362 | 0.011497 | 0.011665 | 0.011396 | 0.011530 | 0.011530 | 0.011463 |
| 0.011295 | 0.011362 | 0.011396 | 0.011799 | 0.011363 | 0.011396 | 0.011362 |
| 0.011396 | 0.011329 | 0.011329 | 0.011631 | 0.011564 | 0.011598 | 0.011329 |
| 0.011430 | 0.011497 | 0.011362 | 0.011430 | 0.011396 | 0.011262 | 0.011597 |
| 0.011362 | 0.011329 | 0.011329 | 0.011497 | 0.011329 | 0.011430 | 0.011665 |
| 0.011362 | 0.011740 | 0.011732 | 0.011548 | 0.011286 | 0.011434 | 0.011267 |
| 0.011280 | 0.011761 | 0.011271 | 0.011507 | 0.011353 | 0.011467 | 0.011485 |
| 0.011519 | 0.011324 | 0.011394 | 0.011258 | 0.011330 | 0.011328 | 0.011425 |
| 0.011437 | 0.011336 | 0.011412 | 0.011342 | 0.011094 | 0.011497 | 0.011564 |
| 0.011564 | 0.011430 | 0.011533 | 0.011535 | 0.011670 | 0.011626 | 0.011329 |
| 0.011597 | 0.011463 | 0.011329 | 0.011430 | 0.011228 | 0.011463 | 0.011262 |
| 0.011329 | 0.011329 | 0.011295 | 0.011262 | 0.011295 | 0.011262 | 0.011094 |
| 0.011340 | 0.011340 | 0.011334 | 0.011368 | 0.011505 | 0.011470 | 0.011470 |
| 0.011469 | 0.011396 | 0.011134 | 0.011168 | 0.011331 | 0.011501 | 0.011501 |
| 0.011296 | 0.011365 | 0.011599 | 0.011567 | 0.011497 | 0.011531 | 0.011463 |
| 0.011396 | 0.011463 | 0.011463 | 0.011362 | 0.011934 | 0.011530 | 0.011598 |
| 0.011631 | 0.011701 | 0.011333 | 0.011407 | 0.011295 | 0.011497 | 0.011463 |
| 0.011498 | 0.011530 | 0.011530 | 0.011530 | 0.011650 | 0.011665 | 0.011303 |
| 0.011196 | 0.011199 | 0.011299 | 0.011264 | 0.011368 | 0.011210 | 0.011536 |
| 0.011335 | 0.011411 | 0.011108 | 0.011360 | 0.011329 | 0.011402 | 0.011295 |
| 0.011262 | 0.011262 | 0.011329 | 0.011295 | 0.011497 | 0.011463 | 0.011396 |
| 0.011497 | 0.011564 | 0.011295 | 0.011295 | 0.011329 | 0.011329 | 0.011330 |
| 0.011398 | 0.011329 | 0.000000 | 0.011094 | 0.011497 | 0.011564 | 0.011564 |
| 0.011430 | 0.011533 | 0.011535 | 0.011670 | 0.011626 | 0.011329 | 0.011530 |
| 0.011463 | 0.011463 | 0.011297 | 0.011478 | 0.011408 | 0.011435 | 0.011270 |
| 0.011439 | 0.011698 | 0.011399 | 0.011366 | 0.011262 | 0.011463 | 0.011329 |
| 0.011430 | 0.011362 | 0.011262 | 0.011363 | 0.011463 | 0.011466 | 0.011362 |
| 0.011262 | 0.011195 | 0.011329 | 0.011262 | 0.011195 | 0.011298 | 0.011463 |
| 0.011362 | 0.011295 | 0.011329 | 0.011295 | 0.011329 | 0.011262 | 0.011463 |
| 0.011329 | 0.011362 | 0.011362 | 0.011295 | 0.011362 | 0.011598 | 0.011262 |
| 0.011295 | 0.011698 | 0.011295 | 0.011329 | 0.011295 | 0.011665 | 0.011274 |
| 0.011735 | 0.011273 | 0.011311 | 0.011503 | 0.011589 | 0.011491 | 0.011227 |
| 0.011270 | 0.011463 | 0.011564 | 0.011671 | 0.011531 | 0.011669 | 0.011800 |

|          |          |          |          |          |          |          |
|----------|----------|----------|----------|----------|----------|----------|
| 0.011699 | 0.011737 | 0.011698 | 0.011949 | 0.011665 | 0.012506 | 0.011700 |
| 0.012439 | 0.012173 | 0.012307 | 0.012612 | 0.011665 | 0.011362 | 0.011665 |
| 0.012103 | 0.012038 | 0.011631 | 0.011531 | 0.011598 | 0.011598 | 0.011568 |
| 0.011463 | 0.011467 | 0.011530 | 0.011497 | 0.011867 | 0.011934 | 0.011935 |
| 0.011834 | 0.011934 | 0.012038 | 0.011804 | 0.012104 | 0.012110 | 0.012171 |
| 0.012172 | 0.012205 | 0.012152 | 0.012172 | 0.012173 | 0.011396 | 0.011699 |
| 0.011766 | 0.012270 | 0.011772 | 0.012001 | 0.012474 | 0.011536 | 0.011430 |
| 0.011396 | 0.011396 | 0.011867 | 0.011924 | 0.012010 | 0.011732 | 0.011397 |
| S724     | 0.011701 | 0.011701 | 0.011971 | 0.011734 | 0.011734 | 0.011802 |
| 0.011708 | 0.011640 | 0.011734 | 0.011296 | 0.011363 | 0.011330 | 0.011296 |
| 0.011330 | 0.011498 | 0.011296 | 0.011330 | 0.011397 | 0.011364 | 0.011330 |
| 0.011296 | 0.011330 | 0.011431 | 0.011296 | 0.011330 | 0.011330 | 0.011674 |
| 0.011566 | 0.011330 | 0.011229 | 0.011465 | 0.011397 | 0.011364 | 0.011397 |
| 0.011364 | 0.011465 | 0.011364 | 0.011364 | 0.011397 | 0.011364 | 0.011532 |
| 0.011296 | 0.011364 | 0.011397 | 0.011330 | 0.011431 | 0.011465 | 0.011397 |
| 0.011364 | 0.011532 | 0.011431 | 0.011701 | 0.011364 | 0.011633 | 0.011364 |
| 0.011330 | 0.011431 | 0.011498 | 0.011633 | 0.011734 | 0.011431 | 0.011532 |
| 0.011397 | 0.011465 | 0.011364 | 0.011599 | 0.011836 | 0.011364 | 0.011431 |
| 0.011330 | 0.011431 | 0.011397 | 0.011465 | 0.011397 | 0.011397 | 0.011397 |
| 0.011296 | 0.011330 | 0.011296 | 0.011397 | 0.011363 | 0.011398 | 0.011465 |
| 0.011397 | 0.011364 | 0.011431 | 0.011330 | 0.011465 | 0.011296 | 0.011364 |
| 0.011532 | 0.011465 | 0.011701 | 0.011532 | 0.011364 | 0.011600 | 0.011363 |
| 0.011544 | 0.011735 | 0.011591 | 0.011296 | 0.011285 | 0.011356 | 0.011495 |
| 0.012126 | 0.011572 | 0.011308 | 0.011599 | 0.011600 | 0.011397 | 0.011498 |
| 0.011431 | 0.011397 | 0.011465 | 0.011364 | 0.011465 | 0.011397 | 0.011397 |
| 0.011363 | 0.011465 | 0.011667 | 0.011532 | 0.011431 | 0.011397 | 0.011330 |
| 0.011296 | 0.011296 | 0.011364 | 0.011330 | 0.011532 | 0.011498 | 0.011431 |
| 0.011532 | 0.011599 | 0.011330 | 0.011330 | 0.011364 | 0.011363 | 0.011365 |
| 0.011433 | 0.011364 | 0.011094 | 0.011241 | 0.011314 | 0.011271 | 0.011364 |
| 0.011366 | 0.011302 | 0.011357 | 0.011337 | 0.011265 | 0.011301 | 0.011331 |
| 0.011602 | 0.011372 | 0.011406 | 0.011296 | 0.011303 | 0.011432 | 0.011398 |
| 0.011465 | 0.011399 | 0.011398 | 0.011498 | 0.011431 | 0.011802 | 0.011600 |
| 0.011633 | 0.011498 | 0.011364 | 0.011465 | 0.011262 | 0.011498 | 0.011296 |
| 0.011364 | 0.011364 | 0.011330 | 0.011296 | 0.011330 | 0.011296 | 0.011128 |
| 0.011364 | 0.011465 | 0.011397 | 0.011296 | 0.011398 | 0.011465 | 0.011501 |
| 0.011498 | 0.011397 | 0.011296 | 0.011229 | 0.011363 | 0.011296 | 0.011229 |
| 0.011333 | 0.011499 | 0.011296 | 0.011499 | 0.011262 | 0.011364 | 0.011330 |
| 0.011431 | 0.011330 | 0.011364 | 0.011330 | 0.011364 | 0.011229 | 0.011364 |
| 0.011397 | 0.011330 | 0.011397 | 0.011330 | 0.011363 | 0.011397 | 0.011633 |
| 0.011734 | 0.011667 | 0.011734 | 0.011500 | 0.011735 | 0.011363 | 0.011330 |
| 0.011365 | 0.011628 | 0.011474 | 0.011267 | 0.011742 | 0.011197 | 0.011297 |
| 0.011742 | 0.011606 | 0.011532 | 0.011735 | 0.011437 | 0.011600 | 0.011566 |
| 0.011498 | 0.011667 | 0.011524 | 0.011350 | 0.011397 | 0.011397 | 0.011468 |
| 0.011566 | 0.011467 | 0.011603 | 0.011672 | 0.011600 | 0.011667 | 0.011775 |
| 0.011502 | 0.011674 | 0.011604 | 0.011536 | 0.011804 | 0.011262 | 0.011399 |
| 0.011431 | 0.011364 | 0.011262 | 0.011262 | 0.011330 | 0.011330 | 0.011397 |
| 0.011330 | 0.011397 | 0.011296 | 0.011397 | 0.011330 | 0.011330 | 0.011397 |
| 0.011330 | 0.011768 | 0.011667 | 0.011701 | 0.011229 | 0.011330 | 0.011364 |
| 0.011364 | 0.011330 | 0.011397 | 0.011431 | 0.011296 | 0.011296 | 0.011296 |
| 0.011836 | 0.011465 | 0.011465 | 0.011262 | 0.011363 | 0.011532 | 0.011296 |
| 0.011296 | 0.011363 | 0.011330 | 0.011498 | 0.011296 | 0.011431 | 0.011566 |
| 0.011498 | 0.011330 | 0.011330 | 0.011262 | 0.011262 | 0.011431 | 0.011364 |
| 0.011262 | 0.011363 | 0.011229 | 0.011262 | 0.011397 | 0.011532 | 0.011296 |
| 0.011195 | 0.011397 | 0.011330 | 0.011229 | 0.011566 | 0.011229 | 0.011330 |
| 0.011473 | 0.011296 | 0.011600 | 0.011431 | 0.011465 | 0.011330 | 0.011431 |
| 0.011296 | 0.011633 | 0.011229 | 0.011498 | 0.011296 | 0.011296 | 0.011229 |
| 0.011465 | 0.011667 | 0.011364 | 0.011431 | 0.011262 | 0.011667 | 0.011296 |
| 0.011296 | 0.011296 | 0.011330 | 0.011431 | 0.011330 | 0.011397 | 0.011498 |
| 0.011498 | 0.011465 | 0.011363 | 0.011465 | 0.011431 | 0.011296 | 0.011262 |
| 0.011296 | 0.011296 | 0.011364 | 0.011296 | 0.011262 | 0.011431 | 0.011296 |

|          |          |          |          |          |          |          |
|----------|----------|----------|----------|----------|----------|----------|
| 0.011330 | 0.011330 | 0.011465 | 0.011498 | 0.011397 | 0.011330 | 0.011330 |
| 0.011397 | 0.011330 | 0.011431 | 0.011296 | 0.011431 | 0.011532 | 0.011836 |
| 0.011330 | 0.011735 | 0.011337 | 0.017890 | 0.011323 | 0.011552 | 0.011691 |
| 0.011651 | 0.011696 | 0.011376 | 0.011352 | 0.011779 | 0.011719 | 0.011427 |
| 0.011535 | 0.011612 | 0.011256 | 0.011355 | 0.011335 | 0.011308 | 0.011363 |
| 0.011579 | 0.011509 | 0.011507 | 0.011392 | 0.011465 | 0.011498 | 0.011502 |
| 0.011371 | 0.011465 | 0.011465 | 0.011431 | 0.011397 | 0.011398 | 0.011364 |
| 0.011397 | 0.011330 | 0.011364 | 0.011330 | 0.011364 | 0.011296 | 0.011330 |
| 0.011330 | 0.011397 | 0.011296 | 0.011397 | 0.011431 | 0.011465 | 0.011363 |
| 0.011397 | 0.011364 | 0.011701 | 0.011701 | 0.011431 | 0.011465 | 0.011498 |
| 0.011262 | 0.011262 | 0.011296 | 0.011397 | 0.011262 | 0.011498 | 0.011498 |
| 0.011532 | 0.011532 | 0.011465 | 0.011566 | 0.011734 | 0.011567 | 0.011397 |
| 0.011397 | 0.011465 | 0.011498 | 0.011262 | 0.011397 | 0.011364 | 0.011397 |
| 0.011465 | 0.011465 | 0.011498 | 0.011465 | 0.011364 | 0.011566 | 0.011532 |
| 0.011400 | 0.011296 | 0.011397 | 0.011498 | 0.011397 | 0.011532 | 0.011566 |
| 0.011735 | 0.011437 | 0.011600 | 0.011566 | 0.011498 | 0.011667 | 0.011296 |
| 0.011466 | 0.011364 | 0.011330 | 0.011330 | 0.011397 | 0.011296 | 0.011397 |
| 0.011431 | 0.011465 | 0.011363 | 0.011397 | 0.011364 | 0.011701 | 0.011701 |
| 0.011431 | 0.011465 | 0.011532 | 0.011465 | 0.012107 | 0.011527 | 0.011449 |
| 0.011519 | 0.011478 | 0.011519 | 0.011478 | 0.011587 | 0.011510 | 0.011476 |
| 0.012060 | 0.011373 | 0.011507 | 0.011442 | 0.011717 | 0.011573 | 0.011675 |
| 0.012085 | 0.011514 | 0.011400 | 0.011397 | 0.011397 | 0.011431 | 0.011366 |
| 0.011262 | 0.011296 | 0.011431 | 0.011397 | 0.011399 | 0.011532 | 0.011432 |
| 0.011363 | 0.011296 | 0.011330 | 0.011364 | 0.011262 | 0.011330 | 0.011229 |
| 0.011364 | 0.011397 | 0.011296 | 0.011262 | 0.011364 | 0.011296 | 0.011330 |
| 0.011330 | 0.011262 | 0.011330 | 0.011364 | 0.011262 | 0.011465 | 0.011498 |
| 0.011397 | 0.011465 | 0.011397 | 0.011397 | 0.011330 | 0.011734 | 0.011364 |
| 0.011410 | 0.011330 | 0.011566 | 0.011571 | 0.011431 | 0.011431 | 0.011431 |
| 0.011431 | 0.011364 | 0.011330 | 0.011364 | 0.011465 | 0.011465 | 0.011397 |
| 0.011364 | 0.011532 | 0.011701 | 0.011431 | 0.011566 | 0.011566 | 0.011498 |
| 0.011330 | 0.011397 | 0.011431 | 0.011836 | 0.011397 | 0.011431 | 0.011397 |
| 0.011431 | 0.011363 | 0.011363 | 0.011667 | 0.011600 | 0.011633 | 0.011364 |
| 0.011465 | 0.011532 | 0.011397 | 0.011465 | 0.011431 | 0.011296 | 0.011633 |
| 0.011397 | 0.011364 | 0.011363 | 0.011532 | 0.011364 | 0.011465 | 0.011701 |
| 0.011397 | 0.011776 | 0.011768 | 0.011591 | 0.011344 | 0.011470 | 0.011319 |
| 0.011281 | 0.011725 | 0.011307 | 0.011463 | 0.011353 | 0.011519 | 0.011486 |
| 0.011572 | 0.011324 | 0.011395 | 0.011259 | 0.011330 | 0.011328 | 0.011468 |
| 0.011476 | 0.011376 | 0.011449 | 0.011378 | 0.000000 | 0.011532 | 0.011532 |
| 0.011599 | 0.011397 | 0.011569 | 0.011571 | 0.011637 | 0.011591 | 0.011397 |
| 0.011633 | 0.011498 | 0.011364 | 0.011465 | 0.011262 | 0.011498 | 0.011296 |
| 0.011364 | 0.011364 | 0.011330 | 0.011296 | 0.011330 | 0.011296 | 0.011128 |
| 0.011376 | 0.011376 | 0.011370 | 0.011404 | 0.011541 | 0.011506 | 0.011506 |
| 0.011505 | 0.011431 | 0.011172 | 0.011205 | 0.011366 | 0.011536 | 0.011537 |
| 0.011330 | 0.011400 | 0.011635 | 0.011603 | 0.011533 | 0.011567 | 0.011498 |
| 0.011431 | 0.011498 | 0.011498 | 0.011397 | 0.011971 | 0.011566 | 0.011634 |
| 0.011667 | 0.011740 | 0.011368 | 0.011443 | 0.011330 | 0.011498 | 0.011498 |
| 0.011533 | 0.011566 | 0.011566 | 0.011566 | 0.011690 | 0.011701 | 0.011339 |
| 0.011230 | 0.011234 | 0.011334 | 0.011299 | 0.011403 | 0.011248 | 0.011572 |
| 0.011370 | 0.011412 | 0.011108 | 0.011361 | 0.011364 | 0.011438 | 0.011330 |
| 0.011296 | 0.011296 | 0.011364 | 0.011330 | 0.011532 | 0.011498 | 0.011431 |
| 0.011532 | 0.011599 | 0.011330 | 0.011330 | 0.011364 | 0.011363 | 0.011365 |
| 0.011433 | 0.011364 | 0.011094 | 0.000000 | 0.011532 | 0.011532 | 0.011599 |
| 0.011397 | 0.011569 | 0.011571 | 0.011637 | 0.011591 | 0.011397 | 0.011566 |
| 0.011498 | 0.011498 | 0.011332 | 0.011514 | 0.011444 | 0.011470 | 0.011271 |
| 0.011475 | 0.011656 | 0.011443 | 0.011401 | 0.011296 | 0.011499 | 0.011364 |
| 0.011465 | 0.011397 | 0.011296 | 0.011398 | 0.011465 | 0.011501 | 0.011397 |
| 0.011296 | 0.011229 | 0.011363 | 0.011296 | 0.011229 | 0.011333 | 0.011499 |
| 0.011397 | 0.011330 | 0.011364 | 0.011330 | 0.011364 | 0.011296 | 0.011498 |
| 0.011364 | 0.011397 | 0.011397 | 0.011330 | 0.011397 | 0.011633 | 0.011296 |
| 0.011330 | 0.011734 | 0.011330 | 0.011364 | 0.011330 | 0.011701 | 0.011319 |



|          |          |          |          |          |          |          |
|----------|----------|----------|----------|----------|----------|----------|
| 0.011681 | 0.011316 | 0.011363 | 0.011545 | 0.011633 | 0.011529 | 0.011270 |
| 0.011324 | 0.011431 | 0.011532 | 0.011640 | 0.011499 | 0.011637 | 0.011769 |
| 0.011668 | 0.011705 | 0.011667 | 0.011918 | 0.011633 | 0.012444 | 0.011669 |
| 0.012411 | 0.012109 | 0.012244 | 0.012584 | 0.011701 | 0.011330 | 0.011633 |
| 0.012074 | 0.012008 | 0.011600 | 0.011499 | 0.011566 | 0.011566 | 0.011604 |
| 0.011431 | 0.011435 | 0.011498 | 0.011465 | 0.011904 | 0.011971 | 0.011972 |
| 0.011871 | 0.011972 | 0.012076 | 0.011841 | 0.012142 | 0.012148 | 0.012209 |
| 0.012210 | 0.012244 | 0.012191 | 0.012210 | 0.012211 | 0.011431 | 0.011735 |
| 0.011803 | 0.012309 | 0.011775 | 0.012039 | 0.012513 | 0.011572 | 0.011465 |
| 0.011431 | 0.011431 | 0.011870 | 0.011968 | 0.012047 | 0.011768 | 0.011432 |
| S725     | 0.011833 | 0.011833 | 0.011900 | 0.011665 | 0.011665 | 0.011732 |
| 0.011570 | 0.011502 | 0.011665 | 0.011430 | 0.011497 | 0.011464 | 0.011429 |
| 0.011396 | 0.011597 | 0.011362 | 0.011463 | 0.011530 | 0.011497 | 0.011463 |
| 0.011429 | 0.011463 | 0.011295 | 0.011430 | 0.011463 | 0.011463 | 0.011536 |
| 0.011195 | 0.011463 | 0.011362 | 0.011329 | 0.011530 | 0.011497 | 0.011530 |
| 0.011497 | 0.011597 | 0.011497 | 0.011497 | 0.011530 | 0.011497 | 0.011665 |
| 0.011362 | 0.011497 | 0.011530 | 0.011463 | 0.011497 | 0.011597 | 0.011530 |
| 0.011497 | 0.011665 | 0.011564 | 0.011564 | 0.011497 | 0.011765 | 0.011497 |
| 0.011463 | 0.011497 | 0.011631 | 0.011765 | 0.011598 | 0.011497 | 0.011597 |
| 0.011530 | 0.011597 | 0.011497 | 0.011732 | 0.011698 | 0.011497 | 0.011564 |
| 0.011463 | 0.011564 | 0.011530 | 0.011597 | 0.011530 | 0.011530 | 0.011530 |
| 0.011429 | 0.011463 | 0.011429 | 0.011463 | 0.011497 | 0.011531 | 0.011597 |
| 0.011530 | 0.011497 | 0.011564 | 0.011463 | 0.011530 | 0.011429 | 0.011497 |
| 0.011665 | 0.011597 | 0.011631 | 0.011665 | 0.011497 | 0.011665 | 0.011497 |
| 0.011691 | 0.011620 | 0.011702 | 0.011451 | 0.011359 | 0.011539 | 0.011257 |
| 0.011902 | 0.011264 | 0.011390 | 0.011732 | 0.011732 | 0.011463 | 0.011564 |
| 0.011564 | 0.011530 | 0.011597 | 0.011497 | 0.011597 | 0.011530 | 0.011530 |
| 0.011497 | 0.011530 | 0.011799 | 0.011665 | 0.011564 | 0.011530 | 0.011463 |
| 0.011429 | 0.011362 | 0.011497 | 0.011463 | 0.011396 | 0.011362 | 0.011295 |
| 0.011396 | 0.011463 | 0.011463 | 0.011463 | 0.011497 | 0.011497 | 0.011499 |
| 0.011567 | 0.011497 | 0.011497 | 0.011384 | 0.011422 | 0.011411 | 0.011497 |
| 0.011500 | 0.011438 | 0.011466 | 0.011474 | 0.011400 | 0.011437 | 0.011465 |
| 0.011456 | 0.011508 | 0.011508 | 0.011430 | 0.011440 | 0.011565 | 0.011464 |
| 0.011531 | 0.011532 | 0.011531 | 0.011631 | 0.011564 | 0.011866 | 0.011665 |
| 0.011362 | 0.011564 | 0.011497 | 0.011530 | 0.011396 | 0.011094 | 0.011430 |
| 0.011497 | 0.011497 | 0.011463 | 0.011429 | 0.011463 | 0.011429 | 0.011530 |
| 0.011497 | 0.011597 | 0.011530 | 0.011429 | 0.011532 | 0.011631 | 0.011635 |
| 0.011631 | 0.011530 | 0.011429 | 0.011364 | 0.011497 | 0.011429 | 0.011362 |
| 0.011366 | 0.011631 | 0.011430 | 0.011631 | 0.011396 | 0.011497 | 0.011463 |
| 0.011564 | 0.011463 | 0.011497 | 0.011463 | 0.011497 | 0.011362 | 0.011497 |
| 0.011530 | 0.011463 | 0.011530 | 0.011463 | 0.011497 | 0.011530 | 0.011765 |
| 0.011598 | 0.011530 | 0.011598 | 0.011633 | 0.011598 | 0.011497 | 0.011463 |
| 0.011432 | 0.011707 | 0.011563 | 0.011403 | 0.011603 | 0.011367 | 0.011454 |
| 0.011604 | 0.011502 | 0.011665 | 0.011866 | 0.011572 | 0.011732 | 0.011698 |
| 0.011631 | 0.011799 | 0.011664 | 0.011554 | 0.011605 | 0.011530 | 0.011602 |
| 0.011698 | 0.011600 | 0.011737 | 0.011805 | 0.011732 | 0.011799 | 0.011907 |
| 0.011636 | 0.011807 | 0.011738 | 0.011669 | 0.011935 | 0.011396 | 0.011600 |
| 0.011497 | 0.011497 | 0.011396 | 0.011396 | 0.011463 | 0.011463 | 0.011530 |
| 0.011463 | 0.011530 | 0.011429 | 0.011463 | 0.011396 | 0.011463 | 0.011530 |
| 0.011463 | 0.011631 | 0.011530 | 0.011564 | 0.011362 | 0.011463 | 0.011497 |
| 0.011497 | 0.011463 | 0.011530 | 0.011497 | 0.011429 | 0.011429 | 0.011429 |
| 0.011698 | 0.011530 | 0.011597 | 0.011396 | 0.011497 | 0.011665 | 0.011429 |
| 0.011429 | 0.011497 | 0.011463 | 0.011631 | 0.011429 | 0.011362 | 0.011497 |
| 0.011430 | 0.011463 | 0.011463 | 0.011396 | 0.011396 | 0.011564 | 0.011497 |
| 0.011396 | 0.011497 | 0.011362 | 0.011396 | 0.011530 | 0.011396 | 0.011430 |
| 0.011396 | 0.011530 | 0.011464 | 0.011362 | 0.011430 | 0.011362 | 0.011530 |
| 0.011608 | 0.011429 | 0.011463 | 0.011564 | 0.011530 | 0.011463 | 0.011564 |
| 0.011429 | 0.011765 | 0.011362 | 0.011564 | 0.011362 | 0.011362 | 0.011362 |
| 0.011597 | 0.011531 | 0.011497 | 0.011564 | 0.011396 | 0.011530 | 0.011362 |
| 0.011429 | 0.011429 | 0.011463 | 0.011564 | 0.011463 | 0.011564 | 0.011631 |

|          |          |          |          |          |          |          |
|----------|----------|----------|----------|----------|----------|----------|
| 0.011631 | 0.011597 | 0.011497 | 0.011597 | 0.011564 | 0.011429 | 0.011396 |
| 0.011429 | 0.011429 | 0.011497 | 0.011362 | 0.011396 | 0.011564 | 0.011429 |
| 0.011396 | 0.011463 | 0.011597 | 0.011564 | 0.011530 | 0.011463 | 0.011463 |
| 0.011530 | 0.011463 | 0.011564 | 0.011429 | 0.011564 | 0.011665 | 0.011698 |
| 0.011463 | 0.011598 | 0.011474 | 0.017936 | 0.011387 | 0.011733 | 0.011548 |
| 0.011510 | 0.011553 | 0.011636 | 0.011408 | 0.011665 | 0.011578 | 0.011668 |
| 0.011487 | 0.011426 | 0.011411 | 0.011521 | 0.011411 | 0.011603 | 0.011533 |
| 0.011342 | 0.011135 | 0.011320 | 0.011126 | 0.011597 | 0.011631 | 0.011635 |
| 0.011507 | 0.011597 | 0.011597 | 0.011497 | 0.011530 | 0.011531 | 0.011497 |
| 0.011530 | 0.011463 | 0.011497 | 0.011530 | 0.011497 | 0.011429 | 0.011463 |
| 0.011463 | 0.011530 | 0.011429 | 0.011530 | 0.011564 | 0.011597 | 0.011497 |
| 0.011463 | 0.011429 | 0.011564 | 0.011564 | 0.011564 | 0.011598 | 0.011631 |
| 0.011396 | 0.011396 | 0.011429 | 0.011530 | 0.011396 | 0.011631 | 0.011631 |
| 0.011665 | 0.011665 | 0.011597 | 0.011698 | 0.011598 | 0.011700 | 0.011530 |
| 0.011530 | 0.011597 | 0.011631 | 0.011463 | 0.011530 | 0.011497 | 0.011530 |
| 0.011598 | 0.011598 | 0.011631 | 0.011598 | 0.011498 | 0.011698 | 0.011665 |
| 0.011534 | 0.011429 | 0.011530 | 0.011631 | 0.011530 | 0.011597 | 0.011698 |
| 0.011866 | 0.011572 | 0.011732 | 0.011698 | 0.011631 | 0.011799 | 0.011430 |
| 0.011599 | 0.011497 | 0.011463 | 0.011463 | 0.011530 | 0.011429 | 0.011530 |
| 0.011564 | 0.011597 | 0.011497 | 0.011463 | 0.011429 | 0.011564 | 0.011564 |
| 0.011564 | 0.011598 | 0.011665 | 0.011597 | 0.012171 | 0.011668 | 0.011588 |
| 0.011658 | 0.011615 | 0.011728 | 0.011615 | 0.011725 | 0.011647 | 0.011612 |
| 0.012125 | 0.011510 | 0.011643 | 0.011579 | 0.011852 | 0.011707 | 0.011809 |
| 0.012148 | 0.011625 | 0.011534 | 0.011530 | 0.011530 | 0.011295 | 0.011500 |
| 0.011396 | 0.011429 | 0.011564 | 0.011530 | 0.011533 | 0.000000 | 0.011363 |
| 0.011497 | 0.011429 | 0.011463 | 0.011497 | 0.011396 | 0.011463 | 0.011362 |
| 0.011429 | 0.011463 | 0.011429 | 0.011396 | 0.011497 | 0.011429 | 0.011463 |
| 0.011463 | 0.011396 | 0.011463 | 0.011497 | 0.011396 | 0.011597 | 0.011631 |
| 0.011530 | 0.011530 | 0.011530 | 0.011530 | 0.011463 | 0.011598 | 0.011497 |
| 0.011269 | 0.011463 | 0.011195 | 0.011196 | 0.011564 | 0.011564 | 0.011564 |
| 0.011564 | 0.011497 | 0.011463 | 0.011497 | 0.011597 | 0.011597 | 0.011530 |
| 0.011530 | 0.011665 | 0.011564 | 0.011564 | 0.011765 | 0.011765 | 0.011631 |
| 0.011463 | 0.011530 | 0.011564 | 0.011698 | 0.011531 | 0.011564 | 0.011530 |
| 0.011564 | 0.011429 | 0.011429 | 0.011732 | 0.011732 | 0.011698 | 0.011497 |
| 0.011597 | 0.011665 | 0.011530 | 0.011597 | 0.011564 | 0.011429 | 0.011497 |
| 0.011530 | 0.011497 | 0.011429 | 0.011665 | 0.011497 | 0.011597 | 0.011631 |
| 0.011530 | 0.011638 | 0.011631 | 0.011101 | 0.011229 | 0.011536 | 0.011112 |
| 0.011500 | 0.011566 | 0.011411 | 0.011551 | 0.011402 | 0.011417 | 0.011379 |
| 0.011111 | 0.011324 | 0.011394 | 0.011258 | 0.011330 | 0.011529 | 0.011587 |
| 0.011625 | 0.011454 | 0.011518 | 0.011483 | 0.011532 | 0.000000 | 0.011195 |
| 0.011463 | 0.011531 | 0.011635 | 0.011433 | 0.011772 | 0.011802 | 0.011530 |
| 0.011362 | 0.011564 | 0.011497 | 0.011530 | 0.011396 | 0.011094 | 0.011430 |
| 0.011497 | 0.011497 | 0.011463 | 0.011429 | 0.011463 | 0.011429 | 0.011530 |
| 0.011514 | 0.011515 | 0.011505 | 0.011540 | 0.011676 | 0.011641 | 0.011640 |
| 0.011639 | 0.011564 | 0.011392 | 0.011384 | 0.011500 | 0.011670 | 0.011671 |
| 0.011464 | 0.011534 | 0.011767 | 0.011736 | 0.011665 | 0.011699 | 0.011631 |
| 0.011564 | 0.011631 | 0.011631 | 0.011530 | 0.011833 | 0.011698 | 0.011766 |
| 0.011799 | 0.011594 | 0.011504 | 0.011580 | 0.011463 | 0.011665 | 0.011631 |
| 0.011666 | 0.011698 | 0.011698 | 0.011698 | 0.011846 | 0.011833 | 0.011477 |
| 0.011365 | 0.011372 | 0.011469 | 0.011434 | 0.011470 | 0.011396 | 0.011434 |
| 0.011506 | 0.011367 | 0.011489 | 0.011547 | 0.011497 | 0.011573 | 0.011463 |
| 0.011429 | 0.011362 | 0.011497 | 0.011463 | 0.011396 | 0.011362 | 0.011295 |
| 0.011396 | 0.011463 | 0.011463 | 0.011463 | 0.011497 | 0.011497 | 0.011499 |
| 0.011567 | 0.011497 | 0.011497 | 0.011532 | 0.000000 | 0.011195 | 0.011463 |
| 0.011531 | 0.011635 | 0.011433 | 0.011772 | 0.011802 | 0.011530 | 0.011698 |
| 0.011631 | 0.011631 | 0.011466 | 0.011652 | 0.011581 | 0.011571 | 0.011481 |
| 0.011646 | 0.011835 | 0.011611 | 0.011536 | 0.011430 | 0.011631 | 0.011497 |
| 0.011597 | 0.011530 | 0.011429 | 0.011532 | 0.011631 | 0.011635 | 0.011530 |
| 0.011429 | 0.011364 | 0.011497 | 0.011429 | 0.011362 | 0.011366 | 0.011631 |
| 0.011530 | 0.011463 | 0.011497 | 0.011530 | 0.011497 | 0.011429 | 0.011362 |

|          |          |          |          |          |          |          |
|----------|----------|----------|----------|----------|----------|----------|
| 0.011497 | 0.011530 | 0.011530 | 0.011463 | 0.011530 | 0.011765 | 0.011362 |
| 0.011463 | 0.011598 | 0.011463 | 0.011497 | 0.011463 | 0.011564 | 0.011403 |
| 0.011622 | 0.011273 | 0.011261 | 0.000000 | 0.011142 | 0.011132 | 0.011227 |
| 0.011218 | 0.011362 | 0.011463 | 0.011569 | 0.011430 | 0.011568 | 0.011699 |
| 0.011598 | 0.011635 | 0.011597 | 0.011846 | 0.011564 | 0.012438 | 0.011599 |
| 0.012338 | 0.012106 | 0.012240 | 0.012511 | 0.011564 | 0.011463 | 0.011564 |
| 0.012204 | 0.011937 | 0.011530 | 0.011430 | 0.011497 | 0.011497 | 0.011466 |
| 0.011362 | 0.011332 | 0.011429 | 0.011396 | 0.011766 | 0.011833 | 0.011834 |
| 0.011733 | 0.011834 | 0.011937 | 0.011703 | 0.012205 | 0.012211 | 0.012272 |
| 0.012273 | 0.012306 | 0.012255 | 0.012273 | 0.012274 | 0.011564 | 0.011799 |
| 0.011867 | 0.012371 | 0.011874 | 0.011900 | 0.012373 | 0.011434 | 0.011329 |
| 0.011295 | 0.011295 | 0.011766 | 0.011800 | 0.011904 | 0.011631 | 0.011296 |
| S726     | 0.011900 | 0.011900 | 0.011900 | 0.011665 | 0.011665 | 0.011732 |
| 0.011638 | 0.011570 | 0.011665 | 0.011497 | 0.011564 | 0.011531 | 0.011497 |
| 0.011463 | 0.011698 | 0.011429 | 0.011530 | 0.011597 | 0.011564 | 0.011530 |
| 0.011497 | 0.011530 | 0.011362 | 0.011497 | 0.011531 | 0.011530 | 0.011604 |
| 0.011262 | 0.011530 | 0.011429 | 0.011396 | 0.011597 | 0.011564 | 0.011598 |
| 0.011564 | 0.011665 | 0.011564 | 0.011564 | 0.011597 | 0.011564 | 0.011732 |
| 0.011430 | 0.011564 | 0.011597 | 0.011530 | 0.011564 | 0.011665 | 0.011597 |
| 0.011564 | 0.011732 | 0.011632 | 0.011631 | 0.011564 | 0.011833 | 0.011564 |
| 0.011530 | 0.011564 | 0.011698 | 0.011833 | 0.011665 | 0.011564 | 0.011665 |
| 0.011597 | 0.011665 | 0.011564 | 0.011799 | 0.011766 | 0.011564 | 0.011631 |
| 0.011530 | 0.011631 | 0.011598 | 0.011665 | 0.011597 | 0.011597 | 0.011597 |
| 0.011497 | 0.011530 | 0.011497 | 0.011530 | 0.011564 | 0.011599 | 0.011665 |
| 0.011598 | 0.011564 | 0.011631 | 0.011530 | 0.011597 | 0.011497 | 0.011564 |
| 0.011732 | 0.011665 | 0.011698 | 0.011732 | 0.011564 | 0.011732 | 0.011564 |
| 0.011728 | 0.011621 | 0.011777 | 0.011490 | 0.011471 | 0.011575 | 0.011336 |
| 0.012011 | 0.011365 | 0.011513 | 0.011799 | 0.011799 | 0.011530 | 0.011631 |
| 0.011631 | 0.011597 | 0.011665 | 0.011564 | 0.011665 | 0.011597 | 0.011597 |
| 0.011564 | 0.011597 | 0.011866 | 0.011732 | 0.011631 | 0.011598 | 0.011530 |
| 0.011497 | 0.011429 | 0.011564 | 0.011530 | 0.011463 | 0.011430 | 0.011362 |
| 0.011463 | 0.011530 | 0.011530 | 0.011530 | 0.011564 | 0.011564 | 0.011567 |
| 0.011635 | 0.011564 | 0.011564 | 0.011456 | 0.011494 | 0.011481 | 0.011564 |
| 0.011568 | 0.011507 | 0.011540 | 0.011543 | 0.011468 | 0.011506 | 0.011533 |
| 0.011528 | 0.011577 | 0.011577 | 0.011497 | 0.011510 | 0.011632 | 0.011531 |
| 0.011598 | 0.011599 | 0.011598 | 0.011698 | 0.011631 | 0.011934 | 0.011732 |
| 0.011430 | 0.011631 | 0.011564 | 0.011598 | 0.011463 | 0.011161 | 0.011497 |
| 0.011564 | 0.011564 | 0.011530 | 0.011497 | 0.011530 | 0.011497 | 0.011597 |
| 0.011564 | 0.011665 | 0.011598 | 0.011497 | 0.011599 | 0.011698 | 0.011702 |
| 0.011698 | 0.011598 | 0.011497 | 0.011431 | 0.011564 | 0.011497 | 0.011430 |
| 0.011434 | 0.011698 | 0.011497 | 0.011698 | 0.011463 | 0.011564 | 0.011530 |
| 0.011631 | 0.011530 | 0.011564 | 0.011530 | 0.011564 | 0.011430 | 0.011564 |
| 0.011598 | 0.011530 | 0.011597 | 0.011530 | 0.011564 | 0.011597 | 0.011833 |
| 0.011665 | 0.011598 | 0.011665 | 0.011701 | 0.011665 | 0.011564 | 0.011530 |
| 0.011499 | 0.011788 | 0.011609 | 0.011472 | 0.011671 | 0.011435 | 0.011532 |
| 0.011672 | 0.011570 | 0.011732 | 0.011934 | 0.011641 | 0.011799 | 0.011766 |
| 0.011698 | 0.011866 | 0.011736 | 0.011555 | 0.011647 | 0.011598 | 0.011670 |
| 0.011766 | 0.011668 | 0.011804 | 0.011873 | 0.011799 | 0.011867 | 0.011976 |
| 0.011704 | 0.011875 | 0.011805 | 0.011737 | 0.012003 | 0.011463 | 0.011600 |
| 0.011631 | 0.011564 | 0.011463 | 0.011463 | 0.011530 | 0.011530 | 0.011597 |
| 0.011530 | 0.011598 | 0.011497 | 0.011530 | 0.011463 | 0.011530 | 0.011597 |
| 0.011530 | 0.011698 | 0.011598 | 0.011631 | 0.011429 | 0.011530 | 0.011564 |
| 0.011564 | 0.011530 | 0.011598 | 0.011564 | 0.011497 | 0.011497 | 0.011497 |
| 0.011766 | 0.011597 | 0.011665 | 0.011463 | 0.011564 | 0.011732 | 0.011497 |
| 0.011497 | 0.011564 | 0.011530 | 0.011698 | 0.011497 | 0.011430 | 0.011564 |
| 0.011497 | 0.011530 | 0.011530 | 0.011463 | 0.011463 | 0.011631 | 0.011564 |
| 0.011463 | 0.011564 | 0.011430 | 0.011463 | 0.011598 | 0.011464 | 0.011497 |
| 0.011464 | 0.011597 | 0.011531 | 0.011430 | 0.011497 | 0.011430 | 0.011598 |
| 0.011677 | 0.011497 | 0.011531 | 0.011631 | 0.011598 | 0.011530 | 0.011631 |
| 0.011497 | 0.011833 | 0.011429 | 0.011631 | 0.011430 | 0.011430 | 0.011429 |

|          |          |          |          |          |          |          |
|----------|----------|----------|----------|----------|----------|----------|
| 0.011665 | 0.011598 | 0.011564 | 0.011631 | 0.011463 | 0.011598 | 0.011430 |
| 0.011497 | 0.011497 | 0.011530 | 0.011631 | 0.011530 | 0.011631 | 0.011698 |
| 0.011698 | 0.011665 | 0.011564 | 0.011665 | 0.011631 | 0.011497 | 0.011463 |
| 0.011497 | 0.011497 | 0.011564 | 0.011430 | 0.011463 | 0.011631 | 0.011497 |
| 0.011463 | 0.011530 | 0.011665 | 0.011631 | 0.011597 | 0.011530 | 0.011530 |
| 0.011597 | 0.011530 | 0.011631 | 0.011497 | 0.011631 | 0.011732 | 0.011766 |
| 0.011530 | 0.011665 | 0.011543 | 0.018050 | 0.011453 | 0.011672 | 0.011619 |
| 0.011579 | 0.011623 | 0.011741 | 0.011524 | 0.011610 | 0.011647 | 0.011728 |
| 0.011535 | 0.011365 | 0.011450 | 0.011605 | 0.011490 | 0.011554 | 0.011576 |
| 0.011436 | 0.011247 | 0.011431 | 0.011325 | 0.011665 | 0.011698 | 0.011703 |
| 0.011576 | 0.011665 | 0.011665 | 0.011564 | 0.011598 | 0.011598 | 0.011564 |
| 0.011598 | 0.011530 | 0.011564 | 0.011597 | 0.011564 | 0.011497 | 0.011530 |
| 0.011530 | 0.011597 | 0.011497 | 0.011598 | 0.011631 | 0.011665 | 0.011564 |
| 0.011530 | 0.011497 | 0.011631 | 0.011631 | 0.011631 | 0.011666 | 0.011698 |
| 0.011463 | 0.011463 | 0.011497 | 0.011598 | 0.011463 | 0.011698 | 0.011698 |
| 0.011732 | 0.011732 | 0.011665 | 0.011765 | 0.011665 | 0.011768 | 0.011598 |
| 0.011597 | 0.011665 | 0.011698 | 0.011463 | 0.011597 | 0.011564 | 0.011598 |
| 0.011665 | 0.011665 | 0.011698 | 0.011665 | 0.011565 | 0.011765 | 0.011732 |
| 0.011602 | 0.011497 | 0.011597 | 0.011698 | 0.011598 | 0.011665 | 0.011765 |
| 0.011934 | 0.011641 | 0.011799 | 0.011766 | 0.011698 | 0.011866 | 0.011497 |
| 0.011667 | 0.011564 | 0.011530 | 0.011530 | 0.011597 | 0.011497 | 0.011598 |
| 0.011631 | 0.011665 | 0.011564 | 0.011530 | 0.011497 | 0.011631 | 0.011631 |
| 0.011631 | 0.011666 | 0.011732 | 0.011665 | 0.012238 | 0.011739 | 0.011658 |
| 0.011728 | 0.011685 | 0.011799 | 0.011684 | 0.011796 | 0.011716 | 0.011681 |
| 0.012194 | 0.011580 | 0.011711 | 0.011648 | 0.011922 | 0.011775 | 0.011877 |
| 0.012217 | 0.011663 | 0.011601 | 0.011597 | 0.011597 | 0.011362 | 0.011567 |
| 0.011463 | 0.011497 | 0.011631 | 0.011597 | 0.011601 | 0.011195 | 0.011363 |
| 0.011564 | 0.011497 | 0.011530 | 0.011564 | 0.011463 | 0.011530 | 0.011429 |
| 0.011497 | 0.011530 | 0.011497 | 0.011463 | 0.011564 | 0.011497 | 0.011530 |
| 0.011530 | 0.011463 | 0.011530 | 0.011564 | 0.011463 | 0.011665 | 0.011698 |
| 0.011598 | 0.011598 | 0.011597 | 0.011598 | 0.011530 | 0.011665 | 0.011564 |
| 0.011339 | 0.011530 | 0.011262 | 0.011264 | 0.011631 | 0.011631 | 0.011631 |
| 0.011631 | 0.011564 | 0.011530 | 0.011564 | 0.011665 | 0.011665 | 0.011597 |
| 0.011597 | 0.011732 | 0.011631 | 0.011631 | 0.011833 | 0.011833 | 0.011698 |
| 0.011530 | 0.011597 | 0.011631 | 0.011766 | 0.011598 | 0.011631 | 0.011598 |
| 0.011631 | 0.011497 | 0.011497 | 0.011799 | 0.011799 | 0.011766 | 0.011564 |
| 0.011665 | 0.011732 | 0.011597 | 0.011665 | 0.011631 | 0.011497 | 0.011564 |
| 0.011597 | 0.011564 | 0.011497 | 0.011732 | 0.011564 | 0.011665 | 0.011699 |
| 0.011597 | 0.011706 | 0.011698 | 0.011182 | 0.011342 | 0.011604 | 0.011267 |
| 0.011445 | 0.011566 | 0.011482 | 0.011551 | 0.011451 | 0.011468 | 0.011432 |
| 0.011213 | 0.011389 | 0.011450 | 0.011324 | 0.011384 | 0.011596 | 0.011669 |
| 0.011701 | 0.011572 | 0.011589 | 0.011589 | 0.011532 | 0.011195 | 0.000000 |
| 0.011530 | 0.011531 | 0.011703 | 0.011501 | 0.011772 | 0.011802 | 0.011598 |
| 0.011430 | 0.011631 | 0.011564 | 0.011598 | 0.011463 | 0.011161 | 0.011497 |
| 0.011564 | 0.011564 | 0.011530 | 0.011497 | 0.011530 | 0.011497 | 0.011597 |
| 0.011584 | 0.011585 | 0.011574 | 0.011608 | 0.011745 | 0.011709 | 0.011709 |
| 0.011708 | 0.011632 | 0.011466 | 0.011456 | 0.011568 | 0.011738 | 0.011739 |
| 0.011531 | 0.011602 | 0.011835 | 0.011804 | 0.011733 | 0.011767 | 0.011698 |
| 0.011631 | 0.011698 | 0.011698 | 0.011597 | 0.011901 | 0.011766 | 0.011833 |
| 0.011866 | 0.011666 | 0.011572 | 0.011649 | 0.011530 | 0.011698 | 0.011698 |
| 0.011733 | 0.011765 | 0.011766 | 0.011766 | 0.011925 | 0.011900 | 0.011546 |
| 0.011432 | 0.011441 | 0.011537 | 0.011502 | 0.011539 | 0.011471 | 0.011502 |
| 0.011575 | 0.011411 | 0.011537 | 0.011585 | 0.011565 | 0.011642 | 0.011530 |
| 0.011497 | 0.011429 | 0.011564 | 0.011530 | 0.011463 | 0.011430 | 0.011362 |
| 0.011463 | 0.011530 | 0.011530 | 0.011530 | 0.011564 | 0.011564 | 0.011567 |
| 0.011635 | 0.011564 | 0.011564 | 0.011532 | 0.011195 | 0.000000 | 0.011530 |
| 0.011531 | 0.011703 | 0.011501 | 0.011772 | 0.011802 | 0.011598 | 0.011765 |
| 0.011698 | 0.011698 | 0.011534 | 0.011722 | 0.011651 | 0.011639 | 0.011516 |
| 0.011715 | 0.011835 | 0.011653 | 0.011604 | 0.011497 | 0.011698 | 0.011564 |
| 0.011665 | 0.011598 | 0.011497 | 0.011599 | 0.011698 | 0.011702 | 0.011598 |

|          |          |          |          |          |          |          |
|----------|----------|----------|----------|----------|----------|----------|
| 0.011497 | 0.011431 | 0.011564 | 0.011497 | 0.011430 | 0.011434 | 0.011698 |
| 0.011598 | 0.011530 | 0.011564 | 0.011597 | 0.011564 | 0.011497 | 0.011430 |
| 0.011564 | 0.011598 | 0.011597 | 0.011530 | 0.011597 | 0.011833 | 0.011430 |
| 0.011530 | 0.011665 | 0.011530 | 0.011564 | 0.011530 | 0.011631 | 0.011532 |
| 0.011622 | 0.011400 | 0.011361 | 0.011181 | 0.011264 | 0.011204 | 0.011353 |
| 0.011323 | 0.011362 | 0.011463 | 0.011570 | 0.011431 | 0.011568 | 0.011699 |
| 0.011599 | 0.011635 | 0.011598 | 0.011846 | 0.011564 | 0.012439 | 0.011599 |
| 0.012338 | 0.012106 | 0.012240 | 0.012511 | 0.011631 | 0.011463 | 0.011564 |
| 0.012204 | 0.011937 | 0.011530 | 0.011430 | 0.011497 | 0.011497 | 0.011534 |
| 0.011362 | 0.011365 | 0.011430 | 0.011396 | 0.011834 | 0.011900 | 0.011901 |
| 0.011801 | 0.011901 | 0.012005 | 0.011771 | 0.012273 | 0.012280 | 0.012340 |
| 0.012340 | 0.012374 | 0.012323 | 0.012341 | 0.012342 | 0.011631 | 0.011867 |
| 0.011935 | 0.012439 | 0.011942 | 0.011968 | 0.012440 | 0.011502 | 0.011396 |
| 0.011362 | 0.011362 | 0.011833 | 0.011883 | 0.011975 | 0.011698 | 0.011364 |
| S727     | 0.011900 | 0.011900 | 0.011900 | 0.011665 | 0.011665 | 0.011732 |
| 0.011638 | 0.011570 | 0.011732 | 0.011497 | 0.011564 | 0.011498 | 0.011497 |
| 0.011463 | 0.011698 | 0.011429 | 0.011530 | 0.011597 | 0.011564 | 0.011530 |
| 0.011497 | 0.011530 | 0.011228 | 0.011497 | 0.011531 | 0.011530 | 0.011604 |
| 0.011497 | 0.011530 | 0.011429 | 0.011262 | 0.011597 | 0.011564 | 0.011597 |
| 0.011564 | 0.011665 | 0.011564 | 0.011564 | 0.011597 | 0.011564 | 0.011732 |
| 0.011429 | 0.011564 | 0.011597 | 0.011530 | 0.011564 | 0.011665 | 0.011597 |
| 0.011564 | 0.011732 | 0.011631 | 0.011631 | 0.011564 | 0.011833 | 0.011564 |
| 0.011530 | 0.011564 | 0.011698 | 0.011833 | 0.011665 | 0.011564 | 0.011665 |
| 0.011597 | 0.011665 | 0.011564 | 0.011799 | 0.011766 | 0.011564 | 0.011631 |
| 0.011530 | 0.011631 | 0.011597 | 0.011665 | 0.011597 | 0.011597 | 0.011597 |
| 0.011497 | 0.011530 | 0.011497 | 0.011530 | 0.011564 | 0.011599 | 0.011665 |
| 0.011597 | 0.011564 | 0.011631 | 0.011530 | 0.011597 | 0.011497 | 0.011564 |
| 0.011732 | 0.011665 | 0.011631 | 0.011732 | 0.011564 | 0.011799 | 0.011564 |
| 0.011728 | 0.011583 | 0.011739 | 0.011451 | 0.011433 | 0.011539 | 0.011296 |
| 0.011938 | 0.011365 | 0.011472 | 0.011799 | 0.011799 | 0.011530 | 0.011631 |
| 0.011631 | 0.011597 | 0.011665 | 0.011564 | 0.011665 | 0.011597 | 0.011597 |
| 0.011564 | 0.011597 | 0.011866 | 0.011732 | 0.011631 | 0.011598 | 0.011530 |
| 0.011497 | 0.011429 | 0.011564 | 0.011530 | 0.011396 | 0.011362 | 0.011295 |
| 0.011396 | 0.011463 | 0.011530 | 0.011530 | 0.011564 | 0.011564 | 0.011567 |
| 0.011635 | 0.011564 | 0.011564 | 0.011420 | 0.011494 | 0.011446 | 0.011531 |
| 0.011534 | 0.011473 | 0.011503 | 0.011509 | 0.011434 | 0.011471 | 0.011499 |
| 0.011492 | 0.011543 | 0.011577 | 0.011464 | 0.011475 | 0.011598 | 0.011497 |
| 0.011565 | 0.011566 | 0.011564 | 0.011698 | 0.011631 | 0.012001 | 0.011665 |
| 0.011564 | 0.011631 | 0.011564 | 0.011597 | 0.011463 | 0.011430 | 0.011497 |
| 0.011564 | 0.011564 | 0.011530 | 0.011497 | 0.011530 | 0.011497 | 0.011597 |
| 0.011564 | 0.011665 | 0.011530 | 0.011497 | 0.011566 | 0.011698 | 0.011702 |
| 0.011698 | 0.011530 | 0.011497 | 0.011431 | 0.011564 | 0.011497 | 0.011430 |
| 0.011434 | 0.011698 | 0.011497 | 0.011698 | 0.011463 | 0.011564 | 0.011530 |
| 0.011631 | 0.011530 | 0.011564 | 0.011530 | 0.011564 | 0.011430 | 0.011564 |
| 0.011597 | 0.011530 | 0.011597 | 0.011530 | 0.011564 | 0.011597 | 0.011833 |
| 0.011665 | 0.011597 | 0.011665 | 0.011701 | 0.011665 | 0.011564 | 0.011530 |
| 0.011499 | 0.011667 | 0.011609 | 0.011472 | 0.011671 | 0.011435 | 0.011532 |
| 0.011672 | 0.011536 | 0.011732 | 0.011934 | 0.011641 | 0.011799 | 0.011766 |
| 0.011698 | 0.011866 | 0.011736 | 0.011637 | 0.011605 | 0.011598 | 0.011669 |
| 0.011766 | 0.011634 | 0.011804 | 0.011873 | 0.011799 | 0.011867 | 0.011975 |
| 0.011703 | 0.011841 | 0.011771 | 0.011737 | 0.011969 | 0.011463 | 0.011633 |
| 0.011631 | 0.011564 | 0.011463 | 0.011463 | 0.011530 | 0.011530 | 0.011597 |
| 0.011530 | 0.011597 | 0.011497 | 0.011530 | 0.011530 | 0.011530 | 0.011597 |
| 0.011530 | 0.011698 | 0.011598 | 0.011631 | 0.011429 | 0.011530 | 0.011564 |
| 0.011564 | 0.011530 | 0.011597 | 0.011564 | 0.011497 | 0.011497 | 0.011497 |
| 0.011766 | 0.011597 | 0.011665 | 0.011463 | 0.011564 | 0.011732 | 0.011497 |
| 0.011497 | 0.011564 | 0.011530 | 0.011698 | 0.011497 | 0.011430 | 0.011564 |
| 0.011497 | 0.011530 | 0.011530 | 0.011463 | 0.011463 | 0.011631 | 0.011564 |
| 0.011463 | 0.011564 | 0.011430 | 0.011463 | 0.011597 | 0.011463 | 0.011497 |
| 0.011464 | 0.011597 | 0.011531 | 0.011430 | 0.011497 | 0.011430 | 0.011597 |

|          |          |          |          |          |          |          |
|----------|----------|----------|----------|----------|----------|----------|
| 0.011642 | 0.011497 | 0.011530 | 0.011631 | 0.011597 | 0.011530 | 0.011631 |
| 0.011497 | 0.011833 | 0.011429 | 0.011631 | 0.011430 | 0.011430 | 0.011429 |
| 0.011665 | 0.011598 | 0.011564 | 0.011631 | 0.011463 | 0.011598 | 0.011430 |
| 0.011497 | 0.011497 | 0.011530 | 0.011631 | 0.011530 | 0.011631 | 0.011698 |
| 0.011698 | 0.011665 | 0.011564 | 0.011665 | 0.011631 | 0.011497 | 0.011463 |
| 0.011497 | 0.011497 | 0.011564 | 0.011429 | 0.011463 | 0.011631 | 0.011497 |
| 0.011463 | 0.011530 | 0.011665 | 0.011631 | 0.011597 | 0.011530 | 0.011530 |
| 0.011597 | 0.011530 | 0.011631 | 0.011497 | 0.011631 | 0.011732 | 0.011698 |
| 0.011530 | 0.011665 | 0.011509 | 0.018049 | 0.011518 | 0.011733 | 0.011583 |
| 0.011545 | 0.011588 | 0.011584 | 0.011408 | 0.011719 | 0.011613 | 0.011789 |
| 0.011534 | 0.011426 | 0.011450 | 0.011521 | 0.011411 | 0.011603 | 0.011533 |
| 0.011389 | 0.011395 | 0.011357 | 0.011193 | 0.011665 | 0.011698 | 0.011703 |
| 0.011541 | 0.011665 | 0.011665 | 0.011564 | 0.011598 | 0.011598 | 0.011564 |
| 0.011597 | 0.011530 | 0.011564 | 0.011597 | 0.011564 | 0.011497 | 0.011530 |
| 0.011530 | 0.011597 | 0.011497 | 0.011597 | 0.011631 | 0.011665 | 0.011564 |
| 0.011530 | 0.011497 | 0.011631 | 0.011631 | 0.011631 | 0.011666 | 0.011698 |
| 0.011463 | 0.011463 | 0.011497 | 0.011597 | 0.011463 | 0.011698 | 0.011698 |
| 0.011732 | 0.011732 | 0.011665 | 0.011765 | 0.011665 | 0.011768 | 0.011597 |
| 0.011597 | 0.011665 | 0.011698 | 0.011530 | 0.011597 | 0.011564 | 0.011597 |
| 0.011665 | 0.011665 | 0.011698 | 0.011665 | 0.011565 | 0.011765 | 0.011732 |
| 0.011602 | 0.011497 | 0.011597 | 0.011698 | 0.011597 | 0.011665 | 0.011765 |
| 0.011934 | 0.011641 | 0.011799 | 0.011766 | 0.011698 | 0.011866 | 0.011497 |
| 0.011667 | 0.011564 | 0.011530 | 0.011530 | 0.011597 | 0.011497 | 0.011597 |
| 0.011631 | 0.011665 | 0.011564 | 0.011530 | 0.011497 | 0.011631 | 0.011631 |
| 0.011631 | 0.011666 | 0.011732 | 0.011665 | 0.012204 | 0.011703 | 0.011658 |
| 0.011693 | 0.011685 | 0.011763 | 0.011684 | 0.011761 | 0.011716 | 0.011646 |
| 0.012194 | 0.011545 | 0.011677 | 0.011614 | 0.011887 | 0.011775 | 0.011843 |
| 0.012183 | 0.011663 | 0.011601 | 0.011597 | 0.011597 | 0.011295 | 0.011567 |
| 0.011463 | 0.011497 | 0.011631 | 0.011597 | 0.011601 | 0.011463 | 0.011431 |
| 0.011564 | 0.011497 | 0.011530 | 0.011564 | 0.011463 | 0.011530 | 0.011429 |
| 0.011497 | 0.011530 | 0.011497 | 0.011463 | 0.011564 | 0.011497 | 0.011530 |
| 0.011530 | 0.011463 | 0.011530 | 0.011564 | 0.011463 | 0.011665 | 0.011698 |
| 0.011597 | 0.011597 | 0.011597 | 0.011597 | 0.011530 | 0.011665 | 0.011564 |
| 0.011269 | 0.011530 | 0.011464 | 0.011467 | 0.011631 | 0.011631 | 0.011564 |
| 0.011631 | 0.011564 | 0.011530 | 0.011564 | 0.011665 | 0.011665 | 0.011597 |
| 0.011597 | 0.011732 | 0.011631 | 0.011631 | 0.011833 | 0.011833 | 0.011698 |
| 0.011530 | 0.011597 | 0.011631 | 0.011766 | 0.011598 | 0.011631 | 0.011597 |
| 0.011631 | 0.011497 | 0.011497 | 0.011799 | 0.011799 | 0.011766 | 0.011564 |
| 0.011665 | 0.011732 | 0.011597 | 0.011665 | 0.011631 | 0.011497 | 0.011564 |
| 0.011597 | 0.011564 | 0.011497 | 0.011732 | 0.011564 | 0.011665 | 0.011698 |
| 0.011597 | 0.011706 | 0.011698 | 0.011467 | 0.011286 | 0.011570 | 0.011318 |
| 0.011500 | 0.011683 | 0.011482 | 0.011641 | 0.011499 | 0.011518 | 0.011485 |
| 0.011366 | 0.011389 | 0.011561 | 0.011390 | 0.011437 | 0.011596 | 0.011668 |
| 0.011663 | 0.011572 | 0.011553 | 0.011553 | 0.011599 | 0.011463 | 0.011530 |
| 0.000000 | 0.011598 | 0.011703 | 0.011433 | 0.011840 | 0.011838 | 0.011597 |
| 0.011564 | 0.011631 | 0.011564 | 0.011597 | 0.011463 | 0.011430 | 0.011497 |
| 0.011564 | 0.011564 | 0.011530 | 0.011497 | 0.011530 | 0.011497 | 0.011597 |
| 0.011549 | 0.011550 | 0.011540 | 0.011574 | 0.011710 | 0.011675 | 0.011675 |
| 0.011673 | 0.011598 | 0.011429 | 0.011420 | 0.011534 | 0.011704 | 0.011705 |
| 0.011497 | 0.011568 | 0.011801 | 0.011770 | 0.011699 | 0.011733 | 0.011698 |
| 0.011631 | 0.011698 | 0.011698 | 0.011597 | 0.011900 | 0.011765 | 0.011833 |
| 0.011866 | 0.011666 | 0.011572 | 0.011614 | 0.011530 | 0.011732 | 0.011698 |
| 0.011733 | 0.011765 | 0.011765 | 0.011765 | 0.011925 | 0.011900 | 0.011511 |
| 0.011432 | 0.011441 | 0.011503 | 0.011468 | 0.011539 | 0.011396 | 0.011468 |
| 0.011540 | 0.011367 | 0.011441 | 0.011547 | 0.011531 | 0.011608 | 0.011530 |
| 0.011497 | 0.011429 | 0.011564 | 0.011530 | 0.011396 | 0.011362 | 0.011295 |
| 0.011396 | 0.011463 | 0.011530 | 0.011530 | 0.011564 | 0.011564 | 0.011567 |
| 0.011635 | 0.011564 | 0.011564 | 0.011599 | 0.011463 | 0.011530 | 0.000000 |
| 0.011598 | 0.011703 | 0.011433 | 0.011840 | 0.011838 | 0.011597 | 0.011765 |
| 0.011698 | 0.011698 | 0.011534 | 0.011687 | 0.011651 | 0.011673 | 0.011516 |

|          |          |          |          |          |          |          |
|----------|----------|----------|----------|----------|----------|----------|
| 0.011680 | 0.011926 | 0.011611 | 0.011604 | 0.011497 | 0.011698 | 0.011564 |
| 0.011665 | 0.011530 | 0.011497 | 0.011566 | 0.011698 | 0.011702 | 0.011530 |
| 0.011497 | 0.011431 | 0.011564 | 0.011497 | 0.011430 | 0.011434 | 0.011698 |
| 0.011597 | 0.011530 | 0.011564 | 0.011597 | 0.011564 | 0.011497 | 0.011430 |
| 0.011564 | 0.011597 | 0.011597 | 0.011530 | 0.011597 | 0.011833 | 0.011429 |
| 0.011530 | 0.011665 | 0.011530 | 0.011564 | 0.011530 | 0.011631 | 0.011489 |
| 0.011678 | 0.011400 | 0.011311 | 0.011423 | 0.011508 | 0.011419 | 0.011311 |
| 0.011270 | 0.011430 | 0.011530 | 0.011603 | 0.011498 | 0.011635 | 0.011766 |
| 0.011632 | 0.011669 | 0.011665 | 0.011880 | 0.011631 | 0.012506 | 0.011633 |
| 0.012338 | 0.012139 | 0.012307 | 0.012579 | 0.011631 | 0.011530 | 0.011631 |
| 0.012272 | 0.012005 | 0.011598 | 0.011497 | 0.011531 | 0.011531 | 0.011534 |
| 0.011430 | 0.011433 | 0.011497 | 0.011430 | 0.011834 | 0.011900 | 0.011867 |
| 0.011801 | 0.011901 | 0.011971 | 0.011737 | 0.012272 | 0.012279 | 0.012340 |
| 0.012306 | 0.012340 | 0.012323 | 0.012307 | 0.012342 | 0.011631 | 0.011867 |
| 0.011901 | 0.012439 | 0.011942 | 0.011968 | 0.012440 | 0.011468 | 0.011396 |
| 0.011362 | 0.011362 | 0.011833 | 0.011842 | 0.011940 | 0.011698 | 0.011363 |
| S728     | 0.011766 | 0.011766 | 0.011968 | 0.011733 | 0.011733 | 0.011800 |
| 0.011707 | 0.011604 | 0.011733 | 0.011363 | 0.011430 | 0.011397 | 0.011363 |
| 0.011329 | 0.011565 | 0.011296 | 0.011396 | 0.011464 | 0.011430 | 0.011396 |
| 0.011363 | 0.011396 | 0.011430 | 0.011363 | 0.011397 | 0.011396 | 0.011672 |
| 0.011564 | 0.011396 | 0.011296 | 0.011464 | 0.011464 | 0.011430 | 0.011464 |
| 0.011430 | 0.011531 | 0.011430 | 0.011430 | 0.011464 | 0.011430 | 0.011598 |
| 0.011296 | 0.011430 | 0.011464 | 0.011396 | 0.011430 | 0.011531 | 0.011464 |
| 0.011430 | 0.011598 | 0.011498 | 0.011699 | 0.011430 | 0.011699 | 0.011430 |
| 0.011396 | 0.011430 | 0.011565 | 0.011699 | 0.011733 | 0.011430 | 0.011262 |
| 0.011464 | 0.011531 | 0.011430 | 0.011665 | 0.011834 | 0.011430 | 0.011497 |
| 0.011396 | 0.011497 | 0.011464 | 0.011531 | 0.011464 | 0.011464 | 0.011464 |
| 0.011363 | 0.011396 | 0.011363 | 0.011397 | 0.011430 | 0.011464 | 0.011531 |
| 0.011464 | 0.011430 | 0.011497 | 0.011396 | 0.011464 | 0.011363 | 0.011430 |
| 0.011598 | 0.011531 | 0.011766 | 0.011598 | 0.011430 | 0.011665 | 0.011430 |
| 0.011617 | 0.011733 | 0.011665 | 0.011373 | 0.011359 | 0.011429 | 0.011494 |
| 0.012122 | 0.011518 | 0.011390 | 0.011665 | 0.011665 | 0.011396 | 0.011497 |
| 0.011497 | 0.011464 | 0.011531 | 0.011430 | 0.011531 | 0.011464 | 0.011464 |
| 0.011430 | 0.011464 | 0.011733 | 0.011598 | 0.011497 | 0.011464 | 0.011396 |
| 0.011363 | 0.011296 | 0.011430 | 0.011396 | 0.011531 | 0.011497 | 0.011430 |
| 0.011531 | 0.011598 | 0.011396 | 0.011396 | 0.011430 | 0.011430 | 0.011432 |
| 0.011500 | 0.011430 | 0.011430 | 0.011312 | 0.011386 | 0.011341 | 0.011430 |
| 0.011433 | 0.011370 | 0.011430 | 0.011406 | 0.011332 | 0.011369 | 0.011398 |
| 0.011565 | 0.011440 | 0.011474 | 0.011363 | 0.011372 | 0.011498 | 0.011397 |
| 0.011464 | 0.011465 | 0.011464 | 0.011564 | 0.011497 | 0.011867 | 0.011598 |
| 0.011632 | 0.011228 | 0.011430 | 0.011128 | 0.011329 | 0.011497 | 0.011363 |
| 0.011430 | 0.011430 | 0.011396 | 0.011363 | 0.011396 | 0.011363 | 0.011464 |
| 0.011430 | 0.011531 | 0.011464 | 0.011363 | 0.011465 | 0.011565 | 0.011568 |
| 0.011565 | 0.011464 | 0.011363 | 0.011297 | 0.011430 | 0.011363 | 0.011296 |
| 0.011400 | 0.011565 | 0.011363 | 0.011565 | 0.011329 | 0.011430 | 0.011396 |
| 0.011497 | 0.011396 | 0.011430 | 0.011396 | 0.011430 | 0.011296 | 0.011430 |
| 0.011464 | 0.011396 | 0.011464 | 0.011396 | 0.011430 | 0.011464 | 0.011699 |
| 0.011665 | 0.011665 | 0.011733 | 0.011566 | 0.011733 | 0.011430 | 0.011396 |
| 0.011364 | 0.011627 | 0.011518 | 0.011335 | 0.011706 | 0.011299 | 0.011375 |
| 0.011740 | 0.011639 | 0.011598 | 0.011800 | 0.011505 | 0.011666 | 0.011632 |
| 0.011565 | 0.011733 | 0.011594 | 0.011390 | 0.011480 | 0.011464 | 0.011535 |
| 0.011632 | 0.011533 | 0.011670 | 0.011738 | 0.011666 | 0.011666 | 0.011841 |
| 0.011569 | 0.011740 | 0.011671 | 0.011602 | 0.011869 | 0.011329 | 0.011465 |
| 0.011497 | 0.011430 | 0.011329 | 0.011329 | 0.011396 | 0.011396 | 0.011464 |
| 0.011396 | 0.011464 | 0.011363 | 0.011396 | 0.011396 | 0.011396 | 0.011464 |
| 0.011396 | 0.011766 | 0.011666 | 0.011699 | 0.011296 | 0.011396 | 0.011430 |
| 0.011430 | 0.011396 | 0.011464 | 0.011161 | 0.011363 | 0.011363 | 0.011363 |
| 0.011834 | 0.011464 | 0.011531 | 0.011329 | 0.011430 | 0.011598 | 0.011363 |
| 0.011363 | 0.011430 | 0.011396 | 0.011565 | 0.011363 | 0.011497 | 0.011632 |
| 0.011565 | 0.011396 | 0.011396 | 0.011329 | 0.011329 | 0.011497 | 0.011430 |

|          |          |          |          |          |          |          |
|----------|----------|----------|----------|----------|----------|----------|
| 0.011329 | 0.011430 | 0.011296 | 0.011329 | 0.011464 | 0.011531 | 0.011363 |
| 0.011329 | 0.011464 | 0.011397 | 0.011296 | 0.011565 | 0.011296 | 0.011464 |
| 0.011540 | 0.011363 | 0.011598 | 0.011497 | 0.011464 | 0.011396 | 0.011497 |
| 0.011363 | 0.011699 | 0.011296 | 0.011497 | 0.011296 | 0.011296 | 0.011296 |
| 0.011531 | 0.011666 | 0.011430 | 0.011497 | 0.011329 | 0.011666 | 0.011296 |
| 0.011363 | 0.011363 | 0.011396 | 0.011497 | 0.011329 | 0.011497 | 0.011564 |
| 0.011565 | 0.011531 | 0.011430 | 0.011531 | 0.011497 | 0.011363 | 0.011329 |
| 0.011363 | 0.011363 | 0.011430 | 0.011296 | 0.011329 | 0.011497 | 0.011363 |
| 0.011329 | 0.011396 | 0.011531 | 0.011497 | 0.011464 | 0.011396 | 0.011397 |
| 0.011464 | 0.011396 | 0.011497 | 0.011363 | 0.011497 | 0.011598 | 0.011834 |
| 0.011396 | 0.011733 | 0.011406 | 0.017943 | 0.011388 | 0.011488 | 0.011689 |
| 0.011649 | 0.011694 | 0.011584 | 0.011525 | 0.011830 | 0.011717 | 0.011486 |
| 0.011535 | 0.011549 | 0.011334 | 0.011438 | 0.011256 | 0.011456 | 0.011448 |
| 0.011577 | 0.011508 | 0.011506 | 0.011325 | 0.011531 | 0.011565 | 0.011568 |
| 0.011439 | 0.011531 | 0.011531 | 0.011430 | 0.011464 | 0.011464 | 0.011430 |
| 0.011464 | 0.011396 | 0.011430 | 0.011464 | 0.011430 | 0.011363 | 0.011396 |
| 0.011396 | 0.011464 | 0.011363 | 0.011464 | 0.011497 | 0.011531 | 0.011430 |
| 0.011396 | 0.011363 | 0.011699 | 0.011699 | 0.011497 | 0.011532 | 0.011565 |
| 0.011329 | 0.011329 | 0.011363 | 0.011464 | 0.011329 | 0.011565 | 0.011565 |
| 0.011598 | 0.011598 | 0.011531 | 0.011632 | 0.011733 | 0.011634 | 0.011464 |
| 0.011464 | 0.011531 | 0.011565 | 0.011329 | 0.011464 | 0.011430 | 0.011464 |
| 0.011531 | 0.011531 | 0.011564 | 0.011531 | 0.011431 | 0.011632 | 0.011598 |
| 0.011467 | 0.011363 | 0.011464 | 0.011565 | 0.011464 | 0.011531 | 0.011632 |
| 0.011800 | 0.011505 | 0.011666 | 0.011632 | 0.011565 | 0.011733 | 0.011363 |
| 0.011532 | 0.011430 | 0.011396 | 0.011396 | 0.011464 | 0.011363 | 0.011464 |
| 0.011497 | 0.011531 | 0.011430 | 0.011396 | 0.011363 | 0.011699 | 0.011699 |
| 0.011497 | 0.011532 | 0.011598 | 0.011531 | 0.012105 | 0.011597 | 0.011518 |
| 0.011588 | 0.011547 | 0.011659 | 0.011546 | 0.011656 | 0.011578 | 0.011544 |
| 0.012058 | 0.011442 | 0.011575 | 0.011510 | 0.011715 | 0.011639 | 0.011742 |
| 0.012082 | 0.011513 | 0.011467 | 0.011464 | 0.011464 | 0.011430 | 0.011432 |
| 0.011329 | 0.011363 | 0.011497 | 0.011464 | 0.011466 | 0.011531 | 0.011431 |
| 0.011430 | 0.011363 | 0.011396 | 0.011430 | 0.011329 | 0.011396 | 0.011296 |
| 0.011363 | 0.011396 | 0.011363 | 0.011329 | 0.011430 | 0.011363 | 0.011396 |
| 0.011396 | 0.011329 | 0.011396 | 0.011430 | 0.011329 | 0.011531 | 0.011564 |
| 0.011464 | 0.011464 | 0.011464 | 0.011464 | 0.011396 | 0.011733 | 0.011430 |
| 0.011409 | 0.011396 | 0.011565 | 0.011570 | 0.011497 | 0.011497 | 0.011497 |
| 0.011497 | 0.011430 | 0.011396 | 0.011430 | 0.011531 | 0.011531 | 0.011464 |
| 0.011464 | 0.011598 | 0.011699 | 0.011497 | 0.011699 | 0.011699 | 0.011564 |
| 0.011396 | 0.011464 | 0.011497 | 0.011834 | 0.011464 | 0.011497 | 0.011464 |
| 0.011497 | 0.011363 | 0.011363 | 0.011666 | 0.011666 | 0.011632 | 0.011430 |
| 0.011531 | 0.011598 | 0.011464 | 0.011531 | 0.011497 | 0.011363 | 0.011632 |
| 0.011464 | 0.011430 | 0.011363 | 0.011598 | 0.011430 | 0.011531 | 0.011767 |
| 0.011464 | 0.011774 | 0.011766 | 0.011589 | 0.011286 | 0.011468 | 0.011370 |
| 0.011335 | 0.011723 | 0.011377 | 0.011463 | 0.011353 | 0.011519 | 0.011486 |
| 0.011519 | 0.011456 | 0.011506 | 0.011325 | 0.011438 | 0.011462 | 0.011547 |
| 0.011550 | 0.011454 | 0.011448 | 0.011413 | 0.011397 | 0.011531 | 0.011531 |
| 0.011598 | 0.000000 | 0.011229 | 0.011569 | 0.011569 | 0.011308 | 0.011430 |
| 0.011632 | 0.011228 | 0.011430 | 0.011128 | 0.011329 | 0.011497 | 0.011363 |
| 0.011430 | 0.011430 | 0.011396 | 0.011363 | 0.011396 | 0.011363 | 0.011464 |
| 0.011445 | 0.011410 | 0.011437 | 0.011471 | 0.011608 | 0.011573 | 0.011573 |
| 0.011572 | 0.011498 | 0.011319 | 0.011313 | 0.011433 | 0.011603 | 0.011604 |
| 0.011397 | 0.011467 | 0.011700 | 0.011669 | 0.011599 | 0.011633 | 0.011564 |
| 0.011497 | 0.011565 | 0.011564 | 0.011464 | 0.011969 | 0.011632 | 0.011699 |
| 0.011733 | 0.011702 | 0.011436 | 0.011511 | 0.011396 | 0.011564 | 0.011565 |
| 0.011599 | 0.011632 | 0.011632 | 0.011632 | 0.011768 | 0.011766 | 0.011408 |
| 0.011297 | 0.011303 | 0.011401 | 0.011366 | 0.011402 | 0.011322 | 0.011571 |
| 0.011438 | 0.011411 | 0.011251 | 0.011435 | 0.011430 | 0.011505 | 0.011396 |
| 0.011363 | 0.011296 | 0.011430 | 0.011396 | 0.011531 | 0.011497 | 0.011430 |
| 0.011531 | 0.011598 | 0.011396 | 0.011396 | 0.011430 | 0.011430 | 0.011432 |
| 0.011500 | 0.011430 | 0.011430 | 0.011397 | 0.011531 | 0.011531 | 0.011598 |



|          |          |          |          |          |          |          |
|----------|----------|----------|----------|----------|----------|----------|
| 0.000000 | 0.011229 | 0.011569 | 0.011569 | 0.011308 | 0.011430 | 0.011632 |
| 0.011565 | 0.011565 | 0.011399 | 0.011583 | 0.011512 | 0.011537 | 0.011376 |
| 0.011577 | 0.011699 | 0.011526 | 0.011469 | 0.011363 | 0.011565 | 0.011430 |
| 0.011531 | 0.011464 | 0.011363 | 0.011465 | 0.011565 | 0.011568 | 0.011464 |
| 0.011363 | 0.011297 | 0.011430 | 0.011363 | 0.011296 | 0.011400 | 0.011565 |
| 0.011464 | 0.011396 | 0.011430 | 0.011464 | 0.011430 | 0.011363 | 0.011497 |
| 0.011430 | 0.011464 | 0.011464 | 0.011396 | 0.011464 | 0.011699 | 0.011296 |
| 0.011396 | 0.011733 | 0.011396 | 0.011430 | 0.011396 | 0.011699 | 0.011403 |
| 0.011679 | 0.011400 | 0.011361 | 0.011543 | 0.011631 | 0.011527 | 0.011353 |
| 0.011270 | 0.011430 | 0.011531 | 0.011638 | 0.011498 | 0.011636 | 0.011767 |
| 0.011666 | 0.011704 | 0.011665 | 0.011915 | 0.011632 | 0.012508 | 0.011667 |
| 0.012407 | 0.012174 | 0.012309 | 0.012580 | 0.011699 | 0.011329 | 0.011632 |
| 0.012071 | 0.012005 | 0.011598 | 0.011497 | 0.011565 | 0.011565 | 0.011602 |
| 0.011430 | 0.011434 | 0.011497 | 0.011464 | 0.011902 | 0.011969 | 0.011969 |
| 0.011869 | 0.011969 | 0.012073 | 0.011839 | 0.012139 | 0.012145 | 0.012206 |
| 0.012207 | 0.012240 | 0.012188 | 0.012207 | 0.012208 | 0.011497 | 0.011733 |
| 0.011801 | 0.012306 | 0.011807 | 0.012036 | 0.012509 | 0.011570 | 0.011464 |
| 0.011430 | 0.011430 | 0.011868 | 0.011924 | 0.012046 | 0.011766 | 0.011431 |
| S729     | 0.011872 | 0.011872 | 0.012143 | 0.011906 | 0.011906 | 0.011973 |
| 0.011813 | 0.011744 | 0.011906 | 0.011466 | 0.011533 | 0.011501 | 0.011466 |
| 0.011432 | 0.011669 | 0.011398 | 0.011500 | 0.011567 | 0.011533 | 0.011500 |
| 0.011466 | 0.011500 | 0.011533 | 0.011466 | 0.011500 | 0.011500 | 0.011779 |
| 0.011669 | 0.011500 | 0.011398 | 0.011567 | 0.011567 | 0.011534 | 0.011567 |
| 0.011533 | 0.011635 | 0.011533 | 0.011534 | 0.011567 | 0.011533 | 0.011703 |
| 0.011398 | 0.011533 | 0.011567 | 0.011500 | 0.011533 | 0.011635 | 0.011567 |
| 0.011533 | 0.011703 | 0.011602 | 0.011804 | 0.011533 | 0.011804 | 0.011533 |
| 0.011500 | 0.011534 | 0.011635 | 0.011804 | 0.011838 | 0.011534 | 0.011364 |
| 0.011567 | 0.011635 | 0.011534 | 0.011770 | 0.011940 | 0.011533 | 0.011601 |
| 0.011500 | 0.011601 | 0.011567 | 0.011635 | 0.011567 | 0.011567 | 0.011567 |
| 0.011466 | 0.011500 | 0.011466 | 0.011500 | 0.011533 | 0.011568 | 0.011635 |
| 0.011567 | 0.011533 | 0.011601 | 0.011500 | 0.011567 | 0.011466 | 0.011533 |
| 0.011703 | 0.011635 | 0.011872 | 0.011703 | 0.011534 | 0.011770 | 0.011533 |
| 0.011693 | 0.011847 | 0.011783 | 0.011452 | 0.011474 | 0.011579 | 0.011574 |
| 0.012240 | 0.011676 | 0.011475 | 0.011736 | 0.011770 | 0.011500 | 0.011601 |
| 0.011601 | 0.011567 | 0.011635 | 0.011533 | 0.011635 | 0.011567 | 0.011567 |
| 0.011533 | 0.011567 | 0.011838 | 0.011702 | 0.011601 | 0.011568 | 0.011500 |
| 0.011466 | 0.011398 | 0.011534 | 0.011500 | 0.011635 | 0.011601 | 0.011533 |
| 0.011635 | 0.011703 | 0.011500 | 0.011500 | 0.011534 | 0.011533 | 0.011536 |
| 0.011605 | 0.011533 | 0.011533 | 0.011386 | 0.011497 | 0.011449 | 0.011534 |
| 0.011503 | 0.011475 | 0.011543 | 0.011512 | 0.011436 | 0.011474 | 0.011502 |
| 0.011676 | 0.011546 | 0.011580 | 0.011466 | 0.011478 | 0.011602 | 0.011500 |
| 0.011568 | 0.011569 | 0.011568 | 0.011669 | 0.011601 | 0.011973 | 0.011703 |
| 0.011736 | 0.011331 | 0.011533 | 0.011229 | 0.011432 | 0.011601 | 0.011466 |
| 0.011534 | 0.011533 | 0.011500 | 0.011466 | 0.011500 | 0.011466 | 0.011567 |
| 0.011534 | 0.011635 | 0.011567 | 0.011466 | 0.011569 | 0.011669 | 0.011673 |
| 0.011669 | 0.011567 | 0.011466 | 0.011400 | 0.011533 | 0.011466 | 0.011398 |
| 0.011505 | 0.011669 | 0.011466 | 0.011669 | 0.011432 | 0.011534 | 0.011500 |
| 0.011567 | 0.011500 | 0.011534 | 0.011500 | 0.011533 | 0.011398 | 0.011533 |
| 0.011567 | 0.011500 | 0.011567 | 0.011500 | 0.011533 | 0.011567 | 0.011804 |
| 0.011770 | 0.011770 | 0.011838 | 0.011671 | 0.011838 | 0.011533 | 0.011500 |
| 0.011468 | 0.011752 | 0.011659 | 0.011440 | 0.011778 | 0.011403 | 0.011496 |
| 0.011847 | 0.011745 | 0.011669 | 0.011906 | 0.011610 | 0.011770 | 0.011737 |
| 0.011669 | 0.011838 | 0.011705 | 0.011432 | 0.011525 | 0.011568 | 0.011640 |
| 0.011737 | 0.011638 | 0.011775 | 0.011844 | 0.011770 | 0.011770 | 0.011947 |
| 0.011640 | 0.011847 | 0.011776 | 0.011707 | 0.011975 | 0.011432 | 0.011637 |
| 0.011601 | 0.011533 | 0.011432 | 0.011432 | 0.011500 | 0.011500 | 0.011567 |
| 0.011500 | 0.011567 | 0.011466 | 0.011500 | 0.011500 | 0.011500 | 0.011567 |
| 0.011500 | 0.011872 | 0.011770 | 0.011804 | 0.011398 | 0.011500 | 0.011534 |
| 0.011534 | 0.011500 | 0.011567 | 0.011263 | 0.011466 | 0.011466 | 0.011466 |
| 0.011940 | 0.011567 | 0.011635 | 0.011432 | 0.011533 | 0.011703 | 0.011466 |

|          |          |          |          |          |          |          |
|----------|----------|----------|----------|----------|----------|----------|
| 0.011466 | 0.011533 | 0.011500 | 0.011669 | 0.011466 | 0.011601 | 0.011736 |
| 0.011669 | 0.011500 | 0.011500 | 0.011432 | 0.011432 | 0.011601 | 0.011500 |
| 0.011432 | 0.011533 | 0.011398 | 0.011432 | 0.011567 | 0.011635 | 0.011466 |
| 0.011432 | 0.011567 | 0.011500 | 0.011398 | 0.011669 | 0.011398 | 0.011567 |
| 0.011646 | 0.011466 | 0.011703 | 0.011601 | 0.011567 | 0.011500 | 0.011601 |
| 0.011466 | 0.011804 | 0.011398 | 0.011601 | 0.011398 | 0.011398 | 0.011398 |
| 0.011635 | 0.011771 | 0.011534 | 0.011601 | 0.011432 | 0.011770 | 0.011398 |
| 0.011466 | 0.011466 | 0.011500 | 0.011601 | 0.011432 | 0.011601 | 0.011669 |
| 0.011669 | 0.011635 | 0.011533 | 0.011635 | 0.011601 | 0.011466 | 0.011432 |
| 0.011466 | 0.011466 | 0.011534 | 0.011398 | 0.011432 | 0.011601 | 0.011466 |
| 0.011432 | 0.011500 | 0.011635 | 0.011601 | 0.011567 | 0.011500 | 0.011500 |
| 0.011567 | 0.011500 | 0.011601 | 0.011466 | 0.011601 | 0.011703 | 0.011940 |
| 0.011500 | 0.011838 | 0.011512 | 0.018098 | 0.011520 | 0.011550 | 0.011798 |
| 0.011757 | 0.011804 | 0.011638 | 0.011645 | 0.011943 | 0.011825 | 0.011609 |
| 0.011777 | 0.011674 | 0.011413 | 0.011563 | 0.011374 | 0.011556 | 0.011535 |
| 0.011723 | 0.011623 | 0.011620 | 0.011394 | 0.011635 | 0.011669 | 0.011673 |
| 0.011545 | 0.011635 | 0.011601 | 0.011533 | 0.011567 | 0.011568 | 0.011534 |
| 0.011567 | 0.011500 | 0.011533 | 0.011567 | 0.011534 | 0.011466 | 0.011500 |
| 0.011500 | 0.011567 | 0.011466 | 0.011567 | 0.011601 | 0.011635 | 0.011533 |
| 0.011500 | 0.011466 | 0.011804 | 0.011804 | 0.011601 | 0.011636 | 0.011669 |
| 0.011432 | 0.011432 | 0.011466 | 0.011567 | 0.011432 | 0.011669 | 0.011669 |
| 0.011703 | 0.011669 | 0.011635 | 0.011736 | 0.011838 | 0.011738 | 0.011567 |
| 0.011567 | 0.011635 | 0.011669 | 0.011500 | 0.011567 | 0.011533 | 0.011567 |
| 0.011568 | 0.011601 | 0.011635 | 0.011635 | 0.011535 | 0.011736 | 0.011703 |
| 0.011572 | 0.011466 | 0.011567 | 0.011669 | 0.011567 | 0.011635 | 0.011736 |
| 0.011906 | 0.011610 | 0.011770 | 0.011737 | 0.011669 | 0.011838 | 0.011466 |
| 0.011637 | 0.011534 | 0.011500 | 0.011500 | 0.011567 | 0.011466 | 0.011567 |
| 0.011601 | 0.011635 | 0.011533 | 0.011500 | 0.011466 | 0.011804 | 0.011804 |
| 0.011601 | 0.011636 | 0.011702 | 0.011635 | 0.012212 | 0.011672 | 0.011627 |
| 0.011698 | 0.011619 | 0.011768 | 0.011653 | 0.011730 | 0.011685 | 0.011616 |
| 0.012167 | 0.011548 | 0.011681 | 0.011617 | 0.011823 | 0.011745 | 0.011849 |
| 0.012190 | 0.011629 | 0.011571 | 0.011567 | 0.011567 | 0.011533 | 0.011537 |
| 0.011432 | 0.011466 | 0.011601 | 0.011567 | 0.011571 | 0.011635 | 0.011603 |
| 0.011533 | 0.011466 | 0.011500 | 0.011533 | 0.011432 | 0.011500 | 0.011398 |
| 0.011466 | 0.011500 | 0.011466 | 0.011432 | 0.011534 | 0.011466 | 0.011500 |
| 0.011500 | 0.011432 | 0.011500 | 0.011534 | 0.011432 | 0.011635 | 0.011669 |
| 0.011567 | 0.011567 | 0.011567 | 0.011567 | 0.011500 | 0.011838 | 0.011533 |
| 0.011516 | 0.011500 | 0.011669 | 0.011675 | 0.011601 | 0.011567 | 0.011601 |
| 0.011601 | 0.011534 | 0.011500 | 0.011534 | 0.011635 | 0.011635 | 0.011567 |
| 0.011567 | 0.011703 | 0.011804 | 0.011601 | 0.011804 | 0.011804 | 0.011669 |
| 0.011500 | 0.011567 | 0.011601 | 0.011940 | 0.011568 | 0.011601 | 0.011567 |
| 0.011601 | 0.011466 | 0.011466 | 0.011771 | 0.011771 | 0.011737 | 0.011534 |
| 0.011635 | 0.011703 | 0.011567 | 0.011635 | 0.011601 | 0.011466 | 0.011736 |
| 0.011567 | 0.011533 | 0.011466 | 0.011669 | 0.011534 | 0.011635 | 0.011838 |
| 0.011567 | 0.011881 | 0.011872 | 0.011672 | 0.011344 | 0.011574 | 0.011529 |
| 0.011391 | 0.011884 | 0.011485 | 0.011643 | 0.011452 | 0.011622 | 0.011646 |
| 0.011626 | 0.011522 | 0.011675 | 0.011458 | 0.011601 | 0.011598 | 0.011629 |
| 0.011627 | 0.011536 | 0.011521 | 0.011521 | 0.011569 | 0.011635 | 0.011703 |
| 0.011703 | 0.011229 | 0.000000 | 0.011571 | 0.011743 | 0.011487 | 0.011534 |
| 0.011736 | 0.011331 | 0.011533 | 0.011229 | 0.011432 | 0.011601 | 0.011466 |
| 0.011534 | 0.011533 | 0.011500 | 0.011466 | 0.011500 | 0.011466 | 0.011567 |
| 0.011517 | 0.011518 | 0.011543 | 0.011577 | 0.011715 | 0.011679 | 0.011679 |
| 0.011678 | 0.011602 | 0.011432 | 0.011423 | 0.011538 | 0.011708 | 0.011709 |
| 0.011500 | 0.011572 | 0.011806 | 0.011775 | 0.011704 | 0.011738 | 0.011669 |
| 0.011601 | 0.011669 | 0.011669 | 0.011567 | 0.012075 | 0.011737 | 0.011804 |
| 0.011838 | 0.011814 | 0.011541 | 0.011618 | 0.011500 | 0.011703 | 0.011669 |
| 0.011704 | 0.011736 | 0.011736 | 0.011736 | 0.011852 | 0.011872 | 0.011514 |
| 0.011401 | 0.011409 | 0.011506 | 0.011471 | 0.011508 | 0.011436 | 0.011676 |
| 0.011544 | 0.011545 | 0.011348 | 0.011589 | 0.011534 | 0.011611 | 0.011500 |
| 0.011466 | 0.011398 | 0.011534 | 0.011500 | 0.011635 | 0.011601 | 0.011533 |

|          |          |          |          |          |          |          |
|----------|----------|----------|----------|----------|----------|----------|
| 0.011635 | 0.011703 | 0.011500 | 0.011500 | 0.011534 | 0.011533 | 0.011536 |
| 0.011605 | 0.011533 | 0.011533 | 0.011569 | 0.011635 | 0.011703 | 0.011703 |
| 0.011229 | 0.000000 | 0.011571 | 0.011743 | 0.011487 | 0.011534 | 0.011736 |
| 0.011669 | 0.011669 | 0.011503 | 0.011690 | 0.011620 | 0.011643 | 0.011518 |
| 0.011684 | 0.011886 | 0.011657 | 0.011573 | 0.011466 | 0.011669 | 0.011534 |
| 0.011635 | 0.011567 | 0.011466 | 0.011569 | 0.011669 | 0.011673 | 0.011567 |
| 0.011466 | 0.011400 | 0.011533 | 0.011466 | 0.011398 | 0.011505 | 0.011669 |
| 0.011567 | 0.011500 | 0.011533 | 0.011567 | 0.011534 | 0.011466 | 0.011601 |
| 0.011533 | 0.011567 | 0.011567 | 0.011500 | 0.011567 | 0.011804 | 0.011398 |
| 0.011500 | 0.011838 | 0.011500 | 0.011533 | 0.011500 | 0.011804 | 0.011492 |
| 0.011854 | 0.011489 | 0.011515 | 0.011628 | 0.011717 | 0.011602 | 0.011439 |
| 0.011431 | 0.011601 | 0.011703 | 0.011812 | 0.011670 | 0.011810 | 0.011941 |
| 0.011839 | 0.011878 | 0.011838 | 0.012093 | 0.011804 | 0.012685 | 0.011840 |
| 0.012584 | 0.012351 | 0.012486 | 0.012759 | 0.011804 | 0.011500 | 0.011804 |
| 0.012246 | 0.012181 | 0.011770 | 0.011669 | 0.011737 | 0.011737 | 0.011708 |
| 0.011601 | 0.011606 | 0.011669 | 0.011636 | 0.012008 | 0.012075 | 0.012076 |
| 0.011975 | 0.012076 | 0.012181 | 0.011946 | 0.012247 | 0.012254 | 0.012314 |
| 0.012315 | 0.012349 | 0.012297 | 0.012315 | 0.012317 | 0.011601 | 0.011839 |
| 0.011907 | 0.012380 | 0.011914 | 0.012143 | 0.012619 | 0.011676 | 0.011568 |
| 0.011533 | 0.011533 | 0.012008 | 0.011972 | 0.012158 | 0.011872 | 0.011535 |
| S730     | 0.011874 | 0.011874 | 0.011874 | 0.011636 | 0.011636 | 0.011704 |
| 0.011609 | 0.011540 | 0.011704 | 0.011467 | 0.011535 | 0.011502 | 0.011467 |
| 0.011433 | 0.011670 | 0.011365 | 0.011501 | 0.011569 | 0.011535 | 0.011501 |
| 0.011467 | 0.011501 | 0.011264 | 0.011467 | 0.011501 | 0.011501 | 0.011575 |
| 0.011467 | 0.011501 | 0.011399 | 0.011297 | 0.011569 | 0.011535 | 0.011569 |
| 0.011535 | 0.011636 | 0.011535 | 0.011535 | 0.011569 | 0.011535 | 0.011704 |
| 0.011399 | 0.011535 | 0.011569 | 0.011501 | 0.011535 | 0.011636 | 0.011569 |
| 0.011535 | 0.011704 | 0.011603 | 0.011603 | 0.011535 | 0.011806 | 0.011535 |
| 0.011501 | 0.011535 | 0.011670 | 0.011806 | 0.011637 | 0.011535 | 0.011636 |
| 0.011569 | 0.011636 | 0.011535 | 0.011772 | 0.011739 | 0.011535 | 0.011603 |
| 0.011501 | 0.011603 | 0.011569 | 0.011636 | 0.011569 | 0.011569 | 0.011569 |
| 0.011467 | 0.011501 | 0.011467 | 0.011501 | 0.011535 | 0.011570 | 0.011603 |
| 0.011569 | 0.011535 | 0.011603 | 0.011501 | 0.011569 | 0.011467 | 0.011535 |
| 0.011636 | 0.011636 | 0.011670 | 0.011704 | 0.011535 | 0.011772 | 0.011535 |
| 0.011734 | 0.011663 | 0.011708 | 0.011376 | 0.011399 | 0.011581 | 0.011219 |
| 0.011947 | 0.011266 | 0.011435 | 0.011772 | 0.011772 | 0.011467 | 0.011603 |
| 0.011603 | 0.011569 | 0.011636 | 0.011535 | 0.011636 | 0.011569 | 0.011569 |
| 0.011535 | 0.011569 | 0.011840 | 0.011670 | 0.011603 | 0.011569 | 0.011501 |
| 0.011467 | 0.011399 | 0.011535 | 0.011501 | 0.011297 | 0.011196 | 0.011196 |
| 0.011230 | 0.011297 | 0.011501 | 0.011501 | 0.011535 | 0.011535 | 0.011537 |
| 0.011606 | 0.011535 | 0.011535 | 0.011423 | 0.011425 | 0.011450 | 0.011535 |
| 0.011539 | 0.011476 | 0.011470 | 0.011513 | 0.011403 | 0.011475 | 0.011503 |
| 0.011497 | 0.011547 | 0.011582 | 0.011467 | 0.011479 | 0.011604 | 0.011501 |
| 0.011569 | 0.011571 | 0.011569 | 0.011670 | 0.011603 | 0.011976 | 0.011704 |
| 0.011535 | 0.011603 | 0.011535 | 0.011569 | 0.011433 | 0.011399 | 0.011467 |
| 0.011535 | 0.011535 | 0.011467 | 0.011467 | 0.011501 | 0.011467 | 0.011569 |
| 0.011535 | 0.011636 | 0.011569 | 0.011467 | 0.011570 | 0.011670 | 0.011674 |
| 0.011670 | 0.011569 | 0.011467 | 0.011401 | 0.011535 | 0.011467 | 0.011399 |
| 0.011403 | 0.011670 | 0.011467 | 0.011670 | 0.011433 | 0.011535 | 0.011501 |
| 0.011569 | 0.011501 | 0.011535 | 0.011501 | 0.011535 | 0.011399 | 0.011535 |
| 0.011569 | 0.011501 | 0.011569 | 0.011501 | 0.011535 | 0.011569 | 0.011806 |
| 0.011637 | 0.011569 | 0.011637 | 0.011673 | 0.011637 | 0.011535 | 0.011501 |
| 0.011435 | 0.011795 | 0.011660 | 0.011441 | 0.011608 | 0.011404 | 0.011576 |
| 0.011643 | 0.011541 | 0.011704 | 0.011908 | 0.011612 | 0.011772 | 0.011738 |
| 0.011670 | 0.011840 | 0.011706 | 0.011476 | 0.011568 | 0.011569 | 0.011641 |
| 0.011738 | 0.011639 | 0.011777 | 0.011846 | 0.011772 | 0.011840 | 0.011950 |
| 0.011641 | 0.011849 | 0.011778 | 0.011709 | 0.011978 | 0.011433 | 0.011639 |
| 0.011603 | 0.011535 | 0.011433 | 0.011433 | 0.011501 | 0.011501 | 0.011569 |
| 0.011501 | 0.011569 | 0.011467 | 0.011501 | 0.011501 | 0.011501 | 0.011569 |
| 0.011501 | 0.011670 | 0.011569 | 0.011603 | 0.011399 | 0.011501 | 0.011535 |

|          |          |          |          |          |          |          |
|----------|----------|----------|----------|----------|----------|----------|
| 0.011535 | 0.011501 | 0.011569 | 0.011535 | 0.011467 | 0.011467 | 0.011467 |
| 0.011738 | 0.011569 | 0.011636 | 0.011433 | 0.011535 | 0.011704 | 0.011467 |
| 0.011467 | 0.011535 | 0.011501 | 0.011670 | 0.011467 | 0.011399 | 0.011535 |
| 0.011467 | 0.011467 | 0.011501 | 0.011433 | 0.011433 | 0.011603 | 0.011535 |
| 0.011433 | 0.011501 | 0.011399 | 0.011433 | 0.011569 | 0.011433 | 0.011467 |
| 0.011433 | 0.011569 | 0.011501 | 0.011399 | 0.011467 | 0.011399 | 0.011569 |
| 0.011648 | 0.011467 | 0.011501 | 0.011603 | 0.011569 | 0.011501 | 0.011603 |
| 0.011467 | 0.011806 | 0.011399 | 0.011603 | 0.011365 | 0.011365 | 0.011399 |
| 0.011636 | 0.011569 | 0.011535 | 0.011603 | 0.011433 | 0.011569 | 0.011365 |
| 0.011467 | 0.011467 | 0.011501 | 0.011603 | 0.011501 | 0.011603 | 0.011670 |
| 0.011670 | 0.011636 | 0.011535 | 0.011637 | 0.011603 | 0.011467 | 0.011433 |
| 0.011467 | 0.011467 | 0.011535 | 0.011399 | 0.011433 | 0.011603 | 0.011467 |
| 0.011399 | 0.011501 | 0.011636 | 0.011603 | 0.011569 | 0.011501 | 0.011501 |
| 0.011569 | 0.011501 | 0.011603 | 0.011467 | 0.011603 | 0.011704 | 0.011738 |
| 0.011501 | 0.011637 | 0.011513 | 0.018120 | 0.011323 | 0.011678 | 0.011588 |
| 0.011549 | 0.011593 | 0.011484 | 0.011236 | 0.011502 | 0.011618 | 0.011548 |
| 0.011444 | 0.011184 | 0.011375 | 0.011525 | 0.011375 | 0.011409 | 0.011494 |
| 0.011298 | 0.011324 | 0.011397 | 0.011260 | 0.011636 | 0.011670 | 0.011675 |
| 0.011546 | 0.011636 | 0.011636 | 0.011535 | 0.011569 | 0.011569 | 0.011535 |
| 0.011569 | 0.011501 | 0.011535 | 0.011569 | 0.011535 | 0.011467 | 0.011501 |
| 0.011501 | 0.011569 | 0.011467 | 0.011569 | 0.011603 | 0.011636 | 0.011535 |
| 0.011501 | 0.011467 | 0.011569 | 0.011569 | 0.011603 | 0.011637 | 0.011670 |
| 0.011433 | 0.011433 | 0.011467 | 0.011569 | 0.011433 | 0.011636 | 0.011636 |
| 0.011704 | 0.011704 | 0.011636 | 0.011738 | 0.011637 | 0.011740 | 0.011569 |
| 0.011569 | 0.011636 | 0.011670 | 0.011501 | 0.011569 | 0.011535 | 0.011569 |
| 0.011637 | 0.011637 | 0.011670 | 0.011637 | 0.011536 | 0.011738 | 0.011704 |
| 0.011573 | 0.011467 | 0.011569 | 0.011670 | 0.011569 | 0.011637 | 0.011738 |
| 0.011908 | 0.011612 | 0.011772 | 0.011738 | 0.011670 | 0.011840 | 0.011467 |
| 0.011638 | 0.011535 | 0.011501 | 0.011501 | 0.011569 | 0.011467 | 0.011569 |
| 0.011603 | 0.011636 | 0.011535 | 0.011501 | 0.011467 | 0.011569 | 0.011569 |
| 0.011603 | 0.011637 | 0.011704 | 0.011637 | 0.012215 | 0.011709 | 0.011628 |
| 0.011699 | 0.011655 | 0.011770 | 0.011655 | 0.011767 | 0.011687 | 0.011652 |
| 0.012170 | 0.011550 | 0.011683 | 0.011619 | 0.011895 | 0.011747 | 0.011851 |
| 0.012193 | 0.011669 | 0.011538 | 0.011569 | 0.011569 | 0.011196 | 0.011538 |
| 0.011433 | 0.011467 | 0.011603 | 0.011569 | 0.011538 | 0.011433 | 0.011400 |
| 0.011535 | 0.011467 | 0.011501 | 0.011535 | 0.011433 | 0.011501 | 0.011399 |
| 0.011467 | 0.011501 | 0.011467 | 0.011433 | 0.011535 | 0.011467 | 0.011501 |
| 0.011501 | 0.011433 | 0.011501 | 0.011535 | 0.011433 | 0.011636 | 0.011670 |
| 0.011569 | 0.011569 | 0.011569 | 0.011569 | 0.011501 | 0.011637 | 0.011535 |
| 0.011236 | 0.011501 | 0.011467 | 0.011471 | 0.011603 | 0.011603 | 0.011603 |
| 0.011603 | 0.011535 | 0.011501 | 0.011535 | 0.011636 | 0.011636 | 0.011569 |
| 0.011569 | 0.011704 | 0.011603 | 0.011603 | 0.011806 | 0.011806 | 0.011670 |
| 0.011501 | 0.011569 | 0.011603 | 0.011738 | 0.011569 | 0.011603 | 0.011569 |
| 0.011603 | 0.011467 | 0.011467 | 0.011772 | 0.011772 | 0.011738 | 0.011535 |
| 0.011636 | 0.011704 | 0.011569 | 0.011636 | 0.011602 | 0.011467 | 0.011535 |
| 0.011569 | 0.011535 | 0.011467 | 0.011704 | 0.011535 | 0.011636 | 0.011671 |
| 0.011569 | 0.011678 | 0.011670 | 0.011348 | 0.011174 | 0.011575 | 0.011269 |
| 0.011449 | 0.011610 | 0.011486 | 0.011554 | 0.011452 | 0.011419 | 0.011327 |
| 0.011266 | 0.011193 | 0.011396 | 0.011127 | 0.011277 | 0.011397 | 0.011591 |
| 0.011668 | 0.011496 | 0.011522 | 0.011558 | 0.011571 | 0.011433 | 0.011501 |
| 0.011433 | 0.011569 | 0.011571 | 0.000000 | 0.011779 | 0.011845 | 0.011569 |
| 0.011535 | 0.011603 | 0.011535 | 0.011569 | 0.011433 | 0.011399 | 0.011467 |
| 0.011535 | 0.011535 | 0.011467 | 0.011467 | 0.011501 | 0.011467 | 0.011569 |
| 0.011554 | 0.011555 | 0.011544 | 0.011579 | 0.011717 | 0.011681 | 0.011681 |
| 0.011679 | 0.011603 | 0.011433 | 0.011424 | 0.011539 | 0.011710 | 0.011711 |
| 0.011502 | 0.011573 | 0.011808 | 0.011777 | 0.011705 | 0.011740 | 0.011670 |
| 0.011603 | 0.011670 | 0.011670 | 0.011569 | 0.011874 | 0.011738 | 0.011806 |
| 0.011840 | 0.011636 | 0.011542 | 0.011585 | 0.011501 | 0.011704 | 0.011670 |
| 0.011706 | 0.011738 | 0.011738 | 0.011738 | 0.011853 | 0.011874 | 0.011516 |
| 0.011402 | 0.011410 | 0.011507 | 0.011472 | 0.011509 | 0.011437 | 0.011472 |

|          |          |          |          |          |          |          |
|----------|----------|----------|----------|----------|----------|----------|
| 0.011545 | 0.011281 | 0.011444 | 0.011590 | 0.011535 | 0.011613 | 0.011501 |
| 0.011467 | 0.011399 | 0.011535 | 0.011501 | 0.011297 | 0.011196 | 0.011196 |
| 0.011230 | 0.011297 | 0.011501 | 0.011501 | 0.011535 | 0.011535 | 0.011537 |
| 0.011606 | 0.011535 | 0.011535 | 0.011571 | 0.011433 | 0.011501 | 0.011433 |
| 0.011569 | 0.011571 | 0.000000 | 0.011779 | 0.011845 | 0.011569 | 0.011738 |
| 0.011670 | 0.011670 | 0.011504 | 0.011692 | 0.011622 | 0.011645 | 0.011520 |
| 0.011685 | 0.011796 | 0.011701 | 0.011575 | 0.011467 | 0.011670 | 0.011535 |
| 0.011636 | 0.011569 | 0.011467 | 0.011570 | 0.011670 | 0.011674 | 0.011569 |
| 0.011467 | 0.011401 | 0.011535 | 0.011467 | 0.011399 | 0.011403 | 0.011670 |
| 0.011569 | 0.011501 | 0.011535 | 0.011569 | 0.011535 | 0.011467 | 0.011399 |
| 0.011535 | 0.011569 | 0.011569 | 0.011501 | 0.011569 | 0.011806 | 0.011399 |
| 0.011501 | 0.011637 | 0.011501 | 0.011535 | 0.011501 | 0.011603 | 0.011406 |
| 0.011625 | 0.011275 | 0.011212 | 0.011345 | 0.011430 | 0.011422 | 0.011229 |
| 0.011167 | 0.011399 | 0.011501 | 0.011608 | 0.011468 | 0.011607 | 0.011739 |
| 0.011638 | 0.011675 | 0.011637 | 0.011819 | 0.011603 | 0.012486 | 0.011638 |
| 0.012384 | 0.012150 | 0.012285 | 0.012559 | 0.011569 | 0.011501 | 0.011603 |
| 0.012215 | 0.011980 | 0.011569 | 0.011467 | 0.011535 | 0.011535 | 0.011504 |
| 0.011399 | 0.011403 | 0.011467 | 0.011434 | 0.011807 | 0.011840 | 0.011875 |
| 0.011774 | 0.011875 | 0.011979 | 0.011743 | 0.012250 | 0.012257 | 0.012318 |
| 0.012318 | 0.012352 | 0.012301 | 0.012318 | 0.012320 | 0.011603 | 0.011840 |
| 0.011909 | 0.012418 | 0.011916 | 0.011942 | 0.012419 | 0.011472 | 0.011366 |
| 0.011331 | 0.011331 | 0.011807 | 0.011848 | 0.011948 | 0.011670 | 0.011332 |
| S731     | 0.012010 | 0.012010 | 0.012214 | 0.011976 | 0.011976 | 0.012044 |
| 0.011952 | 0.011884 | 0.011976 | 0.011603 | 0.011670 | 0.011638 | 0.011602 |
| 0.011569 | 0.011806 | 0.011467 | 0.011636 | 0.011704 | 0.011670 | 0.011569 |
| 0.011602 | 0.011636 | 0.011670 | 0.011603 | 0.011637 | 0.011636 | 0.011918 |
| 0.011806 | 0.011636 | 0.011535 | 0.011704 | 0.011704 | 0.011671 | 0.011704 |
| 0.011670 | 0.011772 | 0.011670 | 0.011670 | 0.011704 | 0.011670 | 0.011840 |
| 0.011535 | 0.011670 | 0.011704 | 0.011636 | 0.011670 | 0.011772 | 0.011704 |
| 0.011670 | 0.011840 | 0.011739 | 0.011942 | 0.011670 | 0.011942 | 0.011670 |
| 0.011636 | 0.011671 | 0.011806 | 0.011942 | 0.011976 | 0.011670 | 0.011704 |
| 0.011704 | 0.011772 | 0.011670 | 0.011908 | 0.012078 | 0.011670 | 0.011704 |
| 0.011636 | 0.011738 | 0.011704 | 0.011738 | 0.011704 | 0.011704 | 0.011704 |
| 0.011602 | 0.011636 | 0.011603 | 0.011637 | 0.011670 | 0.011706 | 0.011772 |
| 0.011704 | 0.011670 | 0.011738 | 0.011636 | 0.011704 | 0.011603 | 0.011670 |
| 0.011840 | 0.011772 | 0.012010 | 0.011840 | 0.011670 | 0.011908 | 0.011670 |
| 0.011808 | 0.011926 | 0.011858 | 0.011532 | 0.011549 | 0.011692 | 0.011654 |
| 0.011650 | 0.011778 | 0.011516 | 0.011908 | 0.011908 | 0.011569 | 0.011738 |
| 0.011738 | 0.011704 | 0.011772 | 0.011670 | 0.011772 | 0.011704 | 0.011704 |
| 0.011670 | 0.011704 | 0.011976 | 0.011772 | 0.011738 | 0.011705 | 0.011636 |
| 0.011602 | 0.011535 | 0.011670 | 0.011636 | 0.011772 | 0.011738 | 0.011670 |
| 0.011772 | 0.011840 | 0.011636 | 0.011636 | 0.011670 | 0.011670 | 0.011674 |
| 0.011743 | 0.011670 | 0.011670 | 0.011496 | 0.011571 | 0.011520 | 0.011671 |
| 0.011641 | 0.011581 | 0.011618 | 0.011617 | 0.011540 | 0.011579 | 0.011572 |
| 0.011787 | 0.011652 | 0.011686 | 0.011603 | 0.011583 | 0.011705 | 0.011637 |
| 0.011705 | 0.011673 | 0.011705 | 0.011806 | 0.011738 | 0.012112 | 0.011840 |
| 0.011874 | 0.011670 | 0.011670 | 0.011636 | 0.011569 | 0.011738 | 0.011603 |
| 0.011670 | 0.011670 | 0.011636 | 0.011603 | 0.011636 | 0.011603 | 0.011704 |
| 0.011670 | 0.011772 | 0.011704 | 0.011602 | 0.011707 | 0.011772 | 0.011811 |
| 0.011806 | 0.011705 | 0.011603 | 0.011537 | 0.011670 | 0.011603 | 0.011535 |
| 0.011643 | 0.011806 | 0.011603 | 0.011806 | 0.011569 | 0.011670 | 0.011636 |
| 0.011738 | 0.011636 | 0.011670 | 0.011636 | 0.011670 | 0.011535 | 0.011670 |
| 0.011704 | 0.011636 | 0.011704 | 0.011636 | 0.011670 | 0.011704 | 0.011942 |
| 0.011874 | 0.011908 | 0.011976 | 0.011809 | 0.011976 | 0.011670 | 0.011636 |
| 0.011538 | 0.011877 | 0.011708 | 0.011580 | 0.011986 | 0.011542 | 0.011656 |
| 0.011986 | 0.011884 | 0.011840 | 0.012044 | 0.011750 | 0.011874 | 0.011874 |
| 0.011806 | 0.011942 | 0.011814 | 0.011643 | 0.011695 | 0.011705 | 0.011778 |
| 0.011874 | 0.011776 | 0.011914 | 0.011983 | 0.011874 | 0.011976 | 0.012087 |
| 0.011812 | 0.011986 | 0.011915 | 0.011846 | 0.012114 | 0.011569 | 0.011707 |
| 0.011738 | 0.011670 | 0.011569 | 0.011569 | 0.011636 | 0.011636 | 0.011670 |

|          |          |          |          |          |          |          |
|----------|----------|----------|----------|----------|----------|----------|
| 0.011636 | 0.011704 | 0.011603 | 0.011636 | 0.011636 | 0.011636 | 0.011704 |
| 0.011636 | 0.012010 | 0.011908 | 0.011942 | 0.011535 | 0.011636 | 0.011670 |
| 0.011670 | 0.011636 | 0.011704 | 0.011603 | 0.011602 | 0.011602 | 0.011602 |
| 0.012078 | 0.011704 | 0.011772 | 0.011569 | 0.011670 | 0.011840 | 0.011603 |
| 0.011602 | 0.011670 | 0.011636 | 0.011806 | 0.011602 | 0.011738 | 0.011874 |
| 0.011806 | 0.011636 | 0.011636 | 0.011569 | 0.011569 | 0.011738 | 0.011670 |
| 0.011569 | 0.011670 | 0.011535 | 0.011569 | 0.011704 | 0.011773 | 0.011603 |
| 0.011569 | 0.011670 | 0.011637 | 0.011535 | 0.011806 | 0.011535 | 0.011704 |
| 0.011787 | 0.011569 | 0.011840 | 0.011739 | 0.011704 | 0.011636 | 0.011738 |
| 0.011602 | 0.011942 | 0.011535 | 0.011738 | 0.011467 | 0.011467 | 0.011535 |
| 0.011772 | 0.011908 | 0.011670 | 0.011738 | 0.011569 | 0.011908 | 0.011467 |
| 0.011603 | 0.011602 | 0.011636 | 0.011738 | 0.011636 | 0.011704 | 0.011806 |
| 0.011806 | 0.011772 | 0.011670 | 0.011772 | 0.011738 | 0.011603 | 0.011569 |
| 0.011602 | 0.011603 | 0.011670 | 0.011535 | 0.011569 | 0.011738 | 0.011602 |
| 0.011501 | 0.011636 | 0.011772 | 0.011738 | 0.011704 | 0.011636 | 0.011637 |
| 0.011704 | 0.011636 | 0.011738 | 0.011602 | 0.011738 | 0.011840 | 0.012078 |
| 0.011636 | 0.011976 | 0.011652 | 0.018187 | 0.011455 | 0.011740 | 0.011941 |
| 0.011864 | 0.011948 | 0.011746 | 0.011704 | 0.012002 | 0.011932 | 0.011489 |
| 0.011680 | 0.011798 | 0.011492 | 0.011652 | 0.011532 | 0.011607 | 0.011581 |
| 0.011817 | 0.011660 | 0.011695 | 0.011393 | 0.011772 | 0.011806 | 0.011811 |
| 0.011685 | 0.011772 | 0.011772 | 0.011670 | 0.011704 | 0.011705 | 0.011671 |
| 0.011704 | 0.011636 | 0.011670 | 0.011704 | 0.011670 | 0.011603 | 0.011636 |
| 0.011636 | 0.011704 | 0.011602 | 0.011704 | 0.011738 | 0.011772 | 0.011670 |
| 0.011636 | 0.011603 | 0.011942 | 0.011942 | 0.011739 | 0.011773 | 0.011806 |
| 0.011569 | 0.011569 | 0.011602 | 0.011704 | 0.011569 | 0.011806 | 0.011806 |
| 0.011840 | 0.011840 | 0.011772 | 0.011874 | 0.011976 | 0.011876 | 0.011704 |
| 0.011704 | 0.011772 | 0.011806 | 0.011569 | 0.011704 | 0.011670 | 0.011704 |
| 0.011773 | 0.011772 | 0.011806 | 0.011772 | 0.011672 | 0.011874 | 0.011840 |
| 0.011710 | 0.011603 | 0.011704 | 0.011806 | 0.011704 | 0.011772 | 0.011874 |
| 0.012044 | 0.011750 | 0.011874 | 0.011874 | 0.011806 | 0.011942 | 0.011603 |
| 0.011775 | 0.011671 | 0.011636 | 0.011636 | 0.011704 | 0.011602 | 0.011704 |
| 0.011738 | 0.011772 | 0.011670 | 0.011636 | 0.011603 | 0.011942 | 0.011942 |
| 0.011739 | 0.011773 | 0.011840 | 0.011772 | 0.012352 | 0.011818 | 0.011771 |
| 0.011841 | 0.011760 | 0.011877 | 0.011795 | 0.011873 | 0.011827 | 0.011756 |
| 0.012309 | 0.011690 | 0.011787 | 0.011759 | 0.012034 | 0.011885 | 0.011988 |
| 0.012331 | 0.011745 | 0.011709 | 0.011704 | 0.011704 | 0.011670 | 0.011674 |
| 0.011569 | 0.011603 | 0.011738 | 0.011704 | 0.011709 | 0.011772 | 0.011672 |
| 0.011670 | 0.011602 | 0.011636 | 0.011670 | 0.011569 | 0.011636 | 0.011535 |
| 0.011602 | 0.011636 | 0.011603 | 0.011569 | 0.011670 | 0.011602 | 0.011636 |
| 0.011636 | 0.011569 | 0.011636 | 0.011670 | 0.011569 | 0.011772 | 0.011806 |
| 0.011704 | 0.011704 | 0.011704 | 0.011704 | 0.011636 | 0.011976 | 0.011670 |
| 0.011658 | 0.011637 | 0.011807 | 0.011814 | 0.011738 | 0.011738 | 0.011738 |
| 0.011738 | 0.011670 | 0.011636 | 0.011670 | 0.011772 | 0.011772 | 0.011704 |
| 0.011670 | 0.011840 | 0.011942 | 0.011738 | 0.011942 | 0.011942 | 0.011806 |
| 0.011636 | 0.011704 | 0.011738 | 0.012078 | 0.011705 | 0.011738 | 0.011704 |
| 0.011738 | 0.011603 | 0.011603 | 0.011874 | 0.011908 | 0.011840 | 0.011670 |
| 0.011772 | 0.011840 | 0.011704 | 0.011772 | 0.011738 | 0.011603 | 0.011874 |
| 0.011670 | 0.011670 | 0.011603 | 0.011840 | 0.011670 | 0.011772 | 0.012010 |
| 0.011704 | 0.012021 | 0.012010 | 0.011714 | 0.011458 | 0.011712 | 0.011527 |
| 0.011559 | 0.011843 | 0.011627 | 0.011463 | 0.011452 | 0.011622 | 0.011433 |
| 0.011676 | 0.011457 | 0.011507 | 0.011392 | 0.011439 | 0.011531 | 0.011713 |
| 0.011744 | 0.011614 | 0.011593 | 0.011700 | 0.011637 | 0.011772 | 0.011772 |
| 0.011840 | 0.011569 | 0.011743 | 0.011779 | 0.000000 | 0.011628 | 0.011704 |
| 0.011874 | 0.011670 | 0.011670 | 0.011636 | 0.011569 | 0.011738 | 0.011603 |
| 0.011670 | 0.011670 | 0.011636 | 0.011603 | 0.011636 | 0.011603 | 0.011704 |
| 0.011624 | 0.011660 | 0.011648 | 0.011683 | 0.011820 | 0.011784 | 0.011784 |
| 0.011783 | 0.011739 | 0.011544 | 0.011532 | 0.011642 | 0.011813 | 0.011814 |
| 0.011603 | 0.011676 | 0.011910 | 0.011879 | 0.011807 | 0.011842 | 0.011806 |
| 0.011738 | 0.011806 | 0.011806 | 0.011704 | 0.012214 | 0.011874 | 0.011942 |
| 0.011976 | 0.011959 | 0.011680 | 0.011760 | 0.011637 | 0.011806 | 0.011806 |

|          |          |          |          |          |          |          |
|----------|----------|----------|----------|----------|----------|----------|
| 0.011842 | 0.011874 | 0.011874 | 0.011874 | 0.012011 | 0.012010 | 0.011621 |
| 0.011538 | 0.011550 | 0.011645 | 0.011575 | 0.011647 | 0.011513 | 0.011815 |
| 0.011684 | 0.011724 | 0.011590 | 0.011666 | 0.011671 | 0.011717 | 0.011636 |
| 0.011602 | 0.011535 | 0.011670 | 0.011636 | 0.011772 | 0.011738 | 0.011670 |
| 0.011772 | 0.011840 | 0.011636 | 0.011636 | 0.011670 | 0.011670 | 0.011674 |
| 0.011743 | 0.011670 | 0.011670 | 0.011637 | 0.011772 | 0.011772 | 0.011840 |
| 0.011569 | 0.011743 | 0.011779 | 0.000000 | 0.011628 | 0.011704 | 0.011874 |
| 0.011806 | 0.011806 | 0.011606 | 0.011834 | 0.011762 | 0.011782 | 0.011591 |
| 0.011790 | 0.011752 | 0.011745 | 0.011712 | 0.011603 | 0.011806 | 0.011670 |
| 0.011772 | 0.011704 | 0.011602 | 0.011707 | 0.011772 | 0.011811 | 0.011705 |
| 0.011603 | 0.011537 | 0.011670 | 0.011603 | 0.011535 | 0.011643 | 0.011806 |
| 0.011704 | 0.011636 | 0.011670 | 0.011704 | 0.011670 | 0.011603 | 0.011738 |
| 0.011636 | 0.011704 | 0.011704 | 0.011636 | 0.011704 | 0.011942 | 0.011535 |
| 0.011636 | 0.011976 | 0.011636 | 0.011670 | 0.011636 | 0.011942 | 0.011535 |
| 0.011796 | 0.011488 | 0.011566 | 0.011668 | 0.011757 | 0.011711 | 0.011481 |
| 0.011537 | 0.011670 | 0.011772 | 0.011883 | 0.011740 | 0.011880 | 0.011977 |
| 0.011909 | 0.011948 | 0.011908 | 0.012164 | 0.011874 | 0.012758 | 0.011911 |
| 0.012657 | 0.012422 | 0.012558 | 0.012832 | 0.011942 | 0.011569 | 0.011874 |
| 0.012317 | 0.012252 | 0.011840 | 0.011739 | 0.011807 | 0.011807 | 0.011846 |
| 0.011670 | 0.011677 | 0.011738 | 0.011705 | 0.012147 | 0.012214 | 0.012215 |
| 0.012114 | 0.012215 | 0.012320 | 0.012085 | 0.012386 | 0.012394 | 0.012454 |
| 0.012455 | 0.012489 | 0.012439 | 0.012455 | 0.012456 | 0.011738 | 0.011976 |
| 0.012045 | 0.012554 | 0.012053 | 0.012282 | 0.012760 | 0.011815 | 0.011705 |
| 0.011670 | 0.011670 | 0.012146 | 0.012058 | 0.012230 | 0.012010 | 0.011673 |
| S732     | 0.012050 | 0.012050 | 0.012227 | 0.011979 | 0.011979 | 0.012050 |
| 0.011990 | 0.011919 | 0.011979 | 0.011626 | 0.011696 | 0.011662 | 0.011626 |
| 0.011590 | 0.011838 | 0.011555 | 0.011625 | 0.011732 | 0.011696 | 0.011661 |
| 0.011590 | 0.011661 | 0.011696 | 0.011626 | 0.011662 | 0.011661 | 0.011954 |
| 0.011838 | 0.011661 | 0.011555 | 0.011732 | 0.011732 | 0.011696 | 0.011696 |
| 0.011696 | 0.011767 | 0.011696 | 0.011696 | 0.011732 | 0.011696 | 0.011873 |
| 0.011555 | 0.011696 | 0.011696 | 0.011661 | 0.011696 | 0.011767 | 0.011732 |
| 0.011661 | 0.011838 | 0.011768 | 0.011979 | 0.011696 | 0.011979 | 0.011696 |
| 0.011661 | 0.011697 | 0.011838 | 0.011979 | 0.012015 | 0.011696 | 0.011519 |
| 0.011732 | 0.011767 | 0.011661 | 0.011944 | 0.012121 | 0.011661 | 0.011767 |
| 0.011661 | 0.011732 | 0.011732 | 0.011767 | 0.011732 | 0.011732 | 0.011732 |
| 0.011590 | 0.011661 | 0.011625 | 0.011661 | 0.011696 | 0.011698 | 0.011802 |
| 0.011732 | 0.011696 | 0.011767 | 0.011661 | 0.011732 | 0.011626 | 0.011696 |
| 0.011873 | 0.011802 | 0.012015 | 0.011873 | 0.011696 | 0.011944 | 0.011696 |
| 0.011843 | 0.011927 | 0.011934 | 0.011596 | 0.011608 | 0.011681 | 0.011724 |
| 0.012407 | 0.011704 | 0.011582 | 0.011873 | 0.011944 | 0.011625 | 0.011767 |
| 0.011767 | 0.011732 | 0.011802 | 0.011661 | 0.011802 | 0.011696 | 0.011731 |
| 0.011696 | 0.011732 | 0.011979 | 0.011838 | 0.011767 | 0.011732 | 0.011661 |
| 0.011626 | 0.011555 | 0.011696 | 0.011661 | 0.011802 | 0.011767 | 0.011696 |
| 0.011802 | 0.011838 | 0.011661 | 0.011661 | 0.011696 | 0.011696 | 0.011700 |
| 0.011772 | 0.011661 | 0.011626 | 0.011553 | 0.011670 | 0.011615 | 0.011662 |
| 0.011702 | 0.011639 | 0.011682 | 0.011641 | 0.011597 | 0.011601 | 0.011629 |
| 0.011819 | 0.011714 | 0.011748 | 0.011626 | 0.011606 | 0.011768 | 0.011662 |
| 0.011733 | 0.011699 | 0.011697 | 0.011838 | 0.011767 | 0.012156 | 0.011873 |
| 0.011908 | 0.011484 | 0.011661 | 0.011378 | 0.011590 | 0.011767 | 0.011626 |
| 0.011696 | 0.011696 | 0.011661 | 0.011625 | 0.011661 | 0.011625 | 0.011661 |
| 0.011696 | 0.011802 | 0.011696 | 0.011625 | 0.011734 | 0.011767 | 0.011806 |
| 0.011838 | 0.011732 | 0.011625 | 0.011556 | 0.011696 | 0.011626 | 0.011555 |
| 0.011667 | 0.011838 | 0.011626 | 0.011838 | 0.011590 | 0.011696 | 0.011661 |
| 0.011732 | 0.011625 | 0.011696 | 0.011661 | 0.011696 | 0.011555 | 0.011696 |
| 0.011732 | 0.011661 | 0.011732 | 0.011625 | 0.011696 | 0.011696 | 0.011979 |
| 0.011908 | 0.011944 | 0.012015 | 0.011841 | 0.012015 | 0.011696 | 0.011661 |
| 0.011593 | 0.011822 | 0.011731 | 0.011529 | 0.011953 | 0.011562 | 0.011597 |
| 0.012026 | 0.011882 | 0.011873 | 0.012015 | 0.011780 | 0.011944 | 0.011873 |
| 0.011838 | 0.011979 | 0.011848 | 0.011582 | 0.011725 | 0.011732 | 0.011809 |
| 0.011909 | 0.011771 | 0.011951 | 0.012023 | 0.011909 | 0.011944 | 0.012131 |

|          |          |          |          |          |          |          |
|----------|----------|----------|----------|----------|----------|----------|
| 0.011844 | 0.012026 | 0.011916 | 0.011880 | 0.012123 | 0.011590 | 0.011663 |
| 0.011767 | 0.011696 | 0.011590 | 0.011590 | 0.011661 | 0.011625 | 0.011732 |
| 0.011661 | 0.011732 | 0.011625 | 0.011661 | 0.011661 | 0.011661 | 0.011732 |
| 0.011661 | 0.012050 | 0.011944 | 0.011979 | 0.011555 | 0.011661 | 0.011626 |
| 0.011696 | 0.011661 | 0.011732 | 0.011413 | 0.011625 | 0.011625 | 0.011625 |
| 0.012121 | 0.011732 | 0.011802 | 0.011590 | 0.011696 | 0.011838 | 0.011626 |
| 0.011625 | 0.011696 | 0.011661 | 0.011838 | 0.011626 | 0.011767 | 0.011873 |
| 0.011838 | 0.011661 | 0.011661 | 0.011590 | 0.011590 | 0.011767 | 0.011696 |
| 0.011590 | 0.011696 | 0.011555 | 0.011590 | 0.011732 | 0.011803 | 0.011626 |
| 0.011591 | 0.011732 | 0.011662 | 0.011555 | 0.011838 | 0.011555 | 0.011696 |
| 0.011818 | 0.011626 | 0.011873 | 0.011767 | 0.011732 | 0.011661 | 0.011767 |
| 0.011625 | 0.011979 | 0.011555 | 0.011767 | 0.011555 | 0.011555 | 0.011555 |
| 0.011767 | 0.011944 | 0.011661 | 0.011767 | 0.011590 | 0.011944 | 0.011555 |
| 0.011626 | 0.011625 | 0.011626 | 0.011732 | 0.011590 | 0.011732 | 0.011838 |
| 0.011838 | 0.011802 | 0.011696 | 0.011803 | 0.011767 | 0.011625 | 0.011590 |
| 0.011625 | 0.011625 | 0.011661 | 0.011555 | 0.011590 | 0.011767 | 0.011626 |
| 0.011590 | 0.011661 | 0.011802 | 0.011732 | 0.011732 | 0.011661 | 0.011661 |
| 0.011732 | 0.011661 | 0.011767 | 0.011626 | 0.011767 | 0.011838 | 0.012121 |
| 0.011661 | 0.012015 | 0.011642 | 0.018498 | 0.011474 | 0.011704 | 0.011942 |
| 0.011862 | 0.011950 | 0.011721 | 0.011670 | 0.012037 | 0.011969 | 0.011698 |
| 0.011708 | 0.011766 | 0.011555 | 0.011590 | 0.011472 | 0.011579 | 0.011603 |
| 0.011753 | 0.011765 | 0.011723 | 0.011549 | 0.011802 | 0.011838 | 0.011843 |
| 0.011712 | 0.011802 | 0.011802 | 0.011696 | 0.011732 | 0.011732 | 0.011697 |
| 0.011732 | 0.011625 | 0.011696 | 0.011732 | 0.011696 | 0.011626 | 0.011661 |
| 0.011661 | 0.011696 | 0.011626 | 0.011696 | 0.011767 | 0.011802 | 0.011696 |
| 0.011626 | 0.011626 | 0.011979 | 0.011979 | 0.011767 | 0.011804 | 0.011838 |
| 0.011555 | 0.011590 | 0.011626 | 0.011696 | 0.011590 | 0.011802 | 0.011802 |
| 0.011873 | 0.011873 | 0.011802 | 0.011908 | 0.012015 | 0.011911 | 0.011732 |
| 0.011732 | 0.011802 | 0.011838 | 0.011590 | 0.011732 | 0.011696 | 0.011732 |
| 0.011732 | 0.011732 | 0.011732 | 0.011803 | 0.011698 | 0.011873 | 0.011873 |
| 0.011737 | 0.011626 | 0.011732 | 0.011802 | 0.011732 | 0.011803 | 0.011908 |
| 0.012015 | 0.011780 | 0.011944 | 0.011873 | 0.011838 | 0.011979 | 0.011626 |
| 0.011769 | 0.011697 | 0.011661 | 0.011661 | 0.011696 | 0.011626 | 0.011696 |
| 0.011767 | 0.011802 | 0.011696 | 0.011626 | 0.011626 | 0.011979 | 0.011979 |
| 0.011767 | 0.011804 | 0.011873 | 0.011802 | 0.012300 | 0.011853 | 0.011803 |
| 0.011839 | 0.011792 | 0.011839 | 0.011791 | 0.011910 | 0.011860 | 0.011787 |
| 0.012255 | 0.011717 | 0.011854 | 0.011790 | 0.012004 | 0.011920 | 0.012028 |
| 0.012278 | 0.011817 | 0.011737 | 0.011732 | 0.011732 | 0.011696 | 0.011701 |
| 0.011590 | 0.011626 | 0.011767 | 0.011732 | 0.011736 | 0.011802 | 0.011698 |
| 0.011696 | 0.011626 | 0.011626 | 0.011661 | 0.011590 | 0.011661 | 0.011555 |
| 0.011626 | 0.011661 | 0.011625 | 0.011590 | 0.011696 | 0.011625 | 0.011590 |
| 0.011661 | 0.011590 | 0.011661 | 0.011696 | 0.011590 | 0.011767 | 0.011838 |
| 0.011732 | 0.011732 | 0.011732 | 0.011732 | 0.011590 | 0.012015 | 0.011696 |
| 0.011684 | 0.011661 | 0.011839 | 0.011846 | 0.011767 | 0.011767 | 0.011732 |
| 0.011767 | 0.011696 | 0.011661 | 0.011696 | 0.011767 | 0.011802 | 0.011696 |
| 0.011696 | 0.011873 | 0.011979 | 0.011767 | 0.011873 | 0.011873 | 0.011802 |
| 0.011661 | 0.011732 | 0.011767 | 0.012086 | 0.011732 | 0.011767 | 0.011732 |
| 0.011767 | 0.011625 | 0.011625 | 0.011909 | 0.011944 | 0.011873 | 0.011626 |
| 0.011802 | 0.011838 | 0.011732 | 0.011802 | 0.011767 | 0.011626 | 0.011908 |
| 0.011732 | 0.011696 | 0.011625 | 0.011873 | 0.011626 | 0.011802 | 0.012050 |
| 0.011732 | 0.012062 | 0.012050 | 0.011830 | 0.011541 | 0.011704 | 0.011602 |
| 0.011524 | 0.011922 | 0.011615 | 0.011670 | 0.011623 | 0.011808 | 0.011561 |
| 0.011653 | 0.011611 | 0.011585 | 0.011477 | 0.011683 | 0.011553 | 0.011786 |
| 0.011775 | 0.011640 | 0.011654 | 0.011654 | 0.011591 | 0.011802 | 0.011802 |
| 0.011838 | 0.011308 | 0.011487 | 0.011845 | 0.011628 | 0.000000 | 0.011732 |
| 0.011908 | 0.011484 | 0.011661 | 0.011378 | 0.011590 | 0.011767 | 0.011626 |
| 0.011696 | 0.011696 | 0.011661 | 0.011625 | 0.011661 | 0.011625 | 0.011661 |
| 0.011686 | 0.011686 | 0.011673 | 0.011745 | 0.011889 | 0.011852 | 0.011851 |
| 0.011849 | 0.011768 | 0.011566 | 0.011552 | 0.011702 | 0.011881 | 0.011882 |
| 0.011662 | 0.011738 | 0.011946 | 0.011879 | 0.011874 | 0.011875 | 0.011838 |



|          |          |          |          |          |          |          |
|----------|----------|----------|----------|----------|----------|----------|
| 0.011767 | 0.011838 | 0.011838 | 0.011731 | 0.012227 | 0.011873 | 0.011980 |
| 0.012015 | 0.011960 | 0.011706 | 0.011790 | 0.011661 | 0.011838 | 0.011838 |
| 0.011875 | 0.011908 | 0.011909 | 0.011909 | 0.011968 | 0.012050 | 0.011682 |
| 0.011559 | 0.011571 | 0.011670 | 0.011633 | 0.011636 | 0.011533 | 0.011848 |
| 0.011711 | 0.011662 | 0.011412 | 0.011693 | 0.011697 | 0.011781 | 0.011661 |
| 0.011626 | 0.011555 | 0.011696 | 0.011661 | 0.011802 | 0.011767 | 0.011696 |
| 0.011802 | 0.011838 | 0.011661 | 0.011661 | 0.011696 | 0.011696 | 0.011700 |
| 0.011772 | 0.011661 | 0.011626 | 0.011591 | 0.011802 | 0.011802 | 0.011838 |
| 0.011308 | 0.011487 | 0.011845 | 0.011628 | 0.000000 | 0.011732 | 0.011908 |
| 0.011838 | 0.011838 | 0.011664 | 0.011865 | 0.011791 | 0.011813 | 0.011614 |
| 0.011820 | 0.011968 | 0.011730 | 0.011740 | 0.011626 | 0.011838 | 0.011696 |
| 0.011802 | 0.011696 | 0.011625 | 0.011734 | 0.011767 | 0.011806 | 0.011732 |
| 0.011625 | 0.011556 | 0.011696 | 0.011626 | 0.011555 | 0.011667 | 0.011838 |
| 0.011732 | 0.011625 | 0.011696 | 0.011732 | 0.011696 | 0.011626 | 0.011767 |
| 0.011696 | 0.011732 | 0.011732 | 0.011661 | 0.011732 | 0.011979 | 0.011555 |
| 0.011661 | 0.012015 | 0.011661 | 0.011696 | 0.011661 | 0.011979 | 0.011511 |
| 0.011833 | 0.011643 | 0.011537 | 0.011782 | 0.011875 | 0.011740 | 0.011500 |
| 0.011449 | 0.011696 | 0.011802 | 0.011918 | 0.011769 | 0.011915 | 0.012051 |
| 0.011946 | 0.011986 | 0.011944 | 0.012212 | 0.011873 | 0.012617 | 0.011947 |
| 0.012653 | 0.012409 | 0.012550 | 0.012801 | 0.011944 | 0.011590 | 0.011909 |
| 0.012335 | 0.012268 | 0.011838 | 0.011767 | 0.011839 | 0.011839 | 0.011880 |
| 0.011696 | 0.011703 | 0.011767 | 0.011732 | 0.012122 | 0.012192 | 0.012229 |
| 0.012123 | 0.012193 | 0.012338 | 0.012022 | 0.012336 | 0.012341 | 0.012407 |
| 0.012408 | 0.012443 | 0.012390 | 0.012408 | 0.012409 | 0.011767 | 0.011980 |
| 0.012087 | 0.012617 | 0.012060 | 0.012298 | 0.012797 | 0.011811 | 0.011732 |
| 0.011696 | 0.011696 | 0.012192 | 0.012149 | 0.012280 | 0.011944 | 0.011699 |
| S733     | 0.011698 | 0.011698 | 0.012034 | 0.011799 | 0.011799 | 0.011866 |
| 0.011705 | 0.011637 | 0.011866 | 0.011295 | 0.011362 | 0.011296 | 0.011295 |
| 0.011329 | 0.011497 | 0.011295 | 0.011329 | 0.011396 | 0.011362 | 0.011329 |
| 0.011295 | 0.011329 | 0.011429 | 0.011295 | 0.011329 | 0.011329 | 0.011671 |
| 0.011564 | 0.011329 | 0.011228 | 0.011463 | 0.011396 | 0.011362 | 0.011396 |
| 0.011362 | 0.011463 | 0.011362 | 0.011362 | 0.011396 | 0.011362 | 0.011530 |
| 0.011295 | 0.011362 | 0.011396 | 0.011329 | 0.011429 | 0.011463 | 0.011396 |
| 0.011362 | 0.011530 | 0.011430 | 0.011698 | 0.011362 | 0.011631 | 0.011362 |
| 0.011329 | 0.011430 | 0.011497 | 0.011631 | 0.011732 | 0.011429 | 0.011530 |
| 0.011396 | 0.011463 | 0.011362 | 0.011597 | 0.011833 | 0.011362 | 0.011429 |
| 0.011329 | 0.011429 | 0.011396 | 0.011463 | 0.011396 | 0.011396 | 0.011396 |
| 0.011295 | 0.011329 | 0.011295 | 0.011396 | 0.011362 | 0.011363 | 0.011463 |
| 0.011396 | 0.011362 | 0.011429 | 0.011329 | 0.011463 | 0.011295 | 0.011362 |
| 0.011530 | 0.011463 | 0.011698 | 0.011530 | 0.011362 | 0.011597 | 0.011362 |
| 0.011468 | 0.011695 | 0.011513 | 0.011216 | 0.011210 | 0.011318 | 0.011415 |
| 0.012011 | 0.011467 | 0.011143 | 0.011597 | 0.011597 | 0.011396 | 0.011497 |
| 0.011429 | 0.011396 | 0.011463 | 0.011362 | 0.011463 | 0.011396 | 0.011396 |
| 0.011362 | 0.011463 | 0.011664 | 0.011530 | 0.011429 | 0.011396 | 0.011329 |
| 0.011295 | 0.011295 | 0.011362 | 0.011329 | 0.011530 | 0.011497 | 0.011430 |
| 0.011530 | 0.011597 | 0.011329 | 0.011329 | 0.011362 | 0.011362 | 0.011364 |
| 0.011432 | 0.011362 | 0.011329 | 0.011168 | 0.011241 | 0.011236 | 0.011329 |
| 0.011331 | 0.011232 | 0.011282 | 0.011302 | 0.011230 | 0.011266 | 0.011297 |
| 0.011564 | 0.011336 | 0.011370 | 0.011262 | 0.011268 | 0.011397 | 0.011363 |
| 0.011430 | 0.011364 | 0.011363 | 0.011496 | 0.011429 | 0.011799 | 0.011598 |
| 0.011631 | 0.011497 | 0.011362 | 0.011463 | 0.011262 | 0.011497 | 0.011295 |
| 0.011362 | 0.011362 | 0.011329 | 0.011295 | 0.011329 | 0.011295 | 0.011396 |
| 0.011362 | 0.011463 | 0.011396 | 0.011295 | 0.011397 | 0.011497 | 0.011500 |
| 0.011497 | 0.011362 | 0.011295 | 0.011229 | 0.011362 | 0.011295 | 0.011228 |
| 0.011332 | 0.011497 | 0.011295 | 0.011497 | 0.011262 | 0.011363 | 0.011329 |
| 0.011430 | 0.011329 | 0.011362 | 0.011329 | 0.011362 | 0.011228 | 0.011362 |
| 0.011396 | 0.011329 | 0.011396 | 0.011329 | 0.011362 | 0.011396 | 0.011631 |
| 0.011732 | 0.011664 | 0.011732 | 0.011465 | 0.011732 | 0.011362 | 0.011329 |
| 0.011330 | 0.011586 | 0.011426 | 0.011232 | 0.011739 | 0.011197 | 0.011336 |
| 0.011739 | 0.011638 | 0.011530 | 0.011732 | 0.011436 | 0.011597 | 0.011564 |

|          |          |          |          |          |          |          |
|----------|----------|----------|----------|----------|----------|----------|
| 0.011497 | 0.011664 | 0.011486 | 0.011307 | 0.011354 | 0.011396 | 0.011466 |
| 0.011564 | 0.011465 | 0.011601 | 0.011669 | 0.011597 | 0.011665 | 0.011772 |
| 0.011500 | 0.011671 | 0.011602 | 0.011534 | 0.011800 | 0.011262 | 0.011465 |
| 0.011429 | 0.011362 | 0.011262 | 0.011262 | 0.011329 | 0.011329 | 0.011396 |
| 0.011329 | 0.011396 | 0.011295 | 0.011396 | 0.011329 | 0.011329 | 0.011396 |
| 0.011329 | 0.011765 | 0.011664 | 0.011698 | 0.011228 | 0.011329 | 0.011362 |
| 0.011362 | 0.011329 | 0.011396 | 0.011429 | 0.011295 | 0.011295 | 0.011295 |
| 0.011832 | 0.011463 | 0.011463 | 0.011262 | 0.011362 | 0.011530 | 0.011295 |
| 0.011295 | 0.011362 | 0.011329 | 0.011497 | 0.011295 | 0.011429 | 0.011564 |
| 0.011497 | 0.011329 | 0.011329 | 0.011262 | 0.011262 | 0.011430 | 0.011362 |
| 0.011262 | 0.011362 | 0.011228 | 0.011262 | 0.011396 | 0.011530 | 0.011295 |
| 0.011262 | 0.011396 | 0.011329 | 0.011228 | 0.011564 | 0.011228 | 0.011396 |
| 0.011471 | 0.011295 | 0.011597 | 0.011430 | 0.011463 | 0.011329 | 0.011429 |
| 0.011295 | 0.011631 | 0.011228 | 0.011497 | 0.011295 | 0.011295 | 0.011228 |
| 0.011463 | 0.011665 | 0.011362 | 0.011429 | 0.011262 | 0.011664 | 0.011295 |
| 0.011295 | 0.011295 | 0.011329 | 0.011429 | 0.011329 | 0.011429 | 0.011497 |
| 0.011497 | 0.011463 | 0.011362 | 0.011463 | 0.011429 | 0.011295 | 0.011262 |
| 0.011295 | 0.011295 | 0.011362 | 0.011295 | 0.011262 | 0.011429 | 0.011295 |
| 0.011329 | 0.011329 | 0.011463 | 0.011497 | 0.011396 | 0.011329 | 0.011329 |
| 0.011396 | 0.011329 | 0.011429 | 0.011295 | 0.011429 | 0.011530 | 0.011832 |
| 0.011329 | 0.011732 | 0.011267 | 0.017785 | 0.011257 | 0.011366 | 0.011618 |
| 0.011614 | 0.011623 | 0.011270 | 0.011234 | 0.011719 | 0.011682 | 0.011303 |
| 0.011487 | 0.011487 | 0.011177 | 0.011228 | 0.011216 | 0.011307 | 0.011275 |
| 0.011482 | 0.011433 | 0.011431 | 0.011259 | 0.011463 | 0.011497 | 0.011500 |
| 0.011369 | 0.011463 | 0.011463 | 0.011430 | 0.011396 | 0.011396 | 0.011363 |
| 0.011396 | 0.011329 | 0.011362 | 0.011396 | 0.011363 | 0.011295 | 0.011329 |
| 0.011329 | 0.011396 | 0.011295 | 0.011396 | 0.011430 | 0.011463 | 0.011362 |
| 0.011396 | 0.011362 | 0.011698 | 0.011698 | 0.011430 | 0.011464 | 0.011497 |
| 0.011262 | 0.011262 | 0.011295 | 0.011396 | 0.011262 | 0.011497 | 0.011497 |
| 0.011530 | 0.011530 | 0.011463 | 0.011564 | 0.011732 | 0.011565 | 0.011396 |
| 0.011396 | 0.011463 | 0.011497 | 0.011329 | 0.011396 | 0.011362 | 0.011396 |
| 0.011430 | 0.011430 | 0.011497 | 0.011430 | 0.011330 | 0.011564 | 0.011530 |
| 0.011399 | 0.011295 | 0.011396 | 0.011497 | 0.011396 | 0.011530 | 0.011564 |
| 0.011732 | 0.011436 | 0.011597 | 0.011564 | 0.011497 | 0.011664 | 0.011295 |
| 0.011464 | 0.011363 | 0.011329 | 0.011329 | 0.011396 | 0.011295 | 0.011396 |
| 0.011430 | 0.011463 | 0.011362 | 0.011396 | 0.011362 | 0.011698 | 0.011698 |
| 0.011430 | 0.011464 | 0.011530 | 0.011463 | 0.012103 | 0.011525 | 0.011447 |
| 0.011482 | 0.011476 | 0.011587 | 0.011476 | 0.011585 | 0.011508 | 0.011474 |
| 0.012056 | 0.011372 | 0.011505 | 0.011441 | 0.011714 | 0.011570 | 0.011673 |
| 0.012080 | 0.011475 | 0.011635 | 0.011698 | 0.011564 | 0.011564 | 0.011601 |
| 0.011262 | 0.011429 | 0.011564 | 0.011530 | 0.011533 | 0.011530 | 0.011464 |
| 0.011362 | 0.011295 | 0.011329 | 0.011362 | 0.011262 | 0.011329 | 0.011228 |
| 0.011362 | 0.011396 | 0.011295 | 0.011262 | 0.011362 | 0.011295 | 0.011329 |
| 0.011329 | 0.011262 | 0.011329 | 0.011362 | 0.011262 | 0.011463 | 0.011497 |
| 0.011396 | 0.011463 | 0.011396 | 0.011396 | 0.011329 | 0.011732 | 0.011362 |
| 0.011408 | 0.011329 | 0.011564 | 0.011569 | 0.011430 | 0.011429 | 0.011429 |
| 0.011429 | 0.011362 | 0.011329 | 0.011362 | 0.011463 | 0.011463 | 0.011396 |
| 0.011396 | 0.011530 | 0.011698 | 0.011429 | 0.011631 | 0.011631 | 0.011496 |
| 0.011329 | 0.011396 | 0.011429 | 0.011833 | 0.011396 | 0.011430 | 0.011396 |
| 0.011429 | 0.011362 | 0.011362 | 0.011665 | 0.011597 | 0.011631 | 0.011362 |
| 0.011463 | 0.011530 | 0.011396 | 0.011463 | 0.011429 | 0.011295 | 0.011631 |
| 0.011396 | 0.011362 | 0.011362 | 0.011530 | 0.011362 | 0.011463 | 0.011698 |
| 0.011396 | 0.011773 | 0.011765 | 0.011507 | 0.011173 | 0.011434 | 0.011215 |
| 0.011170 | 0.011683 | 0.011236 | 0.011417 | 0.011255 | 0.011366 | 0.011379 |
| 0.011417 | 0.011192 | 0.011339 | 0.011192 | 0.011222 | 0.011261 | 0.011385 |
| 0.011399 | 0.011296 | 0.011377 | 0.011307 | 0.011397 | 0.011530 | 0.011598 |
| 0.011597 | 0.011430 | 0.011534 | 0.011569 | 0.011704 | 0.011732 | 0.000000 |
| 0.011631 | 0.011497 | 0.011362 | 0.011463 | 0.011262 | 0.011497 | 0.011295 |
| 0.011362 | 0.011362 | 0.011329 | 0.011295 | 0.011329 | 0.011295 | 0.011396 |
| 0.011340 | 0.011340 | 0.011334 | 0.011368 | 0.011505 | 0.011470 | 0.011470 |

|          |          |          |          |          |          |          |
|----------|----------|----------|----------|----------|----------|----------|
| 0.011469 | 0.011396 | 0.011171 | 0.011204 | 0.011331 | 0.011501 | 0.011501 |
| 0.011296 | 0.011365 | 0.011599 | 0.011567 | 0.011497 | 0.011531 | 0.011496 |
| 0.011429 | 0.011497 | 0.011496 | 0.011396 | 0.011967 | 0.011564 | 0.011631 |
| 0.011665 | 0.011701 | 0.011367 | 0.011407 | 0.011329 | 0.011530 | 0.011497 |
| 0.011531 | 0.011564 | 0.011564 | 0.011564 | 0.011650 | 0.011698 | 0.011338 |
| 0.011229 | 0.011233 | 0.011333 | 0.011298 | 0.011402 | 0.011210 | 0.011570 |
| 0.011369 | 0.011367 | 0.000000 | 0.011322 | 0.011329 | 0.011402 | 0.011329 |
| 0.011295 | 0.011295 | 0.011362 | 0.011329 | 0.011530 | 0.011497 | 0.011430 |
| 0.011530 | 0.011597 | 0.011329 | 0.011329 | 0.011362 | 0.011362 | 0.011364 |
| 0.011432 | 0.011362 | 0.011329 | 0.011397 | 0.011530 | 0.011598 | 0.011597 |
| 0.011430 | 0.011534 | 0.011569 | 0.011704 | 0.011732 | 0.000000 | 0.011564 |
| 0.011497 | 0.011497 | 0.011331 | 0.011513 | 0.011408 | 0.011469 | 0.011305 |
| 0.011473 | 0.011698 | 0.011441 | 0.011400 | 0.011295 | 0.011497 | 0.011362 |
| 0.011463 | 0.011396 | 0.011295 | 0.011397 | 0.011497 | 0.011500 | 0.011362 |
| 0.011295 | 0.011229 | 0.011362 | 0.011295 | 0.011228 | 0.011332 | 0.011497 |
| 0.011396 | 0.011329 | 0.011362 | 0.011396 | 0.011363 | 0.011295 | 0.011497 |
| 0.011362 | 0.011396 | 0.011396 | 0.011329 | 0.011396 | 0.011631 | 0.011295 |
| 0.011329 | 0.011732 | 0.011329 | 0.011362 | 0.011329 | 0.011698 | 0.011189 |
| 0.011622 | 0.011145 | 0.011261 | 0.011382 | 0.011508 | 0.011455 | 0.011144 |
| 0.011218 | 0.011496 | 0.011597 | 0.011671 | 0.011531 | 0.011669 | 0.011800 |
| 0.011733 | 0.011770 | 0.011732 | 0.011949 | 0.011698 | 0.012573 | 0.011700 |
| 0.012473 | 0.012207 | 0.012375 | 0.012579 | 0.011698 | 0.011396 | 0.011665 |
| 0.012137 | 0.012038 | 0.011664 | 0.011564 | 0.011598 | 0.011598 | 0.011601 |
| 0.011496 | 0.011467 | 0.011564 | 0.011497 | 0.011867 | 0.011967 | 0.011935 |
| 0.011868 | 0.011934 | 0.012038 | 0.011804 | 0.012104 | 0.012110 | 0.012205 |
| 0.012172 | 0.012205 | 0.012152 | 0.012172 | 0.012173 | 0.011429 | 0.011732 |
| 0.011767 | 0.012303 | 0.011772 | 0.012034 | 0.012474 | 0.011536 | 0.011430 |
| 0.011429 | 0.011429 | 0.011900 | 0.011883 | 0.011975 | 0.011765 | 0.011397 |
| S734     | 0.011866 | 0.011866 | 0.012203 | 0.011967 | 0.011967 | 0.012034 |
| 0.011875 | 0.011807 | 0.011967 | 0.011463 | 0.011530 | 0.011498 | 0.011463 |
| 0.011496 | 0.011664 | 0.011463 | 0.011496 | 0.011496 | 0.011530 | 0.011496 |
| 0.011463 | 0.011496 | 0.011597 | 0.011463 | 0.011497 | 0.011496 | 0.011841 |
| 0.011732 | 0.011496 | 0.011396 | 0.011631 | 0.011564 | 0.011530 | 0.011564 |
| 0.011530 | 0.011631 | 0.011530 | 0.011530 | 0.011564 | 0.011530 | 0.011698 |
| 0.011463 | 0.011530 | 0.011564 | 0.011496 | 0.011597 | 0.011631 | 0.011564 |
| 0.011530 | 0.011698 | 0.011598 | 0.011866 | 0.011530 | 0.011799 | 0.011530 |
| 0.011496 | 0.011597 | 0.011664 | 0.011799 | 0.011900 | 0.011597 | 0.011698 |
| 0.011564 | 0.011631 | 0.011530 | 0.011765 | 0.012001 | 0.011530 | 0.011597 |
| 0.011496 | 0.011597 | 0.011564 | 0.011631 | 0.011564 | 0.011564 | 0.011564 |
| 0.011463 | 0.011496 | 0.011463 | 0.011564 | 0.011530 | 0.011565 | 0.011631 |
| 0.011564 | 0.011530 | 0.011597 | 0.011496 | 0.011631 | 0.011463 | 0.011530 |
| 0.011698 | 0.011631 | 0.011866 | 0.011698 | 0.011530 | 0.011765 | 0.011530 |
| 0.011690 | 0.011919 | 0.011739 | 0.011451 | 0.011433 | 0.011502 | 0.011651 |
| 0.012268 | 0.011670 | 0.011431 | 0.011765 | 0.011765 | 0.011564 | 0.011664 |
| 0.011597 | 0.011564 | 0.011631 | 0.011530 | 0.011631 | 0.011564 | 0.011564 |
| 0.011530 | 0.011631 | 0.011832 | 0.011698 | 0.011597 | 0.011564 | 0.011497 |
| 0.011396 | 0.011463 | 0.011530 | 0.011497 | 0.011698 | 0.011665 | 0.011597 |
| 0.011698 | 0.011765 | 0.011497 | 0.011497 | 0.011530 | 0.011530 | 0.011533 |
| 0.011601 | 0.011530 | 0.011530 | 0.011420 | 0.011494 | 0.011446 | 0.011531 |
| 0.011534 | 0.011473 | 0.011503 | 0.011509 | 0.011434 | 0.011471 | 0.011499 |
| 0.011780 | 0.011543 | 0.011577 | 0.011464 | 0.011475 | 0.011598 | 0.011564 |
| 0.011632 | 0.011566 | 0.011564 | 0.011664 | 0.011597 | 0.011967 | 0.011765 |
| 0.011799 | 0.011665 | 0.011530 | 0.011631 | 0.011429 | 0.011664 | 0.011463 |
| 0.011530 | 0.011530 | 0.011497 | 0.011463 | 0.011496 | 0.011463 | 0.011564 |
| 0.011530 | 0.011631 | 0.011564 | 0.011463 | 0.011566 | 0.011665 | 0.011668 |
| 0.011665 | 0.011564 | 0.011463 | 0.011397 | 0.011530 | 0.011463 | 0.011396 |
| 0.011502 | 0.011665 | 0.011463 | 0.011665 | 0.011429 | 0.011530 | 0.011497 |
| 0.011597 | 0.011497 | 0.011530 | 0.011497 | 0.011530 | 0.011396 | 0.011530 |
| 0.011564 | 0.011497 | 0.011564 | 0.011497 | 0.011530 | 0.011497 | 0.011396 |
| 0.011900 | 0.011832 | 0.011900 | 0.011633 | 0.011900 | 0.011530 | 0.011497 |

|          |          |          |          |          |          |          |
|----------|----------|----------|----------|----------|----------|----------|
| 0.011533 | 0.011788 | 0.011655 | 0.011403 | 0.011874 | 0.011401 | 0.011532 |
| 0.011909 | 0.011808 | 0.011698 | 0.011900 | 0.011607 | 0.011765 | 0.011732 |
| 0.011664 | 0.011832 | 0.011700 | 0.011513 | 0.011563 | 0.011564 | 0.011635 |
| 0.011463 | 0.011634 | 0.011770 | 0.011838 | 0.011765 | 0.011833 | 0.011941 |
| 0.011669 | 0.011841 | 0.011703 | 0.011703 | 0.011969 | 0.011429 | 0.011633 |
| 0.011597 | 0.011530 | 0.011429 | 0.011429 | 0.011496 | 0.011496 | 0.011564 |
| 0.011496 | 0.011564 | 0.011463 | 0.011564 | 0.011496 | 0.011496 | 0.011564 |
| 0.011496 | 0.011933 | 0.011832 | 0.011866 | 0.011396 | 0.011496 | 0.011530 |
| 0.011530 | 0.011496 | 0.011564 | 0.011597 | 0.011463 | 0.011463 | 0.011463 |
| 0.012000 | 0.011631 | 0.011631 | 0.011429 | 0.011530 | 0.011698 | 0.011463 |
| 0.011463 | 0.011530 | 0.011496 | 0.011664 | 0.011463 | 0.011597 | 0.011732 |
| 0.011664 | 0.011496 | 0.011496 | 0.011429 | 0.011429 | 0.011597 | 0.011530 |
| 0.011429 | 0.011530 | 0.011396 | 0.011429 | 0.011564 | 0.011698 | 0.011463 |
| 0.011430 | 0.011564 | 0.011497 | 0.011396 | 0.011732 | 0.011396 | 0.011564 |
| 0.011642 | 0.011463 | 0.011765 | 0.011598 | 0.011631 | 0.011496 | 0.011597 |
| 0.011463 | 0.011799 | 0.011396 | 0.011664 | 0.011463 | 0.011463 | 0.011396 |
| 0.011631 | 0.011799 | 0.011530 | 0.011597 | 0.011429 | 0.011832 | 0.011463 |
| 0.011463 | 0.011463 | 0.011496 | 0.011597 | 0.011496 | 0.011597 | 0.011664 |
| 0.011664 | 0.011631 | 0.011530 | 0.011631 | 0.011597 | 0.011463 | 0.011429 |
| 0.011463 | 0.011463 | 0.011530 | 0.011463 | 0.011429 | 0.011597 | 0.011463 |
| 0.011496 | 0.011496 | 0.011631 | 0.011664 | 0.011564 | 0.011496 | 0.011497 |
| 0.011564 | 0.011496 | 0.011597 | 0.011463 | 0.011597 | 0.011698 | 0.012000 |
| 0.011496 | 0.011900 | 0.011474 | 0.017936 | 0.011387 | 0.011672 | 0.011827 |
| 0.011787 | 0.011834 | 0.011479 | 0.011466 | 0.011884 | 0.011854 | 0.011485 |
| 0.011677 | 0.011793 | 0.011411 | 0.011395 | 0.011372 | 0.011504 | 0.011490 |
| 0.011670 | 0.011656 | 0.011579 | 0.011391 | 0.011631 | 0.011664 | 0.011669 |
| 0.011541 | 0.011631 | 0.011631 | 0.011597 | 0.011564 | 0.011564 | 0.011530 |
| 0.011564 | 0.011496 | 0.011530 | 0.011564 | 0.011530 | 0.011463 | 0.011497 |
| 0.011497 | 0.011564 | 0.011463 | 0.011564 | 0.011597 | 0.011564 | 0.011530 |
| 0.011564 | 0.011530 | 0.011866 | 0.011866 | 0.011597 | 0.011632 | 0.011665 |
| 0.011429 | 0.011429 | 0.011463 | 0.011564 | 0.011429 | 0.011665 | 0.011665 |
| 0.011698 | 0.011698 | 0.011631 | 0.011732 | 0.011900 | 0.011734 | 0.011564 |
| 0.011564 | 0.011631 | 0.011665 | 0.011497 | 0.011564 | 0.011530 | 0.011564 |
| 0.011631 | 0.011631 | 0.011665 | 0.011631 | 0.011532 | 0.011732 | 0.011698 |
| 0.011568 | 0.011463 | 0.011497 | 0.011665 | 0.011564 | 0.011698 | 0.011127 |
| 0.011900 | 0.011607 | 0.011765 | 0.011732 | 0.011664 | 0.011832 | 0.011463 |
| 0.011633 | 0.011531 | 0.011497 | 0.011497 | 0.011564 | 0.011463 | 0.011564 |
| 0.011597 | 0.011564 | 0.011530 | 0.011564 | 0.011530 | 0.011866 | 0.011866 |
| 0.011597 | 0.011632 | 0.011698 | 0.011631 | 0.012271 | 0.011667 | 0.011623 |
| 0.011693 | 0.011650 | 0.011693 | 0.011649 | 0.011760 | 0.011681 | 0.011646 |
| 0.012228 | 0.011545 | 0.011677 | 0.011614 | 0.011887 | 0.011468 | 0.011843 |
| 0.012250 | 0.011625 | 0.011737 | 0.011765 | 0.011732 | 0.011732 | 0.011702 |
| 0.011429 | 0.011597 | 0.011732 | 0.011698 | 0.011702 | 0.011698 | 0.011666 |
| 0.011530 | 0.011463 | 0.011496 | 0.011530 | 0.011429 | 0.011496 | 0.011396 |
| 0.011530 | 0.011564 | 0.011463 | 0.011429 | 0.011530 | 0.011463 | 0.011496 |
| 0.011496 | 0.011429 | 0.011496 | 0.011530 | 0.011429 | 0.011631 | 0.011396 |
| 0.011564 | 0.011631 | 0.011564 | 0.011564 | 0.011496 | 0.011900 | 0.011530 |
| 0.011582 | 0.011497 | 0.011732 | 0.011739 | 0.011597 | 0.011597 | 0.011597 |
| 0.011597 | 0.011530 | 0.011496 | 0.011530 | 0.011631 | 0.011631 | 0.011564 |
| 0.011496 | 0.011698 | 0.011866 | 0.011597 | 0.011799 | 0.011799 | 0.011664 |
| 0.011496 | 0.011564 | 0.011597 | 0.012001 | 0.011564 | 0.011597 | 0.011564 |
| 0.011597 | 0.011530 | 0.011530 | 0.011833 | 0.011765 | 0.011799 | 0.011530 |
| 0.011631 | 0.011698 | 0.011564 | 0.011631 | 0.011597 | 0.011463 | 0.011799 |
| 0.011564 | 0.011530 | 0.011530 | 0.011698 | 0.011530 | 0.011631 | 0.011866 |
| 0.011564 | 0.011943 | 0.011933 | 0.011751 | 0.011342 | 0.011638 | 0.011473 |
| 0.011445 | 0.011956 | 0.011446 | 0.011685 | 0.011499 | 0.011671 | 0.011591 |
| 0.011621 | 0.011258 | 0.011561 | 0.011324 | 0.011384 | 0.011529 | 0.011222 |
| 0.011588 | 0.011532 | 0.011588 | 0.011518 | 0.011566 | 0.011698 | 0.011765 |
| 0.011765 | 0.011632 | 0.011736 | 0.011738 | 0.011874 | 0.011908 | 0.011564 |
| 0.011799 | 0.011665 | 0.011530 | 0.011631 | 0.011429 | 0.011664 | 0.011463 |

|          |          |          |          |          |          |          |
|----------|----------|----------|----------|----------|----------|----------|
| 0.011530 | 0.011530 | 0.011497 | 0.011463 | 0.011496 | 0.011463 | 0.011564 |
| 0.011549 | 0.011550 | 0.011540 | 0.011574 | 0.011710 | 0.011675 | 0.011675 |
| 0.011673 | 0.011598 | 0.011429 | 0.011420 | 0.011534 | 0.011704 | 0.011705 |
| 0.011497 | 0.011568 | 0.011801 | 0.011770 | 0.011699 | 0.011733 | 0.011664 |
| 0.011597 | 0.011664 | 0.011664 | 0.011564 | 0.012135 | 0.011732 | 0.011799 |
| 0.011833 | 0.011879 | 0.011538 | 0.011614 | 0.011497 | 0.011698 | 0.011664 |
| 0.011699 | 0.011732 | 0.011732 | 0.011732 | 0.011886 | 0.011866 | 0.011511 |
| 0.011398 | 0.011406 | 0.011503 | 0.011468 | 0.011573 | 0.011396 | 0.011740 |
| 0.011540 | 0.011674 | 0.011441 | 0.011585 | 0.011531 | 0.011608 | 0.011497 |
| 0.011396 | 0.011463 | 0.011530 | 0.011497 | 0.011698 | 0.011665 | 0.011597 |
| 0.011698 | 0.011765 | 0.011497 | 0.011497 | 0.011530 | 0.011530 | 0.011533 |
| 0.011601 | 0.011530 | 0.011530 | 0.011566 | 0.011698 | 0.011765 | 0.011765 |
| 0.011632 | 0.011736 | 0.011738 | 0.011874 | 0.011908 | 0.011564 | 0.000000 |
| 0.011664 | 0.011664 | 0.011500 | 0.011652 | 0.011616 | 0.011639 | 0.011481 |
| 0.011680 | 0.011470 | 0.011314 | 0.011570 | 0.011463 | 0.011665 | 0.011530 |
| 0.011631 | 0.011564 | 0.011463 | 0.011566 | 0.011665 | 0.011668 | 0.011564 |
| 0.011463 | 0.011397 | 0.011530 | 0.011463 | 0.011396 | 0.011502 | 0.011665 |
| 0.011564 | 0.011496 | 0.011530 | 0.011564 | 0.011530 | 0.011463 | 0.011665 |
| 0.011530 | 0.011564 | 0.011295 | 0.011496 | 0.011564 | 0.011799 | 0.011463 |
| 0.011496 | 0.011900 | 0.011496 | 0.011530 | 0.011496 | 0.011866 | 0.011403 |
| 0.011791 | 0.011485 | 0.011461 | 0.011664 | 0.011752 | 0.011670 | 0.011395 |
| 0.011375 | 0.011664 | 0.011765 | 0.011875 | 0.011734 | 0.011838 | 0.012002 |
| 0.011901 | 0.011940 | 0.011900 | 0.012119 | 0.011866 | 0.012741 | 0.011902 |
| 0.012641 | 0.012409 | 0.012543 | 0.012815 | 0.011866 | 0.011564 | 0.011866 |
| 0.012305 | 0.012207 | 0.011832 | 0.011732 | 0.011800 | 0.011800 | 0.011771 |
| 0.011664 | 0.011637 | 0.011732 | 0.011699 | 0.012069 | 0.012068 | 0.012137 |
| 0.012036 | 0.012136 | 0.012240 | 0.011974 | 0.012306 | 0.012279 | 0.012373 |
| 0.012374 | 0.012407 | 0.012323 | 0.012374 | 0.012375 | 0.011597 | 0.011900 |
| 0.011968 | 0.012472 | 0.011942 | 0.012203 | 0.012676 | 0.011739 | 0.011632 |
| 0.011597 | 0.011597 | 0.012068 | 0.012130 | 0.012221 | 0.011933 | 0.011599 |
| S735     | 0.011262 | 0.011262 | 0.012135 | 0.011900 | 0.011900 | 0.011967 |
| 0.011807 | 0.011739 | 0.011967 | 0.011396 | 0.011463 | 0.011430 | 0.011396 |
| 0.011429 | 0.011597 | 0.011396 | 0.011429 | 0.011496 | 0.011463 | 0.011429 |
| 0.011396 | 0.011429 | 0.011530 | 0.011396 | 0.011430 | 0.011429 | 0.011773 |
| 0.011664 | 0.011429 | 0.011329 | 0.011564 | 0.011496 | 0.011463 | 0.011497 |
| 0.011463 | 0.011564 | 0.011463 | 0.011463 | 0.011496 | 0.011463 | 0.011631 |
| 0.011396 | 0.011463 | 0.011497 | 0.011429 | 0.011530 | 0.011564 | 0.011497 |
| 0.011463 | 0.011631 | 0.011530 | 0.011799 | 0.011463 | 0.011732 | 0.011463 |
| 0.011429 | 0.011530 | 0.011597 | 0.011732 | 0.011832 | 0.011530 | 0.011631 |
| 0.011496 | 0.011564 | 0.011463 | 0.011698 | 0.011933 | 0.011463 | 0.011530 |
| 0.011429 | 0.011530 | 0.011497 | 0.011564 | 0.011496 | 0.011497 | 0.011497 |
| 0.011396 | 0.011429 | 0.011396 | 0.011497 | 0.011463 | 0.011498 | 0.011564 |
| 0.011497 | 0.011463 | 0.011530 | 0.011429 | 0.011564 | 0.011396 | 0.011463 |
| 0.011631 | 0.011564 | 0.011799 | 0.011631 | 0.011463 | 0.011698 | 0.011463 |
| 0.011616 | 0.011845 | 0.011664 | 0.011373 | 0.011396 | 0.011465 | 0.011572 |
| 0.012231 | 0.011620 | 0.011348 | 0.011698 | 0.011698 | 0.011496 | 0.011597 |
| 0.011530 | 0.011429 | 0.011362 | 0.011463 | 0.011564 | 0.011497 | 0.011362 |
| 0.011396 | 0.011564 | 0.011698 | 0.011631 | 0.011530 | 0.011497 | 0.011430 |
| 0.011396 | 0.011396 | 0.011463 | 0.011430 | 0.011631 | 0.011598 | 0.011530 |
| 0.011631 | 0.011698 | 0.011430 | 0.011430 | 0.011463 | 0.011463 | 0.011466 |
| 0.011534 | 0.011463 | 0.011463 | 0.011348 | 0.011422 | 0.011376 | 0.011464 |
| 0.011467 | 0.011404 | 0.011466 | 0.011440 | 0.011366 | 0.011403 | 0.011432 |
| 0.011708 | 0.011474 | 0.011508 | 0.011396 | 0.011406 | 0.011531 | 0.011497 |
| 0.011565 | 0.011498 | 0.011497 | 0.011463 | 0.011262 | 0.011900 | 0.011698 |
| 0.011732 | 0.011597 | 0.011463 | 0.011564 | 0.011362 | 0.011597 | 0.011396 |
| 0.011463 | 0.011463 | 0.011430 | 0.011396 | 0.011429 | 0.011396 | 0.011497 |
| 0.011463 | 0.011564 | 0.011497 | 0.011396 | 0.011498 | 0.011598 | 0.011601 |
| 0.011598 | 0.011497 | 0.011396 | 0.011330 | 0.011463 | 0.011396 | 0.011329 |
| 0.011434 | 0.011598 | 0.011396 | 0.011598 | 0.011362 | 0.011463 | 0.011430 |
| 0.011530 | 0.011430 | 0.011463 | 0.011430 | 0.011463 | 0.011329 | 0.011463 |

|          |          |          |          |          |          |          |
|----------|----------|----------|----------|----------|----------|----------|
| 0.011497 | 0.011430 | 0.011497 | 0.011430 | 0.011329 | 0.011497 | 0.011732 |
| 0.011833 | 0.011765 | 0.011833 | 0.011600 | 0.011833 | 0.011329 | 0.011430 |
| 0.011466 | 0.011788 | 0.011518 | 0.011369 | 0.011841 | 0.011333 | 0.011414 |
| 0.011841 | 0.011740 | 0.011597 | 0.011765 | 0.011333 | 0.011698 | 0.011665 |
| 0.011597 | 0.011765 | 0.011451 | 0.011349 | 0.011437 | 0.011497 | 0.011500 |
| 0.011665 | 0.011431 | 0.011669 | 0.011771 | 0.011564 | 0.011698 | 0.011738 |
| 0.011466 | 0.011739 | 0.011466 | 0.011635 | 0.011834 | 0.011362 | 0.011566 |
| 0.011530 | 0.011463 | 0.011362 | 0.011362 | 0.011429 | 0.011429 | 0.011496 |
| 0.011429 | 0.011497 | 0.011396 | 0.011496 | 0.011429 | 0.011429 | 0.011496 |
| 0.011429 | 0.011866 | 0.011765 | 0.011799 | 0.011329 | 0.011429 | 0.011463 |
| 0.011463 | 0.011429 | 0.011497 | 0.011530 | 0.011396 | 0.011396 | 0.011396 |
| 0.011933 | 0.011564 | 0.011564 | 0.011362 | 0.011463 | 0.011631 | 0.011396 |
| 0.011396 | 0.011463 | 0.011429 | 0.011597 | 0.011396 | 0.011530 | 0.011664 |
| 0.011597 | 0.011429 | 0.011429 | 0.011362 | 0.011362 | 0.011530 | 0.011463 |
| 0.011362 | 0.011463 | 0.011329 | 0.011362 | 0.011497 | 0.011631 | 0.011396 |
| 0.011363 | 0.011497 | 0.011430 | 0.011329 | 0.011664 | 0.011329 | 0.011497 |
| 0.011437 | 0.011396 | 0.011698 | 0.011530 | 0.011564 | 0.011429 | 0.011530 |
| 0.011396 | 0.011732 | 0.011329 | 0.011597 | 0.011396 | 0.011396 | 0.011329 |
| 0.011564 | 0.011766 | 0.011463 | 0.011530 | 0.011362 | 0.011765 | 0.011396 |
| 0.011396 | 0.011396 | 0.011429 | 0.011530 | 0.011429 | 0.011530 | 0.011597 |
| 0.011597 | 0.011564 | 0.011463 | 0.011564 | 0.011530 | 0.011396 | 0.011362 |
| 0.011396 | 0.011396 | 0.011463 | 0.011396 | 0.011362 | 0.011530 | 0.011396 |
| 0.011429 | 0.011429 | 0.011564 | 0.011597 | 0.011496 | 0.011429 | 0.011430 |
| 0.011497 | 0.011429 | 0.011530 | 0.011396 | 0.011530 | 0.011631 | 0.011933 |
| 0.011429 | 0.011832 | 0.011440 | 0.017975 | 0.011387 | 0.011611 | 0.011793 |
| 0.011752 | 0.011799 | 0.011532 | 0.011466 | 0.011939 | 0.011820 | 0.011546 |
| 0.011629 | 0.011732 | 0.011333 | 0.011437 | 0.011451 | 0.011505 | 0.011447 |
| 0.011623 | 0.011619 | 0.011616 | 0.011325 | 0.011564 | 0.000000 | 0.011534 |
| 0.011438 | 0.011564 | 0.011564 | 0.011530 | 0.011497 | 0.011497 | 0.011463 |
| 0.011497 | 0.011429 | 0.011463 | 0.011497 | 0.011463 | 0.011396 | 0.011295 |
| 0.011295 | 0.011497 | 0.011396 | 0.011497 | 0.011530 | 0.011564 | 0.011329 |
| 0.011496 | 0.011463 | 0.011799 | 0.011799 | 0.011530 | 0.011565 | 0.011598 |
| 0.011362 | 0.011362 | 0.011396 | 0.011497 | 0.011362 | 0.011598 | 0.011598 |
| 0.011631 | 0.011597 | 0.011564 | 0.011665 | 0.011833 | 0.011666 | 0.011497 |
| 0.011497 | 0.011564 | 0.011597 | 0.011430 | 0.011497 | 0.011463 | 0.011497 |
| 0.011564 | 0.011564 | 0.011597 | 0.011564 | 0.011464 | 0.011665 | 0.011631 |
| 0.011500 | 0.011396 | 0.011497 | 0.011598 | 0.011497 | 0.011631 | 0.011664 |
| 0.011765 | 0.011333 | 0.011698 | 0.011665 | 0.011597 | 0.011765 | 0.011396 |
| 0.011566 | 0.011464 | 0.011295 | 0.011295 | 0.011497 | 0.011396 | 0.011497 |
| 0.011530 | 0.011564 | 0.011329 | 0.011496 | 0.011463 | 0.011799 | 0.011799 |
| 0.011530 | 0.011565 | 0.011362 | 0.011295 | 0.012170 | 0.011560 | 0.011377 |
| 0.011587 | 0.011546 | 0.011622 | 0.011510 | 0.011620 | 0.011509 | 0.011577 |
| 0.012056 | 0.011302 | 0.011437 | 0.011406 | 0.011714 | 0.011638 | 0.011741 |
| 0.012080 | 0.011550 | 0.011736 | 0.011799 | 0.011664 | 0.011665 | 0.011702 |
| 0.011362 | 0.011530 | 0.011664 | 0.011631 | 0.011635 | 0.011631 | 0.011599 |
| 0.011463 | 0.011396 | 0.011429 | 0.011463 | 0.011362 | 0.011429 | 0.011329 |
| 0.011463 | 0.011496 | 0.011396 | 0.011362 | 0.011463 | 0.011396 | 0.011429 |
| 0.011429 | 0.011362 | 0.011429 | 0.011463 | 0.011362 | 0.011564 | 0.011597 |
| 0.011497 | 0.011564 | 0.011496 | 0.011497 | 0.011429 | 0.011832 | 0.011463 |
| 0.011478 | 0.011429 | 0.011665 | 0.011671 | 0.011530 | 0.011530 | 0.011530 |
| 0.011530 | 0.011463 | 0.011429 | 0.011463 | 0.011564 | 0.011564 | 0.011496 |
| 0.011496 | 0.011631 | 0.011799 | 0.011530 | 0.011732 | 0.011732 | 0.011597 |
| 0.011429 | 0.011497 | 0.011530 | 0.011933 | 0.011497 | 0.011530 | 0.011497 |
| 0.011530 | 0.011463 | 0.011463 | 0.011765 | 0.011698 | 0.011732 | 0.011463 |
| 0.011564 | 0.011631 | 0.011496 | 0.011564 | 0.011530 | 0.011396 | 0.011732 |
| 0.011496 | 0.011463 | 0.011463 | 0.011631 | 0.011463 | 0.011564 | 0.011799 |
| 0.011496 | 0.011875 | 0.011866 | 0.011670 | 0.011399 | 0.011570 | 0.011370 |
| 0.011500 | 0.011917 | 0.011411 | 0.011641 | 0.011402 | 0.011518 | 0.011538 |
| 0.011672 | 0.011389 | 0.011506 | 0.011390 | 0.011384 | 0.011596 | 0.011506 |
| 0.011550 | 0.011454 | 0.011553 | 0.011483 | 0.011498 | 0.011631 | 0.011698 |

|          |          |          |          |          |          |          |
|----------|----------|----------|----------|----------|----------|----------|
| 0.011698 | 0.011565 | 0.011669 | 0.011670 | 0.011806 | 0.011838 | 0.011497 |
| 0.011732 | 0.011597 | 0.011463 | 0.011564 | 0.011362 | 0.011597 | 0.011396 |
| 0.011463 | 0.011463 | 0.011430 | 0.011396 | 0.011429 | 0.011396 | 0.011497 |
| 0.011479 | 0.011480 | 0.011471 | 0.011505 | 0.011642 | 0.011607 | 0.011606 |
| 0.011605 | 0.011531 | 0.011319 | 0.011348 | 0.011467 | 0.011636 | 0.011637 |
| 0.011430 | 0.011501 | 0.011734 | 0.011702 | 0.011632 | 0.011666 | 0.011329 |
| 0.011530 | 0.011530 | 0.011530 | 0.011497 | 0.012034 | 0.011664 | 0.011732 |
| 0.011766 | 0.011844 | 0.011469 | 0.011545 | 0.011429 | 0.011497 | 0.000000 |
| 0.011632 | 0.011530 | 0.011664 | 0.011664 | 0.011768 | 0.011665 | 0.011442 |
| 0.011331 | 0.011303 | 0.011401 | 0.011400 | 0.011504 | 0.011321 | 0.011672 |
| 0.011472 | 0.011543 | 0.011298 | 0.011397 | 0.011464 | 0.011539 | 0.011430 |
| 0.011396 | 0.011396 | 0.011463 | 0.011430 | 0.011631 | 0.011598 | 0.011530 |
| 0.011631 | 0.011698 | 0.011430 | 0.011430 | 0.011463 | 0.011463 | 0.011466 |
| 0.011534 | 0.011463 | 0.011463 | 0.011498 | 0.011631 | 0.011698 | 0.011698 |
| 0.011565 | 0.011669 | 0.011670 | 0.011806 | 0.011838 | 0.011497 | 0.011664 |
| 0.000000 | 0.000000 | 0.011432 | 0.011617 | 0.011547 | 0.011571 | 0.011446 |
| 0.011611 | 0.011790 | 0.011653 | 0.011502 | 0.011396 | 0.011598 | 0.011463 |
| 0.011564 | 0.011497 | 0.011396 | 0.011498 | 0.011598 | 0.011601 | 0.011497 |
| 0.011396 | 0.011330 | 0.011463 | 0.011396 | 0.011329 | 0.011434 | 0.011598 |
| 0.011497 | 0.011429 | 0.011463 | 0.011497 | 0.011463 | 0.011396 | 0.011598 |
| 0.011463 | 0.011497 | 0.011497 | 0.011429 | 0.011496 | 0.011732 | 0.011396 |
| 0.011429 | 0.011832 | 0.011429 | 0.011463 | 0.011429 | 0.011799 | 0.011403 |
| 0.011903 | 0.011358 | 0.011411 | 0.011624 | 0.011671 | 0.011635 | 0.011353 |
| 0.011375 | 0.011597 | 0.011698 | 0.011807 | 0.011666 | 0.011805 | 0.011935 |
| 0.011834 | 0.011872 | 0.011832 | 0.012086 | 0.011799 | 0.012539 | 0.011835 |
| 0.012574 | 0.012207 | 0.012341 | 0.012748 | 0.011799 | 0.011497 | 0.011799 |
| 0.012205 | 0.012174 | 0.011765 | 0.011665 | 0.011733 | 0.011733 | 0.011703 |
| 0.011597 | 0.011603 | 0.011664 | 0.011632 | 0.012002 | 0.012068 | 0.012070 |
| 0.011969 | 0.012069 | 0.012173 | 0.011940 | 0.012205 | 0.012212 | 0.012272 |
| 0.012273 | 0.012307 | 0.012255 | 0.012273 | 0.012274 | 0.011262 | 0.011800 |
| 0.011901 | 0.012404 | 0.011874 | 0.012135 | 0.012609 | 0.011672 | 0.011564 |
| 0.011530 | 0.011530 | 0.012001 | 0.011965 | 0.012151 | 0.011866 | 0.011532 |
| S736     | 0.011262 | 0.011262 | 0.012135 | 0.011900 | 0.011900 | 0.011967 |
| 0.011807 | 0.011739 | 0.011967 | 0.011396 | 0.011463 | 0.011430 | 0.011396 |
| 0.011429 | 0.011597 | 0.011396 | 0.011429 | 0.011496 | 0.011463 | 0.011429 |
| 0.011396 | 0.011429 | 0.011530 | 0.011396 | 0.011430 | 0.011429 | 0.011773 |
| 0.011664 | 0.011429 | 0.011329 | 0.011564 | 0.011496 | 0.011463 | 0.011497 |
| 0.011463 | 0.011564 | 0.011463 | 0.011463 | 0.011496 | 0.011463 | 0.011631 |
| 0.011396 | 0.011463 | 0.011497 | 0.011429 | 0.011530 | 0.011564 | 0.011497 |
| 0.011463 | 0.011631 | 0.011530 | 0.011799 | 0.011463 | 0.011732 | 0.011463 |
| 0.011429 | 0.011530 | 0.011597 | 0.011732 | 0.011832 | 0.011530 | 0.011631 |
| 0.011496 | 0.011564 | 0.011463 | 0.011698 | 0.011933 | 0.011463 | 0.011530 |
| 0.011429 | 0.011530 | 0.011497 | 0.011564 | 0.011496 | 0.011497 | 0.011497 |
| 0.011396 | 0.011429 | 0.011396 | 0.011497 | 0.011463 | 0.011498 | 0.011564 |
| 0.011497 | 0.011463 | 0.011530 | 0.011429 | 0.011564 | 0.011396 | 0.011463 |
| 0.011631 | 0.011564 | 0.011799 | 0.011631 | 0.011463 | 0.011698 | 0.011463 |
| 0.011616 | 0.011845 | 0.011664 | 0.011373 | 0.011396 | 0.011465 | 0.011572 |
| 0.012231 | 0.011620 | 0.011348 | 0.011698 | 0.011698 | 0.011496 | 0.011597 |
| 0.011530 | 0.011429 | 0.011362 | 0.011463 | 0.011564 | 0.011497 | 0.011362 |
| 0.011396 | 0.011564 | 0.011698 | 0.011631 | 0.011530 | 0.011497 | 0.011430 |
| 0.011396 | 0.011396 | 0.011463 | 0.011430 | 0.011631 | 0.011598 | 0.011530 |
| 0.011631 | 0.011698 | 0.011430 | 0.011430 | 0.011463 | 0.011463 | 0.011466 |
| 0.011534 | 0.011463 | 0.011463 | 0.011348 | 0.011422 | 0.011376 | 0.011464 |
| 0.011467 | 0.011404 | 0.011466 | 0.011440 | 0.011366 | 0.011403 | 0.011432 |
| 0.011708 | 0.011474 | 0.011508 | 0.011396 | 0.011406 | 0.011531 | 0.011497 |
| 0.011565 | 0.011498 | 0.011497 | 0.011463 | 0.011262 | 0.011900 | 0.011698 |
| 0.011732 | 0.011597 | 0.011463 | 0.011564 | 0.011362 | 0.011597 | 0.011396 |
| 0.011463 | 0.011463 | 0.011430 | 0.011396 | 0.011429 | 0.011396 | 0.011497 |
| 0.011463 | 0.011564 | 0.011497 | 0.011396 | 0.011498 | 0.011598 | 0.011601 |
| 0.011598 | 0.011497 | 0.011396 | 0.011330 | 0.011463 | 0.011396 | 0.011329 |

|          |          |          |          |          |          |          |
|----------|----------|----------|----------|----------|----------|----------|
| 0.011434 | 0.011598 | 0.011396 | 0.011598 | 0.011362 | 0.011463 | 0.011430 |
| 0.011530 | 0.011430 | 0.011463 | 0.011430 | 0.011463 | 0.011329 | 0.011463 |
| 0.011497 | 0.011430 | 0.011497 | 0.011430 | 0.011329 | 0.011497 | 0.011732 |
| 0.011833 | 0.011765 | 0.011833 | 0.011600 | 0.011833 | 0.011329 | 0.011430 |
| 0.011466 | 0.011788 | 0.011518 | 0.011369 | 0.011841 | 0.011333 | 0.011414 |
| 0.011841 | 0.011740 | 0.011597 | 0.011765 | 0.011333 | 0.011698 | 0.011665 |
| 0.011597 | 0.011765 | 0.011451 | 0.011349 | 0.011437 | 0.011497 | 0.011500 |
| 0.011665 | 0.011431 | 0.011669 | 0.011771 | 0.011564 | 0.011698 | 0.011738 |
| 0.011466 | 0.011739 | 0.011466 | 0.011635 | 0.011834 | 0.011362 | 0.011566 |
| 0.011530 | 0.011463 | 0.011362 | 0.011362 | 0.011429 | 0.011429 | 0.011496 |
| 0.011429 | 0.011497 | 0.011396 | 0.011496 | 0.011429 | 0.011429 | 0.011496 |
| 0.011429 | 0.011866 | 0.011765 | 0.011799 | 0.011329 | 0.011429 | 0.011463 |
| 0.011463 | 0.011429 | 0.011497 | 0.011530 | 0.011396 | 0.011396 | 0.011396 |
| 0.011933 | 0.011564 | 0.011564 | 0.011362 | 0.011463 | 0.011631 | 0.011396 |
| 0.011396 | 0.011463 | 0.011429 | 0.011597 | 0.011396 | 0.011530 | 0.011664 |
| 0.011597 | 0.011429 | 0.011429 | 0.011362 | 0.011362 | 0.011530 | 0.011463 |
| 0.011362 | 0.011463 | 0.011329 | 0.011362 | 0.011497 | 0.011631 | 0.011396 |
| 0.011363 | 0.011497 | 0.011430 | 0.011329 | 0.011664 | 0.011329 | 0.011497 |
| 0.011437 | 0.011396 | 0.011698 | 0.011530 | 0.011564 | 0.011429 | 0.011530 |
| 0.011396 | 0.011732 | 0.011329 | 0.011597 | 0.011396 | 0.011396 | 0.011329 |
| 0.011564 | 0.011766 | 0.011463 | 0.011530 | 0.011362 | 0.011765 | 0.011396 |
| 0.011396 | 0.011396 | 0.011429 | 0.011530 | 0.011429 | 0.011530 | 0.011597 |
| 0.011597 | 0.011564 | 0.011463 | 0.011564 | 0.011530 | 0.011396 | 0.011362 |
| 0.011396 | 0.011396 | 0.011463 | 0.011396 | 0.011362 | 0.011530 | 0.011396 |
| 0.011429 | 0.011429 | 0.011564 | 0.011597 | 0.011496 | 0.011429 | 0.011430 |
| 0.011497 | 0.011429 | 0.011530 | 0.011396 | 0.011530 | 0.011631 | 0.011933 |
| 0.011429 | 0.011832 | 0.011440 | 0.017975 | 0.011387 | 0.011611 | 0.011793 |
| 0.011752 | 0.011799 | 0.011532 | 0.011466 | 0.011939 | 0.011820 | 0.011546 |
| 0.011629 | 0.011732 | 0.011333 | 0.011437 | 0.011451 | 0.011505 | 0.011447 |
| 0.011623 | 0.011619 | 0.011616 | 0.011325 | 0.011564 | 0.000000 | 0.011534 |
| 0.011438 | 0.011564 | 0.011564 | 0.011530 | 0.011497 | 0.011497 | 0.011463 |
| 0.011497 | 0.011429 | 0.011463 | 0.011497 | 0.011463 | 0.011396 | 0.011295 |
| 0.011295 | 0.011497 | 0.011396 | 0.011497 | 0.011530 | 0.011564 | 0.011329 |
| 0.011496 | 0.011463 | 0.011799 | 0.011799 | 0.011530 | 0.011565 | 0.011598 |
| 0.011362 | 0.011362 | 0.011396 | 0.011497 | 0.011362 | 0.011598 | 0.011598 |
| 0.011631 | 0.011597 | 0.011564 | 0.011665 | 0.011833 | 0.011666 | 0.011497 |
| 0.011497 | 0.011564 | 0.011597 | 0.011430 | 0.011497 | 0.011463 | 0.011497 |
| 0.011564 | 0.011564 | 0.011597 | 0.011564 | 0.011464 | 0.011665 | 0.011631 |
| 0.011500 | 0.011396 | 0.011497 | 0.011598 | 0.011497 | 0.011631 | 0.011664 |
| 0.011765 | 0.011333 | 0.011698 | 0.011665 | 0.011597 | 0.011765 | 0.011396 |
| 0.011566 | 0.011464 | 0.011295 | 0.011295 | 0.011497 | 0.011396 | 0.011497 |
| 0.011530 | 0.011564 | 0.011329 | 0.011496 | 0.011463 | 0.011799 | 0.011799 |
| 0.011530 | 0.011565 | 0.011362 | 0.011295 | 0.012170 | 0.011560 | 0.011377 |
| 0.011587 | 0.011546 | 0.011622 | 0.011510 | 0.011620 | 0.011509 | 0.011577 |
| 0.012056 | 0.011302 | 0.011437 | 0.011406 | 0.011714 | 0.011638 | 0.011741 |
| 0.012080 | 0.011550 | 0.011736 | 0.011799 | 0.011664 | 0.011665 | 0.011702 |
| 0.011362 | 0.011530 | 0.011664 | 0.011631 | 0.011635 | 0.011631 | 0.011599 |
| 0.011463 | 0.011396 | 0.011429 | 0.011463 | 0.011362 | 0.011429 | 0.011329 |
| 0.011463 | 0.011496 | 0.011396 | 0.011362 | 0.011463 | 0.011396 | 0.011429 |
| 0.011429 | 0.011362 | 0.011429 | 0.011463 | 0.011362 | 0.011564 | 0.011597 |
| 0.011497 | 0.011564 | 0.011496 | 0.011497 | 0.011429 | 0.011832 | 0.011463 |
| 0.011478 | 0.011429 | 0.011665 | 0.011671 | 0.011530 | 0.011530 | 0.011530 |
| 0.011530 | 0.011463 | 0.011429 | 0.011463 | 0.011564 | 0.011564 | 0.011496 |
| 0.011496 | 0.011631 | 0.011799 | 0.011530 | 0.011732 | 0.011732 | 0.011597 |
| 0.011429 | 0.011497 | 0.011530 | 0.011933 | 0.011497 | 0.011530 | 0.011497 |
| 0.011530 | 0.011463 | 0.011463 | 0.011765 | 0.011698 | 0.011732 | 0.011463 |
| 0.011564 | 0.011631 | 0.011496 | 0.011564 | 0.011530 | 0.011396 | 0.011732 |
| 0.011496 | 0.011463 | 0.011463 | 0.011631 | 0.011463 | 0.011564 | 0.011799 |
| 0.011496 | 0.011875 | 0.011866 | 0.011670 | 0.011399 | 0.011570 | 0.011370 |
| 0.011500 | 0.011917 | 0.011411 | 0.011641 | 0.011402 | 0.011518 | 0.011538 |



|          |          |          |          |          |          |          |
|----------|----------|----------|----------|----------|----------|----------|
| 0.011672 | 0.011389 | 0.011506 | 0.011390 | 0.011384 | 0.011596 | 0.011506 |
| 0.011550 | 0.011454 | 0.011553 | 0.011483 | 0.011498 | 0.011631 | 0.011698 |
| 0.011698 | 0.011565 | 0.011669 | 0.011670 | 0.011806 | 0.011838 | 0.011497 |
| 0.011732 | 0.011597 | 0.011463 | 0.011564 | 0.011362 | 0.011597 | 0.011396 |
| 0.011463 | 0.011463 | 0.011430 | 0.011396 | 0.011429 | 0.011396 | 0.011497 |
| 0.011479 | 0.011480 | 0.011471 | 0.011505 | 0.011642 | 0.011607 | 0.011606 |
| 0.011605 | 0.011531 | 0.011319 | 0.011348 | 0.011467 | 0.011636 | 0.011637 |
| 0.011430 | 0.011501 | 0.011734 | 0.011702 | 0.011632 | 0.011666 | 0.011329 |
| 0.011530 | 0.011530 | 0.011530 | 0.011497 | 0.012034 | 0.011664 | 0.011732 |
| 0.011766 | 0.011844 | 0.011469 | 0.011545 | 0.011429 | 0.011497 | 0.000000 |
| 0.011632 | 0.011530 | 0.011664 | 0.011664 | 0.011768 | 0.011665 | 0.011442 |
| 0.011331 | 0.011303 | 0.011401 | 0.011400 | 0.011504 | 0.011321 | 0.011672 |
| 0.011472 | 0.011543 | 0.011298 | 0.011397 | 0.011464 | 0.011539 | 0.011430 |
| 0.011396 | 0.011396 | 0.011463 | 0.011430 | 0.011631 | 0.011598 | 0.011530 |
| 0.011631 | 0.011698 | 0.011430 | 0.011430 | 0.011463 | 0.011463 | 0.011466 |
| 0.011534 | 0.011463 | 0.011463 | 0.011498 | 0.011631 | 0.011698 | 0.011698 |
| 0.011565 | 0.011669 | 0.011670 | 0.011806 | 0.011838 | 0.011497 | 0.011664 |
| 0.000000 | 0.000000 | 0.011432 | 0.011617 | 0.011547 | 0.011571 | 0.011446 |
| 0.011611 | 0.011790 | 0.011653 | 0.011502 | 0.011396 | 0.011598 | 0.011463 |
| 0.011564 | 0.011497 | 0.011396 | 0.011498 | 0.011598 | 0.011601 | 0.011497 |
| 0.011396 | 0.011330 | 0.011463 | 0.011396 | 0.011329 | 0.011434 | 0.011598 |
| 0.011497 | 0.011429 | 0.011463 | 0.011497 | 0.011463 | 0.011396 | 0.011598 |
| 0.011463 | 0.011497 | 0.011497 | 0.011429 | 0.011496 | 0.011732 | 0.011396 |
| 0.011429 | 0.011832 | 0.011429 | 0.011463 | 0.011429 | 0.011799 | 0.011403 |
| 0.011903 | 0.011358 | 0.011411 | 0.011624 | 0.011671 | 0.011635 | 0.011353 |
| 0.011375 | 0.011597 | 0.011698 | 0.011807 | 0.011666 | 0.011805 | 0.011935 |
| 0.011834 | 0.011872 | 0.011832 | 0.012086 | 0.011799 | 0.012539 | 0.011835 |
| 0.012574 | 0.012207 | 0.012341 | 0.012748 | 0.011799 | 0.011497 | 0.011799 |
| 0.012205 | 0.012174 | 0.011765 | 0.011665 | 0.011733 | 0.011733 | 0.011703 |
| 0.011597 | 0.011603 | 0.011664 | 0.011632 | 0.012002 | 0.012068 | 0.012070 |
| 0.011969 | 0.012069 | 0.012173 | 0.011940 | 0.012205 | 0.012212 | 0.012272 |
| 0.012273 | 0.012307 | 0.012255 | 0.012273 | 0.012274 | 0.011262 | 0.011800 |
| 0.011901 | 0.012404 | 0.011874 | 0.012135 | 0.012609 | 0.011672 | 0.011564 |
| 0.011530 | 0.011530 | 0.012001 | 0.011965 | 0.012151 | 0.011866 | 0.011532 |
| S737     | 0.011635 | 0.011635 | 0.011974 | 0.011737 | 0.011737 | 0.011804 |
| 0.011642 | 0.011539 | 0.011737 | 0.011229 | 0.011297 | 0.011264 | 0.011229 |
| 0.011263 | 0.011432 | 0.011229 | 0.011229 | 0.011331 | 0.011297 | 0.011263 |
| 0.011229 | 0.011263 | 0.011365 | 0.011229 | 0.011263 | 0.011263 | 0.011608 |
| 0.011500 | 0.011263 | 0.011162 | 0.011398 | 0.011331 | 0.011297 | 0.011331 |
| 0.011297 | 0.011398 | 0.011229 | 0.011297 | 0.011263 | 0.011297 | 0.011466 |
| 0.011229 | 0.011297 | 0.011263 | 0.011196 | 0.011364 | 0.011398 | 0.011331 |
| 0.011263 | 0.011398 | 0.011365 | 0.011635 | 0.011229 | 0.011567 | 0.011229 |
| 0.011263 | 0.011365 | 0.011365 | 0.011567 | 0.011669 | 0.011365 | 0.011466 |
| 0.011331 | 0.011398 | 0.011297 | 0.011534 | 0.011771 | 0.011297 | 0.011365 |
| 0.011263 | 0.011365 | 0.011331 | 0.011398 | 0.011331 | 0.011263 | 0.011263 |
| 0.011229 | 0.011263 | 0.011229 | 0.011331 | 0.011297 | 0.011331 | 0.011398 |
| 0.011331 | 0.011297 | 0.011364 | 0.011263 | 0.011398 | 0.011229 | 0.011297 |
| 0.011466 | 0.011398 | 0.011635 | 0.011432 | 0.011297 | 0.011534 | 0.011229 |
| 0.011434 | 0.011662 | 0.011440 | 0.011178 | 0.011173 | 0.011282 | 0.011338 |
| 0.012018 | 0.011418 | 0.011143 | 0.011500 | 0.011534 | 0.011331 | 0.011432 |
| 0.011365 | 0.011331 | 0.011398 | 0.011297 | 0.011398 | 0.011331 | 0.011331 |
| 0.011297 | 0.011398 | 0.011601 | 0.011466 | 0.011365 | 0.011331 | 0.011263 |
| 0.011229 | 0.011229 | 0.011297 | 0.011263 | 0.011466 | 0.011432 | 0.011365 |
| 0.011466 | 0.011534 | 0.011263 | 0.011263 | 0.011297 | 0.011297 | 0.011298 |
| 0.011367 | 0.011297 | 0.011297 | 0.011169 | 0.011206 | 0.011201 | 0.011297 |
| 0.011299 | 0.011233 | 0.011246 | 0.011268 | 0.011197 | 0.011233 | 0.011230 |
| 0.011531 | 0.011303 | 0.011303 | 0.011229 | 0.011234 | 0.011365 | 0.011331 |
| 0.011399 | 0.011331 | 0.011331 | 0.011432 | 0.011365 | 0.011737 | 0.011534 |
| 0.011567 | 0.011432 | 0.011297 | 0.011398 | 0.011196 | 0.011432 | 0.011229 |
| 0.011297 | 0.011297 | 0.011263 | 0.011229 | 0.011263 | 0.011229 | 0.011331 |

|          |          |          |          |          |          |          |
|----------|----------|----------|----------|----------|----------|----------|
| 0.011297 | 0.011398 | 0.011331 | 0.011229 | 0.011332 | 0.011432 | 0.011435 |
| 0.011432 | 0.011331 | 0.011229 | 0.011162 | 0.011297 | 0.011229 | 0.011162 |
| 0.011265 | 0.011432 | 0.011229 | 0.011432 | 0.011196 | 0.011297 | 0.011263 |
| 0.011365 | 0.011263 | 0.011297 | 0.011263 | 0.011297 | 0.011162 | 0.011297 |
| 0.011331 | 0.011263 | 0.011331 | 0.011229 | 0.011297 | 0.011331 | 0.011534 |
| 0.011669 | 0.011601 | 0.011669 | 0.011366 | 0.011669 | 0.011297 | 0.011263 |
| 0.011298 | 0.011589 | 0.011429 | 0.011198 | 0.011675 | 0.011163 | 0.011258 |
| 0.011676 | 0.011574 | 0.011466 | 0.011669 | 0.011370 | 0.011534 | 0.011500 |
| 0.011432 | 0.011601 | 0.011454 | 0.011309 | 0.011314 | 0.011331 | 0.011401 |
| 0.011500 | 0.011400 | 0.011537 | 0.011606 | 0.011534 | 0.011601 | 0.011709 |
| 0.011435 | 0.011607 | 0.011538 | 0.011469 | 0.011738 | 0.011196 | 0.011400 |
| 0.011365 | 0.011297 | 0.011196 | 0.011196 | 0.011263 | 0.011263 | 0.011263 |
| 0.011263 | 0.011331 | 0.011229 | 0.011331 | 0.011263 | 0.011263 | 0.011331 |
| 0.011263 | 0.011703 | 0.011601 | 0.011635 | 0.011162 | 0.011263 | 0.011297 |
| 0.011297 | 0.011263 | 0.011331 | 0.011365 | 0.011229 | 0.011229 | 0.011229 |
| 0.011770 | 0.011398 | 0.011398 | 0.011196 | 0.011297 | 0.011466 | 0.011229 |
| 0.011229 | 0.011263 | 0.011263 | 0.011432 | 0.011229 | 0.011365 | 0.011500 |
| 0.011432 | 0.011263 | 0.011263 | 0.011196 | 0.011196 | 0.011365 | 0.011297 |
| 0.011196 | 0.011297 | 0.011162 | 0.011196 | 0.011331 | 0.011466 | 0.011229 |
| 0.011196 | 0.011331 | 0.011263 | 0.011162 | 0.011500 | 0.011162 | 0.011331 |
| 0.011405 | 0.011196 | 0.011534 | 0.011365 | 0.011398 | 0.011263 | 0.011297 |
| 0.011229 | 0.011567 | 0.011162 | 0.011432 | 0.011229 | 0.011229 | 0.011162 |
| 0.011398 | 0.011602 | 0.011297 | 0.011365 | 0.011196 | 0.011601 | 0.011229 |
| 0.011229 | 0.011229 | 0.011263 | 0.011365 | 0.011263 | 0.011365 | 0.011432 |
| 0.011398 | 0.011398 | 0.011229 | 0.011398 | 0.011365 | 0.011162 | 0.011196 |
| 0.011229 | 0.011162 | 0.011297 | 0.011229 | 0.011196 | 0.011365 | 0.011229 |
| 0.011263 | 0.011263 | 0.011398 | 0.011432 | 0.011331 | 0.011263 | 0.011263 |
| 0.011331 | 0.011263 | 0.011365 | 0.011229 | 0.011364 | 0.011466 | 0.011770 |
| 0.011263 | 0.011669 | 0.011269 | 0.011760 | 0.011192 | 0.011429 | 0.011587 |
| 0.011548 | 0.011591 | 0.011324 | 0.011177 | 0.011669 | 0.011616 | 0.011366 |
| 0.011442 | 0.011491 | 0.011139 | 0.011228 | 0.011217 | 0.011309 | 0.011233 |
| 0.011438 | 0.011397 | 0.011433 | 0.011194 | 0.011398 | 0.011432 | 0.011435 |
| 0.011302 | 0.011398 | 0.011398 | 0.011364 | 0.011331 | 0.011331 | 0.011297 |
| 0.011331 | 0.011263 | 0.011297 | 0.011331 | 0.011297 | 0.011229 | 0.011263 |
| 0.011263 | 0.011331 | 0.011229 | 0.011331 | 0.011364 | 0.011398 | 0.011297 |
| 0.011331 | 0.011297 | 0.011635 | 0.011635 | 0.011365 | 0.011399 | 0.011432 |
| 0.011196 | 0.011196 | 0.011229 | 0.011331 | 0.011196 | 0.011432 | 0.011432 |
| 0.011466 | 0.011466 | 0.011398 | 0.011500 | 0.011669 | 0.011501 | 0.011331 |
| 0.011331 | 0.011398 | 0.011432 | 0.011263 | 0.011331 | 0.011297 | 0.011331 |
| 0.011365 | 0.011365 | 0.011398 | 0.011398 | 0.011298 | 0.011466 | 0.011466 |
| 0.011333 | 0.011229 | 0.011331 | 0.011365 | 0.011331 | 0.011466 | 0.011500 |
| 0.011669 | 0.011370 | 0.011534 | 0.011500 | 0.011432 | 0.011601 | 0.011229 |
| 0.011399 | 0.011297 | 0.011263 | 0.011263 | 0.011331 | 0.011229 | 0.011331 |
| 0.011364 | 0.011398 | 0.011297 | 0.011331 | 0.011297 | 0.011635 | 0.011635 |
| 0.011365 | 0.011399 | 0.011466 | 0.011398 | 0.012043 | 0.011456 | 0.011379 |
| 0.011450 | 0.011410 | 0.011521 | 0.011409 | 0.011519 | 0.011442 | 0.011407 |
| 0.011994 | 0.011304 | 0.011440 | 0.011374 | 0.011650 | 0.011506 | 0.011609 |
| 0.012019 | 0.011478 | 0.011333 | 0.011331 | 0.011331 | 0.011365 | 0.011299 |
| 0.011196 | 0.011229 | 0.011365 | 0.011331 | 0.011333 | 0.011466 | 0.011433 |
| 0.011297 | 0.011229 | 0.011263 | 0.011297 | 0.011196 | 0.011263 | 0.011162 |
| 0.011297 | 0.011331 | 0.011229 | 0.011196 | 0.011297 | 0.011229 | 0.011263 |
| 0.011263 | 0.011196 | 0.011263 | 0.011297 | 0.011196 | 0.011398 | 0.011432 |
| 0.011331 | 0.011398 | 0.011331 | 0.011331 | 0.011263 | 0.011669 | 0.011297 |
| 0.011341 | 0.011263 | 0.011500 | 0.011505 | 0.011365 | 0.011297 | 0.011365 |
| 0.011365 | 0.011297 | 0.011229 | 0.011297 | 0.011398 | 0.011398 | 0.011331 |
| 0.011331 | 0.011466 | 0.011635 | 0.011365 | 0.011568 | 0.011568 | 0.011432 |
| 0.011263 | 0.011331 | 0.011365 | 0.011771 | 0.011331 | 0.011365 | 0.011331 |
| 0.011364 | 0.011297 | 0.011297 | 0.011601 | 0.011534 | 0.011567 | 0.011297 |
| 0.011398 | 0.011466 | 0.011331 | 0.011398 | 0.011364 | 0.011229 | 0.011567 |
| 0.011331 | 0.011297 | 0.011297 | 0.011466 | 0.011297 | 0.011398 | 0.011635 |

|          |          |          |          |          |          |          |
|----------|----------|----------|----------|----------|----------|----------|
| 0.011331 | 0.011710 | 0.011703 | 0.011428 | 0.011174 | 0.011402 | 0.011164 |
| 0.011226 | 0.011687 | 0.011202 | 0.011375 | 0.011208 | 0.011214 | 0.011274 |
| 0.011419 | 0.000000 | 0.011172 | 0.011127 | 0.011169 | 0.011262 | 0.011305 |
| 0.011364 | 0.011219 | 0.011344 | 0.011273 | 0.011332 | 0.011466 | 0.011534 |
| 0.011534 | 0.011399 | 0.011503 | 0.011504 | 0.011606 | 0.011664 | 0.011331 |
| 0.011567 | 0.011432 | 0.011297 | 0.011398 | 0.011196 | 0.011432 | 0.011229 |
| 0.011297 | 0.011297 | 0.011263 | 0.011229 | 0.011263 | 0.011229 | 0.011331 |
| 0.011306 | 0.011307 | 0.011301 | 0.011336 | 0.011473 | 0.011438 | 0.011438 |
| 0.011437 | 0.011365 | 0.011172 | 0.011169 | 0.011299 | 0.011469 | 0.011436 |
| 0.011263 | 0.011333 | 0.011568 | 0.011536 | 0.011466 | 0.011500 | 0.011432 |
| 0.011365 | 0.011432 | 0.011432 | 0.011331 | 0.011906 | 0.011500 | 0.011568 |
| 0.011601 | 0.011634 | 0.011301 | 0.011374 | 0.011263 | 0.011466 | 0.011432 |
| 0.011467 | 0.011500 | 0.011500 | 0.011500 | 0.011574 | 0.011635 | 0.011270 |
| 0.011162 | 0.011165 | 0.011266 | 0.011197 | 0.011336 | 0.011173 | 0.011505 |
| 0.011302 | 0.011458 | 0.011156 | 0.011286 | 0.011297 | 0.011370 | 0.011263 |
| 0.011229 | 0.011229 | 0.011297 | 0.011263 | 0.011466 | 0.011432 | 0.011365 |
| 0.011466 | 0.011534 | 0.011263 | 0.011263 | 0.011297 | 0.011297 | 0.011298 |
| 0.011367 | 0.011297 | 0.011297 | 0.011332 | 0.011466 | 0.011534 | 0.011534 |
| 0.011399 | 0.011503 | 0.011504 | 0.011606 | 0.011664 | 0.011331 | 0.011500 |
| 0.011432 | 0.011432 | 0.000000 | 0.011445 | 0.011375 | 0.011403 | 0.011272 |
| 0.011441 | 0.011610 | 0.011442 | 0.011334 | 0.011229 | 0.011432 | 0.011297 |
| 0.011398 | 0.011331 | 0.011229 | 0.011332 | 0.011432 | 0.011435 | 0.011331 |
| 0.011229 | 0.011162 | 0.011297 | 0.011229 | 0.011162 | 0.011265 | 0.011432 |
| 0.011331 | 0.011263 | 0.011297 | 0.011331 | 0.011297 | 0.011229 | 0.011432 |
| 0.011297 | 0.011297 | 0.011331 | 0.011263 | 0.011331 | 0.011567 | 0.011229 |
| 0.011263 | 0.011669 | 0.011263 | 0.011263 | 0.011263 | 0.011635 | 0.011146 |
| 0.011625 | 0.011146 | 0.011212 | 0.011384 | 0.011470 | 0.011422 | 0.011102 |
| 0.011166 | 0.011432 | 0.011534 | 0.011641 | 0.011501 | 0.011639 | 0.011771 |
| 0.011670 | 0.011707 | 0.011669 | 0.011920 | 0.011635 | 0.012516 | 0.011671 |
| 0.012415 | 0.012181 | 0.012282 | 0.012589 | 0.011635 | 0.011331 | 0.011635 |
| 0.012077 | 0.012011 | 0.011601 | 0.011500 | 0.011568 | 0.011568 | 0.011537 |
| 0.011432 | 0.011436 | 0.011500 | 0.011466 | 0.011839 | 0.011906 | 0.011907 |
| 0.011806 | 0.011906 | 0.011977 | 0.011775 | 0.012077 | 0.012083 | 0.012145 |
| 0.012145 | 0.012179 | 0.012125 | 0.012145 | 0.012147 | 0.011365 | 0.011669 |
| 0.011737 | 0.012245 | 0.011743 | 0.011974 | 0.012450 | 0.011505 | 0.011399 |
| 0.011365 | 0.011364 | 0.011839 | 0.011847 | 0.011980 | 0.011703 | 0.011366 |
| S738     | 0.011826 | 0.011826 | 0.011896 | 0.011861 | 0.011861 | 0.011931 |
| 0.011835 | 0.011765 | 0.011861 | 0.011408 | 0.011478 | 0.011444 | 0.011408 |
| 0.011443 | 0.011617 | 0.011408 | 0.011443 | 0.011478 | 0.011478 | 0.011443 |
| 0.011408 | 0.011443 | 0.011547 | 0.011409 | 0.011443 | 0.011443 | 0.011800 |
| 0.011687 | 0.011443 | 0.011339 | 0.011582 | 0.011513 | 0.011478 | 0.011513 |
| 0.011478 | 0.011582 | 0.011478 | 0.011478 | 0.011513 | 0.011478 | 0.011652 |
| 0.011408 | 0.011478 | 0.011513 | 0.011443 | 0.011547 | 0.011582 | 0.011513 |
| 0.011443 | 0.011652 | 0.011478 | 0.011826 | 0.011478 | 0.011756 | 0.011478 |
| 0.011443 | 0.011547 | 0.011617 | 0.011756 | 0.011861 | 0.011513 | 0.011652 |
| 0.011513 | 0.011582 | 0.011478 | 0.011721 | 0.011931 | 0.011478 | 0.011547 |
| 0.011443 | 0.011547 | 0.011513 | 0.011582 | 0.011513 | 0.011513 | 0.011513 |
| 0.011408 | 0.011443 | 0.011408 | 0.011513 | 0.011478 | 0.011479 | 0.011582 |
| 0.011513 | 0.011478 | 0.011547 | 0.011443 | 0.011582 | 0.011408 | 0.011478 |
| 0.011652 | 0.011582 | 0.011826 | 0.011617 | 0.011478 | 0.011687 | 0.011478 |
| 0.011636 | 0.011872 | 0.011645 | 0.011424 | 0.011369 | 0.011519 | 0.011547 |
| 0.012232 | 0.011583 | 0.011400 | 0.011687 | 0.011687 | 0.011513 | 0.011617 |
| 0.011547 | 0.011513 | 0.011582 | 0.011478 | 0.011547 | 0.011513 | 0.011513 |
| 0.011478 | 0.011582 | 0.011722 | 0.011652 | 0.011547 | 0.011513 | 0.011443 |
| 0.011408 | 0.011408 | 0.011478 | 0.011443 | 0.011652 | 0.011617 | 0.011547 |
| 0.011652 | 0.011721 | 0.011443 | 0.011443 | 0.011478 | 0.011478 | 0.011480 |
| 0.011551 | 0.011478 | 0.011478 | 0.011358 | 0.011433 | 0.011387 | 0.011478 |
| 0.011481 | 0.011416 | 0.011479 | 0.011453 | 0.011377 | 0.011415 | 0.011445 |
| 0.011730 | 0.011488 | 0.011522 | 0.011408 | 0.011418 | 0.011548 | 0.011513 |
| 0.011583 | 0.011514 | 0.011513 | 0.011617 | 0.011547 | 0.011931 | 0.011652 |

|          |          |          |          |          |          |          |
|----------|----------|----------|----------|----------|----------|----------|
| 0.011756 | 0.011617 | 0.011478 | 0.011582 | 0.011373 | 0.011617 | 0.011408 |
| 0.011443 | 0.011443 | 0.011443 | 0.011408 | 0.011443 | 0.011408 | 0.011513 |
| 0.011478 | 0.011582 | 0.011513 | 0.011408 | 0.011514 | 0.011617 | 0.011621 |
| 0.011617 | 0.011513 | 0.011408 | 0.011340 | 0.011478 | 0.011408 | 0.011339 |
| 0.011447 | 0.011617 | 0.011408 | 0.011617 | 0.011373 | 0.011478 | 0.011443 |
| 0.011513 | 0.011443 | 0.011478 | 0.011443 | 0.011478 | 0.011339 | 0.011478 |
| 0.011513 | 0.011408 | 0.011513 | 0.011443 | 0.011478 | 0.011513 | 0.011756 |
| 0.011861 | 0.011791 | 0.011861 | 0.011619 | 0.011861 | 0.011478 | 0.011443 |
| 0.011445 | 0.011724 | 0.011482 | 0.011380 | 0.011867 | 0.011342 | 0.011426 |
| 0.011870 | 0.011729 | 0.011582 | 0.011791 | 0.011555 | 0.011687 | 0.011687 |
| 0.011617 | 0.011756 | 0.011613 | 0.011447 | 0.011537 | 0.011513 | 0.011586 |
| 0.011652 | 0.011584 | 0.011656 | 0.011762 | 0.011722 | 0.011791 | 0.011833 |
| 0.011622 | 0.011763 | 0.011727 | 0.011656 | 0.011862 | 0.011373 | 0.011584 |
| 0.011547 | 0.011478 | 0.011373 | 0.011373 | 0.011443 | 0.011443 | 0.011513 |
| 0.011443 | 0.011513 | 0.011408 | 0.011513 | 0.011443 | 0.011443 | 0.011513 |
| 0.011443 | 0.011896 | 0.011791 | 0.011826 | 0.011339 | 0.011443 | 0.011478 |
| 0.011478 | 0.011443 | 0.011443 | 0.011547 | 0.011408 | 0.011408 | 0.011408 |
| 0.011965 | 0.011547 | 0.011547 | 0.011373 | 0.011478 | 0.011617 | 0.011408 |
| 0.011408 | 0.011478 | 0.011443 | 0.011582 | 0.011408 | 0.011478 | 0.011582 |
| 0.011547 | 0.011443 | 0.011443 | 0.011373 | 0.011373 | 0.011513 | 0.011478 |
| 0.011373 | 0.011478 | 0.011339 | 0.011373 | 0.011513 | 0.011652 | 0.011408 |
| 0.011374 | 0.011513 | 0.011443 | 0.011339 | 0.011687 | 0.011339 | 0.011513 |
| 0.011557 | 0.011408 | 0.011721 | 0.011548 | 0.011582 | 0.011443 | 0.011547 |
| 0.011408 | 0.011756 | 0.011339 | 0.011617 | 0.011408 | 0.011408 | 0.011339 |
| 0.011582 | 0.011792 | 0.011478 | 0.011547 | 0.011373 | 0.011791 | 0.011408 |
| 0.011408 | 0.011408 | 0.011408 | 0.011547 | 0.011443 | 0.011547 | 0.011617 |
| 0.011582 | 0.011582 | 0.011408 | 0.011582 | 0.011547 | 0.011408 | 0.011373 |
| 0.011408 | 0.011408 | 0.011478 | 0.011408 | 0.011373 | 0.011547 | 0.011408 |
| 0.011443 | 0.011443 | 0.011547 | 0.011582 | 0.011513 | 0.011373 | 0.011408 |
| 0.011513 | 0.011443 | 0.011547 | 0.011408 | 0.011547 | 0.011617 | 0.011896 |
| 0.011443 | 0.011861 | 0.011454 | 0.018155 | 0.011261 | 0.011633 | 0.011747 |
| 0.011778 | 0.011790 | 0.011492 | 0.011476 | 0.011797 | 0.011812 | 0.011313 |
| 0.011501 | 0.011567 | 0.011343 | 0.011405 | 0.011424 | 0.011369 | 0.011416 |
| 0.011591 | 0.011599 | 0.011558 | 0.011334 | 0.011582 | 0.011617 | 0.011621 |
| 0.011452 | 0.011582 | 0.011547 | 0.011547 | 0.011513 | 0.011513 | 0.011408 |
| 0.011513 | 0.011443 | 0.011443 | 0.011513 | 0.011478 | 0.011408 | 0.011443 |
| 0.011443 | 0.011513 | 0.011408 | 0.011513 | 0.011547 | 0.011513 | 0.011478 |
| 0.011513 | 0.011478 | 0.011826 | 0.011826 | 0.011548 | 0.011583 | 0.011617 |
| 0.011339 | 0.011373 | 0.011408 | 0.011478 | 0.011373 | 0.011582 | 0.011582 |
| 0.011617 | 0.011582 | 0.011582 | 0.011652 | 0.011861 | 0.011654 | 0.011478 |
| 0.011443 | 0.011513 | 0.011617 | 0.011443 | 0.011513 | 0.011478 | 0.011513 |
| 0.011548 | 0.011548 | 0.011582 | 0.011583 | 0.011479 | 0.011652 | 0.011617 |
| 0.011517 | 0.011408 | 0.011478 | 0.011617 | 0.011513 | 0.011582 | 0.011652 |
| 0.011791 | 0.011555 | 0.011687 | 0.011687 | 0.011617 | 0.011756 | 0.011408 |
| 0.011583 | 0.011478 | 0.011443 | 0.011443 | 0.011513 | 0.011408 | 0.011513 |
| 0.011547 | 0.011513 | 0.011478 | 0.011513 | 0.011478 | 0.011826 | 0.011826 |
| 0.011548 | 0.011583 | 0.011652 | 0.011582 | 0.012245 | 0.011577 | 0.011535 |
| 0.011607 | 0.011528 | 0.011643 | 0.011563 | 0.011640 | 0.011597 | 0.011561 |
| 0.012164 | 0.011454 | 0.011593 | 0.011526 | 0.011809 | 0.011660 | 0.011766 |
| 0.012188 | 0.011607 | 0.011516 | 0.011513 | 0.011513 | 0.011547 | 0.011481 |
| 0.011373 | 0.011373 | 0.011547 | 0.011513 | 0.011516 | 0.011652 | 0.011549 |
| 0.011478 | 0.011408 | 0.011443 | 0.011478 | 0.011373 | 0.011443 | 0.011339 |
| 0.011478 | 0.011513 | 0.011408 | 0.011373 | 0.011478 | 0.011408 | 0.011443 |
| 0.011443 | 0.011373 | 0.011443 | 0.011478 | 0.011373 | 0.011582 | 0.011617 |
| 0.011478 | 0.011582 | 0.011513 | 0.011513 | 0.011408 | 0.011861 | 0.011478 |
| 0.011493 | 0.011443 | 0.011687 | 0.011658 | 0.011548 | 0.011547 | 0.011547 |
| 0.011548 | 0.011478 | 0.011443 | 0.011478 | 0.011582 | 0.011547 | 0.011513 |
| 0.011478 | 0.011652 | 0.011826 | 0.011547 | 0.011757 | 0.011757 | 0.011617 |
| 0.011443 | 0.011513 | 0.011548 | 0.011931 | 0.011513 | 0.011548 | 0.011513 |
| 0.011513 | 0.011478 | 0.011478 | 0.011757 | 0.011687 | 0.011722 | 0.011478 |

|          |          |          |          |          |          |          |
|----------|----------|----------|----------|----------|----------|----------|
| 0.011582 | 0.011652 | 0.011513 | 0.011582 | 0.011547 | 0.011408 | 0.011756 |
| 0.011513 | 0.011478 | 0.011478 | 0.011652 | 0.011478 | 0.011582 | 0.011791 |
| 0.011443 | 0.011906 | 0.011861 | 0.011689 | 0.011406 | 0.011588 | 0.011326 |
| 0.011402 | 0.011822 | 0.011423 | 0.011565 | 0.011362 | 0.011478 | 0.011333 |
| 0.011585 | 0.011194 | 0.011289 | 0.011196 | 0.011282 | 0.011337 | 0.011478 |
| 0.011527 | 0.011385 | 0.011535 | 0.011461 | 0.011514 | 0.011652 | 0.011722 |
| 0.011687 | 0.011583 | 0.011690 | 0.011692 | 0.011834 | 0.011865 | 0.011513 |
| 0.011756 | 0.011617 | 0.011478 | 0.011582 | 0.011373 | 0.011617 | 0.011408 |
| 0.011443 | 0.011443 | 0.011443 | 0.011408 | 0.011443 | 0.011408 | 0.011513 |
| 0.011458 | 0.011494 | 0.011486 | 0.011521 | 0.011663 | 0.011626 | 0.011626 |
| 0.011589 | 0.011548 | 0.011328 | 0.011358 | 0.011481 | 0.011657 | 0.011658 |
| 0.011443 | 0.011516 | 0.011757 | 0.011725 | 0.011617 | 0.011687 | 0.011617 |
| 0.011547 | 0.011617 | 0.011617 | 0.011513 | 0.012105 | 0.011652 | 0.011687 |
| 0.011791 | 0.011872 | 0.011484 | 0.011562 | 0.011443 | 0.011652 | 0.011617 |
| 0.011653 | 0.011617 | 0.011652 | 0.011652 | 0.011832 | 0.011791 | 0.011420 |
| 0.011306 | 0.011312 | 0.011413 | 0.011377 | 0.011450 | 0.011292 | 0.011658 |
| 0.011451 | 0.011607 | 0.011356 | 0.011487 | 0.011478 | 0.011556 | 0.011443 |
| 0.011408 | 0.011408 | 0.011478 | 0.011443 | 0.011652 | 0.011617 | 0.011547 |
| 0.011652 | 0.011721 | 0.011443 | 0.011443 | 0.011478 | 0.011478 | 0.011480 |
| 0.011551 | 0.011478 | 0.011478 | 0.011514 | 0.011652 | 0.011722 | 0.011687 |
| 0.011583 | 0.011690 | 0.011692 | 0.011834 | 0.011865 | 0.011513 | 0.011652 |
| 0.011617 | 0.011617 | 0.011445 | 0.000000 | 0.011528 | 0.011519 | 0.011314 |
| 0.011632 | 0.011620 | 0.011539 | 0.011447 | 0.011408 | 0.011617 | 0.011478 |
| 0.011582 | 0.011513 | 0.011408 | 0.011514 | 0.011617 | 0.011621 | 0.011513 |
| 0.011408 | 0.011340 | 0.011478 | 0.011408 | 0.011339 | 0.011447 | 0.011617 |
| 0.011513 | 0.011443 | 0.011443 | 0.011513 | 0.011478 | 0.011408 | 0.011617 |
| 0.011478 | 0.011478 | 0.011513 | 0.011443 | 0.011513 | 0.011756 | 0.011408 |
| 0.011443 | 0.011861 | 0.011443 | 0.011478 | 0.011443 | 0.011826 | 0.011370 |
| 0.011758 | 0.011412 | 0.011370 | 0.011643 | 0.011691 | 0.011653 | 0.011320 |
| 0.011330 | 0.011547 | 0.011652 | 0.011728 | 0.011618 | 0.011761 | 0.011897 |
| 0.011791 | 0.011865 | 0.011791 | 0.012051 | 0.011756 | 0.012663 | 0.011793 |
| 0.012489 | 0.012317 | 0.012422 | 0.012703 | 0.011791 | 0.011513 | 0.011757 |
| 0.012211 | 0.012144 | 0.011721 | 0.011617 | 0.011687 | 0.011687 | 0.011656 |
| 0.011547 | 0.011552 | 0.011582 | 0.011582 | 0.012001 | 0.012035 | 0.012105 |
| 0.012002 | 0.012071 | 0.012213 | 0.011971 | 0.012281 | 0.012252 | 0.012351 |
| 0.012351 | 0.012386 | 0.012334 | 0.012351 | 0.012353 | 0.011547 | 0.011861 |
| 0.011896 | 0.012454 | 0.011939 | 0.012175 | 0.012665 | 0.011658 | 0.011582 |
| 0.011547 | 0.011547 | 0.012035 | 0.012034 | 0.012155 | 0.011861 | 0.011549 |
| S739     | 0.011755 | 0.011755 | 0.012069 | 0.011825 | 0.011825 | 0.011860 |
| 0.011764 | 0.011658 | 0.011755 | 0.011338 | 0.011408 | 0.011373 | 0.011338 |
| 0.011373 | 0.011442 | 0.011338 | 0.011373 | 0.011442 | 0.011408 | 0.011373 |
| 0.011303 | 0.011373 | 0.011477 | 0.011338 | 0.011373 | 0.011373 | 0.011693 |
| 0.011616 | 0.011338 | 0.011269 | 0.011477 | 0.011442 | 0.011408 | 0.011442 |
| 0.011408 | 0.011512 | 0.011408 | 0.011408 | 0.011442 | 0.011408 | 0.011581 |
| 0.011338 | 0.011408 | 0.011442 | 0.011373 | 0.011477 | 0.011512 | 0.011442 |
| 0.011408 | 0.011582 | 0.011478 | 0.011755 | 0.011408 | 0.011651 | 0.011408 |
| 0.011373 | 0.011477 | 0.011547 | 0.011651 | 0.011790 | 0.011442 | 0.011581 |
| 0.011408 | 0.011477 | 0.011408 | 0.011651 | 0.011895 | 0.011269 | 0.011477 |
| 0.011373 | 0.011477 | 0.011442 | 0.011512 | 0.011442 | 0.011442 | 0.011442 |
| 0.011338 | 0.011373 | 0.011338 | 0.011442 | 0.011408 | 0.011443 | 0.011477 |
| 0.011442 | 0.011408 | 0.011477 | 0.011373 | 0.011512 | 0.011338 | 0.011408 |
| 0.011547 | 0.011512 | 0.011755 | 0.011582 | 0.011408 | 0.011651 | 0.011338 |
| 0.011598 | 0.011833 | 0.011645 | 0.011342 | 0.011330 | 0.011442 | 0.011548 |
| 0.012194 | 0.011634 | 0.011359 | 0.011616 | 0.011651 | 0.011442 | 0.011547 |
| 0.011477 | 0.011442 | 0.011512 | 0.011408 | 0.011512 | 0.011442 | 0.011442 |
| 0.011408 | 0.011512 | 0.011721 | 0.011512 | 0.011442 | 0.011443 | 0.011373 |
| 0.011338 | 0.011338 | 0.011408 | 0.011373 | 0.011581 | 0.011547 | 0.011477 |
| 0.011581 | 0.011651 | 0.011373 | 0.011373 | 0.011408 | 0.011408 | 0.011410 |
| 0.011480 | 0.011408 | 0.011408 | 0.011282 | 0.011358 | 0.011312 | 0.011408 |
| 0.011410 | 0.011344 | 0.011365 | 0.011345 | 0.011306 | 0.011343 | 0.011375 |

|          |          |          |          |          |          |          |
|----------|----------|----------|----------|----------|----------|----------|
| 0.011653 | 0.011416 | 0.011451 | 0.011338 | 0.011346 | 0.011478 | 0.011443 |
| 0.011512 | 0.011443 | 0.011443 | 0.011547 | 0.011477 | 0.011860 | 0.011651 |
| 0.011686 | 0.011547 | 0.011408 | 0.011512 | 0.011303 | 0.011547 | 0.011338 |
| 0.011408 | 0.011408 | 0.011338 | 0.011338 | 0.011373 | 0.011338 | 0.011442 |
| 0.011408 | 0.011512 | 0.011442 | 0.011338 | 0.011374 | 0.011547 | 0.011550 |
| 0.011547 | 0.011442 | 0.011338 | 0.011270 | 0.011408 | 0.011338 | 0.011269 |
| 0.011377 | 0.011547 | 0.011338 | 0.011547 | 0.011303 | 0.011408 | 0.011373 |
| 0.011477 | 0.011373 | 0.011408 | 0.011373 | 0.011408 | 0.011269 | 0.011408 |
| 0.011442 | 0.011373 | 0.011442 | 0.011373 | 0.011408 | 0.011442 | 0.011651 |
| 0.011755 | 0.011720 | 0.011790 | 0.011548 | 0.011790 | 0.011408 | 0.011373 |
| 0.011409 | 0.011687 | 0.011390 | 0.011308 | 0.011692 | 0.011272 | 0.011345 |
| 0.011799 | 0.011693 | 0.011581 | 0.011790 | 0.011485 | 0.011651 | 0.011616 |
| 0.011547 | 0.011720 | 0.011463 | 0.011314 | 0.011407 | 0.011443 | 0.011515 |
| 0.011616 | 0.011479 | 0.011655 | 0.011691 | 0.011651 | 0.011721 | 0.011832 |
| 0.011551 | 0.011693 | 0.011656 | 0.011585 | 0.011861 | 0.011303 | 0.011514 |
| 0.011477 | 0.011373 | 0.011303 | 0.011303 | 0.011373 | 0.011303 | 0.011442 |
| 0.011373 | 0.011442 | 0.011338 | 0.011442 | 0.011373 | 0.011373 | 0.011442 |
| 0.011373 | 0.011825 | 0.011721 | 0.011755 | 0.011269 | 0.011373 | 0.011373 |
| 0.011408 | 0.011373 | 0.011442 | 0.011477 | 0.011338 | 0.011338 | 0.011338 |
| 0.011894 | 0.011512 | 0.011512 | 0.011303 | 0.011408 | 0.011582 | 0.011338 |
| 0.011338 | 0.011408 | 0.011373 | 0.011547 | 0.011338 | 0.011477 | 0.011616 |
| 0.011547 | 0.011373 | 0.011373 | 0.011303 | 0.011303 | 0.011477 | 0.011408 |
| 0.011303 | 0.011408 | 0.011269 | 0.011303 | 0.011442 | 0.011582 | 0.011304 |
| 0.011304 | 0.011442 | 0.011373 | 0.011269 | 0.011616 | 0.011269 | 0.011373 |
| 0.011450 | 0.011338 | 0.011651 | 0.011477 | 0.011477 | 0.011373 | 0.011477 |
| 0.011303 | 0.011651 | 0.011269 | 0.011547 | 0.011338 | 0.011338 | 0.011269 |
| 0.011512 | 0.011721 | 0.011408 | 0.011477 | 0.011303 | 0.011721 | 0.011338 |
| 0.011303 | 0.011338 | 0.011373 | 0.011442 | 0.011373 | 0.011477 | 0.011547 |
| 0.011547 | 0.011512 | 0.011408 | 0.011442 | 0.011442 | 0.011338 | 0.011303 |
| 0.011338 | 0.011338 | 0.011408 | 0.011338 | 0.011303 | 0.011477 | 0.011338 |
| 0.011373 | 0.011373 | 0.011477 | 0.011547 | 0.011408 | 0.011373 | 0.011373 |
| 0.011442 | 0.011338 | 0.011477 | 0.011338 | 0.011477 | 0.011512 | 0.011894 |
| 0.011373 | 0.011790 | 0.011381 | 0.018110 | 0.011261 | 0.011372 | 0.011746 |
| 0.011704 | 0.011752 | 0.011327 | 0.011295 | 0.011788 | 0.011774 | 0.011308 |
| 0.011598 | 0.011497 | 0.011302 | 0.011274 | 0.011343 | 0.011312 | 0.011368 |
| 0.011639 | 0.011560 | 0.011558 | 0.011474 | 0.011477 | 0.011547 | 0.011550 |
| 0.011415 | 0.011512 | 0.011512 | 0.011477 | 0.011408 | 0.011408 | 0.011408 |
| 0.011442 | 0.011373 | 0.011408 | 0.011442 | 0.011408 | 0.011338 | 0.011373 |
| 0.011373 | 0.011442 | 0.011338 | 0.011442 | 0.011477 | 0.011512 | 0.011408 |
| 0.011442 | 0.011408 | 0.011721 | 0.011721 | 0.011477 | 0.011443 | 0.011547 |
| 0.011303 | 0.011303 | 0.011338 | 0.011408 | 0.011303 | 0.011512 | 0.011512 |
| 0.011581 | 0.011581 | 0.011512 | 0.011616 | 0.011790 | 0.011618 | 0.011408 |
| 0.011442 | 0.011512 | 0.011547 | 0.011373 | 0.011442 | 0.011408 | 0.011408 |
| 0.011477 | 0.011477 | 0.011512 | 0.011512 | 0.011409 | 0.011616 | 0.011547 |
| 0.011446 | 0.011303 | 0.011442 | 0.011547 | 0.011442 | 0.011582 | 0.011616 |
| 0.011790 | 0.011485 | 0.011651 | 0.011616 | 0.011547 | 0.011720 | 0.011338 |
| 0.011513 | 0.011095 | 0.011373 | 0.011373 | 0.011442 | 0.011338 | 0.011442 |
| 0.011477 | 0.011512 | 0.011408 | 0.011442 | 0.011408 | 0.011721 | 0.011721 |
| 0.011477 | 0.011443 | 0.011581 | 0.011512 | 0.012175 | 0.011577 | 0.011423 |
| 0.011569 | 0.011527 | 0.011605 | 0.011454 | 0.011641 | 0.011560 | 0.011523 |
| 0.012127 | 0.011383 | 0.011557 | 0.011490 | 0.011774 | 0.011624 | 0.011695 |
| 0.012152 | 0.011526 | 0.011445 | 0.011442 | 0.011442 | 0.011477 | 0.011410 |
| 0.011303 | 0.011338 | 0.011442 | 0.011408 | 0.011445 | 0.011581 | 0.011547 |
| 0.011408 | 0.011338 | 0.011373 | 0.011408 | 0.011303 | 0.011373 | 0.011269 |
| 0.011408 | 0.011408 | 0.011303 | 0.011303 | 0.011373 | 0.011338 | 0.011373 |
| 0.011373 | 0.011303 | 0.011303 | 0.011373 | 0.011303 | 0.011512 | 0.011512 |
| 0.011408 | 0.011477 | 0.011408 | 0.011408 | 0.011373 | 0.011790 | 0.011408 |
| 0.011383 | 0.011373 | 0.011617 | 0.011622 | 0.011477 | 0.011477 | 0.011477 |
| 0.011442 | 0.011408 | 0.011373 | 0.011408 | 0.011442 | 0.011477 | 0.011442 |
| 0.011442 | 0.011581 | 0.011755 | 0.011477 | 0.011686 | 0.011686 | 0.011477 |

|          |          |          |          |          |          |          |
|----------|----------|----------|----------|----------|----------|----------|
| 0.011373 | 0.011442 | 0.011442 | 0.011895 | 0.011443 | 0.011477 | 0.011442 |
| 0.011477 | 0.011408 | 0.011408 | 0.011721 | 0.011616 | 0.011686 | 0.011373 |
| 0.011512 | 0.011581 | 0.011442 | 0.011512 | 0.011442 | 0.011338 | 0.011651 |
| 0.011442 | 0.011408 | 0.011408 | 0.011581 | 0.011373 | 0.011512 | 0.011721 |
| 0.011442 | 0.011834 | 0.011825 | 0.011648 | 0.011409 | 0.011482 | 0.011433 |
| 0.011284 | 0.011784 | 0.011351 | 0.011615 | 0.011465 | 0.011537 | 0.011498 |
| 0.011582 | 0.011331 | 0.011460 | 0.011329 | 0.011451 | 0.011537 | 0.011524 |
| 0.011529 | 0.011428 | 0.011498 | 0.011424 | 0.011444 | 0.011581 | 0.011651 |
| 0.011651 | 0.011512 | 0.011620 | 0.011622 | 0.011762 | 0.011791 | 0.011408 |
| 0.011686 | 0.011547 | 0.011408 | 0.011512 | 0.011303 | 0.011547 | 0.011338 |
| 0.011408 | 0.011408 | 0.011338 | 0.011338 | 0.011373 | 0.011338 | 0.011442 |
| 0.011421 | 0.011421 | 0.011378 | 0.011449 | 0.011590 | 0.011554 | 0.011554 |
| 0.011552 | 0.011478 | 0.011289 | 0.011283 | 0.011340 | 0.011550 | 0.011550 |
| 0.011373 | 0.011445 | 0.011687 | 0.011654 | 0.011582 | 0.011548 | 0.011547 |
| 0.011477 | 0.011512 | 0.011547 | 0.011442 | 0.012034 | 0.011581 | 0.011686 |
| 0.011721 | 0.011759 | 0.011413 | 0.011454 | 0.011373 | 0.011581 | 0.011547 |
| 0.011583 | 0.011616 | 0.011616 | 0.011616 | 0.011790 | 0.011755 | 0.011383 |
| 0.011270 | 0.011275 | 0.011342 | 0.011341 | 0.011378 | 0.011291 | 0.011623 |
| 0.011415 | 0.011510 | 0.011206 | 0.011369 | 0.011373 | 0.011484 | 0.011373 |
| 0.011338 | 0.011338 | 0.011408 | 0.011373 | 0.011581 | 0.011547 | 0.011477 |
| 0.011581 | 0.011651 | 0.011373 | 0.011373 | 0.011408 | 0.011408 | 0.011410 |
| 0.011480 | 0.011408 | 0.011408 | 0.011444 | 0.011581 | 0.011651 | 0.011651 |
| 0.011512 | 0.011620 | 0.011622 | 0.011762 | 0.011791 | 0.011408 | 0.011616 |
| 0.011547 | 0.011547 | 0.011375 | 0.011528 | 0.000000 | 0.011517 | 0.011348 |
| 0.011522 | 0.011621 | 0.011538 | 0.011447 | 0.011338 | 0.011547 | 0.011408 |
| 0.011512 | 0.011442 | 0.011338 | 0.011374 | 0.011547 | 0.011550 | 0.011442 |
| 0.011338 | 0.011270 | 0.011408 | 0.011338 | 0.011269 | 0.011377 | 0.011547 |
| 0.011442 | 0.011373 | 0.011408 | 0.011442 | 0.011408 | 0.011338 | 0.011547 |
| 0.011373 | 0.011408 | 0.011442 | 0.011373 | 0.011408 | 0.011651 | 0.011338 |
| 0.011373 | 0.011790 | 0.011373 | 0.011408 | 0.011373 | 0.011755 | 0.011325 |
| 0.011810 | 0.011368 | 0.011420 | 0.011602 | 0.011693 | 0.011580 | 0.011276 |
| 0.011330 | 0.011547 | 0.011651 | 0.011761 | 0.011617 | 0.011725 | 0.011860 |
| 0.011757 | 0.011831 | 0.011755 | 0.012049 | 0.011721 | 0.012661 | 0.011791 |
| 0.012487 | 0.012315 | 0.012456 | 0.012664 | 0.011755 | 0.011442 | 0.011755 |
| 0.012209 | 0.011967 | 0.011686 | 0.011616 | 0.011686 | 0.011686 | 0.011655 |
| 0.011547 | 0.011551 | 0.011616 | 0.011582 | 0.011930 | 0.011999 | 0.011965 |
| 0.011861 | 0.011999 | 0.012106 | 0.011864 | 0.012209 | 0.012216 | 0.012279 |
| 0.012280 | 0.012315 | 0.012259 | 0.012280 | 0.012280 | 0.011477 | 0.011790 |
| 0.011861 | 0.012347 | 0.011866 | 0.012104 | 0.012174 | 0.011622 | 0.011512 |
| 0.011477 | 0.011477 | 0.011930 | 0.011946 | 0.012078 | 0.011790 | 0.011478 |
| S740     | 0.011775 | 0.011775 | 0.012117 | 0.011878 | 0.011878 | 0.011946 |
| 0.011749 | 0.011680 | 0.011878 | 0.011367 | 0.011435 | 0.011401 | 0.011367 |
| 0.011401 | 0.011537 | 0.011367 | 0.011401 | 0.011469 | 0.011435 | 0.011401 |
| 0.011367 | 0.011401 | 0.011503 | 0.011367 | 0.011401 | 0.011401 | 0.011715 |
| 0.011639 | 0.011401 | 0.011299 | 0.011537 | 0.011469 | 0.011435 | 0.011469 |
| 0.011435 | 0.011537 | 0.011435 | 0.011435 | 0.011469 | 0.011435 | 0.011605 |
| 0.011367 | 0.011435 | 0.011469 | 0.011401 | 0.011503 | 0.011537 | 0.011469 |
| 0.011435 | 0.011605 | 0.011503 | 0.011775 | 0.011435 | 0.011707 | 0.011435 |
| 0.011401 | 0.011503 | 0.011537 | 0.011707 | 0.011809 | 0.011469 | 0.011605 |
| 0.011469 | 0.011537 | 0.011435 | 0.011673 | 0.011912 | 0.011435 | 0.011503 |
| 0.011401 | 0.011503 | 0.011469 | 0.011537 | 0.011265 | 0.011469 | 0.011469 |
| 0.011367 | 0.011401 | 0.011367 | 0.011469 | 0.011401 | 0.011470 | 0.011537 |
| 0.011469 | 0.011435 | 0.011503 | 0.011265 | 0.011537 | 0.011367 | 0.011435 |
| 0.011605 | 0.011537 | 0.011775 | 0.011605 | 0.011435 | 0.011639 | 0.011435 |
| 0.011550 | 0.011781 | 0.011597 | 0.011298 | 0.011288 | 0.011434 | 0.011500 |
| 0.012174 | 0.011520 | 0.011269 | 0.011673 | 0.011639 | 0.011469 | 0.011571 |
| 0.011503 | 0.011469 | 0.011537 | 0.011435 | 0.011537 | 0.011469 | 0.011469 |
| 0.011435 | 0.011333 | 0.011707 | 0.011605 | 0.011503 | 0.011469 | 0.011401 |
| 0.011367 | 0.011367 | 0.011435 | 0.011401 | 0.011605 | 0.011571 | 0.011503 |
| 0.011605 | 0.011673 | 0.011401 | 0.011401 | 0.011435 | 0.011435 | 0.011437 |

|          |          |          |          |          |          |          |
|----------|----------|----------|----------|----------|----------|----------|
| 0.011506 | 0.011435 | 0.011435 | 0.011279 | 0.011390 | 0.011345 | 0.011435 |
| 0.011438 | 0.011374 | 0.011397 | 0.011410 | 0.011336 | 0.011373 | 0.011368 |
| 0.011681 | 0.011375 | 0.011479 | 0.011367 | 0.011376 | 0.011504 | 0.011469 |
| 0.011538 | 0.011470 | 0.011469 | 0.011571 | 0.011503 | 0.011878 | 0.011673 |
| 0.011673 | 0.011571 | 0.011435 | 0.011537 | 0.011333 | 0.011537 | 0.011367 |
| 0.011435 | 0.011435 | 0.011401 | 0.011367 | 0.011401 | 0.011367 | 0.011469 |
| 0.011435 | 0.011537 | 0.011469 | 0.011367 | 0.011470 | 0.011571 | 0.011540 |
| 0.011571 | 0.011469 | 0.011367 | 0.011265 | 0.011401 | 0.011367 | 0.011299 |
| 0.011370 | 0.011571 | 0.011367 | 0.011571 | 0.011333 | 0.011435 | 0.011401 |
| 0.011503 | 0.011401 | 0.011435 | 0.011401 | 0.011435 | 0.011299 | 0.011435 |
| 0.011469 | 0.011401 | 0.011469 | 0.011401 | 0.011435 | 0.011469 | 0.011673 |
| 0.011809 | 0.011741 | 0.011809 | 0.011539 | 0.011810 | 0.011435 | 0.011401 |
| 0.011437 | 0.011714 | 0.011569 | 0.011304 | 0.011782 | 0.011268 | 0.011378 |
| 0.011784 | 0.011716 | 0.011605 | 0.011775 | 0.011510 | 0.011673 | 0.011639 |
| 0.011571 | 0.011741 | 0.011601 | 0.011437 | 0.011486 | 0.011469 | 0.011541 |
| 0.011639 | 0.011539 | 0.011643 | 0.011747 | 0.011673 | 0.011742 | 0.011851 |
| 0.011575 | 0.011749 | 0.011678 | 0.011609 | 0.011879 | 0.011333 | 0.011539 |
| 0.011503 | 0.011435 | 0.011333 | 0.011333 | 0.011401 | 0.011401 | 0.011469 |
| 0.011401 | 0.011469 | 0.011367 | 0.011469 | 0.011367 | 0.011401 | 0.011469 |
| 0.011401 | 0.011843 | 0.011741 | 0.011775 | 0.011299 | 0.011401 | 0.011435 |
| 0.011435 | 0.011401 | 0.011469 | 0.011503 | 0.011367 | 0.011367 | 0.011367 |
| 0.011912 | 0.011537 | 0.011537 | 0.011333 | 0.011435 | 0.011605 | 0.011367 |
| 0.011367 | 0.011435 | 0.011401 | 0.011571 | 0.011367 | 0.011503 | 0.011639 |
| 0.011571 | 0.011401 | 0.011401 | 0.011333 | 0.011333 | 0.011503 | 0.011435 |
| 0.011333 | 0.011435 | 0.011299 | 0.011333 | 0.011469 | 0.011605 | 0.011367 |
| 0.011333 | 0.011469 | 0.011401 | 0.011299 | 0.011639 | 0.011299 | 0.011469 |
| 0.011512 | 0.011333 | 0.011673 | 0.011503 | 0.011537 | 0.011401 | 0.011503 |
| 0.011367 | 0.011707 | 0.011299 | 0.011571 | 0.011367 | 0.011367 | 0.011299 |
| 0.011537 | 0.011742 | 0.011435 | 0.011503 | 0.011333 | 0.011741 | 0.011367 |
| 0.011333 | 0.011367 | 0.011401 | 0.011503 | 0.011401 | 0.011503 | 0.011571 |
| 0.011571 | 0.011537 | 0.011435 | 0.011503 | 0.011503 | 0.011367 | 0.011333 |
| 0.011367 | 0.011367 | 0.011435 | 0.011367 | 0.011333 | 0.011503 | 0.011367 |
| 0.011401 | 0.011401 | 0.011503 | 0.011571 | 0.011469 | 0.011401 | 0.011401 |
| 0.011333 | 0.011401 | 0.011503 | 0.011367 | 0.011503 | 0.011605 | 0.011912 |
| 0.011401 | 0.011810 | 0.011375 | 0.017959 | 0.011326 | 0.011371 | 0.011733 |
| 0.011692 | 0.011738 | 0.011380 | 0.011237 | 0.011841 | 0.011761 | 0.011368 |
| 0.011540 | 0.011619 | 0.011258 | 0.011230 | 0.011258 | 0.011410 | 0.011322 |
| 0.011535 | 0.011514 | 0.011511 | 0.011462 | 0.011537 | 0.011571 | 0.011575 |
| 0.011444 | 0.011537 | 0.011537 | 0.011503 | 0.011469 | 0.011469 | 0.011435 |
| 0.011469 | 0.011401 | 0.011435 | 0.011469 | 0.011435 | 0.011367 | 0.011401 |
| 0.011401 | 0.011469 | 0.011367 | 0.011469 | 0.011503 | 0.011537 | 0.011435 |
| 0.011469 | 0.011435 | 0.011775 | 0.011775 | 0.011503 | 0.011538 | 0.011571 |
| 0.011333 | 0.011333 | 0.011367 | 0.011469 | 0.011333 | 0.011571 | 0.011571 |
| 0.011605 | 0.011605 | 0.011537 | 0.011639 | 0.011809 | 0.011641 | 0.011469 |
| 0.011469 | 0.011537 | 0.011571 | 0.011401 | 0.011469 | 0.011435 | 0.011469 |
| 0.011537 | 0.011537 | 0.011571 | 0.011537 | 0.011436 | 0.011639 | 0.011605 |
| 0.011472 | 0.011333 | 0.011469 | 0.011571 | 0.011469 | 0.011605 | 0.011639 |
| 0.011775 | 0.011510 | 0.011673 | 0.011639 | 0.011571 | 0.011741 | 0.011367 |
| 0.011538 | 0.011435 | 0.011401 | 0.011401 | 0.011469 | 0.011367 | 0.011469 |
| 0.011503 | 0.011537 | 0.011435 | 0.011469 | 0.011435 | 0.011775 | 0.011775 |
| 0.011503 | 0.011538 | 0.011605 | 0.011537 | 0.012186 | 0.011604 | 0.011524 |
| 0.011595 | 0.011553 | 0.011667 | 0.011552 | 0.011629 | 0.011550 | 0.011550 |
| 0.012140 | 0.011447 | 0.011582 | 0.011516 | 0.011794 | 0.011647 | 0.011751 |
| 0.012164 | 0.011634 | 0.011506 | 0.011503 | 0.011503 | 0.011537 | 0.011472 |
| 0.011333 | 0.011401 | 0.011537 | 0.011503 | 0.011506 | 0.011571 | 0.011538 |
| 0.011435 | 0.011367 | 0.011401 | 0.011435 | 0.011333 | 0.011401 | 0.011299 |
| 0.011435 | 0.011469 | 0.011367 | 0.011333 | 0.011435 | 0.011367 | 0.011401 |
| 0.011401 | 0.011333 | 0.011367 | 0.011435 | 0.011333 | 0.011537 | 0.011571 |
| 0.011469 | 0.011537 | 0.011469 | 0.011469 | 0.011401 | 0.011809 | 0.011435 |
| 0.011484 | 0.011401 | 0.011640 | 0.011645 | 0.011503 | 0.011503 | 0.011503 |



|          |          |          |          |          |          |          |
|----------|----------|----------|----------|----------|----------|----------|
| 0.011503 | 0.011435 | 0.011401 | 0.011435 | 0.011537 | 0.011503 | 0.011469 |
| 0.011469 | 0.011605 | 0.011775 | 0.011503 | 0.011707 | 0.011707 | 0.011571 |
| 0.011401 | 0.011469 | 0.011503 | 0.011912 | 0.011469 | 0.011503 | 0.011469 |
| 0.011503 | 0.011435 | 0.011435 | 0.011741 | 0.011639 | 0.011707 | 0.011435 |
| 0.011537 | 0.011605 | 0.011469 | 0.011537 | 0.011503 | 0.011367 | 0.011673 |
| 0.011469 | 0.011435 | 0.011435 | 0.011605 | 0.011435 | 0.011537 | 0.011741 |
| 0.011469 | 0.011818 | 0.011844 | 0.011514 | 0.011290 | 0.011543 | 0.011321 |
| 0.011283 | 0.011732 | 0.011345 | 0.011514 | 0.011359 | 0.011474 | 0.011437 |
| 0.011474 | 0.011260 | 0.011340 | 0.011260 | 0.011280 | 0.011469 | 0.011472 |
| 0.011481 | 0.011380 | 0.011489 | 0.011418 | 0.011470 | 0.011571 | 0.011639 |
| 0.011673 | 0.011537 | 0.011643 | 0.011645 | 0.011782 | 0.011813 | 0.011469 |
| 0.011673 | 0.011571 | 0.011435 | 0.011537 | 0.011333 | 0.011537 | 0.011367 |
| 0.011435 | 0.011435 | 0.011401 | 0.011367 | 0.011401 | 0.011367 | 0.011469 |
| 0.011450 | 0.011451 | 0.011442 | 0.011269 | 0.011615 | 0.011580 | 0.011580 |
| 0.011579 | 0.011299 | 0.011248 | 0.011279 | 0.011438 | 0.011610 | 0.011611 |
| 0.011401 | 0.011472 | 0.011709 | 0.011677 | 0.011606 | 0.011640 | 0.011571 |
| 0.011503 | 0.011571 | 0.011571 | 0.011469 | 0.011980 | 0.011639 | 0.011673 |
| 0.011741 | 0.011782 | 0.011441 | 0.011517 | 0.011401 | 0.011605 | 0.011571 |
| 0.011401 | 0.011639 | 0.011605 | 0.011605 | 0.011735 | 0.011775 | 0.011412 |
| 0.011300 | 0.011306 | 0.011406 | 0.011336 | 0.011476 | 0.011287 | 0.011646 |
| 0.011443 | 0.011506 | 0.011254 | 0.011441 | 0.011435 | 0.011511 | 0.011401 |
| 0.011367 | 0.011367 | 0.011435 | 0.011401 | 0.011605 | 0.011571 | 0.011503 |
| 0.011605 | 0.011673 | 0.011401 | 0.011401 | 0.011435 | 0.011435 | 0.011437 |
| 0.011506 | 0.011435 | 0.011435 | 0.011470 | 0.011571 | 0.011639 | 0.011673 |
| 0.011537 | 0.011643 | 0.011645 | 0.011782 | 0.011813 | 0.011469 | 0.011639 |
| 0.011571 | 0.011571 | 0.011403 | 0.011519 | 0.011517 | 0.000000 | 0.011379 |
| 0.011548 | 0.011748 | 0.011531 | 0.011474 | 0.011367 | 0.011571 | 0.011435 |
| 0.011537 | 0.011469 | 0.011367 | 0.011470 | 0.011571 | 0.011540 | 0.011469 |
| 0.011367 | 0.011265 | 0.011401 | 0.011367 | 0.011299 | 0.011370 | 0.011571 |
| 0.011469 | 0.011401 | 0.011435 | 0.011469 | 0.011435 | 0.011367 | 0.011571 |
| 0.011435 | 0.011435 | 0.011469 | 0.011401 | 0.011469 | 0.011707 | 0.011367 |
| 0.011401 | 0.011809 | 0.011401 | 0.011435 | 0.011401 | 0.011775 | 0.011234 |
| 0.011745 | 0.011276 | 0.011314 | 0.011551 | 0.011556 | 0.011534 | 0.011229 |
| 0.011273 | 0.011571 | 0.011673 | 0.011783 | 0.011641 | 0.011746 | 0.011845 |
| 0.011743 | 0.011849 | 0.011741 | 0.012031 | 0.011775 | 0.012663 | 0.011812 |
| 0.012561 | 0.012292 | 0.012462 | 0.012737 | 0.011775 | 0.011469 | 0.011776 |
| 0.012221 | 0.012121 | 0.011741 | 0.011639 | 0.011708 | 0.011708 | 0.011678 |
| 0.011571 | 0.011542 | 0.011639 | 0.011606 | 0.011981 | 0.012048 | 0.012015 |
| 0.011948 | 0.012049 | 0.012120 | 0.011884 | 0.012221 | 0.012228 | 0.012289 |
| 0.012290 | 0.012324 | 0.012237 | 0.012290 | 0.012291 | 0.011503 | 0.011810 |
| 0.011879 | 0.012356 | 0.011885 | 0.012117 | 0.012597 | 0.011646 | 0.011537 |
| 0.011503 | 0.011503 | 0.011980 | 0.012065 | 0.012131 | 0.011844 | 0.011504 |
| S741     | 0.011656 | 0.011656 | 0.011656 | 0.011621 | 0.011621 | 0.011691 |
| 0.011663 | 0.011557 | 0.011621 | 0.011235 | 0.011235 | 0.011270 | 0.011235 |
| 0.011270 | 0.011446 | 0.011235 | 0.011270 | 0.011340 | 0.011305 | 0.011270 |
| 0.011200 | 0.011270 | 0.011375 | 0.011236 | 0.011271 | 0.011235 | 0.011628 |
| 0.011516 | 0.011270 | 0.011165 | 0.011411 | 0.011305 | 0.011270 | 0.011305 |
| 0.011305 | 0.011411 | 0.011305 | 0.011270 | 0.011340 | 0.011305 | 0.011481 |
| 0.011235 | 0.011305 | 0.011340 | 0.011270 | 0.011340 | 0.011411 | 0.011340 |
| 0.011305 | 0.011481 | 0.011341 | 0.011656 | 0.011305 | 0.011516 | 0.011305 |
| 0.011270 | 0.011341 | 0.011411 | 0.011516 | 0.011691 | 0.011340 | 0.011481 |
| 0.011340 | 0.011376 | 0.011270 | 0.011551 | 0.011796 | 0.011305 | 0.011376 |
| 0.011270 | 0.011340 | 0.011341 | 0.011376 | 0.011305 | 0.011340 | 0.011340 |
| 0.011235 | 0.011235 | 0.011235 | 0.011341 | 0.011305 | 0.011340 | 0.011411 |
| 0.011341 | 0.011305 | 0.011375 | 0.011235 | 0.011411 | 0.011235 | 0.011270 |
| 0.011481 | 0.011411 | 0.011656 | 0.011446 | 0.011305 | 0.011551 | 0.011270 |
| 0.011485 | 0.011721 | 0.011532 | 0.011223 | 0.011216 | 0.011328 | 0.011430 |
| 0.012087 | 0.011533 | 0.011232 | 0.011516 | 0.011516 | 0.011305 | 0.011446 |
| 0.011376 | 0.011340 | 0.011411 | 0.011305 | 0.011376 | 0.011305 | 0.011340 |
| 0.011305 | 0.011375 | 0.011621 | 0.011481 | 0.011376 | 0.011341 | 0.011270 |

|          |          |          |          |          |          |          |
|----------|----------|----------|----------|----------|----------|----------|
| 0.011235 | 0.011235 | 0.011305 | 0.011235 | 0.011481 | 0.011446 | 0.011375 |
| 0.011481 | 0.011481 | 0.011270 | 0.011270 | 0.011305 | 0.011305 | 0.011307 |
| 0.011378 | 0.011305 | 0.011270 | 0.011173 | 0.011211 | 0.011206 | 0.011305 |
| 0.011307 | 0.011204 | 0.011291 | 0.011276 | 0.011166 | 0.011238 | 0.011236 |
| 0.011473 | 0.011276 | 0.011348 | 0.011235 | 0.011241 | 0.011376 | 0.011341 |
| 0.011411 | 0.011341 | 0.011340 | 0.011375 | 0.011376 | 0.011761 | 0.011516 |
| 0.011586 | 0.011446 | 0.011305 | 0.011411 | 0.011200 | 0.011446 | 0.011235 |
| 0.011305 | 0.011305 | 0.011200 | 0.011235 | 0.011270 | 0.011235 | 0.011305 |
| 0.011305 | 0.011376 | 0.011341 | 0.011235 | 0.011341 | 0.011305 | 0.011378 |
| 0.011446 | 0.011340 | 0.011235 | 0.011166 | 0.011305 | 0.011235 | 0.011165 |
| 0.011273 | 0.011446 | 0.011235 | 0.011446 | 0.011200 | 0.011305 | 0.011270 |
| 0.011376 | 0.011270 | 0.011305 | 0.011270 | 0.011305 | 0.011165 | 0.011200 |
| 0.011341 | 0.011235 | 0.011340 | 0.011270 | 0.011305 | 0.011340 | 0.011516 |
| 0.011691 | 0.011621 | 0.011691 | 0.011411 | 0.011691 | 0.011305 | 0.011270 |
| 0.011306 | 0.011604 | 0.011388 | 0.011203 | 0.011662 | 0.011131 | 0.011223 |
| 0.011663 | 0.011485 | 0.011481 | 0.011691 | 0.011381 | 0.011551 | 0.011516 |
| 0.011411 | 0.011586 | 0.011431 | 0.011274 | 0.011280 | 0.011341 | 0.011413 |
| 0.011516 | 0.011377 | 0.011484 | 0.011555 | 0.011516 | 0.011621 | 0.011661 |
| 0.011413 | 0.011555 | 0.011555 | 0.011484 | 0.011762 | 0.011200 | 0.011376 |
| 0.011375 | 0.011305 | 0.011165 | 0.011200 | 0.011270 | 0.011270 | 0.011340 |
| 0.011270 | 0.011341 | 0.011235 | 0.011340 | 0.011270 | 0.011270 | 0.011305 |
| 0.011270 | 0.011726 | 0.011621 | 0.011656 | 0.011165 | 0.011235 | 0.011270 |
| 0.011305 | 0.011270 | 0.011305 | 0.011376 | 0.011235 | 0.011235 | 0.011235 |
| 0.011796 | 0.011375 | 0.011411 | 0.011200 | 0.011305 | 0.011481 | 0.011235 |
| 0.011235 | 0.011270 | 0.011270 | 0.011446 | 0.011200 | 0.011270 | 0.011446 |
| 0.011375 | 0.011270 | 0.011270 | 0.011200 | 0.011200 | 0.011376 | 0.011305 |
| 0.011200 | 0.011305 | 0.011165 | 0.011200 | 0.011340 | 0.011446 | 0.011235 |
| 0.011201 | 0.011340 | 0.011271 | 0.011165 | 0.011481 | 0.011165 | 0.011305 |
| 0.011381 | 0.011235 | 0.011551 | 0.011376 | 0.011375 | 0.011270 | 0.011375 |
| 0.011235 | 0.011516 | 0.011165 | 0.011446 | 0.011235 | 0.011235 | 0.011165 |
| 0.011375 | 0.011516 | 0.011270 | 0.011376 | 0.011165 | 0.011621 | 0.011235 |
| 0.011200 | 0.011200 | 0.011235 | 0.011376 | 0.011270 | 0.011340 | 0.011411 |
| 0.011411 | 0.011340 | 0.011270 | 0.011411 | 0.011375 | 0.011235 | 0.011165 |
| 0.011200 | 0.011235 | 0.011270 | 0.011235 | 0.011200 | 0.011340 | 0.011235 |
| 0.011270 | 0.011270 | 0.011411 | 0.011446 | 0.011340 | 0.011235 | 0.011271 |
| 0.011340 | 0.011270 | 0.011375 | 0.011235 | 0.011340 | 0.011481 | 0.011691 |
| 0.011270 | 0.011656 | 0.011275 | 0.017916 | 0.011331 | 0.011375 | 0.011640 |
| 0.011600 | 0.011646 | 0.011331 | 0.011300 | 0.011738 | 0.011634 | 0.011372 |
| 0.011403 | 0.011563 | 0.011182 | 0.011276 | 0.011263 | 0.011313 | 0.011283 |
| 0.011544 | 0.011448 | 0.011446 | 0.011268 | 0.011411 | 0.011446 | 0.011448 |
| 0.011275 | 0.011411 | 0.011375 | 0.011375 | 0.011306 | 0.011306 | 0.011306 |
| 0.011341 | 0.011270 | 0.011305 | 0.011340 | 0.011305 | 0.011235 | 0.011270 |
| 0.011270 | 0.011305 | 0.011235 | 0.011305 | 0.011375 | 0.011411 | 0.011305 |
| 0.011340 | 0.011305 | 0.011656 | 0.011656 | 0.011376 | 0.011376 | 0.011411 |
| 0.011200 | 0.011200 | 0.011235 | 0.011341 | 0.011200 | 0.011446 | 0.011446 |
| 0.011481 | 0.011481 | 0.011375 | 0.011516 | 0.011691 | 0.011517 | 0.011341 |
| 0.011340 | 0.011375 | 0.011446 | 0.011235 | 0.011340 | 0.011270 | 0.011341 |
| 0.011376 | 0.011375 | 0.011411 | 0.011376 | 0.011306 | 0.011481 | 0.011446 |
| 0.011343 | 0.011200 | 0.011340 | 0.011411 | 0.011341 | 0.011481 | 0.011481 |
| 0.011691 | 0.011381 | 0.011551 | 0.011516 | 0.011411 | 0.011586 | 0.011235 |
| 0.011412 | 0.011306 | 0.011270 | 0.011270 | 0.011305 | 0.011235 | 0.011305 |
| 0.011375 | 0.011411 | 0.011305 | 0.011340 | 0.011305 | 0.011656 | 0.011656 |
| 0.011376 | 0.011376 | 0.011481 | 0.011411 | 0.012078 | 0.011433 | 0.011354 |
| 0.011426 | 0.011386 | 0.011500 | 0.011349 | 0.011425 | 0.011420 | 0.011420 |
| 0.011991 | 0.011277 | 0.011382 | 0.011348 | 0.011634 | 0.011522 | 0.011556 |
| 0.011981 | 0.011453 | 0.011343 | 0.011340 | 0.011340 | 0.011375 | 0.011307 |
| 0.011200 | 0.011235 | 0.011340 | 0.011305 | 0.011342 | 0.011481 | 0.011340 |
| 0.011235 | 0.011235 | 0.011270 | 0.011270 | 0.011200 | 0.011270 | 0.011165 |
| 0.011305 | 0.011305 | 0.011200 | 0.011200 | 0.011270 | 0.011235 | 0.011270 |
| 0.011270 | 0.011200 | 0.011200 | 0.011270 | 0.011200 | 0.011411 | 0.011411 |

|          |          |          |          |          |          |          |
|----------|----------|----------|----------|----------|----------|----------|
| 0.011305 | 0.011375 | 0.011305 | 0.011305 | 0.011270 | 0.011691 | 0.011305 |
| 0.011315 | 0.011270 | 0.011516 | 0.011484 | 0.011376 | 0.011375 | 0.011375 |
| 0.011376 | 0.011305 | 0.011270 | 0.011305 | 0.011411 | 0.011411 | 0.011340 |
| 0.011340 | 0.011446 | 0.011656 | 0.011340 | 0.011516 | 0.011516 | 0.011446 |
| 0.011270 | 0.011340 | 0.011376 | 0.011796 | 0.011341 | 0.011376 | 0.011341 |
| 0.011375 | 0.011270 | 0.011270 | 0.011621 | 0.011516 | 0.011586 | 0.011305 |
| 0.011376 | 0.011446 | 0.011340 | 0.011376 | 0.011375 | 0.011200 | 0.011551 |
| 0.011305 | 0.011270 | 0.011270 | 0.011481 | 0.011305 | 0.011411 | 0.011621 |
| 0.011270 | 0.011734 | 0.011726 | 0.011527 | 0.011299 | 0.011379 | 0.011221 |
| 0.011286 | 0.011547 | 0.011243 | 0.011431 | 0.011316 | 0.011431 | 0.011443 |
| 0.011536 | 0.011265 | 0.011405 | 0.011265 | 0.011285 | 0.011404 | 0.011399 |
| 0.011413 | 0.011307 | 0.011390 | 0.011317 | 0.011271 | 0.011481 | 0.011516 |
| 0.011516 | 0.011376 | 0.011518 | 0.011520 | 0.011591 | 0.011614 | 0.011305 |
| 0.011586 | 0.011446 | 0.011305 | 0.011411 | 0.011200 | 0.011446 | 0.011235 |
| 0.011305 | 0.011305 | 0.011200 | 0.011235 | 0.011270 | 0.011235 | 0.011305 |
| 0.011315 | 0.011315 | 0.011310 | 0.011310 | 0.011488 | 0.011416 | 0.011452 |
| 0.011450 | 0.011305 | 0.011137 | 0.011173 | 0.011272 | 0.011413 | 0.011414 |
| 0.011200 | 0.011343 | 0.011481 | 0.011553 | 0.011481 | 0.011516 | 0.011446 |
| 0.011340 | 0.011376 | 0.011446 | 0.011340 | 0.011902 | 0.011516 | 0.011586 |
| 0.011516 | 0.011656 | 0.011274 | 0.011385 | 0.011270 | 0.011481 | 0.011446 |
| 0.011446 | 0.011481 | 0.011481 | 0.011481 | 0.011635 | 0.011656 | 0.011241 |
| 0.011131 | 0.011133 | 0.011237 | 0.011202 | 0.011310 | 0.011138 | 0.011485 |
| 0.011275 | 0.011381 | 0.011109 | 0.011295 | 0.011305 | 0.011345 | 0.011270 |
| 0.011235 | 0.011235 | 0.011305 | 0.011235 | 0.011481 | 0.011446 | 0.011375 |
| 0.011481 | 0.011481 | 0.011270 | 0.011270 | 0.011305 | 0.011305 | 0.011307 |
| 0.011378 | 0.011305 | 0.011270 | 0.011271 | 0.011481 | 0.011516 | 0.011516 |
| 0.011376 | 0.011518 | 0.011520 | 0.011591 | 0.011614 | 0.011305 | 0.011481 |
| 0.011446 | 0.011446 | 0.011272 | 0.011314 | 0.011348 | 0.011379 | 0.000000 |
| 0.011381 | 0.011526 | 0.011409 | 0.011308 | 0.011235 | 0.011446 | 0.011305 |
| 0.011376 | 0.011341 | 0.011235 | 0.011341 | 0.011305 | 0.011378 | 0.011340 |
| 0.011235 | 0.011166 | 0.011305 | 0.011235 | 0.011165 | 0.011273 | 0.011446 |
| 0.011341 | 0.011270 | 0.011305 | 0.011340 | 0.011305 | 0.011235 | 0.011411 |
| 0.011235 | 0.011341 | 0.011340 | 0.011270 | 0.011305 | 0.011516 | 0.011235 |
| 0.011270 | 0.011691 | 0.011270 | 0.011305 | 0.011270 | 0.011656 | 0.011238 |
| 0.011587 | 0.011238 | 0.011319 | 0.011480 | 0.011570 | 0.011471 | 0.011190 |
| 0.011277 | 0.011340 | 0.011446 | 0.011556 | 0.011411 | 0.011517 | 0.011621 |
| 0.011516 | 0.011658 | 0.011516 | 0.011840 | 0.011516 | 0.012393 | 0.011586 |
| 0.012217 | 0.012077 | 0.012185 | 0.012500 | 0.011551 | 0.011235 | 0.011481 |
| 0.012007 | 0.011691 | 0.011481 | 0.011411 | 0.011481 | 0.011481 | 0.011449 |
| 0.011340 | 0.011342 | 0.011411 | 0.011376 | 0.011796 | 0.011901 | 0.011866 |
| 0.011762 | 0.011901 | 0.011972 | 0.011763 | 0.012078 | 0.012084 | 0.012183 |
| 0.012148 | 0.012218 | 0.012124 | 0.012183 | 0.012183 | 0.011376 | 0.011691 |
| 0.011761 | 0.012147 | 0.011731 | 0.011972 | 0.011762 | 0.011520 | 0.011411 |
| 0.011376 | 0.011340 | 0.011761 | 0.011832 | 0.011978 | 0.011586 | 0.011341 |
| S742     | 0.011818 | 0.011818 | 0.012094 | 0.011921 | 0.011921 | 0.011990 |
| 0.011827 | 0.011722 | 0.011921 | 0.011405 | 0.011473 | 0.011439 | 0.011405 |
| 0.011439 | 0.011611 | 0.011404 | 0.011439 | 0.011508 | 0.011473 | 0.011439 |
| 0.011405 | 0.011439 | 0.011508 | 0.011405 | 0.011370 | 0.011439 | 0.011792 |
| 0.011680 | 0.011439 | 0.011336 | 0.011542 | 0.011404 | 0.011473 | 0.011232 |
| 0.011473 | 0.011508 | 0.011473 | 0.011473 | 0.011508 | 0.011473 | 0.011646 |
| 0.011405 | 0.011439 | 0.011508 | 0.011439 | 0.011542 | 0.011577 | 0.011508 |
| 0.011473 | 0.011611 | 0.011508 | 0.011818 | 0.011473 | 0.011646 | 0.011473 |
| 0.011439 | 0.011542 | 0.011611 | 0.011646 | 0.011852 | 0.011542 | 0.011646 |
| 0.011439 | 0.011508 | 0.011439 | 0.011611 | 0.011922 | 0.011473 | 0.011542 |
| 0.011439 | 0.011542 | 0.011508 | 0.011577 | 0.011473 | 0.011508 | 0.011508 |
| 0.011404 | 0.011439 | 0.011404 | 0.011508 | 0.011473 | 0.011508 | 0.011577 |
| 0.011508 | 0.011473 | 0.011473 | 0.011404 | 0.011577 | 0.011336 | 0.011473 |
| 0.011646 | 0.011577 | 0.011818 | 0.011646 | 0.011473 | 0.011646 | 0.011439 |
| 0.011592 | 0.011826 | 0.011524 | 0.011341 | 0.011250 | 0.011437 | 0.011464 |
| 0.012107 | 0.011472 | 0.011271 | 0.011714 | 0.011715 | 0.011473 | 0.011611 |

|          |          |          |          |          |          |          |
|----------|----------|----------|----------|----------|----------|----------|
| 0.011542 | 0.011508 | 0.011577 | 0.011473 | 0.011577 | 0.011404 | 0.011508 |
| 0.011473 | 0.011508 | 0.011784 | 0.011646 | 0.011508 | 0.011508 | 0.011370 |
| 0.011405 | 0.011404 | 0.011405 | 0.011439 | 0.011646 | 0.011611 | 0.011542 |
| 0.011646 | 0.011714 | 0.011439 | 0.011439 | 0.011473 | 0.011473 | 0.011476 |
| 0.011511 | 0.011473 | 0.011439 | 0.011208 | 0.011357 | 0.011384 | 0.011474 |
| 0.011477 | 0.011413 | 0.011325 | 0.011379 | 0.011374 | 0.011412 | 0.011406 |
| 0.011614 | 0.011449 | 0.011378 | 0.011405 | 0.011344 | 0.011543 | 0.011508 |
| 0.011577 | 0.011509 | 0.011508 | 0.011611 | 0.011542 | 0.011852 | 0.011715 |
| 0.011749 | 0.011611 | 0.011473 | 0.011577 | 0.011370 | 0.011611 | 0.011405 |
| 0.011473 | 0.011473 | 0.011439 | 0.011404 | 0.011439 | 0.011404 | 0.011473 |
| 0.011405 | 0.011508 | 0.011508 | 0.011404 | 0.011509 | 0.011611 | 0.011580 |
| 0.011542 | 0.011473 | 0.011370 | 0.011337 | 0.011473 | 0.011370 | 0.011336 |
| 0.011443 | 0.011542 | 0.011336 | 0.011542 | 0.011370 | 0.011473 | 0.011439 |
| 0.011473 | 0.011439 | 0.011405 | 0.011439 | 0.011473 | 0.011336 | 0.011404 |
| 0.011439 | 0.011439 | 0.011508 | 0.011439 | 0.011473 | 0.011508 | 0.011714 |
| 0.011852 | 0.011783 | 0.011852 | 0.011612 | 0.011853 | 0.011473 | 0.011439 |
| 0.011475 | 0.011762 | 0.011571 | 0.011376 | 0.011861 | 0.011340 | 0.011420 |
| 0.011827 | 0.011721 | 0.011646 | 0.011853 | 0.011551 | 0.011715 | 0.011611 |
| 0.011611 | 0.011714 | 0.011644 | 0.011526 | 0.011578 | 0.011508 | 0.011581 |
| 0.011680 | 0.011510 | 0.011685 | 0.011720 | 0.011715 | 0.011784 | 0.011895 |
| 0.011616 | 0.011722 | 0.011720 | 0.011650 | 0.011923 | 0.011370 | 0.011579 |
| 0.011473 | 0.011473 | 0.011370 | 0.011370 | 0.011370 | 0.011439 | 0.011508 |
| 0.011370 | 0.011439 | 0.011336 | 0.011508 | 0.011370 | 0.011439 | 0.011508 |
| 0.011439 | 0.011887 | 0.011784 | 0.011818 | 0.011336 | 0.011405 | 0.011439 |
| 0.011473 | 0.011439 | 0.011508 | 0.011542 | 0.011404 | 0.011404 | 0.011404 |
| 0.011956 | 0.011577 | 0.011577 | 0.011370 | 0.011473 | 0.011577 | 0.011405 |
| 0.011404 | 0.011473 | 0.011439 | 0.011542 | 0.011405 | 0.011542 | 0.011611 |
| 0.011611 | 0.011439 | 0.011439 | 0.011370 | 0.011370 | 0.011542 | 0.011473 |
| 0.011370 | 0.011473 | 0.011336 | 0.011370 | 0.011508 | 0.011612 | 0.011405 |
| 0.011370 | 0.011508 | 0.011439 | 0.011336 | 0.011680 | 0.011336 | 0.011473 |
| 0.011517 | 0.011405 | 0.011715 | 0.011542 | 0.011542 | 0.011439 | 0.011542 |
| 0.011404 | 0.011646 | 0.011336 | 0.011611 | 0.011404 | 0.011404 | 0.011336 |
| 0.011473 | 0.011715 | 0.011439 | 0.011542 | 0.011370 | 0.011784 | 0.011404 |
| 0.011405 | 0.011404 | 0.011439 | 0.011473 | 0.011439 | 0.011542 | 0.011611 |
| 0.011611 | 0.011542 | 0.011473 | 0.011577 | 0.011473 | 0.011404 | 0.011370 |
| 0.011404 | 0.011404 | 0.011439 | 0.011405 | 0.011301 | 0.011542 | 0.011370 |
| 0.011439 | 0.011439 | 0.011577 | 0.011611 | 0.011508 | 0.011370 | 0.011439 |
| 0.011508 | 0.011439 | 0.011542 | 0.011405 | 0.011542 | 0.011646 | 0.011783 |
| 0.011439 | 0.011853 | 0.011449 | 0.017438 | 0.011193 | 0.011684 | 0.011810 |
| 0.011769 | 0.011745 | 0.011484 | 0.011236 | 0.011783 | 0.011838 | 0.011550 |
| 0.011541 | 0.011679 | 0.011300 | 0.011359 | 0.011339 | 0.011511 | 0.011411 |
| 0.011488 | 0.011480 | 0.011515 | 0.011197 | 0.011542 | 0.011611 | 0.011615 |
| 0.011413 | 0.011542 | 0.011542 | 0.011542 | 0.011474 | 0.011474 | 0.011474 |
| 0.011508 | 0.011439 | 0.011473 | 0.011508 | 0.011473 | 0.011405 | 0.011439 |
| 0.011439 | 0.011508 | 0.011405 | 0.011473 | 0.011542 | 0.011577 | 0.011473 |
| 0.011508 | 0.011473 | 0.011818 | 0.011818 | 0.011543 | 0.011578 | 0.011611 |
| 0.011370 | 0.011370 | 0.011405 | 0.011439 | 0.011370 | 0.011577 | 0.011577 |
| 0.011646 | 0.011646 | 0.011577 | 0.011680 | 0.011852 | 0.011682 | 0.011439 |
| 0.011508 | 0.011577 | 0.011542 | 0.011439 | 0.011508 | 0.011473 | 0.011508 |
| 0.011577 | 0.011577 | 0.011611 | 0.011508 | 0.011405 | 0.011646 | 0.011577 |
| 0.011512 | 0.011405 | 0.011508 | 0.011611 | 0.011508 | 0.011646 | 0.011680 |
| 0.011853 | 0.011551 | 0.011715 | 0.011611 | 0.011611 | 0.011714 | 0.011405 |
| 0.011578 | 0.011474 | 0.011439 | 0.011439 | 0.011508 | 0.011405 | 0.011473 |
| 0.011542 | 0.011577 | 0.011473 | 0.011508 | 0.011473 | 0.011818 | 0.011818 |
| 0.011543 | 0.011578 | 0.011646 | 0.011577 | 0.012233 | 0.011648 | 0.011566 |
| 0.011638 | 0.011594 | 0.011710 | 0.011558 | 0.011671 | 0.011627 | 0.011591 |
| 0.012188 | 0.011487 | 0.011623 | 0.011557 | 0.011838 | 0.011688 | 0.011724 |
| 0.012211 | 0.011680 | 0.011511 | 0.011508 | 0.011508 | 0.011542 | 0.011476 |
| 0.011370 | 0.011336 | 0.011542 | 0.011508 | 0.011511 | 0.011646 | 0.011612 |
| 0.011473 | 0.011336 | 0.011370 | 0.011473 | 0.011301 | 0.011439 | 0.011336 |

|          |          |          |          |          |          |          |
|----------|----------|----------|----------|----------|----------|----------|
| 0.011473 | 0.011473 | 0.011370 | 0.011370 | 0.011439 | 0.011404 | 0.011439 |
| 0.011439 | 0.011370 | 0.011404 | 0.011439 | 0.011370 | 0.011508 | 0.011577 |
| 0.011473 | 0.011542 | 0.011473 | 0.011473 | 0.011439 | 0.011852 | 0.011439 |
| 0.011525 | 0.011439 | 0.011681 | 0.011687 | 0.011473 | 0.011542 | 0.011542 |
| 0.011542 | 0.011405 | 0.011439 | 0.011405 | 0.011577 | 0.011542 | 0.011473 |
| 0.011508 | 0.011646 | 0.011818 | 0.011542 | 0.011715 | 0.011715 | 0.011577 |
| 0.011439 | 0.011473 | 0.011542 | 0.011956 | 0.011508 | 0.011474 | 0.011508 |
| 0.011542 | 0.011473 | 0.011473 | 0.011784 | 0.011646 | 0.011749 | 0.011473 |
| 0.011577 | 0.011646 | 0.011508 | 0.011577 | 0.011542 | 0.011405 | 0.011749 |
| 0.011473 | 0.011473 | 0.011473 | 0.011646 | 0.011473 | 0.011577 | 0.011818 |
| 0.011439 | 0.011897 | 0.011887 | 0.011558 | 0.011291 | 0.011583 | 0.011270 |
| 0.011452 | 0.011738 | 0.011276 | 0.011517 | 0.011309 | 0.011476 | 0.011437 |
| 0.011474 | 0.011260 | 0.011399 | 0.011194 | 0.011280 | 0.011397 | 0.011393 |
| 0.011485 | 0.011262 | 0.011565 | 0.011493 | 0.011475 | 0.011646 | 0.011715 |
| 0.011680 | 0.011577 | 0.011684 | 0.011685 | 0.011790 | 0.011820 | 0.011473 |
| 0.011749 | 0.011611 | 0.011473 | 0.011577 | 0.011370 | 0.011611 | 0.011405 |
| 0.011473 | 0.011473 | 0.011439 | 0.011404 | 0.011439 | 0.011404 | 0.011473 |
| 0.011419 | 0.011455 | 0.011482 | 0.011482 | 0.011657 | 0.011551 | 0.011620 |
| 0.011619 | 0.011508 | 0.011250 | 0.011208 | 0.011477 | 0.011651 | 0.011617 |
| 0.011439 | 0.011477 | 0.011750 | 0.011719 | 0.011646 | 0.011681 | 0.011611 |
| 0.011542 | 0.011611 | 0.011611 | 0.011508 | 0.012094 | 0.011680 | 0.011749 |
| 0.011783 | 0.011865 | 0.011445 | 0.011522 | 0.011439 | 0.011646 | 0.011611 |
| 0.011612 | 0.011680 | 0.011680 | 0.011680 | 0.011785 | 0.011818 | 0.011452 |
| 0.011338 | 0.011345 | 0.011444 | 0.011409 | 0.011516 | 0.011367 | 0.011688 |
| 0.011483 | 0.011646 | 0.011402 | 0.011522 | 0.011474 | 0.011551 | 0.011370 |
| 0.011405 | 0.011404 | 0.011405 | 0.011439 | 0.011646 | 0.011611 | 0.011542 |
| 0.011646 | 0.011714 | 0.011439 | 0.011439 | 0.011473 | 0.011473 | 0.011476 |
| 0.011511 | 0.011473 | 0.011439 | 0.011475 | 0.011646 | 0.011715 | 0.011680 |
| 0.011577 | 0.011684 | 0.011685 | 0.011790 | 0.011820 | 0.011473 | 0.011680 |
| 0.011611 | 0.011611 | 0.011441 | 0.011632 | 0.011522 | 0.011548 | 0.011381 |
| 0.000000 | 0.011707 | 0.011536 | 0.011513 | 0.011336 | 0.011542 | 0.011405 |
| 0.011508 | 0.011508 | 0.011404 | 0.011509 | 0.011611 | 0.011580 | 0.011473 |
| 0.011370 | 0.011337 | 0.011473 | 0.011370 | 0.011336 | 0.011443 | 0.011542 |
| 0.011508 | 0.011439 | 0.011473 | 0.011508 | 0.011473 | 0.011405 | 0.011577 |
| 0.011473 | 0.011508 | 0.011508 | 0.011439 | 0.011473 | 0.011715 | 0.011405 |
| 0.011439 | 0.011852 | 0.011439 | 0.011404 | 0.011439 | 0.011818 | 0.011277 |
| 0.011685 | 0.011277 | 0.011263 | 0.011514 | 0.011600 | 0.011501 | 0.011230 |
| 0.011220 | 0.011611 | 0.011715 | 0.011826 | 0.011680 | 0.011822 | 0.011921 |
| 0.011819 | 0.011893 | 0.011818 | 0.012073 | 0.011818 | 0.012716 | 0.011853 |
| 0.012612 | 0.012371 | 0.012512 | 0.012718 | 0.011818 | 0.011508 | 0.011818 |
| 0.012268 | 0.012027 | 0.011783 | 0.011680 | 0.011750 | 0.011750 | 0.011685 |
| 0.011611 | 0.011615 | 0.011680 | 0.011612 | 0.012026 | 0.012059 | 0.012095 |
| 0.011992 | 0.012060 | 0.012199 | 0.011960 | 0.012268 | 0.012275 | 0.012337 |
| 0.012338 | 0.012372 | 0.012317 | 0.012338 | 0.012337 | 0.011542 | 0.011853 |
| 0.011922 | 0.012405 | 0.011893 | 0.012163 | 0.011922 | 0.011686 | 0.011577 |
| 0.011542 | 0.011508 | 0.012025 | 0.012120 | 0.012180 | 0.011818 | 0.011543 |
| S743     | 0.012063 | 0.012063 | 0.012063 | 0.011972 | 0.011972 | 0.012063 |
| 0.012033 | 0.011940 | 0.011972 | 0.011561 | 0.011607 | 0.011607 | 0.011607 |
| 0.011607 | 0.011881 | 0.011561 | 0.011607 | 0.011744 | 0.011698 | 0.011652 |
| 0.011561 | 0.011653 | 0.011698 | 0.011608 | 0.011607 | 0.011607 | 0.011986 |
| 0.011789 | 0.011561 | 0.011516 | 0.011698 | 0.011652 | 0.011698 | 0.011653 |
| 0.011698 | 0.011698 | 0.011698 | 0.011698 | 0.011698 | 0.011652 | 0.011881 |
| 0.011561 | 0.011652 | 0.011653 | 0.011607 | 0.011698 | 0.011789 | 0.011744 |
| 0.011607 | 0.011835 | 0.011653 | 0.011972 | 0.011653 | 0.011926 | 0.011653 |
| 0.011607 | 0.011698 | 0.011744 | 0.011926 | 0.012017 | 0.011698 | 0.011789 |
| 0.011653 | 0.011744 | 0.011653 | 0.011926 | 0.012063 | 0.011698 | 0.011744 |
| 0.011653 | 0.011653 | 0.011744 | 0.011744 | 0.011653 | 0.011698 | 0.011698 |
| 0.011607 | 0.011607 | 0.011607 | 0.011698 | 0.011652 | 0.011744 | 0.011698 |
| 0.011744 | 0.011698 | 0.011698 | 0.011607 | 0.011744 | 0.011561 | 0.011652 |
| 0.011835 | 0.011789 | 0.012109 | 0.011789 | 0.011653 | 0.011926 | 0.011653 |

|          |          |          |          |          |          |          |
|----------|----------|----------|----------|----------|----------|----------|
| 0.011982 | 0.012135 | 0.011883 | 0.011592 | 0.011563 | 0.011712 | 0.011812 |
| 0.012601 | 0.011909 | 0.011624 | 0.011880 | 0.011926 | 0.011653 | 0.011789 |
| 0.011744 | 0.011653 | 0.011789 | 0.011698 | 0.011744 | 0.011607 | 0.011698 |
| 0.011698 | 0.011698 | 0.011926 | 0.011881 | 0.011744 | 0.011698 | 0.011607 |
| 0.011561 | 0.011561 | 0.011561 | 0.011561 | 0.011789 | 0.011698 | 0.011698 |
| 0.011789 | 0.011698 | 0.011652 | 0.011652 | 0.011698 | 0.011698 | 0.011703 |
| 0.011750 | 0.011652 | 0.011698 | 0.011552 | 0.011552 | 0.011537 | 0.011653 |
| 0.011705 | 0.011622 | 0.011562 | 0.011579 | 0.011522 | 0.011620 | 0.011611 |
| 0.011947 | 0.011671 | 0.011666 | 0.011607 | 0.011580 | 0.011745 | 0.011699 |
| 0.011790 | 0.011655 | 0.011653 | 0.011698 | 0.011744 | 0.012246 | 0.011881 |
| 0.012017 | 0.011789 | 0.011698 | 0.011744 | 0.011561 | 0.011789 | 0.011607 |
| 0.011698 | 0.011698 | 0.011607 | 0.011607 | 0.011652 | 0.011607 | 0.011744 |
| 0.011653 | 0.011744 | 0.011698 | 0.011607 | 0.011698 | 0.011652 | 0.011700 |
| 0.011835 | 0.011698 | 0.011607 | 0.011516 | 0.011652 | 0.011607 | 0.011516 |
| 0.011660 | 0.011835 | 0.011561 | 0.011835 | 0.011561 | 0.011698 | 0.011653 |
| 0.011653 | 0.011607 | 0.011653 | 0.011653 | 0.011653 | 0.011516 | 0.011607 |
| 0.011653 | 0.011652 | 0.011698 | 0.011607 | 0.011652 | 0.011607 | 0.011653 |
| 0.012109 | 0.012017 | 0.012017 | 0.011835 | 0.012063 | 0.011652 | 0.011652 |
| 0.011653 | 0.011938 | 0.011693 | 0.011568 | 0.012070 | 0.011522 | 0.011623 |
| 0.011986 | 0.011984 | 0.011881 | 0.012018 | 0.011753 | 0.011972 | 0.011926 |
| 0.011789 | 0.012017 | 0.011835 | 0.011575 | 0.011643 | 0.011698 | 0.011751 |
| 0.011653 | 0.011747 | 0.011933 | 0.012027 | 0.011835 | 0.012063 | 0.011796 |
| 0.011797 | 0.012026 | 0.011982 | 0.011842 | 0.011882 | 0.011561 | 0.011654 |
| 0.011744 | 0.011607 | 0.011516 | 0.011561 | 0.011607 | 0.011607 | 0.011698 |
| 0.011561 | 0.011653 | 0.011561 | 0.011607 | 0.011607 | 0.011652 | 0.011652 |
| 0.011653 | 0.012154 | 0.011972 | 0.012017 | 0.011516 | 0.011607 | 0.011698 |
| 0.011653 | 0.011652 | 0.011607 | 0.011744 | 0.011607 | 0.011607 | 0.011607 |
| 0.012154 | 0.011789 | 0.011744 | 0.011516 | 0.011653 | 0.011789 | 0.011607 |
| 0.011607 | 0.011652 | 0.011653 | 0.011653 | 0.011561 | 0.011698 | 0.011789 |
| 0.011789 | 0.011607 | 0.011652 | 0.011561 | 0.011561 | 0.011698 | 0.011698 |
| 0.011561 | 0.011652 | 0.011516 | 0.011516 | 0.011744 | 0.011744 | 0.011607 |
| 0.011562 | 0.011744 | 0.011653 | 0.011516 | 0.011835 | 0.011516 | 0.011698 |
| 0.011662 | 0.011607 | 0.011926 | 0.011790 | 0.011653 | 0.011653 | 0.011698 |
| 0.011561 | 0.011926 | 0.011516 | 0.011789 | 0.011561 | 0.011561 | 0.011516 |
| 0.011744 | 0.011926 | 0.011653 | 0.011744 | 0.011561 | 0.011972 | 0.011561 |
| 0.011516 | 0.011607 | 0.011607 | 0.011698 | 0.011607 | 0.011698 | 0.011789 |
| 0.011744 | 0.011744 | 0.011653 | 0.011698 | 0.011698 | 0.011561 | 0.011516 |
| 0.011607 | 0.011561 | 0.011653 | 0.011561 | 0.011516 | 0.011744 | 0.011561 |
| 0.011607 | 0.011653 | 0.011744 | 0.011698 | 0.011744 | 0.011516 | 0.011653 |
| 0.011698 | 0.011653 | 0.011698 | 0.011607 | 0.011698 | 0.011926 | 0.011926 |
| 0.011653 | 0.011972 | 0.011669 | 0.020484 | 0.011679 | 0.011806 | 0.012007 |
| 0.011999 | 0.012066 | 0.011756 | 0.011730 | 0.012085 | 0.012043 | 0.011625 |
| 0.011619 | 0.012047 | 0.011547 | 0.011733 | 0.011589 | 0.011597 | 0.011748 |
| 0.011847 | 0.011769 | 0.011762 | 0.011610 | 0.011789 | 0.011790 | 0.011791 |
| 0.011527 | 0.011744 | 0.011698 | 0.011607 | 0.011698 | 0.011699 | 0.011608 |
| 0.011698 | 0.011607 | 0.011698 | 0.011698 | 0.011698 | 0.011607 | 0.011607 |
| 0.011607 | 0.011653 | 0.011607 | 0.011653 | 0.011789 | 0.011789 | 0.011653 |
| 0.011698 | 0.011516 | 0.011972 | 0.011972 | 0.011790 | 0.011789 | 0.011835 |
| 0.011561 | 0.011516 | 0.011607 | 0.011607 | 0.011516 | 0.011789 | 0.011789 |
| 0.011926 | 0.011881 | 0.011744 | 0.011972 | 0.012017 | 0.011973 | 0.011653 |
| 0.011744 | 0.011698 | 0.011744 | 0.011561 | 0.011698 | 0.011561 | 0.011698 |
| 0.011744 | 0.011744 | 0.011789 | 0.011698 | 0.011654 | 0.011789 | 0.011881 |
| 0.011703 | 0.011561 | 0.011744 | 0.011789 | 0.011698 | 0.011835 | 0.011425 |
| 0.012018 | 0.011753 | 0.011972 | 0.011926 | 0.011789 | 0.012017 | 0.011562 |
| 0.011790 | 0.011653 | 0.011607 | 0.011607 | 0.011653 | 0.011607 | 0.011653 |
| 0.011789 | 0.011789 | 0.011653 | 0.011698 | 0.011516 | 0.011972 | 0.011972 |
| 0.011790 | 0.011789 | 0.011835 | 0.011744 | 0.012431 | 0.011883 | 0.011730 |
| 0.011779 | 0.011812 | 0.011874 | 0.011624 | 0.011912 | 0.011805 | 0.011863 |
| 0.012318 | 0.011621 | 0.011711 | 0.011623 | 0.012089 | 0.011662 | 0.012031 |
| 0.012351 | 0.011679 | 0.011750 | 0.011698 | 0.011744 | 0.011698 | 0.011703 |

|          |          |          |          |          |          |          |
|----------|----------|----------|----------|----------|----------|----------|
| 0.011561 | 0.011561 | 0.011789 | 0.011744 | 0.011749 | 0.011835 | 0.011607 |
| 0.011653 | 0.011561 | 0.011607 | 0.011653 | 0.011516 | 0.011607 | 0.011516 |
| 0.011561 | 0.011561 | 0.011561 | 0.011561 | 0.011607 | 0.011561 | 0.011607 |
| 0.011653 | 0.011516 | 0.011516 | 0.011653 | 0.011561 | 0.011698 | 0.011607 |
| 0.011653 | 0.011653 | 0.011698 | 0.011653 | 0.011607 | 0.012017 | 0.011652 |
| 0.011630 | 0.011516 | 0.011790 | 0.011749 | 0.011698 | 0.011744 | 0.011789 |
| 0.011744 | 0.011653 | 0.011607 | 0.011653 | 0.011835 | 0.011652 | 0.011744 |
| 0.011698 | 0.011835 | 0.012017 | 0.011744 | 0.011835 | 0.011835 | 0.011835 |
| 0.011652 | 0.011653 | 0.011744 | 0.012200 | 0.011653 | 0.011698 | 0.011744 |
| 0.011744 | 0.011561 | 0.011561 | 0.011881 | 0.011881 | 0.011835 | 0.011653 |
| 0.011835 | 0.011881 | 0.011698 | 0.011835 | 0.011789 | 0.011607 | 0.011926 |
| 0.011607 | 0.011652 | 0.011561 | 0.011835 | 0.011653 | 0.011835 | 0.012063 |
| 0.011652 | 0.012172 | 0.012109 | 0.011940 | 0.011586 | 0.011800 | 0.011611 |
| 0.011654 | 0.011800 | 0.011630 | 0.011669 | 0.011664 | 0.011951 | 0.011769 |
| 0.011924 | 0.011672 | 0.011725 | 0.011592 | 0.011648 | 0.011785 | 0.011448 |
| 0.011833 | 0.011544 | 0.011780 | 0.011726 | 0.011656 | 0.011835 | 0.011835 |
| 0.011926 | 0.011699 | 0.011886 | 0.011796 | 0.011752 | 0.011968 | 0.011698 |
| 0.012017 | 0.011789 | 0.011698 | 0.011744 | 0.011561 | 0.011789 | 0.011607 |
| 0.011698 | 0.011698 | 0.011607 | 0.011607 | 0.011652 | 0.011607 | 0.011744 |
| 0.011634 | 0.011678 | 0.011621 | 0.011667 | 0.011807 | 0.011759 | 0.011804 |
| 0.011847 | 0.011653 | 0.011462 | 0.011504 | 0.011659 | 0.011844 | 0.011845 |
| 0.011516 | 0.011751 | 0.011837 | 0.011933 | 0.011882 | 0.011974 | 0.011789 |
| 0.011653 | 0.011789 | 0.011744 | 0.011652 | 0.012292 | 0.011972 | 0.011926 |
| 0.011789 | 0.012026 | 0.011662 | 0.011763 | 0.011607 | 0.011653 | 0.011790 |
| 0.011790 | 0.011880 | 0.011926 | 0.011926 | 0.012056 | 0.012017 | 0.011533 |
| 0.011473 | 0.011437 | 0.011522 | 0.011567 | 0.011525 | 0.011465 | 0.011844 |
| 0.011667 | 0.011658 | 0.011444 | 0.011576 | 0.011653 | 0.011714 | 0.011607 |
| 0.011561 | 0.011561 | 0.011561 | 0.011561 | 0.011789 | 0.011698 | 0.011698 |
| 0.011789 | 0.011698 | 0.011652 | 0.011652 | 0.011698 | 0.011698 | 0.011703 |
| 0.011750 | 0.011652 | 0.011698 | 0.011656 | 0.011835 | 0.011835 | 0.011926 |
| 0.011699 | 0.011886 | 0.011796 | 0.011752 | 0.011968 | 0.011698 | 0.011470 |
| 0.011790 | 0.011790 | 0.011610 | 0.011620 | 0.011621 | 0.011748 | 0.011526 |
| 0.011707 | 0.000000 | 0.011327 | 0.011611 | 0.011561 | 0.011835 | 0.011653 |
| 0.011744 | 0.011698 | 0.011607 | 0.011698 | 0.011652 | 0.011700 | 0.011698 |
| 0.011607 | 0.011516 | 0.011652 | 0.011607 | 0.011516 | 0.011660 | 0.011835 |
| 0.011698 | 0.011607 | 0.011698 | 0.011698 | 0.011698 | 0.011607 | 0.011789 |
| 0.011607 | 0.011744 | 0.011516 | 0.011607 | 0.011698 | 0.011835 | 0.011561 |
| 0.011653 | 0.012017 | 0.011607 | 0.011653 | 0.011652 | 0.011972 | 0.011581 |
| 0.011739 | 0.011583 | 0.011646 | 0.011892 | 0.011954 | 0.011842 | 0.011563 |
| 0.011598 | 0.011607 | 0.011744 | 0.011892 | 0.011698 | 0.011883 | 0.011972 |
| 0.011836 | 0.011884 | 0.011835 | 0.012121 | 0.011835 | 0.012840 | 0.011927 |
| 0.012612 | 0.012475 | 0.012662 | 0.012934 | 0.012017 | 0.011516 | 0.011698 |
| 0.012339 | 0.011972 | 0.011789 | 0.011699 | 0.011790 | 0.011790 | 0.011841 |
| 0.011607 | 0.011610 | 0.011698 | 0.011607 | 0.012201 | 0.012200 | 0.012155 |
| 0.012111 | 0.012246 | 0.012338 | 0.012112 | 0.012430 | 0.012391 | 0.012385 |
| 0.012523 | 0.012477 | 0.012448 | 0.012523 | 0.012522 | 0.011698 | 0.012018 |
| 0.012110 | 0.012612 | 0.012069 | 0.012338 | 0.012201 | 0.011840 | 0.011744 |
| 0.011698 | 0.011698 | 0.012200 | 0.012178 | 0.012406 | 0.011972 | 0.011699 |
| S744     | 0.011907 | 0.011907 | 0.011907 | 0.011823 | 0.011823 | 0.011907 |
| 0.011834 | 0.011748 | 0.011865 | 0.011357 | 0.011357 | 0.011442 | 0.011399 |
| 0.011399 | 0.011568 | 0.011357 | 0.011399 | 0.011526 | 0.011399 | 0.011441 |
| 0.011399 | 0.011357 | 0.011484 | 0.011399 | 0.011399 | 0.011441 | 0.011833 |
| 0.011695 | 0.011441 | 0.011314 | 0.011484 | 0.011483 | 0.011399 | 0.011483 |
| 0.011441 | 0.011526 | 0.011484 | 0.011483 | 0.011484 | 0.011441 | 0.011695 |
| 0.011357 | 0.011483 | 0.011526 | 0.011357 | 0.011526 | 0.011611 | 0.011484 |
| 0.011441 | 0.011653 | 0.011484 | 0.011865 | 0.011484 | 0.011695 | 0.011484 |
| 0.011441 | 0.011526 | 0.011568 | 0.011695 | 0.011865 | 0.011526 | 0.011568 |
| 0.011441 | 0.011526 | 0.011484 | 0.011653 | 0.011992 | 0.011441 | 0.011483 |
| 0.011357 | 0.011484 | 0.011526 | 0.011568 | 0.011483 | 0.011441 | 0.011441 |
| 0.011399 | 0.011399 | 0.011399 | 0.011484 | 0.011441 | 0.011442 | 0.011526 |

|          |          |          |          |          |          |          |
|----------|----------|----------|----------|----------|----------|----------|
| 0.011526 | 0.011399 | 0.011526 | 0.011441 | 0.011568 | 0.011357 | 0.011441 |
| 0.011610 | 0.011568 | 0.011865 | 0.011526 | 0.011441 | 0.011568 | 0.011399 |
| 0.011631 | 0.011870 | 0.011787 | 0.011407 | 0.011391 | 0.011517 | 0.011612 |
| 0.012403 | 0.011669 | 0.011428 | 0.011695 | 0.011653 | 0.011441 | 0.011568 |
| 0.011568 | 0.011484 | 0.011526 | 0.011484 | 0.011526 | 0.011484 | 0.011526 |
| 0.011484 | 0.011441 | 0.011738 | 0.011568 | 0.011526 | 0.011441 | 0.011399 |
| 0.011399 | 0.011357 | 0.011441 | 0.011357 | 0.011653 | 0.011611 | 0.011526 |
| 0.011653 | 0.011653 | 0.011399 | 0.011399 | 0.011399 | 0.011399 | 0.011401 |
| 0.011487 | 0.011441 | 0.011399 | 0.011332 | 0.011381 | 0.011368 | 0.011441 |
| 0.011443 | 0.011364 | 0.011483 | 0.011452 | 0.011360 | 0.011404 | 0.011442 |
| 0.011694 | 0.011493 | 0.011451 | 0.011399 | 0.011410 | 0.011568 | 0.011441 |
| 0.011526 | 0.011399 | 0.011399 | 0.011568 | 0.011568 | 0.011949 | 0.011568 |
| 0.011738 | 0.011483 | 0.011441 | 0.011483 | 0.011357 | 0.011568 | 0.011399 |
| 0.011483 | 0.011441 | 0.011441 | 0.011399 | 0.011399 | 0.011399 | 0.011441 |
| 0.011441 | 0.011484 | 0.011483 | 0.011357 | 0.011484 | 0.011483 | 0.011527 |
| 0.011568 | 0.011483 | 0.011399 | 0.011314 | 0.011441 | 0.011399 | 0.011314 |
| 0.011446 | 0.011568 | 0.011357 | 0.011568 | 0.011357 | 0.011484 | 0.011441 |
| 0.011526 | 0.011399 | 0.011441 | 0.011399 | 0.011399 | 0.011314 | 0.011441 |
| 0.011441 | 0.011441 | 0.011526 | 0.011399 | 0.011484 | 0.011441 | 0.011356 |
| 0.011865 | 0.011822 | 0.011865 | 0.011613 | 0.011865 | 0.011399 | 0.011441 |
| 0.011400 | 0.011703 | 0.011492 | 0.011361 | 0.011914 | 0.011316 | 0.011391 |
| 0.011747 | 0.011747 | 0.011610 | 0.011823 | 0.011573 | 0.011653 | 0.011568 |
| 0.011653 | 0.011653 | 0.011685 | 0.011425 | 0.011536 | 0.011526 | 0.011616 |
| 0.011357 | 0.011612 | 0.011658 | 0.011699 | 0.011738 | 0.011823 | 0.011699 |
| 0.011531 | 0.011698 | 0.011744 | 0.011573 | 0.011823 | 0.011357 | 0.011610 |
| 0.011441 | 0.011357 | 0.011314 | 0.011357 | 0.011399 | 0.011441 | 0.011399 |
| 0.011357 | 0.011483 | 0.011357 | 0.011483 | 0.011357 | 0.011441 | 0.011484 |
| 0.011357 | 0.011907 | 0.011780 | 0.011822 | 0.011314 | 0.011441 | 0.011484 |
| 0.011441 | 0.011441 | 0.011483 | 0.011483 | 0.011399 | 0.011399 | 0.011399 |
| 0.012034 | 0.011483 | 0.011484 | 0.011357 | 0.011441 | 0.011611 | 0.011399 |
| 0.011399 | 0.011441 | 0.011441 | 0.011568 | 0.011357 | 0.011526 | 0.011653 |
| 0.011526 | 0.011399 | 0.011441 | 0.011357 | 0.011314 | 0.011526 | 0.011484 |
| 0.011357 | 0.011441 | 0.011314 | 0.011314 | 0.011483 | 0.011569 | 0.011399 |
| 0.011314 | 0.011441 | 0.011442 | 0.011314 | 0.011653 | 0.011314 | 0.011526 |
| 0.011534 | 0.011399 | 0.011738 | 0.011568 | 0.011441 | 0.011441 | 0.011526 |
| 0.011399 | 0.011695 | 0.011314 | 0.011568 | 0.011357 | 0.011357 | 0.011314 |
| 0.011568 | 0.011696 | 0.011484 | 0.011526 | 0.011314 | 0.011738 | 0.011357 |
| 0.011357 | 0.011399 | 0.011441 | 0.011483 | 0.011441 | 0.011526 | 0.011611 |
| 0.011483 | 0.011568 | 0.011399 | 0.011526 | 0.011484 | 0.011399 | 0.011314 |
| 0.011357 | 0.011399 | 0.011484 | 0.011357 | 0.011314 | 0.011484 | 0.011399 |
| 0.011399 | 0.011399 | 0.011526 | 0.011441 | 0.011483 | 0.011399 | 0.011441 |
| 0.011483 | 0.011399 | 0.011484 | 0.011399 | 0.011568 | 0.011611 | 0.011780 |
| 0.011441 | 0.011865 | 0.011453 | 0.018123 | 0.011542 | 0.011439 | 0.011854 |
| 0.011802 | 0.011818 | 0.011588 | 0.011637 | 0.012019 | 0.011843 | 0.011436 |
| 0.011653 | 0.011747 | 0.011359 | 0.011481 | 0.011400 | 0.011491 | 0.011485 |
| 0.011751 | 0.011581 | 0.011626 | 0.011410 | 0.011568 | 0.011653 | 0.011570 |
| 0.011405 | 0.011568 | 0.011611 | 0.011526 | 0.011526 | 0.011526 | 0.011442 |
| 0.011441 | 0.011399 | 0.011441 | 0.011441 | 0.011484 | 0.011357 | 0.011399 |
| 0.011399 | 0.011483 | 0.011399 | 0.011526 | 0.011568 | 0.011526 | 0.011399 |
| 0.011483 | 0.011399 | 0.011780 | 0.011780 | 0.011568 | 0.011526 | 0.011611 |
| 0.011357 | 0.011357 | 0.011399 | 0.011399 | 0.011314 | 0.011653 | 0.011653 |
| 0.011610 | 0.011610 | 0.011568 | 0.011653 | 0.011780 | 0.011654 | 0.011441 |
| 0.011441 | 0.011484 | 0.011611 | 0.011357 | 0.011484 | 0.011399 | 0.011483 |
| 0.011526 | 0.011526 | 0.011568 | 0.011526 | 0.011442 | 0.011695 | 0.011611 |
| 0.011530 | 0.011399 | 0.011441 | 0.011568 | 0.011526 | 0.011568 | 0.011314 |
| 0.011823 | 0.011573 | 0.011653 | 0.011568 | 0.011653 | 0.011653 | 0.011399 |
| 0.011611 | 0.011484 | 0.011399 | 0.011399 | 0.011483 | 0.011399 | 0.011526 |
| 0.011568 | 0.011526 | 0.011399 | 0.011483 | 0.011399 | 0.011780 | 0.011780 |
| 0.011568 | 0.011526 | 0.011695 | 0.011568 | 0.012162 | 0.011592 | 0.011590 |
| 0.011588 | 0.011582 | 0.011679 | 0.011494 | 0.011673 | 0.011578 | 0.011496 |



|          |          |          |          |          |          |          |
|----------|----------|----------|----------|----------|----------|----------|
| 0.012054 | 0.011492 | 0.011664 | 0.011407 | 0.011882 | 0.011361 | 0.011745 |
| 0.012129 | 0.011624 | 0.011445 | 0.011399 | 0.011441 | 0.011526 | 0.011402 |
| 0.011357 | 0.011357 | 0.011483 | 0.011441 | 0.011444 | 0.011611 | 0.011527 |
| 0.011399 | 0.011357 | 0.011399 | 0.011441 | 0.011314 | 0.011399 | 0.011314 |
| 0.011441 | 0.011441 | 0.011357 | 0.011357 | 0.011399 | 0.011399 | 0.011399 |
| 0.011399 | 0.011357 | 0.011357 | 0.011484 | 0.011357 | 0.011526 | 0.011230 |
| 0.011441 | 0.011441 | 0.011399 | 0.011441 | 0.011441 | 0.011865 | 0.011483 |
| 0.011497 | 0.011357 | 0.011695 | 0.011698 | 0.011526 | 0.011526 | 0.011526 |
| 0.011526 | 0.011441 | 0.011399 | 0.011441 | 0.011568 | 0.011399 | 0.011483 |
| 0.011526 | 0.011526 | 0.011865 | 0.011568 | 0.011738 | 0.011738 | 0.011611 |
| 0.011441 | 0.011526 | 0.011526 | 0.011907 | 0.011526 | 0.011526 | 0.011526 |
| 0.011483 | 0.011399 | 0.011399 | 0.011738 | 0.011695 | 0.011695 | 0.011441 |
| 0.011568 | 0.011653 | 0.011441 | 0.011568 | 0.011526 | 0.011399 | 0.011780 |
| 0.011483 | 0.011441 | 0.011399 | 0.011568 | 0.011441 | 0.011568 | 0.011907 |
| 0.011441 | 0.011963 | 0.011865 | 0.011678 | 0.011404 | 0.011532 | 0.011510 |
| 0.011331 | 0.011896 | 0.011373 | 0.011573 | 0.011490 | 0.011638 | 0.011526 |
| 0.011671 | 0.011381 | 0.011614 | 0.011464 | 0.011526 | 0.011635 | 0.011216 |
| 0.011542 | 0.011415 | 0.011551 | 0.011461 | 0.011443 | 0.011611 | 0.011653 |
| 0.011611 | 0.011526 | 0.011657 | 0.011701 | 0.011745 | 0.011730 | 0.011441 |
| 0.011738 | 0.011483 | 0.011441 | 0.011483 | 0.011357 | 0.011568 | 0.011399 |
| 0.011483 | 0.011441 | 0.011441 | 0.011399 | 0.011399 | 0.011399 | 0.011441 |
| 0.011413 | 0.011455 | 0.011492 | 0.011491 | 0.011706 | 0.011619 | 0.011574 |
| 0.011658 | 0.011526 | 0.011290 | 0.011331 | 0.011443 | 0.011699 | 0.011614 |
| 0.011357 | 0.011529 | 0.011611 | 0.011655 | 0.011610 | 0.011738 | 0.011653 |
| 0.011484 | 0.011568 | 0.011484 | 0.011484 | 0.012034 | 0.011611 | 0.011653 |
| 0.011695 | 0.011818 | 0.011448 | 0.011540 | 0.011399 | 0.011653 | 0.011653 |
| 0.011654 | 0.011610 | 0.011483 | 0.011483 | 0.011647 | 0.011780 | 0.011451 |
| 0.011315 | 0.011322 | 0.011444 | 0.011401 | 0.011404 | 0.011339 | 0.011699 |
| 0.011491 | 0.011552 | 0.011351 | 0.011434 | 0.011357 | 0.011490 | 0.011399 |
| 0.011399 | 0.011357 | 0.011441 | 0.011357 | 0.011653 | 0.011611 | 0.011526 |
| 0.011653 | 0.011653 | 0.011399 | 0.011399 | 0.011399 | 0.011399 | 0.011401 |
| 0.011487 | 0.011441 | 0.011399 | 0.011443 | 0.011611 | 0.011653 | 0.011611 |
| 0.011526 | 0.011657 | 0.011701 | 0.011745 | 0.011730 | 0.011441 | 0.011314 |
| 0.011653 | 0.011653 | 0.011442 | 0.011539 | 0.011538 | 0.011531 | 0.011409 |
| 0.011536 | 0.011327 | 0.000000 | 0.011486 | 0.011357 | 0.011568 | 0.011441 |
| 0.011484 | 0.011483 | 0.011357 | 0.011484 | 0.011483 | 0.011527 | 0.011483 |
| 0.011399 | 0.011314 | 0.011441 | 0.011399 | 0.011314 | 0.011446 | 0.011568 |
| 0.011441 | 0.011399 | 0.011441 | 0.011441 | 0.011484 | 0.011357 | 0.011484 |
| 0.011399 | 0.011399 | 0.011230 | 0.011441 | 0.011399 | 0.011738 | 0.011357 |
| 0.011357 | 0.011865 | 0.011441 | 0.011399 | 0.011441 | 0.011865 | 0.011439 |
| 0.011756 | 0.011384 | 0.011484 | 0.011624 | 0.011732 | 0.011565 | 0.011375 |
| 0.011439 | 0.011526 | 0.011653 | 0.011740 | 0.011612 | 0.011785 | 0.011908 |
| 0.011822 | 0.011865 | 0.011822 | 0.012089 | 0.011738 | 0.012628 | 0.011781 |
| 0.012502 | 0.012377 | 0.012463 | 0.012548 | 0.011822 | 0.011399 | 0.011611 |
| 0.012162 | 0.012122 | 0.011738 | 0.011611 | 0.011653 | 0.011653 | 0.011572 |
| 0.011526 | 0.011531 | 0.011568 | 0.011568 | 0.012035 | 0.012034 | 0.012119 |
| 0.011909 | 0.012119 | 0.012165 | 0.011997 | 0.012205 | 0.012167 | 0.012121 |
| 0.012290 | 0.012290 | 0.012223 | 0.012205 | 0.012207 | 0.011526 | 0.011780 |
| 0.011865 | 0.012332 | 0.011956 | 0.012162 | 0.012801 | 0.011658 | 0.011484 |
| 0.011526 | 0.011484 | 0.012077 | 0.012078 | 0.012174 | 0.011780 | 0.011485 |
| S745     | 0.011706 | 0.011706 | 0.011978 | 0.011808 | 0.011808 | 0.011876 |
| 0.011713 | 0.011645 | 0.011808 | 0.011298 | 0.011366 | 0.011333 | 0.011298 |
| 0.011332 | 0.011502 | 0.011298 | 0.011332 | 0.011400 | 0.011366 | 0.011332 |
| 0.011298 | 0.011332 | 0.011434 | 0.011298 | 0.011332 | 0.011332 | 0.011679 |
| 0.011570 | 0.011332 | 0.011230 | 0.011468 | 0.011400 | 0.011366 | 0.011400 |
| 0.011366 | 0.011468 | 0.011366 | 0.011366 | 0.011400 | 0.011366 | 0.011536 |
| 0.011298 | 0.011366 | 0.011400 | 0.011332 | 0.011434 | 0.011468 | 0.011400 |
| 0.011366 | 0.011536 | 0.011434 | 0.011706 | 0.011366 | 0.011638 | 0.011366 |
| 0.011332 | 0.011434 | 0.011502 | 0.011638 | 0.011740 | 0.011434 | 0.011536 |
| 0.011400 | 0.011468 | 0.011366 | 0.011604 | 0.011842 | 0.011366 | 0.011434 |

|          |          |          |          |          |          |          |
|----------|----------|----------|----------|----------|----------|----------|
| 0.011332 | 0.011434 | 0.011400 | 0.011468 | 0.011400 | 0.011400 | 0.011400 |
| 0.011298 | 0.011332 | 0.011298 | 0.011400 | 0.011366 | 0.011401 | 0.011468 |
| 0.011400 | 0.011366 | 0.011434 | 0.011332 | 0.011468 | 0.011298 | 0.011366 |
| 0.011536 | 0.011468 | 0.011706 | 0.011536 | 0.011366 | 0.011604 | 0.011366 |
| 0.011548 | 0.011779 | 0.011595 | 0.011298 | 0.011287 | 0.011396 | 0.011459 |
| 0.012135 | 0.011574 | 0.011310 | 0.011604 | 0.011604 | 0.011400 | 0.011502 |
| 0.011434 | 0.011400 | 0.011468 | 0.011366 | 0.011468 | 0.011400 | 0.011400 |
| 0.011366 | 0.011468 | 0.011672 | 0.011536 | 0.011434 | 0.011400 | 0.011332 |
| 0.011298 | 0.011298 | 0.011366 | 0.011332 | 0.011536 | 0.011502 | 0.011434 |
| 0.011536 | 0.011604 | 0.011332 | 0.011332 | 0.011366 | 0.011366 | 0.011368 |
| 0.011436 | 0.011366 | 0.011366 | 0.011206 | 0.011317 | 0.011238 | 0.011366 |
| 0.011369 | 0.011304 | 0.011359 | 0.011340 | 0.011267 | 0.011268 | 0.011334 |
| 0.011570 | 0.011339 | 0.011409 | 0.011298 | 0.011305 | 0.011435 | 0.011401 |
| 0.011469 | 0.011401 | 0.011400 | 0.011502 | 0.011434 | 0.011808 | 0.011604 |
| 0.011638 | 0.011502 | 0.011366 | 0.011468 | 0.011264 | 0.011502 | 0.011298 |
| 0.011366 | 0.011366 | 0.011332 | 0.011298 | 0.011332 | 0.011298 | 0.011400 |
| 0.011366 | 0.011434 | 0.011400 | 0.011298 | 0.011401 | 0.011502 | 0.011505 |
| 0.011502 | 0.011400 | 0.011298 | 0.011231 | 0.011366 | 0.011298 | 0.011230 |
| 0.011335 | 0.011502 | 0.011298 | 0.011502 | 0.011264 | 0.011366 | 0.011332 |
| 0.011434 | 0.011332 | 0.011366 | 0.011332 | 0.011366 | 0.011230 | 0.011366 |
| 0.011400 | 0.011332 | 0.011400 | 0.011332 | 0.011366 | 0.011400 | 0.011638 |
| 0.011740 | 0.011672 | 0.011740 | 0.011504 | 0.011740 | 0.011366 | 0.011332 |
| 0.011368 | 0.011631 | 0.011431 | 0.011269 | 0.011746 | 0.011233 | 0.011338 |
| 0.011747 | 0.011645 | 0.011536 | 0.011740 | 0.011440 | 0.011604 | 0.011570 |
| 0.011502 | 0.011672 | 0.011492 | 0.011310 | 0.011356 | 0.011400 | 0.011471 |
| 0.011570 | 0.011470 | 0.011608 | 0.011677 | 0.011570 | 0.011672 | 0.011712 |
| 0.011471 | 0.011644 | 0.011608 | 0.011539 | 0.011809 | 0.011264 | 0.011435 |
| 0.011434 | 0.011366 | 0.011264 | 0.011264 | 0.011332 | 0.011332 | 0.011400 |
| 0.011332 | 0.011400 | 0.011298 | 0.011400 | 0.011332 | 0.011332 | 0.011400 |
| 0.011332 | 0.011774 | 0.011672 | 0.011706 | 0.011230 | 0.011298 | 0.011366 |
| 0.011366 | 0.011332 | 0.000000 | 0.011434 | 0.011298 | 0.011298 | 0.011298 |
| 0.011842 | 0.011468 | 0.011434 | 0.011264 | 0.011366 | 0.011536 | 0.011298 |
| 0.011298 | 0.011366 | 0.011332 | 0.011502 | 0.011298 | 0.011434 | 0.011570 |
| 0.011502 | 0.011332 | 0.011332 | 0.011264 | 0.011230 | 0.011434 | 0.011366 |
| 0.011264 | 0.011366 | 0.011230 | 0.011264 | 0.011400 | 0.011536 | 0.011298 |
| 0.011264 | 0.011400 | 0.011332 | 0.011230 | 0.011570 | 0.011230 | 0.011400 |
| 0.011441 | 0.011298 | 0.011604 | 0.011434 | 0.011468 | 0.011332 | 0.011434 |
| 0.011298 | 0.011638 | 0.011230 | 0.011502 | 0.011298 | 0.011298 | 0.011230 |
| 0.011468 | 0.011672 | 0.011366 | 0.011434 | 0.011264 | 0.011672 | 0.011298 |
| 0.011298 | 0.011298 | 0.011332 | 0.011434 | 0.011332 | 0.011434 | 0.011502 |
| 0.011502 | 0.011468 | 0.011366 | 0.011468 | 0.011434 | 0.011298 | 0.011264 |
| 0.011298 | 0.011298 | 0.011366 | 0.011298 | 0.011264 | 0.011434 | 0.011298 |
| 0.011332 | 0.011332 | 0.011468 | 0.011502 | 0.011400 | 0.011332 | 0.011332 |
| 0.011400 | 0.011332 | 0.011434 | 0.011298 | 0.011434 | 0.011536 | 0.011774 |
| 0.011332 | 0.011740 | 0.011340 | 0.017933 | 0.011259 | 0.011491 | 0.011696 |
| 0.011656 | 0.011701 | 0.011429 | 0.011468 | 0.011784 | 0.011724 | 0.011368 |
| 0.011588 | 0.011556 | 0.011258 | 0.011355 | 0.011337 | 0.011360 | 0.011363 |
| 0.011583 | 0.011512 | 0.011511 | 0.011262 | 0.011468 | 0.011502 | 0.011505 |
| 0.011338 | 0.011468 | 0.011468 | 0.011434 | 0.011400 | 0.011400 | 0.011298 |
| 0.011400 | 0.011332 | 0.011366 | 0.011400 | 0.011366 | 0.011298 | 0.011332 |
| 0.011332 | 0.011400 | 0.011298 | 0.011400 | 0.011434 | 0.011468 | 0.011366 |
| 0.011400 | 0.011366 | 0.011706 | 0.011706 | 0.011434 | 0.011469 | 0.011502 |
| 0.011264 | 0.011264 | 0.011298 | 0.011400 | 0.011264 | 0.011502 | 0.011502 |
| 0.011536 | 0.011536 | 0.011468 | 0.011570 | 0.011740 | 0.011571 | 0.011400 |
| 0.011400 | 0.011468 | 0.011502 | 0.011332 | 0.011400 | 0.011366 | 0.011400 |
| 0.011468 | 0.011468 | 0.011502 | 0.011468 | 0.011367 | 0.011570 | 0.011536 |
| 0.011403 | 0.011298 | 0.011400 | 0.011502 | 0.011400 | 0.011536 | 0.011570 |
| 0.011740 | 0.011440 | 0.011604 | 0.011570 | 0.011502 | 0.011672 | 0.011298 |
| 0.011469 | 0.011366 | 0.011332 | 0.011332 | 0.011400 | 0.011298 | 0.011400 |
| 0.011434 | 0.011468 | 0.011366 | 0.011400 | 0.011366 | 0.011706 | 0.011706 |

|          |          |          |          |          |          |          |
|----------|----------|----------|----------|----------|----------|----------|
| 0.011434 | 0.011469 | 0.011536 | 0.011434 | 0.012116 | 0.011492 | 0.011416 |
| 0.011487 | 0.011445 | 0.011558 | 0.011446 | 0.011554 | 0.011477 | 0.011479 |
| 0.012033 | 0.011339 | 0.011476 | 0.011410 | 0.011687 | 0.011577 | 0.011646 |
| 0.012058 | 0.011516 | 0.011573 | 0.011570 | 0.011570 | 0.011570 | 0.011539 |
| 0.011264 | 0.011434 | 0.011570 | 0.011536 | 0.011539 | 0.011536 | 0.011503 |
| 0.011366 | 0.011298 | 0.011332 | 0.011366 | 0.011264 | 0.011332 | 0.011230 |
| 0.011366 | 0.011400 | 0.011298 | 0.011264 | 0.011366 | 0.011298 | 0.011332 |
| 0.011332 | 0.011264 | 0.011332 | 0.011366 | 0.011264 | 0.011468 | 0.011502 |
| 0.011400 | 0.011468 | 0.011400 | 0.011400 | 0.011332 | 0.011740 | 0.011366 |
| 0.011377 | 0.011332 | 0.011570 | 0.011541 | 0.011434 | 0.011434 | 0.011434 |
| 0.011434 | 0.011366 | 0.011332 | 0.011366 | 0.011468 | 0.011468 | 0.011400 |
| 0.011400 | 0.011536 | 0.011706 | 0.011434 | 0.011638 | 0.011638 | 0.011502 |
| 0.011332 | 0.011400 | 0.011434 | 0.011842 | 0.011400 | 0.011434 | 0.011400 |
| 0.011434 | 0.011366 | 0.011366 | 0.011672 | 0.011604 | 0.011638 | 0.011366 |
| 0.011468 | 0.011536 | 0.011400 | 0.011468 | 0.011434 | 0.011298 | 0.011638 |
| 0.011400 | 0.011366 | 0.011366 | 0.011536 | 0.011366 | 0.011468 | 0.011706 |
| 0.011332 | 0.011782 | 0.011774 | 0.011593 | 0.011230 | 0.011473 | 0.011321 |
| 0.011337 | 0.011808 | 0.011309 | 0.011513 | 0.011308 | 0.011418 | 0.011436 |
| 0.011576 | 0.011193 | 0.011398 | 0.011194 | 0.011278 | 0.011331 | 0.011429 |
| 0.011442 | 0.011339 | 0.011452 | 0.011381 | 0.011401 | 0.011536 | 0.011604 |
| 0.011604 | 0.011469 | 0.011573 | 0.011575 | 0.011712 | 0.011740 | 0.011400 |
| 0.011638 | 0.011502 | 0.011366 | 0.011468 | 0.011264 | 0.011502 | 0.011298 |
| 0.011366 | 0.011366 | 0.011332 | 0.011298 | 0.011332 | 0.011298 | 0.011400 |
| 0.011343 | 0.011344 | 0.011372 | 0.011407 | 0.011510 | 0.011510 | 0.011509 |
| 0.011474 | 0.011434 | 0.011210 | 0.011206 | 0.011369 | 0.011540 | 0.011541 |
| 0.011332 | 0.011403 | 0.011605 | 0.011573 | 0.011537 | 0.011571 | 0.011468 |
| 0.011434 | 0.011502 | 0.011502 | 0.011400 | 0.011978 | 0.011570 | 0.011638 |
| 0.011638 | 0.011745 | 0.011371 | 0.011446 | 0.011332 | 0.011536 | 0.011502 |
| 0.011537 | 0.011570 | 0.011570 | 0.011570 | 0.011733 | 0.011706 | 0.011306 |
| 0.011231 | 0.011200 | 0.011301 | 0.011267 | 0.011371 | 0.011173 | 0.011576 |
| 0.011338 | 0.011458 | 0.011204 | 0.011363 | 0.011366 | 0.011406 | 0.011332 |
| 0.011298 | 0.011298 | 0.011366 | 0.011332 | 0.011536 | 0.011502 | 0.011434 |
| 0.011536 | 0.011604 | 0.011332 | 0.011332 | 0.011366 | 0.011366 | 0.011368 |
| 0.011436 | 0.011366 | 0.011366 | 0.011401 | 0.011536 | 0.011604 | 0.011604 |
| 0.011469 | 0.011573 | 0.011575 | 0.011712 | 0.011740 | 0.011400 | 0.011570 |
| 0.011502 | 0.011502 | 0.011334 | 0.011447 | 0.011447 | 0.011474 | 0.011308 |
| 0.011513 | 0.011611 | 0.011486 | 0.000000 | 0.011298 | 0.011502 | 0.011366 |
| 0.011434 | 0.011400 | 0.011298 | 0.011401 | 0.011502 | 0.011505 | 0.011400 |
| 0.011298 | 0.011231 | 0.011366 | 0.011298 | 0.011230 | 0.011335 | 0.011502 |
| 0.011400 | 0.011332 | 0.011366 | 0.011400 | 0.011366 | 0.011298 | 0.011502 |
| 0.011366 | 0.011400 | 0.011400 | 0.011332 | 0.011400 | 0.011638 | 0.011298 |
| 0.011332 | 0.011740 | 0.011332 | 0.011366 | 0.011332 | 0.011706 | 0.011320 |
| 0.011800 | 0.011318 | 0.011364 | 0.011549 | 0.011637 | 0.011533 | 0.011271 |
| 0.011272 | 0.011502 | 0.011604 | 0.011713 | 0.011571 | 0.011711 | 0.011843 |
| 0.011741 | 0.011745 | 0.011740 | 0.011994 | 0.011706 | 0.012591 | 0.011742 |
| 0.012490 | 0.012255 | 0.012390 | 0.012665 | 0.011706 | 0.011400 | 0.011706 |
| 0.012150 | 0.012084 | 0.011672 | 0.011570 | 0.011639 | 0.011639 | 0.011608 |
| 0.011502 | 0.011506 | 0.011570 | 0.011536 | 0.011911 | 0.011978 | 0.011979 |
| 0.011877 | 0.011945 | 0.012084 | 0.011847 | 0.012150 | 0.012157 | 0.012218 |
| 0.012219 | 0.012253 | 0.012200 | 0.012219 | 0.012221 | 0.011434 | 0.011740 |
| 0.011809 | 0.012319 | 0.011815 | 0.012046 | 0.012525 | 0.011575 | 0.011468 |
| 0.011434 | 0.011434 | 0.011910 | 0.011932 | 0.012055 | 0.011774 | 0.011435 |
| S746     | 0.011598 | 0.011598 | 0.011934 | 0.011698 | 0.011698 | 0.011766 |
| 0.011604 | 0.011536 | 0.011698 | 0.011195 | 0.011262 | 0.011229 | 0.011195 |
| 0.011228 | 0.011396 | 0.011195 | 0.011228 | 0.011295 | 0.011262 | 0.011228 |
| 0.011195 | 0.011228 | 0.011329 | 0.011195 | 0.011161 | 0.011228 | 0.011570 |
| 0.011463 | 0.011228 | 0.011127 | 0.011362 | 0.011228 | 0.011262 | 0.011228 |
| 0.011262 | 0.011295 | 0.011262 | 0.011262 | 0.011295 | 0.011262 | 0.011430 |
| 0.011195 | 0.011262 | 0.011295 | 0.011228 | 0.011329 | 0.011362 | 0.011295 |
| 0.011262 | 0.011430 | 0.011329 | 0.011597 | 0.011262 | 0.011463 | 0.011262 |

|          |          |          |          |          |          |          |
|----------|----------|----------|----------|----------|----------|----------|
| 0.011228 | 0.011329 | 0.011396 | 0.011463 | 0.011631 | 0.011329 | 0.011430 |
| 0.011228 | 0.011295 | 0.011262 | 0.011429 | 0.011732 | 0.011262 | 0.011329 |
| 0.011228 | 0.011329 | 0.011295 | 0.011362 | 0.011295 | 0.011295 | 0.011295 |
| 0.011195 | 0.011228 | 0.011195 | 0.011295 | 0.011262 | 0.011296 | 0.011362 |
| 0.011295 | 0.011262 | 0.011262 | 0.011228 | 0.011362 | 0.011127 | 0.011262 |
| 0.011430 | 0.011362 | 0.011597 | 0.011430 | 0.011262 | 0.011430 | 0.011262 |
| 0.011431 | 0.011658 | 0.011475 | 0.011177 | 0.011172 | 0.011281 | 0.011375 |
| 0.012012 | 0.011416 | 0.011184 | 0.011497 | 0.011497 | 0.011295 | 0.011396 |
| 0.011329 | 0.011295 | 0.011362 | 0.011262 | 0.011362 | 0.011228 | 0.011295 |
| 0.011262 | 0.011362 | 0.011564 | 0.011430 | 0.011329 | 0.011295 | 0.011161 |
| 0.011195 | 0.011195 | 0.011195 | 0.011228 | 0.011430 | 0.011396 | 0.011329 |
| 0.011430 | 0.011497 | 0.011228 | 0.011228 | 0.011262 | 0.011262 | 0.011263 |
| 0.011331 | 0.011262 | 0.011262 | 0.011096 | 0.011205 | 0.011165 | 0.011262 |
| 0.011263 | 0.011198 | 0.011245 | 0.011233 | 0.011162 | 0.011197 | 0.011229 |
| 0.011492 | 0.011267 | 0.011232 | 0.011195 | 0.011199 | 0.011329 | 0.011296 |
| 0.011363 | 0.011296 | 0.011296 | 0.011396 | 0.011329 | 0.011631 | 0.011497 |
| 0.011530 | 0.011396 | 0.011262 | 0.011362 | 0.011161 | 0.011396 | 0.011195 |
| 0.011262 | 0.011262 | 0.011228 | 0.011195 | 0.011228 | 0.011195 | 0.011295 |
| 0.011195 | 0.011295 | 0.011295 | 0.011195 | 0.011296 | 0.011396 | 0.011398 |
| 0.011329 | 0.011295 | 0.011195 | 0.011128 | 0.011262 | 0.011195 | 0.011128 |
| 0.011230 | 0.011329 | 0.000000 | 0.011329 | 0.011161 | 0.011262 | 0.011228 |
| 0.011262 | 0.011228 | 0.011195 | 0.011228 | 0.011262 | 0.011127 | 0.011195 |
| 0.011228 | 0.011228 | 0.011295 | 0.011228 | 0.011262 | 0.011295 | 0.011463 |
| 0.011631 | 0.011564 | 0.011631 | 0.011397 | 0.011631 | 0.011262 | 0.011228 |
| 0.011263 | 0.011505 | 0.011335 | 0.011163 | 0.011637 | 0.011129 | 0.011257 |
| 0.011638 | 0.011536 | 0.011430 | 0.011631 | 0.011333 | 0.011497 | 0.011396 |
| 0.011396 | 0.011564 | 0.011416 | 0.011225 | 0.011270 | 0.011295 | 0.011365 |
| 0.011463 | 0.011364 | 0.011500 | 0.011500 | 0.011497 | 0.011564 | 0.011670 |
| 0.011399 | 0.011502 | 0.011500 | 0.011432 | 0.011700 | 0.011161 | 0.011364 |
| 0.011262 | 0.011262 | 0.011161 | 0.011161 | 0.011161 | 0.011228 | 0.011295 |
| 0.011161 | 0.011228 | 0.011127 | 0.011295 | 0.011161 | 0.011228 | 0.011295 |
| 0.011228 | 0.011665 | 0.011564 | 0.011598 | 0.011127 | 0.011228 | 0.011262 |
| 0.011262 | 0.011228 | 0.011295 | 0.011329 | 0.011195 | 0.011195 | 0.011195 |
| 0.011732 | 0.011362 | 0.011362 | 0.011161 | 0.011262 | 0.011362 | 0.011195 |
| 0.011195 | 0.011262 | 0.011228 | 0.011329 | 0.011195 | 0.011329 | 0.011396 |
| 0.011396 | 0.011228 | 0.011228 | 0.011161 | 0.011161 | 0.011329 | 0.011262 |
| 0.011161 | 0.011262 | 0.011127 | 0.011161 | 0.011295 | 0.011430 | 0.011195 |
| 0.011161 | 0.011295 | 0.011228 | 0.011127 | 0.011463 | 0.011127 | 0.011295 |
| 0.011300 | 0.011195 | 0.011497 | 0.011329 | 0.011362 | 0.011228 | 0.011329 |
| 0.011195 | 0.011463 | 0.011127 | 0.011396 | 0.011195 | 0.011195 | 0.011127 |
| 0.011295 | 0.011564 | 0.011262 | 0.011329 | 0.011161 | 0.011564 | 0.011195 |
| 0.011195 | 0.011195 | 0.011228 | 0.011262 | 0.011228 | 0.011329 | 0.011396 |
| 0.011396 | 0.011362 | 0.011262 | 0.011363 | 0.011262 | 0.011195 | 0.011161 |
| 0.011195 | 0.011195 | 0.011262 | 0.011195 | 0.011094 | 0.011329 | 0.011195 |
| 0.011228 | 0.011228 | 0.011362 | 0.011396 | 0.011295 | 0.011161 | 0.011228 |
| 0.011295 | 0.011228 | 0.011329 | 0.011195 | 0.011329 | 0.011430 | 0.011732 |
| 0.011228 | 0.011631 | 0.011233 | 0.011748 | 0.011191 | 0.011366 | 0.011583 |
| 0.011545 | 0.011588 | 0.011270 | 0.011234 | 0.011664 | 0.011613 | 0.011303 |
| 0.011440 | 0.011549 | 0.011138 | 0.011186 | 0.011177 | 0.011307 | 0.011232 |
| 0.011436 | 0.011395 | 0.011357 | 0.011193 | 0.011362 | 0.011396 | 0.011398 |
| 0.011198 | 0.011362 | 0.011362 | 0.011329 | 0.011295 | 0.011295 | 0.011262 |
| 0.011295 | 0.011228 | 0.011262 | 0.011295 | 0.011262 | 0.011195 | 0.011228 |
| 0.011228 | 0.011295 | 0.011195 | 0.011295 | 0.011329 | 0.011362 | 0.011262 |
| 0.011295 | 0.011262 | 0.011598 | 0.011597 | 0.011329 | 0.011363 | 0.011396 |
| 0.011161 | 0.011161 | 0.011195 | 0.011195 | 0.011161 | 0.011396 | 0.011396 |
| 0.011430 | 0.011430 | 0.011362 | 0.011463 | 0.011631 | 0.011464 | 0.011228 |
| 0.011295 | 0.011362 | 0.011329 | 0.011228 | 0.011295 | 0.011262 | 0.011295 |
| 0.011363 | 0.011362 | 0.011396 | 0.011295 | 0.011195 | 0.011463 | 0.011362 |
| 0.011297 | 0.011195 | 0.011295 | 0.011396 | 0.011295 | 0.011430 | 0.011463 |
| 0.011631 | 0.011333 | 0.011497 | 0.011396 | 0.011396 | 0.011564 | 0.011195 |

|          |          |          |          |          |          |          |
|----------|----------|----------|----------|----------|----------|----------|
| 0.011363 | 0.011262 | 0.011228 | 0.011228 | 0.011295 | 0.011195 | 0.011295 |
| 0.011329 | 0.011362 | 0.011262 | 0.011295 | 0.011262 | 0.011598 | 0.011597 |
| 0.011329 | 0.011363 | 0.011430 | 0.011362 | 0.011969 | 0.011418 | 0.011342 |
| 0.011412 | 0.011372 | 0.011482 | 0.011372 | 0.011480 | 0.011405 | 0.011371 |
| 0.011919 | 0.011268 | 0.011403 | 0.011337 | 0.011611 | 0.011468 | 0.011503 |
| 0.011944 | 0.011399 | 0.011297 | 0.011295 | 0.011295 | 0.011329 | 0.011263 |
| 0.011161 | 0.011127 | 0.011329 | 0.011295 | 0.011297 | 0.011430 | 0.011397 |
| 0.011262 | 0.011127 | 0.011161 | 0.011262 | 0.011094 | 0.011228 | 0.011127 |
| 0.011262 | 0.011295 | 0.011195 | 0.011161 | 0.011262 | 0.011195 | 0.011228 |
| 0.011228 | 0.011161 | 0.011228 | 0.011262 | 0.011161 | 0.011295 | 0.011396 |
| 0.011295 | 0.011362 | 0.011295 | 0.011295 | 0.011228 | 0.011631 | 0.011262 |
| 0.011304 | 0.011228 | 0.011464 | 0.011467 | 0.011262 | 0.011329 | 0.011329 |
| 0.011329 | 0.011195 | 0.011228 | 0.011195 | 0.011362 | 0.011362 | 0.011295 |
| 0.011295 | 0.011430 | 0.011597 | 0.011329 | 0.011530 | 0.011530 | 0.011396 |
| 0.011228 | 0.011295 | 0.011329 | 0.011732 | 0.011295 | 0.011262 | 0.011295 |
| 0.011329 | 0.011262 | 0.011262 | 0.011564 | 0.011430 | 0.011530 | 0.011262 |
| 0.011362 | 0.011430 | 0.011295 | 0.011362 | 0.011329 | 0.011195 | 0.011530 |
| 0.011295 | 0.011262 | 0.011262 | 0.011430 | 0.011262 | 0.011362 | 0.011598 |
| 0.011295 | 0.011672 | 0.011665 | 0.011467 | 0.011173 | 0.011366 | 0.011215 |
| 0.011170 | 0.011683 | 0.011201 | 0.011417 | 0.011207 | 0.011366 | 0.011326 |
| 0.011417 | 0.011126 | 0.011283 | 0.011126 | 0.011168 | 0.011328 | 0.011304 |
| 0.011324 | 0.011178 | 0.011342 | 0.011272 | 0.011296 | 0.011430 | 0.011497 |
| 0.011497 | 0.011363 | 0.011466 | 0.011467 | 0.011603 | 0.011626 | 0.011295 |
| 0.011530 | 0.011396 | 0.011262 | 0.011362 | 0.011161 | 0.011396 | 0.011195 |
| 0.011262 | 0.011262 | 0.011228 | 0.011195 | 0.011228 | 0.011195 | 0.011295 |
| 0.011270 | 0.011270 | 0.011266 | 0.011300 | 0.011437 | 0.011333 | 0.011402 |
| 0.011401 | 0.011329 | 0.011134 | 0.011132 | 0.011263 | 0.011433 | 0.011400 |
| 0.011228 | 0.011297 | 0.011531 | 0.011500 | 0.011430 | 0.011464 | 0.011396 |
| 0.011329 | 0.011396 | 0.011396 | 0.011295 | 0.011867 | 0.011463 | 0.011497 |
| 0.011564 | 0.011630 | 0.011265 | 0.011337 | 0.011228 | 0.011430 | 0.011396 |
| 0.011430 | 0.011463 | 0.011463 | 0.011463 | 0.011611 | 0.011598 | 0.011234 |
| 0.011128 | 0.011130 | 0.011231 | 0.011196 | 0.011299 | 0.011135 | 0.011468 |
| 0.011266 | 0.011367 | 0.000000 | 0.011285 | 0.011262 | 0.011334 | 0.011161 |
| 0.011195 | 0.011195 | 0.011195 | 0.011228 | 0.011430 | 0.011396 | 0.011329 |
| 0.011430 | 0.011497 | 0.011228 | 0.011228 | 0.011262 | 0.011262 | 0.011263 |
| 0.011331 | 0.011262 | 0.011262 | 0.011296 | 0.011430 | 0.011497 | 0.011497 |
| 0.011363 | 0.011466 | 0.011467 | 0.011603 | 0.011626 | 0.011295 | 0.011463 |
| 0.011396 | 0.011396 | 0.011229 | 0.011408 | 0.011338 | 0.011367 | 0.011235 |
| 0.011336 | 0.011561 | 0.011357 | 0.011298 | 0.000000 | 0.011329 | 0.011195 |
| 0.011295 | 0.011295 | 0.011195 | 0.011296 | 0.011396 | 0.011398 | 0.011295 |
| 0.011195 | 0.011128 | 0.011262 | 0.011195 | 0.011128 | 0.011230 | 0.011329 |
| 0.011295 | 0.011228 | 0.011262 | 0.011295 | 0.011262 | 0.011195 | 0.011396 |
| 0.011262 | 0.011262 | 0.011295 | 0.011228 | 0.011295 | 0.011530 | 0.011195 |
| 0.011228 | 0.011631 | 0.011228 | 0.011195 | 0.011228 | 0.011597 | 0.011189 |
| 0.011622 | 0.011188 | 0.011211 | 0.011422 | 0.011508 | 0.011419 | 0.011144 |
| 0.011165 | 0.011396 | 0.011497 | 0.011603 | 0.011464 | 0.011601 | 0.011733 |
| 0.011632 | 0.011669 | 0.011631 | 0.011880 | 0.011598 | 0.012472 | 0.011633 |
| 0.012372 | 0.012139 | 0.012274 | 0.012545 | 0.011597 | 0.011295 | 0.011598 |
| 0.012002 | 0.011971 | 0.011564 | 0.011463 | 0.011531 | 0.011531 | 0.011500 |
| 0.011396 | 0.011399 | 0.011463 | 0.011430 | 0.011800 | 0.011867 | 0.011867 |
| 0.011767 | 0.011867 | 0.011971 | 0.011737 | 0.012003 | 0.012008 | 0.012070 |
| 0.012070 | 0.012104 | 0.012050 | 0.012071 | 0.012072 | 0.011329 | 0.011598 |
| 0.011699 | 0.012203 | 0.011670 | 0.011934 | 0.012407 | 0.011468 | 0.011363 |
| 0.011329 | 0.011329 | 0.011800 | 0.011842 | 0.011940 | 0.011665 | 0.011330 |
| S747     | 0.011799 | 0.011799 | 0.012136 | 0.011900 | 0.011900 | 0.011967 |
| 0.011808 | 0.011740 | 0.011900 | 0.011396 | 0.011463 | 0.011431 | 0.011396 |
| 0.011430 | 0.011598 | 0.011396 | 0.011430 | 0.011497 | 0.011463 | 0.011430 |
| 0.011396 | 0.011430 | 0.011530 | 0.011396 | 0.011363 | 0.011430 | 0.011774 |
| 0.011665 | 0.011396 | 0.011329 | 0.011564 | 0.011430 | 0.011463 | 0.011430 |
| 0.011463 | 0.011497 | 0.011463 | 0.011463 | 0.011497 | 0.011463 | 0.011631 |

|          |          |          |          |          |          |          |
|----------|----------|----------|----------|----------|----------|----------|
| 0.011396 | 0.011463 | 0.011497 | 0.011430 | 0.011530 | 0.011564 | 0.011497 |
| 0.011463 | 0.011631 | 0.011531 | 0.011799 | 0.011463 | 0.011665 | 0.011463 |
| 0.011430 | 0.011531 | 0.011598 | 0.011665 | 0.011833 | 0.011530 | 0.011631 |
| 0.011430 | 0.011497 | 0.011463 | 0.011631 | 0.011934 | 0.011463 | 0.011530 |
| 0.011430 | 0.011530 | 0.011497 | 0.011564 | 0.011497 | 0.011497 | 0.011497 |
| 0.011396 | 0.011430 | 0.011396 | 0.011497 | 0.011463 | 0.011498 | 0.011564 |
| 0.011497 | 0.011463 | 0.011396 | 0.011430 | 0.011564 | 0.011329 | 0.011463 |
| 0.011631 | 0.011564 | 0.011799 | 0.011631 | 0.011463 | 0.011631 | 0.011463 |
| 0.011654 | 0.011882 | 0.011664 | 0.011373 | 0.011359 | 0.011502 | 0.011572 |
| 0.012231 | 0.011620 | 0.011390 | 0.011698 | 0.011698 | 0.011497 | 0.011598 |
| 0.011530 | 0.011497 | 0.011564 | 0.011463 | 0.011564 | 0.011430 | 0.011497 |
| 0.011463 | 0.011564 | 0.011766 | 0.011631 | 0.011530 | 0.011497 | 0.011362 |
| 0.011396 | 0.011396 | 0.011329 | 0.011430 | 0.011631 | 0.011598 | 0.011530 |
| 0.011631 | 0.011698 | 0.011430 | 0.011430 | 0.011463 | 0.011463 | 0.011466 |
| 0.011534 | 0.011463 | 0.011463 | 0.011312 | 0.011386 | 0.011376 | 0.011464 |
| 0.011467 | 0.011404 | 0.011429 | 0.011440 | 0.011366 | 0.011403 | 0.011432 |
| 0.011708 | 0.011474 | 0.011439 | 0.011396 | 0.011406 | 0.011531 | 0.011498 |
| 0.011565 | 0.011498 | 0.011497 | 0.011597 | 0.011530 | 0.011833 | 0.011699 |
| 0.011732 | 0.011598 | 0.011463 | 0.011564 | 0.011362 | 0.011597 | 0.011396 |
| 0.011463 | 0.011463 | 0.011430 | 0.011396 | 0.011430 | 0.011396 | 0.011497 |
| 0.011396 | 0.011497 | 0.011497 | 0.011396 | 0.011498 | 0.011598 | 0.011601 |
| 0.000000 | 0.011497 | 0.011396 | 0.011330 | 0.011463 | 0.011396 | 0.011329 |
| 0.011434 | 0.000000 | 0.011329 | 0.000000 | 0.011363 | 0.011463 | 0.011430 |
| 0.011463 | 0.011430 | 0.011396 | 0.011430 | 0.011463 | 0.011329 | 0.011396 |
| 0.011430 | 0.011430 | 0.011497 | 0.011430 | 0.011463 | 0.011497 | 0.011732 |
| 0.011833 | 0.011766 | 0.011833 | 0.011600 | 0.011833 | 0.011463 | 0.011430 |
| 0.011466 | 0.011667 | 0.011563 | 0.011369 | 0.011807 | 0.011333 | 0.011454 |
| 0.011842 | 0.011740 | 0.011631 | 0.011833 | 0.011538 | 0.011699 | 0.011598 |
| 0.011598 | 0.011765 | 0.011629 | 0.011514 | 0.011564 | 0.011497 | 0.011568 |
| 0.011665 | 0.011566 | 0.011703 | 0.011704 | 0.011699 | 0.011766 | 0.011874 |
| 0.011602 | 0.011706 | 0.011704 | 0.011635 | 0.011902 | 0.011362 | 0.011566 |
| 0.011463 | 0.011463 | 0.011362 | 0.011362 | 0.011362 | 0.011430 | 0.011497 |
| 0.011362 | 0.011430 | 0.011329 | 0.011497 | 0.011362 | 0.011430 | 0.011497 |
| 0.011430 | 0.011866 | 0.011766 | 0.011799 | 0.011329 | 0.011430 | 0.011463 |
| 0.011463 | 0.011430 | 0.011497 | 0.011530 | 0.011396 | 0.011396 | 0.011396 |
| 0.011934 | 0.011564 | 0.011564 | 0.011362 | 0.011463 | 0.011564 | 0.011396 |
| 0.011396 | 0.011463 | 0.011430 | 0.011530 | 0.011396 | 0.011530 | 0.011597 |
| 0.011598 | 0.011430 | 0.011430 | 0.011362 | 0.011362 | 0.011531 | 0.011463 |
| 0.011362 | 0.011463 | 0.011329 | 0.011362 | 0.011497 | 0.011632 | 0.011396 |
| 0.011363 | 0.011497 | 0.011430 | 0.011329 | 0.011665 | 0.011329 | 0.011497 |
| 0.011506 | 0.011396 | 0.011698 | 0.011531 | 0.011564 | 0.011430 | 0.011530 |
| 0.011396 | 0.011665 | 0.011329 | 0.011598 | 0.011396 | 0.011396 | 0.011329 |
| 0.011497 | 0.011766 | 0.011463 | 0.011530 | 0.011362 | 0.011766 | 0.011396 |
| 0.011396 | 0.011396 | 0.011430 | 0.011463 | 0.011430 | 0.011530 | 0.011598 |
| 0.011598 | 0.011564 | 0.011463 | 0.011564 | 0.011463 | 0.011396 | 0.011362 |
| 0.011396 | 0.011396 | 0.011463 | 0.011396 | 0.011295 | 0.011530 | 0.011396 |
| 0.011430 | 0.011430 | 0.011564 | 0.011598 | 0.011497 | 0.011362 | 0.011430 |
| 0.011497 | 0.011430 | 0.011530 | 0.011396 | 0.011530 | 0.011631 | 0.011934 |
| 0.011430 | 0.011833 | 0.011440 | 0.017975 | 0.011322 | 0.011733 | 0.011793 |
| 0.011752 | 0.011799 | 0.011479 | 0.011408 | 0.011830 | 0.011820 | 0.011546 |
| 0.011629 | 0.011732 | 0.011294 | 0.011437 | 0.011333 | 0.011505 | 0.011491 |
| 0.011670 | 0.011582 | 0.011579 | 0.011193 | 0.011564 | 0.011598 | 0.011601 |
| 0.011404 | 0.011497 | 0.011564 | 0.011530 | 0.011497 | 0.011497 | 0.011463 |
| 0.011497 | 0.011430 | 0.011463 | 0.011497 | 0.011463 | 0.011396 | 0.011430 |
| 0.011430 | 0.011497 | 0.011396 | 0.011497 | 0.011530 | 0.011564 | 0.011463 |
| 0.011497 | 0.011463 | 0.011799 | 0.011799 | 0.011531 | 0.011565 | 0.011598 |
| 0.011362 | 0.011362 | 0.011396 | 0.011430 | 0.011362 | 0.011598 | 0.011598 |
| 0.011631 | 0.011631 | 0.011564 | 0.011665 | 0.011833 | 0.011667 | 0.011430 |
| 0.011497 | 0.011564 | 0.011530 | 0.011430 | 0.011497 | 0.011463 | 0.011497 |
| 0.011564 | 0.011564 | 0.011598 | 0.011497 | 0.011397 | 0.011665 | 0.011564 |

|          |          |          |          |          |          |          |
|----------|----------|----------|----------|----------|----------|----------|
| 0.011501 | 0.011396 | 0.011497 | 0.011598 | 0.011497 | 0.011631 | 0.011665 |
| 0.011833 | 0.011538 | 0.011699 | 0.011598 | 0.011598 | 0.011765 | 0.011396 |
| 0.011566 | 0.011464 | 0.011430 | 0.011430 | 0.011497 | 0.011396 | 0.011497 |
| 0.011530 | 0.011564 | 0.011463 | 0.011497 | 0.011463 | 0.011799 | 0.011799 |
| 0.011531 | 0.011565 | 0.011631 | 0.011564 | 0.012205 | 0.011632 | 0.011553 |
| 0.011623 | 0.011581 | 0.011693 | 0.011580 | 0.011691 | 0.011612 | 0.011578 |
| 0.012160 | 0.011476 | 0.011609 | 0.011545 | 0.011818 | 0.011673 | 0.011707 |
| 0.012183 | 0.011663 | 0.011500 | 0.011497 | 0.011497 | 0.011530 | 0.011466 |
| 0.011362 | 0.011329 | 0.011530 | 0.011497 | 0.011500 | 0.011631 | 0.011599 |
| 0.011463 | 0.011329 | 0.011362 | 0.011463 | 0.011295 | 0.011430 | 0.011329 |
| 0.011463 | 0.011497 | 0.011396 | 0.011362 | 0.011463 | 0.011396 | 0.011430 |
| 0.011430 | 0.011362 | 0.011430 | 0.011463 | 0.011362 | 0.011497 | 0.011598 |
| 0.011497 | 0.011564 | 0.011497 | 0.011497 | 0.011430 | 0.011833 | 0.011463 |
| 0.011513 | 0.011430 | 0.011665 | 0.011671 | 0.011463 | 0.011530 | 0.011530 |
| 0.011531 | 0.011396 | 0.011430 | 0.011396 | 0.011564 | 0.011564 | 0.011497 |
| 0.011497 | 0.011631 | 0.011799 | 0.011530 | 0.011732 | 0.011732 | 0.011598 |
| 0.011430 | 0.011497 | 0.011531 | 0.011934 | 0.011497 | 0.011463 | 0.011497 |
| 0.011530 | 0.011463 | 0.011463 | 0.011766 | 0.011631 | 0.011732 | 0.011463 |
| 0.011564 | 0.011631 | 0.011497 | 0.011564 | 0.011530 | 0.011396 | 0.011732 |
| 0.011497 | 0.011463 | 0.011463 | 0.011631 | 0.011463 | 0.011564 | 0.011799 |
| 0.011497 | 0.011876 | 0.011867 | 0.011670 | 0.011342 | 0.011570 | 0.011318 |
| 0.011555 | 0.011878 | 0.011412 | 0.011596 | 0.011402 | 0.011518 | 0.011485 |
| 0.011570 | 0.011324 | 0.011394 | 0.011258 | 0.011384 | 0.011462 | 0.011466 |
| 0.011475 | 0.011336 | 0.011554 | 0.011448 | 0.011499 | 0.011631 | 0.011698 |
| 0.011698 | 0.011565 | 0.011669 | 0.011670 | 0.011806 | 0.011838 | 0.011497 |
| 0.011732 | 0.011598 | 0.011463 | 0.011564 | 0.011362 | 0.011597 | 0.011396 |
| 0.011463 | 0.011463 | 0.011430 | 0.011396 | 0.011430 | 0.011396 | 0.011497 |
| 0.011479 | 0.011480 | 0.011471 | 0.011505 | 0.011642 | 0.011539 | 0.011607 |
| 0.011605 | 0.011531 | 0.011319 | 0.011348 | 0.011467 | 0.011636 | 0.011637 |
| 0.011430 | 0.011501 | 0.011734 | 0.011703 | 0.011632 | 0.011666 | 0.011598 |
| 0.011530 | 0.011598 | 0.011597 | 0.011497 | 0.012069 | 0.011665 | 0.011732 |
| 0.011766 | 0.011809 | 0.011470 | 0.011545 | 0.011430 | 0.011631 | 0.011598 |
| 0.011632 | 0.011665 | 0.011665 | 0.011665 | 0.011807 | 0.011799 | 0.011442 |
| 0.011331 | 0.011337 | 0.011435 | 0.011400 | 0.011505 | 0.011359 | 0.011672 |
| 0.011472 | 0.011587 | 0.011346 | 0.011510 | 0.011464 | 0.011539 | 0.011362 |
| 0.011396 | 0.011396 | 0.011329 | 0.011430 | 0.011631 | 0.011598 | 0.011530 |
| 0.011631 | 0.011698 | 0.011430 | 0.011430 | 0.011463 | 0.011463 | 0.011466 |
| 0.011534 | 0.011463 | 0.011463 | 0.011499 | 0.011631 | 0.011698 | 0.011698 |
| 0.011565 | 0.011669 | 0.011670 | 0.011806 | 0.011838 | 0.011497 | 0.011665 |
| 0.011598 | 0.011598 | 0.011432 | 0.011617 | 0.011547 | 0.011571 | 0.011446 |
| 0.011542 | 0.011835 | 0.011568 | 0.011502 | 0.011329 | 0.000000 | 0.011396 |
| 0.011497 | 0.011497 | 0.011396 | 0.011498 | 0.011598 | 0.011601 | 0.011497 |
| 0.011396 | 0.011330 | 0.011463 | 0.011396 | 0.011329 | 0.011434 | 0.000000 |
| 0.011497 | 0.011430 | 0.011463 | 0.011497 | 0.011463 | 0.011396 | 0.011598 |
| 0.011463 | 0.011463 | 0.011497 | 0.011430 | 0.011497 | 0.011732 | 0.011396 |
| 0.011430 | 0.011833 | 0.011430 | 0.011396 | 0.011430 | 0.011799 | 0.011403 |
| 0.011847 | 0.011400 | 0.011461 | 0.011624 | 0.011712 | 0.011635 | 0.011353 |
| 0.011323 | 0.011598 | 0.011698 | 0.011807 | 0.011666 | 0.011805 | 0.011935 |
| 0.011834 | 0.011872 | 0.011833 | 0.012086 | 0.011799 | 0.012675 | 0.011835 |
| 0.012574 | 0.012342 | 0.012476 | 0.012748 | 0.011799 | 0.011497 | 0.011800 |
| 0.012239 | 0.012174 | 0.011766 | 0.011665 | 0.011733 | 0.011733 | 0.011703 |
| 0.011598 | 0.011603 | 0.011665 | 0.011632 | 0.012002 | 0.012069 | 0.012070 |
| 0.011969 | 0.012069 | 0.012173 | 0.011940 | 0.012239 | 0.012246 | 0.012306 |
| 0.012307 | 0.012341 | 0.012289 | 0.012307 | 0.012309 | 0.011530 | 0.011833 |
| 0.011901 | 0.012405 | 0.011908 | 0.012136 | 0.012609 | 0.011672 | 0.011565 |
| 0.011530 | 0.011530 | 0.012002 | 0.012048 | 0.012151 | 0.011866 | 0.011532 |
| S748     | 0.011665 | 0.011665 | 0.012001 | 0.011765 | 0.011765 | 0.011833 |
| 0.011672 | 0.011604 | 0.011765 | 0.011262 | 0.011329 | 0.011296 | 0.011262 |
| 0.011295 | 0.011463 | 0.011262 | 0.011295 | 0.011362 | 0.011329 | 0.011295 |
| 0.011262 | 0.011295 | 0.011396 | 0.011262 | 0.011228 | 0.011295 | 0.011638 |

|          |          |          |          |          |          |          |
|----------|----------|----------|----------|----------|----------|----------|
| 0.011530 | 0.011295 | 0.011195 | 0.011429 | 0.011295 | 0.011329 | 0.011295 |
| 0.011329 | 0.011362 | 0.011329 | 0.011329 | 0.011362 | 0.011329 | 0.011497 |
| 0.011262 | 0.011329 | 0.011362 | 0.011295 | 0.011396 | 0.011430 | 0.011362 |
| 0.011329 | 0.011497 | 0.011396 | 0.011665 | 0.011329 | 0.011530 | 0.011329 |
| 0.011295 | 0.011396 | 0.011463 | 0.011530 | 0.011698 | 0.011396 | 0.011497 |
| 0.011295 | 0.011362 | 0.011329 | 0.011497 | 0.011799 | 0.011329 | 0.011396 |
| 0.011295 | 0.011396 | 0.011362 | 0.011430 | 0.011362 | 0.011362 | 0.011362 |
| 0.011262 | 0.011295 | 0.011262 | 0.011362 | 0.011329 | 0.011363 | 0.011429 |
| 0.011362 | 0.011329 | 0.011329 | 0.011295 | 0.011429 | 0.011195 | 0.011329 |
| 0.011497 | 0.011429 | 0.011665 | 0.011497 | 0.011329 | 0.011497 | 0.011329 |
| 0.011468 | 0.011695 | 0.011513 | 0.011216 | 0.011210 | 0.011318 | 0.011415 |
| 0.012048 | 0.011467 | 0.011225 | 0.011564 | 0.011564 | 0.011362 | 0.011463 |
| 0.011396 | 0.011362 | 0.011429 | 0.011329 | 0.011430 | 0.011295 | 0.011362 |
| 0.011329 | 0.011429 | 0.011631 | 0.011497 | 0.011396 | 0.011363 | 0.011228 |
| 0.011262 | 0.011262 | 0.011262 | 0.011295 | 0.011497 | 0.011463 | 0.011396 |
| 0.011497 | 0.011564 | 0.011295 | 0.011295 | 0.011329 | 0.011329 | 0.011330 |
| 0.011398 | 0.011329 | 0.011329 | 0.011132 | 0.011241 | 0.011236 | 0.011329 |
| 0.011331 | 0.011232 | 0.011282 | 0.011267 | 0.011230 | 0.011266 | 0.011297 |
| 0.011528 | 0.011336 | 0.011267 | 0.011262 | 0.011233 | 0.011397 | 0.011363 |
| 0.011430 | 0.011364 | 0.011363 | 0.011463 | 0.011396 | 0.011698 | 0.011564 |
| 0.011597 | 0.011463 | 0.011329 | 0.011430 | 0.011228 | 0.011463 | 0.011262 |
| 0.011329 | 0.011329 | 0.011295 | 0.011262 | 0.011295 | 0.011262 | 0.011362 |
| 0.000000 | 0.011362 | 0.011362 | 0.011262 | 0.011363 | 0.011463 | 0.011466 |
| 0.011396 | 0.011362 | 0.011262 | 0.011195 | 0.011329 | 0.011262 | 0.011195 |
| 0.011298 | 0.011396 | 0.011195 | 0.011396 | 0.011228 | 0.011329 | 0.011295 |
| 0.011329 | 0.011295 | 0.011262 | 0.011295 | 0.011329 | 0.011195 | 0.011262 |
| 0.011295 | 0.011295 | 0.011362 | 0.011295 | 0.011329 | 0.011362 | 0.011597 |
| 0.011698 | 0.011631 | 0.011698 | 0.011465 | 0.011698 | 0.011329 | 0.011295 |
| 0.011330 | 0.011586 | 0.011426 | 0.011232 | 0.011705 | 0.011197 | 0.011296 |
| 0.011705 | 0.011604 | 0.011497 | 0.011698 | 0.011402 | 0.011564 | 0.011463 |
| 0.011463 | 0.011631 | 0.011487 | 0.011307 | 0.011312 | 0.011363 | 0.011433 |
| 0.011530 | 0.011431 | 0.011568 | 0.011568 | 0.011564 | 0.011631 | 0.011738 |
| 0.011466 | 0.011569 | 0.011568 | 0.011500 | 0.011767 | 0.011228 | 0.011431 |
| 0.011329 | 0.011329 | 0.011228 | 0.011228 | 0.011228 | 0.011295 | 0.011362 |
| 0.011228 | 0.011295 | 0.011195 | 0.011362 | 0.011228 | 0.011295 | 0.011362 |
| 0.011295 | 0.011732 | 0.011631 | 0.011665 | 0.011195 | 0.011295 | 0.011329 |
| 0.011329 | 0.011295 | 0.011362 | 0.011396 | 0.011262 | 0.011262 | 0.011262 |
| 0.011799 | 0.011430 | 0.011430 | 0.011228 | 0.011329 | 0.011430 | 0.011262 |
| 0.011262 | 0.011329 | 0.011295 | 0.011396 | 0.011262 | 0.011396 | 0.011463 |
| 0.011463 | 0.011295 | 0.011295 | 0.011228 | 0.011228 | 0.011396 | 0.011329 |
| 0.011228 | 0.011329 | 0.011195 | 0.011228 | 0.011362 | 0.011497 | 0.011262 |
| 0.011228 | 0.011362 | 0.011296 | 0.011195 | 0.011530 | 0.011195 | 0.011362 |
| 0.011368 | 0.011262 | 0.011564 | 0.011396 | 0.011430 | 0.011295 | 0.011396 |
| 0.011262 | 0.011530 | 0.011195 | 0.011463 | 0.011262 | 0.011262 | 0.011195 |
| 0.011362 | 0.011631 | 0.011329 | 0.011396 | 0.011228 | 0.011631 | 0.011262 |
| 0.011262 | 0.011262 | 0.011295 | 0.011329 | 0.011295 | 0.011396 | 0.011463 |
| 0.011463 | 0.011430 | 0.011329 | 0.011430 | 0.011329 | 0.011262 | 0.011228 |
| 0.011262 | 0.011262 | 0.011329 | 0.011262 | 0.011161 | 0.011396 | 0.011262 |
| 0.011295 | 0.011295 | 0.011430 | 0.011463 | 0.011362 | 0.011228 | 0.011295 |
| 0.011362 | 0.011295 | 0.011396 | 0.011262 | 0.011396 | 0.011497 | 0.011799 |
| 0.011295 | 0.011698 | 0.011267 | 0.017785 | 0.011191 | 0.011366 | 0.011618 |
| 0.011579 | 0.011623 | 0.011270 | 0.011234 | 0.011664 | 0.011647 | 0.011303 |
| 0.011487 | 0.011549 | 0.011177 | 0.011186 | 0.011177 | 0.011307 | 0.011275 |
| 0.011482 | 0.011433 | 0.011394 | 0.011259 | 0.011430 | 0.011463 | 0.011466 |
| 0.011266 | 0.011430 | 0.011430 | 0.011396 | 0.011362 | 0.011363 | 0.011329 |
| 0.011362 | 0.011295 | 0.011329 | 0.011362 | 0.011329 | 0.011262 | 0.011295 |
| 0.011295 | 0.011362 | 0.011262 | 0.011363 | 0.011396 | 0.011430 | 0.011329 |
| 0.011362 | 0.011329 | 0.011665 | 0.011665 | 0.011396 | 0.011430 | 0.011463 |
| 0.011228 | 0.011228 | 0.011262 | 0.011295 | 0.011228 | 0.011463 | 0.011463 |
| 0.011497 | 0.011497 | 0.011430 | 0.011530 | 0.011698 | 0.011532 | 0.011295 |



|          |          |          |          |          |          |          |
|----------|----------|----------|----------|----------|----------|----------|
| 0.011362 | 0.011430 | 0.011396 | 0.011295 | 0.011362 | 0.011329 | 0.011362 |
| 0.011430 | 0.011430 | 0.011463 | 0.011363 | 0.011262 | 0.011530 | 0.011429 |
| 0.011365 | 0.011262 | 0.011362 | 0.011463 | 0.011363 | 0.011497 | 0.011530 |
| 0.011698 | 0.011402 | 0.011564 | 0.011463 | 0.011463 | 0.011631 | 0.011262 |
| 0.011431 | 0.011329 | 0.011295 | 0.011295 | 0.011362 | 0.011262 | 0.011363 |
| 0.011396 | 0.011430 | 0.011329 | 0.011362 | 0.011329 | 0.011665 | 0.011665 |
| 0.011396 | 0.011430 | 0.011497 | 0.011429 | 0.012070 | 0.011489 | 0.011412 |
| 0.011482 | 0.011442 | 0.011552 | 0.011441 | 0.011550 | 0.011474 | 0.011440 |
| 0.012022 | 0.011337 | 0.011471 | 0.011406 | 0.011680 | 0.011537 | 0.011571 |
| 0.012047 | 0.011512 | 0.011365 | 0.011362 | 0.011362 | 0.011396 | 0.011331 |
| 0.011228 | 0.011195 | 0.011396 | 0.011362 | 0.011364 | 0.011497 | 0.011464 |
| 0.011329 | 0.011195 | 0.011228 | 0.011329 | 0.011161 | 0.011295 | 0.011195 |
| 0.011329 | 0.011362 | 0.011262 | 0.011228 | 0.011329 | 0.011262 | 0.011295 |
| 0.011295 | 0.011228 | 0.011295 | 0.011329 | 0.011228 | 0.011362 | 0.011463 |
| 0.011362 | 0.011430 | 0.011362 | 0.011362 | 0.011295 | 0.011698 | 0.011329 |
| 0.011373 | 0.011295 | 0.011531 | 0.011535 | 0.011329 | 0.011396 | 0.011396 |
| 0.011396 | 0.011262 | 0.011295 | 0.011262 | 0.011430 | 0.011430 | 0.011362 |
| 0.011362 | 0.011497 | 0.011665 | 0.011396 | 0.011598 | 0.011598 | 0.011463 |
| 0.011295 | 0.011362 | 0.011396 | 0.011799 | 0.011363 | 0.011329 | 0.011362 |
| 0.011396 | 0.011329 | 0.011329 | 0.011631 | 0.011497 | 0.011598 | 0.011329 |
| 0.011430 | 0.011497 | 0.011362 | 0.011430 | 0.011396 | 0.011262 | 0.011597 |
| 0.011362 | 0.011329 | 0.011329 | 0.011497 | 0.011329 | 0.011430 | 0.011665 |
| 0.011362 | 0.011740 | 0.011732 | 0.011507 | 0.011173 | 0.011400 | 0.011267 |
| 0.011225 | 0.011722 | 0.011236 | 0.011462 | 0.011255 | 0.011417 | 0.011379 |
| 0.011468 | 0.011126 | 0.011339 | 0.011126 | 0.011222 | 0.011328 | 0.011344 |
| 0.011362 | 0.011218 | 0.011377 | 0.011307 | 0.011364 | 0.011497 | 0.011564 |
| 0.011564 | 0.011430 | 0.011534 | 0.011535 | 0.011670 | 0.011696 | 0.011362 |
| 0.011597 | 0.011463 | 0.011329 | 0.011430 | 0.011228 | 0.011463 | 0.011262 |
| 0.011329 | 0.011329 | 0.011295 | 0.011262 | 0.011295 | 0.011262 | 0.011362 |
| 0.011305 | 0.011305 | 0.011300 | 0.011368 | 0.011505 | 0.011368 | 0.011470 |
| 0.011469 | 0.011396 | 0.011171 | 0.011168 | 0.011331 | 0.011501 | 0.011501 |
| 0.011296 | 0.011365 | 0.011599 | 0.011533 | 0.011497 | 0.011531 | 0.011463 |
| 0.011396 | 0.011463 | 0.011463 | 0.011362 | 0.011934 | 0.011530 | 0.011598 |
| 0.011631 | 0.011701 | 0.011333 | 0.011407 | 0.011295 | 0.011497 | 0.011463 |
| 0.011498 | 0.011530 | 0.011530 | 0.011530 | 0.011650 | 0.011665 | 0.011303 |
| 0.011196 | 0.011199 | 0.011299 | 0.011264 | 0.011368 | 0.011210 | 0.011536 |
| 0.011335 | 0.011367 | 0.011108 | 0.011360 | 0.011329 | 0.011402 | 0.011228 |
| 0.011262 | 0.011262 | 0.011262 | 0.011295 | 0.011497 | 0.011463 | 0.011396 |
| 0.011497 | 0.011564 | 0.011295 | 0.011295 | 0.011329 | 0.011329 | 0.011330 |
| 0.011398 | 0.011329 | 0.011329 | 0.011364 | 0.011497 | 0.011564 | 0.011564 |
| 0.011430 | 0.011534 | 0.011535 | 0.011670 | 0.011696 | 0.011362 | 0.011530 |
| 0.011463 | 0.011463 | 0.011297 | 0.011478 | 0.011408 | 0.011435 | 0.011305 |
| 0.011405 | 0.011653 | 0.011441 | 0.011366 | 0.011195 | 0.011396 | 0.000000 |
| 0.011362 | 0.011362 | 0.011262 | 0.011363 | 0.011463 | 0.011466 | 0.011362 |
| 0.011262 | 0.011195 | 0.011329 | 0.011262 | 0.011195 | 0.011298 | 0.011396 |
| 0.011362 | 0.011295 | 0.011329 | 0.011362 | 0.011329 | 0.011262 | 0.011463 |
| 0.011329 | 0.011362 | 0.011362 | 0.011295 | 0.011362 | 0.011598 | 0.011262 |
| 0.011295 | 0.011698 | 0.011295 | 0.011262 | 0.011295 | 0.011665 | 0.011232 |
| 0.011622 | 0.011230 | 0.011261 | 0.011463 | 0.011549 | 0.011455 | 0.011186 |
| 0.011218 | 0.011463 | 0.011564 | 0.011671 | 0.011531 | 0.011669 | 0.011800 |
| 0.011699 | 0.011737 | 0.011698 | 0.011949 | 0.011665 | 0.012540 | 0.011700 |
| 0.012439 | 0.012207 | 0.012341 | 0.012613 | 0.011665 | 0.011363 | 0.011665 |
| 0.012103 | 0.012038 | 0.011631 | 0.011531 | 0.011598 | 0.011598 | 0.011568 |
| 0.011463 | 0.011467 | 0.011530 | 0.011497 | 0.011867 | 0.011934 | 0.011935 |
| 0.011801 | 0.011934 | 0.012038 | 0.011804 | 0.012104 | 0.012110 | 0.012171 |
| 0.012172 | 0.012205 | 0.012118 | 0.012172 | 0.012173 | 0.011396 | 0.011699 |
| 0.011767 | 0.012270 | 0.011772 | 0.012001 | 0.012474 | 0.011536 | 0.011430 |
| 0.011396 | 0.011396 | 0.011867 | 0.011924 | 0.011975 | 0.011732 | 0.011397 |
| S749     | 0.011766 | 0.011766 | 0.012102 | 0.011866 | 0.011866 | 0.011934 |
| 0.011774 | 0.011706 | 0.011866 | 0.011362 | 0.011429 | 0.011397 | 0.011362 |

|          |          |          |          |          |          |          |
|----------|----------|----------|----------|----------|----------|----------|
| 0.011396 | 0.011564 | 0.011362 | 0.011396 | 0.011463 | 0.011430 | 0.011396 |
| 0.011362 | 0.011396 | 0.011497 | 0.011363 | 0.011329 | 0.011396 | 0.011740 |
| 0.011631 | 0.011396 | 0.011295 | 0.011530 | 0.011396 | 0.011430 | 0.011396 |
| 0.011430 | 0.011463 | 0.011430 | 0.011430 | 0.011463 | 0.011429 | 0.011597 |
| 0.011362 | 0.011429 | 0.011463 | 0.011396 | 0.011497 | 0.011530 | 0.011463 |
| 0.011430 | 0.011598 | 0.011497 | 0.011765 | 0.011429 | 0.011631 | 0.011429 |
| 0.011396 | 0.011497 | 0.011564 | 0.011631 | 0.011799 | 0.011497 | 0.011597 |
| 0.011396 | 0.011463 | 0.011430 | 0.011597 | 0.011900 | 0.011430 | 0.011497 |
| 0.011396 | 0.011497 | 0.011463 | 0.011530 | 0.011463 | 0.011463 | 0.011463 |
| 0.011362 | 0.011396 | 0.011362 | 0.011463 | 0.011429 | 0.011464 | 0.011530 |
| 0.011463 | 0.011429 | 0.011429 | 0.011396 | 0.011530 | 0.011295 | 0.011429 |
| 0.011597 | 0.011530 | 0.011765 | 0.011598 | 0.011430 | 0.011597 | 0.011429 |
| 0.011616 | 0.011845 | 0.011626 | 0.011334 | 0.011321 | 0.011465 | 0.011533 |
| 0.012195 | 0.011620 | 0.011348 | 0.011665 | 0.011665 | 0.011463 | 0.011564 |
| 0.011497 | 0.011463 | 0.011530 | 0.011430 | 0.011530 | 0.011396 | 0.011463 |
| 0.011429 | 0.011530 | 0.011732 | 0.011597 | 0.011497 | 0.011463 | 0.011329 |
| 0.011362 | 0.011362 | 0.011362 | 0.011396 | 0.011597 | 0.011564 | 0.011497 |
| 0.011597 | 0.011665 | 0.011396 | 0.011396 | 0.011430 | 0.011429 | 0.011432 |
| 0.011500 | 0.011429 | 0.011430 | 0.011276 | 0.011313 | 0.011306 | 0.011430 |
| 0.011433 | 0.011369 | 0.011392 | 0.011405 | 0.011332 | 0.011368 | 0.011398 |
| 0.011636 | 0.011439 | 0.011405 | 0.011363 | 0.011371 | 0.011497 | 0.011464 |
| 0.011531 | 0.011465 | 0.011464 | 0.011564 | 0.011497 | 0.011799 | 0.011665 |
| 0.011698 | 0.011564 | 0.011429 | 0.011530 | 0.011329 | 0.011564 | 0.011362 |
| 0.011430 | 0.011429 | 0.011396 | 0.011362 | 0.011396 | 0.011362 | 0.011463 |
| 0.011362 | 0.000000 | 0.011463 | 0.011362 | 0.011465 | 0.011564 | 0.011567 |
| 0.011497 | 0.011463 | 0.011362 | 0.011296 | 0.011429 | 0.011362 | 0.011295 |
| 0.011400 | 0.011497 | 0.011295 | 0.011497 | 0.011329 | 0.011430 | 0.011396 |
| 0.011429 | 0.011396 | 0.011362 | 0.011396 | 0.011430 | 0.011295 | 0.011362 |
| 0.011396 | 0.011396 | 0.011463 | 0.011396 | 0.011429 | 0.011463 | 0.011698 |
| 0.011799 | 0.011732 | 0.011799 | 0.011566 | 0.011799 | 0.011429 | 0.011396 |
| 0.011432 | 0.011667 | 0.011472 | 0.011335 | 0.011807 | 0.011299 | 0.011454 |
| 0.011807 | 0.011706 | 0.011597 | 0.011799 | 0.011504 | 0.011665 | 0.011564 |
| 0.011564 | 0.011732 | 0.011558 | 0.011431 | 0.011480 | 0.011463 | 0.011500 |
| 0.011631 | 0.011533 | 0.011669 | 0.011669 | 0.011665 | 0.011732 | 0.011840 |
| 0.011568 | 0.011671 | 0.011670 | 0.011601 | 0.011868 | 0.011329 | 0.011532 |
| 0.011429 | 0.011430 | 0.011329 | 0.011329 | 0.011329 | 0.011396 | 0.011463 |
| 0.011262 | 0.011396 | 0.011295 | 0.011463 | 0.011329 | 0.011396 | 0.011463 |
| 0.011396 | 0.011833 | 0.011732 | 0.011765 | 0.011295 | 0.011396 | 0.011430 |
| 0.011430 | 0.011396 | 0.011463 | 0.011497 | 0.011362 | 0.011362 | 0.011362 |
| 0.011900 | 0.011530 | 0.011530 | 0.011329 | 0.011429 | 0.011530 | 0.011362 |
| 0.011362 | 0.011429 | 0.011396 | 0.011497 | 0.011362 | 0.011497 | 0.011497 |
| 0.011564 | 0.011396 | 0.011396 | 0.011329 | 0.011329 | 0.011497 | 0.011429 |
| 0.011329 | 0.011429 | 0.011295 | 0.011329 | 0.011463 | 0.011598 | 0.011362 |
| 0.011329 | 0.011463 | 0.011396 | 0.011295 | 0.011631 | 0.011295 | 0.011463 |
| 0.011471 | 0.011362 | 0.011665 | 0.011497 | 0.011530 | 0.011396 | 0.011497 |
| 0.011362 | 0.011631 | 0.011295 | 0.011564 | 0.011362 | 0.011362 | 0.011295 |
| 0.011463 | 0.011732 | 0.011430 | 0.011497 | 0.011329 | 0.011732 | 0.011362 |
| 0.011362 | 0.011362 | 0.011396 | 0.011429 | 0.011396 | 0.011497 | 0.011564 |
| 0.011564 | 0.011530 | 0.011429 | 0.011530 | 0.011429 | 0.011362 | 0.011329 |
| 0.011362 | 0.011362 | 0.011430 | 0.011362 | 0.011262 | 0.011497 | 0.011362 |
| 0.011396 | 0.011396 | 0.011530 | 0.011564 | 0.011463 | 0.011329 | 0.011396 |
| 0.011463 | 0.011396 | 0.011497 | 0.011362 | 0.011497 | 0.011597 | 0.011900 |
| 0.011396 | 0.011799 | 0.011405 | 0.017936 | 0.011322 | 0.011672 | 0.011758 |
| 0.011718 | 0.011764 | 0.011374 | 0.011350 | 0.011774 | 0.011785 | 0.011425 |
| 0.011582 | 0.011671 | 0.011294 | 0.011353 | 0.011333 | 0.011406 | 0.011447 |
| 0.011576 | 0.011544 | 0.011505 | 0.011325 | 0.011530 | 0.011564 | 0.011567 |
| 0.011369 | 0.011530 | 0.011530 | 0.011497 | 0.011463 | 0.011463 | 0.011430 |
| 0.011463 | 0.011396 | 0.011429 | 0.011463 | 0.011430 | 0.011362 | 0.011396 |
| 0.011396 | 0.011463 | 0.011362 | 0.011463 | 0.011497 | 0.011530 | 0.011429 |
| 0.011463 | 0.011430 | 0.011765 | 0.011765 | 0.011497 | 0.011531 | 0.011564 |

|          |          |          |          |          |          |          |
|----------|----------|----------|----------|----------|----------|----------|
| 0.011329 | 0.011329 | 0.011362 | 0.011396 | 0.011329 | 0.011564 | 0.011564 |
| 0.011597 | 0.011597 | 0.011530 | 0.011631 | 0.011799 | 0.011633 | 0.011396 |
| 0.011463 | 0.011530 | 0.011497 | 0.011396 | 0.011463 | 0.011429 | 0.011463 |
| 0.011531 | 0.011530 | 0.011564 | 0.011396 | 0.011363 | 0.011631 | 0.011530 |
| 0.011467 | 0.011362 | 0.011463 | 0.011564 | 0.011463 | 0.011598 | 0.011631 |
| 0.011799 | 0.011504 | 0.011665 | 0.011564 | 0.011564 | 0.011732 | 0.011363 |
| 0.011498 | 0.011430 | 0.011396 | 0.011396 | 0.011463 | 0.011362 | 0.011463 |
| 0.011497 | 0.011530 | 0.011429 | 0.011463 | 0.011430 | 0.011765 | 0.011765 |
| 0.011497 | 0.011531 | 0.011597 | 0.011530 | 0.012171 | 0.011596 | 0.011482 |
| 0.011588 | 0.011546 | 0.011623 | 0.011545 | 0.011655 | 0.011578 | 0.011543 |
| 0.012125 | 0.011441 | 0.011574 | 0.011510 | 0.011784 | 0.011639 | 0.011673 |
| 0.012149 | 0.011588 | 0.011466 | 0.011463 | 0.011463 | 0.011497 | 0.011432 |
| 0.011329 | 0.011295 | 0.011497 | 0.011463 | 0.011466 | 0.011597 | 0.011565 |
| 0.011429 | 0.011295 | 0.011329 | 0.011429 | 0.011262 | 0.011396 | 0.011295 |
| 0.011429 | 0.011463 | 0.011362 | 0.011329 | 0.011430 | 0.011362 | 0.011396 |
| 0.011396 | 0.011329 | 0.011396 | 0.011430 | 0.011329 | 0.011463 | 0.011564 |
| 0.011463 | 0.011530 | 0.011463 | 0.011463 | 0.011396 | 0.011799 | 0.011429 |
| 0.011443 | 0.011396 | 0.011632 | 0.011637 | 0.011430 | 0.011497 | 0.011497 |
| 0.011497 | 0.011362 | 0.011396 | 0.011362 | 0.011530 | 0.011530 | 0.011463 |
| 0.011463 | 0.011597 | 0.011765 | 0.011497 | 0.011698 | 0.011698 | 0.011564 |
| 0.011396 | 0.011463 | 0.011497 | 0.011900 | 0.011463 | 0.011430 | 0.011463 |
| 0.011497 | 0.011429 | 0.011429 | 0.011732 | 0.011598 | 0.011698 | 0.011430 |
| 0.011530 | 0.011597 | 0.011463 | 0.011530 | 0.011497 | 0.011362 | 0.011698 |
| 0.011463 | 0.011429 | 0.011429 | 0.011597 | 0.011430 | 0.011530 | 0.011766 |
| 0.011463 | 0.011842 | 0.011833 | 0.011629 | 0.011342 | 0.011536 | 0.011318 |
| 0.011445 | 0.011839 | 0.011376 | 0.011596 | 0.011402 | 0.011518 | 0.011485 |
| 0.011570 | 0.011258 | 0.011283 | 0.011258 | 0.011330 | 0.011395 | 0.011466 |
| 0.011512 | 0.011336 | 0.011518 | 0.011448 | 0.011465 | 0.011597 | 0.011665 |
| 0.011665 | 0.011531 | 0.011635 | 0.011636 | 0.011772 | 0.011802 | 0.011463 |
| 0.011698 | 0.011564 | 0.011429 | 0.011530 | 0.011329 | 0.011564 | 0.011362 |
| 0.011430 | 0.011429 | 0.011396 | 0.011362 | 0.011396 | 0.011362 | 0.011463 |
| 0.011444 | 0.011445 | 0.011437 | 0.011471 | 0.011608 | 0.011504 | 0.011572 |
| 0.011571 | 0.011497 | 0.011319 | 0.011312 | 0.011433 | 0.011602 | 0.011603 |
| 0.011396 | 0.011467 | 0.011700 | 0.011669 | 0.011598 | 0.011632 | 0.011564 |
| 0.011497 | 0.011564 | 0.011564 | 0.011463 | 0.012035 | 0.011631 | 0.011698 |
| 0.011732 | 0.011808 | 0.011435 | 0.011511 | 0.011396 | 0.011597 | 0.011564 |
| 0.011599 | 0.011631 | 0.011631 | 0.011631 | 0.011768 | 0.011766 | 0.011373 |
| 0.011297 | 0.011268 | 0.011401 | 0.011332 | 0.011470 | 0.011284 | 0.011638 |
| 0.011438 | 0.011543 | 0.011298 | 0.011435 | 0.011430 | 0.011505 | 0.011329 |
| 0.011362 | 0.011362 | 0.011362 | 0.011396 | 0.011597 | 0.011564 | 0.011497 |
| 0.011597 | 0.011665 | 0.011396 | 0.011396 | 0.011430 | 0.011429 | 0.011432 |
| 0.011500 | 0.011429 | 0.011430 | 0.011465 | 0.011597 | 0.011665 | 0.011665 |
| 0.011531 | 0.011635 | 0.011636 | 0.011772 | 0.011802 | 0.011463 | 0.011631 |
| 0.011564 | 0.011564 | 0.011398 | 0.011582 | 0.011512 | 0.011537 | 0.011376 |
| 0.011508 | 0.011744 | 0.011484 | 0.011434 | 0.011295 | 0.011497 | 0.011362 |
| 0.000000 | 0.011463 | 0.011362 | 0.011465 | 0.011564 | 0.011567 | 0.011463 |
| 0.011362 | 0.011296 | 0.011429 | 0.011362 | 0.011295 | 0.011400 | 0.011497 |
| 0.011463 | 0.011396 | 0.011429 | 0.011463 | 0.011430 | 0.011362 | 0.011564 |
| 0.011429 | 0.011463 | 0.011463 | 0.011396 | 0.011463 | 0.011698 | 0.011362 |
| 0.011396 | 0.011799 | 0.011396 | 0.011295 | 0.011396 | 0.011765 | 0.011317 |
| 0.011735 | 0.011358 | 0.011361 | 0.011584 | 0.011671 | 0.011599 | 0.011311 |
| 0.011323 | 0.011564 | 0.011665 | 0.011773 | 0.011632 | 0.011771 | 0.011901 |
| 0.011800 | 0.011838 | 0.011799 | 0.012051 | 0.011765 | 0.012641 | 0.011801 |
| 0.012540 | 0.012308 | 0.012442 | 0.012714 | 0.011765 | 0.011463 | 0.011766 |
| 0.012204 | 0.012140 | 0.011732 | 0.011631 | 0.011699 | 0.011699 | 0.011669 |
| 0.011564 | 0.011569 | 0.011631 | 0.011598 | 0.011968 | 0.012035 | 0.012036 |
| 0.011935 | 0.012035 | 0.012139 | 0.011906 | 0.012205 | 0.012212 | 0.012272 |
| 0.012273 | 0.012307 | 0.012255 | 0.012273 | 0.012274 | 0.011497 | 0.011800 |
| 0.011867 | 0.012371 | 0.011874 | 0.012102 | 0.012575 | 0.011638 | 0.011531 |
| 0.011497 | 0.011497 | 0.011968 | 0.012006 | 0.012116 | 0.011833 | 0.011498 |

|          |          |          |          |          |          |          |
|----------|----------|----------|----------|----------|----------|----------|
| S750     | 0.011698 | 0.011698 | 0.012035 | 0.011799 | 0.011799 | 0.011866 |
| 0.011706 | 0.011638 | 0.011799 | 0.011295 | 0.011362 | 0.011329 | 0.011295 |
| 0.011329 | 0.011497 | 0.011295 | 0.011329 | 0.011396 | 0.011362 | 0.011329 |
| 0.011295 | 0.011329 | 0.011429 | 0.011296 | 0.011329 | 0.011329 | 0.011672 |
| 0.011564 | 0.011329 | 0.011228 | 0.011463 | 0.011396 | 0.011363 | 0.011396 |
| 0.011362 | 0.011463 | 0.011362 | 0.011362 | 0.011396 | 0.011362 | 0.011530 |
| 0.011295 | 0.011362 | 0.011396 | 0.011329 | 0.011430 | 0.011463 | 0.011396 |
| 0.011362 | 0.011531 | 0.011430 | 0.011698 | 0.011362 | 0.011631 | 0.011362 |
| 0.011329 | 0.011430 | 0.011497 | 0.011631 | 0.011732 | 0.011430 | 0.011530 |
| 0.011396 | 0.011463 | 0.011363 | 0.011597 | 0.011833 | 0.011362 | 0.011430 |
| 0.011329 | 0.011430 | 0.011396 | 0.011463 | 0.011396 | 0.011396 | 0.011396 |
| 0.011295 | 0.011329 | 0.011295 | 0.011396 | 0.011362 | 0.011397 | 0.011463 |
| 0.011396 | 0.011362 | 0.011430 | 0.011329 | 0.011463 | 0.011295 | 0.011362 |
| 0.011530 | 0.011463 | 0.011631 | 0.011530 | 0.011362 | 0.011598 | 0.011362 |
| 0.011542 | 0.011695 | 0.011551 | 0.011255 | 0.011247 | 0.011391 | 0.011493 |
| 0.012121 | 0.011518 | 0.011225 | 0.011597 | 0.011598 | 0.011396 | 0.011497 |
| 0.011430 | 0.011396 | 0.011463 | 0.011362 | 0.011463 | 0.011396 | 0.011396 |
| 0.011362 | 0.011463 | 0.011665 | 0.011530 | 0.011430 | 0.011396 | 0.011329 |
| 0.011295 | 0.011295 | 0.011362 | 0.011329 | 0.011530 | 0.011497 | 0.011430 |
| 0.011530 | 0.011597 | 0.011329 | 0.011329 | 0.011362 | 0.011362 | 0.011364 |
| 0.011432 | 0.011362 | 0.011362 | 0.011240 | 0.011313 | 0.011271 | 0.011363 |
| 0.011365 | 0.011301 | 0.011282 | 0.011336 | 0.011264 | 0.011300 | 0.011330 |
| 0.011600 | 0.011370 | 0.011405 | 0.011296 | 0.011302 | 0.011430 | 0.011397 |
| 0.011464 | 0.011397 | 0.011396 | 0.011497 | 0.011429 | 0.011799 | 0.011598 |
| 0.011631 | 0.011497 | 0.011362 | 0.011463 | 0.011262 | 0.011497 | 0.011295 |
| 0.011362 | 0.011362 | 0.011329 | 0.011295 | 0.011329 | 0.011295 | 0.011396 |
| 0.011362 | 0.011463 | 0.000000 | 0.011295 | 0.011397 | 0.011497 | 0.011500 |
| 0.011497 | 0.011396 | 0.011295 | 0.011229 | 0.011362 | 0.011295 | 0.011228 |
| 0.011332 | 0.011497 | 0.011295 | 0.011497 | 0.011262 | 0.011363 | 0.011329 |
| 0.011430 | 0.011329 | 0.011362 | 0.011329 | 0.011362 | 0.011228 | 0.011362 |
| 0.011396 | 0.011329 | 0.011396 | 0.011329 | 0.011362 | 0.011396 | 0.011631 |
| 0.011732 | 0.011665 | 0.011732 | 0.011498 | 0.011732 | 0.011362 | 0.011329 |
| 0.011364 | 0.011626 | 0.011426 | 0.011266 | 0.011739 | 0.011231 | 0.011336 |
| 0.011739 | 0.011638 | 0.011530 | 0.011732 | 0.011436 | 0.011598 | 0.011564 |
| 0.011497 | 0.011665 | 0.011522 | 0.011349 | 0.011396 | 0.011396 | 0.011466 |
| 0.011564 | 0.011465 | 0.011601 | 0.011670 | 0.011598 | 0.011665 | 0.011772 |
| 0.011500 | 0.011672 | 0.011602 | 0.011534 | 0.011801 | 0.011262 | 0.011465 |
| 0.011430 | 0.011362 | 0.011262 | 0.011262 | 0.011329 | 0.011329 | 0.011396 |
| 0.011329 | 0.011396 | 0.011295 | 0.011396 | 0.011329 | 0.011329 | 0.011396 |
| 0.011329 | 0.011765 | 0.011665 | 0.011698 | 0.011228 | 0.011329 | 0.011363 |
| 0.011362 | 0.011329 | 0.011396 | 0.011430 | 0.011295 | 0.011295 | 0.011295 |
| 0.011833 | 0.011463 | 0.011463 | 0.011262 | 0.011362 | 0.011531 | 0.011295 |
| 0.011295 | 0.011362 | 0.011329 | 0.011497 | 0.011295 | 0.011430 | 0.011564 |
| 0.011497 | 0.011329 | 0.011329 | 0.011262 | 0.011262 | 0.011430 | 0.011362 |
| 0.011262 | 0.011362 | 0.011228 | 0.011262 | 0.011396 | 0.011531 | 0.011295 |
| 0.011262 | 0.011396 | 0.011329 | 0.011228 | 0.011564 | 0.011228 | 0.011396 |
| 0.011471 | 0.011295 | 0.011598 | 0.011430 | 0.011463 | 0.011329 | 0.011430 |
| 0.011295 | 0.011631 | 0.011228 | 0.011497 | 0.011295 | 0.011295 | 0.011228 |
| 0.011463 | 0.011665 | 0.011363 | 0.011430 | 0.011262 | 0.011665 | 0.011295 |
| 0.011295 | 0.011295 | 0.011329 | 0.011430 | 0.011329 | 0.011430 | 0.011497 |
| 0.011497 | 0.011463 | 0.011362 | 0.011463 | 0.011430 | 0.011295 | 0.011262 |
| 0.011295 | 0.011295 | 0.011363 | 0.011295 | 0.011262 | 0.011430 | 0.011295 |
| 0.011329 | 0.011329 | 0.011463 | 0.011497 | 0.011396 | 0.011329 | 0.011329 |
| 0.011396 | 0.011329 | 0.011430 | 0.011295 | 0.011430 | 0.011530 | 0.011833 |
| 0.011329 | 0.011732 | 0.011336 | 0.017861 | 0.011322 | 0.011427 | 0.011688 |
| 0.011648 | 0.011693 | 0.011427 | 0.011408 | 0.011719 | 0.011716 | 0.011364 |
| 0.011582 | 0.011548 | 0.011216 | 0.011312 | 0.011333 | 0.011356 | 0.011318 |
| 0.011576 | 0.011470 | 0.011468 | 0.011325 | 0.011463 | 0.011497 | 0.011500 |
| 0.011370 | 0.011463 | 0.011463 | 0.011430 | 0.011396 | 0.011396 | 0.011363 |
| 0.011396 | 0.011329 | 0.011362 | 0.011396 | 0.011363 | 0.011295 | 0.011329 |

|          |          |          |          |          |          |          |
|----------|----------|----------|----------|----------|----------|----------|
| 0.011329 | 0.011396 | 0.011295 | 0.011396 | 0.011430 | 0.011463 | 0.011362 |
| 0.011396 | 0.011362 | 0.011698 | 0.011698 | 0.011430 | 0.011464 | 0.011497 |
| 0.011262 | 0.011262 | 0.011295 | 0.011396 | 0.011262 | 0.011497 | 0.011497 |
| 0.011530 | 0.011530 | 0.011463 | 0.011564 | 0.011732 | 0.011565 | 0.011396 |
| 0.011396 | 0.011463 | 0.011497 | 0.011329 | 0.011396 | 0.011362 | 0.011396 |
| 0.011463 | 0.011463 | 0.011497 | 0.011463 | 0.011363 | 0.011564 | 0.011530 |
| 0.011399 | 0.011295 | 0.011396 | 0.011497 | 0.011396 | 0.011530 | 0.011564 |
| 0.011732 | 0.011436 | 0.011598 | 0.011564 | 0.011497 | 0.011665 | 0.011295 |
| 0.011464 | 0.011363 | 0.011329 | 0.011329 | 0.011396 | 0.011295 | 0.011396 |
| 0.011430 | 0.011463 | 0.011362 | 0.011396 | 0.011362 | 0.011698 | 0.011698 |
| 0.011430 | 0.011464 | 0.011530 | 0.011463 | 0.012104 | 0.011525 | 0.011447 |
| 0.011517 | 0.011477 | 0.011588 | 0.011476 | 0.011585 | 0.011509 | 0.011474 |
| 0.012057 | 0.011372 | 0.011506 | 0.011441 | 0.011715 | 0.011571 | 0.011673 |
| 0.012081 | 0.011512 | 0.011398 | 0.011396 | 0.011396 | 0.011430 | 0.011364 |
| 0.011262 | 0.011295 | 0.011430 | 0.011396 | 0.011398 | 0.011530 | 0.011498 |
| 0.011362 | 0.011295 | 0.011329 | 0.011362 | 0.011262 | 0.011329 | 0.011228 |
| 0.011362 | 0.011396 | 0.011295 | 0.011262 | 0.011362 | 0.011295 | 0.011329 |
| 0.011329 | 0.011262 | 0.011329 | 0.011363 | 0.011262 | 0.011463 | 0.011497 |
| 0.011396 | 0.011463 | 0.011396 | 0.011396 | 0.011329 | 0.011732 | 0.011362 |
| 0.011408 | 0.011329 | 0.011564 | 0.011569 | 0.011430 | 0.011430 | 0.011362 |
| 0.011430 | 0.011363 | 0.011329 | 0.011363 | 0.011463 | 0.011463 | 0.011396 |
| 0.011396 | 0.011530 | 0.011698 | 0.011429 | 0.011631 | 0.011631 | 0.011497 |
| 0.011329 | 0.011396 | 0.011430 | 0.011833 | 0.011396 | 0.011430 | 0.011396 |
| 0.011430 | 0.011362 | 0.011362 | 0.011665 | 0.011598 | 0.011631 | 0.011362 |
| 0.011463 | 0.011530 | 0.011396 | 0.011463 | 0.011430 | 0.011295 | 0.011631 |
| 0.011396 | 0.011362 | 0.011362 | 0.011530 | 0.011362 | 0.011463 | 0.011698 |
| 0.011396 | 0.011774 | 0.011766 | 0.011548 | 0.011286 | 0.011468 | 0.011318 |
| 0.011225 | 0.011761 | 0.011306 | 0.011462 | 0.011304 | 0.011417 | 0.011432 |
| 0.011519 | 0.011258 | 0.011394 | 0.011258 | 0.011276 | 0.011462 | 0.011466 |
| 0.011475 | 0.011375 | 0.011448 | 0.011377 | 0.011397 | 0.011530 | 0.011598 |
| 0.011530 | 0.011464 | 0.011567 | 0.011569 | 0.011704 | 0.011696 | 0.011396 |
| 0.011631 | 0.011497 | 0.011362 | 0.011463 | 0.011262 | 0.011497 | 0.011295 |
| 0.011362 | 0.011362 | 0.011329 | 0.011295 | 0.011329 | 0.011295 | 0.011396 |
| 0.011375 | 0.011375 | 0.011368 | 0.011403 | 0.011539 | 0.011504 | 0.011504 |
| 0.011503 | 0.011430 | 0.011245 | 0.011240 | 0.011365 | 0.011535 | 0.011535 |
| 0.011329 | 0.011399 | 0.011633 | 0.011601 | 0.011531 | 0.011565 | 0.011497 |
| 0.011430 | 0.011497 | 0.011497 | 0.011396 | 0.011968 | 0.011564 | 0.011631 |
| 0.011665 | 0.011701 | 0.011367 | 0.011441 | 0.011329 | 0.011530 | 0.011497 |
| 0.011531 | 0.011564 | 0.011564 | 0.011564 | 0.011729 | 0.011698 | 0.011338 |
| 0.011229 | 0.011233 | 0.011333 | 0.011298 | 0.011402 | 0.011210 | 0.011570 |
| 0.011369 | 0.011499 | 0.011251 | 0.011397 | 0.011363 | 0.011437 | 0.011329 |
| 0.011295 | 0.011295 | 0.011362 | 0.011329 | 0.011530 | 0.011497 | 0.011430 |
| 0.011530 | 0.011597 | 0.011329 | 0.011329 | 0.011362 | 0.011362 | 0.011364 |
| 0.011432 | 0.011362 | 0.011362 | 0.011397 | 0.011530 | 0.011598 | 0.011530 |
| 0.011464 | 0.011567 | 0.011569 | 0.011704 | 0.011696 | 0.011396 | 0.011564 |
| 0.011497 | 0.011497 | 0.011331 | 0.011513 | 0.011442 | 0.011469 | 0.011341 |
| 0.011508 | 0.011698 | 0.011483 | 0.011400 | 0.011295 | 0.011497 | 0.011362 |
| 0.011463 | 0.000000 | 0.011295 | 0.011397 | 0.011497 | 0.011500 | 0.011396 |
| 0.011295 | 0.011229 | 0.011362 | 0.011295 | 0.011228 | 0.011332 | 0.011497 |
| 0.011396 | 0.011329 | 0.011362 | 0.011396 | 0.011363 | 0.011295 | 0.011497 |
| 0.011362 | 0.011396 | 0.011396 | 0.011329 | 0.011396 | 0.011631 | 0.011295 |
| 0.011329 | 0.011732 | 0.011329 | 0.011362 | 0.011329 | 0.011698 | 0.011232 |
| 0.011735 | 0.011273 | 0.011311 | 0.011503 | 0.011589 | 0.011527 | 0.011186 |
| 0.011270 | 0.011497 | 0.011597 | 0.011705 | 0.011565 | 0.011703 | 0.011834 |
| 0.011733 | 0.011771 | 0.011732 | 0.011983 | 0.011698 | 0.012573 | 0.011734 |
| 0.012473 | 0.012241 | 0.012375 | 0.012646 | 0.011698 | 0.011396 | 0.011699 |
| 0.012137 | 0.012072 | 0.011665 | 0.011564 | 0.011632 | 0.011632 | 0.011602 |
| 0.011497 | 0.011501 | 0.011564 | 0.011531 | 0.011901 | 0.011967 | 0.011968 |
| 0.011868 | 0.011968 | 0.012072 | 0.011838 | 0.012138 | 0.012144 | 0.012205 |
| 0.012206 | 0.012239 | 0.012186 | 0.012206 | 0.012207 | 0.011429 | 0.011732 |

|          |          |          |          |          |          |          |
|----------|----------|----------|----------|----------|----------|----------|
| 0.011800 | 0.012304 | 0.011806 | 0.012035 | 0.012508 | 0.011570 | 0.011464 |
| 0.011430 | 0.011429 | 0.011900 | 0.011965 | 0.012045 | 0.011765 | 0.011431 |
| S751     | 0.011597 | 0.011597 | 0.011934 | 0.011698 | 0.011698 | 0.011765 |
| 0.011604 | 0.011536 | 0.011698 | 0.011195 | 0.011262 | 0.011228 | 0.011195 |
| 0.011228 | 0.011396 | 0.011195 | 0.011228 | 0.011295 | 0.011262 | 0.011228 |
| 0.011195 | 0.011228 | 0.011329 | 0.011195 | 0.011228 | 0.011228 | 0.011570 |
| 0.011463 | 0.011228 | 0.011127 | 0.011362 | 0.011295 | 0.011262 | 0.011295 |
| 0.011262 | 0.011362 | 0.011262 | 0.011262 | 0.011295 | 0.011262 | 0.011430 |
| 0.011195 | 0.011262 | 0.011295 | 0.011228 | 0.011329 | 0.011362 | 0.011295 |
| 0.011262 | 0.011430 | 0.011329 | 0.011597 | 0.011262 | 0.011530 | 0.011262 |
| 0.011228 | 0.011329 | 0.011396 | 0.011530 | 0.011631 | 0.011329 | 0.011429 |
| 0.011295 | 0.011362 | 0.011262 | 0.011497 | 0.011732 | 0.011262 | 0.011329 |
| 0.011228 | 0.011329 | 0.011295 | 0.011362 | 0.011295 | 0.011295 | 0.011295 |
| 0.011195 | 0.011228 | 0.011195 | 0.011295 | 0.011262 | 0.011296 | 0.011362 |
| 0.011295 | 0.011262 | 0.011329 | 0.011228 | 0.011362 | 0.011195 | 0.011262 |
| 0.011429 | 0.011362 | 0.011597 | 0.011430 | 0.011262 | 0.011497 | 0.011262 |
| 0.011357 | 0.011658 | 0.011475 | 0.011177 | 0.011172 | 0.011207 | 0.011336 |
| 0.012011 | 0.011365 | 0.011184 | 0.011497 | 0.011497 | 0.011295 | 0.011396 |
| 0.011329 | 0.011295 | 0.011362 | 0.011262 | 0.011362 | 0.011295 | 0.011295 |
| 0.011262 | 0.011362 | 0.011564 | 0.011429 | 0.011329 | 0.011295 | 0.011228 |
| 0.011195 | 0.011195 | 0.011262 | 0.011228 | 0.011429 | 0.011396 | 0.011329 |
| 0.011429 | 0.011497 | 0.011228 | 0.011228 | 0.011262 | 0.011262 | 0.011263 |
| 0.011331 | 0.011262 | 0.011262 | 0.011096 | 0.011205 | 0.011165 | 0.011262 |
| 0.011263 | 0.011198 | 0.011245 | 0.011233 | 0.011162 | 0.011197 | 0.011229 |
| 0.011456 | 0.011233 | 0.011301 | 0.011195 | 0.011199 | 0.011329 | 0.011296 |
| 0.011363 | 0.011229 | 0.011228 | 0.011396 | 0.011329 | 0.011698 | 0.011497 |
| 0.011530 | 0.011396 | 0.011262 | 0.011362 | 0.011161 | 0.011396 | 0.011195 |
| 0.011262 | 0.011262 | 0.011228 | 0.011195 | 0.011228 | 0.011195 | 0.011295 |
| 0.011262 | 0.011362 | 0.011295 | 0.000000 | 0.011296 | 0.011396 | 0.011398 |
| 0.011396 | 0.011295 | 0.011195 | 0.011128 | 0.011262 | 0.011195 | 0.011127 |
| 0.011230 | 0.011396 | 0.011195 | 0.011396 | 0.011161 | 0.011262 | 0.011228 |
| 0.011329 | 0.011228 | 0.011262 | 0.011228 | 0.011262 | 0.011127 | 0.011262 |
| 0.011295 | 0.011228 | 0.011295 | 0.011228 | 0.011262 | 0.011295 | 0.011530 |
| 0.011631 | 0.011564 | 0.011631 | 0.011397 | 0.011631 | 0.011262 | 0.011228 |
| 0.011229 | 0.011505 | 0.011335 | 0.011163 | 0.011637 | 0.011129 | 0.011257 |
| 0.011637 | 0.011536 | 0.011429 | 0.011631 | 0.011333 | 0.011497 | 0.011463 |
| 0.011396 | 0.011564 | 0.011416 | 0.011266 | 0.011312 | 0.011295 | 0.011365 |
| 0.011463 | 0.011364 | 0.011500 | 0.011568 | 0.011497 | 0.011564 | 0.011670 |
| 0.011399 | 0.011569 | 0.011500 | 0.011432 | 0.011699 | 0.011161 | 0.011364 |
| 0.011329 | 0.011262 | 0.011161 | 0.011161 | 0.011228 | 0.011228 | 0.011295 |
| 0.011228 | 0.011295 | 0.011195 | 0.011295 | 0.011228 | 0.011228 | 0.011295 |
| 0.011228 | 0.011665 | 0.011564 | 0.011597 | 0.011127 | 0.011228 | 0.011262 |
| 0.011262 | 0.011228 | 0.011295 | 0.011329 | 0.011195 | 0.011195 | 0.011195 |
| 0.011732 | 0.011362 | 0.011362 | 0.011161 | 0.011262 | 0.011430 | 0.011195 |
| 0.011195 | 0.011262 | 0.011228 | 0.011396 | 0.011195 | 0.011329 | 0.011463 |
| 0.011396 | 0.011228 | 0.011228 | 0.011161 | 0.011161 | 0.011329 | 0.011262 |
| 0.011161 | 0.011262 | 0.011127 | 0.011161 | 0.011295 | 0.011430 | 0.011195 |
| 0.011161 | 0.011295 | 0.011228 | 0.011127 | 0.011463 | 0.011127 | 0.011295 |
| 0.011368 | 0.011195 | 0.011497 | 0.011329 | 0.011362 | 0.011228 | 0.011329 |
| 0.011195 | 0.011530 | 0.011127 | 0.011396 | 0.011195 | 0.011195 | 0.011127 |
| 0.011362 | 0.011564 | 0.011262 | 0.011329 | 0.011161 | 0.011564 | 0.011195 |
| 0.011195 | 0.011195 | 0.011228 | 0.011329 | 0.011228 | 0.011329 | 0.011396 |
| 0.011396 | 0.011362 | 0.011262 | 0.011362 | 0.011329 | 0.011195 | 0.011161 |
| 0.011195 | 0.011195 | 0.011262 | 0.011195 | 0.011161 | 0.011329 | 0.011195 |
| 0.011228 | 0.011228 | 0.011362 | 0.011396 | 0.011295 | 0.011228 | 0.011228 |
| 0.011295 | 0.011228 | 0.011329 | 0.011195 | 0.011329 | 0.011429 | 0.011732 |
| 0.011228 | 0.011631 | 0.011233 | 0.017747 | 0.011126 | 0.011427 | 0.011583 |
| 0.011545 | 0.011588 | 0.011217 | 0.011234 | 0.011664 | 0.011612 | 0.011303 |
| 0.011440 | 0.011487 | 0.011138 | 0.011228 | 0.011216 | 0.011258 | 0.011232 |
| 0.011436 | 0.011395 | 0.011394 | 0.011126 | 0.011362 | 0.011396 | 0.011398 |

|          |          |          |          |          |          |          |
|----------|----------|----------|----------|----------|----------|----------|
| 0.011266 | 0.011362 | 0.011362 | 0.011329 | 0.011295 | 0.011295 | 0.011262 |
| 0.011295 | 0.011228 | 0.011262 | 0.011295 | 0.011262 | 0.011195 | 0.011228 |
| 0.011228 | 0.011295 | 0.011195 | 0.011295 | 0.011329 | 0.011362 | 0.011262 |
| 0.011295 | 0.011262 | 0.011597 | 0.011597 | 0.011329 | 0.011363 | 0.011396 |
| 0.011161 | 0.011161 | 0.011195 | 0.011295 | 0.011161 | 0.011396 | 0.011396 |
| 0.011429 | 0.011429 | 0.011362 | 0.011463 | 0.011631 | 0.011464 | 0.011295 |
| 0.011295 | 0.011362 | 0.011396 | 0.011228 | 0.011295 | 0.011262 | 0.011295 |
| 0.011363 | 0.011362 | 0.011396 | 0.011362 | 0.011262 | 0.011463 | 0.011429 |
| 0.011297 | 0.011195 | 0.011295 | 0.011396 | 0.011295 | 0.011430 | 0.011463 |
| 0.011631 | 0.011333 | 0.011497 | 0.011463 | 0.011396 | 0.011564 | 0.011195 |
| 0.011363 | 0.011262 | 0.011228 | 0.011228 | 0.011295 | 0.011195 | 0.011295 |
| 0.011329 | 0.011362 | 0.011262 | 0.011295 | 0.011262 | 0.011597 | 0.011597 |
| 0.011329 | 0.011363 | 0.011429 | 0.011362 | 0.012002 | 0.011417 | 0.011342 |
| 0.011412 | 0.011372 | 0.011482 | 0.011372 | 0.011480 | 0.011405 | 0.011371 |
| 0.011953 | 0.011268 | 0.011403 | 0.011337 | 0.011611 | 0.011468 | 0.011571 |
| 0.011978 | 0.011437 | 0.011297 | 0.011295 | 0.011295 | 0.011329 | 0.011263 |
| 0.011161 | 0.011195 | 0.011329 | 0.011295 | 0.011297 | 0.011429 | 0.011397 |
| 0.011262 | 0.011195 | 0.011228 | 0.011262 | 0.011161 | 0.011228 | 0.011127 |
| 0.011262 | 0.011295 | 0.011195 | 0.011161 | 0.011262 | 0.011195 | 0.011228 |
| 0.011228 | 0.011161 | 0.011228 | 0.011262 | 0.011161 | 0.011362 | 0.011396 |
| 0.011295 | 0.011362 | 0.011295 | 0.011295 | 0.011228 | 0.011631 | 0.011262 |
| 0.011304 | 0.011228 | 0.011463 | 0.011467 | 0.011329 | 0.011329 | 0.011329 |
| 0.011329 | 0.011262 | 0.011228 | 0.011262 | 0.011362 | 0.011362 | 0.011295 |
| 0.011295 | 0.011429 | 0.011597 | 0.011329 | 0.011530 | 0.011530 | 0.011396 |
| 0.011228 | 0.011295 | 0.011329 | 0.011732 | 0.011295 | 0.011329 | 0.011295 |
| 0.011329 | 0.011262 | 0.011262 | 0.011564 | 0.011497 | 0.011530 | 0.011262 |
| 0.011362 | 0.011362 | 0.011295 | 0.011362 | 0.011329 | 0.011195 | 0.011530 |
| 0.011295 | 0.011262 | 0.011262 | 0.011429 | 0.011262 | 0.011362 | 0.011597 |
| 0.011295 | 0.011672 | 0.011665 | 0.011467 | 0.011117 | 0.011366 | 0.011163 |
| 0.011225 | 0.011683 | 0.011201 | 0.011417 | 0.011207 | 0.011315 | 0.011326 |
| 0.011366 | 0.011126 | 0.011227 | 0.000000 | 0.011168 | 0.011261 | 0.011303 |
| 0.011324 | 0.011218 | 0.011342 | 0.011236 | 0.011296 | 0.011429 | 0.011497 |
| 0.011497 | 0.011363 | 0.011466 | 0.011467 | 0.011602 | 0.011625 | 0.011295 |
| 0.011530 | 0.011396 | 0.011262 | 0.011362 | 0.011161 | 0.011396 | 0.011195 |
| 0.011262 | 0.011262 | 0.011228 | 0.011195 | 0.011228 | 0.011195 | 0.011295 |
| 0.011270 | 0.011270 | 0.011266 | 0.011300 | 0.011436 | 0.011402 | 0.011402 |
| 0.011401 | 0.011329 | 0.011097 | 0.011096 | 0.011263 | 0.011433 | 0.011433 |
| 0.011228 | 0.011297 | 0.011531 | 0.011499 | 0.011430 | 0.011464 | 0.011396 |
| 0.011329 | 0.011396 | 0.011396 | 0.011295 | 0.011866 | 0.011463 | 0.011530 |
| 0.011564 | 0.011630 | 0.011265 | 0.011337 | 0.011228 | 0.011430 | 0.011396 |
| 0.011430 | 0.011463 | 0.011463 | 0.011463 | 0.011571 | 0.011597 | 0.011234 |
| 0.011128 | 0.011130 | 0.011230 | 0.011196 | 0.011299 | 0.011135 | 0.011468 |
| 0.011266 | 0.011411 | 0.011108 | 0.011285 | 0.011262 | 0.011334 | 0.011228 |
| 0.011195 | 0.011195 | 0.011262 | 0.011228 | 0.011429 | 0.011396 | 0.011329 |
| 0.011429 | 0.011497 | 0.011228 | 0.011228 | 0.011262 | 0.011262 | 0.011263 |
| 0.011331 | 0.011262 | 0.011262 | 0.011296 | 0.011429 | 0.011497 | 0.011497 |
| 0.011363 | 0.011466 | 0.011467 | 0.011602 | 0.011625 | 0.011295 | 0.011463 |
| 0.011396 | 0.011396 | 0.011229 | 0.011408 | 0.011338 | 0.011367 | 0.011235 |
| 0.011404 | 0.011607 | 0.011357 | 0.011298 | 0.011195 | 0.011396 | 0.011262 |
| 0.011362 | 0.011295 | 0.000000 | 0.011296 | 0.011396 | 0.011398 | 0.011295 |
| 0.011195 | 0.011128 | 0.011262 | 0.011195 | 0.011127 | 0.011230 | 0.011396 |
| 0.011295 | 0.011228 | 0.011262 | 0.011295 | 0.011262 | 0.011195 | 0.011396 |
| 0.011262 | 0.011295 | 0.011295 | 0.011228 | 0.011295 | 0.011530 | 0.011195 |
| 0.011228 | 0.011631 | 0.011228 | 0.011262 | 0.011228 | 0.011597 | 0.011189 |
| 0.011678 | 0.011188 | 0.011211 | 0.011422 | 0.011508 | 0.011419 | 0.011144 |
| 0.011113 | 0.011396 | 0.011497 | 0.011603 | 0.011464 | 0.011601 | 0.011733 |
| 0.011632 | 0.011669 | 0.011631 | 0.011880 | 0.011597 | 0.012405 | 0.011633 |
| 0.012372 | 0.012072 | 0.012206 | 0.012545 | 0.011597 | 0.011295 | 0.011598 |
| 0.012036 | 0.011971 | 0.011564 | 0.011463 | 0.011531 | 0.011531 | 0.011500 |
| 0.011396 | 0.011399 | 0.011463 | 0.011430 | 0.011800 | 0.011866 | 0.011867 |

|          |          |          |          |          |          |          |
|----------|----------|----------|----------|----------|----------|----------|
| 0.011767 | 0.011867 | 0.011970 | 0.011737 | 0.012036 | 0.012042 | 0.012103 |
| 0.012104 | 0.012138 | 0.012084 | 0.012104 | 0.012105 | 0.011329 | 0.011631 |
| 0.011699 | 0.012203 | 0.011704 | 0.011934 | 0.012406 | 0.011468 | 0.011363 |
| 0.011329 | 0.011329 | 0.011799 | 0.011800 | 0.011939 | 0.011665 | 0.011330 |
| S752     | 0.011701 | 0.011701 | 0.012038 | 0.011802 | 0.011802 | 0.011869 |
| 0.011708 | 0.011640 | 0.011734 | 0.011296 | 0.011363 | 0.011330 | 0.011296 |
| 0.011330 | 0.011431 | 0.011296 | 0.011330 | 0.011363 | 0.011363 | 0.011330 |
| 0.011296 | 0.011330 | 0.011397 | 0.011296 | 0.011330 | 0.011330 | 0.011674 |
| 0.011566 | 0.011330 | 0.011229 | 0.011431 | 0.011397 | 0.011364 | 0.011397 |
| 0.011363 | 0.011465 | 0.011363 | 0.011363 | 0.011397 | 0.011363 | 0.011532 |
| 0.011296 | 0.011363 | 0.011397 | 0.011330 | 0.011431 | 0.011464 | 0.011397 |
| 0.011363 | 0.011532 | 0.011431 | 0.011700 | 0.011363 | 0.011633 | 0.011363 |
| 0.011330 | 0.011431 | 0.011498 | 0.011633 | 0.011734 | 0.011431 | 0.011532 |
| 0.011397 | 0.011465 | 0.011363 | 0.011599 | 0.011836 | 0.011296 | 0.011431 |
| 0.011330 | 0.011431 | 0.011330 | 0.011465 | 0.011397 | 0.011397 | 0.011397 |
| 0.011296 | 0.011330 | 0.011296 | 0.011397 | 0.011363 | 0.011398 | 0.011464 |
| 0.011397 | 0.011363 | 0.011431 | 0.011330 | 0.011464 | 0.011296 | 0.011363 |
| 0.011532 | 0.011464 | 0.011700 | 0.011532 | 0.011363 | 0.011599 | 0.011296 |
| 0.011544 | 0.011773 | 0.011590 | 0.011295 | 0.011248 | 0.011392 | 0.011455 |
| 0.012089 | 0.011569 | 0.011267 | 0.011599 | 0.011599 | 0.011397 | 0.011498 |
| 0.011431 | 0.011397 | 0.011464 | 0.011363 | 0.011465 | 0.011397 | 0.011397 |
| 0.011363 | 0.011464 | 0.011667 | 0.011464 | 0.011431 | 0.011397 | 0.011330 |
| 0.011296 | 0.011296 | 0.011363 | 0.011330 | 0.011532 | 0.011498 | 0.011431 |
| 0.011532 | 0.011532 | 0.011330 | 0.011330 | 0.011363 | 0.011363 | 0.011365 |
| 0.011433 | 0.011363 | 0.011363 | 0.011241 | 0.011278 | 0.011236 | 0.011364 |
| 0.011366 | 0.011302 | 0.011356 | 0.011337 | 0.011265 | 0.011301 | 0.011331 |
| 0.011566 | 0.011372 | 0.011406 | 0.011296 | 0.011303 | 0.011432 | 0.011398 |
| 0.011465 | 0.011398 | 0.011398 | 0.011498 | 0.011431 | 0.011802 | 0.011600 |
| 0.011633 | 0.011498 | 0.011363 | 0.011465 | 0.011262 | 0.011498 | 0.011296 |
| 0.011363 | 0.011363 | 0.011330 | 0.011296 | 0.011330 | 0.011296 | 0.011397 |
| 0.011363 | 0.011465 | 0.011397 | 0.011296 | 0.000000 | 0.011431 | 0.011467 |
| 0.011498 | 0.011364 | 0.011296 | 0.011229 | 0.011363 | 0.011296 | 0.011229 |
| 0.011333 | 0.011498 | 0.011296 | 0.011498 | 0.011262 | 0.011363 | 0.011330 |
| 0.011431 | 0.011330 | 0.011363 | 0.011330 | 0.011363 | 0.011229 | 0.011363 |
| 0.011397 | 0.011330 | 0.011397 | 0.011330 | 0.011363 | 0.011397 | 0.011633 |
| 0.011734 | 0.011667 | 0.011734 | 0.011500 | 0.011734 | 0.011363 | 0.011330 |
| 0.011365 | 0.011667 | 0.011426 | 0.011266 | 0.011673 | 0.011231 | 0.011336 |
| 0.011742 | 0.011640 | 0.011532 | 0.011734 | 0.011437 | 0.011599 | 0.011566 |
| 0.011498 | 0.011667 | 0.011488 | 0.011350 | 0.011397 | 0.011397 | 0.011434 |
| 0.011566 | 0.011466 | 0.011603 | 0.011672 | 0.011599 | 0.011667 | 0.011774 |
| 0.011502 | 0.011674 | 0.011604 | 0.011535 | 0.011803 | 0.011262 | 0.011466 |
| 0.011431 | 0.011363 | 0.011262 | 0.011262 | 0.011330 | 0.011262 | 0.011397 |
| 0.011330 | 0.011397 | 0.011296 | 0.011397 | 0.011330 | 0.011330 | 0.011397 |
| 0.011330 | 0.011768 | 0.011667 | 0.011701 | 0.011229 | 0.011330 | 0.011363 |
| 0.011363 | 0.011330 | 0.011397 | 0.011431 | 0.011296 | 0.011296 | 0.011296 |
| 0.011835 | 0.011464 | 0.011465 | 0.011262 | 0.011363 | 0.011532 | 0.011296 |
| 0.011296 | 0.011363 | 0.011330 | 0.011498 | 0.011262 | 0.011431 | 0.011566 |
| 0.011498 | 0.011330 | 0.011330 | 0.011262 | 0.011262 | 0.011431 | 0.011363 |
| 0.011262 | 0.011363 | 0.011229 | 0.011262 | 0.011397 | 0.011532 | 0.011262 |
| 0.011263 | 0.011397 | 0.011330 | 0.011229 | 0.011566 | 0.011229 | 0.011330 |
| 0.011473 | 0.011296 | 0.011599 | 0.011431 | 0.011465 | 0.011330 | 0.011431 |
| 0.011296 | 0.011633 | 0.011229 | 0.011498 | 0.011296 | 0.011296 | 0.011229 |
| 0.011464 | 0.011667 | 0.011363 | 0.011431 | 0.011262 | 0.011667 | 0.011296 |
| 0.011296 | 0.011296 | 0.011330 | 0.011431 | 0.011330 | 0.011431 | 0.011498 |
| 0.011498 | 0.011465 | 0.011363 | 0.011465 | 0.011431 | 0.011296 | 0.011262 |
| 0.011296 | 0.011296 | 0.011363 | 0.011296 | 0.011262 | 0.011431 | 0.011296 |
| 0.011330 | 0.011330 | 0.011465 | 0.011498 | 0.011397 | 0.011330 | 0.011330 |
| 0.011397 | 0.011330 | 0.011431 | 0.011296 | 0.011431 | 0.011465 | 0.011802 |
| 0.011330 | 0.011734 | 0.011337 | 0.017849 | 0.011258 | 0.011491 | 0.011690 |
| 0.011651 | 0.011696 | 0.011374 | 0.011292 | 0.011778 | 0.011719 | 0.011427 |



|          |          |          |          |          |          |          |
|----------|----------|----------|----------|----------|----------|----------|
| 0.011487 | 0.011613 | 0.011256 | 0.011355 | 0.011333 | 0.011358 | 0.011363 |
| 0.011529 | 0.011471 | 0.011470 | 0.011259 | 0.011465 | 0.011498 | 0.011501 |
| 0.011371 | 0.011464 | 0.011465 | 0.011431 | 0.011397 | 0.011397 | 0.011364 |
| 0.011397 | 0.011330 | 0.011363 | 0.011397 | 0.011363 | 0.011296 | 0.011330 |
| 0.011330 | 0.011397 | 0.011296 | 0.011397 | 0.011431 | 0.011464 | 0.011363 |
| 0.011397 | 0.011363 | 0.011700 | 0.011700 | 0.011431 | 0.011330 | 0.011498 |
| 0.011262 | 0.011262 | 0.011296 | 0.011397 | 0.011262 | 0.011498 | 0.011498 |
| 0.011532 | 0.011532 | 0.011465 | 0.011566 | 0.011734 | 0.011567 | 0.011397 |
| 0.011397 | 0.011464 | 0.011498 | 0.011330 | 0.011397 | 0.011363 | 0.011397 |
| 0.011465 | 0.011465 | 0.011498 | 0.011465 | 0.011364 | 0.011566 | 0.011532 |
| 0.011366 | 0.011296 | 0.011397 | 0.011498 | 0.011397 | 0.011532 | 0.011566 |
| 0.011734 | 0.011437 | 0.011599 | 0.011566 | 0.011498 | 0.011667 | 0.011296 |
| 0.011466 | 0.011296 | 0.011330 | 0.011330 | 0.011397 | 0.011296 | 0.011397 |
| 0.011431 | 0.011464 | 0.011363 | 0.011397 | 0.011363 | 0.011700 | 0.011700 |
| 0.011431 | 0.011330 | 0.011532 | 0.011465 | 0.012107 | 0.011526 | 0.011413 |
| 0.011519 | 0.011478 | 0.011589 | 0.011477 | 0.011587 | 0.011510 | 0.011476 |
| 0.012060 | 0.011373 | 0.011507 | 0.011442 | 0.011717 | 0.011572 | 0.011675 |
| 0.012084 | 0.011514 | 0.011400 | 0.011397 | 0.011397 | 0.011431 | 0.011365 |
| 0.011262 | 0.011296 | 0.011431 | 0.011397 | 0.011399 | 0.011532 | 0.011500 |
| 0.011363 | 0.011296 | 0.011330 | 0.011363 | 0.011262 | 0.011330 | 0.011229 |
| 0.011363 | 0.011397 | 0.011296 | 0.011262 | 0.011363 | 0.011296 | 0.011330 |
| 0.011330 | 0.011262 | 0.011330 | 0.011363 | 0.011262 | 0.011465 | 0.011498 |
| 0.011397 | 0.011465 | 0.011397 | 0.011397 | 0.011330 | 0.011734 | 0.011363 |
| 0.011375 | 0.011330 | 0.011566 | 0.011571 | 0.011431 | 0.011431 | 0.011431 |
| 0.011431 | 0.011363 | 0.011330 | 0.011363 | 0.011397 | 0.011431 | 0.011397 |
| 0.011397 | 0.011532 | 0.011700 | 0.011431 | 0.011633 | 0.011633 | 0.011498 |
| 0.011330 | 0.011397 | 0.011431 | 0.011836 | 0.011397 | 0.011431 | 0.011397 |
| 0.011431 | 0.011363 | 0.011363 | 0.011667 | 0.011600 | 0.011633 | 0.011363 |
| 0.011465 | 0.011532 | 0.011397 | 0.011465 | 0.011431 | 0.011296 | 0.011633 |
| 0.011397 | 0.011363 | 0.011363 | 0.011532 | 0.011363 | 0.011464 | 0.011701 |
| 0.011397 | 0.011776 | 0.011768 | 0.011550 | 0.011230 | 0.011469 | 0.011267 |
| 0.011281 | 0.011764 | 0.011307 | 0.011509 | 0.011354 | 0.011367 | 0.011434 |
| 0.011519 | 0.011259 | 0.011340 | 0.011193 | 0.011277 | 0.011397 | 0.011467 |
| 0.011476 | 0.011337 | 0.011449 | 0.011343 | 0.011398 | 0.011532 | 0.011599 |
| 0.011566 | 0.011465 | 0.011569 | 0.011570 | 0.011707 | 0.011734 | 0.011397 |
| 0.011633 | 0.011498 | 0.011363 | 0.011465 | 0.011262 | 0.011498 | 0.011296 |
| 0.011363 | 0.011363 | 0.011330 | 0.011296 | 0.011330 | 0.011296 | 0.011397 |
| 0.011376 | 0.011376 | 0.011370 | 0.011404 | 0.011541 | 0.011506 | 0.011506 |
| 0.011505 | 0.011431 | 0.011246 | 0.011241 | 0.011298 | 0.011536 | 0.011537 |
| 0.011330 | 0.011400 | 0.011634 | 0.011603 | 0.011533 | 0.011499 | 0.011498 |
| 0.011431 | 0.011498 | 0.011498 | 0.011397 | 0.011971 | 0.011566 | 0.011633 |
| 0.011599 | 0.011739 | 0.011368 | 0.011443 | 0.011330 | 0.011532 | 0.011498 |
| 0.011533 | 0.011566 | 0.011566 | 0.011566 | 0.011731 | 0.011701 | 0.011304 |
| 0.011230 | 0.011199 | 0.011334 | 0.011299 | 0.011403 | 0.011210 | 0.011572 |
| 0.011370 | 0.011500 | 0.011251 | 0.011361 | 0.011364 | 0.011438 | 0.011330 |
| 0.011296 | 0.011296 | 0.011363 | 0.011330 | 0.011532 | 0.011498 | 0.011431 |
| 0.011532 | 0.011532 | 0.011330 | 0.011330 | 0.011363 | 0.011363 | 0.011365 |
| 0.011433 | 0.011363 | 0.011363 | 0.011398 | 0.011532 | 0.011599 | 0.011566 |
| 0.011465 | 0.011569 | 0.011570 | 0.011707 | 0.011734 | 0.011397 | 0.011566 |
| 0.011498 | 0.011498 | 0.011332 | 0.011514 | 0.011374 | 0.011470 | 0.011341 |
| 0.011509 | 0.011698 | 0.011484 | 0.011401 | 0.011296 | 0.011498 | 0.011363 |
| 0.011465 | 0.011397 | 0.011296 | 0.000000 | 0.011431 | 0.011467 | 0.011364 |
| 0.011296 | 0.011229 | 0.011363 | 0.011296 | 0.011229 | 0.011333 | 0.011498 |
| 0.011397 | 0.011330 | 0.011363 | 0.011397 | 0.011363 | 0.011296 | 0.011498 |
| 0.011363 | 0.011397 | 0.011397 | 0.011330 | 0.011397 | 0.011633 | 0.011296 |
| 0.011330 | 0.011734 | 0.011330 | 0.011363 | 0.011330 | 0.011700 | 0.011232 |
| 0.011678 | 0.011231 | 0.011261 | 0.011505 | 0.011591 | 0.011528 | 0.011228 |
| 0.011218 | 0.011498 | 0.011599 | 0.011708 | 0.011567 | 0.011705 | 0.011836 |
| 0.011735 | 0.011773 | 0.011734 | 0.011986 | 0.011701 | 0.012578 | 0.011736 |
| 0.012478 | 0.012245 | 0.012379 | 0.012652 | 0.011700 | 0.011397 | 0.011667 |

|          |          |          |          |          |          |          |
|----------|----------|----------|----------|----------|----------|----------|
| 0.012141 | 0.012042 | 0.011667 | 0.011566 | 0.011634 | 0.011634 | 0.011603 |
| 0.011498 | 0.011469 | 0.011566 | 0.011533 | 0.011904 | 0.011971 | 0.011972 |
| 0.011871 | 0.011971 | 0.012075 | 0.011841 | 0.012141 | 0.012148 | 0.012209 |
| 0.012209 | 0.012209 | 0.012190 | 0.012176 | 0.012177 | 0.011431 | 0.011735 |
| 0.011803 | 0.012308 | 0.011809 | 0.012038 | 0.012513 | 0.011571 | 0.011465 |
| 0.011431 | 0.011431 | 0.011903 | 0.011928 | 0.012049 | 0.011768 | 0.011432 |
| S753     | 0.011799 | 0.011799 | 0.012136 | 0.011900 | 0.011900 | 0.011967 |
| 0.011808 | 0.011740 | 0.011900 | 0.011396 | 0.011463 | 0.011430 | 0.011396 |
| 0.011430 | 0.011598 | 0.011396 | 0.011430 | 0.011497 | 0.011463 | 0.011430 |
| 0.011396 | 0.011430 | 0.011530 | 0.011396 | 0.011396 | 0.011430 | 0.011774 |
| 0.011665 | 0.011430 | 0.011329 | 0.011564 | 0.011497 | 0.011463 | 0.011497 |
| 0.011463 | 0.011564 | 0.011463 | 0.011463 | 0.011497 | 0.011463 | 0.011631 |
| 0.011396 | 0.011463 | 0.011497 | 0.011430 | 0.011530 | 0.011564 | 0.011497 |
| 0.011463 | 0.011631 | 0.011531 | 0.011799 | 0.011463 | 0.011732 | 0.011463 |
| 0.011430 | 0.011530 | 0.011598 | 0.011732 | 0.011833 | 0.011530 | 0.011631 |
| 0.011497 | 0.011564 | 0.011463 | 0.011698 | 0.011934 | 0.011463 | 0.011530 |
| 0.011430 | 0.011530 | 0.011497 | 0.011564 | 0.011497 | 0.011497 | 0.011497 |
| 0.011396 | 0.011430 | 0.011396 | 0.011497 | 0.011463 | 0.011498 | 0.011564 |
| 0.011497 | 0.011463 | 0.011530 | 0.011429 | 0.011564 | 0.011396 | 0.011463 |
| 0.011631 | 0.011564 | 0.011799 | 0.011631 | 0.011463 | 0.011698 | 0.011463 |
| 0.011654 | 0.011882 | 0.011702 | 0.011412 | 0.011396 | 0.011391 | 0.011611 |
| 0.012231 | 0.011620 | 0.011431 | 0.011698 | 0.011698 | 0.011497 | 0.011598 |
| 0.011530 | 0.011497 | 0.011564 | 0.011463 | 0.011564 | 0.011497 | 0.011497 |
| 0.011463 | 0.011564 | 0.011766 | 0.011631 | 0.011530 | 0.011497 | 0.011430 |
| 0.011396 | 0.011396 | 0.011463 | 0.011430 | 0.011631 | 0.011597 | 0.011530 |
| 0.011631 | 0.011698 | 0.011429 | 0.011429 | 0.011463 | 0.011463 | 0.011465 |
| 0.011533 | 0.011463 | 0.011463 | 0.011348 | 0.011422 | 0.011376 | 0.011464 |
| 0.011467 | 0.011404 | 0.011466 | 0.011440 | 0.011366 | 0.011403 | 0.011432 |
| 0.011672 | 0.011474 | 0.011508 | 0.011396 | 0.011406 | 0.011531 | 0.011497 |
| 0.011565 | 0.011498 | 0.011497 | 0.011597 | 0.011530 | 0.011900 | 0.011699 |
| 0.011732 | 0.011598 | 0.011463 | 0.011564 | 0.011362 | 0.011597 | 0.011396 |
| 0.011463 | 0.011463 | 0.011430 | 0.011396 | 0.011430 | 0.011396 | 0.011497 |
| 0.011463 | 0.011564 | 0.011497 | 0.011396 | 0.011431 | 0.000000 | 0.011466 |
| 0.011598 | 0.011497 | 0.011396 | 0.011263 | 0.011463 | 0.011396 | 0.011329 |
| 0.011434 | 0.011598 | 0.011396 | 0.011598 | 0.011362 | 0.011463 | 0.011430 |
| 0.011530 | 0.011430 | 0.011463 | 0.011430 | 0.011463 | 0.011329 | 0.011463 |
| 0.011497 | 0.011430 | 0.011497 | 0.011429 | 0.011463 | 0.011497 | 0.011732 |
| 0.011833 | 0.011765 | 0.011833 | 0.011600 | 0.011833 | 0.011463 | 0.011430 |
| 0.011466 | 0.011586 | 0.011380 | 0.011266 | 0.011841 | 0.011333 | 0.011454 |
| 0.011841 | 0.011740 | 0.011631 | 0.011833 | 0.011538 | 0.011698 | 0.011665 |
| 0.011598 | 0.011765 | 0.011593 | 0.011472 | 0.011480 | 0.011497 | 0.011568 |
| 0.011665 | 0.011566 | 0.011703 | 0.011771 | 0.011698 | 0.011766 | 0.011874 |
| 0.011602 | 0.011773 | 0.011704 | 0.011635 | 0.011902 | 0.011362 | 0.011566 |
| 0.011530 | 0.011463 | 0.011362 | 0.011362 | 0.011430 | 0.011430 | 0.011497 |
| 0.011430 | 0.011497 | 0.011396 | 0.011497 | 0.011430 | 0.011430 | 0.011497 |
| 0.011430 | 0.011866 | 0.011766 | 0.011799 | 0.011329 | 0.011430 | 0.011463 |
| 0.011463 | 0.011430 | 0.011497 | 0.011530 | 0.011396 | 0.011396 | 0.011396 |
| 0.011934 | 0.011564 | 0.011564 | 0.011362 | 0.011463 | 0.011631 | 0.011396 |
| 0.011396 | 0.011463 | 0.011430 | 0.011598 | 0.011396 | 0.011530 | 0.011665 |
| 0.011597 | 0.011430 | 0.011430 | 0.011362 | 0.011362 | 0.011530 | 0.011463 |
| 0.011362 | 0.011463 | 0.011329 | 0.011362 | 0.011497 | 0.011631 | 0.011396 |
| 0.011363 | 0.011497 | 0.011430 | 0.011329 | 0.011665 | 0.011329 | 0.011497 |
| 0.011540 | 0.011396 | 0.011698 | 0.011531 | 0.011564 | 0.011430 | 0.011530 |
| 0.011396 | 0.011732 | 0.011329 | 0.011598 | 0.011396 | 0.011396 | 0.011329 |
| 0.011564 | 0.011766 | 0.011463 | 0.011530 | 0.011362 | 0.011766 | 0.011396 |
| 0.011396 | 0.011396 | 0.011430 | 0.011530 | 0.011430 | 0.011195 | 0.011597 |
| 0.011598 | 0.011564 | 0.011463 | 0.011564 | 0.011530 | 0.011396 | 0.011362 |
| 0.011396 | 0.011396 | 0.011463 | 0.011396 | 0.011362 | 0.011530 | 0.011396 |
| 0.011430 | 0.011430 | 0.011564 | 0.011598 | 0.011497 | 0.011430 | 0.011430 |
| 0.011497 | 0.011430 | 0.011530 | 0.011396 | 0.011530 | 0.011631 | 0.011934 |

|          |          |          |          |          |          |          |
|----------|----------|----------|----------|----------|----------|----------|
| 0.011430 | 0.011833 | 0.011440 | 0.017937 | 0.011453 | 0.011672 | 0.011793 |
| 0.011752 | 0.011799 | 0.011374 | 0.011408 | 0.011994 | 0.011820 | 0.011607 |
| 0.011582 | 0.011793 | 0.011372 | 0.011437 | 0.011333 | 0.011554 | 0.011490 |
| 0.011623 | 0.011619 | 0.011616 | 0.011325 | 0.011564 | 0.011598 | 0.011601 |
| 0.011473 | 0.011564 | 0.011564 | 0.011530 | 0.011497 | 0.011497 | 0.011463 |
| 0.011497 | 0.011430 | 0.011463 | 0.011497 | 0.011463 | 0.011396 | 0.011429 |
| 0.011429 | 0.011497 | 0.011396 | 0.011497 | 0.011530 | 0.011564 | 0.011463 |
| 0.011497 | 0.011463 | 0.011799 | 0.011799 | 0.011531 | 0.011531 | 0.011598 |
| 0.011362 | 0.011362 | 0.011396 | 0.011497 | 0.011362 | 0.011597 | 0.011597 |
| 0.011631 | 0.011631 | 0.011564 | 0.011665 | 0.011833 | 0.011667 | 0.011497 |
| 0.011497 | 0.011564 | 0.011598 | 0.011430 | 0.011497 | 0.011463 | 0.011497 |
| 0.011564 | 0.011564 | 0.011597 | 0.011564 | 0.011431 | 0.011665 | 0.011631 |
| 0.011501 | 0.011396 | 0.011497 | 0.011598 | 0.011497 | 0.011631 | 0.011665 |
| 0.011833 | 0.011538 | 0.011698 | 0.011665 | 0.011598 | 0.011765 | 0.011396 |
| 0.011566 | 0.011464 | 0.011429 | 0.011429 | 0.011497 | 0.011396 | 0.011497 |
| 0.011530 | 0.011564 | 0.011463 | 0.011497 | 0.011463 | 0.011799 | 0.011799 |
| 0.011531 | 0.011531 | 0.011631 | 0.011564 | 0.012205 | 0.011632 | 0.011518 |
| 0.011623 | 0.011581 | 0.011658 | 0.011545 | 0.011691 | 0.011612 | 0.011578 |
| 0.012160 | 0.011476 | 0.011608 | 0.011545 | 0.011818 | 0.011673 | 0.011775 |
| 0.012149 | 0.011626 | 0.011500 | 0.011497 | 0.011497 | 0.011530 | 0.011466 |
| 0.011362 | 0.011396 | 0.011530 | 0.011497 | 0.011500 | 0.011631 | 0.011599 |
| 0.011463 | 0.011396 | 0.011430 | 0.011463 | 0.011362 | 0.011430 | 0.011329 |
| 0.011463 | 0.011497 | 0.011396 | 0.011362 | 0.011463 | 0.011396 | 0.011430 |
| 0.011430 | 0.011362 | 0.011430 | 0.011463 | 0.011362 | 0.011564 | 0.011597 |
| 0.011497 | 0.011564 | 0.011497 | 0.011497 | 0.011430 | 0.011833 | 0.011463 |
| 0.011513 | 0.011430 | 0.011665 | 0.011671 | 0.011530 | 0.011530 | 0.011530 |
| 0.011530 | 0.011463 | 0.011430 | 0.011463 | 0.011564 | 0.011564 | 0.011497 |
| 0.011497 | 0.011631 | 0.011799 | 0.011530 | 0.011732 | 0.011732 | 0.011597 |
| 0.011430 | 0.011497 | 0.011530 | 0.011934 | 0.011497 | 0.011531 | 0.011497 |
| 0.011530 | 0.011463 | 0.011463 | 0.011766 | 0.011699 | 0.011732 | 0.011463 |
| 0.011564 | 0.011631 | 0.011497 | 0.011564 | 0.011530 | 0.011396 | 0.011732 |
| 0.011497 | 0.011463 | 0.011463 | 0.011631 | 0.011463 | 0.011564 | 0.011799 |
| 0.011497 | 0.011876 | 0.011866 | 0.011711 | 0.011512 | 0.011570 | 0.011370 |
| 0.011500 | 0.011917 | 0.011411 | 0.011641 | 0.011499 | 0.011620 | 0.011645 |
| 0.011621 | 0.011455 | 0.011617 | 0.011457 | 0.011491 | 0.011663 | 0.011587 |
| 0.011588 | 0.011493 | 0.011553 | 0.011483 | 0.011465 | 0.011631 | 0.011698 |
| 0.011698 | 0.011565 | 0.011669 | 0.011670 | 0.011772 | 0.011767 | 0.011497 |
| 0.011732 | 0.011598 | 0.011463 | 0.011564 | 0.011362 | 0.011597 | 0.011396 |
| 0.011463 | 0.011463 | 0.011430 | 0.011396 | 0.011430 | 0.011396 | 0.011497 |
| 0.011479 | 0.011480 | 0.011471 | 0.011505 | 0.011642 | 0.011607 | 0.011607 |
| 0.011605 | 0.011531 | 0.011356 | 0.011348 | 0.011467 | 0.011636 | 0.011637 |
| 0.011430 | 0.011501 | 0.011734 | 0.011702 | 0.011632 | 0.011666 | 0.011597 |
| 0.011530 | 0.011598 | 0.011597 | 0.011497 | 0.012068 | 0.011665 | 0.011732 |
| 0.011766 | 0.011844 | 0.011470 | 0.011545 | 0.011430 | 0.011631 | 0.011598 |
| 0.011632 | 0.011665 | 0.011665 | 0.011665 | 0.011807 | 0.011799 | 0.011442 |
| 0.011331 | 0.011337 | 0.011435 | 0.011400 | 0.011505 | 0.011359 | 0.011672 |
| 0.011472 | 0.011630 | 0.011156 | 0.011472 | 0.011464 | 0.011539 | 0.011430 |
| 0.011396 | 0.011396 | 0.011463 | 0.011430 | 0.011631 | 0.011597 | 0.011530 |
| 0.011631 | 0.011698 | 0.011429 | 0.011429 | 0.011463 | 0.011463 | 0.011465 |
| 0.011533 | 0.011463 | 0.011463 | 0.011465 | 0.011631 | 0.011698 | 0.011698 |
| 0.011565 | 0.011669 | 0.011670 | 0.011772 | 0.011767 | 0.011497 | 0.011665 |
| 0.011598 | 0.011598 | 0.011432 | 0.011617 | 0.011547 | 0.011571 | 0.011305 |
| 0.011611 | 0.011652 | 0.011483 | 0.011502 | 0.011396 | 0.011598 | 0.011463 |
| 0.011564 | 0.011497 | 0.011396 | 0.011431 | 0.000000 | 0.011466 | 0.011497 |
| 0.011396 | 0.011263 | 0.011463 | 0.011396 | 0.011329 | 0.011434 | 0.011598 |
| 0.011497 | 0.011430 | 0.011463 | 0.011497 | 0.011463 | 0.011396 | 0.011597 |
| 0.011463 | 0.011497 | 0.011497 | 0.011430 | 0.011497 | 0.011732 | 0.011396 |
| 0.011430 | 0.011833 | 0.011430 | 0.011463 | 0.011430 | 0.011799 | 0.011446 |
| 0.011791 | 0.011443 | 0.011411 | 0.011664 | 0.011752 | 0.011634 | 0.011395 |
| 0.011375 | 0.011597 | 0.011698 | 0.011807 | 0.011666 | 0.011805 | 0.011935 |

|          |          |          |          |          |          |          |
|----------|----------|----------|----------|----------|----------|----------|
| 0.011834 | 0.011872 | 0.011833 | 0.012086 | 0.011799 | 0.012674 | 0.011835 |
| 0.012574 | 0.012342 | 0.012476 | 0.012748 | 0.011799 | 0.011497 | 0.011799 |
| 0.012238 | 0.012174 | 0.011766 | 0.011665 | 0.011733 | 0.011733 | 0.011703 |
| 0.011597 | 0.011603 | 0.011665 | 0.011632 | 0.012002 | 0.012068 | 0.012069 |
| 0.011969 | 0.012069 | 0.012173 | 0.011940 | 0.012239 | 0.012246 | 0.012306 |
| 0.012307 | 0.012340 | 0.012289 | 0.012307 | 0.012308 | 0.011530 | 0.011833 |
| 0.011901 | 0.012405 | 0.011908 | 0.012136 | 0.012609 | 0.011672 | 0.011564 |
| 0.011530 | 0.011530 | 0.012001 | 0.012006 | 0.012116 | 0.011866 | 0.011532 |
| S754     | 0.011804 | 0.011804 | 0.012143 | 0.011905 | 0.011905 | 0.011973 |
| 0.011813 | 0.011744 | 0.011905 | 0.011398 | 0.011466 | 0.011433 | 0.011398 |
| 0.011432 | 0.011601 | 0.011398 | 0.011432 | 0.011499 | 0.011466 | 0.011432 |
| 0.011398 | 0.011432 | 0.011533 | 0.011365 | 0.011432 | 0.011432 | 0.011778 |
| 0.011669 | 0.011432 | 0.011331 | 0.011567 | 0.011499 | 0.011466 | 0.011500 |
| 0.011466 | 0.011533 | 0.011466 | 0.011466 | 0.011499 | 0.011466 | 0.011635 |
| 0.011398 | 0.011466 | 0.011499 | 0.011432 | 0.011533 | 0.011567 | 0.011499 |
| 0.011466 | 0.011635 | 0.011534 | 0.011804 | 0.011466 | 0.011736 | 0.011466 |
| 0.011432 | 0.011533 | 0.011601 | 0.011736 | 0.011838 | 0.011533 | 0.011635 |
| 0.011499 | 0.011533 | 0.011466 | 0.011702 | 0.011939 | 0.011466 | 0.011533 |
| 0.011432 | 0.011533 | 0.011499 | 0.011567 | 0.011466 | 0.011499 | 0.011499 |
| 0.011398 | 0.011432 | 0.011398 | 0.011500 | 0.011466 | 0.011500 | 0.011567 |
| 0.011500 | 0.011466 | 0.011533 | 0.011432 | 0.011567 | 0.011398 | 0.011466 |
| 0.011635 | 0.011567 | 0.011804 | 0.011635 | 0.011466 | 0.011702 | 0.011466 |
| 0.011620 | 0.011849 | 0.011629 | 0.011335 | 0.011359 | 0.011393 | 0.011575 |
| 0.012203 | 0.011570 | 0.011392 | 0.011702 | 0.011702 | 0.011499 | 0.011601 |
| 0.011533 | 0.011499 | 0.011567 | 0.011466 | 0.011567 | 0.011499 | 0.011499 |
| 0.011466 | 0.011533 | 0.011736 | 0.011635 | 0.011533 | 0.011500 | 0.011432 |
| 0.011398 | 0.011398 | 0.011466 | 0.011432 | 0.011635 | 0.011601 | 0.011533 |
| 0.011635 | 0.011702 | 0.011432 | 0.011432 | 0.011466 | 0.011466 | 0.011468 |
| 0.011537 | 0.011466 | 0.011466 | 0.011314 | 0.011388 | 0.011378 | 0.011466 |
| 0.011469 | 0.011372 | 0.011432 | 0.011442 | 0.011368 | 0.011405 | 0.011434 |
| 0.011676 | 0.011442 | 0.011511 | 0.011399 | 0.011408 | 0.011534 | 0.011500 |
| 0.011568 | 0.011501 | 0.011500 | 0.011601 | 0.011533 | 0.011905 | 0.011702 |
| 0.011736 | 0.011601 | 0.011466 | 0.011567 | 0.011364 | 0.011601 | 0.011398 |
| 0.011466 | 0.011466 | 0.011432 | 0.011398 | 0.011432 | 0.011398 | 0.011499 |
| 0.011466 | 0.011567 | 0.011500 | 0.011398 | 0.011467 | 0.011466 | 0.000000 |
| 0.011601 | 0.011500 | 0.011398 | 0.011297 | 0.011466 | 0.011398 | 0.011331 |
| 0.011401 | 0.011601 | 0.011398 | 0.011601 | 0.011364 | 0.011466 | 0.011432 |
| 0.011533 | 0.011432 | 0.011466 | 0.011432 | 0.011466 | 0.011331 | 0.011466 |
| 0.011500 | 0.011432 | 0.011499 | 0.011432 | 0.011466 | 0.011499 | 0.011736 |
| 0.011838 | 0.011770 | 0.011838 | 0.011603 | 0.011838 | 0.011466 | 0.011432 |
| 0.011468 | 0.011670 | 0.011473 | 0.011302 | 0.011846 | 0.011335 | 0.011457 |
| 0.011846 | 0.011745 | 0.011635 | 0.011804 | 0.011541 | 0.011635 | 0.011669 |
| 0.011601 | 0.011770 | 0.011633 | 0.011434 | 0.011567 | 0.011500 | 0.011571 |
| 0.011669 | 0.011570 | 0.011707 | 0.011776 | 0.011702 | 0.011770 | 0.011879 |
| 0.011605 | 0.011778 | 0.011708 | 0.011639 | 0.011907 | 0.011364 | 0.011569 |
| 0.011533 | 0.011466 | 0.011364 | 0.011364 | 0.011432 | 0.011432 | 0.011499 |
| 0.011432 | 0.011500 | 0.011398 | 0.011499 | 0.011432 | 0.011432 | 0.011499 |
| 0.011432 | 0.011871 | 0.011770 | 0.011804 | 0.011331 | 0.011432 | 0.011466 |
| 0.011466 | 0.011432 | 0.011500 | 0.011533 | 0.011398 | 0.011398 | 0.011398 |
| 0.011939 | 0.011567 | 0.011567 | 0.011364 | 0.011466 | 0.011601 | 0.011398 |
| 0.011398 | 0.011466 | 0.011432 | 0.011601 | 0.011398 | 0.011533 | 0.011668 |
| 0.011601 | 0.011432 | 0.011432 | 0.011364 | 0.011364 | 0.011533 | 0.011466 |
| 0.011364 | 0.011466 | 0.011331 | 0.011364 | 0.011500 | 0.011635 | 0.011398 |
| 0.011365 | 0.011500 | 0.011432 | 0.011331 | 0.011669 | 0.011331 | 0.011500 |
| 0.011577 | 0.011398 | 0.011702 | 0.011534 | 0.011567 | 0.011432 | 0.011533 |
| 0.011398 | 0.011736 | 0.011331 | 0.011601 | 0.011398 | 0.011398 | 0.011331 |
| 0.011567 | 0.011770 | 0.011466 | 0.011533 | 0.011364 | 0.011770 | 0.011398 |
| 0.011398 | 0.011398 | 0.011432 | 0.011500 | 0.011432 | 0.011533 | 0.011601 |
| 0.011601 | 0.011567 | 0.011466 | 0.011567 | 0.011533 | 0.011398 | 0.011364 |
| 0.011398 | 0.011398 | 0.011466 | 0.011398 | 0.011364 | 0.011533 | 0.011398 |

|          |          |          |          |          |          |          |
|----------|----------|----------|----------|----------|----------|----------|
| 0.011432 | 0.011432 | 0.011567 | 0.011601 | 0.011499 | 0.011432 | 0.011432 |
| 0.011466 | 0.011432 | 0.011533 | 0.011398 | 0.011533 | 0.011635 | 0.011939 |
| 0.011432 | 0.011838 | 0.011408 | 0.017940 | 0.011454 | 0.011673 | 0.011762 |
| 0.011756 | 0.011768 | 0.011480 | 0.011234 | 0.011886 | 0.011824 | 0.011547 |
| 0.011583 | 0.011733 | 0.011335 | 0.011440 | 0.011335 | 0.011456 | 0.011405 |
| 0.011577 | 0.011585 | 0.011583 | 0.011328 | 0.011567 | 0.011601 | 0.011605 |
| 0.011475 | 0.011567 | 0.011567 | 0.011533 | 0.011500 | 0.011500 | 0.011466 |
| 0.011499 | 0.011432 | 0.011466 | 0.011499 | 0.011466 | 0.011398 | 0.011432 |
| 0.011432 | 0.011499 | 0.011398 | 0.011500 | 0.011533 | 0.011567 | 0.011466 |
| 0.011499 | 0.011466 | 0.011804 | 0.011804 | 0.011534 | 0.011568 | 0.011601 |
| 0.011364 | 0.011364 | 0.011398 | 0.011500 | 0.011364 | 0.011601 | 0.011601 |
| 0.011635 | 0.011635 | 0.011567 | 0.011669 | 0.011838 | 0.011670 | 0.011500 |
| 0.011499 | 0.011567 | 0.011601 | 0.011432 | 0.011499 | 0.011466 | 0.011500 |
| 0.011567 | 0.011567 | 0.011601 | 0.011567 | 0.011433 | 0.011668 | 0.011635 |
| 0.011503 | 0.011398 | 0.011499 | 0.011601 | 0.011500 | 0.011635 | 0.011668 |
| 0.011804 | 0.011541 | 0.011635 | 0.011669 | 0.011601 | 0.011770 | 0.011398 |
| 0.011569 | 0.011466 | 0.011432 | 0.011432 | 0.011499 | 0.011398 | 0.011500 |
| 0.011533 | 0.011567 | 0.011466 | 0.011499 | 0.011466 | 0.011804 | 0.011804 |
| 0.011534 | 0.011568 | 0.011635 | 0.011567 | 0.012178 | 0.011636 | 0.011556 |
| 0.011627 | 0.011584 | 0.011662 | 0.011514 | 0.011695 | 0.011616 | 0.011581 |
| 0.012132 | 0.011478 | 0.011612 | 0.011513 | 0.011823 | 0.011677 | 0.011780 |
| 0.012156 | 0.011668 | 0.011503 | 0.011499 | 0.011499 | 0.011533 | 0.011468 |
| 0.011364 | 0.011398 | 0.011533 | 0.011499 | 0.011502 | 0.011635 | 0.011603 |
| 0.011466 | 0.011398 | 0.011432 | 0.011466 | 0.011364 | 0.011432 | 0.011331 |
| 0.011466 | 0.011499 | 0.011398 | 0.011364 | 0.011466 | 0.011398 | 0.011398 |
| 0.011432 | 0.011364 | 0.011432 | 0.011466 | 0.011364 | 0.011533 | 0.011601 |
| 0.011500 | 0.011567 | 0.011499 | 0.011500 | 0.011432 | 0.011838 | 0.011466 |
| 0.011516 | 0.011398 | 0.011669 | 0.011675 | 0.011533 | 0.011533 | 0.011533 |
| 0.011533 | 0.011466 | 0.011432 | 0.011466 | 0.011567 | 0.011567 | 0.011499 |
| 0.011499 | 0.011635 | 0.011804 | 0.011533 | 0.011736 | 0.011736 | 0.011601 |
| 0.011432 | 0.011499 | 0.011533 | 0.011939 | 0.011500 | 0.011533 | 0.011500 |
| 0.011499 | 0.011466 | 0.011466 | 0.011770 | 0.011703 | 0.011736 | 0.011466 |
| 0.011567 | 0.011635 | 0.011499 | 0.011567 | 0.011533 | 0.011398 | 0.011736 |
| 0.011432 | 0.011466 | 0.011466 | 0.011635 | 0.011466 | 0.011567 | 0.011804 |
| 0.011499 | 0.011881 | 0.011871 | 0.011671 | 0.011512 | 0.011539 | 0.011318 |
| 0.011445 | 0.011845 | 0.011378 | 0.011600 | 0.011500 | 0.011570 | 0.011539 |
| 0.011571 | 0.011390 | 0.011506 | 0.011391 | 0.011384 | 0.011597 | 0.011550 |
| 0.011553 | 0.011456 | 0.011521 | 0.011450 | 0.011501 | 0.011635 | 0.011702 |
| 0.011702 | 0.011568 | 0.011673 | 0.011674 | 0.011811 | 0.011806 | 0.011500 |
| 0.011736 | 0.011601 | 0.011466 | 0.011567 | 0.011364 | 0.011601 | 0.011398 |
| 0.011466 | 0.011466 | 0.011432 | 0.011398 | 0.011432 | 0.011398 | 0.011499 |
| 0.011482 | 0.011483 | 0.011474 | 0.011439 | 0.011646 | 0.011610 | 0.011610 |
| 0.011609 | 0.011500 | 0.011321 | 0.011314 | 0.011469 | 0.011640 | 0.011641 |
| 0.011433 | 0.011503 | 0.011738 | 0.011706 | 0.011636 | 0.011602 | 0.011601 |
| 0.011533 | 0.011601 | 0.011567 | 0.011499 | 0.012075 | 0.011635 | 0.011736 |
| 0.011770 | 0.011849 | 0.011472 | 0.011548 | 0.011432 | 0.011635 | 0.011601 |
| 0.011602 | 0.011668 | 0.011669 | 0.011669 | 0.011811 | 0.011804 | 0.011444 |
| 0.011333 | 0.011339 | 0.011437 | 0.011402 | 0.011507 | 0.011361 | 0.011676 |
| 0.011475 | 0.011635 | 0.011349 | 0.011513 | 0.011466 | 0.011542 | 0.011432 |
| 0.011398 | 0.011398 | 0.011466 | 0.011432 | 0.011635 | 0.011601 | 0.011533 |
| 0.011635 | 0.011702 | 0.011432 | 0.011432 | 0.011466 | 0.011466 | 0.011468 |
| 0.011537 | 0.011466 | 0.011466 | 0.011501 | 0.011635 | 0.011702 | 0.011702 |
| 0.011568 | 0.011673 | 0.011674 | 0.011811 | 0.011806 | 0.011500 | 0.011668 |
| 0.011601 | 0.011601 | 0.011435 | 0.011621 | 0.011550 | 0.011540 | 0.011378 |
| 0.011580 | 0.011700 | 0.011527 | 0.011505 | 0.011398 | 0.011601 | 0.011466 |
| 0.011567 | 0.011500 | 0.011398 | 0.011467 | 0.011466 | 0.000000 | 0.011500 |
| 0.011398 | 0.011297 | 0.011466 | 0.011398 | 0.011331 | 0.011401 | 0.011601 |
| 0.011499 | 0.011432 | 0.011466 | 0.011499 | 0.011466 | 0.011398 | 0.011601 |
| 0.011466 | 0.011500 | 0.011499 | 0.011432 | 0.011499 | 0.011736 | 0.011398 |
| 0.011432 | 0.011838 | 0.011432 | 0.011466 | 0.011432 | 0.011804 | 0.011404 |

|          |          |          |          |          |          |          |
|----------|----------|----------|----------|----------|----------|----------|
| 0.011848 | 0.011401 | 0.011361 | 0.011627 | 0.011712 | 0.011602 | 0.011353 |
| 0.011323 | 0.011601 | 0.011669 | 0.011778 | 0.011636 | 0.011775 | 0.011906 |
| 0.011805 | 0.011843 | 0.011804 | 0.012092 | 0.011770 | 0.012685 | 0.011840 |
| 0.012584 | 0.012350 | 0.012485 | 0.012758 | 0.011804 | 0.011500 | 0.011804 |
| 0.012246 | 0.012181 | 0.011770 | 0.011669 | 0.011737 | 0.011737 | 0.011707 |
| 0.011601 | 0.011606 | 0.011668 | 0.011635 | 0.012008 | 0.012075 | 0.012076 |
| 0.011975 | 0.012042 | 0.012180 | 0.011946 | 0.012212 | 0.012219 | 0.012280 |
| 0.012281 | 0.012314 | 0.012262 | 0.012281 | 0.012248 | 0.011533 | 0.011804 |
| 0.011873 | 0.012414 | 0.011913 | 0.012143 | 0.012619 | 0.011675 | 0.011568 |
| 0.011533 | 0.011533 | 0.012007 | 0.012054 | 0.012087 | 0.011871 | 0.011535 |
| S755     | 0.011699 | 0.011699 | 0.012035 | 0.011799 | 0.011799 | 0.011867 |
| 0.011672 | 0.011570 | 0.011799 | 0.011295 | 0.011362 | 0.011329 | 0.011295 |
| 0.011329 | 0.011430 | 0.011295 | 0.011329 | 0.011396 | 0.011362 | 0.011329 |
| 0.011295 | 0.011329 | 0.011362 | 0.011296 | 0.011329 | 0.011329 | 0.011638 |
| 0.011564 | 0.011329 | 0.011228 | 0.011396 | 0.011396 | 0.011363 | 0.011396 |
| 0.011362 | 0.011463 | 0.011362 | 0.011362 | 0.011396 | 0.011362 | 0.011530 |
| 0.011295 | 0.011362 | 0.011396 | 0.011329 | 0.011430 | 0.011463 | 0.011396 |
| 0.011362 | 0.011531 | 0.011430 | 0.011698 | 0.011362 | 0.011631 | 0.011362 |
| 0.011329 | 0.011430 | 0.011497 | 0.011631 | 0.011732 | 0.011430 | 0.011530 |
| 0.011396 | 0.011463 | 0.011363 | 0.011598 | 0.011833 | 0.011362 | 0.011430 |
| 0.011329 | 0.011430 | 0.011396 | 0.011463 | 0.011396 | 0.011396 | 0.011396 |
| 0.011295 | 0.011329 | 0.011295 | 0.011396 | 0.011362 | 0.011397 | 0.011463 |
| 0.011396 | 0.011362 | 0.011430 | 0.011329 | 0.011463 | 0.011295 | 0.011362 |
| 0.011530 | 0.011463 | 0.011698 | 0.011531 | 0.011362 | 0.011598 | 0.011362 |
| 0.011542 | 0.011770 | 0.011588 | 0.011295 | 0.011284 | 0.011355 | 0.011493 |
| 0.012121 | 0.011518 | 0.011307 | 0.011598 | 0.011598 | 0.011396 | 0.011497 |
| 0.011430 | 0.011396 | 0.011463 | 0.011362 | 0.011463 | 0.011396 | 0.011396 |
| 0.011362 | 0.011463 | 0.011665 | 0.011530 | 0.011430 | 0.011396 | 0.011329 |
| 0.011295 | 0.011295 | 0.011362 | 0.011329 | 0.011530 | 0.011497 | 0.011430 |
| 0.011530 | 0.011598 | 0.011329 | 0.011329 | 0.011363 | 0.011362 | 0.011364 |
| 0.011432 | 0.011362 | 0.011362 | 0.011240 | 0.011313 | 0.011271 | 0.011363 |
| 0.011365 | 0.011301 | 0.011355 | 0.011336 | 0.011264 | 0.011300 | 0.011330 |
| 0.011600 | 0.011370 | 0.011405 | 0.011296 | 0.011302 | 0.011430 | 0.011396 |
| 0.011464 | 0.011397 | 0.011396 | 0.011497 | 0.011430 | 0.011799 | 0.011598 |
| 0.011631 | 0.011497 | 0.011362 | 0.011463 | 0.011262 | 0.011497 | 0.011295 |
| 0.011362 | 0.011362 | 0.011329 | 0.011295 | 0.011329 | 0.011295 | 0.011396 |
| 0.011362 | 0.011463 | 0.011396 | 0.011295 | 0.011364 | 0.011497 | 0.011500 |
| 0.011497 | 0.000000 | 0.011295 | 0.011229 | 0.011362 | 0.011295 | 0.011228 |
| 0.011332 | 0.011497 | 0.011295 | 0.011497 | 0.011262 | 0.011363 | 0.011329 |
| 0.011430 | 0.011329 | 0.011362 | 0.011329 | 0.011362 | 0.011228 | 0.011362 |
| 0.011396 | 0.011329 | 0.011396 | 0.011329 | 0.011362 | 0.011396 | 0.011631 |
| 0.011732 | 0.011665 | 0.011732 | 0.011498 | 0.011732 | 0.011362 | 0.011329 |
| 0.011364 | 0.011626 | 0.011472 | 0.011266 | 0.011739 | 0.011231 | 0.011336 |
| 0.011706 | 0.011638 | 0.011530 | 0.011732 | 0.011436 | 0.011598 | 0.011564 |
| 0.011497 | 0.011665 | 0.011522 | 0.011349 | 0.011396 | 0.011396 | 0.011466 |
| 0.011564 | 0.011465 | 0.011602 | 0.011670 | 0.011598 | 0.011665 | 0.011772 |
| 0.011500 | 0.011672 | 0.011602 | 0.011534 | 0.011801 | 0.011262 | 0.011465 |
| 0.011430 | 0.011362 | 0.011262 | 0.011262 | 0.011329 | 0.011329 | 0.011396 |
| 0.011329 | 0.011396 | 0.011295 | 0.011396 | 0.011329 | 0.011329 | 0.011396 |
| 0.011329 | 0.011766 | 0.011665 | 0.011698 | 0.011228 | 0.011329 | 0.011363 |
| 0.011362 | 0.011329 | 0.011396 | 0.011430 | 0.011295 | 0.011295 | 0.011295 |
| 0.011833 | 0.011463 | 0.011463 | 0.011262 | 0.011362 | 0.011531 | 0.011295 |
| 0.011295 | 0.011362 | 0.011329 | 0.011497 | 0.011295 | 0.011430 | 0.011564 |
| 0.011497 | 0.011329 | 0.011329 | 0.011262 | 0.011262 | 0.011430 | 0.011362 |
| 0.011262 | 0.011362 | 0.011228 | 0.011262 | 0.011396 | 0.011531 | 0.011295 |
| 0.011262 | 0.011396 | 0.011329 | 0.011228 | 0.011564 | 0.011228 | 0.011396 |
| 0.011471 | 0.011295 | 0.011598 | 0.011430 | 0.011463 | 0.011329 | 0.011430 |
| 0.011295 | 0.011631 | 0.011228 | 0.011497 | 0.011295 | 0.011295 | 0.011228 |
| 0.011463 | 0.011665 | 0.011363 | 0.011430 | 0.011262 | 0.011665 | 0.011295 |
| 0.011295 | 0.011295 | 0.011329 | 0.011430 | 0.011329 | 0.011430 | 0.011497 |

|          |          |          |          |          |          |          |
|----------|----------|----------|----------|----------|----------|----------|
| 0.011497 | 0.011463 | 0.011362 | 0.011463 | 0.011430 | 0.011295 | 0.011262 |
| 0.011295 | 0.011295 | 0.011363 | 0.011295 | 0.011262 | 0.011430 | 0.011295 |
| 0.011329 | 0.011329 | 0.011463 | 0.011497 | 0.011396 | 0.011329 | 0.011329 |
| 0.011396 | 0.011329 | 0.011430 | 0.011295 | 0.011430 | 0.011530 | 0.011766 |
| 0.011329 | 0.011732 | 0.011336 | 0.017861 | 0.011322 | 0.011549 | 0.011688 |
| 0.011648 | 0.011693 | 0.011322 | 0.011350 | 0.011829 | 0.011716 | 0.011485 |
| 0.011535 | 0.011671 | 0.011255 | 0.011353 | 0.011255 | 0.011406 | 0.011361 |
| 0.011576 | 0.011507 | 0.011505 | 0.011193 | 0.011463 | 0.011497 | 0.011500 |
| 0.011370 | 0.011463 | 0.011463 | 0.011430 | 0.011195 | 0.011195 | 0.011363 |
| 0.011396 | 0.011329 | 0.011362 | 0.011396 | 0.011363 | 0.011295 | 0.011329 |
| 0.011329 | 0.011396 | 0.011295 | 0.011396 | 0.011430 | 0.011463 | 0.011362 |
| 0.011396 | 0.011362 | 0.011698 | 0.011698 | 0.011430 | 0.011464 | 0.011497 |
| 0.011262 | 0.011262 | 0.011295 | 0.011396 | 0.011262 | 0.011497 | 0.011497 |
| 0.011530 | 0.011530 | 0.011463 | 0.011564 | 0.011732 | 0.011566 | 0.011396 |
| 0.011396 | 0.011463 | 0.011497 | 0.011329 | 0.011396 | 0.011362 | 0.011396 |
| 0.011463 | 0.011463 | 0.011497 | 0.011463 | 0.011363 | 0.011564 | 0.011530 |
| 0.011399 | 0.011295 | 0.011396 | 0.011497 | 0.011396 | 0.011531 | 0.011564 |
| 0.011732 | 0.011436 | 0.011598 | 0.011564 | 0.011497 | 0.011665 | 0.011296 |
| 0.011464 | 0.011363 | 0.011329 | 0.011329 | 0.011396 | 0.011295 | 0.011396 |
| 0.011430 | 0.011463 | 0.011362 | 0.011396 | 0.011362 | 0.011698 | 0.011698 |
| 0.011430 | 0.011464 | 0.011530 | 0.011463 | 0.012104 | 0.011525 | 0.011447 |
| 0.011517 | 0.011477 | 0.011588 | 0.011476 | 0.011586 | 0.011509 | 0.011474 |
| 0.012057 | 0.011372 | 0.011506 | 0.011441 | 0.011715 | 0.011571 | 0.011673 |
| 0.012081 | 0.011550 | 0.011399 | 0.011396 | 0.011396 | 0.011430 | 0.011364 |
| 0.011262 | 0.011295 | 0.011430 | 0.011396 | 0.011398 | 0.011530 | 0.011498 |
| 0.011362 | 0.011295 | 0.011329 | 0.011362 | 0.011262 | 0.011329 | 0.011228 |
| 0.011362 | 0.011396 | 0.011295 | 0.011262 | 0.011363 | 0.011295 | 0.011329 |
| 0.011329 | 0.011262 | 0.011329 | 0.011363 | 0.011262 | 0.011463 | 0.011497 |
| 0.011396 | 0.011463 | 0.011396 | 0.011396 | 0.011329 | 0.011732 | 0.011362 |
| 0.011408 | 0.011329 | 0.011564 | 0.011569 | 0.011430 | 0.011430 | 0.011430 |
| 0.011430 | 0.011363 | 0.011329 | 0.011363 | 0.011463 | 0.011463 | 0.011396 |
| 0.011396 | 0.011530 | 0.011698 | 0.011430 | 0.011631 | 0.011631 | 0.011497 |
| 0.011329 | 0.011396 | 0.011430 | 0.011833 | 0.011396 | 0.011430 | 0.011396 |
| 0.011430 | 0.011362 | 0.011362 | 0.011665 | 0.011598 | 0.011631 | 0.011362 |
| 0.011463 | 0.011530 | 0.011396 | 0.011463 | 0.011430 | 0.011295 | 0.011631 |
| 0.011396 | 0.011362 | 0.011362 | 0.011530 | 0.011362 | 0.011463 | 0.011699 |
| 0.011396 | 0.011740 | 0.011766 | 0.011588 | 0.011286 | 0.011468 | 0.011267 |
| 0.011335 | 0.011800 | 0.011306 | 0.011551 | 0.011402 | 0.011467 | 0.011485 |
| 0.011519 | 0.011258 | 0.011394 | 0.011192 | 0.011384 | 0.011462 | 0.011466 |
| 0.011475 | 0.011375 | 0.011448 | 0.011377 | 0.011397 | 0.011530 | 0.011598 |
| 0.011530 | 0.011464 | 0.011567 | 0.011569 | 0.011705 | 0.011732 | 0.011362 |
| 0.011631 | 0.011497 | 0.011362 | 0.011463 | 0.011262 | 0.011497 | 0.011295 |
| 0.011362 | 0.011362 | 0.011329 | 0.011295 | 0.011329 | 0.011295 | 0.011396 |
| 0.011375 | 0.011375 | 0.011368 | 0.011403 | 0.011539 | 0.011504 | 0.011504 |
| 0.011503 | 0.011430 | 0.011245 | 0.011240 | 0.011365 | 0.011535 | 0.011535 |
| 0.011329 | 0.011399 | 0.011632 | 0.011601 | 0.011531 | 0.011565 | 0.011497 |
| 0.011430 | 0.011497 | 0.011497 | 0.011396 | 0.011968 | 0.011564 | 0.011631 |
| 0.011665 | 0.011737 | 0.011367 | 0.011441 | 0.011329 | 0.011530 | 0.011497 |
| 0.011531 | 0.011564 | 0.011564 | 0.011564 | 0.011728 | 0.011698 | 0.011338 |
| 0.011229 | 0.011233 | 0.011333 | 0.011298 | 0.011402 | 0.011247 | 0.011570 |
| 0.011369 | 0.011499 | 0.011251 | 0.011360 | 0.011363 | 0.011437 | 0.011329 |
| 0.011295 | 0.011295 | 0.011362 | 0.011329 | 0.011530 | 0.011497 | 0.011430 |
| 0.011530 | 0.011598 | 0.011329 | 0.011329 | 0.011363 | 0.011362 | 0.011364 |
| 0.011432 | 0.011362 | 0.011362 | 0.011397 | 0.011530 | 0.011598 | 0.011530 |
| 0.011464 | 0.011567 | 0.011569 | 0.011705 | 0.011732 | 0.011362 | 0.011564 |
| 0.011497 | 0.011497 | 0.011331 | 0.011513 | 0.011442 | 0.011469 | 0.011340 |
| 0.011473 | 0.011698 | 0.011483 | 0.011400 | 0.011295 | 0.011497 | 0.011362 |
| 0.011463 | 0.011396 | 0.011295 | 0.011364 | 0.011497 | 0.011500 | 0.000000 |
| 0.011295 | 0.011229 | 0.011362 | 0.011295 | 0.011228 | 0.011332 | 0.011497 |
| 0.011396 | 0.011329 | 0.011362 | 0.011396 | 0.011363 | 0.011295 | 0.011497 |

|          |          |          |          |          |          |          |
|----------|----------|----------|----------|----------|----------|----------|
| 0.011362 | 0.011396 | 0.011396 | 0.011329 | 0.011396 | 0.011631 | 0.011295 |
| 0.011329 | 0.011732 | 0.011329 | 0.011362 | 0.011329 | 0.011698 | 0.011317 |
| 0.011679 | 0.011315 | 0.011361 | 0.011543 | 0.011630 | 0.011527 | 0.011269 |
| 0.011270 | 0.011497 | 0.011598 | 0.011705 | 0.011565 | 0.011703 | 0.011834 |
| 0.011733 | 0.011771 | 0.011732 | 0.011983 | 0.011698 | 0.012574 | 0.011734 |
| 0.012473 | 0.012241 | 0.012375 | 0.012646 | 0.011698 | 0.011396 | 0.011698 |
| 0.012137 | 0.012072 | 0.011665 | 0.011564 | 0.011632 | 0.011632 | 0.011602 |
| 0.011497 | 0.011501 | 0.011564 | 0.011531 | 0.011901 | 0.011968 | 0.011968 |
| 0.011868 | 0.011968 | 0.012072 | 0.011838 | 0.012138 | 0.012144 | 0.012205 |
| 0.012205 | 0.012239 | 0.012186 | 0.012205 | 0.012207 | 0.011430 | 0.011732 |
| 0.011800 | 0.012304 | 0.011806 | 0.012035 | 0.012508 | 0.011570 | 0.011464 |
| 0.011430 | 0.011430 | 0.011901 | 0.011965 | 0.012045 | 0.011766 | 0.011431 |
| S756     | 0.011597 | 0.011597 | 0.011934 | 0.011698 | 0.011698 | 0.011765 |
| 0.011604 | 0.011536 | 0.011698 | 0.011195 | 0.011262 | 0.011228 | 0.011195 |
| 0.011228 | 0.011396 | 0.011195 | 0.011228 | 0.011295 | 0.011262 | 0.011228 |
| 0.011195 | 0.011228 | 0.011329 | 0.011195 | 0.011228 | 0.011228 | 0.011570 |
| 0.011463 | 0.011228 | 0.011127 | 0.011362 | 0.011295 | 0.011262 | 0.011295 |
| 0.011262 | 0.011362 | 0.011262 | 0.011262 | 0.011295 | 0.011262 | 0.011430 |
| 0.011195 | 0.011262 | 0.011295 | 0.011228 | 0.011329 | 0.011362 | 0.011295 |
| 0.011262 | 0.011430 | 0.011329 | 0.011597 | 0.011262 | 0.011530 | 0.011262 |
| 0.011228 | 0.011329 | 0.011396 | 0.011530 | 0.011631 | 0.011329 | 0.011429 |
| 0.011295 | 0.011362 | 0.011262 | 0.011497 | 0.011732 | 0.011262 | 0.011329 |
| 0.011228 | 0.011329 | 0.011295 | 0.011362 | 0.011295 | 0.011295 | 0.011295 |
| 0.011195 | 0.011228 | 0.011195 | 0.011295 | 0.011262 | 0.011296 | 0.011362 |
| 0.011295 | 0.011262 | 0.011329 | 0.011228 | 0.011362 | 0.011195 | 0.011262 |
| 0.011429 | 0.011362 | 0.011597 | 0.011430 | 0.011262 | 0.011497 | 0.011262 |
| 0.011431 | 0.011658 | 0.011437 | 0.011138 | 0.011098 | 0.011281 | 0.011375 |
| 0.012011 | 0.011365 | 0.011143 | 0.011497 | 0.011497 | 0.011295 | 0.011396 |
| 0.011329 | 0.011295 | 0.011362 | 0.011262 | 0.011362 | 0.011295 | 0.011295 |
| 0.011262 | 0.011362 | 0.011564 | 0.011429 | 0.011329 | 0.011295 | 0.011228 |
| 0.011195 | 0.011195 | 0.011262 | 0.011228 | 0.011429 | 0.011396 | 0.011329 |
| 0.011429 | 0.011497 | 0.011228 | 0.011228 | 0.011262 | 0.011262 | 0.011263 |
| 0.011331 | 0.011262 | 0.011262 | 0.011132 | 0.011205 | 0.011165 | 0.011262 |
| 0.011263 | 0.011198 | 0.011208 | 0.011233 | 0.011162 | 0.011197 | 0.011229 |
| 0.011492 | 0.011267 | 0.011301 | 0.011195 | 0.011199 | 0.011329 | 0.011296 |
| 0.011363 | 0.011296 | 0.011296 | 0.011396 | 0.011329 | 0.011698 | 0.011497 |
| 0.011530 | 0.011396 | 0.011262 | 0.011362 | 0.011161 | 0.011396 | 0.011195 |
| 0.011262 | 0.011262 | 0.011228 | 0.011195 | 0.011228 | 0.011195 | 0.011295 |
| 0.011262 | 0.011362 | 0.011295 | 0.011195 | 0.011296 | 0.011396 | 0.011398 |
| 0.011396 | 0.011295 | 0.000000 | 0.011128 | 0.011262 | 0.000000 | 0.011127 |
| 0.011230 | 0.011396 | 0.011195 | 0.011396 | 0.011161 | 0.011262 | 0.011228 |
| 0.011329 | 0.011228 | 0.011262 | 0.011228 | 0.011262 | 0.011127 | 0.011262 |
| 0.011295 | 0.011228 | 0.011295 | 0.011228 | 0.011262 | 0.011295 | 0.011530 |
| 0.011631 | 0.011564 | 0.011631 | 0.011397 | 0.011631 | 0.011262 | 0.011228 |
| 0.011263 | 0.011505 | 0.011289 | 0.011163 | 0.011637 | 0.011129 | 0.011218 |
| 0.011637 | 0.011536 | 0.011429 | 0.011631 | 0.011333 | 0.011497 | 0.011463 |
| 0.011396 | 0.011564 | 0.011416 | 0.011266 | 0.011270 | 0.011295 | 0.011365 |
| 0.011463 | 0.011364 | 0.011500 | 0.011568 | 0.011497 | 0.011564 | 0.011670 |
| 0.011399 | 0.011569 | 0.011500 | 0.011432 | 0.011700 | 0.011161 | 0.011364 |
| 0.011329 | 0.011262 | 0.011161 | 0.011161 | 0.011228 | 0.011228 | 0.011295 |
| 0.011228 | 0.011295 | 0.011195 | 0.011295 | 0.011228 | 0.011228 | 0.011295 |
| 0.011228 | 0.011665 | 0.011564 | 0.011597 | 0.011127 | 0.011228 | 0.011262 |
| 0.011262 | 0.011228 | 0.011295 | 0.011329 | 0.011195 | 0.011195 | 0.011195 |
| 0.011732 | 0.011362 | 0.011362 | 0.011161 | 0.011262 | 0.011430 | 0.011195 |
| 0.011195 | 0.011262 | 0.011228 | 0.011396 | 0.011195 | 0.011329 | 0.011463 |
| 0.011396 | 0.011228 | 0.011228 | 0.011161 | 0.011161 | 0.011262 | 0.011262 |
| 0.011161 | 0.011262 | 0.011127 | 0.011161 | 0.011295 | 0.011430 | 0.011195 |
| 0.011161 | 0.011295 | 0.011228 | 0.011127 | 0.011463 | 0.011127 | 0.011295 |
| 0.011368 | 0.011195 | 0.011497 | 0.011329 | 0.011362 | 0.011228 | 0.011329 |
| 0.011195 | 0.011530 | 0.011127 | 0.011396 | 0.011195 | 0.011195 | 0.011127 |



|          |          |          |          |          |          |          |
|----------|----------|----------|----------|----------|----------|----------|
| 0.011362 | 0.011564 | 0.011262 | 0.011329 | 0.011161 | 0.011564 | 0.011195 |
| 0.011195 | 0.011195 | 0.011228 | 0.011329 | 0.011228 | 0.011329 | 0.011396 |
| 0.011396 | 0.011362 | 0.011262 | 0.011362 | 0.011329 | 0.011195 | 0.011161 |
| 0.011195 | 0.011195 | 0.011262 | 0.011195 | 0.011161 | 0.011329 | 0.011195 |
| 0.011228 | 0.011228 | 0.011362 | 0.011396 | 0.011295 | 0.011228 | 0.011228 |
| 0.011295 | 0.011228 | 0.011329 | 0.011195 | 0.011329 | 0.011429 | 0.011732 |
| 0.011228 | 0.011631 | 0.011233 | 0.017747 | 0.011126 | 0.011305 | 0.011583 |
| 0.011545 | 0.011588 | 0.011217 | 0.011176 | 0.011609 | 0.011612 | 0.011242 |
| 0.011392 | 0.011426 | 0.011138 | 0.011186 | 0.011216 | 0.011208 | 0.011146 |
| 0.011389 | 0.011395 | 0.011357 | 0.011259 | 0.011362 | 0.011396 | 0.011398 |
| 0.011266 | 0.011362 | 0.011362 | 0.011329 | 0.011295 | 0.011295 | 0.011262 |
| 0.011295 | 0.011228 | 0.011262 | 0.011295 | 0.011262 | 0.011195 | 0.011228 |
| 0.011228 | 0.011295 | 0.011195 | 0.011295 | 0.011329 | 0.011362 | 0.011262 |
| 0.011295 | 0.011262 | 0.011597 | 0.011597 | 0.011329 | 0.011363 | 0.011396 |
| 0.011161 | 0.011161 | 0.011195 | 0.011295 | 0.011161 | 0.011396 | 0.011396 |
| 0.011429 | 0.011429 | 0.011362 | 0.011463 | 0.011631 | 0.011464 | 0.011295 |
| 0.011295 | 0.011362 | 0.011396 | 0.011228 | 0.011295 | 0.011262 | 0.011295 |
| 0.011363 | 0.011362 | 0.011396 | 0.011363 | 0.011262 | 0.011463 | 0.011429 |
| 0.011297 | 0.011195 | 0.011295 | 0.011396 | 0.011295 | 0.011430 | 0.011463 |
| 0.011631 | 0.011333 | 0.011497 | 0.011463 | 0.011396 | 0.011564 | 0.011195 |
| 0.011363 | 0.011262 | 0.011228 | 0.011228 | 0.011295 | 0.011195 | 0.011295 |
| 0.011329 | 0.011362 | 0.011262 | 0.011295 | 0.011262 | 0.011597 | 0.011597 |
| 0.011329 | 0.011363 | 0.011429 | 0.011362 | 0.012002 | 0.011417 | 0.011342 |
| 0.011412 | 0.011372 | 0.011482 | 0.011372 | 0.011480 | 0.011405 | 0.011371 |
| 0.011953 | 0.011268 | 0.011403 | 0.011337 | 0.011611 | 0.011468 | 0.011571 |
| 0.011978 | 0.011437 | 0.011297 | 0.011295 | 0.011295 | 0.011329 | 0.011263 |
| 0.011161 | 0.011195 | 0.011329 | 0.011295 | 0.011297 | 0.011429 | 0.011397 |
| 0.011262 | 0.011195 | 0.011228 | 0.011262 | 0.011161 | 0.011228 | 0.011127 |
| 0.011262 | 0.011295 | 0.011195 | 0.011161 | 0.011262 | 0.011195 | 0.011228 |
| 0.011228 | 0.011161 | 0.011228 | 0.011262 | 0.011161 | 0.011362 | 0.011396 |
| 0.011295 | 0.011362 | 0.011295 | 0.011295 | 0.011228 | 0.011631 | 0.011262 |
| 0.011304 | 0.011228 | 0.011463 | 0.011467 | 0.011329 | 0.011329 | 0.011329 |
| 0.011329 | 0.011262 | 0.011228 | 0.011262 | 0.011362 | 0.011362 | 0.011295 |
| 0.011295 | 0.011430 | 0.011597 | 0.011329 | 0.011530 | 0.011530 | 0.011396 |
| 0.011228 | 0.011295 | 0.011329 | 0.011732 | 0.011295 | 0.011329 | 0.011295 |
| 0.011329 | 0.011262 | 0.011262 | 0.011564 | 0.011497 | 0.011530 | 0.011262 |
| 0.011362 | 0.011430 | 0.011295 | 0.011362 | 0.011329 | 0.011195 | 0.011530 |
| 0.011295 | 0.011262 | 0.011262 | 0.011430 | 0.011262 | 0.011362 | 0.011597 |
| 0.011295 | 0.011672 | 0.011665 | 0.011426 | 0.011117 | 0.011366 | 0.011163 |
| 0.011115 | 0.011683 | 0.011201 | 0.011373 | 0.011158 | 0.011264 | 0.011273 |
| 0.011366 | 0.000000 | 0.011227 | 0.000000 | 0.011114 | 0.011261 | 0.011344 |
| 0.011362 | 0.011257 | 0.011342 | 0.011272 | 0.011296 | 0.011429 | 0.011497 |
| 0.011497 | 0.011363 | 0.011466 | 0.011467 | 0.011603 | 0.011625 | 0.011295 |
| 0.011530 | 0.011396 | 0.011262 | 0.011362 | 0.011161 | 0.011396 | 0.011195 |
| 0.011262 | 0.011262 | 0.011228 | 0.011195 | 0.011228 | 0.011195 | 0.011295 |
| 0.011270 | 0.011270 | 0.011266 | 0.011300 | 0.011436 | 0.011402 | 0.011402 |
| 0.011401 | 0.011329 | 0.011134 | 0.011132 | 0.011263 | 0.011433 | 0.011433 |
| 0.011228 | 0.011297 | 0.011531 | 0.011500 | 0.011430 | 0.011464 | 0.011396 |
| 0.011329 | 0.011396 | 0.011396 | 0.011295 | 0.011866 | 0.011463 | 0.011530 |
| 0.011564 | 0.011630 | 0.011265 | 0.011337 | 0.011228 | 0.011430 | 0.011396 |
| 0.011430 | 0.011463 | 0.011463 | 0.011463 | 0.011571 | 0.011597 | 0.011234 |
| 0.011128 | 0.011130 | 0.011231 | 0.011196 | 0.011299 | 0.011135 | 0.011468 |
| 0.011266 | 0.011367 | 0.011108 | 0.011285 | 0.011262 | 0.011334 | 0.011228 |
| 0.011195 | 0.011195 | 0.011262 | 0.011228 | 0.011429 | 0.011396 | 0.011329 |
| 0.011429 | 0.011497 | 0.011228 | 0.011228 | 0.011262 | 0.011262 | 0.011263 |
| 0.011331 | 0.011262 | 0.011262 | 0.011296 | 0.011429 | 0.011497 | 0.011497 |
| 0.011363 | 0.011466 | 0.011467 | 0.011603 | 0.011625 | 0.011295 | 0.011463 |
| 0.011396 | 0.011396 | 0.011229 | 0.011408 | 0.011338 | 0.011367 | 0.011235 |
| 0.011370 | 0.011607 | 0.011399 | 0.011298 | 0.011195 | 0.011396 | 0.011262 |
| 0.011362 | 0.011295 | 0.011195 | 0.011296 | 0.011396 | 0.011398 | 0.011295 |

|          |          |          |          |          |          |          |
|----------|----------|----------|----------|----------|----------|----------|
| 0.000000 | 0.011128 | 0.011262 | 0.000000 | 0.011127 | 0.011230 | 0.011396 |
| 0.011295 | 0.011228 | 0.011262 | 0.011295 | 0.011262 | 0.011195 | 0.011396 |
| 0.011262 | 0.011295 | 0.011295 | 0.011228 | 0.011295 | 0.011530 | 0.011195 |
| 0.011228 | 0.011631 | 0.011228 | 0.011262 | 0.011228 | 0.011597 | 0.011103 |
| 0.011566 | 0.011145 | 0.011161 | 0.011422 | 0.011467 | 0.011419 | 0.000000 |
| 0.011113 | 0.011396 | 0.011497 | 0.011603 | 0.011464 | 0.011601 | 0.011733 |
| 0.011632 | 0.011669 | 0.011631 | 0.011880 | 0.011597 | 0.012472 | 0.011633 |
| 0.012372 | 0.012139 | 0.012273 | 0.012545 | 0.011597 | 0.011295 | 0.011598 |
| 0.012036 | 0.011971 | 0.011564 | 0.011463 | 0.011531 | 0.011531 | 0.011500 |
| 0.011396 | 0.011399 | 0.011463 | 0.011430 | 0.011800 | 0.011866 | 0.011867 |
| 0.011767 | 0.011867 | 0.011970 | 0.011737 | 0.012036 | 0.012042 | 0.012103 |
| 0.012104 | 0.012138 | 0.012084 | 0.012104 | 0.012105 | 0.011329 | 0.011631 |
| 0.011699 | 0.012203 | 0.011704 | 0.011934 | 0.012406 | 0.011468 | 0.011363 |
| 0.011329 | 0.011329 | 0.011799 | 0.011842 | 0.011940 | 0.011665 | 0.011330 |
| S757     | 0.011532 | 0.011532 | 0.011870 | 0.011633 | 0.011633 | 0.011701 |
| 0.011538 | 0.011470 | 0.011633 | 0.011128 | 0.011195 | 0.011162 | 0.011128 |
| 0.011161 | 0.011330 | 0.011128 | 0.011161 | 0.011229 | 0.011195 | 0.011161 |
| 0.011128 | 0.011161 | 0.011263 | 0.011128 | 0.011162 | 0.011161 | 0.011504 |
| 0.011397 | 0.011161 | 0.000000 | 0.011296 | 0.011229 | 0.011195 | 0.011229 |
| 0.011195 | 0.011296 | 0.011195 | 0.011195 | 0.011229 | 0.011195 | 0.011364 |
| 0.011128 | 0.011195 | 0.011229 | 0.011161 | 0.011263 | 0.011296 | 0.011229 |
| 0.011195 | 0.011364 | 0.011263 | 0.011532 | 0.011195 | 0.011465 | 0.011195 |
| 0.011161 | 0.011263 | 0.011330 | 0.011465 | 0.011566 | 0.011263 | 0.011364 |
| 0.011229 | 0.011296 | 0.011195 | 0.011431 | 0.011667 | 0.011195 | 0.011263 |
| 0.011161 | 0.011263 | 0.011229 | 0.011296 | 0.011195 | 0.011229 | 0.011229 |
| 0.011128 | 0.011161 | 0.011128 | 0.011229 | 0.011195 | 0.011229 | 0.011296 |
| 0.011229 | 0.011195 | 0.011263 | 0.011161 | 0.011296 | 0.011128 | 0.011195 |
| 0.011364 | 0.011296 | 0.011532 | 0.011364 | 0.011195 | 0.011431 | 0.011195 |
| 0.011358 | 0.011586 | 0.011401 | 0.011100 | 0.011098 | 0.011208 | 0.011298 |
| 0.011942 | 0.011365 | 0.011102 | 0.011431 | 0.011431 | 0.011229 | 0.011330 |
| 0.011263 | 0.011229 | 0.011296 | 0.011195 | 0.011296 | 0.011229 | 0.011229 |
| 0.011195 | 0.011263 | 0.011499 | 0.011364 | 0.011263 | 0.011229 | 0.011161 |
| 0.011128 | 0.011128 | 0.011195 | 0.011161 | 0.011364 | 0.011330 | 0.011263 |
| 0.011364 | 0.011364 | 0.011161 | 0.011161 | 0.011195 | 0.011195 | 0.011196 |
| 0.011264 | 0.011195 | 0.011195 | 0.000000 | 0.011133 | 0.011096 | 0.011195 |
| 0.011196 | 0.011129 | 0.011171 | 0.011164 | 0.011094 | 0.011129 | 0.011162 |
| 0.011422 | 0.011199 | 0.011233 | 0.011128 | 0.011130 | 0.011263 | 0.011229 |
| 0.011297 | 0.011229 | 0.011229 | 0.011330 | 0.011263 | 0.011634 | 0.011431 |
| 0.011465 | 0.011330 | 0.011195 | 0.011296 | 0.011094 | 0.011330 | 0.011128 |
| 0.011195 | 0.011195 | 0.011161 | 0.011128 | 0.011161 | 0.011128 | 0.011229 |
| 0.011195 | 0.011296 | 0.011229 | 0.011128 | 0.011229 | 0.011263 | 0.011297 |
| 0.011330 | 0.011229 | 0.011128 | 0.000000 | 0.011195 | 0.011128 | 0.000000 |
| 0.011162 | 0.011330 | 0.011128 | 0.011330 | 0.011094 | 0.011195 | 0.011161 |
| 0.011263 | 0.011161 | 0.011195 | 0.011161 | 0.011195 | 0.000000 | 0.011195 |
| 0.011229 | 0.011161 | 0.011229 | 0.011161 | 0.011195 | 0.011229 | 0.011465 |
| 0.011566 | 0.011498 | 0.011566 | 0.011331 | 0.011566 | 0.011195 | 0.011161 |
| 0.011196 | 0.011465 | 0.011289 | 0.011095 | 0.011571 | 0.000000 | 0.011179 |
| 0.011572 | 0.011470 | 0.011364 | 0.011566 | 0.011266 | 0.011431 | 0.011398 |
| 0.011330 | 0.011498 | 0.011346 | 0.011185 | 0.011229 | 0.011229 | 0.011298 |
| 0.011397 | 0.011297 | 0.011434 | 0.011502 | 0.011431 | 0.011499 | 0.011605 |
| 0.011332 | 0.011503 | 0.011434 | 0.011366 | 0.011635 | 0.011094 | 0.011297 |
| 0.011263 | 0.011195 | 0.011094 | 0.011094 | 0.011161 | 0.011161 | 0.011229 |
| 0.011161 | 0.011229 | 0.011128 | 0.011229 | 0.011161 | 0.011161 | 0.011229 |
| 0.011161 | 0.011600 | 0.011499 | 0.011532 | 0.000000 | 0.011161 | 0.011195 |
| 0.011195 | 0.011161 | 0.011229 | 0.011263 | 0.011128 | 0.011128 | 0.011128 |
| 0.011667 | 0.011296 | 0.011296 | 0.011094 | 0.011195 | 0.011364 | 0.011128 |
| 0.011128 | 0.011195 | 0.011161 | 0.011330 | 0.011094 | 0.011263 | 0.011397 |
| 0.011330 | 0.011161 | 0.011161 | 0.011094 | 0.011094 | 0.011263 | 0.011195 |
| 0.011094 | 0.011195 | 0.000000 | 0.011094 | 0.011229 | 0.011364 | 0.011128 |
| 0.011094 | 0.011229 | 0.011162 | 0.000000 | 0.011397 | 0.000000 | 0.011229 |

|          |          |          |          |          |          |          |
|----------|----------|----------|----------|----------|----------|----------|
| 0.011301 | 0.011128 | 0.011431 | 0.011263 | 0.011296 | 0.011161 | 0.011263 |
| 0.011128 | 0.011465 | 0.000000 | 0.011330 | 0.011128 | 0.011128 | 0.000000 |
| 0.011296 | 0.011499 | 0.011195 | 0.011263 | 0.011094 | 0.011499 | 0.011128 |
| 0.011128 | 0.011128 | 0.011161 | 0.011263 | 0.011161 | 0.011263 | 0.011330 |
| 0.011330 | 0.011296 | 0.011195 | 0.011296 | 0.011263 | 0.011128 | 0.011094 |
| 0.011128 | 0.011128 | 0.011195 | 0.011128 | 0.011094 | 0.011263 | 0.011128 |
| 0.011161 | 0.011161 | 0.011296 | 0.011330 | 0.011229 | 0.011161 | 0.011161 |
| 0.011195 | 0.011161 | 0.011263 | 0.011128 | 0.011263 | 0.011364 | 0.011667 |
| 0.011161 | 0.011566 | 0.011164 | 0.017704 | 0.011126 | 0.011306 | 0.011516 |
| 0.011477 | 0.011519 | 0.011217 | 0.011176 | 0.011612 | 0.011546 | 0.011243 |
| 0.011392 | 0.011428 | 0.000000 | 0.011144 | 0.011139 | 0.011209 | 0.011147 |
| 0.011389 | 0.011322 | 0.011321 | 0.011127 | 0.011296 | 0.011330 | 0.011332 |
| 0.011198 | 0.011296 | 0.011296 | 0.011263 | 0.011229 | 0.011229 | 0.011195 |
| 0.011229 | 0.011161 | 0.011195 | 0.011229 | 0.011195 | 0.011128 | 0.011161 |
| 0.011161 | 0.011229 | 0.011128 | 0.011229 | 0.011263 | 0.011296 | 0.011195 |
| 0.011229 | 0.011195 | 0.011532 | 0.011532 | 0.011263 | 0.011296 | 0.011330 |
| 0.011094 | 0.011094 | 0.011128 | 0.011229 | 0.011094 | 0.011330 | 0.011330 |
| 0.011364 | 0.011364 | 0.011296 | 0.011397 | 0.011566 | 0.011398 | 0.011229 |
| 0.011229 | 0.011296 | 0.011330 | 0.011161 | 0.011229 | 0.011195 | 0.011229 |
| 0.011296 | 0.011296 | 0.011330 | 0.011296 | 0.011196 | 0.011397 | 0.011364 |
| 0.011230 | 0.011128 | 0.011229 | 0.011330 | 0.011229 | 0.011364 | 0.011397 |
| 0.011566 | 0.011266 | 0.011431 | 0.011398 | 0.011330 | 0.011498 | 0.011128 |
| 0.011297 | 0.011195 | 0.011161 | 0.011161 | 0.011229 | 0.011128 | 0.011229 |
| 0.011263 | 0.011296 | 0.011195 | 0.011229 | 0.011195 | 0.011532 | 0.011532 |
| 0.011263 | 0.011296 | 0.011364 | 0.011296 | 0.011905 | 0.011347 | 0.011272 |
| 0.011343 | 0.011304 | 0.011378 | 0.011304 | 0.011412 | 0.011337 | 0.011303 |
| 0.011853 | 0.011199 | 0.011335 | 0.011269 | 0.011544 | 0.011402 | 0.011505 |
| 0.011880 | 0.011363 | 0.011230 | 0.011229 | 0.011229 | 0.011263 | 0.011196 |
| 0.011094 | 0.011128 | 0.011263 | 0.011229 | 0.011230 | 0.011364 | 0.011331 |
| 0.011195 | 0.011128 | 0.011161 | 0.011195 | 0.011094 | 0.011161 | 0.000000 |
| 0.011195 | 0.011229 | 0.011128 | 0.011094 | 0.011195 | 0.011128 | 0.011161 |
| 0.011161 | 0.011094 | 0.011161 | 0.011195 | 0.011094 | 0.011296 | 0.011330 |
| 0.011229 | 0.011296 | 0.011229 | 0.011229 | 0.011161 | 0.011566 | 0.011195 |
| 0.011235 | 0.011161 | 0.011398 | 0.011401 | 0.011263 | 0.011263 | 0.011263 |
| 0.011263 | 0.011195 | 0.011161 | 0.011195 | 0.011296 | 0.011296 | 0.011229 |
| 0.011229 | 0.011364 | 0.011532 | 0.011263 | 0.011465 | 0.011465 | 0.011330 |
| 0.011161 | 0.011229 | 0.011263 | 0.011667 | 0.011229 | 0.011263 | 0.011229 |
| 0.011263 | 0.011195 | 0.011195 | 0.011499 | 0.011431 | 0.011465 | 0.011195 |
| 0.011296 | 0.011364 | 0.011229 | 0.011296 | 0.011263 | 0.011128 | 0.011465 |
| 0.011229 | 0.011195 | 0.011195 | 0.011364 | 0.011195 | 0.011296 | 0.011532 |
| 0.011229 | 0.011606 | 0.011600 | 0.011386 | 0.011117 | 0.011299 | 0.011164 |
| 0.011115 | 0.011608 | 0.011131 | 0.011330 | 0.011158 | 0.011265 | 0.011274 |
| 0.011366 | 0.000000 | 0.011228 | 0.000000 | 0.011114 | 0.011262 | 0.011264 |
| 0.011287 | 0.011179 | 0.011272 | 0.011202 | 0.011229 | 0.011364 | 0.011431 |
| 0.011431 | 0.011297 | 0.011400 | 0.011401 | 0.011537 | 0.011556 | 0.011229 |
| 0.011465 | 0.011330 | 0.011195 | 0.011296 | 0.011094 | 0.011330 | 0.011128 |
| 0.011195 | 0.011195 | 0.011161 | 0.011128 | 0.011161 | 0.011128 | 0.011229 |
| 0.011201 | 0.011201 | 0.011198 | 0.011198 | 0.011369 | 0.011335 | 0.011334 |
| 0.011334 | 0.011229 | 0.000000 | 0.000000 | 0.011196 | 0.011366 | 0.011367 |
| 0.011162 | 0.011230 | 0.011466 | 0.011434 | 0.011364 | 0.011398 | 0.011330 |
| 0.011263 | 0.011330 | 0.011330 | 0.011229 | 0.011802 | 0.011397 | 0.011465 |
| 0.011499 | 0.011561 | 0.011197 | 0.011269 | 0.011161 | 0.011364 | 0.011330 |
| 0.011331 | 0.011397 | 0.011397 | 0.011397 | 0.011534 | 0.011532 | 0.011165 |
| 0.000000 | 0.000000 | 0.011163 | 0.011129 | 0.011232 | 0.000000 | 0.011402 |
| 0.011198 | 0.011325 | 0.000000 | 0.011211 | 0.011195 | 0.011266 | 0.011161 |
| 0.011128 | 0.011128 | 0.011195 | 0.011161 | 0.011364 | 0.011330 | 0.011263 |
| 0.011364 | 0.011364 | 0.011161 | 0.011161 | 0.011195 | 0.011195 | 0.011196 |
| 0.011264 | 0.011195 | 0.011195 | 0.011229 | 0.011364 | 0.011431 | 0.011431 |
| 0.011297 | 0.011400 | 0.011401 | 0.011537 | 0.011556 | 0.011229 | 0.011397 |
| 0.011330 | 0.011330 | 0.011162 | 0.011340 | 0.011270 | 0.011265 | 0.011166 |

|          |          |          |          |          |          |          |
|----------|----------|----------|----------|----------|----------|----------|
| 0.011337 | 0.011516 | 0.011314 | 0.011231 | 0.011128 | 0.011330 | 0.011195 |
| 0.011296 | 0.011229 | 0.011128 | 0.011229 | 0.011263 | 0.011297 | 0.011229 |
| 0.011128 | 0.000000 | 0.011195 | 0.011128 | 0.000000 | 0.011162 | 0.011330 |
| 0.011229 | 0.011161 | 0.011195 | 0.011229 | 0.011195 | 0.011128 | 0.011330 |
| 0.011195 | 0.011229 | 0.011229 | 0.011161 | 0.011229 | 0.011465 | 0.011128 |
| 0.011161 | 0.011566 | 0.011161 | 0.011195 | 0.011161 | 0.011532 | 0.011103 |
| 0.011566 | 0.011103 | 0.011161 | 0.011343 | 0.011428 | 0.011349 | 0.000000 |
| 0.011113 | 0.011330 | 0.011431 | 0.011537 | 0.011398 | 0.011536 | 0.011668 |
| 0.011567 | 0.011604 | 0.011566 | 0.011815 | 0.011532 | 0.012410 | 0.011568 |
| 0.012310 | 0.012076 | 0.012211 | 0.012483 | 0.011532 | 0.011229 | 0.011499 |
| 0.011972 | 0.011873 | 0.011499 | 0.011398 | 0.011465 | 0.011465 | 0.011434 |
| 0.011330 | 0.011333 | 0.011397 | 0.011364 | 0.011735 | 0.011802 | 0.011803 |
| 0.011702 | 0.011803 | 0.011907 | 0.011672 | 0.011939 | 0.011944 | 0.012006 |
| 0.012007 | 0.012041 | 0.011985 | 0.012007 | 0.012008 | 0.011263 | 0.011533 |
| 0.011634 | 0.012140 | 0.011639 | 0.011870 | 0.012345 | 0.011401 | 0.011296 |
| 0.011263 | 0.011263 | 0.011735 | 0.011763 | 0.011873 | 0.011600 | 0.011263 |
| S758     | 0.011665 | 0.011665 | 0.012001 | 0.011765 | 0.011765 | 0.011833 |
| 0.011672 | 0.011604 | 0.011765 | 0.011262 | 0.011329 | 0.011296 | 0.011262 |
| 0.011295 | 0.011463 | 0.011262 | 0.011295 | 0.011362 | 0.011329 | 0.011295 |
| 0.011262 | 0.011295 | 0.011396 | 0.011262 | 0.011295 | 0.011295 | 0.011638 |
| 0.011530 | 0.011295 | 0.011195 | 0.011429 | 0.011362 | 0.011329 | 0.011362 |
| 0.011329 | 0.011429 | 0.011329 | 0.011329 | 0.011362 | 0.011329 | 0.011497 |
| 0.011262 | 0.011329 | 0.011362 | 0.011295 | 0.011396 | 0.011429 | 0.011362 |
| 0.011329 | 0.011497 | 0.011396 | 0.011665 | 0.011329 | 0.011597 | 0.011329 |
| 0.011295 | 0.011396 | 0.011463 | 0.011597 | 0.011698 | 0.011396 | 0.011497 |
| 0.011295 | 0.011430 | 0.011329 | 0.011497 | 0.011799 | 0.011329 | 0.011396 |
| 0.011295 | 0.011396 | 0.011362 | 0.011429 | 0.011362 | 0.011362 | 0.011362 |
| 0.011262 | 0.011295 | 0.011262 | 0.011362 | 0.011329 | 0.011363 | 0.011429 |
| 0.011362 | 0.011329 | 0.011396 | 0.011295 | 0.011429 | 0.011262 | 0.011329 |
| 0.011497 | 0.011429 | 0.011665 | 0.011497 | 0.011329 | 0.011564 | 0.011329 |
| 0.011505 | 0.011732 | 0.011551 | 0.011255 | 0.011247 | 0.011355 | 0.011454 |
| 0.012085 | 0.011518 | 0.011266 | 0.011564 | 0.011564 | 0.011362 | 0.011463 |
| 0.011396 | 0.011362 | 0.011429 | 0.011329 | 0.011430 | 0.011362 | 0.011362 |
| 0.011329 | 0.011429 | 0.011631 | 0.011497 | 0.011396 | 0.011362 | 0.011295 |
| 0.011262 | 0.011262 | 0.011329 | 0.011295 | 0.011497 | 0.011463 | 0.011396 |
| 0.011497 | 0.011564 | 0.011295 | 0.011295 | 0.011329 | 0.011329 | 0.011330 |
| 0.011398 | 0.011329 | 0.011329 | 0.011204 | 0.011277 | 0.011235 | 0.011329 |
| 0.011331 | 0.011266 | 0.011318 | 0.011302 | 0.011230 | 0.011266 | 0.011297 |
| 0.011564 | 0.011336 | 0.011370 | 0.011262 | 0.011268 | 0.011397 | 0.011363 |
| 0.011430 | 0.011363 | 0.011363 | 0.011463 | 0.011396 | 0.011765 | 0.011564 |
| 0.011597 | 0.011463 | 0.011329 | 0.011430 | 0.011228 | 0.011463 | 0.011262 |
| 0.011329 | 0.011329 | 0.011295 | 0.011262 | 0.011295 | 0.011262 | 0.011362 |
| 0.011329 | 0.011429 | 0.011362 | 0.011262 | 0.011363 | 0.011463 | 0.011466 |
| 0.011463 | 0.011362 | 0.011262 | 0.011195 | 0.000000 | 0.011262 | 0.011195 |
| 0.011298 | 0.011463 | 0.011262 | 0.011463 | 0.011228 | 0.011329 | 0.011295 |
| 0.011396 | 0.011295 | 0.011329 | 0.011295 | 0.011329 | 0.011195 | 0.011329 |
| 0.011362 | 0.011295 | 0.011362 | 0.011295 | 0.011329 | 0.011362 | 0.011597 |
| 0.011698 | 0.011631 | 0.011698 | 0.011465 | 0.011698 | 0.011329 | 0.011295 |
| 0.011330 | 0.011586 | 0.011426 | 0.011232 | 0.011705 | 0.011197 | 0.011296 |
| 0.011705 | 0.011604 | 0.011497 | 0.011698 | 0.011402 | 0.011564 | 0.011530 |
| 0.011463 | 0.011631 | 0.011487 | 0.011349 | 0.011396 | 0.011362 | 0.011432 |
| 0.011530 | 0.011431 | 0.011567 | 0.011636 | 0.011564 | 0.011631 | 0.011738 |
| 0.011466 | 0.011637 | 0.011568 | 0.011500 | 0.011767 | 0.011228 | 0.011431 |
| 0.011396 | 0.011329 | 0.011228 | 0.011228 | 0.011295 | 0.011295 | 0.011362 |
| 0.011295 | 0.011362 | 0.011262 | 0.011362 | 0.011295 | 0.011295 | 0.011362 |
| 0.011295 | 0.011732 | 0.011631 | 0.011665 | 0.011195 | 0.011295 | 0.011329 |
| 0.011329 | 0.011295 | 0.011362 | 0.011396 | 0.011262 | 0.011262 | 0.011262 |
| 0.011799 | 0.011429 | 0.011429 | 0.011228 | 0.011329 | 0.011497 | 0.011262 |
| 0.011262 | 0.011329 | 0.011295 | 0.011463 | 0.011262 | 0.011396 | 0.011530 |
| 0.011463 | 0.011295 | 0.011295 | 0.011228 | 0.011228 | 0.011396 | 0.011329 |

|          |          |          |          |          |          |          |
|----------|----------|----------|----------|----------|----------|----------|
| 0.011228 | 0.011329 | 0.011195 | 0.011228 | 0.011362 | 0.011497 | 0.011262 |
| 0.011228 | 0.011362 | 0.011296 | 0.011195 | 0.011530 | 0.011195 | 0.011362 |
| 0.011437 | 0.011262 | 0.011564 | 0.011396 | 0.011429 | 0.011295 | 0.011396 |
| 0.011262 | 0.011597 | 0.011195 | 0.011463 | 0.011262 | 0.011262 | 0.011195 |
| 0.011429 | 0.011631 | 0.011329 | 0.011396 | 0.011228 | 0.011631 | 0.011262 |
| 0.011262 | 0.011262 | 0.011295 | 0.011396 | 0.011295 | 0.011396 | 0.011463 |
| 0.011463 | 0.011429 | 0.011329 | 0.011430 | 0.011329 | 0.011262 | 0.011228 |
| 0.011262 | 0.011262 | 0.011329 | 0.011262 | 0.011228 | 0.011396 | 0.011262 |
| 0.011295 | 0.011295 | 0.011429 | 0.011463 | 0.011362 | 0.011295 | 0.011295 |
| 0.011362 | 0.011295 | 0.011396 | 0.011262 | 0.011396 | 0.011497 | 0.011799 |
| 0.011295 | 0.011698 | 0.011302 | 0.017823 | 0.011387 | 0.011488 | 0.011653 |
| 0.011614 | 0.011658 | 0.011427 | 0.011408 | 0.011829 | 0.011681 | 0.011425 |
| 0.011582 | 0.011609 | 0.011216 | 0.011311 | 0.011294 | 0.011406 | 0.011318 |
| 0.011576 | 0.011470 | 0.011468 | 0.011193 | 0.011429 | 0.011463 | 0.011466 |
| 0.011335 | 0.011429 | 0.011429 | 0.011396 | 0.011362 | 0.011363 | 0.011329 |
| 0.011362 | 0.011295 | 0.011329 | 0.011362 | 0.011329 | 0.011262 | 0.011295 |
| 0.011295 | 0.011362 | 0.011262 | 0.011362 | 0.011396 | 0.011429 | 0.011329 |
| 0.011362 | 0.011329 | 0.011665 | 0.011665 | 0.011396 | 0.011430 | 0.011463 |
| 0.011228 | 0.011228 | 0.011262 | 0.011362 | 0.011228 | 0.011463 | 0.011463 |
| 0.011497 | 0.011497 | 0.011429 | 0.011530 | 0.011698 | 0.011532 | 0.011362 |
| 0.011362 | 0.011429 | 0.011463 | 0.011295 | 0.011362 | 0.011329 | 0.011362 |
| 0.011430 | 0.011430 | 0.011463 | 0.011430 | 0.011330 | 0.011530 | 0.011497 |
| 0.011365 | 0.011262 | 0.011362 | 0.011463 | 0.011362 | 0.011497 | 0.011530 |
| 0.011698 | 0.011402 | 0.011564 | 0.011530 | 0.011463 | 0.011631 | 0.011262 |
| 0.011431 | 0.011329 | 0.011295 | 0.011295 | 0.011362 | 0.011262 | 0.011362 |
| 0.011396 | 0.011429 | 0.011329 | 0.011362 | 0.011329 | 0.011665 | 0.011665 |
| 0.011396 | 0.011430 | 0.011497 | 0.011429 | 0.012070 | 0.011489 | 0.011412 |
| 0.011482 | 0.011442 | 0.011552 | 0.011441 | 0.011550 | 0.011474 | 0.011440 |
| 0.012022 | 0.011337 | 0.011471 | 0.011406 | 0.011680 | 0.011536 | 0.011639 |
| 0.012046 | 0.011512 | 0.011365 | 0.011362 | 0.011362 | 0.011396 | 0.011331 |
| 0.011228 | 0.011262 | 0.011396 | 0.011362 | 0.011364 | 0.011497 | 0.011464 |
| 0.011329 | 0.011262 | 0.011295 | 0.011329 | 0.011228 | 0.011295 | 0.011195 |
| 0.011329 | 0.011362 | 0.011262 | 0.011228 | 0.011329 | 0.011262 | 0.011295 |
| 0.011295 | 0.011228 | 0.011295 | 0.011329 | 0.011228 | 0.011429 | 0.011463 |
| 0.011362 | 0.011429 | 0.011362 | 0.011362 | 0.011295 | 0.011698 | 0.011329 |
| 0.011373 | 0.011295 | 0.011531 | 0.011535 | 0.011396 | 0.011396 | 0.011396 |
| 0.011396 | 0.011329 | 0.011295 | 0.011329 | 0.011429 | 0.011430 | 0.011362 |
| 0.011362 | 0.011497 | 0.011665 | 0.011396 | 0.011597 | 0.011597 | 0.011463 |
| 0.011295 | 0.011362 | 0.011396 | 0.011799 | 0.011363 | 0.011396 | 0.011362 |
| 0.011396 | 0.011329 | 0.011329 | 0.011631 | 0.011564 | 0.011597 | 0.011329 |
| 0.011430 | 0.011497 | 0.011362 | 0.011430 | 0.011396 | 0.011262 | 0.011597 |
| 0.011362 | 0.011329 | 0.011329 | 0.011497 | 0.011329 | 0.011429 | 0.011665 |
| 0.011362 | 0.011739 | 0.011732 | 0.011548 | 0.011342 | 0.011434 | 0.011318 |
| 0.011280 | 0.011761 | 0.011271 | 0.011507 | 0.011353 | 0.011467 | 0.011485 |
| 0.011570 | 0.011323 | 0.011394 | 0.011258 | 0.011330 | 0.011529 | 0.011425 |
| 0.011437 | 0.011336 | 0.011412 | 0.011342 | 0.011363 | 0.011497 | 0.011564 |
| 0.011564 | 0.011430 | 0.011533 | 0.011535 | 0.011670 | 0.011696 | 0.011362 |
| 0.011597 | 0.011463 | 0.011329 | 0.011430 | 0.011228 | 0.011463 | 0.011262 |
| 0.011329 | 0.011329 | 0.011295 | 0.011262 | 0.011295 | 0.011262 | 0.011362 |
| 0.011340 | 0.011340 | 0.011334 | 0.011368 | 0.011505 | 0.011470 | 0.011470 |
| 0.011469 | 0.011396 | 0.011208 | 0.011204 | 0.011331 | 0.011501 | 0.011501 |
| 0.011296 | 0.011365 | 0.011599 | 0.011567 | 0.011497 | 0.011531 | 0.011463 |
| 0.011396 | 0.011463 | 0.011463 | 0.011362 | 0.011934 | 0.011530 | 0.011598 |
| 0.011631 | 0.011701 | 0.011333 | 0.011407 | 0.011295 | 0.011497 | 0.011463 |
| 0.011498 | 0.011530 | 0.011530 | 0.011530 | 0.011650 | 0.011665 | 0.011303 |
| 0.011196 | 0.011199 | 0.011299 | 0.011264 | 0.011368 | 0.011210 | 0.011536 |
| 0.011335 | 0.011499 | 0.011251 | 0.011360 | 0.011329 | 0.011402 | 0.011295 |
| 0.011262 | 0.011262 | 0.011329 | 0.011295 | 0.011497 | 0.011463 | 0.011396 |
| 0.011497 | 0.011564 | 0.011295 | 0.011295 | 0.011329 | 0.011329 | 0.011330 |
| 0.011398 | 0.011329 | 0.011329 | 0.011363 | 0.011497 | 0.011564 | 0.011564 |

|          |          |          |          |          |          |          |
|----------|----------|----------|----------|----------|----------|----------|
| 0.011430 | 0.011533 | 0.011535 | 0.011670 | 0.011696 | 0.011362 | 0.011530 |
| 0.011463 | 0.011463 | 0.011297 | 0.011478 | 0.011408 | 0.011401 | 0.011305 |
| 0.011473 | 0.011652 | 0.011441 | 0.011366 | 0.011262 | 0.011463 | 0.011329 |
| 0.011429 | 0.011362 | 0.011262 | 0.011363 | 0.011463 | 0.011466 | 0.011362 |
| 0.011262 | 0.011195 | 0.000000 | 0.011262 | 0.011195 | 0.011298 | 0.011463 |
| 0.011362 | 0.011295 | 0.011329 | 0.011362 | 0.011329 | 0.011262 | 0.011463 |
| 0.011329 | 0.011362 | 0.011362 | 0.011295 | 0.011362 | 0.011597 | 0.011262 |
| 0.011295 | 0.011698 | 0.011295 | 0.011329 | 0.011295 | 0.011665 | 0.011274 |
| 0.011791 | 0.011273 | 0.011361 | 0.011503 | 0.011589 | 0.011491 | 0.011227 |
| 0.011323 | 0.011463 | 0.011564 | 0.011671 | 0.011531 | 0.011669 | 0.011800 |
| 0.011699 | 0.011737 | 0.011698 | 0.011948 | 0.011665 | 0.012539 | 0.011700 |
| 0.012439 | 0.012207 | 0.012341 | 0.012612 | 0.011665 | 0.011362 | 0.011665 |
| 0.012103 | 0.012038 | 0.011631 | 0.011530 | 0.011598 | 0.011598 | 0.011568 |
| 0.011463 | 0.011467 | 0.011530 | 0.011497 | 0.011867 | 0.011934 | 0.011935 |
| 0.011834 | 0.011934 | 0.012038 | 0.011804 | 0.012104 | 0.012110 | 0.012171 |
| 0.012171 | 0.012205 | 0.012152 | 0.012172 | 0.012173 | 0.011396 | 0.011699 |
| 0.011766 | 0.012270 | 0.011772 | 0.012001 | 0.012474 | 0.011536 | 0.011430 |
| 0.011396 | 0.011396 | 0.011867 | 0.011924 | 0.012010 | 0.011732 | 0.011397 |
| S759     | 0.011598 | 0.011598 | 0.011934 | 0.011698 | 0.011698 | 0.011766 |
| 0.011604 | 0.011536 | 0.011698 | 0.011195 | 0.011262 | 0.011229 | 0.011195 |
| 0.011228 | 0.011396 | 0.011195 | 0.011228 | 0.011295 | 0.011262 | 0.011228 |
| 0.011195 | 0.011228 | 0.011329 | 0.011195 | 0.011228 | 0.011228 | 0.011570 |
| 0.011463 | 0.011228 | 0.011127 | 0.011362 | 0.011295 | 0.011262 | 0.011295 |
| 0.011262 | 0.011362 | 0.011262 | 0.011262 | 0.011295 | 0.011262 | 0.011430 |
| 0.011195 | 0.011262 | 0.011295 | 0.011228 | 0.011329 | 0.011362 | 0.011295 |
| 0.011262 | 0.011430 | 0.011329 | 0.011597 | 0.011262 | 0.011530 | 0.011262 |
| 0.011228 | 0.011329 | 0.011396 | 0.011530 | 0.011631 | 0.011329 | 0.011430 |
| 0.011295 | 0.011362 | 0.011262 | 0.011497 | 0.011732 | 0.011262 | 0.011329 |
| 0.011228 | 0.011329 | 0.011295 | 0.011362 | 0.011295 | 0.011295 | 0.011295 |
| 0.011195 | 0.011228 | 0.011195 | 0.011295 | 0.011262 | 0.011296 | 0.011362 |
| 0.011295 | 0.011262 | 0.011329 | 0.011228 | 0.011362 | 0.011195 | 0.011262 |
| 0.011429 | 0.011362 | 0.011597 | 0.011430 | 0.011262 | 0.011497 | 0.011262 |
| 0.011431 | 0.011658 | 0.011437 | 0.011138 | 0.011098 | 0.011281 | 0.011375 |
| 0.012011 | 0.011365 | 0.011143 | 0.011497 | 0.011497 | 0.011295 | 0.011396 |
| 0.011329 | 0.011295 | 0.011362 | 0.011262 | 0.011362 | 0.011295 | 0.011295 |
| 0.011262 | 0.011362 | 0.011564 | 0.011430 | 0.011329 | 0.011295 | 0.011228 |
| 0.011195 | 0.011195 | 0.011262 | 0.011228 | 0.011429 | 0.011396 | 0.011329 |
| 0.011429 | 0.011497 | 0.011228 | 0.011228 | 0.011262 | 0.011262 | 0.011263 |
| 0.011331 | 0.011262 | 0.011262 | 0.011132 | 0.011205 | 0.011165 | 0.011262 |
| 0.011263 | 0.011198 | 0.011208 | 0.011233 | 0.011162 | 0.011197 | 0.011229 |
| 0.011492 | 0.011267 | 0.011301 | 0.011195 | 0.011199 | 0.011329 | 0.011296 |
| 0.011363 | 0.011296 | 0.011296 | 0.011396 | 0.011329 | 0.011698 | 0.011497 |
| 0.011530 | 0.011396 | 0.011262 | 0.011362 | 0.011161 | 0.011396 | 0.011195 |
| 0.011262 | 0.011262 | 0.011228 | 0.011195 | 0.011228 | 0.011195 | 0.011295 |
| 0.011262 | 0.011362 | 0.011295 | 0.011195 | 0.011296 | 0.011396 | 0.011398 |
| 0.011396 | 0.011295 | 0.000000 | 0.011128 | 0.011262 | 0.000000 | 0.011127 |
| 0.011230 | 0.011396 | 0.011195 | 0.011396 | 0.011161 | 0.011262 | 0.011228 |
| 0.011329 | 0.011228 | 0.011262 | 0.011228 | 0.011262 | 0.011127 | 0.011262 |
| 0.011295 | 0.011228 | 0.011295 | 0.011228 | 0.011262 | 0.011295 | 0.011530 |
| 0.011631 | 0.011564 | 0.011631 | 0.011397 | 0.011631 | 0.011262 | 0.011228 |
| 0.011263 | 0.011505 | 0.011289 | 0.011163 | 0.011637 | 0.011129 | 0.011218 |
| 0.011637 | 0.011536 | 0.011429 | 0.011631 | 0.011333 | 0.011497 | 0.011463 |
| 0.011396 | 0.011564 | 0.011416 | 0.011266 | 0.011270 | 0.011295 | 0.011365 |
| 0.011463 | 0.011364 | 0.011500 | 0.011568 | 0.011497 | 0.011564 | 0.011670 |
| 0.011399 | 0.011569 | 0.011500 | 0.011432 | 0.011700 | 0.011161 | 0.011364 |
| 0.011329 | 0.011262 | 0.011161 | 0.011161 | 0.011228 | 0.011228 | 0.011295 |
| 0.011228 | 0.011295 | 0.011195 | 0.011295 | 0.011228 | 0.011228 | 0.011295 |
| 0.011228 | 0.011665 | 0.011564 | 0.011597 | 0.011127 | 0.011228 | 0.011262 |
| 0.011262 | 0.011228 | 0.011295 | 0.011329 | 0.011195 | 0.011195 | 0.011195 |
| 0.011732 | 0.011362 | 0.011362 | 0.011161 | 0.011262 | 0.011430 | 0.011195 |

|          |          |          |          |          |          |          |
|----------|----------|----------|----------|----------|----------|----------|
| 0.011195 | 0.011262 | 0.011228 | 0.011396 | 0.011195 | 0.011329 | 0.011463 |
| 0.011396 | 0.011228 | 0.011228 | 0.011161 | 0.011161 | 0.011262 | 0.011262 |
| 0.011161 | 0.011262 | 0.011127 | 0.011161 | 0.011295 | 0.011430 | 0.011195 |
| 0.011161 | 0.011295 | 0.011228 | 0.011127 | 0.011463 | 0.011127 | 0.011295 |
| 0.011368 | 0.011195 | 0.011497 | 0.011329 | 0.011362 | 0.011228 | 0.011329 |
| 0.011195 | 0.011530 | 0.011127 | 0.011396 | 0.011195 | 0.011195 | 0.011127 |
| 0.011362 | 0.011564 | 0.011262 | 0.011329 | 0.011161 | 0.011564 | 0.011195 |
| 0.011195 | 0.011195 | 0.011228 | 0.011329 | 0.011228 | 0.011329 | 0.011396 |
| 0.011396 | 0.011362 | 0.011262 | 0.011362 | 0.011329 | 0.011195 | 0.011161 |
| 0.011195 | 0.011195 | 0.011262 | 0.011195 | 0.011161 | 0.011329 | 0.011195 |
| 0.011228 | 0.011228 | 0.011362 | 0.011396 | 0.011295 | 0.011228 | 0.011228 |
| 0.011295 | 0.011228 | 0.011329 | 0.011195 | 0.011329 | 0.011430 | 0.011732 |
| 0.011228 | 0.011631 | 0.011233 | 0.017748 | 0.011126 | 0.011305 | 0.011583 |
| 0.011545 | 0.011588 | 0.011217 | 0.011176 | 0.011609 | 0.011613 | 0.011242 |
| 0.011392 | 0.011426 | 0.011138 | 0.011186 | 0.011216 | 0.011208 | 0.011146 |
| 0.011389 | 0.011395 | 0.011357 | 0.011259 | 0.011362 | 0.011396 | 0.011398 |
| 0.011266 | 0.011362 | 0.011362 | 0.011329 | 0.011295 | 0.011295 | 0.011262 |
| 0.011295 | 0.011228 | 0.011262 | 0.011295 | 0.011262 | 0.011195 | 0.011228 |
| 0.011228 | 0.011295 | 0.011195 | 0.011295 | 0.011329 | 0.011362 | 0.011262 |
| 0.011295 | 0.011262 | 0.011597 | 0.011597 | 0.011329 | 0.011363 | 0.011396 |
| 0.011161 | 0.011161 | 0.011195 | 0.011295 | 0.011161 | 0.011396 | 0.011396 |
| 0.011429 | 0.011429 | 0.011362 | 0.011463 | 0.011631 | 0.011464 | 0.011295 |
| 0.011295 | 0.011362 | 0.011396 | 0.011228 | 0.011295 | 0.011262 | 0.011295 |
| 0.011363 | 0.011362 | 0.011396 | 0.011363 | 0.011262 | 0.011463 | 0.011430 |
| 0.011297 | 0.011195 | 0.011295 | 0.011396 | 0.011295 | 0.011430 | 0.011463 |
| 0.011631 | 0.011333 | 0.011497 | 0.011463 | 0.011396 | 0.011564 | 0.011195 |
| 0.011363 | 0.011262 | 0.011228 | 0.011228 | 0.011295 | 0.011195 | 0.011295 |
| 0.011329 | 0.011362 | 0.011262 | 0.011295 | 0.011262 | 0.011597 | 0.011597 |
| 0.011329 | 0.011363 | 0.011429 | 0.011362 | 0.012002 | 0.011418 | 0.011342 |
| 0.011412 | 0.011372 | 0.011482 | 0.011372 | 0.011480 | 0.011405 | 0.011371 |
| 0.011953 | 0.011268 | 0.011403 | 0.011337 | 0.011611 | 0.011468 | 0.011571 |
| 0.011978 | 0.011437 | 0.011297 | 0.011295 | 0.011295 | 0.011329 | 0.011263 |
| 0.011161 | 0.011195 | 0.011329 | 0.011295 | 0.011297 | 0.011429 | 0.011397 |
| 0.011262 | 0.011195 | 0.011228 | 0.011262 | 0.011161 | 0.011228 | 0.011127 |
| 0.011262 | 0.011295 | 0.011195 | 0.011161 | 0.011262 | 0.011195 | 0.011228 |
| 0.011228 | 0.011161 | 0.011228 | 0.011262 | 0.011161 | 0.011362 | 0.011396 |
| 0.011295 | 0.011362 | 0.011295 | 0.011295 | 0.011228 | 0.011631 | 0.011262 |
| 0.011304 | 0.011228 | 0.011463 | 0.011467 | 0.011329 | 0.011329 | 0.011329 |
| 0.011329 | 0.011262 | 0.011228 | 0.011262 | 0.011362 | 0.011362 | 0.011295 |
| 0.011295 | 0.011430 | 0.011597 | 0.011329 | 0.011530 | 0.011530 | 0.011396 |
| 0.011228 | 0.011295 | 0.011329 | 0.011732 | 0.011295 | 0.011329 | 0.011295 |
| 0.011329 | 0.011262 | 0.011262 | 0.011564 | 0.011497 | 0.011530 | 0.011262 |
| 0.011362 | 0.011430 | 0.011295 | 0.011362 | 0.011329 | 0.011195 | 0.011530 |
| 0.011295 | 0.011262 | 0.011262 | 0.011430 | 0.011262 | 0.011362 | 0.011598 |
| 0.011295 | 0.011672 | 0.011665 | 0.011426 | 0.011117 | 0.011366 | 0.011164 |
| 0.011115 | 0.011683 | 0.011201 | 0.011373 | 0.011158 | 0.011264 | 0.011273 |
| 0.011366 | 0.000000 | 0.011227 | 0.000000 | 0.011114 | 0.011261 | 0.011344 |
| 0.011362 | 0.011257 | 0.011342 | 0.011272 | 0.011296 | 0.011429 | 0.011497 |
| 0.011497 | 0.011363 | 0.011466 | 0.011467 | 0.011603 | 0.011626 | 0.011295 |
| 0.011530 | 0.011396 | 0.011262 | 0.011362 | 0.011161 | 0.011396 | 0.011195 |
| 0.011262 | 0.011262 | 0.011228 | 0.011195 | 0.011228 | 0.011195 | 0.011295 |
| 0.011270 | 0.011270 | 0.011266 | 0.011300 | 0.011437 | 0.011402 | 0.011402 |
| 0.011401 | 0.011329 | 0.011134 | 0.011132 | 0.011263 | 0.011433 | 0.011433 |
| 0.011228 | 0.011297 | 0.011531 | 0.011500 | 0.011430 | 0.011464 | 0.011396 |
| 0.011329 | 0.011396 | 0.011396 | 0.011295 | 0.011867 | 0.011463 | 0.011530 |
| 0.011564 | 0.011630 | 0.011265 | 0.011337 | 0.011228 | 0.011430 | 0.011396 |
| 0.011430 | 0.011463 | 0.011463 | 0.011463 | 0.011571 | 0.011597 | 0.011234 |
| 0.011128 | 0.011130 | 0.011231 | 0.011196 | 0.011299 | 0.011135 | 0.011468 |
| 0.011266 | 0.011367 | 0.011108 | 0.011285 | 0.011262 | 0.011334 | 0.011228 |
| 0.011195 | 0.011195 | 0.011262 | 0.011228 | 0.011429 | 0.011396 | 0.011329 |

|          |          |          |          |          |          |          |
|----------|----------|----------|----------|----------|----------|----------|
| 0.011429 | 0.011497 | 0.011228 | 0.011228 | 0.011262 | 0.011262 | 0.011263 |
| 0.011331 | 0.011262 | 0.011262 | 0.011296 | 0.011429 | 0.011497 | 0.011497 |
| 0.011363 | 0.011466 | 0.011467 | 0.011603 | 0.011626 | 0.011295 | 0.011463 |
| 0.011396 | 0.011396 | 0.011229 | 0.011408 | 0.011338 | 0.011367 | 0.011235 |
| 0.011370 | 0.011607 | 0.011399 | 0.011298 | 0.011195 | 0.011396 | 0.011262 |
| 0.011362 | 0.011295 | 0.011195 | 0.011296 | 0.011396 | 0.011398 | 0.011295 |
| 0.000000 | 0.011128 | 0.011262 | 0.000000 | 0.011127 | 0.011230 | 0.011396 |
| 0.011295 | 0.011228 | 0.011262 | 0.011295 | 0.011262 | 0.011195 | 0.011396 |
| 0.011262 | 0.011295 | 0.011295 | 0.011228 | 0.011295 | 0.011530 | 0.011195 |
| 0.011228 | 0.011631 | 0.011228 | 0.011262 | 0.011228 | 0.011597 | 0.011103 |
| 0.011566 | 0.011145 | 0.011161 | 0.011422 | 0.011467 | 0.011419 | 0.000000 |
| 0.011113 | 0.011396 | 0.011497 | 0.011603 | 0.011464 | 0.011601 | 0.011733 |
| 0.011632 | 0.011669 | 0.011631 | 0.011880 | 0.011597 | 0.012472 | 0.011633 |
| 0.012372 | 0.012139 | 0.012273 | 0.012545 | 0.011597 | 0.011295 | 0.011598 |
| 0.012036 | 0.011971 | 0.011564 | 0.011463 | 0.011531 | 0.011531 | 0.011500 |
| 0.011396 | 0.011399 | 0.011463 | 0.011430 | 0.011800 | 0.011866 | 0.011867 |
| 0.011767 | 0.011867 | 0.011970 | 0.011737 | 0.012037 | 0.012042 | 0.012104 |
| 0.012104 | 0.012138 | 0.012084 | 0.012104 | 0.012105 | 0.011329 | 0.011631 |
| 0.011666 | 0.012203 | 0.011704 | 0.011934 | 0.012407 | 0.011468 | 0.011363 |
| 0.011329 | 0.011329 | 0.011799 | 0.011842 | 0.011940 | 0.011665 | 0.011330 |
| S760     | 0.011531 | 0.011531 | 0.011867 | 0.011631 | 0.011631 | 0.011699 |
| 0.011536 | 0.011468 | 0.011631 | 0.011128 | 0.011195 | 0.011161 | 0.011127 |
| 0.011161 | 0.011329 | 0.011127 | 0.011161 | 0.011228 | 0.011195 | 0.011161 |
| 0.011127 | 0.011161 | 0.011262 | 0.011128 | 0.011161 | 0.011161 | 0.011502 |
| 0.011396 | 0.011161 | 0.000000 | 0.011295 | 0.011228 | 0.011195 | 0.011228 |
| 0.011195 | 0.011295 | 0.011195 | 0.011195 | 0.011228 | 0.011195 | 0.011363 |
| 0.011127 | 0.011195 | 0.011228 | 0.011161 | 0.011262 | 0.011295 | 0.011228 |
| 0.011195 | 0.011363 | 0.011262 | 0.011530 | 0.011195 | 0.011463 | 0.011195 |
| 0.011161 | 0.011262 | 0.011329 | 0.011463 | 0.011564 | 0.011262 | 0.011363 |
| 0.011228 | 0.011295 | 0.011195 | 0.011430 | 0.011665 | 0.011195 | 0.011262 |
| 0.011161 | 0.011262 | 0.011228 | 0.011295 | 0.011228 | 0.011228 | 0.011228 |
| 0.011127 | 0.011161 | 0.011127 | 0.011228 | 0.011195 | 0.011229 | 0.011295 |
| 0.011228 | 0.011195 | 0.011262 | 0.011161 | 0.011295 | 0.011128 | 0.011195 |
| 0.011362 | 0.011295 | 0.011530 | 0.011363 | 0.011195 | 0.011430 | 0.011195 |
| 0.011357 | 0.011583 | 0.011400 | 0.011099 | 0.011098 | 0.011208 | 0.011297 |
| 0.011939 | 0.011365 | 0.011102 | 0.011430 | 0.011430 | 0.011228 | 0.011329 |
| 0.011262 | 0.011228 | 0.011295 | 0.011195 | 0.011295 | 0.011228 | 0.011228 |
| 0.011195 | 0.011295 | 0.011497 | 0.011363 | 0.011262 | 0.011228 | 0.011161 |
| 0.011127 | 0.011127 | 0.011195 | 0.011161 | 0.011362 | 0.011329 | 0.011262 |
| 0.011362 | 0.011430 | 0.011161 | 0.011161 | 0.011195 | 0.011195 | 0.011195 |
| 0.011263 | 0.011195 | 0.011195 | 0.000000 | 0.011133 | 0.011095 | 0.011195 |
| 0.011196 | 0.011129 | 0.011171 | 0.011164 | 0.011094 | 0.011129 | 0.011162 |
| 0.011420 | 0.011198 | 0.011233 | 0.011128 | 0.011129 | 0.011262 | 0.011228 |
| 0.011296 | 0.011229 | 0.011228 | 0.011329 | 0.011262 | 0.011631 | 0.011430 |
| 0.011463 | 0.011329 | 0.011195 | 0.011295 | 0.011094 | 0.011329 | 0.011128 |
| 0.011195 | 0.011195 | 0.011161 | 0.011127 | 0.011161 | 0.011127 | 0.011228 |
| 0.011195 | 0.011295 | 0.011228 | 0.011127 | 0.011229 | 0.011329 | 0.011331 |
| 0.011329 | 0.011228 | 0.011127 | 0.000000 | 0.011195 | 0.011127 | 0.000000 |
| 0.011162 | 0.011329 | 0.011128 | 0.011329 | 0.011094 | 0.011195 | 0.011161 |
| 0.011262 | 0.011161 | 0.011195 | 0.011161 | 0.011195 | 0.000000 | 0.011195 |
| 0.011228 | 0.011161 | 0.011228 | 0.011161 | 0.011195 | 0.011228 | 0.011463 |
| 0.011564 | 0.011497 | 0.011564 | 0.011330 | 0.011564 | 0.011195 | 0.011161 |
| 0.011195 | 0.011465 | 0.011289 | 0.011095 | 0.011569 | 0.000000 | 0.011178 |
| 0.011570 | 0.011468 | 0.011362 | 0.011564 | 0.011265 | 0.011430 | 0.011396 |
| 0.011329 | 0.011497 | 0.011345 | 0.011184 | 0.011228 | 0.011228 | 0.011297 |
| 0.011396 | 0.011296 | 0.011432 | 0.011500 | 0.011430 | 0.011497 | 0.011603 |
| 0.011331 | 0.011502 | 0.011433 | 0.011365 | 0.011633 | 0.011094 | 0.011296 |
| 0.011262 | 0.011195 | 0.011094 | 0.011094 | 0.011161 | 0.011161 | 0.011228 |
| 0.011161 | 0.011228 | 0.011127 | 0.011228 | 0.011161 | 0.011161 | 0.011228 |
| 0.011161 | 0.011598 | 0.011497 | 0.011531 | 0.000000 | 0.011161 | 0.011195 |



|          |          |          |          |          |          |          |
|----------|----------|----------|----------|----------|----------|----------|
| 0.011195 | 0.011161 | 0.011228 | 0.011262 | 0.011127 | 0.011127 | 0.011127 |
| 0.011665 | 0.011295 | 0.011295 | 0.011094 | 0.011195 | 0.011363 | 0.011128 |
| 0.011127 | 0.011195 | 0.011161 | 0.011329 | 0.011127 | 0.011262 | 0.011396 |
| 0.011329 | 0.011161 | 0.011161 | 0.011094 | 0.011094 | 0.011262 | 0.011195 |
| 0.011094 | 0.011195 | 0.000000 | 0.011094 | 0.011228 | 0.011363 | 0.011128 |
| 0.011094 | 0.011228 | 0.011161 | 0.000000 | 0.011396 | 0.000000 | 0.011228 |
| 0.011300 | 0.011128 | 0.011430 | 0.011262 | 0.011295 | 0.011161 | 0.011262 |
| 0.011127 | 0.011463 | 0.000000 | 0.011329 | 0.011127 | 0.011127 | 0.000000 |
| 0.011295 | 0.011497 | 0.011195 | 0.011262 | 0.011094 | 0.011497 | 0.011127 |
| 0.011128 | 0.011127 | 0.011161 | 0.011262 | 0.011161 | 0.011262 | 0.011329 |
| 0.011329 | 0.011295 | 0.011195 | 0.011295 | 0.011262 | 0.011127 | 0.011094 |
| 0.011127 | 0.011127 | 0.011195 | 0.011127 | 0.011094 | 0.011262 | 0.011127 |
| 0.011161 | 0.011161 | 0.011295 | 0.011329 | 0.011228 | 0.011161 | 0.011161 |
| 0.011228 | 0.011161 | 0.011262 | 0.011127 | 0.011262 | 0.011363 | 0.011665 |
| 0.011161 | 0.011564 | 0.011164 | 0.017638 | 0.011126 | 0.011305 | 0.011514 |
| 0.011476 | 0.011518 | 0.011217 | 0.011176 | 0.011610 | 0.011544 | 0.011242 |
| 0.011392 | 0.011427 | 0.000000 | 0.011144 | 0.011138 | 0.011208 | 0.011146 |
| 0.011389 | 0.011321 | 0.011320 | 0.011126 | 0.011295 | 0.011329 | 0.011331 |
| 0.011198 | 0.011295 | 0.011295 | 0.011262 | 0.011228 | 0.011228 | 0.011195 |
| 0.011228 | 0.011161 | 0.011195 | 0.011228 | 0.011195 | 0.011128 | 0.011161 |
| 0.011161 | 0.011228 | 0.011127 | 0.011228 | 0.011262 | 0.011295 | 0.011195 |
| 0.011228 | 0.011195 | 0.011530 | 0.011530 | 0.011262 | 0.011296 | 0.011329 |
| 0.011094 | 0.011094 | 0.011127 | 0.011228 | 0.011094 | 0.011329 | 0.011329 |
| 0.011362 | 0.011362 | 0.011295 | 0.011396 | 0.011564 | 0.011397 | 0.011228 |
| 0.011228 | 0.011295 | 0.011329 | 0.011161 | 0.011228 | 0.011195 | 0.011228 |
| 0.011296 | 0.011295 | 0.011329 | 0.011295 | 0.011195 | 0.011396 | 0.011363 |
| 0.011230 | 0.011128 | 0.011228 | 0.011329 | 0.011228 | 0.011363 | 0.011396 |
| 0.011564 | 0.011265 | 0.011430 | 0.011396 | 0.011329 | 0.011497 | 0.011128 |
| 0.011296 | 0.011195 | 0.011161 | 0.011161 | 0.011228 | 0.011127 | 0.011228 |
| 0.011262 | 0.011295 | 0.011195 | 0.011228 | 0.011195 | 0.011530 | 0.011530 |
| 0.011262 | 0.011296 | 0.011362 | 0.011295 | 0.011935 | 0.011346 | 0.011271 |
| 0.011342 | 0.011303 | 0.011412 | 0.011303 | 0.011410 | 0.011336 | 0.011302 |
| 0.011885 | 0.011199 | 0.011334 | 0.011268 | 0.011543 | 0.011401 | 0.011503 |
| 0.011911 | 0.011362 | 0.011229 | 0.011228 | 0.011228 | 0.011262 | 0.011196 |
| 0.011094 | 0.011128 | 0.011262 | 0.011228 | 0.011229 | 0.011362 | 0.011330 |
| 0.011195 | 0.011127 | 0.011161 | 0.011195 | 0.011094 | 0.011161 | 0.000000 |
| 0.011195 | 0.011228 | 0.011127 | 0.011094 | 0.011195 | 0.011127 | 0.011161 |
| 0.011161 | 0.011094 | 0.011161 | 0.011195 | 0.011094 | 0.011295 | 0.011329 |
| 0.011228 | 0.011295 | 0.011228 | 0.011228 | 0.011161 | 0.011564 | 0.011195 |
| 0.011234 | 0.011161 | 0.011396 | 0.011400 | 0.011262 | 0.011262 | 0.011262 |
| 0.011262 | 0.011195 | 0.011161 | 0.011195 | 0.011295 | 0.011295 | 0.011228 |
| 0.011228 | 0.011363 | 0.011530 | 0.011262 | 0.011463 | 0.011463 | 0.011329 |
| 0.011161 | 0.011228 | 0.011262 | 0.011665 | 0.011228 | 0.011262 | 0.011228 |
| 0.011262 | 0.011195 | 0.011195 | 0.011497 | 0.011430 | 0.011463 | 0.011195 |
| 0.011295 | 0.011363 | 0.011228 | 0.011295 | 0.011262 | 0.011128 | 0.011463 |
| 0.011228 | 0.011195 | 0.011195 | 0.011363 | 0.011195 | 0.011295 | 0.011531 |
| 0.011228 | 0.011604 | 0.011598 | 0.011385 | 0.011117 | 0.011298 | 0.011164 |
| 0.011115 | 0.011566 | 0.011131 | 0.011328 | 0.011158 | 0.011264 | 0.011273 |
| 0.011366 | 0.000000 | 0.011227 | 0.000000 | 0.011114 | 0.011261 | 0.011263 |
| 0.011286 | 0.011178 | 0.011272 | 0.011201 | 0.011229 | 0.011362 | 0.011430 |
| 0.011430 | 0.011296 | 0.011398 | 0.011399 | 0.011535 | 0.011555 | 0.011228 |
| 0.011463 | 0.011329 | 0.011195 | 0.011295 | 0.011094 | 0.011329 | 0.011128 |
| 0.011195 | 0.011195 | 0.011161 | 0.011127 | 0.011161 | 0.011127 | 0.011228 |
| 0.011200 | 0.011200 | 0.011197 | 0.011232 | 0.011368 | 0.011334 | 0.011333 |
| 0.011333 | 0.011262 | 0.000000 | 0.000000 | 0.011196 | 0.011365 | 0.011366 |
| 0.011161 | 0.011230 | 0.011464 | 0.011432 | 0.011363 | 0.011397 | 0.011329 |
| 0.011262 | 0.011329 | 0.011329 | 0.011228 | 0.011800 | 0.011396 | 0.011463 |
| 0.011497 | 0.011559 | 0.011197 | 0.011268 | 0.011161 | 0.011363 | 0.011329 |
| 0.011363 | 0.011396 | 0.011396 | 0.011396 | 0.011532 | 0.011531 | 0.011164 |
| 0.000000 | 0.000000 | 0.011163 | 0.011128 | 0.011231 | 0.000000 | 0.011400 |

|          |          |          |          |          |          |          |
|----------|----------|----------|----------|----------|----------|----------|
| 0.011198 | 0.011323 | 0.000000 | 0.011210 | 0.011195 | 0.011266 | 0.011161 |
| 0.011127 | 0.011127 | 0.011195 | 0.011161 | 0.011362 | 0.011329 | 0.011262 |
| 0.011362 | 0.011430 | 0.011161 | 0.011161 | 0.011195 | 0.011195 | 0.011195 |
| 0.011263 | 0.011195 | 0.011195 | 0.011229 | 0.011362 | 0.011430 | 0.011430 |
| 0.011296 | 0.011398 | 0.011399 | 0.011535 | 0.011555 | 0.011228 | 0.011396 |
| 0.011329 | 0.011329 | 0.011162 | 0.011339 | 0.011269 | 0.011299 | 0.011165 |
| 0.011336 | 0.011516 | 0.011314 | 0.011230 | 0.011128 | 0.011329 | 0.011195 |
| 0.011295 | 0.011228 | 0.011127 | 0.011229 | 0.011329 | 0.011331 | 0.011228 |
| 0.011127 | 0.000000 | 0.011195 | 0.011127 | 0.000000 | 0.011162 | 0.011329 |
| 0.011228 | 0.011161 | 0.011195 | 0.011228 | 0.011195 | 0.011128 | 0.011329 |
| 0.011195 | 0.011228 | 0.011228 | 0.011161 | 0.011228 | 0.011463 | 0.011127 |
| 0.011161 | 0.011564 | 0.011161 | 0.011195 | 0.011161 | 0.011530 | 0.011103 |
| 0.011566 | 0.011103 | 0.011161 | 0.011342 | 0.011427 | 0.011347 | 0.000000 |
| 0.011113 | 0.011329 | 0.011396 | 0.011502 | 0.011363 | 0.011500 | 0.011632 |
| 0.011531 | 0.011568 | 0.011531 | 0.011812 | 0.011531 | 0.012405 | 0.011566 |
| 0.012305 | 0.012072 | 0.012206 | 0.012478 | 0.011530 | 0.011228 | 0.011531 |
| 0.011969 | 0.011904 | 0.011497 | 0.011396 | 0.011464 | 0.011464 | 0.011432 |
| 0.011329 | 0.011332 | 0.011396 | 0.011363 | 0.011733 | 0.011800 | 0.011800 |
| 0.011700 | 0.011800 | 0.011903 | 0.011669 | 0.011970 | 0.011975 | 0.012037 |
| 0.012037 | 0.012071 | 0.012016 | 0.012037 | 0.012038 | 0.011262 | 0.011564 |
| 0.011632 | 0.012136 | 0.011637 | 0.011867 | 0.012340 | 0.011400 | 0.011296 |
| 0.011262 | 0.011262 | 0.011733 | 0.011759 | 0.011870 | 0.011598 | 0.011263 |
| S761     | 0.011638 | 0.011638 | 0.011842 | 0.011604 | 0.011604 | 0.011672 |
| 0.011541 | 0.011473 | 0.011604 | 0.011230 | 0.011298 | 0.011264 | 0.011230 |
| 0.011264 | 0.011434 | 0.011230 | 0.011264 | 0.011332 | 0.011298 | 0.011196 |
| 0.011230 | 0.011264 | 0.011264 | 0.011230 | 0.011264 | 0.011264 | 0.011507 |
| 0.011400 | 0.011264 | 0.011162 | 0.011298 | 0.011332 | 0.011298 | 0.011332 |
| 0.011298 | 0.011400 | 0.011298 | 0.011298 | 0.011332 | 0.011298 | 0.011468 |
| 0.011230 | 0.011298 | 0.011332 | 0.011264 | 0.011366 | 0.011400 | 0.011332 |
| 0.011298 | 0.011468 | 0.011366 | 0.011468 | 0.011298 | 0.011570 | 0.011298 |
| 0.011264 | 0.011366 | 0.011434 | 0.011570 | 0.011570 | 0.011366 | 0.011468 |
| 0.011332 | 0.011400 | 0.011264 | 0.011536 | 0.011672 | 0.011298 | 0.011366 |
| 0.011264 | 0.011366 | 0.011332 | 0.011400 | 0.011298 | 0.011332 | 0.011332 |
| 0.011230 | 0.011264 | 0.011230 | 0.011332 | 0.011298 | 0.011298 | 0.011400 |
| 0.011298 | 0.011298 | 0.011366 | 0.011264 | 0.011400 | 0.011230 | 0.011298 |
| 0.011468 | 0.011400 | 0.011536 | 0.011434 | 0.011298 | 0.011536 | 0.011298 |
| 0.011472 | 0.011588 | 0.011517 | 0.011218 | 0.011173 | 0.011321 | 0.011299 |
| 0.011947 | 0.011369 | 0.011144 | 0.011536 | 0.011536 | 0.011332 | 0.011434 |
| 0.011366 | 0.011332 | 0.011400 | 0.011298 | 0.011400 | 0.011332 | 0.011332 |
| 0.011298 | 0.011366 | 0.011604 | 0.011468 | 0.011332 | 0.011332 | 0.011264 |
| 0.011230 | 0.011230 | 0.011298 | 0.011264 | 0.011332 | 0.011332 | 0.011264 |
| 0.011366 | 0.011434 | 0.011264 | 0.011264 | 0.011298 | 0.011298 | 0.011299 |
| 0.011368 | 0.011298 | 0.011298 | 0.011169 | 0.011243 | 0.011202 | 0.011298 |
| 0.011300 | 0.011234 | 0.011284 | 0.011270 | 0.011198 | 0.011234 | 0.011265 |
| 0.011425 | 0.011304 | 0.011339 | 0.011162 | 0.011235 | 0.011366 | 0.011332 |
| 0.011400 | 0.011333 | 0.011332 | 0.011434 | 0.011366 | 0.011740 | 0.011536 |
| 0.011468 | 0.011434 | 0.011298 | 0.011400 | 0.011196 | 0.011332 | 0.011230 |
| 0.011298 | 0.011298 | 0.011264 | 0.011230 | 0.011264 | 0.011230 | 0.011332 |
| 0.011298 | 0.011400 | 0.011332 | 0.011230 | 0.011333 | 0.011434 | 0.011401 |
| 0.011434 | 0.011332 | 0.011230 | 0.011162 | 0.011298 | 0.011230 | 0.011162 |
| 0.000000 | 0.011434 | 0.011230 | 0.011434 | 0.011196 | 0.011264 | 0.011264 |
| 0.011366 | 0.011264 | 0.011298 | 0.011264 | 0.011298 | 0.011162 | 0.011298 |
| 0.011332 | 0.011196 | 0.011332 | 0.011264 | 0.011298 | 0.011332 | 0.011570 |
| 0.011570 | 0.011502 | 0.011570 | 0.011435 | 0.011570 | 0.011298 | 0.011196 |
| 0.011299 | 0.011591 | 0.011430 | 0.011199 | 0.011575 | 0.011164 | 0.011299 |
| 0.011575 | 0.011473 | 0.011468 | 0.011672 | 0.011371 | 0.011536 | 0.011502 |
| 0.011434 | 0.011604 | 0.011456 | 0.011311 | 0.011315 | 0.011230 | 0.011403 |
| 0.011502 | 0.011401 | 0.011539 | 0.011539 | 0.011502 | 0.011536 | 0.011711 |
| 0.011437 | 0.011541 | 0.011540 | 0.011471 | 0.011741 | 0.011196 | 0.011401 |
| 0.011366 | 0.011298 | 0.011196 | 0.011196 | 0.011264 | 0.011264 | 0.011332 |

|          |          |          |          |          |          |          |
|----------|----------|----------|----------|----------|----------|----------|
| 0.011264 | 0.011332 | 0.011230 | 0.011332 | 0.011264 | 0.011196 | 0.011332 |
| 0.011264 | 0.011604 | 0.011502 | 0.011536 | 0.011162 | 0.011264 | 0.011298 |
| 0.011264 | 0.011264 | 0.011332 | 0.011366 | 0.011196 | 0.011196 | 0.011196 |
| 0.011672 | 0.011400 | 0.011400 | 0.011196 | 0.011298 | 0.011434 | 0.011230 |
| 0.011230 | 0.011298 | 0.011264 | 0.011434 | 0.011230 | 0.011264 | 0.011400 |
| 0.011332 | 0.011264 | 0.011162 | 0.011196 | 0.011196 | 0.011366 | 0.011298 |
| 0.011196 | 0.011298 | 0.011162 | 0.011196 | 0.011332 | 0.011366 | 0.011230 |
| 0.011196 | 0.011332 | 0.011264 | 0.011162 | 0.011400 | 0.011162 | 0.011332 |
| 0.011407 | 0.011230 | 0.011434 | 0.011366 | 0.011400 | 0.011264 | 0.011366 |
| 0.011230 | 0.011570 | 0.011162 | 0.011434 | 0.011230 | 0.011230 | 0.011162 |
| 0.011400 | 0.011502 | 0.011264 | 0.011366 | 0.011196 | 0.011502 | 0.011230 |
| 0.011230 | 0.011162 | 0.011264 | 0.011366 | 0.011264 | 0.011366 | 0.011434 |
| 0.011400 | 0.011400 | 0.011298 | 0.011400 | 0.011366 | 0.011230 | 0.011196 |
| 0.011230 | 0.011230 | 0.011264 | 0.011230 | 0.011196 | 0.011366 | 0.011230 |
| 0.011264 | 0.011264 | 0.011400 | 0.011434 | 0.011332 | 0.011264 | 0.011264 |
| 0.011298 | 0.011264 | 0.011332 | 0.011230 | 0.011366 | 0.011468 | 0.011672 |
| 0.011264 | 0.011570 | 0.011270 | 0.017851 | 0.011258 | 0.011434 | 0.011519 |
| 0.011480 | 0.011523 | 0.011378 | 0.011351 | 0.011616 | 0.011549 | 0.011429 |
| 0.011537 | 0.011431 | 0.011179 | 0.011273 | 0.011257 | 0.011359 | 0.011277 |
| 0.011392 | 0.011323 | 0.011322 | 0.011260 | 0.011366 | 0.011434 | 0.011436 |
| 0.011304 | 0.011400 | 0.011400 | 0.011366 | 0.011332 | 0.011332 | 0.011298 |
| 0.011332 | 0.011264 | 0.011298 | 0.011332 | 0.011264 | 0.011230 | 0.011264 |
| 0.011264 | 0.011332 | 0.011230 | 0.011298 | 0.011332 | 0.011400 | 0.011298 |
| 0.011332 | 0.011298 | 0.011536 | 0.011536 | 0.011366 | 0.011400 | 0.011434 |
| 0.011196 | 0.011196 | 0.011230 | 0.011332 | 0.011196 | 0.011434 | 0.011434 |
| 0.011468 | 0.011468 | 0.011366 | 0.011502 | 0.011570 | 0.011503 | 0.011332 |
| 0.011298 | 0.011400 | 0.011434 | 0.011264 | 0.011332 | 0.011298 | 0.011332 |
| 0.011400 | 0.011400 | 0.011434 | 0.011400 | 0.011265 | 0.011502 | 0.011468 |
| 0.011334 | 0.011230 | 0.011332 | 0.011400 | 0.011332 | 0.011468 | 0.011502 |
| 0.011672 | 0.011371 | 0.011536 | 0.011502 | 0.011434 | 0.011604 | 0.011230 |
| 0.011401 | 0.011298 | 0.011264 | 0.011264 | 0.011332 | 0.011230 | 0.011298 |
| 0.011332 | 0.011400 | 0.011298 | 0.011332 | 0.011298 | 0.011536 | 0.011536 |
| 0.011366 | 0.011400 | 0.011468 | 0.011400 | 0.012013 | 0.011458 | 0.011381 |
| 0.011452 | 0.011411 | 0.011451 | 0.011376 | 0.011521 | 0.011444 | 0.011409 |
| 0.011964 | 0.011305 | 0.011441 | 0.011375 | 0.011583 | 0.011508 | 0.011542 |
| 0.011989 | 0.011404 | 0.011334 | 0.011332 | 0.011332 | 0.011264 | 0.011300 |
| 0.011196 | 0.011230 | 0.011332 | 0.011332 | 0.011334 | 0.011366 | 0.011333 |
| 0.011298 | 0.011162 | 0.011264 | 0.011298 | 0.011196 | 0.011264 | 0.011162 |
| 0.011298 | 0.011332 | 0.011230 | 0.011196 | 0.011264 | 0.011230 | 0.011264 |
| 0.011264 | 0.011196 | 0.011264 | 0.011298 | 0.011196 | 0.011400 | 0.011434 |
| 0.011298 | 0.011400 | 0.011332 | 0.011332 | 0.011264 | 0.011570 | 0.011298 |
| 0.011236 | 0.011264 | 0.011400 | 0.011403 | 0.011366 | 0.011366 | 0.011366 |
| 0.011366 | 0.011298 | 0.011264 | 0.011298 | 0.011400 | 0.011400 | 0.011298 |
| 0.011298 | 0.011468 | 0.011536 | 0.011366 | 0.011570 | 0.011570 | 0.011434 |
| 0.011264 | 0.011332 | 0.011366 | 0.011672 | 0.011332 | 0.011366 | 0.011298 |
| 0.011366 | 0.011298 | 0.011298 | 0.011604 | 0.011536 | 0.011570 | 0.011298 |
| 0.011400 | 0.011468 | 0.011332 | 0.011400 | 0.011366 | 0.011230 | 0.011468 |
| 0.011298 | 0.011298 | 0.011298 | 0.011468 | 0.011298 | 0.011400 | 0.011536 |
| 0.011332 | 0.011610 | 0.011604 | 0.011388 | 0.011287 | 0.011404 | 0.011319 |
| 0.011283 | 0.011611 | 0.011238 | 0.011467 | 0.011307 | 0.011368 | 0.011381 |
| 0.011369 | 0.011193 | 0.011340 | 0.011193 | 0.011223 | 0.011398 | 0.011388 |
| 0.011403 | 0.011299 | 0.011381 | 0.011310 | 0.011333 | 0.011366 | 0.011434 |
| 0.011434 | 0.011400 | 0.011505 | 0.011403 | 0.011643 | 0.011667 | 0.011332 |
| 0.011468 | 0.011434 | 0.011298 | 0.011400 | 0.011196 | 0.011332 | 0.011230 |
| 0.011298 | 0.011298 | 0.011264 | 0.011230 | 0.011264 | 0.011230 | 0.011332 |
| 0.011308 | 0.011308 | 0.011233 | 0.011303 | 0.011475 | 0.011440 | 0.011440 |
| 0.011439 | 0.011332 | 0.011172 | 0.011170 | 0.011300 | 0.011471 | 0.011472 |
| 0.011264 | 0.011334 | 0.011571 | 0.011539 | 0.011468 | 0.011503 | 0.011434 |
| 0.011366 | 0.011434 | 0.011434 | 0.011332 | 0.011808 | 0.011502 | 0.011570 |
| 0.011604 | 0.011565 | 0.011302 | 0.011376 | 0.011264 | 0.011468 | 0.011434 |

|          |          |          |          |          |          |          |
|----------|----------|----------|----------|----------|----------|----------|
| 0.011435 | 0.011502 | 0.011502 | 0.011502 | 0.011617 | 0.011638 | 0.011271 |
| 0.011163 | 0.011165 | 0.011267 | 0.011232 | 0.011337 | 0.011136 | 0.011404 |
| 0.011234 | 0.011283 | 0.011157 | 0.011288 | 0.011298 | 0.011372 | 0.011264 |
| 0.011230 | 0.011230 | 0.011298 | 0.011264 | 0.011332 | 0.011332 | 0.011264 |
| 0.011366 | 0.011434 | 0.011264 | 0.011264 | 0.011298 | 0.011298 | 0.011299 |
| 0.011368 | 0.011298 | 0.011298 | 0.011333 | 0.011366 | 0.011434 | 0.011434 |
| 0.011400 | 0.011505 | 0.011403 | 0.011643 | 0.011667 | 0.011332 | 0.011502 |
| 0.011434 | 0.011434 | 0.011265 | 0.011447 | 0.011377 | 0.011370 | 0.011273 |
| 0.011443 | 0.011660 | 0.011446 | 0.011335 | 0.011230 | 0.011434 | 0.011298 |
| 0.011400 | 0.011332 | 0.011230 | 0.011333 | 0.011434 | 0.011401 | 0.011332 |
| 0.011230 | 0.011162 | 0.011298 | 0.011230 | 0.011162 | 0.000000 | 0.011434 |
| 0.011332 | 0.011264 | 0.011298 | 0.011332 | 0.011264 | 0.011230 | 0.011332 |
| 0.011298 | 0.011332 | 0.011332 | 0.011264 | 0.011332 | 0.011570 | 0.011230 |
| 0.011264 | 0.011570 | 0.011264 | 0.011298 | 0.011264 | 0.011468 | 0.011233 |
| 0.011739 | 0.011231 | 0.011312 | 0.011345 | 0.011430 | 0.011350 | 0.011187 |
| 0.011271 | 0.011332 | 0.011434 | 0.011507 | 0.011401 | 0.011539 | 0.011672 |
| 0.011571 | 0.011608 | 0.011570 | 0.011821 | 0.011502 | 0.012386 | 0.011571 |
| 0.012285 | 0.012049 | 0.012185 | 0.012459 | 0.011536 | 0.011332 | 0.011536 |
| 0.012081 | 0.011913 | 0.011502 | 0.011400 | 0.011468 | 0.011468 | 0.011402 |
| 0.011332 | 0.011335 | 0.011366 | 0.011366 | 0.011740 | 0.011808 | 0.011809 |
| 0.011707 | 0.011808 | 0.011879 | 0.011642 | 0.012048 | 0.012053 | 0.012115 |
| 0.012116 | 0.012150 | 0.012096 | 0.012116 | 0.012117 | 0.011366 | 0.011638 |
| 0.011741 | 0.012182 | 0.011746 | 0.011842 | 0.012320 | 0.011404 | 0.011298 |
| 0.011264 | 0.011264 | 0.011740 | 0.011685 | 0.011879 | 0.011570 | 0.011265 |
| S762     | 0.011799 | 0.011799 | 0.012136 | 0.011900 | 0.011900 | 0.011967 |
| 0.011808 | 0.011740 | 0.011900 | 0.011396 | 0.011463 | 0.011431 | 0.011396 |
| 0.011430 | 0.011598 | 0.011396 | 0.011430 | 0.011497 | 0.011463 | 0.011430 |
| 0.011396 | 0.011430 | 0.011530 | 0.011396 | 0.011363 | 0.011430 | 0.011774 |
| 0.011665 | 0.011396 | 0.011329 | 0.011564 | 0.011430 | 0.011463 | 0.011430 |
| 0.011463 | 0.011497 | 0.011463 | 0.011463 | 0.011497 | 0.011463 | 0.011631 |
| 0.011396 | 0.011463 | 0.011497 | 0.011430 | 0.011530 | 0.011564 | 0.011497 |
| 0.011463 | 0.011631 | 0.011531 | 0.011799 | 0.011463 | 0.011665 | 0.011463 |
| 0.011430 | 0.011531 | 0.011598 | 0.011665 | 0.011833 | 0.011531 | 0.011631 |
| 0.011430 | 0.011497 | 0.011463 | 0.011631 | 0.011934 | 0.011463 | 0.011530 |
| 0.011430 | 0.011530 | 0.011497 | 0.011564 | 0.011497 | 0.011497 | 0.011497 |
| 0.011396 | 0.011430 | 0.011396 | 0.011497 | 0.011463 | 0.011498 | 0.011564 |
| 0.011497 | 0.011463 | 0.011396 | 0.011430 | 0.011564 | 0.011329 | 0.011463 |
| 0.011631 | 0.011564 | 0.011799 | 0.011631 | 0.011463 | 0.011631 | 0.011463 |
| 0.011654 | 0.011882 | 0.011664 | 0.011373 | 0.011359 | 0.011502 | 0.011572 |
| 0.012231 | 0.011620 | 0.011390 | 0.011698 | 0.011698 | 0.011497 | 0.011598 |
| 0.011531 | 0.011497 | 0.011564 | 0.011463 | 0.011564 | 0.011430 | 0.011497 |
| 0.011463 | 0.011564 | 0.011766 | 0.011631 | 0.011531 | 0.011497 | 0.011362 |
| 0.011396 | 0.011396 | 0.011329 | 0.011430 | 0.011631 | 0.011598 | 0.011530 |
| 0.011631 | 0.011698 | 0.011430 | 0.011430 | 0.011463 | 0.011463 | 0.011466 |
| 0.011534 | 0.011463 | 0.011463 | 0.011312 | 0.011386 | 0.011376 | 0.011464 |
| 0.011467 | 0.011404 | 0.011429 | 0.011440 | 0.011366 | 0.011403 | 0.011432 |
| 0.011708 | 0.011474 | 0.011439 | 0.011397 | 0.011406 | 0.011531 | 0.011498 |
| 0.011565 | 0.011498 | 0.011497 | 0.011597 | 0.011530 | 0.011833 | 0.011699 |
| 0.011732 | 0.011598 | 0.011463 | 0.011564 | 0.011362 | 0.011598 | 0.011396 |
| 0.011463 | 0.011463 | 0.011430 | 0.011396 | 0.011430 | 0.011396 | 0.011497 |
| 0.011396 | 0.011497 | 0.011497 | 0.011396 | 0.011498 | 0.011598 | 0.011601 |
| 0.000000 | 0.011497 | 0.011396 | 0.011330 | 0.011463 | 0.011396 | 0.011329 |
| 0.011434 | 0.000000 | 0.011329 | 0.000000 | 0.011363 | 0.011463 | 0.011430 |
| 0.011463 | 0.011430 | 0.011396 | 0.011430 | 0.011463 | 0.011329 | 0.011396 |
| 0.011430 | 0.011430 | 0.011497 | 0.011430 | 0.011463 | 0.011497 | 0.011732 |
| 0.011833 | 0.011766 | 0.011833 | 0.011600 | 0.011833 | 0.011463 | 0.011430 |
| 0.011466 | 0.011667 | 0.011563 | 0.011369 | 0.011807 | 0.011333 | 0.011454 |
| 0.011842 | 0.011740 | 0.011631 | 0.011833 | 0.011538 | 0.011699 | 0.011598 |
| 0.011598 | 0.011765 | 0.011629 | 0.011514 | 0.011564 | 0.011497 | 0.011568 |
| 0.011665 | 0.011566 | 0.011703 | 0.011704 | 0.011699 | 0.011766 | 0.011874 |

|          |          |          |          |          |          |          |
|----------|----------|----------|----------|----------|----------|----------|
| 0.011602 | 0.011706 | 0.011704 | 0.011636 | 0.011902 | 0.011362 | 0.011566 |
| 0.011463 | 0.011463 | 0.011362 | 0.011362 | 0.011362 | 0.011430 | 0.011497 |
| 0.011362 | 0.011430 | 0.011329 | 0.011497 | 0.011362 | 0.011430 | 0.011497 |
| 0.011430 | 0.011866 | 0.011766 | 0.011799 | 0.011329 | 0.011430 | 0.011463 |
| 0.011463 | 0.011430 | 0.011497 | 0.011531 | 0.011396 | 0.011396 | 0.011396 |
| 0.011934 | 0.011564 | 0.011564 | 0.011362 | 0.011463 | 0.011564 | 0.011396 |
| 0.011396 | 0.011463 | 0.011430 | 0.011530 | 0.011396 | 0.011530 | 0.011597 |
| 0.011598 | 0.011430 | 0.011430 | 0.011362 | 0.011362 | 0.011531 | 0.011463 |
| 0.011362 | 0.011463 | 0.011329 | 0.011362 | 0.011497 | 0.011632 | 0.011396 |
| 0.011363 | 0.011497 | 0.011430 | 0.011329 | 0.011665 | 0.011329 | 0.011497 |
| 0.011506 | 0.011396 | 0.011698 | 0.011531 | 0.011564 | 0.011430 | 0.011530 |
| 0.011396 | 0.011665 | 0.011329 | 0.011598 | 0.011396 | 0.011396 | 0.011329 |
| 0.011497 | 0.011766 | 0.011463 | 0.011530 | 0.011362 | 0.011766 | 0.011396 |
| 0.011396 | 0.011396 | 0.011430 | 0.011463 | 0.011430 | 0.011530 | 0.011598 |
| 0.011598 | 0.011564 | 0.011463 | 0.011564 | 0.011463 | 0.011396 | 0.011362 |
| 0.011396 | 0.011396 | 0.011463 | 0.011396 | 0.011295 | 0.011530 | 0.011396 |
| 0.011430 | 0.011430 | 0.011564 | 0.011598 | 0.011497 | 0.011362 | 0.011430 |
| 0.011497 | 0.011430 | 0.011530 | 0.011396 | 0.011530 | 0.011631 | 0.011934 |
| 0.011430 | 0.011833 | 0.011440 | 0.017937 | 0.011322 | 0.011733 | 0.011793 |
| 0.011753 | 0.011799 | 0.011479 | 0.011408 | 0.011830 | 0.011820 | 0.011546 |
| 0.011630 | 0.011732 | 0.011294 | 0.011437 | 0.011333 | 0.011505 | 0.011491 |
| 0.011670 | 0.011582 | 0.011579 | 0.011193 | 0.011564 | 0.011598 | 0.011601 |
| 0.011404 | 0.011497 | 0.011564 | 0.011530 | 0.011497 | 0.011497 | 0.011463 |
| 0.011497 | 0.011430 | 0.011463 | 0.011497 | 0.011463 | 0.011396 | 0.011430 |
| 0.011430 | 0.011497 | 0.011396 | 0.011497 | 0.011530 | 0.011564 | 0.011463 |
| 0.011497 | 0.011463 | 0.011799 | 0.011799 | 0.011531 | 0.011565 | 0.011598 |
| 0.011362 | 0.011362 | 0.011396 | 0.011430 | 0.011362 | 0.011598 | 0.011598 |
| 0.011631 | 0.011631 | 0.011564 | 0.011665 | 0.011833 | 0.011667 | 0.011430 |
| 0.011497 | 0.011564 | 0.011530 | 0.011430 | 0.011497 | 0.011463 | 0.011497 |
| 0.011564 | 0.011564 | 0.011598 | 0.011497 | 0.011397 | 0.011665 | 0.011564 |
| 0.011501 | 0.011396 | 0.011497 | 0.011598 | 0.011497 | 0.011631 | 0.011665 |
| 0.011833 | 0.011538 | 0.011699 | 0.011598 | 0.011598 | 0.011765 | 0.011396 |
| 0.011566 | 0.011464 | 0.011430 | 0.011430 | 0.011497 | 0.011396 | 0.011497 |
| 0.011530 | 0.011564 | 0.011463 | 0.011497 | 0.011463 | 0.011799 | 0.011799 |
| 0.011531 | 0.011565 | 0.011631 | 0.011564 | 0.012205 | 0.011632 | 0.011553 |
| 0.011623 | 0.011581 | 0.011693 | 0.011580 | 0.011691 | 0.011612 | 0.011578 |
| 0.012160 | 0.011476 | 0.011609 | 0.011545 | 0.011818 | 0.011673 | 0.011707 |
| 0.012183 | 0.011663 | 0.011500 | 0.011497 | 0.011497 | 0.011530 | 0.011466 |
| 0.011362 | 0.011329 | 0.011530 | 0.011497 | 0.011500 | 0.011631 | 0.011599 |
| 0.011463 | 0.011329 | 0.011362 | 0.011463 | 0.011295 | 0.011430 | 0.011329 |
| 0.011463 | 0.011497 | 0.011396 | 0.011362 | 0.011463 | 0.011396 | 0.011430 |
| 0.011430 | 0.011362 | 0.011430 | 0.011463 | 0.011362 | 0.011497 | 0.011598 |
| 0.011497 | 0.011564 | 0.011497 | 0.011497 | 0.011430 | 0.011833 | 0.011463 |
| 0.011513 | 0.011430 | 0.011665 | 0.011671 | 0.011463 | 0.011530 | 0.011530 |
| 0.011531 | 0.011396 | 0.011430 | 0.011396 | 0.011564 | 0.011564 | 0.011497 |
| 0.011497 | 0.011631 | 0.011799 | 0.011530 | 0.011732 | 0.011732 | 0.011598 |
| 0.011430 | 0.011497 | 0.011531 | 0.011934 | 0.011497 | 0.011463 | 0.011497 |
| 0.011530 | 0.011463 | 0.011463 | 0.011766 | 0.011631 | 0.011732 | 0.011463 |
| 0.011564 | 0.011631 | 0.011497 | 0.011564 | 0.011530 | 0.011396 | 0.011732 |
| 0.011497 | 0.011463 | 0.011463 | 0.011631 | 0.011463 | 0.011564 | 0.011799 |
| 0.011497 | 0.011876 | 0.011867 | 0.011670 | 0.011342 | 0.011570 | 0.011318 |
| 0.011555 | 0.011839 | 0.011412 | 0.011596 | 0.011402 | 0.011519 | 0.011485 |
| 0.011570 | 0.011324 | 0.011394 | 0.011258 | 0.011384 | 0.011462 | 0.011466 |
| 0.011475 | 0.011336 | 0.011554 | 0.011448 | 0.011499 | 0.011631 | 0.011698 |
| 0.011698 | 0.011565 | 0.011669 | 0.011670 | 0.011806 | 0.011838 | 0.011497 |
| 0.011732 | 0.011598 | 0.011463 | 0.011564 | 0.011362 | 0.011598 | 0.011396 |
| 0.011463 | 0.011463 | 0.011430 | 0.011396 | 0.011430 | 0.011396 | 0.011497 |
| 0.011479 | 0.011480 | 0.011471 | 0.011505 | 0.011642 | 0.011539 | 0.011607 |
| 0.011605 | 0.011531 | 0.011319 | 0.011348 | 0.011467 | 0.011636 | 0.011637 |
| 0.011430 | 0.011501 | 0.011734 | 0.011703 | 0.011632 | 0.011666 | 0.011598 |

|          |          |          |          |          |          |          |
|----------|----------|----------|----------|----------|----------|----------|
| 0.011530 | 0.011598 | 0.011598 | 0.011497 | 0.012069 | 0.011665 | 0.011732 |
| 0.011766 | 0.011809 | 0.011470 | 0.011545 | 0.011430 | 0.011631 | 0.011598 |
| 0.011632 | 0.011665 | 0.011665 | 0.011665 | 0.011808 | 0.011799 | 0.011442 |
| 0.011331 | 0.011337 | 0.011435 | 0.011400 | 0.011505 | 0.011359 | 0.011672 |
| 0.011472 | 0.011587 | 0.011346 | 0.011510 | 0.011464 | 0.011539 | 0.011362 |
| 0.011396 | 0.011396 | 0.011329 | 0.011430 | 0.011631 | 0.011598 | 0.011530 |
| 0.011631 | 0.011698 | 0.011430 | 0.011430 | 0.011463 | 0.011463 | 0.011466 |
| 0.011534 | 0.011463 | 0.011463 | 0.011499 | 0.011631 | 0.011698 | 0.011698 |
| 0.011565 | 0.011669 | 0.011670 | 0.011806 | 0.011838 | 0.011497 | 0.011665 |
| 0.011598 | 0.011598 | 0.011432 | 0.011617 | 0.011547 | 0.011571 | 0.011446 |
| 0.011542 | 0.011835 | 0.011568 | 0.011502 | 0.011329 | 0.000000 | 0.011396 |
| 0.011497 | 0.011497 | 0.011396 | 0.011498 | 0.011598 | 0.011601 | 0.011497 |
| 0.011396 | 0.011330 | 0.011463 | 0.011396 | 0.011329 | 0.011434 | 0.000000 |
| 0.011497 | 0.011430 | 0.011463 | 0.011497 | 0.011463 | 0.011396 | 0.011598 |
| 0.011463 | 0.011497 | 0.011497 | 0.011430 | 0.011497 | 0.011732 | 0.011396 |
| 0.011430 | 0.011833 | 0.011430 | 0.011396 | 0.011430 | 0.011799 | 0.011403 |
| 0.011847 | 0.011400 | 0.011461 | 0.011624 | 0.011712 | 0.011635 | 0.011353 |
| 0.011323 | 0.011598 | 0.011665 | 0.011773 | 0.011633 | 0.011771 | 0.011901 |
| 0.011801 | 0.011839 | 0.011799 | 0.012086 | 0.011799 | 0.012675 | 0.011835 |
| 0.012574 | 0.012342 | 0.012476 | 0.012748 | 0.011799 | 0.011497 | 0.011800 |
| 0.012239 | 0.012174 | 0.011766 | 0.011665 | 0.011733 | 0.011733 | 0.011703 |
| 0.011598 | 0.011603 | 0.011665 | 0.011632 | 0.012002 | 0.012069 | 0.012070 |
| 0.011969 | 0.012069 | 0.012173 | 0.011940 | 0.012239 | 0.012246 | 0.012306 |
| 0.012307 | 0.012341 | 0.012289 | 0.012307 | 0.012309 | 0.011530 | 0.011833 |
| 0.011901 | 0.012405 | 0.011908 | 0.012136 | 0.012609 | 0.011672 | 0.011565 |
| 0.011530 | 0.011530 | 0.012002 | 0.012048 | 0.012151 | 0.011866 | 0.011532 |
| S763     | 0.011698 | 0.011698 | 0.012034 | 0.011799 | 0.011799 | 0.011866 |
| 0.011672 | 0.011604 | 0.011799 | 0.011295 | 0.011362 | 0.011329 | 0.011295 |
| 0.011329 | 0.011497 | 0.011295 | 0.011329 | 0.011396 | 0.011362 | 0.011329 |
| 0.011295 | 0.011329 | 0.011429 | 0.011295 | 0.011329 | 0.011329 | 0.011637 |
| 0.011564 | 0.011329 | 0.011228 | 0.011463 | 0.011396 | 0.011362 | 0.011396 |
| 0.011362 | 0.011463 | 0.011362 | 0.011362 | 0.011396 | 0.011362 | 0.011530 |
| 0.011295 | 0.011362 | 0.011396 | 0.011329 | 0.011429 | 0.011463 | 0.011396 |
| 0.011362 | 0.011530 | 0.011430 | 0.011698 | 0.011362 | 0.011631 | 0.011362 |
| 0.011329 | 0.011430 | 0.011497 | 0.011631 | 0.011732 | 0.011430 | 0.011530 |
| 0.011396 | 0.011463 | 0.011362 | 0.011597 | 0.011833 | 0.011362 | 0.011430 |
| 0.011329 | 0.011429 | 0.011396 | 0.011463 | 0.011396 | 0.011396 | 0.011396 |
| 0.011295 | 0.011329 | 0.011295 | 0.011396 | 0.011362 | 0.011397 | 0.011463 |
| 0.011396 | 0.011362 | 0.011429 | 0.011329 | 0.011463 | 0.011295 | 0.011362 |
| 0.011530 | 0.011463 | 0.011698 | 0.011530 | 0.011362 | 0.011597 | 0.011362 |
| 0.011505 | 0.011733 | 0.011551 | 0.011256 | 0.011284 | 0.011391 | 0.011454 |
| 0.012121 | 0.011467 | 0.011225 | 0.011530 | 0.011530 | 0.011396 | 0.011497 |
| 0.011430 | 0.011396 | 0.011463 | 0.011362 | 0.011463 | 0.011396 | 0.011396 |
| 0.011362 | 0.011463 | 0.011665 | 0.011530 | 0.011430 | 0.011396 | 0.011329 |
| 0.011295 | 0.011295 | 0.011362 | 0.011329 | 0.011530 | 0.011497 | 0.011430 |
| 0.011530 | 0.011597 | 0.011329 | 0.011329 | 0.011362 | 0.011362 | 0.011364 |
| 0.011432 | 0.011362 | 0.011362 | 0.011240 | 0.011313 | 0.011271 | 0.011363 |
| 0.011365 | 0.011301 | 0.011355 | 0.011336 | 0.011264 | 0.011300 | 0.011330 |
| 0.011600 | 0.011370 | 0.011405 | 0.011296 | 0.011302 | 0.011430 | 0.011397 |
| 0.011464 | 0.011397 | 0.011396 | 0.011497 | 0.011429 | 0.011799 | 0.011598 |
| 0.011631 | 0.011497 | 0.011362 | 0.011463 | 0.011262 | 0.011497 | 0.011295 |
| 0.011362 | 0.011362 | 0.011329 | 0.011295 | 0.011329 | 0.011295 | 0.011396 |
| 0.011362 | 0.011463 | 0.011396 | 0.011295 | 0.011397 | 0.011497 | 0.011499 |
| 0.011497 | 0.011396 | 0.011295 | 0.011229 | 0.011362 | 0.011295 | 0.011228 |
| 0.011332 | 0.011497 | 0.011295 | 0.011497 | 0.011262 | 0.011362 | 0.011329 |
| 0.011430 | 0.011329 | 0.011362 | 0.011329 | 0.011362 | 0.011228 | 0.011362 |
| 0.011396 | 0.011329 | 0.011396 | 0.011329 | 0.011362 | 0.011396 | 0.011631 |
| 0.011732 | 0.011664 | 0.011732 | 0.011431 | 0.011732 | 0.011362 | 0.011329 |
| 0.011364 | 0.011667 | 0.011426 | 0.011232 | 0.011739 | 0.011231 | 0.011336 |
| 0.011705 | 0.011638 | 0.011463 | 0.011732 | 0.011402 | 0.011530 | 0.011564 |

|          |          |          |          |          |          |          |
|----------|----------|----------|----------|----------|----------|----------|
| 0.011497 | 0.011597 | 0.011522 | 0.011307 | 0.011438 | 0.011396 | 0.011466 |
| 0.011564 | 0.011465 | 0.011567 | 0.011669 | 0.011597 | 0.011665 | 0.011772 |
| 0.011500 | 0.011671 | 0.011602 | 0.011534 | 0.011801 | 0.011262 | 0.011465 |
| 0.011429 | 0.011362 | 0.011262 | 0.011262 | 0.011329 | 0.011329 | 0.011396 |
| 0.011329 | 0.011396 | 0.011295 | 0.011396 | 0.011329 | 0.011329 | 0.011396 |
| 0.011329 | 0.011765 | 0.011665 | 0.011698 | 0.011228 | 0.011329 | 0.011362 |
| 0.011362 | 0.011329 | 0.011396 | 0.011430 | 0.011295 | 0.011295 | 0.011295 |
| 0.011833 | 0.011463 | 0.011463 | 0.011262 | 0.011362 | 0.011530 | 0.011295 |
| 0.011295 | 0.011362 | 0.011329 | 0.011497 | 0.011295 | 0.011429 | 0.011564 |
| 0.011497 | 0.011329 | 0.011329 | 0.011262 | 0.011262 | 0.011430 | 0.011362 |
| 0.011262 | 0.011362 | 0.011228 | 0.011262 | 0.011396 | 0.011530 | 0.011295 |
| 0.011262 | 0.011396 | 0.011329 | 0.011228 | 0.011564 | 0.011228 | 0.011396 |
| 0.011471 | 0.011295 | 0.011597 | 0.011430 | 0.011463 | 0.011329 | 0.011429 |
| 0.011295 | 0.011631 | 0.011228 | 0.011497 | 0.011295 | 0.011295 | 0.011228 |
| 0.011463 | 0.011665 | 0.011362 | 0.011430 | 0.011262 | 0.011665 | 0.011295 |
| 0.011295 | 0.011295 | 0.011329 | 0.011430 | 0.011329 | 0.011429 | 0.011497 |
| 0.011497 | 0.011463 | 0.011362 | 0.011463 | 0.011429 | 0.011295 | 0.011262 |
| 0.011295 | 0.011295 | 0.011362 | 0.011295 | 0.011262 | 0.011362 | 0.011295 |
| 0.011329 | 0.011329 | 0.011463 | 0.011497 | 0.011396 | 0.011329 | 0.011329 |
| 0.011396 | 0.011329 | 0.011429 | 0.011295 | 0.011429 | 0.011463 | 0.011833 |
| 0.011329 | 0.011732 | 0.011336 | 0.011785 | 0.011257 | 0.011488 | 0.011688 |
| 0.011648 | 0.011693 | 0.011374 | 0.011350 | 0.011774 | 0.011716 | 0.011425 |
| 0.011487 | 0.011610 | 0.011216 | 0.011270 | 0.011294 | 0.011357 | 0.011318 |
| 0.011529 | 0.011507 | 0.011468 | 0.011325 | 0.011463 | 0.011497 | 0.011500 |
| 0.011369 | 0.011463 | 0.011463 | 0.011430 | 0.011396 | 0.011396 | 0.011363 |
| 0.000000 | 0.011329 | 0.011295 | 0.011396 | 0.011362 | 0.011295 | 0.011329 |
| 0.011329 | 0.011396 | 0.011295 | 0.011396 | 0.011430 | 0.011463 | 0.011362 |
| 0.011396 | 0.011362 | 0.011698 | 0.011698 | 0.011430 | 0.011464 | 0.011430 |
| 0.011262 | 0.011262 | 0.011295 | 0.011396 | 0.011262 | 0.011497 | 0.011497 |
| 0.011463 | 0.011463 | 0.011463 | 0.011497 | 0.011732 | 0.011498 | 0.011396 |
| 0.011329 | 0.011463 | 0.011497 | 0.011329 | 0.011396 | 0.011362 | 0.011329 |
| 0.011396 | 0.011396 | 0.011429 | 0.011463 | 0.011363 | 0.011564 | 0.011530 |
| 0.011399 | 0.011295 | 0.011396 | 0.011497 | 0.011396 | 0.011530 | 0.011564 |
| 0.011732 | 0.011402 | 0.011530 | 0.011564 | 0.011497 | 0.011597 | 0.011295 |
| 0.011464 | 0.011363 | 0.011329 | 0.011329 | 0.011396 | 0.011295 | 0.011396 |
| 0.011430 | 0.011463 | 0.011362 | 0.011396 | 0.011362 | 0.011698 | 0.011698 |
| 0.011430 | 0.011464 | 0.011530 | 0.011463 | 0.012103 | 0.011453 | 0.011447 |
| 0.011517 | 0.011442 | 0.011587 | 0.011476 | 0.011550 | 0.011509 | 0.011439 |
| 0.012056 | 0.011372 | 0.011505 | 0.011441 | 0.011715 | 0.011570 | 0.011673 |
| 0.012080 | 0.011550 | 0.011567 | 0.011597 | 0.011564 | 0.011564 | 0.011533 |
| 0.011262 | 0.011429 | 0.011564 | 0.011530 | 0.011533 | 0.011530 | 0.011498 |
| 0.011362 | 0.011295 | 0.011329 | 0.011362 | 0.011262 | 0.011329 | 0.011228 |
| 0.011362 | 0.011396 | 0.011295 | 0.011262 | 0.011362 | 0.011295 | 0.011329 |
| 0.011329 | 0.011262 | 0.011329 | 0.011295 | 0.011262 | 0.011463 | 0.011497 |
| 0.011396 | 0.011463 | 0.011396 | 0.011396 | 0.011329 | 0.011732 | 0.011362 |
| 0.011408 | 0.011329 | 0.011564 | 0.011569 | 0.011430 | 0.011429 | 0.011429 |
| 0.011430 | 0.011362 | 0.011329 | 0.011362 | 0.011463 | 0.011463 | 0.011396 |
| 0.011396 | 0.011530 | 0.011698 | 0.011429 | 0.011631 | 0.011631 | 0.011497 |
| 0.011329 | 0.011396 | 0.011430 | 0.011833 | 0.011396 | 0.011430 | 0.011396 |
| 0.011362 | 0.011362 | 0.011362 | 0.011665 | 0.011598 | 0.011631 | 0.011362 |
| 0.011463 | 0.011530 | 0.011396 | 0.011463 | 0.011429 | 0.011295 | 0.011631 |
| 0.011396 | 0.011362 | 0.011362 | 0.011530 | 0.011362 | 0.011463 | 0.011698 |
| 0.011396 | 0.011739 | 0.011765 | 0.011548 | 0.011286 | 0.011468 | 0.011267 |
| 0.011280 | 0.011761 | 0.011306 | 0.011417 | 0.011353 | 0.011417 | 0.011379 |
| 0.011519 | 0.011192 | 0.011339 | 0.011192 | 0.011222 | 0.011395 | 0.011425 |
| 0.011437 | 0.011336 | 0.011448 | 0.011377 | 0.011397 | 0.011530 | 0.011598 |
| 0.011597 | 0.011464 | 0.011567 | 0.011569 | 0.011704 | 0.011732 | 0.011396 |
| 0.011631 | 0.011497 | 0.011362 | 0.011463 | 0.011262 | 0.011497 | 0.011295 |
| 0.011362 | 0.011362 | 0.011329 | 0.011295 | 0.011329 | 0.011295 | 0.011396 |
| 0.011305 | 0.011375 | 0.011368 | 0.011403 | 0.011539 | 0.011504 | 0.011231 |

|          |          |          |          |          |          |          |
|----------|----------|----------|----------|----------|----------|----------|
| 0.011503 | 0.011430 | 0.011208 | 0.011096 | 0.011365 | 0.011535 | 0.011535 |
| 0.011329 | 0.011399 | 0.011633 | 0.011601 | 0.011464 | 0.011565 | 0.011497 |
| 0.011429 | 0.011497 | 0.011497 | 0.011396 | 0.011967 | 0.011497 | 0.011564 |
| 0.011665 | 0.011701 | 0.011333 | 0.011441 | 0.011329 | 0.011530 | 0.011497 |
| 0.011531 | 0.011564 | 0.011497 | 0.011497 | 0.011689 | 0.011698 | 0.011338 |
| 0.011229 | 0.011233 | 0.011333 | 0.011298 | 0.011402 | 0.011172 | 0.011570 |
| 0.011369 | 0.011455 | 0.011203 | 0.011360 | 0.011363 | 0.011437 | 0.011329 |
| 0.011295 | 0.011295 | 0.011362 | 0.011329 | 0.011530 | 0.011497 | 0.011430 |
| 0.011530 | 0.011597 | 0.011329 | 0.011329 | 0.011362 | 0.011362 | 0.011364 |
| 0.011432 | 0.011362 | 0.011362 | 0.011397 | 0.011530 | 0.011598 | 0.011597 |
| 0.011464 | 0.011567 | 0.011569 | 0.011704 | 0.011732 | 0.011396 | 0.011564 |
| 0.011497 | 0.011497 | 0.011331 | 0.011513 | 0.011442 | 0.011469 | 0.011341 |
| 0.011508 | 0.011698 | 0.011441 | 0.011400 | 0.011295 | 0.011497 | 0.011362 |
| 0.011463 | 0.011396 | 0.011295 | 0.011397 | 0.011497 | 0.011499 | 0.011396 |
| 0.011295 | 0.011229 | 0.011362 | 0.011295 | 0.011228 | 0.011332 | 0.011497 |
| 0.000000 | 0.011329 | 0.011295 | 0.011396 | 0.011362 | 0.011295 | 0.011497 |
| 0.011362 | 0.011396 | 0.011396 | 0.011329 | 0.011396 | 0.011631 | 0.011295 |
| 0.011329 | 0.011732 | 0.011329 | 0.011362 | 0.011329 | 0.011698 | 0.011232 |
| 0.011735 | 0.011273 | 0.011261 | 0.011543 | 0.011589 | 0.011527 | 0.011227 |
| 0.011218 | 0.011497 | 0.011597 | 0.011705 | 0.011565 | 0.011703 | 0.011834 |
| 0.011733 | 0.011770 | 0.011732 | 0.011983 | 0.011698 | 0.012573 | 0.011734 |
| 0.012406 | 0.012241 | 0.012375 | 0.012646 | 0.011698 | 0.011396 | 0.011699 |
| 0.012137 | 0.012072 | 0.011665 | 0.011564 | 0.011632 | 0.011632 | 0.011534 |
| 0.011497 | 0.011501 | 0.011564 | 0.011531 | 0.011901 | 0.011967 | 0.011968 |
| 0.011868 | 0.011968 | 0.012072 | 0.011838 | 0.012138 | 0.012144 | 0.012205 |
| 0.012205 | 0.012239 | 0.012186 | 0.012206 | 0.012207 | 0.011429 | 0.011732 |
| 0.011800 | 0.012304 | 0.011806 | 0.012035 | 0.012508 | 0.011536 | 0.011464 |
| 0.011429 | 0.011429 | 0.011833 | 0.011924 | 0.012045 | 0.011765 | 0.011431 |
| S764     | 0.011631 | 0.011631 | 0.011967 | 0.011732 | 0.011732 | 0.011799 |
| 0.011603 | 0.011536 | 0.011732 | 0.011228 | 0.011295 | 0.011262 | 0.011228 |
| 0.011262 | 0.011429 | 0.011228 | 0.011262 | 0.011329 | 0.011295 | 0.011262 |
| 0.011228 | 0.011262 | 0.011362 | 0.011228 | 0.011262 | 0.011262 | 0.011569 |
| 0.011496 | 0.011262 | 0.011161 | 0.011396 | 0.011329 | 0.011295 | 0.011329 |
| 0.011295 | 0.011396 | 0.011295 | 0.011295 | 0.011329 | 0.011295 | 0.011463 |
| 0.011228 | 0.011295 | 0.011329 | 0.011262 | 0.011362 | 0.011396 | 0.011329 |
| 0.011295 | 0.011463 | 0.011363 | 0.011631 | 0.011295 | 0.011564 | 0.011295 |
| 0.011262 | 0.011362 | 0.011429 | 0.011564 | 0.011664 | 0.011362 | 0.011463 |
| 0.011329 | 0.011396 | 0.011295 | 0.011530 | 0.011765 | 0.011295 | 0.011362 |
| 0.011262 | 0.011362 | 0.011329 | 0.011396 | 0.011329 | 0.011329 | 0.011329 |
| 0.011228 | 0.011262 | 0.011228 | 0.011329 | 0.011295 | 0.011329 | 0.011396 |
| 0.011329 | 0.011295 | 0.011362 | 0.011262 | 0.011396 | 0.011228 | 0.011295 |
| 0.011463 | 0.011396 | 0.011631 | 0.011463 | 0.011295 | 0.011530 | 0.011295 |
| 0.011431 | 0.011658 | 0.011475 | 0.011138 | 0.011209 | 0.011318 | 0.011375 |
| 0.012048 | 0.011365 | 0.011184 | 0.011530 | 0.011530 | 0.011329 | 0.011429 |
| 0.011362 | 0.011329 | 0.011396 | 0.011295 | 0.011396 | 0.011329 | 0.011262 |
| 0.011228 | 0.011396 | 0.011597 | 0.011463 | 0.011362 | 0.011329 | 0.011262 |
| 0.011228 | 0.011228 | 0.011295 | 0.011262 | 0.011463 | 0.011429 | 0.011362 |
| 0.011463 | 0.011530 | 0.011262 | 0.011262 | 0.011295 | 0.011295 | 0.011297 |
| 0.011364 | 0.011295 | 0.011295 | 0.011168 | 0.011241 | 0.011200 | 0.011296 |
| 0.011297 | 0.011232 | 0.011282 | 0.011267 | 0.011196 | 0.011231 | 0.011263 |
| 0.011528 | 0.011301 | 0.011336 | 0.011228 | 0.011233 | 0.011363 | 0.011329 |
| 0.011396 | 0.011330 | 0.011329 | 0.011362 | 0.011362 | 0.011732 | 0.011530 |
| 0.011564 | 0.011429 | 0.011295 | 0.011396 | 0.011195 | 0.011429 | 0.011228 |
| 0.011295 | 0.011295 | 0.011262 | 0.011228 | 0.011262 | 0.011228 | 0.011329 |
| 0.011295 | 0.011396 | 0.011329 | 0.011228 | 0.011330 | 0.011430 | 0.011432 |
| 0.011430 | 0.011329 | 0.011228 | 0.011161 | 0.011295 | 0.011228 | 0.011161 |
| 0.011264 | 0.011430 | 0.011228 | 0.011430 | 0.011195 | 0.011295 | 0.011262 |
| 0.011362 | 0.000000 | 0.011295 | 0.011262 | 0.011295 | 0.011161 | 0.011295 |
| 0.011329 | 0.011262 | 0.011329 | 0.011262 | 0.011228 | 0.011329 | 0.011564 |
| 0.011664 | 0.011597 | 0.011665 | 0.011431 | 0.011665 | 0.011295 | 0.011262 |



|          |          |          |          |          |          |          |
|----------|----------|----------|----------|----------|----------|----------|
| 0.011297 | 0.011586 | 0.011426 | 0.011197 | 0.011671 | 0.011163 | 0.011296 |
| 0.011637 | 0.011570 | 0.011463 | 0.011664 | 0.011367 | 0.011530 | 0.011497 |
| 0.011429 | 0.011597 | 0.011451 | 0.011225 | 0.011354 | 0.011329 | 0.011399 |
| 0.011497 | 0.011330 | 0.011533 | 0.011602 | 0.011463 | 0.011597 | 0.011704 |
| 0.011365 | 0.011603 | 0.011534 | 0.011466 | 0.011733 | 0.011195 | 0.011397 |
| 0.011362 | 0.011295 | 0.011195 | 0.011195 | 0.011262 | 0.011262 | 0.011329 |
| 0.011262 | 0.011329 | 0.011228 | 0.011329 | 0.011262 | 0.011262 | 0.011329 |
| 0.011262 | 0.011698 | 0.011597 | 0.011631 | 0.011161 | 0.011262 | 0.011295 |
| 0.011295 | 0.011262 | 0.011329 | 0.011362 | 0.011228 | 0.011228 | 0.011228 |
| 0.011765 | 0.011396 | 0.011396 | 0.011195 | 0.011295 | 0.011463 | 0.011228 |
| 0.011228 | 0.011295 | 0.011262 | 0.011429 | 0.011228 | 0.011362 | 0.011496 |
| 0.011429 | 0.011262 | 0.011262 | 0.011195 | 0.011195 | 0.011362 | 0.011295 |
| 0.011195 | 0.011295 | 0.011161 | 0.011195 | 0.011329 | 0.011463 | 0.011228 |
| 0.011195 | 0.011329 | 0.011262 | 0.011161 | 0.011496 | 0.011161 | 0.011329 |
| 0.011403 | 0.011228 | 0.011530 | 0.011362 | 0.011396 | 0.011262 | 0.011362 |
| 0.011228 | 0.011564 | 0.011161 | 0.011429 | 0.011228 | 0.011228 | 0.011161 |
| 0.011396 | 0.011598 | 0.011295 | 0.011362 | 0.011195 | 0.011597 | 0.011228 |
| 0.011228 | 0.011228 | 0.011262 | 0.011362 | 0.011262 | 0.011362 | 0.011429 |
| 0.011429 | 0.011396 | 0.011295 | 0.011396 | 0.011362 | 0.011228 | 0.011195 |
| 0.011228 | 0.011228 | 0.011295 | 0.011228 | 0.011195 | 0.011362 | 0.011228 |
| 0.011262 | 0.011262 | 0.011396 | 0.011429 | 0.011329 | 0.011262 | 0.011262 |
| 0.011329 | 0.011262 | 0.011362 | 0.011228 | 0.011362 | 0.011463 | 0.011765 |
| 0.011262 | 0.011664 | 0.011267 | 0.017785 | 0.011191 | 0.011305 | 0.011618 |
| 0.011579 | 0.011623 | 0.011270 | 0.011176 | 0.011609 | 0.011647 | 0.011242 |
| 0.011440 | 0.011426 | 0.011138 | 0.011228 | 0.011255 | 0.011258 | 0.011189 |
| 0.011436 | 0.011433 | 0.011431 | 0.011325 | 0.011396 | 0.011429 | 0.011432 |
| 0.011301 | 0.011396 | 0.011396 | 0.011362 | 0.011329 | 0.011329 | 0.011295 |
| 0.011329 | 0.000000 | 0.011295 | 0.011329 | 0.011295 | 0.011228 | 0.011262 |
| 0.011262 | 0.011329 | 0.011228 | 0.011329 | 0.011362 | 0.011396 | 0.011295 |
| 0.011329 | 0.011295 | 0.011631 | 0.011631 | 0.011362 | 0.011396 | 0.011430 |
| 0.011195 | 0.011195 | 0.011228 | 0.011329 | 0.011195 | 0.011429 | 0.011429 |
| 0.011463 | 0.011463 | 0.011396 | 0.011496 | 0.011665 | 0.011498 | 0.011329 |
| 0.011329 | 0.011396 | 0.011429 | 0.011262 | 0.011329 | 0.011295 | 0.011329 |
| 0.011396 | 0.011396 | 0.011429 | 0.011396 | 0.011296 | 0.011497 | 0.011396 |
| 0.011331 | 0.011228 | 0.011329 | 0.011430 | 0.011329 | 0.011463 | 0.011496 |
| 0.011664 | 0.011367 | 0.011530 | 0.011497 | 0.011429 | 0.011597 | 0.011228 |
| 0.011397 | 0.011295 | 0.011262 | 0.011262 | 0.011329 | 0.011228 | 0.011329 |
| 0.011362 | 0.011396 | 0.011295 | 0.011329 | 0.011295 | 0.011631 | 0.011631 |
| 0.011362 | 0.011396 | 0.011463 | 0.011396 | 0.012036 | 0.011453 | 0.011377 |
| 0.011447 | 0.011407 | 0.011517 | 0.011407 | 0.011515 | 0.011440 | 0.011405 |
| 0.011987 | 0.011303 | 0.011437 | 0.011371 | 0.011645 | 0.011502 | 0.011605 |
| 0.012012 | 0.011475 | 0.011500 | 0.011530 | 0.011496 | 0.011496 | 0.011466 |
| 0.011195 | 0.011362 | 0.011496 | 0.011463 | 0.011466 | 0.011463 | 0.011431 |
| 0.011295 | 0.011228 | 0.011262 | 0.011295 | 0.011195 | 0.011262 | 0.011161 |
| 0.011295 | 0.011329 | 0.011228 | 0.011195 | 0.011295 | 0.011228 | 0.011262 |
| 0.011262 | 0.011195 | 0.011262 | 0.011295 | 0.011195 | 0.011396 | 0.011429 |
| 0.011329 | 0.011396 | 0.011329 | 0.011329 | 0.011262 | 0.011664 | 0.011295 |
| 0.011339 | 0.011262 | 0.011497 | 0.011501 | 0.011362 | 0.011362 | 0.011362 |
| 0.011362 | 0.011295 | 0.011262 | 0.011295 | 0.011396 | 0.011396 | 0.011329 |
| 0.011329 | 0.011463 | 0.011631 | 0.011362 | 0.011564 | 0.011564 | 0.011429 |
| 0.011262 | 0.011329 | 0.011362 | 0.011765 | 0.011329 | 0.011362 | 0.011329 |
| 0.011362 | 0.011295 | 0.011295 | 0.011597 | 0.011530 | 0.011564 | 0.011295 |
| 0.011396 | 0.011463 | 0.011329 | 0.011396 | 0.011362 | 0.011228 | 0.011564 |
| 0.011329 | 0.011295 | 0.011295 | 0.011463 | 0.011295 | 0.011396 | 0.011631 |
| 0.011329 | 0.011671 | 0.011698 | 0.011467 | 0.011229 | 0.011400 | 0.011215 |
| 0.011115 | 0.011683 | 0.011236 | 0.011373 | 0.011255 | 0.011366 | 0.011326 |
| 0.011417 | 0.011126 | 0.011283 | 0.011126 | 0.011168 | 0.011328 | 0.011344 |
| 0.011362 | 0.011257 | 0.011377 | 0.011307 | 0.011330 | 0.011463 | 0.011530 |
| 0.011530 | 0.011396 | 0.011500 | 0.011501 | 0.011636 | 0.011625 | 0.011329 |
| 0.011564 | 0.011429 | 0.011295 | 0.011396 | 0.011195 | 0.011429 | 0.011228 |

|          |          |          |          |          |          |          |
|----------|----------|----------|----------|----------|----------|----------|
| 0.011295 | 0.011295 | 0.011262 | 0.011228 | 0.011262 | 0.011228 | 0.011329 |
| 0.011305 | 0.011305 | 0.011300 | 0.011334 | 0.011471 | 0.011436 | 0.011436 |
| 0.011435 | 0.011363 | 0.011134 | 0.011132 | 0.011297 | 0.011467 | 0.011467 |
| 0.011262 | 0.011331 | 0.011565 | 0.011533 | 0.011464 | 0.011498 | 0.011429 |
| 0.011362 | 0.011429 | 0.011429 | 0.011329 | 0.011900 | 0.011497 | 0.011564 |
| 0.011597 | 0.011665 | 0.011299 | 0.011372 | 0.011262 | 0.011396 | 0.011429 |
| 0.011464 | 0.011496 | 0.011497 | 0.011497 | 0.011650 | 0.011631 | 0.011268 |
| 0.011162 | 0.011164 | 0.011264 | 0.011230 | 0.011333 | 0.011172 | 0.011502 |
| 0.011300 | 0.011455 | 0.011156 | 0.011285 | 0.011296 | 0.011368 | 0.011262 |
| 0.011228 | 0.011228 | 0.011295 | 0.011262 | 0.011463 | 0.011429 | 0.011362 |
| 0.011463 | 0.011530 | 0.011262 | 0.011262 | 0.011295 | 0.011295 | 0.011297 |
| 0.011364 | 0.011295 | 0.011295 | 0.011330 | 0.011463 | 0.011530 | 0.011530 |
| 0.011396 | 0.011500 | 0.011501 | 0.011636 | 0.011625 | 0.011329 | 0.011496 |
| 0.011429 | 0.011429 | 0.011263 | 0.011443 | 0.011373 | 0.011401 | 0.011270 |
| 0.011439 | 0.011607 | 0.011399 | 0.011332 | 0.011228 | 0.011430 | 0.011295 |
| 0.011396 | 0.011329 | 0.011228 | 0.011330 | 0.011430 | 0.011432 | 0.011329 |
| 0.011228 | 0.011161 | 0.011295 | 0.011228 | 0.011161 | 0.011264 | 0.011430 |
| 0.011329 | 0.000000 | 0.011295 | 0.011329 | 0.011295 | 0.011228 | 0.011430 |
| 0.011295 | 0.011329 | 0.011329 | 0.011262 | 0.011329 | 0.011564 | 0.011228 |
| 0.011262 | 0.011664 | 0.011262 | 0.011295 | 0.011262 | 0.011631 | 0.011189 |
| 0.011678 | 0.011188 | 0.011211 | 0.011463 | 0.011508 | 0.011455 | 0.011144 |
| 0.011165 | 0.011429 | 0.011530 | 0.011637 | 0.011498 | 0.011635 | 0.011766 |
| 0.011666 | 0.011703 | 0.011664 | 0.011914 | 0.011631 | 0.012505 | 0.011666 |
| 0.012405 | 0.012173 | 0.012307 | 0.012578 | 0.011631 | 0.011329 | 0.011631 |
| 0.012070 | 0.012004 | 0.011597 | 0.011497 | 0.011564 | 0.011564 | 0.011534 |
| 0.011429 | 0.011433 | 0.011496 | 0.011464 | 0.011833 | 0.011900 | 0.011901 |
| 0.011800 | 0.011901 | 0.012004 | 0.011770 | 0.012070 | 0.012076 | 0.012137 |
| 0.012138 | 0.012171 | 0.012050 | 0.012138 | 0.012139 | 0.011362 | 0.011665 |
| 0.011733 | 0.012236 | 0.011738 | 0.011967 | 0.012440 | 0.011502 | 0.011396 |
| 0.011362 | 0.011362 | 0.011833 | 0.011842 | 0.011975 | 0.011698 | 0.011363 |
| S765     | 0.011665 | 0.011665 | 0.012001 | 0.011765 | 0.011765 | 0.011832 |
| 0.011671 | 0.011604 | 0.011765 | 0.011262 | 0.011329 | 0.011296 | 0.011262 |
| 0.011295 | 0.011463 | 0.011262 | 0.011295 | 0.011362 | 0.011329 | 0.011295 |
| 0.011262 | 0.011295 | 0.011396 | 0.011262 | 0.011295 | 0.011295 | 0.011637 |
| 0.011530 | 0.011295 | 0.011195 | 0.011429 | 0.011362 | 0.011329 | 0.011362 |
| 0.011329 | 0.011429 | 0.011329 | 0.011329 | 0.011362 | 0.011329 | 0.011497 |
| 0.011262 | 0.011329 | 0.011362 | 0.011295 | 0.011396 | 0.011362 | 0.011362 |
| 0.011329 | 0.011497 | 0.011396 | 0.011664 | 0.011329 | 0.011530 | 0.011329 |
| 0.011295 | 0.011396 | 0.011463 | 0.011530 | 0.011698 | 0.011396 | 0.011497 |
| 0.011362 | 0.011429 | 0.011329 | 0.011564 | 0.011799 | 0.011329 | 0.011396 |
| 0.011295 | 0.011396 | 0.011362 | 0.011429 | 0.011362 | 0.011362 | 0.011362 |
| 0.011262 | 0.011295 | 0.011262 | 0.011362 | 0.011329 | 0.011363 | 0.011429 |
| 0.011362 | 0.011329 | 0.011396 | 0.011295 | 0.011429 | 0.011262 | 0.011329 |
| 0.011497 | 0.011429 | 0.011664 | 0.011497 | 0.011329 | 0.011564 | 0.011329 |
| 0.011505 | 0.011733 | 0.011475 | 0.011216 | 0.011172 | 0.011355 | 0.011375 |
| 0.012048 | 0.011416 | 0.011143 | 0.011362 | 0.011362 | 0.011362 | 0.011463 |
| 0.011396 | 0.011362 | 0.011429 | 0.011329 | 0.011429 | 0.011362 | 0.011362 |
| 0.011329 | 0.011429 | 0.011631 | 0.011496 | 0.011396 | 0.011362 | 0.011295 |
| 0.011262 | 0.011262 | 0.011329 | 0.011295 | 0.011497 | 0.011463 | 0.011396 |
| 0.011497 | 0.011564 | 0.011295 | 0.011295 | 0.011329 | 0.011329 | 0.011330 |
| 0.011398 | 0.011329 | 0.011329 | 0.011204 | 0.011205 | 0.011236 | 0.011329 |
| 0.011331 | 0.011266 | 0.011245 | 0.011302 | 0.011230 | 0.011266 | 0.011297 |
| 0.011528 | 0.011336 | 0.011336 | 0.011262 | 0.011233 | 0.011397 | 0.011363 |
| 0.011430 | 0.011363 | 0.011363 | 0.011463 | 0.011396 | 0.011765 | 0.011564 |
| 0.011597 | 0.011463 | 0.011329 | 0.011430 | 0.011228 | 0.011463 | 0.011262 |
| 0.011329 | 0.011329 | 0.011295 | 0.011262 | 0.011295 | 0.011262 | 0.011362 |
| 0.011329 | 0.011429 | 0.011362 | 0.011262 | 0.011363 | 0.011463 | 0.011466 |
| 0.011463 | 0.011362 | 0.011262 | 0.011195 | 0.011329 | 0.011262 | 0.011195 |
| 0.011298 | 0.011463 | 0.011262 | 0.011463 | 0.011161 | 0.011329 | 0.011228 |
| 0.011396 | 0.011295 | 0.011329 | 0.011228 | 0.011262 | 0.011195 | 0.011329 |

|          |          |          |          |          |          |          |
|----------|----------|----------|----------|----------|----------|----------|
| 0.011362 | 0.011295 | 0.011362 | 0.011295 | 0.011329 | 0.011362 | 0.011597 |
| 0.011698 | 0.011631 | 0.011698 | 0.011397 | 0.011698 | 0.011329 | 0.011295 |
| 0.011330 | 0.011626 | 0.011380 | 0.011197 | 0.011705 | 0.011197 | 0.011336 |
| 0.011705 | 0.011604 | 0.011295 | 0.011698 | 0.011402 | 0.011362 | 0.011530 |
| 0.011463 | 0.011429 | 0.011487 | 0.011184 | 0.011354 | 0.011362 | 0.011432 |
| 0.011530 | 0.011431 | 0.011432 | 0.011635 | 0.011564 | 0.011631 | 0.011738 |
| 0.011466 | 0.011637 | 0.011568 | 0.011500 | 0.011767 | 0.011228 | 0.011431 |
| 0.011396 | 0.011329 | 0.011228 | 0.011228 | 0.011295 | 0.011295 | 0.011362 |
| 0.011295 | 0.011362 | 0.011262 | 0.011362 | 0.011295 | 0.011295 | 0.011362 |
| 0.011295 | 0.011732 | 0.011631 | 0.011664 | 0.011195 | 0.011295 | 0.011329 |
| 0.011329 | 0.011228 | 0.011362 | 0.011396 | 0.011262 | 0.011262 | 0.011262 |
| 0.011799 | 0.011429 | 0.011429 | 0.011228 | 0.011329 | 0.011497 | 0.011262 |
| 0.011262 | 0.011329 | 0.011295 | 0.011463 | 0.011262 | 0.011396 | 0.011530 |
| 0.011463 | 0.011295 | 0.011295 | 0.011228 | 0.011228 | 0.011396 | 0.011329 |
| 0.011228 | 0.011329 | 0.011195 | 0.011228 | 0.011362 | 0.011497 | 0.011262 |
| 0.011228 | 0.011362 | 0.011295 | 0.011195 | 0.011530 | 0.011195 | 0.011362 |
| 0.011437 | 0.011262 | 0.011564 | 0.011396 | 0.011429 | 0.011295 | 0.011396 |
| 0.011262 | 0.011530 | 0.011195 | 0.011463 | 0.011262 | 0.011262 | 0.011195 |
| 0.011429 | 0.011631 | 0.011329 | 0.011396 | 0.011228 | 0.011631 | 0.011262 |
| 0.011262 | 0.011262 | 0.011295 | 0.011396 | 0.011295 | 0.011396 | 0.011463 |
| 0.011463 | 0.011362 | 0.011329 | 0.011430 | 0.011396 | 0.011262 | 0.011228 |
| 0.011262 | 0.011262 | 0.011329 | 0.011262 | 0.011228 | 0.011396 | 0.011262 |
| 0.011295 | 0.011295 | 0.011429 | 0.011463 | 0.011362 | 0.011295 | 0.011295 |
| 0.011362 | 0.011295 | 0.011396 | 0.011262 | 0.011396 | 0.011295 | 0.011799 |
| 0.011295 | 0.011698 | 0.011302 | 0.017710 | 0.011126 | 0.011488 | 0.011653 |
| 0.011614 | 0.011658 | 0.011270 | 0.011234 | 0.011664 | 0.011682 | 0.011364 |
| 0.011440 | 0.011487 | 0.011177 | 0.011270 | 0.011216 | 0.011307 | 0.011318 |
| 0.011436 | 0.011395 | 0.011431 | 0.011193 | 0.011429 | 0.011463 | 0.011466 |
| 0.011335 | 0.011429 | 0.011362 | 0.011396 | 0.011362 | 0.011363 | 0.011329 |
| 0.011295 | 0.011295 | 0.000000 | 0.011362 | 0.011329 | 0.011262 | 0.011295 |
| 0.011295 | 0.011362 | 0.011262 | 0.011362 | 0.011396 | 0.011429 | 0.011329 |
| 0.011362 | 0.011329 | 0.011665 | 0.011665 | 0.011396 | 0.011430 | 0.011463 |
| 0.011228 | 0.011228 | 0.011262 | 0.011362 | 0.011228 | 0.011463 | 0.011463 |
| 0.011295 | 0.011295 | 0.011429 | 0.011329 | 0.011698 | 0.011330 | 0.011362 |
| 0.011161 | 0.011429 | 0.011463 | 0.011295 | 0.011362 | 0.011329 | 0.011295 |
| 0.011228 | 0.011228 | 0.011262 | 0.011430 | 0.011330 | 0.011530 | 0.011497 |
| 0.011365 | 0.011262 | 0.011362 | 0.011463 | 0.011362 | 0.011497 | 0.011530 |
| 0.011698 | 0.011402 | 0.011362 | 0.011530 | 0.011463 | 0.011429 | 0.011262 |
| 0.011363 | 0.011329 | 0.011295 | 0.011295 | 0.011362 | 0.011262 | 0.011362 |
| 0.011396 | 0.011429 | 0.011329 | 0.011362 | 0.011329 | 0.011665 | 0.011665 |
| 0.011396 | 0.011430 | 0.011496 | 0.011429 | 0.012069 | 0.011310 | 0.011412 |
| 0.011482 | 0.011303 | 0.011552 | 0.011441 | 0.011410 | 0.011474 | 0.011302 |
| 0.012022 | 0.011337 | 0.011471 | 0.011406 | 0.011680 | 0.011536 | 0.011639 |
| 0.012046 | 0.011512 | 0.011534 | 0.011564 | 0.011530 | 0.011530 | 0.011499 |
| 0.011228 | 0.011396 | 0.011530 | 0.011496 | 0.011499 | 0.011496 | 0.011464 |
| 0.011329 | 0.011262 | 0.011295 | 0.011329 | 0.011228 | 0.011295 | 0.011195 |
| 0.011329 | 0.011362 | 0.011262 | 0.011228 | 0.011329 | 0.011262 | 0.011295 |
| 0.011295 | 0.011228 | 0.011295 | 0.011329 | 0.011228 | 0.011429 | 0.011463 |
| 0.011362 | 0.011429 | 0.011362 | 0.011362 | 0.011295 | 0.011698 | 0.011329 |
| 0.011373 | 0.011295 | 0.011531 | 0.011535 | 0.011396 | 0.011396 | 0.011396 |
| 0.011396 | 0.011329 | 0.011295 | 0.011329 | 0.011429 | 0.011429 | 0.011362 |
| 0.011362 | 0.011497 | 0.011664 | 0.011329 | 0.011597 | 0.011597 | 0.011463 |
| 0.011295 | 0.011362 | 0.011396 | 0.011799 | 0.011363 | 0.011396 | 0.011362 |
| 0.011195 | 0.011329 | 0.011329 | 0.011564 | 0.011564 | 0.011530 | 0.011329 |
| 0.011429 | 0.011497 | 0.011362 | 0.011429 | 0.011396 | 0.011262 | 0.011597 |
| 0.011362 | 0.011329 | 0.011329 | 0.011497 | 0.011329 | 0.011429 | 0.011665 |
| 0.011362 | 0.011739 | 0.011732 | 0.011467 | 0.011117 | 0.011434 | 0.011215 |
| 0.011280 | 0.011683 | 0.011236 | 0.011373 | 0.011255 | 0.011366 | 0.011326 |
| 0.011417 | 0.000000 | 0.011283 | 0.000000 | 0.011168 | 0.011261 | 0.011344 |
| 0.011437 | 0.011257 | 0.011412 | 0.011342 | 0.011364 | 0.011497 | 0.011564 |

|          |          |          |          |          |          |          |
|----------|----------|----------|----------|----------|----------|----------|
| 0.011564 | 0.011430 | 0.011533 | 0.011535 | 0.011670 | 0.011696 | 0.011362 |
| 0.011597 | 0.011463 | 0.011329 | 0.011430 | 0.011228 | 0.011463 | 0.011262 |
| 0.011329 | 0.011329 | 0.011295 | 0.011262 | 0.011295 | 0.011262 | 0.011362 |
| 0.011165 | 0.011305 | 0.011334 | 0.011368 | 0.011505 | 0.011470 | 0.011402 |
| 0.011469 | 0.011396 | 0.011171 | 0.011132 | 0.011331 | 0.011501 | 0.011501 |
| 0.011296 | 0.011365 | 0.011599 | 0.011567 | 0.011296 | 0.011531 | 0.011463 |
| 0.011396 | 0.011463 | 0.011463 | 0.011362 | 0.011934 | 0.011262 | 0.011396 |
| 0.011631 | 0.011665 | 0.011333 | 0.011407 | 0.011295 | 0.011497 | 0.011463 |
| 0.011497 | 0.011530 | 0.011329 | 0.011329 | 0.011689 | 0.011664 | 0.011303 |
| 0.011195 | 0.011199 | 0.011299 | 0.011264 | 0.011368 | 0.011210 | 0.011536 |
| 0.011335 | 0.011455 | 0.011203 | 0.011360 | 0.011329 | 0.011402 | 0.011295 |
| 0.011262 | 0.011262 | 0.011329 | 0.011295 | 0.011497 | 0.011463 | 0.011396 |
| 0.011497 | 0.011564 | 0.011295 | 0.011295 | 0.011329 | 0.011329 | 0.011330 |
| 0.011398 | 0.011329 | 0.011329 | 0.011364 | 0.011497 | 0.011564 | 0.011564 |
| 0.011430 | 0.011533 | 0.011535 | 0.011670 | 0.011696 | 0.011362 | 0.011530 |
| 0.011463 | 0.011463 | 0.011297 | 0.011443 | 0.011408 | 0.011435 | 0.011305 |
| 0.011473 | 0.011698 | 0.011441 | 0.011366 | 0.011262 | 0.011463 | 0.011329 |
| 0.011429 | 0.011362 | 0.011262 | 0.011363 | 0.011463 | 0.011466 | 0.011362 |
| 0.011262 | 0.011195 | 0.011329 | 0.011262 | 0.011195 | 0.011298 | 0.011463 |
| 0.011295 | 0.011295 | 0.000000 | 0.011362 | 0.011329 | 0.011262 | 0.011463 |
| 0.011329 | 0.011362 | 0.011362 | 0.011295 | 0.011362 | 0.011597 | 0.011262 |
| 0.011295 | 0.011698 | 0.011295 | 0.011329 | 0.011295 | 0.011664 | 0.011146 |
| 0.011566 | 0.011188 | 0.011211 | 0.011422 | 0.011508 | 0.011455 | 0.011144 |
| 0.011165 | 0.011463 | 0.011564 | 0.011671 | 0.011531 | 0.011669 | 0.011800 |
| 0.011699 | 0.011737 | 0.011698 | 0.011949 | 0.011664 | 0.012539 | 0.011700 |
| 0.012372 | 0.012207 | 0.012341 | 0.012612 | 0.011664 | 0.011362 | 0.011665 |
| 0.012103 | 0.012038 | 0.011631 | 0.011530 | 0.011598 | 0.011598 | 0.011500 |
| 0.011463 | 0.011467 | 0.011530 | 0.011497 | 0.011867 | 0.011933 | 0.011935 |
| 0.011834 | 0.011934 | 0.012038 | 0.011804 | 0.012104 | 0.012110 | 0.012171 |
| 0.012172 | 0.012205 | 0.012152 | 0.012172 | 0.012173 | 0.011396 | 0.011699 |
| 0.011766 | 0.012270 | 0.011772 | 0.012001 | 0.012474 | 0.011536 | 0.011430 |
| 0.011362 | 0.011396 | 0.011867 | 0.011924 | 0.012010 | 0.011732 | 0.011397 |
| S766     | 0.011698 | 0.011698 | 0.012035 | 0.011799 | 0.011799 | 0.011866 |
| 0.011706 | 0.011638 | 0.011799 | 0.011295 | 0.011362 | 0.011329 | 0.011295 |
| 0.011329 | 0.011497 | 0.011295 | 0.011329 | 0.011396 | 0.011362 | 0.011329 |
| 0.011295 | 0.011329 | 0.011429 | 0.011296 | 0.011329 | 0.011329 | 0.011672 |
| 0.011564 | 0.011329 | 0.011228 | 0.011463 | 0.011396 | 0.011362 | 0.011396 |
| 0.011362 | 0.011463 | 0.011362 | 0.011362 | 0.011396 | 0.011362 | 0.011530 |
| 0.011295 | 0.011362 | 0.011396 | 0.011329 | 0.011430 | 0.011463 | 0.011396 |
| 0.011362 | 0.011530 | 0.011430 | 0.011698 | 0.011362 | 0.011631 | 0.011362 |
| 0.011329 | 0.011430 | 0.011497 | 0.011631 | 0.011732 | 0.011430 | 0.011530 |
| 0.011396 | 0.011463 | 0.011362 | 0.011597 | 0.011833 | 0.011362 | 0.011430 |
| 0.011329 | 0.011429 | 0.011396 | 0.011463 | 0.011396 | 0.011396 | 0.011396 |
| 0.011295 | 0.011329 | 0.011295 | 0.011396 | 0.011362 | 0.011397 | 0.011463 |
| 0.011396 | 0.011362 | 0.011430 | 0.011329 | 0.011463 | 0.011295 | 0.011362 |
| 0.011530 | 0.011463 | 0.011698 | 0.011530 | 0.011362 | 0.011598 | 0.011362 |
| 0.011542 | 0.011770 | 0.011588 | 0.011295 | 0.011284 | 0.011391 | 0.011493 |
| 0.012121 | 0.011569 | 0.011307 | 0.011597 | 0.011597 | 0.011396 | 0.011497 |
| 0.011430 | 0.011396 | 0.011463 | 0.011362 | 0.011463 | 0.011396 | 0.011396 |
| 0.011362 | 0.011463 | 0.011665 | 0.011530 | 0.011430 | 0.011396 | 0.011329 |
| 0.011295 | 0.011295 | 0.011362 | 0.011329 | 0.011530 | 0.011497 | 0.011429 |
| 0.011530 | 0.011597 | 0.011329 | 0.011329 | 0.011362 | 0.011362 | 0.011364 |
| 0.011398 | 0.011362 | 0.011295 | 0.011240 | 0.011313 | 0.011271 | 0.011363 |
| 0.011365 | 0.011301 | 0.011355 | 0.011336 | 0.011264 | 0.011300 | 0.011330 |
| 0.011600 | 0.011370 | 0.011405 | 0.011296 | 0.011302 | 0.011430 | 0.011396 |
| 0.011464 | 0.011397 | 0.011396 | 0.011497 | 0.011429 | 0.011799 | 0.011598 |
| 0.011631 | 0.011497 | 0.011362 | 0.011463 | 0.011262 | 0.011497 | 0.011295 |
| 0.011362 | 0.011362 | 0.011329 | 0.011295 | 0.011329 | 0.011295 | 0.011329 |
| 0.011362 | 0.011463 | 0.011396 | 0.011295 | 0.011397 | 0.011497 | 0.011499 |
| 0.011497 | 0.011396 | 0.011295 | 0.011229 | 0.011362 | 0.011295 | 0.011228 |

|          |          |          |          |          |          |          |
|----------|----------|----------|----------|----------|----------|----------|
| 0.011332 | 0.011497 | 0.011295 | 0.011497 | 0.011262 | 0.011362 | 0.011329 |
| 0.011430 | 0.011329 | 0.011362 | 0.011329 | 0.011362 | 0.011228 | 0.011362 |
| 0.011329 | 0.011329 | 0.011396 | 0.011329 | 0.011362 | 0.011396 | 0.011631 |
| 0.011732 | 0.011665 | 0.011732 | 0.011498 | 0.011732 | 0.011362 | 0.011329 |
| 0.011364 | 0.011667 | 0.011472 | 0.011266 | 0.011739 | 0.011231 | 0.011336 |
| 0.011739 | 0.011638 | 0.011530 | 0.011732 | 0.011436 | 0.011598 | 0.011564 |
| 0.011497 | 0.011665 | 0.011522 | 0.011349 | 0.011438 | 0.011396 | 0.011466 |
| 0.011564 | 0.011465 | 0.011601 | 0.011670 | 0.011598 | 0.011665 | 0.011772 |
| 0.011500 | 0.011671 | 0.011602 | 0.011534 | 0.011733 | 0.011262 | 0.011465 |
| 0.011429 | 0.011362 | 0.011262 | 0.011262 | 0.011329 | 0.011329 | 0.011396 |
| 0.011329 | 0.011396 | 0.011295 | 0.011396 | 0.011329 | 0.011329 | 0.011396 |
| 0.011329 | 0.011765 | 0.011665 | 0.011698 | 0.011228 | 0.011329 | 0.011362 |
| 0.011362 | 0.011329 | 0.011396 | 0.011430 | 0.011295 | 0.011295 | 0.011295 |
| 0.011833 | 0.011463 | 0.011463 | 0.011262 | 0.011362 | 0.011530 | 0.011295 |
| 0.011295 | 0.011362 | 0.011329 | 0.011497 | 0.011295 | 0.011430 | 0.011564 |
| 0.011429 | 0.011329 | 0.011329 | 0.011262 | 0.011262 | 0.011430 | 0.011362 |
| 0.011262 | 0.011362 | 0.011228 | 0.011262 | 0.011396 | 0.011531 | 0.011295 |
| 0.011195 | 0.011396 | 0.011329 | 0.011228 | 0.011564 | 0.011228 | 0.011396 |
| 0.011471 | 0.011295 | 0.011598 | 0.011430 | 0.011463 | 0.011329 | 0.011430 |
| 0.011295 | 0.011631 | 0.011228 | 0.011497 | 0.011295 | 0.011295 | 0.011228 |
| 0.011463 | 0.011665 | 0.011362 | 0.011430 | 0.011262 | 0.011665 | 0.011295 |
| 0.011295 | 0.011295 | 0.011329 | 0.011430 | 0.011329 | 0.011430 | 0.011497 |
| 0.011497 | 0.011463 | 0.011362 | 0.011463 | 0.011429 | 0.011295 | 0.011262 |
| 0.011295 | 0.011295 | 0.011362 | 0.011295 | 0.011262 | 0.011430 | 0.011295 |
| 0.011329 | 0.011329 | 0.011463 | 0.011497 | 0.011396 | 0.011329 | 0.011329 |
| 0.011396 | 0.011329 | 0.011429 | 0.011295 | 0.011430 | 0.011530 | 0.011833 |
| 0.011329 | 0.011732 | 0.011336 | 0.017861 | 0.011322 | 0.011488 | 0.011688 |
| 0.011648 | 0.011693 | 0.011479 | 0.011466 | 0.011774 | 0.011716 | 0.011485 |
| 0.011629 | 0.011610 | 0.011255 | 0.011353 | 0.011333 | 0.011356 | 0.011361 |
| 0.011576 | 0.011507 | 0.011505 | 0.011325 | 0.011463 | 0.011497 | 0.011500 |
| 0.011369 | 0.011463 | 0.011463 | 0.011429 | 0.011396 | 0.011396 | 0.011363 |
| 0.011396 | 0.011329 | 0.011362 | 0.000000 | 0.011362 | 0.011295 | 0.011329 |
| 0.011329 | 0.011396 | 0.011295 | 0.011396 | 0.011430 | 0.011463 | 0.011362 |
| 0.011396 | 0.011362 | 0.011698 | 0.011698 | 0.011430 | 0.011464 | 0.011497 |
| 0.011262 | 0.011262 | 0.011295 | 0.011396 | 0.011262 | 0.011497 | 0.011497 |
| 0.011530 | 0.011530 | 0.011463 | 0.011564 | 0.011732 | 0.011565 | 0.011396 |
| 0.011396 | 0.011463 | 0.011497 | 0.011329 | 0.011396 | 0.011362 | 0.011396 |
| 0.011463 | 0.011463 | 0.011497 | 0.011463 | 0.011363 | 0.011564 | 0.011530 |
| 0.011399 | 0.011295 | 0.011396 | 0.011497 | 0.011396 | 0.011530 | 0.011564 |
| 0.011732 | 0.011436 | 0.011598 | 0.011564 | 0.011497 | 0.011665 | 0.011295 |
| 0.011464 | 0.011363 | 0.011329 | 0.011329 | 0.011396 | 0.011295 | 0.011396 |
| 0.011430 | 0.011463 | 0.011362 | 0.011396 | 0.011362 | 0.011698 | 0.011698 |
| 0.011430 | 0.011464 | 0.011530 | 0.011463 | 0.012103 | 0.011525 | 0.011447 |
| 0.011517 | 0.011476 | 0.011587 | 0.011476 | 0.011585 | 0.011509 | 0.011474 |
| 0.012056 | 0.011372 | 0.011506 | 0.011441 | 0.011715 | 0.011571 | 0.011673 |
| 0.012081 | 0.011512 | 0.011365 | 0.011396 | 0.011396 | 0.011429 | 0.011331 |
| 0.011262 | 0.011295 | 0.011430 | 0.011396 | 0.011364 | 0.011530 | 0.011498 |
| 0.011362 | 0.011295 | 0.011329 | 0.011362 | 0.011262 | 0.011329 | 0.011228 |
| 0.011362 | 0.011396 | 0.011295 | 0.011262 | 0.011362 | 0.011295 | 0.011329 |
| 0.011329 | 0.011262 | 0.011329 | 0.011362 | 0.011262 | 0.011463 | 0.011497 |
| 0.011396 | 0.011463 | 0.011396 | 0.011396 | 0.011329 | 0.011732 | 0.011362 |
| 0.011408 | 0.011329 | 0.011564 | 0.011569 | 0.011430 | 0.011429 | 0.011430 |
| 0.011430 | 0.011362 | 0.011329 | 0.011362 | 0.011463 | 0.011463 | 0.011396 |
| 0.011396 | 0.011530 | 0.011698 | 0.011429 | 0.011631 | 0.011631 | 0.011497 |
| 0.011329 | 0.011396 | 0.011430 | 0.011833 | 0.011396 | 0.011430 | 0.011396 |
| 0.011430 | 0.011362 | 0.011362 | 0.011665 | 0.011598 | 0.011631 | 0.011362 |
| 0.011463 | 0.011530 | 0.011396 | 0.011463 | 0.011430 | 0.011295 | 0.011631 |
| 0.011396 | 0.011362 | 0.011362 | 0.011530 | 0.011362 | 0.011463 | 0.011698 |
| 0.011396 | 0.011774 | 0.011765 | 0.011589 | 0.011286 | 0.011468 | 0.011421 |
| 0.011280 | 0.011800 | 0.011306 | 0.011551 | 0.011353 | 0.011467 | 0.011432 |

|          |          |          |          |          |          |          |
|----------|----------|----------|----------|----------|----------|----------|
| 0.011570 | 0.011324 | 0.011506 | 0.011324 | 0.011384 | 0.011462 | 0.011466 |
| 0.011475 | 0.011375 | 0.011448 | 0.011377 | 0.011330 | 0.011530 | 0.011597 |
| 0.011597 | 0.011464 | 0.011567 | 0.011569 | 0.011704 | 0.011732 | 0.011396 |
| 0.011631 | 0.011497 | 0.011362 | 0.011463 | 0.011262 | 0.011497 | 0.011295 |
| 0.011362 | 0.011362 | 0.011329 | 0.011295 | 0.011329 | 0.011295 | 0.011329 |
| 0.011375 | 0.011375 | 0.011368 | 0.011403 | 0.011539 | 0.011504 | 0.011504 |
| 0.011503 | 0.011430 | 0.011171 | 0.011240 | 0.011365 | 0.011535 | 0.011535 |
| 0.011329 | 0.011399 | 0.011632 | 0.011601 | 0.011531 | 0.011565 | 0.011497 |
| 0.011429 | 0.011497 | 0.011497 | 0.011396 | 0.011967 | 0.011564 | 0.011631 |
| 0.011665 | 0.011737 | 0.011367 | 0.011407 | 0.011329 | 0.011530 | 0.011497 |
| 0.011531 | 0.011564 | 0.011564 | 0.011564 | 0.011729 | 0.011698 | 0.011338 |
| 0.011229 | 0.011233 | 0.011333 | 0.011298 | 0.011402 | 0.011210 | 0.011570 |
| 0.011335 | 0.011411 | 0.011156 | 0.011360 | 0.011363 | 0.011437 | 0.011329 |
| 0.011295 | 0.011295 | 0.011362 | 0.011329 | 0.011530 | 0.011497 | 0.011429 |
| 0.011530 | 0.011597 | 0.011329 | 0.011329 | 0.011362 | 0.011362 | 0.011364 |
| 0.011398 | 0.011362 | 0.011295 | 0.011330 | 0.011530 | 0.011597 | 0.011597 |
| 0.011464 | 0.011567 | 0.011569 | 0.011704 | 0.011732 | 0.011396 | 0.011564 |
| 0.011497 | 0.011497 | 0.011331 | 0.011513 | 0.011442 | 0.011469 | 0.011340 |
| 0.011508 | 0.011698 | 0.011441 | 0.011400 | 0.011295 | 0.011497 | 0.011362 |
| 0.011463 | 0.011396 | 0.011295 | 0.011397 | 0.011497 | 0.011499 | 0.011396 |
| 0.011295 | 0.011229 | 0.011362 | 0.011295 | 0.011228 | 0.011332 | 0.011497 |
| 0.011396 | 0.011329 | 0.011362 | 0.000000 | 0.011362 | 0.011295 | 0.011497 |
| 0.011362 | 0.011396 | 0.011396 | 0.011329 | 0.011396 | 0.011631 | 0.011295 |
| 0.011329 | 0.011732 | 0.011329 | 0.011362 | 0.011329 | 0.011698 | 0.011317 |
| 0.011735 | 0.011315 | 0.011361 | 0.011543 | 0.011630 | 0.011527 | 0.011269 |
| 0.011323 | 0.011497 | 0.011597 | 0.011705 | 0.011565 | 0.011703 | 0.011834 |
| 0.011733 | 0.011771 | 0.011732 | 0.011983 | 0.011698 | 0.012573 | 0.011734 |
| 0.012473 | 0.012241 | 0.012375 | 0.012646 | 0.011698 | 0.011396 | 0.011699 |
| 0.012137 | 0.012072 | 0.011665 | 0.011564 | 0.011632 | 0.011632 | 0.011602 |
| 0.011497 | 0.011501 | 0.011564 | 0.011531 | 0.011901 | 0.011967 | 0.011968 |
| 0.011868 | 0.011968 | 0.012072 | 0.011838 | 0.012138 | 0.012144 | 0.012205 |
| 0.012205 | 0.012239 | 0.012186 | 0.012206 | 0.012207 | 0.011429 | 0.011732 |
| 0.011800 | 0.012304 | 0.011806 | 0.012035 | 0.012508 | 0.011570 | 0.011464 |
| 0.011429 | 0.011429 | 0.011900 | 0.011924 | 0.012045 | 0.011765 | 0.011431 |
| S767     | 0.011665 | 0.011665 | 0.012001 | 0.011766 | 0.011766 | 0.011833 |
| 0.011672 | 0.011604 | 0.011766 | 0.011262 | 0.011329 | 0.011296 | 0.011262 |
| 0.011295 | 0.011463 | 0.011262 | 0.011295 | 0.011362 | 0.011329 | 0.011295 |
| 0.011262 | 0.011295 | 0.011396 | 0.011262 | 0.011296 | 0.011295 | 0.011638 |
| 0.011530 | 0.011295 | 0.011195 | 0.011430 | 0.011362 | 0.011329 | 0.011363 |
| 0.011329 | 0.011430 | 0.011329 | 0.011329 | 0.011362 | 0.011329 | 0.011497 |
| 0.011262 | 0.011329 | 0.011362 | 0.011295 | 0.011396 | 0.011430 | 0.011362 |
| 0.011329 | 0.011497 | 0.011396 | 0.011665 | 0.011329 | 0.011598 | 0.011329 |
| 0.011295 | 0.011396 | 0.011463 | 0.011598 | 0.011698 | 0.011396 | 0.011497 |
| 0.011362 | 0.011430 | 0.011329 | 0.011564 | 0.011799 | 0.011329 | 0.011396 |
| 0.011295 | 0.011396 | 0.011362 | 0.011430 | 0.011362 | 0.011362 | 0.011362 |
| 0.011262 | 0.011295 | 0.011262 | 0.011363 | 0.011329 | 0.011363 | 0.011430 |
| 0.011228 | 0.011329 | 0.011396 | 0.011295 | 0.011430 | 0.011262 | 0.011329 |
| 0.011497 | 0.011430 | 0.011665 | 0.011497 | 0.011329 | 0.011564 | 0.011329 |
| 0.011468 | 0.011695 | 0.011513 | 0.011216 | 0.011210 | 0.011318 | 0.011415 |
| 0.012048 | 0.011467 | 0.011225 | 0.011564 | 0.011564 | 0.011362 | 0.011463 |
| 0.011396 | 0.011362 | 0.011430 | 0.011329 | 0.011430 | 0.011362 | 0.011362 |
| 0.011329 | 0.011429 | 0.011631 | 0.011497 | 0.011262 | 0.011363 | 0.011295 |
| 0.011262 | 0.011262 | 0.011329 | 0.011295 | 0.011497 | 0.011463 | 0.011396 |
| 0.011497 | 0.011564 | 0.011295 | 0.011295 | 0.011329 | 0.011329 | 0.011330 |
| 0.011398 | 0.011329 | 0.011329 | 0.011168 | 0.011277 | 0.011236 | 0.011329 |
| 0.011331 | 0.011266 | 0.011282 | 0.011267 | 0.011230 | 0.011266 | 0.011297 |
| 0.011528 | 0.011336 | 0.011370 | 0.011262 | 0.011233 | 0.011397 | 0.011363 |
| 0.011430 | 0.011364 | 0.011363 | 0.011463 | 0.011396 | 0.011766 | 0.011564 |
| 0.011597 | 0.011463 | 0.011329 | 0.011430 | 0.011228 | 0.011463 | 0.011262 |
| 0.011329 | 0.011329 | 0.011295 | 0.011262 | 0.011295 | 0.011262 | 0.011362 |

|          |          |          |          |          |          |          |
|----------|----------|----------|----------|----------|----------|----------|
| 0.011329 | 0.011430 | 0.011363 | 0.011262 | 0.011363 | 0.011463 | 0.011466 |
| 0.011463 | 0.011363 | 0.011262 | 0.011195 | 0.011329 | 0.011262 | 0.011195 |
| 0.011264 | 0.011463 | 0.011262 | 0.011463 | 0.011228 | 0.000000 | 0.011295 |
| 0.011396 | 0.011295 | 0.011329 | 0.011295 | 0.011329 | 0.011195 | 0.011329 |
| 0.011363 | 0.011295 | 0.011362 | 0.011295 | 0.011329 | 0.011362 | 0.011597 |
| 0.011698 | 0.011631 | 0.011698 | 0.011465 | 0.011699 | 0.011329 | 0.011295 |
| 0.011330 | 0.011626 | 0.011426 | 0.011232 | 0.011705 | 0.011197 | 0.011336 |
| 0.011706 | 0.011604 | 0.011497 | 0.011699 | 0.011402 | 0.011564 | 0.011531 |
| 0.011463 | 0.011631 | 0.011487 | 0.011307 | 0.011354 | 0.011363 | 0.011433 |
| 0.011530 | 0.011431 | 0.011568 | 0.011636 | 0.011564 | 0.011631 | 0.011738 |
| 0.011466 | 0.011638 | 0.011568 | 0.011500 | 0.011767 | 0.011228 | 0.011431 |
| 0.011396 | 0.011329 | 0.011228 | 0.011228 | 0.011295 | 0.011295 | 0.011362 |
| 0.011295 | 0.011363 | 0.011262 | 0.011362 | 0.011295 | 0.011295 | 0.011362 |
| 0.011295 | 0.011732 | 0.011631 | 0.011665 | 0.011195 | 0.011295 | 0.011329 |
| 0.011195 | 0.011295 | 0.011363 | 0.011396 | 0.011262 | 0.011262 | 0.011262 |
| 0.011799 | 0.011430 | 0.011430 | 0.011228 | 0.011329 | 0.011497 | 0.011262 |
| 0.011262 | 0.011329 | 0.011295 | 0.011463 | 0.011262 | 0.011396 | 0.011530 |
| 0.011463 | 0.011295 | 0.011295 | 0.011228 | 0.011228 | 0.011396 | 0.011329 |
| 0.011228 | 0.011329 | 0.011195 | 0.011228 | 0.011363 | 0.011497 | 0.011262 |
| 0.011228 | 0.011362 | 0.011296 | 0.011195 | 0.011530 | 0.011195 | 0.011362 |
| 0.011437 | 0.011262 | 0.011564 | 0.011396 | 0.011430 | 0.011295 | 0.011396 |
| 0.011262 | 0.011598 | 0.011195 | 0.011463 | 0.011262 | 0.011262 | 0.011195 |
| 0.011430 | 0.011631 | 0.011329 | 0.011396 | 0.011228 | 0.011631 | 0.011262 |
| 0.011262 | 0.011262 | 0.011295 | 0.011396 | 0.011295 | 0.011396 | 0.011463 |
| 0.011463 | 0.011430 | 0.011329 | 0.011430 | 0.011396 | 0.011262 | 0.011228 |
| 0.011262 | 0.011262 | 0.011329 | 0.011262 | 0.011228 | 0.011396 | 0.011262 |
| 0.011295 | 0.011295 | 0.011430 | 0.011463 | 0.011362 | 0.011295 | 0.011295 |
| 0.011362 | 0.011295 | 0.011396 | 0.011262 | 0.011396 | 0.011497 | 0.011799 |
| 0.011295 | 0.011698 | 0.011267 | 0.017785 | 0.011322 | 0.011427 | 0.011618 |
| 0.011579 | 0.011623 | 0.011322 | 0.011234 | 0.011719 | 0.011647 | 0.011364 |
| 0.011535 | 0.011549 | 0.011177 | 0.011270 | 0.011255 | 0.011357 | 0.011275 |
| 0.011529 | 0.011433 | 0.011431 | 0.011193 | 0.011295 | 0.011463 | 0.011466 |
| 0.011335 | 0.011430 | 0.011430 | 0.011396 | 0.011363 | 0.011363 | 0.011329 |
| 0.011362 | 0.011295 | 0.011329 | 0.011362 | 0.000000 | 0.011262 | 0.011295 |
| 0.011295 | 0.011362 | 0.011262 | 0.011363 | 0.011396 | 0.011430 | 0.011329 |
| 0.011362 | 0.011329 | 0.011665 | 0.011665 | 0.011396 | 0.011430 | 0.011463 |
| 0.011228 | 0.011228 | 0.011262 | 0.011363 | 0.011228 | 0.011463 | 0.011463 |
| 0.011497 | 0.011497 | 0.011295 | 0.011530 | 0.011698 | 0.011532 | 0.011363 |
| 0.011362 | 0.011430 | 0.011463 | 0.011295 | 0.011362 | 0.011329 | 0.011363 |
| 0.011430 | 0.011430 | 0.011463 | 0.011430 | 0.011330 | 0.011530 | 0.011497 |
| 0.011365 | 0.011262 | 0.011362 | 0.011463 | 0.011363 | 0.011497 | 0.011530 |
| 0.011699 | 0.011402 | 0.011564 | 0.011531 | 0.011463 | 0.011631 | 0.011262 |
| 0.011431 | 0.011329 | 0.011295 | 0.011295 | 0.011362 | 0.011262 | 0.011363 |
| 0.011396 | 0.011430 | 0.011329 | 0.011362 | 0.011329 | 0.011665 | 0.011665 |
| 0.011396 | 0.011430 | 0.011497 | 0.011430 | 0.012070 | 0.011489 | 0.011412 |
| 0.011482 | 0.011442 | 0.011552 | 0.011441 | 0.011550 | 0.011474 | 0.011440 |
| 0.012022 | 0.011337 | 0.011471 | 0.011406 | 0.011680 | 0.011537 | 0.011639 |
| 0.012047 | 0.011513 | 0.011365 | 0.011362 | 0.011362 | 0.011396 | 0.011331 |
| 0.011228 | 0.011262 | 0.011396 | 0.011362 | 0.011364 | 0.011497 | 0.011464 |
| 0.011329 | 0.011262 | 0.011295 | 0.011329 | 0.011228 | 0.011295 | 0.011195 |
| 0.011329 | 0.011362 | 0.011262 | 0.011228 | 0.011329 | 0.011262 | 0.011295 |
| 0.011295 | 0.011228 | 0.011295 | 0.011329 | 0.011228 | 0.011430 | 0.011463 |
| 0.011363 | 0.011430 | 0.011362 | 0.011363 | 0.011295 | 0.011698 | 0.011329 |
| 0.011373 | 0.011295 | 0.011531 | 0.011535 | 0.011396 | 0.011396 | 0.011396 |
| 0.011396 | 0.011329 | 0.011295 | 0.011329 | 0.011430 | 0.011430 | 0.011228 |
| 0.011362 | 0.011497 | 0.011665 | 0.011396 | 0.011598 | 0.011598 | 0.011463 |
| 0.011295 | 0.011362 | 0.011396 | 0.011799 | 0.011363 | 0.011396 | 0.011228 |
| 0.011396 | 0.011329 | 0.011329 | 0.011631 | 0.011564 | 0.011598 | 0.011329 |
| 0.011430 | 0.011497 | 0.011362 | 0.011430 | 0.011396 | 0.011262 | 0.011598 |
| 0.011362 | 0.011329 | 0.011329 | 0.011497 | 0.011329 | 0.011430 | 0.011665 |

|          |          |          |          |          |          |          |
|----------|----------|----------|----------|----------|----------|----------|
| 0.011362 | 0.011740 | 0.011732 | 0.011507 | 0.011286 | 0.011400 | 0.011267 |
| 0.011225 | 0.011722 | 0.011236 | 0.011462 | 0.011304 | 0.011417 | 0.011432 |
| 0.011519 | 0.011258 | 0.011394 | 0.011258 | 0.011276 | 0.011462 | 0.011385 |
| 0.011399 | 0.011296 | 0.011377 | 0.011307 | 0.011364 | 0.011497 | 0.011564 |
| 0.011564 | 0.011430 | 0.011534 | 0.011535 | 0.011670 | 0.011696 | 0.011363 |
| 0.011597 | 0.011463 | 0.011329 | 0.011430 | 0.011228 | 0.011463 | 0.011262 |
| 0.011329 | 0.011329 | 0.011295 | 0.011262 | 0.011295 | 0.011262 | 0.011362 |
| 0.011340 | 0.011340 | 0.011300 | 0.011368 | 0.011505 | 0.011470 | 0.011470 |
| 0.011469 | 0.011396 | 0.011171 | 0.011168 | 0.011331 | 0.011501 | 0.011501 |
| 0.011296 | 0.011365 | 0.011599 | 0.011567 | 0.011497 | 0.011531 | 0.011463 |
| 0.011396 | 0.011463 | 0.011463 | 0.011362 | 0.011934 | 0.011530 | 0.011598 |
| 0.011631 | 0.011701 | 0.011333 | 0.011303 | 0.011295 | 0.011497 | 0.011463 |
| 0.011498 | 0.011530 | 0.011530 | 0.011530 | 0.011689 | 0.011665 | 0.011303 |
| 0.011196 | 0.011199 | 0.011299 | 0.011264 | 0.011368 | 0.011210 | 0.011536 |
| 0.011335 | 0.011499 | 0.011251 | 0.011360 | 0.011329 | 0.011402 | 0.011295 |
| 0.011262 | 0.011262 | 0.011329 | 0.011295 | 0.011497 | 0.011463 | 0.011396 |
| 0.011497 | 0.011564 | 0.011295 | 0.011295 | 0.011329 | 0.011329 | 0.011330 |
| 0.011398 | 0.011329 | 0.011329 | 0.011364 | 0.011497 | 0.011564 | 0.011564 |
| 0.011430 | 0.011534 | 0.011535 | 0.011670 | 0.011696 | 0.011363 | 0.011530 |
| 0.011463 | 0.011463 | 0.011297 | 0.011478 | 0.011408 | 0.011435 | 0.011305 |
| 0.011473 | 0.011698 | 0.011484 | 0.011366 | 0.011262 | 0.011463 | 0.011329 |
| 0.011430 | 0.011363 | 0.011262 | 0.011363 | 0.011463 | 0.011466 | 0.011363 |
| 0.011262 | 0.011195 | 0.011329 | 0.011262 | 0.011195 | 0.011264 | 0.011463 |
| 0.011362 | 0.011295 | 0.011329 | 0.011362 | 0.000000 | 0.011262 | 0.011463 |
| 0.011329 | 0.011363 | 0.011362 | 0.011295 | 0.011362 | 0.011598 | 0.011262 |
| 0.011295 | 0.011698 | 0.011295 | 0.011329 | 0.011295 | 0.011665 | 0.011232 |
| 0.011735 | 0.011230 | 0.011311 | 0.011463 | 0.011549 | 0.011455 | 0.011186 |
| 0.011270 | 0.011463 | 0.011564 | 0.011671 | 0.011532 | 0.011669 | 0.011800 |
| 0.011700 | 0.011737 | 0.011698 | 0.011949 | 0.011665 | 0.012540 | 0.011700 |
| 0.012439 | 0.012207 | 0.012341 | 0.012613 | 0.011665 | 0.011363 | 0.011665 |
| 0.012104 | 0.012038 | 0.011631 | 0.011531 | 0.011598 | 0.011598 | 0.011568 |
| 0.011463 | 0.011467 | 0.011530 | 0.011497 | 0.011867 | 0.011934 | 0.011935 |
| 0.011834 | 0.011935 | 0.012038 | 0.011804 | 0.012104 | 0.012110 | 0.012171 |
| 0.012172 | 0.012206 | 0.012118 | 0.012172 | 0.012173 | 0.011396 | 0.011699 |
| 0.011767 | 0.012270 | 0.011772 | 0.012001 | 0.012474 | 0.011536 | 0.011430 |
| 0.011396 | 0.011396 | 0.011867 | 0.011883 | 0.011975 | 0.011732 | 0.011397 |
| S768     | 0.011598 | 0.011598 | 0.011934 | 0.011698 | 0.011698 | 0.011765 |
| 0.011604 | 0.011536 | 0.011698 | 0.011195 | 0.011262 | 0.011229 | 0.011195 |
| 0.011228 | 0.011396 | 0.011195 | 0.011228 | 0.011295 | 0.011262 | 0.011228 |
| 0.011195 | 0.011228 | 0.011329 | 0.011195 | 0.011228 | 0.011228 | 0.011570 |
| 0.011463 | 0.011228 | 0.011127 | 0.011362 | 0.011295 | 0.011262 | 0.011295 |
| 0.011262 | 0.011362 | 0.011262 | 0.011262 | 0.011295 | 0.011262 | 0.011430 |
| 0.011195 | 0.011262 | 0.011295 | 0.011228 | 0.011329 | 0.011362 | 0.011295 |
| 0.011262 | 0.011430 | 0.011329 | 0.011597 | 0.011262 | 0.011530 | 0.011262 |
| 0.011228 | 0.011329 | 0.011396 | 0.011530 | 0.011631 | 0.011329 | 0.011430 |
| 0.011295 | 0.011362 | 0.011262 | 0.011497 | 0.011732 | 0.011262 | 0.011329 |
| 0.011228 | 0.011329 | 0.011295 | 0.011362 | 0.011295 | 0.011295 | 0.011295 |
| 0.011195 | 0.011228 | 0.011195 | 0.011295 | 0.011262 | 0.011296 | 0.011362 |
| 0.011295 | 0.011262 | 0.011329 | 0.011228 | 0.011362 | 0.011195 | 0.011262 |
| 0.011429 | 0.011362 | 0.011597 | 0.011430 | 0.011262 | 0.011497 | 0.011262 |
| 0.011431 | 0.011658 | 0.011475 | 0.011177 | 0.011172 | 0.011244 | 0.011375 |
| 0.012011 | 0.011467 | 0.011184 | 0.011497 | 0.011497 | 0.011295 | 0.011396 |
| 0.011329 | 0.011295 | 0.011362 | 0.011262 | 0.011362 | 0.011295 | 0.011295 |
| 0.011262 | 0.011362 | 0.011564 | 0.011429 | 0.011329 | 0.011295 | 0.011228 |
| 0.011195 | 0.011195 | 0.011262 | 0.011228 | 0.011429 | 0.011396 | 0.011329 |
| 0.011429 | 0.011497 | 0.011228 | 0.011228 | 0.011262 | 0.011262 | 0.011263 |
| 0.011331 | 0.011262 | 0.011262 | 0.011132 | 0.011205 | 0.011165 | 0.011262 |
| 0.011263 | 0.011198 | 0.011245 | 0.011233 | 0.011162 | 0.011197 | 0.011229 |
| 0.011492 | 0.011267 | 0.011301 | 0.011195 | 0.011199 | 0.011329 | 0.011296 |
| 0.011363 | 0.011296 | 0.011296 | 0.011396 | 0.011329 | 0.011698 | 0.011497 |



|          |          |          |          |          |          |          |
|----------|----------|----------|----------|----------|----------|----------|
| 0.011530 | 0.011396 | 0.011262 | 0.011362 | 0.011161 | 0.011396 | 0.011195 |
| 0.011262 | 0.011262 | 0.011228 | 0.011195 | 0.011228 | 0.011195 | 0.011295 |
| 0.011262 | 0.011362 | 0.011295 | 0.011195 | 0.011296 | 0.011396 | 0.011398 |
| 0.011396 | 0.011295 | 0.011195 | 0.011128 | 0.011262 | 0.011195 | 0.011128 |
| 0.011230 | 0.011396 | 0.011195 | 0.011396 | 0.011161 | 0.011262 | 0.011228 |
| 0.011329 | 0.011228 | 0.011262 | 0.011228 | 0.011262 | 0.011127 | 0.011262 |
| 0.011295 | 0.011228 | 0.011295 | 0.011228 | 0.011262 | 0.011295 | 0.011530 |
| 0.011631 | 0.011564 | 0.011631 | 0.011397 | 0.011631 | 0.011262 | 0.011228 |
| 0.011263 | 0.011545 | 0.011335 | 0.011163 | 0.011637 | 0.011129 | 0.011218 |
| 0.011637 | 0.011536 | 0.011429 | 0.011631 | 0.011333 | 0.011497 | 0.011463 |
| 0.011396 | 0.011564 | 0.011416 | 0.011266 | 0.011312 | 0.011295 | 0.011365 |
| 0.011463 | 0.011364 | 0.011500 | 0.011568 | 0.011497 | 0.011564 | 0.011670 |
| 0.011399 | 0.011570 | 0.011500 | 0.011432 | 0.011700 | 0.011161 | 0.011364 |
| 0.011329 | 0.011262 | 0.011161 | 0.011161 | 0.011228 | 0.011228 | 0.011295 |
| 0.011228 | 0.011295 | 0.011195 | 0.011295 | 0.011228 | 0.011228 | 0.011295 |
| 0.011228 | 0.011665 | 0.011564 | 0.011597 | 0.011127 | 0.011228 | 0.011262 |
| 0.011262 | 0.011228 | 0.011295 | 0.011329 | 0.011195 | 0.011195 | 0.011195 |
| 0.011732 | 0.011362 | 0.011362 | 0.011161 | 0.011262 | 0.011430 | 0.011195 |
| 0.011195 | 0.011262 | 0.011228 | 0.011396 | 0.011195 | 0.011329 | 0.011463 |
| 0.011396 | 0.011228 | 0.011228 | 0.011161 | 0.011161 | 0.011329 | 0.011262 |
| 0.011161 | 0.011262 | 0.011127 | 0.011161 | 0.011295 | 0.011430 | 0.011195 |
| 0.011161 | 0.011295 | 0.011228 | 0.011127 | 0.011463 | 0.011127 | 0.011295 |
| 0.011368 | 0.011195 | 0.011497 | 0.011329 | 0.011362 | 0.011228 | 0.011329 |
| 0.011195 | 0.011530 | 0.011127 | 0.011396 | 0.011195 | 0.011195 | 0.011127 |
| 0.011362 | 0.011564 | 0.011262 | 0.011329 | 0.011161 | 0.011564 | 0.011195 |
| 0.011195 | 0.011195 | 0.011228 | 0.011329 | 0.011228 | 0.011329 | 0.011396 |
| 0.011396 | 0.011362 | 0.011262 | 0.011363 | 0.011329 | 0.011195 | 0.011161 |
| 0.011195 | 0.011195 | 0.011262 | 0.011195 | 0.011161 | 0.011329 | 0.011195 |
| 0.011228 | 0.011228 | 0.011362 | 0.011396 | 0.011295 | 0.011228 | 0.011228 |
| 0.011295 | 0.011228 | 0.011329 | 0.011195 | 0.011329 | 0.011430 | 0.011732 |
| 0.011228 | 0.011631 | 0.011233 | 0.011748 | 0.011126 | 0.011305 | 0.011583 |
| 0.011545 | 0.011588 | 0.011322 | 0.011292 | 0.011609 | 0.011613 | 0.011242 |
| 0.011487 | 0.011426 | 0.011138 | 0.011228 | 0.011216 | 0.011208 | 0.011189 |
| 0.011482 | 0.011395 | 0.011394 | 0.011259 | 0.011362 | 0.011396 | 0.011398 |
| 0.011266 | 0.011362 | 0.011362 | 0.011329 | 0.011295 | 0.011295 | 0.011262 |
| 0.011295 | 0.011228 | 0.011262 | 0.011295 | 0.011262 | 0.000000 | 0.011228 |
| 0.011228 | 0.011295 | 0.011195 | 0.011295 | 0.011329 | 0.011362 | 0.011262 |
| 0.011295 | 0.011262 | 0.011597 | 0.011597 | 0.011329 | 0.011363 | 0.011396 |
| 0.011161 | 0.011161 | 0.011195 | 0.011295 | 0.011161 | 0.011396 | 0.011396 |
| 0.011429 | 0.011429 | 0.011362 | 0.011463 | 0.011631 | 0.011464 | 0.011295 |
| 0.011295 | 0.011362 | 0.011396 | 0.011228 | 0.011295 | 0.011262 | 0.011295 |
| 0.011363 | 0.011362 | 0.011396 | 0.011363 | 0.011262 | 0.011463 | 0.011430 |
| 0.011297 | 0.011195 | 0.011295 | 0.011396 | 0.011295 | 0.011430 | 0.011463 |
| 0.011631 | 0.011333 | 0.011497 | 0.011463 | 0.011396 | 0.011564 | 0.011195 |
| 0.011363 | 0.011262 | 0.011228 | 0.011228 | 0.011295 | 0.011195 | 0.011295 |
| 0.011329 | 0.011362 | 0.011262 | 0.011295 | 0.011262 | 0.011597 | 0.011597 |
| 0.011329 | 0.011363 | 0.011429 | 0.011362 | 0.012002 | 0.011418 | 0.011342 |
| 0.011412 | 0.011372 | 0.011482 | 0.011372 | 0.011480 | 0.011405 | 0.011371 |
| 0.011953 | 0.011268 | 0.011403 | 0.011337 | 0.011611 | 0.011468 | 0.011571 |
| 0.011978 | 0.011437 | 0.011297 | 0.011295 | 0.011295 | 0.011329 | 0.011263 |
| 0.011161 | 0.011195 | 0.011329 | 0.011295 | 0.011297 | 0.011429 | 0.011397 |
| 0.011262 | 0.011195 | 0.011228 | 0.011262 | 0.011161 | 0.011228 | 0.011127 |
| 0.011262 | 0.011295 | 0.011195 | 0.011161 | 0.011262 | 0.011195 | 0.011228 |
| 0.011228 | 0.011161 | 0.011228 | 0.011262 | 0.011161 | 0.011362 | 0.011396 |
| 0.011295 | 0.011362 | 0.011295 | 0.011295 | 0.011228 | 0.011631 | 0.011262 |
| 0.011304 | 0.011228 | 0.011463 | 0.011467 | 0.011329 | 0.011329 | 0.011329 |
| 0.011329 | 0.011262 | 0.011228 | 0.011262 | 0.011362 | 0.011362 | 0.011295 |
| 0.011295 | 0.011430 | 0.011597 | 0.011329 | 0.011530 | 0.011530 | 0.011396 |
| 0.011228 | 0.011295 | 0.011329 | 0.011732 | 0.011295 | 0.011329 | 0.011295 |
| 0.011329 | 0.011262 | 0.011262 | 0.011564 | 0.011497 | 0.011530 | 0.011262 |

|          |          |          |          |          |          |          |
|----------|----------|----------|----------|----------|----------|----------|
| 0.011362 | 0.011430 | 0.011295 | 0.011362 | 0.011329 | 0.011195 | 0.011530 |
| 0.011295 | 0.011262 | 0.011262 | 0.011430 | 0.011262 | 0.011362 | 0.011598 |
| 0.011295 | 0.011672 | 0.011665 | 0.011467 | 0.011229 | 0.011366 | 0.011267 |
| 0.011115 | 0.011683 | 0.011201 | 0.011417 | 0.011207 | 0.011366 | 0.011326 |
| 0.011468 | 0.000000 | 0.011283 | 0.000000 | 0.011168 | 0.011261 | 0.011344 |
| 0.011362 | 0.011257 | 0.011342 | 0.011272 | 0.011296 | 0.011429 | 0.011497 |
| 0.011497 | 0.011363 | 0.011466 | 0.011467 | 0.011603 | 0.011626 | 0.011295 |
| 0.011530 | 0.011396 | 0.011262 | 0.011362 | 0.011161 | 0.011396 | 0.011195 |
| 0.011262 | 0.011262 | 0.011228 | 0.011195 | 0.011228 | 0.011195 | 0.011295 |
| 0.011270 | 0.011270 | 0.011266 | 0.011300 | 0.011437 | 0.011402 | 0.011402 |
| 0.011401 | 0.011329 | 0.011134 | 0.011132 | 0.011263 | 0.011433 | 0.011433 |
| 0.011228 | 0.011297 | 0.011531 | 0.011500 | 0.011430 | 0.011464 | 0.011396 |
| 0.011329 | 0.011396 | 0.011396 | 0.011295 | 0.011867 | 0.011463 | 0.011531 |
| 0.011564 | 0.011630 | 0.011265 | 0.011337 | 0.011228 | 0.011429 | 0.011396 |
| 0.011430 | 0.011463 | 0.011463 | 0.011463 | 0.011571 | 0.011597 | 0.011234 |
| 0.011128 | 0.011130 | 0.011231 | 0.011196 | 0.011299 | 0.011135 | 0.011468 |
| 0.011266 | 0.011411 | 0.000000 | 0.011285 | 0.011262 | 0.011334 | 0.011228 |
| 0.011195 | 0.011195 | 0.011262 | 0.011228 | 0.011429 | 0.011396 | 0.011329 |
| 0.011429 | 0.011497 | 0.011228 | 0.011228 | 0.011262 | 0.011262 | 0.011263 |
| 0.011331 | 0.011262 | 0.011262 | 0.011296 | 0.011429 | 0.011497 | 0.011497 |
| 0.011363 | 0.011466 | 0.011467 | 0.011603 | 0.011626 | 0.011295 | 0.011463 |
| 0.011396 | 0.011396 | 0.011229 | 0.011408 | 0.011338 | 0.011367 | 0.011235 |
| 0.011405 | 0.011607 | 0.011357 | 0.011298 | 0.011195 | 0.011396 | 0.011262 |
| 0.011362 | 0.011295 | 0.011195 | 0.011296 | 0.011396 | 0.011398 | 0.011295 |
| 0.011195 | 0.011128 | 0.011262 | 0.011195 | 0.011128 | 0.011230 | 0.011396 |
| 0.011295 | 0.011228 | 0.011262 | 0.011295 | 0.011262 | 0.000000 | 0.011396 |
| 0.011262 | 0.011295 | 0.011295 | 0.011228 | 0.011295 | 0.011530 | 0.011195 |
| 0.011228 | 0.011631 | 0.011228 | 0.011262 | 0.011228 | 0.011597 | 0.011189 |
| 0.011679 | 0.011188 | 0.011261 | 0.011422 | 0.011508 | 0.011419 | 0.011144 |
| 0.011218 | 0.011396 | 0.011497 | 0.011603 | 0.011464 | 0.011601 | 0.011733 |
| 0.011632 | 0.011669 | 0.011631 | 0.011880 | 0.011597 | 0.012472 | 0.011633 |
| 0.012372 | 0.012139 | 0.012273 | 0.012545 | 0.011597 | 0.011295 | 0.011598 |
| 0.012036 | 0.011971 | 0.011564 | 0.011463 | 0.011531 | 0.011531 | 0.011500 |
| 0.011396 | 0.011399 | 0.011463 | 0.011430 | 0.011800 | 0.011866 | 0.011867 |
| 0.011767 | 0.011867 | 0.011970 | 0.011737 | 0.012037 | 0.012042 | 0.012104 |
| 0.012104 | 0.012138 | 0.012084 | 0.012104 | 0.012106 | 0.011329 | 0.011631 |
| 0.011699 | 0.012203 | 0.011704 | 0.011934 | 0.012406 | 0.011468 | 0.011363 |
| 0.011329 | 0.011329 | 0.011799 | 0.011842 | 0.011940 | 0.011665 | 0.011330 |
| S769     | 0.011799 | 0.011799 | 0.011732 | 0.011631 | 0.011631 | 0.011698 |
| 0.011536 | 0.011468 | 0.011631 | 0.011396 | 0.011463 | 0.011430 | 0.011396 |
| 0.011362 | 0.011597 | 0.011329 | 0.011430 | 0.011497 | 0.011463 | 0.011430 |
| 0.011396 | 0.011430 | 0.011262 | 0.011396 | 0.011430 | 0.011430 | 0.011502 |
| 0.011396 | 0.011430 | 0.011329 | 0.011295 | 0.011497 | 0.011463 | 0.011497 |
| 0.011463 | 0.011564 | 0.011463 | 0.011463 | 0.011463 | 0.011463 | 0.011631 |
| 0.011329 | 0.011463 | 0.011497 | 0.011430 | 0.011463 | 0.011564 | 0.011497 |
| 0.011463 | 0.011631 | 0.011531 | 0.011530 | 0.011463 | 0.011732 | 0.011463 |
| 0.011430 | 0.011463 | 0.011597 | 0.011732 | 0.011564 | 0.011463 | 0.011564 |
| 0.011497 | 0.011564 | 0.011463 | 0.011698 | 0.011665 | 0.011463 | 0.011530 |
| 0.011430 | 0.011530 | 0.011497 | 0.011564 | 0.011497 | 0.011497 | 0.011497 |
| 0.011396 | 0.011430 | 0.011396 | 0.011430 | 0.011463 | 0.011464 | 0.011564 |
| 0.011497 | 0.011463 | 0.011530 | 0.011430 | 0.011497 | 0.011396 | 0.011463 |
| 0.011631 | 0.011564 | 0.011597 | 0.011631 | 0.011463 | 0.011698 | 0.011463 |
| 0.011616 | 0.011546 | 0.011664 | 0.011373 | 0.011359 | 0.011465 | 0.011257 |
| 0.011902 | 0.011314 | 0.011390 | 0.011698 | 0.011698 | 0.011430 | 0.011530 |
| 0.011530 | 0.011497 | 0.011564 | 0.011463 | 0.011564 | 0.011497 | 0.011497 |
| 0.011463 | 0.011497 | 0.011766 | 0.011631 | 0.011530 | 0.011497 | 0.011430 |
| 0.011396 | 0.011329 | 0.011463 | 0.011430 | 0.011362 | 0.011329 | 0.011262 |
| 0.011362 | 0.011430 | 0.011430 | 0.011430 | 0.011463 | 0.011463 | 0.011466 |
| 0.011534 | 0.011463 | 0.011463 | 0.011348 | 0.011422 | 0.011376 | 0.011464 |
| 0.011467 | 0.011404 | 0.011429 | 0.011440 | 0.011366 | 0.011403 | 0.011432 |

|          |          |          |          |          |          |          |
|----------|----------|----------|----------|----------|----------|----------|
| 0.011420 | 0.011474 | 0.011508 | 0.011396 | 0.011406 | 0.011531 | 0.011430 |
| 0.011497 | 0.011498 | 0.011497 | 0.011598 | 0.011530 | 0.011900 | 0.011631 |
| 0.011463 | 0.011530 | 0.011463 | 0.011497 | 0.011362 | 0.011329 | 0.011396 |
| 0.011463 | 0.011463 | 0.011430 | 0.011396 | 0.011430 | 0.011396 | 0.011497 |
| 0.011463 | 0.011564 | 0.011497 | 0.011396 | 0.011498 | 0.011597 | 0.011601 |
| 0.011597 | 0.011497 | 0.011396 | 0.011330 | 0.011463 | 0.011396 | 0.011329 |
| 0.011332 | 0.011598 | 0.011396 | 0.011598 | 0.011362 | 0.011463 | 0.011430 |
| 0.011530 | 0.011430 | 0.011463 | 0.011430 | 0.011463 | 0.011329 | 0.011463 |
| 0.011497 | 0.011430 | 0.011497 | 0.011430 | 0.011463 | 0.011497 | 0.011732 |
| 0.011564 | 0.011497 | 0.011564 | 0.011566 | 0.011564 | 0.011463 | 0.011430 |
| 0.011364 | 0.011667 | 0.011472 | 0.011335 | 0.011569 | 0.011333 | 0.011336 |
| 0.011570 | 0.011468 | 0.011631 | 0.011833 | 0.011538 | 0.011698 | 0.011665 |
| 0.011597 | 0.011766 | 0.011522 | 0.011390 | 0.011438 | 0.011497 | 0.011568 |
| 0.011665 | 0.011465 | 0.011703 | 0.011669 | 0.011698 | 0.011766 | 0.011772 |
| 0.011602 | 0.011671 | 0.011704 | 0.011635 | 0.011901 | 0.011362 | 0.011566 |
| 0.011530 | 0.011463 | 0.011362 | 0.011362 | 0.011430 | 0.011430 | 0.011497 |
| 0.011430 | 0.011497 | 0.011396 | 0.011430 | 0.011430 | 0.011430 | 0.011497 |
| 0.011430 | 0.011597 | 0.011497 | 0.011530 | 0.011329 | 0.011430 | 0.011463 |
| 0.011463 | 0.011430 | 0.011497 | 0.011463 | 0.011396 | 0.011396 | 0.011396 |
| 0.011665 | 0.011497 | 0.011564 | 0.011362 | 0.011463 | 0.011631 | 0.011396 |
| 0.011396 | 0.011463 | 0.011430 | 0.011598 | 0.011396 | 0.011329 | 0.011463 |
| 0.011396 | 0.011430 | 0.011430 | 0.011363 | 0.011362 | 0.011530 | 0.011463 |
| 0.011363 | 0.011463 | 0.011329 | 0.011362 | 0.011497 | 0.011363 | 0.011396 |
| 0.011363 | 0.011497 | 0.011430 | 0.011329 | 0.011396 | 0.011329 | 0.011497 |
| 0.011471 | 0.011396 | 0.011430 | 0.011531 | 0.011497 | 0.011430 | 0.011497 |
| 0.011396 | 0.011732 | 0.011329 | 0.011530 | 0.011329 | 0.011329 | 0.011329 |
| 0.011564 | 0.011497 | 0.011463 | 0.011530 | 0.011362 | 0.011497 | 0.011329 |
| 0.011396 | 0.011396 | 0.011430 | 0.011530 | 0.011430 | 0.011530 | 0.011598 |
| 0.011597 | 0.011564 | 0.011463 | 0.011564 | 0.011530 | 0.011396 | 0.011362 |
| 0.011396 | 0.011396 | 0.011463 | 0.011329 | 0.011362 | 0.011530 | 0.011396 |
| 0.011362 | 0.011430 | 0.011564 | 0.011530 | 0.011497 | 0.011430 | 0.011430 |
| 0.011497 | 0.011430 | 0.011530 | 0.011396 | 0.011530 | 0.011631 | 0.011598 |
| 0.011430 | 0.011564 | 0.011405 | 0.017936 | 0.011387 | 0.011672 | 0.011479 |
| 0.011441 | 0.011482 | 0.011584 | 0.011408 | 0.011609 | 0.011509 | 0.011668 |
| 0.011487 | 0.011426 | 0.011333 | 0.011437 | 0.011333 | 0.011504 | 0.011447 |
| 0.011342 | 0.011284 | 0.011283 | 0.000000 | 0.011564 | 0.011598 | 0.011601 |
| 0.011369 | 0.011564 | 0.011564 | 0.011463 | 0.011497 | 0.011497 | 0.011464 |
| 0.011497 | 0.011430 | 0.011463 | 0.011497 | 0.011463 | 0.011396 | 0.011430 |
| 0.011430 | 0.011497 | 0.011396 | 0.011497 | 0.011530 | 0.011564 | 0.011463 |
| 0.011430 | 0.011396 | 0.011530 | 0.011530 | 0.011531 | 0.011565 | 0.011598 |
| 0.011362 | 0.011362 | 0.011396 | 0.011497 | 0.011362 | 0.011598 | 0.011598 |
| 0.011631 | 0.011631 | 0.011564 | 0.011665 | 0.011564 | 0.011667 | 0.011497 |
| 0.011497 | 0.011530 | 0.011597 | 0.011430 | 0.011497 | 0.011463 | 0.011497 |
| 0.011564 | 0.011564 | 0.011597 | 0.011564 | 0.011464 | 0.011665 | 0.011631 |
| 0.011501 | 0.011396 | 0.011497 | 0.011598 | 0.011497 | 0.011564 | 0.011665 |
| 0.011833 | 0.011538 | 0.011698 | 0.011665 | 0.011597 | 0.011766 | 0.011396 |
| 0.011566 | 0.011464 | 0.011430 | 0.011430 | 0.011497 | 0.011396 | 0.011497 |
| 0.011530 | 0.011564 | 0.011463 | 0.011430 | 0.011396 | 0.011530 | 0.011530 |
| 0.011531 | 0.011565 | 0.011631 | 0.011564 | 0.012137 | 0.011525 | 0.011447 |
| 0.011517 | 0.011476 | 0.011587 | 0.011476 | 0.011585 | 0.011509 | 0.011543 |
| 0.011987 | 0.011372 | 0.011506 | 0.011441 | 0.011715 | 0.011673 | 0.011707 |
| 0.012012 | 0.011475 | 0.011500 | 0.011497 | 0.011497 | 0.011262 | 0.011466 |
| 0.011362 | 0.011396 | 0.011530 | 0.011497 | 0.011500 | 0.011362 | 0.011296 |
| 0.011463 | 0.011396 | 0.011430 | 0.011463 | 0.011362 | 0.011430 | 0.011329 |
| 0.011396 | 0.011430 | 0.011396 | 0.011362 | 0.011463 | 0.011396 | 0.011430 |
| 0.011430 | 0.011362 | 0.011430 | 0.011463 | 0.011362 | 0.011564 | 0.011598 |
| 0.011497 | 0.011497 | 0.011497 | 0.011497 | 0.011430 | 0.011564 | 0.011463 |
| 0.011130 | 0.011430 | 0.011396 | 0.011298 | 0.011530 | 0.011530 | 0.011530 |
| 0.011530 | 0.011463 | 0.011430 | 0.011463 | 0.011564 | 0.011564 | 0.011497 |
| 0.011497 | 0.011631 | 0.011530 | 0.011530 | 0.011732 | 0.011732 | 0.011597 |

|          |          |          |          |          |          |          |
|----------|----------|----------|----------|----------|----------|----------|
| 0.011430 | 0.011497 | 0.011530 | 0.011665 | 0.011497 | 0.011530 | 0.011497 |
| 0.011530 | 0.011396 | 0.011396 | 0.011698 | 0.011698 | 0.011665 | 0.011463 |
| 0.011564 | 0.011631 | 0.011497 | 0.011564 | 0.011530 | 0.011396 | 0.011463 |
| 0.011497 | 0.011463 | 0.011396 | 0.011631 | 0.011463 | 0.011564 | 0.011598 |
| 0.011430 | 0.011604 | 0.011598 | 0.011345 | 0.011230 | 0.011502 | 0.011112 |
| 0.011445 | 0.011566 | 0.011376 | 0.011551 | 0.011402 | 0.011416 | 0.011379 |
| 0.011315 | 0.011324 | 0.011450 | 0.011324 | 0.011330 | 0.011529 | 0.011547 |
| 0.011550 | 0.011454 | 0.011448 | 0.011448 | 0.011498 | 0.011362 | 0.011430 |
| 0.011430 | 0.011497 | 0.011601 | 0.011399 | 0.011738 | 0.011767 | 0.011497 |
| 0.011463 | 0.011530 | 0.011463 | 0.011497 | 0.011362 | 0.011329 | 0.011396 |
| 0.011463 | 0.011463 | 0.011430 | 0.011396 | 0.011430 | 0.011396 | 0.011497 |
| 0.011479 | 0.011480 | 0.011471 | 0.011505 | 0.011642 | 0.011607 | 0.011606 |
| 0.011605 | 0.011531 | 0.011245 | 0.011348 | 0.011467 | 0.011636 | 0.011637 |
| 0.011430 | 0.011500 | 0.011733 | 0.011702 | 0.011632 | 0.011666 | 0.011598 |
| 0.011530 | 0.011598 | 0.011598 | 0.011497 | 0.011799 | 0.011665 | 0.011732 |
| 0.011766 | 0.011559 | 0.011470 | 0.011545 | 0.011430 | 0.011631 | 0.011598 |
| 0.011632 | 0.011665 | 0.011665 | 0.011665 | 0.011846 | 0.011799 | 0.011338 |
| 0.011229 | 0.011233 | 0.011333 | 0.011298 | 0.011334 | 0.011247 | 0.011298 |
| 0.011369 | 0.011192 | 0.011298 | 0.011397 | 0.011464 | 0.011539 | 0.011430 |
| 0.011396 | 0.011329 | 0.011463 | 0.011430 | 0.011362 | 0.011329 | 0.011262 |
| 0.011362 | 0.011430 | 0.011430 | 0.011430 | 0.011463 | 0.011463 | 0.011466 |
| 0.011534 | 0.011463 | 0.011463 | 0.011498 | 0.011362 | 0.011430 | 0.011430 |
| 0.011497 | 0.011601 | 0.011399 | 0.011738 | 0.011767 | 0.011497 | 0.011665 |
| 0.011598 | 0.011598 | 0.011432 | 0.011617 | 0.011547 | 0.011571 | 0.011411 |
| 0.011577 | 0.011789 | 0.011484 | 0.011502 | 0.011396 | 0.011598 | 0.011463 |
| 0.011564 | 0.011497 | 0.011396 | 0.011498 | 0.011597 | 0.011601 | 0.011497 |
| 0.011396 | 0.011330 | 0.011463 | 0.011396 | 0.011329 | 0.011332 | 0.011598 |
| 0.011497 | 0.011430 | 0.011463 | 0.011497 | 0.011463 | 0.011396 | 0.000000 |
| 0.011463 | 0.011497 | 0.011497 | 0.011430 | 0.011497 | 0.011732 | 0.011329 |
| 0.011430 | 0.011564 | 0.011430 | 0.011463 | 0.011430 | 0.011530 | 0.011403 |
| 0.011678 | 0.011273 | 0.011261 | 0.011302 | 0.011386 | 0.011311 | 0.011227 |
| 0.011218 | 0.011329 | 0.011430 | 0.011535 | 0.011363 | 0.011500 | 0.011666 |
| 0.011565 | 0.011500 | 0.011564 | 0.011778 | 0.011530 | 0.012405 | 0.011532 |
| 0.012304 | 0.012038 | 0.012206 | 0.012443 | 0.011530 | 0.011430 | 0.011531 |
| 0.012170 | 0.011870 | 0.011497 | 0.011396 | 0.011464 | 0.011464 | 0.011399 |
| 0.011329 | 0.011298 | 0.011396 | 0.011363 | 0.011733 | 0.011766 | 0.011800 |
| 0.011666 | 0.011766 | 0.011869 | 0.011635 | 0.012171 | 0.012177 | 0.012238 |
| 0.012239 | 0.012272 | 0.012186 | 0.012239 | 0.012206 | 0.011530 | 0.011766 |
| 0.011834 | 0.012338 | 0.011806 | 0.011867 | 0.012306 | 0.011366 | 0.011295 |
| 0.011262 | 0.011262 | 0.011732 | 0.011636 | 0.011869 | 0.011598 | 0.011229 |
| S770     | 0.011664 | 0.011664 | 0.012001 | 0.011765 | 0.011765 | 0.011832 |
| 0.011671 | 0.011603 | 0.011832 | 0.011262 | 0.011329 | 0.011296 | 0.011262 |
| 0.011295 | 0.011463 | 0.011262 | 0.011295 | 0.011362 | 0.011329 | 0.011295 |
| 0.011262 | 0.011295 | 0.011396 | 0.011262 | 0.011295 | 0.011295 | 0.011637 |
| 0.011530 | 0.011295 | 0.011194 | 0.011429 | 0.011362 | 0.011329 | 0.011362 |
| 0.011329 | 0.011429 | 0.011329 | 0.011329 | 0.011362 | 0.011329 | 0.011496 |
| 0.011262 | 0.011329 | 0.011362 | 0.011295 | 0.011396 | 0.011362 | 0.011362 |
| 0.011329 | 0.011497 | 0.011396 | 0.011664 | 0.011329 | 0.011597 | 0.011329 |
| 0.011295 | 0.011396 | 0.011463 | 0.011597 | 0.011698 | 0.011396 | 0.011496 |
| 0.011362 | 0.011429 | 0.011329 | 0.011564 | 0.011799 | 0.011329 | 0.011396 |
| 0.011295 | 0.011396 | 0.011362 | 0.011429 | 0.011362 | 0.011362 | 0.011362 |
| 0.011262 | 0.011295 | 0.011262 | 0.011362 | 0.011329 | 0.011363 | 0.011429 |
| 0.011362 | 0.011329 | 0.011396 | 0.011295 | 0.011429 | 0.011262 | 0.011329 |
| 0.011496 | 0.011429 | 0.011664 | 0.011497 | 0.011329 | 0.011564 | 0.011329 |
| 0.011505 | 0.011695 | 0.011551 | 0.011216 | 0.011247 | 0.011318 | 0.011414 |
| 0.012085 | 0.011467 | 0.011266 | 0.011564 | 0.011564 | 0.011362 | 0.011463 |
| 0.011396 | 0.011362 | 0.011429 | 0.011329 | 0.011429 | 0.011362 | 0.011362 |
| 0.011329 | 0.011429 | 0.011631 | 0.011496 | 0.011396 | 0.011362 | 0.011295 |
| 0.011262 | 0.011262 | 0.011329 | 0.011295 | 0.011497 | 0.011463 | 0.011396 |
| 0.011497 | 0.011564 | 0.011295 | 0.011295 | 0.011329 | 0.011329 | 0.011330 |

|          |          |          |          |          |          |          |
|----------|----------|----------|----------|----------|----------|----------|
| 0.011398 | 0.011329 | 0.011329 | 0.011204 | 0.011277 | 0.011236 | 0.011329 |
| 0.011331 | 0.011266 | 0.011318 | 0.011302 | 0.011230 | 0.011266 | 0.011297 |
| 0.011564 | 0.011336 | 0.011370 | 0.011262 | 0.011268 | 0.011397 | 0.011363 |
| 0.011430 | 0.011363 | 0.011363 | 0.011463 | 0.011396 | 0.011765 | 0.011564 |
| 0.011597 | 0.011463 | 0.011329 | 0.011430 | 0.011228 | 0.011463 | 0.011262 |
| 0.011329 | 0.011329 | 0.011228 | 0.011262 | 0.011295 | 0.011262 | 0.011362 |
| 0.011329 | 0.011429 | 0.011362 | 0.011262 | 0.011363 | 0.011463 | 0.011466 |
| 0.011463 | 0.011362 | 0.011262 | 0.011195 | 0.011329 | 0.011262 | 0.011195 |
| 0.011298 | 0.011463 | 0.011262 | 0.011463 | 0.011228 | 0.011329 | 0.011295 |
| 0.011396 | 0.011295 | 0.011329 | 0.011295 | 0.011329 | 0.011195 | 0.011329 |
| 0.011362 | 0.011295 | 0.011362 | 0.011295 | 0.011329 | 0.011362 | 0.011597 |
| 0.011698 | 0.011631 | 0.011698 | 0.011465 | 0.011698 | 0.011329 | 0.011295 |
| 0.011330 | 0.011586 | 0.011335 | 0.011232 | 0.011705 | 0.011197 | 0.011296 |
| 0.011705 | 0.011604 | 0.011496 | 0.011698 | 0.011402 | 0.011564 | 0.011530 |
| 0.011463 | 0.011631 | 0.011486 | 0.011349 | 0.011395 | 0.011362 | 0.011432 |
| 0.011530 | 0.011431 | 0.011567 | 0.011635 | 0.011564 | 0.011631 | 0.011738 |
| 0.011466 | 0.011637 | 0.011568 | 0.011500 | 0.011767 | 0.011228 | 0.011431 |
| 0.011396 | 0.011329 | 0.011228 | 0.011228 | 0.011295 | 0.011295 | 0.011329 |
| 0.011295 | 0.011362 | 0.011262 | 0.011362 | 0.011295 | 0.011295 | 0.011362 |
| 0.011295 | 0.011731 | 0.011631 | 0.011664 | 0.011194 | 0.011295 | 0.011329 |
| 0.011329 | 0.011295 | 0.011362 | 0.011396 | 0.011262 | 0.011262 | 0.011262 |
| 0.011799 | 0.011429 | 0.011429 | 0.011228 | 0.011329 | 0.011497 | 0.011262 |
| 0.011262 | 0.011329 | 0.011295 | 0.011463 | 0.011262 | 0.011396 | 0.011530 |
| 0.011463 | 0.011295 | 0.011295 | 0.011228 | 0.011228 | 0.011396 | 0.011329 |
| 0.011228 | 0.011329 | 0.011195 | 0.011228 | 0.011362 | 0.011497 | 0.011262 |
| 0.011228 | 0.011362 | 0.011295 | 0.011195 | 0.011463 | 0.011195 | 0.011362 |
| 0.011437 | 0.011262 | 0.011564 | 0.011396 | 0.011429 | 0.011295 | 0.011396 |
| 0.011262 | 0.011597 | 0.011194 | 0.011463 | 0.011262 | 0.011262 | 0.011194 |
| 0.011429 | 0.011631 | 0.011329 | 0.011396 | 0.011228 | 0.011631 | 0.011262 |
| 0.011262 | 0.011262 | 0.011295 | 0.011396 | 0.011295 | 0.011396 | 0.011463 |
| 0.011463 | 0.011429 | 0.011329 | 0.011429 | 0.011396 | 0.011262 | 0.011228 |
| 0.011262 | 0.011262 | 0.011329 | 0.011262 | 0.011228 | 0.011396 | 0.011262 |
| 0.011295 | 0.011295 | 0.011429 | 0.011463 | 0.011362 | 0.011295 | 0.011295 |
| 0.011362 | 0.011295 | 0.011396 | 0.011262 | 0.011396 | 0.011496 | 0.011799 |
| 0.011295 | 0.011698 | 0.011302 | 0.017823 | 0.011257 | 0.011427 | 0.011653 |
| 0.011614 | 0.011658 | 0.011217 | 0.011176 | 0.011719 | 0.011682 | 0.011364 |
| 0.011487 | 0.011548 | 0.011177 | 0.011270 | 0.011216 | 0.011307 | 0.011275 |
| 0.011482 | 0.011470 | 0.011468 | 0.011259 | 0.011429 | 0.011463 | 0.011466 |
| 0.011335 | 0.011429 | 0.011429 | 0.011396 | 0.011362 | 0.011362 | 0.011329 |
| 0.011362 | 0.011295 | 0.011329 | 0.011362 | 0.011329 | 0.011262 | 0.011295 |
| 0.011295 | 0.011362 | 0.011262 | 0.011362 | 0.011396 | 0.011429 | 0.011329 |
| 0.011362 | 0.011329 | 0.011665 | 0.011665 | 0.011396 | 0.011430 | 0.011463 |
| 0.011228 | 0.011228 | 0.011262 | 0.011362 | 0.011228 | 0.011463 | 0.011463 |
| 0.011497 | 0.011496 | 0.011429 | 0.011530 | 0.011698 | 0.011532 | 0.011362 |
| 0.011362 | 0.011429 | 0.011463 | 0.011295 | 0.011362 | 0.011329 | 0.011362 |
| 0.011430 | 0.011430 | 0.011463 | 0.011430 | 0.011262 | 0.011530 | 0.011497 |
| 0.011365 | 0.011262 | 0.011362 | 0.011463 | 0.011362 | 0.011497 | 0.011530 |
| 0.011698 | 0.011402 | 0.011564 | 0.011530 | 0.011463 | 0.011631 | 0.011262 |
| 0.011363 | 0.011329 | 0.011295 | 0.011295 | 0.011362 | 0.011262 | 0.011362 |
| 0.011396 | 0.011429 | 0.011329 | 0.011362 | 0.011329 | 0.011665 | 0.011665 |
| 0.011396 | 0.011430 | 0.011496 | 0.011429 | 0.012069 | 0.011489 | 0.011412 |
| 0.011482 | 0.011442 | 0.011552 | 0.011441 | 0.011550 | 0.011474 | 0.011439 |
| 0.012021 | 0.011337 | 0.011471 | 0.011406 | 0.011680 | 0.011536 | 0.011639 |
| 0.012046 | 0.011512 | 0.011601 | 0.011664 | 0.011530 | 0.011530 | 0.011567 |
| 0.011228 | 0.011396 | 0.011530 | 0.011496 | 0.011499 | 0.011496 | 0.011464 |
| 0.011329 | 0.011262 | 0.011295 | 0.011329 | 0.011228 | 0.011295 | 0.011194 |
| 0.011329 | 0.011362 | 0.011262 | 0.011228 | 0.011329 | 0.011262 | 0.011295 |
| 0.011295 | 0.011228 | 0.011295 | 0.011329 | 0.011228 | 0.011429 | 0.011463 |
| 0.011362 | 0.011429 | 0.011362 | 0.011362 | 0.011295 | 0.011698 | 0.011329 |
| 0.011373 | 0.011295 | 0.011530 | 0.011535 | 0.011396 | 0.011396 | 0.011396 |

|          |          |          |          |          |          |          |
|----------|----------|----------|----------|----------|----------|----------|
| 0.011396 | 0.011329 | 0.011295 | 0.011329 | 0.011429 | 0.011429 | 0.011362 |
| 0.011362 | 0.011496 | 0.011664 | 0.011396 | 0.011597 | 0.011597 | 0.011463 |
| 0.011295 | 0.011362 | 0.011396 | 0.011799 | 0.011362 | 0.011396 | 0.011362 |
| 0.011396 | 0.011329 | 0.011329 | 0.011631 | 0.011564 | 0.011597 | 0.011329 |
| 0.011429 | 0.011496 | 0.011362 | 0.011429 | 0.011396 | 0.011262 | 0.011597 |
| 0.011362 | 0.011329 | 0.011329 | 0.011496 | 0.011329 | 0.011429 | 0.011664 |
| 0.011362 | 0.011739 | 0.011731 | 0.011507 | 0.011229 | 0.011434 | 0.011215 |
| 0.011225 | 0.011722 | 0.011271 | 0.011462 | 0.011304 | 0.011366 | 0.011379 |
| 0.011417 | 0.011192 | 0.011338 | 0.011192 | 0.011276 | 0.011328 | 0.011425 |
| 0.011437 | 0.011336 | 0.011412 | 0.011342 | 0.011364 | 0.011497 | 0.011564 |
| 0.011564 | 0.011430 | 0.011533 | 0.011535 | 0.011636 | 0.011696 | 0.011362 |
| 0.011597 | 0.011463 | 0.011329 | 0.011430 | 0.011228 | 0.011463 | 0.011262 |
| 0.011329 | 0.011329 | 0.011228 | 0.011262 | 0.011295 | 0.011262 | 0.011362 |
| 0.011340 | 0.011340 | 0.011334 | 0.011368 | 0.011505 | 0.011470 | 0.011470 |
| 0.011469 | 0.011396 | 0.011208 | 0.011204 | 0.011331 | 0.011501 | 0.011501 |
| 0.011296 | 0.011365 | 0.011599 | 0.011567 | 0.011497 | 0.011531 | 0.011463 |
| 0.011396 | 0.011463 | 0.011463 | 0.011362 | 0.011933 | 0.011530 | 0.011597 |
| 0.011631 | 0.011665 | 0.011333 | 0.011407 | 0.011295 | 0.011497 | 0.011463 |
| 0.011497 | 0.011530 | 0.011530 | 0.011530 | 0.011650 | 0.011664 | 0.011303 |
| 0.011195 | 0.011199 | 0.011298 | 0.011264 | 0.011368 | 0.011209 | 0.011536 |
| 0.011335 | 0.011411 | 0.011203 | 0.011360 | 0.011329 | 0.011402 | 0.011295 |
| 0.011262 | 0.011262 | 0.011329 | 0.011295 | 0.011497 | 0.011463 | 0.011396 |
| 0.011497 | 0.011564 | 0.011295 | 0.011295 | 0.011329 | 0.011329 | 0.011330 |
| 0.011398 | 0.011329 | 0.011329 | 0.011364 | 0.011497 | 0.011564 | 0.011564 |
| 0.011430 | 0.011533 | 0.011535 | 0.011636 | 0.011696 | 0.011362 | 0.011530 |
| 0.011463 | 0.011463 | 0.011297 | 0.011478 | 0.011373 | 0.011435 | 0.011235 |
| 0.011473 | 0.011607 | 0.011399 | 0.011366 | 0.011262 | 0.011463 | 0.011329 |
| 0.011429 | 0.011362 | 0.011262 | 0.011363 | 0.011463 | 0.011466 | 0.011362 |
| 0.011262 | 0.011195 | 0.011329 | 0.011262 | 0.011195 | 0.011298 | 0.011463 |
| 0.011362 | 0.011295 | 0.011329 | 0.011362 | 0.011329 | 0.011262 | 0.011463 |
| 0.000000 | 0.011362 | 0.011362 | 0.011295 | 0.011362 | 0.011597 | 0.011262 |
| 0.011295 | 0.011698 | 0.011295 | 0.011329 | 0.011295 | 0.011664 | 0.011274 |
| 0.011622 | 0.011273 | 0.011261 | 0.011503 | 0.011589 | 0.011491 | 0.011227 |
| 0.011165 | 0.011463 | 0.011564 | 0.011671 | 0.011531 | 0.011669 | 0.011800 |
| 0.011699 | 0.011737 | 0.011698 | 0.011949 | 0.011664 | 0.012539 | 0.011700 |
| 0.012439 | 0.012207 | 0.012341 | 0.012612 | 0.011664 | 0.011362 | 0.011665 |
| 0.012103 | 0.012038 | 0.011631 | 0.011530 | 0.011598 | 0.011598 | 0.011567 |
| 0.011463 | 0.011467 | 0.011530 | 0.011497 | 0.011867 | 0.011933 | 0.011935 |
| 0.011834 | 0.011934 | 0.012038 | 0.011804 | 0.012104 | 0.012110 | 0.012171 |
| 0.012172 | 0.012205 | 0.012152 | 0.012172 | 0.012173 | 0.011396 | 0.011699 |
| 0.011766 | 0.012270 | 0.011772 | 0.012001 | 0.012474 | 0.011536 | 0.011430 |
| 0.011396 | 0.011396 | 0.011867 | 0.011924 | 0.012010 | 0.011731 | 0.011397 |
| S771     | 0.011698 | 0.011698 | 0.012034 | 0.011799 | 0.011799 | 0.011866 |
| 0.011705 | 0.011637 | 0.011866 | 0.011295 | 0.011362 | 0.011329 | 0.011295 |
| 0.011329 | 0.011497 | 0.011295 | 0.011329 | 0.011396 | 0.011362 | 0.011329 |
| 0.011295 | 0.011329 | 0.011429 | 0.011295 | 0.011329 | 0.011329 | 0.011671 |
| 0.011564 | 0.011329 | 0.011228 | 0.011463 | 0.011396 | 0.011362 | 0.011396 |
| 0.011362 | 0.011463 | 0.011362 | 0.011362 | 0.011396 | 0.011362 | 0.011530 |
| 0.011295 | 0.011362 | 0.011396 | 0.011329 | 0.011429 | 0.011463 | 0.011396 |
| 0.011362 | 0.011530 | 0.011430 | 0.011698 | 0.011362 | 0.011631 | 0.011362 |
| 0.011329 | 0.011430 | 0.011497 | 0.011631 | 0.011732 | 0.011429 | 0.011530 |
| 0.011396 | 0.011463 | 0.011362 | 0.011597 | 0.011833 | 0.011362 | 0.011429 |
| 0.011329 | 0.011429 | 0.011396 | 0.011463 | 0.011396 | 0.011396 | 0.011396 |
| 0.011295 | 0.011329 | 0.011295 | 0.011396 | 0.011362 | 0.011397 | 0.011463 |
| 0.011396 | 0.011362 | 0.011429 | 0.011329 | 0.011463 | 0.011295 | 0.011362 |
| 0.011530 | 0.011463 | 0.011698 | 0.011530 | 0.011362 | 0.011597 | 0.011362 |
| 0.011542 | 0.011770 | 0.011588 | 0.011295 | 0.011284 | 0.011391 | 0.011493 |
| 0.012121 | 0.011569 | 0.011266 | 0.011597 | 0.011597 | 0.011396 | 0.011497 |
| 0.011429 | 0.011396 | 0.011463 | 0.011362 | 0.011463 | 0.011396 | 0.011396 |
| 0.011362 | 0.011463 | 0.011664 | 0.011530 | 0.011429 | 0.011396 | 0.011329 |

|          |          |          |          |          |          |          |
|----------|----------|----------|----------|----------|----------|----------|
| 0.011295 | 0.011295 | 0.011362 | 0.011329 | 0.011530 | 0.011497 | 0.011430 |
| 0.011530 | 0.011597 | 0.011329 | 0.011329 | 0.011362 | 0.011362 | 0.011364 |
| 0.011432 | 0.011362 | 0.011362 | 0.011240 | 0.011313 | 0.011271 | 0.011363 |
| 0.011365 | 0.011301 | 0.011355 | 0.011336 | 0.011264 | 0.011300 | 0.011330 |
| 0.011600 | 0.011370 | 0.011405 | 0.011296 | 0.011302 | 0.011430 | 0.011397 |
| 0.011464 | 0.011397 | 0.011396 | 0.011496 | 0.011429 | 0.011799 | 0.011598 |
| 0.011631 | 0.011497 | 0.011362 | 0.011463 | 0.011262 | 0.011497 | 0.011295 |
| 0.011362 | 0.011362 | 0.011329 | 0.011295 | 0.011329 | 0.011295 | 0.011396 |
| 0.011362 | 0.011463 | 0.011396 | 0.011295 | 0.011397 | 0.011497 | 0.011500 |
| 0.011497 | 0.011396 | 0.011295 | 0.011229 | 0.011362 | 0.011295 | 0.011228 |
| 0.011332 | 0.011497 | 0.011262 | 0.011463 | 0.011262 | 0.011363 | 0.011329 |
| 0.011430 | 0.011329 | 0.011362 | 0.011329 | 0.011362 | 0.011228 | 0.011362 |
| 0.011396 | 0.011329 | 0.011396 | 0.011329 | 0.011362 | 0.011396 | 0.011631 |
| 0.011732 | 0.011664 | 0.011732 | 0.011498 | 0.011732 | 0.011362 | 0.011329 |
| 0.011364 | 0.011626 | 0.011472 | 0.011266 | 0.011739 | 0.011197 | 0.011375 |
| 0.011739 | 0.011638 | 0.011530 | 0.011732 | 0.011436 | 0.011597 | 0.011564 |
| 0.011497 | 0.011664 | 0.011522 | 0.011349 | 0.011395 | 0.011396 | 0.011466 |
| 0.011564 | 0.011465 | 0.011601 | 0.011669 | 0.011597 | 0.011665 | 0.011772 |
| 0.011500 | 0.011671 | 0.011602 | 0.011534 | 0.011800 | 0.011262 | 0.011465 |
| 0.011429 | 0.011362 | 0.011262 | 0.011262 | 0.011329 | 0.011329 | 0.011396 |
| 0.011329 | 0.011396 | 0.011295 | 0.011396 | 0.011329 | 0.011329 | 0.011396 |
| 0.011329 | 0.011765 | 0.011664 | 0.011698 | 0.011228 | 0.011329 | 0.011362 |
| 0.011362 | 0.011329 | 0.011396 | 0.011429 | 0.011295 | 0.011295 | 0.011295 |
| 0.011832 | 0.011463 | 0.011463 | 0.011262 | 0.011362 | 0.011530 | 0.011295 |
| 0.011295 | 0.011362 | 0.011329 | 0.011497 | 0.011295 | 0.011429 | 0.011564 |
| 0.011497 | 0.011329 | 0.011329 | 0.011262 | 0.011262 | 0.011430 | 0.011362 |
| 0.011262 | 0.011362 | 0.011228 | 0.011262 | 0.011396 | 0.011530 | 0.011295 |
| 0.011262 | 0.011396 | 0.011329 | 0.011228 | 0.011564 | 0.011228 | 0.011396 |
| 0.011471 | 0.011295 | 0.011597 | 0.011430 | 0.011463 | 0.011329 | 0.011429 |
| 0.011295 | 0.011631 | 0.011228 | 0.011497 | 0.011295 | 0.011295 | 0.011228 |
| 0.011463 | 0.011665 | 0.011362 | 0.011429 | 0.011262 | 0.011664 | 0.011295 |
| 0.011295 | 0.011295 | 0.011329 | 0.011429 | 0.011329 | 0.011429 | 0.011497 |
| 0.011497 | 0.011463 | 0.011362 | 0.011463 | 0.011429 | 0.011295 | 0.011262 |
| 0.011295 | 0.011295 | 0.011362 | 0.011295 | 0.011262 | 0.011429 | 0.011295 |
| 0.011329 | 0.011329 | 0.011463 | 0.011497 | 0.011396 | 0.011329 | 0.011329 |
| 0.011396 | 0.011329 | 0.011429 | 0.011295 | 0.011429 | 0.011530 | 0.011832 |
| 0.011329 | 0.011732 | 0.011336 | 0.017823 | 0.011388 | 0.011366 | 0.011688 |
| 0.011648 | 0.011693 | 0.011374 | 0.011350 | 0.011829 | 0.011647 | 0.011485 |
| 0.011630 | 0.011549 | 0.011255 | 0.011270 | 0.011294 | 0.011406 | 0.011361 |
| 0.011623 | 0.011507 | 0.011505 | 0.011457 | 0.011463 | 0.011497 | 0.011500 |
| 0.011369 | 0.011463 | 0.011463 | 0.011430 | 0.011396 | 0.011396 | 0.011363 |
| 0.011396 | 0.011329 | 0.011362 | 0.011396 | 0.011363 | 0.011295 | 0.011329 |
| 0.011329 | 0.011396 | 0.011295 | 0.011396 | 0.011430 | 0.011463 | 0.011362 |
| 0.011396 | 0.011362 | 0.011698 | 0.011698 | 0.011430 | 0.011464 | 0.011497 |
| 0.011262 | 0.011262 | 0.011295 | 0.011396 | 0.011262 | 0.011497 | 0.011497 |
| 0.011530 | 0.011530 | 0.011463 | 0.011564 | 0.011732 | 0.011565 | 0.011396 |
| 0.011396 | 0.011463 | 0.011497 | 0.011329 | 0.011396 | 0.011362 | 0.011396 |
| 0.011463 | 0.011463 | 0.011497 | 0.011463 | 0.011363 | 0.011564 | 0.011530 |
| 0.011399 | 0.011295 | 0.011396 | 0.011497 | 0.011396 | 0.011530 | 0.011564 |
| 0.011732 | 0.011436 | 0.011597 | 0.011564 | 0.011497 | 0.011664 | 0.011295 |
| 0.011464 | 0.011363 | 0.011329 | 0.011329 | 0.011396 | 0.011295 | 0.011396 |
| 0.011430 | 0.011463 | 0.011362 | 0.011396 | 0.011362 | 0.011698 | 0.011698 |
| 0.011430 | 0.011464 | 0.011530 | 0.011463 | 0.012103 | 0.011525 | 0.011447 |
| 0.011517 | 0.011476 | 0.011552 | 0.011476 | 0.011585 | 0.011508 | 0.011474 |
| 0.012056 | 0.011372 | 0.011505 | 0.011441 | 0.011714 | 0.011570 | 0.011673 |
| 0.012080 | 0.011512 | 0.011635 | 0.011698 | 0.011564 | 0.011564 | 0.011601 |
| 0.011262 | 0.011429 | 0.011564 | 0.011530 | 0.011533 | 0.011530 | 0.011498 |
| 0.011362 | 0.011295 | 0.011329 | 0.011362 | 0.011262 | 0.011329 | 0.011228 |
| 0.011362 | 0.011396 | 0.011295 | 0.011262 | 0.011362 | 0.011295 | 0.011329 |
| 0.011329 | 0.011262 | 0.011329 | 0.011362 | 0.011262 | 0.011463 | 0.011497 |

|          |          |          |          |          |          |          |
|----------|----------|----------|----------|----------|----------|----------|
| 0.011396 | 0.011463 | 0.011396 | 0.011396 | 0.011329 | 0.011732 | 0.011362 |
| 0.011408 | 0.011329 | 0.011564 | 0.011569 | 0.011430 | 0.011429 | 0.011429 |
| 0.011429 | 0.011362 | 0.011329 | 0.011362 | 0.011463 | 0.011463 | 0.011396 |
| 0.011396 | 0.011530 | 0.011698 | 0.011429 | 0.011631 | 0.011631 | 0.011496 |
| 0.011329 | 0.011396 | 0.011429 | 0.011833 | 0.011396 | 0.011430 | 0.011396 |
| 0.011429 | 0.011362 | 0.011362 | 0.011665 | 0.011597 | 0.011631 | 0.011362 |
| 0.011463 | 0.011530 | 0.011396 | 0.011463 | 0.011429 | 0.011295 | 0.011631 |
| 0.011396 | 0.011362 | 0.011362 | 0.011530 | 0.011362 | 0.011463 | 0.011698 |
| 0.011396 | 0.011773 | 0.011765 | 0.011589 | 0.011342 | 0.011468 | 0.011422 |
| 0.011225 | 0.011800 | 0.011306 | 0.011507 | 0.011402 | 0.011467 | 0.011485 |
| 0.011570 | 0.011324 | 0.011450 | 0.011324 | 0.011330 | 0.011462 | 0.011466 |
| 0.011475 | 0.011375 | 0.011448 | 0.011377 | 0.011397 | 0.011530 | 0.011598 |
| 0.011597 | 0.011464 | 0.011567 | 0.011569 | 0.011704 | 0.011732 | 0.011396 |
| 0.011631 | 0.011497 | 0.011362 | 0.011463 | 0.011262 | 0.011497 | 0.011295 |
| 0.011362 | 0.011362 | 0.011329 | 0.011295 | 0.011329 | 0.011295 | 0.011396 |
| 0.011375 | 0.011375 | 0.011368 | 0.011403 | 0.011539 | 0.011504 | 0.011504 |
| 0.011503 | 0.011430 | 0.011245 | 0.011240 | 0.011365 | 0.011535 | 0.011535 |
| 0.011329 | 0.011399 | 0.011633 | 0.011601 | 0.011531 | 0.011565 | 0.011496 |
| 0.011429 | 0.011497 | 0.011496 | 0.011396 | 0.011967 | 0.011564 | 0.011631 |
| 0.011665 | 0.011737 | 0.011367 | 0.011441 | 0.011329 | 0.011530 | 0.011497 |
| 0.011531 | 0.011564 | 0.011564 | 0.011564 | 0.011650 | 0.011698 | 0.011338 |
| 0.011229 | 0.011233 | 0.011333 | 0.011298 | 0.011402 | 0.011210 | 0.011570 |
| 0.011369 | 0.011499 | 0.011251 | 0.011360 | 0.011363 | 0.011437 | 0.011329 |
| 0.011295 | 0.011295 | 0.011362 | 0.011329 | 0.011530 | 0.011497 | 0.011430 |
| 0.011530 | 0.011597 | 0.011329 | 0.011329 | 0.011362 | 0.011362 | 0.011364 |
| 0.011432 | 0.011362 | 0.011362 | 0.011397 | 0.011530 | 0.011598 | 0.011597 |
| 0.011464 | 0.011567 | 0.011569 | 0.011704 | 0.011732 | 0.011396 | 0.011564 |
| 0.011497 | 0.011497 | 0.011297 | 0.011478 | 0.011408 | 0.011435 | 0.011341 |
| 0.011508 | 0.011744 | 0.011399 | 0.011400 | 0.011262 | 0.011463 | 0.011362 |
| 0.011463 | 0.011396 | 0.011295 | 0.011397 | 0.011497 | 0.011500 | 0.011396 |
| 0.011295 | 0.011229 | 0.011362 | 0.011295 | 0.011228 | 0.011332 | 0.011497 |
| 0.011396 | 0.011329 | 0.011362 | 0.011396 | 0.011363 | 0.011295 | 0.011497 |
| 0.011362 | 0.000000 | 0.011396 | 0.011329 | 0.011396 | 0.011631 | 0.011295 |
| 0.011329 | 0.011732 | 0.011329 | 0.011362 | 0.011329 | 0.011698 | 0.011317 |
| 0.011791 | 0.011273 | 0.011361 | 0.011503 | 0.011630 | 0.011527 | 0.011269 |
| 0.011323 | 0.011496 | 0.011597 | 0.011705 | 0.011565 | 0.011703 | 0.011834 |
| 0.011733 | 0.011770 | 0.011732 | 0.011983 | 0.011698 | 0.012573 | 0.011734 |
| 0.012473 | 0.012241 | 0.012375 | 0.012646 | 0.011698 | 0.011396 | 0.011699 |
| 0.012137 | 0.012072 | 0.011664 | 0.011564 | 0.011632 | 0.011632 | 0.011601 |
| 0.011496 | 0.011501 | 0.011564 | 0.011531 | 0.011901 | 0.011967 | 0.011968 |
| 0.011868 | 0.011968 | 0.012072 | 0.011838 | 0.012138 | 0.012144 | 0.012205 |
| 0.012206 | 0.012239 | 0.012186 | 0.012206 | 0.012207 | 0.011429 | 0.011732 |
| 0.011800 | 0.012303 | 0.011806 | 0.012034 | 0.012508 | 0.011570 | 0.011464 |
| 0.011429 | 0.011429 | 0.011900 | 0.011924 | 0.012045 | 0.011765 | 0.011431 |
| S772     | 0.011698 | 0.011698 | 0.012034 | 0.011799 | 0.011799 | 0.011866 |
| 0.011671 | 0.011603 | 0.011866 | 0.011295 | 0.011362 | 0.011329 | 0.011295 |
| 0.011329 | 0.011496 | 0.011295 | 0.011329 | 0.011396 | 0.011362 | 0.011329 |
| 0.011295 | 0.011329 | 0.011429 | 0.011295 | 0.011329 | 0.011329 | 0.011637 |
| 0.011564 | 0.011329 | 0.011228 | 0.011463 | 0.011396 | 0.011362 | 0.011396 |
| 0.011362 | 0.011463 | 0.011362 | 0.011362 | 0.011396 | 0.011362 | 0.011530 |
| 0.011295 | 0.011362 | 0.011396 | 0.011329 | 0.011429 | 0.011463 | 0.011396 |
| 0.011362 | 0.011530 | 0.011430 | 0.011698 | 0.011362 | 0.011631 | 0.011362 |
| 0.011329 | 0.011429 | 0.011496 | 0.011631 | 0.011731 | 0.011429 | 0.011530 |
| 0.011396 | 0.011463 | 0.011362 | 0.011597 | 0.011832 | 0.011362 | 0.011429 |
| 0.011329 | 0.011429 | 0.011396 | 0.011463 | 0.011396 | 0.011396 | 0.011396 |
| 0.011295 | 0.011329 | 0.011295 | 0.011396 | 0.011362 | 0.011397 | 0.011463 |
| 0.011396 | 0.011362 | 0.011429 | 0.011329 | 0.011463 | 0.011295 | 0.011362 |
| 0.011530 | 0.011463 | 0.011698 | 0.011530 | 0.011362 | 0.011597 | 0.011362 |
| 0.011542 | 0.011770 | 0.011588 | 0.011295 | 0.011284 | 0.011355 | 0.011493 |
| 0.012121 | 0.011620 | 0.011307 | 0.011597 | 0.011597 | 0.011396 | 0.011496 |



|          |          |          |          |          |          |          |
|----------|----------|----------|----------|----------|----------|----------|
| 0.011429 | 0.011396 | 0.011463 | 0.011362 | 0.011463 | 0.011396 | 0.011396 |
| 0.011362 | 0.011463 | 0.011664 | 0.011530 | 0.011429 | 0.011396 | 0.011329 |
| 0.011295 | 0.011295 | 0.011362 | 0.011329 | 0.011530 | 0.011497 | 0.011429 |
| 0.011530 | 0.011597 | 0.011329 | 0.011329 | 0.011362 | 0.011362 | 0.011364 |
| 0.011432 | 0.011362 | 0.011362 | 0.011240 | 0.011313 | 0.011271 | 0.011363 |
| 0.011365 | 0.011301 | 0.011355 | 0.011336 | 0.011264 | 0.011300 | 0.011330 |
| 0.011600 | 0.011370 | 0.011405 | 0.011296 | 0.011302 | 0.011430 | 0.011396 |
| 0.011464 | 0.011397 | 0.011396 | 0.011496 | 0.011429 | 0.011799 | 0.011597 |
| 0.011631 | 0.011497 | 0.011362 | 0.011463 | 0.011262 | 0.011497 | 0.011295 |
| 0.011362 | 0.011362 | 0.011329 | 0.011295 | 0.011329 | 0.011295 | 0.011396 |
| 0.011362 | 0.011463 | 0.011396 | 0.011295 | 0.011397 | 0.011497 | 0.011499 |
| 0.011497 | 0.011396 | 0.011295 | 0.011229 | 0.011362 | 0.011295 | 0.011228 |
| 0.011332 | 0.011497 | 0.011295 | 0.011497 | 0.011262 | 0.011362 | 0.011329 |
| 0.011430 | 0.011329 | 0.011362 | 0.011329 | 0.011362 | 0.011228 | 0.011362 |
| 0.011396 | 0.011329 | 0.011396 | 0.011329 | 0.011362 | 0.011396 | 0.011362 |
| 0.011732 | 0.011664 | 0.011732 | 0.011498 | 0.011732 | 0.011362 | 0.011329 |
| 0.011364 | 0.011626 | 0.011472 | 0.011266 | 0.011739 | 0.011231 | 0.011375 |
| 0.011705 | 0.011638 | 0.011530 | 0.011732 | 0.011436 | 0.011597 | 0.011564 |
| 0.011496 | 0.011664 | 0.011522 | 0.011349 | 0.011395 | 0.011396 | 0.011466 |
| 0.011295 | 0.011465 | 0.011601 | 0.011669 | 0.011597 | 0.011665 | 0.011772 |
| 0.011500 | 0.011671 | 0.011534 | 0.011533 | 0.011800 | 0.011262 | 0.011465 |
| 0.011429 | 0.011362 | 0.011262 | 0.011262 | 0.011329 | 0.011329 | 0.011396 |
| 0.011329 | 0.011396 | 0.011295 | 0.011396 | 0.011329 | 0.011329 | 0.011396 |
| 0.011329 | 0.011765 | 0.011664 | 0.011698 | 0.011228 | 0.011329 | 0.011362 |
| 0.011362 | 0.011329 | 0.011396 | 0.011429 | 0.011295 | 0.011295 | 0.011295 |
| 0.011832 | 0.011463 | 0.011463 | 0.011262 | 0.011362 | 0.011530 | 0.011295 |
| 0.011295 | 0.011362 | 0.011329 | 0.011497 | 0.011295 | 0.011429 | 0.011564 |
| 0.011496 | 0.011329 | 0.011329 | 0.011262 | 0.011262 | 0.011429 | 0.011362 |
| 0.011262 | 0.011362 | 0.011228 | 0.011262 | 0.011396 | 0.011530 | 0.011295 |
| 0.011262 | 0.011396 | 0.011329 | 0.011228 | 0.011564 | 0.011228 | 0.011396 |
| 0.011471 | 0.011295 | 0.011597 | 0.011430 | 0.011463 | 0.011329 | 0.011429 |
| 0.011295 | 0.011631 | 0.011228 | 0.011496 | 0.011295 | 0.011295 | 0.011228 |
| 0.011463 | 0.011665 | 0.011362 | 0.011429 | 0.011262 | 0.011664 | 0.011295 |
| 0.011295 | 0.011295 | 0.011329 | 0.011429 | 0.011329 | 0.011429 | 0.011496 |
| 0.011496 | 0.011463 | 0.011362 | 0.011463 | 0.011429 | 0.011295 | 0.011262 |
| 0.011295 | 0.011295 | 0.011362 | 0.011295 | 0.011262 | 0.011429 | 0.011295 |
| 0.011329 | 0.011329 | 0.011463 | 0.011496 | 0.011396 | 0.011329 | 0.011329 |
| 0.011396 | 0.011329 | 0.011429 | 0.011295 | 0.011429 | 0.011530 | 0.011832 |
| 0.011329 | 0.011732 | 0.011336 | 0.017823 | 0.011322 | 0.011549 | 0.011688 |
| 0.011648 | 0.011693 | 0.011427 | 0.011408 | 0.011829 | 0.011716 | 0.011485 |
| 0.011629 | 0.011671 | 0.011255 | 0.011353 | 0.011294 | 0.011406 | 0.011361 |
| 0.011623 | 0.011507 | 0.011505 | 0.011193 | 0.011463 | 0.011497 | 0.011500 |
| 0.011369 | 0.011463 | 0.011463 | 0.011429 | 0.011396 | 0.011396 | 0.011363 |
| 0.011396 | 0.011329 | 0.011362 | 0.011396 | 0.011362 | 0.011295 | 0.011329 |
| 0.011329 | 0.011396 | 0.011295 | 0.011396 | 0.011429 | 0.011463 | 0.011362 |
| 0.011396 | 0.011362 | 0.011698 | 0.011698 | 0.011430 | 0.011464 | 0.011497 |
| 0.011262 | 0.011262 | 0.011295 | 0.011396 | 0.011262 | 0.011497 | 0.011497 |
| 0.011530 | 0.011530 | 0.011463 | 0.011564 | 0.011732 | 0.011565 | 0.011396 |
| 0.011396 | 0.011463 | 0.011497 | 0.011329 | 0.011396 | 0.011362 | 0.011396 |
| 0.011463 | 0.011463 | 0.011497 | 0.011463 | 0.011363 | 0.011564 | 0.011530 |
| 0.011399 | 0.011295 | 0.011396 | 0.011497 | 0.011396 | 0.011530 | 0.011295 |
| 0.011732 | 0.011436 | 0.011597 | 0.011564 | 0.011496 | 0.011664 | 0.011295 |
| 0.011464 | 0.011363 | 0.011329 | 0.011329 | 0.011396 | 0.011295 | 0.011396 |
| 0.011429 | 0.011463 | 0.011362 | 0.011396 | 0.011362 | 0.011698 | 0.011698 |
| 0.011430 | 0.011464 | 0.011530 | 0.011463 | 0.012103 | 0.011524 | 0.011447 |
| 0.011517 | 0.011476 | 0.011587 | 0.011476 | 0.011585 | 0.011508 | 0.011474 |
| 0.012056 | 0.011372 | 0.011505 | 0.011441 | 0.011714 | 0.011298 | 0.011673 |
| 0.012080 | 0.011550 | 0.011635 | 0.011698 | 0.011564 | 0.011564 | 0.011601 |
| 0.011262 | 0.011429 | 0.011564 | 0.011530 | 0.011533 | 0.011530 | 0.011498 |
| 0.011362 | 0.011295 | 0.011329 | 0.011362 | 0.011262 | 0.011329 | 0.011228 |

|          |          |          |          |          |          |          |
|----------|----------|----------|----------|----------|----------|----------|
| 0.011362 | 0.011396 | 0.011295 | 0.011262 | 0.011362 | 0.011295 | 0.011329 |
| 0.011329 | 0.011262 | 0.011329 | 0.011362 | 0.011262 | 0.011463 | 0.011228 |
| 0.011396 | 0.011463 | 0.011396 | 0.011396 | 0.011329 | 0.011731 | 0.011362 |
| 0.011408 | 0.011329 | 0.011564 | 0.011569 | 0.011429 | 0.011429 | 0.011429 |
| 0.011429 | 0.011362 | 0.011329 | 0.011362 | 0.011463 | 0.011463 | 0.011396 |
| 0.011396 | 0.011530 | 0.011698 | 0.011429 | 0.011631 | 0.011631 | 0.011496 |
| 0.011329 | 0.011396 | 0.011429 | 0.011832 | 0.011396 | 0.011429 | 0.011396 |
| 0.011429 | 0.011362 | 0.011362 | 0.011664 | 0.011597 | 0.011631 | 0.011362 |
| 0.011463 | 0.011530 | 0.011396 | 0.011463 | 0.011429 | 0.011295 | 0.011631 |
| 0.011396 | 0.011362 | 0.011362 | 0.011530 | 0.011362 | 0.011463 | 0.011698 |
| 0.011396 | 0.011739 | 0.011765 | 0.011589 | 0.011286 | 0.011468 | 0.011421 |
| 0.011335 | 0.011800 | 0.011306 | 0.011551 | 0.011402 | 0.011518 | 0.011538 |
| 0.011570 | 0.011192 | 0.011506 | 0.011258 | 0.011330 | 0.011462 | 0.011182 |
| 0.011475 | 0.011375 | 0.011448 | 0.011377 | 0.011397 | 0.011530 | 0.011597 |
| 0.011597 | 0.011464 | 0.011567 | 0.011569 | 0.011704 | 0.011732 | 0.011396 |
| 0.011631 | 0.011497 | 0.011362 | 0.011463 | 0.011262 | 0.011497 | 0.011295 |
| 0.011362 | 0.011362 | 0.011329 | 0.011295 | 0.011329 | 0.011295 | 0.011396 |
| 0.011375 | 0.011375 | 0.011368 | 0.011403 | 0.011539 | 0.011504 | 0.011504 |
| 0.011503 | 0.011430 | 0.011245 | 0.011240 | 0.011365 | 0.011535 | 0.011535 |
| 0.011329 | 0.011399 | 0.011632 | 0.011601 | 0.011531 | 0.011565 | 0.011496 |
| 0.011429 | 0.011496 | 0.011496 | 0.011396 | 0.011967 | 0.011564 | 0.011631 |
| 0.011665 | 0.011737 | 0.011367 | 0.011441 | 0.011329 | 0.011530 | 0.011497 |
| 0.011531 | 0.011564 | 0.011564 | 0.011564 | 0.011728 | 0.011698 | 0.011338 |
| 0.011229 | 0.011233 | 0.011332 | 0.011298 | 0.011402 | 0.011247 | 0.011570 |
| 0.011369 | 0.011499 | 0.011251 | 0.011360 | 0.011363 | 0.011437 | 0.011329 |
| 0.011295 | 0.011295 | 0.011362 | 0.011329 | 0.011530 | 0.011497 | 0.011429 |
| 0.011530 | 0.011597 | 0.011329 | 0.011329 | 0.011362 | 0.011362 | 0.011364 |
| 0.011432 | 0.011362 | 0.011362 | 0.011397 | 0.011530 | 0.011597 | 0.011597 |
| 0.011464 | 0.011567 | 0.011569 | 0.011704 | 0.011732 | 0.011396 | 0.011295 |
| 0.011497 | 0.011497 | 0.011331 | 0.011513 | 0.011442 | 0.011469 | 0.011340 |
| 0.011508 | 0.011516 | 0.011230 | 0.011400 | 0.011295 | 0.011497 | 0.011362 |
| 0.011463 | 0.011396 | 0.011295 | 0.011397 | 0.011497 | 0.011499 | 0.011396 |
| 0.011295 | 0.011229 | 0.011362 | 0.011295 | 0.011228 | 0.011332 | 0.011497 |
| 0.011396 | 0.011329 | 0.011362 | 0.011396 | 0.011362 | 0.011295 | 0.011497 |
| 0.011362 | 0.011396 | 0.000000 | 0.011329 | 0.011396 | 0.011631 | 0.011295 |
| 0.011329 | 0.011731 | 0.011329 | 0.011362 | 0.011329 | 0.011698 | 0.011317 |
| 0.011735 | 0.011315 | 0.011411 | 0.011543 | 0.011630 | 0.011527 | 0.011269 |
| 0.011323 | 0.011496 | 0.011597 | 0.011705 | 0.011565 | 0.011703 | 0.011834 |
| 0.011733 | 0.011770 | 0.011732 | 0.011983 | 0.011698 | 0.012573 | 0.011734 |
| 0.012473 | 0.012241 | 0.012375 | 0.012646 | 0.011698 | 0.011396 | 0.011698 |
| 0.012137 | 0.012072 | 0.011664 | 0.011564 | 0.011632 | 0.011632 | 0.011601 |
| 0.011496 | 0.011501 | 0.011564 | 0.011531 | 0.011901 | 0.011967 | 0.011968 |
| 0.011867 | 0.011968 | 0.012072 | 0.011838 | 0.012138 | 0.012144 | 0.012205 |
| 0.012205 | 0.012239 | 0.012186 | 0.012205 | 0.012207 | 0.011429 | 0.011732 |
| 0.011800 | 0.012303 | 0.011806 | 0.012034 | 0.012508 | 0.011570 | 0.011464 |
| 0.011429 | 0.011429 | 0.011900 | 0.011965 | 0.012045 | 0.011765 | 0.011431 |
| S773     | 0.011631 | 0.011631 | 0.011967 | 0.011731 | 0.011731 | 0.011799 |
| 0.011637 | 0.011569 | 0.011799 | 0.011228 | 0.011295 | 0.011262 | 0.011228 |
| 0.011262 | 0.011429 | 0.011228 | 0.011262 | 0.011329 | 0.011295 | 0.011262 |
| 0.011228 | 0.011262 | 0.011362 | 0.011228 | 0.011262 | 0.011262 | 0.011603 |
| 0.011496 | 0.011262 | 0.011161 | 0.011396 | 0.011329 | 0.011295 | 0.011329 |
| 0.011295 | 0.011396 | 0.011295 | 0.011295 | 0.011329 | 0.011295 | 0.011463 |
| 0.011228 | 0.011295 | 0.011329 | 0.011262 | 0.011362 | 0.011396 | 0.011329 |
| 0.011295 | 0.011463 | 0.011362 | 0.011631 | 0.011295 | 0.011564 | 0.011295 |
| 0.000000 | 0.011362 | 0.011429 | 0.011564 | 0.011664 | 0.011362 | 0.011463 |
| 0.011329 | 0.011396 | 0.011295 | 0.011530 | 0.011765 | 0.011295 | 0.011362 |
| 0.011262 | 0.011362 | 0.011329 | 0.011396 | 0.011329 | 0.011329 | 0.011329 |
| 0.011228 | 0.011262 | 0.011228 | 0.011329 | 0.011295 | 0.011329 | 0.011396 |
| 0.011329 | 0.011295 | 0.011362 | 0.011262 | 0.011396 | 0.011228 | 0.011295 |
| 0.011463 | 0.011396 | 0.011631 | 0.011463 | 0.011295 | 0.011530 | 0.011295 |

|          |          |          |          |          |          |          |
|----------|----------|----------|----------|----------|----------|----------|
| 0.011468 | 0.011695 | 0.011513 | 0.011216 | 0.011210 | 0.011318 | 0.011414 |
| 0.012048 | 0.011467 | 0.011225 | 0.011530 | 0.011530 | 0.011329 | 0.011429 |
| 0.011362 | 0.011329 | 0.011396 | 0.011295 | 0.011396 | 0.011329 | 0.011329 |
| 0.011295 | 0.011396 | 0.011597 | 0.011463 | 0.011362 | 0.011329 | 0.011262 |
| 0.011228 | 0.011228 | 0.011295 | 0.011262 | 0.011463 | 0.011429 | 0.011362 |
| 0.011463 | 0.011530 | 0.011262 | 0.011262 | 0.011295 | 0.011295 | 0.011297 |
| 0.011364 | 0.011295 | 0.011295 | 0.011168 | 0.011241 | 0.011200 | 0.011296 |
| 0.011297 | 0.011232 | 0.011282 | 0.011267 | 0.011196 | 0.011231 | 0.011263 |
| 0.011528 | 0.011301 | 0.011336 | 0.011228 | 0.011233 | 0.011363 | 0.011329 |
| 0.011396 | 0.011330 | 0.011329 | 0.011429 | 0.011362 | 0.011732 | 0.011530 |
| 0.011564 | 0.011429 | 0.011295 | 0.011396 | 0.011195 | 0.011429 | 0.011228 |
| 0.011295 | 0.011295 | 0.011262 | 0.011228 | 0.011262 | 0.011228 | 0.011329 |
| 0.011295 | 0.011396 | 0.011329 | 0.011228 | 0.011330 | 0.011430 | 0.011432 |
| 0.011430 | 0.011329 | 0.011228 | 0.011161 | 0.011295 | 0.011228 | 0.011161 |
| 0.011264 | 0.011430 | 0.011228 | 0.011430 | 0.011195 | 0.011295 | 0.011262 |
| 0.011362 | 0.011262 | 0.011295 | 0.011262 | 0.011295 | 0.011161 | 0.011295 |
| 0.011329 | 0.011262 | 0.011329 | 0.011262 | 0.011295 | 0.011329 | 0.011564 |
| 0.011664 | 0.011597 | 0.011665 | 0.011431 | 0.011665 | 0.011295 | 0.011262 |
| 0.011297 | 0.011586 | 0.011426 | 0.011197 | 0.011671 | 0.011163 | 0.011296 |
| 0.011671 | 0.011570 | 0.011463 | 0.011664 | 0.011367 | 0.011530 | 0.011497 |
| 0.011429 | 0.011597 | 0.011451 | 0.011266 | 0.011312 | 0.011329 | 0.011398 |
| 0.011497 | 0.011397 | 0.011533 | 0.011601 | 0.011530 | 0.011597 | 0.011704 |
| 0.011432 | 0.011603 | 0.011534 | 0.011466 | 0.011733 | 0.011194 | 0.011397 |
| 0.011362 | 0.011295 | 0.011194 | 0.011194 | 0.011262 | 0.011262 | 0.011329 |
| 0.011262 | 0.011329 | 0.011228 | 0.011329 | 0.011262 | 0.011262 | 0.011329 |
| 0.011262 | 0.011698 | 0.011597 | 0.011631 | 0.011161 | 0.011262 | 0.011295 |
| 0.011295 | 0.011262 | 0.011329 | 0.011362 | 0.011228 | 0.011228 | 0.011228 |
| 0.011765 | 0.011396 | 0.011396 | 0.011194 | 0.011295 | 0.011463 | 0.011228 |
| 0.011228 | 0.011295 | 0.011262 | 0.011429 | 0.011228 | 0.011362 | 0.011496 |
| 0.011429 | 0.011262 | 0.011262 | 0.011194 | 0.011194 | 0.011362 | 0.011295 |
| 0.011194 | 0.011295 | 0.011161 | 0.011194 | 0.011329 | 0.011463 | 0.011228 |
| 0.011195 | 0.011329 | 0.011262 | 0.011161 | 0.011496 | 0.011161 | 0.011329 |
| 0.011402 | 0.011228 | 0.011530 | 0.011362 | 0.011396 | 0.011262 | 0.011362 |
| 0.011228 | 0.011564 | 0.011161 | 0.011429 | 0.011228 | 0.011228 | 0.011161 |
| 0.011396 | 0.011597 | 0.011295 | 0.011362 | 0.011194 | 0.011597 | 0.011228 |
| 0.011228 | 0.011228 | 0.011262 | 0.011362 | 0.011262 | 0.011362 | 0.011429 |
| 0.011429 | 0.011396 | 0.011295 | 0.011396 | 0.011362 | 0.011228 | 0.011194 |
| 0.011228 | 0.011228 | 0.011295 | 0.011228 | 0.011194 | 0.011362 | 0.011228 |
| 0.011262 | 0.011262 | 0.011396 | 0.011429 | 0.011329 | 0.011262 | 0.011262 |
| 0.011329 | 0.011262 | 0.011362 | 0.011228 | 0.011362 | 0.011463 | 0.011765 |
| 0.011262 | 0.011664 | 0.011267 | 0.017785 | 0.011191 | 0.011305 | 0.011618 |
| 0.011579 | 0.011623 | 0.011270 | 0.011234 | 0.011664 | 0.011647 | 0.011242 |
| 0.011487 | 0.011426 | 0.011177 | 0.011186 | 0.011255 | 0.011258 | 0.011232 |
| 0.011482 | 0.011433 | 0.011431 | 0.011325 | 0.011396 | 0.011429 | 0.011432 |
| 0.011301 | 0.011396 | 0.011396 | 0.011362 | 0.011329 | 0.011329 | 0.011295 |
| 0.011329 | 0.011262 | 0.011295 | 0.011329 | 0.011295 | 0.011228 | 0.011262 |
| 0.011262 | 0.011329 | 0.011228 | 0.011329 | 0.011362 | 0.011396 | 0.011295 |
| 0.011329 | 0.011295 | 0.011631 | 0.011631 | 0.011362 | 0.011396 | 0.011430 |
| 0.011195 | 0.011195 | 0.011228 | 0.011329 | 0.011195 | 0.011429 | 0.011429 |
| 0.011463 | 0.011463 | 0.011396 | 0.011496 | 0.011665 | 0.011498 | 0.011329 |
| 0.011329 | 0.011396 | 0.011429 | 0.011262 | 0.011329 | 0.011295 | 0.011329 |
| 0.011396 | 0.011396 | 0.011429 | 0.011396 | 0.011296 | 0.011497 | 0.011463 |
| 0.011331 | 0.011228 | 0.011329 | 0.011430 | 0.011329 | 0.011463 | 0.011496 |
| 0.011664 | 0.011367 | 0.011530 | 0.011497 | 0.011429 | 0.011597 | 0.011228 |
| 0.011397 | 0.011295 | 0.011262 | 0.011262 | 0.011329 | 0.011228 | 0.011329 |
| 0.011362 | 0.011396 | 0.011295 | 0.011329 | 0.011295 | 0.011631 | 0.011631 |
| 0.011362 | 0.011396 | 0.011463 | 0.011396 | 0.012035 | 0.011453 | 0.011377 |
| 0.011447 | 0.011407 | 0.011517 | 0.011406 | 0.011515 | 0.011439 | 0.011405 |
| 0.011987 | 0.011302 | 0.011437 | 0.011371 | 0.011645 | 0.011502 | 0.011604 |
| 0.012012 | 0.011437 | 0.011567 | 0.011631 | 0.011496 | 0.011497 | 0.011533 |

|          |          |          |          |          |          |          |
|----------|----------|----------|----------|----------|----------|----------|
| 0.011194 | 0.011362 | 0.011496 | 0.011463 | 0.011466 | 0.011463 | 0.011431 |
| 0.011295 | 0.011228 | 0.011262 | 0.011295 | 0.011194 | 0.011262 | 0.011161 |
| 0.011295 | 0.011329 | 0.011228 | 0.011194 | 0.011295 | 0.011228 | 0.011262 |
| 0.011262 | 0.011194 | 0.011262 | 0.011295 | 0.011194 | 0.011396 | 0.011429 |
| 0.011329 | 0.011396 | 0.011329 | 0.011329 | 0.011262 | 0.011664 | 0.011295 |
| 0.011338 | 0.011262 | 0.011497 | 0.011501 | 0.011362 | 0.011362 | 0.011362 |
| 0.011362 | 0.011295 | 0.011262 | 0.011295 | 0.011396 | 0.011396 | 0.011329 |
| 0.011329 | 0.011463 | 0.011631 | 0.011362 | 0.011564 | 0.011564 | 0.011429 |
| 0.011262 | 0.011329 | 0.011362 | 0.011765 | 0.011329 | 0.011362 | 0.011329 |
| 0.011362 | 0.011295 | 0.011295 | 0.011597 | 0.011530 | 0.011564 | 0.011295 |
| 0.011396 | 0.011463 | 0.011329 | 0.011396 | 0.011362 | 0.011228 | 0.011564 |
| 0.011329 | 0.011295 | 0.011295 | 0.011463 | 0.011295 | 0.011396 | 0.011631 |
| 0.011329 | 0.011705 | 0.011698 | 0.011507 | 0.011229 | 0.011400 | 0.011267 |
| 0.011115 | 0.011722 | 0.011236 | 0.011462 | 0.011255 | 0.011315 | 0.011379 |
| 0.011468 | 0.011126 | 0.011339 | 0.011192 | 0.011222 | 0.011395 | 0.011385 |
| 0.011399 | 0.011296 | 0.011377 | 0.011307 | 0.011330 | 0.011463 | 0.011530 |
| 0.011530 | 0.011396 | 0.011500 | 0.011501 | 0.011636 | 0.011661 | 0.011329 |
| 0.011564 | 0.011429 | 0.011295 | 0.011396 | 0.011195 | 0.011429 | 0.011228 |
| 0.011295 | 0.011295 | 0.011262 | 0.011228 | 0.011262 | 0.011228 | 0.011329 |
| 0.011305 | 0.011305 | 0.011300 | 0.011334 | 0.011471 | 0.011436 | 0.011436 |
| 0.011435 | 0.011363 | 0.011171 | 0.011168 | 0.011297 | 0.011467 | 0.011467 |
| 0.011262 | 0.011331 | 0.011565 | 0.011533 | 0.011464 | 0.011498 | 0.011429 |
| 0.011362 | 0.011429 | 0.011429 | 0.011329 | 0.011900 | 0.011496 | 0.011564 |
| 0.011597 | 0.011665 | 0.011299 | 0.011372 | 0.011262 | 0.011463 | 0.011429 |
| 0.011464 | 0.011496 | 0.011496 | 0.011496 | 0.011610 | 0.011631 | 0.011268 |
| 0.011162 | 0.011164 | 0.011264 | 0.011230 | 0.011333 | 0.011172 | 0.011502 |
| 0.011300 | 0.011455 | 0.011203 | 0.011322 | 0.011296 | 0.011368 | 0.011262 |
| 0.011228 | 0.011228 | 0.011295 | 0.011262 | 0.011463 | 0.011429 | 0.011362 |
| 0.011463 | 0.011530 | 0.011262 | 0.011262 | 0.011295 | 0.011295 | 0.011297 |
| 0.011364 | 0.011295 | 0.011295 | 0.011330 | 0.011463 | 0.011530 | 0.011530 |
| 0.011396 | 0.011500 | 0.011501 | 0.011636 | 0.011661 | 0.011329 | 0.011496 |
| 0.011429 | 0.011429 | 0.011263 | 0.011443 | 0.011373 | 0.011401 | 0.011270 |
| 0.011439 | 0.011607 | 0.011441 | 0.011332 | 0.011228 | 0.011430 | 0.011295 |
| 0.011396 | 0.011329 | 0.011228 | 0.011330 | 0.011430 | 0.011432 | 0.011329 |
| 0.011228 | 0.011161 | 0.011295 | 0.011228 | 0.011161 | 0.011264 | 0.011430 |
| 0.011329 | 0.011262 | 0.011295 | 0.011329 | 0.011295 | 0.011228 | 0.011430 |
| 0.011295 | 0.011329 | 0.011329 | 0.000000 | 0.011329 | 0.011564 | 0.011228 |
| 0.011262 | 0.011664 | 0.000000 | 0.011295 | 0.011262 | 0.011631 | 0.011189 |
| 0.011678 | 0.011230 | 0.011261 | 0.011422 | 0.011508 | 0.011455 | 0.011144 |
| 0.011218 | 0.011429 | 0.011530 | 0.011637 | 0.011498 | 0.011635 | 0.011766 |
| 0.011666 | 0.011703 | 0.011664 | 0.011914 | 0.011631 | 0.012505 | 0.011666 |
| 0.012405 | 0.012173 | 0.012307 | 0.012578 | 0.011631 | 0.011329 | 0.011631 |
| 0.012070 | 0.012004 | 0.011597 | 0.011497 | 0.011565 | 0.011565 | 0.011534 |
| 0.011429 | 0.011433 | 0.011496 | 0.011464 | 0.011833 | 0.011900 | 0.011901 |
| 0.011800 | 0.011901 | 0.012004 | 0.011770 | 0.012070 | 0.012076 | 0.012137 |
| 0.012138 | 0.012171 | 0.012118 | 0.012138 | 0.012139 | 0.011362 | 0.011665 |
| 0.011733 | 0.012236 | 0.011738 | 0.011967 | 0.012440 | 0.011502 | 0.011396 |
| 0.011362 | 0.011362 | 0.011833 | 0.011842 | 0.011975 | 0.011698 | 0.011363 |
| s774     | 0.011698 | 0.011698 | 0.012034 | 0.011799 | 0.011799 | 0.011866 |
| 0.011705 | 0.011637 | 0.011866 | 0.011295 | 0.011362 | 0.011329 | 0.011295 |
| 0.011329 | 0.011496 | 0.011295 | 0.011329 | 0.011396 | 0.011362 | 0.011329 |
| 0.011295 | 0.011329 | 0.011429 | 0.011295 | 0.011329 | 0.011329 | 0.011671 |
| 0.011564 | 0.011329 | 0.011228 | 0.011463 | 0.011396 | 0.011362 | 0.011396 |
| 0.011362 | 0.011463 | 0.011362 | 0.011362 | 0.011396 | 0.011161 | 0.011530 |
| 0.011295 | 0.011362 | 0.011396 | 0.011329 | 0.011429 | 0.011463 | 0.011396 |
| 0.011362 | 0.011530 | 0.011430 | 0.011698 | 0.011362 | 0.011631 | 0.011362 |
| 0.011329 | 0.011429 | 0.011497 | 0.011631 | 0.011732 | 0.011429 | 0.011530 |
| 0.011396 | 0.011463 | 0.011362 | 0.011530 | 0.011832 | 0.011362 | 0.011429 |
| 0.011329 | 0.011429 | 0.011396 | 0.011463 | 0.011396 | 0.011396 | 0.011396 |
| 0.011295 | 0.011329 | 0.011295 | 0.011396 | 0.011362 | 0.011397 | 0.011463 |

|          |          |          |          |          |          |          |
|----------|----------|----------|----------|----------|----------|----------|
| 0.011396 | 0.011362 | 0.011429 | 0.011329 | 0.011463 | 0.011295 | 0.011362 |
| 0.011530 | 0.011463 | 0.011698 | 0.011329 | 0.011362 | 0.011597 | 0.011362 |
| 0.011394 | 0.011770 | 0.011588 | 0.011295 | 0.011284 | 0.011244 | 0.011493 |
| 0.012121 | 0.011518 | 0.011307 | 0.011597 | 0.011597 | 0.011396 | 0.011497 |
| 0.011429 | 0.011396 | 0.011463 | 0.011362 | 0.011463 | 0.011396 | 0.011396 |
| 0.011362 | 0.011463 | 0.011664 | 0.011530 | 0.011429 | 0.011396 | 0.011329 |
| 0.011295 | 0.011295 | 0.011362 | 0.011329 | 0.011530 | 0.011497 | 0.011429 |
| 0.011530 | 0.011597 | 0.011329 | 0.011329 | 0.011362 | 0.011362 | 0.011364 |
| 0.011432 | 0.011362 | 0.011362 | 0.011240 | 0.011313 | 0.011271 | 0.011363 |
| 0.011162 | 0.011301 | 0.011355 | 0.011336 | 0.011264 | 0.011300 | 0.011330 |
| 0.011600 | 0.011370 | 0.011405 | 0.011296 | 0.011302 | 0.011430 | 0.011396 |
| 0.011464 | 0.011397 | 0.011396 | 0.011496 | 0.011429 | 0.011799 | 0.011598 |
| 0.011631 | 0.011497 | 0.011362 | 0.011463 | 0.011262 | 0.011496 | 0.011295 |
| 0.011362 | 0.011362 | 0.011329 | 0.011295 | 0.011329 | 0.011295 | 0.011396 |
| 0.011362 | 0.011463 | 0.011396 | 0.011295 | 0.011397 | 0.011497 | 0.011499 |
| 0.011497 | 0.011396 | 0.011295 | 0.011229 | 0.011362 | 0.011295 | 0.011228 |
| 0.011332 | 0.011497 | 0.011295 | 0.011497 | 0.011262 | 0.011362 | 0.011329 |
| 0.011430 | 0.011329 | 0.011362 | 0.011329 | 0.011362 | 0.011228 | 0.011362 |
| 0.011396 | 0.011329 | 0.011396 | 0.011329 | 0.011362 | 0.011396 | 0.011631 |
| 0.011732 | 0.011664 | 0.011732 | 0.011498 | 0.011732 | 0.011362 | 0.011329 |
| 0.011364 | 0.011626 | 0.011426 | 0.011266 | 0.011739 | 0.011231 | 0.011296 |
| 0.011739 | 0.011638 | 0.011530 | 0.011732 | 0.011436 | 0.011597 | 0.011564 |
| 0.011496 | 0.011664 | 0.011522 | 0.011349 | 0.011437 | 0.011396 | 0.011466 |
| 0.011564 | 0.011465 | 0.011601 | 0.011669 | 0.011597 | 0.011665 | 0.011772 |
| 0.011500 | 0.011671 | 0.011602 | 0.011331 | 0.011800 | 0.011262 | 0.011465 |
| 0.011429 | 0.011362 | 0.011262 | 0.011262 | 0.011329 | 0.011329 | 0.011396 |
| 0.011329 | 0.011396 | 0.011295 | 0.011396 | 0.011329 | 0.011329 | 0.011396 |
| 0.011329 | 0.011765 | 0.011664 | 0.011698 | 0.011228 | 0.011329 | 0.011362 |
| 0.011362 | 0.011329 | 0.011396 | 0.011429 | 0.011295 | 0.011295 | 0.011295 |
| 0.011832 | 0.011463 | 0.011463 | 0.011262 | 0.011362 | 0.011530 | 0.011295 |
| 0.011295 | 0.011362 | 0.011329 | 0.011497 | 0.011295 | 0.011429 | 0.011564 |
| 0.011496 | 0.011329 | 0.011329 | 0.011262 | 0.011262 | 0.011429 | 0.011362 |
| 0.011262 | 0.011362 | 0.011228 | 0.011262 | 0.011195 | 0.011530 | 0.011295 |
| 0.011262 | 0.011195 | 0.011329 | 0.011228 | 0.011564 | 0.011228 | 0.011396 |
| 0.011471 | 0.011295 | 0.011597 | 0.011430 | 0.011262 | 0.011329 | 0.011429 |
| 0.011295 | 0.011631 | 0.011228 | 0.011497 | 0.011295 | 0.011295 | 0.011228 |
| 0.011463 | 0.011665 | 0.011362 | 0.011429 | 0.011262 | 0.011664 | 0.011295 |
| 0.011295 | 0.011295 | 0.011329 | 0.011429 | 0.011329 | 0.011429 | 0.011496 |
| 0.011295 | 0.011463 | 0.011362 | 0.011463 | 0.011429 | 0.011295 | 0.011262 |
| 0.011295 | 0.011295 | 0.011362 | 0.011295 | 0.011262 | 0.011429 | 0.011295 |
| 0.011329 | 0.011329 | 0.011463 | 0.011496 | 0.011396 | 0.011329 | 0.011329 |
| 0.011396 | 0.011329 | 0.011429 | 0.011295 | 0.011429 | 0.011530 | 0.011832 |
| 0.011329 | 0.011732 | 0.011336 | 0.017823 | 0.011126 | 0.011488 | 0.011688 |
| 0.011648 | 0.011623 | 0.011270 | 0.011350 | 0.011774 | 0.011716 | 0.011425 |
| 0.011535 | 0.011610 | 0.011255 | 0.011311 | 0.011294 | 0.011356 | 0.011318 |
| 0.011529 | 0.011507 | 0.011505 | 0.011325 | 0.011463 | 0.011497 | 0.011500 |
| 0.011369 | 0.011463 | 0.011463 | 0.011429 | 0.011396 | 0.011396 | 0.011362 |
| 0.011396 | 0.011329 | 0.011362 | 0.011396 | 0.011362 | 0.011295 | 0.011329 |
| 0.011329 | 0.011396 | 0.011295 | 0.011396 | 0.011430 | 0.011262 | 0.011362 |
| 0.011396 | 0.011362 | 0.011698 | 0.011698 | 0.011430 | 0.011464 | 0.011497 |
| 0.011262 | 0.011262 | 0.011295 | 0.011396 | 0.011262 | 0.011497 | 0.011497 |
| 0.011530 | 0.011530 | 0.011463 | 0.011564 | 0.011732 | 0.011565 | 0.011396 |
| 0.011396 | 0.011463 | 0.011497 | 0.011329 | 0.011396 | 0.011362 | 0.011396 |
| 0.011463 | 0.011463 | 0.011497 | 0.011463 | 0.011363 | 0.011564 | 0.011530 |
| 0.011399 | 0.011295 | 0.011329 | 0.011497 | 0.011396 | 0.011530 | 0.011564 |
| 0.011732 | 0.011436 | 0.011597 | 0.011564 | 0.011496 | 0.011664 | 0.011295 |
| 0.011464 | 0.011363 | 0.011329 | 0.011329 | 0.011396 | 0.011295 | 0.011396 |
| 0.011430 | 0.011262 | 0.011362 | 0.011396 | 0.011362 | 0.011698 | 0.011698 |
| 0.011430 | 0.011464 | 0.011530 | 0.011463 | 0.012103 | 0.011525 | 0.011447 |
| 0.011306 | 0.011476 | 0.011587 | 0.011476 | 0.011585 | 0.011508 | 0.011474 |

|          |          |          |          |          |          |          |
|----------|----------|----------|----------|----------|----------|----------|
| 0.012056 | 0.011372 | 0.011505 | 0.011441 | 0.011714 | 0.011570 | 0.011673 |
| 0.012080 | 0.011550 | 0.011635 | 0.011698 | 0.011564 | 0.011564 | 0.011601 |
| 0.011262 | 0.011429 | 0.011564 | 0.011530 | 0.011533 | 0.011530 | 0.011498 |
| 0.011362 | 0.011295 | 0.011329 | 0.011362 | 0.011262 | 0.011329 | 0.011228 |
| 0.011295 | 0.011262 | 0.011228 | 0.011262 | 0.011295 | 0.011295 | 0.011329 |
| 0.011329 | 0.011262 | 0.011329 | 0.011362 | 0.011262 | 0.011463 | 0.011295 |
| 0.011194 | 0.011262 | 0.000000 | 0.011262 | 0.011329 | 0.011732 | 0.011362 |
| 0.011408 | 0.011329 | 0.011564 | 0.011569 | 0.011430 | 0.011429 | 0.011429 |
| 0.011429 | 0.011362 | 0.011329 | 0.011362 | 0.011463 | 0.011463 | 0.011396 |
| 0.011396 | 0.011530 | 0.011698 | 0.011429 | 0.011631 | 0.011631 | 0.011496 |
| 0.011329 | 0.011396 | 0.011429 | 0.011832 | 0.011396 | 0.011430 | 0.011396 |
| 0.011429 | 0.011362 | 0.011362 | 0.011665 | 0.011597 | 0.011631 | 0.011362 |
| 0.011463 | 0.011530 | 0.011396 | 0.011463 | 0.011429 | 0.011295 | 0.011631 |
| 0.011396 | 0.011362 | 0.011362 | 0.011530 | 0.011362 | 0.011463 | 0.011698 |
| 0.011396 | 0.011773 | 0.011765 | 0.011589 | 0.011286 | 0.011468 | 0.011370 |
| 0.011280 | 0.011800 | 0.011306 | 0.011462 | 0.011402 | 0.011417 | 0.011326 |
| 0.011468 | 0.011126 | 0.011283 | 0.000000 | 0.011276 | 0.011261 | 0.011466 |
| 0.011475 | 0.011375 | 0.011448 | 0.011377 | 0.011397 | 0.011530 | 0.011597 |
| 0.011597 | 0.011464 | 0.011567 | 0.011569 | 0.011704 | 0.011732 | 0.011396 |
| 0.011631 | 0.011497 | 0.011362 | 0.011463 | 0.011262 | 0.011496 | 0.011295 |
| 0.011362 | 0.011362 | 0.011329 | 0.011295 | 0.011329 | 0.011295 | 0.011396 |
| 0.011375 | 0.011375 | 0.011368 | 0.011403 | 0.011539 | 0.011504 | 0.011504 |
| 0.011503 | 0.011430 | 0.011245 | 0.011240 | 0.011365 | 0.011535 | 0.011535 |
| 0.011329 | 0.011399 | 0.011632 | 0.011601 | 0.011531 | 0.011565 | 0.011496 |
| 0.011429 | 0.011496 | 0.011496 | 0.011396 | 0.011967 | 0.011564 | 0.011631 |
| 0.011665 | 0.011701 | 0.011367 | 0.011441 | 0.011329 | 0.011530 | 0.011496 |
| 0.011531 | 0.011564 | 0.011564 | 0.011564 | 0.011689 | 0.011698 | 0.011338 |
| 0.011229 | 0.011233 | 0.011333 | 0.011298 | 0.011402 | 0.011247 | 0.011570 |
| 0.011369 | 0.011499 | 0.011251 | 0.011397 | 0.011363 | 0.011437 | 0.011329 |
| 0.011295 | 0.011295 | 0.011362 | 0.011329 | 0.011530 | 0.011497 | 0.011429 |
| 0.011530 | 0.011597 | 0.011329 | 0.011329 | 0.011362 | 0.011362 | 0.011364 |
| 0.011432 | 0.011362 | 0.011362 | 0.011397 | 0.011530 | 0.011597 | 0.011597 |
| 0.011464 | 0.011567 | 0.011569 | 0.011704 | 0.011732 | 0.011396 | 0.011564 |
| 0.011496 | 0.011496 | 0.011331 | 0.011513 | 0.011408 | 0.011469 | 0.011305 |
| 0.011473 | 0.011698 | 0.011399 | 0.011400 | 0.011295 | 0.011497 | 0.011362 |
| 0.011463 | 0.011396 | 0.011295 | 0.011397 | 0.011497 | 0.011499 | 0.011396 |
| 0.011295 | 0.011229 | 0.011362 | 0.011295 | 0.011228 | 0.011332 | 0.011497 |
| 0.011396 | 0.011329 | 0.011362 | 0.011396 | 0.011362 | 0.011295 | 0.011497 |
| 0.011362 | 0.011396 | 0.011396 | 0.011329 | 0.000000 | 0.011497 | 0.011295 |
| 0.011329 | 0.011732 | 0.011329 | 0.011362 | 0.011329 | 0.011698 | 0.011274 |
| 0.011678 | 0.011315 | 0.011311 | 0.011543 | 0.011630 | 0.011527 | 0.011227 |
| 0.011218 | 0.011496 | 0.011597 | 0.011705 | 0.011565 | 0.011703 | 0.011834 |
| 0.011733 | 0.011770 | 0.011731 | 0.011983 | 0.011698 | 0.012573 | 0.011734 |
| 0.012473 | 0.012241 | 0.012375 | 0.012646 | 0.011698 | 0.011396 | 0.011699 |
| 0.012137 | 0.012072 | 0.011664 | 0.011564 | 0.011632 | 0.011632 | 0.011601 |
| 0.011496 | 0.011501 | 0.011564 | 0.011531 | 0.011901 | 0.011967 | 0.011968 |
| 0.011868 | 0.011968 | 0.012072 | 0.011838 | 0.012138 | 0.012144 | 0.012205 |
| 0.012205 | 0.012239 | 0.012186 | 0.012206 | 0.012207 | 0.011429 | 0.011732 |
| 0.011800 | 0.012303 | 0.011806 | 0.012034 | 0.012508 | 0.011570 | 0.011464 |
| 0.011429 | 0.011429 | 0.011900 | 0.011965 | 0.012045 | 0.011765 | 0.011431 |
| s775     | 0.011933 | 0.011933 | 0.012270 | 0.012034 | 0.012034 | 0.012101 |
| 0.011943 | 0.011875 | 0.012101 | 0.011530 | 0.011597 | 0.011565 | 0.011530 |
| 0.011564 | 0.011732 | 0.011530 | 0.011564 | 0.011631 | 0.011597 | 0.011564 |
| 0.011530 | 0.011564 | 0.011664 | 0.011531 | 0.011564 | 0.011564 | 0.011909 |
| 0.011799 | 0.011564 | 0.011463 | 0.011698 | 0.011631 | 0.011597 | 0.011631 |
| 0.011597 | 0.011698 | 0.011597 | 0.011597 | 0.011631 | 0.011530 | 0.011765 |
| 0.011530 | 0.011597 | 0.011631 | 0.011564 | 0.011664 | 0.011698 | 0.011631 |
| 0.011597 | 0.011765 | 0.011665 | 0.011933 | 0.011597 | 0.011866 | 0.011597 |
| 0.011564 | 0.011665 | 0.011732 | 0.011866 | 0.011967 | 0.011664 | 0.011765 |
| 0.011631 | 0.011698 | 0.011597 | 0.011765 | 0.012068 | 0.011597 | 0.011664 |

|          |          |          |          |          |          |          |
|----------|----------|----------|----------|----------|----------|----------|
| 0.011564 | 0.011664 | 0.011631 | 0.011698 | 0.011631 | 0.011631 | 0.011631 |
| 0.011530 | 0.011564 | 0.011530 | 0.011631 | 0.011597 | 0.011632 | 0.011698 |
| 0.011631 | 0.011597 | 0.011664 | 0.011564 | 0.011698 | 0.011530 | 0.011597 |
| 0.011765 | 0.011698 | 0.011933 | 0.011698 | 0.011597 | 0.011832 | 0.011597 |
| 0.011691 | 0.011995 | 0.011777 | 0.011490 | 0.011433 | 0.011539 | 0.011651 |
| 0.012268 | 0.011721 | 0.011472 | 0.011832 | 0.011832 | 0.011631 | 0.011732 |
| 0.011597 | 0.011631 | 0.011698 | 0.011597 | 0.011698 | 0.011631 | 0.011631 |
| 0.011597 | 0.011698 | 0.011900 | 0.011765 | 0.011664 | 0.011631 | 0.011564 |
| 0.011530 | 0.011530 | 0.011598 | 0.011564 | 0.011765 | 0.011732 | 0.011665 |
| 0.011765 | 0.011833 | 0.011564 | 0.011564 | 0.011598 | 0.011597 | 0.011601 |
| 0.011669 | 0.011598 | 0.011598 | 0.011456 | 0.011530 | 0.011481 | 0.011598 |
| 0.011501 | 0.011507 | 0.011540 | 0.011543 | 0.011502 | 0.011506 | 0.011567 |
| 0.011816 | 0.011577 | 0.011611 | 0.011531 | 0.011510 | 0.011599 | 0.011632 |
| 0.011699 | 0.011633 | 0.011632 | 0.011731 | 0.011664 | 0.012034 | 0.011833 |
| 0.011866 | 0.011732 | 0.011597 | 0.011698 | 0.011497 | 0.011732 | 0.011530 |
| 0.011597 | 0.011597 | 0.011564 | 0.011463 | 0.011564 | 0.011530 | 0.011631 |
| 0.011598 | 0.011698 | 0.011631 | 0.011530 | 0.011633 | 0.011732 | 0.011736 |
| 0.011732 | 0.011631 | 0.011530 | 0.011465 | 0.011597 | 0.011530 | 0.011463 |
| 0.011570 | 0.011732 | 0.011530 | 0.011732 | 0.011497 | 0.011598 | 0.011564 |
| 0.011665 | 0.011564 | 0.011598 | 0.011564 | 0.011598 | 0.011463 | 0.011598 |
| 0.011631 | 0.011564 | 0.011564 | 0.011564 | 0.011597 | 0.011631 | 0.011866 |
| 0.011967 | 0.011900 | 0.011967 | 0.011633 | 0.011968 | 0.011597 | 0.011564 |
| 0.011601 | 0.011829 | 0.011701 | 0.011438 | 0.011977 | 0.011469 | 0.011532 |
| 0.011977 | 0.011877 | 0.011765 | 0.011967 | 0.011675 | 0.011833 | 0.011799 |
| 0.011732 | 0.011900 | 0.011771 | 0.011596 | 0.011689 | 0.011631 | 0.011703 |
| 0.011799 | 0.011701 | 0.011838 | 0.011906 | 0.011833 | 0.011900 | 0.012009 |
| 0.011737 | 0.011909 | 0.011839 | 0.011703 | 0.011969 | 0.011496 | 0.011701 |
| 0.011664 | 0.011597 | 0.011496 | 0.011496 | 0.011564 | 0.011564 | 0.011631 |
| 0.011564 | 0.011631 | 0.011530 | 0.011631 | 0.011564 | 0.011564 | 0.011631 |
| 0.011564 | 0.012000 | 0.011900 | 0.011933 | 0.011463 | 0.011564 | 0.011597 |
| 0.011597 | 0.011564 | 0.011631 | 0.011664 | 0.011530 | 0.011530 | 0.011530 |
| 0.012000 | 0.011698 | 0.011698 | 0.011497 | 0.011597 | 0.011765 | 0.011530 |
| 0.011530 | 0.011597 | 0.011564 | 0.011732 | 0.011530 | 0.011664 | 0.011799 |
| 0.011732 | 0.011564 | 0.011564 | 0.011497 | 0.011496 | 0.011665 | 0.011597 |
| 0.011497 | 0.011597 | 0.011463 | 0.011497 | 0.011564 | 0.011766 | 0.011530 |
| 0.011497 | 0.011564 | 0.011564 | 0.011463 | 0.011799 | 0.011463 | 0.011631 |
| 0.011711 | 0.011530 | 0.011832 | 0.011665 | 0.011564 | 0.011564 | 0.011664 |
| 0.011530 | 0.011866 | 0.011463 | 0.011732 | 0.011530 | 0.011530 | 0.011463 |
| 0.011698 | 0.011866 | 0.011597 | 0.011664 | 0.011496 | 0.011900 | 0.011530 |
| 0.011530 | 0.011530 | 0.011564 | 0.011664 | 0.011564 | 0.011664 | 0.011732 |
| 0.011665 | 0.011698 | 0.011597 | 0.011698 | 0.011664 | 0.011530 | 0.011497 |
| 0.011530 | 0.011530 | 0.011597 | 0.011530 | 0.011497 | 0.011664 | 0.011530 |
| 0.011564 | 0.011564 | 0.011698 | 0.011732 | 0.011631 | 0.011564 | 0.011564 |
| 0.011631 | 0.011564 | 0.011664 | 0.011530 | 0.011664 | 0.011765 | 0.012068 |
| 0.011564 | 0.011967 | 0.011543 | 0.018012 | 0.011387 | 0.011611 | 0.011898 |
| 0.011856 | 0.011905 | 0.011532 | 0.011524 | 0.011884 | 0.011924 | 0.011485 |
| 0.011677 | 0.011732 | 0.011450 | 0.011479 | 0.011490 | 0.011455 | 0.011490 |
| 0.011717 | 0.011656 | 0.011653 | 0.011589 | 0.011698 | 0.011732 | 0.011737 |
| 0.011610 | 0.011698 | 0.011698 | 0.011665 | 0.011631 | 0.011631 | 0.011598 |
| 0.011631 | 0.011564 | 0.011597 | 0.011631 | 0.011598 | 0.011530 | 0.011564 |
| 0.011564 | 0.011631 | 0.011530 | 0.011631 | 0.011665 | 0.011631 | 0.011597 |
| 0.011631 | 0.011598 | 0.011934 | 0.011934 | 0.011665 | 0.011699 | 0.011732 |
| 0.011497 | 0.011497 | 0.011530 | 0.011631 | 0.011497 | 0.011732 | 0.011732 |
| 0.011765 | 0.011765 | 0.011698 | 0.011799 | 0.011967 | 0.011801 | 0.011631 |
| 0.011631 | 0.011698 | 0.011732 | 0.011564 | 0.011631 | 0.011597 | 0.011631 |
| 0.011699 | 0.011698 | 0.011732 | 0.011699 | 0.011599 | 0.011799 | 0.011766 |
| 0.011636 | 0.011530 | 0.011631 | 0.011732 | 0.011631 | 0.011698 | 0.011799 |
| 0.011967 | 0.011675 | 0.011833 | 0.011799 | 0.011732 | 0.011900 | 0.011531 |
| 0.011700 | 0.011564 | 0.011564 | 0.011564 | 0.011631 | 0.011530 | 0.011631 |
| 0.011665 | 0.011631 | 0.011597 | 0.011631 | 0.011598 | 0.011934 | 0.011934 |

|          |          |          |          |          |          |          |
|----------|----------|----------|----------|----------|----------|----------|
| 0.011665 | 0.011699 | 0.011765 | 0.011698 | 0.012339 | 0.011775 | 0.011693 |
| 0.011693 | 0.011719 | 0.011833 | 0.011718 | 0.011830 | 0.011750 | 0.011681 |
| 0.012297 | 0.011614 | 0.011745 | 0.011683 | 0.011956 | 0.011809 | 0.011911 |
| 0.012319 | 0.011814 | 0.011872 | 0.011933 | 0.011799 | 0.011799 | 0.011838 |
| 0.011496 | 0.011665 | 0.011799 | 0.011765 | 0.011770 | 0.011765 | 0.011700 |
| 0.011597 | 0.011530 | 0.011564 | 0.011597 | 0.011497 | 0.011564 | 0.011463 |
| 0.011530 | 0.011496 | 0.011463 | 0.011497 | 0.011530 | 0.011530 | 0.011564 |
| 0.011564 | 0.011496 | 0.011564 | 0.011597 | 0.011496 | 0.011698 | 0.011597 |
| 0.011497 | 0.011564 | 0.011497 | 0.011497 | 0.011564 | 0.011967 | 0.011597 |
| 0.011652 | 0.011564 | 0.011799 | 0.011807 | 0.011665 | 0.011664 | 0.011664 |
| 0.011665 | 0.011597 | 0.011564 | 0.011597 | 0.011698 | 0.011698 | 0.011631 |
| 0.011631 | 0.011765 | 0.011933 | 0.011664 | 0.011866 | 0.011866 | 0.011732 |
| 0.011564 | 0.011631 | 0.011665 | 0.012068 | 0.011631 | 0.011665 | 0.011631 |
| 0.011664 | 0.011597 | 0.011597 | 0.011900 | 0.011833 | 0.011866 | 0.011530 |
| 0.011631 | 0.011765 | 0.011631 | 0.011631 | 0.011664 | 0.011530 | 0.011866 |
| 0.011631 | 0.011597 | 0.011597 | 0.011765 | 0.011530 | 0.011698 | 0.011933 |
| 0.011631 | 0.012011 | 0.012000 | 0.011751 | 0.011568 | 0.011706 | 0.011576 |
| 0.011390 | 0.011956 | 0.011517 | 0.011641 | 0.011597 | 0.011518 | 0.011485 |
| 0.011672 | 0.011324 | 0.011450 | 0.011324 | 0.011491 | 0.011529 | 0.011709 |
| 0.011701 | 0.011572 | 0.011659 | 0.011553 | 0.011633 | 0.011765 | 0.011833 |
| 0.011833 | 0.011699 | 0.011804 | 0.011806 | 0.011942 | 0.011979 | 0.011631 |
| 0.011866 | 0.011732 | 0.011597 | 0.011698 | 0.011497 | 0.011732 | 0.011530 |
| 0.011597 | 0.011597 | 0.011564 | 0.011463 | 0.011564 | 0.011530 | 0.011631 |
| 0.011584 | 0.011585 | 0.011574 | 0.011608 | 0.011676 | 0.011709 | 0.011709 |
| 0.011708 | 0.011666 | 0.011466 | 0.011456 | 0.011568 | 0.011738 | 0.011739 |
| 0.011565 | 0.011602 | 0.011868 | 0.011838 | 0.011767 | 0.011801 | 0.011732 |
| 0.011664 | 0.011732 | 0.011731 | 0.011631 | 0.012135 | 0.011799 | 0.011866 |
| 0.011900 | 0.011951 | 0.011606 | 0.011684 | 0.011564 | 0.011765 | 0.011732 |
| 0.011767 | 0.011799 | 0.011799 | 0.011799 | 0.011965 | 0.011933 | 0.011581 |
| 0.011466 | 0.011476 | 0.011571 | 0.011536 | 0.011641 | 0.011508 | 0.011808 |
| 0.011575 | 0.011806 | 0.011537 | 0.011622 | 0.011598 | 0.011642 | 0.011564 |
| 0.011530 | 0.011530 | 0.011598 | 0.011564 | 0.011765 | 0.011732 | 0.011665 |
| 0.011765 | 0.011833 | 0.011564 | 0.011564 | 0.011598 | 0.011597 | 0.011601 |
| 0.011669 | 0.011598 | 0.011598 | 0.011633 | 0.011765 | 0.011833 | 0.011833 |
| 0.011699 | 0.011804 | 0.011806 | 0.011942 | 0.011979 | 0.011631 | 0.011799 |
| 0.011732 | 0.011732 | 0.011567 | 0.011756 | 0.011651 | 0.011707 | 0.011516 |
| 0.011715 | 0.011835 | 0.011738 | 0.011638 | 0.011530 | 0.011732 | 0.011598 |
| 0.011698 | 0.011631 | 0.011530 | 0.011633 | 0.011732 | 0.011736 | 0.011631 |
| 0.011530 | 0.011465 | 0.011597 | 0.011530 | 0.011463 | 0.011570 | 0.011732 |
| 0.011631 | 0.011564 | 0.011597 | 0.011631 | 0.011598 | 0.011530 | 0.011732 |
| 0.011597 | 0.011631 | 0.011631 | 0.011564 | 0.011497 | 0.000000 | 0.011530 |
| 0.011564 | 0.011967 | 0.011564 | 0.011597 | 0.011564 | 0.011933 | 0.011403 |
| 0.011903 | 0.011485 | 0.011511 | 0.011704 | 0.011793 | 0.011742 | 0.011353 |
| 0.011427 | 0.011732 | 0.011832 | 0.011943 | 0.011801 | 0.011906 | 0.012070 |
| 0.011969 | 0.012008 | 0.011967 | 0.012188 | 0.011933 | 0.012809 | 0.011970 |
| 0.012709 | 0.012477 | 0.012611 | 0.012883 | 0.011933 | 0.011631 | 0.011934 |
| 0.012373 | 0.012275 | 0.011900 | 0.011799 | 0.011867 | 0.011867 | 0.011838 |
| 0.011732 | 0.011671 | 0.011799 | 0.011766 | 0.012137 | 0.012202 | 0.012204 |
| 0.012103 | 0.012204 | 0.012308 | 0.012042 | 0.012374 | 0.012381 | 0.012441 |
| 0.012442 | 0.012476 | 0.012392 | 0.012442 | 0.012444 | 0.011664 | 0.011968 |
| 0.012036 | 0.012539 | 0.012044 | 0.012270 | 0.012744 | 0.011808 | 0.011699 |
| 0.011664 | 0.011664 | 0.012136 | 0.012212 | 0.012257 | 0.012000 | 0.011667 |
| s776     | 0.011597 | 0.011597 | 0.011866 | 0.011631 | 0.011631 | 0.011698 |
| 0.011535 | 0.011468 | 0.011698 | 0.011195 | 0.011262 | 0.011228 | 0.011194 |
| 0.011161 | 0.011396 | 0.011127 | 0.011228 | 0.011295 | 0.011262 | 0.011228 |
| 0.011194 | 0.011228 | 0.011262 | 0.011195 | 0.011228 | 0.011228 | 0.011501 |
| 0.011396 | 0.011228 | 0.011127 | 0.011295 | 0.011295 | 0.011262 | 0.011295 |
| 0.011262 | 0.011362 | 0.011262 | 0.011262 | 0.011295 | 0.011262 | 0.011429 |
| 0.000000 | 0.011262 | 0.011295 | 0.011228 | 0.011262 | 0.011362 | 0.011295 |
| 0.011262 | 0.011429 | 0.011329 | 0.011530 | 0.011262 | 0.011530 | 0.011262 |



|          |          |          |          |          |          |          |
|----------|----------|----------|----------|----------|----------|----------|
| 0.011228 | 0.011262 | 0.011396 | 0.011530 | 0.011564 | 0.011262 | 0.011362 |
| 0.011295 | 0.011362 | 0.011262 | 0.011496 | 0.011664 | 0.011262 | 0.011329 |
| 0.011228 | 0.011329 | 0.011295 | 0.011362 | 0.011295 | 0.011295 | 0.011295 |
| 0.011194 | 0.011228 | 0.011194 | 0.011228 | 0.011262 | 0.011296 | 0.011362 |
| 0.011295 | 0.011262 | 0.011329 | 0.011228 | 0.011295 | 0.011194 | 0.011262 |
| 0.011429 | 0.011362 | 0.011597 | 0.011429 | 0.011262 | 0.011496 | 0.011262 |
| 0.011431 | 0.011583 | 0.011437 | 0.011138 | 0.011135 | 0.011281 | 0.011257 |
| 0.011938 | 0.011314 | 0.011143 | 0.011496 | 0.011496 | 0.011228 | 0.011329 |
| 0.011329 | 0.011295 | 0.011362 | 0.011262 | 0.011362 | 0.011295 | 0.011295 |
| 0.011262 | 0.011295 | 0.011564 | 0.011429 | 0.011329 | 0.011295 | 0.011228 |
| 0.011195 | 0.011127 | 0.011262 | 0.011228 | 0.011362 | 0.011329 | 0.011262 |
| 0.011362 | 0.011429 | 0.011228 | 0.011228 | 0.011262 | 0.011262 | 0.011263 |
| 0.011331 | 0.011262 | 0.011262 | 0.011132 | 0.011169 | 0.011165 | 0.011262 |
| 0.011263 | 0.011198 | 0.011208 | 0.011233 | 0.011162 | 0.011197 | 0.011229 |
| 0.011420 | 0.011267 | 0.011301 | 0.011195 | 0.011199 | 0.011329 | 0.011228 |
| 0.011296 | 0.011296 | 0.011296 | 0.011396 | 0.011329 | 0.011698 | 0.011430 |
| 0.011463 | 0.011329 | 0.011262 | 0.011295 | 0.011161 | 0.011329 | 0.011195 |
| 0.011262 | 0.011262 | 0.011228 | 0.011194 | 0.011228 | 0.011195 | 0.011295 |
| 0.011262 | 0.011362 | 0.011295 | 0.011195 | 0.011296 | 0.011396 | 0.011398 |
| 0.011396 | 0.011295 | 0.011195 | 0.011128 | 0.011262 | 0.011195 | 0.011127 |
| 0.011230 | 0.011396 | 0.011195 | 0.011396 | 0.011161 | 0.011262 | 0.011228 |
| 0.011329 | 0.011228 | 0.011262 | 0.011228 | 0.011262 | 0.011127 | 0.011262 |
| 0.011295 | 0.011228 | 0.011295 | 0.011228 | 0.011262 | 0.011295 | 0.011530 |
| 0.011564 | 0.011496 | 0.011564 | 0.011397 | 0.011564 | 0.011262 | 0.011228 |
| 0.011195 | 0.011464 | 0.011335 | 0.011163 | 0.011569 | 0.011129 | 0.011257 |
| 0.011569 | 0.011468 | 0.011429 | 0.011631 | 0.011333 | 0.011496 | 0.011463 |
| 0.011396 | 0.011564 | 0.011415 | 0.011266 | 0.011312 | 0.011295 | 0.011365 |
| 0.011463 | 0.011364 | 0.011500 | 0.011568 | 0.011497 | 0.011564 | 0.011670 |
| 0.011399 | 0.011569 | 0.011500 | 0.011432 | 0.011699 | 0.011161 | 0.011363 |
| 0.011329 | 0.011262 | 0.011161 | 0.011161 | 0.011228 | 0.011228 | 0.011295 |
| 0.011228 | 0.011295 | 0.011194 | 0.011228 | 0.011228 | 0.011228 | 0.011295 |
| 0.011228 | 0.011597 | 0.011497 | 0.011530 | 0.011127 | 0.011228 | 0.011262 |
| 0.011262 | 0.011228 | 0.011295 | 0.011262 | 0.011194 | 0.011194 | 0.011194 |
| 0.011664 | 0.011295 | 0.011362 | 0.011161 | 0.011262 | 0.011429 | 0.011194 |
| 0.011194 | 0.011262 | 0.011228 | 0.011396 | 0.011194 | 0.011329 | 0.011463 |
| 0.011396 | 0.011228 | 0.011228 | 0.011161 | 0.011161 | 0.011329 | 0.011262 |
| 0.011161 | 0.011262 | 0.011127 | 0.011161 | 0.011295 | 0.011362 | 0.011195 |
| 0.011161 | 0.011295 | 0.011228 | 0.011127 | 0.011396 | 0.011127 | 0.011295 |
| 0.011368 | 0.011195 | 0.011429 | 0.011329 | 0.011295 | 0.011228 | 0.011329 |
| 0.011194 | 0.011530 | 0.011127 | 0.011329 | 0.011127 | 0.011127 | 0.011127 |
| 0.011362 | 0.011497 | 0.011262 | 0.011329 | 0.011161 | 0.011497 | 0.011127 |
| 0.011194 | 0.011194 | 0.011228 | 0.011329 | 0.011228 | 0.011329 | 0.011396 |
| 0.011396 | 0.011362 | 0.011262 | 0.011362 | 0.011329 | 0.011194 | 0.011161 |
| 0.011194 | 0.011194 | 0.011262 | 0.000000 | 0.011161 | 0.011329 | 0.011194 |
| 0.011161 | 0.011228 | 0.011362 | 0.011329 | 0.011295 | 0.011228 | 0.011228 |
| 0.011295 | 0.011228 | 0.011329 | 0.011194 | 0.011329 | 0.011429 | 0.011664 |
| 0.011228 | 0.011564 | 0.011233 | 0.017747 | 0.011191 | 0.011366 | 0.011514 |
| 0.011475 | 0.011517 | 0.011270 | 0.011234 | 0.011609 | 0.011543 | 0.011303 |
| 0.011345 | 0.011426 | 0.011099 | 0.011228 | 0.011099 | 0.011208 | 0.011232 |
| 0.011342 | 0.011284 | 0.011320 | 0.000000 | 0.011362 | 0.011396 | 0.011398 |
| 0.011266 | 0.011362 | 0.011362 | 0.011262 | 0.011295 | 0.011295 | 0.011262 |
| 0.011295 | 0.011228 | 0.011262 | 0.011295 | 0.011262 | 0.011195 | 0.011228 |
| 0.011228 | 0.011295 | 0.011195 | 0.011295 | 0.011329 | 0.011362 | 0.011262 |
| 0.011228 | 0.011195 | 0.011530 | 0.011530 | 0.011329 | 0.011363 | 0.011396 |
| 0.011161 | 0.011161 | 0.011195 | 0.011295 | 0.011161 | 0.011396 | 0.011396 |
| 0.011429 | 0.011429 | 0.011362 | 0.011463 | 0.011564 | 0.011464 | 0.011295 |
| 0.011295 | 0.011362 | 0.011396 | 0.011228 | 0.011295 | 0.011262 | 0.011295 |
| 0.011363 | 0.011362 | 0.011396 | 0.011363 | 0.011262 | 0.011463 | 0.011429 |
| 0.011297 | 0.011195 | 0.011295 | 0.011396 | 0.011295 | 0.011362 | 0.011463 |
| 0.011631 | 0.011333 | 0.011496 | 0.011463 | 0.011396 | 0.011564 | 0.011195 |

|          |          |          |          |          |          |          |
|----------|----------|----------|----------|----------|----------|----------|
| 0.011363 | 0.011262 | 0.011228 | 0.011228 | 0.011295 | 0.011195 | 0.011295 |
| 0.011329 | 0.011362 | 0.011262 | 0.011228 | 0.011195 | 0.011530 | 0.011530 |
| 0.011329 | 0.011363 | 0.011429 | 0.011362 | 0.011935 | 0.011417 | 0.011341 |
| 0.011412 | 0.011372 | 0.011482 | 0.011372 | 0.011480 | 0.011405 | 0.011370 |
| 0.011884 | 0.011268 | 0.011403 | 0.011337 | 0.011611 | 0.011468 | 0.011570 |
| 0.011910 | 0.011362 | 0.011533 | 0.011597 | 0.011463 | 0.011396 | 0.011499 |
| 0.011161 | 0.011329 | 0.011463 | 0.011429 | 0.011432 | 0.011362 | 0.011330 |
| 0.011262 | 0.011194 | 0.011228 | 0.011262 | 0.011161 | 0.011228 | 0.011127 |
| 0.011194 | 0.011228 | 0.011194 | 0.011161 | 0.011262 | 0.011194 | 0.011228 |
| 0.011228 | 0.011161 | 0.011228 | 0.011262 | 0.011161 | 0.011362 | 0.011396 |
| 0.011295 | 0.011295 | 0.011295 | 0.011295 | 0.011228 | 0.011564 | 0.011262 |
| 0.011234 | 0.011228 | 0.011396 | 0.011399 | 0.011329 | 0.011329 | 0.011329 |
| 0.011329 | 0.011262 | 0.011228 | 0.011262 | 0.011362 | 0.011362 | 0.011295 |
| 0.011295 | 0.011429 | 0.011530 | 0.011329 | 0.011530 | 0.011530 | 0.011396 |
| 0.011228 | 0.011295 | 0.011329 | 0.011664 | 0.011295 | 0.011329 | 0.011295 |
| 0.011329 | 0.011194 | 0.011194 | 0.011497 | 0.011497 | 0.011463 | 0.011262 |
| 0.011362 | 0.011429 | 0.011295 | 0.011362 | 0.011329 | 0.011194 | 0.011463 |
| 0.011295 | 0.011262 | 0.011194 | 0.011429 | 0.011262 | 0.011362 | 0.011597 |
| 0.011295 | 0.011603 | 0.011597 | 0.011345 | 0.000000 | 0.011298 | 0.011112 |
| 0.011170 | 0.011566 | 0.011201 | 0.011283 | 0.011109 | 0.011264 | 0.011220 |
| 0.011315 | 0.011126 | 0.011283 | 0.011126 | 0.011168 | 0.011328 | 0.011303 |
| 0.011362 | 0.011218 | 0.011272 | 0.011272 | 0.011296 | 0.011362 | 0.011430 |
| 0.011429 | 0.011296 | 0.011398 | 0.011399 | 0.011535 | 0.011555 | 0.011295 |
| 0.011463 | 0.011329 | 0.011262 | 0.011295 | 0.011161 | 0.011329 | 0.011195 |
| 0.011262 | 0.011262 | 0.011228 | 0.011194 | 0.011228 | 0.011195 | 0.011295 |
| 0.011270 | 0.011270 | 0.011266 | 0.011300 | 0.011437 | 0.011402 | 0.011402 |
| 0.011401 | 0.011329 | 0.011134 | 0.011132 | 0.011263 | 0.011433 | 0.011433 |
| 0.011228 | 0.011297 | 0.011531 | 0.011500 | 0.011430 | 0.011464 | 0.011396 |
| 0.011329 | 0.011396 | 0.011396 | 0.011295 | 0.011799 | 0.011463 | 0.011530 |
| 0.011564 | 0.011559 | 0.011265 | 0.011337 | 0.011228 | 0.011429 | 0.011396 |
| 0.011430 | 0.011463 | 0.011463 | 0.011463 | 0.011610 | 0.011597 | 0.011234 |
| 0.011128 | 0.011130 | 0.011230 | 0.011196 | 0.011231 | 0.011135 | 0.011400 |
| 0.011266 | 0.011323 | 0.011156 | 0.011285 | 0.011262 | 0.011334 | 0.011228 |
| 0.011195 | 0.011127 | 0.011262 | 0.011228 | 0.011362 | 0.011329 | 0.011262 |
| 0.011362 | 0.011429 | 0.011228 | 0.011228 | 0.011262 | 0.011262 | 0.011263 |
| 0.011331 | 0.011262 | 0.011262 | 0.011296 | 0.011362 | 0.011430 | 0.011429 |
| 0.011296 | 0.011398 | 0.011399 | 0.011535 | 0.011555 | 0.011295 | 0.011463 |
| 0.011396 | 0.011396 | 0.011229 | 0.011408 | 0.011338 | 0.011367 | 0.011235 |
| 0.011405 | 0.011561 | 0.011357 | 0.011298 | 0.011195 | 0.011396 | 0.011262 |
| 0.011362 | 0.011295 | 0.011195 | 0.011296 | 0.011396 | 0.011398 | 0.011295 |
| 0.011195 | 0.011128 | 0.011262 | 0.011195 | 0.011127 | 0.011230 | 0.011396 |
| 0.011295 | 0.011228 | 0.011262 | 0.011295 | 0.011262 | 0.011195 | 0.011329 |
| 0.011262 | 0.011295 | 0.011295 | 0.011228 | 0.011295 | 0.011530 | 0.000000 |
| 0.011228 | 0.011564 | 0.011228 | 0.011262 | 0.011228 | 0.011530 | 0.011146 |
| 0.011510 | 0.011145 | 0.011110 | 0.011302 | 0.011386 | 0.011347 | 0.011102 |
| 0.000000 | 0.011329 | 0.011429 | 0.011535 | 0.011397 | 0.011534 | 0.011665 |
| 0.011565 | 0.011601 | 0.011564 | 0.011812 | 0.011530 | 0.012404 | 0.011565 |
| 0.012304 | 0.012072 | 0.012206 | 0.012477 | 0.011530 | 0.011228 | 0.011530 |
| 0.011969 | 0.011903 | 0.011497 | 0.011396 | 0.011464 | 0.011464 | 0.011432 |
| 0.011329 | 0.011331 | 0.011396 | 0.011363 | 0.011733 | 0.011799 | 0.011800 |
| 0.011699 | 0.011800 | 0.011903 | 0.011669 | 0.011969 | 0.011974 | 0.012036 |
| 0.012037 | 0.012070 | 0.012016 | 0.012037 | 0.012038 | 0.011329 | 0.011564 |
| 0.011632 | 0.012135 | 0.011636 | 0.011866 | 0.012339 | 0.011400 | 0.011295 |
| 0.011262 | 0.011262 | 0.011732 | 0.011759 | 0.011869 | 0.011597 | 0.011262 |
| s777     | 0.011631 | 0.011631 | 0.011967 | 0.011732 | 0.011732 | 0.011799 |
| 0.011637 | 0.011569 | 0.011799 | 0.011228 | 0.011295 | 0.011262 | 0.011228 |
| 0.011262 | 0.011429 | 0.011228 | 0.011262 | 0.011329 | 0.011295 | 0.011262 |
| 0.011228 | 0.011262 | 0.011362 | 0.011228 | 0.011262 | 0.011262 | 0.011603 |
| 0.011496 | 0.011262 | 0.011161 | 0.011396 | 0.011329 | 0.011295 | 0.011329 |
| 0.011295 | 0.011396 | 0.011295 | 0.011295 | 0.011329 | 0.011295 | 0.011463 |

|          |          |          |          |          |          |          |
|----------|----------|----------|----------|----------|----------|----------|
| 0.011228 | 0.011295 | 0.011329 | 0.011262 | 0.011362 | 0.011396 | 0.011329 |
| 0.011295 | 0.011463 | 0.011362 | 0.011631 | 0.011295 | 0.011564 | 0.011295 |
| 0.011262 | 0.011362 | 0.011429 | 0.011564 | 0.011664 | 0.011362 | 0.011463 |
| 0.011329 | 0.011396 | 0.011295 | 0.011530 | 0.011765 | 0.011295 | 0.011362 |
| 0.000000 | 0.011362 | 0.011329 | 0.011396 | 0.011329 | 0.011329 | 0.011329 |
| 0.011228 | 0.011262 | 0.011228 | 0.011329 | 0.011295 | 0.011329 | 0.011396 |
| 0.011329 | 0.011295 | 0.011362 | 0.011262 | 0.011396 | 0.011161 | 0.011295 |
| 0.011463 | 0.011396 | 0.011631 | 0.011463 | 0.011295 | 0.011530 | 0.011295 |
| 0.011468 | 0.011695 | 0.011513 | 0.011216 | 0.011210 | 0.011318 | 0.011415 |
| 0.012048 | 0.011518 | 0.011225 | 0.011530 | 0.011530 | 0.011329 | 0.011429 |
| 0.011362 | 0.011329 | 0.011396 | 0.011295 | 0.011396 | 0.011329 | 0.011329 |
| 0.011295 | 0.011396 | 0.011597 | 0.011463 | 0.011362 | 0.011329 | 0.011262 |
| 0.011228 | 0.011228 | 0.011295 | 0.011262 | 0.011463 | 0.011430 | 0.011362 |
| 0.011463 | 0.011530 | 0.011262 | 0.011262 | 0.011295 | 0.011295 | 0.011297 |
| 0.011364 | 0.011295 | 0.011295 | 0.011168 | 0.011241 | 0.011200 | 0.011296 |
| 0.011297 | 0.011232 | 0.011282 | 0.011267 | 0.011196 | 0.011232 | 0.011263 |
| 0.011528 | 0.011302 | 0.011336 | 0.011228 | 0.011233 | 0.011363 | 0.011329 |
| 0.011397 | 0.011330 | 0.011329 | 0.011429 | 0.011362 | 0.011732 | 0.011530 |
| 0.011564 | 0.011430 | 0.011295 | 0.011396 | 0.011195 | 0.011429 | 0.011228 |
| 0.011295 | 0.011295 | 0.011262 | 0.011228 | 0.011262 | 0.011228 | 0.011329 |
| 0.011295 | 0.011396 | 0.011329 | 0.011228 | 0.011330 | 0.011430 | 0.011432 |
| 0.011430 | 0.011329 | 0.011228 | 0.011161 | 0.011295 | 0.011228 | 0.011161 |
| 0.011264 | 0.011430 | 0.011228 | 0.011430 | 0.011195 | 0.011295 | 0.011262 |
| 0.011362 | 0.011262 | 0.011295 | 0.011262 | 0.011295 | 0.011161 | 0.011295 |
| 0.011329 | 0.011262 | 0.011329 | 0.011262 | 0.011295 | 0.011329 | 0.011564 |
| 0.011664 | 0.011597 | 0.011665 | 0.011431 | 0.011665 | 0.011295 | 0.011262 |
| 0.011297 | 0.011586 | 0.011380 | 0.011197 | 0.011671 | 0.011163 | 0.011296 |
| 0.011671 | 0.011570 | 0.011463 | 0.011664 | 0.011368 | 0.011530 | 0.011497 |
| 0.011429 | 0.011597 | 0.011415 | 0.011266 | 0.011312 | 0.011329 | 0.011398 |
| 0.011497 | 0.011397 | 0.011533 | 0.011601 | 0.011530 | 0.011597 | 0.011704 |
| 0.011432 | 0.011603 | 0.011534 | 0.011466 | 0.011733 | 0.011194 | 0.011397 |
| 0.011362 | 0.011295 | 0.011194 | 0.011194 | 0.011262 | 0.011262 | 0.011329 |
| 0.011262 | 0.011329 | 0.011228 | 0.011329 | 0.011262 | 0.011262 | 0.011329 |
| 0.011262 | 0.011698 | 0.011597 | 0.011631 | 0.011161 | 0.011262 | 0.011295 |
| 0.011295 | 0.011262 | 0.011329 | 0.011362 | 0.011228 | 0.011228 | 0.011228 |
| 0.011765 | 0.011396 | 0.011396 | 0.011194 | 0.011295 | 0.011463 | 0.011228 |
| 0.011228 | 0.011295 | 0.011262 | 0.011429 | 0.011228 | 0.011362 | 0.011496 |
| 0.011429 | 0.011262 | 0.011262 | 0.011194 | 0.011194 | 0.011362 | 0.011295 |
| 0.011194 | 0.011295 | 0.011161 | 0.011195 | 0.011329 | 0.011463 | 0.011228 |
| 0.011195 | 0.011329 | 0.011262 | 0.011161 | 0.011496 | 0.011161 | 0.011329 |
| 0.011368 | 0.011228 | 0.011530 | 0.011362 | 0.011329 | 0.011262 | 0.011362 |
| 0.011228 | 0.011564 | 0.011161 | 0.011429 | 0.011228 | 0.011228 | 0.011161 |
| 0.011396 | 0.011598 | 0.011295 | 0.011362 | 0.011194 | 0.011597 | 0.011228 |
| 0.011228 | 0.011228 | 0.011262 | 0.011362 | 0.011262 | 0.011362 | 0.011429 |
| 0.011429 | 0.011396 | 0.011295 | 0.011396 | 0.011362 | 0.011228 | 0.011194 |
| 0.011228 | 0.011228 | 0.011295 | 0.011228 | 0.011194 | 0.011362 | 0.011228 |
| 0.011262 | 0.011262 | 0.011396 | 0.011429 | 0.011329 | 0.011262 | 0.011262 |
| 0.011329 | 0.011262 | 0.011362 | 0.011228 | 0.011362 | 0.011463 | 0.011765 |
| 0.011262 | 0.011664 | 0.011267 | 0.017785 | 0.011257 | 0.011366 | 0.011618 |
| 0.011579 | 0.011623 | 0.011322 | 0.011292 | 0.011719 | 0.011647 | 0.011303 |
| 0.011534 | 0.011487 | 0.011177 | 0.011228 | 0.011255 | 0.011307 | 0.011275 |
| 0.011529 | 0.011433 | 0.011431 | 0.011325 | 0.011396 | 0.011429 | 0.011432 |
| 0.011301 | 0.011396 | 0.011396 | 0.011362 | 0.011329 | 0.011329 | 0.011295 |
| 0.011329 | 0.011262 | 0.011295 | 0.011329 | 0.011295 | 0.011228 | 0.011262 |
| 0.011262 | 0.011329 | 0.011228 | 0.011329 | 0.011362 | 0.011396 | 0.011295 |
| 0.011329 | 0.011295 | 0.011631 | 0.011631 | 0.011362 | 0.011396 | 0.011430 |
| 0.011195 | 0.011195 | 0.011228 | 0.011329 | 0.011195 | 0.011430 | 0.011430 |
| 0.011463 | 0.011463 | 0.011396 | 0.011497 | 0.011665 | 0.011498 | 0.011329 |
| 0.011329 | 0.011396 | 0.011430 | 0.011262 | 0.011329 | 0.011295 | 0.011329 |
| 0.011396 | 0.011396 | 0.011429 | 0.011396 | 0.011296 | 0.011497 | 0.011463 |

|          |          |          |          |          |          |          |
|----------|----------|----------|----------|----------|----------|----------|
| 0.011331 | 0.011228 | 0.011329 | 0.011430 | 0.011329 | 0.011463 | 0.011496 |
| 0.011664 | 0.011368 | 0.011530 | 0.011497 | 0.011429 | 0.011597 | 0.011228 |
| 0.011397 | 0.011296 | 0.011262 | 0.011262 | 0.011329 | 0.011228 | 0.011329 |
| 0.011362 | 0.011396 | 0.011295 | 0.011329 | 0.011295 | 0.011631 | 0.011631 |
| 0.011362 | 0.011396 | 0.011463 | 0.011396 | 0.012035 | 0.011453 | 0.011341 |
| 0.011447 | 0.011407 | 0.011482 | 0.011372 | 0.011515 | 0.011439 | 0.011405 |
| 0.011953 | 0.011302 | 0.011437 | 0.011371 | 0.011645 | 0.011502 | 0.011605 |
| 0.012012 | 0.011437 | 0.011567 | 0.011631 | 0.011496 | 0.011497 | 0.011533 |
| 0.011194 | 0.011362 | 0.011496 | 0.011463 | 0.011466 | 0.011463 | 0.011431 |
| 0.011295 | 0.011228 | 0.011262 | 0.011295 | 0.011194 | 0.011262 | 0.011161 |
| 0.011295 | 0.011329 | 0.011228 | 0.011194 | 0.011295 | 0.011228 | 0.011262 |
| 0.011262 | 0.011194 | 0.011262 | 0.011295 | 0.011194 | 0.011396 | 0.011429 |
| 0.011329 | 0.011329 | 0.011329 | 0.011329 | 0.011262 | 0.011664 | 0.011295 |
| 0.011304 | 0.011262 | 0.011497 | 0.011501 | 0.011362 | 0.011362 | 0.011362 |
| 0.011362 | 0.011295 | 0.011262 | 0.011295 | 0.011396 | 0.011396 | 0.011329 |
| 0.011329 | 0.011463 | 0.011631 | 0.011362 | 0.011564 | 0.011564 | 0.011429 |
| 0.011262 | 0.011329 | 0.011362 | 0.011765 | 0.011329 | 0.011362 | 0.011329 |
| 0.011362 | 0.011295 | 0.011295 | 0.011597 | 0.011530 | 0.011564 | 0.011295 |
| 0.011396 | 0.011463 | 0.011329 | 0.011396 | 0.011362 | 0.011228 | 0.011564 |
| 0.011329 | 0.011295 | 0.011295 | 0.011463 | 0.011295 | 0.011396 | 0.011631 |
| 0.011329 | 0.011705 | 0.011698 | 0.011507 | 0.011286 | 0.011400 | 0.011318 |
| 0.011225 | 0.011722 | 0.011236 | 0.011462 | 0.011304 | 0.011366 | 0.011432 |
| 0.011519 | 0.011258 | 0.011394 | 0.011258 | 0.011276 | 0.011462 | 0.011385 |
| 0.011399 | 0.011296 | 0.011377 | 0.011307 | 0.011330 | 0.011463 | 0.011530 |
| 0.011530 | 0.011396 | 0.011500 | 0.011501 | 0.011636 | 0.011661 | 0.011329 |
| 0.011564 | 0.011430 | 0.011295 | 0.011396 | 0.011195 | 0.011429 | 0.011228 |
| 0.011295 | 0.011295 | 0.011262 | 0.011228 | 0.011262 | 0.011228 | 0.011329 |
| 0.011305 | 0.011305 | 0.011300 | 0.011334 | 0.011471 | 0.011436 | 0.011436 |
| 0.011435 | 0.011363 | 0.011171 | 0.011168 | 0.011297 | 0.011467 | 0.011467 |
| 0.011262 | 0.011331 | 0.011565 | 0.011533 | 0.011464 | 0.011498 | 0.011429 |
| 0.011362 | 0.011429 | 0.011429 | 0.011329 | 0.011900 | 0.011497 | 0.011564 |
| 0.011597 | 0.011665 | 0.011299 | 0.011372 | 0.011262 | 0.011463 | 0.011429 |
| 0.011464 | 0.011496 | 0.011496 | 0.011496 | 0.011650 | 0.011631 | 0.011268 |
| 0.011162 | 0.011164 | 0.011264 | 0.011230 | 0.011333 | 0.011172 | 0.011502 |
| 0.011300 | 0.011411 | 0.011156 | 0.011285 | 0.011296 | 0.011368 | 0.011262 |
| 0.011228 | 0.011228 | 0.011295 | 0.011262 | 0.011463 | 0.011430 | 0.011362 |
| 0.011463 | 0.011530 | 0.011262 | 0.011262 | 0.011295 | 0.011295 | 0.011297 |
| 0.011364 | 0.011295 | 0.011295 | 0.011330 | 0.011463 | 0.011530 | 0.011530 |
| 0.011396 | 0.011500 | 0.011501 | 0.011636 | 0.011661 | 0.011329 | 0.011496 |
| 0.011429 | 0.011429 | 0.011263 | 0.011443 | 0.011373 | 0.011401 | 0.011270 |
| 0.011439 | 0.011653 | 0.011357 | 0.011332 | 0.011228 | 0.011430 | 0.011295 |
| 0.011396 | 0.011329 | 0.011228 | 0.011330 | 0.011430 | 0.011432 | 0.011329 |
| 0.011228 | 0.011161 | 0.011295 | 0.011228 | 0.011161 | 0.011264 | 0.011430 |
| 0.011329 | 0.011262 | 0.011295 | 0.011329 | 0.011295 | 0.011228 | 0.011430 |
| 0.011295 | 0.011329 | 0.011329 | 0.011262 | 0.011329 | 0.011564 | 0.011228 |
| 0.000000 | 0.011664 | 0.011262 | 0.011295 | 0.011262 | 0.011631 | 0.011232 |
| 0.011735 | 0.011230 | 0.011311 | 0.011463 | 0.011549 | 0.011455 | 0.011186 |
| 0.011270 | 0.011429 | 0.011530 | 0.011637 | 0.011498 | 0.011635 | 0.011766 |
| 0.011666 | 0.011703 | 0.011664 | 0.011914 | 0.011631 | 0.012505 | 0.011667 |
| 0.012406 | 0.012173 | 0.012307 | 0.012579 | 0.011631 | 0.011329 | 0.011631 |
| 0.012070 | 0.012005 | 0.011597 | 0.011497 | 0.011565 | 0.011565 | 0.011534 |
| 0.011429 | 0.011433 | 0.011496 | 0.011464 | 0.011834 | 0.011900 | 0.011901 |
| 0.011800 | 0.011901 | 0.012004 | 0.011770 | 0.012070 | 0.012042 | 0.012137 |
| 0.012138 | 0.012172 | 0.012118 | 0.012138 | 0.012139 | 0.011362 | 0.011665 |
| 0.011733 | 0.012236 | 0.011738 | 0.011967 | 0.012440 | 0.011502 | 0.011396 |
| 0.011362 | 0.011362 | 0.011833 | 0.011842 | 0.011975 | 0.011698 | 0.011363 |
| S778     | 0.012034 | 0.012034 | 0.012102 | 0.011866 | 0.011866 | 0.011933 |
| 0.011434 | 0.011366 | 0.011933 | 0.011631 | 0.011698 | 0.011666 | 0.011631 |
| 0.011597 | 0.011832 | 0.011564 | 0.011664 | 0.011732 | 0.011698 | 0.011664 |
| 0.011631 | 0.011664 | 0.011497 | 0.011631 | 0.011665 | 0.011664 | 0.011400 |

|          |          |          |          |          |          |          |
|----------|----------|----------|----------|----------|----------|----------|
| 0.011631 | 0.011664 | 0.011564 | 0.011530 | 0.011732 | 0.011698 | 0.011732 |
| 0.011698 | 0.011799 | 0.011698 | 0.011698 | 0.011731 | 0.011698 | 0.011866 |
| 0.011564 | 0.011698 | 0.011732 | 0.011664 | 0.011698 | 0.011799 | 0.011732 |
| 0.011698 | 0.011866 | 0.011766 | 0.011429 | 0.011698 | 0.011967 | 0.011698 |
| 0.011664 | 0.011698 | 0.011832 | 0.011967 | 0.000000 | 0.011698 | 0.011799 |
| 0.011731 | 0.011799 | 0.011698 | 0.011933 | 0.011564 | 0.011698 | 0.011765 |
| 0.011664 | 0.011765 | 0.011732 | 0.011799 | 0.011731 | 0.011732 | 0.011732 |
| 0.011631 | 0.011664 | 0.011631 | 0.011664 | 0.011698 | 0.011733 | 0.011799 |
| 0.011732 | 0.011698 | 0.011765 | 0.011664 | 0.011597 | 0.011631 | 0.011698 |
| 0.011866 | 0.011799 | 0.011564 | 0.011866 | 0.011698 | 0.011933 | 0.011698 |
| 0.011913 | 0.011471 | 0.011928 | 0.011646 | 0.011620 | 0.011760 | 0.011533 |
| 0.012121 | 0.011467 | 0.011637 | 0.011933 | 0.011933 | 0.011664 | 0.011564 |
| 0.011765 | 0.011731 | 0.011799 | 0.011698 | 0.011799 | 0.011732 | 0.011731 |
| 0.011698 | 0.011731 | 0.012000 | 0.011866 | 0.011765 | 0.011732 | 0.011665 |
| 0.011631 | 0.011564 | 0.011698 | 0.011665 | 0.011598 | 0.011564 | 0.011497 |
| 0.011598 | 0.011665 | 0.011665 | 0.011665 | 0.011698 | 0.011698 | 0.011702 |
| 0.011770 | 0.011698 | 0.011698 | 0.011528 | 0.011603 | 0.011551 | 0.011699 |
| 0.011670 | 0.011610 | 0.011687 | 0.011647 | 0.011570 | 0.011574 | 0.011634 |
| 0.011528 | 0.011646 | 0.011680 | 0.011632 | 0.011613 | 0.011767 | 0.011666 |
| 0.011733 | 0.011734 | 0.011733 | 0.011832 | 0.011765 | 0.012135 | 0.011867 |
| 0.011698 | 0.011766 | 0.011698 | 0.011732 | 0.011597 | 0.011564 | 0.011631 |
| 0.011698 | 0.011698 | 0.011665 | 0.011631 | 0.011664 | 0.011631 | 0.011732 |
| 0.011698 | 0.011799 | 0.011732 | 0.011631 | 0.011734 | 0.011833 | 0.011838 |
| 0.011833 | 0.011732 | 0.011631 | 0.011566 | 0.011698 | 0.011631 | 0.011564 |
| 0.011570 | 0.011833 | 0.011631 | 0.011833 | 0.011597 | 0.011698 | 0.011665 |
| 0.011766 | 0.011665 | 0.011698 | 0.011665 | 0.011698 | 0.011564 | 0.011698 |
| 0.011732 | 0.011665 | 0.011732 | 0.011665 | 0.011698 | 0.011732 | 0.011967 |
| 0.011463 | 0.011396 | 0.011463 | 0.011836 | 0.011396 | 0.011698 | 0.011665 |
| 0.011634 | 0.011869 | 0.011701 | 0.011609 | 0.011467 | 0.011572 | 0.011769 |
| 0.011468 | 0.011638 | 0.011866 | 0.012068 | 0.011777 | 0.011933 | 0.011900 |
| 0.011832 | 0.012000 | 0.011842 | 0.011761 | 0.011689 | 0.011732 | 0.011805 |
| 0.011900 | 0.011802 | 0.011939 | 0.012008 | 0.011933 | 0.012001 | 0.012111 |
| 0.011839 | 0.012011 | 0.011839 | 0.011838 | 0.012137 | 0.011597 | 0.011802 |
| 0.011765 | 0.011698 | 0.011597 | 0.011597 | 0.011664 | 0.011664 | 0.011731 |
| 0.011664 | 0.011732 | 0.011631 | 0.011664 | 0.011664 | 0.011664 | 0.011731 |
| 0.011664 | 0.011496 | 0.011396 | 0.011429 | 0.011564 | 0.011664 | 0.011698 |
| 0.011698 | 0.011597 | 0.011732 | 0.011698 | 0.011631 | 0.011631 | 0.011631 |
| 0.011564 | 0.011732 | 0.011799 | 0.011597 | 0.011698 | 0.011866 | 0.011631 |
| 0.011631 | 0.011698 | 0.011664 | 0.011832 | 0.011631 | 0.011564 | 0.011698 |
| 0.011631 | 0.011664 | 0.011664 | 0.011597 | 0.011597 | 0.011765 | 0.011698 |
| 0.011597 | 0.011698 | 0.011564 | 0.011597 | 0.011732 | 0.011531 | 0.011631 |
| 0.011598 | 0.011732 | 0.011665 | 0.011564 | 0.011262 | 0.011564 | 0.011732 |
| 0.011814 | 0.011631 | 0.011329 | 0.011765 | 0.011732 | 0.011664 | 0.011765 |
| 0.011631 | 0.011967 | 0.011564 | 0.011631 | 0.011564 | 0.011564 | 0.011564 |
| 0.011799 | 0.011665 | 0.011698 | 0.011765 | 0.011597 | 0.011396 | 0.011564 |
| 0.011631 | 0.011631 | 0.011664 | 0.011765 | 0.011664 | 0.011765 | 0.011832 |
| 0.011832 | 0.011799 | 0.011698 | 0.011799 | 0.011765 | 0.011564 | 0.011597 |
| 0.011631 | 0.011564 | 0.011698 | 0.011564 | 0.011597 | 0.011765 | 0.011631 |
| 0.011597 | 0.011664 | 0.011799 | 0.011765 | 0.011732 | 0.011664 | 0.011665 |
| 0.011732 | 0.011664 | 0.011765 | 0.011631 | 0.011765 | 0.011866 | 0.011362 |
| 0.011664 | 0.011329 | 0.011681 | 0.018201 | 0.011518 | 0.011855 | 0.011409 |
| 0.011372 | 0.011412 | 0.011899 | 0.011640 | 0.011610 | 0.011440 | 0.011850 |
| 0.011677 | 0.011671 | 0.011606 | 0.011688 | 0.011529 | 0.011751 | 0.011663 |
| 0.011389 | 0.011544 | 0.011357 | 0.011391 | 0.011799 | 0.011833 | 0.011838 |
| 0.011713 | 0.011799 | 0.011799 | 0.011698 | 0.011732 | 0.011732 | 0.011699 |
| 0.011732 | 0.011664 | 0.011698 | 0.011732 | 0.011698 | 0.011631 | 0.011665 |
| 0.011665 | 0.011732 | 0.011631 | 0.011732 | 0.011765 | 0.011799 | 0.011698 |
| 0.011664 | 0.011564 | 0.011362 | 0.011362 | 0.011766 | 0.011800 | 0.011833 |
| 0.011597 | 0.011597 | 0.011631 | 0.011732 | 0.011597 | 0.011833 | 0.011833 |
| 0.011866 | 0.011866 | 0.011799 | 0.011900 | 0.011396 | 0.011902 | 0.011732 |

|          |          |          |          |          |          |          |
|----------|----------|----------|----------|----------|----------|----------|
| 0.011732 | 0.011799 | 0.011833 | 0.011665 | 0.011732 | 0.011698 | 0.011732 |
| 0.011800 | 0.011799 | 0.011833 | 0.011799 | 0.011700 | 0.011900 | 0.011866 |
| 0.011738 | 0.011631 | 0.011732 | 0.011799 | 0.011732 | 0.011799 | 0.011899 |
| 0.012068 | 0.011777 | 0.011933 | 0.011900 | 0.011832 | 0.012000 | 0.011631 |
| 0.011802 | 0.011699 | 0.011665 | 0.011665 | 0.011732 | 0.011631 | 0.011732 |
| 0.011765 | 0.011799 | 0.011698 | 0.011664 | 0.011564 | 0.011362 | 0.011362 |
| 0.011766 | 0.011800 | 0.011866 | 0.011799 | 0.012373 | 0.011846 | 0.011799 |
| 0.011834 | 0.011788 | 0.011904 | 0.011822 | 0.011900 | 0.011819 | 0.011750 |
| 0.012297 | 0.011683 | 0.011814 | 0.011752 | 0.012025 | 0.011877 | 0.012013 |
| 0.012353 | 0.011777 | 0.011973 | 0.012034 | 0.011900 | 0.011631 | 0.011939 |
| 0.011597 | 0.011765 | 0.011899 | 0.011866 | 0.011871 | 0.011597 | 0.011566 |
| 0.011698 | 0.011631 | 0.011664 | 0.011698 | 0.011597 | 0.011664 | 0.011564 |
| 0.011631 | 0.011664 | 0.011631 | 0.011597 | 0.011698 | 0.011631 | 0.011664 |
| 0.011664 | 0.011597 | 0.011664 | 0.011698 | 0.011597 | 0.011799 | 0.011832 |
| 0.011732 | 0.011732 | 0.011732 | 0.011732 | 0.011664 | 0.000000 | 0.011698 |
| 0.011478 | 0.011665 | 0.011631 | 0.011637 | 0.011698 | 0.011698 | 0.011765 |
| 0.011698 | 0.011698 | 0.011664 | 0.011698 | 0.011799 | 0.011799 | 0.011732 |
| 0.011731 | 0.011866 | 0.011429 | 0.011765 | 0.011967 | 0.011967 | 0.011832 |
| 0.011664 | 0.011732 | 0.011698 | 0.011496 | 0.011732 | 0.011698 | 0.011732 |
| 0.011765 | 0.011631 | 0.011631 | 0.011934 | 0.011933 | 0.011900 | 0.011698 |
| 0.011799 | 0.011866 | 0.011732 | 0.011799 | 0.011765 | 0.011631 | 0.011362 |
| 0.011731 | 0.011698 | 0.011631 | 0.011866 | 0.011698 | 0.011799 | 0.011631 |
| 0.011731 | 0.011501 | 0.011496 | 0.011629 | 0.011399 | 0.011740 | 0.011473 |
| 0.011664 | 0.011800 | 0.011657 | 0.011775 | 0.011646 | 0.011569 | 0.011538 |
| 0.011570 | 0.011455 | 0.011617 | 0.011523 | 0.011491 | 0.011730 | 0.011831 |
| 0.011814 | 0.011769 | 0.011730 | 0.011730 | 0.011734 | 0.011598 | 0.011665 |
| 0.011665 | 0.011733 | 0.011838 | 0.011637 | 0.011976 | 0.012015 | 0.011732 |
| 0.011698 | 0.011766 | 0.011698 | 0.011732 | 0.011597 | 0.011564 | 0.011631 |
| 0.011698 | 0.011698 | 0.011665 | 0.011631 | 0.011664 | 0.011631 | 0.011732 |
| 0.011654 | 0.011655 | 0.011677 | 0.011677 | 0.011813 | 0.011812 | 0.011709 |
| 0.011776 | 0.011766 | 0.011540 | 0.011492 | 0.011670 | 0.011840 | 0.011841 |
| 0.011666 | 0.011704 | 0.011969 | 0.011939 | 0.011868 | 0.011902 | 0.011832 |
| 0.011765 | 0.011832 | 0.011832 | 0.011732 | 0.011631 | 0.011900 | 0.011967 |
| 0.012001 | 0.011416 | 0.011640 | 0.011788 | 0.011664 | 0.011866 | 0.011832 |
| 0.011868 | 0.011899 | 0.011900 | 0.011900 | 0.011965 | 0.012034 | 0.011685 |
| 0.011567 | 0.011580 | 0.011673 | 0.011638 | 0.011641 | 0.011545 | 0.011298 |
| 0.011712 | 0.011411 | 0.011584 | 0.011660 | 0.011699 | 0.011710 | 0.011665 |
| 0.011631 | 0.011564 | 0.011698 | 0.011665 | 0.011598 | 0.011564 | 0.011497 |
| 0.011598 | 0.011665 | 0.011665 | 0.011665 | 0.011698 | 0.011698 | 0.011702 |
| 0.011770 | 0.011698 | 0.011698 | 0.011734 | 0.011598 | 0.011665 | 0.011665 |
| 0.011733 | 0.011838 | 0.011637 | 0.011976 | 0.012015 | 0.011732 | 0.011900 |
| 0.011832 | 0.011832 | 0.011669 | 0.011861 | 0.011790 | 0.011809 | 0.011691 |
| 0.011852 | 0.012017 | 0.011865 | 0.011740 | 0.011631 | 0.011833 | 0.011698 |
| 0.011799 | 0.011732 | 0.011631 | 0.011734 | 0.011833 | 0.011838 | 0.011732 |
| 0.011631 | 0.011566 | 0.011698 | 0.011631 | 0.011564 | 0.011570 | 0.011833 |
| 0.011732 | 0.011664 | 0.011698 | 0.011732 | 0.011698 | 0.011631 | 0.011564 |
| 0.011698 | 0.011732 | 0.011731 | 0.011664 | 0.011732 | 0.011967 | 0.011564 |
| 0.011664 | 0.000000 | 0.011664 | 0.011698 | 0.011664 | 0.011429 | 0.011660 |
| 0.011848 | 0.011443 | 0.011461 | 0.011503 | 0.011630 | 0.011599 | 0.011436 |
| 0.011428 | 0.011564 | 0.011665 | 0.011774 | 0.011633 | 0.011771 | 0.011901 |
| 0.011801 | 0.011838 | 0.011799 | 0.012017 | 0.011765 | 0.012641 | 0.011802 |
| 0.012541 | 0.012309 | 0.012443 | 0.012715 | 0.011698 | 0.011665 | 0.011766 |
| 0.012407 | 0.012140 | 0.011732 | 0.011631 | 0.011699 | 0.011699 | 0.011669 |
| 0.011564 | 0.011569 | 0.011631 | 0.011598 | 0.011969 | 0.012035 | 0.012036 |
| 0.011935 | 0.012036 | 0.012140 | 0.011906 | 0.012408 | 0.012415 | 0.012475 |
| 0.012475 | 0.012509 | 0.012460 | 0.012476 | 0.012477 | 0.011765 | 0.012002 |
| 0.012070 | 0.012573 | 0.012078 | 0.012035 | 0.012508 | 0.011570 | 0.011464 |
| 0.011362 | 0.011429 | 0.011968 | 0.011924 | 0.012081 | 0.011765 | 0.011498 |
| S779     | 0.011631 | 0.011631 | 0.011967 | 0.011731 | 0.011731 | 0.011799 |
| 0.011637 | 0.011569 | 0.011799 | 0.011228 | 0.011295 | 0.011262 | 0.011228 |

|          |          |          |          |          |          |          |
|----------|----------|----------|----------|----------|----------|----------|
| 0.011262 | 0.011429 | 0.011228 | 0.011262 | 0.011329 | 0.011295 | 0.011262 |
| 0.011228 | 0.011262 | 0.011362 | 0.011228 | 0.011262 | 0.011262 | 0.011603 |
| 0.011496 | 0.011262 | 0.011161 | 0.011396 | 0.011329 | 0.011295 | 0.011329 |
| 0.011295 | 0.011396 | 0.011295 | 0.011295 | 0.011329 | 0.011295 | 0.011463 |
| 0.011228 | 0.011295 | 0.011329 | 0.011262 | 0.011362 | 0.011396 | 0.011329 |
| 0.011295 | 0.011463 | 0.011362 | 0.011631 | 0.011295 | 0.011564 | 0.011295 |
| 0.000000 | 0.011362 | 0.011429 | 0.011564 | 0.011664 | 0.011362 | 0.011463 |
| 0.011329 | 0.011396 | 0.011295 | 0.011530 | 0.011765 | 0.011295 | 0.011362 |
| 0.011262 | 0.011362 | 0.011329 | 0.011396 | 0.011329 | 0.011329 | 0.011329 |
| 0.011228 | 0.011262 | 0.011228 | 0.011329 | 0.011295 | 0.011329 | 0.011396 |
| 0.011329 | 0.011295 | 0.011362 | 0.011262 | 0.011396 | 0.011228 | 0.011295 |
| 0.011463 | 0.011396 | 0.011631 | 0.011463 | 0.011295 | 0.011530 | 0.011295 |
| 0.011468 | 0.011695 | 0.011513 | 0.011216 | 0.011210 | 0.011318 | 0.011414 |
| 0.012048 | 0.011467 | 0.011225 | 0.011530 | 0.011530 | 0.011329 | 0.011429 |
| 0.011362 | 0.011329 | 0.011396 | 0.011295 | 0.011396 | 0.011329 | 0.011329 |
| 0.011295 | 0.011396 | 0.011597 | 0.011463 | 0.011362 | 0.011329 | 0.011262 |
| 0.011228 | 0.011228 | 0.011295 | 0.011262 | 0.011463 | 0.011429 | 0.011362 |
| 0.011463 | 0.011530 | 0.011262 | 0.011262 | 0.011295 | 0.011295 | 0.011297 |
| 0.011364 | 0.011295 | 0.011295 | 0.011168 | 0.011241 | 0.011200 | 0.011296 |
| 0.011297 | 0.011232 | 0.011282 | 0.011267 | 0.011196 | 0.011231 | 0.011263 |
| 0.011528 | 0.011301 | 0.011336 | 0.011228 | 0.011233 | 0.011363 | 0.011329 |
| 0.011396 | 0.011330 | 0.011329 | 0.011429 | 0.011362 | 0.011732 | 0.011530 |
| 0.011564 | 0.011429 | 0.011295 | 0.011396 | 0.011195 | 0.011429 | 0.011228 |
| 0.011295 | 0.011295 | 0.011262 | 0.011228 | 0.011262 | 0.011228 | 0.011329 |
| 0.011295 | 0.011396 | 0.011329 | 0.011228 | 0.011330 | 0.011430 | 0.011432 |
| 0.011430 | 0.011329 | 0.011228 | 0.011161 | 0.011295 | 0.011228 | 0.011161 |
| 0.011264 | 0.011430 | 0.011228 | 0.011430 | 0.011195 | 0.011295 | 0.011262 |
| 0.011362 | 0.011262 | 0.011295 | 0.011262 | 0.011295 | 0.011161 | 0.011295 |
| 0.011329 | 0.011262 | 0.011329 | 0.011262 | 0.011295 | 0.011329 | 0.011564 |
| 0.011664 | 0.011597 | 0.011665 | 0.011431 | 0.011665 | 0.011295 | 0.011262 |
| 0.011297 | 0.011586 | 0.011426 | 0.011197 | 0.011671 | 0.011163 | 0.011296 |
| 0.011671 | 0.011570 | 0.011463 | 0.011664 | 0.011367 | 0.011530 | 0.011497 |
| 0.011429 | 0.011597 | 0.011451 | 0.011266 | 0.011312 | 0.011329 | 0.011398 |
| 0.011497 | 0.011397 | 0.011533 | 0.011601 | 0.011530 | 0.011597 | 0.011704 |
| 0.011432 | 0.011603 | 0.011534 | 0.011466 | 0.011733 | 0.011194 | 0.011397 |
| 0.011362 | 0.011295 | 0.011194 | 0.011194 | 0.011262 | 0.011262 | 0.011329 |
| 0.011262 | 0.011329 | 0.011228 | 0.011329 | 0.011262 | 0.011262 | 0.011329 |
| 0.011262 | 0.011698 | 0.011597 | 0.011631 | 0.011161 | 0.011262 | 0.011295 |
| 0.011295 | 0.011262 | 0.011329 | 0.011362 | 0.011228 | 0.011228 | 0.011228 |
| 0.011765 | 0.011396 | 0.011396 | 0.011194 | 0.011295 | 0.011463 | 0.011228 |
| 0.011228 | 0.011295 | 0.011262 | 0.011429 | 0.011228 | 0.011362 | 0.011496 |
| 0.011429 | 0.011262 | 0.011262 | 0.011194 | 0.011194 | 0.011362 | 0.011295 |
| 0.011194 | 0.011295 | 0.011161 | 0.011194 | 0.011329 | 0.011463 | 0.011228 |
| 0.011195 | 0.011329 | 0.011262 | 0.011161 | 0.011496 | 0.011161 | 0.011329 |
| 0.011402 | 0.011228 | 0.011530 | 0.011362 | 0.011396 | 0.011262 | 0.011362 |
| 0.011228 | 0.011564 | 0.011161 | 0.011429 | 0.011228 | 0.011228 | 0.011161 |
| 0.011396 | 0.011597 | 0.011295 | 0.011362 | 0.011194 | 0.011597 | 0.011228 |
| 0.011228 | 0.011228 | 0.011262 | 0.011362 | 0.011262 | 0.011362 | 0.011429 |
| 0.011429 | 0.011396 | 0.011295 | 0.011396 | 0.011362 | 0.011228 | 0.011194 |
| 0.011228 | 0.011228 | 0.011295 | 0.011228 | 0.011194 | 0.011362 | 0.011228 |
| 0.011262 | 0.011262 | 0.011396 | 0.011429 | 0.011329 | 0.011262 | 0.011262 |
| 0.011329 | 0.011262 | 0.011362 | 0.011228 | 0.011362 | 0.011463 | 0.011765 |
| 0.011262 | 0.011664 | 0.011267 | 0.017785 | 0.011191 | 0.011305 | 0.011618 |
| 0.011579 | 0.011623 | 0.011270 | 0.011234 | 0.011664 | 0.011647 | 0.011242 |
| 0.011487 | 0.011426 | 0.011177 | 0.011186 | 0.011255 | 0.011258 | 0.011232 |
| 0.011482 | 0.011433 | 0.011431 | 0.011325 | 0.011396 | 0.011429 | 0.011432 |
| 0.011301 | 0.011396 | 0.011396 | 0.011362 | 0.011329 | 0.011329 | 0.011295 |
| 0.011329 | 0.011262 | 0.011295 | 0.011329 | 0.011295 | 0.011228 | 0.011262 |
| 0.011262 | 0.011329 | 0.011228 | 0.011329 | 0.011362 | 0.011396 | 0.011295 |
| 0.011329 | 0.011295 | 0.011631 | 0.011631 | 0.011362 | 0.011396 | 0.011430 |

|          |          |          |          |          |          |          |
|----------|----------|----------|----------|----------|----------|----------|
| 0.011195 | 0.011195 | 0.011228 | 0.011329 | 0.011195 | 0.011429 | 0.011429 |
| 0.011463 | 0.011463 | 0.011396 | 0.011496 | 0.011665 | 0.011498 | 0.011329 |
| 0.011329 | 0.011396 | 0.011429 | 0.011262 | 0.011329 | 0.011295 | 0.011329 |
| 0.011396 | 0.011396 | 0.011429 | 0.011396 | 0.011296 | 0.011497 | 0.011463 |
| 0.011331 | 0.011228 | 0.011329 | 0.011430 | 0.011329 | 0.011463 | 0.011496 |
| 0.011664 | 0.011367 | 0.011530 | 0.011497 | 0.011429 | 0.011597 | 0.011228 |
| 0.011397 | 0.011295 | 0.011262 | 0.011262 | 0.011329 | 0.011228 | 0.011329 |
| 0.011362 | 0.011396 | 0.011295 | 0.011329 | 0.011295 | 0.011631 | 0.011631 |
| 0.011362 | 0.011396 | 0.011463 | 0.011396 | 0.012035 | 0.011453 | 0.011377 |
| 0.011447 | 0.011407 | 0.011517 | 0.011406 | 0.011515 | 0.011439 | 0.011405 |
| 0.011987 | 0.011302 | 0.011437 | 0.011371 | 0.011645 | 0.011502 | 0.011604 |
| 0.012012 | 0.011437 | 0.011567 | 0.011631 | 0.011496 | 0.011497 | 0.011533 |
| 0.011194 | 0.011362 | 0.011496 | 0.011463 | 0.011466 | 0.011463 | 0.011431 |
| 0.011295 | 0.011228 | 0.011262 | 0.011295 | 0.011194 | 0.011262 | 0.011161 |
| 0.011295 | 0.011329 | 0.011228 | 0.011194 | 0.011295 | 0.011228 | 0.011262 |
| 0.011262 | 0.011194 | 0.011262 | 0.011295 | 0.011194 | 0.011396 | 0.011429 |
| 0.011329 | 0.011396 | 0.011329 | 0.011329 | 0.011262 | 0.011664 | 0.011295 |
| 0.011338 | 0.011262 | 0.011497 | 0.011501 | 0.011362 | 0.011362 | 0.011362 |
| 0.011362 | 0.011295 | 0.011262 | 0.011295 | 0.011396 | 0.011396 | 0.011329 |
| 0.011329 | 0.011463 | 0.011631 | 0.011362 | 0.011564 | 0.011564 | 0.011429 |
| 0.011262 | 0.011329 | 0.011362 | 0.011765 | 0.011329 | 0.011362 | 0.011329 |
| 0.011362 | 0.011295 | 0.011295 | 0.011597 | 0.011530 | 0.011564 | 0.011295 |
| 0.011396 | 0.011463 | 0.011329 | 0.011396 | 0.011362 | 0.011228 | 0.011564 |
| 0.011329 | 0.011295 | 0.011295 | 0.011463 | 0.011295 | 0.011396 | 0.011631 |
| 0.011329 | 0.011705 | 0.011698 | 0.011507 | 0.011229 | 0.011400 | 0.011267 |
| 0.011115 | 0.011722 | 0.011236 | 0.011462 | 0.011255 | 0.011315 | 0.011379 |
| 0.011468 | 0.011126 | 0.011339 | 0.011192 | 0.011222 | 0.011395 | 0.011385 |
| 0.011399 | 0.011296 | 0.011377 | 0.011307 | 0.011330 | 0.011463 | 0.011530 |
| 0.011530 | 0.011396 | 0.011500 | 0.011501 | 0.011636 | 0.011661 | 0.011329 |
| 0.011564 | 0.011429 | 0.011295 | 0.011396 | 0.011195 | 0.011429 | 0.011228 |
| 0.011295 | 0.011295 | 0.011262 | 0.011228 | 0.011262 | 0.011228 | 0.011329 |
| 0.011305 | 0.011305 | 0.011300 | 0.011334 | 0.011471 | 0.011436 | 0.011436 |
| 0.011435 | 0.011363 | 0.011171 | 0.011168 | 0.011297 | 0.011467 | 0.011467 |
| 0.011262 | 0.011331 | 0.011565 | 0.011533 | 0.011464 | 0.011498 | 0.011429 |
| 0.011362 | 0.011429 | 0.011429 | 0.011329 | 0.011900 | 0.011496 | 0.011564 |
| 0.011597 | 0.011665 | 0.011299 | 0.011372 | 0.011262 | 0.011463 | 0.011429 |
| 0.011464 | 0.011496 | 0.011496 | 0.011496 | 0.011610 | 0.011631 | 0.011268 |
| 0.011162 | 0.011164 | 0.011264 | 0.011230 | 0.011333 | 0.011172 | 0.011502 |
| 0.011300 | 0.011455 | 0.011203 | 0.011322 | 0.011296 | 0.011368 | 0.011262 |
| 0.011228 | 0.011228 | 0.011295 | 0.011262 | 0.011463 | 0.011429 | 0.011362 |
| 0.011463 | 0.011530 | 0.011262 | 0.011262 | 0.011295 | 0.011295 | 0.011297 |
| 0.011364 | 0.011295 | 0.011295 | 0.011330 | 0.011463 | 0.011530 | 0.011530 |
| 0.011396 | 0.011500 | 0.011501 | 0.011636 | 0.011661 | 0.011329 | 0.011496 |
| 0.011429 | 0.011429 | 0.011263 | 0.011443 | 0.011373 | 0.011401 | 0.011270 |
| 0.011439 | 0.011607 | 0.011441 | 0.011332 | 0.011228 | 0.011430 | 0.011295 |
| 0.011396 | 0.011329 | 0.011228 | 0.011330 | 0.011430 | 0.011432 | 0.011329 |
| 0.011228 | 0.011161 | 0.011295 | 0.011228 | 0.011161 | 0.011264 | 0.011430 |
| 0.011329 | 0.011262 | 0.011295 | 0.011329 | 0.011295 | 0.011228 | 0.011430 |
| 0.011295 | 0.011329 | 0.011329 | 0.000000 | 0.011329 | 0.011564 | 0.011228 |
| 0.011262 | 0.011664 | 0.000000 | 0.011295 | 0.011262 | 0.011631 | 0.011189 |
| 0.011678 | 0.011230 | 0.011261 | 0.011422 | 0.011508 | 0.011455 | 0.011144 |
| 0.011218 | 0.011429 | 0.011530 | 0.011637 | 0.011498 | 0.011635 | 0.011766 |
| 0.011666 | 0.011703 | 0.011664 | 0.011914 | 0.011631 | 0.012505 | 0.011666 |
| 0.012405 | 0.012173 | 0.012307 | 0.012578 | 0.011631 | 0.011329 | 0.011631 |
| 0.012070 | 0.012004 | 0.011597 | 0.011497 | 0.011565 | 0.011565 | 0.011534 |
| 0.011429 | 0.011433 | 0.011496 | 0.011464 | 0.011833 | 0.011900 | 0.011901 |
| 0.011800 | 0.011901 | 0.012004 | 0.011770 | 0.012070 | 0.012076 | 0.012137 |
| 0.012138 | 0.012171 | 0.012118 | 0.012138 | 0.012139 | 0.011362 | 0.011665 |
| 0.011733 | 0.012236 | 0.011738 | 0.011967 | 0.012440 | 0.011502 | 0.011396 |
| 0.011362 | 0.011362 | 0.011833 | 0.011842 | 0.011975 | 0.011698 | 0.011363 |



|          |          |          |          |          |          |          |
|----------|----------|----------|----------|----------|----------|----------|
| S780     | 0.011664 | 0.011664 | 0.012001 | 0.011765 | 0.011765 | 0.011832 |
| 0.011671 | 0.011603 | 0.011832 | 0.011262 | 0.011329 | 0.011296 | 0.011262 |
| 0.011295 | 0.011463 | 0.011262 | 0.011295 | 0.011362 | 0.011329 | 0.011295 |
| 0.011262 | 0.011295 | 0.011396 | 0.011262 | 0.011228 | 0.011295 | 0.011637 |
| 0.011530 | 0.011295 | 0.011194 | 0.011429 | 0.011295 | 0.011329 | 0.011295 |
| 0.011329 | 0.011362 | 0.011329 | 0.011329 | 0.011362 | 0.011329 | 0.011497 |
| 0.011262 | 0.011329 | 0.011362 | 0.011295 | 0.011396 | 0.011429 | 0.011362 |
| 0.011329 | 0.011497 | 0.011396 | 0.011664 | 0.011329 | 0.011530 | 0.011329 |
| 0.011295 | 0.011396 | 0.011463 | 0.011530 | 0.011698 | 0.011396 | 0.011496 |
| 0.011295 | 0.011362 | 0.011329 | 0.011496 | 0.011799 | 0.011329 | 0.011396 |
| 0.011295 | 0.011396 | 0.011362 | 0.011429 | 0.011362 | 0.011362 | 0.011362 |
| 0.011262 | 0.011295 | 0.011262 | 0.011362 | 0.011329 | 0.011363 | 0.011429 |
| 0.011362 | 0.011329 | 0.011329 | 0.011295 | 0.011429 | 0.011194 | 0.011329 |
| 0.011496 | 0.011429 | 0.011664 | 0.011497 | 0.011329 | 0.011496 | 0.011329 |
| 0.011505 | 0.011733 | 0.011513 | 0.011216 | 0.011210 | 0.011355 | 0.011415 |
| 0.012048 | 0.011467 | 0.011225 | 0.011564 | 0.011564 | 0.011362 | 0.011463 |
| 0.011396 | 0.011362 | 0.011429 | 0.011329 | 0.011429 | 0.011295 | 0.011362 |
| 0.011329 | 0.011429 | 0.011631 | 0.011496 | 0.011396 | 0.011362 | 0.011228 |
| 0.011262 | 0.011262 | 0.011262 | 0.011295 | 0.011497 | 0.011463 | 0.011396 |
| 0.011497 | 0.011564 | 0.011295 | 0.011295 | 0.011329 | 0.011329 | 0.011330 |
| 0.011398 | 0.011329 | 0.011329 | 0.011132 | 0.011241 | 0.011200 | 0.011329 |
| 0.011297 | 0.011232 | 0.011282 | 0.011267 | 0.011196 | 0.011232 | 0.011263 |
| 0.011528 | 0.011302 | 0.011267 | 0.011262 | 0.011233 | 0.011363 | 0.011363 |
| 0.011430 | 0.011330 | 0.011363 | 0.011463 | 0.011396 | 0.011698 | 0.011564 |
| 0.011597 | 0.011463 | 0.011329 | 0.011430 | 0.011228 | 0.011463 | 0.011262 |
| 0.011329 | 0.011329 | 0.011295 | 0.011262 | 0.011295 | 0.011262 | 0.011362 |
| 0.011262 | 0.011295 | 0.011362 | 0.011262 | 0.011363 | 0.011463 | 0.011466 |
| 0.011396 | 0.011362 | 0.011262 | 0.011195 | 0.011329 | 0.011262 | 0.011195 |
| 0.011298 | 0.011396 | 0.011195 | 0.011396 | 0.011228 | 0.011329 | 0.011295 |
| 0.011329 | 0.011295 | 0.011262 | 0.011295 | 0.011329 | 0.011195 | 0.011262 |
| 0.011295 | 0.011295 | 0.011362 | 0.011295 | 0.011329 | 0.011362 | 0.011597 |
| 0.011698 | 0.011631 | 0.011698 | 0.011465 | 0.011698 | 0.011329 | 0.011295 |
| 0.011330 | 0.011586 | 0.011426 | 0.011232 | 0.011705 | 0.011197 | 0.011336 |
| 0.011705 | 0.011604 | 0.011496 | 0.011698 | 0.011402 | 0.011564 | 0.011463 |
| 0.011463 | 0.011631 | 0.011486 | 0.011349 | 0.011395 | 0.011362 | 0.011432 |
| 0.011530 | 0.011431 | 0.011567 | 0.011568 | 0.011564 | 0.011631 | 0.011738 |
| 0.011466 | 0.011569 | 0.011568 | 0.011500 | 0.011767 | 0.011228 | 0.011431 |
| 0.011329 | 0.011329 | 0.011228 | 0.011228 | 0.011228 | 0.011295 | 0.011362 |
| 0.011161 | 0.011295 | 0.011194 | 0.011362 | 0.011228 | 0.011295 | 0.011362 |
| 0.011295 | 0.011731 | 0.011631 | 0.011664 | 0.011194 | 0.011295 | 0.011329 |
| 0.011329 | 0.011295 | 0.011362 | 0.011396 | 0.011262 | 0.011262 | 0.011262 |
| 0.011799 | 0.011429 | 0.011429 | 0.011228 | 0.011329 | 0.011429 | 0.011262 |
| 0.011262 | 0.011329 | 0.011295 | 0.011396 | 0.011262 | 0.011396 | 0.011396 |
| 0.011463 | 0.011295 | 0.011295 | 0.011228 | 0.011228 | 0.011396 | 0.011329 |
| 0.011228 | 0.011329 | 0.011195 | 0.011228 | 0.011362 | 0.011497 | 0.011262 |
| 0.011228 | 0.011362 | 0.011295 | 0.011195 | 0.011530 | 0.011195 | 0.011362 |
| 0.011368 | 0.011262 | 0.011564 | 0.011396 | 0.011429 | 0.011295 | 0.011396 |
| 0.011262 | 0.011530 | 0.011194 | 0.011463 | 0.011262 | 0.011262 | 0.011194 |
| 0.011362 | 0.011631 | 0.011329 | 0.011396 | 0.011228 | 0.011631 | 0.011262 |
| 0.011262 | 0.011262 | 0.011295 | 0.011329 | 0.011295 | 0.011396 | 0.011463 |
| 0.011463 | 0.011429 | 0.011329 | 0.011429 | 0.011329 | 0.011262 | 0.011228 |
| 0.011262 | 0.011262 | 0.011329 | 0.011262 | 0.011161 | 0.011396 | 0.011262 |
| 0.011295 | 0.011295 | 0.011429 | 0.011463 | 0.011362 | 0.011228 | 0.011295 |
| 0.011362 | 0.011295 | 0.011396 | 0.011262 | 0.011396 | 0.011496 | 0.011799 |
| 0.011295 | 0.011698 | 0.011302 | 0.017823 | 0.011191 | 0.011427 | 0.011653 |
| 0.011614 | 0.011658 | 0.011322 | 0.011292 | 0.011664 | 0.011682 | 0.011303 |
| 0.011487 | 0.011549 | 0.011177 | 0.011228 | 0.011216 | 0.011307 | 0.011232 |
| 0.011482 | 0.011433 | 0.011394 | 0.011259 | 0.011429 | 0.011463 | 0.011466 |
| 0.011266 | 0.011429 | 0.011429 | 0.011396 | 0.011362 | 0.011362 | 0.011329 |
| 0.011362 | 0.011295 | 0.011329 | 0.011362 | 0.011329 | 0.011262 | 0.011295 |

|          |          |          |          |          |          |          |
|----------|----------|----------|----------|----------|----------|----------|
| 0.011295 | 0.011362 | 0.011262 | 0.011362 | 0.011396 | 0.011429 | 0.011329 |
| 0.011362 | 0.011329 | 0.011665 | 0.011665 | 0.011396 | 0.011430 | 0.011463 |
| 0.011228 | 0.011228 | 0.011262 | 0.011295 | 0.011228 | 0.011463 | 0.011463 |
| 0.011497 | 0.011496 | 0.011429 | 0.011530 | 0.011698 | 0.011532 | 0.011295 |
| 0.011362 | 0.011430 | 0.011396 | 0.011295 | 0.011362 | 0.011329 | 0.011362 |
| 0.011430 | 0.011430 | 0.011463 | 0.011295 | 0.011262 | 0.011530 | 0.011429 |
| 0.011365 | 0.011262 | 0.011362 | 0.011463 | 0.011362 | 0.011497 | 0.011530 |
| 0.011698 | 0.011402 | 0.011564 | 0.011463 | 0.011463 | 0.011631 | 0.011262 |
| 0.011431 | 0.011329 | 0.011295 | 0.011295 | 0.011362 | 0.011262 | 0.011362 |
| 0.011396 | 0.011429 | 0.011329 | 0.011362 | 0.011329 | 0.011665 | 0.011665 |
| 0.011396 | 0.011430 | 0.011496 | 0.011429 | 0.012069 | 0.011489 | 0.011412 |
| 0.011482 | 0.011442 | 0.011552 | 0.011441 | 0.011550 | 0.011474 | 0.011439 |
| 0.012022 | 0.011337 | 0.011471 | 0.011406 | 0.011680 | 0.011536 | 0.011570 |
| 0.012046 | 0.011512 | 0.011601 | 0.011664 | 0.011530 | 0.011530 | 0.011567 |
| 0.011228 | 0.011329 | 0.011530 | 0.011496 | 0.011499 | 0.011496 | 0.011464 |
| 0.011329 | 0.011194 | 0.011228 | 0.011329 | 0.011161 | 0.011295 | 0.011194 |
| 0.011329 | 0.011362 | 0.011262 | 0.011228 | 0.011329 | 0.011262 | 0.011295 |
| 0.011295 | 0.011228 | 0.011295 | 0.011329 | 0.011228 | 0.011362 | 0.011463 |
| 0.011362 | 0.011429 | 0.011362 | 0.011362 | 0.011295 | 0.011698 | 0.011329 |
| 0.011373 | 0.011295 | 0.011530 | 0.011535 | 0.011329 | 0.011396 | 0.011396 |
| 0.011396 | 0.011262 | 0.011295 | 0.011262 | 0.011429 | 0.011429 | 0.011362 |
| 0.011362 | 0.011497 | 0.011664 | 0.011396 | 0.011597 | 0.011597 | 0.011463 |
| 0.011295 | 0.011362 | 0.011396 | 0.011799 | 0.011362 | 0.011329 | 0.011362 |
| 0.011396 | 0.011329 | 0.011329 | 0.011631 | 0.011497 | 0.011597 | 0.011329 |
| 0.011429 | 0.011497 | 0.011362 | 0.011429 | 0.011396 | 0.011262 | 0.011597 |
| 0.011362 | 0.011329 | 0.011329 | 0.011497 | 0.011329 | 0.011429 | 0.011664 |
| 0.011362 | 0.011739 | 0.011732 | 0.011507 | 0.011229 | 0.011434 | 0.011267 |
| 0.011225 | 0.011722 | 0.011271 | 0.011462 | 0.011255 | 0.011417 | 0.011379 |
| 0.011468 | 0.000000 | 0.011227 | 0.011126 | 0.011222 | 0.011328 | 0.011385 |
| 0.011399 | 0.011257 | 0.011412 | 0.011342 | 0.011364 | 0.011497 | 0.011564 |
| 0.011564 | 0.011430 | 0.011533 | 0.011535 | 0.011670 | 0.011696 | 0.011362 |
| 0.011597 | 0.011463 | 0.011329 | 0.011430 | 0.011228 | 0.011463 | 0.011262 |
| 0.011329 | 0.011329 | 0.011295 | 0.011262 | 0.011295 | 0.011262 | 0.011362 |
| 0.011305 | 0.011305 | 0.011300 | 0.011334 | 0.011471 | 0.011368 | 0.011436 |
| 0.011435 | 0.011396 | 0.011171 | 0.011168 | 0.011297 | 0.011467 | 0.011467 |
| 0.011262 | 0.011331 | 0.011565 | 0.011533 | 0.011464 | 0.011498 | 0.011463 |
| 0.011396 | 0.011463 | 0.011463 | 0.011362 | 0.011933 | 0.011530 | 0.011597 |
| 0.011631 | 0.011701 | 0.011333 | 0.011407 | 0.011295 | 0.011497 | 0.011463 |
| 0.011497 | 0.011530 | 0.011530 | 0.011530 | 0.011689 | 0.011664 | 0.011303 |
| 0.011195 | 0.011199 | 0.011298 | 0.011264 | 0.011368 | 0.011209 | 0.011536 |
| 0.011335 | 0.011455 | 0.011203 | 0.011322 | 0.011329 | 0.011368 | 0.011228 |
| 0.011262 | 0.011262 | 0.011262 | 0.011295 | 0.011497 | 0.011463 | 0.011396 |
| 0.011497 | 0.011564 | 0.011295 | 0.011295 | 0.011329 | 0.011329 | 0.011330 |
| 0.011398 | 0.011329 | 0.011329 | 0.011364 | 0.011497 | 0.011564 | 0.011564 |
| 0.011430 | 0.011533 | 0.011535 | 0.011670 | 0.011696 | 0.011362 | 0.011530 |
| 0.011463 | 0.011463 | 0.011263 | 0.011478 | 0.011408 | 0.011435 | 0.011305 |
| 0.011404 | 0.011653 | 0.011399 | 0.011366 | 0.011195 | 0.011396 | 0.011262 |
| 0.011295 | 0.011362 | 0.011262 | 0.011363 | 0.011463 | 0.011466 | 0.011362 |
| 0.011262 | 0.011195 | 0.011329 | 0.011262 | 0.011195 | 0.011298 | 0.011396 |
| 0.011362 | 0.011295 | 0.011329 | 0.011362 | 0.011329 | 0.011262 | 0.011463 |
| 0.011329 | 0.011362 | 0.011362 | 0.011295 | 0.011362 | 0.011597 | 0.011262 |
| 0.011295 | 0.011698 | 0.011295 | 0.000000 | 0.011295 | 0.011664 | 0.011232 |
| 0.011678 | 0.011230 | 0.011261 | 0.011463 | 0.011549 | 0.011491 | 0.011186 |
| 0.011218 | 0.011463 | 0.011564 | 0.011671 | 0.011531 | 0.011669 | 0.011800 |
| 0.011699 | 0.011737 | 0.011698 | 0.011949 | 0.011664 | 0.012539 | 0.011700 |
| 0.012439 | 0.012207 | 0.012341 | 0.012613 | 0.011664 | 0.011362 | 0.011665 |
| 0.012103 | 0.012038 | 0.011631 | 0.011530 | 0.011598 | 0.011598 | 0.011567 |
| 0.011463 | 0.011467 | 0.011530 | 0.011497 | 0.011867 | 0.011933 | 0.011935 |
| 0.011834 | 0.011934 | 0.012038 | 0.011804 | 0.012104 | 0.012110 | 0.012171 |
| 0.012172 | 0.012205 | 0.012152 | 0.012172 | 0.012173 | 0.011396 | 0.011699 |

|          |          |          |          |          |          |          |
|----------|----------|----------|----------|----------|----------|----------|
| 0.011767 | 0.012270 | 0.011772 | 0.012001 | 0.012474 | 0.011536 | 0.011430 |
| 0.011396 | 0.011396 | 0.011867 | 0.011883 | 0.011975 | 0.011732 | 0.011397 |
| S781     | 0.011631 | 0.011631 | 0.011967 | 0.011731 | 0.011731 | 0.011799 |
| 0.011637 | 0.011569 | 0.011799 | 0.011228 | 0.011295 | 0.011262 | 0.011228 |
| 0.011262 | 0.011429 | 0.011228 | 0.011262 | 0.011329 | 0.011295 | 0.011262 |
| 0.011228 | 0.011262 | 0.011362 | 0.011228 | 0.011262 | 0.011262 | 0.011603 |
| 0.011496 | 0.011262 | 0.011161 | 0.011396 | 0.011329 | 0.011295 | 0.011329 |
| 0.011295 | 0.011396 | 0.011295 | 0.011295 | 0.011329 | 0.011295 | 0.011463 |
| 0.011228 | 0.011295 | 0.011329 | 0.011262 | 0.011362 | 0.011396 | 0.011329 |
| 0.011295 | 0.011463 | 0.011362 | 0.011631 | 0.011295 | 0.011564 | 0.011295 |
| 0.011262 | 0.011362 | 0.011429 | 0.011564 | 0.011664 | 0.011362 | 0.011463 |
| 0.011329 | 0.011396 | 0.011295 | 0.011530 | 0.011765 | 0.011295 | 0.011362 |
| 0.011262 | 0.011362 | 0.011329 | 0.011396 | 0.011329 | 0.011329 | 0.011329 |
| 0.011228 | 0.011262 | 0.011228 | 0.011329 | 0.011295 | 0.011329 | 0.011396 |
| 0.011329 | 0.011295 | 0.011362 | 0.011262 | 0.011396 | 0.011228 | 0.011295 |
| 0.011463 | 0.011396 | 0.011631 | 0.011463 | 0.011295 | 0.011530 | 0.011295 |
| 0.011431 | 0.011658 | 0.011513 | 0.011177 | 0.011209 | 0.011318 | 0.011375 |
| 0.012048 | 0.011467 | 0.011184 | 0.011530 | 0.011530 | 0.011329 | 0.011429 |
| 0.011362 | 0.011329 | 0.011396 | 0.011295 | 0.011396 | 0.011329 | 0.011329 |
| 0.011295 | 0.011396 | 0.011597 | 0.011463 | 0.011362 | 0.011329 | 0.011262 |
| 0.011228 | 0.011228 | 0.011295 | 0.011262 | 0.011463 | 0.011429 | 0.011362 |
| 0.011463 | 0.011530 | 0.011262 | 0.011262 | 0.011295 | 0.011295 | 0.011297 |
| 0.011364 | 0.011295 | 0.011295 | 0.011132 | 0.011241 | 0.011200 | 0.011296 |
| 0.011297 | 0.011232 | 0.011282 | 0.011267 | 0.011196 | 0.011231 | 0.011263 |
| 0.011492 | 0.011267 | 0.011336 | 0.011228 | 0.011233 | 0.011363 | 0.011329 |
| 0.011396 | 0.011330 | 0.011329 | 0.011429 | 0.011362 | 0.011731 | 0.011530 |
| 0.011563 | 0.011429 | 0.011295 | 0.011396 | 0.011195 | 0.011429 | 0.011228 |
| 0.011295 | 0.011295 | 0.011262 | 0.011228 | 0.011262 | 0.011228 | 0.011329 |
| 0.011295 | 0.011396 | 0.011329 | 0.011228 | 0.011330 | 0.011430 | 0.011432 |
| 0.011430 | 0.011329 | 0.011228 | 0.011161 | 0.011295 | 0.011228 | 0.011161 |
| 0.011264 | 0.011430 | 0.011228 | 0.011430 | 0.011195 | 0.011295 | 0.011262 |
| 0.011362 | 0.011262 | 0.011295 | 0.011262 | 0.011295 | 0.011161 | 0.011295 |
| 0.011329 | 0.011262 | 0.011329 | 0.011262 | 0.011295 | 0.011329 | 0.011564 |
| 0.011664 | 0.011597 | 0.011665 | 0.011431 | 0.011665 | 0.011295 | 0.011262 |
| 0.011297 | 0.011545 | 0.011426 | 0.011197 | 0.011671 | 0.011163 | 0.011296 |
| 0.011671 | 0.011570 | 0.011463 | 0.011664 | 0.011367 | 0.011530 | 0.011497 |
| 0.011429 | 0.011597 | 0.011451 | 0.011266 | 0.011312 | 0.011329 | 0.011398 |
| 0.011497 | 0.011397 | 0.011533 | 0.011601 | 0.011530 | 0.011597 | 0.011704 |
| 0.011432 | 0.011603 | 0.011534 | 0.011466 | 0.011733 | 0.011194 | 0.011397 |
| 0.011362 | 0.011295 | 0.011194 | 0.011194 | 0.011262 | 0.011262 | 0.011329 |
| 0.011262 | 0.011329 | 0.011228 | 0.011329 | 0.011262 | 0.011262 | 0.011329 |
| 0.011262 | 0.011698 | 0.011597 | 0.011631 | 0.011161 | 0.011262 | 0.011295 |
| 0.011295 | 0.011262 | 0.011329 | 0.011362 | 0.011228 | 0.011228 | 0.011228 |
| 0.011765 | 0.011396 | 0.011396 | 0.011194 | 0.011295 | 0.011463 | 0.011228 |
| 0.011228 | 0.011295 | 0.011262 | 0.011429 | 0.011228 | 0.011362 | 0.011496 |
| 0.011429 | 0.011262 | 0.011262 | 0.011194 | 0.011194 | 0.011362 | 0.011295 |
| 0.011194 | 0.011295 | 0.011161 | 0.011194 | 0.011329 | 0.011463 | 0.011228 |
| 0.011195 | 0.011329 | 0.011262 | 0.011161 | 0.011496 | 0.011161 | 0.011329 |
| 0.011402 | 0.011228 | 0.011530 | 0.011362 | 0.011396 | 0.011262 | 0.011362 |
| 0.011228 | 0.011564 | 0.011161 | 0.011429 | 0.011228 | 0.011228 | 0.011161 |
| 0.011396 | 0.011597 | 0.011295 | 0.011362 | 0.011194 | 0.011597 | 0.011228 |
| 0.011228 | 0.011228 | 0.011262 | 0.011362 | 0.011262 | 0.011362 | 0.011429 |
| 0.011429 | 0.011396 | 0.011295 | 0.011396 | 0.011362 | 0.011228 | 0.011194 |
| 0.011228 | 0.011228 | 0.011295 | 0.011228 | 0.011194 | 0.011362 | 0.011228 |
| 0.011262 | 0.011262 | 0.011396 | 0.011429 | 0.011329 | 0.011262 | 0.011262 |
| 0.011329 | 0.011262 | 0.011362 | 0.011228 | 0.011362 | 0.011463 | 0.011765 |
| 0.011262 | 0.011664 | 0.011267 | 0.017785 | 0.011191 | 0.011427 | 0.011618 |
| 0.011579 | 0.011623 | 0.011322 | 0.011292 | 0.011719 | 0.011647 | 0.011364 |
| 0.011534 | 0.011548 | 0.011138 | 0.011270 | 0.011255 | 0.011307 | 0.011232 |
| 0.011529 | 0.011433 | 0.011431 | 0.011193 | 0.011396 | 0.011429 | 0.011432 |

|          |          |          |          |          |          |          |
|----------|----------|----------|----------|----------|----------|----------|
| 0.011301 | 0.011396 | 0.011396 | 0.011362 | 0.011329 | 0.011329 | 0.011295 |
| 0.011329 | 0.011262 | 0.011295 | 0.011329 | 0.011295 | 0.011228 | 0.011262 |
| 0.011262 | 0.011329 | 0.011228 | 0.011329 | 0.011362 | 0.011396 | 0.011295 |
| 0.011329 | 0.011295 | 0.011631 | 0.011631 | 0.011362 | 0.011396 | 0.011430 |
| 0.011195 | 0.011195 | 0.011228 | 0.011329 | 0.011195 | 0.011429 | 0.011429 |
| 0.011463 | 0.011463 | 0.011396 | 0.011496 | 0.011665 | 0.011498 | 0.011329 |
| 0.011329 | 0.011396 | 0.011429 | 0.011262 | 0.011329 | 0.011295 | 0.011329 |
| 0.011396 | 0.011396 | 0.011429 | 0.011396 | 0.011296 | 0.011497 | 0.011463 |
| 0.011331 | 0.011228 | 0.011329 | 0.011430 | 0.011329 | 0.011463 | 0.011496 |
| 0.011664 | 0.011367 | 0.011530 | 0.011497 | 0.011429 | 0.011597 | 0.011228 |
| 0.011397 | 0.011295 | 0.011262 | 0.011262 | 0.011329 | 0.011228 | 0.011329 |
| 0.011362 | 0.011396 | 0.011295 | 0.011329 | 0.011295 | 0.011631 | 0.011631 |
| 0.011362 | 0.011396 | 0.011463 | 0.011396 | 0.012035 | 0.011417 | 0.011377 |
| 0.011447 | 0.011372 | 0.011517 | 0.011406 | 0.011480 | 0.011439 | 0.011370 |
| 0.011987 | 0.011302 | 0.011437 | 0.011371 | 0.011645 | 0.011502 | 0.011604 |
| 0.012012 | 0.011475 | 0.011567 | 0.011631 | 0.011496 | 0.011496 | 0.011533 |
| 0.011194 | 0.011362 | 0.011496 | 0.011463 | 0.011466 | 0.011463 | 0.011431 |
| 0.011295 | 0.011228 | 0.011262 | 0.011295 | 0.011194 | 0.011262 | 0.011161 |
| 0.011295 | 0.011329 | 0.011228 | 0.011194 | 0.011295 | 0.011228 | 0.011262 |
| 0.011262 | 0.011194 | 0.011262 | 0.011295 | 0.011194 | 0.011396 | 0.011429 |
| 0.011329 | 0.011396 | 0.011329 | 0.011329 | 0.011262 | 0.011664 | 0.011295 |
| 0.011338 | 0.011262 | 0.011497 | 0.011501 | 0.011362 | 0.011362 | 0.011362 |
| 0.011362 | 0.011295 | 0.011262 | 0.011295 | 0.011396 | 0.011396 | 0.011329 |
| 0.011329 | 0.011463 | 0.011631 | 0.011362 | 0.011564 | 0.011564 | 0.011429 |
| 0.011262 | 0.011329 | 0.011362 | 0.011765 | 0.011329 | 0.011362 | 0.011329 |
| 0.011362 | 0.011295 | 0.011295 | 0.011597 | 0.011530 | 0.011564 | 0.011295 |
| 0.011396 | 0.011463 | 0.011329 | 0.011396 | 0.011362 | 0.011228 | 0.011564 |
| 0.011329 | 0.011295 | 0.011295 | 0.011463 | 0.011295 | 0.011396 | 0.011631 |
| 0.011329 | 0.011705 | 0.011698 | 0.011467 | 0.011173 | 0.011400 | 0.011267 |
| 0.011225 | 0.011683 | 0.011236 | 0.011417 | 0.011255 | 0.011366 | 0.011379 |
| 0.011417 | 0.011192 | 0.011283 | 0.011126 | 0.011222 | 0.011328 | 0.011344 |
| 0.011362 | 0.011257 | 0.011342 | 0.011272 | 0.011330 | 0.011463 | 0.011530 |
| 0.011530 | 0.011396 | 0.011500 | 0.011501 | 0.011636 | 0.011661 | 0.011329 |
| 0.011563 | 0.011429 | 0.011295 | 0.011396 | 0.011195 | 0.011429 | 0.011228 |
| 0.011295 | 0.011295 | 0.011262 | 0.011228 | 0.011262 | 0.011228 | 0.011329 |
| 0.011270 | 0.011305 | 0.011300 | 0.011334 | 0.011471 | 0.011436 | 0.011436 |
| 0.011435 | 0.011363 | 0.011134 | 0.011132 | 0.011297 | 0.011467 | 0.011467 |
| 0.011262 | 0.011331 | 0.011565 | 0.011533 | 0.011464 | 0.011498 | 0.011429 |
| 0.011362 | 0.011429 | 0.011429 | 0.011329 | 0.011900 | 0.011496 | 0.011564 |
| 0.011597 | 0.011630 | 0.011299 | 0.011372 | 0.011262 | 0.011463 | 0.011429 |
| 0.011464 | 0.011496 | 0.011496 | 0.011496 | 0.011610 | 0.011631 | 0.011268 |
| 0.011162 | 0.011164 | 0.011264 | 0.011230 | 0.011333 | 0.011172 | 0.011502 |
| 0.011300 | 0.011411 | 0.011108 | 0.011322 | 0.011296 | 0.011368 | 0.011262 |
| 0.011228 | 0.011228 | 0.011295 | 0.011262 | 0.011463 | 0.011429 | 0.011362 |
| 0.011463 | 0.011530 | 0.011262 | 0.011262 | 0.011295 | 0.011295 | 0.011297 |
| 0.011364 | 0.011295 | 0.011295 | 0.011330 | 0.011463 | 0.011530 | 0.011530 |
| 0.011396 | 0.011500 | 0.011501 | 0.011636 | 0.011661 | 0.011329 | 0.011496 |
| 0.011429 | 0.011429 | 0.011263 | 0.011443 | 0.011373 | 0.011401 | 0.011270 |
| 0.011439 | 0.011652 | 0.011441 | 0.011332 | 0.011228 | 0.011430 | 0.011295 |
| 0.011396 | 0.011329 | 0.011228 | 0.011330 | 0.011430 | 0.011432 | 0.011329 |
| 0.011228 | 0.011161 | 0.011295 | 0.011228 | 0.011161 | 0.011264 | 0.011430 |
| 0.011329 | 0.011262 | 0.011295 | 0.011329 | 0.011295 | 0.011228 | 0.011430 |
| 0.011295 | 0.011329 | 0.011329 | 0.011262 | 0.011329 | 0.011564 | 0.011228 |
| 0.011262 | 0.011664 | 0.011262 | 0.011295 | 0.000000 | 0.011631 | 0.011189 |
| 0.011678 | 0.011188 | 0.011311 | 0.011422 | 0.011508 | 0.011419 | 0.011144 |
| 0.011218 | 0.011429 | 0.011530 | 0.011637 | 0.011498 | 0.011635 | 0.011766 |
| 0.011666 | 0.011703 | 0.011664 | 0.011914 | 0.011631 | 0.012505 | 0.011666 |
| 0.012405 | 0.012173 | 0.012307 | 0.012578 | 0.011631 | 0.011329 | 0.011631 |
| 0.012070 | 0.012004 | 0.011597 | 0.011497 | 0.011564 | 0.011564 | 0.011534 |
| 0.011429 | 0.011433 | 0.011496 | 0.011464 | 0.011833 | 0.011900 | 0.011901 |

|          |          |          |          |          |          |          |
|----------|----------|----------|----------|----------|----------|----------|
| 0.011800 | 0.011901 | 0.012004 | 0.011770 | 0.012070 | 0.012076 | 0.012137 |
| 0.012138 | 0.012171 | 0.012118 | 0.012138 | 0.012139 | 0.011362 | 0.011665 |
| 0.011733 | 0.012236 | 0.011738 | 0.011967 | 0.012440 | 0.011502 | 0.011396 |
| 0.011362 | 0.011362 | 0.011833 | 0.011800 | 0.011975 | 0.011698 | 0.011363 |
| S782     | 0.012000 | 0.012000 | 0.012068 | 0.011832 | 0.011832 | 0.011900 |
| 0.011332 | 0.011264 | 0.011900 | 0.011597 | 0.011664 | 0.011632 | 0.011597 |
| 0.011564 | 0.011799 | 0.011530 | 0.011631 | 0.011698 | 0.011664 | 0.011631 |
| 0.011597 | 0.011631 | 0.011463 | 0.011598 | 0.011631 | 0.011631 | 0.011298 |
| 0.011597 | 0.011631 | 0.011530 | 0.011497 | 0.011698 | 0.011664 | 0.011698 |
| 0.011664 | 0.011765 | 0.011664 | 0.011664 | 0.011698 | 0.011664 | 0.011832 |
| 0.011530 | 0.011664 | 0.011698 | 0.011631 | 0.011664 | 0.011765 | 0.011698 |
| 0.011664 | 0.011832 | 0.011732 | 0.000000 | 0.011664 | 0.011933 | 0.011664 |
| 0.011631 | 0.011665 | 0.011799 | 0.011933 | 0.011429 | 0.011664 | 0.011765 |
| 0.011698 | 0.011765 | 0.011664 | 0.011899 | 0.011463 | 0.011664 | 0.011732 |
| 0.011631 | 0.011731 | 0.011698 | 0.011765 | 0.011698 | 0.011698 | 0.011698 |
| 0.011597 | 0.011631 | 0.011597 | 0.011631 | 0.011664 | 0.011700 | 0.011765 |
| 0.011698 | 0.011664 | 0.011732 | 0.011631 | 0.011496 | 0.011597 | 0.011664 |
| 0.011832 | 0.011765 | 0.011530 | 0.011832 | 0.011664 | 0.011900 | 0.011664 |
| 0.011876 | 0.011359 | 0.011890 | 0.011568 | 0.011583 | 0.011723 | 0.011493 |
| 0.012121 | 0.011467 | 0.011637 | 0.011899 | 0.011900 | 0.011631 | 0.011530 |
| 0.011732 | 0.011698 | 0.011765 | 0.011664 | 0.011765 | 0.011698 | 0.011698 |
| 0.011664 | 0.011698 | 0.011967 | 0.011832 | 0.011732 | 0.011698 | 0.011631 |
| 0.011597 | 0.011530 | 0.011665 | 0.011631 | 0.011564 | 0.011530 | 0.011463 |
| 0.011564 | 0.011631 | 0.011631 | 0.011631 | 0.011665 | 0.011665 | 0.011668 |
| 0.011736 | 0.011665 | 0.011665 | 0.011528 | 0.011603 | 0.011551 | 0.011665 |
| 0.011636 | 0.011576 | 0.011651 | 0.011612 | 0.011570 | 0.011574 | 0.011634 |
| 0.011528 | 0.011646 | 0.011680 | 0.011598 | 0.011579 | 0.011733 | 0.011632 |
| 0.011699 | 0.011701 | 0.011699 | 0.011799 | 0.011731 | 0.012101 | 0.011833 |
| 0.011664 | 0.011732 | 0.011664 | 0.011698 | 0.011564 | 0.011530 | 0.011598 |
| 0.011664 | 0.011664 | 0.011631 | 0.011597 | 0.011631 | 0.011597 | 0.011698 |
| 0.011665 | 0.011765 | 0.011698 | 0.011597 | 0.011700 | 0.011799 | 0.011804 |
| 0.011799 | 0.011698 | 0.011597 | 0.011532 | 0.011665 | 0.011597 | 0.011530 |
| 0.011468 | 0.011799 | 0.011597 | 0.011799 | 0.011564 | 0.011665 | 0.011631 |
| 0.011732 | 0.011631 | 0.011665 | 0.011631 | 0.011665 | 0.011530 | 0.011665 |
| 0.011698 | 0.011631 | 0.011698 | 0.011631 | 0.011665 | 0.011698 | 0.011933 |
| 0.011362 | 0.011295 | 0.011362 | 0.011802 | 0.011430 | 0.011665 | 0.011631 |
| 0.011601 | 0.011909 | 0.011701 | 0.011575 | 0.011365 | 0.011538 | 0.011729 |
| 0.011366 | 0.011604 | 0.011832 | 0.012034 | 0.011743 | 0.011900 | 0.011866 |
| 0.011799 | 0.011967 | 0.011842 | 0.011719 | 0.011773 | 0.011698 | 0.011771 |
| 0.011866 | 0.011769 | 0.011906 | 0.011974 | 0.011900 | 0.011967 | 0.012077 |
| 0.011805 | 0.011977 | 0.011839 | 0.011838 | 0.012103 | 0.011564 | 0.011768 |
| 0.011731 | 0.011664 | 0.011564 | 0.011564 | 0.011631 | 0.011631 | 0.011698 |
| 0.011631 | 0.011698 | 0.011597 | 0.011631 | 0.011631 | 0.011631 | 0.011698 |
| 0.011631 | 0.011396 | 0.011295 | 0.011329 | 0.011530 | 0.011631 | 0.011664 |
| 0.011664 | 0.011564 | 0.011698 | 0.011664 | 0.011597 | 0.011597 | 0.011597 |
| 0.011463 | 0.011698 | 0.011765 | 0.011564 | 0.011664 | 0.011833 | 0.011597 |
| 0.011597 | 0.011664 | 0.011631 | 0.011799 | 0.011597 | 0.011530 | 0.011664 |
| 0.011597 | 0.011631 | 0.011631 | 0.011564 | 0.011564 | 0.011732 | 0.011664 |
| 0.011564 | 0.011664 | 0.011530 | 0.011564 | 0.011698 | 0.011497 | 0.011597 |
| 0.011564 | 0.011698 | 0.011631 | 0.011530 | 0.011262 | 0.011530 | 0.011698 |
| 0.011779 | 0.011597 | 0.011228 | 0.011732 | 0.011698 | 0.011631 | 0.011731 |
| 0.011597 | 0.011933 | 0.011530 | 0.011530 | 0.011530 | 0.011530 | 0.011530 |
| 0.011765 | 0.011631 | 0.011664 | 0.011732 | 0.011564 | 0.011295 | 0.011530 |
| 0.011597 | 0.011597 | 0.011631 | 0.011732 | 0.011631 | 0.011731 | 0.011799 |
| 0.011799 | 0.011765 | 0.011664 | 0.011765 | 0.011731 | 0.011597 | 0.011564 |
| 0.011597 | 0.011597 | 0.011664 | 0.011530 | 0.011564 | 0.011732 | 0.011597 |
| 0.011564 | 0.011631 | 0.011765 | 0.011732 | 0.011698 | 0.011631 | 0.011631 |
| 0.011698 | 0.011631 | 0.011731 | 0.011597 | 0.011732 | 0.011832 | 0.011530 |
| 0.011631 | 0.011429 | 0.011647 | 0.018163 | 0.011387 | 0.011611 | 0.011304 |
| 0.011268 | 0.011306 | 0.011899 | 0.011698 | 0.011445 | 0.011336 | 0.011728 |

|          |          |          |          |          |          |          |
|----------|----------|----------|----------|----------|----------|----------|
| 0.011677 | 0.011426 | 0.011567 | 0.011688 | 0.011529 | 0.011554 | 0.011663 |
| 0.011389 | 0.011507 | 0.011357 | 0.011589 | 0.011765 | 0.011799 | 0.011804 |
| 0.011678 | 0.011765 | 0.011765 | 0.011665 | 0.011698 | 0.011698 | 0.011665 |
| 0.011698 | 0.011631 | 0.011664 | 0.011698 | 0.011665 | 0.011597 | 0.011631 |
| 0.011631 | 0.011698 | 0.011597 | 0.011698 | 0.011732 | 0.011765 | 0.011664 |
| 0.011631 | 0.011598 | 0.011396 | 0.011396 | 0.011732 | 0.011766 | 0.011799 |
| 0.011564 | 0.011564 | 0.011597 | 0.011698 | 0.011564 | 0.011799 | 0.011799 |
| 0.011833 | 0.011832 | 0.011765 | 0.011866 | 0.011429 | 0.011869 | 0.011698 |
| 0.011698 | 0.011765 | 0.011799 | 0.011631 | 0.011698 | 0.011665 | 0.011698 |
| 0.011766 | 0.011766 | 0.011799 | 0.011766 | 0.011633 | 0.011866 | 0.011833 |
| 0.011704 | 0.011597 | 0.011698 | 0.011799 | 0.011698 | 0.011766 | 0.011866 |
| 0.012034 | 0.011743 | 0.011900 | 0.011866 | 0.011799 | 0.011967 | 0.011598 |
| 0.011768 | 0.011665 | 0.011631 | 0.011631 | 0.011698 | 0.011597 | 0.011698 |
| 0.011732 | 0.011765 | 0.011664 | 0.011631 | 0.011598 | 0.011396 | 0.011396 |
| 0.011732 | 0.011766 | 0.011832 | 0.011765 | 0.012339 | 0.011846 | 0.011764 |
| 0.011834 | 0.011788 | 0.011904 | 0.011788 | 0.011900 | 0.011819 | 0.011750 |
| 0.012297 | 0.011683 | 0.011814 | 0.011752 | 0.012025 | 0.011877 | 0.011979 |
| 0.012318 | 0.011814 | 0.011939 | 0.012000 | 0.011866 | 0.011597 | 0.011905 |
| 0.011564 | 0.011732 | 0.011866 | 0.011832 | 0.011837 | 0.011564 | 0.011532 |
| 0.011664 | 0.011597 | 0.011631 | 0.011664 | 0.011564 | 0.011631 | 0.011530 |
| 0.011597 | 0.011631 | 0.011597 | 0.011564 | 0.011664 | 0.011597 | 0.011631 |
| 0.011631 | 0.011564 | 0.011631 | 0.011664 | 0.011564 | 0.011765 | 0.011799 |
| 0.011698 | 0.011698 | 0.011698 | 0.011698 | 0.011631 | 0.011429 | 0.011664 |
| 0.011443 | 0.011631 | 0.011598 | 0.011603 | 0.011664 | 0.011664 | 0.011731 |
| 0.011732 | 0.011664 | 0.011631 | 0.011664 | 0.011765 | 0.011765 | 0.011698 |
| 0.011698 | 0.011832 | 0.011329 | 0.011731 | 0.011933 | 0.011933 | 0.011799 |
| 0.011631 | 0.011698 | 0.011732 | 0.011530 | 0.011698 | 0.011664 | 0.011698 |
| 0.011732 | 0.011597 | 0.011597 | 0.011900 | 0.011900 | 0.011866 | 0.011664 |
| 0.011765 | 0.011832 | 0.011698 | 0.011765 | 0.011731 | 0.011597 | 0.011262 |
| 0.011698 | 0.011664 | 0.011597 | 0.011832 | 0.011664 | 0.011765 | 0.011530 |
| 0.011698 | 0.011400 | 0.011396 | 0.011589 | 0.011455 | 0.011706 | 0.011473 |
| 0.011445 | 0.011800 | 0.011622 | 0.011730 | 0.011646 | 0.011366 | 0.011432 |
| 0.011621 | 0.011324 | 0.011506 | 0.011390 | 0.011384 | 0.011596 | 0.011831 |
| 0.011814 | 0.011729 | 0.011694 | 0.011694 | 0.011701 | 0.011564 | 0.011631 |
| 0.011631 | 0.011699 | 0.011804 | 0.011603 | 0.011942 | 0.011979 | 0.011698 |
| 0.011664 | 0.011732 | 0.011664 | 0.011698 | 0.011564 | 0.011530 | 0.011598 |
| 0.011664 | 0.011664 | 0.011631 | 0.011597 | 0.011631 | 0.011597 | 0.011698 |
| 0.011654 | 0.011655 | 0.011642 | 0.011677 | 0.011813 | 0.011778 | 0.011777 |
| 0.011776 | 0.011733 | 0.011540 | 0.011528 | 0.011636 | 0.011806 | 0.011807 |
| 0.011632 | 0.011670 | 0.011936 | 0.011905 | 0.011834 | 0.011868 | 0.011799 |
| 0.011731 | 0.011799 | 0.011799 | 0.011698 | 0.011664 | 0.011866 | 0.011933 |
| 0.011967 | 0.011345 | 0.011606 | 0.011753 | 0.011631 | 0.011832 | 0.011799 |
| 0.011834 | 0.011866 | 0.011866 | 0.011866 | 0.011965 | 0.012000 | 0.011650 |
| 0.011533 | 0.011545 | 0.011639 | 0.011604 | 0.011641 | 0.011583 | 0.011196 |
| 0.011678 | 0.011455 | 0.011680 | 0.011697 | 0.011665 | 0.011710 | 0.011631 |
| 0.011597 | 0.011530 | 0.011665 | 0.011631 | 0.011564 | 0.011530 | 0.011463 |
| 0.011564 | 0.011631 | 0.011631 | 0.011631 | 0.011665 | 0.011665 | 0.011668 |
| 0.011736 | 0.011665 | 0.011665 | 0.011701 | 0.011564 | 0.011631 | 0.011631 |
| 0.011699 | 0.011804 | 0.011603 | 0.011942 | 0.011979 | 0.011698 | 0.011866 |
| 0.011799 | 0.011799 | 0.011635 | 0.011826 | 0.011755 | 0.011775 | 0.011656 |
| 0.011818 | 0.011972 | 0.011865 | 0.011706 | 0.011597 | 0.011799 | 0.011665 |
| 0.011765 | 0.011698 | 0.011597 | 0.011700 | 0.011799 | 0.011804 | 0.011698 |
| 0.011597 | 0.011532 | 0.011665 | 0.011597 | 0.011530 | 0.011468 | 0.011799 |
| 0.011698 | 0.011631 | 0.011664 | 0.011698 | 0.011665 | 0.011597 | 0.011530 |
| 0.011664 | 0.011698 | 0.011698 | 0.011631 | 0.011698 | 0.011933 | 0.011530 |
| 0.011631 | 0.011429 | 0.011631 | 0.011664 | 0.011631 | 0.000000 | 0.011660 |
| 0.011960 | 0.011485 | 0.011461 | 0.011543 | 0.011630 | 0.011563 | 0.011395 |
| 0.011427 | 0.011530 | 0.011631 | 0.011739 | 0.011599 | 0.011737 | 0.011868 |
| 0.011767 | 0.011804 | 0.011765 | 0.012017 | 0.011732 | 0.012607 | 0.011768 |
| 0.012507 | 0.012275 | 0.012409 | 0.012681 | 0.011664 | 0.011631 | 0.011732 |

|          |          |          |          |          |          |          |
|----------|----------|----------|----------|----------|----------|----------|
| 0.012373 | 0.012106 | 0.011698 | 0.011598 | 0.011666 | 0.011666 | 0.011601 |
| 0.011530 | 0.011535 | 0.011597 | 0.011565 | 0.011935 | 0.012001 | 0.012002 |
| 0.011902 | 0.012002 | 0.012106 | 0.011872 | 0.012374 | 0.012381 | 0.012441 |
| 0.012442 | 0.012475 | 0.012426 | 0.012442 | 0.012443 | 0.011731 | 0.011968 |
| 0.012036 | 0.012539 | 0.012044 | 0.012001 | 0.012474 | 0.011536 | 0.011430 |
| 0.011329 | 0.011396 | 0.011934 | 0.011965 | 0.012046 | 0.011732 | 0.011465 |
| S783     | 0.011403 | 0.011403 | 0.011746 | 0.011660 | 0.011660 | 0.011746 |
| 0.011578 | 0.011492 | 0.011660 | 0.011189 | 0.011189 | 0.011189 | 0.011146 |
| 0.011189 | 0.011403 | 0.011189 | 0.011146 | 0.011189 | 0.011232 | 0.011189 |
| 0.011189 | 0.011232 | 0.011360 | 0.011146 | 0.011232 | 0.011146 | 0.011578 |
| 0.011489 | 0.011189 | 0.011103 | 0.011403 | 0.011274 | 0.011189 | 0.011146 |
| 0.011232 | 0.011360 | 0.011274 | 0.011275 | 0.011317 | 0.011274 | 0.011446 |
| 0.011146 | 0.011232 | 0.011317 | 0.011232 | 0.011317 | 0.011403 | 0.011317 |
| 0.011274 | 0.011446 | 0.011232 | 0.011660 | 0.011274 | 0.011446 | 0.011274 |
| 0.011189 | 0.011317 | 0.011360 | 0.011446 | 0.011660 | 0.011189 | 0.011489 |
| 0.011317 | 0.011317 | 0.011232 | 0.011489 | 0.011660 | 0.011274 | 0.011317 |
| 0.011232 | 0.011274 | 0.011274 | 0.011360 | 0.011189 | 0.011274 | 0.011274 |
| 0.011189 | 0.011189 | 0.011146 | 0.011189 | 0.011232 | 0.011189 | 0.011317 |
| 0.011275 | 0.011232 | 0.011360 | 0.011103 | 0.011403 | 0.011189 | 0.011189 |
| 0.011403 | 0.011360 | 0.011574 | 0.011403 | 0.011232 | 0.011532 | 0.011232 |
| 0.011368 | 0.011681 | 0.011450 | 0.011150 | 0.011146 | 0.011242 | 0.011374 |
| 0.011360 | 0.011428 | 0.011148 | 0.011403 | 0.011360 | 0.011274 | 0.011317 |
| 0.011274 | 0.011274 | 0.011403 | 0.011232 | 0.011317 | 0.011274 | 0.011232 |
| 0.011189 | 0.011274 | 0.011489 | 0.011403 | 0.011317 | 0.011317 | 0.011232 |
| 0.011189 | 0.011189 | 0.011275 | 0.011146 | 0.011446 | 0.011403 | 0.011317 |
| 0.011446 | 0.011532 | 0.011146 | 0.011146 | 0.011146 | 0.011146 | 0.011146 |
| 0.011189 | 0.011274 | 0.011274 | 0.011105 | 0.011148 | 0.011149 | 0.011232 |
| 0.011274 | 0.011189 | 0.011191 | 0.011189 | 0.011104 | 0.011191 | 0.011233 |
| 0.011417 | 0.011235 | 0.011232 | 0.011189 | 0.011146 | 0.011275 | 0.011275 |
| 0.011360 | 0.011275 | 0.011275 | 0.011317 | 0.011317 | 0.011703 | 0.011532 |
| 0.011617 | 0.011446 | 0.011189 | 0.011403 | 0.011146 | 0.011403 | 0.011103 |
| 0.011189 | 0.011189 | 0.011189 | 0.011189 | 0.011189 | 0.011189 | 0.011317 |
| 0.011232 | 0.011317 | 0.011232 | 0.011189 | 0.011232 | 0.011446 | 0.011404 |
| 0.011403 | 0.011317 | 0.011103 | 0.011103 | 0.011274 | 0.011103 | 0.011103 |
| 0.011233 | 0.011403 | 0.011189 | 0.011403 | 0.011103 | 0.011232 | 0.011189 |
| 0.011360 | 0.011189 | 0.011275 | 0.011189 | 0.011232 | 0.011103 | 0.011232 |
| 0.011275 | 0.011232 | 0.011232 | 0.011146 | 0.011232 | 0.011317 | 0.011403 |
| 0.011660 | 0.011532 | 0.011660 | 0.011360 | 0.011574 | 0.011232 | 0.011232 |
| 0.011275 | 0.011473 | 0.011349 | 0.011147 | 0.011709 | 0.011104 | 0.011260 |
| 0.011621 | 0.011493 | 0.011360 | 0.011532 | 0.011321 | 0.011489 | 0.011489 |
| 0.011403 | 0.011446 | 0.011422 | 0.011165 | 0.011163 | 0.011317 | 0.011360 |
| 0.011446 | 0.011319 | 0.011406 | 0.011493 | 0.011317 | 0.011532 | 0.011754 |
| 0.011319 | 0.011494 | 0.011536 | 0.011493 | 0.011661 | 0.011146 | 0.011318 |
| 0.011232 | 0.011189 | 0.011103 | 0.011103 | 0.011189 | 0.011232 | 0.011317 |
| 0.011232 | 0.011317 | 0.011189 | 0.011274 | 0.011232 | 0.011232 | 0.011146 |
| 0.011232 | 0.011703 | 0.011574 | 0.011617 | 0.011103 | 0.011189 | 0.011275 |
| 0.011275 | 0.011189 | 0.011317 | 0.011360 | 0.011189 | 0.011189 | 0.011189 |
| 0.011746 | 0.011317 | 0.011360 | 0.011146 | 0.011232 | 0.011403 | 0.011146 |
| 0.011146 | 0.011146 | 0.011232 | 0.011403 | 0.011189 | 0.011360 | 0.011489 |
| 0.011446 | 0.011232 | 0.011232 | 0.011146 | 0.011103 | 0.011189 | 0.011274 |
| 0.011146 | 0.011274 | 0.011103 | 0.011103 | 0.011317 | 0.011403 | 0.011189 |
| 0.011146 | 0.011317 | 0.011146 | 0.011103 | 0.011489 | 0.011103 | 0.011317 |
| 0.011280 | 0.011189 | 0.011532 | 0.011275 | 0.011360 | 0.011189 | 0.011317 |
| 0.011189 | 0.011446 | 0.011103 | 0.011317 | 0.011189 | 0.011189 | 0.011103 |
| 0.011274 | 0.011489 | 0.011232 | 0.011317 | 0.011103 | 0.011574 | 0.011189 |
| 0.011146 | 0.011189 | 0.011189 | 0.011275 | 0.011232 | 0.011360 | 0.011446 |
| 0.011403 | 0.011275 | 0.011274 | 0.011403 | 0.011360 | 0.011189 | 0.011146 |
| 0.011146 | 0.011189 | 0.011232 | 0.011146 | 0.011146 | 0.011317 | 0.011146 |
| 0.011189 | 0.011189 | 0.011274 | 0.011403 | 0.011274 | 0.011232 | 0.011189 |
| 0.011189 | 0.011189 | 0.011232 | 0.011146 | 0.011317 | 0.011403 | 0.011703 |

|          |          |          |          |          |          |          |
|----------|----------|----------|----------|----------|----------|----------|
| 0.011232 | 0.011617 | 0.011232 | 0.018319 | 0.011126 | 0.011432 | 0.011575 |
| 0.011574 | 0.011575 | 0.011287 | 0.011243 | 0.011667 | 0.011617 | 0.011259 |
| 0.011451 | 0.011470 | 0.011105 | 0.011205 | 0.011197 | 0.011172 | 0.011207 |
| 0.011450 | 0.011403 | 0.011407 | 0.011137 | 0.011317 | 0.011403 | 0.011276 |
| 0.011236 | 0.011274 | 0.011317 | 0.011317 | 0.011275 | 0.011275 | 0.011275 |
| 0.011232 | 0.011189 | 0.011146 | 0.011317 | 0.011232 | 0.011189 | 0.011232 |
| 0.011232 | 0.011275 | 0.011146 | 0.011275 | 0.011360 | 0.011360 | 0.011232 |
| 0.011317 | 0.011275 | 0.011489 | 0.011489 | 0.011360 | 0.011361 | 0.011446 |
| 0.011103 | 0.011146 | 0.011146 | 0.011232 | 0.011146 | 0.011403 | 0.011403 |
| 0.011317 | 0.011360 | 0.011360 | 0.011360 | 0.011574 | 0.011361 | 0.011275 |
| 0.011232 | 0.011317 | 0.011446 | 0.011232 | 0.011232 | 0.011189 | 0.011275 |
| 0.011232 | 0.011232 | 0.011274 | 0.011232 | 0.011275 | 0.011403 | 0.011403 |
| 0.011276 | 0.011103 | 0.011189 | 0.011446 | 0.011232 | 0.011446 | 0.011446 |
| 0.011532 | 0.011321 | 0.011489 | 0.011489 | 0.011403 | 0.011446 | 0.011189 |
| 0.011404 | 0.011275 | 0.011232 | 0.011232 | 0.011275 | 0.011146 | 0.011275 |
| 0.011360 | 0.011360 | 0.011232 | 0.011317 | 0.011275 | 0.011489 | 0.011489 |
| 0.011360 | 0.011361 | 0.011360 | 0.011360 | 0.011961 | 0.011379 | 0.011240 |
| 0.011465 | 0.011370 | 0.011421 | 0.011283 | 0.011372 | 0.011459 | 0.011320 |
| 0.011942 | 0.011238 | 0.011368 | 0.011283 | 0.011591 | 0.011409 | 0.011539 |
| 0.011973 | 0.011398 | 0.011189 | 0.011232 | 0.011189 | 0.011317 | 0.011146 |
| 0.011146 | 0.011189 | 0.011275 | 0.011232 | 0.011189 | 0.011403 | 0.011446 |
| 0.011232 | 0.011189 | 0.011232 | 0.011232 | 0.011146 | 0.011189 | 0.011103 |
| 0.011274 | 0.011274 | 0.011146 | 0.011146 | 0.011232 | 0.011189 | 0.011232 |
| 0.011232 | 0.011146 | 0.011146 | 0.011232 | 0.011146 | 0.011360 | 0.011403 |
| 0.011232 | 0.011360 | 0.011274 | 0.011232 | 0.011146 | 0.011660 | 0.011232 |
| 0.011327 | 0.011146 | 0.011489 | 0.011494 | 0.011317 | 0.011274 | 0.011317 |
| 0.011360 | 0.011232 | 0.011189 | 0.011232 | 0.011403 | 0.011360 | 0.011275 |
| 0.011274 | 0.011360 | 0.011660 | 0.011274 | 0.011489 | 0.011489 | 0.011360 |
| 0.011189 | 0.011274 | 0.011360 | 0.011660 | 0.011275 | 0.011317 | 0.011275 |
| 0.011232 | 0.011232 | 0.011232 | 0.011489 | 0.011446 | 0.011489 | 0.011232 |
| 0.011360 | 0.011403 | 0.011274 | 0.011360 | 0.011232 | 0.011189 | 0.011489 |
| 0.011274 | 0.011232 | 0.011232 | 0.011360 | 0.011232 | 0.011360 | 0.011617 |
| 0.011232 | 0.011535 | 0.011703 | 0.011459 | 0.011118 | 0.011317 | 0.011223 |
| 0.011191 | 0.011624 | 0.011103 | 0.011351 | 0.011112 | 0.011274 | 0.011222 |
| 0.011366 | 0.000000 | 0.011172 | 0.000000 | 0.011116 | 0.011194 | 0.011293 |
| 0.011374 | 0.011240 | 0.011317 | 0.011234 | 0.011319 | 0.011403 | 0.011532 |
| 0.011489 | 0.011403 | 0.011492 | 0.011406 | 0.011535 | 0.011511 | 0.011189 |
| 0.011617 | 0.011446 | 0.011189 | 0.011403 | 0.011146 | 0.011403 | 0.011103 |
| 0.011189 | 0.011189 | 0.011189 | 0.011189 | 0.011189 | 0.011189 | 0.011317 |
| 0.011190 | 0.011237 | 0.011275 | 0.011191 | 0.011450 | 0.011318 | 0.011319 |
| 0.011362 | 0.011103 | 0.011106 | 0.011105 | 0.011274 | 0.011446 | 0.011361 |
| 0.011189 | 0.011317 | 0.011532 | 0.011360 | 0.011403 | 0.011446 | 0.011274 |
| 0.011274 | 0.011446 | 0.011317 | 0.011275 | 0.011961 | 0.011317 | 0.011446 |
| 0.011660 | 0.011604 | 0.011148 | 0.011326 | 0.011232 | 0.011446 | 0.011403 |
| 0.011232 | 0.011403 | 0.011403 | 0.011403 | 0.011408 | 0.011532 | 0.011236 |
| 0.011104 | 0.011104 | 0.011191 | 0.011190 | 0.011279 | 0.011108 | 0.011495 |
| 0.011280 | 0.011441 | 0.011119 | 0.011251 | 0.011275 | 0.011277 | 0.011232 |
| 0.011189 | 0.011189 | 0.011275 | 0.011146 | 0.011446 | 0.011403 | 0.011317 |
| 0.011446 | 0.011532 | 0.011146 | 0.011146 | 0.011146 | 0.011146 | 0.011146 |
| 0.011189 | 0.011274 | 0.011274 | 0.011319 | 0.011403 | 0.011532 | 0.011489 |
| 0.011403 | 0.011492 | 0.011406 | 0.011535 | 0.011511 | 0.011189 | 0.011403 |
| 0.011403 | 0.011403 | 0.011146 | 0.011370 | 0.011325 | 0.011234 | 0.011238 |
| 0.011277 | 0.011581 | 0.011439 | 0.011320 | 0.011189 | 0.011403 | 0.011232 |
| 0.011317 | 0.011232 | 0.011189 | 0.011232 | 0.011446 | 0.011404 | 0.011317 |
| 0.011103 | 0.011103 | 0.011274 | 0.011103 | 0.011103 | 0.011233 | 0.011403 |
| 0.011232 | 0.011189 | 0.011146 | 0.011317 | 0.011232 | 0.011189 | 0.011403 |
| 0.011274 | 0.011317 | 0.011317 | 0.011189 | 0.011274 | 0.011403 | 0.011146 |
| 0.011232 | 0.011660 | 0.011189 | 0.011232 | 0.011189 | 0.011660 | 0.000000 |
| 0.011566 | 0.011151 | 0.011213 | 0.011411 | 0.011450 | 0.011403 | 0.011104 |
| 0.011167 | 0.011446 | 0.011574 | 0.011711 | 0.011532 | 0.011703 | 0.011789 |



|          |          |          |          |          |          |          |
|----------|----------|----------|----------|----------|----------|----------|
| 0.011661 | 0.011751 | 0.011617 | 0.011961 | 0.011532 | 0.012562 | 0.011660 |
| 0.012305 | 0.012175 | 0.012437 | 0.012477 | 0.011489 | 0.011275 | 0.011703 |
| 0.012090 | 0.011875 | 0.011617 | 0.011532 | 0.011574 | 0.011574 | 0.011492 |
| 0.011446 | 0.011446 | 0.011489 | 0.011446 | 0.011789 | 0.011832 | 0.011832 |
| 0.011703 | 0.011703 | 0.011918 | 0.011704 | 0.011961 | 0.012055 | 0.012048 |
| 0.012090 | 0.012090 | 0.012047 | 0.012004 | 0.012091 | 0.011317 | 0.011575 |
| 0.011575 | 0.012261 | 0.011707 | 0.011875 | 0.011703 | 0.011490 | 0.011403 |
| 0.011360 | 0.011317 | 0.011832 | 0.011788 | 0.011928 | 0.011574 | 0.011360 |
| S784     | 0.011903 | 0.011903 | 0.011566 | 0.011454 | 0.011454 | 0.011510 |
| 0.011854 | 0.011741 | 0.011510 | 0.011622 | 0.011678 | 0.011679 | 0.011622 |
| 0.011566 | 0.011791 | 0.011510 | 0.011566 | 0.011622 | 0.011679 | 0.011678 |
| 0.011678 | 0.011679 | 0.011510 | 0.011567 | 0.011567 | 0.011566 | 0.011854 |
| 0.011735 | 0.011679 | 0.011566 | 0.011510 | 0.011678 | 0.011678 | 0.011566 |
| 0.011679 | 0.011791 | 0.011791 | 0.011791 | 0.011735 | 0.011678 | 0.012016 |
| 0.011510 | 0.011734 | 0.011735 | 0.011678 | 0.011678 | 0.011791 | 0.011735 |
| 0.011791 | 0.011847 | 0.011735 | 0.011960 | 0.011678 | 0.011960 | 0.011678 |
| 0.011678 | 0.011679 | 0.011847 | 0.011960 | 0.011848 | 0.011566 | 0.011791 |
| 0.011734 | 0.011735 | 0.011679 | 0.011903 | 0.011904 | 0.011791 | 0.011791 |
| 0.011735 | 0.011622 | 0.011735 | 0.011847 | 0.011679 | 0.011735 | 0.011735 |
| 0.011678 | 0.011678 | 0.011622 | 0.011566 | 0.011735 | 0.011678 | 0.011847 |
| 0.011791 | 0.011622 | 0.011678 | 0.011566 | 0.011735 | 0.011622 | 0.011678 |
| 0.011903 | 0.011847 | 0.011903 | 0.011848 | 0.011735 | 0.012016 | 0.011735 |
| 0.011859 | 0.011916 | 0.011847 | 0.011592 | 0.011622 | 0.011644 | 0.011581 |
| 0.011566 | 0.011586 | 0.011622 | 0.011847 | 0.011735 | 0.011622 | 0.011735 |
| 0.011791 | 0.011735 | 0.011903 | 0.011735 | 0.011791 | 0.011735 | 0.011734 |
| 0.011678 | 0.011678 | 0.011904 | 0.011847 | 0.011791 | 0.011791 | 0.011679 |
| 0.011622 | 0.011566 | 0.011735 | 0.011566 | 0.011566 | 0.011622 | 0.011510 |
| 0.011678 | 0.011678 | 0.011622 | 0.011622 | 0.011622 | 0.011622 | 0.011623 |
| 0.011680 | 0.011791 | 0.011735 | 0.011572 | 0.011624 | 0.011628 | 0.011622 |
| 0.011678 | 0.011678 | 0.011689 | 0.011679 | 0.011567 | 0.011680 | 0.011736 |
| 0.011688 | 0.011740 | 0.011622 | 0.011678 | 0.011622 | 0.011791 | 0.011566 |
| 0.011679 | 0.011791 | 0.011791 | 0.011791 | 0.011791 | 0.012185 | 0.011904 |
| 0.011904 | 0.011791 | 0.011622 | 0.011791 | 0.011622 | 0.011622 | 0.011566 |
| 0.011622 | 0.011678 | 0.011622 | 0.011678 | 0.011678 | 0.011622 | 0.011791 |
| 0.011622 | 0.011735 | 0.011735 | 0.011678 | 0.011678 | 0.011791 | 0.011848 |
| 0.011847 | 0.011679 | 0.011566 | 0.011566 | 0.011791 | 0.011566 | 0.011566 |
| 0.011739 | 0.011847 | 0.011622 | 0.011847 | 0.011566 | 0.011735 | 0.011678 |
| 0.011791 | 0.011678 | 0.011679 | 0.011622 | 0.011678 | 0.011566 | 0.011678 |
| 0.011735 | 0.011735 | 0.011735 | 0.011622 | 0.011735 | 0.011735 | 0.011847 |
| 0.011904 | 0.011791 | 0.011960 | 0.011847 | 0.011848 | 0.011678 | 0.011735 |
| 0.011624 | 0.011808 | 0.011790 | 0.011628 | 0.011970 | 0.011576 | 0.011723 |
| 0.011911 | 0.011744 | 0.011791 | 0.011960 | 0.011744 | 0.011904 | 0.011960 |
| 0.011847 | 0.011903 | 0.011874 | 0.011520 | 0.011571 | 0.011791 | 0.011847 |
| 0.011791 | 0.011850 | 0.011960 | 0.011851 | 0.011791 | 0.011847 | 0.012254 |
| 0.011791 | 0.011860 | 0.011904 | 0.011904 | 0.012187 | 0.011622 | 0.011681 |
| 0.011678 | 0.011678 | 0.011566 | 0.011566 | 0.011622 | 0.011735 | 0.011735 |
| 0.011678 | 0.011735 | 0.011622 | 0.011679 | 0.011678 | 0.011735 | 0.011566 |
| 0.011679 | 0.012016 | 0.011791 | 0.011847 | 0.011566 | 0.011678 | 0.011735 |
| 0.011735 | 0.011678 | 0.011791 | 0.011735 | 0.011622 | 0.011622 | 0.011622 |
| 0.011904 | 0.011678 | 0.011791 | 0.011622 | 0.011735 | 0.011622 | 0.011622 |
| 0.011622 | 0.011622 | 0.011678 | 0.011791 | 0.011622 | 0.011566 | 0.011678 |
| 0.011735 | 0.011678 | 0.011735 | 0.011566 | 0.011566 | 0.011679 | 0.011735 |
| 0.011566 | 0.011734 | 0.011566 | 0.011566 | 0.011678 | 0.011622 | 0.011679 |
| 0.011623 | 0.011734 | 0.011622 | 0.011566 | 0.011679 | 0.011566 | 0.011847 |
| 0.011640 | 0.011679 | 0.011791 | 0.011791 | 0.011679 | 0.011678 | 0.011735 |
| 0.011678 | 0.011960 | 0.011566 | 0.011678 | 0.011510 | 0.011510 | 0.011566 |
| 0.011678 | 0.011735 | 0.011679 | 0.011791 | 0.011566 | 0.011791 | 0.011510 |
| 0.011566 | 0.011678 | 0.011678 | 0.011678 | 0.011735 | 0.011847 | 0.011960 |
| 0.011848 | 0.011679 | 0.011734 | 0.011904 | 0.011791 | 0.011678 | 0.011622 |
| 0.011622 | 0.011678 | 0.011679 | 0.011510 | 0.011566 | 0.011791 | 0.011622 |

|          |          |          |          |          |          |          |
|----------|----------|----------|----------|----------|----------|----------|
| 0.011510 | 0.011622 | 0.011791 | 0.011735 | 0.011678 | 0.011622 | 0.011678 |
| 0.011679 | 0.011622 | 0.011678 | 0.011510 | 0.011847 | 0.011903 | 0.011847 |
| 0.011678 | 0.011791 | 0.011735 | 0.011682 | 0.011648 | 0.011901 | 0.011791 |
| 0.011847 | 0.011904 | 0.011794 | 0.011730 | 0.011764 | 0.011848 | 0.011919 |
| 0.011183 | 0.011698 | 0.011584 | 0.011696 | 0.011576 | 0.011642 | 0.011562 |
| 0.011609 | 0.011679 | 0.011679 | 0.011419 | 0.011791 | 0.011903 | 0.011796 |
| 0.011574 | 0.011678 | 0.011791 | 0.011735 | 0.011735 | 0.011736 | 0.011735 |
| 0.011735 | 0.011678 | 0.011566 | 0.011735 | 0.011735 | 0.011679 | 0.011678 |
| 0.011678 | 0.011735 | 0.011566 | 0.011735 | 0.011791 | 0.011791 | 0.011678 |
| 0.011678 | 0.011679 | 0.011735 | 0.011735 | 0.011848 | 0.011791 | 0.011904 |
| 0.011566 | 0.011622 | 0.011622 | 0.011678 | 0.011622 | 0.011847 | 0.011847 |
| 0.011735 | 0.011791 | 0.011904 | 0.011735 | 0.011791 | 0.011795 | 0.011678 |
| 0.011679 | 0.011847 | 0.011903 | 0.011622 | 0.011735 | 0.011566 | 0.011735 |
| 0.011678 | 0.011678 | 0.011735 | 0.011678 | 0.011681 | 0.011903 | 0.011791 |
| 0.011798 | 0.011566 | 0.011679 | 0.011904 | 0.011735 | 0.011848 | 0.011847 |
| 0.011960 | 0.011744 | 0.011904 | 0.011960 | 0.011847 | 0.011903 | 0.011622 |
| 0.011794 | 0.011791 | 0.011678 | 0.011678 | 0.011735 | 0.011566 | 0.011735 |
| 0.011791 | 0.011791 | 0.011678 | 0.011678 | 0.011679 | 0.011735 | 0.011735 |
| 0.011848 | 0.011791 | 0.011847 | 0.011847 | 0.012242 | 0.011815 | 0.011699 |
| 0.011859 | 0.011806 | 0.011870 | 0.011757 | 0.011872 | 0.011922 | 0.011791 |
| 0.012267 | 0.011636 | 0.011801 | 0.011690 | 0.011859 | 0.011791 | 0.011911 |
| 0.012263 | 0.011602 | 0.011624 | 0.011678 | 0.011678 | 0.011510 | 0.011623 |
| 0.011622 | 0.011622 | 0.011678 | 0.011678 | 0.011623 | 0.011622 | 0.011285 |
| 0.011734 | 0.011622 | 0.011678 | 0.011735 | 0.011566 | 0.011679 | 0.011566 |
| 0.011622 | 0.011622 | 0.011622 | 0.011622 | 0.011678 | 0.011622 | 0.011622 |
| 0.011678 | 0.011566 | 0.011622 | 0.011735 | 0.011622 | 0.011791 | 0.011735 |
| 0.011622 | 0.011679 | 0.011678 | 0.011679 | 0.011622 | 0.011848 | 0.011734 |
| 0.011463 | 0.011622 | 0.011735 | 0.011688 | 0.011791 | 0.011791 | 0.011847 |
| 0.011904 | 0.011679 | 0.011622 | 0.011679 | 0.011960 | 0.011847 | 0.011735 |
| 0.011735 | 0.011848 | 0.011904 | 0.011791 | 0.012016 | 0.012016 | 0.011847 |
| 0.011678 | 0.011735 | 0.011904 | 0.011791 | 0.011735 | 0.011791 | 0.011791 |
| 0.011678 | 0.011510 | 0.011510 | 0.011848 | 0.011904 | 0.011791 | 0.011735 |
| 0.011848 | 0.011960 | 0.011678 | 0.011848 | 0.011622 | 0.011679 | 0.011735 |
| 0.011791 | 0.011735 | 0.011510 | 0.011735 | 0.011735 | 0.011791 | 0.011960 |
| 0.011678 | 0.011797 | 0.011847 | 0.011688 | 0.011561 | 0.011735 | 0.011474 |
| 0.011588 | 0.011397 | 0.011566 | 0.011681 | 0.011502 | 0.011871 | 0.011589 |
| 0.011592 | 0.011599 | 0.011678 | 0.011577 | 0.011532 | 0.011712 | 0.011765 |
| 0.011928 | 0.011697 | 0.011622 | 0.011631 | 0.011681 | 0.011622 | 0.011622 |
| 0.011678 | 0.011679 | 0.011854 | 0.011625 | 0.011796 | 0.011833 | 0.011622 |
| 0.011904 | 0.011791 | 0.011622 | 0.011791 | 0.011622 | 0.011622 | 0.011566 |
| 0.011622 | 0.011678 | 0.011622 | 0.011678 | 0.011678 | 0.011622 | 0.011791 |
| 0.011679 | 0.011689 | 0.011735 | 0.011679 | 0.011960 | 0.011679 | 0.011795 |
| 0.011851 | 0.011566 | 0.011536 | 0.011579 | 0.011791 | 0.012017 | 0.011736 |
| 0.011678 | 0.011735 | 0.012072 | 0.011904 | 0.011847 | 0.011847 | 0.011735 |
| 0.011735 | 0.011960 | 0.011791 | 0.011734 | 0.012185 | 0.011735 | 0.011847 |
| 0.012185 | 0.011773 | 0.011636 | 0.011755 | 0.011678 | 0.011678 | 0.011903 |
| 0.011736 | 0.011959 | 0.011847 | 0.011847 | 0.011909 | 0.012129 | 0.011632 |
| 0.011515 | 0.011516 | 0.011631 | 0.011631 | 0.011630 | 0.011531 | 0.011687 |
| 0.011743 | 0.011589 | 0.011548 | 0.011605 | 0.011791 | 0.011792 | 0.011679 |
| 0.011622 | 0.011566 | 0.011735 | 0.011566 | 0.011566 | 0.011622 | 0.011510 |
| 0.011678 | 0.011678 | 0.011622 | 0.011622 | 0.011622 | 0.011622 | 0.011623 |
| 0.011680 | 0.011791 | 0.011735 | 0.011681 | 0.011622 | 0.011622 | 0.011678 |
| 0.011679 | 0.011854 | 0.011625 | 0.011796 | 0.011833 | 0.011622 | 0.011791 |
| 0.011903 | 0.011903 | 0.011625 | 0.011758 | 0.011810 | 0.011745 | 0.011587 |
| 0.011685 | 0.011739 | 0.011756 | 0.011800 | 0.011622 | 0.011847 | 0.011622 |
| 0.011735 | 0.011735 | 0.011678 | 0.011678 | 0.011791 | 0.011848 | 0.011679 |
| 0.011566 | 0.011566 | 0.011791 | 0.011566 | 0.011566 | 0.011739 | 0.011847 |
| 0.011735 | 0.011678 | 0.011566 | 0.011735 | 0.011735 | 0.011679 | 0.011678 |
| 0.011622 | 0.011791 | 0.011735 | 0.011678 | 0.011678 | 0.011903 | 0.011510 |
| 0.011735 | 0.011848 | 0.011678 | 0.011678 | 0.011678 | 0.011960 | 0.011566 |

|          |          |          |          |          |          |          |
|----------|----------|----------|----------|----------|----------|----------|
| 0.000000 | 0.011622 | 0.011496 | 0.011622 | 0.011735 | 0.011622 | 0.011575 |
| 0.011448 | 0.011285 | 0.011285 | 0.011510 | 0.011285 | 0.011510 | 0.011566 |
| 0.011398 | 0.011628 | 0.011397 | 0.011735 | 0.011341 | 0.012466 | 0.011397 |
| 0.012129 | 0.012015 | 0.012246 | 0.012130 | 0.011735 | 0.011454 | 0.011285 |
| 0.012242 | 0.011285 | 0.011454 | 0.011398 | 0.011397 | 0.011397 | 0.011400 |
| 0.011285 | 0.011285 | 0.011341 | 0.011285 | 0.012017 | 0.012017 | 0.012073 |
| 0.011960 | 0.012016 | 0.012185 | 0.011960 | 0.012299 | 0.012308 | 0.012355 |
| 0.012468 | 0.012356 | 0.012412 | 0.012299 | 0.012356 | 0.011735 | 0.011960 |
| 0.012017 | 0.012523 | 0.012080 | 0.012129 | 0.011960 | 0.011795 | 0.011679 |
| 0.011622 | 0.011566 | 0.012073 | 0.011977 | 0.012204 | 0.011847 | 0.011622 |
| S785     | 0.011358 | 0.011358 | 0.011613 | 0.011528 | 0.011528 | 0.011613 |
| 0.011402 | 0.011317 | 0.011528 | 0.011145 | 0.011230 | 0.011188 | 0.011145 |
| 0.011188 | 0.011358 | 0.011188 | 0.011230 | 0.011230 | 0.011230 | 0.011188 |
| 0.011188 | 0.011230 | 0.011230 | 0.011145 | 0.011231 | 0.011145 | 0.011402 |
| 0.011358 | 0.011230 | 0.011103 | 0.011273 | 0.011230 | 0.011188 | 0.011145 |
| 0.011188 | 0.011358 | 0.011273 | 0.011273 | 0.011273 | 0.011273 | 0.011485 |
| 0.011145 | 0.011273 | 0.011273 | 0.011230 | 0.011358 | 0.011400 | 0.011273 |
| 0.011273 | 0.011400 | 0.011230 | 0.011485 | 0.011230 | 0.011485 | 0.011230 |
| 0.011230 | 0.011358 | 0.011315 | 0.011485 | 0.011443 | 0.011315 | 0.011485 |
| 0.011315 | 0.011315 | 0.011188 | 0.011485 | 0.011528 | 0.011273 | 0.011315 |
| 0.011230 | 0.011230 | 0.011273 | 0.011358 | 0.011188 | 0.011273 | 0.011273 |
| 0.011188 | 0.011188 | 0.011145 | 0.011188 | 0.011230 | 0.011230 | 0.011358 |
| 0.011273 | 0.011188 | 0.011358 | 0.011103 | 0.011400 | 0.011188 | 0.011188 |
| 0.011400 | 0.011358 | 0.011400 | 0.011400 | 0.011230 | 0.011485 | 0.011273 |
| 0.011319 | 0.011495 | 0.011405 | 0.011151 | 0.011146 | 0.011240 | 0.011236 |
| 0.011230 | 0.011224 | 0.011147 | 0.011485 | 0.011400 | 0.011273 | 0.011315 |
| 0.011273 | 0.011273 | 0.011400 | 0.011273 | 0.011315 | 0.011273 | 0.011230 |
| 0.011188 | 0.011273 | 0.011570 | 0.011443 | 0.011315 | 0.011315 | 0.011230 |
| 0.011188 | 0.011188 | 0.011273 | 0.011145 | 0.011230 | 0.011273 | 0.011188 |
| 0.011315 | 0.011400 | 0.011188 | 0.011188 | 0.011230 | 0.011230 | 0.011230 |
| 0.011316 | 0.011273 | 0.011273 | 0.011103 | 0.011146 | 0.011147 | 0.011188 |
| 0.011273 | 0.011188 | 0.011235 | 0.011230 | 0.011145 | 0.011188 | 0.011231 |
| 0.011365 | 0.011232 | 0.011230 | 0.011188 | 0.011145 | 0.011273 | 0.011273 |
| 0.011358 | 0.011273 | 0.011273 | 0.011273 | 0.011273 | 0.011698 | 0.011485 |
| 0.011485 | 0.011443 | 0.011230 | 0.011400 | 0.011145 | 0.011273 | 0.011103 |
| 0.011230 | 0.011230 | 0.011188 | 0.011188 | 0.011188 | 0.011188 | 0.011315 |
| 0.011230 | 0.011358 | 0.011273 | 0.011188 | 0.011231 | 0.011443 | 0.011401 |
| 0.011400 | 0.011315 | 0.011145 | 0.011103 | 0.011273 | 0.011145 | 0.011103 |
| 0.011231 | 0.011400 | 0.011188 | 0.011400 | 0.011103 | 0.011230 | 0.011188 |
| 0.011358 | 0.011188 | 0.011273 | 0.011188 | 0.011230 | 0.011103 | 0.011230 |
| 0.011273 | 0.011230 | 0.011230 | 0.011188 | 0.011230 | 0.011315 | 0.011400 |
| 0.011443 | 0.011358 | 0.011485 | 0.011400 | 0.011400 | 0.011188 | 0.011230 |
| 0.011274 | 0.011473 | 0.011298 | 0.011147 | 0.011534 | 0.011104 | 0.011210 |
| 0.011445 | 0.011447 | 0.011358 | 0.011656 | 0.011232 | 0.011528 | 0.011485 |
| 0.011400 | 0.011485 | 0.011459 | 0.011216 | 0.011164 | 0.011315 | 0.011404 |
| 0.011528 | 0.011358 | 0.011443 | 0.011444 | 0.011315 | 0.011485 | 0.011746 |
| 0.011315 | 0.011448 | 0.011485 | 0.011485 | 0.011742 | 0.011145 | 0.011316 |
| 0.011230 | 0.011230 | 0.011103 | 0.011103 | 0.011188 | 0.011230 | 0.011315 |
| 0.011230 | 0.011315 | 0.011188 | 0.011273 | 0.011230 | 0.011230 | 0.011230 |
| 0.011230 | 0.011528 | 0.011400 | 0.011443 | 0.011103 | 0.011230 | 0.011273 |
| 0.011273 | 0.011188 | 0.011315 | 0.011358 | 0.011145 | 0.011145 | 0.011145 |
| 0.011570 | 0.011273 | 0.011358 | 0.011145 | 0.011230 | 0.011400 | 0.011145 |
| 0.011145 | 0.011145 | 0.011188 | 0.011358 | 0.011188 | 0.011230 | 0.011315 |
| 0.011315 | 0.011188 | 0.011230 | 0.011103 | 0.011103 | 0.011230 | 0.011273 |
| 0.011103 | 0.011230 | 0.011103 | 0.011103 | 0.011315 | 0.011315 | 0.011188 |
| 0.011145 | 0.011315 | 0.011145 | 0.011103 | 0.011315 | 0.011103 | 0.011315 |
| 0.011278 | 0.011188 | 0.011358 | 0.011273 | 0.011400 | 0.011188 | 0.011273 |
| 0.011188 | 0.011485 | 0.011103 | 0.011315 | 0.011188 | 0.011188 | 0.011103 |
| 0.011273 | 0.011485 | 0.011188 | 0.011315 | 0.011145 | 0.011400 | 0.011188 |
| 0.011188 | 0.011188 | 0.011188 | 0.011273 | 0.011230 | 0.011358 | 0.011443 |

|          |          |          |          |          |          |          |
|----------|----------|----------|----------|----------|----------|----------|
| 0.011400 | 0.011315 | 0.011273 | 0.011400 | 0.011358 | 0.011188 | 0.011145 |
| 0.011188 | 0.011188 | 0.011188 | 0.011145 | 0.011145 | 0.011315 | 0.011188 |
| 0.011188 | 0.011145 | 0.011315 | 0.011400 | 0.011230 | 0.011230 | 0.011230 |
| 0.011230 | 0.011145 | 0.011273 | 0.011145 | 0.011315 | 0.011443 | 0.011528 |
| 0.011230 | 0.011443 | 0.011230 | 0.018825 | 0.011196 | 0.011436 | 0.011400 |
| 0.011400 | 0.011400 | 0.011297 | 0.011252 | 0.011496 | 0.011443 | 0.011329 |
| 0.011416 | 0.011264 | 0.011104 | 0.011212 | 0.011198 | 0.011231 | 0.011110 |
| 0.011317 | 0.011273 | 0.011281 | 0.011209 | 0.011315 | 0.011358 | 0.011359 |
| 0.011233 | 0.011315 | 0.011315 | 0.011315 | 0.011273 | 0.011273 | 0.011273 |
| 0.011273 | 0.011188 | 0.011188 | 0.011315 | 0.011230 | 0.011188 | 0.011188 |
| 0.011188 | 0.011273 | 0.011145 | 0.011230 | 0.011315 | 0.011400 | 0.011188 |
| 0.011315 | 0.011273 | 0.011315 | 0.011315 | 0.011358 | 0.011401 | 0.011400 |
| 0.011103 | 0.011145 | 0.011145 | 0.011315 | 0.011145 | 0.011400 | 0.011400 |
| 0.011358 | 0.011358 | 0.011358 | 0.011400 | 0.011400 | 0.011402 | 0.011273 |
| 0.011273 | 0.011315 | 0.011443 | 0.011230 | 0.011230 | 0.011188 | 0.011315 |
| 0.011315 | 0.011315 | 0.011358 | 0.011273 | 0.011273 | 0.011400 | 0.011400 |
| 0.011318 | 0.011145 | 0.011230 | 0.011358 | 0.011230 | 0.011443 | 0.011485 |
| 0.011656 | 0.011232 | 0.011528 | 0.011485 | 0.011400 | 0.011485 | 0.011188 |
| 0.011402 | 0.011273 | 0.011188 | 0.011188 | 0.011273 | 0.011145 | 0.011230 |
| 0.011315 | 0.011400 | 0.011188 | 0.011315 | 0.011273 | 0.011315 | 0.011315 |
| 0.011358 | 0.011401 | 0.011315 | 0.011315 | 0.011869 | 0.011415 | 0.011239 |
| 0.011453 | 0.011363 | 0.011413 | 0.011324 | 0.011409 | 0.011450 | 0.011316 |
| 0.011883 | 0.011234 | 0.011361 | 0.011276 | 0.011533 | 0.011485 | 0.011446 |
| 0.011923 | 0.011389 | 0.011273 | 0.011273 | 0.011273 | 0.011188 | 0.011231 |
| 0.011145 | 0.011188 | 0.011273 | 0.011273 | 0.011273 | 0.011273 | 0.011315 |
| 0.011230 | 0.011188 | 0.011230 | 0.011230 | 0.011145 | 0.011188 | 0.011103 |
| 0.011273 | 0.011315 | 0.011188 | 0.011145 | 0.011230 | 0.011188 | 0.011230 |
| 0.011230 | 0.011145 | 0.011230 | 0.011230 | 0.011145 | 0.011358 | 0.011443 |
| 0.011273 | 0.011400 | 0.011315 | 0.011273 | 0.011145 | 0.011443 | 0.011273 |
| 0.011193 | 0.011145 | 0.011358 | 0.011361 | 0.011315 | 0.011273 | 0.011315 |
| 0.011358 | 0.011273 | 0.011188 | 0.011273 | 0.011400 | 0.011400 | 0.011273 |
| 0.011273 | 0.011315 | 0.011485 | 0.011273 | 0.011485 | 0.011485 | 0.011358 |
| 0.011188 | 0.011315 | 0.011358 | 0.011443 | 0.011315 | 0.011315 | 0.011273 |
| 0.011273 | 0.011230 | 0.011230 | 0.011528 | 0.011400 | 0.011443 | 0.011230 |
| 0.011315 | 0.011400 | 0.011230 | 0.011315 | 0.011230 | 0.011188 | 0.011358 |
| 0.011315 | 0.011230 | 0.011230 | 0.011358 | 0.011230 | 0.011358 | 0.011485 |
| 0.011230 | 0.011402 | 0.011528 | 0.011321 | 0.011173 | 0.011358 | 0.011172 |
| 0.011192 | 0.011576 | 0.011103 | 0.011304 | 0.011217 | 0.011326 | 0.011334 |
| 0.011273 | 0.011130 | 0.011290 | 0.011129 | 0.011173 | 0.011333 | 0.011288 |
| 0.011368 | 0.011236 | 0.011315 | 0.011189 | 0.011316 | 0.011273 | 0.011400 |
| 0.011400 | 0.011400 | 0.011489 | 0.011275 | 0.011488 | 0.011643 | 0.011145 |
| 0.011485 | 0.011443 | 0.011230 | 0.011400 | 0.011145 | 0.011273 | 0.011103 |
| 0.011230 | 0.011230 | 0.011188 | 0.011188 | 0.011188 | 0.011188 | 0.011315 |
| 0.011231 | 0.011233 | 0.011273 | 0.011188 | 0.011400 | 0.011358 | 0.011359 |
| 0.011359 | 0.011188 | 0.011105 | 0.011104 | 0.011273 | 0.011443 | 0.011358 |
| 0.011188 | 0.011315 | 0.011613 | 0.011443 | 0.011443 | 0.011443 | 0.011230 |
| 0.011315 | 0.011443 | 0.011315 | 0.011273 | 0.011698 | 0.011358 | 0.011528 |
| 0.011613 | 0.011421 | 0.011147 | 0.011279 | 0.011230 | 0.011443 | 0.011358 |
| 0.011273 | 0.011443 | 0.011443 | 0.011443 | 0.011406 | 0.011613 | 0.011236 |
| 0.011103 | 0.011104 | 0.011232 | 0.011190 | 0.011275 | 0.011107 | 0.011318 |
| 0.011277 | 0.011277 | 0.011119 | 0.011293 | 0.011273 | 0.011273 | 0.011230 |
| 0.011188 | 0.011188 | 0.011273 | 0.011145 | 0.011230 | 0.011273 | 0.011188 |
| 0.011315 | 0.011400 | 0.011188 | 0.011188 | 0.011230 | 0.011230 | 0.011230 |
| 0.011316 | 0.011273 | 0.011273 | 0.011316 | 0.011273 | 0.011400 | 0.011400 |
| 0.011400 | 0.011489 | 0.011275 | 0.011488 | 0.011643 | 0.011145 | 0.011485 |
| 0.011358 | 0.011358 | 0.011146 | 0.011412 | 0.011368 | 0.011276 | 0.011238 |
| 0.011277 | 0.011583 | 0.011384 | 0.011318 | 0.011188 | 0.011400 | 0.011230 |
| 0.011358 | 0.011273 | 0.011188 | 0.011231 | 0.011443 | 0.011401 | 0.011315 |
| 0.011145 | 0.011103 | 0.011273 | 0.011145 | 0.011103 | 0.011231 | 0.011400 |
| 0.011273 | 0.011188 | 0.011188 | 0.011315 | 0.011230 | 0.011188 | 0.011273 |

|          |          |          |          |          |          |          |
|----------|----------|----------|----------|----------|----------|----------|
| 0.011273 | 0.011273 | 0.011315 | 0.011230 | 0.011315 | 0.011485 | 0.011145 |
| 0.011230 | 0.011443 | 0.011230 | 0.011230 | 0.011188 | 0.011485 | 0.011151 |
| 0.011622 | 0.000000 | 0.011166 | 0.011276 | 0.011319 | 0.011273 | 0.011105 |
| 0.011116 | 0.011315 | 0.011443 | 0.011577 | 0.011400 | 0.011570 | 0.011740 |
| 0.011613 | 0.011617 | 0.011613 | 0.011783 | 0.011400 | 0.012465 | 0.011613 |
| 0.012210 | 0.012038 | 0.012255 | 0.012296 | 0.011358 | 0.011273 | 0.011570 |
| 0.011997 | 0.011741 | 0.011485 | 0.011400 | 0.011443 | 0.011443 | 0.011360 |
| 0.011315 | 0.011315 | 0.011358 | 0.011358 | 0.011613 | 0.011655 | 0.011698 |
| 0.011528 | 0.011528 | 0.011698 | 0.011528 | 0.011911 | 0.011961 | 0.011911 |
| 0.012039 | 0.011997 | 0.011954 | 0.011954 | 0.011997 | 0.011273 | 0.011528 |
| 0.011613 | 0.012081 | 0.011616 | 0.011783 | 0.011571 | 0.011316 | 0.011273 |
| 0.011230 | 0.011230 | 0.011656 | 0.011612 | 0.011663 | 0.011443 | 0.011230 |
| S786     | 0.011411 | 0.011411 | 0.011512 | 0.011461 | 0.011461 | 0.011512 |
| 0.011414 | 0.011313 | 0.011461 | 0.011261 | 0.011261 | 0.011261 | 0.011211 |
| 0.011161 | 0.011411 | 0.011161 | 0.011211 | 0.011261 | 0.011261 | 0.011261 |
| 0.011261 | 0.011261 | 0.011161 | 0.011211 | 0.011261 | 0.011211 | 0.011414 |
| 0.011361 | 0.011261 | 0.011161 | 0.011161 | 0.011261 | 0.011261 | 0.011161 |
| 0.011311 | 0.011361 | 0.011361 | 0.011361 | 0.011361 | 0.011311 | 0.011511 |
| 0.011110 | 0.011311 | 0.011361 | 0.011211 | 0.011311 | 0.011511 | 0.011411 |
| 0.011361 | 0.011461 | 0.011261 | 0.011461 | 0.011311 | 0.011461 | 0.011311 |
| 0.011261 | 0.011311 | 0.011411 | 0.011461 | 0.011461 | 0.011110 | 0.011411 |
| 0.011311 | 0.011261 | 0.011261 | 0.011561 | 0.011411 | 0.011361 | 0.011311 |
| 0.011311 | 0.011311 | 0.011361 | 0.011461 | 0.011261 | 0.011261 | 0.011261 |
| 0.011261 | 0.011261 | 0.011211 | 0.011110 | 0.011261 | 0.011261 | 0.011411 |
| 0.011361 | 0.011261 | 0.011411 | 0.011161 | 0.011361 | 0.011211 | 0.011211 |
| 0.011511 | 0.011411 | 0.011511 | 0.011411 | 0.011361 | 0.011511 | 0.011311 |
| 0.011473 | 0.011473 | 0.011562 | 0.011215 | 0.011211 | 0.011324 | 0.011215 |
| 0.011211 | 0.011217 | 0.011215 | 0.011461 | 0.011311 | 0.011261 | 0.011311 |
| 0.011311 | 0.011261 | 0.011411 | 0.011311 | 0.011461 | 0.011311 | 0.011261 |
| 0.011211 | 0.011261 | 0.011512 | 0.011511 | 0.011411 | 0.011361 | 0.011261 |
| 0.011211 | 0.011161 | 0.011311 | 0.011161 | 0.011211 | 0.011161 | 0.011161 |
| 0.011261 | 0.011261 | 0.011211 | 0.011211 | 0.011211 | 0.011211 | 0.011211 |
| 0.011211 | 0.011311 | 0.011311 | 0.011164 | 0.011215 | 0.011216 | 0.011211 |
| 0.011311 | 0.011261 | 0.011261 | 0.011261 | 0.011162 | 0.011264 | 0.011312 |
| 0.011218 | 0.011316 | 0.011312 | 0.011261 | 0.011161 | 0.011311 | 0.011211 |
| 0.011311 | 0.011261 | 0.011261 | 0.011361 | 0.011311 | 0.011712 | 0.011411 |
| 0.011461 | 0.011411 | 0.011261 | 0.011361 | 0.011211 | 0.011261 | 0.011161 |
| 0.011261 | 0.011261 | 0.011211 | 0.011261 | 0.011261 | 0.011261 | 0.011361 |
| 0.011261 | 0.011361 | 0.011311 | 0.011211 | 0.011261 | 0.011411 | 0.011361 |
| 0.011461 | 0.011361 | 0.011161 | 0.011161 | 0.011361 | 0.011161 | 0.011161 |
| 0.011312 | 0.011461 | 0.011211 | 0.011461 | 0.011161 | 0.011311 | 0.011211 |
| 0.011361 | 0.011211 | 0.011311 | 0.011261 | 0.011311 | 0.011161 | 0.011211 |
| 0.011311 | 0.011261 | 0.011261 | 0.011211 | 0.011261 | 0.011311 | 0.011511 |
| 0.011461 | 0.011361 | 0.011411 | 0.011411 | 0.011361 | 0.011261 | 0.011261 |
| 0.011261 | 0.011414 | 0.011378 | 0.011212 | 0.011516 | 0.011162 | 0.011348 |
| 0.011464 | 0.011314 | 0.011411 | 0.011562 | 0.011364 | 0.011511 | 0.011461 |
| 0.011511 | 0.011511 | 0.011482 | 0.011121 | 0.011184 | 0.011361 | 0.011411 |
| 0.011461 | 0.011362 | 0.011461 | 0.011463 | 0.011311 | 0.011411 | 0.011870 |
| 0.011363 | 0.011467 | 0.011516 | 0.011516 | 0.011613 | 0.011211 | 0.011413 |
| 0.011261 | 0.011261 | 0.011161 | 0.011161 | 0.011211 | 0.011311 | 0.011261 |
| 0.011261 | 0.011311 | 0.011211 | 0.011211 | 0.011261 | 0.011261 | 0.011211 |
| 0.011261 | 0.011561 | 0.011361 | 0.011361 | 0.011161 | 0.011261 | 0.011361 |
| 0.011361 | 0.011211 | 0.011361 | 0.011311 | 0.011211 | 0.011211 | 0.011211 |
| 0.011612 | 0.011161 | 0.011411 | 0.011211 | 0.011311 | 0.011311 | 0.011211 |
| 0.011211 | 0.011211 | 0.011311 | 0.011411 | 0.011211 | 0.011311 | 0.011361 |
| 0.011411 | 0.011311 | 0.011311 | 0.011211 | 0.011161 | 0.011261 | 0.011361 |
| 0.011211 | 0.011311 | 0.011161 | 0.011161 | 0.011361 | 0.011211 | 0.011261 |
| 0.011211 | 0.011361 | 0.011261 | 0.011161 | 0.011261 | 0.011161 | 0.011411 |
| 0.011266 | 0.011261 | 0.011361 | 0.011361 | 0.011311 | 0.011261 | 0.011361 |
| 0.011261 | 0.011461 | 0.011161 | 0.011211 | 0.011161 | 0.011161 | 0.011161 |

|          |          |          |          |          |          |          |
|----------|----------|----------|----------|----------|----------|----------|
| 0.011311 | 0.011311 | 0.011261 | 0.011411 | 0.011161 | 0.011361 | 0.011161 |
| 0.011161 | 0.011261 | 0.011261 | 0.011211 | 0.011311 | 0.011461 | 0.011461 |
| 0.011411 | 0.011361 | 0.011261 | 0.011411 | 0.011361 | 0.011261 | 0.011211 |
| 0.011211 | 0.011261 | 0.011261 | 0.011110 | 0.011161 | 0.011361 | 0.011211 |
| 0.011161 | 0.011261 | 0.011361 | 0.011311 | 0.011211 | 0.011211 | 0.011261 |
| 0.011261 | 0.011261 | 0.011311 | 0.011261 | 0.011361 | 0.011461 | 0.011411 |
| 0.011311 | 0.011411 | 0.011211 | 0.019624 | 0.011273 | 0.011403 | 0.011361 |
| 0.011411 | 0.011411 | 0.011370 | 0.011318 | 0.011460 | 0.011512 | 0.011427 |
| 0.011422 | 0.011289 | 0.011165 | 0.011224 | 0.011165 | 0.011123 | 0.011227 |
| 0.011261 | 0.011261 | 0.011261 | 0.011152 | 0.011411 | 0.011411 | 0.011363 |
| 0.011264 | 0.011411 | 0.011411 | 0.011261 | 0.011361 | 0.011361 | 0.011261 |
| 0.011261 | 0.011211 | 0.011211 | 0.011361 | 0.011311 | 0.011261 | 0.011261 |
| 0.011261 | 0.011361 | 0.011161 | 0.011311 | 0.011411 | 0.011411 | 0.011261 |
| 0.011211 | 0.011211 | 0.011311 | 0.011311 | 0.011361 | 0.011411 | 0.011461 |
| 0.011161 | 0.011161 | 0.011211 | 0.011261 | 0.011161 | 0.011411 | 0.011411 |
| 0.011311 | 0.011411 | 0.011461 | 0.011361 | 0.011411 | 0.011362 | 0.011261 |
| 0.011311 | 0.011361 | 0.011461 | 0.011311 | 0.011311 | 0.011161 | 0.011311 |
| 0.011311 | 0.011311 | 0.011361 | 0.011261 | 0.011312 | 0.011461 | 0.011361 |
| 0.011313 | 0.011161 | 0.011311 | 0.011461 | 0.011311 | 0.011411 | 0.011511 |
| 0.011562 | 0.011364 | 0.011511 | 0.011461 | 0.011511 | 0.011511 | 0.011211 |
| 0.011513 | 0.011361 | 0.011261 | 0.011261 | 0.011361 | 0.011161 | 0.011311 |
| 0.011411 | 0.011411 | 0.011261 | 0.011211 | 0.011211 | 0.011311 | 0.011311 |
| 0.011361 | 0.011411 | 0.011361 | 0.011361 | 0.011863 | 0.011326 | 0.011216 |
| 0.011525 | 0.011320 | 0.011427 | 0.011370 | 0.011428 | 0.011472 | 0.011368 |
| 0.011932 | 0.011267 | 0.011469 | 0.011267 | 0.011471 | 0.011465 | 0.011515 |
| 0.011927 | 0.011285 | 0.011211 | 0.011261 | 0.011261 | 0.011161 | 0.011211 |
| 0.011211 | 0.011161 | 0.011261 | 0.011261 | 0.011211 | 0.011261 | 0.011261 |
| 0.011311 | 0.011211 | 0.011261 | 0.011261 | 0.011161 | 0.011261 | 0.011161 |
| 0.011261 | 0.011261 | 0.011161 | 0.011211 | 0.011261 | 0.011261 | 0.011311 |
| 0.011261 | 0.011211 | 0.011211 | 0.011261 | 0.011211 | 0.011361 | 0.011461 |
| 0.011261 | 0.011311 | 0.011311 | 0.011311 | 0.011161 | 0.011461 | 0.011311 |
| 0.011164 | 0.011211 | 0.011361 | 0.011365 | 0.011361 | 0.011361 | 0.011361 |
| 0.011411 | 0.011261 | 0.011261 | 0.011261 | 0.011511 | 0.011361 | 0.011311 |
| 0.011261 | 0.011461 | 0.011461 | 0.011361 | 0.011411 | 0.011411 | 0.011461 |
| 0.011261 | 0.011311 | 0.011411 | 0.011411 | 0.011361 | 0.011361 | 0.011361 |
| 0.011311 | 0.011161 | 0.011161 | 0.011411 | 0.011512 | 0.011361 | 0.011311 |
| 0.011411 | 0.011461 | 0.011211 | 0.011411 | 0.011311 | 0.011261 | 0.011311 |
| 0.011311 | 0.011311 | 0.011161 | 0.011411 | 0.011311 | 0.011411 | 0.011461 |
| 0.011311 | 0.011363 | 0.011411 | 0.011319 | 0.011122 | 0.011211 | 0.011176 |
| 0.011208 | 0.011417 | 0.011161 | 0.011285 | 0.011118 | 0.011365 | 0.011299 |
| 0.011225 | 0.011209 | 0.011369 | 0.011201 | 0.011239 | 0.011424 | 0.011383 |
| 0.011472 | 0.011270 | 0.011315 | 0.011314 | 0.011363 | 0.011261 | 0.011361 |
| 0.011311 | 0.011361 | 0.011515 | 0.011212 | 0.011566 | 0.011537 | 0.011261 |
| 0.011461 | 0.011411 | 0.011261 | 0.011361 | 0.011211 | 0.011261 | 0.011161 |
| 0.011261 | 0.011261 | 0.011211 | 0.011261 | 0.011261 | 0.011261 | 0.011361 |
| 0.011265 | 0.011319 | 0.011361 | 0.011213 | 0.011467 | 0.011311 | 0.011363 |
| 0.011464 | 0.011161 | 0.011168 | 0.011164 | 0.011361 | 0.011562 | 0.011412 |
| 0.011261 | 0.011411 | 0.011662 | 0.011462 | 0.011361 | 0.011561 | 0.011261 |
| 0.011311 | 0.011411 | 0.011311 | 0.011261 | 0.011762 | 0.011261 | 0.011411 |
| 0.011762 | 0.011378 | 0.011264 | 0.011423 | 0.011261 | 0.011261 | 0.011411 |
| 0.011261 | 0.011461 | 0.011361 | 0.011361 | 0.011351 | 0.011662 | 0.011265 |
| 0.011162 | 0.011163 | 0.011263 | 0.011263 | 0.011265 | 0.011170 | 0.011314 |
| 0.011316 | 0.011188 | 0.011130 | 0.011281 | 0.011261 | 0.011264 | 0.011261 |
| 0.011211 | 0.011161 | 0.011311 | 0.011161 | 0.011211 | 0.011161 | 0.011161 |
| 0.011261 | 0.011261 | 0.011211 | 0.011211 | 0.011211 | 0.011211 | 0.011211 |
| 0.011211 | 0.011311 | 0.011311 | 0.011363 | 0.011261 | 0.011361 | 0.011311 |
| 0.011361 | 0.011515 | 0.011212 | 0.011566 | 0.011537 | 0.011261 | 0.011461 |
| 0.011411 | 0.011411 | 0.011212 | 0.011370 | 0.011420 | 0.011314 | 0.011319 |
| 0.011263 | 0.011646 | 0.011484 | 0.011364 | 0.011211 | 0.011461 | 0.011261 |
| 0.011361 | 0.011311 | 0.011211 | 0.011261 | 0.011411 | 0.011361 | 0.011361 |

|          |          |          |          |          |          |          |
|----------|----------|----------|----------|----------|----------|----------|
| 0.011161 | 0.011161 | 0.011361 | 0.011161 | 0.011161 | 0.011312 | 0.011461 |
| 0.011261 | 0.011211 | 0.011211 | 0.011361 | 0.011311 | 0.011261 | 0.011261 |
| 0.011261 | 0.011361 | 0.011411 | 0.011261 | 0.011311 | 0.011511 | 0.011110 |
| 0.011311 | 0.011461 | 0.011261 | 0.011261 | 0.011311 | 0.011461 | 0.011213 |
| 0.011496 | 0.011166 | 0.000000 | 0.011270 | 0.011315 | 0.011264 | 0.011162 |
| 0.011114 | 0.011261 | 0.011411 | 0.011511 | 0.011361 | 0.011562 | 0.011612 |
| 0.011512 | 0.011566 | 0.011461 | 0.011763 | 0.011311 | 0.012365 | 0.011411 |
| 0.012064 | 0.011913 | 0.012218 | 0.012165 | 0.011311 | 0.011211 | 0.011511 |
| 0.012064 | 0.011612 | 0.011411 | 0.011361 | 0.011361 | 0.011361 | 0.011262 |
| 0.011261 | 0.011261 | 0.011311 | 0.011261 | 0.011662 | 0.011612 | 0.011712 |
| 0.011511 | 0.011562 | 0.011662 | 0.011461 | 0.011913 | 0.011920 | 0.012015 |
| 0.012064 | 0.011964 | 0.011964 | 0.011914 | 0.011964 | 0.011311 | 0.011461 |
| 0.011511 | 0.012064 | 0.011614 | 0.011662 | 0.011562 | 0.011311 | 0.011261 |
| 0.011211 | 0.011161 | 0.011662 | 0.011681 | 0.011773 | 0.011411 | 0.011211 |
| S787     | 0.011866 | 0.011866 | 0.011664 | 0.011584 | 0.011584 | 0.011664 |
| 0.011509 | 0.011428 | 0.011624 | 0.011422 | 0.011463 | 0.011422 | 0.011422 |
| 0.011382 | 0.011624 | 0.011342 | 0.011463 | 0.011503 | 0.011503 | 0.011422 |
| 0.011422 | 0.011463 | 0.011262 | 0.011383 | 0.011463 | 0.011382 | 0.011509 |
| 0.011181 | 0.011463 | 0.011342 | 0.011302 | 0.011463 | 0.011422 | 0.011382 |
| 0.011463 | 0.011624 | 0.011503 | 0.011503 | 0.011503 | 0.011503 | 0.011704 |
| 0.011302 | 0.011503 | 0.011503 | 0.011463 | 0.011503 | 0.011624 | 0.011503 |
| 0.011503 | 0.011664 | 0.011503 | 0.011543 | 0.011463 | 0.011745 | 0.011463 |
| 0.011422 | 0.011503 | 0.011543 | 0.011745 | 0.011503 | 0.011463 | 0.011624 |
| 0.011543 | 0.011584 | 0.011463 | 0.011745 | 0.011584 | 0.011503 | 0.011543 |
| 0.011463 | 0.011463 | 0.011543 | 0.011584 | 0.011503 | 0.011503 | 0.011503 |
| 0.011422 | 0.011422 | 0.011382 | 0.011342 | 0.011503 | 0.011463 | 0.011583 |
| 0.011503 | 0.011463 | 0.011584 | 0.011422 | 0.011543 | 0.011422 | 0.011422 |
| 0.011624 | 0.011583 | 0.011543 | 0.011624 | 0.011463 | 0.011704 | 0.011503 |
| 0.011561 | 0.011565 | 0.011644 | 0.011407 | 0.011390 | 0.011484 | 0.011273 |
| 0.011262 | 0.011273 | 0.011398 | 0.011704 | 0.011624 | 0.011422 | 0.011503 |
| 0.011543 | 0.011503 | 0.011624 | 0.011463 | 0.011543 | 0.011503 | 0.011543 |
| 0.011503 | 0.011503 | 0.011825 | 0.011664 | 0.011584 | 0.011544 | 0.011463 |
| 0.011422 | 0.011342 | 0.011503 | 0.011422 | 0.011382 | 0.011342 | 0.011262 |
| 0.011382 | 0.011463 | 0.011422 | 0.011422 | 0.011463 | 0.011463 | 0.011463 |
| 0.011544 | 0.011503 | 0.011503 | 0.011349 | 0.011390 | 0.011392 | 0.011503 |
| 0.011503 | 0.011422 | 0.011474 | 0.011463 | 0.011383 | 0.011423 | 0.011463 |
| 0.011393 | 0.011466 | 0.011463 | 0.011422 | 0.011422 | 0.011543 | 0.011423 |
| 0.011503 | 0.011503 | 0.011503 | 0.011543 | 0.011584 | 0.011906 | 0.011624 |
| 0.011342 | 0.011584 | 0.011422 | 0.011543 | 0.011382 | 0.000000 | 0.011342 |
| 0.011463 | 0.011463 | 0.011422 | 0.011422 | 0.011422 | 0.011422 | 0.011543 |
| 0.011463 | 0.011584 | 0.011503 | 0.011422 | 0.011505 | 0.011664 | 0.011627 |
| 0.011624 | 0.011543 | 0.011422 | 0.011343 | 0.011503 | 0.011422 | 0.011342 |
| 0.011345 | 0.011624 | 0.011422 | 0.011624 | 0.011342 | 0.011463 | 0.011422 |
| 0.011584 | 0.011463 | 0.011503 | 0.011422 | 0.011463 | 0.011342 | 0.011463 |
| 0.011503 | 0.011463 | 0.011503 | 0.011463 | 0.011503 | 0.011543 | 0.011624 |
| 0.011584 | 0.011423 | 0.011543 | 0.011624 | 0.011503 | 0.011422 | 0.011463 |
| 0.011424 | 0.011645 | 0.011514 | 0.011388 | 0.011590 | 0.011347 | 0.011485 |
| 0.011550 | 0.011467 | 0.011584 | 0.011906 | 0.011549 | 0.011745 | 0.011745 |
| 0.011624 | 0.011745 | 0.011698 | 0.011504 | 0.011500 | 0.011543 | 0.011629 |
| 0.011745 | 0.011626 | 0.011669 | 0.011751 | 0.011583 | 0.011825 | 0.011996 |
| 0.011624 | 0.011753 | 0.011745 | 0.011705 | 0.011907 | 0.011382 | 0.011545 |
| 0.011463 | 0.011463 | 0.011342 | 0.011342 | 0.011422 | 0.011463 | 0.011543 |
| 0.011463 | 0.011543 | 0.011422 | 0.011422 | 0.011382 | 0.011463 | 0.011422 |
| 0.011463 | 0.011584 | 0.011463 | 0.011503 | 0.011342 | 0.011463 | 0.011503 |
| 0.011503 | 0.011422 | 0.011543 | 0.011503 | 0.011422 | 0.011422 | 0.011422 |
| 0.011664 | 0.011463 | 0.011584 | 0.011382 | 0.011463 | 0.011664 | 0.011382 |
| 0.011382 | 0.011422 | 0.011422 | 0.011624 | 0.011422 | 0.011342 | 0.011423 |
| 0.011423 | 0.011422 | 0.011463 | 0.011342 | 0.011382 | 0.011503 | 0.011503 |
| 0.011342 | 0.011463 | 0.011342 | 0.011342 | 0.011543 | 0.011342 | 0.011423 |
| 0.011383 | 0.011543 | 0.011422 | 0.011342 | 0.011382 | 0.011342 | 0.011543 |

|          |          |          |          |          |          |          |
|----------|----------|----------|----------|----------|----------|----------|
| 0.011554 | 0.011423 | 0.011423 | 0.011503 | 0.011543 | 0.011463 | 0.011503 |
| 0.011422 | 0.011745 | 0.011342 | 0.011463 | 0.011342 | 0.011342 | 0.011342 |
| 0.011543 | 0.011503 | 0.011463 | 0.011543 | 0.011382 | 0.011463 | 0.011342 |
| 0.011422 | 0.011422 | 0.011422 | 0.011543 | 0.011463 | 0.011584 | 0.011664 |
| 0.011624 | 0.011543 | 0.011503 | 0.011624 | 0.011583 | 0.011422 | 0.011382 |
| 0.011422 | 0.011422 | 0.011463 | 0.011302 | 0.011382 | 0.011543 | 0.011422 |
| 0.011342 | 0.011382 | 0.011543 | 0.011543 | 0.011503 | 0.011463 | 0.011463 |
| 0.011543 | 0.011382 | 0.011543 | 0.011382 | 0.011543 | 0.011664 | 0.011584 |
| 0.011463 | 0.011503 | 0.011463 | 0.018653 | 0.011399 | 0.011702 | 0.011463 |
| 0.011463 | 0.011463 | 0.011635 | 0.011438 | 0.011665 | 0.011503 | 0.011657 |
| 0.011512 | 0.011323 | 0.011359 | 0.011494 | 0.011363 | 0.011504 | 0.011498 |
| 0.011361 | 0.011141 | 0.011310 | 0.011132 | 0.011584 | 0.011624 | 0.011586 |
| 0.011472 | 0.011543 | 0.011584 | 0.011463 | 0.011503 | 0.011503 | 0.011503 |
| 0.011543 | 0.011463 | 0.011422 | 0.011543 | 0.011463 | 0.011422 | 0.011422 |
| 0.011422 | 0.011503 | 0.011382 | 0.011503 | 0.011584 | 0.011624 | 0.011422 |
| 0.011463 | 0.011423 | 0.011382 | 0.011382 | 0.011584 | 0.011625 | 0.011664 |
| 0.011342 | 0.011382 | 0.011382 | 0.011543 | 0.011382 | 0.011624 | 0.011624 |
| 0.011584 | 0.011584 | 0.011584 | 0.011624 | 0.011463 | 0.011626 | 0.011503 |
| 0.011503 | 0.011543 | 0.011664 | 0.011463 | 0.011463 | 0.011422 | 0.011543 |
| 0.011543 | 0.011543 | 0.011584 | 0.011503 | 0.011504 | 0.011664 | 0.011664 |
| 0.011548 | 0.011382 | 0.011463 | 0.011624 | 0.011463 | 0.011584 | 0.011704 |
| 0.011906 | 0.011549 | 0.011745 | 0.011745 | 0.011624 | 0.011745 | 0.011423 |
| 0.011626 | 0.011503 | 0.011422 | 0.011422 | 0.011503 | 0.011382 | 0.011503 |
| 0.011584 | 0.011624 | 0.011422 | 0.011463 | 0.011423 | 0.011382 | 0.011382 |
| 0.011584 | 0.011625 | 0.011624 | 0.011624 | 0.012149 | 0.011649 | 0.011528 |
| 0.011684 | 0.011597 | 0.011776 | 0.011562 | 0.011642 | 0.011681 | 0.011584 |
| 0.012134 | 0.011516 | 0.011635 | 0.011555 | 0.011882 | 0.011710 | 0.011755 |
| 0.012204 | 0.011596 | 0.011504 | 0.011503 | 0.011503 | 0.011262 | 0.011463 |
| 0.011382 | 0.011422 | 0.011543 | 0.011503 | 0.011504 | 0.000000 | 0.011342 |
| 0.011463 | 0.011422 | 0.011463 | 0.011463 | 0.011382 | 0.011422 | 0.011342 |
| 0.011422 | 0.011463 | 0.011422 | 0.011382 | 0.011503 | 0.011422 | 0.011463 |
| 0.011463 | 0.011382 | 0.011463 | 0.011503 | 0.011382 | 0.011624 | 0.011664 |
| 0.011503 | 0.011543 | 0.011543 | 0.011503 | 0.011382 | 0.011503 | 0.011503 |
| 0.011227 | 0.011423 | 0.011181 | 0.011182 | 0.011584 | 0.011503 | 0.011543 |
| 0.011584 | 0.011463 | 0.011422 | 0.011463 | 0.011624 | 0.011624 | 0.011543 |
| 0.011543 | 0.011543 | 0.011543 | 0.011543 | 0.011704 | 0.011704 | 0.011624 |
| 0.011422 | 0.011543 | 0.011584 | 0.011503 | 0.011544 | 0.011584 | 0.011503 |
| 0.011543 | 0.011382 | 0.011382 | 0.011705 | 0.011624 | 0.011664 | 0.011463 |
| 0.011624 | 0.011664 | 0.011503 | 0.011624 | 0.011503 | 0.011422 | 0.011463 |
| 0.011543 | 0.011463 | 0.011382 | 0.011583 | 0.011463 | 0.011583 | 0.011664 |
| 0.011463 | 0.011632 | 0.011624 | 0.011103 | 0.011229 | 0.011503 | 0.011114 |
| 0.011438 | 0.011596 | 0.011382 | 0.011577 | 0.011411 | 0.011427 | 0.011388 |
| 0.011112 | 0.011333 | 0.011405 | 0.011266 | 0.011338 | 0.011538 | 0.011544 |
| 0.011613 | 0.011486 | 0.011463 | 0.011427 | 0.011545 | 0.000000 | 0.011181 |
| 0.011423 | 0.011543 | 0.011628 | 0.011345 | 0.011668 | 0.011782 | 0.011382 |
| 0.011342 | 0.011584 | 0.011422 | 0.011543 | 0.011382 | 0.000000 | 0.011342 |
| 0.011463 | 0.011463 | 0.011422 | 0.011422 | 0.011422 | 0.011422 | 0.011543 |
| 0.011465 | 0.011470 | 0.011503 | 0.011504 | 0.011705 | 0.011624 | 0.011626 |
| 0.011626 | 0.011503 | 0.011359 | 0.011351 | 0.011503 | 0.011705 | 0.011585 |
| 0.011422 | 0.011543 | 0.011825 | 0.011705 | 0.011664 | 0.011664 | 0.011624 |
| 0.011543 | 0.011664 | 0.011624 | 0.011503 | 0.011745 | 0.011624 | 0.011785 |
| 0.011866 | 0.011488 | 0.011429 | 0.011557 | 0.011463 | 0.011704 | 0.011624 |
| 0.011624 | 0.011664 | 0.011664 | 0.011664 | 0.011712 | 0.011825 | 0.011479 |
| 0.011344 | 0.011352 | 0.011469 | 0.011427 | 0.011427 | 0.011375 | 0.011387 |
| 0.011513 | 0.011320 | 0.011458 | 0.011552 | 0.011503 | 0.011544 | 0.011463 |
| 0.011422 | 0.011342 | 0.011503 | 0.011422 | 0.011382 | 0.011342 | 0.011262 |
| 0.011382 | 0.011463 | 0.011422 | 0.011422 | 0.011463 | 0.011463 | 0.011463 |
| 0.011544 | 0.011503 | 0.011503 | 0.011545 | 0.000000 | 0.011181 | 0.011423 |
| 0.011543 | 0.011628 | 0.011345 | 0.011668 | 0.011782 | 0.011382 | 0.011664 |
| 0.011624 | 0.011624 | 0.011384 | 0.011643 | 0.011602 | 0.011551 | 0.011480 |



|          |          |          |          |          |          |          |
|----------|----------|----------|----------|----------|----------|----------|
| 0.011514 | 0.011892 | 0.011624 | 0.011549 | 0.011422 | 0.011624 | 0.011463 |
| 0.011584 | 0.011503 | 0.011422 | 0.011505 | 0.011664 | 0.011627 | 0.011543 |
| 0.011422 | 0.011343 | 0.011503 | 0.011422 | 0.011342 | 0.011345 | 0.011624 |
| 0.011543 | 0.011463 | 0.011422 | 0.011543 | 0.011463 | 0.011422 | 0.011302 |
| 0.011503 | 0.011503 | 0.011543 | 0.011422 | 0.011543 | 0.011704 | 0.011302 |
| 0.011463 | 0.011503 | 0.011422 | 0.011463 | 0.011422 | 0.011543 | 0.011411 |
| 0.011622 | 0.011276 | 0.011270 | 0.000000 | 0.011102 | 0.000000 | 0.011234 |
| 0.011225 | 0.011342 | 0.011463 | 0.011590 | 0.011423 | 0.011584 | 0.011745 |
| 0.011625 | 0.011669 | 0.011624 | 0.011907 | 0.011463 | 0.012471 | 0.011624 |
| 0.012189 | 0.012108 | 0.012273 | 0.012433 | 0.011463 | 0.011423 | 0.011584 |
| 0.012230 | 0.011786 | 0.011503 | 0.011423 | 0.011463 | 0.011463 | 0.011426 |
| 0.011342 | 0.011342 | 0.011382 | 0.011382 | 0.011665 | 0.011745 | 0.011745 |
| 0.011624 | 0.011745 | 0.011785 | 0.011625 | 0.012189 | 0.012279 | 0.012189 |
| 0.012311 | 0.012311 | 0.012270 | 0.012230 | 0.012311 | 0.011584 | 0.011785 |
| 0.011785 | 0.012269 | 0.011870 | 0.011866 | 0.011665 | 0.011383 | 0.011302 |
| 0.011262 | 0.011262 | 0.011664 | 0.011632 | 0.011712 | 0.011503 | 0.011262 |
| S788     | 0.011671 | 0.011671 | 0.011753 | 0.011671 | 0.011671 | 0.011753 |
| 0.011552 | 0.011470 | 0.011671 | 0.011508 | 0.011549 | 0.011508 | 0.011467 |
| 0.011427 | 0.011712 | 0.011426 | 0.011549 | 0.011549 | 0.011549 | 0.011508 |
| 0.011508 | 0.011549 | 0.011345 | 0.011468 | 0.011549 | 0.011467 | 0.011552 |
| 0.011264 | 0.011549 | 0.011426 | 0.011386 | 0.011589 | 0.011508 | 0.011467 |
| 0.011549 | 0.011671 | 0.011589 | 0.011589 | 0.011589 | 0.011589 | 0.011793 |
| 0.011386 | 0.011589 | 0.011589 | 0.011549 | 0.011589 | 0.011712 | 0.011630 |
| 0.011589 | 0.011712 | 0.011549 | 0.011630 | 0.011549 | 0.011793 | 0.011549 |
| 0.011508 | 0.011590 | 0.011630 | 0.011793 | 0.011630 | 0.011549 | 0.011712 |
| 0.011630 | 0.011630 | 0.011549 | 0.011793 | 0.011671 | 0.011589 | 0.011630 |
| 0.011549 | 0.011589 | 0.011630 | 0.011671 | 0.011508 | 0.011589 | 0.011589 |
| 0.011508 | 0.011508 | 0.011467 | 0.011427 | 0.011589 | 0.011549 | 0.011671 |
| 0.011589 | 0.011549 | 0.011671 | 0.011426 | 0.011630 | 0.011508 | 0.011508 |
| 0.011711 | 0.011671 | 0.011630 | 0.011712 | 0.011549 | 0.011752 | 0.011589 |
| 0.011638 | 0.011601 | 0.011720 | 0.011449 | 0.011431 | 0.011532 | 0.011313 |
| 0.011305 | 0.011319 | 0.011440 | 0.011793 | 0.011712 | 0.011508 | 0.011549 |
| 0.011589 | 0.011589 | 0.011711 | 0.011549 | 0.011630 | 0.011589 | 0.011549 |
| 0.011508 | 0.011508 | 0.011875 | 0.011752 | 0.011630 | 0.011630 | 0.011549 |
| 0.011508 | 0.011426 | 0.011589 | 0.011467 | 0.011467 | 0.011427 | 0.011345 |
| 0.011467 | 0.011549 | 0.011508 | 0.011508 | 0.011549 | 0.011549 | 0.011549 |
| 0.011631 | 0.011589 | 0.011589 | 0.011440 | 0.011482 | 0.011484 | 0.011549 |
| 0.011589 | 0.011508 | 0.011562 | 0.011549 | 0.011472 | 0.011514 | 0.011551 |
| 0.011486 | 0.011559 | 0.011550 | 0.011508 | 0.011467 | 0.011589 | 0.011508 |
| 0.011590 | 0.011589 | 0.011589 | 0.011630 | 0.011630 | 0.011956 | 0.011753 |
| 0.011427 | 0.011671 | 0.011508 | 0.011630 | 0.011467 | 0.011142 | 0.011427 |
| 0.011549 | 0.011549 | 0.011508 | 0.011508 | 0.011508 | 0.011508 | 0.011630 |
| 0.011549 | 0.011671 | 0.011589 | 0.011508 | 0.011591 | 0.011752 | 0.011712 |
| 0.011712 | 0.011630 | 0.011467 | 0.011428 | 0.011589 | 0.011467 | 0.011427 |
| 0.011430 | 0.011712 | 0.011508 | 0.011712 | 0.011427 | 0.011549 | 0.011508 |
| 0.011671 | 0.011508 | 0.011589 | 0.011508 | 0.011549 | 0.011427 | 0.011549 |
| 0.011589 | 0.011549 | 0.011549 | 0.011508 | 0.011549 | 0.011630 | 0.011712 |
| 0.011671 | 0.011508 | 0.011630 | 0.011712 | 0.011590 | 0.011549 | 0.011549 |
| 0.011510 | 0.011651 | 0.011570 | 0.011475 | 0.011679 | 0.011433 | 0.011536 |
| 0.011593 | 0.011554 | 0.011712 | 0.011956 | 0.011638 | 0.011834 | 0.011793 |
| 0.011712 | 0.011834 | 0.011789 | 0.011614 | 0.011561 | 0.011630 | 0.011718 |
| 0.011834 | 0.011672 | 0.011752 | 0.011837 | 0.011630 | 0.011875 | 0.012045 |
| 0.011674 | 0.011843 | 0.011800 | 0.011799 | 0.011998 | 0.011467 | 0.011632 |
| 0.011549 | 0.011549 | 0.011426 | 0.011426 | 0.011508 | 0.011549 | 0.011630 |
| 0.011549 | 0.011630 | 0.011508 | 0.011508 | 0.011467 | 0.011549 | 0.011508 |
| 0.011549 | 0.011671 | 0.011549 | 0.011590 | 0.011426 | 0.011549 | 0.011589 |
| 0.011589 | 0.011508 | 0.011630 | 0.011589 | 0.011508 | 0.011508 | 0.011508 |
| 0.011712 | 0.011549 | 0.011671 | 0.011467 | 0.011549 | 0.011712 | 0.011467 |
| 0.011467 | 0.011467 | 0.011549 | 0.011671 | 0.011508 | 0.011427 | 0.011549 |
| 0.011508 | 0.011549 | 0.011549 | 0.011467 | 0.011467 | 0.011589 | 0.011589 |

|          |          |          |          |          |          |          |
|----------|----------|----------|----------|----------|----------|----------|
| 0.011467 | 0.011589 | 0.011426 | 0.011426 | 0.011630 | 0.011427 | 0.011508 |
| 0.011468 | 0.011630 | 0.011468 | 0.011426 | 0.011467 | 0.011427 | 0.011630 |
| 0.011643 | 0.011508 | 0.011508 | 0.011590 | 0.011630 | 0.011508 | 0.011589 |
| 0.011508 | 0.011793 | 0.011426 | 0.011549 | 0.011427 | 0.011427 | 0.011426 |
| 0.011630 | 0.011589 | 0.011549 | 0.011630 | 0.011467 | 0.011549 | 0.011427 |
| 0.011508 | 0.011508 | 0.011508 | 0.011589 | 0.011549 | 0.011671 | 0.011752 |
| 0.011712 | 0.011630 | 0.011589 | 0.011712 | 0.011671 | 0.011508 | 0.011467 |
| 0.011508 | 0.011508 | 0.011549 | 0.011386 | 0.011467 | 0.011630 | 0.011508 |
| 0.011426 | 0.011508 | 0.011630 | 0.011630 | 0.011589 | 0.011549 | 0.011549 |
| 0.011549 | 0.011508 | 0.011589 | 0.011467 | 0.011630 | 0.011752 | 0.011671 |
| 0.011549 | 0.011590 | 0.011508 | 0.018783 | 0.011453 | 0.011712 | 0.011508 |
| 0.011508 | 0.011508 | 0.011682 | 0.011487 | 0.011646 | 0.011549 | 0.011636 |
| 0.011598 | 0.011322 | 0.011398 | 0.011541 | 0.011411 | 0.011491 | 0.011543 |
| 0.011402 | 0.011223 | 0.011355 | 0.011203 | 0.011671 | 0.011671 | 0.011674 |
| 0.011558 | 0.011671 | 0.011671 | 0.011549 | 0.011590 | 0.011590 | 0.011590 |
| 0.011589 | 0.011508 | 0.011508 | 0.011630 | 0.011549 | 0.011508 | 0.011549 |
| 0.011549 | 0.011589 | 0.011467 | 0.011589 | 0.011671 | 0.011711 | 0.011549 |
| 0.011549 | 0.011508 | 0.011467 | 0.011467 | 0.011671 | 0.011713 | 0.011712 |
| 0.011426 | 0.011467 | 0.011467 | 0.011630 | 0.011467 | 0.011712 | 0.011712 |
| 0.011671 | 0.011712 | 0.011671 | 0.011712 | 0.011549 | 0.011673 | 0.011589 |
| 0.011589 | 0.011630 | 0.011752 | 0.011549 | 0.011549 | 0.011508 | 0.011630 |
| 0.011630 | 0.011630 | 0.011671 | 0.011589 | 0.011591 | 0.011712 | 0.011712 |
| 0.011636 | 0.011467 | 0.011549 | 0.011752 | 0.011549 | 0.011671 | 0.011793 |
| 0.011956 | 0.011638 | 0.011834 | 0.011793 | 0.011712 | 0.011834 | 0.011508 |
| 0.011714 | 0.011590 | 0.011549 | 0.011549 | 0.011589 | 0.011467 | 0.011589 |
| 0.011671 | 0.011711 | 0.011549 | 0.011549 | 0.011508 | 0.011467 | 0.011467 |
| 0.011671 | 0.011713 | 0.011671 | 0.011671 | 0.012161 | 0.011743 | 0.011616 |
| 0.011777 | 0.011683 | 0.011785 | 0.011650 | 0.011730 | 0.011768 | 0.011636 |
| 0.012139 | 0.011604 | 0.011721 | 0.011603 | 0.011933 | 0.011799 | 0.011840 |
| 0.012216 | 0.011698 | 0.011591 | 0.011589 | 0.011589 | 0.011345 | 0.011549 |
| 0.011467 | 0.011508 | 0.011630 | 0.011589 | 0.011590 | 0.011142 | 0.011427 |
| 0.011549 | 0.011508 | 0.011549 | 0.011549 | 0.011467 | 0.011508 | 0.011426 |
| 0.011508 | 0.011549 | 0.011508 | 0.011467 | 0.011589 | 0.011508 | 0.011549 |
| 0.011549 | 0.011467 | 0.011549 | 0.011589 | 0.011467 | 0.011671 | 0.011752 |
| 0.011589 | 0.011630 | 0.011630 | 0.011589 | 0.011467 | 0.011630 | 0.011589 |
| 0.011315 | 0.011467 | 0.011264 | 0.011266 | 0.011630 | 0.011589 | 0.011630 |
| 0.011671 | 0.011549 | 0.011508 | 0.011549 | 0.011712 | 0.011712 | 0.011589 |
| 0.011630 | 0.011671 | 0.011630 | 0.011589 | 0.011793 | 0.011793 | 0.011671 |
| 0.011508 | 0.011630 | 0.011671 | 0.011630 | 0.011631 | 0.011630 | 0.011589 |
| 0.011589 | 0.011467 | 0.011467 | 0.011753 | 0.011753 | 0.011712 | 0.011549 |
| 0.011671 | 0.011712 | 0.011589 | 0.011671 | 0.011549 | 0.011508 | 0.011508 |
| 0.011630 | 0.011549 | 0.011467 | 0.011671 | 0.011549 | 0.011671 | 0.011712 |
| 0.011549 | 0.011634 | 0.011712 | 0.011187 | 0.011286 | 0.011549 | 0.011165 |
| 0.011443 | 0.011678 | 0.011386 | 0.011664 | 0.011451 | 0.011519 | 0.011432 |
| 0.011162 | 0.011455 | 0.011506 | 0.011390 | 0.011384 | 0.011663 | 0.011582 |
| 0.011648 | 0.011523 | 0.011508 | 0.011513 | 0.011633 | 0.011142 | 0.011264 |
| 0.011508 | 0.011631 | 0.011717 | 0.011430 | 0.011757 | 0.011875 | 0.011508 |
| 0.011427 | 0.011671 | 0.011508 | 0.011630 | 0.011467 | 0.011142 | 0.011427 |
| 0.011549 | 0.011549 | 0.011508 | 0.011508 | 0.011508 | 0.011508 | 0.011630 |
| 0.011552 | 0.011563 | 0.011590 | 0.011514 | 0.011760 | 0.011672 | 0.011676 |
| 0.011675 | 0.011508 | 0.011453 | 0.011441 | 0.011589 | 0.011753 | 0.011713 |
| 0.011508 | 0.011630 | 0.011915 | 0.011794 | 0.011752 | 0.011752 | 0.011671 |
| 0.011630 | 0.011752 | 0.011671 | 0.011589 | 0.011916 | 0.011671 | 0.011834 |
| 0.011956 | 0.011578 | 0.011516 | 0.011649 | 0.011549 | 0.011752 | 0.011671 |
| 0.011590 | 0.011752 | 0.011752 | 0.011752 | 0.011727 | 0.011915 | 0.011565 |
| 0.011430 | 0.011437 | 0.011554 | 0.011514 | 0.011517 | 0.011472 | 0.011472 |
| 0.011599 | 0.011379 | 0.011586 | 0.011646 | 0.011589 | 0.011637 | 0.011549 |
| 0.011508 | 0.011426 | 0.011589 | 0.011467 | 0.011467 | 0.011427 | 0.011345 |
| 0.011467 | 0.011549 | 0.011508 | 0.011508 | 0.011549 | 0.011549 | 0.011549 |
| 0.011631 | 0.011589 | 0.011589 | 0.011633 | 0.011142 | 0.011264 | 0.011508 |

|          |          |          |          |          |          |          |
|----------|----------|----------|----------|----------|----------|----------|
| 0.011631 | 0.011717 | 0.011430 | 0.011757 | 0.011875 | 0.011508 | 0.011752 |
| 0.011671 | 0.011671 | 0.011470 | 0.011691 | 0.011693 | 0.011556 | 0.011570 |
| 0.011600 | 0.011954 | 0.011732 | 0.011637 | 0.011508 | 0.011712 | 0.011549 |
| 0.011671 | 0.011589 | 0.011508 | 0.011591 | 0.011752 | 0.011712 | 0.011630 |
| 0.011467 | 0.011428 | 0.011589 | 0.011467 | 0.011427 | 0.011430 | 0.011712 |
| 0.011589 | 0.011508 | 0.011508 | 0.011630 | 0.011549 | 0.011508 | 0.011386 |
| 0.011589 | 0.011630 | 0.011630 | 0.011508 | 0.011630 | 0.011793 | 0.011386 |
| 0.011549 | 0.011630 | 0.011508 | 0.011549 | 0.011508 | 0.011630 | 0.011450 |
| 0.011735 | 0.011319 | 0.011315 | 0.011102 | 0.000000 | 0.011101 | 0.011274 |
| 0.011327 | 0.011427 | 0.011549 | 0.011678 | 0.011508 | 0.011671 | 0.011834 |
| 0.011712 | 0.011717 | 0.011712 | 0.011916 | 0.011549 | 0.012569 | 0.011712 |
| 0.012324 | 0.012160 | 0.012409 | 0.012489 | 0.011508 | 0.011508 | 0.011671 |
| 0.012284 | 0.011835 | 0.011590 | 0.011508 | 0.011549 | 0.011549 | 0.011512 |
| 0.011427 | 0.011427 | 0.011467 | 0.011467 | 0.011753 | 0.011834 | 0.011834 |
| 0.011671 | 0.011712 | 0.011875 | 0.011671 | 0.012202 | 0.012251 | 0.012243 |
| 0.012324 | 0.012284 | 0.012243 | 0.012202 | 0.012284 | 0.011630 | 0.011793 |
| 0.011875 | 0.012446 | 0.011920 | 0.011916 | 0.011712 | 0.011469 | 0.011386 |
| 0.011345 | 0.011345 | 0.011794 | 0.011745 | 0.011884 | 0.011590 | 0.011345 |
| S789     | 0.011850 | 0.011850 | 0.011671 | 0.011635 | 0.011635 | 0.011671 |
| 0.011569 | 0.011460 | 0.011635 | 0.011419 | 0.011455 | 0.011419 | 0.011419 |
| 0.011383 | 0.011634 | 0.011347 | 0.011455 | 0.011491 | 0.011491 | 0.011419 |
| 0.011419 | 0.011455 | 0.011276 | 0.011419 | 0.011455 | 0.011419 | 0.011533 |
| 0.011204 | 0.011455 | 0.011347 | 0.011311 | 0.011491 | 0.011491 | 0.011419 |
| 0.011491 | 0.011599 | 0.011491 | 0.011491 | 0.011527 | 0.011491 | 0.011670 |
| 0.011347 | 0.011491 | 0.011527 | 0.011455 | 0.011491 | 0.011599 | 0.011527 |
| 0.011491 | 0.011670 | 0.011491 | 0.011563 | 0.011491 | 0.011778 | 0.011491 |
| 0.011455 | 0.011491 | 0.011599 | 0.011778 | 0.011599 | 0.011491 | 0.011599 |
| 0.011527 | 0.011599 | 0.011455 | 0.011706 | 0.011635 | 0.011491 | 0.011563 |
| 0.011455 | 0.011527 | 0.011527 | 0.011563 | 0.011491 | 0.011527 | 0.011527 |
| 0.011419 | 0.011419 | 0.011383 | 0.011383 | 0.011491 | 0.011491 | 0.011598 |
| 0.011527 | 0.011491 | 0.011563 | 0.011419 | 0.011527 | 0.011419 | 0.011455 |
| 0.011634 | 0.011598 | 0.011599 | 0.011634 | 0.011455 | 0.011670 | 0.011491 |
| 0.011623 | 0.011589 | 0.011671 | 0.011416 | 0.011400 | 0.011517 | 0.011257 |
| 0.011949 | 0.011267 | 0.011390 | 0.011706 | 0.011670 | 0.011419 | 0.011527 |
| 0.011563 | 0.011491 | 0.011598 | 0.011491 | 0.011527 | 0.011491 | 0.011527 |
| 0.011491 | 0.011491 | 0.011778 | 0.011634 | 0.011563 | 0.011527 | 0.011455 |
| 0.011419 | 0.011347 | 0.011491 | 0.011419 | 0.011383 | 0.011347 | 0.011276 |
| 0.011383 | 0.011455 | 0.011455 | 0.011455 | 0.011491 | 0.011491 | 0.011491 |
| 0.011564 | 0.011491 | 0.011491 | 0.011359 | 0.011400 | 0.011398 | 0.011491 |
| 0.011494 | 0.011422 | 0.011477 | 0.011458 | 0.011387 | 0.011426 | 0.011457 |
| 0.011437 | 0.011465 | 0.011459 | 0.011419 | 0.011422 | 0.011563 | 0.011455 |
| 0.011527 | 0.011528 | 0.011527 | 0.011599 | 0.011563 | 0.011850 | 0.011635 |
| 0.011347 | 0.011563 | 0.011455 | 0.011527 | 0.011383 | 0.011096 | 0.011383 |
| 0.011491 | 0.011491 | 0.011419 | 0.011419 | 0.011419 | 0.011419 | 0.011527 |
| 0.011455 | 0.011599 | 0.011527 | 0.011419 | 0.011528 | 0.011634 | 0.011602 |
| 0.011635 | 0.011527 | 0.011419 | 0.011349 | 0.011491 | 0.011419 | 0.011347 |
| 0.011350 | 0.011635 | 0.011419 | 0.011635 | 0.011383 | 0.011455 | 0.011455 |
| 0.011563 | 0.011455 | 0.011491 | 0.011455 | 0.011491 | 0.011347 | 0.011455 |
| 0.011491 | 0.011455 | 0.011527 | 0.011455 | 0.011491 | 0.011527 | 0.011706 |
| 0.011599 | 0.011455 | 0.011599 | 0.011634 | 0.011599 | 0.011491 | 0.011455 |
| 0.011420 | 0.011624 | 0.011554 | 0.011389 | 0.011605 | 0.011352 | 0.011437 |
| 0.011605 | 0.011495 | 0.011634 | 0.011850 | 0.011535 | 0.011706 | 0.011706 |
| 0.011599 | 0.011742 | 0.011670 | 0.011503 | 0.011551 | 0.011527 | 0.011603 |
| 0.011706 | 0.011601 | 0.011711 | 0.011820 | 0.011563 | 0.011814 | 0.011930 |
| 0.011601 | 0.011822 | 0.011711 | 0.011675 | 0.011959 | 0.011383 | 0.011564 |
| 0.011527 | 0.011455 | 0.011347 | 0.011347 | 0.011455 | 0.011455 | 0.011527 |
| 0.011455 | 0.011527 | 0.011419 | 0.011419 | 0.011383 | 0.011455 | 0.011491 |
| 0.011455 | 0.011635 | 0.011527 | 0.011563 | 0.011347 | 0.011455 | 0.011491 |
| 0.011491 | 0.011455 | 0.011527 | 0.011491 | 0.011419 | 0.011419 | 0.011419 |
| 0.011706 | 0.011491 | 0.011599 | 0.011383 | 0.011491 | 0.011670 | 0.011383 |

|          |          |          |          |          |          |          |
|----------|----------|----------|----------|----------|----------|----------|
| 0.011383 | 0.011455 | 0.011455 | 0.011599 | 0.011419 | 0.011347 | 0.011455 |
| 0.011419 | 0.011455 | 0.011455 | 0.011383 | 0.011383 | 0.011491 | 0.011491 |
| 0.011383 | 0.011491 | 0.011347 | 0.011383 | 0.011527 | 0.011383 | 0.011419 |
| 0.011384 | 0.011527 | 0.011419 | 0.011347 | 0.011419 | 0.011347 | 0.011527 |
| 0.011609 | 0.011419 | 0.011455 | 0.011527 | 0.011527 | 0.011455 | 0.011563 |
| 0.011419 | 0.011778 | 0.011347 | 0.011563 | 0.011347 | 0.011347 | 0.011347 |
| 0.011527 | 0.011527 | 0.011455 | 0.011563 | 0.011383 | 0.011527 | 0.011347 |
| 0.011419 | 0.011419 | 0.011419 | 0.011563 | 0.011455 | 0.011563 | 0.011634 |
| 0.011634 | 0.011563 | 0.011491 | 0.011599 | 0.011563 | 0.011419 | 0.011383 |
| 0.011419 | 0.011419 | 0.011455 | 0.011347 | 0.011383 | 0.011527 | 0.011419 |
| 0.011383 | 0.011419 | 0.011527 | 0.011563 | 0.011491 | 0.011455 | 0.011455 |
| 0.011527 | 0.011455 | 0.011527 | 0.011383 | 0.011563 | 0.011634 | 0.011635 |
| 0.011455 | 0.011563 | 0.011455 | 0.018019 | 0.011388 | 0.011631 | 0.011496 |
| 0.011459 | 0.011496 | 0.011645 | 0.011474 | 0.011610 | 0.011532 | 0.011679 |
| 0.011494 | 0.011365 | 0.011336 | 0.011495 | 0.011340 | 0.011511 | 0.011496 |
| 0.011394 | 0.011136 | 0.011325 | 0.011126 | 0.011563 | 0.011635 | 0.011566 |
| 0.011464 | 0.011563 | 0.011563 | 0.011455 | 0.011491 | 0.011491 | 0.011491 |
| 0.011527 | 0.011455 | 0.011455 | 0.011527 | 0.011455 | 0.011419 | 0.011455 |
| 0.011455 | 0.011491 | 0.011383 | 0.011491 | 0.011563 | 0.011598 | 0.011491 |
| 0.011455 | 0.011419 | 0.011527 | 0.011527 | 0.011563 | 0.011599 | 0.011635 |
| 0.011347 | 0.011383 | 0.011383 | 0.011527 | 0.011383 | 0.011634 | 0.011634 |
| 0.011634 | 0.011634 | 0.011563 | 0.011670 | 0.011599 | 0.011672 | 0.011527 |
| 0.011491 | 0.011599 | 0.011634 | 0.011455 | 0.011455 | 0.011419 | 0.011527 |
| 0.011563 | 0.011563 | 0.011599 | 0.011563 | 0.011492 | 0.011670 | 0.011670 |
| 0.011531 | 0.011383 | 0.011491 | 0.011635 | 0.011491 | 0.011599 | 0.011670 |
| 0.011850 | 0.011535 | 0.011706 | 0.011706 | 0.011599 | 0.011742 | 0.011419 |
| 0.011600 | 0.011491 | 0.011455 | 0.011455 | 0.011491 | 0.011383 | 0.011491 |
| 0.011563 | 0.011598 | 0.011491 | 0.011455 | 0.011419 | 0.011527 | 0.011527 |
| 0.011563 | 0.011599 | 0.011634 | 0.011599 | 0.012174 | 0.011629 | 0.011551 |
| 0.011659 | 0.011576 | 0.011738 | 0.011543 | 0.011692 | 0.011651 | 0.011571 |
| 0.012163 | 0.011505 | 0.011610 | 0.011578 | 0.011871 | 0.011679 | 0.011824 |
| 0.012187 | 0.011626 | 0.011528 | 0.011527 | 0.011527 | 0.011276 | 0.011491 |
| 0.011383 | 0.011419 | 0.011563 | 0.011527 | 0.011527 | 0.011132 | 0.011347 |
| 0.011455 | 0.011419 | 0.011455 | 0.011455 | 0.011383 | 0.011419 | 0.011347 |
| 0.011419 | 0.011455 | 0.011419 | 0.011383 | 0.011491 | 0.011419 | 0.011455 |
| 0.011455 | 0.011383 | 0.011455 | 0.011491 | 0.011383 | 0.011599 | 0.011634 |
| 0.011491 | 0.011527 | 0.011527 | 0.011491 | 0.011383 | 0.011599 | 0.011491 |
| 0.011247 | 0.011419 | 0.011204 | 0.011205 | 0.011563 | 0.011527 | 0.011563 |
| 0.011563 | 0.011491 | 0.011455 | 0.011491 | 0.011599 | 0.011599 | 0.011527 |
| 0.011527 | 0.011634 | 0.011563 | 0.011563 | 0.011670 | 0.011670 | 0.011634 |
| 0.011419 | 0.011527 | 0.011563 | 0.011635 | 0.011527 | 0.011563 | 0.011527 |
| 0.011527 | 0.011383 | 0.011383 | 0.011707 | 0.011706 | 0.011670 | 0.011491 |
| 0.011599 | 0.011670 | 0.011491 | 0.011599 | 0.011527 | 0.011419 | 0.011491 |
| 0.011527 | 0.011455 | 0.011383 | 0.011634 | 0.011491 | 0.011599 | 0.011635 |
| 0.011455 | 0.011642 | 0.011635 | 0.011101 | 0.011229 | 0.011527 | 0.011113 |
| 0.011457 | 0.011566 | 0.011419 | 0.011551 | 0.011402 | 0.011417 | 0.011379 |
| 0.011111 | 0.011324 | 0.011394 | 0.011258 | 0.011330 | 0.011529 | 0.011547 |
| 0.011594 | 0.011454 | 0.011459 | 0.011500 | 0.011529 | 0.011132 | 0.011204 |
| 0.011419 | 0.011527 | 0.011602 | 0.011422 | 0.011711 | 0.011740 | 0.011455 |
| 0.011347 | 0.011563 | 0.011455 | 0.011527 | 0.011383 | 0.011096 | 0.011383 |
| 0.011491 | 0.011491 | 0.011419 | 0.011419 | 0.011419 | 0.011419 | 0.011527 |
| 0.011461 | 0.011506 | 0.011495 | 0.011499 | 0.011681 | 0.011604 | 0.011607 |
| 0.011606 | 0.011491 | 0.011370 | 0.011362 | 0.011494 | 0.011675 | 0.011604 |
| 0.011455 | 0.011530 | 0.011779 | 0.011708 | 0.011635 | 0.011671 | 0.011634 |
| 0.011527 | 0.011634 | 0.011634 | 0.011491 | 0.011850 | 0.011670 | 0.011742 |
| 0.011814 | 0.011556 | 0.011425 | 0.011541 | 0.011455 | 0.011670 | 0.011635 |
| 0.011636 | 0.011634 | 0.011634 | 0.011634 | 0.011695 | 0.011814 | 0.011469 |
| 0.011349 | 0.011357 | 0.011461 | 0.011423 | 0.011462 | 0.011381 | 0.011424 |
| 0.011500 | 0.011341 | 0.011468 | 0.011543 | 0.011491 | 0.011572 | 0.011455 |
| 0.011419 | 0.011347 | 0.011491 | 0.011419 | 0.011383 | 0.011347 | 0.011276 |

|          |          |          |          |          |          |          |
|----------|----------|----------|----------|----------|----------|----------|
| 0.011383 | 0.011455 | 0.011455 | 0.011455 | 0.011491 | 0.011491 | 0.011491 |
| 0.011564 | 0.011491 | 0.011491 | 0.011529 | 0.011132 | 0.011204 | 0.011419 |
| 0.011527 | 0.011602 | 0.011422 | 0.011711 | 0.011740 | 0.011455 | 0.011670 |
| 0.011635 | 0.011635 | 0.011422 | 0.011653 | 0.011580 | 0.011534 | 0.011471 |
| 0.011501 | 0.011842 | 0.011565 | 0.011533 | 0.011419 | 0.011635 | 0.011455 |
| 0.011599 | 0.011527 | 0.011419 | 0.011528 | 0.011634 | 0.011602 | 0.011527 |
| 0.011419 | 0.011349 | 0.011491 | 0.011419 | 0.011347 | 0.011350 | 0.011635 |
| 0.011527 | 0.011455 | 0.011455 | 0.011527 | 0.011455 | 0.011419 | 0.011311 |
| 0.011491 | 0.011527 | 0.011527 | 0.011455 | 0.011527 | 0.011742 | 0.011347 |
| 0.011455 | 0.011599 | 0.011455 | 0.011491 | 0.011419 | 0.011563 | 0.011403 |
| 0.011622 | 0.011273 | 0.011264 | 0.000000 | 0.011101 | 0.000000 | 0.011227 |
| 0.011220 | 0.011347 | 0.011455 | 0.011568 | 0.011419 | 0.011563 | 0.011706 |
| 0.011599 | 0.011638 | 0.011599 | 0.011859 | 0.011527 | 0.012390 | 0.011599 |
| 0.012282 | 0.012066 | 0.012249 | 0.012536 | 0.011491 | 0.011419 | 0.011563 |
| 0.012210 | 0.011743 | 0.011527 | 0.011419 | 0.011491 | 0.011491 | 0.011458 |
| 0.011347 | 0.011348 | 0.011419 | 0.011383 | 0.011743 | 0.011814 | 0.011778 |
| 0.011671 | 0.011778 | 0.011886 | 0.011635 | 0.012211 | 0.012254 | 0.012319 |
| 0.012319 | 0.012319 | 0.012247 | 0.012283 | 0.012283 | 0.011563 | 0.011778 |
| 0.011850 | 0.012390 | 0.011856 | 0.011814 | 0.011635 | 0.011350 | 0.011311 |
| 0.011276 | 0.011276 | 0.011671 | 0.011720 | 0.011797 | 0.011563 | 0.011276 |
| S790     | 0.011353 | 0.011353 | 0.011604 | 0.011520 | 0.011520 | 0.011604 |
| 0.011355 | 0.011271 | 0.011520 | 0.011144 | 0.011144 | 0.011144 | 0.011102 |
| 0.011144 | 0.011353 | 0.011144 | 0.011102 | 0.011186 | 0.011186 | 0.011144 |
| 0.011144 | 0.011186 | 0.011186 | 0.011102 | 0.011186 | 0.011102 | 0.011355 |
| 0.011311 | 0.011186 | 0.000000 | 0.011227 | 0.011186 | 0.011144 | 0.011102 |
| 0.011186 | 0.011311 | 0.011227 | 0.011227 | 0.011269 | 0.011227 | 0.011436 |
| 0.011102 | 0.011227 | 0.011269 | 0.011186 | 0.011269 | 0.011353 | 0.011269 |
| 0.011227 | 0.011395 | 0.011186 | 0.011395 | 0.011227 | 0.011395 | 0.011227 |
| 0.011144 | 0.011269 | 0.011353 | 0.011395 | 0.011436 | 0.011186 | 0.011436 |
| 0.011269 | 0.011269 | 0.011186 | 0.011436 | 0.011478 | 0.011227 | 0.011311 |
| 0.011186 | 0.011227 | 0.011269 | 0.011311 | 0.011144 | 0.011227 | 0.011227 |
| 0.011144 | 0.011144 | 0.011102 | 0.011144 | 0.011186 | 0.011144 | 0.011311 |
| 0.011227 | 0.011186 | 0.011311 | 0.000000 | 0.011353 | 0.011144 | 0.011102 |
| 0.011353 | 0.011269 | 0.011395 | 0.011353 | 0.011186 | 0.011436 | 0.011186 |
| 0.011317 | 0.011449 | 0.011398 | 0.011104 | 0.011102 | 0.011193 | 0.011191 |
| 0.011186 | 0.011215 | 0.011104 | 0.011353 | 0.011353 | 0.011227 | 0.011227 |
| 0.011227 | 0.011186 | 0.011311 | 0.011186 | 0.011269 | 0.011227 | 0.011144 |
| 0.011102 | 0.011227 | 0.011437 | 0.011353 | 0.011269 | 0.011269 | 0.011186 |
| 0.011144 | 0.011144 | 0.011227 | 0.011102 | 0.011269 | 0.011227 | 0.011144 |
| 0.011269 | 0.011353 | 0.011102 | 0.011102 | 0.011144 | 0.011144 | 0.011144 |
| 0.011186 | 0.011227 | 0.011227 | 0.000000 | 0.011104 | 0.011104 | 0.011186 |
| 0.011227 | 0.011144 | 0.011188 | 0.011186 | 0.000000 | 0.011145 | 0.011186 |
| 0.011192 | 0.011188 | 0.011186 | 0.011144 | 0.000000 | 0.011227 | 0.011186 |
| 0.011269 | 0.011227 | 0.011227 | 0.011227 | 0.011227 | 0.011604 | 0.011478 |
| 0.011436 | 0.011395 | 0.011144 | 0.011353 | 0.011102 | 0.011227 | 0.000000 |
| 0.011186 | 0.011144 | 0.011144 | 0.011144 | 0.011144 | 0.011144 | 0.011269 |
| 0.011186 | 0.011311 | 0.011186 | 0.011144 | 0.011228 | 0.011395 | 0.011353 |
| 0.011353 | 0.011269 | 0.000000 | 0.000000 | 0.011227 | 0.000000 | 0.000000 |
| 0.011187 | 0.011353 | 0.011144 | 0.011353 | 0.000000 | 0.011186 | 0.011102 |
| 0.011311 | 0.011144 | 0.011227 | 0.011144 | 0.011186 | 0.000000 | 0.011186 |
| 0.011227 | 0.011186 | 0.011186 | 0.011102 | 0.011144 | 0.011269 | 0.011353 |
| 0.011395 | 0.011311 | 0.011436 | 0.011395 | 0.011395 | 0.011144 | 0.011144 |
| 0.011228 | 0.011410 | 0.011285 | 0.011103 | 0.011484 | 0.000000 | 0.011205 |
| 0.011397 | 0.011271 | 0.011311 | 0.011520 | 0.011272 | 0.011478 | 0.011395 |
| 0.011311 | 0.011436 | 0.011327 | 0.011162 | 0.011111 | 0.011269 | 0.011271 |
| 0.011478 | 0.011270 | 0.011355 | 0.011482 | 0.011227 | 0.011478 | 0.011652 |
| 0.011228 | 0.011483 | 0.011440 | 0.011440 | 0.011563 | 0.011102 | 0.011270 |
| 0.011186 | 0.011186 | 0.000000 | 0.000000 | 0.011144 | 0.011186 | 0.011269 |
| 0.011186 | 0.011269 | 0.011144 | 0.011227 | 0.011186 | 0.011186 | 0.011144 |
| 0.011186 | 0.011478 | 0.011353 | 0.011353 | 0.000000 | 0.011186 | 0.011228 |

|          |          |          |          |          |          |          |
|----------|----------|----------|----------|----------|----------|----------|
| 0.011227 | 0.011144 | 0.011269 | 0.011311 | 0.011144 | 0.011144 | 0.011144 |
| 0.011520 | 0.011269 | 0.011353 | 0.011102 | 0.011186 | 0.011353 | 0.011102 |
| 0.011102 | 0.011102 | 0.011186 | 0.011353 | 0.011144 | 0.011186 | 0.011311 |
| 0.011269 | 0.011186 | 0.011186 | 0.011102 | 0.000000 | 0.011144 | 0.011227 |
| 0.011102 | 0.011227 | 0.000000 | 0.000000 | 0.011269 | 0.011269 | 0.011144 |
| 0.011102 | 0.011269 | 0.011102 | 0.000000 | 0.011269 | 0.000000 | 0.011269 |
| 0.011274 | 0.011144 | 0.011311 | 0.011269 | 0.011311 | 0.011144 | 0.011269 |
| 0.011144 | 0.011395 | 0.000000 | 0.011269 | 0.011144 | 0.011144 | 0.000000 |
| 0.011227 | 0.011269 | 0.011186 | 0.011311 | 0.011102 | 0.011353 | 0.011144 |
| 0.011102 | 0.011144 | 0.011144 | 0.011227 | 0.011186 | 0.011311 | 0.011353 |
| 0.011353 | 0.011269 | 0.011227 | 0.011353 | 0.011311 | 0.011144 | 0.011102 |
| 0.011144 | 0.011144 | 0.011186 | 0.011102 | 0.011102 | 0.011269 | 0.011144 |
| 0.011144 | 0.011144 | 0.011269 | 0.011353 | 0.011186 | 0.011186 | 0.011186 |
| 0.011186 | 0.011144 | 0.011186 | 0.011102 | 0.011269 | 0.011395 | 0.011478 |
| 0.011186 | 0.011395 | 0.011102 | 0.018650 | 0.011126 | 0.011339 | 0.011353 |
| 0.011353 | 0.011353 | 0.011230 | 0.011184 | 0.011406 | 0.011395 | 0.011248 |
| 0.011402 | 0.011189 | 0.000000 | 0.011108 | 0.011150 | 0.011166 | 0.011154 |
| 0.011207 | 0.011227 | 0.011189 | 0.011139 | 0.011269 | 0.011353 | 0.011271 |
| 0.011189 | 0.011311 | 0.011269 | 0.011227 | 0.011228 | 0.011228 | 0.011228 |
| 0.011227 | 0.011144 | 0.011144 | 0.011269 | 0.011186 | 0.011144 | 0.011144 |
| 0.011144 | 0.011227 | 0.011102 | 0.011228 | 0.011311 | 0.011353 | 0.011144 |
| 0.011269 | 0.011227 | 0.011269 | 0.011269 | 0.011269 | 0.011353 | 0.011395 |
| 0.000000 | 0.011102 | 0.011102 | 0.011227 | 0.000000 | 0.011311 | 0.011311 |
| 0.011311 | 0.011311 | 0.011311 | 0.011353 | 0.011395 | 0.011354 | 0.011269 |
| 0.011227 | 0.011311 | 0.011395 | 0.011186 | 0.011186 | 0.011144 | 0.011269 |
| 0.011227 | 0.011227 | 0.011269 | 0.011186 | 0.011228 | 0.011353 | 0.011353 |
| 0.011272 | 0.000000 | 0.011186 | 0.011353 | 0.011186 | 0.011395 | 0.011436 |
| 0.011520 | 0.011272 | 0.011478 | 0.011395 | 0.011311 | 0.011436 | 0.011102 |
| 0.011354 | 0.011228 | 0.011144 | 0.011144 | 0.011227 | 0.011102 | 0.011228 |
| 0.011311 | 0.011353 | 0.011144 | 0.011269 | 0.011227 | 0.011269 | 0.011269 |
| 0.011269 | 0.011353 | 0.011269 | 0.011269 | 0.011855 | 0.011326 | 0.011193 |
| 0.011411 | 0.011276 | 0.011370 | 0.011234 | 0.011321 | 0.011363 | 0.011272 |
| 0.011791 | 0.011147 | 0.011275 | 0.011190 | 0.011534 | 0.011443 | 0.011485 |
| 0.011823 | 0.011393 | 0.011186 | 0.011186 | 0.011186 | 0.011144 | 0.011144 |
| 0.011102 | 0.011144 | 0.011227 | 0.011186 | 0.011186 | 0.011227 | 0.011269 |
| 0.011186 | 0.011144 | 0.011186 | 0.011144 | 0.011102 | 0.011144 | 0.000000 |
| 0.011227 | 0.011227 | 0.000000 | 0.011102 | 0.011186 | 0.011144 | 0.011186 |
| 0.011186 | 0.011102 | 0.011102 | 0.011186 | 0.011102 | 0.011311 | 0.011353 |
| 0.011186 | 0.011311 | 0.011227 | 0.011186 | 0.000000 | 0.011436 | 0.011227 |
| 0.011148 | 0.011102 | 0.011311 | 0.011314 | 0.011269 | 0.011227 | 0.011227 |
| 0.011269 | 0.011186 | 0.011144 | 0.011186 | 0.011353 | 0.011311 | 0.011227 |
| 0.011269 | 0.011353 | 0.011436 | 0.011227 | 0.011395 | 0.011395 | 0.011311 |
| 0.011144 | 0.011269 | 0.011269 | 0.011478 | 0.011269 | 0.011269 | 0.011227 |
| 0.011227 | 0.011186 | 0.011186 | 0.011437 | 0.011395 | 0.011395 | 0.011186 |
| 0.011311 | 0.011353 | 0.011186 | 0.011311 | 0.011186 | 0.011144 | 0.011269 |
| 0.011227 | 0.011186 | 0.011186 | 0.011311 | 0.011186 | 0.011353 | 0.011395 |
| 0.011186 | 0.011355 | 0.011436 | 0.011276 | 0.011118 | 0.011227 | 0.011169 |
| 0.011122 | 0.011441 | 0.000000 | 0.011299 | 0.011161 | 0.011267 | 0.011273 |
| 0.011216 | 0.000000 | 0.011227 | 0.000000 | 0.011115 | 0.011261 | 0.011244 |
| 0.011322 | 0.011191 | 0.011269 | 0.011187 | 0.011270 | 0.011227 | 0.011353 |
| 0.011311 | 0.011353 | 0.011439 | 0.011229 | 0.011481 | 0.011500 | 0.011144 |
| 0.011436 | 0.011395 | 0.011144 | 0.011353 | 0.011102 | 0.011227 | 0.000000 |
| 0.011186 | 0.011144 | 0.011144 | 0.011144 | 0.011144 | 0.011144 | 0.011269 |
| 0.011186 | 0.011232 | 0.011228 | 0.011103 | 0.011398 | 0.011312 | 0.011313 |
| 0.011313 | 0.011144 | 0.000000 | 0.000000 | 0.011227 | 0.011395 | 0.011312 |
| 0.011144 | 0.011269 | 0.011520 | 0.011395 | 0.011353 | 0.011353 | 0.011186 |
| 0.011269 | 0.011353 | 0.011227 | 0.011186 | 0.011688 | 0.011269 | 0.011478 |
| 0.011604 | 0.011372 | 0.011145 | 0.011276 | 0.011186 | 0.011353 | 0.011353 |
| 0.011186 | 0.011353 | 0.011395 | 0.011395 | 0.011354 | 0.011520 | 0.011191 |
| 0.000000 | 0.000000 | 0.011188 | 0.011145 | 0.011231 | 0.000000 | 0.011272 |

|          |          |          |          |          |          |          |
|----------|----------|----------|----------|----------|----------|----------|
| 0.011231 | 0.011223 | 0.000000 | 0.011201 | 0.011144 | 0.011145 | 0.011186 |
| 0.011144 | 0.011144 | 0.011227 | 0.011102 | 0.011269 | 0.011227 | 0.011144 |
| 0.011269 | 0.011353 | 0.011102 | 0.011102 | 0.011144 | 0.011144 | 0.011144 |
| 0.011186 | 0.011227 | 0.011227 | 0.011270 | 0.011227 | 0.011353 | 0.011311 |
| 0.011353 | 0.011439 | 0.011229 | 0.011481 | 0.011500 | 0.011144 | 0.011395 |
| 0.011353 | 0.011353 | 0.011102 | 0.011320 | 0.011276 | 0.011229 | 0.011190 |
| 0.011230 | 0.011563 | 0.011375 | 0.011271 | 0.011144 | 0.011353 | 0.011186 |
| 0.011311 | 0.011186 | 0.011144 | 0.011228 | 0.011395 | 0.011353 | 0.011269 |
| 0.000000 | 0.000000 | 0.011227 | 0.000000 | 0.000000 | 0.011187 | 0.011353 |
| 0.011227 | 0.011144 | 0.011144 | 0.011269 | 0.011186 | 0.011144 | 0.011227 |
| 0.011227 | 0.011269 | 0.011269 | 0.011144 | 0.011227 | 0.011353 | 0.011102 |
| 0.011186 | 0.011436 | 0.011144 | 0.011186 | 0.011144 | 0.011395 | 0.011104 |
| 0.011575 | 0.011105 | 0.011162 | 0.011234 | 0.011274 | 0.011227 | 0.000000 |
| 0.011114 | 0.011269 | 0.011395 | 0.011526 | 0.011353 | 0.011520 | 0.011604 |
| 0.011479 | 0.011566 | 0.011436 | 0.011813 | 0.011395 | 0.012400 | 0.011562 |
| 0.012148 | 0.012022 | 0.012278 | 0.012359 | 0.011311 | 0.011227 | 0.011520 |
| 0.011939 | 0.011688 | 0.011395 | 0.011353 | 0.011395 | 0.011395 | 0.011355 |
| 0.011269 | 0.011269 | 0.011311 | 0.011311 | 0.011604 | 0.011687 | 0.011646 |
| 0.011520 | 0.011520 | 0.011729 | 0.011479 | 0.011813 | 0.011903 | 0.011898 |
| 0.011939 | 0.011939 | 0.011897 | 0.011856 | 0.011939 | 0.011227 | 0.011436 |
| 0.011604 | 0.012148 | 0.011565 | 0.011729 | 0.011562 | 0.011270 | 0.011227 |
| 0.011144 | 0.011144 | 0.011646 | 0.011623 | 0.011780 | 0.011395 | 0.011186 |
| S791     | 0.011375 | 0.011375 | 0.011480 | 0.011428 | 0.011428 | 0.011533 |
| 0.011378 | 0.011272 | 0.011428 | 0.011218 | 0.011218 | 0.011218 | 0.011165 |
| 0.011113 | 0.011375 | 0.011113 | 0.011165 | 0.011218 | 0.011218 | 0.011218 |
| 0.011218 | 0.011218 | 0.011113 | 0.011165 | 0.011218 | 0.011113 | 0.011378 |
| 0.011323 | 0.011218 | 0.011113 | 0.011113 | 0.011218 | 0.011218 | 0.011113 |
| 0.011270 | 0.011323 | 0.011323 | 0.011323 | 0.011323 | 0.011218 | 0.011480 |
| 0.000000 | 0.011270 | 0.011323 | 0.011165 | 0.011270 | 0.011427 | 0.011375 |
| 0.011323 | 0.011428 | 0.011218 | 0.011427 | 0.011270 | 0.011427 | 0.011270 |
| 0.011218 | 0.011270 | 0.011375 | 0.011427 | 0.011428 | 0.000000 | 0.011270 |
| 0.011323 | 0.011218 | 0.011218 | 0.011480 | 0.011375 | 0.011323 | 0.011270 |
| 0.011270 | 0.011270 | 0.011323 | 0.011428 | 0.011218 | 0.011218 | 0.011218 |
| 0.011218 | 0.011218 | 0.011165 | 0.011165 | 0.011218 | 0.011218 | 0.011375 |
| 0.011323 | 0.011218 | 0.011323 | 0.011113 | 0.011323 | 0.011165 | 0.011165 |
| 0.011480 | 0.011323 | 0.011480 | 0.011323 | 0.011323 | 0.011480 | 0.011270 |
| 0.011384 | 0.011438 | 0.011480 | 0.011168 | 0.011165 | 0.011169 | 0.011169 |
| 0.011165 | 0.011170 | 0.011169 | 0.011375 | 0.011270 | 0.011218 | 0.011270 |
| 0.011270 | 0.011218 | 0.011375 | 0.011270 | 0.011428 | 0.011270 | 0.011218 |
| 0.011165 | 0.011218 | 0.011428 | 0.011480 | 0.011375 | 0.011323 | 0.011218 |
| 0.011165 | 0.011113 | 0.011218 | 0.011113 | 0.011165 | 0.011113 | 0.011113 |
| 0.011218 | 0.011218 | 0.011165 | 0.011165 | 0.011165 | 0.011165 | 0.011165 |
| 0.011166 | 0.011270 | 0.011270 | 0.011115 | 0.011168 | 0.011169 | 0.011165 |
| 0.011218 | 0.011218 | 0.011218 | 0.011218 | 0.011114 | 0.011220 | 0.011271 |
| 0.011169 | 0.011274 | 0.011271 | 0.011218 | 0.011113 | 0.011270 | 0.011165 |
| 0.011270 | 0.011218 | 0.011218 | 0.011323 | 0.011270 | 0.011742 | 0.011375 |
| 0.011428 | 0.011270 | 0.011165 | 0.011270 | 0.011165 | 0.011218 | 0.011113 |
| 0.011218 | 0.011218 | 0.011218 | 0.011218 | 0.011218 | 0.011218 | 0.011323 |
| 0.011218 | 0.011323 | 0.011270 | 0.011113 | 0.011218 | 0.011375 | 0.011323 |
| 0.011323 | 0.011270 | 0.011113 | 0.011113 | 0.011323 | 0.011113 | 0.011113 |
| 0.011271 | 0.011323 | 0.011165 | 0.011323 | 0.011113 | 0.011270 | 0.011165 |
| 0.011323 | 0.011165 | 0.011218 | 0.011165 | 0.011165 | 0.011113 | 0.011165 |
| 0.011270 | 0.011218 | 0.011218 | 0.011165 | 0.011218 | 0.011270 | 0.011428 |
| 0.011428 | 0.011323 | 0.011375 | 0.011375 | 0.011323 | 0.011218 | 0.011218 |
| 0.011218 | 0.011365 | 0.011260 | 0.011166 | 0.011484 | 0.011114 | 0.011296 |
| 0.011378 | 0.011273 | 0.011375 | 0.011480 | 0.011325 | 0.011480 | 0.011428 |
| 0.011480 | 0.011427 | 0.011393 | 0.011125 | 0.011193 | 0.011323 | 0.011375 |
| 0.011375 | 0.011323 | 0.011428 | 0.011377 | 0.011270 | 0.011270 | 0.011855 |
| 0.011324 | 0.011380 | 0.011432 | 0.011432 | 0.011586 | 0.011165 | 0.011377 |
| 0.011218 | 0.011218 | 0.011113 | 0.011113 | 0.011165 | 0.011270 | 0.011270 |

|          |          |          |          |          |          |          |
|----------|----------|----------|----------|----------|----------|----------|
| 0.011218 | 0.011270 | 0.011165 | 0.011165 | 0.011218 | 0.011218 | 0.011165 |
| 0.011218 | 0.011532 | 0.011323 | 0.011323 | 0.011113 | 0.011218 | 0.011323 |
| 0.011323 | 0.011165 | 0.011270 | 0.011218 | 0.011165 | 0.011165 | 0.011165 |
| 0.011585 | 0.011218 | 0.011375 | 0.011165 | 0.011270 | 0.011270 | 0.011165 |
| 0.011165 | 0.011165 | 0.011270 | 0.011375 | 0.011165 | 0.011270 | 0.011323 |
| 0.011375 | 0.011270 | 0.011270 | 0.011165 | 0.011113 | 0.011218 | 0.011323 |
| 0.011165 | 0.011270 | 0.011113 | 0.011113 | 0.011270 | 0.011165 | 0.011218 |
| 0.011165 | 0.011270 | 0.011218 | 0.011113 | 0.011218 | 0.011113 | 0.011375 |
| 0.011222 | 0.011218 | 0.011323 | 0.011323 | 0.011218 | 0.011218 | 0.011323 |
| 0.011218 | 0.011427 | 0.011113 | 0.011165 | 0.011113 | 0.011113 | 0.011113 |
| 0.011270 | 0.011270 | 0.011218 | 0.011375 | 0.011113 | 0.011323 | 0.011113 |
| 0.011113 | 0.011218 | 0.011218 | 0.011165 | 0.011270 | 0.011427 | 0.011375 |
| 0.011323 | 0.011270 | 0.011218 | 0.011323 | 0.011375 | 0.011218 | 0.011165 |
| 0.011165 | 0.011218 | 0.011218 | 0.000000 | 0.011113 | 0.011323 | 0.011165 |
| 0.011113 | 0.011218 | 0.011323 | 0.011270 | 0.011218 | 0.011165 | 0.011218 |
| 0.011218 | 0.011218 | 0.011270 | 0.011218 | 0.011323 | 0.011427 | 0.011375 |
| 0.011270 | 0.011375 | 0.011165 | 0.019979 | 0.011202 | 0.011346 | 0.011375 |
| 0.011375 | 0.011428 | 0.011257 | 0.011254 | 0.011422 | 0.011480 | 0.011381 |
| 0.011380 | 0.011311 | 0.011115 | 0.011177 | 0.011114 | 0.011128 | 0.011179 |
| 0.011218 | 0.011165 | 0.011218 | 0.000000 | 0.011375 | 0.011375 | 0.011325 |
| 0.011221 | 0.011323 | 0.011375 | 0.011218 | 0.011270 | 0.011270 | 0.011270 |
| 0.011218 | 0.011165 | 0.011165 | 0.011323 | 0.011270 | 0.011218 | 0.011218 |
| 0.011218 | 0.011323 | 0.011113 | 0.011270 | 0.011323 | 0.011270 | 0.011218 |
| 0.011270 | 0.011165 | 0.011270 | 0.011270 | 0.011323 | 0.011375 | 0.011375 |
| 0.011113 | 0.011113 | 0.011165 | 0.011218 | 0.011113 | 0.011375 | 0.011375 |
| 0.011218 | 0.011375 | 0.011427 | 0.011270 | 0.011375 | 0.011271 | 0.011218 |
| 0.011270 | 0.011270 | 0.011427 | 0.011270 | 0.011270 | 0.011113 | 0.011270 |
| 0.011270 | 0.011270 | 0.011323 | 0.011218 | 0.011218 | 0.011427 | 0.011375 |
| 0.011272 | 0.011113 | 0.011270 | 0.011375 | 0.011270 | 0.011375 | 0.011427 |
| 0.011480 | 0.011325 | 0.011480 | 0.011428 | 0.011480 | 0.011427 | 0.011165 |
| 0.011429 | 0.011323 | 0.011218 | 0.011218 | 0.011323 | 0.011113 | 0.011270 |
| 0.011323 | 0.011270 | 0.011218 | 0.011270 | 0.011165 | 0.011270 | 0.011270 |
| 0.011323 | 0.011375 | 0.011323 | 0.011323 | 0.011796 | 0.011287 | 0.011171 |
| 0.011389 | 0.011278 | 0.011392 | 0.011334 | 0.011391 | 0.011439 | 0.011329 |
| 0.011866 | 0.011223 | 0.011435 | 0.011223 | 0.011330 | 0.011378 | 0.011431 |
| 0.011861 | 0.011241 | 0.011218 | 0.011218 | 0.011218 | 0.011113 | 0.011165 |
| 0.011165 | 0.011113 | 0.011218 | 0.011218 | 0.011218 | 0.011218 | 0.011218 |
| 0.011270 | 0.011165 | 0.011218 | 0.011218 | 0.011113 | 0.011218 | 0.011113 |
| 0.011165 | 0.011165 | 0.011113 | 0.011165 | 0.011218 | 0.011218 | 0.011270 |
| 0.011218 | 0.011165 | 0.011165 | 0.011218 | 0.011165 | 0.011323 | 0.011323 |
| 0.011165 | 0.011218 | 0.011218 | 0.011218 | 0.011113 | 0.011428 | 0.011270 |
| 0.011115 | 0.011165 | 0.011323 | 0.011327 | 0.011323 | 0.011323 | 0.011323 |
| 0.011375 | 0.011218 | 0.011165 | 0.011218 | 0.011480 | 0.011270 | 0.011270 |
| 0.011218 | 0.011428 | 0.011428 | 0.011323 | 0.011375 | 0.011375 | 0.011427 |
| 0.011218 | 0.011270 | 0.011375 | 0.011375 | 0.011270 | 0.011323 | 0.011323 |
| 0.011218 | 0.011113 | 0.011113 | 0.011375 | 0.011480 | 0.011323 | 0.011218 |
| 0.011375 | 0.011428 | 0.011165 | 0.011375 | 0.011218 | 0.011218 | 0.011270 |
| 0.011270 | 0.011270 | 0.011113 | 0.011375 | 0.011218 | 0.011375 | 0.011375 |
| 0.011270 | 0.011325 | 0.011375 | 0.011277 | 0.000000 | 0.011165 | 0.011119 |
| 0.011141 | 0.011381 | 0.011113 | 0.011235 | 0.000000 | 0.011247 | 0.011243 |
| 0.011172 | 0.011136 | 0.011308 | 0.011131 | 0.011184 | 0.011351 | 0.011339 |
| 0.011384 | 0.011225 | 0.011327 | 0.011270 | 0.011324 | 0.011218 | 0.011323 |
| 0.011270 | 0.011270 | 0.011431 | 0.011167 | 0.011537 | 0.011449 | 0.011218 |
| 0.011428 | 0.011270 | 0.011165 | 0.011270 | 0.011165 | 0.011218 | 0.011113 |
| 0.011218 | 0.011218 | 0.011218 | 0.011218 | 0.011218 | 0.011218 | 0.011323 |
| 0.011221 | 0.011276 | 0.011323 | 0.011167 | 0.011379 | 0.011271 | 0.011324 |
| 0.011378 | 0.011113 | 0.011116 | 0.011114 | 0.011323 | 0.011480 | 0.011375 |
| 0.011218 | 0.011375 | 0.011585 | 0.011428 | 0.011323 | 0.011532 | 0.011218 |
| 0.011270 | 0.011375 | 0.011218 | 0.011218 | 0.011743 | 0.011218 | 0.011375 |
| 0.011743 | 0.011335 | 0.011221 | 0.011386 | 0.011218 | 0.011270 | 0.011375 |



|          |          |          |          |          |          |          |
|----------|----------|----------|----------|----------|----------|----------|
| 0.011165 | 0.011427 | 0.011323 | 0.011323 | 0.011303 | 0.011638 | 0.011222 |
| 0.011113 | 0.011114 | 0.011220 | 0.011220 | 0.011168 | 0.011119 | 0.011273 |
| 0.011275 | 0.011197 | 0.011134 | 0.011237 | 0.011165 | 0.011220 | 0.011218 |
| 0.011165 | 0.011113 | 0.011218 | 0.011113 | 0.011165 | 0.011113 | 0.011113 |
| 0.011218 | 0.011218 | 0.011165 | 0.011165 | 0.011165 | 0.011165 | 0.011165 |
| 0.011166 | 0.011270 | 0.011270 | 0.011324 | 0.011218 | 0.011323 | 0.011270 |
| 0.011270 | 0.011431 | 0.011167 | 0.011537 | 0.011449 | 0.011218 | 0.011375 |
| 0.011375 | 0.011375 | 0.011166 | 0.011330 | 0.011330 | 0.011273 | 0.011277 |
| 0.011220 | 0.011598 | 0.011439 | 0.011272 | 0.011165 | 0.011323 | 0.011218 |
| 0.011323 | 0.011270 | 0.011113 | 0.011218 | 0.011375 | 0.011323 | 0.011270 |
| 0.011113 | 0.011113 | 0.011323 | 0.011113 | 0.011113 | 0.011271 | 0.011323 |
| 0.011218 | 0.011165 | 0.011165 | 0.011323 | 0.011270 | 0.011218 | 0.011218 |
| 0.011165 | 0.011323 | 0.011323 | 0.011218 | 0.011218 | 0.011427 | 0.000000 |
| 0.011270 | 0.011428 | 0.011218 | 0.011218 | 0.011218 | 0.011427 | 0.011167 |
| 0.011448 | 0.011116 | 0.011114 | 0.011225 | 0.011327 | 0.011220 | 0.011114 |
| 0.000000 | 0.011218 | 0.011375 | 0.011486 | 0.011323 | 0.011533 | 0.011585 |
| 0.011481 | 0.011537 | 0.011427 | 0.011743 | 0.011270 | 0.012374 | 0.011428 |
| 0.012111 | 0.011900 | 0.012220 | 0.012112 | 0.011218 | 0.011165 | 0.011480 |
| 0.012006 | 0.011585 | 0.011375 | 0.011323 | 0.011323 | 0.011323 | 0.011219 |
| 0.011218 | 0.011218 | 0.011270 | 0.011218 | 0.011585 | 0.011533 | 0.011637 |
| 0.011428 | 0.011480 | 0.011585 | 0.011375 | 0.011848 | 0.011855 | 0.011954 |
| 0.012006 | 0.011901 | 0.011901 | 0.011848 | 0.011954 | 0.011218 | 0.011428 |
| 0.011533 | 0.011900 | 0.011587 | 0.011638 | 0.011533 | 0.011218 | 0.011218 |
| 0.011165 | 0.011113 | 0.011638 | 0.011585 | 0.011753 | 0.011375 | 0.011165 |
| S792     | 0.011799 | 0.011799 | 0.011597 | 0.011362 | 0.011362 | 0.011429 |
| 0.011536 | 0.011468 | 0.011429 | 0.011396 | 0.011463 | 0.011430 | 0.011396 |
| 0.011362 | 0.011597 | 0.011329 | 0.011429 | 0.011496 | 0.011463 | 0.011429 |
| 0.011396 | 0.011429 | 0.011262 | 0.011363 | 0.011396 | 0.011429 | 0.011502 |
| 0.011396 | 0.011429 | 0.011329 | 0.011295 | 0.011496 | 0.011463 | 0.011496 |
| 0.011463 | 0.011564 | 0.011463 | 0.011463 | 0.011496 | 0.011463 | 0.011631 |
| 0.011329 | 0.011463 | 0.011496 | 0.011429 | 0.011463 | 0.011564 | 0.011496 |
| 0.011463 | 0.011631 | 0.011530 | 0.011530 | 0.011463 | 0.011731 | 0.011463 |
| 0.011429 | 0.011463 | 0.011597 | 0.011731 | 0.011564 | 0.011463 | 0.011564 |
| 0.011496 | 0.011564 | 0.011463 | 0.011698 | 0.011665 | 0.011463 | 0.011530 |
| 0.011429 | 0.011530 | 0.011496 | 0.011564 | 0.011496 | 0.011496 | 0.011496 |
| 0.011396 | 0.011429 | 0.011396 | 0.011429 | 0.011463 | 0.011498 | 0.011564 |
| 0.011496 | 0.011463 | 0.011530 | 0.011429 | 0.011496 | 0.011396 | 0.011463 |
| 0.011631 | 0.011564 | 0.011597 | 0.011631 | 0.011463 | 0.011698 | 0.011463 |
| 0.011653 | 0.011546 | 0.011702 | 0.011373 | 0.011396 | 0.011465 | 0.011296 |
| 0.011938 | 0.011314 | 0.011431 | 0.011698 | 0.011698 | 0.011429 | 0.011530 |
| 0.011530 | 0.011496 | 0.011564 | 0.011463 | 0.011564 | 0.011496 | 0.011496 |
| 0.011463 | 0.011496 | 0.011765 | 0.011631 | 0.011530 | 0.011497 | 0.011430 |
| 0.011396 | 0.011329 | 0.011463 | 0.011429 | 0.011362 | 0.011329 | 0.011262 |
| 0.011362 | 0.011430 | 0.011429 | 0.011429 | 0.011463 | 0.011463 | 0.011465 |
| 0.011533 | 0.011463 | 0.011463 | 0.011348 | 0.011422 | 0.011376 | 0.011464 |
| 0.011467 | 0.011404 | 0.011466 | 0.011440 | 0.011366 | 0.011403 | 0.011432 |
| 0.011420 | 0.011474 | 0.011508 | 0.011396 | 0.011406 | 0.011531 | 0.011430 |
| 0.011497 | 0.011498 | 0.011497 | 0.011597 | 0.011530 | 0.011899 | 0.011631 |
| 0.011463 | 0.011530 | 0.011463 | 0.011497 | 0.011362 | 0.011329 | 0.011396 |
| 0.011463 | 0.011463 | 0.011429 | 0.011396 | 0.011429 | 0.011396 | 0.011497 |
| 0.011463 | 0.011564 | 0.011497 | 0.011396 | 0.011498 | 0.011597 | 0.011601 |
| 0.011597 | 0.011497 | 0.011396 | 0.011330 | 0.011463 | 0.011396 | 0.011329 |
| 0.011332 | 0.011598 | 0.011396 | 0.011598 | 0.011362 | 0.011463 | 0.011429 |
| 0.011530 | 0.011429 | 0.011463 | 0.011430 | 0.011463 | 0.011329 | 0.011463 |
| 0.011497 | 0.011429 | 0.011497 | 0.011429 | 0.011463 | 0.011497 | 0.011732 |
| 0.011564 | 0.011497 | 0.011564 | 0.011599 | 0.011564 | 0.011463 | 0.011429 |
| 0.011398 | 0.011667 | 0.011563 | 0.011369 | 0.011569 | 0.011333 | 0.011454 |
| 0.011569 | 0.011468 | 0.011631 | 0.011832 | 0.011538 | 0.011698 | 0.011664 |
| 0.011597 | 0.011765 | 0.011593 | 0.011390 | 0.011479 | 0.011497 | 0.011568 |
| 0.011665 | 0.011566 | 0.011703 | 0.011737 | 0.011698 | 0.011765 | 0.011805 |

|          |          |          |          |          |          |          |
|----------|----------|----------|----------|----------|----------|----------|
| 0.011602 | 0.011739 | 0.011703 | 0.011635 | 0.011901 | 0.011362 | 0.011498 |
| 0.011530 | 0.011463 | 0.011362 | 0.011362 | 0.011429 | 0.011429 | 0.011496 |
| 0.011429 | 0.011496 | 0.011396 | 0.011429 | 0.011429 | 0.011429 | 0.011496 |
| 0.011429 | 0.011597 | 0.011497 | 0.011530 | 0.011329 | 0.011429 | 0.011463 |
| 0.011463 | 0.011429 | 0.011496 | 0.011463 | 0.011396 | 0.011396 | 0.011396 |
| 0.011597 | 0.011496 | 0.011564 | 0.011362 | 0.011463 | 0.011631 | 0.011396 |
| 0.011396 | 0.011463 | 0.011429 | 0.011597 | 0.011396 | 0.011262 | 0.011396 |
| 0.011329 | 0.011429 | 0.011429 | 0.011362 | 0.011362 | 0.011530 | 0.011463 |
| 0.011362 | 0.011463 | 0.011329 | 0.011362 | 0.011496 | 0.011362 | 0.011396 |
| 0.011363 | 0.011496 | 0.011430 | 0.011329 | 0.011396 | 0.011329 | 0.011496 |
| 0.011539 | 0.011396 | 0.011429 | 0.011530 | 0.011496 | 0.011429 | 0.011530 |
| 0.011396 | 0.011731 | 0.011329 | 0.011530 | 0.011329 | 0.011329 | 0.011329 |
| 0.011564 | 0.011497 | 0.011463 | 0.011530 | 0.011362 | 0.011497 | 0.011329 |
| 0.011396 | 0.011396 | 0.011429 | 0.011530 | 0.011429 | 0.011530 | 0.011597 |
| 0.011597 | 0.011564 | 0.011463 | 0.011564 | 0.011530 | 0.011396 | 0.011362 |
| 0.011396 | 0.011396 | 0.011463 | 0.011329 | 0.011362 | 0.011530 | 0.011396 |
| 0.011362 | 0.011429 | 0.011564 | 0.011530 | 0.011496 | 0.011429 | 0.011429 |
| 0.011496 | 0.011429 | 0.011530 | 0.011396 | 0.011530 | 0.011631 | 0.011665 |
| 0.011429 | 0.011564 | 0.011440 | 0.017974 | 0.011322 | 0.011611 | 0.011514 |
| 0.011475 | 0.011518 | 0.011636 | 0.011408 | 0.011555 | 0.011544 | 0.011607 |
| 0.011203 | 0.011365 | 0.011372 | 0.011479 | 0.011372 | 0.011455 | 0.011447 |
| 0.011342 | 0.011321 | 0.011320 | 0.011193 | 0.011564 | 0.011597 | 0.011601 |
| 0.011438 | 0.011564 | 0.011564 | 0.011463 | 0.011497 | 0.011497 | 0.011463 |
| 0.011497 | 0.011429 | 0.011463 | 0.011497 | 0.011463 | 0.011396 | 0.011429 |
| 0.011429 | 0.011497 | 0.011396 | 0.011497 | 0.011530 | 0.011564 | 0.011463 |
| 0.011429 | 0.011396 | 0.011530 | 0.011530 | 0.011530 | 0.011565 | 0.011597 |
| 0.011362 | 0.011362 | 0.011396 | 0.011497 | 0.011362 | 0.011597 | 0.011597 |
| 0.011631 | 0.011631 | 0.011564 | 0.011664 | 0.011564 | 0.011666 | 0.011497 |
| 0.011497 | 0.011564 | 0.011597 | 0.011362 | 0.011497 | 0.011463 | 0.011497 |
| 0.011564 | 0.011564 | 0.011597 | 0.011564 | 0.011464 | 0.011665 | 0.011631 |
| 0.011500 | 0.011396 | 0.011497 | 0.011597 | 0.011497 | 0.011564 | 0.011664 |
| 0.011832 | 0.011538 | 0.011698 | 0.011664 | 0.011597 | 0.011765 | 0.011396 |
| 0.011565 | 0.011464 | 0.011429 | 0.011429 | 0.011497 | 0.011396 | 0.011497 |
| 0.011530 | 0.011564 | 0.011463 | 0.011429 | 0.011396 | 0.011530 | 0.011530 |
| 0.011530 | 0.011565 | 0.011631 | 0.011564 | 0.012136 | 0.011596 | 0.011517 |
| 0.011587 | 0.011545 | 0.011657 | 0.011545 | 0.011655 | 0.011577 | 0.011577 |
| 0.012056 | 0.011441 | 0.011574 | 0.011510 | 0.011783 | 0.011672 | 0.011741 |
| 0.012080 | 0.011512 | 0.011736 | 0.011799 | 0.011664 | 0.011396 | 0.011702 |
| 0.011362 | 0.011530 | 0.011664 | 0.011631 | 0.011635 | 0.011362 | 0.000000 |
| 0.011463 | 0.011396 | 0.011429 | 0.011463 | 0.011362 | 0.011429 | 0.011329 |
| 0.011396 | 0.011429 | 0.011396 | 0.011362 | 0.011463 | 0.011396 | 0.011429 |
| 0.011429 | 0.011362 | 0.011429 | 0.011463 | 0.011362 | 0.011564 | 0.011597 |
| 0.011496 | 0.011496 | 0.011496 | 0.011496 | 0.011429 | 0.011564 | 0.011463 |
| 0.011199 | 0.011429 | 0.011396 | 0.011365 | 0.011530 | 0.011530 | 0.011530 |
| 0.011530 | 0.011463 | 0.011429 | 0.011463 | 0.011564 | 0.011564 | 0.011496 |
| 0.011496 | 0.011631 | 0.011530 | 0.011530 | 0.011732 | 0.011732 | 0.011597 |
| 0.011429 | 0.011496 | 0.011530 | 0.011665 | 0.011497 | 0.011530 | 0.011496 |
| 0.011530 | 0.011396 | 0.011396 | 0.011698 | 0.011698 | 0.011664 | 0.011463 |
| 0.011564 | 0.011631 | 0.011496 | 0.011564 | 0.011530 | 0.011396 | 0.011463 |
| 0.011496 | 0.011463 | 0.011396 | 0.011631 | 0.011463 | 0.011564 | 0.011597 |
| 0.011496 | 0.011603 | 0.011597 | 0.011385 | 0.011286 | 0.011502 | 0.011215 |
| 0.011390 | 0.011294 | 0.011411 | 0.011462 | 0.011402 | 0.011467 | 0.011326 |
| 0.011315 | 0.011258 | 0.011394 | 0.011258 | 0.011276 | 0.011462 | 0.011587 |
| 0.011588 | 0.011493 | 0.011483 | 0.011483 | 0.011431 | 0.011362 | 0.011362 |
| 0.011430 | 0.011430 | 0.011601 | 0.011399 | 0.011670 | 0.011696 | 0.011496 |
| 0.011463 | 0.011530 | 0.011463 | 0.011497 | 0.011362 | 0.011329 | 0.011396 |
| 0.011463 | 0.011463 | 0.011429 | 0.011396 | 0.011429 | 0.011396 | 0.011497 |
| 0.011479 | 0.011480 | 0.011471 | 0.011505 | 0.011642 | 0.011607 | 0.011606 |
| 0.011605 | 0.011531 | 0.011319 | 0.011348 | 0.011467 | 0.011636 | 0.011637 |
| 0.011430 | 0.011500 | 0.011733 | 0.011702 | 0.011632 | 0.011666 | 0.011597 |

|          |          |          |          |          |          |          |
|----------|----------|----------|----------|----------|----------|----------|
| 0.011530 | 0.011597 | 0.011597 | 0.011497 | 0.011799 | 0.011664 | 0.011732 |
| 0.011765 | 0.011559 | 0.011469 | 0.011545 | 0.011429 | 0.011597 | 0.011597 |
| 0.011632 | 0.011664 | 0.011664 | 0.011664 | 0.011846 | 0.011799 | 0.011407 |
| 0.011297 | 0.011303 | 0.011401 | 0.011366 | 0.011402 | 0.011321 | 0.011366 |
| 0.011437 | 0.011236 | 0.011346 | 0.011435 | 0.011464 | 0.011539 | 0.011430 |
| 0.011396 | 0.011329 | 0.011463 | 0.011429 | 0.011362 | 0.011329 | 0.011262 |
| 0.011362 | 0.011430 | 0.011429 | 0.011429 | 0.011463 | 0.011463 | 0.011465 |
| 0.011533 | 0.011463 | 0.011463 | 0.011431 | 0.011362 | 0.011362 | 0.011430 |
| 0.011430 | 0.011601 | 0.011399 | 0.011670 | 0.011696 | 0.011496 | 0.011664 |
| 0.011597 | 0.011597 | 0.011432 | 0.011547 | 0.011547 | 0.011571 | 0.011340 |
| 0.011611 | 0.011607 | 0.011526 | 0.011502 | 0.011396 | 0.011598 | 0.011463 |
| 0.011564 | 0.011497 | 0.011396 | 0.011498 | 0.011597 | 0.011601 | 0.011497 |
| 0.011396 | 0.011330 | 0.011463 | 0.011396 | 0.011329 | 0.011332 | 0.011598 |
| 0.011497 | 0.011429 | 0.011463 | 0.011497 | 0.011463 | 0.011396 | 0.011329 |
| 0.011463 | 0.011496 | 0.011496 | 0.011429 | 0.011496 | 0.011732 | 0.011329 |
| 0.011429 | 0.011564 | 0.011429 | 0.011463 | 0.011429 | 0.011530 | 0.011446 |
| 0.011285 | 0.011315 | 0.011261 | 0.011342 | 0.011427 | 0.011347 | 0.011269 |
| 0.011218 | 0.000000 | 0.011161 | 0.011264 | 0.011128 | 0.011263 | 0.011396 |
| 0.011296 | 0.011364 | 0.011295 | 0.011538 | 0.011262 | 0.012135 | 0.011296 |
| 0.012035 | 0.011802 | 0.011936 | 0.012274 | 0.011530 | 0.011295 | 0.011262 |
| 0.012036 | 0.011633 | 0.011228 | 0.011127 | 0.011195 | 0.011195 | 0.011229 |
| 0.000000 | 0.000000 | 0.011127 | 0.011094 | 0.011733 | 0.011799 | 0.011800 |
| 0.011699 | 0.011800 | 0.011903 | 0.011669 | 0.012171 | 0.012178 | 0.012238 |
| 0.012239 | 0.012273 | 0.012220 | 0.012239 | 0.012240 | 0.011530 | 0.011766 |
| 0.011834 | 0.012337 | 0.011840 | 0.011866 | 0.012339 | 0.011400 | 0.011296 |
| 0.011262 | 0.011262 | 0.011732 | 0.011718 | 0.011869 | 0.011597 | 0.011262 |
| S793     | 0.011900 | 0.011900 | 0.011698 | 0.011463 | 0.011463 | 0.011530 |
| 0.011638 | 0.011570 | 0.011530 | 0.011497 | 0.011564 | 0.011531 | 0.011496 |
| 0.011463 | 0.011698 | 0.011429 | 0.011463 | 0.011597 | 0.011564 | 0.011530 |
| 0.011496 | 0.011530 | 0.011362 | 0.011463 | 0.011497 | 0.011530 | 0.011603 |
| 0.011497 | 0.011530 | 0.011429 | 0.011396 | 0.011597 | 0.011564 | 0.011597 |
| 0.011564 | 0.011664 | 0.011564 | 0.011564 | 0.011530 | 0.011564 | 0.011732 |
| 0.011429 | 0.011564 | 0.011530 | 0.011530 | 0.011564 | 0.011597 | 0.011597 |
| 0.011564 | 0.011665 | 0.011631 | 0.011631 | 0.011496 | 0.011832 | 0.011496 |
| 0.011530 | 0.011564 | 0.011698 | 0.011832 | 0.011665 | 0.011564 | 0.011664 |
| 0.011597 | 0.011664 | 0.011564 | 0.011799 | 0.011766 | 0.011564 | 0.011631 |
| 0.011530 | 0.011631 | 0.011597 | 0.011664 | 0.011597 | 0.011597 | 0.011597 |
| 0.011496 | 0.011530 | 0.011496 | 0.011530 | 0.011564 | 0.011599 | 0.011664 |
| 0.011597 | 0.011564 | 0.011631 | 0.011530 | 0.011597 | 0.011496 | 0.011564 |
| 0.011731 | 0.011664 | 0.011698 | 0.011732 | 0.011564 | 0.011799 | 0.011564 |
| 0.011765 | 0.011658 | 0.011815 | 0.011490 | 0.011508 | 0.011539 | 0.011415 |
| 0.012048 | 0.011467 | 0.011554 | 0.011731 | 0.011799 | 0.011530 | 0.011631 |
| 0.011631 | 0.011597 | 0.011664 | 0.011564 | 0.011664 | 0.011597 | 0.011597 |
| 0.011564 | 0.011597 | 0.011866 | 0.011731 | 0.011631 | 0.011597 | 0.011530 |
| 0.011497 | 0.011430 | 0.011564 | 0.011530 | 0.011463 | 0.011430 | 0.011362 |
| 0.011463 | 0.011530 | 0.011530 | 0.011530 | 0.011564 | 0.011564 | 0.011567 |
| 0.011635 | 0.011564 | 0.011564 | 0.011456 | 0.011530 | 0.011481 | 0.011564 |
| 0.011568 | 0.011507 | 0.011577 | 0.011543 | 0.011468 | 0.011506 | 0.011533 |
| 0.011528 | 0.011577 | 0.011611 | 0.011497 | 0.011510 | 0.011632 | 0.011531 |
| 0.011598 | 0.011599 | 0.011598 | 0.011698 | 0.011631 | 0.011933 | 0.011732 |
| 0.011564 | 0.011631 | 0.011564 | 0.011598 | 0.011463 | 0.011429 | 0.011497 |
| 0.011564 | 0.011564 | 0.011530 | 0.011497 | 0.011530 | 0.011497 | 0.011597 |
| 0.011564 | 0.011665 | 0.011597 | 0.011497 | 0.011599 | 0.011698 | 0.011669 |
| 0.011698 | 0.011598 | 0.011497 | 0.011431 | 0.011564 | 0.011497 | 0.011396 |
| 0.011434 | 0.011665 | 0.011497 | 0.011698 | 0.011463 | 0.011564 | 0.011530 |
| 0.011631 | 0.011530 | 0.011564 | 0.011530 | 0.011564 | 0.011430 | 0.011564 |
| 0.011597 | 0.011530 | 0.011597 | 0.011530 | 0.011564 | 0.011597 | 0.011833 |
| 0.011665 | 0.011597 | 0.011665 | 0.011701 | 0.011665 | 0.011564 | 0.011530 |
| 0.011499 | 0.011788 | 0.011701 | 0.011472 | 0.011671 | 0.011435 | 0.011532 |
| 0.011671 | 0.011570 | 0.011731 | 0.011933 | 0.011641 | 0.011799 | 0.011765 |

|          |          |          |          |          |          |          |
|----------|----------|----------|----------|----------|----------|----------|
| 0.011631 | 0.011866 | 0.011700 | 0.011472 | 0.011521 | 0.011597 | 0.011669 |
| 0.011765 | 0.011667 | 0.011804 | 0.011838 | 0.011799 | 0.011866 | 0.011907 |
| 0.011703 | 0.011841 | 0.011737 | 0.011737 | 0.011969 | 0.011463 | 0.011599 |
| 0.011631 | 0.011564 | 0.011463 | 0.011463 | 0.011530 | 0.011530 | 0.011597 |
| 0.011530 | 0.011597 | 0.011496 | 0.011530 | 0.011530 | 0.011530 | 0.011530 |
| 0.011530 | 0.011698 | 0.011597 | 0.011631 | 0.011429 | 0.011530 | 0.011564 |
| 0.011564 | 0.011530 | 0.011597 | 0.011564 | 0.011496 | 0.011496 | 0.011496 |
| 0.011698 | 0.011597 | 0.011664 | 0.011463 | 0.011564 | 0.011665 | 0.011496 |
| 0.011496 | 0.011564 | 0.011530 | 0.011698 | 0.011496 | 0.011362 | 0.011496 |
| 0.011429 | 0.011530 | 0.011530 | 0.011463 | 0.011463 | 0.011631 | 0.011564 |
| 0.011463 | 0.011564 | 0.011429 | 0.011463 | 0.011597 | 0.011463 | 0.011497 |
| 0.011463 | 0.011597 | 0.011531 | 0.011429 | 0.011497 | 0.011429 | 0.011597 |
| 0.011642 | 0.011497 | 0.011530 | 0.011631 | 0.011597 | 0.011530 | 0.011564 |
| 0.011496 | 0.011832 | 0.011429 | 0.011631 | 0.011429 | 0.011429 | 0.011429 |
| 0.011664 | 0.011598 | 0.011564 | 0.011631 | 0.011463 | 0.011597 | 0.011429 |
| 0.011496 | 0.011496 | 0.011530 | 0.011631 | 0.011530 | 0.011631 | 0.011698 |
| 0.011698 | 0.011664 | 0.011564 | 0.011664 | 0.011631 | 0.011496 | 0.011463 |
| 0.011496 | 0.011496 | 0.011564 | 0.011429 | 0.011463 | 0.011631 | 0.011496 |
| 0.011463 | 0.011530 | 0.011664 | 0.011631 | 0.011597 | 0.011530 | 0.011530 |
| 0.011597 | 0.011530 | 0.011631 | 0.011496 | 0.011631 | 0.011732 | 0.011765 |
| 0.011530 | 0.011665 | 0.011543 | 0.018013 | 0.011387 | 0.011733 | 0.011618 |
| 0.011579 | 0.011623 | 0.011741 | 0.011582 | 0.011665 | 0.011647 | 0.011728 |
| 0.011297 | 0.011488 | 0.011489 | 0.011605 | 0.011490 | 0.011554 | 0.011576 |
| 0.011483 | 0.011433 | 0.011431 | 0.011259 | 0.011664 | 0.011698 | 0.011703 |
| 0.011541 | 0.011665 | 0.011664 | 0.011564 | 0.011597 | 0.011598 | 0.011564 |
| 0.011597 | 0.011530 | 0.011564 | 0.011597 | 0.011564 | 0.011497 | 0.011530 |
| 0.011530 | 0.011597 | 0.011497 | 0.011598 | 0.011631 | 0.011665 | 0.011564 |
| 0.011530 | 0.011497 | 0.011631 | 0.011631 | 0.011631 | 0.011598 | 0.011698 |
| 0.011463 | 0.011463 | 0.011497 | 0.011597 | 0.011463 | 0.011698 | 0.011698 |
| 0.011732 | 0.011731 | 0.011664 | 0.011765 | 0.011665 | 0.011767 | 0.011597 |
| 0.011597 | 0.011665 | 0.011698 | 0.011463 | 0.011597 | 0.011564 | 0.011530 |
| 0.011665 | 0.011665 | 0.011698 | 0.011665 | 0.011565 | 0.011765 | 0.011732 |
| 0.011602 | 0.011497 | 0.011597 | 0.011698 | 0.011598 | 0.011665 | 0.011765 |
| 0.011933 | 0.011641 | 0.011799 | 0.011765 | 0.011631 | 0.011866 | 0.011497 |
| 0.011599 | 0.011564 | 0.011530 | 0.011530 | 0.011597 | 0.011497 | 0.011598 |
| 0.011631 | 0.011665 | 0.011564 | 0.011530 | 0.011497 | 0.011631 | 0.011631 |
| 0.011631 | 0.011598 | 0.011731 | 0.011664 | 0.012238 | 0.011703 | 0.011623 |
| 0.011693 | 0.011650 | 0.011763 | 0.011649 | 0.011760 | 0.011681 | 0.011681 |
| 0.012159 | 0.011545 | 0.011677 | 0.011613 | 0.011887 | 0.011774 | 0.011843 |
| 0.012182 | 0.011626 | 0.011838 | 0.011900 | 0.011765 | 0.011497 | 0.011804 |
| 0.011463 | 0.011631 | 0.011765 | 0.011731 | 0.011736 | 0.011463 | 0.011161 |
| 0.011564 | 0.011496 | 0.011530 | 0.011564 | 0.011463 | 0.011530 | 0.011429 |
| 0.011496 | 0.011530 | 0.011496 | 0.011463 | 0.011564 | 0.011496 | 0.011530 |
| 0.011463 | 0.011463 | 0.011530 | 0.011564 | 0.011463 | 0.011664 | 0.011698 |
| 0.011597 | 0.011597 | 0.011597 | 0.011597 | 0.011530 | 0.011665 | 0.011564 |
| 0.011304 | 0.011530 | 0.011497 | 0.011467 | 0.011631 | 0.011631 | 0.011631 |
| 0.011631 | 0.011564 | 0.011530 | 0.011564 | 0.011664 | 0.011664 | 0.011597 |
| 0.011597 | 0.011732 | 0.011631 | 0.011631 | 0.011832 | 0.011832 | 0.011698 |
| 0.011530 | 0.011597 | 0.011631 | 0.011765 | 0.011598 | 0.011631 | 0.011597 |
| 0.011631 | 0.011496 | 0.011496 | 0.011799 | 0.011799 | 0.011765 | 0.011564 |
| 0.011664 | 0.011732 | 0.011597 | 0.011664 | 0.011631 | 0.011496 | 0.011564 |
| 0.011597 | 0.011564 | 0.011496 | 0.011732 | 0.011564 | 0.011664 | 0.011698 |
| 0.011597 | 0.011705 | 0.011698 | 0.011507 | 0.011399 | 0.011604 | 0.011370 |
| 0.011500 | 0.011294 | 0.011517 | 0.011596 | 0.011499 | 0.011569 | 0.011485 |
| 0.011468 | 0.011323 | 0.011561 | 0.011390 | 0.011383 | 0.011529 | 0.011709 |
| 0.011701 | 0.011611 | 0.011589 | 0.011589 | 0.011532 | 0.011463 | 0.011463 |
| 0.011530 | 0.011531 | 0.011703 | 0.011501 | 0.011772 | 0.011802 | 0.011597 |
| 0.011564 | 0.011631 | 0.011564 | 0.011598 | 0.011463 | 0.011429 | 0.011497 |
| 0.011564 | 0.011564 | 0.011530 | 0.011497 | 0.011530 | 0.011497 | 0.011597 |
| 0.011584 | 0.011585 | 0.011505 | 0.011608 | 0.011745 | 0.011709 | 0.011641 |

|          |          |          |          |          |          |          |
|----------|----------|----------|----------|----------|----------|----------|
| 0.011708 | 0.011632 | 0.011429 | 0.011420 | 0.011568 | 0.011738 | 0.011739 |
| 0.011531 | 0.011602 | 0.011835 | 0.011804 | 0.011733 | 0.011767 | 0.011698 |
| 0.011631 | 0.011698 | 0.011698 | 0.011597 | 0.011900 | 0.011765 | 0.011833 |
| 0.011866 | 0.011666 | 0.011572 | 0.011649 | 0.011530 | 0.011698 | 0.011698 |
| 0.011733 | 0.011765 | 0.011765 | 0.011765 | 0.011925 | 0.011900 | 0.011511 |
| 0.011398 | 0.011406 | 0.011503 | 0.011468 | 0.011504 | 0.011433 | 0.011468 |
| 0.011540 | 0.011323 | 0.011394 | 0.011547 | 0.011565 | 0.011642 | 0.011530 |
| 0.011497 | 0.011430 | 0.011564 | 0.011530 | 0.011463 | 0.011430 | 0.011362 |
| 0.011463 | 0.011530 | 0.011530 | 0.011530 | 0.011564 | 0.011564 | 0.011567 |
| 0.011635 | 0.011564 | 0.011564 | 0.011532 | 0.011463 | 0.011463 | 0.011530 |
| 0.011531 | 0.011703 | 0.011501 | 0.011772 | 0.011802 | 0.011597 | 0.011765 |
| 0.011698 | 0.011698 | 0.011534 | 0.011652 | 0.011651 | 0.011673 | 0.011446 |
| 0.011715 | 0.011744 | 0.011653 | 0.011604 | 0.011497 | 0.011698 | 0.011564 |
| 0.011665 | 0.011597 | 0.011497 | 0.011599 | 0.011698 | 0.011669 | 0.011598 |
| 0.011497 | 0.011431 | 0.011564 | 0.011497 | 0.011396 | 0.011434 | 0.011665 |
| 0.011597 | 0.011530 | 0.011564 | 0.011597 | 0.011564 | 0.011497 | 0.011430 |
| 0.011564 | 0.011597 | 0.011597 | 0.011530 | 0.011597 | 0.011832 | 0.011429 |
| 0.011530 | 0.011665 | 0.011530 | 0.011564 | 0.011530 | 0.011631 | 0.011574 |
| 0.011285 | 0.011443 | 0.011411 | 0.011463 | 0.011549 | 0.011455 | 0.011395 |
| 0.011375 | 0.011161 | 0.000000 | 0.011230 | 0.011094 | 0.011229 | 0.011363 |
| 0.011262 | 0.011331 | 0.011262 | 0.011641 | 0.011362 | 0.012236 | 0.011397 |
| 0.012136 | 0.011903 | 0.012037 | 0.012376 | 0.011631 | 0.011396 | 0.011295 |
| 0.012137 | 0.011667 | 0.011329 | 0.011228 | 0.011296 | 0.011296 | 0.011331 |
| 0.011161 | 0.011162 | 0.011228 | 0.011195 | 0.011834 | 0.011900 | 0.011901 |
| 0.011800 | 0.011901 | 0.012004 | 0.011771 | 0.012273 | 0.012280 | 0.012340 |
| 0.012340 | 0.012374 | 0.012323 | 0.012341 | 0.012342 | 0.011631 | 0.011867 |
| 0.011935 | 0.012438 | 0.011942 | 0.011967 | 0.012440 | 0.011502 | 0.011396 |
| 0.011362 | 0.011362 | 0.011833 | 0.011842 | 0.011975 | 0.011698 | 0.011364 |
| S794     | 0.012011 | 0.012011 | 0.011603 | 0.011569 | 0.011569 | 0.011603 |
| 0.011747 | 0.011644 | 0.011569 | 0.011603 | 0.011671 | 0.011638 | 0.011603 |
| 0.011569 | 0.011773 | 0.011535 | 0.011569 | 0.011705 | 0.011671 | 0.011637 |
| 0.011603 | 0.011637 | 0.011468 | 0.011570 | 0.011604 | 0.011637 | 0.011713 |
| 0.011603 | 0.011637 | 0.011535 | 0.011502 | 0.011705 | 0.011671 | 0.011705 |
| 0.011671 | 0.011773 | 0.011671 | 0.011671 | 0.011637 | 0.011671 | 0.011841 |
| 0.011535 | 0.011671 | 0.011637 | 0.011637 | 0.011671 | 0.011705 | 0.011705 |
| 0.011671 | 0.011773 | 0.011740 | 0.011739 | 0.011603 | 0.011943 | 0.011603 |
| 0.011637 | 0.011672 | 0.011807 | 0.011943 | 0.011774 | 0.011671 | 0.011773 |
| 0.011671 | 0.011773 | 0.011671 | 0.011909 | 0.011876 | 0.011671 | 0.011739 |
| 0.011637 | 0.011739 | 0.011705 | 0.011773 | 0.011705 | 0.011705 | 0.011705 |
| 0.011603 | 0.011637 | 0.011603 | 0.011637 | 0.011671 | 0.011706 | 0.011773 |
| 0.011705 | 0.011671 | 0.011739 | 0.011637 | 0.011705 | 0.011603 | 0.011671 |
| 0.011841 | 0.011773 | 0.011807 | 0.011841 | 0.011671 | 0.011841 | 0.011671 |
| 0.011885 | 0.011778 | 0.011938 | 0.011574 | 0.011626 | 0.011655 | 0.011538 |
| 0.012170 | 0.011569 | 0.011685 | 0.011841 | 0.011909 | 0.011637 | 0.011739 |
| 0.011739 | 0.011705 | 0.011773 | 0.011671 | 0.011773 | 0.011705 | 0.011705 |
| 0.011671 | 0.011705 | 0.011977 | 0.011841 | 0.011739 | 0.011706 | 0.011637 |
| 0.011603 | 0.011535 | 0.011671 | 0.011637 | 0.011569 | 0.011536 | 0.011468 |
| 0.011569 | 0.011637 | 0.011637 | 0.011637 | 0.011671 | 0.011671 | 0.011675 |
| 0.011744 | 0.011671 | 0.011671 | 0.011569 | 0.011645 | 0.011556 | 0.011671 |
| 0.011676 | 0.011616 | 0.011694 | 0.011652 | 0.011575 | 0.011614 | 0.011640 |
| 0.011642 | 0.011687 | 0.011721 | 0.011603 | 0.011619 | 0.011740 | 0.011637 |
| 0.011705 | 0.011707 | 0.011705 | 0.011807 | 0.011739 | 0.012011 | 0.011807 |
| 0.011671 | 0.011739 | 0.011671 | 0.011705 | 0.011569 | 0.011535 | 0.011603 |
| 0.011671 | 0.011671 | 0.011603 | 0.011603 | 0.011637 | 0.011603 | 0.011705 |
| 0.011671 | 0.011773 | 0.011705 | 0.011603 | 0.011708 | 0.011807 | 0.011778 |
| 0.011807 | 0.011705 | 0.011603 | 0.011537 | 0.011671 | 0.011603 | 0.011502 |
| 0.011507 | 0.011773 | 0.011603 | 0.011807 | 0.011569 | 0.011671 | 0.011637 |
| 0.011739 | 0.011637 | 0.011671 | 0.011637 | 0.011671 | 0.011535 | 0.011671 |
| 0.011705 | 0.011637 | 0.011705 | 0.011637 | 0.011671 | 0.011705 | 0.011943 |
| 0.011773 | 0.011705 | 0.011773 | 0.011810 | 0.011774 | 0.011671 | 0.011637 |

|          |          |          |          |          |          |          |
|----------|----------|----------|----------|----------|----------|----------|
| 0.011606 | 0.011877 | 0.011799 | 0.011580 | 0.011781 | 0.011543 | 0.011657 |
| 0.011782 | 0.011678 | 0.011841 | 0.012045 | 0.011751 | 0.011909 | 0.011875 |
| 0.011739 | 0.011977 | 0.011814 | 0.011556 | 0.011691 | 0.011705 | 0.011779 |
| 0.011875 | 0.011776 | 0.011915 | 0.011950 | 0.011909 | 0.011977 | 0.012020 |
| 0.011813 | 0.011952 | 0.011847 | 0.011813 | 0.012080 | 0.011569 | 0.011707 |
| 0.011739 | 0.011671 | 0.011569 | 0.011569 | 0.011637 | 0.011637 | 0.011671 |
| 0.011637 | 0.011705 | 0.011603 | 0.011637 | 0.011637 | 0.011637 | 0.011637 |
| 0.011637 | 0.011807 | 0.011706 | 0.011740 | 0.011535 | 0.011637 | 0.011671 |
| 0.011671 | 0.011637 | 0.011705 | 0.011671 | 0.011603 | 0.011603 | 0.011603 |
| 0.011808 | 0.011671 | 0.011773 | 0.011569 | 0.011671 | 0.011773 | 0.011603 |
| 0.011603 | 0.011671 | 0.011637 | 0.011807 | 0.011603 | 0.011468 | 0.011603 |
| 0.011535 | 0.011637 | 0.011637 | 0.011569 | 0.011569 | 0.011739 | 0.011671 |
| 0.011569 | 0.011671 | 0.011535 | 0.011569 | 0.011705 | 0.011570 | 0.011603 |
| 0.011570 | 0.011705 | 0.011638 | 0.011535 | 0.011604 | 0.011535 | 0.011705 |
| 0.011752 | 0.011603 | 0.011637 | 0.011739 | 0.011705 | 0.011637 | 0.011671 |
| 0.011603 | 0.011943 | 0.011535 | 0.011739 | 0.011535 | 0.011535 | 0.011535 |
| 0.011773 | 0.011706 | 0.011671 | 0.011739 | 0.011569 | 0.011706 | 0.011535 |
| 0.011603 | 0.011603 | 0.011637 | 0.011739 | 0.011637 | 0.011739 | 0.011807 |
| 0.011807 | 0.011773 | 0.011671 | 0.011773 | 0.011705 | 0.011603 | 0.011569 |
| 0.011603 | 0.011603 | 0.011671 | 0.011535 | 0.011569 | 0.011739 | 0.011603 |
| 0.011569 | 0.011637 | 0.011773 | 0.011739 | 0.011671 | 0.011637 | 0.011638 |
| 0.011705 | 0.011637 | 0.011739 | 0.011603 | 0.011739 | 0.011841 | 0.011807 |
| 0.011637 | 0.011774 | 0.011653 | 0.018201 | 0.011518 | 0.011855 | 0.011730 |
| 0.011689 | 0.011736 | 0.011899 | 0.011709 | 0.011775 | 0.011758 | 0.011850 |
| 0.011397 | 0.011610 | 0.011613 | 0.011730 | 0.011613 | 0.011653 | 0.011663 |
| 0.011584 | 0.011550 | 0.011547 | 0.011330 | 0.011773 | 0.011807 | 0.011813 |
| 0.011650 | 0.011773 | 0.011773 | 0.011671 | 0.011705 | 0.011706 | 0.011638 |
| 0.011705 | 0.011637 | 0.011671 | 0.011705 | 0.011671 | 0.011603 | 0.011637 |
| 0.011637 | 0.011705 | 0.011603 | 0.011705 | 0.011739 | 0.011773 | 0.011671 |
| 0.011637 | 0.011603 | 0.011739 | 0.011739 | 0.011740 | 0.011706 | 0.011807 |
| 0.011569 | 0.011569 | 0.011603 | 0.011705 | 0.011569 | 0.011807 | 0.011807 |
| 0.011841 | 0.011841 | 0.011773 | 0.011875 | 0.011773 | 0.011878 | 0.011671 |
| 0.011637 | 0.011773 | 0.011807 | 0.011569 | 0.011705 | 0.011671 | 0.011637 |
| 0.011773 | 0.011773 | 0.011807 | 0.011773 | 0.011673 | 0.011875 | 0.011807 |
| 0.011711 | 0.011603 | 0.011705 | 0.011807 | 0.011705 | 0.011773 | 0.011875 |
| 0.012045 | 0.011751 | 0.011909 | 0.011875 | 0.011739 | 0.011977 | 0.011604 |
| 0.011707 | 0.011672 | 0.011637 | 0.011637 | 0.011705 | 0.011603 | 0.011705 |
| 0.011739 | 0.011773 | 0.011671 | 0.011637 | 0.011603 | 0.011739 | 0.011739 |
| 0.011740 | 0.011706 | 0.011841 | 0.011773 | 0.012352 | 0.011812 | 0.011731 |
| 0.011800 | 0.011761 | 0.011874 | 0.011755 | 0.011874 | 0.011792 | 0.011792 |
| 0.012276 | 0.011654 | 0.011788 | 0.011724 | 0.012000 | 0.011886 | 0.011954 |
| 0.012297 | 0.011739 | 0.011676 | 0.011705 | 0.011705 | 0.011468 | 0.011675 |
| 0.011569 | 0.011603 | 0.011739 | 0.011705 | 0.011675 | 0.011569 | 0.011264 |
| 0.011671 | 0.011603 | 0.011637 | 0.011671 | 0.011569 | 0.011637 | 0.011535 |
| 0.011603 | 0.011637 | 0.011603 | 0.011569 | 0.011671 | 0.011603 | 0.011637 |
| 0.011569 | 0.011569 | 0.011637 | 0.011671 | 0.011569 | 0.011773 | 0.011807 |
| 0.011705 | 0.011705 | 0.011705 | 0.011705 | 0.011637 | 0.011774 | 0.011671 |
| 0.011409 | 0.011637 | 0.011603 | 0.011574 | 0.011739 | 0.011739 | 0.011739 |
| 0.011739 | 0.011671 | 0.011637 | 0.011671 | 0.011773 | 0.011773 | 0.011705 |
| 0.011705 | 0.011841 | 0.011739 | 0.011739 | 0.011943 | 0.011943 | 0.011807 |
| 0.011637 | 0.011705 | 0.011739 | 0.011876 | 0.011706 | 0.011739 | 0.011705 |
| 0.011739 | 0.011603 | 0.011603 | 0.011910 | 0.011909 | 0.011875 | 0.011671 |
| 0.011773 | 0.011841 | 0.011705 | 0.011773 | 0.011739 | 0.011603 | 0.011671 |
| 0.011705 | 0.011671 | 0.011603 | 0.011841 | 0.011671 | 0.011773 | 0.011808 |
| 0.011637 | 0.011816 | 0.011807 | 0.011636 | 0.011568 | 0.011712 | 0.011479 |
| 0.011609 | 0.011336 | 0.011628 | 0.011694 | 0.011695 | 0.011732 | 0.011600 |
| 0.011570 | 0.011455 | 0.011683 | 0.011523 | 0.011545 | 0.011730 | 0.011840 |
| 0.011822 | 0.011737 | 0.011701 | 0.011701 | 0.011640 | 0.011569 | 0.011570 |
| 0.011603 | 0.011638 | 0.011812 | 0.011608 | 0.011883 | 0.011918 | 0.011671 |
| 0.011671 | 0.011739 | 0.011671 | 0.011705 | 0.011569 | 0.011535 | 0.011603 |

|          |          |          |          |          |          |          |
|----------|----------|----------|----------|----------|----------|----------|
| 0.011671 | 0.011671 | 0.011603 | 0.011603 | 0.011637 | 0.011603 | 0.011705 |
| 0.011695 | 0.011696 | 0.011614 | 0.011717 | 0.011855 | 0.011819 | 0.011750 |
| 0.011817 | 0.011739 | 0.011545 | 0.011533 | 0.011676 | 0.011847 | 0.011848 |
| 0.011637 | 0.011710 | 0.011944 | 0.011914 | 0.011841 | 0.011876 | 0.011807 |
| 0.011739 | 0.011807 | 0.011807 | 0.011705 | 0.012012 | 0.011875 | 0.011943 |
| 0.011977 | 0.011781 | 0.011681 | 0.011759 | 0.011637 | 0.011773 | 0.011807 |
| 0.011843 | 0.011841 | 0.011875 | 0.011875 | 0.012052 | 0.012011 | 0.011620 |
| 0.011505 | 0.011515 | 0.011611 | 0.011575 | 0.011613 | 0.011547 | 0.011575 |
| 0.011649 | 0.011455 | 0.011585 | 0.011660 | 0.011671 | 0.011751 | 0.011637 |
| 0.011603 | 0.011535 | 0.011671 | 0.011637 | 0.011569 | 0.011536 | 0.011468 |
| 0.011569 | 0.011637 | 0.011637 | 0.011637 | 0.011671 | 0.011671 | 0.011675 |
| 0.011744 | 0.011671 | 0.011671 | 0.011640 | 0.011569 | 0.011570 | 0.011603 |
| 0.011638 | 0.011812 | 0.011608 | 0.011883 | 0.011918 | 0.011671 | 0.011875 |
| 0.011807 | 0.011807 | 0.011641 | 0.011728 | 0.011761 | 0.011783 | 0.011556 |
| 0.011826 | 0.011892 | 0.011740 | 0.011713 | 0.011603 | 0.011807 | 0.011671 |
| 0.011773 | 0.011705 | 0.011603 | 0.011708 | 0.011807 | 0.011778 | 0.011705 |
| 0.011603 | 0.011537 | 0.011671 | 0.011603 | 0.011502 | 0.011507 | 0.011773 |
| 0.011705 | 0.011637 | 0.011671 | 0.011705 | 0.011671 | 0.011603 | 0.011535 |
| 0.011671 | 0.011705 | 0.011705 | 0.011637 | 0.011705 | 0.011943 | 0.011535 |
| 0.011637 | 0.011774 | 0.011637 | 0.011671 | 0.011637 | 0.011739 | 0.011711 |
| 0.011510 | 0.011577 | 0.011511 | 0.011590 | 0.011678 | 0.011568 | 0.011526 |
| 0.011486 | 0.011264 | 0.011230 | 0.000000 | 0.011196 | 0.011197 | 0.011400 |
| 0.011298 | 0.011368 | 0.011298 | 0.011681 | 0.011468 | 0.012317 | 0.011468 |
| 0.012182 | 0.011979 | 0.012116 | 0.012389 | 0.011739 | 0.011501 | 0.011400 |
| 0.012250 | 0.011776 | 0.011434 | 0.011332 | 0.011400 | 0.011400 | 0.011436 |
| 0.011264 | 0.011266 | 0.011332 | 0.011298 | 0.011944 | 0.012012 | 0.012011 |
| 0.011911 | 0.012012 | 0.012116 | 0.011880 | 0.012387 | 0.012395 | 0.012455 |
| 0.012455 | 0.012489 | 0.012440 | 0.012455 | 0.012423 | 0.011739 | 0.011978 |
| 0.012011 | 0.012556 | 0.012054 | 0.012080 | 0.012557 | 0.011609 | 0.011502 |
| 0.011468 | 0.011468 | 0.011910 | 0.011924 | 0.012091 | 0.011807 | 0.011469 |
| S795     | 0.011868 | 0.011868 | 0.011498 | 0.011430 | 0.011430 | 0.011498 |
| 0.011605 | 0.011503 | 0.011430 | 0.011464 | 0.011531 | 0.011498 | 0.011464 |
| 0.011430 | 0.011666 | 0.011397 | 0.011430 | 0.011565 | 0.011531 | 0.011498 |
| 0.011464 | 0.011498 | 0.011330 | 0.011431 | 0.011465 | 0.011498 | 0.011571 |
| 0.011464 | 0.011498 | 0.011397 | 0.011363 | 0.011531 | 0.011531 | 0.011565 |
| 0.011531 | 0.011632 | 0.011531 | 0.011531 | 0.011498 | 0.011531 | 0.011700 |
| 0.011397 | 0.011531 | 0.011498 | 0.011498 | 0.011531 | 0.011565 | 0.011565 |
| 0.011531 | 0.011633 | 0.011599 | 0.011599 | 0.011464 | 0.011801 | 0.011464 |
| 0.011498 | 0.011532 | 0.011666 | 0.011801 | 0.011633 | 0.011532 | 0.011632 |
| 0.011565 | 0.011633 | 0.011532 | 0.011767 | 0.011734 | 0.011531 | 0.011599 |
| 0.011498 | 0.011599 | 0.011565 | 0.011632 | 0.011565 | 0.011565 | 0.011565 |
| 0.011464 | 0.011498 | 0.011464 | 0.011498 | 0.011531 | 0.011565 | 0.011632 |
| 0.011565 | 0.011531 | 0.011599 | 0.011498 | 0.011565 | 0.011464 | 0.011531 |
| 0.011700 | 0.011632 | 0.011666 | 0.011700 | 0.011531 | 0.011767 | 0.011531 |
| 0.011728 | 0.011620 | 0.011777 | 0.011451 | 0.011471 | 0.011502 | 0.011375 |
| 0.012011 | 0.011416 | 0.011513 | 0.011700 | 0.011767 | 0.011464 | 0.011599 |
| 0.011599 | 0.011565 | 0.011632 | 0.011531 | 0.011633 | 0.011531 | 0.011565 |
| 0.011531 | 0.011565 | 0.011835 | 0.011700 | 0.011599 | 0.011565 | 0.011498 |
| 0.011464 | 0.011397 | 0.011531 | 0.011498 | 0.011431 | 0.011397 | 0.011330 |
| 0.011430 | 0.011498 | 0.011498 | 0.011498 | 0.011532 | 0.011531 | 0.011534 |
| 0.011602 | 0.011531 | 0.011531 | 0.011420 | 0.011495 | 0.011446 | 0.011532 |
| 0.011535 | 0.011473 | 0.011540 | 0.011509 | 0.011435 | 0.011472 | 0.011500 |
| 0.011493 | 0.011544 | 0.011578 | 0.011464 | 0.011476 | 0.011599 | 0.011498 |
| 0.011566 | 0.011567 | 0.011565 | 0.011666 | 0.011599 | 0.011902 | 0.011700 |
| 0.011532 | 0.011599 | 0.011531 | 0.011565 | 0.011430 | 0.011397 | 0.011464 |
| 0.011531 | 0.011531 | 0.011498 | 0.011464 | 0.011498 | 0.011464 | 0.011565 |
| 0.011531 | 0.011632 | 0.011565 | 0.011464 | 0.011567 | 0.011666 | 0.011636 |
| 0.011666 | 0.011565 | 0.011464 | 0.011398 | 0.011531 | 0.011464 | 0.011363 |
| 0.011401 | 0.011633 | 0.011464 | 0.011666 | 0.011431 | 0.011532 | 0.011498 |
| 0.011599 | 0.011498 | 0.011531 | 0.011498 | 0.011531 | 0.011397 | 0.011531 |

|          |          |          |          |          |          |          |
|----------|----------|----------|----------|----------|----------|----------|
| 0.011565 | 0.011498 | 0.011565 | 0.011498 | 0.011531 | 0.011565 | 0.011767 |
| 0.011633 | 0.011565 | 0.011633 | 0.011667 | 0.011633 | 0.011531 | 0.011498 |
| 0.011466 | 0.011747 | 0.011656 | 0.011438 | 0.011639 | 0.011402 | 0.011493 |
| 0.011639 | 0.011537 | 0.011700 | 0.011902 | 0.011608 | 0.011767 | 0.011734 |
| 0.011599 | 0.011835 | 0.011666 | 0.011432 | 0.011523 | 0.011565 | 0.011637 |
| 0.011734 | 0.011635 | 0.011772 | 0.011807 | 0.011767 | 0.011835 | 0.011876 |
| 0.011671 | 0.011809 | 0.011705 | 0.011705 | 0.011937 | 0.011430 | 0.011567 |
| 0.011599 | 0.011531 | 0.011430 | 0.011430 | 0.011498 | 0.011498 | 0.011565 |
| 0.011498 | 0.011565 | 0.011464 | 0.011498 | 0.011498 | 0.011498 | 0.011498 |
| 0.011498 | 0.011666 | 0.011565 | 0.011599 | 0.011397 | 0.011498 | 0.011532 |
| 0.011531 | 0.011498 | 0.011565 | 0.011532 | 0.011464 | 0.011464 | 0.011464 |
| 0.011666 | 0.011565 | 0.011632 | 0.011430 | 0.011531 | 0.011633 | 0.011464 |
| 0.011464 | 0.011531 | 0.011498 | 0.011666 | 0.011464 | 0.011330 | 0.011464 |
| 0.011397 | 0.011498 | 0.011498 | 0.011430 | 0.011430 | 0.011599 | 0.011531 |
| 0.011430 | 0.011531 | 0.011397 | 0.011430 | 0.011565 | 0.011431 | 0.011464 |
| 0.011431 | 0.011565 | 0.011498 | 0.011397 | 0.011464 | 0.011397 | 0.011565 |
| 0.011609 | 0.011464 | 0.011498 | 0.011599 | 0.011565 | 0.011498 | 0.011531 |
| 0.011464 | 0.011801 | 0.011397 | 0.011599 | 0.011397 | 0.011397 | 0.011397 |
| 0.011632 | 0.011566 | 0.011532 | 0.011599 | 0.011430 | 0.011565 | 0.011397 |
| 0.011464 | 0.011464 | 0.011498 | 0.011599 | 0.011498 | 0.011599 | 0.011666 |
| 0.011666 | 0.011633 | 0.011531 | 0.011633 | 0.011599 | 0.011464 | 0.011430 |
| 0.011464 | 0.011464 | 0.011532 | 0.011397 | 0.011430 | 0.011599 | 0.011464 |
| 0.011430 | 0.011498 | 0.011632 | 0.011599 | 0.011565 | 0.011498 | 0.011498 |
| 0.011565 | 0.011498 | 0.011599 | 0.011464 | 0.011599 | 0.011700 | 0.011666 |
| 0.011498 | 0.011633 | 0.011509 | 0.017974 | 0.011387 | 0.011672 | 0.011583 |
| 0.011545 | 0.011588 | 0.011689 | 0.011524 | 0.011609 | 0.011613 | 0.011668 |
| 0.011250 | 0.011426 | 0.011450 | 0.011563 | 0.011450 | 0.011504 | 0.011533 |
| 0.011436 | 0.011395 | 0.011394 | 0.011259 | 0.011633 | 0.011666 | 0.011670 |
| 0.011508 | 0.011632 | 0.011632 | 0.011531 | 0.011532 | 0.011532 | 0.011532 |
| 0.011565 | 0.011498 | 0.011531 | 0.011565 | 0.011532 | 0.011464 | 0.011498 |
| 0.011498 | 0.011565 | 0.011464 | 0.011565 | 0.011599 | 0.011632 | 0.011531 |
| 0.011498 | 0.011464 | 0.011599 | 0.011599 | 0.011599 | 0.011566 | 0.011666 |
| 0.011430 | 0.011430 | 0.011464 | 0.011565 | 0.011430 | 0.011666 | 0.011666 |
| 0.011700 | 0.011700 | 0.011632 | 0.011734 | 0.011633 | 0.011736 | 0.011565 |
| 0.011565 | 0.011632 | 0.011666 | 0.011430 | 0.011565 | 0.011531 | 0.011498 |
| 0.011633 | 0.011632 | 0.011666 | 0.011633 | 0.011533 | 0.011734 | 0.011700 |
| 0.011570 | 0.011464 | 0.011565 | 0.011666 | 0.011565 | 0.011633 | 0.011734 |
| 0.011902 | 0.011608 | 0.011767 | 0.011734 | 0.011599 | 0.011835 | 0.011464 |
| 0.011567 | 0.011532 | 0.011498 | 0.011498 | 0.011565 | 0.011464 | 0.011565 |
| 0.011599 | 0.011632 | 0.011531 | 0.011498 | 0.011464 | 0.011599 | 0.011599 |
| 0.011599 | 0.011566 | 0.011700 | 0.011633 | 0.012207 | 0.011669 | 0.011589 |
| 0.011659 | 0.011617 | 0.011730 | 0.011616 | 0.011727 | 0.011648 | 0.011648 |
| 0.012128 | 0.011511 | 0.011644 | 0.011580 | 0.011854 | 0.011742 | 0.011811 |
| 0.012151 | 0.011589 | 0.011569 | 0.011565 | 0.011565 | 0.011330 | 0.011535 |
| 0.011430 | 0.011464 | 0.011599 | 0.011565 | 0.011569 | 0.011430 | 0.011128 |
| 0.011531 | 0.011464 | 0.011498 | 0.011531 | 0.011430 | 0.011498 | 0.011397 |
| 0.011464 | 0.011498 | 0.011464 | 0.011430 | 0.011531 | 0.011464 | 0.011498 |
| 0.011430 | 0.011430 | 0.011498 | 0.011532 | 0.011430 | 0.011632 | 0.011666 |
| 0.011565 | 0.011565 | 0.011565 | 0.011565 | 0.011498 | 0.011633 | 0.011531 |
| 0.011270 | 0.011498 | 0.011464 | 0.011434 | 0.011599 | 0.011599 | 0.011599 |
| 0.011599 | 0.011532 | 0.011498 | 0.011532 | 0.011632 | 0.011632 | 0.011565 |
| 0.011565 | 0.011700 | 0.011599 | 0.011599 | 0.011801 | 0.011801 | 0.011666 |
| 0.011498 | 0.011565 | 0.011599 | 0.011734 | 0.011566 | 0.011599 | 0.011565 |
| 0.011599 | 0.011464 | 0.011464 | 0.011767 | 0.011767 | 0.011734 | 0.011531 |
| 0.011633 | 0.011700 | 0.011565 | 0.011633 | 0.011599 | 0.011464 | 0.011532 |
| 0.011565 | 0.011531 | 0.011464 | 0.011700 | 0.011531 | 0.011632 | 0.011666 |
| 0.011498 | 0.011673 | 0.011666 | 0.011467 | 0.011342 | 0.011571 | 0.011318 |
| 0.011445 | 0.011255 | 0.011482 | 0.011551 | 0.011499 | 0.011518 | 0.011432 |
| 0.011417 | 0.011323 | 0.011505 | 0.011324 | 0.011383 | 0.011529 | 0.011668 |
| 0.011663 | 0.011572 | 0.011553 | 0.011553 | 0.011499 | 0.011430 | 0.011431 |



|          |          |          |          |          |          |          |
|----------|----------|----------|----------|----------|----------|----------|
| 0.011498 | 0.011498 | 0.011670 | 0.011468 | 0.011740 | 0.011769 | 0.011531 |
| 0.011532 | 0.011599 | 0.011531 | 0.011565 | 0.011430 | 0.011397 | 0.011464 |
| 0.011531 | 0.011531 | 0.011498 | 0.011464 | 0.011498 | 0.011464 | 0.011565 |
| 0.011550 | 0.011551 | 0.011472 | 0.011575 | 0.011711 | 0.011676 | 0.011607 |
| 0.011675 | 0.011599 | 0.011393 | 0.011385 | 0.011535 | 0.011705 | 0.011706 |
| 0.011498 | 0.011569 | 0.011802 | 0.011771 | 0.011700 | 0.011734 | 0.011666 |
| 0.011599 | 0.011666 | 0.011666 | 0.011565 | 0.011869 | 0.011734 | 0.011801 |
| 0.011835 | 0.011632 | 0.011539 | 0.011616 | 0.011498 | 0.011666 | 0.011666 |
| 0.011701 | 0.011733 | 0.011734 | 0.011734 | 0.011887 | 0.011868 | 0.011478 |
| 0.011365 | 0.011373 | 0.011470 | 0.011435 | 0.011471 | 0.011397 | 0.011435 |
| 0.011507 | 0.011280 | 0.011394 | 0.011511 | 0.011532 | 0.011609 | 0.011498 |
| 0.011464 | 0.011397 | 0.011531 | 0.011498 | 0.011431 | 0.011397 | 0.011330 |
| 0.011430 | 0.011498 | 0.011498 | 0.011498 | 0.011532 | 0.011531 | 0.011534 |
| 0.011602 | 0.011531 | 0.011531 | 0.011499 | 0.011430 | 0.011431 | 0.011498 |
| 0.011498 | 0.011670 | 0.011468 | 0.011740 | 0.011769 | 0.011531 | 0.011734 |
| 0.011666 | 0.011666 | 0.011501 | 0.011618 | 0.011617 | 0.011641 | 0.011411 |
| 0.011680 | 0.011698 | 0.011612 | 0.011571 | 0.011464 | 0.011666 | 0.011531 |
| 0.011632 | 0.011565 | 0.011464 | 0.011567 | 0.011666 | 0.011636 | 0.011565 |
| 0.011464 | 0.011398 | 0.011531 | 0.011464 | 0.011363 | 0.011401 | 0.011633 |
| 0.011565 | 0.011498 | 0.011531 | 0.011565 | 0.011532 | 0.011464 | 0.011363 |
| 0.011531 | 0.011565 | 0.011565 | 0.011498 | 0.011565 | 0.011801 | 0.011397 |
| 0.011498 | 0.011633 | 0.011498 | 0.011531 | 0.011498 | 0.011599 | 0.011532 |
| 0.011285 | 0.011400 | 0.011361 | 0.011423 | 0.011508 | 0.011419 | 0.011353 |
| 0.011323 | 0.011128 | 0.011094 | 0.011196 | 0.000000 | 0.011196 | 0.011329 |
| 0.011229 | 0.011297 | 0.011229 | 0.011607 | 0.011329 | 0.012206 | 0.011363 |
| 0.012105 | 0.011869 | 0.012006 | 0.012342 | 0.011599 | 0.011363 | 0.011262 |
| 0.012105 | 0.011465 | 0.011296 | 0.011195 | 0.011262 | 0.011262 | 0.011298 |
| 0.011128 | 0.011128 | 0.011195 | 0.011161 | 0.011801 | 0.011869 | 0.011869 |
| 0.011769 | 0.011869 | 0.011971 | 0.011737 | 0.012241 | 0.012247 | 0.012308 |
| 0.012309 | 0.012343 | 0.012289 | 0.012309 | 0.012308 | 0.011599 | 0.011835 |
| 0.011903 | 0.012375 | 0.011908 | 0.011936 | 0.011701 | 0.011468 | 0.011363 |
| 0.011330 | 0.011329 | 0.011801 | 0.011802 | 0.011941 | 0.011633 | 0.011330 |
| S796     | 0.012008 | 0.012008 | 0.011602 | 0.011534 | 0.011534 | 0.011601 |
| 0.011745 | 0.011642 | 0.011534 | 0.011601 | 0.011635 | 0.011636 | 0.011601 |
| 0.011568 | 0.011805 | 0.011534 | 0.011568 | 0.011703 | 0.011669 | 0.011635 |
| 0.011601 | 0.011635 | 0.011466 | 0.011568 | 0.011602 | 0.011601 | 0.011711 |
| 0.011602 | 0.011635 | 0.011534 | 0.011500 | 0.011669 | 0.011669 | 0.011703 |
| 0.011669 | 0.011771 | 0.011669 | 0.011669 | 0.011635 | 0.011669 | 0.011838 |
| 0.011534 | 0.011669 | 0.011635 | 0.011635 | 0.011669 | 0.011703 | 0.011703 |
| 0.011669 | 0.011771 | 0.011704 | 0.011737 | 0.011601 | 0.011872 | 0.011601 |
| 0.011635 | 0.011669 | 0.011771 | 0.011872 | 0.011771 | 0.011669 | 0.011771 |
| 0.011703 | 0.011737 | 0.011635 | 0.011906 | 0.011873 | 0.011669 | 0.011737 |
| 0.011635 | 0.011703 | 0.011703 | 0.011737 | 0.011669 | 0.011703 | 0.011703 |
| 0.011601 | 0.011601 | 0.011601 | 0.011635 | 0.011669 | 0.011703 | 0.011771 |
| 0.011703 | 0.011669 | 0.011737 | 0.011601 | 0.011703 | 0.011601 | 0.011635 |
| 0.011838 | 0.011771 | 0.011805 | 0.011839 | 0.011669 | 0.011838 | 0.011669 |
| 0.011877 | 0.011771 | 0.011929 | 0.011608 | 0.011620 | 0.011650 | 0.011533 |
| 0.012158 | 0.011620 | 0.011678 | 0.011838 | 0.011872 | 0.011601 | 0.011737 |
| 0.011737 | 0.011703 | 0.011771 | 0.011669 | 0.011737 | 0.011669 | 0.011703 |
| 0.011669 | 0.011669 | 0.011940 | 0.011838 | 0.011737 | 0.011703 | 0.011635 |
| 0.011601 | 0.011534 | 0.011669 | 0.011601 | 0.011568 | 0.011534 | 0.011466 |
| 0.011568 | 0.011635 | 0.011635 | 0.011635 | 0.011669 | 0.011669 | 0.011673 |
| 0.011741 | 0.011669 | 0.011669 | 0.011567 | 0.011606 | 0.011590 | 0.011669 |
| 0.011674 | 0.011614 | 0.011688 | 0.011651 | 0.011573 | 0.011612 | 0.011638 |
| 0.011640 | 0.011650 | 0.011719 | 0.011602 | 0.011617 | 0.011738 | 0.011636 |
| 0.011704 | 0.011705 | 0.011703 | 0.011771 | 0.011737 | 0.012042 | 0.011839 |
| 0.011669 | 0.011737 | 0.011669 | 0.011703 | 0.011568 | 0.011534 | 0.011568 |
| 0.011669 | 0.011669 | 0.011601 | 0.011601 | 0.011635 | 0.011601 | 0.011703 |
| 0.011669 | 0.011771 | 0.011703 | 0.011601 | 0.011705 | 0.011805 | 0.011775 |
| 0.011805 | 0.011703 | 0.011601 | 0.011536 | 0.011669 | 0.011601 | 0.011500 |

|          |          |          |          |          |          |          |
|----------|----------|----------|----------|----------|----------|----------|
| 0.011539 | 0.011771 | 0.011601 | 0.011805 | 0.011568 | 0.011669 | 0.011635 |
| 0.011737 | 0.011635 | 0.011669 | 0.011635 | 0.011669 | 0.011534 | 0.011635 |
| 0.011703 | 0.011635 | 0.011703 | 0.011635 | 0.011669 | 0.011703 | 0.011872 |
| 0.011771 | 0.011703 | 0.011771 | 0.011805 | 0.011771 | 0.011669 | 0.011635 |
| 0.011603 | 0.011871 | 0.011798 | 0.011542 | 0.011778 | 0.011541 | 0.011652 |
| 0.011779 | 0.011677 | 0.011838 | 0.012008 | 0.011748 | 0.011906 | 0.011873 |
| 0.011737 | 0.011940 | 0.011813 | 0.011600 | 0.011653 | 0.011703 | 0.011776 |
| 0.011872 | 0.011774 | 0.011912 | 0.011879 | 0.011838 | 0.011974 | 0.012016 |
| 0.011776 | 0.011881 | 0.011845 | 0.011844 | 0.012077 | 0.011568 | 0.011705 |
| 0.011737 | 0.011635 | 0.011534 | 0.011568 | 0.011635 | 0.011635 | 0.011703 |
| 0.011635 | 0.011703 | 0.011601 | 0.011635 | 0.011635 | 0.011635 | 0.011635 |
| 0.011635 | 0.011805 | 0.011703 | 0.011737 | 0.011534 | 0.011635 | 0.011669 |
| 0.011669 | 0.011635 | 0.011703 | 0.011669 | 0.011601 | 0.011601 | 0.011601 |
| 0.011805 | 0.011703 | 0.011771 | 0.011568 | 0.011669 | 0.011737 | 0.011601 |
| 0.011601 | 0.011635 | 0.011635 | 0.011805 | 0.011601 | 0.011466 | 0.011601 |
| 0.011534 | 0.011635 | 0.011635 | 0.011568 | 0.011568 | 0.011737 | 0.011669 |
| 0.011568 | 0.011669 | 0.011534 | 0.011568 | 0.011703 | 0.011568 | 0.011601 |
| 0.011568 | 0.011703 | 0.011636 | 0.011534 | 0.011602 | 0.011534 | 0.011703 |
| 0.011750 | 0.011601 | 0.011635 | 0.011737 | 0.011703 | 0.011635 | 0.011669 |
| 0.011601 | 0.011872 | 0.011534 | 0.011703 | 0.011534 | 0.011534 | 0.011534 |
| 0.011737 | 0.011703 | 0.011635 | 0.011737 | 0.011568 | 0.011703 | 0.011534 |
| 0.011601 | 0.011601 | 0.011635 | 0.011703 | 0.011635 | 0.011737 | 0.011805 |
| 0.011805 | 0.011771 | 0.011669 | 0.011771 | 0.011737 | 0.011601 | 0.011568 |
| 0.011601 | 0.011601 | 0.011635 | 0.011534 | 0.011568 | 0.011703 | 0.011601 |
| 0.011568 | 0.011601 | 0.011771 | 0.011737 | 0.011669 | 0.011635 | 0.011636 |
| 0.011703 | 0.011635 | 0.011737 | 0.011601 | 0.011737 | 0.011838 | 0.011805 |
| 0.011635 | 0.011737 | 0.011647 | 0.018125 | 0.011649 | 0.011795 | 0.011724 |
| 0.011684 | 0.011729 | 0.011846 | 0.011698 | 0.011776 | 0.011752 | 0.011850 |
| 0.011440 | 0.011611 | 0.011607 | 0.011689 | 0.011607 | 0.011653 | 0.011706 |
| 0.011623 | 0.011544 | 0.011542 | 0.011391 | 0.011771 | 0.011805 | 0.011810 |
| 0.011649 | 0.011771 | 0.011737 | 0.011669 | 0.011669 | 0.011670 | 0.011670 |
| 0.011703 | 0.011635 | 0.011669 | 0.011703 | 0.011669 | 0.011601 | 0.011635 |
| 0.011635 | 0.011669 | 0.011568 | 0.011669 | 0.011737 | 0.011771 | 0.011669 |
| 0.011635 | 0.011601 | 0.011737 | 0.011737 | 0.011737 | 0.011704 | 0.011805 |
| 0.011568 | 0.011568 | 0.011601 | 0.011703 | 0.011568 | 0.011805 | 0.011805 |
| 0.011838 | 0.011838 | 0.011737 | 0.011872 | 0.011771 | 0.011875 | 0.011703 |
| 0.011703 | 0.011771 | 0.011805 | 0.011568 | 0.011669 | 0.011635 | 0.011635 |
| 0.011771 | 0.011771 | 0.011805 | 0.011771 | 0.011671 | 0.011838 | 0.011838 |
| 0.011709 | 0.011601 | 0.011703 | 0.011805 | 0.011703 | 0.011771 | 0.011838 |
| 0.012008 | 0.011748 | 0.011906 | 0.011873 | 0.011737 | 0.011940 | 0.011602 |
| 0.011705 | 0.011669 | 0.011635 | 0.011635 | 0.011669 | 0.011568 | 0.011669 |
| 0.011737 | 0.011771 | 0.011669 | 0.011635 | 0.011601 | 0.011737 | 0.011737 |
| 0.011737 | 0.011704 | 0.011838 | 0.011771 | 0.012348 | 0.011816 | 0.011734 |
| 0.011804 | 0.011759 | 0.011875 | 0.011724 | 0.011872 | 0.011790 | 0.011790 |
| 0.012272 | 0.011653 | 0.011785 | 0.011722 | 0.011997 | 0.011883 | 0.011883 |
| 0.012294 | 0.011744 | 0.011708 | 0.011703 | 0.011703 | 0.011466 | 0.011673 |
| 0.011568 | 0.011601 | 0.011669 | 0.011635 | 0.011707 | 0.011568 | 0.011263 |
| 0.011635 | 0.011601 | 0.011635 | 0.011635 | 0.011568 | 0.011635 | 0.011534 |
| 0.011601 | 0.011635 | 0.011601 | 0.011568 | 0.011669 | 0.011601 | 0.011635 |
| 0.011568 | 0.011568 | 0.011635 | 0.011669 | 0.011568 | 0.011771 | 0.011805 |
| 0.011703 | 0.011703 | 0.011703 | 0.011703 | 0.011635 | 0.011771 | 0.011669 |
| 0.011411 | 0.011602 | 0.011602 | 0.011573 | 0.011737 | 0.011703 | 0.011737 |
| 0.011737 | 0.011669 | 0.011635 | 0.011669 | 0.011771 | 0.011771 | 0.011703 |
| 0.011703 | 0.011805 | 0.011737 | 0.011737 | 0.011906 | 0.011906 | 0.011805 |
| 0.011601 | 0.011703 | 0.011737 | 0.011873 | 0.011704 | 0.011737 | 0.011703 |
| 0.011737 | 0.011568 | 0.011568 | 0.011906 | 0.011906 | 0.011872 | 0.011669 |
| 0.011771 | 0.011838 | 0.011669 | 0.011771 | 0.011703 | 0.011601 | 0.011669 |
| 0.011703 | 0.011669 | 0.011568 | 0.011838 | 0.011669 | 0.011771 | 0.011805 |
| 0.011635 | 0.011813 | 0.011805 | 0.011629 | 0.011568 | 0.011676 | 0.011473 |
| 0.011610 | 0.011333 | 0.011623 | 0.011730 | 0.011695 | 0.011722 | 0.011644 |

|          |          |          |          |          |          |          |
|----------|----------|----------|----------|----------|----------|----------|
| 0.011621 | 0.011587 | 0.011728 | 0.011589 | 0.011599 | 0.011730 | 0.011832 |
| 0.011815 | 0.011729 | 0.011695 | 0.011694 | 0.011637 | 0.011568 | 0.011568 |
| 0.011635 | 0.011636 | 0.011810 | 0.011607 | 0.011880 | 0.011915 | 0.011669 |
| 0.011669 | 0.011737 | 0.011669 | 0.011703 | 0.011568 | 0.011534 | 0.011568 |
| 0.011669 | 0.011669 | 0.011601 | 0.011601 | 0.011635 | 0.011601 | 0.011703 |
| 0.011693 | 0.011694 | 0.011612 | 0.011681 | 0.011853 | 0.011817 | 0.011748 |
| 0.011815 | 0.011670 | 0.011544 | 0.011532 | 0.011674 | 0.011845 | 0.011812 |
| 0.011636 | 0.011708 | 0.011942 | 0.011911 | 0.011839 | 0.011873 | 0.011805 |
| 0.011737 | 0.011805 | 0.011804 | 0.011703 | 0.012008 | 0.011872 | 0.011940 |
| 0.011974 | 0.011742 | 0.011679 | 0.011758 | 0.011635 | 0.011805 | 0.011805 |
| 0.011806 | 0.011872 | 0.011872 | 0.011872 | 0.012051 | 0.012008 | 0.011620 |
| 0.011503 | 0.011514 | 0.011609 | 0.011574 | 0.011611 | 0.011549 | 0.011574 |
| 0.011648 | 0.011458 | 0.011541 | 0.011664 | 0.011670 | 0.011749 | 0.011635 |
| 0.011601 | 0.011534 | 0.011669 | 0.011601 | 0.011568 | 0.011534 | 0.011466 |
| 0.011568 | 0.011635 | 0.011635 | 0.011635 | 0.011669 | 0.011669 | 0.011673 |
| 0.011741 | 0.011669 | 0.011669 | 0.011637 | 0.011568 | 0.011568 | 0.011635 |
| 0.011636 | 0.011810 | 0.011607 | 0.011880 | 0.011915 | 0.011669 | 0.011838 |
| 0.011805 | 0.011805 | 0.011639 | 0.011761 | 0.011725 | 0.011746 | 0.011517 |
| 0.011822 | 0.011883 | 0.011785 | 0.011711 | 0.011601 | 0.011805 | 0.011669 |
| 0.011771 | 0.011703 | 0.011601 | 0.011705 | 0.011805 | 0.011775 | 0.011703 |
| 0.011601 | 0.011536 | 0.011669 | 0.011601 | 0.011500 | 0.011539 | 0.011771 |
| 0.011703 | 0.011635 | 0.011669 | 0.011703 | 0.011669 | 0.011601 | 0.011500 |
| 0.011669 | 0.011703 | 0.011703 | 0.011635 | 0.011703 | 0.011906 | 0.011534 |
| 0.011635 | 0.011771 | 0.011635 | 0.011669 | 0.011635 | 0.011737 | 0.011703 |
| 0.011510 | 0.011570 | 0.011562 | 0.011584 | 0.011671 | 0.011563 | 0.011520 |
| 0.011533 | 0.011263 | 0.011229 | 0.011197 | 0.011196 | 0.000000 | 0.011398 |
| 0.011297 | 0.011367 | 0.011297 | 0.011675 | 0.011432 | 0.012313 | 0.011500 |
| 0.012212 | 0.011975 | 0.012112 | 0.012416 | 0.011703 | 0.011466 | 0.011398 |
| 0.012246 | 0.011568 | 0.011432 | 0.011331 | 0.011399 | 0.011399 | 0.011435 |
| 0.011263 | 0.011264 | 0.011331 | 0.011297 | 0.011907 | 0.011974 | 0.011975 |
| 0.011874 | 0.011974 | 0.012043 | 0.011840 | 0.012382 | 0.012390 | 0.012450 |
| 0.012451 | 0.012485 | 0.012428 | 0.012451 | 0.012450 | 0.011737 | 0.011974 |
| 0.012043 | 0.012517 | 0.012049 | 0.012042 | 0.011839 | 0.011606 | 0.011500 |
| 0.011466 | 0.011466 | 0.011907 | 0.011973 | 0.012053 | 0.011771 | 0.011467 |
| S797     | 0.012137 | 0.012137 | 0.011935 | 0.011699 | 0.011699 | 0.011766 |
| 0.011877 | 0.011775 | 0.011699 | 0.011733 | 0.011800 | 0.011767 | 0.011733 |
| 0.011699 | 0.011935 | 0.011665 | 0.011699 | 0.011834 | 0.011800 | 0.011766 |
| 0.011733 | 0.011766 | 0.011598 | 0.011700 | 0.011733 | 0.011766 | 0.011843 |
| 0.011733 | 0.011766 | 0.011665 | 0.011632 | 0.011834 | 0.011800 | 0.011834 |
| 0.011800 | 0.011901 | 0.011800 | 0.011800 | 0.011766 | 0.011800 | 0.011968 |
| 0.011665 | 0.011800 | 0.011766 | 0.011766 | 0.011800 | 0.011834 | 0.011834 |
| 0.011800 | 0.011901 | 0.011868 | 0.011868 | 0.011733 | 0.012069 | 0.011733 |
| 0.011766 | 0.011800 | 0.011935 | 0.012069 | 0.011901 | 0.011800 | 0.011901 |
| 0.011834 | 0.011901 | 0.011800 | 0.012036 | 0.012002 | 0.011800 | 0.011867 |
| 0.011766 | 0.011867 | 0.011834 | 0.011901 | 0.011834 | 0.011834 | 0.011834 |
| 0.011733 | 0.011766 | 0.011733 | 0.011766 | 0.011800 | 0.011834 | 0.011901 |
| 0.011834 | 0.011800 | 0.011867 | 0.011766 | 0.011834 | 0.011733 | 0.011800 |
| 0.011968 | 0.011901 | 0.011935 | 0.011968 | 0.011800 | 0.011968 | 0.011800 |
| 0.012025 | 0.011920 | 0.012079 | 0.011763 | 0.011769 | 0.011797 | 0.011690 |
| 0.012305 | 0.011670 | 0.011843 | 0.011968 | 0.012036 | 0.011766 | 0.011867 |
| 0.011867 | 0.011834 | 0.011901 | 0.011800 | 0.011901 | 0.011834 | 0.011834 |
| 0.011800 | 0.011834 | 0.012103 | 0.011968 | 0.011867 | 0.011834 | 0.011766 |
| 0.011733 | 0.011665 | 0.011800 | 0.011766 | 0.011699 | 0.011666 | 0.011598 |
| 0.011699 | 0.011766 | 0.011766 | 0.011766 | 0.011800 | 0.011800 | 0.011804 |
| 0.011873 | 0.011800 | 0.011800 | 0.011708 | 0.011784 | 0.011727 | 0.011801 |
| 0.011806 | 0.011748 | 0.011835 | 0.011785 | 0.011706 | 0.011746 | 0.011770 |
| 0.011781 | 0.011820 | 0.011853 | 0.011733 | 0.011752 | 0.011869 | 0.011767 |
| 0.011835 | 0.011836 | 0.011834 | 0.011935 | 0.011867 | 0.012171 | 0.011969 |
| 0.011800 | 0.011867 | 0.011800 | 0.011834 | 0.011699 | 0.011665 | 0.011733 |
| 0.011800 | 0.011800 | 0.011766 | 0.011733 | 0.011766 | 0.011733 | 0.011834 |

|          |          |          |          |          |          |          |
|----------|----------|----------|----------|----------|----------|----------|
| 0.011800 | 0.011901 | 0.011834 | 0.011733 | 0.011836 | 0.011935 | 0.011906 |
| 0.011935 | 0.011834 | 0.011733 | 0.011668 | 0.011800 | 0.011733 | 0.011632 |
| 0.011672 | 0.011901 | 0.011733 | 0.011935 | 0.011699 | 0.011800 | 0.011766 |
| 0.011867 | 0.011766 | 0.011800 | 0.011766 | 0.011800 | 0.011665 | 0.011800 |
| 0.011834 | 0.011766 | 0.011834 | 0.011766 | 0.011800 | 0.011834 | 0.012036 |
| 0.011901 | 0.011834 | 0.011901 | 0.011937 | 0.011901 | 0.011800 | 0.011766 |
| 0.011736 | 0.012071 | 0.011839 | 0.011712 | 0.011910 | 0.011675 | 0.011769 |
| 0.011911 | 0.011809 | 0.011968 | 0.012171 | 0.011847 | 0.012036 | 0.012002 |
| 0.011867 | 0.012103 | 0.011950 | 0.011679 | 0.011859 | 0.011834 | 0.011908 |
| 0.012002 | 0.011905 | 0.012043 | 0.012077 | 0.012036 | 0.012103 | 0.012147 |
| 0.011942 | 0.012081 | 0.011976 | 0.011975 | 0.012207 | 0.011699 | 0.011837 |
| 0.011867 | 0.011800 | 0.011699 | 0.011699 | 0.011766 | 0.011766 | 0.011834 |
| 0.011766 | 0.011834 | 0.011733 | 0.011766 | 0.011766 | 0.011766 | 0.011766 |
| 0.011766 | 0.011935 | 0.011834 | 0.011868 | 0.011665 | 0.011766 | 0.011800 |
| 0.011800 | 0.011766 | 0.011834 | 0.011800 | 0.011733 | 0.011733 | 0.011733 |
| 0.011935 | 0.011834 | 0.011901 | 0.011699 | 0.011800 | 0.011901 | 0.011733 |
| 0.011733 | 0.011800 | 0.011766 | 0.011935 | 0.011733 | 0.011598 | 0.011733 |
| 0.011665 | 0.011766 | 0.011766 | 0.011699 | 0.011699 | 0.011867 | 0.011800 |
| 0.011699 | 0.011800 | 0.011666 | 0.011699 | 0.011834 | 0.011700 | 0.011733 |
| 0.011700 | 0.011766 | 0.011767 | 0.011666 | 0.011733 | 0.011666 | 0.011834 |
| 0.011883 | 0.011733 | 0.011767 | 0.011868 | 0.011834 | 0.011766 | 0.011800 |
| 0.011733 | 0.012069 | 0.011665 | 0.011867 | 0.011665 | 0.011665 | 0.011665 |
| 0.011901 | 0.011834 | 0.011800 | 0.011867 | 0.011699 | 0.011834 | 0.011665 |
| 0.011733 | 0.011733 | 0.011766 | 0.011867 | 0.011766 | 0.011867 | 0.011935 |
| 0.011935 | 0.011901 | 0.011800 | 0.011901 | 0.011867 | 0.011733 | 0.011699 |
| 0.011733 | 0.011733 | 0.011800 | 0.011665 | 0.011699 | 0.011867 | 0.011733 |
| 0.011699 | 0.011766 | 0.011901 | 0.011867 | 0.011834 | 0.011766 | 0.011767 |
| 0.011834 | 0.011766 | 0.011867 | 0.011733 | 0.011867 | 0.011968 | 0.012002 |
| 0.011766 | 0.011901 | 0.011785 | 0.018239 | 0.011649 | 0.011978 | 0.011863 |
| 0.011822 | 0.011870 | 0.012056 | 0.011815 | 0.011940 | 0.011889 | 0.011911 |
| 0.011487 | 0.011732 | 0.011763 | 0.011856 | 0.011763 | 0.011801 | 0.011835 |
| 0.011717 | 0.011693 | 0.011691 | 0.011589 | 0.011901 | 0.011935 | 0.011941 |
| 0.011783 | 0.011901 | 0.011901 | 0.011800 | 0.011800 | 0.011801 | 0.011801 |
| 0.011834 | 0.011766 | 0.011800 | 0.011834 | 0.011800 | 0.011733 | 0.011766 |
| 0.011766 | 0.011834 | 0.011733 | 0.011834 | 0.011867 | 0.011901 | 0.011800 |
| 0.011766 | 0.011733 | 0.011868 | 0.011868 | 0.011868 | 0.011835 | 0.011935 |
| 0.011699 | 0.011699 | 0.011733 | 0.011834 | 0.011699 | 0.011935 | 0.011935 |
| 0.011968 | 0.011968 | 0.011901 | 0.012002 | 0.011901 | 0.012005 | 0.011834 |
| 0.011834 | 0.011901 | 0.011935 | 0.011699 | 0.011834 | 0.011800 | 0.011766 |
| 0.011901 | 0.011901 | 0.011935 | 0.011901 | 0.011802 | 0.012002 | 0.011968 |
| 0.011841 | 0.011733 | 0.011834 | 0.011935 | 0.011834 | 0.011901 | 0.012002 |
| 0.012171 | 0.011847 | 0.012036 | 0.012002 | 0.011867 | 0.012103 | 0.011733 |
| 0.011836 | 0.011801 | 0.011766 | 0.011766 | 0.011834 | 0.011733 | 0.011834 |
| 0.011867 | 0.011901 | 0.011800 | 0.011766 | 0.011733 | 0.011868 | 0.011868 |
| 0.011868 | 0.011835 | 0.011968 | 0.011901 | 0.012476 | 0.011955 | 0.011871 |
| 0.011941 | 0.011894 | 0.012011 | 0.011893 | 0.012007 | 0.011924 | 0.011924 |
| 0.012402 | 0.011789 | 0.011918 | 0.011857 | 0.012130 | 0.012015 | 0.012083 |
| 0.012423 | 0.011853 | 0.011839 | 0.011834 | 0.011834 | 0.011598 | 0.011805 |
| 0.011699 | 0.011733 | 0.011867 | 0.011834 | 0.011839 | 0.011699 | 0.011397 |
| 0.011800 | 0.011733 | 0.011766 | 0.011800 | 0.011699 | 0.011766 | 0.011665 |
| 0.011733 | 0.011766 | 0.011733 | 0.011699 | 0.011800 | 0.011733 | 0.011766 |
| 0.011632 | 0.011699 | 0.011766 | 0.011800 | 0.011699 | 0.011901 | 0.011935 |
| 0.011834 | 0.011834 | 0.011834 | 0.011834 | 0.011766 | 0.011901 | 0.011800 |
| 0.011548 | 0.011767 | 0.011733 | 0.011706 | 0.011868 | 0.011867 | 0.011867 |
| 0.011867 | 0.011800 | 0.011766 | 0.011800 | 0.011901 | 0.011901 | 0.011834 |
| 0.011834 | 0.011968 | 0.011868 | 0.011867 | 0.012070 | 0.012070 | 0.011935 |
| 0.011766 | 0.011834 | 0.011867 | 0.012002 | 0.011834 | 0.011868 | 0.011834 |
| 0.011867 | 0.011733 | 0.011733 | 0.012036 | 0.012036 | 0.012002 | 0.011800 |
| 0.011901 | 0.011968 | 0.011834 | 0.011901 | 0.011867 | 0.011733 | 0.011800 |
| 0.011834 | 0.011800 | 0.011733 | 0.011968 | 0.011800 | 0.011901 | 0.011935 |

|          |          |          |          |          |          |          |
|----------|----------|----------|----------|----------|----------|----------|
| 0.011834 | 0.011945 | 0.011935 | 0.011792 | 0.011681 | 0.011843 | 0.011628 |
| 0.011719 | 0.011333 | 0.011763 | 0.011864 | 0.011841 | 0.011875 | 0.011698 |
| 0.011723 | 0.011587 | 0.011784 | 0.011655 | 0.011761 | 0.011797 | 0.011993 |
| 0.011965 | 0.011887 | 0.011835 | 0.011835 | 0.011769 | 0.011699 | 0.011699 |
| 0.011766 | 0.011767 | 0.011941 | 0.011739 | 0.011977 | 0.012051 | 0.011800 |
| 0.011800 | 0.011867 | 0.011800 | 0.011834 | 0.011699 | 0.011665 | 0.011733 |
| 0.011800 | 0.011800 | 0.011766 | 0.011733 | 0.011766 | 0.011733 | 0.011834 |
| 0.011830 | 0.011831 | 0.011746 | 0.011849 | 0.011985 | 0.011950 | 0.011881 |
| 0.011947 | 0.011868 | 0.011689 | 0.011673 | 0.011806 | 0.011976 | 0.011978 |
| 0.011767 | 0.011840 | 0.012072 | 0.012042 | 0.011969 | 0.012004 | 0.011935 |
| 0.011867 | 0.011935 | 0.011935 | 0.011834 | 0.012137 | 0.012002 | 0.012070 |
| 0.012103 | 0.011917 | 0.011778 | 0.011893 | 0.011767 | 0.011935 | 0.011935 |
| 0.011970 | 0.012002 | 0.012002 | 0.012002 | 0.012123 | 0.012137 | 0.011755 |
| 0.011636 | 0.011615 | 0.011742 | 0.011707 | 0.011745 | 0.011658 | 0.011707 |
| 0.011747 | 0.011587 | 0.011680 | 0.011773 | 0.011801 | 0.011882 | 0.011766 |
| 0.011733 | 0.011665 | 0.011800 | 0.011766 | 0.011699 | 0.011666 | 0.011598 |
| 0.011699 | 0.011766 | 0.011766 | 0.011766 | 0.011800 | 0.011800 | 0.011804 |
| 0.011873 | 0.011800 | 0.011800 | 0.011769 | 0.011699 | 0.011699 | 0.011766 |
| 0.011767 | 0.011941 | 0.011739 | 0.011977 | 0.012051 | 0.011800 | 0.012002 |
| 0.011935 | 0.011935 | 0.011771 | 0.011897 | 0.011860 | 0.011845 | 0.011621 |
| 0.011921 | 0.011972 | 0.011908 | 0.011843 | 0.011733 | 0.011935 | 0.011800 |
| 0.011901 | 0.011834 | 0.011733 | 0.011836 | 0.011935 | 0.011906 | 0.011834 |
| 0.011733 | 0.011668 | 0.011800 | 0.011733 | 0.011632 | 0.011672 | 0.011901 |
| 0.011834 | 0.011766 | 0.011800 | 0.011834 | 0.011800 | 0.011733 | 0.011666 |
| 0.011800 | 0.011834 | 0.011834 | 0.011766 | 0.011834 | 0.012070 | 0.011665 |
| 0.011766 | 0.011901 | 0.011766 | 0.011800 | 0.011766 | 0.011868 | 0.011789 |
| 0.011566 | 0.011740 | 0.011612 | 0.011745 | 0.011834 | 0.011706 | 0.011604 |
| 0.011585 | 0.011396 | 0.011363 | 0.011400 | 0.011329 | 0.011398 | 0.000000 |
| 0.011296 | 0.011500 | 0.011296 | 0.011812 | 0.011598 | 0.012474 | 0.011633 |
| 0.012373 | 0.012139 | 0.012275 | 0.012544 | 0.011867 | 0.011632 | 0.011531 |
| 0.012374 | 0.011735 | 0.011565 | 0.011464 | 0.011531 | 0.011531 | 0.011568 |
| 0.011396 | 0.011399 | 0.011464 | 0.011430 | 0.012070 | 0.012137 | 0.012138 |
| 0.012038 | 0.012137 | 0.012241 | 0.012008 | 0.012510 | 0.012518 | 0.012578 |
| 0.012578 | 0.012612 | 0.012562 | 0.012578 | 0.012578 | 0.011867 | 0.012104 |
| 0.012172 | 0.012643 | 0.012180 | 0.012205 | 0.012441 | 0.011706 | 0.011632 |
| 0.011598 | 0.011598 | 0.012070 | 0.012090 | 0.012223 | 0.011935 | 0.011599 |
| S798     | 0.012036 | 0.012036 | 0.011632 | 0.011598 | 0.011598 | 0.011666 |
| 0.011775 | 0.011707 | 0.011598 | 0.011632 | 0.011699 | 0.011667 | 0.011632 |
| 0.011598 | 0.011834 | 0.011565 | 0.011598 | 0.011733 | 0.011699 | 0.011666 |
| 0.011632 | 0.011666 | 0.011498 | 0.011599 | 0.011633 | 0.011666 | 0.011741 |
| 0.011632 | 0.011666 | 0.011565 | 0.011531 | 0.011733 | 0.011699 | 0.011733 |
| 0.011699 | 0.011733 | 0.011699 | 0.011699 | 0.011666 | 0.011699 | 0.011868 |
| 0.011565 | 0.011699 | 0.011666 | 0.011666 | 0.011699 | 0.011733 | 0.011733 |
| 0.011699 | 0.011801 | 0.011767 | 0.011767 | 0.011632 | 0.011969 | 0.011632 |
| 0.011666 | 0.011700 | 0.011834 | 0.011969 | 0.011801 | 0.011700 | 0.011800 |
| 0.011733 | 0.011801 | 0.011700 | 0.011935 | 0.011902 | 0.011699 | 0.011767 |
| 0.011666 | 0.011767 | 0.011733 | 0.011800 | 0.011733 | 0.011733 | 0.011733 |
| 0.011632 | 0.011666 | 0.011632 | 0.011666 | 0.011699 | 0.011735 | 0.011800 |
| 0.011733 | 0.011699 | 0.011767 | 0.011666 | 0.011733 | 0.011632 | 0.011699 |
| 0.011868 | 0.011800 | 0.011834 | 0.011868 | 0.011699 | 0.011868 | 0.011699 |
| 0.011914 | 0.011808 | 0.011967 | 0.011647 | 0.011658 | 0.011687 | 0.011573 |
| 0.012196 | 0.011569 | 0.011720 | 0.011868 | 0.011935 | 0.011666 | 0.011767 |
| 0.011767 | 0.011733 | 0.011800 | 0.011699 | 0.011801 | 0.011733 | 0.011733 |
| 0.011699 | 0.011733 | 0.012003 | 0.011868 | 0.011767 | 0.011733 | 0.011666 |
| 0.011632 | 0.011565 | 0.011699 | 0.011666 | 0.011599 | 0.011565 | 0.011498 |
| 0.011599 | 0.011666 | 0.011666 | 0.011666 | 0.011700 | 0.011699 | 0.011703 |
| 0.011772 | 0.011699 | 0.011699 | 0.011600 | 0.011675 | 0.011621 | 0.011700 |
| 0.011704 | 0.011645 | 0.011725 | 0.011682 | 0.011604 | 0.011643 | 0.011668 |
| 0.011672 | 0.011715 | 0.011750 | 0.011632 | 0.011648 | 0.011767 | 0.011666 |
| 0.011734 | 0.011735 | 0.011733 | 0.011834 | 0.011767 | 0.012070 | 0.011834 |

|          |          |          |          |          |          |          |
|----------|----------|----------|----------|----------|----------|----------|
| 0.011700 | 0.011767 | 0.011699 | 0.011733 | 0.011598 | 0.011565 | 0.011632 |
| 0.011699 | 0.011699 | 0.011666 | 0.011632 | 0.011666 | 0.011632 | 0.011733 |
| 0.011699 | 0.011800 | 0.011733 | 0.011632 | 0.011735 | 0.011834 | 0.011805 |
| 0.011834 | 0.011733 | 0.011632 | 0.011567 | 0.011699 | 0.011632 | 0.011531 |
| 0.011571 | 0.011801 | 0.011632 | 0.011834 | 0.011599 | 0.011700 | 0.011666 |
| 0.011767 | 0.011666 | 0.011699 | 0.011666 | 0.011699 | 0.011565 | 0.011699 |
| 0.011733 | 0.011666 | 0.011733 | 0.011666 | 0.011699 | 0.011733 | 0.011969 |
| 0.011801 | 0.011733 | 0.011801 | 0.011837 | 0.011801 | 0.011699 | 0.011666 |
| 0.011635 | 0.011950 | 0.011792 | 0.011610 | 0.011808 | 0.011573 | 0.011690 |
| 0.011809 | 0.011707 | 0.011868 | 0.012070 | 0.011779 | 0.011935 | 0.011902 |
| 0.011767 | 0.012002 | 0.011844 | 0.011597 | 0.011731 | 0.011733 | 0.011806 |
| 0.011902 | 0.011803 | 0.011942 | 0.011976 | 0.011935 | 0.012003 | 0.012045 |
| 0.011840 | 0.011977 | 0.011874 | 0.011874 | 0.012105 | 0.011598 | 0.011735 |
| 0.011767 | 0.011699 | 0.011598 | 0.011598 | 0.011666 | 0.011666 | 0.011733 |
| 0.011666 | 0.011733 | 0.011632 | 0.011666 | 0.011666 | 0.011666 | 0.011666 |
| 0.011666 | 0.011834 | 0.011733 | 0.011767 | 0.011565 | 0.011666 | 0.011700 |
| 0.011699 | 0.011666 | 0.011733 | 0.011700 | 0.011632 | 0.011632 | 0.011632 |
| 0.011834 | 0.011699 | 0.011800 | 0.011598 | 0.011699 | 0.011801 | 0.011632 |
| 0.011632 | 0.011699 | 0.011666 | 0.011834 | 0.011632 | 0.011498 | 0.011632 |
| 0.011565 | 0.011666 | 0.011666 | 0.011598 | 0.011598 | 0.011767 | 0.011699 |
| 0.011598 | 0.011699 | 0.011565 | 0.011598 | 0.011733 | 0.011599 | 0.011632 |
| 0.011599 | 0.011733 | 0.011666 | 0.011565 | 0.011632 | 0.011565 | 0.011733 |
| 0.011780 | 0.011632 | 0.011666 | 0.011767 | 0.011733 | 0.011666 | 0.011699 |
| 0.011632 | 0.011969 | 0.011565 | 0.011767 | 0.011565 | 0.011565 | 0.011565 |
| 0.011800 | 0.011734 | 0.011700 | 0.011767 | 0.011598 | 0.011733 | 0.011565 |
| 0.011632 | 0.011632 | 0.011666 | 0.011767 | 0.011666 | 0.011767 | 0.011834 |
| 0.011834 | 0.011800 | 0.011699 | 0.011801 | 0.011767 | 0.011632 | 0.011598 |
| 0.011632 | 0.011632 | 0.011700 | 0.011565 | 0.011598 | 0.011767 | 0.011632 |
| 0.011598 | 0.011666 | 0.011800 | 0.011767 | 0.011733 | 0.011666 | 0.011666 |
| 0.011733 | 0.011666 | 0.011767 | 0.011632 | 0.011767 | 0.011868 | 0.011834 |
| 0.011666 | 0.011801 | 0.011682 | 0.018169 | 0.011585 | 0.011918 | 0.011759 |
| 0.011718 | 0.011765 | 0.011900 | 0.011641 | 0.011831 | 0.011786 | 0.011851 |
| 0.011393 | 0.011672 | 0.011646 | 0.011731 | 0.011646 | 0.011703 | 0.011706 |
| 0.011577 | 0.011582 | 0.011580 | 0.011457 | 0.011801 | 0.011834 | 0.011840 |
| 0.011679 | 0.011800 | 0.011800 | 0.011699 | 0.011733 | 0.011734 | 0.011700 |
| 0.011733 | 0.011666 | 0.011699 | 0.011733 | 0.011700 | 0.011632 | 0.011666 |
| 0.011666 | 0.011733 | 0.011632 | 0.011733 | 0.011767 | 0.011800 | 0.011699 |
| 0.011666 | 0.011632 | 0.011767 | 0.011767 | 0.011767 | 0.011734 | 0.011834 |
| 0.011598 | 0.011598 | 0.011632 | 0.011733 | 0.011598 | 0.011834 | 0.011834 |
| 0.011868 | 0.011868 | 0.011800 | 0.011901 | 0.011801 | 0.011904 | 0.011733 |
| 0.011733 | 0.011767 | 0.011834 | 0.011598 | 0.011733 | 0.011699 | 0.011666 |
| 0.011801 | 0.011801 | 0.011834 | 0.011801 | 0.011701 | 0.011901 | 0.011868 |
| 0.011739 | 0.011632 | 0.011733 | 0.011834 | 0.011733 | 0.011801 | 0.011901 |
| 0.012070 | 0.011779 | 0.011935 | 0.011902 | 0.011767 | 0.012002 | 0.011632 |
| 0.011735 | 0.011700 | 0.011666 | 0.011666 | 0.011733 | 0.011632 | 0.011733 |
| 0.011767 | 0.011800 | 0.011699 | 0.011666 | 0.011632 | 0.011767 | 0.011767 |
| 0.011767 | 0.011734 | 0.011868 | 0.011800 | 0.012374 | 0.011847 | 0.011765 |
| 0.011834 | 0.011790 | 0.011904 | 0.011789 | 0.011901 | 0.011821 | 0.011820 |
| 0.012299 | 0.011684 | 0.011816 | 0.011752 | 0.012025 | 0.011913 | 0.011980 |
| 0.012320 | 0.011776 | 0.011738 | 0.011733 | 0.011733 | 0.011498 | 0.011704 |
| 0.011598 | 0.011632 | 0.011767 | 0.011733 | 0.011738 | 0.011598 | 0.011296 |
| 0.011699 | 0.011632 | 0.011666 | 0.011699 | 0.011598 | 0.011666 | 0.011565 |
| 0.011632 | 0.011666 | 0.011632 | 0.011598 | 0.011699 | 0.011632 | 0.011666 |
| 0.011598 | 0.011598 | 0.011666 | 0.011700 | 0.011598 | 0.011733 | 0.011834 |
| 0.011733 | 0.011733 | 0.011733 | 0.011733 | 0.011666 | 0.011801 | 0.011699 |
| 0.011444 | 0.011666 | 0.011632 | 0.011604 | 0.011767 | 0.011767 | 0.011767 |
| 0.011767 | 0.011700 | 0.011666 | 0.011700 | 0.011800 | 0.011801 | 0.011733 |
| 0.011733 | 0.011868 | 0.011767 | 0.011767 | 0.011969 | 0.011969 | 0.011834 |
| 0.011666 | 0.011733 | 0.011767 | 0.011902 | 0.011734 | 0.011767 | 0.011733 |
| 0.011767 | 0.011632 | 0.011632 | 0.011936 | 0.011935 | 0.011902 | 0.011699 |

|          |          |          |          |          |          |          |
|----------|----------|----------|----------|----------|----------|----------|
| 0.011801 | 0.011868 | 0.011733 | 0.011801 | 0.011767 | 0.011632 | 0.011700 |
| 0.011733 | 0.011699 | 0.011632 | 0.011868 | 0.011699 | 0.011800 | 0.011835 |
| 0.011666 | 0.011843 | 0.011834 | 0.011671 | 0.011569 | 0.011741 | 0.011576 |
| 0.011665 | 0.011216 | 0.011658 | 0.011776 | 0.011744 | 0.011774 | 0.011592 |
| 0.011571 | 0.011522 | 0.011673 | 0.011523 | 0.011654 | 0.011731 | 0.011872 |
| 0.011852 | 0.011769 | 0.011730 | 0.011730 | 0.011668 | 0.011598 | 0.011599 |
| 0.011632 | 0.011666 | 0.011839 | 0.011638 | 0.011909 | 0.011946 | 0.011733 |
| 0.011700 | 0.011767 | 0.011699 | 0.011733 | 0.011598 | 0.011565 | 0.011632 |
| 0.011699 | 0.011699 | 0.011666 | 0.011632 | 0.011666 | 0.011632 | 0.011733 |
| 0.011725 | 0.011725 | 0.011643 | 0.011745 | 0.011882 | 0.011847 | 0.011778 |
| 0.011844 | 0.011767 | 0.011540 | 0.011528 | 0.011704 | 0.011874 | 0.011875 |
| 0.011666 | 0.011738 | 0.011970 | 0.011940 | 0.011868 | 0.011902 | 0.011834 |
| 0.011767 | 0.011834 | 0.011834 | 0.011733 | 0.012037 | 0.011902 | 0.011969 |
| 0.012003 | 0.011810 | 0.011710 | 0.011788 | 0.011666 | 0.011834 | 0.011834 |
| 0.011870 | 0.011868 | 0.011902 | 0.011902 | 0.012084 | 0.012036 | 0.011650 |
| 0.011534 | 0.011546 | 0.011639 | 0.011604 | 0.011642 | 0.011583 | 0.011604 |
| 0.011678 | 0.011499 | 0.011584 | 0.011697 | 0.011700 | 0.011779 | 0.011666 |
| 0.011632 | 0.011565 | 0.011699 | 0.011666 | 0.011599 | 0.011565 | 0.011498 |
| 0.011599 | 0.011666 | 0.011666 | 0.011666 | 0.011700 | 0.011699 | 0.011703 |
| 0.011772 | 0.011699 | 0.011699 | 0.011668 | 0.011598 | 0.011599 | 0.011632 |
| 0.011666 | 0.011839 | 0.011638 | 0.011909 | 0.011946 | 0.011733 | 0.011901 |
| 0.011834 | 0.011834 | 0.011670 | 0.011791 | 0.011757 | 0.011743 | 0.011516 |
| 0.011819 | 0.011836 | 0.011822 | 0.011741 | 0.011632 | 0.011834 | 0.011699 |
| 0.011800 | 0.011733 | 0.011632 | 0.011735 | 0.011834 | 0.011805 | 0.011733 |
| 0.011632 | 0.011567 | 0.011699 | 0.011632 | 0.011531 | 0.011571 | 0.011801 |
| 0.011733 | 0.011666 | 0.011699 | 0.011733 | 0.011700 | 0.011632 | 0.011565 |
| 0.011699 | 0.011733 | 0.011733 | 0.011666 | 0.011733 | 0.011969 | 0.011565 |
| 0.011666 | 0.011801 | 0.011666 | 0.011699 | 0.011666 | 0.011767 | 0.011661 |
| 0.011398 | 0.011613 | 0.011512 | 0.011625 | 0.011712 | 0.011599 | 0.011479 |
| 0.011481 | 0.011296 | 0.011262 | 0.011298 | 0.011229 | 0.011297 | 0.011296 |
| 0.000000 | 0.011398 | 0.011195 | 0.011710 | 0.011497 | 0.012374 | 0.011532 |
| 0.012239 | 0.012039 | 0.012174 | 0.012445 | 0.011767 | 0.011531 | 0.011430 |
| 0.012273 | 0.011803 | 0.011464 | 0.011363 | 0.011430 | 0.011430 | 0.011467 |
| 0.011296 | 0.011298 | 0.011363 | 0.011329 | 0.011970 | 0.012037 | 0.012037 |
| 0.011937 | 0.012037 | 0.012140 | 0.011907 | 0.012409 | 0.012417 | 0.012476 |
| 0.012476 | 0.012510 | 0.012462 | 0.012477 | 0.012479 | 0.011767 | 0.012003 |
| 0.012070 | 0.012576 | 0.012079 | 0.012104 | 0.012578 | 0.011638 | 0.011531 |
| 0.011498 | 0.011498 | 0.011969 | 0.012007 | 0.012117 | 0.011834 | 0.011499 |
| S799     | 0.012075 | 0.012075 | 0.011703 | 0.011669 | 0.011669 | 0.011737 |
| 0.011779 | 0.011710 | 0.011669 | 0.011669 | 0.011737 | 0.011704 | 0.011669 |
| 0.011635 | 0.011872 | 0.011601 | 0.011635 | 0.011770 | 0.011737 | 0.011703 |
| 0.011669 | 0.011703 | 0.011534 | 0.011636 | 0.011670 | 0.011703 | 0.011745 |
| 0.011669 | 0.011703 | 0.011601 | 0.011567 | 0.011770 | 0.011737 | 0.011770 |
| 0.011737 | 0.011838 | 0.011737 | 0.011737 | 0.011669 | 0.011737 | 0.011906 |
| 0.011601 | 0.011737 | 0.011703 | 0.011703 | 0.011737 | 0.011770 | 0.011770 |
| 0.011737 | 0.011838 | 0.011805 | 0.011804 | 0.011669 | 0.012007 | 0.011669 |
| 0.011703 | 0.011737 | 0.011838 | 0.012007 | 0.011838 | 0.011737 | 0.011838 |
| 0.011770 | 0.011838 | 0.011737 | 0.011973 | 0.011940 | 0.011703 | 0.011804 |
| 0.011703 | 0.011804 | 0.011770 | 0.011838 | 0.011770 | 0.011770 | 0.011770 |
| 0.011669 | 0.011703 | 0.011669 | 0.011703 | 0.011737 | 0.011772 | 0.011838 |
| 0.011770 | 0.011737 | 0.011804 | 0.011703 | 0.011770 | 0.011669 | 0.011737 |
| 0.011906 | 0.011838 | 0.011872 | 0.011906 | 0.011737 | 0.011906 | 0.011737 |
| 0.011919 | 0.011813 | 0.011972 | 0.011611 | 0.011699 | 0.011727 | 0.011576 |
| 0.012239 | 0.011625 | 0.011724 | 0.011906 | 0.011974 | 0.011703 | 0.011804 |
| 0.011804 | 0.011770 | 0.011838 | 0.011737 | 0.011838 | 0.011770 | 0.011770 |
| 0.011737 | 0.011770 | 0.012041 | 0.011906 | 0.011770 | 0.011771 | 0.011703 |
| 0.011669 | 0.011601 | 0.011669 | 0.011703 | 0.011635 | 0.011601 | 0.011534 |
| 0.011635 | 0.011703 | 0.011703 | 0.011703 | 0.011737 | 0.011737 | 0.011741 |
| 0.011810 | 0.011737 | 0.011737 | 0.011602 | 0.011715 | 0.011659 | 0.011737 |
| 0.011742 | 0.011683 | 0.011766 | 0.011720 | 0.011641 | 0.011680 | 0.011705 |

|          |          |          |          |          |          |          |
|----------|----------|----------|----------|----------|----------|----------|
| 0.011711 | 0.011753 | 0.011788 | 0.011669 | 0.011687 | 0.011805 | 0.011703 |
| 0.011771 | 0.011773 | 0.011771 | 0.011838 | 0.011804 | 0.012109 | 0.011872 |
| 0.011737 | 0.011804 | 0.011737 | 0.011771 | 0.011635 | 0.011601 | 0.011669 |
| 0.011737 | 0.011737 | 0.011703 | 0.011669 | 0.011703 | 0.011669 | 0.011771 |
| 0.011737 | 0.011838 | 0.011771 | 0.011669 | 0.011773 | 0.011872 | 0.011843 |
| 0.011872 | 0.011771 | 0.011669 | 0.011604 | 0.011737 | 0.011669 | 0.011568 |
| 0.011608 | 0.011839 | 0.011669 | 0.011872 | 0.011635 | 0.011737 | 0.011703 |
| 0.011804 | 0.011703 | 0.011737 | 0.011703 | 0.011737 | 0.011601 | 0.011737 |
| 0.011771 | 0.011703 | 0.011771 | 0.011703 | 0.011737 | 0.011771 | 0.012008 |
| 0.011838 | 0.011771 | 0.011839 | 0.011875 | 0.011839 | 0.011737 | 0.011703 |
| 0.011673 | 0.011954 | 0.011929 | 0.011648 | 0.011847 | 0.011610 | 0.011772 |
| 0.011847 | 0.011745 | 0.011906 | 0.012109 | 0.011817 | 0.011974 | 0.011940 |
| 0.011804 | 0.012041 | 0.011915 | 0.011679 | 0.011815 | 0.011771 | 0.011844 |
| 0.011940 | 0.011840 | 0.011980 | 0.012047 | 0.011974 | 0.012042 | 0.011944 |
| 0.011879 | 0.012045 | 0.011912 | 0.011912 | 0.012144 | 0.011635 | 0.011770 |
| 0.011804 | 0.011703 | 0.011635 | 0.011635 | 0.011703 | 0.011703 | 0.011770 |
| 0.011703 | 0.011770 | 0.011669 | 0.011703 | 0.011703 | 0.011703 | 0.011703 |
| 0.011703 | 0.011872 | 0.011771 | 0.011805 | 0.011601 | 0.011703 | 0.011737 |
| 0.011737 | 0.011703 | 0.011737 | 0.011737 | 0.011669 | 0.011669 | 0.011669 |
| 0.011872 | 0.011737 | 0.011838 | 0.011635 | 0.011703 | 0.011838 | 0.011669 |
| 0.011669 | 0.011737 | 0.011703 | 0.011872 | 0.011669 | 0.011567 | 0.011703 |
| 0.011635 | 0.011703 | 0.011703 | 0.011635 | 0.011635 | 0.011804 | 0.011737 |
| 0.011635 | 0.011737 | 0.011601 | 0.011635 | 0.011770 | 0.011636 | 0.011669 |
| 0.011635 | 0.011770 | 0.011703 | 0.011601 | 0.011669 | 0.011601 | 0.011770 |
| 0.011849 | 0.011669 | 0.011703 | 0.011805 | 0.011770 | 0.011703 | 0.011703 |
| 0.011669 | 0.012007 | 0.011601 | 0.011804 | 0.011601 | 0.011601 | 0.011601 |
| 0.011838 | 0.011737 | 0.011737 | 0.011804 | 0.011635 | 0.011771 | 0.011601 |
| 0.011669 | 0.011669 | 0.011703 | 0.011804 | 0.011703 | 0.011804 | 0.011872 |
| 0.011872 | 0.011838 | 0.011737 | 0.011838 | 0.011804 | 0.011669 | 0.011635 |
| 0.011669 | 0.011669 | 0.011737 | 0.011601 | 0.011635 | 0.011770 | 0.011669 |
| 0.011635 | 0.011703 | 0.011804 | 0.011804 | 0.011770 | 0.011703 | 0.011703 |
| 0.011770 | 0.011703 | 0.011770 | 0.011669 | 0.011804 | 0.011906 | 0.011872 |
| 0.011703 | 0.011838 | 0.011720 | 0.018251 | 0.011657 | 0.011865 | 0.011798 |
| 0.011757 | 0.011804 | 0.011960 | 0.011764 | 0.011837 | 0.011825 | 0.011921 |
| 0.011491 | 0.011678 | 0.011650 | 0.011778 | 0.011689 | 0.011708 | 0.011711 |
| 0.011628 | 0.011623 | 0.011620 | 0.011590 | 0.011838 | 0.011872 | 0.011878 |
| 0.011747 | 0.011838 | 0.011838 | 0.011737 | 0.011771 | 0.011771 | 0.011737 |
| 0.011770 | 0.011703 | 0.011737 | 0.011771 | 0.011737 | 0.011669 | 0.011703 |
| 0.011703 | 0.011771 | 0.011669 | 0.011771 | 0.011804 | 0.011838 | 0.011737 |
| 0.011703 | 0.011669 | 0.011805 | 0.011805 | 0.011805 | 0.011772 | 0.011872 |
| 0.011635 | 0.011567 | 0.011669 | 0.011771 | 0.011635 | 0.011872 | 0.011872 |
| 0.011906 | 0.011906 | 0.011838 | 0.011940 | 0.011839 | 0.011942 | 0.011770 |
| 0.011771 | 0.011771 | 0.011872 | 0.011635 | 0.011771 | 0.011737 | 0.011703 |
| 0.011839 | 0.011838 | 0.011872 | 0.011839 | 0.011739 | 0.011940 | 0.011906 |
| 0.011777 | 0.011669 | 0.011771 | 0.011838 | 0.011771 | 0.011838 | 0.011940 |
| 0.012109 | 0.011817 | 0.011974 | 0.011940 | 0.011804 | 0.012041 | 0.011669 |
| 0.011773 | 0.011737 | 0.011703 | 0.011703 | 0.011771 | 0.011669 | 0.011771 |
| 0.011804 | 0.011838 | 0.011737 | 0.011703 | 0.011669 | 0.011805 | 0.011805 |
| 0.011805 | 0.011772 | 0.011906 | 0.011838 | 0.012415 | 0.011918 | 0.011835 |
| 0.011904 | 0.011859 | 0.011974 | 0.011859 | 0.011971 | 0.011890 | 0.011824 |
| 0.012368 | 0.011753 | 0.011884 | 0.011821 | 0.012094 | 0.011951 | 0.012050 |
| 0.012391 | 0.011852 | 0.011912 | 0.011872 | 0.011906 | 0.011635 | 0.011877 |
| 0.011635 | 0.011770 | 0.011906 | 0.011872 | 0.011877 | 0.011635 | 0.011366 |
| 0.011737 | 0.011669 | 0.011703 | 0.011737 | 0.011635 | 0.011703 | 0.011601 |
| 0.011669 | 0.011703 | 0.011669 | 0.011635 | 0.011737 | 0.011669 | 0.011703 |
| 0.011635 | 0.011635 | 0.011703 | 0.011737 | 0.011635 | 0.011838 | 0.011872 |
| 0.011770 | 0.011770 | 0.011770 | 0.011770 | 0.011703 | 0.011838 | 0.011737 |
| 0.011514 | 0.011703 | 0.011669 | 0.011672 | 0.011804 | 0.011804 | 0.011804 |
| 0.011804 | 0.011737 | 0.011703 | 0.011737 | 0.011804 | 0.011838 | 0.011770 |
| 0.011770 | 0.011906 | 0.011804 | 0.011804 | 0.011974 | 0.011974 | 0.011804 |



|          |          |          |          |          |          |          |
|----------|----------|----------|----------|----------|----------|----------|
| 0.011703 | 0.011770 | 0.011804 | 0.011940 | 0.011771 | 0.011804 | 0.011770 |
| 0.011804 | 0.011669 | 0.011669 | 0.011974 | 0.011974 | 0.011940 | 0.011737 |
| 0.011838 | 0.011906 | 0.011737 | 0.011838 | 0.011804 | 0.011669 | 0.011737 |
| 0.011770 | 0.011737 | 0.011669 | 0.011906 | 0.011737 | 0.011838 | 0.011872 |
| 0.011703 | 0.011847 | 0.011872 | 0.011675 | 0.011630 | 0.011779 | 0.011576 |
| 0.011615 | 0.011413 | 0.011697 | 0.011736 | 0.011750 | 0.011780 | 0.011650 |
| 0.011627 | 0.011593 | 0.011735 | 0.011595 | 0.011605 | 0.011806 | 0.011878 |
| 0.011857 | 0.011774 | 0.011769 | 0.011769 | 0.011705 | 0.011635 | 0.011635 |
| 0.011669 | 0.011704 | 0.011878 | 0.011675 | 0.011948 | 0.011986 | 0.011770 |
| 0.011737 | 0.011804 | 0.011737 | 0.011771 | 0.011635 | 0.011601 | 0.011669 |
| 0.011737 | 0.011737 | 0.011703 | 0.011669 | 0.011703 | 0.011669 | 0.011771 |
| 0.011763 | 0.011763 | 0.011681 | 0.011783 | 0.011921 | 0.011886 | 0.011816 |
| 0.011881 | 0.011805 | 0.011614 | 0.011603 | 0.011742 | 0.011913 | 0.011914 |
| 0.011703 | 0.011776 | 0.011975 | 0.011979 | 0.011906 | 0.011941 | 0.011872 |
| 0.011804 | 0.011872 | 0.011872 | 0.011770 | 0.012076 | 0.011940 | 0.012008 |
| 0.012008 | 0.011850 | 0.011747 | 0.011827 | 0.011669 | 0.011872 | 0.011872 |
| 0.011908 | 0.011906 | 0.011940 | 0.011940 | 0.012051 | 0.012075 | 0.011720 |
| 0.011603 | 0.011615 | 0.011707 | 0.011672 | 0.011711 | 0.011657 | 0.011673 |
| 0.011747 | 0.011586 | 0.011727 | 0.011735 | 0.011737 | 0.011817 | 0.011703 |
| 0.011669 | 0.011601 | 0.011669 | 0.011703 | 0.011635 | 0.011601 | 0.011534 |
| 0.011635 | 0.011703 | 0.011703 | 0.011703 | 0.011737 | 0.011737 | 0.011741 |
| 0.011810 | 0.011737 | 0.011737 | 0.011705 | 0.011635 | 0.011635 | 0.011669 |
| 0.011704 | 0.011878 | 0.011675 | 0.011948 | 0.011986 | 0.011770 | 0.011940 |
| 0.011872 | 0.011872 | 0.011707 | 0.011865 | 0.011831 | 0.011849 | 0.011658 |
| 0.011893 | 0.011884 | 0.011865 | 0.011745 | 0.011669 | 0.011872 | 0.011737 |
| 0.011838 | 0.011771 | 0.011669 | 0.011773 | 0.011872 | 0.011843 | 0.011771 |
| 0.011669 | 0.011604 | 0.011737 | 0.011669 | 0.011568 | 0.011608 | 0.011839 |
| 0.011770 | 0.011703 | 0.011737 | 0.011771 | 0.011737 | 0.011669 | 0.011500 |
| 0.011737 | 0.011770 | 0.011770 | 0.011703 | 0.011770 | 0.012008 | 0.011601 |
| 0.011703 | 0.011838 | 0.011703 | 0.011737 | 0.011703 | 0.011804 | 0.011751 |
| 0.011628 | 0.011617 | 0.011566 | 0.011669 | 0.011717 | 0.011638 | 0.011566 |
| 0.011537 | 0.011364 | 0.011331 | 0.011368 | 0.011297 | 0.011367 | 0.011500 |
| 0.011398 | 0.000000 | 0.011398 | 0.011782 | 0.011567 | 0.012448 | 0.011603 |
| 0.012313 | 0.012112 | 0.012248 | 0.012521 | 0.011804 | 0.011567 | 0.011500 |
| 0.012348 | 0.011875 | 0.011534 | 0.011432 | 0.011500 | 0.011500 | 0.011537 |
| 0.011364 | 0.011368 | 0.011432 | 0.011399 | 0.012009 | 0.012042 | 0.012076 |
| 0.011941 | 0.012043 | 0.012180 | 0.011946 | 0.012451 | 0.012459 | 0.012518 |
| 0.012518 | 0.012552 | 0.012470 | 0.012518 | 0.012521 | 0.011804 | 0.012042 |
| 0.012110 | 0.012618 | 0.012119 | 0.012144 | 0.012620 | 0.011676 | 0.011568 |
| 0.011534 | 0.011534 | 0.012008 | 0.012089 | 0.012158 | 0.011872 | 0.011535 |
| S800     | 0.012034 | 0.012034 | 0.011832 | 0.011597 | 0.011597 | 0.011664 |
| 0.011773 | 0.011705 | 0.011664 | 0.011631 | 0.011631 | 0.011666 | 0.011631 |
| 0.011597 | 0.011832 | 0.011564 | 0.011597 | 0.011731 | 0.011698 | 0.011664 |
| 0.011631 | 0.011664 | 0.011496 | 0.011598 | 0.011631 | 0.011664 | 0.011739 |
| 0.011631 | 0.011664 | 0.011564 | 0.011530 | 0.011731 | 0.011698 | 0.011732 |
| 0.011698 | 0.011799 | 0.011698 | 0.011698 | 0.011664 | 0.011698 | 0.011866 |
| 0.011564 | 0.011698 | 0.011664 | 0.011664 | 0.011698 | 0.011732 | 0.011732 |
| 0.011698 | 0.011799 | 0.011766 | 0.011765 | 0.011631 | 0.011967 | 0.011631 |
| 0.011664 | 0.011698 | 0.011832 | 0.011967 | 0.011799 | 0.011698 | 0.011799 |
| 0.011731 | 0.011799 | 0.011698 | 0.011933 | 0.011900 | 0.011698 | 0.011765 |
| 0.011664 | 0.011765 | 0.011732 | 0.011799 | 0.011731 | 0.011732 | 0.011732 |
| 0.011631 | 0.011664 | 0.011631 | 0.011664 | 0.011698 | 0.011733 | 0.011799 |
| 0.011732 | 0.011698 | 0.011765 | 0.011664 | 0.011731 | 0.011631 | 0.011698 |
| 0.011866 | 0.011799 | 0.011832 | 0.011866 | 0.011698 | 0.011866 | 0.011698 |
| 0.011913 | 0.011807 | 0.011928 | 0.011607 | 0.011620 | 0.011686 | 0.011572 |
| 0.012195 | 0.011518 | 0.011678 | 0.011866 | 0.011933 | 0.011664 | 0.011765 |
| 0.011765 | 0.011731 | 0.011799 | 0.011698 | 0.011799 | 0.011732 | 0.011731 |
| 0.011698 | 0.011731 | 0.012000 | 0.011866 | 0.011765 | 0.011732 | 0.011665 |
| 0.011631 | 0.011564 | 0.011698 | 0.011665 | 0.011597 | 0.011564 | 0.011497 |
| 0.011597 | 0.011665 | 0.011665 | 0.011665 | 0.011698 | 0.011698 | 0.011702 |

|          |          |          |          |          |          |          |
|----------|----------|----------|----------|----------|----------|----------|
| 0.011770 | 0.011698 | 0.011698 | 0.011600 | 0.011675 | 0.011621 | 0.011699 |
| 0.011704 | 0.011644 | 0.011687 | 0.011681 | 0.011604 | 0.011643 | 0.011668 |
| 0.011672 | 0.011715 | 0.011749 | 0.011632 | 0.011648 | 0.011767 | 0.011666 |
| 0.011733 | 0.011734 | 0.011733 | 0.011832 | 0.011765 | 0.012068 | 0.011866 |
| 0.011698 | 0.011765 | 0.011698 | 0.011732 | 0.011597 | 0.011564 | 0.011631 |
| 0.011698 | 0.011698 | 0.011665 | 0.011631 | 0.011664 | 0.011631 | 0.011732 |
| 0.011698 | 0.011799 | 0.011732 | 0.011631 | 0.011734 | 0.011833 | 0.011804 |
| 0.011833 | 0.011732 | 0.011631 | 0.011566 | 0.011698 | 0.011631 | 0.011531 |
| 0.011570 | 0.011799 | 0.011631 | 0.011833 | 0.011597 | 0.011698 | 0.011665 |
| 0.011765 | 0.011665 | 0.011698 | 0.011665 | 0.011698 | 0.011564 | 0.011698 |
| 0.011732 | 0.011665 | 0.011732 | 0.011665 | 0.011698 | 0.011732 | 0.011967 |
| 0.011799 | 0.011732 | 0.011799 | 0.011836 | 0.011799 | 0.011698 | 0.011665 |
| 0.011635 | 0.011950 | 0.011746 | 0.011609 | 0.011807 | 0.011572 | 0.011690 |
| 0.011807 | 0.011706 | 0.011866 | 0.012068 | 0.011777 | 0.011933 | 0.011900 |
| 0.011765 | 0.012000 | 0.011842 | 0.011596 | 0.011647 | 0.011732 | 0.011805 |
| 0.011900 | 0.011802 | 0.011939 | 0.011974 | 0.011933 | 0.012001 | 0.012043 |
| 0.011839 | 0.011977 | 0.011873 | 0.011872 | 0.012103 | 0.011597 | 0.011734 |
| 0.011765 | 0.011698 | 0.011597 | 0.011597 | 0.011664 | 0.011664 | 0.011731 |
| 0.011664 | 0.011732 | 0.011631 | 0.011664 | 0.011664 | 0.011664 | 0.011664 |
| 0.011664 | 0.011832 | 0.011732 | 0.011765 | 0.011564 | 0.011664 | 0.011698 |
| 0.011698 | 0.011664 | 0.011732 | 0.011698 | 0.011631 | 0.011631 | 0.011631 |
| 0.011833 | 0.011731 | 0.011799 | 0.011597 | 0.011698 | 0.011799 | 0.011631 |
| 0.011631 | 0.011698 | 0.011664 | 0.011832 | 0.011631 | 0.011496 | 0.011631 |
| 0.011564 | 0.011664 | 0.011664 | 0.011597 | 0.011597 | 0.011765 | 0.011698 |
| 0.011597 | 0.011698 | 0.011564 | 0.011597 | 0.011732 | 0.011598 | 0.011631 |
| 0.011598 | 0.011732 | 0.011665 | 0.011564 | 0.011631 | 0.011564 | 0.011732 |
| 0.011779 | 0.011631 | 0.011665 | 0.011765 | 0.011732 | 0.011664 | 0.011698 |
| 0.011631 | 0.011967 | 0.011564 | 0.011765 | 0.011564 | 0.011564 | 0.011564 |
| 0.011799 | 0.011732 | 0.011698 | 0.011765 | 0.011597 | 0.011732 | 0.011564 |
| 0.011631 | 0.011631 | 0.011664 | 0.011765 | 0.011664 | 0.011765 | 0.011832 |
| 0.011832 | 0.011799 | 0.011698 | 0.011799 | 0.011765 | 0.011631 | 0.011597 |
| 0.011631 | 0.011631 | 0.011698 | 0.011564 | 0.011597 | 0.011698 | 0.011631 |
| 0.011597 | 0.011664 | 0.011799 | 0.011765 | 0.011731 | 0.011664 | 0.011665 |
| 0.011732 | 0.011664 | 0.011765 | 0.011631 | 0.011765 | 0.011866 | 0.011900 |
| 0.011664 | 0.011799 | 0.011681 | 0.018163 | 0.011518 | 0.011794 | 0.011758 |
| 0.011718 | 0.011764 | 0.011846 | 0.011582 | 0.011774 | 0.011785 | 0.011789 |
| 0.011345 | 0.011610 | 0.011646 | 0.011647 | 0.011607 | 0.011653 | 0.011663 |
| 0.011529 | 0.011582 | 0.011542 | 0.011523 | 0.011799 | 0.011833 | 0.011838 |
| 0.011678 | 0.011799 | 0.011799 | 0.011698 | 0.011732 | 0.011732 | 0.011699 |
| 0.011732 | 0.011664 | 0.011698 | 0.011732 | 0.011698 | 0.011631 | 0.011665 |
| 0.011665 | 0.011732 | 0.011631 | 0.011732 | 0.011765 | 0.011799 | 0.011698 |
| 0.011664 | 0.011631 | 0.011766 | 0.011766 | 0.011765 | 0.011733 | 0.011833 |
| 0.011597 | 0.011597 | 0.011631 | 0.011732 | 0.011597 | 0.011833 | 0.011833 |
| 0.011866 | 0.011866 | 0.011799 | 0.011900 | 0.011799 | 0.011902 | 0.011732 |
| 0.011732 | 0.011799 | 0.011833 | 0.011597 | 0.011732 | 0.011698 | 0.011665 |
| 0.011800 | 0.011799 | 0.011833 | 0.011799 | 0.011700 | 0.011900 | 0.011866 |
| 0.011738 | 0.011631 | 0.011732 | 0.011833 | 0.011732 | 0.011799 | 0.011899 |
| 0.012068 | 0.011777 | 0.011933 | 0.011900 | 0.011765 | 0.012000 | 0.011631 |
| 0.011734 | 0.011699 | 0.011665 | 0.011665 | 0.011732 | 0.011631 | 0.011732 |
| 0.011765 | 0.011799 | 0.011698 | 0.011664 | 0.011631 | 0.011766 | 0.011766 |
| 0.011765 | 0.011733 | 0.011866 | 0.011799 | 0.012372 | 0.011846 | 0.011764 |
| 0.011834 | 0.011788 | 0.011904 | 0.011788 | 0.011900 | 0.011819 | 0.011819 |
| 0.012297 | 0.011683 | 0.011814 | 0.011752 | 0.012024 | 0.011911 | 0.011979 |
| 0.012318 | 0.011776 | 0.011973 | 0.012034 | 0.011900 | 0.011631 | 0.011939 |
| 0.011597 | 0.011765 | 0.011899 | 0.011866 | 0.011871 | 0.011597 | 0.011296 |
| 0.011631 | 0.011631 | 0.011664 | 0.011698 | 0.011597 | 0.011664 | 0.011564 |
| 0.011631 | 0.011664 | 0.011631 | 0.011597 | 0.011698 | 0.011631 | 0.011664 |
| 0.011597 | 0.011597 | 0.011664 | 0.011698 | 0.011597 | 0.011799 | 0.011832 |
| 0.011732 | 0.011732 | 0.011731 | 0.011732 | 0.011664 | 0.011799 | 0.011698 |
| 0.011443 | 0.011664 | 0.011631 | 0.011603 | 0.011765 | 0.011765 | 0.011765 |

|          |          |          |          |          |          |          |
|----------|----------|----------|----------|----------|----------|----------|
| 0.011765 | 0.011698 | 0.011664 | 0.011698 | 0.011799 | 0.011799 | 0.011731 |
| 0.011731 | 0.011866 | 0.011765 | 0.011765 | 0.011967 | 0.011967 | 0.011832 |
| 0.011664 | 0.011732 | 0.011765 | 0.011900 | 0.011732 | 0.011765 | 0.011732 |
| 0.011765 | 0.011631 | 0.011631 | 0.011933 | 0.011933 | 0.011900 | 0.011698 |
| 0.011799 | 0.011866 | 0.011731 | 0.011799 | 0.011765 | 0.011631 | 0.011698 |
| 0.011731 | 0.011698 | 0.011631 | 0.011866 | 0.011698 | 0.011799 | 0.011833 |
| 0.011731 | 0.011841 | 0.011832 | 0.011670 | 0.011512 | 0.011740 | 0.011525 |
| 0.011609 | 0.011216 | 0.011657 | 0.011730 | 0.011695 | 0.011722 | 0.011538 |
| 0.011519 | 0.011455 | 0.011617 | 0.011456 | 0.011599 | 0.011663 | 0.011872 |
| 0.011852 | 0.011769 | 0.011730 | 0.011730 | 0.011667 | 0.011597 | 0.011598 |
| 0.011665 | 0.011665 | 0.011838 | 0.011637 | 0.011908 | 0.011944 | 0.011732 |
| 0.011698 | 0.011765 | 0.011698 | 0.011732 | 0.011597 | 0.011564 | 0.011631 |
| 0.011698 | 0.011698 | 0.011665 | 0.011631 | 0.011664 | 0.011631 | 0.011732 |
| 0.011724 | 0.011725 | 0.011643 | 0.011745 | 0.011882 | 0.011846 | 0.011777 |
| 0.011844 | 0.011766 | 0.011577 | 0.011564 | 0.011704 | 0.011874 | 0.011875 |
| 0.011666 | 0.011738 | 0.011969 | 0.011939 | 0.011867 | 0.011902 | 0.011832 |
| 0.011765 | 0.011832 | 0.011832 | 0.011732 | 0.012034 | 0.011900 | 0.011967 |
| 0.012001 | 0.011808 | 0.011708 | 0.011788 | 0.011664 | 0.011832 | 0.011832 |
| 0.011868 | 0.011899 | 0.011899 | 0.011899 | 0.012043 | 0.012034 | 0.011615 |
| 0.011533 | 0.011545 | 0.011639 | 0.011604 | 0.011641 | 0.011545 | 0.011604 |
| 0.011678 | 0.011411 | 0.011489 | 0.011697 | 0.011699 | 0.011779 | 0.011665 |
| 0.011631 | 0.011564 | 0.011698 | 0.011665 | 0.011597 | 0.011564 | 0.011497 |
| 0.011597 | 0.011665 | 0.011665 | 0.011665 | 0.011698 | 0.011698 | 0.011702 |
| 0.011770 | 0.011698 | 0.011698 | 0.011667 | 0.011597 | 0.011598 | 0.011665 |
| 0.011665 | 0.011838 | 0.011637 | 0.011908 | 0.011944 | 0.011732 | 0.011900 |
| 0.011832 | 0.011832 | 0.011669 | 0.011791 | 0.011755 | 0.011741 | 0.011516 |
| 0.011818 | 0.011835 | 0.011822 | 0.011740 | 0.011631 | 0.011833 | 0.011698 |
| 0.011799 | 0.011732 | 0.011631 | 0.011734 | 0.011833 | 0.011804 | 0.011732 |
| 0.011631 | 0.011566 | 0.011698 | 0.011631 | 0.011531 | 0.011570 | 0.011799 |
| 0.011732 | 0.011664 | 0.011698 | 0.011732 | 0.011698 | 0.011631 | 0.011564 |
| 0.011698 | 0.011732 | 0.011732 | 0.011664 | 0.011731 | 0.011967 | 0.011564 |
| 0.011664 | 0.011799 | 0.011664 | 0.011698 | 0.011664 | 0.011765 | 0.011617 |
| 0.011397 | 0.011613 | 0.011461 | 0.011624 | 0.011712 | 0.011599 | 0.011436 |
| 0.011427 | 0.011295 | 0.011262 | 0.011298 | 0.011229 | 0.011297 | 0.011296 |
| 0.011195 | 0.011398 | 0.000000 | 0.011709 | 0.011496 | 0.012371 | 0.011532 |
| 0.012271 | 0.012038 | 0.012172 | 0.012443 | 0.011765 | 0.011530 | 0.011430 |
| 0.012272 | 0.011802 | 0.011463 | 0.011362 | 0.011430 | 0.011430 | 0.011466 |
| 0.011295 | 0.011298 | 0.011362 | 0.011329 | 0.011968 | 0.012034 | 0.011969 |
| 0.011935 | 0.012036 | 0.012139 | 0.011906 | 0.012407 | 0.012415 | 0.012475 |
| 0.012475 | 0.012509 | 0.012460 | 0.012475 | 0.012477 | 0.011765 | 0.012001 |
| 0.012070 | 0.012573 | 0.012078 | 0.012102 | 0.012575 | 0.011638 | 0.011531 |
| 0.011496 | 0.011496 | 0.011968 | 0.012006 | 0.012116 | 0.011832 | 0.011498 |
| S801     | 0.012222 | 0.012222 | 0.011709 | 0.011675 | 0.011675 | 0.011743 |
| 0.011959 | 0.011856 | 0.011675 | 0.011880 | 0.011914 | 0.011915 | 0.011880 |
| 0.011846 | 0.012086 | 0.011812 | 0.011914 | 0.011983 | 0.011949 | 0.011914 |
| 0.011880 | 0.011914 | 0.011744 | 0.011847 | 0.011881 | 0.011880 | 0.011925 |
| 0.011880 | 0.011914 | 0.011812 | 0.011778 | 0.011949 | 0.011949 | 0.011983 |
| 0.011949 | 0.012051 | 0.011949 | 0.011949 | 0.011983 | 0.011949 | 0.012120 |
| 0.011812 | 0.011949 | 0.011983 | 0.011914 | 0.011949 | 0.012051 | 0.011983 |
| 0.011949 | 0.012120 | 0.011984 | 0.012017 | 0.011949 | 0.012188 | 0.011949 |
| 0.011914 | 0.011949 | 0.012051 | 0.012188 | 0.012017 | 0.011949 | 0.012051 |
| 0.011983 | 0.012017 | 0.011915 | 0.012188 | 0.012155 | 0.011949 | 0.012017 |
| 0.011914 | 0.011983 | 0.011983 | 0.012017 | 0.011949 | 0.011983 | 0.011983 |
| 0.011880 | 0.011880 | 0.011880 | 0.011915 | 0.011949 | 0.011949 | 0.012051 |
| 0.011983 | 0.011949 | 0.012017 | 0.011880 | 0.011983 | 0.011880 | 0.011914 |
| 0.012120 | 0.012051 | 0.012086 | 0.012120 | 0.011880 | 0.012120 | 0.011949 |
| 0.012073 | 0.011967 | 0.012126 | 0.011848 | 0.011925 | 0.011991 | 0.011735 |
| 0.012125 | 0.011926 | 0.011926 | 0.012188 | 0.012154 | 0.011880 | 0.012017 |
| 0.012017 | 0.011983 | 0.012051 | 0.011949 | 0.012017 | 0.011949 | 0.011983 |
| 0.011948 | 0.011949 | 0.012223 | 0.012120 | 0.012017 | 0.011983 | 0.011915 |

|          |          |          |          |          |          |          |
|----------|----------|----------|----------|----------|----------|----------|
| 0.011880 | 0.011812 | 0.011949 | 0.011880 | 0.011846 | 0.011812 | 0.011744 |
| 0.011846 | 0.011915 | 0.011914 | 0.011914 | 0.011949 | 0.011948 | 0.011954 |
| 0.012024 | 0.011880 | 0.011949 | 0.011865 | 0.011867 | 0.011844 | 0.011949 |
| 0.011955 | 0.011899 | 0.011990 | 0.011937 | 0.011854 | 0.011896 | 0.011918 |
| 0.011939 | 0.011936 | 0.012006 | 0.011880 | 0.011904 | 0.012018 | 0.011880 |
| 0.011949 | 0.011985 | 0.011983 | 0.012051 | 0.012017 | 0.012394 | 0.012086 |
| 0.011949 | 0.012017 | 0.011949 | 0.011983 | 0.011846 | 0.011812 | 0.011846 |
| 0.011949 | 0.011949 | 0.011880 | 0.011880 | 0.011914 | 0.011880 | 0.011983 |
| 0.011949 | 0.012051 | 0.011983 | 0.011880 | 0.011986 | 0.012086 | 0.012092 |
| 0.012086 | 0.011983 | 0.011880 | 0.011815 | 0.011948 | 0.011880 | 0.011812 |
| 0.011821 | 0.012086 | 0.011880 | 0.012086 | 0.011846 | 0.011949 | 0.011914 |
| 0.011949 | 0.011914 | 0.011880 | 0.011915 | 0.011949 | 0.011812 | 0.011914 |
| 0.011983 | 0.011914 | 0.011983 | 0.011914 | 0.011949 | 0.011983 | 0.012154 |
| 0.012052 | 0.011983 | 0.012052 | 0.012086 | 0.012018 | 0.011948 | 0.011914 |
| 0.011883 | 0.012207 | 0.011987 | 0.011859 | 0.012062 | 0.011823 | 0.011938 |
| 0.011994 | 0.011958 | 0.012120 | 0.012291 | 0.012034 | 0.012188 | 0.012154 |
| 0.012086 | 0.012222 | 0.011998 | 0.011858 | 0.011826 | 0.011983 | 0.012025 |
| 0.012154 | 0.012021 | 0.012162 | 0.012162 | 0.012120 | 0.012257 | 0.012198 |
| 0.012059 | 0.012130 | 0.012197 | 0.012128 | 0.012361 | 0.011846 | 0.011986 |
| 0.011914 | 0.011914 | 0.011812 | 0.011846 | 0.011914 | 0.011914 | 0.011983 |
| 0.011914 | 0.011983 | 0.011880 | 0.011915 | 0.011914 | 0.011914 | 0.011983 |
| 0.011914 | 0.012086 | 0.011983 | 0.012018 | 0.011812 | 0.011914 | 0.011949 |
| 0.011949 | 0.011914 | 0.011983 | 0.011949 | 0.011880 | 0.011880 | 0.011880 |
| 0.012086 | 0.011949 | 0.012051 | 0.011846 | 0.011914 | 0.012086 | 0.011880 |
| 0.011880 | 0.011914 | 0.011914 | 0.012086 | 0.011880 | 0.011744 | 0.011880 |
| 0.011812 | 0.011914 | 0.011914 | 0.011846 | 0.011846 | 0.012017 | 0.011949 |
| 0.011846 | 0.011949 | 0.011812 | 0.011846 | 0.011983 | 0.011847 | 0.011880 |
| 0.011847 | 0.011983 | 0.011915 | 0.011812 | 0.011881 | 0.011812 | 0.011983 |
| 0.012001 | 0.011880 | 0.011915 | 0.012017 | 0.011983 | 0.011914 | 0.012017 |
| 0.011880 | 0.012188 | 0.011812 | 0.011983 | 0.011812 | 0.011812 | 0.011812 |
| 0.012017 | 0.011983 | 0.011915 | 0.012017 | 0.011846 | 0.011983 | 0.011812 |
| 0.011880 | 0.011880 | 0.011914 | 0.011983 | 0.011914 | 0.012017 | 0.012086 |
| 0.012086 | 0.012051 | 0.011949 | 0.012052 | 0.012017 | 0.011880 | 0.011846 |
| 0.011880 | 0.011880 | 0.011915 | 0.011812 | 0.011846 | 0.011983 | 0.011880 |
| 0.011846 | 0.011880 | 0.012051 | 0.011983 | 0.011949 | 0.011914 | 0.011915 |
| 0.011983 | 0.011914 | 0.012017 | 0.011880 | 0.012017 | 0.012120 | 0.012052 |
| 0.011914 | 0.011983 | 0.011932 | 0.018539 | 0.011781 | 0.012119 | 0.012013 |
| 0.011970 | 0.012021 | 0.012118 | 0.011931 | 0.012117 | 0.012038 | 0.012094 |
| 0.011677 | 0.011864 | 0.011808 | 0.011993 | 0.011921 | 0.011958 | 0.011932 |
| 0.011859 | 0.011848 | 0.011847 | 0.011656 | 0.012051 | 0.012086 | 0.012093 |
| 0.011829 | 0.012051 | 0.012017 | 0.011949 | 0.011949 | 0.011949 | 0.011949 |
| 0.011983 | 0.011914 | 0.011949 | 0.011983 | 0.011949 | 0.011880 | 0.011914 |
| 0.011914 | 0.011949 | 0.011846 | 0.011949 | 0.012017 | 0.012051 | 0.011914 |
| 0.011914 | 0.011880 | 0.011983 | 0.011983 | 0.012018 | 0.012053 | 0.012086 |
| 0.011846 | 0.011846 | 0.011880 | 0.011983 | 0.011846 | 0.012086 | 0.012086 |
| 0.012120 | 0.012120 | 0.012017 | 0.012154 | 0.012017 | 0.012123 | 0.011983 |
| 0.011983 | 0.012051 | 0.012086 | 0.011846 | 0.011949 | 0.011914 | 0.011983 |
| 0.012052 | 0.012051 | 0.012085 | 0.012051 | 0.011951 | 0.012120 | 0.012120 |
| 0.011957 | 0.011880 | 0.011983 | 0.012086 | 0.011983 | 0.012052 | 0.012120 |
| 0.012291 | 0.012034 | 0.012188 | 0.012154 | 0.012086 | 0.012222 | 0.011881 |
| 0.012054 | 0.011949 | 0.011914 | 0.011914 | 0.011949 | 0.011846 | 0.011949 |
| 0.012017 | 0.012051 | 0.011914 | 0.011914 | 0.011880 | 0.011983 | 0.011983 |
| 0.012018 | 0.012053 | 0.012120 | 0.012051 | 0.012635 | 0.012042 | 0.011920 |
| 0.012026 | 0.011979 | 0.011990 | 0.011977 | 0.012093 | 0.012008 | 0.012078 |
| 0.012529 | 0.011870 | 0.012002 | 0.011905 | 0.012217 | 0.012169 | 0.012133 |
| 0.012548 | 0.011943 | 0.011990 | 0.011983 | 0.011983 | 0.011744 | 0.011955 |
| 0.011846 | 0.011880 | 0.012017 | 0.011983 | 0.011989 | 0.011846 | 0.011538 |
| 0.011914 | 0.011880 | 0.011914 | 0.011914 | 0.011846 | 0.011914 | 0.011812 |
| 0.011880 | 0.011914 | 0.011880 | 0.011846 | 0.011949 | 0.011880 | 0.011914 |
| 0.011914 | 0.011846 | 0.011914 | 0.011949 | 0.011846 | 0.012051 | 0.012086 |

|          |          |          |          |          |          |          |
|----------|----------|----------|----------|----------|----------|----------|
| 0.011983 | 0.011983 | 0.011983 | 0.011983 | 0.011914 | 0.012017 | 0.011949 |
| 0.011627 | 0.011880 | 0.011880 | 0.011819 | 0.012017 | 0.011983 | 0.012017 |
| 0.012017 | 0.011949 | 0.011914 | 0.011949 | 0.012051 | 0.012051 | 0.011983 |
| 0.011983 | 0.012086 | 0.012017 | 0.012017 | 0.012189 | 0.012189 | 0.012085 |
| 0.011880 | 0.011983 | 0.012017 | 0.012120 | 0.011984 | 0.012017 | 0.011983 |
| 0.012017 | 0.011846 | 0.011846 | 0.012189 | 0.012189 | 0.012154 | 0.011949 |
| 0.012051 | 0.012051 | 0.011949 | 0.012051 | 0.011983 | 0.011880 | 0.011949 |
| 0.011983 | 0.011949 | 0.011846 | 0.012120 | 0.011949 | 0.012051 | 0.012086 |
| 0.011914 | 0.012028 | 0.012086 | 0.011839 | 0.011794 | 0.011958 | 0.011680 |
| 0.011842 | 0.011722 | 0.011912 | 0.011954 | 0.011890 | 0.011978 | 0.011751 |
| 0.011877 | 0.011785 | 0.011896 | 0.011787 | 0.011761 | 0.011932 | 0.012042 |
| 0.012013 | 0.011972 | 0.011986 | 0.011985 | 0.011918 | 0.011846 | 0.011846 |
| 0.011880 | 0.011915 | 0.012093 | 0.011819 | 0.012164 | 0.012212 | 0.011949 |
| 0.011949 | 0.012017 | 0.011949 | 0.011983 | 0.011846 | 0.011812 | 0.011846 |
| 0.011949 | 0.011949 | 0.011880 | 0.011880 | 0.011914 | 0.011880 | 0.011983 |
| 0.011984 | 0.011985 | 0.011966 | 0.011965 | 0.012139 | 0.012102 | 0.012102 |
| 0.012099 | 0.011949 | 0.011812 | 0.011866 | 0.011955 | 0.012059 | 0.012095 |
| 0.011915 | 0.011990 | 0.012224 | 0.012194 | 0.012120 | 0.012155 | 0.012085 |
| 0.012017 | 0.012086 | 0.012051 | 0.011983 | 0.012258 | 0.012154 | 0.012223 |
| 0.012257 | 0.012036 | 0.011963 | 0.012047 | 0.011914 | 0.012085 | 0.012086 |
| 0.012088 | 0.012120 | 0.012154 | 0.012154 | 0.012380 | 0.012291 | 0.011837 |
| 0.011748 | 0.011695 | 0.011857 | 0.011820 | 0.011860 | 0.011744 | 0.011821 |
| 0.011898 | 0.011592 | 0.011785 | 0.011785 | 0.011949 | 0.012034 | 0.011915 |
| 0.011880 | 0.011812 | 0.011949 | 0.011880 | 0.011846 | 0.011812 | 0.011744 |
| 0.011846 | 0.011915 | 0.011914 | 0.011914 | 0.011949 | 0.011948 | 0.011954 |
| 0.012024 | 0.011880 | 0.011949 | 0.011918 | 0.011846 | 0.011846 | 0.011880 |
| 0.011915 | 0.012093 | 0.011819 | 0.012164 | 0.012212 | 0.011949 | 0.012119 |
| 0.012086 | 0.012086 | 0.011920 | 0.012051 | 0.012049 | 0.012031 | 0.011840 |
| 0.012073 | 0.012121 | 0.012089 | 0.011994 | 0.011880 | 0.012086 | 0.011949 |
| 0.012051 | 0.011983 | 0.011880 | 0.011986 | 0.012086 | 0.012092 | 0.011983 |
| 0.011880 | 0.011815 | 0.011948 | 0.011880 | 0.011812 | 0.011821 | 0.012086 |
| 0.011983 | 0.011914 | 0.011949 | 0.011983 | 0.011949 | 0.011880 | 0.011778 |
| 0.011949 | 0.011983 | 0.011983 | 0.011914 | 0.011983 | 0.012188 | 0.011812 |
| 0.011914 | 0.012017 | 0.011914 | 0.011949 | 0.011914 | 0.012017 | 0.011961 |
| 0.011735 | 0.011783 | 0.011763 | 0.011907 | 0.011916 | 0.011859 | 0.011813 |
| 0.011743 | 0.011538 | 0.011641 | 0.011681 | 0.011607 | 0.011675 | 0.011812 |
| 0.011710 | 0.011782 | 0.011709 | 0.000000 | 0.011572 | 0.012393 | 0.011641 |
| 0.012325 | 0.012120 | 0.012225 | 0.012223 | 0.011983 | 0.011743 | 0.011744 |
| 0.012532 | 0.011915 | 0.011709 | 0.011539 | 0.011675 | 0.011675 | 0.011645 |
| 0.011538 | 0.011540 | 0.011607 | 0.011538 | 0.012189 | 0.012257 | 0.012257 |
| 0.012156 | 0.012257 | 0.012326 | 0.012121 | 0.012670 | 0.012679 | 0.012738 |
| 0.012738 | 0.012773 | 0.012718 | 0.012704 | 0.012738 | 0.012017 | 0.012257 |
| 0.012326 | 0.012771 | 0.012300 | 0.012326 | 0.012121 | 0.011887 | 0.011778 |
| 0.011744 | 0.011744 | 0.012189 | 0.012151 | 0.012349 | 0.012052 | 0.011744 |
| S802     | 0.012001 | 0.012001 | 0.011463 | 0.011228 | 0.011228 | 0.011295 |
| 0.011705 | 0.011637 | 0.011295 | 0.011597 | 0.011664 | 0.011632 | 0.011597 |
| 0.011564 | 0.011799 | 0.011530 | 0.011631 | 0.011698 | 0.011664 | 0.011631 |
| 0.011597 | 0.011631 | 0.011463 | 0.011564 | 0.011598 | 0.011631 | 0.011671 |
| 0.011597 | 0.011631 | 0.011530 | 0.011497 | 0.011698 | 0.011664 | 0.011698 |
| 0.011664 | 0.011765 | 0.011664 | 0.011664 | 0.011698 | 0.011664 | 0.011832 |
| 0.011530 | 0.011664 | 0.011698 | 0.011631 | 0.011664 | 0.011765 | 0.011698 |
| 0.011664 | 0.011832 | 0.011732 | 0.011732 | 0.011664 | 0.011933 | 0.011664 |
| 0.011631 | 0.011665 | 0.011765 | 0.011933 | 0.011765 | 0.011664 | 0.011765 |
| 0.011698 | 0.011765 | 0.011664 | 0.011899 | 0.011866 | 0.011664 | 0.011732 |
| 0.011631 | 0.011731 | 0.011698 | 0.011765 | 0.011698 | 0.011698 | 0.011698 |
| 0.011597 | 0.011631 | 0.011597 | 0.011631 | 0.011664 | 0.011700 | 0.011765 |
| 0.011698 | 0.011664 | 0.011731 | 0.011631 | 0.011698 | 0.011597 | 0.011664 |
| 0.011832 | 0.011765 | 0.011799 | 0.011832 | 0.011664 | 0.011900 | 0.011664 |
| 0.011802 | 0.011695 | 0.011815 | 0.011490 | 0.011545 | 0.011612 | 0.011415 |
| 0.012085 | 0.011467 | 0.011554 | 0.011899 | 0.011899 | 0.011631 | 0.011732 |

|          |          |          |          |          |          |          |
|----------|----------|----------|----------|----------|----------|----------|
| 0.011732 | 0.011698 | 0.011765 | 0.011664 | 0.011732 | 0.011698 | 0.011698 |
| 0.011664 | 0.011698 | 0.011967 | 0.011832 | 0.011732 | 0.011698 | 0.011631 |
| 0.011597 | 0.011530 | 0.011665 | 0.011631 | 0.011564 | 0.011530 | 0.011463 |
| 0.011564 | 0.011631 | 0.011631 | 0.011631 | 0.011665 | 0.011665 | 0.011668 |
| 0.011736 | 0.011665 | 0.011665 | 0.011528 | 0.011566 | 0.011516 | 0.011665 |
| 0.011636 | 0.011576 | 0.011614 | 0.011612 | 0.011570 | 0.011574 | 0.011634 |
| 0.011600 | 0.011646 | 0.011680 | 0.011598 | 0.011579 | 0.011733 | 0.011632 |
| 0.011699 | 0.011701 | 0.011699 | 0.011799 | 0.011732 | 0.012101 | 0.011833 |
| 0.011664 | 0.011732 | 0.011664 | 0.011698 | 0.011564 | 0.011530 | 0.011598 |
| 0.011664 | 0.011664 | 0.011631 | 0.011597 | 0.011631 | 0.011597 | 0.011698 |
| 0.011665 | 0.011765 | 0.011698 | 0.011597 | 0.011701 | 0.011799 | 0.011770 |
| 0.011799 | 0.011698 | 0.011597 | 0.011532 | 0.011665 | 0.011597 | 0.011531 |
| 0.011502 | 0.011799 | 0.011598 | 0.011799 | 0.011564 | 0.011665 | 0.011631 |
| 0.011732 | 0.011631 | 0.011665 | 0.011631 | 0.011665 | 0.011530 | 0.011665 |
| 0.011698 | 0.011631 | 0.011698 | 0.011631 | 0.011665 | 0.011698 | 0.011934 |
| 0.011765 | 0.011698 | 0.011766 | 0.011768 | 0.011766 | 0.011665 | 0.011631 |
| 0.011601 | 0.011828 | 0.011792 | 0.011540 | 0.011773 | 0.011538 | 0.011650 |
| 0.011739 | 0.011672 | 0.011832 | 0.012034 | 0.011743 | 0.011900 | 0.011866 |
| 0.011799 | 0.011967 | 0.011771 | 0.011596 | 0.011647 | 0.011698 | 0.011737 |
| 0.011866 | 0.011769 | 0.011906 | 0.011906 | 0.011900 | 0.011933 | 0.012009 |
| 0.011805 | 0.011909 | 0.011907 | 0.011838 | 0.012103 | 0.011564 | 0.011700 |
| 0.011731 | 0.011664 | 0.011530 | 0.011564 | 0.011631 | 0.011631 | 0.011698 |
| 0.011631 | 0.011698 | 0.011597 | 0.011631 | 0.011631 | 0.011631 | 0.011698 |
| 0.011631 | 0.011799 | 0.011698 | 0.011732 | 0.011530 | 0.011631 | 0.011664 |
| 0.011664 | 0.011631 | 0.011698 | 0.011664 | 0.011597 | 0.011597 | 0.011597 |
| 0.011799 | 0.011698 | 0.011765 | 0.011564 | 0.011664 | 0.011832 | 0.011597 |
| 0.011597 | 0.011664 | 0.011631 | 0.011799 | 0.011597 | 0.011463 | 0.011597 |
| 0.011530 | 0.011631 | 0.011631 | 0.011564 | 0.011564 | 0.011732 | 0.011664 |
| 0.011564 | 0.011664 | 0.011530 | 0.011564 | 0.011698 | 0.011564 | 0.011597 |
| 0.011564 | 0.011698 | 0.011631 | 0.011530 | 0.011597 | 0.011530 | 0.011698 |
| 0.011745 | 0.011597 | 0.011631 | 0.011732 | 0.011698 | 0.011631 | 0.011732 |
| 0.011597 | 0.011933 | 0.011530 | 0.011732 | 0.011530 | 0.011530 | 0.011530 |
| 0.011765 | 0.011665 | 0.011664 | 0.011732 | 0.011564 | 0.011698 | 0.011530 |
| 0.011597 | 0.011597 | 0.011631 | 0.011732 | 0.011631 | 0.011732 | 0.011799 |
| 0.011799 | 0.011765 | 0.011664 | 0.011765 | 0.011731 | 0.011597 | 0.011564 |
| 0.011597 | 0.011597 | 0.011664 | 0.011530 | 0.011564 | 0.011732 | 0.011597 |
| 0.011564 | 0.011631 | 0.011765 | 0.011732 | 0.011698 | 0.011631 | 0.011631 |
| 0.011698 | 0.011631 | 0.011731 | 0.011597 | 0.011731 | 0.011832 | 0.011866 |
| 0.011631 | 0.011765 | 0.011612 | 0.018125 | 0.011387 | 0.011794 | 0.011653 |
| 0.011614 | 0.011658 | 0.011741 | 0.011466 | 0.011720 | 0.011682 | 0.011789 |
| 0.011250 | 0.011549 | 0.011489 | 0.011605 | 0.011490 | 0.011603 | 0.011576 |
| 0.011436 | 0.011470 | 0.011468 | 0.011325 | 0.011765 | 0.011799 | 0.011804 |
| 0.011610 | 0.011765 | 0.011765 | 0.011665 | 0.011698 | 0.011698 | 0.011665 |
| 0.011698 | 0.011631 | 0.011664 | 0.011698 | 0.011665 | 0.011597 | 0.011631 |
| 0.011631 | 0.011698 | 0.011597 | 0.011698 | 0.011732 | 0.011765 | 0.011664 |
| 0.011631 | 0.011598 | 0.011732 | 0.011732 | 0.011732 | 0.011766 | 0.011799 |
| 0.011564 | 0.011564 | 0.011597 | 0.011698 | 0.011564 | 0.011799 | 0.011799 |
| 0.011833 | 0.011832 | 0.011765 | 0.011866 | 0.011766 | 0.011869 | 0.011698 |
| 0.011698 | 0.011765 | 0.011799 | 0.011564 | 0.011698 | 0.011665 | 0.011698 |
| 0.011766 | 0.011766 | 0.011799 | 0.011766 | 0.011666 | 0.011866 | 0.011833 |
| 0.011704 | 0.011597 | 0.011698 | 0.011799 | 0.011698 | 0.011766 | 0.011866 |
| 0.012034 | 0.011743 | 0.011900 | 0.011866 | 0.011799 | 0.011967 | 0.011598 |
| 0.011768 | 0.011665 | 0.011631 | 0.011631 | 0.011698 | 0.011597 | 0.011698 |
| 0.011732 | 0.011765 | 0.011664 | 0.011631 | 0.011598 | 0.011732 | 0.011732 |
| 0.011732 | 0.011766 | 0.011832 | 0.011765 | 0.012339 | 0.011810 | 0.011693 |
| 0.011798 | 0.011754 | 0.011833 | 0.011753 | 0.011865 | 0.011784 | 0.011750 |
| 0.012262 | 0.011649 | 0.011780 | 0.011717 | 0.011956 | 0.011877 | 0.011911 |
| 0.012284 | 0.011701 | 0.011939 | 0.012000 | 0.011866 | 0.011597 | 0.011905 |
| 0.011564 | 0.011732 | 0.011866 | 0.011832 | 0.011837 | 0.011564 | 0.011262 |
| 0.011664 | 0.011597 | 0.011631 | 0.011664 | 0.011564 | 0.011631 | 0.011530 |

|          |          |          |          |          |          |          |
|----------|----------|----------|----------|----------|----------|----------|
| 0.011597 | 0.011631 | 0.011597 | 0.011564 | 0.011664 | 0.011597 | 0.011631 |
| 0.011631 | 0.011564 | 0.011631 | 0.011664 | 0.011564 | 0.011765 | 0.011799 |
| 0.011698 | 0.011698 | 0.011698 | 0.011698 | 0.011631 | 0.011765 | 0.011664 |
| 0.011373 | 0.011631 | 0.011598 | 0.011569 | 0.011732 | 0.011731 | 0.011732 |
| 0.011732 | 0.011664 | 0.011631 | 0.011664 | 0.011765 | 0.011765 | 0.011698 |
| 0.011698 | 0.011832 | 0.011732 | 0.011731 | 0.011933 | 0.011933 | 0.011799 |
| 0.011631 | 0.011698 | 0.011732 | 0.011866 | 0.011698 | 0.011732 | 0.011698 |
| 0.011731 | 0.011597 | 0.011597 | 0.011900 | 0.011900 | 0.011866 | 0.011664 |
| 0.011765 | 0.011832 | 0.011698 | 0.011765 | 0.011731 | 0.011597 | 0.011664 |
| 0.011698 | 0.011664 | 0.011597 | 0.011832 | 0.011664 | 0.011765 | 0.011799 |
| 0.011698 | 0.011773 | 0.011799 | 0.011507 | 0.011342 | 0.011706 | 0.011267 |
| 0.011555 | 0.011449 | 0.011587 | 0.011596 | 0.011548 | 0.011569 | 0.011432 |
| 0.011417 | 0.011389 | 0.011450 | 0.011324 | 0.011384 | 0.011529 | 0.011750 |
| 0.011738 | 0.011650 | 0.011624 | 0.011659 | 0.011633 | 0.011564 | 0.011564 |
| 0.011631 | 0.011632 | 0.011804 | 0.011603 | 0.011874 | 0.011873 | 0.011698 |
| 0.011664 | 0.011732 | 0.011664 | 0.011698 | 0.011564 | 0.011530 | 0.011598 |
| 0.011664 | 0.011664 | 0.011631 | 0.011597 | 0.011631 | 0.011597 | 0.011698 |
| 0.011654 | 0.011655 | 0.011643 | 0.011677 | 0.011813 | 0.011778 | 0.011777 |
| 0.011776 | 0.011733 | 0.011503 | 0.011528 | 0.011636 | 0.011806 | 0.011807 |
| 0.011632 | 0.011670 | 0.011936 | 0.011905 | 0.011834 | 0.011801 | 0.011799 |
| 0.011732 | 0.011799 | 0.011799 | 0.011698 | 0.012001 | 0.011866 | 0.011933 |
| 0.011967 | 0.011772 | 0.011674 | 0.011753 | 0.011631 | 0.011799 | 0.011799 |
| 0.011834 | 0.011866 | 0.011866 | 0.011866 | 0.012004 | 0.012000 | 0.011581 |
| 0.011500 | 0.011476 | 0.011605 | 0.011570 | 0.011538 | 0.011508 | 0.011570 |
| 0.011609 | 0.011455 | 0.011537 | 0.011547 | 0.011665 | 0.011710 | 0.011631 |
| 0.011597 | 0.011530 | 0.011665 | 0.011631 | 0.011564 | 0.011530 | 0.011463 |
| 0.011564 | 0.011631 | 0.011631 | 0.011631 | 0.011665 | 0.011665 | 0.011668 |
| 0.011736 | 0.011665 | 0.011665 | 0.011633 | 0.011564 | 0.011564 | 0.011631 |
| 0.011632 | 0.011804 | 0.011603 | 0.011874 | 0.011873 | 0.011698 | 0.011866 |
| 0.011799 | 0.011799 | 0.011635 | 0.011756 | 0.011721 | 0.011775 | 0.011516 |
| 0.011818 | 0.011835 | 0.011738 | 0.011706 | 0.011598 | 0.011799 | 0.011665 |
| 0.011765 | 0.011698 | 0.011597 | 0.011701 | 0.011799 | 0.011770 | 0.011698 |
| 0.011597 | 0.011532 | 0.011665 | 0.011597 | 0.011531 | 0.011502 | 0.011799 |
| 0.011698 | 0.011631 | 0.011664 | 0.011698 | 0.011665 | 0.011597 | 0.011530 |
| 0.011664 | 0.011698 | 0.011698 | 0.011631 | 0.011698 | 0.011933 | 0.011530 |
| 0.011631 | 0.011765 | 0.011631 | 0.011664 | 0.011631 | 0.011732 | 0.011532 |
| 0.011341 | 0.011400 | 0.011311 | 0.011463 | 0.011549 | 0.011527 | 0.011395 |
| 0.011270 | 0.011262 | 0.011362 | 0.011468 | 0.011329 | 0.011432 | 0.011598 |
| 0.011497 | 0.011567 | 0.011496 | 0.011572 | 0.000000 | 0.012068 | 0.011363 |
| 0.011900 | 0.011734 | 0.011869 | 0.012342 | 0.011732 | 0.011463 | 0.011463 |
| 0.012238 | 0.011802 | 0.011429 | 0.011329 | 0.011396 | 0.011396 | 0.011432 |
| 0.011262 | 0.011230 | 0.011329 | 0.011296 | 0.011935 | 0.012001 | 0.012002 |
| 0.011901 | 0.012002 | 0.012106 | 0.011838 | 0.012374 | 0.012381 | 0.012441 |
| 0.012442 | 0.012475 | 0.012392 | 0.012442 | 0.012443 | 0.011732 | 0.011968 |
| 0.012036 | 0.012505 | 0.012044 | 0.012068 | 0.012542 | 0.011604 | 0.011497 |
| 0.011463 | 0.011463 | 0.011934 | 0.011842 | 0.012046 | 0.011799 | 0.011465 |
| S803     | 0.012741 | 0.012741 | 0.012404 | 0.012169 | 0.012169 | 0.012236 |
| 0.012454 | 0.012386 | 0.012202 | 0.012472 | 0.012539 | 0.012509 | 0.012472 |
| 0.012438 | 0.012674 | 0.012404 | 0.012505 | 0.012573 | 0.012539 | 0.012505 |
| 0.012472 | 0.012505 | 0.012337 | 0.012439 | 0.012473 | 0.012505 | 0.012420 |
| 0.012472 | 0.012505 | 0.012404 | 0.012371 | 0.012573 | 0.012539 | 0.012573 |
| 0.012539 | 0.012640 | 0.012539 | 0.012539 | 0.012573 | 0.012539 | 0.012708 |
| 0.012404 | 0.012539 | 0.012539 | 0.012505 | 0.012539 | 0.012640 | 0.012573 |
| 0.012539 | 0.012708 | 0.012608 | 0.012607 | 0.012539 | 0.012809 | 0.012539 |
| 0.012505 | 0.012540 | 0.012640 | 0.012809 | 0.012641 | 0.012539 | 0.012573 |
| 0.012573 | 0.012640 | 0.012539 | 0.012775 | 0.012742 | 0.012539 | 0.012606 |
| 0.012505 | 0.012606 | 0.012573 | 0.012640 | 0.012573 | 0.012573 | 0.012573 |
| 0.012471 | 0.012505 | 0.012472 | 0.012505 | 0.012539 | 0.012577 | 0.012640 |
| 0.012573 | 0.012539 | 0.012606 | 0.012505 | 0.012573 | 0.012472 | 0.012539 |
| 0.012707 | 0.012640 | 0.012674 | 0.012708 | 0.012472 | 0.012775 | 0.012539 |

|          |          |          |          |          |          |          |
|----------|----------|----------|----------|----------|----------|----------|
| 0.012657 | 0.012631 | 0.012798 | 0.012468 | 0.012480 | 0.012350 | 0.012440 |
| 0.013002 | 0.012486 | 0.012586 | 0.012775 | 0.012775 | 0.012505 | 0.012607 |
| 0.012606 | 0.012505 | 0.012573 | 0.012539 | 0.012607 | 0.012573 | 0.012505 |
| 0.012471 | 0.012572 | 0.012775 | 0.012707 | 0.012606 | 0.012573 | 0.012506 |
| 0.012472 | 0.012405 | 0.012540 | 0.012506 | 0.012439 | 0.012405 | 0.012338 |
| 0.012439 | 0.012506 | 0.012506 | 0.012506 | 0.012540 | 0.012539 | 0.012548 |
| 0.012617 | 0.012472 | 0.012506 | 0.012392 | 0.012544 | 0.012464 | 0.012541 |
| 0.012552 | 0.012505 | 0.012538 | 0.012476 | 0.012455 | 0.012501 | 0.012514 |
| 0.012466 | 0.012544 | 0.012612 | 0.012474 | 0.012445 | 0.012610 | 0.012508 |
| 0.012576 | 0.012579 | 0.012575 | 0.012606 | 0.012539 | 0.012977 | 0.012708 |
| 0.012539 | 0.012607 | 0.012539 | 0.012573 | 0.012438 | 0.012404 | 0.012472 |
| 0.012539 | 0.012539 | 0.012506 | 0.012472 | 0.012438 | 0.012472 | 0.012539 |
| 0.012540 | 0.012641 | 0.012573 | 0.012405 | 0.012578 | 0.012674 | 0.012685 |
| 0.012675 | 0.012574 | 0.012472 | 0.012410 | 0.012539 | 0.012472 | 0.012405 |
| 0.012386 | 0.012675 | 0.012472 | 0.012675 | 0.012438 | 0.012540 | 0.012506 |
| 0.012539 | 0.012506 | 0.012472 | 0.012506 | 0.012540 | 0.012405 | 0.012540 |
| 0.012573 | 0.012506 | 0.012573 | 0.012506 | 0.012472 | 0.012573 | 0.012809 |
| 0.012641 | 0.012573 | 0.012641 | 0.012579 | 0.012641 | 0.012472 | 0.012506 |
| 0.012447 | 0.012639 | 0.012434 | 0.012399 | 0.012657 | 0.012426 | 0.012518 |
| 0.012488 | 0.012524 | 0.012674 | 0.012843 | 0.012633 | 0.012775 | 0.012742 |
| 0.012674 | 0.012842 | 0.012590 | 0.012545 | 0.012697 | 0.012573 | 0.012551 |
| 0.012742 | 0.012580 | 0.012787 | 0.012789 | 0.012708 | 0.012742 | 0.012688 |
| 0.012619 | 0.012794 | 0.012722 | 0.012720 | 0.012914 | 0.012438 | 0.012579 |
| 0.012539 | 0.012539 | 0.012404 | 0.012438 | 0.012505 | 0.012505 | 0.012573 |
| 0.012505 | 0.012573 | 0.012472 | 0.012505 | 0.012505 | 0.012505 | 0.012572 |
| 0.012505 | 0.012674 | 0.012573 | 0.012607 | 0.012404 | 0.012505 | 0.012539 |
| 0.012539 | 0.012505 | 0.012573 | 0.012539 | 0.012471 | 0.012471 | 0.012471 |
| 0.012674 | 0.012573 | 0.012640 | 0.012438 | 0.012539 | 0.012708 | 0.012472 |
| 0.012471 | 0.012539 | 0.012505 | 0.012674 | 0.012472 | 0.012337 | 0.012472 |
| 0.012404 | 0.012505 | 0.012505 | 0.012438 | 0.012438 | 0.012607 | 0.012539 |
| 0.012438 | 0.012539 | 0.012404 | 0.012438 | 0.012573 | 0.012439 | 0.012472 |
| 0.012440 | 0.012573 | 0.012507 | 0.012404 | 0.012472 | 0.012405 | 0.012573 |
| 0.012568 | 0.012472 | 0.012506 | 0.012607 | 0.012573 | 0.012505 | 0.012606 |
| 0.012471 | 0.012809 | 0.012404 | 0.012607 | 0.012404 | 0.012404 | 0.012404 |
| 0.012640 | 0.012540 | 0.012539 | 0.012606 | 0.012438 | 0.012573 | 0.012404 |
| 0.012472 | 0.012471 | 0.012505 | 0.012606 | 0.012505 | 0.012606 | 0.012674 |
| 0.012674 | 0.012640 | 0.012539 | 0.012640 | 0.012606 | 0.012472 | 0.012438 |
| 0.012471 | 0.012472 | 0.012539 | 0.012404 | 0.012438 | 0.012606 | 0.012472 |
| 0.012438 | 0.012505 | 0.012640 | 0.012606 | 0.012573 | 0.012505 | 0.012506 |
| 0.012573 | 0.012505 | 0.012606 | 0.012472 | 0.012606 | 0.012707 | 0.012742 |
| 0.012505 | 0.012641 | 0.012477 | 0.019071 | 0.012568 | 0.013082 | 0.012562 |
| 0.012516 | 0.012540 | 0.012739 | 0.012571 | 0.012876 | 0.012582 | 0.013069 |
| 0.012247 | 0.012895 | 0.012506 | 0.012570 | 0.012467 | 0.012642 | 0.012525 |
| 0.012470 | 0.012403 | 0.012397 | 0.011987 | 0.012640 | 0.012539 | 0.012686 |
| 0.012505 | 0.012640 | 0.012640 | 0.012472 | 0.012573 | 0.012574 | 0.012540 |
| 0.012573 | 0.012505 | 0.012539 | 0.012573 | 0.012540 | 0.012472 | 0.012438 |
| 0.012438 | 0.012573 | 0.012472 | 0.012573 | 0.012607 | 0.012640 | 0.012472 |
| 0.012505 | 0.012472 | 0.012607 | 0.012607 | 0.012607 | 0.012643 | 0.012675 |
| 0.012438 | 0.012438 | 0.012472 | 0.012573 | 0.012438 | 0.012674 | 0.012674 |
| 0.012708 | 0.012674 | 0.012640 | 0.012741 | 0.012641 | 0.012713 | 0.012573 |
| 0.012573 | 0.012641 | 0.012674 | 0.012438 | 0.012573 | 0.012539 | 0.012573 |
| 0.012642 | 0.012641 | 0.012674 | 0.012641 | 0.012544 | 0.012741 | 0.012708 |
| 0.012383 | 0.012472 | 0.012573 | 0.012675 | 0.012573 | 0.012641 | 0.012741 |
| 0.012843 | 0.012633 | 0.012775 | 0.012742 | 0.012674 | 0.012842 | 0.012473 |
| 0.012646 | 0.012541 | 0.012438 | 0.012438 | 0.012573 | 0.012472 | 0.012573 |
| 0.012607 | 0.012640 | 0.012472 | 0.012505 | 0.012472 | 0.012607 | 0.012607 |
| 0.012607 | 0.012643 | 0.012640 | 0.012573 | 0.013183 | 0.012742 | 0.012539 |
| 0.012715 | 0.012657 | 0.012749 | 0.012656 | 0.012778 | 0.012614 | 0.012683 |
| 0.013124 | 0.012481 | 0.012604 | 0.012549 | 0.012784 | 0.012763 | 0.012798 |
| 0.013137 | 0.012569 | 0.012787 | 0.012842 | 0.012741 | 0.012472 | 0.012752 |



|          |          |          |          |          |          |          |
|----------|----------|----------|----------|----------|----------|----------|
| 0.012438 | 0.012606 | 0.012741 | 0.012707 | 0.012718 | 0.012438 | 0.012139 |
| 0.012539 | 0.012472 | 0.012505 | 0.012539 | 0.012438 | 0.012505 | 0.012404 |
| 0.012472 | 0.012505 | 0.012472 | 0.012438 | 0.012539 | 0.012471 | 0.012505 |
| 0.012505 | 0.012438 | 0.012505 | 0.012539 | 0.012438 | 0.012640 | 0.012674 |
| 0.012573 | 0.012573 | 0.012573 | 0.012573 | 0.012505 | 0.012641 | 0.012539 |
| 0.012279 | 0.012506 | 0.012473 | 0.012453 | 0.012607 | 0.012606 | 0.012606 |
| 0.012607 | 0.012539 | 0.012505 | 0.012539 | 0.012640 | 0.012640 | 0.012573 |
| 0.012572 | 0.012708 | 0.012607 | 0.012606 | 0.012809 | 0.012809 | 0.012674 |
| 0.012505 | 0.012573 | 0.012607 | 0.012742 | 0.012574 | 0.012607 | 0.012573 |
| 0.012606 | 0.012472 | 0.012472 | 0.012775 | 0.012775 | 0.012741 | 0.012539 |
| 0.012640 | 0.012640 | 0.012573 | 0.012640 | 0.012606 | 0.012472 | 0.012539 |
| 0.012572 | 0.012539 | 0.012472 | 0.012708 | 0.012539 | 0.012640 | 0.012674 |
| 0.012572 | 0.012522 | 0.012674 | 0.012566 | 0.012472 | 0.012558 | 0.012248 |
| 0.012655 | 0.012424 | 0.012431 | 0.012670 | 0.012526 | 0.012692 | 0.012443 |
| 0.012439 | 0.012642 | 0.012509 | 0.012581 | 0.012517 | 0.012603 | 0.012725 |
| 0.012682 | 0.012636 | 0.012542 | 0.012506 | 0.012444 | 0.012438 | 0.012439 |
| 0.012506 | 0.012508 | 0.012685 | 0.012486 | 0.012758 | 0.012617 | 0.012573 |
| 0.012539 | 0.012607 | 0.012539 | 0.012573 | 0.012438 | 0.012404 | 0.012472 |
| 0.012539 | 0.012539 | 0.012506 | 0.012472 | 0.012438 | 0.012472 | 0.012539 |
| 0.012564 | 0.012602 | 0.012535 | 0.012603 | 0.012739 | 0.012702 | 0.012701 |
| 0.012698 | 0.012609 | 0.012317 | 0.012358 | 0.012552 | 0.012655 | 0.012725 |
| 0.012508 | 0.012586 | 0.012814 | 0.012786 | 0.012711 | 0.012745 | 0.012606 |
| 0.012606 | 0.012606 | 0.012606 | 0.012573 | 0.012843 | 0.012741 | 0.012809 |
| 0.012843 | 0.012701 | 0.012563 | 0.012656 | 0.012506 | 0.012606 | 0.012539 |
| 0.012711 | 0.012606 | 0.012674 | 0.012674 | 0.012635 | 0.012809 | 0.012484 |
| 0.012380 | 0.012377 | 0.012492 | 0.012455 | 0.012497 | 0.012442 | 0.012455 |
| 0.012537 | 0.012421 | 0.012347 | 0.012485 | 0.012542 | 0.012636 | 0.012506 |
| 0.012472 | 0.012405 | 0.012540 | 0.012506 | 0.012439 | 0.012405 | 0.012338 |
| 0.012439 | 0.012506 | 0.012506 | 0.012506 | 0.012540 | 0.012539 | 0.012548 |
| 0.012617 | 0.012472 | 0.012506 | 0.012444 | 0.012438 | 0.012439 | 0.012506 |
| 0.012508 | 0.012685 | 0.012486 | 0.012758 | 0.012617 | 0.012573 | 0.012741 |
| 0.012539 | 0.012539 | 0.012516 | 0.012663 | 0.012661 | 0.012663 | 0.012393 |
| 0.012716 | 0.012840 | 0.012628 | 0.012591 | 0.012472 | 0.012675 | 0.012540 |
| 0.012641 | 0.012573 | 0.012405 | 0.012578 | 0.012674 | 0.012685 | 0.012574 |
| 0.012472 | 0.012410 | 0.012539 | 0.012472 | 0.012405 | 0.012386 | 0.012675 |
| 0.012573 | 0.012505 | 0.012539 | 0.012573 | 0.012540 | 0.012472 | 0.012405 |
| 0.012539 | 0.012573 | 0.012573 | 0.012505 | 0.012573 | 0.012809 | 0.012404 |
| 0.012505 | 0.012641 | 0.012505 | 0.012539 | 0.012505 | 0.012607 | 0.012562 |
| 0.012466 | 0.012465 | 0.012365 | 0.012471 | 0.012569 | 0.012390 | 0.012400 |
| 0.012374 | 0.012135 | 0.012236 | 0.012317 | 0.012206 | 0.012313 | 0.012474 |
| 0.012374 | 0.012448 | 0.012371 | 0.012393 | 0.012068 | 0.000000 | 0.012240 |
| 0.012844 | 0.011599 | 0.011633 | 0.013221 | 0.012606 | 0.012338 | 0.012338 |
| 0.013082 | 0.012681 | 0.012303 | 0.012135 | 0.012272 | 0.012272 | 0.012245 |
| 0.012135 | 0.012112 | 0.012202 | 0.012137 | 0.012812 | 0.012877 | 0.012879 |
| 0.012779 | 0.012879 | 0.012952 | 0.012720 | 0.013219 | 0.013061 | 0.013286 |
| 0.013287 | 0.013321 | 0.013214 | 0.013287 | 0.013222 | 0.012539 | 0.012810 |
| 0.012913 | 0.013315 | 0.012894 | 0.012945 | 0.013420 | 0.012488 | 0.012373 |
| 0.012337 | 0.012337 | 0.012811 | 0.012790 | 0.012928 | 0.012674 | 0.012342 |
| S804     | 0.012038 | 0.012038 | 0.011498 | 0.011464 | 0.011464 | 0.011532 |
| 0.011742 | 0.011640 | 0.011464 | 0.011633 | 0.011700 | 0.011667 | 0.011633 |
| 0.011599 | 0.011835 | 0.011565 | 0.011666 | 0.011734 | 0.011700 | 0.011666 |
| 0.011633 | 0.011667 | 0.011498 | 0.011600 | 0.011634 | 0.011667 | 0.011708 |
| 0.011633 | 0.011667 | 0.011565 | 0.011532 | 0.011734 | 0.011700 | 0.011734 |
| 0.011700 | 0.011801 | 0.011700 | 0.011700 | 0.011734 | 0.011700 | 0.011869 |
| 0.011565 | 0.011700 | 0.011734 | 0.011666 | 0.011700 | 0.011801 | 0.011734 |
| 0.011700 | 0.011869 | 0.011768 | 0.011768 | 0.011700 | 0.011970 | 0.011700 |
| 0.011666 | 0.011701 | 0.011835 | 0.011970 | 0.011802 | 0.011700 | 0.011801 |
| 0.011734 | 0.011802 | 0.011700 | 0.011936 | 0.011903 | 0.011700 | 0.011768 |
| 0.011667 | 0.011768 | 0.011734 | 0.011801 | 0.011734 | 0.011734 | 0.011734 |
| 0.011633 | 0.011666 | 0.011633 | 0.011667 | 0.011700 | 0.011734 | 0.011801 |

|          |          |          |          |          |          |          |
|----------|----------|----------|----------|----------|----------|----------|
| 0.011734 | 0.011700 | 0.011768 | 0.011666 | 0.011734 | 0.011633 | 0.011700 |
| 0.011869 | 0.011801 | 0.011835 | 0.011869 | 0.011700 | 0.011936 | 0.011700 |
| 0.011913 | 0.011808 | 0.011966 | 0.011646 | 0.011657 | 0.011723 | 0.011572 |
| 0.012195 | 0.011569 | 0.011719 | 0.011936 | 0.011936 | 0.011666 | 0.011768 |
| 0.011768 | 0.011734 | 0.011801 | 0.011700 | 0.011802 | 0.011734 | 0.011734 |
| 0.011700 | 0.011734 | 0.012004 | 0.011869 | 0.011768 | 0.011734 | 0.011667 |
| 0.011633 | 0.011565 | 0.011700 | 0.011666 | 0.011599 | 0.011566 | 0.011498 |
| 0.011599 | 0.011667 | 0.011666 | 0.011666 | 0.011700 | 0.011700 | 0.011704 |
| 0.011772 | 0.011700 | 0.011700 | 0.011601 | 0.011604 | 0.011552 | 0.011700 |
| 0.011705 | 0.011645 | 0.011725 | 0.011682 | 0.011605 | 0.011644 | 0.011669 |
| 0.011673 | 0.011716 | 0.011750 | 0.011633 | 0.011649 | 0.011768 | 0.011667 |
| 0.011734 | 0.011736 | 0.011734 | 0.011835 | 0.011768 | 0.012139 | 0.011835 |
| 0.011700 | 0.011768 | 0.011700 | 0.011734 | 0.011599 | 0.011566 | 0.011633 |
| 0.011700 | 0.011700 | 0.011666 | 0.011633 | 0.011666 | 0.011633 | 0.011734 |
| 0.011700 | 0.011801 | 0.011734 | 0.011633 | 0.011736 | 0.011835 | 0.011840 |
| 0.011835 | 0.011734 | 0.011633 | 0.011568 | 0.011700 | 0.011633 | 0.011566 |
| 0.011571 | 0.011835 | 0.011633 | 0.011835 | 0.011599 | 0.011700 | 0.011667 |
| 0.011768 | 0.011666 | 0.011700 | 0.011667 | 0.011700 | 0.011565 | 0.011700 |
| 0.011734 | 0.011666 | 0.011734 | 0.011666 | 0.011700 | 0.011734 | 0.011936 |
| 0.011802 | 0.011734 | 0.011802 | 0.011837 | 0.011802 | 0.011700 | 0.011666 |
| 0.011635 | 0.011910 | 0.011748 | 0.011610 | 0.011809 | 0.011573 | 0.011729 |
| 0.011776 | 0.011708 | 0.011869 | 0.012072 | 0.011780 | 0.011936 | 0.011903 |
| 0.011835 | 0.012004 | 0.011738 | 0.011473 | 0.011565 | 0.011734 | 0.011739 |
| 0.011903 | 0.011804 | 0.011943 | 0.011977 | 0.011936 | 0.012004 | 0.012046 |
| 0.011841 | 0.011979 | 0.011943 | 0.011875 | 0.012140 | 0.011599 | 0.011736 |
| 0.011768 | 0.011700 | 0.011599 | 0.011599 | 0.011667 | 0.011667 | 0.011734 |
| 0.011666 | 0.011734 | 0.011633 | 0.011667 | 0.011667 | 0.011666 | 0.011734 |
| 0.011667 | 0.011835 | 0.011734 | 0.011768 | 0.011565 | 0.011667 | 0.011700 |
| 0.011700 | 0.011666 | 0.011734 | 0.011700 | 0.011633 | 0.011633 | 0.011633 |
| 0.011835 | 0.011700 | 0.011801 | 0.011599 | 0.011700 | 0.011869 | 0.011633 |
| 0.011633 | 0.011700 | 0.011666 | 0.011835 | 0.011633 | 0.011498 | 0.011633 |
| 0.011566 | 0.011667 | 0.011666 | 0.011599 | 0.011599 | 0.011768 | 0.011700 |
| 0.011599 | 0.011700 | 0.011565 | 0.011599 | 0.011734 | 0.011600 | 0.011633 |
| 0.011600 | 0.011734 | 0.011667 | 0.011565 | 0.011633 | 0.011565 | 0.011734 |
| 0.011781 | 0.011633 | 0.011667 | 0.011768 | 0.011734 | 0.011667 | 0.011768 |
| 0.011633 | 0.011970 | 0.011565 | 0.011768 | 0.011565 | 0.011565 | 0.011565 |
| 0.011801 | 0.011735 | 0.011700 | 0.011768 | 0.011599 | 0.011734 | 0.011565 |
| 0.011633 | 0.011633 | 0.011666 | 0.011768 | 0.011666 | 0.011768 | 0.011835 |
| 0.011835 | 0.011801 | 0.011700 | 0.011802 | 0.011768 | 0.011633 | 0.011599 |
| 0.011633 | 0.011633 | 0.011700 | 0.011565 | 0.011599 | 0.011768 | 0.011633 |
| 0.011599 | 0.011667 | 0.011801 | 0.011768 | 0.011734 | 0.011666 | 0.011667 |
| 0.011666 | 0.011666 | 0.011768 | 0.011633 | 0.011768 | 0.011869 | 0.011835 |
| 0.011667 | 0.011802 | 0.011682 | 0.018239 | 0.011453 | 0.011917 | 0.011758 |
| 0.011718 | 0.011764 | 0.011794 | 0.011641 | 0.011775 | 0.011786 | 0.011972 |
| 0.011440 | 0.011671 | 0.011646 | 0.011689 | 0.011646 | 0.011752 | 0.011706 |
| 0.011577 | 0.011582 | 0.011580 | 0.011391 | 0.011802 | 0.011835 | 0.011841 |
| 0.011611 | 0.011801 | 0.011801 | 0.011700 | 0.011700 | 0.011701 | 0.011701 |
| 0.011734 | 0.011666 | 0.011700 | 0.011734 | 0.011700 | 0.011633 | 0.011666 |
| 0.011666 | 0.011734 | 0.011633 | 0.011734 | 0.011768 | 0.011801 | 0.011700 |
| 0.011667 | 0.011633 | 0.011768 | 0.011768 | 0.011768 | 0.011803 | 0.011835 |
| 0.011599 | 0.011599 | 0.011633 | 0.011734 | 0.011599 | 0.011835 | 0.011835 |
| 0.011869 | 0.011869 | 0.011801 | 0.011903 | 0.011802 | 0.011905 | 0.011734 |
| 0.011734 | 0.011801 | 0.011835 | 0.011599 | 0.011734 | 0.011700 | 0.011734 |
| 0.011802 | 0.011801 | 0.011835 | 0.011802 | 0.011702 | 0.011902 | 0.011869 |
| 0.011740 | 0.011633 | 0.011734 | 0.011835 | 0.011734 | 0.011802 | 0.011902 |
| 0.012072 | 0.011780 | 0.011936 | 0.011903 | 0.011835 | 0.012004 | 0.011633 |
| 0.011804 | 0.011701 | 0.011666 | 0.011666 | 0.011734 | 0.011633 | 0.011734 |
| 0.011768 | 0.011801 | 0.011700 | 0.011667 | 0.011633 | 0.011768 | 0.011768 |
| 0.011768 | 0.011803 | 0.011869 | 0.011801 | 0.012376 | 0.011812 | 0.011625 |
| 0.011800 | 0.011791 | 0.011765 | 0.011755 | 0.011903 | 0.011787 | 0.011821 |

|          |          |          |          |          |          |          |
|----------|----------|----------|----------|----------|----------|----------|
| 0.012266 | 0.011650 | 0.011817 | 0.011754 | 0.012027 | 0.011914 | 0.011982 |
| 0.012322 | 0.011589 | 0.011739 | 0.011734 | 0.011734 | 0.011498 | 0.011704 |
| 0.011599 | 0.011633 | 0.011768 | 0.011734 | 0.011738 | 0.011599 | 0.011296 |
| 0.011700 | 0.011633 | 0.011667 | 0.011700 | 0.011599 | 0.011667 | 0.011565 |
| 0.011633 | 0.011667 | 0.011633 | 0.011599 | 0.011700 | 0.011633 | 0.011667 |
| 0.011666 | 0.011599 | 0.011667 | 0.011700 | 0.011599 | 0.011801 | 0.011835 |
| 0.011734 | 0.011734 | 0.011734 | 0.011734 | 0.011666 | 0.011802 | 0.011700 |
| 0.011340 | 0.011667 | 0.011633 | 0.011605 | 0.011768 | 0.011768 | 0.011768 |
| 0.011768 | 0.011700 | 0.011666 | 0.011700 | 0.011801 | 0.011801 | 0.011734 |
| 0.011734 | 0.011869 | 0.011768 | 0.011768 | 0.011970 | 0.011970 | 0.011835 |
| 0.011666 | 0.011734 | 0.011768 | 0.011903 | 0.011734 | 0.011768 | 0.011734 |
| 0.011768 | 0.011633 | 0.011633 | 0.011937 | 0.011937 | 0.011903 | 0.011700 |
| 0.011802 | 0.011869 | 0.011734 | 0.011802 | 0.011768 | 0.011633 | 0.011700 |
| 0.011734 | 0.011700 | 0.011633 | 0.011869 | 0.011700 | 0.011801 | 0.011836 |
| 0.011666 | 0.011810 | 0.011835 | 0.011670 | 0.011399 | 0.011741 | 0.011473 |
| 0.011665 | 0.011566 | 0.011657 | 0.011775 | 0.011597 | 0.011825 | 0.011698 |
| 0.011519 | 0.011521 | 0.011673 | 0.011523 | 0.011599 | 0.011596 | 0.011872 |
| 0.011852 | 0.011769 | 0.011730 | 0.011730 | 0.011669 | 0.011599 | 0.011599 |
| 0.011633 | 0.011667 | 0.011840 | 0.011638 | 0.011911 | 0.011947 | 0.011700 |
| 0.011700 | 0.011768 | 0.011700 | 0.011734 | 0.011599 | 0.011566 | 0.011633 |
| 0.011700 | 0.011700 | 0.011666 | 0.011633 | 0.011666 | 0.011633 | 0.011734 |
| 0.011725 | 0.011726 | 0.011712 | 0.011746 | 0.011883 | 0.011848 | 0.011847 |
| 0.011845 | 0.011768 | 0.011578 | 0.011601 | 0.011705 | 0.011875 | 0.011876 |
| 0.011667 | 0.011739 | 0.011971 | 0.011941 | 0.011869 | 0.011903 | 0.011835 |
| 0.011768 | 0.011835 | 0.011835 | 0.011734 | 0.012038 | 0.011903 | 0.011970 |
| 0.012004 | 0.011811 | 0.011711 | 0.011789 | 0.011666 | 0.011835 | 0.011835 |
| 0.011871 | 0.011869 | 0.011903 | 0.011903 | 0.012124 | 0.012038 | 0.011547 |
| 0.011501 | 0.011477 | 0.011640 | 0.011605 | 0.011643 | 0.011434 | 0.011605 |
| 0.011645 | 0.011368 | 0.011442 | 0.011511 | 0.011700 | 0.011780 | 0.011667 |
| 0.011633 | 0.011565 | 0.011700 | 0.011666 | 0.011599 | 0.011566 | 0.011498 |
| 0.011599 | 0.011667 | 0.011666 | 0.011666 | 0.011700 | 0.011700 | 0.011704 |
| 0.011772 | 0.011700 | 0.011700 | 0.011669 | 0.011599 | 0.011599 | 0.011633 |
| 0.011667 | 0.011840 | 0.011638 | 0.011911 | 0.011947 | 0.011700 | 0.011902 |
| 0.011835 | 0.011835 | 0.011671 | 0.011793 | 0.011791 | 0.011812 | 0.011586 |
| 0.011853 | 0.011927 | 0.011781 | 0.011742 | 0.011633 | 0.011835 | 0.011700 |
| 0.011801 | 0.011734 | 0.011633 | 0.011736 | 0.011835 | 0.011840 | 0.011734 |
| 0.011633 | 0.011568 | 0.011700 | 0.011633 | 0.011566 | 0.011571 | 0.011835 |
| 0.011734 | 0.011666 | 0.011700 | 0.011734 | 0.011700 | 0.011633 | 0.011532 |
| 0.011700 | 0.011734 | 0.011734 | 0.011666 | 0.011734 | 0.011970 | 0.011565 |
| 0.011667 | 0.011802 | 0.011666 | 0.011700 | 0.011666 | 0.011768 | 0.011660 |
| 0.011397 | 0.011613 | 0.011411 | 0.011624 | 0.011712 | 0.011599 | 0.011562 |
| 0.011428 | 0.011296 | 0.011397 | 0.011468 | 0.011363 | 0.011500 | 0.011633 |
| 0.011532 | 0.011603 | 0.011532 | 0.011641 | 0.011363 | 0.012240 | 0.000000 |
| 0.012105 | 0.011903 | 0.012040 | 0.012376 | 0.011768 | 0.011532 | 0.011498 |
| 0.012275 | 0.011702 | 0.011464 | 0.011364 | 0.011431 | 0.011431 | 0.011468 |
| 0.011296 | 0.011298 | 0.011363 | 0.011330 | 0.011971 | 0.012038 | 0.012038 |
| 0.011938 | 0.012038 | 0.012140 | 0.011906 | 0.012410 | 0.012418 | 0.012478 |
| 0.012478 | 0.012512 | 0.012461 | 0.012478 | 0.012478 | 0.011768 | 0.012004 |
| 0.012072 | 0.012544 | 0.012079 | 0.012106 | 0.011937 | 0.011638 | 0.011532 |
| 0.011498 | 0.011498 | 0.011971 | 0.011802 | 0.012118 | 0.011802 | 0.011499 |
| S805     | 0.012777 | 0.012777 | 0.012103 | 0.012001 | 0.012001 | 0.012069 |
| 0.012490 | 0.012421 | 0.012001 | 0.012372 | 0.012439 | 0.012374 | 0.012372 |
| 0.012338 | 0.012574 | 0.012304 | 0.012405 | 0.012473 | 0.012439 | 0.012405 |
| 0.012372 | 0.012406 | 0.012237 | 0.012306 | 0.012373 | 0.012405 | 0.012455 |
| 0.012372 | 0.012406 | 0.012304 | 0.012271 | 0.012473 | 0.012439 | 0.012473 |
| 0.012439 | 0.012540 | 0.012439 | 0.012439 | 0.012473 | 0.012439 | 0.012608 |
| 0.012304 | 0.012439 | 0.012473 | 0.012405 | 0.012439 | 0.012540 | 0.012473 |
| 0.012439 | 0.012608 | 0.012508 | 0.012507 | 0.012439 | 0.012709 | 0.012439 |
| 0.012405 | 0.012440 | 0.012540 | 0.012709 | 0.012541 | 0.012439 | 0.012540 |
| 0.012473 | 0.012540 | 0.012439 | 0.012675 | 0.012642 | 0.012439 | 0.012507 |

|          |          |          |          |          |          |          |
|----------|----------|----------|----------|----------|----------|----------|
| 0.012406 | 0.012507 | 0.012473 | 0.012540 | 0.012473 | 0.012473 | 0.012473 |
| 0.012372 | 0.012405 | 0.012372 | 0.012406 | 0.012439 | 0.012476 | 0.012540 |
| 0.012473 | 0.012439 | 0.012507 | 0.012405 | 0.012473 | 0.012372 | 0.012439 |
| 0.012608 | 0.012540 | 0.012574 | 0.012608 | 0.012439 | 0.012675 | 0.012439 |
| 0.012657 | 0.012557 | 0.012610 | 0.012312 | 0.012293 | 0.012461 | 0.012243 |
| 0.012856 | 0.012231 | 0.012339 | 0.012607 | 0.012608 | 0.012405 | 0.012507 |
| 0.012507 | 0.012473 | 0.012540 | 0.012439 | 0.012507 | 0.012473 | 0.012473 |
| 0.012439 | 0.012473 | 0.012743 | 0.012608 | 0.012473 | 0.012474 | 0.012406 |
| 0.012372 | 0.012304 | 0.012439 | 0.012405 | 0.012338 | 0.012305 | 0.012237 |
| 0.012338 | 0.012406 | 0.012405 | 0.012405 | 0.012439 | 0.012439 | 0.012413 |
| 0.012483 | 0.012439 | 0.012439 | 0.012248 | 0.012255 | 0.012253 | 0.012407 |
| 0.012383 | 0.012333 | 0.012353 | 0.012373 | 0.012285 | 0.012295 | 0.012379 |
| 0.012322 | 0.012372 | 0.012405 | 0.012339 | 0.012306 | 0.012475 | 0.012373 |
| 0.012441 | 0.012444 | 0.012441 | 0.012574 | 0.012507 | 0.012878 | 0.012541 |
| 0.012439 | 0.012507 | 0.012439 | 0.012473 | 0.012338 | 0.012305 | 0.012372 |
| 0.012439 | 0.012439 | 0.012405 | 0.012372 | 0.012405 | 0.012372 | 0.012473 |
| 0.012439 | 0.012540 | 0.012473 | 0.012372 | 0.012478 | 0.012574 | 0.012584 |
| 0.012574 | 0.012473 | 0.012372 | 0.012310 | 0.012439 | 0.012372 | 0.012305 |
| 0.012285 | 0.012574 | 0.012372 | 0.012574 | 0.012338 | 0.012439 | 0.012406 |
| 0.012507 | 0.012405 | 0.012439 | 0.012406 | 0.012439 | 0.012305 | 0.012439 |
| 0.012473 | 0.012405 | 0.012473 | 0.012405 | 0.012439 | 0.012473 | 0.012709 |
| 0.012541 | 0.012473 | 0.012541 | 0.012478 | 0.012541 | 0.012439 | 0.012405 |
| 0.012346 | 0.012680 | 0.012663 | 0.012297 | 0.012556 | 0.012324 | 0.012400 |
| 0.012523 | 0.012422 | 0.012540 | 0.012810 | 0.012531 | 0.012608 | 0.012642 |
| 0.012507 | 0.012675 | 0.012484 | 0.012132 | 0.012320 | 0.012473 | 0.012518 |
| 0.012642 | 0.012513 | 0.012653 | 0.012688 | 0.012675 | 0.012709 | 0.012792 |
| 0.012586 | 0.012659 | 0.012621 | 0.012585 | 0.012847 | 0.012338 | 0.012444 |
| 0.012507 | 0.012439 | 0.012304 | 0.012338 | 0.012406 | 0.012406 | 0.012473 |
| 0.012405 | 0.012473 | 0.012372 | 0.012406 | 0.012406 | 0.012405 | 0.012473 |
| 0.012406 | 0.012574 | 0.012473 | 0.012507 | 0.012304 | 0.012406 | 0.012439 |
| 0.012439 | 0.012405 | 0.012473 | 0.012439 | 0.012372 | 0.012372 | 0.012372 |
| 0.012574 | 0.012473 | 0.012540 | 0.012338 | 0.012439 | 0.012608 | 0.012372 |
| 0.012372 | 0.012439 | 0.012405 | 0.012574 | 0.012372 | 0.012237 | 0.012372 |
| 0.012305 | 0.012406 | 0.012405 | 0.012338 | 0.012338 | 0.012507 | 0.012439 |
| 0.012338 | 0.012439 | 0.012304 | 0.012338 | 0.012473 | 0.012339 | 0.012372 |
| 0.012339 | 0.012473 | 0.012407 | 0.012304 | 0.012372 | 0.012304 | 0.012473 |
| 0.012432 | 0.012372 | 0.012406 | 0.012507 | 0.012473 | 0.012406 | 0.012507 |
| 0.012372 | 0.012709 | 0.012304 | 0.012507 | 0.012305 | 0.012305 | 0.012304 |
| 0.012540 | 0.012440 | 0.012439 | 0.012507 | 0.012338 | 0.012473 | 0.012305 |
| 0.012372 | 0.012372 | 0.012405 | 0.012507 | 0.012405 | 0.012507 | 0.012574 |
| 0.012574 | 0.012540 | 0.012439 | 0.012541 | 0.012507 | 0.012372 | 0.012338 |
| 0.012372 | 0.012372 | 0.012439 | 0.012304 | 0.012338 | 0.012507 | 0.012372 |
| 0.012338 | 0.012406 | 0.012540 | 0.012507 | 0.012473 | 0.012405 | 0.012406 |
| 0.012473 | 0.012405 | 0.012507 | 0.012372 | 0.012507 | 0.012540 | 0.012574 |
| 0.012406 | 0.012541 | 0.012373 | 0.018884 | 0.012109 | 0.012346 | 0.012458 |
| 0.012412 | 0.012469 | 0.012476 | 0.012396 | 0.012490 | 0.012478 | 0.012459 |
| 0.012057 | 0.012099 | 0.012350 | 0.012318 | 0.012272 | 0.012345 | 0.012353 |
| 0.012235 | 0.012179 | 0.012248 | 0.012186 | 0.012541 | 0.012574 | 0.012585 |
| 0.012299 | 0.012540 | 0.012540 | 0.012439 | 0.012473 | 0.012474 | 0.012440 |
| 0.012406 | 0.012405 | 0.012372 | 0.012473 | 0.012439 | 0.012372 | 0.012405 |
| 0.012405 | 0.012473 | 0.012372 | 0.012473 | 0.012507 | 0.012540 | 0.012439 |
| 0.012406 | 0.012372 | 0.012507 | 0.012507 | 0.012507 | 0.012543 | 0.012574 |
| 0.012338 | 0.012338 | 0.012372 | 0.012473 | 0.012338 | 0.012574 | 0.012574 |
| 0.012540 | 0.012540 | 0.012540 | 0.012574 | 0.012541 | 0.012579 | 0.012473 |
| 0.012405 | 0.012540 | 0.012574 | 0.012338 | 0.012473 | 0.012439 | 0.012406 |
| 0.012474 | 0.012473 | 0.012506 | 0.012541 | 0.012443 | 0.012641 | 0.012608 |
| 0.012486 | 0.012372 | 0.012473 | 0.012574 | 0.012473 | 0.012541 | 0.012641 |
| 0.012810 | 0.012531 | 0.012608 | 0.012642 | 0.012507 | 0.012675 | 0.012373 |
| 0.012545 | 0.012441 | 0.012405 | 0.012405 | 0.012473 | 0.012372 | 0.012473 |
| 0.012507 | 0.012540 | 0.012439 | 0.012406 | 0.012372 | 0.012507 | 0.012507 |

|          |          |          |          |          |          |          |
|----------|----------|----------|----------|----------|----------|----------|
| 0.012507 | 0.012543 | 0.012608 | 0.012540 | 0.013082 | 0.012420 | 0.012399 |
| 0.012504 | 0.012520 | 0.012609 | 0.012449 | 0.012568 | 0.012581 | 0.012442 |
| 0.012987 | 0.012378 | 0.012536 | 0.012446 | 0.012682 | 0.012628 | 0.012663 |
| 0.013036 | 0.012343 | 0.012449 | 0.012473 | 0.012473 | 0.012237 | 0.012414 |
| 0.012338 | 0.012372 | 0.012507 | 0.012473 | 0.012448 | 0.012338 | 0.012038 |
| 0.012439 | 0.012372 | 0.012406 | 0.012439 | 0.012338 | 0.012406 | 0.012304 |
| 0.012372 | 0.012406 | 0.012372 | 0.012338 | 0.012439 | 0.012372 | 0.012406 |
| 0.012405 | 0.012338 | 0.012406 | 0.012439 | 0.012338 | 0.012540 | 0.012574 |
| 0.012473 | 0.012473 | 0.012473 | 0.012473 | 0.012405 | 0.012541 | 0.012439 |
| 0.012071 | 0.012372 | 0.012339 | 0.012318 | 0.012507 | 0.012507 | 0.012507 |
| 0.012507 | 0.012439 | 0.012405 | 0.012439 | 0.012540 | 0.012540 | 0.012473 |
| 0.012473 | 0.012608 | 0.012507 | 0.012507 | 0.012709 | 0.012709 | 0.012574 |
| 0.012405 | 0.012473 | 0.012507 | 0.012642 | 0.012474 | 0.012507 | 0.012473 |
| 0.012439 | 0.012372 | 0.012372 | 0.012676 | 0.012676 | 0.012642 | 0.012439 |
| 0.012540 | 0.012608 | 0.012473 | 0.012540 | 0.012507 | 0.012372 | 0.012439 |
| 0.012473 | 0.012439 | 0.012372 | 0.012608 | 0.012439 | 0.012540 | 0.012507 |
| 0.012405 | 0.012558 | 0.012574 | 0.012322 | 0.012077 | 0.012456 | 0.012145 |
| 0.012160 | 0.012190 | 0.012326 | 0.012447 | 0.012380 | 0.012488 | 0.012337 |
| 0.012235 | 0.012313 | 0.012342 | 0.012184 | 0.012248 | 0.012401 | 0.012563 |
| 0.012607 | 0.012439 | 0.012436 | 0.012436 | 0.012411 | 0.012338 | 0.012338 |
| 0.012338 | 0.012407 | 0.012584 | 0.012384 | 0.012657 | 0.012653 | 0.012473 |
| 0.012439 | 0.012507 | 0.012439 | 0.012473 | 0.012338 | 0.012305 | 0.012372 |
| 0.012439 | 0.012439 | 0.012405 | 0.012372 | 0.012405 | 0.012372 | 0.012473 |
| 0.012319 | 0.012321 | 0.012398 | 0.012398 | 0.012534 | 0.012531 | 0.012462 |
| 0.012527 | 0.012474 | 0.012243 | 0.012178 | 0.012383 | 0.012553 | 0.012555 |
| 0.012373 | 0.012417 | 0.012679 | 0.012651 | 0.012508 | 0.012611 | 0.012574 |
| 0.012507 | 0.012574 | 0.012574 | 0.012473 | 0.012777 | 0.012574 | 0.012642 |
| 0.012743 | 0.012559 | 0.012461 | 0.012483 | 0.012405 | 0.012574 | 0.012574 |
| 0.012611 | 0.012641 | 0.012574 | 0.012574 | 0.012872 | 0.012777 | 0.012346 |
| 0.012279 | 0.012274 | 0.012356 | 0.012319 | 0.012292 | 0.012256 | 0.012320 |
| 0.012366 | 0.012158 | 0.012157 | 0.012223 | 0.012407 | 0.012431 | 0.012406 |
| 0.012372 | 0.012304 | 0.012439 | 0.012405 | 0.012338 | 0.012305 | 0.012237 |
| 0.012338 | 0.012406 | 0.012405 | 0.012405 | 0.012439 | 0.012439 | 0.012413 |
| 0.012483 | 0.012439 | 0.012439 | 0.012411 | 0.012338 | 0.012338 | 0.012338 |
| 0.012407 | 0.012584 | 0.012384 | 0.012657 | 0.012653 | 0.012473 | 0.012641 |
| 0.012574 | 0.012574 | 0.012415 | 0.012489 | 0.012487 | 0.012561 | 0.012217 |
| 0.012612 | 0.012612 | 0.012502 | 0.012490 | 0.012372 | 0.012574 | 0.012439 |
| 0.012540 | 0.012473 | 0.012372 | 0.012478 | 0.012574 | 0.012584 | 0.012473 |
| 0.012372 | 0.012310 | 0.012439 | 0.012372 | 0.012305 | 0.012285 | 0.012574 |
| 0.012406 | 0.012405 | 0.012372 | 0.012473 | 0.012439 | 0.012372 | 0.012304 |
| 0.012439 | 0.012473 | 0.012473 | 0.012405 | 0.012473 | 0.012709 | 0.012304 |
| 0.012406 | 0.012541 | 0.012405 | 0.012439 | 0.012405 | 0.012507 | 0.012305 |
| 0.012129 | 0.012210 | 0.012064 | 0.012189 | 0.012324 | 0.012282 | 0.012148 |
| 0.012111 | 0.012035 | 0.012136 | 0.012182 | 0.012105 | 0.012212 | 0.012373 |
| 0.012239 | 0.012313 | 0.012271 | 0.012325 | 0.011900 | 0.012844 | 0.012105 |
| 0.000000 | 0.012477 | 0.012645 | 0.013052 | 0.012507 | 0.012170 | 0.012237 |
| 0.013014 | 0.012580 | 0.012136 | 0.012103 | 0.012137 | 0.012137 | 0.012144 |
| 0.012035 | 0.012011 | 0.012102 | 0.012036 | 0.012711 | 0.012777 | 0.012745 |
| 0.012679 | 0.012778 | 0.012850 | 0.012585 | 0.013151 | 0.013163 | 0.013218 |
| 0.013185 | 0.013219 | 0.013179 | 0.013185 | 0.013222 | 0.012507 | 0.012743 |
| 0.012778 | 0.013216 | 0.012826 | 0.012845 | 0.013320 | 0.012352 | 0.012272 |
| 0.012237 | 0.012237 | 0.012642 | 0.012502 | 0.012787 | 0.012574 | 0.012241 |
| s806     | 0.012410 | 0.012410 | 0.011869 | 0.011835 | 0.011835 | 0.011903 |
| 0.012186 | 0.012084 | 0.011835 | 0.012139 | 0.012207 | 0.012173 | 0.012139 |
| 0.012105 | 0.012342 | 0.012072 | 0.012173 | 0.012241 | 0.012207 | 0.012173 |
| 0.012139 | 0.012173 | 0.012004 | 0.012107 | 0.012140 | 0.012173 | 0.012152 |
| 0.012139 | 0.012173 | 0.012072 | 0.012038 | 0.012207 | 0.012207 | 0.012241 |
| 0.012207 | 0.012308 | 0.012207 | 0.012207 | 0.012241 | 0.012207 | 0.012376 |
| 0.012072 | 0.012207 | 0.012241 | 0.012173 | 0.012207 | 0.012308 | 0.012241 |
| 0.012207 | 0.012376 | 0.012276 | 0.012275 | 0.012207 | 0.012477 | 0.012207 |

|          |          |          |          |          |          |          |
|----------|----------|----------|----------|----------|----------|----------|
| 0.012173 | 0.012207 | 0.012308 | 0.012477 | 0.012309 | 0.012207 | 0.012241 |
| 0.012241 | 0.012308 | 0.012207 | 0.012443 | 0.012410 | 0.012207 | 0.012274 |
| 0.012173 | 0.012274 | 0.012241 | 0.012308 | 0.012207 | 0.012241 | 0.012241 |
| 0.012139 | 0.012173 | 0.012139 | 0.012173 | 0.012207 | 0.012241 | 0.012308 |
| 0.012241 | 0.012207 | 0.012274 | 0.012139 | 0.012241 | 0.012139 | 0.012207 |
| 0.012376 | 0.012308 | 0.012342 | 0.012376 | 0.012207 | 0.012443 | 0.012207 |
| 0.012285 | 0.012257 | 0.012420 | 0.012076 | 0.012143 | 0.012055 | 0.012045 |
| 0.012672 | 0.012027 | 0.012173 | 0.012443 | 0.012443 | 0.012139 | 0.012275 |
| 0.012274 | 0.012173 | 0.012241 | 0.012207 | 0.012275 | 0.012207 | 0.012173 |
| 0.012139 | 0.012207 | 0.012444 | 0.012376 | 0.012274 | 0.012241 | 0.012173 |
| 0.012139 | 0.012072 | 0.012207 | 0.012173 | 0.012106 | 0.012072 | 0.012004 |
| 0.012106 | 0.012173 | 0.012173 | 0.012173 | 0.012207 | 0.012207 | 0.012214 |
| 0.012283 | 0.012207 | 0.012173 | 0.012106 | 0.012148 | 0.012115 | 0.012207 |
| 0.012215 | 0.012163 | 0.012242 | 0.012202 | 0.012117 | 0.012160 | 0.012178 |
| 0.012180 | 0.012167 | 0.012269 | 0.012139 | 0.012170 | 0.012275 | 0.012173 |
| 0.012241 | 0.012243 | 0.012241 | 0.012274 | 0.012207 | 0.012646 | 0.012342 |
| 0.012207 | 0.012275 | 0.012207 | 0.012241 | 0.012105 | 0.012072 | 0.012140 |
| 0.012207 | 0.012207 | 0.012173 | 0.012139 | 0.012105 | 0.012139 | 0.012207 |
| 0.012207 | 0.012308 | 0.012241 | 0.012072 | 0.012245 | 0.012342 | 0.012350 |
| 0.012342 | 0.012241 | 0.012139 | 0.012076 | 0.012207 | 0.012139 | 0.012072 |
| 0.012049 | 0.012342 | 0.012139 | 0.012342 | 0.012106 | 0.012207 | 0.012173 |
| 0.012274 | 0.012173 | 0.012207 | 0.012173 | 0.012207 | 0.012072 | 0.012173 |
| 0.012241 | 0.012173 | 0.012241 | 0.012173 | 0.012139 | 0.012241 | 0.012443 |
| 0.012309 | 0.012241 | 0.012309 | 0.012242 | 0.012309 | 0.012139 | 0.012173 |
| 0.012109 | 0.012355 | 0.012438 | 0.012091 | 0.012322 | 0.012087 | 0.012242 |
| 0.012220 | 0.012220 | 0.012342 | 0.012511 | 0.012295 | 0.012444 | 0.012410 |
| 0.012342 | 0.012511 | 0.012274 | 0.012177 | 0.012281 | 0.012241 | 0.012216 |
| 0.012410 | 0.012245 | 0.012453 | 0.012454 | 0.012376 | 0.012410 | 0.012490 |
| 0.012284 | 0.012457 | 0.012386 | 0.012385 | 0.012580 | 0.012105 | 0.012244 |
| 0.012274 | 0.012207 | 0.012072 | 0.012105 | 0.012173 | 0.012173 | 0.012241 |
| 0.012173 | 0.012241 | 0.012139 | 0.012173 | 0.012173 | 0.012173 | 0.012241 |
| 0.012173 | 0.012342 | 0.012241 | 0.012275 | 0.012072 | 0.012173 | 0.012207 |
| 0.012207 | 0.012173 | 0.012241 | 0.012207 | 0.012139 | 0.012139 | 0.012139 |
| 0.012342 | 0.012207 | 0.012308 | 0.012105 | 0.012207 | 0.012376 | 0.012139 |
| 0.012139 | 0.012207 | 0.012173 | 0.012342 | 0.012139 | 0.012004 | 0.012139 |
| 0.012072 | 0.012173 | 0.012173 | 0.012106 | 0.012105 | 0.012275 | 0.012207 |
| 0.012106 | 0.012207 | 0.012072 | 0.012105 | 0.012241 | 0.012106 | 0.012139 |
| 0.012107 | 0.012241 | 0.012174 | 0.012072 | 0.012140 | 0.012072 | 0.012241 |
| 0.012229 | 0.012139 | 0.012173 | 0.012275 | 0.012241 | 0.012173 | 0.012274 |
| 0.012139 | 0.012477 | 0.012072 | 0.012275 | 0.012072 | 0.012072 | 0.012072 |
| 0.012274 | 0.012208 | 0.012207 | 0.012274 | 0.012105 | 0.012241 | 0.012072 |
| 0.012139 | 0.012139 | 0.012173 | 0.012274 | 0.012173 | 0.012274 | 0.012342 |
| 0.012342 | 0.012308 | 0.012207 | 0.012308 | 0.012274 | 0.012139 | 0.012105 |
| 0.012139 | 0.012139 | 0.012207 | 0.012072 | 0.012105 | 0.012274 | 0.012139 |
| 0.012106 | 0.012173 | 0.012308 | 0.012274 | 0.012241 | 0.012173 | 0.012174 |
| 0.012241 | 0.012173 | 0.012274 | 0.012139 | 0.012274 | 0.012376 | 0.012342 |
| 0.012173 | 0.012275 | 0.012165 | 0.018730 | 0.012043 | 0.012591 | 0.012247 |
| 0.012203 | 0.012257 | 0.012318 | 0.012105 | 0.012490 | 0.012270 | 0.012581 |
| 0.011819 | 0.012343 | 0.012114 | 0.012276 | 0.012115 | 0.012246 | 0.012136 |
| 0.012046 | 0.012066 | 0.012062 | 0.011656 | 0.012308 | 0.012207 | 0.012351 |
| 0.012163 | 0.012308 | 0.012274 | 0.012139 | 0.012207 | 0.012208 | 0.012208 |
| 0.012241 | 0.012173 | 0.012207 | 0.012241 | 0.012207 | 0.012139 | 0.012105 |
| 0.012105 | 0.012241 | 0.012139 | 0.012241 | 0.012274 | 0.012308 | 0.012139 |
| 0.012173 | 0.012139 | 0.012275 | 0.012275 | 0.012275 | 0.012310 | 0.012342 |
| 0.012105 | 0.012105 | 0.012139 | 0.012241 | 0.012105 | 0.012342 | 0.012342 |
| 0.012376 | 0.012342 | 0.012308 | 0.012410 | 0.012309 | 0.012380 | 0.012241 |
| 0.012241 | 0.012308 | 0.012342 | 0.012105 | 0.012241 | 0.012207 | 0.012241 |
| 0.012309 | 0.012308 | 0.012342 | 0.012308 | 0.012210 | 0.012376 | 0.012376 |
| 0.012217 | 0.012139 | 0.012241 | 0.012342 | 0.012241 | 0.012308 | 0.012409 |
| 0.012511 | 0.012295 | 0.012444 | 0.012410 | 0.012342 | 0.012511 | 0.012140 |

|          |          |          |          |          |          |          |
|----------|----------|----------|----------|----------|----------|----------|
| 0.012312 | 0.012208 | 0.012105 | 0.012105 | 0.012241 | 0.012139 | 0.012241 |
| 0.012274 | 0.012308 | 0.012139 | 0.012173 | 0.012139 | 0.012275 | 0.012275 |
| 0.012275 | 0.012310 | 0.012308 | 0.012241 | 0.012851 | 0.012387 | 0.012191 |
| 0.012366 | 0.012315 | 0.012401 | 0.012313 | 0.012431 | 0.012273 | 0.012341 |
| 0.012786 | 0.012137 | 0.012265 | 0.012206 | 0.012443 | 0.012427 | 0.012461 |
| 0.012801 | 0.012194 | 0.012249 | 0.012241 | 0.012240 | 0.012004 | 0.012215 |
| 0.012105 | 0.012139 | 0.012274 | 0.012241 | 0.012248 | 0.012106 | 0.011802 |
| 0.012207 | 0.012139 | 0.012173 | 0.012207 | 0.012105 | 0.012173 | 0.012072 |
| 0.012139 | 0.012173 | 0.012139 | 0.012105 | 0.012207 | 0.012139 | 0.012173 |
| 0.012173 | 0.012105 | 0.012173 | 0.012207 | 0.012105 | 0.012308 | 0.012342 |
| 0.012241 | 0.012241 | 0.012241 | 0.012241 | 0.012173 | 0.012309 | 0.012207 |
| 0.011934 | 0.012173 | 0.012139 | 0.012116 | 0.012275 | 0.012274 | 0.012274 |
| 0.012275 | 0.012207 | 0.012173 | 0.012207 | 0.012308 | 0.012308 | 0.012241 |
| 0.012240 | 0.012376 | 0.012275 | 0.012274 | 0.012477 | 0.012477 | 0.012342 |
| 0.012173 | 0.012241 | 0.012275 | 0.012410 | 0.012242 | 0.012275 | 0.012241 |
| 0.012274 | 0.012139 | 0.012139 | 0.012444 | 0.012444 | 0.012410 | 0.012207 |
| 0.012308 | 0.012376 | 0.012241 | 0.012308 | 0.012274 | 0.012139 | 0.012207 |
| 0.012240 | 0.012207 | 0.012139 | 0.012376 | 0.012207 | 0.012308 | 0.012342 |
| 0.012173 | 0.012255 | 0.012342 | 0.012159 | 0.011963 | 0.012253 | 0.011783 |
| 0.012215 | 0.012034 | 0.012150 | 0.012267 | 0.012086 | 0.012232 | 0.012123 |
| 0.012030 | 0.012114 | 0.012063 | 0.012051 | 0.012031 | 0.012133 | 0.012318 |
| 0.012304 | 0.012241 | 0.012224 | 0.012188 | 0.012109 | 0.012106 | 0.012106 |
| 0.012139 | 0.012174 | 0.012351 | 0.012150 | 0.012422 | 0.012409 | 0.012207 |
| 0.012207 | 0.012275 | 0.012207 | 0.012241 | 0.012105 | 0.012072 | 0.012140 |
| 0.012207 | 0.012207 | 0.012173 | 0.012139 | 0.012105 | 0.012139 | 0.012207 |
| 0.012252 | 0.012254 | 0.012228 | 0.012228 | 0.012399 | 0.012363 | 0.012362 |
| 0.012359 | 0.012241 | 0.012060 | 0.012071 | 0.012215 | 0.012386 | 0.012388 |
| 0.012173 | 0.012249 | 0.012479 | 0.012450 | 0.012376 | 0.012411 | 0.012274 |
| 0.012274 | 0.012275 | 0.012274 | 0.012240 | 0.012512 | 0.012410 | 0.012478 |
| 0.012511 | 0.012313 | 0.012225 | 0.012312 | 0.012173 | 0.012274 | 0.012207 |
| 0.012345 | 0.012241 | 0.012410 | 0.012410 | 0.012441 | 0.012477 | 0.012140 |
| 0.012045 | 0.012034 | 0.012154 | 0.012117 | 0.012158 | 0.012072 | 0.012118 |
| 0.012196 | 0.012028 | 0.012064 | 0.012075 | 0.012207 | 0.012296 | 0.012173 |
| 0.012139 | 0.012072 | 0.012207 | 0.012173 | 0.012106 | 0.012072 | 0.012004 |
| 0.012106 | 0.012173 | 0.012173 | 0.012173 | 0.012207 | 0.012207 | 0.012214 |
| 0.012283 | 0.012207 | 0.012173 | 0.012109 | 0.012106 | 0.012106 | 0.012139 |
| 0.012174 | 0.012351 | 0.012150 | 0.012422 | 0.012409 | 0.012207 | 0.012409 |
| 0.012207 | 0.012207 | 0.012181 | 0.012317 | 0.012315 | 0.012292 | 0.012077 |
| 0.012371 | 0.012475 | 0.012377 | 0.012255 | 0.012139 | 0.012342 | 0.012207 |
| 0.012308 | 0.012241 | 0.012072 | 0.012245 | 0.012342 | 0.012350 | 0.012241 |
| 0.012139 | 0.012076 | 0.012207 | 0.012139 | 0.012072 | 0.012049 | 0.012342 |
| 0.012241 | 0.012173 | 0.012207 | 0.012241 | 0.012207 | 0.012139 | 0.012038 |
| 0.012207 | 0.012241 | 0.012241 | 0.012173 | 0.012241 | 0.012477 | 0.012072 |
| 0.012173 | 0.012309 | 0.012173 | 0.012207 | 0.012173 | 0.012275 | 0.012175 |
| 0.012015 | 0.012038 | 0.011913 | 0.012108 | 0.012160 | 0.012066 | 0.012022 |
| 0.011900 | 0.011802 | 0.011903 | 0.011979 | 0.011869 | 0.011975 | 0.012139 |
| 0.012039 | 0.012112 | 0.012038 | 0.012120 | 0.011734 | 0.011599 | 0.011903 |
| 0.012477 | 0.000000 | 0.011398 | 0.012884 | 0.012274 | 0.012004 | 0.012004 |
| 0.012749 | 0.012175 | 0.011970 | 0.011870 | 0.011937 | 0.011937 | 0.011977 |
| 0.011802 | 0.011773 | 0.011869 | 0.011836 | 0.012478 | 0.012545 | 0.012545 |
| 0.012446 | 0.012545 | 0.012613 | 0.012381 | 0.012885 | 0.012895 | 0.012953 |
| 0.012953 | 0.012987 | 0.012906 | 0.012953 | 0.012885 | 0.012207 | 0.012478 |
| 0.012579 | 0.012952 | 0.012555 | 0.012613 | 0.012377 | 0.012148 | 0.012038 |
| 0.012004 | 0.012004 | 0.012444 | 0.012381 | 0.012614 | 0.012308 | 0.012005 |
| S807     | 0.012544 | 0.012544 | 0.012071 | 0.011970 | 0.011970 | 0.012037 |
| 0.012322 | 0.012254 | 0.011970 | 0.012274 | 0.012341 | 0.012310 | 0.012273 |
| 0.012240 | 0.012476 | 0.012206 | 0.012307 | 0.012375 | 0.012341 | 0.012307 |
| 0.012273 | 0.012307 | 0.012139 | 0.012241 | 0.012275 | 0.012307 | 0.012288 |
| 0.012274 | 0.012307 | 0.012206 | 0.012172 | 0.012375 | 0.012341 | 0.012375 |
| 0.012341 | 0.012442 | 0.012341 | 0.012341 | 0.012375 | 0.012341 | 0.012510 |

|          |          |          |          |          |          |          |
|----------|----------|----------|----------|----------|----------|----------|
| 0.012206 | 0.012341 | 0.012375 | 0.012307 | 0.012341 | 0.012442 | 0.012375 |
| 0.012341 | 0.012510 | 0.012410 | 0.012409 | 0.012341 | 0.012611 | 0.012341 |
| 0.012307 | 0.012341 | 0.012442 | 0.012611 | 0.012443 | 0.012341 | 0.012375 |
| 0.012375 | 0.012442 | 0.012341 | 0.012577 | 0.012544 | 0.012341 | 0.012409 |
| 0.012307 | 0.012408 | 0.012375 | 0.012442 | 0.012375 | 0.012375 | 0.012375 |
| 0.012273 | 0.012307 | 0.012273 | 0.012307 | 0.012341 | 0.012378 | 0.012442 |
| 0.012375 | 0.012341 | 0.012408 | 0.012307 | 0.012375 | 0.012273 | 0.012341 |
| 0.012510 | 0.012442 | 0.012476 | 0.012510 | 0.012307 | 0.012577 | 0.012341 |
| 0.012512 | 0.012485 | 0.012651 | 0.012315 | 0.012334 | 0.012205 | 0.012286 |
| 0.012860 | 0.012286 | 0.012425 | 0.012577 | 0.012577 | 0.012307 | 0.012409 |
| 0.012409 | 0.012307 | 0.012375 | 0.012341 | 0.012409 | 0.012375 | 0.012307 |
| 0.012273 | 0.012375 | 0.012578 | 0.012510 | 0.012409 | 0.012375 | 0.012307 |
| 0.012273 | 0.012206 | 0.012341 | 0.012307 | 0.012240 | 0.012206 | 0.012139 |
| 0.012240 | 0.012307 | 0.012307 | 0.012307 | 0.012341 | 0.012341 | 0.012348 |
| 0.012418 | 0.012307 | 0.012307 | 0.012215 | 0.012294 | 0.012221 | 0.012342 |
| 0.012352 | 0.012302 | 0.012393 | 0.012341 | 0.012219 | 0.012263 | 0.012314 |
| 0.012289 | 0.012306 | 0.012408 | 0.012275 | 0.012309 | 0.012411 | 0.012309 |
| 0.012376 | 0.012379 | 0.012376 | 0.012408 | 0.012341 | 0.012780 | 0.012510 |
| 0.012341 | 0.012409 | 0.012341 | 0.012375 | 0.012240 | 0.012206 | 0.012274 |
| 0.012341 | 0.012341 | 0.012307 | 0.012273 | 0.012240 | 0.012273 | 0.012341 |
| 0.012341 | 0.012442 | 0.012375 | 0.012206 | 0.012379 | 0.012476 | 0.012485 |
| 0.012476 | 0.012375 | 0.012273 | 0.012211 | 0.012341 | 0.012273 | 0.012206 |
| 0.012185 | 0.012476 | 0.012274 | 0.012476 | 0.012240 | 0.012341 | 0.012307 |
| 0.012375 | 0.012307 | 0.012307 | 0.012307 | 0.012341 | 0.012206 | 0.012341 |
| 0.012375 | 0.012307 | 0.012375 | 0.012307 | 0.012273 | 0.012375 | 0.012611 |
| 0.012443 | 0.012375 | 0.012443 | 0.012380 | 0.012443 | 0.012273 | 0.012307 |
| 0.012247 | 0.012440 | 0.012484 | 0.012231 | 0.012457 | 0.012188 | 0.012364 |
| 0.012356 | 0.012356 | 0.012476 | 0.012645 | 0.012432 | 0.012578 | 0.012544 |
| 0.012476 | 0.012645 | 0.012380 | 0.012218 | 0.012366 | 0.012375 | 0.012351 |
| 0.012544 | 0.012381 | 0.012588 | 0.012589 | 0.012510 | 0.012544 | 0.012591 |
| 0.012419 | 0.012594 | 0.012488 | 0.012486 | 0.012716 | 0.012240 | 0.012380 |
| 0.012375 | 0.012341 | 0.012206 | 0.012240 | 0.012307 | 0.012307 | 0.012375 |
| 0.012307 | 0.012375 | 0.012273 | 0.012307 | 0.012307 | 0.012307 | 0.012375 |
| 0.012307 | 0.012476 | 0.012375 | 0.012409 | 0.012206 | 0.012307 | 0.012341 |
| 0.012341 | 0.012307 | 0.012375 | 0.012341 | 0.012273 | 0.012273 | 0.012273 |
| 0.012476 | 0.012375 | 0.012442 | 0.012240 | 0.012341 | 0.012510 | 0.012273 |
| 0.012273 | 0.012341 | 0.012307 | 0.012476 | 0.012273 | 0.012139 | 0.012273 |
| 0.012206 | 0.012307 | 0.012307 | 0.012240 | 0.012240 | 0.012409 | 0.012341 |
| 0.012240 | 0.012341 | 0.012206 | 0.012240 | 0.012375 | 0.012241 | 0.012274 |
| 0.012241 | 0.012375 | 0.012308 | 0.012206 | 0.012274 | 0.012206 | 0.012375 |
| 0.012366 | 0.012274 | 0.012307 | 0.012409 | 0.012375 | 0.012307 | 0.012408 |
| 0.012273 | 0.012611 | 0.012206 | 0.012409 | 0.012206 | 0.012206 | 0.012206 |
| 0.012442 | 0.012342 | 0.012341 | 0.012409 | 0.012240 | 0.012375 | 0.012206 |
| 0.012273 | 0.012273 | 0.012307 | 0.012409 | 0.012307 | 0.012408 | 0.012476 |
| 0.012476 | 0.012442 | 0.012341 | 0.012443 | 0.012408 | 0.012273 | 0.012240 |
| 0.012206 | 0.012273 | 0.012341 | 0.012206 | 0.012240 | 0.012409 | 0.012273 |
| 0.012240 | 0.012307 | 0.012442 | 0.012409 | 0.012375 | 0.012307 | 0.012308 |
| 0.012375 | 0.012307 | 0.012408 | 0.012273 | 0.012408 | 0.012510 | 0.012476 |
| 0.012307 | 0.012443 | 0.012307 | 0.018941 | 0.012436 | 0.012660 | 0.012391 |
| 0.012345 | 0.012402 | 0.012481 | 0.012285 | 0.012718 | 0.012412 | 0.012894 |
| 0.012104 | 0.012595 | 0.012353 | 0.012406 | 0.012314 | 0.012499 | 0.012356 |
| 0.012333 | 0.012257 | 0.012251 | 0.011855 | 0.012442 | 0.012341 | 0.012486 |
| 0.012267 | 0.012442 | 0.012442 | 0.012273 | 0.012375 | 0.012376 | 0.012342 |
| 0.012375 | 0.012307 | 0.012341 | 0.012375 | 0.012341 | 0.012273 | 0.012240 |
| 0.012240 | 0.012375 | 0.012273 | 0.012375 | 0.012408 | 0.012442 | 0.012273 |
| 0.012307 | 0.012274 | 0.012409 | 0.012409 | 0.012409 | 0.012445 | 0.012476 |
| 0.012240 | 0.012240 | 0.012273 | 0.012375 | 0.012240 | 0.012476 | 0.012476 |
| 0.012510 | 0.012476 | 0.012442 | 0.012544 | 0.012443 | 0.012514 | 0.012375 |
| 0.012375 | 0.012442 | 0.012476 | 0.012240 | 0.012375 | 0.012341 | 0.012375 |
| 0.012443 | 0.012442 | 0.012476 | 0.012443 | 0.012345 | 0.012543 | 0.012510 |



|          |          |          |          |          |          |          |
|----------|----------|----------|----------|----------|----------|----------|
| 0.012353 | 0.012273 | 0.012375 | 0.012476 | 0.012375 | 0.012442 | 0.012543 |
| 0.012645 | 0.012432 | 0.012578 | 0.012544 | 0.012476 | 0.012645 | 0.012274 |
| 0.012447 | 0.012342 | 0.012240 | 0.012240 | 0.012375 | 0.012273 | 0.012375 |
| 0.012408 | 0.012442 | 0.012273 | 0.012307 | 0.012274 | 0.012409 | 0.012409 |
| 0.012409 | 0.012445 | 0.012442 | 0.012375 | 0.012986 | 0.012495 | 0.012331 |
| 0.012472 | 0.012453 | 0.012507 | 0.012452 | 0.012536 | 0.012411 | 0.012445 |
| 0.012922 | 0.012242 | 0.012402 | 0.012310 | 0.012547 | 0.012529 | 0.012598 |
| 0.012938 | 0.012270 | 0.012384 | 0.012375 | 0.012375 | 0.012139 | 0.012349 |
| 0.012240 | 0.012273 | 0.012408 | 0.012375 | 0.012383 | 0.012240 | 0.011939 |
| 0.012341 | 0.012273 | 0.012307 | 0.012341 | 0.012240 | 0.012307 | 0.012206 |
| 0.012273 | 0.012307 | 0.012273 | 0.012240 | 0.012341 | 0.012273 | 0.012307 |
| 0.012307 | 0.012240 | 0.012307 | 0.012341 | 0.012240 | 0.012442 | 0.012476 |
| 0.012375 | 0.012375 | 0.012375 | 0.012375 | 0.012307 | 0.012443 | 0.012341 |
| 0.012038 | 0.012307 | 0.012275 | 0.012252 | 0.012409 | 0.012408 | 0.012408 |
| 0.012409 | 0.012341 | 0.012307 | 0.012341 | 0.012442 | 0.012442 | 0.012375 |
| 0.012375 | 0.012510 | 0.012409 | 0.012408 | 0.012611 | 0.012611 | 0.012476 |
| 0.012307 | 0.012375 | 0.012409 | 0.012544 | 0.012376 | 0.012409 | 0.012375 |
| 0.012408 | 0.012273 | 0.012273 | 0.012578 | 0.012578 | 0.012544 | 0.012341 |
| 0.012442 | 0.012442 | 0.012375 | 0.012442 | 0.012408 | 0.012273 | 0.012341 |
| 0.012375 | 0.012341 | 0.012273 | 0.012510 | 0.012341 | 0.012408 | 0.012477 |
| 0.012307 | 0.012390 | 0.012476 | 0.012366 | 0.012194 | 0.012391 | 0.012041 |
| 0.012274 | 0.012271 | 0.012294 | 0.012536 | 0.012379 | 0.012488 | 0.012390 |
| 0.012341 | 0.012444 | 0.012398 | 0.012449 | 0.012355 | 0.012469 | 0.012567 |
| 0.012535 | 0.012482 | 0.012368 | 0.012333 | 0.012244 | 0.012240 | 0.012240 |
| 0.012307 | 0.012309 | 0.012486 | 0.012285 | 0.012558 | 0.012550 | 0.012375 |
| 0.012341 | 0.012409 | 0.012341 | 0.012375 | 0.012240 | 0.012206 | 0.012274 |
| 0.012341 | 0.012341 | 0.012307 | 0.012273 | 0.012240 | 0.012273 | 0.012341 |
| 0.012392 | 0.012359 | 0.012366 | 0.012366 | 0.012502 | 0.012500 | 0.012499 |
| 0.012496 | 0.012410 | 0.012169 | 0.012178 | 0.012352 | 0.012488 | 0.012524 |
| 0.012309 | 0.012386 | 0.012615 | 0.012587 | 0.012512 | 0.012546 | 0.012408 |
| 0.012408 | 0.012375 | 0.012408 | 0.012374 | 0.012646 | 0.012544 | 0.012612 |
| 0.012645 | 0.012491 | 0.012362 | 0.012451 | 0.012307 | 0.012408 | 0.012341 |
| 0.012513 | 0.012408 | 0.012476 | 0.012476 | 0.012595 | 0.012611 | 0.012279 |
| 0.012180 | 0.012172 | 0.012290 | 0.012254 | 0.012261 | 0.012184 | 0.012254 |
| 0.012334 | 0.012161 | 0.012112 | 0.012226 | 0.012342 | 0.012399 | 0.012307 |
| 0.012273 | 0.012206 | 0.012341 | 0.012307 | 0.012240 | 0.012206 | 0.012139 |
| 0.012240 | 0.012307 | 0.012307 | 0.012307 | 0.012341 | 0.012341 | 0.012348 |
| 0.012418 | 0.012307 | 0.012307 | 0.012244 | 0.012240 | 0.012240 | 0.012307 |
| 0.012309 | 0.012486 | 0.012285 | 0.012558 | 0.012550 | 0.012375 | 0.012543 |
| 0.012341 | 0.012341 | 0.012282 | 0.012422 | 0.012456 | 0.012462 | 0.012185 |
| 0.012512 | 0.012662 | 0.012463 | 0.012390 | 0.012274 | 0.012476 | 0.012341 |
| 0.012442 | 0.012375 | 0.012206 | 0.012379 | 0.012476 | 0.012485 | 0.012375 |
| 0.012273 | 0.012211 | 0.012341 | 0.012273 | 0.012206 | 0.012185 | 0.012476 |
| 0.012375 | 0.012307 | 0.012341 | 0.012375 | 0.012341 | 0.012273 | 0.012206 |
| 0.012341 | 0.012375 | 0.012375 | 0.012307 | 0.012375 | 0.012611 | 0.012206 |
| 0.012307 | 0.012443 | 0.012307 | 0.012341 | 0.012307 | 0.012409 | 0.012437 |
| 0.012246 | 0.012255 | 0.012218 | 0.012273 | 0.012409 | 0.012249 | 0.012278 |
| 0.012220 | 0.011936 | 0.012037 | 0.012116 | 0.012006 | 0.012112 | 0.012275 |
| 0.012174 | 0.012248 | 0.012172 | 0.012225 | 0.011869 | 0.011633 | 0.012040 |
| 0.012645 | 0.011398 | 0.000000 | 0.013023 | 0.012409 | 0.012138 | 0.012139 |
| 0.012884 | 0.012482 | 0.012105 | 0.011970 | 0.012072 | 0.012072 | 0.012079 |
| 0.011936 | 0.011911 | 0.012003 | 0.011937 | 0.012613 | 0.012679 | 0.012681 |
| 0.012581 | 0.012680 | 0.012753 | 0.012520 | 0.013021 | 0.013032 | 0.013088 |
| 0.013089 | 0.013123 | 0.013047 | 0.013089 | 0.013023 | 0.012341 | 0.012612 |
| 0.012715 | 0.013119 | 0.012694 | 0.012747 | 0.013223 | 0.012287 | 0.012173 |
| 0.012139 | 0.012138 | 0.012612 | 0.012423 | 0.012751 | 0.012476 | 0.012142 |
| S808     | 0.012951 | 0.012951 | 0.012511 | 0.012443 | 0.012443 | 0.012511 |
| 0.012665 | 0.012563 | 0.012443 | 0.012545 | 0.012612 | 0.012579 | 0.012545 |
| 0.012511 | 0.012748 | 0.012477 | 0.012578 | 0.012646 | 0.012613 | 0.012578 |
| 0.012545 | 0.012579 | 0.012410 | 0.012546 | 0.012580 | 0.012578 | 0.012631 |

|          |          |          |          |          |          |          |
|----------|----------|----------|----------|----------|----------|----------|
| 0.012545 | 0.012579 | 0.012477 | 0.012444 | 0.012612 | 0.012612 | 0.012646 |
| 0.012545 | 0.012714 | 0.012612 | 0.012613 | 0.012646 | 0.012612 | 0.012782 |
| 0.012477 | 0.012612 | 0.012646 | 0.012578 | 0.012612 | 0.012714 | 0.012646 |
| 0.012613 | 0.012782 | 0.012682 | 0.012681 | 0.012612 | 0.012883 | 0.012612 |
| 0.012578 | 0.012613 | 0.012748 | 0.012883 | 0.012715 | 0.012613 | 0.012714 |
| 0.012646 | 0.012714 | 0.012613 | 0.012849 | 0.012817 | 0.012613 | 0.012680 |
| 0.012579 | 0.012680 | 0.012646 | 0.012714 | 0.012646 | 0.012646 | 0.012646 |
| 0.012545 | 0.012578 | 0.012545 | 0.012579 | 0.012612 | 0.012646 | 0.012714 |
| 0.012646 | 0.012612 | 0.012680 | 0.012578 | 0.012646 | 0.012545 | 0.012612 |
| 0.012781 | 0.012714 | 0.012748 | 0.012782 | 0.012613 | 0.012781 | 0.012612 |
| 0.012696 | 0.012671 | 0.012839 | 0.012508 | 0.012519 | 0.012647 | 0.012363 |
| 0.013041 | 0.012437 | 0.012546 | 0.012849 | 0.012849 | 0.012545 | 0.012680 |
| 0.012680 | 0.012578 | 0.012714 | 0.012612 | 0.012714 | 0.012613 | 0.012646 |
| 0.012612 | 0.012578 | 0.012849 | 0.012781 | 0.012680 | 0.012647 | 0.012579 |
| 0.012545 | 0.012477 | 0.012613 | 0.012578 | 0.012511 | 0.012478 | 0.012410 |
| 0.012511 | 0.012579 | 0.012578 | 0.012578 | 0.012612 | 0.012612 | 0.012621 |
| 0.012691 | 0.012612 | 0.012612 | 0.012469 | 0.012476 | 0.012398 | 0.012613 |
| 0.012591 | 0.012544 | 0.012614 | 0.012585 | 0.012493 | 0.012505 | 0.012587 |
| 0.012507 | 0.012584 | 0.012651 | 0.012546 | 0.012553 | 0.012682 | 0.012580 |
| 0.012648 | 0.012617 | 0.012647 | 0.012747 | 0.012680 | 0.013053 | 0.012782 |
| 0.012613 | 0.012680 | 0.012612 | 0.012647 | 0.012511 | 0.012477 | 0.012545 |
| 0.012613 | 0.012545 | 0.012578 | 0.012545 | 0.012578 | 0.012545 | 0.012646 |
| 0.012613 | 0.012714 | 0.012646 | 0.012545 | 0.012652 | 0.012748 | 0.012758 |
| 0.012748 | 0.012646 | 0.012545 | 0.012483 | 0.012612 | 0.012545 | 0.012478 |
| 0.012459 | 0.012748 | 0.012545 | 0.012748 | 0.012511 | 0.012613 | 0.012579 |
| 0.012680 | 0.012578 | 0.012613 | 0.012579 | 0.012613 | 0.012477 | 0.012613 |
| 0.012646 | 0.012578 | 0.012646 | 0.012578 | 0.012612 | 0.012646 | 0.012849 |
| 0.012715 | 0.012647 | 0.012715 | 0.012751 | 0.012715 | 0.012612 | 0.012578 |
| 0.012550 | 0.012803 | 0.012853 | 0.012539 | 0.012732 | 0.012499 | 0.012559 |
| 0.012699 | 0.012631 | 0.012781 | 0.012917 | 0.012708 | 0.012849 | 0.012816 |
| 0.012748 | 0.012849 | 0.012632 | 0.012426 | 0.012451 | 0.012647 | 0.012659 |
| 0.012816 | 0.012687 | 0.012828 | 0.012829 | 0.012849 | 0.012849 | 0.012933 |
| 0.012727 | 0.012800 | 0.012830 | 0.012760 | 0.012988 | 0.012511 | 0.012652 |
| 0.012680 | 0.012613 | 0.012511 | 0.012511 | 0.012579 | 0.012579 | 0.012646 |
| 0.012578 | 0.012646 | 0.012545 | 0.012579 | 0.012579 | 0.012578 | 0.012646 |
| 0.012579 | 0.012748 | 0.012647 | 0.012681 | 0.012477 | 0.012579 | 0.012613 |
| 0.012613 | 0.012578 | 0.012646 | 0.012613 | 0.012545 | 0.012545 | 0.012545 |
| 0.012816 | 0.012646 | 0.012714 | 0.012511 | 0.012612 | 0.012782 | 0.012545 |
| 0.012545 | 0.012612 | 0.012578 | 0.012748 | 0.012545 | 0.012410 | 0.012545 |
| 0.012477 | 0.012579 | 0.012578 | 0.012511 | 0.012511 | 0.012680 | 0.012612 |
| 0.012511 | 0.012612 | 0.012477 | 0.012511 | 0.012646 | 0.012512 | 0.012545 |
| 0.012512 | 0.012646 | 0.012580 | 0.012477 | 0.012545 | 0.012477 | 0.012646 |
| 0.012677 | 0.012545 | 0.012579 | 0.012681 | 0.012646 | 0.012579 | 0.012680 |
| 0.012545 | 0.012883 | 0.012477 | 0.012680 | 0.012477 | 0.012477 | 0.012477 |
| 0.012714 | 0.012648 | 0.012613 | 0.012680 | 0.012511 | 0.012647 | 0.012477 |
| 0.012545 | 0.012545 | 0.012578 | 0.012680 | 0.012578 | 0.012680 | 0.012748 |
| 0.012748 | 0.012714 | 0.012612 | 0.012714 | 0.012680 | 0.012545 | 0.012511 |
| 0.012545 | 0.012545 | 0.012613 | 0.012477 | 0.012511 | 0.012680 | 0.012545 |
| 0.012511 | 0.012579 | 0.012714 | 0.012680 | 0.012646 | 0.012578 | 0.012579 |
| 0.012646 | 0.012578 | 0.012680 | 0.012545 | 0.012680 | 0.012782 | 0.012748 |
| 0.012579 | 0.012715 | 0.012617 | 0.019076 | 0.011978 | 0.012838 | 0.012704 |
| 0.012656 | 0.012718 | 0.012635 | 0.012514 | 0.012713 | 0.012722 | 0.012643 |
| 0.012296 | 0.012469 | 0.012429 | 0.012698 | 0.012587 | 0.012496 | 0.012527 |
| 0.012377 | 0.012404 | 0.012436 | 0.012254 | 0.012680 | 0.012748 | 0.012760 |
| 0.012510 | 0.012714 | 0.012714 | 0.012612 | 0.012613 | 0.012614 | 0.012613 |
| 0.012646 | 0.012578 | 0.012612 | 0.012646 | 0.012613 | 0.012545 | 0.012578 |
| 0.012578 | 0.012646 | 0.012545 | 0.012647 | 0.012646 | 0.012714 | 0.012612 |
| 0.012579 | 0.012545 | 0.012681 | 0.012681 | 0.012681 | 0.012717 | 0.012680 |
| 0.012511 | 0.012511 | 0.012545 | 0.012646 | 0.012511 | 0.012748 | 0.012748 |
| 0.012781 | 0.012781 | 0.012714 | 0.012815 | 0.012715 | 0.012821 | 0.012646 |

|          |          |          |          |          |          |          |
|----------|----------|----------|----------|----------|----------|----------|
| 0.012646 | 0.012714 | 0.012748 | 0.012511 | 0.012646 | 0.012612 | 0.012646 |
| 0.012714 | 0.012714 | 0.012748 | 0.012714 | 0.012616 | 0.012815 | 0.012781 |
| 0.012626 | 0.012545 | 0.012646 | 0.012748 | 0.012579 | 0.012714 | 0.012815 |
| 0.012917 | 0.012708 | 0.012849 | 0.012816 | 0.012748 | 0.012849 | 0.012545 |
| 0.012719 | 0.012614 | 0.012578 | 0.012578 | 0.012646 | 0.012545 | 0.012647 |
| 0.012646 | 0.012714 | 0.012612 | 0.012579 | 0.012545 | 0.012681 | 0.012681 |
| 0.012681 | 0.012717 | 0.012781 | 0.012713 | 0.013292 | 0.012712 | 0.012580 |
| 0.012685 | 0.012664 | 0.012720 | 0.012697 | 0.012749 | 0.012585 | 0.012724 |
| 0.013201 | 0.012556 | 0.012679 | 0.012554 | 0.012790 | 0.012804 | 0.012804 |
| 0.013213 | 0.012498 | 0.012658 | 0.012646 | 0.012646 | 0.012410 | 0.012623 |
| 0.012511 | 0.012545 | 0.012680 | 0.012646 | 0.012657 | 0.012511 | 0.012276 |
| 0.012612 | 0.012545 | 0.012579 | 0.012612 | 0.012511 | 0.012579 | 0.012477 |
| 0.012545 | 0.012579 | 0.012545 | 0.012511 | 0.012613 | 0.012545 | 0.012579 |
| 0.012578 | 0.012511 | 0.012579 | 0.012613 | 0.012511 | 0.012714 | 0.012748 |
| 0.012646 | 0.012646 | 0.012646 | 0.012646 | 0.012578 | 0.012715 | 0.012612 |
| 0.012249 | 0.012579 | 0.012546 | 0.012492 | 0.012681 | 0.012680 | 0.012680 |
| 0.012680 | 0.012613 | 0.012578 | 0.012613 | 0.012714 | 0.012714 | 0.012646 |
| 0.012646 | 0.012782 | 0.012681 | 0.012680 | 0.012884 | 0.012884 | 0.012748 |
| 0.012578 | 0.012646 | 0.012680 | 0.012816 | 0.012647 | 0.012681 | 0.012646 |
| 0.012680 | 0.012545 | 0.012545 | 0.012850 | 0.012850 | 0.012816 | 0.012613 |
| 0.012714 | 0.012782 | 0.012646 | 0.012714 | 0.012680 | 0.012545 | 0.012613 |
| 0.012646 | 0.012612 | 0.012545 | 0.012782 | 0.012613 | 0.012714 | 0.012749 |
| 0.012578 | 0.012733 | 0.012748 | 0.012446 | 0.012135 | 0.012664 | 0.012249 |
| 0.012492 | 0.012386 | 0.012609 | 0.012537 | 0.012380 | 0.012438 | 0.012231 |
| 0.012339 | 0.012050 | 0.012231 | 0.011987 | 0.012140 | 0.012201 | 0.012768 |
| 0.012646 | 0.012638 | 0.012685 | 0.012613 | 0.012584 | 0.012511 | 0.012511 |
| 0.012579 | 0.012580 | 0.012759 | 0.012559 | 0.012832 | 0.012801 | 0.012579 |
| 0.012613 | 0.012680 | 0.012612 | 0.012647 | 0.012511 | 0.012477 | 0.012545 |
| 0.012613 | 0.012545 | 0.012578 | 0.012545 | 0.012578 | 0.012545 | 0.012646 |
| 0.012639 | 0.012571 | 0.012608 | 0.012608 | 0.012744 | 0.012742 | 0.012706 |
| 0.012737 | 0.012681 | 0.012432 | 0.012470 | 0.012591 | 0.012762 | 0.012764 |
| 0.012580 | 0.012625 | 0.012886 | 0.012826 | 0.012783 | 0.012818 | 0.012748 |
| 0.012680 | 0.012680 | 0.012680 | 0.012646 | 0.012952 | 0.012816 | 0.012884 |
| 0.012917 | 0.012780 | 0.012603 | 0.012661 | 0.012578 | 0.012747 | 0.012748 |
| 0.012751 | 0.012815 | 0.012815 | 0.012815 | 0.012995 | 0.012951 | 0.012489 |
| 0.012419 | 0.012313 | 0.012531 | 0.012494 | 0.012537 | 0.012297 | 0.012494 |
| 0.012577 | 0.012250 | 0.012448 | 0.012414 | 0.012613 | 0.012641 | 0.012579 |
| 0.012545 | 0.012477 | 0.012613 | 0.012578 | 0.012511 | 0.012478 | 0.012410 |
| 0.012511 | 0.012579 | 0.012578 | 0.012578 | 0.012612 | 0.012612 | 0.012621 |
| 0.012691 | 0.012612 | 0.012612 | 0.012584 | 0.012511 | 0.012511 | 0.012579 |
| 0.012580 | 0.012759 | 0.012559 | 0.012832 | 0.012801 | 0.012579 | 0.012815 |
| 0.012748 | 0.012748 | 0.012589 | 0.012703 | 0.012664 | 0.012737 | 0.012500 |
| 0.012718 | 0.012934 | 0.012548 | 0.012665 | 0.012545 | 0.012748 | 0.012613 |
| 0.012714 | 0.012646 | 0.012545 | 0.012652 | 0.012748 | 0.012758 | 0.012646 |
| 0.012545 | 0.012483 | 0.012612 | 0.012545 | 0.012478 | 0.012459 | 0.012748 |
| 0.012646 | 0.012578 | 0.012612 | 0.012646 | 0.012613 | 0.012545 | 0.012443 |
| 0.012612 | 0.012646 | 0.012646 | 0.012578 | 0.012646 | 0.012883 | 0.012477 |
| 0.012579 | 0.012715 | 0.012578 | 0.012613 | 0.012578 | 0.012681 | 0.012477 |
| 0.012130 | 0.012296 | 0.012165 | 0.012433 | 0.012489 | 0.012536 | 0.012359 |
| 0.012112 | 0.012274 | 0.012376 | 0.012389 | 0.012342 | 0.012416 | 0.012544 |
| 0.012445 | 0.012521 | 0.012443 | 0.012223 | 0.012342 | 0.013221 | 0.012376 |
| 0.013052 | 0.012884 | 0.013023 | 0.000000 | 0.012680 | 0.012443 | 0.012477 |
| 0.013189 | 0.012684 | 0.012443 | 0.012343 | 0.012410 | 0.012410 | 0.012454 |
| 0.012274 | 0.012284 | 0.012342 | 0.012309 | 0.012817 | 0.012952 | 0.012952 |
| 0.012853 | 0.012952 | 0.013055 | 0.012824 | 0.013326 | 0.013339 | 0.013394 |
| 0.013395 | 0.013429 | 0.013387 | 0.013395 | 0.013394 | 0.012680 | 0.012918 |
| 0.012986 | 0.013459 | 0.012998 | 0.013020 | 0.012784 | 0.012558 | 0.012444 |
| 0.012410 | 0.012410 | 0.012884 | 0.012754 | 0.013040 | 0.012714 | 0.012411 |
| S809     | 0.012000 | 0.012000 | 0.012068 | 0.011832 | 0.011832 | 0.011900 |
| 0.011637 | 0.011569 | 0.011900 | 0.011597 | 0.011664 | 0.011632 | 0.011597 |

|          |          |          |          |          |          |          |
|----------|----------|----------|----------|----------|----------|----------|
| 0.011564 | 0.011799 | 0.011530 | 0.011631 | 0.011698 | 0.011664 | 0.011631 |
| 0.011597 | 0.011631 | 0.011463 | 0.011598 | 0.011631 | 0.011631 | 0.011603 |
| 0.011597 | 0.011631 | 0.011530 | 0.011496 | 0.011698 | 0.011664 | 0.011698 |
| 0.011664 | 0.011765 | 0.011664 | 0.011664 | 0.011698 | 0.011664 | 0.011832 |
| 0.011530 | 0.011664 | 0.011698 | 0.011631 | 0.011664 | 0.011765 | 0.011698 |
| 0.011664 | 0.011832 | 0.011732 | 0.011664 | 0.011664 | 0.011933 | 0.011664 |
| 0.011631 | 0.011665 | 0.011799 | 0.011933 | 0.011698 | 0.011664 | 0.011765 |
| 0.011698 | 0.011765 | 0.011664 | 0.011899 | 0.011799 | 0.011664 | 0.011731 |
| 0.011631 | 0.011731 | 0.011698 | 0.011765 | 0.011698 | 0.011698 | 0.011698 |
| 0.011597 | 0.011631 | 0.011597 | 0.011631 | 0.011664 | 0.011700 | 0.011765 |
| 0.011698 | 0.011664 | 0.011731 | 0.011631 | 0.011698 | 0.011597 | 0.011664 |
| 0.011832 | 0.011765 | 0.011731 | 0.011832 | 0.011664 | 0.011899 | 0.011664 |
| 0.011802 | 0.011658 | 0.011815 | 0.011568 | 0.011545 | 0.011686 | 0.011415 |
| 0.012085 | 0.011365 | 0.011513 | 0.011899 | 0.011899 | 0.011631 | 0.011732 |
| 0.011731 | 0.011698 | 0.011765 | 0.011664 | 0.011765 | 0.011698 | 0.011698 |
| 0.011664 | 0.011698 | 0.011967 | 0.011832 | 0.011731 | 0.011698 | 0.011631 |
| 0.011597 | 0.011530 | 0.011665 | 0.011631 | 0.011564 | 0.011530 | 0.011463 |
| 0.011564 | 0.011631 | 0.011631 | 0.011631 | 0.011665 | 0.011665 | 0.011668 |
| 0.011736 | 0.011665 | 0.011665 | 0.011528 | 0.011566 | 0.011586 | 0.011665 |
| 0.011670 | 0.011610 | 0.011577 | 0.011647 | 0.011570 | 0.011608 | 0.011634 |
| 0.011564 | 0.011681 | 0.011680 | 0.011598 | 0.011579 | 0.011733 | 0.011632 |
| 0.011699 | 0.011701 | 0.011699 | 0.011799 | 0.011731 | 0.012101 | 0.011833 |
| 0.011664 | 0.011732 | 0.011664 | 0.011698 | 0.011564 | 0.011530 | 0.011598 |
| 0.011664 | 0.011664 | 0.011631 | 0.011597 | 0.011631 | 0.011597 | 0.011698 |
| 0.011665 | 0.011765 | 0.011698 | 0.011597 | 0.011700 | 0.011799 | 0.011804 |
| 0.011799 | 0.011698 | 0.011597 | 0.011532 | 0.011665 | 0.011597 | 0.011530 |
| 0.011536 | 0.011799 | 0.011597 | 0.011799 | 0.011564 | 0.011665 | 0.011631 |
| 0.011732 | 0.011631 | 0.011665 | 0.011631 | 0.011665 | 0.011530 | 0.011665 |
| 0.011698 | 0.011631 | 0.011698 | 0.011631 | 0.011665 | 0.011698 | 0.011933 |
| 0.011698 | 0.011564 | 0.011698 | 0.011802 | 0.011698 | 0.011665 | 0.011631 |
| 0.011601 | 0.011869 | 0.011792 | 0.011575 | 0.011705 | 0.011538 | 0.011650 |
| 0.011671 | 0.011672 | 0.011832 | 0.012034 | 0.011743 | 0.011899 | 0.011866 |
| 0.011799 | 0.011967 | 0.011842 | 0.011719 | 0.011815 | 0.011698 | 0.011771 |
| 0.011866 | 0.011768 | 0.011906 | 0.011974 | 0.011900 | 0.011967 | 0.012077 |
| 0.011805 | 0.011977 | 0.011907 | 0.011838 | 0.012103 | 0.011564 | 0.011768 |
| 0.011731 | 0.011664 | 0.011564 | 0.011564 | 0.011631 | 0.011631 | 0.011698 |
| 0.011631 | 0.011698 | 0.011597 | 0.011631 | 0.011631 | 0.011631 | 0.011698 |
| 0.011631 | 0.011731 | 0.011631 | 0.011664 | 0.011530 | 0.011631 | 0.011664 |
| 0.011664 | 0.011631 | 0.011698 | 0.011664 | 0.011597 | 0.011597 | 0.011597 |
| 0.011799 | 0.011698 | 0.011765 | 0.011564 | 0.011664 | 0.011832 | 0.011597 |
| 0.011597 | 0.011664 | 0.011631 | 0.011799 | 0.011597 | 0.011530 | 0.011664 |
| 0.011597 | 0.011631 | 0.011631 | 0.011564 | 0.011564 | 0.011732 | 0.011664 |
| 0.011564 | 0.011664 | 0.011530 | 0.011564 | 0.011698 | 0.011564 | 0.011597 |
| 0.011564 | 0.011698 | 0.011631 | 0.011530 | 0.011530 | 0.011530 | 0.011698 |
| 0.011779 | 0.011597 | 0.011564 | 0.011732 | 0.011698 | 0.011631 | 0.011731 |
| 0.011597 | 0.011933 | 0.011530 | 0.011732 | 0.011530 | 0.011530 | 0.011530 |
| 0.011765 | 0.011698 | 0.011664 | 0.011731 | 0.011564 | 0.011631 | 0.011530 |
| 0.011597 | 0.011597 | 0.011631 | 0.011731 | 0.011631 | 0.011731 | 0.011799 |
| 0.011799 | 0.011765 | 0.011664 | 0.011765 | 0.011731 | 0.011597 | 0.011564 |
| 0.011597 | 0.011597 | 0.011664 | 0.011530 | 0.011564 | 0.011731 | 0.011597 |
| 0.011564 | 0.011631 | 0.011765 | 0.011731 | 0.011631 | 0.011631 | 0.011631 |
| 0.011698 | 0.011631 | 0.011731 | 0.011597 | 0.011731 | 0.011832 | 0.011799 |
| 0.011631 | 0.011698 | 0.011612 | 0.018125 | 0.011387 | 0.011917 | 0.011618 |
| 0.011579 | 0.011623 | 0.011794 | 0.011408 | 0.011610 | 0.011647 | 0.011850 |
| 0.011582 | 0.011549 | 0.011489 | 0.011605 | 0.011568 | 0.011702 | 0.011619 |
| 0.011483 | 0.011433 | 0.011505 | 0.011193 | 0.011765 | 0.011799 | 0.011804 |
| 0.011678 | 0.011765 | 0.011765 | 0.011665 | 0.011698 | 0.011698 | 0.011665 |
| 0.011698 | 0.011631 | 0.011664 | 0.011698 | 0.011665 | 0.011597 | 0.011631 |
| 0.011631 | 0.011698 | 0.011597 | 0.011698 | 0.011732 | 0.011765 | 0.011664 |
| 0.011631 | 0.011597 | 0.011665 | 0.011665 | 0.011732 | 0.011766 | 0.011799 |

|          |          |          |          |          |          |          |
|----------|----------|----------|----------|----------|----------|----------|
| 0.011564 | 0.011564 | 0.011597 | 0.011698 | 0.011564 | 0.011799 | 0.011799 |
| 0.011833 | 0.011832 | 0.011765 | 0.011866 | 0.011698 | 0.011868 | 0.011698 |
| 0.011698 | 0.011765 | 0.011799 | 0.011631 | 0.011698 | 0.011665 | 0.011698 |
| 0.011766 | 0.011766 | 0.011799 | 0.011766 | 0.011666 | 0.011866 | 0.011833 |
| 0.011704 | 0.011597 | 0.011698 | 0.011799 | 0.011698 | 0.011765 | 0.011866 |
| 0.012034 | 0.011743 | 0.011899 | 0.011866 | 0.011799 | 0.011967 | 0.011598 |
| 0.011768 | 0.011665 | 0.011631 | 0.011631 | 0.011698 | 0.011597 | 0.011698 |
| 0.011732 | 0.011765 | 0.011664 | 0.011631 | 0.011597 | 0.011665 | 0.011665 |
| 0.011732 | 0.011766 | 0.011832 | 0.011765 | 0.012339 | 0.011846 | 0.011764 |
| 0.011834 | 0.011788 | 0.011904 | 0.011788 | 0.011900 | 0.011750 | 0.011784 |
| 0.012297 | 0.011683 | 0.011814 | 0.011752 | 0.012024 | 0.011877 | 0.011979 |
| 0.012318 | 0.011814 | 0.011939 | 0.012000 | 0.011866 | 0.011597 | 0.011905 |
| 0.011564 | 0.011732 | 0.011866 | 0.011832 | 0.011837 | 0.011564 | 0.011532 |
| 0.011664 | 0.011597 | 0.011631 | 0.011664 | 0.011564 | 0.011631 | 0.011530 |
| 0.011597 | 0.011631 | 0.011597 | 0.011564 | 0.011664 | 0.011597 | 0.011631 |
| 0.011631 | 0.011564 | 0.011631 | 0.011664 | 0.011564 | 0.011765 | 0.011799 |
| 0.011698 | 0.011698 | 0.011698 | 0.011698 | 0.011631 | 0.011698 | 0.011664 |
| 0.011443 | 0.011631 | 0.011598 | 0.011603 | 0.011732 | 0.011731 | 0.011731 |
| 0.011732 | 0.011664 | 0.011631 | 0.011664 | 0.011765 | 0.011765 | 0.011698 |
| 0.011698 | 0.011832 | 0.011664 | 0.011731 | 0.011933 | 0.011933 | 0.011799 |
| 0.011631 | 0.011698 | 0.011732 | 0.011799 | 0.011698 | 0.011732 | 0.011698 |
| 0.011731 | 0.011597 | 0.011597 | 0.011900 | 0.011900 | 0.011866 | 0.011664 |
| 0.011765 | 0.011832 | 0.011631 | 0.011765 | 0.011731 | 0.011597 | 0.011597 |
| 0.011698 | 0.011664 | 0.011597 | 0.011832 | 0.011664 | 0.011765 | 0.011732 |
| 0.011698 | 0.011705 | 0.011732 | 0.011467 | 0.011286 | 0.011706 | 0.011318 |
| 0.011664 | 0.011683 | 0.011552 | 0.011686 | 0.011548 | 0.011518 | 0.011432 |
| 0.011366 | 0.011389 | 0.011450 | 0.011324 | 0.011437 | 0.011529 | 0.011709 |
| 0.011738 | 0.011611 | 0.011659 | 0.011624 | 0.011701 | 0.011564 | 0.011631 |
| 0.011631 | 0.011699 | 0.011804 | 0.011569 | 0.011942 | 0.011944 | 0.011698 |
| 0.011664 | 0.011732 | 0.011664 | 0.011698 | 0.011564 | 0.011530 | 0.011598 |
| 0.011664 | 0.011664 | 0.011631 | 0.011597 | 0.011631 | 0.011597 | 0.011698 |
| 0.011689 | 0.011655 | 0.011677 | 0.011711 | 0.011847 | 0.011812 | 0.011811 |
| 0.011810 | 0.011733 | 0.011577 | 0.011456 | 0.011670 | 0.011840 | 0.011841 |
| 0.011632 | 0.011704 | 0.011936 | 0.011905 | 0.011834 | 0.011868 | 0.011799 |
| 0.011731 | 0.011799 | 0.011799 | 0.011698 | 0.011933 | 0.011866 | 0.011933 |
| 0.011967 | 0.011665 | 0.011674 | 0.011753 | 0.011631 | 0.011832 | 0.011799 |
| 0.011834 | 0.011866 | 0.011866 | 0.011866 | 0.012043 | 0.012000 | 0.011650 |
| 0.011533 | 0.011545 | 0.011639 | 0.011604 | 0.011641 | 0.011583 | 0.011536 |
| 0.011678 | 0.011543 | 0.011632 | 0.011697 | 0.011665 | 0.011745 | 0.011631 |
| 0.011597 | 0.011530 | 0.011665 | 0.011631 | 0.011564 | 0.011530 | 0.011463 |
| 0.011564 | 0.011631 | 0.011631 | 0.011631 | 0.011665 | 0.011665 | 0.011668 |
| 0.011736 | 0.011665 | 0.011665 | 0.011701 | 0.011564 | 0.011631 | 0.011631 |
| 0.011699 | 0.011804 | 0.011569 | 0.011942 | 0.011944 | 0.011698 | 0.011866 |
| 0.011799 | 0.011799 | 0.011635 | 0.011791 | 0.011755 | 0.011775 | 0.011551 |
| 0.011818 | 0.012017 | 0.011822 | 0.011706 | 0.011597 | 0.011799 | 0.011665 |
| 0.011765 | 0.011698 | 0.011597 | 0.011700 | 0.011799 | 0.011804 | 0.011698 |
| 0.011597 | 0.011532 | 0.011665 | 0.011597 | 0.011530 | 0.011536 | 0.011799 |
| 0.011698 | 0.011631 | 0.011664 | 0.011698 | 0.011665 | 0.011597 | 0.011530 |
| 0.011664 | 0.011698 | 0.011698 | 0.011631 | 0.011698 | 0.011933 | 0.011530 |
| 0.011631 | 0.011698 | 0.011631 | 0.011664 | 0.011631 | 0.011664 | 0.011489 |
| 0.011735 | 0.011358 | 0.011311 | 0.011463 | 0.011508 | 0.011491 | 0.011311 |
| 0.011218 | 0.011530 | 0.011631 | 0.011739 | 0.011599 | 0.011703 | 0.011867 |
| 0.011767 | 0.011804 | 0.011765 | 0.011983 | 0.011732 | 0.012606 | 0.011768 |
| 0.012507 | 0.012274 | 0.012409 | 0.012680 | 0.000000 | 0.011631 | 0.011732 |
| 0.012373 | 0.012106 | 0.011698 | 0.011598 | 0.011665 | 0.011665 | 0.011635 |
| 0.011530 | 0.011501 | 0.011597 | 0.011565 | 0.011935 | 0.012001 | 0.012002 |
| 0.011901 | 0.012002 | 0.012106 | 0.011838 | 0.012374 | 0.012381 | 0.012441 |
| 0.012441 | 0.012475 | 0.012391 | 0.012441 | 0.012443 | 0.011731 | 0.011968 |
| 0.012036 | 0.012539 | 0.012044 | 0.012068 | 0.012541 | 0.011604 | 0.011497 |
| 0.011463 | 0.011463 | 0.011934 | 0.011883 | 0.012010 | 0.011664 | 0.011465 |

|          |          |          |          |          |          |          |
|----------|----------|----------|----------|----------|----------|----------|
| S810     | 0.011698 | 0.011698 | 0.011665 | 0.011564 | 0.011564 | 0.011631 |
| 0.011638 | 0.011570 | 0.011564 | 0.011295 | 0.011362 | 0.011329 | 0.011295 |
| 0.011262 | 0.011497 | 0.011228 | 0.011329 | 0.011396 | 0.011362 | 0.011329 |
| 0.011295 | 0.011329 | 0.011362 | 0.011296 | 0.011329 | 0.011329 | 0.011604 |
| 0.011497 | 0.011329 | 0.011228 | 0.011396 | 0.011396 | 0.011362 | 0.011396 |
| 0.011362 | 0.011463 | 0.011362 | 0.011363 | 0.011396 | 0.011362 | 0.011530 |
| 0.011228 | 0.011362 | 0.011396 | 0.011329 | 0.011362 | 0.011463 | 0.011396 |
| 0.011362 | 0.011531 | 0.011430 | 0.011631 | 0.011362 | 0.011631 | 0.011362 |
| 0.011329 | 0.011363 | 0.011430 | 0.011631 | 0.011665 | 0.011363 | 0.011463 |
| 0.011396 | 0.011463 | 0.011363 | 0.011598 | 0.011766 | 0.011362 | 0.011430 |
| 0.011329 | 0.011430 | 0.011396 | 0.011463 | 0.011396 | 0.011396 | 0.011396 |
| 0.011295 | 0.011329 | 0.011295 | 0.011329 | 0.011362 | 0.011397 | 0.011463 |
| 0.011396 | 0.011362 | 0.011430 | 0.011329 | 0.011396 | 0.011295 | 0.011362 |
| 0.011530 | 0.011463 | 0.011698 | 0.011531 | 0.011363 | 0.011598 | 0.011362 |
| 0.011505 | 0.011620 | 0.011551 | 0.011216 | 0.011247 | 0.011318 | 0.011375 |
| 0.012011 | 0.011416 | 0.011266 | 0.011598 | 0.011598 | 0.011329 | 0.011430 |
| 0.011430 | 0.011396 | 0.011463 | 0.011362 | 0.011396 | 0.011396 | 0.011396 |
| 0.011362 | 0.011396 | 0.011665 | 0.011530 | 0.011430 | 0.011396 | 0.011329 |
| 0.011295 | 0.011228 | 0.011363 | 0.011329 | 0.011463 | 0.011430 | 0.011362 |
| 0.011463 | 0.011530 | 0.011329 | 0.011329 | 0.011362 | 0.011362 | 0.011364 |
| 0.011432 | 0.011362 | 0.011362 | 0.011240 | 0.011313 | 0.011271 | 0.011363 |
| 0.011365 | 0.011301 | 0.011318 | 0.011336 | 0.011264 | 0.011300 | 0.011330 |
| 0.011528 | 0.011370 | 0.011405 | 0.011296 | 0.011302 | 0.011430 | 0.011329 |
| 0.011397 | 0.011397 | 0.011396 | 0.011497 | 0.011430 | 0.011799 | 0.011531 |
| 0.011564 | 0.011430 | 0.011362 | 0.011396 | 0.011262 | 0.011430 | 0.011295 |
| 0.011363 | 0.011362 | 0.011329 | 0.011295 | 0.011329 | 0.011295 | 0.011396 |
| 0.011363 | 0.011463 | 0.011396 | 0.011295 | 0.011397 | 0.011497 | 0.011500 |
| 0.011497 | 0.011396 | 0.011295 | 0.011229 | 0.011362 | 0.011295 | 0.011228 |
| 0.011332 | 0.011497 | 0.011295 | 0.011497 | 0.011262 | 0.011363 | 0.011329 |
| 0.011430 | 0.011329 | 0.011363 | 0.011329 | 0.011362 | 0.011228 | 0.011362 |
| 0.011396 | 0.011329 | 0.011396 | 0.011329 | 0.011362 | 0.011396 | 0.011631 |
| 0.011665 | 0.011598 | 0.011665 | 0.011465 | 0.011665 | 0.011362 | 0.011329 |
| 0.011297 | 0.011505 | 0.011472 | 0.011232 | 0.011671 | 0.011231 | 0.011336 |
| 0.011672 | 0.011570 | 0.011530 | 0.011732 | 0.011436 | 0.011598 | 0.011564 |
| 0.011497 | 0.011665 | 0.011522 | 0.011307 | 0.011396 | 0.011396 | 0.011466 |
| 0.011564 | 0.011465 | 0.011602 | 0.011670 | 0.011598 | 0.011665 | 0.011772 |
| 0.011500 | 0.011671 | 0.011602 | 0.011534 | 0.011801 | 0.011262 | 0.011397 |
| 0.011430 | 0.011362 | 0.011195 | 0.011262 | 0.011329 | 0.011329 | 0.011396 |
| 0.011329 | 0.011396 | 0.011295 | 0.011329 | 0.011329 | 0.011329 | 0.011396 |
| 0.011329 | 0.011698 | 0.011598 | 0.011631 | 0.011228 | 0.011329 | 0.011363 |
| 0.011363 | 0.011329 | 0.011396 | 0.011363 | 0.011295 | 0.011295 | 0.011295 |
| 0.011766 | 0.011396 | 0.011463 | 0.011262 | 0.011362 | 0.011531 | 0.011295 |
| 0.011295 | 0.011362 | 0.011329 | 0.011497 | 0.011295 | 0.011430 | 0.011564 |
| 0.011497 | 0.011329 | 0.011329 | 0.011262 | 0.011262 | 0.011430 | 0.011362 |
| 0.011262 | 0.011362 | 0.011228 | 0.011262 | 0.011396 | 0.011463 | 0.011295 |
| 0.011262 | 0.011396 | 0.011329 | 0.011228 | 0.011497 | 0.011228 | 0.011396 |
| 0.011471 | 0.011295 | 0.011530 | 0.011430 | 0.011396 | 0.011329 | 0.011430 |
| 0.011295 | 0.011631 | 0.011228 | 0.011430 | 0.011228 | 0.011228 | 0.011228 |
| 0.011463 | 0.011564 | 0.011363 | 0.011430 | 0.011262 | 0.011598 | 0.011228 |
| 0.011295 | 0.011295 | 0.011329 | 0.011430 | 0.011329 | 0.011430 | 0.011497 |
| 0.011497 | 0.011463 | 0.011362 | 0.011463 | 0.011430 | 0.011295 | 0.011262 |
| 0.011295 | 0.011295 | 0.011363 | 0.011228 | 0.011262 | 0.011430 | 0.011295 |
| 0.011262 | 0.011329 | 0.011463 | 0.011430 | 0.011396 | 0.011329 | 0.011329 |
| 0.011396 | 0.011329 | 0.011430 | 0.011295 | 0.011430 | 0.011530 | 0.011698 |
| 0.011329 | 0.011665 | 0.011302 | 0.017823 | 0.011257 | 0.011366 | 0.011583 |
| 0.011545 | 0.011588 | 0.011427 | 0.011350 | 0.011664 | 0.011613 | 0.011364 |
| 0.011345 | 0.011487 | 0.011216 | 0.011312 | 0.011216 | 0.011258 | 0.011275 |
| 0.011436 | 0.011395 | 0.011394 | 0.011193 | 0.011463 | 0.011497 | 0.011500 |
| 0.011369 | 0.011463 | 0.011463 | 0.011362 | 0.011396 | 0.011396 | 0.011363 |
| 0.011396 | 0.011329 | 0.011362 | 0.011396 | 0.011363 | 0.011295 | 0.011329 |

|          |          |          |          |          |          |          |
|----------|----------|----------|----------|----------|----------|----------|
| 0.011329 | 0.011396 | 0.011295 | 0.011396 | 0.011430 | 0.011463 | 0.011362 |
| 0.011329 | 0.011295 | 0.011631 | 0.011631 | 0.011430 | 0.011464 | 0.011497 |
| 0.011262 | 0.011262 | 0.011295 | 0.011396 | 0.011262 | 0.011497 | 0.011497 |
| 0.011530 | 0.011530 | 0.011463 | 0.011564 | 0.011665 | 0.011566 | 0.011396 |
| 0.011396 | 0.011463 | 0.011497 | 0.011262 | 0.011396 | 0.011362 | 0.011396 |
| 0.011463 | 0.011463 | 0.011497 | 0.011463 | 0.011363 | 0.011564 | 0.011530 |
| 0.011399 | 0.011295 | 0.011396 | 0.011497 | 0.011396 | 0.011463 | 0.011564 |
| 0.011732 | 0.011436 | 0.011598 | 0.011564 | 0.011497 | 0.011665 | 0.011295 |
| 0.011465 | 0.011363 | 0.011329 | 0.011329 | 0.011396 | 0.011295 | 0.011396 |
| 0.011430 | 0.011463 | 0.011362 | 0.011329 | 0.011295 | 0.011631 | 0.011631 |
| 0.011430 | 0.011464 | 0.011530 | 0.011463 | 0.012036 | 0.011525 | 0.011447 |
| 0.011517 | 0.011477 | 0.011587 | 0.011476 | 0.011585 | 0.011509 | 0.011474 |
| 0.011988 | 0.011372 | 0.011506 | 0.011441 | 0.011715 | 0.011571 | 0.011673 |
| 0.012013 | 0.011437 | 0.011398 | 0.011396 | 0.011396 | 0.011362 | 0.011364 |
| 0.011262 | 0.011295 | 0.011430 | 0.011396 | 0.011398 | 0.011463 | 0.011296 |
| 0.011362 | 0.011295 | 0.011329 | 0.011362 | 0.011262 | 0.011329 | 0.011228 |
| 0.011295 | 0.011329 | 0.011295 | 0.011262 | 0.011362 | 0.011295 | 0.011329 |
| 0.011329 | 0.011262 | 0.011329 | 0.011363 | 0.011262 | 0.011463 | 0.011497 |
| 0.011396 | 0.011396 | 0.011396 | 0.011396 | 0.011329 | 0.011665 | 0.011362 |
| 0.011339 | 0.011329 | 0.011497 | 0.011501 | 0.011430 | 0.011430 | 0.011430 |
| 0.011430 | 0.011363 | 0.011329 | 0.011363 | 0.011463 | 0.011463 | 0.011396 |
| 0.011396 | 0.011530 | 0.011631 | 0.011430 | 0.011631 | 0.011631 | 0.011497 |
| 0.011329 | 0.011396 | 0.011430 | 0.011766 | 0.011396 | 0.011430 | 0.011396 |
| 0.011430 | 0.011295 | 0.011295 | 0.011598 | 0.011598 | 0.011564 | 0.011363 |
| 0.011463 | 0.011530 | 0.011396 | 0.011463 | 0.011430 | 0.011295 | 0.011564 |
| 0.011396 | 0.011362 | 0.011295 | 0.011530 | 0.011363 | 0.011463 | 0.011699 |
| 0.011329 | 0.011706 | 0.011698 | 0.011467 | 0.011230 | 0.011400 | 0.011215 |
| 0.011170 | 0.011527 | 0.011271 | 0.011283 | 0.011207 | 0.011417 | 0.011273 |
| 0.011417 | 0.011192 | 0.011339 | 0.011192 | 0.011222 | 0.011395 | 0.011425 |
| 0.011437 | 0.011336 | 0.011342 | 0.011342 | 0.011330 | 0.011463 | 0.011463 |
| 0.011530 | 0.011329 | 0.011500 | 0.011501 | 0.011569 | 0.011590 | 0.011396 |
| 0.011564 | 0.011430 | 0.011362 | 0.011396 | 0.011262 | 0.011430 | 0.011295 |
| 0.011363 | 0.011362 | 0.011329 | 0.011295 | 0.011329 | 0.011295 | 0.011396 |
| 0.011375 | 0.011375 | 0.011368 | 0.011403 | 0.011539 | 0.011504 | 0.011504 |
| 0.011503 | 0.011430 | 0.011245 | 0.011240 | 0.011365 | 0.011535 | 0.011535 |
| 0.011329 | 0.011399 | 0.011632 | 0.011601 | 0.011531 | 0.011565 | 0.011497 |
| 0.011430 | 0.011497 | 0.011497 | 0.011396 | 0.011900 | 0.011564 | 0.011631 |
| 0.011665 | 0.011666 | 0.011367 | 0.011441 | 0.011329 | 0.011497 | 0.011497 |
| 0.011531 | 0.011564 | 0.011564 | 0.011564 | 0.011729 | 0.011698 | 0.011338 |
| 0.011229 | 0.011233 | 0.011333 | 0.011298 | 0.011334 | 0.011247 | 0.011502 |
| 0.011369 | 0.011411 | 0.011251 | 0.011360 | 0.011363 | 0.011437 | 0.011329 |
| 0.011295 | 0.011228 | 0.011363 | 0.011329 | 0.011463 | 0.011430 | 0.011362 |
| 0.011463 | 0.011530 | 0.011329 | 0.011329 | 0.011362 | 0.011362 | 0.011364 |
| 0.011432 | 0.011362 | 0.011362 | 0.011330 | 0.011463 | 0.011463 | 0.011530 |
| 0.011329 | 0.011500 | 0.011501 | 0.011569 | 0.011590 | 0.011396 | 0.011564 |
| 0.011497 | 0.011497 | 0.011331 | 0.011513 | 0.011442 | 0.011469 | 0.011235 |
| 0.011508 | 0.011516 | 0.011399 | 0.011400 | 0.011295 | 0.011497 | 0.011363 |
| 0.011463 | 0.011396 | 0.011295 | 0.011397 | 0.011497 | 0.011500 | 0.011396 |
| 0.011295 | 0.011229 | 0.011362 | 0.011295 | 0.011228 | 0.011332 | 0.011497 |
| 0.011396 | 0.011329 | 0.011362 | 0.011396 | 0.011363 | 0.011295 | 0.011430 |
| 0.011362 | 0.011396 | 0.011396 | 0.011329 | 0.011396 | 0.011631 | 0.011228 |
| 0.011329 | 0.011665 | 0.011329 | 0.011362 | 0.011329 | 0.011631 | 0.011275 |
| 0.011454 | 0.011273 | 0.011211 | 0.011423 | 0.011508 | 0.011419 | 0.011227 |
| 0.011165 | 0.011295 | 0.011396 | 0.011501 | 0.011363 | 0.011466 | 0.011632 |
| 0.011531 | 0.011567 | 0.011530 | 0.011743 | 0.011463 | 0.012338 | 0.011532 |
| 0.012170 | 0.012004 | 0.012138 | 0.012443 | 0.011631 | 0.000000 | 0.011497 |
| 0.012002 | 0.011836 | 0.011463 | 0.011363 | 0.011430 | 0.011430 | 0.011466 |
| 0.011295 | 0.011264 | 0.011362 | 0.011329 | 0.011834 | 0.011900 | 0.011901 |
| 0.011801 | 0.011901 | 0.012004 | 0.011737 | 0.012070 | 0.012076 | 0.012137 |
| 0.012138 | 0.012172 | 0.012084 | 0.012138 | 0.012139 | 0.011430 | 0.011665 |

|          |          |          |          |          |          |          |
|----------|----------|----------|----------|----------|----------|----------|
| 0.011733 | 0.012237 | 0.011738 | 0.011968 | 0.012441 | 0.011502 | 0.011396 |
| 0.011362 | 0.011362 | 0.011766 | 0.011883 | 0.011975 | 0.011698 | 0.011363 |
| S811     | 0.012001 | 0.012001 | 0.011799 | 0.011564 | 0.011564 | 0.011631 |
| 0.011740 | 0.011638 | 0.011564 | 0.011598 | 0.011665 | 0.011632 | 0.011598 |
| 0.011564 | 0.011799 | 0.011530 | 0.011564 | 0.011698 | 0.011665 | 0.011631 |
| 0.011598 | 0.011631 | 0.011463 | 0.011565 | 0.011598 | 0.011631 | 0.011706 |
| 0.011598 | 0.011631 | 0.011530 | 0.011497 | 0.011699 | 0.011665 | 0.011699 |
| 0.011665 | 0.011766 | 0.011665 | 0.011665 | 0.011631 | 0.011665 | 0.011833 |
| 0.011530 | 0.011665 | 0.011631 | 0.011631 | 0.011665 | 0.011699 | 0.011699 |
| 0.011665 | 0.011766 | 0.011733 | 0.011732 | 0.011598 | 0.011934 | 0.011598 |
| 0.011631 | 0.011665 | 0.011799 | 0.011934 | 0.011766 | 0.011665 | 0.011766 |
| 0.011698 | 0.011766 | 0.011665 | 0.011900 | 0.011867 | 0.011665 | 0.011732 |
| 0.011631 | 0.011732 | 0.011699 | 0.011766 | 0.011698 | 0.011699 | 0.011699 |
| 0.011598 | 0.011631 | 0.011598 | 0.011631 | 0.011665 | 0.011700 | 0.011766 |
| 0.011699 | 0.011665 | 0.011732 | 0.011631 | 0.011698 | 0.011598 | 0.011665 |
| 0.011833 | 0.011766 | 0.011800 | 0.011833 | 0.011665 | 0.011900 | 0.011665 |
| 0.011876 | 0.011770 | 0.011928 | 0.011607 | 0.011620 | 0.011612 | 0.011533 |
| 0.012158 | 0.011569 | 0.011678 | 0.011833 | 0.011900 | 0.011631 | 0.011732 |
| 0.011732 | 0.011698 | 0.011766 | 0.011665 | 0.011766 | 0.011699 | 0.011698 |
| 0.011665 | 0.011698 | 0.011968 | 0.011833 | 0.011732 | 0.011699 | 0.011631 |
| 0.011598 | 0.011530 | 0.011665 | 0.011631 | 0.011564 | 0.011531 | 0.011463 |
| 0.011564 | 0.011631 | 0.011631 | 0.011631 | 0.011665 | 0.011665 | 0.011668 |
| 0.011737 | 0.011665 | 0.011665 | 0.011564 | 0.011639 | 0.011586 | 0.011665 |
| 0.011670 | 0.011610 | 0.011688 | 0.011647 | 0.011570 | 0.011608 | 0.011634 |
| 0.011636 | 0.011681 | 0.011715 | 0.011598 | 0.011613 | 0.011733 | 0.011632 |
| 0.011699 | 0.011701 | 0.011699 | 0.011799 | 0.011732 | 0.012035 | 0.011833 |
| 0.011665 | 0.011732 | 0.011665 | 0.011699 | 0.011564 | 0.011531 | 0.011598 |
| 0.011665 | 0.011665 | 0.011631 | 0.011598 | 0.011631 | 0.011598 | 0.011699 |
| 0.011665 | 0.011766 | 0.011699 | 0.011598 | 0.011667 | 0.011799 | 0.011804 |
| 0.011800 | 0.011698 | 0.011598 | 0.011499 | 0.011665 | 0.011598 | 0.011531 |
| 0.011536 | 0.011800 | 0.011598 | 0.011800 | 0.011564 | 0.011665 | 0.011631 |
| 0.011732 | 0.011631 | 0.011665 | 0.011631 | 0.011665 | 0.011530 | 0.011665 |
| 0.011699 | 0.011631 | 0.011699 | 0.011631 | 0.011665 | 0.011698 | 0.011934 |
| 0.011766 | 0.011699 | 0.011766 | 0.011802 | 0.011766 | 0.011665 | 0.011631 |
| 0.011601 | 0.011869 | 0.011792 | 0.011540 | 0.011773 | 0.011538 | 0.011572 |
| 0.011774 | 0.011673 | 0.011833 | 0.012035 | 0.011744 | 0.011900 | 0.011867 |
| 0.011732 | 0.011967 | 0.011807 | 0.011637 | 0.011732 | 0.011699 | 0.011771 |
| 0.011867 | 0.011769 | 0.011906 | 0.011941 | 0.011900 | 0.011968 | 0.012010 |
| 0.011805 | 0.011944 | 0.011840 | 0.011839 | 0.012071 | 0.011564 | 0.011701 |
| 0.011732 | 0.011665 | 0.011564 | 0.011564 | 0.011631 | 0.011631 | 0.011698 |
| 0.011631 | 0.011699 | 0.011598 | 0.011631 | 0.011631 | 0.011631 | 0.011631 |
| 0.011631 | 0.011799 | 0.011699 | 0.011732 | 0.011530 | 0.011631 | 0.011665 |
| 0.011665 | 0.011631 | 0.011699 | 0.011665 | 0.011598 | 0.011598 | 0.011598 |
| 0.011800 | 0.011699 | 0.011766 | 0.011564 | 0.011665 | 0.011766 | 0.011598 |
| 0.011598 | 0.011665 | 0.011631 | 0.011800 | 0.011598 | 0.011463 | 0.011598 |
| 0.011531 | 0.011631 | 0.011631 | 0.011564 | 0.011564 | 0.011732 | 0.011665 |
| 0.011564 | 0.011665 | 0.011531 | 0.011564 | 0.011699 | 0.011565 | 0.011598 |
| 0.011565 | 0.011699 | 0.011632 | 0.011531 | 0.011598 | 0.011531 | 0.011699 |
| 0.011746 | 0.011598 | 0.011632 | 0.011732 | 0.011699 | 0.011631 | 0.011665 |
| 0.011598 | 0.011934 | 0.011530 | 0.011732 | 0.011530 | 0.011530 | 0.011530 |
| 0.011766 | 0.011699 | 0.011665 | 0.011732 | 0.011564 | 0.011699 | 0.011530 |
| 0.011598 | 0.011598 | 0.011631 | 0.011732 | 0.011631 | 0.011732 | 0.011799 |
| 0.011799 | 0.011766 | 0.011665 | 0.011766 | 0.011732 | 0.011598 | 0.011564 |
| 0.011598 | 0.011598 | 0.011665 | 0.011530 | 0.011564 | 0.011732 | 0.011598 |
| 0.011564 | 0.011631 | 0.011766 | 0.011732 | 0.011698 | 0.011631 | 0.011631 |
| 0.011699 | 0.011631 | 0.011732 | 0.011530 | 0.011732 | 0.011833 | 0.011867 |
| 0.011631 | 0.011766 | 0.011647 | 0.018201 | 0.011715 | 0.011917 | 0.011723 |
| 0.011683 | 0.011729 | 0.011846 | 0.011640 | 0.011830 | 0.011751 | 0.011972 |
| 0.011202 | 0.011671 | 0.011607 | 0.011730 | 0.011568 | 0.011751 | 0.011706 |
| 0.011577 | 0.011545 | 0.011542 | 0.011325 | 0.011766 | 0.011799 | 0.011805 |



|          |          |          |          |          |          |          |
|----------|----------|----------|----------|----------|----------|----------|
| 0.011645 | 0.011766 | 0.011766 | 0.011665 | 0.011699 | 0.011699 | 0.011665 |
| 0.011699 | 0.011631 | 0.011665 | 0.011699 | 0.011665 | 0.011598 | 0.011631 |
| 0.011631 | 0.011699 | 0.011598 | 0.011699 | 0.011732 | 0.011766 | 0.011665 |
| 0.011631 | 0.011598 | 0.011732 | 0.011732 | 0.011732 | 0.011666 | 0.011800 |
| 0.011564 | 0.011564 | 0.011598 | 0.011699 | 0.011564 | 0.011799 | 0.011799 |
| 0.011833 | 0.011833 | 0.011766 | 0.011867 | 0.011766 | 0.011869 | 0.011699 |
| 0.011699 | 0.011766 | 0.011799 | 0.011564 | 0.011699 | 0.011665 | 0.011631 |
| 0.011766 | 0.011766 | 0.011799 | 0.011766 | 0.011666 | 0.011867 | 0.011833 |
| 0.011670 | 0.011598 | 0.011698 | 0.011800 | 0.011699 | 0.011766 | 0.011867 |
| 0.012035 | 0.011744 | 0.011900 | 0.011867 | 0.011732 | 0.011967 | 0.011598 |
| 0.011700 | 0.011665 | 0.011631 | 0.011631 | 0.011699 | 0.011598 | 0.011699 |
| 0.011732 | 0.011766 | 0.011665 | 0.011631 | 0.011598 | 0.011732 | 0.011732 |
| 0.011732 | 0.011666 | 0.011833 | 0.011766 | 0.012340 | 0.011811 | 0.011729 |
| 0.011799 | 0.011754 | 0.011869 | 0.011754 | 0.011866 | 0.011785 | 0.011785 |
| 0.012263 | 0.011649 | 0.011780 | 0.011718 | 0.011991 | 0.011877 | 0.011946 |
| 0.012285 | 0.011739 | 0.011703 | 0.011698 | 0.011698 | 0.011463 | 0.011669 |
| 0.011564 | 0.011598 | 0.011732 | 0.011698 | 0.011703 | 0.011564 | 0.011262 |
| 0.011665 | 0.011598 | 0.011631 | 0.011665 | 0.011564 | 0.011631 | 0.011530 |
| 0.011598 | 0.011631 | 0.011598 | 0.011564 | 0.011665 | 0.011598 | 0.011631 |
| 0.011564 | 0.011564 | 0.011631 | 0.011665 | 0.011564 | 0.011766 | 0.011799 |
| 0.011699 | 0.011699 | 0.011699 | 0.011699 | 0.011631 | 0.011766 | 0.011665 |
| 0.011408 | 0.011631 | 0.011598 | 0.011570 | 0.011732 | 0.011732 | 0.011732 |
| 0.011732 | 0.011665 | 0.011631 | 0.011665 | 0.011766 | 0.011766 | 0.011699 |
| 0.011698 | 0.011833 | 0.011732 | 0.011732 | 0.011934 | 0.011934 | 0.011799 |
| 0.011631 | 0.011699 | 0.011732 | 0.011867 | 0.011699 | 0.011732 | 0.011699 |
| 0.011732 | 0.011598 | 0.011598 | 0.011901 | 0.011901 | 0.011867 | 0.011665 |
| 0.011766 | 0.011833 | 0.011698 | 0.011766 | 0.011732 | 0.011598 | 0.011665 |
| 0.011698 | 0.011665 | 0.011598 | 0.011833 | 0.011665 | 0.011766 | 0.011800 |
| 0.011698 | 0.011808 | 0.011800 | 0.011629 | 0.011625 | 0.011706 | 0.011473 |
| 0.011719 | 0.011488 | 0.011622 | 0.011730 | 0.011695 | 0.011722 | 0.011645 |
| 0.011570 | 0.011653 | 0.011728 | 0.011655 | 0.011599 | 0.011865 | 0.011831 |
| 0.011814 | 0.011729 | 0.011694 | 0.011694 | 0.011633 | 0.011564 | 0.011564 |
| 0.011631 | 0.011632 | 0.011804 | 0.011603 | 0.011874 | 0.011909 | 0.011665 |
| 0.011665 | 0.011732 | 0.011665 | 0.011699 | 0.011564 | 0.011531 | 0.011598 |
| 0.011665 | 0.011665 | 0.011631 | 0.011598 | 0.011631 | 0.011598 | 0.011699 |
| 0.011689 | 0.011690 | 0.011608 | 0.011711 | 0.011847 | 0.011812 | 0.011743 |
| 0.011810 | 0.011733 | 0.011540 | 0.011528 | 0.011670 | 0.011840 | 0.011841 |
| 0.011632 | 0.011704 | 0.011936 | 0.011905 | 0.011834 | 0.011868 | 0.011799 |
| 0.011732 | 0.011799 | 0.011799 | 0.011698 | 0.012002 | 0.011867 | 0.011934 |
| 0.011968 | 0.011738 | 0.011675 | 0.011753 | 0.011631 | 0.011799 | 0.011799 |
| 0.011835 | 0.011867 | 0.011867 | 0.011867 | 0.012043 | 0.012001 | 0.011616 |
| 0.011500 | 0.011511 | 0.011605 | 0.011570 | 0.011607 | 0.011546 | 0.011570 |
| 0.011644 | 0.011499 | 0.011537 | 0.011660 | 0.011666 | 0.011745 | 0.011631 |
| 0.011598 | 0.011530 | 0.011665 | 0.011631 | 0.011564 | 0.011531 | 0.011463 |
| 0.011564 | 0.011631 | 0.011631 | 0.011631 | 0.011665 | 0.011665 | 0.011668 |
| 0.011737 | 0.011665 | 0.011665 | 0.011633 | 0.011564 | 0.011564 | 0.011631 |
| 0.011632 | 0.011804 | 0.011603 | 0.011874 | 0.011909 | 0.011665 | 0.011866 |
| 0.011799 | 0.011799 | 0.011635 | 0.011757 | 0.011755 | 0.011776 | 0.011481 |
| 0.011818 | 0.011698 | 0.011611 | 0.011706 | 0.011598 | 0.011800 | 0.011665 |
| 0.011766 | 0.011699 | 0.011598 | 0.011667 | 0.011799 | 0.011804 | 0.011698 |
| 0.011598 | 0.011499 | 0.011665 | 0.011598 | 0.011531 | 0.011536 | 0.011800 |
| 0.011699 | 0.011631 | 0.011665 | 0.011699 | 0.011665 | 0.011598 | 0.011531 |
| 0.011665 | 0.011699 | 0.011698 | 0.011631 | 0.011699 | 0.011934 | 0.011530 |
| 0.011631 | 0.011766 | 0.011631 | 0.011665 | 0.011631 | 0.011732 | 0.011703 |
| 0.011285 | 0.011570 | 0.011511 | 0.011584 | 0.011671 | 0.011563 | 0.011520 |
| 0.011480 | 0.011262 | 0.011295 | 0.011400 | 0.011262 | 0.011398 | 0.011531 |
| 0.011430 | 0.011500 | 0.011430 | 0.011744 | 0.011463 | 0.012338 | 0.011498 |
| 0.012237 | 0.012004 | 0.012139 | 0.012477 | 0.011732 | 0.011497 | 0.000000 |
| 0.012238 | 0.011498 | 0.011430 | 0.011329 | 0.011396 | 0.011396 | 0.011433 |
| 0.011262 | 0.011264 | 0.011329 | 0.011296 | 0.011935 | 0.012002 | 0.012002 |

|          |          |          |          |          |          |          |
|----------|----------|----------|----------|----------|----------|----------|
| 0.011902 | 0.012002 | 0.012106 | 0.011872 | 0.012374 | 0.012381 | 0.012441 |
| 0.012442 | 0.012475 | 0.012426 | 0.012442 | 0.012443 | 0.011732 | 0.011968 |
| 0.012036 | 0.012540 | 0.012044 | 0.012069 | 0.012542 | 0.011604 | 0.011497 |
| 0.011463 | 0.011463 | 0.011935 | 0.011924 | 0.012081 | 0.011800 | 0.011465 |
| S812     | 0.012407 | 0.012407 | 0.012373 | 0.012339 | 0.012339 | 0.012407 |
| 0.012286 | 0.012184 | 0.012339 | 0.012036 | 0.012103 | 0.012071 | 0.012036 |
| 0.012002 | 0.012238 | 0.011969 | 0.012070 | 0.012137 | 0.012103 | 0.012070 |
| 0.012036 | 0.012070 | 0.012103 | 0.012037 | 0.012071 | 0.012070 | 0.012252 |
| 0.012238 | 0.012002 | 0.011969 | 0.012137 | 0.012137 | 0.012103 | 0.012137 |
| 0.012103 | 0.012205 | 0.012103 | 0.012103 | 0.012137 | 0.012103 | 0.012239 |
| 0.011969 | 0.012103 | 0.012137 | 0.012070 | 0.012103 | 0.012204 | 0.012137 |
| 0.012103 | 0.012272 | 0.012172 | 0.012373 | 0.012103 | 0.012373 | 0.012103 |
| 0.012070 | 0.012104 | 0.012238 | 0.012373 | 0.012407 | 0.012104 | 0.012205 |
| 0.012137 | 0.012205 | 0.012104 | 0.012339 | 0.012508 | 0.012103 | 0.012171 |
| 0.012070 | 0.012171 | 0.012137 | 0.012205 | 0.012137 | 0.012137 | 0.012137 |
| 0.012036 | 0.012070 | 0.012036 | 0.012070 | 0.012103 | 0.012139 | 0.012204 |
| 0.012137 | 0.012103 | 0.012171 | 0.012070 | 0.012137 | 0.012036 | 0.012103 |
| 0.012272 | 0.012204 | 0.012440 | 0.012272 | 0.012103 | 0.012339 | 0.012103 |
| 0.012249 | 0.012370 | 0.012307 | 0.011960 | 0.012069 | 0.012092 | 0.012164 |
| 0.012820 | 0.012334 | 0.012050 | 0.012339 | 0.012339 | 0.012070 | 0.012171 |
| 0.012171 | 0.012103 | 0.012171 | 0.012103 | 0.012205 | 0.012137 | 0.012103 |
| 0.012069 | 0.012137 | 0.012373 | 0.012272 | 0.012104 | 0.012138 | 0.012070 |
| 0.012036 | 0.011969 | 0.012103 | 0.012070 | 0.012204 | 0.012171 | 0.012103 |
| 0.012204 | 0.012272 | 0.012070 | 0.012070 | 0.012103 | 0.012103 | 0.012076 |
| 0.012144 | 0.012103 | 0.012103 | 0.011960 | 0.012038 | 0.011973 | 0.012104 |
| 0.012112 | 0.012024 | 0.012095 | 0.012027 | 0.011979 | 0.012021 | 0.012075 |
| 0.012286 | 0.012096 | 0.012164 | 0.012037 | 0.012064 | 0.012172 | 0.012071 |
| 0.012138 | 0.012140 | 0.012138 | 0.012204 | 0.012137 | 0.012542 | 0.012272 |
| 0.012306 | 0.012171 | 0.012103 | 0.012137 | 0.012002 | 0.012171 | 0.012036 |
| 0.012103 | 0.012103 | 0.012070 | 0.012036 | 0.012070 | 0.012036 | 0.012137 |
| 0.012103 | 0.012204 | 0.012137 | 0.012036 | 0.012141 | 0.012238 | 0.012246 |
| 0.012239 | 0.012137 | 0.012036 | 0.011972 | 0.012103 | 0.012036 | 0.011969 |
| 0.012081 | 0.012239 | 0.012002 | 0.012239 | 0.012002 | 0.012104 | 0.012070 |
| 0.012171 | 0.012070 | 0.012103 | 0.012070 | 0.012103 | 0.011969 | 0.012103 |
| 0.012137 | 0.012070 | 0.012137 | 0.012070 | 0.012070 | 0.012137 | 0.012373 |
| 0.012407 | 0.012339 | 0.012407 | 0.012243 | 0.012407 | 0.012069 | 0.012070 |
| 0.012008 | 0.012356 | 0.012251 | 0.012023 | 0.012421 | 0.011948 | 0.012085 |
| 0.012320 | 0.012320 | 0.012204 | 0.012441 | 0.012121 | 0.012340 | 0.012306 |
| 0.012238 | 0.012407 | 0.012164 | 0.012010 | 0.012111 | 0.012137 | 0.012179 |
| 0.012306 | 0.012176 | 0.012349 | 0.012350 | 0.012306 | 0.012373 | 0.012419 |
| 0.012214 | 0.012353 | 0.012282 | 0.012247 | 0.012510 | 0.012002 | 0.012141 |
| 0.012171 | 0.012103 | 0.012002 | 0.012002 | 0.012070 | 0.012070 | 0.012137 |
| 0.012070 | 0.012137 | 0.012036 | 0.012070 | 0.012070 | 0.012070 | 0.012137 |
| 0.012070 | 0.012440 | 0.012340 | 0.012373 | 0.011969 | 0.012070 | 0.012104 |
| 0.012103 | 0.012070 | 0.012137 | 0.012104 | 0.012036 | 0.012036 | 0.012036 |
| 0.012508 | 0.012137 | 0.012205 | 0.012002 | 0.012103 | 0.012272 | 0.012036 |
| 0.012036 | 0.012103 | 0.012070 | 0.012238 | 0.012036 | 0.012103 | 0.012238 |
| 0.012171 | 0.012070 | 0.012070 | 0.012002 | 0.012002 | 0.012171 | 0.012103 |
| 0.012002 | 0.012103 | 0.011969 | 0.012002 | 0.012137 | 0.012205 | 0.012036 |
| 0.012003 | 0.012137 | 0.012071 | 0.011969 | 0.012238 | 0.011969 | 0.012137 |
| 0.012192 | 0.012036 | 0.012272 | 0.012171 | 0.012137 | 0.012070 | 0.012171 |
| 0.012036 | 0.012373 | 0.011969 | 0.012171 | 0.011969 | 0.011969 | 0.011969 |
| 0.012204 | 0.012340 | 0.012104 | 0.012171 | 0.012002 | 0.012340 | 0.011969 |
| 0.012036 | 0.012036 | 0.012070 | 0.012171 | 0.012070 | 0.012171 | 0.012238 |
| 0.012238 | 0.012205 | 0.012103 | 0.012205 | 0.012171 | 0.012036 | 0.012002 |
| 0.012036 | 0.012036 | 0.012104 | 0.011969 | 0.012002 | 0.012171 | 0.012036 |
| 0.012002 | 0.012070 | 0.012205 | 0.012171 | 0.012137 | 0.012070 | 0.012070 |
| 0.012137 | 0.012070 | 0.012171 | 0.012036 | 0.012171 | 0.012272 | 0.012441 |
| 0.012070 | 0.012407 | 0.012062 | 0.018622 | 0.012241 | 0.012224 | 0.012353 |
| 0.012343 | 0.012364 | 0.012372 | 0.012339 | 0.012657 | 0.012409 | 0.012399 |

|          |          |          |          |          |          |          |
|----------|----------|----------|----------|----------|----------|----------|
| 0.012057 | 0.012406 | 0.011998 | 0.012151 | 0.012038 | 0.012098 | 0.012008 |
| 0.012330 | 0.012179 | 0.012211 | 0.011921 | 0.012205 | 0.012205 | 0.012213 |
| 0.012058 | 0.012204 | 0.012204 | 0.012103 | 0.012137 | 0.012138 | 0.012104 |
| 0.012137 | 0.012070 | 0.012103 | 0.012137 | 0.012104 | 0.012036 | 0.012036 |
| 0.012036 | 0.012137 | 0.012036 | 0.012137 | 0.012171 | 0.012204 | 0.012069 |
| 0.012070 | 0.012036 | 0.012373 | 0.012373 | 0.012171 | 0.012206 | 0.012238 |
| 0.012002 | 0.012002 | 0.012036 | 0.012137 | 0.012002 | 0.012238 | 0.012238 |
| 0.012272 | 0.012204 | 0.012205 | 0.012306 | 0.012407 | 0.012309 | 0.012137 |
| 0.012137 | 0.012204 | 0.012238 | 0.012002 | 0.012137 | 0.012103 | 0.012137 |
| 0.012205 | 0.012205 | 0.012238 | 0.012205 | 0.012106 | 0.012305 | 0.012272 |
| 0.012147 | 0.012036 | 0.012137 | 0.012238 | 0.012137 | 0.012205 | 0.012305 |
| 0.012441 | 0.012121 | 0.012340 | 0.012306 | 0.012238 | 0.012407 | 0.012036 |
| 0.012208 | 0.012104 | 0.012036 | 0.012036 | 0.012137 | 0.012036 | 0.012137 |
| 0.012171 | 0.012204 | 0.012069 | 0.012070 | 0.012036 | 0.012373 | 0.012373 |
| 0.012171 | 0.012206 | 0.012238 | 0.012171 | 0.011497 | 0.012242 | 0.012118 |
| 0.012187 | 0.012208 | 0.012293 | 0.012206 | 0.012288 | 0.012201 | 0.012200 |
| 0.011438 | 0.012031 | 0.012193 | 0.012100 | 0.012372 | 0.012288 | 0.012356 |
| 0.011434 | 0.012155 | 0.012111 | 0.012137 | 0.012137 | 0.012103 | 0.012076 |
| 0.012002 | 0.012036 | 0.012171 | 0.012137 | 0.012110 | 0.012204 | 0.012039 |
| 0.012103 | 0.012036 | 0.012070 | 0.012103 | 0.012002 | 0.012070 | 0.011969 |
| 0.012036 | 0.012070 | 0.012036 | 0.012002 | 0.012103 | 0.012036 | 0.012070 |
| 0.012070 | 0.012002 | 0.012070 | 0.012104 | 0.012002 | 0.012205 | 0.012238 |
| 0.012137 | 0.012137 | 0.012137 | 0.012137 | 0.012070 | 0.012407 | 0.012103 |
| 0.012072 | 0.012070 | 0.012239 | 0.012216 | 0.012171 | 0.012171 | 0.012171 |
| 0.012103 | 0.012104 | 0.012070 | 0.012104 | 0.012205 | 0.012205 | 0.012137 |
| 0.012137 | 0.012272 | 0.012373 | 0.012171 | 0.012373 | 0.012373 | 0.012238 |
| 0.012070 | 0.012137 | 0.012103 | 0.012508 | 0.012138 | 0.012171 | 0.012137 |
| 0.012171 | 0.012036 | 0.012036 | 0.012340 | 0.012340 | 0.012306 | 0.012103 |
| 0.012137 | 0.012272 | 0.012137 | 0.012137 | 0.012171 | 0.012036 | 0.012306 |
| 0.012137 | 0.012103 | 0.012036 | 0.012272 | 0.012103 | 0.012204 | 0.012441 |
| 0.012070 | 0.012354 | 0.012441 | 0.012241 | 0.011964 | 0.012150 | 0.012042 |
| 0.011940 | 0.012269 | 0.012045 | 0.012179 | 0.011989 | 0.012233 | 0.012177 |
| 0.012389 | 0.011917 | 0.012287 | 0.012119 | 0.012086 | 0.012335 | 0.012157 |
| 0.012192 | 0.012085 | 0.012119 | 0.012118 | 0.012074 | 0.012204 | 0.012204 |
| 0.012272 | 0.012071 | 0.012246 | 0.012215 | 0.012317 | 0.012335 | 0.012137 |
| 0.012306 | 0.012171 | 0.012103 | 0.012137 | 0.012002 | 0.012171 | 0.012036 |
| 0.012103 | 0.012103 | 0.012070 | 0.012036 | 0.012070 | 0.012036 | 0.012137 |
| 0.012145 | 0.012111 | 0.012124 | 0.012123 | 0.012260 | 0.012258 | 0.012257 |
| 0.012255 | 0.012171 | 0.011947 | 0.011925 | 0.012112 | 0.012282 | 0.012284 |
| 0.012071 | 0.012146 | 0.012375 | 0.012347 | 0.012273 | 0.012307 | 0.012204 |
| 0.012171 | 0.012205 | 0.012204 | 0.012137 | 0.012576 | 0.012306 | 0.012306 |
| 0.012407 | 0.012453 | 0.012120 | 0.012205 | 0.012070 | 0.012204 | 0.012205 |
| 0.012275 | 0.012238 | 0.012306 | 0.012306 | 0.012439 | 0.012407 | 0.012068 |
| 0.011941 | 0.011928 | 0.011981 | 0.012013 | 0.012019 | 0.011920 | 0.012218 |
| 0.012057 | 0.012202 | 0.012014 | 0.011961 | 0.012104 | 0.012157 | 0.012070 |
| 0.012036 | 0.011969 | 0.012103 | 0.012070 | 0.012204 | 0.012171 | 0.012103 |
| 0.012204 | 0.012272 | 0.012070 | 0.012070 | 0.012103 | 0.012103 | 0.012076 |
| 0.012144 | 0.012103 | 0.012103 | 0.012074 | 0.012204 | 0.012204 | 0.012272 |
| 0.012071 | 0.012246 | 0.012215 | 0.012317 | 0.012335 | 0.012137 | 0.012305 |
| 0.012205 | 0.012205 | 0.012077 | 0.012211 | 0.012209 | 0.012221 | 0.012007 |
| 0.012268 | 0.012339 | 0.012162 | 0.012150 | 0.012002 | 0.012239 | 0.012103 |
| 0.012204 | 0.012137 | 0.012036 | 0.012141 | 0.012238 | 0.012246 | 0.012137 |
| 0.012036 | 0.011972 | 0.012103 | 0.012036 | 0.011969 | 0.012081 | 0.012239 |
| 0.012137 | 0.012070 | 0.012103 | 0.012137 | 0.012104 | 0.012036 | 0.012170 |
| 0.012103 | 0.012137 | 0.012137 | 0.012070 | 0.012137 | 0.012373 | 0.011969 |
| 0.012070 | 0.012407 | 0.012070 | 0.012103 | 0.012070 | 0.012373 | 0.012090 |
| 0.012242 | 0.011997 | 0.012064 | 0.012230 | 0.012284 | 0.012210 | 0.011939 |
| 0.012006 | 0.012036 | 0.012137 | 0.012250 | 0.012105 | 0.012246 | 0.012374 |
| 0.012273 | 0.012348 | 0.012272 | 0.012532 | 0.012238 | 0.013082 | 0.012275 |
| 0.013014 | 0.012749 | 0.012884 | 0.013189 | 0.012373 | 0.012002 | 0.012238 |

|          |          |          |          |          |          |          |
|----------|----------|----------|----------|----------|----------|----------|
| 0.000000 | 0.012615 | 0.012204 | 0.012104 | 0.012171 | 0.012171 | 0.012213 |
| 0.012036 | 0.012045 | 0.012103 | 0.012070 | 0.012576 | 0.012643 | 0.012644 |
| 0.012544 | 0.012644 | 0.012749 | 0.012517 | 0.011531 | 0.011534 | 0.011598 |
| 0.011599 | 0.011632 | 0.011572 | 0.011599 | 0.011532 | 0.012137 | 0.011666 |
| 0.012475 | 0.012913 | 0.011603 | 0.012711 | 0.013186 | 0.012216 | 0.012137 |
| 0.012103 | 0.012103 | 0.012576 | 0.012667 | 0.012681 | 0.012440 | 0.012106 |
| S813     | 0.012376 | 0.012376 | 0.012140 | 0.011903 | 0.011903 | 0.011971 |
| 0.012050 | 0.011948 | 0.011903 | 0.011971 | 0.012004 | 0.011837 | 0.011971 |
| 0.011937 | 0.012173 | 0.011903 | 0.011937 | 0.012072 | 0.012038 | 0.012004 |
| 0.011971 | 0.012005 | 0.011836 | 0.011938 | 0.011972 | 0.011971 | 0.012016 |
| 0.011971 | 0.012005 | 0.011903 | 0.011870 | 0.012038 | 0.012039 | 0.012072 |
| 0.012038 | 0.012140 | 0.012038 | 0.012038 | 0.012005 | 0.012038 | 0.012207 |
| 0.011903 | 0.012038 | 0.012005 | 0.012004 | 0.012038 | 0.012072 | 0.012072 |
| 0.012038 | 0.012140 | 0.012073 | 0.012106 | 0.011971 | 0.012309 | 0.011971 |
| 0.012004 | 0.012039 | 0.012140 | 0.012309 | 0.012140 | 0.012038 | 0.012140 |
| 0.012072 | 0.012140 | 0.012005 | 0.012275 | 0.012242 | 0.012038 | 0.012106 |
| 0.012005 | 0.012072 | 0.012072 | 0.012106 | 0.012038 | 0.012072 | 0.012072 |
| 0.011971 | 0.011971 | 0.011971 | 0.012005 | 0.012038 | 0.011836 | 0.012140 |
| 0.012072 | 0.012038 | 0.012106 | 0.011971 | 0.012072 | 0.011971 | 0.012004 |
| 0.012207 | 0.012140 | 0.012174 | 0.012207 | 0.012038 | 0.012275 | 0.012038 |
| 0.012025 | 0.011920 | 0.012080 | 0.011764 | 0.011807 | 0.011797 | 0.011691 |
| 0.012342 | 0.011671 | 0.011843 | 0.012207 | 0.012241 | 0.011971 | 0.012106 |
| 0.012106 | 0.012072 | 0.012140 | 0.012038 | 0.012106 | 0.012038 | 0.012072 |
| 0.012038 | 0.012038 | 0.012343 | 0.012207 | 0.012106 | 0.012073 | 0.012005 |
| 0.011971 | 0.011903 | 0.012038 | 0.011971 | 0.011937 | 0.011903 | 0.011836 |
| 0.011937 | 0.012005 | 0.012004 | 0.012004 | 0.012038 | 0.012038 | 0.012044 |
| 0.012113 | 0.012038 | 0.012038 | 0.011963 | 0.012004 | 0.011975 | 0.012039 |
| 0.012047 | 0.011992 | 0.011873 | 0.012030 | 0.011947 | 0.011989 | 0.012010 |
| 0.012036 | 0.012029 | 0.012098 | 0.011972 | 0.011998 | 0.012107 | 0.012006 |
| 0.012073 | 0.012075 | 0.012073 | 0.012139 | 0.012106 | 0.012343 | 0.012208 |
| 0.012038 | 0.012106 | 0.012038 | 0.012072 | 0.011937 | 0.011903 | 0.011971 |
| 0.012038 | 0.012038 | 0.011971 | 0.011971 | 0.012004 | 0.011971 | 0.012072 |
| 0.012038 | 0.012140 | 0.012072 | 0.011971 | 0.012042 | 0.012174 | 0.012181 |
| 0.012174 | 0.012072 | 0.011971 | 0.011873 | 0.012038 | 0.011971 | 0.011904 |
| 0.011913 | 0.012174 | 0.011971 | 0.012174 | 0.011937 | 0.012038 | 0.012005 |
| 0.012106 | 0.012004 | 0.012038 | 0.012005 | 0.012038 | 0.011903 | 0.012005 |
| 0.012072 | 0.012004 | 0.012072 | 0.012004 | 0.012038 | 0.012072 | 0.012241 |
| 0.012140 | 0.012072 | 0.012140 | 0.012005 | 0.012140 | 0.012038 | 0.012004 |
| 0.011805 | 0.012031 | 0.012255 | 0.011747 | 0.012151 | 0.011916 | 0.011769 |
| 0.012084 | 0.012051 | 0.012207 | 0.012410 | 0.012124 | 0.012275 | 0.012241 |
| 0.012106 | 0.012308 | 0.012203 | 0.012095 | 0.012198 | 0.012073 | 0.012148 |
| 0.012241 | 0.012145 | 0.012284 | 0.012319 | 0.012241 | 0.012343 | 0.012388 |
| 0.012149 | 0.012322 | 0.012217 | 0.012216 | 0.012447 | 0.011937 | 0.012076 |
| 0.012106 | 0.012038 | 0.011903 | 0.011937 | 0.012005 | 0.012005 | 0.012072 |
| 0.012004 | 0.012072 | 0.011971 | 0.012005 | 0.012005 | 0.012004 | 0.012004 |
| 0.012005 | 0.012174 | 0.012073 | 0.012106 | 0.011903 | 0.012005 | 0.012038 |
| 0.012038 | 0.012004 | 0.012072 | 0.012038 | 0.011971 | 0.011971 | 0.011971 |
| 0.012174 | 0.012072 | 0.012140 | 0.011937 | 0.012038 | 0.012140 | 0.011971 |
| 0.011971 | 0.012004 | 0.012004 | 0.012174 | 0.011971 | 0.011836 | 0.011971 |
| 0.011903 | 0.012005 | 0.012004 | 0.011937 | 0.011937 | 0.012106 | 0.012038 |
| 0.011937 | 0.012038 | 0.011903 | 0.011937 | 0.012072 | 0.011938 | 0.011971 |
| 0.011938 | 0.012072 | 0.012006 | 0.011903 | 0.011971 | 0.011903 | 0.012072 |
| 0.012127 | 0.011971 | 0.012005 | 0.012106 | 0.012072 | 0.012005 | 0.012038 |
| 0.011971 | 0.012309 | 0.011903 | 0.012106 | 0.011903 | 0.011903 | 0.011903 |
| 0.012106 | 0.012072 | 0.012005 | 0.012106 | 0.011937 | 0.012073 | 0.011903 |
| 0.011971 | 0.011971 | 0.012004 | 0.012106 | 0.012004 | 0.012106 | 0.012173 |
| 0.012174 | 0.012140 | 0.012038 | 0.012140 | 0.012106 | 0.011971 | 0.011937 |
| 0.011971 | 0.011971 | 0.012005 | 0.011903 | 0.011937 | 0.012072 | 0.011971 |
| 0.011937 | 0.012005 | 0.012140 | 0.012106 | 0.012072 | 0.012004 | 0.012005 |
| 0.012072 | 0.012004 | 0.012106 | 0.011903 | 0.012106 | 0.012207 | 0.012241 |

|          |          |          |          |          |          |          |
|----------|----------|----------|----------|----------|----------|----------|
| 0.012005 | 0.012106 | 0.011820 | 0.018394 | 0.011913 | 0.012040 | 0.011898 |
| 0.011857 | 0.011906 | 0.011952 | 0.011757 | 0.011995 | 0.011924 | 0.012155 |
| 0.011297 | 0.011916 | 0.011763 | 0.011815 | 0.011763 | 0.011950 | 0.011878 |
| 0.011671 | 0.011731 | 0.011728 | 0.011457 | 0.012140 | 0.012174 | 0.012181 |
| 0.012026 | 0.012140 | 0.012106 | 0.012038 | 0.012039 | 0.012039 | 0.012039 |
| 0.012072 | 0.012004 | 0.012038 | 0.012072 | 0.012038 | 0.011971 | 0.012004 |
| 0.012004 | 0.012038 | 0.011903 | 0.012038 | 0.012106 | 0.012140 | 0.012038 |
| 0.011937 | 0.011971 | 0.012106 | 0.012106 | 0.012106 | 0.012040 | 0.012174 |
| 0.011937 | 0.011937 | 0.011971 | 0.012072 | 0.011937 | 0.012173 | 0.012173 |
| 0.012207 | 0.012207 | 0.012106 | 0.012241 | 0.012140 | 0.012245 | 0.012072 |
| 0.012072 | 0.012140 | 0.012173 | 0.011937 | 0.012072 | 0.012004 | 0.012005 |
| 0.012140 | 0.012140 | 0.012173 | 0.012140 | 0.012041 | 0.012207 | 0.012207 |
| 0.012047 | 0.011971 | 0.012072 | 0.012174 | 0.012072 | 0.012140 | 0.012207 |
| 0.012410 | 0.012124 | 0.012275 | 0.012241 | 0.012106 | 0.012308 | 0.011972 |
| 0.012075 | 0.012039 | 0.012004 | 0.012004 | 0.012038 | 0.011903 | 0.012038 |
| 0.012106 | 0.012140 | 0.012038 | 0.011937 | 0.011971 | 0.012106 | 0.012106 |
| 0.012106 | 0.012040 | 0.012207 | 0.012140 | 0.012717 | 0.012209 | 0.012120 |
| 0.012190 | 0.012140 | 0.012261 | 0.012104 | 0.012256 | 0.012169 | 0.012169 |
| 0.012647 | 0.012034 | 0.012161 | 0.012102 | 0.012375 | 0.012257 | 0.012325 |
| 0.012666 | 0.012158 | 0.012079 | 0.012072 | 0.012072 | 0.011836 | 0.012045 |
| 0.011937 | 0.011971 | 0.012106 | 0.012072 | 0.012079 | 0.011937 | 0.011465 |
| 0.012004 | 0.011971 | 0.012005 | 0.012004 | 0.011937 | 0.012005 | 0.011903 |
| 0.011971 | 0.012005 | 0.011971 | 0.011937 | 0.012038 | 0.011971 | 0.012005 |
| 0.011937 | 0.011937 | 0.012005 | 0.012038 | 0.011937 | 0.012140 | 0.012173 |
| 0.012072 | 0.012072 | 0.012072 | 0.012072 | 0.012004 | 0.012140 | 0.012038 |
| 0.011794 | 0.012005 | 0.011972 | 0.011946 | 0.012106 | 0.012106 | 0.012106 |
| 0.012106 | 0.012038 | 0.012004 | 0.012038 | 0.012140 | 0.012140 | 0.012072 |
| 0.012072 | 0.012174 | 0.012106 | 0.012106 | 0.012309 | 0.012309 | 0.012173 |
| 0.012004 | 0.012072 | 0.012106 | 0.012242 | 0.012073 | 0.012106 | 0.012072 |
| 0.012106 | 0.011937 | 0.011937 | 0.012275 | 0.012275 | 0.012241 | 0.012038 |
| 0.012072 | 0.012207 | 0.012072 | 0.012072 | 0.012106 | 0.011971 | 0.012039 |
| 0.012072 | 0.012038 | 0.011937 | 0.012207 | 0.012038 | 0.012140 | 0.012174 |
| 0.012072 | 0.012118 | 0.012174 | 0.011793 | 0.011795 | 0.012084 | 0.011525 |
| 0.011830 | 0.011644 | 0.011728 | 0.011865 | 0.011842 | 0.011876 | 0.011805 |
| 0.011775 | 0.011851 | 0.011896 | 0.011788 | 0.011762 | 0.012000 | 0.011953 |
| 0.011965 | 0.011848 | 0.011871 | 0.011871 | 0.012008 | 0.011937 | 0.011937 |
| 0.012005 | 0.012005 | 0.012181 | 0.011980 | 0.012252 | 0.012268 | 0.012038 |
| 0.012038 | 0.012106 | 0.012038 | 0.012072 | 0.011937 | 0.011903 | 0.011971 |
| 0.012038 | 0.012038 | 0.011971 | 0.011971 | 0.012004 | 0.011971 | 0.012072 |
| 0.012078 | 0.012079 | 0.011989 | 0.012057 | 0.012229 | 0.012192 | 0.012123 |
| 0.012189 | 0.012039 | 0.011950 | 0.011928 | 0.012047 | 0.012217 | 0.012185 |
| 0.012006 | 0.012081 | 0.012311 | 0.012282 | 0.012209 | 0.012243 | 0.012173 |
| 0.012106 | 0.012173 | 0.012173 | 0.012072 | 0.012377 | 0.012241 | 0.012309 |
| 0.012342 | 0.012098 | 0.012054 | 0.012138 | 0.012005 | 0.012173 | 0.012174 |
| 0.012176 | 0.012241 | 0.012241 | 0.012241 | 0.012483 | 0.012376 | 0.012001 |
| 0.011875 | 0.011895 | 0.011983 | 0.011947 | 0.011987 | 0.011960 | 0.011948 |
| 0.012025 | 0.011985 | 0.012017 | 0.012000 | 0.012039 | 0.012125 | 0.012005 |
| 0.011971 | 0.011903 | 0.012038 | 0.011971 | 0.011937 | 0.011903 | 0.011836 |
| 0.011937 | 0.012005 | 0.012004 | 0.012004 | 0.012038 | 0.012038 | 0.012044 |
| 0.012113 | 0.012038 | 0.012038 | 0.012008 | 0.011937 | 0.011937 | 0.012005 |
| 0.012005 | 0.012181 | 0.011980 | 0.012252 | 0.012268 | 0.012038 | 0.012207 |
| 0.012174 | 0.012174 | 0.012011 | 0.012144 | 0.011967 | 0.012121 | 0.011691 |
| 0.012027 | 0.011972 | 0.012122 | 0.012084 | 0.011971 | 0.012174 | 0.012038 |
| 0.012140 | 0.012072 | 0.011971 | 0.012042 | 0.012174 | 0.012181 | 0.012072 |
| 0.011971 | 0.011873 | 0.012038 | 0.011971 | 0.011904 | 0.011913 | 0.012174 |
| 0.012072 | 0.012004 | 0.012038 | 0.012072 | 0.012038 | 0.011971 | 0.011870 |
| 0.012038 | 0.012072 | 0.012072 | 0.012004 | 0.012072 | 0.012275 | 0.011903 |
| 0.012005 | 0.012140 | 0.012004 | 0.012038 | 0.012004 | 0.012106 | 0.011875 |
| 0.011285 | 0.011741 | 0.011612 | 0.011786 | 0.011835 | 0.011743 | 0.011688 |
| 0.011585 | 0.011633 | 0.011667 | 0.011776 | 0.011465 | 0.011568 | 0.011735 |

|          |          |          |          |          |          |          |
|----------|----------|----------|----------|----------|----------|----------|
| 0.011803 | 0.011875 | 0.011802 | 0.011915 | 0.011802 | 0.012681 | 0.011702 |
| 0.012580 | 0.012175 | 0.012482 | 0.012684 | 0.012106 | 0.011836 | 0.011498 |
| 0.012615 | 0.000000 | 0.011802 | 0.011701 | 0.011769 | 0.011769 | 0.011808 |
| 0.011633 | 0.011433 | 0.011701 | 0.011668 | 0.012310 | 0.012377 | 0.012378 |
| 0.012278 | 0.012377 | 0.012277 | 0.012076 | 0.012751 | 0.012761 | 0.012819 |
| 0.012820 | 0.012853 | 0.012632 | 0.012820 | 0.012650 | 0.012106 | 0.012343 |
| 0.012412 | 0.012884 | 0.012216 | 0.012411 | 0.012141 | 0.011809 | 0.011870 |
| 0.011836 | 0.011836 | 0.012276 | 0.012382 | 0.012439 | 0.012140 | 0.011668 |
| S814     | 0.011967 | 0.011967 | 0.011698 | 0.011530 | 0.011530 | 0.011597 |
| 0.011706 | 0.011638 | 0.011597 | 0.011564 | 0.011631 | 0.011599 | 0.011564 |
| 0.011530 | 0.011765 | 0.011496 | 0.011597 | 0.011664 | 0.011631 | 0.011597 |
| 0.011564 | 0.011597 | 0.011429 | 0.011531 | 0.011564 | 0.011597 | 0.011672 |
| 0.011564 | 0.011597 | 0.011496 | 0.011463 | 0.011664 | 0.011631 | 0.011664 |
| 0.011631 | 0.011732 | 0.011631 | 0.011631 | 0.011664 | 0.011631 | 0.011799 |
| 0.011497 | 0.011631 | 0.011664 | 0.011597 | 0.011631 | 0.011732 | 0.011664 |
| 0.011631 | 0.011799 | 0.011699 | 0.011698 | 0.011631 | 0.011900 | 0.011631 |
| 0.011597 | 0.011631 | 0.011765 | 0.011900 | 0.011732 | 0.011631 | 0.011732 |
| 0.011664 | 0.011732 | 0.011631 | 0.011866 | 0.011833 | 0.011631 | 0.011698 |
| 0.011597 | 0.011698 | 0.011664 | 0.011732 | 0.011664 | 0.011664 | 0.011664 |
| 0.011564 | 0.011597 | 0.011564 | 0.011597 | 0.011631 | 0.011666 | 0.011732 |
| 0.011664 | 0.011631 | 0.011698 | 0.011597 | 0.011664 | 0.011564 | 0.011631 |
| 0.011799 | 0.011732 | 0.011765 | 0.011799 | 0.011631 | 0.011866 | 0.011631 |
| 0.011839 | 0.011733 | 0.011890 | 0.011529 | 0.011545 | 0.011649 | 0.011454 |
| 0.012085 | 0.011467 | 0.011596 | 0.011866 | 0.011866 | 0.011597 | 0.011698 |
| 0.011698 | 0.011664 | 0.011732 | 0.011631 | 0.011732 | 0.011664 | 0.011664 |
| 0.011631 | 0.011664 | 0.011933 | 0.011799 | 0.011698 | 0.011665 | 0.011598 |
| 0.011564 | 0.011497 | 0.011631 | 0.011597 | 0.011530 | 0.011497 | 0.011430 |
| 0.011530 | 0.011598 | 0.011597 | 0.011597 | 0.011631 | 0.011631 | 0.011634 |
| 0.011703 | 0.011631 | 0.011631 | 0.011528 | 0.011603 | 0.011551 | 0.011632 |
| 0.011636 | 0.011576 | 0.011651 | 0.011612 | 0.011536 | 0.011574 | 0.011601 |
| 0.011600 | 0.011646 | 0.011680 | 0.011565 | 0.011579 | 0.011699 | 0.011598 |
| 0.011666 | 0.011667 | 0.011665 | 0.011765 | 0.011698 | 0.012068 | 0.011799 |
| 0.011631 | 0.011698 | 0.011631 | 0.011665 | 0.011530 | 0.011497 | 0.011564 |
| 0.011631 | 0.011631 | 0.011597 | 0.011564 | 0.011597 | 0.011564 | 0.011665 |
| 0.011631 | 0.011732 | 0.011665 | 0.011564 | 0.011667 | 0.011766 | 0.011770 |
| 0.011766 | 0.011665 | 0.011564 | 0.011499 | 0.011631 | 0.011564 | 0.011497 |
| 0.011502 | 0.011766 | 0.011564 | 0.011766 | 0.011530 | 0.011631 | 0.011597 |
| 0.011698 | 0.011597 | 0.011631 | 0.011598 | 0.011631 | 0.011497 | 0.011631 |
| 0.011665 | 0.011597 | 0.011665 | 0.011597 | 0.011631 | 0.011665 | 0.011900 |
| 0.011732 | 0.011665 | 0.011732 | 0.011768 | 0.011732 | 0.011631 | 0.011597 |
| 0.011567 | 0.011869 | 0.011746 | 0.011541 | 0.011739 | 0.011503 | 0.011650 |
| 0.011740 | 0.011638 | 0.011799 | 0.012001 | 0.011709 | 0.011866 | 0.011833 |
| 0.011765 | 0.011933 | 0.011700 | 0.011472 | 0.011605 | 0.011665 | 0.011737 |
| 0.011833 | 0.011735 | 0.011872 | 0.011906 | 0.011866 | 0.011933 | 0.011975 |
| 0.011771 | 0.011909 | 0.011873 | 0.011804 | 0.012070 | 0.011530 | 0.011667 |
| 0.011698 | 0.011631 | 0.011530 | 0.011530 | 0.011597 | 0.011597 | 0.011664 |
| 0.011597 | 0.011664 | 0.011564 | 0.011597 | 0.011597 | 0.011597 | 0.011664 |
| 0.011597 | 0.011765 | 0.011665 | 0.011698 | 0.011496 | 0.011597 | 0.011631 |
| 0.011631 | 0.011597 | 0.011664 | 0.011631 | 0.011564 | 0.011564 | 0.011564 |
| 0.011765 | 0.011664 | 0.011732 | 0.011530 | 0.011631 | 0.011799 | 0.011564 |
| 0.011564 | 0.011631 | 0.011597 | 0.011765 | 0.011564 | 0.011429 | 0.011564 |
| 0.011497 | 0.011597 | 0.011597 | 0.011530 | 0.011530 | 0.011698 | 0.011631 |
| 0.011530 | 0.011631 | 0.011497 | 0.011530 | 0.011664 | 0.011530 | 0.011564 |
| 0.011531 | 0.011664 | 0.011598 | 0.011497 | 0.011564 | 0.011497 | 0.011664 |
| 0.011676 | 0.011564 | 0.011597 | 0.011698 | 0.011664 | 0.011597 | 0.011698 |
| 0.011564 | 0.011900 | 0.011496 | 0.011698 | 0.011497 | 0.011497 | 0.011496 |
| 0.011732 | 0.011665 | 0.011631 | 0.011698 | 0.011530 | 0.011665 | 0.011497 |
| 0.011564 | 0.011564 | 0.011597 | 0.011698 | 0.011597 | 0.011698 | 0.011765 |
| 0.011765 | 0.011732 | 0.011631 | 0.011732 | 0.011698 | 0.011564 | 0.011530 |
| 0.011564 | 0.011564 | 0.011631 | 0.011497 | 0.011530 | 0.011698 | 0.011564 |

|          |          |          |          |          |          |          |
|----------|----------|----------|----------|----------|----------|----------|
| 0.011530 | 0.011597 | 0.011732 | 0.011698 | 0.011664 | 0.011597 | 0.011597 |
| 0.011664 | 0.011597 | 0.011698 | 0.011564 | 0.011698 | 0.011799 | 0.011765 |
| 0.011597 | 0.011732 | 0.011612 | 0.018125 | 0.011387 | 0.011733 | 0.011688 |
| 0.011649 | 0.011694 | 0.011741 | 0.011524 | 0.011720 | 0.011716 | 0.011668 |
| 0.011345 | 0.011488 | 0.011567 | 0.011605 | 0.011529 | 0.011603 | 0.011619 |
| 0.011483 | 0.011470 | 0.011468 | 0.011391 | 0.011732 | 0.011765 | 0.011771 |
| 0.011610 | 0.011732 | 0.011732 | 0.011631 | 0.011665 | 0.011665 | 0.011631 |
| 0.011665 | 0.011597 | 0.011631 | 0.011665 | 0.011631 | 0.011564 | 0.011597 |
| 0.011597 | 0.011665 | 0.011564 | 0.011665 | 0.011698 | 0.011732 | 0.011631 |
| 0.011597 | 0.011564 | 0.011699 | 0.011698 | 0.011698 | 0.011733 | 0.011766 |
| 0.011530 | 0.011530 | 0.011564 | 0.011665 | 0.011530 | 0.011766 | 0.011766 |
| 0.011799 | 0.011799 | 0.011732 | 0.011833 | 0.011732 | 0.011835 | 0.011665 |
| 0.011665 | 0.011732 | 0.011766 | 0.011530 | 0.011665 | 0.011631 | 0.011665 |
| 0.011732 | 0.011732 | 0.011765 | 0.011732 | 0.011633 | 0.011833 | 0.011799 |
| 0.011670 | 0.011564 | 0.011665 | 0.011766 | 0.011665 | 0.011732 | 0.011832 |
| 0.012001 | 0.011709 | 0.011866 | 0.011833 | 0.011765 | 0.011933 | 0.011564 |
| 0.011734 | 0.011632 | 0.011597 | 0.011597 | 0.011665 | 0.011564 | 0.011665 |
| 0.011698 | 0.011732 | 0.011631 | 0.011597 | 0.011564 | 0.011699 | 0.011698 |
| 0.011698 | 0.011733 | 0.011799 | 0.011732 | 0.012305 | 0.011775 | 0.011623 |
| 0.011763 | 0.011719 | 0.011798 | 0.011684 | 0.011830 | 0.011750 | 0.011750 |
| 0.012193 | 0.011614 | 0.011745 | 0.011683 | 0.011956 | 0.011843 | 0.011911 |
| 0.012250 | 0.011625 | 0.011906 | 0.011967 | 0.011832 | 0.011564 | 0.011871 |
| 0.011530 | 0.011698 | 0.011832 | 0.011799 | 0.011804 | 0.011530 | 0.011229 |
| 0.011631 | 0.011564 | 0.011597 | 0.011631 | 0.011530 | 0.011597 | 0.011496 |
| 0.011564 | 0.011597 | 0.011564 | 0.011530 | 0.011631 | 0.011564 | 0.011597 |
| 0.011597 | 0.011530 | 0.011597 | 0.011631 | 0.011530 | 0.011732 | 0.011765 |
| 0.011664 | 0.011664 | 0.011664 | 0.011664 | 0.011597 | 0.011732 | 0.011631 |
| 0.011373 | 0.011597 | 0.011564 | 0.011535 | 0.011698 | 0.011698 | 0.011698 |
| 0.011698 | 0.011631 | 0.011597 | 0.011631 | 0.011732 | 0.011732 | 0.011664 |
| 0.011664 | 0.011799 | 0.011698 | 0.011698 | 0.011900 | 0.011900 | 0.011765 |
| 0.011597 | 0.011664 | 0.011698 | 0.011833 | 0.011665 | 0.011698 | 0.011664 |
| 0.011698 | 0.011564 | 0.011564 | 0.011866 | 0.011866 | 0.011833 | 0.011631 |
| 0.011732 | 0.011799 | 0.011664 | 0.011732 | 0.011698 | 0.011564 | 0.011631 |
| 0.011664 | 0.011631 | 0.011564 | 0.011799 | 0.011631 | 0.011732 | 0.011698 |
| 0.011597 | 0.011773 | 0.011765 | 0.011548 | 0.011399 | 0.011672 | 0.011318 |
| 0.011555 | 0.011449 | 0.011587 | 0.011641 | 0.011499 | 0.011620 | 0.011485 |
| 0.011519 | 0.011389 | 0.011561 | 0.011456 | 0.011437 | 0.011529 | 0.011790 |
| 0.011738 | 0.011650 | 0.011659 | 0.011624 | 0.011600 | 0.011530 | 0.011530 |
| 0.011598 | 0.011598 | 0.011770 | 0.011569 | 0.011840 | 0.011838 | 0.011664 |
| 0.011631 | 0.011698 | 0.011631 | 0.011665 | 0.011530 | 0.011497 | 0.011564 |
| 0.011631 | 0.011631 | 0.011597 | 0.011564 | 0.011597 | 0.011564 | 0.011665 |
| 0.011654 | 0.011655 | 0.011642 | 0.011677 | 0.011813 | 0.011778 | 0.011777 |
| 0.011776 | 0.011699 | 0.011503 | 0.011528 | 0.011636 | 0.011806 | 0.011807 |
| 0.011598 | 0.011670 | 0.011902 | 0.011872 | 0.011800 | 0.011834 | 0.011765 |
| 0.011698 | 0.011765 | 0.011765 | 0.011665 | 0.011967 | 0.011832 | 0.011900 |
| 0.011934 | 0.011737 | 0.011640 | 0.011719 | 0.011597 | 0.011765 | 0.011765 |
| 0.011800 | 0.011832 | 0.011832 | 0.011832 | 0.012043 | 0.011967 | 0.011581 |
| 0.011466 | 0.011476 | 0.011571 | 0.011536 | 0.011573 | 0.011471 | 0.011536 |
| 0.011575 | 0.011367 | 0.011489 | 0.011547 | 0.011632 | 0.011710 | 0.011598 |
| 0.011564 | 0.011497 | 0.011631 | 0.011597 | 0.011530 | 0.011497 | 0.011430 |
| 0.011530 | 0.011598 | 0.011597 | 0.011597 | 0.011631 | 0.011631 | 0.011634 |
| 0.011703 | 0.011631 | 0.011631 | 0.011600 | 0.011530 | 0.011530 | 0.011598 |
| 0.011598 | 0.011770 | 0.011569 | 0.011840 | 0.011838 | 0.011664 | 0.011832 |
| 0.011765 | 0.011765 | 0.011601 | 0.011721 | 0.011686 | 0.011741 | 0.011481 |
| 0.011783 | 0.011789 | 0.011738 | 0.011672 | 0.011564 | 0.011766 | 0.011631 |
| 0.011732 | 0.011665 | 0.011564 | 0.011667 | 0.011766 | 0.011770 | 0.011665 |
| 0.011564 | 0.011499 | 0.011631 | 0.011564 | 0.011497 | 0.011502 | 0.011766 |
| 0.011665 | 0.011597 | 0.011631 | 0.011665 | 0.011631 | 0.011564 | 0.011497 |
| 0.011631 | 0.011664 | 0.011664 | 0.011597 | 0.011664 | 0.011900 | 0.011497 |
| 0.011597 | 0.011732 | 0.011597 | 0.011631 | 0.011597 | 0.011698 | 0.011617 |

|          |          |          |          |          |          |          |
|----------|----------|----------|----------|----------|----------|----------|
| 0.011454 | 0.011485 | 0.011411 | 0.011503 | 0.011590 | 0.011527 | 0.011395 |
| 0.011375 | 0.011228 | 0.011329 | 0.011434 | 0.011296 | 0.011432 | 0.011565 |
| 0.011464 | 0.011534 | 0.011463 | 0.011709 | 0.011429 | 0.012303 | 0.011464 |
| 0.012136 | 0.011970 | 0.012105 | 0.012443 | 0.011698 | 0.011463 | 0.011430 |
| 0.012204 | 0.011802 | 0.000000 | 0.011295 | 0.011363 | 0.011363 | 0.011398 |
| 0.011228 | 0.011230 | 0.011295 | 0.011262 | 0.011901 | 0.011967 | 0.011969 |
| 0.011868 | 0.011968 | 0.012072 | 0.011838 | 0.012340 | 0.012347 | 0.012407 |
| 0.012408 | 0.012442 | 0.012392 | 0.012408 | 0.012410 | 0.011698 | 0.011934 |
| 0.012002 | 0.012438 | 0.012010 | 0.012035 | 0.012508 | 0.011570 | 0.011464 |
| 0.011429 | 0.011429 | 0.011901 | 0.011842 | 0.012046 | 0.011765 | 0.011431 |
| S815     | 0.011866 | 0.011866 | 0.011665 | 0.011430 | 0.011430 | 0.011497 |
| 0.011570 | 0.011502 | 0.011497 | 0.011463 | 0.011530 | 0.011498 | 0.011463 |
| 0.011430 | 0.011665 | 0.011396 | 0.011497 | 0.011564 | 0.011530 | 0.011497 |
| 0.011463 | 0.011497 | 0.011329 | 0.011430 | 0.011464 | 0.011497 | 0.011536 |
| 0.011463 | 0.011497 | 0.011396 | 0.011362 | 0.011564 | 0.011530 | 0.011564 |
| 0.011530 | 0.011631 | 0.011530 | 0.011530 | 0.011564 | 0.011530 | 0.011698 |
| 0.011396 | 0.011530 | 0.011564 | 0.011497 | 0.011530 | 0.011631 | 0.011564 |
| 0.011530 | 0.011698 | 0.011598 | 0.011598 | 0.011530 | 0.011799 | 0.011530 |
| 0.011497 | 0.011530 | 0.011665 | 0.011799 | 0.011631 | 0.011530 | 0.011631 |
| 0.011564 | 0.011631 | 0.011530 | 0.011765 | 0.011732 | 0.011530 | 0.011597 |
| 0.011497 | 0.011597 | 0.011564 | 0.011631 | 0.011564 | 0.011564 | 0.011564 |
| 0.011463 | 0.011497 | 0.011463 | 0.011497 | 0.011530 | 0.011565 | 0.011631 |
| 0.011564 | 0.011530 | 0.011597 | 0.011497 | 0.011564 | 0.011463 | 0.011530 |
| 0.011698 | 0.011631 | 0.011665 | 0.011698 | 0.011463 | 0.011766 | 0.011530 |
| 0.011728 | 0.011621 | 0.011778 | 0.011451 | 0.011471 | 0.011539 | 0.011375 |
| 0.012012 | 0.011416 | 0.011514 | 0.011765 | 0.011765 | 0.011497 | 0.011598 |
| 0.011597 | 0.011564 | 0.011631 | 0.011530 | 0.011631 | 0.011564 | 0.011564 |
| 0.011530 | 0.011564 | 0.011833 | 0.011698 | 0.011597 | 0.011564 | 0.011497 |
| 0.011463 | 0.011396 | 0.011531 | 0.011497 | 0.011430 | 0.011396 | 0.011329 |
| 0.011430 | 0.011497 | 0.011497 | 0.011497 | 0.011531 | 0.011530 | 0.011533 |
| 0.011601 | 0.011463 | 0.011531 | 0.011420 | 0.011494 | 0.011446 | 0.011531 |
| 0.011535 | 0.011473 | 0.011540 | 0.011509 | 0.011434 | 0.011471 | 0.011499 |
| 0.011492 | 0.011543 | 0.011577 | 0.011464 | 0.011475 | 0.011599 | 0.011498 |
| 0.011565 | 0.011566 | 0.011565 | 0.011665 | 0.011597 | 0.011967 | 0.011699 |
| 0.011530 | 0.011598 | 0.011530 | 0.011564 | 0.011430 | 0.011396 | 0.011463 |
| 0.011530 | 0.011530 | 0.011497 | 0.011463 | 0.011497 | 0.011463 | 0.011564 |
| 0.011531 | 0.011631 | 0.011564 | 0.011463 | 0.011566 | 0.011665 | 0.011669 |
| 0.011665 | 0.011564 | 0.011463 | 0.011398 | 0.011530 | 0.011463 | 0.011396 |
| 0.011400 | 0.011665 | 0.011463 | 0.011665 | 0.011430 | 0.011531 | 0.011497 |
| 0.011530 | 0.011497 | 0.011463 | 0.011497 | 0.011531 | 0.011396 | 0.011531 |
| 0.011564 | 0.011497 | 0.011564 | 0.011497 | 0.011530 | 0.011564 | 0.011799 |
| 0.011631 | 0.011564 | 0.011632 | 0.011667 | 0.011632 | 0.011530 | 0.011497 |
| 0.011466 | 0.011748 | 0.011563 | 0.011438 | 0.011637 | 0.011401 | 0.011493 |
| 0.011604 | 0.011537 | 0.011698 | 0.011900 | 0.011607 | 0.011766 | 0.011732 |
| 0.011665 | 0.011833 | 0.011664 | 0.011472 | 0.011563 | 0.011564 | 0.011636 |
| 0.011732 | 0.011634 | 0.011771 | 0.011805 | 0.011766 | 0.011833 | 0.011806 |
| 0.011670 | 0.011807 | 0.011772 | 0.011703 | 0.011969 | 0.011429 | 0.011566 |
| 0.011530 | 0.011530 | 0.011429 | 0.011429 | 0.011497 | 0.011497 | 0.011564 |
| 0.011497 | 0.011564 | 0.011463 | 0.011497 | 0.011497 | 0.011497 | 0.011564 |
| 0.011497 | 0.011665 | 0.011564 | 0.011598 | 0.011396 | 0.011497 | 0.011530 |
| 0.011530 | 0.011497 | 0.011564 | 0.011530 | 0.011463 | 0.011463 | 0.011463 |
| 0.011665 | 0.011564 | 0.011631 | 0.011430 | 0.011530 | 0.011698 | 0.011463 |
| 0.011463 | 0.011530 | 0.011497 | 0.011665 | 0.011463 | 0.011329 | 0.011463 |
| 0.011396 | 0.011497 | 0.011497 | 0.011430 | 0.011429 | 0.011598 | 0.011530 |
| 0.011430 | 0.011530 | 0.011396 | 0.011430 | 0.011564 | 0.011430 | 0.011463 |
| 0.011430 | 0.011564 | 0.011497 | 0.011396 | 0.011463 | 0.011396 | 0.011564 |
| 0.011608 | 0.011463 | 0.011497 | 0.011598 | 0.011564 | 0.011497 | 0.011597 |
| 0.011463 | 0.011799 | 0.011396 | 0.011598 | 0.011396 | 0.011396 | 0.011396 |
| 0.011597 | 0.011564 | 0.011530 | 0.011597 | 0.011429 | 0.011564 | 0.011396 |
| 0.011463 | 0.011463 | 0.011497 | 0.011597 | 0.011497 | 0.011597 | 0.011665 |



|          |          |          |          |          |          |          |
|----------|----------|----------|----------|----------|----------|----------|
| 0.011665 | 0.011631 | 0.011530 | 0.011631 | 0.011597 | 0.011463 | 0.011430 |
| 0.011463 | 0.011463 | 0.011530 | 0.011396 | 0.011430 | 0.011597 | 0.011463 |
| 0.011430 | 0.011497 | 0.011631 | 0.011597 | 0.011564 | 0.011497 | 0.011497 |
| 0.011564 | 0.011497 | 0.011597 | 0.011463 | 0.011597 | 0.011698 | 0.011732 |
| 0.011497 | 0.011631 | 0.011509 | 0.018053 | 0.011453 | 0.011672 | 0.011584 |
| 0.011545 | 0.011588 | 0.011741 | 0.011525 | 0.011610 | 0.011613 | 0.011668 |
| 0.011297 | 0.011426 | 0.011450 | 0.011563 | 0.011451 | 0.011504 | 0.011534 |
| 0.011436 | 0.011396 | 0.011394 | 0.011259 | 0.011631 | 0.011665 | 0.011669 |
| 0.011507 | 0.011631 | 0.011631 | 0.011530 | 0.011564 | 0.011564 | 0.011531 |
| 0.011564 | 0.011497 | 0.011530 | 0.011564 | 0.011531 | 0.011463 | 0.011497 |
| 0.011497 | 0.011564 | 0.011463 | 0.011564 | 0.011598 | 0.011631 | 0.011530 |
| 0.011497 | 0.011463 | 0.011598 | 0.011598 | 0.011598 | 0.011632 | 0.011665 |
| 0.011430 | 0.011430 | 0.011463 | 0.011564 | 0.011430 | 0.011665 | 0.011665 |
| 0.011698 | 0.011698 | 0.011631 | 0.011732 | 0.011632 | 0.011734 | 0.011564 |
| 0.011564 | 0.011631 | 0.011665 | 0.011430 | 0.011564 | 0.011530 | 0.011564 |
| 0.011632 | 0.011631 | 0.011665 | 0.011632 | 0.011532 | 0.011732 | 0.011699 |
| 0.011568 | 0.011463 | 0.011564 | 0.011665 | 0.011564 | 0.011631 | 0.011732 |
| 0.011900 | 0.011607 | 0.011766 | 0.011732 | 0.011665 | 0.011833 | 0.011464 |
| 0.011633 | 0.011531 | 0.011497 | 0.011497 | 0.011564 | 0.011463 | 0.011564 |
| 0.011598 | 0.011631 | 0.011530 | 0.011497 | 0.011463 | 0.011598 | 0.011598 |
| 0.011598 | 0.011632 | 0.011698 | 0.011631 | 0.012205 | 0.011668 | 0.011588 |
| 0.011658 | 0.011615 | 0.011728 | 0.011615 | 0.011726 | 0.011647 | 0.011647 |
| 0.012125 | 0.011510 | 0.011643 | 0.011579 | 0.011853 | 0.011741 | 0.011809 |
| 0.012149 | 0.011588 | 0.011771 | 0.011866 | 0.011732 | 0.011463 | 0.011770 |
| 0.011429 | 0.011598 | 0.011732 | 0.011698 | 0.011702 | 0.011430 | 0.011128 |
| 0.011530 | 0.011463 | 0.011497 | 0.011530 | 0.011430 | 0.011497 | 0.011396 |
| 0.011463 | 0.011497 | 0.011463 | 0.011430 | 0.011530 | 0.011463 | 0.011497 |
| 0.011497 | 0.011429 | 0.011497 | 0.011497 | 0.011429 | 0.011631 | 0.011665 |
| 0.011564 | 0.011564 | 0.011564 | 0.011564 | 0.011497 | 0.011631 | 0.011530 |
| 0.011269 | 0.011497 | 0.011464 | 0.011434 | 0.011598 | 0.011597 | 0.011597 |
| 0.011598 | 0.011530 | 0.011497 | 0.011530 | 0.011631 | 0.011631 | 0.011564 |
| 0.011564 | 0.011698 | 0.011598 | 0.011597 | 0.011799 | 0.011799 | 0.011665 |
| 0.011497 | 0.011564 | 0.011598 | 0.011732 | 0.011564 | 0.011598 | 0.011564 |
| 0.011597 | 0.011463 | 0.011463 | 0.011766 | 0.011766 | 0.011732 | 0.011530 |
| 0.011631 | 0.011631 | 0.011564 | 0.011631 | 0.011597 | 0.011463 | 0.011530 |
| 0.011564 | 0.011530 | 0.011463 | 0.011698 | 0.011530 | 0.011631 | 0.011665 |
| 0.011564 | 0.011604 | 0.011665 | 0.011467 | 0.011399 | 0.011570 | 0.011318 |
| 0.011445 | 0.011372 | 0.011482 | 0.011552 | 0.011500 | 0.011569 | 0.011326 |
| 0.011417 | 0.011389 | 0.011506 | 0.011390 | 0.011384 | 0.011596 | 0.011669 |
| 0.011663 | 0.011572 | 0.011554 | 0.011554 | 0.011499 | 0.011430 | 0.011430 |
| 0.011497 | 0.011497 | 0.011669 | 0.011467 | 0.011739 | 0.011767 | 0.011564 |
| 0.011530 | 0.011598 | 0.011530 | 0.011564 | 0.011430 | 0.011396 | 0.011463 |
| 0.011530 | 0.011530 | 0.011497 | 0.011463 | 0.011497 | 0.011463 | 0.011564 |
| 0.011549 | 0.011550 | 0.011540 | 0.011574 | 0.011711 | 0.011675 | 0.011675 |
| 0.011674 | 0.011598 | 0.011393 | 0.011420 | 0.011535 | 0.011636 | 0.011705 |
| 0.011498 | 0.011569 | 0.011801 | 0.011770 | 0.011700 | 0.011734 | 0.011665 |
| 0.011597 | 0.011665 | 0.011665 | 0.011564 | 0.011867 | 0.011732 | 0.011799 |
| 0.011833 | 0.011595 | 0.011504 | 0.011615 | 0.011497 | 0.011665 | 0.011665 |
| 0.011700 | 0.011732 | 0.011732 | 0.011732 | 0.011926 | 0.011866 | 0.011477 |
| 0.011365 | 0.011372 | 0.011469 | 0.011434 | 0.011470 | 0.011396 | 0.011434 |
| 0.011506 | 0.011323 | 0.011441 | 0.011510 | 0.011531 | 0.011608 | 0.011497 |
| 0.011463 | 0.011396 | 0.011531 | 0.011497 | 0.011430 | 0.011396 | 0.011329 |
| 0.011430 | 0.011497 | 0.011497 | 0.011497 | 0.011531 | 0.011530 | 0.011533 |
| 0.011601 | 0.011463 | 0.011531 | 0.011499 | 0.011430 | 0.011430 | 0.011497 |
| 0.011497 | 0.011669 | 0.011467 | 0.011739 | 0.011767 | 0.011564 | 0.011732 |
| 0.011665 | 0.011665 | 0.011500 | 0.011617 | 0.011616 | 0.011639 | 0.011411 |
| 0.011680 | 0.011699 | 0.011611 | 0.011570 | 0.011463 | 0.011665 | 0.011531 |
| 0.011631 | 0.011564 | 0.011463 | 0.011566 | 0.011665 | 0.011669 | 0.011564 |
| 0.011463 | 0.011398 | 0.011530 | 0.011463 | 0.011396 | 0.011400 | 0.011665 |
| 0.011564 | 0.011497 | 0.011530 | 0.011564 | 0.011531 | 0.011463 | 0.011396 |

|          |          |          |          |          |          |          |
|----------|----------|----------|----------|----------|----------|----------|
| 0.011530 | 0.011564 | 0.011564 | 0.011497 | 0.011564 | 0.011799 | 0.011396 |
| 0.011497 | 0.011631 | 0.011497 | 0.011530 | 0.011497 | 0.011598 | 0.011532 |
| 0.011398 | 0.011400 | 0.011361 | 0.011423 | 0.011508 | 0.011419 | 0.011353 |
| 0.011323 | 0.011127 | 0.011228 | 0.011332 | 0.011195 | 0.011331 | 0.011464 |
| 0.011363 | 0.011432 | 0.011362 | 0.011539 | 0.011329 | 0.012135 | 0.011364 |
| 0.012103 | 0.011870 | 0.011970 | 0.012343 | 0.011598 | 0.011363 | 0.011329 |
| 0.012104 | 0.011701 | 0.011295 | 0.000000 | 0.011262 | 0.011262 | 0.011229 |
| 0.011127 | 0.011128 | 0.011195 | 0.011128 | 0.011801 | 0.011867 | 0.011868 |
| 0.011767 | 0.011868 | 0.011971 | 0.011737 | 0.012239 | 0.012246 | 0.012307 |
| 0.012307 | 0.012341 | 0.012290 | 0.012307 | 0.012309 | 0.011597 | 0.011834 |
| 0.011902 | 0.012405 | 0.011908 | 0.011934 | 0.012407 | 0.011468 | 0.011363 |
| 0.011329 | 0.011329 | 0.011800 | 0.011801 | 0.011940 | 0.011665 | 0.011330 |
| S816     | 0.011935 | 0.011935 | 0.011531 | 0.011497 | 0.011497 | 0.011565 |
| 0.011673 | 0.011571 | 0.011497 | 0.011531 | 0.011598 | 0.011565 | 0.011531 |
| 0.011497 | 0.011733 | 0.011464 | 0.011564 | 0.011632 | 0.011598 | 0.011564 |
| 0.011531 | 0.011565 | 0.011396 | 0.011498 | 0.011464 | 0.011565 | 0.011639 |
| 0.011531 | 0.011565 | 0.011464 | 0.011430 | 0.011632 | 0.011598 | 0.011632 |
| 0.011598 | 0.011699 | 0.011598 | 0.011598 | 0.011632 | 0.011598 | 0.011766 |
| 0.011464 | 0.011598 | 0.011632 | 0.011565 | 0.011598 | 0.011699 | 0.011632 |
| 0.011598 | 0.011767 | 0.011666 | 0.011666 | 0.011598 | 0.011867 | 0.011598 |
| 0.011565 | 0.011598 | 0.011733 | 0.011867 | 0.011699 | 0.011598 | 0.011699 |
| 0.011632 | 0.011699 | 0.011598 | 0.011834 | 0.011800 | 0.011598 | 0.011665 |
| 0.011565 | 0.011665 | 0.011632 | 0.011699 | 0.011632 | 0.011632 | 0.011632 |
| 0.011531 | 0.011565 | 0.011531 | 0.011565 | 0.011598 | 0.011633 | 0.011699 |
| 0.011632 | 0.011598 | 0.011665 | 0.011564 | 0.011632 | 0.011531 | 0.011598 |
| 0.011766 | 0.011699 | 0.011733 | 0.011766 | 0.011598 | 0.011834 | 0.011598 |
| 0.011802 | 0.011695 | 0.011853 | 0.011490 | 0.011545 | 0.011612 | 0.011454 |
| 0.012085 | 0.011416 | 0.011554 | 0.011834 | 0.011834 | 0.011565 | 0.011666 |
| 0.011665 | 0.011632 | 0.011699 | 0.011598 | 0.011699 | 0.011632 | 0.011632 |
| 0.011598 | 0.011632 | 0.011901 | 0.011766 | 0.011665 | 0.011632 | 0.011565 |
| 0.011531 | 0.011464 | 0.011598 | 0.011564 | 0.011497 | 0.011464 | 0.011396 |
| 0.011497 | 0.011565 | 0.011564 | 0.011564 | 0.011598 | 0.011598 | 0.011601 |
| 0.011670 | 0.011598 | 0.011598 | 0.011492 | 0.011566 | 0.011516 | 0.011598 |
| 0.011602 | 0.011541 | 0.011577 | 0.011578 | 0.011502 | 0.011540 | 0.011567 |
| 0.011564 | 0.011612 | 0.011646 | 0.011531 | 0.011544 | 0.011666 | 0.011565 |
| 0.011632 | 0.011633 | 0.011632 | 0.011733 | 0.011665 | 0.012036 | 0.011733 |
| 0.011598 | 0.011666 | 0.011598 | 0.011632 | 0.011497 | 0.011464 | 0.011531 |
| 0.011598 | 0.011598 | 0.011564 | 0.011531 | 0.011564 | 0.011531 | 0.011632 |
| 0.011598 | 0.011699 | 0.011632 | 0.011531 | 0.011634 | 0.011733 | 0.011737 |
| 0.011733 | 0.011632 | 0.011531 | 0.011465 | 0.011598 | 0.011531 | 0.011464 |
| 0.011468 | 0.011733 | 0.011531 | 0.011733 | 0.011497 | 0.011598 | 0.011565 |
| 0.011665 | 0.011564 | 0.011598 | 0.011565 | 0.011598 | 0.011464 | 0.011598 |
| 0.011632 | 0.011564 | 0.011632 | 0.011564 | 0.011598 | 0.011632 | 0.011867 |
| 0.011699 | 0.011632 | 0.011699 | 0.011735 | 0.011699 | 0.011598 | 0.011564 |
| 0.011534 | 0.011788 | 0.011563 | 0.011507 | 0.011706 | 0.011470 | 0.011611 |
| 0.011706 | 0.011604 | 0.011766 | 0.011969 | 0.011676 | 0.011834 | 0.011800 |
| 0.011733 | 0.011901 | 0.011736 | 0.011514 | 0.011648 | 0.011632 | 0.011704 |
| 0.011800 | 0.011702 | 0.011839 | 0.011874 | 0.011834 | 0.011901 | 0.011943 |
| 0.011738 | 0.011876 | 0.011840 | 0.011772 | 0.012037 | 0.011497 | 0.011634 |
| 0.011665 | 0.011598 | 0.011497 | 0.011497 | 0.011565 | 0.011565 | 0.011632 |
| 0.011565 | 0.011632 | 0.011531 | 0.011565 | 0.011565 | 0.011564 | 0.011632 |
| 0.011565 | 0.011733 | 0.011632 | 0.011666 | 0.011464 | 0.011565 | 0.011598 |
| 0.011598 | 0.011564 | 0.011632 | 0.011598 | 0.011531 | 0.011531 | 0.011531 |
| 0.011733 | 0.011598 | 0.011699 | 0.011497 | 0.011598 | 0.011767 | 0.011531 |
| 0.011531 | 0.011598 | 0.011565 | 0.011733 | 0.011531 | 0.011396 | 0.011531 |
| 0.011464 | 0.011565 | 0.011564 | 0.011497 | 0.011497 | 0.011666 | 0.011598 |
| 0.011497 | 0.011598 | 0.011464 | 0.011497 | 0.011632 | 0.011498 | 0.011531 |
| 0.011498 | 0.011632 | 0.011565 | 0.011464 | 0.011531 | 0.011464 | 0.011632 |
| 0.011677 | 0.011531 | 0.011565 | 0.011666 | 0.011632 | 0.011565 | 0.011665 |
| 0.011531 | 0.011867 | 0.011464 | 0.011666 | 0.011464 | 0.011464 | 0.011464 |

|          |          |          |          |          |          |          |
|----------|----------|----------|----------|----------|----------|----------|
| 0.011699 | 0.011632 | 0.011598 | 0.011665 | 0.011497 | 0.011632 | 0.011464 |
| 0.011531 | 0.011531 | 0.011564 | 0.011665 | 0.011565 | 0.011665 | 0.011733 |
| 0.011733 | 0.011699 | 0.011598 | 0.011699 | 0.011665 | 0.011531 | 0.011497 |
| 0.011531 | 0.011531 | 0.011598 | 0.011464 | 0.011497 | 0.011665 | 0.011531 |
| 0.011497 | 0.011565 | 0.011699 | 0.011665 | 0.011632 | 0.011565 | 0.011565 |
| 0.011632 | 0.011565 | 0.011665 | 0.011531 | 0.011665 | 0.011766 | 0.011733 |
| 0.011565 | 0.011699 | 0.011578 | 0.018087 | 0.011322 | 0.011733 | 0.011653 |
| 0.011614 | 0.011658 | 0.011846 | 0.011582 | 0.011555 | 0.011682 | 0.011607 |
| 0.011345 | 0.011426 | 0.011489 | 0.011647 | 0.011529 | 0.011554 | 0.011576 |
| 0.011483 | 0.011433 | 0.011468 | 0.011325 | 0.011699 | 0.011733 | 0.011737 |
| 0.011576 | 0.011699 | 0.011699 | 0.011598 | 0.011632 | 0.011632 | 0.011599 |
| 0.011632 | 0.011564 | 0.011598 | 0.011632 | 0.011598 | 0.011531 | 0.011565 |
| 0.011565 | 0.011632 | 0.011531 | 0.011632 | 0.011665 | 0.011699 | 0.011598 |
| 0.011565 | 0.011531 | 0.011666 | 0.011666 | 0.011666 | 0.011700 | 0.011733 |
| 0.011497 | 0.011497 | 0.011531 | 0.011632 | 0.011497 | 0.011733 | 0.011733 |
| 0.011766 | 0.011766 | 0.011699 | 0.011800 | 0.011699 | 0.011802 | 0.011632 |
| 0.011632 | 0.011699 | 0.011733 | 0.011497 | 0.011632 | 0.011598 | 0.011632 |
| 0.011699 | 0.011699 | 0.011733 | 0.011699 | 0.011600 | 0.011800 | 0.011766 |
| 0.011637 | 0.011531 | 0.011632 | 0.011733 | 0.011632 | 0.011699 | 0.011800 |
| 0.011969 | 0.011676 | 0.011834 | 0.011800 | 0.011733 | 0.011901 | 0.011531 |
| 0.011701 | 0.011599 | 0.011565 | 0.011565 | 0.011632 | 0.011531 | 0.011632 |
| 0.011665 | 0.011699 | 0.011598 | 0.011565 | 0.011531 | 0.011666 | 0.011666 |
| 0.011666 | 0.011700 | 0.011766 | 0.011699 | 0.012272 | 0.011739 | 0.011659 |
| 0.011729 | 0.011685 | 0.011799 | 0.011685 | 0.011796 | 0.011717 | 0.011716 |
| 0.012195 | 0.011580 | 0.011712 | 0.011649 | 0.011922 | 0.011810 | 0.011878 |
| 0.012217 | 0.011663 | 0.011636 | 0.011632 | 0.011632 | 0.011396 | 0.011602 |
| 0.011497 | 0.011531 | 0.011665 | 0.011632 | 0.011636 | 0.011497 | 0.011195 |
| 0.011598 | 0.011531 | 0.011565 | 0.011598 | 0.011497 | 0.011565 | 0.011464 |
| 0.011531 | 0.011565 | 0.011531 | 0.011497 | 0.011598 | 0.011531 | 0.011565 |
| 0.011565 | 0.011497 | 0.011565 | 0.011598 | 0.011497 | 0.011699 | 0.011733 |
| 0.011632 | 0.011632 | 0.011632 | 0.011632 | 0.011564 | 0.011699 | 0.011598 |
| 0.011339 | 0.011565 | 0.011531 | 0.011502 | 0.011666 | 0.011665 | 0.011665 |
| 0.011666 | 0.011598 | 0.011565 | 0.011598 | 0.011699 | 0.011699 | 0.011632 |
| 0.011632 | 0.011766 | 0.011666 | 0.011665 | 0.011868 | 0.011868 | 0.011733 |
| 0.011564 | 0.011632 | 0.011666 | 0.011800 | 0.011632 | 0.011666 | 0.011632 |
| 0.011665 | 0.011531 | 0.011531 | 0.011834 | 0.011834 | 0.011800 | 0.011598 |
| 0.011699 | 0.011766 | 0.011632 | 0.011699 | 0.011665 | 0.011531 | 0.011598 |
| 0.011632 | 0.011598 | 0.011531 | 0.011766 | 0.011598 | 0.011699 | 0.011733 |
| 0.011564 | 0.011741 | 0.011733 | 0.011507 | 0.011455 | 0.011638 | 0.011267 |
| 0.011500 | 0.011410 | 0.011552 | 0.011462 | 0.011499 | 0.011518 | 0.011326 |
| 0.011417 | 0.011258 | 0.011394 | 0.011258 | 0.011276 | 0.011462 | 0.011709 |
| 0.011738 | 0.011611 | 0.011624 | 0.011624 | 0.011566 | 0.011497 | 0.011497 |
| 0.011531 | 0.011565 | 0.011737 | 0.011535 | 0.011807 | 0.011839 | 0.011598 |
| 0.011598 | 0.011666 | 0.011598 | 0.011632 | 0.011497 | 0.011464 | 0.011531 |
| 0.011598 | 0.011598 | 0.011564 | 0.011531 | 0.011564 | 0.011531 | 0.011632 |
| 0.011619 | 0.011620 | 0.011608 | 0.011642 | 0.011779 | 0.011675 | 0.011743 |
| 0.011742 | 0.011665 | 0.011429 | 0.011492 | 0.011602 | 0.011772 | 0.011773 |
| 0.011565 | 0.011636 | 0.011868 | 0.011838 | 0.011767 | 0.011801 | 0.011733 |
| 0.011665 | 0.011733 | 0.011733 | 0.011632 | 0.011935 | 0.011800 | 0.011868 |
| 0.011901 | 0.011702 | 0.011607 | 0.011684 | 0.011565 | 0.011733 | 0.011733 |
| 0.011768 | 0.011766 | 0.011800 | 0.011800 | 0.011965 | 0.011935 | 0.011546 |
| 0.011433 | 0.011442 | 0.011537 | 0.011502 | 0.011539 | 0.011471 | 0.011502 |
| 0.011575 | 0.011411 | 0.011537 | 0.011585 | 0.011598 | 0.011676 | 0.011565 |
| 0.011531 | 0.011464 | 0.011598 | 0.011564 | 0.011497 | 0.011464 | 0.011396 |
| 0.011497 | 0.011565 | 0.011564 | 0.011564 | 0.011598 | 0.011598 | 0.011601 |
| 0.011670 | 0.011598 | 0.011598 | 0.011566 | 0.011497 | 0.011497 | 0.011531 |
| 0.011565 | 0.011737 | 0.011535 | 0.011807 | 0.011839 | 0.011598 | 0.011800 |
| 0.011733 | 0.011733 | 0.011568 | 0.011687 | 0.011686 | 0.011708 | 0.011481 |
| 0.011750 | 0.011790 | 0.011653 | 0.011639 | 0.011531 | 0.011733 | 0.011598 |
| 0.011699 | 0.011632 | 0.011531 | 0.011634 | 0.011733 | 0.011737 | 0.011632 |

|          |          |          |          |          |          |          |
|----------|----------|----------|----------|----------|----------|----------|
| 0.011531 | 0.011465 | 0.011598 | 0.011531 | 0.011464 | 0.011468 | 0.011733 |
| 0.011632 | 0.011564 | 0.011598 | 0.011632 | 0.011598 | 0.011531 | 0.011464 |
| 0.011598 | 0.011632 | 0.011632 | 0.011565 | 0.011632 | 0.011867 | 0.011464 |
| 0.011565 | 0.011699 | 0.011565 | 0.011598 | 0.011564 | 0.011666 | 0.011574 |
| 0.011397 | 0.011443 | 0.011361 | 0.011463 | 0.011549 | 0.011491 | 0.011395 |
| 0.011323 | 0.011195 | 0.011296 | 0.011400 | 0.011262 | 0.011399 | 0.011531 |
| 0.011430 | 0.011500 | 0.011430 | 0.011675 | 0.011396 | 0.012272 | 0.011431 |
| 0.012137 | 0.011937 | 0.012072 | 0.012410 | 0.011665 | 0.011430 | 0.011396 |
| 0.012171 | 0.011769 | 0.011363 | 0.011262 | 0.000000 | 0.000000 | 0.011365 |
| 0.011195 | 0.011196 | 0.011195 | 0.011228 | 0.011868 | 0.011935 | 0.011935 |
| 0.011835 | 0.011935 | 0.012038 | 0.011805 | 0.012307 | 0.012314 | 0.012374 |
| 0.012374 | 0.012408 | 0.012358 | 0.012374 | 0.012376 | 0.011665 | 0.011901 |
| 0.011969 | 0.012474 | 0.011976 | 0.012003 | 0.012475 | 0.011536 | 0.011430 |
| 0.011396 | 0.011396 | 0.011868 | 0.011883 | 0.012010 | 0.011733 | 0.011397 |
| S817     | 0.011935 | 0.011935 | 0.011531 | 0.011497 | 0.011497 | 0.011565 |
| 0.011673 | 0.011571 | 0.011497 | 0.011531 | 0.011598 | 0.011565 | 0.011531 |
| 0.011497 | 0.011733 | 0.011464 | 0.011564 | 0.011632 | 0.011598 | 0.011564 |
| 0.011531 | 0.011565 | 0.011396 | 0.011498 | 0.011464 | 0.011565 | 0.011639 |
| 0.011531 | 0.011565 | 0.011464 | 0.011430 | 0.011632 | 0.011598 | 0.011632 |
| 0.011598 | 0.011699 | 0.011598 | 0.011598 | 0.011632 | 0.011598 | 0.011766 |
| 0.011464 | 0.011598 | 0.011632 | 0.011565 | 0.011598 | 0.011699 | 0.011632 |
| 0.011598 | 0.011767 | 0.011666 | 0.011666 | 0.011598 | 0.011867 | 0.011598 |
| 0.011565 | 0.011598 | 0.011733 | 0.011867 | 0.011699 | 0.011598 | 0.011699 |
| 0.011632 | 0.011699 | 0.011598 | 0.011834 | 0.011800 | 0.011598 | 0.011665 |
| 0.011565 | 0.011665 | 0.011632 | 0.011699 | 0.011632 | 0.011632 | 0.011632 |
| 0.011531 | 0.011565 | 0.011531 | 0.011565 | 0.011598 | 0.011633 | 0.011699 |
| 0.011632 | 0.011598 | 0.011665 | 0.011564 | 0.011632 | 0.011531 | 0.011598 |
| 0.011766 | 0.011699 | 0.011733 | 0.011766 | 0.011598 | 0.011834 | 0.011598 |
| 0.011802 | 0.011695 | 0.011853 | 0.011490 | 0.011545 | 0.011612 | 0.011454 |
| 0.012085 | 0.011416 | 0.011554 | 0.011834 | 0.011834 | 0.011565 | 0.011666 |
| 0.011665 | 0.011632 | 0.011699 | 0.011598 | 0.011699 | 0.011632 | 0.011632 |
| 0.011598 | 0.011632 | 0.011901 | 0.011766 | 0.011665 | 0.011632 | 0.011565 |
| 0.011531 | 0.011464 | 0.011598 | 0.011564 | 0.011497 | 0.011464 | 0.011396 |
| 0.011497 | 0.011565 | 0.011564 | 0.011564 | 0.011598 | 0.011598 | 0.011601 |
| 0.011670 | 0.011598 | 0.011598 | 0.011492 | 0.011566 | 0.011516 | 0.011598 |
| 0.011602 | 0.011541 | 0.011577 | 0.011578 | 0.011502 | 0.011540 | 0.011567 |
| 0.011564 | 0.011612 | 0.011646 | 0.011531 | 0.011544 | 0.011666 | 0.011565 |
| 0.011632 | 0.011633 | 0.011632 | 0.011733 | 0.011665 | 0.012036 | 0.011733 |
| 0.011598 | 0.011666 | 0.011598 | 0.011632 | 0.011497 | 0.011464 | 0.011531 |
| 0.011598 | 0.011598 | 0.011564 | 0.011531 | 0.011564 | 0.011531 | 0.011632 |
| 0.011598 | 0.011699 | 0.011632 | 0.011531 | 0.011634 | 0.011733 | 0.011737 |
| 0.011733 | 0.011632 | 0.011531 | 0.011465 | 0.011598 | 0.011531 | 0.011464 |
| 0.011468 | 0.011733 | 0.011531 | 0.011733 | 0.011497 | 0.011598 | 0.011565 |
| 0.011665 | 0.011564 | 0.011598 | 0.011565 | 0.011598 | 0.011464 | 0.011598 |
| 0.011632 | 0.011564 | 0.011632 | 0.011564 | 0.011598 | 0.011632 | 0.011867 |
| 0.011699 | 0.011632 | 0.011699 | 0.011735 | 0.011699 | 0.011598 | 0.011564 |
| 0.011534 | 0.011788 | 0.011563 | 0.011507 | 0.011706 | 0.011470 | 0.011611 |
| 0.011706 | 0.011604 | 0.011766 | 0.011969 | 0.011676 | 0.011834 | 0.011800 |
| 0.011733 | 0.011901 | 0.011736 | 0.011514 | 0.011648 | 0.011632 | 0.011704 |
| 0.011800 | 0.011702 | 0.011839 | 0.011874 | 0.011834 | 0.011901 | 0.011943 |
| 0.011738 | 0.011876 | 0.011840 | 0.011772 | 0.012037 | 0.011497 | 0.011634 |
| 0.011665 | 0.011598 | 0.011497 | 0.011497 | 0.011565 | 0.011565 | 0.011632 |
| 0.011565 | 0.011632 | 0.011531 | 0.011565 | 0.011565 | 0.011564 | 0.011632 |
| 0.011565 | 0.011733 | 0.011632 | 0.011666 | 0.011464 | 0.011565 | 0.011598 |
| 0.011598 | 0.011564 | 0.011632 | 0.011598 | 0.011531 | 0.011531 | 0.011531 |
| 0.011733 | 0.011598 | 0.011699 | 0.011497 | 0.011598 | 0.011767 | 0.011531 |
| 0.011531 | 0.011598 | 0.011565 | 0.011733 | 0.011531 | 0.011396 | 0.011531 |
| 0.011464 | 0.011565 | 0.011564 | 0.011497 | 0.011497 | 0.011666 | 0.011598 |
| 0.011497 | 0.011598 | 0.011464 | 0.011497 | 0.011632 | 0.011498 | 0.011531 |
| 0.011498 | 0.011632 | 0.011565 | 0.011464 | 0.011531 | 0.011464 | 0.011632 |

|          |          |          |          |          |          |          |
|----------|----------|----------|----------|----------|----------|----------|
| 0.011677 | 0.011531 | 0.011565 | 0.011666 | 0.011632 | 0.011565 | 0.011665 |
| 0.011531 | 0.011867 | 0.011464 | 0.011666 | 0.011464 | 0.011464 | 0.011464 |
| 0.011699 | 0.011632 | 0.011598 | 0.011665 | 0.011497 | 0.011632 | 0.011464 |
| 0.011531 | 0.011531 | 0.011564 | 0.011665 | 0.011565 | 0.011665 | 0.011733 |
| 0.011733 | 0.011699 | 0.011598 | 0.011699 | 0.011665 | 0.011531 | 0.011497 |
| 0.011531 | 0.011531 | 0.011598 | 0.011464 | 0.011497 | 0.011665 | 0.011531 |
| 0.011497 | 0.011565 | 0.011699 | 0.011665 | 0.011632 | 0.011565 | 0.011565 |
| 0.011632 | 0.011565 | 0.011665 | 0.011531 | 0.011665 | 0.011766 | 0.011733 |
| 0.011565 | 0.011699 | 0.011578 | 0.018087 | 0.011322 | 0.011733 | 0.011653 |
| 0.011614 | 0.011658 | 0.011846 | 0.011582 | 0.011555 | 0.011682 | 0.011607 |
| 0.011345 | 0.011426 | 0.011489 | 0.011647 | 0.011529 | 0.011554 | 0.011576 |
| 0.011483 | 0.011433 | 0.011468 | 0.011325 | 0.011699 | 0.011733 | 0.011737 |
| 0.011576 | 0.011699 | 0.011699 | 0.011598 | 0.011632 | 0.011632 | 0.011599 |
| 0.011632 | 0.011564 | 0.011598 | 0.011632 | 0.011598 | 0.011531 | 0.011565 |
| 0.011565 | 0.011632 | 0.011531 | 0.011632 | 0.011665 | 0.011699 | 0.011598 |
| 0.011565 | 0.011531 | 0.011666 | 0.011666 | 0.011666 | 0.011700 | 0.011733 |
| 0.011497 | 0.011497 | 0.011531 | 0.011632 | 0.011497 | 0.011733 | 0.011733 |
| 0.011766 | 0.011766 | 0.011699 | 0.011800 | 0.011699 | 0.011802 | 0.011632 |
| 0.011632 | 0.011699 | 0.011733 | 0.011497 | 0.011632 | 0.011598 | 0.011632 |
| 0.011699 | 0.011699 | 0.011733 | 0.011699 | 0.011600 | 0.011800 | 0.011766 |
| 0.011637 | 0.011531 | 0.011632 | 0.011733 | 0.011632 | 0.011699 | 0.011800 |
| 0.011969 | 0.011676 | 0.011834 | 0.011800 | 0.011733 | 0.011901 | 0.011531 |
| 0.011701 | 0.011599 | 0.011565 | 0.011565 | 0.011632 | 0.011531 | 0.011632 |
| 0.011665 | 0.011699 | 0.011598 | 0.011565 | 0.011531 | 0.011666 | 0.011666 |
| 0.011666 | 0.011700 | 0.011766 | 0.011699 | 0.012272 | 0.011739 | 0.011659 |
| 0.011729 | 0.011685 | 0.011799 | 0.011685 | 0.011796 | 0.011717 | 0.011716 |
| 0.012195 | 0.011580 | 0.011712 | 0.011649 | 0.011922 | 0.011810 | 0.011878 |
| 0.012217 | 0.011663 | 0.011636 | 0.011632 | 0.011632 | 0.011396 | 0.011602 |
| 0.011497 | 0.011531 | 0.011665 | 0.011632 | 0.011636 | 0.011497 | 0.011195 |
| 0.011598 | 0.011531 | 0.011565 | 0.011598 | 0.011497 | 0.011565 | 0.011464 |
| 0.011531 | 0.011565 | 0.011531 | 0.011497 | 0.011598 | 0.011531 | 0.011565 |
| 0.011565 | 0.011497 | 0.011565 | 0.011598 | 0.011497 | 0.011699 | 0.011733 |
| 0.011632 | 0.011632 | 0.011632 | 0.011632 | 0.011564 | 0.011699 | 0.011598 |
| 0.011339 | 0.011565 | 0.011531 | 0.011502 | 0.011666 | 0.011665 | 0.011665 |
| 0.011666 | 0.011598 | 0.011565 | 0.011598 | 0.011699 | 0.011699 | 0.011632 |
| 0.011632 | 0.011766 | 0.011666 | 0.011665 | 0.011868 | 0.011868 | 0.011733 |
| 0.011564 | 0.011632 | 0.011666 | 0.011800 | 0.011632 | 0.011666 | 0.011632 |
| 0.011665 | 0.011531 | 0.011531 | 0.011834 | 0.011834 | 0.011800 | 0.011598 |
| 0.011699 | 0.011766 | 0.011632 | 0.011699 | 0.011665 | 0.011531 | 0.011598 |
| 0.011632 | 0.011598 | 0.011531 | 0.011766 | 0.011598 | 0.011699 | 0.011733 |
| 0.011564 | 0.011741 | 0.011733 | 0.011507 | 0.011455 | 0.011638 | 0.011267 |
| 0.011500 | 0.011410 | 0.011552 | 0.011462 | 0.011499 | 0.011518 | 0.011326 |
| 0.011417 | 0.011258 | 0.011394 | 0.011258 | 0.011276 | 0.011462 | 0.011709 |
| 0.011738 | 0.011611 | 0.011624 | 0.011624 | 0.011566 | 0.011497 | 0.011497 |
| 0.011531 | 0.011565 | 0.011737 | 0.011535 | 0.011807 | 0.011839 | 0.011598 |
| 0.011598 | 0.011666 | 0.011598 | 0.011632 | 0.011497 | 0.011464 | 0.011531 |
| 0.011598 | 0.011598 | 0.011564 | 0.011531 | 0.011564 | 0.011531 | 0.011632 |
| 0.011619 | 0.011620 | 0.011608 | 0.011642 | 0.011779 | 0.011675 | 0.011743 |
| 0.011742 | 0.011665 | 0.011429 | 0.011492 | 0.011602 | 0.011772 | 0.011773 |
| 0.011565 | 0.011636 | 0.011868 | 0.011838 | 0.011767 | 0.011801 | 0.011733 |
| 0.011665 | 0.011733 | 0.011733 | 0.011632 | 0.011935 | 0.011800 | 0.011868 |
| 0.011901 | 0.011702 | 0.011607 | 0.011684 | 0.011565 | 0.011733 | 0.011733 |
| 0.011768 | 0.011766 | 0.011800 | 0.011800 | 0.011965 | 0.011935 | 0.011546 |
| 0.011433 | 0.011442 | 0.011537 | 0.011502 | 0.011539 | 0.011471 | 0.011502 |
| 0.011575 | 0.011411 | 0.011537 | 0.011585 | 0.011598 | 0.011676 | 0.011565 |
| 0.011531 | 0.011464 | 0.011598 | 0.011564 | 0.011497 | 0.011464 | 0.011396 |
| 0.011497 | 0.011565 | 0.011564 | 0.011564 | 0.011598 | 0.011598 | 0.011601 |
| 0.011670 | 0.011598 | 0.011598 | 0.011566 | 0.011497 | 0.011497 | 0.011531 |
| 0.011565 | 0.011737 | 0.011535 | 0.011807 | 0.011839 | 0.011598 | 0.011800 |
| 0.011733 | 0.011733 | 0.011568 | 0.011687 | 0.011686 | 0.011708 | 0.011481 |

|          |          |          |          |          |          |          |
|----------|----------|----------|----------|----------|----------|----------|
| 0.011750 | 0.011790 | 0.011653 | 0.011639 | 0.011531 | 0.011733 | 0.011598 |
| 0.011699 | 0.011632 | 0.011531 | 0.011634 | 0.011733 | 0.011737 | 0.011632 |
| 0.011531 | 0.011465 | 0.011598 | 0.011531 | 0.011464 | 0.011468 | 0.011733 |
| 0.011632 | 0.011564 | 0.011598 | 0.011632 | 0.011598 | 0.011531 | 0.011464 |
| 0.011598 | 0.011632 | 0.011632 | 0.011565 | 0.011632 | 0.011867 | 0.011464 |
| 0.011565 | 0.011699 | 0.011565 | 0.011598 | 0.011564 | 0.011666 | 0.011574 |
| 0.011397 | 0.011443 | 0.011361 | 0.011463 | 0.011549 | 0.011491 | 0.011395 |
| 0.011323 | 0.011195 | 0.011296 | 0.011400 | 0.011262 | 0.011399 | 0.011531 |
| 0.011430 | 0.011500 | 0.011430 | 0.011675 | 0.011396 | 0.012272 | 0.011431 |
| 0.012137 | 0.011937 | 0.012072 | 0.012410 | 0.011665 | 0.011430 | 0.011396 |
| 0.012171 | 0.011769 | 0.011363 | 0.011262 | 0.000000 | 0.000000 | 0.011365 |
| 0.011195 | 0.011196 | 0.011195 | 0.011228 | 0.011868 | 0.011935 | 0.011935 |
| 0.011835 | 0.011935 | 0.012038 | 0.011805 | 0.012307 | 0.012314 | 0.012374 |
| 0.012374 | 0.012408 | 0.012358 | 0.012374 | 0.012376 | 0.011665 | 0.011901 |
| 0.011969 | 0.012474 | 0.011976 | 0.012003 | 0.012475 | 0.011536 | 0.011430 |
| 0.011396 | 0.011396 | 0.011868 | 0.011883 | 0.012010 | 0.011733 | 0.011397 |
| S818     | 0.011906 | 0.011906 | 0.011771 | 0.011534 | 0.011534 | 0.011601 |
| 0.011539 | 0.011505 | 0.011601 | 0.011500 | 0.011567 | 0.011535 | 0.011500 |
| 0.011466 | 0.011703 | 0.011432 | 0.011534 | 0.011601 | 0.011567 | 0.011534 |
| 0.011500 | 0.011534 | 0.011365 | 0.011466 | 0.011500 | 0.011534 | 0.011539 |
| 0.011500 | 0.011534 | 0.011432 | 0.011398 | 0.011601 | 0.011568 | 0.011567 |
| 0.011567 | 0.011669 | 0.011567 | 0.011567 | 0.011601 | 0.011567 | 0.011737 |
| 0.011432 | 0.011567 | 0.011601 | 0.011534 | 0.011567 | 0.011669 | 0.011567 |
| 0.011567 | 0.011737 | 0.011636 | 0.011601 | 0.011567 | 0.011838 | 0.011567 |
| 0.011534 | 0.011568 | 0.011703 | 0.011838 | 0.011669 | 0.011567 | 0.011669 |
| 0.011601 | 0.011669 | 0.011567 | 0.011804 | 0.011737 | 0.011534 | 0.011635 |
| 0.011534 | 0.011635 | 0.011601 | 0.011669 | 0.011601 | 0.011601 | 0.011601 |
| 0.011500 | 0.011534 | 0.011500 | 0.011534 | 0.011567 | 0.011603 | 0.011669 |
| 0.011601 | 0.011567 | 0.011635 | 0.011534 | 0.011567 | 0.011500 | 0.011567 |
| 0.011737 | 0.011669 | 0.011703 | 0.011737 | 0.011500 | 0.011804 | 0.011567 |
| 0.011770 | 0.011663 | 0.011820 | 0.011493 | 0.011511 | 0.011617 | 0.011378 |
| 0.011982 | 0.011368 | 0.011475 | 0.011736 | 0.011737 | 0.011534 | 0.011635 |
| 0.011635 | 0.011601 | 0.011669 | 0.011534 | 0.011669 | 0.011601 | 0.011601 |
| 0.011567 | 0.011601 | 0.011872 | 0.011737 | 0.011635 | 0.011601 | 0.011534 |
| 0.011500 | 0.011432 | 0.011568 | 0.011534 | 0.011466 | 0.011432 | 0.011365 |
| 0.011466 | 0.011534 | 0.011534 | 0.011534 | 0.011568 | 0.011568 | 0.011571 |
| 0.011639 | 0.011500 | 0.011568 | 0.011459 | 0.011533 | 0.011484 | 0.011568 |
| 0.011572 | 0.011510 | 0.011580 | 0.011547 | 0.011471 | 0.011509 | 0.011537 |
| 0.011531 | 0.011581 | 0.011615 | 0.011501 | 0.011513 | 0.011636 | 0.011535 |
| 0.011602 | 0.011603 | 0.011602 | 0.011703 | 0.011635 | 0.012008 | 0.011737 |
| 0.011568 | 0.011635 | 0.011567 | 0.011602 | 0.011466 | 0.011432 | 0.011500 |
| 0.011567 | 0.011567 | 0.011534 | 0.011500 | 0.011534 | 0.011500 | 0.011601 |
| 0.011568 | 0.011669 | 0.011602 | 0.011500 | 0.011603 | 0.011703 | 0.011707 |
| 0.011703 | 0.011602 | 0.011500 | 0.011434 | 0.011568 | 0.011500 | 0.011432 |
| 0.011402 | 0.011703 | 0.011500 | 0.011703 | 0.011466 | 0.011568 | 0.011534 |
| 0.011568 | 0.011534 | 0.011500 | 0.011534 | 0.011568 | 0.011432 | 0.011568 |
| 0.011602 | 0.011534 | 0.011602 | 0.011534 | 0.011568 | 0.011601 | 0.011839 |
| 0.011635 | 0.011500 | 0.011636 | 0.011638 | 0.011670 | 0.011568 | 0.011534 |
| 0.011503 | 0.011793 | 0.011520 | 0.011440 | 0.011641 | 0.011438 | 0.011575 |
| 0.011608 | 0.011574 | 0.011669 | 0.011940 | 0.011645 | 0.011737 | 0.011771 |
| 0.011703 | 0.011804 | 0.011668 | 0.011433 | 0.011609 | 0.011602 | 0.011674 |
| 0.011771 | 0.011672 | 0.011775 | 0.011844 | 0.011804 | 0.011872 | 0.011811 |
| 0.011708 | 0.011846 | 0.011811 | 0.011742 | 0.012009 | 0.011466 | 0.011671 |
| 0.011567 | 0.011567 | 0.011466 | 0.011466 | 0.011534 | 0.011534 | 0.011601 |
| 0.011534 | 0.011601 | 0.011500 | 0.011534 | 0.011534 | 0.011534 | 0.011601 |
| 0.011534 | 0.011669 | 0.011568 | 0.011602 | 0.011432 | 0.011534 | 0.011567 |
| 0.011567 | 0.011534 | 0.011601 | 0.011567 | 0.011500 | 0.011500 | 0.011500 |
| 0.011669 | 0.011601 | 0.011669 | 0.011466 | 0.011567 | 0.011737 | 0.011500 |
| 0.011500 | 0.011567 | 0.011534 | 0.011703 | 0.011500 | 0.011365 | 0.011500 |
| 0.011432 | 0.011534 | 0.011534 | 0.011466 | 0.011466 | 0.011635 | 0.011567 |

|          |          |          |          |          |          |          |
|----------|----------|----------|----------|----------|----------|----------|
| 0.011466 | 0.011567 | 0.011432 | 0.011466 | 0.011601 | 0.011466 | 0.011500 |
| 0.011466 | 0.011601 | 0.011534 | 0.011432 | 0.011500 | 0.011432 | 0.011601 |
| 0.011646 | 0.011500 | 0.011500 | 0.011635 | 0.011601 | 0.011534 | 0.011635 |
| 0.011500 | 0.011838 | 0.011432 | 0.011601 | 0.011432 | 0.011432 | 0.011432 |
| 0.011669 | 0.011602 | 0.011567 | 0.011635 | 0.011466 | 0.011568 | 0.011432 |
| 0.011500 | 0.011500 | 0.011534 | 0.011635 | 0.011534 | 0.011635 | 0.011703 |
| 0.011703 | 0.011635 | 0.011567 | 0.011669 | 0.011635 | 0.011500 | 0.011466 |
| 0.011500 | 0.011500 | 0.011567 | 0.011432 | 0.011466 | 0.011601 | 0.011500 |
| 0.011466 | 0.011534 | 0.011635 | 0.011635 | 0.011601 | 0.011534 | 0.011500 |
| 0.011601 | 0.011534 | 0.011601 | 0.011500 | 0.011635 | 0.011669 | 0.011771 |
| 0.011534 | 0.011669 | 0.011547 | 0.018104 | 0.011390 | 0.011801 | 0.011588 |
| 0.011548 | 0.011592 | 0.011747 | 0.011411 | 0.011779 | 0.011617 | 0.011794 |
| 0.011299 | 0.011614 | 0.011493 | 0.011567 | 0.011414 | 0.011657 | 0.011580 |
| 0.011391 | 0.011436 | 0.011396 | 0.011127 | 0.011669 | 0.011703 | 0.011708 |
| 0.011544 | 0.011669 | 0.011669 | 0.011568 | 0.011601 | 0.011602 | 0.011568 |
| 0.011534 | 0.011534 | 0.011500 | 0.011602 | 0.011568 | 0.011500 | 0.011534 |
| 0.011534 | 0.011602 | 0.011500 | 0.011602 | 0.011635 | 0.011669 | 0.011567 |
| 0.011534 | 0.011500 | 0.011636 | 0.011636 | 0.011635 | 0.011670 | 0.011703 |
| 0.011466 | 0.011466 | 0.011500 | 0.011602 | 0.011466 | 0.011703 | 0.011703 |
| 0.011669 | 0.011669 | 0.011669 | 0.011703 | 0.011669 | 0.011705 | 0.011601 |
| 0.011534 | 0.011669 | 0.011669 | 0.011534 | 0.011602 | 0.011568 | 0.011534 |
| 0.011602 | 0.011602 | 0.011635 | 0.011670 | 0.011569 | 0.011771 | 0.011737 |
| 0.011606 | 0.011500 | 0.011601 | 0.011669 | 0.011602 | 0.011669 | 0.011770 |
| 0.011940 | 0.011645 | 0.011737 | 0.011771 | 0.011703 | 0.011804 | 0.011500 |
| 0.011671 | 0.011568 | 0.011534 | 0.011534 | 0.011602 | 0.011500 | 0.011602 |
| 0.011635 | 0.011669 | 0.011567 | 0.011534 | 0.011500 | 0.011636 | 0.011636 |
| 0.011635 | 0.011670 | 0.011737 | 0.011669 | 0.012246 | 0.011635 | 0.011626 |
| 0.011697 | 0.011619 | 0.011767 | 0.011653 | 0.011729 | 0.011685 | 0.011616 |
| 0.012166 | 0.011548 | 0.011681 | 0.011617 | 0.011892 | 0.011780 | 0.011848 |
| 0.012189 | 0.011591 | 0.011844 | 0.011906 | 0.011771 | 0.011500 | 0.011809 |
| 0.011466 | 0.011635 | 0.011770 | 0.011737 | 0.011741 | 0.011466 | 0.011230 |
| 0.011567 | 0.011500 | 0.011534 | 0.011567 | 0.011466 | 0.011534 | 0.011432 |
| 0.011500 | 0.011534 | 0.011500 | 0.011466 | 0.011567 | 0.011500 | 0.011534 |
| 0.011534 | 0.011466 | 0.011534 | 0.011567 | 0.011466 | 0.011669 | 0.011703 |
| 0.011601 | 0.011601 | 0.011601 | 0.011601 | 0.011534 | 0.011669 | 0.011567 |
| 0.011305 | 0.011534 | 0.011500 | 0.011470 | 0.011635 | 0.011635 | 0.011635 |
| 0.011635 | 0.011567 | 0.011534 | 0.011567 | 0.011635 | 0.011669 | 0.011601 |
| 0.011601 | 0.011737 | 0.011601 | 0.011635 | 0.011838 | 0.011838 | 0.011703 |
| 0.011534 | 0.011601 | 0.011635 | 0.011771 | 0.011602 | 0.011635 | 0.011601 |
| 0.011567 | 0.011500 | 0.011500 | 0.011805 | 0.011805 | 0.011771 | 0.011567 |
| 0.011669 | 0.011669 | 0.011601 | 0.011669 | 0.011635 | 0.011500 | 0.011534 |
| 0.011601 | 0.011567 | 0.011500 | 0.011737 | 0.011567 | 0.011635 | 0.011669 |
| 0.011601 | 0.011642 | 0.011669 | 0.011511 | 0.011287 | 0.011608 | 0.011216 |
| 0.011614 | 0.011453 | 0.011520 | 0.011600 | 0.011552 | 0.011521 | 0.011274 |
| 0.011369 | 0.011326 | 0.011452 | 0.011326 | 0.011331 | 0.011532 | 0.011714 |
| 0.011706 | 0.011615 | 0.011593 | 0.011593 | 0.011604 | 0.011466 | 0.011534 |
| 0.011534 | 0.011602 | 0.011708 | 0.011504 | 0.011846 | 0.011880 | 0.011601 |
| 0.011568 | 0.011635 | 0.011567 | 0.011602 | 0.011466 | 0.011432 | 0.011500 |
| 0.011567 | 0.011567 | 0.011534 | 0.011500 | 0.011534 | 0.011500 | 0.011601 |
| 0.011518 | 0.011554 | 0.011578 | 0.011612 | 0.011750 | 0.011714 | 0.011645 |
| 0.011712 | 0.011636 | 0.011432 | 0.011423 | 0.011572 | 0.011675 | 0.011744 |
| 0.011535 | 0.011606 | 0.011840 | 0.011809 | 0.011670 | 0.011772 | 0.011703 |
| 0.011635 | 0.011703 | 0.011703 | 0.011601 | 0.011906 | 0.011703 | 0.011771 |
| 0.011873 | 0.011599 | 0.011576 | 0.011654 | 0.011534 | 0.011737 | 0.011703 |
| 0.011738 | 0.011770 | 0.011703 | 0.011703 | 0.011932 | 0.011906 | 0.011514 |
| 0.011401 | 0.011409 | 0.011506 | 0.011471 | 0.011507 | 0.011436 | 0.011437 |
| 0.011544 | 0.011325 | 0.011444 | 0.011588 | 0.011568 | 0.011646 | 0.011534 |
| 0.011500 | 0.011432 | 0.011568 | 0.011534 | 0.011466 | 0.011432 | 0.011365 |
| 0.011466 | 0.011534 | 0.011534 | 0.011534 | 0.011568 | 0.011568 | 0.011571 |
| 0.011639 | 0.011500 | 0.011568 | 0.011604 | 0.011466 | 0.011534 | 0.011534 |

|          |          |          |          |          |          |          |
|----------|----------|----------|----------|----------|----------|----------|
| 0.011602 | 0.011708 | 0.011504 | 0.011846 | 0.011880 | 0.011601 | 0.011771 |
| 0.011703 | 0.011703 | 0.011537 | 0.011656 | 0.011655 | 0.011678 | 0.011449 |
| 0.011685 | 0.011841 | 0.011572 | 0.011608 | 0.011500 | 0.011703 | 0.011568 |
| 0.011669 | 0.011602 | 0.011500 | 0.011603 | 0.011703 | 0.011707 | 0.011602 |
| 0.011500 | 0.011434 | 0.011568 | 0.011500 | 0.011432 | 0.011402 | 0.011703 |
| 0.011534 | 0.011534 | 0.011500 | 0.011602 | 0.011568 | 0.011500 | 0.011399 |
| 0.011567 | 0.011601 | 0.011601 | 0.011534 | 0.011601 | 0.011838 | 0.011432 |
| 0.011534 | 0.011669 | 0.011534 | 0.011567 | 0.011534 | 0.011601 | 0.011492 |
| 0.011400 | 0.011360 | 0.011262 | 0.011426 | 0.011512 | 0.011458 | 0.011355 |
| 0.011219 | 0.011229 | 0.011331 | 0.011436 | 0.011298 | 0.011435 | 0.011568 |
| 0.011467 | 0.011537 | 0.011466 | 0.011645 | 0.011432 | 0.012245 | 0.011468 |
| 0.012144 | 0.011977 | 0.012079 | 0.012454 | 0.011635 | 0.011466 | 0.011433 |
| 0.012213 | 0.011808 | 0.011398 | 0.011229 | 0.011365 | 0.011365 | 0.000000 |
| 0.011229 | 0.011231 | 0.011297 | 0.011230 | 0.011840 | 0.011872 | 0.011907 |
| 0.011772 | 0.011840 | 0.012012 | 0.011776 | 0.012282 | 0.012289 | 0.012349 |
| 0.012350 | 0.012384 | 0.012333 | 0.012350 | 0.012352 | 0.011635 | 0.011873 |
| 0.011941 | 0.012449 | 0.011949 | 0.011906 | 0.012417 | 0.011471 | 0.011399 |
| 0.011365 | 0.011365 | 0.011839 | 0.011846 | 0.011982 | 0.011703 | 0.011366 |
| S819     | 0.011799 | 0.011799 | 0.011597 | 0.011362 | 0.011362 | 0.011429 |
| 0.011536 | 0.011468 | 0.011429 | 0.011396 | 0.011463 | 0.011430 | 0.011396 |
| 0.011362 | 0.011597 | 0.011329 | 0.011429 | 0.011496 | 0.011463 | 0.011429 |
| 0.011396 | 0.011429 | 0.011262 | 0.011363 | 0.011396 | 0.011429 | 0.011502 |
| 0.011396 | 0.011429 | 0.011329 | 0.011295 | 0.011496 | 0.011463 | 0.011496 |
| 0.011463 | 0.011564 | 0.011463 | 0.011463 | 0.011496 | 0.011463 | 0.011631 |
| 0.011329 | 0.011463 | 0.011496 | 0.011429 | 0.011463 | 0.011564 | 0.011496 |
| 0.011463 | 0.011631 | 0.011530 | 0.011530 | 0.011463 | 0.011731 | 0.011463 |
| 0.011429 | 0.011463 | 0.011597 | 0.011731 | 0.011564 | 0.011463 | 0.011564 |
| 0.011496 | 0.011564 | 0.011463 | 0.011698 | 0.011665 | 0.011463 | 0.011530 |
| 0.011429 | 0.011530 | 0.011496 | 0.011564 | 0.011496 | 0.011496 | 0.011496 |
| 0.011396 | 0.011429 | 0.011396 | 0.011429 | 0.011463 | 0.011498 | 0.011564 |
| 0.011496 | 0.011463 | 0.011530 | 0.011429 | 0.011496 | 0.011396 | 0.011463 |
| 0.011631 | 0.011564 | 0.011597 | 0.011631 | 0.011463 | 0.011698 | 0.011463 |
| 0.011653 | 0.011546 | 0.011702 | 0.011373 | 0.011396 | 0.011465 | 0.011296 |
| 0.011938 | 0.011314 | 0.011431 | 0.011698 | 0.011698 | 0.011429 | 0.011530 |
| 0.011530 | 0.011496 | 0.011564 | 0.011463 | 0.011564 | 0.011496 | 0.011496 |
| 0.011463 | 0.011496 | 0.011765 | 0.011631 | 0.011530 | 0.011497 | 0.011430 |
| 0.011396 | 0.011329 | 0.011463 | 0.011429 | 0.011362 | 0.011329 | 0.011262 |
| 0.011362 | 0.011430 | 0.011429 | 0.011429 | 0.011463 | 0.011463 | 0.011465 |
| 0.011533 | 0.011463 | 0.011463 | 0.011348 | 0.011422 | 0.011376 | 0.011464 |
| 0.011467 | 0.011404 | 0.011466 | 0.011440 | 0.011366 | 0.011403 | 0.011432 |
| 0.011420 | 0.011474 | 0.011508 | 0.011396 | 0.011406 | 0.011531 | 0.011430 |
| 0.011497 | 0.011498 | 0.011497 | 0.011597 | 0.011530 | 0.011899 | 0.011631 |
| 0.011463 | 0.011530 | 0.011463 | 0.011497 | 0.011362 | 0.011329 | 0.011396 |
| 0.011463 | 0.011463 | 0.011429 | 0.011396 | 0.011429 | 0.011396 | 0.011497 |
| 0.011463 | 0.011564 | 0.011497 | 0.011396 | 0.011498 | 0.011597 | 0.011601 |
| 0.011597 | 0.011497 | 0.011396 | 0.011330 | 0.011463 | 0.011396 | 0.011329 |
| 0.011332 | 0.011598 | 0.011396 | 0.011598 | 0.011362 | 0.011463 | 0.011429 |
| 0.011530 | 0.011429 | 0.011463 | 0.011430 | 0.011463 | 0.011329 | 0.011463 |
| 0.011497 | 0.011429 | 0.011497 | 0.011429 | 0.011463 | 0.011497 | 0.011732 |
| 0.011564 | 0.011497 | 0.011564 | 0.011599 | 0.011564 | 0.011463 | 0.011429 |
| 0.011398 | 0.011667 | 0.011563 | 0.011369 | 0.011569 | 0.011333 | 0.011454 |
| 0.011569 | 0.011468 | 0.011631 | 0.011832 | 0.011538 | 0.011698 | 0.011664 |
| 0.011597 | 0.011765 | 0.011593 | 0.011390 | 0.011479 | 0.011497 | 0.011568 |
| 0.011665 | 0.011566 | 0.011703 | 0.011737 | 0.011698 | 0.011765 | 0.011805 |
| 0.011602 | 0.011739 | 0.011703 | 0.011635 | 0.011901 | 0.011362 | 0.011498 |
| 0.011530 | 0.011463 | 0.011362 | 0.011362 | 0.011429 | 0.011429 | 0.011496 |
| 0.011429 | 0.011496 | 0.011396 | 0.011429 | 0.011429 | 0.011429 | 0.011496 |
| 0.011429 | 0.011597 | 0.011497 | 0.011530 | 0.011329 | 0.011429 | 0.011463 |
| 0.011463 | 0.011429 | 0.011496 | 0.011463 | 0.011396 | 0.011396 | 0.011396 |
| 0.011597 | 0.011496 | 0.011564 | 0.011362 | 0.011463 | 0.011631 | 0.011396 |



|          |          |          |          |          |          |          |
|----------|----------|----------|----------|----------|----------|----------|
| 0.011396 | 0.011463 | 0.011429 | 0.011597 | 0.011396 | 0.011262 | 0.011396 |
| 0.011329 | 0.011429 | 0.011429 | 0.011362 | 0.011362 | 0.011530 | 0.011463 |
| 0.011362 | 0.011463 | 0.011329 | 0.011362 | 0.011496 | 0.011362 | 0.011396 |
| 0.011363 | 0.011496 | 0.011430 | 0.011329 | 0.011396 | 0.011329 | 0.011496 |
| 0.011539 | 0.011396 | 0.011429 | 0.011530 | 0.011496 | 0.011429 | 0.011530 |
| 0.011396 | 0.011731 | 0.011329 | 0.011530 | 0.011329 | 0.011329 | 0.011329 |
| 0.011564 | 0.011497 | 0.011463 | 0.011530 | 0.011362 | 0.011497 | 0.011329 |
| 0.011396 | 0.011396 | 0.011429 | 0.011530 | 0.011429 | 0.011530 | 0.011597 |
| 0.011597 | 0.011564 | 0.011463 | 0.011564 | 0.011530 | 0.011396 | 0.011362 |
| 0.011396 | 0.011396 | 0.011463 | 0.011329 | 0.011362 | 0.011530 | 0.011396 |
| 0.011362 | 0.011429 | 0.011564 | 0.011530 | 0.011496 | 0.011429 | 0.011429 |
| 0.011496 | 0.011429 | 0.011530 | 0.011396 | 0.011530 | 0.011631 | 0.011665 |
| 0.011429 | 0.011564 | 0.011440 | 0.017974 | 0.011322 | 0.011611 | 0.011514 |
| 0.011475 | 0.011518 | 0.011636 | 0.011408 | 0.011555 | 0.011544 | 0.011607 |
| 0.011203 | 0.011365 | 0.011372 | 0.011479 | 0.011372 | 0.011455 | 0.011447 |
| 0.011342 | 0.011321 | 0.011320 | 0.011193 | 0.011564 | 0.011597 | 0.011601 |
| 0.011438 | 0.011564 | 0.011564 | 0.011463 | 0.011497 | 0.011497 | 0.011463 |
| 0.011497 | 0.011429 | 0.011463 | 0.011497 | 0.011463 | 0.011396 | 0.011429 |
| 0.011429 | 0.011497 | 0.011396 | 0.011497 | 0.011530 | 0.011564 | 0.011463 |
| 0.011429 | 0.011396 | 0.011530 | 0.011530 | 0.011530 | 0.011565 | 0.011597 |
| 0.011362 | 0.011362 | 0.011396 | 0.011497 | 0.011362 | 0.011597 | 0.011597 |
| 0.011631 | 0.011631 | 0.011564 | 0.011664 | 0.011564 | 0.011666 | 0.011497 |
| 0.011497 | 0.011564 | 0.011597 | 0.011362 | 0.011497 | 0.011463 | 0.011497 |
| 0.011564 | 0.011564 | 0.011597 | 0.011564 | 0.011464 | 0.011665 | 0.011631 |
| 0.011500 | 0.011396 | 0.011497 | 0.011597 | 0.011497 | 0.011564 | 0.011664 |
| 0.011832 | 0.011538 | 0.011698 | 0.011664 | 0.011597 | 0.011765 | 0.011396 |
| 0.011565 | 0.011464 | 0.011429 | 0.011429 | 0.011497 | 0.011396 | 0.011497 |
| 0.011530 | 0.011564 | 0.011463 | 0.011429 | 0.011396 | 0.011530 | 0.011530 |
| 0.011530 | 0.011565 | 0.011631 | 0.011564 | 0.012136 | 0.011596 | 0.011517 |
| 0.011587 | 0.011545 | 0.011657 | 0.011545 | 0.011655 | 0.011577 | 0.011577 |
| 0.012056 | 0.011441 | 0.011574 | 0.011510 | 0.011783 | 0.011672 | 0.011741 |
| 0.012080 | 0.011512 | 0.011736 | 0.011799 | 0.011664 | 0.011396 | 0.011702 |
| 0.011362 | 0.011530 | 0.011664 | 0.011631 | 0.011635 | 0.011362 | 0.000000 |
| 0.011463 | 0.011396 | 0.011429 | 0.011463 | 0.011362 | 0.011429 | 0.011329 |
| 0.011396 | 0.011429 | 0.011396 | 0.011362 | 0.011463 | 0.011396 | 0.011429 |
| 0.011429 | 0.011362 | 0.011429 | 0.011463 | 0.011362 | 0.011564 | 0.011597 |
| 0.011496 | 0.011496 | 0.011496 | 0.011496 | 0.011429 | 0.011564 | 0.011463 |
| 0.011199 | 0.011429 | 0.011396 | 0.011365 | 0.011530 | 0.011530 | 0.011530 |
| 0.011530 | 0.011463 | 0.011429 | 0.011463 | 0.011564 | 0.011564 | 0.011496 |
| 0.011496 | 0.011631 | 0.011530 | 0.011530 | 0.011732 | 0.011732 | 0.011597 |
| 0.011429 | 0.011496 | 0.011530 | 0.011665 | 0.011497 | 0.011530 | 0.011496 |
| 0.011530 | 0.011396 | 0.011396 | 0.011698 | 0.011698 | 0.011664 | 0.011463 |
| 0.011564 | 0.011631 | 0.011496 | 0.011564 | 0.011530 | 0.011396 | 0.011463 |
| 0.011496 | 0.011463 | 0.011396 | 0.011631 | 0.011463 | 0.011564 | 0.011597 |
| 0.011496 | 0.011603 | 0.011597 | 0.011385 | 0.011286 | 0.011502 | 0.011215 |
| 0.011390 | 0.011294 | 0.011411 | 0.011462 | 0.011402 | 0.011467 | 0.011326 |
| 0.011315 | 0.011258 | 0.011394 | 0.011258 | 0.011276 | 0.011462 | 0.011587 |
| 0.011588 | 0.011493 | 0.011483 | 0.011483 | 0.011431 | 0.011362 | 0.011362 |
| 0.011430 | 0.011430 | 0.011601 | 0.011399 | 0.011670 | 0.011696 | 0.011496 |
| 0.011463 | 0.011530 | 0.011463 | 0.011497 | 0.011362 | 0.011329 | 0.011396 |
| 0.011463 | 0.011463 | 0.011429 | 0.011396 | 0.011429 | 0.011396 | 0.011497 |
| 0.011479 | 0.011480 | 0.011471 | 0.011505 | 0.011642 | 0.011607 | 0.011606 |
| 0.011605 | 0.011531 | 0.011319 | 0.011348 | 0.011467 | 0.011636 | 0.011637 |
| 0.011430 | 0.011500 | 0.011733 | 0.011702 | 0.011632 | 0.011666 | 0.011597 |
| 0.011530 | 0.011597 | 0.011597 | 0.011497 | 0.011799 | 0.011664 | 0.011732 |
| 0.011765 | 0.011559 | 0.011469 | 0.011545 | 0.011429 | 0.011597 | 0.011597 |
| 0.011632 | 0.011664 | 0.011664 | 0.011664 | 0.011846 | 0.011799 | 0.011407 |
| 0.011297 | 0.011303 | 0.011401 | 0.011366 | 0.011402 | 0.011321 | 0.011366 |
| 0.011437 | 0.011236 | 0.011346 | 0.011435 | 0.011464 | 0.011539 | 0.011430 |
| 0.011396 | 0.011329 | 0.011463 | 0.011429 | 0.011362 | 0.011329 | 0.011262 |

|          |          |          |          |          |          |          |
|----------|----------|----------|----------|----------|----------|----------|
| 0.011362 | 0.011430 | 0.011429 | 0.011429 | 0.011463 | 0.011463 | 0.011465 |
| 0.011533 | 0.011463 | 0.011463 | 0.011431 | 0.011362 | 0.011362 | 0.011430 |
| 0.011430 | 0.011601 | 0.011399 | 0.011670 | 0.011696 | 0.011496 | 0.011664 |
| 0.011597 | 0.011597 | 0.011432 | 0.011547 | 0.011547 | 0.011571 | 0.011340 |
| 0.011611 | 0.011607 | 0.011526 | 0.011502 | 0.011396 | 0.011598 | 0.011463 |
| 0.011564 | 0.011497 | 0.011396 | 0.011498 | 0.011597 | 0.011601 | 0.011497 |
| 0.011396 | 0.011330 | 0.011463 | 0.011396 | 0.011329 | 0.011332 | 0.011598 |
| 0.011497 | 0.011429 | 0.011463 | 0.011497 | 0.011463 | 0.011396 | 0.011329 |
| 0.011463 | 0.011496 | 0.011496 | 0.011429 | 0.011496 | 0.011732 | 0.011329 |
| 0.011429 | 0.011564 | 0.011429 | 0.011463 | 0.011429 | 0.011530 | 0.011446 |
| 0.011285 | 0.011315 | 0.011261 | 0.011342 | 0.011427 | 0.011347 | 0.011269 |
| 0.011218 | 0.000000 | 0.011161 | 0.011264 | 0.011128 | 0.011263 | 0.011396 |
| 0.011296 | 0.011364 | 0.011295 | 0.011538 | 0.011262 | 0.012135 | 0.011296 |
| 0.012035 | 0.011802 | 0.011936 | 0.012274 | 0.011530 | 0.011295 | 0.011262 |
| 0.012036 | 0.011633 | 0.011228 | 0.011127 | 0.011195 | 0.011195 | 0.011229 |
| 0.000000 | 0.000000 | 0.011127 | 0.011094 | 0.011733 | 0.011799 | 0.011800 |
| 0.011699 | 0.011800 | 0.011903 | 0.011669 | 0.012171 | 0.012178 | 0.012238 |
| 0.012239 | 0.012273 | 0.012220 | 0.012239 | 0.012240 | 0.011530 | 0.011766 |
| 0.011834 | 0.012337 | 0.011840 | 0.011866 | 0.012339 | 0.011400 | 0.011296 |
| 0.011262 | 0.011262 | 0.011732 | 0.011718 | 0.011869 | 0.011597 | 0.011262 |
| S820     | 0.011807 | 0.011807 | 0.011569 | 0.011331 | 0.011331 | 0.011399 |
| 0.011541 | 0.011438 | 0.011331 | 0.011399 | 0.011433 | 0.011434 | 0.011399 |
| 0.011365 | 0.011569 | 0.011331 | 0.011433 | 0.011501 | 0.011467 | 0.011433 |
| 0.011399 | 0.011433 | 0.011264 | 0.011366 | 0.011400 | 0.011399 | 0.011506 |
| 0.011399 | 0.011433 | 0.011331 | 0.011298 | 0.011467 | 0.011467 | 0.011501 |
| 0.011467 | 0.011569 | 0.011467 | 0.011467 | 0.011501 | 0.011467 | 0.011637 |
| 0.011331 | 0.011467 | 0.011501 | 0.011433 | 0.011467 | 0.011569 | 0.011501 |
| 0.011467 | 0.011637 | 0.011501 | 0.011535 | 0.011467 | 0.011739 | 0.011467 |
| 0.011433 | 0.011467 | 0.011569 | 0.011739 | 0.011569 | 0.011467 | 0.011569 |
| 0.011501 | 0.011535 | 0.011433 | 0.011705 | 0.011671 | 0.011467 | 0.011535 |
| 0.011433 | 0.011501 | 0.011501 | 0.011535 | 0.011467 | 0.011501 | 0.011501 |
| 0.011399 | 0.011399 | 0.011399 | 0.011433 | 0.011467 | 0.011501 | 0.011569 |
| 0.011501 | 0.011467 | 0.011535 | 0.011399 | 0.011501 | 0.011399 | 0.011433 |
| 0.011637 | 0.011569 | 0.011603 | 0.011637 | 0.011467 | 0.011705 | 0.011467 |
| 0.011656 | 0.011548 | 0.011704 | 0.011374 | 0.011396 | 0.011467 | 0.011297 |
| 0.011939 | 0.011315 | 0.011431 | 0.011671 | 0.011671 | 0.011399 | 0.011535 |
| 0.011535 | 0.011501 | 0.011569 | 0.011467 | 0.011535 | 0.011467 | 0.011501 |
| 0.011467 | 0.011467 | 0.011739 | 0.011637 | 0.011535 | 0.011501 | 0.011433 |
| 0.011399 | 0.011331 | 0.011467 | 0.011399 | 0.011365 | 0.011332 | 0.011264 |
| 0.011365 | 0.011433 | 0.011433 | 0.011433 | 0.011467 | 0.011467 | 0.011470 |
| 0.011538 | 0.011467 | 0.011467 | 0.011351 | 0.011389 | 0.011379 | 0.011467 |
| 0.011471 | 0.011407 | 0.011468 | 0.011443 | 0.011369 | 0.011406 | 0.011435 |
| 0.011424 | 0.011443 | 0.011512 | 0.011400 | 0.011409 | 0.011536 | 0.011434 |
| 0.011502 | 0.011503 | 0.011501 | 0.011569 | 0.011535 | 0.011908 | 0.011637 |
| 0.011467 | 0.011535 | 0.011467 | 0.011501 | 0.011365 | 0.011332 | 0.011365 |
| 0.011467 | 0.011467 | 0.011399 | 0.011399 | 0.011433 | 0.011399 | 0.011501 |
| 0.011467 | 0.011569 | 0.011501 | 0.011399 | 0.011469 | 0.011603 | 0.011606 |
| 0.011603 | 0.011501 | 0.011399 | 0.011333 | 0.011467 | 0.011399 | 0.011332 |
| 0.011335 | 0.011603 | 0.011399 | 0.011603 | 0.011365 | 0.011467 | 0.011433 |
| 0.011535 | 0.011433 | 0.011467 | 0.011433 | 0.011467 | 0.011331 | 0.011433 |
| 0.011501 | 0.011433 | 0.011501 | 0.011433 | 0.011467 | 0.011501 | 0.011671 |
| 0.011569 | 0.011501 | 0.011569 | 0.011603 | 0.011569 | 0.011467 | 0.011433 |
| 0.011401 | 0.011670 | 0.011569 | 0.011370 | 0.011574 | 0.011336 | 0.011456 |
| 0.011575 | 0.011472 | 0.011637 | 0.011807 | 0.011543 | 0.011705 | 0.011671 |
| 0.011603 | 0.011738 | 0.011599 | 0.011394 | 0.011442 | 0.011501 | 0.011573 |
| 0.011671 | 0.011571 | 0.011709 | 0.011744 | 0.011637 | 0.011773 | 0.011813 |
| 0.011573 | 0.011746 | 0.011710 | 0.011641 | 0.011910 | 0.011365 | 0.011503 |
| 0.011501 | 0.011433 | 0.011331 | 0.011365 | 0.011433 | 0.011433 | 0.011501 |
| 0.011433 | 0.011501 | 0.011399 | 0.011433 | 0.011433 | 0.011433 | 0.011501 |
| 0.011433 | 0.011603 | 0.011501 | 0.011535 | 0.011331 | 0.011433 | 0.011467 |

|          |          |          |          |          |          |          |
|----------|----------|----------|----------|----------|----------|----------|
| 0.011467 | 0.011433 | 0.011501 | 0.011467 | 0.011399 | 0.011399 | 0.011399 |
| 0.011569 | 0.011501 | 0.011569 | 0.011365 | 0.011467 | 0.011603 | 0.011399 |
| 0.011399 | 0.011433 | 0.011433 | 0.011603 | 0.011399 | 0.011264 | 0.011399 |
| 0.011332 | 0.011433 | 0.011433 | 0.011365 | 0.011365 | 0.011535 | 0.011467 |
| 0.011365 | 0.011467 | 0.011332 | 0.011365 | 0.011501 | 0.011366 | 0.011399 |
| 0.011366 | 0.011501 | 0.011434 | 0.011332 | 0.011399 | 0.011332 | 0.011501 |
| 0.011545 | 0.011399 | 0.011433 | 0.011535 | 0.011501 | 0.011433 | 0.011535 |
| 0.011399 | 0.011739 | 0.011331 | 0.011501 | 0.011332 | 0.011332 | 0.011331 |
| 0.011535 | 0.011501 | 0.011433 | 0.011535 | 0.011365 | 0.011501 | 0.011332 |
| 0.011399 | 0.011399 | 0.011433 | 0.011501 | 0.011433 | 0.011535 | 0.011603 |
| 0.011603 | 0.011569 | 0.011467 | 0.011569 | 0.011535 | 0.011399 | 0.011365 |
| 0.011399 | 0.011399 | 0.011433 | 0.011331 | 0.011365 | 0.011501 | 0.011399 |
| 0.011365 | 0.011399 | 0.011569 | 0.011535 | 0.011467 | 0.011433 | 0.011433 |
| 0.011501 | 0.011433 | 0.011535 | 0.011399 | 0.011535 | 0.011637 | 0.011671 |
| 0.011433 | 0.011535 | 0.011441 | 0.017977 | 0.011322 | 0.011614 | 0.011516 |
| 0.011477 | 0.011519 | 0.011637 | 0.011408 | 0.011557 | 0.011546 | 0.011608 |
| 0.011203 | 0.011367 | 0.011374 | 0.011481 | 0.011374 | 0.011457 | 0.011449 |
| 0.011342 | 0.011321 | 0.011320 | 0.011193 | 0.011569 | 0.011603 | 0.011607 |
| 0.011442 | 0.011569 | 0.011535 | 0.011467 | 0.011467 | 0.011467 | 0.011467 |
| 0.011501 | 0.011433 | 0.011467 | 0.011501 | 0.011467 | 0.011399 | 0.011433 |
| 0.011433 | 0.011467 | 0.011365 | 0.011467 | 0.011535 | 0.011569 | 0.011467 |
| 0.011433 | 0.011399 | 0.011535 | 0.011535 | 0.011535 | 0.011570 | 0.011603 |
| 0.011365 | 0.011365 | 0.011399 | 0.011467 | 0.011365 | 0.011569 | 0.011569 |
| 0.011637 | 0.011637 | 0.011535 | 0.011671 | 0.011569 | 0.011673 | 0.011501 |
| 0.011501 | 0.011535 | 0.011603 | 0.011365 | 0.011467 | 0.011433 | 0.011501 |
| 0.011535 | 0.011535 | 0.011569 | 0.011569 | 0.011468 | 0.011637 | 0.011637 |
| 0.011505 | 0.011399 | 0.011501 | 0.011603 | 0.011501 | 0.011535 | 0.011637 |
| 0.011807 | 0.011543 | 0.011705 | 0.011671 | 0.011603 | 0.011738 | 0.011400 |
| 0.011570 | 0.011467 | 0.011433 | 0.011433 | 0.011467 | 0.011365 | 0.011467 |
| 0.011535 | 0.011569 | 0.011467 | 0.011433 | 0.011399 | 0.011535 | 0.011535 |
| 0.011535 | 0.011570 | 0.011637 | 0.011569 | 0.012148 | 0.011602 | 0.011522 |
| 0.011593 | 0.011551 | 0.011664 | 0.011515 | 0.011662 | 0.011583 | 0.011583 |
| 0.012067 | 0.011445 | 0.011579 | 0.011515 | 0.011791 | 0.011679 | 0.011748 |
| 0.012091 | 0.011517 | 0.011504 | 0.011501 | 0.011501 | 0.011264 | 0.011470 |
| 0.011365 | 0.011399 | 0.011535 | 0.011501 | 0.011504 | 0.011332 | 0.000000 |
| 0.011433 | 0.011399 | 0.011433 | 0.011433 | 0.011365 | 0.011433 | 0.011331 |
| 0.011399 | 0.011433 | 0.011399 | 0.011365 | 0.011467 | 0.011399 | 0.011433 |
| 0.011433 | 0.011365 | 0.011433 | 0.011467 | 0.011365 | 0.011569 | 0.011603 |
| 0.011501 | 0.011501 | 0.011501 | 0.011501 | 0.011433 | 0.011569 | 0.011467 |
| 0.011201 | 0.011399 | 0.011400 | 0.011369 | 0.011535 | 0.011501 | 0.011535 |
| 0.011535 | 0.011467 | 0.011433 | 0.011467 | 0.011569 | 0.011569 | 0.011501 |
| 0.011501 | 0.011603 | 0.011535 | 0.011535 | 0.011705 | 0.011705 | 0.011603 |
| 0.011399 | 0.011501 | 0.011535 | 0.011671 | 0.011501 | 0.011535 | 0.011501 |
| 0.011535 | 0.011365 | 0.011365 | 0.011705 | 0.011705 | 0.011671 | 0.011467 |
| 0.011569 | 0.011637 | 0.011467 | 0.011569 | 0.011467 | 0.011399 | 0.011467 |
| 0.011501 | 0.011467 | 0.011365 | 0.011637 | 0.011467 | 0.011569 | 0.011603 |
| 0.011501 | 0.011609 | 0.011603 | 0.011386 | 0.011286 | 0.011472 | 0.011215 |
| 0.011392 | 0.011294 | 0.011413 | 0.011462 | 0.011402 | 0.011468 | 0.011326 |
| 0.011315 | 0.011258 | 0.011394 | 0.011258 | 0.011276 | 0.011462 | 0.011589 |
| 0.011590 | 0.011493 | 0.011485 | 0.011483 | 0.011435 | 0.011332 | 0.011365 |
| 0.011433 | 0.011434 | 0.011606 | 0.011403 | 0.011677 | 0.011703 | 0.011467 |
| 0.011467 | 0.011535 | 0.011467 | 0.011501 | 0.011365 | 0.011332 | 0.011365 |
| 0.011467 | 0.011467 | 0.011399 | 0.011399 | 0.011433 | 0.011399 | 0.011501 |
| 0.011484 | 0.011484 | 0.011475 | 0.011475 | 0.011648 | 0.011612 | 0.011612 |
| 0.011611 | 0.011468 | 0.011321 | 0.011351 | 0.011471 | 0.011642 | 0.011608 |
| 0.011400 | 0.011505 | 0.011740 | 0.011709 | 0.011637 | 0.011672 | 0.011603 |
| 0.011535 | 0.011603 | 0.011603 | 0.011501 | 0.011807 | 0.011671 | 0.011739 |
| 0.011773 | 0.011528 | 0.011474 | 0.011550 | 0.011433 | 0.011603 | 0.011603 |
| 0.011604 | 0.011671 | 0.011671 | 0.011671 | 0.011855 | 0.011807 | 0.011411 |
| 0.011299 | 0.011305 | 0.011404 | 0.011369 | 0.011405 | 0.011324 | 0.011369 |

|          |          |          |          |          |          |          |
|----------|----------|----------|----------|----------|----------|----------|
| 0.011441 | 0.011238 | 0.011350 | 0.011439 | 0.011468 | 0.011544 | 0.011433 |
| 0.011399 | 0.011331 | 0.011467 | 0.011399 | 0.011365 | 0.011332 | 0.011264 |
| 0.011365 | 0.011433 | 0.011433 | 0.011433 | 0.011467 | 0.011467 | 0.011470 |
| 0.011538 | 0.011467 | 0.011467 | 0.011435 | 0.011332 | 0.011365 | 0.011433 |
| 0.011434 | 0.011606 | 0.011403 | 0.011677 | 0.011703 | 0.011467 | 0.011637 |
| 0.011603 | 0.011603 | 0.011436 | 0.011552 | 0.011551 | 0.011542 | 0.011342 |
| 0.011615 | 0.011610 | 0.011531 | 0.011506 | 0.011399 | 0.011603 | 0.011467 |
| 0.011569 | 0.011501 | 0.011399 | 0.011469 | 0.011603 | 0.011606 | 0.011501 |
| 0.011399 | 0.011333 | 0.011467 | 0.011399 | 0.011332 | 0.011335 | 0.011603 |
| 0.011501 | 0.011433 | 0.011467 | 0.011501 | 0.011467 | 0.011399 | 0.011298 |
| 0.011467 | 0.011501 | 0.011501 | 0.011433 | 0.011501 | 0.011671 | 0.011331 |
| 0.011433 | 0.011569 | 0.011433 | 0.011467 | 0.011433 | 0.011535 | 0.011446 |
| 0.011285 | 0.011315 | 0.011261 | 0.011342 | 0.011427 | 0.011348 | 0.011269 |
| 0.011218 | 0.000000 | 0.011162 | 0.011266 | 0.011128 | 0.011264 | 0.011399 |
| 0.011298 | 0.011368 | 0.011298 | 0.011540 | 0.011230 | 0.012112 | 0.011298 |
| 0.012011 | 0.011773 | 0.011911 | 0.012284 | 0.011501 | 0.011264 | 0.011264 |
| 0.012045 | 0.011433 | 0.011230 | 0.011128 | 0.011196 | 0.011196 | 0.011231 |
| 0.000000 | 0.000000 | 0.011128 | 0.011094 | 0.011705 | 0.011773 | 0.011773 |
| 0.011672 | 0.011773 | 0.011841 | 0.011638 | 0.012182 | 0.012188 | 0.012250 |
| 0.012250 | 0.012284 | 0.012226 | 0.012251 | 0.012250 | 0.011535 | 0.011773 |
| 0.011841 | 0.012316 | 0.011846 | 0.011841 | 0.011637 | 0.011402 | 0.011298 |
| 0.011264 | 0.011264 | 0.011705 | 0.011726 | 0.011842 | 0.011569 | 0.011264 |
| S821     | 0.011866 | 0.011866 | 0.011664 | 0.011429 | 0.011429 | 0.011496 |
| 0.011603 | 0.011536 | 0.011496 | 0.011463 | 0.011530 | 0.011498 | 0.011463 |
| 0.011429 | 0.011664 | 0.011396 | 0.011496 | 0.011564 | 0.011530 | 0.011496 |
| 0.011463 | 0.011496 | 0.011329 | 0.011430 | 0.011463 | 0.011496 | 0.011569 |
| 0.011463 | 0.011496 | 0.011396 | 0.011362 | 0.011564 | 0.011530 | 0.011564 |
| 0.011530 | 0.011631 | 0.011530 | 0.011530 | 0.011564 | 0.011530 | 0.011698 |
| 0.011396 | 0.011530 | 0.011564 | 0.011496 | 0.011530 | 0.011631 | 0.011564 |
| 0.011530 | 0.011698 | 0.011598 | 0.011597 | 0.011530 | 0.011799 | 0.011530 |
| 0.011496 | 0.011530 | 0.011664 | 0.011799 | 0.011631 | 0.011530 | 0.011631 |
| 0.011564 | 0.011631 | 0.011530 | 0.011765 | 0.011732 | 0.011530 | 0.011597 |
| 0.011496 | 0.011597 | 0.011564 | 0.011631 | 0.011564 | 0.011564 | 0.011564 |
| 0.011463 | 0.011496 | 0.011463 | 0.011496 | 0.011530 | 0.011565 | 0.011631 |
| 0.011564 | 0.011530 | 0.011597 | 0.011496 | 0.011564 | 0.011463 | 0.011530 |
| 0.011698 | 0.011631 | 0.011664 | 0.011698 | 0.011530 | 0.011765 | 0.011530 |
| 0.011728 | 0.011620 | 0.011777 | 0.011451 | 0.011471 | 0.011539 | 0.011375 |
| 0.012011 | 0.011365 | 0.011472 | 0.011765 | 0.011765 | 0.011496 | 0.011597 |
| 0.011597 | 0.011564 | 0.011631 | 0.011530 | 0.011631 | 0.011564 | 0.011564 |
| 0.011530 | 0.011564 | 0.011832 | 0.011698 | 0.011597 | 0.011564 | 0.011497 |
| 0.011463 | 0.011396 | 0.011530 | 0.011497 | 0.011430 | 0.011396 | 0.011329 |
| 0.011430 | 0.011497 | 0.011497 | 0.011497 | 0.011530 | 0.011530 | 0.011533 |
| 0.011601 | 0.011530 | 0.011530 | 0.011420 | 0.011494 | 0.011446 | 0.011531 |
| 0.011534 | 0.011473 | 0.011503 | 0.011509 | 0.011434 | 0.011471 | 0.011499 |
| 0.011492 | 0.011543 | 0.011577 | 0.011464 | 0.011475 | 0.011598 | 0.011497 |
| 0.011565 | 0.011566 | 0.011564 | 0.011664 | 0.011597 | 0.011967 | 0.011698 |
| 0.011530 | 0.011597 | 0.011530 | 0.011564 | 0.011429 | 0.011396 | 0.011463 |
| 0.011530 | 0.011530 | 0.011497 | 0.011463 | 0.011496 | 0.011463 | 0.011564 |
| 0.011530 | 0.011631 | 0.011564 | 0.011463 | 0.011566 | 0.011665 | 0.011668 |
| 0.011665 | 0.011564 | 0.011463 | 0.011397 | 0.011530 | 0.011463 | 0.011396 |
| 0.011366 | 0.011665 | 0.011463 | 0.011665 | 0.011429 | 0.011530 | 0.011497 |
| 0.011597 | 0.011497 | 0.011530 | 0.011497 | 0.011530 | 0.011396 | 0.011530 |
| 0.011564 | 0.011497 | 0.011564 | 0.011497 | 0.011530 | 0.011564 | 0.011799 |
| 0.011631 | 0.011564 | 0.011631 | 0.011667 | 0.011631 | 0.011530 | 0.011497 |
| 0.011466 | 0.011667 | 0.011563 | 0.011437 | 0.011637 | 0.011401 | 0.011532 |
| 0.011637 | 0.011536 | 0.011698 | 0.011900 | 0.011607 | 0.011765 | 0.011732 |
| 0.011664 | 0.011832 | 0.011664 | 0.011472 | 0.011563 | 0.011564 | 0.011635 |
| 0.011732 | 0.011633 | 0.011770 | 0.011804 | 0.011765 | 0.011833 | 0.011873 |
| 0.011669 | 0.011807 | 0.011771 | 0.011703 | 0.011968 | 0.011429 | 0.011566 |
| 0.011597 | 0.011530 | 0.011429 | 0.011429 | 0.011496 | 0.011496 | 0.011564 |

|          |          |          |          |          |          |          |
|----------|----------|----------|----------|----------|----------|----------|
| 0.011496 | 0.011564 | 0.011463 | 0.011496 | 0.011496 | 0.011496 | 0.011564 |
| 0.011496 | 0.011664 | 0.011564 | 0.011597 | 0.011396 | 0.011496 | 0.011530 |
| 0.011530 | 0.011496 | 0.011564 | 0.011530 | 0.011463 | 0.011463 | 0.011463 |
| 0.011664 | 0.011564 | 0.011631 | 0.011429 | 0.011530 | 0.011698 | 0.011463 |
| 0.011463 | 0.011530 | 0.011496 | 0.011664 | 0.011463 | 0.011329 | 0.011463 |
| 0.011396 | 0.011496 | 0.011496 | 0.011429 | 0.011429 | 0.011597 | 0.011530 |
| 0.011429 | 0.011530 | 0.011396 | 0.011429 | 0.011564 | 0.011430 | 0.011463 |
| 0.011430 | 0.011564 | 0.011497 | 0.011396 | 0.011463 | 0.011396 | 0.011564 |
| 0.011608 | 0.011463 | 0.011497 | 0.011597 | 0.011564 | 0.011496 | 0.011597 |
| 0.011463 | 0.011799 | 0.011396 | 0.011597 | 0.011396 | 0.011396 | 0.011396 |
| 0.011631 | 0.011564 | 0.011530 | 0.011597 | 0.011429 | 0.011564 | 0.011396 |
| 0.011463 | 0.011463 | 0.011496 | 0.011597 | 0.011496 | 0.011597 | 0.011664 |
| 0.011664 | 0.011631 | 0.011530 | 0.011631 | 0.011597 | 0.011463 | 0.011429 |
| 0.011463 | 0.011463 | 0.011530 | 0.011396 | 0.011429 | 0.011597 | 0.011463 |
| 0.011429 | 0.011496 | 0.011631 | 0.011597 | 0.011564 | 0.011496 | 0.011497 |
| 0.011564 | 0.011496 | 0.011597 | 0.011463 | 0.011597 | 0.011698 | 0.011732 |
| 0.011496 | 0.011631 | 0.011509 | 0.018049 | 0.011322 | 0.011733 | 0.011583 |
| 0.011545 | 0.011588 | 0.011741 | 0.011524 | 0.011609 | 0.011613 | 0.011668 |
| 0.011297 | 0.011426 | 0.011411 | 0.011563 | 0.011450 | 0.011554 | 0.011533 |
| 0.011436 | 0.011358 | 0.011394 | 0.011259 | 0.011631 | 0.011665 | 0.011669 |
| 0.011507 | 0.011631 | 0.011631 | 0.011530 | 0.011564 | 0.011564 | 0.011530 |
| 0.011564 | 0.011496 | 0.011530 | 0.011564 | 0.011530 | 0.011463 | 0.011497 |
| 0.011497 | 0.011564 | 0.011463 | 0.011564 | 0.011597 | 0.011631 | 0.011530 |
| 0.011496 | 0.011463 | 0.011598 | 0.011597 | 0.011597 | 0.011632 | 0.011665 |
| 0.011429 | 0.011429 | 0.011463 | 0.011564 | 0.011429 | 0.011665 | 0.011665 |
| 0.011698 | 0.011698 | 0.011631 | 0.011732 | 0.011631 | 0.011734 | 0.011564 |
| 0.011564 | 0.011631 | 0.011665 | 0.011429 | 0.011564 | 0.011530 | 0.011564 |
| 0.011631 | 0.011631 | 0.011665 | 0.011631 | 0.011532 | 0.011732 | 0.011698 |
| 0.011568 | 0.011463 | 0.011564 | 0.011665 | 0.011564 | 0.011631 | 0.011731 |
| 0.011900 | 0.011607 | 0.011765 | 0.011732 | 0.011664 | 0.011832 | 0.011463 |
| 0.011633 | 0.011531 | 0.011497 | 0.011497 | 0.011564 | 0.011463 | 0.011564 |
| 0.011597 | 0.011631 | 0.011530 | 0.011496 | 0.011463 | 0.011598 | 0.011597 |
| 0.011597 | 0.011632 | 0.011698 | 0.011631 | 0.012204 | 0.011667 | 0.011588 |
| 0.011658 | 0.011615 | 0.011728 | 0.011614 | 0.011725 | 0.011646 | 0.011646 |
| 0.012124 | 0.011510 | 0.011642 | 0.011579 | 0.011852 | 0.011740 | 0.011809 |
| 0.012148 | 0.011588 | 0.011804 | 0.011866 | 0.011732 | 0.011463 | 0.011770 |
| 0.011429 | 0.011597 | 0.011731 | 0.011698 | 0.011702 | 0.011429 | 0.011128 |
| 0.011530 | 0.011463 | 0.011496 | 0.011530 | 0.011429 | 0.011496 | 0.011396 |
| 0.011463 | 0.011496 | 0.011463 | 0.011429 | 0.011530 | 0.011463 | 0.011496 |
| 0.011496 | 0.011429 | 0.011496 | 0.011530 | 0.011429 | 0.011631 | 0.011664 |
| 0.011564 | 0.011564 | 0.011564 | 0.011564 | 0.011496 | 0.011631 | 0.011530 |
| 0.011269 | 0.011497 | 0.011463 | 0.011433 | 0.011597 | 0.011597 | 0.011597 |
| 0.011597 | 0.011530 | 0.011496 | 0.011530 | 0.011631 | 0.011631 | 0.011564 |
| 0.011563 | 0.011698 | 0.011597 | 0.011597 | 0.011799 | 0.011799 | 0.011664 |
| 0.011496 | 0.011564 | 0.011597 | 0.011732 | 0.011564 | 0.011597 | 0.011564 |
| 0.011597 | 0.011463 | 0.011463 | 0.011765 | 0.011765 | 0.011732 | 0.011530 |
| 0.011631 | 0.011698 | 0.011564 | 0.011631 | 0.011597 | 0.011463 | 0.011530 |
| 0.011564 | 0.011530 | 0.011463 | 0.011698 | 0.011530 | 0.011631 | 0.011664 |
| 0.011563 | 0.011671 | 0.011664 | 0.011426 | 0.011342 | 0.011570 | 0.011267 |
| 0.011500 | 0.011333 | 0.011482 | 0.011507 | 0.011451 | 0.011518 | 0.011379 |
| 0.011366 | 0.011258 | 0.011450 | 0.011324 | 0.011330 | 0.011529 | 0.011669 |
| 0.011663 | 0.011572 | 0.011553 | 0.011553 | 0.011498 | 0.011429 | 0.011430 |
| 0.011497 | 0.011497 | 0.011669 | 0.011467 | 0.011738 | 0.011767 | 0.011564 |
| 0.011530 | 0.011597 | 0.011530 | 0.011564 | 0.011429 | 0.011396 | 0.011463 |
| 0.011530 | 0.011530 | 0.011497 | 0.011463 | 0.011496 | 0.011463 | 0.011564 |
| 0.011549 | 0.011550 | 0.011540 | 0.011574 | 0.011710 | 0.011675 | 0.011675 |
| 0.011673 | 0.011598 | 0.011393 | 0.011420 | 0.011534 | 0.011704 | 0.011705 |
| 0.011497 | 0.011568 | 0.011801 | 0.011770 | 0.011699 | 0.011733 | 0.011664 |
| 0.011597 | 0.011664 | 0.011664 | 0.011564 | 0.011866 | 0.011732 | 0.011799 |
| 0.011833 | 0.011630 | 0.011538 | 0.011615 | 0.011497 | 0.011664 | 0.011664 |

|          |          |          |          |          |          |          |
|----------|----------|----------|----------|----------|----------|----------|
| 0.011699 | 0.011731 | 0.011731 | 0.011731 | 0.011925 | 0.011866 | 0.011476 |
| 0.011364 | 0.011372 | 0.011469 | 0.011434 | 0.011470 | 0.011396 | 0.011434 |
| 0.011506 | 0.011323 | 0.011441 | 0.011510 | 0.011531 | 0.011608 | 0.011497 |
| 0.011463 | 0.011396 | 0.011530 | 0.011497 | 0.011430 | 0.011396 | 0.011329 |
| 0.011430 | 0.011497 | 0.011497 | 0.011497 | 0.011530 | 0.011530 | 0.011533 |
| 0.011601 | 0.011530 | 0.011530 | 0.011498 | 0.011429 | 0.011430 | 0.011497 |
| 0.011497 | 0.011669 | 0.011467 | 0.011738 | 0.011767 | 0.011564 | 0.011732 |
| 0.011664 | 0.011664 | 0.011500 | 0.011582 | 0.011616 | 0.011639 | 0.011411 |
| 0.011680 | 0.011698 | 0.011568 | 0.011570 | 0.011463 | 0.011665 | 0.011530 |
| 0.011631 | 0.011564 | 0.011463 | 0.011566 | 0.011665 | 0.011668 | 0.011564 |
| 0.011463 | 0.011397 | 0.011530 | 0.011463 | 0.011396 | 0.011366 | 0.011665 |
| 0.011564 | 0.011496 | 0.011530 | 0.011564 | 0.011530 | 0.011463 | 0.011396 |
| 0.011530 | 0.011564 | 0.011564 | 0.011496 | 0.011564 | 0.011799 | 0.011396 |
| 0.011496 | 0.011631 | 0.011496 | 0.011530 | 0.011496 | 0.011597 | 0.011489 |
| 0.011341 | 0.011358 | 0.011311 | 0.011382 | 0.011467 | 0.011419 | 0.011311 |
| 0.011270 | 0.011127 | 0.011228 | 0.011332 | 0.011195 | 0.011331 | 0.011464 |
| 0.011363 | 0.011432 | 0.011362 | 0.011607 | 0.011329 | 0.012202 | 0.011363 |
| 0.012102 | 0.011869 | 0.012003 | 0.012342 | 0.011597 | 0.011362 | 0.011329 |
| 0.012103 | 0.011701 | 0.011295 | 0.011195 | 0.011195 | 0.011195 | 0.011297 |
| 0.011127 | 0.011128 | 0.000000 | 0.011161 | 0.011800 | 0.011866 | 0.011867 |
| 0.011767 | 0.011867 | 0.011971 | 0.011737 | 0.012239 | 0.012245 | 0.012306 |
| 0.012306 | 0.012340 | 0.012289 | 0.012307 | 0.012308 | 0.011597 | 0.011833 |
| 0.011901 | 0.012404 | 0.011908 | 0.011934 | 0.012406 | 0.011468 | 0.011363 |
| 0.011329 | 0.011329 | 0.011800 | 0.011801 | 0.011940 | 0.011664 | 0.011330 |
| S822     | 0.011834 | 0.011834 | 0.011430 | 0.011396 | 0.011396 | 0.011464 |
| 0.011571 | 0.011468 | 0.011396 | 0.011430 | 0.011497 | 0.011464 | 0.011430 |
| 0.011396 | 0.011632 | 0.011363 | 0.011464 | 0.011531 | 0.011497 | 0.011464 |
| 0.011430 | 0.011464 | 0.011296 | 0.011397 | 0.011430 | 0.011464 | 0.011536 |
| 0.011430 | 0.011464 | 0.011363 | 0.011329 | 0.011531 | 0.011497 | 0.011531 |
| 0.011497 | 0.011598 | 0.011497 | 0.011497 | 0.011531 | 0.011497 | 0.011665 |
| 0.011363 | 0.011497 | 0.011531 | 0.011464 | 0.011497 | 0.011598 | 0.011531 |
| 0.011497 | 0.011666 | 0.011565 | 0.011565 | 0.011497 | 0.011766 | 0.011497 |
| 0.011464 | 0.011497 | 0.011632 | 0.011766 | 0.011598 | 0.011497 | 0.011598 |
| 0.011531 | 0.011598 | 0.011497 | 0.011733 | 0.011700 | 0.011497 | 0.011565 |
| 0.011464 | 0.011565 | 0.011531 | 0.011598 | 0.011531 | 0.011531 | 0.011531 |
| 0.011430 | 0.011464 | 0.011430 | 0.011464 | 0.011497 | 0.011532 | 0.011598 |
| 0.011531 | 0.011497 | 0.011565 | 0.011464 | 0.011531 | 0.011430 | 0.011497 |
| 0.011665 | 0.011598 | 0.011632 | 0.011666 | 0.011464 | 0.011733 | 0.011497 |
| 0.011691 | 0.011583 | 0.011740 | 0.011412 | 0.011433 | 0.011502 | 0.011336 |
| 0.011975 | 0.011315 | 0.011431 | 0.011733 | 0.011733 | 0.011464 | 0.011565 |
| 0.011565 | 0.011531 | 0.011598 | 0.011497 | 0.011598 | 0.011531 | 0.011531 |
| 0.011497 | 0.011531 | 0.011800 | 0.011665 | 0.011565 | 0.011531 | 0.011464 |
| 0.011430 | 0.011363 | 0.011497 | 0.011464 | 0.011396 | 0.011363 | 0.011296 |
| 0.011396 | 0.011464 | 0.011464 | 0.011464 | 0.011497 | 0.011497 | 0.011500 |
| 0.011568 | 0.011464 | 0.011497 | 0.011384 | 0.011458 | 0.011411 | 0.011497 |
| 0.011501 | 0.011438 | 0.011503 | 0.011474 | 0.011400 | 0.011437 | 0.011466 |
| 0.011456 | 0.011508 | 0.011542 | 0.011430 | 0.011441 | 0.011565 | 0.011464 |
| 0.011531 | 0.011532 | 0.011531 | 0.011632 | 0.011565 | 0.011935 | 0.011632 |
| 0.011497 | 0.011565 | 0.011497 | 0.011531 | 0.011396 | 0.011363 | 0.011430 |
| 0.011497 | 0.011497 | 0.011464 | 0.011430 | 0.011464 | 0.011430 | 0.011531 |
| 0.011497 | 0.011598 | 0.011531 | 0.011430 | 0.011533 | 0.011632 | 0.011635 |
| 0.011632 | 0.011531 | 0.011430 | 0.011364 | 0.011497 | 0.011430 | 0.011363 |
| 0.011366 | 0.011632 | 0.011430 | 0.011632 | 0.011396 | 0.011497 | 0.011464 |
| 0.011531 | 0.011464 | 0.011464 | 0.011464 | 0.011497 | 0.011363 | 0.011497 |
| 0.011531 | 0.011464 | 0.011531 | 0.011464 | 0.011497 | 0.011531 | 0.011766 |
| 0.011598 | 0.011531 | 0.011598 | 0.011634 | 0.011599 | 0.011497 | 0.011464 |
| 0.011432 | 0.011707 | 0.011563 | 0.011404 | 0.011604 | 0.011367 | 0.011493 |
| 0.011604 | 0.011502 | 0.011665 | 0.011868 | 0.011573 | 0.011733 | 0.011699 |
| 0.011632 | 0.011800 | 0.011630 | 0.011431 | 0.011480 | 0.011531 | 0.011602 |
| 0.011699 | 0.011600 | 0.011738 | 0.011772 | 0.011733 | 0.011800 | 0.011807 |

|          |          |          |          |          |          |          |
|----------|----------|----------|----------|----------|----------|----------|
| 0.011636 | 0.011774 | 0.011738 | 0.011670 | 0.011936 | 0.011396 | 0.011532 |
| 0.011531 | 0.011497 | 0.011396 | 0.011396 | 0.011464 | 0.011464 | 0.011531 |
| 0.011464 | 0.011531 | 0.011430 | 0.011464 | 0.011464 | 0.011464 | 0.011531 |
| 0.011464 | 0.011632 | 0.011531 | 0.011565 | 0.011363 | 0.011464 | 0.011497 |
| 0.011497 | 0.011464 | 0.011531 | 0.011497 | 0.011430 | 0.011430 | 0.011430 |
| 0.011632 | 0.011497 | 0.011598 | 0.011396 | 0.011497 | 0.011666 | 0.011396 |
| 0.011430 | 0.011497 | 0.011464 | 0.011632 | 0.011430 | 0.011296 | 0.011430 |
| 0.011363 | 0.011464 | 0.011464 | 0.011396 | 0.011396 | 0.011565 | 0.011497 |
| 0.011396 | 0.011497 | 0.011363 | 0.011396 | 0.011531 | 0.011397 | 0.011430 |
| 0.011397 | 0.011531 | 0.011464 | 0.011363 | 0.011430 | 0.011363 | 0.011531 |
| 0.011574 | 0.011430 | 0.011464 | 0.011565 | 0.011531 | 0.011464 | 0.011565 |
| 0.011430 | 0.011766 | 0.011363 | 0.011565 | 0.011363 | 0.011363 | 0.011363 |
| 0.011598 | 0.011531 | 0.011497 | 0.011565 | 0.011396 | 0.011531 | 0.011363 |
| 0.011430 | 0.011430 | 0.011464 | 0.011565 | 0.011464 | 0.011565 | 0.011632 |
| 0.011632 | 0.011598 | 0.011497 | 0.011598 | 0.011565 | 0.011430 | 0.011396 |
| 0.011430 | 0.011430 | 0.011497 | 0.011363 | 0.011396 | 0.011565 | 0.011430 |
| 0.011396 | 0.011464 | 0.011598 | 0.011565 | 0.011531 | 0.011464 | 0.011464 |
| 0.011531 | 0.011464 | 0.011565 | 0.011430 | 0.011565 | 0.011665 | 0.011632 |
| 0.011464 | 0.011598 | 0.011474 | 0.017975 | 0.011322 | 0.011672 | 0.011549 |
| 0.011510 | 0.011553 | 0.011637 | 0.011408 | 0.011610 | 0.011578 | 0.011668 |
| 0.011203 | 0.011427 | 0.011411 | 0.011479 | 0.011373 | 0.011505 | 0.011490 |
| 0.011342 | 0.011358 | 0.011320 | 0.011193 | 0.011598 | 0.011632 | 0.011636 |
| 0.011473 | 0.011598 | 0.011598 | 0.011497 | 0.011531 | 0.011531 | 0.011498 |
| 0.011531 | 0.011464 | 0.011497 | 0.011531 | 0.011497 | 0.011430 | 0.011464 |
| 0.011464 | 0.011531 | 0.011430 | 0.011531 | 0.011565 | 0.011598 | 0.011497 |
| 0.011464 | 0.011430 | 0.011565 | 0.011565 | 0.011565 | 0.011599 | 0.011632 |
| 0.011396 | 0.011396 | 0.011430 | 0.011531 | 0.011396 | 0.011632 | 0.011632 |
| 0.011665 | 0.011665 | 0.011598 | 0.011699 | 0.011598 | 0.011701 | 0.011531 |
| 0.011531 | 0.011598 | 0.011632 | 0.011396 | 0.011531 | 0.011497 | 0.011531 |
| 0.011598 | 0.011598 | 0.011632 | 0.011598 | 0.011498 | 0.011699 | 0.011665 |
| 0.011535 | 0.011430 | 0.011531 | 0.011598 | 0.011531 | 0.011598 | 0.011699 |
| 0.011868 | 0.011573 | 0.011733 | 0.011699 | 0.011632 | 0.011800 | 0.011430 |
| 0.011600 | 0.011498 | 0.011464 | 0.011464 | 0.011531 | 0.011430 | 0.011531 |
| 0.011565 | 0.011598 | 0.011497 | 0.011464 | 0.011430 | 0.011565 | 0.011565 |
| 0.011565 | 0.011599 | 0.011665 | 0.011598 | 0.012171 | 0.011632 | 0.011553 |
| 0.011623 | 0.011581 | 0.011693 | 0.011581 | 0.011691 | 0.011613 | 0.011612 |
| 0.012092 | 0.011476 | 0.011609 | 0.011545 | 0.011818 | 0.011708 | 0.011775 |
| 0.012115 | 0.011550 | 0.011534 | 0.011531 | 0.011531 | 0.011296 | 0.011500 |
| 0.011396 | 0.011430 | 0.011565 | 0.011531 | 0.011534 | 0.011396 | 0.011094 |
| 0.011497 | 0.011430 | 0.011464 | 0.011497 | 0.011396 | 0.011464 | 0.011363 |
| 0.011430 | 0.011464 | 0.011430 | 0.011396 | 0.011497 | 0.011430 | 0.011464 |
| 0.011464 | 0.011396 | 0.011464 | 0.011497 | 0.011396 | 0.011598 | 0.011632 |
| 0.011531 | 0.011531 | 0.011531 | 0.011531 | 0.011464 | 0.011598 | 0.011497 |
| 0.011235 | 0.011464 | 0.011430 | 0.011400 | 0.011565 | 0.011565 | 0.011565 |
| 0.011565 | 0.011497 | 0.011464 | 0.011497 | 0.011598 | 0.011598 | 0.011531 |
| 0.011531 | 0.011665 | 0.011565 | 0.011565 | 0.011767 | 0.011767 | 0.011632 |
| 0.011464 | 0.011531 | 0.011565 | 0.011699 | 0.011531 | 0.011565 | 0.011531 |
| 0.011565 | 0.011430 | 0.011430 | 0.011733 | 0.011699 | 0.011699 | 0.011497 |
| 0.011598 | 0.011632 | 0.011531 | 0.011598 | 0.011564 | 0.011430 | 0.011497 |
| 0.011531 | 0.011497 | 0.011430 | 0.011665 | 0.011497 | 0.011598 | 0.011632 |
| 0.011464 | 0.011639 | 0.011632 | 0.011426 | 0.011286 | 0.011536 | 0.011215 |
| 0.011445 | 0.011333 | 0.011447 | 0.011462 | 0.011451 | 0.011519 | 0.011273 |
| 0.011315 | 0.011258 | 0.011394 | 0.011258 | 0.011276 | 0.011462 | 0.011628 |
| 0.011625 | 0.011532 | 0.011518 | 0.011518 | 0.011465 | 0.011396 | 0.011396 |
| 0.011430 | 0.011464 | 0.011636 | 0.011434 | 0.011705 | 0.011732 | 0.011497 |
| 0.011497 | 0.011565 | 0.011497 | 0.011531 | 0.011396 | 0.011363 | 0.011430 |
| 0.011497 | 0.011497 | 0.011464 | 0.011430 | 0.011464 | 0.011430 | 0.011531 |
| 0.011514 | 0.011515 | 0.011506 | 0.011540 | 0.011676 | 0.011641 | 0.011641 |
| 0.011640 | 0.011565 | 0.011356 | 0.011384 | 0.011501 | 0.011636 | 0.011671 |
| 0.011464 | 0.011534 | 0.011767 | 0.011736 | 0.011666 | 0.011700 | 0.011632 |

|          |          |          |          |          |          |          |
|----------|----------|----------|----------|----------|----------|----------|
| 0.011565 | 0.011632 | 0.011632 | 0.011531 | 0.011834 | 0.011699 | 0.011767 |
| 0.011800 | 0.011595 | 0.011504 | 0.011580 | 0.011464 | 0.011632 | 0.011632 |
| 0.011667 | 0.011665 | 0.011699 | 0.011699 | 0.011807 | 0.011834 | 0.011442 |
| 0.011331 | 0.011338 | 0.011435 | 0.011400 | 0.011437 | 0.011322 | 0.011400 |
| 0.011472 | 0.011236 | 0.011346 | 0.011472 | 0.011497 | 0.011574 | 0.011464 |
| 0.011430 | 0.011363 | 0.011497 | 0.011464 | 0.011396 | 0.011363 | 0.011296 |
| 0.011396 | 0.011464 | 0.011464 | 0.011464 | 0.011497 | 0.011497 | 0.011500 |
| 0.011568 | 0.011464 | 0.011497 | 0.011465 | 0.011396 | 0.011396 | 0.011430 |
| 0.011464 | 0.011636 | 0.011434 | 0.011705 | 0.011732 | 0.011497 | 0.011699 |
| 0.011632 | 0.011632 | 0.011466 | 0.011582 | 0.011582 | 0.011606 | 0.011376 |
| 0.011612 | 0.011607 | 0.011568 | 0.011536 | 0.011430 | 0.011632 | 0.011497 |
| 0.011598 | 0.011531 | 0.011430 | 0.011533 | 0.011632 | 0.011635 | 0.011531 |
| 0.011430 | 0.011364 | 0.011497 | 0.011430 | 0.011363 | 0.011366 | 0.011632 |
| 0.011531 | 0.011464 | 0.011497 | 0.011531 | 0.011497 | 0.011430 | 0.011363 |
| 0.011497 | 0.011531 | 0.011531 | 0.011464 | 0.011531 | 0.011766 | 0.011363 |
| 0.011464 | 0.011598 | 0.011464 | 0.011497 | 0.011464 | 0.011565 | 0.011446 |
| 0.011285 | 0.011358 | 0.011261 | 0.011382 | 0.011467 | 0.011383 | 0.011311 |
| 0.011218 | 0.011094 | 0.011195 | 0.011298 | 0.011161 | 0.011297 | 0.011430 |
| 0.011329 | 0.011399 | 0.011329 | 0.011538 | 0.011296 | 0.012137 | 0.011330 |
| 0.012036 | 0.011836 | 0.011937 | 0.012309 | 0.011565 | 0.011329 | 0.011296 |
| 0.012070 | 0.011668 | 0.011262 | 0.011128 | 0.011228 | 0.011228 | 0.011230 |
| 0.011094 | 0.011094 | 0.011161 | 0.000000 | 0.011767 | 0.011834 | 0.011834 |
| 0.011734 | 0.011834 | 0.011937 | 0.011703 | 0.012206 | 0.012212 | 0.012273 |
| 0.012273 | 0.012307 | 0.012255 | 0.012273 | 0.012275 | 0.011565 | 0.011800 |
| 0.011868 | 0.012373 | 0.011874 | 0.011902 | 0.012374 | 0.011434 | 0.011329 |
| 0.011296 | 0.011296 | 0.011767 | 0.011760 | 0.011905 | 0.011632 | 0.011296 |
| S823     | 0.012204 | 0.012204 | 0.012103 | 0.012036 | 0.012036 | 0.012103 |
| 0.011945 | 0.011843 | 0.012036 | 0.011800 | 0.011867 | 0.011835 | 0.011800 |
| 0.011766 | 0.012002 | 0.011733 | 0.011833 | 0.011901 | 0.011867 | 0.011833 |
| 0.011800 | 0.011834 | 0.011665 | 0.011801 | 0.011834 | 0.011833 | 0.011911 |
| 0.011800 | 0.011834 | 0.011733 | 0.011699 | 0.011901 | 0.011867 | 0.011901 |
| 0.011867 | 0.011968 | 0.011867 | 0.011867 | 0.011901 | 0.011867 | 0.012036 |
| 0.011733 | 0.011867 | 0.011901 | 0.011833 | 0.011867 | 0.011968 | 0.011901 |
| 0.011867 | 0.012036 | 0.011935 | 0.011935 | 0.011867 | 0.012137 | 0.011867 |
| 0.011833 | 0.011868 | 0.012002 | 0.012137 | 0.011969 | 0.011867 | 0.011968 |
| 0.011901 | 0.011968 | 0.011867 | 0.012103 | 0.012070 | 0.011867 | 0.011935 |
| 0.011834 | 0.011934 | 0.011901 | 0.011968 | 0.011901 | 0.011901 | 0.011901 |
| 0.011800 | 0.011833 | 0.011800 | 0.011834 | 0.011867 | 0.011902 | 0.011968 |
| 0.011901 | 0.011867 | 0.011935 | 0.011833 | 0.011901 | 0.011800 | 0.011867 |
| 0.012035 | 0.011968 | 0.012002 | 0.012036 | 0.011867 | 0.012103 | 0.011867 |
| 0.012062 | 0.011995 | 0.012080 | 0.011803 | 0.011695 | 0.011907 | 0.011612 |
| 0.012232 | 0.011722 | 0.011761 | 0.012103 | 0.012103 | 0.011833 | 0.011935 |
| 0.011935 | 0.011901 | 0.011968 | 0.011867 | 0.011968 | 0.011901 | 0.011901 |
| 0.011867 | 0.011901 | 0.012170 | 0.012035 | 0.011935 | 0.011901 | 0.011834 |
| 0.011800 | 0.011733 | 0.011867 | 0.011833 | 0.011767 | 0.011733 | 0.011666 |
| 0.011766 | 0.011834 | 0.011833 | 0.011833 | 0.011867 | 0.011867 | 0.011872 |
| 0.011940 | 0.011867 | 0.011867 | 0.011744 | 0.011820 | 0.011797 | 0.011868 |
| 0.011874 | 0.011748 | 0.011836 | 0.011820 | 0.011774 | 0.011814 | 0.011838 |
| 0.011817 | 0.011888 | 0.011922 | 0.011800 | 0.011787 | 0.011936 | 0.011834 |
| 0.011902 | 0.011903 | 0.011901 | 0.012002 | 0.011934 | 0.012305 | 0.012036 |
| 0.011867 | 0.011935 | 0.011867 | 0.011901 | 0.011766 | 0.011733 | 0.011800 |
| 0.011867 | 0.011867 | 0.011833 | 0.011800 | 0.011833 | 0.011800 | 0.011901 |
| 0.011867 | 0.011968 | 0.011901 | 0.011800 | 0.011904 | 0.012002 | 0.012008 |
| 0.012002 | 0.011901 | 0.011800 | 0.011735 | 0.011867 | 0.011800 | 0.011733 |
| 0.011740 | 0.012002 | 0.011800 | 0.012002 | 0.011766 | 0.011867 | 0.011834 |
| 0.011935 | 0.011833 | 0.011867 | 0.011834 | 0.011867 | 0.011733 | 0.011867 |
| 0.011901 | 0.011833 | 0.011901 | 0.011833 | 0.011867 | 0.011901 | 0.012136 |
| 0.011969 | 0.011901 | 0.011969 | 0.012005 | 0.011969 | 0.011867 | 0.011833 |
| 0.011804 | 0.012072 | 0.012021 | 0.011781 | 0.011978 | 0.011743 | 0.011808 |
| 0.011979 | 0.011877 | 0.012035 | 0.012238 | 0.011949 | 0.012103 | 0.012070 |



|          |          |          |          |          |          |          |
|----------|----------|----------|----------|----------|----------|----------|
| 0.012002 | 0.012170 | 0.012021 | 0.011926 | 0.012026 | 0.011901 | 0.011975 |
| 0.012069 | 0.011972 | 0.012110 | 0.012179 | 0.012103 | 0.012171 | 0.012282 |
| 0.012009 | 0.012182 | 0.012111 | 0.012043 | 0.012307 | 0.011766 | 0.011971 |
| 0.011934 | 0.011867 | 0.011766 | 0.011766 | 0.011834 | 0.011834 | 0.011901 |
| 0.011833 | 0.011901 | 0.011800 | 0.011834 | 0.011834 | 0.011833 | 0.011901 |
| 0.011834 | 0.012002 | 0.011901 | 0.011935 | 0.011733 | 0.011834 | 0.011867 |
| 0.011867 | 0.011833 | 0.011901 | 0.011867 | 0.011800 | 0.011800 | 0.011800 |
| 0.012070 | 0.011901 | 0.011968 | 0.011766 | 0.011867 | 0.012036 | 0.011800 |
| 0.011800 | 0.011867 | 0.011833 | 0.012002 | 0.011800 | 0.011733 | 0.011867 |
| 0.011800 | 0.011834 | 0.011833 | 0.011766 | 0.011766 | 0.011935 | 0.011867 |
| 0.011766 | 0.011867 | 0.011733 | 0.011766 | 0.011901 | 0.011767 | 0.011800 |
| 0.011767 | 0.011901 | 0.011834 | 0.011733 | 0.011800 | 0.011733 | 0.011901 |
| 0.011952 | 0.011800 | 0.011834 | 0.011867 | 0.011901 | 0.011834 | 0.011935 |
| 0.011800 | 0.012137 | 0.011733 | 0.011935 | 0.011733 | 0.011733 | 0.011733 |
| 0.011968 | 0.011902 | 0.011867 | 0.011935 | 0.011766 | 0.011901 | 0.011733 |
| 0.011800 | 0.011800 | 0.011833 | 0.011935 | 0.011833 | 0.011935 | 0.012002 |
| 0.012002 | 0.011968 | 0.011867 | 0.011969 | 0.011934 | 0.011800 | 0.011766 |
| 0.011800 | 0.011800 | 0.011867 | 0.011733 | 0.011766 | 0.011935 | 0.011800 |
| 0.011766 | 0.011834 | 0.011968 | 0.011935 | 0.011901 | 0.011833 | 0.011834 |
| 0.011901 | 0.011833 | 0.011934 | 0.011800 | 0.011935 | 0.012036 | 0.012002 |
| 0.011834 | 0.011969 | 0.011854 | 0.018315 | 0.011584 | 0.012040 | 0.011933 |
| 0.011892 | 0.011906 | 0.011899 | 0.011699 | 0.012051 | 0.011959 | 0.011911 |
| 0.011868 | 0.011732 | 0.011763 | 0.011856 | 0.011763 | 0.011950 | 0.011921 |
| 0.011765 | 0.011619 | 0.011617 | 0.011457 | 0.011968 | 0.012002 | 0.012009 |
| 0.011886 | 0.011968 | 0.011968 | 0.011867 | 0.011901 | 0.011902 | 0.011868 |
| 0.011901 | 0.011833 | 0.011867 | 0.011901 | 0.011867 | 0.011800 | 0.011833 |
| 0.011833 | 0.011901 | 0.011800 | 0.011901 | 0.011935 | 0.011968 | 0.011867 |
| 0.011834 | 0.011800 | 0.011935 | 0.011935 | 0.011935 | 0.011970 | 0.012002 |
| 0.011766 | 0.011766 | 0.011800 | 0.011901 | 0.011766 | 0.012002 | 0.012002 |
| 0.012035 | 0.012035 | 0.011968 | 0.012069 | 0.011969 | 0.012072 | 0.011901 |
| 0.011901 | 0.011968 | 0.012002 | 0.011834 | 0.011901 | 0.011867 | 0.011901 |
| 0.011968 | 0.011968 | 0.012002 | 0.011968 | 0.011869 | 0.012069 | 0.012035 |
| 0.011908 | 0.011800 | 0.011901 | 0.012002 | 0.011901 | 0.011968 | 0.012035 |
| 0.012238 | 0.011949 | 0.012103 | 0.012070 | 0.012002 | 0.012170 | 0.011800 |
| 0.011971 | 0.011868 | 0.011833 | 0.011833 | 0.011901 | 0.011800 | 0.011901 |
| 0.011935 | 0.011968 | 0.011867 | 0.011834 | 0.011800 | 0.011935 | 0.011935 |
| 0.011935 | 0.011970 | 0.012035 | 0.011968 | 0.012543 | 0.012062 | 0.011941 |
| 0.012046 | 0.011998 | 0.012116 | 0.011962 | 0.012112 | 0.012028 | 0.011958 |
| 0.012505 | 0.011892 | 0.012021 | 0.011961 | 0.012233 | 0.012082 | 0.012185 |
| 0.012490 | 0.012003 | 0.011907 | 0.011901 | 0.011901 | 0.011666 | 0.011872 |
| 0.011766 | 0.011800 | 0.011935 | 0.011901 | 0.011906 | 0.011766 | 0.011735 |
| 0.011867 | 0.011800 | 0.011834 | 0.011867 | 0.011766 | 0.011834 | 0.011733 |
| 0.011800 | 0.011834 | 0.011800 | 0.011766 | 0.011867 | 0.011800 | 0.011834 |
| 0.011833 | 0.011766 | 0.011834 | 0.011867 | 0.011766 | 0.011968 | 0.012002 |
| 0.011901 | 0.011901 | 0.011901 | 0.011901 | 0.011833 | 0.011969 | 0.011867 |
| 0.011618 | 0.011834 | 0.011801 | 0.011808 | 0.011935 | 0.011934 | 0.011935 |
| 0.011935 | 0.011867 | 0.011833 | 0.011867 | 0.011968 | 0.011968 | 0.011901 |
| 0.011901 | 0.012036 | 0.011935 | 0.011934 | 0.012137 | 0.012137 | 0.012002 |
| 0.011833 | 0.011901 | 0.011935 | 0.012070 | 0.011901 | 0.011935 | 0.011901 |
| 0.011935 | 0.011800 | 0.011800 | 0.012103 | 0.012103 | 0.012070 | 0.011867 |
| 0.011968 | 0.012036 | 0.011901 | 0.011968 | 0.011934 | 0.011800 | 0.011868 |
| 0.011901 | 0.011867 | 0.011800 | 0.012036 | 0.011867 | 0.011968 | 0.012003 |
| 0.011833 | 0.012013 | 0.012002 | 0.011711 | 0.011568 | 0.011843 | 0.011628 |
| 0.011940 | 0.011917 | 0.011798 | 0.011910 | 0.011842 | 0.011672 | 0.011698 |
| 0.011673 | 0.011587 | 0.011729 | 0.011655 | 0.011708 | 0.011798 | 0.011994 |
| 0.012003 | 0.011808 | 0.011906 | 0.011800 | 0.011904 | 0.011766 | 0.011834 |
| 0.011834 | 0.011902 | 0.012008 | 0.011807 | 0.012147 | 0.012122 | 0.011867 |
| 0.011867 | 0.011935 | 0.011867 | 0.011901 | 0.011766 | 0.011733 | 0.011800 |
| 0.011867 | 0.011867 | 0.011833 | 0.011800 | 0.011833 | 0.011800 | 0.011901 |
| 0.011864 | 0.011900 | 0.011883 | 0.011917 | 0.012053 | 0.012018 | 0.012017 |

|          |          |          |          |          |          |          |
|----------|----------|----------|----------|----------|----------|----------|
| 0.012015 | 0.011935 | 0.011762 | 0.011709 | 0.011874 | 0.012044 | 0.012045 |
| 0.011834 | 0.011908 | 0.012138 | 0.012109 | 0.012036 | 0.012071 | 0.012002 |
| 0.011934 | 0.011934 | 0.012002 | 0.011901 | 0.012205 | 0.012069 | 0.012137 |
| 0.012170 | 0.011917 | 0.011880 | 0.011962 | 0.011833 | 0.012035 | 0.012002 |
| 0.012038 | 0.012069 | 0.012069 | 0.012069 | 0.012241 | 0.012204 | 0.011859 |
| 0.011737 | 0.011754 | 0.011844 | 0.011809 | 0.011847 | 0.011808 | 0.011809 |
| 0.011885 | 0.011718 | 0.011918 | 0.011923 | 0.011868 | 0.011950 | 0.011834 |
| 0.011800 | 0.011733 | 0.011867 | 0.011833 | 0.011767 | 0.011733 | 0.011666 |
| 0.011766 | 0.011834 | 0.011833 | 0.011833 | 0.011867 | 0.011867 | 0.011872 |
| 0.011940 | 0.011867 | 0.011867 | 0.011904 | 0.011766 | 0.011834 | 0.011834 |
| 0.011902 | 0.012008 | 0.011807 | 0.012147 | 0.012122 | 0.011867 | 0.012069 |
| 0.012002 | 0.012002 | 0.011839 | 0.012001 | 0.011930 | 0.011981 | 0.011796 |
| 0.012026 | 0.012201 | 0.012035 | 0.011911 | 0.011800 | 0.012002 | 0.011867 |
| 0.011968 | 0.011901 | 0.011800 | 0.011904 | 0.012002 | 0.012008 | 0.011901 |
| 0.011800 | 0.011735 | 0.011867 | 0.011800 | 0.011733 | 0.011740 | 0.012002 |
| 0.011901 | 0.011833 | 0.011867 | 0.011901 | 0.011867 | 0.011800 | 0.011733 |
| 0.011867 | 0.011901 | 0.011901 | 0.011833 | 0.011901 | 0.012137 | 0.011733 |
| 0.011834 | 0.011969 | 0.011833 | 0.011867 | 0.011833 | 0.011935 | 0.011789 |
| 0.012017 | 0.011613 | 0.011662 | 0.011665 | 0.011753 | 0.011743 | 0.011604 |
| 0.011585 | 0.011733 | 0.011834 | 0.011944 | 0.011801 | 0.011907 | 0.012070 |
| 0.011970 | 0.012009 | 0.011968 | 0.012189 | 0.011935 | 0.012812 | 0.011971 |
| 0.012711 | 0.012478 | 0.012613 | 0.012817 | 0.011935 | 0.011834 | 0.011935 |
| 0.012576 | 0.012310 | 0.011901 | 0.011801 | 0.011868 | 0.011868 | 0.011840 |
| 0.011733 | 0.011705 | 0.011800 | 0.011767 | 0.000000 | 0.011733 | 0.011733 |
| 0.011633 | 0.011767 | 0.011836 | 0.011602 | 0.012577 | 0.012586 | 0.012644 |
| 0.012645 | 0.012679 | 0.012632 | 0.012645 | 0.012647 | 0.011934 | 0.012171 |
| 0.012239 | 0.012744 | 0.012248 | 0.012272 | 0.012745 | 0.011808 | 0.011699 |
| 0.011666 | 0.011665 | 0.012137 | 0.012130 | 0.012293 | 0.012002 | 0.011667 |
| S824     | 0.012270 | 0.012270 | 0.012270 | 0.012102 | 0.012102 | 0.012169 |
| 0.011978 | 0.011910 | 0.012169 | 0.011866 | 0.011933 | 0.011902 | 0.011866 |
| 0.011832 | 0.012068 | 0.011799 | 0.011900 | 0.011900 | 0.011866 | 0.011900 |
| 0.011866 | 0.011900 | 0.011732 | 0.011867 | 0.011867 | 0.011900 | 0.011944 |
| 0.011866 | 0.011900 | 0.011799 | 0.011765 | 0.011967 | 0.011933 | 0.011967 |
| 0.011933 | 0.012034 | 0.011933 | 0.011933 | 0.011967 | 0.011933 | 0.012102 |
| 0.011799 | 0.011933 | 0.011967 | 0.011900 | 0.011933 | 0.012034 | 0.011967 |
| 0.011933 | 0.012102 | 0.012001 | 0.012001 | 0.011933 | 0.012202 | 0.011933 |
| 0.011900 | 0.011934 | 0.012068 | 0.012202 | 0.012035 | 0.011933 | 0.011967 |
| 0.011967 | 0.012034 | 0.011933 | 0.012169 | 0.012136 | 0.011933 | 0.012001 |
| 0.011900 | 0.012000 | 0.011967 | 0.012034 | 0.011967 | 0.011967 | 0.011967 |
| 0.011866 | 0.011900 | 0.011866 | 0.011900 | 0.011933 | 0.011969 | 0.012034 |
| 0.011967 | 0.011933 | 0.012001 | 0.011900 | 0.011967 | 0.011866 | 0.011933 |
| 0.012101 | 0.012034 | 0.012068 | 0.012102 | 0.011933 | 0.012169 | 0.011933 |
| 0.012099 | 0.011995 | 0.012117 | 0.011802 | 0.011807 | 0.011981 | 0.011651 |
| 0.012378 | 0.011671 | 0.011761 | 0.012169 | 0.012169 | 0.011900 | 0.012001 |
| 0.012001 | 0.011967 | 0.012034 | 0.011933 | 0.012034 | 0.011967 | 0.011967 |
| 0.011933 | 0.011967 | 0.012236 | 0.012101 | 0.012001 | 0.011900 | 0.011900 |
| 0.011866 | 0.011799 | 0.011934 | 0.011900 | 0.011833 | 0.011799 | 0.011732 |
| 0.011833 | 0.011900 | 0.011900 | 0.011900 | 0.011934 | 0.011934 | 0.011939 |
| 0.012007 | 0.011934 | 0.011934 | 0.011816 | 0.011892 | 0.011867 | 0.011935 |
| 0.011941 | 0.011816 | 0.011909 | 0.011889 | 0.011842 | 0.011883 | 0.011905 |
| 0.011889 | 0.011957 | 0.011991 | 0.011867 | 0.011856 | 0.012003 | 0.011901 |
| 0.011969 | 0.011971 | 0.011969 | 0.012068 | 0.012000 | 0.012371 | 0.012035 |
| 0.011933 | 0.012001 | 0.011933 | 0.011967 | 0.011833 | 0.011799 | 0.011867 |
| 0.011933 | 0.011933 | 0.011900 | 0.011866 | 0.011900 | 0.011866 | 0.011967 |
| 0.011934 | 0.012035 | 0.011967 | 0.011866 | 0.011971 | 0.012068 | 0.012075 |
| 0.012068 | 0.011968 | 0.011866 | 0.011802 | 0.011934 | 0.011866 | 0.011800 |
| 0.011808 | 0.012069 | 0.011867 | 0.012069 | 0.011833 | 0.011934 | 0.011900 |
| 0.012001 | 0.011900 | 0.011934 | 0.011900 | 0.011934 | 0.011799 | 0.011934 |
| 0.011967 | 0.011900 | 0.011967 | 0.011900 | 0.011934 | 0.011967 | 0.012135 |
| 0.012035 | 0.011967 | 0.012035 | 0.012072 | 0.012035 | 0.011934 | 0.011900 |

|          |          |          |          |          |          |          |
|----------|----------|----------|----------|----------|----------|----------|
| 0.011871 | 0.012193 | 0.012021 | 0.011850 | 0.012011 | 0.011811 | 0.011926 |
| 0.012012 | 0.011911 | 0.012101 | 0.012304 | 0.012017 | 0.012169 | 0.012135 |
| 0.012068 | 0.012236 | 0.012055 | 0.011967 | 0.012025 | 0.011967 | 0.012042 |
| 0.012135 | 0.012005 | 0.012177 | 0.012211 | 0.012169 | 0.012236 | 0.012315 |
| 0.012076 | 0.012215 | 0.012178 | 0.012109 | 0.012373 | 0.011832 | 0.012038 |
| 0.012000 | 0.011933 | 0.011832 | 0.011832 | 0.011900 | 0.011900 | 0.011967 |
| 0.011900 | 0.011967 | 0.011866 | 0.011900 | 0.011900 | 0.011900 | 0.011967 |
| 0.011900 | 0.012068 | 0.011967 | 0.012001 | 0.011799 | 0.011900 | 0.011933 |
| 0.011933 | 0.011900 | 0.011967 | 0.011933 | 0.011866 | 0.011866 | 0.011866 |
| 0.012135 | 0.011967 | 0.012034 | 0.011832 | 0.011933 | 0.012102 | 0.011866 |
| 0.011866 | 0.011933 | 0.011900 | 0.012068 | 0.011866 | 0.011799 | 0.011933 |
| 0.011866 | 0.011900 | 0.011900 | 0.011832 | 0.011832 | 0.012001 | 0.011933 |
| 0.011832 | 0.011933 | 0.011799 | 0.011832 | 0.011967 | 0.011766 | 0.011866 |
| 0.011833 | 0.011967 | 0.011901 | 0.011799 | 0.011866 | 0.011799 | 0.011967 |
| 0.011985 | 0.011866 | 0.011900 | 0.011934 | 0.011967 | 0.011900 | 0.012001 |
| 0.011866 | 0.012202 | 0.011799 | 0.012001 | 0.011799 | 0.011799 | 0.011799 |
| 0.012034 | 0.011968 | 0.011933 | 0.012001 | 0.011832 | 0.011967 | 0.011799 |
| 0.011866 | 0.011866 | 0.011900 | 0.012001 | 0.011900 | 0.012001 | 0.012068 |
| 0.012068 | 0.012034 | 0.011933 | 0.012034 | 0.012000 | 0.011866 | 0.011832 |
| 0.011866 | 0.011866 | 0.011933 | 0.011799 | 0.011832 | 0.012001 | 0.011866 |
| 0.011832 | 0.011900 | 0.012034 | 0.012001 | 0.011967 | 0.011900 | 0.011900 |
| 0.011967 | 0.011900 | 0.012000 | 0.011866 | 0.012001 | 0.012101 | 0.012068 |
| 0.011900 | 0.012035 | 0.011923 | 0.018390 | 0.011650 | 0.012223 | 0.012003 |
| 0.011961 | 0.011976 | 0.011846 | 0.011582 | 0.012050 | 0.012028 | 0.012033 |
| 0.011867 | 0.011854 | 0.011763 | 0.011856 | 0.011763 | 0.011949 | 0.011964 |
| 0.011718 | 0.011731 | 0.011691 | 0.011523 | 0.012034 | 0.012068 | 0.012042 |
| 0.011919 | 0.012035 | 0.012034 | 0.011934 | 0.011967 | 0.011968 | 0.011934 |
| 0.011967 | 0.011900 | 0.011933 | 0.011967 | 0.011934 | 0.011866 | 0.011900 |
| 0.011900 | 0.011967 | 0.011866 | 0.011968 | 0.011934 | 0.011967 | 0.011933 |
| 0.011900 | 0.011867 | 0.012001 | 0.012001 | 0.012001 | 0.012036 | 0.012068 |
| 0.011833 | 0.011833 | 0.011866 | 0.011967 | 0.011833 | 0.012068 | 0.012068 |
| 0.012102 | 0.012101 | 0.012034 | 0.012135 | 0.012035 | 0.012139 | 0.011967 |
| 0.011967 | 0.012035 | 0.012068 | 0.011900 | 0.011967 | 0.011934 | 0.011967 |
| 0.012035 | 0.012035 | 0.012068 | 0.012035 | 0.011936 | 0.012135 | 0.012102 |
| 0.011975 | 0.011866 | 0.011900 | 0.012068 | 0.011968 | 0.012035 | 0.012034 |
| 0.012304 | 0.012017 | 0.012169 | 0.012135 | 0.012068 | 0.012236 | 0.011867 |
| 0.012038 | 0.011935 | 0.011900 | 0.011900 | 0.011967 | 0.011866 | 0.011968 |
| 0.011934 | 0.011967 | 0.011933 | 0.011900 | 0.011867 | 0.012001 | 0.012001 |
| 0.012001 | 0.012036 | 0.012101 | 0.012034 | 0.012609 | 0.012061 | 0.011975 |
| 0.012045 | 0.012032 | 0.012080 | 0.011996 | 0.012146 | 0.012061 | 0.011957 |
| 0.012538 | 0.011926 | 0.012054 | 0.011960 | 0.012266 | 0.012149 | 0.012218 |
| 0.012523 | 0.011927 | 0.012211 | 0.012270 | 0.012135 | 0.011866 | 0.012176 |
| 0.011832 | 0.012001 | 0.012135 | 0.012101 | 0.012108 | 0.011833 | 0.011802 |
| 0.011933 | 0.011866 | 0.011900 | 0.011933 | 0.011832 | 0.011900 | 0.011799 |
| 0.011866 | 0.011900 | 0.011866 | 0.011832 | 0.011933 | 0.011866 | 0.011900 |
| 0.011900 | 0.011832 | 0.011900 | 0.011933 | 0.011832 | 0.012034 | 0.012068 |
| 0.011967 | 0.011967 | 0.011967 | 0.011967 | 0.011900 | 0.012035 | 0.011933 |
| 0.011652 | 0.011900 | 0.011867 | 0.011841 | 0.012001 | 0.012000 | 0.012001 |
| 0.012001 | 0.011933 | 0.011900 | 0.011933 | 0.012034 | 0.012034 | 0.011967 |
| 0.011900 | 0.012101 | 0.012001 | 0.012000 | 0.012203 | 0.012203 | 0.012068 |
| 0.011900 | 0.011967 | 0.012001 | 0.012136 | 0.011968 | 0.012001 | 0.011967 |
| 0.012001 | 0.011866 | 0.011866 | 0.012169 | 0.012169 | 0.012135 | 0.011933 |
| 0.012034 | 0.012101 | 0.011967 | 0.012034 | 0.012000 | 0.011866 | 0.011934 |
| 0.011967 | 0.011933 | 0.011866 | 0.012101 | 0.011933 | 0.012034 | 0.012068 |
| 0.011900 | 0.012046 | 0.012068 | 0.011752 | 0.011512 | 0.011910 | 0.011473 |
| 0.011995 | 0.011956 | 0.011868 | 0.011954 | 0.011841 | 0.011824 | 0.011751 |
| 0.011622 | 0.011653 | 0.011784 | 0.011721 | 0.011707 | 0.011797 | 0.011993 |
| 0.012002 | 0.011887 | 0.011977 | 0.011906 | 0.011971 | 0.011833 | 0.011900 |
| 0.011900 | 0.011969 | 0.012075 | 0.011840 | 0.012214 | 0.012192 | 0.011967 |
| 0.011933 | 0.012001 | 0.011933 | 0.011967 | 0.011833 | 0.011799 | 0.011867 |

|          |          |          |          |          |          |          |
|----------|----------|----------|----------|----------|----------|----------|
| 0.011933 | 0.011933 | 0.011900 | 0.011866 | 0.011900 | 0.011866 | 0.011967 |
| 0.011934 | 0.011970 | 0.011951 | 0.011985 | 0.012122 | 0.012086 | 0.012085 |
| 0.012083 | 0.012002 | 0.011799 | 0.011781 | 0.011941 | 0.012111 | 0.012113 |
| 0.011901 | 0.011975 | 0.012206 | 0.012176 | 0.012103 | 0.012138 | 0.012068 |
| 0.012000 | 0.012000 | 0.012068 | 0.011967 | 0.012270 | 0.012135 | 0.012203 |
| 0.012237 | 0.011987 | 0.011947 | 0.012031 | 0.011900 | 0.012102 | 0.012068 |
| 0.012104 | 0.012135 | 0.012135 | 0.012135 | 0.012162 | 0.012270 | 0.011893 |
| 0.011770 | 0.011787 | 0.011878 | 0.011842 | 0.011880 | 0.011732 | 0.011842 |
| 0.011918 | 0.011587 | 0.011823 | 0.011885 | 0.011935 | 0.012019 | 0.011900 |
| 0.011866 | 0.011799 | 0.011934 | 0.011900 | 0.011833 | 0.011799 | 0.011732 |
| 0.011833 | 0.011900 | 0.011900 | 0.011900 | 0.011934 | 0.011934 | 0.011939 |
| 0.012007 | 0.011934 | 0.011934 | 0.011971 | 0.011833 | 0.011900 | 0.011900 |
| 0.011969 | 0.012075 | 0.011840 | 0.012214 | 0.012192 | 0.011967 | 0.012068 |
| 0.012068 | 0.012068 | 0.011906 | 0.012035 | 0.011999 | 0.012048 | 0.011901 |
| 0.012059 | 0.012200 | 0.012034 | 0.011978 | 0.011867 | 0.012069 | 0.011934 |
| 0.012035 | 0.011967 | 0.011866 | 0.011971 | 0.012068 | 0.012075 | 0.011968 |
| 0.011866 | 0.011802 | 0.011934 | 0.011866 | 0.011800 | 0.011808 | 0.012069 |
| 0.011967 | 0.011900 | 0.011933 | 0.011967 | 0.011934 | 0.011866 | 0.011766 |
| 0.011933 | 0.011967 | 0.011967 | 0.011900 | 0.011967 | 0.012202 | 0.011799 |
| 0.011900 | 0.012035 | 0.011900 | 0.011933 | 0.011900 | 0.012001 | 0.011832 |
| 0.012017 | 0.011655 | 0.011612 | 0.011745 | 0.011834 | 0.011814 | 0.011687 |
| 0.011533 | 0.011799 | 0.011900 | 0.012012 | 0.011869 | 0.011974 | 0.012137 |
| 0.012037 | 0.012042 | 0.012034 | 0.012257 | 0.012001 | 0.012877 | 0.012038 |
| 0.012777 | 0.012545 | 0.012679 | 0.012952 | 0.012001 | 0.011900 | 0.012002 |
| 0.012643 | 0.012377 | 0.011967 | 0.011867 | 0.011935 | 0.011935 | 0.011872 |
| 0.011799 | 0.011773 | 0.011866 | 0.011834 | 0.011733 | 0.000000 | 0.011800 |
| 0.011497 | 0.011632 | 0.011903 | 0.011601 | 0.012644 | 0.012653 | 0.012711 |
| 0.012712 | 0.012746 | 0.012700 | 0.012712 | 0.012714 | 0.012000 | 0.012237 |
| 0.012306 | 0.012741 | 0.012316 | 0.012338 | 0.012812 | 0.011876 | 0.011767 |
| 0.011732 | 0.011732 | 0.012204 | 0.012089 | 0.012363 | 0.012068 | 0.011734 |
| S825     | 0.012272 | 0.012272 | 0.012137 | 0.012103 | 0.012103 | 0.012171 |
| 0.012013 | 0.011911 | 0.012103 | 0.011867 | 0.011867 | 0.011902 | 0.011867 |
| 0.011834 | 0.012069 | 0.011800 | 0.011901 | 0.011968 | 0.011935 | 0.011901 |
| 0.011867 | 0.011901 | 0.011733 | 0.011868 | 0.011902 | 0.011901 | 0.011979 |
| 0.011867 | 0.011901 | 0.011800 | 0.011766 | 0.011968 | 0.011935 | 0.011968 |
| 0.011935 | 0.012036 | 0.011935 | 0.011935 | 0.011968 | 0.011935 | 0.012103 |
| 0.011800 | 0.011935 | 0.011968 | 0.011901 | 0.011935 | 0.012036 | 0.011968 |
| 0.011935 | 0.012103 | 0.012003 | 0.012002 | 0.011935 | 0.012204 | 0.011935 |
| 0.011901 | 0.011935 | 0.012069 | 0.012204 | 0.012036 | 0.011935 | 0.012036 |
| 0.011968 | 0.012036 | 0.011935 | 0.012170 | 0.012137 | 0.011935 | 0.012002 |
| 0.011901 | 0.012002 | 0.011968 | 0.012036 | 0.011968 | 0.011968 | 0.011968 |
| 0.011867 | 0.011901 | 0.011867 | 0.011901 | 0.011935 | 0.011970 | 0.012036 |
| 0.011968 | 0.011935 | 0.012002 | 0.011901 | 0.011968 | 0.011867 | 0.011935 |
| 0.012103 | 0.012036 | 0.012070 | 0.012103 | 0.011935 | 0.012171 | 0.011935 |
| 0.012099 | 0.012032 | 0.012117 | 0.011881 | 0.011769 | 0.011907 | 0.011690 |
| 0.012305 | 0.011772 | 0.011843 | 0.012170 | 0.012170 | 0.011901 | 0.012002 |
| 0.012002 | 0.011968 | 0.012036 | 0.011935 | 0.012036 | 0.011968 | 0.011968 |
| 0.011935 | 0.011968 | 0.012238 | 0.012103 | 0.012002 | 0.011969 | 0.011901 |
| 0.011867 | 0.011800 | 0.011935 | 0.011901 | 0.011834 | 0.011800 | 0.011733 |
| 0.011834 | 0.011901 | 0.011901 | 0.011901 | 0.011935 | 0.011935 | 0.011940 |
| 0.012008 | 0.011935 | 0.011935 | 0.011780 | 0.011892 | 0.011867 | 0.011935 |
| 0.011941 | 0.011782 | 0.011909 | 0.011854 | 0.011842 | 0.011883 | 0.011905 |
| 0.011852 | 0.011957 | 0.011956 | 0.011867 | 0.011821 | 0.012003 | 0.011901 |
| 0.011969 | 0.011970 | 0.011968 | 0.012069 | 0.012002 | 0.012373 | 0.012070 |
| 0.011935 | 0.012002 | 0.011935 | 0.011968 | 0.011834 | 0.011800 | 0.011868 |
| 0.011935 | 0.011935 | 0.011901 | 0.011867 | 0.011901 | 0.011867 | 0.011968 |
| 0.011935 | 0.012036 | 0.011968 | 0.011867 | 0.011972 | 0.012069 | 0.012076 |
| 0.012070 | 0.011968 | 0.011867 | 0.011803 | 0.011935 | 0.011867 | 0.011800 |
| 0.011809 | 0.012070 | 0.011867 | 0.012070 | 0.011834 | 0.011935 | 0.011901 |
| 0.012002 | 0.011901 | 0.011935 | 0.011901 | 0.011935 | 0.011800 | 0.011935 |

|          |          |          |          |          |          |          |
|----------|----------|----------|----------|----------|----------|----------|
| 0.011968 | 0.011901 | 0.011968 | 0.011901 | 0.011935 | 0.011968 | 0.012204 |
| 0.012036 | 0.011968 | 0.012036 | 0.012073 | 0.012036 | 0.011935 | 0.011901 |
| 0.011872 | 0.012152 | 0.012113 | 0.011850 | 0.012046 | 0.011811 | 0.011926 |
| 0.012047 | 0.011945 | 0.012103 | 0.012305 | 0.012018 | 0.012171 | 0.012137 |
| 0.012069 | 0.012238 | 0.012093 | 0.011968 | 0.011984 | 0.011969 | 0.012043 |
| 0.012137 | 0.012039 | 0.012179 | 0.012247 | 0.012170 | 0.012238 | 0.012350 |
| 0.012078 | 0.012250 | 0.012179 | 0.012111 | 0.012374 | 0.011834 | 0.012039 |
| 0.012002 | 0.011935 | 0.011834 | 0.011834 | 0.011901 | 0.011901 | 0.011968 |
| 0.011901 | 0.011968 | 0.011867 | 0.011901 | 0.011901 | 0.011901 | 0.011968 |
| 0.011901 | 0.012069 | 0.011969 | 0.012002 | 0.011800 | 0.011901 | 0.011935 |
| 0.011935 | 0.011901 | 0.011968 | 0.011935 | 0.011867 | 0.011867 | 0.011867 |
| 0.012137 | 0.011935 | 0.012036 | 0.011834 | 0.011935 | 0.012103 | 0.011867 |
| 0.011867 | 0.011935 | 0.011901 | 0.012070 | 0.011867 | 0.011800 | 0.011935 |
| 0.011867 | 0.011901 | 0.011901 | 0.011834 | 0.011834 | 0.012002 | 0.011935 |
| 0.011834 | 0.011935 | 0.011800 | 0.011834 | 0.011968 | 0.011834 | 0.011867 |
| 0.011834 | 0.011968 | 0.011902 | 0.011800 | 0.011868 | 0.011800 | 0.011968 |
| 0.012020 | 0.011867 | 0.011901 | 0.011935 | 0.011968 | 0.011901 | 0.012002 |
| 0.011867 | 0.012204 | 0.011800 | 0.012002 | 0.011800 | 0.011800 | 0.011800 |
| 0.012036 | 0.011969 | 0.011935 | 0.012002 | 0.011834 | 0.011969 | 0.011800 |
| 0.011867 | 0.011867 | 0.011901 | 0.012002 | 0.011901 | 0.012002 | 0.012069 |
| 0.012069 | 0.012036 | 0.011935 | 0.012036 | 0.012002 | 0.011867 | 0.011834 |
| 0.011867 | 0.011867 | 0.011935 | 0.011800 | 0.011834 | 0.011935 | 0.011867 |
| 0.011834 | 0.011901 | 0.012036 | 0.012002 | 0.011968 | 0.011901 | 0.011901 |
| 0.011968 | 0.011901 | 0.012002 | 0.011867 | 0.012002 | 0.012103 | 0.012070 |
| 0.011901 | 0.012036 | 0.011889 | 0.018314 | 0.011584 | 0.011917 | 0.011968 |
| 0.011926 | 0.011940 | 0.012003 | 0.011756 | 0.011995 | 0.011993 | 0.011972 |
| 0.011914 | 0.011732 | 0.011841 | 0.011856 | 0.011802 | 0.011900 | 0.011964 |
| 0.011811 | 0.011693 | 0.011691 | 0.011655 | 0.012036 | 0.012070 | 0.012077 |
| 0.011954 | 0.012036 | 0.012036 | 0.011935 | 0.011969 | 0.011969 | 0.011935 |
| 0.011968 | 0.011901 | 0.011935 | 0.011968 | 0.011935 | 0.011867 | 0.011901 |
| 0.011901 | 0.011968 | 0.011867 | 0.011968 | 0.012002 | 0.012036 | 0.011935 |
| 0.011901 | 0.011867 | 0.012002 | 0.012002 | 0.012002 | 0.012037 | 0.012070 |
| 0.011834 | 0.011834 | 0.011867 | 0.011968 | 0.011834 | 0.012069 | 0.012069 |
| 0.012103 | 0.012103 | 0.012036 | 0.012137 | 0.012036 | 0.012140 | 0.011968 |
| 0.011968 | 0.012036 | 0.012069 | 0.011901 | 0.011968 | 0.011935 | 0.011968 |
| 0.012036 | 0.012036 | 0.012069 | 0.012036 | 0.011937 | 0.012137 | 0.012103 |
| 0.011977 | 0.011867 | 0.011968 | 0.012070 | 0.011968 | 0.012036 | 0.012103 |
| 0.012305 | 0.012018 | 0.012171 | 0.012137 | 0.012069 | 0.012238 | 0.011868 |
| 0.012039 | 0.011935 | 0.011901 | 0.011901 | 0.011968 | 0.011867 | 0.011968 |
| 0.012002 | 0.012036 | 0.011935 | 0.011901 | 0.011867 | 0.012002 | 0.012002 |
| 0.012002 | 0.012037 | 0.012103 | 0.012036 | 0.012610 | 0.012133 | 0.012012 |
| 0.012116 | 0.012068 | 0.012186 | 0.012032 | 0.012182 | 0.012097 | 0.012027 |
| 0.012574 | 0.011961 | 0.012090 | 0.012030 | 0.012302 | 0.012151 | 0.012253 |
| 0.012558 | 0.012078 | 0.011975 | 0.011968 | 0.011968 | 0.011733 | 0.011941 |
| 0.011834 | 0.011867 | 0.012002 | 0.011968 | 0.011974 | 0.011834 | 0.011802 |
| 0.011867 | 0.011867 | 0.011901 | 0.011935 | 0.011834 | 0.011901 | 0.011800 |
| 0.011867 | 0.011901 | 0.011867 | 0.011834 | 0.011935 | 0.011867 | 0.011901 |
| 0.011901 | 0.011834 | 0.011901 | 0.011935 | 0.011834 | 0.012036 | 0.012069 |
| 0.011968 | 0.011968 | 0.011968 | 0.011968 | 0.011901 | 0.012036 | 0.011935 |
| 0.011688 | 0.011901 | 0.011867 | 0.011875 | 0.012002 | 0.012002 | 0.012002 |
| 0.012002 | 0.011935 | 0.011901 | 0.011935 | 0.012036 | 0.012036 | 0.011968 |
| 0.011968 | 0.012103 | 0.012002 | 0.012002 | 0.012204 | 0.012204 | 0.012069 |
| 0.011901 | 0.011968 | 0.012002 | 0.012137 | 0.011969 | 0.012002 | 0.011968 |
| 0.012002 | 0.011867 | 0.011867 | 0.012171 | 0.012171 | 0.012137 | 0.011935 |
| 0.012036 | 0.012103 | 0.011968 | 0.012036 | 0.012002 | 0.011867 | 0.011935 |
| 0.011968 | 0.011935 | 0.011867 | 0.012103 | 0.011935 | 0.012036 | 0.012070 |
| 0.011901 | 0.012081 | 0.012070 | 0.011792 | 0.011681 | 0.011876 | 0.011731 |
| 0.011830 | 0.011995 | 0.011833 | 0.011999 | 0.011890 | 0.011773 | 0.011804 |
| 0.011775 | 0.011587 | 0.011840 | 0.011721 | 0.011761 | 0.011864 | 0.012075 |
| 0.012040 | 0.011887 | 0.011941 | 0.011835 | 0.011972 | 0.011834 | 0.011901 |

|          |          |          |          |          |          |          |
|----------|----------|----------|----------|----------|----------|----------|
| 0.011867 | 0.011969 | 0.012076 | 0.011875 | 0.012215 | 0.012229 | 0.011935 |
| 0.011935 | 0.012002 | 0.011935 | 0.011968 | 0.011834 | 0.011800 | 0.011868 |
| 0.011935 | 0.011935 | 0.011901 | 0.011867 | 0.011901 | 0.011867 | 0.011968 |
| 0.011899 | 0.011935 | 0.011917 | 0.011985 | 0.012121 | 0.012051 | 0.012051 |
| 0.012083 | 0.012002 | 0.011762 | 0.011744 | 0.011941 | 0.012111 | 0.012113 |
| 0.011901 | 0.011975 | 0.012205 | 0.012142 | 0.012103 | 0.012104 | 0.012069 |
| 0.012002 | 0.012002 | 0.012069 | 0.011968 | 0.012272 | 0.012137 | 0.012204 |
| 0.012238 | 0.011988 | 0.011949 | 0.012031 | 0.011901 | 0.012103 | 0.012070 |
| 0.012105 | 0.012036 | 0.012137 | 0.012137 | 0.012319 | 0.012272 | 0.011928 |
| 0.011805 | 0.011823 | 0.011912 | 0.011876 | 0.011916 | 0.011845 | 0.011877 |
| 0.011953 | 0.011630 | 0.011823 | 0.011997 | 0.011935 | 0.012019 | 0.011901 |
| 0.011867 | 0.011800 | 0.011935 | 0.011901 | 0.011834 | 0.011800 | 0.011733 |
| 0.011834 | 0.011901 | 0.011901 | 0.011901 | 0.011935 | 0.011935 | 0.011940 |
| 0.012008 | 0.011935 | 0.011935 | 0.011972 | 0.011834 | 0.011901 | 0.011867 |
| 0.011969 | 0.012076 | 0.011875 | 0.012215 | 0.012229 | 0.011935 | 0.012137 |
| 0.012070 | 0.012070 | 0.011907 | 0.012105 | 0.011965 | 0.012015 | 0.011866 |
| 0.012095 | 0.012155 | 0.012119 | 0.011979 | 0.011867 | 0.012070 | 0.011935 |
| 0.012036 | 0.011968 | 0.011867 | 0.011972 | 0.012069 | 0.012076 | 0.011968 |
| 0.011867 | 0.011803 | 0.011935 | 0.011867 | 0.011800 | 0.011809 | 0.012070 |
| 0.011968 | 0.011901 | 0.011935 | 0.011968 | 0.011935 | 0.011867 | 0.011800 |
| 0.011935 | 0.011968 | 0.011968 | 0.011901 | 0.011968 | 0.012204 | 0.011800 |
| 0.011901 | 0.012036 | 0.011901 | 0.011935 | 0.011901 | 0.012002 | 0.011832 |
| 0.012073 | 0.011698 | 0.011712 | 0.011745 | 0.011834 | 0.011778 | 0.011646 |
| 0.011637 | 0.011800 | 0.011901 | 0.012011 | 0.011869 | 0.011975 | 0.012138 |
| 0.012037 | 0.012076 | 0.011969 | 0.012257 | 0.012002 | 0.012879 | 0.012038 |
| 0.012745 | 0.012545 | 0.012681 | 0.012952 | 0.012002 | 0.011901 | 0.012002 |
| 0.012644 | 0.012378 | 0.011969 | 0.011868 | 0.011935 | 0.011935 | 0.011907 |
| 0.011800 | 0.011773 | 0.011867 | 0.011834 | 0.011733 | 0.011800 | 0.000000 |
| 0.011666 | 0.011834 | 0.011903 | 0.011669 | 0.012644 | 0.012654 | 0.012712 |
| 0.012712 | 0.012745 | 0.012666 | 0.012712 | 0.012715 | 0.012002 | 0.012238 |
| 0.012305 | 0.012812 | 0.012316 | 0.012340 | 0.012813 | 0.011876 | 0.011767 |
| 0.011733 | 0.011733 | 0.012205 | 0.012212 | 0.012328 | 0.012070 | 0.011735 |
| S826     | 0.012171 | 0.012171 | 0.012070 | 0.012002 | 0.012002 | 0.012070 |
| 0.011877 | 0.011809 | 0.012070 | 0.011767 | 0.011834 | 0.011802 | 0.011766 |
| 0.011733 | 0.011969 | 0.011699 | 0.011800 | 0.011867 | 0.011766 | 0.011800 |
| 0.011766 | 0.011800 | 0.011632 | 0.011767 | 0.011801 | 0.011800 | 0.011843 |
| 0.011767 | 0.011800 | 0.011699 | 0.011598 | 0.011868 | 0.011834 | 0.011868 |
| 0.011834 | 0.011935 | 0.011834 | 0.011834 | 0.011867 | 0.011834 | 0.012002 |
| 0.011699 | 0.011834 | 0.011868 | 0.011800 | 0.011834 | 0.011935 | 0.011868 |
| 0.011834 | 0.012003 | 0.011902 | 0.011902 | 0.011834 | 0.012103 | 0.011834 |
| 0.011800 | 0.011834 | 0.011969 | 0.012103 | 0.011935 | 0.011834 | 0.011935 |
| 0.011867 | 0.011935 | 0.011834 | 0.012069 | 0.012037 | 0.011834 | 0.011901 |
| 0.011800 | 0.011901 | 0.011868 | 0.011935 | 0.011867 | 0.011868 | 0.011868 |
| 0.011766 | 0.011800 | 0.011766 | 0.011767 | 0.011834 | 0.011870 | 0.011935 |
| 0.011868 | 0.011834 | 0.011901 | 0.011800 | 0.011867 | 0.011767 | 0.011834 |
| 0.012002 | 0.011935 | 0.011969 | 0.012002 | 0.011834 | 0.012070 | 0.011834 |
| 0.011951 | 0.011845 | 0.011966 | 0.011646 | 0.011657 | 0.011834 | 0.011493 |
| 0.012231 | 0.011518 | 0.011678 | 0.012069 | 0.012070 | 0.011800 | 0.011901 |
| 0.011901 | 0.011867 | 0.011935 | 0.011834 | 0.011935 | 0.011868 | 0.011867 |
| 0.011834 | 0.011867 | 0.012137 | 0.012002 | 0.011901 | 0.011868 | 0.011801 |
| 0.011767 | 0.011699 | 0.011834 | 0.011800 | 0.011733 | 0.011700 | 0.011632 |
| 0.011733 | 0.011801 | 0.011800 | 0.011800 | 0.011834 | 0.011834 | 0.011839 |
| 0.011907 | 0.011834 | 0.011834 | 0.011672 | 0.011747 | 0.011763 | 0.011835 |
| 0.011841 | 0.011679 | 0.011761 | 0.011785 | 0.011741 | 0.011781 | 0.011805 |
| 0.011781 | 0.011855 | 0.011887 | 0.011768 | 0.011752 | 0.011903 | 0.011802 |
| 0.011869 | 0.011871 | 0.011869 | 0.011968 | 0.011901 | 0.012272 | 0.012003 |
| 0.011834 | 0.011902 | 0.011834 | 0.011868 | 0.011733 | 0.011699 | 0.011767 |
| 0.011834 | 0.011834 | 0.011800 | 0.011767 | 0.011733 | 0.011767 | 0.011868 |
| 0.011801 | 0.011935 | 0.011868 | 0.011767 | 0.011871 | 0.011969 | 0.011975 |
| 0.011969 | 0.011868 | 0.011767 | 0.011702 | 0.011834 | 0.011767 | 0.011700 |

|          |          |          |          |          |          |          |
|----------|----------|----------|----------|----------|----------|----------|
| 0.011707 | 0.011969 | 0.011767 | 0.011969 | 0.011733 | 0.011834 | 0.011801 |
| 0.011902 | 0.011800 | 0.011834 | 0.011801 | 0.011834 | 0.011700 | 0.011834 |
| 0.011868 | 0.011800 | 0.011868 | 0.011800 | 0.011834 | 0.011868 | 0.012036 |
| 0.011935 | 0.011868 | 0.011936 | 0.011972 | 0.011936 | 0.011834 | 0.011800 |
| 0.011771 | 0.012114 | 0.011839 | 0.011748 | 0.011945 | 0.011709 | 0.011769 |
| 0.011911 | 0.011844 | 0.012002 | 0.012205 | 0.011916 | 0.012070 | 0.012036 |
| 0.011969 | 0.012137 | 0.011950 | 0.011845 | 0.011943 | 0.011868 | 0.011942 |
| 0.012036 | 0.011905 | 0.012077 | 0.012112 | 0.012070 | 0.012137 | 0.012215 |
| 0.011976 | 0.012115 | 0.012078 | 0.012009 | 0.012274 | 0.011733 | 0.011938 |
| 0.011901 | 0.011834 | 0.011733 | 0.011733 | 0.011800 | 0.011800 | 0.011867 |
| 0.011800 | 0.011868 | 0.011766 | 0.011800 | 0.011800 | 0.011800 | 0.011867 |
| 0.011800 | 0.011969 | 0.011868 | 0.011902 | 0.011699 | 0.011800 | 0.011834 |
| 0.011834 | 0.011800 | 0.011868 | 0.011834 | 0.011766 | 0.011766 | 0.011766 |
| 0.012036 | 0.011868 | 0.011935 | 0.011733 | 0.011834 | 0.012003 | 0.011699 |
| 0.011766 | 0.011834 | 0.011800 | 0.011969 | 0.011766 | 0.011699 | 0.011834 |
| 0.011767 | 0.011800 | 0.011800 | 0.011733 | 0.011733 | 0.011901 | 0.011834 |
| 0.011733 | 0.011834 | 0.011699 | 0.011733 | 0.011868 | 0.011733 | 0.011767 |
| 0.011734 | 0.011867 | 0.011801 | 0.011699 | 0.011767 | 0.011699 | 0.011867 |
| 0.011883 | 0.011767 | 0.011800 | 0.011834 | 0.011868 | 0.011800 | 0.011901 |
| 0.011766 | 0.012103 | 0.011699 | 0.011901 | 0.011699 | 0.011699 | 0.011699 |
| 0.011935 | 0.011868 | 0.011834 | 0.011901 | 0.011733 | 0.011868 | 0.011699 |
| 0.011767 | 0.011766 | 0.011800 | 0.011901 | 0.011800 | 0.011901 | 0.011969 |
| 0.011969 | 0.011935 | 0.011834 | 0.011935 | 0.011901 | 0.011766 | 0.011733 |
| 0.011766 | 0.011766 | 0.011834 | 0.011699 | 0.011733 | 0.011901 | 0.011766 |
| 0.011733 | 0.011800 | 0.011935 | 0.011901 | 0.011867 | 0.011800 | 0.011800 |
| 0.011868 | 0.011800 | 0.011901 | 0.011766 | 0.011901 | 0.012002 | 0.011969 |
| 0.011800 | 0.011935 | 0.011785 | 0.018277 | 0.011453 | 0.011855 | 0.011863 |
| 0.011857 | 0.011835 | 0.011794 | 0.011524 | 0.011775 | 0.011924 | 0.011728 |
| 0.011772 | 0.011549 | 0.011606 | 0.011772 | 0.011685 | 0.011702 | 0.011792 |
| 0.011624 | 0.011582 | 0.011617 | 0.011523 | 0.011935 | 0.011969 | 0.011976 |
| 0.011817 | 0.011935 | 0.011935 | 0.011834 | 0.011868 | 0.011868 | 0.011835 |
| 0.011868 | 0.011800 | 0.011834 | 0.011868 | 0.011834 | 0.011767 | 0.011800 |
| 0.011800 | 0.011868 | 0.011767 | 0.011868 | 0.011902 | 0.011935 | 0.011834 |
| 0.011800 | 0.011767 | 0.011902 | 0.011902 | 0.011902 | 0.011937 | 0.011969 |
| 0.011733 | 0.011733 | 0.011767 | 0.011868 | 0.011733 | 0.011969 | 0.011969 |
| 0.012003 | 0.012002 | 0.011935 | 0.012036 | 0.011936 | 0.012039 | 0.011868 |
| 0.011868 | 0.011935 | 0.011969 | 0.011801 | 0.011868 | 0.011801 | 0.011868 |
| 0.011936 | 0.011935 | 0.011969 | 0.011936 | 0.011836 | 0.012036 | 0.012003 |
| 0.011875 | 0.011767 | 0.011868 | 0.011969 | 0.011868 | 0.011936 | 0.012002 |
| 0.012205 | 0.011916 | 0.012070 | 0.012036 | 0.011969 | 0.012137 | 0.011767 |
| 0.011938 | 0.011835 | 0.011800 | 0.011800 | 0.011868 | 0.011767 | 0.011868 |
| 0.011902 | 0.011935 | 0.011834 | 0.011800 | 0.011767 | 0.011902 | 0.011902 |
| 0.011902 | 0.011937 | 0.012002 | 0.011935 | 0.012510 | 0.011991 | 0.011871 |
| 0.011976 | 0.011929 | 0.012046 | 0.011893 | 0.012042 | 0.011959 | 0.011855 |
| 0.012437 | 0.011823 | 0.011953 | 0.011892 | 0.012164 | 0.012049 | 0.012117 |
| 0.012423 | 0.011929 | 0.012111 | 0.012171 | 0.012036 | 0.011767 | 0.012076 |
| 0.011733 | 0.011901 | 0.012036 | 0.012002 | 0.012008 | 0.011733 | 0.011702 |
| 0.011834 | 0.011766 | 0.011800 | 0.011834 | 0.011733 | 0.011800 | 0.011699 |
| 0.011766 | 0.011800 | 0.011766 | 0.011733 | 0.011834 | 0.011766 | 0.011800 |
| 0.011800 | 0.011733 | 0.011800 | 0.011834 | 0.011733 | 0.011935 | 0.011969 |
| 0.011868 | 0.011868 | 0.011868 | 0.011868 | 0.011800 | 0.011935 | 0.011834 |
| 0.011548 | 0.011800 | 0.011767 | 0.011740 | 0.011901 | 0.011901 | 0.011901 |
| 0.011901 | 0.011834 | 0.011800 | 0.011834 | 0.011935 | 0.011935 | 0.011868 |
| 0.011867 | 0.012002 | 0.011902 | 0.011901 | 0.012104 | 0.012104 | 0.011968 |
| 0.011800 | 0.011868 | 0.011901 | 0.012037 | 0.011868 | 0.011902 | 0.011868 |
| 0.011901 | 0.011766 | 0.011766 | 0.012070 | 0.012070 | 0.012036 | 0.011834 |
| 0.011935 | 0.012002 | 0.011867 | 0.011935 | 0.011901 | 0.011767 | 0.011834 |
| 0.011867 | 0.011766 | 0.011766 | 0.012002 | 0.011834 | 0.011935 | 0.011969 |
| 0.011800 | 0.011945 | 0.011969 | 0.011589 | 0.011455 | 0.011808 | 0.011473 |
| 0.011664 | 0.011800 | 0.011728 | 0.011775 | 0.011695 | 0.011569 | 0.011592 |

|          |          |          |          |          |          |          |
|----------|----------|----------|----------|----------|----------|----------|
| 0.011570 | 0.011455 | 0.011617 | 0.011523 | 0.011545 | 0.011730 | 0.011871 |
| 0.011889 | 0.011729 | 0.011836 | 0.011765 | 0.011871 | 0.011733 | 0.011801 |
| 0.011801 | 0.011869 | 0.011975 | 0.011774 | 0.012114 | 0.012123 | 0.011868 |
| 0.011834 | 0.011902 | 0.011834 | 0.011868 | 0.011733 | 0.011699 | 0.011767 |
| 0.011834 | 0.011834 | 0.011800 | 0.011767 | 0.011733 | 0.011767 | 0.011868 |
| 0.011829 | 0.011865 | 0.011848 | 0.011884 | 0.012020 | 0.011983 | 0.011983 |
| 0.011982 | 0.011902 | 0.011688 | 0.011672 | 0.011841 | 0.012011 | 0.012012 |
| 0.011801 | 0.011875 | 0.012106 | 0.012075 | 0.012004 | 0.012038 | 0.011968 |
| 0.011901 | 0.011901 | 0.011968 | 0.011868 | 0.012172 | 0.012036 | 0.012104 |
| 0.012138 | 0.011917 | 0.011846 | 0.011893 | 0.011800 | 0.012002 | 0.011969 |
| 0.012004 | 0.012002 | 0.012036 | 0.012036 | 0.012242 | 0.012171 | 0.011790 |
| 0.011670 | 0.011685 | 0.011776 | 0.011741 | 0.011779 | 0.011733 | 0.011741 |
| 0.011816 | 0.011632 | 0.011776 | 0.011811 | 0.011835 | 0.011917 | 0.011801 |
| 0.011767 | 0.011699 | 0.011834 | 0.011800 | 0.011733 | 0.011700 | 0.011632 |
| 0.011733 | 0.011801 | 0.011800 | 0.011800 | 0.011834 | 0.011834 | 0.011839 |
| 0.011907 | 0.011834 | 0.011834 | 0.011871 | 0.011733 | 0.011801 | 0.011801 |
| 0.011869 | 0.011975 | 0.011774 | 0.012114 | 0.012123 | 0.011868 | 0.012036 |
| 0.011969 | 0.011969 | 0.011806 | 0.012002 | 0.011861 | 0.011948 | 0.011762 |
| 0.011992 | 0.012111 | 0.011909 | 0.011877 | 0.011767 | 0.011969 | 0.011801 |
| 0.011935 | 0.011868 | 0.011767 | 0.011871 | 0.011969 | 0.011975 | 0.011868 |
| 0.011767 | 0.011702 | 0.011834 | 0.011767 | 0.011700 | 0.011707 | 0.011969 |
| 0.011868 | 0.011800 | 0.011834 | 0.011868 | 0.011834 | 0.011767 | 0.011666 |
| 0.011834 | 0.011868 | 0.011867 | 0.011800 | 0.011868 | 0.012103 | 0.011699 |
| 0.011800 | 0.011935 | 0.011800 | 0.011834 | 0.011800 | 0.011902 | 0.011703 |
| 0.011960 | 0.011528 | 0.011511 | 0.011624 | 0.011671 | 0.011671 | 0.011520 |
| 0.011428 | 0.011699 | 0.011800 | 0.011911 | 0.011769 | 0.011874 | 0.012038 |
| 0.011937 | 0.011941 | 0.011935 | 0.012156 | 0.011901 | 0.012779 | 0.011938 |
| 0.012679 | 0.012446 | 0.012581 | 0.012853 | 0.011901 | 0.011801 | 0.011902 |
| 0.012544 | 0.012278 | 0.011868 | 0.011767 | 0.011835 | 0.011835 | 0.011772 |
| 0.011699 | 0.011672 | 0.011767 | 0.011734 | 0.011633 | 0.011497 | 0.011666 |
| 0.000000 | 0.011531 | 0.011803 | 0.011568 | 0.012545 | 0.012554 | 0.012612 |
| 0.012613 | 0.012647 | 0.012597 | 0.012613 | 0.012615 | 0.011901 | 0.012104 |
| 0.012206 | 0.012643 | 0.012216 | 0.012239 | 0.012713 | 0.011775 | 0.011667 |
| 0.011632 | 0.011632 | 0.012105 | 0.012008 | 0.012222 | 0.011969 | 0.011634 |
| S827     | 0.012238 | 0.012238 | 0.012204 | 0.012103 | 0.012103 | 0.012170 |
| 0.011979 | 0.011877 | 0.012103 | 0.011867 | 0.011934 | 0.011902 | 0.011867 |
| 0.011833 | 0.012069 | 0.011800 | 0.011901 | 0.011968 | 0.011867 | 0.011901 |
| 0.011867 | 0.011901 | 0.011733 | 0.011868 | 0.011902 | 0.011901 | 0.011945 |
| 0.011867 | 0.011901 | 0.011800 | 0.011766 | 0.011968 | 0.011934 | 0.011968 |
| 0.011934 | 0.012035 | 0.011934 | 0.011934 | 0.011968 | 0.011934 | 0.012103 |
| 0.011800 | 0.011934 | 0.011968 | 0.011901 | 0.011934 | 0.012035 | 0.011968 |
| 0.011934 | 0.012103 | 0.012003 | 0.012002 | 0.011934 | 0.012204 | 0.011934 |
| 0.011901 | 0.011935 | 0.012069 | 0.012204 | 0.012036 | 0.011935 | 0.012035 |
| 0.011968 | 0.012036 | 0.011935 | 0.012170 | 0.012137 | 0.011934 | 0.012002 |
| 0.011901 | 0.012002 | 0.011968 | 0.012035 | 0.011968 | 0.011968 | 0.011968 |
| 0.011867 | 0.011901 | 0.011867 | 0.011901 | 0.011934 | 0.011969 | 0.012035 |
| 0.011968 | 0.011934 | 0.012002 | 0.011901 | 0.011968 | 0.011867 | 0.011934 |
| 0.012103 | 0.012035 | 0.012069 | 0.012103 | 0.011934 | 0.012170 | 0.011934 |
| 0.012025 | 0.011957 | 0.011966 | 0.011763 | 0.011732 | 0.011944 | 0.011612 |
| 0.012341 | 0.011620 | 0.011761 | 0.012170 | 0.012170 | 0.011901 | 0.012002 |
| 0.012002 | 0.011968 | 0.012035 | 0.011934 | 0.012036 | 0.011968 | 0.011968 |
| 0.011934 | 0.011968 | 0.012238 | 0.012103 | 0.012002 | 0.011969 | 0.011901 |
| 0.011867 | 0.011800 | 0.011934 | 0.011901 | 0.011834 | 0.011800 | 0.011733 |
| 0.011834 | 0.011901 | 0.011901 | 0.011901 | 0.011935 | 0.011934 | 0.011906 |
| 0.011974 | 0.011934 | 0.011934 | 0.011780 | 0.011856 | 0.011867 | 0.011935 |
| 0.011942 | 0.011782 | 0.011909 | 0.011889 | 0.011842 | 0.011883 | 0.011905 |
| 0.011853 | 0.011957 | 0.011991 | 0.011868 | 0.011856 | 0.012003 | 0.011902 |
| 0.011969 | 0.011971 | 0.011969 | 0.012069 | 0.012002 | 0.012372 | 0.012103 |
| 0.011935 | 0.012002 | 0.011934 | 0.011968 | 0.011833 | 0.011800 | 0.011867 |
| 0.011934 | 0.011934 | 0.011901 | 0.011867 | 0.011901 | 0.011867 | 0.011968 |



|          |          |          |          |          |          |          |
|----------|----------|----------|----------|----------|----------|----------|
| 0.011934 | 0.012035 | 0.011968 | 0.011867 | 0.011971 | 0.012069 | 0.012042 |
| 0.012069 | 0.011968 | 0.011867 | 0.011803 | 0.011934 | 0.011867 | 0.011800 |
| 0.011808 | 0.012069 | 0.011867 | 0.012069 | 0.011834 | 0.011935 | 0.011901 |
| 0.012002 | 0.011901 | 0.011934 | 0.011901 | 0.011934 | 0.011800 | 0.011934 |
| 0.011968 | 0.011901 | 0.011968 | 0.011901 | 0.011934 | 0.011968 | 0.012103 |
| 0.012036 | 0.011968 | 0.012036 | 0.012072 | 0.012036 | 0.011934 | 0.011901 |
| 0.011871 | 0.012234 | 0.012067 | 0.011850 | 0.012046 | 0.011743 | 0.011926 |
| 0.012013 | 0.011843 | 0.012103 | 0.012305 | 0.012018 | 0.012170 | 0.012137 |
| 0.012069 | 0.012237 | 0.012057 | 0.011967 | 0.012068 | 0.011968 | 0.012043 |
| 0.012137 | 0.012006 | 0.012178 | 0.012213 | 0.012170 | 0.012238 | 0.012316 |
| 0.012077 | 0.012216 | 0.012179 | 0.012110 | 0.012375 | 0.011833 | 0.012039 |
| 0.012002 | 0.011934 | 0.011833 | 0.011833 | 0.011901 | 0.011901 | 0.011968 |
| 0.011901 | 0.011968 | 0.011867 | 0.011901 | 0.011901 | 0.011901 | 0.011968 |
| 0.011901 | 0.012069 | 0.011969 | 0.012002 | 0.011800 | 0.011901 | 0.011935 |
| 0.011934 | 0.011901 | 0.011968 | 0.011935 | 0.011867 | 0.011867 | 0.011867 |
| 0.012137 | 0.011968 | 0.012035 | 0.011833 | 0.011934 | 0.012103 | 0.011867 |
| 0.011867 | 0.011867 | 0.011901 | 0.012069 | 0.011867 | 0.011800 | 0.011934 |
| 0.011867 | 0.011901 | 0.011901 | 0.011833 | 0.011833 | 0.012002 | 0.011867 |
| 0.011833 | 0.011934 | 0.011800 | 0.011833 | 0.011968 | 0.011834 | 0.011867 |
| 0.011834 | 0.011968 | 0.011902 | 0.011800 | 0.011867 | 0.011800 | 0.011968 |
| 0.011986 | 0.011867 | 0.011901 | 0.011935 | 0.011968 | 0.011901 | 0.012002 |
| 0.011867 | 0.012204 | 0.011800 | 0.012002 | 0.011800 | 0.011800 | 0.011800 |
| 0.012035 | 0.011902 | 0.011935 | 0.012002 | 0.011833 | 0.011969 | 0.011800 |
| 0.011867 | 0.011867 | 0.011901 | 0.012002 | 0.011901 | 0.012002 | 0.012069 |
| 0.012069 | 0.012035 | 0.011934 | 0.012036 | 0.012002 | 0.011867 | 0.011833 |
| 0.011867 | 0.011867 | 0.011935 | 0.011800 | 0.011833 | 0.012002 | 0.011867 |
| 0.011833 | 0.011901 | 0.012035 | 0.012002 | 0.011968 | 0.011901 | 0.011901 |
| 0.011968 | 0.011901 | 0.012002 | 0.011867 | 0.012002 | 0.012103 | 0.012070 |
| 0.011901 | 0.012036 | 0.011889 | 0.018390 | 0.011584 | 0.012100 | 0.011968 |
| 0.011926 | 0.011940 | 0.011846 | 0.011582 | 0.011885 | 0.012028 | 0.011911 |
| 0.011772 | 0.011671 | 0.011724 | 0.011814 | 0.011802 | 0.011801 | 0.011835 |
| 0.011671 | 0.011694 | 0.011728 | 0.011656 | 0.012036 | 0.012069 | 0.012076 |
| 0.011920 | 0.012035 | 0.012035 | 0.011934 | 0.011968 | 0.011969 | 0.011935 |
| 0.011968 | 0.011901 | 0.011934 | 0.011968 | 0.011935 | 0.011867 | 0.011901 |
| 0.011901 | 0.011968 | 0.011867 | 0.011968 | 0.012002 | 0.012035 | 0.011934 |
| 0.011901 | 0.011867 | 0.012002 | 0.012002 | 0.012002 | 0.012037 | 0.012069 |
| 0.011833 | 0.011833 | 0.011867 | 0.011968 | 0.011833 | 0.012069 | 0.012069 |
| 0.012103 | 0.012103 | 0.012035 | 0.012136 | 0.012036 | 0.012140 | 0.011968 |
| 0.011968 | 0.012035 | 0.012069 | 0.011901 | 0.011968 | 0.011934 | 0.011968 |
| 0.012036 | 0.012035 | 0.012069 | 0.012036 | 0.011937 | 0.012136 | 0.012103 |
| 0.011976 | 0.011867 | 0.011968 | 0.012069 | 0.011968 | 0.012036 | 0.012069 |
| 0.012305 | 0.012018 | 0.012170 | 0.012137 | 0.012069 | 0.012237 | 0.011868 |
| 0.012038 | 0.011935 | 0.011901 | 0.011901 | 0.011968 | 0.011867 | 0.011968 |
| 0.012002 | 0.012035 | 0.011934 | 0.011901 | 0.011867 | 0.012002 | 0.012002 |
| 0.012002 | 0.012037 | 0.012103 | 0.012035 | 0.012611 | 0.012098 | 0.011976 |
| 0.012046 | 0.012033 | 0.012151 | 0.011997 | 0.012147 | 0.012062 | 0.011958 |
| 0.012540 | 0.011927 | 0.012055 | 0.011996 | 0.012268 | 0.012151 | 0.012219 |
| 0.012525 | 0.012041 | 0.011941 | 0.011968 | 0.011968 | 0.011733 | 0.011906 |
| 0.011833 | 0.011867 | 0.012002 | 0.011968 | 0.011940 | 0.011834 | 0.011802 |
| 0.011934 | 0.011867 | 0.011901 | 0.011934 | 0.011833 | 0.011901 | 0.011800 |
| 0.011867 | 0.011901 | 0.011867 | 0.011833 | 0.011935 | 0.011867 | 0.011901 |
| 0.011901 | 0.011833 | 0.011901 | 0.011935 | 0.011833 | 0.012035 | 0.012069 |
| 0.011968 | 0.011968 | 0.011968 | 0.011968 | 0.011901 | 0.012036 | 0.011934 |
| 0.011653 | 0.011901 | 0.011868 | 0.011842 | 0.012002 | 0.012002 | 0.012002 |
| 0.012002 | 0.011935 | 0.011901 | 0.011935 | 0.012035 | 0.012036 | 0.011968 |
| 0.011968 | 0.012103 | 0.012002 | 0.012002 | 0.012204 | 0.012204 | 0.012069 |
| 0.011901 | 0.011968 | 0.012002 | 0.012137 | 0.011969 | 0.012002 | 0.011968 |
| 0.012002 | 0.011867 | 0.011867 | 0.012171 | 0.012171 | 0.012137 | 0.011934 |
| 0.012036 | 0.012103 | 0.011968 | 0.012036 | 0.012002 | 0.011867 | 0.011935 |
| 0.011968 | 0.011934 | 0.011867 | 0.012103 | 0.011934 | 0.012035 | 0.012070 |

|          |          |          |          |          |          |          |
|----------|----------|----------|----------|----------|----------|----------|
| 0.011901 | 0.012047 | 0.012069 | 0.011629 | 0.011512 | 0.011911 | 0.011473 |
| 0.011884 | 0.011917 | 0.011833 | 0.011954 | 0.011792 | 0.011620 | 0.011698 |
| 0.011621 | 0.011587 | 0.011728 | 0.011655 | 0.011653 | 0.011797 | 0.011953 |
| 0.011965 | 0.011808 | 0.011941 | 0.011871 | 0.011972 | 0.011834 | 0.011901 |
| 0.011901 | 0.011969 | 0.012076 | 0.011875 | 0.012215 | 0.012193 | 0.011934 |
| 0.011935 | 0.012002 | 0.011934 | 0.011968 | 0.011833 | 0.011800 | 0.011867 |
| 0.011934 | 0.011934 | 0.011901 | 0.011867 | 0.011901 | 0.011867 | 0.011968 |
| 0.011934 | 0.011936 | 0.011951 | 0.011986 | 0.012122 | 0.012086 | 0.012085 |
| 0.012083 | 0.012002 | 0.011799 | 0.011781 | 0.011942 | 0.012112 | 0.012113 |
| 0.011902 | 0.011976 | 0.012206 | 0.012177 | 0.012104 | 0.012138 | 0.012069 |
| 0.012002 | 0.012002 | 0.012069 | 0.011968 | 0.012272 | 0.012137 | 0.012204 |
| 0.012238 | 0.012024 | 0.011948 | 0.012031 | 0.011901 | 0.012103 | 0.012069 |
| 0.012105 | 0.012136 | 0.012137 | 0.012137 | 0.012319 | 0.012271 | 0.011894 |
| 0.011771 | 0.011788 | 0.011879 | 0.011843 | 0.011881 | 0.011845 | 0.011843 |
| 0.011919 | 0.011675 | 0.011870 | 0.011923 | 0.011935 | 0.012019 | 0.011901 |
| 0.011867 | 0.011800 | 0.011934 | 0.011901 | 0.011834 | 0.011800 | 0.011733 |
| 0.011834 | 0.011901 | 0.011901 | 0.011901 | 0.011935 | 0.011934 | 0.011906 |
| 0.011974 | 0.011934 | 0.011934 | 0.011972 | 0.011834 | 0.011901 | 0.011901 |
| 0.011969 | 0.012076 | 0.011875 | 0.012215 | 0.012193 | 0.011934 | 0.012136 |
| 0.012069 | 0.012069 | 0.011906 | 0.012071 | 0.011999 | 0.012049 | 0.011901 |
| 0.012060 | 0.012246 | 0.012119 | 0.011945 | 0.011867 | 0.012069 | 0.011934 |
| 0.012035 | 0.011968 | 0.011867 | 0.011971 | 0.012069 | 0.012042 | 0.011968 |
| 0.011867 | 0.011803 | 0.011934 | 0.011867 | 0.011800 | 0.011808 | 0.012069 |
| 0.011968 | 0.011901 | 0.011934 | 0.011968 | 0.011935 | 0.011867 | 0.011766 |
| 0.011934 | 0.011968 | 0.011968 | 0.011901 | 0.011968 | 0.012204 | 0.011800 |
| 0.011901 | 0.012036 | 0.011901 | 0.011934 | 0.011901 | 0.012002 | 0.011703 |
| 0.012016 | 0.011528 | 0.011562 | 0.011745 | 0.011712 | 0.011778 | 0.011520 |
| 0.011480 | 0.011800 | 0.011901 | 0.012012 | 0.011869 | 0.011974 | 0.012137 |
| 0.012037 | 0.012043 | 0.012036 | 0.012257 | 0.012002 | 0.012879 | 0.012038 |
| 0.012778 | 0.012545 | 0.012680 | 0.012952 | 0.012002 | 0.011901 | 0.012002 |
| 0.012644 | 0.012377 | 0.011968 | 0.011868 | 0.011935 | 0.011935 | 0.011840 |
| 0.011800 | 0.011773 | 0.011867 | 0.011834 | 0.011767 | 0.011632 | 0.011834 |
| 0.011531 | 0.000000 | 0.011937 | 0.011703 | 0.012644 | 0.012653 | 0.012712 |
| 0.012713 | 0.012746 | 0.012700 | 0.012713 | 0.012714 | 0.012002 | 0.012238 |
| 0.012306 | 0.012642 | 0.012316 | 0.012339 | 0.012812 | 0.011876 | 0.011767 |
| 0.011733 | 0.011733 | 0.012205 | 0.012172 | 0.012328 | 0.012069 | 0.011735 |
| S828     | 0.012376 | 0.012376 | 0.012173 | 0.012207 | 0.012207 | 0.012275 |
| 0.012118 | 0.012016 | 0.012207 | 0.011970 | 0.012038 | 0.012004 | 0.011970 |
| 0.011937 | 0.012173 | 0.011903 | 0.012004 | 0.012072 | 0.012038 | 0.012004 |
| 0.011970 | 0.012004 | 0.011836 | 0.011971 | 0.012005 | 0.012004 | 0.012084 |
| 0.011971 | 0.012004 | 0.011903 | 0.011869 | 0.012038 | 0.012038 | 0.012072 |
| 0.012038 | 0.012139 | 0.012038 | 0.012038 | 0.012072 | 0.012038 | 0.012207 |
| 0.011903 | 0.012038 | 0.012072 | 0.012004 | 0.012038 | 0.012139 | 0.012072 |
| 0.012038 | 0.012207 | 0.012106 | 0.012106 | 0.012038 | 0.012308 | 0.012038 |
| 0.012004 | 0.012038 | 0.012173 | 0.012308 | 0.012140 | 0.012038 | 0.012139 |
| 0.012072 | 0.012139 | 0.012038 | 0.012274 | 0.012241 | 0.012038 | 0.012106 |
| 0.012004 | 0.012105 | 0.012072 | 0.012139 | 0.012038 | 0.012072 | 0.012072 |
| 0.011970 | 0.012004 | 0.011970 | 0.012004 | 0.012038 | 0.012072 | 0.012139 |
| 0.012072 | 0.012038 | 0.012106 | 0.011970 | 0.012072 | 0.011970 | 0.012038 |
| 0.012207 | 0.012139 | 0.012173 | 0.012207 | 0.012038 | 0.012274 | 0.012038 |
| 0.012211 | 0.012144 | 0.012193 | 0.011920 | 0.011844 | 0.012055 | 0.011769 |
| 0.012378 | 0.011772 | 0.011884 | 0.012274 | 0.012274 | 0.011970 | 0.012106 |
| 0.012106 | 0.012072 | 0.012139 | 0.012038 | 0.012139 | 0.012038 | 0.012072 |
| 0.012038 | 0.012038 | 0.012342 | 0.012207 | 0.012106 | 0.012072 | 0.012004 |
| 0.011970 | 0.011903 | 0.012038 | 0.012004 | 0.011937 | 0.011903 | 0.011836 |
| 0.011937 | 0.012004 | 0.012004 | 0.012004 | 0.012038 | 0.012038 | 0.012044 |
| 0.012113 | 0.012038 | 0.012038 | 0.011853 | 0.011930 | 0.011904 | 0.012038 |
| 0.011977 | 0.011853 | 0.011872 | 0.011925 | 0.011946 | 0.011919 | 0.012009 |
| 0.011927 | 0.011959 | 0.012027 | 0.011970 | 0.011892 | 0.012106 | 0.012004 |
| 0.012072 | 0.012040 | 0.012072 | 0.012173 | 0.012105 | 0.012477 | 0.012173 |

|          |          |          |          |          |          |          |
|----------|----------|----------|----------|----------|----------|----------|
| 0.012038 | 0.012106 | 0.012038 | 0.012072 | 0.011937 | 0.011903 | 0.011971 |
| 0.012038 | 0.012038 | 0.012004 | 0.011970 | 0.011970 | 0.011970 | 0.012072 |
| 0.012038 | 0.012139 | 0.012072 | 0.011970 | 0.012075 | 0.012173 | 0.012180 |
| 0.012173 | 0.012072 | 0.011970 | 0.011907 | 0.012038 | 0.011970 | 0.011903 |
| 0.011879 | 0.012173 | 0.011971 | 0.012173 | 0.011937 | 0.012038 | 0.012004 |
| 0.012038 | 0.012004 | 0.012038 | 0.012004 | 0.012038 | 0.011903 | 0.012004 |
| 0.012072 | 0.012004 | 0.012072 | 0.012004 | 0.012038 | 0.012072 | 0.012274 |
| 0.012140 | 0.012072 | 0.012140 | 0.012141 | 0.012140 | 0.012038 | 0.012004 |
| 0.011974 | 0.012233 | 0.012254 | 0.011919 | 0.012151 | 0.011916 | 0.012005 |
| 0.012152 | 0.012049 | 0.012207 | 0.012410 | 0.012123 | 0.012275 | 0.012241 |
| 0.012173 | 0.012342 | 0.012203 | 0.012136 | 0.012155 | 0.012072 | 0.012148 |
| 0.012241 | 0.012143 | 0.012283 | 0.012352 | 0.012274 | 0.012342 | 0.012456 |
| 0.012182 | 0.012355 | 0.012284 | 0.012215 | 0.012479 | 0.011937 | 0.012143 |
| 0.012105 | 0.012038 | 0.011937 | 0.011937 | 0.012004 | 0.012004 | 0.012072 |
| 0.012004 | 0.012072 | 0.011970 | 0.012004 | 0.012004 | 0.012004 | 0.012072 |
| 0.012004 | 0.012173 | 0.012072 | 0.012106 | 0.011903 | 0.012004 | 0.012038 |
| 0.012038 | 0.012004 | 0.012072 | 0.012038 | 0.011970 | 0.011970 | 0.011970 |
| 0.012241 | 0.012038 | 0.012139 | 0.011937 | 0.012038 | 0.012207 | 0.011970 |
| 0.011970 | 0.012038 | 0.012004 | 0.012173 | 0.011970 | 0.011903 | 0.012038 |
| 0.011971 | 0.012004 | 0.012004 | 0.011937 | 0.011937 | 0.012106 | 0.012038 |
| 0.011937 | 0.012038 | 0.011903 | 0.011937 | 0.012072 | 0.011937 | 0.011971 |
| 0.011938 | 0.012072 | 0.012005 | 0.011903 | 0.011971 | 0.011903 | 0.012072 |
| 0.012125 | 0.011971 | 0.012004 | 0.012038 | 0.012072 | 0.012004 | 0.012106 |
| 0.011970 | 0.012308 | 0.011903 | 0.012106 | 0.011903 | 0.011903 | 0.011903 |
| 0.012106 | 0.012039 | 0.012038 | 0.012106 | 0.011937 | 0.012072 | 0.011903 |
| 0.011970 | 0.011970 | 0.012004 | 0.012106 | 0.012004 | 0.012106 | 0.012173 |
| 0.012173 | 0.012139 | 0.012038 | 0.012140 | 0.012105 | 0.011970 | 0.011937 |
| 0.011970 | 0.011970 | 0.012038 | 0.011903 | 0.011937 | 0.012106 | 0.011970 |
| 0.011937 | 0.012004 | 0.012139 | 0.012106 | 0.012072 | 0.012004 | 0.012005 |
| 0.012072 | 0.012004 | 0.012105 | 0.011970 | 0.012106 | 0.012207 | 0.012173 |
| 0.012004 | 0.012106 | 0.011992 | 0.018427 | 0.011649 | 0.012039 | 0.012073 |
| 0.012030 | 0.012046 | 0.012056 | 0.011815 | 0.011995 | 0.012097 | 0.011972 |
| 0.012010 | 0.011732 | 0.011841 | 0.011940 | 0.011880 | 0.011949 | 0.012007 |
| 0.011905 | 0.011731 | 0.011765 | 0.011656 | 0.012139 | 0.012173 | 0.012181 |
| 0.012060 | 0.012139 | 0.012105 | 0.012038 | 0.012038 | 0.012039 | 0.012039 |
| 0.012072 | 0.012004 | 0.012038 | 0.012072 | 0.012038 | 0.011970 | 0.012004 |
| 0.012004 | 0.012072 | 0.011970 | 0.012072 | 0.012106 | 0.012139 | 0.012038 |
| 0.012004 | 0.011971 | 0.012106 | 0.012106 | 0.012106 | 0.012141 | 0.012173 |
| 0.011937 | 0.011937 | 0.011970 | 0.012072 | 0.011937 | 0.012173 | 0.012173 |
| 0.012207 | 0.012207 | 0.012139 | 0.012241 | 0.012140 | 0.012244 | 0.012072 |
| 0.012072 | 0.012139 | 0.012173 | 0.012004 | 0.012072 | 0.012038 | 0.012072 |
| 0.012140 | 0.012139 | 0.012173 | 0.012139 | 0.012040 | 0.012207 | 0.012207 |
| 0.012047 | 0.011970 | 0.012072 | 0.012173 | 0.012072 | 0.012139 | 0.012207 |
| 0.012410 | 0.012123 | 0.012275 | 0.012241 | 0.012173 | 0.012342 | 0.011971 |
| 0.012143 | 0.012005 | 0.012004 | 0.012004 | 0.012072 | 0.011970 | 0.012072 |
| 0.012106 | 0.012139 | 0.012038 | 0.012004 | 0.011971 | 0.012106 | 0.012106 |
| 0.012106 | 0.012141 | 0.012207 | 0.012139 | 0.012715 | 0.012244 | 0.012120 |
| 0.012225 | 0.012175 | 0.012295 | 0.012139 | 0.012290 | 0.012204 | 0.012098 |
| 0.012682 | 0.012068 | 0.012196 | 0.012136 | 0.012408 | 0.012256 | 0.012358 |
| 0.012664 | 0.012195 | 0.012079 | 0.012072 | 0.012072 | 0.011836 | 0.012045 |
| 0.011937 | 0.011970 | 0.012106 | 0.012072 | 0.012078 | 0.011937 | 0.011870 |
| 0.012038 | 0.011970 | 0.012004 | 0.012038 | 0.011937 | 0.012004 | 0.011903 |
| 0.011970 | 0.012004 | 0.011970 | 0.011937 | 0.012038 | 0.011970 | 0.012004 |
| 0.012004 | 0.011937 | 0.012004 | 0.012038 | 0.011937 | 0.012139 | 0.012173 |
| 0.012072 | 0.012072 | 0.012072 | 0.012072 | 0.012004 | 0.012140 | 0.012038 |
| 0.011794 | 0.012004 | 0.011971 | 0.011980 | 0.012106 | 0.012105 | 0.012106 |
| 0.012106 | 0.012038 | 0.012004 | 0.012038 | 0.012139 | 0.012139 | 0.012072 |
| 0.012072 | 0.012207 | 0.012106 | 0.012105 | 0.012308 | 0.012308 | 0.012173 |
| 0.012004 | 0.012072 | 0.012106 | 0.012241 | 0.012073 | 0.012106 | 0.012072 |
| 0.012106 | 0.011970 | 0.011970 | 0.012275 | 0.012275 | 0.012241 | 0.012038 |

|          |          |          |          |          |          |          |
|----------|----------|----------|----------|----------|----------|----------|
| 0.012139 | 0.012207 | 0.012072 | 0.012139 | 0.012105 | 0.011970 | 0.012038 |
| 0.012072 | 0.012038 | 0.011970 | 0.012207 | 0.012038 | 0.012139 | 0.012174 |
| 0.012004 | 0.012186 | 0.012173 | 0.011833 | 0.011624 | 0.012014 | 0.011731 |
| 0.011829 | 0.012034 | 0.011939 | 0.012088 | 0.011988 | 0.011824 | 0.011910 |
| 0.011877 | 0.011653 | 0.011951 | 0.011721 | 0.011815 | 0.011998 | 0.012196 |
| 0.012153 | 0.012044 | 0.012047 | 0.011976 | 0.012076 | 0.011937 | 0.012005 |
| 0.011971 | 0.012073 | 0.012181 | 0.011979 | 0.012320 | 0.012338 | 0.012038 |
| 0.012038 | 0.012106 | 0.012038 | 0.012072 | 0.011937 | 0.011903 | 0.011971 |
| 0.012038 | 0.012038 | 0.012004 | 0.011970 | 0.011970 | 0.011970 | 0.012072 |
| 0.011971 | 0.012008 | 0.011988 | 0.011987 | 0.012158 | 0.012122 | 0.012122 |
| 0.012119 | 0.012072 | 0.011875 | 0.011818 | 0.011977 | 0.012148 | 0.012149 |
| 0.012004 | 0.012011 | 0.012276 | 0.012247 | 0.012207 | 0.012241 | 0.012173 |
| 0.012105 | 0.012105 | 0.012173 | 0.012072 | 0.012377 | 0.012241 | 0.012309 |
| 0.012342 | 0.012098 | 0.012054 | 0.012137 | 0.012004 | 0.012207 | 0.012173 |
| 0.012142 | 0.012207 | 0.012241 | 0.012241 | 0.012480 | 0.012376 | 0.012035 |
| 0.011909 | 0.011930 | 0.012017 | 0.011981 | 0.012021 | 0.011997 | 0.011981 |
| 0.012059 | 0.011808 | 0.012016 | 0.012037 | 0.012038 | 0.012055 | 0.012004 |
| 0.011970 | 0.011903 | 0.012038 | 0.012004 | 0.011937 | 0.011903 | 0.011836 |
| 0.011937 | 0.012004 | 0.012004 | 0.012004 | 0.012038 | 0.012038 | 0.012044 |
| 0.012113 | 0.012038 | 0.012038 | 0.012076 | 0.011937 | 0.012005 | 0.011971 |
| 0.012073 | 0.012181 | 0.011979 | 0.012320 | 0.012338 | 0.012038 | 0.012240 |
| 0.012173 | 0.012173 | 0.011977 | 0.012213 | 0.012106 | 0.012120 | 0.011972 |
| 0.012199 | 0.012338 | 0.012165 | 0.012084 | 0.011971 | 0.012173 | 0.012038 |
| 0.012139 | 0.012072 | 0.011970 | 0.012075 | 0.012173 | 0.012180 | 0.012072 |
| 0.011970 | 0.011907 | 0.012038 | 0.011970 | 0.011903 | 0.011879 | 0.012173 |
| 0.012072 | 0.012004 | 0.012038 | 0.012072 | 0.012038 | 0.011970 | 0.011869 |
| 0.012038 | 0.012072 | 0.012072 | 0.012004 | 0.012072 | 0.012308 | 0.011903 |
| 0.012004 | 0.012140 | 0.012004 | 0.012038 | 0.012004 | 0.012106 | 0.011918 |
| 0.012185 | 0.011698 | 0.011662 | 0.011785 | 0.011875 | 0.011886 | 0.011729 |
| 0.011585 | 0.011903 | 0.012004 | 0.012116 | 0.011971 | 0.012043 | 0.012241 |
| 0.012140 | 0.012180 | 0.012139 | 0.012326 | 0.012106 | 0.012952 | 0.012140 |
| 0.012850 | 0.012613 | 0.012753 | 0.013055 | 0.012106 | 0.012004 | 0.012106 |
| 0.012749 | 0.012277 | 0.012072 | 0.011971 | 0.012038 | 0.012038 | 0.012012 |
| 0.011903 | 0.011841 | 0.011971 | 0.011937 | 0.011836 | 0.011903 | 0.011903 |
| 0.011803 | 0.011937 | 0.000000 | 0.011737 | 0.012749 | 0.012759 | 0.012817 |
| 0.012817 | 0.012851 | 0.012769 | 0.012817 | 0.012817 | 0.012105 | 0.012342 |
| 0.012410 | 0.012884 | 0.012419 | 0.012444 | 0.012208 | 0.011978 | 0.011869 |
| 0.011836 | 0.011836 | 0.012275 | 0.012257 | 0.012401 | 0.012139 | 0.011836 |
| S829     | 0.012143 | 0.012143 | 0.011974 | 0.011940 | 0.011940 | 0.012008 |
| 0.011848 | 0.011745 | 0.011940 | 0.011737 | 0.011770 | 0.011771 | 0.011737 |
| 0.011703 | 0.011940 | 0.011669 | 0.011770 | 0.011838 | 0.011804 | 0.011770 |
| 0.011737 | 0.011770 | 0.011601 | 0.011737 | 0.011771 | 0.011737 | 0.011813 |
| 0.011737 | 0.011771 | 0.011669 | 0.011635 | 0.011737 | 0.011804 | 0.011838 |
| 0.011804 | 0.011906 | 0.011804 | 0.011804 | 0.011838 | 0.011804 | 0.011974 |
| 0.011669 | 0.011804 | 0.011838 | 0.011770 | 0.011804 | 0.011906 | 0.011838 |
| 0.011804 | 0.011974 | 0.011839 | 0.011872 | 0.011804 | 0.012075 | 0.011804 |
| 0.011770 | 0.011805 | 0.011906 | 0.012075 | 0.011906 | 0.011804 | 0.011838 |
| 0.011838 | 0.011906 | 0.011771 | 0.012041 | 0.012008 | 0.011804 | 0.011872 |
| 0.011770 | 0.011838 | 0.011838 | 0.011872 | 0.011804 | 0.011838 | 0.011838 |
| 0.011737 | 0.011737 | 0.011737 | 0.011771 | 0.011804 | 0.011838 | 0.011906 |
| 0.011838 | 0.011804 | 0.011872 | 0.011737 | 0.011838 | 0.011737 | 0.011770 |
| 0.011974 | 0.011906 | 0.011940 | 0.011974 | 0.011804 | 0.012041 | 0.011804 |
| 0.011913 | 0.011807 | 0.011966 | 0.011607 | 0.011658 | 0.011797 | 0.011493 |
| 0.012196 | 0.011518 | 0.011678 | 0.012041 | 0.012008 | 0.011737 | 0.011872 |
| 0.011872 | 0.011838 | 0.011906 | 0.011804 | 0.011872 | 0.011804 | 0.011838 |
| 0.011804 | 0.011804 | 0.012075 | 0.011974 | 0.011872 | 0.011839 | 0.011771 |
| 0.011737 | 0.011669 | 0.011804 | 0.011737 | 0.011703 | 0.011669 | 0.011601 |
| 0.011703 | 0.011771 | 0.011770 | 0.011770 | 0.011804 | 0.011804 | 0.011809 |
| 0.011878 | 0.011804 | 0.011804 | 0.011675 | 0.011752 | 0.011730 | 0.011804 |
| 0.011810 | 0.011682 | 0.011799 | 0.011754 | 0.011710 | 0.011749 | 0.011774 |

|          |          |          |          |          |          |          |
|----------|----------|----------|----------|----------|----------|----------|
| 0.011749 | 0.011789 | 0.011857 | 0.011737 | 0.011721 | 0.011873 | 0.011771 |
| 0.011838 | 0.011840 | 0.011838 | 0.011906 | 0.011872 | 0.012245 | 0.011940 |
| 0.011804 | 0.011872 | 0.011804 | 0.011838 | 0.011703 | 0.011669 | 0.011703 |
| 0.011804 | 0.011804 | 0.011737 | 0.011737 | 0.011770 | 0.011737 | 0.011838 |
| 0.011804 | 0.011906 | 0.011838 | 0.011737 | 0.011841 | 0.011940 | 0.011946 |
| 0.011940 | 0.011838 | 0.011737 | 0.011672 | 0.011804 | 0.011737 | 0.011669 |
| 0.011642 | 0.011940 | 0.011737 | 0.011940 | 0.011703 | 0.011804 | 0.011770 |
| 0.011872 | 0.011770 | 0.011804 | 0.011771 | 0.011804 | 0.011669 | 0.011770 |
| 0.011838 | 0.011770 | 0.011838 | 0.011770 | 0.011804 | 0.011838 | 0.012007 |
| 0.011839 | 0.011838 | 0.011906 | 0.011940 | 0.011906 | 0.011804 | 0.011770 |
| 0.011739 | 0.012073 | 0.011982 | 0.011713 | 0.011915 | 0.011678 | 0.011809 |
| 0.011881 | 0.011813 | 0.011974 | 0.012143 | 0.011886 | 0.012042 | 0.012008 |
| 0.011940 | 0.012075 | 0.011955 | 0.011849 | 0.011905 | 0.011838 | 0.011913 |
| 0.012008 | 0.011909 | 0.012048 | 0.012117 | 0.011974 | 0.012109 | 0.012220 |
| 0.011913 | 0.012120 | 0.012049 | 0.011980 | 0.012246 | 0.011703 | 0.011909 |
| 0.011872 | 0.011804 | 0.011669 | 0.011703 | 0.011770 | 0.011770 | 0.011838 |
| 0.011770 | 0.011838 | 0.011737 | 0.011771 | 0.011770 | 0.011770 | 0.011838 |
| 0.011770 | 0.011940 | 0.011839 | 0.011872 | 0.011669 | 0.011770 | 0.011804 |
| 0.011804 | 0.011770 | 0.011838 | 0.011804 | 0.011737 | 0.011737 | 0.011737 |
| 0.012008 | 0.011804 | 0.011906 | 0.011703 | 0.011804 | 0.011974 | 0.011737 |
| 0.011737 | 0.011770 | 0.011770 | 0.011940 | 0.011737 | 0.011669 | 0.011804 |
| 0.011737 | 0.011770 | 0.011770 | 0.011703 | 0.011703 | 0.011872 | 0.011804 |
| 0.011703 | 0.011804 | 0.011669 | 0.011703 | 0.011838 | 0.011636 | 0.011737 |
| 0.011703 | 0.011838 | 0.011771 | 0.011669 | 0.011737 | 0.011669 | 0.011838 |
| 0.011888 | 0.011737 | 0.011771 | 0.011805 | 0.011838 | 0.011770 | 0.011872 |
| 0.011737 | 0.012075 | 0.011669 | 0.011872 | 0.011669 | 0.011669 | 0.011669 |
| 0.011872 | 0.011838 | 0.011771 | 0.011872 | 0.011703 | 0.011839 | 0.011669 |
| 0.011737 | 0.011737 | 0.011770 | 0.011872 | 0.011770 | 0.011872 | 0.011940 |
| 0.011940 | 0.011906 | 0.011804 | 0.011906 | 0.011872 | 0.011737 | 0.011703 |
| 0.011737 | 0.011737 | 0.011771 | 0.011669 | 0.011703 | 0.011838 | 0.011737 |
| 0.011703 | 0.011770 | 0.011906 | 0.011872 | 0.011804 | 0.011770 | 0.011771 |
| 0.011838 | 0.011770 | 0.011872 | 0.011737 | 0.011872 | 0.011974 | 0.011940 |
| 0.011770 | 0.011873 | 0.011786 | 0.018245 | 0.011387 | 0.011918 | 0.011863 |
| 0.011822 | 0.011835 | 0.011846 | 0.011524 | 0.011830 | 0.011890 | 0.011789 |
| 0.011724 | 0.011610 | 0.011606 | 0.011773 | 0.011685 | 0.011702 | 0.011706 |
| 0.011577 | 0.011582 | 0.011580 | 0.011457 | 0.011906 | 0.011940 | 0.011912 |
| 0.011821 | 0.011906 | 0.011872 | 0.011804 | 0.011805 | 0.011805 | 0.011805 |
| 0.011838 | 0.011770 | 0.011804 | 0.011838 | 0.011804 | 0.011737 | 0.011770 |
| 0.011770 | 0.011804 | 0.011737 | 0.011804 | 0.011872 | 0.011906 | 0.011804 |
| 0.011770 | 0.011737 | 0.011872 | 0.011872 | 0.011839 | 0.011907 | 0.011940 |
| 0.011703 | 0.011703 | 0.011737 | 0.011838 | 0.011703 | 0.011940 | 0.011940 |
| 0.011974 | 0.011974 | 0.011872 | 0.012008 | 0.011906 | 0.012010 | 0.011838 |
| 0.011838 | 0.011906 | 0.011940 | 0.011770 | 0.011804 | 0.011770 | 0.011838 |
| 0.011906 | 0.011906 | 0.011940 | 0.011906 | 0.011806 | 0.011974 | 0.011974 |
| 0.011845 | 0.011737 | 0.011838 | 0.011940 | 0.011838 | 0.011906 | 0.011940 |
| 0.012143 | 0.011886 | 0.012042 | 0.012008 | 0.011940 | 0.012075 | 0.011737 |
| 0.011909 | 0.011805 | 0.011770 | 0.011770 | 0.011804 | 0.011737 | 0.011804 |
| 0.011872 | 0.011906 | 0.011804 | 0.011770 | 0.011737 | 0.011872 | 0.011872 |
| 0.011839 | 0.011907 | 0.011974 | 0.011906 | 0.012483 | 0.011959 | 0.011876 |
| 0.011980 | 0.011899 | 0.012050 | 0.011863 | 0.012047 | 0.011963 | 0.011893 |
| 0.012444 | 0.011826 | 0.011957 | 0.011895 | 0.012169 | 0.012019 | 0.012122 |
| 0.012430 | 0.011932 | 0.011844 | 0.011838 | 0.011838 | 0.011601 | 0.011809 |
| 0.011703 | 0.011737 | 0.011872 | 0.011838 | 0.011843 | 0.011703 | 0.011669 |
| 0.011770 | 0.011737 | 0.011770 | 0.011770 | 0.011703 | 0.011770 | 0.011669 |
| 0.011737 | 0.011770 | 0.011737 | 0.011703 | 0.011804 | 0.011737 | 0.011770 |
| 0.011770 | 0.011703 | 0.011770 | 0.011804 | 0.011703 | 0.011906 | 0.011940 |
| 0.011838 | 0.011838 | 0.011838 | 0.011838 | 0.011770 | 0.011906 | 0.011804 |
| 0.011551 | 0.011737 | 0.011737 | 0.011743 | 0.011872 | 0.011838 | 0.011872 |
| 0.011805 | 0.011804 | 0.011770 | 0.011804 | 0.011906 | 0.011906 | 0.011838 |
| 0.011838 | 0.011940 | 0.011872 | 0.011872 | 0.012076 | 0.012076 | 0.011940 |

|          |          |          |          |          |          |          |
|----------|----------|----------|----------|----------|----------|----------|
| 0.011737 | 0.011838 | 0.011805 | 0.012008 | 0.011839 | 0.011872 | 0.011838 |
| 0.011872 | 0.011703 | 0.011703 | 0.012042 | 0.012042 | 0.012008 | 0.011804 |
| 0.011906 | 0.011974 | 0.011804 | 0.011906 | 0.011838 | 0.011737 | 0.011805 |
| 0.011838 | 0.011804 | 0.011703 | 0.011974 | 0.011804 | 0.011906 | 0.011940 |
| 0.011770 | 0.011916 | 0.011872 | 0.011589 | 0.011399 | 0.011778 | 0.011421 |
| 0.011720 | 0.011801 | 0.011728 | 0.011820 | 0.011646 | 0.011518 | 0.011591 |
| 0.011570 | 0.011389 | 0.011617 | 0.011522 | 0.011545 | 0.011730 | 0.011871 |
| 0.011851 | 0.011729 | 0.011836 | 0.011765 | 0.011841 | 0.011703 | 0.011771 |
| 0.011737 | 0.011839 | 0.011946 | 0.011743 | 0.012085 | 0.012022 | 0.011804 |
| 0.011804 | 0.011872 | 0.011804 | 0.011838 | 0.011703 | 0.011669 | 0.011703 |
| 0.011804 | 0.011804 | 0.011737 | 0.011737 | 0.011770 | 0.011737 | 0.011838 |
| 0.011798 | 0.011835 | 0.011818 | 0.011818 | 0.011990 | 0.011954 | 0.011953 |
| 0.011952 | 0.011804 | 0.011692 | 0.011640 | 0.011810 | 0.011981 | 0.011948 |
| 0.011771 | 0.011844 | 0.012076 | 0.012046 | 0.011940 | 0.012008 | 0.011940 |
| 0.011872 | 0.011872 | 0.011940 | 0.011838 | 0.012144 | 0.011974 | 0.012076 |
| 0.012109 | 0.011814 | 0.011816 | 0.011897 | 0.011770 | 0.011974 | 0.011940 |
| 0.011942 | 0.011974 | 0.012008 | 0.012008 | 0.012129 | 0.012143 | 0.011793 |
| 0.011673 | 0.011688 | 0.011780 | 0.011744 | 0.011783 | 0.011736 | 0.011745 |
| 0.011820 | 0.011590 | 0.011828 | 0.011814 | 0.011804 | 0.011887 | 0.011771 |
| 0.011737 | 0.011669 | 0.011804 | 0.011737 | 0.011703 | 0.011669 | 0.011601 |
| 0.011703 | 0.011771 | 0.011770 | 0.011770 | 0.011804 | 0.011804 | 0.011809 |
| 0.011878 | 0.011804 | 0.011804 | 0.011841 | 0.011703 | 0.011771 | 0.011737 |
| 0.011839 | 0.011946 | 0.011743 | 0.012085 | 0.012022 | 0.011804 | 0.011974 |
| 0.011940 | 0.011940 | 0.011775 | 0.011971 | 0.011864 | 0.011884 | 0.011763 |
| 0.011960 | 0.012112 | 0.011997 | 0.011847 | 0.011737 | 0.011940 | 0.011804 |
| 0.011906 | 0.011838 | 0.011737 | 0.011841 | 0.011940 | 0.011946 | 0.011838 |
| 0.011737 | 0.011672 | 0.011804 | 0.011737 | 0.011669 | 0.011642 | 0.011940 |
| 0.011838 | 0.011770 | 0.011804 | 0.011838 | 0.011804 | 0.011737 | 0.011635 |
| 0.011804 | 0.011838 | 0.011838 | 0.011770 | 0.011838 | 0.012042 | 0.011669 |
| 0.011770 | 0.011906 | 0.011770 | 0.011804 | 0.011770 | 0.011872 | 0.011704 |
| 0.011960 | 0.011528 | 0.011461 | 0.011625 | 0.011671 | 0.011635 | 0.011479 |
| 0.011375 | 0.011669 | 0.011771 | 0.011880 | 0.011737 | 0.011840 | 0.012008 |
| 0.011907 | 0.011946 | 0.011906 | 0.012121 | 0.011838 | 0.012720 | 0.011906 |
| 0.012585 | 0.012381 | 0.012520 | 0.012824 | 0.011838 | 0.011737 | 0.011872 |
| 0.012517 | 0.012076 | 0.011838 | 0.011737 | 0.011805 | 0.011805 | 0.011776 |
| 0.011669 | 0.011638 | 0.011737 | 0.011703 | 0.011602 | 0.011601 | 0.011669 |
| 0.011568 | 0.011703 | 0.011737 | 0.000000 | 0.012518 | 0.012492 | 0.012586 |
| 0.012585 | 0.012619 | 0.012565 | 0.012586 | 0.012586 | 0.011872 | 0.012110 |
| 0.012177 | 0.012652 | 0.012185 | 0.012178 | 0.011975 | 0.011742 | 0.011635 |
| 0.011601 | 0.011601 | 0.012042 | 0.012054 | 0.012193 | 0.011838 | 0.011602 |
| S830     | 0.012408 | 0.012408 | 0.012543 | 0.012475 | 0.012475 | 0.012543 |
| 0.012287 | 0.012184 | 0.012475 | 0.012036 | 0.012104 | 0.012071 | 0.012036 |
| 0.012003 | 0.012239 | 0.011969 | 0.012070 | 0.012138 | 0.012104 | 0.012070 |
| 0.012036 | 0.012070 | 0.012104 | 0.012038 | 0.012071 | 0.012070 | 0.012252 |
| 0.012239 | 0.012070 | 0.011969 | 0.012138 | 0.012138 | 0.012104 | 0.012138 |
| 0.012104 | 0.012205 | 0.012104 | 0.012104 | 0.012138 | 0.012104 | 0.012239 |
| 0.011969 | 0.012104 | 0.012138 | 0.012070 | 0.012036 | 0.012205 | 0.012138 |
| 0.012104 | 0.012273 | 0.012172 | 0.012374 | 0.012104 | 0.012374 | 0.012104 |
| 0.012070 | 0.012037 | 0.012239 | 0.012374 | 0.012408 | 0.012104 | 0.012205 |
| 0.012138 | 0.012205 | 0.012104 | 0.012340 | 0.012509 | 0.012104 | 0.012171 |
| 0.012070 | 0.012171 | 0.012138 | 0.012205 | 0.012138 | 0.012138 | 0.012138 |
| 0.012036 | 0.012070 | 0.012036 | 0.012070 | 0.012104 | 0.012139 | 0.012205 |
| 0.012138 | 0.012104 | 0.012171 | 0.012070 | 0.012138 | 0.012037 | 0.012104 |
| 0.012272 | 0.012205 | 0.012441 | 0.012273 | 0.012104 | 0.012340 | 0.012104 |
| 0.012249 | 0.012408 | 0.012308 | 0.011960 | 0.011995 | 0.012129 | 0.012125 |
| 0.012783 | 0.012181 | 0.012009 | 0.012340 | 0.012340 | 0.012070 | 0.012172 |
| 0.012171 | 0.012104 | 0.012171 | 0.012104 | 0.012205 | 0.012138 | 0.012104 |
| 0.012070 | 0.012137 | 0.012374 | 0.012272 | 0.012104 | 0.012138 | 0.012070 |
| 0.012036 | 0.011969 | 0.012104 | 0.012070 | 0.012205 | 0.012171 | 0.012104 |
| 0.012205 | 0.012272 | 0.012070 | 0.012070 | 0.012104 | 0.012104 | 0.012110 |

|          |          |          |          |          |          |          |
|----------|----------|----------|----------|----------|----------|----------|
| 0.012179 | 0.012104 | 0.012104 | 0.011961 | 0.012074 | 0.012008 | 0.012104 |
| 0.012112 | 0.012059 | 0.012132 | 0.012062 | 0.011979 | 0.012021 | 0.012075 |
| 0.012251 | 0.012096 | 0.012164 | 0.012037 | 0.012030 | 0.012173 | 0.012071 |
| 0.012139 | 0.012141 | 0.012138 | 0.012205 | 0.012137 | 0.012543 | 0.012273 |
| 0.012306 | 0.012172 | 0.012104 | 0.012138 | 0.012003 | 0.012171 | 0.012037 |
| 0.012104 | 0.012104 | 0.012070 | 0.012036 | 0.012070 | 0.012036 | 0.012138 |
| 0.012104 | 0.012205 | 0.012138 | 0.012036 | 0.012141 | 0.012239 | 0.012212 |
| 0.012239 | 0.012138 | 0.012036 | 0.011939 | 0.012104 | 0.012037 | 0.011970 |
| 0.012048 | 0.012239 | 0.012003 | 0.012239 | 0.012003 | 0.012104 | 0.012070 |
| 0.012171 | 0.012070 | 0.012104 | 0.012070 | 0.012104 | 0.011969 | 0.012104 |
| 0.012138 | 0.012070 | 0.012138 | 0.012070 | 0.012070 | 0.012138 | 0.012340 |
| 0.012408 | 0.012340 | 0.012408 | 0.012243 | 0.012408 | 0.012070 | 0.012070 |
| 0.012008 | 0.012316 | 0.012160 | 0.012023 | 0.012422 | 0.011949 | 0.012124 |
| 0.012320 | 0.012287 | 0.012205 | 0.012442 | 0.012122 | 0.012340 | 0.012307 |
| 0.012239 | 0.012407 | 0.012236 | 0.012134 | 0.012280 | 0.012138 | 0.012180 |
| 0.012306 | 0.012176 | 0.012349 | 0.012384 | 0.012306 | 0.012374 | 0.012488 |
| 0.012214 | 0.012388 | 0.012282 | 0.012248 | 0.012511 | 0.012003 | 0.012209 |
| 0.012171 | 0.012104 | 0.012003 | 0.012003 | 0.012070 | 0.012070 | 0.012138 |
| 0.012070 | 0.012138 | 0.012036 | 0.012070 | 0.012070 | 0.012070 | 0.012137 |
| 0.012070 | 0.012441 | 0.012340 | 0.012374 | 0.011969 | 0.012070 | 0.012104 |
| 0.012104 | 0.012070 | 0.012138 | 0.012104 | 0.012036 | 0.012036 | 0.012036 |
| 0.012509 | 0.012138 | 0.012205 | 0.012003 | 0.012104 | 0.012273 | 0.012037 |
| 0.012036 | 0.012104 | 0.012070 | 0.012239 | 0.012036 | 0.012171 | 0.012306 |
| 0.012239 | 0.012070 | 0.012070 | 0.012003 | 0.012003 | 0.012172 | 0.012104 |
| 0.012003 | 0.012104 | 0.011969 | 0.012003 | 0.012138 | 0.012206 | 0.012037 |
| 0.012004 | 0.012138 | 0.012071 | 0.011969 | 0.012239 | 0.011969 | 0.012138 |
| 0.012227 | 0.012037 | 0.012273 | 0.012172 | 0.012138 | 0.012070 | 0.012171 |
| 0.012036 | 0.012374 | 0.011969 | 0.012172 | 0.011969 | 0.011969 | 0.011969 |
| 0.012205 | 0.012341 | 0.012104 | 0.012171 | 0.012003 | 0.012340 | 0.011969 |
| 0.012037 | 0.012036 | 0.012070 | 0.012171 | 0.012070 | 0.012171 | 0.012239 |
| 0.012239 | 0.012205 | 0.012104 | 0.012205 | 0.012171 | 0.012036 | 0.012003 |
| 0.012036 | 0.012036 | 0.012104 | 0.011969 | 0.012003 | 0.012171 | 0.012036 |
| 0.012003 | 0.012070 | 0.012205 | 0.012171 | 0.012138 | 0.012070 | 0.012071 |
| 0.012138 | 0.012070 | 0.012171 | 0.012036 | 0.012171 | 0.012273 | 0.012441 |
| 0.012070 | 0.012408 | 0.012097 | 0.018586 | 0.012175 | 0.012224 | 0.012388 |
| 0.012343 | 0.012364 | 0.012215 | 0.012164 | 0.012657 | 0.012409 | 0.012277 |
| 0.012105 | 0.012406 | 0.011998 | 0.012109 | 0.012038 | 0.012099 | 0.011922 |
| 0.012188 | 0.012142 | 0.012174 | 0.011921 | 0.012205 | 0.012205 | 0.012213 |
| 0.012093 | 0.012205 | 0.012205 | 0.012104 | 0.012138 | 0.012139 | 0.012105 |
| 0.012138 | 0.012070 | 0.012104 | 0.012138 | 0.012104 | 0.012037 | 0.012036 |
| 0.012036 | 0.012138 | 0.012036 | 0.012138 | 0.012171 | 0.012205 | 0.012070 |
| 0.012070 | 0.012037 | 0.012374 | 0.012374 | 0.012172 | 0.012207 | 0.012239 |
| 0.012003 | 0.012003 | 0.012036 | 0.012138 | 0.012003 | 0.012239 | 0.012239 |
| 0.012205 | 0.012205 | 0.012205 | 0.012239 | 0.012408 | 0.012242 | 0.012138 |
| 0.012138 | 0.012205 | 0.012239 | 0.012070 | 0.012138 | 0.012104 | 0.012138 |
| 0.012206 | 0.012205 | 0.012239 | 0.012138 | 0.012107 | 0.012306 | 0.012272 |
| 0.012147 | 0.012037 | 0.012138 | 0.012239 | 0.012138 | 0.012205 | 0.012306 |
| 0.012442 | 0.012122 | 0.012340 | 0.012307 | 0.012239 | 0.012407 | 0.012003 |
| 0.012209 | 0.012105 | 0.012036 | 0.012036 | 0.012138 | 0.012036 | 0.012138 |
| 0.012171 | 0.012205 | 0.012070 | 0.012070 | 0.012037 | 0.012374 | 0.012374 |
| 0.012172 | 0.012207 | 0.012239 | 0.012171 | 0.011363 | 0.012278 | 0.012189 |
| 0.012259 | 0.012243 | 0.012364 | 0.012242 | 0.012324 | 0.012237 | 0.012201 |
| 0.011335 | 0.012067 | 0.012229 | 0.012135 | 0.012407 | 0.012288 | 0.012391 |
| 0.011332 | 0.012269 | 0.012145 | 0.012138 | 0.012138 | 0.012104 | 0.012111 |
| 0.012003 | 0.012037 | 0.012171 | 0.012138 | 0.012145 | 0.012205 | 0.012174 |
| 0.012104 | 0.012036 | 0.012070 | 0.012104 | 0.012003 | 0.012070 | 0.011969 |
| 0.012036 | 0.012070 | 0.012036 | 0.012003 | 0.012104 | 0.012036 | 0.012070 |
| 0.012070 | 0.012003 | 0.012070 | 0.012104 | 0.012003 | 0.012205 | 0.012239 |
| 0.012138 | 0.012138 | 0.012138 | 0.012138 | 0.012070 | 0.012408 | 0.012104 |
| 0.012107 | 0.012070 | 0.012239 | 0.012251 | 0.012172 | 0.012171 | 0.012171 |

|          |          |          |          |          |          |          |
|----------|----------|----------|----------|----------|----------|----------|
| 0.012172 | 0.012104 | 0.012070 | 0.012104 | 0.012205 | 0.012205 | 0.012138 |
| 0.012138 | 0.012273 | 0.012374 | 0.012171 | 0.012374 | 0.012374 | 0.012239 |
| 0.012070 | 0.012138 | 0.012172 | 0.012509 | 0.012138 | 0.012172 | 0.012138 |
| 0.012171 | 0.011969 | 0.011969 | 0.012341 | 0.012340 | 0.012307 | 0.012104 |
| 0.012205 | 0.012273 | 0.012138 | 0.012205 | 0.012171 | 0.012037 | 0.012306 |
| 0.012138 | 0.012104 | 0.011969 | 0.012273 | 0.012104 | 0.012205 | 0.012441 |
| 0.012070 | 0.012355 | 0.012441 | 0.012159 | 0.011851 | 0.012150 | 0.011990 |
| 0.011996 | 0.012386 | 0.012045 | 0.012224 | 0.011989 | 0.012131 | 0.012071 |
| 0.012235 | 0.011983 | 0.012175 | 0.011986 | 0.012032 | 0.012268 | 0.012157 |
| 0.012192 | 0.012045 | 0.012154 | 0.012119 | 0.012142 | 0.012205 | 0.012273 |
| 0.012272 | 0.012139 | 0.012247 | 0.012250 | 0.012386 | 0.012336 | 0.012104 |
| 0.012306 | 0.012172 | 0.012104 | 0.012138 | 0.012003 | 0.012171 | 0.012037 |
| 0.012104 | 0.012104 | 0.012070 | 0.012036 | 0.012070 | 0.012036 | 0.012138 |
| 0.012110 | 0.012112 | 0.012124 | 0.012124 | 0.012260 | 0.012258 | 0.012258 |
| 0.012255 | 0.012172 | 0.011985 | 0.011926 | 0.012112 | 0.012283 | 0.012284 |
| 0.012071 | 0.012146 | 0.012376 | 0.012347 | 0.012273 | 0.012308 | 0.012205 |
| 0.012171 | 0.012205 | 0.012205 | 0.012137 | 0.012577 | 0.012306 | 0.012307 |
| 0.012408 | 0.012454 | 0.012121 | 0.012206 | 0.012070 | 0.012239 | 0.012205 |
| 0.012275 | 0.012239 | 0.012306 | 0.012306 | 0.012478 | 0.012408 | 0.012104 |
| 0.011975 | 0.011963 | 0.012084 | 0.012048 | 0.012054 | 0.011996 | 0.012253 |
| 0.012126 | 0.012291 | 0.012157 | 0.012074 | 0.012104 | 0.012157 | 0.012070 |
| 0.012036 | 0.011969 | 0.012104 | 0.012070 | 0.012205 | 0.012171 | 0.012104 |
| 0.012205 | 0.012272 | 0.012070 | 0.012070 | 0.012104 | 0.012104 | 0.012110 |
| 0.012179 | 0.012104 | 0.012104 | 0.012142 | 0.012205 | 0.012273 | 0.012272 |
| 0.012139 | 0.012247 | 0.012250 | 0.012386 | 0.012336 | 0.012104 | 0.012306 |
| 0.012205 | 0.012205 | 0.012077 | 0.012281 | 0.012209 | 0.012221 | 0.012078 |
| 0.012268 | 0.012430 | 0.012205 | 0.012150 | 0.012003 | 0.012239 | 0.012104 |
| 0.012205 | 0.012138 | 0.012036 | 0.012141 | 0.012239 | 0.012212 | 0.012138 |
| 0.012036 | 0.011939 | 0.012104 | 0.012037 | 0.011970 | 0.012048 | 0.012239 |
| 0.012138 | 0.012070 | 0.012104 | 0.012138 | 0.012104 | 0.012037 | 0.012171 |
| 0.012104 | 0.012138 | 0.012138 | 0.012070 | 0.012138 | 0.012374 | 0.011969 |
| 0.012070 | 0.012408 | 0.012070 | 0.012104 | 0.012070 | 0.012374 | 0.011961 |
| 0.012299 | 0.011911 | 0.011913 | 0.012189 | 0.012202 | 0.012211 | 0.011813 |
| 0.011848 | 0.012171 | 0.012273 | 0.012387 | 0.012241 | 0.012382 | 0.012510 |
| 0.012409 | 0.012451 | 0.012407 | 0.012670 | 0.012374 | 0.013219 | 0.012410 |
| 0.013151 | 0.012885 | 0.013021 | 0.013326 | 0.012374 | 0.012070 | 0.012374 |
| 0.011531 | 0.012751 | 0.012340 | 0.012239 | 0.012307 | 0.012307 | 0.012282 |
| 0.012171 | 0.012182 | 0.012239 | 0.012206 | 0.012577 | 0.012644 | 0.012644 |
| 0.012545 | 0.012644 | 0.012749 | 0.012518 | 0.000000 | 0.011365 | 0.011464 |
| 0.011464 | 0.011498 | 0.011435 | 0.011464 | 0.011465 | 0.012137 | 0.011599 |
| 0.012476 | 0.012880 | 0.011603 | 0.012712 | 0.013186 | 0.012216 | 0.012138 |
| 0.012104 | 0.012104 | 0.012577 | 0.012751 | 0.012717 | 0.012441 | 0.012107 |
| S831     | 0.012415 | 0.012415 | 0.012551 | 0.012483 | 0.012483 | 0.012551 |
| 0.012294 | 0.012191 | 0.012483 | 0.012042 | 0.012110 | 0.012077 | 0.012042 |
| 0.012008 | 0.012246 | 0.011974 | 0.012076 | 0.012144 | 0.012110 | 0.012076 |
| 0.012042 | 0.012076 | 0.012110 | 0.012043 | 0.012077 | 0.012076 | 0.012259 |
| 0.012246 | 0.012076 | 0.011974 | 0.012144 | 0.012144 | 0.012110 | 0.012144 |
| 0.012076 | 0.012212 | 0.012110 | 0.012110 | 0.012144 | 0.012110 | 0.012246 |
| 0.011974 | 0.012110 | 0.012110 | 0.012076 | 0.012110 | 0.012212 | 0.012110 |
| 0.012110 | 0.012280 | 0.012179 | 0.012381 | 0.012110 | 0.012381 | 0.012110 |
| 0.012076 | 0.012110 | 0.012246 | 0.012381 | 0.012415 | 0.012110 | 0.012212 |
| 0.012144 | 0.012212 | 0.012110 | 0.012347 | 0.012517 | 0.012110 | 0.012144 |
| 0.012042 | 0.012178 | 0.012144 | 0.012212 | 0.012144 | 0.012144 | 0.012144 |
| 0.012042 | 0.012076 | 0.012042 | 0.012076 | 0.012110 | 0.012146 | 0.012211 |
| 0.012144 | 0.012110 | 0.012178 | 0.012076 | 0.012144 | 0.012042 | 0.012110 |
| 0.012279 | 0.012211 | 0.012449 | 0.012280 | 0.012110 | 0.012347 | 0.012110 |
| 0.012256 | 0.012416 | 0.012277 | 0.011966 | 0.012038 | 0.012173 | 0.012172 |
| 0.012868 | 0.012138 | 0.012016 | 0.012347 | 0.012347 | 0.012076 | 0.012178 |
| 0.012178 | 0.012110 | 0.012178 | 0.012110 | 0.012212 | 0.012144 | 0.012110 |
| 0.012076 | 0.012144 | 0.012381 | 0.012279 | 0.012110 | 0.012110 | 0.012076 |



|          |          |          |          |          |          |          |
|----------|----------|----------|----------|----------|----------|----------|
| 0.012042 | 0.011974 | 0.012110 | 0.012076 | 0.012212 | 0.012178 | 0.012110 |
| 0.012212 | 0.012279 | 0.012076 | 0.012076 | 0.012110 | 0.012110 | 0.012116 |
| 0.012185 | 0.012110 | 0.012110 | 0.012003 | 0.012081 | 0.012014 | 0.012110 |
| 0.012118 | 0.012064 | 0.012139 | 0.012103 | 0.011984 | 0.012027 | 0.012081 |
| 0.012294 | 0.012102 | 0.012171 | 0.012042 | 0.012070 | 0.012179 | 0.012077 |
| 0.012145 | 0.012147 | 0.012144 | 0.012211 | 0.012144 | 0.012551 | 0.012280 |
| 0.012313 | 0.012178 | 0.012110 | 0.012144 | 0.012008 | 0.012178 | 0.012042 |
| 0.012110 | 0.012110 | 0.012076 | 0.012042 | 0.012076 | 0.012042 | 0.012144 |
| 0.012110 | 0.012212 | 0.012144 | 0.012042 | 0.012148 | 0.012246 | 0.012219 |
| 0.012246 | 0.012144 | 0.012042 | 0.011944 | 0.012110 | 0.012042 | 0.011975 |
| 0.012053 | 0.012246 | 0.012008 | 0.012246 | 0.012008 | 0.012110 | 0.012076 |
| 0.012178 | 0.012076 | 0.012110 | 0.012076 | 0.012110 | 0.011974 | 0.012110 |
| 0.012144 | 0.012076 | 0.012144 | 0.012076 | 0.012076 | 0.012144 | 0.012313 |
| 0.012415 | 0.012347 | 0.012415 | 0.012249 | 0.012416 | 0.012076 | 0.012076 |
| 0.012013 | 0.012363 | 0.012118 | 0.012028 | 0.012430 | 0.011954 | 0.012131 |
| 0.012328 | 0.012294 | 0.012212 | 0.012449 | 0.012128 | 0.012347 | 0.012314 |
| 0.012246 | 0.012415 | 0.012208 | 0.012142 | 0.012203 | 0.012144 | 0.012186 |
| 0.012313 | 0.012149 | 0.012323 | 0.012358 | 0.012313 | 0.012382 | 0.012462 |
| 0.012221 | 0.012396 | 0.012289 | 0.012254 | 0.012519 | 0.012008 | 0.012216 |
| 0.012178 | 0.012110 | 0.012008 | 0.012008 | 0.012076 | 0.012076 | 0.012144 |
| 0.012076 | 0.012144 | 0.012042 | 0.012076 | 0.012076 | 0.012076 | 0.012144 |
| 0.012076 | 0.012449 | 0.012348 | 0.012381 | 0.011974 | 0.012076 | 0.012110 |
| 0.012110 | 0.012076 | 0.012144 | 0.012110 | 0.012042 | 0.012042 | 0.012042 |
| 0.012517 | 0.012144 | 0.012144 | 0.012008 | 0.012110 | 0.012280 | 0.012042 |
| 0.012042 | 0.012110 | 0.012076 | 0.012246 | 0.012042 | 0.012178 | 0.012313 |
| 0.012246 | 0.012076 | 0.012076 | 0.012008 | 0.012008 | 0.012178 | 0.012110 |
| 0.012008 | 0.012110 | 0.011974 | 0.012008 | 0.012144 | 0.012212 | 0.012042 |
| 0.012009 | 0.012144 | 0.012077 | 0.011974 | 0.012246 | 0.011974 | 0.012144 |
| 0.012234 | 0.012042 | 0.012279 | 0.012178 | 0.012144 | 0.012076 | 0.012178 |
| 0.012042 | 0.012381 | 0.011974 | 0.012178 | 0.011974 | 0.011974 | 0.011974 |
| 0.012212 | 0.012348 | 0.012110 | 0.012178 | 0.012008 | 0.012348 | 0.011974 |
| 0.012042 | 0.012042 | 0.012076 | 0.012178 | 0.012076 | 0.012178 | 0.012246 |
| 0.012246 | 0.012212 | 0.012110 | 0.012212 | 0.012178 | 0.012042 | 0.012008 |
| 0.012042 | 0.012042 | 0.012110 | 0.011974 | 0.012008 | 0.012178 | 0.012042 |
| 0.012008 | 0.012076 | 0.012212 | 0.012178 | 0.012144 | 0.012076 | 0.012076 |
| 0.012144 | 0.012076 | 0.012178 | 0.012042 | 0.012178 | 0.012279 | 0.012449 |
| 0.012076 | 0.012415 | 0.012103 | 0.018710 | 0.012119 | 0.012236 | 0.012396 |
| 0.012350 | 0.012408 | 0.012170 | 0.012115 | 0.012502 | 0.012417 | 0.012221 |
| 0.012113 | 0.012295 | 0.012004 | 0.012115 | 0.012043 | 0.012057 | 0.011971 |
| 0.012197 | 0.012224 | 0.012181 | 0.011929 | 0.012212 | 0.012212 | 0.012220 |
| 0.012065 | 0.012212 | 0.012212 | 0.012110 | 0.012144 | 0.012145 | 0.012111 |
| 0.012144 | 0.012076 | 0.012110 | 0.012144 | 0.012110 | 0.012042 | 0.012042 |
| 0.012042 | 0.012144 | 0.012042 | 0.012144 | 0.012178 | 0.012212 | 0.012076 |
| 0.012076 | 0.012042 | 0.012381 | 0.012381 | 0.012144 | 0.012214 | 0.012246 |
| 0.012008 | 0.012008 | 0.012042 | 0.012144 | 0.012008 | 0.012246 | 0.012246 |
| 0.012279 | 0.012212 | 0.012212 | 0.012313 | 0.012415 | 0.012317 | 0.012144 |
| 0.012144 | 0.012212 | 0.012246 | 0.012076 | 0.012144 | 0.012110 | 0.012144 |
| 0.012212 | 0.012211 | 0.012245 | 0.012212 | 0.012113 | 0.012313 | 0.012279 |
| 0.012151 | 0.012042 | 0.012144 | 0.012246 | 0.012144 | 0.012212 | 0.012279 |
| 0.012449 | 0.012128 | 0.012347 | 0.012314 | 0.012246 | 0.012415 | 0.012043 |
| 0.012215 | 0.012111 | 0.012042 | 0.012042 | 0.012144 | 0.012042 | 0.012144 |
| 0.012178 | 0.012212 | 0.012076 | 0.012076 | 0.012042 | 0.012381 | 0.012381 |
| 0.012144 | 0.012214 | 0.012245 | 0.012178 | 0.011297 | 0.012250 | 0.012196 |
| 0.012230 | 0.012215 | 0.012336 | 0.012214 | 0.012296 | 0.012209 | 0.012208 |
| 0.011233 | 0.012038 | 0.012201 | 0.012107 | 0.012380 | 0.012261 | 0.012365 |
| 0.011129 | 0.012239 | 0.012152 | 0.012144 | 0.012144 | 0.012110 | 0.012117 |
| 0.012008 | 0.012042 | 0.012178 | 0.012144 | 0.012151 | 0.012211 | 0.012181 |
| 0.012110 | 0.012042 | 0.012076 | 0.012110 | 0.012008 | 0.012076 | 0.011974 |
| 0.012042 | 0.012076 | 0.012042 | 0.012008 | 0.012110 | 0.012042 | 0.012076 |
| 0.012076 | 0.012008 | 0.012076 | 0.012110 | 0.012008 | 0.012212 | 0.012246 |

|          |          |          |          |          |          |          |
|----------|----------|----------|----------|----------|----------|----------|
| 0.012144 | 0.012144 | 0.012144 | 0.012110 | 0.012076 | 0.012415 | 0.012110 |
| 0.012113 | 0.012076 | 0.012246 | 0.012258 | 0.012178 | 0.012178 | 0.012178 |
| 0.012178 | 0.012110 | 0.012076 | 0.012110 | 0.012212 | 0.012212 | 0.012144 |
| 0.012144 | 0.012280 | 0.012381 | 0.012178 | 0.012382 | 0.012382 | 0.012245 |
| 0.012076 | 0.012144 | 0.012178 | 0.012517 | 0.012145 | 0.012178 | 0.012144 |
| 0.012178 | 0.011974 | 0.011974 | 0.012314 | 0.012348 | 0.012280 | 0.012110 |
| 0.012212 | 0.012280 | 0.012144 | 0.012212 | 0.012178 | 0.012042 | 0.012313 |
| 0.012144 | 0.012110 | 0.011974 | 0.012280 | 0.012110 | 0.012212 | 0.012449 |
| 0.012076 | 0.012362 | 0.012449 | 0.012208 | 0.011800 | 0.012156 | 0.011945 |
| 0.011948 | 0.012474 | 0.012086 | 0.012187 | 0.011946 | 0.012088 | 0.012025 |
| 0.012244 | 0.011925 | 0.012128 | 0.011928 | 0.011930 | 0.012211 | 0.012082 |
| 0.012161 | 0.012092 | 0.012161 | 0.012160 | 0.012148 | 0.012211 | 0.012280 |
| 0.012279 | 0.012145 | 0.012254 | 0.012257 | 0.012394 | 0.012341 | 0.012110 |
| 0.012313 | 0.012178 | 0.012110 | 0.012144 | 0.012008 | 0.012178 | 0.012042 |
| 0.012110 | 0.012110 | 0.012076 | 0.012042 | 0.012076 | 0.012042 | 0.012144 |
| 0.012152 | 0.012118 | 0.012130 | 0.012130 | 0.012267 | 0.012265 | 0.012264 |
| 0.012262 | 0.012178 | 0.011991 | 0.011967 | 0.012118 | 0.012290 | 0.012291 |
| 0.012077 | 0.012152 | 0.012383 | 0.012354 | 0.012280 | 0.012315 | 0.012212 |
| 0.012178 | 0.012212 | 0.012211 | 0.012144 | 0.012586 | 0.012313 | 0.012280 |
| 0.012415 | 0.012462 | 0.012127 | 0.012212 | 0.012076 | 0.012245 | 0.012212 |
| 0.012282 | 0.012245 | 0.012313 | 0.012313 | 0.012406 | 0.012415 | 0.012040 |
| 0.011981 | 0.011933 | 0.012090 | 0.012019 | 0.012060 | 0.011926 | 0.012260 |
| 0.012133 | 0.012211 | 0.012070 | 0.012042 | 0.012110 | 0.012164 | 0.012076 |
| 0.012042 | 0.011974 | 0.012110 | 0.012076 | 0.012212 | 0.012178 | 0.012110 |
| 0.012212 | 0.012279 | 0.012076 | 0.012076 | 0.012110 | 0.012110 | 0.012116 |
| 0.012185 | 0.012110 | 0.012110 | 0.012148 | 0.012211 | 0.012280 | 0.012279 |
| 0.012145 | 0.012254 | 0.012257 | 0.012394 | 0.012341 | 0.012110 | 0.012279 |
| 0.012212 | 0.012212 | 0.012083 | 0.012252 | 0.012216 | 0.012228 | 0.012084 |
| 0.012275 | 0.012391 | 0.012167 | 0.012157 | 0.012008 | 0.012246 | 0.012110 |
| 0.012212 | 0.012144 | 0.012042 | 0.012148 | 0.012246 | 0.012219 | 0.012144 |
| 0.012042 | 0.011944 | 0.012110 | 0.012042 | 0.011975 | 0.012053 | 0.012246 |
| 0.012144 | 0.012076 | 0.012110 | 0.012144 | 0.012110 | 0.012042 | 0.012177 |
| 0.012110 | 0.012144 | 0.012144 | 0.012076 | 0.012144 | 0.012381 | 0.011974 |
| 0.012042 | 0.012415 | 0.012076 | 0.012110 | 0.012076 | 0.012381 | 0.012055 |
| 0.012308 | 0.011961 | 0.011920 | 0.012279 | 0.012251 | 0.012254 | 0.011903 |
| 0.011855 | 0.012178 | 0.012280 | 0.012395 | 0.012247 | 0.012390 | 0.012518 |
| 0.012417 | 0.012459 | 0.012415 | 0.012679 | 0.012381 | 0.013061 | 0.012418 |
| 0.013163 | 0.012895 | 0.013032 | 0.013339 | 0.012381 | 0.012076 | 0.012381 |
| 0.011534 | 0.012761 | 0.012347 | 0.012246 | 0.012314 | 0.012314 | 0.012289 |
| 0.012178 | 0.012188 | 0.012245 | 0.012212 | 0.012586 | 0.012653 | 0.012654 |
| 0.012554 | 0.012653 | 0.012759 | 0.012492 | 0.011365 | 0.000000 | 0.011399 |
| 0.011263 | 0.011500 | 0.011437 | 0.011466 | 0.011467 | 0.012144 | 0.011602 |
| 0.012484 | 0.012891 | 0.011606 | 0.012721 | 0.013198 | 0.012223 | 0.012144 |
| 0.012110 | 0.012110 | 0.012585 | 0.012680 | 0.012727 | 0.012449 | 0.012045 |
| S832     | 0.012475 | 0.012475 | 0.012610 | 0.012542 | 0.012542 | 0.012610 |
| 0.012355 | 0.012252 | 0.012542 | 0.012104 | 0.012171 | 0.012139 | 0.012104 |
| 0.012070 | 0.012306 | 0.012036 | 0.012137 | 0.012205 | 0.012171 | 0.012137 |
| 0.012104 | 0.012137 | 0.012171 | 0.012105 | 0.012138 | 0.012137 | 0.012320 |
| 0.012306 | 0.012137 | 0.012036 | 0.012205 | 0.012205 | 0.012171 | 0.012205 |
| 0.012171 | 0.012272 | 0.012171 | 0.012171 | 0.012205 | 0.012171 | 0.012306 |
| 0.012036 | 0.012171 | 0.012205 | 0.012137 | 0.012171 | 0.012272 | 0.012205 |
| 0.012171 | 0.012340 | 0.012239 | 0.012441 | 0.012171 | 0.012441 | 0.012171 |
| 0.012137 | 0.012171 | 0.012306 | 0.012441 | 0.012475 | 0.012171 | 0.012272 |
| 0.012205 | 0.012272 | 0.012171 | 0.012407 | 0.012576 | 0.012171 | 0.012238 |
| 0.012137 | 0.012238 | 0.012205 | 0.012272 | 0.012205 | 0.012137 | 0.012137 |
| 0.012103 | 0.012137 | 0.012103 | 0.012137 | 0.012171 | 0.012207 | 0.012272 |
| 0.012205 | 0.012171 | 0.012238 | 0.012137 | 0.012205 | 0.012104 | 0.012171 |
| 0.012339 | 0.012272 | 0.012508 | 0.012340 | 0.012171 | 0.012407 | 0.012171 |
| 0.012361 | 0.012520 | 0.012421 | 0.012077 | 0.012144 | 0.012240 | 0.012283 |
| 0.012931 | 0.012232 | 0.012009 | 0.012407 | 0.012407 | 0.012137 | 0.012239 |

|          |          |          |          |          |          |          |
|----------|----------|----------|----------|----------|----------|----------|
| 0.012238 | 0.012171 | 0.012238 | 0.012171 | 0.012272 | 0.012205 | 0.012171 |
| 0.012137 | 0.012205 | 0.012441 | 0.012339 | 0.012171 | 0.012205 | 0.012137 |
| 0.012104 | 0.012036 | 0.012171 | 0.012137 | 0.012272 | 0.012238 | 0.012171 |
| 0.012272 | 0.012340 | 0.012137 | 0.012137 | 0.012171 | 0.012171 | 0.012178 |
| 0.012246 | 0.012171 | 0.012171 | 0.012069 | 0.012147 | 0.012079 | 0.012172 |
| 0.012180 | 0.012127 | 0.012243 | 0.012166 | 0.012047 | 0.012090 | 0.012143 |
| 0.012359 | 0.012165 | 0.012233 | 0.012104 | 0.012134 | 0.012240 | 0.012138 |
| 0.012206 | 0.012208 | 0.012205 | 0.012272 | 0.012205 | 0.012610 | 0.012340 |
| 0.012373 | 0.012239 | 0.012171 | 0.012205 | 0.012070 | 0.012238 | 0.012104 |
| 0.012171 | 0.012171 | 0.012137 | 0.012103 | 0.012137 | 0.012103 | 0.012205 |
| 0.012171 | 0.012272 | 0.012205 | 0.012103 | 0.012209 | 0.012306 | 0.012280 |
| 0.012306 | 0.012205 | 0.012103 | 0.012006 | 0.012171 | 0.012104 | 0.012037 |
| 0.012115 | 0.012306 | 0.012070 | 0.012306 | 0.012070 | 0.012171 | 0.012137 |
| 0.012238 | 0.012137 | 0.012171 | 0.012137 | 0.012171 | 0.012036 | 0.012171 |
| 0.012205 | 0.012137 | 0.012205 | 0.012137 | 0.012137 | 0.012205 | 0.012441 |
| 0.012475 | 0.012407 | 0.012475 | 0.012310 | 0.012475 | 0.012137 | 0.012137 |
| 0.012076 | 0.012438 | 0.012344 | 0.012092 | 0.012489 | 0.012017 | 0.012203 |
| 0.012388 | 0.012389 | 0.012272 | 0.012509 | 0.012190 | 0.012407 | 0.012374 |
| 0.012306 | 0.012474 | 0.012307 | 0.012258 | 0.012363 | 0.012205 | 0.012248 |
| 0.012373 | 0.012244 | 0.012417 | 0.012452 | 0.012373 | 0.012441 | 0.012555 |
| 0.012282 | 0.012456 | 0.012350 | 0.012315 | 0.012578 | 0.012070 | 0.012276 |
| 0.012238 | 0.012171 | 0.012070 | 0.012070 | 0.012137 | 0.012137 | 0.012205 |
| 0.012137 | 0.012205 | 0.012103 | 0.012137 | 0.012137 | 0.012137 | 0.012205 |
| 0.012137 | 0.012508 | 0.012407 | 0.012441 | 0.012036 | 0.012137 | 0.012171 |
| 0.012171 | 0.012137 | 0.012205 | 0.012171 | 0.012103 | 0.012103 | 0.012103 |
| 0.012576 | 0.012205 | 0.012272 | 0.012070 | 0.012171 | 0.012340 | 0.012104 |
| 0.012103 | 0.012171 | 0.012137 | 0.012306 | 0.012104 | 0.012238 | 0.012373 |
| 0.012306 | 0.012137 | 0.012137 | 0.012070 | 0.012070 | 0.012239 | 0.012171 |
| 0.012070 | 0.012171 | 0.012036 | 0.012070 | 0.012205 | 0.012273 | 0.012104 |
| 0.012071 | 0.012205 | 0.012138 | 0.012036 | 0.012306 | 0.012036 | 0.012205 |
| 0.012296 | 0.012104 | 0.012340 | 0.012239 | 0.012205 | 0.012137 | 0.012238 |
| 0.012103 | 0.012441 | 0.012036 | 0.012239 | 0.012036 | 0.012036 | 0.012036 |
| 0.012272 | 0.012408 | 0.012171 | 0.012238 | 0.012070 | 0.012407 | 0.012036 |
| 0.012104 | 0.012103 | 0.012137 | 0.012238 | 0.012137 | 0.012238 | 0.012306 |
| 0.012306 | 0.012272 | 0.012171 | 0.012272 | 0.012238 | 0.012103 | 0.012070 |
| 0.012103 | 0.012103 | 0.012171 | 0.012036 | 0.012070 | 0.012238 | 0.012104 |
| 0.012070 | 0.012137 | 0.012272 | 0.012238 | 0.012205 | 0.012137 | 0.012138 |
| 0.012205 | 0.012137 | 0.012238 | 0.012104 | 0.012238 | 0.012340 | 0.012508 |
| 0.012137 | 0.012475 | 0.012166 | 0.018626 | 0.012242 | 0.012408 | 0.012458 |
| 0.012413 | 0.012470 | 0.012424 | 0.012398 | 0.012823 | 0.012479 | 0.012522 |
| 0.012201 | 0.012528 | 0.012116 | 0.012277 | 0.012155 | 0.012297 | 0.012095 |
| 0.012424 | 0.012180 | 0.012323 | 0.011988 | 0.012272 | 0.012272 | 0.012281 |
| 0.012162 | 0.012272 | 0.012272 | 0.012171 | 0.012205 | 0.012206 | 0.012172 |
| 0.012205 | 0.012137 | 0.012171 | 0.012205 | 0.012171 | 0.012104 | 0.012103 |
| 0.012103 | 0.012205 | 0.012104 | 0.012205 | 0.012238 | 0.012272 | 0.012137 |
| 0.012137 | 0.012104 | 0.012441 | 0.012441 | 0.012239 | 0.012274 | 0.012306 |
| 0.012070 | 0.012070 | 0.012104 | 0.012205 | 0.012070 | 0.012306 | 0.012306 |
| 0.012339 | 0.012272 | 0.012272 | 0.012373 | 0.012475 | 0.012377 | 0.012205 |
| 0.012205 | 0.012272 | 0.012306 | 0.012137 | 0.012205 | 0.012171 | 0.012205 |
| 0.012273 | 0.012272 | 0.012306 | 0.012273 | 0.012174 | 0.012373 | 0.012340 |
| 0.012215 | 0.012104 | 0.012205 | 0.012306 | 0.012205 | 0.012272 | 0.012373 |
| 0.012509 | 0.012190 | 0.012407 | 0.012374 | 0.012306 | 0.012474 | 0.012104 |
| 0.012276 | 0.012172 | 0.012103 | 0.012103 | 0.012205 | 0.012104 | 0.012205 |
| 0.012238 | 0.012272 | 0.012137 | 0.012137 | 0.012104 | 0.012441 | 0.012441 |
| 0.012239 | 0.012274 | 0.012306 | 0.012238 | 0.011363 | 0.012349 | 0.012259 |
| 0.012329 | 0.012312 | 0.012434 | 0.012311 | 0.012394 | 0.012305 | 0.012270 |
| 0.011335 | 0.012136 | 0.012297 | 0.012204 | 0.012476 | 0.012356 | 0.012459 |
| 0.011332 | 0.012344 | 0.012213 | 0.012205 | 0.012205 | 0.012171 | 0.012178 |
| 0.012070 | 0.012104 | 0.012238 | 0.012205 | 0.012212 | 0.012272 | 0.012242 |
| 0.012171 | 0.012104 | 0.012137 | 0.012171 | 0.012070 | 0.012137 | 0.012036 |

|          |          |          |          |          |          |          |
|----------|----------|----------|----------|----------|----------|----------|
| 0.012104 | 0.012137 | 0.012103 | 0.012070 | 0.012171 | 0.012103 | 0.012137 |
| 0.012137 | 0.012070 | 0.012137 | 0.012171 | 0.012070 | 0.012272 | 0.012306 |
| 0.012205 | 0.012205 | 0.012205 | 0.012205 | 0.012137 | 0.012475 | 0.012171 |
| 0.012177 | 0.012137 | 0.012306 | 0.012319 | 0.012239 | 0.012238 | 0.012238 |
| 0.012239 | 0.012171 | 0.012137 | 0.012171 | 0.012272 | 0.012272 | 0.012205 |
| 0.012205 | 0.012340 | 0.012441 | 0.012238 | 0.012441 | 0.012441 | 0.012306 |
| 0.012137 | 0.012205 | 0.012239 | 0.012576 | 0.012206 | 0.012239 | 0.012205 |
| 0.012238 | 0.012036 | 0.012036 | 0.012407 | 0.012407 | 0.012374 | 0.012171 |
| 0.012272 | 0.012340 | 0.012205 | 0.012272 | 0.012238 | 0.012104 | 0.012373 |
| 0.012205 | 0.012171 | 0.012036 | 0.012340 | 0.012171 | 0.012272 | 0.012508 |
| 0.012137 | 0.012423 | 0.012508 | 0.012200 | 0.011851 | 0.012218 | 0.012042 |
| 0.012105 | 0.012426 | 0.012151 | 0.012269 | 0.012038 | 0.012183 | 0.012178 |
| 0.012287 | 0.012116 | 0.012288 | 0.012120 | 0.012087 | 0.012335 | 0.012157 |
| 0.012306 | 0.012085 | 0.012225 | 0.012225 | 0.012209 | 0.012272 | 0.012340 |
| 0.012340 | 0.012206 | 0.012314 | 0.012318 | 0.012454 | 0.012407 | 0.012205 |
| 0.012373 | 0.012239 | 0.012171 | 0.012205 | 0.012070 | 0.012238 | 0.012104 |
| 0.012171 | 0.012171 | 0.012137 | 0.012103 | 0.012137 | 0.012103 | 0.012205 |
| 0.012215 | 0.012182 | 0.012193 | 0.012192 | 0.012329 | 0.012327 | 0.012326 |
| 0.012323 | 0.012239 | 0.012096 | 0.012034 | 0.012180 | 0.012350 | 0.012352 |
| 0.012138 | 0.012214 | 0.012443 | 0.012415 | 0.012341 | 0.012375 | 0.012272 |
| 0.012238 | 0.012272 | 0.012272 | 0.012205 | 0.012610 | 0.012373 | 0.012374 |
| 0.012475 | 0.012525 | 0.012189 | 0.012275 | 0.012137 | 0.012306 | 0.012272 |
| 0.012342 | 0.012306 | 0.012373 | 0.012373 | 0.012557 | 0.012475 | 0.012173 |
| 0.012043 | 0.012032 | 0.012152 | 0.012116 | 0.012122 | 0.012070 | 0.012321 |
| 0.012195 | 0.012379 | 0.012253 | 0.012149 | 0.012172 | 0.012226 | 0.012137 |
| 0.012104 | 0.012036 | 0.012171 | 0.012137 | 0.012272 | 0.012238 | 0.012171 |
| 0.012272 | 0.012340 | 0.012137 | 0.012137 | 0.012171 | 0.012171 | 0.012178 |
| 0.012246 | 0.012171 | 0.012171 | 0.012209 | 0.012272 | 0.012340 | 0.012340 |
| 0.012206 | 0.012314 | 0.012318 | 0.012454 | 0.012407 | 0.012205 | 0.012373 |
| 0.012272 | 0.012272 | 0.012145 | 0.012351 | 0.012279 | 0.012289 | 0.012183 |
| 0.012337 | 0.012385 | 0.012121 | 0.012218 | 0.012070 | 0.012306 | 0.012171 |
| 0.012272 | 0.012205 | 0.012103 | 0.012209 | 0.012306 | 0.012280 | 0.012205 |
| 0.012103 | 0.012006 | 0.012171 | 0.012104 | 0.012037 | 0.012115 | 0.012306 |
| 0.012205 | 0.012137 | 0.012171 | 0.012205 | 0.012171 | 0.012104 | 0.012238 |
| 0.012171 | 0.012205 | 0.012205 | 0.012137 | 0.012205 | 0.012441 | 0.012036 |
| 0.012137 | 0.012475 | 0.012137 | 0.012171 | 0.012137 | 0.012441 | 0.012048 |
| 0.012355 | 0.011911 | 0.012015 | 0.012189 | 0.012243 | 0.012319 | 0.011898 |
| 0.011954 | 0.012238 | 0.012340 | 0.012455 | 0.012308 | 0.012450 | 0.012578 |
| 0.012476 | 0.012518 | 0.012475 | 0.012738 | 0.012441 | 0.013286 | 0.012478 |
| 0.013218 | 0.012953 | 0.013088 | 0.013394 | 0.012441 | 0.012137 | 0.012441 |
| 0.011598 | 0.012819 | 0.012407 | 0.012307 | 0.012374 | 0.012374 | 0.012349 |
| 0.012238 | 0.012250 | 0.012306 | 0.012273 | 0.012644 | 0.012711 | 0.012712 |
| 0.012612 | 0.012712 | 0.012817 | 0.012586 | 0.011464 | 0.011399 | 0.000000 |
| 0.011464 | 0.011565 | 0.011504 | 0.011531 | 0.011532 | 0.012205 | 0.011666 |
| 0.012543 | 0.012981 | 0.011671 | 0.012779 | 0.013254 | 0.012284 | 0.012205 |
| 0.012171 | 0.012171 | 0.012644 | 0.012791 | 0.012682 | 0.012508 | 0.012174 |
| S833     | 0.012475 | 0.012475 | 0.012577 | 0.012543 | 0.012543 | 0.012610 |
| 0.012355 | 0.012253 | 0.012543 | 0.012104 | 0.012171 | 0.012139 | 0.012104 |
| 0.012070 | 0.012307 | 0.012037 | 0.012138 | 0.012205 | 0.012172 | 0.012138 |
| 0.012104 | 0.012138 | 0.012171 | 0.012105 | 0.012139 | 0.012138 | 0.012321 |
| 0.012307 | 0.012138 | 0.012037 | 0.012205 | 0.012205 | 0.012172 | 0.012206 |
| 0.012172 | 0.012273 | 0.012172 | 0.012172 | 0.012205 | 0.012171 | 0.012307 |
| 0.012037 | 0.012171 | 0.012205 | 0.012138 | 0.012172 | 0.012273 | 0.012205 |
| 0.012172 | 0.012341 | 0.012240 | 0.012442 | 0.012172 | 0.012442 | 0.012172 |
| 0.012138 | 0.012172 | 0.012307 | 0.012442 | 0.012475 | 0.012172 | 0.012273 |
| 0.012205 | 0.012273 | 0.012172 | 0.012408 | 0.012577 | 0.012172 | 0.012239 |
| 0.012138 | 0.012239 | 0.012205 | 0.012273 | 0.012205 | 0.012205 | 0.012205 |
| 0.012104 | 0.012138 | 0.012104 | 0.012138 | 0.012171 | 0.012207 | 0.012273 |
| 0.012206 | 0.012171 | 0.012239 | 0.012138 | 0.012205 | 0.012104 | 0.012172 |
| 0.012340 | 0.012273 | 0.012509 | 0.012341 | 0.012172 | 0.012408 | 0.012171 |

|          |          |          |          |          |          |          |
|----------|----------|----------|----------|----------|----------|----------|
| 0.012361 | 0.012520 | 0.012383 | 0.012038 | 0.012107 | 0.012240 | 0.012283 |
| 0.012930 | 0.012283 | 0.012091 | 0.012408 | 0.012408 | 0.012138 | 0.012239 |
| 0.012239 | 0.012172 | 0.012239 | 0.012172 | 0.012273 | 0.012205 | 0.012171 |
| 0.012138 | 0.012205 | 0.012442 | 0.012340 | 0.012172 | 0.012206 | 0.012138 |
| 0.012104 | 0.012037 | 0.012172 | 0.012138 | 0.012273 | 0.012239 | 0.012172 |
| 0.012273 | 0.012340 | 0.012138 | 0.012138 | 0.012172 | 0.012171 | 0.012178 |
| 0.012247 | 0.012172 | 0.012172 | 0.012069 | 0.012147 | 0.012079 | 0.012171 |
| 0.012180 | 0.012127 | 0.012206 | 0.012166 | 0.012047 | 0.012090 | 0.012143 |
| 0.012359 | 0.012165 | 0.012233 | 0.012104 | 0.012134 | 0.012240 | 0.012138 |
| 0.012206 | 0.012208 | 0.012205 | 0.012272 | 0.012205 | 0.012611 | 0.012307 |
| 0.012374 | 0.012239 | 0.012172 | 0.012206 | 0.012070 | 0.012239 | 0.012104 |
| 0.012172 | 0.012172 | 0.012138 | 0.012104 | 0.012138 | 0.012104 | 0.012205 |
| 0.012172 | 0.012273 | 0.012206 | 0.012104 | 0.012209 | 0.012307 | 0.012281 |
| 0.012307 | 0.012205 | 0.012104 | 0.012007 | 0.012171 | 0.012104 | 0.012037 |
| 0.012116 | 0.012307 | 0.012070 | 0.012307 | 0.012071 | 0.012172 | 0.012138 |
| 0.012239 | 0.012138 | 0.012172 | 0.012138 | 0.012172 | 0.012037 | 0.012172 |
| 0.012206 | 0.012138 | 0.012205 | 0.012138 | 0.012138 | 0.012205 | 0.012441 |
| 0.012475 | 0.012408 | 0.012475 | 0.012311 | 0.012476 | 0.012138 | 0.012138 |
| 0.012076 | 0.012397 | 0.012251 | 0.012092 | 0.012490 | 0.012017 | 0.012203 |
| 0.012389 | 0.012389 | 0.012273 | 0.012509 | 0.012156 | 0.012408 | 0.012375 |
| 0.012307 | 0.012475 | 0.012308 | 0.012217 | 0.012279 | 0.012206 | 0.012248 |
| 0.012374 | 0.012244 | 0.012418 | 0.012453 | 0.012374 | 0.012442 | 0.012556 |
| 0.012283 | 0.012456 | 0.012350 | 0.012316 | 0.012578 | 0.012070 | 0.012277 |
| 0.012239 | 0.012172 | 0.012070 | 0.012070 | 0.012138 | 0.012138 | 0.012205 |
| 0.012138 | 0.012206 | 0.012104 | 0.012138 | 0.012138 | 0.012138 | 0.012205 |
| 0.012138 | 0.012509 | 0.012408 | 0.012442 | 0.012037 | 0.012138 | 0.012172 |
| 0.012172 | 0.012138 | 0.012206 | 0.012172 | 0.012104 | 0.012104 | 0.012104 |
| 0.012577 | 0.012172 | 0.012273 | 0.012070 | 0.012171 | 0.012341 | 0.012104 |
| 0.012104 | 0.012171 | 0.012138 | 0.012307 | 0.012104 | 0.012239 | 0.012374 |
| 0.012307 | 0.012138 | 0.012138 | 0.012070 | 0.012070 | 0.012239 | 0.012171 |
| 0.012070 | 0.012171 | 0.012037 | 0.012070 | 0.012205 | 0.012273 | 0.012104 |
| 0.012071 | 0.012205 | 0.012139 | 0.012037 | 0.012307 | 0.012037 | 0.012205 |
| 0.012296 | 0.012104 | 0.012340 | 0.012239 | 0.012206 | 0.012138 | 0.012239 |
| 0.012104 | 0.012442 | 0.012037 | 0.012239 | 0.012037 | 0.012037 | 0.012037 |
| 0.012273 | 0.012409 | 0.012172 | 0.012239 | 0.012070 | 0.012408 | 0.012037 |
| 0.012104 | 0.012104 | 0.012138 | 0.012239 | 0.012138 | 0.012239 | 0.012307 |
| 0.012307 | 0.012273 | 0.012171 | 0.012273 | 0.012239 | 0.012104 | 0.012070 |
| 0.012104 | 0.012104 | 0.012172 | 0.012037 | 0.012070 | 0.012239 | 0.012104 |
| 0.012070 | 0.012138 | 0.012273 | 0.012239 | 0.012205 | 0.012138 | 0.012138 |
| 0.012205 | 0.012138 | 0.012239 | 0.012104 | 0.012239 | 0.012340 | 0.012509 |
| 0.012138 | 0.012476 | 0.012166 | 0.018698 | 0.012307 | 0.012224 | 0.012458 |
| 0.012412 | 0.012470 | 0.012372 | 0.012339 | 0.012712 | 0.012479 | 0.012461 |
| 0.012248 | 0.012468 | 0.012116 | 0.012235 | 0.012155 | 0.012198 | 0.012051 |
| 0.012377 | 0.012254 | 0.012286 | 0.012120 | 0.012273 | 0.012273 | 0.012281 |
| 0.012162 | 0.012273 | 0.012273 | 0.012172 | 0.012206 | 0.012206 | 0.012172 |
| 0.012205 | 0.012138 | 0.012172 | 0.012205 | 0.012172 | 0.012104 | 0.012104 |
| 0.012104 | 0.012205 | 0.012104 | 0.012206 | 0.012239 | 0.012205 | 0.012138 |
| 0.012138 | 0.012104 | 0.012442 | 0.012442 | 0.012240 | 0.012275 | 0.012307 |
| 0.012070 | 0.012070 | 0.012104 | 0.012206 | 0.012070 | 0.012307 | 0.012307 |
| 0.012340 | 0.012273 | 0.012273 | 0.012374 | 0.012475 | 0.012378 | 0.012206 |
| 0.012205 | 0.012273 | 0.012307 | 0.012138 | 0.012205 | 0.012172 | 0.012206 |
| 0.012273 | 0.012273 | 0.012306 | 0.012273 | 0.012174 | 0.012374 | 0.012340 |
| 0.012216 | 0.012104 | 0.012205 | 0.012307 | 0.012206 | 0.012273 | 0.012374 |
| 0.012509 | 0.012156 | 0.012408 | 0.012375 | 0.012307 | 0.012475 | 0.012105 |
| 0.012276 | 0.012172 | 0.012104 | 0.012104 | 0.012205 | 0.012104 | 0.012206 |
| 0.012239 | 0.012205 | 0.012138 | 0.012138 | 0.012104 | 0.012442 | 0.012442 |
| 0.012240 | 0.012275 | 0.012306 | 0.012239 | 0.011363 | 0.012350 | 0.012260 |
| 0.012329 | 0.012313 | 0.012434 | 0.012312 | 0.012394 | 0.012306 | 0.012270 |
| 0.011335 | 0.012136 | 0.012298 | 0.012204 | 0.012476 | 0.012357 | 0.012459 |
| 0.011196 | 0.012344 | 0.012214 | 0.012205 | 0.012205 | 0.012172 | 0.012179 |

|          |          |          |          |          |          |          |
|----------|----------|----------|----------|----------|----------|----------|
| 0.012070 | 0.012104 | 0.012239 | 0.012205 | 0.012213 | 0.012273 | 0.012242 |
| 0.012171 | 0.012104 | 0.012138 | 0.012172 | 0.012070 | 0.012138 | 0.012037 |
| 0.012104 | 0.012138 | 0.012104 | 0.012070 | 0.012172 | 0.012104 | 0.012138 |
| 0.012138 | 0.012070 | 0.012138 | 0.012172 | 0.012070 | 0.012273 | 0.012307 |
| 0.012206 | 0.012206 | 0.012205 | 0.012206 | 0.012138 | 0.012475 | 0.012171 |
| 0.012177 | 0.012138 | 0.012307 | 0.012319 | 0.012239 | 0.012239 | 0.012239 |
| 0.012239 | 0.012172 | 0.012138 | 0.012172 | 0.012273 | 0.012273 | 0.012205 |
| 0.012205 | 0.012340 | 0.012442 | 0.012239 | 0.012374 | 0.012374 | 0.012306 |
| 0.012138 | 0.012205 | 0.012239 | 0.012577 | 0.012206 | 0.012240 | 0.012206 |
| 0.012239 | 0.012037 | 0.012037 | 0.012408 | 0.012408 | 0.012374 | 0.012172 |
| 0.012273 | 0.012340 | 0.012205 | 0.012273 | 0.012239 | 0.012104 | 0.012374 |
| 0.012205 | 0.012172 | 0.012037 | 0.012340 | 0.012172 | 0.012273 | 0.012509 |
| 0.012138 | 0.012423 | 0.012509 | 0.012282 | 0.011964 | 0.012218 | 0.012094 |
| 0.011996 | 0.012503 | 0.012151 | 0.012268 | 0.012087 | 0.012182 | 0.012178 |
| 0.012389 | 0.012116 | 0.012287 | 0.012119 | 0.012086 | 0.012402 | 0.012238 |
| 0.012306 | 0.012164 | 0.012225 | 0.012225 | 0.012210 | 0.012273 | 0.012340 |
| 0.012306 | 0.012207 | 0.012315 | 0.012318 | 0.012455 | 0.012408 | 0.012172 |
| 0.012374 | 0.012239 | 0.012172 | 0.012206 | 0.012070 | 0.012239 | 0.012104 |
| 0.012172 | 0.012172 | 0.012138 | 0.012104 | 0.012138 | 0.012104 | 0.012205 |
| 0.012215 | 0.012182 | 0.012192 | 0.012192 | 0.012329 | 0.012327 | 0.012326 |
| 0.012323 | 0.012239 | 0.012059 | 0.012034 | 0.012180 | 0.012350 | 0.012352 |
| 0.012138 | 0.012214 | 0.012443 | 0.012415 | 0.012341 | 0.012375 | 0.012273 |
| 0.012239 | 0.012273 | 0.012273 | 0.012205 | 0.012645 | 0.012374 | 0.012374 |
| 0.012475 | 0.012526 | 0.012189 | 0.012275 | 0.012138 | 0.012306 | 0.012273 |
| 0.012343 | 0.012306 | 0.012374 | 0.012374 | 0.012439 | 0.012475 | 0.012138 |
| 0.012044 | 0.012033 | 0.012152 | 0.012116 | 0.012123 | 0.012033 | 0.012321 |
| 0.012195 | 0.012335 | 0.012158 | 0.012149 | 0.012172 | 0.012226 | 0.012138 |
| 0.012104 | 0.012037 | 0.012172 | 0.012138 | 0.012273 | 0.012239 | 0.012172 |
| 0.012273 | 0.012340 | 0.012138 | 0.012138 | 0.012172 | 0.012171 | 0.012178 |
| 0.012247 | 0.012172 | 0.012172 | 0.012210 | 0.012273 | 0.012340 | 0.012306 |
| 0.012207 | 0.012315 | 0.012318 | 0.012455 | 0.012408 | 0.012172 | 0.012374 |
| 0.012273 | 0.012273 | 0.012145 | 0.012351 | 0.012280 | 0.012290 | 0.012148 |
| 0.012338 | 0.012523 | 0.012290 | 0.012219 | 0.012070 | 0.012307 | 0.012172 |
| 0.012273 | 0.012206 | 0.012104 | 0.012209 | 0.012307 | 0.012281 | 0.012205 |
| 0.012104 | 0.012007 | 0.012171 | 0.012104 | 0.012037 | 0.012116 | 0.012307 |
| 0.012205 | 0.012138 | 0.012172 | 0.012205 | 0.012172 | 0.012104 | 0.012239 |
| 0.012172 | 0.012206 | 0.012205 | 0.012138 | 0.012205 | 0.012442 | 0.012037 |
| 0.012138 | 0.012475 | 0.012138 | 0.012172 | 0.012138 | 0.012442 | 0.012090 |
| 0.012468 | 0.012039 | 0.012064 | 0.012311 | 0.012324 | 0.012319 | 0.011939 |
| 0.012006 | 0.012239 | 0.012340 | 0.012455 | 0.012309 | 0.012451 | 0.012578 |
| 0.012476 | 0.012518 | 0.012475 | 0.012738 | 0.012442 | 0.013287 | 0.012478 |
| 0.013185 | 0.012953 | 0.013089 | 0.013395 | 0.012441 | 0.012138 | 0.012442 |
| 0.011599 | 0.012820 | 0.012408 | 0.012307 | 0.012374 | 0.012374 | 0.012350 |
| 0.012239 | 0.012250 | 0.012306 | 0.012273 | 0.012645 | 0.012712 | 0.012712 |
| 0.012613 | 0.012713 | 0.012817 | 0.012585 | 0.011464 | 0.011263 | 0.011464 |
| 0.000000 | 0.011565 | 0.011504 | 0.011531 | 0.011532 | 0.012205 | 0.011666 |
| 0.012543 | 0.012982 | 0.011671 | 0.012780 | 0.013254 | 0.012285 | 0.012205 |
| 0.012172 | 0.012171 | 0.012645 | 0.012792 | 0.012752 | 0.012509 | 0.012107 |
| s834     | 0.012509 | 0.012509 | 0.012610 | 0.012577 | 0.012577 | 0.012644 |
| 0.012355 | 0.012253 | 0.012577 | 0.012138 | 0.012205 | 0.012173 | 0.012138 |
| 0.012104 | 0.012340 | 0.012070 | 0.012172 | 0.012239 | 0.012205 | 0.012172 |
| 0.012138 | 0.012172 | 0.012205 | 0.012139 | 0.012173 | 0.012172 | 0.012321 |
| 0.012340 | 0.012172 | 0.012070 | 0.012239 | 0.012239 | 0.012205 | 0.012239 |
| 0.012205 | 0.012307 | 0.012205 | 0.012205 | 0.012239 | 0.012205 | 0.012341 |
| 0.012070 | 0.012205 | 0.012239 | 0.012171 | 0.012205 | 0.012307 | 0.012239 |
| 0.012205 | 0.012374 | 0.012274 | 0.012475 | 0.012205 | 0.012475 | 0.012205 |
| 0.012171 | 0.012206 | 0.012340 | 0.012475 | 0.012509 | 0.012206 | 0.012307 |
| 0.012239 | 0.012307 | 0.012206 | 0.012441 | 0.012611 | 0.012205 | 0.012273 |
| 0.012172 | 0.012273 | 0.012239 | 0.012307 | 0.012239 | 0.012239 | 0.012239 |
| 0.012138 | 0.012171 | 0.012138 | 0.012172 | 0.012205 | 0.012241 | 0.012306 |

|          |          |          |          |          |          |          |
|----------|----------|----------|----------|----------|----------|----------|
| 0.012239 | 0.012205 | 0.012273 | 0.012171 | 0.012239 | 0.012138 | 0.012205 |
| 0.012374 | 0.012306 | 0.012543 | 0.012374 | 0.012205 | 0.012442 | 0.012205 |
| 0.012323 | 0.012483 | 0.012383 | 0.012038 | 0.012144 | 0.012203 | 0.012244 |
| 0.012930 | 0.012232 | 0.012092 | 0.012441 | 0.012442 | 0.012171 | 0.012273 |
| 0.012273 | 0.012205 | 0.012273 | 0.012205 | 0.012307 | 0.012239 | 0.012205 |
| 0.012171 | 0.012239 | 0.012475 | 0.012374 | 0.012206 | 0.012240 | 0.012172 |
| 0.012138 | 0.012070 | 0.012205 | 0.012172 | 0.012306 | 0.012273 | 0.012205 |
| 0.012306 | 0.012374 | 0.012171 | 0.012171 | 0.012205 | 0.012205 | 0.012212 |
| 0.012281 | 0.012205 | 0.012205 | 0.012069 | 0.012183 | 0.012114 | 0.012205 |
| 0.012214 | 0.012162 | 0.012243 | 0.012166 | 0.012081 | 0.012124 | 0.012177 |
| 0.012358 | 0.012200 | 0.012268 | 0.012138 | 0.012134 | 0.012274 | 0.012172 |
| 0.012240 | 0.012242 | 0.012239 | 0.012306 | 0.012239 | 0.012644 | 0.012341 |
| 0.012408 | 0.012273 | 0.012205 | 0.012239 | 0.012104 | 0.012273 | 0.012138 |
| 0.012205 | 0.012205 | 0.012172 | 0.012138 | 0.012172 | 0.012138 | 0.012239 |
| 0.012205 | 0.012307 | 0.012239 | 0.012138 | 0.012209 | 0.012340 | 0.012314 |
| 0.012341 | 0.012239 | 0.012138 | 0.012041 | 0.012205 | 0.012138 | 0.012071 |
| 0.012150 | 0.012341 | 0.012104 | 0.012341 | 0.012104 | 0.012206 | 0.012172 |
| 0.012273 | 0.012171 | 0.012205 | 0.012172 | 0.012205 | 0.012071 | 0.012205 |
| 0.012239 | 0.012172 | 0.012239 | 0.012171 | 0.012171 | 0.012239 | 0.012475 |
| 0.012509 | 0.012441 | 0.012509 | 0.012345 | 0.012510 | 0.012171 | 0.012172 |
| 0.012110 | 0.012438 | 0.012297 | 0.012126 | 0.012524 | 0.012052 | 0.012243 |
| 0.012389 | 0.012423 | 0.012307 | 0.012543 | 0.012225 | 0.012442 | 0.012408 |
| 0.012340 | 0.012509 | 0.012308 | 0.012300 | 0.012364 | 0.012239 | 0.012282 |
| 0.012408 | 0.012278 | 0.012452 | 0.012487 | 0.012408 | 0.012476 | 0.012590 |
| 0.012283 | 0.012490 | 0.012384 | 0.012350 | 0.012612 | 0.012104 | 0.012310 |
| 0.012273 | 0.012205 | 0.012104 | 0.012104 | 0.012172 | 0.012172 | 0.012239 |
| 0.012171 | 0.012239 | 0.012138 | 0.012172 | 0.012172 | 0.012172 | 0.012239 |
| 0.012172 | 0.012543 | 0.012442 | 0.012475 | 0.012070 | 0.012172 | 0.012206 |
| 0.012205 | 0.012172 | 0.012239 | 0.012206 | 0.012138 | 0.012138 | 0.012138 |
| 0.012610 | 0.012205 | 0.012307 | 0.012104 | 0.012205 | 0.012374 | 0.012138 |
| 0.012138 | 0.012205 | 0.012171 | 0.012341 | 0.012138 | 0.012273 | 0.012408 |
| 0.012340 | 0.012172 | 0.012172 | 0.012104 | 0.012104 | 0.012273 | 0.012205 |
| 0.012104 | 0.012205 | 0.012070 | 0.012104 | 0.012239 | 0.012307 | 0.012138 |
| 0.012105 | 0.012239 | 0.012173 | 0.012070 | 0.012340 | 0.012070 | 0.012239 |
| 0.012330 | 0.012138 | 0.012374 | 0.012273 | 0.012239 | 0.012172 | 0.012273 |
| 0.012138 | 0.012475 | 0.012070 | 0.012273 | 0.012070 | 0.012070 | 0.012070 |
| 0.012307 | 0.012442 | 0.012206 | 0.012273 | 0.012104 | 0.012442 | 0.012070 |
| 0.012138 | 0.012138 | 0.012172 | 0.012273 | 0.012171 | 0.012273 | 0.012340 |
| 0.012340 | 0.012307 | 0.012205 | 0.012307 | 0.012273 | 0.012138 | 0.012104 |
| 0.012138 | 0.012138 | 0.012206 | 0.012070 | 0.012104 | 0.012273 | 0.012138 |
| 0.012104 | 0.012172 | 0.012307 | 0.012239 | 0.012239 | 0.012171 | 0.012172 |
| 0.012239 | 0.012171 | 0.012273 | 0.012138 | 0.012273 | 0.012374 | 0.012543 |
| 0.012172 | 0.012509 | 0.012166 | 0.018698 | 0.012241 | 0.012470 | 0.012458 |
| 0.012412 | 0.012470 | 0.012372 | 0.012280 | 0.012767 | 0.012479 | 0.012521 |
| 0.012201 | 0.012590 | 0.012076 | 0.012193 | 0.012116 | 0.012247 | 0.012008 |
| 0.012283 | 0.012254 | 0.012286 | 0.011788 | 0.012307 | 0.012307 | 0.012315 |
| 0.012197 | 0.012306 | 0.012307 | 0.012205 | 0.012239 | 0.012240 | 0.012206 |
| 0.012239 | 0.012171 | 0.012205 | 0.012239 | 0.012206 | 0.012138 | 0.012138 |
| 0.012138 | 0.012239 | 0.012138 | 0.012239 | 0.012273 | 0.012306 | 0.012171 |
| 0.012172 | 0.012138 | 0.012475 | 0.012475 | 0.012240 | 0.012309 | 0.012341 |
| 0.012104 | 0.012104 | 0.012138 | 0.012239 | 0.012104 | 0.012340 | 0.012340 |
| 0.012374 | 0.012307 | 0.012307 | 0.012408 | 0.012509 | 0.012412 | 0.012239 |
| 0.012239 | 0.012307 | 0.012340 | 0.012172 | 0.012239 | 0.012205 | 0.012239 |
| 0.012307 | 0.012306 | 0.012340 | 0.012307 | 0.012208 | 0.012407 | 0.012374 |
| 0.012250 | 0.012138 | 0.012239 | 0.012341 | 0.012239 | 0.012307 | 0.012408 |
| 0.012543 | 0.012225 | 0.012442 | 0.012408 | 0.012340 | 0.012509 | 0.012138 |
| 0.012310 | 0.012206 | 0.012138 | 0.012138 | 0.012239 | 0.012138 | 0.012239 |
| 0.012273 | 0.012306 | 0.012171 | 0.012172 | 0.012138 | 0.012475 | 0.012475 |
| 0.012240 | 0.012309 | 0.012340 | 0.012272 | 0.011464 | 0.012386 | 0.012295 |
| 0.012364 | 0.012348 | 0.012470 | 0.012346 | 0.012429 | 0.012341 | 0.012305 |

|          |          |          |          |          |          |          |
|----------|----------|----------|----------|----------|----------|----------|
| 0.011438 | 0.012170 | 0.012332 | 0.012239 | 0.012511 | 0.012391 | 0.012494 |
| 0.011434 | 0.012382 | 0.012248 | 0.012239 | 0.012239 | 0.012205 | 0.012213 |
| 0.012104 | 0.012138 | 0.012273 | 0.012239 | 0.012247 | 0.012306 | 0.012276 |
| 0.012205 | 0.012138 | 0.012172 | 0.012205 | 0.012104 | 0.012172 | 0.012070 |
| 0.012138 | 0.012172 | 0.012138 | 0.012104 | 0.012205 | 0.012138 | 0.012172 |
| 0.012171 | 0.012104 | 0.012172 | 0.012206 | 0.012104 | 0.012307 | 0.012340 |
| 0.012239 | 0.012239 | 0.012239 | 0.012239 | 0.012172 | 0.012509 | 0.012205 |
| 0.012212 | 0.012172 | 0.012340 | 0.012353 | 0.012273 | 0.012273 | 0.012273 |
| 0.012273 | 0.012206 | 0.012171 | 0.012206 | 0.012307 | 0.012307 | 0.012239 |
| 0.012239 | 0.012374 | 0.012475 | 0.012273 | 0.012476 | 0.012476 | 0.012340 |
| 0.012171 | 0.012239 | 0.012273 | 0.012611 | 0.012240 | 0.012273 | 0.012239 |
| 0.012273 | 0.012070 | 0.012070 | 0.012442 | 0.012442 | 0.012408 | 0.012205 |
| 0.012307 | 0.012374 | 0.012239 | 0.012307 | 0.012273 | 0.012138 | 0.012408 |
| 0.012239 | 0.012205 | 0.012070 | 0.012374 | 0.012205 | 0.012307 | 0.012543 |
| 0.012172 | 0.012423 | 0.012543 | 0.012241 | 0.011851 | 0.012218 | 0.012042 |
| 0.012161 | 0.012464 | 0.012151 | 0.012313 | 0.012038 | 0.012233 | 0.012178 |
| 0.012287 | 0.012116 | 0.012287 | 0.012053 | 0.012086 | 0.012335 | 0.012157 |
| 0.012230 | 0.012124 | 0.012225 | 0.012225 | 0.012244 | 0.012306 | 0.012374 |
| 0.012340 | 0.012240 | 0.012349 | 0.012352 | 0.012489 | 0.012443 | 0.012205 |
| 0.012408 | 0.012273 | 0.012205 | 0.012239 | 0.012104 | 0.012273 | 0.012138 |
| 0.012205 | 0.012205 | 0.012172 | 0.012138 | 0.012172 | 0.012138 | 0.012239 |
| 0.012250 | 0.012217 | 0.012192 | 0.012226 | 0.012294 | 0.012361 | 0.012360 |
| 0.012357 | 0.012273 | 0.012059 | 0.011998 | 0.012214 | 0.012384 | 0.012386 |
| 0.012172 | 0.012248 | 0.012477 | 0.012449 | 0.012374 | 0.012409 | 0.012306 |
| 0.012273 | 0.012307 | 0.012306 | 0.012239 | 0.012679 | 0.012408 | 0.012408 |
| 0.012509 | 0.012562 | 0.012224 | 0.012310 | 0.012171 | 0.012340 | 0.012307 |
| 0.012377 | 0.012340 | 0.012408 | 0.012408 | 0.012558 | 0.012509 | 0.012208 |
| 0.012078 | 0.012068 | 0.012186 | 0.012150 | 0.012157 | 0.012108 | 0.012355 |
| 0.012229 | 0.012379 | 0.012301 | 0.012149 | 0.012205 | 0.012260 | 0.012172 |
| 0.012138 | 0.012070 | 0.012205 | 0.012172 | 0.012306 | 0.012273 | 0.012205 |
| 0.012306 | 0.012374 | 0.012171 | 0.012171 | 0.012205 | 0.012205 | 0.012212 |
| 0.012281 | 0.012205 | 0.012205 | 0.012244 | 0.012306 | 0.012374 | 0.012340 |
| 0.012240 | 0.012349 | 0.012352 | 0.012489 | 0.012443 | 0.012205 | 0.012407 |
| 0.012307 | 0.012307 | 0.012179 | 0.012386 | 0.012315 | 0.012324 | 0.012218 |
| 0.012372 | 0.012477 | 0.012290 | 0.012253 | 0.012104 | 0.012341 | 0.012205 |
| 0.012307 | 0.012239 | 0.012138 | 0.012209 | 0.012340 | 0.012314 | 0.012239 |
| 0.012138 | 0.012041 | 0.012205 | 0.012138 | 0.012071 | 0.012150 | 0.012341 |
| 0.012239 | 0.012171 | 0.012205 | 0.012239 | 0.012206 | 0.012138 | 0.012272 |
| 0.012205 | 0.012239 | 0.012239 | 0.012171 | 0.012239 | 0.012476 | 0.012070 |
| 0.012172 | 0.012509 | 0.012171 | 0.012205 | 0.012171 | 0.012475 | 0.012090 |
| 0.012356 | 0.011997 | 0.011964 | 0.012311 | 0.012284 | 0.012319 | 0.011939 |
| 0.011901 | 0.012273 | 0.012374 | 0.012489 | 0.012343 | 0.012485 | 0.012612 |
| 0.012510 | 0.012552 | 0.012509 | 0.012773 | 0.012475 | 0.013321 | 0.012512 |
| 0.013219 | 0.012987 | 0.013123 | 0.013429 | 0.012475 | 0.012172 | 0.012475 |
| 0.011632 | 0.012853 | 0.012442 | 0.012341 | 0.012408 | 0.012408 | 0.012384 |
| 0.012273 | 0.012284 | 0.012340 | 0.012307 | 0.012679 | 0.012746 | 0.012745 |
| 0.012647 | 0.012746 | 0.012851 | 0.012619 | 0.011498 | 0.011500 | 0.011565 |
| 0.011565 | 0.000000 | 0.011504 | 0.011363 | 0.011364 | 0.012239 | 0.011700 |
| 0.012577 | 0.013016 | 0.011705 | 0.012814 | 0.013288 | 0.012319 | 0.012239 |
| 0.012205 | 0.012205 | 0.012678 | 0.012874 | 0.012752 | 0.012543 | 0.012208 |
| S835     | 0.012460 | 0.012460 | 0.012563 | 0.012494 | 0.012494 | 0.012528 |
| 0.012303 | 0.012200 | 0.012494 | 0.012084 | 0.012118 | 0.012119 | 0.012084 |
| 0.012050 | 0.012289 | 0.012015 | 0.012118 | 0.012186 | 0.012152 | 0.012118 |
| 0.012084 | 0.012118 | 0.012152 | 0.012085 | 0.012119 | 0.012084 | 0.012269 |
| 0.012289 | 0.012118 | 0.012015 | 0.012186 | 0.012152 | 0.012152 | 0.012186 |
| 0.012152 | 0.012255 | 0.012152 | 0.012152 | 0.012186 | 0.012152 | 0.012289 |
| 0.012016 | 0.012152 | 0.012186 | 0.012118 | 0.012152 | 0.012255 | 0.012186 |
| 0.012152 | 0.012323 | 0.012187 | 0.012426 | 0.012152 | 0.012426 | 0.012152 |
| 0.012118 | 0.012153 | 0.012255 | 0.012426 | 0.012460 | 0.012152 | 0.012255 |
| 0.012186 | 0.012255 | 0.012118 | 0.012357 | 0.012563 | 0.012152 | 0.012221 |



|          |          |          |          |          |          |          |
|----------|----------|----------|----------|----------|----------|----------|
| 0.012118 | 0.012186 | 0.012186 | 0.012221 | 0.012152 | 0.012186 | 0.012186 |
| 0.012084 | 0.012084 | 0.012050 | 0.012084 | 0.012152 | 0.012186 | 0.012255 |
| 0.012186 | 0.012152 | 0.012221 | 0.012084 | 0.012186 | 0.012084 | 0.012118 |
| 0.012323 | 0.012255 | 0.012494 | 0.012289 | 0.012152 | 0.012392 | 0.012152 |
| 0.012249 | 0.012407 | 0.012307 | 0.011960 | 0.012069 | 0.012203 | 0.012164 |
| 0.012856 | 0.012232 | 0.012050 | 0.012391 | 0.012357 | 0.012084 | 0.012221 |
| 0.012221 | 0.012152 | 0.012220 | 0.012152 | 0.012221 | 0.012152 | 0.012084 |
| 0.012049 | 0.012152 | 0.012392 | 0.012323 | 0.012152 | 0.012187 | 0.012118 |
| 0.012084 | 0.012015 | 0.012152 | 0.012084 | 0.012255 | 0.012220 | 0.012152 |
| 0.012255 | 0.012323 | 0.012118 | 0.012118 | 0.012152 | 0.012152 | 0.012159 |
| 0.012228 | 0.012152 | 0.012152 | 0.012002 | 0.012085 | 0.012022 | 0.012153 |
| 0.012161 | 0.012104 | 0.012169 | 0.012137 | 0.012026 | 0.012035 | 0.012124 |
| 0.012293 | 0.012076 | 0.012211 | 0.012084 | 0.012104 | 0.012222 | 0.012119 |
| 0.012187 | 0.012190 | 0.012187 | 0.012152 | 0.012186 | 0.012597 | 0.012324 |
| 0.012357 | 0.012221 | 0.012152 | 0.012187 | 0.012050 | 0.012220 | 0.012050 |
| 0.012152 | 0.012152 | 0.012084 | 0.012084 | 0.012118 | 0.012084 | 0.012186 |
| 0.012118 | 0.012255 | 0.012186 | 0.012084 | 0.012190 | 0.012289 | 0.012262 |
| 0.012289 | 0.012186 | 0.012084 | 0.011985 | 0.012152 | 0.012084 | 0.012016 |
| 0.012096 | 0.012289 | 0.012050 | 0.012289 | 0.012050 | 0.012118 | 0.012118 |
| 0.012221 | 0.012050 | 0.012152 | 0.012118 | 0.012152 | 0.012016 | 0.012118 |
| 0.012152 | 0.012118 | 0.012186 | 0.012118 | 0.012050 | 0.012186 | 0.012357 |
| 0.012460 | 0.012391 | 0.012460 | 0.012289 | 0.012460 | 0.012118 | 0.012118 |
| 0.012053 | 0.012371 | 0.012221 | 0.012066 | 0.012475 | 0.011995 | 0.012134 |
| 0.012338 | 0.012373 | 0.012255 | 0.012460 | 0.012171 | 0.012392 | 0.012358 |
| 0.012289 | 0.012425 | 0.012217 | 0.012152 | 0.012211 | 0.012187 | 0.012230 |
| 0.012357 | 0.012157 | 0.012401 | 0.012437 | 0.012221 | 0.012426 | 0.012507 |
| 0.012161 | 0.012406 | 0.012334 | 0.012298 | 0.012565 | 0.012050 | 0.012225 |
| 0.012220 | 0.012152 | 0.012015 | 0.012015 | 0.012118 | 0.012118 | 0.012186 |
| 0.012118 | 0.012186 | 0.012084 | 0.012118 | 0.012118 | 0.012118 | 0.012186 |
| 0.012118 | 0.012494 | 0.012392 | 0.012426 | 0.012015 | 0.012118 | 0.012152 |
| 0.012152 | 0.012118 | 0.012186 | 0.012152 | 0.012084 | 0.012084 | 0.012084 |
| 0.012563 | 0.012186 | 0.012255 | 0.012050 | 0.012152 | 0.012323 | 0.012084 |
| 0.012050 | 0.012118 | 0.012118 | 0.012289 | 0.012084 | 0.012220 | 0.012357 |
| 0.012289 | 0.012118 | 0.012118 | 0.012050 | 0.012050 | 0.012221 | 0.012152 |
| 0.012050 | 0.012152 | 0.012015 | 0.012050 | 0.012186 | 0.012255 | 0.012084 |
| 0.012051 | 0.012186 | 0.012119 | 0.012015 | 0.012289 | 0.012015 | 0.012186 |
| 0.012244 | 0.012084 | 0.012323 | 0.012221 | 0.012186 | 0.012118 | 0.012221 |
| 0.012084 | 0.012426 | 0.012015 | 0.012221 | 0.012015 | 0.012015 | 0.012015 |
| 0.012221 | 0.012391 | 0.012118 | 0.012221 | 0.012050 | 0.012392 | 0.012015 |
| 0.012084 | 0.012084 | 0.012118 | 0.012221 | 0.012118 | 0.012221 | 0.012289 |
| 0.012289 | 0.012255 | 0.012152 | 0.012255 | 0.012220 | 0.012084 | 0.012050 |
| 0.012084 | 0.012084 | 0.012118 | 0.012016 | 0.012050 | 0.012186 | 0.012084 |
| 0.012050 | 0.012118 | 0.012255 | 0.012221 | 0.012152 | 0.012118 | 0.012118 |
| 0.012186 | 0.012118 | 0.012220 | 0.012084 | 0.012221 | 0.012323 | 0.012494 |
| 0.012118 | 0.012426 | 0.012132 | 0.018661 | 0.012175 | 0.012285 | 0.012423 |
| 0.012378 | 0.012435 | 0.012214 | 0.012164 | 0.012712 | 0.012444 | 0.012399 |
| 0.012153 | 0.012406 | 0.011998 | 0.012108 | 0.012077 | 0.012148 | 0.011965 |
| 0.012235 | 0.012217 | 0.012249 | 0.011987 | 0.012255 | 0.012255 | 0.012263 |
| 0.012108 | 0.012255 | 0.012220 | 0.012084 | 0.012152 | 0.012153 | 0.012153 |
| 0.012186 | 0.012050 | 0.012152 | 0.012186 | 0.012118 | 0.012084 | 0.012084 |
| 0.012084 | 0.012152 | 0.012084 | 0.012152 | 0.012221 | 0.012255 | 0.012118 |
| 0.012118 | 0.012084 | 0.012426 | 0.012426 | 0.012221 | 0.012257 | 0.012289 |
| 0.012050 | 0.012050 | 0.012084 | 0.012186 | 0.012050 | 0.012289 | 0.012289 |
| 0.012323 | 0.012255 | 0.012221 | 0.012357 | 0.012460 | 0.012361 | 0.012186 |
| 0.012186 | 0.012255 | 0.012289 | 0.012118 | 0.012152 | 0.012084 | 0.012118 |
| 0.012255 | 0.012255 | 0.012289 | 0.012255 | 0.012155 | 0.012323 | 0.012255 |
| 0.012196 | 0.012084 | 0.012186 | 0.012289 | 0.012187 | 0.012255 | 0.012323 |
| 0.012460 | 0.012171 | 0.012392 | 0.012358 | 0.012289 | 0.012425 | 0.012084 |
| 0.012258 | 0.012153 | 0.012084 | 0.012084 | 0.012152 | 0.012084 | 0.012152 |
| 0.012221 | 0.012255 | 0.012118 | 0.012118 | 0.012084 | 0.012426 | 0.012426 |

|          |          |          |          |          |          |          |
|----------|----------|----------|----------|----------|----------|----------|
| 0.012221 | 0.012257 | 0.012289 | 0.012220 | 0.011401 | 0.012296 | 0.012169 |
| 0.012276 | 0.012260 | 0.012347 | 0.012188 | 0.012342 | 0.012253 | 0.012252 |
| 0.011339 | 0.012081 | 0.012245 | 0.012150 | 0.012426 | 0.012340 | 0.012410 |
| 0.011302 | 0.012249 | 0.012195 | 0.012186 | 0.012186 | 0.012152 | 0.012159 |
| 0.012050 | 0.012084 | 0.012221 | 0.012186 | 0.012194 | 0.012255 | 0.012220 |
| 0.012118 | 0.012084 | 0.012118 | 0.012118 | 0.012050 | 0.012084 | 0.012015 |
| 0.012084 | 0.012118 | 0.012084 | 0.012050 | 0.012152 | 0.012084 | 0.012118 |
| 0.012118 | 0.012050 | 0.012118 | 0.012152 | 0.012050 | 0.012255 | 0.012289 |
| 0.012186 | 0.012186 | 0.012186 | 0.012186 | 0.012118 | 0.012460 | 0.012152 |
| 0.012122 | 0.012084 | 0.012290 | 0.012267 | 0.012221 | 0.012186 | 0.012221 |
| 0.012221 | 0.012152 | 0.012118 | 0.012152 | 0.012255 | 0.012255 | 0.012186 |
| 0.012186 | 0.012289 | 0.012426 | 0.012220 | 0.012426 | 0.012426 | 0.012289 |
| 0.012084 | 0.012186 | 0.012221 | 0.012563 | 0.012187 | 0.012221 | 0.012186 |
| 0.012221 | 0.011981 | 0.011981 | 0.012392 | 0.012392 | 0.012358 | 0.012152 |
| 0.012255 | 0.012323 | 0.012152 | 0.012255 | 0.012186 | 0.012084 | 0.012357 |
| 0.012186 | 0.012152 | 0.011981 | 0.012323 | 0.012152 | 0.012255 | 0.012494 |
| 0.012118 | 0.012372 | 0.012494 | 0.012200 | 0.011908 | 0.012189 | 0.011938 |
| 0.012050 | 0.012425 | 0.012116 | 0.012268 | 0.012038 | 0.012131 | 0.012124 |
| 0.012338 | 0.012049 | 0.012231 | 0.012053 | 0.012032 | 0.012335 | 0.012157 |
| 0.012192 | 0.012085 | 0.012189 | 0.012189 | 0.012191 | 0.012255 | 0.012323 |
| 0.012323 | 0.012188 | 0.012297 | 0.012301 | 0.012439 | 0.012390 | 0.012152 |
| 0.012357 | 0.012221 | 0.012152 | 0.012187 | 0.012050 | 0.012220 | 0.012050 |
| 0.012152 | 0.012152 | 0.012084 | 0.012084 | 0.012118 | 0.012084 | 0.012186 |
| 0.012191 | 0.012124 | 0.012164 | 0.012138 | 0.012312 | 0.012305 | 0.012308 |
| 0.012272 | 0.012153 | 0.011990 | 0.011930 | 0.012161 | 0.012334 | 0.012266 |
| 0.012119 | 0.012196 | 0.012428 | 0.012398 | 0.012324 | 0.012359 | 0.012255 |
| 0.012220 | 0.012255 | 0.012255 | 0.012186 | 0.012632 | 0.012357 | 0.012358 |
| 0.012460 | 0.012474 | 0.012170 | 0.012257 | 0.012118 | 0.012220 | 0.012255 |
| 0.012291 | 0.012289 | 0.012357 | 0.012357 | 0.012541 | 0.012460 | 0.012118 |
| 0.012022 | 0.011976 | 0.012098 | 0.012062 | 0.012068 | 0.012010 | 0.012304 |
| 0.012141 | 0.012268 | 0.012179 | 0.012013 | 0.012153 | 0.012207 | 0.012118 |
| 0.012084 | 0.012015 | 0.012152 | 0.012084 | 0.012255 | 0.012220 | 0.012152 |
| 0.012255 | 0.012323 | 0.012118 | 0.012118 | 0.012152 | 0.012152 | 0.012159 |
| 0.012228 | 0.012152 | 0.012152 | 0.012191 | 0.012255 | 0.012323 | 0.012323 |
| 0.012188 | 0.012297 | 0.012301 | 0.012439 | 0.012390 | 0.012152 | 0.012323 |
| 0.012255 | 0.012255 | 0.012125 | 0.012334 | 0.012259 | 0.012237 | 0.012124 |
| 0.012317 | 0.012448 | 0.012223 | 0.012200 | 0.012050 | 0.012289 | 0.012118 |
| 0.012255 | 0.012186 | 0.012084 | 0.012190 | 0.012289 | 0.012262 | 0.012186 |
| 0.012084 | 0.011985 | 0.012152 | 0.012084 | 0.012016 | 0.012096 | 0.012289 |
| 0.012186 | 0.012050 | 0.012152 | 0.012186 | 0.012118 | 0.012084 | 0.012186 |
| 0.012152 | 0.012186 | 0.012186 | 0.012118 | 0.012186 | 0.012392 | 0.012016 |
| 0.012118 | 0.012460 | 0.012118 | 0.012152 | 0.012118 | 0.012426 | 0.012047 |
| 0.012412 | 0.011954 | 0.011964 | 0.012270 | 0.012243 | 0.012247 | 0.011897 |
| 0.011901 | 0.012220 | 0.012323 | 0.012440 | 0.012289 | 0.012428 | 0.012562 |
| 0.012462 | 0.012470 | 0.012460 | 0.012718 | 0.012392 | 0.013214 | 0.012461 |
| 0.013179 | 0.012906 | 0.013047 | 0.013387 | 0.012391 | 0.012084 | 0.012426 |
| 0.011572 | 0.012632 | 0.012392 | 0.012290 | 0.012358 | 0.012358 | 0.012333 |
| 0.012220 | 0.012226 | 0.012289 | 0.012255 | 0.012632 | 0.012700 | 0.012666 |
| 0.012597 | 0.012700 | 0.012769 | 0.012565 | 0.011435 | 0.011437 | 0.011504 |
| 0.011504 | 0.011504 | 0.000000 | 0.011470 | 0.011469 | 0.012186 | 0.011606 |
| 0.012530 | 0.012939 | 0.011609 | 0.012734 | 0.012530 | 0.012265 | 0.012187 |
| 0.012152 | 0.012152 | 0.012597 | 0.012737 | 0.012726 | 0.012460 | 0.012153 |
| s836     | 0.012476 | 0.012476 | 0.012577 | 0.012543 | 0.012543 | 0.012611 |
| 0.012321 | 0.012219 | 0.012543 | 0.012104 | 0.012171 | 0.012139 | 0.012104 |
| 0.012071 | 0.012307 | 0.012037 | 0.012138 | 0.012205 | 0.012172 | 0.012138 |
| 0.012104 | 0.012138 | 0.012172 | 0.012105 | 0.012139 | 0.012138 | 0.012287 |
| 0.012307 | 0.012138 | 0.012037 | 0.012205 | 0.012206 | 0.012172 | 0.012206 |
| 0.012172 | 0.012273 | 0.012172 | 0.012172 | 0.012205 | 0.012172 | 0.012307 |
| 0.012037 | 0.012172 | 0.012206 | 0.012138 | 0.012172 | 0.012273 | 0.012206 |
| 0.012172 | 0.012341 | 0.012240 | 0.012442 | 0.012172 | 0.012442 | 0.012172 |

|          |          |          |          |          |          |          |
|----------|----------|----------|----------|----------|----------|----------|
| 0.012138 | 0.012172 | 0.012307 | 0.012442 | 0.012476 | 0.012172 | 0.012273 |
| 0.012205 | 0.012273 | 0.012172 | 0.012408 | 0.012577 | 0.012172 | 0.012239 |
| 0.012138 | 0.012239 | 0.012206 | 0.012273 | 0.012205 | 0.012205 | 0.012205 |
| 0.012104 | 0.012138 | 0.012104 | 0.012138 | 0.012172 | 0.012140 | 0.012273 |
| 0.012206 | 0.012172 | 0.012239 | 0.012138 | 0.012205 | 0.012104 | 0.012172 |
| 0.012340 | 0.012273 | 0.012509 | 0.012341 | 0.012172 | 0.012408 | 0.012172 |
| 0.012286 | 0.012370 | 0.012345 | 0.011999 | 0.012107 | 0.012203 | 0.012204 |
| 0.012856 | 0.012181 | 0.012050 | 0.012408 | 0.012408 | 0.012138 | 0.012240 |
| 0.012239 | 0.012172 | 0.012239 | 0.012172 | 0.012273 | 0.012206 | 0.012171 |
| 0.012138 | 0.012205 | 0.012442 | 0.012340 | 0.012172 | 0.012206 | 0.012138 |
| 0.012104 | 0.012037 | 0.012172 | 0.012138 | 0.012273 | 0.012239 | 0.012172 |
| 0.012273 | 0.012340 | 0.012138 | 0.012138 | 0.012172 | 0.012172 | 0.012178 |
| 0.012247 | 0.012172 | 0.012172 | 0.012033 | 0.012147 | 0.012079 | 0.012172 |
| 0.012180 | 0.012127 | 0.012206 | 0.012131 | 0.012047 | 0.012090 | 0.012143 |
| 0.012322 | 0.012165 | 0.012233 | 0.012104 | 0.012099 | 0.012240 | 0.012138 |
| 0.012206 | 0.012208 | 0.012206 | 0.012273 | 0.012205 | 0.012611 | 0.012307 |
| 0.012374 | 0.012240 | 0.012172 | 0.012206 | 0.012070 | 0.012239 | 0.012105 |
| 0.012172 | 0.012172 | 0.012138 | 0.012104 | 0.012138 | 0.012104 | 0.012206 |
| 0.012172 | 0.012273 | 0.012206 | 0.012104 | 0.012176 | 0.012307 | 0.012281 |
| 0.012307 | 0.012205 | 0.012104 | 0.012007 | 0.012172 | 0.012104 | 0.012037 |
| 0.012116 | 0.012307 | 0.012071 | 0.012307 | 0.012071 | 0.012172 | 0.012138 |
| 0.012239 | 0.012138 | 0.012172 | 0.012138 | 0.012172 | 0.012037 | 0.012172 |
| 0.012138 | 0.012138 | 0.012206 | 0.012138 | 0.012138 | 0.012205 | 0.012441 |
| 0.012476 | 0.012408 | 0.012476 | 0.012311 | 0.012476 | 0.012138 | 0.012138 |
| 0.012076 | 0.012438 | 0.012206 | 0.012092 | 0.012490 | 0.012017 | 0.012204 |
| 0.012355 | 0.012389 | 0.012273 | 0.012510 | 0.012191 | 0.012408 | 0.012375 |
| 0.012307 | 0.012475 | 0.012272 | 0.012218 | 0.012195 | 0.012206 | 0.012248 |
| 0.012374 | 0.012244 | 0.012418 | 0.012453 | 0.012374 | 0.012442 | 0.012556 |
| 0.012249 | 0.012456 | 0.012350 | 0.012316 | 0.012579 | 0.012070 | 0.012277 |
| 0.012239 | 0.012172 | 0.012070 | 0.012070 | 0.012138 | 0.012138 | 0.012205 |
| 0.012138 | 0.012206 | 0.012104 | 0.012138 | 0.012138 | 0.012138 | 0.012205 |
| 0.012138 | 0.012509 | 0.012408 | 0.012442 | 0.012037 | 0.012138 | 0.012172 |
| 0.012172 | 0.012138 | 0.012206 | 0.012172 | 0.012104 | 0.012104 | 0.012104 |
| 0.012577 | 0.012172 | 0.012273 | 0.012071 | 0.012172 | 0.012341 | 0.012104 |
| 0.012104 | 0.012172 | 0.012138 | 0.012307 | 0.012104 | 0.012239 | 0.012374 |
| 0.012307 | 0.012138 | 0.012138 | 0.012071 | 0.012070 | 0.012240 | 0.012172 |
| 0.012071 | 0.012172 | 0.012037 | 0.012070 | 0.012206 | 0.012274 | 0.012104 |
| 0.012072 | 0.012205 | 0.012139 | 0.012037 | 0.012307 | 0.012037 | 0.012205 |
| 0.012296 | 0.012104 | 0.012340 | 0.012240 | 0.012206 | 0.012138 | 0.012239 |
| 0.012104 | 0.012442 | 0.012037 | 0.012240 | 0.012037 | 0.012037 | 0.012037 |
| 0.012273 | 0.012409 | 0.012172 | 0.012239 | 0.012070 | 0.012408 | 0.012037 |
| 0.012104 | 0.012104 | 0.012138 | 0.012239 | 0.012138 | 0.012239 | 0.012307 |
| 0.012307 | 0.012273 | 0.012172 | 0.012273 | 0.012239 | 0.012104 | 0.012071 |
| 0.012104 | 0.012104 | 0.012172 | 0.012037 | 0.012071 | 0.012239 | 0.012104 |
| 0.012071 | 0.012138 | 0.012273 | 0.012206 | 0.012205 | 0.012138 | 0.012138 |
| 0.012206 | 0.012138 | 0.012239 | 0.012104 | 0.012239 | 0.012340 | 0.012509 |
| 0.012138 | 0.012476 | 0.012132 | 0.018698 | 0.012175 | 0.012347 | 0.012423 |
| 0.012378 | 0.012435 | 0.012320 | 0.012164 | 0.012712 | 0.012444 | 0.012400 |
| 0.012153 | 0.012467 | 0.012037 | 0.012151 | 0.012077 | 0.012148 | 0.012008 |
| 0.012188 | 0.012254 | 0.012286 | 0.011855 | 0.012273 | 0.012273 | 0.012282 |
| 0.012162 | 0.012273 | 0.012273 | 0.012172 | 0.012206 | 0.012206 | 0.012172 |
| 0.012206 | 0.012138 | 0.012172 | 0.012206 | 0.012172 | 0.012104 | 0.012104 |
| 0.012104 | 0.012206 | 0.012104 | 0.012206 | 0.012239 | 0.012273 | 0.012138 |
| 0.012138 | 0.012104 | 0.012442 | 0.012442 | 0.012240 | 0.012275 | 0.012307 |
| 0.012070 | 0.012071 | 0.012104 | 0.012206 | 0.012071 | 0.012307 | 0.012307 |
| 0.012340 | 0.012273 | 0.012273 | 0.012374 | 0.012476 | 0.012378 | 0.012206 |
| 0.012206 | 0.012273 | 0.012307 | 0.012138 | 0.012206 | 0.012172 | 0.012206 |
| 0.012273 | 0.012273 | 0.012307 | 0.012273 | 0.012175 | 0.012374 | 0.012340 |
| 0.012216 | 0.012104 | 0.012205 | 0.012307 | 0.012206 | 0.012273 | 0.012374 |
| 0.012510 | 0.012191 | 0.012408 | 0.012375 | 0.012307 | 0.012475 | 0.012105 |

|          |          |          |          |          |          |          |
|----------|----------|----------|----------|----------|----------|----------|
| 0.012277 | 0.012173 | 0.012104 | 0.012104 | 0.012206 | 0.012104 | 0.012206 |
| 0.012239 | 0.012273 | 0.012138 | 0.012138 | 0.012104 | 0.012442 | 0.012442 |
| 0.012240 | 0.012275 | 0.012306 | 0.012239 | 0.011430 | 0.012314 | 0.012260 |
| 0.012329 | 0.012313 | 0.012435 | 0.012312 | 0.012394 | 0.012306 | 0.012270 |
| 0.011404 | 0.012136 | 0.012298 | 0.012204 | 0.012476 | 0.012357 | 0.012460 |
| 0.011400 | 0.012269 | 0.012214 | 0.012205 | 0.012205 | 0.012172 | 0.012179 |
| 0.012070 | 0.012104 | 0.012239 | 0.012205 | 0.012213 | 0.012273 | 0.012242 |
| 0.012171 | 0.012104 | 0.012138 | 0.012172 | 0.012071 | 0.012138 | 0.012037 |
| 0.012104 | 0.012138 | 0.012104 | 0.012071 | 0.012172 | 0.012104 | 0.012138 |
| 0.012138 | 0.012070 | 0.012138 | 0.012172 | 0.012070 | 0.012273 | 0.012307 |
| 0.012206 | 0.012206 | 0.012206 | 0.012206 | 0.012138 | 0.012476 | 0.012172 |
| 0.012177 | 0.012138 | 0.012307 | 0.012319 | 0.012240 | 0.012239 | 0.012239 |
| 0.012240 | 0.012172 | 0.012138 | 0.012172 | 0.012273 | 0.012273 | 0.012206 |
| 0.012205 | 0.012341 | 0.012442 | 0.012239 | 0.012442 | 0.012442 | 0.012307 |
| 0.012138 | 0.012205 | 0.012240 | 0.012577 | 0.012206 | 0.012240 | 0.012206 |
| 0.012239 | 0.012037 | 0.012037 | 0.012409 | 0.012408 | 0.012375 | 0.012172 |
| 0.012273 | 0.012341 | 0.012205 | 0.012273 | 0.012239 | 0.012104 | 0.012374 |
| 0.012205 | 0.012172 | 0.012037 | 0.012307 | 0.012172 | 0.012273 | 0.012510 |
| 0.012138 | 0.012389 | 0.012509 | 0.012241 | 0.011795 | 0.012184 | 0.011990 |
| 0.012051 | 0.012425 | 0.012116 | 0.012269 | 0.011989 | 0.012131 | 0.012124 |
| 0.012236 | 0.012050 | 0.012232 | 0.011987 | 0.012032 | 0.012268 | 0.012198 |
| 0.012230 | 0.012124 | 0.012189 | 0.012189 | 0.012210 | 0.012273 | 0.012341 |
| 0.012307 | 0.012207 | 0.012315 | 0.012318 | 0.012455 | 0.012408 | 0.012172 |
| 0.012374 | 0.012240 | 0.012172 | 0.012206 | 0.012070 | 0.012239 | 0.012105 |
| 0.012172 | 0.012172 | 0.012138 | 0.012104 | 0.012138 | 0.012104 | 0.012206 |
| 0.012215 | 0.012182 | 0.012158 | 0.012192 | 0.012260 | 0.012327 | 0.012326 |
| 0.012323 | 0.012239 | 0.012022 | 0.011962 | 0.012180 | 0.012350 | 0.012352 |
| 0.012138 | 0.012214 | 0.012443 | 0.012415 | 0.012341 | 0.012375 | 0.012273 |
| 0.012239 | 0.012273 | 0.012273 | 0.012205 | 0.012645 | 0.012374 | 0.012375 |
| 0.012475 | 0.012490 | 0.012190 | 0.012275 | 0.012138 | 0.012306 | 0.012273 |
| 0.012343 | 0.012307 | 0.012374 | 0.012374 | 0.012518 | 0.012476 | 0.012173 |
| 0.012044 | 0.012033 | 0.012152 | 0.012116 | 0.012123 | 0.012033 | 0.012321 |
| 0.012195 | 0.012247 | 0.012158 | 0.012074 | 0.012172 | 0.012226 | 0.012138 |
| 0.012104 | 0.012037 | 0.012172 | 0.012138 | 0.012273 | 0.012239 | 0.012172 |
| 0.012273 | 0.012340 | 0.012138 | 0.012138 | 0.012172 | 0.012172 | 0.012178 |
| 0.012247 | 0.012172 | 0.012172 | 0.012210 | 0.012273 | 0.012341 | 0.012307 |
| 0.012207 | 0.012315 | 0.012318 | 0.012455 | 0.012408 | 0.012172 | 0.012374 |
| 0.012273 | 0.012273 | 0.012145 | 0.012351 | 0.012280 | 0.012290 | 0.012183 |
| 0.012338 | 0.012523 | 0.012205 | 0.012219 | 0.012071 | 0.012307 | 0.012172 |
| 0.012273 | 0.012206 | 0.012104 | 0.012176 | 0.012307 | 0.012281 | 0.012205 |
| 0.012104 | 0.012007 | 0.012172 | 0.012104 | 0.012037 | 0.012116 | 0.012307 |
| 0.012206 | 0.012138 | 0.012172 | 0.012206 | 0.012172 | 0.012104 | 0.012239 |
| 0.012172 | 0.012206 | 0.012205 | 0.012138 | 0.012206 | 0.012442 | 0.012037 |
| 0.012138 | 0.012476 | 0.012138 | 0.012172 | 0.012138 | 0.012442 | 0.012004 |
| 0.012299 | 0.011954 | 0.011914 | 0.012230 | 0.012202 | 0.012283 | 0.011856 |
| 0.011848 | 0.012239 | 0.012341 | 0.012455 | 0.012309 | 0.012451 | 0.012578 |
| 0.012477 | 0.012518 | 0.012475 | 0.012704 | 0.012442 | 0.013287 | 0.012478 |
| 0.013185 | 0.012953 | 0.013089 | 0.013395 | 0.012441 | 0.012138 | 0.012442 |
| 0.011599 | 0.012820 | 0.012408 | 0.012307 | 0.012374 | 0.012374 | 0.012350 |
| 0.012239 | 0.012251 | 0.012307 | 0.012273 | 0.012645 | 0.012712 | 0.012712 |
| 0.012613 | 0.012713 | 0.012817 | 0.012586 | 0.011464 | 0.011466 | 0.011531 |
| 0.011531 | 0.011363 | 0.011470 | 0.000000 | 0.011262 | 0.012205 | 0.011666 |
| 0.012543 | 0.012982 | 0.011671 | 0.012780 | 0.013255 | 0.012285 | 0.012206 |
| 0.012172 | 0.012172 | 0.012645 | 0.012750 | 0.012752 | 0.012509 | 0.012175 |
| S837     | 0.012477 | 0.012477 | 0.012613 | 0.012545 | 0.012545 | 0.012612 |
| 0.012323 | 0.012220 | 0.012545 | 0.012106 | 0.012173 | 0.012140 | 0.012105 |
| 0.012072 | 0.012308 | 0.012038 | 0.012139 | 0.012207 | 0.012173 | 0.012139 |
| 0.012105 | 0.012139 | 0.012173 | 0.012107 | 0.012140 | 0.012139 | 0.012289 |
| 0.012308 | 0.012072 | 0.012038 | 0.012207 | 0.012173 | 0.012173 | 0.012207 |
| 0.012173 | 0.012274 | 0.012173 | 0.012173 | 0.012207 | 0.012173 | 0.012309 |

|          |          |          |          |          |          |          |
|----------|----------|----------|----------|----------|----------|----------|
| 0.012038 | 0.012173 | 0.012207 | 0.012139 | 0.012173 | 0.012274 | 0.012207 |
| 0.012173 | 0.012342 | 0.012242 | 0.012443 | 0.012173 | 0.012443 | 0.012173 |
| 0.012139 | 0.012174 | 0.012308 | 0.012443 | 0.012477 | 0.012173 | 0.012274 |
| 0.012207 | 0.012275 | 0.012173 | 0.012409 | 0.012579 | 0.012173 | 0.012241 |
| 0.012139 | 0.012240 | 0.012207 | 0.012274 | 0.012207 | 0.012207 | 0.012207 |
| 0.012105 | 0.012139 | 0.012105 | 0.012140 | 0.012173 | 0.012207 | 0.012274 |
| 0.012207 | 0.012173 | 0.012241 | 0.012139 | 0.012207 | 0.012106 | 0.012173 |
| 0.012342 | 0.012274 | 0.012511 | 0.012342 | 0.012173 | 0.012410 | 0.012173 |
| 0.012286 | 0.012445 | 0.012346 | 0.011999 | 0.012107 | 0.012203 | 0.012204 |
| 0.012893 | 0.012232 | 0.012092 | 0.012409 | 0.012410 | 0.012105 | 0.012241 |
| 0.012241 | 0.012173 | 0.012240 | 0.012173 | 0.012275 | 0.012173 | 0.012173 |
| 0.012139 | 0.012207 | 0.012443 | 0.012342 | 0.012173 | 0.012207 | 0.012139 |
| 0.012105 | 0.012038 | 0.012173 | 0.012139 | 0.012274 | 0.012241 | 0.012173 |
| 0.012274 | 0.012342 | 0.012139 | 0.012139 | 0.012173 | 0.012173 | 0.012179 |
| 0.012249 | 0.012173 | 0.012173 | 0.012035 | 0.012149 | 0.012045 | 0.012174 |
| 0.012182 | 0.012129 | 0.012132 | 0.012064 | 0.012049 | 0.012092 | 0.012145 |
| 0.012325 | 0.012167 | 0.012236 | 0.012106 | 0.012101 | 0.012242 | 0.012140 |
| 0.012208 | 0.012210 | 0.012208 | 0.012274 | 0.012206 | 0.012613 | 0.012343 |
| 0.012376 | 0.012241 | 0.012173 | 0.012207 | 0.012072 | 0.012240 | 0.012106 |
| 0.012173 | 0.012173 | 0.012139 | 0.012105 | 0.012139 | 0.012105 | 0.012207 |
| 0.012173 | 0.012274 | 0.012207 | 0.012105 | 0.012177 | 0.012308 | 0.012248 |
| 0.012309 | 0.012207 | 0.012105 | 0.012008 | 0.012173 | 0.012105 | 0.012038 |
| 0.012117 | 0.012309 | 0.012072 | 0.012309 | 0.012072 | 0.012173 | 0.012139 |
| 0.012241 | 0.012139 | 0.012173 | 0.012139 | 0.012173 | 0.012038 | 0.012173 |
| 0.012207 | 0.012139 | 0.012207 | 0.012139 | 0.012139 | 0.012207 | 0.012409 |
| 0.012477 | 0.012409 | 0.012477 | 0.012310 | 0.012478 | 0.012139 | 0.012139 |
| 0.012076 | 0.012438 | 0.012254 | 0.012092 | 0.012492 | 0.012019 | 0.012203 |
| 0.012357 | 0.012392 | 0.012274 | 0.012511 | 0.012192 | 0.012410 | 0.012376 |
| 0.012308 | 0.012477 | 0.012310 | 0.012219 | 0.012325 | 0.012207 | 0.012250 |
| 0.012376 | 0.012246 | 0.012419 | 0.012454 | 0.012376 | 0.012444 | 0.012558 |
| 0.012250 | 0.012459 | 0.012352 | 0.012317 | 0.012581 | 0.012072 | 0.012279 |
| 0.012240 | 0.012173 | 0.012072 | 0.012072 | 0.012139 | 0.012139 | 0.012207 |
| 0.012139 | 0.012207 | 0.012105 | 0.012139 | 0.012139 | 0.012139 | 0.012207 |
| 0.012139 | 0.012511 | 0.012410 | 0.012443 | 0.012038 | 0.012139 | 0.012173 |
| 0.012173 | 0.012139 | 0.012207 | 0.012173 | 0.012105 | 0.012105 | 0.012105 |
| 0.012579 | 0.012207 | 0.012274 | 0.012072 | 0.012173 | 0.012342 | 0.012106 |
| 0.012105 | 0.012173 | 0.012139 | 0.012308 | 0.012105 | 0.012241 | 0.012375 |
| 0.012308 | 0.012139 | 0.012139 | 0.012072 | 0.012072 | 0.012241 | 0.012173 |
| 0.012072 | 0.012173 | 0.012038 | 0.012072 | 0.012207 | 0.012275 | 0.012106 |
| 0.012073 | 0.012207 | 0.012140 | 0.012038 | 0.012308 | 0.012038 | 0.012207 |
| 0.012298 | 0.012106 | 0.012342 | 0.012241 | 0.012207 | 0.012139 | 0.012241 |
| 0.012105 | 0.012443 | 0.012038 | 0.012241 | 0.012038 | 0.012038 | 0.012038 |
| 0.012274 | 0.012410 | 0.012173 | 0.012241 | 0.012072 | 0.012410 | 0.012038 |
| 0.012106 | 0.012105 | 0.012139 | 0.012241 | 0.012139 | 0.012241 | 0.012308 |
| 0.012308 | 0.012274 | 0.012173 | 0.012275 | 0.012240 | 0.012105 | 0.012072 |
| 0.012105 | 0.012105 | 0.012173 | 0.012038 | 0.012072 | 0.012241 | 0.012105 |
| 0.012072 | 0.012139 | 0.012274 | 0.012207 | 0.012207 | 0.012139 | 0.012140 |
| 0.012207 | 0.012139 | 0.012240 | 0.012105 | 0.012241 | 0.012342 | 0.012511 |
| 0.012139 | 0.012477 | 0.012132 | 0.018698 | 0.012241 | 0.012286 | 0.012423 |
| 0.012378 | 0.012435 | 0.012320 | 0.012222 | 0.012712 | 0.012444 | 0.012461 |
| 0.012248 | 0.012468 | 0.012037 | 0.012151 | 0.012116 | 0.012148 | 0.011965 |
| 0.012283 | 0.012254 | 0.012286 | 0.011987 | 0.012275 | 0.012274 | 0.012283 |
| 0.012164 | 0.012274 | 0.012274 | 0.012173 | 0.012173 | 0.012174 | 0.012174 |
| 0.012207 | 0.012139 | 0.012173 | 0.012207 | 0.012173 | 0.012106 | 0.012105 |
| 0.012105 | 0.012207 | 0.012105 | 0.012207 | 0.012241 | 0.012274 | 0.012139 |
| 0.012139 | 0.012106 | 0.012443 | 0.012443 | 0.012241 | 0.012276 | 0.012308 |
| 0.012072 | 0.012072 | 0.012105 | 0.012207 | 0.012072 | 0.012308 | 0.012308 |
| 0.012342 | 0.012274 | 0.012274 | 0.012376 | 0.012477 | 0.012380 | 0.012207 |
| 0.012207 | 0.012274 | 0.012308 | 0.012139 | 0.012207 | 0.012173 | 0.012207 |
| 0.012275 | 0.012274 | 0.012308 | 0.012275 | 0.012176 | 0.012375 | 0.012342 |

|          |          |          |          |          |          |          |
|----------|----------|----------|----------|----------|----------|----------|
| 0.012217 | 0.012106 | 0.012207 | 0.012308 | 0.012207 | 0.012275 | 0.012375 |
| 0.012511 | 0.012192 | 0.012410 | 0.012376 | 0.012308 | 0.012477 | 0.012106 |
| 0.012278 | 0.012174 | 0.012105 | 0.012105 | 0.012207 | 0.012105 | 0.012207 |
| 0.012241 | 0.012274 | 0.012139 | 0.012139 | 0.012106 | 0.012443 | 0.012443 |
| 0.012241 | 0.012276 | 0.012308 | 0.012240 | 0.011431 | 0.012352 | 0.012262 |
| 0.012332 | 0.012315 | 0.012437 | 0.012313 | 0.012396 | 0.012308 | 0.012272 |
| 0.011404 | 0.012138 | 0.012299 | 0.012207 | 0.012479 | 0.012359 | 0.012462 |
| 0.011401 | 0.012309 | 0.012215 | 0.012207 | 0.012207 | 0.012173 | 0.012180 |
| 0.012072 | 0.012106 | 0.012241 | 0.012207 | 0.012214 | 0.012274 | 0.012242 |
| 0.012173 | 0.012105 | 0.012139 | 0.012173 | 0.012072 | 0.012139 | 0.012038 |
| 0.012105 | 0.012139 | 0.012105 | 0.012072 | 0.012173 | 0.012105 | 0.012139 |
| 0.012139 | 0.012072 | 0.012139 | 0.012173 | 0.012072 | 0.012274 | 0.012308 |
| 0.012207 | 0.012207 | 0.012207 | 0.012207 | 0.012139 | 0.012477 | 0.012173 |
| 0.012179 | 0.012139 | 0.012309 | 0.012321 | 0.012241 | 0.012240 | 0.012241 |
| 0.012241 | 0.012173 | 0.012139 | 0.012173 | 0.012274 | 0.012274 | 0.012207 |
| 0.012207 | 0.012342 | 0.012443 | 0.012240 | 0.012444 | 0.012444 | 0.012308 |
| 0.012139 | 0.012207 | 0.012241 | 0.012579 | 0.012208 | 0.012241 | 0.012207 |
| 0.012241 | 0.012038 | 0.012038 | 0.012410 | 0.012410 | 0.012376 | 0.012173 |
| 0.012275 | 0.012342 | 0.012207 | 0.012275 | 0.012240 | 0.012106 | 0.012376 |
| 0.012207 | 0.012173 | 0.012038 | 0.012342 | 0.012173 | 0.012274 | 0.012511 |
| 0.012139 | 0.012391 | 0.012511 | 0.012241 | 0.011851 | 0.012186 | 0.012042 |
| 0.011996 | 0.012464 | 0.012116 | 0.012314 | 0.012038 | 0.012233 | 0.012231 |
| 0.012287 | 0.012116 | 0.012344 | 0.012053 | 0.012086 | 0.012335 | 0.012198 |
| 0.012230 | 0.012124 | 0.012190 | 0.012189 | 0.012211 | 0.012274 | 0.012342 |
| 0.012342 | 0.012208 | 0.012317 | 0.012320 | 0.012456 | 0.012409 | 0.012173 |
| 0.012376 | 0.012241 | 0.012173 | 0.012207 | 0.012072 | 0.012240 | 0.012106 |
| 0.012173 | 0.012173 | 0.012139 | 0.012105 | 0.012139 | 0.012105 | 0.012207 |
| 0.012217 | 0.012184 | 0.012160 | 0.012194 | 0.012262 | 0.012329 | 0.012328 |
| 0.012326 | 0.012241 | 0.012024 | 0.011964 | 0.012182 | 0.012353 | 0.012354 |
| 0.012140 | 0.012216 | 0.012446 | 0.012417 | 0.012343 | 0.012377 | 0.012274 |
| 0.012240 | 0.012274 | 0.012274 | 0.012206 | 0.012647 | 0.012376 | 0.012376 |
| 0.012477 | 0.012528 | 0.012191 | 0.012277 | 0.012139 | 0.012308 | 0.012274 |
| 0.012345 | 0.012342 | 0.012376 | 0.012376 | 0.012481 | 0.012477 | 0.012175 |
| 0.012045 | 0.012034 | 0.012086 | 0.012118 | 0.012124 | 0.012072 | 0.012323 |
| 0.012197 | 0.012293 | 0.012160 | 0.012113 | 0.012174 | 0.012228 | 0.012139 |
| 0.012105 | 0.012038 | 0.012173 | 0.012139 | 0.012274 | 0.012241 | 0.012173 |
| 0.012274 | 0.012342 | 0.012139 | 0.012139 | 0.012173 | 0.012173 | 0.012179 |
| 0.012249 | 0.012173 | 0.012173 | 0.012211 | 0.012274 | 0.012342 | 0.012342 |
| 0.012208 | 0.012317 | 0.012320 | 0.012456 | 0.012409 | 0.012173 | 0.012375 |
| 0.012274 | 0.012274 | 0.012147 | 0.012353 | 0.012280 | 0.012291 | 0.012183 |
| 0.012337 | 0.012522 | 0.012207 | 0.012221 | 0.012072 | 0.012309 | 0.012173 |
| 0.012274 | 0.012207 | 0.012105 | 0.012177 | 0.012308 | 0.012248 | 0.012207 |
| 0.012105 | 0.012008 | 0.012173 | 0.012105 | 0.012038 | 0.012117 | 0.012309 |
| 0.012207 | 0.012139 | 0.012173 | 0.012207 | 0.012173 | 0.012106 | 0.012206 |
| 0.012173 | 0.012207 | 0.012207 | 0.012139 | 0.012207 | 0.012444 | 0.012038 |
| 0.012139 | 0.012477 | 0.012139 | 0.012173 | 0.012139 | 0.012443 | 0.012091 |
| 0.012356 | 0.011997 | 0.011964 | 0.012311 | 0.012284 | 0.012283 | 0.011939 |
| 0.011954 | 0.012240 | 0.012342 | 0.012423 | 0.012308 | 0.012450 | 0.012578 |
| 0.012479 | 0.012521 | 0.012477 | 0.012738 | 0.012443 | 0.013222 | 0.012478 |
| 0.013222 | 0.012885 | 0.013023 | 0.013394 | 0.012443 | 0.012139 | 0.012443 |
| 0.011532 | 0.012650 | 0.012410 | 0.012309 | 0.012376 | 0.012376 | 0.012352 |
| 0.012240 | 0.012250 | 0.012308 | 0.012275 | 0.012647 | 0.012714 | 0.012715 |
| 0.012615 | 0.012714 | 0.012817 | 0.012586 | 0.011465 | 0.011467 | 0.011532 |
| 0.011532 | 0.011364 | 0.011469 | 0.011262 | 0.000000 | 0.012206 | 0.011667 |
| 0.012546 | 0.012951 | 0.011671 | 0.012782 | 0.012546 | 0.012284 | 0.012207 |
| 0.012173 | 0.012173 | 0.012647 | 0.012795 | 0.012684 | 0.012477 | 0.012174 |
| S838     | 0.011463 | 0.011463 | 0.012068 | 0.011832 | 0.011832 | 0.011900 |
| 0.011739 | 0.011671 | 0.011899 | 0.011329 | 0.011396 | 0.011363 | 0.011329 |
| 0.011362 | 0.011530 | 0.011329 | 0.011362 | 0.011429 | 0.011396 | 0.011362 |
| 0.011329 | 0.011362 | 0.011463 | 0.011329 | 0.011362 | 0.011362 | 0.011705 |

|          |          |          |          |          |          |          |
|----------|----------|----------|----------|----------|----------|----------|
| 0.011597 | 0.011362 | 0.011262 | 0.011496 | 0.011429 | 0.011396 | 0.011429 |
| 0.011396 | 0.011496 | 0.011396 | 0.011396 | 0.011429 | 0.011396 | 0.011564 |
| 0.011329 | 0.011396 | 0.011429 | 0.011362 | 0.011463 | 0.011496 | 0.011429 |
| 0.011396 | 0.011564 | 0.011463 | 0.011731 | 0.011396 | 0.011664 | 0.011396 |
| 0.011362 | 0.011463 | 0.011530 | 0.011664 | 0.011765 | 0.011463 | 0.011564 |
| 0.011429 | 0.011496 | 0.011396 | 0.011631 | 0.011866 | 0.011396 | 0.011463 |
| 0.011362 | 0.011463 | 0.011429 | 0.011496 | 0.011429 | 0.011429 | 0.011429 |
| 0.011329 | 0.011362 | 0.011329 | 0.011429 | 0.011396 | 0.011430 | 0.011496 |
| 0.011429 | 0.011396 | 0.011463 | 0.011362 | 0.011496 | 0.011329 | 0.011396 |
| 0.011564 | 0.011496 | 0.011731 | 0.011564 | 0.011396 | 0.011631 | 0.011396 |
| 0.011542 | 0.011770 | 0.011588 | 0.011295 | 0.011321 | 0.011391 | 0.011493 |
| 0.012158 | 0.011518 | 0.011307 | 0.011631 | 0.011631 | 0.011429 | 0.011530 |
| 0.011463 | 0.011362 | 0.011295 | 0.011396 | 0.011496 | 0.011429 | 0.011295 |
| 0.011329 | 0.011496 | 0.011631 | 0.011564 | 0.011463 | 0.011429 | 0.011362 |
| 0.011329 | 0.011329 | 0.011396 | 0.011362 | 0.011564 | 0.011530 | 0.011463 |
| 0.011564 | 0.011631 | 0.011362 | 0.011362 | 0.011396 | 0.011396 | 0.011398 |
| 0.011466 | 0.011396 | 0.011396 | 0.011276 | 0.011349 | 0.011306 | 0.011396 |
| 0.011399 | 0.011335 | 0.011392 | 0.011371 | 0.011298 | 0.011334 | 0.011364 |
| 0.011636 | 0.011405 | 0.011439 | 0.011329 | 0.011337 | 0.011464 | 0.011430 |
| 0.011497 | 0.011431 | 0.011430 | 0.011396 | 0.011127 | 0.011832 | 0.011631 |
| 0.011664 | 0.011530 | 0.011396 | 0.011497 | 0.011295 | 0.011530 | 0.011329 |
| 0.011396 | 0.011396 | 0.011362 | 0.011329 | 0.011362 | 0.011329 | 0.011429 |
| 0.011396 | 0.011497 | 0.011429 | 0.011329 | 0.011431 | 0.011530 | 0.011533 |
| 0.011530 | 0.011430 | 0.011329 | 0.011263 | 0.011396 | 0.011329 | 0.011262 |
| 0.011366 | 0.011530 | 0.011329 | 0.011530 | 0.011295 | 0.011396 | 0.011362 |
| 0.011463 | 0.011362 | 0.011396 | 0.011362 | 0.011396 | 0.011262 | 0.011396 |
| 0.011429 | 0.011362 | 0.011429 | 0.011362 | 0.011262 | 0.011429 | 0.011665 |
| 0.011765 | 0.011698 | 0.011765 | 0.011532 | 0.011765 | 0.011262 | 0.011362 |
| 0.011398 | 0.011707 | 0.011380 | 0.011300 | 0.011773 | 0.011265 | 0.011336 |
| 0.011773 | 0.011672 | 0.011530 | 0.011698 | 0.011197 | 0.011631 | 0.011597 |
| 0.011530 | 0.011698 | 0.011380 | 0.011225 | 0.011312 | 0.011429 | 0.011432 |
| 0.011597 | 0.011364 | 0.011601 | 0.011703 | 0.011497 | 0.011631 | 0.011670 |
| 0.011399 | 0.011671 | 0.011399 | 0.011567 | 0.011766 | 0.011295 | 0.011498 |
| 0.011463 | 0.011396 | 0.011295 | 0.011295 | 0.011362 | 0.011362 | 0.011429 |
| 0.011362 | 0.011429 | 0.011329 | 0.011429 | 0.011362 | 0.011362 | 0.011429 |
| 0.011362 | 0.011799 | 0.011698 | 0.011731 | 0.011262 | 0.011362 | 0.011396 |
| 0.011396 | 0.011362 | 0.011429 | 0.011463 | 0.011329 | 0.011329 | 0.011329 |
| 0.011866 | 0.011496 | 0.011496 | 0.011295 | 0.011396 | 0.011564 | 0.011329 |
| 0.011329 | 0.011396 | 0.011362 | 0.011530 | 0.011329 | 0.011463 | 0.011597 |
| 0.011530 | 0.011362 | 0.011362 | 0.011295 | 0.011295 | 0.011463 | 0.011396 |
| 0.011295 | 0.011396 | 0.011262 | 0.011295 | 0.011429 | 0.011564 | 0.011329 |
| 0.011295 | 0.011429 | 0.011363 | 0.011262 | 0.011597 | 0.011262 | 0.011429 |
| 0.011437 | 0.011329 | 0.011631 | 0.011463 | 0.011496 | 0.011362 | 0.011463 |
| 0.011329 | 0.011664 | 0.011262 | 0.011530 | 0.011329 | 0.011329 | 0.011262 |
| 0.011496 | 0.011698 | 0.011396 | 0.011463 | 0.011295 | 0.011698 | 0.011329 |
| 0.011329 | 0.011329 | 0.011362 | 0.011463 | 0.011362 | 0.011463 | 0.011530 |
| 0.011530 | 0.011496 | 0.011396 | 0.011496 | 0.011463 | 0.011329 | 0.011295 |
| 0.011329 | 0.011329 | 0.011396 | 0.011329 | 0.011295 | 0.011463 | 0.011329 |
| 0.011362 | 0.011362 | 0.011496 | 0.011530 | 0.011429 | 0.011362 | 0.011362 |
| 0.011429 | 0.011362 | 0.011463 | 0.011329 | 0.011463 | 0.011564 | 0.011866 |
| 0.011362 | 0.011765 | 0.011371 | 0.011789 | 0.011191 | 0.011488 | 0.011723 |
| 0.011683 | 0.011728 | 0.011374 | 0.011292 | 0.011774 | 0.011751 | 0.011364 |
| 0.011534 | 0.011549 | 0.011255 | 0.011311 | 0.011333 | 0.011356 | 0.011318 |
| 0.011529 | 0.011544 | 0.011542 | 0.011325 | 0.011496 | 0.011262 | 0.011466 |
| 0.011369 | 0.011497 | 0.011497 | 0.011463 | 0.011429 | 0.011430 | 0.011396 |
| 0.011429 | 0.011362 | 0.011396 | 0.011429 | 0.011396 | 0.011329 | 0.011228 |
| 0.011228 | 0.011429 | 0.011329 | 0.011430 | 0.011463 | 0.011497 | 0.011262 |
| 0.011429 | 0.011396 | 0.011732 | 0.011732 | 0.011463 | 0.011497 | 0.011530 |
| 0.011295 | 0.011295 | 0.011329 | 0.011429 | 0.011295 | 0.011530 | 0.011530 |
| 0.011564 | 0.011530 | 0.011496 | 0.011597 | 0.011765 | 0.011599 | 0.011429 |

|          |          |          |          |          |          |          |
|----------|----------|----------|----------|----------|----------|----------|
| 0.011429 | 0.011497 | 0.011530 | 0.011362 | 0.011429 | 0.011396 | 0.011429 |
| 0.011497 | 0.011497 | 0.011530 | 0.011497 | 0.011397 | 0.011597 | 0.011564 |
| 0.011433 | 0.011329 | 0.011429 | 0.011530 | 0.011430 | 0.011564 | 0.011597 |
| 0.011698 | 0.011197 | 0.011631 | 0.011597 | 0.011530 | 0.011698 | 0.011329 |
| 0.011498 | 0.011396 | 0.011228 | 0.011228 | 0.011429 | 0.011329 | 0.011430 |
| 0.011463 | 0.011497 | 0.011262 | 0.011429 | 0.011396 | 0.011732 | 0.011732 |
| 0.011463 | 0.011497 | 0.011228 | 0.011161 | 0.012103 | 0.011489 | 0.011236 |
| 0.011517 | 0.011476 | 0.011552 | 0.011441 | 0.011550 | 0.011439 | 0.011508 |
| 0.011987 | 0.011164 | 0.011300 | 0.011337 | 0.011645 | 0.011570 | 0.011672 |
| 0.012012 | 0.011475 | 0.011669 | 0.011731 | 0.011597 | 0.011597 | 0.011635 |
| 0.011295 | 0.011463 | 0.011597 | 0.011564 | 0.011567 | 0.011564 | 0.011532 |
| 0.011396 | 0.011329 | 0.011362 | 0.011396 | 0.011295 | 0.011362 | 0.011262 |
| 0.011396 | 0.011429 | 0.011329 | 0.011295 | 0.011396 | 0.011329 | 0.011362 |
| 0.011362 | 0.011295 | 0.011362 | 0.011396 | 0.011295 | 0.011496 | 0.011530 |
| 0.011429 | 0.011496 | 0.011429 | 0.011429 | 0.011362 | 0.011765 | 0.011396 |
| 0.011408 | 0.011362 | 0.011598 | 0.011603 | 0.011463 | 0.011463 | 0.011463 |
| 0.011463 | 0.011396 | 0.011362 | 0.011396 | 0.011496 | 0.011496 | 0.011429 |
| 0.011429 | 0.011564 | 0.011731 | 0.011463 | 0.011664 | 0.011664 | 0.011530 |
| 0.011362 | 0.011429 | 0.011463 | 0.011866 | 0.011430 | 0.011463 | 0.011429 |
| 0.011463 | 0.011396 | 0.011396 | 0.011698 | 0.011631 | 0.011664 | 0.011396 |
| 0.011496 | 0.011564 | 0.011429 | 0.011496 | 0.011463 | 0.011329 | 0.011664 |
| 0.011429 | 0.011396 | 0.011396 | 0.011564 | 0.011396 | 0.011496 | 0.011732 |
| 0.011429 | 0.011807 | 0.011799 | 0.011548 | 0.011229 | 0.011502 | 0.011318 |
| 0.011335 | 0.011839 | 0.011341 | 0.011551 | 0.011353 | 0.011416 | 0.011432 |
| 0.011519 | 0.011192 | 0.011394 | 0.011192 | 0.011222 | 0.011395 | 0.011425 |
| 0.011475 | 0.011375 | 0.011483 | 0.011412 | 0.011431 | 0.011564 | 0.011631 |
| 0.011631 | 0.011497 | 0.011601 | 0.011603 | 0.011738 | 0.011767 | 0.011429 |
| 0.011664 | 0.011530 | 0.011396 | 0.011497 | 0.011295 | 0.011530 | 0.011329 |
| 0.011396 | 0.011396 | 0.011362 | 0.011329 | 0.011362 | 0.011329 | 0.011429 |
| 0.011409 | 0.011410 | 0.011403 | 0.011437 | 0.011573 | 0.011538 | 0.011538 |
| 0.011537 | 0.011464 | 0.011245 | 0.011276 | 0.011399 | 0.011568 | 0.011569 |
| 0.011363 | 0.011433 | 0.011666 | 0.011635 | 0.011565 | 0.011599 | 0.011194 |
| 0.011463 | 0.011463 | 0.011463 | 0.011429 | 0.011967 | 0.011597 | 0.011664 |
| 0.011698 | 0.011772 | 0.011401 | 0.011476 | 0.011362 | 0.011429 | 0.011262 |
| 0.011565 | 0.011463 | 0.011597 | 0.011597 | 0.011689 | 0.011597 | 0.011372 |
| 0.011263 | 0.011233 | 0.011332 | 0.011332 | 0.011436 | 0.011247 | 0.011604 |
| 0.011403 | 0.011455 | 0.011108 | 0.011322 | 0.011396 | 0.011471 | 0.011362 |
| 0.011329 | 0.011329 | 0.011396 | 0.011362 | 0.011564 | 0.011530 | 0.011463 |
| 0.011564 | 0.011631 | 0.011362 | 0.011362 | 0.011396 | 0.011396 | 0.011398 |
| 0.011466 | 0.011396 | 0.011396 | 0.011431 | 0.011564 | 0.011631 | 0.011631 |
| 0.011497 | 0.011601 | 0.011603 | 0.011738 | 0.011767 | 0.011429 | 0.011597 |
| 0.011262 | 0.011262 | 0.011365 | 0.011547 | 0.011477 | 0.011503 | 0.011376 |
| 0.011542 | 0.011698 | 0.011526 | 0.011434 | 0.011329 | 0.011530 | 0.011396 |
| 0.011497 | 0.011429 | 0.011329 | 0.011431 | 0.011530 | 0.011533 | 0.011430 |
| 0.011329 | 0.011263 | 0.011396 | 0.011329 | 0.011262 | 0.011366 | 0.011530 |
| 0.011429 | 0.011362 | 0.011396 | 0.011429 | 0.011396 | 0.011329 | 0.011530 |
| 0.011396 | 0.011429 | 0.011429 | 0.011362 | 0.011429 | 0.011664 | 0.011329 |
| 0.011362 | 0.011765 | 0.011362 | 0.011396 | 0.011362 | 0.011731 | 0.011317 |
| 0.011735 | 0.011273 | 0.011311 | 0.011584 | 0.011630 | 0.011563 | 0.011227 |
| 0.011218 | 0.011530 | 0.011631 | 0.011739 | 0.011599 | 0.011737 | 0.011867 |
| 0.011767 | 0.011804 | 0.011765 | 0.012017 | 0.011732 | 0.012539 | 0.011768 |
| 0.012507 | 0.012207 | 0.012341 | 0.012680 | 0.011731 | 0.011430 | 0.011732 |
| 0.012137 | 0.012106 | 0.011698 | 0.011597 | 0.011665 | 0.011665 | 0.011635 |
| 0.011530 | 0.011535 | 0.011597 | 0.011565 | 0.011934 | 0.012000 | 0.012002 |
| 0.011901 | 0.012002 | 0.012105 | 0.011872 | 0.012137 | 0.012144 | 0.012205 |
| 0.012205 | 0.012239 | 0.012186 | 0.012205 | 0.012206 | 0.000000 | 0.011732 |
| 0.011834 | 0.012337 | 0.011806 | 0.012068 | 0.012541 | 0.011604 | 0.011497 |
| 0.011463 | 0.011463 | 0.011934 | 0.011883 | 0.012080 | 0.011799 | 0.011465 |
| S839     | 0.012002 | 0.012002 | 0.012170 | 0.012069 | 0.012069 | 0.012136 |
| 0.011910 | 0.011842 | 0.012069 | 0.011632 | 0.011699 | 0.011666 | 0.011631 |



|          |          |          |          |          |          |          |
|----------|----------|----------|----------|----------|----------|----------|
| 0.011598 | 0.011833 | 0.011564 | 0.011665 | 0.011732 | 0.011699 | 0.011665 |
| 0.011631 | 0.011665 | 0.011699 | 0.011632 | 0.011666 | 0.011665 | 0.011876 |
| 0.011833 | 0.011665 | 0.011564 | 0.011732 | 0.011732 | 0.011699 | 0.011732 |
| 0.011699 | 0.011800 | 0.011699 | 0.011699 | 0.011732 | 0.011699 | 0.011833 |
| 0.011564 | 0.011699 | 0.011732 | 0.011665 | 0.011699 | 0.011800 | 0.011732 |
| 0.011699 | 0.011867 | 0.011767 | 0.011968 | 0.011699 | 0.011968 | 0.011699 |
| 0.011665 | 0.011699 | 0.011833 | 0.011968 | 0.012002 | 0.011699 | 0.011800 |
| 0.011732 | 0.011800 | 0.011699 | 0.011934 | 0.012103 | 0.011699 | 0.011766 |
| 0.011665 | 0.011766 | 0.011732 | 0.011800 | 0.011732 | 0.011732 | 0.011732 |
| 0.011631 | 0.011665 | 0.011631 | 0.011665 | 0.011699 | 0.011734 | 0.011799 |
| 0.011732 | 0.011699 | 0.011766 | 0.011665 | 0.011732 | 0.011631 | 0.011699 |
| 0.011867 | 0.011799 | 0.012035 | 0.011867 | 0.011699 | 0.011934 | 0.011699 |
| 0.011839 | 0.011995 | 0.011891 | 0.011529 | 0.011583 | 0.011723 | 0.011730 |
| 0.012378 | 0.011721 | 0.011596 | 0.011934 | 0.011934 | 0.011665 | 0.011766 |
| 0.011766 | 0.011699 | 0.011766 | 0.011699 | 0.011800 | 0.011732 | 0.011699 |
| 0.011665 | 0.011732 | 0.011968 | 0.011867 | 0.011732 | 0.011733 | 0.011665 |
| 0.011631 | 0.011564 | 0.011699 | 0.011665 | 0.011799 | 0.011766 | 0.011699 |
| 0.011799 | 0.011867 | 0.011665 | 0.011665 | 0.011699 | 0.011699 | 0.011702 |
| 0.011771 | 0.011699 | 0.011699 | 0.011564 | 0.011639 | 0.011621 | 0.011699 |
| 0.011704 | 0.011610 | 0.011688 | 0.011647 | 0.011604 | 0.011643 | 0.011668 |
| 0.011852 | 0.011716 | 0.011715 | 0.011632 | 0.011614 | 0.011767 | 0.011666 |
| 0.011733 | 0.011735 | 0.011733 | 0.011799 | 0.011732 | 0.012136 | 0.011867 |
| 0.011900 | 0.011766 | 0.011699 | 0.011732 | 0.011598 | 0.011766 | 0.011632 |
| 0.011699 | 0.011699 | 0.011665 | 0.011631 | 0.011665 | 0.011631 | 0.011732 |
| 0.011699 | 0.011800 | 0.011732 | 0.011631 | 0.011735 | 0.011833 | 0.011804 |
| 0.011833 | 0.011732 | 0.011631 | 0.011533 | 0.011699 | 0.011631 | 0.011564 |
| 0.011638 | 0.011833 | 0.011598 | 0.011833 | 0.011598 | 0.011699 | 0.011665 |
| 0.011766 | 0.011665 | 0.011699 | 0.011665 | 0.011699 | 0.011564 | 0.011699 |
| 0.011732 | 0.011665 | 0.011732 | 0.011665 | 0.011665 | 0.011732 | 0.011968 |
| 0.012002 | 0.011934 | 0.012002 | 0.011836 | 0.012002 | 0.011665 | 0.011665 |
| 0.011635 | 0.011910 | 0.011792 | 0.011609 | 0.012011 | 0.011572 | 0.011651 |
| 0.011944 | 0.011911 | 0.011800 | 0.012035 | 0.011744 | 0.011934 | 0.011901 |
| 0.011833 | 0.012001 | 0.011843 | 0.011761 | 0.011816 | 0.011733 | 0.011771 |
| 0.011901 | 0.011769 | 0.011940 | 0.011975 | 0.011901 | 0.011968 | 0.012078 |
| 0.011806 | 0.011978 | 0.011907 | 0.011873 | 0.012104 | 0.011598 | 0.011802 |
| 0.011766 | 0.011699 | 0.011598 | 0.011598 | 0.011665 | 0.011665 | 0.011732 |
| 0.011665 | 0.011732 | 0.011631 | 0.011665 | 0.011665 | 0.011665 | 0.011732 |
| 0.011665 | 0.012035 | 0.011934 | 0.011968 | 0.011564 | 0.011665 | 0.011699 |
| 0.011699 | 0.011665 | 0.011732 | 0.011699 | 0.011631 | 0.011631 | 0.011631 |
| 0.012102 | 0.011732 | 0.011800 | 0.011598 | 0.011699 | 0.011867 | 0.011631 |
| 0.011631 | 0.011699 | 0.011665 | 0.011833 | 0.011631 | 0.011766 | 0.011900 |
| 0.011833 | 0.011665 | 0.011665 | 0.011598 | 0.011598 | 0.011766 | 0.011699 |
| 0.011598 | 0.011699 | 0.011564 | 0.011598 | 0.011732 | 0.011800 | 0.011631 |
| 0.011598 | 0.011732 | 0.011666 | 0.011564 | 0.011833 | 0.011564 | 0.011732 |
| 0.011814 | 0.011632 | 0.011867 | 0.011766 | 0.011732 | 0.011665 | 0.011766 |
| 0.011631 | 0.011968 | 0.011564 | 0.011766 | 0.011564 | 0.011564 | 0.011564 |
| 0.011800 | 0.011935 | 0.011699 | 0.011766 | 0.011598 | 0.011934 | 0.011564 |
| 0.011631 | 0.011631 | 0.011665 | 0.011766 | 0.011665 | 0.011766 | 0.011833 |
| 0.011833 | 0.011800 | 0.011699 | 0.011800 | 0.011766 | 0.011631 | 0.011598 |
| 0.011631 | 0.011631 | 0.011699 | 0.011564 | 0.011598 | 0.011766 | 0.011631 |
| 0.011598 | 0.011665 | 0.011800 | 0.011766 | 0.011732 | 0.011665 | 0.011665 |
| 0.011732 | 0.011665 | 0.011766 | 0.011631 | 0.011766 | 0.011867 | 0.012035 |
| 0.011665 | 0.012002 | 0.011647 | 0.018165 | 0.011584 | 0.011855 | 0.011933 |
| 0.011891 | 0.011940 | 0.011846 | 0.011815 | 0.012104 | 0.011958 | 0.011850 |
| 0.011677 | 0.011976 | 0.011568 | 0.011689 | 0.011607 | 0.011653 | 0.011577 |
| 0.011764 | 0.011731 | 0.011765 | 0.011391 | 0.011800 | 0.011800 | 0.011805 |
| 0.011713 | 0.011799 | 0.011800 | 0.011699 | 0.011732 | 0.011733 | 0.011699 |
| 0.011732 | 0.011665 | 0.011699 | 0.011732 | 0.011699 | 0.011631 | 0.011631 |
| 0.011631 | 0.011732 | 0.011631 | 0.011732 | 0.011766 | 0.011799 | 0.011665 |
| 0.011665 | 0.011632 | 0.011968 | 0.011968 | 0.011766 | 0.011801 | 0.011833 |

|          |          |          |          |          |          |          |
|----------|----------|----------|----------|----------|----------|----------|
| 0.011598 | 0.011598 | 0.011631 | 0.011732 | 0.011598 | 0.011833 | 0.011833 |
| 0.011867 | 0.011800 | 0.011800 | 0.011900 | 0.012002 | 0.011903 | 0.011732 |
| 0.011732 | 0.011800 | 0.011833 | 0.011665 | 0.011732 | 0.011699 | 0.011732 |
| 0.011800 | 0.011800 | 0.011833 | 0.011800 | 0.011700 | 0.011900 | 0.011867 |
| 0.011738 | 0.011631 | 0.011732 | 0.011833 | 0.011732 | 0.011800 | 0.011900 |
| 0.012035 | 0.011744 | 0.011934 | 0.011901 | 0.011833 | 0.012001 | 0.011632 |
| 0.011802 | 0.011699 | 0.011631 | 0.011631 | 0.011732 | 0.011631 | 0.011732 |
| 0.011766 | 0.011799 | 0.011665 | 0.011665 | 0.011632 | 0.011968 | 0.011968 |
| 0.011766 | 0.011801 | 0.011833 | 0.011766 | 0.011565 | 0.011883 | 0.011764 |
| 0.011870 | 0.011824 | 0.011940 | 0.011823 | 0.011936 | 0.011820 | 0.011820 |
| 0.011541 | 0.011684 | 0.011815 | 0.011753 | 0.012025 | 0.011911 | 0.011980 |
| 0.011536 | 0.011852 | 0.011737 | 0.011732 | 0.011732 | 0.011699 | 0.011703 |
| 0.011598 | 0.011631 | 0.011766 | 0.011732 | 0.011737 | 0.011799 | 0.011768 |
| 0.011699 | 0.011631 | 0.011665 | 0.011699 | 0.011598 | 0.011665 | 0.011564 |
| 0.011631 | 0.011665 | 0.011631 | 0.011598 | 0.011699 | 0.011631 | 0.011665 |
| 0.011665 | 0.011598 | 0.011665 | 0.011699 | 0.011598 | 0.011800 | 0.011833 |
| 0.011732 | 0.011732 | 0.011732 | 0.011732 | 0.011665 | 0.012002 | 0.011699 |
| 0.011687 | 0.011665 | 0.011834 | 0.011841 | 0.011766 | 0.011766 | 0.011766 |
| 0.011766 | 0.011699 | 0.011665 | 0.011699 | 0.011800 | 0.011800 | 0.011732 |
| 0.011732 | 0.011867 | 0.011968 | 0.011766 | 0.011968 | 0.011968 | 0.011833 |
| 0.011665 | 0.011732 | 0.011766 | 0.012103 | 0.011733 | 0.011766 | 0.011732 |
| 0.011766 | 0.011631 | 0.011631 | 0.011935 | 0.011934 | 0.011901 | 0.011699 |
| 0.011800 | 0.011867 | 0.011732 | 0.011800 | 0.011766 | 0.011631 | 0.011900 |
| 0.011732 | 0.011699 | 0.011631 | 0.011867 | 0.011699 | 0.011800 | 0.012035 |
| 0.011665 | 0.011978 | 0.012035 | 0.011751 | 0.011455 | 0.011706 | 0.011473 |
| 0.011609 | 0.011995 | 0.011622 | 0.011775 | 0.011451 | 0.011620 | 0.011591 |
| 0.011826 | 0.011521 | 0.011673 | 0.011589 | 0.011491 | 0.011730 | 0.011750 |
| 0.011776 | 0.011650 | 0.011695 | 0.011694 | 0.011735 | 0.011799 | 0.011867 |
| 0.011867 | 0.011733 | 0.011839 | 0.011840 | 0.011976 | 0.011980 | 0.011732 |
| 0.011900 | 0.011766 | 0.011699 | 0.011732 | 0.011598 | 0.011766 | 0.011632 |
| 0.011699 | 0.011699 | 0.011665 | 0.011631 | 0.011665 | 0.011631 | 0.011732 |
| 0.011689 | 0.011690 | 0.011677 | 0.011745 | 0.011882 | 0.011812 | 0.011812 |
| 0.011844 | 0.011767 | 0.011577 | 0.011564 | 0.011704 | 0.011874 | 0.011875 |
| 0.011666 | 0.011738 | 0.011970 | 0.011906 | 0.011868 | 0.011902 | 0.011799 |
| 0.011766 | 0.011800 | 0.011799 | 0.011732 | 0.012170 | 0.011901 | 0.011901 |
| 0.012001 | 0.012023 | 0.011709 | 0.011788 | 0.011665 | 0.011833 | 0.011800 |
| 0.011869 | 0.011867 | 0.011901 | 0.011901 | 0.012044 | 0.012002 | 0.011685 |
| 0.011568 | 0.011580 | 0.011674 | 0.011638 | 0.011676 | 0.011620 | 0.011843 |
| 0.011713 | 0.011894 | 0.011727 | 0.011697 | 0.011699 | 0.011779 | 0.011665 |
| 0.011631 | 0.011564 | 0.011699 | 0.011665 | 0.011799 | 0.011766 | 0.011699 |
| 0.011799 | 0.011867 | 0.011665 | 0.011665 | 0.011699 | 0.011699 | 0.011702 |
| 0.011771 | 0.011699 | 0.011699 | 0.011735 | 0.011799 | 0.011867 | 0.011867 |
| 0.011733 | 0.011839 | 0.011840 | 0.011976 | 0.011980 | 0.011732 | 0.011900 |
| 0.011800 | 0.011800 | 0.011669 | 0.011861 | 0.011790 | 0.011810 | 0.011691 |
| 0.011853 | 0.012018 | 0.011780 | 0.011740 | 0.011598 | 0.011833 | 0.011699 |
| 0.011800 | 0.011732 | 0.011631 | 0.011735 | 0.011833 | 0.011804 | 0.011732 |
| 0.011631 | 0.011533 | 0.011699 | 0.011631 | 0.011564 | 0.011638 | 0.011833 |
| 0.011732 | 0.011665 | 0.011699 | 0.011732 | 0.011699 | 0.011631 | 0.011766 |
| 0.011699 | 0.011732 | 0.011732 | 0.011665 | 0.011732 | 0.011968 | 0.011564 |
| 0.011665 | 0.012002 | 0.011665 | 0.011699 | 0.011665 | 0.011968 | 0.011575 |
| 0.011960 | 0.011528 | 0.011461 | 0.011785 | 0.011793 | 0.011778 | 0.011436 |
| 0.011428 | 0.011766 | 0.011867 | 0.011978 | 0.011835 | 0.011974 | 0.012104 |
| 0.012003 | 0.012042 | 0.012001 | 0.012257 | 0.011968 | 0.012810 | 0.012004 |
| 0.012743 | 0.012478 | 0.012612 | 0.012918 | 0.011968 | 0.011665 | 0.011968 |
| 0.011666 | 0.012343 | 0.011934 | 0.011834 | 0.011901 | 0.011901 | 0.011873 |
| 0.011766 | 0.011773 | 0.011833 | 0.011800 | 0.012171 | 0.012237 | 0.012238 |
| 0.012104 | 0.012238 | 0.012342 | 0.012110 | 0.011599 | 0.011602 | 0.011666 |
| 0.011666 | 0.011700 | 0.011606 | 0.011666 | 0.011667 | 0.011732 | 0.000000 |
| 0.012070 | 0.012574 | 0.011433 | 0.012305 | 0.012778 | 0.011808 | 0.011733 |
| 0.011699 | 0.011699 | 0.012170 | 0.012295 | 0.012257 | 0.012035 | 0.011701 |

|          |          |          |          |          |          |          |
|----------|----------|----------|----------|----------|----------|----------|
| S840     | 0.012103 | 0.012103 | 0.012171 | 0.012137 | 0.012137 | 0.012204 |
| 0.012047 | 0.011945 | 0.012137 | 0.011699 | 0.011766 | 0.011734 | 0.011699 |
| 0.011666 | 0.011901 | 0.011632 | 0.011733 | 0.011800 | 0.011767 | 0.011733 |
| 0.011699 | 0.011733 | 0.011766 | 0.011700 | 0.011734 | 0.011733 | 0.012013 |
| 0.011901 | 0.011733 | 0.011632 | 0.011800 | 0.011800 | 0.011766 | 0.011800 |
| 0.011767 | 0.011868 | 0.011766 | 0.011767 | 0.011800 | 0.011766 | 0.011935 |
| 0.011632 | 0.011766 | 0.011800 | 0.011733 | 0.011766 | 0.011867 | 0.011800 |
| 0.011767 | 0.011935 | 0.011835 | 0.012036 | 0.011766 | 0.012036 | 0.011766 |
| 0.011733 | 0.011767 | 0.011901 | 0.012036 | 0.012070 | 0.011767 | 0.011868 |
| 0.011800 | 0.011868 | 0.011767 | 0.012002 | 0.012171 | 0.011767 | 0.011834 |
| 0.011733 | 0.011834 | 0.011800 | 0.011868 | 0.011800 | 0.011800 | 0.011800 |
| 0.011699 | 0.011733 | 0.011699 | 0.011733 | 0.011766 | 0.011802 | 0.011867 |
| 0.011800 | 0.011766 | 0.011834 | 0.011733 | 0.011800 | 0.011699 | 0.011766 |
| 0.011935 | 0.011867 | 0.012103 | 0.011935 | 0.011767 | 0.012002 | 0.011766 |
| 0.011951 | 0.012107 | 0.011928 | 0.011646 | 0.011620 | 0.011797 | 0.011769 |
| 0.012415 | 0.011721 | 0.011596 | 0.012002 | 0.012002 | 0.011733 | 0.011834 |
| 0.011834 | 0.011800 | 0.011867 | 0.011766 | 0.011868 | 0.011800 | 0.011800 |
| 0.011766 | 0.011800 | 0.012070 | 0.011935 | 0.011834 | 0.011801 | 0.011733 |
| 0.011699 | 0.011632 | 0.011767 | 0.011733 | 0.011867 | 0.011834 | 0.011766 |
| 0.011867 | 0.011935 | 0.011733 | 0.011733 | 0.011699 | 0.011699 | 0.011703 |
| 0.011771 | 0.011766 | 0.011766 | 0.011600 | 0.011675 | 0.011656 | 0.011766 |
| 0.011738 | 0.011679 | 0.011688 | 0.011681 | 0.011672 | 0.011677 | 0.011736 |
| 0.011888 | 0.011750 | 0.011784 | 0.011699 | 0.011648 | 0.011834 | 0.011733 |
| 0.011801 | 0.011802 | 0.011800 | 0.011901 | 0.011834 | 0.012205 | 0.011901 |
| 0.011968 | 0.011834 | 0.011766 | 0.011800 | 0.011665 | 0.011834 | 0.011699 |
| 0.011767 | 0.011766 | 0.011733 | 0.011699 | 0.011733 | 0.011699 | 0.011800 |
| 0.011767 | 0.011867 | 0.011800 | 0.011699 | 0.011803 | 0.011901 | 0.011873 |
| 0.011901 | 0.011800 | 0.011699 | 0.011634 | 0.011766 | 0.011666 | 0.011632 |
| 0.011741 | 0.011901 | 0.011699 | 0.011901 | 0.011666 | 0.011767 | 0.011733 |
| 0.011834 | 0.011733 | 0.011767 | 0.011733 | 0.011767 | 0.011632 | 0.011767 |
| 0.011800 | 0.011733 | 0.011800 | 0.011733 | 0.011766 | 0.011800 | 0.012036 |
| 0.012070 | 0.012002 | 0.012070 | 0.011904 | 0.012070 | 0.011766 | 0.011733 |
| 0.011703 | 0.011869 | 0.011884 | 0.011610 | 0.012080 | 0.011641 | 0.011729 |
| 0.012081 | 0.011979 | 0.011935 | 0.012137 | 0.011847 | 0.012002 | 0.011969 |
| 0.011901 | 0.012069 | 0.011915 | 0.011803 | 0.011816 | 0.011800 | 0.011874 |
| 0.011969 | 0.011871 | 0.012009 | 0.012078 | 0.012002 | 0.012070 | 0.012181 |
| 0.011908 | 0.012080 | 0.012009 | 0.011941 | 0.012206 | 0.011665 | 0.011870 |
| 0.011834 | 0.011767 | 0.011665 | 0.011665 | 0.011733 | 0.011733 | 0.011800 |
| 0.011733 | 0.011800 | 0.011699 | 0.011733 | 0.011733 | 0.011733 | 0.011733 |
| 0.011733 | 0.012103 | 0.012002 | 0.012036 | 0.011632 | 0.011733 | 0.011767 |
| 0.011767 | 0.011733 | 0.011800 | 0.011767 | 0.011699 | 0.011699 | 0.011699 |
| 0.012171 | 0.011766 | 0.011868 | 0.011666 | 0.011766 | 0.011935 | 0.011699 |
| 0.011699 | 0.011766 | 0.011733 | 0.011901 | 0.011699 | 0.011834 | 0.011968 |
| 0.011901 | 0.011733 | 0.011733 | 0.011666 | 0.011665 | 0.011834 | 0.011766 |
| 0.011666 | 0.011766 | 0.011632 | 0.011665 | 0.011800 | 0.011868 | 0.011699 |
| 0.011666 | 0.011800 | 0.011734 | 0.011632 | 0.011901 | 0.011632 | 0.011800 |
| 0.011883 | 0.011699 | 0.011935 | 0.011834 | 0.011800 | 0.011733 | 0.011834 |
| 0.011699 | 0.012036 | 0.011632 | 0.011834 | 0.011632 | 0.011632 | 0.011632 |
| 0.011867 | 0.012003 | 0.011767 | 0.011834 | 0.011665 | 0.012002 | 0.011632 |
| 0.011699 | 0.011699 | 0.011733 | 0.011834 | 0.011733 | 0.011834 | 0.011901 |
| 0.011901 | 0.011868 | 0.011766 | 0.011868 | 0.011834 | 0.011699 | 0.011666 |
| 0.011699 | 0.011699 | 0.011767 | 0.011632 | 0.011666 | 0.011834 | 0.011699 |
| 0.011666 | 0.011733 | 0.011868 | 0.011834 | 0.011800 | 0.011733 | 0.011733 |
| 0.011800 | 0.011733 | 0.011834 | 0.011699 | 0.011834 | 0.011935 | 0.012103 |
| 0.011733 | 0.012070 | 0.011751 | 0.018239 | 0.011715 | 0.011856 | 0.012037 |
| 0.011995 | 0.012010 | 0.011741 | 0.011757 | 0.012215 | 0.012062 | 0.011911 |
| 0.011772 | 0.012038 | 0.011607 | 0.011605 | 0.011568 | 0.011752 | 0.011706 |
| 0.011764 | 0.011768 | 0.011765 | 0.011457 | 0.011868 | 0.011901 | 0.011907 |
| 0.011782 | 0.011867 | 0.011868 | 0.011767 | 0.011800 | 0.011801 | 0.011767 |
| 0.011800 | 0.011733 | 0.011766 | 0.011800 | 0.011767 | 0.011699 | 0.011733 |

|          |          |          |          |          |          |          |
|----------|----------|----------|----------|----------|----------|----------|
| 0.011733 | 0.011800 | 0.011699 | 0.011800 | 0.011834 | 0.011867 | 0.011766 |
| 0.011733 | 0.011699 | 0.012036 | 0.012036 | 0.011834 | 0.011869 | 0.011901 |
| 0.011665 | 0.011666 | 0.011699 | 0.011800 | 0.011666 | 0.011901 | 0.011901 |
| 0.011935 | 0.011935 | 0.011868 | 0.011969 | 0.012070 | 0.011971 | 0.011800 |
| 0.011800 | 0.011867 | 0.011901 | 0.011733 | 0.011800 | 0.011766 | 0.011800 |
| 0.011868 | 0.011867 | 0.011901 | 0.011868 | 0.011768 | 0.011968 | 0.011935 |
| 0.011807 | 0.011699 | 0.011800 | 0.011901 | 0.011800 | 0.011868 | 0.011968 |
| 0.012137 | 0.011847 | 0.012002 | 0.011969 | 0.011901 | 0.012069 | 0.011699 |
| 0.011870 | 0.011767 | 0.011733 | 0.011733 | 0.011800 | 0.011699 | 0.011800 |
| 0.011834 | 0.011867 | 0.011766 | 0.011733 | 0.011699 | 0.012036 | 0.012036 |
| 0.011834 | 0.011869 | 0.011935 | 0.011867 | 0.012441 | 0.011919 | 0.011835 |
| 0.011905 | 0.011894 | 0.011975 | 0.011859 | 0.012007 | 0.011924 | 0.011854 |
| 0.012402 | 0.011788 | 0.011918 | 0.011857 | 0.012129 | 0.011980 | 0.012082 |
| 0.012422 | 0.011890 | 0.011738 | 0.011800 | 0.011733 | 0.011766 | 0.011703 |
| 0.011665 | 0.011699 | 0.011834 | 0.011800 | 0.011737 | 0.011867 | 0.011836 |
| 0.011766 | 0.011699 | 0.011733 | 0.011766 | 0.011666 | 0.011733 | 0.011632 |
| 0.011699 | 0.011733 | 0.011699 | 0.011666 | 0.011767 | 0.011699 | 0.011733 |
| 0.011733 | 0.011665 | 0.011733 | 0.011767 | 0.011665 | 0.011868 | 0.011901 |
| 0.011800 | 0.011800 | 0.011800 | 0.011800 | 0.011733 | 0.012070 | 0.011766 |
| 0.011723 | 0.011733 | 0.011901 | 0.011909 | 0.011834 | 0.011834 | 0.011834 |
| 0.011834 | 0.011767 | 0.011733 | 0.011767 | 0.011868 | 0.011868 | 0.011800 |
| 0.011800 | 0.011935 | 0.012036 | 0.011834 | 0.012036 | 0.012036 | 0.011901 |
| 0.011733 | 0.011800 | 0.011834 | 0.012171 | 0.011801 | 0.011834 | 0.011800 |
| 0.011834 | 0.011699 | 0.011699 | 0.012003 | 0.012003 | 0.011969 | 0.011767 |
| 0.011868 | 0.011935 | 0.011800 | 0.011868 | 0.011834 | 0.011699 | 0.011969 |
| 0.011800 | 0.011766 | 0.011699 | 0.011935 | 0.011767 | 0.011867 | 0.012103 |
| 0.011733 | 0.012115 | 0.012103 | 0.011833 | 0.011568 | 0.011808 | 0.011628 |
| 0.011665 | 0.012073 | 0.011693 | 0.011820 | 0.011646 | 0.011824 | 0.011751 |
| 0.011775 | 0.011653 | 0.011840 | 0.011721 | 0.011653 | 0.011932 | 0.011831 |
| 0.011889 | 0.011769 | 0.011800 | 0.011800 | 0.011803 | 0.011867 | 0.011935 |
| 0.011901 | 0.011801 | 0.011907 | 0.011909 | 0.012045 | 0.012087 | 0.011767 |
| 0.011968 | 0.011834 | 0.011766 | 0.011800 | 0.011665 | 0.011834 | 0.011699 |
| 0.011767 | 0.011766 | 0.011733 | 0.011699 | 0.011733 | 0.011699 | 0.011800 |
| 0.011724 | 0.011760 | 0.011745 | 0.011780 | 0.011916 | 0.011846 | 0.011880 |
| 0.011878 | 0.011834 | 0.011614 | 0.011600 | 0.011738 | 0.011908 | 0.011909 |
| 0.011733 | 0.011772 | 0.012037 | 0.012007 | 0.011935 | 0.011969 | 0.011901 |
| 0.011834 | 0.011901 | 0.011901 | 0.011800 | 0.012306 | 0.011969 | 0.012036 |
| 0.012070 | 0.012024 | 0.011744 | 0.011788 | 0.011733 | 0.011935 | 0.011901 |
| 0.011937 | 0.011935 | 0.011969 | 0.011969 | 0.012201 | 0.012103 | 0.011720 |
| 0.011636 | 0.011650 | 0.011742 | 0.011706 | 0.011745 | 0.011583 | 0.011911 |
| 0.011781 | 0.011762 | 0.011537 | 0.011772 | 0.011767 | 0.011813 | 0.011733 |
| 0.011699 | 0.011632 | 0.011767 | 0.011733 | 0.011867 | 0.011834 | 0.011766 |
| 0.011867 | 0.011935 | 0.011733 | 0.011733 | 0.011699 | 0.011699 | 0.011703 |
| 0.011771 | 0.011766 | 0.011766 | 0.011803 | 0.011867 | 0.011935 | 0.011901 |
| 0.011801 | 0.011907 | 0.011909 | 0.012045 | 0.012087 | 0.011767 | 0.011968 |
| 0.011901 | 0.011901 | 0.011737 | 0.011896 | 0.011861 | 0.011879 | 0.011761 |
| 0.011922 | 0.012110 | 0.011865 | 0.011809 | 0.011699 | 0.011901 | 0.011767 |
| 0.011867 | 0.011800 | 0.011699 | 0.011803 | 0.011901 | 0.011873 | 0.011800 |
| 0.011699 | 0.011634 | 0.011766 | 0.011666 | 0.011632 | 0.011741 | 0.011901 |
| 0.011800 | 0.011733 | 0.011766 | 0.011800 | 0.011767 | 0.011699 | 0.011834 |
| 0.011766 | 0.011800 | 0.011800 | 0.011733 | 0.011800 | 0.012036 | 0.011632 |
| 0.011733 | 0.012070 | 0.011733 | 0.011767 | 0.011733 | 0.012036 | 0.011575 |
| 0.012017 | 0.011613 | 0.011511 | 0.011785 | 0.011875 | 0.011850 | 0.011604 |
| 0.011533 | 0.011834 | 0.011935 | 0.012011 | 0.011903 | 0.012043 | 0.012172 |
| 0.012070 | 0.012110 | 0.012070 | 0.012326 | 0.012036 | 0.012913 | 0.012072 |
| 0.012778 | 0.012579 | 0.012715 | 0.012986 | 0.012036 | 0.011733 | 0.012036 |
| 0.012475 | 0.012412 | 0.012002 | 0.011902 | 0.011969 | 0.011969 | 0.011941 |
| 0.011834 | 0.011841 | 0.011901 | 0.011868 | 0.012239 | 0.012306 | 0.012305 |
| 0.012206 | 0.012306 | 0.012410 | 0.012177 | 0.012476 | 0.012484 | 0.012543 |
| 0.012543 | 0.012577 | 0.012530 | 0.012543 | 0.012546 | 0.011834 | 0.012070 |

|          |          |          |          |          |          |          |
|----------|----------|----------|----------|----------|----------|----------|
| 0.000000 | 0.012643 | 0.012146 | 0.012374 | 0.012847 | 0.011910 | 0.011800 |
| 0.011766 | 0.011766 | 0.012238 | 0.012171 | 0.012363 | 0.012103 | 0.011768 |
| S841     | 0.012607 | 0.012607 | 0.012843 | 0.012606 | 0.012606 | 0.012674 |
| 0.012522 | 0.012454 | 0.012674 | 0.012203 | 0.012270 | 0.012205 | 0.012202 |
| 0.012169 | 0.012404 | 0.012135 | 0.012236 | 0.012303 | 0.012270 | 0.012236 |
| 0.012202 | 0.012236 | 0.012270 | 0.012204 | 0.012237 | 0.012236 | 0.012488 |
| 0.012404 | 0.012236 | 0.012135 | 0.012303 | 0.012303 | 0.012270 | 0.012303 |
| 0.012270 | 0.012371 | 0.012270 | 0.012270 | 0.012303 | 0.012270 | 0.012438 |
| 0.012135 | 0.012270 | 0.012303 | 0.012236 | 0.012270 | 0.012371 | 0.012303 |
| 0.012270 | 0.012438 | 0.012338 | 0.012539 | 0.012270 | 0.012539 | 0.012270 |
| 0.012236 | 0.012270 | 0.012404 | 0.012539 | 0.012573 | 0.012270 | 0.012371 |
| 0.012303 | 0.012371 | 0.012270 | 0.012505 | 0.012674 | 0.012270 | 0.012337 |
| 0.012236 | 0.012337 | 0.012303 | 0.012371 | 0.012303 | 0.012303 | 0.012303 |
| 0.012202 | 0.012236 | 0.012202 | 0.012236 | 0.012202 | 0.012273 | 0.012371 |
| 0.012303 | 0.012270 | 0.012337 | 0.012236 | 0.012303 | 0.012202 | 0.012270 |
| 0.012438 | 0.012371 | 0.012606 | 0.012438 | 0.012270 | 0.012505 | 0.012270 |
| 0.012471 | 0.012631 | 0.012458 | 0.012116 | 0.012143 | 0.012202 | 0.012243 |
| 0.012966 | 0.012231 | 0.012215 | 0.012505 | 0.012505 | 0.012236 | 0.012337 |
| 0.012337 | 0.012303 | 0.012371 | 0.012270 | 0.012371 | 0.012303 | 0.012303 |
| 0.012270 | 0.012303 | 0.012573 | 0.012438 | 0.012337 | 0.012304 | 0.012237 |
| 0.012203 | 0.012136 | 0.012270 | 0.012237 | 0.012371 | 0.012338 | 0.012270 |
| 0.012371 | 0.012439 | 0.012236 | 0.012236 | 0.012270 | 0.012270 | 0.012277 |
| 0.012346 | 0.012270 | 0.012270 | 0.012104 | 0.012110 | 0.012148 | 0.012272 |
| 0.012281 | 0.012195 | 0.012205 | 0.012269 | 0.012114 | 0.012157 | 0.012244 |
| 0.012394 | 0.012199 | 0.012336 | 0.012204 | 0.012237 | 0.012340 | 0.012238 |
| 0.012306 | 0.012309 | 0.012306 | 0.012404 | 0.012337 | 0.012708 | 0.012439 |
| 0.012472 | 0.012338 | 0.012270 | 0.012304 | 0.012169 | 0.012337 | 0.012203 |
| 0.012270 | 0.012270 | 0.012236 | 0.012202 | 0.012236 | 0.012203 | 0.012304 |
| 0.012270 | 0.012371 | 0.012304 | 0.012203 | 0.012308 | 0.012405 | 0.012414 |
| 0.012405 | 0.012304 | 0.012203 | 0.012140 | 0.012270 | 0.012203 | 0.012136 |
| 0.012182 | 0.012405 | 0.012203 | 0.012405 | 0.012169 | 0.012270 | 0.012237 |
| 0.012338 | 0.012236 | 0.012270 | 0.012237 | 0.012270 | 0.012136 | 0.012270 |
| 0.012304 | 0.012237 | 0.012304 | 0.012236 | 0.012270 | 0.012304 | 0.012472 |
| 0.012573 | 0.012506 | 0.012574 | 0.012376 | 0.012574 | 0.012270 | 0.012237 |
| 0.012176 | 0.012356 | 0.012388 | 0.012159 | 0.012589 | 0.012152 | 0.012084 |
| 0.012556 | 0.012422 | 0.012371 | 0.012640 | 0.012325 | 0.012505 | 0.012472 |
| 0.012404 | 0.012573 | 0.012376 | 0.012298 | 0.012361 | 0.012304 | 0.012381 |
| 0.012472 | 0.012377 | 0.012516 | 0.012449 | 0.012506 | 0.012439 | 0.012689 |
| 0.012381 | 0.012453 | 0.012450 | 0.012380 | 0.012711 | 0.012169 | 0.012376 |
| 0.012337 | 0.012270 | 0.012169 | 0.012169 | 0.012236 | 0.012236 | 0.012303 |
| 0.012236 | 0.012303 | 0.012202 | 0.012236 | 0.012236 | 0.012236 | 0.012303 |
| 0.012236 | 0.012606 | 0.012505 | 0.012539 | 0.012135 | 0.012236 | 0.012270 |
| 0.012270 | 0.012236 | 0.012303 | 0.012270 | 0.012202 | 0.012202 | 0.012202 |
| 0.012674 | 0.012303 | 0.012337 | 0.012169 | 0.012270 | 0.012371 | 0.012202 |
| 0.012202 | 0.012202 | 0.012236 | 0.012404 | 0.012202 | 0.012337 | 0.012472 |
| 0.012404 | 0.012236 | 0.012236 | 0.012169 | 0.012169 | 0.012337 | 0.012202 |
| 0.012169 | 0.012270 | 0.012135 | 0.012169 | 0.012304 | 0.012372 | 0.012203 |
| 0.012170 | 0.012303 | 0.012237 | 0.012135 | 0.012404 | 0.012135 | 0.012303 |
| 0.012397 | 0.012202 | 0.012438 | 0.012338 | 0.012303 | 0.012236 | 0.012337 |
| 0.012202 | 0.012539 | 0.012135 | 0.012337 | 0.012135 | 0.012135 | 0.012135 |
| 0.012371 | 0.012439 | 0.012270 | 0.012303 | 0.012169 | 0.012505 | 0.012135 |
| 0.012202 | 0.012202 | 0.012236 | 0.012337 | 0.012236 | 0.012337 | 0.012404 |
| 0.012404 | 0.012371 | 0.012270 | 0.012371 | 0.012337 | 0.012202 | 0.012169 |
| 0.012202 | 0.012202 | 0.012270 | 0.012135 | 0.012169 | 0.012337 | 0.012202 |
| 0.012169 | 0.012236 | 0.012371 | 0.012337 | 0.012303 | 0.012236 | 0.012236 |
| 0.012303 | 0.012236 | 0.012337 | 0.012202 | 0.012337 | 0.012438 | 0.012674 |
| 0.012236 | 0.012573 | 0.012235 | 0.018808 | 0.012043 | 0.012592 | 0.012527 |
| 0.012481 | 0.012540 | 0.012319 | 0.012164 | 0.012711 | 0.012547 | 0.012459 |
| 0.012200 | 0.012528 | 0.012076 | 0.012234 | 0.011959 | 0.012296 | 0.012266 |
| 0.012329 | 0.012291 | 0.012322 | 0.011722 | 0.012371 | 0.012405 | 0.012415 |

|          |          |          |          |          |          |          |
|----------|----------|----------|----------|----------|----------|----------|
| 0.012264 | 0.012371 | 0.012371 | 0.012270 | 0.012304 | 0.012304 | 0.012271 |
| 0.012304 | 0.012236 | 0.012270 | 0.012304 | 0.012270 | 0.012203 | 0.012236 |
| 0.012236 | 0.012304 | 0.012203 | 0.012304 | 0.012270 | 0.012371 | 0.012270 |
| 0.012236 | 0.012203 | 0.012540 | 0.012540 | 0.012338 | 0.012373 | 0.012405 |
| 0.012169 | 0.012169 | 0.012203 | 0.012304 | 0.012169 | 0.012405 | 0.012405 |
| 0.012439 | 0.012371 | 0.012371 | 0.012472 | 0.012574 | 0.012476 | 0.012304 |
| 0.012304 | 0.012371 | 0.012405 | 0.012237 | 0.012304 | 0.012203 | 0.012304 |
| 0.012372 | 0.012372 | 0.012405 | 0.012372 | 0.012274 | 0.012472 | 0.012439 |
| 0.012315 | 0.012203 | 0.012304 | 0.012405 | 0.012304 | 0.012371 | 0.012472 |
| 0.012640 | 0.012325 | 0.012505 | 0.012472 | 0.012404 | 0.012573 | 0.012204 |
| 0.012376 | 0.012272 | 0.012236 | 0.012236 | 0.012304 | 0.012203 | 0.012304 |
| 0.012270 | 0.012371 | 0.012270 | 0.012236 | 0.012203 | 0.012540 | 0.012540 |
| 0.012338 | 0.012373 | 0.012438 | 0.012371 | 0.012878 | 0.012419 | 0.012398 |
| 0.012398 | 0.012379 | 0.012503 | 0.012413 | 0.012462 | 0.012407 | 0.012337 |
| 0.012847 | 0.012238 | 0.012432 | 0.012306 | 0.012439 | 0.012422 | 0.012457 |
| 0.012864 | 0.012419 | 0.012550 | 0.012606 | 0.012472 | 0.012405 | 0.012515 |
| 0.012169 | 0.012337 | 0.012472 | 0.012438 | 0.012447 | 0.012371 | 0.012308 |
| 0.012270 | 0.012202 | 0.012236 | 0.012270 | 0.012169 | 0.012236 | 0.012135 |
| 0.012202 | 0.012236 | 0.012202 | 0.012169 | 0.012270 | 0.012202 | 0.012236 |
| 0.012236 | 0.012169 | 0.012236 | 0.012270 | 0.012169 | 0.012371 | 0.012404 |
| 0.012303 | 0.012303 | 0.012303 | 0.012303 | 0.012236 | 0.012573 | 0.012270 |
| 0.012244 | 0.012236 | 0.012406 | 0.012419 | 0.012337 | 0.012337 | 0.012337 |
| 0.012337 | 0.012270 | 0.012236 | 0.012270 | 0.012371 | 0.012371 | 0.012303 |
| 0.012303 | 0.012438 | 0.012539 | 0.012270 | 0.012539 | 0.012539 | 0.012404 |
| 0.012236 | 0.012303 | 0.012337 | 0.012674 | 0.012304 | 0.012337 | 0.012303 |
| 0.012337 | 0.012202 | 0.012202 | 0.012506 | 0.012506 | 0.012472 | 0.012270 |
| 0.012371 | 0.012438 | 0.012303 | 0.012371 | 0.012337 | 0.012202 | 0.012472 |
| 0.012303 | 0.012270 | 0.012202 | 0.012438 | 0.012270 | 0.012337 | 0.012539 |
| 0.012303 | 0.012590 | 0.012606 | 0.012403 | 0.011907 | 0.012285 | 0.011835 |
| 0.012325 | 0.012502 | 0.012220 | 0.012357 | 0.012135 | 0.012283 | 0.012230 |
| 0.012337 | 0.012115 | 0.012175 | 0.012052 | 0.012139 | 0.012201 | 0.012237 |
| 0.012343 | 0.012242 | 0.012294 | 0.012224 | 0.012309 | 0.012371 | 0.012439 |
| 0.012439 | 0.012306 | 0.012380 | 0.012418 | 0.012554 | 0.012617 | 0.012303 |
| 0.012472 | 0.012338 | 0.012270 | 0.012304 | 0.012169 | 0.012337 | 0.012203 |
| 0.012270 | 0.012270 | 0.012236 | 0.012202 | 0.012236 | 0.012203 | 0.012304 |
| 0.012319 | 0.012216 | 0.012295 | 0.012260 | 0.012396 | 0.012428 | 0.012427 |
| 0.012425 | 0.012339 | 0.012095 | 0.012105 | 0.012281 | 0.012451 | 0.012453 |
| 0.012238 | 0.012315 | 0.012543 | 0.012515 | 0.012441 | 0.012475 | 0.012404 |
| 0.012337 | 0.012404 | 0.012404 | 0.012303 | 0.012809 | 0.012472 | 0.012539 |
| 0.012574 | 0.012557 | 0.012289 | 0.012309 | 0.012236 | 0.012438 | 0.012404 |
| 0.012441 | 0.012472 | 0.012472 | 0.012472 | 0.012635 | 0.012606 | 0.012276 |
| 0.012143 | 0.012100 | 0.012253 | 0.012216 | 0.012189 | 0.012181 | 0.012421 |
| 0.012296 | 0.012465 | 0.012157 | 0.012298 | 0.012272 | 0.012293 | 0.012237 |
| 0.012203 | 0.012136 | 0.012270 | 0.012237 | 0.012371 | 0.012338 | 0.012270 |
| 0.012371 | 0.012439 | 0.012236 | 0.012236 | 0.012270 | 0.012270 | 0.012277 |
| 0.012346 | 0.012270 | 0.012270 | 0.012309 | 0.012371 | 0.012439 | 0.012439 |
| 0.012306 | 0.012380 | 0.012418 | 0.012554 | 0.012617 | 0.012303 | 0.012472 |
| 0.012404 | 0.012404 | 0.012245 | 0.012454 | 0.012347 | 0.012356 | 0.012147 |
| 0.012405 | 0.012612 | 0.012332 | 0.012319 | 0.012203 | 0.012405 | 0.012270 |
| 0.012371 | 0.012304 | 0.012203 | 0.012308 | 0.012405 | 0.012414 | 0.012304 |
| 0.012203 | 0.012140 | 0.012270 | 0.012203 | 0.012136 | 0.012182 | 0.012405 |
| 0.012304 | 0.012236 | 0.012270 | 0.012304 | 0.012270 | 0.012203 | 0.012338 |
| 0.012270 | 0.012303 | 0.012303 | 0.012236 | 0.012303 | 0.012539 | 0.012135 |
| 0.012236 | 0.012573 | 0.012236 | 0.012270 | 0.012236 | 0.012539 | 0.012261 |
| 0.012523 | 0.012081 | 0.012064 | 0.012269 | 0.012446 | 0.012390 | 0.012148 |
| 0.011900 | 0.012337 | 0.012438 | 0.012556 | 0.012375 | 0.012517 | 0.012643 |
| 0.012576 | 0.012618 | 0.012573 | 0.012771 | 0.012505 | 0.013315 | 0.012544 |
| 0.013216 | 0.012952 | 0.013119 | 0.013459 | 0.012539 | 0.012237 | 0.012540 |
| 0.012913 | 0.012884 | 0.012438 | 0.012405 | 0.012474 | 0.012474 | 0.012449 |
| 0.012337 | 0.012316 | 0.012404 | 0.012373 | 0.012744 | 0.012741 | 0.012812 |

|          |          |          |          |          |          |          |
|----------|----------|----------|----------|----------|----------|----------|
| 0.012643 | 0.012642 | 0.012884 | 0.012652 | 0.012880 | 0.012891 | 0.012981 |
| 0.012982 | 0.013016 | 0.012939 | 0.012982 | 0.012951 | 0.012337 | 0.012574 |
| 0.012643 | 0.000000 | 0.012621 | 0.012877 | 0.013319 | 0.012386 | 0.012272 |
| 0.012270 | 0.012270 | 0.012743 | 0.012749 | 0.012892 | 0.012606 | 0.012241 |
| S842     | 0.012078 | 0.012078 | 0.012214 | 0.012146 | 0.012146 | 0.012214 |
| 0.011918 | 0.011849 | 0.012146 | 0.011704 | 0.011772 | 0.011739 | 0.011704 |
| 0.011670 | 0.011908 | 0.011636 | 0.011738 | 0.011806 | 0.011772 | 0.011738 |
| 0.011704 | 0.011738 | 0.011772 | 0.011705 | 0.011739 | 0.011738 | 0.011918 |
| 0.011908 | 0.011738 | 0.011636 | 0.011806 | 0.011772 | 0.011772 | 0.011806 |
| 0.011772 | 0.011874 | 0.011772 | 0.011772 | 0.011806 | 0.011772 | 0.011908 |
| 0.011636 | 0.011772 | 0.011806 | 0.011738 | 0.011772 | 0.011874 | 0.011806 |
| 0.011772 | 0.011942 | 0.011841 | 0.012044 | 0.011772 | 0.012010 | 0.011772 |
| 0.011738 | 0.011772 | 0.011908 | 0.012010 | 0.012078 | 0.011772 | 0.011874 |
| 0.011806 | 0.011874 | 0.011772 | 0.012010 | 0.012180 | 0.011772 | 0.011840 |
| 0.011738 | 0.011840 | 0.011806 | 0.011874 | 0.011806 | 0.011806 | 0.011806 |
| 0.011704 | 0.011738 | 0.011704 | 0.011738 | 0.011772 | 0.011806 | 0.011874 |
| 0.011806 | 0.011772 | 0.011840 | 0.011738 | 0.011806 | 0.011704 | 0.011772 |
| 0.011942 | 0.011874 | 0.012112 | 0.011942 | 0.011772 | 0.012010 | 0.011772 |
| 0.011920 | 0.012077 | 0.011973 | 0.011611 | 0.011737 | 0.011839 | 0.011814 |
| 0.012462 | 0.011877 | 0.011640 | 0.012010 | 0.012010 | 0.011704 | 0.011840 |
| 0.011806 | 0.011772 | 0.011840 | 0.011772 | 0.011874 | 0.011772 | 0.011772 |
| 0.011738 | 0.011806 | 0.012044 | 0.011942 | 0.011840 | 0.011806 | 0.011738 |
| 0.011704 | 0.011636 | 0.011772 | 0.011738 | 0.011874 | 0.011840 | 0.011772 |
| 0.011874 | 0.011942 | 0.011738 | 0.011738 | 0.011772 | 0.011772 | 0.011776 |
| 0.011845 | 0.011772 | 0.011772 | 0.011677 | 0.011754 | 0.011697 | 0.011772 |
| 0.011778 | 0.011719 | 0.011804 | 0.011756 | 0.011677 | 0.011717 | 0.011742 |
| 0.011969 | 0.011791 | 0.011825 | 0.011705 | 0.011723 | 0.011807 | 0.011739 |
| 0.011807 | 0.011808 | 0.011806 | 0.011874 | 0.011806 | 0.012214 | 0.011942 |
| 0.011976 | 0.011840 | 0.011772 | 0.011806 | 0.011670 | 0.011840 | 0.011704 |
| 0.011772 | 0.011772 | 0.011738 | 0.011704 | 0.011738 | 0.011704 | 0.011806 |
| 0.011772 | 0.011874 | 0.011806 | 0.011704 | 0.011809 | 0.011908 | 0.011913 |
| 0.011908 | 0.011806 | 0.011704 | 0.011639 | 0.011772 | 0.011704 | 0.011637 |
| 0.011746 | 0.011908 | 0.011670 | 0.011908 | 0.011670 | 0.011772 | 0.011738 |
| 0.011840 | 0.011738 | 0.011772 | 0.011738 | 0.011772 | 0.011636 | 0.011772 |
| 0.011806 | 0.011738 | 0.011772 | 0.011738 | 0.011738 | 0.011806 | 0.012010 |
| 0.012078 | 0.012010 | 0.012078 | 0.011909 | 0.012078 | 0.011738 | 0.011738 |
| 0.011707 | 0.012037 | 0.011846 | 0.011682 | 0.012089 | 0.011645 | 0.011810 |
| 0.011986 | 0.011987 | 0.011874 | 0.012112 | 0.011852 | 0.012010 | 0.011976 |
| 0.011908 | 0.012078 | 0.011922 | 0.011852 | 0.011951 | 0.011806 | 0.011846 |
| 0.011976 | 0.011844 | 0.012017 | 0.012052 | 0.011976 | 0.012044 | 0.012121 |
| 0.011881 | 0.012054 | 0.011983 | 0.011914 | 0.012181 | 0.011670 | 0.011877 |
| 0.011840 | 0.011772 | 0.011670 | 0.011670 | 0.011738 | 0.011738 | 0.011806 |
| 0.011738 | 0.011806 | 0.011704 | 0.011738 | 0.011738 | 0.011738 | 0.011806 |
| 0.011738 | 0.012112 | 0.012010 | 0.012044 | 0.011636 | 0.011738 | 0.011772 |
| 0.011772 | 0.011704 | 0.011806 | 0.011772 | 0.011704 | 0.011704 | 0.011704 |
| 0.012180 | 0.011806 | 0.011874 | 0.011670 | 0.011772 | 0.011942 | 0.011704 |
| 0.011704 | 0.011772 | 0.011738 | 0.011908 | 0.011704 | 0.011840 | 0.011976 |
| 0.011908 | 0.011738 | 0.011738 | 0.011670 | 0.011670 | 0.011840 | 0.011772 |
| 0.011670 | 0.011772 | 0.011636 | 0.011670 | 0.011806 | 0.011874 | 0.011704 |
| 0.011671 | 0.011806 | 0.011739 | 0.011636 | 0.011908 | 0.011636 | 0.011806 |
| 0.011855 | 0.011704 | 0.011942 | 0.011840 | 0.011806 | 0.011738 | 0.011806 |
| 0.011704 | 0.012010 | 0.011636 | 0.011840 | 0.011636 | 0.011636 | 0.011636 |
| 0.011874 | 0.012010 | 0.011772 | 0.011840 | 0.011670 | 0.012010 | 0.011636 |
| 0.011704 | 0.011704 | 0.011738 | 0.011840 | 0.011738 | 0.011840 | 0.011908 |
| 0.011908 | 0.011874 | 0.011772 | 0.011874 | 0.011840 | 0.011704 | 0.011670 |
| 0.011704 | 0.011704 | 0.011772 | 0.011636 | 0.011670 | 0.011840 | 0.011704 |
| 0.011670 | 0.011738 | 0.011874 | 0.011840 | 0.011806 | 0.011738 | 0.011738 |
| 0.011806 | 0.011738 | 0.011840 | 0.011704 | 0.011840 | 0.011942 | 0.012078 |
| 0.011738 | 0.012078 | 0.011755 | 0.018351 | 0.011787 | 0.011921 | 0.012044 |
| 0.012001 | 0.012053 | 0.011957 | 0.011937 | 0.012223 | 0.012069 | 0.011918 |

|          |          |          |          |          |          |          |
|----------|----------|----------|----------|----------|----------|----------|
| 0.011822 | 0.012046 | 0.011650 | 0.011776 | 0.011690 | 0.011756 | 0.011711 |
| 0.011863 | 0.011884 | 0.011882 | 0.011594 | 0.011874 | 0.011874 | 0.011912 |
| 0.011789 | 0.011874 | 0.011874 | 0.011772 | 0.011772 | 0.011773 | 0.011773 |
| 0.011806 | 0.011738 | 0.011772 | 0.011806 | 0.011772 | 0.011704 | 0.011704 |
| 0.011704 | 0.011806 | 0.011704 | 0.011806 | 0.011840 | 0.011874 | 0.011738 |
| 0.011738 | 0.011704 | 0.012044 | 0.012044 | 0.011840 | 0.011841 | 0.011908 |
| 0.011670 | 0.011670 | 0.011704 | 0.011806 | 0.011670 | 0.011908 | 0.011908 |
| 0.011942 | 0.011874 | 0.011874 | 0.011976 | 0.012044 | 0.011979 | 0.011806 |
| 0.011806 | 0.011874 | 0.011874 | 0.011738 | 0.011806 | 0.011772 | 0.011772 |
| 0.011874 | 0.011874 | 0.011908 | 0.011874 | 0.011774 | 0.011976 | 0.011942 |
| 0.011813 | 0.011704 | 0.011806 | 0.011908 | 0.011806 | 0.011874 | 0.011942 |
| 0.012112 | 0.011852 | 0.012010 | 0.011976 | 0.011908 | 0.012078 | 0.011705 |
| 0.011876 | 0.011773 | 0.011704 | 0.011704 | 0.011806 | 0.011704 | 0.011806 |
| 0.011840 | 0.011874 | 0.011738 | 0.011738 | 0.011704 | 0.012044 | 0.012044 |
| 0.011840 | 0.011841 | 0.011908 | 0.011840 | 0.011569 | 0.011926 | 0.011842 |
| 0.011912 | 0.011866 | 0.012019 | 0.011900 | 0.012015 | 0.011896 | 0.011896 |
| 0.011545 | 0.011759 | 0.011891 | 0.011829 | 0.012104 | 0.011988 | 0.012057 |
| 0.011540 | 0.011898 | 0.011812 | 0.011806 | 0.011806 | 0.011772 | 0.011777 |
| 0.011670 | 0.011704 | 0.011840 | 0.011806 | 0.011811 | 0.011874 | 0.011841 |
| 0.011772 | 0.011704 | 0.011738 | 0.011772 | 0.011670 | 0.011738 | 0.011636 |
| 0.011704 | 0.011738 | 0.011704 | 0.011670 | 0.011772 | 0.011704 | 0.011738 |
| 0.011738 | 0.011670 | 0.011738 | 0.011772 | 0.011670 | 0.011874 | 0.011908 |
| 0.011806 | 0.011806 | 0.011806 | 0.011806 | 0.011738 | 0.012078 | 0.011772 |
| 0.011763 | 0.011738 | 0.011908 | 0.011917 | 0.011840 | 0.011840 | 0.011840 |
| 0.011840 | 0.011772 | 0.011738 | 0.011772 | 0.011874 | 0.011874 | 0.011806 |
| 0.011806 | 0.011908 | 0.012044 | 0.011840 | 0.012044 | 0.012044 | 0.011908 |
| 0.011738 | 0.011806 | 0.011840 | 0.012180 | 0.011806 | 0.011840 | 0.011806 |
| 0.011840 | 0.011704 | 0.011704 | 0.012010 | 0.011976 | 0.011976 | 0.011772 |
| 0.011874 | 0.011942 | 0.011806 | 0.011874 | 0.011840 | 0.011704 | 0.011976 |
| 0.011806 | 0.011772 | 0.011704 | 0.011942 | 0.011772 | 0.011874 | 0.012112 |
| 0.011738 | 0.012021 | 0.012112 | 0.011919 | 0.011572 | 0.011815 | 0.011630 |
| 0.011667 | 0.012078 | 0.011732 | 0.011824 | 0.011650 | 0.011727 | 0.011702 |
| 0.011934 | 0.011658 | 0.011789 | 0.011727 | 0.011657 | 0.011871 | 0.011876 |
| 0.011858 | 0.011772 | 0.011805 | 0.011805 | 0.011775 | 0.011874 | 0.011942 |
| 0.011942 | 0.011807 | 0.011914 | 0.011916 | 0.012053 | 0.012060 | 0.011772 |
| 0.011976 | 0.011840 | 0.011772 | 0.011806 | 0.011670 | 0.011840 | 0.011704 |
| 0.011772 | 0.011772 | 0.011738 | 0.011704 | 0.011738 | 0.011704 | 0.011806 |
| 0.011801 | 0.011802 | 0.011786 | 0.011820 | 0.011958 | 0.011922 | 0.011922 |
| 0.011920 | 0.011840 | 0.011694 | 0.011642 | 0.011778 | 0.011949 | 0.011950 |
| 0.011739 | 0.011812 | 0.012045 | 0.012015 | 0.011909 | 0.011977 | 0.011874 |
| 0.011840 | 0.011874 | 0.011874 | 0.011806 | 0.012248 | 0.011942 | 0.011976 |
| 0.012078 | 0.012104 | 0.011783 | 0.011864 | 0.011738 | 0.011908 | 0.011874 |
| 0.011944 | 0.011908 | 0.011976 | 0.011976 | 0.012090 | 0.012078 | 0.011761 |
| 0.011641 | 0.011655 | 0.011748 | 0.011712 | 0.011750 | 0.011664 | 0.011918 |
| 0.011788 | 0.011859 | 0.011735 | 0.011741 | 0.011773 | 0.011854 | 0.011738 |
| 0.011704 | 0.011636 | 0.011772 | 0.011738 | 0.011874 | 0.011840 | 0.011772 |
| 0.011874 | 0.011942 | 0.011738 | 0.011738 | 0.011772 | 0.011772 | 0.011776 |
| 0.011845 | 0.011772 | 0.011772 | 0.011775 | 0.011874 | 0.011942 | 0.011942 |
| 0.011807 | 0.011914 | 0.011916 | 0.012053 | 0.012060 | 0.011772 | 0.011942 |
| 0.011874 | 0.011874 | 0.011743 | 0.011939 | 0.011866 | 0.011885 | 0.011731 |
| 0.011893 | 0.012069 | 0.011956 | 0.011815 | 0.011670 | 0.011908 | 0.011772 |
| 0.011874 | 0.011806 | 0.011704 | 0.011809 | 0.011908 | 0.011913 | 0.011806 |
| 0.011704 | 0.011639 | 0.011772 | 0.011704 | 0.011637 | 0.011746 | 0.011908 |
| 0.011806 | 0.011738 | 0.011772 | 0.011806 | 0.011772 | 0.011704 | 0.011806 |
| 0.011772 | 0.011806 | 0.011806 | 0.011738 | 0.011806 | 0.012044 | 0.011636 |
| 0.011738 | 0.012078 | 0.011738 | 0.011772 | 0.011738 | 0.012044 | 0.011707 |
| 0.012080 | 0.011616 | 0.011614 | 0.011870 | 0.011920 | 0.011856 | 0.011565 |
| 0.011587 | 0.011840 | 0.011942 | 0.012054 | 0.011908 | 0.012049 | 0.012180 |
| 0.012079 | 0.012119 | 0.012078 | 0.012300 | 0.012044 | 0.012894 | 0.012079 |
| 0.012826 | 0.012555 | 0.012694 | 0.012998 | 0.012044 | 0.011738 | 0.012044 |



|          |          |          |          |          |          |          |
|----------|----------|----------|----------|----------|----------|----------|
| 0.011603 | 0.012216 | 0.012010 | 0.011908 | 0.011976 | 0.011976 | 0.011949 |
| 0.011840 | 0.011846 | 0.011908 | 0.011874 | 0.012248 | 0.012316 | 0.012316 |
| 0.012216 | 0.012316 | 0.012419 | 0.012185 | 0.011603 | 0.011606 | 0.011671 |
| 0.011671 | 0.011705 | 0.011609 | 0.011671 | 0.011671 | 0.011806 | 0.011433 |
| 0.012146 | 0.012621 | 0.000000 | 0.012384 | 0.012147 | 0.011914 | 0.011806 |
| 0.011772 | 0.011772 | 0.012248 | 0.012350 | 0.012407 | 0.012078 | 0.011773 |
| S843     | 0.012337 | 0.012337 | 0.012405 | 0.012169 | 0.012169 | 0.012237 |
| 0.011978 | 0.011910 | 0.012236 | 0.011934 | 0.012001 | 0.011970 | 0.011933 |
| 0.011900 | 0.012135 | 0.011866 | 0.011967 | 0.012034 | 0.012001 | 0.011967 |
| 0.011933 | 0.011967 | 0.011799 | 0.011934 | 0.011968 | 0.011967 | 0.011944 |
| 0.011934 | 0.011967 | 0.011866 | 0.011833 | 0.012034 | 0.012001 | 0.012034 |
| 0.012001 | 0.012102 | 0.012001 | 0.012001 | 0.012034 | 0.012001 | 0.012102 |
| 0.011866 | 0.012001 | 0.012034 | 0.011967 | 0.012001 | 0.012102 | 0.012034 |
| 0.012001 | 0.012169 | 0.012069 | 0.012001 | 0.012001 | 0.012203 | 0.012001 |
| 0.011967 | 0.012001 | 0.012135 | 0.012203 | 0.012035 | 0.012001 | 0.012102 |
| 0.012034 | 0.012102 | 0.012001 | 0.012236 | 0.012136 | 0.012001 | 0.012068 |
| 0.011967 | 0.012068 | 0.012034 | 0.012102 | 0.012034 | 0.012034 | 0.012034 |
| 0.011933 | 0.011967 | 0.011933 | 0.011967 | 0.012001 | 0.012037 | 0.012102 |
| 0.012034 | 0.012001 | 0.012068 | 0.011967 | 0.011967 | 0.011933 | 0.012001 |
| 0.012169 | 0.012102 | 0.012068 | 0.012169 | 0.012001 | 0.012236 | 0.012001 |
| 0.012062 | 0.011920 | 0.012117 | 0.011803 | 0.011844 | 0.011981 | 0.011730 |
| 0.012415 | 0.011569 | 0.011843 | 0.012236 | 0.012236 | 0.011967 | 0.012068 |
| 0.012068 | 0.012034 | 0.012101 | 0.012001 | 0.012102 | 0.012034 | 0.012034 |
| 0.012001 | 0.012034 | 0.012304 | 0.012169 | 0.012068 | 0.012035 | 0.011968 |
| 0.011934 | 0.011867 | 0.012001 | 0.011967 | 0.011900 | 0.011867 | 0.011799 |
| 0.011900 | 0.011968 | 0.011967 | 0.011967 | 0.012001 | 0.012001 | 0.012007 |
| 0.012075 | 0.012001 | 0.012001 | 0.011852 | 0.011965 | 0.011937 | 0.012002 |
| 0.012009 | 0.011920 | 0.011909 | 0.011923 | 0.011910 | 0.011952 | 0.011973 |
| 0.011853 | 0.012026 | 0.012025 | 0.011935 | 0.011890 | 0.012070 | 0.011969 |
| 0.012036 | 0.012038 | 0.012036 | 0.012135 | 0.012068 | 0.012438 | 0.012102 |
| 0.012001 | 0.012069 | 0.012001 | 0.012035 | 0.011900 | 0.011866 | 0.011934 |
| 0.012001 | 0.012001 | 0.011967 | 0.011934 | 0.011967 | 0.011934 | 0.012035 |
| 0.012001 | 0.012102 | 0.012035 | 0.011934 | 0.012038 | 0.012136 | 0.012143 |
| 0.012136 | 0.012035 | 0.011934 | 0.011870 | 0.012001 | 0.011934 | 0.011867 |
| 0.011842 | 0.012136 | 0.011934 | 0.012136 | 0.011900 | 0.012001 | 0.011968 |
| 0.012069 | 0.011967 | 0.012001 | 0.011968 | 0.012001 | 0.011867 | 0.012001 |
| 0.012035 | 0.011967 | 0.012035 | 0.011967 | 0.012001 | 0.012035 | 0.012270 |
| 0.012035 | 0.011934 | 0.012035 | 0.012106 | 0.012036 | 0.012001 | 0.011967 |
| 0.011939 | 0.012194 | 0.012021 | 0.011850 | 0.012045 | 0.011879 | 0.011887 |
| 0.012012 | 0.011945 | 0.012169 | 0.012371 | 0.012051 | 0.012236 | 0.012203 |
| 0.012135 | 0.012304 | 0.012163 | 0.012009 | 0.012067 | 0.012035 | 0.012110 |
| 0.012203 | 0.012107 | 0.012245 | 0.012246 | 0.012236 | 0.012304 | 0.012417 |
| 0.012110 | 0.012215 | 0.012246 | 0.012177 | 0.012441 | 0.011900 | 0.012106 |
| 0.012068 | 0.012001 | 0.011900 | 0.011900 | 0.011967 | 0.011967 | 0.012034 |
| 0.011967 | 0.012034 | 0.011933 | 0.011967 | 0.011967 | 0.011967 | 0.012034 |
| 0.011967 | 0.012068 | 0.011968 | 0.012001 | 0.011866 | 0.011967 | 0.012001 |
| 0.012001 | 0.011900 | 0.012034 | 0.012001 | 0.011933 | 0.011933 | 0.011933 |
| 0.012136 | 0.012034 | 0.012102 | 0.011900 | 0.011967 | 0.012169 | 0.011933 |
| 0.011933 | 0.012001 | 0.011967 | 0.012135 | 0.011933 | 0.011866 | 0.012001 |
| 0.011934 | 0.011967 | 0.011967 | 0.011900 | 0.011900 | 0.012068 | 0.012001 |
| 0.011900 | 0.012001 | 0.011866 | 0.011900 | 0.012035 | 0.011766 | 0.011934 |
| 0.011901 | 0.012034 | 0.011968 | 0.011866 | 0.011867 | 0.011866 | 0.012034 |
| 0.012088 | 0.011934 | 0.011900 | 0.012069 | 0.012034 | 0.011967 | 0.012068 |
| 0.011933 | 0.012203 | 0.011866 | 0.012001 | 0.011866 | 0.011866 | 0.011866 |
| 0.012102 | 0.011934 | 0.012001 | 0.012068 | 0.011900 | 0.011968 | 0.011866 |
| 0.011933 | 0.011933 | 0.011967 | 0.012068 | 0.011967 | 0.012068 | 0.012135 |
| 0.012135 | 0.012102 | 0.012001 | 0.012102 | 0.012068 | 0.011933 | 0.011900 |
| 0.011933 | 0.011933 | 0.012001 | 0.011866 | 0.011900 | 0.012068 | 0.011933 |
| 0.011900 | 0.011967 | 0.012102 | 0.012068 | 0.012034 | 0.011967 | 0.011967 |
| 0.012034 | 0.011967 | 0.012068 | 0.011933 | 0.012068 | 0.012169 | 0.012136 |

|          |          |          |          |          |          |          |
|----------|----------|----------|----------|----------|----------|----------|
| 0.011967 | 0.012035 | 0.011923 | 0.018391 | 0.011846 | 0.011978 | 0.011933 |
| 0.011891 | 0.011905 | 0.012004 | 0.011873 | 0.011995 | 0.011959 | 0.012215 |
| 0.011867 | 0.011793 | 0.011802 | 0.011814 | 0.011841 | 0.011850 | 0.011878 |
| 0.011718 | 0.011805 | 0.011654 | 0.011788 | 0.012102 | 0.012136 | 0.012144 |
| 0.012023 | 0.012102 | 0.012102 | 0.012001 | 0.012035 | 0.012035 | 0.012002 |
| 0.012035 | 0.011967 | 0.012001 | 0.012035 | 0.012001 | 0.011934 | 0.011967 |
| 0.011967 | 0.012035 | 0.011934 | 0.012035 | 0.012068 | 0.012102 | 0.012001 |
| 0.011967 | 0.011934 | 0.012002 | 0.012002 | 0.012069 | 0.012104 | 0.012136 |
| 0.011900 | 0.011900 | 0.011934 | 0.012035 | 0.011900 | 0.012136 | 0.012136 |
| 0.012169 | 0.012169 | 0.012102 | 0.012203 | 0.012035 | 0.012206 | 0.012035 |
| 0.012035 | 0.012102 | 0.012136 | 0.011968 | 0.012035 | 0.012001 | 0.012035 |
| 0.012103 | 0.012102 | 0.012136 | 0.012103 | 0.012004 | 0.012203 | 0.012169 |
| 0.011941 | 0.011934 | 0.012035 | 0.012136 | 0.012035 | 0.012102 | 0.012202 |
| 0.012371 | 0.012051 | 0.012236 | 0.012203 | 0.012135 | 0.012304 | 0.011935 |
| 0.012106 | 0.011969 | 0.011967 | 0.011967 | 0.012035 | 0.011934 | 0.012035 |
| 0.012068 | 0.012102 | 0.012001 | 0.011967 | 0.011934 | 0.012002 | 0.012002 |
| 0.012069 | 0.012104 | 0.012169 | 0.012102 | 0.012677 | 0.012168 | 0.012081 |
| 0.012186 | 0.012136 | 0.012221 | 0.012100 | 0.012216 | 0.012165 | 0.012130 |
| 0.012607 | 0.012030 | 0.012157 | 0.012064 | 0.012370 | 0.012184 | 0.012286 |
| 0.012626 | 0.012117 | 0.012279 | 0.012337 | 0.012203 | 0.011934 | 0.012244 |
| 0.011900 | 0.012068 | 0.012202 | 0.012169 | 0.012176 | 0.011900 | 0.011836 |
| 0.012001 | 0.011933 | 0.011967 | 0.012001 | 0.011900 | 0.011967 | 0.011866 |
| 0.011933 | 0.011967 | 0.011933 | 0.011900 | 0.012001 | 0.011933 | 0.011967 |
| 0.011967 | 0.011900 | 0.011967 | 0.012001 | 0.011900 | 0.012102 | 0.012135 |
| 0.012034 | 0.012034 | 0.012034 | 0.012034 | 0.011967 | 0.012035 | 0.012001 |
| 0.011756 | 0.011967 | 0.011934 | 0.011943 | 0.012068 | 0.012068 | 0.012068 |
| 0.012068 | 0.012001 | 0.011967 | 0.012001 | 0.012102 | 0.012102 | 0.012034 |
| 0.012034 | 0.012169 | 0.012001 | 0.012068 | 0.012203 | 0.012203 | 0.012135 |
| 0.011967 | 0.012034 | 0.012068 | 0.012136 | 0.012035 | 0.012068 | 0.012034 |
| 0.012068 | 0.011933 | 0.011933 | 0.012237 | 0.012237 | 0.012203 | 0.012001 |
| 0.012102 | 0.012169 | 0.012034 | 0.012102 | 0.012068 | 0.011933 | 0.011934 |
| 0.012034 | 0.012001 | 0.011933 | 0.012169 | 0.012001 | 0.012102 | 0.012069 |
| 0.012034 | 0.012046 | 0.012068 | 0.011833 | 0.011738 | 0.012013 | 0.011628 |
| 0.011774 | 0.012073 | 0.011868 | 0.011954 | 0.011890 | 0.011824 | 0.011804 |
| 0.011877 | 0.011719 | 0.011896 | 0.011787 | 0.011761 | 0.011999 | 0.012034 |
| 0.012003 | 0.011966 | 0.011977 | 0.011977 | 0.012039 | 0.011900 | 0.011968 |
| 0.011968 | 0.012036 | 0.012143 | 0.011942 | 0.012282 | 0.012298 | 0.012034 |
| 0.012001 | 0.012069 | 0.012001 | 0.012035 | 0.011900 | 0.011866 | 0.011934 |
| 0.012001 | 0.012001 | 0.011967 | 0.011934 | 0.011967 | 0.011934 | 0.012035 |
| 0.011969 | 0.012006 | 0.011986 | 0.012054 | 0.012156 | 0.012120 | 0.012120 |
| 0.012152 | 0.012070 | 0.011799 | 0.011817 | 0.012009 | 0.012180 | 0.012181 |
| 0.011969 | 0.012043 | 0.012273 | 0.012210 | 0.012171 | 0.012205 | 0.012135 |
| 0.012068 | 0.012135 | 0.012135 | 0.011967 | 0.012271 | 0.012203 | 0.012270 |
| 0.012304 | 0.011987 | 0.011948 | 0.012066 | 0.011967 | 0.012169 | 0.012135 |
| 0.012104 | 0.012202 | 0.012203 | 0.012203 | 0.012359 | 0.012337 | 0.011998 |
| 0.011872 | 0.011892 | 0.011980 | 0.011944 | 0.011983 | 0.011882 | 0.011876 |
| 0.012021 | 0.011675 | 0.011966 | 0.012035 | 0.012002 | 0.012088 | 0.011968 |
| 0.011934 | 0.011867 | 0.012001 | 0.011967 | 0.011900 | 0.011867 | 0.011799 |
| 0.011900 | 0.011968 | 0.011967 | 0.011967 | 0.012001 | 0.012001 | 0.012007 |
| 0.012075 | 0.012001 | 0.012001 | 0.012039 | 0.011900 | 0.011968 | 0.011968 |
| 0.012036 | 0.012143 | 0.011942 | 0.012282 | 0.012298 | 0.012034 | 0.012203 |
| 0.012135 | 0.012135 | 0.011974 | 0.012175 | 0.012104 | 0.012117 | 0.011972 |
| 0.012163 | 0.012338 | 0.012162 | 0.012046 | 0.011934 | 0.012136 | 0.012001 |
| 0.012102 | 0.012035 | 0.011934 | 0.012038 | 0.012136 | 0.012143 | 0.012035 |
| 0.011934 | 0.011870 | 0.012001 | 0.011934 | 0.011867 | 0.011842 | 0.012136 |
| 0.012035 | 0.011967 | 0.012001 | 0.012035 | 0.012001 | 0.011934 | 0.011867 |
| 0.012001 | 0.012034 | 0.012034 | 0.011967 | 0.012034 | 0.012270 | 0.011866 |
| 0.011967 | 0.012035 | 0.011967 | 0.012001 | 0.011967 | 0.012001 | 0.011875 |
| 0.012129 | 0.011783 | 0.011662 | 0.011866 | 0.011916 | 0.011814 | 0.011729 |
| 0.011638 | 0.011866 | 0.011967 | 0.012080 | 0.011936 | 0.012042 | 0.012205 |

|          |          |          |          |          |          |          |
|----------|----------|----------|----------|----------|----------|----------|
| 0.012104 | 0.012144 | 0.012102 | 0.012326 | 0.012068 | 0.012945 | 0.012106 |
| 0.012845 | 0.012613 | 0.012747 | 0.013020 | 0.012068 | 0.011968 | 0.012069 |
| 0.012711 | 0.012411 | 0.012035 | 0.011934 | 0.012003 | 0.012003 | 0.011906 |
| 0.011866 | 0.011841 | 0.011934 | 0.011902 | 0.012272 | 0.012338 | 0.012340 |
| 0.012239 | 0.012339 | 0.012444 | 0.012178 | 0.012712 | 0.012721 | 0.012779 |
| 0.012780 | 0.012814 | 0.012734 | 0.012780 | 0.012782 | 0.012068 | 0.012305 |
| 0.012374 | 0.012877 | 0.012384 | 0.000000 | 0.012272 | 0.011808 | 0.011699 |
| 0.011732 | 0.011732 | 0.012272 | 0.012337 | 0.012399 | 0.012136 | 0.011735 |
| S844     | 0.012812 | 0.012812 | 0.012879 | 0.012643 | 0.012643 | 0.012710 |
| 0.012456 | 0.012354 | 0.012643 | 0.012407 | 0.012474 | 0.012138 | 0.012406 |
| 0.012373 | 0.012609 | 0.012339 | 0.012440 | 0.012508 | 0.012474 | 0.012440 |
| 0.012406 | 0.012440 | 0.012272 | 0.012408 | 0.012442 | 0.012440 | 0.012422 |
| 0.012407 | 0.012440 | 0.012339 | 0.012305 | 0.012508 | 0.012474 | 0.012508 |
| 0.012474 | 0.012575 | 0.012474 | 0.012474 | 0.012508 | 0.012474 | 0.012643 |
| 0.012339 | 0.012474 | 0.012508 | 0.012440 | 0.012474 | 0.012575 | 0.012508 |
| 0.012474 | 0.012643 | 0.012543 | 0.012474 | 0.012474 | 0.012676 | 0.012474 |
| 0.012440 | 0.012474 | 0.012609 | 0.012676 | 0.012508 | 0.012474 | 0.012575 |
| 0.012508 | 0.012575 | 0.012474 | 0.012710 | 0.012609 | 0.012474 | 0.012541 |
| 0.012440 | 0.012541 | 0.012508 | 0.012575 | 0.012508 | 0.012508 | 0.012508 |
| 0.012406 | 0.012440 | 0.012406 | 0.012440 | 0.012474 | 0.011801 | 0.012575 |
| 0.012508 | 0.012474 | 0.012541 | 0.012440 | 0.012440 | 0.012406 | 0.012474 |
| 0.012643 | 0.012575 | 0.012541 | 0.012643 | 0.012474 | 0.012710 | 0.012474 |
| 0.011877 | 0.011733 | 0.011966 | 0.011646 | 0.011695 | 0.011797 | 0.011533 |
| 0.012232 | 0.011467 | 0.011678 | 0.012710 | 0.012710 | 0.012440 | 0.012541 |
| 0.012541 | 0.012508 | 0.012575 | 0.012474 | 0.012575 | 0.012508 | 0.012508 |
| 0.012474 | 0.012508 | 0.012778 | 0.012643 | 0.012541 | 0.012508 | 0.012440 |
| 0.012406 | 0.012339 | 0.012474 | 0.012440 | 0.012373 | 0.012339 | 0.012272 |
| 0.012373 | 0.012440 | 0.012406 | 0.012406 | 0.012441 | 0.012440 | 0.012448 |
| 0.012518 | 0.012474 | 0.012474 | 0.012394 | 0.012510 | 0.012430 | 0.012475 |
| 0.012486 | 0.012438 | 0.011761 | 0.012443 | 0.012388 | 0.012433 | 0.012448 |
| 0.012359 | 0.012511 | 0.012544 | 0.012408 | 0.012411 | 0.012544 | 0.012442 |
| 0.012509 | 0.012512 | 0.012509 | 0.012609 | 0.012541 | 0.012913 | 0.012643 |
| 0.012474 | 0.012541 | 0.012474 | 0.012508 | 0.012373 | 0.012339 | 0.012407 |
| 0.012474 | 0.012474 | 0.012440 | 0.012406 | 0.012440 | 0.012406 | 0.012508 |
| 0.012474 | 0.012575 | 0.012508 | 0.012406 | 0.012513 | 0.012609 | 0.012619 |
| 0.012609 | 0.012508 | 0.012406 | 0.012345 | 0.012474 | 0.012407 | 0.012340 |
| 0.012320 | 0.012609 | 0.012407 | 0.012609 | 0.012373 | 0.012474 | 0.012440 |
| 0.012541 | 0.012440 | 0.012474 | 0.012440 | 0.012474 | 0.012339 | 0.012474 |
| 0.012508 | 0.012440 | 0.012508 | 0.012440 | 0.012474 | 0.012508 | 0.012710 |
| 0.012508 | 0.012406 | 0.012508 | 0.011904 | 0.012508 | 0.012474 | 0.012440 |
| 0.011703 | 0.012031 | 0.012802 | 0.011644 | 0.012523 | 0.012359 | 0.011809 |
| 0.012490 | 0.012389 | 0.012643 | 0.012845 | 0.012567 | 0.012710 | 0.012677 |
| 0.012609 | 0.012777 | 0.012700 | 0.012713 | 0.012826 | 0.012508 | 0.012587 |
| 0.012677 | 0.012582 | 0.012722 | 0.012723 | 0.012710 | 0.012778 | 0.012896 |
| 0.012588 | 0.012728 | 0.012724 | 0.012654 | 0.012916 | 0.012373 | 0.012581 |
| 0.012541 | 0.012474 | 0.012373 | 0.012373 | 0.012440 | 0.012440 | 0.012508 |
| 0.012440 | 0.012508 | 0.012406 | 0.012440 | 0.012440 | 0.012440 | 0.012508 |
| 0.012440 | 0.012541 | 0.012440 | 0.012474 | 0.012339 | 0.012440 | 0.012474 |
| 0.012474 | 0.012373 | 0.012508 | 0.012474 | 0.012406 | 0.012406 | 0.012406 |
| 0.012609 | 0.012508 | 0.012575 | 0.012373 | 0.012474 | 0.012643 | 0.012406 |
| 0.012406 | 0.012474 | 0.012440 | 0.012609 | 0.012406 | 0.012339 | 0.012474 |
| 0.012407 | 0.012440 | 0.012440 | 0.012373 | 0.012373 | 0.012541 | 0.012474 |
| 0.012373 | 0.012474 | 0.012339 | 0.012373 | 0.012508 | 0.012239 | 0.012407 |
| 0.012374 | 0.012508 | 0.012442 | 0.012339 | 0.012339 | 0.012339 | 0.012508 |
| 0.012605 | 0.012407 | 0.012373 | 0.012542 | 0.012508 | 0.012440 | 0.012541 |
| 0.012406 | 0.012676 | 0.012339 | 0.012474 | 0.012339 | 0.012339 | 0.012339 |
| 0.012575 | 0.012408 | 0.012474 | 0.012541 | 0.012373 | 0.012440 | 0.012339 |
| 0.012406 | 0.012406 | 0.012440 | 0.012541 | 0.012440 | 0.012541 | 0.012609 |
| 0.012609 | 0.012575 | 0.012474 | 0.012575 | 0.012541 | 0.012406 | 0.012373 |
| 0.012406 | 0.012406 | 0.012474 | 0.012339 | 0.012373 | 0.012541 | 0.012406 |

|          |          |          |          |          |          |          |
|----------|----------|----------|----------|----------|----------|----------|
| 0.012373 | 0.012440 | 0.012575 | 0.012541 | 0.012508 | 0.012440 | 0.012441 |
| 0.012508 | 0.012440 | 0.012541 | 0.012406 | 0.012541 | 0.012643 | 0.012609 |
| 0.012440 | 0.012508 | 0.011751 | 0.018131 | 0.011584 | 0.011794 | 0.011759 |
| 0.011719 | 0.011730 | 0.011794 | 0.011699 | 0.011775 | 0.011786 | 0.011850 |
| 0.011772 | 0.011549 | 0.011607 | 0.011647 | 0.011646 | 0.011653 | 0.011706 |
| 0.011577 | 0.011619 | 0.011505 | 0.011590 | 0.012575 | 0.012609 | 0.012620 |
| 0.012507 | 0.012575 | 0.012575 | 0.012474 | 0.012474 | 0.012475 | 0.012475 |
| 0.012508 | 0.012440 | 0.012474 | 0.012508 | 0.012474 | 0.012406 | 0.012440 |
| 0.012440 | 0.012508 | 0.012406 | 0.012508 | 0.012541 | 0.012575 | 0.012474 |
| 0.012440 | 0.012406 | 0.012474 | 0.012474 | 0.012542 | 0.012578 | 0.012609 |
| 0.012373 | 0.012373 | 0.012406 | 0.012508 | 0.012373 | 0.012609 | 0.012609 |
| 0.012643 | 0.012643 | 0.012575 | 0.012676 | 0.012508 | 0.012681 | 0.012508 |
| 0.012508 | 0.012575 | 0.012609 | 0.012440 | 0.012508 | 0.012474 | 0.012508 |
| 0.012576 | 0.012575 | 0.012609 | 0.012575 | 0.012478 | 0.012676 | 0.012643 |
| 0.012521 | 0.012406 | 0.012508 | 0.012609 | 0.012508 | 0.012575 | 0.012676 |
| 0.012845 | 0.012567 | 0.012710 | 0.012677 | 0.012609 | 0.012777 | 0.012408 |
| 0.012580 | 0.012475 | 0.012440 | 0.012440 | 0.012508 | 0.012406 | 0.012508 |
| 0.012541 | 0.012575 | 0.012474 | 0.012440 | 0.012406 | 0.012474 | 0.012474 |
| 0.012542 | 0.012578 | 0.012643 | 0.012575 | 0.013152 | 0.012708 | 0.012612 |
| 0.012682 | 0.012625 | 0.012752 | 0.012624 | 0.012746 | 0.012652 | 0.012616 |
| 0.013127 | 0.012518 | 0.012641 | 0.012587 | 0.012856 | 0.012664 | 0.012767 |
| 0.013141 | 0.012723 | 0.012484 | 0.012474 | 0.012474 | 0.012272 | 0.012450 |
| 0.012373 | 0.012406 | 0.012508 | 0.012474 | 0.012484 | 0.012373 | 0.011633 |
| 0.012474 | 0.012406 | 0.012440 | 0.012474 | 0.012373 | 0.012440 | 0.012339 |
| 0.012406 | 0.012440 | 0.012406 | 0.012373 | 0.012474 | 0.012406 | 0.012440 |
| 0.012440 | 0.012373 | 0.012440 | 0.012474 | 0.012373 | 0.012575 | 0.012609 |
| 0.012508 | 0.012508 | 0.012508 | 0.012508 | 0.012440 | 0.012508 | 0.012474 |
| 0.012281 | 0.012441 | 0.012408 | 0.012421 | 0.012541 | 0.012541 | 0.012541 |
| 0.012542 | 0.012474 | 0.012440 | 0.012474 | 0.012575 | 0.012541 | 0.012508 |
| 0.012508 | 0.012643 | 0.012474 | 0.012541 | 0.012744 | 0.012744 | 0.012609 |
| 0.012440 | 0.012508 | 0.012542 | 0.012609 | 0.012509 | 0.012542 | 0.012508 |
| 0.012541 | 0.012406 | 0.012406 | 0.012710 | 0.012710 | 0.012676 | 0.012474 |
| 0.012575 | 0.012643 | 0.012508 | 0.012575 | 0.012541 | 0.012406 | 0.012407 |
| 0.012508 | 0.012474 | 0.012406 | 0.012643 | 0.012474 | 0.012575 | 0.012542 |
| 0.012508 | 0.012524 | 0.012542 | 0.011630 | 0.011512 | 0.012525 | 0.011576 |
| 0.011555 | 0.011879 | 0.011693 | 0.011775 | 0.011744 | 0.011620 | 0.011592 |
| 0.011673 | 0.011521 | 0.011673 | 0.011523 | 0.011545 | 0.011730 | 0.011832 |
| 0.011814 | 0.011769 | 0.011801 | 0.011801 | 0.012513 | 0.012373 | 0.012440 |
| 0.012440 | 0.012509 | 0.012619 | 0.012419 | 0.012760 | 0.012797 | 0.012474 |
| 0.012474 | 0.012541 | 0.012474 | 0.012508 | 0.012373 | 0.012339 | 0.012407 |
| 0.012474 | 0.012474 | 0.012440 | 0.012406 | 0.012440 | 0.012406 | 0.012508 |
| 0.012496 | 0.012533 | 0.012502 | 0.012536 | 0.012672 | 0.012635 | 0.012634 |
| 0.012631 | 0.012543 | 0.012430 | 0.012395 | 0.012486 | 0.012656 | 0.012659 |
| 0.012442 | 0.012520 | 0.012747 | 0.012720 | 0.012644 | 0.012679 | 0.012609 |
| 0.012541 | 0.012609 | 0.012609 | 0.012508 | 0.012744 | 0.012676 | 0.012744 |
| 0.012778 | 0.012524 | 0.012428 | 0.012588 | 0.012441 | 0.012643 | 0.012609 |
| 0.012646 | 0.012676 | 0.012676 | 0.012676 | 0.012951 | 0.012811 | 0.012487 |
| 0.012348 | 0.012380 | 0.012460 | 0.012423 | 0.012465 | 0.012482 | 0.012355 |
| 0.012505 | 0.012422 | 0.012826 | 0.012600 | 0.012475 | 0.012569 | 0.012440 |
| 0.012406 | 0.012339 | 0.012474 | 0.012440 | 0.012373 | 0.012339 | 0.012272 |
| 0.012373 | 0.012440 | 0.012406 | 0.012406 | 0.012441 | 0.012440 | 0.012448 |
| 0.012518 | 0.012474 | 0.012474 | 0.012513 | 0.012373 | 0.012440 | 0.012440 |
| 0.012509 | 0.012619 | 0.012419 | 0.012760 | 0.012797 | 0.012474 | 0.012676 |
| 0.012609 | 0.012609 | 0.012450 | 0.012665 | 0.012174 | 0.012597 | 0.011762 |
| 0.011922 | 0.012201 | 0.012801 | 0.012525 | 0.012407 | 0.012609 | 0.012474 |
| 0.012575 | 0.012508 | 0.012406 | 0.012513 | 0.012609 | 0.012619 | 0.012508 |
| 0.012406 | 0.012345 | 0.012474 | 0.012407 | 0.012340 | 0.012320 | 0.012609 |
| 0.012508 | 0.012440 | 0.012474 | 0.012508 | 0.012474 | 0.012406 | 0.012306 |
| 0.012474 | 0.012508 | 0.012508 | 0.012440 | 0.012508 | 0.012744 | 0.012339 |
| 0.012440 | 0.012508 | 0.012440 | 0.012474 | 0.012440 | 0.012474 | 0.011703 |

|          |          |          |          |          |          |          |
|----------|----------|----------|----------|----------|----------|----------|
| 0.011960 | 0.011571 | 0.011562 | 0.011665 | 0.011712 | 0.011635 | 0.011562 |
| 0.011533 | 0.012339 | 0.012440 | 0.012557 | 0.011701 | 0.011839 | 0.012441 |
| 0.012578 | 0.012620 | 0.012575 | 0.012121 | 0.012542 | 0.013420 | 0.011937 |
| 0.013320 | 0.012377 | 0.013223 | 0.012784 | 0.012541 | 0.012441 | 0.012542 |
| 0.013186 | 0.012141 | 0.012508 | 0.012407 | 0.012475 | 0.012475 | 0.012417 |
| 0.012339 | 0.011637 | 0.012406 | 0.012374 | 0.012745 | 0.012812 | 0.012813 |
| 0.012713 | 0.012812 | 0.012208 | 0.011975 | 0.013186 | 0.013198 | 0.013254 |
| 0.013254 | 0.013288 | 0.012530 | 0.013255 | 0.012546 | 0.012541 | 0.012778 |
| 0.012847 | 0.013319 | 0.012147 | 0.012272 | 0.000000 | 0.011570 | 0.012171 |
| 0.012204 | 0.012204 | 0.012745 | 0.012999 | 0.012929 | 0.012542 | 0.011499 |
| S845     | 0.011876 | 0.011876 | 0.011740 | 0.011706 | 0.011706 | 0.011774 |
| 0.011541 | 0.011438 | 0.011706 | 0.011468 | 0.011536 | 0.011502 | 0.011468 |
| 0.011434 | 0.011671 | 0.011400 | 0.011502 | 0.011570 | 0.011536 | 0.011502 |
| 0.011468 | 0.011502 | 0.011332 | 0.011468 | 0.011502 | 0.011502 | 0.011507 |
| 0.011468 | 0.011502 | 0.011400 | 0.011366 | 0.011536 | 0.011536 | 0.011570 |
| 0.011536 | 0.011638 | 0.011536 | 0.011536 | 0.011570 | 0.011536 | 0.011705 |
| 0.011400 | 0.011536 | 0.011570 | 0.011502 | 0.011536 | 0.011637 | 0.011570 |
| 0.011536 | 0.011706 | 0.011604 | 0.011536 | 0.011536 | 0.011807 | 0.011536 |
| 0.011502 | 0.011536 | 0.011672 | 0.011807 | 0.011570 | 0.011536 | 0.011638 |
| 0.011570 | 0.011638 | 0.011536 | 0.011773 | 0.011672 | 0.011536 | 0.011604 |
| 0.011502 | 0.011603 | 0.011570 | 0.011638 | 0.011570 | 0.011570 | 0.011570 |
| 0.011468 | 0.011502 | 0.011468 | 0.011502 | 0.011536 | 0.011570 | 0.011637 |
| 0.011570 | 0.011536 | 0.011604 | 0.011502 | 0.011502 | 0.011468 | 0.011536 |
| 0.011705 | 0.011637 | 0.011604 | 0.011706 | 0.011536 | 0.011773 | 0.011536 |
| 0.011734 | 0.011588 | 0.011744 | 0.011453 | 0.011436 | 0.011580 | 0.011338 |
| 0.011983 | 0.011162 | 0.011473 | 0.011773 | 0.011739 | 0.011468 | 0.011604 |
| 0.011604 | 0.011570 | 0.011637 | 0.011536 | 0.011638 | 0.011536 | 0.011570 |
| 0.011536 | 0.011570 | 0.011842 | 0.011705 | 0.011604 | 0.011570 | 0.011502 |
| 0.011468 | 0.011400 | 0.011536 | 0.011502 | 0.011434 | 0.011400 | 0.011332 |
| 0.011434 | 0.011502 | 0.011502 | 0.011502 | 0.011536 | 0.011536 | 0.011538 |
| 0.011607 | 0.011536 | 0.011536 | 0.011424 | 0.011461 | 0.011450 | 0.011536 |
| 0.011539 | 0.011477 | 0.011506 | 0.011513 | 0.011438 | 0.011476 | 0.011504 |
| 0.011388 | 0.011548 | 0.011547 | 0.011468 | 0.011444 | 0.011604 | 0.011502 |
| 0.011570 | 0.011571 | 0.011570 | 0.011671 | 0.011604 | 0.011978 | 0.011672 |
| 0.011536 | 0.011604 | 0.011536 | 0.011570 | 0.011434 | 0.011400 | 0.011468 |
| 0.011536 | 0.011536 | 0.011502 | 0.011468 | 0.011502 | 0.011468 | 0.011570 |
| 0.011536 | 0.011638 | 0.011570 | 0.011468 | 0.011571 | 0.011672 | 0.011675 |
| 0.011672 | 0.011570 | 0.011468 | 0.011401 | 0.011536 | 0.011468 | 0.011400 |
| 0.011404 | 0.011672 | 0.011468 | 0.011672 | 0.011434 | 0.011536 | 0.011502 |
| 0.011604 | 0.011502 | 0.011536 | 0.011502 | 0.011536 | 0.011400 | 0.011536 |
| 0.011570 | 0.011502 | 0.011570 | 0.011502 | 0.011536 | 0.011570 | 0.011773 |
| 0.011570 | 0.011502 | 0.011570 | 0.011672 | 0.011570 | 0.011536 | 0.011502 |
| 0.011469 | 0.011752 | 0.011476 | 0.011441 | 0.011575 | 0.011405 | 0.011533 |
| 0.011576 | 0.011472 | 0.011705 | 0.011910 | 0.011610 | 0.011773 | 0.011740 |
| 0.011671 | 0.011841 | 0.011708 | 0.011561 | 0.011655 | 0.011570 | 0.011642 |
| 0.011740 | 0.011640 | 0.011779 | 0.011848 | 0.011773 | 0.011842 | 0.011951 |
| 0.011676 | 0.011850 | 0.011779 | 0.011710 | 0.011979 | 0.011434 | 0.011639 |
| 0.011603 | 0.011536 | 0.011434 | 0.011434 | 0.011502 | 0.011502 | 0.011570 |
| 0.011502 | 0.011570 | 0.011468 | 0.011502 | 0.011502 | 0.011502 | 0.011570 |
| 0.011502 | 0.011604 | 0.011502 | 0.011536 | 0.011400 | 0.011502 | 0.011536 |
| 0.011536 | 0.011434 | 0.011570 | 0.011536 | 0.011468 | 0.011468 | 0.011468 |
| 0.011672 | 0.011536 | 0.011638 | 0.011434 | 0.011502 | 0.011706 | 0.011468 |
| 0.011468 | 0.011536 | 0.011502 | 0.011672 | 0.011468 | 0.011400 | 0.011536 |
| 0.011468 | 0.011502 | 0.011502 | 0.011434 | 0.011434 | 0.011604 | 0.011536 |
| 0.011434 | 0.011536 | 0.011400 | 0.011434 | 0.011570 | 0.011298 | 0.011468 |
| 0.011434 | 0.011570 | 0.011502 | 0.011400 | 0.011400 | 0.011400 | 0.011570 |
| 0.011649 | 0.011468 | 0.011434 | 0.011604 | 0.011570 | 0.011502 | 0.011604 |
| 0.011468 | 0.011807 | 0.011400 | 0.011536 | 0.011400 | 0.011400 | 0.011400 |
| 0.011637 | 0.011502 | 0.011536 | 0.011604 | 0.011434 | 0.011502 | 0.011400 |
| 0.011468 | 0.011468 | 0.011502 | 0.011604 | 0.011502 | 0.011604 | 0.011672 |

|          |          |          |          |          |          |          |
|----------|----------|----------|----------|----------|----------|----------|
| 0.011672 | 0.011638 | 0.011536 | 0.011638 | 0.011603 | 0.011468 | 0.011434 |
| 0.011468 | 0.011468 | 0.011536 | 0.011400 | 0.011434 | 0.011570 | 0.011468 |
| 0.011434 | 0.011502 | 0.011637 | 0.011604 | 0.011570 | 0.011502 | 0.011502 |
| 0.011570 | 0.011502 | 0.011603 | 0.011468 | 0.011604 | 0.011705 | 0.011604 |
| 0.011502 | 0.011570 | 0.011513 | 0.018014 | 0.011258 | 0.011619 | 0.011518 |
| 0.011479 | 0.011522 | 0.011747 | 0.011529 | 0.011504 | 0.011548 | 0.011674 |
| 0.011535 | 0.011307 | 0.011453 | 0.011568 | 0.011453 | 0.011458 | 0.011538 |
| 0.011297 | 0.011359 | 0.011322 | 0.011326 | 0.011570 | 0.011672 | 0.011675 |
| 0.011546 | 0.011637 | 0.011637 | 0.011536 | 0.011536 | 0.011536 | 0.011536 |
| 0.011536 | 0.011502 | 0.011536 | 0.011570 | 0.011536 | 0.011468 | 0.011502 |
| 0.011502 | 0.011570 | 0.011468 | 0.011570 | 0.011604 | 0.011637 | 0.011536 |
| 0.011502 | 0.011468 | 0.011536 | 0.011536 | 0.011604 | 0.011638 | 0.011638 |
| 0.011434 | 0.011434 | 0.011468 | 0.011570 | 0.011434 | 0.011671 | 0.011671 |
| 0.011705 | 0.011705 | 0.011638 | 0.011739 | 0.011536 | 0.011742 | 0.011570 |
| 0.011570 | 0.011637 | 0.011671 | 0.011502 | 0.011570 | 0.011536 | 0.011570 |
| 0.011638 | 0.011637 | 0.011671 | 0.011638 | 0.011537 | 0.011739 | 0.011705 |
| 0.011574 | 0.011468 | 0.011570 | 0.011672 | 0.011570 | 0.011638 | 0.011739 |
| 0.011910 | 0.011610 | 0.011773 | 0.011740 | 0.011671 | 0.011841 | 0.011468 |
| 0.011639 | 0.011536 | 0.011502 | 0.011502 | 0.011570 | 0.011468 | 0.011570 |
| 0.011604 | 0.011637 | 0.011536 | 0.011502 | 0.011468 | 0.011536 | 0.011536 |
| 0.011604 | 0.011638 | 0.011705 | 0.011638 | 0.012182 | 0.011711 | 0.011630 |
| 0.011700 | 0.011657 | 0.011771 | 0.011656 | 0.011768 | 0.011688 | 0.011653 |
| 0.012137 | 0.011550 | 0.011684 | 0.011620 | 0.011896 | 0.011749 | 0.011852 |
| 0.012160 | 0.011670 | 0.011573 | 0.011570 | 0.011569 | 0.011332 | 0.011539 |
| 0.011434 | 0.011468 | 0.011604 | 0.011570 | 0.011573 | 0.011434 | 0.011400 |
| 0.011536 | 0.011468 | 0.011502 | 0.011536 | 0.011434 | 0.011502 | 0.011400 |
| 0.011468 | 0.011502 | 0.011468 | 0.011434 | 0.011536 | 0.011468 | 0.011502 |
| 0.011468 | 0.011434 | 0.011502 | 0.011502 | 0.011434 | 0.011638 | 0.011672 |
| 0.011570 | 0.011570 | 0.011570 | 0.011570 | 0.011502 | 0.011570 | 0.011536 |
| 0.011307 | 0.011502 | 0.011468 | 0.011472 | 0.011604 | 0.011603 | 0.011604 |
| 0.011604 | 0.011536 | 0.011502 | 0.011536 | 0.011638 | 0.011638 | 0.011570 |
| 0.011569 | 0.011705 | 0.011536 | 0.011603 | 0.011808 | 0.011808 | 0.011671 |
| 0.011502 | 0.011570 | 0.011604 | 0.011672 | 0.011570 | 0.011604 | 0.011570 |
| 0.011604 | 0.011468 | 0.011468 | 0.011774 | 0.011774 | 0.011740 | 0.011536 |
| 0.011638 | 0.011705 | 0.011570 | 0.011638 | 0.011603 | 0.011468 | 0.011468 |
| 0.011569 | 0.011536 | 0.011468 | 0.011705 | 0.011536 | 0.011637 | 0.011604 |
| 0.011502 | 0.011610 | 0.011604 | 0.011427 | 0.011230 | 0.011575 | 0.011318 |
| 0.011394 | 0.011646 | 0.011450 | 0.011464 | 0.011403 | 0.011265 | 0.011274 |
| 0.011419 | 0.011193 | 0.011340 | 0.011193 | 0.011223 | 0.011397 | 0.011630 |
| 0.011669 | 0.011534 | 0.011558 | 0.011558 | 0.011572 | 0.011434 | 0.011502 |
| 0.011468 | 0.011570 | 0.011676 | 0.011472 | 0.011815 | 0.011811 | 0.011536 |
| 0.011536 | 0.011604 | 0.011536 | 0.011570 | 0.011434 | 0.011400 | 0.011468 |
| 0.011536 | 0.011536 | 0.011502 | 0.011468 | 0.011502 | 0.011468 | 0.011570 |
| 0.011554 | 0.011520 | 0.011545 | 0.011579 | 0.011717 | 0.011682 | 0.011647 |
| 0.011680 | 0.011604 | 0.011396 | 0.011388 | 0.011539 | 0.011711 | 0.011712 |
| 0.011502 | 0.011573 | 0.011808 | 0.011777 | 0.011706 | 0.011740 | 0.011671 |
| 0.011604 | 0.011671 | 0.011671 | 0.011570 | 0.011808 | 0.011739 | 0.011808 |
| 0.011841 | 0.011565 | 0.011473 | 0.011550 | 0.011502 | 0.011705 | 0.011672 |
| 0.011707 | 0.011705 | 0.011739 | 0.011739 | 0.011812 | 0.011875 | 0.011516 |
| 0.011402 | 0.011411 | 0.011508 | 0.011472 | 0.011510 | 0.011438 | 0.011404 |
| 0.011546 | 0.011238 | 0.011543 | 0.011591 | 0.011536 | 0.011613 | 0.011502 |
| 0.011468 | 0.011400 | 0.011536 | 0.011502 | 0.011434 | 0.011400 | 0.011332 |
| 0.011434 | 0.011502 | 0.011502 | 0.011502 | 0.011536 | 0.011536 | 0.011538 |
| 0.011607 | 0.011536 | 0.011536 | 0.011572 | 0.011434 | 0.011502 | 0.011468 |
| 0.011570 | 0.011676 | 0.011472 | 0.011815 | 0.011811 | 0.011536 | 0.011739 |
| 0.011672 | 0.011672 | 0.011505 | 0.011658 | 0.011622 | 0.011646 | 0.011520 |
| 0.011686 | 0.011840 | 0.011658 | 0.011575 | 0.011468 | 0.011672 | 0.011536 |
| 0.011638 | 0.011570 | 0.011468 | 0.011571 | 0.011672 | 0.011675 | 0.011570 |
| 0.011468 | 0.011401 | 0.011536 | 0.011468 | 0.011400 | 0.011404 | 0.011672 |
| 0.011536 | 0.011502 | 0.011536 | 0.011570 | 0.011536 | 0.011468 | 0.011366 |

|          |          |          |          |          |          |          |
|----------|----------|----------|----------|----------|----------|----------|
| 0.011536 | 0.011570 | 0.011570 | 0.011502 | 0.011570 | 0.011808 | 0.011400 |
| 0.011502 | 0.011570 | 0.011502 | 0.011536 | 0.011502 | 0.011536 | 0.011490 |
| 0.011795 | 0.011316 | 0.011311 | 0.011383 | 0.011469 | 0.011350 | 0.011270 |
| 0.011218 | 0.011400 | 0.011502 | 0.011609 | 0.011468 | 0.011606 | 0.011706 |
| 0.011638 | 0.011676 | 0.011638 | 0.011887 | 0.011604 | 0.012488 | 0.011638 |
| 0.012352 | 0.012148 | 0.012287 | 0.012558 | 0.011604 | 0.011502 | 0.011604 |
| 0.012216 | 0.011809 | 0.011570 | 0.011468 | 0.011536 | 0.011536 | 0.011471 |
| 0.011400 | 0.011402 | 0.011468 | 0.011434 | 0.011808 | 0.011876 | 0.011876 |
| 0.011775 | 0.011876 | 0.011978 | 0.011742 | 0.012216 | 0.012223 | 0.012284 |
| 0.012285 | 0.012319 | 0.012265 | 0.012285 | 0.012284 | 0.011604 | 0.011808 |
| 0.011910 | 0.012386 | 0.011914 | 0.011808 | 0.011570 | 0.000000 | 0.011230 |
| 0.011264 | 0.011264 | 0.011808 | 0.011852 | 0.011946 | 0.011638 | 0.011264 |
| S846     | 0.011766 | 0.011766 | 0.011632 | 0.011598 | 0.011598 | 0.011665 |
| 0.011434 | 0.011332 | 0.011598 | 0.011363 | 0.011430 | 0.011397 | 0.011363 |
| 0.011329 | 0.011564 | 0.011295 | 0.011396 | 0.011464 | 0.011430 | 0.011396 |
| 0.011363 | 0.011396 | 0.011228 | 0.011363 | 0.011397 | 0.011396 | 0.011400 |
| 0.011363 | 0.011396 | 0.011295 | 0.011262 | 0.011464 | 0.011430 | 0.011464 |
| 0.011430 | 0.011531 | 0.011430 | 0.011430 | 0.011464 | 0.011430 | 0.011598 |
| 0.011295 | 0.011430 | 0.011464 | 0.011396 | 0.011430 | 0.011531 | 0.011464 |
| 0.011430 | 0.011598 | 0.011498 | 0.011430 | 0.011430 | 0.011699 | 0.011430 |
| 0.011396 | 0.011430 | 0.011564 | 0.011699 | 0.011464 | 0.011430 | 0.011531 |
| 0.011464 | 0.011531 | 0.011430 | 0.011665 | 0.011565 | 0.011430 | 0.011497 |
| 0.011396 | 0.011497 | 0.011464 | 0.011531 | 0.011464 | 0.011464 | 0.011464 |
| 0.011363 | 0.011396 | 0.011363 | 0.011396 | 0.011430 | 0.011464 | 0.011531 |
| 0.011464 | 0.011430 | 0.011497 | 0.011396 | 0.011396 | 0.011363 | 0.011430 |
| 0.011598 | 0.011531 | 0.011497 | 0.011598 | 0.011430 | 0.011665 | 0.011430 |
| 0.011616 | 0.011471 | 0.011664 | 0.011373 | 0.011359 | 0.011465 | 0.011257 |
| 0.011902 | 0.011111 | 0.011390 | 0.011665 | 0.011665 | 0.011396 | 0.011497 |
| 0.011497 | 0.011464 | 0.011531 | 0.011430 | 0.011531 | 0.011464 | 0.011464 |
| 0.011430 | 0.011464 | 0.011733 | 0.011598 | 0.011497 | 0.011464 | 0.011396 |
| 0.011363 | 0.011295 | 0.011430 | 0.011396 | 0.011329 | 0.011296 | 0.011228 |
| 0.011329 | 0.011396 | 0.011396 | 0.011396 | 0.011430 | 0.011430 | 0.011432 |
| 0.011500 | 0.011430 | 0.011430 | 0.011312 | 0.011386 | 0.011341 | 0.011430 |
| 0.011433 | 0.011369 | 0.011429 | 0.011405 | 0.011332 | 0.011369 | 0.011398 |
| 0.011312 | 0.011439 | 0.011473 | 0.011363 | 0.011371 | 0.011498 | 0.011397 |
| 0.011464 | 0.011465 | 0.011464 | 0.011564 | 0.011497 | 0.011867 | 0.011598 |
| 0.011430 | 0.011497 | 0.011430 | 0.011464 | 0.011329 | 0.011296 | 0.011363 |
| 0.011430 | 0.011430 | 0.011396 | 0.011363 | 0.011396 | 0.011363 | 0.011464 |
| 0.011430 | 0.011531 | 0.011464 | 0.011363 | 0.011465 | 0.011564 | 0.011568 |
| 0.011564 | 0.011464 | 0.011363 | 0.011296 | 0.011430 | 0.011363 | 0.011296 |
| 0.011298 | 0.011565 | 0.011363 | 0.011565 | 0.011329 | 0.011430 | 0.011396 |
| 0.011497 | 0.011396 | 0.011430 | 0.011396 | 0.011430 | 0.011296 | 0.011430 |
| 0.011464 | 0.011396 | 0.011464 | 0.011396 | 0.011430 | 0.011464 | 0.011665 |
| 0.011464 | 0.011396 | 0.011464 | 0.011566 | 0.011464 | 0.011430 | 0.011396 |
| 0.011364 | 0.011667 | 0.011472 | 0.011335 | 0.011468 | 0.011265 | 0.011454 |
| 0.011468 | 0.011366 | 0.011598 | 0.011800 | 0.011505 | 0.011665 | 0.011632 |
| 0.011564 | 0.011733 | 0.011594 | 0.011431 | 0.011522 | 0.011464 | 0.011534 |
| 0.011632 | 0.011533 | 0.011670 | 0.011738 | 0.011665 | 0.011733 | 0.011840 |
| 0.011568 | 0.011740 | 0.011670 | 0.011602 | 0.011868 | 0.011329 | 0.011532 |
| 0.011497 | 0.011430 | 0.011329 | 0.011329 | 0.011396 | 0.011396 | 0.011464 |
| 0.011396 | 0.011464 | 0.011363 | 0.011396 | 0.011396 | 0.011396 | 0.011464 |
| 0.011396 | 0.011497 | 0.011397 | 0.011430 | 0.011295 | 0.011396 | 0.011430 |
| 0.011430 | 0.011329 | 0.011464 | 0.011430 | 0.011363 | 0.011363 | 0.011363 |
| 0.011565 | 0.011430 | 0.011531 | 0.011329 | 0.011430 | 0.011598 | 0.011363 |
| 0.011363 | 0.011430 | 0.011396 | 0.011564 | 0.011363 | 0.011296 | 0.011430 |
| 0.011363 | 0.011396 | 0.011396 | 0.011329 | 0.011329 | 0.011497 | 0.011430 |
| 0.011329 | 0.011430 | 0.011295 | 0.011329 | 0.011464 | 0.011195 | 0.011363 |
| 0.011329 | 0.011464 | 0.011397 | 0.011295 | 0.011296 | 0.011295 | 0.011464 |
| 0.011540 | 0.011363 | 0.011329 | 0.011497 | 0.011464 | 0.011396 | 0.011497 |
| 0.011363 | 0.011699 | 0.011295 | 0.011430 | 0.011296 | 0.011296 | 0.011295 |

|          |          |          |          |          |          |          |
|----------|----------|----------|----------|----------|----------|----------|
| 0.011531 | 0.011397 | 0.011430 | 0.011497 | 0.011329 | 0.011397 | 0.011296 |
| 0.011363 | 0.011363 | 0.011396 | 0.011497 | 0.011396 | 0.011497 | 0.011564 |
| 0.011564 | 0.011531 | 0.011430 | 0.011531 | 0.011497 | 0.011363 | 0.011329 |
| 0.011363 | 0.011363 | 0.011430 | 0.011295 | 0.011329 | 0.011497 | 0.011363 |
| 0.011329 | 0.011396 | 0.011531 | 0.011497 | 0.011464 | 0.011396 | 0.011396 |
| 0.011464 | 0.011396 | 0.011497 | 0.011363 | 0.011497 | 0.011598 | 0.011497 |
| 0.011396 | 0.011464 | 0.011405 | 0.017898 | 0.011322 | 0.011488 | 0.011409 |
| 0.011372 | 0.011412 | 0.011584 | 0.011350 | 0.011500 | 0.011440 | 0.011607 |
| 0.011487 | 0.011304 | 0.011333 | 0.011395 | 0.011294 | 0.011406 | 0.011447 |
| 0.011248 | 0.011284 | 0.011209 | 0.011259 | 0.011531 | 0.011564 | 0.011568 |
| 0.011438 | 0.011531 | 0.011531 | 0.011430 | 0.011464 | 0.011464 | 0.011430 |
| 0.011464 | 0.011396 | 0.011430 | 0.011464 | 0.011430 | 0.011363 | 0.011396 |
| 0.011396 | 0.011464 | 0.011363 | 0.011464 | 0.011497 | 0.011531 | 0.011430 |
| 0.011396 | 0.011363 | 0.011430 | 0.011430 | 0.011497 | 0.011532 | 0.011564 |
| 0.011329 | 0.011329 | 0.011363 | 0.011464 | 0.011329 | 0.011564 | 0.011564 |
| 0.011598 | 0.011598 | 0.011531 | 0.011632 | 0.011464 | 0.011633 | 0.011464 |
| 0.011464 | 0.011531 | 0.011564 | 0.011396 | 0.011464 | 0.011430 | 0.011464 |
| 0.011531 | 0.011531 | 0.011564 | 0.011531 | 0.011431 | 0.011632 | 0.011598 |
| 0.011467 | 0.011363 | 0.011464 | 0.011564 | 0.011464 | 0.011531 | 0.011632 |
| 0.011800 | 0.011505 | 0.011665 | 0.011632 | 0.011564 | 0.011733 | 0.011363 |
| 0.011532 | 0.011430 | 0.011396 | 0.011396 | 0.011464 | 0.011363 | 0.011464 |
| 0.011497 | 0.011531 | 0.011430 | 0.011396 | 0.011363 | 0.011430 | 0.011430 |
| 0.011497 | 0.011532 | 0.011598 | 0.011531 | 0.012104 | 0.011596 | 0.011518 |
| 0.011588 | 0.011546 | 0.011658 | 0.011546 | 0.011656 | 0.011578 | 0.011543 |
| 0.012057 | 0.011441 | 0.011575 | 0.011510 | 0.011784 | 0.011639 | 0.011741 |
| 0.012081 | 0.011550 | 0.011467 | 0.011464 | 0.011464 | 0.011228 | 0.011432 |
| 0.011329 | 0.011363 | 0.011497 | 0.011464 | 0.011466 | 0.011329 | 0.011296 |
| 0.011430 | 0.011363 | 0.011396 | 0.011430 | 0.011329 | 0.011396 | 0.011295 |
| 0.011363 | 0.011396 | 0.011363 | 0.011329 | 0.011430 | 0.011363 | 0.011396 |
| 0.011396 | 0.011329 | 0.011396 | 0.011430 | 0.011329 | 0.011531 | 0.011564 |
| 0.011464 | 0.011464 | 0.011464 | 0.011464 | 0.011396 | 0.011464 | 0.011430 |
| 0.011200 | 0.011396 | 0.011363 | 0.011366 | 0.011497 | 0.011497 | 0.011497 |
| 0.011497 | 0.011430 | 0.011396 | 0.011430 | 0.011531 | 0.011531 | 0.011464 |
| 0.011463 | 0.011598 | 0.011430 | 0.011497 | 0.011699 | 0.011699 | 0.011564 |
| 0.011396 | 0.011464 | 0.011497 | 0.011565 | 0.011464 | 0.011497 | 0.011464 |
| 0.011497 | 0.011363 | 0.011363 | 0.011666 | 0.011665 | 0.011632 | 0.011430 |
| 0.011531 | 0.011598 | 0.011464 | 0.011531 | 0.011497 | 0.011363 | 0.011363 |
| 0.011464 | 0.011430 | 0.011363 | 0.011598 | 0.011430 | 0.011531 | 0.011497 |
| 0.011396 | 0.011502 | 0.011497 | 0.011345 | 0.011229 | 0.011468 | 0.011267 |
| 0.011335 | 0.011566 | 0.011376 | 0.011507 | 0.011402 | 0.011315 | 0.011326 |
| 0.011315 | 0.011258 | 0.011394 | 0.011258 | 0.011276 | 0.011462 | 0.011547 |
| 0.011550 | 0.011454 | 0.011448 | 0.011448 | 0.011465 | 0.011329 | 0.011396 |
| 0.011396 | 0.011464 | 0.011568 | 0.011366 | 0.011705 | 0.011732 | 0.011430 |
| 0.011430 | 0.011497 | 0.011430 | 0.011464 | 0.011329 | 0.011296 | 0.011363 |
| 0.011430 | 0.011430 | 0.011396 | 0.011363 | 0.011396 | 0.011363 | 0.011464 |
| 0.011444 | 0.011445 | 0.011437 | 0.011471 | 0.011608 | 0.011573 | 0.011572 |
| 0.011571 | 0.011497 | 0.011319 | 0.011312 | 0.011433 | 0.011602 | 0.011603 |
| 0.011397 | 0.011467 | 0.011700 | 0.011669 | 0.011598 | 0.011632 | 0.011564 |
| 0.011497 | 0.011564 | 0.011564 | 0.011464 | 0.011699 | 0.011632 | 0.011699 |
| 0.011733 | 0.011453 | 0.011368 | 0.011511 | 0.011396 | 0.011598 | 0.011564 |
| 0.011599 | 0.011598 | 0.011632 | 0.011632 | 0.011768 | 0.011766 | 0.011407 |
| 0.011297 | 0.011303 | 0.011401 | 0.011366 | 0.011402 | 0.011322 | 0.011298 |
| 0.011438 | 0.000000 | 0.011346 | 0.011472 | 0.011430 | 0.011505 | 0.011396 |
| 0.011363 | 0.011295 | 0.011430 | 0.011396 | 0.011329 | 0.011296 | 0.011228 |
| 0.011329 | 0.011396 | 0.011396 | 0.011396 | 0.011430 | 0.011430 | 0.011432 |
| 0.011500 | 0.011430 | 0.011430 | 0.011465 | 0.011329 | 0.011396 | 0.011396 |
| 0.011464 | 0.011568 | 0.011366 | 0.011705 | 0.011732 | 0.011430 | 0.011632 |
| 0.011564 | 0.011564 | 0.011399 | 0.011582 | 0.011512 | 0.011537 | 0.011411 |
| 0.011577 | 0.011744 | 0.011484 | 0.011468 | 0.011363 | 0.011565 | 0.011430 |
| 0.011531 | 0.011464 | 0.011363 | 0.011465 | 0.011564 | 0.011568 | 0.011464 |



|          |          |          |          |          |          |          |
|----------|----------|----------|----------|----------|----------|----------|
| 0.011363 | 0.011296 | 0.011430 | 0.011363 | 0.011296 | 0.011298 | 0.011565 |
| 0.011464 | 0.011396 | 0.011430 | 0.011464 | 0.011430 | 0.011363 | 0.011295 |
| 0.011430 | 0.011464 | 0.011464 | 0.011396 | 0.011464 | 0.011699 | 0.011295 |
| 0.011396 | 0.011464 | 0.011396 | 0.011430 | 0.011396 | 0.011430 | 0.011403 |
| 0.011679 | 0.011273 | 0.011261 | 0.011302 | 0.011386 | 0.011311 | 0.011227 |
| 0.011218 | 0.011296 | 0.011396 | 0.011502 | 0.011363 | 0.011500 | 0.011632 |
| 0.011531 | 0.011568 | 0.011531 | 0.011778 | 0.011497 | 0.012373 | 0.011532 |
| 0.012272 | 0.012038 | 0.012173 | 0.012444 | 0.011497 | 0.011396 | 0.011497 |
| 0.012137 | 0.011870 | 0.011464 | 0.011363 | 0.011430 | 0.011430 | 0.011399 |
| 0.011296 | 0.011298 | 0.011363 | 0.011329 | 0.011699 | 0.011767 | 0.011767 |
| 0.011667 | 0.011767 | 0.011869 | 0.011635 | 0.012138 | 0.012144 | 0.012205 |
| 0.012205 | 0.012239 | 0.012187 | 0.012206 | 0.012207 | 0.011497 | 0.011733 |
| 0.011800 | 0.012272 | 0.011806 | 0.011699 | 0.012171 | 0.011230 | 0.000000 |
| 0.011161 | 0.011161 | 0.011699 | 0.011718 | 0.011834 | 0.011564 | 0.011161 |
| S847     | 0.011732 | 0.011732 | 0.011799 | 0.011564 | 0.011564 | 0.011631 |
| 0.011332 | 0.011264 | 0.011631 | 0.011329 | 0.011396 | 0.011363 | 0.011329 |
| 0.011295 | 0.011530 | 0.011262 | 0.011362 | 0.011429 | 0.011396 | 0.011362 |
| 0.011329 | 0.011362 | 0.011194 | 0.011329 | 0.011362 | 0.011362 | 0.011298 |
| 0.011329 | 0.011362 | 0.011262 | 0.011228 | 0.011429 | 0.011396 | 0.011429 |
| 0.011396 | 0.011496 | 0.011396 | 0.011396 | 0.011429 | 0.011396 | 0.011564 |
| 0.011262 | 0.011396 | 0.011429 | 0.011362 | 0.011396 | 0.011463 | 0.011429 |
| 0.011396 | 0.011564 | 0.011463 | 0.011329 | 0.011396 | 0.011664 | 0.011396 |
| 0.011362 | 0.011396 | 0.011530 | 0.011664 | 0.011362 | 0.011396 | 0.011496 |
| 0.011429 | 0.011496 | 0.011396 | 0.011631 | 0.011463 | 0.011396 | 0.011463 |
| 0.011362 | 0.011463 | 0.011429 | 0.011496 | 0.011429 | 0.011429 | 0.011429 |
| 0.011329 | 0.011362 | 0.011329 | 0.011362 | 0.011396 | 0.011430 | 0.011496 |
| 0.011429 | 0.011396 | 0.011463 | 0.011362 | 0.011362 | 0.011329 | 0.011396 |
| 0.011564 | 0.011496 | 0.011396 | 0.011564 | 0.011396 | 0.011631 | 0.011396 |
| 0.011579 | 0.011359 | 0.011626 | 0.011334 | 0.011321 | 0.011428 | 0.011218 |
| 0.011865 | 0.011162 | 0.011348 | 0.011597 | 0.011597 | 0.011362 | 0.011396 |
| 0.011463 | 0.011429 | 0.011496 | 0.011396 | 0.011496 | 0.011429 | 0.011429 |
| 0.011396 | 0.011429 | 0.011698 | 0.011564 | 0.011463 | 0.011429 | 0.011362 |
| 0.011329 | 0.011262 | 0.011396 | 0.011362 | 0.011295 | 0.011262 | 0.011195 |
| 0.011295 | 0.011362 | 0.011362 | 0.011362 | 0.011396 | 0.011396 | 0.011398 |
| 0.011466 | 0.011396 | 0.011396 | 0.011276 | 0.011349 | 0.011306 | 0.011396 |
| 0.011399 | 0.011335 | 0.011392 | 0.011371 | 0.011298 | 0.011334 | 0.011364 |
| 0.011276 | 0.011405 | 0.011439 | 0.011329 | 0.011337 | 0.011464 | 0.011363 |
| 0.011430 | 0.011431 | 0.011430 | 0.011530 | 0.011463 | 0.011832 | 0.011564 |
| 0.011396 | 0.011463 | 0.011396 | 0.011430 | 0.011295 | 0.011262 | 0.011329 |
| 0.011396 | 0.011396 | 0.011362 | 0.011329 | 0.011362 | 0.011329 | 0.011429 |
| 0.011396 | 0.011497 | 0.011430 | 0.011329 | 0.011431 | 0.011530 | 0.011533 |
| 0.011530 | 0.011430 | 0.011329 | 0.011263 | 0.011396 | 0.011329 | 0.011262 |
| 0.011264 | 0.011530 | 0.011329 | 0.011530 | 0.011295 | 0.011396 | 0.011362 |
| 0.011463 | 0.011362 | 0.011396 | 0.011362 | 0.011396 | 0.011262 | 0.011396 |
| 0.011430 | 0.011362 | 0.011429 | 0.011362 | 0.011396 | 0.011429 | 0.011665 |
| 0.011362 | 0.011295 | 0.011362 | 0.011532 | 0.011363 | 0.011396 | 0.011362 |
| 0.011330 | 0.011626 | 0.011426 | 0.011300 | 0.011365 | 0.011265 | 0.011414 |
| 0.011366 | 0.011332 | 0.011530 | 0.011765 | 0.011470 | 0.011597 | 0.011597 |
| 0.011530 | 0.011664 | 0.011558 | 0.011431 | 0.011479 | 0.011429 | 0.011500 |
| 0.011597 | 0.011499 | 0.011635 | 0.011703 | 0.011631 | 0.011698 | 0.011805 |
| 0.011534 | 0.011705 | 0.011636 | 0.011567 | 0.011834 | 0.011295 | 0.011498 |
| 0.011463 | 0.011396 | 0.011295 | 0.011295 | 0.011362 | 0.011362 | 0.011429 |
| 0.011362 | 0.011429 | 0.011329 | 0.011362 | 0.011362 | 0.011362 | 0.011429 |
| 0.011362 | 0.011396 | 0.011295 | 0.011329 | 0.011262 | 0.011362 | 0.011396 |
| 0.011396 | 0.011295 | 0.011429 | 0.011396 | 0.011329 | 0.011329 | 0.011329 |
| 0.011463 | 0.011429 | 0.011496 | 0.011295 | 0.011396 | 0.011564 | 0.011329 |
| 0.011329 | 0.011396 | 0.011362 | 0.011530 | 0.011329 | 0.011262 | 0.011396 |
| 0.011329 | 0.011362 | 0.011362 | 0.011295 | 0.011295 | 0.011463 | 0.011396 |
| 0.011295 | 0.011396 | 0.011262 | 0.011295 | 0.011429 | 0.011228 | 0.011329 |
| 0.011295 | 0.011429 | 0.011363 | 0.011262 | 0.011195 | 0.011262 | 0.011429 |

|          |          |          |          |          |          |          |
|----------|----------|----------|----------|----------|----------|----------|
| 0.011505 | 0.011329 | 0.011228 | 0.011463 | 0.011429 | 0.011362 | 0.011463 |
| 0.011329 | 0.011664 | 0.011262 | 0.011396 | 0.011262 | 0.011262 | 0.011262 |
| 0.011496 | 0.011362 | 0.011396 | 0.011463 | 0.011295 | 0.011295 | 0.011262 |
| 0.011329 | 0.011329 | 0.011362 | 0.011463 | 0.011362 | 0.011463 | 0.011530 |
| 0.011530 | 0.011496 | 0.011396 | 0.011496 | 0.011463 | 0.011329 | 0.011295 |
| 0.011329 | 0.011329 | 0.011396 | 0.011262 | 0.011295 | 0.011463 | 0.011329 |
| 0.011295 | 0.011362 | 0.011496 | 0.011463 | 0.011429 | 0.011362 | 0.011362 |
| 0.011429 | 0.011362 | 0.011463 | 0.011329 | 0.011463 | 0.011530 | 0.011463 |
| 0.011362 | 0.011362 | 0.011371 | 0.017823 | 0.011257 | 0.011488 | 0.011304 |
| 0.011268 | 0.011306 | 0.011532 | 0.011350 | 0.011390 | 0.011336 | 0.011546 |
| 0.011440 | 0.011304 | 0.011294 | 0.011395 | 0.011294 | 0.011406 | 0.011404 |
| 0.011107 | 0.011246 | 0.011097 | 0.011193 | 0.011496 | 0.011530 | 0.011534 |
| 0.011404 | 0.011497 | 0.011463 | 0.011396 | 0.011429 | 0.011430 | 0.011396 |
| 0.011429 | 0.011362 | 0.011362 | 0.011429 | 0.011396 | 0.011329 | 0.011362 |
| 0.011362 | 0.011429 | 0.011329 | 0.011430 | 0.011463 | 0.011497 | 0.011396 |
| 0.011362 | 0.011329 | 0.011329 | 0.011329 | 0.011463 | 0.011497 | 0.011530 |
| 0.011295 | 0.011295 | 0.011329 | 0.011430 | 0.011295 | 0.011530 | 0.011530 |
| 0.011530 | 0.011530 | 0.011496 | 0.011564 | 0.011362 | 0.011565 | 0.011429 |
| 0.011396 | 0.011497 | 0.011530 | 0.011362 | 0.011429 | 0.011396 | 0.011429 |
| 0.011463 | 0.011463 | 0.011497 | 0.011497 | 0.011397 | 0.011597 | 0.011564 |
| 0.011433 | 0.011329 | 0.011429 | 0.011530 | 0.011430 | 0.011497 | 0.011597 |
| 0.011765 | 0.011470 | 0.011597 | 0.011597 | 0.011530 | 0.011664 | 0.011329 |
| 0.011464 | 0.011396 | 0.011362 | 0.011362 | 0.011429 | 0.011329 | 0.011430 |
| 0.011463 | 0.011497 | 0.011396 | 0.011362 | 0.011329 | 0.011329 | 0.011329 |
| 0.011463 | 0.011497 | 0.011564 | 0.011496 | 0.012069 | 0.011560 | 0.011482 |
| 0.011552 | 0.011511 | 0.011622 | 0.011510 | 0.011620 | 0.011543 | 0.011508 |
| 0.012021 | 0.011406 | 0.011540 | 0.011475 | 0.011749 | 0.011604 | 0.011707 |
| 0.012046 | 0.011512 | 0.011669 | 0.011732 | 0.011597 | 0.011329 | 0.011635 |
| 0.011295 | 0.011463 | 0.011597 | 0.011564 | 0.011567 | 0.011295 | 0.011262 |
| 0.011396 | 0.011329 | 0.011362 | 0.011396 | 0.011295 | 0.011362 | 0.011262 |
| 0.011329 | 0.011362 | 0.011329 | 0.011295 | 0.011396 | 0.011329 | 0.011362 |
| 0.011362 | 0.011295 | 0.011362 | 0.011396 | 0.011295 | 0.011496 | 0.011530 |
| 0.011429 | 0.011429 | 0.011429 | 0.011429 | 0.011362 | 0.011362 | 0.011396 |
| 0.011165 | 0.011362 | 0.011329 | 0.011332 | 0.011463 | 0.011463 | 0.011463 |
| 0.011463 | 0.011396 | 0.011362 | 0.011396 | 0.011496 | 0.011496 | 0.011429 |
| 0.011429 | 0.011564 | 0.011329 | 0.011463 | 0.011664 | 0.011664 | 0.011530 |
| 0.011362 | 0.011429 | 0.011463 | 0.011463 | 0.011430 | 0.011463 | 0.011429 |
| 0.011429 | 0.011329 | 0.011329 | 0.011631 | 0.011631 | 0.011597 | 0.011396 |
| 0.011496 | 0.011564 | 0.011429 | 0.011496 | 0.011463 | 0.011329 | 0.011262 |
| 0.011429 | 0.011396 | 0.011329 | 0.011564 | 0.011396 | 0.011496 | 0.011463 |
| 0.011429 | 0.011400 | 0.011396 | 0.011304 | 0.011173 | 0.011434 | 0.011215 |
| 0.011335 | 0.011527 | 0.011341 | 0.011462 | 0.011353 | 0.011315 | 0.011273 |
| 0.011264 | 0.011192 | 0.011339 | 0.011192 | 0.011222 | 0.011395 | 0.011506 |
| 0.011512 | 0.011414 | 0.011412 | 0.011412 | 0.011431 | 0.011295 | 0.011362 |
| 0.011362 | 0.011430 | 0.011533 | 0.011331 | 0.011670 | 0.011696 | 0.011429 |
| 0.011396 | 0.011463 | 0.011396 | 0.011430 | 0.011295 | 0.011262 | 0.011329 |
| 0.011396 | 0.011396 | 0.011362 | 0.011329 | 0.011362 | 0.011329 | 0.011429 |
| 0.011409 | 0.011410 | 0.011403 | 0.011437 | 0.011573 | 0.011538 | 0.011538 |
| 0.011537 | 0.011464 | 0.011282 | 0.011276 | 0.011399 | 0.011568 | 0.011569 |
| 0.011363 | 0.011433 | 0.011666 | 0.011635 | 0.011531 | 0.011599 | 0.011530 |
| 0.011463 | 0.011530 | 0.011530 | 0.011429 | 0.011597 | 0.011564 | 0.011631 |
| 0.011698 | 0.011345 | 0.011333 | 0.011476 | 0.011362 | 0.011564 | 0.011530 |
| 0.011565 | 0.011597 | 0.011564 | 0.011564 | 0.011728 | 0.011732 | 0.011372 |
| 0.011263 | 0.011268 | 0.011366 | 0.011332 | 0.011368 | 0.011284 | 0.011196 |
| 0.011403 | 0.011148 | 0.011346 | 0.011435 | 0.011396 | 0.011471 | 0.011362 |
| 0.011329 | 0.011262 | 0.011396 | 0.011362 | 0.011295 | 0.011262 | 0.011195 |
| 0.011295 | 0.011362 | 0.011362 | 0.011362 | 0.011396 | 0.011396 | 0.011398 |
| 0.011466 | 0.011396 | 0.011396 | 0.011431 | 0.011295 | 0.011362 | 0.011362 |
| 0.011430 | 0.011533 | 0.011331 | 0.011670 | 0.011696 | 0.011429 | 0.011597 |
| 0.011530 | 0.011530 | 0.011365 | 0.011547 | 0.011477 | 0.011503 | 0.011376 |

|          |          |          |          |          |          |          |
|----------|----------|----------|----------|----------|----------|----------|
| 0.011542 | 0.011698 | 0.011526 | 0.011434 | 0.011329 | 0.011530 | 0.011396 |
| 0.011497 | 0.011430 | 0.011329 | 0.011431 | 0.011530 | 0.011533 | 0.011430 |
| 0.011329 | 0.011263 | 0.011396 | 0.011329 | 0.011262 | 0.011264 | 0.011530 |
| 0.011429 | 0.011362 | 0.011362 | 0.011429 | 0.011396 | 0.011329 | 0.011262 |
| 0.011396 | 0.011429 | 0.011429 | 0.011362 | 0.011429 | 0.011664 | 0.011262 |
| 0.011362 | 0.011362 | 0.011362 | 0.011396 | 0.011362 | 0.011329 | 0.011360 |
| 0.011622 | 0.011230 | 0.011211 | 0.011262 | 0.011345 | 0.011276 | 0.011144 |
| 0.011165 | 0.011262 | 0.011362 | 0.011468 | 0.011330 | 0.011466 | 0.011598 |
| 0.011498 | 0.011534 | 0.011496 | 0.011744 | 0.011463 | 0.012337 | 0.011498 |
| 0.012237 | 0.012004 | 0.012139 | 0.012410 | 0.011463 | 0.011362 | 0.011463 |
| 0.012103 | 0.011836 | 0.011429 | 0.011329 | 0.011396 | 0.011396 | 0.011365 |
| 0.011262 | 0.011264 | 0.011329 | 0.011296 | 0.011666 | 0.011732 | 0.011733 |
| 0.011632 | 0.011733 | 0.011836 | 0.011601 | 0.012104 | 0.012110 | 0.012171 |
| 0.012172 | 0.012205 | 0.012152 | 0.012172 | 0.012173 | 0.011463 | 0.011699 |
| 0.011766 | 0.012270 | 0.011772 | 0.011732 | 0.012204 | 0.011264 | 0.011161 |
| 0.000000 | 0.011127 | 0.011665 | 0.011677 | 0.011799 | 0.011530 | 0.011195 |
| S848     | 0.011732 | 0.011732 | 0.011799 | 0.011564 | 0.011564 | 0.011631 |
| 0.011400 | 0.011332 | 0.011631 | 0.011329 | 0.011396 | 0.011363 | 0.011329 |
| 0.011295 | 0.011530 | 0.011262 | 0.011362 | 0.011429 | 0.011396 | 0.011362 |
| 0.011329 | 0.011362 | 0.011194 | 0.011329 | 0.011362 | 0.011362 | 0.011366 |
| 0.011329 | 0.011362 | 0.011262 | 0.011228 | 0.011429 | 0.011396 | 0.011429 |
| 0.011396 | 0.011496 | 0.011396 | 0.011396 | 0.011429 | 0.011396 | 0.011564 |
| 0.011262 | 0.011396 | 0.011429 | 0.011362 | 0.011396 | 0.011496 | 0.011429 |
| 0.011396 | 0.011564 | 0.011463 | 0.011396 | 0.011396 | 0.011664 | 0.011396 |
| 0.011362 | 0.011396 | 0.011530 | 0.011664 | 0.011429 | 0.011396 | 0.011496 |
| 0.011429 | 0.011496 | 0.011396 | 0.011631 | 0.011530 | 0.011396 | 0.011463 |
| 0.011362 | 0.011463 | 0.011429 | 0.011496 | 0.011429 | 0.011429 | 0.011429 |
| 0.011329 | 0.011362 | 0.011329 | 0.011362 | 0.011396 | 0.011430 | 0.011496 |
| 0.011429 | 0.011396 | 0.011463 | 0.011362 | 0.011362 | 0.011329 | 0.011396 |
| 0.011563 | 0.011496 | 0.011463 | 0.011564 | 0.011396 | 0.011631 | 0.011396 |
| 0.011579 | 0.011434 | 0.011626 | 0.011334 | 0.011321 | 0.011428 | 0.011218 |
| 0.011865 | 0.011111 | 0.011348 | 0.011631 | 0.011631 | 0.011362 | 0.011463 |
| 0.011463 | 0.011429 | 0.011496 | 0.011396 | 0.011496 | 0.011429 | 0.011429 |
| 0.011396 | 0.011429 | 0.011698 | 0.011564 | 0.011463 | 0.011429 | 0.011362 |
| 0.011329 | 0.011262 | 0.011396 | 0.011362 | 0.011295 | 0.011262 | 0.011195 |
| 0.011295 | 0.011362 | 0.011362 | 0.011362 | 0.011396 | 0.011396 | 0.011398 |
| 0.011466 | 0.011396 | 0.011396 | 0.011276 | 0.011349 | 0.011306 | 0.011396 |
| 0.011399 | 0.011335 | 0.011392 | 0.011371 | 0.011298 | 0.011334 | 0.011364 |
| 0.011204 | 0.011405 | 0.011439 | 0.011329 | 0.011337 | 0.011464 | 0.011363 |
| 0.011430 | 0.011431 | 0.011430 | 0.011530 | 0.011463 | 0.011832 | 0.011564 |
| 0.011396 | 0.011463 | 0.011396 | 0.011429 | 0.011295 | 0.011262 | 0.011329 |
| 0.011396 | 0.011396 | 0.011362 | 0.011329 | 0.011362 | 0.011329 | 0.011429 |
| 0.011396 | 0.011497 | 0.011429 | 0.011329 | 0.011431 | 0.011530 | 0.011533 |
| 0.011530 | 0.011430 | 0.011329 | 0.011263 | 0.011396 | 0.011329 | 0.011262 |
| 0.011264 | 0.011530 | 0.011329 | 0.011530 | 0.011295 | 0.011396 | 0.011362 |
| 0.011463 | 0.011362 | 0.011396 | 0.011362 | 0.011396 | 0.011262 | 0.011396 |
| 0.011429 | 0.011362 | 0.011429 | 0.011362 | 0.011396 | 0.011429 | 0.011665 |
| 0.011430 | 0.011362 | 0.011430 | 0.011532 | 0.011430 | 0.011396 | 0.011362 |
| 0.011330 | 0.011626 | 0.011472 | 0.011300 | 0.011433 | 0.011265 | 0.011414 |
| 0.011434 | 0.011264 | 0.011563 | 0.011765 | 0.011470 | 0.011631 | 0.011597 |
| 0.011530 | 0.011698 | 0.011557 | 0.011390 | 0.011479 | 0.011429 | 0.011500 |
| 0.011597 | 0.011498 | 0.011635 | 0.011703 | 0.011631 | 0.011698 | 0.011805 |
| 0.011534 | 0.011705 | 0.011636 | 0.011567 | 0.011834 | 0.011295 | 0.011498 |
| 0.011463 | 0.011396 | 0.011295 | 0.011295 | 0.011362 | 0.011362 | 0.011429 |
| 0.011362 | 0.011429 | 0.011329 | 0.011362 | 0.011362 | 0.011362 | 0.011429 |
| 0.011362 | 0.011463 | 0.011362 | 0.011396 | 0.011262 | 0.011362 | 0.011396 |
| 0.011396 | 0.011295 | 0.011429 | 0.011396 | 0.011329 | 0.011329 | 0.011329 |
| 0.011530 | 0.011429 | 0.011496 | 0.011295 | 0.011396 | 0.011564 | 0.011329 |
| 0.011329 | 0.011396 | 0.011362 | 0.011530 | 0.011329 | 0.011262 | 0.011396 |
| 0.011329 | 0.011362 | 0.011362 | 0.011295 | 0.011295 | 0.011463 | 0.011396 |

|          |          |          |          |          |          |          |
|----------|----------|----------|----------|----------|----------|----------|
| 0.011295 | 0.011396 | 0.011262 | 0.011295 | 0.011429 | 0.011228 | 0.011329 |
| 0.011295 | 0.011429 | 0.011363 | 0.011262 | 0.011262 | 0.011262 | 0.011429 |
| 0.011505 | 0.011329 | 0.011295 | 0.011463 | 0.011429 | 0.011362 | 0.011463 |
| 0.011329 | 0.011664 | 0.011262 | 0.011396 | 0.011262 | 0.011262 | 0.011262 |
| 0.011496 | 0.011295 | 0.011396 | 0.011463 | 0.011295 | 0.011362 | 0.011262 |
| 0.011329 | 0.011329 | 0.011362 | 0.011463 | 0.011362 | 0.011463 | 0.011530 |
| 0.011530 | 0.011496 | 0.011396 | 0.011496 | 0.011463 | 0.011329 | 0.011295 |
| 0.011329 | 0.011329 | 0.011396 | 0.011262 | 0.011295 | 0.011463 | 0.011329 |
| 0.011295 | 0.011362 | 0.011496 | 0.011463 | 0.011429 | 0.011362 | 0.011362 |
| 0.011429 | 0.011362 | 0.011463 | 0.011329 | 0.011463 | 0.011564 | 0.011530 |
| 0.011362 | 0.011430 | 0.011371 | 0.017861 | 0.011191 | 0.011488 | 0.011374 |
| 0.011337 | 0.011377 | 0.011479 | 0.011292 | 0.011445 | 0.011405 | 0.011485 |
| 0.011392 | 0.011243 | 0.011294 | 0.011353 | 0.011294 | 0.011356 | 0.011361 |
| 0.011154 | 0.011246 | 0.011172 | 0.011193 | 0.011496 | 0.011530 | 0.011534 |
| 0.011404 | 0.011497 | 0.011496 | 0.011396 | 0.011429 | 0.011430 | 0.011396 |
| 0.011429 | 0.011362 | 0.011396 | 0.011429 | 0.011396 | 0.011329 | 0.011362 |
| 0.011362 | 0.011429 | 0.011329 | 0.011430 | 0.011463 | 0.011497 | 0.011396 |
| 0.011362 | 0.011329 | 0.011396 | 0.011396 | 0.011463 | 0.011497 | 0.011530 |
| 0.011295 | 0.011295 | 0.011329 | 0.011429 | 0.011295 | 0.011530 | 0.011530 |
| 0.011564 | 0.011563 | 0.011496 | 0.011597 | 0.011430 | 0.011599 | 0.011429 |
| 0.011429 | 0.011497 | 0.011530 | 0.011362 | 0.011429 | 0.011396 | 0.011429 |
| 0.011497 | 0.011497 | 0.011530 | 0.011497 | 0.011397 | 0.011597 | 0.011564 |
| 0.011433 | 0.011329 | 0.011429 | 0.011530 | 0.011430 | 0.011497 | 0.011597 |
| 0.011765 | 0.011470 | 0.011631 | 0.011597 | 0.011530 | 0.011698 | 0.011329 |
| 0.011498 | 0.011396 | 0.011362 | 0.011362 | 0.011429 | 0.011329 | 0.011430 |
| 0.011463 | 0.011497 | 0.011396 | 0.011362 | 0.011329 | 0.011396 | 0.011396 |
| 0.011463 | 0.011497 | 0.011564 | 0.011496 | 0.012069 | 0.011560 | 0.011482 |
| 0.011552 | 0.011511 | 0.011622 | 0.011510 | 0.011620 | 0.011543 | 0.011508 |
| 0.012021 | 0.011406 | 0.011540 | 0.011475 | 0.011749 | 0.011604 | 0.011706 |
| 0.012046 | 0.011512 | 0.011669 | 0.011731 | 0.011597 | 0.011329 | 0.011635 |
| 0.011295 | 0.011463 | 0.011597 | 0.011563 | 0.011567 | 0.011295 | 0.011262 |
| 0.011396 | 0.011329 | 0.011362 | 0.011396 | 0.011295 | 0.011362 | 0.011262 |
| 0.011329 | 0.011362 | 0.011329 | 0.011295 | 0.011396 | 0.011329 | 0.011362 |
| 0.011362 | 0.011295 | 0.011362 | 0.011396 | 0.011295 | 0.011496 | 0.011530 |
| 0.011429 | 0.011429 | 0.011429 | 0.011429 | 0.011362 | 0.011429 | 0.011396 |
| 0.011165 | 0.011362 | 0.011329 | 0.011332 | 0.011463 | 0.011463 | 0.011463 |
| 0.011463 | 0.011396 | 0.011362 | 0.011396 | 0.011496 | 0.011496 | 0.011429 |
| 0.011429 | 0.011564 | 0.011396 | 0.011463 | 0.011664 | 0.011664 | 0.011530 |
| 0.011362 | 0.011429 | 0.011463 | 0.011530 | 0.011430 | 0.011463 | 0.011429 |
| 0.011463 | 0.011329 | 0.011329 | 0.011631 | 0.011631 | 0.011597 | 0.011396 |
| 0.011496 | 0.011564 | 0.011429 | 0.011496 | 0.011463 | 0.011329 | 0.011329 |
| 0.011429 | 0.011396 | 0.011329 | 0.011564 | 0.011396 | 0.011496 | 0.011463 |
| 0.011429 | 0.011468 | 0.011463 | 0.011304 | 0.011173 | 0.011434 | 0.011215 |
| 0.011280 | 0.011527 | 0.011341 | 0.011462 | 0.011353 | 0.011315 | 0.011220 |
| 0.011213 | 0.011126 | 0.011283 | 0.011126 | 0.011222 | 0.011328 | 0.011506 |
| 0.011512 | 0.011414 | 0.011412 | 0.011412 | 0.011431 | 0.011295 | 0.011362 |
| 0.011362 | 0.011430 | 0.011533 | 0.011331 | 0.011670 | 0.011696 | 0.011429 |
| 0.011396 | 0.011463 | 0.011396 | 0.011429 | 0.011295 | 0.011262 | 0.011329 |
| 0.011396 | 0.011396 | 0.011362 | 0.011329 | 0.011362 | 0.011329 | 0.011429 |
| 0.011409 | 0.011410 | 0.011403 | 0.011437 | 0.011573 | 0.011538 | 0.011538 |
| 0.011537 | 0.011464 | 0.011282 | 0.011276 | 0.011399 | 0.011568 | 0.011569 |
| 0.011363 | 0.011433 | 0.011666 | 0.011635 | 0.011565 | 0.011598 | 0.011530 |
| 0.011463 | 0.011530 | 0.011530 | 0.011429 | 0.011665 | 0.011597 | 0.011664 |
| 0.011698 | 0.011416 | 0.011333 | 0.011476 | 0.011362 | 0.011564 | 0.011530 |
| 0.011565 | 0.011597 | 0.011597 | 0.011597 | 0.011728 | 0.011731 | 0.011372 |
| 0.011263 | 0.011268 | 0.011366 | 0.011332 | 0.011368 | 0.011284 | 0.011264 |
| 0.011403 | 0.011148 | 0.011298 | 0.011435 | 0.011396 | 0.011471 | 0.011362 |
| 0.011329 | 0.011262 | 0.011396 | 0.011362 | 0.011295 | 0.011262 | 0.011195 |
| 0.011295 | 0.011362 | 0.011362 | 0.011362 | 0.011396 | 0.011396 | 0.011398 |
| 0.011466 | 0.011396 | 0.011396 | 0.011431 | 0.011295 | 0.011362 | 0.011362 |

|          |          |          |          |          |          |          |
|----------|----------|----------|----------|----------|----------|----------|
| 0.011430 | 0.011533 | 0.011331 | 0.011670 | 0.011696 | 0.011429 | 0.011597 |
| 0.011530 | 0.011530 | 0.011364 | 0.011547 | 0.011477 | 0.011503 | 0.011340 |
| 0.011508 | 0.011698 | 0.011484 | 0.011434 | 0.011329 | 0.011530 | 0.011396 |
| 0.011497 | 0.011429 | 0.011329 | 0.011431 | 0.011530 | 0.011533 | 0.011430 |
| 0.011329 | 0.011263 | 0.011396 | 0.011329 | 0.011262 | 0.011264 | 0.011530 |
| 0.011429 | 0.011362 | 0.011396 | 0.011429 | 0.011396 | 0.011329 | 0.011262 |
| 0.011396 | 0.011429 | 0.011429 | 0.011362 | 0.011429 | 0.011664 | 0.011262 |
| 0.011362 | 0.011429 | 0.011362 | 0.011396 | 0.011362 | 0.011396 | 0.011317 |
| 0.011566 | 0.011230 | 0.011161 | 0.011262 | 0.011345 | 0.011276 | 0.011144 |
| 0.011113 | 0.011262 | 0.011362 | 0.011468 | 0.011329 | 0.011466 | 0.011598 |
| 0.011498 | 0.011534 | 0.011496 | 0.011744 | 0.011463 | 0.012337 | 0.011498 |
| 0.012237 | 0.012004 | 0.012138 | 0.012410 | 0.011463 | 0.011362 | 0.011463 |
| 0.012103 | 0.011836 | 0.011429 | 0.011329 | 0.011396 | 0.011396 | 0.011365 |
| 0.011262 | 0.011264 | 0.011329 | 0.011296 | 0.011665 | 0.011732 | 0.011733 |
| 0.011632 | 0.011733 | 0.011836 | 0.011601 | 0.012104 | 0.012110 | 0.012171 |
| 0.012171 | 0.012205 | 0.012152 | 0.012172 | 0.012173 | 0.011463 | 0.011699 |
| 0.011766 | 0.012270 | 0.011772 | 0.011732 | 0.012204 | 0.011264 | 0.011161 |
| 0.011127 | 0.000000 | 0.011665 | 0.011677 | 0.011799 | 0.011530 | 0.011195 |
| S849     | 0.012203 | 0.012203 | 0.012137 | 0.012035 | 0.012035 | 0.012103 |
| 0.011945 | 0.011876 | 0.012035 | 0.011800 | 0.011867 | 0.011835 | 0.011799 |
| 0.011766 | 0.012001 | 0.011732 | 0.011833 | 0.011900 | 0.011867 | 0.011833 |
| 0.011799 | 0.011833 | 0.011665 | 0.011800 | 0.011834 | 0.011833 | 0.011910 |
| 0.011800 | 0.011833 | 0.011732 | 0.011699 | 0.011900 | 0.011867 | 0.011900 |
| 0.011867 | 0.011968 | 0.011867 | 0.011799 | 0.011900 | 0.011867 | 0.012035 |
| 0.011732 | 0.011867 | 0.011900 | 0.011833 | 0.011867 | 0.011968 | 0.011900 |
| 0.011867 | 0.012035 | 0.011935 | 0.011934 | 0.011867 | 0.012136 | 0.011867 |
| 0.011833 | 0.011867 | 0.012001 | 0.012136 | 0.011968 | 0.011867 | 0.011968 |
| 0.011900 | 0.011968 | 0.011867 | 0.012102 | 0.012069 | 0.011867 | 0.011934 |
| 0.011833 | 0.011934 | 0.011900 | 0.011968 | 0.011900 | 0.011900 | 0.011900 |
| 0.011799 | 0.011833 | 0.011799 | 0.011833 | 0.011867 | 0.011902 | 0.011968 |
| 0.011900 | 0.011867 | 0.011934 | 0.011833 | 0.011900 | 0.011799 | 0.011867 |
| 0.012035 | 0.011968 | 0.012002 | 0.012035 | 0.011867 | 0.012102 | 0.011867 |
| 0.011988 | 0.011920 | 0.012042 | 0.011724 | 0.011732 | 0.011760 | 0.011651 |
| 0.012268 | 0.011722 | 0.011761 | 0.012102 | 0.012102 | 0.011833 | 0.011934 |
| 0.011934 | 0.011900 | 0.011968 | 0.011867 | 0.011968 | 0.011900 | 0.011900 |
| 0.011867 | 0.011900 | 0.012170 | 0.012035 | 0.011934 | 0.011901 | 0.011833 |
| 0.011799 | 0.011732 | 0.011867 | 0.011833 | 0.011766 | 0.011732 | 0.011665 |
| 0.011766 | 0.011833 | 0.011833 | 0.011833 | 0.011867 | 0.011867 | 0.011871 |
| 0.011940 | 0.011867 | 0.011867 | 0.011708 | 0.011711 | 0.011797 | 0.011867 |
| 0.011874 | 0.011748 | 0.011835 | 0.011854 | 0.011774 | 0.011814 | 0.011837 |
| 0.011817 | 0.011854 | 0.011922 | 0.011800 | 0.011821 | 0.011935 | 0.011834 |
| 0.011902 | 0.011903 | 0.011901 | 0.012001 | 0.011934 | 0.012304 | 0.012035 |
| 0.011867 | 0.011934 | 0.011867 | 0.011901 | 0.011766 | 0.011732 | 0.011800 |
| 0.011867 | 0.011867 | 0.011833 | 0.011799 | 0.011833 | 0.011799 | 0.011900 |
| 0.011867 | 0.011968 | 0.011900 | 0.011799 | 0.011903 | 0.012001 | 0.012007 |
| 0.012002 | 0.011901 | 0.011799 | 0.011735 | 0.011867 | 0.011799 | 0.011733 |
| 0.011740 | 0.012002 | 0.011800 | 0.012002 | 0.011766 | 0.011867 | 0.011833 |
| 0.011934 | 0.011833 | 0.011867 | 0.011833 | 0.011867 | 0.011732 | 0.011867 |
| 0.011900 | 0.011833 | 0.011900 | 0.011833 | 0.011867 | 0.011900 | 0.012136 |
| 0.011968 | 0.011901 | 0.011968 | 0.011971 | 0.011968 | 0.011867 | 0.011833 |
| 0.011804 | 0.012153 | 0.012067 | 0.011747 | 0.011977 | 0.011743 | 0.011848 |
| 0.011978 | 0.011877 | 0.012035 | 0.012237 | 0.011949 | 0.012102 | 0.012002 |
| 0.012001 | 0.012169 | 0.012056 | 0.011967 | 0.011984 | 0.011901 | 0.011975 |
| 0.012069 | 0.011972 | 0.012110 | 0.012178 | 0.012102 | 0.012170 | 0.012282 |
| 0.012009 | 0.012182 | 0.012111 | 0.012042 | 0.012307 | 0.011766 | 0.011971 |
| 0.011934 | 0.011867 | 0.011766 | 0.011766 | 0.011833 | 0.011833 | 0.011900 |
| 0.011833 | 0.011900 | 0.011799 | 0.011833 | 0.011833 | 0.011833 | 0.011900 |
| 0.011833 | 0.012002 | 0.011901 | 0.011934 | 0.011732 | 0.011833 | 0.011867 |
| 0.011867 | 0.011833 | 0.011900 | 0.011867 | 0.011799 | 0.011799 | 0.011799 |
| 0.012069 | 0.011900 | 0.011968 | 0.011766 | 0.011867 | 0.012035 | 0.011799 |

|          |          |          |          |          |          |          |
|----------|----------|----------|----------|----------|----------|----------|
| 0.011799 | 0.011867 | 0.011833 | 0.012002 | 0.011799 | 0.011732 | 0.011867 |
| 0.011800 | 0.011833 | 0.011833 | 0.011766 | 0.011766 | 0.011934 | 0.011867 |
| 0.011766 | 0.011867 | 0.011732 | 0.011766 | 0.011900 | 0.011766 | 0.011800 |
| 0.011767 | 0.011900 | 0.011834 | 0.011732 | 0.011800 | 0.011732 | 0.011900 |
| 0.011986 | 0.011800 | 0.011833 | 0.011934 | 0.011900 | 0.011833 | 0.011934 |
| 0.011799 | 0.012136 | 0.011732 | 0.011934 | 0.011732 | 0.011732 | 0.011732 |
| 0.011968 | 0.011901 | 0.011867 | 0.011934 | 0.011766 | 0.011901 | 0.011732 |
| 0.011799 | 0.011799 | 0.011833 | 0.011934 | 0.011833 | 0.011934 | 0.012001 |
| 0.012001 | 0.011968 | 0.011867 | 0.011968 | 0.011934 | 0.011799 | 0.011766 |
| 0.011799 | 0.011799 | 0.011867 | 0.011732 | 0.011766 | 0.011934 | 0.011799 |
| 0.011766 | 0.011833 | 0.011968 | 0.011934 | 0.011900 | 0.011833 | 0.011833 |
| 0.011900 | 0.011833 | 0.011934 | 0.011799 | 0.011934 | 0.012035 | 0.012002 |
| 0.011833 | 0.011901 | 0.011751 | 0.018315 | 0.011781 | 0.011855 | 0.011828 |
| 0.011857 | 0.011835 | 0.011846 | 0.011757 | 0.011830 | 0.011924 | 0.011911 |
| 0.011867 | 0.011610 | 0.011724 | 0.011773 | 0.011685 | 0.011702 | 0.011792 |
| 0.011765 | 0.011656 | 0.011654 | 0.011523 | 0.011968 | 0.012001 | 0.011974 |
| 0.011885 | 0.011968 | 0.011900 | 0.011867 | 0.011901 | 0.011901 | 0.011867 |
| 0.011833 | 0.011833 | 0.011867 | 0.011900 | 0.011867 | 0.011799 | 0.011833 |
| 0.011833 | 0.011900 | 0.011799 | 0.011901 | 0.011934 | 0.011968 | 0.011867 |
| 0.011833 | 0.011800 | 0.011934 | 0.011934 | 0.011934 | 0.011969 | 0.012002 |
| 0.011766 | 0.011766 | 0.011799 | 0.011900 | 0.011766 | 0.011934 | 0.011934 |
| 0.012035 | 0.012035 | 0.011968 | 0.012069 | 0.011968 | 0.012072 | 0.011900 |
| 0.011900 | 0.011968 | 0.012001 | 0.011833 | 0.011900 | 0.011867 | 0.011900 |
| 0.011968 | 0.011968 | 0.012001 | 0.011968 | 0.011869 | 0.012068 | 0.012035 |
| 0.011908 | 0.011799 | 0.011900 | 0.012002 | 0.011901 | 0.011968 | 0.012068 |
| 0.012237 | 0.011949 | 0.012102 | 0.012002 | 0.012001 | 0.012169 | 0.011800 |
| 0.011971 | 0.011867 | 0.011833 | 0.011833 | 0.011900 | 0.011799 | 0.011901 |
| 0.011934 | 0.011968 | 0.011867 | 0.011833 | 0.011800 | 0.011934 | 0.011934 |
| 0.011934 | 0.011969 | 0.012035 | 0.011967 | 0.012542 | 0.012062 | 0.011976 |
| 0.012046 | 0.011998 | 0.012116 | 0.011997 | 0.012112 | 0.012027 | 0.011992 |
| 0.012504 | 0.011892 | 0.012021 | 0.011960 | 0.012233 | 0.012082 | 0.012185 |
| 0.012524 | 0.011965 | 0.011906 | 0.011900 | 0.011900 | 0.011665 | 0.011872 |
| 0.011766 | 0.011799 | 0.011934 | 0.011900 | 0.011906 | 0.011766 | 0.011701 |
| 0.011867 | 0.011799 | 0.011833 | 0.011867 | 0.011766 | 0.011833 | 0.011732 |
| 0.011799 | 0.011833 | 0.011799 | 0.011766 | 0.011867 | 0.011799 | 0.011833 |
| 0.011833 | 0.011766 | 0.011833 | 0.011867 | 0.011766 | 0.011968 | 0.012001 |
| 0.011900 | 0.011900 | 0.011900 | 0.011900 | 0.011833 | 0.011968 | 0.011867 |
| 0.011652 | 0.011833 | 0.011800 | 0.011807 | 0.011934 | 0.011934 | 0.011934 |
| 0.011934 | 0.011867 | 0.011833 | 0.011867 | 0.011968 | 0.011968 | 0.011900 |
| 0.011900 | 0.012035 | 0.011934 | 0.011934 | 0.012136 | 0.012136 | 0.012001 |
| 0.011833 | 0.011900 | 0.011934 | 0.012069 | 0.011901 | 0.011934 | 0.011900 |
| 0.011934 | 0.011799 | 0.011799 | 0.012103 | 0.012103 | 0.012069 | 0.011867 |
| 0.011968 | 0.012035 | 0.011900 | 0.011968 | 0.011934 | 0.011799 | 0.011867 |
| 0.011900 | 0.011867 | 0.011799 | 0.012035 | 0.011867 | 0.011968 | 0.012002 |
| 0.011833 | 0.012012 | 0.012002 | 0.011752 | 0.011625 | 0.011876 | 0.011628 |
| 0.011610 | 0.011956 | 0.011728 | 0.011909 | 0.011841 | 0.011825 | 0.011751 |
| 0.011621 | 0.011653 | 0.011840 | 0.011655 | 0.011707 | 0.011798 | 0.011953 |
| 0.011927 | 0.011847 | 0.011800 | 0.011800 | 0.011870 | 0.011766 | 0.011833 |
| 0.011833 | 0.011868 | 0.012008 | 0.011807 | 0.012146 | 0.012192 | 0.011900 |
| 0.011867 | 0.011934 | 0.011867 | 0.011901 | 0.011766 | 0.011732 | 0.011800 |
| 0.011867 | 0.011867 | 0.011833 | 0.011799 | 0.011833 | 0.011799 | 0.011900 |
| 0.011899 | 0.011865 | 0.011883 | 0.011917 | 0.012053 | 0.012017 | 0.011948 |
| 0.012015 | 0.011935 | 0.011799 | 0.011709 | 0.011874 | 0.012044 | 0.012045 |
| 0.011834 | 0.011907 | 0.012138 | 0.012109 | 0.012036 | 0.012070 | 0.012001 |
| 0.011934 | 0.012001 | 0.012001 | 0.011900 | 0.012204 | 0.012069 | 0.012136 |
| 0.012170 | 0.011988 | 0.011880 | 0.011927 | 0.011833 | 0.012035 | 0.012001 |
| 0.012037 | 0.012068 | 0.012069 | 0.012069 | 0.012201 | 0.012203 | 0.011859 |
| 0.011737 | 0.011753 | 0.011844 | 0.011808 | 0.011847 | 0.011770 | 0.011809 |
| 0.011884 | 0.011718 | 0.011870 | 0.011960 | 0.011868 | 0.011950 | 0.011833 |
| 0.011799 | 0.011732 | 0.011867 | 0.011833 | 0.011766 | 0.011732 | 0.011665 |

|          |          |          |          |          |          |          |
|----------|----------|----------|----------|----------|----------|----------|
| 0.011766 | 0.011833 | 0.011833 | 0.011833 | 0.011867 | 0.011867 | 0.011871 |
| 0.011940 | 0.011867 | 0.011867 | 0.011870 | 0.011766 | 0.011833 | 0.011833 |
| 0.011868 | 0.012008 | 0.011807 | 0.012146 | 0.012192 | 0.011900 | 0.012068 |
| 0.012001 | 0.012001 | 0.011839 | 0.012035 | 0.011930 | 0.011980 | 0.011761 |
| 0.012025 | 0.012200 | 0.012077 | 0.011910 | 0.011800 | 0.012002 | 0.011867 |
| 0.011968 | 0.011900 | 0.011799 | 0.011903 | 0.012001 | 0.012007 | 0.011901 |
| 0.011799 | 0.011735 | 0.011867 | 0.011799 | 0.011733 | 0.011740 | 0.012002 |
| 0.011833 | 0.011833 | 0.011867 | 0.011900 | 0.011867 | 0.011799 | 0.011732 |
| 0.011867 | 0.011900 | 0.011900 | 0.011833 | 0.011900 | 0.012136 | 0.011732 |
| 0.011833 | 0.011968 | 0.011833 | 0.011867 | 0.011833 | 0.011934 | 0.011832 |
| 0.012073 | 0.011656 | 0.011662 | 0.011664 | 0.011794 | 0.011671 | 0.011646 |
| 0.011638 | 0.011732 | 0.011833 | 0.011910 | 0.011801 | 0.011907 | 0.012070 |
| 0.011969 | 0.012008 | 0.011968 | 0.012189 | 0.011934 | 0.012811 | 0.011971 |
| 0.012642 | 0.012444 | 0.012612 | 0.012884 | 0.011934 | 0.011766 | 0.011935 |
| 0.012576 | 0.012276 | 0.011901 | 0.011800 | 0.011868 | 0.011868 | 0.011839 |
| 0.011732 | 0.011705 | 0.011800 | 0.011767 | 0.012137 | 0.012204 | 0.012205 |
| 0.012105 | 0.012205 | 0.012275 | 0.012042 | 0.012577 | 0.012585 | 0.012644 |
| 0.012645 | 0.012678 | 0.012597 | 0.012645 | 0.012647 | 0.011934 | 0.012170 |
| 0.012238 | 0.012743 | 0.012248 | 0.012272 | 0.012745 | 0.011808 | 0.011699 |
| 0.011665 | 0.011665 | 0.000000 | 0.012130 | 0.012222 | 0.012002 | 0.011667 |
| S850     | 0.012213 | 0.012213 | 0.012048 | 0.011965 | 0.011965 | 0.012007 |
| 0.011936 | 0.011853 | 0.012007 | 0.011800 | 0.011924 | 0.011884 | 0.011842 |
| 0.011800 | 0.012048 | 0.011759 | 0.011883 | 0.011924 | 0.011883 | 0.011800 |
| 0.011842 | 0.011842 | 0.011677 | 0.011801 | 0.011883 | 0.011883 | 0.011894 |
| 0.011801 | 0.011842 | 0.011759 | 0.011718 | 0.011924 | 0.011924 | 0.011965 |
| 0.011883 | 0.012048 | 0.011883 | 0.011924 | 0.011883 | 0.011924 | 0.012048 |
| 0.011759 | 0.011924 | 0.011924 | 0.011883 | 0.011924 | 0.012048 | 0.011924 |
| 0.011924 | 0.012089 | 0.011966 | 0.011965 | 0.011883 | 0.012254 | 0.011883 |
| 0.011842 | 0.011924 | 0.012006 | 0.012254 | 0.011924 | 0.011883 | 0.011965 |
| 0.011924 | 0.012048 | 0.011924 | 0.012212 | 0.012130 | 0.011883 | 0.012006 |
| 0.011842 | 0.011965 | 0.011883 | 0.012048 | 0.011924 | 0.011924 | 0.011924 |
| 0.011842 | 0.011883 | 0.011842 | 0.011842 | 0.011924 | 0.011926 | 0.011965 |
| 0.011883 | 0.011883 | 0.011965 | 0.011883 | 0.011924 | 0.011800 | 0.011883 |
| 0.012089 | 0.012048 | 0.012089 | 0.012006 | 0.011842 | 0.012130 | 0.011924 |
| 0.011999 | 0.011962 | 0.012113 | 0.011871 | 0.011755 | 0.011923 | 0.011631 |
| 0.012417 | 0.011742 | 0.011705 | 0.012171 | 0.012212 | 0.011883 | 0.011965 |
| 0.012006 | 0.011965 | 0.011924 | 0.011883 | 0.011883 | 0.011965 | 0.011924 |
| 0.011924 | 0.011965 | 0.012254 | 0.012089 | 0.011965 | 0.011966 | 0.011883 |
| 0.011842 | 0.011759 | 0.011883 | 0.011883 | 0.011800 | 0.011759 | 0.011677 |
| 0.011801 | 0.011883 | 0.011842 | 0.011842 | 0.011883 | 0.011883 | 0.011889 |
| 0.011973 | 0.011924 | 0.011924 | 0.011788 | 0.011833 | 0.011801 | 0.011924 |
| 0.011924 | 0.011814 | 0.011881 | 0.011859 | 0.011801 | 0.011842 | 0.011883 |
| 0.011827 | 0.011884 | 0.011897 | 0.011800 | 0.011819 | 0.012006 | 0.011883 |
| 0.011965 | 0.011924 | 0.011924 | 0.011965 | 0.011842 | 0.012336 | 0.012006 |
| 0.011883 | 0.011924 | 0.011883 | 0.011883 | 0.011801 | 0.011759 | 0.011842 |
| 0.011883 | 0.011883 | 0.011842 | 0.011842 | 0.011883 | 0.011842 | 0.011965 |
| 0.011924 | 0.012006 | 0.011965 | 0.011800 | 0.011928 | 0.012006 | 0.012054 |
| 0.012048 | 0.011965 | 0.011842 | 0.011763 | 0.011924 | 0.011842 | 0.011759 |
| 0.011685 | 0.012048 | 0.011842 | 0.012048 | 0.011801 | 0.011883 | 0.011842 |
| 0.012006 | 0.011842 | 0.011924 | 0.011883 | 0.011883 | 0.011759 | 0.011924 |
| 0.011924 | 0.011800 | 0.011965 | 0.011883 | 0.011883 | 0.011965 | 0.012254 |
| 0.011965 | 0.011924 | 0.012006 | 0.012052 | 0.012007 | 0.011842 | 0.011842 |
| 0.011847 | 0.012104 | 0.012079 | 0.011776 | 0.012017 | 0.011770 | 0.011928 |
| 0.011894 | 0.011936 | 0.012047 | 0.012336 | 0.011811 | 0.012171 | 0.012130 |
| 0.011965 | 0.012295 | 0.012056 | 0.011897 | 0.011946 | 0.011883 | 0.012007 |
| 0.012089 | 0.012007 | 0.012089 | 0.012254 | 0.012171 | 0.012254 | 0.012130 |
| 0.012052 | 0.012254 | 0.012130 | 0.012048 | 0.012378 | 0.011800 | 0.011924 |
| 0.012006 | 0.011883 | 0.011800 | 0.011800 | 0.011842 | 0.011883 | 0.011924 |
| 0.011883 | 0.011924 | 0.011842 | 0.011883 | 0.011883 | 0.011842 | 0.011965 |
| 0.011842 | 0.012006 | 0.011924 | 0.011965 | 0.011759 | 0.011883 | 0.011924 |

|          |          |          |          |          |          |          |
|----------|----------|----------|----------|----------|----------|----------|
| 0.011883 | 0.011883 | 0.011924 | 0.011883 | 0.011842 | 0.011842 | 0.011842 |
| 0.012130 | 0.011924 | 0.012006 | 0.011800 | 0.011883 | 0.012089 | 0.011842 |
| 0.011842 | 0.011883 | 0.011842 | 0.012006 | 0.011842 | 0.011718 | 0.011842 |
| 0.011800 | 0.011800 | 0.011842 | 0.011759 | 0.011801 | 0.011965 | 0.011883 |
| 0.011759 | 0.011800 | 0.011759 | 0.011801 | 0.011965 | 0.011800 | 0.011842 |
| 0.011800 | 0.011924 | 0.011842 | 0.011759 | 0.011801 | 0.011759 | 0.011965 |
| 0.012048 | 0.011842 | 0.011842 | 0.012007 | 0.011965 | 0.011883 | 0.011924 |
| 0.011842 | 0.012254 | 0.011759 | 0.011965 | 0.011759 | 0.011759 | 0.011759 |
| 0.012048 | 0.011925 | 0.011924 | 0.011965 | 0.011801 | 0.011924 | 0.011759 |
| 0.011842 | 0.011800 | 0.011842 | 0.012006 | 0.011800 | 0.011924 | 0.012006 |
| 0.011965 | 0.012006 | 0.011924 | 0.012006 | 0.011965 | 0.011842 | 0.011759 |
| 0.011842 | 0.011842 | 0.011924 | 0.011759 | 0.011800 | 0.011965 | 0.011842 |
| 0.011801 | 0.011842 | 0.011965 | 0.011965 | 0.011924 | 0.011883 | 0.011801 |
| 0.011924 | 0.011801 | 0.011965 | 0.011800 | 0.012006 | 0.012089 | 0.012048 |
| 0.011883 | 0.012007 | 0.011910 | 0.019896 | 0.011670 | 0.011931 | 0.011952 |
| 0.011860 | 0.011962 | 0.012023 | 0.011750 | 0.012084 | 0.011941 | 0.012176 |
| 0.011885 | 0.011795 | 0.011813 | 0.012009 | 0.011785 | 0.011912 | 0.011830 |
| 0.011758 | 0.011661 | 0.011703 | 0.011535 | 0.011965 | 0.011965 | 0.011929 |
| 0.011924 | 0.011924 | 0.012006 | 0.011883 | 0.011965 | 0.011966 | 0.011883 |
| 0.011924 | 0.011842 | 0.011924 | 0.011924 | 0.011883 | 0.011842 | 0.011800 |
| 0.011800 | 0.011965 | 0.011842 | 0.011965 | 0.011965 | 0.012006 | 0.011842 |
| 0.011842 | 0.011801 | 0.011883 | 0.011883 | 0.012007 | 0.012008 | 0.012048 |
| 0.011800 | 0.011800 | 0.011842 | 0.011965 | 0.011800 | 0.012006 | 0.012006 |
| 0.012047 | 0.012047 | 0.012006 | 0.012089 | 0.012006 | 0.012089 | 0.011924 |
| 0.011924 | 0.011924 | 0.012006 | 0.011883 | 0.011965 | 0.011924 | 0.011965 |
| 0.012047 | 0.012047 | 0.012089 | 0.012048 | 0.011927 | 0.012130 | 0.012048 |
| 0.011928 | 0.011842 | 0.011924 | 0.011924 | 0.011924 | 0.012006 | 0.012171 |
| 0.012336 | 0.011811 | 0.012171 | 0.012130 | 0.011965 | 0.012295 | 0.011842 |
| 0.012050 | 0.011842 | 0.011800 | 0.011800 | 0.011965 | 0.011842 | 0.011965 |
| 0.011965 | 0.012006 | 0.011842 | 0.011842 | 0.011801 | 0.011883 | 0.011883 |
| 0.012007 | 0.012008 | 0.012006 | 0.011924 | 0.012667 | 0.012089 | 0.012007 |
| 0.012055 | 0.012048 | 0.012172 | 0.012048 | 0.012089 | 0.012089 | 0.012010 |
| 0.012544 | 0.011883 | 0.011965 | 0.012007 | 0.012295 | 0.012089 | 0.012254 |
| 0.012626 | 0.012016 | 0.011890 | 0.011924 | 0.011924 | 0.011677 | 0.011890 |
| 0.011800 | 0.011842 | 0.011965 | 0.011924 | 0.011890 | 0.011800 | 0.011720 |
| 0.011924 | 0.011800 | 0.011883 | 0.011924 | 0.011800 | 0.011883 | 0.011759 |
| 0.011842 | 0.011883 | 0.011842 | 0.011800 | 0.011924 | 0.011842 | 0.011883 |
| 0.011883 | 0.011800 | 0.011883 | 0.011924 | 0.011759 | 0.012048 | 0.012089 |
| 0.011924 | 0.011965 | 0.011965 | 0.011965 | 0.011883 | 0.011924 | 0.011924 |
| 0.011636 | 0.011883 | 0.011801 | 0.011801 | 0.012006 | 0.012006 | 0.011965 |
| 0.012006 | 0.011883 | 0.011842 | 0.011883 | 0.012006 | 0.012048 | 0.011924 |
| 0.011965 | 0.012048 | 0.011965 | 0.012006 | 0.012212 | 0.012212 | 0.012006 |
| 0.011883 | 0.011924 | 0.012006 | 0.012089 | 0.011966 | 0.012006 | 0.011883 |
| 0.011965 | 0.011842 | 0.011842 | 0.012171 | 0.012130 | 0.012130 | 0.011883 |
| 0.012048 | 0.012130 | 0.011924 | 0.012048 | 0.011965 | 0.011842 | 0.011883 |
| 0.011965 | 0.011883 | 0.011842 | 0.012089 | 0.011883 | 0.012048 | 0.012048 |
| 0.011883 | 0.012020 | 0.012006 | 0.011752 | 0.011566 | 0.011977 | 0.011691 |
| 0.011907 | 0.011975 | 0.011841 | 0.012004 | 0.011829 | 0.011755 | 0.011861 |
| 0.011662 | 0.011465 | 0.011944 | 0.011635 | 0.011738 | 0.011944 | 0.011957 |
| 0.012017 | 0.011876 | 0.011952 | 0.011835 | 0.011968 | 0.011800 | 0.011883 |
| 0.011842 | 0.011924 | 0.011972 | 0.011848 | 0.012058 | 0.012149 | 0.011883 |
| 0.011883 | 0.011924 | 0.011883 | 0.011883 | 0.011801 | 0.011759 | 0.011842 |
| 0.011883 | 0.011883 | 0.011842 | 0.011842 | 0.011883 | 0.011842 | 0.011965 |
| 0.011901 | 0.011898 | 0.011852 | 0.011966 | 0.012131 | 0.012098 | 0.012052 |
| 0.012048 | 0.011965 | 0.011809 | 0.011754 | 0.011883 | 0.012130 | 0.012049 |
| 0.011800 | 0.011965 | 0.012089 | 0.012133 | 0.012130 | 0.012089 | 0.011924 |
| 0.011965 | 0.012048 | 0.012048 | 0.011965 | 0.012171 | 0.012130 | 0.012213 |
| 0.012171 | 0.012019 | 0.011895 | 0.011821 | 0.011842 | 0.012048 | 0.011965 |
| 0.012091 | 0.012047 | 0.012171 | 0.012171 | 0.012283 | 0.012171 | 0.011885 |
| 0.011759 | 0.011761 | 0.011842 | 0.011842 | 0.011842 | 0.011741 | 0.011801 |



|          |          |          |          |          |          |          |
|----------|----------|----------|----------|----------|----------|----------|
| 0.011883 | 0.011642 | 0.011677 | 0.011948 | 0.011924 | 0.011965 | 0.011883 |
| 0.011842 | 0.011759 | 0.011883 | 0.011883 | 0.011800 | 0.011759 | 0.011677 |
| 0.011801 | 0.011883 | 0.011842 | 0.011842 | 0.011883 | 0.011883 | 0.011889 |
| 0.011973 | 0.011924 | 0.011924 | 0.011968 | 0.011800 | 0.011883 | 0.011842 |
| 0.011924 | 0.011972 | 0.011848 | 0.012058 | 0.012149 | 0.011883 | 0.012130 |
| 0.011965 | 0.011965 | 0.011847 | 0.012034 | 0.011946 | 0.012065 | 0.011832 |
| 0.012120 | 0.012178 | 0.012078 | 0.011932 | 0.011842 | 0.012048 | 0.011924 |
| 0.012006 | 0.011965 | 0.011800 | 0.011928 | 0.012006 | 0.012054 | 0.011965 |
| 0.011842 | 0.011763 | 0.011924 | 0.011842 | 0.011759 | 0.011685 | 0.012048 |
| 0.011924 | 0.011842 | 0.011924 | 0.011924 | 0.011883 | 0.011842 | 0.011636 |
| 0.011924 | 0.011924 | 0.011965 | 0.011842 | 0.011965 | 0.012212 | 0.011759 |
| 0.011842 | 0.011924 | 0.011842 | 0.011883 | 0.011800 | 0.011965 | 0.011788 |
| 0.011977 | 0.011612 | 0.011681 | 0.011632 | 0.011745 | 0.011720 | 0.011623 |
| 0.011585 | 0.011718 | 0.011842 | 0.011924 | 0.011802 | 0.011973 | 0.012090 |
| 0.012007 | 0.012089 | 0.012006 | 0.012151 | 0.011842 | 0.012790 | 0.011802 |
| 0.012502 | 0.012381 | 0.012423 | 0.012754 | 0.011883 | 0.011883 | 0.011924 |
| 0.012667 | 0.012382 | 0.011842 | 0.011801 | 0.011883 | 0.011883 | 0.011846 |
| 0.011718 | 0.011726 | 0.011801 | 0.011760 | 0.012130 | 0.012089 | 0.012212 |
| 0.012008 | 0.012172 | 0.012257 | 0.012054 | 0.012751 | 0.012680 | 0.012791 |
| 0.012792 | 0.012874 | 0.012737 | 0.012750 | 0.012795 | 0.011883 | 0.012295 |
| 0.012171 | 0.012749 | 0.012350 | 0.012337 | 0.012999 | 0.011852 | 0.011718 |
| 0.011677 | 0.011677 | 0.012130 | 0.000000 | 0.012051 | 0.011924 | 0.011679 |
| S851     | 0.012363 | 0.012363 | 0.012187 | 0.012151 | 0.012151 | 0.012187 |
| 0.012058 | 0.011951 | 0.012151 | 0.011940 | 0.012010 | 0.011976 | 0.011940 |
| 0.011904 | 0.012151 | 0.011869 | 0.011975 | 0.012045 | 0.012010 | 0.011975 |
| 0.011940 | 0.011975 | 0.011799 | 0.011905 | 0.011976 | 0.011975 | 0.012022 |
| 0.011940 | 0.011975 | 0.011869 | 0.011834 | 0.012045 | 0.012010 | 0.012045 |
| 0.012010 | 0.012116 | 0.012010 | 0.012010 | 0.012045 | 0.012010 | 0.012186 |
| 0.011869 | 0.012010 | 0.012045 | 0.011975 | 0.012010 | 0.012116 | 0.012045 |
| 0.012010 | 0.012187 | 0.012046 | 0.012046 | 0.012010 | 0.012292 | 0.012010 |
| 0.011975 | 0.012010 | 0.012151 | 0.012292 | 0.012081 | 0.012010 | 0.012116 |
| 0.012045 | 0.012116 | 0.012010 | 0.012221 | 0.012187 | 0.012010 | 0.012081 |
| 0.011975 | 0.012080 | 0.012045 | 0.012116 | 0.012045 | 0.012045 | 0.012045 |
| 0.011939 | 0.011975 | 0.011904 | 0.011940 | 0.012010 | 0.012012 | 0.012116 |
| 0.012045 | 0.012010 | 0.012081 | 0.011975 | 0.012045 | 0.011940 | 0.011975 |
| 0.012151 | 0.012116 | 0.012151 | 0.012116 | 0.012010 | 0.012257 | 0.012010 |
| 0.012165 | 0.012059 | 0.012176 | 0.011937 | 0.011897 | 0.011968 | 0.011783 |
| 0.012440 | 0.011886 | 0.011852 | 0.012257 | 0.012257 | 0.011975 | 0.012010 |
| 0.012045 | 0.012045 | 0.012116 | 0.012010 | 0.012116 | 0.012045 | 0.012045 |
| 0.012010 | 0.012045 | 0.012327 | 0.012186 | 0.012081 | 0.012046 | 0.011975 |
| 0.011940 | 0.011869 | 0.012010 | 0.011975 | 0.011905 | 0.011869 | 0.011799 |
| 0.011905 | 0.011975 | 0.011975 | 0.011975 | 0.012010 | 0.012010 | 0.012011 |
| 0.012082 | 0.012010 | 0.012010 | 0.011866 | 0.011912 | 0.011899 | 0.012010 |
| 0.012010 | 0.011940 | 0.011970 | 0.011983 | 0.011878 | 0.011914 | 0.011943 |
| 0.011912 | 0.011991 | 0.011986 | 0.011940 | 0.011914 | 0.012010 | 0.011975 |
| 0.012046 | 0.012045 | 0.012045 | 0.012116 | 0.012080 | 0.012468 | 0.012151 |
| 0.012010 | 0.012081 | 0.012010 | 0.012046 | 0.011904 | 0.011869 | 0.011940 |
| 0.011940 | 0.012010 | 0.011975 | 0.011940 | 0.011939 | 0.011940 | 0.012045 |
| 0.011975 | 0.012116 | 0.012045 | 0.011939 | 0.012049 | 0.012116 | 0.012087 |
| 0.012151 | 0.012045 | 0.011940 | 0.011873 | 0.012010 | 0.011940 | 0.011870 |
| 0.011879 | 0.012151 | 0.011940 | 0.012151 | 0.011905 | 0.011975 | 0.011975 |
| 0.012081 | 0.011975 | 0.012010 | 0.011975 | 0.012010 | 0.011869 | 0.012010 |
| 0.012010 | 0.011975 | 0.012010 | 0.011975 | 0.012010 | 0.012045 | 0.012292 |
| 0.012046 | 0.012010 | 0.012081 | 0.012155 | 0.012081 | 0.012010 | 0.011975 |
| 0.011945 | 0.012248 | 0.012172 | 0.011851 | 0.012056 | 0.011880 | 0.012004 |
| 0.012093 | 0.012021 | 0.012186 | 0.012398 | 0.012057 | 0.012222 | 0.012222 |
| 0.012151 | 0.012327 | 0.012106 | 0.012018 | 0.012070 | 0.012046 | 0.012124 |
| 0.012222 | 0.012120 | 0.012230 | 0.012338 | 0.012186 | 0.012328 | 0.012446 |
| 0.012160 | 0.012341 | 0.012231 | 0.012195 | 0.012470 | 0.011904 | 0.012119 |
| 0.012045 | 0.012010 | 0.011904 | 0.011869 | 0.011975 | 0.011975 | 0.012045 |

|          |          |          |          |          |          |          |
|----------|----------|----------|----------|----------|----------|----------|
| 0.011975 | 0.012045 | 0.011940 | 0.011975 | 0.011975 | 0.011975 | 0.012045 |
| 0.011975 | 0.012116 | 0.012010 | 0.012046 | 0.011869 | 0.011975 | 0.012010 |
| 0.012010 | 0.011975 | 0.012045 | 0.012010 | 0.011940 | 0.011940 | 0.011940 |
| 0.012186 | 0.012010 | 0.012116 | 0.011904 | 0.012010 | 0.012187 | 0.011904 |
| 0.011904 | 0.011975 | 0.011975 | 0.012151 | 0.011940 | 0.011869 | 0.012010 |
| 0.011940 | 0.011975 | 0.011975 | 0.011904 | 0.011904 | 0.012010 | 0.012010 |
| 0.011904 | 0.012010 | 0.011869 | 0.011904 | 0.012045 | 0.011905 | 0.011940 |
| 0.011905 | 0.012045 | 0.011976 | 0.011869 | 0.011905 | 0.011869 | 0.012045 |
| 0.011993 | 0.011940 | 0.011940 | 0.012081 | 0.012045 | 0.011975 | 0.012045 |
| 0.011939 | 0.012292 | 0.011869 | 0.012045 | 0.011869 | 0.011869 | 0.011869 |
| 0.012081 | 0.012046 | 0.012010 | 0.012081 | 0.011904 | 0.012010 | 0.011869 |
| 0.011940 | 0.011939 | 0.011975 | 0.012081 | 0.011975 | 0.012045 | 0.012151 |
| 0.012116 | 0.012116 | 0.012010 | 0.012116 | 0.012080 | 0.011940 | 0.011904 |
| 0.011940 | 0.011940 | 0.012010 | 0.011869 | 0.011904 | 0.012081 | 0.011940 |
| 0.011904 | 0.011975 | 0.012081 | 0.012081 | 0.012045 | 0.011975 | 0.011975 |
| 0.012045 | 0.011940 | 0.012080 | 0.011940 | 0.012081 | 0.012186 | 0.012116 |
| 0.011975 | 0.012081 | 0.011945 | 0.018567 | 0.011912 | 0.012006 | 0.011955 |
| 0.011812 | 0.011963 | 0.012136 | 0.011717 | 0.012304 | 0.011991 | 0.012376 |
| 0.012010 | 0.011879 | 0.011896 | 0.011916 | 0.011896 | 0.012174 | 0.011896 |
| 0.011926 | 0.011813 | 0.011854 | 0.011987 | 0.012116 | 0.012151 | 0.012157 |
| 0.012032 | 0.012116 | 0.012116 | 0.012010 | 0.012046 | 0.012046 | 0.012011 |
| 0.012045 | 0.011975 | 0.012010 | 0.012045 | 0.011975 | 0.011940 | 0.011975 |
| 0.011975 | 0.012045 | 0.011940 | 0.012046 | 0.012081 | 0.012080 | 0.012010 |
| 0.011975 | 0.011940 | 0.011975 | 0.011975 | 0.012081 | 0.012118 | 0.012151 |
| 0.011904 | 0.011904 | 0.011940 | 0.012045 | 0.011904 | 0.012151 | 0.012151 |
| 0.012186 | 0.012186 | 0.012116 | 0.012221 | 0.012046 | 0.012225 | 0.012045 |
| 0.012045 | 0.012116 | 0.012151 | 0.011975 | 0.012010 | 0.011975 | 0.012045 |
| 0.012116 | 0.012116 | 0.012151 | 0.012116 | 0.012013 | 0.012221 | 0.012186 |
| 0.012055 | 0.011904 | 0.012045 | 0.012151 | 0.012010 | 0.012116 | 0.012221 |
| 0.012398 | 0.012057 | 0.012222 | 0.012222 | 0.012151 | 0.012327 | 0.011940 |
| 0.012119 | 0.011976 | 0.011975 | 0.011975 | 0.012045 | 0.011940 | 0.012046 |
| 0.012081 | 0.012080 | 0.012010 | 0.011975 | 0.011940 | 0.011975 | 0.011975 |
| 0.012081 | 0.012118 | 0.012116 | 0.012116 | 0.012681 | 0.012186 | 0.011984 |
| 0.012197 | 0.012152 | 0.012167 | 0.011933 | 0.012236 | 0.012182 | 0.012138 |
| 0.012610 | 0.012040 | 0.012174 | 0.012112 | 0.012396 | 0.012237 | 0.012344 |
| 0.012628 | 0.012012 | 0.012047 | 0.012045 | 0.012045 | 0.011799 | 0.012011 |
| 0.011904 | 0.011940 | 0.012081 | 0.012045 | 0.012047 | 0.011904 | 0.011872 |
| 0.012010 | 0.011940 | 0.011975 | 0.012010 | 0.011904 | 0.011940 | 0.011869 |
| 0.011940 | 0.011975 | 0.011940 | 0.011904 | 0.012010 | 0.011939 | 0.011975 |
| 0.011975 | 0.011904 | 0.011975 | 0.012010 | 0.011904 | 0.012116 | 0.012151 |
| 0.012010 | 0.012045 | 0.012045 | 0.012010 | 0.011975 | 0.012081 | 0.012010 |
| 0.011718 | 0.011975 | 0.011940 | 0.011949 | 0.012081 | 0.012080 | 0.012081 |
| 0.012081 | 0.012010 | 0.011975 | 0.012010 | 0.012116 | 0.012116 | 0.012045 |
| 0.012010 | 0.012186 | 0.012046 | 0.012080 | 0.012222 | 0.012222 | 0.012151 |
| 0.011975 | 0.012045 | 0.012081 | 0.012187 | 0.012046 | 0.012081 | 0.012045 |
| 0.012081 | 0.011940 | 0.011940 | 0.012257 | 0.012187 | 0.012222 | 0.012010 |
| 0.012116 | 0.012151 | 0.012045 | 0.012116 | 0.012045 | 0.011940 | 0.011975 |
| 0.012045 | 0.011940 | 0.011940 | 0.012151 | 0.012010 | 0.012080 | 0.012152 |
| 0.011975 | 0.012129 | 0.012116 | 0.011842 | 0.011748 | 0.012046 | 0.011731 |
| 0.011964 | 0.012124 | 0.011889 | 0.012133 | 0.011939 | 0.011977 | 0.011911 |
| 0.011889 | 0.011983 | 0.012007 | 0.011986 | 0.011869 | 0.012133 | 0.012054 |
| 0.012106 | 0.011984 | 0.011964 | 0.011964 | 0.012047 | 0.011904 | 0.011975 |
| 0.011940 | 0.012046 | 0.012158 | 0.011948 | 0.012230 | 0.012280 | 0.011975 |
| 0.012010 | 0.012081 | 0.012010 | 0.012046 | 0.011904 | 0.011869 | 0.011940 |
| 0.011940 | 0.012010 | 0.011975 | 0.011940 | 0.011939 | 0.011940 | 0.012045 |
| 0.011999 | 0.011966 | 0.011975 | 0.012021 | 0.012162 | 0.012119 | 0.012122 |
| 0.012122 | 0.012080 | 0.011894 | 0.011836 | 0.012010 | 0.012187 | 0.012152 |
| 0.011975 | 0.012045 | 0.012257 | 0.012222 | 0.012186 | 0.012222 | 0.012151 |
| 0.012080 | 0.012116 | 0.012151 | 0.012010 | 0.012328 | 0.012186 | 0.012292 |
| 0.012292 | 0.012104 | 0.012026 | 0.012077 | 0.011975 | 0.012186 | 0.012151 |

|          |          |          |          |          |          |          |
|----------|----------|----------|----------|----------|----------|----------|
| 0.012188 | 0.012151 | 0.012186 | 0.012186 | 0.012195 | 0.012363 | 0.011933 |
| 0.011875 | 0.011896 | 0.011988 | 0.011950 | 0.011956 | 0.011924 | 0.011915 |
| 0.012029 | 0.011838 | 0.011906 | 0.011960 | 0.012010 | 0.012056 | 0.011975 |
| 0.011940 | 0.011869 | 0.012010 | 0.011975 | 0.011905 | 0.011869 | 0.011799 |
| 0.011905 | 0.011975 | 0.011975 | 0.011975 | 0.012010 | 0.012010 | 0.012011 |
| 0.012082 | 0.012010 | 0.012010 | 0.012047 | 0.011904 | 0.011975 | 0.011940 |
| 0.012046 | 0.012158 | 0.011948 | 0.012230 | 0.012280 | 0.011975 | 0.012221 |
| 0.012151 | 0.012151 | 0.011980 | 0.012155 | 0.012078 | 0.012131 | 0.011978 |
| 0.012180 | 0.012406 | 0.012174 | 0.012055 | 0.011940 | 0.012151 | 0.011975 |
| 0.012116 | 0.012045 | 0.011939 | 0.012049 | 0.012116 | 0.012087 | 0.012045 |
| 0.011940 | 0.011873 | 0.012010 | 0.011940 | 0.011870 | 0.011879 | 0.012151 |
| 0.012045 | 0.011975 | 0.012010 | 0.012045 | 0.011975 | 0.011940 | 0.011869 |
| 0.012010 | 0.012045 | 0.012045 | 0.011975 | 0.012045 | 0.012257 | 0.011869 |
| 0.011975 | 0.012081 | 0.011975 | 0.011975 | 0.011975 | 0.012046 | 0.011928 |
| 0.012204 | 0.011663 | 0.011773 | 0.011712 | 0.011884 | 0.011797 | 0.011780 |
| 0.011753 | 0.011869 | 0.011975 | 0.012091 | 0.011941 | 0.012053 | 0.012223 |
| 0.012117 | 0.012158 | 0.012116 | 0.012349 | 0.012046 | 0.012928 | 0.012118 |
| 0.012787 | 0.012614 | 0.012751 | 0.013040 | 0.012010 | 0.011975 | 0.012081 |
| 0.012681 | 0.012439 | 0.012046 | 0.011940 | 0.012010 | 0.012010 | 0.011982 |
| 0.011869 | 0.011842 | 0.011940 | 0.011905 | 0.012293 | 0.012363 | 0.012328 |
| 0.012222 | 0.012328 | 0.012401 | 0.012193 | 0.012717 | 0.012727 | 0.012682 |
| 0.012752 | 0.012752 | 0.012726 | 0.012752 | 0.012684 | 0.012080 | 0.012257 |
| 0.012363 | 0.012892 | 0.012407 | 0.012399 | 0.012929 | 0.011946 | 0.011834 |
| 0.011799 | 0.011799 | 0.012222 | 0.012051 | 0.000000 | 0.012081 | 0.011801 |
| S852     | 0.012068 | 0.012068 | 0.012135 | 0.011900 | 0.011900 | 0.011967 |
| 0.011739 | 0.011671 | 0.011967 | 0.011665 | 0.011732 | 0.011700 | 0.011664 |
| 0.011631 | 0.011866 | 0.011597 | 0.011698 | 0.011765 | 0.011732 | 0.011698 |
| 0.011664 | 0.011698 | 0.011530 | 0.011665 | 0.011699 | 0.011698 | 0.011705 |
| 0.011664 | 0.011698 | 0.011597 | 0.011564 | 0.011765 | 0.011732 | 0.011765 |
| 0.011732 | 0.011832 | 0.011732 | 0.011732 | 0.011765 | 0.011731 | 0.011900 |
| 0.011597 | 0.011731 | 0.011765 | 0.011698 | 0.011731 | 0.011832 | 0.011765 |
| 0.011732 | 0.011900 | 0.011799 | 0.011732 | 0.011732 | 0.012000 | 0.011732 |
| 0.011698 | 0.011732 | 0.011866 | 0.012000 | 0.011765 | 0.011732 | 0.011832 |
| 0.011765 | 0.011832 | 0.011664 | 0.011967 | 0.011866 | 0.011732 | 0.011799 |
| 0.011698 | 0.011799 | 0.011765 | 0.011832 | 0.011765 | 0.011765 | 0.011765 |
| 0.011664 | 0.011698 | 0.011664 | 0.011698 | 0.011731 | 0.011733 | 0.011832 |
| 0.011765 | 0.011731 | 0.011799 | 0.011698 | 0.011765 | 0.011664 | 0.011731 |
| 0.011899 | 0.011832 | 0.011799 | 0.011900 | 0.011732 | 0.011967 | 0.011732 |
| 0.011913 | 0.011770 | 0.011928 | 0.011685 | 0.011545 | 0.011760 | 0.011454 |
| 0.012085 | 0.011518 | 0.011596 | 0.011967 | 0.011967 | 0.011631 | 0.011799 |
| 0.011799 | 0.011765 | 0.011832 | 0.011732 | 0.011832 | 0.011698 | 0.011765 |
| 0.011731 | 0.011765 | 0.012034 | 0.011900 | 0.011799 | 0.011765 | 0.011698 |
| 0.011665 | 0.011597 | 0.011732 | 0.011698 | 0.011631 | 0.011598 | 0.011530 |
| 0.011631 | 0.011698 | 0.011698 | 0.011698 | 0.011732 | 0.011732 | 0.011736 |
| 0.011804 | 0.011732 | 0.011732 | 0.011636 | 0.011675 | 0.011656 | 0.011733 |
| 0.011738 | 0.011679 | 0.011687 | 0.011716 | 0.011638 | 0.011677 | 0.011702 |
| 0.011672 | 0.011750 | 0.011749 | 0.011665 | 0.011648 | 0.011800 | 0.011699 |
| 0.011767 | 0.011768 | 0.011766 | 0.011866 | 0.011799 | 0.012169 | 0.011900 |
| 0.011732 | 0.011799 | 0.011732 | 0.011765 | 0.011631 | 0.011597 | 0.011665 |
| 0.011732 | 0.011731 | 0.011698 | 0.011664 | 0.011698 | 0.011665 | 0.011765 |
| 0.011732 | 0.011833 | 0.011765 | 0.011665 | 0.011768 | 0.011866 | 0.011871 |
| 0.011866 | 0.011766 | 0.011665 | 0.011600 | 0.011732 | 0.011665 | 0.011598 |
| 0.011570 | 0.011866 | 0.011665 | 0.011866 | 0.011631 | 0.011732 | 0.011698 |
| 0.011799 | 0.011698 | 0.011732 | 0.011698 | 0.011732 | 0.011597 | 0.011732 |
| 0.011765 | 0.011698 | 0.011765 | 0.011698 | 0.011732 | 0.011765 | 0.012001 |
| 0.011765 | 0.011698 | 0.011766 | 0.011836 | 0.011766 | 0.011732 | 0.011698 |
| 0.011567 | 0.011950 | 0.011929 | 0.011609 | 0.011773 | 0.011606 | 0.011650 |
| 0.011773 | 0.011706 | 0.011899 | 0.012101 | 0.011812 | 0.011967 | 0.011933 |
| 0.011866 | 0.012034 | 0.011913 | 0.011843 | 0.011857 | 0.011765 | 0.011839 |
| 0.011934 | 0.011768 | 0.011973 | 0.012042 | 0.011967 | 0.012034 | 0.012145 |

|          |          |          |          |          |          |          |
|----------|----------|----------|----------|----------|----------|----------|
| 0.011873 | 0.012045 | 0.011975 | 0.011906 | 0.012171 | 0.011631 | 0.011835 |
| 0.011799 | 0.011732 | 0.011631 | 0.011631 | 0.011698 | 0.011698 | 0.011765 |
| 0.011698 | 0.011765 | 0.011664 | 0.011698 | 0.011698 | 0.011698 | 0.011765 |
| 0.011698 | 0.011799 | 0.011698 | 0.011732 | 0.011597 | 0.011698 | 0.011664 |
| 0.011732 | 0.011698 | 0.011765 | 0.011732 | 0.011664 | 0.011664 | 0.011664 |
| 0.011866 | 0.011765 | 0.011832 | 0.011631 | 0.011731 | 0.011900 | 0.011664 |
| 0.011664 | 0.011731 | 0.011698 | 0.011866 | 0.011664 | 0.011597 | 0.011732 |
| 0.011664 | 0.011698 | 0.011698 | 0.011631 | 0.011631 | 0.011799 | 0.011732 |
| 0.011631 | 0.011731 | 0.011597 | 0.011631 | 0.011765 | 0.011631 | 0.011665 |
| 0.011631 | 0.011765 | 0.011699 | 0.011597 | 0.011597 | 0.011597 | 0.011765 |
| 0.011848 | 0.011664 | 0.011631 | 0.011799 | 0.011765 | 0.011698 | 0.011799 |
| 0.011664 | 0.012000 | 0.011597 | 0.011799 | 0.011597 | 0.011597 | 0.011597 |
| 0.011832 | 0.011766 | 0.011664 | 0.011799 | 0.011631 | 0.011698 | 0.011597 |
| 0.011664 | 0.011664 | 0.011698 | 0.011799 | 0.011698 | 0.011799 | 0.011866 |
| 0.011866 | 0.011832 | 0.011732 | 0.011832 | 0.011799 | 0.011664 | 0.011631 |
| 0.011664 | 0.011664 | 0.011664 | 0.011597 | 0.011631 | 0.011799 | 0.011664 |
| 0.011631 | 0.011698 | 0.011832 | 0.011799 | 0.011765 | 0.011698 | 0.011698 |
| 0.011765 | 0.011698 | 0.011799 | 0.011664 | 0.011799 | 0.011899 | 0.011866 |
| 0.011698 | 0.011765 | 0.011681 | 0.018125 | 0.011584 | 0.011978 | 0.011688 |
| 0.011649 | 0.011693 | 0.011741 | 0.011408 | 0.011774 | 0.011716 | 0.011850 |
| 0.011630 | 0.011671 | 0.011646 | 0.011688 | 0.011646 | 0.011801 | 0.011706 |
| 0.011530 | 0.011470 | 0.011505 | 0.011325 | 0.011832 | 0.011866 | 0.011872 |
| 0.011747 | 0.011833 | 0.011832 | 0.011732 | 0.011765 | 0.011766 | 0.011732 |
| 0.011765 | 0.011698 | 0.011732 | 0.011765 | 0.011732 | 0.011665 | 0.011698 |
| 0.011698 | 0.011765 | 0.011665 | 0.011698 | 0.011799 | 0.011833 | 0.011732 |
| 0.011698 | 0.011665 | 0.011732 | 0.011732 | 0.011799 | 0.011834 | 0.011866 |
| 0.011631 | 0.011631 | 0.011665 | 0.011765 | 0.011631 | 0.011866 | 0.011866 |
| 0.011900 | 0.011899 | 0.011832 | 0.011933 | 0.011766 | 0.011936 | 0.011765 |
| 0.011765 | 0.011833 | 0.011866 | 0.011698 | 0.011765 | 0.011732 | 0.011765 |
| 0.011833 | 0.011833 | 0.011866 | 0.011833 | 0.011734 | 0.011934 | 0.011900 |
| 0.011771 | 0.011665 | 0.011765 | 0.011866 | 0.011766 | 0.011833 | 0.011933 |
| 0.012101 | 0.011812 | 0.011967 | 0.011933 | 0.011866 | 0.012034 | 0.011665 |
| 0.011835 | 0.011733 | 0.011698 | 0.011698 | 0.011765 | 0.011665 | 0.011698 |
| 0.011799 | 0.011833 | 0.011732 | 0.011698 | 0.011665 | 0.011732 | 0.011732 |
| 0.011799 | 0.011834 | 0.011899 | 0.011832 | 0.012406 | 0.011918 | 0.011834 |
| 0.011904 | 0.011858 | 0.011974 | 0.011857 | 0.011971 | 0.011888 | 0.011853 |
| 0.012365 | 0.011753 | 0.011882 | 0.011821 | 0.012093 | 0.011945 | 0.012047 |
| 0.012386 | 0.011890 | 0.012007 | 0.012068 | 0.011933 | 0.011664 | 0.011973 |
| 0.011631 | 0.011799 | 0.011933 | 0.011899 | 0.011905 | 0.011631 | 0.011566 |
| 0.011731 | 0.011664 | 0.011698 | 0.011732 | 0.011631 | 0.011698 | 0.011597 |
| 0.011664 | 0.011698 | 0.011664 | 0.011631 | 0.011732 | 0.011664 | 0.011698 |
| 0.011698 | 0.011631 | 0.011698 | 0.011732 | 0.011631 | 0.011832 | 0.011866 |
| 0.011765 | 0.011765 | 0.011765 | 0.011765 | 0.011698 | 0.011765 | 0.011731 |
| 0.011513 | 0.011698 | 0.011665 | 0.011671 | 0.011799 | 0.011799 | 0.011799 |
| 0.011799 | 0.011732 | 0.011698 | 0.011732 | 0.011832 | 0.011832 | 0.011765 |
| 0.011765 | 0.011900 | 0.011732 | 0.011799 | 0.012001 | 0.012001 | 0.011866 |
| 0.011698 | 0.011765 | 0.011799 | 0.011866 | 0.011766 | 0.011799 | 0.011765 |
| 0.011799 | 0.011664 | 0.011664 | 0.011967 | 0.011967 | 0.011933 | 0.011732 |
| 0.011832 | 0.011900 | 0.011765 | 0.011832 | 0.011799 | 0.011664 | 0.011664 |
| 0.011765 | 0.011731 | 0.011664 | 0.011900 | 0.011732 | 0.011832 | 0.011799 |
| 0.011765 | 0.011807 | 0.011799 | 0.011548 | 0.011455 | 0.011774 | 0.011370 |
| 0.011774 | 0.011761 | 0.011622 | 0.011775 | 0.011646 | 0.011620 | 0.011538 |
| 0.011519 | 0.011521 | 0.011617 | 0.011523 | 0.011545 | 0.011663 | 0.011831 |
| 0.011852 | 0.011650 | 0.011730 | 0.011659 | 0.011768 | 0.011631 | 0.011698 |
| 0.011698 | 0.011766 | 0.011872 | 0.011670 | 0.012010 | 0.011944 | 0.011765 |
| 0.011732 | 0.011799 | 0.011732 | 0.011765 | 0.011631 | 0.011597 | 0.011665 |
| 0.011732 | 0.011731 | 0.011698 | 0.011664 | 0.011698 | 0.011665 | 0.011765 |
| 0.011759 | 0.011725 | 0.011745 | 0.011780 | 0.011916 | 0.011880 | 0.011880 |
| 0.011878 | 0.011800 | 0.011651 | 0.011600 | 0.011738 | 0.011908 | 0.011909 |
| 0.011699 | 0.011772 | 0.012003 | 0.011973 | 0.011901 | 0.011935 | 0.011866 |

|          |          |          |          |          |          |          |
|----------|----------|----------|----------|----------|----------|----------|
| 0.011799 | 0.011866 | 0.011866 | 0.011765 | 0.012001 | 0.011933 | 0.012001 |
| 0.012035 | 0.011772 | 0.011742 | 0.011823 | 0.011698 | 0.011900 | 0.011866 |
| 0.011901 | 0.011933 | 0.011933 | 0.011933 | 0.012122 | 0.012068 | 0.011719 |
| 0.011601 | 0.011614 | 0.011707 | 0.011672 | 0.011709 | 0.011620 | 0.011604 |
| 0.011746 | 0.011586 | 0.011680 | 0.011810 | 0.011733 | 0.011813 | 0.011698 |
| 0.011665 | 0.011597 | 0.011732 | 0.011698 | 0.011631 | 0.011598 | 0.011530 |
| 0.011631 | 0.011698 | 0.011698 | 0.011698 | 0.011732 | 0.011732 | 0.011736 |
| 0.011804 | 0.011732 | 0.011732 | 0.011768 | 0.011631 | 0.011698 | 0.011698 |
| 0.011766 | 0.011872 | 0.011670 | 0.012010 | 0.011944 | 0.011765 | 0.011933 |
| 0.011866 | 0.011866 | 0.011703 | 0.011861 | 0.011790 | 0.011844 | 0.011586 |
| 0.011818 | 0.011972 | 0.011780 | 0.011774 | 0.011665 | 0.011866 | 0.011732 |
| 0.011833 | 0.011765 | 0.011665 | 0.011768 | 0.011866 | 0.011871 | 0.011766 |
| 0.011665 | 0.011600 | 0.011732 | 0.011665 | 0.011598 | 0.011570 | 0.011866 |
| 0.011765 | 0.011698 | 0.011732 | 0.011765 | 0.011732 | 0.011665 | 0.011598 |
| 0.011731 | 0.011765 | 0.011765 | 0.011698 | 0.011765 | 0.012000 | 0.011597 |
| 0.011698 | 0.011765 | 0.011698 | 0.011732 | 0.011698 | 0.011732 | 0.011574 |
| 0.011847 | 0.011443 | 0.011411 | 0.011503 | 0.011590 | 0.011563 | 0.011395 |
| 0.011375 | 0.011597 | 0.011698 | 0.011807 | 0.011633 | 0.011771 | 0.011935 |
| 0.011834 | 0.011872 | 0.011832 | 0.012052 | 0.011799 | 0.012674 | 0.011802 |
| 0.012574 | 0.012308 | 0.012476 | 0.012714 | 0.011664 | 0.011698 | 0.011800 |
| 0.012440 | 0.012140 | 0.011765 | 0.011665 | 0.011733 | 0.011733 | 0.011703 |
| 0.011597 | 0.011569 | 0.011664 | 0.011632 | 0.012002 | 0.012068 | 0.012070 |
| 0.011969 | 0.012069 | 0.012139 | 0.011838 | 0.012441 | 0.012449 | 0.012508 |
| 0.012509 | 0.012543 | 0.012460 | 0.012509 | 0.012477 | 0.011799 | 0.012035 |
| 0.012103 | 0.012606 | 0.012078 | 0.012136 | 0.012542 | 0.011638 | 0.011564 |
| 0.011530 | 0.011530 | 0.012002 | 0.011924 | 0.012081 | 0.000000 | 0.011498 |
| S853     | 0.011734 | 0.011734 | 0.011633 | 0.011566 | 0.011566 | 0.011633 |
| 0.011469 | 0.011367 | 0.011566 | 0.011330 | 0.011397 | 0.011364 | 0.011330 |
| 0.011296 | 0.011532 | 0.011262 | 0.011363 | 0.011431 | 0.011397 | 0.011363 |
| 0.011330 | 0.011363 | 0.011195 | 0.011330 | 0.011364 | 0.011363 | 0.011435 |
| 0.011330 | 0.011363 | 0.011262 | 0.011229 | 0.011397 | 0.011397 | 0.011431 |
| 0.011397 | 0.011498 | 0.011397 | 0.011397 | 0.011431 | 0.011397 | 0.011566 |
| 0.011262 | 0.011397 | 0.011431 | 0.011363 | 0.011397 | 0.011498 | 0.011431 |
| 0.011397 | 0.011566 | 0.011465 | 0.011465 | 0.011397 | 0.011667 | 0.011397 |
| 0.011363 | 0.011397 | 0.011532 | 0.011667 | 0.011498 | 0.011397 | 0.011498 |
| 0.011431 | 0.011498 | 0.011397 | 0.011633 | 0.011600 | 0.011397 | 0.011465 |
| 0.011363 | 0.011465 | 0.011431 | 0.011498 | 0.011431 | 0.011431 | 0.011431 |
| 0.011330 | 0.011363 | 0.011330 | 0.011363 | 0.011397 | 0.011431 | 0.011498 |
| 0.011431 | 0.011397 | 0.011465 | 0.011363 | 0.011431 | 0.011330 | 0.011397 |
| 0.011566 | 0.011498 | 0.011532 | 0.011566 | 0.011397 | 0.011633 | 0.011397 |
| 0.011580 | 0.011509 | 0.011626 | 0.011334 | 0.011321 | 0.011429 | 0.011218 |
| 0.011866 | 0.011162 | 0.011348 | 0.011633 | 0.011633 | 0.011330 | 0.011465 |
| 0.011465 | 0.011431 | 0.011498 | 0.011397 | 0.011498 | 0.011397 | 0.011431 |
| 0.011397 | 0.011431 | 0.011701 | 0.011566 | 0.011465 | 0.011431 | 0.011363 |
| 0.011330 | 0.011262 | 0.011397 | 0.011363 | 0.011296 | 0.011262 | 0.011195 |
| 0.011296 | 0.011363 | 0.011363 | 0.011363 | 0.011397 | 0.011397 | 0.011399 |
| 0.011467 | 0.011397 | 0.011397 | 0.011277 | 0.011350 | 0.011306 | 0.011397 |
| 0.011400 | 0.011336 | 0.011392 | 0.011372 | 0.011299 | 0.011335 | 0.011365 |
| 0.011349 | 0.011406 | 0.011440 | 0.011330 | 0.011338 | 0.011465 | 0.011364 |
| 0.011431 | 0.011432 | 0.011431 | 0.011532 | 0.011465 | 0.011835 | 0.011566 |
| 0.011397 | 0.011465 | 0.011397 | 0.011431 | 0.011296 | 0.011262 | 0.011330 |
| 0.011397 | 0.011397 | 0.011363 | 0.011330 | 0.011363 | 0.011330 | 0.011431 |
| 0.011397 | 0.011498 | 0.011431 | 0.011330 | 0.011432 | 0.011532 | 0.011535 |
| 0.011532 | 0.011431 | 0.011330 | 0.011263 | 0.011397 | 0.011330 | 0.011263 |
| 0.011265 | 0.011532 | 0.011330 | 0.011532 | 0.011296 | 0.011397 | 0.011363 |
| 0.011465 | 0.011363 | 0.011397 | 0.011363 | 0.011397 | 0.011262 | 0.011397 |
| 0.011431 | 0.011363 | 0.011431 | 0.011363 | 0.011397 | 0.011431 | 0.011633 |
| 0.011498 | 0.011431 | 0.011498 | 0.011533 | 0.011499 | 0.011397 | 0.011363 |
| 0.011331 | 0.011627 | 0.011427 | 0.011301 | 0.011503 | 0.011265 | 0.011415 |
| 0.011503 | 0.011401 | 0.011566 | 0.011768 | 0.011471 | 0.011633 | 0.011600 |

|          |          |          |          |          |          |          |
|----------|----------|----------|----------|----------|----------|----------|
| 0.011532 | 0.011700 | 0.011560 | 0.011432 | 0.011481 | 0.011431 | 0.011502 |
| 0.011599 | 0.011500 | 0.011637 | 0.011706 | 0.011633 | 0.011701 | 0.011808 |
| 0.011536 | 0.011707 | 0.011638 | 0.011569 | 0.011837 | 0.011296 | 0.011500 |
| 0.011465 | 0.011397 | 0.011296 | 0.011296 | 0.011363 | 0.011363 | 0.011431 |
| 0.011363 | 0.011431 | 0.011330 | 0.011363 | 0.011363 | 0.011363 | 0.011431 |
| 0.011363 | 0.011532 | 0.011431 | 0.011465 | 0.011262 | 0.011363 | 0.011397 |
| 0.011397 | 0.011363 | 0.011431 | 0.011397 | 0.011330 | 0.011330 | 0.011330 |
| 0.011599 | 0.011431 | 0.011498 | 0.011296 | 0.011397 | 0.011566 | 0.011330 |
| 0.011330 | 0.011397 | 0.011363 | 0.011532 | 0.011330 | 0.011262 | 0.011397 |
| 0.011330 | 0.011363 | 0.011363 | 0.011296 | 0.011296 | 0.011465 | 0.011397 |
| 0.011296 | 0.011397 | 0.011262 | 0.011296 | 0.011431 | 0.011229 | 0.011330 |
| 0.011296 | 0.011431 | 0.011364 | 0.011262 | 0.011330 | 0.011262 | 0.011431 |
| 0.011507 | 0.011330 | 0.011364 | 0.011465 | 0.011431 | 0.011363 | 0.011465 |
| 0.011330 | 0.011667 | 0.011262 | 0.011465 | 0.011262 | 0.011262 | 0.011262 |
| 0.011498 | 0.011431 | 0.011397 | 0.011465 | 0.011296 | 0.011431 | 0.011262 |
| 0.011330 | 0.011330 | 0.011363 | 0.011465 | 0.011363 | 0.011465 | 0.011532 |
| 0.011532 | 0.011498 | 0.011397 | 0.011498 | 0.011465 | 0.011330 | 0.011296 |
| 0.011330 | 0.011330 | 0.011397 | 0.011262 | 0.011296 | 0.011465 | 0.011330 |
| 0.011296 | 0.011363 | 0.011498 | 0.011465 | 0.011431 | 0.011363 | 0.011364 |
| 0.011431 | 0.011363 | 0.011465 | 0.011330 | 0.011465 | 0.011566 | 0.011532 |
| 0.011363 | 0.011498 | 0.011371 | 0.017906 | 0.011257 | 0.011489 | 0.011444 |
| 0.011407 | 0.011448 | 0.011532 | 0.011350 | 0.011445 | 0.011475 | 0.011546 |
| 0.011440 | 0.011243 | 0.011294 | 0.011396 | 0.011294 | 0.011356 | 0.011405 |
| 0.011295 | 0.011246 | 0.011246 | 0.011193 | 0.011498 | 0.011532 | 0.011535 |
| 0.011405 | 0.011498 | 0.011498 | 0.011397 | 0.011397 | 0.011397 | 0.011397 |
| 0.011431 | 0.011363 | 0.011397 | 0.011431 | 0.011397 | 0.011330 | 0.011363 |
| 0.011363 | 0.011431 | 0.011330 | 0.011431 | 0.011465 | 0.011498 | 0.011397 |
| 0.011363 | 0.011330 | 0.011465 | 0.011465 | 0.011465 | 0.011499 | 0.011532 |
| 0.011296 | 0.011296 | 0.011330 | 0.011431 | 0.011296 | 0.011532 | 0.011532 |
| 0.011566 | 0.011566 | 0.011498 | 0.011599 | 0.011498 | 0.011601 | 0.011431 |
| 0.011431 | 0.011498 | 0.011532 | 0.011363 | 0.011431 | 0.011397 | 0.011431 |
| 0.011498 | 0.011498 | 0.011532 | 0.011498 | 0.011398 | 0.011599 | 0.011566 |
| 0.011434 | 0.011330 | 0.011431 | 0.011532 | 0.011431 | 0.011498 | 0.011599 |
| 0.011768 | 0.011471 | 0.011633 | 0.011600 | 0.011532 | 0.011700 | 0.011330 |
| 0.011500 | 0.011397 | 0.011363 | 0.011363 | 0.011431 | 0.011330 | 0.011431 |
| 0.011465 | 0.011498 | 0.011397 | 0.011363 | 0.011330 | 0.011465 | 0.011465 |
| 0.011465 | 0.011499 | 0.011566 | 0.011498 | 0.012073 | 0.011562 | 0.011484 |
| 0.011554 | 0.011513 | 0.011624 | 0.011512 | 0.011622 | 0.011545 | 0.011510 |
| 0.012025 | 0.011408 | 0.011542 | 0.011477 | 0.011751 | 0.011607 | 0.011709 |
| 0.011981 | 0.011514 | 0.011434 | 0.011431 | 0.011431 | 0.011195 | 0.011399 |
| 0.011296 | 0.011330 | 0.011465 | 0.011431 | 0.011433 | 0.011296 | 0.011263 |
| 0.011397 | 0.011330 | 0.011363 | 0.011397 | 0.011296 | 0.011363 | 0.011262 |
| 0.011330 | 0.011363 | 0.011330 | 0.011296 | 0.011397 | 0.011330 | 0.011363 |
| 0.011363 | 0.011296 | 0.011363 | 0.011397 | 0.011296 | 0.011498 | 0.011532 |
| 0.011431 | 0.011431 | 0.011431 | 0.011431 | 0.011363 | 0.011498 | 0.011397 |
| 0.011165 | 0.011364 | 0.011330 | 0.011333 | 0.011465 | 0.011465 | 0.011465 |
| 0.011465 | 0.011397 | 0.011363 | 0.011397 | 0.011498 | 0.011498 | 0.011431 |
| 0.011431 | 0.011566 | 0.011465 | 0.011465 | 0.011667 | 0.011667 | 0.011532 |
| 0.011363 | 0.011431 | 0.011465 | 0.011600 | 0.011431 | 0.011465 | 0.011431 |
| 0.011465 | 0.011330 | 0.011330 | 0.011633 | 0.011633 | 0.011599 | 0.011397 |
| 0.011498 | 0.011566 | 0.011431 | 0.011498 | 0.011465 | 0.011330 | 0.011397 |
| 0.011431 | 0.011397 | 0.011330 | 0.011566 | 0.011397 | 0.011498 | 0.011532 |
| 0.011363 | 0.011537 | 0.011532 | 0.011304 | 0.011173 | 0.011435 | 0.011215 |
| 0.011280 | 0.011527 | 0.011341 | 0.011462 | 0.011353 | 0.011264 | 0.011273 |
| 0.011264 | 0.011192 | 0.011339 | 0.011192 | 0.011222 | 0.011395 | 0.011506 |
| 0.011513 | 0.011414 | 0.011413 | 0.011413 | 0.011432 | 0.011296 | 0.011364 |
| 0.011363 | 0.011431 | 0.011535 | 0.011332 | 0.011673 | 0.011699 | 0.011397 |
| 0.011397 | 0.011465 | 0.011397 | 0.011431 | 0.011296 | 0.011262 | 0.011330 |
| 0.011397 | 0.011397 | 0.011363 | 0.011330 | 0.011363 | 0.011330 | 0.011431 |
| 0.011410 | 0.011411 | 0.011404 | 0.011438 | 0.011575 | 0.011540 | 0.011539 |

|          |          |          |          |          |          |          |
|----------|----------|----------|----------|----------|----------|----------|
| 0.011539 | 0.011465 | 0.011282 | 0.011277 | 0.011400 | 0.011570 | 0.011571 |
| 0.011364 | 0.011434 | 0.011668 | 0.011636 | 0.011566 | 0.011600 | 0.011532 |
| 0.011465 | 0.011532 | 0.011532 | 0.011431 | 0.011735 | 0.011599 | 0.011667 |
| 0.011701 | 0.011489 | 0.011402 | 0.011477 | 0.011363 | 0.011566 | 0.011532 |
| 0.011567 | 0.011599 | 0.011599 | 0.011599 | 0.011730 | 0.011734 | 0.011374 |
| 0.011264 | 0.011269 | 0.011368 | 0.011333 | 0.011369 | 0.011285 | 0.011333 |
| 0.011404 | 0.011148 | 0.011347 | 0.011436 | 0.011397 | 0.011472 | 0.011363 |
| 0.011330 | 0.011262 | 0.011397 | 0.011363 | 0.011296 | 0.011262 | 0.011195 |
| 0.011296 | 0.011363 | 0.011363 | 0.011363 | 0.011397 | 0.011397 | 0.011399 |
| 0.011467 | 0.011397 | 0.011397 | 0.011432 | 0.011296 | 0.011364 | 0.011363 |
| 0.011431 | 0.011535 | 0.011332 | 0.011673 | 0.011699 | 0.011397 | 0.011599 |
| 0.011532 | 0.011532 | 0.011366 | 0.011549 | 0.011478 | 0.011504 | 0.011341 |
| 0.011543 | 0.011699 | 0.011485 | 0.011435 | 0.011330 | 0.011532 | 0.011397 |
| 0.011498 | 0.011431 | 0.011330 | 0.011432 | 0.011532 | 0.011535 | 0.011431 |
| 0.011330 | 0.011263 | 0.011397 | 0.011330 | 0.011263 | 0.011265 | 0.011532 |
| 0.011431 | 0.011363 | 0.011397 | 0.011431 | 0.011397 | 0.011330 | 0.011229 |
| 0.011397 | 0.011431 | 0.011431 | 0.011363 | 0.011431 | 0.011667 | 0.011262 |
| 0.011363 | 0.011498 | 0.011363 | 0.011397 | 0.011363 | 0.011465 | 0.011360 |
| 0.011622 | 0.011230 | 0.011211 | 0.011262 | 0.011345 | 0.011276 | 0.011186 |
| 0.011165 | 0.011262 | 0.011364 | 0.011469 | 0.011330 | 0.011467 | 0.011599 |
| 0.011499 | 0.011535 | 0.011498 | 0.011744 | 0.011465 | 0.012342 | 0.011499 |
| 0.012241 | 0.012005 | 0.012142 | 0.012411 | 0.011465 | 0.011363 | 0.011465 |
| 0.012106 | 0.011668 | 0.011431 | 0.011330 | 0.011397 | 0.011397 | 0.011366 |
| 0.011262 | 0.011264 | 0.011330 | 0.011296 | 0.011667 | 0.011734 | 0.011735 |
| 0.011634 | 0.011735 | 0.011836 | 0.011602 | 0.012107 | 0.012045 | 0.012174 |
| 0.012107 | 0.012208 | 0.012153 | 0.012175 | 0.012174 | 0.011465 | 0.011701 |
| 0.011768 | 0.012241 | 0.011773 | 0.011735 | 0.011499 | 0.011264 | 0.011161 |
| 0.011195 | 0.011195 | 0.011667 | 0.011679 | 0.011801 | 0.011498 | 0.000000 |
