# Supplementary material for: Molecular Analysis of SARS-CoV-2 Circulating in Bangladesh during 2020 Revealed Lineage Diversity and Potential Mutations
Source: MDPI journal article supplement (doi:10.3390/microorganisms9051035), 2021-05-12
Supplement: s1 [file s1]

**Suppl. Table S2.** Amino acid substitutions of spike (S) protein among Bangladeshi SARS CoV 2 strains (sequence available at GISAID until 31<sup>st</sup> January 2021) compared to Spike\_hCoV-19/Wuhan/WIV04/2019

| <b>Mutations</b> | <b>Biological signature/Functions (GISAID*)</b>                | <b>Speciality</b>                                                       |
|------------------|----------------------------------------------------------------|-------------------------------------------------------------------------|
| L5F              | Antigenic Drift                                                | Infectious variant in an in vivo experimental [8]                       |
| S12F             | N/A                                                            | N/A                                                                     |
| S13I             | N/A                                                            | N/A                                                                     |
| Q14H             | Antigenic Drift                                                | N/A                                                                     |
| Q14R             | Antigenic Drift                                                | N/A                                                                     |
| C15F             | N/A                                                            | N/A                                                                     |
| L18F             | Antigenic Drift                                                | N/A                                                                     |
| P26L             | N/A                                                            | N/A                                                                     |
| A27S             | N/A                                                            | N/A                                                                     |
| T29I             | N/A                                                            | N/A                                                                     |
| F32L             | N/A                                                            | N/A                                                                     |
| F43L             | Antibody Recognition Sites<br>Viral Oligomerization Interfaces | N/A                                                                     |
| H49Y             | Antibody Recognition Sites<br>Viral Oligomerization Interfaces | N/A                                                                     |
| A67S             | N/A                                                            | N/A                                                                     |
| I68T             | N/A                                                            | N/A                                                                     |
| H69del           | Antigenic Drift                                                | H69del+V70del have 2-fold higher infectivity compared to wild type [36] |
| V70del           | Antigenic Drift                                                |                                                                         |
| G75V             | N/A                                                            | N/A                                                                     |
| T76I             | N/A                                                            | N/A                                                                     |
| T95I             | N/A                                                            | N/A                                                                     |
| E96A             | N/A                                                            | N/A                                                                     |
| S98F             | N/A                                                            | N/A                                                                     |
| R102I            | N/A                                                            | N/A                                                                     |
| S112L            | Antibody Recognition Sites<br>Viral Oligomerization Interfaces | N/A                                                                     |
| V127F            | N/A                                                            | N/A                                                                     |
| D138Y            | N/A                                                            | N/A                                                                     |
| D138H            | N/A                                                            | N/A                                                                     |
| G142V            | N/A                                                            | N/A                                                                     |
| V143F            | Antibody Recognition Sites                                     | N/A                                                                     |
| Y144del          | Antigenic Drift<br>Antibody Recognition Sites                  | Decreased sensitivity to convalescent sera [8]                          |
| Y145del          | Antibody Recognition Sites                                     | Y145del is similar to Y144del in SARS-CoV-2 [8]                         |
| H146Y            | N/A                                                            | N/A                                                                     |
| H146Q            | Antibody Recognition Sites<br>Ligand Binding                   | N/A                                                                     |
| W152L            | Antibody Recognition Sites                                     | N/A                                                                     |
| E154G            | N/A                                                            | N/A                                                                     |
| S155I            | N/A                                                            | N/A                                                                     |
| E156D            | N/A                                                            | N/A                                                                     |
| F157L            | N/A                                                            | N/A                                                                     |
| G172C            | N/A                                                            | N/A                                                                     |

|       |                                                                                                                                    |                                                                                                                                                                                                         |
|-------|------------------------------------------------------------------------------------------------------------------------------------|---------------------------------------------------------------------------------------------------------------------------------------------------------------------------------------------------------|
| L176F | N/A                                                                                                                                | N/A                                                                                                                                                                                                     |
| M177I | N/A                                                                                                                                | N/A                                                                                                                                                                                                     |
| G184D | N/A                                                                                                                                | N/A                                                                                                                                                                                                     |
| F186L | N/A                                                                                                                                | N/A                                                                                                                                                                                                     |
| N211Y | N/A                                                                                                                                | N/A                                                                                                                                                                                                     |
| V213L | N/A                                                                                                                                | N/A                                                                                                                                                                                                     |
| D215Y | N/A                                                                                                                                | N/A                                                                                                                                                                                                     |
| S221L | N/A                                                                                                                                | N/A                                                                                                                                                                                                     |
| T236S | Viral Oligomerization Interfaces                                                                                                   | N/A                                                                                                                                                                                                     |
| Y248H | N/A                                                                                                                                | N/A                                                                                                                                                                                                     |
| G261R | N/A                                                                                                                                | N/A                                                                                                                                                                                                     |
| N354S | Host Change and Antigenic Drift<br>Antibody Recognition Sites<br>Viral Oligomerization Interfaces                                  | N/A                                                                                                                                                                                                     |
| S359T | Host Change.<br>Ligand Binding<br>Viral Oligomerization Interfaces                                                                 | N/A                                                                                                                                                                                                     |
| V382L | Antigenic Drift<br>Antibody Recognition Sites<br>Viral Oligomerization Interfaces                                                  | N/A                                                                                                                                                                                                     |
| E484K | Host Change and Antigenic Drift<br>Host Cell Receptor Binding<br>Antibody Recognition Sites                                        | In a deep mutational scanning experiment that expresses Spike RBD in a yeast-display platform, E484K mildly increases the binding to ACE2 (apparent dissociation constant delta-log10 value: 0.06) [33] |
| N501Y | Antigenic Drift and Host Change<br>Host Surface Receptor Binding<br>Antibody Recognition Sites<br>Viral Oligomerization Interfaces | In a deep mutational scanning experiment that expresses Spike RBD in a yeast-display platform, N501Y mildly increases the binding to ACE2 (apparent dissociation constant delta-log10 value: 0.24) [33] |
| E516Q | Antibody Recognition Sites<br>Viral Oligomerization Interfaces                                                                     | N/A                                                                                                                                                                                                     |
| L518I | Only in Bangladesh                                                                                                                 | N/A                                                                                                                                                                                                     |
| A520S | Host Change<br>Viral Oligomerization Interfaces                                                                                    | N/A                                                                                                                                                                                                     |
| T547I | Viral Oligomerization Interfaces                                                                                                   | N/A                                                                                                                                                                                                     |
| K558N | Ligand Binding<br>Viral Oligomerization Interfaces                                                                                 | N/A                                                                                                                                                                                                     |
| I569S | Viral Oligomerization Interfaces                                                                                                   | N/A                                                                                                                                                                                                     |
| A570D | Viral Oligomerization Interfaces                                                                                                   | N/A                                                                                                                                                                                                     |
| T573I | Viral Oligomerization Interfaces                                                                                                   | N/A                                                                                                                                                                                                     |
| D574Y | N/A                                                                                                                                | N/A                                                                                                                                                                                                     |
| G594S | N/A                                                                                                                                | N/A                                                                                                                                                                                                     |
| I569S | Viral Oligomerization Interfaces                                                                                                   | Bangladesh only                                                                                                                                                                                         |
| D614G | Ligand Binding<br>Viral Oligomerization Interfaces                                                                                 | Most common in Bangladesh<br>D614G mutant increases the infectivity SARS-CoV-2 [30]                                                                                                                     |
| V622F | N/A                                                                                                                                | N/A                                                                                                                                                                                                     |
| S640Y | N/A                                                                                                                                | N/A                                                                                                                                                                                                     |

|        |                                                                       |                                                                                                                                                                                                                              |
|--------|-----------------------------------------------------------------------|------------------------------------------------------------------------------------------------------------------------------------------------------------------------------------------------------------------------------|
| A647S  | Viral Oligomerization Interfaces                                      | N/A                                                                                                                                                                                                                          |
| A653V  | N/A                                                                   | N/A                                                                                                                                                                                                                          |
| E654Q  | N/A                                                                   | N/A                                                                                                                                                                                                                          |
| N658D  | N/A                                                                   | N/A                                                                                                                                                                                                                          |
| Y660F  | N/A                                                                   | N/A                                                                                                                                                                                                                          |
| Q675H  | Antigenic Drift                                                       | N/A                                                                                                                                                                                                                          |
| Q675R  | Antigenic Drift                                                       | N/A                                                                                                                                                                                                                          |
| Q677H  | N/A                                                                   | N/A                                                                                                                                                                                                                          |
| N679K  | N/A                                                                   | N/A                                                                                                                                                                                                                          |
| S698L  | Viral Oligomerization Interfaces                                      | N/A                                                                                                                                                                                                                          |
| P681R  | Furin Cleavage Site                                                   | N/A                                                                                                                                                                                                                          |
| P681H  | Furin Cleavage Site                                                   | N/A                                                                                                                                                                                                                          |
| T716I  | N/A                                                                   | N/A                                                                                                                                                                                                                          |
| G769V  | Viral Oligomerization Interfaces                                      | N/A                                                                                                                                                                                                                          |
| A771S  | N/A                                                                   | N/A                                                                                                                                                                                                                          |
| A783S  | N/A                                                                   | N/A                                                                                                                                                                                                                          |
| Q787L  | Viral Oligomerization Interfaces                                      | N/A                                                                                                                                                                                                                          |
| Y789N  | Viral Oligomerization Interfaces                                      | Creates a new potential N-glycosylation site at position 789 which may also affect antigenic and other properties of this strain. In detail, the motif at positions 789-791 changed from YKT (no glyco) to NKT (glyco) [37]. |
| T791I  | N/A                                                                   | N/A                                                                                                                                                                                                                          |
| F797C  | Ligand Binding<br>Viral Oligomerization Interfaces                    | N/A                                                                                                                                                                                                                          |
| G799S  | Viral Oligomerization Interfaces                                      | N/A                                                                                                                                                                                                                          |
| S803L  |                                                                       | Removes a potential N-glycosylation site at position 801 which may also affect antigenic and other properties of this strain. In detail, the motif at positions 801-803 changed from NFS (glyco) to NFL (no glyco) [37].     |
| I834V  | Ligand Binding<br>Viral Oligomerization Interfaces                    | N/A                                                                                                                                                                                                                          |
| D843B  | Viral Oligomerization Interfaces                                      | N/A                                                                                                                                                                                                                          |
| K854N  | Viral Oligomerization Interfaces                                      | N/A                                                                                                                                                                                                                          |
| A871V  | Antigenic Drift<br>Viral Oligomerization Interfaces                   | N/A                                                                                                                                                                                                                          |
| D936Y  | N/A                                                                   | N/A                                                                                                                                                                                                                          |
| S939F  | N/A                                                                   | N/A                                                                                                                                                                                                                          |
| T941A  | N/A                                                                   | N/A                                                                                                                                                                                                                          |
| A942V  | Viral Oligomerization Interfaces                                      | N/A                                                                                                                                                                                                                          |
| S982A  | Viral Oligomerization Interfaces                                      | N/A                                                                                                                                                                                                                          |
| V1068F | Viral Oligomerization Interfaces                                      | N/A                                                                                                                                                                                                                          |
| N1074H | Antigenic drift<br>Ligand Binding<br>Viral Oligomerization Interfaces | Mutation Spike N1074H removes a potential N-glycosylation site at position 1074 which may also affect antigenic and other properties of this strain. In detail, the motif at positions 1074-1076 changed from                |

|        |                                  |                                        |
|--------|----------------------------------|----------------------------------------|
|        |                                  | NFT (glyco) to HFT (no glyco)<br>[37]. |
| D1084Y | N/A                              | N/A                                    |
| D1084H | N/A                              | N/A                                    |
| R1091H | N/A                              | N/A                                    |
| V1104L | N/A                              | N/A                                    |
| F1109L | N/A                              | N/A                                    |
| T1117I | Viral Oligomerization Interfaces | N/A                                    |
| D1118Y | Viral Oligomerization Interfaces | N/A                                    |
| D1118H | Viral Oligomerization Interfaces | N/A                                    |
| V1122L | Viral Oligomerization Interfaces | N/A                                    |
| G1167V | Viral Oligomerization Interfaces | N/A                                    |
| R1185H | N/A                              | N/A                                    |
| K1191N | Viral Oligomerization Interfaces | N/A                                    |
| M1229I | N/A                              | N/A                                    |
| M1233I | N/A                              | N/A                                    |
| C1247F | N/A                              | N/A                                    |
| C1250F | N/A                              | N/A                                    |

**118**

\*Functions are mentioned in GISAID CovSurver
