# Supplementary material for: Molecular Analysis of SARS-CoV-2 Circulating in Bangladesh during 2020 Revealed Lineage Diversity and Potential Mutations
Source: Microorganisms. 2021 May 12;9(5):1035. doi: 10.3390/microorganisms9051035 (PMC8150345; doi:10.3390/microorganisms9051035)
Supplement: Supplementary file 1 [file microorganisms-09-01035-s001.zip]

Archive with 8 entries (8 files):
- Supplementa Fig. S1.pdf
- Supplemental Fig. S2.pdf
- Supplemental file 1_Bangladeshi SARS-CoV 2 metadata.xlsx
- Supplemental file 2_FastME_Distance_matrix.pdf
- Supplemental file 3_Amino acid substitutions-SARS CoV 2 Bangladesh.xlsx
- Supplemental file 4_nextstrain__diversity.xlsx
- Supplemental Table S1.pdf
- Supplemental Table S2.pdf
