# Supplementary material for: Molecular Analysis of SARS-CoV-2 Circulating in Bangladesh during 2020 Revealed Lineage Diversity and Potential Mutations
Source: Microorganisms. 2021 May 12;9(5):1035. doi: 10.3390/microorganisms9051035 (PMC8150345; doi:10.3390/microorganisms9051035)
Supplement: Supplementary file 1 [file microorganisms-09-01035-s001.zip › Supplemental file 1_Bangladeshi SARS-CoV 2 metadata.xlsx]

## Sheet: All BD-31st jan
Virus name	Accession ID	Collection date	Location	Host	Additional location information	Sampling strategy	Gender	Patient age	Patient status	Last vaccinated	Passage	Specimen	Additional host information	Lineage	Clade
hCoV-19/Bangladesh/GRBL_S2/2020	EPI_ISL_1233922	2020-12-05	Asia / Bangladesh	Human			unknown	unknown	unknown		Original	Nasopharyngeal and oropharyngeal swab		B.1.1.103	GR
hCoV-19/Bangladesh/GRBL_S3/2020	EPI_ISL_1233923	2020-12-08	Asia / Bangladesh	Human			unknown	unknown	unknown		Original	Nasopharyngeal and oropharyngeal swab		B.1.1.103	GR
hCoV-19/Bangladesh/CHRF-0001/2020	EPI_ISL_437912	2020-04-18	Asia / Bangladesh / Dhaka	Human			Female	22	unknown		Original			B.1.1.80	GR
hCoV-19/Bangladesh/DNAS-CPH-467/2020	EPI_ISL_445213	2020-04-28	Asia / Bangladesh / Dhaka	Human			Male	46	Released		Original			B.1.1.25	GR
hCoV-19/Bangladesh/DNAS-CPH-471/2020	EPI_ISL_445214	2020-04-28	Asia / Bangladesh / Dhaka	Human			Female	34	Released		Original	Oropharyngeal swab		B.1.1.25	GR
hCoV-19/Bangladesh/DNAS-CPH-427/2020	EPI_ISL_445215	2020-04-28	Asia / Bangladesh / Dhaka	Human			Female	18	Released		Original			B.1.1.25	GR
hCoV-19/Bangladesh/DNAS-CPH-466/2020	EPI_ISL_445216	2020-04-28	Asia / Bangladesh / Dhaka	Human			Male	23	Released		Original			B.1	G
hCoV-19/Bangladesh/DNAS-CPH-436/2020	EPI_ISL_445217	2020-04-28	Asia / Bangladesh / Dhaka	Human			Male	27	Released		Original			B.1.1.25	GR
hCoV-19/Bangladesh/Akbiomed-01/2020	EPI_ISL_445244	2020-04-25	Asia / Bangladesh	Human			Male	39	unknown		Original			B.1	G
hCoV-19/Bangladesh/CHRF-01/2020	EPI_ISL_447899	2020-04-18	Asia / Bangladesh	Human			unknown	unknown	unknown		Original			B.1.1.80	GR
hCoV-19/Bangladesh/NIB-01/2020	EPI_ISL_447904	2020-05-11	Asia / Bangladesh	Human			Female	28	unknown		Original	Oropharyngeal swab		B.1.1	GR
hCoV-19/Bangladesh/BARJ-CVASU-CTG-501/2020	EPI_ISL_450339	2020-05-10	Asia / Bangladesh / Chittagong	Human			Male	42	unknown		Original	Nasopharyngeal swab		A	S
hCoV-19/Bangladesh/BARJ-CVASU-CTG-502/2020	EPI_ISL_450340	2020-05-13	Asia / Bangladesh / Chittagong	Human			Female	43	Live		Original	Nasopharyngeal swab		A	S
hCoV-19/Bangladesh/BARJ-CVASU-CTG-503/2020	EPI_ISL_450341	2020-05-13	Asia / Bangladesh / Chittagong	Human			Female	85	Released		Original	Nasopharyngeal swab		A	S
hCoV-19/Bangladesh/BARJ-CVASU-CTG-506/2020	EPI_ISL_450342	2020-05-08	Asia / Bangladesh / Chittagong / Chittagong / Satkania Upazila	Human			Male	42	Released		Original	Nasopharyngeal swab		A	S
hCoV-19/Bangladesh/BARJ-CVASU-CTG-511/2020	EPI_ISL_450343	2020-05-09	Asia / Bangladesh / Chittagong	Human			Male	32	Live		Original	Nasopharyngeal swab		B.1.36.16	GH
hCoV-19/Bangladesh/BARJ-CVASU-CTG-517/2020	EPI_ISL_450344	2020-05-03	Asia / Bangladesh / Chittagong	Human			unknown	unknown	unknown		Original	Nasopharyngeal swab		B.1.36.16	GH
hCoV-19/Bangladesh/BARJ-CVASU-CTG-518/2020	EPI_ISL_450345	2020-05-10	Asia / Bangladesh / Chittagong	Human			Male	55	unknown		Original	Nasopharyngeal swab		A	S
hCoV-19/Bangladesh/DU-50740/2020	EPI_ISL_450839	2020-05-06	Asia / Bangladesh / Dhaka	Human			Male	8	Released		Original	Oropharyngeal swab		B.1.1.25	GR
hCoV-19/Bangladesh/DU-50758/2020	EPI_ISL_450840	2020-05-06	Asia / Bangladesh / Dhaka	Human			Male	47	Released		Original	Oropharyngeal swab		B.1.1.25	GR
hCoV-19/Bangladesh/DU-CARS-5586/2020	EPI_ISL_450841	2020-05-13	Asia / Bangladesh / Dhaka	Human			Male	44	Released		Original	Oropharyngeal swab		B.1.1.25	GR
hCoV-19/Bangladesh/DU-50761/2020	EPI_ISL_450842	2020-05-06	Asia / Bangladesh / Dhaka	Human			Female	45	Released		Original	Oropharyngeal swab		B.1.1.25	GR
hCoV-19/Bangladesh/DU-50768/2020	EPI_ISL_450843	2020-05-06	Asia / Bangladesh / Dhaka	Human			Female	27	Released		Original	Oropharyngeal swab		B.1	G
hCoV-19/Bangladesh/BCSIR-NILMRC-007/2020	EPI_ISL_455420	2020-05-21	Asia / Bangladesh / Dhaka / Dhaka / Mirpur	Human			Female	43	unknown		Original	Nasopharyngeal swab		B.1.1.80	GR
hCoV-19/Bangladesh/BCSIR-NILMRC-006/2020	EPI_ISL_455458	2020-05-21	Asia / Bangladesh / Dhaka / Narayanganj	Human	Narayanganj High School		Male	48	unknown		Original	Nasopharyngeal swab		B.1.1.25	GR
hCoV-19/Bangladesh/BCSIR-NILMRC-008/2020	EPI_ISL_455459	2020-05-21	Asia / Bangladesh / Dhaka / Dhaka / Mirpur	Human			Male	51	unknown		Original	Nasopharyngeal swab		B.1.1	GR
hCoV-19/Bangladesh/NIB-BCSIR-02/2020	EPI_ISL_458133	2020-05-11	Asia / Bangladesh / Dhaka	Human			Female	45	Hospitalized		Original	Oropharyngeal swab		B	L
hCoV-19/Bangladesh/BCSIR-NILMRC-004/2020	EPI_ISL_462090	2020-05-23	Asia / Bangladesh / Dhaka	Human			Female	50	unknown		Original	Nasopharyngeal swab		B.1.1.25	GR
hCoV-19/Bangladesh/BCSIR-NILMRC-002/2020	EPI_ISL_462091	2020-05-23	Asia / Bangladesh / Dhaka	Human			Female	40	unknown		Original	Nasopharyngeal swab		B.1.1	GR
hCoV-19/Bangladesh/BCSIR-NILMRC-003/2020	EPI_ISL_462092	2020-05-23	Asia / Bangladesh / Dhaka	Human			Male	50	unknown		Original	Nasopharyngeal swab		B.1.1	GR
hCoV-19/Bangladesh/BCSIR-NILMRC-005/2020	EPI_ISL_462093	2020-05-23	Asia / Bangladesh / Dhaka / Dhaka / Mirpur	Human			Female	27	unknown		Original	Nasopharyngeal swab		B.1.1.25	GR
hCoV-19/Bangladesh/BCSIR-NILMRC-006.2/2020	EPI_ISL_462094	2020-05-23	Asia / Bangladesh / Dhaka / Dhaka / Mirpur	Human			Male	40	unknown		Original	Nasopharyngeal swab		B.1.1.25	GR
hCoV-19/Bangladesh/BCSIR-NILMRC-009/2020	EPI_ISL_462095	2020-05-23	Asia / Bangladesh / Dhaka / Dhaka / Uttara	Human			Male	26	unknown		Original	Nasopharyngeal swab		B.1.1	GR
hCoV-19/Bangladesh/BCSIR-NILMRC-015/2020	EPI_ISL_462096	2020-05-23	Asia / Bangladesh / Dhaka / Dhaka / Jatrabari	Human			Female	27	unknown		Original	Nasopharyngeal swab		B.1.1.25	GR
hCoV-19/Bangladesh/BCSIR-NILMRC-042/2020	EPI_ISL_462097	2020-05-23	Asia / Bangladesh / Dhaka / Dhaka / Uttara	Human			Female	24	unknown		Original	Nasopharyngeal swab		B.1.1.25	GR
hCoV-19/Bangladesh/BCSIR-NILMRC-050/2020	EPI_ISL_462098	2020-05-21	Asia / Bangladesh / Dhaka / Dhaka / Jatrabari	Human			Female	60	unknown		Original	Nasopharyngeal swab		B.1.1.25	GR
hCoV-19/Bangladesh/BCSIR-NILMRC-087/2020	EPI_ISL_464159	2020-05-09	Asia / Bangladesh / Dhaka / Narayanganj	Human	300 Bed Hospital		Female	20	unknown		Original	Nasopharyngeal swab		B.1.1.80	GR
hCoV-19/Bangladesh/BCSIR-NILMRC-084/2020	EPI_ISL_464160	2020-06-01	Asia / Bangladesh / Dhaka	Human	NITOR		Female	38	unknown		Original	Nasopharyngeal swab		B.1.1.29	GR
hCoV-19/Bangladesh/BCSIR-NILMRC-083/2020	EPI_ISL_464161	2020-06-01	Asia / Bangladesh / Dhaka	Human	NITOR		Male	34	unknown		Original	Nasopharyngeal swab		B.1.1	GR
hCoV-19/Bangladesh/BCSIR-NILMRC-080/2020	EPI_ISL_464162	2020-06-01	Asia / Bangladesh / Dhaka / Dhaka / Mohammadpur	Human			Male	38	unknown		Original	Nasopharyngeal swab		B.1.1.29	GR
hCoV-19/Bangladesh/BCSIR-NILMRC-064/2020	EPI_ISL_464163	2020-05-31	Asia / Bangladesh / Dhaka / Narayanganj	Human	300 Bed Hospital		Male	32	unknown		Original	Nasopharyngeal swab		B.1.1.25	GR
hCoV-19/Bangladesh/BCSIR-NILMRC-066/2020	EPI_ISL_464164	2020-05-26	Asia / Bangladesh / Chittagong	Human			Male	52	unknown		Original	Nasopharyngeal swab		B.1.1	GR
hCoV-19/Bangladesh/BCSIR-NILMRC-060/2020	EPI_ISL_464165	2020-05-10	Asia / Bangladesh / Dhaka / Narayanganj	Human	300 Bed Hospital		Male	20	unknown		Original	Nasopharyngeal swab		B.1.1.25	GR
hCoV-19/Bangladesh/BCSIR-NILMRC-062/2020	EPI_ISL_464166	2020-05-31	Asia / Bangladesh / Dhaka / Narayanganj	Human	300 Bed Hospital		Male	39	unknown		Original	Nasopharyngeal swab		B.1.1.25	GR
hCoV-19/Bangladesh/BCSIR-NILMRC-053/2020	EPI_ISL_465163	2020-05-07	Asia / Bangladesh / Dhaka / Narayanganj	Human	300 Bed Hospital		Male	30	unknown		Original	Nasopharyngeal swab		B.1.1	GR
hCoV-19/Bangladesh/BCSIR-NILMRC-059/2020	EPI_ISL_465164	2020-05-10	Asia / Bangladesh / Dhaka / Narayanganj	Human	300 Bed Hospital		Male	45	unknown		Original	Nasopharyngeal swab		B.1.1.25	GR
hCoV-19/Bangladesh/BCSIR-NILMRC-051/2020	EPI_ISL_466626	2020-05-07	Asia / Bangladesh / Dhaka / Narayanganj	Human	300 Bed Hospital		Male	31	unknown		Original	Nasopharyngeal swab		B.1.1.25	GR
hCoV-19/Bangladesh/BCSIR-NILMRC-052/2020	EPI_ISL_466627	2020-06-01	Asia / Bangladesh / Dhaka / Narayanganj	Human	300 Bed Hospital		Female	65	unknown		Original			B.1.1.29	GR
hCoV-19/Bangladesh/BCSIR-NILMRC-054/2020	EPI_ISL_466628	2020-06-01	Asia / Bangladesh / Dhaka / Narayanganj	Human	300 Bed Hospital		Male	35	unknown		Original	Nasopharyngeal swab		B.1.1.25	GR
hCoV-19/Bangladesh/BCSIR-NILMRC-056/2020	EPI_ISL_466629	2020-05-10	Asia / Bangladesh / Dhaka / Narayanganj	Human	300 Bed Hospital		Male	22	unknown		Original	Nasopharyngeal swab		B.1.1.25	GR
hCoV-19/Bangladesh/BCSIR-NILMRC-057/2020	EPI_ISL_466630	2020-05-10	Asia / Bangladesh / Dhaka / Narayanganj	Human	300 Bed Hospital		Female	35	unknown		Original	Nasopharyngeal swab		B.1.1.25	GR
hCoV-19/Bangladesh/BCSIR-NILMRC-058/2020	EPI_ISL_466636	2020-05-10	Asia / Bangladesh / Dhaka / Narayanganj	Human	300 Bed Hospital		Male	32	unknown		Original	Nasopharyngeal swab		B.1.1.25	GR
hCoV-19/Bangladesh/BCSIR-NILMRC-067/2020	EPI_ISL_466637	2020-05-26	Asia / Bangladesh / Chittagong	Human			Male	28	unknown		Original	Nasopharyngeal swab		B.1.36.16	GH
hCoV-19/Bangladesh/BCSIR-NILMRC-069/2020	EPI_ISL_466638	2020-05-26	Asia / Bangladesh / Chittagong	Human			Female	25	unknown		Original	Nasopharyngeal swab		B.1.36.16	GH
hCoV-19/Bangladesh/BCSIR-NILMRC-070/2020	EPI_ISL_466639	2020-05-26	Asia / Bangladesh / Chittagong	Human			Female	60	unknown		Original	Nasopharyngeal swab		B.1.36.16	GH
hCoV-19/Bangladesh/BCSIR-NILMRC-076/2020	EPI_ISL_466644	2020-06-01	Asia / Bangladesh / Dhaka / Dhaka / Uttara	Human			Female	38	unknown		Original	Nasopharyngeal swab		B.1.1	GR
hCoV-19/Bangladesh/BCSIR-NILMRC-077/2020	EPI_ISL_466645	2020-06-01	Asia / Bangladesh / Dhaka / Dhaka / Mirpur	Human			Female	33	unknown		Original	Nasopharyngeal swab		B.1.1.80	GR
hCoV-19/Bangladesh/BCSIR-NILMRC-082/2020	EPI_ISL_466649	2020-06-01	Asia / Bangladesh / Dhaka / Dhaka / Agargaon	Human			Female	27	unknown		Original	Nasopharyngeal swab		B.1.1	GR
hCoV-19/Bangladesh/BCSIR-NILMRC-085/2020	EPI_ISL_466650	2020-06-01	Asia / Bangladesh / Dhaka	Human	NICVD		Female	32	unknown		Original	Nasopharyngeal swab		B.1.1.25	GR
hCoV-19/Bangladesh/BCSIR-NILMRC-088/2020	EPI_ISL_466686	2020-05-09	Asia / Bangladesh / Dhaka / Narayanganj	Human	300 Bed Hospital		Male	62	unknown		Original	Nasopharyngeal swab		B.1	G
hCoV-19/Bangladesh/BCSIR-NILMRC-072/2020	EPI_ISL_466687	2020-05-26	Asia / Bangladesh / Chittagong	Human			Male	55	unknown		Original	Nasopharyngeal swab		B.1.1.80	GR
hCoV-19/Bangladesh/BCSIR-NILMRC-086/2020	EPI_ISL_466688	2020-06-01	Asia / Bangladesh / Dhaka	Human	NICVD		Male	66	unknown		Original	Nasopharyngeal swab		B.1.1.175	GR
hCoV-19/Bangladesh/BCSIR-NILMRC-073/2020	EPI_ISL_466689	2020-06-01	Asia / Bangladesh / Dhaka / Dhaka / Uttara	Human			Female	45	unknown		Original	Nasopharyngeal swab		B.1.1	GR
hCoV-19/Bangladesh/BCSIR-NILMRC-074/2020	EPI_ISL_466690	2020-06-01	Asia / Bangladesh / Dhaka / Dhaka / Gulshan	Human			Male	9	unknown		Original	Nasopharyngeal swab		B.1.1	GR
hCoV-19/Bangladesh/BCSIR-NILMRC-075/2020	EPI_ISL_466691	2020-06-01	Asia / Bangladesh / Dhaka / Dhaka / Uttara	Human			Male	31	unknown		Original	Nasopharyngeal swab		B.1.1	GR
hCoV-19/Bangladesh/BCSIR-NILMRC-071/2020	EPI_ISL_466692	2020-05-26	Asia / Bangladesh / Chittagong	Human			Female	34	unknown		Original	Nasopharyngeal swab		B.1.36.16	O
hCoV-19/Bangladesh/BCSIR-NILMRC-078/2020	EPI_ISL_466693	2020-06-01	Asia / Bangladesh / Dhaka	Human	NILMRC		Female	45	unknown		Original	Nasopharyngeal swab		B.1.1.29	GR
hCoV-19/Bangladesh/BCSIR-NILMRC-081/2020	EPI_ISL_466694	2020-06-01	Asia / Bangladesh / Dhaka / Dhaka / Mirpur	Human			Male	46	unknown		Original	Nasopharyngeal swab		B.1.1.25	GR
hCoV-19/Bangladesh/CHRF-0002/2020	EPI_ISL_468070	2020-04-20	Asia / Bangladesh / Dhaka	Human			Male	57	unknown		Original			B.1	G
hCoV-19/Bangladesh/CHRF-0003/2020	EPI_ISL_468071	2020-04-17	Asia / Bangladesh / Dhaka	Human			Male	59	unknown		Original			B.1.1.25	O
hCoV-19/Bangladesh/CHRF-0004/2020	EPI_ISL_468072	2020-04-17	Asia / Bangladesh / Dhaka	Human			Female	36	unknown		Original			B.1.1.25	O
hCoV-19/Bangladesh/CHRF-0005/2020	EPI_ISL_468073	2020-05-10	Asia / Bangladesh / Dhaka / Tangail	Human			Male	10 days	unknown		Original			B.1.1	GR
hCoV-19/Bangladesh/CHRF-0006/2020	EPI_ISL_468074	2020-05-17	Asia / Bangladesh / Chittagong	Human			Male	8 days	unknown		Original			B.1.36.16	GH
hCoV-19/Bangladesh/CHRF-0007/2020	EPI_ISL_468075	2020-05-14	Asia / Bangladesh / Dhaka	Human			Male	26	unknown		Original			B.1	G
hCoV-19/Bangladesh/CHRF-0008/2020	EPI_ISL_468076	2020-05-16	Asia / Bangladesh / Dhaka	Human			Male	6	unknown		Original			B.1.1.80	GR
hCoV-19/Bangladesh/CHRF-0009/2020	EPI_ISL_468077	2020-04-08	Asia / Bangladesh / Dhaka	Human			Male	65	unknown		Original			B.1.1	GR
hCoV-19/Bangladesh/CHRF-0010/2020	EPI_ISL_468078	2020-05-03	Asia / Bangladesh / Dhaka	Human			Female	21	unknown		Original			B.1	G
hCoV-19/Bangladesh/BCSIR-NILMRC-090/2020	EPI_ISL_469285	2020-06-02	Asia / Bangladesh / Rangpur	Human			Male	40	unknown		Original	Nasopharyngeal swab		B.1.1.25	GR
hCoV-19/Bangladesh/BCSIR-NILMRC-094/2020	EPI_ISL_469286	2020-05-23	Asia / Bangladesh / Rangpur	Human			Female	43	unknown		Original	Nasopharyngeal swab		B.1.1.25	GR
hCoV-19/Bangladesh/BCSIR-NILMRC-095/2020	EPI_ISL_469297	2020-05-23	Asia / Bangladesh / Rangpur	Human			Female	27	unknown		Original	Nasopharyngeal swab		B.1.1.25	GR
hCoV-19/Bangladesh/BCSIR-NILMRC-096/2020	EPI_ISL_469298	2020-05-23	Asia / Bangladesh / Rangpur	Human			Male	26	unknown		Original	Nasopharyngeal swab		B.1.1	GR
hCoV-19/Bangladesh/BCSIR-NILMRC-100/2020	EPI_ISL_469299	2020-05-23	Asia / Bangladesh / Rangpur	Human			Male	44	unknown		Original	Nasopharyngeal swab		B.1.1.25	GR
hCoV-19/Bangladesh/BCSIR-NILMRC-091/2020	EPI_ISL_469300	2020-06-02	Asia / Bangladesh / Rangpur	Human			Female	31	unknown		Original	Nasopharyngeal swab		B.1.1.25	GR
hCoV-19/Bangladesh/icddrb-2083/2020	EPI_ISL_470801	2020-06-07	Asia / Bangladesh	Human			unknown	unknown	unknown		Original	Nasal swab		B.1.1.25	GR
hCoV-19/Bangladesh/BCSIR-NILMRC-101/2020	EPI_ISL_475083	2020-06-07	Asia / Bangladesh / Rangpur	Human			Male	48	unknown		Original	Nasopharyngeal swab		B.1.1.80	GR
hCoV-19/Bangladesh/BCSIR-NILMRC-103/2020	EPI_ISL_475084	2020-06-07	Asia / Bangladesh / Rangpur	Human			Male	72	unknown		Original	Nasopharyngeal swab		B.1.1	GR
hCoV-19/Bangladesh/BCSIR-NILMRC-104/2020	EPI_ISL_475165	2020-06-07	Asia / Bangladesh / Rangpur	Human			Male	68	unknown		Original	Nasopharyngeal swab		B.1.1.80	GR
hCoV-19/Bangladesh/BCSIR-NILMRC-107/2020	EPI_ISL_475166	2020-06-07	Asia / Bangladesh / Rangpur	Human			Female	52	unknown		Original	Nasopharyngeal swab		B.1.1.25	GR
hCoV-19/Bangladesh/BCSIR-NILMRC-111/2020	EPI_ISL_475167	2020-06-07	Asia / Bangladesh / Rangpur	Human			Male	20	unknown		Original	Nasopharyngeal swab		B.1.1.25	GR
hCoV-19/Bangladesh/BCSIR-NILMRC-117/2020	EPI_ISL_475168	2020-06-07	Asia / Bangladesh / Rangpur	Human			Male	55	unknown		Original	Nasopharyngeal swab		B.1.1.25	GR
hCoV-19/Bangladesh/BCSIR-NILMRC-018/2020	EPI_ISL_475169	2020-05-24	Asia / Bangladesh / Dhaka	Human			Female	29	unknown		Original	Nasopharyngeal swab		B.1.1	GR
hCoV-19/Bangladesh/BCSIR-NILMRC-017/2020	EPI_ISL_475170	2020-05-24	Asia / Bangladesh / Dhaka	Human			Male	21	unknown		Original	Nasopharyngeal swab		B.1.1.25	GR
hCoV-19/Bangladesh/BCSIR-NILMRC-102/2020	EPI_ISL_475171	2020-06-07	Asia / Bangladesh / Rangpur	Human			Male	29	unknown		Original	Nasopharyngeal swab		B.1.1.25	GR
hCoV-19/Bangladesh/BCSIR-NILMRC-109/2020	EPI_ISL_475172	2020-06-07	Asia / Bangladesh / Rangpur	Human			Male	29	unknown		Original	Nasopharyngeal swab		B.1.1.25	GR
hCoV-19/Bangladesh/BCSIR-NILMRC-110/2020	EPI_ISL_475173	2020-06-07	Asia / Bangladesh / Rangpur	Human			Male	63	unknown		Original	Nasopharyngeal swab		B.1.1.80	GR
hCoV-19/Bangladesh/BCSIR-NILMRC-114/2020	EPI_ISL_475238	2020-06-07	Asia / Bangladesh / Rangpur	Human			Male	24	unknown		Original	Nasopharyngeal swab		B.1.1.25	GR
hCoV-19/Bangladesh/JUST-GC15.09/2020	EPI_ISL_475570	2020-05-06	Asia / Bangladesh / Khulna / Jhenaidah / Shailkupa Upazila	Human			Male	35	unknown		Original	Nasal and throat swab		B.1	O
hCoV-19/Bangladesh/JUST-GC40.38/2020	EPI_ISL_475571	2020-06-11	Asia / Bangladesh / Khulna / Narail / Kalia Upazila	Human			Female	49	unknown		Original	Nasal and throat swab		B.1	O
hCoV-19/Bangladesh/JUST-GC40.86/2020	EPI_ISL_475573	2020-06-11	Asia / Bangladesh / Khulna / Bagerhat	Human			Male	31	unknown		Original	Nasal and throat swab		B.1	O
hCoV-19/Bangladesh/BCSIR-NILMRC-025/2020	EPI_ISL_475754	2020-05-24	Asia / Bangladesh / Dhaka	Human			Male	28	unknown		Original	Nasopharyngeal swab		B.1.1.80	GR
hCoV-19/Bangladesh/BCSIR-NILMRC-113/2020	EPI_ISL_475755	2020-06-07	Asia / Bangladesh / Rangpur	Human			Male	68	unknown		Original	Nasopharyngeal swab		B.1.1.25	GR
hCoV-19/Bangladesh/BCSIR-NILMRC-108/2020	EPI_ISL_475756	2020-06-07	Asia / Bangladesh / Rangpur	Human			Male	35	unknown		Original	Nasopharyngeal swab		B.1.1	GR
hCoV-19/Bangladesh/BCSIR-NILMRC-105/2020	EPI_ISL_475757	2020-06-07	Asia / Bangladesh / Rangpur	Human			Male	20	unknown		Original	Nasopharyngeal swab		B.1.1.25	GR
hCoV-19/Bangladesh/BCSIR-NILMRC-115/2020	EPI_ISL_475758	2020-06-07	Asia / Bangladesh / Rangpur	Human			Male	55	unknown		Original	Nasopharyngeal swab		B.1.1.80	GR
hCoV-19/Bangladesh/BCSIR-NILMRC-116/2020	EPI_ISL_475759	2020-06-07	Asia / Bangladesh / Rangpur	Human			Male	26	unknown		Original	Nasopharyngeal swab		B.1.1.25	GR
hCoV-19/Bangladesh/BCSIR-NILMRC-021/2020	EPI_ISL_475760	2020-05-24	Asia / Bangladesh / Dhaka	Human			Female	43	unknown		Original	Nasopharyngeal swab		B.1.1	GR
hCoV-19/Bangladesh/BCSIR-NILMRC-112/2020	EPI_ISL_475761	2020-06-07	Asia / Bangladesh / Rangpur	Human			Male	38	unknown		Original	Nasopharyngeal swab		B.1.1.80	GR
hCoV-19/Bangladesh/CHRF-0012/2020	EPI_ISL_477125	2020-05-05	Asia / Bangladesh	Human			Male	unknown	unknown		Original			B.1.1	GR
hCoV-19/Bangladesh/CHRF-0013/2020	EPI_ISL_477126	2020-05-09	Asia / Bangladesh	Human			Male	unknown	unknown		Original			B.1.1.80	GR
hCoV-19/Bangladesh/CHRF-0014/2020	EPI_ISL_477127	2020-05-21	Asia / Bangladesh	Human			Female	unknown	unknown		Original			B.1.1.25	GR
hCoV-19/Bangladesh/CHRF-0015/2020	EPI_ISL_477128	2020-05-02	Asia / Bangladesh	Human			Female	unknown	unknown		Original			B.1	GH
hCoV-19/Bangladesh/CHRF-0016/2020	EPI_ISL_477129	2020-05-23	Asia / Bangladesh	Human			Male	unknown	unknown		Original			B.1.1.25	GR
hCoV-19/Bangladesh/CHRF-0017/2020	EPI_ISL_477130	2020-05-30	Asia / Bangladesh	Human			Female	unknown	unknown		Original			B.1.1.250	GR
hCoV-19/Bangladesh/CHRF-0020/2020	EPI_ISL_477131	2020-05-30	Asia / Bangladesh	Human			Male	unknown	unknown		Original			B.1.1.25	GR
hCoV-19/Bangladesh/CHRF-0022/2020	EPI_ISL_477132	2020-06-14	Asia / Bangladesh	Human			Male	unknown	unknown		Original			B.1.1.25	GR
hCoV-19/Bangladesh/CHRF-0023/2020	EPI_ISL_477133	2020-06-12	Asia / Bangladesh	Human			Female	unknown	unknown		Original			B.1.1	GR
hCoV-19/Bangladesh/CHRF-0024/2020	EPI_ISL_477134	2020-06-14	Asia / Bangladesh	Human			Female	unknown	unknown		Original			B.1.36	GH
hCoV-19/Bangladesh/CHRF-0025/2020	EPI_ISL_477135	2020-06-14	Asia / Bangladesh	Human			Male	unknown	unknown		Original			B.1.1	GR
hCoV-19/Bangladesh/CHRF-0027/2020	EPI_ISL_477136	2020-06-16	Asia / Bangladesh	Human			Female	unknown	unknown		Original			B.1.1	GR
hCoV-19/Bangladesh/CHRF-0028/2020	EPI_ISL_477137	2020-06-18	Asia / Bangladesh	Human			Female	unknown	unknown		Original			B.1.1.25	GR
hCoV-19/Bangladesh/CHRF-0029/2020	EPI_ISL_477138	2020-06-17	Asia / Bangladesh	Human			Female	unknown	unknown		Original			B.1.1	GR
hCoV-19/Bangladesh/CHRF-0030/2020	EPI_ISL_477139	2020-06-11	Asia / Bangladesh	Human			Male	unknown	unknown		Original			B.1.36.16	GH
hCoV-19/Bangladesh/CHRF-0031/2020	EPI_ISL_477140	2020-06-16	Asia / Bangladesh	Human			Male	unknown	unknown		Original			B.1.1	GR
hCoV-19/Bangladesh/BCSIR-NILMRC-130/2020	EPI_ISL_480414	2020-06-17	Asia / Bangladesh / Dhaka / Dhaka / Kadamtali	Human			Male	35	unknown		Original	Nasopharyngeal swab		B.1.1.29	GR
hCoV-19/Bangladesh/BCSIR-NILMRC-131/2020	EPI_ISL_480415	2020-06-18	Asia / Bangladesh / Dhaka / Dhaka / Tejgaon	Human			Male	42	unknown		Original	Nasopharyngeal swab		B.1.1.29	GR
hCoV-19/Bangladesh/BCSIR-NILMRC-132/2020	EPI_ISL_480416	2020-06-18	Asia / Bangladesh / Dhaka / Dhaka / Mirpur	Human			Male	48	unknown		Original			B.1.1.25	GR
hCoV-19/Bangladesh/BCSIR-NILMRC-141/2020	EPI_ISL_480417	2020-06-18	Asia / Bangladesh / Dhaka	Human	Shishu Hospital		Female	29	unknown		Original			B.1.1.80	GR
hCoV-19/Bangladesh/BCSIR-NILMRC-144/2020	EPI_ISL_480418	2020-06-18	Asia / Bangladesh / Dhaka / Narayanganj	Human			Female	60	unknown		Original	Nasopharyngeal swab		B.1.1.80	GR
hCoV-19/Bangladesh/BCSIR-NILMRC-133/2020	EPI_ISL_480419	2020-06-18	Asia / Bangladesh / Dhaka / Dhaka / Mohammadpur	Human			Male	43	unknown		Original	Nasopharyngeal swab		B.1.1.25	GR
hCoV-19/Bangladesh/BCSIR-NILMRC-135/2020	EPI_ISL_480420	2020-06-18	Asia / Bangladesh / Dhaka / Dhaka / Mirpur	Human			Female	25	unknown		Original	Nasopharyngeal swab		B.1.1	GR
hCoV-19/Bangladesh/BCSIR-NILMRC-137/2020	EPI_ISL_480421	2020-06-18	Asia / Bangladesh / Dhaka / Dhaka / Mirpur	Human			Male	32	unknown		Original	Nasopharyngeal swab		B.1.1.25	GR
hCoV-19/Bangladesh/BCSIR-NILMRC-138/2020	EPI_ISL_480424	2020-06-18	Asia / Bangladesh / Dhaka	Human			Male	34	unknown		Original	Nasopharyngeal swab		B.1.1.25	GR
hCoV-19/Bangladesh/BCSIR-NILMRC-139/2020	EPI_ISL_480425	2020-06-18	Asia / Bangladesh / Dhaka / Dhaka / Jatrabari	Human			Female	37	unknown		Original	Nasopharyngeal swab		B.1.1.80	GR
hCoV-19/Bangladesh/BCSIR-NILMRC-145/2020	EPI_ISL_480426	2020-06-18	Asia / Bangladesh / Dhaka / Dhaka / Mirpur	Human			Male	62	unknown		Original	Nasopharyngeal swab		B.1.1.80	GR
hCoV-19/Bangladesh/BCSIR-NILMRC-146/2020	EPI_ISL_480427	2020-06-18	Asia / Bangladesh / Dhaka / Dhaka / Tejgaon	Human			Male	55	unknown		Original	Nasopharyngeal swab		B.1.1.25	GR
hCoV-19/Bangladesh/BCSIR-NILMRC-150/2020	EPI_ISL_480439	2020-06-18	Asia / Bangladesh / Dhaka / Dhaka / Jatrabari	Human			Male	25	unknown		Original	Nasopharyngeal swab		B.1.1.80	GR
hCoV-19/Bangladesh/BCSIR-NILMRC-151/2020	EPI_ISL_480440	2020-06-18	Asia / Bangladesh / Dhaka / Dhaka / Jatrabari	Human			Male	50	unknown		Original	Nasopharyngeal swab		B.1.1	GR
hCoV-19/Bangladesh/BCSIR-NILMRC-152/2020	EPI_ISL_480441	2020-06-18	Asia / Bangladesh / Dhaka / Dhaka / Jatrabari	Human			Female	52	unknown		Original	Nasopharyngeal swab		B.1.1.80	GR
hCoV-19/Bangladesh/BCSIR-NILMRC-153/2020	EPI_ISL_480442	2020-06-18	Asia / Bangladesh / Rajshahi	Human			Female	79	unknown		Original	Nasopharyngeal swab		B.1.1.80	GR
hCoV-19/Bangladesh/BCSIR-NILMRC-125/2020	EPI_ISL_480443	2020-06-17	Asia / Bangladesh / Rajshahi	Human			Male	44	unknown		Original	Nasopharyngeal swab		B.1.1.25	GR
hCoV-19/Bangladesh/BCSIR-NILMRC-126/2020	EPI_ISL_480444	2020-06-17	Asia / Bangladesh / Rajshahi	Human			Male	52	unknown		Original	Nasopharyngeal swab		B.1.1.25	GR
hCoV-19/Bangladesh/BCSIR-NILMRC-154/2020	EPI_ISL_480445	2020-06-18	Asia / Bangladesh / Rajshahi	Human			Female	16	unknown		Original	Nasopharyngeal swab		B.1.1.29	GR
hCoV-19/Bangladesh/BCSIR-NILMRC-156/2020	EPI_ISL_480446	2020-06-18	Asia / Bangladesh / Rajshahi	Human			Male	32	unknown		Original	Nasopharyngeal swab		B.1.1	GR
hCoV-19/Bangladesh/BCSIR-NILMRC-158/2020	EPI_ISL_480447	2020-06-18	Asia / Bangladesh / Rajshahi	Human			Male	59	unknown		Original	Nasopharyngeal swab		B.1.36	GH
hCoV-19/Bangladesh/BCSIR-NILMRC-168/2020	EPI_ISL_480448	2020-06-18	Asia / Bangladesh / Rajshahi	Human			Male	25	unknown		Original	Nasopharyngeal swab		B.1.1.80	GR
hCoV-19/Bangladesh/BCSIR-NILMRC-172/2020	EPI_ISL_480449	2020-06-18	Asia / Bangladesh / Rajshahi	Human			Female	66	unknown		Original	Nasopharyngeal swab		B.1.1.25	GR
hCoV-19/Bangladesh/BCSIR-NILMRC-173/2020	EPI_ISL_480450	2020-06-18	Asia / Bangladesh / Rajshahi	Human			Male	38	unknown		Original	Nasopharyngeal swab		B.1.1.25	GR
hCoV-19/Bangladesh/BCSIR-NILMRC-155/2020	EPI_ISL_482485	2020-06-18	Asia / Bangladesh / Rajshahi	Human			Female	27	unknown		Original	Nasopharyngeal swab		B.1.1.80	GR
hCoV-19/Bangladesh/BCSIR-NILMRC-160/2020	EPI_ISL_482486	2020-06-18	Asia / Bangladesh / Rajshahi	Human			Female	35	unknown		Original	Nasopharyngeal swab		B.1.1.25	GR
hCoV-19/Bangladesh/BCSIR-NILMRC-118a/2020	EPI_ISL_482487	2020-06-18	Asia / Bangladesh / Dhaka / Dhaka / Keraniganj Upazila	Human			Female	50	unknown		Original	Nasopharyngeal swab		B.1.1.29	GR
hCoV-19/Bangladesh/BCSIR-NILMRC-161/2020	EPI_ISL_482488	2020-06-18	Asia / Bangladesh / Rajshahi	Human			Male	38	unknown		Original	Nasopharyngeal swab		B.1.1.25	GR
hCoV-19/Bangladesh/BCSIR-NILMRC-149/2020	EPI_ISL_482489	2020-06-18	Asia / Bangladesh / Dhaka / Dhaka / Keraniganj Upazila	Human			Male	36	unknown		Original	Nasopharyngeal swab		B.1.1.25	GR
hCoV-19/Bangladesh/BCSIR-NILMRC-118/2020	EPI_ISL_482700	2020-06-18	Asia / Bangladesh / Dhaka / Dhaka / Keraniganj Upazila	Human			Female	50	unknown		Original	Nasopharyngeal swab		B.1.1.29	GR
hCoV-19/Bangladesh/BCSIR-NILMRC-004-2/2020	EPI_ISL_482701	2020-05-21	Asia / Bangladesh / Dhaka / Dhaka / Uttara	Human			Male	unknown	unknown		Original	Nasopharyngeal swab		B.1.1	GR
hCoV-19/Bangladesh/BCSIR-NILMRC-175/2020	EPI_ISL_483622	2020-06-12	Asia / Bangladesh / Rajshahi / Pabna	Human			Male	55	unknown		Original	Nasopharyngeal swab		B.1.1	GR
hCoV-19/Bangladesh/BCSIR-NILMRC-176/2020	EPI_ISL_483623	2020-06-12	Asia / Bangladesh / Rajshahi / Pabna	Human			Male	53	unknown		Original	Nasopharyngeal swab		B.1.1.25	GR
hCoV-19/Bangladesh/BCSIR-NILMRC-177/2020	EPI_ISL_483624	2020-06-12	Asia / Bangladesh / Rajshahi / Pabna	Human			Male	21	unknown		Original	Nasopharyngeal swab		B.1.1.25	GR
hCoV-19/Bangladesh/BCSIR-NILMRC-178/2020	EPI_ISL_483626	2020-06-15	Asia / Bangladesh / Rajshahi / Pabna	Human			Male	65	unknown		Original	Nasopharyngeal swab		B.1.1.80	GR
hCoV-19/Bangladesh/BCSIR-NILMRC-174/2020	EPI_ISL_483627	2020-06-12	Asia / Bangladesh / Rajshahi / Pabna	Human			Male	43	unknown		Original	Nasopharyngeal swab		B.1.1.25	GR
hCoV-19/Bangladesh/BCSIR-NILMRC-179/2020	EPI_ISL_483628	2020-06-15	Asia / Bangladesh / Rajshahi / Pabna	Human			Male	34	unknown		Original	Nasopharyngeal swab		B.1.1.25	GR
hCoV-19/Bangladesh/BCSIR-NILMRC-181/2020	EPI_ISL_483629	2020-06-20	Asia / Bangladesh / Rajshahi / Pabna	Human			Female	51	unknown		Original	Nasopharyngeal swab		B.1.1.296	GR
hCoV-19/Bangladesh/BCSIR-NILMRC-182/2020	EPI_ISL_483630	2020-06-20	Asia / Bangladesh / Rajshahi / Pabna	Human			Female	62	unknown		Original			B.1.1.29	GR
hCoV-19/Bangladesh/BCSIR-NILMRC-184/2020	EPI_ISL_483631	2020-06-20	Asia / Bangladesh / Rajshahi / Pabna	Human			Female	28	unknown		Original	Nasopharyngeal swab		B.1.1	GR
hCoV-19/Bangladesh/BCSIR-NILMRC-187/2020	EPI_ISL_483632	2020-06-16	Asia / Bangladesh / Chittagong / Brahmanbaria	Human			Male	40	unknown		Original	Nasopharyngeal swab		B.1.1.25	GR
hCoV-19/Bangladesh/BCSIR-NILMRC-188/2020	EPI_ISL_483633	2020-06-16	Asia / Bangladesh / Chittagong / Brahmanbaria	Human			Male	40	unknown		Original			B.1.1.80	GR
hCoV-19/Bangladesh/BCSIR-NILMRC-192/2020	EPI_ISL_483634	2020-06-17	Asia / Bangladesh / Chittagong / Brahmanbaria	Human			Male	37	unknown		Original	Nasopharyngeal swab		B.1.1.25	GR
hCoV-19/Bangladesh/BCSIR-NILMRC-193/2020	EPI_ISL_483635	2020-06-17	Asia / Bangladesh / Chittagong / Brahmanbaria	Human			Male	28	unknown		Original	Nasopharyngeal swab		B.1.1.25	GR
hCoV-19/Bangladesh/BCSIR-NILMRC-196/2020	EPI_ISL_483636	2020-06-20	Asia / Bangladesh / Chittagong / Chandpur	Human			Male	82	unknown		Original	Nasopharyngeal swab		B.1.1	GR
hCoV-19/Bangladesh/BCSIR-NILMRC-195/2020	EPI_ISL_483641	2020-06-20	Asia / Bangladesh / Chittagong / Chandpur	Human			Male	50	unknown		Original	Nasopharyngeal swab		B.1.1.25	GR
hCoV-19/Bangladesh/BCSIR-NILMRC-198/2020	EPI_ISL_483642	2020-06-20	Asia / Bangladesh / Chittagong / Chandpur	Human			Male	50	unknown		Original	Nasopharyngeal swab		B.1.1.29	GR
hCoV-19/Bangladesh/BCSIR-NILMRC-199/2020	EPI_ISL_483643	2020-06-20	Asia / Bangladesh / Chittagong / Chandpur	Human			Male	65	unknown		Original	Nasopharyngeal swab		B.1.1.80	GR
hCoV-19/Bangladesh/BCSIR-NILMRC-201/2020	EPI_ISL_483644	2020-06-20	Asia / Bangladesh / Chittagong	Human			Male	30	unknown		Original	Nasopharyngeal swab		B.1.1	GR
hCoV-19/Bangladesh/BCSIR-NILMRC-211/2020	EPI_ISL_483645	2020-06-14	Asia / Bangladesh / Sylhet / Habiganj	Human			Male	25	unknown		Original	Nasopharyngeal swab		B.1.1.103	GR
hCoV-19/Bangladesh/BCSIR-NILMRC-212/2020	EPI_ISL_483646	2020-06-14	Asia / Bangladesh / Sylhet / Habiganj	Human			Female	45	unknown		Original	Nasopharyngeal swab		B.1.1.25	GR
hCoV-19/Bangladesh/BCSIR-NILMRC-213/2020	EPI_ISL_483647	2020-06-14	Asia / Bangladesh / Sylhet / Habiganj	Human			Male	17	unknown		Original	Nasopharyngeal swab		B.1.1.80	GR
hCoV-19/Bangladesh/BCSIR-NILMRC-204/2020	EPI_ISL_483686	2020-06-26	Asia / Bangladesh / Chittagong / Chandpur	Human			Male	22	unknown		Original	Nasopharyngeal swab		B.1.36.16	GH
hCoV-19/Bangladesh/BCSIR-NILMRC-205/2020	EPI_ISL_483687	2020-06-26	Asia / Bangladesh / Chittagong / Chandpur	Human			Male	22	unknown		Original	Nasopharyngeal swab		B.1.1.25	GR
hCoV-19/Bangladesh/BCSIR-NILMRC-206/2020	EPI_ISL_483688	2020-06-27	Asia / Bangladesh / Chittagong / Chandpur	Human			Male	55	unknown		Original	Nasopharyngeal swab		B.1.1.25	GR
hCoV-19/Bangladesh/BCSIR-NILMRC-207/2020	EPI_ISL_483689	2020-06-27	Asia / Bangladesh / Chittagong / Chandpur	Human			Male	95	unknown		Original	Nasopharyngeal swab		B.1.1.25	GR
hCoV-19/Bangladesh/BCSIR-NILMRC-208/2020	EPI_ISL_483690	2020-06-27	Asia / Bangladesh / Chittagong / Chandpur	Human			Female	26	unknown		Original	Nasopharyngeal swab		B.1.1.80	GR
hCoV-19/Bangladesh/BCSIR-NILMRC-210/2020	EPI_ISL_483691	2020-06-14	Asia / Bangladesh / Sylhet / Habiganj	Human			Female	22	unknown		Original	Nasopharyngeal swab		B.1.1.29	GR
hCoV-19/Bangladesh/BCSIR-NILMRC-217/2020	EPI_ISL_483692	2020-06-24	Asia / Bangladesh / Sylhet / Moulvibazar	Human			Male	43	unknown		Original	Nasopharyngeal swab		B.1.1.25	GR
hCoV-19/Bangladesh/BCSIR-NILMRC-180/2020	EPI_ISL_483693	2020-06-20	Asia / Bangladesh / Rajshahi / Pabna	Human			Male	43	unknown		Original	Nasopharyngeal swab		B.1.1.25	GR
hCoV-19/Bangladesh/BCSIR-NILMRC-186/2020	EPI_ISL_483694	2020-06-16	Asia / Bangladesh / Chittagong / Brahmanbaria	Human			Female	47	unknown		Original	Nasopharyngeal swab		B.1.36	GH
hCoV-19/Bangladesh/BCSIR-NILMRC-190/2020	EPI_ISL_483695	2020-06-17	Asia / Bangladesh / Chittagong / Brahmanbaria	Human			Male	61	unknown		Original	Nasopharyngeal swab		B.1.1.59	GR
hCoV-19/Bangladesh/BCSIR-NILMRC-194/2020	EPI_ISL_483699	2020-06-20	Asia / Bangladesh / Chittagong / Chandpur	Human			Female	52	unknown		Original	Nasopharyngeal swab		B.1.1.175	GR
hCoV-19/Bangladesh/BCSIR-NILMRC-203/2020	EPI_ISL_483700	2020-06-20	Asia / Bangladesh / Chittagong / Chandpur	Human			Male	60	unknown		Original	Nasopharyngeal swab		B.1.1.25	GR
hCoV-19/Bangladesh/BCSIR-NILMRC-216/2020	EPI_ISL_483703	2020-06-24	Asia / Bangladesh / Sylhet / Moulvibazar	Human			Male	33	unknown		Original	Nasopharyngeal swab		B.1.36	GH
hCoV-19/Bangladesh/BCSIR-NILMRC-218/2020	EPI_ISL_483705	2020-06-24	Asia / Bangladesh / Sylhet / Habiganj	Human			Male	67	unknown		Original	Nasopharyngeal swab		B.1.1	GR
hCoV-19/Bangladesh/BCSIR-NILMRC-219/2020	EPI_ISL_483707	2020-06-24	Asia / Bangladesh / Sylhet / Habiganj	Human			Female	44	unknown		Original	Nasopharyngeal swab		B.1.1	GR
hCoV-19/Bangladesh/BCSIR-NILMRC-220/2020	EPI_ISL_483710	2020-06-24	Asia / Bangladesh / Sylhet / Habiganj	Human			Male	35	unknown		Original	Nasopharyngeal swab		B.1.36.16	GH
hCoV-19/Bangladesh/BCSIR-NILMRC-222/2020	EPI_ISL_487362	2020-07-06	Asia / Bangladesh / Barisal	Human			Male	47	unknown		Original	Nasopharyngeal swab		B.1	G
hCoV-19/Bangladesh/BCSIR-NILMRC-223/2020	EPI_ISL_487363	2020-07-06	Asia / Bangladesh / Barisal	Human			Male	35	unknown		Original	Nasopharyngeal swab		B.1.1.29	GR
hCoV-19/Bangladesh/BCSIR-NILMRC-224/2020	EPI_ISL_487364	2020-07-06	Asia / Bangladesh / Barisal	Human			Female	29	unknown		Original	Nasopharyngeal swab		B.1.1.29	GR
hCoV-19/Bangladesh/BCSIR-NILMRC-226/2020	EPI_ISL_487366	2020-07-06	Asia / Bangladesh / Barisal	Human			Male	54	unknown		Original	Nasopharyngeal swab		B.1.1	GR
hCoV-19/Bangladesh/BCSIR-NILMRC-227/2020	EPI_ISL_487367	2020-07-06	Asia / Bangladesh / Barisal	Human			Male	38	unknown		Original	Nasopharyngeal swab		B.1.1.25	GR
hCoV-19/Bangladesh/BCSIR-NILMRC-228/2020	EPI_ISL_487368	2020-07-06	Asia / Bangladesh / Barisal	Human			Female	43	unknown		Original	Nasopharyngeal swab		B.1.159	GH
hCoV-19/Bangladesh/BCSIR-NILMRC-229/2020	EPI_ISL_487371	2020-07-06	Asia / Bangladesh / Barisal	Human			Male	61	unknown		Original	Nasopharyngeal swab		B.1.1	GR
hCoV-19/Bangladesh/BCSIR-NILMRC-230/2020	EPI_ISL_487372	2020-07-06	Asia / Bangladesh / Barisal	Human			Male	19	unknown		Original	Nasopharyngeal swab		B.1.1.25	GR
hCoV-19/Bangladesh/BCSIR-NILMRC-231/2020	EPI_ISL_487373	2020-07-06	Asia / Bangladesh / Barisal	Human			Female	21	unknown		Original	Nasopharyngeal swab		B.1.1.25	GR
hCoV-19/Bangladesh/BCSIR-NILMRC-232/2020	EPI_ISL_487375	2020-07-06	Asia / Bangladesh / Barisal	Human			Female	27	unknown		Original	Nasopharyngeal swab		B.1.36.16	GH
hCoV-19/Bangladesh/BCSIR-NILMRC-233/2020	EPI_ISL_487376	2020-07-06	Asia / Bangladesh / Barisal	Human			Female	28	unknown		Original	Nasopharyngeal swab		B.1.1.29	GR
hCoV-19/Bangladesh/BCSIR-NILMRC-234/2020	EPI_ISL_487378	2020-07-06	Asia / Bangladesh / Barisal	Human			Male	41	unknown		Original	Nasopharyngeal swab		B.1.1	GR
hCoV-19/Bangladesh/BCSIR-NILMRC-235/2020	EPI_ISL_487380	2020-07-06	Asia / Bangladesh / Barisal	Human			Male	71	unknown		Original	Nasopharyngeal swab		B.1.1.25	GR
hCoV-19/Bangladesh/BCSIR-NILMRC-242/2020	EPI_ISL_487382	2020-07-06	Asia / Bangladesh / Barisal	Human			Male	67	unknown		Original	Nasopharyngeal swab		B.1.1	GR
hCoV-19/Bangladesh/BCSIR-NILMRC-243/2020	EPI_ISL_487383	2020-07-06	Asia / Bangladesh / Barisal	Human			Male	17	unknown		Original	Nasopharyngeal swab		B.1.1.25	GR
hCoV-19/Bangladesh/BCSIR-NILMRC-244/2020	EPI_ISL_487384	2020-07-06	Asia / Bangladesh / Barisal	Human			Male	23	unknown		Original	Nasopharyngeal swab		B.1.1	GR
hCoV-19/Bangladesh/BCSIR-NILMRC-245/2020	EPI_ISL_487385	2020-07-06	Asia / Bangladesh / Barisal	Human			Male	30	unknown		Original	Nasopharyngeal swab		B.1.1.25	GR
hCoV-19/Bangladesh/BCSIR-NILMRC-236/2020	EPI_ISL_487386	2020-07-06	Asia / Bangladesh / Barisal	Human			Female	84	unknown		Original	Nasopharyngeal swab		B.1.1.25	GR
hCoV-19/Bangladesh/BCSIR-NILMRC-237/2020	EPI_ISL_487392	2020-07-06	Asia / Bangladesh / Barisal	Human			Female	15	unknown		Original	Nasopharyngeal swab		B.1.1.25	GR
hCoV-19/Bangladesh/BCSIR-NILMRC-238/2020	EPI_ISL_487393	2020-07-06	Asia / Bangladesh / Barisal	Human			Female	33	unknown		Original	Nasopharyngeal swab		B.1.1.25	GR
hCoV-19/Bangladesh/BCSIR-NILMRC-239/2020	EPI_ISL_487394	2020-07-06	Asia / Bangladesh / Barisal	Human			Male	49	unknown		Original	Nasopharyngeal swab		B.1.1.25	GR
hCoV-19/Bangladesh/BCSIR-NILMRC-240/2020	EPI_ISL_487395	2020-07-06	Asia / Bangladesh / Barisal	Human			Male	51	unknown		Original	Nasopharyngeal swab		B.1.1.80	GR
hCoV-19/Bangladesh/BCSIR-NILMRC-241/2020	EPI_ISL_487396	2020-07-06	Asia / Bangladesh / Barisal	Human			Male	56	unknown		Original	Nasopharyngeal swab		B.1.1.25	GR
hCoV-19/Bangladesh/BCSIR-NILMRC-246/2020	EPI_ISL_490109	2020-07-07	Asia / Bangladesh / Khulna	Human			Male	31	unknown		Original	Nasopharyngeal swab		B.1.1.25	GR
hCoV-19/Bangladesh/BCSIR-NILMRC-247/2020	EPI_ISL_490110	2020-07-07	Asia / Bangladesh / Khulna	Human			Male	44	unknown		Original	Nasopharyngeal swab		B.1.1.25	GR
hCoV-19/Bangladesh/BCSIR-NILMRC-248/2020	EPI_ISL_490111	2020-07-07	Asia / Bangladesh / Khulna	Human			Male	22	unknown		Original	Nasopharyngeal swab		B.1.1.25	GR
hCoV-19/Bangladesh/BCSIR-NILMRC-249/2020	EPI_ISL_490113	2020-07-07	Asia / Bangladesh / Khulna	Human			Male	60	unknown		Original	Nasopharyngeal swab		B.1.1.25	GR
hCoV-19/Bangladesh/BCSIR-NILMRC-250/2020	EPI_ISL_490114	2020-07-07	Asia / Bangladesh / Khulna	Human			Female	55	unknown		Original	Nasopharyngeal swab		B.1.1	GR
hCoV-19/Bangladesh/BCSIR-NILMRC-251/2020	EPI_ISL_490144	2020-07-07	Asia / Bangladesh / Khulna	Human			Female	20	unknown		Original	Nasopharyngeal swab		B.1.1.25	GR
hCoV-19/Bangladesh/BCSIR-NILMRC-253/2020	EPI_ISL_490164	2020-07-07	Asia / Bangladesh / Khulna / Jessore	Human			Male	37	unknown		Original	Nasopharyngeal swab		B.1.1.25	GR
hCoV-19/Bangladesh/BCSIR-NILMRC-256/2020	EPI_ISL_490165	2020-07-07	Asia / Bangladesh / Khulna / Jessore	Human			Male	29	unknown		Original	Nasopharyngeal swab		B.1.1	GR
hCoV-19/Bangladesh/BCSIR-NILMRC-255/2020	EPI_ISL_490167	2020-07-07	Asia / Bangladesh / Khulna / Jessore	Human			Male	25	unknown		Original	Nasopharyngeal swab		B.1.1.25	GR
hCoV-19/Bangladesh/BCSIR-NILMRC-257/2020	EPI_ISL_490168	2020-07-07	Asia / Bangladesh / Khulna / Jessore	Human			Male	17	unknown		Original	Nasopharyngeal swab		B.1.36.16	GH
hCoV-19/Bangladesh/CHRF-0011/2020	EPI_ISL_492028	2020-03-30	Asia / Bangladesh	Human			Male	unknown	unknown		Original			B.1	G
hCoV-19/Bangladesh/CHRF-0018/2020	EPI_ISL_492029	2020-05-08	Asia / Bangladesh	Human			Male	unknown	unknown		Original			B.1.1.25	GR
hCoV-19/Bangladesh/CHRF-0019/2020	EPI_ISL_492030	2020-05-14	Asia / Bangladesh	Human			Female	unknown	unknown		Original			B.1	G
hCoV-19/Bangladesh/CHRF-0021/2020	EPI_ISL_492031	2020-05-14	Asia / Bangladesh	Human			Male	unknown	unknown		Original			B.1	G
hCoV-19/Bangladesh/BCSIR-NILMRC-165/2020	EPI_ISL_498227	2020-06-18	Asia / Bangladesh / Rajshahi	Human			Male	58	unknown		Original			B.1.1.29	GR
hCoV-19/Bangladesh/BCSIR-NILMRC-167/2020	EPI_ISL_498228	2020-06-18	Asia / Bangladesh / Rajshahi	Human			Male	31	unknown		Original	Nasopharyngeal swab		B.1.1.25	GR
hCoV-19/Bangladesh/BCSIR-NILMRC-258/2020	EPI_ISL_498253	2020-07-07	Asia / Bangladesh / Khulna / Jessore	Human			Male	53	unknown		Original	Nasopharyngeal swab		B.1.1.80	GR
hCoV-19/Bangladesh/BCSIR-NILMRC-260/2020	EPI_ISL_498254	2020-07-07	Asia / Bangladesh / Khulna / Jessore	Human			Female	58	unknown		Original	Nasopharyngeal swab		B.1.1.80	GR
hCoV-19/Bangladesh/BCSIR-NILMRC-263/2020	EPI_ISL_498267	2020-07-07	Asia / Bangladesh / Khulna	Human			Female	26	unknown		Original	Nasopharyngeal swab		B.1.1.29	GR
hCoV-19/Bangladesh/BCSIR-NILMRC-265/2020	EPI_ISL_498268	2020-07-19	Asia / Bangladesh / Chittagong	Human			Female	33	unknown		Original	Nasopharyngeal swab		B.1.1.25	GR
hCoV-19/Bangladesh/BCSIR-NILMRC-268/2020	EPI_ISL_498272	2020-07-19	Asia / Bangladesh / Chittagong	Human			Male	24	unknown		Original	Nasopharyngeal swab		B.1.1.25	GR
hCoV-19/Bangladesh/BCSIR-NILMRC-273/2020	EPI_ISL_498273	2020-07-19	Asia / Bangladesh / Chittagong	Human			Male	33	unknown		Original	Nasopharyngeal swab		B.1.1.107	GR
hCoV-19/Bangladesh/BCSIR-NILMRC-274/2020	EPI_ISL_498274	2020-07-19	Asia / Bangladesh / Chittagong / Brahmanbaria	Human			Female	20	unknown		Original	Nasopharyngeal swab		B.1.1	GR
hCoV-19/Bangladesh/BCSIR-NILMRC-276/2020	EPI_ISL_498417	2020-07-19	Asia / Bangladesh / Chittagong / Brahmanbaria	Human			Male	52	unknown		Original	Nasopharyngeal swab		B.1.1.25	GR
hCoV-19/Bangladesh/BCSIR-NILMRC-278/2020	EPI_ISL_498418	2020-07-19	Asia / Bangladesh / Chittagong / Chandpur	Human			Female	45	unknown		Original	Nasopharyngeal swab		B.1.1.25	GR
hCoV-19/Bangladesh/BCSIR-NILMRC-280/2020	EPI_ISL_498419	2020-07-21	Asia / Bangladesh / Chittagong / Chandpur	Human			Male	34	unknown		Original	Nasopharyngeal swab		B.1.1.103	GR
hCoV-19/Bangladesh/BCSIR-NILMRC-282/2020	EPI_ISL_498466	2020-07-21	Asia / Bangladesh / Chittagong / Chandpur	Human			Female	30	unknown		Original	Nasopharyngeal swab		B.1.1.25	GR
hCoV-19/Bangladesh/BCSIR-NILMRC-285/2020	EPI_ISL_498467	2020-07-21	Asia / Bangladesh / Chittagong / Chandpur	Human			Male	32	unknown		Original	Nasopharyngeal swab		B.1.1.80	GR
hCoV-19/Bangladesh/BCSIR-NILMRC-290/2020	EPI_ISL_498549	2020-07-14	Asia / Bangladesh / Rangpur / Nilphamari	Human			Male	47	unknown		Original	Nasopharyngeal swab		B.1.1	GR
hCoV-19/Bangladesh/BCSIR-NILMRC-291/2020	EPI_ISL_498550	2020-07-18	Asia / Bangladesh / Sylhet / Moulvibazar	Human			Male	25	unknown		Original	Nasopharyngeal swab		B.1.1	GR
hCoV-19/Bangladesh/BCSIR-NILMRC-293/2020	EPI_ISL_498783	2020-05-31	Asia / Bangladesh / Sylhet / Moulvibazar	Human			Male	40	unknown		Original	Nasopharyngeal swab		B.1.1	GR
hCoV-19/Bangladesh/BCSIR-NILMRC-297/2020	EPI_ISL_498784	2020-07-18	Asia / Bangladesh / Sylhet / Moulvibazar	Human			Male	35	unknown		Original	Nasopharyngeal swab		B.1.1	GR
hCoV-19/Bangladesh/BCSIR-NILMRC-298/2020	EPI_ISL_498785	2020-07-18	Asia / Bangladesh / Sylhet	Human			Male	48	unknown		Original	Nasopharyngeal swab		B.1.1	GR
hCoV-19/Bangladesh/BCSIR-NILMRC-306/2020	EPI_ISL_498786	2020-07-18	Asia / Bangladesh / Sylhet / Moulvibazar	Human			Male	23	unknown		Original	Nasopharyngeal swab		B.1.1.80	GR
hCoV-19/Bangladesh/BCSIR-NILMRC-307/2020	EPI_ISL_498787	2020-07-18	Asia / Bangladesh / Sylhet / Moulvibazar	Human			Male	50	unknown		Original	Nasopharyngeal swab		B.1.1.103	GR
hCoV-19/Bangladesh/BCSIR-NILMRC-315/2020	EPI_ISL_498788	2020-05-31	Asia / Bangladesh / Mymensingh	Human			Female	32	unknown		Original	Nasopharyngeal swab		B.1.1.25	GR
hCoV-19/Bangladesh/BCSIR-NILMRC-318/2020	EPI_ISL_498789	2020-05-31	Asia / Bangladesh / Mymensingh	Human			Female	38	unknown		Original	Nasopharyngeal swab		B.1.1.25	GR
hCoV-19/Bangladesh/BCSIR-NILMRC-322/2020	EPI_ISL_498790	2020-05-31	Asia / Bangladesh / Mymensingh	Human			Female	50	unknown		Original	Nasopharyngeal swab		B.1.1.80	GR
hCoV-19/Bangladesh/BCSIR-NILMRC-323/2020	EPI_ISL_498791	2020-06-03	Asia / Bangladesh / Mymensingh	Human			Male	54	unknown		Original	Nasopharyngeal swab		B.1.1.103	GR
hCoV-19/Bangladesh/BCSIR-NILMRC-326/2020	EPI_ISL_498792	2020-06-03	Asia / Bangladesh / Mymensingh	Human			Male	47	unknown		Original	Nasopharyngeal swab		B.1.1.80	GR
hCoV-19/Bangladesh/BCSIR-NILMRC-327/2020	EPI_ISL_498793	2020-06-03	Asia / Bangladesh / Mymensingh	Human			Male	20	unknown		Original	Nasopharyngeal swab		B.1.1.127	GR
hCoV-19/Bangladesh/BCSIR-NILMRC-328/2020	EPI_ISL_498794	2020-06-03	Asia / Bangladesh / Mymensingh	Human			Male	57	unknown		Original	Nasopharyngeal swab		B.1.1.25	GR
hCoV-19/Bangladesh/BCSIR-NILMRC-329/2020	EPI_ISL_498795	2020-06-03	Asia / Bangladesh / Mymensingh	Human			Female	50	unknown		Original	Nasopharyngeal swab		B.1.1.80	GR
hCoV-19/Bangladesh/BCSIR-NILMRC-333/2020	EPI_ISL_498796	2020-06-04	Asia / Bangladesh / Mymensingh	Human			Male	26	unknown		Original	Nasopharyngeal swab		B.1.1	GR
hCoV-19/Bangladesh/BCSIR-NILMRC-338/2020	EPI_ISL_498797	2020-07-15	Asia / Bangladesh / Rajshahi	Human			Male	61	unknown		Original	Nasopharyngeal swab		B.1.1.25	GR
hCoV-19/Bangladesh/BCSIR-NILMRC-339/2020	EPI_ISL_498800	2020-07-15	Asia / Bangladesh / Rajshahi	Human			Male	37	unknown		Original	Nasopharyngeal swab		B.1.1.25	GR
hCoV-19/Bangladesh/BCSIR-NILMRC-340/2020	EPI_ISL_498801	2020-07-15	Asia / Bangladesh / Rajshahi	Human			Female	13	unknown		Original	Nasopharyngeal swab		B.1.1.25	GR
hCoV-19/Bangladesh/BCSIR-NILMRC-341/2020	EPI_ISL_498802	2020-07-15	Asia / Bangladesh / Rajshahi	Human			Male	55	unknown		Original	Nasopharyngeal swab		B.1.1	GR
hCoV-19/Bangladesh/BCSIR-NILMRC-344/2020	EPI_ISL_498803	2020-07-12	Asia / Bangladesh / Rajshahi	Human			Male	55	unknown		Original	Nasopharyngeal swab		B.1.1.163	GR
hCoV-19/Bangladesh/BCSIR-NILMRC-345/2020	EPI_ISL_498804	2020-07-12	Asia / Bangladesh / Rajshahi	Human			Male	40	unknown		Original	Nasopharyngeal swab		B.1.1.25	GR
hCoV-19/Bangladesh/BCSIR-NILMRC-346/2020	EPI_ISL_498805	2020-07-15	Asia / Bangladesh / Rajshahi	Human			Male	25	unknown		Original	Nasopharyngeal swab		B.1.1	GR
hCoV-19/Bangladesh/BCSIR-NILMRC-349/2020	EPI_ISL_498806	2020-07-15	Asia / Bangladesh / Khulna	Human			Female	42	unknown		Original	Nasopharyngeal swab		B.1.1.25	GR
hCoV-19/Bangladesh/BCSIR-NILMRC-259/2020	EPI_ISL_498808	2020-07-07	Asia / Bangladesh / Khulna / Jessore	Human			Male	72	unknown		Original	Nasopharyngeal swab		B.1.1	GR
hCoV-19/Bangladesh/BCSIR-NILMRC-269/2020	EPI_ISL_498809	2020-07-19	Asia / Bangladesh / Chittagong / Brahmanbaria	Human			Male	30	unknown		Original	Nasopharyngeal swab		B.1.1.25	GR
hCoV-19/Bangladesh/BCSIR-NILMRC-275/2020	EPI_ISL_498811	2020-07-19	Asia / Bangladesh / Chittagong	Human			Male	54	unknown		Original	Nasopharyngeal swab		B.1.1.25	GR
hCoV-19/Bangladesh/BCSIR-NILMRC-281/2020	EPI_ISL_498814	2020-07-21	Asia / Bangladesh / Chittagong / Chandpur	Human			Female	8	unknown		Original	Nasopharyngeal swab		B.1.1	GR
hCoV-19/Bangladesh/BCSIR-NILMRC-283/2020	EPI_ISL_498815	2020-07-21	Asia / Bangladesh / Chittagong / Chandpur	Human			Female	40	unknown		Original	Nasopharyngeal swab		B.1.1	GR
hCoV-19/Bangladesh/BCSIR-NILMRC-288/2020	EPI_ISL_498816	2020-07-14	Asia / Bangladesh / Rangpur / Nilphamari	Human			Male	52	unknown		Original	Nasopharyngeal swab		B.1.36.16	GH
hCoV-19/Bangladesh/BCSIR-NILMRC-296/2020	EPI_ISL_498817	2020-07-18	Asia / Bangladesh / Sylhet / Moulvibazar	Human			Female	49	unknown		Original	Nasopharyngeal swab		B.1.1.25	GR
hCoV-19/Bangladesh/BCSIR-NILMRC-305/2020	EPI_ISL_498818	2020-07-18	Asia / Bangladesh / Sylhet / Moulvibazar	Human			Male	45	unknown		Original	Nasopharyngeal swab		B.1.1	GR
hCoV-19/Bangladesh/BCSIR-NILMRC-311/2020	EPI_ISL_498830	2020-07-19	Asia / Bangladesh / Sylhet / Moulvibazar	Human			Male	50	unknown		Original	Nasopharyngeal swab		B.1.1	GR
hCoV-19/Bangladesh/BCSIR-NILMRC-312/2020	EPI_ISL_498892	2020-07-20	Asia / Bangladesh / Sylhet / Moulvibazar	Human			Male	50	unknown		Original	Nasopharyngeal swab		B.1.1	GR
hCoV-19/Bangladesh/BCSIR-NILMRC-319/2020	EPI_ISL_498932	2020-05-31	Asia / Bangladesh / Mymensingh	Human			Male	35	unknown		Original	Nasopharyngeal swab		B.1.1	GR
hCoV-19/Bangladesh/BCSIR-NILMRC-321/2020	EPI_ISL_498933	2020-05-31	Asia / Bangladesh / Mymensingh	Human			Male	27	unknown		Original	Nasopharyngeal swab		B.1.1.25	GR
hCoV-19/Bangladesh/BCSIR-NILMRC-261/2020	EPI_ISL_503958	2020-07-07	Asia / Bangladesh / Khulna / Jessore	Human			Female	32	unknown		Original	Nasopharyngeal swab		B.1.1.80	GR
hCoV-19/Bangladesh/BCSIR-NILMRC-262/2020	EPI_ISL_504040	2020-07-07	Asia / Bangladesh / Khulna / Jessore	Human			Female	21	unknown		Original	Nasopharyngeal swab		B.1.1.25	GR
hCoV-19/Bangladesh/BCSIR-NILMRC-264/2020	EPI_ISL_504137	2020-07-16	Asia / Bangladesh / Chittagong / Brahmanbaria	Human			Male	26	unknown		Original	Nasopharyngeal swab		B.1.1.25	GR
hCoV-19/Bangladesh/BCSIR-NILMRC-284/2020	EPI_ISL_504176	2020-07-21	Asia / Bangladesh / Chittagong / Chandpur	Human			Male	70	unknown		Original	Nasopharyngeal swab		B.1.1.103	GR
hCoV-19/Bangladesh/BCSIR-NILMRC-287/2020	EPI_ISL_504177	2020-07-14	Asia / Bangladesh / Rangpur / Nilphamari	Human			Male	65	unknown		Original	Nasopharyngeal swab		B.1	G
hCoV-19/Bangladesh/BCSIR-NILMRC-292/2020	EPI_ISL_504178	2020-07-17	Asia / Bangladesh / Sylhet / Moulvibazar	Human			Male	34	unknown		Original	Nasopharyngeal swab		B.1.1.25	GR
hCoV-19/Bangladesh/BCSIR-NILMRC-295/2020	EPI_ISL_504179	2020-07-18	Asia / Bangladesh / Sylhet / Moulvibazar	Human			Male	40	unknown		Original	Nasopharyngeal swab		B.1.1	GR
hCoV-19/Bangladesh/BCSIR-NILMRC-317/2020	EPI_ISL_504180	2020-05-31	Asia / Bangladesh / Mymensingh	Human			Male	30	unknown		Original	Nasopharyngeal swab		B.1.1.25	GR
hCoV-19/Bangladesh/BCSIR-NILMRC-320/2020	EPI_ISL_504181	2020-05-31	Asia / Bangladesh / Mymensingh	Human			Male	34	unknown		Original	Nasopharyngeal swab		B.1.1	GR
hCoV-19/Bangladesh/BCSIR-NILMRC-330/2020	EPI_ISL_504182	2020-06-03	Asia / Bangladesh / Mymensingh	Human			Male	23	unknown		Original	Nasopharyngeal swab		B.1.1	GR
hCoV-19/Bangladesh/BCSIR-NILMRC-342/2020	EPI_ISL_504183	2020-07-15	Asia / Bangladesh / Rajshahi	Human			Male	40	unknown		Original	Nasopharyngeal swab		B.1.1.103	GR
hCoV-19/Bangladesh/BCSIR-NILMRC-343/2020	EPI_ISL_504184	2020-07-15	Asia / Bangladesh / Rajshahi	Human			Female	62	unknown		Original	Nasopharyngeal swab		B.1.36	GH
hCoV-19/Bangladesh/BCSIR-NILMRC-254/2020	EPI_ISL_512774	2020-07-07	Asia / Bangladesh / Khulna / Jessore	Human			Male	18	unknown		Original	Nasopharyngeal swab		B.1.1.25	GR
hCoV-19/Bangladesh/BCSIR-NILMRC-356/2020	EPI_ISL_514129	2020-07-24	Asia / Bangladesh / Chittagong / Brahmanbaria	Human			Male	58	unknown		Original	Nasopharyngeal swab		B.1.1.25	GR
hCoV-19/Bangladesh/BCSIR-NILMRC-358/2020	EPI_ISL_514130	2020-07-24	Asia / Bangladesh / Chittagong / Brahmanbaria	Human			Male	50	unknown		Original	Nasopharyngeal swab		B.1.1.25	GR
hCoV-19/Bangladesh/BCSIR-NILMRC-350/2020	EPI_ISL_514228	2020-07-15	Asia / Bangladesh / Khulna	Human			Male	70	unknown		Original	Nasopharyngeal swab		B.1.1.163	GR
hCoV-19/Bangladesh/BCSIR-NILMRC-351/2020	EPI_ISL_514229	2020-07-15	Asia / Bangladesh / Khulna	Human			Female	32	unknown		Original	Nasopharyngeal swab		B.1.36	GH
hCoV-19/Bangladesh/BCSIR-NILMRC-352/2020	EPI_ISL_514230	2020-07-15	Asia / Bangladesh / Khulna	Human			Male	36	unknown		Original	Nasopharyngeal swab		B.1.1.103	GR
hCoV-19/Bangladesh/BCSIR-NILMRC-353/2020	EPI_ISL_514231	2020-07-15	Asia / Bangladesh / Khulna	Human			Male	31	unknown		Original	Nasopharyngeal swab		B.1.1.25	GR
hCoV-19/Bangladesh/BCSIR-NILMRC-354/2020	EPI_ISL_514232	2020-07-15	Asia / Bangladesh / Khulna	Human			Male	52	unknown		Original	Nasopharyngeal swab		B.1.1.25	GR
hCoV-19/Bangladesh/BCSIR-NILMRC-359/2020	EPI_ISL_514233	2020-07-24	Asia / Bangladesh / Chittagong / Brahmanbaria	Human			Male	28	unknown		Original	Nasopharyngeal swab		B.1.1	GR
hCoV-19/Bangladesh/BCSIR-NILMRC-361/2020	EPI_ISL_514234	2020-07-24	Asia / Bangladesh / Chittagong / Brahmanbaria	Human			Male	52	unknown		Original	Nasopharyngeal swab		B.1.1.29	GR
hCoV-19/Bangladesh/BCSIR-NILMRC-362/2020	EPI_ISL_514235	2020-07-24	Asia / Bangladesh / Chittagong / Brahmanbaria	Human			Male	23	unknown		Original	Nasopharyngeal swab		B.1.1.29	GR
hCoV-19/Bangladesh/BCSIR-NILMRC-363/2020	EPI_ISL_514236	2020-07-24	Asia / Bangladesh / Chittagong / Brahmanbaria	Human			Male	55	unknown		Original	Nasopharyngeal swab		B.1.1.208	GR
hCoV-19/Bangladesh/BCSIR-NILMRC-364/2020	EPI_ISL_514237	2020-07-24	Asia / Bangladesh / Chittagong / Brahmanbaria	Human			Female	28	unknown		Original	Nasopharyngeal swab		B.1.1.25	GR
hCoV-19/Bangladesh/BCSIR-NILMRC-365/2020	EPI_ISL_514238	2020-07-21	Asia / Bangladesh / Chittagong / Brahmanbaria	Human			Male	35	unknown		Original	Nasopharyngeal swab		B.1.1.208	GR
hCoV-19/Bangladesh/BCSIR-NILMRC-367/2020	EPI_ISL_514239	2020-07-21	Asia / Bangladesh / Chittagong / Brahmanbaria	Human			Male	30	unknown		Original	Nasopharyngeal swab		B.1.1.80	GR
hCoV-19/Bangladesh/BCSIR-NILMRC-368/2020	EPI_ISL_514240	2020-07-21	Asia / Bangladesh / Chittagong / Brahmanbaria	Human			Male	26	unknown		Original	Nasopharyngeal swab		B.1.1.25	GR
hCoV-19/Bangladesh/BCSIR-NILMRC-370/2020	EPI_ISL_514241	2020-07-21	Asia / Bangladesh / Chittagong / Brahmanbaria	Human			Male	52	unknown		Original	Nasopharyngeal swab		B.1.1.25	GR
hCoV-19/Bangladesh/BCSIR-NILMRC-385/2020	EPI_ISL_514242	2020-07-21	Asia / Bangladesh / Chittagong / Chandpur	Human			Female	26	unknown		Original	Nasopharyngeal swab		B.1.1	GR
hCoV-19/Bangladesh/BCSIR-NILMRC-386/2020	EPI_ISL_514243	2020-07-21	Asia / Bangladesh / Chittagong / Chandpur	Human			Male	34	unknown		Original	Nasopharyngeal swab		B.1.1.25	GR
hCoV-19/Bangladesh/BCSIR-NILMRC-387/2020	EPI_ISL_514244	2020-07-18	Asia / Bangladesh / Chittagong / Chandpur	Human			Male	47	unknown		Original	Nasopharyngeal swab		B.1.1.103	GR
hCoV-19/Bangladesh/BCSIR-NILMRC-369/2020	EPI_ISL_514245	2020-07-21	Asia / Bangladesh / Chittagong / Brahmanbaria	Human			Male	57	unknown		Original	Nasopharyngeal swab		B.1.1.25	GR
hCoV-19/Bangladesh/BCSIR-NILMRC-381/2020	EPI_ISL_514246	2020-07-21	Asia / Bangladesh / Chittagong / Chandpur	Human			Male	51	unknown		Original	Nasopharyngeal swab		B.1.36.16	GH
hCoV-19/Bangladesh/BCSIR-NILMRC-382/2020	EPI_ISL_514247	2020-07-21	Asia / Bangladesh / Chittagong / Chandpur	Human			Male	48	unknown		Original	Nasopharyngeal swab		B.1.1.80	GR
hCoV-19/Bangladesh/BCSIR-NILMRC-371/2020	EPI_ISL_514248	2020-07-31	Asia / Bangladesh / Dhaka / Narayanganj	Human			Female	52	unknown		Original	Nasopharyngeal swab		B.1.1.25	GR
hCoV-19/Bangladesh/BCSIR-NILMRC-372/2020	EPI_ISL_514249	2020-07-31	Asia / Bangladesh / Dhaka / Narayanganj	Human			Female	24	unknown		Original	Nasopharyngeal swab		B.1.1.29	GR
hCoV-19/Bangladesh/BCSIR-NILMRC-374/2020	EPI_ISL_514250	2020-07-31	Asia / Bangladesh / Dhaka / Narayanganj	Human			Male	55	unknown		Original	Nasopharyngeal swab		B.1.1.25	GR
hCoV-19/Bangladesh/BCSIR-NILMRC-383/2020	EPI_ISL_514251	2020-07-21	Asia / Bangladesh / Chittagong / Chandpur	Human			Male	58	unknown		Original	Nasopharyngeal swab		B.1.1.80	GR
hCoV-19/Bangladesh/BCSIR-NILMRC-384/2020	EPI_ISL_514252	2020-07-21	Asia / Bangladesh / Chittagong / Chandpur	Human			Female	43	unknown		Original	Nasopharyngeal swab		B.1.1.25	GR
hCoV-19/Bangladesh/BCSIR-DU-16/2020	EPI_ISL_514253	2020-07-12	Asia / Bangladesh / Dhaka / Dhaka / Mohammadpur	Human			Male	34	unknown		Original	Oropharyngeal swab		B.1.260	GH
hCoV-19/Bangladesh/NGRI-NSTU-02/2020	EPI_ISL_514434	2020-07-22	Asia / Bangladesh / Chittagong / Noakhali / Companiganj Upazila	Human			Male	30	Live		Original	Nasopharyngeal and oropharyngeal swab		B.1.36	GH
hCoV-19/Bangladesh/NGRI-NSTU-03/2020	EPI_ISL_514440	2020-07-22	Asia / Bangladesh / Chittagong / Noakhali / Companigonj	Human			Male	38	Live		Original	Nasopharyngeal and oropharyngeal swab		B.1.1.80	GR
hCoV-19/Bangladesh/NGRI-NSTU-05/2020	EPI_ISL_514441	2020-07-23	Asia / Bangladesh / Chittagong / Noakhali / Begumganj	Human			Male	41	Live		Original	Nasopharyngeal and oropharyngeal swab		B.1.36	GH
hCoV-19/Bangladesh/NGRI-NSTU-16/2020	EPI_ISL_514580	2020-07-21	Asia / Bangladesh / Chittagong / Noakhali / Kabirhat	Human			Male	33	Live		Original			B.1.1.25	GR
hCoV-19/Bangladesh/NGRI-NSTU-18/2020	EPI_ISL_514613	2020-07-21	Asia / Bangladesh / Chittagong / Noakhali / Kabirhat	Human			Male	51	Live		Original	Nasopharyngeal and oropharyngeal swab		B.1.1.80	GR
hCoV-19/Bangladesh/NGRI-NSTU-31/2020	EPI_ISL_514614	2020-07-21	Asia / Bangladesh / Chittagong / Noakhali / Kabirhat	Human			Male	73	Live		Original	Nasopharyngeal and oropharyngeal swab		B.1.36.16	GH
hCoV-19/Bangladesh/NGRI-NSTU-21/2020	EPI_ISL_514615	2020-07-20	Asia / Bangladesh / Chittagong / Lakshmipur / Lakshmipur	Human			Male	24	Live		Original	Nasopharyngeal and oropharyngeal swab		B.1.36.16	GH
hCoV-19/Bangladesh/109879/2020	EPI_ISL_600428	2020-04-09	Asia / Bangladesh / Barishal	Human			unknown	35	unknown		Original			B.1.1	GR
hCoV-19/Bangladesh/110/2020	EPI_ISL_600429	2020-04-08	Asia / Bangladesh / Barishal	Human			Male	unknown	Deceased		Original			B	O
hCoV-19/Bangladesh/1138/2020	EPI_ISL_600430	2020-04-20	Asia / Bangladesh / Dhaka	Human			Male	45	unknown		Original			B.1	G
hCoV-19/Bangladesh/1757/2020	EPI_ISL_600431	2020-03-13	Asia / Bangladesh / Dhaka	Human			unknown	unknown	unknown		Original			B.1	G
hCoV-19/Bangladesh/201/2020	EPI_ISL_600432	2020-04-09	Asia / Bangladesh / Barishal	Human			Male	27	unknown		Original			B.1	G
hCoV-19/Bangladesh/202/2020	EPI_ISL_600433	2020-04-09	Asia / Bangladesh / Barishal	Human			Female	21	unknown		Original			B.1	G
hCoV-19/Bangladesh/203/2020	EPI_ISL_600434	2020-04-09	Asia / Bangladesh / Barishal	Human			Male	6 months	unknown		Original			B.1	G
hCoV-19/Bangladesh/250/2020	EPI_ISL_600435	2020-04-10	Asia / Bangladesh / Barishal	Human			Female	40	unknown		Original			B.1	G
hCoV-19/Bangladesh/256/2020	EPI_ISL_600436	2020-03-15	Asia / Bangladesh / Dhaka	Human			Male	74	unknown		Original			B.1	G
hCoV-19/Bangladesh/2702/2020	EPI_ISL_600437	2020-05-02	Asia / Bangladesh / Dhaka	Human			Male	50	unknown		Original			B.1	G
hCoV-19/Bangladesh/2802/2020	EPI_ISL_600438	2020-03-07	Asia / Bangladesh / Dhaka	Human			Male	unknown	unknown		Original			B.1	G
hCoV-19/Bangladesh/29156/2020	EPI_ISL_600439	2020-04-05	Asia / Bangladesh / Dhaka	Human			unknown	unknown	unknown		Original			B.1.1.29	GR
hCoV-19/Bangladesh/294/2020	EPI_ISL_600440	2020-03-17	Asia / Bangladesh / Dhaka	Human			Female	unknown	unknown		Original			B.1	G
hCoV-19/Bangladesh/361/2020	EPI_ISL_600441	2020-04-05	Asia / Bangladesh / Dhaka	Human			Female	38	unknown		Original			B.1.1.256	GR
hCoV-19/Bangladesh/374/2020	EPI_ISL_600442	2020-03-20	Asia / Bangladesh / Dhaka	Human			Male	32	unknown		Original			B.40	O
hCoV-19/Bangladesh/G-10/2020	EPI_ISL_600444	2020-04-14	Asia / Bangladesh / Dhaka	Human			unknown	40	unknown		Original			B.1.1.80	GR
hCoV-19/Bangladesh/G-103/2020	EPI_ISL_600445	2020-06-19	Asia / Bangladesh / Dhaka	Human			unknown	unknown	unknown		Original			B.1.1.128	GR
hCoV-19/Bangladesh/G-104/2020	EPI_ISL_600446	2020-07-01	Asia / Bangladesh / Dhaka	Human			unknown	unknown	unknown		Original			B.1.1.29	GR
hCoV-19/Bangladesh/G-106/2020	EPI_ISL_600449	2020-06-20	Asia / Bangladesh / Dhaka	Human			unknown	unknown	unknown		Original			B.1	G
hCoV-19/Bangladesh/G-108/2020	EPI_ISL_600451	2020-06-20	Asia / Bangladesh / Dhaka	Human			unknown	unknown	unknown		Original			B	G
hCoV-19/Bangladesh/G-11/2020	EPI_ISL_600454	2020-04-14	Asia / Bangladesh / Dhaka	Human			unknown	unknown	unknown		Original			B.1	G
hCoV-19/Bangladesh/G-110/2020	EPI_ISL_600456	2020-06-20	Asia / Bangladesh / Dhaka	Human			unknown	unknown	unknown		Original			B	G
hCoV-19/Bangladesh/G-111/2020	EPI_ISL_600459	2020-06-20	Asia / Bangladesh / Dhaka	Human			unknown	unknown	unknown		Original			A	G
hCoV-19/Bangladesh/G-115/2020	EPI_ISL_600461	2020-06-20	Asia / Bangladesh / Dhaka	Human			unknown	unknown	unknown		Original			A	G
hCoV-19/Bangladesh/G-119/2020	EPI_ISL_600463	2020-06-20	Asia / Bangladesh / Dhaka	Human			unknown	unknown	unknown		Original			B	G
hCoV-19/Bangladesh/G-123/2020	EPI_ISL_600466	2020-07-01	Asia / Bangladesh / Dhaka	Human			unknown	unknown	unknown		Original			A	G
hCoV-19/Bangladesh/G-126/2020	EPI_ISL_600468	2020-07-02	Asia / Bangladesh / Dhaka	Human			unknown	unknown	unknown		Original			B.1.1.80	GR
hCoV-19/Bangladesh/G-127/2020	EPI_ISL_600471	2020-07-01	Asia / Bangladesh / Dhaka	Human			unknown	unknown	unknown		Original			B.1.1.103	GR
hCoV-19/Bangladesh/G-129/2020	EPI_ISL_600473	2020-07-02	Asia / Bangladesh / Dhaka	Human			unknown	unknown	unknown		Original			B.1.1.25	GR
hCoV-19/Bangladesh/G-130/2020	EPI_ISL_600476	2020-07-01	Asia / Bangladesh / Dhaka	Human			unknown	unknown	unknown		Original			B.1.1.29	GR
hCoV-19/Bangladesh/G-131/2020	EPI_ISL_600478	2020-07-01	Asia / Bangladesh / Dhaka	Human			unknown	unknown	unknown		Original			B.1.1.25	GR
hCoV-19/Bangladesh/G-134/2020	EPI_ISL_600480	2020-06-19	Asia / Bangladesh / Dhaka	Human			unknown	unknown	unknown		Original			B.1.1.25	GR
hCoV-19/Bangladesh/G-14/2020	EPI_ISL_600484	2020-04-14	Asia / Bangladesh / Dhaka	Human			unknown	58	unknown		Original			B.1.1	GR
hCoV-19/Bangladesh/G-142/2020	EPI_ISL_600487	2020-06-19	Asia / Bangladesh / Dhaka	Human			unknown	unknown	unknown		Original			A	G
hCoV-19/Bangladesh/G-144/2020	EPI_ISL_600489	2020-07-01	Asia / Bangladesh / Dhaka	Human			unknown	unknown	unknown		Original			B.1.1.29	GR
hCoV-19/Bangladesh/G-149/2020	EPI_ISL_600492	2020-06-08	Asia / Bangladesh / Chittagong	Human			unknown	unknown	unknown		Original			B.1.36.16	GH
hCoV-19/Bangladesh/G-152/2020	EPI_ISL_600495	2020-06-17	Asia / Bangladesh / Chittagong	Human			unknown	unknown	unknown		Original			B.1.36.16	GH
hCoV-19/Bangladesh/G-156/2020	EPI_ISL_600498	2020-06-18	Asia / Bangladesh / Chittagong	Human			unknown	unknown	unknown		Original			B.1.36.16	GH
hCoV-19/Bangladesh/G-168/2020	EPI_ISL_600500	2020-07-04	Asia / Bangladesh / Chattogram	Human			unknown	unknown	unknown		Original			B.1.1.25	GR
hCoV-19/Bangladesh/G-171/2020	EPI_ISL_600502	2020-07-01	Asia / Bangladesh / Chattogram	Human			unknown	unknown	unknown		Original			B.1.36.16	GH
hCoV-19/Bangladesh/G-173/2020	EPI_ISL_600505	2020-07-03	Asia / Bangladesh / Chattogram	Human			unknown	unknown	unknown		Original			B.1.1	GR
hCoV-19/Bangladesh/G-176/2020	EPI_ISL_600507	2020-07-04	Asia / Bangladesh / Barishal	Human			unknown	unknown	unknown		Original			B.1.1	GR
hCoV-19/Bangladesh/G-182/2020	EPI_ISL_600510	2020-06-16	Asia / Bangladesh / Chattogram	Human			unknown	unknown	unknown		Original			B.1.1	GR
hCoV-19/Bangladesh/G-183/2020	EPI_ISL_600512	2020-06-12	Asia / Bangladesh / Chattogram	Human			unknown	unknown	unknown		Original			B.1.1.25	GR
hCoV-19/Bangladesh/G-185/2020	EPI_ISL_600517	2020-06-08	Asia / Bangladesh / Chattogram	Human			unknown	unknown	unknown		Original			B.1.1	GR
hCoV-19/Bangladesh/G-187/2020	EPI_ISL_600519	2020-06-15	Asia / Bangladesh / Chattogram	Human			unknown	unknown	unknown		Original			B.1.243	G
hCoV-19/Bangladesh/G-192/2020	EPI_ISL_600522	2020-07-02	Asia / Bangladesh / Chattogram	Human			unknown	unknown	unknown		Original			B	G
hCoV-19/Bangladesh/G-193/2020	EPI_ISL_600524	2020-07-03	Asia / Bangladesh / Chittagong	Human			unknown	unknown	unknown		Original			B.1.36.16	GH
hCoV-19/Bangladesh/G-194/2020	EPI_ISL_600527	2020-07-05	Asia / Bangladesh / Barishal	Human			unknown	unknown	unknown		Original			B.1.1	GR
hCoV-19/Bangladesh/G-201/2020	EPI_ISL_600530	2020-05-18	Asia / Bangladesh / Barishal	Human			unknown	unknown	unknown		Original			B	O
hCoV-19/Bangladesh/G-203/2020	EPI_ISL_600533	2020-05-19	Asia / Bangladesh / Barishal	Human			unknown	unknown	unknown		Original			B	G
hCoV-19/Bangladesh/G-216/2020	EPI_ISL_600535	2020-05-11	Asia / Bangladesh / Barishal	Human			unknown	unknown	unknown		Original			B.1.1	GR
hCoV-19/Bangladesh/G-217/2020	EPI_ISL_600538	2020-05-17	Asia / Bangladesh / Barishal	Human			unknown	unknown	unknown		Original			B.1.1.25	GR
hCoV-19/Bangladesh/G-218/2020	EPI_ISL_600541	2020-05-20	Asia / Bangladesh / Barishal	Human			unknown	unknown	unknown		Original			B.1.1.29	GR
hCoV-19/Bangladesh/G-219/2020	EPI_ISL_600543	2020-05-14	Asia / Bangladesh / Barishal	Human			unknown	unknown	unknown		Original			B.1.1.29	GR
hCoV-19/Bangladesh/G-220/2020	EPI_ISL_600546	2020-05-20	Asia / Bangladesh / Barishal	Human			unknown	unknown	unknown		Original			B.1.1	GR
hCoV-19/Bangladesh/G-23/2020	EPI_ISL_600549	2020-03-21	Asia / Bangladesh / Rangpur	Human			Female	48	unknown		Original			B.1	GH
hCoV-19/Bangladesh/G-24/2020	EPI_ISL_600552	2020-03-14	Asia / Bangladesh / Dhaka	Human			unknown	unknown	unknown		Original			B.1	G
hCoV-19/Bangladesh/G-27/2020	EPI_ISL_600554	2020-03-26	Asia / Bangladesh / Rangpur	Human			unknown	unknown	unknown		Original			B.1	GH
hCoV-19/Bangladesh/G-29/2020	EPI_ISL_600557	2020-03-23	Asia / Bangladesh / Dhaka	Human			unknown	unknown	unknown		Original			B.1	G
hCoV-19/Bangladesh/G-31/2020	EPI_ISL_600559	2020-03-26	Asia / Bangladesh / Dhaka	Human			Female	unknown	unknown		Original			B.1	G
hCoV-19/Bangladesh/G-38/2020	EPI_ISL_600562	2020-03-26	Asia / Bangladesh / Dhaka	Human			unknown	55	unknown		Original			B.1	G
hCoV-19/Bangladesh/G-40/2020	EPI_ISL_600564	2020-03-26	Asia / Bangladesh / Dhaka	Human			unknown	unknown	unknown		Original			B.1	GH
hCoV-19/Bangladesh/G-66/2020	EPI_ISL_600567	2020-04-07	Asia / Bangladesh / Dhaka	Human			unknown	69	unknown		Original			B.1.1.25	GR
hCoV-19/Bangladesh/BCSIR-NILMRC_392/2020	EPI_ISL_603221	2020-10-14	Asia / Bangladesh / Dhaka	Human	DNCC		Male	30	Asymptomatic		Original	Nasopharyngeal swab		B.1.1	GR
hCoV-19/Bangladesh/BCSIR-NILMRC_398/2020	EPI_ISL_603222	2020-10-08	Asia / Bangladesh / Dhaka	Human	DNCC		Male	32	Asymptomatic		Original	Nasopharyngeal swab		B.1.1.220	GR
hCoV-19/Bangladesh/BCSIR-NILMRC_376A/2020	EPI_ISL_603223	2020-07-31	Asia / Bangladesh / Dhaka / Narayanganj	Human			Male	47	ICU		Original	Nasopharyngeal swab		B.1.1.29	GR
hCoV-19/Bangladesh/BCSIR-NILMRC_390/2020	EPI_ISL_603224	2020-07-31	Asia / Bangladesh / Dhaka	Human			Male	47	unknown		Original	Nasopharyngeal swab		B.1.1.29	GR
hCoV-19/Bangladesh/BCSIR-NILMRC_391/2020	EPI_ISL_603225	2020-07-31	Asia / Bangladesh / Dhaka	Human			Male	40	unknown		Original	Nasopharyngeal swab		B.1.1.80	GR
hCoV-19/Bangladesh/BCSIR-NILMRC_393/2020	EPI_ISL_603238	2020-10-14	Asia / Bangladesh / Dhaka	Human			Male	50	Asymptomatic		Original	Nasopharyngeal swab		B.1.1.103	GR
hCoV-19/Bangladesh/BCSIR-NILMRC_396/2020	EPI_ISL_603239	2020-10-08	Asia / Bangladesh / Dhaka	Human	DNCC		Male	42	Asymptomatic		Original	Nasopharyngeal swab		B.1.1.103	GR
hCoV-19/Bangladesh/BCSIR-NILMRC_397/2020	EPI_ISL_603240	2020-10-08	Asia / Bangladesh / Dhaka	Human	DNCC		Male	43	Asymptomatic		Original	Nasopharyngeal swab		B.1.1.25	GR
hCoV-19/Bangladesh/BCSIR-NILMRC_411/2020	EPI_ISL_603241	2020-10-18	Asia / Bangladesh / Dhaka / Narayanganj	Human			Male	39	ICU		Original	Nasopharyngeal swab		B.1.1	GR
hCoV-19/Bangladesh/BCSIR-NILMRC_420/2020	EPI_ISL_603242	2020-10-10	Asia / Bangladesh / Dhaka	Human			Female	50	unknown		Original	Nasopharyngeal swab		B.1.1.25	GR
hCoV-19/Bangladesh/BCSIR-NILMRC_421/2020	EPI_ISL_603243	2020-10-10	Asia / Bangladesh / Dhaka	Human			Male	35	unknown		Original	Nasopharyngeal swab		B.1.1.103	GR
hCoV-19/Bangladesh/BCSIR-NILMRC_422/2020	EPI_ISL_603244	2020-10-10	Asia / Bangladesh / Dhaka	Human			Female	43	unknown		Original	Nasopharyngeal swab		B.1.1.103	GR
hCoV-19/Bangladesh/BCSIR-NILMRC_423/2020	EPI_ISL_603245	2020-10-10	Asia / Bangladesh / Dhaka	Human			Male	55	unknown		Original	Nasopharyngeal swab		B.1.1.103	GR
hCoV-19/Bangladesh/BCSIR-NILMRC_424/2020	EPI_ISL_603246	2020-10-05	Asia / Bangladesh / Dhaka	Human			Male	44	unknown		Original	Nasopharyngeal swab		B.1.1.103	GR
hCoV-19/Bangladesh/BCSIR-NILMRC_426/2020	EPI_ISL_603247	2020-10-05	Asia / Bangladesh / Dhaka	Human			Male	74	unknown		Original	Nasopharyngeal swab		B.1.1	GR
hCoV-19/Bangladesh/BCSIR-NILMRC_427/2020	EPI_ISL_603249	2020-10-05	Asia / Bangladesh / Dhaka	Human			Male	22	unknown		Original	Nasopharyngeal swab		B.1.1.25	GR
hCoV-19/Bangladesh/BCSIR-NILMRC_428/2020	EPI_ISL_603250	2020-10-05	Asia / Bangladesh / Dhaka	Human			Male	45	unknown		Original	Nasopharyngeal swab		B.1.1	GR
hCoV-19/Bangladesh/JUST-GC91.124/2020	EPI_ISL_605783	2020-08-08	Asia / Bangladesh / Khulna / Jashore / Chowgacha / Mohespur	Human			Male	29	unknown		Original			B.1.1.25	GR
hCoV-19/Bangladesh/DNAS-CPH-isl-441/2020	EPI_ISL_605882	2020-04-29	Asia / Bangladesh	Human			unknown	unknown	unknown		Original	Oropharyngeal swab		B.1.1.25	GR
hCoV-19/Bangladesh/DNAS-CPH-isl-475/2020	EPI_ISL_605883	2020-04-29	Asia / Bangladesh	Human			unknown	unknown	unknown		Original	Oropharyngeal swab		B.1.1	GR
hCoV-19/Bangladesh/DNAS-CPH-isl-428/2020	EPI_ISL_605884	2020-04-29	Asia / Bangladesh	Human			unknown	unknown	unknown		Original	Oropharyngeal swab		B.1.1.29	GR
hCoV-19/Bangladesh/DNAS-CPH-isl-521/2020	EPI_ISL_605885	2020-04-29	Asia / Bangladesh	Human			unknown	unknown	unknown		Original	Oropharyngeal swab		B.1.1.25	GR
hCoV-19/Bangladesh/DNAS-P-isl-T/2020	EPI_ISL_605886	2020-04-29	Asia / Bangladesh	Human			unknown	unknown	unknown		Original	Oropharyngeal swab		B.1.1	GR
hCoV-19/Bangladesh/DNAS-CPH-isl-417/2020	EPI_ISL_605887	2020-04-29	Asia / Bangladesh	Human			unknown	unknown	unknown		Original	Oropharyngeal swab		B.1	G
hCoV-19/Bangladesh/DNAS-CPH-isl-485/2020	EPI_ISL_605888	2020-04-29	Asia / Bangladesh	Human			unknown	unknown	unknown		Original	Oropharyngeal swab		B.1	G
hCoV-19/Bangladesh/DNAS-CPH-isl-509/2020	EPI_ISL_605889	2020-04-29	Asia / Bangladesh	Human			unknown	unknown	unknown		Original	Oropharyngeal swab		B.1	G
hCoV-19/Bangladesh/DNAS-CPH-isl-479/2020	EPI_ISL_605890	2020-04-29	Asia / Bangladesh	Human			unknown	unknown	unknown		Original	Oropharyngeal swab		B.1	G
hCoV-19/Bangladesh/DNAS-CPH-isl-486/2020	EPI_ISL_605891	2020-04-29	Asia / Bangladesh	Human			unknown	unknown	unknown		Original	Oropharyngeal swab		B.1	G
hCoV-19/Bangladesh/DNAS-CPH-isl-430/2020	EPI_ISL_605892	2020-04-29	Asia / Bangladesh	Human			unknown	unknown	unknown		Original	Oropharyngeal swab		B.1.1.25	GR
hCoV-19/Bangladesh/DNAS-CPH-isl-510/2020	EPI_ISL_605893	2020-04-29	Asia / Bangladesh	Human			unknown	unknown	unknown		Original	Oropharyngeal swab		B.1.1.25	GR
hCoV-19/Bangladesh/DNAS-CPH-isl-506/2020	EPI_ISL_605894	2020-04-29	Asia / Bangladesh	Human			unknown	unknown	unknown		Original	Oropharyngeal swab		B.1.1.25	GR
hCoV-19/Bangladesh/DNAS-CPH-isl-438/2020	EPI_ISL_605895	2020-04-29	Asia / Bangladesh	Human			unknown	unknown	unknown		Original	Oropharyngeal swab		B.1.1.25	GR
hCoV-19/Bangladesh/DNAS-CPH-isl-525/2020	EPI_ISL_605896	2020-04-29	Asia / Bangladesh	Human			unknown	unknown	unknown		Original	Oropharyngeal swab		B.1.1.25	GR
hCoV-19/Bangladesh/DNAS-CPH-isl-515/2020	EPI_ISL_605897	2020-04-29	Asia / Bangladesh	Human			unknown	unknown	unknown		Original	Oropharyngeal swab		B.1.1.25	GR
hCoV-19/Bangladesh/DNAS-BSH-isl-1/2020	EPI_ISL_605898	2020-04-29	Asia / Bangladesh	Human			unknown	unknown	unknown		Original	Oropharyngeal swab		B.1.1.80	GR
hCoV-19/Bangladesh/DNAS-RAB-isl-88/2020	EPI_ISL_605899	2020-04-29	Asia / Bangladesh	Human			unknown	unknown	unknown		Original	Oropharyngeal swab		B.1.1.250	GR
hCoV-19/Bangladesh/DNAS-RAB-isl-86/2020	EPI_ISL_605900	2020-04-29	Asia / Bangladesh	Human			unknown	unknown	unknown		Original	Oropharyngeal swab		B.1.1.250	GR
hCoV-19/Bangladesh/DNAS-CPH-isl-426/2020	EPI_ISL_605901	2020-04-29	Asia / Bangladesh	Human			unknown	unknown	unknown		Original	Oropharyngeal swab		B.1	G
hCoV-19/Bangladesh/DNAS-CPH-isl-461/2020	EPI_ISL_605902	2020-04-29	Asia / Bangladesh	Human			unknown	unknown	unknown		Original	Oropharyngeal swab		B.1	G
hCoV-19/Bangladesh/DNAS-CPH-isl-437/2020	EPI_ISL_605903	2020-04-29	Asia / Bangladesh	Human			unknown	unknown	unknown		Original	Oropharyngeal swab		B.1	G
hCoV-19/Bangladesh/DNAS-RAB-isl-114/2020	EPI_ISL_605904	2020-04-29	Asia / Bangladesh	Human			unknown	unknown	unknown		Original	Oropharyngeal swab		B.1.1.175	GR
hCoV-19/Bangladesh/DNAS-RAB-isl-118/2020	EPI_ISL_605905	2020-04-29	Asia / Bangladesh	Human			unknown	unknown	unknown		Original	Oropharyngeal swab		B.1.1.175	GR
hCoV-19/Bangladesh/DNAS-CPH-isl-537/2020	EPI_ISL_605906	2020-04-29	Asia / Bangladesh	Human			unknown	unknown	unknown		Original	Oropharyngeal swab		B.1	G
hCoV-19/Bangladesh/DNAS-BSH-isl-9/2020	EPI_ISL_605907	2020-04-29	Asia / Bangladesh	Human			unknown	unknown	unknown		Original	Oropharyngeal swab		B.1.1.175	GR
hCoV-19/Bangladesh/DNAS-RAB-isl-82/2020	EPI_ISL_605908	2020-04-29	Asia / Bangladesh	Human			unknown	unknown	unknown		Original	Oropharyngeal swab		B.1.1.175	GR
hCoV-19/Bangladesh/DNAS-isl-113/2020	EPI_ISL_605909	2020-05-24	Asia / Bangladesh	Human			unknown	unknown	unknown		Original	Oropharyngeal swab		B.1.1.80	GR
hCoV-19/Bangladesh/DNAS-isl-1-003/2020	EPI_ISL_605910	2020-05-24	Asia / Bangladesh	Human			unknown	unknown	unknown		Original	Oropharyngeal swab		B.1	G
hCoV-19/Bangladesh/DNAS-isl-75/2020	EPI_ISL_605911	2020-05-24	Asia / Bangladesh	Human			unknown	unknown	unknown		Original	Oropharyngeal swab		B.1.1.175	GR
hCoV-19/Bangladesh/DNAS-isl-95/2020	EPI_ISL_605912	2020-05-24	Asia / Bangladesh	Human			unknown	unknown	unknown		Original	Oropharyngeal swab		B.1.1	GR
hCoV-19/Bangladesh/DNAS-isl-116/2020	EPI_ISL_605913	2020-05-24	Asia / Bangladesh	Human			unknown	unknown	unknown		Original	Oropharyngeal swab		B.1.1.175	GR
hCoV-19/Bangladesh/DNAS-isl-6299/2020	EPI_ISL_605914	2020-05-18	Asia / Bangladesh	Human			unknown	unknown	unknown		Original	Oropharyngeal swab		B.1.1.25	GR
hCoV-19/Bangladesh/DNAS-isl-6840/2020	EPI_ISL_605915	2020-05-18	Asia / Bangladesh	Human			unknown	unknown	unknown		Original	Oropharyngeal swab		B.1	G
hCoV-19/Bangladesh/DNAS-isl-6841/2020	EPI_ISL_605916	2020-05-18	Asia / Bangladesh	Human			unknown	unknown	unknown		Original	Oropharyngeal swab		B.1.1	GR
hCoV-19/Bangladesh/DNAS-isl-8225/2020	EPI_ISL_605917	2020-05-18	Asia / Bangladesh	Human			unknown	unknown	unknown		Original	Oropharyngeal swab		B.1.1	GR
hCoV-19/Bangladesh/DNAS-isl-6300/2020	EPI_ISL_605918	2020-05-18	Asia / Bangladesh	Human			unknown	unknown	unknown		Original	Oropharyngeal swab		B.1.1	GR
hCoV-19/Bangladesh/DNAS-isl-2/2020	EPI_ISL_605919	2020-05-18	Asia / Bangladesh	Human			unknown	unknown	unknown		Original	Oropharyngeal swab		B.1.1	GR
hCoV-19/Bangladesh/DNAS-isl-6302/2020	EPI_ISL_605920	2020-05-18	Asia / Bangladesh	Human			unknown	unknown	unknown		Original	Oropharyngeal swab		B.1.1.80	GR
hCoV-19/Bangladesh/DNAS-isl-17/2020	EPI_ISL_605921	2020-05-18	Asia / Bangladesh	Human			unknown	unknown	unknown		Original	Oropharyngeal swab		B.1.1.25	GR
hCoV-19/Bangladesh/DNAS-isl-6301/2020	EPI_ISL_605922	2020-05-18	Asia / Bangladesh	Human			unknown	unknown	unknown		Original	Oropharyngeal swab		B.1.1.25	GR
hCoV-19/Bangladesh/DNAS-isl-4/2020	EPI_ISL_605923	2020-05-18	Asia / Bangladesh	Human			unknown	unknown	unknown		Original	Oropharyngeal swab		B.1.1.250	GR
hCoV-19/Bangladesh/CHRF-0043/2020	EPI_ISL_625457	2020-06-21	Asia / Bangladesh	Human			Female	9 months	unknown		Original			B.1.1	GR
hCoV-19/Bangladesh/CHRF-0044/2020	EPI_ISL_625458	2020-06-09	Asia / Bangladesh	Human			Male	4	unknown		Original			B.1.1	GR
hCoV-19/Bangladesh/CHRF-0045/2020	EPI_ISL_625459	2020-05-16	Asia / Bangladesh	Human			Male	6	unknown		Original			B.1.1.80	GR
hCoV-19/Bangladesh/CHRF-0046/2020	EPI_ISL_625460	2020-05-23	Asia / Bangladesh	Human			Female	8	unknown		Original			B.1.1.25	GR
hCoV-19/Bangladesh/CHRF-0047/2020	EPI_ISL_625461	2020-05-24	Asia / Bangladesh	Human			Female	5	unknown		Original			B.1.1.25	GR
hCoV-19/Bangladesh/CHRF-0048/2020	EPI_ISL_625462	2020-05-27	Asia / Bangladesh	Human			Male	1	unknown		Original			B.1.1.25	GR
hCoV-19/Bangladesh/CHRF-0049/2020	EPI_ISL_625463	2020-05-31	Asia / Bangladesh	Human			Male	4	unknown		Original			B.1.1.80	GR
hCoV-19/Bangladesh/CHRF-0050/2020	EPI_ISL_625464	2020-06-02	Asia / Bangladesh	Human			Male	6	unknown		Original			B.1.1.80	GR
hCoV-19/Bangladesh/CHRF-0051/2020	EPI_ISL_625465	2020-06-14	Asia / Bangladesh	Human			Male	2 months	unknown		Original			B.1.1	GR
hCoV-19/Bangladesh/CHRF-0052/2020	EPI_ISL_625466	2020-06-14	Asia / Bangladesh	Human			Female	7 months	unknown		Original			B.1.1.80	GR
hCoV-19/Bangladesh/CHRF-0053/2020	EPI_ISL_625467	2020-06-17	Asia / Bangladesh	Human			Male	5	unknown		Original			B.1.1	GR
hCoV-19/Bangladesh/CHRF-0054/2020	EPI_ISL_625468	2020-06-27	Asia / Bangladesh	Human			Male	9	unknown		Original			B.1.159	GH
hCoV-19/Bangladesh/CHRF-0055/2020	EPI_ISL_625469	2020-07-01	Asia / Bangladesh	Human			Male	8 days	unknown		Original			B.1.1	GR
hCoV-19/Bangladesh/CHRF-0056/2020	EPI_ISL_625470	2020-07-02	Asia / Bangladesh	Human			Male	7	unknown		Original			B.1.1.25	GR
hCoV-19/Bangladesh/CHRF-0058/2020	EPI_ISL_625471	2020-06-19	Asia / Bangladesh	Human			Male	2 months	unknown		Original			B.1.1.25	GR
hCoV-19/Bangladesh/CHRF-0059/2020	EPI_ISL_625472	2020-08-04	Asia / Bangladesh	Human			Male	10	unknown		Original			B.1.1.80	GR
hCoV-19/Bangladesh/CHRF-0060/2020	EPI_ISL_625473	2020-07-31	Asia / Bangladesh	Human			Female	1	unknown		Original			B.1.1.80	GR
hCoV-19/Bangladesh/CHRF-0061/2020	EPI_ISL_625474	2020-07-17	Asia / Bangladesh	Human			Female	3 days	unknown		Original			B.1.1.29	GR
hCoV-19/Bangladesh/CHRF-0062/2020	EPI_ISL_625475	2020-07-24	Asia / Bangladesh	Human			Female	3 days	unknown		Original			B.1.1.29	GR
hCoV-19/Bangladesh/CHRF-0063/2020	EPI_ISL_625476	2020-07-18	Asia / Bangladesh	Human			Male	11	unknown		Original			B.1.1.25	GR
hCoV-19/Bangladesh/CHRF-0064/2020	EPI_ISL_625477	2020-07-18	Asia / Bangladesh	Human			Female	17	unknown		Original			B.1.1.25	GR
hCoV-19/Bangladesh/CHRF-0085/2020	EPI_ISL_700328	2020-09-16	Asia / Bangladesh	Human			Male	33	unknown		Original			B.1.1	GR
hCoV-19/Bangladesh/CHRF-0076/2020	EPI_ISL_700329	2020-08-26	Asia / Bangladesh	Human			Female	12	unknown		Original			B.1.1	GR
hCoV-19/Bangladesh/CHRF-0075/2020	EPI_ISL_700330	2020-08-23	Asia / Bangladesh	Human			Female	32	unknown		Original			B.1.1.25	GR
hCoV-19/Bangladesh/CHRF-0080/2020	EPI_ISL_700331	2020-09-06	Asia / Bangladesh	Human			Male	42	unknown		Original			B.1.1.103	GR
hCoV-19/Bangladesh/CHRF-0082/2020	EPI_ISL_700332	2020-09-12	Asia / Bangladesh	Human			Male	42	unknown		Original			B.1.1.80	GR
hCoV-19/Bangladesh/CHRF-0073/2020	EPI_ISL_700333	2020-08-21	Asia / Bangladesh	Human			Male	0	unknown		Original			B.1.1.25	GR
hCoV-19/Bangladesh/CHRF-0068/2020	EPI_ISL_700334	2020-08-10	Asia / Bangladesh	Human			Male	6	unknown		Original			B.1.1.80	GR
hCoV-19/Bangladesh/CHRF-0078/2020	EPI_ISL_700335	2020-08-31	Asia / Bangladesh	Human			Male	1	unknown		Original			B.1.1.80	GR
hCoV-19/Bangladesh/CHRF-0087/2020	EPI_ISL_700336	2020-09-21	Asia / Bangladesh	Human			Male	0	unknown		Original			B.1.1.103	GR
hCoV-19/Bangladesh/CHRF-0071/2020	EPI_ISL_700337	2020-08-20	Asia / Bangladesh	Human			Female	27	unknown		Original			B.1.1	GR
hCoV-19/Bangladesh/CHRF-0067/2020	EPI_ISL_700338	2020-08-07	Asia / Bangladesh	Human			Female	25	unknown		Original			B.1.1	GR
hCoV-19/Bangladesh/CHRF-0069/2020	EPI_ISL_700339	2020-08-12	Asia / Bangladesh	Human			Male	32	unknown		Original			B.1.1	GR
hCoV-19/Bangladesh/CHRF-0070/2020	EPI_ISL_700340	2020-08-15	Asia / Bangladesh	Human			Male	27	unknown		Original			B.1.1	GR
hCoV-19/Bangladesh/CHRF-0074/2020	EPI_ISL_700341	2020-08-18	Asia / Bangladesh	Human			Female	27	unknown		Original			B.1.1	GR
hCoV-19/Bangladesh/CHRF-0079/2020	EPI_ISL_700342	2020-09-01	Asia / Bangladesh	Human			Female	21	unknown		Original			B.1.1	GR
hCoV-19/Bangladesh/CHRF-0081/2020	EPI_ISL_700343	2020-09-06	Asia / Bangladesh	Human			Female	65	unknown		Original			B.1.1	GR
hCoV-19/Bangladesh/CHRF-0083/2020	EPI_ISL_700344	2020-09-13	Asia / Bangladesh	Human			Male	36	unknown		Original			B.1.1.25	GR
hCoV-19/Bangladesh/CHRF-0084/2020	EPI_ISL_700345	2020-09-14	Asia / Bangladesh	Human			Male	47	unknown		Original			B.1.1.80	GR
hCoV-19/Bangladesh/CHRF-0086/2020	EPI_ISL_700346	2020-09-17	Asia / Bangladesh	Human			Female	8	unknown		Original			B.1.1	GR
hCoV-19/Bangladesh/CHRF-0088/2020	EPI_ISL_700347	2020-09-26	Asia / Bangladesh	Human			Female	32	unknown		Original			B.1.1.25	GR
hCoV-19/Bangladesh/CU-CTG-02/2020	EPI_ISL_735490	2020-11-26	Asia / Bangladesh / Chittagong	Human			Male	50	unknown		Original	Nasopharyngeal swab		B.1.1.103	GR
hCoV-19/Bangladesh/CU-CTG-04/2020	EPI_ISL_735492	2020-10-16	Asia / Bangladesh / Chittagong	Human			Male	42	unknown		Original	Nasopharyngeal swab		B.1.1	GR
hCoV-19/Bangladesh/CU-CTG-09/2020	EPI_ISL_735493	2020-11-22	Asia / Bangladesh / Chittagong / Cox's Bazar	Human			Male	70	unknown		Original	Nasopharyngeal swab		B.1.1.103	GR
hCoV-19/Bangladesh/CU-CTG-13/2020	EPI_ISL_735494	2020-11-24	Asia / Bangladesh / Chittagong / Bandarban	Human			Male	57	unknown		Original	Nasopharyngeal swab		B.1.1.103	GR
hCoV-19/Bangladesh/CU-CTG-18/2020	EPI_ISL_735495	2020-11-15	Asia / Bangladesh / Chittagong / Chandpur	Human			Male	65	unknown		Original			B.1.1.25	GR
hCoV-19/Bangladesh/CU-CTG-24/2020	EPI_ISL_735496	2020-11-23	Asia / Bangladesh / Chittagong / Khagrachari	Human			Male	43	unknown		Original			B.1.36	GH
hCoV-19/Bangladesh/CU-CTG-32/2020	EPI_ISL_735497	2020-11-21	Asia / Bangladesh / Chittagong	Human			Male	47	unknown		Original			B.1.1.25	GR
hCoV-19/Bangladesh/CU-CTG-38/2020	EPI_ISL_735498	2020-12-04	Asia / Bangladesh / Chittagong	Human			Male	36	unknown		Original	Nasopharyngeal swab		B.1.1	GR
hCoV-19/Bangladesh/CU-CTG-44/2020	EPI_ISL_735499	2020-12-05	Asia / Bangladesh / Chittagong	Human			Male	36	unknown		Original	Nasopharyngeal swab		B.1.1.25	GR
hCoV-19/Bangladesh/CU-CTG-57/2020	EPI_ISL_735500	2020-12-02	Asia / Bangladesh / Chittagong	Human			Male	59	unknown		Original	Nasopharyngeal swab		B.1.1.103	GR
hCoV-19/Bangladesh/CU-CTG-71/2020	EPI_ISL_735501	2020-08-23	Asia / Bangladesh / Chittagong / Feni	Human			Female	34	unknown		Original	Nasopharyngeal swab		B.1.1.103	GR
hCoV-19/Bangladesh/CU-CTG-76/2020	EPI_ISL_735502	2020-08-26	Asia / Bangladesh / Chittagong / Noakhali	Human			Female	40	unknown		Original	Nasopharyngeal swab		B.1.1.25	GR
hCoV-19/Bangladesh/JUST-GC47-099/2020	EPI_ISL_746318	2020-06-18	Asia / Bangladesh / Khulna / Jashore / Fatepur	Human			Male	33	unknown		Original			B.1.36.16	GH
hCoV-19/Bangladesh/JUST-GC55-034/2020	EPI_ISL_746319	2020-06-26	Asia / Bangladesh / Khulna / Satkhira / Tala	Human			Male	48	unknown		Original			B.1	G
hCoV-19/Bangladesh/JUST-GC59-083/2020	EPI_ISL_746323	2020-06-30	Asia / Bangladesh / Khulna / Jashore / Jashore Sadar	Human			Male	55	unknown		Original			B.1.1	GR
hCoV-19/Bangladesh/JUST-GC56-105/2020	EPI_ISL_746324	2020-06-27	Asia / Bangladesh / Khulna / Magura	Human			Male	70	unknown		Original			B.1.1	GR
hCoV-19/Bangladesh/DNAS-Jakir/2020	EPI_ISL_747283	2020-12-06	Asia / Bangladesh / Dhaka	Human			Male	30	Released		Original	Oropharyngeal swab		B.1.1.103	GR
hCoV-19/Bangladesh/SUST-GEB-Sunamganj-1/2020	EPI_ISL_753697	2020-12-02	Asia / Bangladesh / Sylhet / Sunamganj	Human			Female	58	unknown		Original	Nasopharyngeal swab		B.1.1.103	GR
hCoV-19/Bangladesh/SUST-GEB-Sunamganj-2/2020	EPI_ISL_753700	2020-12-02	Asia / Bangladesh / Sylhet / Sunamganj	Human			Male	68	unknown		Original	Nasopharyngeal swab		B.1.1.103	GR
hCoV-19/Bangladesh/SUST-GEB-Sunamganj-3/2020	EPI_ISL_753701	2020-12-02	Asia / Bangladesh / Sylhet / Sunamganj	Human			Male	31	unknown		Original	Nasopharyngeal swab		B.1.1.103	GR
hCoV-19/Bangladesh/SUST-GEB-Sunamganj-4/2020	EPI_ISL_754059	2020-12-02	Asia / Bangladesh / Sylhet / Sunamganj	Human			Male	52	unknown		Original	Nasopharyngeal swab		B.1.1.107	GR
hCoV-19/Bangladesh/SUST-GEB-Habiganj-1/2020	EPI_ISL_754109	2020-12-02	Asia / Bangladesh / Sylhet / Habiganj	Human			Male	30	unknown		Original	Nasopharyngeal swab		B.1.1.25	GR
hCoV-19/Bangladesh/SUST-GEB-Habiganj-3/2020	EPI_ISL_754173	2020-11-25	Asia / Bangladesh / Sylhet / Habiganj	Human			Male	26	unknown		Original	Nasopharyngeal swab		B.1.1.103	GR
hCoV-19/Bangladesh/SUST-GEB-Sunamganj-5/2020	EPI_ISL_754176	2020-11-30	Asia / Bangladesh / Sylhet / Sunamganj	Human			Female	55	unknown		Original	Nasopharyngeal swab		B.1.1	GR
hCoV-19/Bangladesh/SUST-GEB-Habiganj-4/2020	EPI_ISL_754177	2020-11-25	Asia / Bangladesh / Sylhet / Habiganj	Human			Female	24	unknown		Original	Nasopharyngeal swab		B.1.1	GR
hCoV-19/Bangladesh/SUST-GEB-Habiganj-5/2020	EPI_ISL_754178	2020-11-12	Asia / Bangladesh / Sylhet / Habiganj	Human			Male	31	unknown		Original	Nasopharyngeal swab		B.1.1.103	GR
hCoV-19/Bangladesh/SUST-GEB-Habiganj-6/2020	EPI_ISL_754179	2020-11-12	Asia / Bangladesh / Sylhet / Habiganj	Human			Male	41	unknown		Original	Nasopharyngeal swab		B.1.1.103	GR
hCoV-19/Bangladesh/CHRF-0032/2020	EPI_ISL_768728	2020-06-09	Asia / Bangladesh / Dhaka	Human			Female	54	unknown		Original			B.1.1	GR
hCoV-19/Bangladesh/CHRF-0033/2020	EPI_ISL_768729	2020-05-12	Asia / Bangladesh / Dhaka	Human			Female	9	unknown		Original			B.1.1	GR
hCoV-19/Bangladesh/CHRF-0034/2020	EPI_ISL_768730	2020-06-30	Asia / Bangladesh / Mymensingh	Human			Male	4	unknown		Original			B.1.1.25	GR
hCoV-19/Bangladesh/CHRF-0035/2020	EPI_ISL_768731	2020-06-14	Asia / Bangladesh / Dhaka	Human			Male	9	unknown		Original			B.1.1	GR
hCoV-19/Bangladesh/CHRF-0036/2020	EPI_ISL_768732	2020-05-13	Asia / Bangladesh	Human			Male	1	unknown		Original			B.1.1.80	GR
hCoV-19/Bangladesh/CHRF-0037/2020	EPI_ISL_768733	2020-06-17	Asia / Bangladesh / Chittagong	Human			Female	4	unknown		Original			B.1.1	GR
hCoV-19/Bangladesh/CHRF-0038/2020	EPI_ISL_768734	2020-06-24	Asia / Bangladesh / Sylhet	Human			Male	6	unknown		Original			B.1.1.12	GR
hCoV-19/Bangladesh/CHRF-0040B/2020	EPI_ISL_768735	2020-04-24	Asia / Bangladesh / Dhaka	Human			Male	28	unknown		Original			B.1.1	GR
hCoV-19/Bangladesh/CHRF-0041/2020	EPI_ISL_768736	2020-06-22	Asia / Bangladesh / Dhaka	Human			Male	0	unknown		Original			B.1.36.16	GH
hCoV-19/Bangladesh/CHRF-0042B/2020	EPI_ISL_768737	2020-06-13	Asia / Bangladesh / Dhaka	Human			Male	34	unknown		Original			B.1.1.25	GR
hCoV-19/Bangladesh/CHRF-0043B/2020	EPI_ISL_768738	2020-04-24	Asia / Bangladesh / Dhaka	Human			Male	35	unknown		Original			B.1	GH
hCoV-19/Bangladesh/CHRF-0044B/2020	EPI_ISL_768739	2020-06-23	Asia / Bangladesh / Dhaka	Human			Male	35	unknown		Original			B.1.1	GR
hCoV-19/Bangladesh/CHRF-0045B/2020	EPI_ISL_768740	2020-07-29	Asia / Bangladesh / Dhaka	Human			Male	22	unknown		Original			B.1.1	GR
hCoV-19/Bangladesh/CHRF-0065/2020	EPI_ISL_768741	2020-07-20	Asia / Bangladesh	Human			Female	8	unknown		Original			B.1.1.25	GR
hCoV-19/Bangladesh/CHRF-0077/2020	EPI_ISL_768742	2020-08-29	Asia / Bangladesh / Dhaka	Human			Male	0	unknown		Original			B.1.1.25	GR
hCoV-19/Bangladesh/DNAS_DRICM_CPH_isl_441_BGD/2020	EPI_ISL_774872	2020-04-29	Asia / Bangladesh / Dhaka	Human			Male	32	unknown		Original	Oropharyngeal swab		B.1.1.25	GR
hCoV-19/Bangladesh/DNAS_DRCIM_CPH_isl_475_BGD/2020	EPI_ISL_774873	2020-04-29	Asia / Bangladesh / Dhaka	Human			Male	27	unknown		Original	Oropharyngeal swab		B.1.1	GR
hCoV-19/Bangladesh/DNAS_DRCIM_CPH_isl_428_BGD/2020	EPI_ISL_774874	2020-04-29	Asia / Bangladesh / Dhaka	Human			Male	37	unknown		Original	Oropharyngeal swab		B.1.1.29	GR
hCoV-19/Bangladesh/DNAS_DRICM_CPH_isl_521_BGD/2020	EPI_ISL_774875	2020-04-29	Asia / Bangladesh / Dhaka	Human			Female	38	unknown		Original	Oropharyngeal swab		B.1.1.25	GR
hCoV-19/Bangladesh/DNAS_DRCIM_P_isl_T_BGD/2020	EPI_ISL_774876	2020-04-29	Asia / Bangladesh / Dhaka	Human			Female	45	unknown		Original	Oropharyngeal swab		B.1.1	GR
hCoV-19/Bangladesh/DNAS_DRCIM_CPH_isl_417_BGD/2020	EPI_ISL_774877	2020-04-29	Asia / Bangladesh / Dhaka	Human			Male	39	unknown		Original	Oropharyngeal swab		B.1	G
hCoV-19/Bangladesh/DNAS_DRCIM_CPH_isl_485_BGD/2020	EPI_ISL_774878	2020-04-29	Asia / Bangladesh / Dhaka	Human			Male	43	unknown		Original	Oropharyngeal swab		B.1	G
hCoV-19/Bangladesh/DNAS_DRCIM_CPH_isl_509_BGD/2020	EPI_ISL_774879	2020-04-29	Asia / Bangladesh / Dhaka	Human			Female	65	unknown		Original	Oropharyngeal swab		B.1	G
hCoV-19/Bangladesh/DNAS_DRCIM_CPH_isl_479_BGD/2020	EPI_ISL_774880	2020-04-29	Asia / Bangladesh / Dhaka	Human			Male	39	unknown		Original	Oropharyngeal swab		B.1	G
hCoV-19/Bangladesh/DNAS_DRCIM_CPH_isl_486_BGD/2020	EPI_ISL_774881	2020-04-29	Asia / Bangladesh / Dhaka	Human			Male	28	unknown		Original	Oropharyngeal swab		B.1	G
hCoV-19/Bangladesh/DRICM_DNAS_CPH_isl_430_BGD/2020	EPI_ISL_774882	2020-04-29	Asia / Bangladesh / Dhaka	Human			Male	30	unknown		Original	Oropharyngeal swab		B.1.1.25	GR
hCoV-19/Bangladesh/DNAS_DRCIM_CPH_isl_510_BGD/2020	EPI_ISL_774883	2020-04-29	Asia / Bangladesh / Dhaka	Human			Male	33	unknown		Original	Oropharyngeal swab		B.1.1.25	GR
hCoV-19/Bangladesh/DNAS_DRCIM_CPH_isl_506_BGD/2020	EPI_ISL_774884	2020-04-29	Asia / Bangladesh / Dhaka	Human			Male	47	unknown		Original	Oropharyngeal swab		B.1.1.25	GR
hCoV-19/Bangladesh/DNAS_DRCIM_CPH_isl_438_BGD/2020	EPI_ISL_774885	2020-04-29	Asia / Bangladesh / Dhaka	Human			Female	55	unknown		Original	Oropharyngeal swab		B.1.1.25	GR
hCoV-19/Bangladesh/DNAS_DRCIM_CPH_isl_525_BGD/2020	EPI_ISL_774886	2020-04-29	Asia / Bangladesh / Dhaka	Human			Female	58	unknown		Original	Oropharyngeal swab		B.1.1.25	GR
hCoV-19/Bangladesh/DNAS_DRCIM_CPH_isl_515_BGD/2020	EPI_ISL_774887	2020-04-29	Asia / Bangladesh / Dhaka	Human			Female	59	unknown		Original	Oropharyngeal swab		B.1.1.25	GR
hCoV-19/Bangladesh/DNAS_DRCIM_BSH_isl_1_BGD/2020	EPI_ISL_774888	2020-04-29	Asia / Bangladesh / Dhaka	Human			Female	61	unknown		Original	Oropharyngeal swab		B.1.1.80	GR
hCoV-19/Bangladesh/DNAS_DRCIM_RAB_isl_88_BGD/2020	EPI_ISL_774889	2020-04-29	Asia / Bangladesh / Dhaka	Human			Female	63	unknown		Original	Oropharyngeal swab		B.1.1.250	GR
hCoV-19/Bangladesh/DNAS_DRCIM_RAB_isl_86_BGD/2020	EPI_ISL_774890	2020-04-29	Asia / Bangladesh / Dhaka	Human			Female	67	unknown		Original	Oropharyngeal swab		B.1.1.250	GR
hCoV-19/Bangladesh/DNAS_DRCIM_CPH_isl_426_BGD/2020	EPI_ISL_774891	2020-04-29	Asia / Bangladesh / Dhaka	Human			Female	68	unknown		Original	Oropharyngeal swab		B.1	G
hCoV-19/Bangladesh/DNAS_DRCIM_CPH_isl_461_BGD/2020	EPI_ISL_774892	2020-04-29	Asia / Bangladesh / Dhaka	Human			Male	35	unknown		Original	Oropharyngeal swab		B.1	G
hCoV-19/Bangladesh/DNAS_DRCIM_CPH_isl_437_BGD/2020	EPI_ISL_774893	2020-04-29	Asia / Bangladesh / Dhaka	Human			Male	36	unknown		Original	Oropharyngeal swab		B.1	G
hCoV-19/Bangladesh/DNAS_DRCIM_RAB_isl_114_BGD/2020	EPI_ISL_774894	2020-04-29	Asia / Bangladesh / Dhaka	Human			Male	37	unknown		Original	Oropharyngeal swab		B.1.1.175	GR
hCoV-19/Bangladesh/DNAS_DRCIM_RAB_isl_118_BGD/2020	EPI_ISL_774895	2020-04-29	Asia / Bangladesh / Dhaka	Human			Male	39	unknown		Original	Oropharyngeal swab		B.1.1.175	GR
hCoV-19/Bangladesh/DNAS_DRCIM_CPH_isl_537_BGD/2020	EPI_ISL_774896	2020-04-29	Asia / Bangladesh / Dhaka	Human			Male	30	unknown		Original	Oropharyngeal swab		B.1	G
hCoV-19/Bangladesh/DNAS_DRCIM_BSH_isl_9_BGD/2020	EPI_ISL_774897	2020-04-29	Asia / Bangladesh / Dhaka	Human			Male	36	unknown		Original	Oropharyngeal swab		B.1.1.175	GR
hCoV-19/Bangladesh/DNAS_DRCIM_RAB_isl_82_BGD/2020	EPI_ISL_774898	2020-04-29	Asia / Bangladesh / Dhaka	Human			Male	35	unknown		Original	Oropharyngeal swab		B.1.1.175	GR
hCoV-19/Bangladesh/DNAS_DRCIM_isl_113/2020	EPI_ISL_774899	2020-04-29	Asia / Bangladesh / Dhaka	Human			Male	39	unknown		Original	Oropharyngeal swab		B.1.1.80	GR
hCoV-19/Bangladesh/DNAS_DRCIM_isl_1-003/2020	EPI_ISL_774900	2020-04-29	Asia / Bangladesh / Dhaka	Human			Male	47	unknown		Original	Oropharyngeal swab		B.1	G
hCoV-19/Bangladesh/DNAS_DRCIM_isl_75/2020	EPI_ISL_774901	2020-04-29	Asia / Bangladesh / Dhaka	Human			Male	45	unknown		Original	Oropharyngeal swab		B.1.1.175	GR
hCoV-19/Bangladesh/DNAS_DRCIM_isl_95/2020	EPI_ISL_774902	2020-04-29	Asia / Bangladesh / Dhaka	Human			Male	49	unknown		Original	Oropharyngeal swab		B.1.1	GR
hCoV-19/Bangladesh/DNAS_DRCIM_isl_116/2020	EPI_ISL_774903	2020-04-29	Asia / Bangladesh / Dhaka	Human			Male	48	unknown		Original	Oropharyngeal swab		B.1.1.175	GR
hCoV-19/Bangladesh/DNAS_DRCIM_isl_6299/2020	EPI_ISL_774904	2020-04-29	Asia / Bangladesh / Dhaka	Human			Female	61	unknown		Original	Oropharyngeal swab		B.1.1.25	GR
hCoV-19/Bangladesh/DNAS_DRCIM_isl_6840/2020	EPI_ISL_774905	2020-04-29	Asia / Bangladesh / Dhaka	Human			Male	49	unknown		Original	Oropharyngeal swab		B.1	G
hCoV-19/Bangladesh/DNAS_DRCIM_isl_6841/2020	EPI_ISL_774906	2020-04-29	Asia / Bangladesh / Dhaka	Human			Male	48	unknown		Original	Oropharyngeal swab		B.1.1	GR
hCoV-19/Bangladesh/DNAS_DRCIM_isl_8225/2020	EPI_ISL_774907	2020-04-29	Asia / Bangladesh / Dhaka	Human			Male	45	unknown		Original	Oropharyngeal swab		B.1.1	GR
hCoV-19/Bangladesh/DNAS_DRCIM_isl_6300/2020	EPI_ISL_774908	2020-04-29	Asia / Bangladesh / Dhaka	Human			Male	39	unknown		Original	Oropharyngeal swab		B.1.1	GR
hCoV-19/Bangladesh/DNAS_DRCIM_isl_2/2020	EPI_ISL_774909	2020-04-29	Asia / Bangladesh / Dhaka	Human			Male	35	unknown		Original	Oropharyngeal swab		B.1.1	GR
hCoV-19/Bangladesh/DNAS_isl_DRCIM_6302/2020	EPI_ISL_774910	2020-04-29	Asia / Bangladesh / Dhaka	Human			Male	36	unknown		Original	Oropharyngeal swab		B.1.1.80	GR
hCoV-19/Bangladesh/DNAS_DRCIM_isl_17/2020	EPI_ISL_774911	2020-04-29	Asia / Bangladesh / Dhaka	Human			Male	33	unknown		Original	Oropharyngeal swab		B.1.1.25	GR
hCoV-19/Bangladesh/DNAS_DRCIM_isl_6301/2020	EPI_ISL_774912	2020-04-29	Asia / Bangladesh / Dhaka	Human			Male	31	unknown		Original	Oropharyngeal swab		B.1.1.25	GR
hCoV-19/Bangladesh/DNAS_DRCIM_isl_4/2020	EPI_ISL_774913	2020-04-29	Asia / Bangladesh / Dhaka	Human			Male	36	unknown		Original	Oropharyngeal swab		B.1.1.250	GR
hCoV-19/Bangladesh/DNAS_DRCIM_isl_DSIMCH-3/2020	EPI_ISL_774914	2020-07-03	Asia / Bangladesh / Dhaka	Human			Male	86	unknown		Original	Oropharyngeal swab		B.1.1.25	GR
hCoV-19/Bangladesh/DNAS_DRCIM_isl_BRB 4/2020	EPI_ISL_774915	2020-07-03	Asia / Bangladesh / Dhaka	Human			Female	50	unknown		Original	Oropharyngeal swab		B.1.1.25	GR
hCoV-19/Bangladesh/DNAS_DRCIM_isl_OPS 8/2020	EPI_ISL_774916	2020-07-03	Asia / Bangladesh / Dhaka	Human			Male	44	unknown		Original	Oropharyngeal swab		B.1.1	GR
hCoV-19/Bangladesh/DNAS_DRCIM_isl_P2-98/2020	EPI_ISL_774917	2020-07-02	Asia / Bangladesh / Dhaka	Human			Male	55	unknown		Original	Oropharyngeal swab		B.1.1.25	GR
hCoV-19/Bangladesh/DNAS_DRCIM_isl_Sik-Bip-01/2020	EPI_ISL_774918	2020-07-03	Asia / Bangladesh / Dhaka	Human			Male	32	unknown		Original	Oropharyngeal swab		B.1.1	GR
hCoV-19/Bangladesh/DNAS_DRCIM_isl_SM-01/2020	EPI_ISL_774919	2020-07-04	Asia / Bangladesh / Dhaka	Human			Male	58	unknown		Original	Oropharyngeal swab		B.1.1.25	GR
hCoV-19/Bangladesh/DNAS_DRCIM_isl_R-88/2020	EPI_ISL_774920	2020-07-02	Asia / Bangladesh / Dhaka	Human			Male	31	unknown		Original	Oropharyngeal swab		B.1.1	GR
hCoV-19/Bangladesh/DNAS_isl_P2-104/2020	EPI_ISL_774921	2020-07-02	Asia / Bangladesh / Dhaka	Human			Female	50	unknown		Original	Oropharyngeal swab		B.1.1.25	GR
hCoV-19/Bangladesh/DNAS_DRCIM_isl_Amal/2020	EPI_ISL_774922	2020-07-02	Asia / Bangladesh / Dhaka	Human			Male	42	unknown		Original	Oropharyngeal swab		B.1.1	GR
hCoV-19/Bangladesh/DNAS_DRCIM_isl_MH-03/2020	EPI_ISL_774923	2020-07-02	Asia / Bangladesh / Dhaka	Human			Female	34	unknown		Original	Oropharyngeal swab		B.1.1.80	GR
hCoV-19/Bangladesh/DNAS_DRCIM_isl_P2-102/2020	EPI_ISL_774924	2020-07-02	Asia / Bangladesh / Dhaka	Human			Female	45	unknown		Original	Oropharyngeal swab		B.1.1	GR
hCoV-19/Bangladesh/DNAS_DRCIM_isl_SM-12/2020	EPI_ISL_774925	2020-07-02	Asia / Bangladesh / Dhaka	Human			Female	8	unknown		Original	Oropharyngeal swab		B.1.1	GR
hCoV-19/Bangladesh/DNAS_DRCIM_isl_MH-02/2020	EPI_ISL_774926	2020-07-02	Asia / Bangladesh / Dhaka	Human			Female	2	unknown		Original	Oropharyngeal swab		B.1.1.80	GR
hCoV-19/Bangladesh/DNAS_DRCIM_isl_P2-101/2020	EPI_ISL_774927	2020-07-02	Asia / Bangladesh / Dhaka	Human			Male	57	unknown		Original	Oropharyngeal swab		B.1.1	GR
hCoV-19/Bangladesh/DNAS_DRCIM_isl_MH-09/2020	EPI_ISL_774928	2020-07-02	Asia / Bangladesh / Dhaka	Human			Male	52	unknown		Original	Oropharyngeal swab		B.1	G
hCoV-19/Bangladesh/DNAS_DRCIM_isl_P2-107/2020	EPI_ISL_774929	2020-07-02	Asia / Bangladesh / Dhaka	Human			Male	15	unknown		Original	Oropharyngeal swab		B.1.1.25	GR
hCoV-19/Bangladesh/DNAS_DRCIM_isl_Hia/2020	EPI_ISL_774930	2020-07-02	Asia / Bangladesh / Dhaka	Human			Female	20	unknown		Original	Oropharyngeal swab		B.1.1.25	GR
hCoV-19/Bangladesh/DNAS_DRCIM_isl_P2-106/2020	EPI_ISL_774931	2020-07-02	Asia / Bangladesh / Dhaka	Human			Male	18	unknown		Original	Oropharyngeal swab		B.1.1.25	GR
hCoV-19/Bangladesh/DNAS_DRCIM_isl_R-36/2020	EPI_ISL_774932	2020-06-30	Asia / Bangladesh / Dhaka	Human			Female	28	unknown		Original	Oropharyngeal swab		B.1.1	GR
hCoV-19/Bangladesh/DNAS_DRCIM_isl_HH_12/2020	EPI_ISL_774933	2020-07-02	Asia / Bangladesh / Dhaka	Human			Male	54	unknown		Original	Oropharyngeal swab		B.1.1.25	GR
hCoV-19/Bangladesh/DNAS_DRCIM_isl_KHL-1/2020	EPI_ISL_774934	2020-06-30	Asia / Bangladesh / Dhaka	Human			Male	40	unknown		Original	Oropharyngeal swab		B.1.1	GR
hCoV-19/Bangladesh/DNAS_DRCIM_isl_B-1/2020	EPI_ISL_774935	2020-07-05	Asia / Bangladesh / Dhaka	Human			Female	39	unknown		Original	Oropharyngeal swab		B.1.1.25	GR
hCoV-19/Bangladesh/DNAS_DRCIM_isl_Sik-bip 1/2020	EPI_ISL_774936	2020-06-30	Asia / Bangladesh / Dhaka	Human			Male	40	unknown		Original	Oropharyngeal swab		B.1.1	GR
hCoV-19/Bangladesh/DNAS_DRCIM_isl_NUR/2020	EPI_ISL_774937	2020-07-05	Asia / Bangladesh / Dhaka	Human			Male	37	unknown		Original	Oropharyngeal swab		B.1.1.25	GR
hCoV-19/Bangladesh/DNAS_DRCIM_isl_SIBL-7/2020	EPI_ISL_774938	2020-06-30	Asia / Bangladesh / Dhaka	Human			Male	46	unknown		Original	Oropharyngeal swab		B.1.1	GR
hCoV-19/Bangladesh/DNAS_DRCIM_isl_SIBL-FH 3/2020	EPI_ISL_774939	2020-07-05	Asia / Bangladesh / Dhaka	Human			Male	47	unknown		Original	Oropharyngeal swab		B.1.1	GR
hCoV-19/Bangladesh/DNAS_DRCIM_isl_IH-04/2020	EPI_ISL_774940	2020-07-05	Asia / Bangladesh / Dhaka	Human			Male	53	unknown		Original	Oropharyngeal swab		B.1.1	GR
hCoV-19/Bangladesh/DNAS_DRCIM_isl_IH-03/2020	EPI_ISL_774941	2020-06-30	Asia / Bangladesh / Dhaka	Human			Male	72	unknown		Original	Oropharyngeal swab		B.1.1	GR
hCoV-19/Bangladesh/DNAS_DRCIM_isl_KHL-0135/2020	EPI_ISL_774942	2020-07-05	Asia / Bangladesh / Dhaka	Human			Female	15	unknown		Original	Oropharyngeal swab		B.1.1	GR
hCoV-19/Bangladesh/DNAS_DRCIM_isl_HH_13/2020	EPI_ISL_774943	2020-06-30	Asia / Bangladesh / Dhaka	Human			Male	55	unknown		Original	Oropharyngeal swab		B.1.1.29	GR
hCoV-19/Bangladesh/DNAS_DRCIM_isl_MT-04/2020	EPI_ISL_774944	2020-07-05	Asia / Bangladesh / Dhaka	Human			Female	55	unknown		Original	Oropharyngeal swab		B.1.1	GR
hCoV-19/Bangladesh/DNAS_DRCIM_isl_MT-05/2020	EPI_ISL_774945	2020-07-05	Asia / Bangladesh / Dhaka	Human			Male	12	unknown		Original	Oropharyngeal swab		B.1.1	GR
hCoV-19/Bangladesh/DNAS_DRCIM_isl_ICHRI-2/2020	EPI_ISL_774946	2020-07-05	Asia / Bangladesh / Dhaka	Human			Male	58	unknown		Original	Oropharyngeal swab		B.1.1.80	GR
hCoV-19/Bangladesh/DNAS_DRCIM_isl_R-101/2020	EPI_ISL_774947	2020-07-04	Asia / Bangladesh / Dhaka	Human			Female	68	unknown		Original	Oropharyngeal swab		B.1.1.80	GR
hCoV-19/Bangladesh/DNAS_DRCIM_isl_Sik-bip 2/2020	EPI_ISL_774948	2020-06-30	Asia / Bangladesh / Dhaka	Human			Male	68	unknown		Original	Oropharyngeal swab		B.1.1	GR
hCoV-19/Bangladesh/DNAS_DRCIM_isl_HH-12/2020	EPI_ISL_774949	2020-06-30	Asia / Bangladesh / Dhaka	Human			Male	60	unknown		Original	Oropharyngeal swab		B.1.1	GR
hCoV-19/Bangladesh/DNAS_DRCIM_isl_GL-01/2020	EPI_ISL_774950	2020-07-04	Asia / Bangladesh / Dhaka	Human			Male	44	unknown		Original	Oropharyngeal swab		B.1.1.250	GR
hCoV-19/Bangladesh/DNAS_DRCIM_isl_HH-11/2020	EPI_ISL_774951	2020-06-30	Asia / Bangladesh / Dhaka	Human			Female	28	unknown		Original	Oropharyngeal swab		B.1.1.25	GR
hCoV-19/Bangladesh/DNAS_DRCIM_isl_Hafiz Riad/2020	EPI_ISL_774952	2020-06-28	Asia / Bangladesh / Dhaka	Human			Male	43	unknown		Original	Oropharyngeal swab		B.1.1	GR
hCoV-19/Bangladesh/DNAS_DRCIM_isl_SIBL-09/2020	EPI_ISL_774953	2020-06-28	Asia / Bangladesh / Dhaka	Human			Male	33	unknown		Original	Oropharyngeal swab		B.1.1.103	GR
hCoV-19/Bangladesh/DNAS_DRCIM_isl_SIBL-08/2020	EPI_ISL_774954	2020-06-28	Asia / Bangladesh / Dhaka	Human			Female	67	unknown		Original	Oropharyngeal swab		B.1.1.103	GR
hCoV-19/Bangladesh/DNAS_DRCIM_isl_BGH-485/2020	EPI_ISL_774955	2020-06-28	Asia / Bangladesh / Dhaka	Human			Male	70	unknown		Original	Oropharyngeal swab		B.1.1	GR
hCoV-19/Bangladesh/DNAS_DRCIM_isl_Tanjima/2020	EPI_ISL_774956	2020-06-28	Asia / Bangladesh / Dhaka	Human			Female	24	unknown		Original	Oropharyngeal swab		B.1.1	GR
hCoV-19/Bangladesh/DNAS_DRCIM_isl_DSIMCH-2/2020	EPI_ISL_774957	2020-06-30	Asia / Bangladesh / Dhaka	Human			Female	35	unknown		Original	Oropharyngeal swab		B.1.1	GR
hCoV-19/Bangladesh/DNAS_DRCIM_isl_SIBL-06/2020	EPI_ISL_774958	2020-06-30	Asia / Bangladesh / Dhaka	Human			Female	32	unknown		Original	Oropharyngeal swab		B.1.1	GR
hCoV-19/Bangladesh/DNAS_DRCIM_isl_S-3/2020	EPI_ISL_774959	2020-06-27	Asia / Bangladesh / Dhaka	Human			Male	58	unknown		Original	Oropharyngeal swab		B.1.1.25	GR
hCoV-19/Bangladesh/DNAS_DRCIM_isl_SIBL-07/2020	EPI_ISL_774960	2020-06-28	Asia / Bangladesh / Dhaka	Human			Male	46	unknown		Original	Oropharyngeal swab		B.1.1.103	GR
hCoV-19/Bangladesh/DNAS_DRCIM_isl_S-5/2020	EPI_ISL_774961	2020-07-04	Asia / Bangladesh / Dhaka	Human			Female	26	unknown		Original	Oropharyngeal swab		B.1.1.29	GR
hCoV-19/Bangladesh/DNAS_DRCIM_isl_BRB-3/2020	EPI_ISL_774962	2020-06-30	Asia / Bangladesh / Dhaka	Human			Male	45	unknown		Original	Oropharyngeal swab		B.1.1.29	GR
hCoV-19/Bangladesh/DNAS_DRCIM_isl_MMC-01/2020	EPI_ISL_774963	2020-06-28	Asia / Bangladesh / Dhaka	Human			Male	63	unknown		Original	Oropharyngeal swab		B.1.36	GH
hCoV-19/Bangladesh/DNAS_DRCIM_isl_MMC-02/2020	EPI_ISL_774964	2020-06-28	Asia / Bangladesh / Dhaka	Human			Female	59	unknown		Original	Oropharyngeal swab		B.1.36	GH
hCoV-19/Bangladesh/DNAS_DRCIM_isl_UMCH-1/2020	EPI_ISL_774965	2020-06-28	Asia / Bangladesh / Dhaka	Human			Male	9	unknown		Original	Oropharyngeal swab		B.1.1.25	GR
hCoV-19/Bangladesh/DNAS_DRCIM_isl_R-97/2020	EPI_ISL_774966	2020-07-04	Asia / Bangladesh / Dhaka	Human			Female	58	unknown		Original	Oropharyngeal swab		B.1.1.25	GR
hCoV-19/Bangladesh/DNAS_DRICM_isl_19183/2020	EPI_ISL_774967	2020-06-28	Asia / Bangladesh / Dhaka	Human			Female	37	unknown		Original	Oropharyngeal swab		B.1.1.103	GR
hCoV-19/Bangladesh/DNAS_DRICM_isl_19189/2020	EPI_ISL_774968	2020-06-28	Asia / Bangladesh / Dhaka	Human			Male	32	unknown		Original	Oropharyngeal swab		B.1.1	GR
hCoV-19/Bangladesh/DNAS_DRICM_isl_ICHRI_4/2020	EPI_ISL_774969	2020-06-28	Asia / Bangladesh / Dhaka	Human			Male	72	unknown		Original	Oropharyngeal swab		B.1.1	GR
hCoV-19/Bangladesh/DNAS_DRICM_isl_19215/2020	EPI_ISL_774970	2020-06-28	Asia / Bangladesh / Dhaka	Human			Male	27	unknown		Original	Oropharyngeal swab		B.1.1	GR
hCoV-19/Bangladesh/DNAS_DRICM_isl_MH-32/2020	EPI_ISL_774971	2020-07-11	Asia / Bangladesh / Dhaka	Human			Male	65	unknown		Original	Oropharyngeal swab		B.1.1.25	GR
hCoV-19/Bangladesh/DNAS_DRICM_isl_SIBL-5/2020	EPI_ISL_774972	2020-07-11	Asia / Bangladesh / Dhaka	Human			Male	31	unknown		Original	Oropharyngeal swab		B.1.1	GR
hCoV-19/Bangladesh/DNAS_DRICM_isl_MH-22/2020	EPI_ISL_774973	2020-07-11	Asia / Bangladesh / Dhaka	Human			Male	0	unknown		Original	Oropharyngeal swab		B.1.1	GR
hCoV-19/Bangladesh/DNAS_DRICM_isl_MH-23/2020	EPI_ISL_774974	2020-07-11	Asia / Bangladesh / Dhaka	Human			Female	48	unknown		Original	Oropharyngeal swab		B.1.1	GR
hCoV-19/Bangladesh/DNAS_DRICM_isl_B-3/2020	EPI_ISL_774975	2020-07-12	Asia / Bangladesh / Dhaka	Human			Female	20	unknown		Original	Oropharyngeal swab		B.1.1	GR
hCoV-19/Bangladesh/GRMDRC/2020	EPI_ISL_774976	2020-12-19	Asia / Bangladesh / Dhaka / Dhamrai	Human			Male	68	Live		Original	Nasopharyngeal and oropharyngeal swab		B.1.1	GR
hCoV-19/Bangladesh/DNAS_DRICM_isl_19205/2020	EPI_ISL_774977	2020-06-28	Asia / Bangladesh / Dhaka	Human			Male	40	unknown		Original	Oropharyngeal swab		B.1.1.25	GR
hCoV-19/Bangladesh/DNAS_DRICM_isl_B-4/2020	EPI_ISL_774978	2020-07-12	Asia / Bangladesh / Dhaka	Human			Female	15	unknown		Original	Oropharyngeal swab		B.1.1	GR
hCoV-19/Bangladesh/DNAS_DRICM_isl_SIBL_12/2020	EPI_ISL_774979	2020-06-28	Asia / Bangladesh / Dhaka	Human			Male	55	unknown		Original	Oropharyngeal swab		B.1.36	GH
hCoV-19/Bangladesh/DNAS_DRICM_isl_B-2/2020	EPI_ISL_774980	2020-07-12	Asia / Bangladesh / Dhaka	Human			Female	40	unknown		Original	Oropharyngeal swab		B.1.1.25	GR
hCoV-19/Bangladesh/DNAS_DRICM_isl_N-3/2020	EPI_ISL_774981	2020-07-12	Asia / Bangladesh / Dhaka	Human			Female	74	unknown		Original	Oropharyngeal swab		B.1.1.25	GR
hCoV-19/Bangladesh/DNAS_DRICM_isl_MH-09/2020	EPI_ISL_774982	2020-07-12	Asia / Bangladesh / Dhaka	Human			Male	4	unknown		Original	Oropharyngeal swab		B.1.1	GR
hCoV-19/Bangladesh/DNAS_DRICM_isl_MR-03/2020	EPI_ISL_774983	2020-07-11	Asia / Bangladesh / Dhaka	Human			Female	31	unknown		Original	Oropharyngeal swab		B.1.1	GR
hCoV-19/Bangladesh/DNAS_DRICM_isl_18941/2020	EPI_ISL_774984	2020-06-27	Asia / Bangladesh / Dhaka	Human			Male	32	unknown		Original	Oropharyngeal swab		B.1.1.25	GR
hCoV-19/Bangladesh/DNAS_DRICM_isl_Iffat/2020	EPI_ISL_774985	2020-07-10	Asia / Bangladesh / Dhaka	Human			Female	47	unknown		Original	Oropharyngeal swab		B.1.1.25	GR
hCoV-19/Bangladesh/DNAS_DRICM_isl_IH-2/2020	EPI_ISL_774986	2020-07-12	Asia / Bangladesh / Dhaka	Human			Female	45	unknown		Original	Oropharyngeal swab		B.1.1.25	GR
hCoV-19/Bangladesh/DNAS_DRICM_isl_BRB-13/2020	EPI_ISL_774987	2020-06-28	Asia / Bangladesh / Dhaka	Human			Male	53	unknown		Original	Oropharyngeal swab		B.1.1.25	GR
hCoV-19/Bangladesh/DNAS_DRICM_isl_18927/2020	EPI_ISL_774988	2020-06-27	Asia / Bangladesh / Dhaka	Human			Male	23	unknown		Original	Oropharyngeal swab		B.1.1.80	GR
hCoV-19/Bangladesh/DNAS_DRICM_isl_HH-08/2020	EPI_ISL_774989	2020-07-11	Asia / Bangladesh / Dhaka	Human			Male	48	unknown		Original	Oropharyngeal swab		B.1.1	GR
hCoV-19/Bangladesh/DNAS_DRICM_isl_MM-50/2020	EPI_ISL_774990	2020-06-29	Asia / Bangladesh / Dhaka	Human			Male	55	unknown		Original	Oropharyngeal swab		B.1.1.103	GR
hCoV-19/Bangladesh/DNAS_DRICM_isl_R-136/2020	EPI_ISL_774991	2020-07-12	Asia / Bangladesh / Dhaka	Human			Male	48	unknown		Original	Oropharyngeal swab		B.1.1	GR
hCoV-19/Bangladesh/DNAS_DRICM_isl_MLS-4/2020	EPI_ISL_774992	2020-07-10	Asia / Bangladesh / Dhaka	Human			Male	60	unknown		Original	Oropharyngeal swab		B.1.1.80	GR
hCoV-19/Bangladesh/DNAS_DRICM_isl_R-138/2020	EPI_ISL_774993	2020-07-12	Asia / Bangladesh / Dhaka	Human			Female	25	unknown		Original	Oropharyngeal swab		B.1.36.16	GH
hCoV-19/Bangladesh/DNAS_DRICM_isl_EK-91/2020	EPI_ISL_774994	2020-07-10	Asia / Bangladesh / Dhaka	Human			Male	62	unknown		Original	Oropharyngeal swab		B.1.36.16	GH
hCoV-19/Bangladesh/DNAS_DRICM_isl_Enayet/2020	EPI_ISL_774995	2020-07-10	Asia / Bangladesh / Dhaka	Human			Male	61	unknown		Original	Oropharyngeal swab		B.1.36.16	GH
hCoV-19/Bangladesh/DNAS_DRICM_isl_S-02/2020	EPI_ISL_774996	2020-06-28	Asia / Bangladesh / Dhaka	Human			Female	44	unknown		Original	Oropharyngeal swab		B.1.1.25	GR
hCoV-19/Bangladesh/DNAS_DRICM_isl_OPS_3/2020	EPI_ISL_774997	2020-06-28	Asia / Bangladesh / Dhaka	Human			Male	58	unknown		Original	Oropharyngeal swab		B.1.36	GH
hCoV-19/Bangladesh/DNAS_DRICM_isl_Ismail/2020	EPI_ISL_774998	2020-06-28	Asia / Bangladesh / Dhaka	Human			Male	25	unknown		Original	Oropharyngeal swab		B.1.1.103	GR
hCoV-19/Bangladesh/DNAS_DRICM_isl_MH-13/2020	EPI_ISL_774999	2020-06-28	Asia / Bangladesh / Dhaka	Human			Female	50	unknown		Original	Oropharyngeal swab		B.1.1.25	GR
hCoV-19/Bangladesh/DNAS_DRICM_isl_MLS-5/2020	EPI_ISL_775000	2020-07-16	Asia / Bangladesh / Dhaka	Human			Male	32	unknown		Original	Oropharyngeal swab		B.1.1	GR
hCoV-19/Bangladesh/DNAS_DRICM_isl_UMCH-1/2020	EPI_ISL_775001	2020-06-28	Asia / Bangladesh / Dhaka	Human			Male	49	unknown		Original	Oropharyngeal swab		B.1.1	GR
hCoV-19/Bangladesh/DNAS_DRICM_isl_18974/2020	EPI_ISL_775002	2020-06-27	Asia / Bangladesh / Dhaka	Human			Male	29	unknown		Original	Oropharyngeal swab		B.1.1	GR
hCoV-19/Bangladesh/DNAS_DRICM_isl_R-28/2020	EPI_ISL_775003	2020-06-28	Asia / Bangladesh / Dhaka	Human			Female	49	unknown		Original	Oropharyngeal swab		B.1.1.25	GR
hCoV-19/Bangladesh/DNAS_DRICM_isl_R-2/2020	EPI_ISL_775004	2020-07-17	Asia / Bangladesh / Dhaka	Human			Male	54	unknown		Original	Oropharyngeal swab		B.1.1	GR
hCoV-19/Bangladesh/DNAS_DRICM_isl_R-6/2020	EPI_ISL_775005	2020-07-17	Asia / Bangladesh / Dhaka	Human			Female	16	unknown		Original	Oropharyngeal swab		B.1.1	GR
hCoV-19/Bangladesh/DNAS_DRICM_isl_R-3/2020	EPI_ISL_775006	2020-07-17	Asia / Bangladesh / Dhaka	Human			Female	24	unknown		Original	Oropharyngeal swab		B.1.1	GR
hCoV-19/Bangladesh/DNAS_DRICM_isl_18953/2020	EPI_ISL_775007	2020-06-27	Asia / Bangladesh / Dhaka	Human			Male	31	unknown		Original	Oropharyngeal swab		B.1.1.25	GR
hCoV-19/Bangladesh/DNAS_DRICM_isl_MH-25/2020	EPI_ISL_775008	2020-06-28	Asia / Bangladesh / Dhaka	Human			Male	51	unknown		Original	Oropharyngeal swab		B.1.1.25	GR
hCoV-19/Bangladesh/DNAS_DRICM_isl_18944/2020	EPI_ISL_775009	2020-06-27	Asia / Bangladesh / Dhaka	Human			Male	36	unknown		Original	Oropharyngeal swab		B.1.1.279	GR
hCoV-19/Bangladesh/DNAS_DRICM_isl_MLS-9/2020	EPI_ISL_775010	2020-07-16	Asia / Bangladesh / Dhaka	Human			Male	40	unknown		Original	Oropharyngeal swab		B.1.1.25	GR
hCoV-19/Bangladesh/DNAS_DRICM_isl_18964/2020	EPI_ISL_775011	2020-06-27	Asia / Bangladesh / Dhaka	Human			Male	39	unknown		Original	Oropharyngeal swab		B.1.1	GR
hCoV-19/Bangladesh/DNAS_DRICM_isl_Al-52/2020	EPI_ISL_775012	2020-07-19	Asia / Bangladesh / Dhaka	Human			Female	40	unknown		Original	Oropharyngeal swab		B.1.1	GR
hCoV-19/Bangladesh/DNAS_DRICM_isl_S-1/2020	EPI_ISL_775013	2020-07-22	Asia / Bangladesh / Dhaka	Human			Male	16	unknown		Original	Oropharyngeal swab		B.1.1	GR
hCoV-19/Bangladesh/DNAS_DRICM_isl_SM-14/2020	EPI_ISL_775014	2020-07-20	Asia / Bangladesh / Dhaka	Human			Male	43	unknown		Original	Oropharyngeal swab		B.1.1.25	GR
hCoV-19/Bangladesh/DNAS_DRICM_isl_Razia/2020	EPI_ISL_775015	2020-07-21	Asia / Bangladesh / Dhaka	Human			Female	50	unknown		Original	Oropharyngeal swab		B.1.1.103	GR
hCoV-19/Bangladesh/DNAS_DRICM_isl_SM-12/2020	EPI_ISL_775016	2020-07-20	Asia / Bangladesh / Dhaka	Human			Female	28	unknown		Original	Oropharyngeal swab		B.1.1.107	GR
hCoV-19/Bangladesh/DNAS_DRICM_isl_Sharmin/2020	EPI_ISL_775017	2020-07-21	Asia / Bangladesh / Dhaka	Human			Female	32	unknown		Original	Oropharyngeal swab		B.1.1.80	GR
hCoV-19/Bangladesh/DNAS_DRICM_isl_Reza/2020	EPI_ISL_775018	2020-07-21	Asia / Bangladesh / Dhaka	Human			Male	1	unknown		Original	Oropharyngeal swab		B.1.1.80	GR
hCoV-19/Bangladesh/GRMDRC-2/2020	EPI_ISL_775019	2020-12-05	Asia / Bangladesh / Dhaka	Human			Male	48	Live		Original	Nasopharyngeal and oropharyngeal swab		B.1.1.103	GR
hCoV-19/Bangladesh/GRMDRC-3/2020	EPI_ISL_775020	2020-12-08	Asia / Bangladesh / Dhaka	Human	Adabor, Shamoly		Female	21	Live		Original	Nasopharyngeal and oropharyngeal swab		B.1.1.103	GR
hCoV-19/Bangladesh/GRMDRC-4/2020	EPI_ISL_775213	2020-12-08	Asia / Bangladesh / Chittagong / Comilla	Human			Male	62	Alive		Original	Naso-oropharyngeal swab		B.1.1.103	GR
hCoV-19/Bangladesh/GRMDRC-5/2020	EPI_ISL_775214	2020-11-14	Asia / Bangladesh / Dhaka	Human	Shamoly		Female	50	Alive		Original	Naso-oropharyngeal swab		B.1.1	GR
hCoV-19/Bangladesh/GRMDRC-6/2020	EPI_ISL_775215	2020-10-05	Asia / Bangladesh / Dhaka	Human	Dhanmondi		Female	17	Alive		Original			B.1.1	GR
hCoV-19/Bangladesh/GRMDRC-7/2020	EPI_ISL_775216	2020-10-17	Asia / Bangladesh / Dhaka / Faridpur	Human			Female	35	Alive		Original			B.1.1.25	GR
hCoV-19/Bangladesh/GRMDRC-8/2020	EPI_ISL_775217	2020-09-05	Asia / Bangladesh / Dhaka	Human			Male	45	Alive		Original			B.1.1.25	GR
hCoV-19/Bangladesh/GRMDRC-9/2020	EPI_ISL_775218	2020-12-15	Asia / Bangladesh / Dhaka	Human	Dhanmondi		Male	23	Alive		Original	Naso-oropharyngeal swab		B.1.1	GR
hCoV-19/Bangladesh/BCSIR_NILMRC_128/2020	EPI_ISL_803117	2020-06-17	Asia / Bangladesh / Rajshahi	Human			Female	61	unknown		Original	Nasopharyngeal swab		B.1.1	GR
hCoV-19/Bangladesh/BCSIR-NILMRC_185/2020	EPI_ISL_803118	2020-06-06	Asia / Bangladesh / Chittagong	Human			Female	48	unknown		Original	Nasopharyngeal swab		B.1.1.80	GR
hCoV-19/Bangladesh/BCSIR-NILMRC_171/2020	EPI_ISL_803121	2020-06-18	Asia / Bangladesh / Rajshahi	Human			Female	71	unknown		Original	Nasopharyngeal swab		B.1.1	GR
hCoV-19/Bangladesh/13-BCSIR-NILMRC-142/2020	EPI_ISL_803850	2020-06-18	Asia / Bangladesh / Dhaka	Human	Jatrabari		Female	24	unknown		Original	Nasopharyngeal swab		B.1.1.25	GR
hCoV-19/Bangladesh/13-BCSIR-NILMRC_148/2020	EPI_ISL_803852	2020-06-18	Asia / Bangladesh / Dhaka	Human	Tejgaon		Male	53	unknown		Original	Nasopharyngeal swab		B.1.1.80	O
hCoV-19/Bangladesh/BCSIR-NILMRC_159/2020	EPI_ISL_803853	2020-06-18	Asia / Bangladesh / Rajshahi	Human			Male	22	unknown		Original	Nasopharyngeal swab		B.1.1	GR
hCoV-19/Bangladesh/BCSIR-NILMRC_225/2020	EPI_ISL_803865	2020-06-07	Asia / Bangladesh / Barisal	Human			Male	58	unknown		Original	Nasopharyngeal swab		B.1.1.103	GR
hCoV-19/Bangladesh/BCSIR-NILMRC_355/2020	EPI_ISL_803867	2020-06-24	Asia / Bangladesh / Chittagong / Brahmanbaria	Human			Female	38	unknown		Original			B.1.1	O
hCoV-19/Bangladesh/BCSIR-NILMRC_360/2020	EPI_ISL_803870	2020-07-14	Asia / Bangladesh / Chittagong / Brahmanbaria	Human			Male	37	unknown		Original	Nasopharyngeal swab		B.1.1.25	GR
hCoV-19/Bangladesh/BCSIR-NILMRC_378/2020	EPI_ISL_833150	2020-07-31	Asia / Bangladesh / Dhaka / Naraynganj	Human			Female	69	unknown		Original	Nasopharyngeal swab		B.1.1.29	GR
hCoV-19/Bangladesh/BCSIR-NILMRC_304/2020	EPI_ISL_833151	2020-05-30	Asia / Bangladesh / Dhaka	Human			Male	35	Unknown		Original	Nasopharyngeal swab		B.1.1.107	GR
hCoV-19/Bangladesh/BCSIR-NILMRC_267/2020	EPI_ISL_833177	2020-07-09	Asia / Bangladesh / Rajshahi	Human			Female	40	unknown		Original	Nasopharyngeal swab		B.1.1.29	GR
hCoV-19/Bangladesh/BCSIR-NILMRC_28/2020	EPI_ISL_833178	2020-05-24	Asia / Bangladesh / Dhaka	Human			Male	28	Unknown		Original	Nasopharyngeal swab		B.1.1	GR
hCoV-19/Bangladesh/BCSIR-DU-08/2020	EPI_ISL_833179	2020-07-07	Asia / Bangladesh / Dhaka	Human			Female	34	unknown		Original	Nasopharyngeal swab		B.1.36.16	GH
hCoV-19/Bangladesh/BCSIR-NILMRC-93/2020	EPI_ISL_833180	2020-05-23	Asia / Bangladesh / Dhaka	Human			Male	50	unknown		Original	Nasopharyngeal swab		B.1.1	GR
hCoV-19/Bangladesh/BCSIR-NILMRC-324/2020	EPI_ISL_833181	2020-07-15	Asia / Bangladesh / Dhaka	Human			Female	22	unknown		Original	Nasopharyngeal swab		B.1.1	GR
hCoV-19/Bangladesh/BCSIR-NILMRC-347/2020	EPI_ISL_845807	2020-07-15	Asia / Bangladesh / Dhaka	Human			Female	48	unknown		Original	Nasopharyngeal swab		B.1.1.29	O
hCoV-19/Bangladesh/BCSIR-NILMRC-348/2020	EPI_ISL_845808	2020-07-24	Asia / Bangladesh / Dhaka	Human			Female	48	unknown		Original	Nasopharyngeal swab		B.1.1.29	GR
hCoV-19/Bangladesh/BCSIR-NILMRC-65/2020	EPI_ISL_850180	2020-05-24	Asia / Bangladesh / Chittagong	Human			Male	54	unknown		Original	Nasopharyngeal swab		B.1.1.80	GR
hCoV-19/Bangladesh/BCSIR-NILMRC-68/2020	EPI_ISL_850506	2020-05-24	Asia / Bangladesh / Chittagong	Human			Female	60	unknown		Original	Nasopharyngeal swab		B.1.36.16	GH
hCoV-19/Bangladesh/BCSIR-6/2020	EPI_ISL_850945	2020-05-21	Asia / Bangladesh / Dhaka	Human			Male	70	unknown		Original	Nasopharyngeal swab		B.1.159	GH
hCoV-19/Bangladesh/DNAS_isl_Hia/2020	EPI_ISL_854977	2020-06-30	Asia / Bangladesh	Human			unknown	unknown	unknown		Original	Oropharyngeal swab		B.1.1.25	GR
hCoV-19/Bangladesh/DNAS_isl_P2-106/2020	EPI_ISL_854978	2020-06-30	Asia / Bangladesh	Human			unknown	unknown	unknown		Original	Oropharyngeal swab		B.1.1.25	GR
hCoV-19/Bangladesh/DNAS_isl_DSIMCH-3/2020	EPI_ISL_854979	2020-06-30	Asia / Bangladesh	Human			unknown	unknown	unknown		Original	Oropharyngeal swab		B.1.1.25	GR
hCoV-19/Bangladesh/DNAS_isl_BRB/2020	EPI_ISL_854980	2020-06-30	Asia / Bangladesh	Human			unknown	unknown	unknown		Original	Oropharyngeal swab		B.1.1.25	GR
hCoV-19/Bangladesh/DNAS_isl_OPS/2020	EPI_ISL_854981	2020-06-30	Asia / Bangladesh	Human			unknown	unknown	unknown		Original	Oropharyngeal swab		B.1.1	GR
hCoV-19/Bangladesh/DNAS_isl_P2-98/2020	EPI_ISL_854982	2020-06-30	Asia / Bangladesh	Human			unknown	unknown	unknown		Original	Oropharyngeal swab		B.1.1.25	GR
hCoV-19/Bangladesh/DNAS_isl_Sik-Bip-01/2020	EPI_ISL_854983	2020-06-30	Asia / Bangladesh	Human			unknown	unknown	unknown		Original	Oropharyngeal swab		B.1.1	GR
hCoV-19/Bangladesh/DNAS_isl_SM-01/2020	EPI_ISL_854984	2020-06-30	Asia / Bangladesh	Human			unknown	unknown	unknown		Original	Oropharyngeal swab		B.1.1.25	GR
hCoV-19/Bangladesh/DNAS_isl_R-88/2020	EPI_ISL_854985	2020-06-30	Asia / Bangladesh	Human			unknown	unknown	unknown		Original	Oropharyngeal swab		B.1.1	GR
hCoV-19/Bangladesh/DNAS_isl_Amal/2020	EPI_ISL_854986	2020-06-30	Asia / Bangladesh	Human			unknown	unknown	unknown		Original	Oropharyngeal swab		B.1.1	GR
hCoV-19/Bangladesh/DNAS_isl_MH-03/2020	EPI_ISL_854987	2020-06-30	Asia / Bangladesh	Human			unknown	unknown	unknown		Original	Oropharyngeal swab		B.1.1.80	GR
hCoV-19/Bangladesh/DNAS_isl_P2-102/2020	EPI_ISL_854988	2020-06-30	Asia / Bangladesh	Human			unknown	unknown	unknown		Original	Oropharyngeal swab		B.1.1	GR
hCoV-19/Bangladesh/DNAS_isl_SM-12/2020	EPI_ISL_854989	2020-06-30	Asia / Bangladesh	Human			unknown	unknown	unknown		Original	Oropharyngeal swab		B.1.1	GR
hCoV-19/Bangladesh/DNAS_isl_MH-02/2020	EPI_ISL_854990	2020-06-30	Asia / Bangladesh	Human			unknown	unknown	unknown		Original	Oropharyngeal swab		B.1.1.80	GR
hCoV-19/Bangladesh/DNAS_isl_P2-101/2020	EPI_ISL_854991	2020-06-30	Asia / Bangladesh	Human			unknown	unknown	unknown		Original	Oropharyngeal swab		B.1.1	GR
hCoV-19/Bangladesh/DNAS_isl_MH-09/2020	EPI_ISL_854992	2020-06-30	Asia / Bangladesh	Human			unknown	unknown	unknown		Original	Oropharyngeal swab		B.1	G
hCoV-19/Bangladesh/DNAS_isl_P2-107/2020	EPI_ISL_854993	2020-06-30	Asia / Bangladesh	Human			unknown	unknown	unknown		Original	Oropharyngeal swab		B.1.1.25	GR
hCoV-19/Bangladesh/DNAS_isl_R-101/2020	EPI_ISL_854994	2020-06-30	Asia / Bangladesh	Human			unknown	unknown	unknown		Original	Oropharyngeal swab		B.1.1.80	GR
hCoV-19/Bangladesh/DNAS_isl_Sik-bip/2020	EPI_ISL_854995	2020-06-30	Asia / Bangladesh	Human			unknown	unknown	unknown		Original	Oropharyngeal swab		B.1.1	GR
hCoV-19/Bangladesh/DNAS_isl_HH-12/2020	EPI_ISL_854996	2020-06-30	Asia / Bangladesh	Human			unknown	unknown	unknown		Original	Oropharyngeal swab		B.1.1	GR
hCoV-19/Bangladesh/DNAS_isl_GL-01/2020	EPI_ISL_854997	2020-06-30	Asia / Bangladesh	Human			unknown	unknown	unknown		Original	Oropharyngeal swab		B.1.1.250	GR
hCoV-19/Bangladesh/DNAS_isl_HH-11/2020	EPI_ISL_854998	2020-06-30	Asia / Bangladesh	Human			unknown	unknown	unknown		Original	Oropharyngeal swab		B.1.1.25	GR
hCoV-19/Bangladesh/DNAS_isl_Hafiz/2020	EPI_ISL_854999	2020-06-30	Asia / Bangladesh	Human			unknown	unknown	unknown		Original	Oropharyngeal swab		B.1.1	GR
hCoV-19/Bangladesh/DNAS_isl_SIBL-09/2020	EPI_ISL_855000	2020-06-30	Asia / Bangladesh	Human			unknown	unknown	unknown		Original	Oropharyngeal swab		B.1.1.103	GR
hCoV-19/Bangladesh/DNAS_isl_SIBL-08/2020	EPI_ISL_855001	2020-06-30	Asia / Bangladesh	Human			unknown	unknown	unknown		Original	Oropharyngeal swab		B.1.1.103	GR
hCoV-19/Bangladesh/DNAS_isl_BGH-485/2020	EPI_ISL_855002	2020-06-30	Asia / Bangladesh	Human			unknown	unknown	unknown		Original	Oropharyngeal swab		B.1.1	GR
hCoV-19/Bangladesh/DNAS_isl_Tanjima/2020	EPI_ISL_855003	2020-06-30	Asia / Bangladesh	Human			unknown	unknown	unknown		Original	Oropharyngeal swab		B.1.1	GR
hCoV-19/Bangladesh/DNAS_isl_DSIMCH-2/2020	EPI_ISL_855004	2020-06-30	Asia / Bangladesh	Human			unknown	unknown	unknown		Original	Oropharyngeal swab		B.1.1	GR
hCoV-19/Bangladesh/DNAS_isl_SIBL-06/2020	EPI_ISL_855005	2020-06-30	Asia / Bangladesh	Human			unknown	unknown	unknown		Original	Oropharyngeal swab		B.1.1	GR
hCoV-19/Bangladesh/DNAS_isl_S-3/2020	EPI_ISL_855006	2020-06-30	Asia / Bangladesh	Human			unknown	unknown	unknown		Original	Oropharyngeal swab		B.1.1.25	GR
hCoV-19/Bangladesh/DNAS_isl_SIBL-07/2020	EPI_ISL_855007	2020-06-30	Asia / Bangladesh	Human			unknown	unknown	unknown		Original	Oropharyngeal swab		B.1.1.103	GR
hCoV-19/Bangladesh/DNAS_isl_S-5/2020	EPI_ISL_855008	2020-06-30	Asia / Bangladesh	Human			unknown	unknown	unknown		Original	Oropharyngeal swab		B.1.1.29	GR
hCoV-19/Bangladesh/DNAS_isl_BRB-3/2020	EPI_ISL_855009	2020-06-30	Asia / Bangladesh	Human			unknown	unknown	unknown		Original	Oropharyngeal swab		B.1.1.29	GR
hCoV-19/Bangladesh/DNAS_isl_MMC-01/2020	EPI_ISL_855010	2020-06-30	Asia / Bangladesh	Human			unknown	unknown	unknown		Original	Oropharyngeal swab		B.1.36	GH
hCoV-19/Bangladesh/DNAS_isl_MMC-02/2020	EPI_ISL_855011	2020-06-30	Asia / Bangladesh	Human			unknown	unknown	unknown		Original	Oropharyngeal swab		B.1.36	GH
hCoV-19/Bangladesh/DNAS_isl_UMCH-1/2020	EPI_ISL_855012	2020-06-30	Asia / Bangladesh	Human			unknown	unknown	unknown		Original	Oropharyngeal swab		B.1.1.25	GR
hCoV-19/Bangladesh/DNAS_isl_R-97/2020	EPI_ISL_855013	2020-06-30	Asia / Bangladesh	Human			unknown	unknown	unknown		Original	Oropharyngeal swab		B.1.1.25	GR
hCoV-19/Bangladesh/JU-WMSRC-Dhaka-8/2020	EPI_ISL_884087	2020-12-04	Asia / Bangladesh / Dhaka	Human			Female	28	Live		Original	Nasopharyngeal swab		B.1.1.296	GR
hCoV-19/Bangladesh/JU-WMSRC-Dhaka-5/2020	EPI_ISL_884088	2020-12-02	Asia / Bangladesh / Dhaka	Human			Female	43	Live		Original	Nasopharyngeal swab		B.1.1.103	GR
hCoV-19/Bangladesh/GRBL_S1/2020	EPI_ISL_890188	2020-12-19	Asia / Bangladesh / Dhaka	Human			unknown	unknown	unknown		Original	Nasopharyngeal and oropharyngeal swab		B.1.1	GR
hCoV-19/Bangladesh/GRBL_S4/2020	EPI_ISL_890189	2020-12-08	Asia / Bangladesh / Dhaka	Human			unknown	unknown	unknown		Original	Nasopharyngeal and oropharyngeal swab		B.1.1.103	GR
hCoV-19/Bangladesh/GRBL_S6/2020	EPI_ISL_890190	2020-11-14	Asia / Bangladesh / Dhaka	Human			unknown	unknown	unknown		Original	Nasopharyngeal and oropharyngeal swab		B.1.1	GR
hCoV-19/Bangladesh/GRBL_S9/2020	EPI_ISL_890191	2020-10-05	Asia / Bangladesh / Dhaka	Human			unknown	unknown	unknown		Original	Nasopharyngeal and oropharyngeal swab		B.1.1	GR
hCoV-19/Bangladesh/GRBL_S10/2020	EPI_ISL_890192	2020-10-17	Asia / Bangladesh / Dhaka	Human			unknown	unknown	unknown		Original	Nasopharyngeal and oropharyngeal swab		B.1.1.25	GR
hCoV-19/Bangladesh/GRBL_S11/2020	EPI_ISL_890193	2020-09-05	Asia / Bangladesh / Dhaka	Human			unknown	unknown	unknown		Original	Nasopharyngeal and oropharyngeal swab		B.1.1.25	GR
hCoV-19/Bangladesh/GRBL_S14/2020	EPI_ISL_890194	2020-12-15	Asia / Bangladesh / Dhaka	Human			unknown	unknown	unknown		Original	Nasopharyngeal and oropharyngeal swab		B.1.1	GR
hCoV-19/Bangladesh/G039392/2021	EPI_ISL_890237	2021-01-06	Asia / Bangladesh	Human			unknown	unknown	unknown		Original	Nasal swab		B.1.1.7	GRY
hCoV-19/Bangladesh/CHRF-0104/2020	EPI_ISL_906082	2020-12-02	Asia / Bangladesh / Dhaka	Human			Male	3	unknown		Original			B.1.1	GR
hCoV-19/Bangladesh/CHRF-0120/2020	EPI_ISL_906083	2020-12-24	Asia / Bangladesh / Dhaka	Human			Male	4	unknown		Original			B.1.1.103	GR
hCoV-19/Bangladesh/CHRF-0112/2020	EPI_ISL_906084	2020-12-06	Asia / Bangladesh / Chittagong	Human			Male	7	unknown		Original			B.1.1.163	GR
hCoV-19/Bangladesh/CHRF-0105/2020	EPI_ISL_906085	2020-12-02	Asia / Bangladesh / Dhaka	Human			Female	34	unknown		Original			B.1.1	GR
hCoV-19/Bangladesh/CHRF-0123/2021	EPI_ISL_906086	2021-01-07	Asia / Bangladesh / Rajshahi	Human			Male	0	unknown		Original			B.1.1.25	GR
hCoV-19/Bangladesh/CHRF-0072/2020	EPI_ISL_906087	2020-08-20	Asia / Bangladesh / Mymensingh	Human			Male	6	unknown		Original			B.1.1.80	GR
hCoV-19/Bangladesh/CHRF-0094/2020	EPI_ISL_906088	2020-12-03	Asia / Bangladesh / Dhaka	Human			Female	22	unknown		Original			B.1.1	GR
hCoV-19/Bangladesh/CHRF-0089/2020	EPI_ISL_906089	2020-12-01	Asia / Bangladesh / Dhaka	Human			Male	34	unknown		Original			B.1.1.103	GR
hCoV-19/Bangladesh/CHRF-0106/2020	EPI_ISL_906090	2020-12-02	Asia / Bangladesh / Dhaka	Human			Male	54	unknown		Original			B.1.1	GR
hCoV-19/Bangladesh/CHRF-0128/2020	EPI_ISL_906091	2020-12-31	Asia / Bangladesh / Sylhet	Human			Female	unknown	unknown		Original			B.1.1.7	GRY
hCoV-19/Bangladesh/CHRF-0117/2020	EPI_ISL_906092	2020-12-12	Asia / Bangladesh / Dhaka	Human			Male	34	unknown		Original			B.1.1.103	GR
hCoV-19/Bangladesh/CHRF-0096/2020	EPI_ISL_906093	2020-12-05	Asia / Bangladesh / Dhaka	Human			Male	38	unknown		Original			B.1.1.103	GR
hCoV-19/Bangladesh/CHRF-0091/2020	EPI_ISL_906094	2020-12-02	Asia / Bangladesh / Dhaka	Human			Female	44	unknown		Original			B.1.1.103	GR
hCoV-19/Bangladesh/CHRF-0099/2020	EPI_ISL_906095	2020-12-20	Asia / Bangladesh / Rajshahi	Human			Male	60	unknown		Original			B.1.1.103	GR
hCoV-19/Bangladesh/CHRF-0102/2020	EPI_ISL_906096	2020-11-22	Asia / Bangladesh / Sylhet	Human			Female	34	unknown		Original			B.1.1.80	GR
hCoV-19/Bangladesh/CHRF-0097/2020	EPI_ISL_906097	2020-12-10	Asia / Bangladesh / Rangpur	Human			Female	32	unknown		Original			B.1.1.25	GR
hCoV-19/Bangladesh/CHRF-0135/2021	EPI_ISL_906098	2021-01-04	Asia / Bangladesh / Sylhet	Human			Female	unknown	unknown		Original			B.1.1.7	GRY
hCoV-19/Bangladesh/CHRF-0118/2020	EPI_ISL_906099	2020-12-12	Asia / Bangladesh / Mymensingh	Human			Male	6	unknown		Original			B.1.1.269	GR
hCoV-19/Bangladesh/CHRF-0113/2020	EPI_ISL_906100	2020-12-09	Asia / Bangladesh / Rajshahi	Human			Male	36	unknown		Original			B.1.1.103	GR
hCoV-19/Bangladesh/CHRF-0057/2020	EPI_ISL_906101	2020-07-08	Asia / Bangladesh / Chattogram	Human			Female	0	unknown		Original			B.1.1	GR
hCoV-19/Bangladesh/CHRF-0107/2020	EPI_ISL_906102	2020-12-02	Asia / Bangladesh / Dhaka	Human			Male	69	unknown		Original			B.1.1	GR
hCoV-19/Bangladesh/CHRF-0100/2020	EPI_ISL_906103	2020-09-08	Asia / Bangladesh / Sylhet	Human			Female	7	unknown		Original			B.1.1.25	GR
hCoV-19/Bangladesh/CHRF-0108/2020	EPI_ISL_906104	2020-12-02	Asia / Bangladesh / Chittagong	Human			Male	2	unknown		Original			B.1.1.103	GR
hCoV-19/Bangladesh/CHRF-0101/2020	EPI_ISL_906105	2020-11-18	Asia / Bangladesh / Sylhet	Human			Male	0	unknown		Original			B.1.1.80	GR
hCoV-19/Bangladesh/CHRF-0098/2020	EPI_ISL_906106	2020-12-19	Asia / Bangladesh / Chittagong	Human			Male	40	unknown		Original			B.1.1.103	GR
hCoV-19/Bangladesh/CHRF-0090/2020	EPI_ISL_906107	2020-12-02	Asia / Bangladesh / Dhaka	Human			Female	55	unknown		Original			B.1.1	GR
hCoV-19/Bangladesh/CHRF-0093/2020	EPI_ISL_906108	2020-12-03	Asia / Bangladesh / Rangpur	Human			Female	8	unknown		Original			B.1.1.25	GR
hCoV-19/Bangladesh/CHRF-0109/2020	EPI_ISL_906109	2020-12-03	Asia / Bangladesh / Dhaka	Human			Male	6	unknown		Original			B.1.1.103	GR
hCoV-19/Bangladesh/CHRF-0110/2020	EPI_ISL_906110	2020-12-03	Asia / Bangladesh / Dhaka	Human			Male	58	unknown		Original			B.1.1.103	GR
hCoV-19/Bangladesh/CHRF-0111/2020	EPI_ISL_906111	2020-12-05	Asia / Bangladesh / Dhaka	Human			Female	30	unknown		Original			B.1.1.103	GR
hCoV-19/Bangladesh/CHRF-0114/2020	EPI_ISL_906112	2020-12-09	Asia / Bangladesh / Dhaka	Human			Male	0	unknown		Original			B.1.1.103	GR
hCoV-19/Bangladesh/CHRF-0115/2020	EPI_ISL_906113	2020-12-10	Asia / Bangladesh / Rangpur	Human			Female	8	unknown		Original			B.1.1.25	GR
hCoV-19/Bangladesh/CHRF-0116/2020	EPI_ISL_906114	2020-12-12	Asia / Bangladesh / Dhaka	Human			Female	18	unknown		Original			B.1.1.103	GR
hCoV-19/Bangladesh/CHRF-0119/2020	EPI_ISL_906115	2020-12-12	Asia / Bangladesh / Chittagong	Human			Male	7	unknown		Original			B.1.1.163	GR
hCoV-19/Bangladesh/CHRF-0122/2020	EPI_ISL_906116	2020-12-31	Asia / Bangladesh / Dhaka	Human			Female	22	unknown		Original			B.1.1.10	GR
