# Supplementary material for: Molecular Analysis of SARS-CoV-2 Circulating in Bangladesh during 2020 Revealed Lineage Diversity and Potential Mutations
Source: Microorganisms. 2021 May 12;9(5):1035. doi: 10.3390/microorganisms9051035 (PMC8150345; doi:10.3390/microorganisms9051035)
Supplement: Supplementary file 1 [file microorganisms-09-01035-s001.zip › Supplemental file 3_Amino acid substitutions-SARS CoV 2 Bangladesh.xlsx]

## Sheet: Sheet1
ORF1ab																Structural Genes				Accessory Genes
NSP1	NSP2	NSP3	NSP4	NSP5	NSP6	NSP7	NSP8	NSP9	NSP10	NSP11	NSP12	NSP13	NSP14	NSP15	NSP16	S	E	M	N	NS3	NS6	NS7a	NS7b	NS8
R24C	R27L	K19R	N4B	A7V	V3M	M3I	P10S	T21I	T49I	S6L	K59N	P47S	A1S	V10L	K24N	L5F	E8D	A2V	D3Y	I10V	F2L	L12P	S5L	L4I
E37D	D40N	E29A	F17L	S46A	V3M	M75I	A27T	T24I	E66Z		K91R	P47L	Q22H	H14Y	P26L	S12F	F20L	A2S	D3L	G11R	V5F	T14I	L14del	V5T
E55D	R52C	W45L	V20F	R60C	L22I	T81A	G29S	K84T	K95R		A97V	K78S	T31I	F15S	T35I	S13I	L21F	S4F	Q7K	L15F	E13D	T28I	A15del	L7G
V56A	E66Z	N51D	S34F	N72D	V24F	T81I	K37N		V97A		K103R	S80G	G37V	T33I	G39D	Q14H		V10A	Q9H	G18V	I11T	C35S	S31L	T11I
E57K	Y69F	T64I	E42A	N84T	T29P		M70I		T101I		M124I	D105G	C39F	A34V	A79S	Q14R		V10I	N11D	I20L	I17F	S37F	L32F	T11K
R73C	L71S	P74L	D56N	K90R	Q30E		T89I		T102A		L127F	R161K	M72I	V35F	T91M	C15F		F28L	N11S	I20V	T21I	T39I	Q35H	H17Y
M85del	K67N	P74S	T60I	D92G	W31Y		T93I		V116F		K160N	E162A	H95Y	D36G	T110I	L18F		C33F	P13S	K21N	S25F	G42V	D36 E	Q18E
H110R	T85I	P109L	A69V	P96S	L33M		T123I		V119I		A176T	Q170R	V125F	D39Y	V118L	P26L		N66B	P13L	D22Y	W27L	H47N	H37stop	Q18stop
A117S	G88E	D112Y	D85E	P96S	F34V		P133S				Q224K	P172S	P140S	E44V	L126F	A27S		V70F	G18C	A23V	N39Y	A50S	C41Y	C25F
K120N	N92H	C118Y	A93V	I106S	F36del		T145I				P227L	G206C	L157F	K64E	P134S	T29I		M84I	G18V	P25S	K42N	Q62E		Q27stop
V121D	G115C	E120K	T109M	P108L	F36V		T148I				P227S	S236I	V161L	P65S	T151I	F32L		H125Y	R40C	S26T	E55G	Q62stop		H28L
V121I	I120F	S126L	A128V	A116T	F36L		V159F				L247F	T239I	V167L	E68D	K160R	F43L		D209Y	T49I	D27E	I60V	F63L		Y31H
L122I	S122F	P141S	P166S	P132L	L37F		A194V				E254D	V247F	G189C	A80S	D179N	H49Y			P67L	I35L		Q94H		V32L
A138V	S128L	A146V	V192A	P132S	L37F						D269A	I258T	R213L	D91Y	K182N	A67S			V72I	I37T		Q94K		P36T
K141del	P129S	L151P	M194I	N133B	Y38F						Y298H	E261D	F217I	A94V	M184I	I68T			D81H	Q38L		Q94L		P36S
S142del	P129L	L151I	A231V	R188S	E39Vstop						P323I	E261D	I242V	K109N	R216N	H69del			Q83R	Q38E		C113F		P38R
F143del	P129L	L151I	G288S	A191V	E39F						P323L	S264N	S255I	T112I	D246G	V70del			A90V	S40L		V104F		I39V
G150D	N133D	P153L	S336L	V202I	E39L						N360H	M274I	A274S	G129V	S256L	G75V			D103N	P42L		A106S		R52I
T170I	S138L	D163Y	V344I	N221S	N40K						A379V	M274V	K304N	G129V	K263N	T76I			T135I	G44R		T120I		E59K
	T166I	Q168R	L353F	A234V	N41C						A382V	H290Y	A323S	D132Y	V294F	T95I			L139F	V48F				E59stop
	L169F	Q172R	S386F	K236R	F42L						T402I	A296V	E347K	R138C		E96A			D144H	G49V				V62L
	T170I	D174Y	V403F	V247F	L43F						A423V	A296S	D375Y	G150V		S98F			H145N	V50I				V62M
	Q172R	S176I	E425G	A260V	P44T						P437S	P300L	P412S	V155A		R102I			A152T	A54S				D63N
	H194Y	E177D	L435del	R279H	A46C						A443S	S301F	V437F	V172L		S112L			A152S	V55F				E64D
	P200S	Q180H	L438F		A46V						A449V	E319D	V459I	K181stop		V127F			T166I	V55I				E64stop
	E201K	T182I	A446V		M47Y						M463I	E341D	D496Y	V182F		D138Y			L167F	Q57H				A65V
	E210K	T183I	A457V		I49Y						D517G	D344G	I502V	R206S		D138H			G179S	K67N				A65S
	R218C	T186I			I49V						A529S	A368S	A504S	M209T		G142V			S180T	W69R				G66C
	T223I	E197K			I50Y						A550V	V372I	N521H	A217S		V143F			S194L	W69L				S67F
	C253F	Y198H			A51C						S607I	R392C		M218I		Y144del			G200V	W69C				Y73C
	S263F	V202I			M52Y						N611B	L428F		D219B		Y145del			S202N	K75E				G77C
	Y272H	E206del			S53V						M629I	R442Q		H234Y		H146Y			R203K	K75N				T80I
	I293V	V207del			A54C						A656S	K460R		A255V		H146Q			G204R	H78Y				L84S
	A306V	N208del			A56C						M668I	T481M		S261L		W152L			T205I	V88L				T87I
	V308M	S209del			M57N						H725Y	Q518H		P262S		E154G			P207L	T89I				P93L
	E309K	F210del			M58D						T739I	L518F		S273I		S155I			M210I	G100C				L95F
	T310I	Y246C			F59del						E744D	V570L		S287L		E156D			A211S	A103S				C102R
	L314F	Y272H			E59del						M755I	M576I		C290F		F157L			Q229H	P104R				S103P
	G339S	T275A			K61C						V776E	L581F		S312T		G172C			L230F	P104S				E110D
	A357V	L279I			H62Q						K780R	T588I		M330T		L176F			S235F	L108F				I121L
	A360V	G282S			K63T						D804N	T599I		H337R		M177I			A252S	L219F
	S369F	C296F			H64stop						L829F			Y342S		G184D			V270L	F120C
	R370C	L297F			F66C						V848L					F186L			T271I	W131C
	N377D	I310V			L67I						T870I					N211Y			T282I	K132Q
	Q383R	I320V			C68S						M906I					V213L			T282A	R134H
	A386V	L330V			M83I											D215Y			T296I	L139J
	I393V	P340S			V84F											S221L			H300Y	L140F
	D409N	S370L			A88V											T236S			M322V	D142H
	D409B	L373M			L98F											Y248H			S327L	A143V
	A411V	L373M			S106del											G261R			W330L	W149L
	A411S	S377I			G107del											N354S			T334A	T151P
	T412I	K384N			F108del											S359T			T334I	T151I
	T412I	E387D			K109N											V382L			D348Y	D155Y
	M418V	I388V			C113Y											E484K			D377Y	S166L
	Q427H	E405D			V120L											N501Y			D377G	S171L
	T429I	Q406K			I124T											E516Q			K373N	G172V
	S430L	K408N			V149F											L518I			D377G	G172C
	T434I	D410V			M164V											A520S			E378A	T175I
	T434I	K412N			T181I											T547I			T379I	Q185H
	N435K	T423I			M183I											K558N			P383L	G188C
	K443E	P447S			A186T											I569S			Q389H	W193C
	V447F	K462R			I210V											A570D			Q406R	V202A
	V469F	K462N			M211I											T573I			Q418L	D210B
	V469A	K462R			K263N											D574Y			Q418H	Q213K
	V469F	A465V			K270E											G594S				L219F
	A476V	V469A														I569S				S220N
	V480I	V473A														D614G				T223I
	G481C	A488T														V622F				G224C
	G481S	M494I														S640Y				V225F
	V495I	V527L														A647S				I236S
	A510V	Y536F														A653V				E239D
	G516S	S582A														E654Q				E239K
	A518V	E595D														N658D				P240S
	L520F	E595V														Y660F				E242A
	N524K	E595V														Q675H				G254stop
	T528I	E595V														Q675R				V255del
	S533T	A602S														Q677H				N257D
	G548C	T611I														N679K				P258S
	L550F	R646W														S698L				D265G
	A555V	S650F														P681R
	I559V	T678I														P681H
	P585S	P679S														T716I
	E587K	P679L														G769V
	V594F	H682Y														A771S
	A596T	I687V														A783S
	V599I	S688L														Q787L
	P624L	L689F														Y789N
	T634I	D695N														T791I
		P679S														F797C
		T724I														G799S
		I759J														S803L
		T771I														I834V
		G773A														D843B
		P778S														K854N
		D782B														A871V
		T819I														D936Y
		P822S														S939F
		P822L														T941A
		V843F														A942V
		K871R														S982A
		P874S														V1068F
		P875S														N1074H
		R883G														D1084Y
		A889V														D1084H
		A890D														R1091H
		T942I														V1104L
		T943I														F1109L
		P968S														T1117I
		T1004I														D1118Y
		E1025D														D1118H
		I1027F														V1122L
		L1027F														G1167V
		T1036I														R1185H
		S1038F														K1191N
		T1056I														M1229I
		K1077N														M1233I
		P1103S														C1247F
		D1115G														C1250F
		K1130R
		S1134L
		T1189I
		S1206L
		K1211N
		D1214N
		Q1216H
		P1228S
		P1228L
		S1230Y
		D1242H
		L1244F
		I1257S
		A1262S
		N1264del
		S1265del
		L1266del
		K1267del
		I1268del
		T1269I
		T1275I
		L1287F
		K1290N
		A1305V
		T1306I
		G1308C
		A1311V
		S1314G
		L1328F
		N1337S
		R1341W
		T1356Y
		L1357F
		L1358I
		L1359A
		Q1360T
		L1361I
		C1362V
		T1363Y
		T1363I
		T1365stop
		T1365Y
		T1365I
		R1366K
		S1367F
		T1368stop
		S1370stop
		R1371S
		K1373Y
		S1375D
		M1376Y
		P1377Y
		T1378S
		T1389K
		I1380del
		A1381del
		K1382del
		N1383del
		T1384del
		V1385del
		K1386del
		S1387del
		V1388del
		G1389del
		k1390e
		F1391Y
		L1393stop
		A1395C
		S1396del
		F1397del
		N1398R
		Y1399stop
		L1400I
		K1401L
		P1403R
		N1404G
		S1406I
		K1407stop
		I1409F
		N1410E
		I1411V
		I1412T
		I1413stop
		W1414F
		I1415stop
		I1412T
		S1419I
		S1424F
		T1465I
		S1467F
		S1485F
		F1496L
		F1496L
		F1510L
		I1541V
		M1547I
		L1657J
		I1672S
		K1679N
		G1691C
		T1694I
		A1711V
		S1734P
		S1735F
		A1766V
		A1769V
		D1774G
		A1803V
		S1813A
		A1818T
		A1818T
		A1819S
		L1870F
		A1872V
		A1883T
		Q1884H
		K1898R
		T1928I
		I1940V
