# Supplementary material for: Molecular Analysis of SARS-CoV-2 Circulating in Bangladesh during 2020 Revealed Lineage Diversity and Potential Mutations
Source: Microorganisms. 2021 May 12;9(5):1035. doi: 10.3390/microorganisms9051035 (PMC8150345; doi:10.3390/microorganisms9051035)
Supplement: Supplementary file 1 [file microorganisms-09-01035-s001.zip › Supplemental file 4_nextstrain__diversity.xlsx]

## Sheet: nextstrain__diversity
gene	position	entropy
E	4	0.003
E	5	0.007
E	8	0.011
E	9	0.006
E	16	0.003
E	20	0.003
E	21	0.029
E	36	0.003
E	58	0.014
E	61	0.003
E	62	0.006
E	63	0.003
E	68	0.012
E	69	0.003
E	71	0.114
E	72	0.007
E	73	0.003
		0.0135294
M	2	0.055
M	3	0.027
M	4	0.003
M	10	0.007
M	13	0.003
M	15	0.003
M	17	0.006
M	28	0.011
M	29	0.006
M	33	0.003
M	44	0.016
M	64	0.003
M	66	0.009
M	70	0.039
M	73	0.011
M	81	0.003
M	82	0.024
M	84	0.009
M	85	0.012
M	86	0.007
M	91	0.003
M	92	0.003
M	93	0.003
M	94	0.003
M	95	0.003
M	96	0.003
M	97	0.003
M	98	0.007
M	109	0.009
M	125	0.029
M	130	0.003
M	138	0.003
M	142	0.003
M	146	0.003
M	148	0.014
M	155	0.018
M	162	0.003
M	168	0.006
M	175	0.009
M	201	0.003
M	208	0.016
M	209	0.007
		0.00978571
N	2	0.077
N	3	0.332
N	6	0.016
N	7	0.011
N	8	0.02
N	9	0.024
N	11	0.03
N	12	0.043
N	13	0.05
N	14	0.009
N	15	0.003
N	16	0.014
N	18	0.021
N	20	0.006
N	22	0.015
N	25	0.009
N	27	0.003
N	28	0.003
N	32	0.003
N	34	0.022
N	35	0.018
N	37	0.003
N	40	0.017
N	43	0.003
N	49	0.009
N	63	0.003
N	67	0.125
N	68	0.003
N	72	0.009
N	78	0.011
N	80	0.024
N	81	0.003
N	83	0.006
N	90	0.01
N	93	0.003
N	95	0.006
N	96	0.011
N	103	0.02
N	119	0.033
N	126	0.003
N	128	0.03
N	134	0.003
N	135	0.014
N	136	0.003
N	139	0.018
N	141	0.011
N	142	0.006
N	144	0.033
N	145	0.04
N	148	0.006
N	151	0.049
N	152	0.021
N	157	0.003
N	158	0.003
N	160	0.027
N	162	0.003
N	163	0.006
N	164	0.003
N	166	0.003
N	167	0.009
N	168	0.003
N	169	0.003
N	179	0.009
N	180	0.012
N	182	0.006
N	183	0.02
N	185	0.006
N	186	0.012
N	187	0.009
N	190	0.018
N	191	0.003
N	193	0.03
N	194	0.263
N	195	0.007
N	197	0.02
N	198	0.009
N	199	0.157
N	200	0.003
N	201	0.003
N	202	0.082
N	203	0.701
N	204	0.75
N	205	0.198
N	206	0.024
N	207	0.011
N	208	0.009
N	209	0.037
N	210	0.024
N	211	0.055
N	212	0.04
N	213	0.009
N	214	0.007
N	215	0.019
N	217	0.006
N	218	0.003
N	219	0.014
N	220	0.257
N	221	0.006
N	229	0.014
N	230	0.009
N	234	0.187
N	235	0.296
N	236	0.003
N	238	0.019
N	239	0.003
N	244	0.009
N	246	0.011
N	247	0.003
N	252	0.02
N	270	0.009
N	271	0.006
N	280	0.003
N	281	0.003
N	282	0.017
N	289	0.006
N	292	0.058
N	296	0.006
N	297	0.003
N	300	0.012
N	308	0.003
N	319	0.009
N	321	0.003
N	322	0.003
N	325	0.006
N	326	0.006
N	327	0.009
N	330	0.006
N	334	0.012
N	343	0.011
N	344	0.006
N	348	0.02
N	359	0.003
N	361	0.003
N	362	0.014
N	363	0.003
N	364	0.031
N	365	0.059
N	366	0.02
N	367	0.003
N	369	0.007
N	370	0.003
N	371	0.009
N	373	0.022
N	375	0.003
N	376	0.127
N	377	0.125
N	378	0.009
N	379	0.014
N	380	0.01
N	381	0.014
N	382	0.003
N	383	0.042
N	384	0.038
N	385	0.042
N	386	0.003
N	387	0.003
N	389	0.02
N	391	0.029
N	398	0.009
N	399	0.011
N	401	0.026
N	402	0.019
N	406	0.003
N	414	0.009
N	415	0.003
N	416	0.003
N	418	0.009
		0.0341856
ORF1a	4	0.009
ORF1a	6	0.003
ORF1a	16	0.007
ORF1a	24	0.051
ORF1a	27	0.012
ORF1a	28	0.003
ORF1a	29	0.003
ORF1a	30	0.006
ORF1a	37	0.03
ORF1a	43	0.003
ORF1a	45	0.003
ORF1a	49	0.006
ORF1a	55	0.007
ORF1a	56	0.009
ORF1a	57	0.079
ORF1a	59	0.003
ORF1a	60	0.003
ORF1a	73	0.003
ORF1a	75	0.003
ORF1a	76	0.003
ORF1a	77	0.003
ORF1a	78	0.003
ORF1a	80	0.007
ORF1a	82	0.006
ORF1a	83	0.02
ORF1a	84	0.011
ORF1a	85	0.019
ORF1a	86	0.009
ORF1a	93	0.003
ORF1a	102	0.006
ORF1a	105	0.007
ORF1a	106	0.003
ORF1a	107	0.003
ORF1a	110	0.02
ORF1a	114	0.003
ORF1a	116	0.009
ORF1a	117	0.012
ORF1a	118	0.003
ORF1a	119	0.003
ORF1a	120	0.006
ORF1a	121	0.007
ORF1a	122	0.007
ORF1a	123	0.003
ORF1a	126	0.003
ORF1a	135	0.009
ORF1a	136	0.003
ORF1a	138	0.003
ORF1a	139	0.003
ORF1a	141	0.014
ORF1a	142	0.014
ORF1a	143	0.017
ORF1a	144	0.014
ORF1a	146	0.003
ORF1a	147	0.003
ORF1a	150	0.003
ORF1a	158	0.003
ORF1a	166	0.003
ORF1a	167	0.003
ORF1a	168	0.003
ORF1a	170	0.014
ORF1a	173	0.003
ORF1a	177	0.003
ORF1a	184	0.009
ORF1a	190	0.011
ORF1a	192	0.007
ORF1a	193	0.009
ORF1a	194	0.011
ORF1a	197	0.006
ORF1a	198	0.003
ORF1a	203	0.026
ORF1a	204	0.007
ORF1a	206	0.003
ORF1a	207	0.012
ORF1a	211	0.003
ORF1a	212	0.006
ORF1a	214	0.006
ORF1a	216	0.007
ORF1a	220	0.003
ORF1a	224	0.019
ORF1a	226	0.009
ORF1a	230	0.003
ORF1a	231	0.003
ORF1a	232	0.02
ORF1a	238	0.003
ORF1a	246	0.003
ORF1a	247	0.003
ORF1a	249	0.003
ORF1a	251	0.009
ORF1a	257	0.003
ORF1a	261	0.003
ORF1a	262	0.009
ORF1a	265	0.294
ORF1a	268	0.011
ORF1a	271	0.009
ORF1a	272	0.012
ORF1a	279	0.009
ORF1a	283	0.003
ORF1a	286	0.009
ORF1a	287	0.003
ORF1a	292	0.006
ORF1a	293	0.003
ORF1a	294	0.006
ORF1a	295	0.007
ORF1a	297	0.012
ORF1a	300	0.554
ORF1a	302	0.011
ORF1a	305	0.003
ORF1a	308	0.006
ORF1a	309	0.051
ORF1a	313	0.018
ORF1a	314	0.003
ORF1a	315	0.003
ORF1a	316	0.003
ORF1a	317	0.003
ORF1a	318	0.027
ORF1a	320	0.011
ORF1a	322	0.006
ORF1a	324	0.003
ORF1a	333	0.003
ORF1a	335	0.014
ORF1a	336	0.003
ORF1a	337	0.003
ORF1a	340	0.003
ORF1a	345	0.003
ORF1a	346	0.036
ORF1a	347	0.006
ORF1a	349	0.006
ORF1a	350	0.011
ORF1a	354	0.009
ORF1a	361	0.009
ORF1a	363	0.003
ORF1a	365	0.017
ORF1a	367	0.003
ORF1a	371	0.003
ORF1a	374	0.018
ORF1a	376	0.003
ORF1a	377	0.003
ORF1a	378	0.009
ORF1a	379	0.003
ORF1a	380	0.009
ORF1a	381	0.003
ORF1a	382	0.003
ORF1a	384	0.003
ORF1a	385	0.003
ORF1a	388	0.011
ORF1a	389	0.003
ORF1a	390	0.009
ORF1a	391	0.003
ORF1a	392	0.01
ORF1a	397	0.009
ORF1a	398	0.016
ORF1a	400	0.009
ORF1a	402	0.006
ORF1a	403	0.014
ORF1a	410	0.003
ORF1a	415	0.003
ORF1a	417	0.014
ORF1a	431	0.006
ORF1a	433	0.003
ORF1a	436	0.003
ORF1a	438	0.003
ORF1a	440	0.003
ORF1a	441	0.003
ORF1a	442	0.007
ORF1a	443	0.028
ORF1a	444	0.003
ORF1a	445	0.007
ORF1a	446	0.02
ORF1a	448	0.003
ORF1a	450	0.003
ORF1a	451	0.009
ORF1a	453	0.003
ORF1a	454	0.006
ORF1a	455	0.011
ORF1a	459	0.003
ORF1a	460	0.012
ORF1a	464	0.003
ORF1a	465	0.003
ORF1a	473	0.003
ORF1a	474	0.003
ORF1a	476	0.003
ORF1a	481	0.006
ORF1a	486	0.024
ORF1a	488	0.006
ORF1a	489	0.006
ORF1a	490	0.003
ORF1a	494	0.006
ORF1a	496	0.003
ORF1a	498	0.018
ORF1a	506	0.009
ORF1a	513	0.016
ORF1a	516	0.014
ORF1a	519	0.047
ORF1a	522	0.003
ORF1a	523	0.003
ORF1a	526	0.011
ORF1a	533	0.003
ORF1a	535	0.003
ORF1a	537	0.003
ORF1a	538	0.003
ORF1a	540	0.011
ORF1a	541	0.009
ORF1a	547	0.011
ORF1a	549	0.009
ORF1a	550	0.009
ORF1a	551	0.003
ORF1a	554	0.003
ORF1a	555	0.009
ORF1a	556	0.003
ORF1a	557	0.007
ORF1a	558	0.003
ORF1a	559	0.007
ORF1a	560	0.007
ORF1a	561	0.047
ORF1a	563	0.012
ORF1a	565	0.007
ORF1a	566	0.003
ORF1a	568	0.018
ORF1a	573	0.003
ORF1a	580	0.006
ORF1a	589	0.017
ORF1a	590	0.003
ORF1a	591	0.022
ORF1a	592	0.036
ORF1a	598	0.009
ORF1a	599	0.022
ORF1a	602	0.003
ORF1a	603	0.003
ORF1a	607	0.011
ORF1a	609	0.009
ORF1a	610	0.049
ORF1a	611	0.018
ORF1a	614	0.018
ORF1a	615	0.003
ORF1a	623	0.003
ORF1a	626	0.003
ORF1a	627	0.011
ORF1a	628	0.006
ORF1a	630	0.007
ORF1a	631	0.003
ORF1a	633	0.003
ORF1a	634	0.009
ORF1a	637	0.003
ORF1a	642	0.003
ORF1a	645	0.003
ORF1a	646	0.003
ORF1a	647	0.003
ORF1a	649	0.022
ORF1a	656	0.006
ORF1a	660	0.003
ORF1a	661	0.007
ORF1a	665	0.009
ORF1a	668	0.003
ORF1a	671	0.003
ORF1a	675	0.009
ORF1a	676	0.003
ORF1a	679	0.006
ORF1a	680	0.006
ORF1a	681	0.009
ORF1a	686	0.006
ORF1a	687	0.009
ORF1a	689	0.003
ORF1a	690	0.011
ORF1a	693	0.006
ORF1a	696	0.003
ORF1a	698	0.006
ORF1a	700	0.011
ORF1a	704	0.003
ORF1a	708	0.038
ORF1a	712	0.006
ORF1a	713	0.003
ORF1a	721	0.011
ORF1a	723	0.006
ORF1a	727	0.022
ORF1a	728	0.011
ORF1a	730	0.046
ORF1a	731	0.009
ORF1a	735	0.003
ORF1a	739	0.014
ORF1a	743	0.003
ORF1a	747	0.003
ORF1a	748	0.003
ORF1a	749	0.003
ORF1a	753	0.003
ORF1a	754	0.003
ORF1a	755	0.003
ORF1a	760	0.009
ORF1a	762	0.006
ORF1a	765	0.011
ORF1a	767	0.009
ORF1a	774	0.009
ORF1a	776	0.003
ORF1a	779	0.003
ORF1a	781	0.003
ORF1a	792	0.006
ORF1a	798	0.003
ORF1a	802	0.003
ORF1a	804	0.015
ORF1a	809	0.003
ORF1a	810	0.006
ORF1a	812	0.006
ORF1a	814	0.014
ORF1a	828	0.003
ORF1a	837	0.003
ORF1a	840	0.003
ORF1a	844	0.003
ORF1a	846	0.003
ORF1a	847	0.007
ORF1a	851	0.003
ORF1a	856	0.003
ORF1a	858	0.003
ORF1a	859	0.016
ORF1a	862	0.003
ORF1a	866	0.003
ORF1a	867	0.006
ORF1a	868	0.003
ORF1a	869	0.014
ORF1a	875	0.003
ORF1a	876	0.009
ORF1a	877	0.003
ORF1a	878	0.003
ORF1a	879	0.003
ORF1a	882	0.02
ORF1a	887	0.006
ORF1a	890	0.009
ORF1a	892	0.047
ORF1a	901	0.009
ORF1a	903	0.017
ORF1a	906	0.003
ORF1a	910	0.003
ORF1a	913	0.006
ORF1a	918	0.003
ORF1a	919	0.003
ORF1a	926	0.003
ORF1a	927	0.016
ORF1a	928	0.003
ORF1a	929	0.003
ORF1a	930	0.009
ORF1a	932	0.003
ORF1a	934	0.003
ORF1a	935	0.006
ORF1a	936	0.006
ORF1a	938	0.02
ORF1a	942	0.003
ORF1a	944	0.042
ORF1a	945	0.006
ORF1a	950	0.006
ORF1a	951	0.014
ORF1a	953	0.006
ORF1a	958	0.006
ORF1a	959	0.022
ORF1a	963	0.007
ORF1a	964	0.011
ORF1a	965	0.007
ORF1a	966	0.003
ORF1a	967	0.021
ORF1a	969	0.02
ORF1a	971	0.046
ORF1a	972	0.009
ORF1a	981	0.003
ORF1a	982	0.003
ORF1a	985	0.009
ORF1a	986	0.003
ORF1a	988	0.009
ORF1a	989	0.024
ORF1a	990	0.006
ORF1a	991	0.003
ORF1a	992	0.007
ORF1a	993	0.013
ORF1a	994	0.007
ORF1a	995	0.014
ORF1a	996	0.009
ORF1a	997	0.003
ORF1a	998	0.035
ORF1a	999	0.009
ORF1a	1000	0.017
ORF1a	1001	0.304
ORF1a	1002	0.006
ORF1a	1003	0.006
ORF1a	1004	0.009
ORF1a	1005	0.006
ORF1a	1006	0.006
ORF1a	1007	0.006
ORF1a	1008	0.006
ORF1a	1009	0.015
ORF1a	1010	0.006
ORF1a	1011	0.006
ORF1a	1012	0.006
ORF1a	1013	0.037
ORF1a	1014	0.007
ORF1a	1015	0.007
ORF1a	1016	0.003
ORF1a	1018	0.007
ORF1a	1019	0.003
ORF1a	1020	0.007
ORF1a	1021	0.006
ORF1a	1022	0.003
ORF1a	1023	0.003
ORF1a	1024	0.006
ORF1a	1025	0.006
ORF1a	1026	0.006
ORF1a	1027	0.006
ORF1a	1028	0.006
ORF1a	1029	0.003
ORF1a	1030	0.003
ORF1a	1031	0.003
ORF1a	1032	0.003
ORF1a	1033	0.003
ORF1a	1034	0.003
ORF1a	1035	0.009
ORF1a	1036	0.034
ORF1a	1037	0.003
ORF1a	1038	0.003
ORF1a	1039	0.003
ORF1a	1040	0.003
ORF1a	1041	0.003
ORF1a	1042	0.003
ORF1a	1043	0.007
ORF1a	1044	0.003
ORF1a	1045	0.003
ORF1a	1046	0.003
ORF1a	1047	0.009
ORF1a	1048	0.003
ORF1a	1049	0.014
ORF1a	1052	0.003
ORF1a	1054	0.003
ORF1a	1055	0.007
ORF1a	1056	0.03
ORF1a	1057	0.003
ORF1a	1058	0.003
ORF1a	1060	0.007
ORF1a	1061	0.003
ORF1a	1062	0.003
ORF1a	1064	0.028
ORF1a	1065	0.003
ORF1a	1066	0.003
ORF1a	1067	0.003
ORF1a	1068	0.003
ORF1a	1069	0.003
ORF1a	1070	0.003
ORF1a	1071	0.013
ORF1a	1072	0.003
ORF1a	1073	0.019
ORF1a	1074	0.003
ORF1a	1075	0.003
ORF1a	1076	0.007
ORF1a	1077	0.003
ORF1a	1078	0.007
ORF1a	1079	0.003
ORF1a	1080	0.007
ORF1a	1081	0.007
ORF1a	1082	0.009
ORF1a	1083	0.003
ORF1a	1084	0.003
ORF1a	1085	0.003
ORF1a	1086	0.003
ORF1a	1087	0.003
ORF1a	1088	0.003
ORF1a	1089	0.003
ORF1a	1090	0.007
ORF1a	1091	0.003
ORF1a	1092	0.003
ORF1a	1093	0.015
ORF1a	1094	0.003
ORF1a	1095	0.003
ORF1a	1096	0.003
ORF1a	1097	0.003
ORF1a	1100	0.014
ORF1a	1101	0.007
ORF1a	1102	0.007
ORF1a	1103	0.003
ORF1a	1104	0.003
ORF1a	1105	0.003
ORF1a	1106	0.003
ORF1a	1107	0.003
ORF1a	1108	0.017
ORF1a	1109	0.003
ORF1a	1110	0.003
ORF1a	1111	0.003
ORF1a	1112	0.003
ORF1a	1113	0.071
ORF1a	1114	0.009
ORF1a	1115	0.009
ORF1a	1116	0.003
ORF1a	1117	0.003
ORF1a	1118	0.003
ORF1a	1119	0.007
ORF1a	1120	0.003
ORF1a	1121	0.003
ORF1a	1122	0.003
ORF1a	1123	0.003
ORF1a	1124	0.009
ORF1a	1125	0.012
ORF1a	1126	0.003
ORF1a	1127	0.003
ORF1a	1128	0.009
ORF1a	1129	0.003
ORF1a	1130	0.014
ORF1a	1131	0.003
ORF1a	1132	0.003
ORF1a	1133	0.003
ORF1a	1134	0.007
ORF1a	1135	0.003
ORF1a	1136	0.003
ORF1a	1137	0.003
ORF1a	1140	0.003
ORF1a	1141	0.003
ORF1a	1142	0.007
ORF1a	1143	0.011
ORF1a	1145	0.003
ORF1a	1146	0.003
ORF1a	1147	0.003
ORF1a	1148	0.003
ORF1a	1149	0.003
ORF1a	1151	0.009
ORF1a	1152	0.003
ORF1a	1153	0.007
ORF1a	1154	0.003
ORF1a	1155	0.007
ORF1a	1156	0.003
ORF1a	1157	0.003
ORF1a	1158	0.037
ORF1a	1159	0.007
ORF1a	1160	0.012
ORF1a	1161	0.003
ORF1a	1162	0.003
ORF1a	1163	0.003
ORF1a	1164	0.003
ORF1a	1165	0.003
ORF1a	1166	0.003
ORF1a	1167	0.003
ORF1a	1168	0.029
ORF1a	1170	0.003
ORF1a	1171	0.003
ORF1a	1172	0.01
ORF1a	1173	0.007
ORF1a	1174	0.003
ORF1a	1175	0.006
ORF1a	1176	0.007
ORF1a	1177	0.003
ORF1a	1179	0.003
ORF1a	1180	0.003
ORF1a	1181	0.003
ORF1a	1183	0.003
ORF1a	1184	0.003
ORF1a	1186	0.003
ORF1a	1187	0.003
ORF1a	1188	0.029
ORF1a	1190	0.003
ORF1a	1191	0.017
ORF1a	1192	0.003
ORF1a	1193	0.003
ORF1a	1195	0.007
ORF1a	1196	0.003
ORF1a	1197	0.003
ORF1a	1198	0.003
ORF1a	1199	0.007
ORF1a	1200	0.009
ORF1a	1201	0.003
ORF1a	1202	0.03
ORF1a	1203	0.003
ORF1a	1204	0.01
ORF1a	1205	0.007
ORF1a	1206	0.009
ORF1a	1207	0.02
ORF1a	1208	0.006
ORF1a	1209	0.009
ORF1a	1210	0.006
ORF1a	1211	0.009
ORF1a	1212	0.006
ORF1a	1213	0.009
ORF1a	1214	0.006
ORF1a	1215	0.003
ORF1a	1216	0.003
ORF1a	1217	0.003
ORF1a	1218	0.003
ORF1a	1219	0.003
ORF1a	1220	0.009
ORF1a	1221	0.003
ORF1a	1222	0.003
ORF1a	1223	0.013
ORF1a	1224	0.007
ORF1a	1225	0.003
ORF1a	1226	0.009
ORF1a	1227	0.003
ORF1a	1228	0.01
ORF1a	1229	0.003
ORF1a	1230	0.034
ORF1a	1231	0.003
ORF1a	1232	0.007
ORF1a	1233	0.003
ORF1a	1234	0.003
ORF1a	1235	0.003
ORF1a	1236	0.019
ORF1a	1237	0.007
ORF1a	1238	0.003
ORF1a	1239	0.003
ORF1a	1240	0.003
ORF1a	1241	0.007
ORF1a	1242	0.009
ORF1a	1243	0.003
ORF1a	1244	0.003
ORF1a	1245	0.003
ORF1a	1246	0.127
ORF1a	1247	0.03
ORF1a	1248	0.003
ORF1a	1249	0.01
ORF1a	1250	0.003
ORF1a	1256	0.003
ORF1a	1257	0.003
ORF1a	1258	0.003
ORF1a	1259	0.017
ORF1a	1260	0.003
ORF1a	1261	0.003
ORF1a	1262	0.007
ORF1a	1263	0.003
ORF1a	1264	0.003
ORF1a	1265	0.007
ORF1a	1266	0.003
ORF1a	1267	0.003
ORF1a	1268	0.003
ORF1a	1269	0.007
ORF1a	1270	0.003
ORF1a	1271	0.007
ORF1a	1272	0.003
ORF1a	1273	0.003
ORF1a	1274	0.003
ORF1a	1275	0.003
ORF1a	1276	0.003
ORF1a	1277	0.007
ORF1a	1278	0.003
ORF1a	1279	0.003
ORF1a	1280	0.023
ORF1a	1281	0.003
ORF1a	1282	0.003
ORF1a	1283	0.019
ORF1a	1284	0.003
ORF1a	1285	0.003
ORF1a	1286	0.003
ORF1a	1287	0.023
ORF1a	1288	0.003
ORF1a	1289	0.003
ORF1a	1290	0.003
ORF1a	1291	0.015
ORF1a	1292	0.003
ORF1a	1293	0.003
ORF1a	1294	0.003
ORF1a	1295	0.006
ORF1a	1297	0.003
ORF1a	1298	0.02
ORF1a	1299	0.003
ORF1a	1300	0.003
ORF1a	1301	0.003
ORF1a	1302	0.003
ORF1a	1303	0.007
ORF1a	1304	0.003
ORF1a	1305	0.012
ORF1a	1306	0.01
ORF1a	1307	0.003
ORF1a	1308	0.003
ORF1a	1309	0.003
ORF1a	1310	0.007
ORF1a	1311	0.003
ORF1a	1312	0.051
ORF1a	1314	0.009
ORF1a	1316	0.003
ORF1a	1317	0.003
ORF1a	1320	0.003
ORF1a	1321	0.007
ORF1a	1322	0.003
ORF1a	1323	0.003
ORF1a	1324	0.003
ORF1a	1325	0.003
ORF1a	1326	0.003
ORF1a	1327	0.003
ORF1a	1328	0.003
ORF1a	1329	0.007
ORF1a	1330	0.003
ORF1a	1331	0.003
ORF1a	1332	0.003
ORF1a	1333	0.003
ORF1a	1334	0.003
ORF1a	1335	0.003
ORF1a	1336	0.003
ORF1a	1337	0.003
ORF1a	1338	0.007
ORF1a	1339	0.003
ORF1a	1340	0.007
ORF1a	1341	0.003
ORF1a	1342	0.003
ORF1a	1343	0.003
ORF1a	1344	0.007
ORF1a	1345	0.009
ORF1a	1346	0.007
ORF1a	1347	0.003
ORF1a	1351	0.003
ORF1a	1352	0.007
ORF1a	1354	0.003
ORF1a	1355	0.003
ORF1a	1357	0.003
ORF1a	1359	0.003
ORF1a	1360	0.003
ORF1a	1361	0.05
ORF1a	1362	0.003
ORF1a	1363	0.003
ORF1a	1364	0.003
ORF1a	1365	0.003
ORF1a	1366	0.003
ORF1a	1367	0.007
ORF1a	1368	0.003
ORF1a	1369	0.003
ORF1a	1370	0.003
ORF1a	1371	0.003
ORF1a	1372	0.003
ORF1a	1373	0.003
ORF1a	1374	0.003
ORF1a	1375	0.009
ORF1a	1376	0.007
ORF1a	1377	0.003
ORF1a	1378	0.017
ORF1a	1379	0.007
ORF1a	1380	0.003
ORF1a	1381	0.003
ORF1a	1382	0.007
ORF1a	1383	0.003
ORF1a	1384	0.003
ORF1a	1385	0.003
ORF1a	1386	0.007
ORF1a	1387	0.003
ORF1a	1390	0.003
ORF1a	1392	0.003
ORF1a	1393	0.003
ORF1a	1394	0.003
ORF1a	1395	0.003
ORF1a	1396	0.003
ORF1a	1397	0.012
ORF1a	1398	0.029
ORF1a	1399	0.003
ORF1a	1400	0.01
ORF1a	1401	0.003
ORF1a	1402	0.003
ORF1a	1403	0.003
ORF1a	1404	0.003
ORF1a	1407	0.006
ORF1a	1408	0.003
ORF1a	1409	0.003
ORF1a	1410	0.003
ORF1a	1411	0.003
ORF1a	1412	0.003
ORF1a	1413	0.045
ORF1a	1414	0.003
ORF1a	1415	0.007
ORF1a	1416	0.003
ORF1a	1417	0.003
ORF1a	1418	0.003
ORF1a	1419	0.003
ORF1a	1420	0.01
ORF1a	1421	0.003
ORF1a	1422	0.003
ORF1a	1423	0.003
ORF1a	1424	0.003
ORF1a	1425	0.003
ORF1a	1426	0.003
ORF1a	1427	0.003
ORF1a	1428	0.007
ORF1a	1429	0.012
ORF1a	1430	0.003
ORF1a	1431	0.003
ORF1a	1432	0.003
ORF1a	1433	0.003
ORF1a	1436	0.003
ORF1a	1437	0.007
ORF1a	1439	0.003
ORF1a	1442	0.003
ORF1a	1443	0.003
ORF1a	1444	0.007
ORF1a	1445	0.003
ORF1a	1446	0.003
ORF1a	1447	0.003
ORF1a	1448	0.003
ORF1a	1449	0.003
ORF1a	1450	0.003
ORF1a	1451	0.003
ORF1a	1452	0.003
ORF1a	1453	0.003
ORF1a	1454	0.003
ORF1a	1455	0.003
ORF1a	1456	0.003
ORF1a	1457	0.003
ORF1a	1458	0.007
ORF1a	1459	0.003
ORF1a	1460	0.003
ORF1a	1461	0.003
ORF1a	1462	0.003
ORF1a	1463	0.003
ORF1a	1464	0.007
ORF1a	1465	0.007
ORF1a	1466	0.003
ORF1a	1467	0.003
ORF1a	1468	0.012
ORF1a	1469	0.003
ORF1a	1470	0.003
ORF1a	1471	0.003
ORF1a	1472	0.007
ORF1a	1473	0.012
ORF1a	1474	0.014
ORF1a	1475	0.003
ORF1a	1476	0.003
ORF1a	1477	0.003
ORF1a	1478	0.003
ORF1a	1479	0.003
ORF1a	1480	0.003
ORF1a	1481	0.003
ORF1a	1482	0.003
ORF1a	1483	0.003
ORF1a	1484	0.003
ORF1a	1485	0.003
ORF1a	1486	0.003
ORF1a	1487	0.003
ORF1a	1488	0.003
ORF1a	1489	0.003
ORF1a	1490	0.003
ORF1a	1491	0.003
ORF1a	1492	0.003
ORF1a	1493	0.003
ORF1a	1496	0.036
ORF1a	1497	0.034
ORF1a	1498	0.003
ORF1a	1499	0.003
ORF1a	1500	0.007
ORF1a	1501	0.003
ORF1a	1502	0.003
ORF1a	1503	0.003
ORF1a	1504	0.003
ORF1a	1505	0.007
ORF1a	1506	0.009
ORF1a	1507	0.017
ORF1a	1508	0.003
ORF1a	1509	0.003
ORF1a	1510	0.007
ORF1a	1511	0.003
ORF1a	1512	0.007
ORF1a	1513	0.007
ORF1a	1514	0.003
ORF1a	1515	0.007
ORF1a	1516	0.003
ORF1a	1517	0.007
ORF1a	1518	0.003
ORF1a	1519	0.007
ORF1a	1520	0.003
ORF1a	1521	0.003
ORF1a	1522	0.003
ORF1a	1523	0.003
ORF1a	1524	0.003
ORF1a	1525	0.007
ORF1a	1526	0.003
ORF1a	1527	0.003
ORF1a	1528	0.003
ORF1a	1529	0.003
ORF1a	1530	0.003
ORF1a	1531	0.003
ORF1a	1532	0.007
ORF1a	1533	0.003
ORF1a	1534	0.003
ORF1a	1535	0.003
ORF1a	1536	0.003
ORF1a	1537	0.003
ORF1a	1538	0.009
ORF1a	1539	0.003
ORF1a	1540	0.003
ORF1a	1541	0.007
ORF1a	1542	0.03
ORF1a	1543	0.007
ORF1a	1544	0.003
ORF1a	1545	0.003
ORF1a	1548	0.003
ORF1a	1550	0.009
ORF1a	1552	0.007
ORF1a	1553	0.003
ORF1a	1554	0.026
ORF1a	1555	0.003
ORF1a	1556	0.003
ORF1a	1558	0.003
ORF1a	1560	0.003
ORF1a	1562	0.003
ORF1a	1563	0.003
ORF1a	1564	0.01
ORF1a	1565	0.007
ORF1a	1566	0.009
ORF1a	1567	0.035
ORF1a	1568	0.003
ORF1a	1569	0.003
ORF1a	1570	0.003
ORF1a	1571	0.003
ORF1a	1572	0.003
ORF1a	1573	0.003
ORF1a	1574	0.003
ORF1a	1575	0.003
ORF1a	1576	0.003
ORF1a	1577	0.003
ORF1a	1578	0.003
ORF1a	1579	0.003
ORF1a	1580	0.012
ORF1a	1581	0.003
ORF1a	1582	0.009
ORF1a	1583	0.007
ORF1a	1584	0.007
ORF1a	1585	0.003
ORF1a	1586	0.014
ORF1a	1587	0.009
ORF1a	1588	0.003
ORF1a	1589	0.007
ORF1a	1590	0.007
ORF1a	1591	0.01
ORF1a	1592	0.007
ORF1a	1593	0.003
ORF1a	1594	0.003
ORF1a	1595	0.003
ORF1a	1596	0.009
ORF1a	1597	0.014
ORF1a	1600	0.003
ORF1a	1601	0.003
ORF1a	1602	0.003
ORF1a	1603	0.003
ORF1a	1604	0.003
ORF1a	1605	0.003
ORF1a	1606	0.003
ORF1a	1607	0.014
ORF1a	1608	0.003
ORF1a	1609	0.003
ORF1a	1610	0.003
ORF1a	1611	0.009
ORF1a	1612	0.021
ORF1a	1613	0.003
ORF1a	1614	0.003
ORF1a	1615	0.003
ORF1a	1616	0.003
ORF1a	1618	0.003
ORF1a	1622	0.003
ORF1a	1623	0.003
ORF1a	1624	0.003
ORF1a	1625	0.003
ORF1a	1627	0.003
ORF1a	1628	0.003
ORF1a	1629	0.01
ORF1a	1630	0.003
ORF1a	1631	0.003
ORF1a	1632	0.003
ORF1a	1633	0.003
ORF1a	1634	0.003
ORF1a	1635	0.003
ORF1a	1636	0.003
ORF1a	1637	0.026
ORF1a	1638	0.003
ORF1a	1639	0.009
ORF1a	1640	0.06
ORF1a	1641	0.003
ORF1a	1642	0.003
ORF1a	1643	0.003
ORF1a	1644	0.003
ORF1a	1647	0.011
ORF1a	1653	0.003
ORF1a	1655	0.107
ORF1a	1657	0.009
ORF1a	1659	0.003
ORF1a	1661	0.003
ORF1a	1662	0.003
ORF1a	1665	0.003
ORF1a	1668	0.003
ORF1a	1679	0.011
ORF1a	1680	0.003
ORF1a	1687	0.011
ORF1a	1689	0.006
ORF1a	1692	0.022
ORF1a	1693	0.003
ORF1a	1701	0.003
ORF1a	1705	0.003
ORF1a	1706	0.003
ORF1a	1707	0.003
ORF1a	1708	0.293
ORF1a	1714	0.003
ORF1a	1716	0.003
ORF1a	1720	0.006
ORF1a	1733	0.003
ORF1a	1744	0.003
ORF1a	1747	0.006
ORF1a	1754	0.006
ORF1a	1757	0.003
ORF1a	1759	0.011
ORF1a	1760	0.003
ORF1a	1761	0.003
ORF1a	1762	0.003
ORF1a	1763	0.009
ORF1a	1765	0.003
ORF1a	1769	0.006
ORF1a	1771	0.003
ORF1a	1780	0.003
ORF1a	1786	0.017
ORF1a	1791	0.003
ORF1a	1792	0.007
ORF1a	1795	0.02
ORF1a	1803	0.009
ORF1a	1810	0.007
ORF1a	1812	0.031
ORF1a	1813	0.006
ORF1a	1820	0.003
ORF1a	1822	0.027
ORF1a	1830	0.003
ORF1a	1838	0.003
ORF1a	1840	0.011
ORF1a	1842	0.003
ORF1a	1843	0.003
ORF1a	1845	0.006
ORF1a	1846	0.006
ORF1a	1851	0.003
ORF1a	1854	0.018
ORF1a	1856	0.003
ORF1a	1857	0.003
ORF1a	1862	0.009
ORF1a	1872	0.003
ORF1a	1874	0.003
ORF1a	1881	0.024
ORF1a	1887	0.007
ORF1a	1892	0.003
ORF1a	1895	0.047
ORF1a	1896	0.003
ORF1a	1912	0.007
ORF1a	1920	0.022
ORF1a	1921	0.037
ORF1a	1923	0.003
ORF1a	1924	0.014
ORF1a	1926	0.003
ORF1a	1931	0.006
ORF1a	1933	0.009
ORF1a	1938	0.006
ORF1a	1939	0.017
ORF1a	1946	0.003
ORF1a	1948	0.003
ORF1a	1950	0.009
ORF1a	1952	0.003
ORF1a	1959	0.009
ORF1a	1964	0.003
ORF1a	1973	0.003
ORF1a	1977	0.024
ORF1a	1983	0.003
ORF1a	1989	0.003
ORF1a	1995	0.003
ORF1a	1997	0.031
ORF1a	1998	0.003
ORF1a	2001	0.003
ORF1a	2003	0.003
ORF1a	2007	0.047
ORF1a	2015	0.015
ORF1a	2016	0.074
ORF1a	2018	0.034
ORF1a	2019	0.007
ORF1a	2020	0.007
ORF1a	2022	0.006
ORF1a	2024	0.021
ORF1a	2029	0.011
ORF1a	2030	0.02
ORF1a	2031	0.003
ORF1a	2032	0.006
ORF1a	2033	0.003
ORF1a	2034	0.011
ORF1a	2035	0.006
ORF1a	2036	0.006
ORF1a	2037	0.006
ORF1a	2039	0.011
ORF1a	2043	0.003
ORF1a	2046	0.045
ORF1a	2047	0.014
ORF1a	2048	0.003
ORF1a	2049	0.009
ORF1a	2050	0.003
ORF1a	2053	0.003
ORF1a	2054	0.003
ORF1a	2055	0.009
ORF1a	2059	0.012
ORF1a	2060	0.003
ORF1a	2061	0.007
ORF1a	2062	0.024
ORF1a	2063	0.003
ORF1a	2066	0.003
ORF1a	2068	0.003
ORF1a	2069	0.006
ORF1a	2071	0.006
ORF1a	2075	0.009
ORF1a	2078	0.003
ORF1a	2079	0.003
ORF1a	2080	0.006
ORF1a	2083	0.009
ORF1a	2084	0.003
ORF1a	2085	0.009
ORF1a	2086	0.003
ORF1a	2087	0.012
ORF1a	2089	0.003
ORF1a	2092	0.006
ORF1a	2093	0.011
ORF1a	2094	0.003
ORF1a	2096	0.007
ORF1a	2097	0.014
ORF1a	2098	0.003
ORF1a	2101	0.003
ORF1a	2103	0.014
ORF1a	2105	0.014
ORF1a	2106	0.034
ORF1a	2108	0.003
ORF1a	2115	0.003
ORF1a	2118	0.006
ORF1a	2120	0.003
ORF1a	2121	0.003
ORF1a	2122	0.006
ORF1a	2123	0.006
ORF1a	2124	0.02
ORF1a	2125	0.015
ORF1a	2126	0.009
ORF1a	2129	0.019
ORF1a	2130	0.003
ORF1a	2132	0.009
ORF1a	2134	0.003
ORF1a	2137	0.009
ORF1a	2139	0.011
ORF1a	2143	0.007
ORF1a	2144	0.003
ORF1a	2146	0.022
ORF1a	2148	0.003
ORF1a	2152	0.011
ORF1a	2153	0.003
ORF1a	2154	0.006
ORF1a	2155	0.003
ORF1a	2156	0.007
ORF1a	2159	0.007
ORF1a	2166	0.014
ORF1a	2172	0.006
ORF1a	2178	0.003
ORF1a	2179	0.02
ORF1a	2181	0.018
ORF1a	2183	0.011
ORF1a	2193	0.009
ORF1a	2194	0.003
ORF1a	2195	0.003
ORF1a	2196	0.003
ORF1a	2197	0.003
ORF1a	2198	0.003
ORF1a	2199	0.003
ORF1a	2200	0.006
ORF1a	2201	0.009
ORF1a	2202	0.006
ORF1a	2204	0.003
ORF1a	2207	0.003
ORF1a	2210	0.006
ORF1a	2215	0.003
ORF1a	2224	0.003
ORF1a	2230	0.293
ORF1a	2235	0.003
ORF1a	2237	0.006
ORF1a	2242	0.02
ORF1a	2247	0.003
ORF1a	2249	0.006
ORF1a	2250	0.003
ORF1a	2251	0.003
ORF1a	2255	0.003
ORF1a	2257	0.003
ORF1a	2258	0.003
ORF1a	2259	0.024
ORF1a	2260	0.007
ORF1a	2261	0.003
ORF1a	2264	0.006
ORF1a	2265	0.014
ORF1a	2269	0.003
ORF1a	2273	0.003
ORF1a	2274	0.044
ORF1a	2276	0.003
ORF1a	2278	0.012
ORF1a	2279	0.003
ORF1a	2283	0.014
ORF1a	2285	0.006
ORF1a	2287	0.009
ORF1a	2293	0.003
ORF1a	2300	0.006
ORF1a	2303	0.011
ORF1a	2313	0.003
ORF1a	2314	0.003
ORF1a	2321	0.003
ORF1a	2324	0.006
ORF1a	2328	0.003
ORF1a	2332	0.006
ORF1a	2336	0.006
ORF1a	2345	0.006
ORF1a	2355	0.014
ORF1a	2356	0.009
ORF1a	2357	0.003
ORF1a	2359	0.009
ORF1a	2361	0.006
ORF1a	2365	0.012
ORF1a	2370	0.006
ORF1a	2374	0.007
ORF1a	2376	0.033
ORF1a	2389	0.003
ORF1a	2396	0.011
ORF1a	2405	0.003
ORF1a	2406	0.006
ORF1a	2407	0.003
ORF1a	2408	0.014
ORF1a	2418	0.003
ORF1a	2430	0.003
ORF1a	2488	0.018
ORF1a	2490	0.003
ORF1a	2493	0.003
ORF1a	2497	0.006
ORF1a	2500	0.003
ORF1a	2501	0.134
ORF1a	2502	0.003
ORF1a	2509	0.009
ORF1a	2511	0.006
ORF1a	2512	0.006
ORF1a	2517	0.003
ORF1a	2523	0.003
ORF1a	2524	0.003
ORF1a	2529	0.009
ORF1a	2532	0.006
ORF1a	2533	0.011
ORF1a	2534	0.003
ORF1a	2535	0.003
ORF1a	2537	0.003
ORF1a	2552	0.032
ORF1a	2553	0.017
ORF1a	2554	0.016
ORF1a	2556	0.011
ORF1a	2565	0.003
ORF1a	2568	0.003
ORF1a	2573	0.003
ORF1a	2579	0.003
ORF1a	2582	0.003
ORF1a	2584	0.009
ORF1a	2586	0.006
ORF1a	2587	0.03
ORF1a	2588	0.009
ORF1a	2589	0.011
ORF1a	2592	0.017
ORF1a	2596	0.006
ORF1a	2603	0.006
ORF1a	2604	0.02
ORF1a	2605	0.003
ORF1a	2606	0.056
ORF1a	2607	0.003
ORF1a	2613	0.006
ORF1a	2615	0.006
ORF1a	2616	0.007
ORF1a	2620	0.003
ORF1a	2621	0.009
ORF1a	2622	0.003
ORF1a	2624	0.011
ORF1a	2625	0.033
ORF1a	2626	0.003
ORF1a	2631	0.012
ORF1a	2632	0.003
ORF1a	2633	0.006
ORF1a	2636	0.003
ORF1a	2637	0.007
ORF1a	2648	0.018
ORF1a	2656	0.003
ORF1a	2662	0.006
ORF1a	2665	0.003
ORF1a	2667	0.006
ORF1a	2680	0.003
ORF1a	2681	0.003
ORF1a	2683	0.003
ORF1a	2688	0.018
ORF1a	2690	0.009
ORF1a	2695	0.003
ORF1a	2696	0.003
ORF1a	2699	0.003
ORF1a	2701	0.003
ORF1a	2702	0.053
ORF1a	2714	0.009
ORF1a	2715	0.003
ORF1a	2716	0.009
ORF1a	2728	0.003
ORF1a	2734	0.003
ORF1a	2739	0.017
ORF1a	2746	0.006
ORF1a	2758	0.003
ORF1a	2759	0.012
ORF1a	2761	0.018
ORF1a	2766	0.003
ORF1a	2768	0.003
ORF1a	2769	0.024
ORF1a	2771	0.003
ORF1a	2777	0.009
ORF1a	2779	0.014
ORF1a	2780	0.047
ORF1a	2783	0.011
ORF1a	2791	0.049
ORF1a	2792	0.007
ORF1a	2796	0.021
ORF1a	2797	0.024
ORF1a	2799	0.012
ORF1a	2805	0.003
ORF1a	2813	0.016
ORF1a	2819	0.003
ORF1a	2821	0.003
ORF1a	2822	0.003
ORF1a	2823	0.011
ORF1a	2828	0.003
ORF1a	2832	0.006
ORF1a	2836	0.006
ORF1a	2846	0.006
ORF1a	2848	0.014
ORF1a	2856	0.003
ORF1a	2859	0.003
ORF1a	2863	0.003
ORF1a	2869	0.006
ORF1a	2872	0.006
ORF1a	2877	0.003
ORF1a	2891	0.003
ORF1a	2899	0.003
ORF1a	2900	0.016
ORF1a	2906	0.003
ORF1a	2909	0.003
ORF1a	2921	0.006
ORF1a	2928	0.006
ORF1a	2929	0.003
ORF1a	2944	0.003
ORF1a	2947	0.009
ORF1a	2952	0.006
ORF1a	2955	0.003
ORF1a	2957	0.006
ORF1a	2967	0.009
ORF1a	2969	0.003
ORF1a	2980	0.035
ORF1a	2981	0.016
ORF1a	2993	0.003
ORF1a	2994	0.036
ORF1a	3000	0.003
ORF1a	3022	0.006
ORF1a	3023	0.012
ORF1a	3027	0.009
ORF1a	3035	0.003
ORF1a	3042	0.033
ORF1a	3048	0.003
ORF1a	3051	0.003
ORF1a	3052	0.009
ORF1a	3057	0.003
ORF1a	3058	0.018
ORF1a	3059	0.003
ORF1a	3060	0.003
ORF1a	3063	0.014
ORF1a	3070	0.003
ORF1a	3071	0.011
ORF1a	3072	0.006
ORF1a	3076	0.011
ORF1a	3078	0.003
ORF1a	3082	0.003
ORF1a	3086	0.006
ORF1a	3087	0.131
ORF1a	3089	0.003
ORF1a	3090	0.003
ORF1a	3091	0.003
ORF1a	3097	0.003
ORF1a	3099	0.006
ORF1a	3107	0.003
ORF1a	3115	0.003
ORF1a	3116	0.014
ORF1a	3117	0.003
ORF1a	3123	0.003
ORF1a	3129	0.003
ORF1a	3134	0.003
ORF1a	3140	0.003
ORF1a	3143	0.046
ORF1a	3149	0.017
ORF1a	3158	0.011
ORF1a	3162	0.006
ORF1a	3164	0.003
ORF1a	3165	0.003
ORF1a	3166	0.006
ORF1a	3188	0.003
ORF1a	3189	0.003
ORF1a	3197	0.003
ORF1a	3198	0.003
ORF1a	3201	0.039
ORF1a	3202	0.009
ORF1a	3209	0.024
ORF1a	3212	0.011
ORF1a	3220	0.014
ORF1a	3221	0.014
ORF1a	3222	0.006
ORF1a	3224	0.003
ORF1a	3229	0.006
ORF1a	3244	0.009
ORF1a	3249	0.003
ORF1a	3255	0.038
ORF1a	3256	0.003
ORF1a	3261	0.003
ORF1a	3267	0.003
ORF1a	3270	0.006
ORF1a	3276	0.003
ORF1a	3278	0.125
ORF1a	3284	0.003
ORF1a	3287	0.054
ORF1a	3288	0.003
ORF1a	3298	0.003
ORF1a	3308	0.006
ORF1a	3309	0.006
ORF1a	3310	0.003
ORF1a	3323	0.006
ORF1a	3331	0.003
ORF1a	3334	0.033
ORF1a	3335	0.003
ORF1a	3338	0.007
ORF1a	3340	0.003
ORF1a	3344	0.009
ORF1a	3346	0.006
ORF1a	3347	0.003
ORF1a	3351	0.007
ORF1a	3352	0.105
ORF1a	3353	0.167
ORF1a	3355	0.011
ORF1a	3357	0.011
ORF1a	3359	0.033
ORF1a	3362	0.003
ORF1a	3369	0.006
ORF1a	3371	0.057
ORF1a	3379	0.009
ORF1a	3384	0.006
ORF1a	3392	0.009
ORF1a	3394	0.003
ORF1a	3395	0.012
ORF1a	3420	0.009
ORF1a	3421	0.003
ORF1a	3431	0.003
ORF1a	3440	0.011
ORF1a	3443	0.003
ORF1a	3449	0.016
ORF1a	3451	0.003
ORF1a	3454	0.003
ORF1a	3456	0.003
ORF1a	3458	0.003
ORF1a	3459	0.003
ORF1a	3463	0.003
ORF1a	3465	0.006
ORF1a	3468	0.031
ORF1a	3475	0.006
ORF1a	3476	0.003
ORF1a	3483	0.003
ORF1a	3484	0.006
ORF1a	3490	0.009
ORF1a	3497	0.018
ORF1a	3499	0.003
ORF1a	3500	0.003
ORF1a	3504	0.011
ORF1a	3506	0.006
ORF1a	3510	0.011
ORF1a	3523	0.011
ORF1a	3526	0.003
ORF1a	3529	0.009
ORF1a	3532	0.003
ORF1a	3537	0.003
ORF1a	3542	0.003
ORF1a	3546	0.003
ORF1a	3564	0.003
ORF1a	3570	0.003
ORF1a	3571	0.006
ORF1a	3572	0.009
ORF1a	3574	0.017
ORF1a	3575	0.003
ORF1a	3577	0.007
ORF1a	3580	0.012
ORF1a	3585	0.016
ORF1a	3591	0.012
ORF1a	3593	0.022
ORF1a	3596	0.003
ORF1a	3598	0.003
ORF1a	3605	0.011
ORF1a	3606	0.209
ORF1a	3607	0.007
ORF1a	3615	0.034
ORF1a	3616	0.003
ORF1a	3618	0.031
ORF1a	3620	0.009
ORF1a	3623	0.034
ORF1a	3634	0.003
ORF1a	3643	0.003
ORF1a	3644	0.029
ORF1a	3646	0.003
ORF1a	3648	0.003
ORF1a	3652	0.006
ORF1a	3653	0.054
ORF1a	3655	0.066
ORF1a	3657	0.003
ORF1a	3662	0.003
ORF1a	3667	0.056
ORF1a	3669	0.003
ORF1a	3672	0.003
ORF1a	3675	0.36
ORF1a	3676	0.37
ORF1a	3677	0.367
ORF1a	3678	0.003
ORF1a	3679	0.009
ORF1a	3681	0.022
ORF1a	3682	0.003
ORF1a	3686	0.007
ORF1a	3689	0.009
ORF1a	3691	0.006
ORF1a	3693	0.003
ORF1a	3704	0.003
ORF1a	3705	0.018
ORF1a	3711	0.017
ORF1a	3712	0.003
ORF1a	3716	0.022
ORF1a	3718	0.049
ORF1a	3722	0.003
ORF1a	3723	0.007
ORF1a	3728	0.003
ORF1a	3729	0.011
ORF1a	3730	0.003
ORF1a	3732	0.009
ORF1a	3733	0.011
ORF1a	3736	0.006
ORF1a	3737	0.003
ORF1a	3748	0.003
ORF1a	3750	0.02
ORF1a	3751	0.003
ORF1a	3752	0.061
ORF1a	3754	0.003
ORF1a	3755	0.003
ORF1a	3759	0.011
ORF1a	3761	0.003
ORF1a	3764	0.04
ORF1a	3767	0.014
ORF1a	3770	0.003
ORF1a	3776	0.011
ORF1a	3777	0.009
ORF1a	3779	0.003
ORF1a	3780	0.003
ORF1a	3790	0.003
ORF1a	3796	0.003
ORF1a	3802	0.003
ORF1a	3817	0.003
ORF1a	3818	0.006
ORF1a	3829	0.018
ORF1a	3832	0.006
ORF1a	3833	0.003
ORF1a	3837	0.006
ORF1a	3839	0.017
ORF1a	3842	0.003
ORF1a	3845	0.003
ORF1a	3847	0.003
ORF1a	3859	0.006
ORF1a	3862	0.011
ORF1a	3875	0.003
ORF1a	3879	0.003
ORF1a	3884	0.076
ORF1a	3885	0.003
ORF1a	3889	0.003
ORF1a	3901	0.009
ORF1a	3905	0.003
ORF1a	3917	0.006
ORF1a	3922	0.003
ORF1a	3924	0.003
ORF1a	3930	0.064
ORF1a	3934	0.011
ORF1a	3936	0.003
ORF1a	3937	0.003
ORF1a	3939	0.003
ORF1a	3940	0.019
ORF1a	3944	0.003
ORF1a	3950	0.006
ORF1a	3951	0.009
ORF1a	3952	0.04
ORF1a	3956	0.003
ORF1a	3959	0.006
ORF1a	3963	0.003
ORF1a	3966	0.033
ORF1a	3968	0.003
ORF1a	3969	0.021
ORF1a	3971	0.011
ORF1a	3972	0.003
ORF1a	3976	0.018
ORF1a	3979	0.009
ORF1a	3983	0.003
ORF1a	3987	0.003
ORF1a	3989	0.003
ORF1a	3993	0.015
ORF1a	3996	0.003
ORF1a	4012	0.006
ORF1a	4015	0.003
ORF1a	4016	0.018
ORF1a	4031	0.009
ORF1a	4035	0.034
ORF1a	4044	0.003
ORF1a	4049	0.003
ORF1a	4064	0.003
ORF1a	4065	0.014
ORF1a	4067	0.003
ORF1a	4075	0.029
ORF1a	4080	0.018
ORF1a	4082	0.003
ORF1a	4083	0.02
ORF1a	4087	0.024
ORF1a	4090	0.038
ORF1a	4092	0.003
ORF1a	4097	0.003
ORF1a	4098	0.003
ORF1a	4101	0.006
ORF1a	4103	0.006
ORF1a	4114	0.003
ORF1a	4116	0.003
ORF1a	4120	0.007
ORF1a	4129	0.003
ORF1a	4136	0.006
ORF1a	4140	0.003
ORF1a	4144	0.003
ORF1a	4145	0.003
ORF1a	4152	0.003
ORF1a	4159	0.003
ORF1a	4161	0.012
ORF1a	4164	0.006
ORF1a	4165	0.014
ORF1a	4175	0.042
ORF1a	4176	0.003
ORF1a	4178	0.003
ORF1a	4182	0.024
ORF1a	4187	0.009
ORF1a	4189	0.007
ORF1a	4203	0.003
ORF1a	4204	0.007
ORF1a	4205	0.027
ORF1a	4207	0.003
ORF1a	4211	0.006
ORF1a	4220	0.006
ORF1a	4222	0.003
ORF1a	4223	0.017
ORF1a	4224	0.003
ORF1a	4241	0.125
ORF1a	4249	0.011
ORF1a	4261	0.003
ORF1a	4265	0.003
ORF1a	4277	0.029
ORF1a	4285	0.012
ORF1a	4288	0.003
ORF1a	4292	0.003
ORF1a	4301	0.003
ORF1a	4302	0.003
ORF1a	4304	0.007
ORF1a	4308	0.003
ORF1a	4314	0.003
ORF1a	4334	0.003
ORF1a	4338	0.003
ORF1a	4342	0.003
ORF1a	4348	0.003
ORF1a	4350	0.003
ORF1a	4354	0.006
ORF1a	4355	0.007
ORF1a	4357	0.006
ORF1a	4358	0.007
ORF1a	4364	0.003
ORF1a	4365	0.003
ORF1a	4369	0.003
ORF1a	4372	0.003
ORF1a	4375	0.003
ORF1a	4387	0.007
ORF1a	4391	0.003
ORF1a	4395	0.009
ORF1a	4398	0.014
		0.0103271
ORF1b	3	0.003
ORF1b	7	0.014
ORF1b	17	0.029
ORF1b	22	0.006
ORF1b	29	0.018
ORF1b	48	0.003
ORF1b	50	0.006
ORF1b	54	0.006
ORF1b	55	0.003
ORF1b	59	0.006
ORF1b	67	0.003
ORF1b	72	0.003
ORF1b	76	0.003
ORF1b	82	0.011
ORF1b	83	0.003
ORF1b	85	0.003
ORF1b	88	0.024
ORF1b	91	0.003
ORF1b	94	0.006
ORF1b	100	0.003
ORF1b	101	0.003
ORF1b	115	0.014
ORF1b	118	0.014
ORF1b	126	0.003
ORF1b	128	0.014
ORF1b	129	0.003
ORF1b	131	0.006
ORF1b	132	0.003
ORF1b	134	0.006
ORF1b	145	0.003
ORF1b	151	0.003
ORF1b	164	0.003
ORF1b	167	0.012
ORF1b	170	0.003
ORF1b	175	0.003
ORF1b	176	0.131
ORF1b	177	0.003
ORF1b	183	0.003
ORF1b	186	0.003
ORF1b	187	0.014
ORF1b	192	0.003
ORF1b	206	0.003
ORF1b	214	0.003
ORF1b	215	0.003
ORF1b	218	0.079
ORF1b	238	0.006
ORF1b	239	0.006
ORF1b	245	0.003
ORF1b	252	0.003
ORF1b	255	0.012
ORF1b	257	0.003
ORF1b	258	0.003
ORF1b	260	0.006
ORF1b	267	0.003
ORF1b	270	0.003
ORF1b	275	0.009
ORF1b	280	0.003
ORF1b	284	0.006
ORF1b	290	0.003
ORF1b	293	0.024
ORF1b	295	0.003
ORF1b	298	0.003
ORF1b	302	0.007
ORF1b	310	0.003
ORF1b	314	0.25
ORF1b	316	0.006
ORF1b	343	0.003
ORF1b	345	0.003
ORF1b	346	0.003
ORF1b	347	0.003
ORF1b	351	0.003
ORF1b	367	0.003
ORF1b	370	0.02
ORF1b	373	0.003
ORF1b	393	0.006
ORF1b	396	0.007
ORF1b	414	0.049
ORF1b	417	0.003
ORF1b	425	0.006
ORF1b	427	0.003
ORF1b	434	0.003
ORF1b	435	0.006
ORF1b	436	0.034
ORF1b	440	0.006
ORF1b	442	0.006
ORF1b	445	0.003
ORF1b	454	0.014
ORF1b	469	0.007
ORF1b	485	0.003
ORF1b	508	0.006
ORF1b	517	0.006
ORF1b	520	0.017
ORF1b	528	0.003
ORF1b	541	0.003
ORF1b	573	0.006
ORF1b	579	0.003
ORF1b	587	0.009
ORF1b	598	0.014
ORF1b	600	0.003
ORF1b	602	0.006
ORF1b	604	0.003
ORF1b	606	0.003
ORF1b	620	0.014
[truncated: 2,238 more rows]

## Sheet: Sheet1
		gene	position	entropy		gene	position	entropy		gene	position	entropy		gene	position	entropy		gene	position	entropy		gene	position	entropy		gene	position	entropy		gene	position	entropy		gene	position	entropy		gene	position	entropy		gene	position	entropy		gene	position	entropy
		E	4	0.003		M	2	0.055		N	2	0.077		ORF1a	4	0.009		ORF1b	3	0.003		ORF3a	2	0.003		ORF6	1	0.003		ORF7a	3	0.003		ORF7b	1	0.006		ORF8	1	0.009		ORF9b	3	0.032		S	1	0.003
		E	5	0.007		M	3	0.027		N	3	0.332		ORF1a	6	0.003		ORF1b	7	0.014		ORF3a	7	0.009		ORF6	2	0.036		ORF7a	5	0.006		ORF7b	5	0.016		ORF8	2	0.032		ORF9b	5	0.023		S	3	0.027
		E	8	0.011		M	4	0.003		N	6	0.016		ORF1a	16	0.007		ORF1b	17	0.029		ORF3a	10	0.003		ORF6	3	0.007		ORF7a	6	0.027		ORF7b	8	0.003		ORF8	3	0.006		ORF9b	6	0.026		S	5	0.101
		E	9	0.006		M	10	0.007		N	7	0.011		ORF1a	24	0.051		ORF1b	22	0.006		ORF3a	11	0.006		ORF6	4	0.009		ORF7a	8	0.009		ORF7b	11	0.003		ORF8	4	0.006		ORF9b	8	0.039		S	6	0.02
		E	16	0.003		M	13	0.003		N	8	0.02		ORF1a	27	0.012		ORF1b	29	0.018		ORF3a	12	0.009		ORF6	5	0.009		ORF7a	10	0.007		ORF7b	12	0.003		ORF8	5	0.003		ORF9b	9	0.039		S	9	0.006
		E	20	0.003		M	15	0.003		N	9	0.024		ORF1a	28	0.003		ORF1b	48	0.003		ORF3a	13	0.012		ORF6	6	0.007		ORF7a	11	0.003		ORF7b	14	0.006		ORF8	7	0.003		ORF9b	10	0.046		S	12	0.029
		E	21	0.029		M	17	0.006		N	11	0.03		ORF1a	29	0.003		ORF1b	50	0.006		ORF3a	14	0.003		ORF6	7	0.014		ORF7a	12	0.006		ORF7b	15	0.022		ORF8	8	0.013		ORF9b	11	0.003		S	13	0.033
		E	36	0.003		M	28	0.011		N	12	0.043		ORF1a	30	0.006		ORF1b	54	0.006		ORF3a	15	0.046		ORF6	8	0.003		ORF7a	14	0.054		ORF7b	16	0.003		ORF8	9	0.017		ORF9b	13	0.05		S	14	0.015
		E	58	0.014		M	29	0.006		N	13	0.05		ORF1a	37	0.03		ORF1b	55	0.003		ORF3a	16	0.007		ORF6	9	0.003		ORF7a	15	0.003		ORF7b	18	0.003		ORF8	10	0.015		ORF9b	14	0.006		S	15	0.009
		E	61	0.003		M	33	0.003		N	14	0.009		ORF1a	43	0.003		ORF1b	59	0.006		ORF3a	18	0.011		ORF6	10	0.003		ORF7a	16	0.007		ORF7b	21	0.003		ORF8	11	0.035		ORF9b	15	0.011		S	16	0.007
		E	62	0.006		M	44	0.016		N	15	0.003		ORF1a	45	0.003		ORF1b	67	0.003		ORF3a	19	0.003		ORF6	11	0.003		ORF7a	17	0.003		ORF7b	25	0.003		ORF8	12	0.009		ORF9b	17	0.006		S	18	0.144
		E	63	0.003		M	64	0.003		N	16	0.014		ORF1a	49	0.006		ORF1b	72	0.003		ORF3a	20	0.012		ORF6	12	0.007		ORF7a	18	0.003		ORF7b	26	0.003		ORF8	13	0.006		ORF9b	18	0.012		S	19	0.003
		E	68	0.012		M	66	0.009		N	18	0.021		ORF1a	55	0.007		ORF1b	76	0.003		ORF3a	21	0.016		ORF6	13	0.014		ORF7a	19	0.003		ORF7b	29	0.003		ORF8	14	0.009		ORF9b	19	0.009		S	20	0.03
		E	69	0.003		M	70	0.039		N	20	0.006		ORF1a	56	0.009		ORF1b	82	0.011		ORF3a	22	0.009		ORF6	17	0.006		ORF7a	20	0.003		ORF7b	30	0.003		ORF8	15	0.006		ORF9b	20	0.003		S	21	0.003
		E	71	0.114		M	73	0.011		N	22	0.015		ORF1a	57	0.079		ORF1b	83	0.003		ORF3a	23	0.009		ORF6	19	0.003		ORF7a	25	0.003		ORF7b	31	0.011		ORF8	16	0.009		ORF9b	24	0.003		S	22	0.014
		E	72	0.007		M	81	0.003		N	25	0.009		ORF1a	59	0.003		ORF1b	85	0.003		ORF3a	24	0.009		ORF6	20	0.006		ORF7a	27	0.006		ORF7b	32	0.009		ORF8	17	0.012		ORF9b	25	0.003		S	23	0.01
		E	73	0.003		M	82	0.024		N	27	0.003		ORF1a	60	0.003		ORF1b	88	0.024		ORF3a	25	0.006		ORF6	21	0.009		ORF7a	28	0.031		ORF7b	35	0.003		ORF8	18	0.056		ORF9b	28	0.003		S	25	0.003
		Average		0.0135294		M	84	0.009		N	28	0.003		ORF1a	73	0.003		ORF1b	91	0.003		ORF3a	26	0.006		ORF6	22	0.003		ORF7a	29	0.009		ORF7b	36	0.006		ORF8	19	0.009		ORF9b	29	0.003		S	26	0.05
						M	85	0.012		N	32	0.003		ORF1a	75	0.003		ORF1b	94	0.006		ORF3a	27	0.012		ORF6	23	0.006		ORF7a	30	0.009		ORF7b	37	0.014		ORF8	20	0.009		ORF9b	31	0.003		S	27	0.019
						M	86	0.007		N	34	0.022		ORF1a	76	0.003		ORF1b	100	0.003		ORF3a	28	0.003		ORF6	24	0.006		ORF7a	31	0.006		ORF7b	39	0.026		ORF8	21	0.015		ORF9b	32	0.091		S	28	0.009
						M	91	0.003		N	35	0.018		ORF1a	77	0.003		ORF1b	101	0.003		ORF3a	30	0.003		ORF6	25	0.009		ORF7a	32	0.009		ORF7b	40	0.006		ORF8	22	0.006		ORF9b	37	0.006		S	29	0.011
						M	92	0.003		N	37	0.003		ORF1a	78	0.003		ORF1b	115	0.014		ORF3a	32	0.011		ORF6	26	0.009		ORF7a	33	0.012		ORF7b	41	0.017		ORF8	23	0.009		ORF9b	38	0.012		S	30	0.003
						M	93	0.003		N	40	0.017		ORF1a	80	0.007		ORF1b	118	0.014		ORF3a	33	0.009		ORF6	27	0.012		ORF7a	34	0.015		ORF7b	42	0.003		ORF8	24	0.127		ORF9b	39	0.003		S	32	0.003
						M	94	0.003		N	43	0.003		ORF1a	82	0.006		ORF1b	126	0.003		ORF3a	34	0.007		ORF6	28	0.006		ORF7a	35	0.012		ORF7b	43	0.013		ORF8	25	0.009		ORF9b	40	0.003		S	33	0.003
						M	95	0.003		N	49	0.009		ORF1a	83	0.02		ORF1b	128	0.014		ORF3a	35	0.012		ORF6	29	0.007		ORF7a	36	0.006		Average		0.00783333		ORF8	26	0.017		ORF9b	41	0.003		S	37	0.003
						M	96	0.003		N	63	0.003		ORF1a	84	0.011		ORF1b	129	0.003		ORF3a	37	0.007		ORF6	30	0.007		ORF7a	37	0.009						ORF8	27	0.3		ORF9b	51	0.011		S	43	0.003
						M	97	0.003		N	67	0.125		ORF1a	85	0.019		ORF1b	131	0.006		ORF3a	38	0.099		ORF6	31	0.003		ORF7a	38	0.012						ORF8	28	0.015		ORF9b	57	0.022		S	49	0.033
						M	98	0.007		N	68	0.003		ORF1a	86	0.009		ORF1b	132	0.003		ORF3a	39	0.007		ORF6	33	0.054		ORF7a	39	0.029						ORF8	29	0.015		ORF9b	59	0.003		S	51	0.006
						M	109	0.009		N	72	0.009		ORF1a	93	0.003		ORF1b	134	0.006		ORF3a	40	0.018		ORF6	34	0.007		ORF7a	40	0.012						ORF8	30	0.023		ORF9b	61	0.003		S	52	0.032
						M	125	0.029		N	78	0.011		ORF1a	102	0.006		ORF1b	145	0.003		ORF3a	41	0.007		ORF6	39	0.003		ORF7a	41	0.012						ORF8	31	0.012		ORF9b	64	0.009		S	54	0.031
						M	130	0.003		N	80	0.024		ORF1a	105	0.007		ORF1b	151	0.003		ORF3a	42	0.021		ORF6	42	0.016		ORF7a	42	0.015						ORF8	32	0.017		ORF9b	65	0.003		S	67	0.046
						M	138	0.003		N	81	0.003		ORF1a	106	0.003		ORF1b	164	0.003		ORF3a	43	0.003		ORF6	53	0.003		ORF7a	43	0.009						ORF8	33	0.009		ORF9b	72	0.003		S	68	0.007
						M	142	0.003		N	83	0.006		ORF1a	107	0.003		ORF1b	167	0.012		ORF3a	44	0.01		ORF6	54	0.003		ORF7a	44	0.012						ORF8	34	0.022		ORF9b	74	0.011		S	69	0.367
						M	146	0.003		N	90	0.01		ORF1a	110	0.02		ORF1b	170	0.003		ORF3a	45	0.037		ORF6	55	0.012		ORF7a	45	0.023						ORF8	35	0.018		ORF9b	75	0.006		S	70	0.363
						M	148	0.014		N	93	0.003		ORF1a	114	0.003		ORF1b	175	0.003		ORF3a	46	0.012		ORF6	57	0.006		ORF7a	46	0.013						ORF8	36	0.027		ORF9b	77	0.024		S	75	0.029
						M	155	0.018		N	95	0.006		ORF1a	116	0.009		ORF1b	176	0.131		ORF3a	48	0.009		ORF6	58	0.003		ORF7a	47	0.013						ORF8	37	0.009		ORF9b	78	0.011		S	76	0.009
						M	162	0.003		N	96	0.011		ORF1a	117	0.012		ORF1b	177	0.003		ORF3a	49	0.011		ORF6	60	0.011		ORF7a	48	0.009						ORF8	38	0.026		ORF9b	79	0.003		S	78	0.003
						M	168	0.006		N	103	0.02		ORF1a	118	0.003		ORF1b	183	0.003		ORF3a	50	0.006		ORF6	61	0.015		ORF7a	49	0.009						ORF8	39	0.015		ORF9b	80	0.006		S	80	0.131
						M	175	0.009		N	119	0.033		ORF1a	119	0.003		ORF1b	186	0.003		ORF3a	52	0.032		Average		0.00902632		ORF7a	50	0.015						ORF8	40	0.018		ORF9b	83	0.006		S	90	0.003
						M	201	0.003		N	126	0.003		ORF1a	120	0.006		ORF1b	187	0.014		ORF3a	53	0.012						ORF7a	51	0.009						ORF8	41	0.009		ORF9b	86	0.003		S	94	0.006
						M	208	0.016		N	128	0.03		ORF1a	121	0.007		ORF1b	192	0.003		ORF3a	54	0.02						ORF7a	52	0.009						ORF8	42	0.009		ORF9b	90	0.003		S	95	0.042
						M	209	0.007		N	134	0.003		ORF1a	122	0.007		ORF1b	206	0.003		ORF3a	55	0.029						ORF7a	53	0.009						ORF8	43	0.012		ORF9b	92	0.006		S	96	0.009
						Average		0.00978571		N	135	0.014		ORF1a	123	0.003		ORF1b	214	0.003		ORF3a	57	0.489						ORF7a	54	0.012						ORF8	44	0.009		Average		0.0135952		S	97	0.003
										N	136	0.003		ORF1a	126	0.003		ORF1b	215	0.003		ORF3a	58	0.027						ORF7a	55	0.009						ORF8	45	0.029						S	98	0.073
										N	139	0.018		ORF1a	135	0.009		ORF1b	218	0.079		ORF3a	59	0.003						ORF7a	56	0.009						ORF8	46	0.015						S	100	0.003
										N	141	0.011		ORF1a	136	0.003		ORF1b	238	0.006		ORF3a	60	0.013						ORF7a	57	0.009						ORF8	47	0.009						S	101	0.003
										N	142	0.006		ORF1a	138	0.003		ORF1b	239	0.006		ORF3a	61	0.012						ORF7a	58	0.011						ORF8	48	0.009						S	102	0.028
										N	144	0.033		ORF1a	139	0.003		ORF1b	245	0.003		ORF3a	64	0.006						ORF7a	59	0.009						ORF8	49	0.009						S	105	0.003
										N	145	0.04		ORF1a	141	0.014		ORF1b	252	0.003		ORF3a	65	0.003						ORF7a	60	0.014						ORF8	50	0.009						S	112	0.006
										N	148	0.006		ORF1a	142	0.014		ORF1b	255	0.012		ORF3a	67	0.019						ORF7a	61	0.011						ORF8	51	0.029						S	118	0.009
										N	151	0.049		ORF1a	143	0.017		ORF1b	257	0.003		ORF3a	68	0.003						ORF7a	62	0.023						ORF8	52	0.334						S	127	0.006
										N	152	0.021		ORF1a	144	0.014		ORF1b	258	0.003		ORF3a	69	0.019						ORF7a	63	0.019						ORF8	53	0.009						S	128	0.003
										N	157	0.003		ORF1a	146	0.003		ORF1b	260	0.006		ORF3a	72	0.038						ORF7a	64	0.014						ORF8	54	0.018						S	138	0.087
										N	158	0.003		ORF1a	147	0.003		ORF1b	267	0.003		ORF3a	73	0.006						ORF7a	65	0.017						ORF8	55	0.026						S	140	0.003
										N	160	0.027		ORF1a	150	0.003		ORF1b	270	0.003		ORF3a	74	0.014						ORF7a	66	0.019						ORF8	56	0.009						S	141	0.033
										N	162	0.003		ORF1a	158	0.003		ORF1b	275	0.009		ORF3a	75	0.021						ORF7a	67	0.014						ORF8	57	0.009						S	142	0.035
										N	163	0.006		ORF1a	166	0.003		ORF1b	280	0.003		ORF3a	77	0.069						ORF7a	68	0.016						ORF8	58	0.009						S	143	0.042
										N	164	0.003		ORF1a	167	0.003		ORF1b	284	0.006		ORF3a	78	0.036						ORF7a	69	0.017						ORF8	59	0.018						S	144	0.308
										N	166	0.003		ORF1a	168	0.003		ORF1b	290	0.003		ORF3a	81	0.003						ORF7a	70	0.017						ORF8	60	0.009						S	146	0.032
										N	167	0.009		ORF1a	170	0.014		ORF1b	293	0.024		ORF3a	83	0.006						ORF7a	71	0.017						ORF8	61	0.033						S	148	0.003
										N	168	0.003		ORF1a	173	0.003		ORF1b	295	0.003		ORF3a	85	0.003						ORF7a	72	0.019						ORF8	62	0.045						S	152	0.041
										N	169	0.003		ORF1a	177	0.003		ORF1b	298	0.003		ORF3a	86	0.011						ORF7a	73	0.016						ORF8	63	0.032						S	153	0.079
										N	179	0.009		ORF1a	184	0.009		ORF1b	302	0.007		ORF3a	88	0.006						ORF7a	74	0.019						ORF8	64	0.067						S	154	0.012
										N	180	0.012		ORF1a	190	0.011		ORF1b	310	0.003		ORF3a	89	0.016						ORF7a	75	0.014						ORF8	65	0.05						S	155	0.009
										N	182	0.006		ORF1a	192	0.007		ORF1b	314	0.25		ORF3a	92	0.006						ORF7a	76	0.017						ORF8	66	0.022						S	156	0.007
										N	183	0.02		ORF1a	193	0.009		ORF1b	316	0.006		ORF3a	93	0.009						ORF7a	77	0.009						ORF8	67	0.047						S	157	0.066
										N	185	0.006		ORF1a	194	0.011		ORF1b	343	0.003		ORF3a	94	0.006						ORF7a	78	0.012						ORF8	68	0.135						S	159	0.007
										N	186	0.012		ORF1a	197	0.006		ORF1b	345	0.003		ORF3a	95	0.009						ORF7a	79	0.021						ORF8	69	0.015						S	163	0.003
										N	187	0.009		ORF1a	198	0.003		ORF1b	346	0.003		ORF3a	97	0.003						ORF7a	80	0.017						ORF8	70	0.015						S	174	0.007
										N	190	0.018		ORF1a	203	0.026		ORF1b	347	0.003		ORF3a	98	0.003						ORF7a	81	0.011						ORF8	71	0.009						S	176	0.029
										N	191	0.003		ORF1a	204	0.007		ORF1b	351	0.003		ORF3a	99	0.037						ORF7a	82	0.006						ORF8	72	0.017						S	177	0.011
										N	193	0.03		ORF1a	206	0.003		ORF1b	367	0.003		ORF3a	100	0.02						ORF7a	83	0.012						ORF8	73	0.305						S	178	0.013
										N	194	0.263		ORF1a	207	0.012		ORF1b	370	0.02		ORF3a	101	0.007						ORF7a	84	0.026						ORF8	74	0.009						S	179	0.003
										N	195	0.007		ORF1a	211	0.003		ORF1b	373	0.003		ORF3a	103	0.015						ORF7a	85	0.009						ORF8	75	0.012						S	181	0.012
										N	197	0.02		ORF1a	212	0.006		ORF1b	393	0.006		ORF3a	104	0.015						ORF7a	86	0.006						ORF8	76	0.012						S	182	0.006
										N	198	0.009		ORF1a	214	0.006		ORF1b	396	0.007		ORF3a	105	0.003						ORF7a	87	0.006						ORF8	77	0.017						S	184	0.007
										N	199	0.157		ORF1a	216	0.007		ORF1b	414	0.049		ORF3a	106	0.017						ORF7a	88	0.017						ORF8	78	0.009						S	185	0.003
										N	200	0.003		ORF1a	220	0.003		ORF1b	417	0.003		ORF3a	108	0.016						ORF7a	89	0.009						ORF8	79	0.009						S	186	0.009
										N	201	0.003		ORF1a	224	0.019		ORF1b	425	0.006		ORF3a	109	0.009						ORF7a	90	0.009						ORF8	80	0.012						S	189	0.038
										N	202	0.082		ORF1a	226	0.009		ORF1b	427	0.003		ORF3a	110	0.017						ORF7a	91	0.009						ORF8	81	0.009						S	190	0.02
										N	203	0.701		ORF1a	230	0.003		ORF1b	434	0.003		ORF3a	112	0.003						ORF7a	92	0.006						ORF8	82	0.009						S	193	0.003
										N	204	0.75		ORF1a	231	0.003		ORF1b	435	0.006		ORF3a	113	0.003						ORF7a	93	0.012						ORF8	83	0.009						S	198	0.006
										N	205	0.198		ORF1a	232	0.02		ORF1b	436	0.034		ORF3a	114	0.003						ORF7a	94	0.015						ORF8	84	0.133						S	210	0.022
										N	206	0.024		ORF1a	238	0.003		ORF1b	440	0.006		ORF3a	119	0.009						ORF7a	95	0.003						ORF8	85	0.009						S	211	0.029
										N	207	0.011		ORF1a	246	0.003		ORF1b	442	0.006		ORF3a	120	0.007						ORF7a	96	0.006						ORF8	86	0.009						S	213	0.022
										N	208	0.009		ORF1a	247	0.003		ORF1b	445	0.003		ORF3a	122	0.014						ORF7a	97	0.003						ORF8	87	0.022						S	214	0.017
										N	209	0.037		ORF1a	249	0.003		ORF1b	454	0.014		ORF3a	125	0.003						ORF7a	98	0.007						ORF8	88	0.009						S	215	0.116
										N	210	0.024		ORF1a	251	0.009		ORF1b	469	0.007		ORF3a	126	0.027						ORF7a	99	0.012						ORF8	89	0.006						S	216	0.003
										N	211	0.055		ORF1a	257	0.003		ORF1b	485	0.003		ORF3a	128	0.009						ORF7a	100	0.007						ORF8	90	0.006						S	218	0.003
										N	212	0.04		ORF1a	261	0.003		ORF1b	508	0.006		ORF3a	129	0.011						ORF7a	101	0.003						ORF8	91	0.021						S	221	0.009
										N	213	0.009		ORF1a	262	0.009		ORF1b	517	0.006		ORF3a	131	0.07						ORF7a	102	0.003						ORF8	92	0.074						S	222	0.268
										N	214	0.007		ORF1a	265	0.294		ORF1b	520	0.017		ORF3a	132	0.006						ORF7a	103	0.003						ORF8	93	0.017						S	230	0.003
										N	215	0.019		ORF1a	268	0.011		ORF1b	528	0.003		ORF3a	134	0.017						ORF7a	104	0.017						ORF8	94	0.006						S	236	0.006
										N	217	0.006		ORF1a	271	0.009		ORF1b	541	0.003		ORF3a	135	0.003						ORF7a	105	0.006						ORF8	95	0.033						S	237	0.003
										N	218	0.003		ORF1a	272	0.012		ORF1b	573	0.006		ORF3a	140	0.009						ORF7a	106	0.003						ORF8	96	0.009						S	240	0.003
										N	219	0.014		ORF1a	279	0.009		ORF1b	579	0.003		ORF3a	141	0.003						ORF7a	113	0.003						ORF8	97	0.022						S	241	0.11
										N	220	0.257		ORF1a	283	0.003		ORF1b	587	0.009		ORF3a	142	0.006						ORF7a	115	0.003						ORF8	98	0.009						S	242	0.112
										N	221	0.006		ORF1a	286	0.009		ORF1b	598	0.014		ORF3a	143	0.009						ORF7a	116	0.003						ORF8	99	0.009						S	243	0.112
										N	229	0.014		ORF1a	287	0.003		ORF1b	600	0.003		ORF3a	145	0.003						ORF7a	118	0.003						ORF8	100	0.012						S	245	0.007
										N	230	0.009		ORF1a	292	0.006		ORF1b	602	0.006		ORF3a	149	0.007						ORF7a	120	0.02						ORF8	101	0.018						S	246	0.011
										N	234	0.187		ORF1a	293	0.003		ORF1b	604	0.003		ORF3a	151	0.047						ORF7a	121	0.009						ORF8	102	0.012						S	248	0.003
										N	235	0.296		ORF1a	294	0.006		ORF1b	606	0.003		ORF3a	155	0.052						ORF7a	122	0.006						ORF8	103	0.02						S	251	0.003
										N	236	0.003		ORF1a	295	0.007		ORF1b	620	0.014		ORF3a	156	0.003						Average		0.0112549						ORF8	104	0.009						S	252	0.003
										N	238	0.019		ORF1a	297	0.012		ORF1b	621	0.003		ORF3a	163	0.014														ORF8	105	0.009						S	253	0.009
										N	239	0.003		ORF1a	300	0.554		ORF1b	623	0.003		ORF3a	165	0.019														ORF8	106	0.026						S	254	0.003
										N	244	0.009		ORF1a	302	0.011		ORF1b	627	0.003		ORF3a	166	0.04														ORF8	107	0.012						S	255	0.009
										N	246	0.011		ORF1a	305	0.003		ORF1b	629	0.006		ORF3a	171	0.172														ORF8	108	0.009						S	256	0.009
										N	247	0.003		ORF1a	308	0.006		ORF1b	634	0.003		ORF3a	172	0.21														ORF8	109	0.009						S	257	0.009
										N	252	0.02		ORF1a	309	0.051		ORF1b	638	0.009		ORF3a	173	0.019														ORF8	110	0.015						S	258	0.003
										N	270	0.009		ORF1a	313	0.018		ORF1b	647	0.017		ORF3a	174	0.028														ORF8	111	0.012						S	261	0.01
										N	271	0.006		ORF1a	314	0.003		ORF1b	657	0.085		ORF3a	175	0.031														ORF8	112	0.009						S	262	0.046
										N	280	0.003		ORF1a	315	0.003		ORF1b	659	0.006		ORF3a	177	0.009														ORF8	113	0.012						S	267	0.003
										N	281	0.003		ORF1a	316	0.003		ORF1b	662	0.007		ORF3a	180	0.012														ORF8	114	0.006						S	272	0.034
										N	282	0.017		ORF1a	317	0.003		ORF1b	690	0.009		ORF3a	182	0.003														ORF8	115	0.009						S	273	0.003
										N	289	0.006		ORF1a	318	0.027		ORF1b	698	0.003		ORF3a	185	0.043														ORF8	116	0.006						S	288	0.003
										N	292	0.058		ORF1a	320	0.011		ORF1b	710	0.003		ORF3a	186	0.006														ORF8	117	0.006						S	289	0.003
										N	296	0.006		ORF1a	322	0.006		ORF1b	711	0.116		ORF3a	188	0.014														ORF8	118	0.009						S	307	0.003
										N	297	0.003		ORF1a	324	0.003		ORF1b	712	0.003		ORF3a	193	0.012														ORF8	119	0.018						S	309	0.003
										N	300	0.012		ORF1a	333	0.003		ORF1b	716	0.003		ORF3a	194	0.009														ORF8	120	0.021						S	314	0.003
										N	308	0.003		ORF1a	335	0.014		ORF1b	728	0.003		ORF3a	196	0.016														ORF8	121	0.056						S	323	0.003
										N	319	0.009		ORF1a	336	0.003		ORF1b	729	0.011		ORF3a	202	0.08														ORF8	122	0.006						S	330	0.003
										N	321	0.003		ORF1a	337	0.003		ORF1b	730	0.014		ORF3a	209	0.018														Average		0.0262479						S	346	0.009
										N	322	0.003		ORF1a	340	0.003		ORF1b	733	0.009		ORF3a	213	0.018																						S	348	0.006
										N	325	0.006		ORF1a	345	0.003		ORF1b	735	0.006		ORF3a	216	0.003																						S	352	0.02
										N	326	0.006		ORF1a	346	0.036		ORF1b	745	0.003		ORF3a	217	0.006																						S	354	0.011
										N	327	0.009		ORF1a	347	0.006		ORF1b	746	0.003		ORF3a	219	0.015																						S	358	0.003
										N	330	0.006		ORF1a	349	0.006		ORF1b	747	0.003		ORF3a	220	0.035																						S	359	0.006
										N	334	0.012		ORF1a	350	0.011		ORF1b	759	0.003		ORF3a	222	0.018																						S	361	0.003
										N	343	0.011		ORF1a	354	0.009		ORF1b	765	0.003		ORF3a	223	0.099																						S	367	0.06
										N	344	0.006		ORF1a	361	0.009		ORF1b	767	0.136		ORF3a	224	0.056																						S	382	0.009
										N	348	0.02		ORF1a	363	0.003		ORF1b	771	0.006		ORF3a	225	0.003																						S	385	0.016
										N	359	0.003		ORF1a	365	0.017		ORF1b	772	0.003		ORF3a	226	0.006																						S	408	0.003
										N	361	0.003		ORF1a	367	0.003		ORF1b	786	0.009		ORF3a	229	0.003																						S	409	0.003
										N	362	0.014		ORF1a	371	0.003		ORF1b	792	0.003		ORF3a	236	0.007																						S	414	0.012
										N	363	0.003		ORF1a	374	0.018		ORF1b	794	0.009		ORF3a	239	0.007																						S	417	0.126
										N	364	0.031		ORF1a	376	0.003		ORF1b	795	0.006		ORF3a	240	0.02																						S	427	0.003
										N	365	0.059		ORF1a	377	0.003		ORF1b	797	0.011		ORF3a	242	0.003																						S	434	0.003
										N	366	0.02		ORF1a	378	0.009		ORF1b	802	0.003		ORF3a	245	0.003																						S	439	0.149
										N	367	0.003		ORF1a	379	0.003		ORF1b	813	0.016		ORF3a	247	0.006																						S	440	0.014
										N	369	0.007		ORF1a	380	0.009		ORF1b	814	0.017		ORF3a	251	0.038																						S	445	0.003
										N	370	0.003		ORF1a	381	0.003		ORF1b	818	0.003		ORF3a	253	0.029																						S	452	0.085
										N	371	0.009		ORF1a	382	0.003		ORF1b	820	0.009		ORF3a	254	0.009																						S	459	0.018
										N	373	0.022		ORF1a	384	0.003		ORF1b	839	0.018		ORF3a	255	0.003																						S	470	0.003
										N	375	0.003		ORF1a	385	0.003		ORF1b	861	0.003		ORF3a	256	0.017																						S	472	0.003
										N	376	0.127		ORF1a	388	0.011		ORF1b	870	0.003		ORF3a	257	0.014																						S	475	0.007
										N	377	0.125		ORF1a	389	0.003		ORF1b	896	0.003		ORF3a	258	0.009																						S	477	0.193
										N	378	0.009		ORF1a	390	0.009		ORF1b	897	0.006		ORF3a	259	0.003																						S	478	0.018
										N	379	0.014		ORF1a	391	0.003		ORF1b	901	0.011		ORF3a	260	0.003																						S	479	0.003
										N	380	0.01		ORF1a	392	0.01		ORF1b	902	0.003		ORF3a	261	0.016																						S	481	0.003
										N	381	0.014		ORF1a	397	0.009		ORF1b	904	0.006		ORF3a	262	0.003																						S	483	0.003
										N	382	0.003		ORF1a	398	0.016		ORF1b	905	0.003		ORF3a	265	0.003																						S	484	0.17
										N	383	0.042		ORF1a	400	0.009		ORF1b	909	0.006		ORF3a	268	0.006																						S	490	0.009
										N	384	0.038		ORF1a	402	0.006		ORF1b	910	0.003		Average		0.0205987																						S	494	0.006
										N	385	0.042		ORF1a	403	0.014		ORF1b	913	0.003																										S	496	0.003
										N	386	0.003		ORF1a	410	0.003		ORF1b	914	0.003																										S	501	0.402
										N	387	0.003		ORF1a	415	0.003		ORF1b	920	0.003																										S	507	0.003
										N	389	0.02		ORF1a	417	0.014		ORF1b	927	0.003																										S	508	0.003
										N	391	0.029		ORF1a	431	0.006		ORF1b	941	0.011																										S	516	0.009
										N	398	0.009		ORF1a	433	0.003		ORF1b	958	0.003																										S	518	0.009
										N	399	0.011		ORF1a	436	0.003		ORF1b	959	0.003																										S	520	0.02
										N	401	0.026		ORF1a	438	0.003		ORF1b	961	0.009																										S	521	0.003
										N	402	0.019		ORF1a	440	0.003		ORF1b	969	0.003																										S	522	0.017
										N	406	0.003		ORF1a	441	0.003		ORF1b	970	0.012																										S	547	0.014
										N	414	0.009		ORF1a	442	0.007		ORF1b	975	0.006																										S	553	0.003
										N	415	0.003		ORF1a	443	0.028		ORF1b	976	0.036																										S	554	0.003
										N	416	0.003		ORF1a	444	0.003		ORF1b	977	0.006																										S	558	0.006
										N	418	0.009		ORF1a	445	0.007		ORF1b	997	0.014																										S	569	0.006
										Average		0.0341856		ORF1a	446	0.02		ORF1b	1000	0.009																										S	570	0.294
														ORF1a	448	0.003		ORF1b	1001	0.024																										S	572	0.006
														ORF1a	450	0.003		ORF1b	1003	0.014																										S	573	0.003
														ORF1a	451	0.009		ORF1b	1008	0.003																										S	574	0.009
														ORF1a	453	0.003		ORF1b	1012	0.003																										S	575	0.006
														ORF1a	454	0.006		ORF1b	1021	0.018																										S	582	0.006
														ORF1a	455	0.011		ORF1b	1023	0.009																										S	583	0.011
														ORF1a	459	0.003		ORF1b	1026	0.006																										S	588	0.006
														ORF1a	460	0.012		ORF1b	1028	0.003																										S	594	0.006
														ORF1a	464	0.003		ORF1b	1033	0.009																										S	607	0.003
														ORF1a	465	0.003		ORF1b	1036	0.003																										S	613	0.058
														ORF1a	473	0.003		ORF1b	1038	0.003																										S	614	0.212
														ORF1a	474	0.003		ORF1b	1040	0.003																										S	615	0.003
														ORF1a	476	0.003		ORF1b	1041	0.003																										S	622	0.019
														ORF1a	481	0.006		ORF1b	1043	0.003																										S	623	0.011
														ORF1a	486	0.024		ORF1b	1044	0.007																										S	626	0.011
														ORF1a	488	0.006		ORF1b	1045	0.003																										S	627	0.003
														ORF1a	489	0.006		ORF1b	1046	0.007																										S	631	0.006
														ORF1a	490	0.003		ORF1b	1047	0.007																										S	639	0.003
														ORF1a	494	0.006		ORF1b	1048	0.012																										S	640	0.009
														ORF1a	496	0.003		ORF1b	1049	0.003																										S	641	0.003
														ORF1a	498	0.018		ORF1b	1050	0.012																										S	647	0.003
														ORF1a	506	0.009		ORF1b	1051	0.003																										S	653	0.016
														ORF1a	513	0.016		ORF1b	1053	0.003																										S	654	0.006
														ORF1a	516	0.014		ORF1b	1056	0.003																										S	655	0.033
														ORF1a	519	0.047		ORF1b	1057	0.003																										S	658	0.006
														ORF1a	522	0.003		ORF1b	1058	0.003																										S	659	0.003
														ORF1a	523	0.003		ORF1b	1059	0.003																										S	660	0.011
														ORF1a	526	0.011		ORF1b	1060	0.003																										S	670	0.003
														ORF1a	533	0.003		ORF1b	1061	0.003																										S	672	0.006
														ORF1a	535	0.003		ORF1b	1062	0.003																										S	673	0.003
														ORF1a	537	0.003		ORF1b	1063	0.003																										S	675	0.083
														ORF1a	538	0.003		ORF1b	1064	0.012																										S	676	0.003
														ORF1a	540	0.011		ORF1b	1065	0.003																										S	677	0.116
														ORF1a	541	0.009		ORF1b	1066	0.003																										S	679	0.024
														ORF1a	547	0.011		ORF1b	1067	0.003																										S	681	0.47
														ORF1a	549	0.009		ORF1b	1068	0.012																										S	684	0.014
														ORF1a	550	0.009		ORF1b	1069	0.003																										S	688	0.032
														ORF1a	551	0.003		ORF1b	1070	0.003																										S	689	0.035
														ORF1a	554	0.003		ORF1b	1071	0.003																										S	690	0.006
														ORF1a	555	0.009		ORF1b	1072	0.003																										S	696	0.003
														ORF1a	556	0.003		ORF1b	1073	0.003																										S	697	0.003
														ORF1a	557	0.007		ORF1b	1074	0.003																										S	698	0.006
														ORF1a	558	0.003		ORF1b	1075	0.007																										S	701	0.145
														ORF1a	559	0.007		ORF1b	1076	0.003																										S	702	0.006
														ORF1a	560	0.007		ORF1b	1077	0.007																										S	705	0.003
														ORF1a	561	0.047		ORF1b	1078	0.007																										S	706	0.003
														ORF1a	563	0.012		ORF1b	1079	0.003																										S	708	0.003
														ORF1a	565	0.007		ORF1b	1080	0.012																										S	716	0.293
														ORF1a	566	0.003		ORF1b	1081	0.003																										S	726	0.003
														ORF1a	568	0.018		ORF1b	1082	0.003																										S	732	0.021
														ORF1a	573	0.003		ORF1b	1083	0.003																										S	735	0.003
														ORF1a	580	0.006		ORF1b	1084	0.007																										S	769	0.027
														ORF1a	589	0.017		ORF1b	1085	0.007																										S	771	0.006
														ORF1a	590	0.003		ORF1b	1086	0.003																										S	772	0.04
														ORF1a	591	0.022		ORF1b	1087	0.012																										S	778	0.006
														ORF1a	592	0.036		ORF1b	1088	0.003																										S	779	0.003
														ORF1a	598	0.009		ORF1b	1089	0.032																										S	780	0.003
														ORF1a	599	0.022		ORF1b	1090	0.003																										S	783	0.006
														ORF1a	602	0.003		ORF1b	1092	0.01																										S	787	0.011
														ORF1a	603	0.003		ORF1b	1094	0.006																										S	789	0.011
														ORF1a	607	0.011		ORF1b	1095	0.017																										S	791	0.003
														ORF1a	609	0.009		ORF1b	1096	0.003																										S	793	0.007
														ORF1a	610	0.049		ORF1b	1097	0.007																										S	794	0.003
														ORF1a	611	0.018		ORF1b	1098	0.003																										S	796	0.003
														ORF1a	614	0.018		ORF1b	1099	0.007																										S	797	0.009
														ORF1a	615	0.003		ORF1b	1100	0.003																										S	799	0.006
														ORF1a	623	0.003		ORF1b	1101	0.003																										S	803	0.006
														ORF1a	626	0.003		ORF1b	1102	0.003																										S	808	0.003
														ORF1a	627	0.011		ORF1b	1103	0.003																										S	812	0.012
														ORF1a	628	0.006		ORF1b	1104	0.003																										S	813	0.012
														ORF1a	630	0.007		ORF1b	1105	0.003																										S	818	0.003
														ORF1a	631	0.003		ORF1b	1106	0.003																										S	822	0.003
														ORF1a	633	0.003		ORF1b	1107	0.003																										S	826	0.006
														ORF1a	634	0.009		ORF1b	1108	0.003																										S	829	0.003
														ORF1a	637	0.003		ORF1b	1109	0.003																										S	831	0.003
														ORF1a	642	0.003		ORF1b	1110	0.007																										S	834	0.009
														ORF1a	645	0.003		ORF1b	1111	0.003																										S	835	0.003
														ORF1a	646	0.003		ORF1b	1112	0.003																										S	836	0.007
														ORF1a	647	0.003		ORF1b	1113	0.003																										S	837	0.003
														ORF1a	649	0.022		ORF1b	1115	0.003																										S	839	0.014
														ORF1a	656	0.006		ORF1b	1116	0.003																										S	841	0.003
														ORF1a	660	0.003		ORF1b	1117	0.003																										S	842	0.02
														ORF1a	661	0.007		ORF1b	1119	0.003																										S	843	0.003
														ORF1a	665	0.009		ORF1b	1121	0.007																										S	845	0.018
														ORF1a	668	0.003		ORF1b	1123	0.003																										S	846	0.009
														ORF1a	671	0.003		ORF1b	1124	0.003																										S	854	0.006
														ORF1a	675	0.009		ORF1b	1126	0.012																										S	858	0.003
														ORF1a	676	0.003		ORF1b	1127	0.012																										S	859	0.006
														ORF1a	679	0.006		ORF1b	1128	0.003																										S	871	0.006
														ORF1a	680	0.006		ORF1b	1129	0.021																										S	879	0.018
														ORF1a	681	0.009		ORF1b	1130	0.003																										S	884	0.003
														ORF1a	686	0.006		ORF1b	1131	0.007																										S	888	0.024
														ORF1a	687	0.009		ORF1b	1132	0.003																										S	892	0.003
														ORF1a	689	0.003		ORF1b	1133	0.003																										S	895	0.003
														ORF1a	690	0.011		ORF1b	1134	0.003																										S	929	0.003
														ORF1a	693	0.006		ORF1b	1135	0.003																										S	932	0.003
														ORF1a	696	0.003		ORF1b	1136	0.003																										S	935	0.006
														ORF1a	698	0.006		ORF1b	1137	0.006																										S	936	0.014
														ORF1a	700	0.011		ORF1b	1139	0.003																										S	938	0.009
														ORF1a	704	0.003		ORF1b	1140	0.003																										S	939	0.028
														ORF1a	708	0.038		ORF1b	1141	0.132																										S	940	0.003
														ORF1a	712	0.006		ORF1b	1143	0.003																										S	941	0.003
														ORF1a	713	0.003		ORF1b	1144	0.003																										S	942	0.006
														ORF1a	721	0.011		ORF1b	1145	0.003																										S	950	0.012
														ORF1a	723	0.006		ORF1b	1146	0.003																										S	957	0.016
														ORF1a	727	0.022		ORF1b	1147	0.003																										S	961	0.003
														ORF1a	728	0.011		ORF1b	1148	0.003																										S	982	0.294
														ORF1a	730	0.046		ORF1b	1149	0.003																										S	1009	0.003
														ORF1a	731	0.009		ORF1b	1150	0.003																										S	1020	0.009
														ORF1a	735	0.003		ORF1b	1151	0.003																										S	1022	0.003
														ORF1a	739	0.014		ORF1b	1152	0.003																										S	1027	0.027
														ORF1a	743	0.003		ORF1b	1153	0.003																										S	1029	0.003
														ORF1a	747	0.003		ORF1b	1154	0.003																										S	1055	0.003
														ORF1a	748	0.003		ORF1b	1156	0.02																										S	1063	0.016
														ORF1a	749	0.003		ORF1b	1157	0.007																										S	1065	0.003
														ORF1a	753	0.003		ORF1b	1159	0.009																										S	1068	0.006
														ORF1a	754	0.003		ORF1b	1160	0.007																										S	1069	0.003
														ORF1a	755	0.003		ORF1b	1161	0.003																										S	1070	0.003
														ORF1a	760	0.009		ORF1b	1162	0.012																										S	1071	0.014
														ORF1a	762	0.006		ORF1b	1163	0.003																										S	1073	0.003
														ORF1a	765	0.011		ORF1b	1164	0.003																										S	1074	0.003
														ORF1a	767	0.009		ORF1b	1165	0.003																										S	1078	0.031
														ORF1a	774	0.009		ORF1b	1166	0.003																										S	1079	0.003
														ORF1a	776	0.003		ORF1b	1167	0.003																										S	1081	0.003
														ORF1a	779	0.003		ORF1b	1168	0.003																										S	1083	0.006
														ORF1a	781	0.003		ORF1b	1169	0.003																										S	1084	0.009
														ORF1a	792	0.006		ORF1b	1170	0.007																										S	1085	0.007
														ORF1a	798	0.003		ORF1b	1171	0.012																										S	1088	0.003
														ORF1a	802	0.003		ORF1b	1172	0.003																										S	1091	0.01
														ORF1a	804	0.015		ORF1b	1174	0.007																										S	1092	0.022
														ORF1a	809	0.003		ORF1b	1176	0.009																										S	1094	0.003
														ORF1a	810	0.006		ORF1b	1177	0.007																										S	1101	0.029
														ORF1a	812	0.006		ORF1b	1178	0.003																										S	1104	0.011
														ORF1a	814	0.014		ORF1b	1179	0.007																										S	1109	0.003
														ORF1a	828	0.003		ORF1b	1180	0.003																										S	1114	0.006
														ORF1a	837	0.003		ORF1b	1181	0.012																										S	1117	0.04
														ORF1a	840	0.003		ORF1b	1182	0.011																										S	1118	0.301
														ORF1a	844	0.003		ORF1b	1183	0.041																										S	1122	0.006
														ORF1a	846	0.003		ORF1b	1184	0.137																										S	1124	0.006
														ORF1a	847	0.007		ORF1b	1185	0.003																										S	1134	0.003
														ORF1a	851	0.003		ORF1b	1186	0.003																										S	1139	0.007
														ORF1a	856	0.003		ORF1b	1187	0.03																										S	1143	0.003
														ORF1a	858	0.003		ORF1b	1188	0.003																										S	1144	0.003
														ORF1a	859	0.016		ORF1b	1189	0.003																										S	1153	0.007
														ORF1a	862	0.003		ORF1b	1191	0.003																										S	1155	0.016
														ORF1a	866	0.003		ORF1b	1192	0.003																										S	1159	0.034
														ORF1a	867	0.006		ORF1b	1195	0.003																										S	1162	0.023
														ORF1a	868	0.003		ORF1b	1196	0.003																										S	1163	0.009
														ORF1a	869	0.014		ORF1b	1197	0.018																										S	1165	0.003
														ORF1a	875	0.003		ORF1b	1198	0.003																										S	1167	0.022
														ORF1a	876	0.009		ORF1b	1199	0.007																										S	1168	0.003
														ORF1a	877	0.003		ORF1b	1200	0.007																										S	1174	0.007
														ORF1a	878	0.003		ORF1b	1202	0.003																										S	1176	0.089
														ORF1a	879	0.003		ORF1b	1203	0.029																										S	1185	0.003
														ORF1a	882	0.02		ORF1b	1204	0.003																										S	1187	0.003
														ORF1a	887	0.006		ORF1b	1205	0.003																										S	1188	0.003
														ORF1a	890	0.009		ORF1b	1206	0.003																										S	1191	0.016
														ORF1a	892	0.047		ORF1b	1207	0.003																										S	1200	0.003
														ORF1a	901	0.009		ORF1b	1208	0.003																										S	1201	0.006
														ORF1a	903	0.017		ORF1b	1209	0.003																										S	1202	0.009
														ORF1a	906	0.003		ORF1b	1210	0.003																										S	1208	0.009
														ORF1a	910	0.003		ORF1b	1211	0.003																										S	1209	0.003
														ORF1a	913	0.006		ORF1b	1212	0.003																										S	1219	0.026
														ORF1a	918	0.003		ORF1b	1213	0.14																										S	1222	0.003
														ORF1a	919	0.003		ORF1b	1214	0.003																										S	1225	0.009
														ORF1a	926	0.003		ORF1b	1215	0.003																										S	1228	0.02
														ORF1a	927	0.016		ORF1b	1216	0.003																										S	1229	0.009
														ORF1a	928	0.003		ORF1b	1217	0.003																										S	1232	0.003
														ORF1a	929	0.003		ORF1b	1218	0.006																										S	1233	0.009
														ORF1a	930	0.009		ORF1b	1219	0.031																										S	1235	0.003
														ORF1a	932	0.003		ORF1b	1220	0.009																										S	1237	0.014
														ORF1a	934	0.003		ORF1b	1221	0.003																										S	1246	0.003
														ORF1a	935	0.006		ORF1b	1222	0.003																										S	1247	0.018
														ORF1a	936	0.006		ORF1b	1223	0.007																										S	1250	0.006
														ORF1a	938	0.02		ORF1b	1224	0.013																										S	1251	0.011
														ORF1a	942	0.003		ORF1b	1225	0.007																										S	1252	0.011
														ORF1a	944	0.042		ORF1b	1226	0.003																										S	1254	0.003
														ORF1a	945	0.006		ORF1b	1227	0.003																										S	1261	0.003
														ORF1a	950	0.006		ORF1b	1228	0.003																										S	1263	0.009
														ORF1a	951	0.014		ORF1b	1229	0.007																										S	1264	0.031
														ORF1a	953	0.006		ORF1b	1230	0.003																										Average		0.0262529
														ORF1a	958	0.006		ORF1b	1231	0.003
														ORF1a	959	0.022		ORF1b	1232	0.003
														ORF1a	963	0.007		ORF1b	1233	0.003
														ORF1a	964	0.011		ORF1b	1234	0.003
														ORF1a	965	0.007		ORF1b	1235	0.003
														ORF1a	966	0.003		ORF1b	1236	0.003
														ORF1a	967	0.021		ORF1b	1237	0.003
														ORF1a	969	0.02		ORF1b	1238	0.003
														ORF1a	971	0.046		ORF1b	1241	0.003
														ORF1a	972	0.009		ORF1b	1242	0.012
														ORF1a	981	0.003		ORF1b	1243	0.003
														ORF1a	982	0.003		ORF1b	1244	0.003
														ORF1a	985	0.009		ORF1b	1245	0.007
														ORF1a	986	0.003		ORF1b	1246	0.003
														ORF1a	988	0.009		ORF1b	1249	0.003
														ORF1a	989	0.024		ORF1b	1251	0.003
														ORF1a	990	0.006		ORF1b	1252	0.003
														ORF1a	991	0.003		ORF1b	1253	0.003
														ORF1a	992	0.007		ORF1b	1254	0.003
														ORF1a	993	0.013		ORF1b	1255	0.003
														ORF1a	994	0.007		ORF1b	1256	0.003
														ORF1a	995	0.014		ORF1b	1257	0.003
														ORF1a	996	0.009		ORF1b	1258	0.003
														ORF1a	997	0.003		ORF1b	1259	0.003
														ORF1a	998	0.035		ORF1b	1260	0.003
														ORF1a	999	0.009		ORF1b	1261	0.009
														ORF1a	1000	0.017		ORF1b	1262	0.01
														ORF1a	1001	0.304		ORF1b	1263	0.003
														ORF1a	1002	0.006		ORF1b	1264	0.033
														ORF1a	1003	0.006		ORF1b	1265	0.003
														ORF1a	1004	0.009		ORF1b	1266	0.003
														ORF1a	1005	0.006		ORF1b	1267	0.007
														ORF1a	1006	0.006		ORF1b	1268	0.003
														ORF1a	1007	0.006		ORF1b	1269	0.003
														ORF1a	1008	0.006		ORF1b	1270	0.003
														ORF1a	1009	0.015		ORF1b	1272	0.003
														ORF1a	1010	0.006		ORF1b	1273	0.009
														ORF1a	1011	0.006		ORF1b	1274	0.017
														ORF1a	1012	0.006		ORF1b	1276	0.003
														ORF1a	1013	0.037		ORF1b	1277	0.006
														ORF1a	1014	0.007		ORF1b	1278	0.003
														ORF1a	1015	0.007		ORF1b	1279	0.003
														ORF1a	1016	0.003		ORF1b	1280	0.003
														ORF1a	1018	0.007		ORF1b	1281	0.003
														ORF1a	1019	0.003		ORF1b	1282	0.003
														ORF1a	1020	0.007		ORF1b	1283	0.003
														ORF1a	1021	0.006		ORF1b	1284	0.003
														ORF1a	1022	0.003		ORF1b	1285	0.014
														ORF1a	1023	0.003		ORF1b	1287	0.003
														ORF1a	1024	0.006		ORF1b	1288	0.003
														ORF1a	1025	0.006		ORF1b	1289	0.013
														ORF1a	1026	0.006		ORF1b	1290	0.007
														ORF1a	1027	0.006		ORF1b	1291	0.029
														ORF1a	1028	0.006		ORF1b	1292	0.003
														ORF1a	1029	0.003		ORF1b	1293	0.003
														ORF1a	1030	0.003		ORF1b	1294	0.003
														ORF1a	1031	0.003		ORF1b	1295	0.007
														ORF1a	1032	0.003		ORF1b	1296	0.003
														ORF1a	1033	0.003		ORF1b	1297	0.003
														ORF1a	1034	0.003		ORF1b	1298	0.003
														ORF1a	1035	0.009		ORF1b	1299	0.003
														ORF1a	1036	0.034		ORF1b	1300	0.003
														ORF1a	1037	0.003		ORF1b	1301	0.003
														ORF1a	1038	0.003		ORF1b	1302	0.003
														ORF1a	1039	0.003		ORF1b	1303	0.003
														ORF1a	1040	0.003		ORF1b	1304	0.003
														ORF1a	1041	0.003		ORF1b	1306	0.003
														ORF1a	1042	0.003		ORF1b	1309	0.003
														ORF1a	1043	0.007		ORF1b	1310	0.003
														ORF1a	1044	0.003		ORF1b	1311	0.003
														ORF1a	1045	0.003		ORF1b	1312	0.003
														ORF1a	1046	0.003		ORF1b	1313	0.003
														ORF1a	1047	0.009		ORF1b	1314	0.003
														ORF1a	1048	0.003		ORF1b	1315	0.022
														ORF1a	1049	0.014		ORF1b	1316	0.003
														ORF1a	1052	0.003		ORF1b	1317	0.003
														ORF1a	1054	0.003		ORF1b	1318	0.003
														ORF1a	1055	0.007		ORF1b	1319	0.003
														ORF1a	1056	0.03		ORF1b	1320	0.003
														ORF1a	1057	0.003		ORF1b	1321	0.003
														ORF1a	1058	0.003		ORF1b	1322	0.007
														ORF1a	1060	0.007		ORF1b	1323	0.003
														ORF1a	1061	0.003		ORF1b	1324	0.003
														ORF1a	1062	0.003		ORF1b	1325	0.012
														ORF1a	1064	0.028		ORF1b	1326	0.007
														ORF1a	1065	0.003		ORF1b	1327	0.003
														ORF1a	1066	0.003		ORF1b	1328	0.003
														ORF1a	1067	0.003		ORF1b	1329	0.003
														ORF1a	1068	0.003		ORF1b	1330	0.003
														ORF1a	1069	0.003		ORF1b	1331	0.003
														ORF1a	1070	0.003		ORF1b	1332	0.003
														ORF1a	1071	0.013		ORF1b	1336	0.012
														ORF1a	1072	0.003		ORF1b	1337	0.007
														ORF1a	1073	0.019		ORF1b	1338	0.003
														ORF1a	1074	0.003		ORF1b	1339	0.007
														ORF1a	1075	0.003		ORF1b	1340	0.003
														ORF1a	1076	0.007		ORF1b	1341	0.003
														ORF1a	1077	0.003		ORF1b	1342	0.007
														ORF1a	1078	0.007		ORF1b	1343	0.003
														ORF1a	1079	0.003		ORF1b	1344	0.003
														ORF1a	1080	0.007		ORF1b	1345	0.003
														ORF1a	1081	0.007		ORF1b	1346	0.003
														ORF1a	1082	0.009		ORF1b	1347	0.003
														ORF1a	1083	0.003		ORF1b	1348	0.003
														ORF1a	1084	0.003		ORF1b	1349	0.003
														ORF1a	1085	0.003		ORF1b	1350	0.003
														ORF1a	1086	0.003		ORF1b	1351	0.079
														ORF1a	1087	0.003		ORF1b	1352	0.007
														ORF1a	1088	0.003		ORF1b	1353	0.003
														ORF1a	1089	0.003		ORF1b	1354	0.009
														ORF1a	1090	0.007		ORF1b	1357	0.003
														ORF1a	1091	0.003		ORF1b	1358	0.003
														ORF1a	1092	0.003		ORF1b	1359	0.003
														ORF1a	1093	0.015		ORF1b	1360	0.003
														ORF1a	1094	0.003		ORF1b	1361	0.003
														ORF1a	1095	0.003		ORF1b	1362	0.003
														ORF1a	1096	0.003		ORF1b	1363	0.007
														ORF1a	1097	0.003		ORF1b	1364	0.003
														ORF1a	1100	0.014		ORF1b	1365	0.012
														ORF1a	1101	0.007		ORF1b	1366	0.003
														ORF1a	1102	0.007		ORF1b	1367	0.003
														ORF1a	1103	0.003		ORF1b	1368	0.003
														ORF1a	1104	0.003		ORF1b	1369	0.019
														ORF1a	1105	0.003		ORF1b	1370	0.003
														ORF1a	1106	0.003		ORF1b	1371	0.003
														ORF1a	1107	0.003		ORF1b	1372	0.003
														ORF1a	1108	0.017		ORF1b	1373	0.003
														ORF1a	1109	0.003		ORF1b	1374	0.003
														ORF1a	1110	0.003		ORF1b	1376	0.003
														ORF1a	1111	0.003		ORF1b	1377	0.007
														ORF1a	1112	0.003		ORF1b	1379	0.003
														ORF1a	1113	0.071		ORF1b	1380	0.003
														ORF1a	1114	0.009		ORF1b	1381	0.003
														ORF1a	1115	0.009		ORF1b	1383	0.142
														ORF1a	1116	0.003		ORF1b	1385	0.003
														ORF1a	1117	0.003		ORF1b	1387	0.012
														ORF1a	1118	0.003		ORF1b	1389	0.003
														ORF1a	1119	0.007		ORF1b	1390	0.007
														ORF1a	1120	0.003		ORF1b	1391	0.007
														ORF1a	1121	0.003		ORF1b	1392	0.003
														ORF1a	1122	0.003		ORF1b	1393	0.007
														ORF1a	1123	0.003		ORF1b	1396	0.003
														ORF1a	1124	0.009		ORF1b	1397	0.003
														ORF1a	1125	0.012		ORF1b	1398	0.003
														ORF1a	1126	0.003		ORF1b	1399	0.003
														ORF1a	1127	0.003		ORF1b	1400	0.003
														ORF1a	1128	0.009		ORF1b	1401	0.003
														ORF1a	1129	0.003		ORF1b	1402	0.003
														ORF1a	1130	0.014		ORF1b	1403	0.003
														ORF1a	1131	0.003		ORF1b	1404	0.021
														ORF1a	1132	0.003		ORF1b	1406	0.003
														ORF1a	1133	0.003		ORF1b	1407	0.003
														ORF1a	1134	0.007		ORF1b	1408	0.003
														ORF1a	1135	0.003		ORF1b	1409	0.003
														ORF1a	1136	0.003		ORF1b	1410	0.003
														ORF1a	1137	0.003		ORF1b	1411	0.003
														ORF1a	1140	0.003		ORF1b	1412	0.003
														ORF1a	1141	0.003		ORF1b	1413	0.003
														ORF1a	1142	0.007		ORF1b	1414	0.003
														ORF1a	1143	0.011		ORF1b	1415	0.003
														ORF1a	1145	0.003		ORF1b	1416	0.007
														ORF1a	1146	0.003		ORF1b	1417	0.003
														ORF1a	1147	0.003		ORF1b	1418	0.003
														ORF1a	1148	0.003		ORF1b	1419	0.012
														ORF1a	1149	0.003		ORF1b	1420	0.003
														ORF1a	1151	0.009		ORF1b	1421	0.003
														ORF1a	1152	0.003		ORF1b	1422	0.003
														ORF1a	1153	0.007		ORF1b	1423	0.007
														ORF1a	1154	0.003		ORF1b	1424	0.003
														ORF1a	1155	0.007		ORF1b	1425	0.007
														ORF1a	1156	0.003		ORF1b	1426	0.009
														ORF1a	1157	0.003		ORF1b	1427	0.048
														ORF1a	1158	0.037		ORF1b	1428	0.027
														ORF1a	1159	0.007		ORF1b	1430	0.003
														ORF1a	1160	0.012		ORF1b	1431	0.003
														ORF1a	1161	0.003		ORF1b	1432	0.007
														ORF1a	1162	0.003		ORF1b	1433	0.003
														ORF1a	1163	0.003		ORF1b	1434	0.003
														ORF1a	1164	0.003		ORF1b	1435	0.003
														ORF1a	1165	0.003		ORF1b	1436	0.003
														ORF1a	1166	0.003		ORF1b	1437	0.003
														ORF1a	1167	0.003		ORF1b	1438	0.003
														ORF1a	1168	0.029		ORF1b	1439	0.003
														ORF1a	1170	0.003		ORF1b	1440	0.003
														ORF1a	1171	0.003		ORF1b	1441	0.026
														ORF1a	1172	0.01		ORF1b	1442	0.003
														ORF1a	1173	0.007		ORF1b	1443	0.007
														ORF1a	1174	0.003		ORF1b	1444	0.003
														ORF1a	1175	0.006		ORF1b	1445	0.003
														ORF1a	1176	0.007		ORF1b	1446	0.003
														ORF1a	1177	0.003		ORF1b	1447	0.003
														ORF1a	1179	0.003		ORF1b	1450	0.009
														ORF1a	1180	0.003		ORF1b	1452	0.02
														ORF1a	1181	0.003		ORF1b	1453	0.003
														ORF1a	1183	0.003		ORF1b	1454	0.003
														ORF1a	1184	0.003		ORF1b	1455	0.003
														ORF1a	1186	0.003		ORF1b	1456	0.003
														ORF1a	1187	0.003		ORF1b	1457	0.003
														ORF1a	1188	0.029		ORF1b	1458	0.003
														ORF1a	1190	0.003		ORF1b	1459	0.003
														ORF1a	1191	0.017		ORF1b	1460	0.003
														ORF1a	1192	0.003		ORF1b	1461	0.003
														ORF1a	1193	0.003		ORF1b	1462	0.003
														ORF1a	1195	0.007		ORF1b	1463	0.003
														ORF1a	1196	0.003		ORF1b	1464	0.032
														ORF1a	1197	0.003		ORF1b	1465	0.007
														ORF1a	1198	0.003		ORF1b	1466	0.007
														ORF1a	1199	0.007		ORF1b	1467	0.003
														ORF1a	1200	0.009		ORF1b	1469	0.003
														ORF1a	1201	0.003		ORF1b	1470	0.007
														ORF1a	1202	0.03		ORF1b	1472	0.003
														ORF1a	1203	0.003		ORF1b	1474	0.003
														ORF1a	1204	0.01		ORF1b	1475	0.003
														ORF1a	1205	0.007		ORF1b	1476	0.003
														ORF1a	1206	0.009		ORF1b	1477	0.003
														ORF1a	1207	0.02		ORF1b	1478	0.003
														ORF1a	1208	0.006		ORF1b	1479	0.003
														ORF1a	1209	0.009		ORF1b	1480	0.003
														ORF1a	1210	0.006		ORF1b	1481	0.003
														ORF1a	1211	0.009		ORF1b	1482	0.003
														ORF1a	1212	0.006		ORF1b	1483	0.003
														ORF1a	1213	0.009		ORF1b	1484	0.003
														ORF1a	1214	0.006		ORF1b	1485	0.003
														ORF1a	1215	0.003		ORF1b	1487	0.003
														ORF1a	1216	0.003		ORF1b	1488	0.003
														ORF1a	1217	0.003		ORF1b	1490	0.003
														ORF1a	1218	0.003		ORF1b	1491	0.009
														ORF1a	1219	0.003		ORF1b	1492	0.003
														ORF1a	1220	0.009		ORF1b	1493	0.017
														ORF1a	1221	0.003		ORF1b	1494	0.003
														ORF1a	1222	0.003		ORF1b	1496	0.003
														ORF1a	1223	0.013		ORF1b	1497	0.003
														ORF1a	1224	0.007		ORF1b	1498	0.009
														ORF1a	1225	0.003		ORF1b	1499	0.025
														ORF1a	1226	0.009		ORF1b	1500	0.003
														ORF1a	1227	0.003		ORF1b	1501	0.003
														ORF1a	1228	0.01		ORF1b	1502	0.003
														ORF1a	1229	0.003		ORF1b	1503	0.007
														ORF1a	1230	0.034		ORF1b	1504	0.021
														ORF1a	1231	0.003		ORF1b	1505	0.003
														ORF1a	1232	0.007		ORF1b	1506	0.003
														ORF1a	1233	0.003		ORF1b	1507	0.007
														ORF1a	1234	0.003		ORF1b	1508	0.003
														ORF1a	1235	0.003		ORF1b	1509	0.007
														ORF1a	1236	0.019		ORF1b	1510	0.003
														ORF1a	1237	0.007		ORF1b	1511	0.061
														ORF1a	1238	0.003		ORF1b	1514	0.007
														ORF1a	1239	0.003		ORF1b	1515	0.003
														ORF1a	1240	0.003		ORF1b	1516	0.003
														ORF1a	1241	0.007		ORF1b	1517	0.003
														ORF1a	1242	0.009		ORF1b	1518	0.003
														ORF1a	1243	0.003		ORF1b	1519	0.003
														ORF1a	1244	0.003		ORF1b	1521	0.129
														ORF1a	1245	0.003		ORF1b	1522	0.012
														ORF1a	1246	0.127		ORF1b	1523	0.003
														ORF1a	1247	0.03		ORF1b	1525	0.017
														ORF1a	1248	0.003		ORF1b	1526	0.003
														ORF1a	1249	0.01		ORF1b	1527	0.003
														ORF1a	1250	0.003		ORF1b	1528	0.003
														ORF1a	1256	0.003		ORF1b	1529	0.003
														ORF1a	1257	0.003		ORF1b	1530	0.003
														ORF1a	1258	0.003		ORF1b	1532	0.003
														ORF1a	1259	0.017		ORF1b	1535	0.003
														ORF1a	1260	0.003		ORF1b	1536	0.003
														ORF1a	1261	0.003		ORF1b	1537	0.003
														ORF1a	1262	0.007		ORF1b	1538	0.02
														ORF1a	1263	0.003		ORF1b	1539	0.009
														ORF1a	1264	0.003		ORF1b	1540	0.007
														ORF1a	1265	0.007		ORF1b	1541	0.01
														ORF1a	1266	0.003		ORF1b	1542	0.003
														ORF1a	1267	0.003		ORF1b	1544	0.003
														ORF1a	1268	0.003		ORF1b	1545	0.003
														ORF1a	1269	0.007		ORF1b	1546	0.019
														ORF1a	1270	0.003		ORF1b	1547	0.007
														ORF1a	1271	0.007		ORF1b	1548	0.003
														ORF1a	1272	0.003		ORF1b	1549	0.003
														ORF1a	1273	0.003		ORF1b	1550	0.006
														ORF1a	1274	0.003		ORF1b	1551	0.003
														ORF1a	1275	0.003		ORF1b	1554	0.003
														ORF1a	1276	0.003		ORF1b	1555	0.018
														ORF1a	1277	0.007		ORF1b	1557	0.003
														ORF1a	1278	0.003		ORF1b	1558	0.003
														ORF1a	1279	0.003		ORF1b	1559	0.003
														ORF1a	1280	0.023		ORF1b	1560	0.003
														ORF1a	1281	0.003		ORF1b	1561	0.011
														ORF1a	1282	0.003		ORF1b	1563	0.007
														ORF1a	1283	0.019		ORF1b	1564	0.003
														ORF1a	1284	0.003		ORF1b	1565	0.007
														ORF1a	1285	0.003		ORF1b	1566	0.003
														ORF1a	1286	0.003		ORF1b	1567	0.039
														ORF1a	1287	0.023		ORF1b	1568	0.003
														ORF1a	1288	0.003		ORF1b	1569	0.003
														ORF1a	1289	0.003		ORF1b	1570	0.042
														ORF1a	1290	0.003		ORF1b	1571	0.003
														ORF1a	1291	0.015		ORF1b	1572	0.003
														ORF1a	1292	0.003		ORF1b	1573	0.02
														ORF1a	1293	0.003		ORF1b	1576	0.003
														ORF1a	1294	0.003		ORF1b	1577	0.003
														ORF1a	1295	0.006		ORF1b	1578	0.003
														ORF1a	1297	0.003		ORF1b	1580	0.003
														ORF1a	1298	0.02		ORF1b	1581	0.003
														ORF1a	1299	0.003		ORF1b	1583	0.012
														ORF1a	1300	0.003		ORF1b	1584	0.003
														ORF1a	1301	0.003		ORF1b	1585	0.003
														ORF1a	1302	0.003		ORF1b	1586	0.003
														ORF1a	1303	0.007		ORF1b	1587	0.003
														ORF1a	1304	0.003		ORF1b	1588	0.003
														ORF1a	1305	0.012		ORF1b	1589	0.003
														ORF1a	1306	0.01		ORF1b	1590	0.003
														ORF1a	1307	0.003		ORF1b	1591	0.003
														ORF1a	1308	0.003		ORF1b	1592	0.003
														ORF1a	1309	0.003		ORF1b	1593	0.003
														ORF1a	1310	0.007		ORF1b	1594	0.007
														ORF1a	1311	0.003		ORF1b	1595	0.003
														ORF1a	1312	0.051		ORF1b	1596	0.036
														ORF1a	1314	0.009		ORF1b	1597	0.003
														ORF1a	1316	0.003		ORF1b	1598	0.012
														ORF1a	1317	0.003		ORF1b	1599	0.007
														ORF1a	1320	0.003		ORF1b	1600	0.003
														ORF1a	1321	0.007		ORF1b	1601	0.003
														ORF1a	1322	0.003		ORF1b	1602	0.003
														ORF1a	1323	0.003		ORF1b	1603	0.003
														ORF1a	1324	0.003		ORF1b	1604	0.003
														ORF1a	1325	0.003		ORF1b	1605	0.003
														ORF1a	1326	0.003		ORF1b	1606	0.003
														ORF1a	1327	0.003		ORF1b	1607	0.01
														ORF1a	1328	0.003		ORF1b	1608	0.003
														ORF1a	1329	0.007		ORF1b	1609	0.038
														ORF1a	1330	0.003		ORF1b	1610	0.003
														ORF1a	1331	0.003		ORF1b	1611	0.007
														ORF1a	1332	0.003		ORF1b	1612	0.003
														ORF1a	1333	0.003		ORF1b	1613	0.003
														ORF1a	1334	0.003		ORF1b	1614	0.003
														ORF1a	1335	0.003		ORF1b	1615	0.003
														ORF1a	1336	0.003		ORF1b	1616	0.003
														ORF1a	1337	0.003		ORF1b	1617	0.003
														ORF1a	1338	0.007		ORF1b	1618	0.003
														ORF1a	1339	0.003		ORF1b	1619	0.012
														ORF1a	1340	0.007		ORF1b	1620	0.017
														ORF1a	1341	0.003		ORF1b	1621	0.003
														ORF1a	1342	0.003		ORF1b	1622	0.003
														ORF1a	1343	0.003		ORF1b	1623	0.003
														ORF1a	1344	0.007		ORF1b	1624	0.003
														ORF1a	1345	0.009		ORF1b	1625	0.003
														ORF1a	1346	0.007		ORF1b	1627	0.003
														ORF1a	1347	0.003		ORF1b	1628	0.003
														ORF1a	1351	0.003		ORF1b	1630	0.003
														ORF1a	1352	0.007		ORF1b	1633	0.003
														ORF1a	1354	0.003		ORF1b	1634	0.003
														ORF1a	1355	0.003		ORF1b	1635	0.003
														ORF1a	1357	0.003		ORF1b	1636	0.003
														ORF1a	1359	0.003		ORF1b	1637	0.017
														ORF1a	1360	0.003		ORF1b	1638	0.003
														ORF1a	1361	0.05		ORF1b	1639	0.007
														ORF1a	1362	0.003		ORF1b	1640	0.003
														ORF1a	1363	0.003		ORF1b	1641	0.003
														ORF1a	1364	0.003		ORF1b	1642	0.003
														ORF1a	1365	0.003		ORF1b	1643	0.003
														ORF1a	1366	0.003		ORF1b	1644	0.009
														ORF1a	1367	0.007		ORF1b	1645	0.003
														ORF1a	1368	0.003		ORF1b	1646	0.003
														ORF1a	1369	0.003		ORF1b	1647	0.003
														ORF1a	1370	0.003		ORF1b	1648	0.003
														ORF1a	1371	0.003		ORF1b	1649	0.018
														ORF1a	1372	0.003		ORF1b	1650	0.003
														ORF1a	1373	0.003		ORF1b	1652	0.007
														ORF1a	1374	0.003		ORF1b	1653	0.106
														ORF1a	1375	0.009		ORF1b	1654	0.003
														ORF1a	1376	0.007		ORF1b	1655	0.003
														ORF1a	1377	0.003		ORF1b	1656	0.003
														ORF1a	1378	0.017		ORF1b	1657	0.014
														ORF1a	1379	0.007		ORF1b	1658	0.007
														ORF1a	1380	0.003		ORF1b	1659	0.003
														ORF1a	1381	0.003		ORF1b	1660	0.003
														ORF1a	1382	0.007		ORF1b	1661	0.007
														ORF1a	1383	0.003		ORF1b	1662	0.003
														ORF1a	1384	0.003		ORF1b	1663	0.007
														ORF1a	1385	0.003		ORF1b	1664	0.007
														ORF1a	1386	0.007		ORF1b	1665	0.003
														ORF1a	1387	0.003		ORF1b	1666	0.012
														ORF1a	1390	0.003		ORF1b	1667	0.003
														ORF1a	1392	0.003		ORF1b	1668	0.003
														ORF1a	1393	0.003		ORF1b	1669	0.003
														ORF1a	1394	0.003		ORF1b	1670	0.003
														ORF1a	1395	0.003		ORF1b	1671	0.003
														ORF1a	1396	0.003		ORF1b	1674	0.021
														ORF1a	1397	0.012		ORF1b	1675	0.003
														ORF1a	1398	0.029		ORF1b	1676	0.003
														ORF1a	1399	0.003		ORF1b	1677	0.012
														ORF1a	1400	0.01		ORF1b	1678	0.003
														ORF1a	1401	0.003		ORF1b	1679	0.003
														ORF1a	1402	0.003		ORF1b	1680	0.003
														ORF1a	1403	0.003		ORF1b	1681	0.043
														ORF1a	1404	0.003		ORF1b	1682	0.007
														ORF1a	1407	0.006		ORF1b	1683	0.003
														ORF1a	1408	0.003		ORF1b	1684	0.007
														ORF1a	1409	0.003		ORF1b	1685	0.012
														ORF1a	1410	0.003		ORF1b	1686	0.003
														ORF1a	1411	0.003		ORF1b	1687	0.003
														ORF1a	1412	0.003		ORF1b	1688	0.003
														ORF1a	1413	0.045		ORF1b	1689	0.003
														ORF1a	1414	0.003		ORF1b	1690	0.003
														ORF1a	1415	0.007		ORF1b	1691	0.034
														ORF1a	1416	0.003		ORF1b	1692	0.003
														ORF1a	1417	0.003		ORF1b	1693	0.003
														ORF1a	1418	0.003		ORF1b	1694	0.003
														ORF1a	1419	0.003		ORF1b	1695	0.003
														ORF1a	1420	0.01		ORF1b	1696	0.003
														ORF1a	1421	0.003		ORF1b	1698	0.003
														ORF1a	1422	0.003		ORF1b	1699	0.003
														ORF1a	1423	0.003		ORF1b	1700	0.007
														ORF1a	1424	0.003		ORF1b	1701	0.009
														ORF1a	1425	0.003		ORF1b	1703	0.003
														ORF1a	1426	0.003		ORF1b	1704	0.003
														ORF1a	1427	0.003		ORF1b	1705	0.003
														ORF1a	1428	0.007		ORF1b	1706	0.01
														ORF1a	1429	0.012		ORF1b	1707	0.003
														ORF1a	1430	0.003		ORF1b	1708	0.003
														ORF1a	1431	0.003		ORF1b	1709	0.003
														ORF1a	1432	0.003		ORF1b	1710	0.003
														ORF1a	1433	0.003		ORF1b	1711	0.003
														ORF1a	1436	0.003		ORF1b	1712	0.003
														ORF1a	1437	0.007		ORF1b	1713	0.003
														ORF1a	1439	0.003		ORF1b	1714	0.003
														ORF1a	1442	0.003		ORF1b	1715	0.003
														ORF1a	1443	0.003		ORF1b	1716	0.003
														ORF1a	1444	0.007		ORF1b	1717	0.003
														ORF1a	1445	0.003		ORF1b	1719	0.003
														ORF1a	1446	0.003		ORF1b	1720	0.003
														ORF1a	1447	0.003		ORF1b	1721	0.003
														ORF1a	1448	0.003		ORF1b	1722	0.003
														ORF1a	1449	0.003		ORF1b	1723	0.003
														ORF1a	1450	0.003		ORF1b	1724	0.003
														ORF1a	1451	0.003		ORF1b	1725	0.003
														ORF1a	1452	0.003		ORF1b	1726	0.003
														ORF1a	1453	0.003		ORF1b	1727	0.027
														ORF1a	1454	0.003		ORF1b	1728	0.012
														ORF1a	1455	0.003		ORF1b	1729	0.003
														ORF1a	1456	0.003		ORF1b	1730	0.007
														ORF1a	1457	0.003		ORF1b	1731	0.003
														ORF1a	1458	0.007		ORF1b	1732	0.003
														ORF1a	1459	0.003		ORF1b	1733	0.003
														ORF1a	1460	0.003		ORF1b	1734	0.003
														ORF1a	1461	0.003		ORF1b	1735	0.003
														ORF1a	1462	0.003		ORF1b	1736	0.003
														ORF1a	1463	0.003		ORF1b	1737	0.021
														ORF1a	1464	0.007		ORF1b	1740	0.003
														ORF1a	1465	0.007		ORF1b	1741	0.009
														ORF1a	1466	0.003		ORF1b	1742	0.003
														ORF1a	1467	0.003		ORF1b	1743	0.003
														ORF1a	1468	0.012		ORF1b	1744	0.007
														ORF1a	1469	0.003		ORF1b	1745	0.003
														ORF1a	1470	0.003		ORF1b	1746	0.007
														ORF1a	1471	0.003		ORF1b	1747	0.003
														ORF1a	1472	0.007		ORF1b	1748	0.003
														ORF1a	1473	0.012		ORF1b	1749	0.007
														ORF1a	1474	0.014		ORF1b	1750	0.003
														ORF1a	1475	0.003		ORF1b	1751	0.003
														ORF1a	1476	0.003		ORF1b	1752	0.003
														ORF1a	1477	0.003		ORF1b	1753	0.003
														ORF1a	1478	0.003		ORF1b	1754	0.003
														ORF1a	1479	0.003		ORF1b	1755	0.007
														ORF1a	1480	0.003		ORF1b	1756	0.003
														ORF1a	1481	0.003		ORF1b	1757	0.006
														ORF1a	1482	0.003		ORF1b	1758	0.003
														ORF1a	1483	0.003		ORF1b	1759	0.003
														ORF1a	1484	0.003		ORF1b	1761	0.003
														ORF1a	1485	0.003		ORF1b	1763	0.003
														ORF1a	1486	0.003		ORF1b	1764	0.003
														ORF1a	1487	0.003		ORF1b	1765	0.003
														ORF1a	1488	0.003		ORF1b	1766	0.009
														ORF1a	1489	0.003		ORF1b	1767	0.003
														ORF1a	1490	0.003		ORF1b	1768	0.003
														ORF1a	1491	0.003		ORF1b	1769	0.003
														ORF1a	1492	0.003		ORF1b	1770	0.003
														ORF1a	1493	0.003		ORF1b	1771	0.007
														ORF1a	1496	0.036		ORF1b	1772	0.003
														ORF1a	1497	0.034		ORF1b	1773	0.003
														ORF1a	1498	0.003		ORF1b	1774	0.014
														ORF1a	1499	0.003		ORF1b	1776	0.003
														ORF1a	1500	0.007		ORF1b	1779	0.014
														ORF1a	1501	0.003		ORF1b	1780	0.003
														ORF1a	1502	0.003		ORF1b	1781	0.003
														ORF1a	1503	0.003		ORF1b	1782	0.003
														ORF1a	1504	0.003		ORF1b	1783	0.003
														ORF1a	1505	0.007		ORF1b	1784	0.003
														ORF1a	1506	0.009		ORF1b	1785	0.003
														ORF1a	1507	0.017		ORF1b	1786	0.003
														ORF1a	1508	0.003		ORF1b	1787	0.003
														ORF1a	1509	0.003		ORF1b	1788	0.003
														ORF1a	1510	0.007		ORF1b	1789	0.003
														ORF1a	1511	0.003		ORF1b	1790	0.003
														ORF1a	1512	0.007		ORF1b	1791	0.003
														ORF1a	1513	0.007		ORF1b	1792	0.003
														ORF1a	1514	0.003		ORF1b	1793	0.012
														ORF1a	1515	0.007		ORF1b	1794	0.003
														ORF1a	1516	0.003		ORF1b	1795	0.003
														ORF1a	1517	0.007		ORF1b	1796	0.003
														ORF1a	1518	0.003		ORF1b	1797	0.003
														ORF1a	1519	0.007		ORF1b	1798	0.021
														ORF1a	1520	0.003		ORF1b	1799	0.003
														ORF1a	1521	0.003		ORF1b	1801	0.003
														ORF1a	1522	0.003		ORF1b	1802	0.003
														ORF1a	1523	0.003		ORF1b	1803	0.003
														ORF1a	1524	0.003		ORF1b	1805	0.003
														ORF1a	1525	0.007		ORF1b	1806	0.003
														ORF1a	1526	0.003		ORF1b	1807	0.003
														ORF1a	1527	0.003		ORF1b	1808	0.003
														ORF1a	1528	0.003		ORF1b	1809	0.003
														ORF1a	1529	0.003		ORF1b	1810	0.003
														ORF1a	1530	0.003		ORF1b	1811	0.003
														ORF1a	1531	0.003		ORF1b	1812	0.003
														ORF1a	1532	0.007		ORF1b	1813	0.003
														ORF1a	1533	0.003		ORF1b	1814	0.007
														ORF1a	1534	0.003		ORF1b	1815	0.007
														ORF1a	1535	0.003		ORF1b	1816	0.003
														ORF1a	1536	0.003		ORF1b	1817	0.003
														ORF1a	1537	0.003		ORF1b	1818	0.003
														ORF1a	1538	0.009		ORF1b	1819	0.003
														ORF1a	1539	0.003		ORF1b	1820	0.003
														ORF1a	1540	0.003		ORF1b	1821	0.007
														ORF1a	1541	0.007		ORF1b	1822	0.007
														ORF1a	1542	0.03		ORF1b	1823	0.003
														ORF1a	1543	0.007		ORF1b	1824	0.003
														ORF1a	1544	0.003		ORF1b	1825	0.003
														ORF1a	1545	0.003		ORF1b	1826	0.003
														ORF1a	1548	0.003		ORF1b	1827	0.003
														ORF1a	1550	0.009		ORF1b	1828	0.014
														ORF1a	1552	0.007		ORF1b	1831	0.003
														ORF1a	1553	0.003		ORF1b	1832	0.003
														ORF1a	1554	0.026		ORF1b	1833	0.003
														ORF1a	1555	0.003		ORF1b	1834	0.003
														ORF1a	1556	0.003		ORF1b	1835	0.003
														ORF1a	1558	0.003		ORF1b	1836	0.007
														ORF1a	1560	0.003		ORF1b	1837	0.003
														ORF1a	1562	0.003		ORF1b	1838	0.007
														ORF1a	1563	0.003		ORF1b	1839	0.009
														ORF1a	1564	0.01		ORF1b	1840	0.009
														ORF1a	1565	0.007		ORF1b	1841	0.003
														ORF1a	1566	0.009		ORF1b	1842	0.003
														ORF1a	1567	0.035		ORF1b	1843	0.007
														ORF1a	1568	0.003		ORF1b	1844	0.019
														ORF1a	1569	0.003		ORF1b	1845	0.003
														ORF1a	1570	0.003		ORF1b	1846	0.003
														ORF1a	1571	0.003		ORF1b	1847	0.009
														ORF1a	1572	0.003		ORF1b	1848	0.013
														ORF1a	1573	0.003		ORF1b	1849	0.003
														ORF1a	1574	0.003		ORF1b	1850	0.007
														ORF1a	1575	0.003		ORF1b	1851	0.021
														ORF1a	1576	0.003		ORF1b	1852	0.003
														ORF1a	1577	0.003		ORF1b	1855	0.003
														ORF1a	1578	0.003		ORF1b	1856	0.003
														ORF1a	1579	0.003		ORF1b	1857	0.003
														ORF1a	1580	0.012		ORF1b	1858	0.003
														ORF1a	1581	0.003		ORF1b	1859	0.003
														ORF1a	1582	0.009		ORF1b	1860	0.003
														ORF1a	1583	0.007		ORF1b	1861	0.003
														ORF1a	1584	0.007		ORF1b	1862	0.003
														ORF1a	1585	0.003		ORF1b	1863	0.003
														ORF1a	1586	0.014		ORF1b	1864	0.003
														ORF1a	1587	0.009		ORF1b	1865	0.007
														ORF1a	1588	0.003		ORF1b	1866	0.003
														ORF1a	1589	0.007		ORF1b	1867	0.003
														ORF1a	1590	0.007		ORF1b	1868	0.003
														ORF1a	1591	0.01		ORF1b	1869	0.009
														ORF1a	1592	0.007		ORF1b	1871	0.034
														ORF1a	1593	0.003		ORF1b	1872	0.007
														ORF1a	1594	0.003		ORF1b	1873	0.006
														ORF1a	1595	0.003		ORF1b	1874	0.003
														ORF1a	1596	0.009		ORF1b	1875	0.003
														ORF1a	1597	0.014		ORF1b	1876	0.003
														ORF1a	1600	0.003		ORF1b	1877	0.012
														ORF1a	1601	0.003		ORF1b	1878	0.003
														ORF1a	1602	0.003		ORF1b	1879	0.003
														ORF1a	1603	0.003		ORF1b	1880	0.003
														ORF1a	1604	0.003		ORF1b	1881	0.003
														ORF1a	1605	0.003		ORF1b	1882	0.007
														ORF1a	1606	0.003		ORF1b	1884	0.012
														ORF1a	1607	0.014		ORF1b	1886	0.003
														ORF1a	1608	0.003		ORF1b	1888	0.003
														ORF1a	1609	0.003		ORF1b	1889	0.003
														ORF1a	1610	0.003		ORF1b	1891	0.003
														ORF1a	1611	0.009		ORF1b	1892	0.003
														ORF1a	1612	0.021		ORF1b	1893	0.003
														ORF1a	1613	0.003		ORF1b	1894	0.003
														ORF1a	1614	0.003		ORF1b	1895	0.01
														ORF1a	1615	0.003		ORF1b	1896	0.003
														ORF1a	1616	0.003		ORF1b	1897	0.003
														ORF1a	1618	0.003		ORF1b	1898	0.02
														ORF1a	1622	0.003		ORF1b	1899	0.009
														ORF1a	1623	0.003		ORF1b	1900	0.003
														ORF1a	1624	0.003		ORF1b	1901	0.009
														ORF1a	1625	0.003		ORF1b	1902	0.003
														ORF1a	1627	0.003		ORF1b	1903	0.007
														ORF1a	1628	0.003		ORF1b	1904	0.003
														ORF1a	1629	0.01		ORF1b	1905	0.02
														ORF1a	1630	0.003		ORF1b	1906	0.003
														ORF1a	1631	0.003		ORF1b	1907	0.003
														ORF1a	1632	0.003		ORF1b	1908	0.003
														ORF1a	1633	0.003		ORF1b	1909	0.003
														ORF1a	1634	0.003		ORF1b	1910	0.003
														ORF1a	1635	0.003		ORF1b	1911	0.003
														ORF1a	1636	0.003		ORF1b	1912	0.003
														ORF1a	1637	0.026		ORF1b	1914	0.007
														ORF1a	1638	0.003		ORF1b	1915	0.003
														ORF1a	1639	0.009		ORF1b	1917	0.007
														ORF1a	1640	0.06		ORF1b	1919	0.003
														ORF1a	1641	0.003		ORF1b	1922	0.003
														ORF1a	1642	0.003		ORF1b	1923	0.003
														ORF1a	1643	0.003		ORF1b	1924	0.003
														ORF1a	1644	0.003		ORF1b	1925	0.003
														ORF1a	1647	0.011		ORF1b	1928	0.003
														ORF1a	1653	0.003		ORF1b	1929	0.003
														ORF1a	1655	0.107		ORF1b	1930	0.003
														ORF1a	1657	0.009		ORF1b	1931	0.003
														ORF1a	1659	0.003		ORF1b	1932	0.003
														ORF1a	1661	0.003		ORF1b	1933	0.003
														ORF1a	1662	0.003		ORF1b	1934	0.003
														ORF1a	1665	0.003		ORF1b	1935	0.003
														ORF1a	1668	0.003		ORF1b	1936	0.015
														ORF1a	1679	0.011		ORF1b	1937	0.003
														ORF1a	1680	0.003		ORF1b	1938	0.003
														ORF1a	1687	0.011		ORF1b	1939	0.003
														ORF1a	1689	0.006		ORF1b	1940	0.003
														ORF1a	1692	0.022		ORF1b	1941	0.007
														ORF1a	1693	0.003		ORF1b	1942	0.003
														ORF1a	1701	0.003		ORF1b	1943	0.007
														ORF1a	1705	0.003		ORF1b	1944	0.013
														ORF1a	1706	0.003		ORF1b	1947	0.007
														ORF1a	1707	0.003		ORF1b	1948	0.003
														ORF1a	1708	0.293		ORF1b	1949	0.003
														ORF1a	1714	0.003		ORF1b	1950	0.003
														ORF1a	1716	0.003		ORF1b	1951	0.003
														ORF1a	1720	0.006		ORF1b	1952	0.003
														ORF1a	1733	0.003		ORF1b	1953	0.003
														ORF1a	1744	0.003		ORF1b	1954	0.003
														ORF1a	1747	0.006		ORF1b	1955	0.003
														ORF1a	1754	0.006		ORF1b	1956	0.003
														ORF1a	1757	0.003		ORF1b	1957	0.003
														ORF1a	1759	0.011		ORF1b	1958	0.015
														ORF1a	1760	0.003		ORF1b	1959	0.003
														ORF1a	1761	0.003		ORF1b	1960	0.003
														ORF1a	1762	0.003		ORF1b	1961	0.01
														ORF1a	1763	0.009		ORF1b	1962	0.003
														ORF1a	1765	0.003		ORF1b	1963	0.003
														ORF1a	1769	0.006		ORF1b	1965	0.003
														ORF1a	1771	0.003		ORF1b	1967	0.003
														ORF1a	1780	0.003		ORF1b	1968	0.003
														ORF1a	1786	0.017		ORF1b	1969	0.003
														ORF1a	1791	0.003		ORF1b	1970	0.003
														ORF1a	1792	0.007		ORF1b	1971	0.003
														ORF1a	1795	0.02		ORF1b	1972	0.003
														ORF1a	1803	0.009		ORF1b	1973	0.003
														ORF1a	1810	0.007		ORF1b	1974	0.003
														ORF1a	1812	0.031		ORF1b	1975	0.021
														ORF1a	1813	0.006		ORF1b	1976	0.003
														ORF1a	1820	0.003		ORF1b	1977	0.038
														ORF1a	1822	0.027		ORF1b	1978	0.003
														ORF1a	1830	0.003		ORF1b	1979	0.012
														ORF1a	1838	0.003		ORF1b	1980	0.003
														ORF1a	1840	0.011		ORF1b	1981	0.003
														ORF1a	1842	0.003		ORF1b	1982	0.003
														ORF1a	1843	0.003		ORF1b	1983	0.007
														ORF1a	1845	0.006		ORF1b	1985	0.003
														ORF1a	1846	0.006		ORF1b	1986	0.007
														ORF1a	1851	0.003		ORF1b	1988	0.003
														ORF1a	1854	0.018		ORF1b	1991	0.003
														ORF1a	1856	0.003		ORF1b	1992	0.009
														ORF1a	1857	0.003		ORF1b	1993	0.003
														ORF1a	1862	0.009		ORF1b	1994	0.003
														ORF1a	1872	0.003		ORF1b	1995	0.003
														ORF1a	1874	0.003		ORF1b	1996	0.007
														ORF1a	1881	0.024		ORF1b	1997	0.003
														ORF1a	1887	0.007		ORF1b	1998	0.003
														ORF1a	1892	0.003		ORF1b	1999	0.003
														ORF1a	1895	0.047		ORF1b	2000	0.003
														ORF1a	1896	0.003		ORF1b	2001	0.003
														ORF1a	1912	0.007		ORF1b	2002	0.003
														ORF1a	1920	0.022		ORF1b	2003	0.003
														ORF1a	1921	0.037		ORF1b	2004	0.003
														ORF1a	1923	0.003		ORF1b	2005	0.003
														ORF1a	1924	0.014		ORF1b	2006	0.003
														ORF1a	1926	0.003		ORF1b	2007	0.003
														ORF1a	1931	0.006		ORF1b	2008	0.003
														ORF1a	1933	0.009		ORF1b	2009	0.003
														ORF1a	1938	0.006		ORF1b	2011	0.003
														ORF1a	1939	0.017		ORF1b	2013	0.007
														ORF1a	1946	0.003		ORF1b	2014	0.003
														ORF1a	1948	0.003		ORF1b	2015	0.003
														ORF1a	1950	0.009		ORF1b	2016	0.003
														ORF1a	1952	0.003		ORF1b	2017	0.006
														ORF1a	1959	0.009		ORF1b	2018	0.003
														ORF1a	1964	0.003		ORF1b	2019	0.003
														ORF1a	1973	0.003		ORF1b	2020	0.006
														ORF1a	1977	0.024		ORF1b	2021	0.003
														ORF1a	1983	0.003		ORF1b	2022	0.003
														ORF1a	1989	0.003		ORF1b	2023	0.003
														ORF1a	1995	0.003		ORF1b	2025	0.007
														ORF1a	1997	0.031		ORF1b	2026	0.003
														ORF1a	1998	0.003		ORF1b	2028	0.009
														ORF1a	2001	0.003		ORF1b	2031	0.003
														ORF1a	2003	0.003		ORF1b	2032	0.003
														ORF1a	2007	0.047		ORF1b	2033	0.003
														ORF1a	2015	0.015		ORF1b	2034	0.003
														ORF1a	2016	0.074		ORF1b	2035	0.003
														ORF1a	2018	0.034		ORF1b	2036	0.003
														ORF1a	2019	0.007		ORF1b	2037	0.003
														ORF1a	2020	0.007		ORF1b	2038	0.003
														ORF1a	2022	0.006		ORF1b	2039	0.003
														ORF1a	2024	0.021		ORF1b	2040	0.011
														ORF1a	2029	0.011		ORF1b	2041	0.003
														ORF1a	2030	0.02		ORF1b	2044	0.003
														ORF1a	2031	0.003		ORF1b	2045	0.007
														ORF1a	2032	0.006		ORF1b	2046	0.003
														ORF1a	2033	0.003		ORF1b	2047	0.003
														ORF1a	2034	0.011		ORF1b	2048	0.006
														ORF1a	2035	0.006		ORF1b	2049	0.007
														ORF1a	2036	0.006		ORF1b	2052	0.007
														ORF1a	2037	0.006		ORF1b	2053	0.003
														ORF1a	2039	0.011		ORF1b	2054	0.003
														ORF1a	2043	0.003		ORF1b	2055	0.003
														ORF1a	2046	0.045		ORF1b	2056	0.003
														ORF1a	2047	0.014		ORF1b	2057	0.003
														ORF1a	2048	0.003		ORF1b	2059	0.007
														ORF1a	2049	0.009		ORF1b	2061	0.026
														ORF1a	2050	0.003		ORF1b	2062	0.003
														ORF1a	2053	0.003		ORF1b	2063	0.015
														ORF1a	2054	0.003		ORF1b	2064	0.003
														ORF1a	2055	0.009		ORF1b	2065	0.009
														ORF1a	2059	0.012		ORF1b	2066	0.006
														ORF1a	2060	0.003		ORF1b	2067	0.007
														ORF1a	2061	0.007		ORF1b	2068	0.003
														ORF1a	2062	0.024		ORF1b	2069	0.003
														ORF1a	2063	0.003		ORF1b	2070	0.009
														ORF1a	2066	0.003		ORF1b	2071	0.003
														ORF1a	2068	0.003		ORF1b	2072	0.003
														ORF1a	2069	0.006		ORF1b	2073	0.007
														ORF1a	2071	0.006		ORF1b	2074	0.003
														ORF1a	2075	0.009		ORF1b	2075	0.003
														ORF1a	2078	0.003		ORF1b	2077	0.003
														ORF1a	2079	0.003		ORF1b	2079	0.003
														ORF1a	2080	0.006		ORF1b	2080	0.003
														ORF1a	2083	0.009		ORF1b	2082	0.003
														ORF1a	2084	0.003		ORF1b	2083	0.003
														ORF1a	2085	0.009		ORF1b	2084	0.044
														ORF1a	2086	0.003		ORF1b	2085	0.003
														ORF1a	2087	0.012		ORF1b	2086	0.058
														ORF1a	2089	0.003		ORF1b	2087	0.007
														ORF1a	2092	0.006		ORF1b	2088	0.003
														ORF1a	2093	0.011		ORF1b	2089	0.016
														ORF1a	2094	0.003		ORF1b	2090	0.015
														ORF1a	2096	0.007		ORF1b	2091	0.003
														ORF1a	2097	0.014		ORF1b	2092	0.003
														ORF1a	2098	0.003		ORF1b	2093	0.003
														ORF1a	2101	0.003		ORF1b	2094	0.003
														ORF1a	2103	0.014		ORF1b	2095	0.01
														ORF1a	2105	0.014		ORF1b	2096	0.003
														ORF1a	2106	0.034		ORF1b	2097	0.003
														ORF1a	2108	0.003		ORF1b	2098	0.003
														ORF1a	2115	0.003		ORF1b	2099	0.007
														ORF1a	2118	0.006		ORF1b	2101	0.003
														ORF1a	2120	0.003		ORF1b	2102	0.003
														ORF1a	2121	0.003		ORF1b	2104	0.003
														ORF1a	2122	0.006		ORF1b	2105	0.003
														ORF1a	2123	0.006		ORF1b	2107	0.003
														ORF1a	2124	0.02		ORF1b	2109	0.009
														ORF1a	2125	0.015		ORF1b	2111	0.007
														ORF1a	2126	0.009		ORF1b	2112	0.003
														ORF1a	2129	0.019		ORF1b	2114	0.003
														ORF1a	2130	0.003		ORF1b	2115	0.009
														ORF1a	2132	0.009		ORF1b	2116	0.017
														ORF1a	2134	0.003		ORF1b	2117	0.012
														ORF1a	2137	0.009		ORF1b	2118	0.003
														ORF1a	2139	0.011		ORF1b	2119	0.007
														ORF1a	2143	0.007		ORF1b	2120	0.003
														ORF1a	2144	0.003		ORF1b	2121	0.003
														ORF1a	2146	0.022		ORF1b	2123	0.003
														ORF1a	2148	0.003		ORF1b	2124	0.003
														ORF1a	2152	0.011		ORF1b	2125	0.003
														ORF1a	2153	0.003		ORF1b	2126	0.003
														ORF1a	2154	0.006		ORF1b	2127	0.003
														ORF1a	2155	0.003		ORF1b	2128	0.003
														ORF1a	2156	0.007		ORF1b	2129	0.003
														ORF1a	2159	0.007		ORF1b	2130	0.003
														ORF1a	2166	0.014		ORF1b	2131	0.01
														ORF1a	2172	0.006		ORF1b	2132	0.009
														ORF1a	2178	0.003		ORF1b	2133	0.007
														ORF1a	2179	0.02		ORF1b	2134	0.003
														ORF1a	2181	0.018		ORF1b	2135	0.003
														ORF1a	2183	0.011		ORF1b	2138	0.007
														ORF1a	2193	0.009		ORF1b	2140	0.003
														ORF1a	2194	0.003		ORF1b	2141	0.003
														ORF1a	2195	0.003		ORF1b	2142	0.014
														ORF1a	2196	0.003		ORF1b	2143	0.003
														ORF1a	2197	0.003		ORF1b	2144	0.003
														ORF1a	2198	0.003		ORF1b	2145	0.006
														ORF1a	2199	0.003		ORF1b	2146	0.003
														ORF1a	2200	0.006		ORF1b	2147	0.003
														ORF1a	2201	0.009		ORF1b	2148	0.007
														ORF1a	2202	0.006		ORF1b	2150	0.003
														ORF1a	2204	0.003		ORF1b	2151	0.003
														ORF1a	2207	0.003		ORF1b	2152	0.003
														ORF1a	2210	0.006		ORF1b	2153	0.003
														ORF1a	2215	0.003		ORF1b	2154	0.003
														ORF1a	2224	0.003		ORF1b	2155	0.003
														ORF1a	2230	0.293		ORF1b	2156	0.003
														ORF1a	2235	0.003		ORF1b	2157	0.003
														ORF1a	2237	0.006		ORF1b	2158	0.007
														ORF1a	2242	0.02		ORF1b	2159	0.003
														ORF1a	2247	0.003		ORF1b	2160	0.009
														ORF1a	2249	0.006		ORF1b	2161	0.003
														ORF1a	2250	0.003		ORF1b	2162	0.003
														ORF1a	2251	0.003		ORF1b	2163	0.014
														ORF1a	2255	0.003		ORF1b	2164	0.003
														ORF1a	2257	0.003		ORF1b	2165	0.007
														ORF1a	2258	0.003		ORF1b	2166	0.003
														ORF1a	2259	0.024		ORF1b	2167	0.003
														ORF1a	2260	0.007		ORF1b	2168	0.003
														ORF1a	2261	0.003		ORF1b	2169	0.014
														ORF1a	2264	0.006		ORF1b	2171	0.003
														ORF1a	2265	0.014		ORF1b	2172	0.009
														ORF1a	2269	0.003		ORF1b	2173	0.003
														ORF1a	2273	0.003		ORF1b	2174	0.003
														ORF1a	2274	0.044		ORF1b	2175	0.003
														ORF1a	2276	0.003		ORF1b	2176	0.003
														ORF1a	2278	0.012		ORF1b	2177	0.003
														ORF1a	2279	0.003		ORF1b	2178	0.032
														ORF1a	2283	0.014		ORF1b	2179	0.01
														ORF1a	2285	0.006		ORF1b	2180	0.009
														ORF1a	2287	0.009		ORF1b	2181	0.003
														ORF1a	2293	0.003		ORF1b	2182	0.003
														ORF1a	2300	0.006		ORF1b	2183	0.014
														ORF1a	2303	0.011		ORF1b	2184	0.003
														ORF1a	2313	0.003		ORF1b	2185	0.003
														ORF1a	2314	0.003		ORF1b	2186	0.003
														ORF1a	2321	0.003		ORF1b	2187	0.003
														ORF1a	2324	0.006		ORF1b	2188	0.003
														ORF1a	2328	0.003		ORF1b	2189	0.007
														ORF1a	2332	0.006		ORF1b	2190	0.007
														ORF1a	2336	0.006		ORF1b	2191	0.003
														ORF1a	2345	0.006		ORF1b	2192	0.003
														ORF1a	2355	0.014		ORF1b	2194	0.007
														ORF1a	2356	0.009		ORF1b	2195	0.003
														ORF1a	2357	0.003		ORF1b	2196	0.003
														ORF1a	2359	0.009		ORF1b	2197	0.003
														ORF1a	2361	0.006		ORF1b	2198	0.007
														ORF1a	2365	0.012		ORF1b	2200	0.003
														ORF1a	2370	0.006		ORF1b	2201	0.009
														ORF1a	2374	0.007		ORF1b	2204	0.003
														ORF1a	2376	0.033		ORF1b	2205	0.007
														ORF1a	2389	0.003		ORF1b	2206	0.006
														ORF1a	2396	0.011		ORF1b	2207	0.003
														ORF1a	2405	0.003		ORF1b	2208	0.003
														ORF1a	2406	0.006		ORF1b	2210	0.003
														ORF1a	2407	0.003		ORF1b	2211	0.003
														ORF1a	2408	0.014		ORF1b	2212	0.003
														ORF1a	2418	0.003		ORF1b	2213	0.009
														ORF1a	2430	0.003		ORF1b	2214	0.003
														ORF1a	2488	0.018		ORF1b	2215	0.003
														ORF1a	2490	0.003		ORF1b	2216	0.003
														ORF1a	2493	0.003		ORF1b	2217	0.003
														ORF1a	2497	0.006		ORF1b	2218	0.003
														ORF1a	2500	0.003		ORF1b	2219	0.003
														ORF1a	2501	0.134		ORF1b	2220	0.003
														ORF1a	2502	0.003		ORF1b	2221	0.003
														ORF1a	2509	0.009		ORF1b	2222	0.012
														ORF1a	2511	0.006		ORF1b	2223	0.022
														ORF1a	2512	0.006		ORF1b	2225	0.003
														ORF1a	2517	0.003		ORF1b	2226	0.003
														ORF1a	2523	0.003		ORF1b	2227	0.003
														ORF1a	2524	0.003		ORF1b	2228	0.003
														ORF1a	2529	0.009		ORF1b	2229	0.003
														ORF1a	2532	0.006		ORF1b	2230	0.003
														ORF1a	2533	0.011		ORF1b	2231	0.003
														ORF1a	2534	0.003		ORF1b	2232	0.007
														ORF1a	2535	0.003		ORF1b	2233	0.029
														ORF1a	2537	0.003		ORF1b	2234	0.003
														ORF1a	2552	0.032		ORF1b	2235	0.003
														ORF1a	2553	0.017		ORF1b	2236	0.003
														ORF1a	2554	0.016		ORF1b	2237	0.007
														ORF1a	2556	0.011		ORF1b	2238	0.003
														ORF1a	2565	0.003		ORF1b	2239	0.003
														ORF1a	2568	0.003		ORF1b	2241	0.003
														ORF1a	2573	0.003		ORF1b	2243	0.003
														ORF1a	2579	0.003		ORF1b	2245	0.003
														ORF1a	2582	0.003		ORF1b	2246	0.003
														ORF1a	2584	0.009		ORF1b	2247	0.012
														ORF1a	2586	0.006		ORF1b	2248	0.003
														ORF1a	2587	0.03		ORF1b	2249	0.003
														ORF1a	2588	0.009		ORF1b	2250	0.003
														ORF1a	2589	0.011		ORF1b	2251	0.003
														ORF1a	2592	0.017		ORF1b	2252	0.003
														ORF1a	2596	0.006		ORF1b	2253	0.01
														ORF1a	2603	0.006		ORF1b	2254	0.003
														ORF1a	2604	0.02		ORF1b	2255	0.003
														ORF1a	2605	0.003		ORF1b	2256	0.032
														ORF1a	2606	0.056		ORF1b	2257	0.079
														ORF1a	2607	0.003		ORF1b	2258	0.007
														ORF1a	2613	0.006		ORF1b	2259	0.003
														ORF1a	2615	0.006		ORF1b	2260	0.013
														ORF1a	2616	0.007		ORF1b	2261	0.003
														ORF1a	2620	0.003		ORF1b	2262	0.007
														ORF1a	2621	0.009		ORF1b	2263	0.003
														ORF1a	2622	0.003		ORF1b	2264	0.003
														ORF1a	2624	0.011		ORF1b	2266	0.003
														ORF1a	2625	0.033		ORF1b	2268	0.015
														ORF1a	2626	0.003		ORF1b	2269	0.029
														ORF1a	2631	0.012		ORF1b	2270	0.017
														ORF1a	2632	0.003		ORF1b	2271	0.007
														ORF1a	2633	0.006		ORF1b	2272	0.003
														ORF1a	2636	0.003		ORF1b	2273	0.003
														ORF1a	2637	0.007		ORF1b	2274	0.007
														ORF1a	2648	0.018		ORF1b	2275	0.003
														ORF1a	2656	0.003		ORF1b	2276	0.003
														ORF1a	2662	0.006		ORF1b	2277	0.003
														ORF1a	2665	0.003		ORF1b	2279	0.009
														ORF1a	2667	0.006		ORF1b	2281	0.007
														ORF1a	2680	0.003		ORF1b	2282	0.003
														ORF1a	2681	0.003		ORF1b	2284	0.003
														ORF1a	2683	0.003		ORF1b	2285	0.007
														ORF1a	2688	0.018		ORF1b	2286	0.003
														ORF1a	2690	0.009		ORF1b	2287	0.003
														ORF1a	2695	0.003		ORF1b	2288	0.003
														ORF1a	2696	0.003		ORF1b	2289	0.003
														ORF1a	2699	0.003		ORF1b	2290	0.003
														ORF1a	2701	0.003		ORF1b	2291	0.003
														ORF1a	2702	0.053		ORF1b	2292	0.003
														ORF1a	2714	0.009		ORF1b	2293	0.003
														ORF1a	2715	0.003		ORF1b	2294	0.007
														ORF1a	2716	0.009		ORF1b	2295	0.003
														ORF1a	2728	0.003		ORF1b	2296	0.003
														ORF1a	2734	0.003		ORF1b	2297	0.003
														ORF1a	2739	0.017		ORF1b	2298	0.003
														ORF1a	2746	0.006		ORF1b	2299	0.003
														ORF1a	2758	0.003		ORF1b	2300	0.003
														ORF1a	2759	0.012		ORF1b	2302	0.007
														ORF1a	2761	0.018		ORF1b	2303	0.014
														ORF1a	2766	0.003		ORF1b	2304	0.003
														ORF1a	2768	0.003		ORF1b	2306	0.026
														ORF1a	2769	0.024		ORF1b	2307	0.007
														ORF1a	2771	0.003		ORF1b	2308	0.014
														ORF1a	2777	0.009		ORF1b	2309	0.003
														ORF1a	2779	0.014		ORF1b	2310	0.003
														ORF1a	2780	0.047		ORF1b	2311	0.007
														ORF1a	2783	0.011		ORF1b	2312	0.009
														ORF1a	2791	0.049		ORF1b	2313	0.012
														ORF1a	2792	0.007		ORF1b	2314	0.007
														ORF1a	2796	0.021		ORF1b	2315	0.003
														ORF1a	2797	0.024		ORF1b	2317	0.003
														ORF1a	2799	0.012		ORF1b	2318	0.007
														ORF1a	2805	0.003		ORF1b	2319	0.003
														ORF1a	2813	0.016		ORF1b	2320	0.009
														ORF1a	2819	0.003		ORF1b	2321	0.024
														ORF1a	2821	0.003		ORF1b	2322	0.003
														ORF1a	2822	0.003		ORF1b	2323	0.007
														ORF1a	2823	0.011		ORF1b	2324	0.028
														ORF1a	2828	0.003		ORF1b	2328	0.003
														ORF1a	2832	0.006		ORF1b	2329	0.003
														ORF1a	2836	0.006		ORF1b	2330	0.003
														ORF1a	2846	0.006		ORF1b	2331	0.003
														ORF1a	2848	0.014		ORF1b	2332	0.007
														ORF1a	2856	0.003		ORF1b	2333	0.012
														ORF1a	2859	0.003		ORF1b	2334	0.003
														ORF1a	2863	0.003		ORF1b	2336	0.003
														ORF1a	2869	0.006		ORF1b	2337	0.012
														ORF1a	2872	0.006		ORF1b	2338	0.009
														ORF1a	2877	0.003		ORF1b	2339	0.003
														ORF1a	2891	0.003		ORF1b	2340	0.007
														ORF1a	2899	0.003		ORF1b	2341	0.003
														ORF1a	2900	0.016		ORF1b	2342	0.003
														ORF1a	2906	0.003		ORF1b	2343	0.003
														ORF1a	2909	0.003		ORF1b	2344	0.003
														ORF1a	2921	0.006		ORF1b	2345	0.003
														ORF1a	2928	0.006		ORF1b	2346	0.003
														ORF1a	2929	0.003		ORF1b	2347	0.003
														ORF1a	2944	0.003		ORF1b	2351	0.003
														ORF1a	2947	0.009		ORF1b	2352	0.003
														ORF1a	2952	0.006		ORF1b	2353	0.003
														ORF1a	2955	0.003		ORF1b	2354	0.003
														ORF1a	2957	0.006		ORF1b	2355	0.003
														ORF1a	2967	0.009		ORF1b	2357	0.003
														ORF1a	2969	0.003		ORF1b	2358	0.003
														ORF1a	2980	0.035		ORF1b	2359	0.007
														ORF1a	2981	0.016		ORF1b	2360	0.003
														ORF1a	2993	0.003		ORF1b	2361	0.007
														ORF1a	2994	0.036		ORF1b	2363	0.007
														ORF1a	3000	0.003		ORF1b	2364	0.003
														ORF1a	3022	0.006		ORF1b	2365	0.003
														ORF1a	3023	0.012		ORF1b	2366	0.003
														ORF1a	3027	0.009		ORF1b	2367	0.003
														ORF1a	3035	0.003		ORF1b	2368	0.007
														ORF1a	3042	0.033		ORF1b	2369	0.003
														ORF1a	3048	0.003		ORF1b	2370	0.003
														ORF1a	3051	0.003		ORF1b	2371	0.009
														ORF1a	3052	0.009		ORF1b	2372	0.003
														ORF1a	3057	0.003		ORF1b	2373	0.003
														ORF1a	3058	0.018		ORF1b	2374	0.003
														ORF1a	3059	0.003		ORF1b	2375	0.003
														ORF1a	3060	0.003		ORF1b	2376	0.003
														ORF1a	3063	0.014		ORF1b	2377	0.003
														ORF1a	3070	0.003		ORF1b	2378	0.003
														ORF1a	3071	0.011		ORF1b	2379	0.006
														ORF1a	3072	0.006		ORF1b	2380	0.003
														ORF1a	3076	0.011		ORF1b	2381	0.009
														ORF1a	3078	0.003		ORF1b	2383	0.003
														ORF1a	3082	0.003		ORF1b	2384	0.003
														ORF1a	3086	0.006		ORF1b	2385	0.003
														ORF1a	3087	0.131		ORF1b	2386	0.003
														ORF1a	3089	0.003		ORF1b	2387	0.003
														ORF1a	3090	0.003		ORF1b	2388	0.013
														ORF1a	3091	0.003		ORF1b	2389	0.003
														ORF1a	3097	0.003		ORF1b	2390	0.003
														ORF1a	3099	0.006		ORF1b	2391	0.003
														ORF1a	3107	0.003		ORF1b	2393	0.014
														ORF1a	3115	0.003		ORF1b	2394	0.003
														ORF1a	3116	0.014		ORF1b	2397	0.003
														ORF1a	3117	0.003		ORF1b	2398	0.003
														ORF1a	3123	0.003		ORF1b	2399	0.01
														ORF1a	3129	0.003		ORF1b	2400	0.003
														ORF1a	3134	0.003		ORF1b	2401	0.003
														ORF1a	3140	0.003		ORF1b	2402	0.003
														ORF1a	3143	0.046		ORF1b	2403	0.066
														ORF1a	3149	0.017		ORF1b	2404	0.007
														ORF1a	3158	0.011		ORF1b	2405	0.003
														ORF1a	3162	0.006		ORF1b	2407	0.003
														ORF1a	3164	0.003		ORF1b	2408	0.007
														ORF1a	3165	0.003		ORF1b	2409	0.007
														ORF1a	3166	0.006		ORF1b	2411	0.003
														ORF1a	3188	0.003		ORF1b	2412	0.003
														ORF1a	3189	0.003		ORF1b	2413	0.003
														ORF1a	3197	0.003		ORF1b	2414	0.003
														ORF1a	3198	0.003		ORF1b	2415	0.003
														ORF1a	3201	0.039		ORF1b	2416	0.007
														ORF1a	3202	0.009		ORF1b	2417	0.009
														ORF1a	3209	0.024		ORF1b	2418	0.003
														ORF1a	3212	0.011		ORF1b	2419	0.003
														ORF1a	3220	0.014		ORF1b	2420	0.003
														ORF1a	3221	0.014		ORF1b	2421	0.009
														ORF1a	3222	0.006		ORF1b	2422	0.003
														ORF1a	3224	0.003		ORF1b	2423	0.003
														ORF1a	3229	0.006		ORF1b	2424	0.003
														ORF1a	3244	0.009		ORF1b	2425	0.014
														ORF1a	3249	0.003		ORF1b	2426	0.003
														ORF1a	3255	0.038		ORF1b	2428	0.003
														ORF1a	3256	0.003		ORF1b	2429	0.009
														ORF1a	3261	0.003		ORF1b	2430	0.007
														ORF1a	3267	0.003		ORF1b	2431	0.014
														ORF1a	3270	0.006		ORF1b	2432	0.027
														ORF1a	3276	0.003		ORF1b	2433	0.003
														ORF1a	3278	0.125		ORF1b	2434	0.003
														ORF1a	3284	0.003		ORF1b	2435	0.003
														ORF1a	3287	0.054		ORF1b	2436	0.009
														ORF1a	3288	0.003		ORF1b	2439	0.003
														ORF1a	3298	0.003		ORF1b	2440	0.003
														ORF1a	3308	0.006		ORF1b	2442	0.003
														ORF1a	3309	0.006		ORF1b	2443	0.003
														ORF1a	3310	0.003		ORF1b	2446	0.003
														ORF1a	3323	0.006		ORF1b	2447	0.003
														ORF1a	3331	0.003		ORF1b	2448	0.003
														ORF1a	3334	0.033		ORF1b	2449	0.003
														ORF1a	3335	0.003		ORF1b	2450	0.003
														ORF1a	3338	0.007		ORF1b	2451	0.003
														ORF1a	3340	0.003		ORF1b	2452	0.003
														ORF1a	3344	0.009		ORF1b	2453	0.012
														ORF1a	3346	0.006		ORF1b	2454	0.003
														ORF1a	3347	0.003		ORF1b	2455	0.007
														ORF1a	3351	0.007		ORF1b	2456	0.003
														ORF1a	3352	0.105		ORF1b	2457	0.003
														ORF1a	3353	0.167		ORF1b	2458	0.003
														ORF1a	3355	0.011		ORF1b	2459	0.003
														ORF1a	3357	0.011		ORF1b	2460	0.007
														ORF1a	3359	0.033		ORF1b	2461	0.003
														ORF1a	3362	0.003		ORF1b	2462	0.003
														ORF1a	3369	0.006		ORF1b	2463	0.003
														ORF1a	3371	0.057		ORF1b	2465	0.003
														ORF1a	3379	0.009		ORF1b	2466	0.003
														ORF1a	3384	0.006		ORF1b	2467	0.003
														ORF1a	3392	0.009		ORF1b	2468	0.003
														ORF1a	3394	0.003		ORF1b	2469	0.003
														ORF1a	3395	0.012		ORF1b	2470	0.003
														ORF1a	3420	0.009		ORF1b	2471	0.003
														ORF1a	3421	0.003		ORF1b	2472	0.003
														ORF1a	3431	0.003		ORF1b	2473	0.003
														ORF1a	3440	0.011		ORF1b	2474	0.003
														ORF1a	3443	0.003		ORF1b	2475	0.003
														ORF1a	3449	0.016		ORF1b	2476	0.007
														ORF1a	3451	0.003		ORF1b	2477	0.003
														ORF1a	3454	0.003		ORF1b	2478	0.003
														ORF1a	3456	0.003		ORF1b	2479	0.003
														ORF1a	3458	0.003		ORF1b	2480	0.003
														ORF1a	3459	0.003		ORF1b	2483	0.003
														ORF1a	3463	0.003		ORF1b	2484	0.003
														ORF1a	3465	0.006		ORF1b	2485	0.003
														ORF1a	3468	0.031		ORF1b	2487	0.003
														ORF1a	3475	0.006		ORF1b	2488	0.012
														ORF1a	3476	0.003		ORF1b	2489	0.003
														ORF1a	3483	0.003		ORF1b	2490	0.007
														ORF1a	3484	0.006		ORF1b	2492	0.003
														ORF1a	3490	0.009		ORF1b	2493	0.003
														ORF1a	3497	0.018		ORF1b	2496	0.003
														ORF1a	3499	0.003		ORF1b	2498	0.003
														ORF1a	3500	0.003		ORF1b	2499	0.003
														ORF1a	3504	0.011		ORF1b	2500	0.003
														ORF1a	3506	0.006		ORF1b	2501	0.003
														ORF1a	3510	0.011		ORF1b	2503	0.003
														ORF1a	3523	0.011		ORF1b	2504	0.007
														ORF1a	3526	0.003		ORF1b	2505	0.003
														ORF1a	3529	0.009		ORF1b	2506	0.003
														ORF1a	3532	0.003		ORF1b	2507	0.007
														ORF1a	3537	0.003		ORF1b	2508	0.003
														ORF1a	3542	0.003		ORF1b	2509	0.009
														ORF1a	3546	0.003		ORF1b	2510	0.014
														ORF1a	3564	0.003		ORF1b	2511	0.003
														ORF1a	3570	0.003		ORF1b	2512	0.003
														ORF1a	3571	0.006		ORF1b	2513	0.007
														ORF1a	3572	0.009		ORF1b	2515	0.009
														ORF1a	3574	0.017		ORF1b	2517	0.006
														ORF1a	3575	0.003		ORF1b	2521	0.003
														ORF1a	3577	0.007		ORF1b	2523	0.02
														ORF1a	3580	0.012		ORF1b	2524	0.003
														ORF1a	3585	0.016		ORF1b	2531	0.011
														ORF1a	3591	0.012		ORF1b	2544	0.003
														ORF1a	3593	0.022		ORF1b	2548	0.047
														ORF1a	3596	0.003		ORF1b	2554	0.003
														ORF1a	3598	0.003		ORF1b	2557	0.038
														ORF1a	3605	0.011		ORF1b	2560	0.009
														ORF1a	3606	0.209		ORF1b	2567	0.003
														ORF1a	3607	0.007		ORF1b	2571	0.003
														ORF1a	3615	0.034		ORF1b	2573	0.003
														ORF1a	3616	0.003		ORF1b	2575	0.003
														ORF1a	3618	0.031		ORF1b	2576	0.013
														ORF1a	3620	0.009		ORF1b	2577	0.003
														ORF1a	3623	0.034		ORF1b	2579	0.024
														ORF1a	3634	0.003		ORF1b	2580	0.003
														ORF1a	3643	0.003		ORF1b	2581	0.003
														ORF1a	3644	0.029		ORF1b	2585	0.003
														ORF1a	3646	0.003		ORF1b	2592	0.016
														ORF1a	3648	0.003		ORF1b	2606	0.003
														ORF1a	3652	0.006		ORF1b	2612	0.003
														ORF1a	3653	0.054		ORF1b	2613	0.123
														ORF1a	3655	0.066		ORF1b	2614	0.003
														ORF1a	3657	0.003		ORF1b	2631	0.003
														ORF1a	3662	0.003		ORF1b	2633	0.059
														ORF1a	3667	0.056		ORF1b	2634	0.003
														ORF1a	3669	0.003		ORF1b	2635	0.016
														ORF1a	3672	0.003		ORF1b	2636	0.003
														ORF1a	3675	0.36		ORF1b	2637	0.003
														ORF1a	3676	0.37		ORF1b	2643	0.003
														ORF1a	3677	0.367		ORF1b	2646	0.006
														ORF1a	3678	0.003		ORF1b	2653	0.003
														ORF1a	3679	0.009		ORF1b	2658	0.014
														ORF1a	3681	0.022		ORF1b	2660	0.003
														ORF1a	3682	0.003		ORF1b	2667	0.018
														ORF1a	3686	0.007		ORF1b	2684	0.031
														ORF1a	3689	0.009		ORF1b	2687	0.007
														ORF1a	3691	0.006		ORF1b	2691	0.011
														ORF1a	3693	0.003		ORF1b	2695	0.006
														ORF1a	3704	0.003		Average		0.00700465
														ORF1a	3705	0.018
														ORF1a	3711	0.017
														ORF1a	3712	0.003
														ORF1a	3716	0.022
														ORF1a	3718	0.049
														ORF1a	3722	0.003
														ORF1a	3723	0.007
														ORF1a	3728	0.003
														ORF1a	3729	0.011
														ORF1a	3730	0.003
														ORF1a	3732	0.009
														ORF1a	3733	0.011
														ORF1a	3736	0.006
														ORF1a	3737	0.003
														ORF1a	3748	0.003
														ORF1a	3750	0.02
														ORF1a	3751	0.003
														ORF1a	3752	0.061
														ORF1a	3754	0.003
														ORF1a	3755	0.003
														ORF1a	3759	0.011
														ORF1a	3761	0.003
														ORF1a	3764	0.04
														ORF1a	3767	0.014
														ORF1a	3770	0.003
														ORF1a	3776	0.011
														ORF1a	3777	0.009
														ORF1a	3779	0.003
														ORF1a	3780	0.003
														ORF1a	3790	0.003
														ORF1a	3796	0.003
														ORF1a	3802	0.003
														ORF1a	3817	0.003
														ORF1a	3818	0.006
														ORF1a	3829	0.018
														ORF1a	3832	0.006
														ORF1a	3833	0.003
														ORF1a	3837	0.006
														ORF1a	3839	0.017
														ORF1a	3842	0.003
														ORF1a	3845	0.003
														ORF1a	3847	0.003
														ORF1a	3859	0.006
														ORF1a	3862	0.011
														ORF1a	3875	0.003
														ORF1a	3879	0.003
														ORF1a	3884	0.076
														ORF1a	3885	0.003
														ORF1a	3889	0.003
														ORF1a	3901	0.009
														ORF1a	3905	0.003
														ORF1a	3917	0.006
														ORF1a	3922	0.003
														ORF1a	3924	0.003
														ORF1a	3930	0.064
														ORF1a	3934	0.011
														ORF1a	3936	0.003
														ORF1a	3937	0.003
														ORF1a	3939	0.003
														ORF1a	3940	0.019
														ORF1a	3944	0.003
														ORF1a	3950	0.006
														ORF1a	3951	0.009
														ORF1a	3952	0.04
														ORF1a	3956	0.003
														ORF1a	3959	0.006
														ORF1a	3963	0.003
														ORF1a	3966	0.033
														ORF1a	3968	0.003
														ORF1a	3969	0.021
														ORF1a	3971	0.011
														ORF1a	3972	0.003
														ORF1a	3976	0.018
														ORF1a	3979	0.009
														ORF1a	3983	0.003
														ORF1a	3987	0.003
														ORF1a	3989	0.003
														ORF1a	3993	0.015
														ORF1a	3996	0.003
														ORF1a	4012	0.006
														ORF1a	4015	0.003
														ORF1a	4016	0.018
														ORF1a	4031	0.009
														ORF1a	4035	0.034
														ORF1a	4044	0.003
														ORF1a	4049	0.003
														ORF1a	4064	0.003
														ORF1a	4065	0.014
														ORF1a	4067	0.003
														ORF1a	4075	0.029
														ORF1a	4080	0.018
														ORF1a	4082	0.003
														ORF1a	4083	0.02
														ORF1a	4087	0.024
														ORF1a	4090	0.038
														ORF1a	4092	0.003
														ORF1a	4097	0.003
														ORF1a	4098	0.003
														ORF1a	4101	0.006
														ORF1a	4103	0.006
														ORF1a	4114	0.003
														ORF1a	4116	0.003
														ORF1a	4120	0.007
														ORF1a	4129	0.003
														ORF1a	4136	0.006
														ORF1a	4140	0.003
														ORF1a	4144	0.003
														ORF1a	4145	0.003
														ORF1a	4152	0.003
														ORF1a	4159	0.003
														ORF1a	4161	0.012
														ORF1a	4164	0.006
														ORF1a	4165	0.014
														ORF1a	4175	0.042
														ORF1a	4176	0.003
														ORF1a	4178	0.003
														ORF1a	4182	0.024
														ORF1a	4187	0.009
														ORF1a	4189	0.007
														ORF1a	4203	0.003
														ORF1a	4204	0.007
														ORF1a	4205	0.027
														ORF1a	4207	0.003
														ORF1a	4211	0.006
														ORF1a	4220	0.006
														ORF1a	4222	0.003
														ORF1a	4223	0.017
														ORF1a	4224	0.003
														ORF1a	4241	0.125
														ORF1a	4249	0.011
														ORF1a	4261	0.003
														ORF1a	4265	0.003
														ORF1a	4277	0.029
														ORF1a	4285	0.012
														ORF1a	4288	0.003
														ORF1a	4292	0.003
														ORF1a	4301	0.003
														ORF1a	4302	0.003
														ORF1a	4304	0.007
														ORF1a	4308	0.003
														ORF1a	4314	0.003
														ORF1a	4334	0.003
														ORF1a	4338	0.003
														ORF1a	4342	0.003
														ORF1a	4348	0.003
														ORF1a	4350	0.003
														ORF1a	4354	0.006
														ORF1a	4355	0.007
														ORF1a	4357	0.006
														ORF1a	4358	0.007
														ORF1a	4364	0.003
														ORF1a	4365	0.003
														ORF1a	4369	0.003
														ORF1a	4372	0.003
														ORF1a	4375	0.003
														ORF1a	4387	0.007
														ORF1a	4391	0.003
														ORF1a	4395	0.009
														ORF1a	4398	0.014
														Average		0.0103271
