# Supplementary figures and images for: Molecular Analysis of SARS-CoV-2 Circulating in Bangladesh during 2020 Revealed Lineage Diversity and Potential Mutations
Source: MDPI journal article supplement (doi:10.3390/microorganisms9051035), 2021-05-12

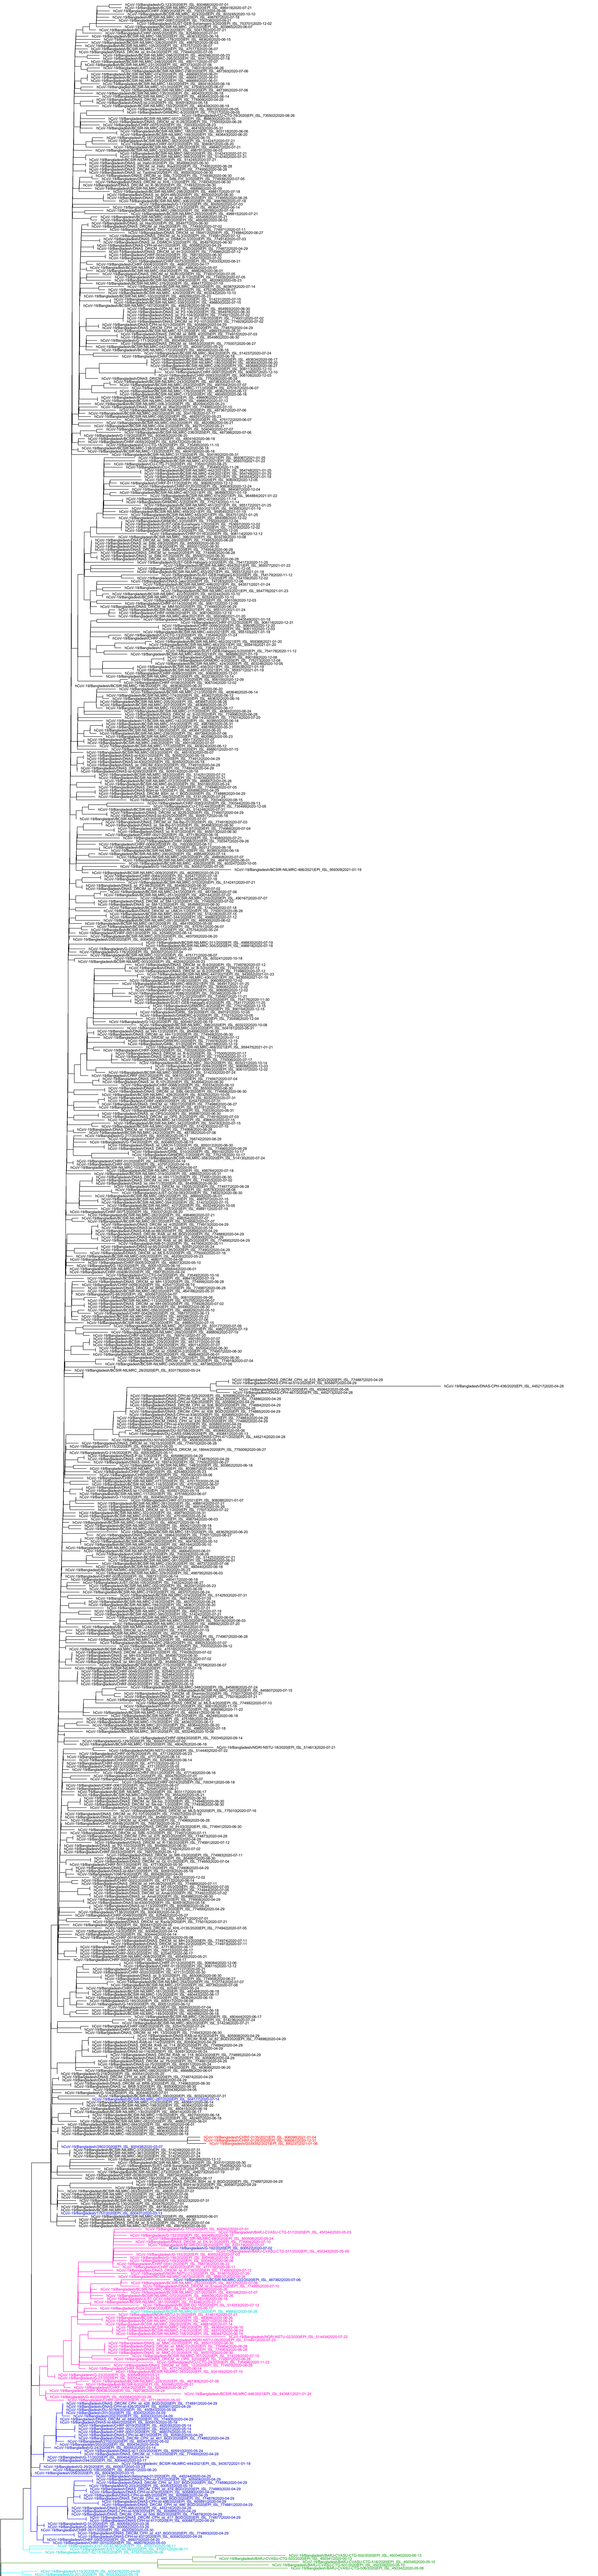

Supplement: s1 [file s1]

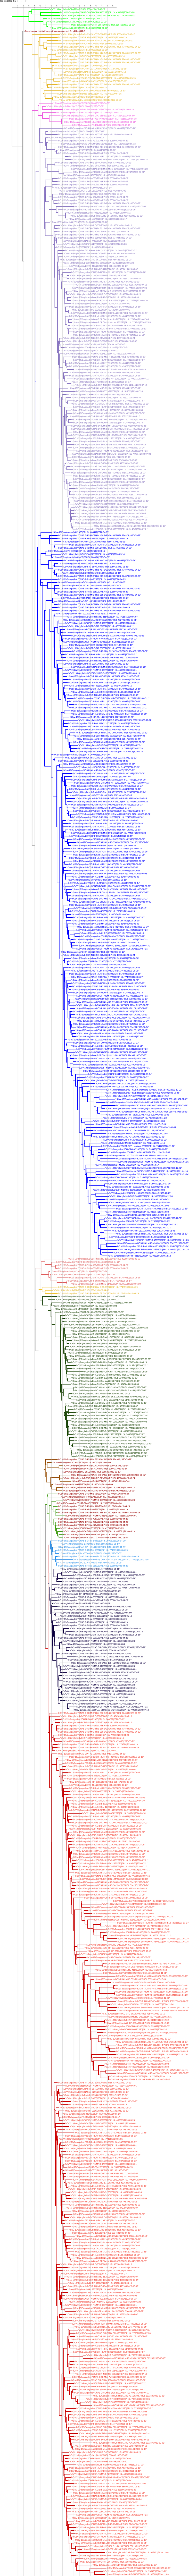

Supplement: s1 [file s1]
